# Supplementary material for: Calcium depletion challenges endoplasmic reticulum proteostasis by destabilising BiP-substrate complexes
Source: eLife. 2020 Dec 9;9:e62601. doi: 10.7554/eLife.62601 (PMC7758071; doi:10.7554/eLife.62601)
Supplement: Figure 1—source data 1. [file elife-62601-fig1-data1.xlsx]

## Sheet: Median
Source data: Figure 1B
Summary				Median		Normalised		FLAG-M1/Turquoise	Normalised	Average	SD	Average	SD	Average	SD
	all cells			FLAG-M1	Turquoise	FLAG-M1	Turquoise			FLAG-M1		Turquoise		Ratio
	Cell lines	Cell line - Treatment	Treatment time
	TCRa (UK2469 Clone) clone 24 or TCRa-N/Q (UK2520) clone 12	24-Unt	3 hours	214	600	1	1	0.356667	1	1.1028	0.150624	1.04222	0.0494788	1.05529	0.0935039
		24-Tg		1224	328	5.71963	0.546667	3.73171	10.4627	6.50935	1.67198	0.556667	0.0202759	11.632	2.52919		3.92217
		12-Unt		152	487	0.71028	0.811667	0.312115	0.875089	0.744548	0.0514726	0.837222	0.0309719	0.888641	0.0291231		4.22872
		12-Tg		512	366	2.39252	0.61	1.39891	3.92217	2.85202	0.651904	0.626667	0.031798	4.52507	0.793713		5.42432
		24-Unt		221	618	1.03271	1.03	0.357605	1.00263
		24-Tg		1151	326	5.3785	0.543333	3.53067	9.89909
		12-Unt		154	497	0.719626	0.828333	0.309859	0.868764
		12-Tg		549	364	2.56542	0.606667	1.50824	4.22872
		24-Unt		273	658	1.2757	1.09667	0.414894	1.16325
		24-Tg		1804	348	8.42991	0.58	5.18391	14.5343
		12-Unt		172	523	0.803738	0.871667	0.328872	0.922071
		12-Tg		770	398	3.59813	0.663333	1.93467	5.42432
