# Supplementary material for: Calcium depletion challenges endoplasmic reticulum proteostasis by destabilising BiP-substrate complexes
Source: eLife. 2020 Dec 9;9:e62601. doi: 10.7554/eLife.62601 (PMC7758071; doi:10.7554/eLife.62601)
Supplement: Figure 1—source data 2. [file elife-62601-fig1-data2.xlsx]

## Sheet: Median ed
Source data: Figure 1D
Summary				Median		Normalised		FLAG-M1/Turquoise	Normalised	Average	SD	Average	SD	Average	SD
	all cells			FLAG-M1	Turquoise	FLAG-M1	Turquoise			FLAG-M1		Turquoise		Ratio
	Cell line	Treatment (min)	Time
	UK2520 Clone 12	Unt	3 hours (or 1-4 hours)	152	490	1	1	0.310204	1	1.0614	0.0662266	0.99932	0.060207	1.06321	0.0608039
		Tg		565	366	3.71711	0.746939	1.54372	4.97645	4.10526	0.416972	0.74966	0.0735072	5.49051	0.502825
		A23187		513	404	3.375	0.82449	1.2698	4.09344	3.91886	0.868977	0.805442	0.0459221	4.85189	0.914177
		Tm		156	481	1.02632	0.981633	0.324324	1.04552	1.05921	0.03663	0.955782	0.0671095	1.11142	0.0774514
		2-DG		176	483	1.15789	0.985714	0.364389	1.17468	1.25439	0.0898052	0.979592	0.0604371	1.28285	0.105605
		Unt		172	519	1.13158	1.05918	0.331407	1.06835
		Tg		691	404	4.54605	0.82449	1.7104	5.51378
		A23187		748	411	4.92105	0.838776	1.81995	5.86695
		Tm		167	493	1.09868	1.00612	0.338742	1.092
		2-DG		203	508	1.33553	1.03673	0.399606	1.2882
		Unt		160	460	1.05263	0.938776	0.347826	1.12128
		Tg		616	332	4.05263	0.677551	1.85542	5.98129
		A23187		526	369	3.46053	0.753061	1.42547	4.59528
		Tm		160	431	1.05263	0.879592	0.37123	1.19673
		2-DG		193	449	1.26974	0.916327	0.429844	1.38568

## Sheet: Median
Summary				Median		Normalized		Ratio FLAG-M1/Turquoise	Normalized	Average	SD	Average	SD	Average	SD
	all cells			FLAG-M1	Turquoise	FLAG-M1	Turquoise			FLAG-M1		Turquoise		Ratio
	Cell line	Treatment (min)	Time
26112019	UK2520 Clone 12	12-Unt	3 hours (or 1-4 hours)	152	490	1	1	0.310204	1	1.0614	0.0662266	0.99932	0.060207	1.06321	0.0608039
		12-Tg1h		394	438	2.59211	0.893878	0.899543	2.89984	3.54167	0.830365	0.892517	0.0857224	3.98864	0.991509
		12-Tg2h		526	402	3.46053	0.820408	1.30846	4.21805	3.85746	0.419319	0.819728	0.0744921	4.71557	0.459
		12-Tg3h		565	366	3.71711	0.746939	1.54372	4.97645	4.10526	0.416972	0.74966	0.0735072	5.49051	0.502825
		12-Tg4h		589	336	3.875	0.685714	1.75298	5.65104	4.26096	0.574381	0.685714	0.0714286	6.21358	0.487198
		12-A23187		513	404	3.375	0.82449	1.2698	4.09344	3.91886	0.868977	0.805442	0.0459221	4.85189	0.914177
		12-ionomycin		337	448	2.21711	0.914286	0.752232	2.42496	2.63377	1.14393	0.901361	0.103667	3.04843	1.68864
		12-Tm		156	481	1.02632	0.981633	0.324324	1.04552	1.05921	0.03663	0.955782	0.0671095	1.11142	0.0774514
		12-2DG		176	483	1.15789	0.985714	0.364389	1.17468	1.25439	0.0898052	0.979592	0.0604371	1.28285	0.105605
3122019		12-Unt		172	519	1.13158	1.05918	0.331407	1.06835
		12-Tg1h		628	479	4.13158	0.977551	1.31106	4.22646
		12-Tg2h		653	438	4.29605	0.893878	1.49087	4.80609
		12-Tg3h		691	404	4.54605	0.82449	1.7104	5.51378
		12-Tg4h		748	371	4.92105	0.757143	2.01617	6.4995
		12-A23187		748	411	4.92105	0.838776	1.81995	5.86695
		12-ionomycin		267	489	1.75658	0.997959	0.546012	1.76017
		12-Tm		167	493	1.09868	1.00612	0.338742	1.092
		12-2DG		203	508	1.33553	1.03673	0.399606	1.2882
5122019		12-Unt		160	460	1.05263	0.938776	0.347826	1.12128
		12-Tg1h		593	395	3.90132	0.806122	1.50127	4.83961
		12-Tg2h		580	365	3.81579	0.744898	1.58904	5.12257
		12-Tg3h		616	332	4.05263	0.677551	1.85542	5.98129
		12-Tg4h		606	301	3.98684	0.614286	2.01329	6.49021
		12-A23187		526	369	3.46053	0.753061	1.42547	4.59528
		12-ionomycin		597	388	3.92763	0.791837	1.53866	4.96015
		12-Tm		160	431	1.05263	0.879592	0.37123	1.19673
		12-2DG		193	449	1.26974	0.916327	0.429844	1.38568
