# Supplementary material for: Calcium depletion challenges endoplasmic reticulum proteostasis by destabilising BiP-substrate complexes
Source: eLife. 2020 Dec 9;9:e62601. doi: 10.7554/eLife.62601 (PMC7758071; doi:10.7554/eLife.62601)
Supplement: Figure 1—source data 3. [file elife-62601-fig1-data3.xlsx]

## Sheet: Median
Source data: Figure 1E
				Median				Normalised				FLAG-M1/Turquoise		Normalised		Average	SD	Average	SD	Average	SD	Average	SD	Average	SD	Average	SD
	all cells			FLAG-M1		Turquoise		FLAG-M1		Turquoise						FLAG-M1				Turquoise				Ratio
	Cell line	1st Treatment (3h)	2nd Treatment (3h)	Unt	Tg	Unt	Tg	Unt	Tg	Unt	Tg	Unt	Tg	Unt	Tg	Unt		Tg		Unt		Tg		Unt		Tg
Experiment 1	CHO-K1 TCRa-N/Q (UK2520) clone 12	-	Unt/Tg (keeping the pre-treatment)	197	785	554	414	1	3.98477	1	0.747292	0.355596	1.89614	1	5.33228	0.912014	0.0803143	3.79357	0.173952	0.954874	0.0442514	0.722022	0.0437702	0.953932	0.0404219	5.26534	0.359406
		Tm		163	454	387	355	0.827411	2.30457	0.698556	0.640794	0.421189	1.27887	1.18446	3.59643	0.778342	0.072205	2.10152	0.347299	0.676895	0.04887	0.619134	0.0422938	1.14881	0.0327801	3.37871	0.344716
		Tm+PERKi		174	244	500	478	0.883249	1.23858	0.902527	0.862816	0.348	0.51046	0.97864	1.43551	0.84264	0.0537208	1.0846	0.172315	0.870036	0.0316271	0.834537	0.0298971	0.967966	0.0326193	1.29581	0.16178
		Tg		714	631	321	324	3.62437	3.20305	0.579422	0.584838	2.2243	1.94753	6.25514	5.47681	3.35871	0.269099	3.3824	0.157388	0.556558	0.0365198	0.555957	0.0439189	6.05235	0.616602	6.11711	0.673518
		Tg+PERKi		347	383	406	405	1.76142	1.94416	0.732852	0.731047	0.85468	0.945679	2.40352	2.65942	1.7022	0.120587	1.82572	0.241175	0.711793	0.0319006	0.712395	0.0453903	2.38958	0.0677851	2.5551	0.183266
		PERKi		195	645	590	521	0.989848	3.27411	1.06498	0.940433	0.330508	1.238	0.92945	3.48149	1.00846	0.0279572	3.17766	0.486913	1.09807	0.0316957	0.926594	0.124467	0.918478	0.0133696	3.41703	0.350024
Experiment 2		-		176	718	528	414	0.893401	3.64467	0.953069	0.747292	0.333333	1.7343	0.937394	4.87717
		Tm		160	453	394	358	0.812183	2.29949	0.711191	0.646209	0.406091	1.26536	1.142	3.55843		Data shown in red were not relevant for the final figure.
		Tm+PERKi		170	220	481	464	0.862944	1.11675	0.868231	0.837545	0.35343	0.474138	0.993911	1.33336
		Tg		608	689	319	320	3.08629	3.49746	0.575812	0.577617	1.90596	2.15313	5.3599	6.05498
		Tg+PERKi		351	391	403	413	1.78173	1.98477	0.727437	0.745487	0.870968	0.946731	2.44932	2.66238
		PERKi		205	711	625	536	1.04061	3.60914	1.12816	0.967509	0.328	1.32649	0.922396	3.73034
Experiment 3		-		166	739	505	372	0.84264	3.75127	0.911552	0.67148	0.328713	1.98656	0.924401	5.58657
		Tm		137	335	344	316	0.695431	1.70051	0.620939	0.570397	0.398256	1.06013	1.11997	2.98127
		Tm+PERKi		154	177	465	445	0.781726	0.898477	0.83935	0.803249	0.331183	0.397753	0.931347	1.11855
		Tg		663	679	285	280	3.36548	3.4467	0.51444	0.505415	2.32632	2.425	6.54203	6.81954
		Tg+PERKi		308	305	374	366	1.56345	1.54822	0.67509	0.66065	0.823529	0.833333	2.31592	2.34349
		PERKi		196	522	610	483	0.994924	2.64975	1.10108	0.871841	0.321311	1.08075	0.903587	3.03925
