# Supplementary material for: Calcium depletion challenges endoplasmic reticulum proteostasis by destabilising BiP-substrate complexes
Source: eLife. 2020 Dec 9;9:e62601. doi: 10.7554/eLife.62601 (PMC7758071; doi:10.7554/eLife.62601)
Supplement: Figure 1—source data 4. [file elife-62601-fig1-data4.xlsx]

## Sheet: Median
Source data: Figure 1F
Summary				Median		Normalised		Average	SD	Average	SD
	all cells			CHOP::GFP	XBP1s::Turquoise	CHOP::GFP	XBP1s::Turquoise	CHOP::GFP		XBP1s::Turquoise
	Cell line	Treatment	Time (h)
	CHO-K1 S21	-	6	129	135	1	1	0.971576	0.0272239	1.01481	0.0195982
		Tg		1233	628	9.55814	4.65185	9.16537	0.373812	4.81235	0.163019
		A23187		1177	2382	9.12403	17.6444	9.28165	0.140892	16.4741	1.23391
		Tm		837	381	6.48837	2.82222	5.76744	0.627811	2.71852	0.107599
		2DG		473	266	3.66667	1.97037	3.58915	0.121089	2.05679	0.079205
		Tm+PERKi		306	296	2.37209	2.19259	2.2739	0.100875	2.40741	0.207804
		Tg+PERKi		438	426	3.39535	3.15556	3.86047	0.402803	3.78025	0.541011
		PERKi		157	138	1.21705	1.02222	1.28165	0.0659295	1.03704	0.02566
		-		125	140	0.968992	1.03704
		Tg		1137	649	8.81395	4.80741
		A23187		1212	2050	9.39535	15.1852
		Tm		706	368	5.47287	2.72593
		2DG		471	287	3.65116	2.12593
		Tm+PERKi		294	352	2.27907	2.60741
		Tg+PERKi		528	553	4.09302	4.0963
		PERKi		174	144	1.34884	1.06667
		-		122	136	0.945736	1.00741
		Tg		1177	672	9.12403	4.97778
		A23187		1203	2240	9.32558	16.5926
		Tm		689	352	5.34109	2.60741
		2DG		445	280	3.44961	2.07407
		Tm+PERKi		280	327	2.17054	2.42222
		Tg+PERKi		528	552	4.09302	4.08889
		PERKi		165	138	1.27907	1.02222
