# Supplementary material for: Calcium depletion challenges endoplasmic reticulum proteostasis by destabilising BiP-substrate complexes
Source: eLife. 2020 Dec 9;9:e62601. doi: 10.7554/eLife.62601 (PMC7758071; doi:10.7554/eLife.62601)
Supplement: Figure 2—source data 1. [file elife-62601-fig2-data1.xlsx]

## Sheet: Exp. 1
Source data: Figure 2B and Figure 2-figure supplement 1
	Experiment 1
	Absorbance
		1	2	3	4	5	6	7
	Time [s]	Ctrl.	Ctrl. + Ca	1 µM BiP	1 µM BiP + Ca	1 µM BiP + 2 µM J	1 µM BiP + 2 µM J + Ca	1 µM BiP + 2 µM J*
	0	1.168	1.241	0.992	0.992	0.995	1.011	1.013
	30	1.145	1.224	0.985	0.979	0.983	1.008	1.015
	60	1.153	1.232	0.985	0.982	0.984	1.003	1.013
	90	1.153	1.227	0.979	0.976	0.978	0.999	1.007
	120	1.154	1.229	0.98	0.978	0.977	1.001	1.008
	150	1.149	1.231	0.985	0.981	0.98	1.007	1.013
	180	1.153	1.23	0.979	0.978	0.975	0.998	1.009
	210	1.158	1.228	0.975	0.973	0.973	0.991	1.002
	240	1.142	1.225	0.977	0.974	0.969	0.995	1.006
	270	1.143	1.225	0.974	0.971	0.969	0.993	1.007
	300	1.151	1.225	0.974	0.975	0.97	0.991	1.004
	330	1.147	1.224	0.972	0.972	0.964	0.984	1.001
	360	1.144	1.223	0.967	0.967	0.962	0.978	0.996
	390	1.144	1.224	0.97	0.971	0.961	0.976	0.999
	420	1.136	1.219	0.966	0.966	0.957	0.971	0.999
	450	1.136	1.214	0.964	0.961	0.951	0.964	0.995
	480	1.139	1.216	0.963	0.964	0.953	0.964	0.994
	510	1.144	1.221	0.965	0.964	0.953	0.967	0.995
	540	1.136	1.215	0.963	0.962	0.949	0.964	0.995
	570	1.138	1.216	0.961	0.962	0.947	0.96	0.989
	600	1.139	1.212	0.958	0.958	0.945	0.957	0.988
	630	1.13	1.209	0.96	0.96	0.939	0.956	0.991
	660	1.137	1.216	0.96	0.958	0.942	0.957	0.987
	690	1.131	1.211	0.959	0.955	0.935	0.952	0.986
	720	1.137	1.21	0.957	0.957	0.937	0.95	0.982
	750	1.129	1.208	0.957	0.953	0.931	0.948	0.985
	780	1.131	1.206	0.955	0.952	0.931	0.946	0.984
	810	1.13	1.205	0.954	0.951	0.929	0.945	0.982
	840	1.13	1.203	0.949	0.948	0.928	0.941	0.976
	870	1.129	1.204	0.952	0.949	0.923	0.941	0.981
	900	1.131	1.202	0.951	0.949	0.923	0.94	0.973
	930	1.125	1.2	0.951	0.947	0.921	0.937	0.979
	960	1.139	1.203	0.949	0.946	0.919	0.935	0.967
	990	1.126	1.2	0.949	0.944	0.918	0.933	0.974
	1020	1.123	1.195	0.946	0.943	0.914	0.931	0.973
	1050	1.122	1.197	0.945	0.943	0.912	0.93	0.973
	1080	1.127	1.197	0.943	0.942	0.912	0.929	0.965
	1110	1.121	1.192	0.943	0.938	0.907	0.924	0.965
	1140	1.124	1.194	0.943	0.941	0.905	0.926	0.969
	1170	1.124	1.195	0.942	0.941	0.905	0.924	0.964
	1200	1.119	1.189	0.941	0.939	0.902	0.921	0.963
	1230	1.123	1.193	0.94	0.939	0.904	0.923	0.965
	1260	1.124	1.194	0.942	0.942	0.901	0.924	0.966
	1290	1.12	1.192	0.937	0.935	0.895	0.917	0.962
	1320	1.123	1.19	0.94	0.936	0.897	0.917	0.959
	1350	1.121	1.188	0.935	0.936	0.894	0.916	0.957
	1380	1.12	1.189	0.936	0.934	0.891	0.912	0.961
	1410	1.124	1.184	0.936	0.933	0.889	0.911	0.952
	1440	1.12	1.188	0.937	0.934	0.887	0.913	0.959
	1470	1.116	1.187	0.928	0.926	0.881	0.906	0.95
	1500	1.12	1.182	0.93	0.928	0.884	0.905	0.946
	1530	1.113	1.181	0.925	0.927	0.88	0.904	0.948
	1560	1.113	1.182	0.929	0.927	0.877	0.902	0.95
	1590	1.114	1.186	0.931	0.928	0.876	0.901	0.948
	1620	1.117	1.186	0.934	0.932	0.879	0.904	0.949
	1650	1.117	1.186	0.931	0.929	0.876	0.903	0.948
	1680	1.111	1.183	0.929	0.926	0.872	0.898	0.95
	1710	1.117	1.185	0.929	0.93	0.874	0.899	0.946
	1740	1.111	1.18	0.926	0.923	0.867	0.893	0.946
	1770	1.114	1.184	0.925	0.925	0.869	0.896	0.942
	1800	1.112	1.18	0.923	0.923	0.865	0.893	0.941
	1830	1.113	1.179	0.925	0.924	0.865	0.891	0.943
	1860	1.114	1.182	0.924	0.924	0.863	0.891	0.941
	1890	1.107	1.179	0.922	0.919	0.858	0.887	0.941
	1920	1.108	1.178	0.922	0.92	0.857	0.884	0.94
	1950	1.108	1.18	0.922	0.92	0.856	0.885	0.937
	1980	1.107	1.178	0.916	0.915	0.852	0.883	0.937
	2010	1.107	1.174	0.913	0.912	0.849	0.878	0.931
	2040	1.107	1.176	0.914	0.915	0.847	0.88	0.931
	2070	1.109	1.177	0.912	0.916	0.847	0.877	0.932
	2100	1.107	1.175	0.914	0.914	0.844	0.876	0.935
	2130	1.105	1.176	0.912	0.913	0.843	0.875	0.935
	2160	1.103	1.173	0.911	0.914	0.84	0.873	0.932
	2190	1.101	1.168	0.908	0.911	0.834	0.868	0.927
	2220	1.1	1.17	0.906	0.91	0.835	0.868	0.93
	2250	1.102	1.171	0.905	0.91	0.832	0.866	0.928
	2280	1.1	1.167	0.905	0.907	0.828	0.864	0.925
	2310	1.1	1.171	0.903	0.906	0.829	0.864	0.927
	2340	1.098	1.17	0.901	0.91	0.828	0.861	0.923
	2370	1.096	1.165	0.902	0.908	0.823	0.858	0.921
	2400	1.097	1.167	0.898	0.905	0.82	0.858	0.915
	2430	1.093	1.163	0.896	0.9	0.815	0.85	0.916
	2460	1.103	1.171	0.901	0.909	0.821	0.861	0.92
	2490	1.098	1.169	0.898	0.909	0.821	0.857	0.915
	2520	1.096	1.165	0.897	0.907	0.815	0.849	0.911
	2550	1.092	1.163	0.894	0.902	0.811	0.851	0.916
	2580	1.098	1.169	0.892	0.905	0.814	0.854	0.912
	2610	1.091	1.165	0.893	0.904	0.806	0.843	0.911
	2640	1.096	1.166	0.893	0.91	0.807	0.845	0.908
	2670	1.095	1.164	0.891	0.907	0.802	0.845	0.908
	2700	1.097	1.166	0.889	0.906	0.805	0.847	0.91
	2730	1.098	1.168	0.89	0.909	0.805	0.846	0.908
	2760	1.099	1.164	0.892	0.906	0.801	0.841	0.907
	2790	1.095	1.163	0.884	0.907	0.799	0.839	0.906
	2820	1.091	1.165	0.885	0.902	0.797	0.838	0.905
	2850	1.096	1.165	0.883	0.904	0.796	0.836	0.908
	2880	1.089	1.157	0.884	0.903	0.79	0.834	0.903
	2910	1.09	1.163	0.882	0.904	0.791	0.833	0.906
	2940	1.096	1.165	0.878	0.904	0.791	0.836	0.905
	2970	1.091	1.162	0.874	0.901	0.786	0.831	0.898
	3000	1.091	1.163	0.876	0.903	0.786	0.831	0.902
	3030	1.087	1.161	0.875	0.898	0.779	0.825	0.897
	3060	1.09	1.162	0.874	0.902	0.78	0.829	0.897
	3090	1.081	1.154	0.868	0.896	0.774	0.82	0.89
	3120	1.087	1.16	0.87	0.9	0.779	0.825	0.896
	3150	1.091	1.16	0.874	0.901	0.779	0.826	0.897
	3180	1.081	1.159	0.87	0.893	0.772	0.822	0.895
	3210	1.086	1.158	0.871	0.901	0.774	0.822	0.894
	3240	1.086	1.157	0.871	0.898	0.77	0.82	0.891
	3270	1.079	1.152	0.867	0.893	0.764	0.815	0.892
	3300	1.086	1.157	0.87	0.897	0.768	0.817	0.896
	3330	1.078	1.155	0.865	0.892	0.761	0.812	0.891
	3360	1.081	1.154	0.862	0.893	0.759	0.81	0.886
	3390	1.079	1.153	0.864	0.893	0.76	0.81	0.886
	3420	1.079	1.152	0.865	0.887	0.754	0.803	0.887
	3450	1.078	1.152	0.864	0.888	0.754	0.801	0.886
	3480	1.079	1.152	0.863	0.89	0.754	0.805	0.885
	3510	1.081	1.155	0.863	0.89	0.75	0.804	0.885
	3540	1.076	1.152	0.86	0.881	0.749	0.802	0.884
	3570	1.078	1.152	0.862	0.884	0.749	0.803	0.882
	3600	1.077	1.148	0.858	0.877	0.746	0.798	0.878
	3630	1.08	1.153	0.862	0.875	0.747	0.799	0.88
	3660	1.076	1.151	0.857	0.864	0.745	0.798	0.88
	3690	1.075	1.149	0.857	0.86	0.741	0.795	0.879
	3720	1.073	1.147	0.853	0.852	0.736	0.794	0.875
	3750	1.078	1.15	0.855	0.853	0.738	0.795	0.878
	3780	1.075	1.147	0.851	0.846	0.735	0.789	0.871
	3810	1.075	1.148	0.849	0.843	0.732	0.789	0.872
	3840	1.086	1.156	0.851	0.845	0.735	0.794	0.875
	3870	1.075	1.153	0.848	0.842	0.732	0.791	0.876
	3900	1.076	1.154	0.844	0.84	0.731	0.794	0.875
	3930	1.076	1.151	0.841	0.841	0.732	0.794	0.874
	3960	1.074	1.149	0.839	0.837	0.727	0.79	0.871
	3990	1.068	1.149	0.841	0.835	0.725	0.785	0.87
	4020	1.072	1.147	0.832	0.833	0.72	0.78	0.867
	4050	1.069	1.143	0.836	0.836	0.717	0.775	0.863
	4080	1.061	1.138	0.836	0.832	0.707	0.764	0.857
	4110	1.072	1.146	0.831	0.83	0.713	0.775	0.864
	4140	1.07	1.143	0.831	0.834	0.711	0.774	0.86
	4170	1.07	1.144	0.825	0.832	0.71	0.774	0.861
	4200	1.07	1.145	0.825	0.829	0.711	0.773	0.861
	4230	1.069	1.145	0.823	0.83	0.711	0.773	0.863
	4260	1.061	1.141	0.819	0.828	0.703	0.766	0.858
	4290	1.07	1.144	0.819	0.829	0.704	0.768	0.859
	4320	1.066	1.144	0.816	0.827	0.7	0.764	0.856
	4350	1.065	1.147	0.814	0.826	0.698	0.764	0.856
	4380	1.065	1.142	0.815	0.825	0.698	0.767	0.855
	4410	1.062	1.141	0.813	0.825	0.696	0.76	0.849
	4440	1.062	1.139	0.813	0.827	0.689	0.757	0.85
	4470	1.061	1.142	0.813	0.823	0.691	0.758	0.85
	4500	1.063	1.141	0.81	0.823	0.69	0.759	0.85
	4530	1.066	1.145	0.814	0.823	0.69	0.757	0.849
	4560	1.063	1.141	0.81	0.821	0.686	0.754	0.844
	4590	1.065	1.142	0.81	0.825	0.684	0.751	0.845
	4620	1.065	1.142	0.811	0.821	0.68	0.749	0.842
	4650	1.067	1.143	0.808	0.82	0.678	0.75	0.844
	4680	1.062	1.138	0.811	0.821	0.674	0.748	0.838
	4710	1.064	1.141	0.808	0.822	0.672	0.747	0.838
	4740	1.069	1.141	0.806	0.819	0.676	0.75	0.835
	4770	1.06	1.137	0.806	0.816	0.67	0.745	0.838
	4800	1.054	1.136	0.806	0.816	0.666	0.741	0.839
	4830	1.058	1.138	0.806	0.819	0.669	0.746	0.836
	4860	1.056	1.138	0.804	0.813	0.669	0.746	0.833
	4890	1.054	1.139	0.806	0.814	0.667	0.746	0.831
	4920	1.059	1.139	0.805	0.815	0.671	0.744	0.837
	4950	1.056	1.139	0.802	0.812	0.668	0.746	0.837
	4980	1.059	1.139	0.803	0.812	0.668	0.742	0.834
	5010	1.054	1.14	0.806	0.812	0.661	0.738	0.832
	5040	1.054	1.136	0.799	0.811	0.66	0.742	0.823
	5070	1.065	1.141	0.798	0.808	0.663	0.747	0.826
	5100	1.065	1.141	0.796	0.808	0.661	0.748	0.827
	5130	1.057	1.139	0.799	0.808	0.653	0.74	0.827
	5160	1.058	1.141	0.799	0.809	0.653	0.74	0.828
	5190	1.056	1.139	0.797	0.806	0.65	0.74	0.824
	5220	1.055	1.137	0.797	0.806	0.653	0.738	0.824
	5250	1.053	1.136	0.794	0.806	0.652	0.738	0.823
	5280	1.053	1.135	0.795	0.805	0.65	0.74	0.823
	5310	1.051	1.134	0.795	0.803	0.648	0.738	0.817
	5340	1.049	1.133	0.791	0.804	0.645	0.739	0.815
	5370	1.05	1.135	0.792	0.804	0.645	0.74	0.818
	5400	1.051	1.135	0.79	0.801	0.647	0.742	0.817
	5430	1.049	1.134	0.788	0.801	0.646	0.743	0.815
	5460	1.05	1.134	0.789	0.8	0.646	0.736	0.814
	5490	1.05	1.135	0.786	0.8	0.648	0.736	0.817
	5520	1.052	1.138	0.788	0.797	0.645	0.73	0.817
	5550	1.051	1.137	0.785	0.799	0.635	0.72	0.814
	5580	1.052	1.134	0.784	0.798	0.628	0.71	0.812
	5610	1.049	1.133	0.784	0.796	0.623	0.7	0.81
	5640	1.052	1.138	0.784	0.794	0.617	0.696	0.808
	5670	1.045	1.133	0.779	0.793	0.608	0.688	0.804
	5700	1.043	1.131	0.782	0.794	0.597	0.68	0.803
	5730	1.042	1.133	0.783	0.792	0.593	0.676	0.803
	5760	1.044	1.134	0.779	0.792	0.591	0.67	0.801
	5790	1.04	1.131	0.779	0.79	0.585	0.664	0.801
	5820	1.044	1.135	0.779	0.792	0.584	0.661	0.801
	5850	1.048	1.135	0.778	0.79	0.584	0.66	0.802
	5880	1.046	1.133	0.776	0.79	0.579	0.654	0.799
	5910	1.045	1.134	0.775	0.787	0.579	0.655	0.799
	5940	1.043	1.133	0.774	0.789	0.576	0.654	0.797
	5970	1.044	1.132	0.777	0.785	0.575	0.651	0.798
	6000	1.044	1.134	0.771	0.784	0.571	0.648	0.795
	6030	1.045	1.138	0.771	0.786	0.573	0.647	0.798
	6060	1.044	1.139	0.773	0.784	0.573	0.642	0.797
	6090	1.046	1.142	0.772	0.784	0.571	0.643	0.795
	6120	1.044	1.141	0.769	0.784	0.568	0.638	0.794
	6150	1.053	1.147	0.77	0.784	0.567	0.64	0.795
	6180	1.042	1.137	0.767	0.783	0.566	0.636	0.794
	6210	1.043	1.142	0.769	0.782	0.568	0.636	0.791
	6240	1.042	1.139	0.765	0.78	0.566	0.633	0.793
	6270	1.042	1.14	0.766	0.781	0.567	0.632	0.789
	6300	1.042	1.14	0.767	0.781	0.564	0.634	0.786
	6330	1.043	1.143	0.765	0.779	0.564	0.634	0.785
	6360	1.038	1.139	0.764	0.776	0.558	0.629	0.78
	6390	1.039	1.139	0.76	0.775	0.556	0.624	0.779
	6420	1.041	1.14	0.763	0.777	0.556	0.628	0.781
	6450	1.049	1.145	0.762	0.776	0.554	0.626	0.783
	6480	1.04	1.14	0.762	0.772	0.553	0.627	0.784
	6510	1.038	1.138	0.761	0.775	0.549	0.624	0.783
	6540	1.044	1.141	0.759	0.772	0.549	0.624	0.785
	6570	1.044	1.141	0.759	0.775	0.546	0.625	0.787
	6600	1.042	1.137	0.759	0.774	0.546	0.624	0.783
	6630	1.041	1.142	0.757	0.773	0.544	0.624	0.781
	6660	1.04	1.141	0.757	0.77	0.541	0.623	0.78
	6690	1.038	1.136	0.754	0.771	0.539	0.622	0.78
	6720	1.038	1.128	0.755	0.77	0.536	0.618	0.781
	6750	1.035	1.117	0.754	0.769	0.534	0.615	0.78
	6780	1.04	1.114	0.751	0.767	0.534	0.615	0.778
	6810	1.036	1.102	0.752	0.764	0.53	0.612	0.775
	6840	1.039	1.1	0.753	0.766	0.53	0.612	0.774
	6870	1.036	1.09	0.75	0.764	0.525	0.609	0.769
	6900	1.037	1.093	0.753	0.763	0.525	0.61	0.771
	6930	1.034	1.089	0.749	0.763	0.525	0.606	0.767
	6960	1.03	1.084	0.747	0.76	0.519	0.605	0.765
	6990	1.034	1.081	0.747	0.761	0.518	0.604	0.768
	7020	1.033	1.078	0.747	0.76	0.516	0.604	0.761
	7050	1.032	1.08	0.746	0.762	0.515	0.602	0.761
	7080	1.036	1.079	0.745	0.761	0.516	0.6	0.761
	7110	1.035	1.079	0.743	0.759	0.512	0.598	0.761
	7140	1.033	1.074	0.74	0.754	0.508	0.598	0.759
	7170	1.032	1.076	0.741	0.756	0.51	0.597	0.76
	7200	1.03	1.074	0.743	0.76	0.509	0.596	0.757
	7230	1.026	1.069	0.74	0.755	0.505	0.594	0.756
	7260	1.025	1.07	0.738	0.753	0.504	0.592	0.754
	7290	1.023	1.068	0.738	0.754	0.503	0.591	0.752
	7320	1.02	1.066	0.739	0.75	0.501	0.588	0.749
	7350	1.019	1.062	0.737	0.75	0.498	0.589	0.753
	7380	1.02	1.064	0.734	0.75	0.496	0.587	0.752
	7410	1.02	1.063	0.734	0.749	0.494	0.584	0.754
	7440	1.026	1.065	0.734	0.75	0.492	0.584	0.759
	7470	1.028	1.065	0.734	0.751	0.492	0.583	0.76
	7500	1.031	1.065	0.733	0.748	0.492	0.582	0.76
	7530	1.026	1.065	0.734	0.748	0.488	0.579	0.761
	7560	1.028	1.065	0.731	0.746	0.486	0.577	0.762
	7590	1.034	1.064	0.731	0.748	0.486	0.577	0.768
	7620	1.027	1.062	0.73	0.745	0.481	0.575	0.772
	7650	1.031	1.067	0.73	0.748	0.481	0.574	0.773
	7680	1.032	1.065	0.728	0.745	0.48	0.575	0.77
	7710	1.027	1.061	0.726	0.743	0.476	0.57	0.767
	7740	1.028	1.064	0.725	0.742	0.477	0.569	0.765
	7770	1.028	1.063	0.726	0.74	0.47	0.57	0.765
	7800	1.025	1.063	0.725	0.741	0.471	0.567	0.759
	7830	1.028	1.066	0.721	0.739	0.47	0.566	0.755
	7860	1.026	1.064	0.723	0.739	0.471	0.566	0.753
	7890	1.026	1.066	0.722	0.741	0.468	0.565	0.751
	7920	1.028	1.067	0.721	0.737	0.464	0.562	0.748
	7950	1.028	1.065	0.72	0.737	0.463	0.559	0.746
	7980	1.028	1.064	0.72	0.736	0.463	0.561	0.745
	8010	1.024	1.064	0.719	0.737	0.458	0.559	0.745
	8040	1.021	1.063	0.719	0.736	0.458	0.558	0.744
	8070	1.019	1.06	0.717	0.734	0.455	0.554	0.741
	8100	1.021	1.059	0.714	0.733	0.453	0.554	0.739
	8130	1.022	1.058	0.713	0.732	0.452	0.554	0.739
	8160	1.023	1.061	0.714	0.732	0.451	0.552	0.736
	8190	1.022	1.061	0.713	0.73	0.449	0.552	0.729
	8220	1.035	1.065	0.713	0.732	0.446	0.55	0.727
	8250	1.023	1.059	0.713	0.73	0.448	0.549	0.719
	8280	1.023	1.06	0.712	0.73	0.447	0.546	0.718
	8310	1.024	1.06	0.711	0.73	0.442	0.546	0.713
	8340	1.023	1.057	0.708	0.726	0.441	0.544	0.71
	8370	1.024	1.059	0.71	0.726	0.439	0.542	0.708
	8400	1.023	1.057	0.706	0.724	0.435	0.54	0.702
	8430	1.022	1.059	0.709	0.726	0.435	0.54	0.7
	8460	1.021	1.06	0.707	0.727	0.434	0.539	0.699
	8490	1.02	1.057	0.704	0.723	0.43	0.535	0.693
	8520	1.018	1.056	0.709	0.724	0.431	0.537	0.691
	8550	1.016	1.056	0.705	0.722	0.431	0.535	0.693
	8580	1.017	1.057	0.703	0.724	0.425	0.533	0.694
	8610	1.017	1.056	0.701	0.719	0.423	0.531	0.692
	8640	1.021	1.056	0.703	0.721	0.424	0.53	0.693
	8670	1.022	1.056	0.702	0.72	0.421	0.53	0.695
	8700	1.023	1.055	0.699	0.719	0.421	0.528	0.693
	8730	1.019	1.052	0.695	0.717	0.417	0.523	0.689
	8760	1.021	1.056	0.698	0.715	0.416	0.524	0.693
	8790	1.025	1.054	0.699	0.717	0.415	0.523	0.695
	8820	1.018	1.051	0.698	0.717	0.413	0.521	0.695
	8850	1.023	1.057	0.695	0.714	0.412	0.518	0.692
	8880	1.023	1.052	0.694	0.713	0.41	0.52	0.692
	8910	1.02	1.052	0.693	0.712	0.404	0.516	0.69
	8940	1.021	1.053	0.691	0.715	0.406	0.517	0.687
	8970	1.024	1.053	0.693	0.713	0.405	0.518	0.687
	9000	1.02	1.052	0.691	0.713	0.402	0.513	0.687
	9030	1.017	1.053	0.692	0.711	0.401	0.514	0.686
	9060	1.013	1.054	0.692	0.709	0.402	0.512	0.685
	9090	1.01	1.052	0.688	0.711	0.397	0.509	0.686
	9120	1.002	1.051	0.687	0.709	0.396	0.51	0.684
	9150	1	1.052	0.689	0.709	0.4	0.51	0.685
	9180	0.994	1.054	0.689	0.707	0.394	0.506	0.683
	9210	0.994	1.051	0.688	0.706	0.393	0.504	0.684
	9240	0.999	1.053	0.686	0.708	0.391	0.505	0.686
	9270	1	1.051	0.686	0.707	0.389	0.505	0.682
	9300	1	1.05	0.683	0.704	0.386	0.5	0.68
	9330	1.004	1.049	0.683	0.704	0.385	0.5	0.68
	9360	1.001	1.048	0.684	0.703	0.383	0.496	0.676
	9390	1.003	1.049	0.684	0.702	0.383	0.496	0.677
	9420	1.006	1.049	0.682	0.701	0.378	0.495	0.677
	9450	1.008	1.049	0.679	0.702	0.38	0.495	0.676
	9480	1.012	1.047	0.679	0.698	0.379	0.491	0.674
	9510	1.011	1.049	0.678	0.699	0.374	0.489	0.672
	9540	1.018	1.049	0.679	0.699	0.374	0.491	0.674
	9570	1.014	1.045	0.675	0.696	0.37	0.488	0.67
	9600	1.013	1.046	0.675	0.694	0.37	0.487	0.67
	9630	1.012	1.046	0.677	0.696	0.368	0.484	0.669
	9660	1.011	1.045	0.674	0.694	0.364	0.484	0.669
	9690	1.007	1.047	0.676	0.698	0.366	0.483	0.666
	9720	0.992	1.046	0.671	0.696	0.363	0.481	0.666
	9750	0.99	1.044	0.671	0.692	0.363	0.481	0.667
	9780	0.987	1.042	0.67	0.694	0.36	0.478	0.666
	9810	0.974	1.042	0.668	0.691	0.359	0.476	0.663
	9840	0.974	1.046	0.67	0.691	0.357	0.477	0.664
	9870	0.966	1.046	0.668	0.689	0.355	0.476	0.663
	9900	0.961	1.046	0.668	0.689	0.355	0.475	0.663
	9930	0.955	1.045	0.667	0.689	0.353	0.474	0.663
	9960	0.95	1.042	0.665	0.687	0.35	0.469	0.66
	9990	0.952	1.042	0.668	0.688	0.348	0.471	0.66
	10020	0.947	1.041	0.665	0.686	0.346	0.468	0.66
	10050	0.95	1.042	0.662	0.686	0.345	0.467	0.657
	10080	0.953	1.042	0.662	0.686	0.343	0.465	0.655
	10110	0.954	1.042	0.661	0.685	0.342	0.463	0.657
	10140	0.953	1.044	0.661	0.685	0.343	0.463	0.655
	10170	0.963	1.044	0.66	0.683	0.337	0.462	0.654
	10200	0.963	1.042	0.658	0.684	0.334	0.46	0.652
	10230	0.948	1.042	0.657	0.68	0.334	0.456	0.651
	10260	0.951	1.042	0.661	0.682	0.335	0.46	0.654
	10290	0.946	1.042	0.656	0.682	0.332	0.455	0.65
	10320	0.942	1.039	0.657	0.68	0.331	0.454	0.65
	10350	0.942	1.038	0.656	0.68	0.329	0.455	0.649
	10380	0.944	1.038	0.656	0.682	0.327	0.451	0.649
	10410	0.941	1.039	0.655	0.68	0.326	0.45	0.648
	10440	0.944	1.04	0.656	0.677	0.325	0.449	0.647
	10470	0.943	1.04	0.653	0.678	0.325	0.449	0.647
	10500	0.944	1.038	0.65	0.676	0.321	0.446	0.645
	10530	0.946	1.041	0.655	0.677	0.32	0.447	0.649
	10560	0.945	1.038	0.65	0.673	0.317	0.444	0.644
	10590	0.948	1.036	0.648	0.671	0.315	0.441	0.643
	10620	0.95	1.038	0.648	0.674	0.314	0.443	0.642
	10650	0.948	1.036	0.648	0.672	0.313	0.44	0.641
	10680	0.949	1.036	0.647	0.673	0.312	0.437	0.641
	10710	0.948	1.035	0.645	0.671	0.308	0.438	0.639
	10740	0.951	1.036	0.647	0.673	0.307	0.437	0.642
	10770	0.948	1.034	0.645	0.669	0.304	0.434	0.641
	10800	0.952	1.036	0.647	0.671	0.305	0.435	0.64
	10830	0.948	1.035	0.645	0.667	0.303	0.432	0.639
	10860	0.949	1.035	0.646	0.667	0.302	0.433	0.64
	10890	0.949	1.033	0.639	0.666	0.3	0.43	0.636
	10920	0.951	1.033	0.641	0.665	0.298	0.429	0.635
	10950	0.95	1.034	0.641	0.667	0.301	0.427	0.635
	10980	0.951	1.033	0.64	0.664	0.298	0.427	0.635
	11010	0.948	1.034	0.639	0.665	0.295	0.425	0.634
	11040	0.946	1.031	0.638	0.664	0.291	0.423	0.634
	11070	0.948	1.032	0.638	0.663	0.289	0.42	0.633
	11100	0.947	1.031	0.636	0.663	0.289	0.42	0.63
	11130	0.946	1.029	0.635	0.66	0.287	0.417	0.628
	11160	0.945	1.028	0.633	0.662	0.284	0.417	0.628
	11190	0.944	1.031	0.632	0.658	0.283	0.416	0.628
	11220	0.947	1.032	0.635	0.661	0.284	0.415	0.628
	11250	0.944	1.028	0.632	0.657	0.28	0.415	0.627
	11280	0.945	1.032	0.631	0.658	0.278	0.412	0.629
	11310	0.943	1.029	0.63	0.658	0.277	0.412	0.625
	11340	0.945	1.031	0.633	0.661	0.277	0.412	0.624
	11370	0.944	1.029	0.631	0.655	0.273	0.407	0.625
	11400	0.944	1.029	0.628	0.655	0.272	0.409	0.622
	11430	0.942	1.028	0.629	0.655	0.27	0.406	0.624
	11460	0.943	1.029	0.628	0.653	0.27	0.405	0.62
	11490	0.939	1.027	0.625	0.652	0.266	0.402	0.619
	11520	0.942	1.027	0.629	0.653	0.265	0.403	0.62
	11550	0.942	1.027	0.627	0.651	0.264	0.4	0.621
	11580	0.943	1.029	0.624	0.651	0.264	0.4	0.619
	11610	0.942	1.031	0.625	0.652	0.264	0.4	0.621
	11640	0.941	1.027	0.626	0.649	0.258	0.397	0.617
	11670	0.94	1.027	0.623	0.649	0.258	0.397	0.617
	11700	0.938	1.024	0.621	0.645	0.257	0.393	0.614
	11730	0.941	1.026	0.621	0.646	0.257	0.394	0.615
	11760	0.94	1.028	0.62	0.647	0.255	0.392	0.613
	11790	0.937	1.026	0.618	0.646	0.254	0.39	0.614
	11820	0.937	1.025	0.617	0.646	0.251	0.39	0.612
	11850	0.939	1.024	0.619	0.644	0.25	0.388	0.613
	11880	0.937	1.021	0.616	0.643	0.246	0.387	0.612
	11910	0.939	1.026	0.617	0.645	0.246	0.387	0.611
	11940	0.939	1.026	0.615	0.644	0.244	0.385	0.61
	11970	0.936	1.024	0.614	0.643	0.243	0.383	0.607
	12000	0.938	1.022	0.615	0.641	0.239	0.382	0.609
	12030	0.935	1.021	0.615	0.641	0.239	0.381	0.611
	12060	0.935	1.022	0.611	0.638	0.236	0.38	0.609
	12090	0.938	1.022	0.612	0.639	0.233	0.378	0.606
	12120	0.934	1.022	0.615	0.639	0.234	0.377	0.606
	12150	0.936	1.022	0.613	0.638	0.233	0.375	0.606
	12180	0.934	1.025	0.611	0.637	0.231	0.374	0.604
	12210	0.934	1.021	0.61	0.636	0.23	0.374	0.606
	12240	0.934	1.023	0.608	0.635	0.227	0.372	0.604
	12270	0.933	1.022	0.608	0.635	0.227	0.371	0.602
	12300	0.935	1.02	0.608	0.633	0.225	0.373	0.601
	12330	0.933	1.02	0.606	0.634	0.224	0.366	0.602
	12360	0.931	1.02	0.606	0.631	0.222	0.365	0.6
	12390	0.932	1.018	0.606	0.631	0.22	0.363	0.6
	12420	0.932	1.022	0.606	0.63	0.222	0.365	0.597
	12450	0.931	1.018	0.601	0.633	0.218	0.364	0.597
	12480	0.934	1.018	0.603	0.63	0.216	0.361	0.597
	12510	0.931	1.02	0.6	0.63	0.215	0.365	0.595
	12540	0.93	1.016	0.601	0.628	0.212	0.358	0.594
	12570	0.932	1.02	0.601	0.63	0.212	0.358	0.595
	12600	0.932	1.016	0.601	0.628	0.208	0.355	0.595
	12630	0.933	1.016	0.604	0.63	0.208	0.356	0.595
	12660	0.931	1.016	0.598	0.627	0.207	0.353	0.592
	12690	0.928	1.016	0.598	0.626	0.205	0.35	0.592
	12720	0.93	1.017	0.599	0.625	0.201	0.351	0.592
	12750	0.931	1.017	0.597	0.624	0.202	0.351	0.591
	12780	0.928	1.018	0.595	0.625	0.201	0.348	0.587
	12810	0.928	1.015	0.593	0.622	0.2	0.345	0.587
	12840	0.928	1.014	0.595	0.622	0.196	0.345	0.59
	12870	0.928	1.015	0.593	0.622	0.195	0.344	0.587
	12900	0.927	1.014	0.589	0.621	0.195	0.343	0.585
	12930	0.925	1.013	0.592	0.62	0.195	0.342	0.585
	12960	0.929	1.017	0.592	0.62	0.195	0.342	0.585
	12990	0.928	1.014	0.589	0.621	0.191	0.341	0.585
	13020	0.926	1.012	0.589	0.621	0.192	0.338	0.584
	13050	0.923	1.01	0.585	0.614	0.183	0.333	0.582
	13080	0.925	1.014	0.591	0.618	0.186	0.337	0.584
	13110	0.925	1.012	0.587	0.617	0.182	0.334	0.581
	13140	0.924	1.012	0.585	0.616	0.18	0.333	0.58
	13170	0.925	1.011	0.586	0.616	0.181	0.333	0.581
	13200	0.924	1.01	0.584	0.614	0.177	0.332	0.58
	13230	0.924	1.014	0.584	0.616	0.181	0.332	0.579
	13260	0.923	1.014	0.582	0.614	0.181	0.328	0.577
	13290	0.926	1.011	0.583	0.612	0.174	0.328	0.577
	13320	0.922	1.011	0.581	0.611	0.175	0.326	0.575
	13350	0.925	1.007	0.58	0.61	0.172	0.325	0.576
	13380	0.924	1.011	0.579	0.614	0.173	0.325	0.577
	13410	0.923	1.01	0.578	0.608	0.17	0.32	0.575
	13440	0.923	1.012	0.579	0.611	0.172	0.323	0.573
	13470	0.924	1.009	0.579	0.608	0.167	0.319	0.575
	13500	0.923	1.01	0.576	0.609	0.17	0.319	0.572
	13530	0.922	1.008	0.576	0.608	0.165	0.317	0.571
	13560	0.921	1.01	0.579	0.607	0.165	0.317	0.573
	13590	0.923	1.009	0.575	0.604	0.164	0.315	0.572
	13620	0.92	1.009	0.576	0.603	0.162	0.314	0.568
	13650	0.922	1.009	0.573	0.606	0.164	0.314	0.567
	13680	0.919	1.008	0.572	0.604	0.162	0.311	0.566
	13710	0.918	1.006	0.571	0.602	0.16	0.308	0.566
	13740	0.917	1.006	0.57	0.601	0.158	0.308	0.565
	13770	0.919	1.008	0.572	0.604	0.161	0.309	0.565
	13800	0.917	1.006	0.572	0.601	0.158	0.306	0.565
	13830	0.92	1.007	0.571	0.601	0.157	0.306	0.564
	13860	0.916	1.003	0.568	0.598	0.156	0.302	0.562
	13890	0.925	1.007	0.566	0.599	0.156	0.301	0.56
	13920	0.917	1.006	0.571	0.597	0.158	0.301	0.562
	13950	0.914	1.006	0.565	0.602	0.16	0.298	0.561
	13980	0.917	1.003	0.565	0.596	0.154	0.298	0.559
	14010	0.917	1.004	0.564	0.596	0.156	0.297	0.56
	14040	0.914	1.002	0.561	0.595	0.158	0.296	0.558
	14070	0.913	1.003	0.562	0.595	0.157	0.293	0.556
	14100	0.918	1.004	0.564	0.594	0.157	0.294	0.56
	14130	0.913	1.001	0.562	0.594	0.154	0.291	0.556
	14160	0.917	1.005	0.562	0.595	0.158	0.293	0.558
	14190	0.912	1.005	0.563	0.592	0.153	0.289	0.556
	14220	0.915	1.004	0.561	0.593	0.154	0.288	0.556
	14250	0.912	1.002	0.558	0.59	0.154	0.288	0.552
	14280	0.914	1.004	0.56	0.592	0.155	0.286	0.559
	14310	0.911	1.002	0.558	0.59	0.154	0.287	0.551
	14340	0.914	1.003	0.557	0.589	0.155	0.285	0.552
	14370	0.912	1.003	0.556	0.589	0.154	0.286	0.551

## Sheet: Exp. 2
	Experiment 2
	Absorbance
		1	2	3	4	5	6	7	8	9	10	11	12	13	14
	Time [s]	Ctrl.	Ctrl. + Ca	2 µM BiP	2 µM BiP + Ca	5 µM J	2 µM BiP + 5 µM J	2 µM BiP + 5 µM J + Ca	2 µM BiP + 5 µM J*	1 µM BiP	1 µM BiP + Ca	1 µM BiP + 2 µM J	1 µM BiP + 2 µM J + Ca	1 µM BiP + 2 µM J	2 µM J
	0	1.07	1.086	1.042	0.982	0.998	0.957	0.995	0.965	0.954	0.951	0.956	0.94	0.95	0.963
	30	1.068	1.083	1.038	0.976	0.99	0.952	0.986	0.962	0.951	0.945	0.948	0.934	0.947	0.957
	60	1.063	1.076	1.029	0.972	0.984	0.945	0.98	0.957	0.951	0.946	0.947	0.931	0.941	0.954
	90	1.071	1.084	1.037	0.975	0.989	0.951	0.978	0.959	0.952	0.945	0.947	0.931	0.944	0.954
	120	1.075	1.079	1.04	0.972	0.986	0.944	0.975	0.96	0.953	0.942	0.944	0.932	0.939	0.952
	150	1.066	1.078	1.03	0.968	0.984	0.938	0.966	0.953	0.952	0.941	0.941	0.929	0.941	0.955
	180	1.062	1.077	1.027	0.964	0.98	0.935	0.962	0.95	0.948	0.942	0.94	0.928	0.942	0.954
	210	1.062	1.071	1.021	0.959	0.977	0.929	0.954	0.946	0.944	0.939	0.938	0.924	0.937	0.952
	240	1.075	1.078	1.034	0.967	0.981	0.932	0.965	0.952	0.947	0.943	0.94	0.927	0.937	0.95
	270	1.064	1.075	1.024	0.96	0.979	0.926	0.953	0.946	0.944	0.94	0.932	0.921	0.936	0.948
	300	1.057	1.068	1.017	0.955	0.974	0.918	0.945	0.942	0.94	0.937	0.93	0.921	0.935	0.95
	330	1.071	1.079	1.024	0.961	0.98	0.921	0.954	0.946	0.943	0.94	0.932	0.922	0.932	0.952
	360	1.061	1.072	1.015	0.956	0.975	0.915	0.943	0.941	0.941	0.933	0.928	0.918	0.933	0.947
	390	1.061	1.072	1.019	0.956	0.974	0.914	0.945	0.942	0.938	0.932	0.926	0.918	0.932	0.949
	420	1.065	1.073	1.016	0.954	0.976	0.911	0.941	0.94	0.939	0.933	0.925	0.916	0.931	0.945
	450	1.061	1.07	1.015	0.952	0.975	0.907	0.938	0.939	0.936	0.932	0.925	0.915	0.931	0.947
	480	1.061	1.07	1.012	0.95	0.974	0.906	0.935	0.935	0.936	0.932	0.922	0.915	0.928	0.946
	510	1.068	1.071	1.019	0.953	0.975	0.901	0.942	0.937	0.935	0.932	0.917	0.913	0.927	0.946
	540	1.056	1.067	1.009	0.949	0.972	0.896	0.93	0.933	0.932	0.929	0.916	0.91	0.926	0.944
	570	1.059	1.07	1.006	0.946	0.973	0.895	0.93	0.931	0.932	0.93	0.914	0.908	0.926	0.945
	600	1.058	1.067	1.004	0.946	0.971	0.886	0.922	0.93	0.93	0.927	0.913	0.907	0.924	0.942
	630	1.063	1.064	1.01	0.945	0.971	0.885	0.926	0.929	0.929	0.926	0.911	0.906	0.922	0.941
	660	1.064	1.07	1.014	0.946	0.974	0.886	0.928	0.934	0.93	0.93	0.912	0.907	0.923	0.944
	690	1.061	1.063	1.009	0.942	0.969	0.878	0.921	0.926	0.926	0.924	0.906	0.903	0.922	0.941
	720	1.064	1.066	1.009	0.944	0.972	0.879	0.92	0.927	0.929	0.928	0.905	0.904	0.921	0.941
	750	1.063	1.066	1.007	0.942	0.97	0.873	0.92	0.926	0.928	0.928	0.905	0.905	0.92	0.94
	780	1.051	1.06	0.993	0.938	0.971	0.87	0.905	0.924	0.927	0.925	0.903	0.898	0.916	0.942
	810	1.061	1.062	1	0.935	0.966	0.863	0.91	0.923	0.923	0.923	0.899	0.899	0.918	0.938
	840	1.05	1.06	0.989	0.933	0.966	0.862	0.9	0.917	0.923	0.92	0.897	0.895	0.915	0.938
	870	1.061	1.064	1.001	0.937	0.967	0.859	0.908	0.922	0.924	0.922	0.897	0.896	0.917	0.935
	900	1.06	1.063	1	0.934	0.967	0.856	0.905	0.922	0.922	0.921	0.896	0.895	0.915	0.94
	930	1.056	1.06	0.995	0.928	0.963	0.846	0.898	0.916	0.92	0.919	0.892	0.894	0.913	0.94
	960	1.049	1.058	0.985	0.928	0.963	0.849	0.89	0.911	0.919	0.919	0.891	0.889	0.912	0.936
	990	1.046	1.057	0.984	0.927	0.964	0.845	0.89	0.911	0.918	0.919	0.888	0.889	0.913	0.938
	1020	1.058	1.057	0.993	0.928	0.961	0.84	0.892	0.912	0.915	0.918	0.886	0.887	0.91	0.939
	1050	1.056	1.058	0.989	0.927	0.963	0.84	0.89	0.912	0.918	0.918	0.887	0.888	0.911	0.937
	1080	1.057	1.059	0.989	0.924	0.962	0.832	0.888	0.911	0.916	0.915	0.882	0.887	0.908	0.936
	1110	1.05	1.057	0.978	0.923	0.964	0.832	0.881	0.906	0.913	0.914	0.881	0.884	0.909	0.937
	1140	1.046	1.055	0.975	0.919	0.961	0.824	0.875	0.904	0.912	0.912	0.878	0.88	0.905	0.932
	1170	1.044	1.054	0.973	0.919	0.959	0.82	0.872	0.905	0.912	0.912	0.874	0.877	0.904	0.93
	1200	1.044	1.054	0.973	0.918	0.96	0.819	0.87	0.902	0.913	0.912	0.873	0.877	0.905	0.933
	1230	1.046	1.055	0.971	0.917	0.959	0.817	0.869	0.9	0.911	0.913	0.872	0.877	0.902	0.933
	1260	1.04	1.052	0.969	0.911	0.959	0.811	0.862	0.896	0.908	0.909	0.869	0.871	0.899	0.932
	1290	1.04	1.052	0.968	0.913	0.958	0.807	0.862	0.895	0.907	0.904	0.866	0.87	0.9	0.93
	1320	1.043	1.049	0.966	0.912	0.958	0.803	0.859	0.894	0.907	0.906	0.867	0.87	0.901	0.931
	1350	1.039	1.047	0.962	0.907	0.954	0.797	0.854	0.89	0.901	0.902	0.863	0.866	0.901	0.93
	1380	1.035	1.044	0.958	0.903	0.953	0.79	0.845	0.884	0.898	0.899	0.854	0.86	0.895	0.925
	1410	1.037	1.048	0.96	0.907	0.955	0.792	0.848	0.887	0.901	0.902	0.859	0.863	0.898	0.931
	1440	1.039	1.046	0.958	0.907	0.958	0.789	0.845	0.889	0.907	0.903	0.858	0.863	0.898	0.928
	1470	1.037	1.046	0.958	0.902	0.954	0.784	0.841	0.887	0.903	0.901	0.856	0.861	0.897	0.929
	1500	1.041	1.048	0.971	0.906	0.954	0.784	0.844	0.887	0.905	0.902	0.854	0.861	0.898	0.929
	1530	1.048	1.049	0.965	0.906	0.953	0.779	0.847	0.889	0.903	0.902	0.854	0.866	0.896	0.93
	1560	1.039	1.045	0.953	0.898	0.954	0.774	0.835	0.882	0.9	0.898	0.849	0.859	0.894	0.927
	1590	1.037	1.047	0.954	0.898	0.953	0.77	0.833	0.879	0.898	0.899	0.846	0.853	0.894	0.927
	1620	1.037	1.048	0.951	0.897	0.951	0.769	0.831	0.878	0.897	0.895	0.845	0.852	0.893	0.926
	1650	1.043	1.045	0.96	0.898	0.952	0.768	0.837	0.884	0.898	0.899	0.847	0.857	0.89	0.928
	1680	1.035	1.047	0.948	0.895	0.952	0.761	0.827	0.877	0.897	0.894	0.841	0.85	0.89	0.928
	1710	1.038	1.048	0.949	0.898	0.952	0.759	0.824	0.874	0.897	0.896	0.841	0.851	0.891	0.925
	1740	1.034	1.045	0.946	0.894	0.949	0.752	0.817	0.875	0.896	0.895	0.837	0.847	0.889	0.927
	1770	1.04	1.044	0.953	0.892	0.949	0.75	0.824	0.876	0.898	0.894	0.836	0.85	0.888	0.925
	1800	1.031	1.041	0.94	0.887	0.948	0.745	0.811	0.87	0.894	0.893	0.831	0.845	0.885	0.921
	1830	1.032	1.044	0.941	0.888	0.95	0.743	0.812	0.871	0.894	0.891	0.831	0.844	0.885	0.925
	1860	1.034	1.045	0.943	0.89	0.949	0.741	0.808	0.872	0.895	0.89	0.832	0.843	0.884	0.927
	1890	1.033	1.044	0.938	0.888	0.948	0.736	0.807	0.868	0.894	0.888	0.828	0.839	0.884	0.922
	1920	1.028	1.037	0.933	0.879	0.943	0.724	0.795	0.865	0.894	0.886	0.824	0.835	0.878	0.918
	1950	1.027	1.04	0.935	0.88	0.944	0.727	0.798	0.867	0.891	0.889	0.824	0.836	0.88	0.919
	1980	1.039	1.04	0.941	0.884	0.943	0.725	0.804	0.87	0.891	0.893	0.826	0.839	0.88	0.92
	2010	1.029	1.042	0.931	0.878	0.943	0.715	0.791	0.866	0.891	0.887	0.822	0.834	0.877	0.917
	2040	1.026	1.036	0.928	0.875	0.943	0.711	0.787	0.865	0.889	0.883	0.818	0.827	0.874	0.916
	2070	1.025	1.034	0.925	0.874	0.941	0.704	0.784	0.864	0.889	0.883	0.82	0.829	0.875	0.918
	2100	1.037	1.041	0.937	0.88	0.944	0.709	0.795	0.866	0.888	0.887	0.822	0.831	0.879	0.922
	2130	1.032	1.042	0.93	0.878	0.948	0.708	0.786	0.868	0.888	0.885	0.817	0.828	0.874	0.922
	2160	1.03	1.037	0.924	0.873	0.942	0.701	0.778	0.867	0.888	0.88	0.816	0.822	0.871	0.917
	2190	1.026	1.04	0.924	0.874	0.942	0.7	0.777	0.868	0.891	0.881	0.816	0.823	0.871	0.916
	2220	1.025	1.036	0.922	0.871	0.941	0.697	0.771	0.868	0.888	0.881	0.814	0.821	0.869	0.915
	2250	1.023	1.033	0.917	0.865	0.941	0.689	0.766	0.865	0.887	0.881	0.81	0.815	0.865	0.912
	2280	1.024	1.036	0.921	0.868	0.941	0.688	0.768	0.869	0.888	0.881	0.812	0.819	0.867	0.913
	2310	1.025	1.036	0.919	0.868	0.94	0.684	0.765	0.867	0.887	0.88	0.811	0.817	0.866	0.913
	2340	1.02	1.031	0.913	0.861	0.939	0.676	0.758	0.868	0.885	0.876	0.81	0.814	0.862	0.91
	2370	1.022	1.034	0.916	0.862	0.939	0.675	0.756	0.865	0.886	0.875	0.81	0.811	0.862	0.914
	2400	1.018	1.027	0.911	0.858	0.934	0.67	0.754	0.859	0.88	0.872	0.804	0.808	0.86	0.91
	2430	1.023	1.034	0.913	0.862	0.939	0.668	0.754	0.86	0.882	0.874	0.804	0.808	0.864	0.913
	2460	1.03	1.034	0.922	0.863	0.938	0.668	0.762	0.86	0.884	0.875	0.814	0.808	0.865	0.917
	2490	1.022	1.034	0.911	0.861	0.94	0.662	0.748	0.857	0.885	0.873	0.801	0.805	0.863	0.917
	2520	1.018	1.03	0.905	0.856	0.936	0.654	0.744	0.852	0.888	0.87	0.798	0.801	0.86	0.914
	2550	1.018	1.03	0.904	0.856	0.934	0.651	0.742	0.84	0.879	0.868	0.794	0.795	0.86	0.911
	2580	1.023	1.033	0.907	0.857	0.937	0.65	0.742	0.836	0.875	0.869	0.791	0.794	0.857	0.91
	2610	1.017	1.028	0.9	0.851	0.929	0.642	0.734	0.83	0.88	0.864	0.784	0.788	0.854	0.901
	2640	1.025	1.029	0.908	0.853	0.932	0.645	0.742	0.829	0.869	0.869	0.78	0.79	0.855	0.907
	2670	1.017	1.03	0.9	0.85	0.934	0.636	0.733	0.823	0.867	0.868	0.776	0.782	0.855	0.904
	2700	1.015	1.026	0.897	0.847	0.931	0.629	0.726	0.816	0.86	0.868	0.784	0.782	0.852	0.903
	2730	1.018	1.03	0.897	0.848	0.932	0.631	0.729	0.81	0.855	0.861	0.773	0.777	0.849	0.907
	2760	1.022	1.027	0.902	0.847	0.93	0.628	0.734	0.807	0.849	0.866	0.761	0.779	0.852	0.908
	2790	1.014	1.023	0.893	0.843	0.931	0.624	0.722	0.801	0.846	0.864	0.758	0.778	0.85	0.906
	2820	1.024	1.028	0.899	0.844	0.93	0.621	0.73	0.801	0.841	0.859	0.747	0.775	0.85	0.91
	2850	1.017	1.025	0.891	0.842	0.93	0.618	0.716	0.798	0.841	0.858	0.745	0.772	0.845	0.907
	2880	1.02	1.026	0.898	0.842	0.93	0.613	0.725	0.797	0.841	0.857	0.741	0.77	0.842	0.907
	2910	1.009	1.021	0.88	0.832	0.925	0.603	0.706	0.795	0.837	0.852	0.744	0.766	0.84	0.904
	2940	1.012	1.023	0.885	0.839	0.931	0.603	0.708	0.794	0.84	0.853	0.739	0.767	0.844	0.911
	2970	1.011	1.022	0.882	0.833	0.925	0.595	0.703	0.794	0.835	0.847	0.733	0.763	0.841	0.907
	3000	1.009	1.021	0.879	0.83	0.922	0.591	0.7	0.791	0.837	0.85	0.73	0.761	0.839	0.904
	3030	1.01	1.022	0.879	0.833	0.926	0.588	0.7	0.79	0.838	0.847	0.73	0.762	0.839	0.907
	3060	1.017	1.022	0.889	0.835	0.929	0.589	0.711	0.791	0.842	0.843	0.731	0.766	0.836	0.913
	3090	1.019	1.022	0.888	0.832	0.926	0.584	0.705	0.792	0.838	0.84	0.729	0.767	0.834	0.913
	3120	1.015	1.025	0.884	0.833	0.927	0.583	0.7	0.792	0.837	0.835	0.725	0.76	0.831	0.915
	3150	1.019	1.023	0.886	0.834	0.928	0.577	0.703	0.793	0.836	0.838	0.729	0.762	0.829	0.917
	3180	1.016	1.021	0.883	0.831	0.926	0.575	0.703	0.787	0.835	0.836	0.727	0.764	0.831	0.915
	3210	1.018	1.021	0.884	0.83	0.924	0.569	0.7	0.786	0.833	0.835	0.722	0.76	0.835	0.915
	3240	1.013	1.019	0.88	0.825	0.926	0.566	0.697	0.782	0.833	0.835	0.722	0.762	0.839	0.918
	3270	1.003	1.017	0.867	0.817	0.921	0.556	0.686	0.777	0.829	0.832	0.719	0.753	0.83	0.913
	3300	1.004	1.018	0.868	0.819	0.922	0.553	0.685	0.776	0.832	0.829	0.718	0.752	0.828	0.918
	3330	1.004	1.018	0.867	0.82	0.926	0.552	0.685	0.777	0.831	0.83	0.712	0.751	0.826	0.917
	3360	1.004	1.019	0.868	0.819	0.924	0.549	0.684	0.773	0.83	0.83	0.712	0.75	0.822	0.919
	3390	1.005	1.017	0.865	0.819	0.921	0.546	0.681	0.771	0.829	0.828	0.709	0.746	0.816	0.916
	3420	1.007	1.023	0.866	0.82	0.923	0.546	0.679	0.772	0.827	0.831	0.707	0.747	0.814	0.913
	3450	1.003	1.017	0.861	0.814	0.919	0.538	0.679	0.77	0.832	0.831	0.707	0.748	0.814	0.913
	3480	1.007	1.013	0.864	0.813	0.918	0.533	0.688	0.771	0.828	0.832	0.702	0.754	0.814	0.907
	3510	1.001	1.013	0.855	0.807	0.916	0.527	0.676	0.765	0.824	0.826	0.701	0.746	0.813	0.903
	3540	1.004	1.018	0.86	0.812	0.921	0.527	0.673	0.765	0.825	0.828	0.704	0.742	0.815	0.902
	3570	1.003	1.016	0.857	0.81	0.917	0.521	0.673	0.764	0.824	0.827	0.696	0.739	0.813	0.891
	3600	1.007	1.013	0.86	0.808	0.917	0.515	0.674	0.763	0.824	0.826	0.695	0.739	0.809	0.887
	3630	0.997	1.013	0.851	0.803	0.915	0.512	0.666	0.761	0.821	0.824	0.69	0.736	0.808	0.881
	3660	0.994	1.01	0.847	0.801	0.914	0.507	0.669	0.758	0.816	0.82	0.689	0.731	0.806	0.874
	3690	1.008	1.013	0.862	0.809	0.919	0.511	0.679	0.763	0.82	0.825	0.688	0.733	0.808	0.88
	3720	1.01	1.014	0.86	0.809	0.921	0.511	0.683	0.757	0.82	0.823	0.688	0.733	0.805	0.876
	3750	1.005	1.016	0.858	0.81	0.919	0.508	0.672	0.756	0.819	0.822	0.687	0.731	0.806	0.873
	3780	0.995	1.01	0.844	0.801	0.918	0.501	0.663	0.752	0.815	0.82	0.681	0.725	0.805	0.867
	3810	0.996	1.009	0.844	0.8	0.916	0.497	0.653	0.749	0.815	0.818	0.678	0.724	0.807	0.867
	3840	0.996	1.01	0.841	0.796	0.913	0.494	0.646	0.749	0.813	0.826	0.676	0.723	0.803	0.869
	3870	1.005	1.012	0.85	0.805	0.916	0.49	0.636	0.752	0.817	0.82	0.674	0.724	0.804	0.869
	3900	0.996	1.01	0.839	0.798	0.92	0.488	0.615	0.745	0.812	0.815	0.671	0.72	0.8	0.87
	3930	0.993	1.011	0.839	0.793	0.912	0.479	0.6	0.742	0.813	0.816	0.672	0.718	0.798	0.868
	3960	1.003	1.011	0.845	0.794	0.912	0.474	0.588	0.746	0.81	0.816	0.67	0.718	0.797	0.867
	3990	1.001	1.008	0.846	0.793	0.913	0.474	0.582	0.745	0.813	0.816	0.668	0.719	0.798	0.867
	4020	1.001	1.016	0.845	0.794	0.913	0.473	0.57	0.737	0.809	0.812	0.662	0.713	0.795	0.868
	4050	1.002	1.009	0.841	0.792	0.912	0.468	0.568	0.742	0.81	0.815	0.664	0.717	0.794	0.871
	4080	0.993	1.009	0.833	0.79	0.915	0.467	0.558	0.737	0.808	0.81	0.663	0.71	0.794	0.869
	4110	0.991	1.007	0.832	0.788	0.912	0.463	0.557	0.739	0.806	0.81	0.66	0.709	0.791	0.87
	4140	0.99	1.006	0.826	0.786	0.911	0.457	0.557	0.735	0.803	0.81	0.657	0.708	0.792	0.87
	4170	0.993	1.007	0.827	0.782	0.911	0.452	0.555	0.731	0.805	0.808	0.654	0.707	0.789	0.868
	4200	0.989	1.004	0.825	0.782	0.908	0.451	0.548	0.729	0.803	0.808	0.651	0.705	0.788	0.867
	4230	0.998	1.005	0.834	0.783	0.909	0.446	0.556	0.734	0.804	0.81	0.653	0.705	0.789	0.869
	4260	0.998	1.003	0.832	0.782	0.909	0.443	0.552	0.734	0.805	0.811	0.651	0.705	0.788	0.87
	4290	0.988	1.004	0.821	0.775	0.905	0.438	0.544	0.728	0.803	0.804	0.65	0.7	0.786	0.873
	4320	1	1.004	0.829	0.778	0.907	0.432	0.547	0.728	0.801	0.808	0.646	0.701	0.787	0.867
	4350	0.986	1	0.817	0.773	0.903	0.427	0.536	0.721	0.797	0.802	0.642	0.694	0.783	0.868
	4380	0.991	1.005	0.82	0.777	0.908	0.426	0.537	0.724	0.8	0.803	0.644	0.697	0.785	0.867
	4410	0.989	1.002	0.816	0.773	0.907	0.426	0.532	0.722	0.798	0.802	0.641	0.695	0.786	0.866
	4440	0.994	0.996	0.824	0.775	0.906	0.422	0.534	0.722	0.795	0.802	0.637	0.693	0.78	0.862
	4470	0.995	1.002	0.823	0.775	0.906	0.421	0.538	0.729	0.797	0.806	0.637	0.694	0.783	0.866
	4500	0.986	1	0.812	0.766	0.903	0.414	0.529	0.718	0.794	0.801	0.632	0.687	0.781	0.863
	4530	0.987	1	0.815	0.766	0.905	0.41	0.527	0.715	0.796	0.802	0.636	0.687	0.783	0.864
	4560	0.996	1.002	0.821	0.772	0.909	0.412	0.529	0.722	0.795	0.802	0.632	0.689	0.779	0.865
	4590	0.99	1.001	0.816	0.768	0.904	0.405	0.525	0.715	0.791	0.799	0.626	0.685	0.777	0.863
	4620	0.993	1	0.817	0.767	0.905	0.399	0.527	0.715	0.792	0.799	0.626	0.683	0.779	0.862
	4650	0.99	1.003	0.816	0.77	0.91	0.402	0.517	0.708	0.79	0.796	0.626	0.679	0.774	0.862
	4680	0.989	0.998	0.811	0.762	0.902	0.392	0.521	0.713	0.79	0.798	0.623	0.68	0.775	0.865
	4710	0.984	0.998	0.8	0.757	0.902	0.386	0.513	0.707	0.787	0.795	0.618	0.676	0.772	0.862
	4740	0.992	0.999	0.814	0.767	0.908	0.392	0.518	0.708	0.789	0.794	0.62	0.679	0.774	0.862
	4770	0.983	1	0.803	0.763	0.906	0.385	0.508	0.705	0.785	0.794	0.616	0.676	0.774	0.86
	4800	0.982	1	0.801	0.76	0.905	0.377	0.503	0.701	0.785	0.792	0.614	0.669	0.77	0.857
	4830	0.983	1	0.799	0.76	0.905	0.373	0.503	0.7	0.786	0.792	0.614	0.67	0.771	0.859
	4860	0.982	0.998	0.801	0.761	0.907	0.365	0.499	0.7	0.787	0.791	0.611	0.67	0.767	0.86
	4890	0.982	0.998	0.798	0.761	0.903	0.354	0.495	0.698	0.783	0.789	0.606	0.668	0.769	0.859
	4920	0.989	0.996	0.803	0.766	0.903	0.349	0.501	0.703	0.785	0.792	0.607	0.669	0.77	0.861
	4950	0.982	0.998	0.793	0.756	0.901	0.336	0.491	0.696	0.78	0.787	0.602	0.666	0.766	0.859
	4980	0.989	0.998	0.8	0.758	0.898	0.336	0.493	0.699	0.78	0.789	0.601	0.665	0.769	0.858
	5010	0.976	0.997	0.786	0.752	0.897	0.332	0.484	0.693	0.779	0.788	0.599	0.662	0.764	0.855
	5040	0.981	0.996	0.792	0.753	0.899	0.334	0.487	0.694	0.779	0.789	0.603	0.663	0.765	0.858
	5070	0.973	0.994	0.78	0.747	0.899	0.334	0.475	0.691	0.777	0.783	0.594	0.658	0.763	0.853
	5100	0.976	0.996	0.785	0.747	0.9	0.335	0.475	0.688	0.785	0.784	0.592	0.655	0.762	0.856
	5130	0.975	0.998	0.784	0.75	0.899	0.332	0.472	0.69	0.776	0.786	0.594	0.657	0.762	0.854
	5160	0.977	1	0.784	0.75	0.899	0.331	0.471	0.686	0.774	0.785	0.599	0.654	0.761	0.857
	5190	0.977	0.998	0.783	0.744	0.897	0.323	0.467	0.684	0.774	0.779	0.589	0.653	0.76	0.853
	5220	0.983	0.995	0.786	0.74	0.891	0.321	0.473	0.687	0.776	0.783	0.585	0.654	0.758	0.857
	5250	0.983	0.993	0.788	0.741	0.894	0.318	0.469	0.686	0.777	0.783	0.584	0.652	0.76	0.852
	5280	0.981	0.993	0.785	0.74	0.891	0.312	0.466	0.682	0.772	0.78	0.581	0.65	0.755	0.853
	5310	0.974	0.993	0.775	0.74	0.894	0.306	0.456	0.679	0.773	0.778	0.58	0.647	0.754	0.853
	5340	0.984	0.991	0.784	0.733	0.89	0.301	0.463	0.681	0.77	0.782	0.579	0.647	0.754	0.851
	5370	0.982	0.989	0.782	0.733	0.889	0.296	0.46	0.681	0.77	0.781	0.579	0.647	0.753	0.852
	5400	0.981	0.989	0.778	0.73	0.887	0.293	0.458	0.678	0.767	0.778	0.575	0.645	0.755	0.854
	5430	0.982	0.994	0.777	0.731	0.888	0.291	0.455	0.677	0.768	0.777	0.576	0.645	0.752	0.852
	5460	0.98	0.99	0.774	0.728	0.886	0.288	0.449	0.674	0.766	0.778	0.572	0.642	0.753	0.852
	5490	0.976	0.992	0.774	0.731	0.888	0.286	0.448	0.673	0.767	0.78	0.57	0.642	0.751	0.851
	5520	0.967	0.99	0.761	0.727	0.889	0.281	0.438	0.668	0.765	0.778	0.567	0.64	0.751	0.851
	5550	0.967	0.987	0.757	0.725	0.886	0.281	0.434	0.666	0.763	0.773	0.564	0.635	0.748	0.854
	5580	0.967	0.99	0.759	0.723	0.89	0.275	0.43	0.665	0.76	0.772	0.562	0.632	0.747	0.849
	5610	0.969	0.993	0.763	0.728	0.895	0.273	0.429	0.666	0.762	0.77	0.56	0.632	0.746	0.86
	5640	0.978	0.992	0.771	0.731	0.893	0.269	0.434	0.664	0.762	0.773	0.561	0.634	0.746	0.851
	5670	0.969	0.99	0.761	0.728	0.896	0.266	0.424	0.661	0.762	0.771	0.56	0.629	0.746	0.849
	5700	0.968	0.993	0.762	0.725	0.895	0.263	0.421	0.662	0.762	0.77	0.559	0.629	0.745	0.851
	5730	0.976	0.99	0.765	0.724	0.893	0.261	0.427	0.662	0.759	0.77	0.556	0.628	0.745	0.848
	5760	0.966	0.988	0.757	0.715	0.89	0.254	0.413	0.656	0.756	0.765	0.55	0.623	0.74	0.845
	5790	0.967	0.991	0.752	0.714	0.893	0.253	0.412	0.654	0.756	0.765	0.549	0.623	0.739	0.849
	5820	0.964	0.989	0.752	0.714	0.892	0.25	0.408	0.653	0.755	0.765	0.546	0.621	0.739	0.844
	5850	0.965	0.992	0.752	0.713	0.899	0.248	0.406	0.655	0.754	0.766	0.547	0.621	0.741	0.848
	5880	0.962	0.992	0.752	0.714	0.898	0.243	0.405	0.65	0.755	0.765	0.543	0.619	0.74	0.846
	5910	0.975	0.991	0.761	0.719	0.902	0.239	0.411	0.656	0.761	0.769	0.545	0.623	0.742	0.846
	5940	0.963	0.989	0.75	0.71	0.903	0.238	0.4	0.648	0.75	0.762	0.538	0.613	0.739	0.841
	5970	0.966	0.99	0.752	0.708	0.899	0.232	0.395	0.647	0.75	0.778	0.539	0.613	0.736	0.847
	6000	0.963	0.991	0.747	0.702	0.892	0.228	0.392	0.646	0.75	0.762	0.537	0.612	0.733	0.844
	6030	0.962	0.988	0.744	0.696	0.89	0.225	0.392	0.645	0.752	0.762	0.535	0.611	0.734	0.844
	6060	0.965	0.985	0.744	0.693	0.889	0.221	0.388	0.644	0.75	0.761	0.535	0.609	0.734	0.843
	6090	0.971	0.984	0.748	0.692	0.883	0.219	0.394	0.646	0.751	0.763	0.534	0.612	0.737	0.847
	6120	0.971	0.983	0.749	0.683	0.876	0.217	0.393	0.644	0.75	0.762	0.531	0.609	0.732	0.844
	6150	0.96	0.986	0.738	0.673	0.868	0.211	0.381	0.639	0.747	0.758	0.529	0.605	0.73	0.843
	6180	0.96	0.988	0.737	0.669	0.868	0.208	0.379	0.637	0.746	0.756	0.526	0.605	0.73	0.843
	6210	0.961	0.986	0.739	0.665	0.866	0.204	0.376	0.637	0.744	0.756	0.529	0.602	0.729	0.844
	6240	0.961	0.982	0.736	0.659	0.863	0.201	0.373	0.634	0.744	0.757	0.52	0.599	0.73	0.841
	6270	0.958	0.988	0.74	0.658	0.862	0.197	0.369	0.634	0.744	0.754	0.522	0.599	0.729	0.842
	6300	0.959	0.987	0.741	0.66	0.862	0.195	0.368	0.632	0.744	0.755	0.517	0.599	0.726	0.843
	6330	0.968	0.987	0.748	0.663	0.86	0.192	0.372	0.638	0.741	0.756	0.517	0.599	0.726	0.84
	6360	0.959	0.985	0.737	0.665	0.861	0.189	0.361	0.629	0.742	0.754	0.514	0.596	0.725	0.838
	6390	0.96	0.99	0.738	0.666	0.862	0.187	0.357	0.628	0.739	0.753	0.512	0.595	0.724	0.84
	6420	0.96	0.989	0.738	0.665	0.861	0.183	0.356	0.628	0.739	0.754	0.514	0.593	0.724	0.841
	6450	0.96	0.988	0.743	0.663	0.866	0.179	0.355	0.626	0.74	0.752	0.509	0.589	0.722	0.838
	6480	0.959	0.99	0.736	0.661	0.862	0.177	0.351	0.625	0.739	0.75	0.509	0.588	0.723	0.839
	6510	0.963	0.983	0.738	0.66	0.863	0.174	0.358	0.628	0.738	0.752	0.506	0.593	0.722	0.839
	6540	0.957	0.985	0.732	0.656	0.862	0.173	0.344	0.622	0.734	0.748	0.503	0.587	0.72	0.837
	6570	0.959	0.983	0.724	0.654	0.861	0.167	0.341	0.62	0.734	0.747	0.503	0.584	0.721	0.835
	6600	0.958	0.985	0.719	0.651	0.863	0.166	0.339	0.619	0.735	0.747	0.499	0.583	0.719	0.838
	6630	0.956	0.98	0.715	0.65	0.862	0.165	0.339	0.616	0.735	0.75	0.497	0.581	0.72	0.837
	6660	0.955	0.981	0.714	0.649	0.865	0.162	0.338	0.619	0.734	0.747	0.497	0.582	0.719	0.839
	6690	0.953	0.982	0.714	0.646	0.863	0.16	0.334	0.614	0.731	0.747	0.493	0.583	0.715	0.837
	6720	0.959	0.979	0.715	0.647	0.859	0.157	0.338	0.616	0.729	0.746	0.492	0.578	0.713	0.835
	6750	0.953	0.989	0.717	0.645	0.866	0.159	0.323	0.61	0.732	0.744	0.498	0.574	0.711	0.836
	6780	0.955	0.984	0.712	0.644	0.861	0.155	0.324	0.609	0.727	0.742	0.487	0.574	0.713	0.835
	6810	0.954	0.985	0.716	0.644	0.862	0.158	0.321	0.61	0.736	0.742	0.485	0.572	0.713	0.836
	6840	0.955	0.989	0.716	0.642	0.862	0.155	0.32	0.612	0.731	0.74	0.483	0.572	0.71	0.833
	6870	0.954	0.986	0.715	0.639	0.859	0.155	0.313	0.606	0.728	0.738	0.481	0.57	0.708	0.834
	6900	0.956	0.988	0.711	0.642	0.862	0.155	0.315	0.608	0.727	0.739	0.481	0.568	0.713	0.836
	6930	0.953	0.986	0.708	0.641	0.858	0.155	0.312	0.603	0.727	0.742	0.477	0.567	0.708	0.833
	6960	0.954	0.98	0.7	0.636	0.861	0.155	0.313	0.601	0.725	0.739	0.478	0.564	0.706	0.839
	6990	0.952	0.976	0.693	0.636	0.86	0.156	0.309	0.602	0.726	0.737	0.476	0.566	0.708	0.834
	7020	0.948	0.974	0.69	0.633	0.859	0.155	0.303	0.599	0.721	0.735	0.472	0.562	0.707	0.832
	7050	0.945	0.967	0.685	0.629	0.857	0.151	0.294	0.596	0.72	0.734	0.471	0.557	0.701	0.83
	7080	0.947	0.969	0.68	0.63	0.858	0.154	0.301	0.598	0.721	0.734	0.469	0.558	0.704	0.83
	7110	0.948	0.962	0.673	0.63	0.86	0.153	0.296	0.597	0.72	0.734	0.466	0.559	0.704	0.832
	7140	0.947	0.953	0.667	0.628	0.857	0.152	0.291	0.594	0.72	0.733	0.466	0.555	0.704	0.83
	7170	0.947	0.95	0.662	0.628	0.86	0.153	0.292	0.597	0.719	0.737	0.465	0.558	0.704	0.834
	7200	0.943	0.941	0.657	0.624	0.857	0.153	0.283	0.589	0.718	0.734	0.46	0.555	0.699	0.83
	7230	0.949	0.942	0.656	0.628	0.856	0.154	0.287	0.593	0.716	0.732	0.459	0.552	0.7	0.829
	7260	0.945	0.932	0.658	0.623	0.856	0.153	0.282	0.589	0.714	0.731	0.455	0.55	0.698	0.829
	7290	0.945	0.928	0.662	0.624	0.856	0.15	0.278	0.589	0.715	0.728	0.455	0.548	0.696	0.827
	7320	0.945	0.927	0.659	0.621	0.856	0.156	0.278	0.59	0.715	0.731	0.456	0.547	0.7	0.831
	7350	0.945	0.923	0.658	0.619	0.855	0.153	0.276	0.585	0.712	0.729	0.451	0.544	0.696	0.83
	7380	0.942	0.919	0.652	0.616	0.855	0.152	0.271	0.582	0.711	0.728	0.45	0.543	0.692	0.826
	7410	0.945	0.919	0.651	0.617	0.857	0.153	0.27	0.585	0.712	0.73	0.449	0.546	0.696	0.83
	7440	0.945	0.918	0.649	0.615	0.854	0.15	0.267	0.581	0.71	0.727	0.451	0.543	0.693	0.828
	7470	0.943	0.919	0.644	0.614	0.851	0.153	0.264	0.579	0.708	0.729	0.447	0.539	0.691	0.827
	7500	0.944	0.92	0.642	0.614	0.852	0.154	0.262	0.582	0.717	0.727	0.445	0.54	0.693	0.829
	7530	0.942	0.918	0.644	0.613	0.854	0.151	0.26	0.576	0.707	0.725	0.442	0.536	0.691	0.828
	7560	0.941	0.915	0.636	0.612	0.854	0.152	0.254	0.577	0.707	0.724	0.439	0.535	0.693	0.828
	7590	0.941	0.919	0.638	0.611	0.853	0.155	0.257	0.574	0.708	0.724	0.44	0.536	0.691	0.827
	7620	0.94	0.915	0.637	0.609	0.851	0.154	0.251	0.574	0.706	0.723	0.436	0.533	0.689	0.825
	7650	0.938	0.918	0.634	0.607	0.851	0.154	0.249	0.572	0.706	0.722	0.433	0.531	0.689	0.824
	7680	0.939	0.919	0.631	0.605	0.851	0.153	0.249	0.572	0.703	0.724	0.432	0.53	0.689	0.827
	7710	0.94	0.921	0.632	0.605	0.851	0.152	0.244	0.569	0.704	0.72	0.43	0.529	0.687	0.826
	7740	0.938	0.918	0.635	0.605	0.853	0.154	0.242	0.569	0.704	0.719	0.43	0.528	0.686	0.827
	7770	0.937	0.92	0.629	0.604	0.851	0.155	0.239	0.569	0.7	0.72	0.428	0.528	0.686	0.825
	7800	0.933	0.918	0.623	0.603	0.853	0.152	0.232	0.563	0.7	0.72	0.426	0.522	0.684	0.823
	7830	0.937	0.916	0.634	0.601	0.848	0.152	0.241	0.569	0.699	0.719	0.423	0.524	0.684	0.824
	7860	0.934	0.92	0.626	0.601	0.851	0.151	0.232	0.564	0.7	0.719	0.422	0.522	0.683	0.825
	7890	0.933	0.921	0.622	0.599	0.848	0.152	0.226	0.561	0.698	0.717	0.421	0.521	0.681	0.822
	7920	0.934	0.922	0.618	0.595	0.85	0.151	0.227	0.56	0.698	0.714	0.417	0.519	0.679	0.821
	7950	0.934	0.921	0.617	0.599	0.847	0.152	0.226	0.56	0.697	0.713	0.416	0.519	0.679	0.823
	7980	0.936	0.92	0.616	0.595	0.848	0.152	0.222	0.558	0.696	0.714	0.417	0.517	0.679	0.822
	8010	0.936	0.917	0.612	0.592	0.847	0.15	0.218	0.557	0.695	0.711	0.412	0.516	0.677	0.819
	8040	0.937	0.917	0.612	0.593	0.846	0.151	0.218	0.554	0.696	0.713	0.412	0.514	0.675	0.821
	8070	0.937	0.915	0.611	0.59	0.847	0.153	0.215	0.555	0.696	0.711	0.409	0.513	0.676	0.821
	8100	0.938	0.915	0.609	0.588	0.844	0.15	0.213	0.554	0.692	0.71	0.407	0.508	0.676	0.819
	8130	0.934	0.915	0.607	0.587	0.845	0.151	0.21	0.551	0.692	0.709	0.405	0.509	0.675	0.821
	8160	0.931	0.917	0.608	0.588	0.847	0.153	0.208	0.553	0.694	0.71	0.404	0.508	0.675	0.823
	8190	0.937	0.915	0.616	0.586	0.842	0.151	0.211	0.553	0.691	0.712	0.401	0.508	0.671	0.82
	8220	0.935	0.915	0.605	0.586	0.846	0.151	0.203	0.548	0.69	0.709	0.401	0.504	0.672	0.82
	8250	0.942	0.914	0.614	0.584	0.842	0.153	0.208	0.553	0.691	0.709	0.399	0.505	0.673	0.82
	8280	0.941	0.911	0.611	0.584	0.843	0.151	0.204	0.547	0.687	0.709	0.395	0.503	0.672	0.817
	8310	0.94	0.917	0.602	0.582	0.846	0.152	0.197	0.545	0.688	0.71	0.396	0.501	0.67	0.819
	8340	0.939	0.912	0.601	0.579	0.843	0.15	0.194	0.542	0.686	0.704	0.394	0.499	0.668	0.816
	8370	0.938	0.912	0.598	0.578	0.843	0.151	0.191	0.539	0.685	0.707	0.391	0.496	0.667	0.819
	8400	0.934	0.913	0.598	0.578	0.843	0.152	0.188	0.539	0.683	0.703	0.389	0.494	0.668	0.815
	8430	0.931	0.912	0.596	0.576	0.843	0.152	0.187	0.538	0.684	0.705	0.387	0.495	0.665	0.817
	8460	0.934	0.911	0.594	0.573	0.842	0.149	0.185	0.536	0.681	0.702	0.388	0.492	0.663	0.816
	8490	0.932	0.911	0.594	0.574	0.841	0.151	0.182	0.536	0.683	0.702	0.387	0.49	0.664	0.816
	8520	0.93	0.909	0.594	0.573	0.841	0.151	0.181	0.535	0.68	0.703	0.38	0.492	0.662	0.816
	8550	0.93	0.911	0.591	0.572	0.843	0.151	0.181	0.533	0.68	0.7	0.38	0.49	0.664	0.817
	8580	0.927	0.909	0.588	0.571	0.841	0.152	0.179	0.531	0.68	0.702	0.386	0.487	0.662	0.814
	8610	0.926	0.91	0.588	0.57	0.842	0.151	0.179	0.532	0.68	0.7	0.378	0.485	0.662	0.813
	8640	0.929	0.908	0.594	0.568	0.838	0.151	0.185	0.535	0.679	0.704	0.376	0.486	0.658	0.816
	8670	0.928	0.91	0.586	0.566	0.841	0.151	0.176	0.528	0.677	0.698	0.373	0.481	0.66	0.813
	8700	0.926	0.908	0.586	0.565	0.837	0.151	0.175	0.526	0.675	0.695	0.372	0.478	0.658	0.812
	8730	0.923	0.908	0.585	0.567	0.841	0.152	0.175	0.528	0.676	0.698	0.372	0.48	0.658	0.815
	8760	0.925	0.908	0.589	0.565	0.837	0.149	0.183	0.527	0.674	0.696	0.367	0.479	0.656	0.813
	8790	0.93	0.91	0.585	0.563	0.841	0.151	0.175	0.525	0.676	0.696	0.366	0.479	0.656	0.816
	8820	0.93	0.908	0.589	0.565	0.835	0.153	0.182	0.528	0.673	0.696	0.364	0.478	0.657	0.811
	8850	0.926	0.909	0.588	0.564	0.838	0.151	0.181	0.525	0.673	0.695	0.363	0.477	0.657	0.812
	8880	0.925	0.908	0.585	0.56	0.836	0.151	0.182	0.521	0.674	0.694	0.361	0.475	0.655	0.813
	8910	0.93	0.907	0.586	0.559	0.838	0.151	0.18	0.522	0.67	0.694	0.361	0.475	0.655	0.813
	8940	0.929	0.908	0.575	0.556	0.836	0.152	0.175	0.517	0.67	0.693	0.358	0.473	0.652	0.811
	8970	0.93	0.906	0.573	0.556	0.839	0.15	0.171	0.514	0.669	0.692	0.353	0.473	0.651	0.812
	9000	0.929	0.906	0.585	0.557	0.835	0.154	0.18	0.519	0.671	0.693	0.357	0.475	0.651	0.814
	9030	0.923	0.903	0.571	0.551	0.836	0.153	0.172	0.513	0.666	0.688	0.353	0.465	0.646	0.809
	9060	0.925	0.904	0.569	0.55	0.836	0.15	0.171	0.511	0.667	0.688	0.351	0.461	0.648	0.807
	9090	0.929	0.903	0.568	0.552	0.835	0.154	0.172	0.512	0.664	0.691	0.348	0.462	0.648	0.812
	9120	0.927	0.904	0.568	0.549	0.834	0.15	0.171	0.508	0.663	0.685	0.347	0.463	0.647	0.807
	9150	0.926	0.904	0.568	0.549	0.834	0.152	0.172	0.51	0.665	0.687	0.346	0.461	0.646	0.809
	9180	0.925	0.905	0.564	0.549	0.832	0.153	0.173	0.507	0.665	0.686	0.343	0.456	0.645	0.808
	9210	0.929	0.906	0.565	0.548	0.831	0.152	0.172	0.506	0.664	0.687	0.345	0.457	0.645	0.809
	9240	0.933	0.904	0.562	0.543	0.827	0.15	0.17	0.503	0.664	0.683	0.342	0.454	0.645	0.809
	9270	0.929	0.905	0.563	0.547	0.833	0.152	0.171	0.503	0.661	0.685	0.338	0.454	0.641	0.807
	9300	0.932	0.904	0.561	0.543	0.83	0.152	0.172	0.503	0.669	0.684	0.337	0.453	0.645	0.807
	9330	0.932	0.903	0.561	0.545	0.827	0.15	0.172	0.502	0.66	0.682	0.335	0.452	0.64	0.805
	9360	0.931	0.904	0.559	0.544	0.831	0.154	0.172	0.5	0.662	0.684	0.336	0.454	0.642	0.808
	9390	0.936	0.903	0.556	0.54	0.827	0.15	0.17	0.497	0.657	0.683	0.334	0.449	0.641	0.807
	9420	0.933	0.903	0.556	0.541	0.828	0.153	0.171	0.496	0.659	0.68	0.331	0.45	0.64	0.807
	9450	0.931	0.901	0.554	0.537	0.828	0.15	0.171	0.496	0.658	0.68	0.327	0.447	0.636	0.803
	9480	0.933	0.903	0.556	0.539	0.827	0.153	0.172	0.494	0.656	0.678	0.324	0.447	0.638	0.804
	9510	0.922	0.898	0.551	0.536	0.825	0.148	0.172	0.491	0.656	0.679	0.324	0.445	0.638	0.806
	9540	0.922	0.9	0.551	0.534	0.826	0.15	0.171	0.491	0.655	0.677	0.322	0.443	0.635	0.804
	9570	0.928	0.901	0.549	0.533	0.826	0.151	0.171	0.49	0.658	0.684	0.321	0.44	0.633	0.803
	9600	0.924	0.898	0.555	0.531	0.822	0.148	0.177	0.493	0.653	0.679	0.319	0.439	0.634	0.803
	9630	0.92	0.9	0.545	0.529	0.825	0.15	0.17	0.488	0.651	0.673	0.315	0.437	0.632	0.802
	9660	0.921	0.898	0.546	0.529	0.823	0.148	0.171	0.489	0.652	0.675	0.315	0.433	0.631	0.802
	9690	0.919	0.9	0.545	0.531	0.827	0.151	0.171	0.487	0.651	0.674	0.313	0.434	0.632	0.804
	9720	0.91	0.898	0.542	0.527	0.825	0.151	0.171	0.485	0.651	0.674	0.313	0.435	0.631	0.802
	9750	0.906	0.897	0.542	0.527	0.823	0.15	0.17	0.481	0.648	0.673	0.31	0.432	0.632	0.804
	9780	0.901	0.899	0.541	0.527	0.823	0.152	0.17	0.481	0.649	0.672	0.309	0.43	0.627	0.8
	9810	0.892	0.896	0.546	0.526	0.823	0.15	0.178	0.483	0.648	0.673	0.308	0.434	0.628	0.8
	9840	0.888	0.898	0.537	0.522	0.823	0.15	0.169	0.477	0.645	0.672	0.305	0.429	0.626	0.799
	9870	0.885	0.897	0.545	0.524	0.82	0.15	0.177	0.483	0.645	0.673	0.303	0.431	0.627	0.8
	9900	0.88	0.897	0.535	0.521	0.824	0.151	0.171	0.476	0.645	0.669	0.302	0.427	0.626	0.801
	9930	0.874	0.895	0.531	0.518	0.819	0.149	0.168	0.473	0.644	0.667	0.297	0.422	0.622	0.796
	9960	0.875	0.897	0.532	0.52	0.822	0.15	0.171	0.474	0.643	0.667	0.298	0.421	0.625	0.799
	9990	0.874	0.895	0.531	0.518	0.822	0.151	0.171	0.473	0.643	0.668	0.298	0.421	0.624	0.8
	10020	0.878	0.898	0.54	0.519	0.82	0.151	0.179	0.475	0.644	0.67	0.297	0.422	0.625	0.801
	10050	0.869	0.894	0.528	0.516	0.818	0.149	0.17	0.47	0.641	0.668	0.292	0.417	0.621	0.796
	10080	0.87	0.894	0.526	0.515	0.82	0.15	0.17	0.467	0.641	0.666	0.291	0.416	0.62	0.799
	10110	0.871	0.896	0.529	0.514	0.82	0.15	0.171	0.469	0.64	0.667	0.29	0.417	0.624	0.799
	10140	0.869	0.895	0.526	0.512	0.822	0.149	0.17	0.465	0.638	0.663	0.288	0.416	0.621	0.799
	10170	0.866	0.894	0.524	0.512	0.82	0.152	0.169	0.465	0.639	0.663	0.286	0.41	0.618	0.797
	10200	0.863	0.893	0.522	0.509	0.821	0.151	0.168	0.462	0.637	0.662	0.284	0.412	0.617	0.798
	10230	0.861	0.892	0.52	0.508	0.816	0.15	0.168	0.461	0.635	0.661	0.282	0.407	0.615	0.797
	10260	0.868	0.893	0.529	0.51	0.817	0.148	0.175	0.463	0.635	0.661	0.282	0.41	0.616	0.795
	10290	0.858	0.892	0.52	0.505	0.818	0.15	0.171	0.461	0.633	0.658	0.28	0.407	0.614	0.797
	10320	0.866	0.892	0.526	0.506	0.82	0.148	0.178	0.462	0.635	0.662	0.279	0.408	0.616	0.796
	10350	0.855	0.891	0.514	0.502	0.815	0.147	0.167	0.456	0.63	0.658	0.275	0.402	0.613	0.794
	10380	0.856	0.891	0.515	0.502	0.817	0.149	0.168	0.454	0.629	0.656	0.274	0.401	0.614	0.794
	10410	0.867	0.892	0.525	0.504	0.815	0.151	0.176	0.458	0.632	0.659	0.273	0.403	0.613	0.796
	10440	0.856	0.891	0.512	0.499	0.815	0.148	0.17	0.452	0.633	0.654	0.275	0.399	0.611	0.792
	10470	0.858	0.891	0.513	0.501	0.816	0.15	0.171	0.45	0.63	0.655	0.269	0.399	0.609	0.791
	10500	0.858	0.889	0.511	0.497	0.816	0.149	0.169	0.449	0.63	0.654	0.271	0.397	0.608	0.792
	10530	0.857	0.888	0.509	0.499	0.816	0.15	0.169	0.45	0.629	0.652	0.266	0.395	0.61	0.796
	10560	0.858	0.889	0.507	0.496	0.815	0.149	0.169	0.446	0.626	0.654	0.263	0.394	0.607	0.791
	10590	0.86	0.891	0.507	0.502	0.816	0.149	0.169	0.447	0.627	0.653	0.262	0.393	0.608	0.791
	10620	0.862	0.889	0.505	0.494	0.814	0.151	0.17	0.447	0.627	0.653	0.259	0.393	0.606	0.795
	10650	0.858	0.888	0.504	0.492	0.815	0.151	0.167	0.443	0.625	0.653	0.259	0.389	0.604	0.79
	10680	0.863	0.89	0.504	0.491	0.814	0.151	0.17	0.445	0.625	0.649	0.257	0.389	0.605	0.792
	10710	0.859	0.888	0.502	0.491	0.815	0.149	0.167	0.44	0.624	0.649	0.257	0.388	0.605	0.793
	10740	0.862	0.888	0.503	0.488	0.812	0.149	0.168	0.44	0.624	0.648	0.256	0.385	0.602	0.791
	10770	0.863	0.89	0.5	0.489	0.814	0.151	0.171	0.442	0.624	0.651	0.256	0.386	0.604	0.792
	10800	0.863	0.887	0.502	0.487	0.814	0.149	0.168	0.439	0.621	0.648	0.25	0.384	0.6	0.792
	10830	0.862	0.885	0.496	0.486	0.813	0.148	0.168	0.436	0.62	0.648	0.249	0.38	0.599	0.789
	10860	0.861	0.889	0.497	0.485	0.819	0.15	0.171	0.437	0.621	0.645	0.248	0.383	0.6	0.79
	10890	0.863	0.886	0.495	0.484	0.813	0.15	0.167	0.437	0.619	0.647	0.246	0.379	0.599	0.789
	10920	0.862	0.887	0.494	0.484	0.811	0.15	0.168	0.433	0.62	0.646	0.244	0.379	0.598	0.79
	10950	0.862	0.889	0.493	0.482	0.812	0.15	0.168	0.434	0.619	0.645	0.242	0.376	0.599	0.798
	10980	0.858	0.884	0.489	0.477	0.808	0.147	0.168	0.428	0.614	0.642	0.24	0.373	0.596	0.788
	11010	0.859	0.884	0.486	0.477	0.816	0.148	0.164	0.427	0.615	0.644	0.239	0.372	0.597	0.788
	11040	0.861	0.886	0.492	0.482	0.812	0.149	0.166	0.428	0.615	0.642	0.238	0.373	0.596	0.789
	11070	0.861	0.885	0.486	0.476	0.809	0.148	0.169	0.428	0.619	0.64	0.236	0.372	0.594	0.787
	11100	0.857	0.882	0.486	0.474	0.808	0.148	0.168	0.425	0.614	0.641	0.234	0.368	0.593	0.788
	11130	0.859	0.884	0.485	0.474	0.809	0.15	0.17	0.428	0.613	0.641	0.233	0.369	0.593	0.788
	11160	0.858	0.884	0.485	0.473	0.811	0.148	0.168	0.423	0.613	0.641	0.232	0.369	0.594	0.788
	11190	0.858	0.885	0.484	0.472	0.809	0.149	0.167	0.423	0.61	0.641	0.229	0.365	0.591	0.788
	11220	0.857	0.884	0.482	0.471	0.809	0.148	0.167	0.42	0.611	0.639	0.228	0.364	0.591	0.787
	11250	0.858	0.88	0.48	0.469	0.816	0.149	0.166	0.418	0.61	0.64	0.227	0.365	0.592	0.786
	11280	0.857	0.883	0.478	0.471	0.807	0.148	0.167	0.418	0.609	0.639	0.223	0.362	0.589	0.786
	11310	0.856	0.881	0.477	0.468	0.807	0.149	0.169	0.417	0.609	0.637	0.222	0.361	0.588	0.786
	11340	0.857	0.881	0.475	0.467	0.806	0.15	0.168	0.417	0.609	0.636	0.22	0.359	0.59	0.787
	11370	0.854	0.882	0.475	0.466	0.803	0.148	0.17	0.414	0.604	0.637	0.217	0.356	0.585	0.783
	11400	0.855	0.88	0.476	0.464	0.803	0.149	0.168	0.414	0.606	0.635	0.22	0.356	0.586	0.782
	11430	0.854	0.881	0.475	0.463	0.802	0.149	0.168	0.416	0.606	0.633	0.216	0.355	0.584	0.785
	11460	0.856	0.881	0.474	0.463	0.805	0.15	0.17	0.413	0.606	0.635	0.215	0.354	0.585	0.784
	11490	0.854	0.88	0.47	0.461	0.804	0.151	0.169	0.41	0.604	0.635	0.214	0.352	0.583	0.785
	11520	0.853	0.878	0.472	0.46	0.801	0.151	0.167	0.411	0.606	0.63	0.211	0.35	0.584	0.782
	11550	0.853	0.88	0.468	0.458	0.802	0.146	0.167	0.407	0.604	0.631	0.21	0.349	0.582	0.782
	11580	0.854	0.88	0.47	0.465	0.802	0.15	0.169	0.407	0.602	0.63	0.207	0.347	0.58	0.782
	11610	0.853	0.879	0.465	0.456	0.802	0.148	0.17	0.405	0.601	0.629	0.205	0.345	0.58	0.782
	11640	0.853	0.879	0.466	0.459	0.802	0.149	0.168	0.404	0.6	0.63	0.206	0.348	0.581	0.785
	11670	0.853	0.878	0.466	0.455	0.801	0.149	0.17	0.402	0.601	0.629	0.203	0.343	0.58	0.78
	11700	0.851	0.877	0.463	0.452	0.8	0.148	0.169	0.401	0.597	0.628	0.201	0.343	0.578	0.777
	11730	0.85	0.875	0.461	0.453	0.798	0.15	0.168	0.401	0.598	0.625	0.2	0.341	0.575	0.781
	11760	0.856	0.882	0.467	0.453	0.8	0.147	0.167	0.399	0.598	0.626	0.198	0.341	0.578	0.782
	11790	0.851	0.877	0.459	0.454	0.8	0.149	0.168	0.399	0.595	0.628	0.199	0.338	0.579	0.783
	11820	0.851	0.879	0.46	0.45	0.8	0.149	0.168	0.397	0.595	0.625	0.198	0.336	0.576	0.779
	11850	0.851	0.875	0.457	0.448	0.801	0.15	0.169	0.397	0.595	0.626	0.194	0.338	0.576	0.78
	11880	0.849	0.876	0.456	0.445	0.797	0.15	0.167	0.392	0.594	0.624	0.19	0.331	0.573	0.778
	11910	0.851	0.875	0.456	0.446	0.798	0.148	0.17	0.394	0.594	0.625	0.191	0.332	0.572	0.78
	11940	0.849	0.875	0.452	0.443	0.794	0.148	0.167	0.391	0.591	0.622	0.19	0.331	0.572	0.776
	11970	0.85	0.877	0.454	0.445	0.799	0.15	0.167	0.391	0.588	0.623	0.189	0.331	0.574	0.782
	12000	0.858	0.873	0.46	0.445	0.797	0.149	0.174	0.393	0.59	0.628	0.187	0.331	0.572	0.779
	12030	0.845	0.872	0.449	0.443	0.801	0.148	0.162	0.386	0.59	0.622	0.185	0.327	0.567	0.776
	12060	0.851	0.875	0.451	0.443	0.796	0.149	0.169	0.388	0.591	0.622	0.184	0.327	0.568	0.78
	12090	0.845	0.872	0.445	0.44	0.8	0.148	0.162	0.385	0.591	0.622	0.184	0.324	0.569	0.776
	12120	0.847	0.872	0.446	0.44	0.795	0.148	0.168	0.384	0.586	0.618	0.182	0.323	0.566	0.777
	12150	0.844	0.874	0.446	0.438	0.795	0.148	0.166	0.381	0.586	0.616	0.179	0.321	0.564	0.777
	12180	0.851	0.875	0.445	0.438	0.795	0.149	0.168	0.383	0.588	0.62	0.179	0.325	0.566	0.777
	12210	0.847	0.874	0.443	0.439	0.795	0.15	0.169	0.381	0.587	0.618	0.178	0.321	0.566	0.774
	12240	0.847	0.872	0.443	0.434	0.793	0.148	0.167	0.38	0.583	0.617	0.173	0.316	0.562	0.775
	12270	0.845	0.872	0.441	0.434	0.794	0.148	0.167	0.378	0.589	0.615	0.175	0.315	0.564	0.774
	12300	0.844	0.873	0.439	0.432	0.794	0.148	0.168	0.38	0.585	0.616	0.172	0.317	0.564	0.778
	12330	0.845	0.872	0.438	0.43	0.794	0.146	0.166	0.375	0.582	0.614	0.171	0.313	0.562	0.775
	12360	0.844	0.869	0.438	0.43	0.794	0.148	0.168	0.374	0.582	0.615	0.171	0.314	0.565	0.776
	12390	0.844	0.872	0.438	0.429	0.794	0.148	0.167	0.373	0.58	0.613	0.169	0.311	0.56	0.773
	12420	0.843	0.872	0.434	0.429	0.795	0.149	0.167	0.374	0.581	0.611	0.169	0.311	0.558	0.778
	12450	0.84	0.869	0.434	0.426	0.792	0.147	0.166	0.372	0.58	0.609	0.165	0.308	0.556	0.774
	12480	0.843	0.87	0.431	0.425	0.79	0.148	0.167	0.369	0.576	0.617	0.165	0.306	0.558	0.77
	12510	0.844	0.871	0.43	0.427	0.792	0.147	0.168	0.37	0.577	0.61	0.169	0.305	0.558	0.772
	12540	0.845	0.869	0.431	0.423	0.792	0.149	0.167	0.369	0.578	0.636	0.165	0.305	0.556	0.772
	12570	0.841	0.868	0.427	0.424	0.789	0.149	0.165	0.367	0.574	0.607	0.164	0.302	0.555	0.775
	12600	0.841	0.871	0.43	0.423	0.791	0.151	0.17	0.369	0.58	0.609	0.167	0.305	0.558	0.773
	12630	0.843	0.87	0.427	0.42	0.79	0.149	0.167	0.366	0.576	0.606	0.166	0.301	0.555	0.771
	12660	0.842	0.868	0.429	0.42	0.792	0.148	0.169	0.364	0.578	0.607	0.163	0.298	0.553	0.774
	12690	0.84	0.869	0.423	0.419	0.789	0.148	0.167	0.363	0.574	0.607	0.164	0.299	0.555	0.772
	12720	0.842	0.868	0.424	0.418	0.789	0.15	0.169	0.361	0.574	0.604	0.162	0.297	0.552	0.769
	12750	0.839	0.866	0.422	0.415	0.789	0.146	0.166	0.357	0.574	0.604	0.16	0.293	0.551	0.771
	12780	0.84	0.867	0.42	0.415	0.787	0.147	0.164	0.356	0.571	0.603	0.166	0.292	0.551	0.77
	12810	0.842	0.866	0.42	0.414	0.791	0.148	0.168	0.359	0.57	0.602	0.167	0.294	0.551	0.771
	12840	0.839	0.866	0.417	0.413	0.788	0.148	0.166	0.355	0.569	0.602	0.162	0.29	0.548	0.767
	12870	0.839	0.867	0.418	0.413	0.786	0.149	0.168	0.355	0.568	0.601	0.162	0.289	0.549	0.769
	12900	0.84	0.867	0.419	0.413	0.789	0.148	0.167	0.357	0.568	0.604	0.161	0.289	0.548	0.771
	12930	0.838	0.866	0.416	0.411	0.788	0.149	0.166	0.351	0.568	0.604	0.16	0.287	0.547	0.769
	12960	0.838	0.865	0.414	0.408	0.788	0.149	0.167	0.351	0.566	0.6	0.161	0.287	0.545	0.769
	12990	0.838	0.866	0.413	0.409	0.788	0.147	0.166	0.35	0.566	0.599	0.16	0.285	0.545	0.769
	13020	0.838	0.867	0.413	0.409	0.788	0.149	0.167	0.35	0.566	0.6	0.161	0.283	0.546	0.776
	13050	0.838	0.863	0.41	0.405	0.786	0.149	0.168	0.348	0.563	0.598	0.16	0.282	0.545	0.765
	13080	0.838	0.865	0.41	0.407	0.789	0.148	0.167	0.349	0.565	0.596	0.159	0.282	0.542	0.77
	13110	0.837	0.865	0.41	0.406	0.787	0.149	0.168	0.346	0.566	0.599	0.163	0.282	0.544	0.77
	13140	0.838	0.862	0.405	0.4	0.785	0.148	0.165	0.343	0.564	0.595	0.159	0.278	0.541	0.764
	13170	0.836	0.863	0.406	0.403	0.784	0.148	0.168	0.344	0.562	0.595	0.159	0.279	0.542	0.768
	13200	0.836	0.863	0.406	0.4	0.786	0.149	0.167	0.342	0.561	0.594	0.159	0.275	0.539	0.766
	13230	0.837	0.862	0.403	0.398	0.786	0.15	0.166	0.341	0.56	0.592	0.159	0.274	0.538	0.765
	13260	0.835	0.862	0.403	0.398	0.784	0.149	0.168	0.339	0.56	0.592	0.159	0.272	0.538	0.765
	13290	0.833	0.861	0.402	0.397	0.784	0.148	0.165	0.339	0.557	0.591	0.158	0.273	0.536	0.764
	13320	0.836	0.861	0.4	0.398	0.785	0.148	0.166	0.337	0.558	0.592	0.159	0.272	0.537	0.765
	13350	0.834	0.862	0.402	0.396	0.785	0.148	0.166	0.338	0.558	0.593	0.16	0.269	0.537	0.763
	13380	0.832	0.863	0.398	0.394	0.784	0.149	0.165	0.335	0.556	0.591	0.159	0.269	0.54	0.763
	13410	0.833	0.86	0.398	0.392	0.783	0.149	0.167	0.332	0.556	0.593	0.157	0.266	0.534	0.764
	13440	0.84	0.857	0.405	0.394	0.782	0.149	0.173	0.336	0.559	0.592	0.158	0.268	0.534	0.765
	13470	0.833	0.862	0.396	0.39	0.785	0.146	0.166	0.333	0.554	0.59	0.158	0.264	0.532	0.763
	13500	0.832	0.861	0.393	0.39	0.783	0.147	0.166	0.33	0.553	0.588	0.159	0.263	0.533	0.761
	13530	0.834	0.86	0.391	0.388	0.781	0.146	0.167	0.328	0.551	0.588	0.156	0.26	0.531	0.762
	13560	0.834	0.859	0.392	0.389	0.781	0.149	0.166	0.329	0.551	0.588	0.157	0.259	0.532	0.764
	13590	0.832	0.858	0.39	0.388	0.78	0.149	0.166	0.33	0.551	0.588	0.158	0.259	0.529	0.762
	13620	0.829	0.859	0.39	0.384	0.781	0.149	0.164	0.324	0.549	0.585	0.159	0.257	0.529	0.761
	13650	0.831	0.859	0.389	0.385	0.783	0.148	0.168	0.326	0.549	0.584	0.157	0.257	0.53	0.763
	13680	0.831	0.857	0.386	0.384	0.781	0.148	0.166	0.323	0.549	0.586	0.158	0.255	0.53	0.762
	13710	0.83	0.856	0.385	0.382	0.778	0.146	0.166	0.322	0.546	0.583	0.158	0.254	0.527	0.759
	13740	0.827	0.857	0.385	0.381	0.783	0.146	0.166	0.322	0.546	0.583	0.156	0.253	0.526	0.759
	13770	0.831	0.858	0.385	0.382	0.782	0.15	0.167	0.324	0.546	0.582	0.157	0.251	0.527	0.76
	13800	0.828	0.856	0.383	0.378	0.779	0.148	0.166	0.317	0.545	0.58	0.156	0.249	0.529	0.759
	13830	0.828	0.857	0.38	0.378	0.78	0.146	0.166	0.317	0.544	0.581	0.158	0.25	0.524	0.758
	13860	0.827	0.856	0.379	0.377	0.778	0.146	0.164	0.316	0.544	0.58	0.156	0.244	0.524	0.759
	13890	0.828	0.859	0.38	0.378	0.779	0.147	0.165	0.316	0.548	0.581	0.158	0.246	0.523	0.761
	13920	0.827	0.856	0.378	0.375	0.78	0.146	0.166	0.313	0.541	0.577	0.158	0.244	0.52	0.756
	13950	0.826	0.853	0.376	0.374	0.776	0.147	0.165	0.311	0.542	0.577	0.158	0.243	0.523	0.757
	13980	0.829	0.857	0.378	0.375	0.778	0.147	0.167	0.311	0.543	0.58	0.159	0.243	0.52	0.758
	14010	0.828	0.854	0.375	0.372	0.776	0.148	0.165	0.311	0.541	0.577	0.157	0.24	0.519	0.755
	14040	0.825	0.854	0.372	0.37	0.775	0.147	0.165	0.308	0.539	0.574	0.155	0.238	0.517	0.755
	14070	0.828	0.853	0.374	0.371	0.777	0.15	0.167	0.308	0.541	0.577	0.158	0.238	0.519	0.76
	14100	0.825	0.854	0.371	0.369	0.781	0.149	0.167	0.307	0.538	0.576	0.156	0.238	0.518	0.759
	14130	0.826	0.853	0.37	0.368	0.777	0.149	0.166	0.307	0.538	0.574	0.16	0.235	0.517	0.756
	14160	0.825	0.853	0.37	0.369	0.774	0.148	0.165	0.305	0.537	0.573	0.156	0.234	0.515	0.757
	14190	0.822	0.852	0.368	0.365	0.775	0.146	0.166	0.303	0.536	0.572	0.157	0.234	0.513	0.755
	14220	0.827	0.853	0.367	0.366	0.776	0.147	0.166	0.303	0.537	0.571	0.156	0.234	0.515	0.757
	14250	0.824	0.854	0.364	0.363	0.774	0.147	0.165	0.301	0.533	0.571	0.157	0.231	0.511	0.753
	14280	0.829	0.856	0.373	0.363	0.776	0.145	0.166	0.301	0.534	0.572	0.156	0.231	0.514	0.757
	14310	0.825	0.853	0.365	0.364	0.775	0.147	0.167	0.3	0.537	0.572	0.158	0.228	0.513	0.755
	14340	0.824	0.851	0.361	0.36	0.774	0.147	0.167	0.297	0.531	0.57	0.156	0.226	0.511	0.755
	14370	0.822	0.852	0.363	0.362	0.776	0.151	0.17	0.299	0.533	0.571	0.159	0.228	0.513	0.755

## Sheet: Exp. 3
	Experiment 3
	Absorbance
		1	2	3	4	5	6	7	8	9	10	11	12	13	14
	Time [s]	Ctrl.	Ctrl. + Ca	2 µM BiP	2 µM BiP + Ca	5 µM J	2 µM BiP + 5 µM J	2 µM BiP + 5 µM J + Ca	2 µM BiP + 5 µM J*	1 µM BiP	1 µM BiP + Ca	1 µM BiP + 2 µM J	1 µM BiP + 2 µM J + Ca	1 µM BiP + 2 µM J	2 µM J
	0	1.119	1.059	1.04	1.017	1.04	1.025	1.003	1.005	1.031	1.049	1.028	1.002	1.019	1.008
	30	1.119	1.057	1.035	1.016	1.035	1.02	1.004	0.999	1.023	1.046	1.021	0.998	1.017	1.003
	60	1.11	1.05	1.028	1.007	1.032	1.019	0.991	0.998	1.022	1.048	1.022	0.993	1.015	1.002
	90	1.108	1.051	1.026	1.006	1.032	1.018	0.993	0.998	1.02	1.043	1.017	0.992	1.009	1
	120	1.106	1.044	1.023	1.003	1.029	1.014	0.987	0.996	1.016	1.045	1.017	0.992	1.007	0.998
	150	1.109	1.045	1.024	1.002	1.031	1.011	0.989	0.993	1.015	1.046	1.014	0.988	1.006	0.997
	180	1.098	1.038	1.01	0.993	1.023	1.002	0.979	0.99	1.012	1.039	1.011	0.987	1.006	0.997
	210	1.103	1.044	1.014	0.996	1.026	1.006	0.979	0.989	1.014	1.042	1.01	0.992	0.999	0.997
	240	1.108	1.045	1.016	0.997	1.027	1.003	0.977	0.988	1.012	1.04	1.006	0.981	1	0.995
	270	1.102	1.043	1.015	0.995	1.025	0.997	0.975	0.985	1.011	1.039	1.006	0.979	1.001	0.995
	300	1.105	1.046	1.012	0.993	1.027	0.996	0.974	0.985	1.009	1.039	1.005	0.986	0.997	0.997
	330	1.103	1.041	1.008	0.991	1.025	0.992	0.972	0.985	1.007	1.037	1	0.984	0.993	0.996
	360	1.096	1.035	1.004	0.985	1.022	0.984	0.965	0.98	1.007	1.034	0.998	0.975	0.993	0.992
	390	1.097	1.035	1.003	0.988	1.02	0.985	0.965	0.979	1.003	1.033	0.997	0.976	0.996	0.993
	420	1.101	1.041	1.005	0.989	1.025	0.983	0.963	0.982	1.004	1.036	0.999	0.975	0.996	0.994
	450	1.101	1.042	0.995	0.984	1.025	0.976	0.961	0.975	1.002	1.03	0.993	0.98	0.989	0.99
	480	1.094	1.03	0.993	0.979	1.018	0.97	0.956	0.975	0.998	1.027	0.992	0.972	0.992	0.991
	510	1.102	1.038	0.998	0.984	1.023	0.971	0.956	0.973	1	1.03	0.989	0.976	0.99	0.991
	540	1.099	1.036	0.994	0.98	1.022	0.966	0.952	0.972	0.998	1.029	0.987	0.973	0.986	0.993
	570	1.095	1.035	0.993	0.979	1.021	0.962	0.951	0.971	0.999	1.027	0.986	0.969	0.993	0.988
	600	1.093	1.032	0.994	0.98	1.02	0.964	0.949	0.973	0.999	1.027	0.987	0.968	0.989	0.994
	630	1.096	1.03	0.994	0.975	1.02	0.957	0.947	0.969	0.998	1.025	0.983	0.966	0.992	0.991
	660	1.093	1.031	0.985	0.975	1.021	0.954	0.94	0.968	0.995	1.027	0.983	0.973	0.987	0.996
	690	1.094	1.028	0.985	0.974	1.017	0.949	0.936	0.965	0.995	1.021	0.978	0.969	0.984	0.991
	720	1.093	1.031	0.984	0.971	1.018	0.947	0.934	0.963	0.993	1.022	0.976	0.968	0.981	0.992
	750	1.093	1.031	0.984	0.973	1.017	0.943	0.934	0.962	0.992	1.022	0.978	0.969	0.983	0.992
	780	1.087	1.028	0.982	0.97	1.014	0.94	0.929	0.957	0.988	1.017	0.972	0.959	0.983	0.99
	810	1.088	1.026	0.979	0.968	1.011	0.935	0.926	0.956	0.988	1.014	0.97	0.954	0.977	0.986
	840	1.083	1.02	0.972	0.963	1.012	0.925	0.919	0.952	0.982	1.014	0.967	0.951	0.975	0.983
	870	1.083	1.022	0.974	0.963	1.012	0.925	0.92	0.954	0.986	1.012	0.965	0.951	0.979	0.987
	900	1.083	1.022	0.975	0.962	1.013	0.926	0.916	0.95	0.982	1.01	0.962	0.948	0.973	0.984
	930	1.088	1.026	0.972	0.963	1.015	0.924	0.918	0.952	0.983	1.014	0.965	0.955	0.975	0.988
	960	1.087	1.021	0.972	0.961	1.01	0.918	0.913	0.95	0.98	1.01	0.959	0.947	0.969	0.985
	990	1.088	1.024	0.966	0.959	1.013	0.91	0.915	0.95	0.98	1.008	0.957	0.946	0.975	0.986
	1020	1.092	1.024	0.969	0.961	1.012	0.914	0.906	0.947	0.979	1.01	0.957	0.951	0.971	0.987
	1050	1.087	1.024	0.968	0.958	1.009	0.906	0.901	0.942	0.977	1.006	0.954	0.939	0.971	0.983
	1080	1.088	1.025	0.967	0.955	1.011	0.905	0.899	0.942	0.979	1.009	0.955	0.937	0.97	0.983
	1110	1.079	1.021	0.961	0.953	1.008	0.898	0.899	0.941	0.977	1.007	0.951	0.933	0.968	0.984
	1140	1.079	1.022	0.96	0.952	1.008	0.896	0.893	0.939	0.979	1.004	0.951	0.932	0.968	0.981
	1170	1.08	1.022	0.962	0.951	1.007	0.896	0.889	0.936	0.975	1.008	0.946	0.929	0.966	0.982
	1200	1.081	1.021	0.959	0.95	1.006	0.889	0.886	0.936	0.975	1.005	0.946	0.923	0.964	0.979
	1230	1.084	1.028	0.96	0.952	1.011	0.891	0.885	0.937	0.973	1.002	0.944	0.93	0.965	0.979
	1260	1.08	1.024	0.957	0.949	1.008	0.885	0.88	0.933	0.975	1.002	0.942	0.918	0.963	0.975
	1290	1.077	1.02	0.957	0.947	1.009	0.879	0.877	0.93	0.972	0.999	0.94	0.917	0.961	0.971
	1320	1.077	1.019	0.952	0.945	1.006	0.876	0.874	0.932	0.971	0.999	0.936	0.919	0.961	0.969
	1350	1.082	1.02	0.953	0.945	1.008	0.876	0.872	0.932	0.97	0.998	0.936	0.922	0.959	0.966
	1380	1.08	1.024	0.948	0.943	1.01	0.868	0.87	0.929	0.966	0.996	0.93	0.923	0.959	0.964
	1410	1.083	1.023	0.951	0.943	1.006	0.868	0.865	0.928	0.968	0.999	0.932	0.918	0.96	0.969
	1440	1.078	1.018	0.947	0.94	1.004	0.864	0.861	0.923	0.966	0.995	0.927	0.913	0.953	0.964
	1470	1.076	1.014	0.945	0.936	1	0.856	0.859	0.92	0.964	0.992	0.927	0.907	0.958	0.965
	1500	1.073	1.012	0.941	0.931	0.999	0.848	0.851	0.916	0.962	0.99	0.922	0.901	0.949	0.961
	1530	1.07	1.01	0.937	0.93	0.997	0.846	0.854	0.915	0.962	0.99	0.922	0.903	0.949	0.961
	1560	1.072	1.012	0.937	0.929	0.997	0.845	0.848	0.911	0.961	0.99	0.92	0.899	0.945	0.96
	1590	1.077	1.018	0.939	0.933	1.001	0.844	0.854	0.916	0.963	0.99	0.919	0.911	0.952	0.964
	1620	1.076	1.016	0.939	0.934	1	0.84	0.848	0.914	0.963	0.99	0.917	0.898	0.945	0.961
	1650	1.075	1.014	0.936	0.928	1	0.839	0.841	0.908	0.957	0.986	0.912	0.902	0.946	0.96
	1680	1.075	1.015	0.934	0.929	1.001	0.833	0.84	0.91	0.961	0.989	0.913	0.905	0.946	0.963
	1710	1.074	1.011	0.937	0.927	0.998	0.829	0.838	0.904	0.959	0.985	0.911	0.899	0.945	0.96
	1740	1.072	1.017	0.934	0.926	1	0.829	0.833	0.906	0.958	0.986	0.909	0.903	0.947	0.961
	1770	1.073	1.012	0.931	0.923	0.997	0.821	0.831	0.901	0.955	0.983	0.908	0.895	0.943	0.961
	1800	1.071	1.012	0.927	0.922	1	0.818	0.825	0.898	0.954	0.98	0.905	0.899	0.94	0.961
	1830	1.066	1.009	0.928	0.919	0.994	0.812	0.823	0.897	0.952	0.98	0.9	0.889	0.937	0.96
	1860	1.073	1.015	0.928	0.919	1	0.814	0.821	0.899	0.955	0.98	0.903	0.898	0.939	0.961
	1890	1.069	1.012	0.924	0.917	0.998	0.808	0.82	0.895	0.952	0.98	0.9	0.892	0.935	0.962
	1920	1.066	1.008	0.917	0.912	0.992	0.799	0.816	0.896	0.947	0.975	0.896	0.886	0.932	0.961
	1950	1.073	1.01	0.925	0.915	0.996	0.801	0.812	0.893	0.95	0.977	0.895	0.885	0.932	0.961
	1980	1.067	1.007	0.921	0.915	0.998	0.797	0.81	0.889	0.948	0.975	0.891	0.89	0.936	0.959
	2010	1.067	1.012	0.919	0.914	0.997	0.793	0.809	0.89	0.949	0.977	0.89	0.888	0.932	0.96
	2040	1.064	1.009	0.918	0.91	0.995	0.789	0.805	0.886	0.946	0.974	0.887	0.88	0.929	0.956
	2070	1.06	1.002	0.911	0.906	0.99	0.777	0.801	0.885	0.937	0.969	0.88	0.879	0.922	0.955
	2100	1.071	1.011	0.916	0.908	0.992	0.784	0.803	0.885	0.945	0.974	0.884	0.877	0.926	0.955
	2130	1.064	1.01	0.912	0.908	0.993	0.78	0.798	0.883	0.945	0.971	0.883	0.884	0.928	0.953
	2160	1.064	1.005	0.911	0.904	0.992	0.771	0.797	0.876	0.941	0.97	0.877	0.874	0.922	0.951
	2190	1.063	1.009	0.913	0.903	0.992	0.766	0.794	0.877	0.94	0.968	0.877	0.872	0.924	0.954
	2220	1.06	1.005	0.905	0.902	0.992	0.762	0.79	0.877	0.935	0.968	0.871	0.87	0.92	0.953
	2250	1.063	1.011	0.909	0.903	0.992	0.765	0.79	0.88	0.938	0.969	0.874	0.878	0.922	0.958
	2280	1.059	1.007	0.903	0.901	0.989	0.755	0.786	0.879	0.934	0.965	0.869	0.876	0.919	0.956
	2310	1.061	1.007	0.906	0.9	0.988	0.756	0.781	0.875	0.938	0.97	0.867	0.869	0.919	0.958
	2340	1.06	1.005	0.902	0.897	0.986	0.747	0.775	0.871	0.931	0.962	0.867	0.865	0.92	0.957
	2370	1.057	1.006	0.901	0.895	0.986	0.741	0.776	0.868	0.929	0.961	0.863	0.861	0.917	0.956
	2400	1.06	1.004	0.902	0.896	0.984	0.743	0.773	0.867	0.932	0.964	0.862	0.863	0.916	0.954
	2430	1.057	1.008	0.897	0.899	0.988	0.74	0.769	0.869	0.933	0.962	0.862	0.871	0.914	0.954
	2460	1.055	1.004	0.896	0.896	0.985	0.732	0.769	0.867	0.929	0.963	0.857	0.871	0.911	0.96
	2490	1.054	1.002	0.894	0.896	0.978	0.728	0.766	0.866	0.926	0.959	0.851	0.861	0.91	0.957
	2520	1.057	1.001	0.897	0.893	0.978	0.73	0.767	0.862	0.93	0.958	0.855	0.859	0.907	0.955
	2550	1.055	0.999	0.898	0.892	0.981	0.726	0.759	0.86	0.929	0.957	0.852	0.86	0.907	0.954
	2580	1.055	1.001	0.894	0.888	0.979	0.72	0.757	0.863	0.925	0.96	0.848	0.857	0.903	0.955
	2610	1.054	1.004	0.895	0.889	0.98	0.712	0.753	0.86	0.922	0.957	0.844	0.858	0.905	0.957
	2640	1.053	1.002	0.893	0.885	0.976	0.711	0.75	0.857	0.922	0.953	0.843	0.854	0.912	0.952
	2670	1.055	1.004	0.891	0.88	0.974	0.709	0.746	0.857	0.921	0.954	0.845	0.851	0.905	0.951
	2700	1.056	1.008	0.89	0.879	0.977	0.71	0.747	0.858	0.921	0.956	0.841	0.858	0.906	0.955
	2730	1.054	1.008	0.885	0.877	0.976	0.704	0.745	0.854	0.92	0.955	0.837	0.856	0.908	0.952
	2760	1.053	1.004	0.887	0.878	0.974	0.696	0.741	0.851	0.917	0.955	0.832	0.848	0.909	0.949
	2790	1.047	1	0.881	0.873	0.968	0.686	0.735	0.849	0.914	0.949	0.828	0.848	0.905	0.947
	2820	1.049	0.999	0.881	0.874	0.971	0.683	0.734	0.848	0.911	0.951	0.826	0.845	0.908	0.949
	2850	1.05	1.002	0.879	0.873	0.969	0.681	0.73	0.85	0.912	0.947	0.826	0.847	0.906	0.947
	2880	1.051	1.003	0.881	0.872	0.975	0.683	0.729	0.846	0.913	0.948	0.826	0.85	0.904	0.95
	2910	1.049	1	0.878	0.872	0.969	0.672	0.724	0.845	0.91	0.949	0.82	0.846	0.902	0.949
	2940	1.051	1.007	0.878	0.87	0.973	0.667	0.724	0.842	0.912	0.946	0.821	0.839	0.901	0.951
	2970	1.051	1.001	0.877	0.872	0.968	0.668	0.721	0.841	0.908	0.947	0.817	0.837	0.901	0.947
	3000	1.05	1.001	0.877	0.868	0.967	0.667	0.718	0.841	0.91	0.947	0.816	0.836	0.897	0.946
	3030	1.048	0.999	0.874	0.87	0.968	0.659	0.713	0.836	0.904	0.943	0.812	0.833	0.897	0.946
	3060	1.049	1.001	0.871	0.865	0.965	0.654	0.712	0.833	0.903	0.943	0.807	0.833	0.896	0.947
	3090	1.048	1.001	0.869	0.86	0.969	0.657	0.706	0.837	0.907	0.943	0.813	0.839	0.896	0.948
	3120	1.045	0.999	0.866	0.858	0.966	0.648	0.706	0.831	0.906	0.943	0.807	0.829	0.893	0.946
	3150	1.047	0.999	0.862	0.856	0.968	0.643	0.702	0.83	0.903	0.94	0.805	0.828	0.975	1.027
	3180	1.049	1.007	0.869	0.855	0.976	0.636	0.7	0.833	0.906	0.938	0.804	0.827	0.892	0.944
	3210	1.044	1.002	0.864	0.852	0.971	0.63	0.698	0.827	0.903	0.94	0.802	0.826	0.892	0.945
	3240	1.046	0.999	0.861	0.847	0.969	0.632	0.694	0.826	0.903	0.939	0.803	0.823	0.89	0.946
	3270	1.046	0.999	0.86	0.843	0.969	0.63	0.693	0.826	0.903	0.938	0.804	0.823	0.891	0.945
	3300	1.047	0.999	0.857	0.843	0.967	0.625	0.688	0.82	0.902	0.936	0.798	0.817	0.887	0.941
	3330	1.045	0.997	0.854	0.844	0.97	0.623	0.686	0.82	0.899	0.936	0.795	0.82	0.889	0.946
	3360	1.042	0.995	0.852	0.841	0.965	0.618	0.684	0.819	0.893	0.935	0.792	0.815	0.884	0.944
	3390	1.044	0.994	0.849	0.845	0.968	0.613	0.684	0.82	0.895	0.937	0.793	0.819	0.887	0.945
	3420	1.041	0.989	0.846	0.838	0.965	0.607	0.679	0.815	0.889	0.931	0.789	0.813	0.881	0.941
	3450	1.044	0.991	0.836	0.838	0.968	0.609	0.677	0.816	0.889	0.93	0.787	0.819	0.883	0.943
	3480	1.043	0.992	0.841	0.839	0.966	0.6	0.674	0.814	0.888	0.93	0.785	0.811	0.887	0.944
	3510	1.041	0.989	0.84	0.837	0.961	0.598	0.67	0.815	0.884	0.929	0.783	0.808	0.88	0.943
	3540	1.046	0.988	0.836	0.836	0.967	0.598	0.669	0.813	0.885	0.934	0.783	0.819	0.88	0.945
	3570	1.039	0.986	0.834	0.833	0.964	0.591	0.662	0.806	0.878	0.927	0.781	0.804	0.879	0.938
	3600	1.047	0.99	0.829	0.831	0.967	0.592	0.66	0.809	0.879	0.93	0.782	0.809	0.878	0.941
	3630	1.045	0.993	0.829	0.83	0.971	0.588	0.661	0.81	0.883	0.93	0.78	0.812	0.878	0.943
	3660	1.041	0.985	0.832	0.826	0.965	0.58	0.656	0.804	0.882	0.927	0.771	0.805	0.88	0.936
	3690	1.037	0.985	0.832	0.825	0.966	0.578	0.652	0.805	0.876	0.925	0.77	0.804	0.878	0.938
	3720	1.043	0.993	0.83	0.826	0.972	0.574	0.65	0.804	0.87	0.927	0.772	0.813	0.877	0.938
	3750	1.038	0.985	0.832	0.824	0.963	0.566	0.647	0.799	0.87	0.924	0.77	0.798	0.872	0.938
	3780	1.038	0.989	0.831	0.823	0.964	0.565	0.647	0.803	0.868	0.924	0.772	0.798	0.871	0.937
	3810	1.042	0.989	0.834	0.825	0.967	0.564	0.644	0.801	0.872	0.923	0.766	0.805	0.875	0.941
	3840	1.037	0.99	0.829	0.824	0.962	0.559	0.639	0.796	0.863	0.92	0.763	0.792	0.871	0.939
	3870	1.038	0.991	0.825	0.819	0.964	0.551	0.635	0.793	0.866	0.918	0.762	0.791	0.868	0.935
	3900	1.037	0.993	0.826	0.818	0.961	0.546	0.633	0.793	0.866	0.915	0.762	0.789	0.866	0.938
	3930	1.038	0.992	0.821	0.821	0.961	0.544	0.631	0.795	0.864	0.916	0.76	0.787	0.868	0.94
	3960	1.036	0.994	0.819	0.817	0.96	0.539	0.627	0.791	0.865	0.917	0.76	0.785	0.864	0.935
	3990	1.034	0.998	0.816	0.816	0.967	0.542	0.624	0.791	0.865	0.918	0.765	0.796	0.864	0.936
	4020	1.034	0.99	0.816	0.812	0.962	0.534	0.619	0.786	0.865	0.912	0.759	0.789	0.863	0.935
	4050	1.034	0.994	0.814	0.813	0.961	0.533	0.619	0.791	0.862	0.917	0.752	0.789	0.864	0.938
	4080	1.038	0.991	0.812	0.814	0.963	0.53	0.617	0.789	0.867	0.919	0.752	0.79	0.865	0.941
	4110	1.034	0.985	0.807	0.809	0.956	0.521	0.612	0.782	0.863	0.908	0.744	0.777	0.86	0.934
	4140	1.034	0.984	0.802	0.809	0.958	0.515	0.611	0.785	0.866	0.908	0.746	0.78	0.863	0.94
	4170	1.035	0.981	0.794	0.808	0.957	0.514	0.608	0.78	0.861	0.908	0.733	0.776	0.858	0.933
	4200	1.039	0.978	0.794	0.808	0.959	0.512	0.609	0.78	0.866	0.907	0.736	0.775	0.86	0.934
	4230	1.035	0.973	0.792	0.807	0.958	0.508	0.603	0.777	0.863	0.905	0.731	0.773	0.861	0.934
	4260	1.03	0.968	0.788	0.804	0.957	0.507	0.602	0.775	0.862	0.907	0.731	0.773	0.857	0.936
	4290	1.031	0.968	0.783	0.803	0.955	0.502	0.596	0.775	0.863	0.899	0.723	0.768	0.856	0.933
	4320	1.032	0.967	0.784	0.803	0.958	0.5	0.594	0.776	0.86	0.903	0.719	0.77	0.854	0.93
	4350	1.027	0.96	0.782	0.801	0.955	0.494	0.59	0.77	0.86	0.902	0.711	0.768	0.854	0.932
	4380	1.029	0.961	0.784	0.801	0.953	0.495	0.589	0.773	0.86	0.903	0.712	0.766	0.855	0.933
	4410	1.029	0.959	0.786	0.801	0.954	0.491	0.585	0.767	0.859	0.899	0.709	0.765	0.851	0.928
	4440	1.03	0.962	0.782	0.795	0.959	0.49	0.585	0.767	0.86	0.899	0.709	0.766	0.851	0.93
	4470	1.028	0.964	0.783	0.797	0.957	0.486	0.582	0.77	0.862	0.905	0.708	0.772	0.854	0.936
	4500	1.028	0.964	0.778	0.797	0.954	0.481	0.579	0.765	0.86	0.895	0.708	0.77	0.849	0.93
	4530	1.024	0.96	0.776	0.793	0.953	0.473	0.575	0.761	0.856	0.89	0.704	0.758	0.846	0.932
	4560	1.025	0.96	0.775	0.791	0.951	0.471	0.571	0.76	0.857	0.888	0.703	0.759	0.849	0.931
	4590	1.025	0.964	0.774	0.788	0.95	0.464	0.568	0.761	0.855	0.887	0.698	0.754	0.845	0.929
	4620	1.025	0.956	0.773	0.788	0.953	0.461	0.564	0.758	0.855	0.889	0.698	0.754	0.845	0.93
	4650	1.024	0.954	0.771	0.786	0.95	0.46	0.565	0.757	0.852	0.889	0.698	0.75	0.843	0.93
	4680	1.028	0.955	0.771	0.787	0.953	0.458	0.565	0.755	0.856	0.889	0.696	0.753	0.848	0.93
	4710	1.022	0.947	0.766	0.784	0.949	0.453	0.559	0.754	0.852	0.886	0.692	0.75	0.844	0.927
	4740	1.018	0.952	0.765	0.784	0.951	0.45	0.554	0.754	0.853	0.888	0.692	0.753	0.842	0.927
	4770	1.02	0.952	0.765	0.782	0.947	0.443	0.552	0.752	0.853	0.885	0.687	0.745	0.842	0.925
	4800	1.019	0.953	0.764	0.783	0.953	0.441	0.552	0.751	0.851	0.888	0.689	0.753	0.841	0.928
	4830	1.021	0.953	0.758	0.78	0.948	0.435	0.548	0.749	0.847	0.878	0.684	0.75	0.84	0.928
	4860	1.022	0.955	0.76	0.78	0.95	0.433	0.544	0.748	0.847	0.884	0.686	0.75	0.838	0.927
	4890	1.023	0.953	0.76	0.778	0.951	0.429	0.545	0.75	0.85	0.877	0.681	0.749	0.841	0.93
	4920	1.024	0.954	0.758	0.777	0.952	0.422	0.54	0.747	0.846	0.879	0.679	0.74	0.839	0.924
	4950	1.022	0.953	0.757	0.779	0.948	0.419	0.537	0.745	0.846	0.875	0.677	0.74	0.837	0.926
	4980	1.019	0.951	0.755	0.774	0.948	0.416	0.535	0.741	0.845	0.878	0.673	0.736	0.835	0.926
	5010	1.019	0.947	0.757	0.773	0.947	0.411	0.532	0.743	0.846	0.878	0.673	0.736	0.835	0.923
	5040	1.018	0.946	0.754	0.773	0.947	0.411	0.527	0.74	0.843	0.874	0.672	0.733	0.836	0.923
	5070	1.013	0.95	0.748	0.77	0.948	0.404	0.523	0.736	0.842	0.878	0.669	0.738	0.835	0.925
	5100	1.019	0.95	0.75	0.77	0.947	0.399	0.524	0.734	0.842	0.872	0.668	0.731	0.831	0.924
	5130	1.016	0.947	0.748	0.765	0.945	0.393	0.521	0.732	0.841	0.866	0.666	0.729	0.834	0.92
	5160	1.018	0.952	0.748	0.77	0.949	0.393	0.516	0.736	0.84	0.87	0.664	0.738	0.833	0.925
	5190	1.021	0.95	0.747	0.767	0.944	0.385	0.517	0.732	0.84	0.869	0.661	0.728	0.832	0.923
	5220	1.016	0.946	0.745	0.766	0.945	0.382	0.512	0.728	0.835	0.868	0.661	0.726	0.827	0.923
	5250	1.017	0.947	0.743	0.763	0.943	0.382	0.51	0.729	0.835	0.868	0.656	0.726	0.827	0.921
	5280	1.012	0.948	0.74	0.763	0.942	0.376	0.506	0.725	0.836	0.867	0.654	0.723	0.827	0.921
	5310	1.014	0.949	0.739	0.758	0.948	0.373	0.505	0.728	0.834	0.866	0.654	0.723	0.828	0.92
	5340	1.017	0.948	0.74	0.764	0.944	0.368	0.501	0.725	0.837	0.86	0.653	0.721	0.827	0.923
	5370	1.015	0.95	0.736	0.757	0.945	0.362	0.498	0.726	0.832	0.861	0.654	0.72	0.826	0.919
	5400	1.012	0.946	0.733	0.757	0.945	0.361	0.497	0.721	0.835	0.862	0.647	0.722	0.823	0.919
	5430	1.016	0.945	0.732	0.755	0.939	0.356	0.493	0.718	0.829	0.858	0.643	0.716	0.822	0.92
	5460	1.016	0.948	0.732	0.754	0.947	0.356	0.491	0.722	0.832	0.865	0.646	0.719	0.822	0.92
	5490	1.015	0.942	0.731	0.752	0.939	0.347	0.487	0.717	0.831	0.852	0.638	0.71	0.818	0.919
	5520	1.012	0.944	0.732	0.756	0.944	0.347	0.486	0.718	0.828	0.861	0.638	0.719	0.821	0.921
	5550	1.016	0.946	0.726	0.752	0.942	0.343	0.482	0.717	0.827	0.855	0.638	0.71	0.819	0.917
	5580	1.016	0.943	0.727	0.75	0.939	0.335	0.478	0.712	0.827	0.853	0.634	0.707	0.819	0.918
	5610	1.02	0.947	0.729	0.754	0.942	0.33	0.479	0.713	0.83	0.852	0.636	0.709	0.818	0.922
	5640	1.015	0.943	0.725	0.748	0.94	0.327	0.473	0.709	0.825	0.847	0.63	0.705	0.818	0.917
	5670	1.021	0.945	0.724	0.75	0.941	0.323	0.473	0.711	0.826	0.848	0.629	0.704	0.817	0.919
	5700	1.017	0.95	0.723	0.747	0.946	0.316	0.476	0.709	0.824	0.85	0.633	0.714	0.818	0.919
	5730	1.014	0.941	0.718	0.744	0.939	0.313	0.465	0.706	0.825	0.846	0.625	0.707	0.814	0.915
	5760	1.016	0.944	0.72	0.747	0.942	0.313	0.466	0.706	0.825	0.848	0.628	0.706	0.814	0.92
	5790	1.019	0.942	0.719	0.744	0.939	0.311	0.462	0.704	0.823	0.845	0.623	0.697	0.812	0.919
	5820	1.016	0.942	0.716	0.739	0.941	0.302	0.46	0.703	0.82	0.85	0.623	0.696	0.813	0.914
	5850	1.016	0.942	0.716	0.738	0.937	0.303	0.456	0.7	0.818	0.844	0.618	0.694	0.81	0.915
	5880	1.011	0.939	0.712	0.737	0.938	0.305	0.451	0.697	0.818	0.843	0.615	0.692	0.809	0.915
	5910	1.01	0.944	0.712	0.738	0.939	0.303	0.448	0.698	0.819	0.845	0.617	0.7	0.815	0.915
	5940	1.007	0.938	0.711	0.735	0.937	0.297	0.449	0.697	0.813	0.839	0.61	0.687	0.808	0.909
	5970	1.009	0.939	0.711	0.737	0.94	0.295	0.444	0.698	0.816	0.837	0.61	0.688	0.815	0.913
	6000	1.01	0.936	0.711	0.733	0.937	0.293	0.444	0.692	0.815	0.834	0.606	0.688	0.81	0.914
	6030	1.007	0.938	0.708	0.734	0.934	0.288	0.436	0.692	0.812	0.836	0.607	0.685	0.807	0.91
	6060	1.01	0.937	0.707	0.731	0.937	0.288	0.435	0.691	0.815	0.835	0.605	0.682	0.805	0.909
	6090	1.007	0.935	0.702	0.728	0.935	0.283	0.434	0.689	0.81	0.832	0.601	0.684	0.804	0.91
	6120	1.003	0.937	0.701	0.73	0.936	0.284	0.433	0.691	0.814	0.838	0.603	0.688	0.805	0.915
	6150	1.005	0.934	0.701	0.727	0.933	0.28	0.428	0.688	0.81	0.832	0.599	0.682	0.803	0.912
	6180	1.001	0.941	0.698	0.727	0.937	0.275	0.428	0.684	0.808	0.832	0.598	0.687	0.804	0.909
	6210	0.999	0.936	0.699	0.724	0.935	0.275	0.421	0.685	0.811	0.829	0.595	0.685	0.8	0.91
	6240	1.002	0.94	0.699	0.725	0.936	0.274	0.423	0.685	0.813	0.829	0.594	0.682	0.799	0.912
	6270	1	0.934	0.696	0.723	0.935	0.27	0.417	0.681	0.808	0.827	0.591	0.682	0.8	0.91
	6300	1.004	0.936	0.692	0.72	0.934	0.268	0.413	0.677	0.807	0.825	0.593	0.678	0.796	0.91
	6330	1.008	0.934	0.695	0.724	0.937	0.264	0.413	0.68	0.809	0.828	0.589	0.672	0.8	0.91
	6360	0.998	0.932	0.689	0.716	0.931	0.259	0.407	0.675	0.802	0.822	0.587	0.667	0.793	0.911
	6390	0.995	0.937	0.691	0.721	0.936	0.258	0.41	0.679	0.808	0.827	0.586	0.675	0.797	0.909
	6420	0.992	0.937	0.69	0.721	0.932	0.254	0.403	0.673	0.805	0.824	0.581	0.67	0.794	0.909
	6450	0.995	0.934	0.692	0.718	0.932	0.25	0.402	0.675	0.804	0.82	0.582	0.666	0.795	0.909
	6480	0.989	0.933	0.687	0.713	0.929	0.245	0.397	0.67	0.803	0.817	0.576	0.663	0.794	0.907
	6510	0.985	0.935	0.684	0.716	0.932	0.243	0.395	0.672	0.804	0.817	0.576	0.665	0.792	0.91
	6540	0.973	0.936	0.683	0.713	0.933	0.24	0.393	0.67	0.801	0.816	0.576	0.665	0.791	0.907
	6570	0.974	0.931	0.684	0.711	0.928	0.236	0.39	0.668	0.798	0.812	0.572	0.66	0.791	0.908
	6600	0.963	0.934	0.682	0.712	0.935	0.235	0.388	0.667	0.8	0.817	0.573	0.667	0.792	0.909
	6630	0.964	0.934	0.678	0.711	0.93	0.229	0.385	0.667	0.797	0.81	0.569	0.663	0.787	0.907
	6660	0.963	0.933	0.681	0.708	0.93	0.227	0.382	0.665	0.797	0.81	0.567	0.655	0.787	0.907
	6690	0.96	0.934	0.68	0.706	0.93	0.224	0.381	0.662	0.798	0.808	0.566	0.655	0.789	0.906
	6720	0.965	0.93	0.678	0.705	0.928	0.218	0.378	0.66	0.797	0.806	0.563	0.652	0.787	0.905
	6750	0.958	0.934	0.676	0.704	0.927	0.215	0.377	0.661	0.793	0.805	0.561	0.649	0.782	0.903
	6780	0.955	0.931	0.674	0.705	0.929	0.213	0.371	0.659	0.794	0.807	0.56	0.659	0.785	0.903
	6810	0.959	0.928	0.675	0.704	0.929	0.211	0.37	0.657	0.795	0.806	0.559	0.649	0.785	0.907
	6840	0.954	0.93	0.669	0.701	0.928	0.206	0.366	0.654	0.792	0.81	0.557	0.654	0.783	0.906
	6870	0.957	0.931	0.668	0.697	0.928	0.199	0.362	0.655	0.788	0.806	0.554	0.646	0.781	0.902
	6900	0.962	0.931	0.669	0.698	0.931	0.198	0.361	0.653	0.791	0.808	0.551	0.643	0.78	0.904
	6930	0.959	0.93	0.667	0.697	0.926	0.196	0.36	0.649	0.79	0.806	0.55	0.642	0.78	0.901
	6960	0.955	0.93	0.666	0.697	0.928	0.193	0.359	0.65	0.79	0.81	0.549	0.647	0.779	0.904
	6990	0.958	0.927	0.665	0.695	0.923	0.191	0.351	0.649	0.788	0.804	0.547	0.639	0.778	0.9
	7020	0.957	0.93	0.66	0.691	0.93	0.183	0.349	0.645	0.786	0.797	0.544	0.638	0.777	0.9
	7050	0.958	0.929	0.663	0.693	0.926	0.185	0.347	0.645	0.789	0.8	0.544	0.638	0.776	0.903
	7080	0.96	0.928	0.662	0.691	0.925	0.181	0.347	0.644	0.788	0.797	0.545	0.636	0.777	0.903
	7110	0.96	0.933	0.662	0.693	0.931	0.178	0.344	0.644	0.788	0.798	0.541	0.641	0.777	0.903
	7140	0.959	0.927	0.66	0.691	0.926	0.174	0.34	0.641	0.787	0.79	0.538	0.633	0.776	0.904
	7170	0.957	0.928	0.659	0.689	0.925	0.173	0.338	0.639	0.784	0.786	0.538	0.633	0.774	0.9
	7200	0.958	0.925	0.658	0.688	0.924	0.17	0.336	0.64	0.783	0.787	0.538	0.629	0.774	0.9
	7230	0.96	0.927	0.653	0.683	0.927	0.163	0.333	0.635	0.783	0.787	0.532	0.627	0.771	0.897
	7260	0.955	0.925	0.651	0.686	0.926	0.166	0.331	0.637	0.78	0.788	0.533	0.632	0.773	0.897
	7290	0.963	0.925	0.654	0.686	0.925	0.163	0.329	0.637	0.782	0.783	0.531	0.627	0.775	0.902
	7320	0.96	0.931	0.65	0.685	0.925	0.163	0.326	0.634	0.781	0.789	0.529	0.632	0.771	0.901
	7350	0.956	0.921	0.646	0.68	0.918	0.16	0.323	0.63	0.776	0.778	0.526	0.62	0.766	0.893
	7380	0.962	0.922	0.649	0.68	0.922	0.16	0.319	0.631	0.779	0.78	0.524	0.622	0.769	0.899
	7410	0.96	0.925	0.648	0.677	0.919	0.157	0.317	0.63	0.775	0.777	0.522	0.621	0.767	0.895
	7440	0.965	0.924	0.648	0.68	0.923	0.157	0.315	0.629	0.777	0.778	0.522	0.62	0.768	0.9
	7470	0.957	0.922	0.645	0.676	0.924	0.156	0.311	0.627	0.775	0.779	0.52	0.618	0.765	0.896
	7500	0.958	0.926	0.643	0.676	0.928	0.156	0.309	0.629	0.776	0.785	0.517	0.623	0.767	0.898
	7530	0.956	0.921	0.643	0.673	0.92	0.154	0.307	0.624	0.774	0.784	0.516	0.616	0.767	0.896
	7560	0.952	0.92	0.637	0.673	0.921	0.154	0.304	0.621	0.774	0.783	0.513	0.618	0.763	0.894
	7590	0.958	0.927	0.639	0.672	0.926	0.152	0.302	0.623	0.774	0.788	0.512	0.612	0.761	0.895
	7620	0.955	0.928	0.639	0.673	0.923	0.154	0.298	0.622	0.774	0.787	0.512	0.621	0.763	0.897
	7650	0.955	0.923	0.635	0.668	0.921	0.151	0.298	0.618	0.769	0.787	0.507	0.609	0.761	0.891
	7680	0.953	0.922	0.637	0.67	0.918	0.152	0.295	0.619	0.77	0.79	0.506	0.606	0.76	0.895
	7710	0.952	0.924	0.635	0.668	0.918	0.154	0.291	0.617	0.768	0.79	0.505	0.607	0.76	0.895
	7740	0.951	0.919	0.633	0.666	0.917	0.152	0.29	0.613	0.771	0.785	0.503	0.606	0.756	0.893
	7770	0.951	0.921	0.633	0.667	0.918	0.152	0.287	0.613	0.769	0.783	0.501	0.603	0.759	0.895
	7800	0.954	0.924	0.629	0.666	0.924	0.15	0.284	0.614	0.768	0.78	0.5	0.615	0.76	0.894
	7830	0.954	0.921	0.633	0.665	0.919	0.152	0.282	0.612	0.766	0.778	0.498	0.604	0.759	0.897
	7860	0.952	0.922	0.63	0.66	0.918	0.152	0.279	0.606	0.766	0.776	0.495	0.599	0.754	0.892
	7890	0.952	0.919	0.627	0.66	0.919	0.153	0.276	0.607	0.769	0.776	0.495	0.599	0.753	0.894
	7920	0.953	0.919	0.628	0.66	0.917	0.152	0.275	0.607	0.766	0.773	0.493	0.597	0.755	0.893
	7950	0.95	0.924	0.625	0.659	0.918	0.152	0.272	0.606	0.765	0.774	0.491	0.602	0.754	0.894
	7980	0.947	0.917	0.622	0.654	0.915	0.148	0.269	0.603	0.762	0.771	0.488	0.594	0.751	0.892
	8010	0.946	0.921	0.618	0.654	0.916	0.152	0.265	0.605	0.761	0.774	0.487	0.598	0.753	0.89
	8040	0.95	0.917	0.62	0.655	0.915	0.151	0.265	0.6	0.764	0.775	0.484	0.59	0.75	0.887
	8070	0.946	0.917	0.619	0.653	0.911	0.152	0.259	0.6	0.758	0.772	0.483	0.588	0.749	0.892
	8100	0.948	0.915	0.618	0.653	0.914	0.151	0.259	0.598	0.761	0.774	0.481	0.585	0.748	0.889
	8130	0.945	0.916	0.615	0.651	0.912	0.149	0.256	0.594	0.757	0.774	0.478	0.584	0.749	0.888
	8160	0.947	0.919	0.616	0.65	0.915	0.151	0.254	0.596	0.758	0.776	0.475	0.585	0.748	0.89
	8190	0.945	0.917	0.616	0.651	0.914	0.152	0.252	0.595	0.759	0.773	0.477	0.584	0.747	0.89
	8220	0.947	0.919	0.615	0.649	0.915	0.151	0.25	0.595	0.757	0.777	0.474	0.582	0.747	0.891
	8250	0.947	0.917	0.613	0.646	0.914	0.152	0.246	0.594	0.755	0.775	0.474	0.587	0.744	0.888
	8280	0.946	0.919	0.612	0.646	0.916	0.152	0.241	0.59	0.756	0.774	0.472	0.589	0.745	0.891
	8310	0.948	0.923	0.606	0.645	0.914	0.148	0.24	0.59	0.754	0.776	0.471	0.589	0.743	0.888
	8340	0.943	0.914	0.608	0.642	0.912	0.151	0.237	0.587	0.75	0.775	0.466	0.577	0.74	0.887
	8370	0.944	0.915	0.607	0.641	0.912	0.15	0.235	0.585	0.752	0.775	0.465	0.574	0.742	0.886
	8400	0.948	0.917	0.605	0.643	0.913	0.153	0.233	0.588	0.754	0.778	0.465	0.583	0.742	0.888
	8430	0.945	0.913	0.605	0.641	0.909	0.151	0.232	0.586	0.749	0.774	0.462	0.572	0.742	0.887
	8460	0.944	0.915	0.603	0.641	0.908	0.154	0.23	0.585	0.751	0.773	0.461	0.571	0.739	0.883
	8490	0.946	0.916	0.599	0.637	0.912	0.15	0.225	0.582	0.748	0.772	0.46	0.57	0.738	0.885
	8520	0.945	0.912	0.599	0.636	0.908	0.15	0.223	0.579	0.747	0.771	0.458	0.571	0.738	0.885
	8550	0.946	0.918	0.598	0.636	0.913	0.152	0.222	0.579	0.75	0.774	0.458	0.574	0.739	0.888
	8580	0.944	0.912	0.598	0.635	0.908	0.15	0.222	0.578	0.748	0.771	0.454	0.567	0.737	0.885
	8610	0.943	0.909	0.597	0.63	0.908	0.15	0.217	0.574	0.745	0.768	0.453	0.564	0.734	0.883
	8640	0.943	0.91	0.594	0.634	0.911	0.152	0.213	0.575	0.748	0.772	0.453	0.563	0.733	0.881
	8670	0.942	0.914	0.593	0.631	0.914	0.151	0.21	0.575	0.748	0.771	0.452	0.568	0.733	0.886
	8700	0.943	0.909	0.593	0.631	0.907	0.151	0.209	0.571	0.745	0.769	0.446	0.558	0.734	0.884
	8730	0.94	0.91	0.59	0.628	0.909	0.15	0.205	0.571	0.743	0.768	0.445	0.558	0.731	0.885
	8760	0.943	0.909	0.589	0.627	0.906	0.15	0.205	0.568	0.743	0.765	0.442	0.558	0.731	0.883
	8790	0.942	0.912	0.589	0.626	0.905	0.149	0.201	0.57	0.742	0.764	0.441	0.556	0.731	0.883
	8820	0.94	0.91	0.586	0.626	0.908	0.15	0.199	0.569	0.743	0.764	0.44	0.554	0.73	0.882
	8850	0.94	0.911	0.584	0.626	0.906	0.15	0.199	0.565	0.74	0.763	0.439	0.56	0.73	0.884
	8880	0.941	0.909	0.581	0.623	0.908	0.147	0.194	0.563	0.737	0.759	0.437	0.553	0.725	0.881
	8910	0.941	0.91	0.586	0.623	0.908	0.15	0.191	0.563	0.742	0.763	0.436	0.553	0.73	0.885
	8940	0.943	0.911	0.583	0.622	0.907	0.151	0.192	0.564	0.741	0.764	0.434	0.55	0.73	0.879
	8970	0.939	0.908	0.579	0.619	0.903	0.15	0.186	0.558	0.736	0.76	0.431	0.544	0.724	0.878
	9000	0.939	0.909	0.583	0.618	0.906	0.15	0.186	0.559	0.737	0.759	0.429	0.547	0.725	0.88
	9030	0.937	0.907	0.578	0.616	0.905	0.149	0.183	0.557	0.734	0.758	0.424	0.543	0.721	0.875
	9060	0.937	0.908	0.575	0.618	0.904	0.151	0.181	0.556	0.736	0.759	0.428	0.55	0.728	0.881
	9090	0.936	0.904	0.574	0.613	0.904	0.149	0.178	0.555	0.734	0.755	0.422	0.54	0.722	0.878
	9120	0.939	0.911	0.572	0.613	0.908	0.147	0.176	0.552	0.737	0.753	0.423	0.54	0.722	0.876
	9150	0.939	0.905	0.574	0.614	0.901	0.15	0.174	0.55	0.733	0.755	0.421	0.54	0.72	0.884
	9180	0.941	0.906	0.574	0.616	0.907	0.152	0.175	0.554	0.733	0.756	0.421	0.541	0.723	0.882
	9210	0.938	0.908	0.576	0.614	0.904	0.151	0.171	0.551	0.733	0.755	0.416	0.54	0.719	0.88
	9240	0.936	0.905	0.571	0.61	0.903	0.15	0.168	0.549	0.73	0.753	0.416	0.535	0.716	0.877
	9270	0.933	0.905	0.57	0.61	0.902	0.15	0.168	0.548	0.73	0.752	0.413	0.534	0.718	0.874
	9300	0.935	0.904	0.568	0.605	0.901	0.15	0.164	0.545	0.727	0.749	0.413	0.53	0.716	0.877
	9330	0.936	0.902	0.568	0.607	0.903	0.149	0.164	0.545	0.728	0.749	0.409	0.53	0.715	0.877
	9360	0.936	0.906	0.565	0.606	0.9	0.151	0.162	0.544	0.728	0.75	0.406	0.532	0.717	0.878
	9390	0.937	0.908	0.563	0.605	0.902	0.15	0.16	0.542	0.729	0.75	0.41	0.537	0.714	0.877
	9420	0.935	0.908	0.565	0.605	0.904	0.152	0.161	0.542	0.734	0.782	0.438	0.562	0.75	0.915
	9450	0.933	0.905	0.561	0.603	0.901	0.15	0.157	0.539	0.725	0.746	0.403	0.525	0.711	0.875
	9480	0.938	0.91	0.561	0.601	0.907	0.147	0.157	0.539	0.726	0.748	0.405	0.526	0.713	0.877
	9510	0.933	0.902	0.56	0.599	0.902	0.149	0.155	0.536	0.723	0.742	0.399	0.521	0.71	0.877
	9540	0.937	0.904	0.558	0.601	0.902	0.152	0.157	0.536	0.724	0.747	0.398	0.522	0.707	0.875
	9570	0.934	0.906	0.557	0.596	0.9	0.15	0.155	0.536	0.722	0.746	0.398	0.522	0.712	0.879
	9600	0.934	0.903	0.555	0.597	0.9	0.15	0.154	0.536	0.724	0.744	0.394	0.518	0.709	0.876
	9630	0.931	0.902	0.551	0.591	0.894	0.146	0.151	0.532	0.716	0.742	0.39	0.514	0.705	0.874
	9660	0.934	0.904	0.553	0.597	0.9	0.149	0.154	0.532	0.721	0.744	0.392	0.519	0.712	0.876
	9690	0.932	0.9	0.55	0.594	0.896	0.147	0.152	0.527	0.717	0.74	0.388	0.512	0.707	0.872
	9720	0.931	0.901	0.549	0.593	0.898	0.148	0.151	0.529	0.716	0.739	0.39	0.513	0.705	0.874
	9750	0.933	0.904	0.546	0.591	0.902	0.15	0.155	0.53	0.721	0.74	0.386	0.521	0.705	0.877
	9780	0.93	0.903	0.549	0.591	0.902	0.147	0.154	0.528	0.718	0.74	0.385	0.513	0.704	0.875
	9810	0.929	0.899	0.547	0.592	0.901	0.15	0.153	0.524	0.716	0.739	0.382	0.508	0.704	0.873
	9840	0.931	0.901	0.545	0.588	0.899	0.148	0.152	0.523	0.715	0.738	0.381	0.508	0.705	0.874
	9870	0.931	0.899	0.542	0.585	0.896	0.147	0.153	0.521	0.715	0.736	0.38	0.505	0.702	0.873
	9900	0.93	0.898	0.542	0.585	0.894	0.149	0.151	0.519	0.711	0.734	0.378	0.504	0.701	0.872
	9930	0.929	0.899	0.541	0.583	0.897	0.15	0.154	0.52	0.712	0.737	0.375	0.505	0.697	0.871
	9960	0.932	0.901	0.542	0.584	0.901	0.148	0.152	0.519	0.714	0.736	0.375	0.501	0.7	0.872
	9990	0.927	0.897	0.538	0.582	0.895	0.148	0.153	0.515	0.711	0.733	0.372	0.5	0.695	0.866
	10020	0.93	0.899	0.54	0.581	0.897	0.149	0.154	0.52	0.714	0.734	0.372	0.499	0.7	0.872
	10050	0.929	0.899	0.537	0.582	0.9	0.149	0.152	0.514	0.711	0.735	0.372	0.499	0.7	0.871
	10080	0.928	0.897	0.538	0.581	0.896	0.148	0.152	0.512	0.708	0.733	0.367	0.498	0.696	0.871
	10110	0.927	0.899	0.534	0.578	0.897	0.148	0.151	0.511	0.707	0.733	0.364	0.494	0.698	0.87
	10140	0.928	0.896	0.532	0.575	0.895	0.147	0.149	0.509	0.709	0.73	0.362	0.492	0.697	0.867
	10170	0.928	0.9	0.533	0.577	0.896	0.15	0.151	0.512	0.708	0.729	0.364	0.493	0.697	0.867
	10200	0.927	0.899	0.529	0.572	0.894	0.144	0.149	0.511	0.705	0.73	0.36	0.493	0.695	0.867
	10230	0.928	0.897	0.529	0.577	0.894	0.149	0.15	0.508	0.707	0.73	0.358	0.489	0.696	0.87
	10260	0.928	0.898	0.528	0.571	0.895	0.15	0.151	0.504	0.706	0.73	0.358	0.491	0.695	0.866
	10290	0.93	0.9	0.527	0.572	0.897	0.148	0.151	0.504	0.705	0.728	0.356	0.496	0.693	0.871
	10320	0.927	0.895	0.526	0.571	0.894	0.148	0.15	0.501	0.703	0.728	0.354	0.489	0.69	0.865
	10350	0.927	0.895	0.525	0.57	0.894	0.15	0.151	0.5	0.702	0.726	0.351	0.485	0.692	0.867
	10380	0.927	0.896	0.52	0.567	0.896	0.144	0.15	0.498	0.698	0.723	0.348	0.484	0.688	0.867
	10410	0.925	0.895	0.523	0.566	0.893	0.148	0.15	0.498	0.703	0.726	0.348	0.481	0.686	0.868
	10440	0.926	0.896	0.521	0.566	0.89	0.148	0.15	0.497	0.699	0.724	0.347	0.481	0.687	0.867
	10470	0.927	0.898	0.523	0.566	0.894	0.148	0.152	0.498	0.703	0.725	0.346	0.481	0.688	0.869
	10500	0.926	0.895	0.518	0.564	0.892	0.149	0.149	0.495	0.697	0.721	0.344	0.478	0.686	0.865
	10530	0.924	0.893	0.517	0.561	0.889	0.148	0.149	0.492	0.697	0.72	0.342	0.477	0.682	0.865
	10560	0.924	0.895	0.515	0.563	0.893	0.149	0.15	0.495	0.696	0.721	0.339	0.474	0.684	0.866
	10590	0.926	0.894	0.514	0.56	0.891	0.148	0.148	0.492	0.697	0.721	0.339	0.475	0.684	0.866
	10620	0.922	0.894	0.512	0.558	0.89	0.144	0.149	0.487	0.693	0.717	0.336	0.472	0.679	0.862
	10650	0.924	0.894	0.512	0.556	0.89	0.147	0.149	0.487	0.695	0.722	0.335	0.472	0.681	0.863
	10680	0.92	0.89	0.511	0.559	0.89	0.148	0.15	0.49	0.694	0.719	0.334	0.474	0.682	0.862
	10710	0.923	0.893	0.509	0.556	0.888	0.149	0.15	0.49	0.692	0.719	0.334	0.469	0.681	0.863
	10740	0.921	0.894	0.507	0.554	0.889	0.148	0.149	0.486	0.693	0.717	0.331	0.467	0.68	0.864
	10770	0.918	0.89	0.509	0.555	0.889	0.149	0.153	0.486	0.694	0.719	0.331	0.466	0.68	0.861
	10800	0.923	0.898	0.503	0.553	0.892	0.147	0.151	0.484	0.689	0.717	0.328	0.477	0.681	0.862
	10830	0.922	0.89	0.507	0.551	0.887	0.145	0.148	0.483	0.689	0.715	0.327	0.466	0.676	0.865
	10860	0.916	0.893	0.503	0.55	0.887	0.149	0.149	0.481	0.688	0.713	0.324	0.462	0.677	0.863
	10890	0.923	0.889	0.501	0.55	0.886	0.149	0.151	0.479	0.688	0.713	0.323	0.461	0.674	0.862
	10920	0.919	0.889	0.501	0.545	0.888	0.147	0.149	0.476	0.687	0.714	0.323	0.459	0.676	0.859
	10950	0.917	0.889	0.5	0.546	0.886	0.147	0.15	0.476	0.686	0.713	0.321	0.458	0.675	0.86
	10980	0.916	0.892	0.499	0.545	0.884	0.147	0.149	0.474	0.687	0.712	0.319	0.455	0.674	0.86
	11010	0.919	0.891	0.501	0.548	0.886	0.148	0.15	0.477	0.686	0.715	0.318	0.456	0.675	0.862
	11040	0.918	0.892	0.496	0.543	0.887	0.147	0.15	0.473	0.686	0.713	0.317	0.455	0.676	0.862
	11070	0.918	0.887	0.496	0.545	0.889	0.146	0.15	0.47	0.684	0.709	0.313	0.454	0.672	0.862
	11100	0.918	0.89	0.495	0.541	0.884	0.149	0.15	0.469	0.685	0.708	0.311	0.453	0.67	0.862
	11130	0.917	0.889	0.494	0.544	0.887	0.147	0.149	0.471	0.683	0.709	0.313	0.452	0.671	0.864
	11160	0.915	0.889	0.493	0.54	0.884	0.149	0.149	0.468	0.684	0.709	0.309	0.449	0.67	0.861
	11190	0.919	0.89	0.493	0.54	0.888	0.146	0.148	0.465	0.684	0.708	0.306	0.451	0.668	0.859
	11220	0.918	0.89	0.489	0.543	0.884	0.149	0.15	0.466	0.683	0.706	0.304	0.449	0.667	0.858
	11250	0.915	0.887	0.49	0.539	0.883	0.147	0.148	0.465	0.68	0.705	0.302	0.446	0.664	0.853
	11280	0.916	0.889	0.489	0.54	0.881	0.147	0.15	0.463	0.679	0.704	0.302	0.443	0.67	0.862
	11310	0.92	0.889	0.487	0.535	0.882	0.148	0.15	0.46	0.678	0.702	0.301	0.439	0.667	0.858
	11340	0.916	0.89	0.483	0.534	0.886	0.149	0.148	0.461	0.681	0.705	0.297	0.447	0.666	0.859
	11370	0.915	0.889	0.483	0.534	0.886	0.148	0.151	0.459	0.677	0.703	0.298	0.442	0.665	0.861
	11400	0.913	0.884	0.483	0.532	0.884	0.147	0.147	0.456	0.679	0.702	0.295	0.439	0.663	0.857
	11430	0.913	0.887	0.481	0.531	0.882	0.147	0.15	0.456	0.676	0.702	0.295	0.435	0.665	0.857
	11460	0.916	0.885	0.481	0.529	0.883	0.149	0.15	0.455	0.677	0.702	0.292	0.437	0.663	0.853
	11490	0.918	0.89	0.478	0.531	0.883	0.148	0.15	0.456	0.676	0.703	0.293	0.442	0.662	0.856
	11520	0.915	0.885	0.478	0.528	0.884	0.147	0.148	0.453	0.674	0.7	0.289	0.44	0.659	0.857
	11550	0.916	0.889	0.477	0.53	0.889	0.15	0.15	0.454	0.676	0.703	0.291	0.442	0.663	0.857
	11580	0.911	0.882	0.475	0.526	0.878	0.148	0.149	0.452	0.67	0.697	0.287	0.43	0.659	0.859
	11610	0.912	0.886	0.473	0.525	0.883	0.149	0.15	0.45	0.672	0.696	0.282	0.434	0.658	0.853
	11640	0.911	0.884	0.474	0.525	0.882	0.147	0.15	0.449	0.67	0.698	0.285	0.431	0.658	0.857
	11670	0.912	0.883	0.472	0.522	0.88	0.146	0.149	0.446	0.67	0.696	0.281	0.426	0.66	0.855
	11700	0.913	0.884	0.472	0.522	0.882	0.148	0.149	0.444	0.667	0.695	0.281	0.426	0.657	0.856
	11730	0.915	0.887	0.47	0.523	0.882	0.148	0.15	0.445	0.669	0.697	0.279	0.424	0.657	0.861
	11760	0.911	0.885	0.469	0.52	0.881	0.147	0.149	0.443	0.671	0.694	0.276	0.421	0.657	0.856
	11790	0.912	0.887	0.47	0.519	0.883	0.148	0.147	0.443	0.667	0.696	0.274	0.424	0.656	0.855
	11820	0.912	0.88	0.469	0.517	0.88	0.148	0.15	0.441	0.669	0.693	0.277	0.42	0.654	0.851
	11850	0.909	0.881	0.467	0.516	0.876	0.146	0.148	0.438	0.666	0.691	0.27	0.418	0.651	0.853
	11880	0.912	0.883	0.465	0.516	0.878	0.149	0.149	0.438	0.663	0.691	0.269	0.418	0.653	0.85
	11910	0.91	0.882	0.461	0.514	0.877	0.149	0.146	0.437	0.662	0.691	0.268	0.422	0.652	0.853
	11940	0.911	0.881	0.462	0.513	0.877	0.147	0.148	0.435	0.663	0.69	0.266	0.415	0.65	0.851
	11970	0.912	0.88	0.46	0.512	0.878	0.147	0.148	0.435	0.663	0.692	0.266	0.414	0.65	0.85
	12000	0.91	0.882	0.459	0.511	0.88	0.146	0.15	0.432	0.663	0.688	0.262	0.413	0.649	0.852
	12030	0.908	0.879	0.455	0.509	0.876	0.146	0.148	0.432	0.662	0.689	0.262	0.411	0.646	0.85
	12060	0.907	0.879	0.459	0.508	0.879	0.147	0.15	0.431	0.66	0.686	0.263	0.411	0.652	0.852
	12090	0.91	0.884	0.456	0.51	0.883	0.15	0.149	0.432	0.662	0.689	0.26	0.42	0.648	0.853
	12120	0.911	0.887	0.452	0.505	0.88	0.145	0.146	0.429	0.661	0.686	0.257	0.422	0.645	0.849
	12150	0.905	0.879	0.453	0.504	0.874	0.147	0.147	0.425	0.657	0.684	0.255	0.406	0.643	0.848
	12180	0.909	0.883	0.452	0.505	0.881	0.15	0.149	0.428	0.66	0.69	0.256	0.414	0.646	0.851
	12210	0.91	0.879	0.453	0.503	0.874	0.147	0.149	0.43	0.656	0.683	0.253	0.405	0.645	0.849
	12240	0.911	0.881	0.45	0.504	0.877	0.15	0.15	0.424	0.657	0.685	0.251	0.404	0.646	0.848
	12270	0.906	0.879	0.448	0.502	0.876	0.148	0.148	0.425	0.657	0.685	0.251	0.399	0.641	0.848
	12300	0.909	0.879	0.451	0.503	0.878	0.148	0.151	0.424	0.657	0.687	0.25	0.403	0.644	0.85
	12330	0.907	0.876	0.448	0.499	0.877	0.147	0.148	0.422	0.653	0.682	0.245	0.397	0.642	0.847
	12360	0.907	0.881	0.445	0.502	0.877	0.148	0.148	0.42	0.655	0.684	0.247	0.406	0.64	0.85
	12390	0.91	0.88	0.444	0.5	0.878	0.151	0.149	0.42	0.655	0.683	0.245	0.405	0.642	0.85
	12420	0.908	0.878	0.445	0.496	0.874	0.146	0.149	0.417	0.652	0.68	0.241	0.395	0.637	0.85
	12450	0.906	0.884	0.439	0.497	0.877	0.146	0.149	0.417	0.652	0.681	0.24	0.406	0.638	0.849
	12480	0.905	0.877	0.441	0.496	0.874	0.146	0.148	0.414	0.651	0.678	0.24	0.398	0.637	0.847
	12510	0.907	0.878	0.442	0.493	0.872	0.145	0.148	0.412	0.651	0.678	0.236	0.391	0.637	0.847
	12540	0.906	0.877	0.439	0.492	0.872	0.145	0.148	0.412	0.651	0.678	0.235	0.39	0.635	0.848
	12570	0.905	0.877	0.436	0.491	0.872	0.147	0.149	0.409	0.649	0.677	0.234	0.39	0.635	0.851
	12600	0.909	0.883	0.437	0.491	0.877	0.147	0.149	0.411	0.649	0.677	0.234	0.4	0.635	0.848
	12630	0.906	0.876	0.434	0.489	0.874	0.146	0.151	0.408	0.647	0.675	0.233	0.385	0.635	0.848
	12660	0.902	0.875	0.434	0.488	0.871	0.146	0.148	0.406	0.647	0.674	0.23	0.383	0.633	0.846
	12690	0.903	0.878	0.431	0.487	0.875	0.146	0.147	0.408	0.647	0.675	0.23	0.389	0.632	0.846
	12720	0.903	0.874	0.43	0.485	0.872	0.148	0.149	0.403	0.644	0.672	0.226	0.382	0.632	0.846
	12750	0.905	0.875	0.431	0.486	0.869	0.147	0.15	0.403	0.644	0.675	0.224	0.383	0.629	0.845
	12780	0.901	0.875	0.431	0.486	0.87	0.148	0.153	0.401	0.644	0.673	0.223	0.38	0.63	0.842
	12810	0.903	0.875	0.427	0.484	0.871	0.146	0.148	0.4	0.644	0.673	0.226	0.378	0.629	0.849
	12840	0.901	0.874	0.428	0.484	0.872	0.147	0.149	0.4	0.642	0.672	0.219	0.376	0.627	0.843
	12870	0.901	0.877	0.423	0.48	0.871	0.147	0.149	0.397	0.641	0.669	0.219	0.383	0.628	0.845
	12900	0.9	0.872	0.424	0.479	0.868	0.144	0.148	0.395	0.638	0.669	0.215	0.373	0.625	0.84
	12930	0.905	0.878	0.421	0.487	0.875	0.15	0.15	0.399	0.644	0.674	0.218	0.381	0.628	0.853
	12960	0.903	0.876	0.423	0.479	0.872	0.148	0.148	0.394	0.642	0.672	0.214	0.373	0.625	0.845
	12990	0.898	0.87	0.42	0.477	0.868	0.147	0.146	0.395	0.638	0.667	0.213	0.37	0.622	0.843
	13020	0.9	0.876	0.419	0.477	0.869	0.148	0.146	0.395	0.638	0.665	0.212	0.377	0.623	0.844
	13050	0.898	0.871	0.417	0.473	0.869	0.145	0.147	0.392	0.636	0.665	0.207	0.366	0.626	0.844
	13080	0.9	0.873	0.417	0.472	0.867	0.147	0.149	0.389	0.636	0.666	0.207	0.365	0.62	0.842
	13110	0.899	0.873	0.421	0.474	0.872	0.148	0.149	0.389	0.637	0.664	0.206	0.366	0.621	0.841
	13140	0.902	0.873	0.416	0.475	0.869	0.148	0.148	0.387	0.634	0.667	0.204	0.363	0.621	0.841
	13170	0.902	0.87	0.416	0.469	0.866	0.146	0.147	0.386	0.632	0.664	0.203	0.363	0.62	0.839
	13200	0.906	0.873	0.41	0.467	0.87	0.141	0.146	0.383	0.631	0.66	0.202	0.36	0.618	0.839
	13230	0.899	0.869	0.41	0.466	0.866	0.144	0.146	0.383	0.633	0.661	0.198	0.359	0.616	0.839
	13260	0.899	0.875	0.408	0.467	0.875	0.144	0.146	0.383	0.63	0.661	0.199	0.369	0.62	0.841
	13290	0.898	0.868	0.41	0.467	0.866	0.146	0.147	0.382	0.634	0.661	0.198	0.357	0.616	0.841
	13320	0.898	0.868	0.408	0.465	0.867	0.148	0.148	0.381	0.631	0.66	0.195	0.357	0.619	0.837
	13350	0.896	0.869	0.407	0.465	0.866	0.148	0.148	0.38	0.629	0.661	0.192	0.353	0.616	0.837
	13380	0.897	0.871	0.406	0.462	0.866	0.145	0.149	0.379	0.628	0.66	0.193	0.356	0.615	0.838
	13410	0.894	0.872	0.405	0.465	0.869	0.146	0.149	0.378	0.63	0.661	0.193	0.36	0.617	0.837
	13440	0.896	0.871	0.402	0.462	0.867	0.148	0.146	0.377	0.63	0.66	0.19	0.358	0.615	0.839
	13470	0.898	0.871	0.402	0.462	0.866	0.149	0.148	0.377	0.63	0.662	0.191	0.349	0.612	0.837
	13500	0.9	0.87	0.402	0.461	0.865	0.146	0.146	0.372	0.629	0.66	0.187	0.348	0.612	0.841
	13530	0.899	0.867	0.401	0.459	0.864	0.147	0.148	0.373	0.625	0.653	0.185	0.35	0.613	0.836
	13560	0.894	0.873	0.4	0.458	0.866	0.148	0.147	0.372	0.627	0.658	0.186	0.355	0.611	0.84
	13590	0.896	0.869	0.398	0.456	0.863	0.147	0.147	0.37	0.623	0.654	0.183	0.345	0.612	0.837
	13620	0.895	0.869	0.397	0.454	0.866	0.144	0.147	0.369	0.622	0.654	0.181	0.345	0.61	0.837
	13650	0.894	0.87	0.397	0.456	0.863	0.145	0.146	0.367	0.625	0.654	0.181	0.343	0.609	0.837
	13680	0.894	0.867	0.393	0.453	0.862	0.145	0.145	0.366	0.621	0.655	0.18	0.346	0.608	0.835
	13710	0.897	0.868	0.395	0.454	0.865	0.147	0.149	0.367	0.623	0.653	0.178	0.341	0.609	0.837
	13740	0.892	0.868	0.393	0.451	0.863	0.146	0.148	0.364	0.618	0.651	0.178	0.339	0.607	0.834
	13770	0.892	0.869	0.393	0.452	0.864	0.149	0.149	0.363	0.622	0.655	0.175	0.338	0.608	0.833
	13800	0.893	0.866	0.39	0.449	0.863	0.147	0.148	0.361	0.618	0.651	0.174	0.337	0.606	0.832
	13830	0.895	0.866	0.391	0.45	0.863	0.148	0.148	0.36	0.62	0.651	0.173	0.335	0.605	0.832
	13860	0.895	0.869	0.389	0.447	0.864	0.146	0.149	0.36	0.619	0.649	0.173	0.333	0.605	0.831
	13890	0.894	0.868	0.388	0.448	0.862	0.148	0.147	0.358	0.621	0.649	0.169	0.331	0.603	0.833
	13920	0.893	0.867	0.386	0.449	0.864	0.149	0.149	0.359	0.617	0.649	0.172	0.332	0.602	0.837
	13950	0.893	0.867	0.385	0.444	0.862	0.146	0.146	0.355	0.617	0.647	0.168	0.335	0.598	0.836
	13980	0.891	0.869	0.384	0.444	0.862	0.148	0.15	0.358	0.617	0.651	0.171	0.338	0.603	0.835
	14010	0.892	0.867	0.381	0.445	0.865	0.148	0.147	0.355	0.617	0.647	0.167	0.339	0.601	0.837
	14040	0.89	0.865	0.38	0.441	0.86	0.148	0.147	0.352	0.613	0.645	0.166	0.335	0.596	0.831
	14070	0.893	0.868	0.379	0.441	0.861	0.147	0.146	0.352	0.612	0.645	0.162	0.332	0.599	0.832
	14100	0.892	0.863	0.376	0.44	0.86	0.146	0.145	0.352	0.613	0.643	0.162	0.329	0.596	0.83
	14130	0.889	0.862	0.377	0.437	0.858	0.147	0.146	0.35	0.611	0.643	0.16	0.323	0.595	0.833
	14160	0.89	0.863	0.377	0.439	0.858	0.146	0.148	0.35	0.613	0.644	0.162	0.321	0.598	0.834
	14190	0.888	0.864	0.374	0.438	0.861	0.146	0.147	0.346	0.608	0.643	0.159	0.319	0.596	0.831
	14220	0.892	0.861	0.374	0.435	0.86	0.145	0.145	0.344	0.608	0.642	0.159	0.318	0.596	0.83
	14250	0.891	0.862	0.374	0.436	0.86	0.149	0.149	0.344	0.608	0.642	0.16	0.319	0.596	0.832
	14280	0.89	0.863	0.371	0.433	0.855	0.146	0.146	0.342	0.608	0.639	0.157	0.317	0.59	0.829
	14310	0.889	0.862	0.373	0.434	0.859	0.147	0.148	0.343	0.607	0.638	0.16	0.316	0.594	0.832
	14340	0.888	0.865	0.368	0.433	0.859	0.148	0.146	0.341	0.611	0.642	0.157	0.321	0.596	0.836
	14370	0.889	0.864	0.368	0.428	0.857	0.141	0.144	0.337	0.601	0.634	0.155	0.312	0.59	0.826

## Sheet: Exp. 4
	Experiment 4
	Absorbance
		1	2	3	4	5	6	7	8	9	10	11	12	13	14
	Time [s]	Ctrl.	Ctrl. + Ca	2 µM BiP	2 µM BiP + Ca	5 µM J	2 µM BiP + 5 µM J	2 µM BiP + 5 µM J + Ca	2 µM BiP + 5 µM J*	1 µM BiP	1 µM BiP + Ca	1 µM BiP + 2 µM J	1 µM BiP + 2 µM J + Ca	1 µM BiP + 2 µM J	2 µM J
	0	1.028	1.007	0.987	0.988	0.998	0.973	0.987	0.966	0.975	0.987	0.963	0.973	0.978	1.008
	30	1.023	1.002	0.981	0.986	0.994	0.965	0.978	0.96	0.971	0.98	0.956	0.966	0.97	1.003
	60	1.024	1	0.981	0.984	0.993	0.96	0.977	0.96	0.969	0.981	0.954	0.963	0.97	0.998
	90	1.024	1.001	0.978	0.984	0.992	0.957	0.973	0.958	0.968	0.98	0.953	0.964	0.969	0.993
	120	1.021	0.999	0.978	0.981	0.988	0.951	0.967	0.953	0.966	0.977	0.952	0.962	0.966	0.992
	150	1.023	1.001	0.98	0.98	0.987	0.949	0.965	0.953	0.961	0.975	0.946	0.958	0.966	0.99
	180	1.018	0.997	0.974	0.975	0.983	0.943	0.962	0.951	0.963	0.976	0.947	0.958	0.965	0.992
	210	1.017	0.998	0.973	0.976	0.984	0.941	0.964	0.949	0.962	0.978	0.945	0.956	0.967	0.989
	240	1.017	0.994	0.97	0.972	0.983	0.938	0.958	0.95	0.96	0.976	0.943	0.955	0.963	0.991
	270	1.018	0.996	0.97	0.974	0.984	0.935	0.958	0.948	0.96	0.974	0.942	0.95	0.959	0.989
	300	1.016	0.992	0.968	0.971	0.983	0.931	0.951	0.944	0.959	0.973	0.94	0.953	0.961	0.988
	330	1.013	0.989	0.965	0.967	0.979	0.927	0.948	0.941	0.955	0.971	0.937	0.948	0.959	0.988
	360	1.013	0.991	0.964	0.967	0.981	0.924	0.949	0.945	0.959	0.972	0.939	0.95	0.958	0.985
	390	1.005	0.983	0.956	0.955	0.974	0.919	0.942	0.938	0.954	0.965	0.93	0.944	0.954	0.987
	420	1.012	0.989	0.962	0.967	0.979	0.918	0.943	0.938	0.956	0.97	0.932	0.946	0.956	0.986
	450	1.012	0.988	0.962	0.964	0.977	0.913	0.943	0.939	0.952	0.969	0.929	0.947	0.956	0.985
	480	1.009	0.987	0.956	0.959	0.976	0.909	0.938	0.935	0.951	0.968	0.929	0.946	0.954	0.982
	510	1	0.98	0.951	0.952	0.97	0.907	0.933	0.931	0.95	0.962	0.923	0.939	0.948	0.984
	540	1.004	0.985	0.952	0.955	0.975	0.902	0.93	0.931	0.949	0.964	0.924	0.939	0.948	0.98
	570	1.006	0.985	0.953	0.952	0.975	0.902	0.929	0.931	0.948	0.965	0.924	0.94	0.952	0.982
	600	1.001	0.976	0.946	0.948	0.967	0.893	0.921	0.927	0.944	0.96	0.918	0.936	0.948	0.978
	630	1.006	0.987	0.951	0.955	0.975	0.895	0.925	0.931	0.948	0.96	0.919	0.935	0.949	0.978
	660	1.006	0.984	0.95	0.952	0.974	0.893	0.925	0.933	0.947	0.963	0.919	0.934	0.949	0.978
	690	1.002	0.98	0.945	0.947	0.971	0.885	0.916	0.923	0.944	0.96	0.914	0.93	0.946	0.978
	720	1.002	0.981	0.946	0.947	0.969	0.884	0.917	0.924	0.944	0.958	0.912	0.932	0.945	0.98
	750	1.006	0.982	0.944	0.946	0.971	0.881	0.917	0.923	0.942	0.957	0.911	0.926	0.946	0.978
	780	1.001	0.98	0.942	0.945	0.97	0.877	0.91	0.919	0.94	0.956	0.907	0.927	0.944	0.977
	810	1.004	0.979	0.941	0.944	0.97	0.874	0.909	0.918	0.94	0.955	0.906	0.925	0.942	0.974
	840	0.997	0.974	0.94	0.939	0.965	0.868	0.904	0.913	0.937	0.952	0.905	0.924	0.94	0.975
	870	1.001	0.978	0.942	0.941	0.969	0.868	0.904	0.911	0.94	0.953	0.902	0.924	0.941	0.975
	900	0.996	0.974	0.935	0.937	0.964	0.859	0.898	0.906	0.936	0.95	0.9	0.919	0.938	0.974
	930	0.995	0.975	0.933	0.936	0.966	0.858	0.898	0.908	0.933	0.947	0.896	0.917	0.937	0.969
	960	0.998	0.974	0.931	0.935	0.967	0.856	0.896	0.908	0.939	0.951	0.898	0.917	0.934	0.973
	990	1.001	0.979	0.934	0.937	0.969	0.855	0.898	0.907	0.938	0.952	0.898	0.919	0.94	0.975
	1020	0.994	0.974	0.931	0.933	0.964	0.849	0.889	0.902	0.932	0.948	0.892	0.913	0.934	0.968
	1050	0.999	0.977	0.93	0.932	0.968	0.846	0.892	0.9	0.932	0.947	0.892	0.912	0.935	0.968
	1080	0.994	0.972	0.927	0.929	0.963	0.84	0.883	0.894	0.929	0.944	0.886	0.906	0.93	0.964
	1110	0.994	0.975	0.926	0.928	0.963	0.839	0.883	0.895	0.93	0.943	0.887	0.91	0.933	0.968
	1140	1	0.973	0.923	0.926	0.962	0.835	0.88	0.892	0.929	0.942	0.883	0.907	0.93	0.967
	1170	0.994	0.97	0.924	0.925	0.961	0.831	0.878	0.89	0.927	0.94	0.882	0.906	0.929	0.967
	1200	0.995	0.972	0.923	0.923	0.96	0.831	0.876	0.887	0.929	0.942	0.881	0.906	0.928	0.967
	1230	0.991	0.969	0.919	0.924	0.959	0.824	0.871	0.884	0.925	0.94	0.878	0.902	0.929	0.964
	1260	0.991	0.973	0.92	0.923	0.963	0.822	0.869	0.882	0.926	0.943	0.877	0.9	0.927	0.964
	1290	0.993	0.966	0.915	0.917	0.958	0.817	0.864	0.881	0.924	0.938	0.872	0.9	0.924	0.964
	1320	0.994	0.968	0.916	0.917	0.958	0.816	0.863	0.879	0.924	0.941	0.871	0.899	0.925	0.963
	1350	0.99	0.967	0.914	0.917	0.957	0.81	0.862	0.882	0.924	0.938	0.87	0.899	0.925	0.963
	1380	0.987	0.966	0.912	0.914	0.957	0.807	0.861	0.877	0.923	0.936	0.868	0.897	0.924	0.959
	1410	0.984	0.966	0.909	0.911	0.956	0.803	0.857	0.878	0.919	0.935	0.865	0.894	0.92	0.96
	1440	0.989	0.967	0.909	0.914	0.959	0.8	0.855	0.875	0.921	0.936	0.864	0.892	0.919	0.963
	1470	0.987	0.968	0.908	0.912	0.957	0.799	0.856	0.877	0.921	0.934	0.863	0.892	0.919	0.96
	1500	0.983	0.964	0.905	0.91	0.956	0.791	0.847	0.872	0.916	0.93	0.857	0.889	0.917	0.959
	1530	0.984	0.963	0.903	0.907	0.956	0.792	0.85	0.873	0.918	0.931	0.858	0.888	0.915	0.957
	1560	0.986	0.966	0.905	0.91	0.956	0.788	0.848	0.872	0.917	0.931	0.856	0.887	0.916	0.957
	1590	0.985	0.966	0.903	0.909	0.956	0.785	0.842	0.869	0.914	0.93	0.853	0.887	0.915	0.956
	1620	0.985	0.966	0.904	0.905	0.954	0.782	0.841	0.871	0.917	0.931	0.852	0.883	0.915	0.956
	1650	0.987	0.965	0.902	0.907	0.958	0.778	0.842	0.871	0.917	0.933	0.852	0.887	0.917	0.957
	1680	0.982	0.962	0.897	0.901	0.954	0.769	0.834	0.864	0.911	0.927	0.845	0.88	0.911	0.956
	1710	0.984	0.962	0.896	0.901	0.951	0.768	0.831	0.863	0.912	0.925	0.841	0.876	0.909	0.953
	1740	0.981	0.96	0.897	0.9	0.955	0.764	0.832	0.86	0.91	0.928	0.843	0.88	0.913	0.955
	1770	0.981	0.96	0.894	0.899	0.954	0.762	0.829	0.859	0.91	0.927	0.841	0.878	0.911	0.954
	1800	0.979	0.959	0.892	0.894	0.949	0.751	0.821	0.855	0.904	0.923	0.834	0.875	0.912	0.96
	1830	0.977	0.957	0.889	0.893	0.95	0.75	0.822	0.854	0.905	0.925	0.832	0.872	0.909	0.951
	1860	0.978	0.957	0.889	0.893	0.951	0.75	0.82	0.851	0.908	0.92	0.83	0.871	0.906	0.951
	1890	0.978	0.956	0.886	0.891	0.947	0.74	0.813	0.851	0.903	0.922	0.826	0.869	0.907	0.954
	1920	0.98	0.957	0.887	0.89	0.948	0.74	0.813	0.848	0.904	0.92	0.825	0.869	0.902	0.952
	1950	0.979	0.958	0.886	0.891	0.951	0.74	0.811	0.849	0.905	0.921	0.825	0.87	0.903	0.95
	1980	0.975	0.955	0.884	0.888	0.947	0.731	0.807	0.849	0.902	0.919	0.821	0.868	0.906	0.952
	2010	0.974	0.955	0.879	0.885	0.946	0.726	0.804	0.845	0.9	0.917	0.817	0.863	0.902	0.952
	2040	0.975	0.955	0.879	0.883	0.948	0.723	0.8	0.844	0.898	0.915	0.814	0.861	0.9	0.948
	2070	0.974	0.954	0.881	0.883	0.947	0.717	0.802	0.843	0.897	0.916	0.812	0.86	0.901	0.952
	2100	0.975	0.955	0.877	0.88	0.946	0.714	0.797	0.841	0.896	0.914	0.806	0.857	0.898	0.95
	2130	0.972	0.953	0.875	0.88	0.945	0.711	0.794	0.837	0.897	0.912	0.804	0.858	0.895	0.948
	2160	0.971	0.955	0.874	0.88	0.945	0.706	0.791	0.838	0.892	0.912	0.803	0.856	0.897	0.951
	2190	0.975	0.958	0.873	0.879	0.946	0.705	0.791	0.836	0.894	0.911	0.801	0.855	0.897	0.948
	2220	0.974	0.956	0.874	0.881	0.947	0.704	0.788	0.837	0.894	0.912	0.802	0.855	0.897	0.945
	2250	0.971	0.951	0.873	0.875	0.943	0.697	0.782	0.836	0.891	0.908	0.796	0.849	0.894	0.946
	2280	0.973	0.954	0.87	0.876	0.943	0.69	0.78	0.839	0.889	0.91	0.794	0.849	0.892	0.945
	2310	0.973	0.953	0.869	0.875	0.945	0.694	0.78	0.848	0.891	0.909	0.792	0.848	0.893	0.945
	2340	0.969	0.95	0.864	0.869	0.94	0.688	0.774	0.841	0.888	0.905	0.786	0.843	0.886	0.948
	2370	0.97	0.949	0.865	0.871	0.939	0.68	0.771	0.836	0.885	0.903	0.785	0.843	0.886	0.946
	2400	0.969	0.948	0.864	0.87	0.941	0.676	0.769	0.832	0.884	0.903	0.783	0.842	0.887	0.943
	2430	0.967	0.95	0.861	0.869	0.941	0.677	0.769	0.828	0.882	0.901	0.781	0.84	0.886	0.941
	2460	0.965	0.947	0.86	0.866	0.939	0.667	0.761	0.825	0.881	0.901	0.776	0.835	0.881	0.944
	2490	0.964	0.948	0.859	0.862	0.937	0.663	0.758	0.826	0.878	0.898	0.775	0.836	0.88	0.942
	2520	0.967	0.95	0.861	0.866	0.942	0.664	0.759	0.828	0.883	0.903	0.776	0.837	0.883	0.945
	2550	0.965	0.947	0.857	0.861	0.939	0.658	0.755	0.825	0.877	0.899	0.769	0.833	0.879	0.946
	2580	0.963	0.945	0.85	0.859	0.936	0.649	0.75	0.822	0.875	0.893	0.767	0.828	0.874	0.942
	2610	0.961	0.944	0.85	0.855	0.934	0.647	0.743	0.823	0.872	0.894	0.766	0.826	0.873	0.945
	2640	0.966	0.948	0.853	0.861	0.939	0.649	0.745	0.823	0.876	0.896	0.764	0.829	0.878	0.942
	2670	0.966	0.945	0.851	0.859	0.936	0.644	0.745	0.818	0.87	0.894	0.76	0.825	0.873	0.94
	2700	0.965	0.947	0.85	0.857	0.935	0.639	0.742	0.816	0.874	0.896	0.759	0.825	0.873	0.939
	2730	0.963	0.945	0.85	0.858	0.939	0.644	0.742	0.816	0.874	0.894	0.757	0.826	0.873	0.94
	2760	0.962	0.944	0.847	0.854	0.932	0.634	0.735	0.816	0.871	0.892	0.755	0.82	0.871	0.943
	2790	0.965	0.946	0.847	0.854	0.936	0.633	0.733	0.816	0.871	0.894	0.755	0.82	0.871	0.94
	2820	0.96	0.94	0.841	0.849	0.93	0.626	0.723	0.812	0.866	0.886	0.749	0.814	0.864	0.938
	2850	0.959	0.942	0.84	0.85	0.93	0.622	0.723	0.811	0.864	0.885	0.75	0.811	0.865	0.94
	2880	0.961	0.942	0.84	0.848	0.934	0.621	0.723	0.809	0.865	0.886	0.748	0.811	0.865	0.94
	2910	0.958	0.941	0.837	0.845	0.932	0.615	0.719	0.806	0.863	0.884	0.743	0.804	0.861	0.938
	2940	0.957	0.937	0.837	0.845	0.931	0.615	0.716	0.804	0.863	0.883	0.745	0.807	0.859	0.938
	2970	0.961	0.939	0.834	0.842	0.929	0.605	0.713	0.804	0.86	0.882	0.739	0.804	0.86	0.94
	3000	0.958	0.937	0.83	0.839	0.928	0.601	0.708	0.802	0.855	0.878	0.737	0.802	0.858	0.936
	3030	0.959	0.937	0.832	0.84	0.928	0.599	0.706	0.801	0.857	0.879	0.736	0.801	0.856	0.938
	3060	0.951	0.932	0.827	0.83	0.923	0.592	0.696	0.802	0.852	0.874	0.732	0.795	0.853	0.936
	3090	0.958	0.939	0.826	0.839	0.928	0.588	0.7	0.803	0.854	0.877	0.731	0.799	0.855	0.939
	3120	0.96	0.941	0.828	0.839	0.929	0.589	0.701	0.8	0.858	0.877	0.73	0.796	0.855	0.938
	3150	0.957	0.937	0.826	0.835	0.926	0.584	0.692	0.796	0.851	0.873	0.729	0.794	0.851	0.936
	3180	0.96	0.941	0.828	0.835	0.928	0.582	0.692	0.797	0.853	0.876	0.726	0.794	0.852	0.936
	3210	0.958	0.938	0.825	0.833	0.928	0.576	0.689	0.794	0.852	0.872	0.723	0.789	0.851	0.933
	3240	0.954	0.935	0.823	0.83	0.924	0.573	0.682	0.791	0.849	0.869	0.717	0.785	0.847	0.931
	3270	0.954	0.933	0.819	0.826	0.923	0.571	0.677	0.787	0.847	0.866	0.716	0.782	0.848	0.929
	3300	0.956	0.937	0.82	0.829	0.922	0.566	0.678	0.788	0.85	0.87	0.716	0.785	0.848	0.933
	3330	0.955	0.935	0.819	0.828	0.924	0.563	0.676	0.785	0.846	0.867	0.714	0.781	0.844	0.93
	3360	0.95	0.935	0.817	0.823	0.924	0.565	0.673	0.784	0.847	0.864	0.712	0.779	0.841	0.933
	3390	0.951	0.932	0.815	0.821	0.921	0.556	0.667	0.786	0.845	0.866	0.709	0.776	0.84	0.929
	3420	0.95	0.931	0.813	0.818	0.918	0.549	0.662	0.782	0.842	0.863	0.703	0.773	0.84	0.927
	3450	0.953	0.936	0.814	0.824	0.924	0.55	0.666	0.783	0.845	0.867	0.708	0.776	0.845	0.929
	3480	0.953	0.933	0.811	0.82	0.922	0.545	0.662	0.781	0.84	0.865	0.702	0.771	0.838	0.929
	3510	0.951	0.934	0.813	0.821	0.92	0.54	0.659	0.777	0.842	0.862	0.698	0.771	0.838	0.925
	3540	0.948	0.932	0.811	0.816	0.922	0.537	0.653	0.777	0.84	0.862	0.698	0.766	0.837	0.924
	3570	0.95	0.932	0.809	0.817	0.92	0.536	0.65	0.776	0.84	0.859	0.699	0.765	0.836	0.925
	3600	0.947	0.933	0.806	0.813	0.92	0.529	0.646	0.775	0.838	0.861	0.697	0.767	0.834	0.922
	3630	0.95	0.931	0.804	0.814	0.921	0.529	0.647	0.774	0.84	0.859	0.696	0.764	0.833	0.921
	3660	0.95	0.928	0.805	0.816	0.922	0.528	0.644	0.773	0.837	0.861	0.694	0.762	0.831	0.925
	3690	0.943	0.924	0.798	0.804	0.913	0.514	0.631	0.77	0.831	0.852	0.687	0.755	0.827	0.916
	3720	0.946	0.926	0.798	0.805	0.912	0.512	0.63	0.769	0.832	0.854	0.687	0.754	0.83	0.918
	3750	0.945	0.929	0.799	0.804	0.915	0.513	0.632	0.767	0.833	0.852	0.686	0.753	0.825	0.922
	3780	0.945	0.927	0.794	0.805	0.914	0.505	0.628	0.765	0.828	0.851	0.685	0.751	0.825	0.917
	3810	0.949	0.929	0.798	0.806	0.916	0.508	0.63	0.769	0.833	0.853	0.686	0.752	0.829	0.916
	3840	0.946	0.928	0.794	0.801	0.913	0.502	0.623	0.762	0.829	0.85	0.679	0.747	0.823	0.914
	3870	0.947	0.927	0.795	0.802	0.913	0.501	0.621	0.763	0.829	0.851	0.681	0.749	0.822	0.915
	3900	0.947	0.929	0.791	0.802	0.915	0.499	0.62	0.76	0.829	0.851	0.68	0.747	0.821	0.914
	3930	0.943	0.924	0.789	0.797	0.913	0.497	0.616	0.759	0.829	0.847	0.677	0.744	0.819	0.916
	3960	0.946	0.926	0.79	0.801	0.915	0.492	0.616	0.758	0.824	0.849	0.68	0.743	0.822	0.916
	3990	0.945	0.926	0.788	0.801	0.914	0.485	0.613	0.756	0.824	0.848	0.677	0.74	0.818	0.914
	4020	0.941	0.925	0.788	0.797	0.911	0.484	0.608	0.754	0.823	0.845	0.672	0.736	0.818	0.91
	4050	0.936	0.923	0.785	0.789	0.908	0.48	0.602	0.752	0.822	0.844	0.669	0.736	0.816	0.909
	4080	0.945	0.925	0.784	0.794	0.911	0.475	0.606	0.75	0.821	0.845	0.671	0.733	0.818	0.911
	4110	0.943	0.923	0.784	0.791	0.911	0.47	0.601	0.751	0.821	0.844	0.666	0.731	0.814	0.908
	4140	0.944	0.927	0.781	0.79	0.913	0.464	0.599	0.749	0.82	0.844	0.667	0.732	0.815	0.911
	4170	0.943	0.926	0.779	0.792	0.912	0.462	0.597	0.747	0.819	0.84	0.667	0.727	0.812	0.908
	4200	0.939	0.922	0.777	0.788	0.91	0.457	0.591	0.747	0.815	0.84	0.666	0.726	0.811	0.905
	4230	0.937	0.921	0.775	0.783	0.908	0.453	0.589	0.749	0.817	0.842	0.66	0.726	0.811	0.906
	4260	0.935	0.921	0.771	0.781	0.903	0.446	0.585	0.74	0.811	0.834	0.656	0.722	0.808	0.905
	4290	0.942	0.921	0.771	0.785	0.908	0.441	0.584	0.743	0.811	0.834	0.65	0.723	0.81	0.906
	4320	0.938	0.921	0.769	0.781	0.906	0.44	0.585	0.739	0.812	0.837	0.645	0.719	0.807	0.909
	4350	0.939	0.921	0.768	0.78	0.907	0.435	0.58	0.741	0.811	0.833	0.648	0.719	0.808	0.904
	4380	0.939	0.921	0.766	0.779	0.907	0.433	0.58	0.738	0.81	0.833	0.651	0.719	0.808	0.904
	4410	0.938	0.92	0.763	0.78	0.907	0.432	0.576	0.737	0.808	0.828	0.654	0.716	0.809	0.904
	4440	0.939	0.92	0.759	0.776	0.905	0.427	0.572	0.734	0.806	0.826	0.645	0.716	0.807	0.904
	4470	0.94	0.92	0.758	0.776	0.908	0.428	0.574	0.735	0.809	0.829	0.644	0.716	0.81	0.904
	4500	0.941	0.92	0.755	0.775	0.908	0.424	0.569	0.733	0.805	0.824	0.641	0.711	0.806	0.901
	4530	0.94	0.918	0.753	0.779	0.91	0.423	0.573	0.73	0.806	0.825	0.64	0.712	0.804	0.907
	4560	0.937	0.918	0.751	0.773	0.905	0.415	0.563	0.728	0.803	0.819	0.634	0.71	0.804	0.9
	4590	0.937	0.917	0.749	0.776	0.911	0.417	0.568	0.728	0.809	0.819	0.636	0.716	0.806	0.904
	4620	0.934	0.919	0.75	0.77	0.908	0.409	0.56	0.725	0.805	0.813	0.631	0.709	0.802	0.898
	4650	0.938	0.918	0.748	0.772	0.906	0.407	0.555	0.725	0.807	0.813	0.635	0.713	0.806	0.9
	4680	0.932	0.918	0.749	0.764	0.905	0.406	0.555	0.726	0.801	0.809	0.627	0.706	0.797	0.899
	4710	0.935	0.917	0.746	0.767	0.906	0.404	0.546	0.725	0.803	0.807	0.626	0.711	0.802	0.899
	4740	0.932	0.919	0.748	0.762	0.903	0.397	0.547	0.721	0.8	0.81	0.623	0.706	0.793	0.895
	4770	0.933	0.918	0.747	0.766	0.905	0.394	0.546	0.721	0.803	0.806	0.624	0.71	0.799	0.898
	4800	0.936	0.918	0.743	0.767	0.906	0.394	0.545	0.717	0.805	0.813	0.619	0.708	0.795	0.898
	4830	0.937	0.916	0.738	0.767	0.905	0.39	0.544	0.718	0.806	0.813	0.619	0.709	0.798	0.899
	4860	0.932	0.916	0.737	0.759	0.899	0.387	0.536	0.716	0.802	0.81	0.618	0.705	0.792	0.895
	4890	0.935	0.915	0.733	0.762	0.901	0.384	0.535	0.716	0.809	0.814	0.619	0.714	0.792	0.899
	4920	0.935	0.916	0.73	0.758	0.902	0.378	0.532	0.714	0.803	0.815	0.613	0.712	0.785	0.898
	4950	0.932	0.918	0.729	0.755	0.9	0.377	0.527	0.714	0.803	0.815	0.614	0.714	0.779	0.897
	4980	0.928	0.913	0.723	0.752	0.898	0.376	0.523	0.71	0.799	0.811	0.612	0.718	0.776	0.894
	5010	0.931	0.912	0.722	0.75	0.896	0.37	0.519	0.707	0.797	0.809	0.606	0.709	0.77	0.892
	5040	0.927	0.909	0.723	0.748	0.892	0.367	0.516	0.708	0.797	0.809	0.605	0.697	0.77	0.892
	5070	0.93	0.911	0.721	0.75	0.895	0.363	0.513	0.707	0.795	0.808	0.605	0.693	0.773	0.894
	5100	0.929	0.912	0.72	0.748	0.894	0.357	0.509	0.706	0.795	0.807	0.601	0.686	0.772	0.891
	5130	0.93	0.91	0.721	0.749	0.893	0.356	0.514	0.706	0.792	0.804	0.6	0.682	0.77	0.895
	5160	0.926	0.911	0.714	0.744	0.89	0.351	0.502	0.7	0.793	0.805	0.598	0.68	0.769	0.885
	5190	0.926	0.913	0.716	0.743	0.892	0.346	0.506	0.699	0.789	0.805	0.596	0.679	0.77	0.89
	5220	0.925	0.909	0.715	0.743	0.892	0.343	0.505	0.698	0.788	0.804	0.594	0.676	0.77	0.89
	5250	0.931	0.912	0.711	0.745	0.894	0.343	0.51	0.699	0.789	0.807	0.595	0.677	0.771	0.891
	5280	0.93	0.912	0.711	0.745	0.894	0.337	0.509	0.694	0.783	0.805	0.588	0.672	0.768	0.889
	5310	0.93	0.91	0.709	0.744	0.894	0.336	0.512	0.698	0.786	0.806	0.589	0.672	0.769	0.89
	5340	0.931	0.911	0.708	0.744	0.893	0.331	0.51	0.692	0.782	0.807	0.585	0.665	0.767	0.888
	5370	0.931	0.912	0.705	0.745	0.895	0.326	0.503	0.692	0.784	0.806	0.586	0.666	0.77	0.887
	5400	0.928	0.909	0.703	0.74	0.893	0.322	0.493	0.69	0.782	0.804	0.58	0.66	0.772	0.885
	5430	0.927	0.911	0.702	0.741	0.894	0.322	0.486	0.689	0.782	0.807	0.581	0.658	0.774	0.882
	5460	0.929	0.911	0.697	0.741	0.892	0.318	0.479	0.689	0.784	0.806	0.579	0.657	0.778	0.883
	5490	0.926	0.913	0.696	0.737	0.891	0.312	0.478	0.687	0.781	0.803	0.575	0.655	0.774	0.879
	5520	0.926	0.907	0.689	0.734	0.889	0.312	0.468	0.686	0.782	0.803	0.574	0.653	0.775	0.878
	5550	0.927	0.909	0.69	0.733	0.886	0.307	0.463	0.685	0.779	0.802	0.57	0.652	0.773	0.878
	5580	0.926	0.907	0.688	0.73	0.887	0.302	0.458	0.683	0.779	0.803	0.57	0.652	0.775	0.877
	5610	0.928	0.906	0.685	0.73	0.884	0.299	0.451	0.681	0.778	0.799	0.569	0.651	0.772	0.869
	5640	0.925	0.908	0.685	0.729	0.883	0.297	0.445	0.679	0.776	0.802	0.565	0.653	0.774	0.866
	5670	0.922	0.905	0.683	0.725	0.882	0.293	0.442	0.68	0.779	0.801	0.563	0.651	0.771	0.865
	5700	0.921	0.905	0.683	0.724	0.881	0.292	0.439	0.68	0.78	0.801	0.562	0.654	0.772	0.864
	5730	0.924	0.903	0.676	0.722	0.88	0.285	0.436	0.677	0.775	0.797	0.558	0.65	0.77	0.865
	5760	0.918	0.902	0.679	0.719	0.875	0.282	0.433	0.674	0.777	0.796	0.556	0.649	0.769	0.862
	5790	0.926	0.905	0.681	0.72	0.881	0.281	0.437	0.673	0.775	0.797	0.558	0.653	0.77	0.87
	5820	0.924	0.907	0.678	0.719	0.88	0.279	0.437	0.675	0.778	0.798	0.558	0.654	0.772	0.873
	5850	0.923	0.901	0.677	0.714	0.872	0.272	0.433	0.669	0.77	0.795	0.55	0.649	0.765	0.877
	5880	0.922	0.901	0.674	0.712	0.871	0.27	0.43	0.667	0.774	0.795	0.551	0.649	0.768	0.879
	5910	0.924	0.899	0.673	0.709	0.869	0.265	0.427	0.668	0.772	0.793	0.547	0.65	0.764	0.878
	5940	0.922	0.903	0.671	0.709	0.87	0.262	0.427	0.665	0.772	0.791	0.546	0.648	0.765	0.881
	5970	0.924	0.901	0.667	0.708	0.867	0.261	0.426	0.665	0.769	0.794	0.545	0.649	0.763	0.884
	6000	0.926	0.901	0.668	0.706	0.868	0.257	0.422	0.663	0.77	0.792	0.542	0.648	0.762	0.884
	6030	0.926	0.896	0.663	0.704	0.865	0.252	0.417	0.662	0.767	0.79	0.538	0.643	0.76	0.879
	6060	0.922	0.897	0.665	0.703	0.868	0.251	0.418	0.661	0.768	0.793	0.538	0.646	0.762	0.878
	6090	0.924	0.894	0.663	0.704	0.869	0.248	0.417	0.66	0.768	0.791	0.538	0.643	0.76	0.872
	6120	0.922	0.892	0.66	0.7	0.867	0.244	0.413	0.659	0.765	0.789	0.533	0.642	0.763	0.871
	6150	0.918	0.892	0.658	0.697	0.863	0.239	0.412	0.655	0.764	0.784	0.535	0.639	0.758	0.865
	6180	0.917	0.891	0.659	0.698	0.869	0.238	0.409	0.655	0.764	0.785	0.529	0.64	0.759	0.868
	6210	0.918	0.884	0.654	0.692	0.867	0.235	0.41	0.656	0.765	0.786	0.532	0.641	0.76	0.871
	6240	0.919	0.886	0.652	0.694	0.867	0.23	0.404	0.652	0.764	0.783	0.525	0.635	0.755	0.867
	6270	0.917	0.884	0.651	0.694	0.871	0.229	0.402	0.653	0.761	0.785	0.526	0.637	0.756	0.869
	6300	0.919	0.886	0.651	0.694	0.867	0.227	0.402	0.651	0.763	0.783	0.524	0.635	0.754	0.868
	6330	0.917	0.882	0.649	0.691	0.867	0.221	0.4	0.651	0.762	0.784	0.523	0.631	0.755	0.866
	6360	0.922	0.884	0.647	0.689	0.862	0.218	0.394	0.646	0.759	0.781	0.518	0.628	0.751	0.864
	6390	0.919	0.887	0.645	0.689	0.862	0.215	0.395	0.648	0.76	0.783	0.516	0.627	0.752	0.866
	6420	0.917	0.884	0.645	0.685	0.856	0.211	0.39	0.644	0.758	0.781	0.516	0.625	0.751	0.866
	6450	0.917	0.881	0.646	0.686	0.854	0.208	0.389	0.648	0.756	0.779	0.514	0.627	0.753	0.867
	6480	0.92	0.885	0.644	0.685	0.859	0.207	0.388	0.644	0.759	0.78	0.513	0.625	0.75	0.868
	6510	0.92	0.883	0.638	0.684	0.857	0.201	0.382	0.64	0.756	0.776	0.51	0.62	0.746	0.866
	6540	0.92	0.882	0.64	0.683	0.85	0.198	0.382	0.639	0.755	0.777	0.507	0.619	0.746	0.866
	6570	0.919	0.881	0.639	0.679	0.852	0.195	0.378	0.637	0.754	0.775	0.505	0.617	0.745	0.867
	6600	0.919	0.885	0.643	0.681	0.852	0.193	0.376	0.636	0.755	0.777	0.503	0.616	0.745	0.867
	6630	0.921	0.885	0.643	0.681	0.856	0.192	0.374	0.637	0.754	0.775	0.503	0.616	0.747	0.866
	6660	0.917	0.884	0.644	0.681	0.855	0.189	0.372	0.637	0.755	0.777	0.503	0.615	0.746	0.867
	6690	0.914	0.88	0.643	0.678	0.854	0.186	0.37	0.632	0.752	0.774	0.5	0.615	0.744	0.864
	6720	0.918	0.886	0.641	0.675	0.854	0.183	0.367	0.633	0.752	0.774	0.499	0.612	0.744	0.87
	6750	0.916	0.882	0.64	0.677	0.854	0.181	0.363	0.631	0.753	0.772	0.494	0.611	0.743	0.865
	6780	0.918	0.886	0.637	0.669	0.851	0.176	0.365	0.63	0.752	0.773	0.494	0.61	0.741	0.865
	6810	0.919	0.884	0.636	0.662	0.852	0.174	0.359	0.628	0.748	0.771	0.49	0.604	0.741	0.866
	6840	0.917	0.879	0.637	0.659	0.853	0.171	0.357	0.627	0.748	0.77	0.491	0.604	0.739	0.864
	6870	0.921	0.881	0.635	0.656	0.852	0.168	0.354	0.626	0.748	0.771	0.489	0.604	0.739	0.867
	6900	0.921	0.877	0.632	0.649	0.852	0.168	0.35	0.625	0.746	0.768	0.487	0.6	0.736	0.866
	6930	0.923	0.879	0.635	0.647	0.857	0.166	0.349	0.626	0.746	0.767	0.484	0.601	0.741	0.866
	6960	0.92	0.876	0.629	0.645	0.854	0.166	0.346	0.622	0.747	0.766	0.483	0.597	0.735	0.865
	6990	0.921	0.879	0.631	0.641	0.855	0.164	0.344	0.623	0.746	0.768	0.48	0.598	0.737	0.866
	7020	0.915	0.873	0.631	0.636	0.856	0.162	0.341	0.618	0.744	0.766	0.476	0.596	0.735	0.861
	7050	0.919	0.879	0.63	0.635	0.857	0.161	0.339	0.619	0.744	0.766	0.477	0.595	0.733	0.864
	7080	0.923	0.878	0.628	0.635	0.857	0.159	0.335	0.616	0.758	0.764	0.474	0.592	0.732	0.861
	7110	0.919	0.877	0.626	0.635	0.859	0.161	0.335	0.615	0.743	0.762	0.471	0.591	0.732	0.867
	7140	0.916	0.876	0.625	0.632	0.856	0.16	0.328	0.613	0.74	0.763	0.47	0.589	0.732	0.863
	7170	0.914	0.876	0.622	0.633	0.855	0.155	0.325	0.611	0.738	0.761	0.467	0.584	0.729	0.86
	7200	0.915	0.875	0.622	0.635	0.859	0.157	0.323	0.612	0.741	0.761	0.466	0.588	0.729	0.86
	7230	0.918	0.873	0.62	0.637	0.856	0.155	0.323	0.608	0.737	0.76	0.463	0.583	0.727	0.862
	7260	0.917	0.87	0.621	0.637	0.857	0.157	0.32	0.608	0.737	0.761	0.465	0.584	0.725	0.86
	7290	0.914	0.864	0.617	0.633	0.857	0.155	0.317	0.608	0.736	0.758	0.461	0.582	0.729	0.861
	7320	0.913	0.868	0.617	0.635	0.86	0.158	0.315	0.609	0.738	0.762	0.461	0.579	0.726	0.863
	7350	0.913	0.864	0.616	0.633	0.857	0.16	0.315	0.607	0.736	0.758	0.456	0.58	0.727	0.865
	7380	0.911	0.863	0.614	0.632	0.857	0.156	0.309	0.603	0.735	0.755	0.454	0.577	0.724	0.859
	7410	0.912	0.861	0.614	0.631	0.857	0.154	0.304	0.598	0.731	0.756	0.452	0.575	0.722	0.858
	7440	0.905	0.861	0.613	0.631	0.859	0.157	0.305	0.601	0.735	0.756	0.452	0.574	0.723	0.86
	7470	0.901	0.863	0.61	0.632	0.857	0.156	0.302	0.599	0.73	0.754	0.449	0.574	0.723	0.859
	7500	0.905	0.862	0.61	0.631	0.856	0.155	0.299	0.595	0.73	0.755	0.447	0.572	0.72	0.858
	7530	0.903	0.862	0.609	0.635	0.855	0.153	0.298	0.594	0.729	0.754	0.444	0.569	0.721	0.859
	7560	0.903	0.859	0.608	0.632	0.858	0.158	0.296	0.595	0.729	0.752	0.443	0.566	0.715	0.863
	7590	0.894	0.86	0.606	0.63	0.857	0.154	0.292	0.593	0.727	0.752	0.443	0.568	0.719	0.86
	7620	0.883	0.859	0.607	0.634	0.861	0.156	0.29	0.592	0.727	0.753	0.441	0.568	0.718	0.858
	7650	0.891	0.859	0.603	0.627	0.86	0.157	0.287	0.591	0.727	0.753	0.439	0.566	0.718	0.858
	7680	0.885	0.861	0.604	0.621	0.857	0.155	0.286	0.591	0.728	0.751	0.438	0.565	0.719	0.857
	7710	0.879	0.859	0.6	0.614	0.856	0.153	0.281	0.585	0.724	0.748	0.432	0.561	0.714	0.857
	7740	0.881	0.859	0.604	0.616	0.858	0.157	0.281	0.589	0.725	0.751	0.435	0.563	0.717	0.858
	7770	0.876	0.859	0.598	0.609	0.854	0.153	0.276	0.588	0.723	0.749	0.431	0.557	0.712	0.855
	7800	0.87	0.859	0.597	0.607	0.855	0.156	0.275	0.584	0.722	0.747	0.428	0.558	0.712	0.854
	7830	0.863	0.858	0.598	0.606	0.854	0.155	0.272	0.584	0.721	0.744	0.429	0.558	0.713	0.858
	7860	0.858	0.859	0.595	0.607	0.856	0.155	0.272	0.584	0.721	0.748	0.427	0.557	0.711	0.853
	7890	0.861	0.859	0.594	0.607	0.855	0.153	0.267	0.581	0.72	0.745	0.424	0.554	0.712	0.853
	7920	0.855	0.856	0.593	0.61	0.852	0.154	0.266	0.58	0.718	0.744	0.424	0.553	0.71	0.855
	7950	0.861	0.858	0.589	0.607	0.852	0.154	0.264	0.576	0.719	0.744	0.418	0.551	0.71	0.852
	7980	0.859	0.858	0.589	0.608	0.853	0.155	0.261	0.578	0.717	0.743	0.419	0.549	0.707	0.855
	8010	0.864	0.855	0.587	0.605	0.853	0.153	0.257	0.573	0.716	0.741	0.417	0.548	0.708	0.853
	8040	0.865	0.858	0.587	0.606	0.849	0.153	0.254	0.575	0.713	0.738	0.414	0.546	0.711	0.852
	8070	0.863	0.854	0.584	0.605	0.851	0.151	0.252	0.572	0.715	0.741	0.41	0.545	0.704	0.851
	8100	0.863	0.856	0.584	0.604	0.851	0.154	0.252	0.574	0.714	0.74	0.412	0.545	0.706	0.852
	8130	0.864	0.853	0.583	0.603	0.851	0.155	0.249	0.568	0.712	0.738	0.41	0.54	0.703	0.853
	8160	0.86	0.853	0.583	0.605	0.85	0.154	0.247	0.572	0.714	0.74	0.41	0.543	0.705	0.853
	8190	0.859	0.854	0.582	0.605	0.849	0.152	0.242	0.568	0.712	0.739	0.406	0.54	0.702	0.851
	8220	0.855	0.852	0.579	0.602	0.852	0.158	0.242	0.565	0.712	0.738	0.404	0.536	0.698	0.855
	8250	0.855	0.854	0.579	0.604	0.85	0.155	0.239	0.566	0.712	0.739	0.404	0.54	0.7	0.851
	8280	0.852	0.855	0.579	0.606	0.85	0.154	0.239	0.566	0.711	0.741	0.402	0.537	0.702	0.853
	8310	0.851	0.856	0.576	0.604	0.848	0.154	0.234	0.561	0.709	0.737	0.399	0.535	0.699	0.851
	8340	0.849	0.851	0.575	0.604	0.848	0.155	0.231	0.562	0.708	0.734	0.396	0.534	0.699	0.85
	8370	0.855	0.853	0.573	0.601	0.846	0.153	0.231	0.559	0.708	0.735	0.395	0.532	0.696	0.854
	8400	0.857	0.853	0.574	0.6	0.85	0.154	0.228	0.559	0.705	0.732	0.393	0.529	0.698	0.85
	8430	0.856	0.852	0.571	0.602	0.846	0.155	0.227	0.559	0.706	0.734	0.394	0.53	0.698	0.85
	8460	0.858	0.854	0.572	0.598	0.848	0.152	0.221	0.556	0.706	0.73	0.387	0.526	0.694	0.847
	8490	0.859	0.853	0.57	0.599	0.847	0.154	0.22	0.554	0.704	0.734	0.389	0.527	0.694	0.851
	8520	0.858	0.851	0.569	0.598	0.846	0.153	0.217	0.554	0.704	0.731	0.385	0.525	0.694	0.848
	8550	0.858	0.848	0.566	0.594	0.845	0.152	0.214	0.551	0.704	0.728	0.384	0.521	0.693	0.846
	8580	0.859	0.85	0.565	0.595	0.848	0.153	0.213	0.552	0.702	0.731	0.384	0.522	0.691	0.847
	8610	0.857	0.847	0.565	0.593	0.846	0.154	0.212	0.549	0.703	0.728	0.381	0.519	0.688	0.851
	8640	0.857	0.849	0.562	0.591	0.844	0.153	0.207	0.549	0.703	0.729	0.379	0.52	0.692	0.849
	8670	0.854	0.85	0.561	0.591	0.845	0.154	0.204	0.548	0.7	0.729	0.377	0.517	0.692	0.847
	8700	0.854	0.85	0.561	0.59	0.845	0.153	0.202	0.546	0.702	0.727	0.377	0.516	0.689	0.845
	8730	0.852	0.848	0.558	0.589	0.845	0.151	0.199	0.544	0.699	0.726	0.371	0.515	0.687	0.846
	8760	0.854	0.85	0.558	0.586	0.844	0.153	0.197	0.544	0.698	0.725	0.372	0.513	0.688	0.848
	8790	0.851	0.848	0.555	0.585	0.843	0.152	0.196	0.542	0.697	0.724	0.369	0.512	0.686	0.845
	8820	0.851	0.847	0.554	0.583	0.843	0.152	0.194	0.538	0.694	0.723	0.365	0.509	0.684	0.844
	8850	0.85	0.85	0.555	0.584	0.843	0.153	0.192	0.541	0.696	0.723	0.366	0.509	0.686	0.846
	8880	0.85	0.848	0.553	0.585	0.843	0.153	0.19	0.539	0.696	0.723	0.364	0.508	0.684	0.844
	8910	0.848	0.847	0.553	0.584	0.845	0.154	0.19	0.537	0.695	0.722	0.364	0.509	0.684	0.845
	8940	0.847	0.847	0.551	0.578	0.841	0.152	0.186	0.535	0.695	0.721	0.36	0.505	0.68	0.843
	8970	0.848	0.846	0.547	0.576	0.84	0.152	0.179	0.532	0.689	0.718	0.356	0.504	0.681	0.841
	9000	0.85	0.849	0.548	0.579	0.843	0.154	0.18	0.534	0.693	0.72	0.357	0.503	0.681	0.844
	9030	0.852	0.847	0.546	0.575	0.842	0.154	0.179	0.533	0.69	0.72	0.354	0.503	0.679	0.843
	9060	0.85	0.848	0.545	0.574	0.844	0.152	0.176	0.532	0.689	0.719	0.352	0.501	0.679	0.843
	9090	0.849	0.847	0.546	0.578	0.845	0.157	0.177	0.534	0.691	0.719	0.352	0.5	0.68	0.842
	9120	0.847	0.844	0.542	0.572	0.84	0.152	0.172	0.528	0.686	0.718	0.347	0.496	0.678	0.84
	9150	0.849	0.848	0.544	0.573	0.844	0.154	0.171	0.527	0.688	0.717	0.349	0.495	0.677	0.844
	9180	0.846	0.845	0.54	0.57	0.838	0.152	0.166	0.523	0.684	0.713	0.346	0.492	0.673	0.84
	9210	0.848	0.844	0.538	0.571	0.839	0.152	0.165	0.522	0.685	0.713	0.344	0.492	0.674	0.84
	9240	0.846	0.844	0.538	0.569	0.84	0.152	0.166	0.524	0.687	0.714	0.343	0.491	0.675	0.842
	9270	0.848	0.844	0.538	0.569	0.84	0.155	0.164	0.521	0.686	0.713	0.341	0.49	0.677	0.843
	9300	0.846	0.847	0.538	0.567	0.842	0.152	0.164	0.522	0.685	0.714	0.339	0.489	0.676	0.843
	9330	0.847	0.843	0.535	0.565	0.837	0.152	0.161	0.519	0.682	0.713	0.335	0.487	0.673	0.839
	9360	0.842	0.843	0.536	0.564	0.838	0.154	0.161	0.518	0.681	0.711	0.337	0.486	0.671	0.839
	9390	0.847	0.844	0.533	0.565	0.837	0.152	0.159	0.517	0.682	0.71	0.332	0.485	0.67	0.839
	9420	0.845	0.843	0.534	0.563	0.84	0.153	0.158	0.515	0.68	0.71	0.331	0.481	0.671	0.839
	9450	0.845	0.842	0.53	0.56	0.837	0.152	0.158	0.514	0.68	0.708	0.331	0.484	0.671	0.839
	9480	0.847	0.843	0.53	0.561	0.837	0.154	0.158	0.515	0.681	0.709	0.33	0.48	0.669	0.844
	9510	0.844	0.844	0.528	0.558	0.837	0.152	0.154	0.513	0.675	0.708	0.327	0.478	0.667	0.836
	9540	0.843	0.841	0.527	0.557	0.836	0.152	0.155	0.512	0.68	0.707	0.326	0.478	0.666	0.838
	9570	0.845	0.844	0.527	0.557	0.835	0.153	0.154	0.509	0.675	0.706	0.322	0.477	0.665	0.835
	9600	0.843	0.841	0.525	0.555	0.836	0.151	0.154	0.509	0.676	0.705	0.322	0.475	0.664	0.838
	9630	0.843	0.841	0.523	0.555	0.834	0.154	0.154	0.506	0.676	0.705	0.321	0.474	0.664	0.84
	9660	0.845	0.84	0.523	0.554	0.835	0.154	0.152	0.507	0.675	0.703	0.317	0.472	0.663	0.837
	9690	0.846	0.839	0.521	0.552	0.834	0.153	0.152	0.504	0.676	0.704	0.315	0.469	0.664	0.838
	9720	0.843	0.84	0.521	0.551	0.836	0.153	0.152	0.504	0.672	0.703	0.314	0.47	0.662	0.836
	9750	0.843	0.841	0.518	0.553	0.836	0.153	0.151	0.506	0.674	0.703	0.313	0.468	0.66	0.838
	9780	0.841	0.84	0.516	0.549	0.832	0.15	0.151	0.5	0.67	0.699	0.308	0.464	0.658	0.833
	9810	0.841	0.841	0.517	0.549	0.834	0.154	0.153	0.5	0.672	0.7	0.312	0.466	0.66	0.834
	9840	0.841	0.839	0.515	0.544	0.833	0.152	0.152	0.497	0.671	0.701	0.307	0.463	0.659	0.835
	9870	0.841	0.84	0.514	0.545	0.835	0.152	0.153	0.498	0.669	0.698	0.308	0.462	0.658	0.837
	9900	0.841	0.841	0.515	0.546	0.835	0.154	0.155	0.497	0.672	0.699	0.306	0.462	0.657	0.836
	9930	0.84	0.836	0.511	0.542	0.834	0.151	0.15	0.493	0.667	0.698	0.301	0.458	0.658	0.832
	9960	0.837	0.838	0.51	0.541	0.833	0.152	0.152	0.493	0.667	0.697	0.301	0.457	0.654	0.835
	9990	0.84	0.84	0.513	0.543	0.835	0.152	0.152	0.494	0.67	0.699	0.299	0.459	0.657	0.834
	10020	0.848	0.84	0.509	0.539	0.836	0.154	0.152	0.492	0.666	0.696	0.297	0.456	0.655	0.833
	10050	0.839	0.837	0.507	0.538	0.83	0.152	0.15	0.489	0.664	0.696	0.294	0.454	0.653	0.833
	10080	0.837	0.836	0.506	0.536	0.83	0.152	0.153	0.488	0.664	0.694	0.291	0.452	0.651	0.832
	10110	0.837	0.837	0.506	0.537	0.833	0.152	0.152	0.485	0.662	0.693	0.29	0.451	0.653	0.831
	10140	0.838	0.836	0.504	0.537	0.831	0.151	0.151	0.486	0.661	0.692	0.288	0.448	0.65	0.829
	10170	0.839	0.836	0.503	0.535	0.83	0.151	0.15	0.484	0.66	0.693	0.287	0.447	0.649	0.831
	10200	0.836	0.84	0.504	0.534	0.832	0.154	0.153	0.485	0.662	0.691	0.289	0.449	0.651	0.831
	10230	0.839	0.835	0.503	0.534	0.832	0.153	0.151	0.482	0.661	0.691	0.286	0.446	0.648	0.832
	10260	0.835	0.835	0.5	0.53	0.83	0.152	0.152	0.48	0.659	0.689	0.284	0.446	0.649	0.83
	10290	0.834	0.833	0.496	0.528	0.828	0.151	0.149	0.48	0.659	0.687	0.278	0.443	0.645	0.829
	10320	0.833	0.834	0.499	0.53	0.831	0.153	0.152	0.48	0.659	0.688	0.281	0.444	0.649	0.831
	10350	0.837	0.834	0.496	0.528	0.828	0.152	0.151	0.478	0.659	0.687	0.278	0.442	0.646	0.827
	10380	0.835	0.835	0.496	0.528	0.829	0.152	0.15	0.475	0.657	0.688	0.275	0.441	0.646	0.828
	10410	0.834	0.833	0.495	0.529	0.829	0.152	0.152	0.474	0.657	0.685	0.273	0.439	0.643	0.829
	10440	0.832	0.833	0.492	0.524	0.828	0.156	0.151	0.473	0.655	0.685	0.275	0.436	0.642	0.832
	10470	0.83	0.832	0.49	0.523	0.826	0.151	0.15	0.473	0.655	0.683	0.267	0.435	0.64	0.831
	10500	0.837	0.831	0.49	0.524	0.829	0.153	0.152	0.472	0.654	0.684	0.269	0.435	0.641	0.83
	10530	0.833	0.83	0.486	0.522	0.826	0.152	0.149	0.47	0.65	0.683	0.267	0.431	0.639	0.826
	10560	0.833	0.833	0.489	0.522	0.827	0.152	0.151	0.469	0.652	0.683	0.266	0.431	0.641	0.826
	10590	0.831	0.832	0.487	0.52	0.827	0.151	0.149	0.468	0.652	0.682	0.264	0.432	0.638	0.825
	10620	0.83	0.832	0.484	0.518	0.827	0.153	0.149	0.467	0.651	0.683	0.262	0.43	0.638	0.826
	10650	0.833	0.832	0.484	0.516	0.826	0.151	0.15	0.466	0.651	0.681	0.261	0.428	0.639	0.827
	10680	0.833	0.831	0.483	0.519	0.829	0.153	0.15	0.464	0.648	0.682	0.258	0.427	0.637	0.827
	10710	0.833	0.832	0.481	0.518	0.825	0.15	0.15	0.462	0.649	0.677	0.256	0.425	0.634	0.826
	10740	0.831	0.833	0.481	0.516	0.827	0.151	0.152	0.465	0.647	0.68	0.254	0.427	0.638	0.829
	10770	0.838	0.831	0.479	0.515	0.825	0.154	0.151	0.46	0.648	0.679	0.254	0.424	0.635	0.826
	10800	0.831	0.83	0.479	0.512	0.825	0.152	0.15	0.46	0.648	0.678	0.251	0.422	0.634	0.825
	10830	0.831	0.83	0.479	0.511	0.824	0.151	0.15	0.458	0.653	0.678	0.25	0.418	0.633	0.825
	10860	0.831	0.831	0.475	0.51	0.825	0.152	0.15	0.459	0.646	0.677	0.249	0.419	0.632	0.826
	10890	0.83	0.83	0.477	0.509	0.823	0.154	0.151	0.454	0.644	0.677	0.247	0.416	0.631	0.826
	10920	0.828	0.83	0.472	0.508	0.824	0.152	0.148	0.453	0.643	0.677	0.244	0.413	0.631	0.825
	10950	0.83	0.831	0.474	0.509	0.825	0.155	0.152	0.455	0.644	0.676	0.247	0.414	0.632	0.822
	10980	0.828	0.828	0.47	0.504	0.821	0.152	0.149	0.452	0.641	0.674	0.24	0.411	0.629	0.823
	11010	0.828	0.829	0.469	0.504	0.822	0.152	0.149	0.451	0.641	0.673	0.239	0.41	0.629	0.822
	11040	0.829	0.828	0.47	0.504	0.823	0.152	0.151	0.45	0.641	0.674	0.238	0.41	0.629	0.822
	11070	0.83	0.827	0.467	0.504	0.824	0.151	0.15	0.447	0.641	0.673	0.236	0.41	0.627	0.823
	11100	0.828	0.827	0.466	0.502	0.822	0.153	0.149	0.447	0.638	0.671	0.235	0.408	0.627	0.823
	11130	0.828	0.829	0.468	0.501	0.823	0.153	0.152	0.447	0.639	0.671	0.234	0.406	0.625	0.821
	11160	0.827	0.826	0.463	0.5	0.821	0.151	0.153	0.444	0.639	0.67	0.23	0.405	0.624	0.822
	11190	0.825	0.825	0.462	0.498	0.822	0.154	0.149	0.443	0.638	0.667	0.228	0.401	0.623	0.822
	11220	0.828	0.826	0.461	0.497	0.82	0.153	0.149	0.442	0.636	0.669	0.23	0.402	0.624	0.821
	11250	0.825	0.827	0.46	0.494	0.821	0.151	0.148	0.439	0.635	0.667	0.225	0.399	0.621	0.819
	11280	0.826	0.828	0.461	0.496	0.819	0.153	0.15	0.439	0.634	0.667	0.225	0.4	0.622	0.822
	11310	0.824	0.824	0.459	0.495	0.819	0.153	0.15	0.437	0.635	0.664	0.224	0.399	0.621	0.822
	11340	0.828	0.825	0.458	0.495	0.819	0.159	0.149	0.438	0.634	0.667	0.223	0.396	0.624	0.822
	11370	0.825	0.822	0.407	0.444	0.771	0.105	0.101	0.388	0.586	0.617	0.173	0.348	0.572	0.773
	11400	0.823	0.824	0.453	0.489	0.818	0.151	0.149	0.433	0.63	0.664	0.216	0.392	0.617	0.819
	11430	0.826	0.826	0.453	0.489	0.818	0.151	0.15	0.433	0.63	0.665	0.216	0.392	0.62	0.818
	11460	0.822	0.825	0.453	0.489	0.818	0.151	0.149	0.431	0.628	0.665	0.212	0.391	0.619	0.818
	11490	0.821	0.824	0.451	0.486	0.816	0.149	0.147	0.429	0.627	0.661	0.21	0.387	0.614	0.818
	11520	0.822	0.823	0.451	0.485	0.816	0.15	0.147	0.427	0.628	0.66	0.209	0.387	0.616	0.819
	11550	0.823	0.823	0.448	0.486	0.817	0.151	0.147	0.427	0.627	0.659	0.208	0.387	0.614	0.817
	11580	0.824	0.824	0.449	0.485	0.819	0.153	0.148	0.427	0.626	0.659	0.207	0.387	0.615	0.818
	11610	0.822	0.824	0.448	0.485	0.819	0.151	0.151	0.427	0.628	0.661	0.207	0.384	0.615	0.818
	11640	0.821	0.821	0.445	0.482	0.818	0.152	0.15	0.426	0.626	0.66	0.203	0.384	0.613	0.817
	11670	0.819	0.821	0.444	0.48	0.815	0.149	0.146	0.422	0.624	0.658	0.201	0.379	0.61	0.815
	11700	0.823	0.822	0.445	0.484	0.818	0.152	0.15	0.423	0.624	0.66	0.202	0.382	0.615	0.817
	11730	0.821	0.823	0.444	0.481	0.816	0.152	0.148	0.421	0.625	0.656	0.199	0.378	0.611	0.815
	11760	0.822	0.823	0.442	0.479	0.817	0.152	0.148	0.419	0.622	0.658	0.196	0.377	0.61	0.815
	11790	0.826	0.821	0.441	0.48	0.817	0.152	0.149	0.42	0.622	0.658	0.198	0.377	0.609	0.819
	11820	0.816	0.818	0.436	0.474	0.814	0.149	0.148	0.416	0.62	0.653	0.192	0.373	0.608	0.813
	11850	0.819	0.819	0.437	0.473	0.812	0.151	0.146	0.415	0.619	0.653	0.193	0.374	0.607	0.814
	11880	0.819	0.819	0.436	0.474	0.814	0.15	0.147	0.414	0.619	0.654	0.192	0.373	0.606	0.816
	11910	0.82	0.821	0.435	0.474	0.815	0.155	0.148	0.416	0.62	0.653	0.191	0.372	0.605	0.816
	11940	0.817	0.816	0.432	0.47	0.814	0.151	0.147	0.413	0.616	0.653	0.187	0.369	0.604	0.811
	11970	0.818	0.818	0.432	0.472	0.813	0.151	0.149	0.413	0.618	0.653	0.186	0.37	0.605	0.815
	12000	0.818	0.819	0.432	0.471	0.815	0.152	0.15	0.412	0.618	0.652	0.184	0.368	0.607	0.814
	12030	0.818	0.818	0.43	0.469	0.812	0.151	0.148	0.409	0.616	0.649	0.183	0.366	0.604	0.815
	12060	0.817	0.818	0.43	0.468	0.814	0.151	0.148	0.408	0.616	0.65	0.182	0.367	0.604	0.813
	12090	0.817	0.817	0.427	0.466	0.812	0.151	0.148	0.407	0.614	0.648	0.181	0.363	0.6	0.812
	12120	0.817	0.819	0.428	0.466	0.815	0.15	0.148	0.406	0.614	0.649	0.179	0.362	0.601	0.812
	12150	0.819	0.817	0.427	0.466	0.812	0.151	0.151	0.406	0.614	0.649	0.179	0.363	0.601	0.814
	12180	0.816	0.817	0.423	0.465	0.812	0.151	0.147	0.403	0.611	0.648	0.174	0.36	0.598	0.813
	12210	0.816	0.816	0.425	0.464	0.811	0.151	0.151	0.403	0.612	0.648	0.173	0.358	0.598	0.811
	12240	0.816	0.816	0.423	0.46	0.811	0.15	0.148	0.4	0.61	0.645	0.172	0.356	0.597	0.811
	12270	0.816	0.815	0.42	0.461	0.81	0.151	0.149	0.401	0.611	0.644	0.171	0.353	0.597	0.81
	12300	0.817	0.814	0.42	0.46	0.812	0.149	0.147	0.399	0.608	0.644	0.17	0.355	0.596	0.81
	12330	0.814	0.815	0.419	0.457	0.811	0.153	0.148	0.399	0.61	0.641	0.171	0.351	0.593	0.813
	12360	0.816	0.817	0.417	0.458	0.81	0.152	0.149	0.396	0.609	0.643	0.168	0.353	0.596	0.812
	12390	0.813	0.814	0.416	0.457	0.809	0.151	0.148	0.396	0.607	0.641	0.167	0.351	0.593	0.809
	12420	0.82	0.815	0.415	0.457	0.81	0.152	0.149	0.394	0.607	0.642	0.165	0.35	0.595	0.81
	12450	0.815	0.816	0.415	0.454	0.811	0.151	0.15	0.394	0.608	0.641	0.165	0.348	0.592	0.809
	12480	0.816	0.816	0.415	0.454	0.81	0.152	0.147	0.394	0.606	0.644	0.165	0.349	0.593	0.811
	12510	0.814	0.814	0.412	0.453	0.808	0.151	0.147	0.39	0.605	0.639	0.162	0.346	0.591	0.81
	12540	0.813	0.814	0.412	0.452	0.808	0.153	0.148	0.389	0.605	0.64	0.162	0.346	0.59	0.809
	12570	0.813	0.812	0.409	0.452	0.809	0.149	0.147	0.388	0.604	0.638	0.159	0.342	0.588	0.808
	12600	0.816	0.813	0.409	0.45	0.808	0.152	0.148	0.388	0.602	0.639	0.157	0.342	0.587	0.806
	12630	0.813	0.81	0.406	0.448	0.807	0.149	0.146	0.385	0.6	0.636	0.155	0.337	0.59	0.805
	12660	0.81	0.81	0.405	0.447	0.808	0.153	0.147	0.386	0.601	0.636	0.156	0.338	0.584	0.809
	12690	0.812	0.813	0.405	0.446	0.806	0.15	0.148	0.384	0.601	0.636	0.156	0.337	0.587	0.808
	12720	0.812	0.817	0.405	0.447	0.806	0.151	0.148	0.383	0.601	0.636	0.156	0.335	0.588	0.808
	12750	0.81	0.811	0.404	0.444	0.806	0.151	0.145	0.38	0.598	0.633	0.155	0.333	0.585	0.805
	12780	0.81	0.811	0.402	0.444	0.806	0.149	0.148	0.379	0.598	0.635	0.155	0.333	0.583	0.806
	12810	0.809	0.81	0.399	0.44	0.806	0.154	0.146	0.379	0.598	0.631	0.151	0.331	0.581	0.808
	12840	0.809	0.81	0.4	0.44	0.804	0.149	0.147	0.377	0.595	0.633	0.151	0.331	0.585	0.806
	12870	0.811	0.814	0.402	0.441	0.806	0.151	0.148	0.377	0.596	0.633	0.152	0.328	0.581	0.804
	12900	0.81	0.811	0.398	0.439	0.804	0.15	0.148	0.374	0.595	0.631	0.152	0.328	0.58	0.805
	12930	0.81	0.811	0.397	0.44	0.805	0.152	0.149	0.375	0.594	0.632	0.152	0.329	0.58	0.806
	12960	0.809	0.811	0.399	0.439	0.807	0.151	0.149	0.373	0.594	0.632	0.153	0.331	0.581	0.803
	12990	0.808	0.811	0.395	0.438	0.805	0.152	0.149	0.374	0.593	0.631	0.152	0.323	0.579	0.805
	13020	0.81	0.811	0.395	0.436	0.804	0.15	0.148	0.371	0.592	0.629	0.151	0.323	0.578	0.806
	13050	0.808	0.809	0.392	0.433	0.805	0.15	0.148	0.369	0.59	0.628	0.153	0.321	0.578	0.806
	13080	0.809	0.81	0.392	0.435	0.804	0.151	0.147	0.367	0.593	0.629	0.15	0.32	0.578	0.806
	13110	0.808	0.808	0.39	0.432	0.804	0.149	0.147	0.366	0.598	0.626	0.148	0.319	0.578	0.803
	13140	0.807	0.808	0.389	0.43	0.802	0.15	0.146	0.37	0.588	0.626	0.15	0.318	0.573	0.803
	13170	0.807	0.809	0.389	0.429	0.803	0.151	0.149	0.366	0.59	0.626	0.151	0.317	0.575	0.804
	13200	0.807	0.809	0.387	0.43	0.802	0.15	0.148	0.364	0.588	0.625	0.15	0.316	0.574	0.8
	13230	0.806	0.809	0.387	0.429	0.803	0.151	0.148	0.362	0.589	0.624	0.152	0.315	0.572	0.802
	13260	0.81	0.805	0.383	0.428	0.804	0.155	0.15	0.361	0.588	0.624	0.149	0.311	0.571	0.804
	13290	0.806	0.808	0.382	0.426	0.802	0.15	0.146	0.359	0.586	0.624	0.149	0.311	0.572	0.802
	13320	0.806	0.809	0.384	0.427	0.803	0.15	0.147	0.359	0.586	0.624	0.15	0.311	0.571	0.803
	13350	0.803	0.805	0.38	0.422	0.802	0.151	0.147	0.356	0.584	0.621	0.148	0.305	0.568	0.804
	13380	0.808	0.807	0.383	0.427	0.803	0.151	0.153	0.359	0.584	0.622	0.151	0.308	0.57	0.802
	13410	0.806	0.807	0.381	0.423	0.801	0.15	0.146	0.356	0.585	0.621	0.151	0.306	0.569	0.801
	13440	0.804	0.808	0.379	0.422	0.801	0.15	0.147	0.353	0.582	0.619	0.149	0.303	0.568	0.8
	13470	0.803	0.806	0.377	0.421	0.8	0.15	0.147	0.354	0.584	0.62	0.149	0.303	0.567	0.8
	13500	0.804	0.805	0.375	0.419	0.801	0.148	0.145	0.351	0.581	0.619	0.147	0.302	0.566	0.8
	13530	0.806	0.806	0.377	0.42	0.8	0.151	0.148	0.353	0.578	0.619	0.149	0.304	0.566	0.801
	13560	0.805	0.808	0.374	0.42	0.802	0.151	0.148	0.35	0.582	0.618	0.15	0.301	0.567	0.801
	13590	0.802	0.804	0.371	0.416	0.799	0.149	0.145	0.347	0.579	0.616	0.148	0.299	0.565	0.797
	13620	0.804	0.805	0.373	0.416	0.802	0.151	0.147	0.347	0.579	0.616	0.147	0.298	0.564	0.8
	13650	0.802	0.807	0.372	0.417	0.799	0.149	0.145	0.346	0.577	0.615	0.149	0.297	0.562	0.798
	13680	0.8	0.803	0.368	0.412	0.796	0.149	0.146	0.345	0.575	0.614	0.149	0.293	0.56	0.797
	13710	0.8	0.801	0.366	0.41	0.797	0.151	0.147	0.344	0.577	0.613	0.147	0.29	0.559	0.799
	13740	0.8	0.802	0.368	0.411	0.798	0.15	0.147	0.343	0.576	0.613	0.148	0.292	0.559	0.797
	13770	0.801	0.802	0.366	0.411	0.799	0.152	0.149	0.344	0.577	0.613	0.148	0.289	0.558	0.803
	13800	0.801	0.806	0.367	0.412	0.799	0.154	0.147	0.343	0.577	0.612	0.15	0.291	0.561	0.797
	13830	0.803	0.802	0.363	0.409	0.799	0.149	0.147	0.341	0.572	0.612	0.151	0.287	0.558	0.795
	13860	0.802	0.802	0.363	0.408	0.796	0.149	0.147	0.338	0.572	0.61	0.148	0.288	0.558	0.797
	13890	0.802	0.804	0.363	0.408	0.796	0.149	0.147	0.339	0.573	0.612	0.149	0.286	0.558	0.797
	13920	0.801	0.803	0.363	0.406	0.796	0.15	0.147	0.336	0.571	0.609	0.149	0.284	0.554	0.796
	13950	0.801	0.803	0.361	0.405	0.798	0.151	0.147	0.333	0.57	0.609	0.149	0.285	0.554	0.796
	13980	0.801	0.802	0.36	0.404	0.795	0.15	0.146	0.335	0.571	0.608	0.146	0.282	0.555	0.796
	14010	0.801	0.801	0.358	0.404	0.797	0.151	0.149	0.334	0.571	0.608	0.148	0.283	0.554	0.799
	14040	0.801	0.803	0.358	0.403	0.797	0.15	0.148	0.332	0.569	0.609	0.15	0.281	0.552	0.797
	14070	0.797	0.804	0.356	0.402	0.797	0.148	0.146	0.33	0.565	0.604	0.147	0.277	0.554	0.795
	14100	0.8	0.803	0.357	0.401	0.794	0.15	0.148	0.331	0.567	0.606	0.15	0.278	0.553	0.797
	14130	0.8	0.8	0.354	0.4	0.793	0.151	0.147	0.328	0.566	0.606	0.147	0.276	0.55	0.794
	14160	0.798	0.802	0.353	0.398	0.793	0.149	0.148	0.328	0.566	0.603	0.147	0.274	0.551	0.795
	14190	0.798	0.801	0.351	0.4	0.796	0.15	0.147	0.327	0.565	0.607	0.149	0.274	0.551	0.794
	14220	0.799	0.801	0.353	0.399	0.798	0.152	0.147	0.328	0.565	0.604	0.149	0.274	0.55	0.796
	14250	0.796	0.798	0.349	0.394	0.791	0.152	0.148	0.324	0.562	0.603	0.147	0.27	0.545	0.795
	14280	0.796	0.798	0.347	0.392	0.792	0.15	0.146	0.321	0.561	0.6	0.145	0.269	0.546	0.791
	14310	0.798	0.8	0.346	0.393	0.794	0.148	0.146	0.32	0.562	0.599	0.148	0.268	0.546	0.794
	14340	0.802	0.799	0.344	0.391	0.789	0.149	0.145	0.318	0.559	0.599	0.146	0.267	0.545	0.789
	14370	0.797	0.799	0.347	0.393	0.792	0.151	0.15	0.32	0.56	0.603	0.147	0.268	0.545	0.792

## Sheet: Calculations
Source data: Figure 2B and Figure 2-figure supplement 1
NADH-based ATP hydrolysis assay
		Slopes determined by linear regression (s-1)
		Column:	1	2	3	4	5	6	7	8	9	10	11	12	13	14
	Experiment		Ctrl.	Ctrl. + Ca	2 µM BiP	2 µM BiP + Ca	5 µM J	2 µM BiP + 5 µM J	2 µM BiP + 5 µM J + Ca	2 µM BiP + 5 µM J*	1 µM BiP	1 µM BiP + Ca	1 µM BiP + 2 µM J	1 µM BiP + 2 µM J + Ca	1 µM BiP + 2 µM J*	2 µM J
	1	Slope	-1.67e-05	-1.6e-05							-2.953e-05	-2.729e-05	-6.128e-05	-5.015e-05	-3.262e-05
		R2	0.9756	0.9604							0.9925	0.9893	0.9971	0.9949	0.9944
	2	Slope	-1.784e-05	-1.678e-05	-4.841e-05	-4.369e-05	-1.472e-05	-0.0001223	-9.687e-05	-4.64e-05	-2.906e-05	-2.593e-05	-6.435e-05	-4.971e-05	-3.014e-05	-1.385e-05
		R2	0.9812	0.9701	0.9956	0.9951	0.9874	0.9996	0.9964	0.9949	0.9939	0.9923	0.9968	0.9978	0.9939	0.9706
	3	Slope	-1.583e-05	-1.27e-05	-4.563e-05	-3.979e-05	-1.138e-05	-0.0001224	-9.081e-05	-4.568e-05	-2.806e-05	-2.855e-05	-6.226e-05	-4.731e-05	-2.846e-05	-1.124e-05
		R2	0.9692	0.9645	0.9947	0.9959	0.9773	0.9992	0.9994	0.9974	0.9921	0.9863	0.9963	0.9982	0.9933	0.9793
	4	Slope	-1.603e-05	-1.39e-05	-4.468e-05	-4.159e-05	-1.33e-05	-0.0001184	-9.054e-05	-4.408e-05	-2.786e-05	-2.609e-05	-6.432e-05	-4.885e-05	-2.914e-05	-1.364e-05
		R2	0.9764	0.9798	0.994	0.9944	0.9642	0.9992	0.9989	0.9977	0.9927	0.9895	0.9975	0.9968	0.9911	0.9639
			Note: Ctrl. represents buffer only
		Absolute slopes (s-1)
		Column:	1	2	3	4	5	6	7	8	9	10	11	12	13	14
		Experiment	Ctrl.	Ctrl. + Ca	2 µM BiP	2 µM BiP + Ca	5 µM J	2 µM BiP + 5 µM J	2 µM BiP + 5 µM J + Ca	2 µM BiP + 5 µM J*	1 µM BiP	1 µM BiP + Ca	1 µM BiP + 2 µM J	1 µM BiP + 2 µM J + Ca	1 µM BiP + 2 µM J*	2 µM J
		1	1.67e-05	1.6e-05							2.953e-05	2.729e-05	6.128e-05	5.015e-05	3.262e-05
		2	1.784e-05	1.678e-05	4.841e-05	4.369e-05	1.472e-05	0.0001223	9.687e-05	4.64e-05	2.906e-05	2.593e-05	6.435e-05	4.971e-05	3.014e-05	1.385e-05
		3	1.583e-05	1.27e-05	4.563e-05	3.979e-05	1.138e-05	0.0001224	9.081e-05	4.568e-05	2.806e-05	2.855e-05	6.226e-05	4.731e-05	2.846e-05	1.124e-05
		4	1.603e-05	1.39e-05	4.468e-05	4.159e-05	1.33e-05	0.0001184	9.054e-05	4.408e-05	2.786e-05	2.609e-05	6.432e-05	4.885e-05	2.914e-05	1.364e-05
		Slopes after background (buffer only ctrl.) substration (s-1)
		Column:	1	2	3	4	5	6	7	8	9	10	11	12	13	14
		Experiment	Ctrl.	Ctrl. + Ca	2 µM BiP	2 µM BiP + Ca	5 µM J	2 µM BiP + 5 µM J	2 µM BiP + 5 µM J + Ca	2 µM BiP + 5 µM J*	1 µM BiP	1 µM BiP + Ca	1 µM BiP + 2 µM J	1 µM BiP + 2 µM J + Ca	1 µM BiP + 2 µM J*	2 µM J
		1	0	-7e-07							1.283e-05	1.059e-05	4.458e-05	3.345e-05	1.592e-05
		2	0	-1.06e-06	3.057e-05	2.585e-05	-3.12e-06	0.00010446	7.903e-05	2.856e-05	1.122e-05	8.09e-06	4.651e-05	3.187e-05	1.23e-05	-3.99e-06
		3	0	-3.13e-06	2.98e-05	2.396e-05	-4.45e-06	0.00010657	7.498e-05	2.985e-05	1.223e-05	1.272e-05	4.643e-05	3.148e-05	1.263e-05	-4.59e-06
		4	0	-2.13e-06	2.865e-05	2.556e-05	-2.73e-06	0.00010237	7.451e-05	2.805e-05	1.183e-05	1.006e-05	4.829e-05	3.282e-05	1.311e-05	-2.39e-06
		Calculations
		Extinction coefficient of NADH = 6220 M-1cm-1
		Volume of reaction = 110 µl = 1.1 x 10-4 L
		MW BiP 70940 g/mol
		1 µM BiP in 110 µl reaction --> 110 pmol
		The rate is given by slope/Ext. coeff --> M/s = mol/L/s
		Convert mol/L/s*110 µl --> mol/s
		Devide by n(BiP) --> mol(ATP)/s/mol(BiP)
		Column:	1	2	3	4	5	6	7	8	9	10	11	12	13	14
		Experiment	Ctrl.	Ctrl. + Ca	2 µM BiP	2 µM BiP + Ca	5 µM J	2 µM BiP + 5 µM J	2 µM BiP + 5 µM J + Ca	2 µM BiP + 5 µM J*	1 µM BiP	1 µM BiP + Ca	1 µM BiP + 2 µM J	1 µM BiP + 2 µM J + Ca	1 µM BiP + 2 µM J*	2 µM J
		1									0.0020627	0.00170257	0.0071672	0.00537781	0.00255949
		2			0.0024574	0.00207797		0.00839711	0.00635289	0.00229582	0.00180386	0.00130064	0.00747749	0.00512379	0.00197749
		3			0.0023955	0.00192605		0.00856672	0.00602733	0.00239952	0.00196624	0.00204502	0.00746463	0.00506109	0.00203055
		4			0.00230305	0.00205466		0.0082291	0.00598955	0.00225482	0.00190193	0.00161736	0.00776367	0.00527653	0.00210772
		Summary
			mol(ATP)/s/mol(BiP)
			Mean	SD	N
		2 µM BiP	0.00238532	7.76722e-05	3
		2 µM BiP + Ca	0.00201956	8.18211e-05	3
		2 µM BiP + 5 µM J	0.00839764	0.000168811	3
		2 µM BiP + 5 µM J + Ca	0.00612326	0.000199766	3
		2 µM BiP + 5 µM J*	0.00231672	7.45773e-05	3
		1 µM BiP	0.00193368	0.000108885	4
		1 µM BiP + Ca	0.0016664	0.000305964	4
		1 µM BiP + 2 µM J	0.00746825	0.000243583	4
		1 µM BiP + 2 µM J + Ca	0.00520981	0.000143981	4
		1 µM BiP + 2 µM J*	0.00216881	0.000265882	4
