# Supplementary material for: Calcium depletion challenges endoplasmic reticulum proteostasis by destabilising BiP-substrate complexes
Source: eLife. 2020 Dec 9;9:e62601. doi: 10.7554/eLife.62601 (PMC7758071; doi:10.7554/eLife.62601)
Supplement: Figure 2—source data 2. [file elife-62601-fig2-data2.xlsx]

## Sheet: Exp 1 
Source data: Figure 2C
Experiment 1
##BLOCKS= 1														Standard
Plate:	Plate1		1.3	PlateFormat	Kinetic	Absorbance	Raw	FALSE	3	60	30					A623
	Temperature(¡C)		1	2	3	4	5	6	7	8	9			KH2PO4 (µM)	pmol (in 15 µl)	read 1	read 2	read 3	average	A623-background
00:00:00	28.3	Controls	0.166	0.2028	0.2386	0.2344	0.2938	0.0472	0.0464	0.0457	0.0458			0	0	0.1709	0.1715	0.1719	0.171433	0
		A	0.1661	0.5363	0.5083	0.4879	0.4972	0.548	0.5436	0.5604	0.5278			6.25	93.75	0.1832	0.1837	0.1841	0.183667	0.0122333
		B	0.2096	0.5426	0.4046	0.4382	0.4886	0.4763	0.5009	0.5462	0.5442			12.5	187.5	0.2122	0.2123	0.2126	0.212367	0.0409333
		C	0.264	0.5593	0.4313	0.4606	0.4957	0.487	0.5059	0.5098	0.5403			25	375	0.2657	0.2666	0.2669	0.2664	0.0949667
		Standard	0.1709	0.1832	0.2122	0.2657	0.3748	0.5909	1.027	1.7159	3.0859			50	750	0.3748	0.3749	0.3755	0.375067	0.203633
														100	1500	0.5909	0.5915	0.5924	0.5916	0.420167
														200	3000	1.027	1.0298	1.029	1.0286	0.857167
														400	6000	1.7159	1.7194	1.7215	1.71893	1.5475
00:00:30	28.3	Controls	0.166	0.2033	0.239	0.2351	0.2946	0.0473	0.0464	0.0458	0.0458
		A	0.1666	0.5372	0.5098	0.4878	0.4987	0.5492	0.545	0.5607	0.5286
		B	0.21	0.5435	0.4043	0.4395	0.4894	0.477	0.5029	0.5467	0.5454
		C	0.2646	0.5598	0.4306	0.4615	0.4965	0.4873	0.5067	0.5106	0.5411
		Standard	0.1715	0.1837	0.2123	0.2666	0.3749	0.5915	1.0298	1.7194	3.089
00:01:00	28.2	Controls	0.1662	0.2037	0.2397	0.2359	0.2951	0.0474	0.0464	0.0458	0.0459
		A	0.1668	0.5376	0.5102	0.4883	0.4992	0.5496	0.5453	0.5612	0.5295
		B	0.2105	0.5442	0.4048	0.4403	0.4899	0.4774	0.5035	0.5473	0.546
		C	0.2648	0.5611	0.431	0.4624	0.497	0.4886	0.5069	0.5108	0.5416
		Standard	0.1719	0.1841	0.2126	0.2669	0.3755	0.5924	1.029	1.7215	3.0878
	no ADP			0.5 mM ADP			1 mM ADP			Controls
read	1	2	3	1	2	3	1	2	3	1	2	3
	0.1661	0.1666	0.1668	0.2096	0.21	0.2105	0.264	0.2646	0.2648	0.166	0.166	0.1662
	0.5363	0.5372	0.5376	0.5426	0.5435	0.5442	0.5593	0.5598	0.5611	0.2028	0.2033	0.2037
	0.5083	0.5098	0.5102	0.4046	0.4043	0.4048	0.4313	0.4306	0.431	0.2386	0.239	0.2397
	0.4879	0.4878	0.4883	0.4382	0.4395	0.4403	0.4606	0.4615	0.4624	0.2344	0.2351	0.2359
	0.4972	0.4987	0.4992	0.4886	0.4894	0.4899	0.4957	0.4965	0.497	0.2938	0.2946	0.2951
	0.548	0.5492	0.5496	0.4763	0.477	0.4774	0.487	0.4873	0.4886
	0.5436	0.545	0.5453	0.5009	0.5029	0.5035	0.5059	0.5067	0.5069
	0.5604	0.5607	0.5612	0.5462	0.5467	0.5473	0.5098	0.5106	0.5108
	0.5278	0.5286	0.5295	0.5442	0.5454	0.546	0.5403	0.5411	0.5416
				Averages				w/o background
			Sample	A (no ADP)	B (0.5 mM ADP)	C (1 mM ADP)		A (no ADP)	B (0.5 mM ADP)	C (1 mM ADP)
			buffer	0.166067																												t = 5400 s
			ATP	0.203267																												n (BiP) = 100 pmol
			ADP	0.2391
			ATP+1/2ADP	0.235133								reorder
			ATP+ADP	0.2945														pmol					Pi (pmol/µM/min)				mol					mol (Pi) / s / mol (BiP)
			BiP	0.1665	0.210033	0.264467						[CaCl2] (µM)	A (no ADP)	B (0.5 mM ADP)	C (1 mM ADP)		[CaCl2] (µM)	A (no ADP)	B (0.5 mM ADP)	C (1 mM ADP)		[CaCl2] (µM)	A (no ADP)	B (0.5 mM ADP)	C (1 mM ADP)		[CaCl2] (µM)	A (no ADP)	B (0.5 mM ADP)	C (1 mM ADP)		[CaCl2] (µM)	A (no ADP)	B (0.5 mM ADP)	C (1 mM ADP)
			BiP+ATP	0.537033	0.543433	0.560067		0.333767	0.3083	0.265567		0	0.333767	0.3083	0.265567		0	1092.56	1007.67	865.222		0	2.4279	2.23926	1.92272		0	1.09256e-09	1.00767e-09	8.65222e-10		0	0.00202325	0.00186605	0.00160226
		[CaCl2] (µM)	1600	0.509433	0.404567	0.430967		0.306167	0.169433	0.136467		25	0.325367	0.310067	0.2465		25	1064.56	1013.56	801.667		25	2.36568	2.25235	1.78148		25	1.06456e-09	1.01356e-09	8.01667e-10		25	0.0019714	0.00187695	0.00148457
			800	0.488	0.439333	0.4615		0.284733	0.2042	0.167		50	0.3575	0.3116	0.2159		50	1171.67	1018.67	699.667		50	2.6037	2.2637	1.55481		50	1.17167e-09	1.01867e-09	6.99667e-10		50	0.00216975	0.00188642	0.00129568
			400	0.498367	0.4893	0.4964		0.2951	0.254167	0.2019		100	0.341367	0.2673	0.212		100	1117.89	871	686.667		100	2.4842	1.93556	1.52593		100	1.11789e-09	8.71e-10	6.86667e-10		100	0.00207016	0.00161296	0.0012716
			200	0.548933	0.4769	0.487633		0.345667	0.241767	0.193133		200	0.345667	0.241767	0.193133		200	1132.22	785.889	623.778		200	2.51605	1.74642	1.38617		200	1.13222e-09	7.85889e-10	6.23778e-10		200	0.00209671	0.00145535	0.00115514
			100	0.544633	0.502433	0.5065		0.341367	0.2673	0.212		400	0.2951	0.254167	0.2019		400	963.667	827.222	653		400	2.14148	1.83827	1.45111		400	9.63667e-10	8.27222e-10	6.53e-10		400	0.00178457	0.00153189	0.00120926
			50	0.560767	0.546733	0.5104		0.3575	0.3116	0.2159		800	0.284733	0.2042	0.167		800	929.111	660.667	536.667		800	2.06469	1.46815	1.19259		800	9.29111e-10	6.60667e-10	5.36667e-10		800	0.00172058	0.00122346	0.000993827
			25	0.528633	0.5452	0.541		0.325367	0.310067	0.2465		1600	0.306167	0.169433	0.136467		1600	1000.56	544.778	434.889		1600	2.22346	1.21062	0.96642		1600	1.00056e-09	5.44778e-10	4.34889e-10		1600	0.00185288	0.00100885	0.00080535
				Note: red indicates outlier

## Sheet: Exp 2
Experiment 2
##BLOCKS= 1														Standard
Plate:	Plate1		1.3	PlateFormat	Kinetic	Absorbance	Raw	FALSE	3	30	15					A623
	Temperature(¡C)		1	2	3	4	5	6	7	8	9			KH2PO4 (µM)	pmol (in 15 µl)	read 1	read 2	read 3	average	A623-background
00:00:00	27.6	Controls	0.1681	0.2076	0.2383	0.2455	0.2889	0.0458	0.0458	0.0458	0.0454			0	0	0.1713	0.1714	0.1716	0.171433	0
		A	0.1659	0.5863	0.5004	0.505	0.5105	0.487	0.5411	0.5451	0.5318			6.25	93.75	0.1827	0.1828	0.1831	0.182867	0.0114333
		B	0.2127	0.5207	0.3931	0.4555	0.497	0.47	0.529	0.5588	0.5367			12.5	187.5	0.2073	0.2074	0.2075	0.2074	0.0359667
		C	0.2534	0.7374	0.4157	0.4554	0.4807	0.516	0.4937	0.5163	0.5424			25	375	0.2629	0.2631	0.2627	0.2629	0.0914667
		Standard	0.1713	0.1827	0.2073	0.2629	0.3737	0.5825	0.9625	1.7202	2.3259			50	750	0.3737	0.3735	0.3738	0.373667	0.202233
														100	1500	0.5825	0.5829	0.5833	0.5829	0.411467
														200	3000	0.9625	0.9631	0.9637	0.9631	0.791667
														400	6000	1.7202	1.7212	1.7207	1.7207	1.54927
00:00:15	27.6	Controls	0.1683	0.2077	0.239	0.2458	0.2893	0.0456	0.0458	0.0457	0.0452
		A	0.1662	0.5863	0.5008	0.5067	0.5113	0.4877	0.5424	0.5458	0.5326
		B	0.2126	0.5204	0.393	0.4556	0.4991	0.4706	0.5307	0.5602	0.5382
		C	0.2537	0.9365	0.4159	0.4561	0.4812	0.5184	0.4942	0.5164	0.5423
		Standard	0.1714	0.1828	0.2074	0.2631	0.3735	0.5829	0.9631	1.7212	2.3317
00:00:30	27.6	Controls	0.1685	0.2085	0.2389	0.2466	0.2898	0.0457	0.0458	0.0457	0.0454
		A	0.1664	0.5865	0.5008	0.5064	0.5109	0.487	0.5422	0.5446	0.5324
		B	0.2126	0.5201	0.3928	0.456	0.4993	0.4703	0.5302	0.5596	0.5383
		C	0.2538	0.9321	0.416	0.456	0.4812	0.5176	0.4937	0.5158	0.5418
		Standard	0.1716	0.1831	0.2075	0.2627	0.3738	0.5833	0.9637	1.7207	2.3285
	no ADP			0.5 mM ADP			1 mM ADP			Controls
read	1	2	3	1	2	3	1	2	3	1	2	3
	0.1659	0.1662	0.1664	0.2127	0.2126	0.2126	0.2534	0.2537	0.2538	0.1681	0.1683	0.1685
	0.5863	0.5863	0.5865	0.5207	0.5204	0.5201	0.7374	0.9365	0.9321	0.2076	0.2077	0.2085
	0.5004	0.5008	0.5008	0.3931	0.393	0.3928	0.4157	0.4159	0.416	0.2383	0.239	0.2389
	0.505	0.5067	0.5064	0.4555	0.4556	0.456	0.4554	0.4561	0.456	0.2455	0.2458	0.2466
	0.5105	0.5113	0.5109	0.497	0.4991	0.4993	0.4807	0.4812	0.4812	0.2889	0.2893	0.2898
	0.487	0.4877	0.487	0.47	0.4706	0.4703	0.516	0.5184	0.5176
	0.5411	0.5424	0.5422	0.529	0.5307	0.5302	0.4937	0.4942	0.4937
	0.5451	0.5458	0.5446	0.5588	0.5602	0.5596	0.5163	0.5164	0.5158
	0.5318	0.5326	0.5324	0.5367	0.5382	0.5383	0.5424	0.5423	0.5418
				Averages				w/o background
			Sample	A (no ADP)	B (0.5 mM ADP)	C (1 mM ADP)		A (no ADP)	B (0.5 mM ADP)	C (1 mM ADP)
			buffer	0.1683																												t = 5400 s
			ATP	0.207933																												n (BiP) = 100 pmol
			ADP	0.238733
			ATP+1/2ADP	0.245967								reorder
			ATP+ADP	0.289333														pmol					Pi (pmol/µM/min)				mol					mol (Pi) / s / mol (BiP)
			BiP	0.166167	0.212633	0.253633						[CaCl2] (µM)	A (no ADP)	B (0.5 mM ADP)	C (1 mM ADP)		[CaCl2] (µM)	A (no ADP)	B (0.5 mM ADP)	C (1 mM ADP)		[CaCl2] (µM)	A (no ADP)	B (0.5 mM ADP)	C (1 mM ADP)		[CaCl2] (µM)	A (no ADP)	B (0.5 mM ADP)	C (1 mM ADP)		[CaCl2] (µM)	A (no ADP)	B (0.5 mM ADP)	C (1 mM ADP)
			BiP+ATP	0.586367	0.5204	0.868667		0.378433	0.274433	0.579333		0	0.378433	0.274433	0.579333		0	1263.11	916.444	1932.78		0	2.80691	2.03654			0	1.26311e-09	9.16444e-10			0	0.00233909	0.00169712
		[CaCl2] (µM)	1600	0.500667	0.392967	0.415867		0.292733	0.147	0.126533		25	0.324333	0.291767	0.252833		25	1082.78	974.222	844.444		25	2.40617	2.16494	1.87654		25	1.08278e-09	9.74222e-10	8.44444e-10		25	0.00200514	0.00180412	0.00156379
			800	0.506033	0.4557	0.455833		0.2981	0.209733	0.1665		50	0.337233	0.313567	0.226833		50	1125.78	1046.89	757.778		50	2.50173	2.32642	1.68395		50	1.12578e-09	1.04689e-09	7.57778e-10		50	0.00208477	0.00193868	0.00140329
			400	0.5109	0.498467	0.481033		0.302967	0.2525	0.1917		100	0.333967	0.284	0.204533		100	1114.89	948.333	683.444		100	2.47753	2.10741	1.51877		100	1.11489e-09	9.48333e-10	6.83444e-10		100	0.00206461	0.00175617	0.00126564
			200	0.487233	0.4703	0.517333		0.2793	0.224333	0.228		200	0.2793	0.224333	0.228		200	932.667	749.444	761.667		200	2.07259	1.66543	1.69259		200	9.32667e-10	7.49444e-10	7.61667e-10		200	0.00172716	0.00138786	0.00141049
			100	0.5419	0.529967	0.493867		0.333967	0.284	0.204533		400	0.302967	0.2525	0.1917		400	1011.56	843.333	640.667		400	2.2479	1.87407	1.4237		400	1.01156e-09	8.43333e-10	6.40667e-10		400	0.00187325	0.00156173	0.00118642
			50	0.545167	0.559533	0.516167		0.337233	0.313567	0.226833		800	0.2981	0.209733	0.1665		800	995.333	700.778	556.667		800	2.21185	1.55728	1.23704		800	9.95333e-10	7.00778e-10	5.56667e-10		800	0.00184321	0.00129774	0.00103086
			25	0.532267	0.537733	0.542167		0.324333	0.291767	0.252833		1600	0.292733	0.147	0.126533		1600	977.444	491.667	423.444		1600	2.1721	1.09259	0.940988		1600	9.77444e-10	4.91667e-10	4.23444e-10		1600	0.00181008	0.000910494	0.000784156
				Note: red indicates outlier

## Sheet: Exp 3
Experiment 3
##BLOCKS= 1															Standard
Plate:	Plate1		1.3	PlateFormat	Kinetic	Absorbance	Raw	FALSE	3	60	30						A623
	Temperature(¡C)		1	2	3	4	5	6	7	8	9				KH2PO4 (µM)	pmol (in 15 µl)	read 1	read 2	read 3	average	A623-background
00:00:00	28	Controls	0.1657	0.2033	0.2425	0.2554	0.311	0.0456	0.0457	0.0457	0.0453				0	0	0.1686	0.1685	0.1689	0.168667	0
		A	0.1681	0.5495	0.5097	0.5142	0.5663	0.5744	0.5557	0.5614	0.5934				6.25	93.75	0.18	0.1791	0.1792	0.179433	0.0107667
		B	0.2049	0.5951	0.4251	0.4711	0.5092	0.527	0.4991	0.5548	0.5602				12.5	187.5	0.203	0.2029	0.2032	0.203033	0.0343667
		C	0.2618	0.5617	0.4355	0.4573	0.4912	0.5093	0.4966	0.5468	0.5373				25	375	0.262	0.2621	0.2622	0.2621	0.0934333
		Standard	0.1686	0.18	0.203	0.262	0.3784	0.6097	1.0747	1.8616	3.1223				50	750	0.3784	0.3786	0.3786	0.378533	0.209867
															100	1500	0.6097	0.6102	0.6106	0.610167	0.4415
															200	3000	1.0747	1.075	1.0757	1.07513	0.906467
															400	6000	1.8616	1.8645	1.8661	1.86407	1.6954
00:00:30	28	Controls	0.166	0.2034	0.2428	0.2558	0.3117	0.0456	0.0456	0.0457	0.0454
		A	0.1686	0.5501	0.5106	0.5163	0.5681	0.5755	0.5571	0.5631	0.595
		B	0.2047	0.5948	0.4256	0.472	0.5109	0.5277	0.5005	0.5565	0.5618
		C	0.2558	0.5625	0.4355	0.4587	0.4925	0.5112	0.4973	0.5476	0.5383
		Standard	0.1685	0.1791	0.2029	0.2621	0.3786	0.6102	1.075	1.8645	3.1289
00:01:00	28	Controls	0.1662	0.2038	0.243	0.2566	0.3125	0.0456	0.0457	0.0457	0.0453
		A	0.1691	0.5507	0.511	0.5162	0.5679	0.5758	0.5574	0.5638	0.5956
		B	0.2048	0.595	0.4262	0.4728	0.5114	0.5283	0.5006	0.5571	0.562
		C	0.2566	0.5636	0.4362	0.4588	0.4928	0.5112	0.4978	0.548	0.5384
		Standard	0.1689	0.1792	0.2032	0.2622	0.3786	0.6106	1.0757	1.8661	3.1293
		no ADP			0.5 mM ADP			1 mM ADP			Controls
read		1	2	3	1	2	3	1	2	3	1	2	3
		0.1681	0.1686	0.1691	0.2049	0.2047	0.2048	0.2618	0.2558	0.2566	0.1657	0.166	0.1662
		0.5495	0.5501	0.5507	0.5951	0.5948	0.595	0.5617	0.5625	0.5636	0.2033	0.2034	0.2038
		0.5097	0.5106	0.511	0.4251	0.4256	0.4262	0.4355	0.4355	0.4362	0.2425	0.2428	0.243
		0.5142	0.5163	0.5162	0.4711	0.472	0.4728	0.4573	0.4587	0.4588	0.2554	0.2558	0.2566
		0.5663	0.5681	0.5679	0.5092	0.5109	0.5114	0.4912	0.4925	0.4928	0.311	0.3117	0.3125
		0.5744	0.5755	0.5758	0.527	0.5277	0.5283	0.5093	0.5112	0.5112
		0.5557	0.5571	0.5574	0.4991	0.5005	0.5006	0.4966	0.4973	0.4978
		0.5614	0.5631	0.5638	0.5548	0.5565	0.5571	0.5468	0.5476	0.548
		0.5934	0.595	0.5956	0.5602	0.5618	0.562	0.5373	0.5383	0.5384
					Averages				w/o background
				Sample	A (no ADP)	B (0.5 mM ADP)	C (1 mM ADP)		A (no ADP)	B (0.5 mM ADP)	C (1 mM ADP)
				buffer	0.165967																												t = 5400 s
				ATP	0.2035																												n (BiP) = 100 pmol
				ADP	0.242767
				ATP+1/2ADP	0.255933								reorder
				ATP+ADP	0.311733														pmol					Pi (pmol/µM/min)				mol					mol (Pi) / s / mol (BiP)
				BiP	0.1686	0.2048	0.258067						[CaCl2] (µM)	A (no ADP)	B (0.5 mM ADP)	C (1 mM ADP)		[CaCl2] (µM)	A (no ADP)	B (0.5 mM ADP)	C (1 mM ADP)		[CaCl2] (µM)	A (no ADP)	B (0.5 mM ADP)	C (1 mM ADP)		[CaCl2] (µM)	A (no ADP)	B (0.5 mM ADP)	C (1 mM ADP)		[CaCl2] (µM)	A (no ADP)	B (0.5 mM ADP)	C (1 mM ADP)
				BiP+ATP	0.5501	0.594967	0.5626		0.3466	0.339033	0.250867		0	0.3466	0.339033	0.250867		0	1168.67	1143.44	849.556		0	2.59704	2.54099	1.8879		0	1.16867e-09	1.14344e-09	8.49556e-10		0	0.0021642	0.00211749	0.00157325
			[CaCl2] (µM)	1600	0.510433	0.425633	0.435733		0.306933	0.1697	0.124		25	0.391167	0.3054	0.226267		25	1317.22	1031.33	767.556		25	2.92716	2.29185	1.70568		25	1.31722e-09	1.03133e-09	7.67556e-10		25	0.0024393	0.00190988	0.0014214
				800	0.515567	0.471967	0.458267		0.312067	0.216033	0.146533		50	0.359267	0.3002	0.235733		50	1210.89	1014	799.111		50	2.69086	2.25333	1.7758		50	1.21089e-09	1.014e-09	7.99111e-10		50	0.00224239	0.00187778	0.00147984
				400	0.567433	0.5105	0.492167		0.363933	0.254567	0.180433		100	0.353233	0.244133	0.1855		100	1190.78	827.111	631.667		100	2.64617	1.83802	1.4037		100	1.19078e-09	8.27111e-10	6.31667e-10		100	0.00220514	0.00153169	0.00116975
				200	0.575233	0.527667	0.510567		0.371733	0.271733	0.198833		200	0.371733	0.271733	0.198833		200	1252.44	919.111	676.111		200	2.78321	2.04247	1.50247		200	1.25244e-09	9.19111e-10	6.76111e-10		200	0.00231934	0.00170206	0.00125206
				100	0.556733	0.500067	0.497233		0.353233	0.244133	0.1855		400	0.363933	0.254567	0.180433		400	1226.44	861.889	614.778		400	2.72543	1.91531	1.36617		400	1.22644e-09	8.61889e-10	6.14778e-10		400	0.00227119	0.00159609	0.00113848
				50	0.562767	0.556133	0.547467		0.359267	0.3002	0.235733		800	0.312067	0.216033	0.146533		800	1053.56	733.444	501.778		800	2.34123	1.62988	1.11506		800	1.05356e-09	7.33444e-10	5.01778e-10		800	0.00195103	0.00135823	0.000929218
				25	0.594667	0.561333	0.538		0.391167	0.3054	0.226267		1600	0.306933	0.1697	0.124		1600	1036.44	579	426.667		1600	2.30321	1.28667	0.948148		1600	1.03644e-09	5.79e-10	4.26667e-10		1600	0.00191934	0.00107222	0.000790123
					Note: red indicates outlier

## Sheet: Exp 4
Experiment 4
##BLOCKS= 1															Standard
Plate:	Plate1		1.3	PlateFormat	Kinetic	Absorbance	Raw	FALSE	3	40	20						A623
	Temperature(¡C)		1	2	3	4	5	6	7	8	9				KH2PO4 (µM)	pmol (in 15 µl)	read 1	read 2	read 3	average	A623-background
00:00:00	27.5	Controls	0.1643	0.1997	0.2253	0.2296	0.282	0.0458	0.0457	0.0459	0.0454				0	0	0.1657	0.1641	0.1642	0.164667	0
		A	0.1599	0.5851	0.5071	0.5279	0.5553	0.5429	0.557	0.5713	0.5992				6.25	93.75	0.1755	0.1744	0.1742	0.1747	0.0100333
		B	0.1993	0.5343	0.4197	0.4782	0.4994	0.539	0.5269	0.5679	0.5583				12.5	187.5	0.1981	0.197	0.1971	0.1974	0.0327333
		C	0.2433	0.5752	0.4149	0.4468	0.5006	0.5268	0.568	0.5781	0.5615				25	375	0.2546	0.2544	0.2542	0.2544	0.0897333
		Standard	0.1657	0.1755	0.1981	0.2546	0.3784	0.5895	1.0661	1.9951	3.0906				50	750	0.3784	0.3774	0.3776	0.3778	0.213133
															100	1500	0.5895	0.5893	0.5893	0.589367	0.4247
															200	3000	1.0661	1.0686	1.0686	1.06777	0.9031
															400	6000	1.9951	2.0024	2.0036	2.00037	1.8357
00:00:20	27.5	Controls	0.1636	0.1996	0.2247	0.229	0.2819	0.0454	0.0454	0.0458	0.0451
		A	0.1597	0.5874	0.5091	0.5323	0.5573	0.544	0.5598	0.5716	0.6008
		B	0.1992	0.5351	0.4201	0.4782	0.4996	0.5421	0.5286	0.5697	0.5604
		C	0.2889	0.5764	0.4152	0.4474	0.5062	0.5267	0.5698	0.5806	0.5621
		Standard	0.1641	0.1744	0.197	0.2544	0.3774	0.5893	1.0686	2.0024	3.0955
00:00:40	27.5	Controls	0.164	0.2	0.2247	0.2297	0.2823	0.0455	0.0453	0.0457	0.0451
		A	0.1601	0.5882	0.5088	0.533	0.5583	0.5445	0.5592	0.5723	0.6026
		B	0.1998	0.5358	0.4205	0.4784	0.4998	0.542	0.5288	0.5704	0.5609
		C	0.2953	0.5772	0.418	0.448	0.5069	0.5271	0.5699	0.5812	0.5633
		Standard	0.1642	0.1742	0.1971	0.2542	0.3776	0.5893	1.0686	2.0036	3.0955
		no ADP			0.5 mM ADP			1 mM ADP			Controls
read		1	2	3	1	2	3	1	2	3	1	2	3
		0.1599	0.1597	0.1601	0.1993	0.1992	0.1998	0.2433	0.2889	0.2953	0.1643	0.1636	0.164
		0.5851	0.5874	0.5882	0.5343	0.5351	0.5358	0.5752	0.5764	0.5772	0.1997	0.1996	0.2
		0.5071	0.5091	0.5088	0.4197	0.4201	0.4205	0.4149	0.4152	0.418	0.2253	0.2247	0.2247
		0.5279	0.5323	0.533	0.4782	0.4782	0.4784	0.4468	0.4474	0.448	0.2296	0.229	0.2297
		0.5553	0.5573	0.5583	0.4994	0.4996	0.4998	0.5006	0.5062	0.5069	0.282	0.2819	0.2823
		0.5429	0.544	0.5445	0.539	0.5421	0.542	0.5268	0.5267	0.5271
		0.557	0.5598	0.5592	0.5269	0.5286	0.5288	0.568	0.5698	0.5699
		0.5713	0.5716	0.5723	0.5679	0.5697	0.5704	0.5781	0.5806	0.5812
		0.5992	0.6008	0.6026	0.5583	0.5604	0.5609	0.5615	0.5621	0.5633
					Averages				w/o background
				Sample	A (no ADP)	B (0.5 mM ADP)	C (1 mM ADP)		A (no ADP)	B (0.5 mM ADP)	C (1 mM ADP)
				buffer	0.163967																												t = 5400 s
				ATP	0.199767																												n (BiP) = 100 pmol
				ADP	0.2249
				ATP+1/2ADP	0.229433								reorder
				ATP+ADP	0.282067														pmol					Pi (pmol/µM/min)				mol					mol (Pi) / s / mol (BiP)
				BiP	0.1599	0.199433	0.275833						[CaCl2] (µM)	A (no ADP)	B (0.5 mM ADP)	C (1 mM ADP)		[CaCl2] (µM)	A (no ADP)	B (0.5 mM ADP)	C (1 mM ADP)		[CaCl2] (µM)	A (no ADP)	B (0.5 mM ADP)	C (1 mM ADP)		[CaCl2] (µM)	A (no ADP)	B (0.5 mM ADP)	C (1 mM ADP)		[CaCl2] (µM)	A (no ADP)	B (0.5 mM ADP)	C (1 mM ADP)
				BiP+ATP	0.5869	0.535067	0.576267		0.387133	0.305633	0.2942		0	0.387133	0.305633	0.2942		0	1358.44	1086.78	1048.67		0	3.01877	2.41506	2.33037		0	1.35844e-09	1.08678e-09	1.04867e-09		0	0.00251564	0.00201255	0.00194198
			[CaCl2] (µM)	1600	0.508333	0.4201	0.416033		0.308567	0.190667	0.133967		25	0.4011	0.330433	0.280233		25	1405	1169.44	1002.11		25	3.12222	2.59877	2.22691		25	1.405e-09	1.16944e-09	1.00211e-09		25	0.00260185	0.00216564	0.00185576
				800	0.531067	0.478267	0.4474		0.3313	0.248833	0.165333		50	0.371967	0.3399	0.2979		50	1307.89	1201	1061		50	2.90642	2.66889	2.35778		50	1.30789e-09	1.201e-09	1.061e-09		50	0.00242202	0.00222407	0.00196481
				400	0.556967	0.4996	0.504567		0.3572	0.270167	0.2225		100	0.3589	0.298667	0.287167		100	1264.33	1063.56	1025.22		100	2.80963	2.36346	2.27827		100	1.26433e-09	1.06356e-09	1.02522e-09		100	0.00234136	0.00196955	0.00189856
				200	0.5438	0.541033	0.526867		0.344033	0.3116	0.2448		200	0.344033	0.3116	0.2448		200	1214.78	1106.67	884		200	2.69951	2.45926	1.96444		200	1.21478e-09	1.10667e-09	8.84e-10		200	0.00224959	0.00204938	0.00163704
				100	0.558667	0.5281	0.569233		0.3589	0.298667	0.287167		400	0.3572	0.270167	0.2225		400	1258.67	968.556	809.667		400	2.79704	2.15235	1.79926		400	1.25867e-09	9.68556e-10	8.09667e-10		400	0.00233086	0.00179362	0.00149938
				50	0.571733	0.569333	0.579967		0.371967	0.3399	0.2979		800	0.3313	0.248833	0.165333		800	1172.33	897.444	619.111		800	2.60519	1.99432	1.3758		800	1.17233e-09	8.97444e-10	6.19111e-10		800	0.00217099	0.00166193	0.0011465
				25	0.600867	0.559867	0.5623		0.4011	0.330433	0.280233		1600	0.308567	0.190667	0.133967		1600	1096.56	703.556	514.556		1600	2.43679	1.56346	1.14346		1600	1.09656e-09	7.03556e-10	5.14556e-10		1600	0.00203066	0.00130288	0.000952881
					Note: red indicates outlier

## Sheet: Summary
Source data: Figure 2C
	Mean and SD values (pmol Pi / s / mol BiP)
			A (no ADP)			B (0.5 mM ADP)			C (1 mM ADP)
			Mean	SD	N	Mean	SD	N	Mean	SD	N
	[CaCl2] (µM)	0	0.00226055	0.000213568	4	0.0019233	0.000182675	4	0.00170583	0.000205026	3
		25	0.00225442	0.000314711	4	0.00193915	0.000157328	4	0.00158138	0.000191972	4
		50	0.00222973	0.000143465	4	0.00198174	0.00016378	4	0.0015359	0.000295746	4
		100	0.00217032	0.000131242	4	0.00171759	0.000191901	4	0.00140139	0.000334718	4
		200	0.0020982	0.000264257	4	0.00164866	0.00029934	4	0.00136368	0.000210448	4
		400	0.00206497	0.000276046	4	0.00162083	0.000118141	4	0.00125839	0.000163348	4
		800	0.00192145	0.00019115	4	0.00138534	0.000192454	4	0.0010251	9.1181e-05	4
		1600	0.00190324	9.61075e-05	4	0.00107361	0.000166702	4	0.000833127	8.0332e-05	4
