# Supplementary material for: Calcium depletion challenges endoplasmic reticulum proteostasis by destabilising BiP-substrate complexes
Source: eLife. 2020 Dec 9;9:e62601. doi: 10.7554/eLife.62601 (PMC7758071; doi:10.7554/eLife.62601)
Supplement: Figure 3—source data 1. [file elife-62601-fig3-data1.xlsx]

## Sheet: All Data
Source data: Figure 3A
						Final concentrations (dissociation): 1.3 µM MABA-ADP, 1.3 µM BiP, 3 mM MgCl2, 100 mM KCl, 50 mM HEPES-KOH pH 7.4, 1 mM CaCl2, 1.3 µM Grp170, 1.5 mM ATP
	Fitting method: Prism --> One phase decay (no constraints). Data were fitted over the entire data range. Data for the samples "ae" BiP without calcium + Grp170 (fast kinetics) were fitted only over the 50 seconds.
		173_BiP_ac (no Ca)			173_BiP_ad (Ca in diss)			173_BiP_bc (Ca in ass)			173_BiP_ae (no Ca + Grp170)			173_BiP_be (Ca in ass + Grp170)
		Experiment 1	Experiment 2	Experiment 3	Experiment 1	Experiment 2	Experiment 3	Experiment 1	Experiment 2	Experiment 3	Experiment 1	Experiment 2	Experiment 3	Experiment 1	Experiment 2	Experiment 3
	k (sec-1)	0.0895	0.08856	0.08133	0.06787	0.06261	0.06914	0.01745	0.01697	0.01676	0.2243	0.3249	0.2551	0.1836	0.1724	0.2126
	R2	0.9766	0.9737	0.9791	0.9559	0.9447	0.9569	0.9921	0.991	0.9929	0.9045	0.9071	0.9035	0.9327	0.9259	0.949
		173_BiP_ac (no Ca)			173_BiP_ad (Ca in diss)			173_BiP_bc (Ca in ass)			173_BiP_ae (no Ca + Grp170)			173_BiP_be (Ca in ass + Grp170)
FL data	Time (s)	Experiment 1	Experiment 2	Experiment 3	Experiment 1	Experiment 2	Experiment 3	Experiment 1	Experiment 2	Experiment 3	Experiment 1	Experiment 2	Experiment 3	Experiment 1	Experiment 2	Experiment 3
	0	118.252	111.652	113.846	130.708	117.541	113.747	132.048	125.598	108	108.724	88.5293	85.2627	130.057	109.854	98.7382
	0.1	117.921	111.527	114.332	130.522	116.458	113.577	132.113	124.93	107.398	109.159	87.9548	84.4344	128.885	109.391	97.9453
	0.2	117.518	111.636	114.387	130.201	115.79	113.553	132.14	124.645	107.104	108.943	87.1142	83.7417	127.967	108.608	97.1079
	0.3	117.804	111.622	114.302	130.142	115.216	113.544	131.814	124.3	107.14	108.145	86.259	82.825	126.524	107.49	96.1603
	0.4	117.914	111.27	114.015	130.175	115.218	113.339	131.512	124.192	107.336	107.338	85.905	82.1848	125.04	106.485	95.3532
	0.5	117.709	110.597	113.824	130.447	115.019	113.158	131.138	124.074	107.464	106.999	85.8711	81.307	123.398	105.547	94.4518
	0.6	116.83	110.012	114.078	130.474	114.475	113.017	130.85	123.717	107.656	106.799	85.8348	80.5947	122.057	104.633	93.299
	0.7	115.857	109.738	114.479	130.193	113.645	112.871	130.715	123.573	107.867	106.127	85.4116	80.0356	121.26	103.722	92.2947
	0.8	114.926	109.687	114.511	129.798	113.019	112.576	130.648	123.385	107.948	105.033	85.1507	79.7072	120.493	103.044	91.4827
	0.9	114.42	109.604	113.889	129.389	112.704	112.248	130.561	123.534	107.678	104.321	84.784	79.2913	119.673	102.558	90.7322
	1	114.457	109.747	113.182	129.219	112.71	111.917	130.347	122.995	107.329	104.214	84.5903	78.9908	118.862	101.999	89.5261
	1.1	115.079	109.656	112.679	129.118	112.517	111.594	130.193	122.057	107.103	104.133	84.1277	78.9888	118.199	101.298	88.1533
	1.2	115.57	109.147	112.286	128.952	112.099	110.862	130.143	120.887	107.06	103.763	83.7616	79.2956	117.514	100.405	87.2337
	1.3	115.709	108.389	111.71	128.74	111.533	110.175	130.052	120.582	107.071	103.084	83.4894	79.3588	116.693	99.4821	87.1122
	1.4	115.119	107.967	111.024	128.009	111.413	109.712	129.92	121.081	106.876	102.586	83.4049	79.1159	115.979	98.4078	87.261
	1.5	114.311	108.28	110.436	127.046	111.573	109.712	129.982	121.974	106.689	102.097	83.3688	78.4281	115.429	97.2433	87.1497
	1.6	113.548	108.462	109.848	125.902	111.842	109.802	130.108	122.531	106.448	101.637	82.9823	77.6627	114.839	96.2657	86.5357
	1.7	113.355	108.268	109.763	125.168	111.853	109.74	130.012	122.769	106.441	101.348	82.404	76.768	114.204	95.8096	85.6958
	1.8	113.044	107.749	109.855	124.794	111.766	109.639	129.651	122.736	106.283	101.42	81.7847	75.9468	113.778	95.8191	84.9534
	1.9	112.453	107.33	110.14	124.761	111.392	109.37	129.064	122.674	106.169	101.693	81.4616	75.3407	113.355	96.0862	84.2702
	2	111.392	106.855	110.063	124.654	110.439	109.009	128.651	122.232	105.719	101.749	81.1487	75.0522	112.719	96.0612	83.7468
	2.1	110.949	106.244	109.865	124.427	109.374	108.54	128.478	121.586	105.422	101.417	80.5369	75.2037	111.692	96.1011	83.2461
	2.2	111.133	105.567	109.679	123.935	108.534	108.229	128.493	120.692	105.055	101.182	79.9104	75.5286	110.979	95.7168	83.2033
	2.3	111.629	105.517	109.425	123.689	108.64	107.916	128.558	120.337	104.791	101.28	79.5483	75.9263	110.642	95.3954	83.1702
	2.4	111.884	105.51	109.153	123.519	108.903	107.442	128.467	120.576	104.426	101.574	79.9119	76.2356	110.587	94.4389	83.0368
	2.5	111.84	105.522	108.516	123.291	109.057	106.725	128.444	121.392	104.318	101.485	80.1476	76.2059	110.375	93.7829	82.2392
	2.6	111.786	105.266	107.824	122.86	108.688	105.783	128.404	121.714	104.683	100.867	80.4902	75.8769	109.739	93.2526	81.3767
	2.7	111.904	105.316	107.302	122.548	108.253	105.261	127.989	121.362	105.039	100.094	80.2709	75.3178	108.896	93.163	80.6182
	2.8	111.751	105.689	107.057	122.915	108.118	105.402	127.489	120.582	105.109	99.688	80.1848	74.8972	108.077	92.7554	80.3498
	2.9	111.699	105.923	106.891	123.592	108.264	106.067	127.14	120.073	104.603	99.9462	79.5612	74.5894	107.526	92.0559	80.3296
	3	111.162	105.977	106.382	124.146	108.586	106.58	127.523	119.99	104.276	100.65	79.323	74.3048	107.263	91.4403	80.2513
	3.1	110.804	105.483	105.952	124.034	108.617	106.477	127.911	119.961	103.994	100.959	78.9931	74.0458	106.84	91.213	79.887
	3.2	110.055	104.768	105.8	123.401	108.585	105.925	127.816	120.104	104.19	100.564	78.9899	73.7532	106.715	90.8429	79.2421
	3.3	109.634	104.024	105.789	122.478	108.404	105.025	127.275	119.995	104.207	99.785	78.7093	73.5911	106.495	90.2819	78.6874
	3.4	109.287	103.62	105.65	121.801	108.407	104.281	126.865	120.007	104.115	99.015	78.823	73.721	106.436	89.439	78.4766
	3.5	109.115	103.596	105.216	121.438	108.106	103.854	126.995	119.981	103.661	98.4532	79.0868	74.1424	106.028	89.0001	78.385
	3.6	108.601	103.247	104.889	121.584	107.586	103.896	127.009	119.924	103.139	97.9161	79.4124	74.6343	105.608	88.6621	78.2539
	3.7	107.88	102.889	104.751	121.698	107.001	104.038	126.578	119.747	102.986	98.0814	79.3301	74.8892	105.252	88.6372	77.7812
	3.8	107.028	102.524	104.722	121.727	106.552	104.325	125.946	119.147	103.129	98.6498	79.1383	75.0118	104.982	88.8638	77.3162
	3.9	106.327	102.591	104.456	121.325	106.138	104.497	125.688	119.057	103.543	99.224	78.9692	74.9136	104.889	89.0978	76.5946
	4	106.27	102.438	103.897	120.693	105.607	104.733	125.969	118.979	103.606	98.6427	78.7481	74.7221	104.81	89.0921	75.929
	4.1	106.854	101.965	103.606	120.168	105.314	104.644	125.948	118.97	103.259	97.8716	78.2514	74.3707	104.841	88.5842	75.1383
	4.2	107.828	101.444	103.725	119.768	105.245	104.522	125.561	118.369	102.542	97.2488	77.6924	74.3076	104.709	88.115	74.8924
	4.3	108.101	101.294	104.259	119.373	105.192	104.254	125.106	117.966	102.069	97.4504	77.5918	74.3062	104.519	87.6653	74.9093
	4.4	108.005	101.551	104.147	118.56	104.794	104.23	124.905	118.093	102.183	97.5423	77.7672	74.4512	104.331	87.3638	75.2204
	4.5	107.519	101.482	103.685	118.035	104.459	104.156	125.008	118.595	102.399	97.54	77.9514	74.3641	104.243	87.0384	75.2839
	4.6	107.007	101.098	102.626	117.969	103.982	103.865	124.911	118.831	102.454	97.6761	77.8483	74.1837	104.335	86.821	75.2572
	4.7	106.184	100.485	102.196	118.358	103.812	103.35	125.147	118.589	101.727	97.9089	77.7639	73.7346	104.47	86.7401	75.0298
	4.8	105.564	100.355	102.034	118.575	103.623	102.876	125.453	118.026	101.017	98.1548	77.9181	73.2409	104.28	86.5047	74.6314
	4.9	105.678	100.65	102.508	118.349	103.947	102.687	125.566	117.448	100.484	98.032	78.0599	72.8322	103.911	86.121	73.8854
	5	106.153	101.083	102.816	118.144	104.424	102.466	125.311	116.897	100.733	97.9129	78.4032	72.9384	103.36	85.7236	73.215
	5.1	106.545	101.372	102.912	117.74	104.795	101.906	124.935	116.507	101.333	97.7804	78.6164	73.3151	103.081	85.4928	72.8338
	5.2	106.285	101.391	102.6	117.422	104.784	100.878	124.96	116.395	101.807	97.6357	78.7716	73.4757	102.854	85.3772	73.029
	5.3	106.113	101.063	102.179	116.685	104.516	99.8928	124.987	116.825	101.705	97.4977	78.3189	73.0329	102.953	84.6802	73.3082
	5.4	105.862	100.426	101.701	115.978	104.291	99.4502	125.034	117.379	101.56	97.6076	77.8498	72.3384	103.238	84.0904	73.3679
	5.5	105.718	99.6936	101.262	115.497	104.026	99.686	125.057	117.852	101.28	97.8768	77.7084	72.302	103.099	83.5393	73.0887
	5.6	105.011	99.1684	100.647	115.43	103.518	99.9278	125.076	117.401	101.407	97.9518	77.9888	72.8684	102.641	83.7241	72.6457
	5.7	104.469	98.8638	100.407	115.53	102.87	100.076	124.8	116.69	101.263	97.5488	78.2196	73.6272	102.116	83.6824	72.3293
	5.8	104.302	98.636	100.188	115.467	102.42	100.058	124.39	115.988	101.293	97.1308	78.1471	73.8913	102.329	83.6174	72.1852
	5.9	104.423	98.5381	100.196	115.42	102.276	100.389	124.058	115.983	101.294	96.9842	78.168	73.6998	102.356	83.5621	71.9901
	6	104.24	98.6624	99.6264	115.471	102.383	100.499	123.715	116.347	101.259	97.1637	78.1727	73.2263	102.119	83.8674	71.9958
	6.1	103.758	98.7727	99.0753	115.4	102.368	100.54	123.313	116.514	101.372	97.217	77.9519	72.7041	101.388	84.3363	71.8733
	6.2	103.65	99.0084	98.3081	115.002	102.447	100.216	122.895	116.536	101.247	97.1134	77.4618	72.3766	101.196	84.3679	72.0077
	6.3	103.831	98.8749	98.096	114.535	102.266	99.9977	123.033	116.372	101.268	96.917	76.783	72.3267	101.168	84.0753	71.7754
	6.4	104.039	98.605	98.2444	114.469	102.405	99.8003	123.515	116.239	101.064	96.9472	76.4196	72.496	101.377	83.3597	71.6492
	6.5	103.671	97.9382	99.1442	114.504	102.234	99.581	124.209	115.929	101.013	97.2984	76.1729	72.4738	101.267	82.9022	71.2309
	6.6	103.036	97.5273	100.059	114.557	102.064	99.2562	124.524	115.523	100.934	97.7881	76.3234	72.4293	100.965	82.405	71.098
	6.7	102.049	97.2844	100.601	114.344	101.618	98.7622	124.436	115.347	100.941	98.2678	76.4691	72.2957	100.387	82.1549	71.0127
	6.8	101.647	97.4	100.462	114.443	101.19	98.3659	123.927	115.157	100.721	98.3246	76.6482	72.4066	99.6938	82.0382	71.3469
	6.9	101.533	97.4436	99.8829	114.519	101.147	98.1008	123.213	114.908	100.453	98.261	76.8587	72.3054	99.1962	82.2344	71.5999
	7	101.909	97.7338	99.1347	114.371	100.883	98.1559	122.443	114.645	99.8723	97.7216	77.285	71.9979	99.1441	82.7851	71.5446
	7.1	102.01	97.7899	97.9581	113.921	100.875	98.3762	121.973	114.883	99.3922	97.06	77.6092	71.5682	99.4107	83.2197	71.3944
	7.2	102.08	97.955	97.1902	113.357	100.498	98.6648	121.755	115.427	98.8876	96.2379	77.4812	71.3696	99.8623	83.4164	71.0918
	7.3	101.981	97.8029	96.7248	113.077	100.335	98.615	121.723	115.856	98.8163	95.867	76.9544	71.6313	99.8989	83.1498	71.0027
	7.4	101.444	97.7998	97.4293	113.03	100.115	98.2883	121.819	115.867	99.101	96.135	76.6493	72.0512	99.6022	82.9342	70.7208
	7.5	100.639	97.5714	98.1697	113.182	99.9717	97.747	122.079	115.809	99.6396	96.6963	76.7557	72.3584	98.8134	82.8583	70.6774
	7.6	100.142	97.4103	98.9903	113.609	99.9073	97.1678	122.385	115.608	100.173	97.1128	77.0184	72.435	98.3689	82.777	70.5858
	7.7	100.592	97.1007	99.1426	113.788	99.8777	96.6461	122.326	115.345	100.124	96.8824	77.0183	72.3281	98.3953	82.548	70.4624
	7.8	101.476	96.9111	98.863	113.715	99.8057	96.391	122.159	114.906	99.7918	96.3104	76.7337	72.2764	98.9413	82.0552	70.2309
	7.9	101.995	96.6776	98.5184	112.973	99.8542	96.5511	122.105	114.507	99.2158	95.7806	76.4018	72.0899	99.6538	81.6991	70.2864
	8	101.677	96.2056	98.0983	112.394	99.6981	96.9761	122.034	114.268	98.9023	95.5271	76.1453	72.0017	100.125	81.4119	70.4928
	8.1	101.248	95.4882	97.7211	111.764	99.5969	97.2092	121.707	114.116	98.6256	95.9532	76.0838	71.8989	100.402	81.511	70.8518
	8.2	100.684	94.6207	97.2374	111.399	99.1034	97.418	120.711	114.144	98.3594	96.438	76.3601	72.0662	99.8814	81.8482	70.7444
	8.3	100.285	94.1999	96.8776	111.217	98.5819	97.49	119.773	114.325	98.2522	96.9398	76.717	72.3209	99.2941	82.2018	70.4659
	8.4	99.5762	94.3928	96.6664	111.176	98.1201	97.5594	119.037	114.391	98.3389	96.8412	76.9799	72.5286	98.645	82.2716	69.7536
	8.5	99.2501	95.0043	96.2086	111.249	98.0581	97.1731	119.043	114.473	98.6822	96.7097	76.7864	72.3253	98.5252	81.9358	69.3462
	8.6	99.2779	95.5268	95.707	110.697	98.253	96.5692	119.482	114.261	99.0067	96.5847	76.6097	71.6388	98.3737	81.4472	69.0427
	8.7	99.6672	95.5769	95.3703	110.244	98.3876	96.0968	120.079	114.24	98.9841	96.4627	76.6854	71.0349	98.4733	80.8374	68.9357
	8.8	99.9159	95.3028	95.3609	109.785	98.1838	95.9373	120.475	114.184	98.78	96.4367	76.8752	70.8888	98.6483	80.3414	68.9908
	8.9	100.347	94.8954	95.4129	109.665	97.6557	95.8923	120.167	114.265	98.5026	96.6043	76.9188	71.3022	99.1061	80.024	69.3069
	9	100.521	94.3738	95.3292	109.529	97.1891	95.8753	119.474	114.176	98.5923	96.9353	76.6113	71.8882	99.0067	80.1619	69.8053
	9.1	100.512	93.7957	95.1344	109.54	96.8539	95.6487	118.772	113.87	98.6869	96.907	76.4557	72.3789	98.9914	80.5973	69.9868
	9.2	99.5969	93.3717	94.6311	109.657	96.7894	95.4307	118.567	113.45	98.6157	96.5494	76.4553	72.9	98.5577	80.9653	69.7252
	9.3	98.8224	93.2873	94.1231	110.046	96.6547	94.923	118.642	113.189	98.4118	95.9561	76.4964	73.1238	98.5329	81.421	69.4569
	9.4	98.3687	93.3634	93.8398	110.068	96.6856	94.5813	118.69	113.277	98.2037	95.5719	76.3024	72.9333	97.986	81.7023	69.0971
	9.5	98.5627	93.2357	94.0403	109.837	96.9581	94.4319	118.549	113.757	98.1542	95.3	76.0114	72.3857	97.8471	82.2213	68.7964
	9.6	98.9213	93.0149	94.45	109.104	97.4344	94.518	118.342	114.285	98.0678	95.6996	75.9621	71.6753	97.5441	81.9251	68.5209
	9.7	99.0026	93.0048	94.4821	108.807	97.8107	94.5011	118.252	114.257	98.0218	96.2153	76.0799	71.2076	97.6649	81.127	68.4767
	9.8	98.98	93.2597	94.3888	108.746	97.8303	94.2909	118.307	113.829	98.0214	96.5923	76.3452	70.764	97.3079	79.8517	68.7412
	9.9	98.461	93.525	93.785	108.735	97.7223	93.8979	118.658	113.136	97.9389	96.3176	76.6198	70.7126	97.0433	79.2533	68.6049
	10	97.9157	93.3796	93.5628	108.309	97.6407	93.5289	119.114	112.883	97.7378	96.1517	76.8829	70.8048	96.5213	79.4506	68.4892
	10.1	97.4071	92.8643	93.2909	108.076	97.6756	93.1829	119.739	112.364	97.6474	96.3638	76.7682	70.9736	96.2829	79.9598	68.1574
	10.2	97.3211	92.018	93.7373	108.398	97.4808	93.1614	119.747	112.167	97.9361	96.5647	76.1462	70.9651	96.1651	80.2922	68.3524
	10.3	97.5574	91.4158	94.1678	108.862	97.1334	93.3807	119.324	112.318	98.5048	96.4862	75.6802	70.9157	96.1952	80.1351	68.495
	10.4	97.5606	91.3652	94.5139	109.171	96.9782	93.5437	118.594	113.235	98.7263	96.1989	75.8246	71.0737	96.249	79.9347	68.7063
	10.5	97.4492	91.8734	94.0411	109.028	97.1444	93.4077	118.588	113.714	98.3213	96.5616	76.5536	71.2876	96.277	79.7968	68.7571
	10.6	97.3334	92.322	93.18	109.053	97.5332	93.1358	118.974	113.44	97.5872	97.0626	76.9374	71.5824	96.4166	79.9434	68.7707
	10.7	97.4731	92.3684	92.5479	108.864	97.2216	93.0708	119.365	112.632	96.813	97.3246	76.8266	71.8012	96.7016	80.2106	68.8969
	10.8	97.3911	92.0277	92.4224	108.308	96.6469	93.2699	119.164	112.177	96.3592	96.9477	76.3763	71.6844	96.9442	80.3579	68.8001
	10.9	96.9772	91.801	92.6086	107.482	95.8887	93.4651	118.56	112.038	96.0029	96.5743	76.2056	71.0828	97.325	80.2502	68.7316
	11	96.3327	91.7597	92.5478	106.82	95.791	93.5583	118.145	112.034	95.9927	96.4523	76.0601	69.7548	97.6639	79.782	68.451
	11.1	95.8141	92.0633	92.4401	106.921	96.007	93.53	118.035	112.043	96.2266	96.4397	76.2391	68.8563	98.0041	79.3522	68.4379
	11.2	95.3724	92.3226	92.484	107.541	96.3474	93.477	118.424	112.212	96.1028	96.1233	76.5826	68.627	98.0038	78.9677	68.4177
	11.3	95.3926	92.4791	92.5698	108.457	96.4884	93.6176	118.747	112.251	95.5241	95.7988	77.2229	69.6202	97.575	78.9492	68.5969
	11.4	95.6883	92.4069	92.6833	109.023	96.697	93.6023	119.276	112.105	94.5304	95.4456	77.5496	70.7024	96.9284	79.133	68.4411
	11.5	96.071	92.3446	92.4312	109.155	96.876	93.544	119.258	112.021	94.3628	95.3046	77.4651	71.5637	96.3181	79.3758	67.9678
	11.6	95.918	92.286	92.5636	108.583	96.9809	93.0006	119.044	112.244	94.9134	94.9426	77.1033	72.0296	95.9869	79.4496	67.1769
	11.7	95.6209	91.9686	92.5571	107.918	96.544	92.3199	118.386	112.264	95.9458	94.6769	76.7409	72.0903	96.13	79.0534	66.6008
	11.8	95.3367	91.3403	92.6119	107.133	95.687	91.797	118.195	111.985	96.6289	94.6104	76.4162	72.0173	96.389	78.7329	66.7732
	11.9	95.3742	90.6962	92.0194	107.01	94.8206	91.7119	118.169	111.331	96.9096	95.0084	76.2311	71.4219	97.0051	78.438	67.2146
	12	95.4187	90.4239	91.5163	106.993	94.2519	92.017	118.206	111.137	96.6611	95.7022	76.3662	71.1706	97.5071	78.2213	67.6031
	12.1	95.5748	90.5457	91.2649	107.069	94.5063	92.0753	117.98	110.937	96.2793	96.3384	76.6926	70.8926	98.0717	77.9131	67.4187
	12.2	95.5654	90.7201	91.631	107.007	95.0701	92.027	117.697	111.308	95.794	96.6873	76.8456	71.1176	98.1917	77.8434	67.2691
	12.3	95.4243	90.9114	92.287	106.944	95.7208	92.1057	117.415	111.445	95.7123	96.5104	76.6982	71.0831	97.8194	78.2171	67.3569
	12.4	95.2571	90.9379	92.8897	106.967	95.5469	92.2719	117.04	111.797	95.5384	95.9663	76.5986	71.1052	97.119	78.5968	67.7276
	12.5	95.3402	90.9406	93.0691	106.379	95.1413	92.231	116.642	111.771	95.3602	95.261	76.7992	70.7248	96.5516	78.6324	67.9317
	12.6	95.6791	90.7272	92.503	105.458	94.6272	91.966	116.488	111.841	95.0474	94.978	77.002	70.4823	96.4234	78.3838	67.8907
	12.7	95.7786	90.6373	91.5782	104.624	94.7166	92.0916	116.507	111.726	95.0138	95.1312	76.7761	70.2447	96.3868	78.2731	67.513
	12.8	95.4626	90.3392	90.8244	104.561	95.0942	92.3349	116.845	111.454	95.2874	95.7141	76.1461	70.3367	95.9897	78.3734	67.4167
	12.9	94.7822	90.3997	90.6987	105.188	95.6134	92.5783	116.886	111.166	95.6008	96.0231	75.2981	70.3501	95.4427	78.6293	67.2557
	13	94.3798	90.3499	90.8461	106.02	95.753	92.1852	117.071	110.919	95.92	95.9424	74.8741	70.5422	95.1889	78.9171	67.3537
	13.1	94.37	90.8357	90.7777	106.334	95.2906	91.916	116.897	110.69	95.8028	95.1341	74.8868	70.6091	95.5633	79.1504	67.1709
	13.2	94.7506	90.8559	90.4552	106.183	94.6951	91.348	117.166	110.42	95.4906	94.3288	75.4994	70.6747	95.8243	79.2621	67.461
	13.3	94.7844	90.9106	90.0962	105.61	94.6672	90.9799	117.283	110.224	94.7526	93.7989	75.915	70.3849	95.752	78.9266	67.812
	13.4	94.5853	90.6602	90.0588	105.293	94.7713	90.1766	117.298	110.4	94.331	94.0797	76.0144	70.2186	95.4307	78.3422	68.0521
	13.5	94.1122	90.5338	90.1804	105.173	94.8361	89.6461	116.825	110.636	93.7979	94.4996	75.7712	70.3103	95.3541	77.9643	67.7207
	13.6	93.9788	90.3178	90.3503	105.031	94.1367	89.222	116.512	110.716	93.7011	95.1207	75.8857	70.6781	95.5963	78.0489	67.1312
	13.7	93.9641	89.7906	90.4003	104.82	93.7936	89.4826	116.733	110.645	93.6211	95.4466	76.3914	70.868	95.5786	78.407	66.8148
	13.8	93.736	89.2177	90.2754	104.184	93.6006	89.9204	117.352	110.652	94.1677	95.8788	77.0517	70.9648	95.3382	78.4903	66.9289
	13.9	93.2512	88.7183	90.1757	103.776	94.0142	90.4291	118.036	110.838	94.6772	95.9139	76.949	71.2512	94.8716	78.4506	67.321
	14	92.6524	88.5359	90.0714	103.606	94.3604	90.5648	118.105	111.038	95.1241	95.9142	76.2706	71.7748	94.7812	78.5776	67.5844
	14.1	92.3809	88.5117	89.9884	104.012	94.5752	90.5798	117.695	111.117	95.3801	95.7626	75.5492	72.2857	94.6956	78.5883	67.5144
	14.2	92.3471	88.3034	89.7894	104.457	94.431	90.6222	116.709	111.141	95.3799	95.5343	75.4658	72.4319	94.783	78.3086	67.3224
	14.3	92.4341	88.195	89.6758	104.718	93.9919	90.689	116.018	110.879	95.1707	95.2988	75.7432	72.1367	94.5454	77.5532	67.1046
	14.4	92.7648	88.1769	89.5346	104.564	93.7937	90.5248	115.855	110.621	94.3017	94.7721	75.7338	71.647	94.6712	77.3503	66.8422
	14.5	93.2907	88.5223	89.4702	104.055	93.7028	90.2107	116.189	110.375	93.5381	94.4942	75.8126	71.1586	94.9144	77.5224	66.4733
	14.6	93.5037	88.6437	89.3847	103.444	93.9594	89.6388	116.419	110.354	93.2236	94.1787	75.8923	71.2038	95.7227	78.0346	66.3702
	14.7	93.2108	88.6439	89.5373	103.196	93.8257	89.0542	115.843	110.137	93.3373	94.4017	76.0071	71.0841	96.2888	77.8993	66.5453
	14.8	92.5483	88.5886	89.6772	103.542	93.7519	88.3296	115.067	109.986	93.5123	94.6491	75.7817	70.9552	96.2058	77.7803	66.7839
	14.9	92.6126	88.8317	89.5672	103.896	93.4146	88.2858	114.429	109.886	93.1709	94.6949	75.7191	70.6054	95.466	77.6318	66.6846
	15	93.1153	88.9247	89.1254	104.187	93.1143	88.9007	114.718	110.193	92.9173	94.3666	76.1402	70.6964	94.5984	77.9212	66.5839
	15.1	93.5428	88.7177	88.6467	104.051	92.7696	89.8993	115.154	110.351	92.7187	94.079	76.6734	71.0668	94.4736	78.1642	66.5139
	15.2	93.2608	88.3619	88.3259	104.044	92.5394	90.3579	115.551	110.359	92.9586	94.2381	76.7761	71.4234	95.0468	78.3184	66.4311
	15.3	92.8414	88.4588	88.4512	103.608	92.8448	90.2897	115.498	110.003	93.4633	94.5828	76.6602	71.5897	95.7012	78.271	66.0792
	15.4	92.6733	89.0269	88.7801	103.092	93.2983	90.0783	115.501	109.649	94.1296	95.0003	76.3996	71.4736	95.8602	78.0718	65.6043
	15.5	92.8571	89.6851	89.318	102.518	94.0152	90.0246	115.71	109.266	94.5058	95.0892	76.4532	71.1237	95.1969	77.7122	65.4238
	15.6	92.6633	90.0204	89.563	102.365	94.2916	89.9707	115.999	108.952	94.3923	95.2067	76.2383	70.6441	94.647	77.6297	65.5247
	15.7	92.0851	90.0583	89.3502	102.588	94.1544	89.6461	115.783	108.442	94.0972	94.7448	76.2274	70.0928	94.1157	77.6692	65.8519
	15.8	91.3549	89.7518	88.6692	103.025	93.581	89.1368	115.332	107.869	94.1462	94.5229	76.0324	69.7737	93.7366	78.1006	65.8882
	15.9	91.2587	89.4759	87.8208	103.546	92.986	88.7721	114.827	107.405	94.387	94.0297	76.1092	69.5158	93.2688	78.1302	65.8416
	16	91.9088	89.1813	87.2066	103.851	92.7053	88.6149	114.735	107.445	94.3429	94.1399	75.867	69.7049	93.074	78.0108	65.5919
	16.1	92.6006	88.8847	86.9503	103.414	92.5763	88.6833	114.6	107.761	93.7926	94.0743	75.5961	69.9744	93.4738	77.7361	65.5057
	16.2	92.8732	88.238	87.092	102.461	92.7617	88.4099	114.49	108.074	93.1029	94.2891	75.2838	70.6121	93.9498	77.8957	65.4787
	16.3	92.6208	87.4194	87.3979	101.596	92.8962	88.5099	114.474	108.089	92.5881	94.2163	75.4007	70.9011	94.3532	78.3988	65.6588
	16.4	92.5596	86.974	87.566	101.624	93.1774	88.9179	114.453	108.291	92.26	94.3553	75.7692	70.9209	94.1503	78.9193	66.0902
	16.5	92.4723	86.9788	87.4447	102.121	93.1913	90.1077	114.465	108.35	92.2657	94.6148	76.0412	70.672	93.8314	79.1506	66.5504
	16.6	92.4043	87.1487	87.3559	102.626	93.3138	90.6764	114.433	108.448	92.506	95.0847	76.4217	70.2078	93.674	78.6751	66.9478
	16.7	92.1453	87.191	87.3777	102.735	93.4629	90.6664	114.816	107.604	93.2219	95.0669	76.6148	69.921	94.001	77.8826	66.8273
	16.8	91.9207	87.1161	87.631	102.833	93.4847	89.6967	115.208	106.801	93.7382	94.5428	76.8367	69.3553	94.3613	76.9969	66.3767
	16.9	91.572	87.2608	87.8981	102.75	93.1969	89.0392	115.366	105.827	94.114	93.7962	76.327	69.0139	94.2951	76.684	65.9538
	17	91.0117	87.445	88.2671	102.943	92.5817	88.5073	114.943	105.908	93.8358	93.5102	75.7238	68.826	94.1179	76.8419	66.0706
	17.1	90.7766	87.8398	88.6464	103.069	92.2547	88.3083	114.366	106.316	93.3527	93.508	75.0208	69.2382	94.3194	77.2617	66.5183
	17.2	91.0143	87.8968	88.7313	103.011	92.3897	88.037	114.168	107.101	92.7358	93.677	74.8377	69.9671	94.8527	77.701	67.0094
	17.3	91.511	87.6932	88.7274	102.793	92.7977	88.1661	114.349	107.528	92.3497	93.9619	74.948	70.4214	95.2229	77.6833	67.0114
	17.4	91.7447	87.1386	88.2388	102.206	93.1171	88.521	114.6	107.728	92.0639	94.5281	75.1999	70.489	95.2674	77.3934	66.7374
	17.5	91.7049	86.6826	87.4736	102.134	93.0689	88.8958	114.427	107.718	91.9482	94.8643	75.6416	70.5431	95.5157	76.9543	66.2128
	17.6	91.8206	86.7021	86.3611	101.651	93.0072	88.7884	113.906	107.693	91.8649	94.876	75.871	70.9652	95.8148	77.1678	65.9164
	17.7	91.965	86.7754	85.7204	101.703	92.7641	88.7461	113.586	107.514	92.1197	94.5784	75.8838	71.6403	95.6624	77.6771	66.1124
	17.8	91.9532	86.9053	85.7296	101.406	92.6157	88.7304	113.066	107.193	92.4026	94.4623	75.463	72.1472	95.1728	78.3831	66.6017
	17.9	91.67	86.4381	86.0144	101.386	92.4057	88.5872	112.893	106.554	92.5487	94.4148	75.3208	72.0926	94.7509	78.4203	67.0692
	18	91.1719	86.266	86.063	101.055	92.2784	88.2179	112.564	106.026	92.3046	94.4519	75.3543	71.512	94.78	78.1322	66.9964
	18.1	90.6617	86.1159	85.8361	100.747	92.268	87.8299	113.081	105.941	92.0152	94.5781	75.3528	70.6003	94.5552	77.4597	66.553
	18.2	90.3246	86.4061	85.6736	100.703	92.1892	88.0162	113.549	106.249	92.3388	94.6088	74.9201	70.0794	94.3189	77.0239	66.1243
	18.3	90.2664	86.4786	85.5718	100.633	92.303	88.3564	113.991	106.628	92.8702	94.3992	74.8711	69.6629	93.9483	77.0469	65.8708
	18.4	90.5219	86.737	85.4392	100.819	92.3648	88.7507	113.833	106.568	92.9446	94.1103	75.0121	69.7179	93.6886	77.1194	65.8507
	18.5	90.6601	86.785	85.4468	100.618	92.2691	88.6878	113.306	106.473	92.1147	94.0296	75.2212	69.8238	93.1297	77.4063	65.6408
	18.6	90.8314	86.7549	85.6896	100.769	92.0728	88.3514	112.684	106.287	91.3026	94.2916	74.8142	70.2041	93.0081	77.3251	65.3196
	18.7	90.6436	86.1623	86.3214	100.676	91.6454	87.7979	112.075	106.266	91.0609	94.4588	74.4596	70.2207	93.0809	77.6103	64.8692
	18.8	90.714	85.6037	86.682	100.91	91.4819	87.4956	112.014	106.19	91.5312	94.4149	74.196	70.1834	93.5502	77.8839	64.4294
	18.9	90.5719	85.2253	86.6196	100.804	91.3671	87.2367	112.321	106.284	92.0706	94.085	74.0828	70.1816	93.355	78.0836	64.1331
	19	90.8381	85.4183	85.7716	101.035	91.3716	87.226	112.822	106.314	92.6144	93.7982	74.0596	70.3103	93.2619	77.9104	64.1322
	19.1	90.6501	85.8301	84.7402	101.233	91.1407	87.053	112.835	106.487	92.923	93.6873	74.3611	70.3444	92.8646	77.4148	64.6779
	19.2	90.6177	86.1331	83.8882	101.498	91.0304	87.3899	112.402	106.573	92.9613	93.848	75.2148	70.4308	93.3113	77.0824	65.57
	19.3	90.2426	86.2021	84.0466	101.484	91.2132	87.446	112.013	107.009	92.7468	94.0859	75.8189	70.4464	93.8164	77.1082	66.2752
	19.4	89.9686	86.1646	84.8253	101.502	91.6674	87.3522	111.913	107.42	92.2507	94.2831	76.0044	70.2416	94.3847	77.1072	66.5494
	19.5	89.6938	85.9868	86.2343	101.73	91.4688	86.4961	112.227	107.78	91.8266	94.1217	75.436	69.7744	94.1306	77.1979	66.3046
	19.6	89.616	85.6363	87.2558	102.103	90.9288	85.8306	112.582	107.616	91.4753	93.8532	75.1089	69.7001	93.5108	77.1116	65.8841
	19.7	89.7704	85.2253	87.9462	102.223	90.5402	85.7003	113.002	106.784	91.5192	93.7212	74.9087	70.0011	92.9964	77.2737	65.4118
	19.8	90.0338	85.3458	87.5893	101.885	91.0242	86.133	113.009	105.512	91.7023	93.7657	74.9646	70.6758	92.5822	77.3586	64.9446
	19.9	90.3069	85.7892	86.653	101.206	91.6684	86.7399	112.801	104.465	91.8904	93.9403	74.893	70.7559	92.6692	77.3636	64.7673
	20	90.2953	86.1916	85.5731	100.548	91.9874	86.9863	112.378	104.176	92.0176	93.7561	74.894	70.6034	92.9271	77.3873	64.7787
	20.1	89.9097	86.0734	85.1962	100.097	91.8528	87.1112	112.158	104.708	92.1416	93.7493	75.1228	69.8504	93.6026	77.164	65.1853
	20.2	89.2083	86.0244	85.3091	99.8169	91.808	86.8942	111.645	105.226	92.3604	93.6788	75.5511	69.3836	93.7819	76.9269	65.5659
	20.3	89.0084	85.9547	85.6729	99.5418	91.9577	86.8126	111.283	105.396	92.5287	94.1281	76.0356	69.1244	93.8006	76.8572	65.8327
	20.4	89.2006	86.0584	86.0048	99.4366	91.9544	86.6301	111.132	104.963	92.5108	94.6607	76.2806	69.3081	93.4841	77.3983	65.8843
	20.5	89.7608	85.6366	86.3386	99.5827	91.5743	86.971	111.495	104.535	92.2523	95.3227	76.0066	69.6448	93.4516	78.1198	66.142
	20.6	89.8063	85.3358	86.4934	100.047	91.1144	87.5846	111.528	104.289	91.6262	95.5176	75.7149	69.7777	93.1172	78.28	66.4824
	20.7	89.4981	85.2124	86.1691	100.485	91.1201	88.2589	111.285	104.579	91.0036	95.5577	75.4278	69.7123	93.2717	77.9279	66.7843
	20.8	89.0869	85.7224	85.9744	100.788	91.1951	88.3843	111.077	104.781	90.5872	95.3972	75.4447	69.5981	93.3821	77.229	66.381
	20.9	88.7104	86.1886	85.8944	100.859	91.015	87.8422	111.246	105.038	90.6419	95.3166	75.2338	69.768	93.8948	76.863	65.8302
	21	88.5149	86.3631	86.307	100.612	90.4239	86.982	111.626	104.767	91.0513	95.147	75.1218	70.4194	93.7541	76.5648	65.1108
	21.1	88.3073	86.1274	86.5068	100.058	90.141	86.1066	111.772	104.926	91.3047	95.1376	75.1904	70.8992	93.4316	76.7591	64.8532
	21.2	88.5264	85.6931	86.3339	99.5276	89.938	85.6274	111.816	105.354	91.402	95.3659	75.2702	71.0992	92.991	76.7927	64.7433
	21.3	89.0997	85.2734	85.7343	99.3362	89.7809	85.7223	111.963	105.869	91.2416	95.8376	75.4148	70.599	92.9859	77.0106	65.1836
	21.4	89.7296	84.7737	85.3019	99.5891	89.43	86.2744	112.098	106.096	91.3777	96.0884	75.3154	70.2327	92.9606	77.02	65.5774
	21.5	90.285	84.7241	85.3054	99.8828	89.5957	86.7948	112.072	105.619	91.0927	96.0077	75.2594	69.8216	92.6811	77.3492	65.7209
	21.6	90.6412	84.8382	85.4971	100.055	89.9503	87.014	111.328	105.314	90.5613	95.3692	74.7133	69.6338	91.795	77.3334	65.3881
	21.7	90.9804	85.0057	85.4028	100.14	90.5222	86.8041	110.454	104.528	89.5583	94.8402	74.3776	69.1979	91.1524	77.0878	64.9274
	21.8	91.0499	84.6669	85.2108	100.083	90.519	86.3849	109.879	104.181	89.1664	94.2687	74.4019	69.2004	90.9597	76.9116	64.8266
	21.9	91.0029	84.1029	85.0398	100.055	90.6832	85.9877	110.059	103.98	88.7981	94.0677	75.3087	69.3988	91.8331	77.3421	64.8448
	22	90.9092	83.9794	85.0817	99.7138	90.5008	85.8487	110.603	104.484	88.7574	93.8774	76.1698	69.9766	92.5608	77.6928	65.2109
	22.1	90.6489	84.2279	85.2091	99.1361	90.5706	85.9862	110.944	104.892	88.8036	94.018	76.8181	69.8572	93.0269	77.3302	65.5668
	22.2	89.8983	84.5868	85.5528	98.5297	90.0332	86.3504	111.096	105.166	89.2724	94.0203	76.7506	69.6776	93.0479	76.3649	65.9183
	22.3	88.8623	84.4813	85.7856	98.2079	90.093	86.7836	110.927	105.211	89.7993	93.8557	76.3999	69.2843	93.2629	75.9846	65.8122
	22.4	88.1909	84.1309	85.4958	98.9416	90.3424	87.0879	110.731	104.934	89.9853	93.5716	75.7706	69.6103	93.7403	76.4564	65.1876
	22.5	87.9216	83.8861	84.6739	99.8203	91.0096	86.9972	110.26	104.192	90.0028	93.4244	75.3277	70.0457	93.8264	77.2669	64.556
	22.6	88.1226	83.9563	83.7822	100.71	91.1841	86.5609	110.109	103.359	89.7849	93.6558	75.1393	70.5457	93.6304	77.8663	64.4721
	22.7	88.4556	84.2556	83.7629	100.493	91.0697	86.1603	110.077	103.06	89.4954	94.292	75.2352	70.7107	92.9746	78.0217	65.1361
	22.8	89.1564	84.2171	84.1999	100.26	90.9708	85.8348	110.208	103.456	89.332	95.111	75.2603	70.3383	92.3506	77.957	65.8177
	22.9	89.7198	83.8587	84.772	99.7879	90.8143	85.774	110.081	103.959	89.4797	95.7992	75.2342	69.9033	91.8223	77.4857	66.0362
	23	89.6874	83.433	84.6196	99.7519	90.8758	85.7882	109.714	103.944	89.7887	96.0824	75.0442	69.4254	91.671	76.8701	65.533
	23.1	89.0813	83.5734	84.2177	99.4611	90.7448	85.8863	109.334	103.674	89.7887	96.0761	75.1348	69.6842	91.7552	76.3914	64.805
	23.2	88.1157	83.8772	83.7969	99.2957	90.6757	85.7992	109.013	103.306	89.6548	95.7766	75.117	69.9049	92.0951	76.2916	64.1464
	23.3	87.7461	83.9369	83.7314	98.9472	90.051	85.3544	109.293	103.274	89.4138	94.9802	75.0328	70.029	92.1197	76.3402	63.8482
	23.4	87.7047	83.3851	84.1282	99.0066	89.5574	84.8626	109.326	103.311	89.2994	94.2036	74.7418	69.6022	92.0509	76.4212	63.9229
	23.5	88.179	82.7388	84.5293	99.2774	89.3058	84.5836	109.347	103.587	88.9216	93.4807	74.7851	69.3149	91.9262	76.5382	64.0973
	23.6	88.4703	82.4437	84.8903	99.9197	89.5033	84.9056	108.782	103.881	88.6746	93.4614	75.1243	69.1848	92.4093	76.8108	64.4854
	23.7	89.0191	82.7408	84.8826	100.087	89.67	85.4877	108.857	103.91	88.549	93.6041	75.5317	69.2131	93.1617	77.0478	64.9323
	23.8	89.5218	82.8711	85.154	100.269	89.7243	86.3501	109.008	103.591	88.7037	94.1129	75.4958	69.086	93.4146	77.1397	65.4481
	23.9	89.7097	82.7863	85.3752	100.253	89.8119	86.6951	109.254	103.291	88.67	94.3959	75.3389	68.8851	93.0699	77.1337	65.5359
	24	89.0532	82.5291	85.6049	100.557	89.6632	86.5961	108.921	103.259	88.4953	94.5322	75.1197	68.736	92.4379	76.956	65.408
	24.1	87.9576	83.1486	85.5304	100.179	89.3308	85.8157	108.524	103.269	88.2706	94.4788	75.2686	68.8694	92.5259	76.6668	65.2332
	24.2	87.4358	83.8003	85.4552	99.5189	88.9502	85.1686	108.341	103.232	88.3671	94.4366	75.5752	69.2851	92.7542	76.3827	65.3487
	24.3	87.8823	84.1514	85.2471	98.7939	89.0187	84.9757	108.436	103.128	88.3393	94.3482	75.8446	70.1866	93.2949	76.4221	65.6124
	24.4	88.8232	83.4694	84.4533	98.5986	89.4073	85.1253	108.776	103.279	88.3657	94.3046	75.6272	70.8522	93.1518	76.8992	65.7027
	24.5	89.3851	82.7177	83.459	98.7866	89.748	85.5733	108.627	103.145	87.8129	94.3968	75.0543	71.1599	93.1459	77.1481	65.5679
	24.6	89.405	82.2842	82.6577	98.585	89.8699	85.6906	108.523	102.893	87.5997	94.7758	74.6571	70.5171	92.8811	76.9532	65.0777
	24.7	89.1602	82.3383	82.7214	98.6432	89.589	85.7252	108.189	102.515	87.3051	94.9443	74.8487	69.7931	92.8714	76.3088	64.8544
	24.8	88.6498	82.6688	83.0569	98.4906	89.3904	85.541	108.445	102.453	87.8968	94.8217	75.3268	69.4251	92.3798	76.1354	64.8501
	24.9	88.2329	82.8681	83.1833	98.8598	89.4967	85.4562	108.602	102.505	88.2926	94.1689	75.5088	69.5	91.6776	76.3036	64.8731
	25	87.8068	83.2247	82.9864	98.5273	90.0136	85.4364	108.892	102.491	88.6077	93.6792	75.5326	69.8926	91.116	76.5598	64.5266
	25.1	87.9857	83.4793	82.801	98.1579	90.2859	85.3569	108.925	102.443	88.2518	93.1672	75.335	70.1362	91.3468	76.5713	63.955
	25.2	88.1992	83.7943	82.9967	97.6176	89.8636	85.5071	108.934	102.195	87.7851	93.0736	75.4293	70.4617	91.8139	76.6223	63.8327
	25.3	88.5344	83.7683	83.5321	97.6703	89.1403	85.647	108.484	102.128	87.4789	93.1538	75.2451	70.1894	92.2456	76.7616	64.095
	25.4	88.3133	83.7644	83.827	97.8358	88.7319	85.9502	107.819	101.916	87.3489	93.7268	75.5294	69.6101	92.1438	76.4633	64.4281
	25.5	88.0322	83.6673	83.7501	97.961	89.0918	85.9774	107.105	101.983	87.4862	94.3181	75.861	68.9879	92.1538	76.1147	64.4332
	25.6	87.6211	83.4964	83.2133	97.9464	89.5308	86.1516	106.821	101.618	87.6626	94.4303	76.2093	69.0134	92.0474	75.9599	64.1677
	25.7	87.6737	83.1072	82.8104	98.1534	89.5919	85.9726	106.841	101.377	88.0006	94.0518	76.0736	69.2258	92.217	76.5078	64.1342
	25.8	87.5589	83.0272	82.6774	98.5912	89.1268	85.5586	106.877	100.921	88.0208	93.7949	75.5896	69.2274	92.4016	76.8994	64.2999
	25.9	87.6313	83.2957	82.7663	98.8351	88.5143	84.8069	106.651	101.362	87.9163	94.018	75.3522	69.0391	92.8486	77.0247	64.8876
	26	87.4137	83.7292	82.897	98.6681	88.4283	84.4151	106.616	101.998	87.7957	94.2914	75.1652	68.7649	93.2754	76.7923	65.1557
	26.1	87.4336	83.6562	82.7727	98.1023	88.3556	84.6408	106.987	102.868	87.9264	93.7893	75.4234	68.9126	93.4003	76.6916	64.9646
	26.2	87.166	83.2542	82.7358	97.6957	88.2473	85.3373	107.771	102.832	87.8354	92.9328	75.6242	69.0694	93.3163	76.547	64.3794
	26.3	86.776	82.6759	82.7658	97.3691	87.3764	85.7716	108.191	102.554	87.3352	92.3284	75.9774	69.6299	93.0467	76.468	64.0264
	26.4	86.0991	82.2874	82.9461	97.4503	86.893	85.6761	108.079	102.004	86.755	92.5413	75.7089	70.1592	93.3746	76.074	64.224
	26.5	85.5376	82.1461	83.0373	97.4447	86.9902	84.8913	107.914	101.76	86.3052	92.7956	75.7156	70.4966	93.543	75.6722	64.4803
	26.6	85.3928	82.3536	83.1438	97.5599	87.7442	84.0662	107.947	101.599	86.2349	92.662	75.6118	70.5473	93.6584	75.3489	64.7464
	26.7	85.6129	82.7926	83.4027	97.4531	88.1069	83.5237	108.648	102.152	86.4382	92.4992	76.1019	70.2611	93.1079	75.5672	64.878
	26.8	85.7986	83.249	83.2887	97.6307	88.0821	83.1032	109.155	102.564	87.0459	92.7637	76.0461	70.1878	92.6867	75.9209	64.9186
	26.9	85.6379	83.3254	82.916	97.9191	87.8027	82.9301	109.366	102.944	87.4458	93.7544	75.757	70.2329	92.1907	76.0756	64.8311
	27	85.4977	83.0624	82.4561	98.0502	87.9507	82.857	108.807	102.583	87.4726	94.1571	75.3646	70.5378	91.9117	75.9433	64.7526
	27.1	85.7716	82.8758	82.5937	97.8252	88.2149	83.6132	108.153	102.672	87.1418	94.1413	75.3329	70.5981	91.6793	75.8783	64.9888
	27.2	86.5068	82.9584	83.0313	97.5236	88.6422	84.2784	107.908	102.86	86.5907	93.9528	75.8437	70.528	91.6406	76.12	65.243
	27.3	87.1946	83.2838	83.1683	97.4638	88.7214	84.7066	107.873	103.148	86.1862	94.4633	76.1609	70.4222	91.5378	76.2934	65.2343
	27.4	87.5724	83.2114	82.8657	97.613	88.8188	84.3291	107.844	103.216	85.9712	95.1234	76.3814	70.3831	91.4988	76.2268	65.014
	27.5	87.6638	82.936	82.3122	97.605	88.8171	84.1381	107.669	102.811	86.2877	95.0951	76.3248	70.2356	91.5067	75.9373	64.8397
	27.6	87.7959	82.5119	81.8564	97.6554	88.717	84.0321	107.436	102.301	86.8936	94.3841	76.1471	69.709	91.797	75.6561	64.738
	27.7	87.8173	82.4357	81.8061	97.6799	88.264	84.2543	107.42	101.614	87.3181	93.6817	75.8249	69.352	92.2816	75.5797	64.4696
	27.8	87.4739	82.5533	81.8813	97.7922	88.1981	84.1893	107.434	101.419	87.8192	93.3967	75.4687	69.2174	92.8878	75.4782	64.1059
	27.9	86.8287	82.9644	82.2377	97.8498	88.6986	84.091	107.689	101.479	87.8326	93.4034	75.513	69.3722	93.3221	75.6729	63.811
	28	86.4766	83.499	82.4062	97.886	89.3792	84.0277	107.811	101.514	87.9502	93.4303	75.6009	69.6272	93.1079	75.8759	63.8613
	28.1	87.0228	83.9568	82.4887	97.954	89.1373	83.9481	107.878	101.394	87.5706	93.4256	75.648	69.8043	92.737	76.1797	63.7864
	28.2	87.661	83.929	82.4553	97.5726	88.1071	83.7299	107.598	101.286	87.1653	93.7663	75.2996	69.8349	92.3998	76.081	63.8146
	28.3	87.8616	83.4761	82.4123	97.0273	87.4064	83.2734	107.277	101.315	86.6302	93.8026	75.2277	69.5462	92.5419	75.9261	64.0359
	28.4	87.2062	83.0862	82.7561	96.554	87.5873	83.1132	106.718	101.42	86.511	93.5294	75.4428	69.2329	92.2297	75.9056	64.6884
	28.5	86.8069	82.9863	83.188	96.7697	88.4647	83.3139	106.514	101.422	86.6293	92.8901	76.1112	69.1786	91.719	76.2513	65.298
	28.6	86.5436	82.8403	83.4266	97.2933	89.1353	83.6801	105.986	101.43	86.7187	92.4953	76.3151	69.6486	91.3462	76.4083	65.2629
	28.7	86.3446	82.4371	83.1714	97.6248	89.6536	83.7094	105.611	101.333	86.3982	92.8084	75.8581	70.1186	91.6613	76.2742	65.0617
	28.8	85.5914	82.1921	82.6478	97.4701	89.8984	83.4407	105.133	101.021	85.9464	93.343	75.0846	70.4734	92.235	76.1026	64.8788
	28.9	85.0462	82.3158	82.4018	97.0078	89.8871	83.1266	105.388	100.6	85.6687	94.0821	74.7917	70.2028	92.3067	76.2452	64.8163
	29	85.2526	82.6431	82.2871	96.788	89.3244	83.1227	105.969	100.452	85.7681	94.2876	75.2972	70.2333	91.9698	76.619	64.3127
	29.1	86.3462	82.776	82.44	96.8069	88.5869	83.3819	106.729	100.623	85.9552	94.3569	75.4596	70.2263	91.5991	76.6023	63.8376
	29.2	87.2143	82.6398	82.4073	96.8623	87.8216	83.7164	107.047	100.907	86.1613	93.9916	75.2729	70.23	91.5903	76.3811	63.788
	29.3	87.4393	82.5522	82.3682	96.7372	87.5056	83.8703	107.049	100.907	86.0339	93.676	74.781	69.7571	91.8647	76.0621	64.1998
	29.4	86.9158	82.2891	81.8647	96.6133	87.3421	83.5974	106.77	100.973	86.0087	93.1422	74.9346	69.4716	91.7962	76.3742	64.6021
	29.5	86.5936	81.9389	81.4783	96.8768	87.4344	83.2436	106.534	101.27	85.9602	92.9066	75.4373	69.4546	91.6542	76.8387	64.8342
	29.6	86.402	81.4554	81.1287	97.295	87.305	83.1782	106.238	101.676	86.0491	92.9272	75.8088	69.7013	91.4702	77.1373	65.1823
	29.7	86.4818	81.2306	81.4701	97.5602	87.1247	83.6142	105.94	101.648	86.0508	93.2927	75.8377	69.8391	91.9787	76.805	65.2417
	29.8	86.428	81.5347	81.744	97.3619	86.9724	84.2151	105.537	101.153	85.9413	93.8263	75.5997	70.1837	92.6147	76.5267	65.1169
	29.9	86.2064	81.8862	81.8713	97.116	86.9683	84.3663	105.223	100.589	86.1366	94.539	75.4482	70.3061	93.3362	76.6076	64.8016
	30	86.0056	82.0801	81.3366	97.3807	87.1429	84.1777	105.099	100.405	86.6543	95.0963	75.5749	70.2372	93.21	76.8377	64.9062
	30.1	86.1083	81.9167	80.7011	98.1663	87.2191	83.76	105.484	100.716	87.1978	95.3402	75.9507	69.7843	92.7794	76.63	65.0593
	30.2	86.4362	81.819	80.562	98.7454	87.4548	83.5184	105.925	100.753	87.0217	94.9697	76.4301	69.637	91.7559	76.2027	65.1838
	30.3	86.6897	81.9097	81.0139	98.5424	87.4452	83.1363	106.236	100.913	86.1799	94.6514	76.5656	69.5642	91.1839	75.7856	64.8248
	30.4	86.5302	82.3391	81.7923	97.671	87.7066	82.7993	105.843	100.655	85.3896	94.5193	76.3684	69.8873	90.7407	75.6853	64.5047
	30.5	86.2966	82.7066	82.1693	96.9709	87.6964	82.5413	105.433	100.986	85.2089	94.5827	76.1728	69.9339	91.0169	75.6212	63.929
	30.6	85.9709	82.9727	82.1474	96.8061	87.9031	82.4814	105.073	101.184	85.493	94.4171	76.1137	69.9709	91.2677	75.6601	63.6843
	30.7	85.6648	82.785	81.9224	96.9619	87.9667	82.469	105.109	101.75	85.9372	93.8857	75.9164	69.5468	91.2908	75.7918	63.5781
	30.8	85.6336	82.6849	81.9193	97.1721	88.3801	82.4774	105.085	102.052	86.1373	93.2709	75.3807	69.1814	90.5528	76.1439	63.9362
	30.9	85.8041	82.5471	82.0551	97.1614	88.6424	82.9239	105.133	101.795	86.1614	92.9008	74.9124	69.0598	89.764	76.3286	64.3832
	31	86.1886	82.7719	82.2718	97.3147	88.6227	83.3401	105.35	101.253	85.8303	92.9827	74.7643	69.1701	89.8831	76.2831	64.7534
	31.1	86.0037	82.833	82.2887	97.3436	87.955	83.3721	105.661	100.314	85.6793	93.6156	75.0078	69.6433	91.2249	75.6299	64.9612
	31.2	85.8078	82.8878	82.3617	97.5013	87.1436	82.8147	105.88	100.024	85.5426	94.4088	75.0638	70.002	92.9108	75.3106	64.9577
	31.3	85.8662	82.5078	82.1974	97.5979	86.4522	82.1908	105.868	99.8167	85.6901	94.9629	75.2043	70.2106	93.5374	75.2522	64.9134
	31.4	86.6363	82.4561	82.2394	97.5904	86.6119	82.32	105.866	100.387	85.8676	95.1582	75.3016	69.9081	93.2909	75.4791	64.9899
	31.5	87.2334	82.6232	82.3313	97.4846	87.1779	82.906	105.794	100.769	86.6164	94.8742	75.843	69.658	92.9176	75.5984	65.0964
	31.6	87.6147	82.806	82.5573	97.3817	87.9912	83.606	105.522	100.998	87.3764	94.4238	76.4479	69.6518	93.0947	75.3038	65.1531
	31.7	87.4498	82.6587	82.4303	97.5804	88.288	83.6672	105.23	100.818	87.943	93.6687	76.8508	70.0068	93.3032	75.0851	64.8734
	31.8	87.1326	82.465	81.8274	97.8909	88.505	83.4099	105.031	100.674	87.2353	93.4729	76.7889	70.3884	93.0853	74.6094	64.9003
	31.9	86.1453	82.7816	81.3044	97.9318	88.4468	83.1499	105.35	100.639	86.4164	93.7702	76.2786	70.5547	92.7237	74.4262	64.9511
	32	85.021	83.212	80.9324	97.9737	88.2986	83.161	105.469	100.42	85.9072	94.6796	76.0222	70.3544	92.2666	74.6283	65.0081
	32.1	84.4768	83.437	81.1519	98.0424	88.0308	83.3306	105.446	99.9274	86.3196	95.1709	75.9401	69.5327	92.0152	75.287	64.602
	32.2	84.9228	83.086	81.6109	98.3082	87.9228	83.6673	104.945	99.281	86.2904	95.2259	76.1672	68.8102	91.7248	76.0274	64.089
	32.3	85.7017	82.527	82.1767	98.3054	88.1178	84.0028	104.627	98.874	85.6723	94.8606	75.93	68.4721	91.7337	76.0323	63.987
	32.4	85.9573	81.9602	82.3477	98.1297	88.2971	83.7933	104.412	98.774	85.0828	94.6241	75.8042	68.9997	91.7479	75.6451	64.1407
	32.5	85.7157	81.7912	81.717	97.902	88.5072	83.3447	104.209	98.6289	85.1939	94.4593	75.6954	69.6111	91.899	75.3023	64.695
	32.6	85.425	81.8026	80.8396	97.5267	88.4302	82.6316	104.258	98.5176	85.6787	94.1482	75.7867	70.0773	91.7047	75.3849	64.8371
	32.7	85.6753	81.8136	80.319	97.1647	88.1432	82.7333	104.487	98.6891	85.6243	93.8184	75.6357	70.1493	91.3239	75.4688	64.8684
	32.8	85.9672	81.8542	80.5023	96.7034	87.719	83.2053	104.802	99.5113	85.0212	93.7803	75.1714	70.1401	90.5972	75.1517	64.3741
	32.9	86.2559	81.946	81.1609	96.5234	87.5842	84.1949	104.678	100.249	84.3159	94.2771	75.0724	70.1388	90.0922	74.8131	64.0188
	33	85.9272	82.1456	81.5473	96.3054	87.9192	84.7459	104.334	100.399	84.0828	94.7231	75.0963	69.9854	89.993	74.9008	63.8286
	33.1	85.5802	82.1342	81.8626	96.3867	88.1453	84.3366	104.183	100.135	84.2637	94.9377	75.4558	69.6349	90.2737	75.2421	64.0637
	33.2	85.2778	82.135	81.9118	96.4543	88.1938	83.3649	104.161	99.9768	84.461	94.708	75.5683	69.1117	90.6854	75.2221	64.3654
	33.3	85.2358	82.0326	82.35	96.5287	87.8979	82.3403	104.23	100.086	84.4352	94.6032	75.6916	69.0708	91.0412	74.6972	64.5533
	33.4	85.1341	81.8458	82.5541	96.1344	87.8139	82.4702	104.165	100.175	84.3547	94.3133	75.8923	69.2574	91.5801	73.9508	64.5996
	33.5	85.0082	81.5056	82.2253	95.8629	87.8116	82.8488	103.833	99.9261	84.4081	93.8377	76.1552	69.6131	92.0729	73.8137	64.7132
	33.6	84.9486	81.0909	81.2694	95.8048	87.7413	83.3381	103.443	99.7987	84.7484	93.1481	76.2927	69.4106	92.6831	73.8794	64.7696
	33.7	85.1147	80.7194	80.6361	96.273	87.3864	83.2117	103.201	99.5042	85.1589	92.7018	76.1826	69.1266	92.802	74.5874	64.7033
	33.8	85.1937	80.253	80.667	96.6242	86.7168	82.9464	103.395	99.3724	85.5966	92.686	75.9089	68.8314	92.8936	75.0657	64.5489
	33.9	85.1086	80.11	81.1123	96.7422	86.5296	82.6056	103.692	98.8886	85.8987	93.0022	75.6102	68.8411	92.709	75.6553	64.333
	34	84.8257	80.3447	81.0478	96.6918	86.9863	82.1913	103.701	98.8756	85.8189	93.5711	75.359	69.0858	92.589	75.6702	64.1258
	34.1	84.4593	81.0711	80.9553	96.6283	87.7156	82.0342	103.672	99.123	85.4641	94.0879	75.0536	69.4439	92.0313	75.8792	63.9397
	34.2	84.4292	81.7862	80.7456	96.6969	87.6744	82.2207	103.43	99.8567	85.1249	94.1654	75.2807	69.7399	91.2929	75.9636	64.02
	34.3	84.5589	82.0283	81.0907	96.8692	86.9596	82.6896	103.477	100.116	85.111	93.6729	75.5349	69.6719	90.7721	76.1852	64.2726
	34.4	85.0203	81.6298	81.271	96.9106	86.3689	83.0527	103.699	100.051	85.4529	93.3813	76.0616	69.2872	90.6427	75.9343	64.3254
	34.5	85.1223	80.9634	81.3047	96.7803	86.4318	83.0813	104.353	99.3999	85.4284	93.4528	76.0899	68.7027	90.7051	75.6874	64.1066
	34.6	85.0999	80.776	80.9198	96.1724	86.6677	83.2378	104.926	98.6364	85.3214	93.967	76.096	68.4311	90.444	75.6337	63.8327
	34.7	84.942	81.1149	80.6906	95.7984	86.8641	83.0878	104.692	97.8096	84.6826	94.0742	76.0626	68.5333	90.6362	75.922	64.0506
	34.8	84.9146	81.5756	80.7063	95.6544	87.0657	83.0343	103.855	97.6816	84.3081	94.179	75.9343	69.2291	91.0421	76.2306	64.4579
	34.9	84.9871	81.7816	81.0601	95.72	87.5669	82.4973	102.88	98.255	83.8444	94.1192	75.5229	69.808	91.9858	76.0698	64.9813
	35	84.9721	81.8708	81.2909	95.4936	87.7389	82.569	102.62	99.0898	83.9761	94.2691	74.5536	70.3873	92.1184	75.4693	65.1081
	35.1	84.8161	81.9206	81.5987	95.0651	87.4354	82.6704	102.749	99.1587	84.0338	94.3038	74.02	70.6806	92.0488	74.7606	65.1553
	35.2	84.5649	82.013	81.8179	94.6908	86.7889	83.1096	102.938	98.6612	84.1771	94.1092	74.017	70.8239	91.7023	74.4564	64.7938
	35.3	84.2039	81.9254	81.9057	94.86	86.4722	83.1926	103.022	98.0637	84.2129	93.5919	74.8967	70.5476	91.9462	74.751	64.2863
	35.4	84.0823	81.7806	81.7636	95.3538	86.4227	83.3398	103.312	98.1119	84.5137	93.1197	75.2313	69.99	92.003	75.3651	64.0944
	35.5	83.9622	81.0946	81.5822	96.2541	86.5634	83.4354	103.673	98.5737	84.9216	92.9632	75.1662	69.618	91.6361	76.0513	64.3426
	35.6	84.0897	80.7192	81.6918	96.7009	86.6551	83.7477	103.964	99.3318	84.859	93.483	74.5277	69.8011	90.8702	76.1509	64.6842
	35.7	84.3973	80.6714	81.8294	96.8358	86.8376	83.9053	103.923	99.5866	84.2882	93.9692	74.2154	70.1308	90.4576	75.8444	64.4498
	35.8	84.906	81.2773	81.6802	96.3513	87.0204	83.9701	103.569	99.3369	83.4034	94.4076	74.1813	70.1554	90.4867	75.1156	64.0369
	35.9	85.3248	81.588	81.1599	95.8499	86.9666	83.9769	103.287	98.7776	82.9118	94.1873	74.3564	69.5954	90.6654	74.8428	63.8874
	36	85.1974	81.623	80.708	95.4951	86.7521	84.029	102.938	98.5201	83.0056	93.7754	74.5596	69.123	90.7051	74.908	64.0008
	36.1	84.9746	81.7358	80.655	95.5423	86.6123	84.013	103.252	98.6516	83.4733	93.2139	74.6121	69.1158	91.0968	75.1938	63.9253
	36.2	85.0851	82.271	80.6468	95.6494	86.7271	83.6059	103.465	98.5939	84.084	92.8494	74.537	69.2888	91.5912	75.3058	63.5451
	36.3	85.6299	82.7582	80.4923	95.5257	87.0198	83.0164	104.023	98.5666	84.5713	92.8113	74.4983	69.5492	92.1768	75.0656	63.0754
	36.4	86.0138	83.0243	79.8569	95.2182	87.0251	82.6712	104.154	98.2049	84.8303	92.9686	74.9492	69.6143	92.152	74.8091	62.9481
	36.5	85.9754	82.6547	79.6967	95.316	87.0357	82.6264	104.396	98.46	84.8168	93.2991	75.5487	69.8509	92.1037	74.5026	63.1484
	36.6	85.6184	82.3083	79.7856	95.7341	86.8396	82.8579	104.305	98.6572	84.6704	93.677	75.9932	70.032	91.9703	74.3647	63.7146
	36.7	85.4438	81.9001	80.3826	96.1031	86.8993	83.0012	104.298	99.1243	84.5189	94.0176	76.0064	70.0944	92.1677	74.4362	64.1781
	36.8	85.2039	81.6712	80.729	95.9903	87.142	83.0431	103.934	99.0923	84.3511	94.0901	75.7448	70.068	92.2551	74.7926	64.4612
	36.9	85.3633	81.576	80.8138	95.6287	87.6234	83.0674	103.366	98.9169	84.0547	93.6349	75.6154	69.7207	92.0668	75.1089	64.5961
	37	85.6203	81.4004	80.442	95.4577	88.037	83.0808	102.357	98.6659	83.9964	92.9883	75.3959	69.5341	91.3821	75.3254	64.621
	37.1	86.1131	81.479	79.9188	95.363	88.0926	83.2839	101.743	98.372	84.085	92.6018	75.499	69.3139	90.8464	75.3866	64.8509
	37.2	86.3807	81.5217	79.5619	95.5478	87.9062	83.2288	101.831	98.2714	84.1467	92.6716	75.1906	69.548	90.9787	75.7901	64.9944
	37.3	86.4032	81.5662	79.7647	95.7021	87.2656	82.9781	102.579	97.889	83.7383	93.2576	74.8743	69.6611	91.8896	76.0771	65.4816
	37.4	86.4443	81.4657	80.1023	96.0293	86.6946	82.3568	103.233	97.9503	83.1521	93.874	74.7327	69.9716	92.8264	76.266	65.6088
	37.5	86.4762	81.355	80.6643	96.0996	86.4028	81.7453	103.583	98.1423	82.7894	94.4259	75.0804	69.7838	93.2894	76.1484	65.4313
	37.6	86.1416	81.1906	80.9424	96.0252	86.7127	81.2292	103.563	98.8122	83.0623	94.3277	75.4871	69.8267	93.3458	76.3168	64.9003
	37.7	85.6636	81.0084	81.0396	95.5561	87.0482	81.3446	103.442	98.9579	83.3659	94.0574	75.5234	69.7893	93.122	76.6381	64.474
	37.8	84.9546	80.6636	80.6498	95.0599	86.9431	81.8044	103.263	98.6438	83.7766	94.0254	75.7088	70.1382	92.8301	76.9298	64.4538
	37.9	84.8119	80.6177	80.2416	94.8437	86.4783	82.4338	103.328	98.3612	83.5088	94.4333	75.8889	70.3039	92.3292	76.5327	64.3239
	38	84.5803	80.744	80.2974	95.1549	86.0142	82.2471	103.615	98.2697	83.3211	94.9631	76.0327	70.1397	91.7526	76.0414	64.2072
	38.1	84.8154	81.197	80.7218	95.7138	86.0901	81.8793	103.701	98.394	82.7114	95.0006	75.5306	69.8642	91.6508	75.49	63.8178
	38.2	85.007	81.599	81.2523	95.8048	86.6407	81.6312	103.531	98.3551	82.7239	94.6372	74.9802	69.5933	91.9431	75.3959	63.5984
	38.3	85.6131	81.8117	81.4299	95.6936	87.5227	82.1194	103.247	98.3633	83.0131	93.8518	74.5022	69.6727	92.667	75.0273	63.6944
	38.4	85.6532	81.8354	81.5204	95.3823	88.1368	82.7378	103.003	98.0611	83.7729	93.1732	74.7871	69.8076	92.8834	74.8562	64.245
	38.5	85.3803	81.6847	81.395	95.4832	88.429	83.0439	103.001	97.4757	84.1626	92.9156	75.3267	70.024	92.8176	74.7829	64.8742
	38.6	84.6036	81.5829	81.3344	95.4234	87.9301	82.9547	103.162	97.0262	84.1247	93.4391	75.973	70.1529	92.4514	74.8696	65.2056
	38.7	84.4206	81.561	81.0808	95.4341	87.1287	82.7452	103.544	96.8858	83.8434	93.9057	76.1149	70.291	91.9821	74.7237	65.1529
	38.8	84.4931	81.8333	81.048	95.129	86.509	82.5474	103.651	96.9707	83.598	94.0113	75.8086	70.1952	91.4138	74.5878	64.9894
	38.9	84.6903	82.0912	80.8652	94.9153	86.4691	82.3596	103.152	96.9623	83.4101	93.2348	75.4432	70.0104	90.7584	74.6951	64.9363
	39	84.6829	82.2013	80.6124	94.964	86.7981	82.2227	102.813	97.0804	83.2068	92.8716	74.9666	69.9266	90.4117	75.0198	65.0326
	39.1	84.9478	82.2279	80.0541	95.5089	86.6544	82.3211	102.922	97.021	83.0296	92.6768	74.942	70.1004	90.4394	75.1844	65.1177
	39.2	85.5297	82.1503	79.58	96.2928	86.4224	82.5504	103.414	97.1294	82.6929	93.0222	74.9542	70.5471	90.7154	75.0064	65.2632
	39.3	85.8906	81.7872	79.7073	96.8309	86.1008	82.5689	103.471	97.4544	82.2498	93.2767	75.1193	70.7068	91.1161	74.5698	65.3468
	39.4	85.9317	80.9973	80.2948	96.9703	86.0976	82.4552	102.965	98.2121	81.7293	93.9648	75.1823	70.688	91.434	73.7849	65.3518
	39.5	85.769	80.4484	81.0094	96.8744	85.9466	82.237	102.553	98.4133	81.6286	94.7147	75.1523	70.5782	91.9202	73.4346	65.058
	39.6	85.656	80.5814	81.4097	96.7164	85.8242	82.1747	102.09	98.1101	81.7549	95.2257	75.2894	70.2908	92.1334	73.7066	64.7188
	39.7	85.5272	81.0202	81.5758	96.5844	85.8648	82.2352	101.732	97.3133	82.0831	94.9682	75.3697	70.05	91.8712	74.8064	64.7587
	39.8	85.2322	81.6147	81.7449	96.1316	86.1778	82.6757	100.94	96.8044	82.34	94.567	75.4479	69.4197	91.2063	75.8969	65.0539
	39.9	85.3316	81.8864	81.6853	95.6456	86.3626	83.1013	100.652	96.409	82.5164	94.3686	75.3771	69.2561	90.5867	76.5764	65.2823
	40	85.4152	82.0913	81.4644	95.1878	86.3059	83.2979	100.484	96.2926	82.5458	94.7582	75.4803	68.8876	90.3796	76.743	65.3156
	40.1	85.794	81.9363	80.9536	95.24	86.1048	83.1806	101.146	96.2727	82.5168	95.0539	75.7722	68.8801	90.4491	76.3813	65.0084
	40.2	85.6239	81.5759	80.4708	95.3871	86.2161	83.4592	101.595	96.3806	82.5648	95.0839	76.1628	69.0008	90.9899	75.7128	64.7689
	40.3	85.3639	81.2324	79.9527	95.5564	86.1202	84.1083	102.378	96.5124	82.6316	94.6586	75.9702	69.5046	91.4787	75.255	64.4799
	40.4	84.6957	80.9563	79.3804	95.6379	85.9078	84.4547	102.562	96.7614	82.7499	94.354	75.6087	69.8329	91.9389	75.4229	64.707
	40.5	84.3041	81.0921	79.0847	95.7519	85.6584	83.9374	102.508	96.9112	82.8923	94.1786	75.194	69.715	91.8018	75.9833	65.0626
	40.6	84.2351	81.5886	79.1956	95.9272	86.0792	82.6864	102.159	97.139	83.2826	94.3243	75.4852	69.4997	92.136	76.1482	65.3001
	40.7	84.5073	82.0763	79.7902	95.9506	86.7638	81.7462	102.32	97.3574	83.2907	94.4543	75.5713	69.5317	92.2394	75.6459	65.1264
	40.8	84.8889	82.6012	80.2696	95.8766	87.0261	81.3764	102.897	97.5947	82.8134	94.6744	75.5971	69.797	92.4358	75.0614	64.9292
	40.9	85.3804	82.6252	80.5929	95.5077	87.0503	81.5839	103.236	97.4256	81.9477	94.786	75.2197	69.976	91.8067	74.6584	64.8278
	41	85.9382	82.3397	80.7957	95.0764	86.7313	82.1321	102.593	96.9531	81.5591	94.6877	75.5912	69.7049	91.3786	74.3903	64.8299
	41.1	86.1974	81.3438	80.882	94.5466	86.6327	82.5817	101.497	96.4924	81.5907	94.1211	76.2377	69.1611	91.2474	74.149	64.4317
	41.2	85.6662	80.5174	80.7893	94.2856	86.3277	82.8907	100.906	96.3189	81.8761	93.2059	77.0149	68.6112	91.718	74.4052	63.917
	41.3	85.0292	80.2423	80.446	94.2029	86.32	82.5224	101.128	95.9256	81.9898	92.5246	77.1399	68.7562	92.0942	75.0176	63.3704
	41.4	84.8198	80.4851	80.3951	94.4219	86.1751	82.1783	101.618	95.7232	82.03	92.6596	76.7544	69.3657	92.2696	75.5093	63.4272
	41.5	85.2577	80.6888	80.6298	94.7534	85.772	81.9657	101.445	95.6156	82.0037	93.6567	76.1693	70.2159	92.0576	75.2262	63.885
	41.6	85.4797	80.8273	81.0164	95.1719	85.5283	82.118	101.17	96.4186	82.2049	94.7241	75.5212	70.6626	91.7206	74.9493	64.6964
	41.7	85.3277	80.8434	80.8697	95.363	85.8684	82.3037	101.06	96.8897	82.6237	95.392	75.3247	70.7413	91.1827	74.9462	65.2583
	41.8	84.928	81.1324	80.4864	95.1118	86.5232	82.2703	101.826	97.1874	83.1366	95.381	75.4163	70.5701	90.8636	75.1519	65.259
	41.9	84.6896	81.1664	80.2643	94.6011	86.7698	82.3174	102.348	96.9408	83.1667	95.2279	75.6957	70.3867	91.0282	75.0936	64.6072
	42	84.5708	81.2071	80.4701	94.1926	86.5237	82.2026	102.485	96.7511	82.9853	94.9597	75.8622	70.4223	91.5066	74.8786	63.6462
	42.1	84.4482	81.0052	80.7622	94.3694	86.0399	82.3078	102.071	96.6179	82.5741	94.5781	75.6887	70.5778	91.9828	75.0451	63.1714
	42.2	84.3294	80.7443	80.7549	94.9096	85.6338	82.1959	102.057	96.6461	82.3221	94.1152	75.3782	70.8838	92.0948	75.4858	63.232
	42.3	84.2234	80.8377	80.8203	95.326	85.4202	82.3107	102.464	97.1926	82.245	93.7073	74.738	70.8629	92.2307	75.7374	63.891
	42.4	84.1554	81.0242	80.8493	95.4319	85.7514	82.2397	103.07	97.628	82.3889	93.7887	74.5049	70.8303	92.4126	75.7402	64.5476
	42.5	84.2237	81.5563	80.7841	95.2429	86.199	82.1426	103.074	97.6568	82.534	93.6964	74.4264	70.6653	92.6087	75.5766	65.2036
	42.6	84.1357	81.6356	80.365	95.391	86.526	81.7381	102.714	97.3493	82.3164	93.9563	74.5981	70.7889	92.6478	75.5056	65.3442
	42.7	84.465	81.2659	79.8379	95.7912	86.5969	81.5321	101.729	97.2681	81.7334	93.9204	74.5378	70.646	92.4739	75.5129	65.2359
	42.8	84.6708	80.6998	79.6189	96.2161	86.8111	81.6544	101.178	97.1696	81.3802	94.2921	74.6536	70.1794	92.2354	75.6502	64.8664
	42.9	85.1261	80.3479	79.5692	96.1079	87.0347	82.1953	100.619	96.4231	81.3708	93.9567	74.9159	69.517	92.04	76.0293	64.8051
	43	84.9308	80.7406	79.5912	95.3726	87.0259	82.4481	100.833	95.286	81.7227	93.8193	75.3682	69.1892	91.7957	76.1777	64.7869
	43.1	84.8218	81.1946	79.6617	94.6247	86.6541	82.5498	100.862	94.6439	81.8904	93.4769	75.579	69.3397	91.6991	76.011	64.9234
	43.2	84.8372	81.4876	79.6937	94.215	86.0359	82.5564	100.918	94.7399	81.855	93.4864	75.6264	69.8088	91.2611	75.4554	64.9628
	43.3	85.2409	81.2198	79.5873	94.2156	85.2874	82.8699	100.787	95.4934	81.7214	93.0817	75.4398	70.3364	90.8824	75.1354	64.9519
	43.4	85.4833	80.8609	79.0662	94.1551	84.512	83.1439	101.011	96.0748	81.593	92.7967	75.3398	71.0242	90.3119	75.2228	64.7323
	43.5	85.1248	80.6012	78.8593	94.2621	84.3802	83.3532	101.333	96.4417	81.611	92.6186	75.3511	71.4587	90.3109	75.8118	64.4681
	43.6	84.5892	80.6658	79.3014	94.5804	84.9657	83.4048	101.342	96.0659	81.6629	92.8842	75.2347	71.4923	90.773	76.1851	64.2883
	43.7	83.8819	80.6846	80.0806	95.261	85.9161	83.2277	100.759	95.7317	82.006	93.3604	74.9588	71.0316	91.4633	76.0712	64.4304
	43.8	83.6708	80.7158	80.1586	95.4166	86.2416	82.8152	100.155	95.539	82.3652	93.8136	74.7798	70.6068	92.1919	75.2422	64.6298
	43.9	83.8266	80.4767	79.6206	95.1867	86.1706	82.3383	99.7822	95.6651	82.503	94.1676	74.9262	70.4	92.4796	74.5567	64.7228
	44	84.4401	80.1652	79.0262	94.4883	85.9858	82.0497	99.756	95.378	82.1024	93.9291	75.2328	70.1291	92.6011	74.1807	64.3089
	44.1	84.5733	79.7118	79.2216	94.32	85.9512	81.8573	99.8349	94.8956	81.394	93.3771	75.1017	69.6703	92.1373	74.382	63.5951
	44.2	84.354	79.4631	79.8113	94.3439	85.7426	82.0341	100.075	94.6237	81.0418	92.8122	75.0038	69.2339	91.6238	74.7752	62.9098
	44.3	83.9273	79.5897	80.5004	94.8347	85.4199	82.4929	100.555	94.7694	81.2308	92.6714	75.2096	69.4187	91.1693	75.2819	62.5916
	44.4	84.3316	79.8244	80.6463	94.9857	85.5861	82.9363	101.052	95.0852	81.8688	92.967	75.6434	70.1092	90.8467	75.4956	62.7044
	44.5	84.9892	79.9161	80.3212	95.1063	86.1588	82.8188	101.226	95.186	82.0392	93.2353	75.8199	70.7483	90.5493	75.3033	62.8369
	44.6	85.8582	79.8134	79.7543	94.6867	86.6336	82.4628	100.881	95.2154	81.6442	93.7717	75.6348	70.9569	90.4563	74.8178	63.1138
	44.7	86.086	79.6288	79.3678	94.5267	86.649	82.2999	100.515	95.2749	80.9233	94.2793	75.5084	70.7718	90.6097	74.5058	63.3502
	44.8	85.8013	79.7569	79.4132	94.6099	86.5322	82.6009	100.219	95.4404	80.8639	94.8466	75.455	70.4716	90.9158	74.4063	63.8936
	44.9	84.9432	79.8974	79.5868	95.4236	86.5779	82.5707	100.004	95.5864	81.324	94.93	75.2137	69.9228	91.0422	74.5739	64.1544
	45	84.2364	80.5223	79.8932	95.9169	86.3638	82.2563	99.5356	95.2131	81.8609	94.7781	75.1904	69.3332	91.2979	74.7303	64.1897
	45.1	83.808	80.7789	79.7096	96.185	86.0159	81.5549	99.225	94.4784	81.8492	94.5041	75.2526	69.1003	91.612	74.9008	63.809
	45.2	83.9181	81.0742	79.6508	95.8729	86.1918	81.3768	99.4761	93.8553	81.5304	94.0877	75.4852	69.3234	91.8232	74.9544	63.5443
	45.3	84.026	80.7791	79.4723	95.7973	86.8156	81.79	100.018	94.0739	81.33	93.622	75.4708	69.6739	91.8288	75.1874	63.4996
	45.4	83.9182	80.4709	79.78	95.6767	87.3158	82.4967	100.491	94.7126	81.4762	93.1393	75.4328	69.8094	92.1389	75.6177	63.6294
	45.5	83.6169	80.2132	80.1518	95.7533	87.0151	82.7529	100.518	94.8352	81.6733	93.2358	75.4206	69.9759	92.5661	75.9783	63.7481
	45.6	83.285	80.1136	80.492	95.7412	86.3849	82.5286	100.541	94.3146	81.8216	93.7721	75.3723	70.3567	93.1732	75.9578	63.7877
	45.7	83.4299	80.2281	80.685	95.31	85.9366	82.1808	100.687	93.7561	81.8584	94.3578	75.0074	70.7186	92.9298	75.7571	63.6672
	45.8	83.5027	80.1229	80.588	94.8447	85.6832	82.2254	100.75	93.8914	81.8879	94.202	74.7307	70.5248	92.8488	75.7207	63.6582
	45.9	83.8003	80.3983	80.489	94.4743	85.8328	82.3901	100.655	94.4423	81.6998	93.8463	74.55	69.9006	92.2891	75.8704	63.4821
	46	84.1928	80.6376	80.134	94.9553	86.2079	82.6051	100.283	95.1502	81.2327	93.6251	74.907	69.2564	92.3682	75.8696	63.3943
	46.1	84.805	81.0274	79.9759	95.4757	86.6716	82.7492	100.036	95.7059	80.9438	93.8736	75.1322	69.2714	92.2399	75.7381	63.1112
	46.2	85.0742	81.0873	79.9674	95.9178	86.6819	82.6221	99.6807	95.8256	81.1158	93.5163	75.2339	69.7693	92.5138	75.537	63.0902
	46.3	84.6024	81.1257	80.2082	95.7627	86.3366	82.3988	99.5606	95.4753	81.6419	92.9968	75.1239	70.146	92.3263	75.3846	63.3843
	46.4	84.0221	81.1176	80.5222	95.487	86.089	82.1451	99.4823	94.7348	82.2026	92.6781	75.1896	70.2303	92.1372	74.8936	63.8467
	46.5	83.9347	81.1509	80.6236	95.3682	86.5004	82.3026	99.5136	94.1352	82.1247	93.2529	75.5013	70.0333	91.7717	74.5141	64.0853
	46.6	84.6172	81.1487	80.8962	95.4658	87.0773	82.575	99.7472	93.823	81.9463	93.9913	75.8648	70.0386	91.8523	74.243	64.0107
	46.7	85.2066	80.8877	80.9994	95.3321	87.7084	82.9804	99.9959	93.9573	81.3764	94.2257	76.1469	70.1343	91.5886	74.9004	63.8029
	46.8	85.1383	80.3938	81.2698	95.0813	87.6412	83.2178	100.292	94.1633	81.0611	94.1059	76.1331	70.0064	91.2317	75.5216	63.7101
	46.9	84.6447	80.0006	81.2292	94.8666	87.2132	83.4613	100.006	94.1421	80.7322	93.6211	75.8639	69.8468	90.6034	76.2133	63.5146
	47	84.4099	80.0172	81.0009	95.1494	86.2548	83.1501	99.5666	94.0489	80.4101	93.2714	75.8542	69.4112	90.644	76.0299	63.4753
	47.1	84.436	80.3716	80.6687	95.3659	85.6194	82.8422	99.2576	94.4964	80.3499	92.643	75.8662	69.4429	90.9334	75.8799	63.6251
	47.2	84.4444	80.4383	80.2732	95.6074	85.489	82.3266	99.3891	95.1337	80.2037	92.4608	75.9009	69.6068	91.3277	75.6249	64.28
	47.3	84.1952	80.3889	80.0979	95.7622	85.7748	82.3633	99.6019	95.6408	80.4328	92.7348	75.2612	69.871	91.3617	75.7832	64.9238
	47.4	84.1464	80.18	79.7952	95.8002	86.3399	82.2701	99.8794	95.357	80.6159	93.468	74.9082	69.9648	91.2401	75.9349	65.262
	47.5	84.1811	80.4492	79.726	95.6514	86.7171	82.4968	100.043	95.0891	80.9532	93.9917	75.1011	69.9316	91.0898	76.0647	65.1829
	47.6	84.1133	80.7022	79.4348	95.1967	87.1024	82.1482	100.513	94.5078	80.8987	94.0714	76.122	70.4764	90.9622	76.0337	64.9306
	47.7	83.6262	81.019	79.3922	94.8162	86.9064	82.169	100.755	94.0159	80.384	93.9328	77.0536	70.9309	90.8386	75.9326	64.7086
	47.8	83.0397	81.1027	79.3233	94.2223	86.4982	82.1523	101.029	93.5302	79.4393	94.0262	77.4128	71.425	90.8228	75.953	64.3274
	47.9	82.7843	81.1534	79.3831	93.6964	86.1851	82.9412	100.98	93.6997	78.8838	94.0763	77.0658	71.1802	90.9353	75.9882	64.1618
	48	83.0269	80.8896	79.3198	93.4671	86.0583	83.1194	100.516	94.3193	78.9872	93.9496	76.4634	70.9646	91.2996	75.7954	64.233
	48.1	83.5666	80.6977	79.1428	93.6418	86.3571	82.9017	100.014	94.8754	79.5883	93.6007	75.6891	70.5371	91.4799	75.434	64.5562
	48.2	83.6192	80.5563	79.2507	94.0607	86.6653	82.2548	99.458	94.7141	80.0156	93.714	74.8383	70.1753	91.4246	75.1033	64.531
	48.3	83.4698	80.826	79.4093	94.3238	87.0298	81.9411	99.2683	93.9543	80.1696	94.0567	74.0828	69.7598	91.1732	75.1137	64.2311
	48.4	83.389	80.8464	79.5507	94.825	86.9976	82.0614	98.8099	93.1637	80.5252	94.2134	73.9293	69.681	90.792	74.7822	63.9902
	48.5	83.9051	80.9146	79.4788	95.2241	86.6331	82.044	98.4513	93.1049	80.8647	94.1448	74.4026	69.9024	90.5927	74.4869	64.0678
	48.6	84.4962	80.8371	79.5667	95.3334	86.4129	82.0901	98.2043	93.5154	80.8773	94.1581	74.7587	70.0231	90.2109	74.1159	64.3121
	48.7	84.535	81.0313	79.7851	94.8834	86.4906	81.9374	98.2714	93.8633	80.3466	94.4638	75.0319	69.6979	90.2449	74.5944	64.6059
	48.8	84.2374	81.1201	79.9202	94.3204	86.68	82.0722	98.4216	93.9478	80.0456	94.591	75.2838	69.3429	90.2762	75.0743	64.4973
	48.9	83.7867	81.2401	79.7377	94.16	86.9442	82.3662	98.673	94.0756	80.0966	94.4829	76.2421	69.4246	91.0377	75.3459	64.1348
	49	83.8769	81.1189	79.5759	94.4456	86.641	82.9431	98.7458	94.5274	80.4071	94.2417	77.0919	69.593	91.526	75.0101	63.2667
	49.1	84.1906	80.7154	79.7608	95.1353	86.1724	83.1754	98.5781	94.8403	80.5321	93.9456	77.5038	69.3579	92.1906	74.6951	62.9738
	49.2	84.8214	80.2087	80.2469	95.7803	85.0222	82.9138	98.5652	94.6404	80.5789	93.8197	77.3396	68.8348	92.0977	74.6027	63.0726
	49.3	85.054	79.8489	80.5522	96.1947	84.6404	82.2403	98.8477	94.2181	80.1891	93.8948	76.9857	68.6369	91.9977	74.8159	63.7809
	49.4	85.0821	79.9246	80.6204	96.0813	84.5987	81.9321	99.1897	93.658	79.9137	94.4841	76.9224	69.0862	91.694	74.9219	64.1651
	49.5	84.5878	80.1047	80.417	95.7	85.141	81.9568	98.9454	93.7723	79.8717	95.1966	76.6847	69.6324	91.6641	75.0256	64.32
	49.6	84.329	80.4134	80.4467	95.3336	84.9617	81.9843	98.6062	93.9737	80.558	95.8723	76.3691	70.1567	91.8358	74.9219	64.1268
	49.7	84.0456	80.6631	80.3901	95.3244	84.4751	81.7931	98.677	94.3083	80.819	95.969	75.6048	70.3729	92.0108	74.8849	63.893
	49.8	84.0319	80.8937	80.4452	95.5206	84.0931	81.4931	99.063	94.0959	80.603	95.4634	75.036	70.5246	92.1834	75.0331	63.6766
	49.9	83.8024	80.9148	80.4493	95.615	84.5338	81.3197	99.2959	93.8234	79.8564	94.7117	74.6957	70.6992	92.273	75.271	63.6116
	50	83.556	80.7846	80.3806	95.4298	85.6438	81.1949	99.3472	93.9404	79.7789	94.3991	75.1708	71.0062	91.7571	75.3801	63.7226
	50.1	83.3449	80.6831	80.0966	95.1958	86.5757	81.2422	99.4382	94.426	79.9163	94.6549	75.6766	71.0411	91.212	74.9771	63.6942
	50.2	82.9318	80.6144	79.6251	95.1404	87.0359	81.4629	99.46	94.8536	80.2961	94.8996	76.3559	70.9042	90.8348	74.3137	63.5369
	50.3	82.5023	80.7374	79.2782	94.9921	86.8404	81.7738	99.2971	95.0296	79.9786	94.6219	76.4214	70.6961	91.5892	73.771	63.1939
	50.4	82.2144	80.8301	79.1683	94.8112	86.3141	81.9449	99.1492	94.9042	79.901	94.0144	76.6086	70.9243	92.2704	73.9823	63.1996
	50.5	82.7093	80.8452	79.1964	94.8311	85.6203	82.0623	99.2123	94.5849	79.8384	93.4732	76.6864	71.0133	92.3659	74.5429	63.509
	50.6	83.6703	80.6322	79.5666	95.3959	84.8121	82.1171	99.1352	93.7081	80.3794	93.2344	76.899	70.9218	91.8894	75.4212	64.1547
	50.7	84.4081	80.2057	80.0732	96.0181	84.3881	82.4531	98.7872	92.93	80.5748	93.6253	76.8709	70.4267	91.6932	75.4536	64.596
	50.8	84.861	79.8703	80.5814	95.9744	84.4147	82.9381	98.1972	92.5341	80.4077	94.4361	76.5439	70.274	92.1654	75.2632	64.5308
	50.9	84.9077	79.647	80.4712	95.4767	84.8983	83.4857	97.711	92.9406	79.7583	95.1932	75.9804	69.8881	92.6014	74.8013	63.7838
	51	85.2527	79.6394	80.2006	95.0592	85.3593	83.6987	97.42	93.322	79.3963	95.1512	75.7398	69.655	92.5252	75.1078	63.1356
	51.1	85.2616	79.6398	79.6274	94.9882	85.3292	83.395	97.3016	93.6482	79.4038	94.3939	75.8633	68.9869	92.062	75.5861	63.1811
	51.2	85.1917	79.5262	79.3008	95.4471	85.1322	82.8399	97.2376	93.8001	79.4149	93.771	76.2592	68.8286	91.7287	75.493	64.05
	51.3	84.7407	79.4026	78.8961	95.8148	85.174	82.3756	97.4297	94.33	79.1248	93.7681	76.6529	69.0277	91.832	74.8087	64.8114
	51.4	84.6863	79.5199	79.0908	96.18	85.3462	82.3197	97.8394	94.4917	78.8271	94.2069	76.9506	69.4332	92.0231	74.3769	64.997
	51.5	84.9581	80.025	79.4882	95.8572	85.4086	82.7624	98.5648	94.3351	79.0432	94.5251	77.3888	69.8019	92.3509	74.6938	64.7681
	51.6	85.0586	80.5789	80.1644	95.3124	85.0706	83.3483	99.2088	93.921	79.3198	94.2678	77.2238	69.7091	92.3872	75.2669	64.4173
	51.7	84.8884	80.8636	80.5517	94.8257	84.8462	83.8269	99.7819	93.9842	79.4998	93.7643	76.8607	69.97	92.3482	75.3368	64.143
	51.8	84.1657	80.8262	80.6644	94.4212	84.9597	83.8783	100.078	94.1929	79.4208	93.3478	76.1824	70.0453	92.1648	75.0399	63.7814
	51.9	83.7717	80.983	80.3903	94.3877	85.2107	83.477	99.746	94.1869	79.387	93.564	75.9389	70.1779	92.338	74.6152	63.466
	52	83.4768	80.9898	79.9094	94.4078	85.8068	83.0122	98.9151	94.0992	79.3863	94.2954	75.6944	69.7704	92.6107	74.5763	63.2817
	52.1	83.692	80.7933	79.4988	94.7908	86.1481	82.3398	98.08	94.0806	79.2188	95.1179	75.6851	69.3609	92.4459	74.9937	63.3798
	52.2	84.1428	80.002	79.2886	94.7487	86.1354	81.5878	98.0003	94.423	79.2876	95.5297	75.8272	69.242	91.8331	75.7588	63.6143
	52.3	84.4758	79.485	79.4207	94.5798	85.2843	80.7328	98.2657	94.613	79.4598	95.3188	76.1501	69.5187	91.1277	75.8966	63.7521
	52.4	84.5364	79.538	79.5972	94.1521	84.6157	80.3493	98.3014	94.5741	79.9928	94.6517	76.2092	69.8582	91.1252	75.5599	63.7602
	52.5	84.001	80.1693	79.7691	94.1211	84.6021	80.8069	97.9212	94.2116	80.3341	93.9174	76.0132	70.1829	91.539	74.9393	63.9877
	52.6	83.6306	80.5763	79.7354	94.3936	85.2656	81.5653	97.7102	94.0554	80.511	93.5161	76.1388	70.2973	92.1377	74.7089	64.3772
	52.7	83.5461	80.5621	79.5751	94.8831	85.7476	82.4406	97.9592	94.2041	80.1293	93.6248	76.6013	70.1841	92.101	74.508	64.4771
	52.8	84.1922	80.5232	79.4967	94.9887	85.7807	83.0459	98.397	94.3741	79.5129	93.9808	76.989	69.6361	91.8523	74.2722	64.2374
	52.9	84.7931	80.8611	79.346	94.6724	85.7276	83.5543	98.7058	94.2174	78.866	94.2663	76.51	69.2671	91.6142	74.3054	63.907
	53	85.0384	81.3557	79.3722	94.6708	85.8258	83.6554	98.5608	94.2848	78.6911	94.5989	75.76	69.2857	91.6254	74.6961	63.868
	53.1	84.5881	81.446	79.2031	95.2207	86.0718	83.4839	98.2913	94.6172	78.9737	94.7288	75.1421	69.8599	91.6501	75.018	63.7147
	53.2	83.9801	81.485	79.1377	96.0964	86.2068	83.1446	97.7884	94.9872	79.4956	94.747	75.1944	70.2928	91.3482	74.9883	63.4087
	53.3	83.6261	81.4937	78.8616	96.2603	86.0637	82.8733	97.6507	94.4086	79.6847	94.3576	75.2407	70.5454	91.2548	74.5364	63.131
	53.4	83.6959	81.732	78.6177	95.649	85.7956	82.4432	97.5551	93.6668	79.646	94.1309	75.2408	70.4776	91.11	74.452	63.2022
	53.5	84.054	81.44	78.2953	94.7224	85.4829	82.0609	97.6844	92.9418	79.2047	94.1048	75.079	70.4594	91.1623	74.5104	63.4408
	53.6	84.1728	81.0097	78.1788	94.1037	85.3637	81.7343	97.8637	92.9071	79.005	93.7637	74.9716	70.6276	91.0993	74.4594	63.514
	53.7	84.1792	80.5994	78.0948	94.4733	85.4568	81.8018	97.9684	92.5613	78.7921	93.2028	74.8662	70.8126	91.101	73.722	63.5422
	53.8	83.848	80.6634	78.2403	95.1332	85.3896	82.0512	98.0192	92.2529	78.8054	92.6589	74.8536	70.7702	91.193	73.1567	63.5636
	53.9	83.8807	80.7164	78.6286	95.9038	85.3519	82.2672	97.836	92.1367	78.8051	93.0818	75.23	70.3039	91.209	73.3781	63.5796
	54	83.9527	80.3518	79.3136	96.151	85.3607	82.073	97.8598	92.4666	78.7571	93.809	75.9264	69.7301	91.0623	74.3009	63.2671
	54.1	84.0232	79.5721	79.9171	96.1679	85.7529	81.5698	97.9847	92.9447	78.8797	94.1577	76.4588	69.202	91.0772	74.791	62.8834
	54.2	83.6733	79.0927	80.06	95.7922	85.7201	81.1321	98.0923	92.9371	79.1817	93.7208	76.3017	68.8018	91.1104	74.6672	62.9026
	54.3	83.2444	79.2031	79.7276	95.1614	85.0951	81.2836	97.9278	92.7442	79.8197	93.064	75.7199	68.549	91.5062	74.2749	63.0953
	54.4	82.997	79.6634	79.247	94.5854	84.3663	81.9033	97.5684	92.4143	80.414	92.9334	75.178	68.5501	91.3113	74.2799	63.4587
	54.5	83.2731	79.8396	78.946	94.1124	84.4611	82.4576	97.1234	92.2654	80.7377	93.1742	75.2938	69.0613	91.0618	74.3736	63.491
	54.6	83.5517	79.9967	78.9814	93.7971	84.9943	82.739	97.0148	92.2121	80.7142	93.6463	75.676	69.6222	90.4074	74.6011	63.7134
	54.7	84.2302	80.1777	79.099	93.5612	85.4676	82.7767	97.2487	92.5261	80.3659	93.7014	76.1192	70.3088	89.9268	74.9067	63.8867
	54.8	84.5981	80.7468	79.3757	93.5823	85.3749	82.6093	98.0804	93.1633	79.9059	93.5581	76.002	70.5668	89.4974	75.4501	64.17
	54.9	84.8708	80.8536	79.768	93.9397	85.7437	82.3791	98.7384	93.6912	79.5637	93.0927	75.6064	70.6318	89.5459	75.9238	64.2769
	55	84.4248	80.6322	80.1306	94.0726	86.2068	82.2306	99.2302	93.7437	79.5332	92.9892	75.3104	70.3874	90.0832	75.968	64.1694
	55.1	84.0591	80.2131	80.0667	94.3179	86.7273	82.6592	99.0492	93.3894	79.7624	93.1077	75.6852	69.9839	90.772	75.4893	63.9103
	55.2	84.1324	80.2268	79.6323	94.3102	86.5374	82.952	98.6748	93.295	79.9389	93.5342	76.2854	69.6582	91.0349	74.6103	63.8331
	55.3	84.6749	80.5876	79.5936	94.7097	86.116	82.9888	98.0251	93.2243	80.0326	93.5661	76.6201	69.4311	90.8121	73.6848	63.9236
	55.4	85.0339	80.5046	79.9193	94.8794	86.015	82.5888	97.5672	93.258	79.8367	93.5467	76.0373	69.3262	90.745	73.3531	64.2276
	55.5	85.1239	80.1964	80.149	95.1954	86.271	82.1989	97.5914	93.1957	79.5951	93.6247	75.5339	69.1171	90.8051	73.7234	64.3348
	55.6	84.8349	79.9297	79.7116	95.4267	86.961	81.6197	97.9461	93.1372	79.1017	94.0422	75.2217	68.6061	91.3127	74.3982	64.4707
	55.7	84.6499	80.0356	79.3081	95.531	87.0718	80.9961	98.5336	93.0502	78.7299	94.3417	75.8379	68.1868	91.5238	74.7046	64.3012
	55.8	84.1931	80.193	79.3848	95.2659	86.7754	80.6616	98.9548	92.7444	78.4	94.2856	76.4658	68.0264	92.0214	74.7086	64.1972
	55.9	84.0479	80.0698	79.8597	95.0109	85.7669	80.7544	99.2467	92.6306	78.4098	94.2537	76.8881	68.1414	92.0537	74.9504	64.2469
	56	84.142	80.1486	80.0063	95.1252	84.8004	80.8263	98.9473	92.4811	78.5247	94.2026	76.5912	68.6441	91.9431	75.3577	64.5294
	56.1	84.3214	80.1202	80.0116	95.5256	84.3103	80.5796	97.8904	92.5077	78.4696	94.1926	75.8938	69.4918	91.5079	75.562	64.6708
	56.2	84.3393	80.076	80.0459	95.5698	84.6764	80.4664	96.5209	92.6127	78.1852	94.0997	75.454	70.6138	91.2907	75.4193	64.4222
	56.3	84.0613	79.6778	80.578	95.4296	85.439	80.9294	95.6119	92.8521	77.8167	94.1196	75.4796	71.296	91.4006	75.181	63.9112
	56.4	84.2641	79.4201	80.7513	95.0497	85.9862	81.752	95.5613	92.7499	77.647	93.8788	75.909	71.7989	91.5807	74.9409	63.577
	56.5	84.5587	79.4001	80.7572	94.5943	85.9939	82.4194	95.9519	92.4454	77.9059	93.2062	76.041	71.9592	91.5466	74.515	63.4957
	56.6	84.772	79.4177	80.2706	93.8657	86.0592	82.6182	95.9614	92.1341	78.3468	92.4422	75.8417	71.8306	91.0801	74.3158	63.8727
	56.7	84.396	79.407	79.7803	93.3116	86.1463	82.7037	95.933	92.3503	78.8793	92.2736	75.4539	71.0792	90.782	74.6383	64.3272
	56.8	83.9809	79.5087	79.2962	93.5834	85.924	82.5583	95.9412	92.7868	78.9078	92.3641	75.242	70.453	91.2577	75.4776	64.7054
	56.9	83.6711	80.0666	79.004	94.1089	85.361	82.2973	96.5104	93.0164	78.7693	92.6029	75.135	70.1568	92.2986	76.1887	64.8804
	57	83.6258	80.6596	78.9706	94.9316	84.6499	81.8656	96.4633	92.7692	78.6269	92.7014	74.8807	70.0584	93.0691	76.5386	64.9228
	57.1	83.575	80.8042	78.7277	94.9579	84.5526	81.8271	96.1557	92.3612	78.7052	93.3886	74.6394	69.917	92.5436	76.6283	64.8888
	57.2	83.6562	80.2694	78.4218	95.2187	84.4973	82.008	95.6281	92.285	78.9159	94.1206	74.4816	69.9814	91.3351	76.757	64.7838
	57.3	83.7959	79.576	78.3496	94.9398	84.6631	82.3304	95.6818	92.6074	79.0819	94.5893	74.6648	70.2918	90.3538	76.537	64.7514
	57.4	84.0466	79.1122	78.8023	95.0344	84.7383	82.0858	95.7399	92.6071	79.209	94.2284	74.7958	70.5826	90.3028	75.9092	64.7642
	57.5	84.3879	79.1953	79.4692	94.6709	85.1504	81.7544	95.8227	92.3968	79.1377	93.8148	74.9554	70.6522	90.9291	74.8124	64.5659
	57.6	84.9592	79.6879	79.9753	94.678	85.5159	81.4273	95.7601	91.8923	78.8563	93.6349	75.2082	70.7454	91.2913	73.9244	64.1834
	57.7	85.4212	80.6139	80.2462	94.4307	85.5564	81.4677	96.0464	92.0799	78.5998	93.8528	75.7463	70.8482	91.4548	73.5752	64.0678
	57.8	85.3777	81.366	80.1662	94.5887	85.2356	81.8811	96.377	92.4221	78.404	93.9219	76.5244	70.7727	91.4947	73.6293	64.323
	57.9	84.7326	81.8222	79.9954	94.6361	84.5976	82.2401	97.0024	92.8696	78.433	93.9082	77.0202	70.2069	91.5537	73.8656	64.6237
	58	84.0693	81.28	79.7186	95.1603	84.022	82.4898	97.1909	92.6419	78.4401	93.8956	77.1234	69.4899	91.6568	74.1487	64.4716
	58.1	84.1703	80.5741	79.9449	95.5456	83.686	82.0251	97.2106	92.0563	78.6051	93.9329	76.7347	69.107	91.4674	74.5253	64.0439
	58.2	84.5649	79.8532	80.0901	96.2103	83.9226	81.4016	96.6719	91.2682	78.7767	93.896	76.0538	69.4294	91.3281	75.2808	63.7064
	58.3	85.1556	79.8198	80.4406	96.2927	84.6036	80.9829	96.5152	90.6262	78.953	93.5754	75.3593	69.9524	91.046	75.9792	64.0178
	58.4	85.0884	79.9726	80.4143	96.0687	85.215	81.2957	96.3858	90.2782	78.8054	93.2563	74.6301	70.3001	90.833	76.5338	64.6696
	58.5	85.0428	80.1297	80.6419	95.1486	85.798	81.7703	96.6202	90.5773	78.5911	92.9347	74.3637	70.2359	90.7867	76.4231	65.5248
	58.6	84.6297	80.3093	80.5468	94.6609	85.9814	82.0429	96.8088	91.2498	78.3426	92.9159	74.3689	70.3659	90.8877	75.8217	65.5057
	58.7	84.44	80.4487	80.4699	94.6369	86.1191	81.9782	97.1074	91.7558	78.3936	92.9743	74.6862	70.395	91.1384	75.4706	65.1577
	58.8	84.4974	80.279	80.2622	95.1006	86.0081	81.948	97.2469	91.7114	78.5741	93.3006	75.0562	70.313	91.2288	75.2787	64.413
	58.9	84.7481	79.7379	80.2012	95.1936	86.1467	82.0932	97.0501	91.7533	78.9196	93.6282	75.3659	69.7191	91.0848	75.5289	64.0861
	59	84.7052	79.3563	80.05	94.7728	86.5099	82.351	97.0054	92.0818	79.1248	94.3171	75.6258	69.5876	90.7689	75.584	64.0179
	59.1	84.1299	79.6907	79.8616	94.3258	86.7981	82.5248	96.9747	92.6051	78.813	94.9506	75.6492	69.8268	90.4862	75.7801	64.3127
	59.2	83.6468	80.4383	79.8652	94.3229	86.8712	82.6752	97.4333	92.5192	78.1846	95.5538	75.703	70.3839	90.4147	75.7609	64.6554
	59.3	83.587	80.6431	80.2817	94.733	86.6581	82.4826	97.6412	92.1928	77.5573	95.4567	75.8761	70.4534	90.5693	75.1851	64.587
	59.4	83.6613	80.3498	80.6877	94.9416	86.4936	82.2651	97.914	91.7109	77.3509	95.0233	76.0139	70.106	90.8833	74.4194	63.8693
	59.5	83.4068	80.1223	80.8023	94.5846	86.2853	82.0958	97.7239	91.5243	77.2509	94.6539	76.057	69.6423	91.5391	73.7921	63.1188
	59.6	82.979	80.287	80.3098	94.2781	86.1747	81.9379	97.367	91.4612	77.0917	94.6509	75.8989	69.3804	92.3774	73.8363	62.9312
	59.7	83.2039	80.7548	79.7121	94.5156	85.9442	81.8117	97.0507	91.757	76.8991	94.9048	76.0329	69.5571	93.2086	74.2359	63.4847
	59.8	84.0827	80.9176	79.2371	95.288	86.0771	81.2822	96.9903	92.3811	76.9599	95.0664	76.0718	69.6737	93.5378	74.7063	64.0277
	59.9	84.9019	81.2724	79.1531	95.4788	86.248	80.9324	97.2283	92.871	76.8937	95.2192	75.9614	69.717	93.0991	74.9303	64.0706
	60	84.6866	81.205	79.0169	95.0258	86.8593	80.5866	97.2978	92.6859	76.9232	95.1571	75.6237	69.6336	92.2638	74.7792	63.8197
	60.1	83.9832	81.1276	78.9383	94.284	86.7284	80.5067	97.0482	91.822	76.7729	94.8869	75.8927	69.8912	91.0654	74.2619	63.7067
	60.2	83.7214	80.7082	78.587	94.0124	86.1537	80.7154	96.6737	90.9651	76.9427	94.3263	76.6069	70.0074	90.4671	73.8023	64.0808
	60.3	83.9097	80.5462	78.6616	93.7672	85.2764	81.1561	96.4816	90.7754	77.0037	93.946	77.4022	70.0439	90.5588	73.2303	64.4283
	60.4	83.9793	80.424	78.9293	93.5578	85.4531	81.7271	96.5928	91.2643	77.0588	94.1582	77.4517	69.811	91.4474	73.0173	64.4891
	60.5	83.4112	80.2623	79.5853	93.7966	86.1722	81.9373	96.698	91.9169	77.2044	94.7616	77.1436	69.9452	92.0877	73.1722	64.1109
	60.6	82.9526	79.9978	79.9987	94.622	86.4969	81.9168	96.5412	92.1213	77.4634	95.4143	76.6882	70.04	92.1703	73.6571	63.7246
	60.7	82.747	79.9268	79.9929	95.7133	85.6896	81.7892	96.4243	92.0256	77.8026	95.291	76.5326	70.0998	92.0612	74.1254	63.6203
	60.8	83.1259	80.3234	79.6727	95.9727	84.5217	81.6232	96.5697	91.8736	77.996	94.7682	76.4491	69.8157	92.059	74.0616	63.6437
	60.9	83.6614	81.1221	79.2432	95.5299	83.962	81.5126	96.9499	91.8503	77.9841	93.8162	76.3543	69.564	91.9059	74.0933	63.8272
	61	84.0201	81.5733	78.9006	94.3717	84.4667	81.4627	97.208	91.4744	78.0682	93.1624	75.9116	69.373	91.2934	74.3241	64.092
	61.1	83.8533	81.5094	78.8402	93.6234	85.1407	81.8561	97.0887	90.8906	78.1677	93.0787	75.565	69.4648	90.5923	74.8323	64.3288
	61.2	83.4342	80.9134	79.0071	93.759	85.306	82.2341	97.1472	90.4231	78.1313	93.671	75.305	69.675	90.5437	75.283	64.3388
	61.3	83.434	80.4099	79.533	94.3459	84.7979	82.4018	96.8923	90.3296	77.4128	94.4294	75.3569	70.0306	91.1824	75.2306	64.0271
	61.4	83.6311	80.3291	79.7829	94.7919	84.2746	82.3468	96.5612	90.3956	76.4757	94.7159	75.2946	70.1309	91.9559	74.9869	63.9283
	61.5	84.0113	80.4831	79.8611	94.4098	84.3366	81.9398	95.9278	90.7173	76.0896	94.3954	75.4711	70.1227	92.0911	74.5543	64.0251
	61.6	84.0068	80.8774	79.5606	94.2084	84.5598	81.5574	95.8409	91.2559	76.4771	93.7901	75.8094	70.1773	91.7661	74.4771	64.4606
	61.7	84.1837	80.923	79.6744	94.0367	85.1561	80.7917	96.0912	91.8356	77.1054	93.308	76.2828	70.4834	91.4793	74.5758	64.6594
	61.8	84.0763	80.6952	79.9192	94.1412	85.46	80.5804	96.4637	92.0844	77.2716	93.3833	76.4101	70.7604	91.4408	74.925	64.8023
	61.9	83.7831	80.1681	80.2797	94.0342	85.8498	80.4217	96.6793	91.9824	77.2251	93.6863	76.3816	70.7204	91.4212	75.1683	64.4497
	62	83.2829	79.645	80.2288	94.0586	85.7244	80.5878	96.6009	91.8487	76.9312	93.7573	76.2589	70.5594	91.0917	75.492	64.1834
	62.1	83.0707	79.5571	79.7701	94.2907	85.5833	80.6009	96.3402	91.5544	76.7261	93.648	76.0192	70.4519	90.982	75.6544	63.7343
	62.2	83.4751	79.7409	79.0823	94.9228	85.3883	80.8122	95.9702	91.6736	76.3504	93.8523	75.7703	70.5174	91.0481	75.6347	63.6912
	62.3	83.868	80.1258	78.4267	95.3558	85.5946	80.8759	95.957	91.8038	76.3171	94.6087	75.6344	70.5207	91.5496	75.3861	63.6722
	62.4	84.0738	80.43	78.2781	95.5151	85.8689	80.7208	96.1569	92.1502	76.2984	95.3116	75.6824	70.5927	91.9052	75.0901	64.0053
	62.5	83.824	80.6713	78.2508	95.1831	86.0109	80.4224	96.5097	91.7848	76.4892	95.3462	75.6691	70.922	91.9824	75.1681	64.0439
	62.6	83.753	81.0271	78.2102	95.1431	85.6941	80.3152	96.5701	91.3812	76.4513	94.5539	75.5216	71.4518	91.8188	75.26	63.9034
	62.7	83.6422	81.2638	78.1368	95.1289	85.3659	80.6464	96.3152	90.8233	76.7871	93.7551	75.5541	71.6466	91.439	75.2967	63.5726
	62.8	83.6321	81.2153	78.5589	95.3676	85.1698	81.0422	95.5894	90.8806	77.1412	93.2456	75.7512	71.1979	91.2719	75.237	63.7598
	62.9	83.5839	80.9584	79.3121	95.2796	85.0857	81.3417	95.0413	91.3111	77.454	93.6871	75.8522	70.4513	90.9361	75.1492	64.1983
	63	83.6936	80.7402	79.7859	95.1361	84.5749	81.158	94.6922	92.1251	77.2862	93.783	76.0482	69.8167	90.7602	75.0493	64.5581
	63.1	83.926	81.0888	79.6646	94.6576	83.9741	80.8428	95.146	92.6424	77.1432	94.0354	76.0738	69.429	90.7968	74.7358	64.3016
	63.2	84.1714	81.2392	79.1713	94.0273	83.723	80.8098	95.4798	92.5974	77.2429	93.8912	76.4182	69.1409	91.312	74.787	64.0728
	63.3	84.5098	81.439	78.8584	93.363	84.3829	81.3316	95.7538	92.1732	77.5011	94.3928	76.4338	69.3448	91.7387	75.135	63.964
	63.4	84.7416	81.0432	78.7737	93.0318	85.0189	81.9856	95.6243	91.7698	77.5392	94.8641	76.452	69.6867	91.728	75.6878	64.2847
	63.5	84.5543	80.9191	78.9691	93.2737	85.4468	82.2913	95.7164	91.3491	77.4497	95.0078	76.1224	70.2589	90.8928	75.5603	64.4523
	63.6	84.0119	80.3786	79.1047	93.8119	85.1358	82.0581	96.1769	90.8548	77.1993	94.6919	75.8303	70.3157	90.2187	75.1958	64.6171
	63.7	83.3737	80.3153	79.3029	94.3242	85.0208	81.6574	96.41	90.3074	76.839	94.228	75.6314	70.3567	89.6654	74.4851	64.7323
	63.8	83.3972	80.0989	79.4318	94.8648	84.6884	81.271	96.3472	90.1738	76.4627	94.2242	75.739	69.8676	89.9193	74.4858	64.7934
	63.9	83.853	80.4861	79.5841	95.4563	84.6563	80.7413	95.7519	90.5329	76.3184	94.2458	75.9116	69.3288	90.3216	74.3154	64.5222
	64	84.6006	80.2188	79.649	95.664	84.5986	80.2888	95.4327	91.1483	76.5216	94.0996	76.1414	68.8554	90.7916	74.5758	63.9799
	64.1	84.9428	80.3074	79.4991	95.0074	84.9578	80.0856	95.3118	91.372	76.5286	93.7647	76.1682	68.7819	90.9393	74.4481	63.5022
	64.2	84.754	79.997	78.9973	93.9669	85.2259	80.605	95.675	90.8251	76.5623	93.488	76.2008	69.0211	91.1767	74.6671	63.6926
	64.3	84.2533	80.4747	78.5601	93.5682	85.4228	81.0812	95.731	90.0887	76.4676	93.5739	76.3243	69.1007	91.6533	74.5103	64.0338
	64.4	83.8302	80.5221	78.3929	93.9361	85.2384	81.3996	95.834	89.6202	76.5149	93.538	76.3039	69.3011	92.4236	74.5017	64.4952
	64.5	83.7637	80.6847	78.8589	94.5999	85.1768	81.1233	95.732	89.8907	76.6161	93.5176	76.3661	69.5831	92.292	74.3044	64.4233
	64.6	83.8682	80.4696	79.2629	94.9136	84.8029	81.0377	95.7891	90.336	77.1107	93.4514	75.8009	69.9122	91.8873	74.5251	64.5092
	64.7	83.8516	80.6962	79.6612	95.0964	84.6591	80.7913	95.8094	90.8199	77.8423	93.7069	75.305	70.0591	91.0042	74.812	64.4011
	64.8	83.6078	80.8922	79.9027	94.8862	84.3042	80.7337	95.6652	91.0934	78.1887	94.3531	74.7446	69.9096	90.8308	75.1356	64.4583
	64.9	83.2511	80.9384	79.9622	94.7267	84.4998	80.7426	95.77	90.9994	77.9152	94.7812	74.9169	70.1153	90.4824	75.272	64.3976
	65	83.1637	80.4021	79.843	94.4534	84.6892	81.0776	95.6477	90.7848	77.5703	95.05	75.5644	70.2999	90.151	75.1778	64.5516
	65.1	83.4806	80.0236	79.2054	94.681	85.0378	81.5403	95.7828	90.2506	77.304	94.3929	76.1504	70.6127	89.7272	75.2607	64.5823
	65.2	83.7906	79.9518	78.8287	94.6894	85.2196	81.5936	95.8076	90.1632	77.3194	93.6488	76.4344	70.5083	89.8179	75.1861	64.4666
	65.3	84.0432	80.2802	78.5591	94.6253	85.2383	81.458	95.8888	90.1779	76.8699	92.903	76.4114	70.5037	90.5957	75.1706	64.0403
	65.4	84.0539	80.3874	79.1406	94.3529	84.9528	81.0549	95.721	90.4706	76.7423	93.174	76.502	70.5276	91.3828	74.81	63.6321
	65.5	84.2147	80.2719	79.6891	94.5547	84.4269	81.2124	95.3204	90.3889	76.3483	94.0964	76.5437	70.3937	91.8417	74.4763	63.3882
	65.6	84.1502	80.1001	80.1278	95.0528	84.2876	81.3116	95.058	90.2092	76.4423	94.8558	76.5087	70.235	91.9059	74.2131	63.5153
	65.7	84.0557	80.2799	79.8066	95.4169	84.6326	81.389	94.9673	90.0192	76.1337	94.9234	76.344	70.2588	92.0907	74.483	63.8513
	65.8	84.0054	80.6766	79.3826	95.3282	85.2594	80.8837	94.9784	89.789	76.0638	94.2812	76.3401	70.7081	92.1732	75.0821	64.0883
	65.9	84.0724	81.1082	78.8389	94.9669	85.4499	80.4088	94.835	89.4622	75.8829	93.8368	76.2413	71.052	92.2072	75.8686	64.0053
	66	84.2291	81.1991	78.8354	94.8729	85.4592	80.5153	94.4407	89.4104	76.1566	93.6504	76.2687	70.8649	91.9753	76.3571	63.8007
	66.1	84.1081	81.1496	79.0133	94.9903	85.3819	80.7576	94.2273	89.8228	76.4352	93.4384	76.0313	70.3132	91.878	76.5963	63.5176
	66.2	84.1272	80.9697	79.4729	95.2554	85.4259	81.1964	94.2792	89.988	76.6509	92.8243	75.9618	69.4803	91.53	76.4856	63.3459
	66.3	83.913	80.815	79.458	95.0588	85.4324	81.1216	94.8171	89.5043	76.2789	92.0312	75.7342	69.1948	91.16	76.3027	63.0993
	66.4	83.7217	80.7836	79.3361	94.8477	85.5561	81.4522	95.1437	88.7604	75.902	91.872	75.6208	69.2493	90.7283	75.9368	63.42
	66.5	83.329	80.8682	79.1692	94.3884	85.7928	81.5282	95.2251	88.7834	75.684	92.4161	75.575	70.0883	90.5752	75.5962	63.8901
	66.6	83.2978	81.0243	79.1203	94.1664	85.903	81.5429	94.753	89.2833	76.0039	93.506	75.675	70.4053	90.7059	75.1441	64.7873
	66.7	83.649	80.7168	78.7778	93.5557	85.6699	81.1242	94.225	89.9342	76.2596	94.272	76.0144	70.6768	91.0263	74.948	65.1284
	66.8	84.1631	80.4302	78.3887	93.0117	85.2517	80.6441	93.9981	90.1027	76.4201	94.6972	76.2703	70.5686	91.1612	75.0143	65.3486
	66.9	84.3784	79.9128	78.0682	92.7429	84.8898	80.4433	94.4083	90.2623	76.5288	94.6919	76.7841	70.8056	91.0494	75.1774	64.8499
	67	84.0947	80.0722	78.1833	92.9684	84.7753	80.5462	95.1872	90.2208	76.6547	94.4862	77.3018	70.805	90.5967	75.5232	64.2314
	67.1	83.5588	80.0723	78.3	93.3118	84.6728	81.0477	95.7114	90.3633	76.7541	94.2377	77.8738	70.6342	90.3561	75.5801	63.5154
	67.2	83.1841	80.6603	78.5739	93.7249	84.6271	81.6492	95.8668	90.3799	76.8183	93.6984	77.7769	70.4819	90.3909	75.9734	63.3796
	67.3	83.2174	80.7672	78.5907	94.4902	84.2386	81.9353	95.8162	90.2318	76.7169	93.3063	77.3624	70.5533	91.0899	76.0183	63.6081
	67.4	83.7271	80.8133	78.7144	95.4097	83.9839	81.9258	95.8738	89.7132	76.8107	92.9032	76.7023	70.5196	91.593	76.235	63.7662
	67.5	84.1744	80.2607	78.7222	95.7393	83.7983	81.3483	95.608	89.1006	76.839	92.7817	76.5147	70.3853	91.8188	75.7556	63.8282
	67.6	84.2864	79.7782	78.9	95.2208	84.1777	80.9972	95.4483	88.8168	77.25	92.5963	76.3729	69.9713	91.4039	75.23	63.9899
	67.7	84.0139	79.5168	78.9429	94.5452	84.946	80.939	95.4582	89.1944	77.1814	92.5571	76.7734	69.7976	91.2767	74.6602	64.6292
	67.8	83.9886	79.6357	78.8819	94.4014	85.6851	81.5051	95.8836	89.7779	77.1997	92.8652	77.1541	69.6028	91.4367	74.5466	65.0454
	67.9	84.2926	80.0452	78.9319	94.68	85.8359	81.7978	96.0953	90.3672	77.0611	93.435	77.686	69.6932	91.7728	74.5354	65.167
	68	84.6238	80.3792	78.9103	94.6846	85.2521	81.699	95.8412	90.6088	77.5434	93.6298	77.5424	69.9719	92.1589	74.5966	65.0231
	68.1	84.4506	80.8172	79.1086	94.2007	84.4824	81.3438	95.6261	90.9192	77.4909	93.5371	77.2576	70.201	92.6983	74.4133	64.6823
	68.2	83.7436	81.1971	78.9222	93.2853	84.1782	81.4699	95.4564	91.1727	76.9357	93.2984	76.7833	70.3293	93.1413	74.1471	64.2379
	68.3	83.0067	81.6191	78.7842	92.7037	84.1411	81.5154	95.1994	91.3154	75.7031	93.4544	76.5266	70.0074	92.964	73.7548	63.7013
	68.4	82.5306	81.6506	78.401	92.8322	84.3666	81.2804	94.7123	91.1821	74.942	93.7184	76.2139	69.6549	92.1154	73.6774	63.81
	68.5	82.7706	81.4944	78.3337	93.7353	84.2098	80.4656	94.1766	91.0201	75.0559	94.1729	76.2094	69.1769	91.4298	73.9019	64.1274
	68.6	82.8573	81.4414	78.4458	94.8744	83.9854	80.0921	94.2019	90.5748	75.7937	94.6167	76.4671	69.0958	91.5809	74.2801	64.3768
	68.7	83.0448	81.7308	78.9142	95.2302	83.7581	80.1398	94.459	90.2501	76.8618	94.8232	76.7161	69.4262	92.0547	74.7597	64.3437
	68.8	83.0258	81.7952	79.1238	94.914	84.2418	80.6677	94.8371	89.7358	77.4459	94.779	76.435	69.8927	92.2202	74.9464	64.4698
	68.9	83.7928	81.4234	79	93.9199	84.9033	81.0021	94.9654	89.9074	77.499	94.4836	75.954	70.2623	91.4991	75.102	64.6456
	69	84.489	80.3487	78.8663	93.2619	85.4674	81.1464	95.0678	90.0587	76.7884	94.2198	75.753	70.0189	90.7392	74.7134	64.6574
	69.1	84.9107	79.6666	79.1901	93.0158	85.4973	81.2831	95.2704	90.4832	75.9192	93.8307	75.9528	69.7694	90.6016	74.6886	64.6213
	69.2	84.6474	79.6876	80.1028	93.4056	85.7012	81.6731	95.5837	90.3588	75.317	93.5303	76.0078	69.1912	91.3051	74.7637	64.6388
	69.3	84.4019	80.3718	80.597	93.9602	85.7689	82.0483	95.5972	90.2558	75.0856	93.4188	75.7601	69.114	92.2662	75.3671	64.8077
	69.4	84.4678	80.7704	80.7131	94.6311	85.9044	81.9278	95.348	89.8907	75.3056	93.4689	75.4436	69.0777	92.7463	75.5407	64.7631
	69.5	84.6121	80.4796	80.2652	95.1938	85.6157	81.2768	94.8323	89.6557	75.4379	93.7712	75.3778	69.3714	92.8267	75.2008	64.7742
	69.6	84.7363	80.2034	79.7868	95.4982	85.3267	80.7289	94.5594	89.0088	75.662	93.9243	75.6991	69.3506	92.7598	74.8634	64.5994
	69.7	84.6594	80.0607	79.1928	95.0629	84.8764	80.7166	94.4247	88.4078	75.5058	94.3703	76.0333	69.2976	92.7527	74.8347	64.3479
	69.8	84.5261	80.0692	78.4912	94.4174	84.7524	81.0047	94.4764	87.9798	75.3803	94.3559	76.0912	69.2914	92.5907	75.288	64.2258
	69.9	84.2557	79.7337	77.9144	93.952	84.8549	81.2603	94.4664	88.4167	75.2289	94.3937	75.9324	69.3097	92.2877	75.3018	64.5337
	70	83.8977	79.3819	77.5646	94.1974	85.2271	81.4218	94.3731	89.2168	75.3887	94.0004	75.899	69.3481	91.8157	75.1118	64.9842
	70.1	83.6994	79.4154	77.5429	94.1638	85.3533	81.5489	94.2521	90.1282	75.7278	93.8199	76.3059	69.2423	91.4688	74.7313	65.2237
	70.2	83.5672	79.6973	77.8214	93.7494	85.2212	81.7203	93.9786	90.4604	76.2541	93.5853	76.5703	69.2993	90.8922	74.4259	65.0664
	70.3	83.4892	80.217	78.1721	93.1089	84.941	81.3853	93.9143	90.5024	76.742	93.5533	76.4331	69.3347	90.6929	74.2318	64.9668
	70.4	83.9102	80.4742	78.7769	92.6734	84.8168	80.9291	93.8808	90.2352	76.9201	93.7387	75.9564	69.3967	90.7444	74.1484	64.7822
	70.5	84.6881	80.6448	78.9934	92.5909	85.0966	80.1571	94.0111	90.0876	76.445	94.188	75.6411	69.5469	91.4003	74.3651	64.7811
	70.6	85.2269	80.5984	78.8879	92.5417	85.3422	79.9827	93.9488	90.1147	75.6723	94.3586	75.8473	69.7571	91.8988	74.767	64.9704
	70.7	84.6788	80.6203	78.3017	93.2303	85.2959	80.1461	93.8327	90.0379	75.0749	94.4244	76.1841	69.8181	91.8069	75.0916	65.4064
	70.8	83.6653	80.646	78.2802	94.3433	84.8509	80.9616	93.9228	89.8479	74.8243	93.7382	76.3257	69.6631	91.1133	75.2036	65.7627
	70.9	83.2609	80.7746	78.7909	95.2599	84.3143	81.3963	94.1312	89.3588	74.7209	93.1133	76.3222	69.5834	90.5079	74.8839	65.8496
	71	83.5607	80.879	79.7128	95.2439	84.4198	81.4656	94.3573	89.5199	74.5843	92.2429	76.4779	70.1458	90.492	74.7009	65.6303
	71.1	84.0362	80.9479	80.2157	94.8111	84.603	80.8774	94.2409	90.0737	74.533	92.285	76.5472	70.8768	91.2101	74.6057	65.276
	71.2	84.1741	80.7518	80.2512	94.683	85.3636	80.458	93.9176	90.6527	74.2663	92.6446	76.3331	71.2456	91.9931	74.8031	64.7722
	71.3	84.0577	79.9837	79.8863	94.8819	85.6352	80.4762	93.6079	90.4982	74.0826	93.1512	75.5416	70.633	92.5408	75.038	64.6626
	71.4	83.8084	79.1269	79.3316	94.5982	85.9801	80.8358	93.4567	89.927	73.9554	93.3404	75.0952	69.8577	92.3591	75.5388	64.6721
	71.5	83.3337	78.6088	78.8669	93.9877	85.5386	81.2582	93.4774	89.7569	74.4039	93.6373	74.9293	69.4347	91.7637	75.6683	65.0811
	71.6	83.1998	79.0578	78.5821	93.4294	85.0631	81.181	93.5732	89.7517	74.9109	94.3713	75.4646	69.6239	91.1701	75.1468	65.1479
	71.7	83.1754	79.8951	78.5203	93.5408	84.7078	81.1036	93.726	89.8621	75.5411	94.8443	75.8917	69.8493	91.2053	73.9882	65.0986
	71.8	83.5861	80.4368	78.445	94.1656	84.709	81.1363	93.9241	89.6036	75.6391	94.9053	76.1513	69.8003	91.7337	73.2613	64.4577
	71.9	83.6098	80.5636	78.1489	94.7031	84.8754	81.4681	94.0464	89.6719	75.3151	94.5372	75.6886	69.8784	92.5014	73.237	63.6437
	72	83.7401	80.3294	77.6757	94.5557	84.7216	81.7234	94.1638	89.8559	74.3328	94.8876	75.288	69.9038	92.9188	73.7816	63.2661
	72.1	83.7972	80.3237	77.1994	93.8768	84.7023	81.3799	94.3457	90.0552	73.6242	95.5692	74.9146	69.75	93.1853	74.4423	63.2424
	72.2	83.9964	80.2854	77.3252	93.085	84.572	80.8207	94.4053	90.1111	73.2408	96.2422	75.2888	69.1877	93.0826	75.0212	63.7052
	72.3	84.3389	80.3121	78.1148	93.0344	84.7158	80.2759	94.2801	89.8549	73.5178	96.1652	75.4299	68.8652	92.9521	75.4228	63.6494
	72.4	84.666	80.1818	79.2082	93.2843	84.947	80.5114	93.854	89.8922	73.6622	95.6711	75.8713	69.2828	92.5434	75.3389	63.5514
	72.5	85.0347	79.9493	79.7647	94.165	85.2829	81.1414	93.8196	89.6952	73.9007	94.9478	76.0808	70.0046	92.211	75.3341	63.0704
	72.6	84.8092	79.9023	79.8664	94.8172	85.8843	81.9089	94.0048	89.6453	73.9483	94.3296	76.5146	70.4846	91.8563	75.1463	63.0019
	72.7	84.4516	80.0134	79.9474	95.2003	86.0462	82.241	94.2201	89.1017	73.8151	93.9224	76.3248	70.4756	91.71	75.0629	63.2933
	72.8	83.9894	80.4206	80.4531	94.8516	86.2372	81.9018	93.8307	88.7957	73.6577	93.8151	75.6969	70.0039	91.6241	74.4341	63.808
	72.9	83.875	80.6203	80.8176	94.4419	85.9222	81.1541	92.9833	89.0173	73.8408	93.759	75.0787	69.8176	91.6693	73.93	63.9761
	73	83.5897	80.4563	80.7344	94.3394	85.3878	80.357	92.1862	89.7644	74.7147	93.9209	74.9386	69.6641	91.5562	73.9887	63.6606
	73.1	83.2192	79.868	80.1572	94.4764	84.6284	79.9319	91.4951	90.2747	75.2562	94.1556	75.4581	70.026	91.4436	74.4601	63.289
	73.2	83.1349	79.603	79.7266	94.4703	84.1308	79.9183	91.2474	89.9622	75.1212	94.4803	76.0922	70.1061	91.3734	74.952	63.1388
	73.3	83.0932	79.9654	79.5019	94.2388	84.444	80.2097	91.321	89.3147	74.4067	94.5174	76.638	70.2467	91.7989	74.9298	63.4064
	73.4	83.1901	80.8202	79.623	94.0119	85.1381	80.8957	91.8917	89.2061	74.4152	94.1902	76.662	70.1837	91.9032	74.7253	63.8303
	73.5	83.016	81.1533	79.6939	93.9024	85.3779	81.383	92.6038	89.4642	74.9037	94.1319	76.4664	70.1244	91.4923	74.5334	64.3706
	73.6	83.0876	80.8948	79.8356	93.6051	85.0816	81.7586	93.095	89.5914	75.446	94.1522	76.4611	70.134	90.5794	74.0443	64.5567
	73.7	83.2369	80.0952	79.6622	93.4787	84.3311	81.4977	93.3592	88.8762	75.2312	94.6574	76.6261	70.0513	90.1454	74.0842	65.0258
	73.8	83.2548	79.4902	79.4474	93.7036	84.0883	81.4589	93.3661	88.0008	75.0123	94.7331	76.5637	70.1593	90.0963	74.1889	65.0898
	73.9	83.6716	79.328	79.1344	94.5093	83.9548	81.5193	93.4491	87.4192	74.9704	94.6703	76.0799	70.0947	90.2318	74.8436	65.2228
	74	84.0879	79.6811	79.0962	94.9693	83.8993	81.8662	93.5869	87.453	75.2228	94.3326	75.4796	70.4018	90.4526	74.9127	64.6466
	74.1	84.5659	80.3432	79.2403	94.7716	83.542	81.636	93.7827	87.6881	75.0883	94.1429	75.088	70.5929	90.6989	74.9438	64.3634
	74.2	84.2201	80.7178	79.5476	94.2917	83.5833	80.89	93.7373	87.822	75.032	94.3573	74.9106	70.9189	90.6654	74.7359	64.0362
	74.3	83.8606	80.9846	79.7368	94.0477	83.8842	80.1086	93.5824	87.8326	74.911	94.8772	75.0936	70.7357	90.2969	74.8577	64.017
	74.4	83.6666	81.0133	79.6993	94.1929	84.4818	79.7481	93.4573	88.006	74.9786	95.1731	75.6209	70.6752	90.3751	74.8888	63.9384
	74.5	83.9374	81.2171	79.5339	94.0227	84.6897	79.6341	93.3928	88.1362	74.4887	94.9004	76.1807	70.2804	90.9653	75.0913	63.8387
	74.6	84.0911	81.0799	79.5518	93.9542	84.7294	79.5026	93.0907	88.2786	74.0289	93.9739	76.4847	70.169	91.8126	75.032	63.6387
	74.7	83.9557	80.8748	79.4983	94.0599	84.6203	79.5091	92.6171	87.9904	73.7527	93.3263	76.3432	69.8174	92.1228	75.094	63.4111
	74.8	83.5743	80.5209	79.1778	94.6803	84.3714	79.8341	92.3816	87.9448	74.2623	93.1796	75.9523	69.8631	92.1594	75.1979	63.5216
	74.9	83.2747	80.52	78.4859	94.8582	84.4538	80.5673	92.4424	87.7886	75.036	93.8184	75.5253	69.8579	92.1221	75.366	63.9506
	75	83.3092	80.647	78.297	94.4958	84.5906	81.1114	92.3136	87.8741	75.6376	94.6617	75.471	69.7426	92.2746	75.2742	64.2029
	75.1	83.37	80.9504	78.6839	93.8692	85.5044	81.508	92.0279	87.4943	75.4761	95.1216	75.898	69.4917	92.4869	75.093	64.1312
	75.2	83.5244	81.0974	79.4661	93.7429	85.9932	81.4274	91.7283	87.2206	74.8009	94.7831	76.5147	69.1806	92.7288	74.9517	63.7367
	75.3	83.6376	81.0082	80.0314	94.0069	86.3038	81.4537	92.3148	87.3383	73.9309	94.2506	76.7799	69.2472	92.9193	75.0942	63.5319
	75.4	84.0663	80.6906	80.0436	94.1352	85.5869	81.295	92.8607	87.9823	73.4911	94.3618	76.6984	69.3044	92.8663	75.0067	63.7092
	75.5	84.08	80.3519	79.5793	93.6654	84.9994	81.215	93.3788	88.7059	73.3668	94.9931	76.2862	69.4732	92.4197	75.0442	64.1218
	75.6	83.9411	80.0292	78.842	93.1303	84.7556	80.9919	93.1139	88.9532	73.8689	95.2974	75.977	69.6099	91.8391	74.7589	64.9153
	75.7	83.7447	79.8667	78.4069	93.0158	85.0461	80.8704	92.7716	89.3566	74.4207	94.8334	75.7433	69.869	91.5097	74.5963	65.2393
	75.8	83.8601	79.9421	78.2982	93.4178	85.4198	80.8661	92.898	89.8837	74.8944	94.2404	75.8261	70.151	91.4571	74.1439	65.5007
	75.9	83.8812	80.4826	78.2748	93.9237	85.4801	81.2679	93.3059	90.4889	74.6031	93.8952	75.973	70.1712	91.4123	74.106	65.085
	76	83.6007	80.8757	78.2696	93.8446	85.182	81.775	93.985	90.5839	74.2242	94.0378	75.8246	70.1118	91.3433	74.2253	64.7274
	76.1	83.5602	80.8369	78.5148	93.7311	84.9696	81.9571	93.7196	90.311	73.9616	94.2282	75.6742	70.0396	91.1801	74.5169	64.1296
	76.2	83.7024	80.4382	78.9626	93.2948	84.5862	81.3957	93.2223	90.0106	74.2716	94.7117	75.2813	70.1678	91.2561	74.4907	63.9953
	76.3	83.9582	80.3509	79.5151	93.4939	84.4738	80.5828	92.5256	89.7556	74.3352	95.0144	75.4436	70.5053	91.3578	74.2638	64.127
	76.4	83.9188	80.4704	79.6371	93.6621	84.1513	79.9637	92.6381	89.2612	74.0879	95.2794	75.4351	70.8434	92.1333	74.3762	64.4241
	76.5	83.9716	80.5088	79.4168	94.0464	84.194	79.7193	93.0869	88.6267	73.5017	95.1059	75.707	71.22	92.8003	74.8392	64.6922
	76.6	84.2103	79.905	78.787	94.0869	84.4342	79.6302	93.5396	87.9191	72.9851	95.0327	75.6842	71.0771	93.0497	75.5844	64.7678
	76.7	84.3349	79.1984	78.1509	94.1128	84.6804	79.6219	93.4591	87.8197	72.756	94.8053	75.6333	70.7953	92.0492	75.8551	64.8911
	76.8	84.0954	78.6328	77.8767	94.2818	85.0363	79.7299	92.8898	87.9613	72.8242	94.7383	75.2787	70.3823	91.0909	75.8388	64.6432
	76.9	83.7049	78.8081	77.9429	94.4456	85.0853	80.1691	92.3654	88.286	73.3508	94.3384	74.9193	70.1957	90.799	75.608	64.466
	77	83.661	79.5559	78.4272	94.063	85.255	80.8728	91.8626	88.2528	73.6978	94.149	74.4684	69.9807	91.5233	75.4997	64.0287
	77.1	84.0598	80.5369	79.0851	93.4422	84.974	81.4453	91.6751	87.9109	73.6347	93.9137	74.4956	69.8629	91.8984	75.5907	63.8267
	77.2	84.3792	80.7871	79.9178	92.8747	85.0814	81.5803	91.863	87.5207	73.1114	93.639	74.5516	70.1558	92.0251	75.6131	63.7037
	77.3	84.3071	80.3987	80.5644	93.055	85.0859	81.3628	92.5046	87.4222	72.7713	93.3753	75.123	70.5127	91.5353	75.3952	63.9618
	77.4	83.8036	79.6223	80.5794	93.2296	85.5041	80.995	93.1497	87.5204	72.6488	93.2922	75.3214	70.626	91.1366	74.5734	64.2647
	77.5	83.187	79.487	80.3719	93.5893	85.3262	80.5114	92.8597	87.5766	72.702	93.6468	75.5753	70.2531	90.6269	73.6751	64.5824
	77.6	82.8777	79.6667	80.1132	93.7432	85.2604	79.9447	92.0141	87.7131	73.0371	93.7327	75.3469	70.1344	90.4696	73.0039	64.59
	77.7	82.9228	79.9389	80.1538	93.8389	84.9216	79.8932	91.3071	88.4071	73.778	93.6184	75.205	70.1768	90.8101	73.0773	64.5979
	77.8	83.2787	79.9047	79.933	93.5102	85.0507	80.3939	91.5068	89.095	74.5462	93.2339	74.899	70.4127	91.1749	73.5437	64.639
	77.9	83.7331	79.6364	79.517	93.2189	85.1172	81.1444	92.0917	89.025	74.748	93.1264	74.8568	70.3126	91.476	74.2843	65.0424
	78	84.0456	79.5639	78.9249	93.2986	85.5907	81.323	92.6671	88.0118	74.4103	93.1241	75.1212	70.2902	91.2324	74.7528	65.5192
	78.1	84.0689	79.7719	78.3287	93.7227	85.7096	80.9523	92.62	87.1102	74.0063	93.4139	75.714	70.0929	90.9299	75.2014	65.7038
	78.2	83.7997	80.107	77.8829	93.9042	85.5682	80.4654	92.5912	87.032	73.8112	93.5258	76.1751	70.0399	90.7319	75.4527	65.552
	78.3	83.7978	80.4333	77.8839	93.8561	84.9094	80.2903	92.0918	87.5083	73.7046	93.6513	76.2909	69.8652	90.8686	75.5697	65.2082
	78.4	84.1958	80.4871	78.298	93.8628	84.3233	80.4549	92.0714	88.1232	73.792	93.5464	76.2879	69.9999	91.1808	75.2153	64.9516
	78.5	84.8329	80.5342	78.8222	94.1823	84.1304	80.5658	91.8727	88.4612	73.9033	93.7776	76.2504	70.1744	91.3847	74.7899	64.9567
	78.6	85.1178	80.3436	79.0754	94.2674	84.1292	80.5431	92.0828	88.6106	74.2022	93.7431	76.2548	70.5396	91.4278	74.8222	65.117
	78.7	85.4823	80.3716	79.1594	94.0121	84.4928	80.2501	92.0728	88.4862	73.9554	93.948	75.9429	70.386	91.5731	75.3637	65.1848
	78.8	85.5074	80.5237	79.0752	93.7039	84.9329	80.1581	92.0024	88.3189	73.8236	93.7837	75.6672	70.1451	91.7294	75.9897	64.899
	78.9	85.3337	80.9117	79.0089	93.6544	85.3812	80.3409	91.8432	88.2528	73.5986	93.7827	75.5192	69.9169	91.903	76.0971	64.313
	79	84.5868	81.0726	78.848	93.7812	85.6083	80.9029	91.8466	88.323	73.7709	93.5484	75.6942	70.197	91.6172	75.7888	63.8233
	79.1	84.3632	81.0686	78.9849	93.6546	85.2212	81.2521	92.143	88.283	73.7618	93.5656	75.9559	70.4683	91.251	75.4158	63.4881
	79.2	84.85	80.6383	79.0904	93.5433	84.687	81.3357	92.544	88.1866	73.8208	93.661	76.2019	70.4414	91.1637	75.3611	63.2714
	79.3	85.508	80.2323	79.2291	93.4783	83.9214	81.1676	92.7082	87.7414	73.9237	93.8333	76.2063	70.1678	91.488	75.6364	63.2352
	79.4	85.3813	79.9143	79.0099	93.6274	83.7887	80.8177	92.6048	87.4831	73.7752	93.7042	76.2907	70.0598	91.9077	75.6702	63.2688
	79.5	84.596	79.8579	79.0491	93.6194	83.9336	80.4133	92.4251	87.1952	73.4862	93.5681	75.9383	70.0489	92.0053	75.2693	63.5929
	79.6	83.9436	79.9112	79.3283	93.3917	84.4607	79.7404	92.4057	87.2986	73.2029	93.4042	75.7412	70.2969	92.0387	74.5252	63.7826
	79.7	84.1258	79.979	79.8198	93.0858	84.731	79.4248	92.4767	87.5686	73.6487	93.4611	75.0192	70.2839	92.0858	74.226	64.0882
	79.8	84.5817	80.1684	79.8589	92.9578	84.842	79.2154	92.2141	87.8407	74.1933	93.7236	74.8794	70.4274	91.9907	74.3829	64.1362
	79.9	85.0842	80.3487	79.5953	93.1672	84.8951	79.4764	91.9974	88.4147	74.4323	94.1293	74.7907	70.1883	91.5496	74.4812	64.1168
	80	84.9673	80.4398	79.2326	93.3998	85.0227	79.6038	91.7514	88.4677	74.033	94.5036	75.1643	70.1238	90.9002	74.2297	63.9583
	80.1	84.632	80.4173	79.2607	93.7969	85.1973	79.8593	92.0627	88.6096	73.4494	94.2241	75.2026	69.7652	90.753	73.8484	64.0197
	80.2	84.0661	80.1658	79.3837	94.1717	85.1469	80.1384	92.0318	88.0126	73.1328	93.5884	75.2753	69.5038	91.1017	74.0718	64.3751
	80.3	83.6668	79.7396	79.4708	94.404	85.1411	80.735	91.93	87.7226	73.0116	93.1322	75.4527	69.0843	91.503	74.4661	64.989
	80.4	83.6959	79.6056	79.4108	94.3318	85.0247	80.9359	91.6901	87.2937	73.1021	93.3308	75.9051	69.1152	91.3066	74.945	65.5032
	80.5	83.9877	79.84	79.3998	93.6367	84.9422	80.7329	91.8023	87.4107	73.4931	93.8001	76.2681	69.3151	90.7383	75.0152	65.7243
	80.6	84.4146	80.5419	79.7751	93.1522	84.8068	80.2069	92.1516	87.8087	74.0594	94.101	76.3466	69.8366	90.2718	75.1554	65.4012
	80.7	84.7374	81.0193	79.8767	92.5618	85.1474	80.2609	92.4621	88.1741	74.516	94.1808	76.0857	70.1256	90.097	75.0223	64.9823
	80.8	84.8763	81.199	79.8498	92.9593	85.3884	80.7701	92.918	88.1504	74.2578	94.2629	75.7113	70.5116	90.0577	74.8207	64.8037
	80.9	84.6686	81.0544	79.5781	93.3317	85.3269	81.4951	93.5076	87.5548	73.6246	94.2324	75.3999	70.7248	90.2649	74.4848	64.8958
	81	84.1861	80.7118	79.9138	93.9366	84.9704	81.9242	93.9296	87.3221	73.0797	94.6277	75.2974	70.9132	90.6934	74.4004	64.9929
	81.1	83.9339	80.2663	80.4234	93.8708	84.914	82.0259	94.0172	87.4053	73.0614	94.9928	75.1262	70.7201	91.3701	74.4563	64.7996
	81.2	84.2359	79.7379	80.5612	93.5407	84.807	81.9564	93.5588	87.6791	73.3757	95.3132	74.9494	70.4036	91.849	74.58	64.6313
	81.3	84.5403	79.5182	80.2777	93.2036	84.3766	82.0358	93.0457	87.3191	73.7276	94.8572	74.6587	70.066	92.3489	74.7637	64.392
	81.4	84.4193	79.8829	79.8268	93.0723	83.7353	82.0931	92.2441	86.6044	73.96	94.1006	74.6682	69.971	92.1803	75.1854	64.4294
	81.5	84.273	80.8	79.5432	93.1204	83.8206	81.7667	91.8264	85.8764	74.1397	93.5183	74.7296	69.9384	91.5291	75.5346	64.5092
	81.6	84.5579	81.4298	79.1264	93.1202	84.3326	81.0281	91.5856	85.8164	74.1607	92.9718	75.0063	69.9783	90.3807	75.5301	64.6953
	81.7	85.3611	81.6247	79.0379	93.1091	85.1602	80.5217	91.8204	86.2339	73.8287	92.8016	75.1867	69.9071	90.1506	75.0427	64.6892
	81.8	85.6964	81.3773	79.1224	93.4647	85.3964	80.5338	91.8109	87.0059	73.2283	92.653	75.3657	69.7772	90.7634	74.5142	64.5453
	81.9	85.7412	81.0747	79.5577	94.043	85.2679	80.9454	91.6182	87.5181	72.6259	93.0097	75.5367	69.2846	91.5276	74.0713	64.4079
	82	85.5219	80.7547	79.2974	94.2808	84.815	81.3511	91.2588	87.9557	72.6717	93.4462	75.7138	69.1234	91.395	73.8516	64.134
	82.1	85.6634	80.1992	78.8652	93.7544	84.5984	81.5582	91.0016	88.2724	72.9623	93.9818	75.8998	69.2851	90.8448	73.6884	63.7753
	82.2	85.4556	80.0924	78.1082	92.9191	84.5383	81.354	91.3012	88.4719	73.2536	94.3036	75.7898	69.8752	90.3997	73.9922	63.2554
	82.3	85.1039	80.358	78.0261	92.503	84.4373	80.7601	91.7736	88.1942	73.2304	94.0647	75.4973	70.2623	90.7444	74.1862	62.9682
	82.4	84.6218	81.0414	78.1258	92.6431	84.3746	80.2642	92.4638	87.6793	73.2987	93.6396	75.1201	70.6253	90.9672	74.5417	62.9489
	82.5	84.3587	81.4252	78.4313	92.793	84.3232	80.3223	92.4843	87.5076	73.6701	93.5062	75.1017	70.9789	91.4456	74.2241	63.1704
	82.6	84.3618	81.293	78.1083	93.0132	84.5041	80.7122	92.4877	87.7596	73.8334	94.1929	75.3239	70.8652	91.4624	74.1986	63.3956
	82.7	84.5299	81.0684	77.624	93.3743	84.2508	80.7117	92.2493	88.5833	73.7938	94.8978	75.6688	70.237	91.6938	74.014	63.7154
	82.8	84.9662	80.9928	77.1791	93.6656	84.0666	80.4637	92.3093	89.2162	73.291	95.1004	75.6782	69.4866	91.6414	74.1547	63.9576
	82.9	84.9732	81.3308	77.8373	93.7198	83.9794	80.2059	92.0341	89.6391	72.8912	94.6498	75.6031	69.3057	91.5189	74.1064	64.0506
	83	84.328	81.5882	79.0453	93.5777	84.722	80.5623	91.8031	89.1236	72.4094	94.2691	75.5488	69.3034	91.5679	74.207	63.8391
	83.1	83.6914	81.4701	80.3874	93.7647	85.3168	80.5696	91.602	88.0788	72.1951	94.1718	75.6852	69.2972	91.5457	74.4236	63.7576
	83.2	83.743	80.9723	80.5939	93.943	85.3009	80.6984	91.8416	87.1204	72.0641	94.5707	75.6967	69.2466	91.9049	74.5404	63.9027
	83.3	84.454	80.2556	80.4088	94.109	84.5552	80.5293	92.0218	86.6604	72.2766	94.9207	75.5639	69.3094	91.8882	74.2946	64.1672
	83.4	84.7658	79.9272	80.0339	94.0066	84.1234	80.9548	91.923	86.8146	72.431	95.4509	75.3511	69.5386	92.2337	73.8028	64.2334
	83.5	84.3797	79.8204	80.032	94.234	84.5489	81.0191	91.3093	87.4418	72.6977	95.7906	75.3654	69.6148	92.1634	73.2037	64.0171
	83.6	83.8804	79.9778	79.6669	94.2223	85.3559	80.9972	90.3897	87.9972	72.9069	95.8449	75.6268	69.8937	92.0672	72.9338	63.8402
	83.7	83.6226	80.0764	79.13	94.3887	85.9176	80.4829	89.9627	88.249	73.4381	95.4187	76.1923	69.818	91.5039	73.0091	63.6768
	83.8	83.6354	80.1292	78.7992	94.2909	85.7668	80.2486	90.0839	87.37	74.0291	94.4222	76.7122	69.8334	91.0728	73.5169	63.7556
	83.9	83.2907	80.1432	78.6791	94.2276	85.1172	80.5326	90.9727	86.5889	74.5361	94.0314	76.9902	69.4437	90.9923	73.9581	63.7481
	84	83.0333	79.9684	78.6627	94.1069	84.2381	81.2642	91.6213	86.2892	74.7402	93.9152	77.0483	69.4367	91.3429	74.1387	63.9736
	84.1	83.0876	79.7744	78.502	93.9969	83.3947	81.9103	91.958	87.173	74.5987	94.2661	77.087	69.5887	91.7224	74.293	64.135
	84.2	83.5066	79.7373	78.5367	94.2392	83.0696	81.9586	91.8203	88.2411	74.3087	93.9654	77.2758	70.2486	92.0273	74.5424	64.2242
	84.3	84.0614	79.8913	78.6704	94.3762	83.1454	81.7024	91.2303	89.0097	73.8376	93.6269	77.414	70.7271	91.9602	74.9696	64.0408
	84.4	84.303	80.1911	78.948	94.2976	84.0374	81.5074	90.7331	88.9462	73.5493	93.7197	77.6599	70.8616	91.9761	75.3983	63.7541
	84.5	84.3956	80.3056	78.9597	94.0464	84.9657	81.4541	90.3922	88.2033	73.2804	94.5841	77.622	70.6711	91.8316	75.6286	63.829
	84.6	84.283	80.1816	78.9622	93.7749	85.9618	81.1996	90.825	87.5221	73.3788	95.2994	77.1258	70.4959	91.9098	75.3566	63.906
	84.7	84.1672	79.8377	78.5937	93.6498	86.0541	80.8599	91.4036	87.5486	73.6449	95.4043	76.0601	70.3693	92.2303	74.6684	64.1348
	84.8	84.4847	79.5572	78.4977	93.4972	85.8053	80.5467	92.0372	88.4452	73.9724	94.7418	75.3401	70.1371	92.6534	74.0163	64.1209
	84.9	84.622	79.5567	78.3482	93.5102	85.1256	80.4257	92.4507	89.1791	73.8298	94.2713	75.4354	69.9484	93.0961	73.9338	64.4651
	85	84.6009	79.6304	78.4951	93.6129	85.0251	80.0133	92.5644	89.164	73.1532	93.8878	76.0676	69.8816	93.2168	73.7619	64.7352
	85.1	84.0467	79.7394	78.6396	93.6399	85.2847	79.5179	92.3958	88.4106	72.7306	93.9676	76.4699	69.8938	93.042	73.5942	64.8844
	85.2	83.6756	80.0599	78.613	93.6171	85.7899	79.0451	92.0198	87.8369	72.6439	93.9742	76.3843	69.7568	92.7151	73.2608	64.6763
	85.3	83.6222	80.5116	78.607	93.6389	85.5998	78.907	91.7233	87.48	72.9472	93.9264	76.3394	69.4221	92.192	73.7178	64.4259
	85.4	83.7816	81.1758	78.6059	93.4147	84.9451	78.984	91.4671	87.3966	72.5842	93.6719	76.3937	69.2602	91.9244	74.5784	64.2513
	85.5	83.855	81.4946	78.978	93.2811	84.1586	79.2107	91.225	86.8517	72.378	93.6661	76.4729	69.4118	91.6851	75.6736	64.0742
	85.6	83.88	81.7486	79.3237	93.2122	84.1982	79.3943	91.0386	86.5358	72.4456	93.7574	76.4107	70.122	91.5462	76.1212	64.1486
	85.7	83.9021	81.4913	79.5496	93.7928	84.7362	79.6689	91.0049	86.1222	73.2757	93.8583	76.1883	70.9327	91.1761	75.9097	64.4814
	85.8	84.1543	80.8314	79.4503	94.1238	85.2534	80.1528	91.0111	86.3427	73.7432	93.6776	76.1118	71.3323	91.2346	75.2578	65.2593
	85.9	84.4088	79.9952	79.2842	94.2417	85.4329	80.8628	91.168	86.2396	73.5779	93.6308	75.8278	71.0922	91.6049	74.8447	65.6237
	86	84.5411	79.3744	78.9927	94.0618	85.2987	81.4044	91.5627	86.5193	72.9381	93.5369	75.5651	70.5096	92.2394	74.71	65.6978
	86.1	84.3412	79.6909	78.9433	94.0871	85.2018	81.5331	91.9911	86.5834	72.3948	93.633	75.3008	70.1694	92.1156	74.8121	65.01
	86.2	84.2714	80.2683	78.8046	93.9277	84.7948	81.3338	91.8198	87.2811	72.1864	93.6644	75.0478	70.1018	91.8046	74.7412	64.629
	86.3	84.4004	80.7504	78.9771	93.5138	84.2192	81.0589	91.2264	87.7393	72.0856	94.115	74.9313	70.1039	91.435	74.8857	64.5667
	86.4	84.7439	80.3681	78.9944	93.2388	83.736	80.941	90.7014	87.9261	72.3472	94.5667	74.8681	70.1194	91.55	74.8203	65.1124
	86.5	84.8258	79.8257	78.9318	93.569	83.569	81.1556	90.878	87.6872	72.5512	95.1797	75.2779	70.1449	91.5224	74.8912	65.4629
	86.6	84.8677	79.3722	78.8373	94.4748	83.897	81.27	91.2423	87.3868	72.8409	95.4673	75.6821	70.1703	91.6802	74.7048	65.4667
	86.7	84.7327	79.4747	79.1409	94.7924	84.3994	81.1563	91.184	87.3019	72.5813	95.472	75.7228	69.7133	91.8462	74.4719	65.2224
	86.8	84.4856	79.8552	79.8321	94.6762	84.7316	80.6801	90.8022	87.0951	72.4399	95.5557	75.4418	69.2363	92.3642	74.2124	64.9444
	86.9	83.9257	80.4523	80.2194	93.9021	84.5376	80.2613	90.3986	86.9866	72.0921	95.4038	75.5081	68.9719	92.7863	73.9789	64.4111
	87	83.6852	80.6721	79.9871	93.9019	84.2793	80.0824	90.6481	86.5749	71.778	95.2081	76.0954	69.693	92.7516	73.8596	63.6198
	87.1	83.6414	80.5647	79.4897	94.1314	84.2288	80.1064	91.1579	86.3512	71.2998	94.4118	76.6644	70.4649	92.3919	73.7293	62.9948
	87.2	83.9582	80.1609	79.1242	94.5513	84.5331	80.2807	91.5573	86.0544	71.1464	94.1357	76.541	70.9251	91.7996	73.764	62.9638
	87.3	83.9456	80.0814	79.1257	94.3372	84.6953	80.5689	91.5648	86.312	71.302	94.5927	75.9451	70.6393	91.5929	74.1658	63.4306
	87.4	83.9668	80.1468	79.291	93.6579	84.9977	80.8693	91.1488	86.5957	71.5248	95.3649	75.2598	70.0706	91.4579	74.5309	63.9714
	87.5	83.7086	80.2227	79.3493	93.349	85.1451	81.265	90.871	86.8999	71.3541	95.4148	75.0242	69.7416	91.4221	74.5787	64.014
	87.6	83.6732	80.0499	79.3291	93.0267	85.2652	81.3761	90.5998	87.1463	71.29	94.4658	75.2024	69.5853	91.3924	74.3662	63.8814
	87.7	83.6939	79.6689	79.247	93.0336	84.8189	81.2658	90.3056	87.2123	71.5221	93.7697	75.914	69.893	91.393	74.0851	63.7011
	87.8	83.9971	79.6081	79.61	92.6656	84.5209	80.9926	89.8364	87.1392	72.2277	93.799	76.6527	70.1103	91.4409	74.2156	63.9726
	87.9	84.2744	79.6133	80.0576	92.6488	84.3634	80.9003	89.663	86.5359	72.8099	94.4636	77.1076	70.2964	91.2534	74.4791	64.2071
	88	84.3963	79.7446	80.3542	92.7728	84.7593	81.1589	90.17	86.013	72.8618	94.7096	76.8328	70.1151	90.8734	75.1588	64.3217
	88.1	84.4262	79.5848	80.1766	92.8289	84.8961	81.452	90.8633	85.5568	72.5273	94.581	76.3082	70.0077	90.5716	75.7257	64.1699
	88.2	84.2418	79.4583	79.8047	92.873	84.8199	81.5779	91.3296	85.5148	71.9696	94.1834	75.7537	70.0673	90.8032	76.0958	63.9713
	88.3	84.2206	79.4288	79.3433	92.6264	84.4424	81.2754	91.3438	85.6451	71.722	93.7202	75.2848	70.3216	91.3429	76.2108	63.8996
	88.4	83.993	79.3589	78.8963	92.8391	84.105	80.652	91.0863	86.0198	71.4472	93.2938	74.9358	70.7064	91.6228	76.0681	64.1156
	88.5	83.8507	79.4378	78.2336	92.987	83.884	80.0442	90.6293	86.3917	71.3227	93.2031	74.9853	70.7469	91.6736	75.7816	64.5742
	88.6	83.3238	79.5796	77.8832	93.3991	83.8773	79.8322	89.9184	86.5051	71.1498	93.7011	75.4694	70.4521	91.9144	75.4443	64.9003
	88.7	83.015	80.006	77.6842	93.3502	84.3363	80.0787	89.5736	86.5611	71.4191	94.1912	75.8487	69.5819	92.4142	75.1313	64.652
	88.8	83.0498	80.3681	77.8724	93.2646	84.8978	80.685	89.6474	86.6739	71.908	94.233	76.0923	68.8982	92.5412	75.2092	63.9556
	88.9	83.4838	80.6706	77.6057	92.9728	85.2733	81.179	90.4073	86.9463	72.5518	93.9542	76.3177	68.6989	92.0706	74.9173	63.2193
	89	84.1079	80.87	77.3611	92.8671	85.1067	81.3474	90.9619	86.9353	72.9068	93.8234	76.6629	69.1301	91.3091	74.7996	63.1394
	89.1	84.3243	80.6928	77.2107	92.6	84.6942	80.638	90.9583	86.8618	72.635	93.6757	76.5571	69.9754	90.8242	74.4774	63.5604
	89.2	84.4559	80.236	77.9199	92.466	84.265	79.506	90.3178	87.1082	72.2201	93.2971	76.2052	70.9493	90.734	74.7583	64.1812
	89.3	84.2153	79.5791	78.8229	92.4621	84.1802	78.6282	89.9743	87.6382	71.9476	92.739	75.7848	71.8088	90.952	74.9607	64.4059
	89.4	83.9533	79.0972	79.5913	92.8912	84.4431	78.5462	89.953	88.0616	72.202	92.9246	75.8253	72.1358	91.4711	75.0946	64.5659
	89.5	83.3399	78.8929	79.4922	93.343	84.8948	78.7562	90.2486	87.8372	72.4183	93.5683	75.9936	71.7676	92.0391	74.9043	64.6288
	89.6	82.8916	79.2857	79.2353	93.7058	85.2027	78.9323	90.1714	87.4242	72.3247	94.2042	76.4194	71.0862	92.697	74.5613	64.9201
	89.7	82.6443	80.2921	78.7132	93.9088	84.7809	78.9687	90.344	87.2111	72.2434	94.0708	76.4876	70.5992	92.6654	74.1848	64.7364
	89.8	83.1671	81.2348	78.6767	93.991	84.0112	79.4698	90.3763	87.3059	72.0334	93.6357	76.5134	70.5683	92.1569	74.1848	64.6903
	89.9	83.6116	81.5064	78.4066	93.8133	83.2132	79.9348	90.4067	87.3813	71.975	93.6912	76.0472	70.5274	91.4886	74.4596	64.437
	90	84.1111	81.2181	78.5257	93.6253	83.3699	80.3898	90.1598	86.98	71.6668	94.0994	76.1196	70.3411	91.2981	74.9308	64.4728
	90.1	83.9786	81.1351	78.6696	93.6376	83.6997	80.435	90.0749	86.3058	71.6216	94.5594	76.0509	69.948	91.7183	74.9136	64.3094
	90.2	84.0184	81.0848	79.1266	93.9599	83.9757	80.5598	90.3142	85.8307	72.0574	94.7821	76.4584	69.6396	91.9263	74.8597	64.1947
	90.3	83.9731	80.7703	79.6762	94.2338	83.9624	80.6233	90.7271	85.4747	72.9086	94.7899	76.3398	69.4832	92.0491	74.5946	64.1856
	90.4	84.2766	79.979	79.7718	94.4588	84.2262	80.6976	91.1977	85.4564	73.5738	94.883	76.133	69.5006	91.6904	74.5197	64.2161
	90.5	84.4593	79.513	79.8582	94.6816	84.6264	80.8832	91.2967	85.4279	73.2947	94.5921	75.9144	69.639	91.8343	74.4014	64.374
	90.6	84.4132	79.6929	79.5424	94.6038	84.7413	81.2271	91.2903	85.7473	72.1487	94.5591	76.1808	69.7492	91.8849	74.3834	64.6694
	90.7	84.1124	80.1837	79.616	94.2821	84.66	81.7031	91.0887	85.9598	70.947	94.3349	76.9431	69.4703	92.4526	74.1528	64.8807
	90.8	83.6892	80.544	79.5544	93.8248	84.6486	81.8202	91.0974	86.0761	70.2618	94.2329	77.1461	69.3828	92.5788	74.0227	64.941
	90.9	83.654	80.6683	79.5562	93.6172	84.6068	81.7859	90.9409	86.4302	70.3497	93.9173	76.8169	69.2244	92.7489	73.9173	64.6084
	91	83.5767	80.8511	79.3519	93.5583	84.5244	81.409	90.2958	87.1898	70.4509	93.9959	76.1323	69.4231	92.5646	74.1336	64.4437
	91.1	83.9468	80.8681	79.2293	93.5842	84.3659	81.1024	89.6942	87.6989	70.7164	94.0474	75.7623	69.3789	92.2667	74.0669	64.142
	91.2	84.2714	80.4772	79.3133	93.6752	84.561	80.7766	89.3142	87.4099	71.147	94.2641	75.491	69.3741	91.8434	74.1166	64.0151
	91.3	84.6239	79.8832	79.723	93.5991	84.3588	80.7298	89.6916	86.5049	71.9543	93.9548	75.6427	69.3869	91.2286	74.2051	63.9893
	91.4	84.3947	79.4452	79.9992	93.2876	83.7294	80.7008	90.0282	86.0466	72.4668	94.0046	76.0722	69.3981	90.7977	74.3289	64.3649
	91.5	83.9657	79.556	80.2812	92.6088	83.0358	80.7534	90.4373	86.0357	72.0596	93.947	76.6797	69.5984	90.5543	74.3247	64.6589
	91.6	83.7619	79.6954	80.2926	91.843	83.1813	80.8861	90.4888	86.4222	71.2378	94.3399	76.325	69.705	90.6123	74.2024	64.5822
	91.7	83.4778	79.7869	80.2431	91.3489	84.0268	81.2356	90.5092	86.5243	70.3917	94.3193	75.6328	69.8139	91.2028	74.3928	64.4878
	91.8	83.2062	79.7152	79.6553	91.5086	84.6223	81.4257	90.3787	86.407	70.6262	94.3358	75.0762	69.6323	91.8531	74.3049	64.6023
	91.9	83.0594	79.812	79.051	92.3901	85.0787	81.3338	90.5124	85.8284	71.3288	93.9821	75.5682	69.4549	92.4078	74.3042	64.8171
	92	83.5591	80.3188	78.4028	93.1586	85.4683	80.7766	90.55	85.748	72.3702	93.9188	76.1016	69.6378	92.3768	74.0527	64.3292
	92.1	84.0524	80.8389	78.4844	93.5314	86.0639	80.1131	90.3843	86.426	72.4724	93.7308	76.4933	70.004	92.1973	74.1838	63.6734
	92.2	84.1301	81.1851	78.4556	93.4867	86.0636	79.738	89.9166	87.4916	72.2086	93.7057	76.337	70.6973	92.0934	73.9746	63.277
	92.3	83.9203	80.7691	78.6398	93.6642	85.4934	79.7864	89.4906	87.626	71.7111	93.6771	76.2202	70.7954	91.9503	74.0931	63.6146
	92.4	84.1353	80.2296	78.6237	93.7159	85.0922	80.1699	89.225	86.8172	71.6981	93.7022	76.0284	70.9114	92.0648	74.2086	63.9117
	92.5	84.3758	80.0679	78.7004	93.2492	85.1007	80.3434	89.3756	85.7486	71.7792	93.7856	76.0594	70.769	92.0321	74.4857	64.1566
	92.6	84.4262	80.3539	78.9231	92.576	85.3417	80.6369	89.4881	85.3393	71.7033	93.7452	76.22	70.9129	92.1851	74.4621	64.3374
	92.7	84.0742	80.4973	78.8539	92.2634	85.1593	80.8354	89.5763	85.4373	71.4862	93.9147	76.5686	71.1753	92.0718	74.5146	64.5957
	92.8	84.1409	79.993	79.1016	92.7124	84.6291	81.0401	89.1437	85.9623	71.1182	94.1328	76.7796	71.2526	91.969	74.9501	64.627
	92.9	84.3389	79.6256	79.0569	93.1873	84.316	80.666	88.7753	86.4103	71.069	94.4646	76.9996	71.3083	91.732	75.3376	64.3803
	93	84.419	79.6478	79.2052	93.711	84.1286	80.1626	88.7586	86.6437	71.268	94.5322	76.8348	70.8393	91.4152	75.2554	64.0958
	93.1	83.7994	80.1696	79.0559	93.929	84.2833	79.8222	89.207	86.6258	71.4212	94.3114	76.6827	70.6334	91.5092	74.7012	63.9361
	93.2	83.3004	80.2662	79.1213	94.0512	84.3437	80.1018	90.0597	86.7519	71.517	94.0689	76.346	70.4356	91.5622	74.1462	64.0344
	93.3	83.0674	80.0226	79.2296	93.9492	84.6144	80.5476	90.641	87.093	71.3003	94.0718	76.4526	70.4957	91.6603	73.8192	64.3389
	93.4	83.4157	79.5654	79.6113	93.924	84.7234	80.8697	91.0418	87.1884	71.1901	94.3909	76.5642	70.1752	91.1134	73.5491	64.7066
	93.5	83.7926	79.3251	79.9107	94.0592	84.7827	81.0448	90.8488	86.8486	70.7528	94.3741	76.881	69.7784	90.8428	73.4086	64.8461
	93.6	84.0003	79.3004	80.1197	93.9354	84.4733	81.0681	90.3848	86.4158	70.522	94.1916	76.831	69.6553	90.8273	73.5449	64.6038
	93.7	83.9942	79.3501	79.8868	93.7127	84.2781	81.0723	89.6274	86.2148	70.6504	94.0404	76.7759	69.8753	91.2073	73.9071	64.0967
	93.8	83.7953	79.4652	79.3304	93.444	83.9782	80.5743	89.0094	86.5118	71.3319	94.4203	76.4344	70.135	91.5094	74.4304	63.6461
	93.9	83.8578	79.6496	78.9232	93.4257	84.0428	80.197	88.9271	86.5549	71.7098	94.6563	76.5389	69.909	91.6856	74.8384	63.7199
	94	84.1144	80.3009	78.7696	93.1138	84.0832	79.8529	89.3583	86.7901	71.6174	94.5281	76.8458	69.8203	91.9174	75.2882	64.0879
	94.1	84.6328	81.0817	78.9471	92.415	84.5907	79.9661	90.1668	86.2494	70.8869	93.9277	77.1156	69.9373	92.1363	75.1994	64.5647
	94.2	84.699	81.4726	78.9011	91.7377	85.2607	80.0467	90.7662	85.7704	70.5977	93.5581	76.8517	70.4724	92.2378	74.9299	64.3823
	94.3	84.689	80.7986	78.8719	91.613	85.7854	80.0857	91.2361	84.9367	70.3506	93.6068	76.0312	70.7368	91.9194	74.3816	64.0246
	94.4	84.522	79.7971	78.9083	92.2256	85.5961	80.0992	91.1336	84.6832	70.6992	94.0629	75.7582	70.9516	91.407	74.1842	63.7049
	94.5	84.7704	79.3253	78.9936	92.8509	84.9838	79.9917	90.8281	84.3058	70.6333	94.5071	75.9251	71.0316	91.1204	74.1176	64.1092
	94.6	85.0023	79.8532	78.7914	93.2009	84.6733	80.0626	90.2728	84.274	70.7759	94.615	76.5221	71.0988	91.5147	74.2674	64.7077
	94.7	85.3448	80.6687	78.3984	93.259	84.678	80.04	90.0257	84.5566	70.536	94.4764	76.6767	70.8344	92.0997	74.6484	64.9586
	94.8	85.5337	81.1917	78.0596	93.4563	84.6822	80.2089	89.7188	85.4623	70.6456	94.3167	76.3567	70.6103	92.4738	74.7386	64.6023
	94.9	85.6036	81.3517	78.2114	93.646	84.3552	80.2993	89.635	86.17	70.7687	93.9771	76.1108	70.4251	92.128	74.6001	64.1683
	95	85.3884	81.5233	78.4957	93.4432	84.2773	80.8289	89.7818	86.1414	71.2211	93.754	75.7714	70.3151	91.8308	74.2242	64.0528
	95.1	85.1484	81.5184	78.8574	92.8874	84.5134	81.3349	90.3294	85.6521	71.4623	93.6438	75.8463	69.8999	91.5152	74.2011	64.2509
	95.2	85.1173	81.3223	78.8977	92.5601	85.2307	81.6436	90.6327	85.0561	71.6673	94.0351	75.88	69.532	91.7161	74.2232	64.4979
	95.3	85.0517	80.8334	78.8772	92.9697	85.6638	81.1678	90.4424	85.0146	71.4137	94.3238	76.2329	69.47	91.876	74.1137	64.6
	95.4	84.7552	80.7744	78.6671	93.4502	85.4724	80.6993	90.0079	85.4326	70.9832	94.2962	76.2838	69.6004	92.2372	73.8729	64.5546
	95.5	84.1332	80.7391	78.4779	93.5017	84.6817	80.3661	89.8281	86.2553	70.1574	94.1262	75.9901	69.6599	92.466	73.9776	64.5222
	95.6	83.7502	80.8228	78.3356	92.6267	83.6982	80.5576	89.7032	87.062	69.6332	94.094	75.6083	69.6323	92.6939	74.3048	64.7218
	95.7	83.777	80.4949	78.4453	92.1158	83.4657	80.632	89.5176	87.3849	69.5058	94.3938	75.685	69.8898	92.7718	75.0664	64.9104
	95.8	83.7689	80.3942	78.8761	92.0768	83.5287	80.8987	89.0687	87.2441	70.0212	94.6337	76.0322	70.1824	92.4836	75.4263	64.8452
	95.9	83.952	80.3658	79.4644	92.7032	84.0638	80.8806	88.7197	86.7838	70.4923	94.5667	76.1571	70.1106	91.8626	75.6701	64.3506
	96	83.9192	80.6797	79.7822	92.9668	84.2298	80.945	88.6589	86.4688	70.7624	94.2697	75.8566	69.6077	91.1391	75.2708	64.0412
	96.1	84.1876	80.851	79.6449	93.0006	84.3372	80.5832	88.5879	86.2223	70.6789	93.9622	75.7032	69.0992	91.0168	75.4161	64.0161
	96.2	83.9202	80.9039	79.1856	92.8476	84.2427	80.2492	88.7081	86.1589	70.5132	94.1321	75.8334	68.9894	91.4258	75.6599	64.3829
	96.3	83.7794	80.6356	78.9098	92.8058	84.298	79.9126	88.5142	85.8953	70.5772	94.5718	76.0181	69.4481	92.0576	75.9197	64.4869
	96.4	83.244	80.5487	78.6633	92.7247	84.4968	80.0157	88.5887	85.8163	70.5506	94.9994	75.9114	70.0797	92.2692	75.213	64.1038
	96.5	83.0498	80.6736	78.3787	92.6421	84.9368	80.3686	88.5693	85.3924	70.5549	95.0334	75.7421	70.6199	91.7066	74.2813	63.4617
	96.6	82.8711	80.9533	78.0513	92.6354	85.4097	80.673	88.7636	84.9901	70.2406	95.0481	75.9969	70.5667	91.1436	73.7662	63.0553
	96.7	83.4806	81.0872	78.2182	92.5916	86.0421	81.0133	89.3013	84.3393	69.9599	95.2541	76.5739	70.2078	90.5746	74.1161	63.3153
	96.8	83.8889	81.1072	78.7506	92.7079	86.542	81.2523	89.9357	84.257	69.8934	95.4658	77.0442	69.8456	91.0461	74.6048	63.7218
	96.9	84.1294	81.1739	79.3099	92.5641	86.6386	81.5027	90.3831	84.8017	70.2439	95.0763	77.0954	69.9897	91.3632	74.8638	64.0806
	97	83.714	80.9751	79.3043	92.6731	86.2563	81.1812	90.0958	85.8289	70.9312	94.3689	76.7562	70.5319	91.9694	74.8171	63.8696
	97.1	83.5183	80.717	79.0413	92.6984	85.622	80.8911	89.8926	86.2427	71.2587	93.8558	76.6614	70.837	92.1309	75.0626	63.872
	97.2	83.3149	80.3478	78.7981	92.9709	85.2882	80.6432	89.8353	85.8968	71.0454	93.7921	76.4717	70.4798	92.2274	75.2356	63.8392
	97.3	83.3293	80.1537	78.8316	92.9367	85.2207	80.8477	90.08	84.9902	70.6983	93.9191	76.3382	69.6023	92.1071	75.3344	64.13
	97.4	83.2918	79.9513	78.8306	92.7557	85.2547	80.9383	89.8488	84.7269	70.6928	94.0673	75.5707	69.139	91.7511	74.9768	63.8106
	97.5	83.4501	79.9262	78.9233	92.5988	85.2044	81.0294	89.5596	84.7241	71.1381	94.2904	75.1492	69.179	91.6718	74.7091	63.4843
	97.6	83.5733	80.1254	78.9763	92.798	85.0973	80.94	89.3303	85.0471	71.4278	94.3161	74.9321	69.6313	91.8077	74.5437	63.1
	97.7	83.6151	80.1776	79.0441	93.0973	84.9513	80.8953	89.5376	85.0588	71.3887	93.9726	75.666	69.9777	92.1858	74.5173	63.3788
	97.8	83.3974	79.8573	78.5788	93.4082	84.7813	80.5118	89.7227	85.1889	70.8022	93.2857	76.2057	70.1287	92.4959	74.743	63.8638
	97.9	83.1233	79.2261	78.3008	93.4172	84.3828	80.2678	89.6114	85.24	70.0172	92.7106	76.8761	70.0654	92.4161	75.0292	64.4576
	98	82.9998	78.944	78.2748	93.7017	84.2812	80.0378	89.19	85.3574	69.8283	92.6448	76.695	69.7349	92.1527	75.2467	64.9196
	98.1	82.9889	78.9674	78.8377	93.7671	84.3733	80.4089	89.0798	85.4269	70.4727	92.7761	76.4324	69.7593	91.8264	74.8254	65.0878
	98.2	83.2143	79.4411	79.0081	93.6691	84.731	80.3206	89.4467	85.522	71.6888	93.2259	75.862	70.0188	92.065	74.0932	65.2934
	98.3	83.3267	79.9522	78.9363	93.272	84.5533	80.0918	89.8448	85.607	72.2238	93.4339	75.769	70.6746	92.5982	73.6732	65.1008
	98.4	83.4344	80.6228	78.7458	93.3836	84.3092	79.4621	89.6926	85.5566	72.0392	94.0337	75.6593	71.0068	93.0324	74.0114	64.7836
	98.5	83.2302	81.0956	78.5956	94.0559	84.1858	79.5663	89.2277	85.5806	71.3302	94.2973	75.3922	70.813	93.0528	74.7769	63.8583
	98.6	83.3501	81.2452	78.7627	94.5068	84.7306	79.6669	88.9359	85.4556	70.9531	94.5409	74.9883	70.1776	92.8699	75.1964	63.1282
	98.7	83.797	81.0511	78.9222	94.2621	85.3224	79.6981	89.1964	85.4798	70.665	94.3432	74.809	69.7267	92.599	75.2648	62.7624
	98.8	84.3416	80.7253	79.433	93.6188	85.5772	79.1054	89.7123	85.295	70.4777	94.2489	74.8943	70.0197	92.3602	74.9509	63.3478
	98.9	84.3493	80.3992	79.4974	93.0993	85.2614	78.6606	90.1481	85.3028	70.0647	94.0748	75.0227	70.6734	91.84	74.7907	64.1527
	99	84.0693	80.3038	79.4041	92.7979	84.5338	78.7133	90.151	85.3372	70.1847	93.8827	75.2208	70.9456	91.5056	74.6093	64.7523
	99.1	83.797	80.1761	79.0646	92.596	84.1157	79.5897	89.7362	85.4858	70.6412	93.575	75.7387	70.5522	91.1966	74.6567	64.3937
	99.2	83.6244	80.2057	79.099	92.5984	84.308	80.4618	89.3214	85.3118	71.2268	93.3803	76.1627	69.9937	91.2493	74.4232	63.8672
	99.3	83.4856	79.9923	79.1938	92.7272	84.9013	80.7146	89.1648	84.909	71.1221	93.4437	76.5687	69.6399	91.1519	73.847	63.4944
	99.4	83.4703	79.9196	79.154	92.9356	85.2247	80.1568	89.2994	84.3751	70.6599	93.5702	76.6619	69.6013	91.0154	73.2061	64.0298
	99.5	83.6211	79.9909	78.8908	93.1983	84.5842	79.5862	89.3923	84.1949	70.4648	93.5239	76.8348	69.6358	90.8339	73.145	64.649
	99.6	83.6156	80.4679	78.5789	93.4008	83.9517	79.4622	89.1134	84.0971	70.6853	93.3767	76.7717	69.8854	91.1917	73.6907	65.1386
	99.7	83.5832	80.8749	78.5439	93.2766	83.5916	79.5267	88.765	84.2031	71.1258	93.6039	76.6058	70.2639	91.9657	74.4473	65.0944
	99.8	83.7633	81.0383	78.6444	92.8582	83.9528	79.6089	88.5759	84.2644	71.1349	94.1993	76.4246	70.4749	92.7536	74.9858	64.772
	99.9	84.0469	80.9153	78.9772	92.6858	84.4131	79.5958	88.815	84.5289	70.7789	94.7452	76.2539	70.3464	93.1328	75.2788	64.4811
	100	84.0536	80.8867	79.5342	92.6436	84.5557	79.91	88.8478	84.9633	70.0698	94.7232	76.2541	70.1242	93.1046	75.0581	64.1104
	100.1	83.6502	80.981	80.1027	92.6882	84.6692	80.286	88.753	85.514	69.6943	94.5271	76.2756	70.1449	93.2401	74.3876	63.7984
	100.2	83.324	81.1123	80.3211	92.263	84.2306	80.4832	88.6438	85.7264	69.8957	94.4134	76.2363	70.7218	93.2694	73.4872	63.5708
	100.3	83.3542	81.2559	80.2021	92.2858	84.1546	80.0431	88.956	85.2266	70.6981	94.6172	75.9896	71.0504	93.2178	72.9747	63.594
	100.4	83.8512	81.2761	79.9331	92.433	84.137	79.4542	89.2916	84.0184	71.3866	94.9269	75.5472	71.2828	92.4558	73.2827	63.8547
	100.5	84.096	81.2691	80.095	92.8354	84.5588	79.0557	89.0209	83.0144	71.747	95.0322	75.2937	70.7067	91.6381	73.9813	63.9414
	100.6	83.986	81.0334	80.201	92.7199	84.6954	79.263	88.5102	82.9124	71.5103	95.01	75.1302	70.3421	90.7157	74.9496	64.0533
	100.7	83.3792	80.848	80.0459	92.5548	84.4089	79.8119	88.0498	83.7254	70.9808	94.6829	75.2603	70.1326	90.8168	75.3452	64.186
	100.8	83.3558	80.3636	79.4988	92.4942	84.0304	80.4569	88.3288	84.7871	70.1833	94.3169	75.1554	70.6871	91.2132	75.8573	64.4044
	100.9	83.5963	79.7827	78.8474	92.6477	83.9474	81.006	88.7118	85.4376	69.5807	93.7092	74.9836	71.4419	91.9752	75.7842	64.2638
	101	83.7174	79.2004	78.6951	92.9544	84.1464	81.1952	88.5553	85.6763	69.3868	93.0853	74.6936	71.6453	92.0438	75.6769	64.0783
	101.1	83.0801	79.2348	78.3757	93.1488	84.3431	81.3031	87.9444	85.4423	69.5871	92.8031	75.0044	71.3091	92.215	74.9028	63.8271
	101.2	82.6507	79.7574	78.4061	93.377	84.1798	81.0007	87.3907	85.0562	69.8676	92.873	75.6247	70.6182	92.302	74.2679	64.1109
	101.3	82.859	80.4059	78.3306	93.2568	84.254	80.8477	87.8887	84.6821	70.1616	93.1661	76.3053	70.0916	92.4781	73.325	64.2504
	101.4	83.6946	80.8268	78.9553	93.286	84.5254	80.5861	88.6698	84.9374	70.4988	93.2704	76.3481	69.5401	91.9756	72.5842	64.6662
	101.5	84.1832	80.6132	79.2468	93.1204	84.9012	80.587	89.0738	85.4841	70.8493	93.2762	76.2746	69.0522	91.4099	72.1717	64.6868
	101.6	84.2936	80.0412	79.0812	93.1126	85.0043	80.4869	88.8786	85.9687	70.9811	93.2991	76.2241	68.9598	90.7433	72.7663	64.7918
	101.7	84.0668	79.2321	78.5489	92.5881	85.0001	80.4343	88.549	85.6922	71.0866	93.3032	76.4429	69.5816	90.6967	73.8231	64.6221
	101.8	83.8623	79.3089	78.3617	92.0898	85.3518	80.6703	88.4308	85.0461	71.3359	93.4591	76.409	70.0724	90.9312	74.6549	64.626
	101.9	83.9991	79.7718	78.7664	91.3812	85.6559	80.7294	88.2176	84.4822	71.6977	93.8529	76.3554	70.3174	91.7158	74.8991	64.382
	102	84.4534	80.4354	79.2486	91.3829	85.9017	80.6986	88.0253	84.2929	71.5839	94.5087	76.3031	69.616	92.1537	74.8519	64.1522
	102.1	85.0754	80.4889	79.4474	91.6943	85.5559	80.3919	88.049	84.4741	71.2803	95.0853	76.5333	69.2683	92.1207	74.8241	64.067
	102.2	85.2299	80.4884	79.5342	92.5842	85.2581	80.2981	88.5338	84.5507	70.6946	95.3153	76.3197	68.9196	91.7787	74.8749	64.334
	102.3	85.1054	80.6492	79.3221	92.887	84.8433	80.3142	89.133	84.5857	70.1659	95.3326	75.9482	69.3923	91.9317	74.9506	64.7403
	102.4	84.7198	80.9749	79.3622	92.865	85.0178	80.3567	89.5992	84.4923	69.4771	95.2167	75.4978	70.025	92.0383	74.9018	64.6329
	102.5	84.4804	81.3277	79.3832	92.3603	85.1341	80.8499	89.6887	84.5176	69.2277	94.9933	75.4519	70.8431	91.9848	74.7202	64.5321
	102.6	84.1186	81.3087	79.8058	92.3184	85.4724	81.1851	89.9967	84.735	69.4234	94.5706	75.6229	70.9388	91.4573	74.215	64.4521
	102.7	83.8616	81.1916	80.1171	92.4827	85.5726	81.4938	90.132	84.8831	69.6824	94.1238	75.5952	70.4062	91.3152	73.889	64.6008
	102.8	83.6	80.904	80.4	92.9004	85.6559	81.1393	90.1457	85.0796	69.674	93.8494	75.6752	69.7286	91.2939	73.6341	64.4292
	102.9	83.6224	80.8291	80.3752	93.1874	85.3182	81.1478	89.4568	85.0569	69.6927	93.7949	75.5544	69.5541	91.663	73.9006	64.2644
	103	83.9703	80.7783	80.3292	93.2287	84.6286	81.1392	88.7258	84.8448	69.9036	93.9681	75.6552	69.5664	92.3102	73.9151	64.5049
	103.1	84.4362	80.7431	80.0428	93.2508	84.1256	81.1751	87.6632	84.2912	69.9846	94.2244	75.5099	69.4868	93.0377	73.8222	65.1518
	103.2	84.5391	80.7046	79.7918	93.1914	84.0263	80.8192	87.0824	83.74	69.7866	94.4788	75.4754	69.2497	93.3203	73.4588	65.6119
	103.3	84.1406	80.8268	79.362	93.4804	84.2651	80.54	86.761	83.5522	69.5908	94.6024	75.5042	69.4898	92.9034	73.4579	65.6672
	103.4	83.5833	81.3247	79.1026	93.7741	84.0914	80.5067	87.2467	83.9222	69.6381	94.9459	75.6091	69.8851	92.2598	73.525	65.42
	103.5	83.7429	81.7307	78.8472	94.2029	83.5607	80.4804	87.121	84.3266	69.8536	95.3931	75.6043	70.1342	91.6598	73.5811	65.0748
	103.6	84.0516	81.8709	78.6866	94.3477	82.8278	80.4261	86.7676	84.4153	69.9877	95.6146	75.3932	69.6899	91.1702	73.3327	64.7396
	103.7	84.2879	81.4288	78.6314	94.2178	82.5109	80.2	86.1	83.8973	70.3978	95.1267	75.3549	69.1572	90.689	73.2033	64.4807
	103.8	83.5453	81.012	78.7628	93.8761	82.5626	80.0644	86.4758	83.5301	70.8762	94.3929	75.5401	68.8116	90.337	73.3188	64.3291
	103.9	82.8897	80.5506	79.3092	93.7492	83.1794	80.0456	87.0381	83.7946	71.4594	93.9183	75.7938	68.6708	90.1667	73.6077	64.3678
	104	82.7026	79.9861	79.8072	93.6714	83.9439	80.2796	87.5681	84.6881	71.4094	93.8869	75.8424	68.6512	90.2764	73.8804	64.251
	104.1	83.427	79.5854	80.1364	93.4807	84.7109	80.6104	87.246	85.6052	70.8143	93.897	75.6961	68.4941	90.8546	73.771	63.9872
	104.2	84.0021	79.5148	79.7868	93.1058	84.8104	80.5791	87.0618	85.775	69.7272	93.9124	75.5683	68.6637	91.8249	73.6873	63.4314
	104.3	83.9633	80.1897	79.0604	92.8274	84.6266	80.1853	87.2179	85.7067	69.0007	94.0399	75.4792	68.7519	92.7376	73.7254	63.0083
	104.4	83.2593	80.8303	78.4321	92.8716	84.4324	79.8307	88.2241	85.401	68.6897	94.3787	75.4799	69.1431	92.9086	74.0869	62.9754
	104.5	82.7873	81.3191	78.1419	93.0066	84.5232	79.7762	88.852	85.217	69.0384	94.6939	75.4533	69.3612	92.3513	74.0273	63.2917
	104.6	83.0004	81.3406	78.2869	93.1353	84.3472	79.879	89.0947	84.6449	69.296	94.5234	75.6882	69.5459	91.5241	73.3868	63.9434
	104.7	83.5008	80.9569	78.3249	93.0209	83.9942	79.6977	88.5492	84.0139	69.8707	93.9081	76.0119	69.5468	90.878	72.7309	64.736
	104.8	83.8008	80.4608	78.4318	92.7321	83.8249	79.4299	88.349	83.8232	70.2017	93.3203	76.5241	69.5629	90.8467	72.5369	65.429
	104.9	83.3508	79.929	78.6078	92.817	84.216	79.5848	88.2441	83.8947	70.4924	93.448	76.7784	69.7179	91.3583	73.0198	65.5856
	105	83.0776	79.775	78.9598	93.0903	84.5099	80.2013	88.1423	84.2709	70.3518	94.0866	77.1549	70.0031	92.1647	73.4947	65.0469
	105.1	83.2366	79.9854	79.2889	93.5757	84.6327	80.7244	87.9584	84.3948	70.3183	94.8206	77.3321	70.2303	92.5921	74.1813	64.1598
	105.2	84.0303	80.3968	79.52	93.5684	84.3917	80.6918	87.7774	84.6112	70.4637	94.9868	77.1314	70.5914	92.3327	75.0047	63.4633
	105.3	84.5904	81.0121	79.6481	93.6308	84.3917	79.9987	87.9657	84.3813	70.7071	94.7976	76.2398	70.7372	92.125	76.0494	63.2151
	105.4	84.6366	81.14	79.623	93.8547	84.3688	79.3821	88.1789	84.0367	70.4479	94.3399	75.3782	71.1534	91.9853	76.8516	63.414
	105.5	84.3581	81.1192	79.3113	94.1081	84.5486	78.8487	88.4609	83.6504	69.9627	94.1416	75.1766	71.1009	92.1933	76.8871	63.8031
	105.6	84.0077	80.6209	78.9141	94.1452	84.8706	79.0826	88.7733	83.3941	69.467	94.2349	75.6516	71.0921	91.8591	76.2984	64.1813
	105.7	83.8123	80.3018	78.7048	93.9253	85.0794	79.4588	88.7772	83.2461	69.6054	94.6942	75.9152	70.5017	91.4882	75.4556	64.3059
	105.8	83.795	79.9516	78.8392	93.9358	84.8049	79.7629	88.3077	83.1121	69.7929	94.906	75.8207	69.9264	91.2488	75.1042	64.2872
	105.9	84.0241	79.8569	78.9816	93.6834	83.9731	79.6679	87.8071	83.3011	69.9406	94.9957	75.4469	69.3201	91.466	75.0841	64.2616
	106	84.1634	79.8499	79.1841	93.4039	83.0947	79.7428	87.8174	83.4981	69.668	94.6462	75.5453	69.3277	91.9746	75.326	64.146
	106.1	83.9447	80.1102	79.5732	93.0446	82.8621	80.4482	88.5793	83.7658	69.7476	94.4236	75.7199	69.799	92.4124	75.1003	63.8716
	106.2	83.6309	80.4739	80.208	93.1478	82.8769	81.4662	88.9429	83.9019	69.9128	93.864	75.6983	70.3959	92.6466	74.6878	63.4636
	106.3	83.6196	80.9728	80.4552	93.2583	83.3642	81.973	88.7977	83.9017	70.2253	93.3698	75.3668	70.4188	92.4952	74.3397	63.4066
	106.4	84.1343	81.1858	79.8238	93.323	83.6427	81.8736	88.054	83.7908	69.9612	92.8024	74.9882	69.9582	92.0219	74.7266	63.7687
	106.5	84.4264	81.1866	78.742	93.3034	84.2776	81.2086	87.6073	83.781	69.5253	92.7868	75.1441	69.4277	91.7971	75.3557	64.181
	106.6	84.468	80.9694	78.0817	93.1113	84.4182	80.8173	87.207	84.0846	69.0583	92.9693	75.6014	69.3832	91.5281	75.6153	64.4631
	106.7	84.1742	80.9439	78.4322	92.7216	84.2561	80.5908	87.1878	84.4913	69.186	93.6619	76.3652	69.479	91.5381	75.1238	64.2381
	106.8	84.0206	80.7847	79.3167	92.3327	83.8032	80.6553	87.1108	84.6904	69.4287	94.0459	76.8282	69.6263	91.3393	74.3651	64.16
	106.9	84.2612	80.2524	79.8548	92.3783	83.352	80.4393	87.2029	84.607	69.6541	94.3803	76.8666	69.4939	91.6702	74.1881	64.0621
	107	84.5743	79.6201	79.6448	92.909	83.284	80.0247	87.1791	84.42	69.4801	93.902	76.6133	69.5428	92.0848	74.739	64.2001
	107.1	85.112	79.2274	79.0531	93.1564	83.1468	79.557	87.3501	84.3801	69.4392	93.6106	76.4553	69.2776	92.4017	75.4538	64.3767
	107.2	85.0352	79.5279	78.5432	93.1628	83.4726	79.2099	87.5927	84.4386	69.4922	93.4816	76.4439	69.0778	92.2859	75.4647	64.5267
	107.3	84.7919	80.0302	78.6169	92.9038	83.8884	79.2873	87.9316	84.4702	69.663	93.8788	76.6592	68.934	91.7119	74.7293	64.7573
	107.4	84.4277	80.4637	78.8616	93.2532	84.7172	79.8191	88.1448	84.2542	69.9196	93.9714	76.6089	69.2661	91.4151	73.9543	64.6018
	107.5	84.1893	80.7542	79.2282	93.3824	85.4161	80.8052	88.2473	84.0814	70.1482	93.7571	76.7347	69.8948	91.1333	73.4778	64.6329
	107.6	84.1178	81.1133	79.289	93.1919	85.7184	81.2879	88.2418	84.0174	70.2502	93.4762	76.6692	70.4182	91.2398	73.6118	64.5817
	107.7	83.8226	81.6866	79.3483	92.2492	85.7931	80.8288	88.1453	84.2866	70.0672	93.4821	76.8477	70.5851	90.9776	73.9251	64.5066
	107.8	84.1006	82.0737	79.2993	91.6203	85.6054	79.891	88.2457	84.591	69.809	93.387	76.7234	70.406	91.0509	74.212	63.964
	107.9	84.4703	81.8512	79.2908	91.3827	85.6943	79.3781	88.102	84.8588	69.6719	93.326	76.6098	70.1508	91.2747	74.3164	63.4331
	108	84.8419	81.2812	79.2912	91.6578	85.4888	79.642	87.8773	84.8817	69.4938	93.2317	76.6439	70.2844	91.9027	74.5791	63.7171
	108.1	84.4901	80.6782	79.6449	91.9192	85.127	80.1799	87.4361	84.9984	69.3688	93.8539	76.8549	70.6362	92.3969	75.0622	64.3468
	108.2	84.2158	80.6603	79.6572	92.0499	84.5298	80.5553	87.2961	84.9721	69.3976	94.5138	76.6402	71.0409	92.2597	75.6133	65.1442
	108.3	84.4246	81.1793	79.3344	92.1299	84.1293	80.4389	87.5601	84.9704	69.6927	95.3667	75.8737	71.1168	91.568	75.912	65.3879
	108.4	85.111	81.9018	78.5382	92.1341	84.2042	79.9109	87.7181	84.7589	69.9308	95.4704	75.3662	70.8476	90.5416	75.9587	65.3466
	108.5	85.0074	82.2059	78.4163	92.42	84.5226	79.3503	87.8596	84.5704	69.9589	95.4074	75.5308	70.352	90.1586	75.4911	64.8263
	108.6	84.352	81.7828	78.6794	92.6892	84.7354	79.2404	87.5726	84.3938	69.7209	94.9973	76.1321	69.7593	90.4989	74.8941	64.1393
	108.7	83.3429	81.147	79.166	92.8419	84.6953	79.5459	87.7074	84.2709	69.5102	94.8677	75.9372	69.2503	91.0741	74.3622	63.7846
	108.8	83.3358	80.7389	79.3018	92.6727	84.3182	79.8054	87.8686	84.2217	69.5061	94.7128	75.4539	68.949	91.7542	74.3172	63.8643
	108.9	83.4708	80.9016	79.4992	92.45	83.9091	79.8663	88.3603	84.1024	69.5923	94.3973	74.9519	68.8982	92.1073	74.2669	63.899
	109	83.7919	81.045	79.8382	92.5021	83.4959	79.9092	88.2069	83.8247	69.7661	93.5714	75.1176	69.2457	92.6298	74.4437	63.8858
	109.1	83.4626	81.1126	80.2373	92.7857	83.4017	80.0557	87.6436	83.6353	69.6681	92.7076	75.4896	70.0359	92.7887	74.7129	63.4863
	109.2	83.2868	80.8071	80.5141	93.1233	83.7112	80.2072	86.77	83.6119	69.56	92.1668	75.949	70.7541	92.9983	75.2103	63.3581
	109.3	83.0688	80.7444	80.5252	93.4493	84.4806	80.2933	86.6018	83.6906	69.5427	92.6013	76.259	70.887	93.2269	75.2678	63.2447
	109.4	83.3392	80.868	80.3033	93.3282	85.309	80.3214	87.0406	83.7313	69.6803	93.3084	76.3702	70.3519	93.2138	74.833	63.5864
	109.5	83.5048	81.104	79.8021	92.8784	85.4757	80.3362	87.6387	83.6111	70.0428	94.0591	76.3198	70.121	92.8434	74.0748	63.8467
	109.6	83.8198	81.3641	79.188	92.4303	84.7691	80.1364	87.8323	83.4777	70.299	94.2956	76.377	70.2797	91.8242	73.44	63.9321
	109.7	83.873	81.3987	78.693	92.6741	83.7803	80.1483	87.9084	83.3558	70.4333	93.9457	76.5128	70.3573	91.2709	73.0034	63.7464
	109.8	84.1648	81.5609	78.3401	93.1486	83.4903	80.3394	88.1899	83.4702	70.5487	93.2159	76.5777	69.9773	91.1163	72.9681	63.6684
	109.9	84.1388	81.3363	78.4599	93.2444	83.9254	80.8568	88.6256	83.5384	70.688	92.8017	76.4826	69.6247	91.4064	73.4117	63.6263
	110	84.2282	81.3036	78.79	92.5023	84.6357	80.9869	88.5861	83.3333	70.9727	93.3357	76.5313	69.7322	91.2496	74.2057	63.7067
	110.1	84.3661	81.0181	79.3564	91.8527	84.9906	80.7752	88.2116	82.7764	71.0117	94.3146	76.5634	69.8774	90.8719	74.7439	63.6912
	110.2	85.0527	81.0899	79.5262	91.1802	84.586	80.337	87.9029	82.0796	70.6851	94.6246	76.7764	69.9707	90.542	74.8776	63.8432
	110.3	85.2541	80.7658	79.3107	91.4043	83.9417	80.0323	88.1137	81.5709	70.2774	94.1489	76.8587	70.1054	90.7493	74.745	64.4221
	110.4	84.7977	80.4908	78.9237	91.5198	83.472	79.679	88.3022	81.5189	69.8749	93.4776	77.059	70.437	90.994	74.7499	64.8211
	110.5	83.9233	79.9761	78.722	92.1237	83.7548	79.1581	88.2399	81.9638	69.8479	93.6336	77.0703	70.5264	91.0439	74.7779	64.7669
	110.6	83.5778	79.5993	78.8137	92.197	84.0614	78.9051	88.0141	82.5562	69.828	94.1654	76.7929	70.1902	90.566	74.7987	63.7218
	110.7	83.6929	79.2597	78.9924	92.1418	84.3934	79.2586	88.1631	82.9839	69.861	94.6272	76.5779	69.8316	90.2859	74.876	62.9724
	110.8	84.0783	78.9468	79.026	92.1207	84.3486	79.998	88.5351	83.2007	69.8573	94.2909	76.5324	69.6558	90.5671	74.8622	62.7998
	110.9	84.4123	78.6928	79.113	92.3866	84.3322	80.521	88.7954	83.5732	69.8909	93.7927	76.7822	69.8443	91.1864	75.1979	63.0681
	111	84.7427	78.4229	78.9704	93.1776	84.1346	80.533	88.659	83.851	69.8112	93.3461	76.7884	70.073	91.7172	75.1993	63.4383
	111.1	84.6924	78.3131	78.8841	93.5134	84.2709	80.3698	88.3254	84.2936	69.8931	93.2034	76.6307	70.4206	91.8047	75.2476	63.5254
	111.2	84.6501	78.706	78.3303	93.4192	84.5651	80.2128	88.1457	84.3142	69.8371	93.188	76.2677	70.3671	92.0174	74.5269	63.7072
	111.3	84.4206	79.5937	78.0446	93.0582	84.8264	80.0523	88.1159	84.3231	69.847	93.3838	76.0417	69.9148	92.2694	74.1064	63.6634
	111.4	84.247	80.761	77.7749	93.1676	84.7309	80.2713	87.8089	84.0561	69.302	94.0259	75.8922	69.0839	92.2429	73.8157	63.7236
	111.5	83.9419	81.6904	77.9984	93.54	84.621	80.5236	87.4657	83.877	68.9204	94.6041	75.9591	68.6599	91.8068	74.026	63.9542
	111.6	83.9191	82.4263	78.0997	93.7438	84.6647	81.2639	87.1704	83.5653	68.8801	95.1387	76.2337	68.6689	91.0247	74.3148	63.9907
	111.7	84.1881	82.5917	78.1741	93.6519	84.9189	81.3654	87.5958	83.2398	69.2704	95.0263	76.5767	69.0277	90.8451	74.6692	64.0407
	111.8	84.5394	82.5043	78.2597	93.5314	85.1386	81.366	87.8848	82.9706	69.4711	94.9266	76.7876	69.3382	90.8444	74.9434	63.9763
	111.9	84.6436	82.1186	78.3973	93.1503	85.0528	80.7428	88.1952	82.9588	69.2524	94.7736	76.9602	69.4864	91.3272	74.7901	64.1948
	112	84.8722	82.1156	78.7686	92.5046	84.5197	80.4169	87.9769	82.7456	68.864	94.8044	76.7719	69.6539	91.3772	74.4804	64.4342
	112.1	85.0566	82.2387	78.9728	91.7368	83.8209	80.3674	87.7822	82.8344	68.5896	94.6432	76.7283	69.6742	91.4941	74.3228	64.4749
	112.2	85.2684	82.2469	79.2142	91.518	83.5339	80.7176	87.4142	82.8761	68.4921	93.9782	76.3953	69.9604	91.432	74.3767	64.4301
	112.3	84.7582	81.6621	79.266	91.5493	83.9411	81.2622	87.3084	83.359	68.5082	93.3832	76.4124	70.2991	91.7538	74.232	64.247
	112.4	83.8837	80.7664	79.2791	91.7364	84.2254	81.5137	87.1933	83.6569	68.4889	93.038	76.4792	70.9826	91.9774	73.9222	64.2992
	112.5	83.0407	80.1724	79.1891	92.0358	84.3374	81.2297	87.2929	83.8	68.3777	93.2682	76.6471	71.3877	92.2471	73.7432	64.5482
	112.6	82.7803	79.8761	78.9908	92.3988	84.1406	80.379	87.1009	83.6582	68.3679	93.4031	76.7006	71.3264	92.2509	73.9294	64.606
	112.7	83.0852	79.972	78.8042	92.7577	84.312	79.4464	86.9159	83.1577	68.3569	93.5656	76.4067	70.865	92.2991	74.3341	64.5533
	112.8	83.694	80.1034	78.6249	92.7012	84.6616	79.0671	86.7707	83.0943	68.3634	93.7922	76.0838	70.4112	92.0143	74.5943	64.1494
	112.9	84.1268	80.5596	78.5732	92.7941	85.2088	79.1297	86.7049	83.2663	68.0844	94.0471	76.0289	70.5924	91.876	74.6779	64.1128
	113	84.4632	80.8058	78.5154	92.8431	85.3849	79.4881	86.877	83.7873	67.9282	94.087	76.5054	70.547	91.6956	74.3663	64.2938
	113.1	84.4577	80.6734	78.493	92.533	85.0024	79.7656	86.927	83.7561	67.9118	93.7106	77.2312	70.3077	91.7443	74.1224	64.8021
	113.2	84.4106	80.4593	78.8499	91.9	84.2488	80.0222	87.6233	83.6471	68.0657	93.4149	77.6172	69.4194	91.4434	74.0276	65.3257
	113.3	84.0966	80.3912	79.2601	91.4029	83.5551	80.3716	88.0252	83.375	68.2402	93.315	77.5788	69.2061	91.11	74.0577	65.4048
	113.4	83.6607	80.6006	79.5417	91.9327	83.2658	80.5102	88.1021	83.3954	68.2377	93.5004	77.1234	69.6077	90.7507	74.0901	65.2061
	113.5	83.151	80.6884	79.1464	93.0659	83.1157	80.6711	87.3787	83.473	68.1907	94.1168	76.7548	70.495	90.6824	73.9104	64.963
	113.6	82.8694	80.5654	78.9338	94.1336	83.4278	80.649	86.6526	83.5939	68.0467	94.6216	76.4878	70.9506	90.7997	73.913	64.8162
	113.7	82.962	80.2858	79.0338	94.1547	83.8439	81.0504	86.2156	83.7168	67.9157	94.8861	76.5194	70.9814	91.1612	73.8188	64.9207
	113.8	83.3781	80.1079	79.3189	93.4616	84.4833	81.3193	86.1781	83.5964	67.8942	94.5237	76.7696	70.8659	91.734	73.7679	64.7903
	113.9	83.758	80.1636	79.1728	92.7443	84.716	81.5241	86.5691	83.55	68.1009	94.3019	77.0637	70.8738	92.5004	73.7386	64.7689
	114	83.7052	80.4066	78.7118	92.6073	84.8568	81.1963	86.9676	83.3314	68.6396	94.4344	77.3612	70.9461	93.2799	73.8778	64.3078
	114.1	83.3322	80.1392	78.3502	92.8581	84.5539	80.8201	87.292	83.2147	69.3137	94.8407	77.0788	71.1128	93.5663	74.1786	63.7191
	114.2	82.6807	79.6692	78.3793	92.8866	84.6632	80.3689	87.1766	83.0921	69.8346	95.1847	76.8629	71.4617	93.2843	74.3984	63.2831
	114.3	82.5053	79.0641	78.4884	92.7976	84.6959	80.4277	87.2224	83.1468	69.9839	95.3674	76.4936	71.747	92.6302	74.4854	63.3014
	114.4	82.6472	79.1144	78.6168	92.4466	85.0991	80.565	87.0592	83.432	69.846	95.1816	76.532	71.7291	92.0607	74.3307	63.9172
	114.5	83.2927	79.318	78.5868	92.3837	85.114	80.7932	87.1411	83.5896	69.3607	94.8807	76.1191	71.1756	91.6998	74.1519	64.4312
	114.6	84.0356	79.7541	78.8361	92.4306	85.0339	80.7006	87.2627	83.4061	69.0454	94.3282	75.7914	70.4311	91.267	74.2051	64.8817
	114.7	84.5309	80.1199	79.0614	92.5706	84.4824	80.8591	87.6587	82.8656	68.8229	94.0191	75.4674	70.0142	91.1331	74.5421	65.0287
	114.8	84.699	80.6971	79.1522	92.3617	83.745	81.1887	87.808	82.623	68.9692	93.8358	75.7933	70.0154	91.3159	74.8252	64.7197
	114.9	84.0403	81.2551	78.8172	92.1723	83.0824	81.4479	87.5812	82.943	69.051	93.7432	76.1692	70.3734	91.745	74.8248	64.1901
	115	83.452	81.4101	78.3961	91.9697	82.9311	81.1653	86.9789	83.4504	69.1181	93.787	76.8986	70.3333	92.0073	74.8401	63.5627
	115.1	83.2523	81.0172	78.3247	92.5957	83.1323	80.6568	86.5791	83.4331	69.1287	93.4083	77.329	70.0693	91.6372	74.7699	63.7214
	115.2	84.0711	80.5123	78.4511	93.2342	83.723	80.1332	86.3781	82.6751	69.2272	93.2332	77.8873	69.7208	91.4864	74.5461	64.0438
	115.3	84.8861	80.5403	78.809	94.1056	84.4949	80.0889	86.3279	81.8422	69.3044	92.897	77.89	69.5491	91.2532	73.8909	64.2454
	115.4	84.8556	81.0196	79.0551	94.1958	85.4553	80.054	86.1609	81.3838	69.2881	93.1268	77.8432	69.5211	91.786	73.4358	63.8153
	115.5	84.1334	81.2868	79.5452	93.7404	85.9613	80.1763	86.0318	81.4362	69.2196	93.3351	77.545	69.5166	92.065	73.415	63.4357
	115.6	83.5281	81.2948	79.7354	92.7986	85.8384	79.8813	86.0636	81.7906	69.3317	93.6382	77.1578	69.7819	92.5003	73.6816	63.5699
	115.7	83.6706	81.1192	79.6768	91.9373	85.2557	79.6491	86.3001	82.0204	69.4476	93.3896	76.6679	70.06	92.4603	73.6029	64.1621
	115.8	83.8219	81.1507	79.2006	91.6632	84.472	79.3997	86.5723	82.2512	69.2627	93.1717	75.9304	70.0922	92.3632	73.3839	64.7137
	115.9	83.9388	81.0464	78.919	91.7917	84.0064	79.3556	87.2001	81.918	68.7031	92.9254	75.543	70.1011	92.2162	73.056	64.7011
	116	83.898	80.6839	78.6589	92.0444	83.7986	79.37	87.6268	81.8453	68.2977	93.205	75.2764	70.1673	91.838	73.2622	64.4248
	116.1	83.9613	80.2764	78.3991	92.1386	84.0834	79.3832	87.5256	81.7803	68.2804	93.5694	75.4184	70.3679	91.4961	73.5113	64.1559
	116.2	83.6481	79.7581	78.1704	92.2594	84.2473	79.6229	86.7504	82.3101	68.6491	94.1718	75.3181	70.2384	91.0334	74.0844	64.4922
	116.3	82.9629	79.7558	78.2527	92.637	84.3496	79.7452	85.9748	82.8178	68.8572	94.8176	75.052	69.9034	91.1561	74.4772	64.8893
	116.4	82.5196	79.66	78.6504	93.0388	84.495	79.991	86.2266	83.5276	68.895	94.8554	74.614	69.6751	91.0721	74.6796	65.1721
	116.5	82.5714	79.7501	78.9683	93.3053	84.8348	80.0607	86.8713	83.9361	68.5967	94.5204	74.5217	69.6614	91.0592	74.6258	64.6351
	116.6	83.2889	79.7333	79.136	93.1547	84.8772	80.3072	87.7757	83.9706	68.0977	93.9193	74.9373	69.9202	90.7866	74.2731	64.0164
	116.7	83.8823	80.0109	79.1007	93.3207	84.5062	80.3588	88.0206	83.849	67.5947	93.9999	75.828	70.1916	91.0233	73.9872	63.3991
	116.8	84.0394	80.6583	79.0633	93.6126	83.6964	80.3862	88.3514	83.959	67.3337	94.3724	76.6214	70.5288	91.3156	73.9171	63.2183
	116.9	83.807	81.0008	79.0634	94.1923	83.0343	80.304	88.4149	84.1494	67.8566	94.6487	77.0103	70.7369	91.4328	74.3593	63.2757
	117	83.6064	81.0372	79.2454	94.0531	82.4599	80.1306	88.5098	83.9991	68.626	94.6124	76.7707	70.8616	91.2077	74.8111	63.4372
	117.1	84.0408	80.4184	79.363	93.5369	82.3981	79.9613	88.0644	83.5186	69.404	94.3239	76.1666	70.6632	91.3951	74.7672	63.5494
	117.2	84.3532	80.0773	79.3396	92.6251	82.8839	79.8327	87.4642	83.4907	69.4143	94.3117	75.5986	70.2883	92.0033	74.2021	63.4687
	117.3	84.5126	80.165	79.3877	92.1082	83.7654	79.956	86.6969	83.6291	69.3142	94.293	75.4161	70.0742	92.68	73.8739	63.3698
	117.4	84.2323	80.8253	79.8016	92.1507	84.7927	80.0659	86.289	83.7281	69.252	94.3011	75.74	70.1217	92.415	73.8869	63.6959
	117.5	84.2812	81.639	80.1954	92.387	85.2731	80.1316	86.0474	83.3209	69.351	94.1451	76.2519	70.5528	91.4434	73.9733	64.4893
	117.6	84.5051	82.018	80.1194	92.3473	85.1391	80.0873	86.1463	82.9612	69.5512	93.9287	76.529	70.7234	90.582	73.6924	65.0459
	117.7	84.8842	82.2159	79.5082	91.7759	84.239	79.9617	86.3316	83.0011	69.4282	93.6372	76.5138	70.7928	90.5037	73.439	64.8892
	117.8	84.9927	82.072	78.7839	91.3198	83.7471	79.8431	86.6951	83.4146	69.5363	93.3019	76.3378	70.4148	91.1838	73.6567	63.8346
	117.9	84.8931	82.1617	78.166	91.2987	83.573	80.0271	86.6614	83.7969	69.2109	93.2062	76.5869	70.1038	91.7011	74.0692	62.9672
	118	84.3538	81.9697	77.6546	91.4076	84.0059	80.4708	86.3837	83.822	69.0438	93.1631	76.952	70.0654	91.842	74.5193	62.5106
	118.1	83.8037	81.8292	77.627	91.5807	83.8293	80.7439	85.8677	83.5503	68.7052	93.3001	77.2922	70.4383	91.6856	74.6	62.5011
	118.2	83.1226	81.4741	78.0467	91.8786	83.6012	80.5977	85.648	83.6036	68.6388	93.4019	77.0137	70.859	91.5021	74.8542	62.5367
	118.3	82.7122	81.2818	78.7954	92.6383	83.1621	80.0456	85.5297	83.7852	68.7204	93.6843	76.5056	70.729	91.4617	75.0179	62.6152
	118.4	82.1658	81.027	79.5447	93.3618	82.9683	79.6514	85.6891	84.0781	69.0557	93.7938	75.9507	70.2566	91.493	75.0622	62.9524
	118.5	82.2348	80.7972	80.0032	93.5423	82.9279	79.2941	86.1361	83.8556	69.6236	93.8517	75.5599	70.0124	91.7697	74.8107	63.6146
	118.6	82.6072	80.4176	80.0934	92.9961	82.8288	79.3602	86.5904	83.6902	70.0581	93.7302	75.5942	70.3359	92.1718	74.4834	64.5073
	118.7	83.4952	80.1599	79.8627	92.1881	83.2044	79.3757	87.1854	83.5483	70.1106	93.7064	75.9491	70.9096	92.0092	74.4591	65.156
	118.8	83.8597	79.9256	79.4253	91.5032	83.7059	79.7072	87.4619	83.484	69.5626	93.7693	76.7127	71.2384	91.5804	74.3717	65.2107
	118.9	84.021	79.9342	79.2212	91.3826	84.4274	80.1261	87.94	83.352	68.7621	94.1082	77.1837	71.2909	90.8219	74.237	64.6563
	119	83.9524	79.8631	78.8001	91.6613	84.5661	80.7428	87.8974	83.1334	68.0464	94.551	77.4201	71.1683	90.8008	73.9263	64.0918
	119.1	83.9912	80.0412	78.6776	91.9686	84.3581	81.0029	87.4919	83.2029	67.697	94.8449	77.1311	70.8522	90.9001	73.6562	63.7189
	119.2	83.9931	80.2716	78.4801	92.0332	84.1329	80.8208	86.6511	83.1918	68.1182	94.8014	76.9344	70.3231	91.1077	73.4146	63.4856
	119.3	84.0143	80.8203	78.6927	91.6459	84.1729	80.5249	85.8739	83.1183	68.7269	94.3023	76.5733	69.6201	91.3251	73.5218	63.2319
	119.4	84.2363	80.9948	79.1147	91.4513	84.3808	80.5154	85.8666	82.6786	69.4028	93.6978	76.3382	69.0761	91.7099	73.8411	63.2477
	119.5	84.4346	80.8618	79.7514	91.2843	84.5091	80.6602	86.2556	82.2863	69.5813	93.3048	75.8737	68.9227	91.8896	74.2543	63.6622
	119.6	84.5708	80.3924	80.2438	91.2538	84.3172	80.5811	86.9579	81.7732	69.7012	93.5482	75.6604	69.3291	91.624	74.1428	64.229
	119.7	84.6762	80.2308	80.2094	91.1358	83.9033	80.1261	87.0722	81.8523	69.7114	94.2826	75.6397	70.0267	91.0627	74.1046	64.5371
	119.8	84.5484	80.6507	79.7287	91.0487	83.3468	79.4319	86.9497	81.9727	69.6752	95.017	75.9722	70.861	90.9538	74.0479	64.4459
	119.9	84.2901	81.0631	79.0897	91.2229	83.3581	78.9556	86.6972	82.5382	69.579	95.358	76.172	71.3527	90.8194	74.3084	64.2236
	120	83.8718	81.1893	78.6546	91.3673	83.3186	78.6507	86.8136	82.658	69.347	95.4812	76.2146	71.5677	90.7052	74.3307	63.9814
	120.1	84.1111	80.8784	78.5249	91.7242	83.6162	78.7491	87.0967	82.8418	69.0358	95.68	75.7921	71.3838	90.5428	74.5386	63.9668
	120.2	84.4996	80.6838	78.6484	92.072	83.7729	78.851	87.2363	82.7936	68.682	95.8058	75.644	70.9352	90.8831	74.5691	64.122
	120.3	84.7543	80.5909	78.6396	92.4652	84.6476	78.8188	87.1498	82.6281	68.6554	95.2741	75.9297	70.116	91.5384	74.6062	64.4132
	120.4	84.4417	80.3003	78.6731	92.6261	85.3266	78.5988	87.0144	82.4263	68.6598	94.4537	76.7181	69.2306	91.9802	74.3687	64.5391
	120.5	84.1481	79.9164	78.6506	92.6519	85.6818	78.3343	86.887	82.2759	68.5573	93.6259	77.2618	68.924	91.833	74.1427	64.3507
	120.6	83.9603	80.2743	78.995	92.5741	85.3274	78.4732	86.8009	82.4916	68.2141	93.6171	77.1676	69.0863	91.3264	73.8933	64.2601
	120.7	84.0804	81.1536	79.1419	92.6234	84.6648	78.6633	86.6083	82.8361	67.9677	93.8681	76.6621	69.1756	91.1527	73.8553	64.2167
	120.8	84.281	82.2939	79.3258	93.0574	83.9151	79.0826	86.4508	83.0327	67.6846	94.5478	76.0819	68.9046	91.5584	74.2168	64.4493
	120.9	84.2727	82.1738	79.3129	94.0292	83.3982	79.5619	85.934	82.8703	67.6316	94.5533	75.663	68.4379	91.978	74.8138	64.3089
	121	83.9203	81.5548	79.4636	94.7278	83.152	80.3303	85.3494	82.3213	67.6253	94.1392	75.4858	68.3463	91.9707	75.2971	64.3679
	121.1	83.3591	80.6041	79.2441	94.3854	83.1067	81.0392	84.9064	82.252	68.0118	93.4607	75.664	68.3917	91.6784	75.263	64.1413
	121.2	83.2364	80.2521	79.069	93.19	82.8198	81.1106	85.042	82.7481	68.2682	93.5886	76.0751	68.7551	91.9604	75.2701	64.2576
	121.3	83.4999	80.2657	78.7104	92.2213	82.5931	80.699	85.5646	83.4391	68.7063	94.1458	76.4652	69.2698	92.5949	75.1963	64.0636
	121.4	83.7643	80.57	78.7561	92.1231	82.6519	80.002	85.9443	83.4422	68.7869	94.6233	76.4614	69.5478	93.3836	75.0481	64.1613
	121.5	83.985	81.1329	78.6757	92.3276	83.2786	79.866	85.927	82.8921	68.5288	94.5622	76.2314	69.9233	93.3482	74.2656	64.188
	121.6	83.7796	81.443	78.8522	92.4242	83.7457	79.7728	85.5952	82.4471	67.667	94.6619	75.851	70.0144	92.7012	73.3822	64.5744
	121.7	83.8217	81.3799	78.9633	92.0952	83.8497	79.691	85.3323	82.3279	67.035	94.77	75.4079	70.4189	91.579	72.965	65.0197
	121.8	83.7339	80.757	78.9991	91.9383	83.4899	79.5242	85.4759	82.4419	66.9914	94.9657	75.3728	70.3983	90.9811	73.3779	65.1868
	121.9	84.0596	80.0637	78.8636	92.0462	83.3533	79.7511	85.9476	82.4701	67.4323	94.7213	75.6743	70.1754	91.1996	74.2196	64.9668
	122	84.4336	79.4081	78.7226	92.543	83.4757	79.9856	86.2629	82.3809	67.8091	94.5573	76.1757	69.8132	91.7341	74.8474	64.3131
	122.1	84.7364	78.9892	78.636	92.8493	83.8051	80.0251	86.2788	82.2499	68.0532	94.3734	76.2168	69.3284	91.9633	74.732	63.9432
	122.2	84.6493	79.0374	78.4544	92.8221	84.0251	79.7057	86.1266	82.2192	68.5526	94.4198	76.1614	69.0508	91.8722	74.2511	63.6444
	122.3	84.0207	79.4946	78.0633	92.7218	83.9652	79.9328	86.3479	82.4449	69.1904	94.4962	76.3706	68.8742	92.0883	73.9087	63.5928
	122.4	83.2477	79.9971	77.9447	92.6039	83.7044	80.1893	86.6334	82.6307	69.3271	94.6662	76.6773	69.1648	92.4361	74.0124	63.4672
	122.5	82.6496	80.1596	78.072	92.7121	83.4647	80.3981	86.5608	82.6909	68.8278	94.648	76.8131	69.7964	92.4976	74.3641	63.6378
	122.6	82.527	80.1482	78.392	92.4973	83.6709	79.8437	86.1626	82.7229	68.0277	94.6772	76.2729	70.0453	92.0848	74.3113	64.1661
	122.7	83.0943	80.217	78.6517	92.2259	84.0644	79.3708	85.7296	82.6924	67.6709	94.6417	75.8464	70.2332	91.9477	74.3644	64.9834
	122.8	84.1429	80.299	78.7286	91.6963	84.6659	79.1624	85.8216	82.5328	67.6802	94.8562	75.5474	70.1252	91.9414	74.1387	65.3007
	122.9	84.7858	80.1167	79.1051	91.6363	84.5231	79.4219	86.0843	82.253	67.7	94.8007	76.097	70.7936	92.2957	74.1237	64.9701
	123	84.5472	79.7121	79.4332	92.2684	84.1693	79.5728	86.6491	81.9453	67.6477	94.8322	76.6084	71.341	92.1272	73.8589	63.9802
	123.1	83.7766	79.1734	79.9333	92.9339	83.0888	79.5299	86.8474	81.8792	67.4261	94.4973	77.0144	71.6522	92.1758	73.957	63.5383
	123.2	83.568	78.7846	79.7978	93.2599	82.4048	79.2758	87.1508	81.9843	67.599	94.4198	76.8349	71.1181	91.9542	74.3272	63.8198
	123.3	83.9787	78.8086	79.4332	92.9532	82.0788	79.0198	87.0061	82.4124	67.8262	94.3856	76.6992	70.4503	92.0902	74.6688	64.706
	123.4	84.1613	79.1112	78.9342	92.8269	82.4883	79.109	86.8236	82.957	68.015	94.555	76.4376	70.2526	92.0593	74.9982	65.2871
	123.5	83.8221	79.5147	78.8169	92.8353	82.9382	79.3457	86.2229	83.2204	68.0289	94.6402	76.592	70.6257	92.0179	75.41	64.8216
	123.6	83.2867	79.6629	78.7741	92.6841	83.1643	79.6629	85.9841	83.2364	68.0194	94.519	76.4617	71.0948	91.9677	75.9766	63.7672
	123.7	83.2351	79.8262	78.6447	92.3989	83.2737	79.7096	85.938	82.6512	68.3677	94.5562	76.4657	71.0306	91.8674	76.0774	62.7647
	123.8	83.4064	80.0353	78.5839	92.1996	83.7564	79.6943	86.3251	82.1166	68.649	94.4243	76.0093	70.8046	91.9402	75.4372	62.7319
	123.9	83.456	79.9788	78.6443	92.2366	84.0546	80.1282	86.3841	81.5123	68.7988	94.2648	75.9019	70.676	91.9741	74.8704	63.4119
	124	83.4632	79.8	78.9274	92.4489	84.1933	80.2653	86.7152	81.3446	68.7206	93.6547	76.0282	70.8612	92.2207	74.6383	64.0998
	124.1	83.5846	79.5107	79.0641	92.2919	83.9778	80.2766	86.9584	81.1752	68.4906	93.3049	76.613	70.7873	92.181	75.1724	64.3619
	124.2	84.099	79.6722	79.303	92.5833	84.273	79.8001	87.5182	81.2558	68.4356	93.0986	77.3589	70.5801	92.0987	75.3062	64.1931
	124.3	84.5063	79.887	79.552	92.8084	84.5149	79.885	87.4589	81.4911	68.3203	93.4358	77.821	70.5894	91.9398	75.3326	63.9804
	124.4	84.8368	80.304	79.949	93.3492	84.6973	80.2947	87.3129	82.0222	68.3742	93.5531	77.8651	70.9753	92.0998	74.9323	63.9621
	124.5	84.5342	80.3466	80.1908	93.1584	84.3639	80.5731	86.6741	82.2377	68.2039	93.4936	77.2571	71.4058	92.0068	74.8731	64.1311
	124.6	83.995	80.2493	80.2519	92.8876	84.2561	80.4669	86.1094	82.4093	67.7977	92.963	76.8509	71.2499	91.4627	74.7693	64.5383
	124.7	83.6802	79.8709	80.0647	92.5287	83.5937	80.0024	85.3786	82.4444	67.5006	92.586	76.4634	70.7466	90.7109	74.5752	64.8961
	124.8	83.8806	79.7537	79.8548	92.3651	83.0062	79.7633	85.1427	82.5951	67.2676	92.7109	76.6776	70.1248	90.4143	74.2832	65.0258
	124.9	84.2671	79.8412	79.1392	92.123	82.4694	79.8738	85.5431	82.5389	67.5154	93.3984	76.7169	69.7957	90.8577	73.9097	64.9308
	125	84.2384	79.8662	78.305	91.8934	83.0278	80.4129	85.8593	82.2187	67.4808	94.2414	76.8319	69.8222	91.3211	73.8393	64.6023
	125.1	84.0638	79.9493	77.4199	91.9407	83.8591	80.9944	86.002	81.948	67.6801	94.7068	76.5436	69.9989	91.2909	73.6701	64.5779
	125.2	83.9367	79.9088	77.5359	92.3176	84.1319	81.3883	85.6318	81.8662	67.7297	94.8903	76.3543	70.2566	91.0092	73.9088	64.4626
	125.3	83.8828	80.1416	77.9481	92.641	83.8251	81.3212	85.6139	81.9207	68.0013	94.9238	76.2533	70.3177	91.0798	74.1079	64.5391
	125.4	83.7831	80.3151	78.3077	92.824	83.4428	80.9772	85.5112	82.2393	67.9849	95.0126	76.3174	70.3838	91.9157	74.4092	64.1771
	125.5	83.7101	80.3891	78.0207	92.6183	83.9166	80.3632	85.4688	82.3143	67.7459	94.9252	76.0326	70.4366	92.2812	74.4307	63.9811
	125.6	83.5547	80.187	77.6087	92.5374	84.6029	79.6651	85.4216	82.4904	67.3963	94.7438	75.8349	70.4584	92.0166	74.4161	63.9478
	125.7	83.3294	79.6907	77.3491	92.6908	85.2824	79.0977	85.5753	82.3026	67.3099	94.3246	75.73	70.4232	91.025	74.6142	64.2416
	125.8	83.0466	79.4171	77.6174	93.2337	85.1569	78.8833	85.7757	82.3691	67.53	94.1072	75.9671	70.1712	90.5231	74.9267	64.2942
	125.9	83.0759	79.5516	78.1142	93.7249	84.734	79.0452	85.9116	82.4534	67.815	94.0624	76.1132	70.0503	90.6704	75.1977	64.0949
	126	83.2226	79.7653	78.8603	93.5673	84.1706	79.0624	85.8583	82.8099	68.0214	94.4542	76.1719	69.956	91.0612	75.0921	63.871
	126.1	83.6758	79.7037	79.4091	92.929	83.6667	78.891	85.7206	83.0477	68.1109	94.8332	76.1837	70.0213	91.5589	74.8454	64.0757
	126.2	84.1928	79.2688	79.8482	92.3129	83.2992	78.5194	85.6449	83.2591	67.9176	95.089	76.1382	69.8507	91.996	74.5932	64.3634
	126.3	84.6046	79.1276	80.0178	92.4512	82.8944	78.724	85.7757	83.3267	67.8271	94.9657	76.0261	69.7793	92.6761	74.5024	64.6882
	126.4	84.1778	79.235	80.0082	93.0178	83.082	79.0589	86.01	83.0983	67.8206	94.933	76.1199	69.8963	93.1062	74.3868	64.7169
	126.5	83.3127	79.4588	79.975	93.3263	83.4691	79.7448	86.0449	82.6408	68.3524	94.8214	76.3674	70.1362	93.3282	74.3848	64.665
	126.6	82.9121	79.6263	79.8691	93.1146	84.3372	79.6513	85.8474	81.9773	68.3908	94.8533	76.5217	70.1208	93.4212	74.2063	64.2622
	126.7	83.6001	79.8352	79.9062	92.5483	84.4943	79.6327	85.748	81.7562	68.2637	94.6071	76.3057	70.0601	93.7783	74.1513	63.9783
	126.8	84.4538	80.2488	79.8398	91.7938	84.1766	79.3174	85.6454	81.7582	67.7067	94.5582	75.7128	69.9757	93.7104	73.8869	63.6274
	126.9	84.6873	80.2613	79.8864	91.0484	83.3047	79.7931	85.5192	82.2906	67.6057	94.6452	75.4689	70.0256	93.501	73.9854	63.9078
	127	84.3117	79.9911	79.6953	90.4268	83.2111	79.6136	85.19	82.4986	67.6318	94.9674	75.2063	69.8656	92.95	73.9327	64.0841
	127.1	84.2403	79.287	79.3424	90.394	83.5848	79.5604	84.9074	82.7508	67.8457	94.955	75.2998	69.8713	92.8267	74.0712	64.4078
	127.2	84.4439	79.032	78.9828	90.6194	83.9901	79.2267	84.8851	82.2134	67.861	94.6099	75.1964	70.1172	92.5692	74.0568	64.1742
	127.3	84.7662	79.0498	78.947	90.9257	83.9339	79.921	84.8288	82.0631	67.7348	94.1666	75.4769	70.3658	92.2653	74.351	64.1356
	127.4	84.612	79.3966	79.305	91.2344	83.8403	80.2957	84.9093	81.878	67.4994	93.8994	75.3748	70.5202	91.913	74.5327	64.2847
	127.5	84.6018	79.4022	79.5734	91.4898	83.8688	80.4843	84.934	82.3481	67.3444	94.1091	75.2896	70.4093	91.7457	74.8167	64.4633
	127.6	84.5849	79.264	79.425	91.8353	83.9697	79.9279	85.1964	82.6228	66.9517	94.1901	74.9617	70.51	91.6218	74.8993	64.125
	127.7	85.1718	79.2767	78.9661	92.143	83.9376	79.7101	85.3879	82.6112	66.6982	94.5706	75.2344	70.4379	91.6122	75.2081	63.6311
	127.8	85.4741	80.0826	78.6717	92.7377	84.0344	79.433	85.3769	82.1356	66.6009	94.7291	75.4586	70.204	91.6391	75.2519	63.4577
	127.9	85.5416	80.9644	78.4964	93.4276	84.322	79.6129	85.3378	81.597	67.0744	95.1646	75.8888	69.7106	91.9816	75.246	63.781
	128	84.9314	81.3018	78.6778	93.747	84.6513	79.8219	85.4677	81.2371	67.5464	95.0557	75.8811	69.4156	91.9879	74.8223	64.198
	128.1	84.4559	80.4572	78.6058	93.3272	84.9943	80.0603	85.9299	81.521	67.7634	94.9412	75.848	69.4826	91.613	74.2939	64.5424
	128.2	84.1907	79.3306	78.6348	92.5521	84.8396	80.0541	86.2162	81.6813	67.6821	94.5684	75.5967	69.8036	91.0863	73.8337	64.7988
	128.3	84.2584	78.5759	78.327	92.1566	84.537	80.0276	86.0518	81.8141	67.2852	94.7143	75.6534	70.0461	91.2197	73.7896	64.7018
	128.4	84.3127	78.542	78.3538	92.2966	83.8909	80.3043	85.5032	81.296	66.8972	94.4949	75.9134	69.965	91.8463	74.0159	64.3398
	128.5	84.5392	78.89	78.5342	92.4862	83.5613	80.6266	84.9644	81.0838	66.6218	94.0383	76.3794	69.6872	92.1117	74.2743	63.9506
	128.6	84.809	79.4622	78.9091	92.5702	83.2727	80.5623	84.5014	81.213	66.682	93.2112	76.6404	69.6389	91.5986	74.3058	63.6693
	128.7	84.9729	79.9999	79.1057	92.5322	83.5809	80.3314	84.4899	81.7196	66.7884	92.7486	76.6664	70.0512	91.0601	74.8049	63.6018
	128.8	84.6914	80.305	79.4697	92.6971	84.0049	80.221	84.9574	82.2353	66.8501	92.8793	76.3431	70.5487	91.1221	75.6808	63.5839
	128.9	84.0899	80.0969	79.6968	92.5016	84.4498	80.581	85.885	82.2162	66.8497	93.4194	76.2243	70.5132	91.6192	76.6273	63.8444
	129	83.4107	79.6776	79.8491	92.3517	84.3134	81.09	86.7242	82.1472	67.1022	93.9661	76.1838	70.0089	91.9709	76.615	63.8764
	129.1	83.0244	79.4673	79.5153	92.2339	83.8421	81.5626	86.953	81.8239	67.248	94.2799	76.4186	69.3572	92.1438	75.7696	63.9154
	129.2	82.8089	79.6119	79.1812	92.5042	83.1577	81.624	86.7888	81.9778	67.3113	94.1958	76.3931	69.0981	92.4008	74.6749	63.6064
	129.3	83.2147	80.2982	78.9652	92.5153	82.481	81.342	85.9763	82.0674	66.9607	94.0672	76.4346	69.076	92.7666	74.1191	63.7221
	129.4	83.678	80.8917	78.8001	92.4286	81.7961	80.742	85.2969	82.2778	66.8303	93.9183	76.3473	69.1388	92.9319	74.0857	63.8443
	129.5	84.0419	81.179	78.6456	92.2756	81.765	80.1814	84.8707	82.2984	66.8788	93.9969	76.2112	69.1577	92.8721	74.4281	64.411
	129.6	83.6043	80.5158	78.3158	92.5297	82.3289	79.7031	84.7476	82.1262	67.3173	94.136	76.0181	69.0694	92.498	74.7837	65.0344
	129.7	82.9619	79.5046	78.0241	92.7006	83.6086	79.4826	84.6004	81.8814	67.6351	94.0761	75.953	69.0897	92.1643	74.8506	65.4206
	129.8	82.8794	78.6588	77.7591	92.8734	84.4853	79.6879	84.329	81.677	67.6403	93.9037	76.0969	69.1904	91.6431	74.7052	65.3507
	129.9	83.2622	78.5888	77.6956	92.8728	84.9576	79.9658	84.4243	81.7662	67.3656	93.889	76.0059	69.1723	91.35	74.3426	64.7414
	130	83.706	79.1873	78.0707	92.906	84.628	80.1588	84.7847	81.9376	67.1329	94.5258	75.8464	69.315	90.6721	74.093	64.4133
	130.1	83.8811	79.9758	78.7527	92.9669	84.2266	79.7437	85.1551	82.034	67.3396	94.8777	75.5774	69.447	90.4451	74.0236	64.4094
	130.2	83.7967	80.373	79.3843	92.846	83.3014	79.2844	85.4193	82.0923	67.543	94.9051	75.8809	69.9112	90.3831	74.3896	64.6222
	130.3	84.1024	80.3432	79.5263	92.7961	82.8371	78.9258	85.4261	82.192	67.6339	94.3976	76.2326	69.9813	90.9274	74.8273	64.4893
	130.4	84.5754	80.2976	79.2521	92.7303	82.585	79.0392	85.6032	82.2924	67.3912	94.7147	76.532	69.8452	91.2173	74.8446	64.231
	130.5	85.0699	80.4599	79.1809	93.0151	83.2769	79.1281	85.4392	82.3134	67.0931	95.0521	76.4682	69.5503	91.4053	74.2331	64.3204
	130.6	85.1257	80.6704	79.4351	93.3604	83.8229	79.3702	85.3459	82.0472	66.752	95.6559	76.2091	69.5034	91.7091	73.5846	64.8233
	130.7	84.614	80.421	80.0027	93.3746	84.1743	79.7274	84.8563	81.5568	66.5798	95.624	75.7406	69.7977	92.0597	73.6364	65.1921
	130.8	84.2653	79.9854	80.0733	92.7798	84.0786	80.2442	85.0386	81.0393	66.7996	95.5867	75.4088	70.1882	92.0256	74.279	64.8162
	130.9	83.8791	79.3648	79.877	91.7069	83.9922	80.4137	85.4323	81.0044	67.123	94.9959	75.2733	70.4233	91.7149	74.8223	64.2358
	131	83.7053	78.9648	79.261	90.8142	83.8682	80.4639	86.013	81.4551	67.1793	94.2974	75.6369	70.2009	91.4712	74.5917	63.9634
	131.1	83.484	78.6734	78.8208	90.6379	83.8136	80.5324	85.9467	82.0963	66.8689	93.5754	75.8268	69.7662	91.7743	74.0272	64.2727
	131.2	83.5272	78.5819	78.4839	90.9168	83.723	80.9796	85.308	82.3596	66.7678	93.3556	75.9524	69.4017	91.7492	73.6852	64.591
	131.3	83.4482	78.4737	78.4506	91.4512	84.0432	81.215	84.7499	82.1483	66.9448	93.3888	76.0881	69.1803	91.7166	73.9316	64.4038
	131.4	83.4827	78.4152	78.4403	91.5372	84.4664	81.1214	84.5694	81.7734	67.3712	93.7886	76.2912	69.0133	91.3337	73.8518	64.0744
	131.5	83.2592	78.7431	78.2563	91.7303	84.8174	80.1644	85.1302	81.8032	67.4346	94.4279	76.5472	68.9482	91.4218	74.006	63.7793
	131.6	83.3371	79.4368	78.043	91.7969	84.687	79.1526	85.498	82.3882	66.9387	95.0869	76.3741	69.2332	90.9761	73.7962	64.1704
	131.7	83.1178	80.1841	78.0212	91.9634	84.3446	78.3782	85.651	82.9254	66.3329	95.3169	76.0366	69.8791	90.5057	74.184	64.3864
	131.8	83.1128	80.5701	78.0932	91.7137	83.917	78.591	85.3302	82.7361	65.8838	94.7798	75.4873	70.6559	89.8939	74.3577	64.4043
	131.9	82.8877	80.772	78.3102	91.4822	83.6446	78.8812	85.0754	82.2093	66.3783	94.1352	75.179	71.3991	90.3248	74.9943	63.8299
	132	83.261	80.7628	78.4382	91.2098	83.4418	79.5586	84.6089	81.7436	66.8476	93.7289	75.1497	71.524	91.0357	75.7464	63.7191
	132.1	83.75	80.6003	78.759	91.2388	83.843	79.8526	84.1709	81.7106	67.312	93.7607	75.4084	71.0943	91.6639	76.1973	63.8251
	132.2	84.7929	80.6128	78.6469	91.4014	84.2749	80.3857	84.0494	81.4353	67.2562	93.9244	75.9146	70.1886	91.4338	76.3127	64.3504
	132.3	85.3194	80.9708	78.5026	91.8152	84.4103	80.4502	84.6147	81.0521	67.3008	94.0024	76.3573	69.7318	91.087	75.9347	64.4622
	132.4	85.7826	81.5662	78.1843	92.3041	83.6598	80.4963	85.7028	80.632	67.5371	94.1729	76.5908	69.6514	91.1292	75.6609	64.4734
	132.5	85.6059	81.5188	78.0304	92.5802	82.7562	80.4998	86.7497	80.6572	67.9203	94.4137	76.1793	69.6069	91.6908	75.3803	64.0948
	132.6	85.6721	81.0582	78.0199	92.6838	82.7782	80.5404	87.2362	81.0137	68.1771	94.9188	75.6634	69.6733	92.1561	75.2047	63.8133
	132.7	85.2509	80.3864	78.225	92.6777	83.6204	80.5734	87.06	81.3856	68.2314	95.1904	75.1352	69.7597	92.1661	75.0202	63.7328
	132.8	84.9281	80.117	78.6546	92.8411	85.163	80.3437	86.3863	81.452	67.9184	95.1519	75.2357	70.0727	91.8922	74.5781	64.0479
	132.9	84.5179	80.0051	78.8091	93.1854	85.7578	79.9114	85.8971	81.193	67.4528	94.4596	75.5519	69.7363	91.8213	74.1001	64.5032
	133	84.2199	80.0074	78.5429	93.4952	85.8608	79.4336	85.645	80.9903	66.783	93.6897	76.0577	69.3811	92.0323	73.7599	64.81
	133.1	84.1483	80.1016	77.9093	93.6743	85.0298	79.339	85.7249	81.0084	66.5041	93.1243	76.3128	69.2229	92.5818	73.9633	64.7232
	133.2	83.6817	80.4033	77.3679	93.6068	84.5336	79.5019	85.5231	81.2317	66.5088	93.1963	76.3543	69.5731	93.0274	74.2016	64.3688
	133.3	83.4624	80.6986	77.5262	93.6689	83.9241	79.8776	85.3263	81.5247	66.6044	93.6796	76.4499	69.7488	92.9101	74.331	64.1928
	133.4	83.0323	80.9523	78.1221	93.6494	83.6288	79.9529	85.1331	82.003	66.2953	94.205	76.3858	69.6014	92.3762	74.0112	64.2897
	133.5	82.8677	80.8801	79.0988	93.6237	83.3484	80.1789	85.1917	82.3109	65.9812	94.9348	76.4456	69.4934	91.8476	73.8499	64.4896
	133.6	82.9742	80.6764	79.7328	93.2198	83.4948	80.4088	84.9386	82.4628	66.0739	95.4832	76.481	69.6484	92.0639	73.9041	64.4029
	133.7	83.3809	80.0749	80.3581	93.052	83.6012	80.4824	84.7301	82.2428	66.6261	95.9353	76.8268	70.0869	92.3301	74.0547	64.2877
	133.8	84.1419	79.5301	80.5533	93.0952	83.76	80.2762	84.7334	82.2269	67.0589	95.6388	77.0778	70.2678	92.7694	74.0886	64.4846
	133.9	84.6902	79.2363	80.374	93.3201	83.6334	79.8797	85.2514	82.3872	67.2681	95.3954	77.1173	70.3333	92.9038	74.023	64.7932
	134	85.049	79.7077	79.9977	93.1903	83.8316	79.6698	85.3109	82.6951	67.3348	95.1632	76.8609	70.1224	93.1817	74.2696	64.8443
	134.1	84.9681	80.5346	79.6417	92.9659	83.9198	79.6223	85.0016	82.7206	67.5501	94.9244	76.4959	69.982	93.117	74.7138	64.4303
	134.2	84.7346	81.4694	79.5039	92.9484	84.1414	79.5153	84.5512	82.592	67.8378	94.3667	76.207	69.8041	92.8182	75.0777	63.9067
	134.3	84.1974	81.6702	78.9967	93.2292	84.0229	79.3307	84.4852	81.9947	68.1993	93.7511	76.1844	69.8738	92.0816	75.2636	63.6664
	134.4	83.7874	81.3748	78.4072	93.3328	83.9656	79.0474	84.537	81.5578	68.4124	93.5449	76.6021	69.9406	91.0872	75.1064	63.5728
	134.5	83.5761	80.7773	77.9899	93.2269	83.9947	78.8971	84.5563	81.063	68.1852	93.6048	77.0951	69.9894	90.3436	74.8873	63.7653
	134.6	83.6787	80.6381	78.2073	92.7779	84.2154	79.0641	84.7574	80.9289	67.7893	93.6003	77.2263	69.8642	90.2699	74.5333	64.1033
	134.7	83.8834	80.5922	78.7987	92.497	84.5599	79.3692	85.1521	80.6134	67.477	93.9346	76.6581	70.112	91.0683	74.3599	64.4561
	134.8	83.9482	80.5536	79.2996	92.2302	84.8933	79.7312	85.301	80.2984	67.4934	94.0543	76.0374	70.5277	91.9331	74.1882	64.5119
	134.9	84.0402	80.167	79.3551	92.3683	84.9007	79.8123	85.2964	80.0732	67.1651	94.2012	75.8839	71.0149	92.4072	74.003	64.2101
	135	84.1646	79.9071	78.9708	92.326	84.7204	79.771	84.963	79.9977	66.666	93.4903	76.6277	71.2021	92.3959	73.9908	63.8848
	135.1	84.2667	79.8126	78.2056	92.3543	84.0691	79.6317	85.0782	80.094	66.2597	93.3296	77.3189	71.0094	92.5638	74.0116	63.6848
	135.2	84.1764	79.8867	77.7752	92.2721	84.0018	79.5811	85.2646	80.2707	66.5359	93.2927	77.8174	70.9019	92.9648	74.0927	63.6737
	135.3	84.044	80.2036	77.5014	92.4352	83.8148	79.5176	85.7077	80.7748	66.7723	93.7951	77.7077	70.4048	93.3034	73.9251	63.8628
	135.4	84.0023	80.1844	77.8569	92.268	84.1872	79.5162	85.9332	81.2848	66.8014	93.7313	77.7914	70.3356	93.0203	73.789	64.1129
	135.5	84.2726	80.2999	77.965	91.9863	84.2372	79.4682	85.9718	81.4646	66.5986	93.8052	77.7003	70.0783	92.2249	73.7826	64.5356
	135.6	84.526	79.9628	78.2711	91.2088	84.458	79.4738	85.9038	80.994	66.6697	93.8641	77.7246	70.2144	91.1189	73.7393	64.9568
	135.7	84.9856	79.7843	78.3581	90.807	84.4131	79.2504	85.6539	80.3363	67.0241	94.1388	77.5781	70.0779	90.424	74.0189	65.2193
	135.8	85.4163	79.5119	78.8606	90.4733	84.3899	79.2109	85.3339	80.0172	67.0646	94.1253	77.4578	69.8888	90.4913	74.3003	65.1479
	135.9	85.717	79.5319	79.404	90.6001	84.5296	79.1829	85.1052	80.1999	67.0437	94.0634	77.2418	69.7708	91.1559	74.7567	64.7518
	136	85.4624	79.9324	79.619	90.6836	84.9821	79.5377	85.1313	80.4501	66.7871	93.9097	76.8607	69.7563	91.5662	74.8244	64.4544
	136.1	85.1139	80.1864	79.3262	90.9529	85.3429	79.7812	85.5176	80.6298	67.0212	94.0711	76.7718	70.0934	91.7041	74.598	64.3049
	136.2	84.9331	80.4116	78.7273	91.6109	85.3813	80.2417	85.7312	80.6863	67.3226	93.9803	76.9032	70.4506	91.4887	74.0598	64.517
	136.3	85.1091	80.2246	78.5377	92.0859	84.6907	80.72	85.7584	81.029	67.7529	93.9236	77.2517	70.8562	91.3364	73.518	64.9446
	136.4	85.233	80.4174	78.7037	92.1996	83.8738	80.9732	85.2233	81.3488	67.9157	93.7144	76.9971	70.7939	90.929	73.4894	65.1681
	136.5	85.2663	80.5234	79.0498	91.6149	83.196	80.7244	84.8832	81.4208	67.7561	93.8447	76.3289	70.5656	90.782	73.8226	65.1128
	136.6	85.0076	80.6281	79.3181	91.1496	83.1307	80.1094	84.6548	80.9907	67.357	94.0383	75.5999	70.2152	90.966	74.0627	64.7037
	136.7	84.3721	80.3563	79.2258	90.841	83.4521	79.7456	84.8911	80.3259	67.074	94.1194	75.4241	70.2309	91.2598	73.7623	64.3853
	136.8	83.5856	80.2221	79.0317	90.7156	83.8744	79.8092	85.0284	80.0394	67.0296	94.3353	75.3566	70.2838	91.4526	73.5359	64.3462
	136.9	83.0903	80.3223	78.6539	90.9111	84.0993	80.1678	85.1632	80.0688	67.2848	94.4918	75.3384	70.5816	91.4419	73.7951	64.4969
	137	83.0857	80.5367	78.4057	91.4484	84.0518	80.4184	85.4628	80.4442	67.4666	94.814	75.4786	70.5429	91.4261	74.294	64.6962
	137.1	83.0167	80.5813	78.135	92.3431	83.6321	80.4133	85.6077	80.6913	67.7281	94.5441	75.8234	70.3188	91.4447	74.5032	64.4589
	137.2	83.0394	80.5551	78.1959	92.8013	83.2962	80.1706	85.9212	80.8108	67.5633	94.3613	76.0154	69.7332	91.2984	74.259	64.3292
	137.3	82.625	80.4906	78.4926	92.8394	83.0627	79.7826	86.033	80.6271	67.4811	94.2046	75.6883	69.6114	90.8927	74.2937	64.279
	137.4	82.6691	80.3854	78.9663	92.5379	83.2721	79.4467	86.3057	80.5623	67.4568	94.487	75.2802	69.8423	90.2959	74.4282	64.5538
	137.5	82.6027	80.1578	79.0917	92.5619	83.3613	79.3632	85.9813	80.562	67.8471	94.7516	75.2882	70.1734	90.1361	74.7318	64.482
	137.6	83.2399	79.8232	79.0192	92.6152	83.1391	79.7589	85.3179	80.8944	68.0424	94.7743	75.728	70.3184	90.7978	74.6549	64.5358
	137.7	83.7344	79.619	78.803	92.5417	82.744	80.3073	84.751	80.85	68.0081	94.811	76.2838	70.1759	91.8696	74.5247	64.5354
	137.8	84.3369	79.4759	79.0659	92.2132	82.8446	80.764	84.5977	80.8583	67.9572	94.8524	76.3069	70.3738	92.4953	74.5846	64.5788
	137.9	84.6024	79.5928	79.3533	91.7357	83.6436	80.8671	85.0177	80.506	67.9248	95.1031	76.2519	70.5158	92.6419	74.8896	64.4708
	138	84.4168	79.8597	79.8154	91.7149	84.5313	80.7218	85.5096	80.4381	67.6473	95.1153	76.3437	71.0291	92.2706	75.0046	64.5093
	138.1	83.7534	80.2062	79.5068	92.0577	84.6326	80.4458	86.0307	80.2627	67.0757	95.024	76.8077	71.1873	92.151	74.8024	64.719
	138.2	82.8842	80.7582	78.9756	92.8329	84.1524	80.0328	85.6888	80.3589	66.4818	94.7756	76.83	71.1891	91.953	74.4307	64.732
	138.3	82.6253	80.9082	78.1556	93.146	83.4949	79.7878	84.6517	80.3429	66.2023	94.7068	76.4329	70.9034	92.272	74.5241	64.5378
	138.4	82.9853	80.8809	77.8996	92.9846	83.6129	79.5674	83.3954	80.3137	66.155	94.4438	75.8274	70.8331	92.6854	74.6992	64.0629
	138.5	83.734	80.088	78.1933	92.4438	83.961	79.7033	82.7683	80.1863	66.454	94.0381	75.3987	70.8876	93.225	74.7387	63.8718
	138.6	84.3533	79.5037	78.6371	92.279	84.2492	79.8754	82.8511	80.1437	66.8206	93.3249	75.316	70.7306	93.4829	74.4046	63.6806
	138.7	84.6243	79.0654	79.168	92.3106	83.7856	79.9547	83.2972	80.2353	67.0984	92.9299	75.2538	70.211	93.3492	73.9214	64.022
	138.8	84.4643	79.2244	79.3167	92.76	83.0152	79.7547	83.7039	80.6547	67.0602	92.97	75.4223	69.9108	92.947	73.5507	64.2359
	138.9	83.9739	79.5469	79.4876	92.9868	82.5419	79.4321	83.9987	81.1484	66.9362	93.7094	75.5648	70.2082	92.2964	73.549	64.7354
	139	83.2094	80.0394	79.1139	93.3383	82.6272	79.3873	84.1936	81.5388	66.9879	94.5372	75.9728	70.917	91.8557	73.9263	65.057
	139.1	82.2479	80.5751	78.7181	93.4786	83.1107	79.5834	84.4312	81.291	66.9746	95.1383	76.4288	71.0542	91.4461	74.2754	65.2922
	139.2	81.628	80.7973	78.4151	93.5597	83.571	79.6809	84.5503	80.7886	66.6316	95.1122	76.6732	70.5656	91.3684	74.4561	64.9603
	139.3	81.5671	80.8459	78.558	93.4823	83.8433	79.5253	84.4536	80.0854	65.78	94.7849	76.9946	69.7851	91.0203	74.4553	64.3537
	139.4	82.2203	80.7556	78.923	93.2588	83.9283	79.2298	84.3046	79.8117	65.2438	94.4508	77.3243	69.5942	90.849	74.8102	63.9719
	139.5	82.7463	80.9452	79.203	93.1606	83.8366	79.1428	84.2888	79.9196	65.3639	94.2878	77.6433	69.9917	90.7613	74.8022	64.2553
	139.6	82.97	81.26	79.607	92.9533	83.8101	79.4673	84.4423	80.4291	66.2523	94.2598	77.4871	70.609	91.2097	74.772	64.714
	139.7	82.8932	81.4708	79.9652	92.8586	83.6991	79.8977	84.5744	80.6733	66.7979	93.9797	76.9762	71.0477	91.5421	74.3293	65.1081
	139.8	83.0563	81.4866	80.2183	92.5626	83.5186	80.3011	84.774	80.7182	66.8933	93.6387	76.732	71.0474	91.4387	74.4842	64.9961
	139.9	83.5684	81.0996	80.2269	92.2774	83.2811	80.2151	84.9621	81.0362	66.4787	93.4796	76.6654	71.1244	91.0466	74.6076	65.0856
	140	83.8758	80.5379	79.9016	91.6697	83.0506	79.8574	85.0786	81.6216	66.5947	93.9331	76.5911	70.9958	90.9706	74.9594	64.9051
	140.1	83.6853	79.888	79.6911	91.4082	83.1092	79.54	84.7599	81.9204	67.0397	94.3076	76.2961	70.9924	91.501	74.8964	64.6849
	140.2	83.1432	79.5912	79.2381	91.4626	83.1679	79.7363	84.6203	81.3428	67.4242	94.408	75.9927	70.617	92.0226	74.9523	64.2682
	140.3	83.0321	79.6602	78.8529	91.985	83.5146	80.0541	84.5372	80.6038	67.096	93.8283	76.3096	70.6394	92.4127	74.6241	64.3236
	140.4	83.2648	80.2414	78.1866	92.2137	83.7091	80.2241	84.6937	80.185	66.4598	93.4837	76.6832	70.7651	92.4208	74.37	64.7707
	140.5	83.407	80.6851	77.9831	92.2087	83.684	79.8262	84.4588	80.5097	66.0578	93.2221	76.9646	70.9082	92.3273	74.1102	64.9586
	140.6	83.2097	81.1496	78.4734	92.1677	83.5723	79.7913	84.2587	80.9479	66.0821	93.599	76.5802	70.601	92.0089	74.3221	64.7838
	140.7	82.8103	81.0231	79.6917	92.363	83.7396	79.8452	84.1439	81.4294	66.2204	94.0897	76.1203	70.0136	91.9426	74.7303	64.5713
	140.8	82.7059	80.6689	80.6792	92.7027	84.2716	80.2746	84.4831	81.4642	66.4286	94.7966	75.7297	69.9637	92.2	75.1567	64.7784
	140.9	82.6954	79.9498	80.806	93.0018	84.7653	80.1954	84.7727	81.3472	66.5711	95.2548	75.4572	70.2801	92.633	75.3788	64.842
	141	82.9198	79.7734	79.9851	93.0724	84.7891	80.1451	84.9921	80.9743	66.678	95.4343	75.437	70.9663	92.5954	75.7069	64.544
	141.1	83.1362	80.0299	78.7732	92.8777	84.7089	79.7372	84.6496	80.5022	66.4714	95.2264	75.5439	71.1242	92.3542	75.9247	63.9981
	141.2	83.4887	80.5579	77.9312	92.744	84.4196	79.7023	84.0282	79.8914	66.2118	94.8519	76.0862	70.9311	91.9709	76.1103	63.8879
	141.3	83.7233	80.9886	77.7168	92.8151	84.4316	80.014	83.5881	79.5454	66.0901	94.4688	76.6264	70.397	91.7221	75.8158	64.0883
	141.4	83.9806	81.2378	78.2297	93.1513	84.436	80.8121	83.4137	79.4833	66.2354	94.244	77.2801	69.9114	91.4528	75.2774	64.4897
	141.5	84.2736	81.3686	78.7569	93.2643	84.9398	81.3582	84.133	79.891	66.6412	93.8999	77.4483	69.6683	91.4309	74.784	64.8348
	141.6	84.6932	80.9739	79.1211	93.1858	85.2287	81.1414	84.5868	80.146	67.1717	93.4838	77.0678	69.513	91.572	74.4914	65.2318
	141.7	84.855	80.6172	78.8556	92.7698	85.245	80.7754	85.255	80.5806	67.8044	93.1903	76.4631	69.523	91.7007	74.6852	65.4066
	141.8	84.7543	80.1533	78.4126	92.3726	84.5559	80.5774	84.8639	80.8091	68.1887	93.3969	76.0926	69.6814	91.4238	75.018	65.24
	141.9	84.572	79.758	78.0072	91.9903	83.9476	80.7391	84.3252	80.956	68.0139	94.1001	76.137	69.9511	91.0612	75.0587	64.6161
	142	84.6647	79.304	78.2303	91.8412	83.6638	80.5289	83.3787	80.779	67.4883	94.5351	76.0928	70.0562	91.049	74.5153	64.093
	142.1	84.597	79.2854	78.6746	91.5768	83.8269	80.2747	82.8772	80.5483	66.8474	94.4281	75.9271	69.6529	91.6771	73.5448	63.7741
	142.2	84.0977	79.8851	79.1564	91.4587	83.9036	80.2441	82.8202	80.4302	66.6008	93.7642	76.0403	69.3003	92.7704	72.9111	63.836
	142.3	83.4557	80.3836	79.4053	91.5504	83.9311	80.4986	83.1013	80.4569	66.5181	93.3419	76.5973	69.3497	93.3617	72.7068	63.7801
	142.4	83.3711	80.4998	79.6058	91.8232	83.9829	80.5761	83.668	80.4869	66.4458	93.5854	77.3423	69.929	93.4258	73.034	63.7974
	142.5	84.0137	80.0503	79.6016	92.2728	84.1412	80.2063	84.1591	80.5391	66.3432	94.2502	77.7573	70.5381	92.5601	73.5127	63.9364
	142.6	84.4996	79.7898	79.3381	92.7737	84.0787	79.8038	84.4212	80.5238	66.1621	95.0387	77.5774	70.8111	91.7523	73.9812	64.4619
	142.7	84.4838	79.6963	79.1419	93.4901	83.8474	79.5479	84.3789	80.5192	66.1813	95.2627	77.1817	71.012	90.9711	74.1062	64.8886
	142.8	83.9166	80.0434	79.1412	93.8129	83.9511	79.4282	84.1517	80.587	65.9313	95.1123	76.5764	70.8157	90.8791	73.9144	64.9357
	142.9	83.8011	80.6321	79.3417	93.5568	84.5908	79.2148	84.262	80.874	65.8839	94.7256	76.3201	70.6783	90.9453	73.7227	64.3131
	143	83.9589	81.1228	79.1502	92.8997	85.1011	78.9708	84.5446	81.3706	65.766	94.3608	76.1503	70.2757	91.0957	73.5918	63.8327
	143.1	84.3002	81.2412	78.8547	92.3397	85.1509	79.0584	84.9341	81.931	66.0999	94.2829	76.2773	70.3234	91.3384	73.8668	63.5904
	143.2	84.044	80.7059	78.4214	92.2276	84.6379	79.5813	85.0851	82.1242	66.191	94.1901	76.3104	70.468	91.7011	74.2167	63.8683
	143.3	83.7922	80.2697	78.5223	92.2953	84.5148	79.9978	84.6513	81.8664	66.264	94.1416	76.3583	70.7604	92.268	74.7949	64.1764
	143.4	83.8238	79.8199	78.831	92.1447	84.573	80.1682	83.9208	81.2656	66.0487	93.9124	76.2189	70.8101	92.3418	75.1058	64.5037
	143.5	84.0784	79.8886	79.2972	91.616	84.7857	79.909	83.2522	80.8782	66.2141	93.9411	76.2713	70.5562	92.2997	75.2387	64.7499
	143.6	84.1759	79.915	79.5852	91.1949	84.6556	79.8447	83.4719	80.8101	66.5061	94.4119	76.2901	70.1424	91.981	75.3146	64.6472
	143.7	83.9308	80.2873	79.6029	91.1248	84.3186	79.6662	84.1218	81.0019	66.9929	94.948	76.4081	69.7432	91.6513	75.5129	64.4548
	143.8	83.9491	80.646	79.5789	91.3146	84.1726	79.7481	84.8574	81.3308	67.1768	95.2018	76.2336	69.6583	91.178	75.9224	64.3153
	143.9	84.1019	81.1313	79.0434	91.3236	84.1246	80.0501	84.92	81.5874	67.4127	95.2069	76.4541	69.9282	90.8302	76.0231	64.3863
	144	84.4966	81.5693	78.4479	91.3311	84.2898	80.5107	84.8097	81.7274	67.5989	95.0284	76.729	70.3577	91.1474	75.6657	64.5056
	144.1	84.7756	81.6512	78.0314	91.2593	84.1816	80.5631	84.3446	81.4301	67.9148	94.9087	77.0928	70.3933	91.687	74.8467	64.5118
	144.2	84.8191	81.3476	78.3627	91.5173	84.1849	80.0842	84.4101	80.9876	67.9551	94.7984	76.7711	70.0907	92.2186	74.1654	64.4829
	144.3	84.5441	80.8002	78.9526	91.9057	84.1751	79.6377	84.7166	80.4262	67.7614	94.7211	76.4341	69.5546	92.3626	73.8357	64.4739
	144.4	84.0767	80.4466	79.4032	92.5733	84.1873	79.774	85.3162	80.0502	67.1698	94.5667	75.9306	69.3242	92.5038	73.5494	64.5098
	144.5	83.8158	80.401	79.564	92.7617	84.181	80.0951	85.5083	79.7707	66.4521	94.1967	75.779	69.0842	92.5351	73.4626	64.4914
	144.6	83.6793	80.1592	79.4962	92.5163	83.8471	80.3559	85.1174	79.6102	65.9307	94.2326	75.5416	69.0118	92.4311	73.5993	64.3481
	144.7	83.6773	79.9881	79.1231	92.3551	83.49	79.8479	84.5207	79.6733	65.8116	94.2856	75.6089	69.1434	92.0523	74.2063	64.1423
	144.8	83.8002	79.5981	78.7028	92.6677	82.8172	79.4243	83.9479	80.1348	65.9199	94.2288	75.5537	69.4726	91.5673	74.695	63.951
	144.9	83.9846	79.7358	78.4892	93.1302	82.4804	78.9721	83.6291	81.0182	65.9907	93.8539	75.5353	69.6347	90.8498	74.7824	63.7827
	145	84.2223	79.7681	78.6879	92.9833	82.6971	79.2273	83.4964	81.7712	65.9567	93.7222	75.3789	69.6342	90.0819	74.8002	63.5891
	145.1	84.5116	80.0623	78.9362	92.3306	83.5613	79.509	83.3179	82.1883	66.3074	93.8326	75.3734	69.781	89.5964	74.6716	63.6531
	145.2	84.8412	80.2707	79.2646	91.8579	84.4651	79.8949	83.4436	82.086	66.6339	93.7924	75.4239	70.2379	89.8036	75.014	63.8854
	145.3	84.8846	80.4648	79.417	91.6977	84.6693	80.1956	83.5809	81.9777	66.8227	93.4716	75.5509	70.5217	90.3253	75.1763	64.294
	145.4	84.4871	80.5141	79.4474	91.7737	84.1113	80.4099	83.8084	81.6672	66.3304	93.2471	75.8621	70.6544	91.1293	75.409	64.5542
	145.5	83.897	80.3299	79.2226	91.6646	83.4094	80.5016	83.9724	81.6127	65.8526	93.341	76.0439	70.6229	91.5857	75.2021	64.6951
	145.6	83.481	80.3696	79.0419	91.7287	83.0564	80.1039	84.0161	81.4694	65.7694	93.5528	76.2282	70.7538	91.7076	74.9852	64.3709
	145.7	83.1902	80.3396	79.2381	91.8837	83.4989	79.4029	84.3716	81.2768	66.1857	93.5048	76.0597	70.6323	91.0011	74.871	63.9102
	145.8	82.9801	80.2191	79.5747	92.3684	84.1686	78.6018	84.4534	80.5842	66.6877	93.3076	76.4628	70.11	90.2849	74.7474	63.686
	145.9	83.3267	79.8351	79.6454	92.7803	85.0166	78.0754	84.5781	79.904	66.9424	93.071	77.1043	69.5362	90.3893	74.9571	64.1524
	146	84.0923	79.7122	79.0411	93.2432	85.1417	78.2618	84.3129	79.6198	66.7852	93.1453	77.9027	69.2059	91.3674	75.1887	64.7063
	146.1	84.9456	79.8318	78.2772	93.2528	84.6762	78.8006	84.3559	80.0863	66.3179	93.6167	77.9107	69.6347	92.3894	75.7861	65.0342
	146.2	85.0283	80.0924	77.8311	93.0022	83.6287	79.3588	84.5979	80.8408	66.0451	94.1122	77.5233	70.0888	92.7421	75.9044	65.2118
	146.3	84.7018	80.1621	77.7653	92.5037	82.9007	79.4326	85.0278	81.4417	66.2331	94.429	77.0603	70.4444	92.6004	75.562	65.386
	146.4	84.1828	80.2059	77.8306	92.4618	82.7383	79.1813	85.2663	81.6552	66.7286	94.1289	76.9557	70.4303	92.3456	74.7356	65.0007
	146.5	83.9879	80.4221	77.8929	92.6336	82.8092	79.0919	85.3662	81.4517	66.8519	93.863	76.7624	70.4497	92.4187	74.0169	63.9416
	146.6	84.0649	80.6044	77.9486	93.0389	83.1276	79.0066	85.3279	81.1873	66.5922	93.5626	76.3587	70.3854	92.7829	74.1032	62.9998
	146.7	84.4688	80.4892	78.0408	92.8247	83.588	79.0834	85.0682	80.624	66.366	93.2998	75.9683	70.1137	93.0802	74.515	62.7826
	146.8	84.7699	79.849	78.0797	92.7388	84.3458	79.2547	84.5496	80.1167	66.4181	93.2321	76.1107	69.9198	92.819	74.6186	63.0946
	146.9	84.5518	79.179	78.0986	92.6716	84.5709	79.8588	84.071	79.5948	66.8237	93.0969	76.8901	69.9419	92.0993	73.7804	63.222
	147	84.1954	78.9667	77.9513	92.9703	84.1339	80.4348	83.9791	79.509	67.0609	93.2682	77.6044	70.4004	91.5424	72.7681	63.3166
	147.1	83.6677	79.0577	77.626	92.9934	83.1938	80.4779	84.1621	79.3627	67.0923	92.9982	77.7379	70.5602	91.6154	72.2028	63.5944
	147.2	83.6504	79.0662	77.3799	92.4638	82.7324	79.8897	84.3907	79.2909	66.8413	92.9432	77.1951	70.8581	91.7738	72.3938	64.1712
	147.3	83.7334	78.5959	77.4406	92.0043	82.6577	79.4082	84.3968	79.0996	66.5762	93.2248	76.5619	71.0133	91.9621	72.5519	64.7149
	147.4	84.0159	78.2934	77.9108	91.4283	82.855	79.1143	84.4953	79.3403	66.526	93.9158	76.2839	71.2509	91.4512	72.7707	64.9679
	147.5	84.169	78.2938	78.328	91.4507	82.7379	79.4084	84.7466	79.7476	66.6579	94.4218	76.521	71.0577	91.2702	72.8567	64.9029
	147.6	84.1469	78.8221	78.4923	91.5233	82.881	79.4687	84.9404	80.4069	66.9449	94.4643	76.8554	70.4233	91.1509	73.3912	64.7653
	147.7	84.3277	79.2163	78.4542	91.945	83.279	79.6844	85.0322	80.9831	66.8034	94.512	77.0138	69.8472	91.7726	74.0726	64.7604
	147.8	84.2218	79.6822	78.5993	92.2839	83.9479	79.5861	84.8664	81.2847	66.525	94.7462	76.4623	69.5532	92.3689	75.0779	64.7088
	147.9	84.0353	79.8304	78.7	92.6123	84.2822	79.6424	84.641	81.1577	66.2068	94.7791	75.7527	69.725	92.9016	75.9794	64.5774
	148	83.466	80.0093	78.4489	92.7268	84.1864	79.7357	83.9994	81.0122	66.4794	94.6553	75.1954	70.1502	92.887	76.4557	64.3777
	148.1	83.3586	79.9396	78.063	93.1546	83.6326	79.7146	83.3519	80.8967	66.625	94.5361	75.2494	70.2711	92.5086	76.2133	64.4024
	148.2	83.3238	79.8773	77.8008	93.4206	82.9668	79.4367	82.9252	80.9394	66.573	94.4206	75.587	70.1914	91.7816	75.5154	64.3332
	148.3	83.6939	79.6093	78.3004	93.5008	82.633	78.6994	82.9222	80.6291	66.1159	94.0324	75.7122	69.3661	91.365	74.9083	64.2689
	148.4	84.0296	79.3679	78.8663	92.8703	82.7297	77.9496	82.9469	80.4601	65.8627	93.4299	75.875	68.9848	91.4049	74.5187	64.0866
	148.5	84.5491	79.4331	79.6086	92.0916	83.2339	77.4486	83.0397	80.3463	65.7917	93.1352	75.9779	68.5099	92.0544	74.5472	64.106
	148.6	84.8062	79.6857	79.6627	91.9326	83.8979	77.5691	83.244	80.3531	66.0236	93.1718	76.1631	68.798	92.4579	74.732	64.0037
	148.7	84.9343	80.1779	79.397	92.0039	84.2536	77.737	83.7251	80.0659	66.4567	93.4326	76.1176	68.7321	92.3657	74.7318	63.9579
	148.8	84.7821	80.3559	78.8014	92.3214	84.1869	77.824	84.0081	80.0621	66.9771	93.8609	76.301	69.2027	91.7997	74.4981	63.9331
	148.9	84.7633	80.4672	78.4461	92.1917	83.6587	77.6759	83.9518	80.2353	67.278	94.1531	76.4991	69.6876	91.3306	74.2772	64.2264
	149	84.3449	80.2443	78.412	92.2252	83.6256	78.042	83.5059	80.843	67.1889	94.3697	76.8862	70.647	91.2997	74.6227	64.5092
	149.1	84.2559	79.9487	78.7938	92.1581	83.9703	78.7691	83.0571	80.6406	66.8963	94.4117	76.5891	71.3161	91.2774	74.9012	64.5378
	149.2	84.0403	79.5549	79.1929	92.3127	84.7666	79.6629	82.8314	80.2596	66.4779	94.6306	76.3521	71.5598	91.3617	75.0133	64.2118
	149.3	84.3059	79.267	79.5818	92.4586	85.3956	80.1982	82.8988	79.6952	65.9514	94.8507	75.8777	71.4131	91.364	74.7773	64.0842
	149.4	84.1564	79.1223	79.6362	92.6933	85.8456	80.3407	83.0081	79.9828	65.4109	95.1651	75.8488	70.9631	91.6044	74.7016	64.5174
	149.5	83.9313	79.3294	79.4354	92.6887	85.6368	80.2328	82.9884	80.5849	65.0191	95.3649	75.6804	70.6922	91.8316	74.5591	65.1383
	149.6	83.4649	79.7033	78.8933	92.4673	85.1162	80.1769	82.675	81.1587	65.096	95.3201	75.6322	70.0373	91.7816	74.2376	65.4277
	149.7	83.3037	80.4344	78.0977	92.0131	84.4917	79.9788	82.5699	81.2192	65.459	95.1046	75.7778	69.5322	91.5354	73.898	65.0187
	149.8	83.2647	80.7398	77.6401	91.7318	84.3247	79.8808	82.7222	80.9142	65.8528	94.6956	76.1411	68.8859	91.1422	73.93	64.5119
	149.9	83.3802	80.7377	77.4764	91.6318	84.1761	79.5576	83.3886	80.573	65.8433	94.62	76.5892	69.0232	90.9858	74.2396	64.0362
	150	83.3363	80.195	77.7159	92.157	84.0477	79.7293	83.9773	80.5586	65.4561	94.4413	76.818	69.4111	91.1001	74.8522	63.8586
	150.1	83.1431	79.9507	77.8489	92.5013	83.9496	79.7286	84.3537	80.6259	65.2666	94.4492	77.1323	69.9758	91.4231	75.1956	63.833
	150.2	83.1024	79.7778	77.9876	92.8148	83.7609	79.9069	84.1929	80.6461	65.5228	94.2868	77.3712	70.1737	91.6629	75.5019	63.9854
	150.3	83.6291	79.8146	78.1631	92.6479	83.6516	79.8801	83.8592	80.1463	66.0466	94.2802	77.4698	70.1097	91.7702	75.3018	64.1596
	150.4	84.5434	80.0598	78.5053	92.9817	83.4756	80.2974	83.7043	79.7606	66.3463	94.4147	77.2003	69.9194	91.8854	74.6924	64.0213
	150.5	85.3054	80.6352	79.0346	93.7438	83.6598	80.4294	83.8642	79.4273	66.3984	94.7681	76.61	69.8238	91.9822	73.9849	63.7517
	150.6	85.2957	81.1889	79.348	94.3253	83.839	80.4488	84.2938	79.4184	66.4188	95.2814	76.0032	69.746	92.2793	73.4428	63.4917
	150.7	85.1152	81.0869	79.2749	94.2772	83.588	79.9374	84.4511	79.4112	66.5592	95.8156	75.5912	69.9741	92.2737	73.6586	63.7234
	150.8	84.7462	80.5001	78.8026	93.0879	83.5101	79.5796	84.4148	79.3824	66.5928	96.0518	75.5529	70.0451	92.4119	73.982	63.8894
	150.9	84.6991	79.6533	78.5343	91.941	83.5748	79.1602	84.254	79.5706	66.4856	95.7821	75.75	70.31	92.0908	74.2601	64.2256
	151	84.5326	79.3281	78.4534	90.9839	84.3867	78.9676	83.9774	79.6897	66.0619	95.077	76.1324	69.9713	92.0649	74.0059	64.1978
	151.1	84.5151	79.4467	78.5554	91.1883	84.6526	79.0354	83.7728	79.9633	65.6641	94.548	76.4536	69.6618	91.9893	73.7036	64.3117
	151.2	84.6644	80.0508	78.7217	91.7617	84.3946	79.1932	83.1813	80.1182	65.2332	94.1073	76.5428	69.1428	92.2066	73.5483	64.1388
	151.3	84.8242	80.6046	79.049	92.507	83.679	79.3073	82.7996	80.3854	64.914	93.8913	76.2807	69.2201	92.335	73.6536	64.1427
	151.4	85.0346	80.9112	79.437	92.7331	83.134	79.2411	82.4419	80.6669	64.8423	93.7779	76.1041	69.1908	92.2523	73.7179	64.2821
	151.5	84.904	80.9491	79.3806	92.8519	82.9532	79.3846	82.5536	80.9647	65.1907	94.2371	76.3087	69.3339	91.9056	73.755	64.5354
	151.6	84.7538	80.5731	79.2567	92.8002	82.6164	79.6219	82.9333	81.1702	65.8921	94.783	76.8469	69.2647	91.0822	73.9574	64.6252
	151.7	84.5871	80.1389	78.7818	92.9638	82.2552	79.667	83.0652	81.1002	66.3421	94.9181	77.1649	69.6347	90.647	74.3214	64.5723
	151.8	84.4518	79.6692	78.3844	92.9252	81.9218	79.4738	82.7564	80.5829	66.3942	94.5197	76.9886	69.8282	90.5396	74.5922	64.5241
	151.9	84.4038	79.6376	77.7861	92.7867	82.1319	79.2778	82.1986	79.791	66.2218	94.3568	76.396	69.9961	91.2127	74.3443	64.6612
	152	84.2411	79.7716	77.7863	92.2401	82.5713	79.478	82.2911	79.0864	66.1012	94.4023	75.947	69.7856	91.7056	73.9918	64.828
	152.1	83.9448	80.0639	78.4262	91.8511	83.1424	79.7479	83.1523	79.0361	66.1297	94.6208	75.8201	69.7196	92.2627	73.748	65.0179
	152.2	83.3717	79.9979	79.2707	91.429	83.3726	80.0827	83.8253	79.5243	66.197	94.0962	76.0148	69.6574	92.5027	74.0896	64.9247
	152.3	83.034	79.9448	79.6952	91.1752	83.7268	80.7153	83.762	80.2062	66.2257	93.5237	76.413	69.6618	92.651	74.7572	64.7976
	152.4	83.242	79.7458	79.4681	90.9597	83.9906	81.4026	82.9558	80.3871	66.1343	92.8416	76.8248	69.4948	92.215	75.2226	64.5429
	152.5	84.1627	79.9126	79.0279	91.2166	84.3116	81.9799	82.2593	80.3067	65.8403	92.7634	77.141	69.2612	91.8426	75.293	64.4317
	152.6	84.8364	80.0471	78.7232	91.9197	84.1987	81.4588	82.1337	80.169	65.6081	93.0241	77.1211	69.3654	91.5788	74.7909	64.0709
	152.7	85.3313	80.4096	78.7658	92.6828	84.0092	80.8713	82.5917	80.5257	65.523	93.4417	76.7886	69.7369	91.6143	74.5499	63.8237
	152.8	84.9946	80.4969	78.9836	93.1647	83.9444	80.1986	83.4581	80.9537	65.5073	93.7237	76.6482	70.3518	91.405	74.5328	63.5119
	152.9	84.4402	80.3889	79.174	93.1063	84.1909	80.2788	84.197	81.1192	65.5602	93.7347	76.5577	70.344	91.1767	74.7443	63.432
	153	83.6746	79.9049	79.32	93.04	84.6426	80.342	84.2849	80.5401	65.571	93.8607	76.807	70.1442	91.459	74.92	63.2992
	153.1	83.429	79.6606	79.3849	93.0461	84.9413	80.4212	83.7998	79.5483	65.6483	94.0508	76.6238	69.663	92.1962	74.8884	63.3874
	153.2	83.611	79.8693	79.2173	93.1673	84.7288	80.2512	82.9652	78.6041	65.6804	94.2373	76.3759	69.492	92.868	74.9602	63.6311
	153.3	83.7014	80.1894	78.8449	92.6869	84.3678	80.0397	82.4884	78.2956	65.6659	94.3078	75.8854	69.4202	92.9277	74.6688	63.8379
	153.4	83.6602	80.4726	78.5453	91.944	83.8981	79.9552	82.3423	78.6474	65.857	94.3952	75.5776	69.3772	92.519	74.339	63.9261
	153.5	83.6549	80.2789	78.5579	91.2377	83.9672	79.9298	82.4522	79.5477	66.1277	94.7394	75.5036	69.5449	92.062	73.7034	63.7558
	153.6	83.9743	80.2784	78.3321	91.3672	83.61	79.7739	82.5718	80.2753	66.4881	95.1574	75.5512	69.6944	91.8376	73.4712	63.7118
	153.7	84.2611	80.0868	78.2539	91.7428	83.2548	79.5057	82.5722	80.6199	66.3544	95.5828	75.8181	69.9373	91.7972	73.5196	63.816
	153.8	84.287	79.9572	78.1391	92.3739	82.8673	79.5089	82.5493	80.5171	66.0208	95.6428	76.1688	69.937	91.9927	73.7766	64.1223
	153.9	84.29	79.6619	78.4517	92.5653	83.0903	79.7431	82.8388	80.6208	65.4546	95.3494	76.7426	69.7297	92.1294	73.9156	64.5833
	154	84.2232	79.5831	78.4488	92.5853	83.7319	80.0186	83.237	80.9283	65.4934	94.6069	77.4204	69.363	92.3351	73.8714	65.0942
	154.1	84.1914	79.6003	78.3123	92.3613	84.1963	79.9628	83.3469	81.3211	65.5294	93.8398	77.803	68.7338	92.2444	73.796	65.6961
	154.2	84.024	79.7847	78.3264	92.2896	84.3008	79.8121	82.7304	81.0202	65.7589	93.0868	77.8178	68.2628	92.0486	73.8046	65.9164
	154.3	83.9462	79.9628	78.6236	92.3629	84.0212	79.7924	82.2713	80.2953	65.7011	92.8212	77.463	68.3079	91.8224	74.0184	65.5589
	154.4	84.2731	80.4327	79.1	92.404	83.7351	79.6881	82.545	79.2109	65.9544	92.7743	77.3811	69.094	91.6509	74.2319	64.6182
	154.5	84.4594	80.9917	79.0412	92.1592	83.5014	79.5143	83.4012	78.9647	66.3566	93.1546	77.4823	69.9781	91.4179	74.1819	63.9044
	154.6	84.8661	81.2738	78.8424	91.9608	83.0009	79.0364	84.0723	79.2617	66.6194	93.3794	77.6088	70.2296	90.826	73.9741	63.6962
	154.7	84.7844	81.0143	78.7266	91.842	82.6123	78.6348	84.3332	80.153	66.4334	93.6703	77.3806	70.1081	90.0956	73.8187	64.1784
	154.8	84.8447	80.4899	79.0659	92.2857	82.6663	78.4719	84.3297	80.6433	66.0823	94.035	77.1008	69.9472	89.7924	74.0003	64.5571
	154.9	84.4834	80.357	79.2024	92.6426	83.5352	78.5907	84.013	80.6336	65.8507	94.6992	76.9041	70.1417	90.0488	74.1812	64.8654
	155	84.177	80.388	79.0104	92.843	84.2024	78.8821	83.4284	80.2621	65.7341	95.2506	76.841	69.9312	90.8332	74.6369	64.5159
	155.1	83.8877	80.6314	78.6559	92.666	84.1787	79.2421	83.0462	79.9227	65.3474	95.4443	76.743	69.658	91.2988	74.6532	63.9988
	155.2	83.4674	80.5012	78.8197	92.4029	83.1953	79.5678	83.0913	79.8514	64.9893	95.1032	76.6158	69.544	91.3417	74.6128	63.379
	155.3	83.0568	80.6992	79.1093	92.2427	82.3631	80.0113	83.4722	80.024	65.1958	94.9633	76.5624	70.0733	90.6732	74.2599	63.3951
	155.4	82.6791	80.5099	79.4852	92.0092	81.8066	80.0642	83.799	80.0321	66.0462	95.0392	76.5492	70.6743	90.3537	74.3159	63.7512
	155.5	82.7816	80.5763	79.5924	92.215	81.9801	80.0691	84.0319	80.0268	67.0118	95.367	76.4552	70.7679	90.5047	74.2671	64.1351
	155.6	83.1028	80.3066	79.9612	92.4388	82.097	79.7983	84.0281	79.6599	67.4591	95.2121	76.3633	70.5284	91.525	74.2654	64.2421
	155.7	83.3592	80.6452	80.2903	92.512	82.2257	79.7308	83.8114	79.5596	67.2928	94.4289	76.441	70.208	92.3928	74.6721	64.314
	155.8	83.5719	80.7807	80.4984	92.0691	82.1951	79.6301	83.4513	79.3812	66.7543	93.5339	76.5436	70.275	92.7169	75.0669	64.3898
	155.9	83.8304	80.9723	80.1844	91.8868	82.3677	79.6188	83.2971	79.4203	66.2769	92.721	76.4032	70.1982	92.5506	75.1969	64.4346
	156	84.1631	80.6127	79.4982	92.3266	82.6702	79.4542	83.4393	79.4113	66.1694	92.9019	75.8793	70.0261	92.4579	74.1947	64.3392
	156.1	84.4033	80.2456	78.8596	92.7537	82.8789	79.2393	83.5509	79.5368	66.3397	93.5721	75.3814	69.6924	92.7658	73.3347	64.3174
	156.2	84.122	79.7297	78.7553	92.8847	82.7922	78.9884	83.4317	79.4884	66.189	94.5082	75.0418	69.6383	92.9688	72.6561	64.4767
	156.3	83.7634	79.2589	79.1917	92.3873	82.9041	79.0158	83.0624	79.0883	65.6191	94.8892	74.8519	70.0753	92.7436	72.6182	64.7932
	156.4	83.4279	78.9102	79.6448	92.0708	83.1086	79.1558	83.0006	78.7937	65.2151	94.8279	74.9569	70.6179	92.438	72.6678	64.9577
	156.5	83.8912	78.7177	79.609	91.6434	83.5842	79.1703	83.3259	78.8852	65.3183	94.9597	75.4003	70.8799	92.4512	73.1578	64.7701
	156.6	84.2669	78.7272	79.226	91.4643	83.4506	79.0051	83.5666	79.4713	66.0648	95.1971	76.097	70.4757	92.5032	73.7354	64.2348
	156.7	84.5633	78.9032	78.6928	91.6634	83.2031	78.7679	83.489	79.7856	66.3833	95.2891	76.5471	69.7619	92.3367	74.6516	63.8263
	156.8	84.4224	79.3879	78.2902	92.1659	82.9788	78.7553	82.991	80.0119	66.6259	94.8423	76.6918	69.2011	91.6758	75.1061	63.8423
	156.9	84.5946	79.7497	78.2373	92.565	83.2026	78.9587	82.7799	80.3439	66.1473	94.0008	76.6968	68.9229	91.1299	75.4799	64.2833
	157	84.7323	79.9588	78.4494	92.3512	83.5781	79.2907	82.7272	80.6117	66.0396	93.4933	76.5508	68.9187	90.7058	75.368	64.695
	157.1	84.4517	80.0398	78.8613	92.107	83.6159	79.5267	83.2163	80.4778	65.9041	93.1902	76.1008	69.1906	90.6653	75.1987	64.585
	157.2	83.9506	80.4897	78.8692	92.3487	83.4938	79.7197	83.71	79.6999	66.3354	93.3731	75.6072	69.5628	90.8723	74.8529	64.222
	157.3	83.492	80.8411	78.6407	93.0251	83.2448	79.6752	84.1933	79.0496	66.389	93.2632	75.6308	69.9452	91.2674	74.4812	63.9431
	157.4	83.5444	80.8514	78.3262	93.5706	83.2347	79.5473	84.2393	78.9903	66.2857	93.4429	76.1831	69.8166	91.8159	74.185	64.4103
	157.5	83.6117	80.1082	78.4797	93.5928	83.3923	78.8783	84.1616	79.4362	65.8319	93.554	76.4852	69.4859	92.3579	74.2479	65.2038
	157.6	83.8734	79.4544	79.1522	93.1997	83.675	78.2837	84.0256	79.8603	65.6797	94.1401	76.2979	68.973	92.9194	74.3684	65.8871
	157.7	84.3984	79	79.7878	92.4786	84.0579	78.2579	83.7172	79.7318	65.6923	94.4248	76.0111	68.904	93.0892	74.8	66.0441
	157.8	84.9134	79.2691	80.0723	91.9638	84.3117	78.7872	83.1962	79.3692	65.8347	94.6896	76.247	68.9227	92.9278	74.8934	65.6632
	157.9	85.2151	79.3997	79.865	91.737	84.1659	79.4131	82.5349	79.0881	65.6633	94.5598	76.5802	69.2932	92.4808	74.8751	65.0617
	158	84.7413	79.6702	79.7354	92.1254	83.7878	79.1861	82.1708	79.2051	65.1246	94.6812	76.7103	69.4321	92.492	74.5438	64.3363
	158.1	84.3659	79.7636	79.6407	92.3548	83.3739	78.922	82.3657	79.4383	64.6377	94.5396	76.4683	69.7644	92.61	74.3749	63.8218
	158.2	84.0869	79.9748	79.6	92.5943	83.1961	78.9467	83.0648	79.4858	64.536	94.3896	76.3424	70.144	92.7373	74.4639	63.9054
	158.3	84.6458	80.2639	79.6438	92.4364	82.891	79.6026	83.946	79.3947	64.7641	93.7751	76.3502	70.8	92.3336	74.3764	64.3614
	158.4	85.0642	80.4558	79.6926	92.2026	82.5019	80.1762	84.4324	79.4767	64.9316	93.4589	76.3064	71.1849	92.0876	73.9916	65.2462
	158.5	85.4303	80.6623	79.682	91.8556	82.465	80.323	84.6131	79.9696	65.013	93.4329	76.1107	70.9358	92.0909	73.5751	65.6517
	158.6	85.0833	80.6804	79.2174	91.7278	82.6997	80.174	84.4937	80.2358	65.2307	93.8542	75.8592	70.161	92.5539	73.4379	65.828
	158.7	84.6962	80.6408	78.7194	92.0109	83.1309	79.9257	84.2229	80.1621	65.3958	94.1926	76.1093	69.6663	93.0101	73.7814	65.3288
	158.8	84.1236	80.7619	78.327	92.4871	83.2863	79.6324	83.8303	79.8111	65.2489	94.3252	76.2704	69.4679	93.1093	74.0069	64.8247
	158.9	83.8083	80.679	78.3888	92.9247	83.208	79.4026	83.528	79.4229	64.679	94.1914	76.6422	69.6173	92.7014	74.2716	64.4512
	159	83.8332	80.6123	78.4798	93.0657	82.9811	79.1767	83.5953	79.0087	64.2688	93.9922	76.5233	69.4893	92.1697	74.3199	64.5624
	159.1	84.3543	80.3627	78.6719	92.8676	82.6967	79.1783	83.7622	78.6184	64.2164	93.7104	76.9588	69.5331	91.8742	74.6138	64.9436
	159.2	84.9408	80.2123	78.7241	92.3862	82.8101	79.2284	83.6756	78.9623	64.631	93.6931	77.0881	69.7071	91.6332	74.9173	65.2827
	159.3	85.0999	80.0574	78.9431	92.0356	82.9654	79.3942	83.2619	79.5463	65.0273	93.8554	77.2419	70.1771	91.2758	75.1736	65.2984
	159.4	84.8916	79.9981	79.1066	91.9117	83.287	79.3179	82.8499	80.005	65.4038	93.9843	76.8888	70.679	90.7614	74.9879	65.1641
	159.5	84.5862	80.1451	79.2264	92.0377	83.3519	79.3564	82.8108	79.5368	65.4949	93.7587	76.7648	70.8094	90.5948	74.7832	64.8792
	159.6	84.7407	80.4004	79.0372	91.9713	83.4836	79.5782	83.0174	78.9267	65.2926	93.3536	76.8453	70.4329	90.5574	74.4688	64.6427
	159.7	85.058	80.7546	78.6364	91.7719	83.3356	80.0012	82.9424	78.3302	64.7051	93.3076	76.7102	69.726	90.8434	74.5103	64.2887
	159.8	85.6311	81.26	78.3664	91.4007	83.1938	80.0581	82.8389	78.5379	63.9874	93.4198	76.2977	69.2931	91.2531	74.191	63.8902
	159.9	85.646	81.9717	78.323	91.1266	82.9513	79.8577	82.6761	78.8164	63.5617	93.6663	75.8002	69.2019	92.0599	73.9863	63.5852
	160	84.9888	82.2941	78.6518	90.9134	83.0366	79.6614	83.1222	79.2014	63.5541	93.7068	75.7148	69.3846	92.8639	73.704	63.2798
	160.1	83.8486	82.0019	78.7732	90.8876	82.9621	79.4673	83.0184	78.8693	64.0467	94.0453	75.7909	69.6784	93.2694	73.8099	63.4932
	160.2	82.9294	81.2791	79.064	91.1409	83.1211	79.0556	82.9187	78.7002	64.6726	94.4391	75.8604	70.1928	93.268	74.1119	63.7862
	160.3	82.6309	80.5919	78.8114	91.3919	83.0038	78.5877	82.5334	78.8374	65.3309	94.6602	75.9474	70.6142	92.8217	74.5248	64.3867
	160.4	82.482	80.2731	78.6693	91.858	83.2472	78.609	82.9192	79.5518	65.716	94.5769	75.9396	70.7767	92.414	74.9486	64.3639
	160.5	82.2671	80.017	77.9956	92.3456	83.2607	78.9517	83.1888	79.936	65.8851	94.0757	75.9239	70.5447	92.032	75.2581	64.112
	160.6	82.4233	80.214	77.9021	93.2239	83.1927	79.2703	83.1653	79.8347	66.1036	93.9316	76.0593	70.4819	91.8481	75.4738	63.5338
	160.7	82.8967	80.5954	78.0859	93.6814	83.2532	79.3372	82.8212	79.0707	66.4481	93.8818	76.4149	70.4231	91.7264	75.7843	63.3983
	160.8	83.8526	80.7993	78.976	93.6137	83.3586	79.4098	82.7244	78.4359	66.9028	94.1308	76.6683	70.478	91.3789	75.8662	63.7824
	160.9	84.039	80.8424	79.7364	92.979	83.8244	79.3999	83.1019	78.0748	67.0787	93.9387	76.2883	70.1956	90.9161	75.6904	64.5443
	161	84.049	80.4207	80.0441	92.6524	83.574	79.4691	83.2989	78.505	67.1298	93.4496	75.6853	69.954	90.8086	74.9216	65.1431
	161.1	83.7341	80.5987	79.7799	92.6923	83.2284	79.6478	83.037	78.9682	66.8188	93.1484	75.3758	69.9319	91.2681	74.3383	65.1469
	161.2	83.6143	80.4118	79.3317	92.6418	82.7248	80.1049	82.326	79.4816	66.469	93.3006	75.2657	70.268	92.141	74.0567	64.8688
	161.3	83.5112	80.5173	78.9138	92.27	82.8237	80.0026	82.1076	79.4941	65.8767	93.7334	75.2347	70.8479	92.4998	74.3718	64.5471
	161.4	83.4269	80.2809	78.515	91.5898	83.174	79.3547	82.3887	79.5872	65.4029	93.944	75	71.2457	92.0887	74.6651	64.428
	161.5	83.7756	80.203	78.0649	91.2632	83.6272	78.5157	83.0213	79.4834	64.9192	94.0382	75.1082	71.6368	91.5712	74.6443	64.4099
	161.6	83.9987	80.1083	77.8448	91.0376	83.5703	78.3401	83.0512	79.3923	64.5758	94.5163	75.4641	71.5352	91.3242	74.2573	64.3233
	161.7	84.1394	79.928	78.1186	91.3458	83.312	78.7523	82.9066	79.0889	64.659	94.9608	75.8084	71.0108	91.693	73.949	64.4009
	161.8	84.1837	79.8369	78.32	91.8262	82.642	79.1898	82.4134	78.4969	64.9283	95.4476	76.1728	69.9777	91.7566	74.054	64.4532
	161.9	84.7582	79.519	78.3513	92.4698	82.4512	79.4048	82.4824	78.0316	65.5357	95.3518	76.236	69.2608	91.6857	74.2841	64.7302
	162	85.446	79.3029	77.557	92.4493	82.333	79.0884	82.5049	77.7046	65.8292	95.3986	76.3326	69.1987	91.4047	74.1851	64.9694
	162.1	85.7991	79.0626	77.1627	92.049	82.592	78.82	82.8844	78.1899	66.1509	95.1481	76.2157	69.7461	91.3479	73.6857	65.0821
	162.2	85.7361	79.1697	76.8606	91.5689	82.8446	78.1883	82.7916	78.9578	66.1553	94.9943	76.1264	70.2552	91.5041	73.2863	65.1084
	162.3	85.5904	79.3263	77.141	91.6804	83.1533	78.0131	82.7482	79.5706	66.1668	94.4716	76.2052	70.6262	91.7753	73.1061	64.8707
	162.4	85.7506	79.4977	77.3202	91.8976	83.6984	77.8009	82.7107	79.6661	65.9351	93.8514	76.4254	70.4848	92.0726	73.2693	64.4761
	162.5	85.7011	79.7583	77.5803	92.3159	84.0202	78.3718	83.0327	79.8039	65.6158	93.3518	76.8486	70.1933	92.0966	73.4466	63.9753
	162.6	85.438	80.0273	77.931	92.5588	84.4986	78.8214	83.2328	80.3299	65.421	93.3718	76.6928	69.6719	91.978	73.8778	63.7506
	162.7	84.7018	80.3603	78.2111	92.8562	84.6791	79.4362	83.2199	80.6987	65.5623	93.8408	76.228	69.5531	91.524	74.1189	64.1398
	162.8	84.0966	80.2463	78.5391	92.6207	84.9643	79.5613	82.9202	80.1769	65.755	94.1697	75.4818	69.9441	91.1603	74.0457	64.899
	162.9	83.8093	80.0324	78.3073	91.7571	84.8628	79.5727	82.7743	79.4646	65.9122	94.1694	75.2858	70.6503	90.8692	73.5953	65.5602
	163	83.844	79.8344	77.9897	90.7149	84.7722	79.3141	82.8657	79.1471	65.7924	94.0264	75.3236	71.1804	90.9633	73.108	65.6252
	163.1	84.0249	79.8664	77.3891	90.1822	84.6533	79.0256	83.2137	79.3972	65.6834	93.8881	75.4317	71.1299	91.2201	72.8692	65.1997
	163.2	84.235	80.17	77.5032	90.2833	85.1619	79.0141	83.6776	79.4371	65.4104	94.1319	75.3542	70.8168	91.5689	72.9337	64.6682
	163.3	84.4374	80.332	77.6374	90.4678	85.6629	79.1799	83.8616	79.267	65.2828	94.1396	75.2982	70.5036	91.8599	73.1457	64.3869
	163.4	84.297	80.5721	77.9732	90.4493	86.1549	79.3938	83.8404	79.2338	65.4423	94.2956	75.4204	70.2059	92.0421	73.5929	64.293
	163.5	83.9443	80.3166	77.8653	90.4388	85.5392	79.1699	83.3773	79.266	65.6152	93.8787	75.7312	69.9432	91.8171	73.8083	64.2204
	163.6	83.8266	80.3159	77.7154	90.6909	84.761	78.639	83.0071	79.2233	65.6623	93.8296	76.1629	69.922	91.5098	74.0503	64.141
	163.7	84.198	80.3588	77.5557	91.3059	83.734	78.3512	82.7243	79.0153	65.4552	93.989	76.6109	70.3539	91.2358	74.3269	63.9731
	163.8	84.7052	80.8913	77.6381	91.8226	83.361	78.4383	82.8094	78.9459	65.3946	94.6746	77.0497	70.904	91.5772	74.8644	64.093
	163.9	85.19	81.1229	77.8744	92.2687	83.127	78.9263	82.9354	79.1022	65.45	95.0024	77.3082	71.2859	91.6818	75.2721	64.0883
	164	85.7148	80.9072	78.0616	92.0281	83.4756	79.2276	82.9974	79.2602	65.549	94.7942	77.0468	71.2461	91.6666	75.1527	64.0884
	164.1	86.3172	80.3619	77.9206	91.7063	83.9483	79.387	82.7549	79.5403	65.3704	94.112	76.4448	71.0768	91.2703	74.7341	63.762
	164.2	86.4161	79.8791	77.7934	91.2638	84.3441	79.3076	82.3446	79.4518	64.7888	93.8314	75.6946	70.6701	91.4538	74.4707	63.6862
	164.3	85.8967	79.7889	77.7922	91.0857	84.2606	79.2349	82.063	79.3007	64.129	93.9529	75.6878	70.3808	91.8702	74.3948	63.86
	164.4	84.859	79.806	78.3004	91.0877	84.1099	79.1914	82.3818	79.1639	63.7	94.4158	75.8061	70.0853	92.1389	74.6157	64.348
	164.5	84.3174	80.0557	78.5459	91.1678	84.0124	79.3786	83.0488	79.5392	63.9928	94.5508	75.9668	69.9857	91.7607	74.8804	64.7507
	164.6	84.3582	80.2307	78.6803	91.2678	84.0742	79.4271	83.6519	79.9012	64.4362	94.5001	75.4264	69.8424	91.0457	75.1692	64.7396
	164.7	84.7832	80.5412	78.5057	91.3707	83.9362	79.4547	83.628	79.7449	65.1344	94.2217	74.988	69.6851	90.3591	75.0409	64.4436
	164.8	84.6767	80.4058	78.6337	91.096	83.7602	79.1643	83.07	79.1483	65.4519	94.1123	74.9734	69.4013	90.3296	74.6439	64.1534
	164.9	84.1297	80.0441	78.8647	90.8432	83.7869	79.1142	82.5678	78.6793	65.4784	94.2398	75.8713	69.291	90.6363	74.639	64.2479
	165	83.5878	79.5426	78.9172	90.425	84.0083	79.2548	82.4543	78.4334	65.011	94.6901	76.8747	69.3608	91.5926	74.8723	64.4799
	165.1	83.5343	79.4542	78.8161	90.7036	84.458	79.9392	82.7649	78.3878	64.2218	94.9172	77.2838	69.6459	92.1683	74.9922	64.542
	165.2	83.5886	79.5189	78.3843	91.2328	84.3084	80.611	82.8919	78.4518	63.6531	94.9197	76.7518	69.9349	92.6429	74.4732	64.4688
	165.3	83.7159	79.4807	78.3988	91.8646	83.9659	81.1347	82.6008	78.7696	63.4128	94.6556	75.957	70.2301	92.658	74.2488	64.2079
	165.4	83.5276	79.2798	78.5783	91.9537	83.3439	80.9513	82.4452	79.0853	63.685	94.516	75.5581	70.263	92.7052	74.3422	64.0647
	165.5	83.764	79.5198	79.1247	91.8241	83.0283	80.3137	82.535	79.3462	64.3203	94.3898	75.585	69.9677	92.5778	74.7034	64.0582
	165.6	84.3414	79.8873	79.258	91.624	82.8616	79.2589	83.0671	79.4661	64.9546	94.3003	75.8737	69.2557	92.4387	74.7664	63.9522
	165.7	85.1944	80.345	79.1511	91.7521	82.8134	78.5098	83.3861	79.2858	65.6503	94.2722	75.8499	68.9263	92.2886	74.9367	63.7239
	165.8	85.382	80.3889	78.6882	92.0498	83.0927	78.2436	83.3227	79.0253	65.9847	93.9816	75.555	69.1533	92.1111	75.246	63.2349
	165.9	84.776	80.5518	78.2276	92.2493	83.4616	78.3209	83.046	78.8271	66.1271	93.6149	75.1537	69.9987	91.857	75.3733	63.3051
	166	84.0559	80.5653	77.9398	92.2332	84.0744	78.4886	82.6294	79.2463	65.9979	93.0687	75.3428	70.5439	91.3953	75.1566	63.7028
	166.1	84.0557	80.5509	78.0348	91.9877	84.4718	78.7117	82.653	79.6127	65.7296	93.0144	75.9958	70.8953	91.1022	74.5033	64.4461
	166.2	84.4029	80.3912	78.2423	91.8316	84.7221	79.178	82.7311	79.8172	65.5459	93.3452	76.7866	70.9144	90.6716	73.9511	64.9891
	166.3	84.5156	80.3429	78.224	91.3908	84.3417	79.7149	82.9739	79.619	65.2683	94.0238	77.0229	71.0072	90.6123	73.5716	65.3358
	166.4	83.7357	80.379	78.2752	91.0424	83.8401	80.013	82.852	79.4206	65.0317	94.3043	76.8736	70.7209	90.5924	73.758	65.2591
	166.5	82.9131	80.3811	78.494	90.8547	83.1303	80.1252	82.8691	79.49	64.7542	94.1072	76.3066	70.3991	91.1481	74.2887	64.7909
	166.6	82.6616	80.587	79.0404	91.3473	82.8552	79.686	82.8776	79.5967	64.5162	93.6359	75.8736	70.0141	91.403	74.8991	64.3103
	166.7	83.2833	80.7011	78.9583	91.7069	82.4466	79.2936	83.0677	79.6559	64.5507	93.6671	75.681	69.8691	91.4116	75.0298	64.0886
	166.8	83.9828	80.7971	78.6279	91.805	82.468	79.1547	82.8342	79.1926	64.8457	93.9683	75.8832	69.7401	90.9388	74.5546	64.1672
	166.9	84.1569	80.8014	78.077	91.4478	82.4504	79.9317	82.5553	78.7199	65.3701	94.4709	76.0363	69.6643	91.0272	73.9586	64.2919
	167	83.8388	80.9402	78.0933	91.5544	82.873	80.8674	82.3854	78.4789	65.6728	94.544	76.1374	69.6927	91.8982	73.5641	64.3662
	167.1	83.7403	81.124	78.02	91.9784	83.0902	81.5444	82.5939	78.5569	65.6572	94.3474	76.306	69.9311	93.0102	73.7367	64.5238
	167.2	83.8479	80.5939	77.7979	92.5829	83.5292	81.4966	82.9299	78.4472	65.4298	93.9199	76.5847	70.3076	93.5908	73.9992	64.7354
	167.3	84.314	79.92	77.4363	92.3792	83.6898	81.2491	83.1376	78.1814	65.253	93.8537	76.3818	70.7234	93.2852	74.3589	65.0703
	167.4	84.6233	79.2248	77.4368	92.1616	83.9047	80.8011	83.0551	78.1432	65.2493	94.1901	75.53	70.7466	92.8263	74.4674	65.2473
	167.5	84.8887	79.2443	77.8978	91.9673	83.6806	80.468	82.7118	78.5107	65.4267	94.6927	74.6908	70.6068	92.3603	74.3441	65.1696
	167.6	84.5854	79.508	78.1889	92.4646	83.2984	80.0821	82.4837	78.8211	65.6103	94.7631	74.5033	70.1714	92.107	74.105	65.0454
	167.7	84.1289	79.8232	78.3286	92.7684	82.8692	79.9114	82.5613	79.0392	65.6948	94.7409	74.9297	70.1849	91.7314	73.8901	65.1568
	167.8	83.7759	79.8696	78.2109	92.8368	82.75	79.8487	83.1119	79.0349	65.5587	94.7619	75.2186	70.0741	91.1269	73.7734	65.4228
	167.9	83.9591	79.6336	78.4622	92.4611	82.9618	79.7811	83.2882	78.9414	65.7273	94.8942	75.2256	70.0351	90.7481	73.9322	65.5897
	168	84.0233	79.3162	78.4614	91.8868	83.0507	79.3583	83.4281	78.7998	65.9882	94.7834	75.1738	69.8036	90.8341	74.0048	65.5039
	168.1	84.0736	79.3192	78.1481	91.7724	82.8579	79.0093	82.9073	78.7078	66.4406	94.6199	75.2573	69.846	91.685	74.2637	65.4496
	168.2	84.0459	79.385	77.416	92.062	82.3114	78.9533	82.9747	78.9377	66.2344	94.5196	75.4672	70.3452	92.4559	74.391	65.1087
	168.3	84.2943	79.6641	77.1873	92.8157	81.8761	79.1596	82.8123	78.8308	66.1033	94.3581	75.6087	70.7434	92.637	75.022	64.6683
	168.4	84.6367	79.6746	77.414	92.8243	81.4597	79.2061	83.1378	78.6028	65.7903	94.2233	75.7204	71.2792	92.0899	75.858	64.5034
	168.5	84.7494	79.822	77.8401	92.6584	81.2711	79.1426	83.2559	78.1597	65.785	94.454	75.8494	71.2538	91.3914	76.4973	64.8209
	168.6	84.7626	79.7219	78.1392	92.2023	81.018	79.4622	83.5176	78.1332	65.2144	94.8519	75.9706	71.2829	91.1862	76.4884	65.3062
	168.7	84.0957	79.5132	78.5678	92.1978	81.0669	79.9167	83.4377	78.3862	64.7948	95.0066	76.2937	70.7231	91.3302	75.8757	65.1021
	168.8	83.6546	79.1522	79.2653	91.7723	81.5579	80.2088	82.9149	78.9376	64.3433	94.6386	76.6951	70.351	91.2816	75.3379	64.8144
	168.9	83.5571	78.9019	79.7776	91.333	82.5783	79.9082	82.644	79.5208	64.2921	94.6518	76.8053	69.7343	91.0018	75.0493	64.3623
	169	84.3202	78.8893	79.6862	91.0343	83.6549	79.6304	82.8377	79.9038	64.19	94.759	76.392	69.3981	90.8187	74.9814	64.2253
	169.1	84.7197	79.1521	79.1012	91.5163	84.1521	79.5413	83.3711	79.8268	64.3207	94.8268	76.048	68.7994	91.4526	75.1218	63.793
	169.2	84.6889	79.6348	78.488	91.965	84.0672	80.0221	83.293	79.4228	64.7633	94.4499	76.2549	68.5608	92.0069	75.2413	63.6562
	169.3	84.19	80.0209	78.4331	92.1488	83.7538	80.3396	82.9163	79.1231	65.0994	94.111	76.9496	68.4618	92.289	75.1259	63.7959
	169.4	84.0732	80.016	78.7441	91.9803	83.5822	80.3963	82.658	79.2636	65.0903	94.0381	76.8824	68.8976	91.6543	74.4888	64.2644
	169.5	84.0814	79.5781	79.014	92.0866	83.4083	79.8903	82.9869	79.7467	64.797	93.9741	76.4348	69.26	91.1816	73.9217	64.3596
	169.6	84.2432	79.2046	79	92.2537	83.1399	79.4936	83.0581	80.0507	64.7243	93.8389	75.7098	69.6387	91.1138	73.8647	64.1319
	169.7	84.3521	79.1507	78.4863	92.2698	82.8477	79.1938	82.5962	79.978	64.7402	93.5458	75.5876	69.8242	91.5601	74.2282	63.9074
	169.8	84.0907	79.489	78.272	92.0612	82.5207	79.4031	81.6491	79.4188	64.5427	93.1478	75.4616	69.8778	91.9707	74.4198	64.2591
	169.9	83.5947	79.9354	77.9973	91.8438	82.5656	79.7517	80.8727	78.5747	64.0792	92.9052	75.5042	69.8637	91.945	74.4192	64.615
	170	82.8492	80.4492	78.1131	91.8943	82.8084	80.2464	80.9118	77.866	63.9268	92.7402	75.5712	69.557	91.833	74.3782	64.6628
	170.1	82.8992	80.6434	77.8859	92.1454	83.4859	80.4637	81.384	77.5032	64.1023	92.7737	75.8033	69.3309	91.7151	74.6424	64.151
	170.2	83.3088	80.4937	77.804	92.3719	83.6703	80.3938	82.148	78.1173	64.5053	92.8614	76.0487	68.8951	91.742	74.9721	64.013
	170.3	84.0139	79.9783	77.87	92.319	83.5958	80.363	82.5744	78.8302	64.876	93.2998	76.3177	68.8493	91.257	75.2868	63.8713
	170.4	83.778	79.7487	78.186	91.8988	83.3484	80.3268	82.8704	79.4057	65.3436	93.891	76.6216	68.9619	90.7083	75.1683	64.0093
	170.5	83.2619	79.8939	78.6941	91.6906	83.489	80.0621	82.8978	79.272	65.8987	94.6272	76.8212	69.3122	90.3981	74.8953	63.8526
	170.6	82.497	80.0726	79.0044	91.8807	83.6171	79.6059	82.563	79.0081	66.0843	95.034	76.7437	69.4494	90.7893	74.3433	64.5163
	170.7	82.5739	79.8902	79.1953	92.1803	83.4142	79.0851	82.3319	78.9916	65.9539	94.997	76.3661	69.5454	91.3913	74.0931	65.1646
	170.8	83.1429	79.6804	78.9866	91.9623	82.9476	79.1896	82.3809	79.1011	65.6201	94.4664	75.8249	69.8701	91.8803	73.6741	65.6889
	170.9	84.3308	79.5516	78.63	91.1493	82.783	79.2414	82.7213	79.2404	65.4068	93.7723	75.3747	70.2347	92.1466	73.6118	65.0466
	171	85.4973	79.9116	78.2993	90.5854	83.1722	79.43	82.6768	79.1766	65.1991	93.4809	75.3677	70.5103	91.9489	73.5251	64.1788
	171.1	86.0163	80.1873	78.2848	90.7706	83.6268	79.3826	82.5771	79.2183	64.9219	93.4629	75.7031	70.2412	91.421	73.8457	63.5527
	171.2	85.5668	80.6699	78.4009	91.2632	83.5897	79.5384	82.8537	79.2652	64.7001	93.7699	76.3111	69.8228	91.0258	74.1316	63.5379
	171.3	84.5299	80.5639	78.6102	91.7377	82.9973	79.5969	83.1912	79.3457	64.6931	94.1086	76.7203	69.4359	91.237	73.9648	63.6926
	171.4	83.6483	80.5436	78.637	91.987	82.5886	79.7004	83.1849	79.1561	65.0129	94.5891	76.8722	69.2447	92.0137	73.5603	63.6718
	171.5	83.2737	80.3376	79.0041	92.2558	82.5892	79.8018	82.4997	79.0261	65.6611	94.7054	76.6612	69.4151	92.6814	73.2157	63.723
	171.6	83.0439	80.5368	79.5172	92.3951	82.9417	79.9499	82.0074	79.1502	66.0126	94.6479	76.3113	69.6046	92.8209	73.6946	64.0449
	171.7	83.201	80.3652	79.9107	92.3213	83.1148	79.9441	81.8897	79.3928	65.8446	94.37	76.3147	69.9633	92.5081	74.2959	64.6188
	171.8	83.3337	80.0747	79.5664	92.1964	82.9578	79.7594	82.0461	79.5976	65.1393	94.7019	76.6324	70.023	91.946	74.5447	65.0394
	171.9	83.681	79.5946	78.5162	92.0381	82.9229	79.6088	82.1841	79.3368	64.4839	95.024	77.057	69.9464	92.0036	74.4843	65.0489
	172	83.688	79.3404	77.6292	91.9861	83.123	79.4319	81.7579	78.9566	64.2981	95.2068	76.8843	69.8303	92.1393	74.5046	64.8357
	172.1	83.8043	79.179	77.3043	92.1368	83.7817	79.1181	81.2458	78.6432	64.3302	94.6281	76.6854	69.7761	92.7033	74.8293	64.616
	172.2	83.9358	79.0712	77.4744	92.3373	83.9691	78.6602	80.626	78.5798	64.6728	93.8611	76.527	69.6269	92.7206	74.8627	64.7793
	172.3	84.3728	79.0158	77.6904	92.3108	83.8648	78.4127	80.5783	78.7372	64.6537	93.1857	76.794	69.3251	92.8434	74.4959	65.0413
	172.4	84.7414	79.2856	77.7936	92.1207	83.6029	78.8513	80.9908	78.6153	64.526	92.8459	76.6333	69.4367	92.8214	73.9717	65.2051
	172.5	85.0499	79.9619	77.9263	91.9893	83.6243	79.4244	81.6217	78.6699	64.256	92.9629	76.3359	69.8692	93.3302	73.8213	64.8974
	172.6	84.7961	80.5598	77.8323	92.2209	83.5727	80.0082	82.0272	78.7531	64.4348	93.5002	76.0971	70.4911	93.5641	74.145	64.5158
	172.7	84.3894	80.8449	77.7879	92.3129	83.3193	79.9826	81.9567	79.2526	64.9144	94.1292	76.156	70.5203	93.31	74.7058	64.2276
	172.8	83.836	80.6219	77.8452	92.2862	83.1072	80.4229	81.724	79.3554	65.2473	94.437	76.1376	70.4643	92.2296	75.1912	64.0997
	172.9	83.8034	80.1979	78.133	91.8264	83.287	80.5793	81.7081	79.3323	65.2122	94.1721	75.7012	70.3756	91.5328	75.4287	64.0749
	173	84.0693	79.8828	78.3211	91.271	83.5962	80.9548	81.6624	79.0072	64.7937	93.9991	75.4443	70.5856	91.6436	75.539	64.1959
	173.1	84.444	79.7597	78.2069	90.7009	83.6243	80.6481	81.753	78.7437	64.5447	93.9728	75.4727	70.7122	92.0822	75.2203	64.8927
	173.2	84.4613	80.2272	78.1857	90.4722	83.3642	80.4122	81.566	78.6202	64.3642	94.3263	76.1522	70.7933	92.1492	74.885	65.7088
	173.3	84.078	80.5072	78.4779	90.9812	83.1518	79.8907	81.7633	78.6724	64.3799	94.3503	76.5751	70.682	91.6708	74.4868	66.3161
	173.4	83.6619	80.687	78.9758	91.6588	83.3302	79.4352	81.9919	79.0889	64.2779	94.1333	76.6989	70.4599	91.3676	74.5679	66.0248
	173.5	83.536	80.4556	79.2403	92.2551	83.7312	78.8837	82.4426	79.3492	64.3208	94.0063	76.1058	70.1114	91.2508	74.7424	65.2454
	173.6	83.6182	80.2784	79.092	92.4428	84.2007	78.4904	82.7074	79.652	64.2643	94.1662	75.416	69.9038	91.1771	74.9846	64.6584
	173.7	83.5792	79.9156	79.0491	92.3122	84.3319	78.0896	82.8193	79.5457	64.2838	94.5403	74.9829	69.9791	91.184	74.9696	64.4864
	173.8	83.3894	79.6113	79.2063	92.1939	83.9778	78.0509	82.9113	79.182	64.0331	94.3606	75.0464	70.1373	91.3077	74.8087	64.7516
	173.9	83.2333	79.3321	79.0974	91.7371	83.2464	78.0719	82.7203	78.3547	64.0332	94.0136	75.3843	70.2086	91.4914	74.2836	64.8024
	174	83.6926	79.3938	78.6213	91.5801	82.7142	78.4772	82.5537	77.8217	64.236	93.5762	75.6334	70.1332	91.1971	73.8287	64.8399
	174.1	84.4109	79.3638	78.1062	91.1404	82.6222	78.8053	82.2839	77.9921	64.6264	93.6878	75.6916	70.185	90.9601	73.562	64.5263
	174.2	85.0913	79.649	78.4472	91.1291	82.8099	79.2104	82.4598	78.6916	64.5881	93.9014	75.7244	70.3056	90.9457	73.5848	64.2561
	174.3	85.0488	79.8966	79.0816	91.381	82.9761	79.2039	82.8019	79.1907	64.2152	94.2998	75.9148	70.1846	91.3592	73.7186	64.048
	174.4	84.6787	80.0617	79.407	92.3026	82.7094	79.1057	83.28	78.9894	64.1447	94.5841	76.2501	69.8388	91.3646	73.8606	64.2552
	174.5	84.1922	79.6638	78.7722	92.9581	82.5309	78.7766	83.6912	78.4927	64.5062	95.0533	76.5906	69.5881	91.2506	74.132	64.4246
	174.6	84.0313	79.1836	78.1102	93.1312	82.2416	78.6464	83.953	78.284	64.9038	95.5319	76.8426	69.675	91.1603	74.3789	64.5856
	174.7	83.5563	79.0938	78.0332	92.8044	82.8481	78.5564	84.0719	78.4904	64.741	95.6974	76.8521	69.805	91.7482	74.7663	64.3866
	174.8	83.2686	79.5869	78.8836	92.7166	83.2877	78.8126	83.9653	78.9389	64.4961	95.3886	76.7577	69.8669	92.6773	75.156	64.3123
	174.9	82.8974	80.3083	79.3746	92.4972	83.8357	78.895	83.2842	79.3024	64.3652	94.7037	76.308	69.7571	93.6408	75.3033	63.9733
	175	83.1452	80.7843	79.0424	92.2786	83.7383	78.5788	82.3129	79.9048	64.7849	94.196	76.174	69.6909	93.8728	74.6166	63.6077
	175.1	83.3057	80.8719	78.3928	91.966	83.8149	78.1664	81.161	80.3039	65.0997	93.7097	75.8324	69.4317	93.2268	73.8621	63.249
	175.2	83.4718	80.4407	78.5741	92.0506	84.2147	78.1488	80.6714	80.4277	65.4568	93.4517	75.7174	69.3009	92.325	73.6829	63.2087
	175.3	83.476	80.2059	79.4986	92.3951	84.6169	79.1881	80.6917	79.8262	65.1364	93.4176	75.2629	69.3268	91.657	74.38	63.6793
	175.4	83.6187	80.2627	79.932	92.2944	84.6309	80.1426	81.2669	79.1817	64.784	93.5856	75.2008	69.5863	91.4771	75.2798	64.2289
	175.5	83.8722	80.98	79.4112	91.8886	83.8988	80.8289	82.0069	78.6207	64.2529	93.8008	75.6599	69.8256	91.3478	75.5574	64.6314
	175.6	84.4188	81.5934	78.517	90.9939	83.1962	80.2083	82.3971	78.1688	64.2843	93.7437	76.2776	69.8581	91.4091	75.6577	64.4768
	175.7	84.7511	81.8073	77.9002	90.2957	82.904	79.7096	82.3901	78.112	64.6097	94.1561	76.6601	69.6601	91.4356	75.3317	64.1364
	175.8	84.8881	81.3918	77.7778	89.8172	83.257	79.2601	82.2648	78.1974	65.2244	94.751	76.4806	69.2606	91.6607	75.0993	63.9338
	175.9	84.4609	80.656	77.6996	89.7643	83.9561	79.5822	82.4293	79.0311	65.6626	95.606	76.4342	69.0663	91.7644	74.5633	64.1362
	176	84.1132	80.246	77.8102	90.1852	84.5418	79.6757	82.7079	79.3171	65.8697	95.809	76.759	69.3303	91.7958	74.0336	64.2483
	176.1	84.0722	80.0902	77.8228	90.8334	84.9352	79.6582	82.4568	79.3594	66.0537	95.3866	76.9842	69.8739	91.5206	73.9353	64.2071
	176.2	84.4924	79.9236	77.7984	91.3501	84.9024	79.37	82.0501	78.6613	65.9248	94.5209	77.3168	70.491	91.2532	74.2486	64.0301
	176.3	85.1982	79.52	77.7563	91.8692	84.5707	79.2712	81.8108	78.5226	65.3832	93.9214	77.1654	70.5353	91.393	74.8051	64.0991
	176.4	85.256	79.1443	77.9736	91.9482	83.8164	79.2319	82.2439	78.7146	64.4708	93.6924	77.381	70.417	92.0831	74.8942	64.2381
	176.5	84.6448	79.2828	78.403	92.1638	83.1467	79.1763	82.8159	79.4229	63.9701	93.5606	77.2779	70.1596	92.6479	74.6426	64.2374
	176.6	83.5878	79.4691	78.549	91.7154	82.5917	78.9847	83.1179	79.7541	64.1316	93.0893	77.5304	70.3494	92.4854	74.2921	64.3508
	176.7	83.2466	79.7829	78.1901	91.4119	82.6004	78.7914	82.9424	80.0151	64.5682	92.7371	77.7198	70.535	91.6059	74.2468	64.2758
	176.8	83.6819	79.8486	77.7983	90.9944	82.7406	78.8727	82.5497	79.9169	64.9052	92.7893	77.8599	70.3833	90.9586	74.4131	64.4787
	176.9	84.267	80.0416	77.8762	90.9984	83.3038	78.9061	82.0816	79.8608	64.9579	93.2491	77.8373	69.6428	91.1298	74.6843	64.4142
	177	84.4909	80.1496	78.4156	91.1046	83.6937	79.014	81.8447	79.7182	64.7606	93.7673	77.3283	68.9978	91.9114	74.3906	64.6249
	177.1	83.8154	80.2833	79.026	91.2687	84.0639	78.9213	81.684	79.6866	64.6766	94.4306	76.9844	68.6649	92.6403	73.8061	64.6541
	177.2	83.2323	80.548	79.1524	91.4909	84.1533	78.9354	81.6971	79.5247	64.4957	95.2574	76.527	68.8732	92.6783	73.0822	64.6793
	177.3	83.0472	80.5564	78.9856	91.4457	84.1557	79.0463	81.4593	79.4509	64.5086	96.189	76.6514	69.2632	92.1472	72.989	64.738
	177.4	83.8482	80.3359	78.4248	91.3724	83.7898	79.3924	81.2983	79.4398	64.5296	96.2883	76.7393	69.5477	91.3316	73.3256	64.6833
	177.5	84.5693	79.6374	78.1238	91.3044	83.4581	79.7849	81.287	79.6468	64.7507	95.9392	76.7612	69.7492	90.8172	73.9166	64.7039
	177.6	84.8779	79.354	78.0128	91.4554	83.2166	79.9428	81.518	79.7862	65.0801	95.1462	76.5791	69.5719	90.596	74.511	64.4369
	177.7	84.6847	79.6136	78.4499	91.3829	83.1589	79.9252	81.4946	79.706	65.055	94.9566	76.485	69.6973	90.5989	74.8766	64.386
	177.8	84.651	80.4231	78.901	91.122	83.0266	79.8003	81.2758	79.6462	64.965	94.8024	76.761	70.0003	90.7496	74.8046	64.2021
	177.9	84.781	81.1078	79.272	90.8943	83.0807	79.8344	81.348	79.4337	64.825	94.8809	76.9868	70.4663	90.9066	74.3969	64.1527
	178	84.9518	81.2089	79.0204	90.8478	83.412	79.8074	81.7877	79.3051	65.115	94.6117	76.8327	70.7978	91.243	74.1968	64.0329
	178.1	84.9497	80.8311	78.5358	90.7374	83.7841	79.72	82.4451	79.1193	65.4056	94.4587	76.4848	70.7321	91.3194	74.6023	63.844
	178.2	84.6041	80.2543	78.1052	90.4106	83.7403	79.4908	82.674	79.0258	65.5956	94.3039	76.4738	70.8323	91.5282	75.1951	63.8838
	178.3	84.3876	79.7969	78.1037	89.9966	83.7267	79.3064	82.8224	78.9812	65.4522	94.4433	77.0318	70.5141	91.6754	75.0461	63.7903
	178.4	84.1191	79.6206	78.7346	90.0164	83.9071	79.5334	82.7257	78.8968	65.3726	94.6433	77.379	70.4493	91.9983	74.5442	64.0634
	178.5	84.3707	79.6848	79.2136	90.5588	84.3229	79.8648	82.6912	78.8513	65.2714	94.4713	77.061	70.1869	92.2638	73.9436	63.9799
	178.6	84.4737	79.9622	79.5446	91.45	84.5404	80.0031	82.3884	78.8424	65.5069	94.249	76.185	70.2851	92.3012	74.1816	64.0693
	178.7	84.7746	80.2723	79.3133	92.0386	84.5578	79.7379	82.0314	78.9008	65.7262	94.0486	75.5401	70.3248	92.2342	74.3252	64.1057
	178.8	84.9314	80.1886	79.0926	92.1939	84.5201	79.6161	81.7787	79.1226	66.1001	94.4054	75.697	70.4482	91.9547	74.5099	64.3359
	178.9	85.3258	80.1944	78.7641	92.1293	84.1598	79.7977	81.5289	79.3939	65.8252	94.6721	76.125	70.5878	91.6584	74.4862	64.5211
	179	85.4808	79.9534	78.5309	92.0078	83.7897	79.9827	81.4763	79.5497	65.2778	94.5892	76.6548	70.7311	91.4999	74.5169	64.7482
	179.1	85.3891	80.3284	78.3568	91.8266	83.4869	79.7829	81.1483	79.1329	64.5698	94.0584	76.7049	70.6788	91.2998	74.5396	64.8038
	179.2	84.811	80.545	78.4772	91.3216	83.5688	79.6033	81.0242	78.4734	64.4707	93.5166	76.9896	70.2669	91.0498	74.3724	64.5039
	179.3	84.5868	80.952	78.5694	91.0332	83.3594	79.3224	80.893	77.7756	64.6506	93.3932	77.1441	69.5128	90.3824	74.1046	63.735
	179.4	84.5138	80.8222	78.8174	91.0042	82.8367	79.1554	81.2157	77.8372	64.9454	93.6293	77.3304	68.8934	89.972	73.7728	63.2161
	179.5	84.904	80.7926	79.1122	91.542	82.3782	78.7471	81.7713	78.348	65.0803	93.9013	76.8951	68.9621	90.0086	73.7536	63.5844
	179.6	84.8914	81.0584	79.2483	91.9761	82.1902	78.9914	82.3481	79.3182	65.1741	93.9999	76.456	69.5173	90.407	73.9519	64.3882
	179.7	84.8334	81.4334	79.3486	92.2127	82.2056	79.6154	82.6672	79.6411	65.0671	93.8362	75.9882	70.0319	90.6792	74.2917	64.756
	179.8	84.5711	81.5661	79.1049	92.0374	82.3221	80.2239	82.5117	79.6587	64.7427	93.7864	76.3118	69.8922	90.6609	74.1816	64.4928
	179.9	84.3968	81.2092	79.2764	91.8007	82.6876	80.1348	82.2491	78.9353	64.3098	93.7603	76.6724	69.5922	90.6144	74.1628	64.0707
	180	84.3659	81.022	79.1432	91.7163	83.3584	79.8246	81.8496	78.7839	64.0476	94.1284	77.1678	69.5353	90.6423	74.2857	64.2013
	180.1	84.4254	80.931	79.2258	92.0789	83.6134	79.928	81.9889	78.4534	63.986	94.4237	77.2109	69.9426	90.6164	74.5616	64.1401
	180.2	84.5637	80.982	79.1646	92.7568	83.6216	80.3198	82.1626	78.7769	63.8684	94.481	77.1132	70.2783	90.7549	74.5888	64.2747
	180.3	84.3664	80.8432	79.2777	93.3771	83.7082	80.3314	82.5944	78.9226	63.6719	94.0309	76.6833	70.085	90.9962	74.4028	64.2194
	180.4	84.1177	80.6734	79.3804	93.3646	84.0378	79.887	82.6048	79.378	63.7298	93.5353	76.3463	69.7063	91.2666	74.3898	64.3879
	180.5	84.3316	80.4262	79.3382	92.6291	84.3997	79.465	82.5263	79.739	64.3513	93.357	76.0856	69.4947	91.2787	74.3499	64.3748
	180.6	84.9013	79.9852	79.5378	91.4538	84.1064	79.3726	82.2917	79.7942	65.0548	93.5419	76.2631	69.8021	91.2521	74.3517	64.3254
	180.7	85.3412	79.3606	79.6748	90.8506	83.6342	79.4944	82.1291	79.8807	65.3116	93.7183	76.3786	70.0204	91.3449	74.2813	64.6022
	180.8	84.9937	78.73	79.7698	90.606	83.297	79.5273	81.9442	79.5181	64.7989	93.9319	76.7862	70.0869	91.4679	74.3076	64.8402
	180.9	84.7102	78.6857	79.5646	90.9897	83.2003	79.4929	81.792	79.2659	63.9916	94.0462	76.9513	69.9774	91.269	74.0246	65.0722
	181	84.5843	78.9899	78.9941	90.8776	82.8881	79.3118	81.6491	78.6517	63.3819	94.2304	76.9387	70.0259	91.2433	73.7913	64.808
	181.1	84.6564	79.4896	78.6127	91.1383	82.1821	79.1208	81.6366	78.5051	63.2907	94.4611	76.3726	70.0069	91.3686	73.6784	64.6343
	181.2	84.581	79.877	78.33	91.1758	81.6322	79.1529	81.7488	78.5901	63.6878	94.7653	75.8611	69.7416	91.608	74.0217	64.3842
	181.3	84.6644	80.2718	78.5259	91.8088	81.6777	79.3102	81.7272	79.0464	64.2361	94.9246	75.7317	69.4701	91.5672	74.0933	64.4706
	181.4	84.9661	80.5534	78.5896	91.7997	82.1333	79.5482	81.5868	79.1904	64.5273	94.6292	76.1004	69.2527	91.5274	74.2	64.3777
	181.5	85.0951	80.4198	78.4441	92.0059	82.4536	79.5109	81.2197	79.1058	64.6132	93.9927	76.4081	69.4473	91.911	74.2929	64.2952
	181.6	85.0257	79.9426	78.4712	91.6557	82.7098	79.3034	81.1376	78.7691	64.4517	93.6312	76.5077	69.5259	92.4789	74.6906	63.9802
	181.7	84.6943	79.3723	78.6843	91.6098	82.9531	78.8761	81.3652	78.5951	64.4341	93.7457	76.4157	69.4789	92.8749	74.9559	63.836
	181.8	84.2251	79.3449	79.0869	91.0374	83.5019	78.446	81.888	78.6861	64.3377	94.0677	76.4961	69.2027	93.0577	74.9061	63.7802
	181.9	83.581	79.6101	78.8816	90.7043	83.8851	78.2384	82.2264	79.0222	64.355	94.1784	76.4857	69.0066	92.9936	74.9486	63.7246
	182	83.1666	79.928	78.4919	90.6566	84.0327	78.3922	82.5518	79.2009	64.2576	93.8007	76.356	69.1309	92.8484	74.8752	63.6203
	182.1	83.1738	79.8402	78.2598	90.8422	83.7329	78.7478	82.52	79.21	64.4916	93.511	76.1023	69.2389	92.2548	74.9674	63.6791
	182.2	83.4023	79.7522	78.2751	90.9216	83.3467	79.154	82.4644	78.6298	64.7652	93.3899	75.8481	69.2316	91.5231	75.0054	63.8349
	182.3	83.8251	80.017	78.2642	90.8137	83.1983	79.2318	82.0226	77.9534	65.1172	93.7999	75.2059	69.3504	91.1176	75.1442	63.9374
	182.4	84.0274	80.5478	78.0822	91.266	83.4601	79.2598	81.9267	77.0169	65.0308	94.1476	74.483	69.7079	91.3419	75.244	63.4909
	182.5	83.9601	81.2682	78.0516	91.8333	83.813	79.042	81.9699	76.8371	65.0124	94.1658	74.0642	70.1529	91.8533	74.9987	63.1807
	182.6	83.23	81.5333	78.0814	92.3087	83.9449	79.0817	82.0847	76.8368	65.2946	93.9844	74.5836	70.0836	92.0422	74.5149	63.0967
	182.7	82.4368	81.5014	77.9868	92.0993	83.7137	79.0108	81.9436	77.1782	65.7887	94.0701	75.3269	69.7259	91.9602	73.8471	63.3322
	182.8	82.3152	81.2079	77.9316	91.712	83.3083	79.4029	81.9211	77.1816	66.0908	94.5479	76.1387	69.5682	91.6624	73.2361	63.5111
	182.9	82.7019	81.4046	77.7447	91.498	82.9788	79.7307	81.9167	77.6197	65.9738	94.819	76.6129	69.7572	91.2856	73.106	63.6314
	183	83.2492	81.3964	77.642	91.5764	83.1653	80.3897	81.9308	78.1193	65.8953	94.4268	77.3196	70.0599	90.7261	73.6138	63.8694
	183.1	83.0382	81.2249	77.4292	92.1023	83.7176	80.4608	81.7961	78.8239	65.6463	93.6758	77.4822	70.0046	90.517	74.705	64.0069
	183.2	83.0287	80.7104	77.5436	92.2108	84.373	80.3512	82.0796	79.1033	65.1427	93.2461	77.4636	69.8372	90.6424	75.8197	63.9097
	183.3	83.3073	80.7689	77.7476	92.2103	84.261	79.8018	82.6366	79.3412	64.5318	93.334	76.7829	69.6752	91.1083	75.8637	63.8797
	183.4	84.2027	80.949	77.7641	91.8634	83.6387	79.4968	83.2247	79.2246	64.1838	93.4363	76.6481	69.598	91.3539	74.9022	63.9806
	183.5	84.8267	80.8731	77.649	91.8817	82.4612	79.4824	83.3102	79.0069	64.2651	93.5979	76.7221	69.6626	91.6313	73.2643	64.426
	183.6	85.1724	80.4188	77.8234	91.9014	81.7249	79.7363	83.2832	78.5037	64.1567	93.6601	77.0527	69.7442	91.5633	72.5119	64.6533
	183.7	85.028	80.0759	78.577	91.8388	81.6157	79.9023	82.9523	78.1209	64.1322	93.732	76.8048	69.9591	91.588	72.4571	64.7476
	183.8	84.755	80.1947	79.3209	91.8644	82.3256	79.7673	82.8231	77.7373	64.2301	93.3574	75.9286	69.9574	91.2809	72.75	64.4999
	183.9	84.3753	80.3504	79.6174	91.8412	83.2797	79.6694	82.3138	77.4476	64.5086	93.0987	74.786	69.9553	91.2438	72.9748	64.1741
	184	84.0831	80.2688	79.1643	92.1542	83.9508	79.6743	82.0719	77.314	64.3862	93.0706	74.0674	69.8282	90.9606	73.297	63.9723
	184.1	83.7199	79.7197	78.7798	92.1318	84.2672	79.8742	81.7983	77.5386	63.8816	93.4238	74.4424	69.8217	91.0239	73.7818	64.1109
	184.2	83.5956	79.5943	78.6669	92.1531	84.2799	79.6792	81.8379	77.9622	63.5021	93.6574	75.6694	69.838	90.9919	74.056	64.5671
	184.3	83.7784	79.7532	78.8839	91.8558	84.154	79.3511	81.8038	78.3232	63.7141	94.0798	76.8018	70.1809	91.4232	74.1576	64.8991
	184.4	84.3173	80.191	79.0352	91.9006	84.0426	78.6813	81.7561	78.4157	64.1618	94.1348	77.0537	70.5577	91.6481	74.2897	65.0123
	184.5	84.5883	80.2037	78.9108	91.8921	84.0364	78.2507	81.6424	78.5027	64.573	94.3098	76.303	70.7942	92.1818	74.5039	64.969
	184.6	85.0096	80.304	78.7588	92.0431	84.0072	78.2028	81.441	78.7223	64.6263	94.243	75.5768	70.617	92.4299	74.8538	64.8519
	184.7	85.0607	80.4534	78.5051	92.1209	83.9231	78.7181	81.1264	79.0234	64.596	94.4481	75.5306	70.3057	92.6732	75.1956	64.6987
	184.8	85.0111	80.8429	78.359	92.1924	83.7359	79.5377	80.8749	79.0929	64.4693	94.2736	76.3202	70.1238	92.1351	75.8049	64.3487
	184.9	84.1393	80.9578	78.3818	91.8116	83.839	80.0291	80.884	78.9081	64.3031	93.8626	77.1318	70.1627	91.5181	76.0711	64.2204
	185	83.6293	81.0674	78.6511	90.6624	83.7219	80.2572	81.1556	78.7087	64.2676	93.371	77.3714	70.3602	90.7997	76.3646	63.964
	185.1	83.2479	80.769	79.1468	89.8934	83.396	79.9366	81.5417	78.5604	64.3898	93.084	77.1761	70.4367	90.862	76.1357	64.1004
	185.2	83.4208	80.2207	79.5553	89.9022	82.7347	79.4884	81.7727	78.1784	64.7287	93.1961	76.8613	70.0898	90.9507	75.9917	64.2457
	185.3	83.1901	79.4197	79.431	90.9618	82.5038	78.9418	82.0207	77.9312	64.8776	93.495	76.387	69.4101	91.4636	75.3126	64.5503
	185.4	83.096	78.959	78.783	91.7491	82.7682	78.5574	82.079	78.0251	65.0958	93.5704	75.9809	69.0443	91.8049	74.5236	64.4979
	185.5	83.0223	79.2587	77.9562	92.1808	83.0753	78.5902	82.081	78.7148	65.2496	93.524	75.8848	69.2624	92.515	73.7106	64.2557
	185.6	83.4146	79.7303	77.2858	92.0792	83.2949	78.8346	81.8411	79.0986	65.5011	93.4653	76.4502	69.9183	92.9161	73.3501	64.2869
	185.7	83.767	80.1483	76.9556	91.9561	82.9969	79.2873	81.4847	79.1941	65.1997	94.1499	77.0756	70.0241	93.1493	73.4169	64.4284
	185.8	84.1086	80.0366	76.9887	91.9377	83.0289	79.1662	81.2336	78.7679	64.7737	94.4458	77.2536	69.8806	92.5648	73.6778	64.4974
	185.9	84.0546	80.2047	77.7958	92.1344	82.7176	78.8692	81.1652	78.216	64.3313	94.4143	76.9524	69.5593	91.8859	73.7903	64.2218
	186	83.8391	80.5387	78.8799	92.4688	82.8098	78.6518	81.6212	77.6569	64.3173	93.6043	76.5921	69.721	90.9547	73.821	64.191
	186.1	83.3718	81.2368	79.6432	92.449	82.4631	79.224	82.2547	77.5524	64.4061	93.3366	76.5896	69.7872	90.7454	73.7723	64.4838
	186.2	82.9891	81.492	79.4153	92.5833	82.4037	79.7491	82.5554	77.9309	64.7328	93.2832	76.6839	69.7464	90.9722	74.0268	64.6328
	186.3	82.8259	81.473	78.9283	92.1737	81.6826	80.0031	82.2832	78.4137	65.0493	93.855	76.6537	69.5088	91.7409	74.4282	64.3492
	186.4	82.7947	80.9596	78.665	91.8662	81.2576	79.8294	81.7771	78.8229	65.4043	94.2513	76.3298	69.4859	92.3186	74.9566	63.6481
	186.5	82.9618	80.6548	78.7918	91.0411	80.7804	79.7591	81.8107	78.9167	65.4014	94.6394	76.0967	69.7993	92.4486	75.3723	63.484
	186.6	83.0794	80.3392	78.5891	90.6943	81.142	79.648	82.0949	78.7769	65.373	94.6193	76.0023	70.5681	92.0966	75.7598	63.5417
	186.7	83.1267	80.0006	78.1184	90.6481	81.3779	79.2673	82.2249	78.3517	65.2029	94.5561	76.2046	71.3656	91.7396	75.7217	64.038
	186.8	83.0982	79.6944	77.7226	90.9127	81.9407	78.7939	81.8188	78.242	65.0279	94.7589	76.5833	71.815	91.4894	75.6324	64.2613
	186.9	82.9974	79.5589	77.7219	91.2332	82.9113	78.5234	81.284	78.4142	64.8756	95.118	76.9857	71.6277	91.4952	75.2029	64.6959
	187	83.13	79.7147	77.9789	91.1761	84.081	78.5301	81.2267	78.7168	64.586	95.6619	77.098	71.0609	91.5148	75.1278	65.0154
	187.1	83.1437	79.7078	78.4008	91.3678	84.8716	78.6503	81.4413	78.6538	64.5563	95.4	76.7618	70.257	91.7462	75.0344	65.3361
	187.2	83.3084	79.684	78.6084	91.4168	84.7513	78.8087	81.7983	78.2198	64.3577	95.0162	76.4068	69.5033	92.1064	75.0528	65.3888
	187.3	83.4469	79.7814	78.4954	91.5552	84.7457	78.9291	81.4929	77.7531	64.3809	94.1576	76.331	68.9753	92.533	75.1093	65.076
	187.4	83.6793	80.0131	77.8402	91.351	84.694	79.3339	81.1798	77.4502	64.0356	93.9934	76.4468	69.0991	92.695	74.8601	64.5987
	187.5	83.8199	80.0656	77.1962	91.125	84.6327	79.6669	80.8851	77.2552	63.9769	93.7887	76.416	69.423	92.7073	74.6893	64.2483
	187.6	83.7518	79.7684	77.1011	91.3658	84.0109	80.1593	81.1603	77.2279	64.1731	93.8728	75.8631	69.9248	92.3586	74.1296	64.2646
	187.7	83.8402	79.3114	77.6702	91.4953	83.7954	80.0336	81.8264	77.2827	64.8226	94.1078	75.2783	69.8234	92.0852	73.7126	64.5636
	187.8	84.0292	78.7812	78.5291	91.4673	83.8957	79.9334	82.7268	77.7858	65.1207	94.7054	74.8953	69.5788	91.7652	73.1213	64.716
	187.9	84.7189	78.4773	78.9156	91.1181	84.2109	79.5533	83.5581	78.1299	65.1469	95.3481	75.2074	69.0644	91.7627	73.0041	64.8263
	188	84.9428	78.437	78.8011	90.9344	84.0789	79.5112	83.8	78.3483	64.9094	95.4194	75.6753	69.0602	91.7684	73.1342	64.4858
	188.1	84.9989	79.0868	78.4897	91.1017	83.8372	79.3428	83.459	78.1232	64.8138	95.0812	75.9311	69.4488	91.8252	73.6689	64.0128
	188.2	84.5089	79.8982	78.3678	91.3196	83.6913	79.4694	82.8213	77.8187	64.2746	94.6212	75.6231	70.0203	91.6627	74.1801	63.4942
	188.3	84.478	80.7703	78.7556	91.7276	83.8893	79.7644	82.1294	77.3911	63.76	94.2506	75.2866	70.3564	91.2964	74.7036	63.637
	188.4	84.4161	81.1036	79.2167	91.9799	83.9368	80.0688	81.7753	77.2204	63.4726	93.9459	75.0696	70.1157	91.1346	75.0809	64.2239
	188.5	84.3498	81.2058	79.5347	92.0109	84.0237	80.0822	81.7428	77.2923	64.0031	93.7914	75.221	69.9318	91.4053	74.8731	64.7057
	188.6	84.0077	81.0544	79.2854	91.8271	83.6527	79.7271	81.9394	77.6883	64.6434	94.0251	75.2594	69.6961	91.8973	74.3074	64.7379
	188.7	83.825	80.9164	78.8839	91.7781	83.3433	79.4957	82.1767	77.9123	64.8772	94.3463	75.2907	69.8374	91.938	73.4806	64.3183
	188.8	83.9729	80.5999	78.3479	91.8893	83.1241	79.2241	82.3262	77.8422	64.6872	94.6011	75.2977	69.6818	91.5428	73.3667	64.257
	188.9	84.3539	80.2694	78.0409	91.9678	83.2386	79.1704	82.4949	77.4926	64.1994	94.6034	75.5212	69.7794	90.8967	73.5702	64.145
	189	84.5684	79.9713	77.8186	91.9862	83.4277	78.929	82.4746	77.2353	63.7783	94.6027	75.9801	70.0132	90.5328	73.9743	64.3226
	189.1	84.5086	80.1237	77.9281	92.1084	83.2554	78.8848	82.1779	77.3227	63.2233	94.2181	76.3963	70.7079	90.7003	74.1877	64.1576
	189.2	84.2719	80.6327	77.8629	92.4164	82.8137	78.6694	81.9839	77.589	62.8629	93.8534	76.6583	71.006	91.6533	74.4671	64.1157
	189.3	84.0338	80.9524	77.7838	92.3497	82.4463	78.5693	82.0382	77.9944	62.993	93.5512	76.7697	70.7974	92.4346	75.0142	64.0412
	189.4	83.905	80.9083	77.7374	91.9449	82.4629	78.405	82.4427	78.3027	63.4414	93.9592	76.6648	69.9918	92.6928	75.3586	63.9833
	189.5	83.9447	80.7921	77.9194	91.3769	82.797	78.3682	82.8073	78.4303	63.8634	94.43	76.5749	69.5312	92.2836	75.5672	64.0417
	189.6	84.2597	81.1824	77.8468	91.353	82.9598	78.1987	82.8714	78.116	64.0349	94.7774	76.4423	69.2882	92.0658	75.2378	64.0074
	189.7	84.5723	81.5808	77.7602	91.6882	82.8939	78.2134	82.7231	77.5129	63.884	94.6043	76.5708	69.5189	91.966	74.993	64.2766
	189.8	84.8359	81.1294	77.6859	91.9112	82.9662	78.3683	82.3651	76.9892	63.7408	94.2694	76.5901	69.5102	91.8873	74.4511	64.6848
	189.9	84.7659	80.177	78.1086	91.7042	83.1006	78.7898	82.287	77.0474	63.6189	93.9452	76.4411	69.5152	91.736	74.0928	65.2766
	190	84.3679	79.3901	78.2124	91.4923	83.1276	79.2836	82.0354	77.491	63.9892	94.069	76.0972	69.4977	91.6967	73.9568	65.5022
	190.1	83.6661	79.5447	78.1179	91.8113	82.7198	79.7491	81.9483	78.1337	64.7487	94.2984	75.8373	69.6169	91.7996	74.2218	65.4297
	190.2	83.127	80.0398	77.7738	92.3706	82.324	80.2571	81.7953	78.5896	65.0188	94.6041	75.6351	69.9282	91.9982	74.7154	65.5043
	190.3	82.9669	80.6337	77.5163	92.621	82.2983	80.3526	81.894	79.1863	64.7308	94.7101	75.6777	69.9801	91.8801	74.8149	65.8501
	190.4	82.9631	80.9783	77.5476	92.2644	82.5417	80.3098	81.9346	79.7543	63.9091	95.0558	75.7889	70.0087	91.5082	74.8724	65.9862
	190.5	82.8957	81.0963	77.5228	91.7036	82.9974	80.0111	81.5916	80.2508	63.5432	95.3388	76.054	70.2069	90.9076	74.7933	65.6117
	190.6	82.9724	80.8874	77.7247	91.2329	83.1717	80.1721	81.4172	80.2129	63.5533	95.3442	76.0638	70.6978	90.6993	74.7831	64.9391
	190.7	83.3496	80.5357	77.993	91.1369	83.1732	80.3449	81.2131	79.921	63.9807	94.8206	76.0481	71.2749	90.8481	74.7028	64.6881
	190.8	84.017	80.292	78.7183	91.4857	82.9757	80.6742	81.3894	79.2057	64.3686	94.2116	76.1778	71.4873	91.3598	74.4624	64.5231
	190.9	84.7921	79.9979	79.2712	92.0698	82.9658	80.701	81.5071	78.6424	64.5958	93.7573	76.4682	71.3462	91.9293	74.4402	64.5734
	191	85.4389	79.685	79.1807	92.597	83.2149	80.6572	81.6379	78.0259	64.4521	93.8134	76.7381	71.0267	92.421	74.5801	64.3396
	191.1	85.7381	79.0803	78.4304	92.7018	83.6917	80.4926	81.7212	77.9752	64.4591	94.1301	76.555	70.6247	92.3234	74.9647	63.9861
	191.2	85.5921	79.0006	77.5812	92.5278	84.1321	79.9898	81.6579	78.2297	64.4544	94.7304	76.5492	70.391	91.802	75.2552	63.5718
	191.3	85.3737	79.1583	77.0722	91.9424	84.1783	79.5249	81.6109	78.9102	64.5384	94.9741	76.6718	70.2287	91.1119	75.1973	63.2191
	191.4	85.2078	79.8377	76.8678	91.253	84.0167	79.0578	81.4476	79.3604	64.3763	94.7702	77.0827	70.0257	90.8574	75.039	63.5791
	191.5	85.0063	80.3852	76.9911	90.5864	84.0149	79.0646	81.0987	79.4147	64.2624	94.1677	76.9381	69.9963	90.7853	74.9441	64.1238
	191.6	84.6106	80.8351	77.2736	90.3208	84.3109	78.8971	80.7624	78.9424	64.0387	93.7492	76.3668	70.0651	90.9114	74.997	65.0056
	191.7	84.3589	80.5384	77.3467	90.3147	84.405	78.7733	80.7582	78.1498	63.7799	93.6193	75.7403	70.5203	91.006	74.8264	65.1111
	191.8	84.4063	79.6722	77.1331	90.1867	84.1448	78.951	80.9277	77.3489	63.7511	93.5691	75.5773	70.5321	91.2471	74.4731	64.7653
	191.9	84.5064	78.9022	77.2736	90.2907	83.7238	79.4864	80.8366	76.9696	64.1434	93.4984	75.7843	70.3112	91.1737	74.2273	64.0724
	192	84.4711	79.1952	77.8834	90.7868	83.5258	80.1082	80.3313	77.1266	64.7422	93.6967	76.2449	69.7653	90.9673	74.3913	63.9186
	192.1	84.2162	79.8848	78.7521	91.6962	83.4096	79.9926	80.2677	77.61	64.9592	94.0234	76.5824	69.4113	90.3546	74.5423	64.2404
	192.2	84.1471	80.5669	78.8689	92.084	83.4592	79.7499	80.7878	78.176	64.8068	94.3234	76.853	69.1437	89.9823	74.4899	64.6358
	192.3	83.9754	80.3819	78.6263	91.967	83.5134	79.5253	81.5823	78.6358	64.4333	94.3522	76.6866	68.91	90.1246	74.1026	64.834
	192.4	83.9057	80.0781	78.1671	91.5982	83.4119	79.727	81.7566	79.0086	63.9527	94.6642	76.3799	68.6716	90.9286	73.8404	64.6483
	192.5	83.7638	79.4022	78.1511	91.7271	82.9804	79.9974	81.802	78.6462	63.6219	94.8864	76.1116	68.6892	91.7384	74.0267	64.529
	192.6	83.7233	79.1004	78.4514	92.1798	82.5386	79.8454	81.9294	78.143	63.438	95.1307	76.0669	69.0038	91.9172	74.5571	64.4504
	192.7	83.6234	78.9628	78.8811	92.8529	82.2408	79.5499	82.2636	77.4792	63.6562	94.8717	76.1174	69.5233	91.8708	75.3949	64.4879
	192.8	83.4043	79.1104	78.9441	92.6442	82.2384	79.1699	82.4949	77.6544	63.8599	94.7132	76.079	69.825	91.9982	75.5959	64.3769
	192.9	83.5002	78.9967	78.4816	91.5861	82.3324	78.9457	82.4081	77.8742	64.2307	94.7223	76.2461	69.7863	92.5842	75.2479	64.0806
	193	83.9142	79.0487	77.8992	90.1729	82.8952	78.5832	82.0939	78.0163	64.5293	94.9554	76.7384	69.7102	92.8654	74.3372	64.1457
	193.1	84.7592	78.9956	77.6698	89.4582	83.5348	78.2479	81.3053	77.9192	64.8009	95.0657	77.0761	69.7428	92.908	73.9596	64.2177
	193.2	85.134	79.4587	77.7942	89.3669	83.911	78.5998	80.7488	77.9846	64.7294	94.7063	77.1599	70.1608	92.4127	74.1512	64.2802
	193.3	85.0508	79.6992	78.1183	89.7739	83.5686	79.1848	80.6214	78.3871	64.7044	94.4413	76.6794	70.6597	92.0951	74.6096	63.8308
	193.4	84.5461	80.0666	78.4409	90.3646	83.1281	79.7588	81.1484	78.5784	64.7533	94.4698	76.5224	70.8736	91.5943	74.6724	63.8184
	193.5	84.1427	79.7784	78.8676	91.1741	82.7354	79.6638	81.7542	78.4946	64.987	94.9517	76.4267	70.621	91.299	74.4712	64.1134
	193.6	83.6714	79.7409	78.9206	91.5247	82.801	79.6521	82.1364	78.2962	65.1353	94.9793	76.6318	69.9647	90.9089	74.2931	64.7807
	193.7	83.3772	79.7359	78.8454	91.4039	82.944	79.6764	82.1998	78.4007	65.277	94.617	76.6182	69.6013	90.9827	74.3602	64.9603
	193.8	83.445	80.2533	78.5838	90.8464	83.4861	79.9546	81.7636	78.5802	65.5214	93.8177	76.3653	69.6468	91.1709	74.4567	64.9038
	193.9	83.9311	80.3794	78.875	90.4717	83.5097	80.3204	81.4731	78.641	66.0016	93.4809	76.2978	69.9386	91.5867	74.631	64.6476
	194	84.2458	80.3078	79.1943	90.4104	83.368	80.5702	81.2823	78.3386	66.3803	93.6038	76.5277	69.7629	91.4753	74.5703	64.4302
	194.1	84.1026	79.8892	79.2484	90.6929	82.7912	80.6047	81.369	78.223	66.5743	94.3374	76.8826	69.1189	91.7072	74.4919	64.2477
	194.2	83.5674	79.5537	79.0376	91.0093	83.119	80.2638	81.3236	78.0891	66.1236	94.8514	76.9562	68.6523	91.7791	74.2073	64.1892
	194.3	83.3646	79.4483	78.7514	91.5414	83.6168	79.8567	81.0108	78.1637	65.6859	94.9351	76.7509	68.959	92.4637	74.1266	64.1941
	194.4	83.6527	79.5947	79.0961	92.138	84.0314	79.5048	80.9748	77.9618	65.0634	94.7894	76.8301	69.5136	92.5502	73.9096	64.0676
	194.5	84.5114	79.9587	79.2213	92.9173	83.7681	79.208	81.2129	77.9142	64.7327	94.8182	76.7663	69.7991	92.538	73.7353	63.6467
	194.6	84.9521	80.0141	79.2508	93.2424	83.175	79.078	81.7839	77.6676	64.4051	95.0794	76.6676	69.5564	92.0488	73.5198	63.4093
	194.7	85.0649	79.8977	78.8466	93.2582	83.0269	78.9072	81.9769	77.6469	64.2489	95.059	76.3338	69.5404	91.9176	73.5771	63.564
	194.8	84.8428	79.8979	78.8526	92.587	82.7934	78.8832	81.6223	77.4851	64.2338	94.8646	76.3508	69.4256	92.0222	73.538	63.8844
	194.9	84.943	80.2283	79.277	91.9402	82.9411	78.9593	81.4072	77.7231	64.1928	94.5988	76.2631	69.3864	92.5438	73.7142	64.0282
	195	84.8959	80.5667	79.7594	91.2978	82.98	79.464	81.5458	77.652	64.2889	94.2601	76.1107	69.118	92.7751	74.0619	64.0342
	195.1	84.6834	80.3126	79.6583	91.2057	83.5209	79.8658	81.6237	77.4949	64.2022	94.0181	75.7852	69.232	92.8352	74.8238	64.5338
	195.2	84.131	79.8881	79.2882	91.4708	83.9557	80.0422	81.2422	76.9571	63.9447	93.8369	75.8982	69.4977	92.3071	75.2838	64.8867
	195.3	83.8596	79.4159	78.8808	91.9633	83.9461	79.8257	80.5364	77.1098	63.6539	94.0097	75.8181	69.9593	91.9066	75.3701	64.8248
	195.4	83.7604	79.0897	78.7393	92.4281	83.6079	79.6876	80.642	77.4856	63.5956	94.1979	75.4117	70.1742	91.5059	75.1046	64.0853
	195.5	84.0161	78.8826	78.5062	92.2221	83.1851	79.6233	80.8712	77.9259	63.8801	94.168	75.0417	70.295	91.4326	74.7891	63.7144
	195.6	83.9193	78.7739	78.6153	91.7458	83.368	79.4064	81.2798	77.6612	64.2313	93.9442	75.2062	70.2466	91.482	74.4983	63.7676
	195.7	83.9309	78.8647	79.1013	91.334	83.3942	79.1984	81.345	77.6486	64.5872	93.7958	76.1021	70.1934	91.4393	74.1511	64.005
	195.8	83.9299	78.6406	79.9546	91.597	83.4353	78.7558	81.6967	77.917	64.8198	94.1773	76.624	70.1691	91.2984	73.9913	64.1423
	195.9	84.2522	78.3468	80.2528	92.1499	83.0188	78.333	82.2049	78.2394	64.9764	94.8678	76.6913	70.196	91.1352	73.8568	64.2587
	196	84.2619	78.2653	80.031	92.5667	83.0744	77.8604	82.5393	78.2184	64.8831	95.1807	76.0372	70.4324	91.3759	74.0172	64.3242
	196.1	83.9938	78.6806	79.1493	92.844	83.2601	77.948	82.7028	78.0127	64.9517	94.8481	75.559	70.5434	91.9353	74.2003	64.1651
	196.2	83.8308	79.3638	78.7826	92.6229	83.8683	78.6013	82.6403	78.0546	64.9309	94.2016	75.4869	70.2213	92.3266	74.3751	64.072
	196.3	84.0237	79.805	78.8516	92.1044	84.2163	79.3332	82.44	77.9534	65.2729	93.9734	75.8986	69.7306	92.2857	74.4058	64.2902
	196.4	84.1852	80.006	79.68	91.3483	84.3569	79.5256	81.867	77.8233	65.4138	93.9951	76.069	69.6441	91.7508	74.197	64.5996
	196.5	83.8308	79.8544	80.2673	91.0697	84.0528	79.2186	81.2686	77.716	65.393	94.2626	75.8394	70.471	91.3848	74.1676	64.8709
	196.6	83.3528	79.6777	80.3403	91.2874	83.5894	78.817	81.27	77.7682	64.6924	94.5046	75.6359	71.3406	91.0361	73.9388	64.7799
	196.7	83.1396	79.6557	79.6163	91.577	83.2828	78.7286	82.1242	77.6746	63.8216	95.0499	75.7734	71.5754	91.2159	74.0138	64.6401
	196.8	83.3689	80.2197	78.755	91.7257	83.2798	78.7596	83.0166	77.4312	63.1793	95.367	76.2907	70.9028	91.3324	73.8984	64.2853
	196.9	83.366	81.0022	78.2381	91.2429	83.5137	78.984	83.067	77.2812	63.3919	95.3937	76.3949	70.2426	91.8946	74.1821	64.1819
	197	83.2046	81.4442	78.3	90.6496	83.7071	79.1821	82.4717	77.3296	63.8893	94.923	75.8871	69.9167	92.2554	74.4473	64.3841
	197.1	82.9886	81.2137	78.4521	90.1828	83.8091	79.4741	81.7021	77.7659	64.3768	94.3486	75.0398	70.1559	92.7372	74.9137	64.5463
	197.2	82.923	80.8207	78.7784	90.526	83.7507	79.7936	81.5964	78.1894	64.3966	93.8806	74.4574	70.2099	92.8314	75.392	64.5204
	197.3	83.0516	80.5191	79.011	91.2372	83.3566	80.2406	81.4649	78.5638	64.4827	93.6226	74.7642	70.0004	92.603	75.8759	64.222
	197.4	83.1892	80.4483	79.2498	91.8278	82.6816	80.4737	81.647	78.5068	64.5724	93.5643	75.4716	69.311	92.0717	76.2772	64.2166
	197.5	83.5068	80.1841	78.9668	91.9458	81.8347	80.0929	81.7972	78.2857	64.6472	93.6498	76.1982	68.7796	91.9033	76.3584	64.2387
	197.6	83.7138	79.9308	78.7468	91.9651	81.398	79.6246	82.2641	77.9867	64.6166	93.9301	76.2764	68.6627	92.2066	76.0847	64.2054
	197.7	84.0736	79.8424	78.6934	92.0959	81.2473	79.6017	82.6749	77.7837	64.6451	94.3969	76.0754	69.0101	92.5719	75.6046	64.1078
	197.8	84.3542	79.8562	79.0198	92.314	81.7571	80.3868	82.8086	77.7289	64.7003	94.5948	75.9657	69.4059	92.5991	74.7874	64.2821
	197.9	84.4586	79.7492	79.3141	92.1414	82.291	80.9066	82.6027	77.7389	64.4982	94.415	75.8191	69.6594	92.5049	74.1012	64.6089
	198	84.0793	79.3298	79.4847	91.7348	82.9273	81.0522	82.1011	77.6328	64.2191	93.6532	75.601	69.7624	92.9721	73.5716	64.7108
	198.1	83.6152	79.1843	79.3723	91.2703	83.241	80.8163	81.3299	77.4569	64.0396	93.0744	75.1799	69.7116	93.585	73.6166	64.3783
	198.2	83.8299	79.5989	78.735	91.0966	83.5207	80.708	80.9616	77.5888	64.004	92.974	75.1838	69.9923	93.8363	73.859	63.9554
	198.3	84.7333	80.4253	78.0093	91.1472	83.7812	80.4404	80.9264	77.7106	63.9834	93.5637	75.2163	70.2888	93.336	74.1446	63.6436
	198.4	85.6539	81.1251	77.6581	91.3394	83.7874	79.9868	81.3184	77.9886	64.0034	94.1978	75.5473	70.6893	92.397	74.4096	63.5537
	198.5	85.6733	81.2358	78.0738	91.4196	83.6051	79.2938	81.4173	78.0579	64.1028	94.2593	75.9804	70.3733	91.8588	74.6054	63.7006
	198.6	84.7061	80.929	78.7682	91.411	83.2178	78.8218	81.2859	78.6056	64.2433	93.8128	76.7269	69.8959	91.6432	74.7203	63.87
	198.7	83.5176	80.4561	79.2647	91.6044	82.8509	78.6671	80.9966	78.7444	64.3482	93.5259	77.2886	69.2432	91.8692	74.6948	64.2393
	198.8	82.7896	80.2577	79.2627	92.1576	82.6161	79.1959	81.003	78.4994	64.691	93.7454	77.4872	68.8806	91.9912	74.7948	64.1927
	198.9	83.0047	80.1719	78.8123	92.4998	82.7253	79.8876	81.3123	77.6054	64.9176	94.3426	77.3122	68.6578	92.1226	75.0107	64.227
	199	83.8281	79.8753	78.2312	91.9663	82.9776	80.3401	81.8549	77.2094	64.7226	94.384	77.0026	68.6189	92.2033	75.3807	63.7907
[truncated: 1,010 more rows]

## Sheet: Rates Average
		Mean (s-1)	SD	N
	173_BiP_ac (no Ca)	0.0864633	0.00447037	3
	173_BiP_ad (Ca in diss)	0.06654	0.00346221	3
	173_BiP_bc (Ca in ass)	0.01706	0.000353695	3
	173_BiP_ae (no Ca + Grp170)	0.2681	0.0515445	3
	173_BiP_be (Ca in ass + Grp170)	0.189533	0.0207464	3
