# Supplementary material for: Calcium depletion challenges endoplasmic reticulum proteostasis by destabilising BiP-substrate complexes
Source: eLife. 2020 Dec 9;9:e62601. doi: 10.7554/eLife.62601 (PMC7758071; doi:10.7554/eLife.62601)
Supplement: Figure 3—source data 2. [file elife-62601-fig3-data2.xlsx]

## Sheet: Sheet1
Source data: Figure 3B
	Dissociation of MABA-ADP from BiP					Final concentrations: 50 mM HEPES pH 7.4, 100 mM KCl, 1.3 mM BiP, 1.3 mM MABA-ADP, 3 mM MgCl2, titration of CaCl2 during association
	[Ca2+] (µM)	koff (s-1)
		Exp. 1	Exp. 2	Exp. 3
	0.78	0.08935	0.08485	0.07977
	1.56	0.09234	0.09675	0.09559				Exp. 1	Exp. 2	Exp. 3	Mean	SD
	3.13	0.08424	0.07856	0.08652			IC50 (µM)	99.48	66.74	80.53	82.25	16.4376
	6.25	0.08468	0.08324	0.08036
	12.5	0.07862	0.07716	0.08012
	25	0.06762	0.06372	0.07156
	50	0.07778	0.0583	0.06434
	100	0.05503	0.04387	0.04332
	200	0.0315	0.02648	0.0281
	400	0.02403	0.02067	0.02285
	800	0.01997	0.01667	0.01845
	1600	0.01566	0.01446	0.015
	3200	0.01392	0.01288	0.0134
	6400	0.01327	0.01089	0.01208
	1.17	0.08565	0.08785	0.08152
	2.34	0.09099	0.08275	0.0824
	4.69	0.08458	0.08316	0.09057
	9.38	0.08296	0.08615	0.07483
	18.75	0.08385	0.07493	0.06913
	37.5	0.07036	0.06079	0.06477
	75	0.05384	0.04894	0.05344
	150	0.03553	0.03304	0.03611
	300	0.02858	0.02507	0.0242
	600	0.02064	0.02035	0.01912
	1200	0.01654	0.01607	0.01621
	2400	0.01501	0.01449	0.01487
	4800	0.01346	0.01271	0.01291
	9600	0.01219	0.01199	0.01265
