# Supplementary material for: Calcium depletion challenges endoplasmic reticulum proteostasis by destabilising BiP-substrate complexes
Source: eLife. 2020 Dec 9;9:e62601. doi: 10.7554/eLife.62601 (PMC7758071; doi:10.7554/eLife.62601)
Supplement: Figure 3—source data 3. [file elife-62601-fig3-data3.xlsx]

## Sheet: E1_Diss
Source data: Figure 3C
	Experiment 1
	Dissociation: Raw fluorescence data								Nonlinear fit (one-phase decay, GrapPad Prism)
	Time (s)	BiP_ADP_Mg_DC1	BiP_ADP_Ca_DC2	T229A_ADP_Mg_DC3	T229A_ADP_Ca_DC4	T229A_ATP_Mg_DC5_rep	T229A_ATP_Ca_DC6			BiP_ADP_Mg_DC1	BiP_ADP_Ca_DC2	T229A_ADP_Mg_DC3	T229A_ADP_Ca_DC4	T229A_ATP_Mg_DC5_rep	T229A_ATP_Ca_DC6
	0	153.316	184.463	107.272	156.572	132.309	177.842		koff (s-1)	0.06228	0.01326	0.1582	0.02968	0.01021	0.00804
	0.1	152.23	184.238	106.466	156.389	133.354	177.527		R2	0.9784	0.9984	0.9508	0.9969	0.9539	0.9935
	0.2	151.256	184.127	105.757	156.283	134.261	177.133
	0.3	150.131	184.269	105.214	156.015	135.544	176.768
	0.4	149.329	184.364	104.92	155.463	135.822	176.922
	0.5	149.077	184.368	104.726	154.753	136.034	176.92
	0.6	149.045	184.211	104.518	154.562	135.741	176.578
	0.7	149.294	184.186	104.324	154.488	135.543	175.773
	0.8	148.874	184.12	104.056	154.42	134.86	175.465
	0.9	147.94	183.675	103.55	153.922	134.383	175.617
	1	146.681	182.82	102.991	153.594	134.081	175.922
	1.1	145.858	182.029	102.446	153.191	134.173	176.064
	1.2	145.588	181.593	102.017	152.78	134.116	175.671
	1.3	145.554	181.654	101.699	152.44	134.239	174.991
	1.4	145.509	181.759	101.455	152.563	134.647	174.006
	1.5	145.2	182.113	101.399	152.73	135.638	173.609
	1.6	144.71	182.37	101.274	152.95	136.338	173.674
	1.7	143.913	182.352	101.186	152.954	136.278	173.919
	1.8	143.295	181.944	100.981	153.317	135.315	173.787
	1.9	143.077	181.299	100.745	153.816	134.375	173.311
	2	143.498	180.988	100.334	154.088	133.752	172.935
	2.1	143.723	180.956	99.7813	153.887	133.5	172.706
	2.2	143.335	181.468	99.4361	153.19	133.499	172.645
	2.3	142.264	182	99.4247	152.333	133.816	172.381
	2.4	141.26	182.216	99.2759	151.543	134.298	172.107
	2.5	140.823	181.874	98.4569	150.655	134.391	171.957
	2.6	140.701	181.486	97.0777	150.31	134.175	171.98
	2.7	140.596	181.586	96.0739	149.793	133.832	172.081
	2.8	140.243	182.35	95.8679	149.56	133.771	172.197
	2.9	139.929	183.067	96.0048	149.064	133.778	172.238
	3	139.962	183.357	96.2201	149.188	133.971	172.314
	3.1	140.039	182.388	96.2503	149.133	134.141	172.214
	3.2	139.878	181.24	96.4246	148.835	134.314	172.026
	3.3	139.329	179.8	96.339	148.026	133.991	171.654
	3.4	138.891	178.859	96.1062	147.718	133.571	171.384
	3.5	138.617	177.997	95.7029	148.065	133.411	171.438
	3.6	138.311	177.844	95.492	148.671	133.741	171.724
	3.7	137.874	178.238	95.2488	149.129	134.052	171.798
	3.8	137.685	178.933	94.9179	149.088	133.984	171.732
	3.9	137.69	179.344	94.4089	148.73	133.743	171.196
	4	137.612	179.461	94.0639	147.653	133.792	170.805
	4.1	137.191	179.232	93.8763	146.882	134.105	170.323
	4.2	136.517	178.629	93.6921	146.193	134.378	170.39
	4.3	135.762	178.153	93.3296	146.168	134.124	170.55
	4.4	135.199	177.334	93.1704	145.579	133.439	170.927
	4.5	135.02	176.737	93.4939	145.244	132.768	171.292
	4.6	135.054	175.999	94.214	145.245	132.555	171.901
	4.7	134.887	176.059	94.6998	146.028	132.783	172.263
	4.8	134.357	176.859	94.5271	146.954	132.956	172.028
	4.9	133.755	177.699	93.8756	147.249	133.309	170.879
	5	133.51	178.113	93.4641	147.036	133.6	169.768
	5.1	133.659	177.661	93.2957	146.254	134.075	169.08
	5.2	133.953	177.592	93.6871	145.406	134.018	169.358
	5.3	133.573	177.748	93.6519	144.359	133.813	169.352
	5.4	132.688	178.022	93.6969	143.789	133.372	169.528
	5.5	131.773	177.923	93.2919	143.496	133.004	169.248
	5.6	131.583	177.595	93.1731	143.695	132.654	169.501
	5.7	131.987	177.268	93.1603	143.652	132.596	169.351
	5.8	132.282	176.394	93.2056	143.757	132.69	169.379
	5.9	132.401	175.44	93.1619	144.11	132.819	169.286
	6	131.883	174.734	92.9381	144.827	132.815	169.286
	6.1	131.336	174.458	92.7362	145.376	132.953	169.257
	6.2	130.676	174.474	92.5096	144.929	133.325	169.255
	6.3	130.773	174.651	92.3369	143.874	133.567	169.514
	6.4	131.193	175.175	92.3628	142.818	133.27	169.589
	6.5	131.603	175.583	92.7193	142.264	132.501	169.399
	6.6	131.221	175.811	93.0073	141.869	132.266	169.055
	6.7	130.559	175.829	93.0669	141.178	132.772	168.523
	6.8	129.939	175.707	92.6788	140.912	133.664	168.595
	6.9	129.651	174.935	92.379	140.993	133.83	168.607
	7	129.398	173.818	92.1826	141.42	133.394	169.322
	7.1	129.171	173	92.2607	141.163	132.639	169.1
	7.2	129.146	173.036	92.3174	140.628	132.451	168.827
	7.3	129.137	173.66	92.367	140.198	132.635	168.335
	7.4	129.122	174.166	92.391	140.304	133.05	168.44
	7.5	129.033	174.575	92.2972	140.465	133.226	168.581
	7.6	128.876	174.66	92.0796	140.336	133.312	168.311
	7.7	128.635	174.556	91.6142	139.882	133.564	167.897
	7.8	128.303	173.929	91.1183	139.346	133.683	167.541
	7.9	128.206	173.521	91.0116	138.993	133.569	167.366
	8	128.119	173.204	91.3426	138.898	133.194	167.054
	8.1	127.815	173.337	92.0707	139.166	132.565	166.63
	8.2	126.807	173.144	92.2819	139.125	132.27	166.384
	8.3	125.863	172.926	91.9664	138.741	131.778	166.581
	8.4	125.13	172.52	91.4302	137.992	131.913	166.902
	8.5	125.32	172.256	91.0909	137.633	132.18	167.124
	8.6	125.445	172.185	91.155	137.567	132.982	166.909
	8.7	125.554	172.157	91.1173	137.897	133.498	166.735
	8.8	125.13	172.187	91.155	138.325	133.689	166.246
	8.9	124.793	172.323	91.1351	138.617	133.3	165.815
	9	124.583	172.47	91.18	138.602	132.648	165.323
	9.1	124.648	172.317	91.314	138.197	131.532	165.378
	9.2	124.61	171.529	91.2013	137.902	130.756	165.636
	9.3	124.447	171.204	91.2189	137.609	130.34	165.772
	9.4	124.197	171.458	90.8998	137.51	130.546	165.387
	9.5	124.437	172.198	90.7136	137.505	130.558	164.947
	9.6	124.802	172.131	90.1462	137.654	130.673	164.847
	9.7	124.897	171.293	89.9811	137.905	130.805	165.115
	9.8	124.39	170.519	90.1562	137.879	131.247	165.476
	9.9	123.745	169.937	90.8353	137.522	131.656	165.836
	10	123.359	169.884	91.3128	137.048	131.859	166.118
	10.1	122.863	169.948	91.2274	136.511	131.915	166.024
	10.2	122.509	170.617	90.9037	136.261	131.808	165.799
	10.3	122.197	171.44	90.4009	135.822	131.9	165.672
	10.4	122.501	171.487	89.9688	135.469	131.945	165.989
	10.5	122.556	170.755	89.1757	134.792	131.893	166.018
	10.6	122.614	169.668	88.6963	134.237	131.702	165.774
	10.7	122.338	169.162	88.6688	134.155	131.289	165.098
	10.8	122.444	169.258	89.4468	134.731	130.965	164.434
	10.9	122.267	169.499	90.0298	135.347	130.557	163.697
	11	122.063	169.518	90.363	135.144	130.733	163.05
	11.1	121.381	169.02	90.1048	134.315	130.818	162.531
	11.2	121.171	168.262	90.2358	133.435	131.048	162.648
	11.3	121.026	168.04	90.5682	133.331	130.866	163.092
	11.4	121.395	168.448	90.818	133.72	131.064	163.941
	11.5	121.383	170.019	90.5394	134.396	131.116	164.366
	11.6	121.156	171.175	89.9734	134.525	131.332	164.936
	11.7	120.584	171.692	89.6419	134.387	131.012	165.076
	11.8	120.216	170.717	89.4673	134.018	130.836	165.03
	11.9	120.336	169.714	89.179	134.098	130.749	164.416
	12	120.508	169.088	88.9277	134.012	131.406	163.955
	12.1	120.587	168.972	88.8636	134.011	132.027	164.013
	12.2	120.386	168.792	89.0004	133.55	132.2	164.561
	12.3	120.397	168.504	89.0736	133.178	131.948	165.13
	12.4	120.647	168.33	88.9151	132.647	131.937	165.301
	12.5	120.811	168.693	88.8973	132.38	132.194	165.102
	12.6	120.772	169.11	88.9238	132.222	131.881	165.046
	12.7	120.561	169.391	88.8819	132.16	131.161	164.993
	12.8	120.469	169.161	88.675	131.957	130.369	164.959
	12.9	120.224	168.606	88.4177	131.58	130.314	164.322
	13	119.73	167.982	88.636	131.076	130.553	163.385
	13.1	119.292	167.26	88.8008	130.904	130.818	162.131
	13.2	119.15	166.981	88.9406	130.771	130.768	161.458
	13.3	119.241	166.9	88.7689	130.588	130.39	161.627
	13.4	118.974	166.93	88.7504	130.015	130.141	162.512
	13.5	118.318	166.525	88.917	129.732	130.137	163.34
	13.6	117.682	165.999	88.9361	129.63	130.65	163.673
	13.7	117.555	165.646	88.8383	129.822	131.175	163.912
	13.8	117.925	165.69	88.7338	129.975	131.374	163.981
	13.9	118.218	165.82	88.9802	130.417	130.796	163.915
	14	118.316	165.947	89.5424	130.668	130.124	163.943
	14.1	118.32	165.927	89.8843	130.503	129.635	163.943
	14.2	118.29	166.245	89.8861	129.903	129.852	164.09
	14.3	118.448	166.43	89.5632	129.476	130.224	163.445
	14.4	118.256	166.423	89.6573	129.32	130.748	162.949
	14.5	118.139	165.682	90.058	129.195	130.957	162.742
	14.6	117.396	165.103	90.3884	128.722	131.049	162.941
	14.7	117.089	164.848	89.9396	128.068	131.015	162.809
	14.8	116.697	165.062	89.4244	127.646	131.332	162.216
	14.9	116.979	164.906	88.8759	127.667	131.375	161.767
	15	117.053	164.59	89.1146	128.237	131.376	161.346
	15.1	117.489	164.516	89.4894	128.793	130.764	160.768
	15.2	117.533	165.132	90.3107	129.315	130.607	160.12
	15.3	117.486	165.731	90.8387	129.506	130.505	159.992
	15.4	117.124	165.949	90.7769	129.414	130.843	160.514
	15.5	116.818	165.284	90.3174	128.724	130.878	161.154
	15.6	116.727	164.617	89.8493	127.691	130.545	161.957
	15.7	116.517	163.712	89.7839	126.781	130.057	162.707
	15.8	116.28	163.477	89.7071	126.344	129.535	163.165
	15.9	115.897	163.617	89.4249	126.191	129.733	162.445
	16	115.772	164.198	89.1332	126.13	129.949	161.275
	16.1	116.017	164.507	89.1293	125.928	130.326	160.633
	16.2	116.343	164.246	89.3039	125.876	130.023	160.958
	16.3	116.666	163.745	89.2658	125.858	129.918	161.541
	16.4	116.695	163.179	88.8584	126.247	129.797	161.481
	16.5	116.535	163.063	88.2702	126.52	129.97	161.483
	16.6	116.184	163.194	87.8881	126.711	129.678	161.555
	16.7	115.444	163.837	87.5828	126.507	129.295	162.1
	16.8	114.671	164.268	87.5681	126.299	129.003	162.136
	16.9	113.857	164.668	87.5153	126.24	129.272	162.115
	17	113.849	164.261	87.8361	126.079	129.662	162.125
	17.1	114.371	163.519	87.8599	126.059	130.312	161.883
	17.2	115.261	162.694	87.826	125.871	130.587	161.665
	17.3	115.693	162.697	87.3192	126.06	131.074	161.35
	17.4	115.886	163.343	87.2163	125.912	131.335	161.975
	17.5	115.877	163.499	87.452	125.637	131.846	162.251
	17.6	116.037	162.92	88.0237	124.899	132.093	162
	17.7	115.532	162.078	88.5902	124.443	132.213	160.995
	17.8	114.724	161.657	88.8274	124.292	132.078	160.065
	17.9	113.56	161.49	88.8491	124.679	131.552	159.785
	18	113.281	161.177	88.3879	125.04	130.535	159.759
	18.1	113.38	161.017	87.8534	124.924	129.435	160.138
	18.2	113.902	160.795	87.8406	124.285	128.95	160.265
	18.3	114.107	160.629	88.1809	123.465	129.158	160.601
	18.4	114.399	160.311	88.6061	123.139	129.556	160.578
	18.5	114.416	160.634	88.2587	123.339	129.518	160.688
	18.6	114.38	161.286	87.9006	123.665	129.407	160.708
	18.7	114.189	161.906	87.8127	123.777	129.743	160.957
	18.8	113.859	161.832	88.2948	123.469	130.552	160.78
	18.9	113.565	161.169	88.7257	123.258	131.21	160.303
	19	113.173	160.37	89.0199	122.926	130.981	159.802
	19.1	113.191	159.675	89.1616	122.555	130.257	159.804
	19.2	113.063	159.362	89.1023	122.074	129.498	160.15
	19.3	112.959	159.693	88.7424	121.887	129.103	160.239
	19.4	112.639	160.383	88.1577	121.96	129.487	160.086
	19.5	112.472	161.068	87.973	121.798	129.79	159.515
	19.6	112.35	160.919	88.2511	121.934	130.414	159.186
	19.7	112.436	160.286	88.8524	122.196	129.891	158.652
	19.8	112.543	159.881	89.3287	122.83	129.451	158.609
	19.9	112.695	160.044	89.5951	122.637	128.598	158.36
	20	112.453	160.123	89.6122	122.166	128.931	158.55
	20.1	112.13	159.747	89.371	121.833	129.431	158.373
	20.2	111.938	159.359	89.0624	122.142	130.504	158.679
	20.3	112.281	159.823	88.8104	122.72	130.338	158.891
	20.4	112.786	160.647	88.5809	122.737	129.984	159.22
	20.5	113.023	161.227	88.0652	122.432	128.755	159.271
	20.6	112.93	160.866	87.2747	122.017	128.184	159.142
	20.7	112.742	160.072	86.7899	122.155	127.645	159.004
	20.8	112.41	159.537	86.888	122.471	128.046	158.498
	20.9	112.08	159.328	87.4261	122.322	128.817	158.285
	21	111.692	159.577	87.6892	121.929	129.707	158.239
	21.1	111.684	159.368	87.7127	121.473	129.749	158.91
	21.2	111.826	159.603	87.7099	121.729	129.461	159.033
	21.3	111.94	159.599	87.7763	121.94	129.165	159.051
	21.4	111.735	159.721	87.695	121.975	129.443	158.299
	21.5	111.567	159.173	87.5762	121.709	129.418	157.81
	21.6	111.581	158.67	87.6288	121.273	129.375	157.032
	21.7	111.877	158.697	87.9564	120.851	129.174	156.838
	21.8	111.578	159.055	88.0079	120.309	129.331	157.002
	21.9	111.263	159.158	88.0614	120.254	129.313	157.622
	22	111.006	158.651	88.1879	120.412	129.261	157.932
	22.1	111.37	158.094	88.7432	120.554	129.171	157.775
	22.2	111.436	157.582	88.876	120.197	128.956	157.62
	22.3	110.969	157.18	88.3989	119.785	128.629	157.764
	22.4	110.193	156.878	87.3916	119.607	128.322	158.429
	22.5	109.379	156.965	86.6744	119.624	128.636	158.796
	22.6	109.223	157.445	86.3664	119.51	129.055	158.74
	22.7	109.284	157.626	86.626	119.403	129.296	158.366
	22.8	109.806	157.471	87.0428	119.252	128.933	157.932
	22.9	109.977	157.26	87.5608	119.243	128.476	157.618
	23	109.932	157.635	87.8418	119.011	128.022	157.354
	23.1	109.388	158.414	87.7554	118.743	127.997	157.109
	23.2	108.76	158.767	87.291	118.387	128.044	156.966
	23.3	108.506	158.564	86.7706	117.887	128.089	156.548
	23.4	108.63	157.662	86.6667	117.618	127.694	156.602
	23.5	108.783	156.777	87.0473	117.587	127.457	156.789
	23.6	108.482	155.794	87.491	118.065	127.547	157.55
	23.7	108.029	155.245	87.536	118.492	128.2	158.023
	23.8	107.746	154.983	87.159	118.737	128.741	158.237
	23.9	107.663	155.03	86.4234	118.716	128.701	157.739
	24	107.781	155.416	86.0567	118.609	127.814	157.055
	24.1	108.126	155.734	86.1603	118.326	127.242	156.576
	24.2	108.641	156.019	86.8062	117.678	127.274	156.621
	24.3	109.091	155.995	87.2503	116.682	127.98	156.676
	24.4	109.267	155.907	87.248	115.892	127.926	156.522
	24.5	109.403	156.269	87.0512	115.715	127.706	155.856
	24.6	109.717	156.819	86.7863	116.223	127.419	155.376
	24.7	110.261	157.351	86.8942	116.621	127.804	155.3
	24.8	110.632	156.985	87.0632	116.847	128.257	155.664
	24.9	110.126	156.105	87.3991	116.733	128.819	156.251
	25	109.084	155.225	87.1933	116.674	128.894	156.299
	25.1	108.207	155.312	86.7896	116.467	128.763	156.392
	25.2	108.348	155.987	86.4864	116.304	128.372	156.061
	25.3	108.59	156.563	86.911	116.329	128.327	156.336
	25.4	108.751	155.994	87.6783	116.699	128.259	156.674
	25.5	108.447	154.775	88.0988	117.197	128.15	157.221
	25.6	108.485	153.909	87.9343	117.529	127.899	157.043
	25.7	108.641	154.348	87.409	117.619	127.893	156.278
	25.8	108.882	155.366	86.9347	117.477	127.782	155.261
	25.9	109.041	156.055	86.564	117.344	127.781	155.076
	26	108.661	155.614	86.2229	116.966	127.331	155.507
	26.1	108.305	154.73	86.1033	116.47	127.608	156.101
	26.2	108.023	154.296	86.0292	115.834	127.963	155.999
	26.3	108.118	154.163	86.0894	115.269	128.651	155.613
	26.4	108.23	154.158	86.1133	115.061	128.44	155.595
	26.5	108.031	153.312	86.3253	114.945	128.22	155.79
	26.6	107.732	152.594	86.4397	115.232	128.083	155.751
	26.7	107.214	152.059	86.6227	114.938	128.564	155.295
	26.8	107.039	152.204	86.9318	114.77	128.544	154.948
	26.9	107.402	152.556	87.4407	114.336	128.291	155.312
	27	107.854	152.986	87.5629	114.439	127.778	155.623
	27.1	108.224	153.314	87.3198	114.741	127.616	155.884
	27.2	108.066	153.602	87.0467	114.89	127.403	155.568
	27.3	107.972	153.725	86.94	115.14	127.21	155.481
	27.4	107.943	153.617	86.7904	114.583	127.27	155.275
	27.5	107.624	153.203	86.708	114.234	127.443	155.413
	27.6	107.289	152.835	87.0618	113.675	127.851	155.412
	27.7	106.7	153.086	87.2374	114.109	127.684	155.538
	27.8	107.131	153.63	86.7798	114.497	127.83	155.175
	27.9	107.662	154.067	85.8231	114.458	127.676	154.973
	28	108.242	153.796	85.4151	113.72	128.189	154.628
	28.1	107.934	153.512	85.6296	112.907	128.035	155.075
	28.2	107.346	153.562	86.0809	112.604	127.848	155.523
	28.3	106.971	154.017	86.2314	112.817	127.388	156.067
	28.4	106.527	154.188	86.1983	113.33	127.517	155.765
	28.5	106.281	154.198	85.9466	113.994	127.711	155.176
	28.6	105.757	154.018	86.22	113.916	127.482	154.88
	28.7	105.914	153.682	86.6974	113.421	127.109	154.939
	28.8	106.317	152.909	87.6542	112.824	126.858	155.202
	28.9	106.643	152.239	87.7681	113.079	127.487	155.126
	29	106.622	152.074	87.3934	113.765	128.153	155.205
	29.1	106.024	152.287	86.3016	114.269	128.732	155.347
	29.2	105.711	152.059	85.6932	114.566	128.342	155.49
	29.3	105.249	151.543	85.5367	114.333	127.947	155.482
	29.4	105.287	150.971	85.8962	114.057	127.433	154.989
	29.5	105.346	150.815	86.2628	113.457	127.506	154.273
	29.6	105.709	150.654	86.7846	113.264	127.358	153.599
	29.7	106.108	150.083	87.2086	113.291	127.712	153.554
	29.8	106.362	149.642	87.5314	113.139	128.032	154.115
	29.9	106.072	149.548	87.3546	112.873	128.603	154.545
	30	105.409	150.02	87.3636	112.454	128.596	154.82
	30.1	104.828	150.745	87.3574	112.445	128.509	154.768
	30.2	105.031	151.291	87.6627	112.23	127.97	154.475
	30.3	105.172	152.215	87.6519	111.663	127.493	153.976
	30.4	105.16	152.684	87.5168	110.87	126.891	153.261
	30.5	104.797	153.179	87.2227	110.342	127.056	153.095
	30.6	104.972	153.015	86.8704	110.473	127.466	152.913
	30.7	105.543	152.635	86.6113	111.099	127.839	153.175
	30.8	106.047	152.063	86.59	111.782	127.638	153.227
	30.9	106.264	151.536	86.8412	112.023	127.319	153.522
	31	106.089	151.656	87.3393	111.711	127.516	153.628
	31.1	106.011	151.551	87.5523	111.324	127.8	153.952
	31.2	105.981	151.365	87.5794	111.228	128.125	154.231
	31.3	106.197	150.401	87.2882	111.487	127.773	154.189
	31.4	106.28	149.995	86.8981	111.561	127.585	153.641
	31.5	106.257	149.71	86.427	111.1	127.414	153.139
	31.6	106.104	150.146	86.201	110.521	127.702	153
	31.7	106.355	150.715	86.2616	110.093	127.846	153.162
	31.8	106.47	151.458	86.6061	110.567	128.286	153.165
	31.9	106.331	151.537	86.6054	110.701	128.558	153.195
	32	105.659	151.034	86.4209	110.697	128.634	153.365
	32.1	105.502	150.614	86.1253	110.082	128.011	153.82
	32.2	105.87	150.446	86.2848	109.834	127.314	154.809
	32.3	106.288	150.276	86.3753	109.915	126.777	155.876
	32.4	105.968	150.007	86.3761	110.221	126.499	156.535
	32.5	105.275	150.202	86.3717	110.705	126.414	156.174
	32.6	104.777	150.443	87.0283	111.049	126.716	155.004
	32.7	105.418	150.125	88.0207	111.154	127.088	153.887
	32.8	106.352	148.823	88.5401	111.128	127.294	153.127
	32.9	107.312	147.997	88.4009	111.352	127.125	153.478
	33	107.06	147.855	87.7272	111.566	127.23	153.964
	33.1	106.336	148.858	87.1592	111.451	127.364	154.219
	33.2	105.296	149.848	86.7294	110.791	127.556	153.756
	33.3	104.746	150.385	86.7186	109.816	127.463	153.452
	33.4	104.621	149.887	86.9674	108.916	127.561	153.565
	33.5	104.95	148.959	87.5063	108.247	127.579	154.143
	33.6	105.464	148.385	87.5004	108.333	127.714	154.328
	33.7	105.968	148.59	87.185	108.596	127.378	154.402
	33.8	106.133	148.659	86.3396	108.98	126.971	153.673
	33.9	105.881	148.569	86.3634	109.04	126.399	153.119
	34	105.242	148.211	86.5487	109.071	126.039	152.225
	34.1	104.848	148.267	87.167	108.573	126.322	151.854
	34.2	104.583	148.466	87.0542	108.232	126.798	151.762
	34.3	104.565	148.257	87.1637	108.267	127.933	152.287
	34.4	104.397	147.828	87.0803	108.964	128.582	153.09
	34.5	104.233	147.219	87.334	109.529	129.229	153.419
	34.6	104.194	147.12	87.4478	109.403	128.904	153.492
	34.7	104.204	147.078	87.2241	108.981	128.3	153.265
	34.8	104.575	147.126	86.7111	108.405	127.628	153.391
	34.9	104.923	147.467	85.868	108.133	127.534	153.255
	35	105.34	148.172	85.6657	108.22	127.563	153.021
	35.1	105.313	149.006	85.7789	108.637	127.328	152.64
	35.2	105.27	149.54	86.3353	109.373	126.658	152.836
	35.3	105.243	149.663	86.5443	109.789	126.526	152.932
	35.4	105.128	149.59	86.6981	109.853	126.45	152.954
	35.5	104.706	148.882	87.0727	109.119	126.824	152.175
	35.6	104.055	147.952	87.655	108.084	126.567	151.815
	35.7	103.762	147.144	88.0779	107.261	126.359	151.678
	35.8	103.995	146.579	87.7364	107.187	125.761	151.999
	35.9	104.457	146.491	86.9367	107.534	125.407	151.993
	36	104.949	146.135	85.8934	107.583	125.612	151.945
	36.1	105.124	146.316	85.1399	107.015	126.347	151.966
	36.2	105.216	146.106	85.0657	106.41	127.388	152.27
	36.3	105.308	145.97	85.7396	106.407	127.749	152.398
	36.4	105.109	145.933	86.4712	107.198	127.746	152.598
	36.5	104.664	146.301	86.7097	107.829	127.374	152.603
	36.6	104.15	147.096	86.2146	107.898	127.678	152.877
	36.7	104.274	147.389	85.7964	107.468	128.393	153.19
	36.8	104.751	147.37	85.5258	107.129	129.205	153.261
	36.9	104.967	146.777	85.7977	106.866	129.576	152.984
	37	104.903	145.807	86.1809	106.628	129.214	151.709
	37.1	104.88	145.167	86.8137	106.418	128.373	150.684
	37.2	105.41	145.122	87.2497	106.47	127.207	149.929
	37.3	105.901	145.878	87.4232	106.45	126.157	150.294
	37.4	106.214	146.396	87.0252	106.386	125.844	150.917
	37.5	105.712	146.301	86.5643	106.377	125.935	151.581
	37.6	104.82	145.833	86.1908	106.612	126.271	151.997
	37.7	103.772	145.223	86.2686	107.045	126.191	152.333
	37.8	103.464	145.142	86.3304	107.361	126.311	152.235
	37.9	103.9	145.632	86.2451	107.465	126.488	151.751
	38	104.783	146.258	85.7277	107.345	126.72	150.587
	38.1	105.302	146.456	85.1671	107.083	126.412	150.005
	38.2	105.375	145.679	84.9193	106.728	126.178	150.299
	38.3	104.817	145.23	85.1848	106.448	126.177	151.495
	38.4	104.211	144.758	85.8791	106.379	126.49	152.207
	38.5	103.628	144.795	86.5104	106.739	126.759	151.933
	38.6	103.694	144.232	86.8954	106.92	127.008	151.387
	38.7	103.868	143.887	86.8766	106.901	127.161	151.232
	38.8	104.156	143.747	86.8984	106.505	127.221	151.51
	38.9	104.079	144.123	86.7846	106.018	126.956	151.56
	39	104.033	144.506	86.6792	105.299	126.933	151.444
	39.1	104.123	144.725	86.1703	104.437	126.744	151.021
	39.2	104.33	144.394	85.7079	103.949	127.058	150.723
	39.3	104.583	144.241	85.179	103.871	127.36	150.478
	39.4	104.429	143.798	84.8646	104.208	128.009	150.714
	39.5	104.209	143.963	84.7771	104.541	127.922	151.179
	39.6	103.774	143.939	84.9268	104.735	127.779	151.358
	39.7	103.688	144.422	85.4164	104.891	127.4	151.518
	39.8	103.454	144.81	86.0101	104.973	127.409	151.083
	39.9	103.594	145.295	86.6888	104.991	126.964	151.185
	40	103.575	145.554	86.7798	104.846	126.358	150.973
	40.1	103.57	145.561	86.6219	104.516	126.042	151.037
	40.2	103.269	145.438	86.0463	104.306	126.019	150.607
	40.3	102.974	145.136	86.0561	104.345	126.5	150.637
	40.4	102.973	144.478	85.9984	104.428	126.576	150.875
	40.5	103.17	143.7	85.9671	104.556	126.872	151.345
	40.6	103.647	142.92	85.6506	104.471	126.972	150.864
	40.7	104.298	142.853	85.3999	104.656	127.053	150.218
	40.8	104.697	143.037	85.3187	104.691	126.994	149.478
	40.9	104.59	143.203	85.0001	104.725	126.975	150
	41	103.817	142.96	84.8733	104.554	127.088	150.735
	41.1	103.283	142.534	85.168	104.6	126.945	151.306
	41.2	103.029	142.485	86.0191	104.426	126.776	150.576
	41.3	103.332	142.698	86.664	104.015	126.783	149.58
	41.4	103.385	143.37	86.777	103.479	127.007	148.808
	41.5	103.372	143.733	86.6884	103.364	126.84	149.015
	41.6	103.051	143.935	86.5758	103.577	126.523	149.029
	41.7	103.396	143.52	86.6067	103.735	126.322	148.925
	41.8	103.888	143.147	86.1724	103.804	126.619	148.807
	41.9	104.328	143.003	85.739	103.949	126.968	149.463
	42	103.692	142.919	85.7029	103.884	126.994	150.564
	42.1	102.871	142.963	86.4201	103.679	126.507	151.22
	42.2	102.315	142.549	87.4522	103.149	126.055	151.595
	42.3	102.258	142.247	87.7359	103.189	125.802	151.513
	42.4	101.915	141.833	87.3191	103.072	125.673	151.439
	42.5	101.424	141.82	86.6229	103.404	125.122	151.061
	42.6	101.279	141.883	86.2586	103.188	124.789	150.713
	42.7	101.668	142.094	86.1288	103.193	124.949	150.468
	42.8	102.252	141.95	86.0794	102.676	125.326	149.962
	42.9	102.553	141.841	86.0571	102.78	125.359	149.526
	43	103.066	141.465	86.0724	102.903	125.19	149.075
	43.1	103.52	141.245	85.7833	103.22	125.64	149.021
	43.2	103.979	141.317	85.4517	103.145	126.554	149.274
	43.3	104.033	142.075	85.2087	102.909	127.615	149.614
	43.4	104.216	143.204	85.3737	102.855	128.012	150.03
	43.5	104.445	143.442	85.7344	102.486	127.57	149.829
	43.6	104.636	142.814	85.9411	102.32	126.723	149.504
	43.7	104.446	141.907	85.9333	102.057	125.918	149.063
	43.8	104.216	141.674	85.9626	101.914	125.684	148.846
	43.9	104.324	141.591	86.4444	101.71	125.572	148.769
	44	104.489	141.351	87.0198	101.588	125.604	148.584
	44.1	104.645	141.293	87.1969	101.975	125.602	148.145
	44.2	104.424	141.368	86.7318	102.458	125.543	147.757
	44.3	104.185	141.341	85.9826	103.054	125.434	147.875
	44.4	103.949	140.75	85.3543	103.488	125.418	148.913
	44.5	103.652	140.075	84.8782	103.751	125.493	149.571
	44.6	103.536	139.584	84.7991	103.474	125.786	149.602
	44.7	103.244	139.503	84.5658	102.73	126.209	149.059
	44.8	102.838	139.772	84.6202	102.081	126.637	148.951
	44.9	102.178	140.367	84.8454	101.712	126.923	148.897
	45	101.762	140.88	85.6042	101.774	127.044	148.624
	45.1	101.927	141.422	86.2497	101.553	126.945	148.246
	45.2	102.761	141.818	86.2884	101.717	126.662	148.28
	45.3	103.409	142.285	86.0501	101.94	125.702	148.88
	45.4	103.877	142.173	85.6309	102.469	125.263	149.629
	45.5	103.574	141.864	85.4918	102.451	124.786	150.01
	45.6	103.554	141.308	85.4012	102.068	125.188	149.986
	45.7	103.321	141.212	85.698	101.678	125.228	149.562
	45.8	103.423	141.057	86.0013	101.618	125.672	149.432
	45.9	103.131	140.631	85.9628	101.667	125.898	149.339
	46	102.904	139.993	85.4781	101.631	126.305	149.743
	46.1	102.876	139.416	85.3144	101.33	126.581	149.924
	46.2	103.07	139.735	85.6537	101.224	126.732	150.366
	46.3	103.139	140.235	86.4473	101.088	126.517	150.124
	46.4	102.772	140.999	87.003	101.249	126.417	149.699
	46.5	102.544	140.986	87.2309	101.174	126.514	148.617
	46.6	102.727	140.827	86.9853	101.317	127.23	148.151
	46.7	103.278	140.312	86.4363	100.758	127.519	148.043
	46.8	104.001	139.967	86.0751	100.204	127.629	148.258
	46.9	104.342	139.869	86.1348	99.2671	127.191	148.086
	47	103.997	139.958	86.6348	99.1326	126.689	148.323
	47.1	102.971	140.379	87.0467	99.4144	126.029	148.945
	47.2	101.861	140.006	87.0819	100.147	125.266	149.701
	47.3	101.454	139.591	86.6382	100.521	124.691	149.531
	47.4	101.89	139.072	85.9576	100.124	124.442	149.283
	47.5	102.972	139.713	85.7901	99.2293	124.613	149.203
	47.6	103.864	140.352	86.114	98.6072	125.093	149.326
	47.7	103.905	140.778	86.7958	98.8786	125.389	148.644
	47.8	103.302	140.405	86.8087	99.6593	125.612	147.402
	47.9	102.932	140.099	86.338	100.285	125.569	146.701
	48	102.991	139.536	85.747	100.617	125.434	146.863
	48.1	103.199	139.101	85.6392	100.731	124.93	147.553
	48.2	103.093	138.71	86.0847	100.852	124.877	147.61
	48.3	102.889	138.985	86.405	100.501	125.454	147.398
	48.4	102.799	139.727	86.4506	100.074	126.844	147.118
	48.5	102.926	140.198	86.0573	99.6929	127.559	147.278
	48.6	103.298	140.36	85.9127	99.8814	127.683	147.59
	48.7	103.389	139.828	85.8837	100.317	127.118	148.058
	48.8	103.264	139.51	85.9414	100.777	126.625	148.59
	48.9	103.018	138.976	86.0006	100.901	126.041	148.843
	49	103.055	138.862	86.1771	100.863	125.798	148.669
	49.1	103.125	138.456	86.6318	100.462	125.935	147.948
	49.2	102.747	138.192	86.9938	100.184	126.269	147.629
	49.3	102.355	137.987	87.2399	99.7207	126.345	147.815
	49.4	102.075	138.424	86.9754	99.4766	126.285	148.663
	49.5	102.253	138.862	86.5173	99.2858	126.237	148.751
	49.6	102.334	139.073	85.9213	99.172	126.146	148.536
	49.7	102.265	138.31		99.2519	126.049	147.819
	49.8	102.183	137.498		99.4103	126.216	147.796
	49.9	102.03	136.683		99.8816	126.621	147.633
	50	102.069	137.124		100.239	126.941	147.683
	50.1	102.357	138.013		100.08	126.863	147.805
	50.2	103.182	138.808		99.5919	126.966	148.425
	50.3	103.901	138.596		99.1046	127.195	149.026
	50.4	104.167	138.034		99.073	127.655	148.633
	50.5	103.642	137.896		98.9337	127.403	147.735
	50.6	103.082	137.865		98.7611	126.935	147.032
	50.7	102.46	137.627		98.7671	126.124	147.311
	50.8	102.309	136.915		99.2089	125.982	147.524
	50.9	102.179	136.54		99.483	125.86	147.431
	51	102.326	136.799		99.552	126.152	147.305
	51.1	102.592	137.698		99.2488	126.031	147.624
	51.2	102.633	138.564		99.298	126.022	148.196
	51.3	102.467	138.897		99.0699	125.539	148.755
	51.4	102.264	138.65		98.894	125.006	149.102
	51.5	102.366	137.991		98.0629	124.399	149.01
	51.6	102.689	137.237		97.5249	124.299	148.031
	51.7	102.595	136.445		97.1486	124.673	147.023
	51.8	102.528	136.117		97.6807	125.304	146.401
	51.9	102.461	135.851		98.3506	125.722	146.705
	52	102.478	135.86		99.2758	125.648	146.974
	52.1	102.321	135.545		99.9458	125.378	147.152
	52.2	101.639	135.446		100.204	124.843	147.442
	52.3	101.147	135.278		99.7989	124.515	147.95
	52.4	100.909	135.674		98.8856	124.616	148.177
	52.5	101.451	135.873		98.2271	125.28	148.004
	52.6	102.116	135.917		98.0008	126.009	147.822
	52.7	102.306	135.568		98.1228	125.978	147.956
	52.8	101.994	135.662		98.0599	125.633	147.658
	52.9	101.29	136.2		98.0092	125.479	146.843
	53	101.022	136.662		97.9616	125.653	146.19
	53.1	101.117	136.499		97.9442	125.982	146.268
	53.2	101.915	136.198		97.8099	126.312	146.716
	53.3	102.893	136.209		97.6564	126.8	146.563
	53.4	103.668	136.869		97.6414	126.849	145.901
	53.5	103.911	137.323		97.5572	126.699	145.255
	53.6	103.828	137.464		97.6711	126.363	145.096
	53.7	103.967	137.209		97.7619	126.518	145.023
	53.8	103.955	136.896		97.914	126.295	145.01
	53.9	103.509	136.693		97.8567	125.936	145.119
	54	102.88	136.41		97.7432	125.49	145.601
	54.1	102.469	136.209		97.7056	125.148	146.147
	54.2	102.83	135.869		97.6508	125.079	146.426
	54.3	103.093	135.709		97.8293	124.836	146.526
	54.4	103.444	135.665		98.1747	125.183	146.179
	54.5	103.576	135.678		98.443	125.449	145.973
	54.6	103.516	135.968		98.7441	125.751	145.708
	54.7	103.396	136.003		98.6461	125.527	146.18
	54.8	103.185	136.157		98.5607	125.257	146.644
	54.9	103.487	135.691		97.9132	124.948	147.275
	55	103.749	135.403		97.3833	125.073	147.574
	55.1	103.925	135.207		97.1364	125.272	147.655
	55.2	104.014	135.401		97.2217	125.505	147.58
	55.3	104.016	135.777		97.2597	125.534	147.288
	55.4	103.758	135.978		96.9266	125.504	147.661
	55.5	102.982	135.703		96.8003	125.646	147.803
	55.6	102.289	134.852		97.0319	125.745	147.662
	55.7	102.142	133.766		97.469	125.83	146.415
	55.8	102.337	133.201		97.5164	125.784	145.498
	55.9	102.455	133.17		97.1502	125.64	145.327
	56	102.366	133.398		96.6011	125.823	145.846
	56.1	102.45	133.71		95.9339	126.116	146.38
	56.2	102.501	133.869		95.2641	126.446	146.358
	56.3	102.328	134.156		94.8813	126.032	146.341
	56.4	101.605	134.35		95.0004	125.35	146.151
	56.5	101.038	134.579		95.4551	124.664	146.274
	56.6	100.397	134.779		95.694	124.549	146.121
	56.7	100.355	134.596		95.8587	124.44	146.137
	56.8	100.542	134.343		95.973	124.435	146.189
	56.9	101.676	133.987		96.1929	124.307	146.922
	57	102.626	134.054		96.251	124.591	147.398
	57.1	103.387	134.482		96.3328	124.858	147.502
	57.2	103.191	135.246		96.4171	125.23	146.531
	57.3	102.645	135.964		96.7277	124.995	145.754
	57.4	101.536	136.31		97.0561	124.629	145.518
	57.5	100.6	135.77		97.6362	124.046	145.693
	57.6	100.069	134.858		97.8226	123.714	145.453
	57.7	100.326	133.955		97.3846	123.645	144.611
	57.8	100.849	133.735		96.3453	123.821	144.03
	57.9	101.368	133.768		95.4899	124.594	144.279
	58	101.334	133.756		95.4369	125.19	144.79
	58.1	101.028	133.551		95.7879	125.673	145.318
	58.2	100.767	133.347		96.4799	125.618	145.685
	58.3	101.38	133.183		96.8259	125.608	146.319
	58.4	102.259	133.217		97.2483	125.757	146.818
	58.5	102.971	133.007		97.3082	125.722	146.54
	58.6	102.967	132.888		97.0679	125.698	145.802
	58.7	102.855	132.402		96.4502	125.079	145.004
	58.8	102.525	132.28		95.7328	124.978	144.919
	58.9	102.067	132.081		95.3839	124.763	145.531
	59	101.665	132.209		95.5428	125.162	146.225
	59.1	101.938	132.358		95.9053	125.331	146.566
	59.2	102.567	132.688		96.4463	125.652	145.962
	59.3	103.087	132.927		96.7513	125.685	145.146
	59.4	103.105	133.335		96.8699	125.323	144.55
	59.5	102.732	133.615		96.5871	124.691	144.753
	59.6	102.351	134.003		96.2901	124.659	145.507
	59.7	102.064	133.888		96.2599	125.085	145.952
	59.8	102.071	133.759		96.1758	125.789	145.66
	59.9	101.919	133.351		95.7007	125.609	145.137
	60	101.856	132.872		95.1001	125.192	145.111
	60.1	102.002	132.204		95.3302	124.666	145.903
	60.2	102.464	131.626		96.2906	124.357	146.112
	60.3	102.579	131.359		97.3322	124.514	145.621
	60.4	102.212	131.447		97.4239	124.869	144.3
	60.5	101.698	131.775		97.2371	125.516	143.651
	60.6	101.573	132.045		97.0834	125.683	143.952
	60.7	101.812	132.092		97.3741	125.869	145.148
	60.8	102.211	131.938		96.9789	126.086	146.273
	60.9	102.618	131.662		96.0834	126.067	146.461
	61	103.021	131.2		95.019	125.541	145.79
	61.1	103.04	130.822		94.9438	124.503	144.681
	61.2	102.636	130.888		95.0379	123.927	144.352
	61.3	101.878	131.619		94.8812	123.725	144.577
	61.4	101.392	132.55		94.1998	123.949	145.428
	61.5	101.152	133.127		94.1126	124.425	145.707
	61.6	101.085	133.006		94.6108	124.502	145.773
	61.7	100.85	132.381		95.3336	124.733	145.318
	61.8	100.665	131.783		95.7109	124.482	145.227
	61.9	100.578	131.364		95.7704	125.018	145.146
	62	100.819	131.035		95.6717	125.342	144.894
	62.1	100.95	130.581		95.3853	125.714	144.033
	62.2	101.231	130.141		94.8423	125.396	143.293
	62.3	101.268	130.215		94.3611	124.822	143.349
	62.4	101.377	130.743		93.9808	124.258	144.051
	62.5	101.24	131.553		94.1041	123.998	144.436
	62.6	101.151	131.656		94.4114	123.96	144.216
	62.7	101.337	130.995		94.6943	124.295	143.853
	62.8	101.521	130.116		94.9111	124.86	143.93
	62.9	101.691	129.937		94.6464	125.662	144.252
	63	101.358	130.198		94.7217	125.996	144.243
	63.1	101.103	130.197		94.692	125.995	144.277
	63.2	101.088	129.541		95.0519	126.053	144.423
	63.3	101.579	128.828		95.0639	126.545	144.799
	63.4	102.147	128.751		95.0692	126.88	144.539
	63.5	102.081	129.212		94.9947	126.419	143.643
	63.6	101.558	129.941		94.8437	125.497	142.994
	63.7	100.891	130.303		94.726	124.765	142.839
	63.8	100.877	130.701		94.8516	124.585	143.306
	63.9	101.143	131		95.5309	124.672	143.257
	64	101.354	131.369		95.8109	124.984	142.995
	64.1	101.228	131.241		95.5496	125.274	142.714
	64.2	100.777	130.612		94.4822	125.578	142.879
	64.3	100.468	129.773		93.7946	125.811	143.225
	64.4	100.427	129.434		93.5361	126.193	143.238
	64.5	101.04	129.797		93.7551	125.858	143.258
	64.6	101.611	130.264		94.0567	125.041	143.377
	64.7	101.845	130.149		94.0996	123.969	143.919
	64.8	101.511	129.987		93.964	124.082	144.574
	64.9	101.371	130.331		93.478	124.558	145.037
	65	101.225	131.26		93.0456	124.968	144.956
	65.1	101.255	131.651		92.9351	124.864	144.207
	65.2	101.098	131.276		93.4944	124.869	143.272
	65.3	101.447	130.558		94.0799	125.08	142.547
	65.4	101.803	130.255		94.2197	124.91	142.173
	65.5	102.359	130.273		93.7968	124.498	142.113
	65.6	102.472	130.298		93.6451	124.18	142.372
	65.7	102.325	130.004		93.8612	124.357	142.995
	65.8	102.073	129.64		94.088	124.563	143.621
	65.9	102.236	129.72		93.7161	124.291	143.914
	66	102.819	130.168		93.3133	123.729	144.189
	66.1	103.054	130.672		93.2426	123.139	144.293
	66.2	102.994	130.298		93.8643	123.116	144.806
	66.3	102.622	129.406		94.1462	123.666	144.921
	66.4	102.22	128.265		94.0124	124.719	145.086
	66.5	101.287	127.875		93.7743	125.673	144.516
	66.6	100.361	127.773		93.8079	125.71	143.807
	66.7	99.8194	128.206		93.9374	124.83	143.242
	66.8	99.7614	128.553		93.5861	123.711	143.122
	66.9	100.093	128.98		93.3923	123.447	143.224
	67	100.312	128.807		93.3631	124.269	142.794
	67.1	100.526	128.147		93.4001	125.158	142.582
	67.2	100.652	127.59		93.3534	125.795	142.673
	67.3	101.327	127.394		93.3173	125.646	143.596
	67.4	102.315	127.719		93.4996	125.489	144.383
	67.5	102.627	127.851		93.3619	124.447	144.639
	67.6	101.888	127.819		93.3774	123.56	144.223
	67.7	100.938	127.338		93.6697	122.684	143.49
	67.8	100.622	127.319		94.187	122.866	143.037
	67.9	100.823	127.598		94.2694	123.368	142.716
	68	100.636	128.403		93.7726	124.075	142.497
	68.1	100.236	128.307		93.1898	124.522	142.324
	68.2	100.084	128.164		92.8558	124.478	142.294
	68.3	100.529	127.349		92.7377	124.27	142.477
	68.4	101.298	127.368		92.735	124.012	142.381
	68.5	101.701	127.425		92.7633	124.225	142.537
	68.6	101.772	128.438		92.9643	124.409	142.39
	68.7	101.31	129.294		93.0611	124.517	142.62
	68.8	100.895	129.924		93.0271	124.317	142.47
	68.9	100.713	129.955		93.1637	124.118	142.819
	69	100.837	129.49		93.4338	124.234	143.011
	69.1	101.222	129.239		93.8048	124.575	143.104
	69.2	101.499	129.27		93.7942	125.064	142.866
	69.3	101.914	129.881		93.7699	125.038	142.836
	69.4	102.071	130.115		93.6587	124.372	143.037
	69.5	102.117	129.87		93.4816	123.332	143.091
	69.6	101.811	129.052		93.3122	122.809	142.729
	69.7	101.576	128.411		93.3226	123.174	142.323
	69.8	101.067	127.955		93.5723	124.024	142.229
	69.9	100.656	127.815		93.65	124.76	142.528
	70	100.058	127.72		93.3824	124.965	142.977
	70.1	99.9108	127.872		92.8877	124.54	142.981
	70.2	100.272	128.09		92.4279	123.872	142.511
	70.3	100.834	128.219		92.2357	123.387	141.484
	70.4	101.318	127.825		92.4654	123.521	141.273
	70.5	101.088	127.33		92.9571	124.08	141.92
	70.6	101.105	127.295		93.3538	124.525	143.409
	70.7	101.177	128.007		93.4334	124.689	144.23
	70.8	101.877	128.875		93.3187	124.245	143.929
	70.9	102.152	129.302		93.2077	123.989	143.031
	71	102.285	128.987		93.1269	123.987	142.451
	71.1	101.837	128.412		93.0769	124.555	142.306
	71.2	101.48	127.752		93.1567	125.095	142.58
	71.3	101.079	127.565		93.12	125.541	142.71
	71.4	101.002	127.972		93.1579	125.78	143.142
	71.5	100.88	128.357		93.0442	125.909	142.785
	71.6	100.963	128.504		92.7314	125.649	142.168
	71.7	100.712	127.608		92.0117	124.822	141.179
	71.8	100.807	127.158		91.2641	123.608	140.861
	71.9	100.85	126.934		91.0908	122.402	140.668
	72	101.61	127.576		91.1849	121.975	141.041
	72.1	102.101	128.052		91.5422	122.092	141.49
	72.2	102.351	128.367		91.724	122.904	142.419
	72.3	101.885	128.285		91.7549	123.244	142.913
	72.4	101.211	127.836		91.4994	123.521	143.23
	72.5	100.667	127.472		91.1824	123.398	142.864
	72.6	100.599	126.915		91.2276	123.585	142.464
	72.7	101.251	126.518		91.3733	123.871	141.938
	72.8	102.106	125.74		91.6068	124.411	141.892
	72.9	102.664	125.801		91.943	125.131	141.789
	73	102.551	125.998		92.2543	125.563	141.76
	73.1	102.158	126.66		92.4171	125.528	141.764
	73.2	101.805	126.551		92.2234	125.11	141.95
	73.3	101.466	126.459		92.277	124.94	142.254
	73.4	101.141	126.253		92.292	124.678	142.052
	73.5	100.771	126.14		92.2617	124.512	141.615
	73.6	100.718	126.248		92.1556	124.542	140.75
	73.7	100.925	126.532		92.0422	124.95	140.461
	73.8	101.16	126.862		92.0554	125.192	140.661
	73.9	101.289	126.597		91.9161	124.32	141.213
	74	101.246	125.944		92.1086	123.355	141.493
	74.1	101.513	125.415		92.4427	122.679	141.406
	74.2	101.603	125.171		92.6976	123.049	141.61
	74.3	101.487	125.087		92.8224	123.482	141.918
	74.4	100.653	124.966		92.4186	123.989	142.415
	74.5	99.9699	124.719		92.0053	124.28	142.392
	74.6	99.3762	124.548		91.3393	124.32	141.885
	74.7	99.4928	124.593		91.4473	123.852	141.094
	74.8	99.5927	124.876		91.8536	123.392	140.751
	74.9	100.108	125.128		92.6214	123.228	141.46
	75	100.666	125.085		92.9704	123.496	142.469
	75.1	101.544	124.973		92.8806	123.463	142.996
	75.2	101.961	124.785		92.2988	123.643	142.626
	75.3	101.731	124.564		91.5368	123.612	142.227
	75.4	100.904	124.692		91.0419	123.852	141.933
	75.5	100.496	125.324		90.9784	123.718	141.908
	75.6	100.607	126.271		91.1564	123.835	141.415
	75.7	101.051	126.9		91.2017	124.214	141.533
	75.8	101.21	126.971		91.172	124.428	141.348
	75.9	100.995	126.607		91.2407	124.459	141.331
	76	100.631	125.927		91.5701	124.197	140.411
	76.1	100.468	125.349		91.7933	124.438	140.023
	76.2	100.669	125.329		91.9591	124.549	140.152
	76.3	101.12	125.559		92.3444	124.382	140.657
	76.4	101.09	125.658		92.9986	123.523	140.704
	76.5	100.96	125.133		93.533	122.855	140.134
	76.6	100.608	124.798		93.4313	122.689	139.605
	76.7	100.435	124.541		92.9763	123.081	139.439
	76.8	99.996	124.62		92.3567	123.516	139.722
	76.9	99.5189	124.409		91.8713	123.775	140.453
	77	99.3712	124.172		91.305	123.996	141.231
	77.1	99.6653	123.846		91.323	124.229	142.075
	77.2	100.24	123.368		91.6089	124.325	142.03
	77.3	100.771	123.239		92.1269	123.971	141.605
	77.4	101.173	123.122		92.1509	123.243	140.953
	77.5	101.358	123.597		91.8359	122.609	140.836
	77.6	101.117	123.783		91.2727	122.786	140.465
	77.7	100.642	124.255		90.891	123.401	139.97
	77.8	100.291	124.43		90.845	124.059	139.54
	77.9	100.311	124.772		91.1783	123.949	140.003
	78	100.561	124.768		91.3458	124.024	140.228
	78.1	100.779	124.698		91.289	123.99	140.155
	78.2	100.853	124.461		91.1139	124.374	139.715
	78.3	100.822	124.428		91.0133	124.286	140.06
	78.4	100.719	124.407		91.0029	124.318	140.726
	78.5	100.918	124.359		90.8904	123.816	141.057
	78.6	100.988	124.109		90.4602	123.097	140.931
	78.7	101.373	123.926		90.0127	122.185	140.693
	78.8	101.631	123.859		89.7864	121.896	140.586
	78.9	102.165	123.92		90.1973	122.086	140.369
	79	101.853	124.161		90.6664	122.629	139.808
	79.1	100.955	124.05		90.7341	123.346	139.551
	79.2	99.8292	123.594		90.7578	124.548	139.862
	79.3	99.5442	122.848		90.7496	125.269	140.665
	79.4	99.7266	122.58		91.2307	125.494	140.996
	79.5	99.9313	122.842		91.4189	124.624	140.595
	79.6	99.9593	122.942		91.7171	124.185	139.737
	79.7	99.9652	122.961		91.8554	123.432	139.262
	79.8	100.022	122.744		91.7314	122.946	139.029
	79.9	99.8437	123.069		91.4266	122.246	138.993
	80	99.8279	123.169		90.7804	122.178	139.266
	80.1	99.8123	123.393		90.5256	122.405	139.782
	80.2	99.7473	123.116		90.2844	122.422	140.839
	80.3	99.6984	122.886		90.4486	122.338	141.248
	80.4	99.928	122.73		90.7001	122.648	141.895
	80.5	100.645	122.914		91.0218	123.531	142.05
	80.6	101.35	123.121		90.9566	124.252	142.519
	80.7	101.768	122.778		90.5103	124.126	141.809
	80.8	102.03	121.864		89.9326	123.568	140.969
	80.9	102.07	120.932		89.461	123.201	139.896
	81	102.118	120.587		89.3813	123.397	139.741
	81.1	101.575	120.839		89.8129	123.664	139.479
	81.2	100.963	121.43		90.299	123.649	139.453
	81.3	100.264	121.956		90.4452	123.241	139.364
	81.4	100.037	122.483		90.3881	122.785	139.525
	81.5	99.7338	123.121		90.7249	122.347	139.245
	81.6	99.3733	123.554		90.961	122.204	138.989
	81.7	99.2907	123.744		90.2836	122.54	138.665
	81.8	99.9657	123.124		89.1003	123.225	138.735
	81.9	100.974	122.108		88.4204	123.998	138.777
	82	101.378	121.061		88.8059	124.451	138.705
	82.1	101.14	120.646		89.4811	124.627	138.629
	82.2	101.036	121.065		90.2649	124.274	138.505
	82.3	101.372	121.622		90.577	123.849	138.849
	82.4	101.509	121.769		90.7703	123.592	139.357
	82.5	100.875	121.577		90.4437	123.665	139.64
	82.6	99.9858	121.378		90.4577	123.502	139.637
	82.7	99.6517	121.681		90.4554	123.036	139.411
	82.8	100.004	122.034		90.4108	122.226	139.726
	82.9	100.38	122.476		89.8711	121.602	140.092
	83	99.9596	122.525		89.3352	121.034	140.679
	83.1	99.083	122.297		89.3952	121.185	140.812
	83.2	98.5727	122.054		90	121.506	141.253
	83.3	98.8927	122.355		90.7008	122.325	141.317
	83.4	99.4726	122.97		91.0242	123.03	141.28
	83.5	99.6006	123.484		91.0167	123.413	140.064
	83.6	99.4253	123.386		90.8763	123.096	139.08
	83.7	99.3758	123.064		90.4769	122.354	138.507
	83.8	99.6683	122.88		90.299	122.018	139.468
	83.9	100.243	122.701		90.1006	121.924	140.453
	84	100.64	122.706		90.1446	122.102	140.765
	84.1	100.606	122.549		89.877	122.205	139.993
	84.2	100.095	122.507		89.8258	122.579	138.773
	84.3	99.7338	122.449		89.9388	122.751	138.34
	84.4	100.073	122.535		89.945	122.504	138.302
	84.5	100.934	122.843		89.77	122.197	138.687
	84.6	101.676	123.025		89.5222	122.183	138.486
	84.7	101.859	122.943		89.8673	122.687	138.094
	84.8	101.39	122.776		90.5036	123.03	137.571
	84.9	100.55	122.639		90.989	123.193	137.299
	85	99.7313	122.374		90.9766	123.311	137.174
	85.1	99.2772	121.754		90.6333	123.413	137.379
	85.2	99.3717	121.018		90.4443	123.408	138.075
	85.3	99.6091	120.746		90.6794	123.111	139.079
	85.4	99.7691	120.995		90.9093	123.01	139.497
	85.5	99.7209	121.457		90.7808	123.346	138.851
	85.6	99.4437	121.804		90.226	123.881	137.269
	85.7	99.5546	121.536		89.6086	124.254	136.207
	85.8	99.738	121.095		89.4748	124.099	136.486
	85.9	100.119	120.603		89.4826	123.63	137.539
	86	99.6287	120.599		89.8607	123.106	138.564
	86.1	99.2337	120.944		89.796	122.697	138.662
	86.2	98.9811	121.426		89.8369	122.433	139.087
	86.3	99.722	122.101		89.7327	122.352	139.417
	86.4	100.346	122.087		89.9059	122.44	139.802
	86.5	101.153	121.776		89.8611	123.183	139.656
	86.6	100.916	121.001		89.897	124.181	139.26
	86.7	100.708	120.976		90.0201	125.23	139.021
	86.8	99.8659	120.78		90.0202	125.277	138.786
	86.9	99.8853	120.568		89.441	124.28	138.896
	87	99.9696	119.931		88.8601	123.102	138.837
	87.1	100.112	119.653		88.8094	122.597	138.733
	87.2	100.242	119.834		89.3469	123.12	138.414
	87.3	99.9617	119.99		89.6818	123.66	138.248
	87.4	100.161	119.968		89.8721	123.986	138.295
	87.5	99.8328	119.274		89.7608	123.728	138.605
	87.6	99.8827	118.863		89.3784	123.487	139.324
	87.7	99.577	118.979		88.5721	123.119	140.037
	87.8	99.6391	119.659		88.1336	123.041	140.26
	87.9	99.6262	120.271		88.2374	122.729	139.826
	88	100.026	120.271		88.6539	122.425	138.865
	88.1	100.207	120.352		88.8504	122.064	138.103
	88.2	100.403	120.345		89.0709	122.319	137.436
	88.3	100.123	120.572		89.4671	122.674	137.458
	88.4	100.091	120.303		89.9406	123.394	137.721
	88.5	100.073	120.162		89.9651	123.528	137.971
	88.6	100.329	120.087		89.7718	123.52	137.683
	88.7	100.536	119.946		89.237	122.879	137.37
	88.8	100.77	119.697		89.0478	122.548	137.328
	88.9	100.817	119.202		88.8231	122.481	137.849
	89	100.85	119.389		89.0303	122.891	137.984
	89.1	100.912	119.661		89.2107	123.103	138.038
	89.2	101.262	120.115		89.5234	123.072	137.998
	89.3	101.342	120.225		89.5038	122.613	138.35
	89.4	101.341	120.082		89.0177	122.346	138.634
	89.5	100.966	120.296		88.7926	122.363	138.653
	89.6	100.918	120.419		88.7774	122.594	138.409
	89.7	100.54	120.574		89.2798	122.619	138.09
	89.8	100.408	119.911		88.9223	122.471	137.533
	89.9	100.12	119.459		88.4072	122.656	137.034
	90	100.233	119.109		87.947	123.235	136.342
	90.1	100.449	119.31		88.1991	123.787	135.934
	90.2	100.682	119.126		88.5139	123.941	135.528
	90.3	100.903	118.955		88.4579	123.823	136.038
	90.4	100.577	118.458		88.1806	123.94	136.787
	90.5	100.36	118.179		88.0366	124.186	138.149
	90.6	100.096	118.161		88.3233	124.312	138.737
	90.7	100.314	118.514		88.8962	123.988	139.106
	90.8	100.291	119.113		89.3197	123.575	138.675
	90.9	100.205	119.123		89.0666	123.297	138.181
	91	99.9499	118.989		88.2297	123.346	137.437
	91.1	99.7199	118.574		87.5418	123.264	136.856
	91.2	99.5729	118.677		87.5627	123.028	136.59
	91.3	99.5754	118.914		88.1739	122.331	136.951
	91.4	99.7292	119.252		88.8644	121.934	137.506
	91.5	99.6996	119.392		89.4233	121.696	137.727
	91.6	99.9012	119.403		89.6021	122.098	137.208
	91.7	100.075	119.162		89.6308	122.35	136.682
	91.8	100.349	118.991		89.1928	122.692	136.763
	91.9	100.047	118.648		88.7652	123.007	137.224
	92	100.145	118.903		88.376	123.768	137.276
	92.1	100.516	119.344		88.2877	124.564	136.561
	92.2	101.195	119.789		88.4584	124.849	136.199
	92.3	100.974	119.286		88.225	124.046	136.366
	92.4	100.437	118.201		87.9508	122.881	137.274
	92.5	99.7094	117.568		87.5793	121.961	137.871
	92.6	99.9672	117.673		87.6377	122.01	138.428
	92.7	100.164	118.633		88.0157	122.305	138.832
	92.8	100.706	119.259		88.4869	122.715	138.731
	92.9	100.705	119.749		89.0618	122.934	138.083
	93	100.92	119.286		89.4261	123.091	136.856
	93.1	100.971	118.861		89.4397	123.317	136.642
	93.2	100.844	118.53		89.0503	123.342	137.024
	93.3	100.675	118.5		88.6323	123.639	138.017
	93.4	100.287	118.395		88.6092	123.494	138.309
	93.5	100.568	118.293		88.9024	123.545	138.235
	93.6	100.933	118.551		88.9443	123.248	137.755
	93.7	101.71	119.069		88.6707	123.446	137.092
	93.8	101.929	119.411		88.1738	123.721	136.543
	93.9	102.102	119.686		87.9157	124.019	136.214
	94	101.927	119.808		87.9094	123.913	136.348
	94.1	101.642	119.77		88.0656	123.113	136.603
	94.2	101.257	119.341		88.1243	122.295	136.93
	94.3	100.718	118.834		88.0212	121.965	136.944
	94.4	100.393	118.767		88.2253	122.294	136.955
	94.5	99.8167	118.882		88.5586	123.043	136.711
	94.6	99.7186	119.141		88.5942	123.134	136.797
	94.7	99.9713	119.09		87.9366	122.745	136.92
	94.8	100.929	119.378		87.0484	122.043	137.199
	94.9	101.539	119.464		87.0729	122.243	137.373
	95	101.501	119.507		87.6311	123.318	137.234
	95.1	100.814	119.154		88.5354	124.165	137.115
	95.2	100.447	118.745		88.63	124.065	136.933
	95.3	100.209	118.457		88.3528	122.924	136.494
	95.4	100.229	118.257		87.679	122.223	135.828
	95.5	100.087	118.134		87.1817	122.188	135.1
	95.6	100.295	117.947		87.0929	122.923	135.321
	95.7	100.573	117.797		87.673	123.011	135.865
	95.8	100.572	117.687		88.3941	122.809	136.244
	95.9	100.141	117.492		88.818	122.364	135.813
	96	99.481	117.293		88.7018	122.409	135.481
	96.1	98.8751	117.111		88.7261	122.431	135.37
	96.2	98.7662	117.096		88.8701	122.112	135.621
	96.3	98.779	117.038		89.1487	121.794	135.544
	96.4	99.2923	117.263		88.848	121.57	135.973
	96.5	99.7562	117.235		88.6712	121.918	136.441
	96.6	100.226	117.135		88.2764	122.5	137.095
	96.7	100.407	116.624		88.4146	122.781	136.85
	96.8	100.265	116.592		88.2638	122.823	136.578
	96.9	100.186	116.869		88.46	122.512	136.035
	97	100.038	117.601		88.4614	122.528	135.886
	97.1	99.9841	118.091		88.2982	122.553	135.596
	97.2	99.7922	118.355		87.7879	122.857	135.944
	97.3	99.7252	118.102		87.1448	123.27	136.783
	97.4	99.6991	117.82		87.0811	123.767	137.524
	97.5	99.9959	117.608		87.3419	123.607	137.32
	97.6	100.374	117.786		87.846	123.339	136.662
	97.7	100.795	117.975		87.9767	122.856	136.226
	97.8	100.649	118.303		88.1678	122.994	136.689
	97.9	100.057	118.367		88.2913	122.951	136.752
	98	99.0514	118.315		88.4307	122.979	136.858
	98.1	98.3682	118.014		88.2282	122.518	136.144
	98.2	98.1082	117.963		88.0424	122.478	135.865
	98.3	98.3577	118.2		87.716	122.778	135.228
	98.4	98.5734	118.303		87.5902	123.843	134.814
	98.5	98.7586	118.052		87.6504	124.354	134.128
	98.6	98.8526	117.431		88.0624	124.153	134.087
	98.7	99.1886	116.954		88.4076	123.29	134.745
	98.8	99.3852	116.689		88.3723	122.549	135.79
	98.9	99.5649	116.745		88.3534	122.345	136.39
	99	99.634	116.931		88.4308	122.141	136.45
	99.1	99.7698	117.079		88.6012	122.432	136.492
	99.2	99.9954	117.111		88.3956	122.812	136.257
	99.3	100.134	116.936		87.9379	123.299	135.794
	99.4	100.265	116.515		87.5951	123.08	134.611
	99.5	100.406	116.095		87.7654	122.195	133.847
	99.6	100.527	115.631		87.9076	121.845	133.239
	99.7	100.652	115.338		87.7911	122.177	133.582
	99.8	100.598	114.978		87.1324	122.995	134.167
	99.9	100.555	115.126		87.0198	122.936	134.904
	100	100.368	115.85		87.3552	122.136	135.3
	100.1	99.9777	116.639		87.9342	121.449	135.408
	100.2	99.5551	117.171		87.9531	121.327	135.877
	100.3	99.3317	117.129		87.4623	121.832	135.926
	100.4	99.6731	117.293		86.908	122.37	135.869
	100.5	100.166	117.579		86.5654	122.827	135.108
	100.6	100.523	118.121		86.9398	123.023	134.801
	100.7	100.424	118.247		87.7256	123.245	134.604
	100.8	99.7992	117.696		88.859	123.46	134.521
	100.9	99.5996	116.846		89.2322	123.606	134.792
	101	99.6097	116.154		88.9171	122.993	135.041
	101.1	100.159	116.255		87.9922	121.891	135.879
	101.2	100.031	116.458		87.6811	120.913	135.951
	101.3	99.6876	116.893		87.7147	120.925	135.685
	101.4	99.2468	116.988		87.9762	122.067	135.056
	101.5	99.0487	116.895		87.6734	122.997	134.915
	101.6	99.0236	116.302		87.4036	123.243	135.464
	101.7	99.1183	115.717		87.2843	122.315	136.007
	101.8	99.439	115.147		87.7673	121.739	136.367
	101.9	99.8576	114.993		88.4034	121.282	136.178
	102	100.029	114.789		88.957	121.599	135.865
	102.1	99.996	114.947		88.9936	121.843	135.843
	102.2	99.5926	115.075		88.616	122.195	135.951
	102.3	99.2971	115.227		88.1401	122.304	135.926
	102.4	99.1477	115.53		87.8278	122.202	135.179
	102.5	99.5753	115.636		87.993	122.216	134.59
	102.6	100.198	115.839		88.3191	122.164	134.292
	102.7	100.574	115.687		88.8073	122.193	135.074
	102.8	100.382	115.629		89.0128	122.187	135.886
	102.9	99.7158	115.656		88.7607	121.933	136.886
	103	99.3643	115.756		88.2714	122.208	137.009
	103.1	99.4941	116.096		87.7388	122.528	136.752
	103.2	99.9334	116.333		87.705	123.207	135.898
	103.3	100.036	116.539		87.751	123.177	135.319
	103.4	99.4568	116.264		87.8388	122.998	135.019
	103.5	98.8232	115.966		87.9037	122.894	134.978
	103.6	98.638	115.518		87.9259	122.949	134.712
	103.7	99.3377	115.262		87.966	123.087	134.032
	103.8	100.167	114.664		87.6074	122.86	133.571
	103.9	100.444	114.242		87.335	122.651	133.361
	104	100.013	114.394		87.0651	122.146	134.089
	104.1	99.5633	115.228		86.9406	122.058	134.465
	104.2	99.63	116.051		86.7166	122.233	134.594
	104.3	100.233	116.137		86.4011	122.778	133.907
	104.4	100.44	115.591		86.3364	123.205	133.681
	104.5	100.254	114.9		86.2483	123.395	133.813
	104.6	99.6694	114.385		86.4043	123.551	134.14
	104.7	99.4353	114.288		86.5763	123.394	134.156
	104.8	99.4274	114.446		86.5412	123.232	133.806
	104.9	99.9502	114.877		86.1602	122.818	133.513
	105	100.542	115.353		85.824	122.751	133.304
	105.1	101.353	115.975		86.5881	122.658	133.696
	105.2	101.409	116.449		87.9109	122.994	134.292
	105.3	101.463	116.973		88.9387	123.1	134.964
	105.4	101.025	117.009		88.7569	123.42	135.234
	105.5	100.944	116.597		88.1168	123.523	135.137
	105.6	100.45	115.632		87.652	123.693	134.729
	105.7	99.8196	114.811		87.4422	123.38	134.371
	105.8	98.9641	114.595		87.2442	122.937	134.238
	105.9	98.3804	114.703		86.9783	122.381	134.378
	106	98.4261	114.895		86.9344	122.373	134.368
	106.1	98.8472	114.757		86.6704	122.308	134.374
	106.2	99.5062	114.322		86.258	122.523	134.354
	106.3	99.9463	113.815		85.8712	122.654	134.265
	106.4	100.349	113.274		85.9706	123.121	134.1
	106.5	100.479	113.307		86.2898	123.608	133.746
	106.6	100.9	113.248		86.5566	123.619	133.489
	106.7	101.517	113.408		86.5561	123.248	133.388
	106.8	102.306	113		86.5832	122.278	133.95
	106.9	102.513	112.707		86.3272	121.545	134.856
	107	101.932	112.485		86.3337	120.926	135.463
	107.1	101.14	112.745		86.1644	121.048	135.322
	107.2	100.646	113.239		86.3822	121.265	134.887
	107.3	100.778	113.639		86.2012	121.468	134.331
	107.4	100.936	113.665		86.2578	121.385	133.643
	107.5	101.025	113.427		86.3742	121.421	132.783
	107.6	101.108	112.99		87.0566	121.758	132.613
	107.7	101.294	112.829		87.41	122.177	133.006
	107.8	101.298	112.706		87.2792	122.69	133.8
	107.9	100.813	112.737		86.8676	122.725	134.324
	108	100.233	112.816		86.4896	122.406	134.912
	108.1	99.8578	113.064		86.2824	121.767	135.115
	108.2	100.193	113.427		85.7014	121.747	134.826
	108.3	100.561	113.454		85.5308	121.82	134.348
	108.4	100.703	113.179		85.8449	121.855	134.117
	108.5	100.162	112.618		86.6578	121.284	134.511
	108.6	99.5727	112.468		87.2231	121.274	134.433
	108.7	99.1794	112.771		87.151	121.532	134.171
	108.8	99.1003	113.144		86.9407	122.381	133.649
	108.9	99.046	113.188		86.7336	122.893	133.681
	109	99.1637	112.78		86.7683	123.44	133.809
	109.1	99.3283	112.847		86.7146	123.315	133.593
	109.2	99.8842	113.36		86.4968	122.962	133.378
	109.3	100.297	114.13		86.5141	122.422	133.448
	109.4	100.861	114.571		86.5042	122.371	133.943
	109.5	100.91	114.588		86.5492	122.197	134.11
	109.6	100.68	114.525		86.1293	121.675	133.805
	109.7	100.134	114.156		85.7764	120.962	133.639
	109.8	99.877	113.823		85.9418	120.785	134.004
	109.9	100.024	113.33		86.4769	121.258	134.673
	110	100.364	113.254		87.151	121.892	134.698
	110.1	100.511	113.446		87.2602	122.552	134.274
	110.2	100.35	113.882		87.2601	123.223	133.959
	110.3	99.9007	113.94		87.0159	123.628	134.07
	110.4	99.4698	113.62		87.0184	123.622	133.868
	110.5	99.1218	113.47		87.1508	122.858	133.102
	110.6	99.0698	113.61		87.3658	121.972	132.643
	110.7	98.9503	114.004		87.3702	121.198	132.857
	110.8	99.3097	113.882		87.5434	121.224	133.466
	110.9	99.6282	113.766		88.0048	121.482	133.482
	111	100.275	113.524		88.6757	121.831	133.26
	111.1	100.502	113.499		88.6058	121.848	133.154
	111.2	100.679	113.426		88.1826	121.996	133.378
	111.3	100.652	113.15		87.4334	122.08	133.471
	111.4	100.531	113.11		86.945	121.999	133.153
	111.5	100.539	113.09		86.5002	121.868	132.609
	111.6	100.434	113.427		86.0748	121.688	132.233
	111.7	100.565	113.398		85.7887	121.927	132.464
	111.8	100.632	113.463		85.4591	121.98	133.083
	111.9	101.067	113.656		85.3962	122.131	133.747
	112	101.175	113.94		85.6746	122.047	134.12
	112.1	100.907	113.95		85.7651	122.296	133.99
	112.2	100.02	113.376		85.9746	122.341	133.835
	112.3	99.4457	112.729		85.8257	122.314	133.896
	112.4	99.3944	112.237		86.2943	122.07	134.299
	112.5	99.7141	112.381		86.6409	122.145	134.363
	112.6	99.937	112.89		87.3182	122.414	133.562
	112.7	99.6774	113.337		87.7876	122.371	132.656
	112.8	99.3978	113.557		88.1697	121.614	132.091
	112.9	98.9266	113.615		87.9414	120.625	132.293
	113	98.7259	113.671		87.5026	120.677	132.563
	113.1	98.5663	113.255		87.1134	121.95	132.848
	113.2	98.6618	112.78		87.4937	123.359	132.835
	113.3	98.8038	112.42		88.0748	123.647	132.886
	113.4	98.9817	112.568		88.6301	123.284	132.594
	113.5	98.9273	112.648		88.4141	123.026	132.405
	113.6	99.1198	112.413		87.7611	123.347	132.173
	113.7	99.1072	111.982		86.9512	123.377	132.319
	113.8	99.3821	111.587		86.2457	123.322	132.555
	113.9	99.1676	111.876		85.9096	123.232	132.595
	114	99.2999	112.512		85.7612	123.594	132.936
	114.1	99.6179	113.24		86.0602	123.68	133.714
	114.2	100.179	113.231		86.2846	123.226	134.881
	114.3	100.377	112.792		86.1418	122.646	135.189
	114.4	99.7453	112.37		85.6309	122.406	134.537
	114.5	98.9843	112.566		85.0889	122.662	133.666
	114.6	98.3766	113.139		85.2323	122.639	133.362
	114.7	98.5164	113.877		85.5568	122.222	133.581
	114.8	98.8948	114.316		86.3344	121.798	133.406
	114.9	99.3989	114.753		86.8302	121.836	132.805
	115	99.7964	114.637		87.2757	122.511	132.527
	115.1	99.7684	114.436		87.0942	123.19	132.76
	115.2	99.1962	113.814		86.769	123.477	133.338
	115.3	98.0709	113.33		86.4446	123.291	132.831
	115.4	97.2656	112.637		86.2341	123.021	131.999
	115.5	97.1901	111.913		86.1408	122.733	131.091
	115.6	97.595	111.826		86.3097	122.357	131.309
	115.7	98.0394	112.244		86.6066	121.623	132.089
	115.8	98.1502	113.037		86.5721	121.246	132.852
	115.9	98.3573	112.98		86.1624	121.359	132.881
	116	98.4689	112.403		85.6039	122.072	132.311
	116.1	98.6716	111.649		85.3227	122.281	131.794
	116.2	99.1414	111.406		85.1392	121.891	131.459
	116.3	99.9697	111.75		85.3252	121.056	131.245
	116.4	101.058	112.245		85.8546	120.794	131.268
	116.5	101.526	112.755		86.3956	121.047	131.713
	116.6	101.373	112.9		86.9226	121.748	132.297
	116.7	100.686	112.837		87.0213	122.312	132.147
	116.8	100.087	112.449		87.011	122.617	131.627
	116.9	99.8453	111.948		86.7157	122.583	131.138
	117	99.9259	111.846		86.6432	122.211	131.105
	117.1	100.115	111.953		86.911	121.759	131.21
	117.2	100.41	112.076		87.3512	121.368	131.188
	117.3	100.416	111.677		87.5886	121.18	131.37
	117.4	100.237	111.245		87.4458	121.078	131.57
	117.5	99.5339	111.17		86.7636	121.172	132.002
	117.6	98.7148	111.117		85.9708	121.742	132.251
	117.7	98.0989	111.17		85.5318	122.43	132.507
	117.8	98.1766	111.023		85.5711	122.896	132.455
	117.9	98.7647	111.321		85.9332	122.813	132.218
	118	99.3109	111.386		86.1573	122.688	131.405
	118.1	99.2612	111.479		86.411	122.309	130.487
	118.2	99.0326	111.27		86.653	121.837	130.042
	118.3	99.3592	111.516		86.6892	121.402	130.664
	118.4	100.135	112.029		86.6717	121.436	131.788
	118.5	100.977	112.505		86.3533	121.733	132.552
	118.6	100.874	112.123		86.568	122.049	132.53
	118.7	100.114	111.007		87.0097	122.21	132.294
	118.8	99.4424	109.751		87.7838	122.36	131.854
	118.9	99.382	109.255		87.9104	122.398	131.433
	119	100.184	109.276		87.4104	122.474	130.954
	119.1	100.608	110.079		86.9478	122.169	130.969
	119.2	100.876	110.659		86.7279	121.52	131.343
	119.3	100.44	111.194		87.0749	120.735	131.66
	119.4	99.9986	110.861		87.0463	120.223	131.67
	119.5	99.0286	110.833		86.8514	120.221	131.279
	119.6	98.4983	111.026		86.177	120.322	130.88
	119.7	98.4407	111.873		85.533	120.474	130.684
	119.8	99.0758	112.205		85.1069	120.464	130.845
	119.9	99.4791	111.941		84.7678	120.631	131.185
	120	99.6851	111.14		84.4879	120.837	131.539
	120.1	99.7318	110.512		84.3281	121.269	131.853
	120.2	99.9812	110.452		84.9931	121.415	132.234
	120.3	99.9004	110.766		85.8291	121.625	132.328
	120.4	100.094	111.202		86.5437	121.68	132.376
	120.5	100.122	111.18		86.4432	121.94	132.252
	120.6	100.434	110.635		86.5483	121.881	132.29
	120.7	100.044	110.119		86.8492	121.571	132.345
	120.8	99.7542	110.15		87.4994	121.144	132.272
	120.9	99.314	110.863		87.8547	121.31	132.107
	121	99.1912	111.314		87.8583	121.8	131.826
	121.1	98.9678	111.217		87.5646	122.261	132.004
	121.2	99.1009	110.545		86.9174	122.392	132.519
	121.3	99.6751	110.056		86.1046	122.364	132.924
	121.4	100.336	110.033		85.3517	122.382	132.749
	121.5	100.715	110.584		85.1239	122.171	132.097
	121.6	100.57	111.182		85.3452	122.232	131.57
	121.7	100.115	111.595		85.3617	122.208	131.101
	121.8	99.479	111.646		85.3847	122.398	130.825
	121.9	98.811	111.401		85.2859	122.284	130.771
	122	98.7284	111.043		85.8332	122.518	130.935
	122.1	98.8831	110.679		86.0924	122.534	131.309
	122.2	99.2769	110.504		86.4168	122.35	131.422
	122.3	98.8131	110.229		86.3442	121.663	131.678
	122.4	98.3211	110.061		86.2846	121.337	131.83
	122.5	97.7306	110.362		85.9947	121.596	132.323
	122.6	97.814	111.27		86.0582	122.22	132.383
	122.7	97.9669	112.18		86.478	122.623	131.973
	122.8	98.1389	112.273		87.2906	122.683	130.857
	122.9	98.4414	111.551		87.5282	122.507	130.352
	123	98.202	110.623		87.1443	122.489	130.26
	123.1	97.9411	110.183		86.2024	122.48	130.818
	123.2	97.1898	110.158		85.4576	122.572	131.081
	123.3	97.2119	110.629		85.2123	122.2	131.659
	123.4	97.2902	111.359		85.5951	121.695	131.695
	123.5	98.0431	112.118		85.9289	121.038	131.343
	123.6	98.7449	112.184		86.096	120.796	130.421
	123.7	99.5828	111.325		85.6426	120.754	130.2
	123.8	99.864	110.441		85.3327	120.972	130.511
	123.9	99.8026	109.851		85.2798	121.256	130.951
	124	99.5662	110.028		85.7272	121.591	131.189
	124.1	99.3492	110.126		86.2732	121.929	131.19
	124.2	99.2501	110.452		86.4832	122.312	131.337
	124.3	99.1512	110.491		86.31	122.737	131.248
	124.4	99.229	110.256		85.7999	122.85	131.386
	124.5	99.5477	109.574		85.5632	122.803	131.831
	124.6	99.9992	109.214		85.6714	122.189	132.214
	124.7	100.063	109.441		86.2731	121.874	131.968
	124.8	99.3719	109.98		86.5364	121.348	130.979
	124.9	98.3504	110.35		86.4908	121.467	130.002
	125	97.638	110.48		85.8116	121.387	129.535
	125.1	97.6509	110.788		85.3722	121.587	129.38
	125.2	97.9409	110.692		85.2286	121.628	129.453
	125.3	98.404	110.33		85.6237	121.444	129.715
	125.4	98.7339	109.544		85.9068	120.708	130.339
	125.5	99.1803	109.411		85.6031	119.952	130.921
	125.6	99.481	109.684		84.9252	119.87	130.993
	125.7	99.6734	110.057		84.305	120.728	130.6
	125.8	99.7579	109.346		84.3822	121.297	130.053
	125.9	99.834	108.179		84.8463	121.431	130.137
	126	99.8879	107.108		85.287	121.045	130.494
	126.1	99.5018	107.265		85.4686	121.238	131.053
	126.2	98.9789	107.977		85.5404	121.768	131.072
	126.3	98.5392	109.151		85.7707	122.317	131.114
	126.4	98.6477	109.969		86.0074	122.575	131.311
	126.5	98.8619	110.56		85.9699	122.797	131.699
	126.6	98.869	110.35		85.6002	123.108	131.851
	126.7	98.8343	109.811		85.3338	122.951	131.202
	126.8	98.9611	109.285		85.268	122.211	130.363
	126.9	99.2379	109.388		85.3704	121.262	129.839
	127	99.3621	109.925		85.0076	120.926	130.079
	127.1	99.3404	110.483		84.7454	120.998	130.596
	127.2	99.314	110.576		84.7157	121.268	130.822
	127.3	99.4728	110.462		85.0921	121.399	130.625
	127.4	99.5772	110.178		85.3611	121.651	130.394
	127.5	99.8849	110.255		85.5131	122.045	130.179
	127.6	100.149	110.519		85.882	122.289	129.958
	127.7	100.432	110.529		86.2231	122.179	129.43
	127.8	100.368	110.037		86.3641	121.824	129.101
	127.9	99.9137	109.082		86.2021	121.647	129.384
	128	99.0986	108.672		85.9658	121.792	130.221
	128.1	98.4216	108.481		86.0224	121.694	130.6
	128.2	97.9848	108.512		86.4167	121.498	130.293
	128.3	98.0826	108.324		86.9852	121.057	129.273
	128.4	98.2549	108.596		87.0279	121.202	128.828
	128.5	98.3164	108.807		86.336	121.384	129.04
	128.6	98.6451	108.887		85.7511	121.735	129.884
	128.7	99.15	108.189		85.7318	121.892	130.71
	128.8	100.276	107.787		86.356	122.13	130.99
	128.9	100.888	107.915		86.6454	122.332	130.881
	129	100.959	108.807		86.6371	122.174	130.381
	129.1	100.123	109.441		86.2472	121.977	129.823
	129.2	99.2552	109.41		85.7692	121.964	129.625
	129.3	98.6051	108.82		85.2768	122.429	129.692
	129.4	98.1958	108.235		84.9126	122.823	129.8
	129.5	97.6703	107.99		84.6419	122.951	129.729
	129.6	97.434	108.323		84.232	122.48	129.459
	129.7	97.7772	108.929		84.105	121.808	129.656
	129.8	98.3432	109.591		84.1924	120.86	129.738
	129.9	98.5664	109.662		84.8918	120.345	130.15
	130	98.5206	109.288		84.9941	120.182	130.527
	130.1	98.9708	108.595		85.2283	120.834	130.989
	130.2	99.8348	108.078		84.9888	121.606	131.008
	130.3	100.376	108.115		85.2804	122.315	130.647
	130.4	100.039	108.674		85.3099	122.615	130.276
	130.5	99.3301	109.381		85.7276	122.689	130.196
	130.6	98.821	109.549		86.1059	122.537	130.023
	130.7	98.9006	109.161		86.3182	121.788	129.906
	130.8	99.226	108.512		85.8177	121.185	129.816
	130.9	99.618	108.065		85.1882	121.032	130.076
	131	99.7203	107.818		85.0119	121.789	130.087
	131.1	99.5249	107.984		85.2343	122.423	129.673
	131.2	99.006	108.374		85.0299	122.74	129.121
	131.3	98.5614	108.782		84.3928	122.496	128.995
	131.4	98.2294	108.84		83.8376	122.002	129.525
	131.5	98.3604	108.48		84.1741	121.338	130.248
	131.6	98.8798	108.045		85.0503	120.797	130.55
	131.7	99.6768	107.616		85.9897	120.595	130.45
	131.8	100.297	107.342		85.9227	120.701	130.148
	131.9	100.39	107.283		85.1203	121.008	130.308
	132	100.143	107.373		84.0733	121.438	130.353
	132.1	100.044	107.451		83.9626	121.63	130.295
	132.2	100.086	107.268		84.4767	121.627	129.698
	132.3	100.342	107.119		85.3828	121.194	129.357
	132.4	100.154	107.063		86.0267	120.785	128.875
	132.5	99.7087	107.472		86.6217	120.587	128.806
	132.6	98.9813	107.668		86.8562	120.662	129.041
	132.7	98.5074	108.015		86.8501	120.59	129.78
	132.8	98.4398	107.857		86.6287	120.308	130.161
	132.9	98.7164	107.827		86.4723	120.243	129.937
	133	98.922	107.761		86.2824	120.77	129.432
	133.1	99.1091	107.888		86.0479	121.429	129.486
	133.2	99.004	107.936		85.752	121.873	129.91
	133.3	99.1918	107.747		85.3994	122.181	130.312
	133.4	99.1603	107.513		84.9938	122.444	130.036
	133.5	99.3287	107.774		84.7321	122.853	129.629
	133.6	99.2423	108.12		84.7782	122.674	129.348
	133.7	99.5962	108.51		84.9478	122.257	129.433
	133.8	100.005	108.377		84.9662	121.501	129.436
	133.9	100.278	108.214		84.9809	121.338	129.396
	134	99.9788	108.054		85.1434	121.487	129.261
	134.1	99.2836	107.641		85.3683	121.795	129.278
	134.2	99.0388	107.301		85.1266	121.872	129.238
	134.3	99.0604	106.893		84.5931	121.996	129.232
	134.4	99.3943	107.139		84.2844	121.96	129.417
	134.5	99.5068	107.399		84.6511	121.99	129.717
	134.6	99.6733	108.087		85.263	121.551	130.176
	134.7	99.6747	108.365		85.7587	121.053	130.05
	134.8	99.288	108.453		85.9976	120.433	129.833
	134.9	98.7281	108.004		86.279	119.793	129.529
	135	98.2863	107.785		86.679	119.694	129.5
	135.1	98.4006	107.894		87.0182	120.013	129.502
	135.2	98.7747	108.426		87.1312	121.406	129.531
	135.3	99.0447	108.808		86.6167	122.278	129.787
	135.4	98.833	108.85		86.0217	122.439	130.047
	135.5	97.9456	108.15		85.5632	121.373	130.289
	135.6	97.033	107.345		85.6423	120.68	129.963
	135.7	96.5083	106.377		85.7564	120.161	129.373
	135.8	96.8228	105.753		85.6332	120.392	128.698
	135.9	97.5551	105.23		85.0958	120.382	128.64
	136	98.0613	105.498		84.3107	120.513	129.162
	136.1	98.1306	106.141		83.7524	120.354	129.558
	136.2	97.9106	107.012		83.6187	120.109	129.722
	136.3	98.2068	107.05		84.1246	120.305	129.396
	136.4	98.9932	106.878		84.5791	120.688	129.128
	136.5	99.8033	106.481		84.9551	121.505	128.927
	136.6	100.075	106.732		84.9287	121.933	128.748
	136.7	99.7717	106.921		84.757	121.841	128.978
	136.8	99.3838	107.258		84.5218	121.504	129.28
	136.9	99.28	107.165		84.4509	121.198	129.445
	137	99.6964	107.246		84.675	121.57	128.81
	137.1	100.654	106.893		84.732	121.914	127.955
	137.2	101.437	106.867		84.4692	122.251	127.682
	137.3	101.743	106.745		84.2658	122.217	128.214
	137.4	100.962	107.178		84.6331	122.076	128.511
	137.5	99.9328	107.428		85.3592	121.78	128.541
	137.6	98.8322	107.759		85.77	121.351	128.275
	137.7	98.3316	107.972		85.9432	121.005	128.869
	137.8	98.0016	108.357		85.9771	120.909	129.535
	137.9	98.1929	108.34		86.17	121.014	130.27
	138	98.4959	108.041		86.1504	121.367	129.961
	138.1	98.885	107.313		86.0774	121.55	129.551
	138.2	98.7043	106.763		85.8073	121.78	129.24
	138.3	98.4189	106.38		85.3959	121.363	129.789
	138.4	98.1258	106.365		85.0193	120.691	130.306
	138.5	98.3161	106.365		84.9617	120.191	130.331
	138.6	98.6309	106.159		85.1353	120.423	129.881
	138.7	99.4812	105.684		84.9787	121.178	129.443
	138.8	99.892	105.61		84.5044	121.476	129.239
	138.9	99.9686	106.036		83.8943	121.21	129.352
	139	99.2609	106.553		83.9713	120.722	129.237
	139.1	98.8401	106.792		84.4714	120.437	129.566
	139.2	98.8234	106.755		85.5396	120.599	129.546
	139.3	99.2729	106.866		86.171	120.596	129.701
	139.4	99.6852	106.875		86.4093	120.923	129.098
	139.5	99.714	106.65		85.8193	121.199	128.759
	139.6	99.2782	106.248		85.3673	122.008	128.569
	139.7	98.8228	105.924		84.8709	122.28	128.865
	139.8	98.7326	105.842		84.7103	122.389	128.824
	139.9	98.999	105.833		84.5332	122.014	128.495
	140	99.5667	105.591		84.7934	122.044	127.817
	140.1	99.8637	105.11		85.3902	121.704	127.256
	140.2	99.8866	104.711		86.1652	121.281	126.833
	140.3	99.1391	104.872		86.5103	120.451	126.884
	140.4	98.216	105.949		86.2908	119.98	127.236
	140.5	97.6916	107.045		85.6497	119.799	127.721
	140.6	97.9938	107.381		85.3	120.086	127.943
	140.7	98.5679	106.564		85.3901	120.787	128.109
	140.8	98.4509	105.596		85.5701	121.88	128.156
	140.9	98.0373	105.347		85.583	122.68	128.321
	141	98.2443	105.398		85.1981	122.845	128.345
	141.1	99.5848	105.465		84.8846	122.137	128.644
	141.2	100.504	104.987		84.6812	121.381	128.933
	141.3	100.589	104.776		84.8239	121.026	129.107
	141.4	99.62	104.659		85.018	121.017	129
	141.5	99.1956	105.365		84.5841	121.26	128.721
	141.6	98.7574	106.126		83.8114	121.127	128.73
	141.7	98.6887	107.01		83.2779	121.003	128.784
	141.8	98.2083	107.19		83.5939	120.718	128.811
	141.9	98.1713	107.136		84.2324	120.709	128.651
	142	98.0718	106.761		84.329	120.607	128.373
	142.1	98.7519	106.377		84.1522	120.549	128.013
	142.2	99.4181	105.853		83.8178	120.581	127.456
	142.3	100.516	105.273		83.9278	120.764	127.032
	142.4	100.929	104.771		84.0714	120.573	126.99
	142.5	100.888	105.091		84.3992	120.438	127.416
	142.6	100.379	105.823		84.6131	120.316	127.718
	142.7	99.8458	106.753		84.595	120.612	127.893
	142.8	99.5958	106.711		84.4859	120.51	127.44
	142.9	99.3547	106.811		84.1694	120.731	127.243
	143	99.4682	106.771		84.2614	121.057	127.221
	143.1	99.4179	106.978		84.3778	121.306	127.906
	143.2	99.4026	106.699		85.048	120.854	128.287
	143.3	98.9653	105.954		85.5143	120.104	128.339
	143.4	98.7852	105.092		86.0633	119.635	127.847
	143.5	98.6949	104.216		86.1141	119.794	127.452
	143.6	98.7616	104.399		86.2648	120.317	127.033
	143.7	98.4921	104.943		86.1746	120.826	126.942
	143.8	98.4642	105.542		86.0498	120.796	126.974
	143.9	98.7378	105.477		85.329	120.706	127.188
	144	99.2613	105.656		84.5481	121.079	127.257
	144.1	99.6236	106.177		83.9794	122.087	127.507
	144.2	99.944	106.898		84.2388	122.666	127.746
	144.3	100.263	107.237		84.9222	122.491	128.067
	144.4	100.26	107.329		85.7187	121.556	128.226
	144.5	99.4633	107.301		86.2716	120.702	128.336
	144.6	98.4762	106.939		86.3102	120.081	128.608
	144.7	97.6412	106.356		85.9919	120.064	128.757
	144.8	97.6901	105.688		85.5328	120.25	129.001
	144.9	98.0988	105.499		85.3933	120.643	128.481
	145	98.8002	105.655		85.2673	121.016	127.868
	145.1	99.1569	105.783		85.2104	121.776	127.049
	145.2	99.2883	105.769		85.1397	122.224	127.197
	145.3	99.2318	105.561		85.5578	122.256	127.508
	145.4	99.0969	105.431		86.0297	121.677	127.73
	145.5	99.0776	105.188		86.411	121.36	127.446
	145.6	98.7843	105.117		86.3143	121.157	126.743
	145.7	98.7504	105.07		85.675	120.989	126.386
	145.8	98.4683	105.115		84.7809	120.909	126.206
	145.9	98.4821	104.774		84.0299	120.943	126.697
	146	98.5071	104.342		84.1873	121.081	126.846
	146.1	98.5493	104.103		84.9421	121.039	126.807
	146.2	98.4032	104.486		85.7876	121.038	126.594
	146.3	97.7328	104.949		85.9999	121.089	126.838
	146.4	97.1983	105.093		85.914	121.044	127.322
	146.5	97.0773	104.872		85.65	120.888	127.64
	146.6	97.5191	104.925		85.6197	120.656	127.797
	146.7	98.047	105.173		85.2352	120.394	128.001
	146.8	98.4254	105.287		85.1504	119.936	128.393
	146.9	98.6539	104.947		84.9353	119.706	128.602
	147	98.843	104.586		85.2728	119.659	128.283
	147.1	99.03	104.521		85.2456	119.98	127.599
	147.2	99.4584	104.744		85.0851	119.777	127.058
	147.3	100.095	104.924		84.9042	119.609	126.645
	147.4	100.566	104.954		84.8183	119.435	126.162
	147.5	100.618	104.788		84.9659	120.026	125.567
	147.6	100.031	104.822		84.8196	120.416	125.257
	147.7	99.3248	104.807		85.0653	120.69	125.61
	147.8	98.9022	105.055		85.3213	120.307	125.846
	147.9	98.7904	105.045		85.7202	120.058	126.055
	148	98.7189	105.155		85.4304	120.129	125.902
	148.1	98.2574	105.095		85.2143	120.597	126.04
	148.2	97.9032	105.317		84.7566	120.932	126.539
	148.3	97.7989	105.439		84.9182	120.641	127.191
	148.4	98.115	105.595		84.7327	120.186	127.718
	148.5	98.4434	105.238		85.0634	119.681	127.625
	148.6	98.4776	105.203		85.2289	119.618	127.292
	148.7	98.5101	105.274		85.4788	119.775	127.252
	148.8	98.5484	105.759		85.0027	120.644	127.694
	148.9	98.828	105.575		84.0382	121.519	128.332
	149	98.8616	105.136		83.3666	121.939	128.482
	149.1	98.9748	104.501		83.099	121.393	128.1
	149.2	98.9661	104.444		83.3134	120.5	127.518
	149.3	98.7424	104.618		83.3787	119.92	127.154
	149.4	98.3814	104.774		83.8241	119.833	127.4
	149.5	98.2181	104.574		84.0188	119.995	127.797
	149.6	98.4151	104.06		84.2057	120.34	128.309
	149.7	98.636	103.686		83.9912	120.622	128.304
	149.8	98.867	103.611		84.387	120.711	128.425
	149.9	99.3018	104.026		84.8968	120.346	128.583
	150	99.8512	104.573		85.0981	119.798	128.983
	150.1	100.241	104.971		84.5206	119.539	129.056
	150.2	100.502	104.811		83.7447	119.885	128.555
	150.3	100.416	104.442		83.4836	120.671	127.951
	150.4	100.028	104.012		83.7297	121.238	126.965
	150.5	99.4957	103.871		84.1028	121.241	126.295
	150.6	99.1176	103.83		84.2692	121.047	125.663
	150.7	99.1901	104.229		84.2381	121.197	125.811
	150.8	99.066	105.009		84.0177	121.384	126.499
	150.9	98.8699	105.692		84.0726	121.179	127.013
	151	98.4848	105.804		84.3989	120.477	127.343
	151.1	98.5891	105.461		84.8756	120.077	126.908
	151.2	99.0186	105.135		84.5693	120.342	126.719
	151.3	99.5981	105.111		83.5409	121.049	126.599
	151.4	99.817	105.043		82.5097	121.624	127.004
	151.5	99.7842	105.288		82.3997	121.78	127.176
	151.6	99.5739	105.767		83.1483	121.748	127.206
	151.7	99.2562	106.318		83.981	121.688	127.119
	151.8	99.0594	106.409		84.3106	121.284	127.335
	151.9	98.9436	106.151		83.9233	120.373	127.722
	152	99.2596	106.109		83.5416	119.152	127.756
	152.1	99.3148	106.034		83.1623	118.253	127.446
	152.2	99.2873	105.84		83.3184	118.278	126.599
	152.3	98.9088	105.303		83.429	118.828	125.995
	152.4	98.7509	105.199		83.7481	119.798	125.822
	152.5	98.6599	105.065		83.85	120.132	126.098
	152.6	98.427	105.11		83.8176	120.123	126.439
	152.7	98.3083	104.967		83.5483	119.671	126.306
	152.8	98.406	105.168		83.3857	119.637	126.061
	152.9	99.112	105.466		83.4631	119.897	125.794
	153	99.613	105.73		83.8597	120.269	125.533
	153.1	99.8536	105.724		84.144	120.461	125.169
	153.2	99.9967	105.364		84.1563	120.654	124.901
	153.3	100.128	104.824		83.8709	121.173	125.101
	153.4	100.261	104.224		83.5838	121.654	125.744
	153.5	99.6706	104.14		83.4513	121.841	126.389
	153.6	99.3164	104.208		83.6614	121.617	127.005
	153.7	98.7543	104.18		84.1327	121.462	127.299
	153.8	98.8183	103.747		84.8391	121.458	127.222
	153.9	98.5503	103.406		85.2367	121.278	126.86
	154	98.7683	103.314		85.1553	120.673	126.544
	154.1	98.9953	103.255		84.7803	120.064	126.475
	154.2	99.4498	103.182		84.3802	119.764	126.507
	154.3	99.8667	103.619		84.3771	119.817	126.278
	154.4	100.004	104.257		84.2882	119.88	125.81
	154.5	100.147	104.609		84.6423	119.675	125.296
	154.6	99.9484	104.09		84.8684	119.472	125.262
	154.7	99.6441	103.268		84.9997	119.424	125.891
	154.8	99.1261	102.88		84.4081	119.871	126.525
	154.9	98.7748	103.004		83.8112	120.401	126.754
	155	98.6183	103.255		83.6952	120.41	126.514
	155.1	98.6382	103.363		83.9563	120.091	126.381
	155.2	98.2401	103.46		84.0442	119.675	126.151
	155.3	97.7909	104.151		83.5007	119.583	125.828
	155.4	97.4869	104.719		82.7958	119.286	125.288
	155.5	97.8377	105.204		82.3233	118.933	125.024
	155.6	98.5714	105.033		82.691	118.558	124.772
	155.7	99.0613	104.94		83.6628	118.507	124.726
	155.8	99.4551	104.791		84.6812	118.741	124.892
	155.9	99.4067	104.756		84.9407	119.273	125.573
	156	99.273	104.872		84.9334	120.016	126.154
	156.1	99.012	105.118		84.5367	120.466	126.824
	156.2	98.9509	105.517		84.7967	120.586	126.924
	156.3	99.3247	105.555		84.6708	120.585	127.094
	156.4	99.3817	105.293		85.0749	120.644	126.528
	156.5	98.9634	104.619		84.8853	120.7	126.38
	156.6	98.0514	104.376		84.9658	120.412	126.264
	156.7	97.6947	104.317		84.6671	120.301	126.366
	156.8	98.0046	104.194		84.568	120.321	125.898
	156.9	98.5987	103.624		84.3993	120.263	125.199
	157	98.6641	103.116		84.3892	120.03	125.003
	157.1	98.6457	103.388		84.54	120.029	125.665
	157.2	98.7632	103.839		84.8822	120.463	126.546
	157.3	99.1793	104.121		85.37	120.98	126.835
	157.4	99.2152	103.717		85.5502	120.946	126.06
	157.5	98.737	103.321		85.4232	120.364	125.433
	157.6	98.2784	102.888		84.9028	119.455	125.317
	157.7	98.141	102.872		84.383	118.906	125.738
	157.8	98.2621	102.841		83.788	119.096	125.665
	157.9	98.3191	103.251		83.45	119.696	125.474
	158	98.363	103.467		83.3981	120.155	125.577
	158.1	98.7708	103.729		83.7406	120.217	125.92
	158.2	99.1833	103.493		84.3413	120.254	125.846
	158.3	99.2241	103.446		85.0052	120.411	125.382
	158.4	98.6343	103.465		85.5076	120.469	125.413
	158.5	97.7647	103.806		85.4428	120.073	125.967
	158.6	97.2209	103.96		85.2538	119.318	126.513
	158.7	97.1488	104.3		85.175	118.671	126.255
	158.8	97.7352	104.431		85.4977	118.684	125.888
	158.9	98.413	104.233		85.8538	119.384	125.574
	159	98.9976	103.201		86.1012	120.339	125.784
	159.1	99.2287	102.024		85.9457	120.94	125.945
	159.2	99.2593	101.164		85.5634	121.038	126.512
	159.3	99.2137	101.027		84.853	121.174	126.773
	159.4	99.2738	101.392		84.4949	121.284	126.647
	159.5	99.7214	102.31		84.067	121.306	125.912
	159.6	100.386	103.179		83.9981	120.67	125.22
	159.7	100.595	103.563		83.8642	120.134	125.026
	159.8	100.337	103.206		83.8533	119.81	125.211
	159.9	99.7529	103.124		83.8953	119.844	125.612
	160	100.013	103.357		83.9493	119.679	125.57
	160.1	100.431	103.756		84.3812	119.592	125.503
	160.2	100.956	103.616		84.76	119.485	125.299
	160.3	100.599	103.561		85.077	119.154	125.661
	160.4	100.091	103.864		84.9491	119.026	125.91
	160.5	99.5642	104.256		84.6101	119.04	126.003
	160.6	99.3608	104.08		84.0073	119.922	125.563
	160.7	99.41	103.11		83.4628	120.337	124.913
	160.8	99.5347	102.031		83.2902	120.811	124.501
	160.9	99.5952	101.512		83.5937	120.512	124.212
	161	99.3599	101.905		84.1218	120.23	124.225
	161.1	99.1108	102.631		84.2479	119.771	123.95
	161.2	99.1249	103.047		84.0138	119.744	123.746
	161.3	99.5151	102.735		83.3788	119.725	123.156
	161.4	100.144	102.197		82.7702	119.665	123.186
	161.5	100.913	101.858		82.8832	119.674	123.623
	161.6	101.307	102.023		83.885	120.184	125.024
	161.7	101.146	102.297		85.6586	120.636	126.085
	161.8	100.325	102.361		86.4534	120.421	126.739
	161.9	99.5379	101.968		86.5932	119.565	126.526
	162	99.1724	101.481		85.8414	119.133	126.265
	162.1	99.2792	101.087		85.4267	119.641	126.258
	162.2	99.5821	101.272		84.797	120.315	126.645
	162.3	99.7468	101.834		84.5551	120.593	126.706
	162.4	99.5061	102.644		84.8159	120.416	126.262
	162.5	99.1582	103.024		85.3486	120.456	125.332
	162.6	98.5992	102.75		85.7363	120.392	124.737
	162.7	98.4616	102.435		85.5467	120.123	124.58
	162.8	98.5568	102.283		85.37	119.688	124.835
	162.9	99.1021	102.784		85.0552	119.613	125.255
	163	99.4642	102.958		84.5717	119.749	125.456
	163.1	99.2713	103.018		83.8463	120.135	125.434
	163.2	98.5159	102.603		83.3776	120.324	125.255
	163.3	97.9529	102.61		83.4737	120.619	125.152
	163.4	98.0359	102.804		83.858	120.91	125.322
	163.5	98.8206	103.116		84.2324	121.319	125.092
	163.6	99.734	103.036		84.2751	121.331	124.952
	163.7	100.176	102.786		84.1874	120.977	124.28
	163.8	100.142	102.775		83.9863	120.587	124.185
	163.9	99.6492	102.677		84.1659	120.619	123.723
	164	99.5962	102.816		84.7877	120.53	123.667
	164.1	99.5089	102.827		85.4613	120.249	123.46
	164.2	99.4424	103.234		85.6822	119.775	123.67
	164.3	98.9772	103.449		84.9518	119.577	124.146
	164.4	98.6677	103.465		84.0868	119.602	124.538
	164.5	98.5841	103.233		83.3138	119.877	124.946
	164.6	98.7081	102.966		83.3929	120.24	124.924
	164.7	98.7193	102.786		83.5824	120.507	125.11
	164.8	98.7832	102.69		83.863	120.23	125.364
	164.9	98.7354	102.45		83.7381	120.018	125.965
	165	98.7519	102.278		83.8333	120.05	126.027
	165.1	98.636	102.055		83.6609	120.495	125.315
	165.2	98.5509	101.989		83.4246	120.73	124.278
	165.3	98.5746	101.938		83.0547	120.454	123.64
	165.4	98.3858	101.926		83.3458	120.041	123.908
	165.5	98.1993	102.087		83.853	119.676	124.371
	165.6	97.9933	102.17		84.187	119.878	125.193
	165.7	97.9789	102.293		84.1113	120.161	125.769
	165.8	98.0756	102.254		84.3226	120.739	126.363
	165.9	98.1059	102.317		84.4838	120.83	126.348
	166	98.5622	102.404		84.4018	120.749	125.906
	166.1	99.0741	102.249		83.8842	119.914	125.116
	166.2	99.5983	102.111		83.6906	119.275	124.43
	166.3	99.5787	101.923		83.979	118.827	124.084
	166.4	99.28	102.112		84.2117	119.136	124.011
	166.5	98.853	101.992		84.3042	119.593	123.993
	166.6	98.5493	101.896		83.9916	120.17	124.116
	166.7	98.5812	101.969		83.9912	120.377	124.463
	166.8	98.7339	102.515		84.0209	120.523	125.121
	166.9	98.7519	102.805		84.5638	120.4	125.531
	167	98.3524	102.662		84.7802	120.761	125.466
	167.1	98.3824	102.399		84.8297	121.103	125.022
	167.2	98.729	102.74		84.36	121.47	124.75
	167.3	99.255	103.406		84.2002	121.003	124.584
	167.4	99.2689	103.889		84.2257	120.103	124.554
	167.5	99.3203	103.736		84.4073	119.354	124.297
	167.6	99.4126	103.227		84.3659	119.354	124.234
	167.7	99.4583	102.573		83.8747	119.802	123.975
	167.8	99.3779	102.323		83.2439	120.265	123.787
	167.9	99.3994	102.295		82.8246	120.241	123.737
	168	99.3243	102.798		82.9174	120.517	124.086
	168.1	98.9146	103.013		83.1607	120.677	124.254
	168.2	98.1658	103.419		83.2062	121.037	124.043
	168.3	97.8181	103.565		83.2944	120.586	123.644
	168.4	97.7338	103.855		83.6593	120.033	123.767
	168.5	97.8269	103.442		84.0082	119.598	124.111
	168.6	97.9169	102.886		84.1207	119.989	124.534
	168.7	98.1294	102.578		83.6484	120.351	124.746
	168.8	98.7236	103.443		83.3849	120.376	124.79
	168.9	98.9667	104.336		83.2972	119.972	124.513
	169	98.9844	104.335		83.9104	120.16	124.159
	169.1	98.5852	103.211		84.7116	120.59	124.219
	169.2	98.3546	102.31		85.3129	120.719	124.477
	169.3	98.4972	102.194		85.1301	119.916	124.782
	169.4	98.805	102.438		84.269	119.141	124.691
	169.5	99.4824	102.262		83.5108	118.668	124.542
	169.6	99.7299	102.108		83.4552	118.661	124.5
	169.7	99.7564	102.039		84.1549	118.481	124.668
	169.8	99.2836	102.171		85.1962	118.912	125.163
	169.9	99.2649	101.955		85.7691	119.732	125.407
	170	99.4663	101.474		85.8542	120.791	125.258
	170.1	99.7982	101.099		85.3047	121.099	124.803
	170.2	99.4551	101.113		85.0032	120.639	124.555
	170.3	98.7481	101.324		84.685	120.161	124.733
	170.4	98.0087	101.384		84.4423	119.72	125.271
	170.5	97.9072	101.252		84.1209	119.596	125.641
	170.6	98.4099	101.552		84.2271	118.991	125.747
	170.7	98.9363	102.079		84.812	118.468	125.241
	170.8	99.3804	102.435		85.5967	118.337	124.846
	170.9	99.5464	102.287		85.812	118.942	124.689
	171	99.6901	101.906		85.4732	119.9	124.619
	171.1	99.6484	101.737		84.2659	120.532	124.506
	171.2	99.6232	101.694		83.3698	121.068	124.255
	171.3	99.8011	101.865		82.6406	121.385	124.327
	171.4	100.036	101.953		83.1556	121.601	124.286
	171.5	100.251	102.096		83.5061	121.083	124.014
	171.6	100.092	102.142		84.1554	120.187	123.617
	171.7	99.7782	102.269		84.3473	119.435	123.238
	171.8	99.4604	102.201		84.8858	119.112	123.202
	171.9	99.5616	102.454		85.4628	119.097	123.137
	172	99.598	102.492		85.743	119.324	123.21
	172.1	99.4934	102.333		85.4521	119.562	123.404
	172.2	99.2779	101.562		84.7803	120.064	123.476
	172.3	99.1731	101.069		84.2278	120.202	123.352
	172.4	99.1291	101.283		84.1672	120.421	122.945
	172.5	98.61	101.839		84.1636	120.226	122.852
	172.6	98.2623	102.185		84.1878	120.069	123.251
	172.7	97.6477	102.134		84.0134	119.619	123.722
	172.8	97.2776	101.926		83.909	119.443	123.984
	172.9	96.8826	101.86		83.5769	119.491	123.723
	173	97.2411	101.62		83.0609	120.037	123.458
	173.1	98.0228	101.39		82.5717	120.169	123.553
	173.2	98.954	101.352		82.625	120.057	124.105
	173.3	99.8547	101.694		83.2389	119.653	124.923
	173.4	100.501	102.297		83.9413	119.533	125.364
	173.5	100.615	102.41		84.3229	119.649	125.628
	173.6	99.9314	102.013		84.3473	119.993	125.105
	173.7	99.2827	101.339		84.2611	120.713	124.265
	173.8	99.2682	100.779		84.3532	121.165	123.142
	173.9	99.8533	100.859		84.1411	121.327	122.808
	174	100.156	101.171		83.9252	121.218	123.001
	174.1	100.002	101.693		83.4791	121.097	123.307
	174.2	99.0771	101.798		83.9668	120.902	123.077
	174.3	98.4548	101.728		84.3753	120.551	122.661
	174.4	97.9362	101.68		84.7987	120.331	122.495
	174.5	98.526	101.915		84.2409	120.23	123.004
	174.6	99.2852	102.043		83.6889	120.175	123.435
	174.7	99.9877	101.984		83.1874	120.338	123.305
	174.8	100.082	101.507		83.0888	120.826	122.281
	174.9	99.8867	101.147		83.2769	121.299	121.641
	175	100.181	100.904		83.4533	121.349	121.894
	175.1	100.493	100.995		83.6924	120.825	122.821
	175.2	100.442	101.408		83.612	120.24	123.75
	175.3	99.684	101.509		83.6142	119.449	123.842
	175.4	98.6842	101.205		83.661	118.875	123.823
	175.5	98.4071	100.466		83.5733	118.156	123.533
	175.6	98.4357	100.066		83.2376	117.95	123.665
	175.7	99.0392	100.166		82.5059	118.099	123.742
	175.8	99.2607	100.611		82.1292	118.634	123.454
	175.9	99.3718	101.243		82.0321	119.237	123.069
	176	99.4768	101.741		82.2316	119.437	122.795
	176.1	99.5753	102.016		82.5494	119.497	123.218
	176.2	99.8969	102.041		82.8778	119.642	123.475
	176.3	99.625	102.032		83.2116	120.175	123.635
	176.4	99.264	101.991		83.0324	120.915	123.198
	176.5	98.736	101.857		82.8056	121.289	123.222
	176.6	98.2559	101.803		82.6703	121.224	123.136
	176.7	98.0973	101.787		83.0502	120.56	123.315
	176.8	97.8159	101.935		83.3346	119.809	123.235
	176.9	97.8713	101.52		83.6279	119.281	123.138
	177	97.7367	101.247		83.5858	119.233	123.062
	177.1	98.0622	100.887		83.6116	119.683	122.94
	177.2	98.5399	101.096		83.437	119.927	123.05
	177.3	99.2688	100.815		83.8629	119.866	123.357
	177.4	99.6304	100.232		84.3422	119.22	123.608
	177.5	99.41	99.6802		84.6249	119.061	123.727
	177.6	98.6493	99.7699		84.163	119.531	123.584
	177.7	98.1604	100.357		83.7907	120.296	123.61
	177.8	98.3754	100.509		84.219	120.498	123.474
	177.9	99.0419	100.201		85.0123	120.124	123.477
	178	99.1636	99.7191		85.4734	120.066	123.471
	178.1	98.7093	99.6407		84.9428	120.119	123.761
	178.2	98.1878	99.8124		84.0929	120.426	123.957
	178.3	98.7751	99.708		83.2577	120.477	123.951
	178.4	99.8886	99.6019		82.5347	120.501	123.742
	178.5	101.055	99.6541		82.0514	120.208	123.281
	178.6	101.18	100.49		81.8114	119.564	122.818
	178.7	101.044	100.872		82.3276	119.285	122.315
	178.8	100.682	101.112		82.9179	119.4	122.252
	178.9	100.7	100.95		83.3593	119.449	122.266
	179	100.299	101.371		83.2702	119.154	122.667
	179.1	99.7022	101.273		83.0062	118.563	123.138
	179.2	98.813	100.98		83.1294	118.272	123.366
	179.3	98.5359	100.674		83.6237	118.417	123.075
	179.4	98.94	101.198		84.1016	118.829	122.388
	179.5	99.2782	101.818		84.2361	119.624	122.4
	179.6	99.4526	101.989		83.9803	120.148	122.514
	179.7	99.0607	101.545		84.146	120.382	122.683
	179.8	98.937	100.841		84.4154	120.098	122.418
	179.9	98.5887	100.272		85.0431	119.655	122.53
	180	98.4491	100.005		85.3587	119.593	122.464
	180.1	98.3941	99.9008		85.4839	119.692	122.3
	180.2	98.4183	99.8923		85.3433	119.777	121.86
	180.3	98.3342	99.7447		84.9343	119.339	121.921
	180.4	98.3983	99.655		84.6567	119.09	122.444
	180.5	98.7403	99.7849		84.24	119.008	122.893
	180.6	99.2982	100.156		84.0453	119.292	123.205
	180.7	99.6252	100.71		83.6587	119.315	123.177
	180.8	99.3919	100.709		83.2823	119.352	123.244
	180.9	98.7233	100.539		83.001	119.341	123.395
	181	97.8753	100.517		82.8882	119.274	123.194
	181.1	97.6122	101.264		83.2212	119.383	122.905
	181.2	97.6938	102.198		83.6716	119.67	122.176
	181.3	98.067	102.459		84.1298	120.311	121.829
	181.4	98.3803	101.574		84.2491	120.409	121.623
	181.5	98.8483	100.216		83.6864	120.046	121.755
	181.6	99.1426	99.1929		83.4047	119.505	121.985
	181.7	99.1114	99.1372		83.2414	119.421	122.183
	181.8	98.8698	99.4646		84.0333	119.554	122.037
	181.9	98.6981	100.109		84.5628	119.807	121.78
	182	98.5919	100.356		85.2634	119.879	121.605
	182.1	98.4944	100.619		85.4904	119.95	121.703
	182.2	98.5082	100.43		85.6034	119.831	121.543
	182.3	98.796	100.537		85.3982	119.788	121.208
	182.4	99.0017	100.471		85.3501	119.733	120.977
	182.5	99.0587	100.609		85.2623	119.658	121.409
	182.6	98.8474	100.365		84.9507	119.629	121.941
	182.7	98.8588	100.219		84.2264	119.267	122.592
	182.8	98.6303	100.101		83.5301	118.941	122.692
	182.9	98.4527	100.405		83.1813	118.362	122.627
	183	98.0727	100.862		83.1794	118.586	122.169
	183.1	98.2208	101.145		83.5368	118.98	121.783
	183.2	98.6287	101.165		83.7436	119.469	121.763
	183.3	99.0986	100.586		83.7421	119.539	121.983
	183.4	99.1432	100.09		83.25	119.391	122.154
	183.5	98.8838	99.5806		82.8776	119.549	122.012
	183.6	98.748	99.5699		82.6728	119.731	121.724
	183.7	98.9058	99.4273		82.9327	119.74	121.439
	183.8	98.9881	99.3581		83.2364	119.503	121.474
	183.9	98.7826	99.153		83.6424	118.764	121.508
	184	98.4789	99.2833		83.6816	118.341	121.44
	184.1	98.2042	99.4371		83.7661	117.861	121.05
	184.2	98.0067	99.4203		83.5746	118.2	121.064
	184.3	97.7521	99.3333		83.3309	118.61	121.964
	184.4	97.7404	99.3867		83.3471	119.278	122.975
	184.5	97.9172	100.096		83.6394	119.983	123.68
	184.6	98.101	100.72		84.1686	120.894	123.317
	184.7	98.2439	100.982		83.9908	121.493	122.809
	184.8	98.3131	100.282		83.6674	121.509	122.208
	184.9	98.3287	99.2454		83.4511	120.777	122.201
	185	98.3286	98.3053		83.6962	120.353	122.416
	185.1	98.24	98.2606		83.7713	120.434	122.647
	185.2	98.3678	98.7184		83.6919	120.975	122.546
	185.3	98.5082	99.3289		83.5437	121.187	122.174
	185.4	98.7451	99.5509		83.7352	120.777	121.632
	185.5	98.8127	99.4196		84.0406	120.244	121.355
	185.6	98.5107	99.2511		84.4094	119.874	121.375
	185.7	98.0319	99.1994		84.814	119.623	121.683
	185.8	97.5007	99.3663		85.1887	119.538	121.869
	185.9	97.3304	99.7212		85.1618	119.475	122.067
	186	97.3563	99.7388		84.8871	119.692	122.406
	186.1	97.426	99.9443		84.2407	119.811	122.708
	186.2	97.7002	99.7566		84.0154	119.538	122.819
	186.3	98.0729	99.8756		83.6183	119.235	122.774
	186.4	98.6534	99.6589		83.387	118.676	122.532
	186.5	99.047	99.7743		83.122	118.7	122.074
	186.6	99.1083	99.8497		83.2643	118.645	121.51
	186.7	99.0947	99.9796		83.7039	119.151	121.227
	186.8	99.0598	99.6418		84.1472	119.447	121.669
	186.9	99.4002	99.0481		84.5359	119.732	122.265
	187	99.5974	98.2933		84.6934	119.423	123.105
	187.1	99.6762	98.1533		84.7796	119.099	122.938
	187.2	99.6389	98.4588		84.5003	118.916	122.57
	187.3	99.6951	99.0318		84.2641	119.079	121.583
	187.4	99.7526	99.4087		83.9689	119.153	121.295
	187.5	99.5167	99.8742		83.909	119.046	120.952
	187.6	99.04	100.584		84.0732	118.869	120.923
	187.7	98.5436	100.891		84.4256	118.931	120.783
	187.8	98.1913	100.773		84.9153	118.859	121
	187.9	98.209	100.301		84.9006	118.736	121.159
	188	98.6063	100.262		84.6827	118.669	121.657
	188.1	99.2839	100.112		84.3721	119.342	122.083
	188.2	99.7404	99.5726		84.4709	120.448	122.629
	188.3	99.7863	98.7098		84.3006	121.127	122.633
	188.4	99.7744	98.1359		83.8276	120.916	122.32
	188.5	99.8899	98.322		83.3762	120.139	122.214
	188.6	99.874	98.9634		83.4888	119.703	122.369
	188.7	99.5624	99.5769		84.1219	119.626	123.074
	188.8	99.0582	99.8394		84.3123	119.608	123.229
	188.9	98.909	99.6787		84.0571	119.349	122.803
	189	99.1831	99.5272		83.3906	119.08	121.776
	189.1	99.2507	99.5202		83.2006	118.856	121.087
	189.2	99.1814	99.7219		83.2626	118.871	121.062
	189.3	98.3589	99.9244		83.3328	118.922	121.335
	189.4	98.3368	99.926		83.2684	119.105	121.414
	189.5	98.3916	100.118		83.0253	119.041	121.339
	189.6	98.7511	100.125		83.145	118.809	121.131
	189.7	98.1503	100.226		83.0993	118.475	121.225
	189.8	97.5462	100.004		83.456	118.319	121.501
	189.9	97.1717	99.7483		83.5067	118.305	121.877
	190	97.4064	99.2856		83.5176	118.704	121.845
	190.1	97.3823	98.3901		83.1452	119.583	121.359
	190.2	97.7671	97.8369		82.9159	120.687	121.182
	190.3	98.3672	97.6458		83.1207	121.214	121.549
	190.4	99.4571	98.3239		83.6202	120.518	122.537
	190.5	99.658	98.7944		83.9934	119.416	123.193
	190.6	99.2431	99.0589		83.9498	118.625	123.446
	190.7	98.2782	98.8256		83.636	118.639	123.046
	190.8	97.7901	98.4172		83.3322	118.671	122.218
	190.9	97.5566	97.8343		83.3434	118.177	121.472
	191	97.6482	97.476		83.3201	117.476	120.997
	191.1	97.997	97.6619		83.5491	117.11	120.825
	191.2	98.5113	98.3372		83.6078	117.492	120.474
	191.3	99.0234	98.924		84.0244	118.268	120.281
	191.4	98.8137	99.1178		84.3018	118.999	120.535
	191.5	98.6016	99.1098		84.4197	119.371	121.161
	191.6	98.2834	99.335		83.9188	119.303	121.374
	191.7	98.6447	99.674		83.1488	119.293	121.154
	191.8	98.6082	99.926		82.3888	119.294	120.825
	191.9	98.5812	99.9737		82.2877	119.106	120.951
	192	98.119	99.8831		82.4636	118.196	121.296
	192.1	98.1222	99.5146		82.9809	117.245	121.608
	192.2	98.3808	99.1046		83.1528	117.124	121.888
	192.3	99.0557	98.8928		83.0843	118.013	122.087
	192.4	99.1876	99.3091		82.8314	119.264	122.315
	192.5	98.8788	99.4037		82.682	119.759	122.302
	192.6	98.2823	99.3296		82.9322	119.537	122.134
	192.7	98.2678	98.9477		83.4414	118.669	121.759
	192.8	98.665	99.019		84.2031	118.309	121.655
	192.9	99.055	99.131		84.826	118.378	121.956
	193	99.3751	98.9591		85.0716	118.861	122.352
	193.1	99.5331	98.8571		84.9273	119.148	122.276
	193.2	99.8081	98.8033		84.8553	119.02	121.867
	193.3	99.6597	99.1782		84.9974	118.93	121.644
	193.4	99.554	99.2729		85.207	118.734	121.836
	193.5	99.1189	99.4091		84.8216	118.924	122.006
	193.6	98.6999	99.1606		84.0382	119.077	121.724
	193.7	98.2292	98.9222		83.0288	119.061	121.065
	193.8	98.3019	98.5051		82.7532	118.796	120.539
	193.9	98.7112	98.412		82.8533	118.47	120.603
	194	98.7872	98.3771		83.3544	118.585	120.975
	194.1	98.3417	98.5686		83.3696	118.826	121.618
	194.2	98.1064	98.5601		83.3402	118.636	122.357
	194.3	98.5232	98.6891		83.5244	118.086	123.16
	194.4	99.1843	98.6908		84.0011	117.407	123.175
	194.5	99.3611	98.6947		84.7857	117.678	122.369
	194.6	99.0446	98.7929		84.8251	118.216	121.106
	194.7	98.9124	99.0763		84.8972	119.353	120.365
	194.8	98.8387	99.7399		84.5877	120.082	120.111
	194.9	98.7997	100.051		84.75	120.761	120.594
	195	98.3867	100.23		84.6831	120.364	121.008
	195.1	98.0986	100.177		84.4704	119.541	121.453
	195.2	98.0942	100.205		84.0221	118.602	121.445
	195.3	98.3259	100.106		83.3433	118.253	121.447
	195.4	98.7497	99.8201		82.9459	118.119	121.287
	195.5	99.0473	99.5021		83.0466	117.908	121.164
	195.6	99.2981	98.7901		83.8453	117.861	121.31
	195.7	98.9997	98.0378		84.2362	118.14	121.46
	195.8	98.6426	97.6419		84.0434	118.597	121.67
	195.9	98.1857	97.8546		83.3731	119.1	121.695
	196	98.1732	98.3958		83.1212	119.378	121.935
	196.1	98.2119	98.538		83.0434	119.552	122.192
	196.2	98.232	98.6506		83.229	119.175	122.126
	196.3	97.9229	98.3466		83.4508	118.753	121.764
	196.4	97.3488	98.1446		83.7636	118.472	121.189
	196.5	96.8934	97.7814		83.7892	118.352	120.779
	196.6	96.826	97.7244		83.7769	118.298	120.647
	196.7	97.4576	97.6447		83.8111	118.199	120.662
	196.8	98.2732	97.8582		83.8537	118.592	120.832
	196.9	99.0562	98.2633		83.7476	119.003	121.063
	197	99.2798	99.0122		83.6047	119.348	121.211
	197.1	99.3567	99.4046		83.9687	119.332	121.306
	197.2	99.3604	99.1729		84.4518	119.299	121.046
	197.3	99.3902	98.5557		85.1274	119.02	121.137
	197.4	99.2094	98.1264		85.1367	118.755	121.068
	197.5	98.6942	98.1767		84.8734	118.627	121.281
	197.6	98.1843	98.4277		84.3281	119.175	121.343
	197.7	98.0847	98.4368		83.9956	119.751	121.844
	197.8	98.4243	98.7491		83.6863	119.881	122.088
	197.9	99.022	98.8628		83.3526	119.585	121.776
	198	99.4327	99.4191		83.138	119.609	121.055
	198.1	99.4316	99.2966		83.2033	120.175	120.883
	198.2	99.1612	99.2792		83.2503	120.683	121.232
	198.3	98.7339	98.8478		83.4208	120.789	121.369
	198.4	98.6239	98.7831		83.444	120.684	120.553
	198.5	98.5847	98.6014		83.6287	120.731	120.03
	198.6	98.2999	98.7343		83.5766	120.771	120.014
	198.7	97.917	99.051		83.7384	120.621	120.881
	198.8	97.58	99.6631		83.9801	120.13	121.115
	198.9	97.7922	100.222		84.3589	119.766	121.226
	199	98.0834	100.294		84.4479	119.384	121.042
	199.1	98.3403	100.118		84.1158	119.203	121.116
	199.2	98.3044	99.6171		83.4936	118.578	120.928
	199.3	98.2692	99.1354		83.06	118.255	120.669
	199.4	98.2221	98.6426		83.2628	118.576	120.283
	199.5	98.2311	98.1326		84.1528	119.522	120.188
[truncated: 1,005 more rows]

## Sheet: E1_ADP_Asso
	Experiment 1
	ADP association: Raw fluorescence data																											Nonlinear fit (one-phase association, GraphPad Prism)
	Time (s)	BiP_Mg_ADP_B1A1	BiP_Mg_ADP_B1A2	BiP_Mg_ADP_B1A3	BiP_Mg_ADP_B1A4	BiP_Mg_ADP_B1A5	BiP_Mg_ADP_B1A6	T229A_Mg_ADP_B1A1	T229A_Mg_ADP_B1A2	T229A_Mg_ADP_B1A3	T229A_Mg_ADP_B1A4	T229A_Mg_ADP_B1A5	T229A_Mg_ADP_B1A6	BiP_Ca_ADP_B2A1	BiP_Ca_ADP_B2A2	BiP_Ca_ADP_B2A3	BiP_Ca_ADP_B2A4	BiP_Ca_ADP_B2A5	BiP_Ca_ADP_B2A6	T229A_Ca_ADP_B2A1	T229A_Ca_ADP_B2A2	T229A_Ca_ADP_B2A3	T229A_Ca_ADP_B2A4	T229A_Ca_ADP_B2A5	T229A_Ca_ADP_B2A6			BiP_Mg_ADP_B1A1	BiP_Mg_ADP_B1A2	BiP_Mg_ADP_B1A3	BiP_Mg_ADP_B1A4	BiP_Mg_ADP_B1A5	BiP_Mg_ADP_B1A6	T229A_Mg_ADP_B1A1	T229A_Mg_ADP_B1A2	T229A_Mg_ADP_B1A3	T229A_Mg_ADP_B1A4	T229A_Mg_ADP_B1A5	T229A_Mg_ADP_B1A6	BiP_Ca_ADP_B2A1	BiP_Ca_ADP_B2A2	BiP_Ca_ADP_B2A3	BiP_Ca_ADP_B2A4	BiP_Ca_ADP_B2A5	BiP_Ca_ADP_B2A6	T229A_Ca_ADP_B2A1	T229A_Ca_ADP_B2A2	T229A_Ca_ADP_B2A3	T229A_Ca_ADP_B2A4
	0	78.9187	85.2392	99.4087	97.638	93.9023	109.269	79.4842	88.7273	100.435	98.059	101.044	101.834	79.34	85.799	98.3718	98.933	129.556	125.072	92.0062	100.862	124.179	110.626	133.45	125.332		Protein (µM)	1.3	2.6	3.9	5.2	6.5	7.8	1.3	2.6	3.9	5.2	6.5	7.8	1.3	2.6	3.9	5.2	6.5	7.8	1.3	2.6	3.9	5.2
	0.1	79.7478	85.6036	100.004	97.7599	94.6894	110.423	79.9095	89.782	100.806	98.4296	101.833	104.163	80.5018	86.6925	98.3548	99.8345	130.846	125.727	92.6205	103.245	124.866	111.531	134.968	126.664		Fit interval	40 s	40 s	40 s	40 s	40 s	40 s	10 s	10 s	10 s	10 s	10 s	10 s	40 s	40 s	40 s	40 s	40 s	40 s	10 s	10 s	10 s	10 s
	0.2	80.8416	86.3302	100.85	98.328	95.4406	111.872	80.1476	90.61	101.546	98.9283	102.531	106.034	81.4999	87.7573	98.8912	100.788	132.936	127.036	93.1311	105.279	126.345	112.519	137.152	128.48		kobs (s-1)	0.1636	0.2128	0.2784	0.3276	0.3672	0.5494	0.4928	0.5845	0.8066	0.7057	0.8811	0.9048	0.1184	0.2231	0.3874	0.443	0.5871	0.657	0.1924	0.3846	0.6848	0.7094
	0.3	82.1891	87.3018	102.005	99.3108	96.9201	113.3	80.6573	91.425	102.548	99.9931	103.565	107.644	82.384	88.9078	99.9778	102.399	135.529	128.902	94.0389	107.31	128.146	113.727	139.673	131.241		R2	0.9737	0.984	0.9879	0.9792	0.9684	0.9539	0.8956	0.9476	0.9664	0.9751	0.9644	0.9712	0.9959	0.9926	0.9875	0.9743	0.9727	0.9429	0.9965	0.9868	0.9858	0.9708
	0.4	83.3751	88.3222	103.428	100.683	98.6262	114.666	81.1086	91.8853	103.626	100.931	104.839	108.306	83.0336	90.1044	101.775	104.26	138.19	130.693	94.9458	108.429	130.105	114.899	141.1	133.709
	0.5	83.6844	88.9628	104.623	101.932	100.256	115.617	81.4531	92.584	104.512	102.127	106.351	109.138	83.4719	91.5401	103.862	106.159	140.652	132.255	96.3371	109.386	131.906	116.012	141.691	135.784			Linear regression of kobs vs. [prot]
	0.6	83.8512	89.6072	105.706	103.063	101.624	116.744	81.448	93.2067	105.718	103.698	107.515	110.338	84.2603	93.16	106.084	107.529	142.823	133.393	97.6199	110.582	133.413	117.446	142.218	137.119		kon (s-1 µM-1)	0.05545						0.1134						0.08536						0.127
	0.7	83.948	89.9307	106.445	104.079	102.585	117.838	81.3887	93.7908	106.625	105.247	108.191	111.404	85.0331	94.5327	107.649	108.242	144.527	134.605	98.9856	112.279	134.468	119.032	143.626	138.284
	0.8	84.4949	90.3158	107.29	105.185	103.313	119.071	81.374	94.0653	107.43	106.612	108.528	112.102	85.731	95.2049	108.756	108.631	145.744	135.486	99.8498	114.592	135.478	120.218	145.467	139.208
	0.9	84.8999	90.8331	108.207	105.861	104.149	120.432	81.6531	94.3961	107.774	106.782	109.132	112.788	85.8071	95.4767	109.517	109.393	147.131	136.678	100.427	117.257	136.622	120.971	147.117	140.06
	1	85.1073	91.8214	109.122	106.413	105.221	121.439	82.0416	94.9886	108.243	106.743	109.666	113.769	85.6084	95.615	110.607	110.642	148.58	137.839	100.616	119.479	138.066	121.441	148.347	141.04
	1.1	85.1167	92.8581	110.177	106.501	106.646	122.621	82.8386	95.486	108.82	106.697	110.409	114.606	85.9924	96.1988	111.533	111.916	149.968	139.228	100.995	120.844	139.258	122.429	149.129	142.088
	1.2	85.1393	93.6043	111.191	106.802	107.629	123.503	83.1894	95.8896	109.294	107.591	110.643	114.828	87.0581	97.4073	112.263	112.951	150.928	140.205	101.914	121.185	140.494	123.165	149.881	143.094
	1.3	85.0792	94.0748	112.356	107.073	108.503	124.708	83.13	96.1019	109.773	108.667	110.967	114.917	88.394	99.419	113.259	113.823	151.796	141.134	103.248	121.262	141.319	123.591	150.501	143.108
	1.4	84.9351	94.5331	113.377	108.213	109.398	125.605	82.5454	96.6471	110.09	109.622	110.917	115.017	89.2602	101.499	114.97	114.909	152.793	141.926	104.857	121.432	141.921	123.489	150.872	142.984
	1.5	84.7647	95.0656	114.368	109.806	110.374	126.514	82.4084	97.2987	110.656	109.964	111.27	115.646	89.9887	102.874	117.213	116.017	154.113	142.813	106.406	121.71	142.114	123.814	151.062	142.927
	1.6	84.8453	95.9743	115.15	111.716	111.316	127.148	82.6319	97.8166	111.181	110.162	111.751	116.093	90.4627	103.408	118.673	116.718	155.448	143.433	107.991	121.99	142.601	124.556	150.934	144.044
	1.7	85.1773	97.1347	115.949	113.114	112.362	128.082	83.1434	98.0407	111.601	110.273	112.493	116.763	90.7553	103.673	119.381	117.321	156.545	143.825	108.999	122.294	143.555	125.41	151.274	144.808
	1.8	85.5614	98.5678	116.26	114.391	113.91	129.273	83.5259	98.3476	112.023	110.643	112.96	117.046	90.7062	103.941	119.428	117.683	157.283	144.008	109.336	122.717	144.776	126.011	151.758	145.448
	1.9	85.6676	99.6391	116.803	115.208	115.398	130.908	83.7363	98.7197	112.395	110.898	113.241	117.345	90.8006	104.329	119.921	118.202	157.839	143.947	109.285	123.315	145.854	126.576	152.629	145.445
	2	85.9101	100.127	117.01	115.956	116.427	131.878	83.8461	98.8321	112.9	111.306	113.305	117.545	91.234	104.684	120.433	118.473	158.511	143.402	109.441	123.85	146.682	127.652	153.235	145.757
	2.1	86.5667	99.8707	117.72	116.033	116.784	132.306	84.3408	98.7156	113.219	111.49	113.57	118.135	91.9487	105.472	121.2	119.283	159.359	142.975	110.059	124.463	147.431	128.835	154.167	146.252
	2.2	87.6812	99.3048	118.021	116.367	117.004	131.851	85.1119	98.4908	113.714	111.864	113.834	118.669	92.8263	106.535	121.812	120.396	160.333	142.893	110.659	124.882	148.488	129.767	155.097	147.031
	2.3	88.5562	99.2508	118.639	116.71	117.231	131.86	85.8439	98.5259	114.231	111.906	114.032	119.15	93.5841	107.877	123.036	121.561	161.43	143.923	111.031	125.547	149.363	129.865	155.778	147.751
	2.4	88.5993	100.015	119.345	117.441	117.512	131.885	85.8888	98.3923	114.689	112.351	113.999	119.248	94.3844	108.812	124.427	122.253	162.209	144.947	111.177	126.678	149.924	129.568	155.541	148.364
	2.5	88.4237	101.453	120.182	118.039	117.566	132.194	85.3743	98.4284	114.632	112.594	113.815	119.436	95.1038	109.617	125.664	122.78	163.086	145.927	111.806	128.078	149.692	129.024	154.89	148.912
	2.6	88.4808	102.506	120.688	118.623	117.612	132.184	84.6632	98.7043	114.258	113.121	113.943	119.372	95.7836	110.282	126.213	123.464	163.723	146.523	113.06	129.257	149.525	129.191	154.582	150.006
	2.7	89.1087	102.971	120.877	119.126	118.084	132.532	83.9776	99.3983	113.854	112.784	114.193	119.387	96.0706	111.467	126.492	123.997	164.626	147.238	114.667	129.741	149.63	129.942	154.452	151.298
	2.8	89.5743	102.815	121.114	119.869	118.93	133.251	83.7262	100.025	113.581	112.684	114.981	119.235	96.2716	112.571	126.868	124.181	165.213	147.648	115.692	130.122	150.417	131.047	154.302	152.541
	2.9	89.7842	103.071	121.511	120.48	119.848	134.135	83.7834	100.252	113.501	112.552	115.658	119.298	96.2204	113.468	127.297	124.135	165.639	147.614	115.794	130.439	151.124	131.54	153.968	152.948
	3	89.7596	103.597	121.823	120.837	120.04	135.15	84.3892	100.167	113.835	113.161	116.242	119.347	96.4521	113.897	127.576	124.193	166.004	147.28	115.457	130.861	151.755	131.613	153.937	152.962
	3.1	89.977	104.166	121.916	120.661	120.097	136.214	84.9143	100.112	114.56	113.481	116.136	119.426	96.5711	113.936	127.662	124.467	166.383	147.428	115.366	130.861	152.104	131.576	154.431	153.016
	3.2	90.3742	104.147	121.984	120.559	120.335	137.755	85.3561	100.29	115.292	113.708	115.739	119.515	97.3224	114.184	128.021	124.939	166.798	148.145	116.089	130.786	152.617	131.884	154.927	153.759
	3.3	90.6848	104.12	121.994	120.777	121.164	138.395	85.2626	100.436	115.377	113.527	115.255	119.707	98.149	114.38	128.915	125.388	166.92	149.368	117.024	130.947	153.105	132.183	155.28	154.485
	3.4	90.6274	104.393	122.419	121.219	122.268	138.177	85.2989	100.386	114.799	113.483	115.057	120.377	99.1414	114.952	130.132	126.113	166.646	150.365	117.883	131.673	153.543	132.53	155.001	154.705
	3.5	90.0497	105.215	123.206	121.622	123.121	137.122	85.4972	100.223	114.108	113.176	114.967	121.085	99.7666	115.148	131.174	126.764	166.572	150.754	118.377	132.353	153.595	132.451	154.881	154.225
	3.6	89.5073	105.924	124.624	121.843	123.593	136.662	85.9796	100.254	113.714	113.081	115.007	121.3	100.456	115.466	131.355	127.4	166.587	150.681	118.91	132.552	153.669	132.593	155.129	153.788
	3.7	89.3487	106.45	125.828	121.729	123.352	136.782	86.0968	100.151	113.838	113.165	114.989	120.715	101.035	115.697	131.342	127.327	167.009	150.546	119.723	132.416	153.608	132.761	155.874	153.538
	3.8	89.7208	106.579	126.562	121.377	122.919	137.149	85.8387	99.9697	114.27	113.689	115.454	120.006	101.338	116.252	131.114	127.058	167.187	150.714	120.749	132.568	153.783	133.584	156.445	153.629
	3.9	90.6844	106.72	126.745	121.256	122.706	137.53	85.5791	99.7141	114.96	114.492	116.105	120.114	100.842	116.853	131.085	126.886	167.313	150.809	121.84	132.904	153.889	134.308	156.711	153.395
	4	91.3946	106.885	126.763	121.336	122.925	138.331	85.5844	99.9054	115.684	115.088	117.167	120.726	100.25	117.602	130.77	127.147	167.613	150.85	122.386	133.318	153.855	134.598	156.639	153.239
	4.1	91.8254	107.198	126.961	121.836	123.392	139.349	85.9057	100.414	116.136	115.197	117.479	121.104	100.1	118.547	130.837	127.511	167.914	151.096	122.429	133.587	153.661	134.306	156.546	152.804
	4.2	91.6496	107.435	127.037	122.135	123.781	140.116	86.1526	101.042	116.113	114.825	117.338	121.11	101.113	119.753	131.556	127.988	168.441	151.384	121.924	133.924	153.381	133.759	156.568	152.905
	4.3	91.5106	107.588	127.492	122.955	124.416	140.209	86.2776	101.579	115.977	114.511	116.572	121.103	102.536	120.846	132.931	128.826	168.641	151.676	121.451	134.278	153.51	133.703	157.101	153.146
	4.4	91.5653	107.629	127.948	123.659	124.972	139.798	85.9959	101.766	115.879	114.851	116.291	121.179	103.989	121.614	133.953	129.794	169.224	151.617	121.383	134.772	153.885	133.629	157.624	153.882
	4.5	91.8923	107.791	128.98	124.439	125.455	139.603	85.9833	101.704	115.998	115.344	116.283	120.875	104.859	122.313	134.598	130.48	169.957	151.527	121.978	135.54	154.44	133.6	158.038	154.552
	4.6	92.4546	108	129.638	125.026	125.847	139.355	86.2187	101.379	116.116	115.853	116.221	120.509	105.569	123.064	134.718	130.583	170.931	151.132	122.864	136.351	154.962	133.343	157.567	155.178
	4.7	93.1599	108.293	130.094	125.732	126.641	139.626	86.9608	101.206	116.32	115.945	115.733	120.691	106.077	123.505	134.828	130.352	171.391	150.772	123.784	136.892	155.411	133.204	157.108	155.014
	4.8	93.5892	108.506	129.86	126.628	127.676	139.947	87.0263	100.84	116.313	116.028	115.172	121.16	106.494	123.102	134.718	130.035	171.651	150.977	124.424	137.155	155.804	132.996	156.402	154.605
	4.9	93.743	109.025	129.925	127.429	128.609	140.464	86.9939	100.769	115.795	115.942	114.937	121.311	106.506	122.251	134.75	129.444	172.024	151.817	125.144	137.511	156.011	132.735	156.16	153.97
	5	93.3264	109.572	130.333	127.877	128.89	140.512	86.6933	100.826	114.743	116.115	115.328	120.932	106.267	122.012	135.05	128.93	172.669	152.674	125.435	138.047	156.342	132.577	155.76	153.458
	5.1	93.0913	110.14	131.118	128.067	129.018	140.331	87.0874	101.523	113.936	116.45	115.711	120.713	106.069	122.545	135.737	128.829	172.678	152.533	125.563	138.679	156.319	132.545	155.585	152.693
	5.2	93.1836	110.055	131.535	127.589	128.714	140.222	87.2166	101.961	113.816	117.003	116.201	120.787	106.328	123.764	136.629	129.244	172.067	152.129	125.526	138.991	156.146	132.584	155.751	152.322
	5.3	94.141	110.079	131.835	127.216	128.808	140.712	87.4186	102.185	114.335	117.155	116.226	120.778	106.997	124.556	137.292	130.189	171.248	151.635	125.74	139.521	155.334	132.812	156.429	152.819
	5.4	95.03	110.104	132.095	126.85	128.88	141.477	87.0262	102.061	114.558	116.981	116.342	120.559	107.794	124.898	137.554	131.002	171.057	151.759	125.738	139.916	155.005	133.564	157.386	153.854
	5.5	95.3674	110.845	132.63	127.33	129.233	142.14	86.4941	102.197	114.444	116.121	116.176	120.519	108.188	124.799	137.064	131.85	171.228	151.654	125.641	140.368	154.849	134.368	157.7	154.47
	5.6	94.8367	111.242	133.048	127.704	129.437	142.107	85.9477	102.393	114.333	115.082	116.023	120.86	108.252	125.068	136.562	132.201	171.692	151.413	125.776	140.268	155.261	134.76	157.424	154.349
	5.7	94.138	111.456	133.852	128.032	129.43	141.704	85.6293	102.558	114.926	114.142	115.806	121.263	107.977	125.785	135.905	132.261	172.32	151.145	126.602	140.499	155.172	134.677	156.498	154.012
	5.8	93.6229	111.368	134.401	128.178	129.268	141.137	85.8442	102.558	115.721	114.022	115.929	121.082	108.029	126.407	136.027	132.341	173.003	151.298	127.786	141.14	154.782	134.495	155.777	153.548
	5.9	93.4088	111.387	134.69	128.748	128.963	140.795	85.9994	102.553	116.306	114.393	116.181	120.764	108.442	126.624	136.372	132.408	173.153	152.075	128.681	141.856	154.553	134.262	155.333	153.162
	6	93.4339	111.54	134.041	129.441	128.699	140.737	86.3733	102.419	116.422	114.852	116.464	120.391	109.397	126.676	137.143	132.347	172.434	152.736	129.264	142.216	154.953	133.834	155.325	152.646
	6.1	93.7057	111.364	133.24	129.91	128.653	141.179	86.2614	102.332	116.395	115.023	116.387	120.715	110.067	127.242	137.683	131.933	171.415	152.957	129.314	141.615	155.591	133.398	155.662	152.793
	6.2	94.2811	111.442	132.572	129.718	128.645	141.993	86.0113	101.985	115.972	115.051	116.4	120.94	110.35	127.731	137.979	131.796	170.755	152.591	129.423	141.008	155.641	133.324	155.994	153.216
	6.3	94.9968	111.742	132.427	129.05	128.873	142.286	85.6951	101.71	115.568	115.058	116.742	121.201	110.214	127.833	138.216	132.118	170.57	152.127	129.422	140.058	154.823	133.34	156.363	154.034
	6.4	95.8466	112.229	132.759	128.301	129.129	142.022	86.0053	101.401	115.275	115.108	117.51	121.017	110.468	127.667	138.38	132.719	170.767	152.051	129.627	140.052	154.301	133.453	156.359	154.296
	6.5	96.5528	112.518	133.279	128.026	129.311	141.55	86.7678	101.836	115.472	115.215	117.951	121.047	110.978	127.895	138.627	133.026	171.085	152.313	129.703	140.256	154.214	133.718	156.048	154.49
	6.6	96.9309	112.554	134	128.235	129.316	141.603	87.4461	102.639	115.452	115.513	117.483	120.974	111.651	128.516	138.719	133.312	171.777	152.948	130.017	140.95	154.912	134.143	155.346	154.473
	6.7	96.9101	112.332	134.99	128.342	129.337	142.091	87.761	103.461	115.162	115.68	116.245	121.103	111.934	128.671	138.693	133.615	172.553	153.183	130.519	141.056	155.376	134.532	154.439	154.612
	6.8	96.8262	111.851	135.641	128.11	129.682	142.226	87.5991	103.713	115.018	115.781	115.299	121.078	112.061	128.305	138.817	133.684	173.427	153.158	131.205	141.166	155.572	134.245	153.87	154.752
	6.9	96.9868	111.569	135.794	127.744	130.146	141.905	87.3307	103.83	115.09	115.505	115.025	121.043	112.104	128.067	138.987	133.436	174.456	152.707	131.422	140.744	155.584	133.78	153.708	154.775
	7	97.1667	111.903	135.102	128.092	130.559	141.199	86.7831	103.932	115.588	115.367	115.571	120.754	112.25	128.387	139.315	132.863	174.931	152.529	131.726	140.817	155.562	133.315	154.245	155.129
	7.1	97.328	112.708	135.094	128.988	130.951	141.008	86.311	104.147	115.946	115.299	115.904	120.541	112.233	129.271	139.34	132.573	174.964	152.452	132.04	140.616	155.369	133.283	154.813	155.269
	7.2	97.3994	112.992	135.365	129.798	131.299	141.418	85.9793	104.003	116.092	115.116	116.236	120.987	112.181	129.808	139.318	132.357	174.333	152.799	132.835	140.762	154.985	133.217	155.338	155.073
	7.3	97.4046	112.886	135.953	129.738	131.219	141.987	85.9288	103.536	115.695	115.092	116.272	121.777	112.123	130.053	139.179	132.366	173.652	152.827	133.228	139.98	154.531	132.772	155.705	154.513
	7.4	97.0741	112.438	135.769	129.055	130.74	142.032	86.4546	102.851	115.183	115.086	116.4	122.755	112.603	129.707	139.206	132.491	172.85	152.657	133.693	139.432	154.466	132.111	156.327	153.943
	7.5	96.4751	112.708	135.647	128.449	130.247	142.057	86.9909	102.466	115.168	115.483	115.906	122.895	113.245	129.43	139.337	132.775	172.136	151.93	133.868	139.392	154.645	131.683	156.899	153.841
	7.6	96.2681	113.444	135.701	128.535	130.491	142.251	87.4642	102.59	115.708	115.676	115.424	122.504	114.425	129.38	139.578	133.069	172.216	151.694	134.318	140.222	155.503	131.521	157.155	153.927
	7.7	96.3296	114.469	136.17	129.113	131.179	142.943	86.978	102.775	116.28	115.971	115.371	121.675	115.038	130.005	139.981	133.456	172.59	151.839	134.611	140.969	156.11	131.367	156.622	154.345
	7.8	96.7408	115.1	136.657	130.024	131.868	143.351	86.42	102.599	116.562	116.184	116.041	121.208	115.914	130.566	140.537	133.832	172.967	152.418	134.93	141.105	156.688	131.26	155.993	154.989
	7.9	96.5417	114.971	136.916	130.667	132.136	143.57	85.9089	101.73	116.39	116.325	116.392	120.765	116.043	130.955	141.07	134.349	172.753	152.805	134.841	141.121	156.388	131.476	155.132	155.207
	8	96.4997	114.527	137.088	131.488	132.246	143.367	85.8297	100.871	116.085	115.738	116.142	120.299	116.391	131.128	141.101	134.512	172.765	153.312	134.389	140.904	156.252	132.143	154.808	154.936
	8.1	96.3547	114.218	137.007	132.062	132.334	143.057	85.9138	100.483	115.668	115.145	115.899	119.671	115.96	131.694	140.766	134.532	172.896	153.805	134.068	140.898	155.546	132.691	154.782	154.153
	8.2	96.9324	114.255	137.184	132.388	132.575	142.803	85.9118	101.18	115.466	114.562	116.301	119.491	115.44	132.314	140.631	133.961	173.085	154.284	134.362	140.862	155.19	133.212	155.457	153.627
	8.3	97.2467	114.617	137.415	132.047	132.838	142.498	86.1814	102.168	115.353	115.012	116.745	119.357	115.303	132.86	140.904	133.444	173.101	154.215	135.409	141.268	154.659	133.694	155.767	153.672
	8.4	97.4821	114.801	137.962	131.549	133.333	142.076	86.0159	102.691	115.334	115.581	116.665	119.269	115.695	133.249	141.02	132.931	173.072	153.914	136.202	141.634	154.626	133.643	155.732	154.033
	8.5	97.4883	115.11	138.271	131.546	133.702	141.315	85.9636	102.202	115.578	116.197	116.093	119.337	116.72	133.657	140.645	132.79	173.08	153.261	136.286	142.119	153.806	133.405	155.409	154.582
	8.6	97.8854	115.138	138.582	131.671	133.743	141.14	85.7354	101.829	115.977	116.036	115.889	119.647	117.305	133.928	140.041	132.634	173.406	152.995	135.721	142.813	153.222	132.875	155.233	154.658
	8.7	98.6961	115.019	138.463	131.782	133.072	141.284	85.9636	102.059	116.426	115.616	116.473	120.218	117.914	133.748	140.06	132.592	174.001	153.026	135.62	143.498	152.953	133.432	155.044	154.713
	8.8	99.5413	114.935	138.338	131.447	132.137	141.54	86.4836	102.839	116.652	115.18	117.116	120.377	118.387	133.379	140.678	132.68	174.683	153.544	136.078	143.905	153.528	133.931	154.617	154.53
	8.9	100.212	115.165	137.92	131.287	131.681	141.283	86.8529	103.295	116.79	115.361	116.968	120.443	118.761	132.962	141.23	133.069	174.733	153.724	136.607	143.443	153.909	134.356	154.873	154.537
	9	100.387	115.739	137.675	131.219	132.125	140.851	87.1692	103.1	117.037	115.805	115.773	120.068	118.703	132.915	141.129	133.37	174.743	153.266	136.323	142.934	153.602	134.452	155.222	154.545
	9.1	100.259	116.198	137.356	131.155	133.301	140.967	87.1033	102.603	117.234	116.648	114.634	119.974	118.257	133.123	140.338	133.642	174.342	152.295	135.618	142.348	153.29	134.966	155.625	154.765
	9.2	99.9891	116.068	137.519	131.169	133.946	141.108	87.5767	101.774	117.296	116.695	114.587	120.043	117.623	133.626	140.037	133.823	173.905	151.279	135.193	142.28	153.445	135.848	155.243	154.857
	9.3	99.7086	115.635	137.652	131.102	133.891	141.134	87.873	101.258	116.73	116.469	115.175	120.555	117.218	134.225	140.209	134.088	172.88	150.843	135.758	142.048	154.187	136.147	154.682	155.02
	9.4	99.7912	115.306	137.912	131.242	133.048	140.737	88.3733	100.843	115.802	115.962	115.592	121.134	117.378	134.759	140.806	134.137	172.472	150.697	136.795	142.15	154.83	135.71	154.542	154.826
	9.5	99.7814	115.587	137.56	131.556	132.78	140.645	87.6999	100.523	115.111	116.386	115.375	121.959	118.18	134.809	140.772	134.069	172.403	151.132	137.96	142.439	155.198	134.764	154.689	154.792
	9.6	99.7656	116.255	137.405	132.108	132.784	141.393	86.9976	100.626	115.219	116.882	115.256	122.705	119.446	134.434	140.709	133.867	172.854	151.287	138.48	142.921	155.424	134.004	155.222	154.355
	9.7	99.4752	116.408	137.638	132.444	132.833	142.754	85.8626	101.04	115.726	116.885	115.485	122.636	120.467	133.898	140.87	134.052	172.905	151.666	138.755	143.103	155.883	133.793	155.271	154.173
	9.8	99.5128	116.34	138.524	132.011	132.587	144.288	85.8	101.834	115.739	116.041	115.802	121.786	121.302	133.615	141.6	134.109	173.129	151.89	138.527	142.729	155.953	133.479	155.016	154.309
	9.9	99.7737	116.216	139.233	131.081	132.475	144.858	86.1331	101.901	115.372	115.014	115.571	120.589	121.577	133.517	142.101	134.095	173.165	152.873	138.121	142.274	155.674	133.295	154.689	154.554
	10	100	116.823	139.35	130.528	133.062	144.131	86.8489	101.659	114.726	114.741	115.071	120.117	121.206	133.603	141.904	133.426	173.375	153.826	137.592	141.67	155.011	132.794	154.672	154.863
	10.1	99.7031	117.193	138.887	130.48	133.509	142.702	87.2796	101.393	114.668	114.909	114.84	119.891	120.71	133.854	141.456	132.924	172.998	154.367	137.315	141.373	154.858	132.716	155.065	154.489
	10.2	99.2249	117.102	138.466	130.872	134.059	141.377	87.1457	101.255	114.772	115.678	115.198	119.948	120.144	134.462	140.796	132.943	172.736	153.933	137.576	141.184	155.35	132.986	155.287	154.58
	10.3	98.5768	116.573	137.66	130.886	134.159	141.098	86.848	100.904	115.751	116.018	115.969	119.849	120.14	134.843	140.439	133.269	172.23	153.413	137.722	141.309	156.248	133.796	155.31	154.687
	10.4	98.2858	116.945	137.257	130.908	134.311	141.233	86.3568	100.263	116.378	116.561	116.288	119.987	119.887	135.397	139.989	133.493	172.132	152.958	137.63	141.422	157.011	134.876	155.098	154.993
	10.5	98.0123	117.703	136.681	131.112	133.651	141.799	86.158	99.5407	116.764	116.59	116.472	119.928	120.198	135.728	140.188	133.012	171.645	152.691	137.236	141.394	156.869	135.787	154.475	154.769
	10.6	98.2111	118.556	136.926	131.603	133.014	142.188	86.0517	99.0272	116.084	116.46	116.038	119.632	120.885	136.025	140.797	133.01	171.091	152.279	137.334	141.286	156.029	136.113	153.515	154.13
	10.7	98.3557	118.033	137.014	132.252	132.644	142.839	86.5271	98.9893	115.376	115.981	115.86	119.21	122.107	135.888	141.664	133.095	170.627	151.967	137.985	141.278	155.029	135.959	152.273	153.639
	10.8	98.8209	117.163	137.958	132.626	133.036	143.339	87.2341	99.6566	114.873	115.58	115.347	118.901	122.97	135.601	142.051	133.612	170.91	151.95	138.619	141.354	154.375	135.249	151.795	153.392
	10.9	99.0836	116.195	138.632	132.69	133.413	143.627	87.9086	100.688	115.142	115.523	115.155	119.209	123.325	135.927	141.671	133.91	172.168	151.929	138.629	141.387	154.199	134.505	151.759	153.611
	11	99.7477	116.312	139.338	132.189	133.548	143.285	88.132	101.794	115.901	115.701	114.866	119.3	123.402	136.306	140.953	134.481	173.686	152.137	138.039	141.168	153.928	133.833	152.322	153.699
	11.1	100.446	117.096	139.16	131.416	133.382	142.595	88.0537	102.52	116.292	116.19	114.634	119.449	123.224	136.436	140.292	135.148	174.623	152.013	137.305	140.966	154.029	133.613	152.703	153.537
	11.2	101.5	118.044	139.411	130.991	133.099	142.102	88.1252	103.057	116.111	116.664	114.382	119.112	123.036	135.515	140.243	135.423	174.412	151.934	137.311	140.855	153.994	133.458	153.483	152.91
	11.3	102.206	118.592	139.572	131.057	132.643	142.163	88.1018	102.753	115.452	116.93	114.25	118.887	122.734	134.489	140.505	135.13	173.795	151.531	137.804	141.008	153.968	133.266	153.878	152.303
	11.4	102.633	118.654	139.84	131.41	132.474	142.819	88.1653	102.416	115.368	116.746	114.572	118.33	122.828	133.965	140.969	134.203	173.52	151.569	138.919	141.15	153.509	133.061	154.342	152.243
	11.5	102.609	118.676	139.226	131.642	132.554	143.045	88.0311	101.858	115.526	116.379	114.874	118.033	123.041	134.181	141.434	133.463	173.954	151.892	139.507	141.518	152.852	133.075	153.995	152.875
	11.6	102.399	118.611	138.858	131.895	133.298	142.783	88.0987	102.097	115.849	115.885	114.883	117.905	123.303	134.572	141.834	132.967	173.964	152.552	139.529	141.594	152.346	133.272	153.992	153.786
	11.7	101.871	118.644	138.459	132.426	133.839	141.999	88.1061	102.229	116.156	115.393	114.95	117.969	123.389	134.826	142.524	133.101	173.911	153.271	138.969	141.933	151.941	133.471	153.655	154.099
	11.8	101.119	118.971	138.828	132.812	134.504	141.425	88.1749	102.788	116.574	114.944	115.273	117.619	123.091	135.303	143.115	133.129	173.383	153.385	138.536	141.906	152.048	133.381	154.043	154.274
	11.9	100.364	119.495	138.874	132.832	134.546	141.083	87.7579	103.201	116.774	114.621	115.754	117.345	122.782	136.19	143.647	133.58	173.12	153.244	139.152	142.356	152.622	133.246	154.466	154.459
	12	100.178	119.964	139.508	132.123	134.433	140.89	86.9989	103.798	116.341	114.72	115.559	117.598	122.499	137.272	143.636	134.164	172.387	152.391	140.91	142.697	153.661	133.202	155.406	155.074
	12.1	100.601	119.854	139.769	131.416	133.719	140.959	86.2172	103.815	115.792	115.06	114.72	118.625	123.17	137.616	143.505	135.114	171.742	152.124	142.549	143.392	154.722	133.942	155.826	155.083
	12.2	101.404	119.823	140.093	131.339	132.997	140.967	86.1972	103.482	115.438	115.732	114.195	119.679	124.144	137.07	142.943	135.607	171.464	152.035	143.125	143.94	155.327	134.801	155.638	154.364
	12.3	101.873	120.393	139.907	131.951	132.344	141.366	86.6994	103.117	115.736	116.046	114.326	120.048	125.124	135.761	142.272	135.398	171.839	152.49	142.293	144.231	155.734	135.383	154.919	153
	12.4	101.677	121.043	140.081	132.833	132.341	141.86	87.0914	103.076	116.095	116.235	115.157	119.411	124.947	134.821	141.45	134.892	172.74	152.339	141.666	144.153	155.78	135.003	154.698	151.934
	12.5	101.168	121.246	140.518	132.977	132.892	142.433	87.139	103.21	116.555	116.308	115.634	118.558	124.263	134.761	141.167	134.175	173.565	151.772	141.059	143.699	155.606	134.297	155.268	151.563
	12.6	100.648	120.38	140.639	132.663	133.941	142.257	86.9418	102.691	116.68	116.818	115.782	117.786	123.41	135.594	141.232	133.652	174.028	151.225	140.73	143.198	155.154	133.496	156.02	151.549
	12.7	100.439	119.662	140.055	132.006	134.837	141.754	86.889	102.213	116.692	116.941	116.035	117.382	123.276	136.867	141.562	132.959	173.745	151.346	140.359	142.759	154.731	133.436	156.256	151.607
	12.8	100.277	119.124	139.229	132.092	135.314	141.277	86.3424	101.877	116.706	116.635	116.72	116.649	123.676	137.831	141.545	132.39	173.214	152.042	140.476	142.747	154.695	133.407	155.923	151.712
	12.9	100.046	118.965	138.804	132.987	135.552	141.208	85.6542	102.443	116.691	115.83	117.081	116.122	124.728	138.648	141.231	132.485	172.587	152.37	140.596	142.935	154.938	133.78	155.393	152.398
	13	99.9169	118.884	138.79	134.296	135.392	141.322	84.7097	102.985	116.766	115.488	116.838	116.116	125.924	138.669	140.667	132.88	172.252	152.218	140.501	142.995	155.143	133.726	154.921	152.797
	13.1	99.7379	118.838	138.642	135.048	134.998	141.404	84.6176	103.254	116.703	115.572	116.371	116.865	126.821	138.291	140.76	133.851	172.328	151.983	140.4	142.388	154.655	133.981	154.327	152.676
	13.2	99.8319	119.029	138.361	134.906	134.094	141.84	84.9744	103.471	116.708	115.749	116.611	117.71	126.862	137.24	141.305	134.448	172.903	152.285	140.616	141.585	153.203	134.274	154.153	152.118
	13.3	100.187	118.96	138.18	134.442	133.165	141.972	85.8766	103.338	116.679	115.482	117.18	117.882	126.263	136.658	142.363	135.515	173.876	153.137	141.21	141.006	152.088	134.474	154.118	152.225
	13.4	100.83	118.86	138.334	134.203	132.669	141.987	86.4297	103.58	116.591	115.191	117.494	117.457	125.514	136.392	142.845	136.173	174.214	153.685	141.509	141.509	151.942	133.877	154.151	152.981
	13.5	101.647	118.489	138.988	133.859	132.724	141.581	86.8407	103.36	116.453	115.078	117.401	117.097	124.975	136.758	143.007	136.154	174.082	153.628	141.557	142.628	153.205	132.856	153.705	153.583
	13.6	102.023	118.323	139.742	133.446	133.265	141.291	87.2852	103.383	115.952	115.515	117.012	117.168	124.894	137.079	142.672	135.359	173.33	153.121	141.218	144.043	154.197	132.087	153.457	153.25
	13.7	102.014	118.005	139.807	132.474	133.658	141.178	87.9062	102.699	115.34	115.268	116.77	117.261	125.012	137.331	142.538	134.453	173.222	152.714	140.916	144.441	154.427	132.33	153.91	152.187
	13.8	101.736	117.94	139.002	131.896	133.607	140.986	88.4239	102.224	114.551	115.115	116.438	117.102	125.323	137.539	142.486	134.086	173.501	152.359	140.815	144.107	153.947	132.924	154.788	151.493
	13.9	102.001	117.969	137.865	131.432	133.235	140.861	88.4167	102.141	114.289	114.706	115.967	116.618	125.432	137.688	142.926	133.446	174.62	151.949	141.126	143.077	153.668	133.533	155.448	151.714
	14	102.727	118.586	137.778	131.478	132.987	140.634	87.9316	102.857	114.514	115.103	115.435	116.817	125.624	138.086	143.428	132.907	175.574	151.611	141.393	142.229	153.797	133.644	155.634	152.312
	14.1	103.32	119.24	138.519	131.592	133.243	140.47	87.3552	103.354	115.484	115.222	114.938	117.344	126.034	138.404	143.76	132.86	175.881	151.653	141.449	141.147	153.74	133.48	155.819	152.504
	14.2	103.068	120.128	139.667	131.713	133.831	140.528	86.9128	103.238	116.521	115.385	114.981	118.577	126.426	138.875	143.328	133.813	174.689	151.656	141.465	140.269	153.087	133.26	155.859	152.418
	14.3	102.236	120.515	140.558	131.815	134.607	140.789	86.8294	102.26	117.293	115.279	115.414	119.44	126.752	139.271	142.609	135.186	172.893	151.211	142.108	139.64	152.444	133.116	155.903	152.018
	14.4	101.409	120.732	140.698	131.835	135.164	141.319	87.0682	101.469	117.437	114.983	116.476	119.616	126.739	139.447	142.098	135.893	171.444	150.851	142.97	139.869	152.274	132.648	155.579	151.543
	14.5	101.008	120.191	139.992	132.064	135.688	141.467	87.4847	100.809	117.077	114.315	117.351	118.706	126.799	139.263	142.015	136.252	171.071	150.806	143.316	140.69	153.08	131.897	155.255	151.101
	14.6	101.165	119.589	138.899	132.494	135.855	141.456	87.9117	101.069	116.426	113.719	117.49	117.616	126.654	138.991	142.164	136.044	171.313	151.191	143.243	141.546	153.993	131.053	154.597	151.57
	14.7	101.392	118.672	138.661	133.355	135.775	141.484	88.0182	101.768	115.636	113.514	116.778	117.491	126.716	138.734	142.544	135.844	171.793	151.356	142.826	142.148	154.909	131.146	153.901	152.523
	14.8	101.744	118.637	139.515	134.218	135.133	141.675	87.9396	102.682	115.415	113.855	116.079	118.43	127.06	138.742	143.118	135.47	172.304	151.494	142.644	141.949	155.189	131.754	153.329	152.969
	14.9	101.568	119.35	140.262	134.825	134.238	141.959	87.6883	103.013	115.553	114.143	115.596	119.755	127.857	138.528	143.247	135.17	172.544	151.917	142.289	141.727	155.243	132.683	152.881	152.632
	15	101.486	120.609	140.543	134.793	133.774	141.786	87.2986	102.761	116.01	114.383	115.418	120.353	128.651	138.267	142.406	135.243	172.49	152.539	142.349	141.017	154.887	133.124	153.163	151.972
	15.1	101.292	120.981	140.588	134.272	133.811	141.85	86.7448	102.301	115.696	114.917	114.927	120.167	129.174	137.566	141.286	134.84	172.411	153.075	142.631	140.662	154.139	133.183	153.425	151.645
	15.2	101.661	120.669	141.323	134.151	134.103	141.952	86.2749	102.087	115.465	115.759	114.945	119.376	129.245	136.824	140.747	134.208	172.482	153.19	142.951	140.455	153.515	133.174	154.091	151.353
	15.3	102.028	120.205	142.233	134.025	133.981	142.422	86.3523	101.552	115.228	117.037	114.862	118.905	128.859	136.386	141.528	133.494	172.702	153.052	143.232	141.022	153.386	133.184	154.11	151.002
	15.4	102.393	120.153	142.672	134.128	133.797	142.53	86.6098	100.853	115.941	117.298	115.138	119.052	128.229	136.585	142.68	133.571	172.493	152.774	143.276	142	154.082	133.392	154.629	150.494
	15.5	102.511	120.038	142.288	133.502	134.12	142.52	86.8653	100.069	116.204	117.131	115.009	119.192	127.818	137.227	143.738	134.017	172.538	152.825	143.368	143.033	154.497	133.656	154.97	150.052
	15.6	102.82	119.669	141.217	133.095	134.7	142.164	86.7732	100.077	116.525	116.181	115.118	118.716	127.987	138.114	143.661	134.281	172.426	152.596	143	143.696	154.681	133.866	155.447	149.634
	15.7	103.144	119.168	140.218	132.724	135.166	141.995	86.5181	100.304	116.139	116.04	115.252	117.249	128.792	138.886	142.9	134.259	172.925	152.707	142.807	143.589	154.655	133.881	155.162	150.03
	15.8	103.18	118.68	139.798	132.728	135	141.697	86.2722	100.521	116.008	115.882	115.595	116.279	129.26	139.657	142.127	134.477	172.924	152.568	142.82	142.977	155.021	133.692	154.729	150.985
	15.9	102.601	118.495	140.116	132.558	134.575	142.03	86.0054	100.556	115.654	116.062	115.623	115.997	129.153	139.9	141.891	134.683	172.919	152.939	143.206	142.015	155.33	133.579	154.239	152.734
	16	102.183	118.744	140.266	132.515	134.275	142.433	86.3702	101.023	115.4	115.866	115.431	116.727	128.725	139.599	142.12	134.632	172.293	152.799	143.748	141.507	155.265	133.754	153.871	153.988
	16.1	101.746	119.311	140.073	132.596	134.274	142.846	86.6877	101.86	115.716	116.25	115.035	117.355	129.112	139.025	141.979	133.932	171.943	152.688	143.831	141.331	155.049	133.762	153.476	154.614
	16.2	102.083	120.041	139.634	133.115	134.476	142.79	87.3122	102.151	116.112	116.646	114.991	117.553	130.225	138.557	141.985	133.118	172.214	151.957	143.821	141.55	154.638	133.964	153.325	153.962
	16.3	101.945	120.288	139.875	133.518	134.347	142.678	87.3758	101.98	116.876	117.09	114.937	117.375	131.11	138.901	142.021	132.788	172.824	151.376	142.9	141.878	154.449	133.994	153.435	152.713
	16.4	102.518	120.307	140.491	133.469	133.922	142.616	87.4373	101.375	116.738	116.848	115.082	116.996	131.08	139.188	142.702	133.194	173.632	150.621	142.236	141.504	153.864	134.298	153.839	151.475
	16.5	102.492	120.193	141.25	132.741	133.776	142.494	87.0062	101.551	116.848	116.544	114.917	116.59	130.55	139.511	143.143	134.062	173.629	150.793	141.68	141.207	153.429	134.307	154.026	150.94
	16.6	102.612	120.216	141.807	131.991	134.062	142.217	86.711	101.887	116.546	116.477	115.035	115.671	130.254	139.328	143.614	134.769	173.501	151.271	142.072	140.401	153.405	134.174	154.368	150.829
	16.7	102.3	120.342	141.984	131.819	134.654	142.217	86.6041	102.013	116.623	116.546	115.097	114.869	130.348	139.604	143.331	134.752	173.135	152.086	142.719	140.945	154.05	133.804	154.452	151.023
	16.8	102.329	120.033	141.847	132.474	134.47	142.31	86.6678	101.557	116.074	116.508	115.504	114.734	130.011	140.035	142.758	134.56	173.334	152.571	143.473	141.314	154.928	133.166	154.298	150.995
	16.9	102.754	120.079	141.076	133.369	133.878	142.726	86.7091	101.053	115.544	116.255	115.607	115.6	129.426	140.606	141.889	134.529	173.701	152.937	144.176	142.119	155.18	132.702	153.761	150.992
	17	103.325	119.849	140.488	134.053	133.194	142.717	86.5334	101.125	115.096	116.02	115.431	116.584	128.775	140.817	141.245	134.937	174.072	152.958	144.636	141.771	154.959	132.434	153.464	150.409
	17.1	103.677	119.96	140.226	134.083	133.338	142.626	86.5644	101.463	115.268	115.902	115.214	117.102	129.185	140.752	141.185	135.2	174.17	153.036	144.63	141.266	154.555	132.786	153.543	149.92
	17.2	103.728	119.598	140.634	133.864	134.059	142.076	86.7029	101.774	115.811	115.709	115.167	117.502	129.784	140.396	141.089	135.076	174.111	153.17	144.179	140.655	154.541	133.329	154.159	149.472
	17.3	103.483	119.443	140.984	133.617	134.535	141.816	87.0224	102.159	116.567	115.751	115.432	118.038	130.592	139.576	141.216	135.058	174.318	153.512	143.831	140.916	154.464	133.94	154.59	149.7
	17.4	103.231	119.023	140.817	133.762	134.367	141.8	87.0253	102.615	117.127	115.864	115.346	118.887	130.796	138.668	141.161	135.206	174.661	153.334	144.118	141.512	154.378	134.391	155.036	150.272
	17.5	103.088	118.837	140.23	133.635	133.629	142.285	87.0387	103.248	117.326	116.081	115.048	119.439	130.769	137.927	141.364	135.585	175.001	152.697	144.422	142.202	154.085	134.502	154.935	151.449
	17.6	102.899	119.063	139.34	133.365	132.913	142.389	86.6369	103.365	116.696	116.393	114.788	119.733	130.427	137.691	141.586	135.584	174.732	151.947	144.281	142.494	153.939	134.449	154.628	152.504
	17.7	102.624	119.657	138.687	132.455	132.836	142.052	86.2777	103.38	115.739	116.734	114.674	119.669	130.031	137.614	141.616	135.166	174.107	151.412	143.35	142.781	153.642	134.295	153.894	153.1
	17.8	102.282	120.192	138.279	131.849	132.963	140.96	85.9108	103.287	114.805	117.066	114.671	119.824	129.98	137.408	141.924	134.515	174.005	151.424	142.848	142.96	153.199	134.192	153.198	152.62
	17.9	102.133	120.803	138.485	131.447	133.39	140.264	85.9152	103.423	114.479	116.577	114.452	119.795	130.219	137.165	142.412	133.804	173.808	151.796	142.574	142.406	152.962	134.312	152.867	151.924
	18	102.323	121.448	139.222	131.824	133.352	139.989	85.9897	103.342	114.602	116.083	114.182	119.647	130.555	137.136	143.311	133.689	173.876	152.453	143.045	141.592	152.945	134.366	153.146	151.235
	18.1	102.444	122.03	140.114	132.395	133.268	140.359	85.6442	103.119	114.901	115.689	114.096	118.922	131.144	137.708	143.682	134.012	173.212	152.94	143.412	140.89	153.121	134.521	153.599	151.066
	18.2	102.602	121.943	140.836	132.876	133.349	140.528	85.3551	102.703	115.364	116.075	114.002	118.503	131.498	138.693	143.4	134.797	173.169	152.925	144.019	141.412	153.675	134.709	153.861	151.246
	18.3	102.465	121.886	141.41	132.892	133.764	140.7	85.761	102.641	115.687	116.32	113.993	118.563	131.88	139.268	142.518	134.98	173.056	152.442	143.996	141.941	154.211	135.007	153.58	152.086
	18.4	102.284	121.971	141.794	132.588	134.225	140.623	86.6437	102.439	115.809	116.383	113.929	118.846	131.433	139.244	141.82	134.852	173.134	151.783	143.489	142.091	154.775	135.155	153.355	152.633
	18.5	101.857	122.05	141.802	132.101	134.101	140.977	87.1972	102.243	115.635	116.068	114.191	119.026	130.734	138.503	141.679	134.378	173.593	151.058	142.968	141.597	154.223	134.623	153.112	152.453
	18.6	101.427	121.507	141.163	131.79	133.646	141.186	87.0214	101.686	115.446	115.683	114.727	118.818	130.003	138.56	141.818	134.075	174.115	150.811	143.18	141.455	153.444	133.786	153.419	151.15
	18.7	101.057	120.948	140.318	132.015	133.399	141.632	86.8278	101.079	115.458	115.175	115.304	118.427	129.976	138.973	142.008	133.496	174.684	150.753	143.903	142.049	152.945	132.669	153.295	150.011
	18.8	100.879	120.911	140.099	132.835	133.584	141.496	87.22	100.717	115.38	115.1	115.867	117.98	130.708	139.973	141.909	133.197	174.272	151.374	144.458	142.827	152.957	131.867	153.184	149.395
	18.9	100.969	121.668	140.57	133.759	134.162	141.435	87.5436	100.559	115.041	114.942	116.21	117.855	131.395	140.199	142.255	133.178	173.858	151.707	144.357	143.082	153.171	131.43	152.42	149.728
	19	101.303	122.372	140.9	134.229	134.642	141.201	87.5372	100.66	114.633	115.016	116.26	118.358	131.346	140.409	142.49	133.589	173.494	151.864	144.497	142.21	152.622	131.502	151.993	150.462
	19.1	101.858	122.865	140.377	134.146	135.027	141.363	86.6537	100.619	114.479	114.803	116.103	118.961	130.798	140.177	142.707	133.636	173.544	151.562	145.203	141.439	152.218	132.119	151.957	151.377
	19.2	102.388	122.842	139.426	134.096	134.798	141.683	85.9703	100.794	114.813	115.014	115.792	119.365	130.403	140.137	142.196	133.639	173.674	151.439	146.291	141.093	151.567	132.938	152.589	151.918
	19.3	102.724	122.733	139.475	133.832	134.595	141.965	85.5492	101.068	115.156	115.279	115.733	119.406	130.813	139.726	141.754	133.467	173.563	151.59	146.413	141.562	151.5	133.89	153.282	152.068
	19.4	102.771	122.195	140.062	133.708	134.738	142.042	85.7299	101.183	115.098	115.425	115.558	119.345	131.28	139.366	141.678	133.592	173.256	151.892	145.728	141.576	151.496	134.344	153.5	151.899
	19.5	102.753	121.548	140.556	133.185	135.305	142.072	86.0086	100.778	114.913	115.512	115.803	119.354	131.784	139.368	141.635	133.649	172.773	152.056	144.885	141.509	152.264	134.08	153.566	151.528
	19.6	102.961	120.883	139.83	133.051	135.436	142.473	85.9687	100.432	114.92	115.671	116.096	119.305	131.954	139.627	141.53	133.837	172.75	152.328	144.84	141.364	153.041	133.643	153.689	151.286
	19.7	103.329	120.807	139.311	132.765	134.771	142.962	86.1049	100.584	115.24	116.367	116.367	118.961	132.156	140.238	141.224	134.168	172.888	152.645	145.076	141.637	153.657	133.301	153.974	150.849
	19.8	103.529	121.079	139.598	132.546	133.769	143.291	86.061	101.292	115.414	116.901	115.755	118.113	131.963	140.174	141.639	134.635	172.887	152.687	145.324	141.903	153.256	133.157	154.018	150.679
	19.9	103.413	121.426	141.101	132.283	133.013	143.366	86.5267	101.314	115.083	117.148	114.738	117.38	131.551	139.635	142.396	135.16	172.365	152.092	145.163	142.358	152.646	132.955	153.497	150.461
	20	103.605	121.066	141.932	132.21	132.648	143.325	86.6529	101.038	114.569	116.769	113.939	117.311	130.991	138.906	142.875	135.166	172.118	151.112	145.113	142.592	152.062	132.861	152.492	150.656
	20.1	104.132	120.453	141.761	132.429	132.74	142.992	86.7251	100.35	113.969	116.391	114.17	118.209	130.766	138.75	142.787	134.896	171.778	150.956	145.054	142.539	152.245	133.074	151.423	150.783
	20.2	104.762	119.38	140.633	132.456	133.069	142.11	86.7362	100.39	113.776	116.1	114.991	118.885	130.847	139.341	142.402	134.478	171.789	151.531	145.22	142.05	152.753	133.29	151.519	150.865
	20.3	104.867	118.801	140.136	132.611	133.17	141.215	86.5982	100.11	114.18	116.118	115.831	119.04	131.318	139.682	142.275	134.251	171.072	152.534	144.892	141.71	153.217	133.192	152.715	151.262
	20.4	104.505	118.265	140.151	132.602	132.818	140.614	87.1521	99.623	115.285	116.039	116.147	118.126	132.062	139.649	142.325	134.092	171.211	152.809	144.382	141.894	153.509	133.102	154.089	152.128
	20.5	104.042	118.577	140.198	132.772	132.109	140.691	87.2316	99.2943	116.577	116.061	115.989	117.269	132.729	139.789	142.131	133.798	171.318	152.598	143.944	142.02	153.631	133.231	154.448	153.083
	20.6	103.496	118.99	139.831	132.693	131.992	140.725	87.7266	99.696	116.971	115.874	115.877	116.693	133.102	140.637	142.163	133.71	172.565	152.185	144.308	142.008	153.576	133.768	153.892	153.536
	20.7	103.367	119.749	139.595	132.85	132.397	140.477	87.4669	100.557	116.296	115.575	116.117	116.934	132.997	141.813	142.303	133.919	173.292	152.032	145.019	141.615	153.28	134.074	153.257	152.957
	20.8	103.44	120.149	139.768	132.878	133.03	139.994	87.6211	100.624	115.024	115.395	116.466	117.131	132.917	141.933	142.741	134.51	173.956	152.072	145.374	141.685	152.711	133.816	152.741	152.004
	20.9	103.867	120.341	140.39	133.118	133.311	139.797	87.3406	99.8108	114.632	115.588	116.702	117.323	132.591	141.138	142.685	134.991	173.513	152.213	144.95	141.857	152.581	133.065	152.41	150.638
	21	104.07	120.263	140.625	133.55	133.173	139.723	86.5029	99.0148	115.031	116.217	116.295	117.234	132.003	140.27	142.388	134.738	172.704	152.598	144.026	142.22	152.787	132.362	152.085	149.893
	21.1	104.038	119.972	140.762	133.857	132.92	139.65	85.5752	98.8044	115.853	116.471	116.065	117.7	130.936	140.02	142.176	133.948	172.187	152.956	143.372	142.6	153.129	131.671	151.999	149.631
	21.2	103.753	119.872	140.36	133.743	132.633	139.484	85.3241	99.6456	116.266	116.208	115.667	118.247	130.155	140.036	142.442	132.872	172.217	152.919	143.351	142.678	153.311	131.274	151.987	149.765
	21.3	103.407	120.045	140.026	132.395	132.607	139.677	86.4102	100.688	116.552	115.425	115.723	118.503	130.22	139.803	142.681	132.742	172.719	152.455	143.784	142.509	153.098	131.101	152.006	150.429
	21.4	103.174	120.724	139.598	131.152	132.931	140.018	87.4888	101.543	116.672	114.613	115.842	117.983	131.08	139.887	142.531	133.022	172.809	152.025	144.775	141.618	152.999	131.404	152.26	151.057
	21.5	102.948	121.133	139.411	130.596	133.66	140.441	87.6821	101.38	116.504	114.242	116.005	116.986	131.971	140.184	142.051	133.574	172.906	152.373	145.521	141.163	152.861	131.538	152.841	152.145
	21.6	102.785	121.134	139.409	131.412	134.382	140.849	87.221	100.848	115.953	114.306	116.324	116.331	132.585	140.506	142.029	133.244	173.034	152.883	146.481	140.724	153.248	131.093	153.444	152.616
	21.7	102.364	120.658	139.86	132.551	134.601	141.226	86.7351	100.553	115.567	114.913	116.153	116.179	132.928	140.267	142.404	132.699	173.368	153.12	146.548	140.778	153.668	130.935	153.578	152.796
	21.8	102.05	120.033	140.889	133.085	134.377	141.373	86.6431	100.749	115.228	115.228	116.201	116.378	133.603	139.986	142.593	132.248	173.368	152.678	146.584	140.9	153.965	131.35	153.324	152.158
	21.9	101.861	119.159	142.139	133.014	134.22	141.406	86.3527	100.758	114.662	115.48	115.797	116.697	134.169	140.123	142.05	132.443	172.617	152.173	146.222	141.239	153.558	132.585	152.969	150.909
	22	102.582	118.179	142.942	132.905	134.605	141.471	85.8693	100.792	113.84	115.41	115.515	116.754	134.823	140.456	141.199	132.647	171.783	151.698	146.117	141.594	152.945	133.009	152.953	150.111
	22.1	103.45	117.66	142.971	133.085	135.058	142.219	85.5439	100.851	113.226	115.507	115.007	116.587	134.994	140.555	140.773	132.962	171.243	151.402	145.8	141.724	152.603	132.658	153.31	150.102
	22.2	104.249	118.115	142.371	133.63	135.421	142.804	85.6986	101.375	113.677	115.483	114.622	116.082	134.843	140.037	141.103	133.13	171.563	151.23	145.225	142.088	152.844	131.551	153.797	151.291
	22.3	104.166	119.31	141.675	133.911	135.338	143.389	86.1218	101.414	114.489	115.214	114.299	115.831	134.516	139.374	141.863	133.752	171.942	151.621	144.261	142.775	153.194	130.925	154.041	152.034
	22.4	103.934	120.472	141.358	134.116	135.133	142.798	86.6208	101.521	115.47	115.203	114.112	115.918	134.203	138.891	142.701	133.876	172.352	152.307	143.369	143.176	153.112	130.835	153.705	152.142
	22.5	103.462	120.9	141.892	133.735	134.761	142.181	87.0394	101.502	115.943	115.186	113.981	116.342	134.493	138.929	142.989	133.59	172.883	152.886	143.306	142.953	152.792	131.312	153.071	151.528
	22.6	103.06	120.946	142.606	133.252	134.856	141.393	87.3788	101.942	116.099	115.495	114.314	116.943	134.954	139.118	142.966	132.882	173.336	153.101	144.091	142.17	152.545	131.535	152.167	151.089
	22.7	102.625	120.976	142.968	132.87	135.065	141.596	87.3859	102.173	116.015	115.4	114.744	117.731	135.648	139.494	142.314	132.712	173.484	152.603	145.493	141.916	153.097	131.973	151.592	151.277
	22.8	102.617	121.484	142.066	132.953	135.174	142.055	87.1264	102.132	115.389	115.368	115.18	118.561	135.728	139.413	141.442	132.917	172.891	152.07	146.342	141.999	153.809	132.527	151.759	151.686
	22.9	102.843	121.715	140.914	133.485	134.726	142.354	86.9186	101.789	114.799	115.117	115.131	118.868	135.401	138.925	140.596	133.223	172.467	151.129	146.473	142.3	154.247	133.051	152.829	151.893
	23	102.976	121.911	139.918	133.759	134.443	141.677	86.9089	101.364	114.411	114.872	114.491	118.387	134.991	138.31	140.402	133.25	172.486	150.78	145.66	142.256	153.682	132.936	154.311	151.384
	23.1	102.747	121.437	140.05	133.885	134.511	140.727	86.9706	101.308	114.665	115.03	114.017	117.155	134.927	138.228	140.749	133.321	172.661	150.215	144.43	142.002	152.706	132.291	155.085	151.247
	23.2	102.712	121.226	140.674	133.673	135.01	140.194	86.7928	101.358	115.044	115.879	113.56	116.21	135.107	138.834	141.229	133.428	172.05	149.99	143.666	141.707	152.096	132.251	155.242	151.413
	23.3	102.767	121.194	141.455	133.505	135.508	140.472	86.4979	101.56	115.008	117.102	113.785	115.697	135.018	139.182	141.598	133.713	171.141	149.871	143.477	141.097	152.25	132.386	154.572	152.194
	23.4	103.327	121.777	141.8	133.002	136.016	140.809	86.3117	101.294	114.483	117.472	113.884	115.758	134.517	139.321	141.619	133.984	170.745	150.423	144.394	140.83	152.72	132.869	154.095	152.261
	23.5	103.516	122.33	141.536	132.469	136.255	140.616	86.5526	100.812	113.727	117.05	114.504	115.802	133.889	139.101	141.615	134.3	171.447	151.276	145.062	140.557	153.407	132.766	153.362	152.059
	23.6	104.092	122.47	140.988	132.533	136.14	140.275	86.9888	100.62	113.782	116.345	115.184	115.958	133.721	139.508	141.213	134.45	171.799	151.701	145.804	140.887	153.885	132.981	153.088	151.235
	23.7	104.412	122.138	140.525	133.276	135.596	139.975	87.5074	100.835	114.586	116.091	115.583	116.354	134.399	140.102	141.3	134.849	171.676	151.765	145.9	141.127	154.231	133.143	153.056	150.568
	23.8	104.777	121.467	140.249	134.031	134.855	140.085	87.885	101.122	115.786	115.995	115.38	116.778	135.428	140.996	141.262	135.128	171.152	151.736	146.275	141.684	153.938	133.493	153.396	149.881
	23.9	104.491	120.784	139.89	134.11	134.397	139.867	88.2056	100.972	116.205	115.951	115.087	117.169	136.343	141.118	141.735	135.678	171.022	151.964	146.353	142.095	153.226	133.458	153.673	149.543
	24	103.92	120.347	139.533	133.971	134.266	139.828	88.2118	100.555	115.92	116.045	115.068	117.238	136.705	140.587	141.73	135.904	170.991	152.063	145.875	142.168	152.746	133.117	153.569	149.607
	24.1	103.24	120.263	139.608	134.2	134.288	139.934	87.9091	100.509	115.436	116.139	115.138	117.063	136.825	139.571	141.882	135.726	170.797	151.838	144.715	141.665	152.467	132.964	153.206	150.504
	24.2	102.662	120.521	140.206	134.726	134.287	140.78	87.3644	100.723	115.251	116.411	114.634	116.796	136.423	139.014	141.876	135.063	171.121	151.421	143.57	141.296	152.721	133.354	152.94	151.45
	24.3	102.247	120.779	140.688	134.932	133.938	141.739	87.2484	101.14	115.448	116.861	114.398	116.688	135.759	138.82	142.504	134.086	171.76	151.116	143.037	141.647	152.733	133.896	153.036	151.848
	24.4	102.007	120.814	140.845	134.52	133.789	142.564	87.4991	101.465	115.649	117.857	114.377	116.613	134.981	138.951	143.193	133.907	172.839	151.386	143.491	142.426	152.922	133.916	153.785	151.396
	24.5	101.907	120.855	140.59	133.924	133.383	142.713	87.6839	101.721	115.914	118.361	114.874	116.589	134.532	139.096	143.764	133.621	173.55	152.195	144.393	142.703	152.886	133.25	154.569	150.972
	24.6	101.883	121.013	140.728	132.974	133.432	142.548	87.3371	101.732	116.055	118.526	115.25	116.429	133.977	139.293	143.896	133.969	174.415	153.049	145.42	142.287	152.644	132.939	155.206	150.941
	24.7	102.329	121.658	141.215	132.211	133.633	142.457	87.0501	101.326	116.026	118.039	115.639	116.808	133.663	140	143.682	133.941	174.583	153.358	145.955	141.74	152.086	132.75	155.2	150.735
	24.8	103.282	121.79	141.812	131.237	134.263	142.153	87.2683	100.435	115.95	118.177	115.889	117.094	133.684	140.732	143.303	134.586	174.196	153.399	146.532	141.748	151.312	132.703	154.862	150.435
	24.9	104.069	121.526	141.877	130.936	134.453	141.259	88.0642	99.8642	116.17	118.148	115.853	117.355	134.63	141.33	142.492	134.561	172.982	153.476	146.957	141.834	150.866	132.142	154.479	150.276
	25	104.039	120.834	140.851	130.732	133.933	140.11	88.5112	99.6361	116.519	118.28	115.835	117.312	135.33	141.02	141.721	134.46	172.058	153.496	147.336	141.644	150.778	131.822	154.025	150.491
	25.1	103.026	120.31	140.164	131.06	132.929	139.699	88.4469	99.9014	116.559	117.552	115.995	117.803	135.898	139.892	141.308	134.193	171.836	152.93	146.667	141.321	151.478	131.981	153.308	150.685
	25.2	102.404	120.022	139.496	131.562	132.459	140.309	87.86	100.105	115.789	116.438	116.334	118.464	135.792	138.735	141.536	134.483	172.009	152.044	145.897	141.186	152.277	132.68	152.552	150.529
	25.3	102.021	120.064	140.24	132.15	132.913	141.075	87.1992	100.381	114.95	115.159	116.427	119.118	135.849	137.835	142.126	135.114	172.165	151.596	144.97	141.726	153.015	133.798	152.243	150.452
	25.4	102.637	120.483	140.683	132.235	133.638	141.483	87.1458	100.832	114.275	114.831	116.199	119.121	135.605	138.347	142.86	135.614	171.813	151.566	144.847	142.103	153.007	134.645	152.542	150.595
	25.5	103.178	121.014	141.633	131.871	133.808	141.792	87.3563	101.303	114.388	115.404	116.071	119.228	135.571	139.34	143.815	136.286	171.273	151.824	145.076	142.518	153.256	135.303	152.661	150.71
	25.6	104.178	121.168	142.018	131.414	133.603	141.921	87.7537	101.434	114.77	116.303	115.731	119.142	135.387	140.76	144.302	136.577	171.139	151.835	145.523	142.076	153.342	135.387	152.654	150.65
	25.7	104.3	121.144	142.22	131.328	133.397	142.147	87.7429	101.252	115.574	116.707	115.365	119.233	135.417	141.625	143.887	136.838	171.192	152.048	145.76	142.021	153.27	135.483	152.666	150.343
	25.8	104.212	121.051	141.841	131.166	133.63	142.151	87.6712	100.895	115.868	116.958	114.341	118.733	135.195	142.467	142.566	136.126	171.394	152.228	145.374	142.075	152.494	134.918	153.203	150.236
	25.9	103.917	121.078	141.016	131.349	133.781	142.503	87.7041	101.132	115.738	116.982	113.866	118.292	134.929	142.636	141.355	135.319	171.072	152.657	145.199	142.634	151.761	134.194	153.79	150.48
	26	104.15	120.973	140.566	131.623	133.936	142.747	87.4369	101.679	115.113	117.198	113.7	118.026	134.299	142.192	140.904	133.975	171.04	152.991	145.43	142.287	152.027	133.152	154.27	150.869
	26.1	104.317	120.883	140.232	132.35	133.805	142.793	86.8119	102.292	114.551	117.175	114.108	118.659	133.873	141.254	140.748	133.275	171.395	153.631	146.343	141.361	152.961	132.565	154.119	151.447
	26.2	104.179	120.647	140.556	132.466	133.116	142.482	85.9023	102.233	114.367	117.338	114.339	119.344	133.541	140.338	140.723	132.586	172.568	153.983	146.7	140.371	153.719	132.349	153.936	151.75
	26.3	104.201	120.599	140.513	132.304	132.253	142.046	85.3523	101.838	114.245	117.13	114.561	119.872	133.589	139.767	140.732	132.679	173.848	153.866	146.42	139.886	153.354	132.295	153.822	151.907
	26.4	103.951	120.348	141.007	132.025	131.469	141.757	85.2718	101.554	114.423	117.005	115.287	119.587	133.607	139.261	141.009	132.814	175.085	152.915	145.502	139.896	152.446	132.497	154.242	151.262
	26.5	103.648	120.273	140.762	132.32	131.474	141.705	85.5953	101.624	114.234	116.677	116.026	119.611	133.534	139.424	141.573	133.143	175.648	151.615	145.111	139.791	151.961	132.552	154.877	150.618
	26.6	102.872	120.001	141.015	132.947	132.106	141.986	86.0108	101.938	114.425	116.883	116.629	119.217	133.424	139.677	142.065	133.398	175.622	151.226	145.146	140.193	151.948	133.177	155.003	150.296
	26.7	102.814	120.367	140.899	133.531	133.158	142.379	86.6321	101.889	115.054	117.015	116.198	118.675	133.572	139.815	142.562	133.506	174.863	151.59	145.605	140.662	152.226	133.259	154.835	151.062
	26.8	103.042	120.873	141.409	134.121	134.132	142.641	87.1281	101.845	116.495	117.578	115.459	117.554	134.199	139.692	142.676	133.744	173.751	152.756	145.709	141.81	152.297	133.111	154.081	151.665
	26.9	103.397	121.992	141.316	134.402	134.727	143.063	87.5851	101.5	117.767	117.532	114.644	116.723	134.729	140.109	142.419	133.479	172.932	153.135	145.487	142.396	152.296	132.333	154.099	151.741
	27	103.304	122.174	141.156	134.698	134.824	143.301	87.7502	101.519	118.005	117.641	114.55	116.437	134.907	140.682	142.056	133.434	172.513	153.03	145.443	142.689	151.983	132.088	154.324	151.192
	27.1	103.286	121.948	141.097	134.713	134.441	143.647	87.936	101.279	117.131	117.478	114.665	116.288	134.762	140.889	141.759	133.525	172.588	152.058	145.552	141.797	151.662	132.496	154.81	151.048
	27.2	103.536	120.793	141.625	134.812	133.88	143.617	87.8911	101.267	115.706	117.745	115.038	116.683	134.798	140.056	141.498	133.91	172.38	151.395	145.857	141.153	151.683	133.361	154.499	151.392
	27.3	103.902	120.302	142.36	134.641	133.517	144.103	87.5604	101.229	114.796	117.585	115.172	117.175	134.914	139.636	141.388	133.918	172.374	151.205	145.807	140.827	152.075	134.39	153.817	151.621
	27.4	104.013	120.427	142.45	134.315	133.498	144.903	87.0976	101.42	115.011	116.987	115.678	118.031	134.854	139.44	141.25	133.312	172.01	151.459	146.055	141.413	152.265	134.986	152.945	151.509
	27.5	104.056	121.028	142.053	133.898	133.341	145.464	86.8293	101.562	115.761	116.341	115.854	118.471	134.559	139.983	141.44	132.811	171.795	151.756	146.791	141.683	152.149	134.845	152.756	150.89
	27.6	103.923	121.368	141.418	133.797	132.983	145.465	87.1454	101.554	116.545	116.163	115.872	118.9	134.274	140.624	141.166	132.522	171.229	151.813	147.645	141.556	151.737	134.203	153.025	150.439
	27.7	103.835	120.959	141.109	133.743	132.855	144.431	87.2969	101.414	116.215	116.455	115.712	119.113	134.307	141.416	141.034	133.039	171.246	152.221	148.025	141.192	152.151	133.362	153.458	149.686
	27.8	103.412	120.358	140.819	133.419	133.339	143.391	87.4412	101.107	115.929	116.428	115.945	119.215	134.195	141.767	140.888	133.29	171.587	152.245	147.607	141.174	152.725	132.861	153.606	149.325
	27.9	103.456	119.661	140.465	132.908	134.213	142.388	87.4307	100.574	115.505	116.409	116.383	118.43	134.162	141.243	141.353	133.549	172.386	152.029	146.717	141.368	153.69	132.511	153.532	149.173
	28	103.602	119.708	140.321	132.87	134.543	142.108	87.5476	100.445	116.028	116.553	116.287	117.512	134.151	140.392	141.719	133.402	172.908	151.387	145.941	141.691	153.693	132.415	153.73	149.768
	28.1	104.071	120.097	140.119	133.607	134.376	142.513	87.5152	100.505	116.323	117.264	115.757	116.578	134.578	139.764	141.67	134.022	172.965	151.38	145.738	141.923	153.862	132.601	154.182	150.327
	28.2	104.214	120.654	140.293	134.226	133.628	142.55	87.2056	101.076	116.585	117.774	115.079	116.763	134.885	139.285	141.183	134.681	172.448	152.047	146.41	142.488	153.928	132.974	154.603	150.437
	28.3	104.477	120.684	140.266	134.444	133.738	142.612	86.9408	101.069	116.226	117.942	115.104	116.838	134.853	138.925	140.731	135.053	172.153	153.005	147.301	142.819	154.501	133.462	154.51	149.957
	28.4	104.132	120.361	140.759	134.134	134.111	142.276	86.6506	101.19	116.242	117.528	115.272	117.071	134.517	138.897	140.621	134.608	172.352	153.704	147.629	143.04	154.739	133.647	154.042	149.212
	28.5	103.548	119.783	140.877	133.795	134.959	142.352	86.4568	101.191	116.772	117.27	115.928	117.101	134.443	139.425	140.679	134.263	173.3	153.96	147.015	142.651	154.911	133.386	153.675	148.801
	28.6	102.445	119.522	140.98	133.43	134.879	142.006	86.4051	101.36	117.499	117.036	116.287	117.543	134.694	140.599	140.788	134.144	173.997	153.29	145.926	142.236	154.833	132.785	153.692	148.639
	28.7	102.29	119.462	140.478	133.285	134.247	141.62	86.6274	101.415	117.783	116.749	116.95	117.804	135.676	141.361	140.94	134.321	174.568	152.14	145.111	141.896	154.569	132.413	153.557	148.944
	28.8	102.446	119.968	140.485	133.343	133.439	141.709	86.6061	101.337	117.474	115.666	116.753	117.96	136.232	141.891	141.026	134.068	174.452	150.71	145.042	141.97	153.734	132.155	153.069	149.328
	28.9	103.143	120.174	140.45	133.09	133.177	142.598	86.3296	101.428	117.456	114.517	116.168	118.129	136.298	141.608	140.841	133.84	174.352	150.036	145.653	142.201	153.11	131.881	152.676	149.889
	29	103.409	120.224	140.693	132.633	133.612	143.406	86.1398	101.332	117.538	114.019	115.045	118.617	135.561	141.293	140.547	133.713	173.87	149.676	146.331	142.363	153.033	131.202	152.48	150.029
	29.1	103.537	120.225	140.221	132.384	134.219	143.901	86.7709	101.323	117.455	114.502	114.509	118.429	134.906	141.151	140.563	134.046	173.447	149.601	146.569	142.332	153.924	131.061	152.694	150.285
	29.2	103.402	120.875	140.321	133.258	134.909	143.569	87.8823	101.149	116.363	115.226	114.413	118.037	134.826	141.284	141.121	134.391	172.945	149.913	146.191	141.737	154.358	131.463	152.794	150.572
	29.3	102.937	121.946	140.717	133.998	135.263	143.238	88.5143	100.967	115.321	115.708	114.788	117.324	134.808	141.614	141.89	134.645	173.104	150.873	145.959	141.279	153.95	132.237	153.435	151.442
	29.4	102.644	122.635	141.361	134.388	135.486	142.749	88.2312	100.868	114.965	116.006	114.934	117.298	134.996	141.708	142.221	134.893	173.695	152.261	146.233	140.85	153.131	132.749	154.175	151.935
	29.5	102.783	122.937	141.244	133.645	135.049	142.889	87.606	101.228	115.653	116.221	115.014	117.452	134.915	141.783	141.89	134.929	174.648	153.301	146.835	141.257	152.996	132.862	154.731	151.768
	29.6	103.164	122.798	140.4	133.38	134.65	143.374	87.4781	101.9	116.492	116.295	114.966	118.121	134.951	141.503	141.418	134.692	175.119	153.651	147.173	141.177	153.44	132.527	154.596	151.142
	29.7	103.436	122.504	139.627	133.53	134.245	143.627	87.3569	102.262	116.587	116.704	115.268	119.074	135.472	141.319	141.27	134.364	175.397	153.498	146.616	140.861	153.024	132.311	154.236	150.896
	29.8	103.322	121.864	139.228	134.243	134.167	143.395	86.9993	102.011	115.974	116.886	115.797	119.82	136.131	141.072	141.649	134.264	175.081	153.298	146.117	140.214	152.139	132.072	154.01	151.281
	29.9	103.764	121.811	139.676	134.409	133.847	142.963	86.2574	101.495	114.817	117.108	116.192	120.089	136.958	140.99	142.029	134.382	174.444	153.358	145.612	140.296	151.82	132.657	154.062	151.419
	30	104.299	122.27	140.561	133.898	133.166	142.505	86.2487	101.454	114.057	116.497	116.099	119.651	137.237	140.929	142.114	134.184	173.496	153.28	145.982	140.772	153.194	132.678	154.136	151.182
	30.1	104.847	122.965	141.116	133.082	132.587	142.225	86.4118	101.538	114.267	116.127	115.521	118.741	137.278	141.101	142.268	133.879	172.706	153.235	146.025	141.281	154.684	132.643	154.132	150.9
	30.2	104.713	122.591	141.18	132.616	132.462	141.612	86.9003	101.716	115.102	115.684	115.253	117.394	136.989	141.619	142.349	133.706	172.366	153.358	146.137	141.17	155.24	132.052	154.049	151.311
	30.3	104.617	121.718	140.486	132.919	132.963	141.494	87.0432	101.286	115.943	115.582	115.462	116.246	136.086	141.597	142.456	133.754	172.547	153.707	145.902	141.039	154.676	131.857	153.708	151.709
	30.4	104.899	120.693	140.1	133.64	133.676	141.191	87.5323	100.956	115.917	116.235	116.02	115.935	135.176	141.25	141.829	134.012	173.093	153.594	145.623	140.895	154.337	131.858	153.809	151.703
	30.5	105.151	120.466	139.876	134.626	134.108	141.577	87.6888	100.892	115.358	117.333	116.007	116.514	134.545	140.326	141.085	134.059	173.543	152.804	145.558	141.433	154.661	131.958	154.045	151.191
	30.6	104.899	120.558	140.131	135.04	134.26	141.997	87.6759	101.436	114.88	118.449	115.636	117.105	135.003	139.946	140.726	134.199	173.761	152.135	145.599	142	155.13	131.985	154.382	150.692
	30.7	103.602	120.99	140.375	135.043	134.19	142.963	87.081	102.129	114.594	117.885	115.089	117.523	135.742	139.349	141.385	133.937	173.776	152.105	146.153	142.398	155.257	132.253	153.882	150.289
	30.8	102.664	121.294	140.274	134.22	134.297	143.595	86.5238	102.26	114.744	116.902	114.924	117.449	136.302	139.126	142.424	133.883	173.77	152.345	146.523	141.806	154.848	132.372	153.297	149.79
	30.9	102.431	121.797	139.922	133.419	134.24	144.012	86.2403	101.966	114.363	116.26	114.847	117.253	136.012	139.231	143.192	133.528	173.37	152.496	146.806	140.773	154.391	132.447	153.149	149.518
	31	102.865	121.909	139.65	132.579	133.857	144.248	86.3412	101.682	113.848	116.605	114.962	117.024	135.746	140.161	143.383	133.47	173.258	152.689	146.681	139.631	153.875	132.208	153.826	149.595
	31.1	102.904	121.509	139.888	132.637	133.412	144.281	86.7509	101.884	113.235	116.7	115.122	117.084	135.878	141.087	143.316	133.01	173.711	153.13	146.245	139.316	153.65	132.172	154.048	149.752
	31.2	102.179	120.414	140.189	133.085	133.359	143.925	87.4084	101.935	113.567	115.993	115.318	117.873	136.912	141.171	143.233	132.914	174.575	153.491	145.885	139.836	153.491	131.989	153.509	149.792
	31.3	101.989	119.629	140.019	133.805	134.152	142.861	88.01	101.614	114.113	115.412	115.586	118.346	137.569	140.77	143.126	132.984	174.362	153.137	146.2	140.922	153.55	131.471	152.308	149.552
	31.4	102.734	119.677	139.521	134.251	134.848	141.764	88.2961	101.01	114.475	115.199	115.839	118.478	137.489	140.846	143.091	133.581	173.388	152.385	147.195	142.112	153.496	131.074	151.878	149.358
	31.5	104.529	120.321	139.155	134.361	135.156	141.267	87.6834	101.038	114.439	115.75	116.133	117.934	136.884	141.661	142.916	134.225	172.518	151.578	148.052	142.481	153.414	131.098	152.224	149.112
	31.6	105.706	121.096	139.144	134.318	134.613	141.779	86.9289	101.483	114.355	116.216	115.876	117.438	136.799	142.358	142.631	134.547	172.885	151.862	147.925	142.395	153.101	131.927	152.914	149.309
	31.7	105.955	121.847	139.125	133.757	134.351	142.744	86.486	102.108	114.621	116.576	115.274	117.255	137.47	142.324	142.31	134.715	173.312	152.646	147.729	141.816	152.344	132.881	153.233	149.584
	31.8	105.068	122.632	139.176	133.511	134.429	143.673	86.6601	102.109	114.566	116.592	114.446	117.072	137.819	141.615	142.383	134.507	173.475	153.373	147.651	141.287	152	133.52	153.128	149.949
	31.9	104.034	122.859	139.698	133.101	134.903	143.94	86.8381	101.743	114.817	116.379	113.936	117.35	137.688	141.236	142.482	134.509	172.976	153.024	147.97	140.968	152.242	133.132	153.074	149.719
	32	102.933	122.494	140.619	133.115	135.174	143.677	86.5457	101.31	115.066	116.795	113.771	117.728	137.105	141.015	142.326	134.284	172.923	152.273	147.66	140.816	153.436	132.241	153.366	149.415
	32.1	102.506	122.097	141.352	132.437	135.336	142.894	85.8067	101.163	115.704	117.658	113.766	118.175	136.803	141.332	141.541	134.206	173.262	151.976	147.049	141.046	153.897	131.607	153.877	149.636
	32.2	102.265	122.085	141.248	132.077	135.209	142.514	85.3283	101.058	115.944	118.59	113.786	118.13	136.487	141.473	140.916	134.123	174.211	152.147	146.842	141.205	153.389	131.603	154.404	150.334
	32.3	102.139	122.355	140.851	131.794	134.915	142.489	85.4772	100.743	115.675	118.476	113.836	117.961	136.335	141.334	140.975	134.109	174.384	152.308	147.029	141.303	152.123	131.631	154.471	151.381
	32.4	101.79	122.458	140.429	132.022	134.931	142.863	86.4661	100.314	114.956	117.663	114.181	118.183	136.123	140.758	141.685	134.144	173.917	151.821	147.392	141.259	151.672	131.464	154.223	151.67
	32.5	101.513	122.685	140.634	132.287	135.299	143.103	87.4368	100.136	114.356	116.866	114.788	118.589	136.448	140.094	142.631	133.762	172.814	151.229	147.227	141.322	151.897	131.882	153.402	151.195
	32.6	101.524	122.637	140.33	132.582	135.955	143.035	87.7481	100.438	114.438	116.835	115.238	118.932	136.744	139.949	142.571	133.216	172.499	151.037	146.804	141.627	152.345	132.713	152.652	150.272
	32.7	101.805	122.171	140.289	133.107	136.262	143.012	87.6636	101.158	114.93	117.143	115.113	119.164	136.778	140.359	141.687	132.596	172.355	151.297	146.796	141.733	151.994	133.768	152.501	149.35
	32.8	102.387	121.497	139.997	133.739	136.572	142.673	87.545	101.648	115.562	117.351	114.47	119.393	136.122	140.723	139.998	132.236	172.544	151.476	146.935	141.192	151.479	134.043	152.791	149.171
	32.9	103.486	121.196	140.611	134.17	136.741	142.656	88.1493	101.244	115.636	117.074	113.881	119.327	135.358	140.772	139.094	131.925	172.418	151.284	147.008	140.382	151.345	134.216	153.101	149.114
	33	104.664	121.363	141.133	134.365	136.404	142.502	88.516	100.1	115.199	116.786	113.788	118.856	135.114	140.515	139.094	131.842	172.592	151.271	146.384	139.71	152.117	134.289	152.971	149.502
	33.1	105.615	121.43	141.771	134.026	136.051	142.664	88.5878	99.1347	114.672	116.816	114.233	118.415	135.119	140.569	140.115	132.356	172.846	151.519	145.42	139.702	153.493	134.434	153.033	149.989
	33.2	105.724	120.901	142.081	133.731	135.789	143.04	87.8757	99.4227	114.258	117.069	114.612	118.778	135.27	140.585	141.059	133.862	173.497	151.816	144.767	139.824	154.214	134.341	153.154	150.655
	33.3	105.438	120.031	142.085	133.578	136.119	143.515	87.2896	100.513	114.944	117.197	114.854	119.194	135.485	140.329	142.09	135.53	174.4	151.709	144.771	140.59	154.193	134.068	153.339	151.01
	33.4	104.996	119.613	141.496	133.718	135.972	143.877	86.927	101.666	115.844	116.976	114.879	119.101	135.78	140.105	142.611	136.584	175.029	151.768	145.649	142.081	153.385	134.267	154.095	151.035
	33.5	104.818	120.09	140.817	133.85	135.694	143.582	87.2212	102.08	116.681	116.673	115.136	118.021	136.282	140.353	143.442	136.488	174.932	152.137	146.81	143.395	153.314	134.783	155.062	150.92
	33.6	104.684	121.635	140.065	133.718	135.321	143.386	87.3821	101.836	116.182	116.614	115.235	117.045	136.765	141.129	143.813	135.952	174.449	152.585	147.594	143.831	153.344	135.152	156.179	150.951
	33.7	104.645	122.791	139.702	133.596	135.481	143.452	87.4074	101.329	115.293	116.774	115.132	117.114	137.203	141.606	143.992	135.43	173.722	152.982	147.404	142.461	153.221	134.9	155.925	151.259
	33.8	104.232	123.456	139.456	133.603	135.273	144.44	86.853	100.496	114.938	117.049	114.653	117.537	137.139	141.728	143.323	135.211	173.288	153.307	146.331	141.314	152.432	134.268	155.558	151.507
	33.9	103.978	123.11	140.065	133.653	134.955	144.793	86.4836	99.7052	115.463	117.161	114.188	118.128	136.61	141.418	142.453	135.234	172.951	153.728	145.402	140.691	151.673	134.409	154.952	151.475
	34	103.833	122.856	141.07	133.58	134.146	144.723	86.3983	98.9858	115.977	117.152	113.846	117.699	136.313	140.724	141.909	135.549	173.002	153.563	144.782	141.466	151.592	135.076	154.988	150.918
	34.1	104.258	122.764	141.818	133	134.176	143.304	86.5839	99.0994	115.725	116.832	113.808	117.672	136.098	139.952	141.62	135.813	173.169	152.879	145.028	141.948	151.777	135.851	154.471	150.781
	34.2	104.798	122.754	141.813	132.666	134.59	142.066	86.8472	99.7356	115.177	116.416	114.08	117.482	136.035	139.403	141.585	135.766	172.791	151.943	145.362	141.533	152.342	135.761	153.872	150.836
	34.3	105.1	122.507	141.143	132.977	135.517	140.86	86.8771	100.522	114.79	115.927	114.523	118.064	135.869	139.373	141.376	135.318	172.436	151.39	146.23	140.56	152.755	134.802	153.334	150.958
	34.4	104.979	121.651	140.582	134.222	136.086	140.544	87.1854	100.944	114.965	115.658	114.662	118.415	135.862	139.478	141.333	134.878	172.093	152.179	146.562	139.871	152.984	133.672	153.476	150.21
	34.5	104.555	120.599	140.181	135.329	135.989	140.863	87.6679	101.321	115.273	115.88	114.249	119.088	136.085	139.63	141.218	134.563	172.207	153.596	146.49	140.05	153.108	132.871	153.598	149.332
	34.6	104.17	119.797	140.278	135.59	135.496	141.521	88.4006	101.746	115.799	116.344	113.506	119.46	136.011	139.923	140.739	134.784	172.008	154.839	146.178	140.587	152.99	133.039	153.872	148.843
	34.7	103.98	119.841	140.404	135.209	134.647	142.082	88.6679	102.132	116.171	116.885	113.36	119.677	136.059	140.498	140.285	134.987	171.847	154.4	146.295	141.27	153.401	133.709	154.457	149.253
	34.8	103.827	120.686	140.789	134.541	134.57	142.189	88.2148	102.549	116.019	116.934	113.475	119.527	136.132	140.728	140.028	134.877	171.495	153.336	146.947	141.936	153.259	134.448	155.464	150.037
	34.9	103.643	121.527	140.552	134.217	134.824	142.213	87.3352	102.881	115.311	116.768	113.992	119.624	136.555	140.831	140.838	133.944	171.399	152.277	147.153	142.218	153.415	134.657	155.973	150.544
	35	103.404	122.135	140.213	134.035	135.531	142.091	86.7638	103.621	114.615	116.701	113.98	119.728	136.707	140.42	141.656	133.149	171.184	152.065	147.015	142.2	153.306	134.445	155.417	150.295
	35.1	102.945	122.048	139.387	134.24	135.84	142.315	86.7233	103.939	114.701	116.673	114.087	119.646	136.422	140.639	142.342	133.013	171.634	152.028	146.236	142.143	153.989	134.194	154.432	149.774
	35.2	102.855	121.573	139.614	134.23	136.176	142.332	87.1573	104.136	115.411	116.934	113.852	118.734	135.754	141.014	141.88	133.484	172.391	152.511	145.821	142.125	154.135	134.014	153.336	149.297
	35.3	102.944	121.25	140.097	133.898	136.181	142.853	87.3974	103.399	115.8	116.844	113.488	117.522	135.224	141.494	141.514	134.039	173.569	152.736	145.664	142.169	154.111	134.16	152.666	149.37
	35.4	103.59	121.228	140.977	133.332	135.885	143.087	87.4854	102.678	115.79	116.679	113.368	116.609	135.004	141.671	141.076	134.576	174.48	152.671	146.147	141.533	153.321	134.23	152.03	149.672
	35.5	103.75	122.062	141.151	132.865	135.32	143.559	87.0627	102.237	115.343	116.315	113.273	116.407	135.423	141.687	141.5	135.014	174.903	151.451	146.769	141.097	153.141	134.767	152.027	150.6
	35.6	103.659	122.251	141.418	132.729	134.877	143.553	86.9821	102.416	115.3	116.362	113.502	116.99	136.327	142.103	141.622	135.133	174.316	150.185	147.239	140.333	153.218	135.179	152.116	151.408
	35.7	103.321	122.009	141.276	132.703	134.884	143.209	87.1529	102.603	115.35	116.711	113.263	117.667	137.56	142.579	141.944	134.64	173.096	149.71	146.944	140.39	154.078	135.568	152.537	151.853
	35.8	103.358	120.762	141.16	132.961	134.609	143.055	87.6274	101.916	115.875	116.94	113.099	118.611	138.288	142.758	142.148	133.799	172.158	150.572	146.004	140.317	154.724	135.024	152.778	151.347
	35.9	103.752	119.861	140.719	133.455	134.415	143.009	87.8548	101.233	116.428	116.942	113.022	118.94	138.267	142.321	142.845	133.262	172.431	151.927	145.047	140.703	154.979	134.449	153.115	150.663
	36	104.025	119.771	140.919	134.029	133.57	143.768	88.0857	101.101	116.775	117.048	113.06	119.109	138.009	141.638	143.218	132.912	173.282	152.877	144.89	140.807	154.719	134.198	153.154	150.103
	36.1	104.005	120.391	141.192	134.237	133.093	144.1	88.1411	102.391	116.695	117.248	113.039	118.599	137.978	140.979	143.136	132.888	173.885	153.204	145.342	140.703	154.339	134.49	153.155	150.081
	36.2	103.686	121.487	141.746	133.869	132.545	144.382	87.9907	103.337	116.244	117.077	112.721	118.346	138.287	140.688	142.317	132.622	173.64	152.924	145.657	140.734	154.124	134.422	153.151	150.479
	36.3	103.384	122.23	141.845	133.207	132.88	144.021	87.5154	103.488	116.022	116.617	112.446	118.194	138.457	140.267	141.598	132.893	172.833	152.137	145.415	140.953	153.505	133.914	153.292	151.136
	36.4	103.272	122.842	141.804	132.837	133.363	143.711	87.3829	102.431	115.921	116.041	112.53	118.437	138.458	139.879	140.952	133.043	172.084	151.436	145.118	141.575	152.858	133.777	153.29	151.553
	36.5	103.058	122.67	141.235	132.763	134.05	143.346	87.5747	101.543	116.159	115.933	112.827	118.587	138.23	139.262	140.641	133.613	171.386	151.252	145.137	141.979	152.391	134.113	153.026	151.551
	36.6	102.932	122.664	141.065	133.068	134.293	142.729	87.866	100.922	116.432	115.588	113.354	118.316	137.836	138.918	140.545	133.978	171.298	151.691	145.597	142.272	152.685	134.402	152.69	151.159
	36.7	102.775	122.547	141.017	133.446	134.512	142.027	88.0976	100.734	116.707	115.809	113.458	117.7	137.289	139.073	141.068	134.72	171.139	152.03	146.233	142.064	153.675	134.232	152.668	150.85
	36.8	103.033	122.603	141.413	133.82	134.486	141.983	88.2429	100.764	116.997	116.153	113.74	117.139	137.038	139.761	141.807	135.007	171.31	152.489	146.999	141.784	154.601	133.767	152.908	150.605
	36.9	103.751	122.097	141.092	133.837	134.593	142.841	88.1186	100.972	116.966	116.885	113.563	117.313	136.547	140.576	142.446	135.152	171.369	152.833	147.624	141.098	155.437	133.724	153.793	150.651
	37	104.501	121.726	141.208	133.655	134.275	144.09	87.6999	101.17	116.389	116.875	113.867	118.019	136.659	140.814	142.63	135.002	171.624	153.353	147.954	141.257	155.521	133.426	154.898	150.742
	37.1	105.088	121.806	141.365	133.652	133.817	144.114	87.4493	101.165	115.387	116.289	114.052	118.753	136.74	140.454	142.651	134.974	171.968	153.503	147.541	141.552	155.757	133.511	156.18	151.049
	37.2	105.141	122.068	141.993	134.067	132.765	143.249	87.8692	101.262	114.936	115.904	114.952	118.853	137.506	140.064	142.795	134.621	172.484	153.245	146.851	142.277	155.83	133.139	156.58	151.412
	37.3	105.29	122.141	141.602	134.543	131.745	141.962	88.1152	101.288	115.423	116.046	115.317	118.245	137.656	140.253	143.06	134.538	173.112	152.477	146.073	142.541	155.633	133.245	156.145	151.153
	37.4	105.109	121.749	141.139	134.967	130.859	141.178	87.7517	101.652	116.509	117.008	115.111	117.677	137.298	140.723	143.8	134.305	173.56	151.419	146.174	142.344	154.836	133.198	155.439	150.392
	37.5	104.929	121.541	141.017	135.112	130.872	140.954	87.0992	102.038	117.194	117.482	113.941	117.431	136.788	141.227	144.125	133.834	173.896	150.939	146.687	141.94	153.96	133.878	154.723	149.554
	37.6	104.519	121.283	141.912	134.881	131.411	140.614	87.2313	102.676	117.573	117.814	113.023	117.873	136.216	141.437	143.99	132.535	174.26	151.559	147.397	141.052	153.722	134.495	154.542	149.63
	37.7	104.38	121.273	142.723	134.645	132.206	140.439	87.9908	102.91	117.5	117.573	112.667	118.266	136.349	141.638	143.069	131.697	174.497	152.67	147.769	140.588	154.05	134.768	154.333	149.981
	37.8	104.037	121.286	142.744	134.499	132.585	140.76	88.2847	102.437	117.226	117.115	112.976	118.653	136.519	141.314	142.642	131.714	174.343	153.565	147.915	140.488	154.431	134.464	154.455	149.902
	37.9	103.614	121.714	142.426	134.991	132.553	141.894	87.9003	101.69	116.571	116.298	113.201	118.328	137.154	140.657	142.414	132.897	173.948	153.264	147.763	140.904	154.655	134.13	154.365	149.374
	38	103.268	121.997	141.856	135.08	132.171	143.15	87.1301	100.961	115.81	115.457	113.622	117.66	137.348	140.06	142.544	133.988	173.755	152.835	147.214	141.205	154.724	134.167	154.274	148.939
	38.1	103.495	122.192	141.884	134.857	131.901	143.118	86.9973	100.848	115.487	115.696	113.763	117.06	137.512	139.963	142.544	135.287	173.61	152.449	146.711	140.996	154.623	134.36	154.538	148.936
	38.2	103.951	122.011	141.871	133.929	131.802	142.436	87.3869	101.139	115.567	116.389	114.121	116.895	137.86	140.096	143.123	136.399	173.352	153.037	146.443	140.657	154.271	134.313	154.898	148.993
	38.3	104.126	122.133	142.279	133.26	131.746	141.628	87.9901	101.632	115.932	117.707	113.938	117.23	138.582	139.983	143.458	137.314	172.728	153.642	146.361	140.275	153.547	134.229	155.667	149.149
	38.4	103.884	122.22	142.412	132.535	131.427	141.429	88.2867	102.169	116.317	118.18	114.158	117.09	138.973	139.992	143.15	137.506	172.825	154.114	146.267	140.368	153.039	133.896	156.13	149.245
	38.5	103.749	122.437	142.502	132.067	131.23	141.192	88.4036	102.283	116.408	118.608	114.444	116.931	139.191	140.607	141.999	136.549	173.146	153.814	146.237	140.863	152.778	133.724	156.599	149.659
	38.6	104.11	122.516	142.343	131.653	131.3	140.809	88.7449	102.382	116.524	118.301	115.033	116.707	139.033	141.69	141.037	135.517	173.695	153.561	146.732	141.472	153.207	133.585	156.318	150.082
	38.7	104.657	122.37	141.893	132.102	131.523	140.619	89.2938	102.481	116.253	118.465	115.295	117.267	138.866	142.458	140.788	134.412	173.308	153.596	147.392	141.484	153.411	134.019	155.869	150.412
	38.8	104.927	122.34	141.308	133.168	131.346	140.466	89.5972	102.754	116.134	118.923	114.879	118.311	138.151	142.623	141.092	134.171	172.773	154.113	147.788	140.658	153.442	134.365	155.595	150.673
	38.9	104.513	121.993	140.63	134.091	131.003	140.344	89.8308	102.722	115.849	119.772	114.459	119.046	137.299	142.153	141.833	134.031	172.167	154.214	147.526	140.038	153.23	134.488	155.999	151.147
	39	103.989	122.013	140.212	134.342	130.667	139.988	89.956	102.039	115.696	119.998	113.931	119.227	136.638	141.639	142.565	134.379	171.988	153.85	146.925	139.91	153.308	133.888	156.351	151.931
	39.1	103.716	121.602	139.699	133.902	130.468	139.928	90.0863	101.104	115.689	119.191	113.477	118.683	136.34	141.316	142.807	134.813	171.877	153.282	146.576	140.383	153.508	133.292	156.081	152.187
	39.2	103.948	121.32	139.571	133.445	130.316	140.072	89.7601	100.321	115.92	118.067	112.726	118.54	136.549	141.467	142.513	134.895	172.452	153.025	146.879	140.508	153.197	132.888	154.969	151.822
	39.3	103.828	121.176	139.88	133.095	129.823	140.601	89.1031	100.436	116.255	117.308	112.334	118.865	136.989	141.65	141.764	134.474	173.156	153.037	147.656	140.48	152.735	132.985	153.955	151.146
	39.4	103.318	121.414	140.977	133.016	129.523	141.241	88.6987	100.48	116.462	117.279	112.914	119.529	137.284	141.768	141.83	133.719	173.83	152.59	148.229	140.566	152.16	133.328	153.51	150.784
	39.5	102.838	121.706	142.033	133.235	129.003	141.983	88.6552	100.439	116.303	117.662	114.121	119.639	137.731	142.139	141.861	133.271	173.969	151.939	147.546	140.812	152.154	133.558	154.286	150.435
	39.6	103.112	121.79	142.654	133.242	128.971	142.441	88.7601	99.7872	116.38	118.118	114.743	118.799	137.708	142.945	142.282	133.731	174.192	150.967	146.279	140.906	152.34	133.353	155.327	150.086
	39.7	103.619	121.822	142.593	133.169	128.866	142.636	88.555	99.6909	116.591	118.751	114.679	117.585	138.004	143.544	141.742	134.36	174.693	150.591	145.383	140.434	153.094	132.978	156.38	149.703
	39.8	103.812	122.252	142.011	132.898	129.219	142.253	88.0207	100.004	117.339	119.107	114.158	116.818	137.364	143.161	141.261	135.411	175.037	150.53	145.819	139.865	153.754	132.406	156.597	149.887
	39.9	103.64	122.601	141.524	132.901	129.648	141.84	87.764	100.555	117.618	119.341	114.128	116.755	137.187	142.263	140.632	135.53	175.117	150.839	146.535	139.549	154.366	132.259	156.5	150.249
	40	103.558	123.124	140.777	132.743	130.292	141.074	87.6212	100.988	117.761	119.324	114.181	117.1	136.52	141.119	140.549	135.766	174.894	151.221	146.86	139.679	154.384	131.984	156.248	150.966
[truncated: 2 more columns]

## Sheet: E1_ATP_Asso
	Experiment 1
	ATP association: Raw fluorescence data
																	Nonlinear fit (one-phase association, GraphPad Prism)
	Time (s)	T229A_ATP_Mg_B3A1	T229A_ATP_Mg_B3A2_rep	T229A_ATP_Mg_B3A3	T229A_ATP_Mg_B3A4	T229A_ATP_Mg_B3A5	T229A_ATP_Mg_B3A6	T229A_ATP_Ca_B4A1	T229A_ATP_Ca_B4A2	T229A_ATP_Ca_B4A3	T229A_ATP_Ca_B4A4	T229A_ATP_Ca_B4A5	T229A_ATP_Ca_B4A6
	0	90.4947	111.053	98.7631	122.745	111.184	121.566	89.05	113.337	126.634	130.625	143.2	158.028				T229A_ATP_Mg_B3A1	T229A_ATP_Mg_B3A2_rep	T229A_ATP_Mg_B3A3	T229A_ATP_Mg_B3A4	T229A_ATP_Mg_B3A5	T229A_ATP_Mg_B3A6	T229A_ATP_Ca_B4A1	T229A_ATP_Ca_B4A2	T229A_ATP_Ca_B4A3	T229A_ATP_Ca_B4A4	T229A_ATP_Ca_B4A5	T229A_ATP_Ca_B4A6
	0.1	90.6634	111.288	99.0168	123.092	111.768	121.972	89.2247	113.741	127.052	131.141	143.632	158.458			Protein (µM)	1.3	2.6	3.9	5.2	6.5	7.8	1.3	2.6	3.9	5.2	6.5	7.8
	0.2	90.8292	111.546	99.2907	123.477	112.399	122.415	89.4229	114.189	127.506	131.716	144.109	158.919			Fit interval	60 s	60 s	60 s	60 s	60 s	60 s	60 s	60 s	60 s	60 s	60 s	60 s
	0.3	91.0065	111.819	99.5791	123.884	113.07	122.884	89.6376	114.675	127.984	132.34	144.618	159.393			kobs (s-1)	0.05126	0.1186	0.171	0.2116	0.4086	0.4932	0.03973	0.06742	0.08668	0.128	0.1376	0.1507
	0.4	91.1952	112.088	99.893	124.31	113.775	123.382	89.8641	115.186	128.487	132.99	145.146	159.88			R2	0.9972	0.9953	0.9941	0.9855	0.9836	0.9419	0.9987	0.9982	0.996	0.9853	0.9923	0.9907
	0.5	91.3854	112.366	100.231	124.76	114.5	123.901	90.1047	115.71	129.007	133.662	145.7	160.393
	0.6	91.5803	112.657	100.585	125.228	115.238	124.436	90.3546	116.244	129.55	134.35	146.27	160.92				Linear regression of kobs vs. [prot]
	0.7	91.767	112.954	100.948	125.701	115.993	124.987	90.6196	116.776	130.11	135.046	146.853	161.458			kon (s-1 µM-1)	0.0544						0.02003
	0.8	91.9496	113.263	101.321	126.183	116.749	125.55	90.8966	117.317	130.685	135.755	147.45	162.003
	0.9	92.1296	113.588	101.692	126.675	117.517	126.125	91.1763	117.864	131.278	136.478	148.057	162.553
	1	92.3214	113.922	102.067	127.176	118.296	126.711	91.4646	118.419	131.879	137.214	148.661	163.106
	1.1	92.522	114.265	102.452	127.674	119.079	127.301	91.7639	118.98	132.485	137.96	149.264	163.672
	1.2	92.7251	114.612	102.844	128.182	119.86	127.899	92.0699	119.553	133.105	138.711	149.876	164.246
	1.3	92.9343	114.962	103.249	128.693	120.64	128.507	92.3782	120.138	133.733	139.476	150.495	164.83
	1.4	93.1478	115.315	103.661	129.21	121.415	129.116	92.6881	120.74	134.362	140.239	151.12	165.415
	1.5	93.3655	115.683	104.079	129.736	122.18	129.727	93.0006	121.346	134.994	141.014	151.748	166.002
	1.6	93.5895	116.061	104.501	130.268	122.935	130.342	93.315	121.96	135.636	141.8	152.389	166.604
	1.7	93.8144	116.45	104.935	130.812	123.679	130.966	93.6392	122.585	136.286	142.598	153.048	167.215
	1.8	94.0406	116.839	105.383	131.369	124.409	131.598	93.9729	123.216	136.939	143.402	153.716	167.828
	1.9	94.2678	117.223	105.836	131.934	125.132	132.239	94.3089	123.853	137.601	144.211	154.399	168.45
	2	94.4949	117.616	106.293	132.506	125.849	132.879	94.6486	124.502	138.277	145.023	155.084	169.085
	2.1	94.7239	118.014	106.755	133.089	126.559	133.519	95.0011	125.159	138.971	145.854	155.777	169.733
	2.2	94.959	118.424	107.22	133.68	127.27	134.17	95.3808	125.829	139.684	146.696	156.493	170.392
	2.3	95.2027	118.841	107.691	134.28	127.995	134.832	95.7741	126.514	140.413	147.554	157.222	171.058
	2.4	95.4526	119.269	108.173	134.893	128.733	135.496	96.1774	127.209	141.156	148.425	157.962	171.738
	2.5	95.7053	119.708	108.678	135.519	129.483	136.17	96.5881	127.92	141.914	149.31	158.718	172.428
	2.6	95.9615	120.16	109.197	136.157	130.247	136.859	97.0067	128.644	142.688	150.213	159.489	173.141
	2.7	96.2008	120.604	109.705	136.774	130.97	137.516	97.42	129.346	143.44	151.096	160.238	173.827
	2.8	96.441	121.044	110.205	137.372	131.654	138.152	97.8229	130.025	144.179	151.954	160.974	174.502
	2.9	96.6732	121.476	110.699	137.956	132.306	138.768	98.2225	130.686	144.903	152.785	161.688	175.167
	3	96.8977	121.909	111.175	138.529	132.917	139.359	98.6186	131.331	145.61	153.598	162.388	175.823
	3.1	97.1205	122.338	111.631	139.083	133.488	139.93	99.0094	131.957	146.298	154.387	163.067	176.458
	3.2	97.339	122.756	112.073	139.624	134.026	140.473	99.3935	132.571	146.967	155.162	163.731	177.078
	3.3	97.5646	123.168	112.501	140.157	134.53	140.985	99.7747	133.186	147.616	155.927	164.372	177.686
	3.4	97.7931	123.562	112.919	140.675	135.011	141.469	100.154	133.792	148.246	156.673	164.997	178.273
	3.5	98.0219	123.939	113.332	141.179	135.463	141.927	100.535	134.394	148.858	157.399	165.604	178.845
	3.6	98.2463	124.311	113.745	141.676	135.892	142.357	100.914	134.985	149.453	158.1	166.204	179.408
	3.7	98.4634	124.677	114.151	142.171	136.298	142.771	101.282	135.571	150.032	158.786	166.794	179.956
	3.8	98.6778	125.043	114.545	142.645	136.682	143.165	101.641	136.147	150.588	159.464	167.377	180.492
	3.9	98.8852	125.404	114.921	143.108	137.036	143.534	101.996	136.71	151.124	160.115	167.946	181.012
	4	99.0838	125.766	115.291	143.553	137.374	143.884	102.35	137.26	151.657	160.759	168.506	181.528
	4.1	99.2752	126.123	115.65	143.977	137.692	144.218	102.703	137.808	152.184	161.387	169.044	182.046
	4.2	99.4663	126.473	116.004	144.385	137.993	144.537	103.055	138.351	152.702	162.004	169.564	182.549
	4.3	99.6633	126.818	116.347	144.776	138.286	144.838	103.405	138.889	153.216	162.602	170.066	183.041
	4.4	99.861	127.161	116.671	145.154	138.573	145.121	103.752	139.418	153.726	163.193	170.558	183.523
	4.5	100.063	127.508	116.99	145.52	138.854	145.387	104.103	139.944	154.23	163.777	171.043	183.995
	4.6	100.265	127.856	117.31	145.876	139.128	145.642	104.459	140.463	154.716	164.353	171.52	184.452
	4.7	100.471	128.201	117.626	146.228	139.401	145.889	104.809	140.977	155.188	164.916	171.986	184.891
	4.8	100.671	128.542	117.944	146.57	139.669	146.121	105.142	141.487	155.644	165.463	172.434	185.313
	4.9	100.861	128.883	118.258	146.904	139.918	146.345	105.47	141.988	156.086	165.996	172.877	185.731
	5	101.046	129.219	118.566	147.231	140.145	146.565	105.8	142.485	156.523	166.523	173.314	186.135
	5.1	101.23	129.548	118.856	147.543	140.356	146.778	106.131	142.975	156.956	167.048	173.748	186.534
	5.2	101.419	129.87	119.144	147.847	140.552	146.976	106.463	143.463	157.389	167.567	174.18	186.917
	5.3	101.612	130.188	119.425	148.148	140.739	147.162	106.793	143.947	157.818	168.081	174.596	187.289
	5.4	101.806	130.497	119.697	148.444	140.922	147.333	107.125	144.425	158.235	168.582	174.999	187.641
	5.5	101.995	130.806	119.963	148.733	141.089	147.489	107.452	144.897	158.641	169.066	175.394	187.984
	5.6	102.181	131.116	120.233	149.018	141.257	147.634	107.775	145.365	159.045	169.536	175.779	188.31
	5.7	102.362	131.422	120.501	149.296	141.428	147.763	108.094	145.834	159.454	169.998	176.156	188.627
	5.8	102.538	131.732	120.77	149.563	141.594	147.892	108.412	146.302	159.861	170.442	176.522	188.93
	5.9	102.705	132.039	121.039	149.82	141.757	148.025	108.722	146.757	160.268	170.866	176.886	189.222
	6	102.87	132.353	121.305	150.068	141.907	148.154	109.025	147.209	160.674	171.278	177.236	189.517
	6.1	103.032	132.67	121.561	150.307	142.049	148.274	109.319	147.645	161.072	171.68	177.58	189.804
	6.2	103.191	132.973	121.804	150.529	142.176	148.389	109.61	148.077	161.474	172.077	177.915	190.086
	6.3	103.351	133.271	122.034	150.735	142.29	148.494	109.911	148.498	161.878	172.463	178.241	190.356
	6.4	103.511	133.559	122.263	150.941	142.398	148.587	110.214	148.911	162.282	172.828	178.554	190.62
	6.5	103.676	133.843	122.492	151.139	142.515	148.674	110.523	149.327	162.685	173.196	178.851	190.878
	6.6	103.846	134.117	122.717	151.338	142.633	148.75	110.83	149.745	163.077	173.552	179.138	191.122
	6.7	104.017	134.379	122.943	151.54	142.753	148.812	111.132	150.152	163.466	173.903	179.438	191.345
	6.8	104.182	134.635	123.162	151.742	142.874	148.858	111.429	150.557	163.851	174.245	179.738	191.557
	6.9	104.341	134.881	123.378	151.942	142.987	148.897	111.714	150.96	164.226	174.584	180.03	191.763
	7	104.497	135.124	123.601	152.132	143.091	148.929	111.999	151.364	164.591	174.919	180.308	191.97
	7.1	104.648	135.359	123.82	152.314	143.189	148.955	112.275	151.765	164.949	175.245	180.571	192.173
	7.2	104.792	135.591	124.032	152.49	143.28	148.972	112.541	152.162	165.308	175.566	180.835	192.381
	7.3	104.928	135.82	124.24	152.658	143.364	148.983	112.803	152.556	165.661	175.886	181.101	192.597
	7.4	105.065	136.04	124.438	152.825	143.441	148.986	113.066	152.948	166.014	176.208	181.357	192.811
	7.5	105.209	136.259	124.633	152.992	143.514	148.976	113.326	153.348	166.374	176.529	181.606	193.019
	7.6	105.354	136.475	124.825	153.153	143.588	148.956	113.58	153.751	166.731	176.838	181.846	193.224
	7.7	105.502	136.695	125.015	153.317	143.659	148.928	113.831	154.165	167.081	177.132	182.07	193.422
	7.8	105.647	136.916	125.198	153.479	143.734	148.897	114.081	154.579	167.427	177.42	182.287	193.616
	7.9	105.788	137.137	125.376	153.637	143.8	148.863	114.337	154.991	167.768	177.693	182.51	193.81
	8	105.925	137.35	125.55	153.793	143.86	148.826	114.591	155.41	168.104	177.956	182.727	194.009
	8.1	106.067	137.554	125.719	153.943	143.919	148.787	114.845	155.824	168.441	178.225	182.94	194.206
	8.2	106.214	137.746	125.873	154.079	143.97	148.738	115.1	156.229	168.767	178.497	183.143	194.406
	8.3	106.358	137.93	126.022	154.209	144.022	148.693	115.354	156.623	169.077	178.767	183.345	194.608
	8.4	106.506	138.105	126.162	154.335	144.079	148.639	115.603	157	169.384	179.044	183.544	194.813
	8.5	106.655	138.268	126.294	154.46	144.14	148.571	115.85	157.378	169.684	179.319	183.735	195.013
	8.6	106.799	138.424	126.419	154.582	144.208	148.499	116.097	157.748	169.98	179.59	183.931	195.207
	8.7	106.942	138.573	126.544	154.703	144.271	148.432	116.348	158.121	170.277	179.867	184.125	195.401
	8.8	107.09	138.731	126.673	154.829	144.342	148.368	116.594	158.485	170.564	180.136	184.315	195.595
	8.9	107.237	138.883	126.806	154.955	144.42	148.306	116.832	158.851	170.843	180.403	184.502	195.789
	9	107.385	139.038	126.939	155.074	144.496	148.255	117.069	159.217	171.129	180.672	184.69	195.975
	9.1	107.526	139.194	127.073	155.188	144.559	148.207	117.302	159.571	171.416	180.932	184.899	196.155
	9.2	107.671	139.343	127.207	155.298	144.616	148.166	117.531	159.913	171.71	181.188	185.113	196.336
	9.3	107.814	139.504	127.334	155.4	144.671	148.127	117.759	160.257	172.002	181.433	185.316	196.518
	9.4	107.959	139.667	127.465	155.494	144.725	148.103	117.996	160.588	172.297	181.666	185.509	196.704
	9.5	108.096	139.836	127.591	155.583	144.778	148.082	118.243	160.915	172.584	181.891	185.706	196.884
	9.6	108.23	140.007	127.706	155.674	144.829	148.06	118.482	161.245	172.871	182.101	185.907	197.062
	9.7	108.361	140.177	127.825	155.769	144.879	148.044	118.723	161.578	173.153	182.306	186.11	197.229
	9.8	108.501	140.342	127.939	155.867	144.93	148.037	118.97	161.913	173.431	182.501	186.309	197.381
	9.9	108.646	140.507	128.049	155.959	144.975	148.026	119.219	162.247	173.711	182.682	186.497	197.515
	10	108.793	140.673	128.155	156.047	145.01	148.008	119.471	162.578	173.982	182.846	186.691	197.645
	10.1	108.932	140.832	128.254	156.13	145.039	147.995	119.723	162.901	174.237	183	186.885	197.768
	10.2	109.071	140.989	128.351	156.211	145.076	147.983	119.982	163.216	174.482	183.155	187.082	197.891
	10.3	109.203	141.135	128.447	156.29	145.119	147.977	120.241	163.522	174.724	183.307	187.287	198.021
	10.4	109.331	141.273	128.548	156.361	145.157	147.975	120.496	163.821	174.959	183.45	187.479	198.16
	10.5	109.459	141.402	128.653	156.424	145.195	147.976	120.738	164.121	175.194	183.59	187.665	198.294
	10.6	109.584	141.535	128.755	156.476	145.235	147.975	120.976	164.416	175.428	183.729	187.852	198.418
	10.7	109.705	141.673	128.858	156.521	145.275	147.974	121.211	164.709	175.653	183.851	188.04	198.533
	10.8	109.819	141.811	128.971	156.569	145.317	147.981	121.441	165.011	175.878	183.947	188.233	198.641
	10.9	109.938	141.95	129.088	156.616	145.345	147.986	121.669	165.322	176.109	184.029	188.421	198.747
	11	110.052	142.094	129.208	156.662	145.352	147.994	121.906	165.644	176.333	184.099	188.613	198.846
	11.1	110.171	142.251	129.324	156.701	145.353	148.012	122.139	165.963	176.558	184.169	188.808	198.946
	11.2	110.295	142.411	129.44	156.747	145.349	148.027	122.373	166.284	176.777	184.228	188.994	199.046
	11.3	110.417	142.576	129.554	156.782	145.35	148.028	122.603	166.606	176.992	184.271	189.18	199.138
	11.4	110.528	142.738	129.659	156.808	145.346	148.024	122.834	166.931	177.202	184.315	189.362	199.222
	11.5	110.634	142.905	129.756	156.83	145.339	148.014	123.065	167.246	177.406	184.36	189.54	199.299
	11.6	110.738	143.064	129.844	156.851	145.334	147.989	123.292	167.553	177.597	184.398	189.71	199.382
	11.7	110.847	143.215	129.924	156.869	145.334	147.96	123.515	167.858	177.773	184.432	189.856	199.47
	11.8	110.951	143.374	130.003	156.882	145.328	147.934	123.741	168.163	177.935	184.457	189.991	199.566
	11.9	111.059	143.52	130.081	156.899	145.314	147.913	123.966	168.46	178.091	184.485	190.122	199.667
	12	111.167	143.663	130.15	156.924	145.294	147.878	124.18	168.757	178.239	184.521	190.263	199.767
	12.1	111.287	143.799	130.221	156.953	145.27	147.841	124.38	169.046	178.39	184.56	190.405	199.867
	12.2	111.414	143.926	130.296	156.982	145.251	147.813	124.578	169.313	178.545	184.602	190.548	199.958
	12.3	111.547	144.048	130.362	157.009	145.237	147.785	124.766	169.566	178.704	184.636	190.686	200.062
	12.4	111.671	144.166	130.435	157.03	145.221	147.751	124.948	169.809	178.864	184.674	190.819	200.171
	12.5	111.793	144.274	130.515	157.053	145.208	147.728	125.13	170.046	179.025	184.712	190.953	200.291
	12.6	111.91	144.385	130.604	157.076	145.207	147.71	125.309	170.277	179.189	184.759	191.076	200.418
	12.7	112.031	144.499	130.703	157.095	145.22	147.691	125.49	170.504	179.362	184.814	191.189	200.554
	12.8	112.145	144.611	130.805	157.117	145.226	147.676	125.662	170.724	179.541	184.865	191.296	200.687
	12.9	112.265	144.727	130.907	157.138	145.223	147.66	125.83	170.937	179.714	184.918	191.406	200.803
	13	112.386	144.849	130.997	157.161	145.225	147.646	126.001	171.15	179.882	184.97	191.524	200.912
	13.1	112.513	144.978	131.076	157.184	145.229	147.633	126.178	171.357	180.042	185.02	191.638	201.023
	13.2	112.642	145.105	131.148	157.208	145.235	147.627	126.354	171.56	180.205	185.078	191.748	201.138
	13.3	112.773	145.227	131.222	157.24	145.237	147.619	126.528	171.763	180.377	185.142	191.858	201.256
	13.4	112.906	145.352	131.289	157.275	145.23	147.609	126.709	171.955	180.553	185.229	191.963	201.381
	13.5	113.034	145.474	131.347	157.311	145.223	147.597	126.889	172.141	180.725	185.325	192.055	201.501
	13.6	113.166	145.588	131.407	157.348	145.23	147.583	127.069	172.332	180.898	185.417	192.137	201.628
	13.7	113.294	145.692	131.469	157.386	145.235	147.567	127.253	172.52	181.067	185.51	192.216	201.758
	13.8	113.414	145.788	131.532	157.414	145.232	147.555	127.432	172.705	181.244	185.61	192.292	201.886
	13.9	113.535	145.881	131.593	157.45	145.224	147.56	127.616	172.886	181.419	185.711	192.363	202.021
	14	113.664	145.965	131.665	157.496	145.21	147.562	127.799	173.072	181.595	185.807	192.434	202.155
	14.1	113.793	146.035	131.742	157.549	145.185	147.564	127.98	173.269	181.772	185.897	192.504	202.29
	14.2	113.923	146.107	131.823	157.604	145.151	147.574	128.157	173.467	181.956	185.988	192.575	202.412
	14.3	114.048	146.178	131.914	157.672	145.117	147.592	128.336	173.673	182.149	186.082	192.651	202.525
	14.4	114.171	146.237	131.998	157.747	145.093	147.612	128.513	173.881	182.344	186.187	192.726	202.62
	14.5	114.292	146.295	132.079	157.823	145.08	147.634	128.686	174.091	182.531	186.297	192.798	202.707
	14.6	114.412	146.349	132.162	157.892	145.076	147.66	128.87	174.307	182.715	186.401	192.856	202.788
	14.7	114.521	146.405	132.24	157.956	145.075	147.685	129.066	174.536	182.893	186.502	192.906	202.868
	14.8	114.623	146.472	132.315	158.013	145.071	147.695	129.271	174.781	183.064	186.602	192.954	202.949
	14.9	114.724	146.542	132.389	158.069	145.057	147.694	129.488	175.027	183.232	186.713	192.998	203.021
	15	114.829	146.616	132.454	158.128	145.039	147.691	129.71	175.278	183.392	186.82	193.045	203.082
	15.1	114.934	146.692	132.504	158.187	145.017	147.689	129.931	175.532	183.549	186.935	193.095	203.137
	15.2	115.042	146.764	132.541	158.245	144.993	147.686	130.156	175.786	183.706	187.046	193.153	203.184
	15.3	115.144	146.826	132.571	158.304	144.954	147.687	130.369	176.034	183.861	187.147	193.224	203.223
	15.4	115.255	146.882	132.596	158.349	144.915	147.682	130.583	176.283	184.011	187.244	193.299	203.261
	15.5	115.362	146.936	132.625	158.389	144.879	147.675	130.802	176.527	184.169	187.341	193.363	203.308
	15.6	115.463	146.984	132.665	158.427	144.839	147.66	131.013	176.769	184.333	187.446	193.414	203.352
	15.7	115.553	147.022	132.713	158.468	144.795	147.644	131.223	177.008	184.503	187.551	193.458	203.396
	15.8	115.643	147.056	132.776	158.516	144.75	147.625	131.436	177.239	184.667	187.654	193.494	203.436
	15.9	115.733	147.086	132.834	158.559	144.707	147.615	131.655	177.467	184.825	187.758	193.521	203.473
	16	115.83	147.108	132.884	158.588	144.673	147.61	131.864	177.698	184.976	187.847	193.55	203.499
	16.1	115.933	147.131	132.936	158.61	144.652	147.606	132.073	177.926	185.124	187.932	193.594	203.53
	16.2	116.031	147.158	132.984	158.631	144.632	147.6	132.275	178.143	185.271	188.023	193.637	203.554
	16.3	116.128	147.185	133.028	158.652	144.611	147.591	132.47	178.362	185.415	188.108	193.681	203.574
	16.4	116.225	147.212	133.064	158.675	144.596	147.583	132.667	178.581	185.547	188.194	193.73	203.589
	16.5	116.319	147.236	133.097	158.696	144.577	147.576	132.857	178.801	185.678	188.28	193.781	203.599
	16.6	116.409	147.266	133.12	158.713	144.568	147.575	133.046	179.019	185.812	188.366	193.831	203.614
	16.7	116.498	147.308	133.135	158.726	144.576	147.579	133.233	179.228	185.95	188.457	193.877	203.635
	16.8	116.58	147.355	133.148	158.738	144.593	147.585	133.422	179.433	186.081	188.549	193.929	203.662
	16.9	116.662	147.412	133.145	158.74	144.608	147.584	133.606	179.631	186.21	188.639	193.984	203.694
	17	116.741	147.479	133.143	158.735	144.609	147.569	133.784	179.822	186.338	188.721	194.04	203.736
	17.1	116.817	147.551	133.145	158.723	144.599	147.551	133.967	180.018	186.472	188.798	194.101	203.778
	17.2	116.891	147.626	133.145	158.71	144.583	147.534	134.136	180.205	186.609	188.874	194.172	203.824
	17.3	116.972	147.695	133.148	158.697	144.569	147.524	134.3	180.379	186.747	188.949	194.246	203.869
	17.4	117.051	147.749	133.151	158.695	144.558	147.529	134.456	180.547	186.886	189.02	194.321	203.91
	17.5	117.124	147.798	133.159	158.685	144.553	147.541	134.601	180.719	187.018	189.096	194.402	203.956
	17.6	117.191	147.846	133.171	158.668	144.55	147.549	134.735	180.892	187.147	189.172	194.474	204.01
	17.7	117.254	147.89	133.191	158.655	144.547	147.545	134.866	181.06	187.268	189.24	194.537	204.068
	17.8	117.315	147.929	133.217	158.64	144.537	147.546	134.989	181.227	187.386	189.307	194.594	204.125
	17.9	117.383	147.97	133.239	158.626	144.53	147.54	135.119	181.402	187.498	189.383	194.635	204.183
	18	117.448	148.014	133.259	158.619	144.533	147.536	135.249	181.574	187.606	189.47	194.669	204.242
	18.1	117.519	148.062	133.266	158.613	144.537	147.532	135.37	181.75	187.714	189.559	194.701	204.293
	18.2	117.594	148.108	133.263	158.61	144.545	147.534	135.5	181.921	187.81	189.634	194.743	204.34
	18.3	117.671	148.151	133.254	158.606	144.56	147.54	135.622	182.091	187.895	189.708	194.799	204.381
	18.4	117.744	148.203	133.231	158.596	144.565	147.548	135.74	182.265	187.979	189.78	194.87	204.423
	18.5	117.809	148.262	133.21	158.587	144.568	147.541	135.853	182.447	188.058	189.85	194.941	204.468
	18.6	117.855	148.325	133.204	158.591	144.567	147.524	135.965	182.619	188.136	189.927	195.007	204.514
	18.7	117.898	148.388	133.196	158.603	144.547	147.512	136.079	182.788	188.212	190.006	195.073	204.55
	18.8	117.944	148.442	133.188	158.621	144.516	147.508	136.191	182.948	188.283	190.077	195.144	204.575
	18.9	117.99	148.495	133.181	158.644	144.49	147.506	136.301	183.099	188.349	190.149	195.207	204.592
	19	118.044	148.552	133.18	158.668	144.466	147.498	136.41	183.249	188.412	190.221	195.272	204.609
	19.1	118.101	148.604	133.184	158.69	144.455	147.481	136.521	183.393	188.477	190.305	195.333	204.619
	19.2	118.16	148.649	133.189	158.706	144.439	147.462	136.632	183.529	188.541	190.391	195.395	204.626
	19.3	118.221	148.688	133.201	158.721	144.41	147.445	136.748	183.659	188.6	190.476	195.457	204.627
	19.4	118.288	148.717	133.212	158.737	144.381	147.426	136.861	183.795	188.66	190.564	195.512	204.624
	19.5	118.349	148.733	133.233	158.753	144.357	147.406	136.979	183.932	188.721	190.655	195.56	204.62
	19.6	118.411	148.738	133.258	158.768	144.344	147.394	137.103	184.074	188.782	190.746	195.613	204.611
	19.7	118.469	148.739	133.276	158.784	144.341	147.381	137.218	184.208	188.845	190.838	195.656	204.605
	19.8	118.526	148.738	133.294	158.796	144.337	147.361	137.337	184.337	188.903	190.932	195.689	204.603
	19.9	118.575	148.74	133.312	158.806	144.331	147.333	137.447	184.467	188.965	191.022	195.713	204.61
	20	118.626	148.755	133.327	158.81	144.321	147.298	137.561	184.594	189.018	191.121	195.737	204.629
	20.1	118.683	148.779	133.332	158.816	144.306	147.263	137.68	184.717	189.088	191.206	195.753	204.649
	20.2	118.744	148.802	133.335	158.824	144.289	147.24	137.805	184.834	189.167	191.294	195.772	204.662
	20.3	118.812	148.835	133.33	158.825	144.281	147.228	137.928	184.952	189.256	191.39	195.796	204.675
	20.4	118.883	148.874	133.318	158.826	144.281	147.212	138.054	185.065	189.351	191.488	195.826	204.688
	20.5	118.947	148.917	133.302	158.826	144.279	147.198	138.178	185.175	189.452	191.575	195.865	204.702
	20.6	119.007	148.956	133.287	158.831	144.266	147.185	138.31	185.29	189.557	191.651	195.909	204.717
	20.7	119.063	148.989	133.279	158.844	144.249	147.168	138.445	185.407	189.65	191.721	195.953	204.736
	20.8	119.124	149.019	133.269	158.857	144.224	147.147	138.571	185.532	189.758	191.801	195.992	204.761
	20.9	119.188	149.054	133.263	158.874	144.192	147.125	138.702	185.66	189.871	191.879	196.025	204.789
	21	119.253	149.072	133.257	158.894	144.181	147.1	138.835	185.789	189.983	191.953	196.048	204.819
	21.1	119.324	149.084	133.248	158.913	144.176	147.088	138.965	185.902	190.098	192.02	196.075	204.847
	21.2	119.404	149.093	133.228	158.926	144.176	147.083	139.101	186.018	190.209	192.08	196.106	204.876
	21.3	119.482	149.101	133.211	158.933	144.191	147.073	139.234	186.139	190.32	192.141	196.129	204.921
	21.4	119.549	149.119	133.201	158.929	144.216	147.054	139.373	186.27	190.435	192.206	196.149	204.984
	21.5	119.62	149.137	133.198	158.916	144.235	147.038	139.518	186.404	190.564	192.275	196.173	205.053
	21.6	119.68	149.159	133.201	158.902	144.254	147.034	139.665	186.531	190.706	192.34	196.193	205.125
	21.7	119.739	149.193	133.197	158.893	144.262	147.035	139.814	186.657	190.839	192.392	196.215	205.206
	21.8	119.795	149.231	133.193	158.886	144.265	147.033	139.956	186.788	190.964	192.443	196.239	205.284
	21.9	119.859	149.271	133.186	158.876	144.279	147.028	140.095	186.925	191.087	192.492	196.267	205.366
	22	119.924	149.319	133.175	158.863	144.291	147.023	140.237	187.058	191.21	192.54	196.297	205.458
	22.1	120.003	149.375	133.161	158.848	144.292	147.03	140.371	187.192	191.338	192.59	196.326	205.554
	22.2	120.086	149.441	133.144	158.831	144.29	147.039	140.504	187.325	191.464	192.644	196.347	205.648
	22.3	120.174	149.503	133.13	158.817	144.28	147.054	140.65	187.459	191.589	192.696	196.377	205.741
	22.4	120.264	149.559	133.112	158.807	144.269	147.087	140.804	187.6	191.718	192.742	196.409	205.825
	22.5	120.357	149.61	133.09	158.797	144.252	147.128	140.969	187.745	191.839	192.792	196.44	205.899
	22.6	120.444	149.643	133.065	158.788	144.238	147.172	141.135	187.887	191.97	192.842	196.47	205.959
	22.7	120.524	149.67	133.046	158.792	144.23	147.214	141.295	188.032	192.089	192.894	196.507	206.013
	22.8	120.597	149.693	133.025	158.8	144.228	147.242	141.451	188.178	192.202	192.942	196.546	206.067
	22.9	120.663	149.706	133.011	158.812	144.218	147.269	141.607	188.325	192.304	192.982	196.588	206.11
	23	120.725	149.718	133.007	158.821	144.206	147.298	141.762	188.472	192.399	193.018	196.622	206.149
	23.1	120.788	149.732	133.017	158.831	144.195	147.331	141.917	188.617	192.486	193.058	196.651	206.185
	23.2	120.852	149.752	133.026	158.833	144.185	147.366	142.056	188.753	192.562	193.105	196.672	206.213
	23.3	120.915	149.776	133.037	158.823	144.171	147.403	142.202	188.886	192.649	193.156	196.694	206.245
	23.4	120.965	149.81	133.058	158.805	144.163	147.437	142.352	189.012	192.729	193.205	196.722	206.271
	23.5	121.012	149.845	133.084	158.779	144.158	147.461	142.5	189.131	192.818	193.255	196.744	206.293
	23.6	121.063	149.893	133.118	158.756	144.137	147.482	142.652	189.249	192.909	193.31	196.762	206.309
	23.7	121.111	149.943	133.159	158.733	144.115	147.497	142.806	189.38	192.998	193.376	196.776	206.327
	23.8	121.169	149.993	133.206	158.707	144.086	147.509	142.956	189.519	193.089	193.447	196.79	206.344
	23.9	121.228	150.046	133.252	158.684	144.048	147.521	143.104	189.654	193.183	193.51	196.808	206.346
	24	121.291	150.094	133.287	158.664	144.01	147.536	143.244	189.786	193.279	193.568	196.825	206.335
	24.1	121.351	150.135	133.309	158.655	143.982	147.545	143.38	189.917	193.364	193.621	196.844	206.322
	24.2	121.417	150.164	133.32	158.652	143.948	147.542	143.51	190.052	193.441	193.672	196.865	206.309
	24.3	121.48	150.185	133.339	158.643	143.921	147.533	143.642	190.188	193.524	193.73	196.875	206.292
	24.4	121.543	150.202	133.362	158.634	143.9	147.525	143.78	190.325	193.619	193.779	196.884	206.278
	24.5	121.593	150.223	133.385	158.622	143.876	147.521	143.918	190.461	193.718	193.825	196.891	206.257
	24.6	121.63	150.241	133.417	158.614	143.85	147.523	144.059	190.593	193.813	193.859	196.897	206.227
	24.7	121.655	150.255	133.451	158.611	143.837	147.507	144.207	190.716	193.893	193.876	196.908	206.196
	24.8	121.673	150.261	133.486	158.612	143.824	147.484	144.35	190.833	193.976	193.886	196.924	206.162
	24.9	121.69	150.271	133.52	158.616	143.81	147.45	144.485	190.949	194.051	193.898	196.935	206.124
	25	121.701	150.287	133.561	158.62	143.799	147.397	144.605	191.06	194.123	193.924	196.952	206.079
	25.1	121.716	150.31	133.605	158.625	143.802	147.338	144.715	191.168	194.2	193.942	196.976	206.033
	25.2	121.737	150.348	133.654	158.625	143.809	147.278	144.82	191.278	194.275	193.961	197.005	205.983
	25.3	121.761	150.388	133.702	158.615	143.812	147.221	144.931	191.379	194.348	193.983	197.034	205.934
	25.4	121.79	150.428	133.753	158.597	143.816	147.17	145.046	191.474	194.42	194.004	197.06	205.894
	25.5	121.821	150.471	133.804	158.578	143.827	147.116	145.173	191.571	194.498	194.035	197.076	205.87
	25.6	121.852	150.51	133.845	158.56	143.838	147.057	145.298	191.674	194.578	194.068	197.095	205.857
	25.7	121.888	150.541	133.875	158.546	143.856	146.993	145.422	191.78	194.664	194.105	197.12	205.849
	25.8	121.922	150.565	133.907	158.539	143.882	146.924	145.548	191.892	194.764	194.135	197.155	205.852
	25.9	121.955	150.589	133.938	158.54	143.916	146.859	145.661	192.008	194.86	194.16	197.189	205.85
	26	121.994	150.607	133.959	158.55	143.944	146.808	145.773	192.128	194.954	194.186	197.223	205.856
	26.1	122.031	150.626	133.97	158.565	143.97	146.768	145.883	192.25	195.035	194.219	197.267	205.869
	26.2	122.067	150.642	133.975	158.572	143.996	146.737	145.986	192.37	195.119	194.247	197.329	205.884
	26.3	122.109	150.661	133.971	158.572	144.013	146.705	146.085	192.481	195.21	194.268	197.397	205.897
	26.4	122.132	150.681	133.965	158.575	144.034	146.675	146.185	192.575	195.309	194.282	197.464	205.916
	26.5	122.15	150.696	133.96	158.583	144.059	146.645	146.288	192.667	195.41	194.308	197.526	205.946
	26.6	122.177	150.707	133.959	158.591	144.084	146.618	146.393	192.758	195.505	194.348	197.583	205.986
	26.7	122.204	150.725	133.965	158.594	144.099	146.6	146.494	192.85	195.603	194.393	197.632	206.028
	26.8	122.225	150.749	133.975	158.59	144.118	146.585	146.596	192.946	195.7	194.444	197.683	206.071
	26.9	122.246	150.769	133.981	158.585	144.133	146.577	146.686	193.042	195.795	194.493	197.75	206.111
	27	122.27	150.791	133.981	158.587	144.142	146.567	146.769	193.135	195.885	194.552	197.814	206.152
	27.1	122.296	150.806	133.983	158.597	144.142	146.55	146.847	193.223	195.968	194.606	197.879	206.192
	27.2	122.336	150.821	133.98	158.605	144.147	146.528	146.913	193.316	196.053	194.67	197.948	206.236
	27.3	122.38	150.834	133.974	158.612	144.146	146.514	146.975	193.414	196.15	194.755	198.014	206.275
	27.4	122.422	150.849	133.966	158.615	144.146	146.505	147.035	193.517	196.244	194.844	198.082	206.322
	27.5	122.469	150.867	133.964	158.611	144.151	146.507	147.092	193.623	196.34	194.929	198.156	206.373
	27.6	122.516	150.888	133.96	158.611	144.152	146.522	147.159	193.728	196.441	195.001	198.228	206.436
	27.7	122.559	150.907	133.964	158.625	144.144	146.536	147.238	193.839	196.533	195.083	198.3	206.503
	27.8	122.603	150.916	133.965	158.644	144.126	146.547	147.322	193.951	196.618	195.159	198.367	206.578
	27.9	122.652	150.92	133.965	158.667	144.105	146.562	147.402	194.071	196.708	195.234	198.427	206.656
	28	122.701	150.928	133.964	158.698	144.079	146.583	147.481	194.199	196.79	195.31	198.483	206.718
	28.1	122.746	150.93	133.962	158.729	144.046	146.608	147.548	194.323	196.869	195.377	198.546	206.766
	28.2	122.789	150.935	133.966	158.764	144.014	146.638	147.615	194.437	196.951	195.446	198.612	206.802
	28.3	122.829	150.946	133.977	158.795	143.98	146.671	147.679	194.551	197.026	195.51	198.669	206.831
	28.4	122.871	150.959	133.986	158.823	143.939	146.713	147.751	194.663	197.091	195.58	198.727	206.852
	28.5	122.913	150.967	133.991	158.845	143.899	146.747	147.835	194.77	197.16	195.652	198.793	206.876
	28.6	122.96	150.972	133.996	158.863	143.87	146.764	147.92	194.872	197.23	195.718	198.85	206.892
	28.7	123.011	150.979	134	158.886	143.838	146.78	148.006	194.974	197.298	195.78	198.9	206.903
	28.8	123.06	150.984	134.006	158.913	143.813	146.786	148.093	195.074	197.358	195.847	198.929	206.911
	28.9	123.103	150.984	134.018	158.948	143.802	146.796	148.175	195.178	197.416	195.922	198.957	206.917
	29	123.163	150.99	134.024	158.986	143.791	146.809	148.255	195.295	197.467	196.007	198.976	206.92
	29.1	123.238	151.002	134.025	159.023	143.785	146.83	148.333	195.415	197.51	196.089	199.002	206.919
	29.2	123.31	151.023	134.03	159.058	143.769	146.853	148.422	195.526	197.549	196.158	199.029	206.916
	29.3	123.38	151.042	134.031	159.092	143.756	146.867	148.519	195.641	197.587	196.218	199.065	206.914
	29.4	123.456	151.061	134.034	159.129	143.747	146.882	148.621	195.748	197.627	196.279	199.098	206.915
	29.5	123.537	151.09	134.042	159.172	143.744	146.895	148.733	195.849	197.667	196.345	199.125	206.917
	29.6	123.616	151.118	134.054	159.207	143.744	146.914	148.852	195.948	197.708	196.407	199.16	206.922
	29.7	123.701	151.146	134.059	159.233	143.753	146.935	148.976	196.044	197.751	196.483	199.196	206.932
	29.8	123.778	151.171	134.066	159.261	143.759	146.959	149.119	196.137	197.79	196.563	199.227	206.937
	29.9	123.857	151.194	134.078	159.287	143.756	146.988	149.264	196.225	197.826	196.635	199.259	206.947
	30	123.944	151.219	134.092	159.315	143.75	147.02	149.41	196.309	197.865	196.711	199.29	206.951
	30.1	124.024	151.242	134.101	159.35	143.746	147.045	149.555	196.388	197.906	196.79	199.311	206.955
	30.2	124.114	151.262	134.107	159.377	143.747	147.063	149.693	196.472	197.951	196.866	199.325	206.957
	30.3	124.204	151.276	134.102	159.389	143.744	147.077	149.822	196.549	198.001	196.927	199.339	206.96
	30.4	124.287	151.294	134.105	159.396	143.748	147.094	149.949	196.611	198.056	196.988	199.355	206.962
	30.5	124.369	151.323	134.112	159.408	143.758	147.102	150.071	196.67	198.111	197.054	199.372	206.965
	30.6	124.45	151.352	134.126	159.415	143.768	147.102	150.191	196.724	198.165	197.111	199.4	206.977
	30.7	124.541	151.391	134.141	159.426	143.776	147.093	150.31	196.776	198.21	197.161	199.43	206.998
	30.8	124.637	151.429	134.153	159.434	143.782	147.082	150.431	196.834	198.249	197.198	199.456	207.021
	30.9	124.733	151.469	134.162	159.442	143.778	147.068	150.558	196.884	198.291	197.233	199.484	207.042
	31	124.828	151.515	134.177	159.451	143.773	147.044	150.682	196.931	198.33	197.266	199.502	207.064
	31.1	124.924	151.568	134.195	159.469	143.763	147.021	150.797	196.976	198.363	197.3	199.513	207.081
	31.2	125.012	151.623	134.218	159.488	143.751	147.009	150.907	197.02	198.397	197.343	199.529	207.095
	31.3	125.098	151.667	134.245	159.503	143.75	146.997	151.013	197.069	198.442	197.383	199.543	207.107
	31.4	125.18	151.706	134.272	159.526	143.747	146.994	151.12	197.119	198.488	197.414	199.558	207.123
	31.5	125.27	151.744	134.286	159.555	143.742	146.987	151.239	197.163	198.526	197.432	199.571	207.14
	31.6	125.341	151.772	134.308	159.579	143.739	146.976	151.364	197.201	198.558	197.439	199.593	207.151
	31.7	125.397	151.792	134.335	159.602	143.727	146.955	151.486	197.244	198.594	197.444	199.616	207.157
	31.8	125.44	151.809	134.357	159.623	143.722	146.922	151.596	197.303	198.633	197.452	199.645	207.15
	31.9	125.481	151.831	134.384	159.641	143.718	146.893	151.707	197.349	198.675	197.47	199.662	207.141
	32	125.513	151.856	134.406	159.651	143.709	146.862	151.818	197.395	198.718	197.481	199.678	207.123
	32.1	125.543	151.877	134.423	159.653	143.692	146.833	151.92	197.444	198.756	197.481	199.692	207.11
	32.2	125.571	151.9	134.438	159.665	143.683	146.798	152.015	197.5	198.79	197.479	199.693	207.093
	32.3	125.594	151.925	134.456	159.69	143.674	146.767	152.111	197.567	198.818	197.457	199.681	207.074
	32.4	125.621	151.952	134.471	159.719	143.667	146.731	152.197	197.635	198.843	197.422	199.667	207.063
	32.5	125.644	151.98	134.483	159.751	143.669	146.682	152.28	197.709	198.857	197.385	199.644	207.048
	32.6	125.662	152.009	134.488	159.79	143.675	146.628	152.365	197.788	198.861	197.333	199.623	207.036
	32.7	125.683	152.033	134.494	159.828	143.68	146.58	152.46	197.868	198.866	197.279	199.606	207.026
	32.8	125.696	152.052	134.498	159.869	143.682	146.538	152.562	197.938	198.861	197.228	199.595	207.016
	32.9	125.709	152.076	134.506	159.908	143.687	146.505	152.66	198.008	198.854	197.192	199.575	207
	33	125.722	152.097	134.504	159.949	143.688	146.472	152.759	198.096	198.842	197.164	199.553	206.977
	33.1	125.73	152.113	134.497	159.987	143.689	146.444	152.865	198.183	198.831	197.129	199.536	206.949
	33.2	125.739	152.124	134.483	160.021	143.691	146.423	152.967	198.271	198.831	197.102	199.512	206.911
	33.3	125.738	152.131	134.461	160.05	143.701	146.404	153.072	198.355	198.845	197.091	199.485	206.875
	33.4	125.73	152.144	134.439	160.084	143.716	146.39	153.167	198.439	198.854	197.09	199.46	206.841
	33.5	125.719	152.153	134.409	160.119	143.744	146.383	153.261	198.532	198.857	197.095	199.439	206.821
	33.6	125.711	152.157	134.372	160.146	143.777	146.381	153.355	198.627	198.867	197.099	199.427	206.806
	33.7	125.701	152.162	134.336	160.167	143.807	146.388	153.456	198.723	198.876	197.101	199.411	206.801
	33.8	125.692	152.172	134.296	160.185	143.831	146.391	153.561	198.821	198.879	197.097	199.398	206.805
	33.9	125.686	152.187	134.257	160.2	143.841	146.391	153.676	198.912	198.873	197.09	199.383	206.821
	34	125.682	152.212	134.216	160.202	143.85	146.387	153.794	198.997	198.869	197.094	199.38	206.845
	34.1	125.671	152.235	134.189	160.196	143.855	146.388	153.905	199.085	198.862	197.107	199.38	206.872
	34.2	125.682	152.26	134.158	160.194	143.855	146.39	154.011	199.172	198.862	197.127	199.379	206.902
	34.3	125.696	152.29	134.123	160.195	143.859	146.402	154.121	199.254	198.858	197.145	199.375	206.942
	34.4	125.723	152.317	134.096	160.201	143.867	146.423	154.224	199.331	198.854	197.16	199.361	206.998
	34.5	125.754	152.334	134.071	160.215	143.877	146.444	154.313	199.419	198.845	197.167	199.358	207.053
	34.6	125.794	152.339	134.051	160.238	143.889	146.464	154.402	199.511	198.83	197.176	199.355	207.122
	34.7	125.831	152.342	134.031	160.269	143.911	146.478	154.5	199.606	198.817	197.193	199.351	207.187
	34.8	125.867	152.343	134.011	160.292	143.915	146.488	154.611	199.7	198.809	197.22	199.35	207.251
	34.9	125.907	152.344	133.99	160.3	143.917	146.494	154.716	199.781	198.817	197.26	199.368	207.317
	35	125.943	152.355	133.97	160.302	143.921	146.505	154.815	199.865	198.834	197.31	199.397	207.374
	35.1	125.984	152.37	133.952	160.303	143.923	146.53	154.916	199.94	198.86	197.372	199.437	207.44
	35.2	126.022	152.385	133.944	160.296	143.928	146.559	155.015	200.012	198.894	197.443	199.475	207.503
	35.3	126.053	152.409	133.938	160.289	143.935	146.584	155.109	200.081	198.92	197.518	199.517	207.564
	35.4	126.085	152.439	133.941	160.285	143.941	146.605	155.201	200.163	198.948	197.6	199.559	207.625
	35.5	126.116	152.473	133.941	160.288	143.954	146.614	155.295	200.252	198.971	197.675	199.597	207.699
	35.6	126.155	152.508	133.949	160.286	143.971	146.623	155.382	200.333	198.998	197.741	199.639	207.783
	35.7	126.193	152.541	133.968	160.283	143.982	146.63	155.468	200.413	199.021	197.804	199.675	207.874
	35.8	126.227	152.571	133.991	160.288	143.993	146.633	155.564	200.491	199.04	197.866	199.71	207.982
	35.9	126.265	152.596	134.013	160.3	144.006	146.639	155.666	200.577	199.053	197.923	199.742	208.088
	36	126.311	152.607	134.038	160.311	144.012	146.637	155.775	200.664	199.074	197.975	199.776	208.2
	36.1	126.359	152.616	134.068	160.328	144.015	146.632	155.877	200.744	199.104	198.018	199.808	208.304
	36.2	126.403	152.624	134.097	160.354	144.015	146.625	155.97	200.823	199.131	198.06	199.833	208.401
	36.3	126.45	152.629	134.125	160.379	144.024	146.609	156.057	200.908	199.161	198.106	199.863	208.487
	36.4	126.501	152.629	134.158	160.404	144.041	146.591	156.143	200.991	199.195	198.154	199.893	208.566
	36.5	126.544	152.633	134.188	160.431	144.065	146.577	156.218	201.07	199.231	198.202	199.928	208.633
	36.6	126.594	152.628	134.212	160.461	144.087	146.558	156.291	201.156	199.27	198.237	199.958	208.689
	36.7	126.647	152.628	134.228	160.488	144.106	146.534	156.359	201.243	199.319	198.271	199.985	208.742
	36.8	126.679	152.636	134.247	160.508	144.119	146.507	156.423	201.331	199.373	198.303	200.011	208.795
	36.9	126.713	152.637	134.269	160.526	144.13	146.476	156.48	201.417	199.434	198.335	200.034	208.847
	37	126.746	152.638	134.287	160.541	144.142	146.44	156.548	201.493	199.495	198.367	200.066	208.89
	37.1	126.781	152.646	134.293	160.554	144.154	146.404	156.626	201.56	199.563	198.402	200.101	208.928
	37.2	126.817	152.658	134.291	160.57	144.166	146.374	156.702	201.619	199.64	198.433	200.137	208.948
	37.3	126.855	152.671	134.288	160.582	144.173	146.35	156.766	201.667	199.713	198.466	200.172	208.96
	37.4	126.897	152.687	134.286	160.6	144.189	146.339	156.818	201.701	199.785	198.486	200.209	208.968
	37.5	126.928	152.702	134.283	160.624	144.209	146.331	156.87	201.738	199.842	198.502	200.236	208.974
	37.6	126.959	152.704	134.288	160.652	144.232	146.319	156.929	201.756	199.892	198.518	200.255	208.977
	37.7	126.988	152.697	134.291	160.682	144.252	146.297	156.994	201.776	199.947	198.518	200.266	208.969
	37.8	127.024	152.681	134.285	160.717	144.267	146.273	157.06	201.789	200.005	198.509	200.271	208.951
	37.9	127.071	152.656	134.281	160.748	144.278	146.257	157.125	201.802	200.074	198.491	200.265	208.929
	38	127.121	152.627	134.269	160.781	144.289	146.248	157.188	201.802	200.143	198.465	200.267	208.906
	38.1	127.173	152.594	134.257	160.817	144.3	146.251	157.255	201.791	200.224	198.436	200.285	208.87
	38.2	127.219	152.565	134.241	160.856	144.313	146.256	157.33	201.775	200.302	198.411	200.292	208.826
	38.3	127.274	152.539	134.218	160.897	144.336	146.261	157.4	201.763	200.388	198.39	200.302	208.776
	38.4	127.331	152.523	134.196	160.928	144.358	146.265	157.463	201.757	200.47	198.368	200.312	208.714
	38.5	127.384	152.52	134.184	160.945	144.368	146.272	157.514	201.748	200.563	198.338	200.329	208.656
	38.6	127.428	152.528	134.179	160.952	144.384	146.286	157.562	201.739	200.66	198.304	200.347	208.591
	38.7	127.471	152.544	134.186	160.948	144.397	146.302	157.616	201.733	200.764	198.278	200.363	208.524
	38.8	127.516	152.56	134.2	160.942	144.405	146.321	157.683	201.721	200.876	198.257	200.388	208.464
	38.9	127.564	152.572	134.213	160.942	144.407	146.344	157.76	201.703	200.985	198.227	200.415	208.407
	39	127.609	152.576	134.222	160.942	144.405	146.372	157.836	201.69	201.09	198.195	200.437	208.361
	39.1	127.657	152.575	134.24	160.948	144.403	146.399	157.919	201.684	201.2	198.166	200.463	208.321
	39.2	127.697	152.586	134.276	160.956	144.405	146.433	158.003	201.674	201.306	198.145	200.488	208.281
	39.3	127.735	152.593	134.32	160.97	144.408	146.469	158.096	201.659	201.407	198.121	200.513	208.245
	39.4	127.785	152.597	134.366	160.993	144.424	146.51	158.199	201.646	201.503	198.101	200.54	208.207
	39.5	127.834	152.613	134.415	161.01	144.437	146.548	158.308	201.632	201.598	198.087	200.565	208.159
	39.6	127.873	152.631	134.461	161.026	144.442	146.592	158.416	201.622	201.692	198.079	200.584	208.114
	39.7	127.911	152.653	134.517	161.039	144.443	146.638	158.519	201.616	201.778	198.068	200.594	208.078
	39.8	127.941	152.681	134.582	161.049	144.442	146.687	158.618	201.619	201.852	198.057	200.601	208.06
	39.9	127.97	152.709	134.651	161.059	144.445	146.725	158.723	201.637	201.93	198.039	200.614	208.059
	40	127.996	152.736	134.717	161.058	144.446	146.755	158.831	201.666	202.012	198.025	200.631	208.072
	40.1	128.031	152.761	134.787	161.055	144.436	146.781	158.942	201.702	202.099	198.011	200.65	208.085
	40.2	128.068	152.801	134.846	161.053	144.416	146.81	159.051	201.767	202.185	197.992	200.668	208.11
	40.3	128.104	152.853	134.897	161.044	144.391	146.843	159.15	201.836	202.268	197.989	200.693	208.152
	40.4	128.145	152.923	134.947	161.031	144.368	146.87	159.245	201.914	202.345	197.999	200.723	208.214
	40.5	128.183	152.998	134.989	161.019	144.346	146.884	159.336	201.983	202.422	198.013	200.762	208.291
	40.6	128.213	153.076	135.029	160.999	144.322	146.885	159.428	202.053	202.498	198.03	200.788	208.361
	40.7	128.239	153.155	135.073	160.97	144.291	146.879	159.517	202.131	202.564	198.046	200.802	208.44
	40.8	128.262	153.232	135.113	160.946	144.257	146.868	159.601	202.216	202.628	198.067	200.83	208.529
	40.9	128.275	153.306	135.149	160.915	144.221	146.859	159.687	202.296	202.688	198.085	200.855	208.623
	41	128.29	153.369	135.184	160.889	144.184	146.858	159.774	202.358	202.75	198.109	200.885	208.718
	41.1	128.314	153.416	135.212	160.874	144.151	146.856	159.869	202.416	202.786	198.146	200.912	208.8
	41.2	128.34	153.457	135.225	160.87	144.118	146.847	159.966	202.472	202.813	198.195	200.932	208.883
	41.3	128.363	153.489	135.225	160.865	144.09	146.836	160.064	202.527	202.823	198.245	200.953	208.965
	41.4	128.382	153.521	135.221	160.854	144.069	146.822	160.153	202.593	202.825	198.298	200.968	209.04
	41.5	128.393	153.558	135.22	160.84	144.042	146.814	160.232	202.659	202.828	198.358	200.983	209.118
	41.6	128.405	153.614	135.224	160.825	144.011	146.804	160.307	202.716	202.833	198.422	201.002	209.181
	41.7	128.419	153.671	135.22	160.806	143.986	146.797	160.374	202.775	202.831	198.488	201.016	209.241
	41.8	128.433	153.719	135.195	160.786	143.967	146.787	160.435	202.834	202.824	198.554	201.027	209.301
	41.9	128.451	153.77	135.162	160.767	143.954	146.773	160.49	202.896	202.815	198.618	201.043	209.359
	42	128.465	153.821	135.126	160.74	143.93	146.758	160.54	202.956	202.796	198.68	201.056	209.413
	42.1	128.481	153.862	135.086	160.721	143.914	146.745	160.589	203.022	202.767	198.734	201.072	209.473
	42.2	128.506	153.905	135.048	160.709	143.907	146.728	160.636	203.095	202.737	198.781	201.096	209.532
	42.3	128.527	153.936	135.008	160.702	143.899	146.708	160.681	203.166	202.714	198.832	201.125	209.579
	42.4	128.553	153.966	134.969	160.695	143.893	146.684	160.731	203.234	202.701	198.893	201.16	209.61
	42.5	128.579	154	134.927	160.686	143.876	146.678	160.782	203.292	202.683	198.962	201.196	209.627
	42.6	128.611	154.035	134.897	160.69	143.864	146.68	160.83	203.353	202.66	199.031	201.226	209.626
	42.7	128.638	154.075	134.864	160.689	143.859	146.691	160.876	203.412	202.63	199.108	201.254	209.63
	42.8	128.665	154.101	134.841	160.687	143.866	146.705	160.927	203.458	202.605	199.187	201.286	209.623
	42.9	128.691	154.119	134.826	160.685	143.884	146.719	160.989	203.502	202.577	199.252	201.312	209.604
	43	128.705	154.122	134.817	160.684	143.901	146.739	161.054	203.544	202.538	199.311	201.34	209.567
	43.1	128.713	154.123	134.812	160.687	143.918	146.763	161.122	203.605	202.489	199.372	201.37	209.511
	43.2	128.73	154.12	134.806	160.695	143.936	146.794	161.186	203.672	202.44	199.434	201.407	209.456
	43.3	128.756	154.112	134.801	160.709	143.961	146.825	161.246	203.738	202.401	199.501	201.443	209.389
	43.4	128.79	154.098	134.795	160.716	143.98	146.859	161.305	203.798	202.364	199.568	201.473	209.317
	43.5	128.833	154.084	134.792	160.733	143.991	146.892	161.367	203.866	202.328	199.635	201.501	209.242
	43.6	128.875	154.079	134.785	160.752	144.003	146.927	161.424	203.951	202.29	199.696	201.522	209.164
	43.7	128.906	154.088	134.778	160.766	144.024	146.953	161.473	204.036	202.273	199.748	201.536	209.09
	43.8	128.941	154.097	134.783	160.78	144.042	146.983	161.527	204.121	202.258	199.797	201.554	209.017
	43.9	128.982	154.108	134.79	160.808	144.058	147.013	161.579	204.201	202.253	199.836	201.574	208.946
	44	129.029	154.118	134.797	160.839	144.075	147.045	161.638	204.271	202.247	199.869	201.592	208.876
	44.1	129.079	154.123	134.799	160.872	144.107	147.068	161.703	204.344	202.238	199.896	201.609	208.805
	44.2	129.121	154.108	134.8	160.911	144.139	147.096	161.766	204.424	202.23	199.919	201.62	208.744
	44.3	129.163	154.094	134.809	160.949	144.158	147.124	161.832	204.496	202.22	199.939	201.631	208.684
	44.4	129.206	154.077	134.836	160.982	144.164	147.154	161.903	204.572	202.219	199.951	201.642	208.633
	44.5	129.243	154.059	134.865	161.012	144.169	147.189	161.972	204.648	202.22	199.971	201.646	208.583
	44.6	129.279	154.044	134.892	161.049	144.187	147.223	162.046	204.728	202.236	199.986	201.655	208.537
	44.7	129.313	154.029	134.922	161.083	144.202	147.259	162.113	204.809	202.263	200.001	201.664	208.497
	44.8	129.345	154.015	134.951	161.11	144.21	147.301	162.18	204.881	202.288	200.019	201.661	208.459
	44.9	129.383	154.017	134.976	161.129	144.22	147.344	162.255	204.951	202.307	200.034	201.66	208.43
	45	129.413	154.013	134.992	161.145	144.229	147.389	162.327	205.02	202.317	200.042	201.659	208.411
	45.1	129.447	154.007	135.006	161.161	144.249	147.421	162.398	205.094	202.328	200.043	201.651	208.401
	45.2	129.474	153.995	135.01	161.174	144.269	147.445	162.47	205.157	202.339	200.049	201.648	208.407
	45.3	129.504	153.974	135.012	161.194	144.283	147.46	162.54	205.205	202.358	200.045	201.651	208.41
	45.4	129.532	153.96	135.011	161.213	144.292	147.47	162.598	205.244	202.375	200.042	201.655	208.424
	45.5	129.564	153.949	135.011	161.236	144.299	147.482	162.64	205.28	202.393	200.04	201.662	208.446
	45.6	129.599	153.943	135.013	161.259	144.312	147.495	162.68	205.311	202.429	200.04	201.664	208.479
	45.7	129.641	153.937	135.017	161.278	144.33	147.519	162.716	205.333	202.47	200.04	201.657	208.526
	45.8	129.675	153.932	135.028	161.295	144.348	147.542	162.757	205.354	202.505	200.037	201.644	208.58
	45.9	129.698	153.934	135.039	161.297	144.359	147.564	162.799	205.37	202.533	200.03	201.635	208.642
	46	129.715	153.938	135.053	161.297	144.376	147.587	162.843	205.381	202.554	200.018	201.63	208.709
	46.1	129.73	153.944	135.067	161.294	144.392	147.6	162.886	205.39	202.575	200.002	201.633	208.773
	46.2	129.746	153.943	135.08	161.291	144.408	147.6	162.939	205.395	202.595	199.986	201.645	208.85
	46.3	129.77	153.931	135.093	161.288	144.419	147.614	163.005	205.395	202.614	199.963	201.662	208.938
	46.4	129.789	153.913	135.099	161.279	144.429	147.625	163.065	205.402	202.631	199.931	201.674	209.034
	46.5	129.807	153.896	135.104	161.257	144.434	147.634	163.125	205.412	202.641	199.908	201.686	209.129
	46.6	129.821	153.877	135.105	161.24	144.43	147.643	163.179	205.427	202.648	199.884	201.694	209.226
	46.7	129.839	153.867	135.113	161.225	144.415	147.655	163.225	205.442	202.655	199.856	201.692	209.319
	46.8	129.864	153.877	135.123	161.206	144.405	147.655	163.278	205.461	202.665	199.824	201.692	209.403
	46.9	129.88	153.893	135.129	161.19	144.401	147.651	163.329	205.489	202.688	199.793	201.693	209.486
	47	129.896	153.909	135.123	161.188	144.4	147.647	163.383	205.521	202.706	199.762	201.697	209.559
	47.1	129.913	153.924	135.118	161.187	144.393	147.638	163.436	205.549	202.728	199.724	201.708	209.632
	47.2	129.932	153.935	135.115	161.181	144.379	147.632	163.479	205.565	202.743	199.689	201.716	209.708
	47.3	129.954	153.946	135.107	161.171	144.365	147.621	163.529	205.572	202.754	199.651	201.724	209.773
	47.4	129.977	153.944	135.106	161.161	144.354	147.601	163.58	205.582	202.77	199.612	201.744	209.825
	47.5	129.994	153.924	135.108	161.157	144.344	147.583	163.625	205.596	202.79	199.57	201.76	209.877
	47.6	130.015	153.905	135.117	161.155	144.337	147.556	163.673	205.609	202.818	199.521	201.771	209.923
	47.7	130.031	153.881	135.128	161.16	144.321	147.531	163.72	205.619	202.85	199.468	201.78	209.964
	47.8	130.051	153.853	135.137	161.162	144.306	147.503	163.775	205.64	202.888	199.412	201.788	209.997
	47.9	130.061	153.826	135.15	161.163	144.295	147.482	163.837	205.678	202.922	199.357	201.795	210.026
	48	130.069	153.794	135.166	161.166	144.285	147.463	163.899	205.724	202.958	199.303	201.798	210.037
	48.1	130.071	153.753	135.178	161.166	144.272	147.444	163.963	205.779	202.992	199.251	201.802	210.032
	48.2	130.07	153.707	135.189	161.16	144.25	147.413	164.027	205.84	203.016	199.196	201.817	210.023
	48.3	130.063	153.662	135.202	161.147	144.22	147.372	164.1	205.897	203.042	199.143	201.832	210.004
	48.4	130.062	153.618	135.211	161.136	144.189	147.333	164.167	205.956	203.081	199.094	201.851	209.979
	48.5	130.067	153.573	135.218	161.144	144.159	147.296	164.237	206.017	203.13	199.053	201.867	209.948
	48.6	130.071	153.535	135.229	161.156	144.133	147.263	164.305	206.087	203.189	199.019	201.876	209.903
	48.7	130.072	153.497	135.239	161.168	144.116	147.241	164.368	206.146	203.246	198.991	201.876	209.863
	48.8	130.07	153.471	135.261	161.185	144.096	147.224	164.419	206.211	203.299	198.971	201.871	209.816
	48.9	130.068	153.454	135.287	161.202	144.076	147.198	164.457	206.287	203.351	198.964	201.869	209.753
	49	130.076	153.452	135.326	161.223	144.055	147.175	164.494	206.353	203.408	198.971	201.873	209.683
	49.1	130.085	153.456	135.367	161.25	144.039	147.159	164.53	206.415	203.47	198.97	201.873	209.615
	49.2	130.092	153.461	135.407	161.272	144.027	147.149	164.571	206.464	203.531	198.972	201.879	209.541
	49.3	130.094	153.453	135.444	161.291	144.023	147.137	164.616	206.505	203.601	198.983	201.892	209.473
	49.4	130.09	153.426	135.471	161.307	144.018	147.13	164.66	206.538	203.671	199.001	201.903	209.412
	49.5	130.095	153.39	135.496	161.315	144.017	147.125	164.707	206.561	203.731	199.024	201.911	209.342
	49.6	130.106	153.363	135.526	161.311	144.017	147.114	164.748	206.572	203.791	199.054	201.919	209.267
	49.7	130.118	153.33	135.557	161.308	144.025	147.102	164.792	206.586	203.849	199.093	201.921	209.191
	49.8	130.12	153.305	135.588	161.307	144.03	147.089	164.845	206.613	203.911	199.127	201.92	209.105
	49.9	130.12	153.283	135.626	161.309	144.032	147.075	164.896	206.654	203.975	199.168	201.917	209.029
	50	130.123	153.269	135.654	161.311	144.032	147.069	164.937	206.699	204.038	199.212	201.901	208.968
	50.1	130.133	153.266	135.684	161.312	144.026	147.065	164.977	206.738	204.102	199.265	201.885	208.904
	50.2	130.143	153.261	135.712	161.318	144.016	147.064	165.015	206.781	204.161	199.328	201.869	208.835
	50.3	130.156	153.263	135.738	161.313	144.013	147.055	165.055	206.823	204.218	199.398	201.859	208.76
	50.4	130.169	153.276	135.771	161.302	144.011	147.057	165.086	206.855	204.272	199.465	201.847	208.687
	50.5	130.194	153.293	135.798	161.29	144.01	147.05	165.111	206.882	204.324	199.532	201.822	208.617
	50.6	130.224	153.323	135.82	161.281	143.999	147.042	165.151	206.913	204.378	199.596	201.797	208.564
	50.7	130.255	153.37	135.846	161.272	143.987	147.03	165.202	206.938	204.432	199.659	201.762	208.528
	50.8	130.29	153.428	135.866	161.281	143.981	147.031	165.257	206.961	204.487	199.725	201.707	208.495
	50.9	130.327	153.489	135.88	161.305	143.977	147.036	165.304	206.989	204.538	199.784	201.656	208.463
	51	130.362	153.549	135.892	161.335	143.979	147.04	165.359	207.011	204.581	199.834	201.608	208.439
	51.1	130.388	153.607	135.907	161.356	143.983	147.046	165.418	207.038	204.612	199.88	201.565	208.423
	51.2	130.416	153.659	135.922	161.378	143.982	147.046	165.48	207.06	204.635	199.916	201.528	208.423
	51.3	130.445	153.709	135.942	161.395	143.969	147.045	165.554	207.086	204.657	199.956	201.494	208.418
	51.4	130.474	153.752	135.954	161.4	143.958	147.05	165.629	207.101	204.684	199.986	201.458	208.415
	51.5	130.5	153.791	135.958	161.399	143.942	147.056	165.707	207.106	204.712	200.01	201.416	208.422
	51.6	130.514	153.815	135.947	161.398	143.928	147.059	165.785	207.12	204.731	200.021	201.371	208.43
	51.7	130.528	153.835	135.929	161.401	143.913	147.053	165.862	207.145	204.753	200.037	201.333	208.444
	51.8	130.546	153.857	135.915	161.404	143.901	147.033	165.931	207.185	204.781	200.058	201.3	208.464
	51.9	130.571	153.885	135.896	161.401	143.882	147.008	166.001	207.244	204.806	200.073	201.273	208.49
	52	130.602	153.922	135.886	161.402	143.861	146.985	166.065	207.309	204.829	200.085	201.256	208.522
	52.1	130.631	153.96	135.873	161.409	143.841	146.957	166.128	207.38	204.855	200.088	201.239	208.572
	52.2	130.656	153.99	135.859	161.422	143.822	146.938	166.192	207.464	204.875	200.077	201.222	208.633
	52.3	130.684	154.026	135.843	161.436	143.793	146.923	166.255	207.548	204.887	200.051	201.203	208.692
	52.4	130.729	154.051	135.827	161.444	143.767	146.906	166.315	207.615	204.894	200.03	201.187	208.758
	52.5	130.774	154.075	135.804	161.444	143.743	146.893	166.376	207.674	204.894	200.003	201.17	208.825
	52.6	130.812	154.101	135.783	161.443	143.726	146.875	166.448	207.732	204.891	199.978	201.158	208.898
	52.7	130.845	154.124	135.755	161.437	143.722	146.854	166.531	207.79	204.883	199.951	201.146	208.981
	52.8	130.883	154.151	135.726	161.422	143.722	146.838	166.618	207.843	204.882	199.918	201.136	209.08
	52.9	130.917	154.179	135.702	161.414	143.72	146.831	166.701	207.901	204.877	199.886	201.124	209.196
	53	130.954	154.198	135.672	161.419	143.715	146.811	166.784	207.969	204.872	199.853	201.112	209.316
	53.1	130.987	154.221	135.654	161.427	143.708	146.795	166.872	208.04	204.871	199.821	201.109	209.443
	53.2	131.023	154.226	135.633	161.423	143.713	146.782	166.95	208.095	204.863	199.791	201.114	209.556
	53.3	131.065	154.215	135.615	161.414	143.724	146.77	167.022	208.148	204.852	199.771	201.128	209.658
	53.4	131.108	154.201	135.602	161.394	143.738	146.749	167.09	208.198	204.847	199.744	201.159	209.753
	53.5	131.151	154.175	135.596	161.362	143.757	146.725	167.155	208.248	204.842	199.72	201.197	209.851
	53.6	131.198	154.148	135.594	161.321	143.778	146.706	167.213	208.306	204.829	199.704	201.236	209.948
	53.7	131.256	154.127	135.586	161.288	143.793	146.688	167.261	208.36	204.823	199.686	201.269	210.044
	53.8	131.314	154.11	135.572	161.257	143.812	146.667	167.307	208.42	204.812	199.672	201.307	210.131
	53.9	131.369	154.087	135.553	161.227	143.846	146.635	167.341	208.487	204.807	199.652	201.343	210.226
	54	131.423	154.06	135.531	161.214	143.887	146.593	167.383	208.564	204.799	199.632	201.382	210.319
	54.1	131.48	154.034	135.506	161.207	143.933	146.556	167.428	208.643	204.786	199.616	201.43	210.404
	54.2	131.543	154.018	135.491	161.197	143.979	146.526	167.477	208.716	204.781	199.607	201.484	210.486
	54.3	131.606	154.008	135.482	161.179	144.016	146.503	167.526	208.78	204.768	199.593	201.531	210.551
	54.4	131.666	154	135.475	161.162	144.051	146.494	167.58	208.844	204.744	199.575	201.566	210.607
	54.5	131.725	154	135.471	161.149	144.087	146.494	167.632	208.889	204.717	199.56	201.594	210.647
	54.6	131.786	154.004	135.47	161.133	144.122	146.494	167.695	208.926	204.688	199.546	201.614	210.675
	54.7	131.845	154.01	135.472	161.111	144.151	146.501	167.756	208.961	204.653	199.545	201.64	210.689
	54.8	131.905	154.021	135.469	161.082	144.182	146.508	167.814	208.986	204.628	199.558	201.666	210.705
	54.9	131.963	154.032	135.466	161.045	144.219	146.507	167.874	209.006	204.612	199.592	201.695	210.728
	55	132.006	154.053	135.459	161.02	144.252	146.507	167.941	209.042	204.6	199.634	201.724	210.749
	55.1	132.048	154.071	135.448	161.008	144.283	146.507	168.008	209.077	204.591	199.684	201.761	210.764
	55.2	132.093	154.089	135.443	161.006	144.307	146.507	168.071	209.1	204.577	199.73	201.802	210.768
	55.3	132.138	154.106	135.451	161.007	144.32	146.505	168.121	209.119	204.566	199.774	201.849	210.757
	55.4	132.18	154.118	135.456	161.008	144.327	146.499	168.163	209.14	204.545	199.823	201.897	210.738
	55.5	132.224	154.131	135.464	161.005	144.33	146.489	168.2	209.149	204.52	199.874	201.945	210.704
	55.6	132.261	154.149	135.474	160.99	144.332	146.487	168.242	209.147	204.494	199.929	201.991	210.659
	55.7	132.294	154.161	135.471	160.968	144.328	146.483	168.279	209.139	204.461	199.979	202.036	210.599
	55.8	132.319	154.183	135.472	160.96	144.321	146.476	168.317	209.144	204.432	200.034	202.076	210.545
	55.9	132.341	154.206	135.475	160.962	144.303	146.467	168.355	209.153	204.405	200.084	202.109	210.49
	56	132.364	154.222	135.477	160.966	144.275	146.463	168.39	209.162	204.371	200.138	202.132	210.438
	56.1	132.387	154.249	135.474	160.981	144.242	146.458	168.435	209.166	204.342	200.188	202.153	210.381
	56.2	132.406	154.271	135.468	160.998	144.205	146.444	168.484	209.164	204.32	200.233	202.174	210.314
	56.3	132.419	154.285	135.472	161.004	144.177	146.425	168.538	209.165	204.3	200.277	202.196	210.246
	56.4	132.433	154.296	135.474	161.01	144.143	146.415	168.593	209.164	204.295	200.323	202.212	210.187
	56.5	132.458	154.314	135.474	161.014	144.099	146.42	168.66	209.156	204.287	200.372	202.237	210.124
	56.6	132.488	154.344	135.483	161.009	144.045	146.436	168.723	209.147	204.276	200.427	202.26	210.057
	56.7	132.516	154.376	135.497	161.002	143.993	146.447	168.783	209.141	204.269	200.475	202.271	209.995
	56.8	132.536	154.404	135.511	160.997	143.948	146.45	168.838	209.136	204.251	200.524	202.269	209.937
	56.9	132.552	154.421	135.529	160.994	143.916	146.447	168.897	209.133	204.236	200.575	202.272	209.89
	57	132.57	154.432	135.542	160.991	143.889	146.434	168.96	209.112	204.229	200.622	202.285	209.853
	57.1	132.586	154.43	135.558	160.989	143.863	146.422	169.021	209.09	204.219	200.674	202.297	209.824
	57.2	132.601	154.421	135.568	160.991	143.844	146.407	169.076	209.071	204.213	200.733	202.311	209.801
	57.3	132.617	154.409	135.58	161.005	143.829	146.39	169.138	209.043	204.211	200.78	202.31	209.779
	57.4	132.63	154.396	135.6	161.031	143.81	146.374	169.206	209.019	204.207	200.819	202.314	209.745
	57.5	132.649	154.381	135.621	161.065	143.788	146.365	169.27	208.997	204.199	200.844	202.315	209.7
	57.6	132.672	154.357	135.646	161.093	143.767	146.357	169.323	208.968	204.182	200.86	202.319	209.659
	57.7	132.696	154.338	135.678	161.11	143.75	146.343	169.368	208.938	204.166	200.868	202.316	209.618
	57.8	132.718	154.319	135.706	161.123	143.733	146.331	169.413	208.926	204.158	200.878	202.308	209.573
	57.9	132.737	154.304	135.722	161.138	143.716	146.318	169.459	208.922	204.149	200.885	202.295	209.53
	58	132.75	154.296	135.743	161.166	143.704	146.309	169.51	208.92	204.145	200.889	202.277	209.481
	58.1	132.761	154.287	135.757	161.195	143.697	146.305	169.572	208.931	204.148	200.883	202.254	209.432
	58.2	132.778	154.275	135.77	161.233	143.696	146.302	169.625	208.949	204.153	200.876	202.238	209.392
	58.3	132.802	154.268	135.787	161.277	143.701	146.302	169.683	208.97	204.162	200.877	202.221	209.358
	58.4	132.831	154.258	135.804	161.314	143.71	146.302	169.738	208.988	204.172	200.865	202.204	209.327
	58.5	132.857	154.252	135.811	161.347	143.729	146.308	169.792	209.003	204.185	200.85	202.196	209.307
	58.6	132.882	154.253	135.813	161.375	143.754	146.313	169.849	209.02	204.203	200.838	202.195	209.29
	58.7	132.909	154.253	135.814	161.392	143.779	146.327	169.905	209.04	204.215	200.835	202.185	209.279
	58.8	132.938	154.259	135.814	161.411	143.803	146.347	169.955	209.06	204.23	200.838	202.171	209.276
	58.9	132.966	154.269	135.807	161.439	143.821	146.371	170.009	209.072	204.242	200.843	202.154	209.274
	59	132.993	154.277	135.811	161.466	143.846	146.399	170.063	209.08	204.236	200.846	202.134	209.256
	59.1	133.007	154.283	135.822	161.502	143.877	146.419	170.107	209.082	204.228	200.843	202.101	209.232
	59.2	133.017	154.274	135.827	161.544	143.92	146.431	170.151	209.075	204.226	200.83	202.068	209.214
	59.3	133.02	154.258	135.835	161.588	143.963	146.442	170.197	209.058	204.228	200.824	202.038	209.185
	59.4	133.034	154.236	135.839	161.637	143.997	146.457	170.246	209.031	204.249	200.822	202.021	209.15
	59.5	133.052	154.22	135.839	161.694	144.022	146.48	170.293	209.003	204.274	200.824	201.994	209.114
	59.6	133.064	154.209	135.839	161.751	144.04	146.512	170.33	208.996	204.298	200.831	201.96	209.066
	59.7	133.07	154.206	135.836	161.815	144.056	146.539	170.367	208.999	204.336	200.826	201.934	209.018
	59.8	133.067	154.211	135.838	161.882	144.062	146.567	170.397	209.005	204.362	200.803	201.912	208.968
	59.9	133.067	154.225	135.834	161.937	144.065	146.594	170.412	209.03	204.384	200.779	201.91	208.915
	60	133.08	154.237	135.823	161.971	144.071	146.617	170.421	209.056	204.403	200.759	201.892	208.877

## Sheet: E2_Diss
	Experiment 2
	Dissociation: Raw fluorescence data								Nonlinear fit (one-phase decay, GrapPad Prism)
	Time (s)	BiP_MgADP_DC1	BiP_CaADP_DC2	T229A_MgADP_DC3	T229A_CaADP_DC4	T229A_MgATP_DC5	T229A_CaATP_DC6			BiP_MgADP_DC1	BiP_CaADP_DC2	T229A_MgADP_DC3	T229A_CaADP_DC4	T229A_MgATP_DC5	T229A_CaATP_DC6
	0	136.97	206.714	133.433	189.192	138.402	211.764		koff (s-1)	0.07369	0.01329	0.2227	0.02981	0.009372	0.008856
	0.1	136.715	206.442	133.814	189.989	138.702	211.266		R2	0.9831	0.999	0.9392	0.9982	0.9453	0.9952
	0.2	136.865	206.212	133.736	190.542	138.635	211.23		Fit interval	300 s	300 s	100 s	300 s	300 s	300 s
	0.3	136.834	205.703	133.624	190.776	138.768	211.543
	0.4	136.877	205.524	132.92	190.813	138.92	211.799
	0.5	136.748	205.138	132.292	191.157	139.085	211.372
	0.6	136.38	205.046	131.286	191.474	139.363	210.595
	0.7	135.838	204.818	130.253	191.552	139.434	210.151
	0.8	135.21	204.668	128.907	190.758	139.511	210.332
	0.9	134.944	204.568	127.9	189.598	139.339	210.559
	1	134.642	204.143	127.194	188.111	139.12	210.321
	1.1	134.214	204.089	126.75	187.098	139.025	209.428
	1.2	133.598	203.429	126.127	186.476	139.255	208.511
	1.3	133.132	202.915	125.607	186.744	139.85	207.756
	1.4	132.827	201.983	125.212	186.927	140.351	207.665
	1.5	132.598	201.89	125.138	187.141	140.299	207.453
	1.6	132.005	201.999	124.823	186.458	139.856	207.642
	1.7	131.332	202.339	124.534	185.728	139.392	207.299
	1.8	130.678	202.324	123.715	184.727	139.018	207.345
	1.9	130.385	202.405	122.971	184.3	138.452	207.166
	2	130.397	202.734	122.324	184.08	137.991	207.681
	2.1	130.548	203.217	122.228	184.141	137.962	208.066
	2.2	130.821	203.385	121.974	184.131	138.615	208.236
	2.3	130.887	202.679	121.596	184.104	139.045	207.611
	2.4	130.461	201.567	121.12	184.116	138.933	206.642
	2.5	129.751	200.653	121.073	183.918	138.431	206.108
	2.6	128.874	200.543	120.877	183.871	138.059	206.377
	2.7	128.263	200.716	120.529	183.447	138.097	207.268
	2.8	127.938	200.994	119.98	182.972	138.339	207.732
	2.9	127.795	200.83	119.738	182.299	138.989	207.77
	3	127.865	200.656	119.628	181.947	139.45	206.92
	3.1	127.698	199.874	119.377	181.815	139.571	206.111
	3.2	127.542	199.258	118.918	181.701	139.097	205.042
	3.3	127.524	198.504	118.566	181.809	139.045	204.497
	3.4	127.409	198.422	118.523	182.063	139.24	204.029
	3.5	127.16	198.202	118.374	182.349	139.915	203.91
	3.6	126.156	198.117	117.956	182.313	140.294	203.782
	3.7	125.521	197.884	117.175	182.183	140.417	204.047
	3.8	124.863	197.903	116.518	181.657	140.244	203.958
	3.9	124.871	197.85	115.869	181.001	139.84	203.793
	4	124.522	197.778	115.653	179.968	139.975	202.917
	4.1	124.254	197.767	115.388	179.397	140.03	202.543
	4.2	123.554	198.203	115.302	179.132	139.931	202.615
	4.3	122.932	198.47	114.864	179.416	139.106	203.294
	4.4	122.562	198.315	114.891	179.5	138.046	203.72
	4.5	122.65	197.477	115.252	179.203	137.3	203.452
	4.6	122.91	196.6	115.783	178.6	136.807	202.702
	4.7	122.743	196.343	115.745	178.211	137.097	202.091
	4.8	122.136	196.51	114.995	178.131	137.782	202.339
	4.9	121.499	196.982	114.169	178.119	138.607	203.219
	5	121.23	197.09	113.701	178.21	138.819	204.229
	5.1	121.337	196.826	113.68	178.465	138.662	204.552
	5.2	121.346	196.309	113.935	178.747	138.565	204.228
	5.3	121.016	195.643	114.185	178.724	138.569	203.491
	5.4	120.44	195.157	114.57	178.322	138.543	202.784
	5.5	120.11	194.811	114.624	177.571	138.85	202.168
	5.6	120.185	194.648	114.609	176.597	139.572	201.611
	5.7	120.482	194.705	114.357	175.717	140.299	201.278
	5.8	120.564	195.016	114.449	175.107	140.534	201.143
	5.9	120.456	195.284	114.443	175.028	140.623	201.348
	6	120.253	195.463	114.212	175.028	140.797	201.592
	6.1	120.179	195.261	113.601	175.334	140.839	202.157
	6.2	120.066	195.013	112.797	175.12	140.202	202.377
	6.3	120.048	194.612	112.32	174.955	139.512	202.241
	6.4	119.643	194.117	111.843	174.265	138.913	201.637
	6.5	119.276	193.935	111.575	174.1	138.926	201.341
	6.6	118.521	194.377	111.271	174.031	138.696	201.416
	6.7	118.072	195.222	111.427	174.627	138.657	201.591
	6.8	117.559	195.6	111.596	175.189	138.599	201.584
	6.9	117.666	195.048	111.804	175.422	139.028	201.213
	7	117.699	194.159	111.838	175.002	139.629	200.682
	7.1	117.75	193.703	112.378	174.115	140.073	200.107
	7.2	117.163	193.761	112.8	173.243	140.116	199.988
	7.3	116.764	194.207	113.12	172.483	139.375	200.009
	7.4	116.834	194.449	112.816	172.174	138.591	199.771
	7.5	117.403	194.135	112.716	172.247	137.914	199.527
	7.6	117.899	193.33	112.659	172.484	137.864	199.75
	7.7	117.673	192.321	112.912	172.397	137.914	200.751
	7.8	117.243	191.98	112.883	171.929	137.852	201.078
	7.9	116.905	191.728	112.679	171.615	137.611	200.835
	8	116.796	191.997	112.14	171.147	137.157	199.831
	8.1	116.603	192.326	111.721	170.738	136.913	199.229
	8.2	116.207	193.087	111.526	169.811	137.046	198.478
	8.3	115.782	193.466	111.521	169.398	137.968	197.738
	8.4	115.307	193.221	111.654	169.416	138.995	197.594
	8.5	114.896	192.278	111.599	169.891	139.722	198.096
	8.6	114.775	191.281	111.421	170.499	139.526	199.239
	8.7	114.903	190.911	111.238	170.516	138.978	199.449
	8.8	115.046	191.381	111.239	170.315	138.182	198.908
	8.9	114.672	191.85	111.402	169.311	137.676	197.783
	9	113.82	191.833	111.115	168.489	137.242	197.475
	9.1	112.911	190.933	110.665	167.768	137.243	198.01
	9.2	112.591	190.578	110.341	167.581	137.429	198.904
	9.3	113.054	190.803	110.658	167.785	138.253	199.148
	9.4	113.477	192.031	111.082	168.057	138.524	198.724
	9.5	113.702	192.726	111.371	168.321	138.358	198.278
	9.6	113.46	192.568	111.316	168.005	137.537	198.089
	9.7	113.034	191.541	111.109	167.535	137.35	198.342
	9.8	112.291	190.459	110.911	166.997	137.714	198.44
	9.9	111.508	190.129	110.914	166.875	138.188	198.486
	10	111.287	190.099	111.308	166.921	138.382	198.271
	10.1	111.465	189.811	111.464	167.192	138.187	198.071
	10.2	111.547	188.742	111.403	167.249	137.993	198.066
	10.3	111.3	187.607	111.144	167.187	137.605	198.153
	10.4	111.016	187.459	111.145	166.831	137.834	198.288
	10.5	111.322	188.148	110.908	166.822	138.34	197.977
	10.6	111.61	189.109	110.583	166.829	139.183	197.859
	10.7	111.559	189.277	110.339	167.188	139.039	197.731
	10.8	110.949	189.12	110.664	166.905	138.102	197.881
	10.9	110.81	188.573	110.962	166.323	136.98	197.564
	11	111.017	188.395	111.247	165.243	136.662	197.007
	11.1	111.372	188.213	111.123	164.726	136.982	196.329
	11.2	111.045	188.254	111.014	164.718	137.177	195.73
	11.3	110.617	188.067	110.547	164.734	136.535	195.458
	11.4	110.421	187.778	110.364	164.141	135.83	195.183
	11.5	110.573	187.657	110.447	163.504	135.506	195.186
	11.6	110.935	187.691	110.719	163.078	136.028	195.377
	11.7	110.942	187.913	110.936	163.157	136.37	196.021
	11.8	110.774	187.953	110.81	162.909	136.458	196.613
	11.9	110.393	187.938	110.933	162.596	136.179	197.089
	12	110.082	187.593	110.808	162.442	136.397	197.178
	12.1	110.091	187.39	110.885	162.353	136.34	197.179
	12.2	110.044	187.146	110.621	162.374	136.416	196.627
	12.3	109.897	187.056	110.522	161.899	136.037	196.084
	12.4	109.379	186.469	110.217	161.668	136.209	195.5
	12.5	108.498	185.903	110.188	161.319	136.292	195.346
	12.6	107.79	185.755	109.995	161.389	136.663	195.078
	12.7	107.084	185.824	109.717	161.454	137.194	194.84
	12.8	106.891	185.768	109.423	161.751	137.892	194.264
	12.9	106.916	185.237	109.466	161.969	138.024	193.957
	13	107.284	185.184	109.802	162.095	137.4	193.79
	13.1	107.621	185.64	109.696	162.096	136.394	194.195
	13.2	107.599	186.349	109.223	161.683	135.829	194.841
	13.3	107.289	186.453	108.915	161.214	135.639	195.207
	13.4	107.106	186.027	108.965	160.651	135.837	194.724
	13.5	107.096	185.543	109.468	160.626	136.217	193.355
	13.6	107.199	185.132	109.71	160.6	136.961	192.244
	13.7	107.064	184.719	109.976	160.374	137.427	192.093
	13.8	106.987	184.292	109.932	159.867	137.215	192.529
	13.9	106.918	184.392	109.9	159.299	136.154	192.735
	14	106.945	184.634	109.772	158.961	135.31	192.538
	14.1	106.776	184.803	109.835	158.699	135.387	192.669
	14.2	106.634	184.753	109.782	158.402	136.37	193.293
	14.3	106.491	185.007	109.821	158.423	137.196	194.496
	14.4	106.429	185.399	109.671	158.533	137.361	195.034
	14.5	106.454	185.498	109.591	158.694	136.932	194.868
	14.6	106.562	184.942	109.709	158.364	136.532	193.625
	14.7	106.873	184.102	109.871	157.831	136.284	192.541
	14.8	107.066	183.578	110.134	157.413	136.33	192.176
	14.9	107.013	183.449	110.029	157.206	136.587	192.651
	15	106.902	183.561	109.894	156.974	136.729	193.54
	15.1	106.603	183.606	109.64	156.506	136.377	193.701
	15.2	106.321	183.934	109.393	155.78	135.651	193.425
	15.3	105.779	184.027	109.1	155.168	134.954	192.464
	15.4	105.677	183.949	108.91	154.958	134.669	191.989
	15.5	105.729	183.228	108.885	155.091	134.77	191.506
	15.6	105.802	182.997	109.131	155.546	135.429	191.417
	15.7	105.202	183.274	109.365	156.065	136.247	190.978
	15.8	104.327	184.245	109.534	156.64	136.859	190.639
	15.9	103.487	184.412	109.468	156.87	136.83	190.503
	16	103.082	183.649	109.493	156.678	136.951	190.617
	16.1	103.285	182.204	109.834	156.241	137.33	190.888
	16.2	103.959	181.436	110.155	155.793	137.864	191.044
	16.3	105.057	181.054	110.373	155.628	137.806	191.309
	16.4	105.633	180.922	110.169	155.678	137.213	191.438
	16.5	105.803	180.557	110.035	155.777	136.78	191.449
	16.6	105.126	180.515	109.878	155.788	136.552	191.465
	16.7	104.57	180.873	109.61	155.693	136.834	191.683
	16.8	103.819	181.298	109.227	155.399	136.905	191.974
	16.9	103.868	181.662	108.874	154.854	136.722	192.036
	17	103.927	181.891	108.931	154.369	136.142	191.605
	17.1	104.298	182.126	109.295	153.972	135.756	191.226
	17.2	103.933	182.098	109.483	153.667	135.416	191.184
	17.3	103.75	181.602	109.331	152.993	135.202	191.544
	17.4	103.489	181.122	108.742	152.468	134.801	191.75
	17.5	103.724	181.143	108.285	152.097	134.924	191.314
	17.6	103.803	181.41	107.928	152.31	135.235	190.724
	17.7	104.096	181.657	107.792	152.731	135.446	190.277
	17.8	104.202	181.08	107.958	152.783	135.349	190.288
	17.9	104.389	180.367	108.39	152.349	134.91	190.076
	18	104.254	179.706	108.714	151.632	134.591	189.796
	18.1	103.996	179.54	108.637	151.785	134.218	189.545
	18.2	103.563	179.535	108.246	152.067	134.08	189.631
	18.3	103.091	179.596	107.825	152.209	134.29	189.758
	18.4	102.723	179.93	107.255	151.726	134.805	189.618
	18.5	102.175	180.701	106.76	151.533	135.691	189.658
	18.6	101.909	181.184	107.028	151.836	136.29	189.641
	18.7	102.035	181.023	107.878	151.868	136.606	189.914
	18.8	102.637	180.236	108.735	151.591	136.512	189.857
	18.9	103.082	179.622	108.817	150.656	136.684	189.405
	19	103.155	179.518	108.541	150.206	136.891	189.235
	19.1	102.691	179.179	108.409	149.492	136.529	189.084
	19.2	101.685	178.651	108.254	149.136	135.507	189.385
	19.3	100.262	177.668	108.387	148.593	134.445	189.003
	19.4	99.5734	177.141	108.57	148.847	134.382	188.677
	19.5	100.446	176.928	109.237	149.291	135.232	188.683
	19.6	102.051	177.088	109.539	149.944	136.451	188.842
	19.7	103.007	177.358	109.577	150.027	137.114	189.172
	19.8	102.261	177.403	109.074	149.913	136.962	189.171
	19.9	101.138	177.82	108.754	149.327	136.165	189.383
	20	100.429	178.12	108.714	148.772	135.654	189.256
	20.1	100.661	178.527	108.949	148.133	135.291	188.642
	20.2	101.202	178.278	108.952	148.276	135.198	188.172
	20.3	101.639	178.31	108.675	148.785	134.76	188.07
	20.4	101.705	178.526	108.374	149.256	134.428	188.602
	20.5	101.68	178.912	108.448	148.998	134.595	188.599
	20.6	101.364	178.963	108.716	148.308	135.087	188.103
	20.7	101.366	178.59	109.145	147.945	135.565	186.973
	20.8	101.027	177.919	109.055	147.896	135.156	185.798
	20.9	101.002	177.33	108.57	148.049	134.225	184.838
	21	100.686	177.05	107.805	148.089	133.36	185.014
	21.1	100.58	177.069	107.552	148.103	133.065	185.922
	21.2	100.3	176.998	107.836	147.918	133.447	187.193
	21.3	100.152	176.556	108.317	147.638	133.801	187.537
	21.4	99.9662	176.328	108.685	147.493	133.7	187.688
	21.5	99.7591	175.791	108.731	147.43	133.213	187.579
	21.6	99.4323	175.561	108.662	146.804	133.021	187.543
	21.7	99.4033	174.722	108.501	145.689	133.803	187.449
	21.8	99.4449	174.335	108.57	144.637	134.96	187.814
	21.9	99.9264	173.961	108.675	144.482	135.839	188.543
	22	100.048	174.044	108.881	144.617	136.132	188.783
	22.1	100.348	173.977	108.99	144.599	135.932	188.323
	22.2	100.203	173.779	109.125	144.164	135.64	187.6
	22.3	100.24	173.858	109.035	143.915	135.086	187.193
	22.4	100.286	174.22	108.804	144.197	134.82	186.86
	22.5	100.54	174.632	108.473	144.577	134.767	186.152
	22.6	100.653	174.939	108.212	144.781	134.806	185.39
	22.7	100.449	174.865	107.792	144.362	134.891	184.747
	22.8	100.217	174.947	107.458	143.831	134.817	185.012
	22.9	100.245	174.219	107.213	143.577	134.893	185.841
	23	100.488	173.764	107.501	143.822	134.907	186.69
	23.1	100.519	173.445	107.938	144.204	135.002	186.921
	23.2	100.21	174.092	108.403	144.132	134.795	186.621
	23.3	99.9639	174.595	108.511	143.502	134.537	186.313
	23.4	99.9759	174.811	108.257	142.876	134.557	186.386
	23.5	100.16	174.712	107.949	142.607	135.24	186.372
	23.6	100.176	174.445	107.783	142.759	135.604	186.255
	23.7	100.245	173.996	107.883	142.988	135.365	185.742
	23.8	100.494	173.348	108.111	142.774	134.437	185.394
	23.9	100.732	173.045	108.054	142.33	134.194	185.072
	24	100.457	173.046	107.816	141.38	134.537	184.754
	24.1	99.6499	173.383	107.254	140.938	135.36	184.45
	24.2	99.1032	173.737	106.934	140.784	135.613	184.436
	24.3	99.1667	174.098	106.941	141.07	135.225	184.522
	24.4	99.9073	174.455	107.187	140.952	134.543	184.664
	24.5	100.475	174.908	107.376	140.914	134.055	184.624
	24.6	100.442	175.243	107.332	141.135	133.793	184.474
	24.7	99.8524	175.139	107.574	141.557	133.513	184.297
	24.8	99.0109	174.594	108.046	141.462	133.204	184.24
	24.9	98.6432	173.914	108.23	140.833	133.145	184.876
	25	98.4791	173.462	108.023	140.773	133.287	185.69
	25.1	98.5351	173.054	107.626	141.428	133.657	186.427
	25.2	98.4741	172.732	107.772	142.448	134.031	186.59
	25.3	98.4006	172.894	107.924	142.416	134.257	185.913
	25.4	98.2261	172.996	108.388	141.738	134.2	185.078
	25.5	97.8171	173.313	108.531	140.917	133.871	184.224
	25.6	97.2581	172.638	108.721	140.769	133.665	184.398
	25.7	96.9317	172.081	108.445	140.765	133.579	184.515
	25.8	96.8993	171.678	108.234	140.673	133.791	184.72
	25.9	97.2617	171.937	107.886	140.181	134.058	184.504
	26	97.5452	172.148	107.405	139.562	134.311	184.351
	26.1	97.9729	171.88	107.101	138.757	134.226	183.982
	26.2	98.0522	171.467	107.092	138.202	134.052	183.251
	26.3	98.1071	171.293	107.698	137.864	134.022	182.922
	26.4	97.8109	170.94	108.238	138.294	134.402	182.776
	26.5	97.6957	170.538	108.61	138.888	134.353	183.156
	26.6	97.4879	170.232	108.569	139.382	133.833	183.37
	26.7	97.4822	170.569	108.348	138.884	133.085	184.146
	26.8	97.5589	171.247	108.321	138.044	133.195	184.99
	26.9	97.8409	171.623	108.544	137.401	133.929	185.508
	27	98.1663	171.607	108.982	137.478	134.53	185.098
	27.1	98.1516	171.434	109.105	137.657	134.459	184.424
	27.2	97.6943	171.679	109.07	137.741	134.038	184.503
	27.3	96.8811	171.974	108.793	137.622	133.871	185.198
	27.4	96.501	171.783	108.647	137.727	133.999	185.694
	27.5	96.8967	171.105	108.283	138.028	133.95	184.917
	27.6	97.7144	170.714	108.32	138.585	133.834	183.74
	27.7	98.4711	171.054	108.61	139	133.789	183.093
	27.8	98.7144	171.467	109.417	138.947	134.138	183.301
	27.9	98.6564	171.308	109.694	138.608	134.477	183.675
	28	98.291	170.371	109.534	138.498	135.043	183.745
	28.1	97.9362	169.579	108.981	138.933	135.875	184.141
	28.2	97.6599	169.22	108.71	139.242	136.773	184.665
	28.3	97.2281	169.432	108.531	138.742	137.007	184.917
	28.4	96.9094	169.225	108.078	137.774	136.582	184.08
	28.5	96.6328	169.122	107.564	136.808	135.702	182.828
	28.6	97.011	169.044	107.317	136.484	135.028	182.03
	28.7	97.357	169.527	107.677	136.752	134.095	182.24
	28.8	97.8289	169.692	107.921	137.788	133.576	183.059
	28.9	97.6554	169.994	107.847	138.762	133.472	183.552
	29	97.081	170.357	107.534	138.902	134.035	183.494
	29.1	96.3079	171.051	107.489	137.79	134.277	182.774
	29.2	95.972	171.076	107.437	136.683	133.534	182.259
	29.3	96.2934	170.563	106.967	135.895	132.687	181.909
	29.4	96.7366	169.74	106.402	135.566	132.26	181.856
	29.5	96.9381	169.349	106.697	134.921	132.862	181.748
	29.6	96.6009	169.108	108.148	134.07	133.45	181.748
	29.7	96.0083	168.871	109.64	133.58	134.011	182.226
	29.8	95.6417	168.575	109.928	133.875	134.384	182.957
	29.9	95.7544	168.501	109.305	135.079	134.598	183.747
	30	96.2329	168.603	108.633	136.175	134.412	183.838
	30.1	96.8304	168.494	108.32	136.641	133.888	183.539
	30.2	96.9458	168.533	107.913	136.195	133.49	183.004
	30.3	97.0466	168.466	107.351	135.314	133.586	182.592
	30.4	96.4998	168.66	106.98	134.496	133.686	182.01
	30.5	96.3122	168.549	107.024	134.343	133.647	181.279
	30.6	95.916	168.637	107.199	134.857	133.505	180.961
	30.7	96.0752	168.581	107.633	135.385	133.503	181.399
	30.8	96.1793	168.603	107.888	135.376	134.006	181.971
	30.9	96.3313	168.269	108.262	135.162	134.331	182.094
	31	96.1211	167.929	108.237	135.258	134.63	181.749
	31.1	95.8157	167.612	108.358	135.751	134.151	181.6
	31.2	95.3883	167.498	108.076	136.214	133.684	181.355
	31.3	95.1793	167.776	108.004	136.155	133.403	180.887
	31.4	95.0664	168.027	107.823	135.81	133.556	180.345
	31.5	95.361	168.211	108.147	135.521	133.553	180.11
	31.6	95.8067	167.92	108.089	135.363	133.422	180.345
	31.7	96.3083	167.361	107.978	134.767	133.133	180.462
	31.8	96.5283	167.012	107.863	133.836	133.247	180.682
	31.9	96.2539	166.841	108.279	132.984	133.293	180.558
	32	95.4693	166.918	108.461	133.06	133.657	180.5
	32.1	94.5607	166.783	108.088	133.546	133.631	180.567
	32.2	94.2971	166.696	106.976	134.027	133.541	180.88
	32.3	94.6153	167.012	105.963	133.965	133.265	181.308
	32.4	95.2267	167.163	105.647	133.346	133.2	181.454
	32.5	95.7264	167.014	106.43	132.787	133.317	181.252
	32.6	96.064	165.968	107.692	131.999	133.283	180.68
	32.7	96.1197	165.492	108.409	131.625	133.49	179.876
	32.8	95.5886	165.289	108.422	131.071	133.725	179.33
	32.9	95.134	165.621	108.286	131.024	134.042	179.172
	33	94.8506	165.079	108.031	130.69	133.483	179.299
	33.1	95.204	164.426	107.484	130.376	132.688	179.435
	33.2	95.4502	163.716	106.688	130.101	131.913	179.452
	33.3	95.7157	163.459	106.526	130.278	132.101	179.399
	33.4	95.7559	163.228	107.05	131.092	132.507	179.537
	33.5	95.8758	163.271	107.76	131.88	133.19	179.882
	33.6	95.9879	163.942	108.084	132.624	133.42	180.38
	33.7	96.1951	164.948	107.949	133.096	133.683	180.627
	33.8	96.3593	165.578	107.627	133.376	133.577	180.635
	33.9	96.4997	165.532	107.298	133.263	133.552	180.54
	34	96.3458	165.254	107.175	132.907	133.411	179.985
	34.1	96.3319	164.965	107.438	132.506	133.515	179.452
	34.2	96.0833	164.764	107.952	132.612	133.698	178.652
	34.3	95.731	164.485	108.384	132.274	133.663	178.498
	34.4	95.0127	164.388	108.093	131.775	133.274	178.37
	34.5	94.5623	164.313	107.431	130.514	132.813	178.66
	34.6	94.4073	164.057	106.973	130.236	132.726	178.954
	34.7	94.7649	164.135	107.14	130.529	133.21	179.21
	34.8	95.2477	164.171	107.678	131.719	133.619	179.304
	34.9	95.8843	164.45	108.119	132.472	133.71	179.293
	35	96.0807	164.317	108.344	132.497	133.188	179.194
	35.1	96.0754	164.538	108.524	131.871	132.852	178.91
	35.2	96.2021	164.753	108.658	130.926	132.827	178.047
	35.3	96.3049	164.489	108.664	130.836	132.818	177.104
	35.4	96.4159	163.23	108.186	130.935	132.657	176.397
	35.5	95.8	161.632	107.763	131.458	132.076	176.711
	35.6	95.2412	160.885	107.717	131.638	131.893	177.626
	35.7	94.7343	161.093	108.221	132.057	131.544	179.11
	35.8	95.1881	162.255	108.489	132.129	131.558	180.021
	35.9	95.8526	163.329	108.432	131.691	131.513	180.598
	36	96.4456	164.136	108.093	130.824	132.006	180.024
	36.1	96.16	163.837	108.03	130.378	132.333	179.392
	36.2	95.6507	162.618	108.322	130.263	132.482	178.614
	36.3	95.0293	161.549	108.716	130.363	132.243	178.184
	36.4	94.876	161.161	108.95	129.944	132.495	177.962
	36.5	94.8854	161.739	108.562	129.56	132.986	177.673
	36.6	95.298	162.081	108.343	129.063	133.532	177.428
	36.7	95.3877	162.361	107.989	128.784	133.51	177.257
	36.8	95.7129	162.474	108.081	128.712	133.221	177.434
	36.9	95.6836	162.611	107.717	129.101	132.771	178.425
	37	95.9596	162.378	107.645	129.588	132.496	178.921
	37.1	95.7138	162.066	107.429	129.92	132.56	179.1
	37.2	95.2964	162.057	107.628	129.739	132.956	178.212
	37.3	94.6996	162.196	107.484	129.73	133.539	177.849
	37.4	94.3589	162.095	107.739	129.877	133.935	177.527
	37.5	94.1588	161.318	107.957	130.029	134.295	177.521
	37.6	94.1511	160.697	108.324	129.679	134.259	177.432
	37.7	94.2331	160.179	107.984	128.659	134.315	177.713
	37.8	94.6013	160.368	107.282	127.925	134.264	178.511
	37.9	94.7579	160.418	107.064	127.742	134.047	179.221
	38	94.9298	160.707	107.703	128.128	133.393	179.695
	38.1	95.1103	160.528	108.822	128.357	132.491	179.355
	38.2	95.3202	160.423	109.098	128.269	132.083	178.718
	38.3	95.2138	160.222	108.801	128.342	132.049	177.979
	38.4	95.0938	160.751	108.041	128.645	132.263	177.691
	38.5	95.1853	161.66	107.933	128.777	132.579	177.696
	38.6	95.6217	162.529	107.77	128.683	132.844	177.649
	38.7	95.6724	162.612	108.222	128.247	133.248	177.624
	38.8	95.4632	161.623	108.44	127.85	133.439	177.943
	38.9	94.8963	160.467	108.798	126.988	133.716	178.379
	39	94.477	159.221	108.434	126.013	134.156	178.396
	39.1	94.1339	159.065	107.992	125.477	134.528	177.708
	39.2	94.0747	159.057	107.832	125.637	134.486	176.884
	39.3	93.9709	159.421	108.076	126.342	133.897	176.524
	39.4	94.2423	159.351	108.431	126.998	133.546	176.533
	39.5	94.609	159.547	108.483	127.462	133.721	176.779
	39.6	95.3228	160.109	108.559	127.4	133.896	177.204
	39.7	95.4774	160.767	108.539	126.884	133.441	177.708
	39.8	95.1941	161.057	108.301	126.311	132.741	177.912
	39.9	94.6492	160.829	108.044	126.253	132.151	177.676
	40	94.4721	160.484	108.044	126.365	132.119	177.375
	40.1	94.3559	160.281	108.294	126.352	131.907	177.614
	40.2	94.3848	160.033	108.386	126.002	132.063	177.814
	40.3	94.2112	159.704	108.136	126.13	132.239	178.011
	40.4	94.5816	159.246	107.762	126.647	132.738	177.594
	40.5	94.717	158.909	107.279	127.106	133.019	177.151
	40.6	94.59	158.892	107.295	126.796	132.998	176.674
	40.7	94.1832	159.346	107.292	125.984	133.072	176.529
	40.8	94.2059	160.302	107.364	125.394	133.068	176.713
	40.9	94.932	160.776	106.833	125.375	133.037	176.92
	41	95.5139	160.578	106.519	125.456	132.572	176.804
	41.1	95.4201	159.563	106.217	125.599	132.27	176.779
	41.2	95.0247	158.618	105.98	125.554	132.323	176.745
	41.3	94.8193	157.673	105.846	125.759	132.649	176.825
	41.4	95.3024	157.378	106.435	125.557	132.842	176.612
	41.5	95.5258	157.472	107.47	125.259	132.923	176.406
	41.6	95.522	158.218	108.309	124.819	132.79	176.786
	41.7	95.1112	158.306	108.164	124.587	132.193	177.079
	41.8	94.6972	158.126	107.834	124.616	131.481	177.383
	41.9	94.0844	157.2	107.518	124.903	131.205	177.317
	42	93.4803	156.573	107.709	125.412	131.639	177.338
	42.1	93.1858	156.462	107.94	125.56	132.443	177.041
	42.2	93.7141	157.339	108.198	125.485	132.793	176.374
	42.3	94.2474	158.294	108.365	125.287	133.072	175.569
	42.4	94.463	158.595	108.561	125.307	132.959	175.193
	42.5	94.1228	158.255	108.803	124.978	133.231	175.329
	42.6	93.9091	158.236	108.771	124.185	133.059	176.158
	42.7	94.1216	158.684	108.342	123.116	132.475	177.098
	42.8	94.3826	158.72	107.659	122.727	131.235	177.783
	42.9	94.893	158.105	107.328	122.69	130.541	177.947
	43	95.0206	156.92	107.154	122.765	130.692	177.466
	43.1	94.9168	156.607	107.498	122.303	131.838	176.639
	43.2	94.3349	156.906	107.687	121.992	133.07	175.64
	43.3	93.8136	157.643	107.979	122.151	134.088	175.384
	43.4	93.5916	157.984	107.795	122.798	134.518	175.863
	43.5	93.6628	157.791	107.898	123.685	134.289	176.631
	43.6	93.9909	157.149	108.085	124.32	133.807	176.785
	43.7	94.3004	156.342	108.28	124.657	133.156	176.271
	43.8	94.2413	155.955	107.845	124.331	132.706	175.753
	43.9	94.2207	156.302	107.418	123.891	132.114	175.57
	44	94.2814	156.798	107.124	123.196	131.844	175.955
	44.1	94.757	157.049	107.266	123.116	131.652	176.274
	44.2	94.4932	156.86	107.271	123.086	131.885	176.852
	44.3	93.7048	156.897	107.126	123.313	131.939	177.34
	44.4	93.0468	156.935	106.836	123.15	132.199	177.991
	44.5	93.3806	156.861	106.372	123.275	132.31	178.081
	44.6	94.5202	156.37	106.206	123.574	132.738	177.865
	44.7	95.1126	156.173	106.35	123.961	133.178	177.369
	44.8	95.0736	156.372	106.954	123.519	133.562	177
	44.9	94.524	156.792	107.618	123.046	133.463	176.366
	45	94.0601	156.827	108.137	122.57	132.777	175.496
	45.1	93.6624	156.385	108.276	122.724	132.285	174.818
	45.2	93.5096	155.811	107.922	122.334	132.195	174.733
	45.3	93.931	155.524	107.206	122.004	132.86	174.819
	45.4	94.4499	155.81	106.604	121.751	133.074	174.686
	45.5	94.6747	156.395	106.281	122.453	132.879	174.432
	45.6	94.345	156.991	106.208	123.315	132.182	174.574
	45.7	93.9408	156.985	106.291	124.019	131.87	174.816
	45.8	93.6799	156.584	106.649	123.914	132.134	174.927
	45.9	93.5622	155.65	107.236	123.655	132.656	174.431
	46	93.4306	155.185	107.541	123.321	133.428	173.956
	46.1	93.2378	155.042	107.849	123.112	133.85	173.611
	46.2	92.9246	155.577	108.15	122.593	133.943	173.898
	46.3	93.1432	155.846	108.636	122.142	133.274	174.554
	46.4	93.7986	155.93	108.383	121.795	132.374	175.168
	46.5	94.8586	155.284	107.574	121.714	131.674	175.665
	46.6	95.5529	154.751	106.938	121.543	131.311	175.37
	46.7	95.6494	154.629	106.875	121.629	131.029	174.929
	46.8	95.3837	155.511	107.299	121.695	130.672	174.473
	46.9	95.0447	156.241	107.296	121.889	130.719	174.604
	47	94.9468	156.338	107.052	121.877	131.358	174.608
	47.1	94.8322	155.564	106.609	122.112	132.253	174.039
	47.2	94.5781	154.682	106.246	122.465	132.877	173.119
	47.3	94.1557	153.743	106.022	122.971	133.2	172.505
	47.4	93.9252	153.166	106.268	123.004	133.351	172.664
	47.5	93.6134	152.798	106.911	122.738	133.131	173.304
	47.6	93.4637	153.074	107.953	121.909	132.509	174.139
	47.7	93.0517	153.657	108.122	120.917	131.858	174.113
	47.8	93.1829	154.351	107.908	119.812	131.561	173.703
	47.9	93.2898	155.046	106.858	119.299	131.786	172.983
	48	93.6933	155.426	106.575	119.663	132.119	172.892
	48.1	93.5658	155.766	106.511	120.349	132.423	172.597
	48.2	93.4232	155.501	107.324	120.648	132.339	172.037
	48.3	93.2448	154.836	108.095	120.267	132.109	171.634
	48.4	93.1599	154.068	108.993	119.802	132.088	171.689
	48.5	93.3884	153.595	109.365	119.62	132.245	172.401
	48.6	93.4959	153.309	109.25	119.755	132.797	173.004
	48.7	93.7077	152.994	108.961	119.948	133.183	173.727
	48.8	93.4339	152.572	108.668	120.369	133.551	173.91
	48.9	93.3047	152.469	108.247	120.79	133.334	173.545
	49	93.3567	152.532	107.514	121.258	132.947	172.926
	49.1	93.5059	153.013	106.911	121.396	132.187	172.663
	49.2	93.1993	153.309	107.072	121.558	131.519	172.923
	49.3	92.6839	153.469	107.676	121.489	130.932	173.282
	49.4	92.5663	153.006	108.196	121.294	131.143	173.438
	49.5	93.0982	152.788	108.44	120.806	131.667	173.093
	49.6	93.5663	152.951	108.661	120.3	131.959	172.221
	49.7	93.674	153.614	109.221	119.75	131.125	171.677
	49.8	93.4171	154.214	109.461	119.125	130.119	171.956
	49.9	93.389	154.135	109.224	118.689	129.721	173.045
	50	93.4356	153.754	108.349	118.666	130.542	173.706
	50.1	93.632	152.973	107.501	118.95	131.745	173.726
	50.2	93.5371	152.452	107.066	119.255	132.621	173.034
	50.3	93.4451	152.055	106.857	119.2	133.056	172.296
	50.4	93.1409	151.712	107.059	119.091	132.905	171.898
	50.5	92.968	151.361	107.215	119.089	132.502	171.958
	50.6	92.9827	150.879	107.535	119.393	131.952	172.538
	50.7	93.0876	150.936	107.525	119.879	131.563	172.755
	50.8	93.2763	151.092	107.579	120.003	131.827	172.887
	50.9	93.3428	151.533	107.677	119.717	132.323	172.53
	51	93.6131	151.051	107.821	119.195	132.934	172.651
	51.1	93.8174	150.484	108.077	119.035	133.245	172.743
	51.2	93.6239	149.908	108.358	119.17	133.319	172.875
	51.3	93.2601	150.719	108.844	119.521	133.056	172.297
	51.4	92.7966	151.773	108.646	119.363	132.173	171.563
	51.5	92.7469	152.429	108.224	119.481	131.292	170.784
	51.6	92.6801	151.797	107.455	119.311	130.99	170.646
	51.7	93.004	150.899	107.223	119.347	131.148	170.505
	51.8	92.9616	150.475	107.185	118.422	131.441	170.882
	51.9	92.9898	150.917	107.33	117.59	131.507	171.293
	52	92.8476	151.541	107.508	117.139	131.901	172.08
	52.1	93.5076	152.017	107.471	117.554	132.089	172.395
	52.2	94.1356	151.721	107.447	117.951	132.37	172.513
	52.3	94.3194	151.028	107.359	118.352	132.435	172.161
	52.4	93.6896	150.438	107.379	118.759	132.536	171.669
	52.5	92.8479	150.723	107.447	119.089	132.388	171.139
	52.6	92.4781	151.645	107.231	119.045	132.338	171.177
	52.7	92.5128	152.172	107.222	118.695	132.4	171.784
	52.8	93.0616	151.745	107.092	118.604	132.621	172.331
	52.9	93.3967	150.979	107.302	118.541	132.701	172.383
	53	93.3948	150.458	107.12	118.626	132.97	172.07
	53.1	92.8704	150.869	107.068	118.374	133.118	171.659
	53.2	92.6999	151.269	106.85	118.204	133.182	171.352
	53.3	93.0693	151.301	107.112	117.929	132.82	170.786
	53.4	93.6207	150.376	107.273	117.978	132.325	170.319
	53.5	93.9149	149.34	107.601	118.07	131.935	169.869
	53.6	93.8519	148.643	107.425	118.124	131.987	169.804
	53.7	94	148.745	107.796	117.771	132.604	170.192
	53.8	93.7057	149.099	108.265	117.336	133.139	170.646
	53.9	93.3024	149.527	108.825	116.801	133.521	171.335
	54	92.4668	149.243	108.284	116.739	132.726	171.513
	54.1	92.3434	148.77	107.251	116.755	132.057	171.945
	54.2	92.5936	148.469	106.675	117.222	131.292	172.069
	54.3	93.1359	149.135	106.974	117.416	131.674	172.345
	54.4	93.5273	149.955	107.658	117.706	131.305	171.843
	54.5	93.6719	150.39	108.039	117.446	130.739	171.35
	54.6	93.9556	149.985	107.938	117.408	129.908	170.993
	54.7	94.0491	149.37	107.792	117.089	130.063	171.168
	54.8	94.2574	148.874	107.48	117.199	130.443	171.488
	54.9	94.2434	149.291	107.287	117.323	131.01	171.338
	55	94.2736	150.094	106.956	117.484	131.289	171.135
	55.1	93.9727	150.886	106.759	117.443	131.624	170.31
	55.2	93.652	150.533	106.676	117.081	131.831	169.752
	55.3	93.5111	149.575	106.654	116.926	132.105	169.108
	55.4	94.0494	148.47	106.656	116.602	132.338	169.177
	55.5	94.8241	147.495	106.968	116.076	132.236	169.254
	55.6	95.3586	147.027	107.292	115.419	131.962	169.55
	55.7	95.1922	146.762	107.616	115.047	131.447	169.669
	55.8	94.4447	146.907	107.467	115.184	131.018	169.678
	55.9	93.6138	146.651	107.419	115.43	130.899	169.391
	56	93.2076	146.26	107.405	115.823	131.116	169.043
	56.1	93.4239	146.045	107.178	116.212	131.211	168.667
	56.2	93.6243	146.29	106.942	116.597	130.949	168.21
	56.3	93.2752	146.996	106.826	116.858	130.781	167.593
	56.4	92.5389	147.843	107.314	116.947	131.214	167.657
	56.5	92.1198	148.394	107.5	116.954	131.545	168.74
	56.6	92.4454	148.447	107.266	116.477	131.637	170.28
	56.7	93.3648	147.91	106.553	116.047	131.239	171.128
	56.8	93.9706	147.449	106.247	115.541	131.317	171.117
	56.9	93.8861	147.41	106.156	115.59	131.495	170.583
	57	92.8411	147.788	106.481	115.451	132.036	170.562
	57.1	92.0069	147.981	106.568	115.318	132.427	170.687
	57.2	91.3983	147.683	106.743	114.99	132.68	171.081
	57.3	91.6196	147.244	106.826	114.74	132.636	170.697
	57.4	91.9542	147.34	107.038	114.502	132.4	169.929
	57.5	92.5709	147.737	107.11	114.302	132.027	168.967
	57.6	92.6496	148.041	106.748	114.726	131.747	168.677
	57.7	92.5799	147.854	106.35	115.354	131.202	169.096
	57.8	92.3712	147.573	106.292	115.959	130.705	170.078
	57.9	92.5492	147.415	106.746	115.607	129.654	171.094
	58	92.8463	147.36	107.196	115.177	128.935	171.576
	58.1	93.2774	147.249	107.397	114.8	128.363	171.495
	58.2	93.5137	146.88	107.485	114.721	128.674	170.707
	58.3	93.6744	146.558	107.53	114.434	129.544	169.937
	58.4	93.6032	146.334	107.416	114.233	131.319	169.26
	58.5	93.629	146.093	107.001	114.619	132.71	169.119
	58.6	93.5291	145.782	106.594	115.397	133.419	168.836
	58.7	93.3239	145.708	106.45	116.036	132.879	168.573
	58.8	92.9346	146.005	106.447	115.799	132.403	168.194
	58.9	92.4587	146.444	106.524	115.34	132.085	168.723
	59	92.0136	146.466	106.526	114.576	131.899	168.983
	59.1	91.7114	146.693	106.76	114.413	131.366	169.329
	59.2	91.5973	146.706	106.834	114.135	130.664	168.677
	59.3	91.8112	146.503	107.039	114.416	130.302	168.675
	59.4	92.3629	145.702	107.341	114.541	130.465	168.734
	59.5	93.2237	144.941	108.1	115.119	130.744	169.449
	59.6	94.1828	144.639	108.555	115.483	130.671	169.939
	59.7	94.8954	144.772	108.509	115.964	130.463	170.092
	59.8	95.1653	145.328	107.803	115.927	130.47	169.788
	59.9	95.0634	146.174	107.328	115.862	130.815	169.27
	60	94.6819	146.828	107.232	115.587	131.051	169.069
	60.1	94.188	146.889	107.465	115.323	130.903	168.976
	60.2	94.0453	146.418	107.709	114.793	130.885	168.925
	60.3	94.1001	145.914	107.899	114.055	131.09	168.49
	60.4	94.55	145.802	108.06	113.604	131.597	167.591
	60.5	94.3487	145.683	107.885	113.76	131.784	166.158
	60.6	94.1273	145.267	107.451	114.247	131.572	165.111
	60.7	93.5141	144.399	106.976	114.382	131.272	164.855
	60.8	93.3804	143.375	106.827	114.022	131.104	165.947
	60.9	93.1073	143.108	107.151	113.667	131.341	167.311
	61	92.9076	143.471	107.626	113.907	131.812	168.26
	61.1	92.4269	144.56	108.105	114.492	132.142	168.026
	61.2	92.1954	145.087	107.681	115.109	132.017	167.178
	61.3	92.4103	144.907	106.931	115.333	131.447	166.955
	61.4	93.0008	144.447	106.19	115.074	130.953	167.392
	61.5	93.5149	144.135	106.674	114.579	130.584	168.103
	61.6	93.5137	144.634	107.544	113.934	130.723	168.466
	61.7	93.1554	144.793	108.186	113.749	131.149	168.434
	61.8	92.8977	144.925	107.893	113.902	131.737	168.263
	61.9	93.1221	144.653	107.335	113.939	131.914	167.742
	62	93.5324	144.737	106.741	113.708	131.573	167.535
	62.1	93.546	144.816	106.342	113.233	131.151	167.254
	62.2	93.1081	144.667	106.199	113.11	130.573	167.244
	62.3	92.6721	144.368	106.307	113.256	130.415	167.096
	62.4	92.5134	144.104	106.793	113.223	130.513	167.425
	62.5	92.455	143.974	106.968	113.081	131.264	167.535
	62.6	92.3981	143.856	107.23	112.434	131.925	167.654
	62.7	92.3888	144.009	107.22	111.979	132.309	167.471
	62.8	92.5147	144.845	107.447	111.625	131.906	167.607
	62.9	92.596	145.611	107.526	111.904	131.385	167.439
	63	92.6459	146.026	107.333	112.682	131.003	167.563
	63.1	92.7478	145.375	106.985	113.722	131.247	167.541
	63.2	92.8513	144.727	106.597	114.586	131.66	167.816
	63.3	92.7379	144.342	106.74	114.859	131.759	167.497
	63.4	92.3518	144.604	107.016	114.608	131.56	167.056
	63.5	92.0809	144.778	106.988	113.703	131.249	166.535
	63.6	92.0064	144.468	106.888	112.588	131.366	166.341
	63.7	92.2383	143.962	107.01	111.84	131.614	166.574
	63.8	92.6089	143.681	107.736	112.038	131.802	166.869
	63.9	93.4352	143.37	108.432	112.856	131.546	167.425
	64	94.1071	142.96	108.573	113.546	131.18	167.659
	64.1	94.353	142.531	108.569	114.034	130.577	168.105
	64.2	93.825	142.505	108.448	114.058	130.509	168.047
	64.3	93.3023	142.538	108.473	113.775	130.459	168.112
	64.4	92.5376	142.458	108.07	112.739	130.702	167.907
	64.5	92.0993	142.577	107.409	111.873	130.635	167.864
	64.6	91.6696	142.782	107.07	111.515	130.752	167.523
	64.7	91.9103	142.879	107.206	111.895	130.798	167.126
	64.8	92.0626	142.678	107.606	112.309	130.639	166.487
	64.9	92.2356	142.084	107.651	112.27	130.179	165.816
	65	92.5039	141.819	107.446	111.899	130.168	165.407
	65.1	93.1963	141.419	107.437	111.593	130.497	165.771
	65.2	93.7951	141.691	107.586	111.631	130.877	166.686
	65.3	93.9526	141.76	107.844	111.796	130.946	167.194
	65.4	93.2517	141.838	107.866	111.894	130.962	167.295
	65.5	92.7403	141.482	107.929	111.789	131.087	166.801
	65.6	92.449	141.012	107.714	111.82	130.812	166.51
	65.7	92.861	140.719	107.504	111.568	130.45	166.156
	65.8	93.161	140.435	107.099	111.175	130.442	166.026
	65.9	92.9571	140.555	107.31	110.549	131.161	165.91
	66	92.525	140.808	107.414	110.261	132.056	165.247
	66.1	92.0519	141.199	107.822	110.335	132.495	164.64
	66.2	92.1911	141.179	107.721	110.664	132.441	164.467
	66.3	92.5331	140.909	107.744	111.317	132.564	165.248
	66.4	93.1349	140.739	107.462	111.872	132.566	166.134
	66.5	93.6953	140.929	107.303	112.386	132.539	166.63
	66.6	93.9559	141.343	107.177	112.107	131.651	166.654
	66.7	93.8611	141.762	107.048	111.76	131.309	166.371
	66.8	93.4977	141.724	106.889	111.247	131.1	166.103
	66.9	93.2993	141.362	106.609	111.312	131.735	166.234
	67	93.0311	140.804	106.886	111.654	131.842	166.864
	67.1	92.867	140.631	107.449	111.926	131.727	167.383
	67.2	92.7996	140.766	108.375	111.799	131.062	167.271
	67.3	93.1172	140.87	108.735	111.484	130.464	166.564
	67.4	93.3788	141.163	108.501	111.264	130.343	165.707
	67.5	93.4096	141.489	107.926	111.169	130.647	165.244
	67.6	93.1548	142.183	107.707	110.875	131.385	165.327
	67.7	92.8407	142.255	107.952	110.701	131.629	165.677
	67.8	92.4511	142.205	108.468	110.554	131.735	165.671
	67.9	92.1916	142.138	108.726	110.475	131.62	165.237
	68	92.338	142.402	108.871	110.22	131.87	164.752
	68.1	92.8676	142.54	108.618	110.002	132.133	164.315
	68.2	93.5684	141.945	108.124	109.71	132.092	163.845
	68.3	93.6718	141.207	107.712	109.498	131.945	163.338
	68.4	93.5216	140.226	107.278	109.604	131.786	163.14
	68.5	93.1098	139.612	107.229	110.132	131.834	163.385
	68.6	93.2261	139.196	106.884	110.569	131.817	163.676
	68.7	93.6837	139.406	106.727	110.616	131.858	164.299
	68.8	94.095	139.913	106.248	110.19	131.856	164.816
	68.9	94.2909	140.108	106.1	109.875	131.868	165.413
	69	93.9504	140.085	106.254	109.783	131.434	165.7
	69.1	93.7598	140.103	107.046	110.053	130.972	165.459
	69.2	93.3091	140.637	107.869	110.461	130.427	164.656
	69.3	93.1727	141.042	108.276	110.802	130.702	163.559
	69.4	92.8248	140.974	108.396	111.147	131.355	163.391
	69.5	92.8462	140.571	108.302	111.532	132.331	164.135
	69.6	92.5993	140.162	108.239	111.8	132.577	165.148
	69.7	92.6167	139.896	108.183	111.806	132.276	165.439
	69.8	92.6259	139.531	108.044	111.633	131.506	165.269
	69.9	92.98	139.192	108.082	111.281	130.85	165.017
	70	93.1556	139.361	107.912	110.857	130.411	164.8
	70.1	92.7308	140.136	107.774	110.197	130.223	164.568
	70.2	91.8872	141.109	107.589	109.68	130.232	164.216
	70.3	91.0182	141.516	107.398	109.393	130.337	164.006
	70.4	90.9679	141.12	107.457	109.463	130.588	164.225
	70.5	91.4089	140.538	107.16	110.007	130.69	164.717
	70.6	92.4517	140.286	106.727	110.336	130.873	165.138
	70.7	93.3359	140.641	106.343	110.546	130.688	165.23
	70.8	93.9963	140.914	106.454	110.19	130.92	165.089
	70.9	93.6079	140.717	106.762	109.826	130.733	165.335
	71	92.713	140.282	106.653	109.558	130.9	165.379
	71.1	91.7287	139.869	106.586	109.791	130.587	165.367
	71.2	91.4981	139.687	106.362	110.568	130.613	165.181
	71.3	91.6716	138.935	106.542	110.934	130.879	165.087
	71.4	91.8972	138.108	106.748	110.808	131.434	165.166
	71.5	91.9267	137.483	107.425	110.515	132.222	164.79
	71.6	91.792	137.901	107.988	110.745	131.991	163.985
	71.7	92.0464	138.859	108.012	111.136	131.056	163.194
	71.8	92.2851	139.785	107.721	110.83	129.515	162.727
	71.9	92.8277	140.007	107.234	110.049	128.641	163.289
	72	92.8631	139.533	107.093	109.217	128.662	163.879
	72.1	92.9932	138.794	106.892	109.293	129.367	164.867
	72.2	92.8443	138.403	106.889	109.77	130.284	164.832
	72.3	92.7703	138.582	106.783	110.524	130.524	164.509
	72.4	92.3904	138.724	106.704	110.455	129.958	163.506
	72.5	91.9996	138.642	106.443	110.234	129.03	163.303
	72.6	91.7793	138.266	106.34	109.577	128.743	163.203
	72.7	91.9897	138.586	106.396	109.56	128.972	163.247
	72.8	92.5623	138.852	106.627	109.825	129.739	163.207
	72.9	93.0361	138.75	106.755	110.356	130.649	163.381
	73	93.1806	138.076	106.738	110.455	131.823	163.704
	73.1	92.7662	137.34	106.669	110.01	132.348	163.263
	73.2	92.3246	136.985	106.576	109.578	132.332	162.326
	73.3	92.0244	136.698	106.701	109.309	131.541	161.38
	73.4	91.6254	136.887	106.825	109.484	131.258	161.72
	73.5	91.2559	137.515	106.786	109.492	131.04	162.943
	73.6	91.0934	137.922	106.687	109.545	131.516	163.915
	73.7	91.9587	137.948	106.486	109.53	131.274	163.64
	73.8	92.8463	137.677	106.635	109.765	130.87	162.995
	73.9	93.472	137.576	106.602	110.143	129.916	163.157
	74	93.543	137.309	106.588	109.918	129.556	163.983
	74.1	93.6286	136.451	106.251	109.159	129.633	164.478
	74.2	93.9882	136.238	105.876	108.433	130.061	164.002
	74.3	93.7064	136.652	105.743	108.44	130.493	162.934
	74.4	93.1414	137.734	105.887	109.14	130.541	162.051
	74.5	92.1087	138.13	106.296	109.348	130.599	162.025
	74.6	91.892	138.259	106.859	109.383	130.67	162.598
	74.7	92.2263	138.024	107.587	109.185	131.128	162.975
	74.8	92.9348	137.746	107.999	109.673	131.8	162.932
	74.9	93.3063	137.334	107.785	110.33	132.385	163.18
	75	93.1386	137.569	107.342	110.905	132.426	164.154
	75.1	92.562	138.074	107.252	110.944	131.882	165.001
	75.2	92.2114	138.726	107.575	110.484	130.995	164.961
	75.3	92.175	138.58	107.71	109.949	130.425	163.995
	75.4	92.5213	138.167	107.384	109.336	130.135	163.018
	75.5	92.472	137.873	106.647	109.015	129.966	162.761
	75.6	92.2681	138.186	105.752	108.685	129.821	163.258
	75.7	91.7742	138.422	105.27	108.724	129.615	163.801
	75.8	91.3051	138.004	105.4	108.597	129.941	163.91
	75.9	91.1168	137.306	106.192	108.894	130.5	163.178
	76	91.1628	136.945	107.055	108.95	131.194	162.561
	76.1	91.855	136.911	107.595	109.014	131.35	162.264
	76.2	92.2952	136.709	107.73	108.586	131.231	162.936
	76.3	92.9831	136.439	107.966	108.489	131.024	163.681
	76.4	93.1498	136.224	108.328	108.689	131.028	164.214
	76.5	93.4057	135.957	108.691	108.966	130.573	163.916
	76.6	93.0156	135.22	108.49	108.678	129.96	163.283
	76.7	92.6721	134.635	108.121	108.346	129.162	162.663
	76.8	92.4439	134.421	107.685	108.145	129.281	162.246
	76.9	92.5886	134.857	107.387	108.476	129.719	161.995
	77	92.5676	135.118	106.825	108.654	130.325	161.711
	77.1	92.3594	135.339	106.427	108.88	130.359	161.815
	77.2	92.4289	135.697	106.241	108.621	130.354	161.971
	77.3	92.7423	136.396	106.57	108.239	130.485	162.133
	77.4	93.0213	136.94	106.862	107.65	130.983	162.164
	77.5	92.615	136.876	106.809	107.292	131.371	162.362
	77.6	92.1951	136.484	106.534	106.921	131.501	162.541
	77.7	91.8443	136.079	106.445	106.929	131.176	162.787
	77.8	92.1583	135.612	106.786	107.58	130.594	162.771
	77.9	92.6013	134.901	107.372	108.783	130.106	162.439
	78	92.7198	134.003	107.715	109.696	129.955	161.795
	78.1	92.2857	133.842	107.786	109.618	130.217	161.245
	78.2	91.7117	134.039	107.537	108.917	130.544	161.316
	78.3	91.7996	134.822	107.097	108.173	130.627	161.402
	78.4	92.5749	135.486	106.879	107.783	130.515	161.599
	78.5	93.4571	136.477	107.172	108.034	129.966	161.831
	78.6	93.9808	136.983	107.979	108.226	129.366	162.134
	78.7	93.695	136.846	108.76	108.751	128.799	162.401
	78.8	92.8291	136.258	108.995	108.217	128.847	162.398
	78.9	91.8217	135.806	108.81	108.016	129.274	162.644
	79	90.9506	135.727	108.311	107.515	129.868	162.731
	79.1	90.7891	135.672	108.035	108	130.225	162.389
	79.2	90.8658	135.634	107.786	108.406	130.52	161.831
	79.3	91.4097	135.259	107.641	108.62	130.469	161.28
	79.4	91.4351	134.803	107.099	108.559	130.41	161.023
	79.5	91.3599	134.478	106.721	108.279	129.984	160.328
	79.6	91.2884	134.697	106.617	108.572	129.891	159.384
	79.7	91.7439	135.132	106.926	108.786	129.732	158.643
	79.8	92.397	135.339	106.969	108.902	130.01	158.734
	79.9	93.0209	135.351	106.947	108.288	130.205	159.499
	80	93.2353	135.212	106.768	107.754	130.473	160.385
	80.1	93.4209	135.356	107.146	107.182	130.581	160.979
	80.2	93.0159	135.497	107.32	106.945	130.941	161.318
	80.3	92.7061	135.695	107.481	106.403	131.086	161.483
	80.4	92.0164	135.409	107.13	106.568	130.951	161.49
	80.5	91.6193	134.907	106.721	106.78	130.19	161.178
	80.6	91.311	134.093	106.44	107.478	130.081	161.002
	80.7	91.098	133.223	106.315	107.61	130.345	160.857
	80.8	90.8759	132.64	106.491	108.062	130.779	160.819
	80.9	90.702	132.751	106.557	108.445	130.343	160.59
	81	90.8427	133.609	106.605	108.993	129.822	160.658
	81.1	91.1954	134.58	106.46	109.109	129.343	161.009
	81.2	91.4584	135.371	106.774	108.865	129.393	160.984
	81.3	91.5531	135.696	107.643	108.476	129.373	160.74
	81.4	91.7854	135.447	108.812	108.008	130.009	160.489
	81.5	92.2248	134.999	109.354	107.679	130.697	161.063
	81.6	93.0129	134.575	108.982	107.209	131.307	161.404
	81.7	93.7096	134.234	108.282	106.736	130.947	161.33
	81.8	93.9707	133.409	107.688	106.313	130.314	160.809
	81.9	93.7062	132.703	107.406	106.188	130.075	160.61
	82	93.0923	132.681	107.042	106.215	130.425	160.674
	82.1	92.9451	133.533	107.013	106.468	130.784	160.788
	82.2	92.7594	134.258	107.239	106.825	130.597	161.017
	82.3	92.8176	134.427	107.902	107.09	129.895	161.4
	82.4	92.52	133.965	108.425	106.699	129.28	161.398
	82.5	92.7617	133.772	108.474	105.857	128.644	160.956
	82.6	93.0594	133.812	107.977	105.35	128.65	160.389
	82.7	93.3886	134	107.252	105.569	129.087	160.238
	82.8	92.944	133.6	107.111	106.17	129.992	160.095
	82.9	92.5121	133.101	107.447	106.762	130.366	159.74
	83	92.2479	133.109	108.152	107.037	130.07	159.454
	83.1	92.5922	133.372	108.594	107.048	129.68	159.618
	83.2	92.6622	133.508	108.694	106.468	129.798	160.178
	83.3	92.7614	132.888	108.27	106.164	129.91	160.64
	83.4	92.8714	132.498	107.341	106.126	129.699	160.767
	83.5	93.1597	132.491	106.611	106.596	128.95	160.766
	83.6	92.9739	133.189	106.172	106.591	128.545	160.388
	83.7	92.5394	133.8	106.59	106.77	128.724	159.82
	83.8	92.075	134.083	107.33	106.881	129.422	159.075
	83.9	92.4011	134.09	108.155	107.234	130.339	159.032
	84	92.7913	134.425	108.468	107.232	130.709	159.497
	84.1	93.1981	134.971	107.816	107.195	130.753	159.808
	84.2	93.0698	135.305	107.204	106.873	130.457	160.067
	84.3	93.0101	135.291	106.982	106.43	130.335	160.288
	84.4	92.9207	134.767	107.732	105.902	130.417	160.889
	84.5	93.0499	134.309	108.357	105.8	130.595	160.786
	84.6	93.027	133.649	108.681	105.682	131.021	160.234
	84.7	93.1307	133.581	108.449	105.8	131.496	159.586
	84.8	93.0126	133.263	108.052	105.905	131.963	159.416
	84.9	92.74	132.907	107.5	106.353	132.117	159.988
	85	92.1969	132.231	106.869	106.555	131.682	160.622
	85.1	91.5921	132.032	106.244	106.68	131.265	160.943
	85.2	91.4358	132.151	105.705	106.613	130.897	160.387
	85.3	91.3186	132.616	105.504	106.517	130.915	159.681
	85.4	91.33	132.74	105.864	106.312	130.597	159.06
	85.5	91.0904	132.655	106.749	106.156	129.88	158.804
	85.6	91.2784	132.027	107.421	106.361	129.325	158.51
	85.7	91.7323	131.571	107.334	106.763	129.079	158.313
	85.8	92.1526	131.383	106.677	107.384	129.339	158.179
	85.9	92.285	131.552	106.472	107.759	129.432	158.208
	86	91.9737	131.755	107.235	107.609	129.568	158.466
	86.1	91.8884	131.309	108.268	106.952	130.061	158.482
	86.2	91.7607	130.805	108.805	106.083	130.516	158.433
	86.3	92.2068	130.18	108.219	105.639	130.785	158.258
	86.4	92.5817	130.341	107.295	105.479	130.307	158.599
	86.5	92.9581	130.619	106.346	105.517	129.854	158.815
	86.6	92.7629	131.3	106.214	105.751	129.591	159.134
	86.7	92.6538	131.806	106.54	106.096	129.905	158.701
	86.8	92.7871	131.863	107.079	106.687	130.273	158.216
	86.9	93.0638	131.522	107.181	107.295	130.336	157.657
	87	92.9059	131.336	107.014	107.989	130.185	158.039
	87.1	92.2452	131.802	107.163	108.393	130.241	158.83
	87.2	92.1146	132.395	107.249	108.164	130.66	159.569
	87.3	92.4172	132.08	107.675	107.464	130.536	159.567
	87.4	93.0998	131.504	107.7	107.017	130.023	158.979
	87.5	93.2111	130.987	108.287	107.033	129.425	158.337
	87.6	93.4054	131.325	107.918	107.268	129.698	158.292
	87.7	93.4134	131.649	107.553	106.997	130.208	159.002
	87.8	93.1984	132.166	106.631	106.51	130.439	159.691
	87.9	92.3766	132.761	106.443	106.226	130.427	159.551
	88	91.9681	133.137	106.421	106.165	130.19	158.504
	88.1	92.1212	132.577	106.916	106.44	130.197	157.131
	88.2	92.487	131.471	107.524	106.216	129.657	156.478
	88.3	92.3159	130.378	108.053	105.917	129.435	156.825
	88.4	91.6837	130.218	108.13	104.964	129.177	158.12
	88.5	91.3978	130.576	108.078	104.604	129.556	159.126
	88.6	91.3762	131.649	107.814	104.621	129.645	159.547
	88.7	91.6588	132.337	107.678	105.365	129.915	158.642
	88.8	91.871	132.407	107.48	105.87	129.689	157.63
	88.9	92.0953	131.536	107.387	106.397	129.617	156.683
	89	92.2231	130.791	107.014	106.684	129.189	157.237
	89.1	92.1379	130.639	106.54	106.922	128.968	158.333
	89.2	91.8234	130.997	105.846	106.624	128.7	159.377
	89.3	91.4637	131.141	105.605	106.046	128.592	159.454
	89.4	91.201	130.817	105.366	105.464	128.557	158.872
	89.5	91.3944	130.064	105.913	105.498	128.491	158.288
	89.6	92.1242	129.48	106.483	106.095	128.7	157.818
	89.7	92.8283	129.179	107.309	106.74	129.2	157.48
	89.8	93.0693	129.303	107.287	106.805	129.63	157.095
	89.9	92.6523	129.424	107.013	106.204	129.792	156.722
	90	92.4317	129.328	106.601	105.563	129.868	156.709
	90.1	92.5394	129.195	106.934	105.071	130.415	156.807
	90.2	92.7291	129.172	107.376	105	130.687	157.6
	90.3	92.5747	129.732	107.438	105.12	130.257	158.351
	90.4	92.1186	130.054	106.747	105.498	129.225	159.095
	90.5	91.9109	130.276	105.87	105.902	128.787	158.643
	90.6	91.9078	130.156	105.688	106.161	128.716	157.71
	90.7	91.9732	130.393	105.745	106.219	129.07	156.798
	90.8	91.8191	130.917	105.705	106.019	128.857	156.714
	90.9	91.6248	131.368	105.112	106.005	128.905	157.21
	91	91.7552	131.645	105.03	106.005	128.562	157.929
	91.1	92.0434	131.374	105.404	106.149	128.534	158.498
	91.2	92.5403	130.888	106.225	105.575	128.353	158.613
	91.3	92.7582	130.477	106.574	104.616	128.756	158.377
	91.4	92.7843	130.409	106.893	103.781	129.364	157.892
	91.5	92.3829	130.675	107.063	103.874	130.321	157.952
	91.6	91.7539	130.758	107.355	104.862	130.686	158.467
	91.7	91.4091	130.904	107.071	105.658	130.465	159.397
	91.8	91.4724	130.67	106.742	105.64	129.815	159.333
	91.9	92.3607	130.174	106.21	104.938	129.486	158.618
	92	93.0848	129.254	106.174	104.505	129.875	157.557
	92.1	93.4446	128.723	105.864	104.624	130.439	157.48
	92.2	92.9608	128.868	105.784	104.993	130.95	157.425
	92.3	92.5726	129.156	105.644	105.259	130.624	157.568
	92.4	92.3522	129.217	105.723	105.686	129.797	157.536
	92.5	92.4719	128.673	105.548	106.234	128.985	158.231
	92.6	92.2762	128.347	105.183	106.289	128.831	158.729
	92.7	92.0089	128.039	104.78	105.735	129.461	158.777
	92.8	91.6698	128.237	104.87	104.998	129.938	158.267
	92.9	91.7732	128.681	105.44	104.854	130.298	157.712
	93	91.8841	129.171	106.315	105.261	130.186	157.427
	93.1	91.7181	129.339	106.799	105.913	130.161	157.239
	93.2	91.3553	128.783	106.752	106.407	129.86	157.108
	93.3	91.1474	128.46	106.498	106.321	129.599	157.444
	93.4	91.2394	128.155	106.39	105.678	129.402	157.689
	93.5	90.8704	128.18	106.476	104.953	129.606	157.958
	93.6	90.428	127.804	106.405	104.486	129.787	157.059
	93.7	90.3547	127.645	106.29	104.301	129.672	156.262
	93.8	91.093	127.802	106.279	104.194	129.317	155.728
	93.9	92.0329	128.574	106.402	104.499	129.374	156.185
	94	92.8394	129.106	106.589	105.033	129.895	156.404
	94.1	93.5834	129.603	106.869	105.236	130.412	156.348
	94.2	94.0804	129.506	107.342	104.981	130.333	155.612
	94.3	94.0646	129.699	107.939	104.237	129.895	155.177
	94.4	93.3481	129.712	108.153	104.032	129.385	155.191
	94.5	92.5252	129.924	108.368	103.926	129.158	156.255
	94.6	91.7837	130.058	108.315	103.942	128.997	157.543
	94.7	91.3439	130.144	108.596	103.614	128.936	158.297
	94.8	91.3188	130.047	108.158	103.234	128.811	158.101
	94.9	91.5461	129.634	107.455	103.357	129.102	157.596
	95	92.1733	129.218	106.466	103.628	129.747	157.073
	95.1	92.638	128.85	106.157	103.917	130.202	156.846
	95.2	93.2321	128.636	106.319	104.247	129.962	156.938
	95.3	93.4649	128.384	106.726	104.933	129.172	157.407
	95.4	93.5707	128.549	107.104	105.741	129.045	157.905
	95.5	93.4089	128.848	107.384	105.836	129.448	158.001
	95.6	93.2601	129.342	107.607	105.103	129.774	157.804
	95.7	92.9408	129.281	107.615	104.253	129.407	157.196
	95.8	92.7984	128.93	107.695	103.919	128.413	156.652
	95.9	92.7143	128.594	107.831	104.224	127.801	156.3
	96	92.9023	128.927	108.022	104.936	127.737	156.412
	96.1	92.9882	129.629	107.839	105.492	128.463	156.38
	96.2	93.2319	129.513	107.383	105.655	129	156.18
	96.3	93.2749	128.787	106.755	105.246	129.173	156.075
	96.4	93.3557	128.095	106.329	104.849	129.211	156.208
	96.5	93.0801	128.324	106.132	104.709	129.392	156.423
	96.6	93.0298	128.608	106.271	104.572	129.508	156.073
	96.7	92.7134	128.424	106.79	104.457	129.201	155.601
	96.8	92.8398	127.824	107.215	104.254	128.93	155.025
	96.9	92.8821	127.37	107.509	104.621	128.773	155.186
	97	93.2513	126.983	107.333	104.618	128.574	155.424
	97.1	93.0007	126.896	107.428	104.502	128.254	155.734
	97.2	92.5609	126.789	107.794	103.915	128.004	155.522
	97.3	92.1062	126.914	108.368	103.673	128.242	155.391
	97.4	92.2398	127.179	108.452	103.551	128.311	155.224
	97.5	92.6976	127.563	107.87	103.373	128.447	155.351
	97.6	92.8946	128.094	106.996	103.279	128.451	155.146
	97.7	92.5468	128.094	106.176	103.003	129.148	155.171
	97.8	92.01	127.942	106.019	102.854	129.911	155.011
	97.9	91.8317	127.507	106.246	102.511	130.602	155.362
	98	92.0678	127.525	107.268	102.52	130.637	155.584
	98.1	92.2351	127.494	108.003	102.703	130.103	155.824
	98.2	92.1033	127.826	108.355	103.134	129.057	155.798
	98.3	91.9079	127.715	107.843	103.343	128.042	155.456
	98.4	91.7749	127.986	107.195	103.392	127.677	155.599
	98.5	91.8036	127.741	106.983	103.215	128.313	155.75
	98.6	91.4469	127.954	107.098	103.18	129.007	156.222
	98.7	91.2826	127.561	107.774	103.271	129.588	155.785
	98.8	91.19	127.58	108.198	103.437	129.64	155.346
	98.9	91.7109	127.202	108.427	103.731	129.767	155.106
	99	92.1429	127.307	107.905	104.045	129.614	155.77
	99.1	92.4643	127.211	107.326	104.506	129.715	156.584
	99.2	92.3647	127.368	106.548	104.515	129.928	156.906
	99.3	92.2009	127.374	105.92	104.289	130.291	156.799
	99.4	91.7093	127.529	105.614	103.837	130.034	156.26
	99.5	91.3904	127.49	105.634	103.855	129.562	155.818
	99.6	91.1013	127.033	105.821	104.191	129.077	154.789
	99.7	91.5467	126.287	105.815	104.638	129.059	153.872
	99.8	92.0644	125.473	106.142	104.631	129.204	153.346
	99.9	92.5774	125.079	106.544	104.313	129.267	153.753
	100	92.8568	125.182	106.92	104.17	129.235	154.243
	100.1	93.0188	125.739	106.908	104.437	129.219	154.29
	100.2	92.8569	126.48	106.69	104.783	129.554	153.738
	100.3	92.1853	126.768	106.32	104.761	129.822	153.683
	100.4	91.7536	126.92	105.784	104.465	129.414	154.188
	100.5	91.759	126.912	105.567	104.215	128.289	155.002
	100.6	92.124	126.847	105.386	104.091	127.158	155.208
	100.7	92.2382	126.557	105.377	104.146	127.048	154.375
	100.8	92.2244	126.156	105.252	104.2	127.644	153.532
	100.9	92.2589	125.694	105.58	104.396	128.758	153.218
	101	92.2671	125.073	106.291	104.205	129.386	154.241
	101.1	92.2957	124.486	106.948	104.02	129.94	154.722
	101.2	92.1371	124.648	107.208	103.437	129.527	154.274
	101.3	91.8122	125.371	107.481	103.184	129.087	153.22
	101.4	91.0657	126.266	107.627	102.796	128.375	153.347
	101.5	90.4321	126.619	107.663	102.84	128.508	154.432
	101.6	90.227	126.616	107.037	102.894	129.004	155.222
	101.7	90.7597	126.618	106.458	103.294	129.929	155.213
	101.8	91.5293	126.503	106.133	103.663	130.396	155.136
	101.9	92.277	126.539	106.284	104.023	130.528	155.644
	102	92.6097	126.321	106.555	104.037	130.036	156.427
	102.1	92.4017	126.375	106.782	103.89	129.639	156.946
	102.2	91.9648	126.209	106.664	103.639	128.843	157.044
	102.3	91.7947	125.952	106.419	103.458	128.197	156.518
	102.4	92.118	125.335	106.018	103.547	127.519	155.726
	102.5	92.5766	124.749	105.761	103.904	127.519	154.891
	102.6	92.7546	124.265	105.76	104.406	127.717	154.735
	102.7	92.7894	124.297	105.843	104.625	128.097	154.664
	102.8	92.7148	124.727	106.129	104.648	128.42	154.605
	102.9	92.5411	125.382	106.101	104.461	128.619	154.399
	103	92.3367	125.635	106.212	104.134	128.394	154.769
	103.1	92.0289	125.482	106.168	103.65	127.998	155.551
	103.2	92.1796	125.682	106.679	103.287	128.14	156.249
	103.3	92.2062	126.459	107.258	103.216	129.021	155.793
	103.4	92.5737	127.18	107.72	103.561	129.679	154.871
	103.5	92.5463	126.877	107.567	104.31	129.786	153.82
	103.6	92.7439	125.747	106.859	105.032	129.726	153.989
	103.7	92.4842	125.055	106.283	105.336	130.316	154.009
	103.8	92.6608	125.095	105.731	104.875	130.828	153.898
	103.9	92.7231	125.519	105.64	103.917	130.659	153.341
	104	93.0456	125.514	105.446	103.033	130.006	153.268
	104.1	92.8518	125.173	105.558	102.536	129.276	153.951
	104.2	92.6971	124.933	105.75	102.839	128.941	154.483
	104.3	92.4796	124.936	106.1	103.293	128.506	155.192
	104.4	92.5748	125.375	106.124	103.702	128.544	155.192
	104.5	92.8868	125.97	106.188	103.848	128.629	155.231
	104.6	93.4146	126.452	106.218	103.982	128.875	154.628
	104.7	93.9216	126.438	106.674	104.322	128.826	154.064
	104.8	94.0347	125.997	106.949	104.332	128.881	153.388
	104.9	93.8827	125.409	107.508	103.972	128.798	152.745
	105	93.0977	125.222	107.908	102.989	128.901	152.392
	105.1	92.2101	125.232	108.018	102.33	128.816	152.364
	105.2	91.4786	125.525	107.549	102.019	128.866	152.735
	105.3	91.8394	125.513	106.918	102.26	128.869	152.776
	105.4	92.3772	125.291	106.522	102.329	128.81	152.748
	105.5	92.7151	125.086	106.442	102.342	129.126	152.932
	105.6	92.337	125.169	106.532	102.384	128.911	153.67
	105.7	92.0621	125.758	107.004	102.448	129.065	154.123
	105.8	92.2358	126.117	107.359	102.612	128.582	154.2
	105.9	92.3392	126.027	107.461	102.786	128.711	153.602
	106	92.355	125.258	106.785	103.09	128.229	153.342
	106.1	91.4913	124.509	106.07	103.436	128.149	153.192
	106.2	90.7638	124.004	105.757	103.369	128.011	153.465
	106.3	90.2401	124.242	106.215	102.997	128.608	153.784
	106.4	90.7244	124.804	106.822	102.269	129.101	153.775
	106.5	91.2923	125.64	107.052	101.985	129.439	153.574
	106.6	91.4951	126.127	106.776	102.386	129.268	152.869
	106.7	91.1562	126.137	106.439	102.902	128.943	152.301
	106.8	91.3413	125.439	106.197	103.131	128.576	151.793
	106.9	92.0642	124.215	106.084	102.807	128.548	151.739
	107	92.8359	123.136	106.086	102.801	128.832	152.181
	107.1	92.7941	122.795	106.223	102.82	129.277	153.093
	107.2	92.5313	123.369	106.401	102.846	129.587	153.882
	107.3	92.3053	124.246	106.627	102.792	129.602	154.092
	107.4	92.3339	125.176	106.643	103.263	129.625	153.596
	107.5	91.9861	125.454	107.187	103.865	129.446	152.932
	107.6	91.7161	125.345	107.615	104.154	129.246	152.615
	107.7	91.6472	124.843	108.126	103.714	129.165	152.816
	107.8	91.9588	124.723	107.432	103.18	129.252	153.353
	107.9	92.0494	124.699	106.685	102.91	129.537	153.457
	108	91.899	124.656	106.186	102.866	129.585	153.124
	108.1	91.4764	124.129	106.583	103.034	129.683	152.482
	108.2	91.4564	123.412	106.938	103.223	129.545	151.97
	108.3	91.4218	122.637	106.935	103.618	129.555	151.647
	108.4	91.5601	122.193	106.624	103.647	129.524	151.553
	108.5	91.5146	122.213	106.341	103.462	129.611	152.18
	108.6	91.6011	122.404	106.154	102.788	129.297	152.976
	108.7	91.511	123.162	106.257	102.387	128.866	153.772
	108.8	91.2986	124.187	106.56	102.265	128.766	153.781
	108.9	91.1369	125.212	107.218	102.937	128.907	153.348
	109	91.287	125.212	107.532	103.6	129.112	152.54
	109.1	91.3191	124.269	107.698	104.053	128.729	151.863
	109.2	91.131	123.212	107.507	103.844	128.567	151.777
	109.3	90.7618	122.493	107.248	103.684	128.664	152.544
	109.4	90.8547	122.273	106.8	103.653	129.068	153.697
	109.5	91.381	122.136	106.61	103.778	129.222	154.308
	109.6	91.7636	122.213	106.733	103.754	128.499	154.061
	109.7	91.6552	122.328	107.028	103.319	127.881	153.572
	109.8	91.2511	122.426	106.88	103.027	127.513	153.431
	109.9	91.3326	122.67	106.856	102.53	128.387	153.39
	110	91.6858	122.881	106.899	102.274	128.964	152.888
	110.1	91.9531	123.336	106.894	101.591	129.249	152.156
	110.2	91.8291	123.546	106.504	101.429	128.784	151.686
	110.3	91.7463	123.705	106.036	101.768	128.759	151.602
	110.4	91.7039	123.514	106.123	102.766	128.783	151.506
	110.5	91.6093	123.241	106.522	103.441	128.88	151.197
	110.6	91.2738	122.878	106.86	103.825	128.413	150.863
	110.7	90.698	122.39	106.673	103.663	128.171	150.439
	110.8	90.4853	122.025	106.145	103.605	128.341	149.991
	110.9	90.6491	122.095	105.683	103.211	129.22	149.815
	111	91.4581	122.721	105.874	103.14	129.904	150.371
	111.1	92.1227	123.362	106.245	102.967	129.722	151.532
	111.2	92.5681	123.504	106.59	103.02	128.974	152.667
	111.3	92.5737	123.327	106.608	102.981	128.518	153.374
	111.4	92.5142	123.226	106.569	102.907	128.957	153.422
	111.5	92.386	123.341	106.535	102.654	129.812	153.073
	111.6	92.3459	123.359	106.329	102.142	130.294	152.517
	111.7	92.4072	122.953	106.223	102.054	130.3	152.449
	111.8	92.63	122.204	106.508	102.522	130.204	152.93
	111.9	92.7834	121.865	106.777	103.691	129.936	153.781
	112	92.5686	121.933	107.343	104.35	129.666	154.178
	112.1	92.2719	122.402	107.373	104.467	128.613	154.067
	112.2	92.1547	122.217	107.367	103.941	128.314	153.448
	112.3	92.2207	121.933	106.847	103.429	128.496	153.396
	112.4	92.0264	121.8	106.337	102.767	129.811	153.34
	112.5	91.6648	122.296	106.15	101.984	130.157	153.377
	112.6	91.3438	122.956	106.218	101.182	129.714	152.923
	112.7	91.1479	123.459	106.785	100.644	128.629	152.677
	112.8	91.2153	123.613	107.18	100.699	128.459	153.05
	112.9	91.4624	123.561	107.442	101.375	128.711	153.635
	113	92.2439	123.284	107.589	102.368	129.249	154.124
	113.1	92.8621	123.348	107.938	103.204	129.147	153.894
	113.2	93.276	123.386	108.543	103.458	129.373	153.29
	113.3	92.9421	123.323	108.422	103.184	129.455	152.953
	113.4	92.2341	122.791	107.839	102.375	130.067	152.576
	113.5	91.4932	122.162	106.904	101.418	130.195	152.352
	113.6	91.1407	121.871	106.639	100.975	130.133	151.704
	113.7	91.2042	121.778	106.558	100.913	129.406	151.666
	113.8	91.4261	121.88	106.568	101.507	128.701	151.901
	113.9	91.8576	121.929	106.342	101.848	127.827	152.182
	114	92.5269	122.139	106.313	102.604	127.203	152.208
	114.1	93.1387	122.601	106.46	102.848	126.652	152.021
	114.2	93.1917	123.124	106.841	103.066	127.018	151.923
	114.3	92.7229	123.377	107.006	102.741	128	151.776
	114.4	92.3984	122.897	106.918	102.522	129.031	151.384
	114.5	92.4812	122.506	106.526	102.248	129.165	151.029
	114.6	92.6896	122.335	106.399	102.134	128.291	150.622
	114.7	92.6392	122.957	106.612	101.931	127.318	150.901
	114.8	92.2629	123.262	106.885	101.933	126.922	151.426
	114.9	91.8386	123.386	106.968	101.982	127.3	152.034
	115	91.6548	123.139	106.927	102.03	128.167	151.908
	115.1	91.8492	122.771	107.091	101.851	128.59	151.496
	115.2	92.0747	122.44	106.882	101.678	128.834	151.019
	115.3	91.8022	122.212	106.408	102.187	128.55	151.077
	115.4	91.1928	122.515	106.001	102.782	128.592	151.297
	115.5	91.148	122.681	106.373	103.217	128.634	151.679
	115.6	91.5353	122.323	107.232	102.812	128.884	151.931
	115.7	92.1429	121.516	107.796	102.713	129.089	152.179
	115.8	92.1443	120.931	108.109	102.873	129.196	152.182
	115.9	92.2904	121.305	107.909	103.452	128.906	152.014
	116	92.5397	121.701	107.793	103.502	128.414	151.602
	116.1	93.0834	121.903	107.453	103.284	128.137	151.332
	116.2	93.3536	121.307	107.159	102.709	128.301	151.423
	116.3	93.3628	121.066	106.837	102.26	128.5	151.623
	116.4	92.7122	121.208	106.6	101.933	128.099	151.379
	116.5	91.7004	121.909	106.83	102.121	127.478	150.573
	116.6	90.7442	122.423	107.445	102.597	126.979	149.841
	116.7	90.5356	122.517	108.24	102.947	126.997	150.108
	116.8	91.2174	122.127	108.575	102.451	127.772	150.714
	116.9	91.9466	121.471	108.221	101.636	128.81	151.087
	117	92.2061	121.175	107.572	100.903	129.621	150.492
	117.1	91.8166	120.886	106.947	101.133	129.336	150.136
	117.2	91.2681	120.832	106.676	101.616	128.579	150.12
	117.3	91.057	120.579	106.185	102.326	127.865	150.775
	117.4	90.9382	120.934	105.641	102.356	127.534	151.005
	117.5	91.2222	121.545	105.053	101.891	127.308	151.038
	117.6	91.2893	122.078	104.94	100.884	127.475	150.536
	117.7	91.5273	121.533	105.356	100.218	127.811	150.411
	117.8	91.5861	120.401	105.956	100.177	128.551	150.561
	117.9	91.9014	119.434	106.503	100.418	128.955	151.427
	118	92.3399	119.26	106.68	100.709	129.389	152.217
	118.1	92.3732	119.532	106.845	100.894	129.375	153.072
	118.2	92.2273	119.741	106.86	101.452	129.18	153.476
	118.3	91.8306	120.243	106.883	102.06	128.505	153.452
	118.4	92.1771	120.733	106.625	102.492	127.992	152.679
	118.5	92.2892	121.341	106.533	102.661	127.996	151.473
	118.6	91.9383	121.163	106.279	102.29	128.606	150.437
	118.7	90.9437	120.74	106.11	101.845	128.796	149.805
	118.8	90.2904	119.914	105.904	101.404	128.347	149.868
	118.9	90.3174	119.843	106.143	101.915	127.522	150.292
	119	90.7451	120.142	106.589	102.807	127.2	150.85
	119.1	91.3978	121.105	106.964	103.727	127.179	150.999
	119.2	91.9839	121.624	107.036	103.726	127.164	150.809
	119.3	92.0781	121.905	106.969	103.299	127.477	150.421
	119.4	91.3274	121.884	106.74	102.633	127.904	149.94
	119.5	90.5527	121.991	106.318	102.217	128.854	149.751
	119.6	90.4109	121.947	105.881	101.882	129.132	150.059
	119.7	91.1621	121.225	105.905	101.724	129.419	150.796
	119.8	91.8296	120.086	106.253	101.816	129.049	150.941
	119.9	92.2194	119.007	106.69	101.821	128.744	150.073
	120	92.555	118.789	106.668	101.533	127.933	148.579
	120.1	92.8503	119.235	106.812	101.078	127.483	147.637
	120.2	93.0714	119.749	106.744	101.214	127.262	147.71
	120.3	92.8127	120.124	106.68	101.874	127.98	148.56
	120.4	92.7611	119.919	106.107	102.77	128.635	149.035
	120.5	92.6597	119.897	105.734	103.132	129.27	149.063
	120.6	92.5614	119.677	105.639	103.138	129.044	148.674
	120.7	92.2239	119.567	105.845	102.573	128.71	149.204
	120.8	92.1958	119.362	106.169	101.917	128.617	150.059
	120.9	92.3064	119.159	106.672	101.445	129.212	150.72
	121	92.4948	119.477	107.255	101.274	129.93	150.277
	121.1	92.3499	119.855	107.737	101.172	129.836	149.521
	121.2	92.179	120.782	107.799	100.985	128.999	149.372
	121.3	91.8541	121.171	107.723	100.902	127.786	149.77
	121.4	91.619	121.4	107.513	101.128	127.056	150.163
	121.5	91.428	120.912	107.475	101.298	126.732	150.441
	121.6	91.4601	120.677	107.658	101.248	127.033	150.476
	121.7	91.6289	120.54	107.888	100.977	127.727	150.851
	121.8	92.1217	120.557	108.361	100.817	128.351	150.769
	121.9	92.5872	120.402	108.457	101.052	128.784	150.405
	122	92.8153	120.029	108.192	101.522	128.845	149.556
	122.1	92.6099	119.621	106.94	102.086	128.91	149.018
	122.2	92.2843	119.035	105.932	102.459	128.797	149.433
	122.3	92.2119	118.597	105.201	102.495	128.483	150.038
	122.4	92.132	118.589	105.208	102.394	128.257	150.351
	122.5	92.0812	119.263	104.979	102.243	128.116	150.111
	122.6	91.4591	119.885	104.853	102.327	128.363	149.883
	122.7	90.852	119.67	105.064	102.419	128.717	150.046
	122.8	90.3011	118.767	105.568	102.441	129.108	150.23
	122.9	90.4579	118.076	106.38	102.445	129.243	150.295
	123	90.8649	118.502	106.782	102.497	128.929	150.035
	123.1	91.1881	119.406	107.413	102.379	128.327	149.468
	123.2	91.4483	120.278	108.011	101.913	127.974	148.914
	123.3	91.9368	120.701	108.623	101.34	127.993	148.617
	123.4	92.7092	120.926	108.544	101.26	127.964	148.816
	123.5	92.9896	121.145	108.044	101.42	127.704	149.585
	123.6	92.6734	121.017	107.582	101.476	127.509	150.52
	123.7	92.1423	120.882	107.353	101.38	127.728	151.134
	123.8	91.9406	120.598	106.999	101.528	127.756	151.311
	123.9	91.8383	120.473	106.332	101.649	127.723	151.001
	124	91.5301	120.26	105.455	101.477	127.765	150.808
	124.1	91.3871	119.915	104.757	100.742	128.478	150.371
	124.2	91.4489	119.929	104.516	100.321	129.142	149.922
	124.3	91.7452	120.101	104.998	100.122	129.296	149.332
	124.4	91.7778	120.232	105.581	100.406	128.727	148.998
	124.5	91.7966	119.588	106.154	100.575	127.954	149.101
	124.6	91.7463	118.443	106.42	100.946	127.324	149.343
	124.7	91.7409	117.679	107.184	101.289	126.964	149.829
	124.8	91.5534	117.568	107.756	101.847	127.004	150.194
	124.9	91.3381	118.343	108.025	101.892	127.48	150.598
	125	91.1268	119.039	107.255	101.534	128.168	150.214
	125.1	91.2643	119.381	106.436	100.748	128.628	149.324
	125.2	91.5854	119.042	105.621	100.474	128.689	148.193
	125.3	91.9242	118.661	105.646	100.884	128.405	147.649
	125.4	91.7291	118.605	105.937	101.536	127.96	147.83
	125.5	91.1869	119.279	106.569	101.69	127.949	148.319
	125.6	90.5903	119.816	107.003	101.249	128.409	148.699
	125.7	90.4779	119.73	107.1	100.763	129.038	148.712
	125.8	90.7246	118.747	107.431	100.503	129.12	148.752
	125.9	91.106	118.026	107.818	100.593	128.688	148.782
	126	91.6443	118.467	108.468	100.796	128.251	148.891
	126.1	92.0199	119.476	108.44	101.05	128.222	148.909
	126.2	92.3806	120.219	108.102	101.172	128.352	149.297
	126.3	91.9103	120.103	107.498	100.963	128.349	149.699
	126.4	91.339	119.48	107.209	100.795	127.93	149.923
	126.5	90.5268	118.961	106.741	100.442	127.584	149.745
	126.6	90.399	118.436	106.54	100.506	127.263	149.411
	126.7	90.5459	118.547	106.378	100.626	127.237	149.094
	126.8	91.2511	118.332	106.606	100.87	127.353	148.87
	126.9	91.9827	118.234	106.813	100.715	127.917	149.148
	127	92.8642	117.841	106.953	100.493	128.359	149.804
	127.1	93.0076	118.183	107.18	100.142	128.433	150.381
	127.2	92.8046	118.835	107.299	100.02	128.116	150.379
	127.3	92.1346	119.229	107.438	99.7982	127.995	149.708
	127.4	91.8614	119.247	107.482	99.965	128.171	148.852
	127.5	91.5821	118.782	107.594	100.28	128.24	148.129
	127.6	91.4633	118.493	107.506	100.56	128.2	148.107
	127.7	91.4921	117.815	107.002	100.622	128.103	148.636
	127.8	91.8162	117.508	106.332	100.797	128.052	149.173
	127.9	92.2798	117.512	105.987	101.459	128.092	148.995
	128	92.5147	118.008	106.463	102.149	127.892	148.35
	128.1	92.5708	118.166	107.159	102.195	128.054	147.718
	128.2	92.1978	118.1	107.941	101.591	127.894	147.901
	128.3	91.8384	117.964	108.112	101.264	128.011	148.563
	128.4	91.8416	118.102	108.013	101.427	127.867	149.082
	128.5	92.4121	118.296	107.407	101.774	127.75	149.014
	128.6	92.7012	118.221	106.58	101.625	127.394	148.417
	128.7	92.2399	118.018	105.995	101.211	126.849	148.231
	128.8	91.6194	117.836	106.029	101.038	126.867	148.172
	128.9	91.5387	117.717	106.817	100.975	127.567	148.473
	129	91.7119	117.715	107.66	100.98	128.718	148.301
	129.1	91.2459	117.653	108.224	100.512	129.274	148.15
	129.2	90.4381	118.106	108.204	100.326	129.1	147.407
	129.3	89.9223	118.687	107.845	100.187	128.567	147.014
	129.4	90.4482	119.165	107.034	100.532	128.155	146.596
	129.5	91.0751	119.192	106.503	100.521	127.923	146.78
	129.6	91.6041	118.746	106.21	100.413	127.786	146.993
	129.7	91.6319	118.12	106.267	100	127.877	147.758
	129.8	91.7644	117.704	106.178	99.8736	128.005	148.995
	129.9	91.7804	117.726	106.078	99.8403	128.273	150.018
	130	91.4047	117.957	106.138	100.165	128.208	150.021
	130.1	91.0348	117.807	106.139	100.37	128.421	148.698
	130.2	90.9003	117.638	105.836	100.831	128.585	147.231
	130.3	91.6199	117.797	105.475	100.848	129.118	146.458
	130.4	92.3617	118.4	105.364	100.533	128.897	146.487
	130.5	92.8211	118.605	106.082	100.022	128.061	146.811
	130.6	92.6511	118.367	106.8	99.6681	127.015	146.831
	130.7	92.2534	118.051	107.192	99.9033	126.779	146.913
	130.8	92.1404	117.707	107.196	100.216	127.397	146.896
	130.9	92.2931	117.912	107.117	101.034	128.085	147.346
	131	92.4733	118	107.564	101.475	128.39	147.572
	131.1	92.2416	118.916	107.493	101.837	128.497	148.117
	131.2	91.8238	119.126	107.747	101.392	128.445	148.256
	131.3	91.3343	119.233	107.681	101.315	128.458	148.442
	131.4	91.1813	118.538	108.021	101.33	128.35	148.026
	131.5	90.9048	118.176	107.81	101.983	128.527	147.653
	131.6	91.046	117.772	107.576	102.249	128.664	147.298
	131.7	91.0753	117.66	107.372	102.068	128.891	147.123
	131.8	91.234	117.568	107.338	101.485	129.084	146.904
	131.9	90.9883	117.44	107.031	101.037	129.254	146.938
	132	90.8692	117.268	106.541	101.158	129.2	147.181
	132.1	90.9271	117.231	106.123	101.236	128.78	147.539
	132.2	91.2352	117.478	106.244	101.316	128.407	147.288
	132.3	91.4838	117.699	106.387	100.967	128.001	147.288
	132.4	91.5996	117.43	106.494	100.977	127.967	147.397
	132.5	91.6328	117.026	106.332	100.988	127.805	148.24
	132.6	91.5682	116.748	106.521	100.99	127.73	148.714
	132.7	91.7051	116.991	107.034	100.578	127.76	148.889
	132.8	91.9121	117.37	107.525	100.24	128.149	148.365
	132.9	92.2752	117.534	107.514	100.469	128.78	147.756
	133	92.3134	117.358	107.564	101.061	128.88	147.543
	133.1	92.2032	117.189	107.857	101.495	128.508	147.766
	133.2	91.9197	117.052	108.689	101.312	128.056	147.768
	133.3	91.8349	117.202	108.755	100.957	127.69	147.452
	133.4	91.5893	117.074	108.433	100.557	127.437	147.091
	133.5	91.2598	117.271	107.289	100.757	127.182	147.51
	133.6	90.7522	117.05	106.346	101.046	127.089	147.824
	133.7	90.3284	116.862	105.362	101.357	127.155	147.902
	133.8	90.2048	115.96	105.369	100.782	126.829	147.449
	133.9	90.6934	115.305	106.061	99.9568	126.92	147.583
	134	91.7308	114.801	107.258	99.3883	127.211	148.035
	134.1	92.4923	115.118	107.885	99.8758	127.985	148.588
	134.2	92.3758	115.577	107.802	100.659	128.517	148.41
	134.3	91.7966	116.142	107.117	101.382	128.982	147.733
	134.4	91.4982	116.225	106.286	101.581	129.048	146.831
	134.5	91.6383	116.383	105.491	101.783	128.821	146.083
	134.6	91.9278	116.378	105.239	101.958	128.039	145.739
	134.7	92.2522	116.562	105.334	101.985	127.573	145.851
	134.8	92.6377	116.515	105.848	101.742	127.246	146.409
	134.9	92.636	116.773	105.902	101.028	127.415	147.013
	135	92.4203	117.407	106.184	100.395	127.457	146.91
	135.1	92.3892	117.674	106.6	99.7799	127.533	146.187
	135.2	92.5376	117.248	107.547	99.6847	127.507	145.068
	135.3	92.4518	115.891	108.238	99.3401	127.527	144.835
	135.4	91.8018	115.539	108.19	99.3091	127.676	145.38
	135.5	91.4391	115.674	107.842	99.3497	127.964	146.339
	135.6	91.5451	116.46	107.16	100.256	128.211	146.606
	135.7	92.1737	116.469	106.807	101.178	128.088	146.629
	135.8	92.5894	116.585	106.313	102.101	127.713	146.691
	135.9	92.6683	116.632	106.245	102.257	127.468	147.26
	136	92.3782	116.872	106.575	102.1	127.612	147.236
	136.1	92.0827	117.04	107.321	101.489	128.016	146.926
	136.2	91.9994	116.769	107.712	101.001	128.433	146.225
	136.3	91.876	116.084	107.524	100.812	128.403	145.979
	136.4	91.4547	115.186	106.547	100.788	127.833	145.989
	136.5	90.9109	114.858	105.794	101.074	127.247	146.469
	136.6	90.4737	115.255	105.513	101.046	127.358	146.806
	136.7	90.6601	115.891	106.016	101.183	128.033	146.869
	136.8	90.8692	116.469	106.539	101.122	128.48	146.82
	136.9	90.9898	116.525	106.997	101.368	128.452	147.015
	137	90.5746	116.344	107.114	101.862	128.373	147.437
	137.1	90.1111	115.941	107.165	102.333	128.574	147.413
	137.2	90.1322	116.078	106.922	102.3	128.757	147.236
	137.3	90.469	116.217	106.755	101.381	128.633	147.021
	137.4	91.1178	116.354	106.482	100.285	128.297	146.871
	137.5	91.0729	116.044	106.172	99.5261	128.037	146.595
	137.6	91.0013	115.972	106.011	99.6411	128.316	146.168
	137.7	90.7922	116.198	106.033	100.001	128.522	145.999
	137.8	91.4312	116.538	106.327	100.37	128.458	146.012
	137.9	91.789	116.39	106.299	100.342	127.874	146.084
	138	91.8452	116.004	106.252	100.196	127.302	145.645
	138.1	91.2096	115.297	106.332	100.22	126.987	145.069
	138.2	91.0389	115.222	106.847	100.67	126.778	144.764
	138.3	91.0252	115.066	107.494	101.242	126.569	145.189
	138.4	91.277	115.509	107.903	101.44	126.593	145.362
	138.5	91.2578	115.815	108.175	101.244	126.757	145.08
	138.6	91.4468	116.308	108.283	101.028	127.063	144.329
	138.7	91.5512	116.536	108.401	100.865	126.745	144.353
	138.8	91.8953	116.518	108.424	100.55	126.38	144.776
	138.9	92.0557	116.13	108.236	100.048	126.225	145.723
	139	92.4161	115.629	107.955	100.018	126.725	146.255
	139.1	92.4418	115.395	107.377	100.473	126.947	146.666
	139.2	92.2406	115.504	107.276	100.948	126.86	146.557
	139.3	91.745	115.565	107.227	101.11	126.897	146.058
	139.4	91.3168	115.506	107.504	100.837	127.402	145.373
	139.5	91.0768	115.613	107.256	100.646	127.997	145.136
	139.6	90.6582	115.818	107.211	100.267	127.911	145.406
	139.7	90.1881	115.866	106.969	100.241	127.613	145.794
	139.8	89.9584	115.547	107.073	100.461	127.214	145.814
	139.9	90.3121	115.256	107.093	101.017	127.218	146.008
	140	90.6811	114.925	107.52	101.161	126.997	146.211
	140.1	90.7501	114.829	107.78	101.288	126.704	146.739
	140.2	90.4827	114.728	108.035	101.177	126.165	146.782
	140.3	90.4624	114.995	108.124	101.399	126.154	146.947
	140.4	90.7284	115.144	108.372	101.132	126.36	146.745
	140.5	91.0616	115.317	108.182	100.852	126.669	146.683
	140.6	91.2462	115.205	107.514	100.51	126.471	146.433
	140.7	91.0084	115.049	106.664	100.481	126.384	146.309
	140.8	90.5116	114.928	106.261	100.508	126.452	146.297
	140.9	90.3031	114.47	106.126	100.497	126.897	146.516
	141	90.6588	114.076	105.833	100.65	127.337	146.674
	141.1	91.7604	113.773	105.29	101.007	128.025	146.79
	141.2	92.5422	114.258	104.924	101.226	128.465	146.269
	141.3	93.184	114.865	105.366	101.136	128.637	145.532
	141.4	92.931	115.244	106.131	100.961	127.951	144.796
	141.5	92.449	115.12	107.063	101.118	127.311	144.668
	141.6	91.5343	114.557	107.107	101.305	126.768	144.953
	141.7	91.0974	113.876	106.953	100.984	127.22	145.417
	141.8	91.1117	113.501	106.519	100.161	127.834	145.777
	141.9	91.2467	113.725	106.469	99.5456	128.368	145.821
	142	91.4211	114.264	106.584	99.5171	128.312	145.394
	142.1	91.3778	114.637	106.504	100.06	127.968	144.917
	142.2	91.7344	114.606	106.306	100.67	127.758	144.68
	142.3	91.9021	114.649	105.633	101.146	127.431	144.815
	142.4	92.167	114.699	105.336	101.316	127.255	145.101
	142.5	92.098	114.865	105.071	101.361	127.443	145.253
	142.6	91.9109	115.076	105.492	101.432	127.836	145.064
	142.7	91.6471	115.133	105.846	101.438	128.149	144.87
	142.8	91.4933	115.051	106.292	101.331	127.906	144.952
	142.9	91.3599	114.164	106.226	101.058	127.738	145.331
	143	90.7634	113.422	105.782	100.782	127.676	146.082
	143.1	89.9959	113.127	105.211	100.376	127.393	146.788
	143.2	89.5062	113.523	105.308	99.6908	127.105	147.37
	143.3	89.8982	113.773	106.124	99.0363	126.873	146.799
	143.4	90.538	113.309	107.103	98.8859	127.128	145.69
	143.5	91.1744	113.033	107.344	99.5937	127.606	144.707
	143.6	91.2106	113.29	107.225	100.963	127.989	144.449
	143.7	91.1976	114.374	107.008	101.903	128.302	144.834
	143.8	91.1572	114.963	107.21	102.088	128.234	145.154
	143.9	91.4234	115.163	107.1	101.06	127.954	145.779
	144	91.6987	114.778	106.966	99.9827	127.674	145.9
	144.1	92.1141	114.461	106.665	98.9819	127.724	146.044
	144.2	92.4797	114.342	106.887	98.9102	128.197	145.435
	144.3	92.7966	114.661	107.294	99.1998	128.505	145.282
	144.4	92.7943	115.376	107.892	100.137	128.004	145.412
	144.5	92.8401	115.506	108.249	100.48	127.081	146.307
	144.6	92.6866	115.028	108.343	100.505	126.55	146.814
	144.7	92.2668	114.173	107.903	99.8639	126.853	146.395
	144.8	91.6503	113.856	107.247	99.7061	127.953	145.248
	144.9	91.1481	114.074	106.525	99.4532	128.661	144.509
	145	91.1043	114.316	106.299	99.3817	128.897	144.697
	145.1	91.0896	114.151	106.043	98.9619	128.281	145.219
	145.2	91.369	113.763	106.04	98.7714	127.693	145.521
	145.3	91.5454	113.678	105.855	98.478	127.78	145.669
	145.4	91.9363	113.909	106.038	98.5008	127.89	145.843
	145.5	91.9508	114.074	106.064	98.6401	128.311	145.778
	145.6	91.9613	113.824	105.988	99.1929	128.212	145.352
	145.7	91.9148	113.49	105.823	99.944	128.503	144.839
	145.8	92.1751	113.117	105.787	100.521	128.163	144.428
	145.9	92.4188	112.963	105.859	100.689	127.597	143.912
	146	92.19	113.095	105.93	100.31	126.976	143.293
	146.1	91.8163	113.601	106.167	100.114	126.881	142.734
	146.2	91.5392	114.17	106.831	100.046	127.337	142.492
	146.3	92.0856	114.288	107.565	99.9837	127.805	142.463
	146.4	92.2888	114.16	107.938	99.7027	128.091	142.738
	146.5	92.62	113.935	107.496	99.5423	127.678	143.239
	146.6	92.2373	114.067	106.709	99.928	127.032	143.949
	146.7	92.4888	114.131	106.21	100.751	126.701	144.293
	146.8	92.5189	113.86	106.169	101.408	127.033	144.317
	146.9	93.004	113.267	106.303	101.607	127.556	143.929
	147	93.0789	112.922	106.248	101.278	127.447	143.746
	147.1	92.8973	113.636	106.579	101.141	127.222	143.651
	147.2	92.0407	114.451	107.117	100.874	126.714	143.88
	147.3	91.0726	114.876	107.588	100.678	127.208	144.105
	147.4	90.497	114.249	107.013	100.249	127.71	144.559
	147.5	90.6283	113.73	106.252	100.009	128.613	144.847
	147.6	91.3821	113.569	105.47	99.9769	128.346	145.095
	147.7	92.188	114.046	105.627	99.9454	128.008	144.898
	147.8	92.6887	114.65	105.842	99.911	127.798	144.663
	147.9	92.3834	115.041	106.627	99.5096	128.35	144.404
	148	91.7281	114.909	107.049	99.1346	128.735	144.472
	148.1	91.0638	114.53	107.21	98.736	128.662	144.503
	148.2	90.9793	114.206	106.591	98.655	128.571	144.41
	148.3	91.1663	114.179	105.986	98.874	128.705	144.13
	148.4	91.4834	114.06	105.72	99.4804	129.035	144.081
	148.5	91.3477	113.998	105.66	100.077	128.927	144.295
	148.6	90.9297	113.879	105.932	100.457	128.577	144.689
	148.7	90.4519	114.141	106.349	100.501	127.961	145.018
	148.8	90.4054	114.362	107.086	100.353	127.615	145.185
	148.9	90.714	114.684	107.133	100.045	127.053	145.361
	149	90.946	114.971	106.567	99.9748	126.806	145.419
	149.1	91.2831	115.1	105.834	100.502	126.537	145.452
	149.2	91.3534	114.865	105.588	101.083	127.072	145.208
	149.3	91.5764	114.1	105.785	101.087	127.776	144.791
	149.4	91.3909	113.629	105.98	100.393	128.415	144.309
	149.5	91.4889	113.223	105.947	99.9712	128.042	144.09
	149.6	91.4263	113.01	105.718	100.04	127.447	144.499
	149.7	91.2337	112.716	105.32	100.208	127.039	145.231
	149.8	90.6972	112.967	105.219	100.031	127.499	145.786
	149.9	90.4369	113.86	105.358	99.7737	127.788	145.648
	150	90.8811	114.732	105.828	99.828	127.738	145.247
	150.1	91.3792	115.193	106.4	100.249	127.5	144.978
	150.2	91.6737	114.866	107.02	100.379	127.299	144.963
	150.3	91.4187	114.631	107.625	100.394	127.441	144.786
	150.4	91.4537	114.443	107.738	100.151	127.605	144.322
	150.5	91.5321	114.673	107.153	100.216	127.997	144.028
	150.6	91.6134	114.597	106.187	100.194	128.067	143.855
	150.7	91.6204	114.576	105.539	100.285	127.959	143.873
	150.8	91.7947	114.266	105.784	100.495	127.735	143.247
	150.9	92.3878	114.195	106.401	100.763	127.927	142.793
	151	93.1053	113.925	106.895	101.033	128.233	142.434
	151.1	93.3092	113.865	106.988	101.104	128.57	142.96
	151.2	93.1574	113.814	106.874	101.088	128.561	143.39
	151.3	92.5523	113.886	106.715	100.752	128.508	144.017
	151.4	92.4147	113.689	106.516	100.191	128.473	144.127
	151.5	92.1163	113.343	106.662	99.7808	128.921	144.199
	151.6	92.0066	113.106	107.167	99.7018	129.061	144.11
	151.7	91.6881	113.406	107.851	99.9611	128.798	144.291
	151.8	91.5812	113.682	107.981	100.098	127.95	144.691
	151.9	91.3983	113.803	107.833	100.075	127.635	144.69
	152	91.36	113.505	107.733	99.9016	127.731	144.383
	152.1	91.3861	113.249	107.839	99.528	128.022	143.368
	152.2	91.5832	113.035	107.679	99.4941	127.978	142.484
	152.3	91.7201	112.89	107.183	99.7008	127.706	141.892
	152.4	91.8668	112.904	106.989	100.413	127.298	142.205
	152.5	91.9539	112.903	107.211	100.723	126.981	142.843
	152.6	91.8384	112.871	107.667	100.615	127.137	143.237
	152.7	91.5367	112.82	107.737	100.105	127.485	143.287
	152.8	91.312	112.664	107.444	99.8566	127.957	143.126
	152.9	91.5313	112.761	106.652	100.107	127.819	143.164
	153	91.8768	112.836	105.532	100.736	127.585	143.139
	153.1	92.1277	113.385	104.785	100.921	127.095	143.717
	153.2	92.2138	113.716	104.682	100.412	127.03	143.978
	153.3	92.1076	113.797	105.416	99.3848	126.999	144.2
	153.4	91.8894	113.44	106.228	98.7616	127.253	143.312
	153.5	91.3506	113.13	106.994	98.688	127.211	142.839
	153.6	91.0888	113.052	107.471	98.953	127.364	142.577
	153.7	91.3609	112.97	107.365	99.4261	127.168	143.177
	153.8	92.0973	112.988	106.955	99.9106	127.328	143.361
	153.9	92.6901	113.189	106.607	100.548	127.38	143.594
	154	92.5314	113.545	106.851	100.92	127.386	143.152
	154.1	91.9419	113.512	107.028	101.109	126.898	142.924
	154.2	91.3564	113.139	106.759	101.184	126.471	142.346
	154.3	91.1273	112.812	106.009	101.182	126.565	142.398
	154.4	91.0687	113.149	105.608	100.924	127.567	142.712
	154.5	91.0116	113.828	105.693	100.306	128.401	143.153
	154.6	90.8442	114.348	106.107	99.5978	129.132	143.376
	154.7	90.9876	114.268	106.609	99.6008	128.67	143.468
	154.8	91.0894	113.505	106.803	99.5831	128.027	143.288
	154.9	91.3363	112.704	106.749	99.9113	126.89	143.111
	155	91.2456	112.017	106.298	99.943	127.007	142.998
	155.1	91.5087	111.888	106.042	100.384	127.287	143.412
	155.2	91.7277	111.862	106.195	100.411	127.787	143.81
	155.3	91.877	111.947	106.7	100.455	127.244	143.855
	155.4	91.7174	112.043	106.973	100.652	126.998	143.938
	155.5	91.6212	112.216	106.85	101.149	126.837	143.813
	155.6	91.5364	112.604	106.67	101.085	127.105	143.864
	155.7	91.5849	112.789	106.91	100.387	127.089	143.374
	155.8	91.5764	112.767	107.496	99.6444	126.936	143.36
	155.9	91.8527	112.157	107.717	99.5889	126.539	143.018
	156	92.0453	111.681	107.391	100.003	125.948	142.974
	156.1	92.2482	111.377	106.365	100.302	125.731	142.388
	156.2	92.2024	111.663	105.741	100.025	125.743	142.602
	156.3	92.0861	112.01	105.703	99.748	126.47	143.041
	156.4	92.0051	112.287	106.565	99.6778	126.887	143.6
	156.5	92.2293	112.41	107.14	100.16	127.213	143.417
	156.6	92.5481	112.142	107.449	100.609	127.096	142.696
	156.7	92.7213	112.073	107.173	101.03	127.213	142.127
	156.8	92.5706	112.013	106.756	101.262	127.828	141.813
	156.9	92.4373	112.456	106.276	100.927	128.52	141.955
	157	92.3347	112.712	106.174	100.253	128.97	142.009
	157.1	92.0752	112.604	106.735	99.5218	128.642	142.083
	157.2	91.639	112.545	107.115	99.621	128.051	141.939
	157.3	91.4148	112.357	107.104	100.177	127.628	142.191
	157.4	91.7916	112.551	106.564	100.576	127.738	142.534
	157.5	92.3877	112.115	106.415	100.541	127.984	143.017
	157.6	92.6908	111.823	106.544	100.346	128.177	143.385
	157.7	92.4357	111.186	106.678	100.352	127.972	143.453
	157.8	91.9694	111.247	106.567	100.355	127.514	143.251
	157.9	91.801	111.397	106.17	100.187	126.826	142.395
	158	91.8459	111.953	106.083	100.232	126.575	141.749
	158.1	91.8922	111.982	106.023	100.491	126.792	141.318
	158.2	91.7222	111.927	106.321	100.667	127.183	141.287
	158.3	91.6364	111.799	106.409	100.38	127.169	141.559
	158.4	91.8027	111.752	106.585	99.9666	126.79	141.733
	158.5	92.2064	111.768	106.75	99.9998	126.334	142.366
	158.6	92.6687	111.649	106.835	100.461	126.022	142.69
	158.7	92.9419	111.897	106.946	101.021	126.004	143.202
	158.8	92.9842	112.179	106.757	101.422	126.447	143.119
	158.9	92.5732	112.517	106.989	101.366	127.031	143.022
	159	92.2459	112.411	107.387	101.035	127.511	143.042
	159.1	91.8571	111.984	107.847	100.445	127.539	142.996
	159.2	91.8263	111.535	107.647	100.306	127.301	142.74
	159.3	91.6809	111.632	107.285	100.433	127.078	141.955
	159.4	91.4887	111.999	107.153	100.687	126.99	141.435
	159.5	91.249	112.443	107.046	100.636	127.324	141.254
	159.6	91.2146	112.392	106.399	100.426	128.097	141.176
	159.7	91.7059	112.293	105.697	100.161	128.993	141.156
	159.8	92.199	112.013	105.616	99.9793	129.635	140.927
	159.9	92.5652	111.697	105.869	100.013	129.356	141.074
	160	92.0687	111.253	105.684	100.436	128.674	141.546
	160.1	91.4843	111.207	105.087	100.595	127.812	142.411
	160.2	90.9554	111.303	104.933	100.616	127.585	143.4
	160.3	90.9109	111.541	105.54	100.31	127.562	143.851
	160.4	90.9943	111.312	106.552	100.261	127.68	143.708
	160.5	91.1266	111.117	107.29	99.8856	127.797	142.791
	160.6	91.6237	111.106	107.274	99.2592	128.032	141.961
	160.7	92.2533	111.489	106.769	99.0059	128.335	141.436
	160.8	92.838	111.918	106.303	99.254	128.045	141.569
	160.9	92.8639	112.014	106.226	100.035	127.513	141.63
	161	92.58	111.697	106.28	100.378	126.913	141.715
	161.1	92.0013	111.017	106.162	100.383	126.725	141.572
	161.2	91.9249	110.439	106.578	100.12	126.944	141.463
	161.3	92.0596	110.339	107.423	100.142	127.28	141.539
	161.4	92.6513	111.219	108.388	100.472	127.723	141.648
	161.5	92.7699	112.404	108.517	100.812	127.824	141.824
	161.6	92.5996	113.029	108.05	100.618	127.737	141.349
	161.7	92.279	112.781	107.337	100.334	127.482	140.924
	161.8	92.2598	112.069	106.578	99.6993	126.986	140.962
	161.9	92.5327	111.87	106.141	99.4841	126.591	141.667
	162	92.4469	111.868	106.083	99.0387	126.389	141.966
	162.1	92.0441	112.144	106.603	99.4149	126.645	141.564
	162.2	91.4372	111.92	106.961	99.9997	126.935	140.899
	162.3	91.1088	111.409	107.146	101.097	127.161	140.747
	162.4	91.1483	110.677	106.941	101.512	127.619	140.841
	162.5	91.6311	110.383	106.638	101.174	127.859	140.883
	162.6	92.3953	110.699	106.527	100.146	127.852	140.622
	162.7	92.9209	111.204	106.507	99.485	127.12	140.24
	162.8	93.0403	111.648	106.642	99.4213	126.612	140.068
	162.9	92.7606	111.718	106.368	99.6152	126.221	140.414
	163	92.5598	111.647	106.448	99.8381	126.63	140.848
	163.1	92.2818	111.16	106.772	99.8703	126.884	141.312
	163.2	92.1313	110.862	107.242	99.9814	127.419	141.165
	163.3	91.9226	110.622	107.273	99.902	127.405	140.998
	163.4	91.8601	110.849	106.732	100.117	127.696	140.594
	163.5	91.7489	110.827	106.388	100.357	127.523	140.343
	163.6	91.831	111.196	105.902	100.3	127.343	140.41
	163.7	91.7984	111.755	106.128	99.7802	127.123	140.552
	163.8	91.9271	112.369	106.259	99.3322	127.375	141.079
	163.9	91.8044	112.52	106.74	98.9978	127.55	141.258
	164	91.9847	112.081	106.782	98.9179	127.209	141.274
	164.1	91.9966	111.531	106.858	98.8654	126.598	140.807
	164.2	92.0948	110.981	106.826	99.4719	126.134	140.366
	164.3	92.0584	110.5	106.729	100.093	126.242	140.255
	164.4	92.2193	110.514	106.639	100.565	126.455	140.285
	164.5	92.338	110.316	106.382	100.559	127.024	140.738
	164.6	92.4368	110.479	106.319	100.474	127.272	141.007
	164.7	92.2519	110.274	106.171	100.364	127.385	141.443
	164.8	92.083	110.487	106.297	100.15	127.157	141.331
	164.9	91.7534	110.221	106.418	100.032	127.161	141.469
	165	91.4746	110.186	106.758	99.998	127.083	141.546
	165.1	91.0944	110.386	107.372	99.9613	126.934	141.598
	165.2	90.962	111.031	107.934	99.667	126.482	141.272
	165.3	91.007	111.332	108.14	99.3418	126.139	140.78
	165.4	91.3548	111.07	107.584	99.3541	126.055	140.874
	165.5	91.7018	110.667	106.734	99.9262	126.214	141.121
	165.6	91.8746	110.517	106.009	100.411	126.63	141.522
	165.7	92.1222	110.374	105.95	100.705	126.828	141.425
	165.8	92.299	110.188	106.355	100.558	127.123	141.323
	165.9	92.6411	109.77	106.695	100.558	127.465	141.216
	166	92.7567	109.694	106.582	100.589	127.764	141.398
	166.1	92.6878	109.856	106.326	100.674	127.901	141.755
	166.2	92.3131	110.386	106.466	100.715	127.825	141.974
	166.3	91.8649	111.07	106.714	100.235	128.163	141.943
	166.4	91.2288	111.534	107.032	99.5399	128.391	141.689
	166.5	91.1293	111.632	106.815	98.896	128.03	141.572
	166.6	91.1028	111.315	106.668	98.9267	127.338	141.348
	166.7	91.8861	111.281	106.308	99.2928	126.911	141.03
	166.8	92.3119	111.379	106.1	99.6182	127.114	140.642
	166.9	92.5632	111.492	106.21	99.7891	127.229	140.718
	167	92.2213	111	106.548	99.8279	126.763	140.946
	167.1	92.0306	110.563	107.169	99.6899	126.289	141.053
	167.2	92.183	110.374	107.383	99.3041	125.767	140.664
	167.3	92.3146	110.568	107.463	99.1357	125.639	140.431
	167.4	92.0422	111.017	107.312	99.1803	125.552	140.468
	167.5	91.4257	111.286	107.141	99.6136	125.59	140.774
	167.6	90.8291	111.645	106.957	99.5512	126.043	140.786
	167.7	90.6307	111.664	107.077	99.343	126.528	140.551
	167.8	90.9051	111.625	107.257	99.06	127.137	140.235
	167.9	91.7932	111.015	107.392	99.3293	127.177	140.217
	168	92.4689	110.291	107.155	99.6281	126.9	140.101
	168.1	92.7439	109.784	107	99.8137	126.795	139.972
	168.2	92.2596	109.872	107.044	99.7457	126.962	139.279
	168.3	92.0354	110.232	107.056	99.7479	127.258	139.016
	168.4	91.4853	110.493	106.869	99.5896	126.942	139.077
	168.5	91.2191	110.895	106.281	99.3737	126.42	139.918
	168.6	90.8233	110.807	105.473	99.3073	126.008	140.529
	168.7	91.0567	110.613	104.849	99.5631	126.078	140.867
	168.8	91.3468	110.097	104.505	99.9348	126.478	140.807
	168.9	91.7577	110.256	104.701	100.024	126.959	140.772
	169	92.1053	110.763	105.089	99.7681	127.5	140.466
	169.1	92.5053	111.21	105.697	99.6191	127.829	139.821
	169.2	92.5621	111.524	106.317	99.7933	127.816	139.405
	169.3	92.6376	111.343	106.705	100.485	127.414	139.298
	169.4	92.6409	110.887	107.071	100.699	126.884	139.848
	169.5	92.8698	110.005	107.355	100.385	126.506	139.763
	169.6	92.5152	109.332	107.746	99.3386	126.26	139.616
	169.7	91.9882	109.295	107.686	98.926	126.249	139.431
	169.8	91.7129	109.538	107.357	99.0121	126.609	140.124
	169.9	91.875	109.669	106.956	99.6568	127.316	141.084
	170	91.9828	109.278	106.88	100.126	128.109	141.777
	170.1	91.7031	108.996	106.998	100.58	128.626	141.876
	170.2	91.7036	109.026	107.277	100.922	128.913	141.655
	170.3	92.2644	109.524	107.515	100.783	128.81	141.492
	170.4	93.312	109.681	107.78	100.275	128.229	141.151
	170.5	93.9508	109.592	107.719	99.8153	127.34	140.775
	170.6	93.7738	109.359	107.562	99.6488	126.78	139.996
	170.7	92.7817	109.406	107.371	99.6293	126.71	139.659
	170.8	92.0634	109.758	107.37	99.51	126.852	139.669
	170.9	91.7428	110.123	107.581	99.6367	126.639	140.236
	171	91.7098	110.256	107.662	99.6707	126.491	140.697
	171.1	91.0953	109.982	107.757	99.8229	126.171	140.9
	171.2	90.5783	109.448	107.45	99.5699	126.072	140.672
	171.3	90.392	109.023	107.132	99.663	126.152	140.34
	171.4	91.0536	108.808	106.523	99.4523	126.597	139.936
	171.5	91.5073	109.015	106.109	99.3919	126.95	139.881
	171.6	91.8637	109.472	105.804	99.0578	126.58	139.818
	171.7	91.8121	110.152	105.898	98.9849	126.209	140.01
	171.8	92.0764	110.529	106.097	99.416	126.209	140.288
	171.9	92.1504	110.78	106.557	100.25	126.886	140.765
	172	91.8829	110.674	106.802	101.015	127.629	141.041
	172.1	91.3639	110.35	106.997	101.021	128.142	140.761
	172.2	90.9722	109.942	106.682	100.515	128.376	140.277
	172.3	91.0369	109.59	106.357	99.9454	128.407	139.462
	172.4	91.3332	109.743	105.868	99.8291	128.351	139.159
	172.5	91.4108	109.948	105.84	100.121	128.118	139.081
	172.6	91.3797	110.018	106.161	100.418	127.591	139.5
	172.7	91.1293	109.825	106.932	100.732	126.968	139.67
	172.8	91.1679	109.722	107.194	100.817	126.384	139.495
	172.9	91.0361	110.038	106.93	100.815	125.959	139.136
	173	90.925	110.254	105.925	100.367	125.82	138.41
	173.1	90.7759	110.241	105.086	99.6612	126.184	137.563
	173.2	90.9294	109.961	104.506	99.3536	126.976	136.569
	173.3	90.9858	109.917	104.81	99.599	127.442	136.242
	173.4	91.1498	110.001	105.808	100.236	127.324	136.665
	173.5	91.04	109.986	106.893	100.443	126.849	137.718
	173.6	91.1523	109.733	107.278	100.501	126.534	138.598
	173.7	90.8112	109.221	106.713	100.405	126.387	138.701
	173.8	90.4418	108.898	105.975	100.329	126.052	138.252
	173.9	89.9319	108.58	105.644	99.956	125.662	138.009
	174	89.911	108.613	106.074	99.4774	125.393	138.396
	174.1	90.3268	108.498	106.796	99.3927	125.464	138.878
	174.2	91.0419	108.813	107.43	99.3931	125.649	139.118
	174.3	91.4907	109.215	107.55	99.556	125.772	139.318
	174.4	91.3037	109.852	107.253	99.2997	125.523	140.024
	174.5	90.912	110.188	107	99.3141	125.187	140.774
	174.6	91.1316	110.304	106.995	99.3722	125.096	140.796
	174.7	91.9266	110.242	107.613	99.6699	125.7	140.23
	174.8	92.6754	110.455	108.159	99.7558	126.621	139.867
	174.9	92.6752	110.601	108.465	99.7833	127.171	140.395
	175	92.5067	110.534	107.729	99.7112	127.183	141.004
	175.1	92.0673	109.802	106.892	99.348	126.825	141.016
	175.2	91.5324	109.124	106.19	98.9649	126.767	140.249
	175.3	90.9223	108.944	106.42	98.6976	126.676	139.405
	175.4	90.6112	109.412	107.008	99.1661	126.59	138.682
	175.5	90.5424	110.038	107.793	99.7669	126.248	138.252
	175.6	90.3262	110.599	108.223	100.459	126.183	137.742
	175.7	90.2286	110.919	108.269	100.726	126.246	137.867
	175.8	90.3951	111.21	107.749	100.827	126.313	138.348
	175.9	90.9226	111.029	107.36	100.673	126.339	139.139
	176	91.4023	110.48	107.057	100.218	126.355	139.523
	176.1	91.6782	109.753	107.044	99.4982	126.295	139.659
	176.2	91.5148	109.382	106.654	98.5078	126.378	139.679
	176.3	91.1579	109.209	105.905	98.0894	126.586	139.573
	176.4	90.6238	109.012	105.099	97.9729	127.326	139.369
	176.5	90.5154	108.754	104.481	98.5327	127.851	139.283
	176.6	90.4099	108.969	104.555	99.0298	128.189	139.359
	176.7	90.5151	109.194	105.241	99.4858	128.037	139.593
	176.8	90.5692	109.352	106.068	99.3239	127.599	139.776
	176.9	90.8943	109.351	106.295	98.7781	126.885	139.837
	177	91.3782	109.663	106.099	98.531	126.126	139.993
	177.1	91.5742	109.845	106.284	98.6253	125.714	140.278
	177.2	91.7792	109.701	107.076	98.9666	125.932	140.538
	177.3	92.0391	109.164	107.702	99.1738	126.745	140.318
	177.4	92.4082	108.849	108.076	99.6723	127.378	139.708
	177.5	92.1993	108.545	108.022	100.2	127.665	139.354
	177.6	91.4347	108.257	107.932	100.309	127.525	139.419
	177.7	90.7671	107.999	107.3	99.935	127.558	139.402
	177.8	90.5793	108.305	107.02	99.13	127.257	139.094
	177.9	90.9116	109.014	106.923	98.891	126.616	138.795
	178	91.1481	109.806	107.149	98.9229	125.833	138.915
	178.1	91.4216	110.228	106.867	99.4011	125.591	139.338
	178.2	91.3954	110.258	106.71	99.418	125.782	139.448
	178.3	91.3773	110.292	106.564	99.1788	126.016	139.56
	178.4	90.9381	110.058	106.761	98.8112	126.236	139.514
	178.5	90.4601	110.244	106.777	98.8572	126.306	139.568
	178.6	89.9781	109.907	106.93	99.042	126.329	139.121
	178.7	90.1944	109.265	106.969	99.5758	126.03	138.507
	178.8	90.9044	108.247	107.134	99.9384	125.766	138.184
	178.9	91.9761	107.759	107.322	100.387	125.775	138.603
	179	92.6966	108.47	107.53	100.629	125.842	139.645
	179.1	92.8524	109.087	107.306	100.808	125.972	140.499
	179.2	92.4648	109.456	106.684	100.792	125.857	140.66
	179.3	92.1231	108.978	106.163	100.488	126.214	139.94
	179.4	92.0948	108.567	105.922	100.178	126.626	138.827
	179.5	91.8781	108.089	106.06	99.8308	127	137.938
	179.6	91.3462	107.941	106.114	99.5089	126.811	137.343
	179.7	90.5946	108.168	106.459	99.0896	126.342	137.489
	179.8	90.5584	108.844	106.572	98.8491	126.387	138.017
	179.9	90.7052	109.467	106.738	98.9582	126.959	139.111
	180	90.9222	109.887	106.732	99.255	127.749	139.625
	180.1	90.8398	110.251	106.957	99.5591	127.875	139.418
	180.2	90.7168	110.471	106.828	99.6304	127.354	138.709
	180.3	90.8027	110.698	106.338	99.7481	126.669	138.359
	180.4	90.8856	110.388	105.697	99.6971	126.161	138.368
	180.5	91.1021	110.172	105.484	99.8953	125.78	138.227
	180.6	91.2039	109.975	105.801	99.985	125.509	138.024
	180.7	91.3533	110.027	106.37	100.246	125.194	137.972
	180.8	91.4734	109.99	106.991	99.9054	125.237	138.301
	180.9	91.5549	109.537	107.065	99.2518	125.412	138.644
	181	91.4491	109.169	106.896	98.6596	125.617	139.301
	181.1	91.3972	108.734	106.495	98.6788	125.543	139.768
	181.2	91.0238	108.625	106.671	99.0848	125.144	140.077
	181.3	90.9017	108.615	106.956	99.2123	124.992	139.964
	181.4	90.6701	108.576	107.276	99.1394	125.006	139.916
	181.5	91.0582	108.738	107.343	98.9967	125.887	139.439
	181.6	91.2432	108.73	107.096	99.2624	127.024	138.873
	181.7	91.488	109.217	106.931	99.6449	128.196	138.489
	181.8	91.2439	109.267	106.947	100.427	128.122	138.764
	181.9	91.1731	109.097	107.448	101.174	127.376	138.896
	182	90.9746	108.545	108.301	101.611	126.628	138.436
	182.1	90.9817	108.511	108.754	101.172	126.568	137.849
	182.2	90.7089	108.734	108.801	100.184	126.77	137.504
	182.3	90.6804	108.726	107.436	99.4476	126.962	137.662
	182.4	90.6964	108.292	105.825	99.2172	127.341	137.912
	182.5	91.0726	107.842	104.281	99.4418	127.601	138.208
	182.6	91.3117	107.743	104.453	99.6048	127.647	138.266
	182.7	91.5176	107.893	105.726	99.7336	127.315	138.403
	182.8	91.6378	108.015	106.997	99.7992	127.058	138.628
	182.9	91.8373	107.721	107.092	99.6883	127.156	138.928
	183	91.9553	107.435	106.481	99.7731	127.323	138.766
	183.1	92.1569	107.44	106.097	100.046	127.838	138.439
	183.2	92.0496	108.025	106.259	100.656	127.715	138.134
	183.3	92.0339	108.416	106.533	100.857	127.531	137.917
	183.4	91.7822	108.403	106.814	100.351	126.684	137.252
	183.5	91.6426	107.976	107.189	99.4016	126.569	136.658
	183.6	91.3299	107.78	107.223	98.5907	126.771	136.255
	183.7	90.9783	108.129	106.934	98.4107	127.568	136.653
	183.8	90.9533	108.722	106.51	98.5982	127.865	136.905
	183.9	91.3273	109.043	106.439	98.821	127.586	137.459
	184	91.846	108.553	106.658	98.8748	126.886	137.77
	184.1	92.0732	107.968	106.716	98.7698	126.261	137.975
	184.2	91.8691	107.254	106.7	98.869	126.153	137.499
	184.3	91.7144	106.935	106.463	98.8624	125.986	137.046
	184.4	91.6721	106.743	106.041	99.0286	125.66	136.812
	184.5	91.7513	107.141	105.518	98.6674	125.244	137.109
	184.6	91.821	107.521	105.187	98.2119	125.215	137.471
	184.7	91.904	107.693	105.702	97.5084	125.59	138.019
	184.8	91.718	107.404	106.48	97.5027	125.705	138.313
	184.9	91.1228	107.307	107.128	98.0662	125.484	138.415
	185	90.4873	107.539	107.188	99.0291	125.268	138.143
	185.1	90.2772	108.35	107.35	99.7024	125.354	137.883
	185.2	90.6922	109.01	107.831	99.8963	126.013	137.73
	185.3	91.1094	109.239	108.02	99.7749	126.6	138.136
	185.4	91.5572	108.557	107.459	99.4816	127.078	138.904
	185.5	91.6187	107.709	106.217	99.4918	126.831	139.409
	185.6	91.8941	107.28	105.423	99.5401	126.548	138.929
	185.7	92.1541	107.533	105.48	99.7677	126.603	137.576
	185.8	92.4684	108.227	105.923	99.8107	127.082	136.238
	185.9	92.2153	108.498	106.192	99.7776	127.506	135.653
	186	91.8389	108.415	106.024	99.608	127.215	135.946
	186.1	91.4812	107.632	106.289	99.0866	126.647	136.683
	186.2	91.5451	106.965	106.811	98.6479	125.8	137.242
	186.3	91.3058	106.592	107.491	98.4378	125.373	137.594
	186.4	91.1147	106.861	107.621	99.0302	125.16	137.831
	186.5	90.7899	107.159	107.423	99.671	125.355	138.442
	186.6	90.9288	107.357	107.076	99.9778	125.315	139.186
	186.7	91.0128	107.606	106.988	99.8523	125.18	139.396
	186.8	91.3553	107.868	107.008	99.7906	125.209	139.036
	186.9	91.48	108.216	107.097	100.052	125.739	138.013
	187	91.5699	108.308	106.791	100.108	126.534	137.428
	187.1	91.3434	108.512	106.379	100.102	126.717	137.148
	187.2	91.1884	108.494	106.271	99.8567	126.489	137.713
	187.3	91.1339	108.508	106.841	99.8084	126.005	138.392
	187.4	91.2187	108.678	107.747	99.4923	125.818	138.919
	187.5	91.5426	108.955	108.071	99.4357	125.462	138.663
	187.6	91.892	109.069	107.847	99.1714	125.159	137.892
	187.7	92.4412	108.74	107.094	99.1241	125.157	137.103
	187.8	92.508	108.209	106.576	98.8864	125.516	136.703
	187.9	92.3937	107.826	106.163	99.1647	125.765	136.784
	188	91.9139	107.859	106.254	99.4184	125.92	136.968
	188.1	91.5559	108.113	106.231	99.3657	126.226	137.279
	188.2	91.502	108.1	106.34	98.8929	126.77	137.591
	188.3	91.3577	107.604	106.381	98.3943	126.917	137.899
	188.4	91.664	107.084	106.482	98.4233	126.723	138.1
	188.5	91.926	106.85	106.32	98.5488	126.61	138.099
	188.6	92.5713	107.071	106.046	98.8148	126.458	138.087
	188.7	92.7359	107.383	106.044	98.85	126.32	138.108
	188.8	92.7794	107.842	106.216	98.9701	126.007	138.143
	188.9	92.5926	108.044	106.213	99.2254	126.177	137.897
	189	92.5884	108.051	106.263	99.6953	126.456	137.656
	189.1	92.1979	107.813	106.401	100.004	126.457	137.587
	189.2	91.9333	107.546	106.711	100.165	126.331	138.063
	189.3	91.322	107.162	106.746	100.407	126.034	138.332
	189.4	91.2818	106.981	106.829	100.867	125.88	138.435
	189.5	91.3274	106.944	107.237	101.134	125.594	138.032
	189.6	91.6154	107.261	107.585	100.8	125.6	137.677
	189.7	91.4441	107.499	107.757	100.268	126.067	137.235
	189.8	91.0847	107.802	107.478	99.6887	126.904	137.163
	189.9	91.0163	108.001	107.553	99.4047	127.471	136.901
	190	91.3453	107.848	107.568	98.9527	127.403	137.188
	190.1	91.8374	107.554	107.704	98.4807	126.787	137.16
	190.2	92.2069	107.128	107.748	98.141	126.3	137.636
	190.3	92.312	106.913	107.937	98.325	126.042	137.312
	190.4	91.9488	106.86	108.002	98.8199	125.918	137.106
	190.5	91.4361	106.906	107.77	99.2286	125.837	136.695
	190.6	91.227	107.295	107.479	99.0893	125.939	136.717
	190.7	91.4421	107.236	107.139	99.1289	126.115	136.954
	190.8	91.308	106.998	106.764	99.124	126.251	137.063
	190.9	91.1382	106.188	106.205	99.4968	126.147	136.73
	191	90.9781	105.937	105.888	99.4772	126.065	136.314
	191.1	91.7332	106.305	105.689	99.8611	125.972	135.879
	191.2	92.4828	107.285	105.764	99.9118	126.272	136.031
	191.3	93.2498	107.931	105.741	99.8637	126.303	135.813
	191.4	92.9398	107.884	105.802	99.3776	126.432	135.872
	191.5	92.0743	107.257	105.715	99.4717	125.967	135.912
	191.6	91.0343	106.974	105.515	99.7488	125.966	136.57
	191.7	90.853	106.886	105.297	99.5531	125.624	137.167
	191.8	91.2269	107.255	105.246	98.6126	125.802	137.694
	191.9	91.3867	107.49	105.694	97.604	125.826	137.967
	192	91.0749	108	106.219	97.4603	126.118	138.136
	192.1	90.4627	108.455	106.664	97.8478	125.928	138.103
	192.2	90.5337	108.501	106.664	98.5966	125.739	137.84
	192.3	90.769	108.184	106.614	99.1043	125.732	137.448
	192.4	91.3071	107.553	106.443	99.7802	126.211	137.219
	192.5	91.3558	107.163	106.212	100.133	126.668	137.255
	192.6	91.5024	106.97	105.847	100.528	126.906	137.349
	192.7	91.4929	107.017	105.916	100.26	126.8	137.347
	192.8	91.57	107.443	106.236	99.9408	126.461	136.894
	192.9	91.4371	107.824	106.426	99.5392	126.023	136.514
	193	91.2386	108.011	106.051	99.4588	125.652	136.035
	193.1	91.1452	107.559	105.419	99.7384	125.363	136.019
	193.2	91.0902	107.019	105.202	99.875	125.113	136.146
	193.3	90.9391	106.853	105.202	100.192	125.277	136.639
	193.4	90.5013	107.248	105.607	99.9116	125.75	136.933
	193.5	90.3092	107.569	105.827	99.8499	126.345	136.957
	193.6	90.6057	107.403	106.019	99.462	126.385	136.702
	193.7	91.3232	106.847	106.028	99.3751	126.461	136.859
	193.8	91.7977	106.508	106.129	98.9408	126.45	137.269
	193.9	91.8091	106.719	106.55	98.8069	126.498	137.764
	194	91.5367	107.161	106.961	98.8297	126.042	137.718
	194.1	91.1273	107.466	107.514	99.3262	125.634	137.481
	194.2	91.17	107.357	107.523	99.5571	125.355	136.966
	194.3	91.2938	107.231	107.34	99.4328	125.09	137.131
	194.4	91.7997	107.191	106.894	98.8972	124.665	137.2
	194.5	91.5923	107.122	107.069	98.6743	124.185	137.603
	194.6	91.2088	106.781	107.281	98.8848	124.277	137.304
	194.7	90.5878	106.431	107.302	99.4737	124.645	137.539
	194.8	90.2232	106.402	106.941	99.775	125.211	137.97
	194.9	89.8787	106.678	106.863	99.8738	125.451	138.458
	195	89.5448	107.126	107.08	99.558	125.345	138.268
	195.1	89.6234	107.434	107.141	99.2839	125.201	137.413
	195.2	90.1533	107.795	106.543	98.904	125.332	136.722
	195.3	91.1393	107.841	105.836	98.7798	125.908	136.245
	195.4	92.321	107.8	105.437	98.5107	126.28	135.94
	195.5	93.3663	107.526	105.706	98.3671	126.214	135.717
	195.6	93.5713	107.6	106.152	98.0367	125.818	135.414
	195.7	92.7857	107.834	106.907	98.1693	125.417	135.345
	195.8	91.564	108.21	107.746	98.4014	125.205	135.06
	195.9	90.9471	108.101	108.482	99.1993	125.503	135.593
	196	90.8891	107.797	108.339	99.4229	125.963	136.685
	196.1	91.3199	107.439	107.64	99.3524	126.251	137.916
	196.2	91.6653	107.366	106.674	98.6536	125.882	138.42
	196.3	92.1336	107.264	105.967	98.7017	125.685	138.067
	196.4	92.1263	107.052	105.491	98.9918	125.957	137.69
	196.5	91.9228	106.633	105.304	99.4648	126.461	137.165
	196.6	91.4629	106.193	105.836	99.4512	126.609	136.806
	196.7	91.3794	105.572	106.601	99.2644	126.197	136.722
	196.8	91.4707	105.262	107.455	99.1074	125.965	136.913
	196.9	91.4568	105.292	107.621	98.8128	125.927	137.164
	197	91.2366	106.153	107.58	98.7381	125.942	136.834
	197.1	91.1732	107.03	107.298	98.8097	125.696	136.294
	197.2	91.7192	107.664	107.115	99.4638	125.425	135.88
	197.3	92.4584	107.543	106.885	100.162	125.359	135.894
	197.4	92.5083	107.303	106.923	100.664	125.156	136.225
	197.5	92.0289	107.159	106.921	100.688	124.836	136.251
	197.6	91.5084	107.185	107.253	100.678	124.592	136.278
	197.7	91.9153	107.216	107.11	100.769	124.759	136.156
	197.8	92.9579	107.143	106.973	100.661	125.123	136.334
	197.9	93.8516	107.125	106.232	100.053	125.8	136.169
	198	94.0018	106.921	106.066	99.324	126.351	136.052
	198.1	93.3164	106.821	106.191	98.9558	126.879	136.083
	198.2	92.7168	106.469	106.557	98.8942	126.594	136.459
	198.3	92.5658	105.98	106.57	98.8726	126.09	136.555
	198.4	92.9426	105.451	106.536	98.999	125.057	136.013
	198.5	93.2979	105.448	106.762	99.1409	124.475	135.499
	198.6	93.1731	106.043	107.27	99.059	124.337	135.3
	198.7	92.4422	106.722	107.683	98.4759	125.097	135.685
	198.8	91.4881	106.762	107.977	98.0524	126.186	135.881
	198.9	90.7102	106.397	107.817	98.0234	126.897	136.073
	199	90.3903	105.524	107.282	98.4163	126.997	136.249
	199.1	90.228	105.281	106.778	98.7994	126.691	136.418
	199.2	90.2707	105.319	106.426	99.1943	126.497	136.357
	199.3	90.3457	106.318	106.294	99.5296	126.491	136.062
	199.4	90.4497	106.903	105.768	99.9266	126.353	135.992
	199.5	90.6676	107.436	105.223	100.245	126.186	136.328
	199.6	90.66	107.231	104.855	100.315	125.867	136.768
[truncated: 1,004 more rows]

## Sheet: E2_ADP_Asso
	Experiment 2
	ADP association: Raw fluorescence data
	Time (s)	BiP_MgADP_B1A1	BiP_MgADP_B1A2	BiP_MgADP_B1A3	BiP_MgADP_B1A4	BiP_MgADP_B1A5	BiP_MgADP_B1A6	BiP_CaADP_B2A1	BiP_CaADP_B2A2	BiP_CaADP_B2A3	BiP_CaADP_B2A4	BiP_CaADP_B2A5	BiP_CaADP_B2A6	T229A_MgADP_B1A1	T229A_MgADP_B1A2	T229A_MgADP_B1A3	T229A_MgADP_B1A4	T229A_MgADP_B1A5	T229A_MgADP_B1A6	T229A_CaADP_B2A1	T229A_CaADP_B2A2	T229A_CaADP_B2A3	T229A_CaADP_B2A4	T229A_CaADP_B2A5	T229A_CaADP_B2A6				Nonlinear fit (one-phase association, GraphPad Prism)
	0	87.9925	87.0467	106.415	116.462	106.144	118.834	72.8332	94.1688	99.9443	106.343	110.676	124.959	79.1445	100.177	101.016	133.394	107.639	120.971	71.5077	99.4982	103.051	103.763	134.517	121.947
	0.1	88.4613	86.8661	107.17	117.302	105.993	119.569	73.2583	94.6965	100.138	107.809	112.801	125.473	79.1163	99.9426	100.689	133.506	108.631	121.575	72.501	101.019	104.787	105.268	136.058	123.204				BiP_MgADP_B1A1	BiP_MgADP_B1A2	BiP_MgADP_B1A3	BiP_MgADP_B1A4	BiP_MgADP_B1A5	BiP_MgADP_B1A6	BiP_CaADP_B2A1	BiP_CaADP_B2A2	BiP_CaADP_B2A3	BiP_CaADP_B2A4	BiP_CaADP_B2A5	BiP_CaADP_B2A6	T229A_MgADP_B1A1	T229A_MgADP_B1A2	T229A_MgADP_B1A3	T229A_MgADP_B1A4	T229A_MgADP_B1A5	T229A_MgADP_B1A6	T229A_CaADP_B2A1	T229A_CaADP_B2A2	T229A_CaADP_B2A3
	0.2	89.0247	87.1383	107.971	118.074	106.593	120.517	73.8751	95.7474	100.513	109.586	114.606	126.54	79.1857	99.6671	100.721	134.627	109.814	122.378	73.4629	102.691	106.402	106.612	137.717	124.348			Protein (µM)	1.3	2.6	3.9	5.2	6.5	7.8	1.3	2.6	3.9	5.2	6.5	7.8	1.3	2.6	3.9	5.2	6.5	7.8	1.3	2.6	3.9
	0.3	89.5389	87.5873	108.82	119.012	107.659	121.699	74.516	97.5454	100.904	111.71	116.46	127.665	79.4552	99.9237	101.427	136.293	111.018	123.467	74.289	104.621	107.993	108.122	140.12	125.614			Fit interval	40 s	40 s	40 s	40 s	40 s	40 s	40 s	40 s	40 s	40 s	40 s	40 s	10 s	10 s	10 s	10 s	10 s	10 s	10 s	10 s	10 s
	0.4	89.3423	88.1518	109.492	119.549	109.227	123.08	75.1932	99.4867	102.087	113.877	117.741	129.451	79.8617	100.297	103.025	138.471	111.877	124.633	74.9811	106.53	108.788	109.857	142.381	126.387			kobs (s-1)	0.1539	0.2082	0.2979	0.4891	0.4853	0.6866	0.136	0.2754	0.4172	0.5007	0.6963	0.716	0.4539	0.4814	0.7489	0.8844	1.027	0.9773	0.2556	0.4339	0.6104
	0.5	89.0942	88.5537	110.021	120.235	110.954	124.594	75.912	100.806	104.227	115.587	119.155	131.355	80.0957	100.723	104.478	140.465	112.756	126.176	75.5633	108.239	109.481	111.69	144.368	127.155			R2	0.982	0.9862	0.9838	0.8628	0.9397	0.9486	0.9952	0.9921	0.9847	0.9821	0.9587	0.9009	0.9094	0.9401	0.9712	0.9682	0.9571	0.9628	0.9944	0.9973	0.988
	0.6	89.3128	89.1287	110.644	121.253	112.895	125.575	76.5736	101.374	106.938	117.071	120.786	133.488	80.0291	100.937	105.377	141.612	113.581	127.608	76.215	109.961	110.089	113.607	145.879	127.949
	0.7	90.195	90.0559	111.392	122.561	114.693	126.03	77.2762	101.841	109.268	118.119	122.546	134.936	80.0617	101.317	105.839	141.86	114.237	128.955	76.8703	111.232	110.927	114.88	147.336	128.707				Linear regression of kobs vs. [prot]
	0.8	91.1616	91.1612	112.531	123.809	115.762	126.234	77.7026	102.843	111.036	119.354	124.141	135.63	80.5791	102.286	106.576	141.432	114.582	129.728	77.8116	112.539	111.801	116.196	148.873	129.295			kon (s-1 µM-1)	0.07117						0.0967						0.1143						0.1594
	0.9	91.6739	92.0462	113.753	125.072	116.396	127.325	78.2777	104.103	112.283	120.522	125.509	136.438	81.6401	103.438	107.415	141.523	114.978	130.405	79.1577	113.729	112.745	117.543	150.286	129.82
	1	91.9871	92.514	114.875	126.229	116.956	129.076	78.7313	105.336	113.338	122.045	126.646	137.552	82.3922	104.502	108.017	142.119	115.764	131.1	80.3209	114.774	113.55	119.018	151	130.107
	1.1	92.3058	93.0173	115.862	127.271	118.158	131.236	79.3047	106.358	114.097	123.341	127.545	138.874	82.6767	105.109	108.325	142.936	116.705	131.858	81.4661	115.619	114.391	120.287	151.383	130.576
	1.2	92.8669	93.6158	116.808	127.887	119.551	132.882	79.7878	107.696	115.135	125.026	128.636	139.617	82.5412	105.456	108.489	143.75	117.645	132.904	81.9683	116.412	115.338	121.234	151.63	131.2
	1.3	93.5507	94.6261	117.992	128.379	120.761	134.044	80.4236	108.902	116.136	126.191	129.945	140.225	82.4367	105.667	108.812	144.387	118.447	133.459	82.6938	117.481	116.302	122.056	152.03	132.104
	1.4	94.1473	95.4216	118.514	129.036	121.461	134.452	81.0477	110.083	117.153	127.577	131.718	141.236	82.229	105.735	109.016	145.027	119.098	133.875	83.0704	118.771	117.17	122.765	152.59	132.741
	1.5	94.4397	96.2303	118.552	129.912	121.902	134.973	81.6713	111.022	117.878	128.286	133.304	142.645	82.1062	105.649	109.462	145.073	119.391	134.053	83.9829	120.03	118.108	123.096	153.5	132.844
	1.6	94.195	96.475	118.316	131.13	122.28	135.529	82.2497	112.113	118.939	129.197	134.399	144.176	82.3596	105.537	110.016	145.25	119.477	134.792	84.9552	121.135	119.341	123.016	154.516	133.187
	1.7	93.9168	96.5677	119.104	132.271	122.772	136.569	82.7474	113.341	120.195	129.882	134.962	145.352	83.1853	105.569	110.921	145.464	119.848	135.444	86.4504	122.032	120.48	122.846	155.173	133.59
	1.8	93.9383	96.6276	120.624	133.484	123.316	137.291	83.2802	114.479	121.385	130.639	135.246	146.155	83.7539	105.907	111.736	146.092	120.488	135.233	87.8937	122.893	121.38	123.14	155.304	134.172
	1.9	94.5332	97.1509	122.326	134.322	124.129	138.038	83.77	115.35	122.355	131.243	135.767	146.474	83.9289	106.301	112.166	146.592	120.867	134.547	89.2092	123.559	121.884	124.52	155.491	133.945
	2	95.0682	97.8851	123.503	134.958	124.887	138.976	84.622	115.543	122.887	131.692	136.154	146.786	83.6974	106.362	112.5	146.877	120.711	134.091	90.1006	124.168	122.572	125.895	155.96	133.682
	2.1	95.4787	98.112	124.076	135.098	125.71	139.897	85.3793	115.984	123.492	132.533	136.552	146.938	84.0588	106.062	112.556	147.283	120.708	134.582	90.9314	124.529	123.137	127.15	156.564	133.611
	2.2	95.8693	98.085	124.301	135.063	126.498	140.934	86.102	117.063	123.811	133.693	136.492	147.024	84.5754	105.752	112.903	147.457	121.14	135.046	91.8454	125.148	123.706	126.983	157.102	133.926
	2.3	96.3682	97.821	124.38	135.118	127.427	141.61	86.3374	118.777	124.636	134.969	136.74	146.415	85.199	105.731	112.849	147.514	121.759	135.063	92.6574	125.844	123.768	126.846	157.364	134.165
	2.4	96.5898	98.15	124.756	135.715	128.037	142.852	86.4864	119.76	125.414	135.634	136.936	145.822	85.3098	106.244	112.995	147.09	121.85	134.775	93.0346	126.958	123.658	126.548	157.49	134.085
	2.5	96.3954	98.5292	125.259	137.007	128.159	143.904	86.4551	119.638	126.586	135.547	137.666	145.537	85.2084	106.918	113.055	147.098	121.705	134.747	92.8619	127.756	123.821	126.821	157.308	134.059
	2.6	96.0637	99.5709	125.705	138.563	128.049	144.442	86.2993	119.028	127.344	135.449	138.421	146.241	84.9442	107.851	113.459	147.919	121.906	135.022	92.6239	128.34	124.428	127.065	157.347	134
	2.7	96.244	100.658	126.027	140.082	128.051	144.049	86.5283	119.275	128.138	135.56	139.417	147.321	84.9949	108.771	113.451	148.949	122.465	135.392	92.69	128.599	125.398	127.595	157.514	134.098
	2.8	96.7779	101.812	126.405	140.903	128.147	143.258	87.0558	120.654	128.49	135.909	140.048	148.193	85.2816	109.493	113.571	149.301	122.748	135.68	93.3613	128.695	125.839	128.237	157.624	134.001
	2.9	97.3716	102.134	126.965	141.382	128.306	143.04	88.2034	122.915	128.845	135.866	140.231	148.481	85.46	109.656	113.616	148.606	122.526	136.384	94.4178	128.938	126.096	128.609	157.206	133.94
	3	97.6148	102.087	127.241	141.63	128.593	143.477	89.0723	124.671	129.118	135.951	140.25	148.538	85.4668	109.141	114.306	147.999	122.242	136.94	95.3604	129.341	126.188	128.398	156.546	133.906
	3.1	97.6551	102.083	127.529	142.132	129.289	144.466	89.853	125.849	129.882	136.47	140.245	148.5	85.4439	108.736	114.649	148.321	122.368	137.277	96.2247	130.358	126.405	128.114	155.975	133.909
	3.2	97.9136	102.528	127.797	142.731	129.953	145.358	90.2773	126.377	130.795	137.493	140.636	148.704	85.6614	108.669	114.881	149.14	122.627	137.007	96.8169	131.466	126.309	128.207	155.765	133.679
	3.3	98.3508	102.832	128.826	142.979	130.465	145.917	90.7637	126.912	131.361	138.48	141.011	148.899	85.7756	108.788	114.783	149.795	122.782	136.72	97.6252	132.034	126.143	128.492	156.157	133.455
	3.4	98.7769	102.604	129.633	142.854	130.646	146.081	91.095	127.127	131.309	138.986	141.78	149.148	85.7567	108.627	114.786	149.733	122.741	136.569	97.9069	132.05	126.264	128.79	156.665	133.319
	3.5	98.7493	102.308	130.402	142.429	130.573	146.173	91.5108	127.246	131.104	139.473	142.091	148.902	86.0168	108.462	114.703	149.577	122.86	136.441	98.271	131.755	127.001	129.028	157.242	133.414
	3.6	98.5069	102.79	130.663	142.734	130.453	146.12	91.7476	127.533	131.146	139.78	142.395	148.519	86.3033	108.798	114.862	149.441	123.074	136.478	98.269	131.85	127.579	129.376	157.014	133.342
	3.7	98.5121	103.982	131.238	143.422	130.579	145.993	92.3008	127.845	131.167	140.331	142.085	148.268	86.6179	109.576	114.829	149.4	123.259	136.339	98.4701	131.997	127.789	129.52	156.879	133.284
	3.8	99.0833	105.158	131.702	144.486	131.165	145.391	92.801	128.441	130.99	140.328	142.287	148.691	86.439	110.272	115.033	149.438	122.958	136.159	98.6397	132.085	127.519	129.627	156.717	133.486
	3.9	99.9077	105.116	131.985	144.714	131.914	144.965	93.467	129.036	130.962	140.527	142.666	149.581	86.3209	110.457	114.801	149.717	122.386	135.718	98.9114	132.346	127.731	129.974	156.73	134.037
	4	100.768	104.539	132.036	144.584	132.479	144.594	93.8421	130.215	130.993	140.557	143.696	150.595	86.4222	110.088	114.956	149.854	122.17	135.575	99.3599	132.999	128.208	130.066	156.984	134.473
	4.1	101.142	103.725	132.298	144.178	132.658	144.399	94.176	130.932	131.345	141.212	144.128	151.328	87.0468	109.843	114.668	149.465	122.359	135.742	99.5541	134.12	128.691	129.696	157.097	134.604
	4.2	101.426	103.886	132.744	144.211	132.862	144.059	94.5374	131.356	131.312	141.979	144.188	151.326	87.812	110.265	114.722	148.643	122.626	136.092	99.8596	135.277	128.833	128.975	157.418	134.215
	4.3	101.636	104.306	133.219	144.691	132.998	143.87	94.9852	131.288	131.362	142.912	143.547	150.833	88.378	111.397	114.677	148.324	122.537	136.394	100.15	136.005	128.584	128.95	156.939	134.18
	4.4	102.131	105.008	133.431	145.478	133.414	144.149	95.433	131.341	130.944	143.358	143.459	150.402	88.372	112.184	114.918	148.649	122.356	136.697	100.463	136.17	128.397	129.197	156.526	134.357
	4.5	102.581	105.49	133.505	146.328	133.893	144.547	95.8372	131.294	131.006	143.269	143.586	150.52	88.3587	112.16	115.005	149.105	122.214	137.176	100.602	135.908	128.215	129.641	156.556	134.744
	4.6	102.424	105.753	133.578	146.867	134.469	145.059	96.1854	131.258	131.714	142.97	144.286	151.045	88.1172	111.504	115.153	149.275	122.382	137.533	100.486	135.897	128.462	129.706	157.5	134.663
	4.7	102.109	105.981	133.933	147.085	134.863	145.608	96.4827	131.435	133.329	142.704	144.612	151.193	88.015	111.189	115.707	149.363	122.614	137.482	100.483	136.372	128.568	129.933	158.645	134.27
	4.8	101.813	106.205	134.5	146.773	135.087	146.387	96.5333	132.063	135.088	142.899	144.873	151.233	87.4078	111.301	116.064	149.67	123.03	137.081	100.754	136.949	128.374	129.568	159.063	134.254
	4.9	102.409	106.754	135.316	146.303	135.331	146.88	96.6733	133.052	136.311	143.273	144.693	151.23	87.1649	111.838	116.296	149.887	122.748	136.628	101.371	137.174	127.775	129.168	158.453	134.712
	5	103.103	107.269	135.94	145.693	135.677	146.786	96.9234	133.87	136.757	143.815	144.831	151.514	87.2557	111.951	116.133	149.724	122.37	136.564	102.303	136.751	127.196	129.019	157.809	135.287
	5.1	103.952	107.978	136.433	145.409	135.718	146.164	97.3968	134.581	136.583	144.001	145.126	151.556	87.8443	111.747	116.281	149.378	121.987	136.543	103.183	136.353	126.898	129.646	157.514	135.444
	5.2	104.175	108.265	136.208	145.229	135.596	145.762	97.8732	134.676	136.227	143.874	145.778	151.575	88.1988	111.274	116.052	148.984	122.251	136.62	103.993	136.31	127.063	130.132	158.454	134.957
	5.3	104.289	108.244	135.642	145.34	135.121	145.844	98.4586	134.46	135.869	143.787	146.217	151.475	87.4907	111.396	115.601	148.944	122.749	136.502	104.17	136.843	127.781	130.071	159.239	134.289
	5.4	104.112	107.645	134.851	145.538	135.081	146.485	99.0327	133.721	135.808	143.726	146.42	151.466	86.4611	111.749	115.047	148.592	123.232	136.638	104.055	137.406	129.131	129.815	159.854	133.53
	5.5	104.194	107.458	134.667	145.792	135.304	147.074	99.4103	133.612	135.862	143.956	146.374	151.335	85.3578	112.048	114.754	148.199	123.644	136.872	103.592	137.792	130.233	129.993	159.19	133.237
	5.6	104.346	107.596	135.079	145.66	136.054	147.658	99.3078	134.19	136.137	144.128	146.075	150.993	85.4767	111.839	114.601	147.833	123.753	137.037	103.515	137.946	130.416	130.229	158.128	133.387
	5.7	104.8	108.068	136.054	145.402	136.453	147.941	99.0478	134.808	136.192	144.414	145.648	150.478	86.0533	111.836	114.456	148.254	123.74	136.87	103.528	137.875	129.558	130.189	156.87	133.815
	5.8	105.328	108.444	136.803	145.411	136.255	148.017	99.2049	134.736	136.368	144.519	145.148	149.679	87.1649	111.942	114.756	149.396	123.408	136.779	103.708	137.858	128.379	129.833	156.128	134.044
	5.9	105.922	108.88	137.32	145.768	135.674	147.869	100.173	134.181	136.778	144.278	144.956	149.466	88.1857	112.438	115.273	150.746	123.073	136.977	104.126	137.902	127.967	129.778	155.457	133.86
	6	106.126	109.211	137.558	146.682	135.277	147.662	101.251	134.365	137.433	144.361	144.67	149.83	89.005	112.472	115.604	151.528	122.665	137.446	104.822	138.356	128.147	130.35	155.24	133.763
	6.1	106.097	109.486	138.051	147.463	135.321	147.554	101.679	135.134	137.947	144.915	144.34	150.772	89.2237	112.614	115.702	151.395	122.197	137.879	105.752	138.486	128.95	131.245	155.308	133.702
	6.2	105.797	109.693	138.487	148.645	135.59	147.435	100.845	135.755	137.825	145.9	144.275	151.612	88.9119	112.439	115.271	150.548	122.056	138.108	106.498	138.593	129.458	131.979	156.152	133.618
	6.3	105.505	110.115	138.771	149.218	135.707	147.58	100.282	135.914	137.411	146.371	144.834	152.015	88.1984	112.419	115.088	149.612	122.258	138.144	106.983	138.574	129.527	131.732	156.744	133.267
	6.4	104.932	110.554	138.578	149.829	135.605	147.743	100.276	135.73	137.046	146.37	145.67	152.072	87.737	112.148	114.612	149.124	123.205	138.014	107.271	139.032	129.212	130.976	156.711	133.25
	6.5	104.384	110.974	138.182	149.875	134.952	148.126	101.293	135.991	137.133	146.162	145.974	151.843	87.6131	112.197	115.065	148.963	123.659	137.868	107.443	138.952	129.087	130.338	155.86	133.542
	6.6	104.024	111.356	137.984	150.038	134.312	147.939	101.865	136.416	137.293	145.922	145.702	151.62	88.0659	112.309	115.618	149.355	123.603	137.762	107.622	138.593	129.26	130.912	154.794	133.762
	6.7	104.322	111.609	138.453	149.753	133.783	147.752	102.039	137.045	137.102	145.522	145.745	151.72	88.5586	112.595	116.409	149.728	122.655	137.324	108.06	138.026	129.618	131.781	154.505	133.367
	6.8	104.749	111.595	139.276	149.54	134.149	147.203	101.968	137.715	136.889	144.989	145.8	151.81	88.7771	112.662	116.539	150.368	121.904	137.235	108.615	138.273	129.372	132.457	154.901	133.109
	6.9	105.338	111.206	139.975	149.153	135.085	147.126	101.98	138.288	136.906	144.747	146.046	152.056	88.5338	112.826	116.197	150.472	121.578	137.573	109.165	138.809	129.19	131.807	155.818	133.062
	7	105.589	110.832	139.963	149.206	136.349	147.129	102.322	138.898	137.163	144.773	145.729	151.703	88.0589	113.051	115.711	150.355	121.83	138.46	109.252	139.111	129.018	131.098	156.061	133.331
	7.1	105.79	110.785	139.74	149.549	137.052	147.03	103.027	139.41	137.466	145.3	146.095	151.521	88.0128	112.941	115.324	149.826	122.396	138.73	108.969	139.15	129.813	130.377	155.498	133.509
	7.2	105.557	110.871	139.333	150.356	137.163	147.065	103.86	139.806	137.458	145.687	146.498	151.322	88.5404	112.499	115.475	149.577	122.646	138.6	108.763	139.175	130.4	130.518	154.479	133.568
	7.3	105.205	110.802	139.084	150.821	137.148	147.056	104.492	140.059	137.637	146.108	146.525	151.561	89.3281	111.723	115.801	149.612	122.476	138.237	108.761	139.758	130.616	130.679	153.407	133.786
	7.4	105.032	110.781	138.848	150.775	137.272	147.122	104.478	139.828	137.459	146.182	145.735	151.453	89.4444	111.174	116.124	149.599	122.076	138.13	108.815	140.424	129.879	131.109	153.078	133.563
	7.5	105.341	111.258	138.774	150.331	137.628	146.796	104.697	139.516	137.901	146.51	144.836	151.261	89.0378	111.006	116	149.526	121.814	137.876	108.696	140.841	129.248	131.206	153.144	133.529
	7.6	105.912	112.449	139.069	150.197	137.87	146.228	105.207	139.037	138.485	146.505	144.933	151.379	88.777	111.007	115.651	149.213	121.921	137.344	108.39	140.615	128.869	131.011	154.095	133.225
	7.7	106.311	113.215	139.364	150.195	137.793	146.331	106.01	139.022	139.195	146.358	145.603	151.544	89.0789	111.185	115.392	149.584	122.152	136.797	108.364	140.04	128.998	130.631	154.67	133.371
	7.8	106.416	113.497	139.556	150.255	137.208	146.719	106.476	139.093	139.122	146.026	146.586	151.527	89.344	111.306	115.646	149.733	122.705	136.296	108.344	139.585	128.912	130.393	155.09	133.501
	7.9	106.658	113.051	139.426	150.412	136.553	147.495	106.539	139.48	138.61	145.932	147.018	150.794	88.9176	111.633	116.278	149.785	123.192	136.415	108.468	139.571	128.73	130.883	154.84	133.919
	8	107.18	112.791	139.521	150.737	136.436	147.931	106.52	139.671	138.373	146.281	147.221	150.178	87.9502	112.133	117.06	149.194	123.253	136.864	108.566	139.611	128.704	131.105	154.632	134.497
	8.1	107.863	112.677	139.98	151.327	137.345	148.092	106.523	139.804	138.376	146.477	147.102	149.642	86.9998	112.139	117.199	149.254	122.766	137.856	108.876	139.618	129.05	131.144	154.035	135.095
	8.2	107.967	112.68	140.363	151.587	138.176	147.816	106.842	139.627	138.586	146.922	146.759	149.58	86.7886	111.795	116.879	149.584	121.885	138.564	109.364	139.381	129.583	130.586	153.67	135.622
	8.3	107.482	113.082	140.542	151.825	138.788	147.132	107.191	139.895	138.41	146.856	146.443	150.103	87.0644	110.754	116.088	150.087	121.183	138.89	109.976	139.494	129.848	130.502	153.449	135.421
	8.4	106.585	113.788	140.278	151.58	138.608	146.708	107.498	140.538	138.592	146.657	146.251	150.979	87.7761	110.316	115.454	149.951	120.69	138.589	110.56	139.926	129.93	130.813	153.834	135.067
	8.5	105.954	114.766	140.334	151.677	138.487	146.747	107.349	141.486	138.737	146.003	146.205	151.651	88.1777	110.221	114.85	149.866	120.747	138.427	110.818	140.685	129.947	131.616	154.06	134.848
	8.6	105.789	115.489	140.245	151.879	138.491	147.119	107.014	141.735	139.116	145.437	145.648	151.949	88.5186	110.808	114.192	149.747	121.163	138.392	110.602	141.114	130.014	132.268	154.121	135.27
	8.7	106.28	115.641	140.702	152.522	138.736	147.163	106.396	141.534	139.101	144.791	144.789	152.038	88.5168	111.122	114.081	149.572	121.648	138.316	110.303	141.005	130.194	132.857	153.934	135.652
	8.8	107.177	115.48	140.677	152.778	138.988	147.288	106.374	141.062	139.016	144.334	144.301	152.332	88.5534	111.133	114.539	149.261	122.197	137.853	110.336	140.453	130.233	132.595	153.881	135.497
	8.9	108.214	115.128	140.79	152.84	138.699	147.649	106.609	140.809	138.918	144.338	144.84	152.898	88.4743	110.812	115.68	149.458	122.585	137.469	110.758	139.897	130.105	132.254	154.108	134.913
	9	108.912	114.874	139.963	152.706	138.028	148.475	107.341	140.627	138.82	145.3	146.165	153.517	88.2966	110.683	116.444	150.068	123.244	137.2	111.152	139.801	130.069	131.152	154.545	134.454
	9.1	109.022	114.703	139.475	152.618	137.28	148.452	107.613	140.828	138.877	146.119	147.155	154.097	87.8651	110.866	116.493	150.834	123.448	137.335	111.556	139.939	129.962	130.551	154.857	134.297
	9.2	108.556	114.683	139.234	152.655	136.783	147.435	107.877	141.252	139.157	146.373	147.137	153.501	86.9722	111.092	115.864	150.732	123.449	137.142	111.904	140.604	129.891	129.61	154.875	134.147
	9.3	107.894	114.932	139.707	152.428	136.566	146.189	108.363	141.973	139.869	145.923	146.27	152.897	86.2338	111.06	114.912	150.211	123.109	137.136	112.137	141.06	129.504	129.365	154.579	133.808
	9.4	107.466	115.366	140.263	152.394	136.904	145.826	108.786	142.191	140.466	145.829	145.343	151.796	85.7812	110.794	114.48	149.516	122.822	136.807	111.935	141.67	129.394	129.257	154.398	133.54
	9.5	107.262	115.458	140.338	151.945	137.699	146.666	108.712	142.272	140.501	145.814	144.931	151.637	86.2564	110.95	114.587	149.361	122.562	136.684	111.762	141.76	129.429	129.942	154.555	133.83
	9.6	107.396	114.922	140.521	151.939	138.74	147.198	108.006	142.158	140.174	145.64	145.38	150.941	86.9406	111.576	114.993	149.76	122.029	136.804	111.802	141.695	129.83	130.45	154.708	134.621
	9.7	107.641	113.957	140.483	151.478	139.485	147.37	107.545	142.329	139.75	145.164	146.06	150.708	87.6218	112.43	115.16	150.157	121.556	137.109	112.272	141.224	130.375	130.66	154.881	135.386
	9.8	108.343	113.449	140.757	151.17	139.998	146.84	107.959	142.386	139.717	145.027	146.704	150.449	87.9218	112.819	115.005	150.327	121.142	137.598	112.56	140.938	130.676	129.94	154.573	135.331
	9.9	108.918	113.566	141.094	150.184	139.914	146.534	108.767	142.302	139.643	145.403	146.531	150.688	88.1964	112.377	114.756	149.959	121.293	137.886	112.987	140.942	130.653	129.196	154.459	134.617
	10	109.661	114.296	141.754	149.349	139.214	146.278	109.471	142.245	139.838	145.805	146.376	150.967	88.2998	111.322	114.751	149.641	121.773	138.421	113.154	140.882	130.138	128.925	154.063	133.662
	10.1	110.012	114.776	142.544	149.082	138.335	146.122	109.559	142.548	140.006	146.202	146.221	151.353	88.2183	110.298	114.974	149.638	122.704	139.166	113.346	140.452	129.745	129.487	154.215	133.375
	10.2	110.299	115.254	142.725	149.819	138.265	146.22	109.547	142.847	140.057	146.588	146.306	152.09	87.7697	109.711	115.707	149.95	123.442	139.636	113.107	140.069	129.255	130.364	154.316	133.45
	10.3	110.159	115.247	142.94	150.942	139.101	146.248	109.724	142.858	139.971	147.203	146.286	152.612	87.7176	109.779	116.622	150.241	123.848	139.505	113.056	140.272	129.046	130.829	154.627	134.009
	10.4	110.206	115.557	142.995	151.5	139.821	146.694	109.889	142.105	139.697	147.456	145.977	152.19	87.8901	109.882	117.461	150.194	123.492	138.895	112.892	141	128.956	130.744	154.433	134.324
	10.5	110.312	115.76	143.457	151.232	140.126	147.052	109.888	141.703	139.536	147.219	145.78	151.185	88.1278	110.325	118.221	150.154	122.803	138.348	112.497	140.948	129.047	130.295	154.182	134.484
	10.6	110.629	116.087	143.31	151.045	139.994	147.548	109.612	141.718	139.268	146.72	145.885	150.269	87.6256	110.726	118.215	150.171	122.05	138.176	111.823	140.009	129.216	130.162	153.754	134.12
	10.7	110.424	115.932	143.164	151.098	139.927	147.405	109.434	142.65	139.201	146.375	146.622	150.616	86.6459	111.461	118.238	150.232	121.592	138.129	111.582	138.465	129.671	130.43	153.801	133.849
	10.8	110.217	115.438	142.846	151.493	139.456	146.997	109.232	143.284	139.455	146.19	147.173	151.222	85.6594	112.087	117.781	150.211	121.636	138.526	112.512	137.696	130.518	130.525	153.722	133.569
	10.9	110.05	115.16	143.116	151.617	138.556	146.641	109.322	143.812	139.927	146.433	147.064	152.154	85.4739	112.631	117.659	150.058	121.737	138.786	113.892	138.107	131.231	130.198	153.96	133.659
	11	110.5	115.265	143.407	151.568	137.885	146.895	109.866	143.865	140.492	146.705	146.345	152.534	86.1738	112.743	117.045	150.111	121.868	138.903	115.161	139.221	131.599	129.818	153.811	133.48
	11.1	111.092	115.971	143.761	151.629	138.076	147.381	110.685	143.617	140.455	146.985	145.594	152.804	87.2478	112.334	116.239	149.812	121.428	138.419	115.436	140.3	131.404	130.109	153.839	133.358
	11.2	111.304	116.419	143.7	151.412	138.757	147.751	111.479	143.054	140.235	146.613	145.419	152.381	87.9221	111.627	115.444	149.295	121.134	138.02	115.032	140.983	130.971	130.76	153.981	133.102
	11.3	110.864	116.789	143.286	151.242	139.296	147.832	111.783	142.836	139.824	146.04	145.32	151.85	87.7057	110.872	115.196	148.313	120.771	137.718	114.061	141.447	130.301	131.211	154.243	133.224
	11.4	110.041	116.688	142.584	150.913	139.196	147.782	111.826	143.686	139.927	145.369	145.424	151.345	87.322	110.629	115.513	148.114	120.909	137.543	113.543	141.903	129.458	131.294	154.511	133.575
	11.5	109.472	116.566	142.002	150.807	138.825	147.652	111.652	144.708	139.998	145.438	145.217	151.216	87.0268	110.899	115.929	148.487	120.926	137.545	113.409	142.019	129.106	131.027	154.37	133.835
	11.6	109.408	116.198	142.107	150.899	138.228	147.313	111.48	145.352	139.918	146.065	145.338	151.358	87.1706	111.464	116.297	149.213	121.173	137.51	113.651	141.967	129.244	130.471	154.238	134.016
	11.7	109.523	115.913	142.809	151.293	137.483	147.279	111.451	144.999	139.978	147.071	145.365	151.531	87.1531	111.817	116.377	149.14	121.347	137.704	113.636	141.534	129.843	129.665	154.277	133.935
	11.8	109.628	115.657	143.341	151.937	136.845	147.588	111.487	144.67	140.156	147.588	145.397	152.041	87.1243	111.663	116.54	148.893	121.657	137.628	114.169	141.247	130.004	129.036	154.526	134.202
	11.9	109.805	115.696	142.906	152.524	136.621	148.418	111.803	144.175	140.635	147.811	145.21	152.41	86.9858	111.407	116.606	148.766	122.117	138.185	114.986	141.028	129.713	128.835	154.514	134.438
	12	110.199	115.923	141.828	152.37	136.857	148.727	112.66	144.203	140.572	147.592	145.075	152.675	86.7291	111.159	116.777	149.401	122.473	138.916	115.951	141.485	129.273	129.002	154.238	134.815
	12.1	110.731	116.139	141.214	152.263	137.212	148.604	113.604	144.429	140.885	147.163	144.798	152.259	86.1244	111.114	116.476	150.007	122.714	139.789	116.035	141.844	129.296	129.167	153.809	134.929
	12.2	110.669	116.025	141.516	152.178	137.533	148.044	114.464	144.973	141.02	146.498	144.4	151.644	85.8052	110.955	115.824	150.475	122.359	139.763	115.678	141.983	129.68	129.5	153.801	135.14
	12.3	110.037	115.966	142.403	153.092	137.813	147.762	114.528	145.19	141.294	146.014	143.966	151.459	85.9913	110.868	115.093	150.28	122.111	139.205	114.892	141.564	130.36	129.749	153.828	135.257
	12.4	109.36	116.211	143.193	153.778	138.419	147.479	114.4	145.202	140.869	145.74	144.043	151.74	86.7596	111.004	114.981	150.013	121.73	138.574	114.456	141.104	130.628	130.072	153.96	135.268
	12.5	109.168	116.687	143.706	154.181	138.744	147.06	113.952	144.903	140.617	145.726	144.445	151.858	87.1253	111.366	115.436	149.774	121.855	138.18	114.266	140.892	130.599	130.054	153.961	134.742
	12.6	109.825	117.1	143.787	153.792	138.686	146.926	113.572	144.644	140.592	145.818	145.073	151.141	87.0502	111.469	115.848	149.883	121.831	138.078	114.427	140.773	130.393	130.123	154.205	134.147
	12.7	110.391	117.33	143.66	153.441	138.013	147.053	113.314	144.397	140.526	145.83	145.639	150.326	86.6438	111.281	116.063	150.022	122.243	137.934	114.476	140.948	130.343	130.302	154.444	133.893
	12.8	111.175	117.901	143.53	153.425	137.556	147.514	113.322	144.625	140.027	145.838	146.142	150.201	86.187	110.82	116.183	150.314	122.187	138.283	114.764	141.279	130.072	130.549	154.699	134.051
	12.9	111.288	118.492	143.747	153.62	137.489	147.449	113.612	144.936	139.508	146.133	146.514	150.651	85.7593	110.831	116.718	150.633	122.175	138.913	115.233	141.664	129.469	130.676	154.7	134.173
	13	111.246	118.544	143.949	153.701	137.847	146.796	114.114	145.372	139.763	146.96	146.718	151.096	85.3892	111.013	116.811	150.453	121.622	139.473	115.928	141.448	128.831	130.652	154.871	133.747
	13.1	111.161	117.823	143.945	153.564	138.297	146.124	114.63	145.512	140.659	147.551	146.777	151.146	85.3648	111.342	116.464	149.509	121.443	139.079	116.011	140.851	128.576	130.759	154.92	133.375
	13.2	111.192	116.498	143.797	153.545	138.842	145.586	114.779	145.391	141.428	147.528	146.965	151.287	85.7104	111.4	115.651	148.106	121.57	137.828	115.559	140.14	128.066	130.736	154.651	133.597
	13.3	111.449	115.987	143.805	153.372	139.287	145.972	114.455	144.851	141.447	146.76	147.175	151.616	86.2012	111.43	115.175	147.304	122.134	136.77	115.027	140.168	127.697	130.47	154.073	134.27
	13.4	111.301	116.371	143.843	153.162	139.379	146.279	113.91	144.601	140.767	145.928	147.082	152.229	86.9234	111.609	114.987	147.532	122.379	136.586	114.91	140.16	127.731	129.951	153.456	134.698
	13.5	111.285	117.424	143.702	152.779	138.866	147.141	113.607	144.867	139.78	145.315	146.556	152.923	87.5434	111.806	114.603	148.484	121.914	137.147	115.61	140.557	128.436	129.602	153.405	134.289
	13.6	111.109	118.304	143.364	152.671	138.241	147.415	113.671	145.492	139.091	145.621	145.67	153.321	88.0917	111.801	114.186	149.691	121.334	138.062	116.284	140.647	128.858	129.676	153.549	133.596
	13.7	110.72	118.596	143.348	152.436	137.808	147.863	114.09	145.595	138.925	146.693	145.356	153.105	88.171	111.435	113.721	150.493	121.484	138.879	116.703	141.001	128.748	129.968	153.847	132.812
	13.8	109.956	118.384	143.507	152.383	138.05	147.47	114.286	144.914	139.332	147.902	145.14	152.424	88.2241	111.033	113.673	150.904	122.47	139.647	116.271	140.829	128.963	130.08	153.751	132.483
	13.9	109.744	117.727	143.952	152.205	138.324	147.472	114.173	144.038	140.104	148.168	145.326	151.943	88.467	110.836	113.808	150.848	123.281	139.755	115.994	140.592	129.621	130.275	153.391	132.614
	14	110.077	117.038	144.059	152.171	138.589	147.451	113.86	143.185	140.876	147.425	145.365	152.174	88.7692	110.867	114.148	150.79	123.412	139.675	116.022	140.417	130.547	130.664	152.707	133.135
	14.1	111.147	116.608	144.189	151.814	138.342	148.039	114.092	142.871	141.257	146.671	145.782	152.702	88.6637	110.995	114.486	150.641	122.643	139.345	116.463	140.148	130.765	131.257	152.444	133.49
	14.2	111.584	116.472	143.878	151.319	138.2	148.284	114.696	142.946	141.184	146.161	145.949	152.795	88.0827	111.081	114.585	150.594	121.923	139.206	116.356	139.94	130.519	131.255	152.381	133.394
	14.3	111.622	116.479	143.566	151.388	138.042	147.98	115.19	143.864	140.754	146.033	145.888	152.593	87.4537	111.481	114.866	150.309	121.384	138.731	115.988	139.386	129.73	130.951	152.934	133.588
	14.4	111.284	116.642	143.218	152.156	138.187	147.56	115.291	144.683	140.643	145.741	145.596	151.976	87.3693	111.667	115.188	149.932	121.527	138.509	115.597	139.469	129.073	130.519	153.172	134.007
	14.5	111.107	116.814	143.172	153.255	138.521	147.488	115.277	144.933	140.532	145.977	145.392	151.788	87.6041	111.898	115.665	149.391	121.845	138.1	116.185	139.254	128.424	130.595	153.532	135.121
	14.6	111.314	116.958	143.569	153.459	138.988	148.447	115.542	144.58	140.908	146.65	145.119	151.694	88.1289	111.614	115.939	149.382	121.763	137.95	116.88	139.422	128.191	130.455	153.496	135.94
	14.7	111.517	116.985	143.916	152.826	139.254	149.091	116.03	144.234	140.731	147.14	144.463	152.277	88.339	111.67	116.211	149.989	121.193	137.705	117.748	138.877	128.211	130.46	153.177	136.647
	14.8	111.8	117.081	144.424	152.146	139.164	148.789	116.614	144.28	140.458	147.262	143.707	152.871	88.4658	111.716	116.048	151.157	120.098	138.124	117.787	138.921	128.808	130.275	152.648	136.3
	14.9	112.243	117.325	144.846	152.034	138.817	147.592	116.813	144.072	139.601	146.977	143.328	153.008	88.1858	112.269	115.514	151.955	119.679	138.538	117.74	138.839	129.795	130.53	152.398	135.349
	15	113.112	117.669	145.605	152.359	138.737	146.787	116.718	144.168	139.405	147.245	143.555	152.737	87.831	112.602	114.725	152.331	120.208	138.918	117.284	139.649	130.8	130.797	152.798	133.966
	15.1	114.062	117.856	146.381	152.638	138.522	147.212	116.111	144.118	139.588	147.583	144.381	152.197	87.6331	112.521	114.891	152.262	121.819	138.496	116.759	140.199	131.2	131.498	153.735	132.603
	15.2	114.51	117.775	146.588	152.666	138.561	147.659	115.606	144.479	139.997	147.952	145.286	151.921	88.0844	111.972	115.472	152.155	123.306	138.298	116.495	141.096	131.07	131.735	154.39	131.316
	15.3	113.857	117.354	146.036	152.504	138.286	147.151	115.276	144.841	140.306	147.838	145.929	151.713	88.8551	111.662	116.163	151.686	123.83	137.867	116.249	141.24	130.674	131.645	155.003	130.553
	15.4	112.905	116.844	144.789	152.182	138.515	145.985	115.639	145.186	140.665	147.28	145.993	151.739	89.1879	112.147	116.133	150.941	123.506	138.012	116.393	141.211	130.424	130.928	154.666	130.741
	15.5	112.012	116.345	143.823	151.778	138.875	145.149	116.163	145.396	141.13	146.606	145.514	151.799	88.4918	113.097	115.954	150.536	122.847	137.947	116.362	140.607	130.222	130.846	154.039	131.791
	15.6	111.925	116.304	143.371	151.865	139.887	145.452	116.791	145.29	141.118	146.138	145.464	151.747	87.2756	113.711	116.042	150.847	122.439	138.023	116.741	140.503	130.076	131.469	153.103	133.034
	15.7	112.061	116.443	143.594	152.309	140.252	146.015	116.842	145.58	140.498	145.909	145.611	151.726	86.2531	113.72	116.301	151.633	122.019	137.742	116.916	140.617	130.223	132.111	152.794	133.777
	15.8	112.274	116.596	143.925	153.098	139.856	146.567	116.954	145.863	139.965	145.723	146.189	151.846	86.3259	113.002	116.383	152.088	121.758	137.966	116.98	140.708	130.633	132.308	152.677	133.743
	15.9	112.118	116.51	144.178	153.129	138.567	147.195	116.87	145.851	139.847	145.413	146.118	152.134	86.8277	112.587	116.049	151.944	121.398	138.588	116.97	139.948	131.203	131.741	152.197	132.745
	16	112.005	116.348	143.823	152.73	137.606	147.347	116.927	145.246	140.014	145.524	145.998	152.267	87.6404	112.378	116.013	151.162	121.509	139.479	117.138	139.072	131.176	131.411	151.663	131.622
	16.1	111.947	116.459	143.542	152.308	137.593	147.353	116.823	144.841	139.924	146.096	145.993	152.28	87.7162	112.368	116.123	150.038	121.692	139.684	117.49	138.65	130.564	131.165	151.593	130.823
	16.2	112.481	116.619	143.421	152.611	138.214	146.677	116.825	145.058	139.647	147	146.167	152.197	87.6343	111.99	116.137	149.084	122.328	139.775	117.612	139.156	129.406	130.944	151.898	131.126
	16.3	112.772	117.369	144.075	153.343	138.841	146.642	117.08	145.461	139.648	147.354	146.345	152.228	87.3209	111.469	115.621	148.902	122.688	139.741	117.175	139.505	128.716	130.671	152.242	131.741
	16.4	113.136	118.265	144.03	153.495	138.372	146.757	117.412	145.675	139.864	146.969	146.155	152.291	87.399	111.432	115.318	149.075	122.999	140.061	116.477	139.208	128.175	130.541	152.332	132.279
	16.5	112.885	118.992	143.27	153.102	137.653	147.073	117.529	145.796	140.161	146.374	146.466	152.522	87.751	111.707	115.43	149.127	122.984	140.084	115.861	138.491	128.205	130.743	152.843	132.511
	16.6	112.775	118.585	142.12	152.521	136.856	146.616	117.482	146.51	140.308	146.26	146.746	152.729	88.0467	112.173	115.67	149.088	122.781	140.401	116	138.083	128.025	130.842	152.998	132.553
	16.7	112.205	117.569	141.814	152.339	137.044	145.98	117.257	147.093	140.647	146.782	146.962	152.89	88.2573	112.334	115.604	149.552	122.662	140.304	116.218	138.288	128.463	130.795	152.95	132.675
	16.8	111.863	116.667	142.286	152.011	137.214	145.662	116.967	147.079	141.149	147.316	146.06	152.713	88.2968	112.346	115.497	150.449	122.548	140.153	116.136	138.911	128.781	130.783	152.578	132.375
	16.9	111.778	116.503	142.809	151.178	137.939	146.115	116.98	145.981	141.45	147.396	145.078	152.033	88.3226	112.559	115.536	151.106	122.596	139.63	115.695	139.769	129.687	130.875	152.988	132.037
	17	112.396	116.907	143.075	150.429	138.63	146.886	117.328	144.648	141.191	146.923	144	151.288	87.993	112.87	115.754	151.351	122.409	139.379	115.597	140.606	130.344	130.965	154.039	132.005
	17.1	113.189	117.545	143.444	150.159	139.271	147.272	117.996	143.832	140.632	146.134	143.686	150.63	87.2832	113.483	116.15	151.328	122.16	139.041	116.051	141.441	131.138	131.103	154.95	132.34
	17.2	113.354	118.185	143.799	150.531	139.297	147.183	117.897	143.992	140.167	145.526	143.402	151.01	87.0322	113.852	116.548	150.997	121.885	138.347	116.674	141.622	131.104	131.429	154.837	132.808
	17.3	113.146	118.406	144.156	150.621	138.895	146.624	117.381	144.846	139.742	145.088	143.833	151.772	87.0903	114.227	116.499	150.37	121.773	137.606	116.938	141.456	130.873	131.596	153.979	132.74
	17.4	112.68	118.447	144.207	150.787	138.539	146.103	117.049	145.56	139.249	145.161	144.598	152.89	87.7356	114.024	115.779	150.063	121.648	137.244	116.97	140.737	130.19	131.629	153.359	132.662
	17.5	112.895	118.385	144.468	151.083	138.559	145.723	117.181	145.891	139.276	145.315	145.696	153.079	87.9866	113.408	114.789	150.42	121.559	137.671	116.82	140.762	129.778	131.493	153.615	132.699
	17.6	113.089	118.548	144.987	151.951	138.734	146.15	117.629	146.032	140.013	145.941	145.943	152.587	88.4077	112.657	114.459	151.454	120.974	138.149	116.539	141.313	129.318	131.413	154.374	132.955
	17.7	113.223	118.788	145.156	152.765	139.108	146.678	117.657	146.382	141.257	146.074	145.558	152.002	88.4608	112.321	114.863	151.734	120.873	138.651	115.819	142.097	129.358	131.031	154.76	133.072
	17.8	112.758	119.075	145.108	153.288	138.996	147.749	117.895	146.303	141.569	146.221	144.888	151.723	88.519	112.563	115.567	151.331	120.715	138.622	115.121	142.323	129.83	130.387	154.452	132.813
	17.9	112.276	119.211	144.567	153.573	138.659	147.832	118.26	146.151	141.354	146.218	145.023	151.677	88.5333	112.92	116.049	150.358	121.252	138.808	114.957	141.986	130.167	129.786	153.638	132.381
	18	112.525	119.013	144.761	153.88	138.312	147.673	118.955	145.965	140.955	146.762	145.569	151.408	89.0143	113.049	116.033	150.264	121.097	138.896	115.799	141.546	130.158	129.243	152.774	131.673
	18.1	113.401	118.647	144.78	153.625	138.389	146.432	119.249	146.22	141.316	147.368	146.053	151.054	89.351	112.718	115.772	150.831	120.94	139.472	117.139	141.211	129.807	129.251	152.063	131.392
	18.2	114.417	118.216	144.794	153.24	138.774	145.645	119.37	146.568	141.321	147.153	146.112	150.57	89.1196	112.17	115.218	151.17	120.814	139.885	118.184	141.107	129.62	129.694	151.346	131.476
	18.3	114.721	118.249	144.151	152.76	138.813	145.549	119.397	147.097	140.956	146.503	145.762	149.874	88.0357	111.663	114.751	150.656	121.321	140.105	118.558	140.768	129.445	130.54	151.215	132.267
	18.4	114.702	118.307	143.334	153.361	138.523	146.379	119.504	147.703	140.042	145.67	145.685	149.467	86.9752	111.623	114.651	149.941	122.175	140.1	118.258	140.377	128.987	130.63	151.83	132.967
	18.5	114.338	118.779	142.573	154.064	138.277	147.648	118.874	147.72	139.667	145.94	146.026	149.337	86.6986	111.826	114.768	149.974	122.55	140.068	117.904	139.96	128.832	130.194	153.163	133.475
	18.6	113.697	118.858	142.17	154.891	138.286	148.268	117.842	146.694	139.44	146.641	146.877	149.609	87.2422	112.183	114.967	150.848	122.089	140.307	117.526	139.794	128.747	129.413	154.131	133.944
	18.7	112.799	118.945	142.72	155.169	138.707	148.488	116.926	145.369	139.825	147.616	147.214	149.744	87.9094	112.359	114.867	151.267	121.284	140.296	117.321	139.825	129.006	129.322	153.968	134.326
	18.8	112.356	118.585	143.687	155.362	139.129	147.683	117.049	144.843	140.42	148.073	146.739	150.342	88.0412	112.256	115.015	150.944	120.916	139.919	117.457	139.858	128.983	129.43	152.998	134.847
	18.9	112.627	118.255	144.508	154.956	139.69	146.87	117.174	145.341	141.128	147.966	145.872	151.016	87.7722	111.956	115.124	150.022	121.331	138.509	117.659	140.058	128.942	129.633	151.876	134.725
	19	113.161	117.814	144.211	154.561	140.029	145.989	117.449	146.253	141.323	147.331	145.264	151.551	87.5131	111.574	115.264	149.565	121.705	137.114	117.994	140.227	129.021	129.641	151.353	134.372
	19.1	113.451	117.93	143.639	153.874	139.948	145.679	117.172	146.498	141.313	146.913	145.015	151.622	87.1771	111.469	114.961	149.765	121.785	136.811	117.758	140.433	129.374	129.76	151.474	133.76
	19.2	113.259	118.372	142.98	153.519	139.344	145.362	117.361	146.307	141.271	146.959	144.49	151.291	86.8191	111.566	114.635	150.234	121.644	137.88	117.452	140.725	129.887	130.417	152.079	133.478
	19.3	113.142	118.966	142.782	152.798	138.512	145.108	117.028	145.901	141.251	147.452	144.003	151.055	86.4681	111.84	114.359	150.373	121.611	138.855	117.308	140.461	129.948	131.168	152.555	133.381
	19.4	112.994	119.04	142.392	151.804	137.837	145.115	117.402	146.259	140.395	147.259	143.789	150.436	86.5332	112.005	114.52	150.359	121.66	138.688	117.341	140.36	129.464	131.686	152.612	133.185
	19.5	112.817	118.907	142.193	150.86	137.212	145.529	117.876	146.85	139.396	146.718	144.487	150.202	86.7066	111.95	114.862	150.607	121.377	138.127	117.604	140.391	128.913	131.443	151.949	132.796
	19.6	112.452	119.215	142.311	149.884	136.128	145.761	118.761	147.258	138.696	145.893	145.501	149.754	87.0497	111.665	115.107	151.431	121.032	138.214	117.442	141.345	128.546	131.117	151.341	132.162
	19.7	112.393	119.714	142.682	149.627	135.242	145.804	118.979	146.709	139.392	145.831	145.975	149.81	87.159	111.591	114.729	152.106	120.82	138.488	117.68	142.001	128.66	130.857	150.959	131.71
	19.8	112.957	120.053	143.045	148.772	134.941	145.932	118.727	145.922	140.588	145.978	145.464	149.163	87.145	111.937	113.955	151.965	120.934	138.359	117.686	141.993	128.623	130.871	151.495	131.395
	19.9	113.395	119.143	143.264	148.388	135.762	146.789	118.913	145.136	141.67	146.206	144.511	148.911	86.7799	112.573	113.41	151.423	121.174	137.958	117.761	141.204	128.82	130.566	152.265	131.563
	20	113.617	117.816	143.702	147.857	136.478	147.186	119.26	145.021	141.775	146.029	144.093	148.308	86.7437	113.562	113.534	150.827	121.092	138.277	117.371	140.524	128.761	130.215	153.094	131.808
	20.1	113.356	116.612	144.167	148.125	136.877	147.301	119.985	145.344	141.257	145.728	144.314	148.738	86.9641	114.449	113.878	150.917	121.032	139.599	117.178	140.237	128.867	130.141	153.641	132.376
	20.2	113.293	116.849	144.566	148.109	137.049	146.689	119.93	146.258	140.622	145.568	144.524	149.254	87.2458	115.059	113.994	150.958	120.943	140.741	117.172	140.144	128.893	130.668	153.973	132.339
	20.3	113.343	117.679	144.872	147.832	137.121	146.833	119.703	146.873	140.053	145.301	144.457	150.71	87.3062	114.561	113.992	150.827	120.711	140.962	117.125	139.829	129.126	131.522	153.822	132.506
	20.4	113.683	118.517	145.257	147.166	137.12	146.742	119.041	146.899	139.838	145.258	144.078	151.817	87.252	113.525	114.375	150.483	120.204	139.977	117.247	139.729	129.446	132.15	153.467	132.406
	20.5	114.464	118.403	145.871	146.873	136.673	147.037	118.591	146.102	139.607	145.42	143.661	152.79	87.526	112.702	115	150.261	119.511	139.015	117.46	140.172	129.539	132.425	153.097	133.048
	20.6	115.015	118.047	145.75	146.914	136.261	147.11	118.115	145.322	139.938	146.253	143.449	152.982	87.5733	112.581	115.243	150.732	119.724	138.455	117.862	141.311	129.779	132.215	152.923	133.313
	20.7	115.172	117.542	145.146	147.318	135.961	147.336	118.113	144.619	140.324	146.887	143.303	152.833	87.4704	113.019	114.847	151.055	120.737	138.382	117.782	141.691	129.91	131.883	152.643	133.463
	20.8	114.597	117.562	143.623	147.785	135.936	147.627	118.467	144.37	141.135	147.27	143.739	152.789	87.1021	112.9	114.155	151.277	122.077	138.043	117.35	141.325	130.016	131.374	152.315	133.194
	20.9	113.982	117.764	142.833	148.235	136.1	147.707	119.174	144.739	141.508	147.067	143.79	152.657	87.0301	112.719	113.703	150.729	122.655	137.628	116.95	140.107	129.557	131.272	152.057	132.984
	21	113.172	118.543	142.362	148.574	135.858	148.02	119.476	145.466	141.553	146.81	144.003	152.456	87.2743	112.012	114.072	150.514	122.449	137.591	116.666	139.726	128.768	131.491	151.832	132.562
	21.1	112.706	119.01	142.728	148.516	135.363	147.652	119.34	146.095	141.185	146.216	143.724	151.748	87.7516	111.861	114.606	150.687	121.857	138.089	116.459	139.746	128.211	132.063	151.828	132.755
	21.2	112.422	118.95	143.211	148.298	134.616	147.288	119.013	145.522	140.922	145.772	144.286	151.422	88.2402	111.672	115.264	151.599	121.435	138.787	116.699	140.336	127.893	132.506	152.162	133.275
	21.3	112.809	118.344	143.513	148.069	134.931	146.586	118.856	144.787	140.452	145.484	144.924	151.561	88.7911	111.843	115.023	152.601	121.171	138.65	117.058	140.625	128.057	132.374	152.504	134.521
	21.4	113.313	117.836	143.307	148.083	136.005	146.445	118.754	144.119	139.667	145.7	145.688	151.804	89.0228	111.94	114.486	153.151	121.145	138.198	117.725	140.948	127.988	131.676	152.881	134.765
	21.5	113.95	117.769	142.204	148.338	137.561	146.151	118.781	144.47	139.061	145.896	145.277	151.141	88.8778	112.02	113.945	153.245	121.096	137.965	117.645	140.967	127.837	130.841	152.867	134.565
	21.6	114.276	118.106	141.46	148.371	138.388	146.055	118.945	145.117	139.355	146.242	144.537	150.002	88.4628	112.136	113.662	152.955	121.093	138.622	117.593	140.853	127.388	130.031	153.333	133.966
	21.7	114.467	118.512	141.068	148.025	138.064	145.961	119.327	145.516	140.202	146.401	143.769	149.109	88.0801	112.301	113.531	152.99	121.224	139.506	117.482	140.308	127.272	129.827	153.647	133.739
	21.8	114.221	118.825	141.784	147.432	136.809	146.221	119.885	145.509	140.453	146.889	143.666	149.349	87.9561	112.538	113.347	152.95	121.285	140.052	117.65	139.736	127.793	129.156	153.839	133.488
	21.9	113.905	118.969	142.399	147.15	135.056	146.42	119.99	145.387	139.956	147.147	143.607	150.119	87.6282	112.726	113.745	153.111	121.342	140.117	117.756	139.126	128.524	129.148	152.973	133.092
	22	113.631	119.123	143.051	147.619	134.099	146.605	119.59	146.162	139.353	147.073	143.654	150.684	87.4374	112.848	114.655	152.705	121.433	139.99	117.744	138.921	129.243	129.137	151.248	132.502
	22.1	113.905	119.585	143.407	148.185	134.183	146.644	118.669	147.171	139.542	146.149	143.959	150.957	87.1157	112.697	115.602	152.188	121.954	139.7	117.763	139.019	129.543	130.252	149.832	132.243
	22.2	114.408	119.904	143.814	148.382	134.953	146.946	118.356	147.75	140.004	145.072	144.56	151.165	86.786	112.63	115.692	151.102	122.47	139.322	117.736	139.681	129.572	131.117	149.272	132.173
	22.3	114.514	119.862	144.668	147.885	135.383	147.042	118.789	147.444	140.413	144.471	144.976	151.737	86.3892	112.668	115.266	150.373	122.834	139.09	117.329	140.325	129.222	131.347	149.981	132.594
	22.4	114.355	119.186	145.245	147.359	135.267	146.977	119.373	147.188	140.335	144.615	145.067	151.612	86.2744	112.774	114.383	150.17	122.299	139.334	116.982	140.995	128.765	130.853	151.086	132.716
	22.5	113.804	118.322	145.478	147.287	135.008	146.041	119.097	147.251	140.161	144.991	144.93	151.079	86.7369	112.603	113.77	150.742	121.509	139.811	117.037	141.213	128.584	130.214	152.15	132.535
	22.6	113.602	118.085	144.826	147.416	134.582	145.031	117.926	147.319	140.287	145.459	144.552	150.602	87.2136	112.194	113.291	151.63	120.191	140.16	117.581	141.272	128.709	130.118	153.246	132.187
	22.7	113.51	118.541	143.997	147.619	134.387	144.256	116.92	146.782	140.497	145.936	144.053	151.037	87.2586	112.106	113.157	152.443	119.775	139.861	117.998	141.115	128.561	129.953	153.94	132.229
	22.8	113.891	119.481	143.802	147.946	134.231	144.981	117.257	146.008	140.658	146.364	143.726	151.648	86.7182	112.335	113.54	153.088	119.668	139.922	117.922	140.738	128.304	129.814	154.372	132.886
	22.9	114.585	120.083	144.387	148.382	134.446	146.161	118.367	145.523	140.116	146.599	144.258	151.548	86.3042	112.898	114.258	153.397	120.476	139.823	117.757	140.395	127.957	129.786	154.216	133.434
	23	115.03	120.041	145.23	148.913	134.54	147.482	119.205	145.517	139.551	146.565	144.912	151.077	86.387	113.158	115.009	153.016	121.18	139.967	117.529	139.863	128.039	130.022	153.882	133.81
	23.1	115.346	119.528	145.478	149.108	134.739	147.414	119.091	145.669	139.265	146.641	145.274	150.503	86.8739	113.069	115.352	152.352	121.841	139.154	117.54	139.549	128.062	130.175	153.826	133.875
	23.2	115.341	118.927	144.847	149.035	134.983	146.714	119.085	145.848	139.685	147.071	145.059	150.749	87.1401	112.56	115.065	151.834	121.722	138.634	117.271	139.501	128.12	129.766	153.945	134.034
	23.3	115.773	118.263	144.157	148.654	135.322	146.087	119.48	145.856	140.39	147.665	144.796	151.184	87.0849	112.197	114.734	152.078	121.182	138.24	117.173	139.837	127.753	129.563	153.918	134.211
	23.4	115.946	117.637	143.64	148.022	135.558	146.57	120.301	145.678	141.154	148.109	144.628	151.896	86.9191	112.187	114.502	152.633	120.89	138.38	116.753	140.308	127.217	129.505	153.761	134.179
	23.5	116.239	116.819	143.578	147.593	136.254	147.694	120.571	145.234	141.654	147.593	144.404	152.135	86.9906	112.381	114.492	152.35	120.905	138.242	116.871	140.663	126.614	129.977	153.131	133.834
	23.6	115.914	116.592	143.467	147.415	137.095	148.182	120.534	144.982	141.821	146.909	144.349	152.232	87.5532	112.439	114.205	151.491	120.97	138.172	117.139	140.551	126.569	129.964	153.008	133.291
	23.7	115.718	116.988	143.65	147.5	137.956	147.909	119.806	145.361	141.262	145.915	144.399	152.03	87.9319	112.162	113.675	150.674	120.603	137.993	117.769	140.256	126.909	129.904	152.703	132.49
	23.8	114.954	117.878	143.8	147.825	137.806	147.498	119.316	145.896	140.444	145.707	144.657	151.466	87.9776	111.901	113.415	151.012	120.334	137.756	118.379	139.941	127.49	129.638	152.826	132.279
	23.9	114.557	118.449	143.979	148.112	137.138	147.511	119.424	146.631	139.637	145.643	144.706	150.391	87.3577	111.905	113.789	151.607	120.64	137.56	118.743	139.904	127.743	129.575	152.446	132.243
	24	114.294	118.58	143.505	148.461	136.557	147.52	120.248	146.99	139.503	146.188	144.728	149.562	87.0906	112.127	114.149	151.973	121.397	137.731	118.873	139.687	127.909	129.473	152.221	133.019
	24.1	114.463	118.477	143.085	148.374	136.272	147.277	121.01	147.536	139.54	146.423	144.625	149.708	87.2882	112.018	114.321	152.224	122.186	138.572	118.357	138.952	127.846	129.555	152.12	133.372
	24.2	114.332	118.588	142.633	148.444	135.977	147.044	121.108	147.508	139.778	146.368	144.737	150.438	87.9887	111.433	114.322	152.826	122.449	139.203	117.809	137.867	128.371	130.158	152.181	133.423
	24.3	113.993	118.995	142.74	148.107	135.412	147.021	121.16	146.923	140.053	146.049	144.802	151.095	88.5064	110.673	114.817	153.362	122.345	139.945	117.564	137.377	129.146	130.943	152.416	132.862
	24.4	113.855	119.916	143.004	147.828	135.472	147.016	121.339	145.44	140.764	146.083	144.79	151.092	88.7699	110.21	115.594	153.512	121.911	140.275	118.082	137.54	130.042	131.567	152.489	132.248
	24.5	113.98	120.527	143.547	146.956	136.302	147.008	121.652	144.02	141.133	146.578	144.496	151.057	88.5852	110.081	115.938	152.879	121.254	140.677	118.689	138.375	130.534	131.575	152.852	132.336
	24.6	114.086	120.452	143.94	146.751	137.331	146.67	121.408	143.851	141.265	147.175	144.113	151.062	88.0473	110.268	115.766	151.946	120.535	140.288	118.992	138.718	130.62	131.366	152.569	132.745
	24.7	113.592	119.177	144.18	146.955	138.143	146.173	120.884	144.901	140.769	147.332	143.888	151.307	87.3426	110.731	115.092	150.863	120.487	139.733	118.479	138.746	130.401	131.239	152.324	133.366
	24.8	113.025	118.405	144.131	147.631	138.547	145.53	120.044	146.291	140.71	146.974	143.897	151.219	86.6844	111.546	114.791	150.673	121.244	139.387	117.857	138.955	129.8	131.095	152.152	133.708
	24.9	112.72	118.318	144.115	147.917	139.032	145.659	119.544	146.547	140.6	146.348	144.173	151.12	86.3328	112.48	114.833	151.146	122.201	139.445	117.386	139.779	129.278	130.873	152.899	133.996
	25	113.039	118.918	144.139	147.872	138.881	146.315	118.95	146.445	140.844	146.09	144.431	150.771	86.0543	113.079	115.214	151.685	122.537	139.957	117.483	141.232	128.943	130.722	153.702	134.351
[truncated: 150 more rows]
[truncated: 3 more columns]

## Sheet: E2_ATP_Asso
	Experiment 2
	ATP association: Raw fluorescence data
																Nonlinear fit (one-phase association, GraphPad Prism)
[truncated: 902 more rows]

## Sheet: E3_Diss
	Experiment 3
[truncated: 3,005 more rows]

## Sheet: E3_ADP_Asso
	Experiment 3
[truncated: 403 more rows]
[truncated: 2 more columns]

## Sheet: E3_ATP_Asso
	Experiment 3
[truncated: 904 more rows]

## Sheet: E4_Diss
	Experiment 4
[truncated: 3,006 more rows]

[truncated: 2 more sheets: E4_ADP_Asso, Summary]
