# Supplementary material for: Calcium depletion challenges endoplasmic reticulum proteostasis by destabilising BiP-substrate complexes
Source: eLife. 2020 Dec 9;9:e62601. doi: 10.7554/eLife.62601 (PMC7758071; doi:10.7554/eLife.62601)
Supplement: Figure 4—source data 1. [file elife-62601-fig4-data1.xlsx]

## Sheet: Exp_1
Source data: Figure 4A
Binding raw data (nm)								Normalised to baseline step
Time (s)	BiP + Mg + ATP -> Mg + ATP	BiP + Mg + Ca + ATP -> Mg + ATP	BiP + Mg + ATP -> Mg + Ca + ATP	QPD BiP + Mg + ATP -> Mg + ATP	BiP + Mg + ATP -> Ca + ATP	BiP + Mg + ATP -> Mg + ADP		Time (s)	BiP + Mg + ATP -> Mg + ATP	BiP + Mg + Ca + ATP -> Mg + ATP	BiP + Mg + ATP -> Mg + Ca + ATP	QPD BiP + Mg + ATP -> Mg + ATP	BiP + Mg + ATP -> Ca + ATP	BiP + Mg + ATP -> Mg + ADP
0	0	0	0	0	0	0		0	-1.18987	-1.16972	-1.24725	-1.36549	-1.42146	-1.34482
0.2	-0.00035923	-0.00024858	0.0016466	-0.00605431	0.00092878	0.00189804		0.2	-1.19023	-1.16997	-1.2456	-1.37155	-1.42053	-1.34292
0.4	-0.00233768	-0.00484857	0.00133407	-0.00252268	-0.00368496	0.00196117		0.4	-1.19221	-1.17457	-1.24591	-1.36802	-1.42515	-1.34286
0.59	-0.00603033	-0.00080274	-0.00101401	-0.002541	-0.00339879	0.00041225		0.59	-1.1959	-1.17052	-1.24826	-1.36804	-1.42486	-1.34441
0.79	-0.00284216	-0.00478909	-0.00230042	-0.00543589	-0.00182615	-0.00074959		0.79	-1.19271	-1.17451	-1.24955	-1.37093	-1.42329	-1.34557
0.99	-0.00172635	-0.00189139	-0.00241524	-0.00227856	-0.00450669	0.00274652		0.99	-1.1916	-1.17161	-1.24966	-1.36777	-1.42597	-1.34207
1.2	-0.00360497	-0.00392755	-0.0005331	-0.00638817	0.00018582	-0.00232283		1.2	-1.19348	-1.17365	-1.24778	-1.37188	-1.42128	-1.34714
1.39	-0.00085869	-0.00135582	-0.00173722	-0.0042782	-0.00508325	0.00398298		1.39	-1.19073	-1.17108	-1.24898	-1.36977	-1.42655	-1.34084
1.59	0.00221699	-0.00049972	-0.00092658	-0.00150536	8.93e-05	0.00366431		1.59	-1.18766	-1.17022	-1.24817	-1.367	-1.42137	-1.34116
1.79	-0.0019127	-0.00367156	-0.00030783	-0.00514268	-0.00186627	0.00083929		1.79	-1.19178	-1.17339	-1.24755	-1.37064	-1.42333	-1.34398
2	0.00032313	-0.0025923	-0.00229041	-0.00236508	-0.0019078	-0.00045279		2	-1.18955	-1.17231	-1.24954	-1.36786	-1.42337	-1.34527
2.19	-0.00244602	-0.00288224	-0.00243229	-0.0048688	3.095e-05	0.00149058		2.19	-1.19232	-1.1726	-1.24968	-1.37036	-1.42143	-1.34333
2.39	-0.00055747	-0.0004807	0.00329782	-0.00391762	0.00022528	0.00606347		2.39	-1.19043	-1.1702	-1.24395	-1.36941	-1.42124	-1.33876
2.59	-0.00346385	0.00062788	-0.00051592	-0.00197419	-0.00234851	0.00571702		2.59	-1.19334	-1.16909	-1.24776	-1.36747	-1.42381	-1.3391
2.79	-0.00094647	-0.00154079	-0.00285442	-0.00485075	-0.00523146	0.00198745		2.79	-1.19082	-1.17126	-1.2501	-1.37034	-1.42669	-1.34283
2.99	0.00075816	0.00031956	0.00040387	-0.00544339	-0.00252048	0.00334589		2.99	-1.18911	-1.1694	-1.24684	-1.37094	-1.42398	-1.34147
3.19	-0.00285057	0.00013959	-0.00196295	-0.00791192	0.00210362	0.00521161		3.19	-1.19272	-1.16958	-1.24921	-1.37341	-1.41936	-1.33961
3.39	-0.00062179	-0.00357069	-0.00046275	-0.00345945	-0.00162153	0.00262825		3.39	-1.19049	-1.17329	-1.24771	-1.36895	-1.42308	-1.34219
3.59	0.00089541	0.00323786	-0.00510623	-0.0075907	-0.00041764	0.00522615		3.59	-1.18898	-1.16648	-1.25235	-1.37308	-1.42188	-1.33959
3.79	0.00109012	-0.00456954	6.256e-05	-0.00473104	0.00212326	0.00861427		3.79	-1.18878	-1.17429	-1.24718	-1.37023	-1.41934	-1.33621
3.99	5.577e-05	-0.00181456	-0.00219677	-0.00397368	-0.00367327	0.00216689		3.99	-1.18982	-1.17154	-1.24944	-1.36947	-1.42514	-1.34265
4.19	0.00252125	-0.006906	-0.00225199	-0.00364204	-0.00320007	0.00257041		4.19	-1.18735	-1.17663	-1.2495	-1.36914	-1.42466	-1.34225
4.39	0.00374055	-0.00287864	-0.00292007	-0.00061779	-0.00244688	0.00319008		4.39	-1.18613	-1.1726	-1.25017	-1.36611	-1.42391	-1.34163
4.59	-0.00045276	-0.00323016	-0.0034003	4.378e-05	0.00047807	0.00567769		4.59	-1.19033	-1.17295	-1.25065	-1.36545	-1.42098	-1.33914
4.79	0.00142694	-0.00077435	-0.00282738	-0.00745813	-0.00105265	0.00538649		4.79	-1.18845	-1.1705	-1.25007	-1.37295	-1.42252	-1.33943
4.99	0.00493102	-0.00257263	-0.00133592	-0.00401807	-0.00036152	0.00636433		4.99	-1.18494	-1.17229	-1.24858	-1.36951	-1.42182	-1.33846
5.19	0.00229299	0.00045723	-0.00319083	-0.00361078	-8.353e-05	0.00866478		5.19	-1.18758	-1.16926	-1.25044	-1.36911	-1.42155	-1.33616
5.39	0.00547491	-0.00097148	-0.00209492	-0.00244069	-9.94e-06	0.0056052		5.39	-1.1844	-1.17069	-1.24934	-1.36793	-1.42147	-1.33921
5.59	0.00294384	-0.00567294	-0.00169283	-0.00558904	-0.00366113	0.0080485		5.59	-1.18693	-1.17539	-1.24894	-1.37108	-1.42512	-1.33677
5.8	0.00207203	-0.0025531	-0.00044589	-0.00171698	-0.00244087	0.00601844		5.8	-1.1878	-1.17227	-1.24769	-1.36721	-1.4239	-1.3388
5.99	0.00565332	-0.00169955	-0.00119383	-0.00393357	-0.00423863	0.00534192		5.99	-1.18422	-1.17142	-1.24844	-1.36943	-1.4257	-1.33948
6.19	0.00172208	0.00074783	0.00023029	-0.0050226	-0.00172216	0.00486473		6.19	-1.18815	-1.16897	-1.24702	-1.37052	-1.42318	-1.33996
6.39	0.00224571	-0.00535241	-0.00088283	-0.00077167	1.869e-05	0.0043754		6.39	-1.18763	-1.17507	-1.24813	-1.36627	-1.42144	-1.34044
6.59	0.00396129	-0.00389707	-0.00053009	-0.00483533	-0.00228896	0.00564117		6.59	-1.18591	-1.17362	-1.24778	-1.37033	-1.42375	-1.33918
6.79	0.0038416	-0.00430091	-0.00235049	-0.0048242	0.00089786	0.00828297		6.79	-1.18603	-1.17402	-1.2496	-1.37032	-1.42056	-1.33654
6.99	0.00155266	-0.00520795	0.00041293	-0.00552136	-0.00027377	0.010618		6.99	-1.18832	-1.17493	-1.24683	-1.37102	-1.42174	-1.3342
7.19	0.00456755	-0.00265021	-0.00119893	-0.0005731	0.00245287	0.00837156		7.19	-1.1853	-1.17237	-1.24845	-1.36607	-1.41901	-1.33645
7.39	0.00255662	-0.00394711	-0.00205728	-0.00294713	0.00491826	0.0110802		7.39	-1.18732	-1.17367	-1.2493	-1.36844	-1.41654	-1.33374
7.59	0.00252713	-0.00265165	-0.00051385	-0.00048647	0.00442679	0.00353893		7.59	-1.18735	-1.17237	-1.24776	-1.36598	-1.41704	-1.34128
7.79	0.00342548	-0.00502233	-0.00176885	-0.00427563	-0.00099741	0.00556485		7.79	-1.18645	-1.17474	-1.24902	-1.36977	-1.42246	-1.33926
7.99	0.0023698	-0.00557385	-0.00025853	-0.00756577	0.0002964	0.00606408		7.99	-1.1875	-1.1753	-1.24751	-1.37306	-1.42117	-1.33876
8.19	0.00262194	-0.00216764	-0.00106818	-0.00114027	-0.00102712	0.00730901		8.19	-1.18725	-1.17189	-1.24831	-1.36663	-1.42249	-1.33751
8.39	0.00565182	-0.00657599	-0.00356475	-0.00199008	-0.00425365	0.00769329		8.39	-1.18422	-1.1763	-1.25081	-1.36748	-1.42572	-1.33713
8.59	0.00042551	-0.00121071	-0.00563858	-0.0032011	0.00150062	0.0095417		8.59	-1.18945	-1.17093	-1.25289	-1.3687	-1.41996	-1.33528
8.8	0.00696545	-0.00284428	0.00024316	-0.00862096	0.00073626	0.0078571		8.8	-1.18291	-1.17257	-1.247	-1.37412	-1.42073	-1.33696
8.99	0.00591918	-0.00302516	-0.00158877	-0.0060312	0.00249683	0.00744926		8.99	-1.18395	-1.17275	-1.24884	-1.37153	-1.41897	-1.33737
9.19	0.00089183	-0.00469304	-0.00533581	-0.00628129	-0.00296679	0.00729216		9.19	-1.18898	-1.17441	-1.25258	-1.37178	-1.42443	-1.33753
9.39	0.00684444	-0.00112449	0.00035734	-0.00560435	-0.00198116	0.00622546		9.39	-1.18303	-1.17085	-1.24689	-1.3711	-1.42344	-1.33859
9.59	0.00461112	-0.00100692	-0.00382188	-0.00443376	-0.00166948	0.00329211		9.59	-1.18526	-1.17073	-1.25107	-1.36993	-1.42313	-1.34153
9.8	0.00509879	-0.00352218	0.00123871	-0.00388116	0.00095662	0.00587425		9.8	-1.18477	-1.17324	-1.24601	-1.36938	-1.42051	-1.33895
9.99	0.00550919	0.00035647	-0.00512869	-0.00239884	0.00161423	0.0103263		9.99	-1.18436	-1.16936	-1.25238	-1.36789	-1.41985	-1.33449
10.19	-0.00027751	-0.00555498	-0.00234554	-0.0029009	0.00020385	0.00720924		10.19	-1.19015	-1.17528	-1.24959	-1.3684	-1.42126	-1.33761
10.39	0.00561174	0.00083855	-0.00437072	-0.00179862	0.00216869	0.0109765		10.39	-1.18426	-1.16888	-1.25162	-1.36729	-1.41929	-1.33384
10.59	0.00454981	0.00064195	-0.00219006	-0.00441096	0.00201107	0.0107495		10.59	-1.18532	-1.16908	-1.24944	-1.36991	-1.41945	-1.33407
10.79	0.00389917	-0.00571265	-0.00089843	-0.00290118	0.00262937	0.00487669		10.79	-1.18597	-1.17543	-1.24815	-1.3684	-1.41883	-1.33994
10.99	0.00458167	-0.00092384	-0.00339457	-0.00208732	0.00026457	0.00772319		10.99	-1.18529	-1.17065	-1.25064	-1.36758	-1.4212	-1.3371
11.19	0.00752877	-0.00277177	-0.0049699	-0.00771511	-0.00082035	0.0130029		11.19	-1.18234	-1.17249	-1.25222	-1.37321	-1.42228	-1.33182
11.39	0.00481106	-0.00179164	-0.00172384	1.076e-05	0.00088136	0.00878484		11.39	-1.18506	-1.17151	-1.24897	-1.36548	-1.42058	-1.33604
11.6	0.00826679	-0.00075239	-0.00059361	-0.00220101	0.00040888	0.0101128		11.6	-1.18161	-1.17047	-1.24784	-1.3677	-1.42105	-1.33471
11.79	0.00642439	-0.00499557	-0.00264021	-0.00107985	-0.00136357	0.0116216		11.79	-1.18345	-1.17472	-1.24989	-1.36657	-1.42283	-1.3332
11.99	0.00285967	-0.00220156	-0.0016956	-0.00583759	-0.00116936	0.010094		11.99	-1.18701	-1.17192	-1.24894	-1.37133	-1.42263	-1.33473
12.19	0.00721573	-0.00627964	0.00096211	0.0018799	0.00117687	0.0105778		12.19	-1.18266	-1.176	-1.24628	-1.36361	-1.42029	-1.33424
12.39	0.00447267	-0.00175708	-0.00078815	-0.00519236	0.00171051	0.0107287		12.39	-1.1854	-1.17148	-1.24803	-1.37069	-1.41975	-1.33409
12.59	0.00768715	-0.00093552	-0.00365105	-0.00262769	0.00176898	0.0115549		12.59	-1.18219	-1.17066	-1.2509	-1.36812	-1.41969	-1.33327
12.79	0.00791308	-0.00295945	-0.00241749	-0.00521235	0.00321034	0.00879265		12.79	-1.18196	-1.17268	-1.24966	-1.37071	-1.41825	-1.33603
12.99	0.0058265	-0.0022578	-0.00373495	-0.00171643	0.00304425	0.0104856		12.99	-1.18405	-1.17198	-1.25098	-1.36721	-1.41842	-1.33433
13.19	0.00445199	0.00058666	-0.00511577	-0.00385577	0.00151361	0.0112861		13.19	-1.18542	-1.16913	-1.25236	-1.36935	-1.41995	-1.33353
13.39	0.00784647	-0.00170741	-0.00325654	-0.00089532	0.00079543	0.0107829		13.39	-1.18203	-1.17143	-1.2505	-1.36639	-1.42067	-1.33404
13.59	0.00683909	-0.00031937	0.00060627	-0.00386143	0.00192625	0.0116601		13.59	-1.18303	-1.17004	-1.24664	-1.36936	-1.41954	-1.33316
13.79	0.00210889	0.0001031	-0.00246736	-0.00041597	0.00049533	0.0144606		13.79	-1.18776	-1.16962	-1.24971	-1.36591	-1.42097	-1.33036
13.99	0.00709262	-0.00371988	-0.00418019	-0.00088963	0.00279047	0.0119791		13.99	-1.18278	-1.17344	-1.25143	-1.36638	-1.41867	-1.33284
14.19	0.00454433	-0.00342447	-0.00179682	-0.00321391	-0.0001344	0.0121838		14.19	-1.18533	-1.17315	-1.24904	-1.36871	-1.4216	-1.33264
14.39	0.00312432	-0.0003498	-0.00272437	-0.00191894	0.00034709	0.0111499		14.39	-1.18675	-1.17007	-1.24997	-1.36741	-1.42112	-1.33367
14.6	0.0060459	-0.00216456	-0.00280641	-0.00363407	0.0063834	0.00929394		14.6	-1.18383	-1.17189	-1.25005	-1.36913	-1.41508	-1.33553
14.8	0.00202883	-0.00108954	-0.00134281	0.00062521	0.00295587	0.0130733		14.8	-1.18784	-1.17081	-1.24859	-1.36487	-1.41851	-1.33175
14.99	0.00677008	-0.00053086	-0.00048124	0.00027637	0.00279163	0.0129054		14.99	-1.1831	-1.17025	-1.24773	-1.36522	-1.41867	-1.33191
15.19	0.00304448	0.00149341	-0.00420663	-0.00262085	0.00245153	0.0130005		15.19	-1.18683	-1.16823	-1.25145	-1.36812	-1.41901	-1.33182
15.39	0.00357928	-0.00326835	-0.00119675	-0.00021709	-0.0005702	0.0128566		15.39	-1.18629	-1.17299	-1.24844	-1.36571	-1.42203	-1.33196
15.6	0.0021533	-0.00013449	0.00053047	-0.00313212	0.00470877	0.0132222		15.6	-1.18772	-1.16986	-1.24672	-1.36863	-1.41675	-1.3316
15.8	0.00582591	-0.0045122	-0.00140465	-0.00427904	0.00294582	0.0148793		15.8	-1.18405	-1.17423	-1.24865	-1.36977	-1.41852	-1.32994
15.99	0.00443744	-0.0030099	-0.00287831	-0.00025788	0.00087933	0.0158709		15.99	-1.18543	-1.17273	-1.25013	-1.36575	-1.42058	-1.32895
16.2	0.00400121	-0.00337185	0.00045309	0.00090022	0.00162334	0.0136405		16.2	-1.18587	-1.17309	-1.24679	-1.36459	-1.41984	-1.33118
16.4	0.00484231	-0.00085502	-0.00254592	-0.00355384	4.018e-05	0.0151514		16.4	-1.18503	-1.17058	-1.24979	-1.36905	-1.42142	-1.32967
16.6	0.00385149	-0.00169002	-0.0027733	-0.00173325	0.00488461	0.0154536		16.6	-1.18602	-1.17141	-1.25002	-1.36723	-1.41658	-1.32937
16.8	0.00413098	-0.00318208	-0.00128133	-0.00257252	0.00382369	0.0133895		16.8	-1.18574	-1.1729	-1.24853	-1.36807	-1.41764	-1.33143
17	0.00239436	-0.00462616	-0.00059309	-0.00339763	0.00362056	0.0180954		17	-1.18748	-1.17435	-1.24784	-1.36889	-1.41784	-1.32672
17.2	0.00350994	0.00100703	-0.0002018	-0.00105577	0.00546591	0.0129209		17.2	-1.18636	-1.16871	-1.24745	-1.36655	-1.416	-1.3319
17.4	0.00553441	-0.00034442	-0.00314254	-0.00502018	-0.0030804	0.0141961		17.4	-1.18434	-1.17007	-1.25039	-1.37051	-1.42454	-1.33062
17.6	0.00175188	-0.00087298	-0.00340112	-0.00371818	0.00439949	0.0121503		17.6	-1.18812	-1.17059	-1.25065	-1.36921	-1.41706	-1.33267
17.8	0.0035453	1.8e-06	-0.00163442	-0.00374274	0.00242884	0.0107237		17.8	-1.18633	-1.16972	-1.24888	-1.36924	-1.41903	-1.3341
18	0.00319721	-0.00168581	-0.00238867	-0.00451638	0.00464848	0.0144513		18	-1.18668	-1.17141	-1.24964	-1.37001	-1.41681	-1.33037
18.2	0.00322102	0.00037943	-0.00176425	-0.00254299	0.00379452	0.0152097		18.2	-1.18665	-1.16934	-1.24901	-1.36804	-1.41767	-1.32961
18.4	0.0078023	0.00075903	-0.00493255	-0.00314379	0.00292356	0.0181226		18.4	-1.18207	-1.16896	-1.25218	-1.36864	-1.41854	-1.3267
18.6	0.00212783	-0.00201142	-0.00198705	-0.00372758	0.004834	0.0174726		18.6	-1.18774	-1.17173	-1.24923	-1.36922	-1.41663	-1.32735
18.8	0.00453905	-0.0012482	-0.00351536	-0.00546823	0.00737556	0.0206539		18.8	-1.18533	-1.17097	-1.25076	-1.37096	-1.41409	-1.32417
19	0.00414445	-0.00299496	0.00170953	-0.00475093	0.00175895	0.0155809		19	-1.18573	-1.17272	-1.24554	-1.37025	-1.4197	-1.32924
19.2	-3.841e-05	0.00132144	-0.00045896	-0.00522676	0.00627582	0.0166146		19.2	-1.18991	-1.1684	-1.24771	-1.37072	-1.41519	-1.32821
19.4	0.00561351	0.00115834	-0.00230749	-0.00267723	-0.00099055	0.015318		19.4	-1.18426	-1.16856	-1.24955	-1.36817	-1.42245	-1.3295
19.6	0.00201256	-0.00431411	-0.0038698	-0.00288924	0.00152519	0.0157581		19.6	-1.18786	-1.17404	-1.25112	-1.36838	-1.41994	-1.32906
19.8	0.00574408	-0.00071623	-0.00327279	-0.00321834	0.00199815	0.0170266		19.8	-1.18413	-1.17044	-1.25052	-1.36871	-1.41946	-1.32779
20	-0.00171713	0.00071334	-0.00167668	-0.00455827	0.00180643	0.0153316		20	-1.19159	-1.16901	-1.24892	-1.37005	-1.41966	-1.32949
20.19	0.00013399	0.00111546	-0.00152863	-0.00141689	0.00526973	0.0146157		20.19	-1.18974	-1.16861	-1.24878	-1.36691	-1.41619	-1.3302
20.39	0.00545203	-0.00055785	-0.00132652	-0.00542406	0.00244964	0.017405		20.39	-1.18442	-1.17028	-1.24857	-1.37092	-1.41901	-1.32742
20.6	0.00054572	0.0005008	-0.00291605	-0.0025995	0.0011637	0.0167752		20.6	-1.18933	-1.16922	-1.25016	-1.36809	-1.4203	-1.32804
20.8	0.00340646	-0.00355265	-0.00298759	0.00275986	0.00447918	0.017281		20.8	-1.18647	-1.17327	-1.25023	-1.36273	-1.41698	-1.32754
21	0.00031283	-0.00381928	-0.00360849	-0.0082856	0.00359893	0.0140653		21	-1.18956	-1.17354	-1.25086	-1.37378	-1.41786	-1.33075
21.2	0.00286365	-0.00355673	0.0006817	-0.00597741	0.00430954	0.0118044		21.2	-1.18701	-1.17328	-1.24657	-1.37147	-1.41715	-1.33302
21.4	0.00281902	0.00132278	-0.00207943	-0.00344851	0.0031501	0.0155665		21.4	-1.18705	-1.1684	-1.24933	-1.36894	-1.41831	-1.32925
21.6	0.00403066	-0.0038789	-0.00286806	-0.00072699	0.00252038	0.0188718		21.6	-1.18584	-1.1736	-1.25011	-1.36622	-1.41894	-1.32595
21.8	0.00413978	0.00089466	-0.00121944	-0.00298633	0.00547401	0.0154285		21.8	-1.18573	-1.16883	-1.24847	-1.36848	-1.41599	-1.32939
22	0.00013084	-0.00182304	-0.00148637	-0.00239879	0.00306972	0.0180939		22	-1.18974	-1.17154	-1.24873	-1.36789	-1.41839	-1.32673
22.19	0.00438989	-0.00207785	-0.00248347	-0.00051696	0.00278128	0.0170643		22.19	-1.18548	-1.1718	-1.24973	-1.36601	-1.41868	-1.32776
22.4	0.0035506	-0.0016743	-0.00323248	0.00033613	0.00262587	0.0143906		22.4	-1.18632	-1.1714	-1.25048	-1.36516	-1.41884	-1.33043
22.6	0.00105224	-0.00377747	-0.00198075	0.00238771	0.00056063	0.0188541		22.6	-1.18882	-1.1735	-1.24923	-1.36311	-1.4209	-1.32597
22.79	0.00628713	-0.00343049	-0.00295536	-0.00472884	0.00500725	0.0188106		22.79	-1.18359	-1.17315	-1.2502	-1.37022	-1.41646	-1.32601
23	0.00113588	-0.00120539	-0.00493725	-0.00092432	0.00573557	0.0140096		23	-1.18874	-1.17093	-1.25218	-1.36642	-1.41573	-1.33081
23.2	0.00332904	-0.00402561	-0.00133761	-0.00537253	0.00241473	0.0197795		23.2	-1.18654	-1.17375	-1.24858	-1.37087	-1.41905	-1.32504
23.4	0.00023813	-0.00117107	-0.0029248	0.00115666	0.00231972	0.0171213		23.4	-1.18963	-1.17089	-1.25017	-1.36434	-1.41914	-1.3277
23.59	0.00073863	-0.00139703	-0.0005074	-0.00239853	0.0028458	0.0166643		23.59	-1.18913	-1.17112	-1.24775	-1.36789	-1.41862	-1.32816
23.8	0.00222343	-0.0012267	-0.00211742	-0.0009634	0.00270381	0.0160725		23.8	-1.18765	-1.17095	-1.24936	-1.36646	-1.41876	-1.32875
24	0.00439643	-7.649e-05	-0.00330282	-0.00531057	0.00782964	0.0146362		24	-1.18548	-1.1698	-1.25055	-1.3708	-1.41363	-1.33018
24.2	0.00627853	0.00082293	-0.00359069	-0.00177342	0.00376406	0.020682		24.2	-1.18359	-1.1689	-1.25084	-1.36727	-1.4177	-1.32414
24.39	0.00283272	-0.00188746	0.00028412	-0.00239608	0.00345447	0.0152589		24.39	-1.18704	-1.17161	-1.24696	-1.36789	-1.41801	-1.32956
24.6	0.00128094	-0.00057245	-0.00143991	0.00360524	0.00408618	0.017795		24.6	-1.18859	-1.17029	-1.24869	-1.36189	-1.41738	-1.32702
24.8	0.00153408	-0.00094161	-0.00010712	-0.00334967	0.00288023	0.0205453		24.8	-1.18834	-1.17066	-1.24735	-1.36884	-1.41858	-1.32427
25	-0.00041146	-0.00034401	-0.00692488	-0.0072125	0.00488972	0.0210824		25	-1.19028	-1.17007	-1.25417	-1.37271	-1.41657	-1.32374
25.2	0.00187617	-0.00349118	-0.00394432	-0.00072347	0.0044973	0.0208236		25.2	-1.188	-1.17321	-1.25119	-1.36622	-1.41697	-1.324
25.39	0.00325798	-0.0007281	-0.00213616	-0.00375009	0.00323181	0.0163773		25.39	-1.18661	-1.17045	-1.24938	-1.36924	-1.41823	-1.32844
25.6	0.0042221	-0.001231	-0.00362784	0.00196683	0.00739445	0.020111		25.6	-1.18565	-1.17095	-1.25087	-1.36353	-1.41407	-1.32471
25.8	0.00479201	-1.007e-05	-0.0016695	-0.00425588	0.00694584	0.0173578		25.8	-1.18508	-1.16973	-1.24892	-1.36975	-1.41452	-1.32746
26	-0.00167756	-0.00216654	-0.00015091	-0.00394273	0.00403905	0.0180202		26	-1.19155	-1.17189	-1.2474	-1.36944	-1.41742	-1.3268
26.2	0.00531044	-0.00184214	-0.00141298	-0.00126477	0.00321203	0.0196622		26.2	-1.18456	-1.17156	-1.24866	-1.36676	-1.41825	-1.32516
26.39	0.0024317	0.00150663	-0.00303817	-0.00418344	0.00517515	0.0218591		26.39	-1.18744	-1.16821	-1.25028	-1.36968	-1.41629	-1.32296
26.6	0.00076556	-0.00321412	-0.00102815	-0.0069095	0.00397175	0.01909		26.6	-1.18911	-1.17294	-1.24827	-1.3724	-1.41749	-1.32573
26.79	0.00322929	-0.00297401	-0.00170277	-0.00244743	0.00441947	0.0222985		26.79	-1.18664	-1.1727	-1.24895	-1.36794	-1.41704	-1.32252
27	0.00662234	0.00223183	-0.00523211	-0.00229143	0.00267892	0.0213763		27	-1.18325	-1.16749	-1.25248	-1.36779	-1.41878	-1.32344
27.19	0.00365363	-0.00053074	-0.0051648	-0.00142002	0.00161816	0.0201116		27.19	-1.18622	-1.17025	-1.25241	-1.36691	-1.41984	-1.32471
27.4	0.00020437	-0.00300682	-0.00197886	0.00171044	0.00314827	0.0194786		27.4	-1.18967	-1.17273	-1.24923	-1.36378	-1.41831	-1.32534
27.6	0.0010064	0.00012125	-0.00322233	-0.002239	0.00645367	0.0205972		27.6	-1.18887	-1.1696	-1.25047	-1.36773	-1.41501	-1.32422
27.8	0.0020706	0.00102011	-0.00241137	-0.00013921	0.00473798	0.0215493		27.8	-1.1878	-1.1687	-1.24966	-1.36563	-1.41672	-1.32327
28	0.00331707	-0.00333078	-0.00568855	-0.00117293	0.00472718	0.0246806		28	-1.18656	-1.17305	-1.25294	-1.36667	-1.41674	-1.32014
28.19	0.00120176	0.00057393	-0.00336524	-0.0004731	0.00257845	0.019171		28.19	-1.18867	-1.16915	-1.25061	-1.36597	-1.41888	-1.32565
28.4	0.00323915	-0.00291127	-0.00101979	-0.00101913	0.0059449	0.0222427		28.4	-1.18663	-1.17263	-1.24827	-1.36651	-1.41552	-1.32258
28.59	0.00281332	0.00064674	-0.00311654	-0.00316478	0.00793235	0.0222037		28.59	-1.18706	-1.16907	-1.25036	-1.36866	-1.41353	-1.32262
28.8	0.00816546	-0.00033196	-0.00326444	-0.0015306	0.00892393	0.0180906		28.8	-1.18171	-1.17005	-1.25051	-1.36702	-1.41254	-1.32673
28.99	0.00553971	-0.00360083	-0.0023657	0.0009027	0.00230553	0.0184564		28.99	-1.18433	-1.17332	-1.24961	-1.36459	-1.41916	-1.32636
29.2	0.00352153	-0.00128865	-0.00050022	-0.00443304	0.00310788	0.018507		29.2	-1.18635	-1.17101	-1.24775	-1.36993	-1.41835	-1.32631
29.39	0.00221912	-0.00080111	-0.00427931	-0.00563401	0.00507109	0.018561		29.39	-1.18765	-1.17052	-1.25153	-1.37113	-1.41639	-1.32626
29.59	0.00168439	0.00146703	-0.00305354	-0.00303977	0.00405496	0.0239554		29.59	-1.18819	-1.16825	-1.2503	-1.36853	-1.41741	-1.32086
29.8	0.00518797	-0.00023988	-0.00460368	0.00151581	0.00494708	0.0239125		29.8	-1.18468	-1.16996	-1.25185	-1.36398	-1.41652	-1.32091
30	0.00416485	-0.00215418	-0.00513655	-0.00311104	0.00391335	0.0225022		30	-1.18571	-1.17188	-1.25238	-1.36861	-1.41755	-1.32232
30.2	0.00222933	-0.00193244	-0.00438197	-0.00077013	0.00483359	0.0205722		30.2	-1.18764	-1.17165	-1.25163	-1.36626	-1.41663	-1.32425
30.39	0.00445671	0.001999	0.00096855	-0.00297655	0.00416478	0.0216785		30.39	-1.18542	-1.16772	-1.24628	-1.36847	-1.4173	-1.32314
30.6	0.00034486	0.00299371	-0.00388492	-0.00235932	0.00394843	0.0207592		30.6	-1.18953	-1.16673	-1.25113	-1.36785	-1.41751	-1.32406
30.79	0.00535731	-0.0009628	-0.00304836	-0.00323015	0.0059603	0.0199967		30.79	-1.18451	-1.17068	-1.2503	-1.36872	-1.4155	-1.32482
30.99	0.00503181	-0.0002473	-0.00164463	0.00024731	0.0103939	0.0204248		30.99	-1.18484	-1.16997	-1.24889	-1.36525	-1.41107	-1.3244
31.2	0.00145132	0.00143386	-0.00942823	-0.0022494	0.00534829	0.0207078		31.2	-1.18842	-1.16829	-1.25667	-1.36774	-1.41611	-1.32411
31.4	0.00259087	-0.00024203	-0.00364329	-0.0018061	0.00337775	0.0212724		31.4	-1.18728	-1.16996	-1.25089	-1.3673	-1.41808	-1.32355
31.6	0.00333734	-0.0015836	-0.00430709	-0.00162091	0.00333349	0.0200343		31.6	-1.18653	-1.1713	-1.25155	-1.36712	-1.41813	-1.32479
31.79	0.0030136	0.00398802	1.066e-05	-0.00437017	0.00643378	0.0221011		31.79	-1.18686	-1.16573	-1.24724	-1.36986	-1.41503	-1.32272
31.99	0.00371041	-0.00084249	-0.00492616	0.00080215	0.00674055	0.023693		31.99	-1.18616	-1.17056	-1.25217	-1.36469	-1.41472	-1.32113
32.19	0.00337736	0.0035863	-0.00338126	-0.00123025	0.00200291	0.0172409		32.19	-1.18649	-1.16614	-1.25063	-1.36672	-1.41946	-1.32758
32.4	0.00372474	-0.00244064	-0.00269909	-0.00101924	0.00545942	0.02417		32.4	-1.18615	-1.17216	-1.24995	-1.36651	-1.416	-1.32065
32.59	0.00250402	0.0003551	-0.00521625	-0.00505162	0.0018912	0.0237109		32.59	-1.18737	-1.16937	-1.25246	-1.37055	-1.41957	-1.32111
32.79	0.00500777	-0.0026348	-0.00374419	-0.00634397	0.00611098	0.0192489		32.79	-1.18486	-1.17236	-1.25099	-1.37184	-1.41535	-1.32557
32.99	0.00658137	-0.00129819	-0.00291333	-0.00145518	0.00333696	0.0237781		32.99	-1.18329	-1.17102	-1.25016	-1.36695	-1.41813	-1.32104
33.19	0.0062881	-0.00370493	-0.00428173	0.00067862	0.00483025	0.0194575		33.19	-1.18358	-1.17343	-1.25153	-1.36482	-1.41663	-1.32536
33.4	0.00461601	0.00284666	-0.00327405	-0.00200381	0.00675385	0.0236648		33.4	-1.18526	-1.16687	-1.25052	-1.3675	-1.41471	-1.32116
33.59	0.00729661	0.00066035	-0.0039156	0.0001504	0.00584895	0.020731		33.59	-1.18258	-1.16906	-1.25116	-1.36534	-1.41561	-1.32409
33.79	0.00427555	-0.00214699	-0.00164603	-0.00275501	0.00854557	0.0248367		33.79	-1.1856	-1.17187	-1.24889	-1.36825	-1.41292	-1.31998
33.99	0.00421835	-0.004529	-0.00593323	-0.00300039	0.0039282	0.0188343		33.99	-1.18565	-1.17425	-1.25318	-1.36849	-1.41753	-1.32599
34.19	0.00421093	0.00045977	-0.00362556	-0.00200394	0.00661493	0.0207789		34.19	-1.18566	-1.16926	-1.25087	-1.3675	-1.41485	-1.32404
34.39	0.00533737	-5.86e-06	-0.00683688	-0.00237988	0.0071228	0.0214765		34.39	-1.18453	-1.16973	-1.25408	-1.36787	-1.41434	-1.32334
34.59	0.00276887	0.0011498	-0.001488	7.449e-05	0.00521028	0.0268335		34.59	-1.1871	-1.16857	-1.24873	-1.36542	-1.41625	-1.31799
34.79	0.00285711	-0.00187602	-0.0063605	-0.00206199	0.00851715	0.0220591		34.79	-1.18702	-1.1716	-1.25361	-1.36756	-1.41295	-1.32276
34.99	0.0030723	-0.00051428	-0.00292101	-0.00227403	0.00520531	0.0229756		34.99	-1.1868	-1.17024	-1.25017	-1.36777	-1.41626	-1.32184
35.19	0.00351281	-0.00104507	-0.00206651	-0.00504358	0.0102551	0.0240689		35.19	-1.18636	-1.17077	-1.24931	-1.37054	-1.41121	-1.32075
35.39	0.00430409	-0.00162917	0.0003784	-0.00109699	0.00586023	0.0221474		35.39	-1.18557	-1.17135	-1.24687	-1.36659	-1.4156	-1.32267
35.59	0.00691761	-0.00297933	-0.00490028	-0.00334223	0.00607133	0.0219125		35.59	-1.18295	-1.1727	-1.25215	-1.36884	-1.41539	-1.32291
35.79	0.00176638	4.595e-05	-0.00301507	-0.00414259	0.0036618	0.0234872		35.79	-1.18811	-1.16968	-1.25026	-1.36964	-1.4178	-1.32133
35.99	0.00302874	-0.00248263	-0.00542427	0.00124856	0.00170293	0.0223562		35.99	-1.18684	-1.1722	-1.25267	-1.36425	-1.41976	-1.32246
36.19	0.00441369	0.00279019	-0.00407296	0.00369922	0.00370414	0.0253371		36.19	-1.18546	-1.16693	-1.25132	-1.3618	-1.41776	-1.31948
36.39	0.00387303	-0.00367363	-0.00042574	7.206e-05	0.00362948	0.0207691		36.39	-1.186	-1.17339	-1.24767	-1.36542	-1.41783	-1.32405
36.59	0.00080266	0.00128805	-0.00067673	-0.0043097	0.00365388	0.0236537		36.59	-1.18907	-1.16843	-1.24792	-1.3698	-1.41781	-1.32117
36.79	0.00270512	-0.00081636	-0.00215294	-0.00348965	0.00594487	0.0231615		36.79	-1.18717	-1.17054	-1.2494	-1.36898	-1.41552	-1.32166
36.99	0.00662507	-0.00104881	-0.00382185	-0.00308442	0.00628981	0.0213451		36.99	-1.18325	-1.17077	-1.25107	-1.36858	-1.41517	-1.32347
37.19	0.00400592	0.00032699	-0.00188746	-0.00444146	0.00335693	0.0172338		37.19	-1.18587	-1.16939	-1.24913	-1.36994	-1.41811	-1.32759
37.4	0.00322293	-0.00204419	-0.00156575	-0.0027006	0.00627488	0.0244533		37.4	-1.18665	-1.17177	-1.24881	-1.36819	-1.41519	-1.32037
37.59	0.00304335	-0.00046441	-0.00470709	-0.00175562	0.00377623	0.0239399		37.59	-1.18683	-1.17019	-1.25195	-1.36725	-1.41769	-1.32088
37.79	-0.00040213	0.00096894	-0.00419863	-0.00142158	0.00373135	0.026031		37.79	-1.19027	-1.16875	-1.25145	-1.36692	-1.41773	-1.31879
37.99	0.00298272	0.00281445	-0.00071057	-0.00017664	0.00473478	0.0263161		37.99	-1.18689	-1.16691	-1.24796	-1.36567	-1.41673	-1.3185
38.19	0.0058308	-0.00027464	-0.00498756	-0.00143099	0.00417162	0.0223347		38.19	-1.18404	-1.17	-1.25223	-1.36693	-1.41729	-1.32249
38.39	0.00137973	-0.00452559	-0.00367304	-0.00708309	0.0031483	0.0262332		38.39	-1.18849	-1.17425	-1.25092	-1.37258	-1.41831	-1.31859
38.59	0.00409783	-7.365e-05	-0.00223973	-0.00506083	0.00211696	0.0229261		38.59	-1.18577	-1.1698	-1.24949	-1.37056	-1.41935	-1.32189
38.79	0.00465692	-0.002174	-0.0027178	-0.00195436	0.00834552	0.0218197		38.79	-1.18522	-1.1719	-1.24996	-1.36745	-1.41312	-1.323
38.99	0.00800528	-0.00215372	0.00032749	0.00077523	0.00528083	0.0246453		38.99	-1.18187	-1.17188	-1.24692	-1.36472	-1.41618	-1.32017
39.19	0.00097161	-0.0003874	0.00173089	-0.00154792	0.00635921	0.0233974		39.19	-1.1889	-1.17011	-1.24552	-1.36704	-1.4151	-1.32142
39.39	0.00520529	-0.00138081	-0.00141547	-0.00179615	0.00623316	0.0215646		39.39	-1.18467	-1.1711	-1.24866	-1.36729	-1.41523	-1.32326
39.59	0.00393003	-0.00058211	-0.00337439	-0.00124797	0.00256744	0.0259742		39.59	-1.18594	-1.1703	-1.25062	-1.36674	-1.4189	-1.31885
39.79	0.0063487	0.00074526	-0.00220426	-0.00317821	0.00589749	0.0240012		39.79	-1.18352	-1.16898	-1.24945	-1.36867	-1.41557	-1.32082
39.99	0.00335171	-0.00191105	-0.00329026	-0.00439728	0.00470963	0.0209339		39.99	-1.18652	-1.17163	-1.25054	-1.36989	-1.41675	-1.32389
40.19	0.00431229	-0.00158999	-0.00205178	-0.00288745	0.0090469	0.0256431		40.19	-1.18556	-1.17131	-1.2493	-1.36838	-1.41242	-1.31918
40.39	0.00691652	-0.0015468	-0.00056204	-0.00450291	0.00672692	0.0221769		40.39	-1.18296	-1.17127	-1.24781	-1.37	-1.41474	-1.32264
40.59	0.00077269	-0.00122574	-0.00111666	0.00067915	0.00561036	0.0245149		40.59	-1.1891	-1.17095	-1.24836	-1.36482	-1.41585	-1.32031
40.79	0.00534211	-0.00188637	-0.00323362	-0.00118007	0.0043618	0.0249975		40.79	-1.18453	-1.17161	-1.25048	-1.36667	-1.4171	-1.31982
40.99	0.00123581	-0.00012424	-0.00277786	-0.00239212	0.00932737	0.0254943		40.99	-1.18864	-1.16985	-1.25002	-1.36789	-1.41214	-1.31933
41.19	0.0012253	0.00049153	-0.00630736	-0.001386	0.00692997	0.0263352		41.19	-1.18865	-1.16923	-1.25355	-1.36688	-1.41453	-1.31848
41.4	0.00436028	0.0001816	-0.0043867	-0.00244679	0.00421374	0.0289062		41.4	-1.18551	-1.16954	-1.25163	-1.36794	-1.41725	-1.31591
41.59	0.00720934	-0.00193375	-0.00377265	-0.00455028	0.00571112	0.0247824		41.59	-1.18266	-1.17166	-1.25102	-1.37004	-1.41575	-1.32004
41.79	0.00246477	-0.00184459	-0.00060626	-0.00252001	0.00669177	0.0296705		41.79	-1.18741	-1.17157	-1.24785	-1.36801	-1.41477	-1.31515
41.99	0.0063868	-0.00276972	-0.00136256	-0.0037161	0.00745726	0.023917		41.99	-1.18349	-1.17249	-1.24861	-1.36921	-1.41401	-1.3209
42.19	0.00189739	-0.00081014	-0.00401534	-0.00016485	0.00878649	0.0227177		42.19	-1.18797	-1.17053	-1.25126	-1.36566	-1.41268	-1.3221
42.4	0.00427549	-0.0030369	-0.00397828	-0.00348886	0.00517087	0.0285403		42.4	-1.1856	-1.17276	-1.25123	-1.36898	-1.41629	-1.31628
42.59	-0.00031051	-0.00046263	-0.00478125	-0.00344949	-0.00123577	0.0219434		42.59	-1.19018	-1.17018	-1.25203	-1.36894	-1.4227	-1.32288
42.79	0.00508067	-0.00206841	-0.00180125	-0.00421047	0.00197322	0.0239322		42.79	-1.18479	-1.17179	-1.24905	-1.3697	-1.41949	-1.32089
42.99	0.00483678	-0.00236182	-0.00330961	-0.00264395	0.0103802	0.024761		42.99	-1.18504	-1.17208	-1.25056	-1.36814	-1.41108	-1.32006
43.23	0.00141456	0.00047349	-0.0038312	-0.00218666	0.00705377	0.023585		43.23	-1.18846	-1.16925	-1.25108	-1.36768	-1.41441	-1.32124
43.4	0.0059188	-0.00353501	-0.00336084	-0.00624913	0.00519667	0.0268399		43.4	-1.18395	-1.17326	-1.25061	-1.37174	-1.41627	-1.31798
43.59	0.00262946	-0.00414506	-0.00480889	-0.00410242	0.00571241	0.0256686		43.59	-1.18724	-1.17387	-1.25206	-1.3696	-1.41575	-1.31915
43.79	0.00227622	-0.00028651	-0.00160952	-0.00345239	0.00661049	0.0269721		43.79	-1.1876	-1.17001	-1.24886	-1.36895	-1.41485	-1.31785
43.99	0.00340805	0.00160646	-0.00288184	-0.00206234	0.00838945	0.019687		43.99	-1.18646	-1.16811	-1.25013	-1.36756	-1.41307	-1.32513
44.19	0.00386578	-0.00195163	-0.00287032	0.00041647	0.00430209	0.0259289		44.19	-1.18601	-1.17167	-1.25012	-1.36508	-1.41716	-1.31889
44.4	-0.0001367	-0.00301135	-0.004474	-0.00354218	0.00174844	0.0296495		44.4	-1.19001	-1.17273	-1.25172	-1.36904	-1.41971	-1.31517
44.6	0.00636373	-0.00260694	-0.00309247	-0.00454471	0.00506031	0.0253191		44.6	-1.18351	-1.17233	-1.25034	-1.37004	-1.4164	-1.3195
44.79	0.0011137	0.00123684	-0.00409015	-0.00558457	0.00750795	0.0281099		44.79	-1.18876	-1.16848	-1.25134	-1.37108	-1.41395	-1.31671
44.99	0.00565587	-0.00209159	-0.00350068	-0.00132788	0.0041794	0.0238518		44.99	-1.18422	-1.17181	-1.25075	-1.36682	-1.41728	-1.32097
45.2	0.00398733	-0.00227238	-0.00439215	-0.0022131	0.011156	0.0260128		45.2	-1.18588	-1.17199	-1.25164	-1.36771	-1.41031	-1.31881
45.4	0.00506089	-0.00020137	-0.00382863	-0.00314876	0.00283422	0.0257815		45.4	-1.18481	-1.16992	-1.25108	-1.36864	-1.41863	-1.31904
45.59	0.0021847	-0.00428705	-0.00151257	-0.00405106	0.00777684	0.0252321		45.59	-1.18769	-1.17401	-1.24876	-1.36955	-1.41369	-1.31959
45.79	0.00191229	-0.00355353	-0.00442312	0.00109586	0.00643838	0.0271807		45.79	-1.18796	-1.17327	-1.25167	-1.3644	-1.41502	-1.31764
45.99	0.00394956	-0.0002585	-0.0040252	-0.00447463	0.00723769	0.0255304		45.99	-1.18592	-1.16998	-1.25127	-1.36997	-1.41422	-1.31929
46.19	0.0005863	0.00451902	-0.00241243	-0.00317875	0.010254	0.0247763		46.19	-1.18929	-1.1652	-1.24966	-1.36867	-1.41121	-1.32004
46.4	0.00188347	0.00016494	-0.00066842	-0.00606251	0.00522829	0.0269787		46.4	-1.18799	-1.16956	-1.24792	-1.37156	-1.41623	-1.31784
46.6	0.00052033	-0.001776	-0.00361568	-0.00052647	0.0093474	0.0279299		46.6	-1.18935	-1.1715	-1.25086	-1.36602	-1.41212	-1.31689
46.79	0.00514865	-0.00076043	-0.00495134	-0.00358736	0.00884944	0.0257824		46.79	-1.18472	-1.17048	-1.2522	-1.36908	-1.41261	-1.31904
47.03	0.00387653	-0.00101262	-0.00374421	-0.00469271	0.00951801	0.0258938		47.03	-1.186	-1.17073	-1.25099	-1.37019	-1.41194	-1.31893
47.22	0.00511553	-0.00300079	-0.00416442	-0.00258959	0.0104338	0.0207992		47.22	-1.18476	-1.17272	-1.25141	-1.36808	-1.41103	-1.32402
47.4	0.00364647	-0.00173596	-0.00798084	-0.00143802	0.00763938	0.0232064		47.4	-1.18623	-1.17146	-1.25523	-1.36693	-1.41382	-1.32161
47.59	0.00456077	-8.489e-05	-0.00216463	-0.00533943	0.00483193	0.0229293		47.59	-1.18531	-1.16981	-1.24941	-1.37083	-1.41663	-1.32189
47.79	0.00372373	-0.00681466	-0.00391072	-0.00106769	0.00786909	0.0256718		47.79	-1.18615	-1.17654	-1.25116	-1.36656	-1.41359	-1.31915
47.99	0.00653259	-0.0003458	-0.00087451	-0.00256363	0.00344307	0.0248735		47.99	-1.18334	-1.17007	-1.24812	-1.36806	-1.41802	-1.31995
48.19	0.00204388	-0.00088544	-0.00330202	-0.00172825	0.00913087	0.0255606		48.19	-1.18783	-1.17061	-1.25055	-1.36722	-1.41233	-1.31926
48.39	0.00498356	-0.00412782	-0.00444573	-0.00058459	0.00940688	0.029619		48.39	-1.18489	-1.17385	-1.25169	-1.36608	-1.41206	-1.3152
48.59	0.0073497	0.00151094	-0.00381278	-0.00128374	0.00437105	0.0238566		48.59	-1.18252	-1.16821	-1.25106	-1.36678	-1.41709	-1.32096
48.79	-0.00027564	-0.00314517	-0.00314208	-0.00152931	0.00737043	0.0278599		48.79	-1.19015	-1.17287	-1.25039	-1.36702	-1.41409	-1.31696
48.99	0.00418743	-0.00142808	-0.0007846	-0.0020493	0.00390134	0.0282614		48.99	-1.18568	-1.17115	-1.24803	-1.36754	-1.41756	-1.31656
49.19	0.00554296	-0.00402912	-0.00395743	-0.00386381	0.00841844	0.0303534		49.19	-1.18433	-1.17375	-1.2512	-1.36936	-1.41304	-1.31447
49.4	0.00520483	-0.00215679	-0.00409072	-0.00283937	0.00754415	0.0306142		49.4	-1.18467	-1.17188	-1.25134	-1.36833	-1.41392	-1.31421
49.59	0.00405968	-0.00363963	-0.00237956	-0.00419034	0.00762999	0.0282722		49.59	-1.18581	-1.17336	-1.24963	-1.36968	-1.41383	-1.31655
49.79	0.00854701	-0.00210606	-0.0049885	-0.00222819	0.0072403	0.0312312		49.79	-1.18133	-1.17183	-1.25224	-1.36772	-1.41422	-1.31359
49.99	0.00662556	-0.00089872	-0.00239109	-0.0014806	0.00615738	0.0322633		49.99	-1.18325	-1.17062	-1.24964	-1.36697	-1.41531	-1.31256
50.19	0.0044294	-0.00049607	-0.00488564	-0.00128246	0.003673	0.0250502		50.19	-1.18544	-1.17022	-1.25213	-1.36678	-1.41779	-1.31977
50.4	0.00417909	-0.00144178	-0.00534965	-0.00132327	0.00965897	0.0290849		50.4	-1.18569	-1.17116	-1.2526	-1.36682	-1.4118	-1.31574
50.59	0.00522854	0.00141678	6.499e-05	-0.0020006	0.0042959	0.0247536		50.59	-1.18464	-1.1683	-1.24718	-1.36749	-1.41717	-1.32007
50.79	0.00439834	-0.00197716	-0.00487031	-0.00677191	0.00523158	0.0306372		50.79	-1.18547	-1.1717	-1.25212	-1.37227	-1.41623	-1.31418
50.99	0.00339582	0.00139255	-0.00241424	-0.00243848	0.00810258	0.0232174		50.99	-1.18648	-1.16833	-1.24966	-1.36793	-1.41336	-1.3216
51.19	0.00426864	0.00142922	-0.00152212	-0.00218999	0.00637567	0.0284452		51.19	-1.1856	-1.16829	-1.24877	-1.36768	-1.41509	-1.31637
51.39	0.00489269	-0.00085849	-0.00521211	0.00023041	0.00447258	0.0251768		51.39	-1.18498	-1.17058	-1.25246	-1.36526	-1.41699	-1.31964
51.59	0.00890467	-0.00140841	-0.00511829	0.00063115	0.00913051	0.0292277		51.59	-1.18097	-1.17113	-1.25237	-1.36486	-1.41233	-1.31559
51.79	0.00501134	-0.00191161	-0.00663265	-0.00424372	0.00721732	0.0283988		51.79	-1.18486	-1.17163	-1.25388	-1.36974	-1.41425	-1.31642
51.99	0.00651907	-0.00208606	-0.00325952	-0.002732	0.00567289	0.030734		51.99	-1.18335	-1.17181	-1.25051	-1.36823	-1.41579	-1.31409
52.19	0.00543649	-0.00237111	-0.00308942	-0.00350489	0.00933606	0.0320712		52.19	-1.18444	-1.17209	-1.25034	-1.369	-1.41213	-1.31275
52.39	0.00491824	-0.00074409	-0.00468762	-0.00284081	0.00509594	0.0264383		52.39	-1.18495	-1.17047	-1.25193	-1.36834	-1.41637	-1.31838
52.59	0.00791842	0.00061264	-0.00485509	-0.00484109	0.0080509	0.0301992		52.59	-1.18195	-1.16911	-1.2521	-1.37034	-1.41341	-1.31462
52.79	0.00386873	-0.00135423	-0.00557589	-0.00413571	0.00644502	0.0269469		52.79	-1.186	-1.17108	-1.25282	-1.36963	-1.41502	-1.31787
52.99	0.00508143	-0.00344516	-0.00300278	-0.00295938	0.00714267	0.027363		52.99	-1.18479	-1.17317	-1.25025	-1.36845	-1.41432	-1.31746
53.19	0.0086968	6.244e-05	-0.00799185	-0.0031375	0.00652951	0.0250848		53.19	-1.18118	-1.16966	-1.25524	-1.36863	-1.41493	-1.31974
53.39	0.00504971	-0.00243344	-0.00121748	-0.00415887	0.00589191	0.0262754		53.39	-1.18482	-1.17215	-1.24846	-1.36965	-1.41557	-1.31854
53.59	0.0023233	-0.00186601	-0.00699322	-0.00364201	0.00536384	0.0271265		53.59	-1.18755	-1.17159	-1.25424	-1.36914	-1.4161	-1.31769
53.8	0.00696932	-0.00218772	-0.00227267	-0.00679512	0.00749034	0.0288709		53.8	-1.1829	-1.17191	-1.24952	-1.37229	-1.41397	-1.31595
53.99	0.00401488	6.248e-05	-0.00224779	-0.00202124	0.00536154	0.0294977		53.99	-1.18586	-1.16966	-1.24949	-1.36752	-1.4161	-1.31532
54.19	0.00454129	0.00114157	-0.00315342	-0.00187094	0.00354192	0.0294148		54.19	-1.18533	-1.16858	-1.2504	-1.36737	-1.41792	-1.31541
54.39	0.00485497	-0.00383269	-0.00435175	-0.00167585	0.00841259	0.0289764		54.39	-1.18502	-1.17355	-1.2516	-1.36717	-1.41305	-1.31584
54.59	0.0038438	-0.00129286	-0.00295462	-0.00585215	0.00641649	0.0269359		54.59	-1.18603	-1.17101	-1.2502	-1.37135	-1.41505	-1.31788
54.79	0.00474732	-0.00151651	-0.00431098	-0.00379072	0.00789285	0.027784		54.79	-1.18512	-1.17124	-1.25156	-1.36928	-1.41357	-1.31704
54.99	0.00366885	-0.00117091	-0.00271839	-0.0023727	0.00814663	0.0252891		54.99	-1.1862	-1.17089	-1.24997	-1.36787	-1.41332	-1.31953
55.19	0.00474774	0.0010702	-0.00418091	-0.00369314	0.00757888	0.0280444		55.19	-1.18512	-1.16865	-1.25143	-1.36919	-1.41388	-1.31678
55.39	0.00677328	-0.00263801	-0.00586645	-0.00345191	0.00672439	0.0314993		55.39	-1.1831	-1.17236	-1.25311	-1.36895	-1.41474	-1.31332
55.59	0.00344417	-0.00221019	-0.00165648	-0.00096451	0.00624687	0.0254229		55.59	-1.18643	-1.17193	-1.2489	-1.36646	-1.41522	-1.3194
55.79	0.00582134	0.0016864	-0.00113559	-0.00061958	0.00943418	0.0310093		55.79	-1.18405	-1.16803	-1.24838	-1.36611	-1.41203	-1.31381
55.99	0.00573631	-0.00072369	-0.00408498	-0.00323843	0.00790783	0.0309679		55.99	-1.18414	-1.17045	-1.25133	-1.36873	-1.41355	-1.31385
56.19	0.0034042	-0.00078652	-0.00640225	-0.00598345	0.00359394	0.0276468		56.19	-1.18647	-1.17051	-1.25365	-1.37148	-1.41787	-1.31717
56.39	0.00424655	-0.00154105	-0.00434944	-0.00292192	0.00787153	0.0284783		56.39	-1.18563	-1.17126	-1.2516	-1.36842	-1.41359	-1.31634
56.59	0.00344381	0.00261854	-0.00437414	-0.00401958	0.00170519	0.0291285		56.59	-1.18643	-1.1671	-1.25162	-1.36951	-1.41976	-1.31569
56.79	0.00759406	-0.00323354	-0.00508556	-0.00201052	0.00566542	0.0268868		56.79	-1.18228	-1.17295	-1.25233	-1.3675	-1.4158	-1.31793
56.99	0.0049157	-0.0039202	-0.00120403	0.0002247	0.0106297	0.0253436		56.99	-1.18496	-1.17364	-1.24845	-1.36527	-1.41083	-1.31948
57.19	0.00404505	-0.00349542	-0.0032238	-0.00142548	0.00387722	0.0242424		57.19	-1.18583	-1.17322	-1.25047	-1.36692	-1.41759	-1.32058
57.39	0.00285374	-0.0036365	-0.00472929	-0.00462574	0.0118778	0.0293525		57.39	-1.18702	-1.17336	-1.25198	-1.37012	-1.40958	-1.31547
57.59	0.00483589	-0.00157779	-0.00301608	-0.00765867	0.00752467	0.027331		57.59	-1.18504	-1.1713	-1.25026	-1.37315	-1.41394	-1.31749
57.79	0.00321384	0.00050543	-0.00291402	-0.00214923	0.00590793	0.0255681		57.79	-1.18666	-1.16922	-1.25016	-1.36764	-1.41555	-1.31925
57.99	0.00566553	-0.0002252	-0.00090212	-0.00290394	0.0061725	0.0242864		57.99	-1.18421	-1.16995	-1.24815	-1.3684	-1.41529	-1.32053
58.19	0.003179	-0.00286238	-0.00421774	-0.0024293	0.00859761	0.029393		58.19	-1.18669	-1.17258	-1.25146	-1.36792	-1.41286	-1.31543
58.4	0.00724432	-0.00208956	-0.00441639	-0.00206758	0.00725981	0.0266244		58.4	-1.18263	-1.17181	-1.25166	-1.36756	-1.4142	-1.3182
58.6	0.00356127	-0.00304191	-0.00322167	-0.00590863	0.00982354	0.0287924		58.6	-1.18631	-1.17276	-1.25047	-1.3714	-1.41164	-1.31603
58.79	0.00553941	-0.00119512	-0.00665379	-0.00280439	0.00878881	0.0278933		58.79	-1.18433	-1.17092	-1.2539	-1.3683	-1.41267	-1.31693
58.99	0.00517596	-0.00028876	-0.00425007	-0.00451581	0.00773528	0.0323044		58.99	-1.1847	-1.17001	-1.2515	-1.37001	-1.41373	-1.31252
59.19	0.00417218	-0.0010822	-0.0036316	-0.00131677	0.00762782	0.0281396		59.19	-1.1857	-1.1708	-1.25088	-1.36681	-1.41383	-1.31668
59.4	0.00499657	-0.00408879	-0.00596033	-0.00363233	0.00763756	0.0248034		59.4	-1.18488	-1.17381	-1.25321	-1.36913	-1.41382	-1.32002
59.59	0.00525009	-0.00021438	-0.00504955	-0.00340419	0.006797	0.0307172		59.59	-1.18462	-1.16994	-1.2523	-1.3689	-1.41467	-1.3141
59.79	0.00273112	-0.00325217	-0.0046526	-0.00118032	0.00259591	0.0281901		59.79	-1.18714	-1.17297	-1.2519	-1.36667	-1.41887	-1.31663
59.99	0.00078015	-0.00218429	-0.00246017	-0.00359216	0.011122	0.029401		59.99	-1.18909	-1.17191	-1.24971	-1.36909	-1.41034	-1.31542
60.19	0.00763648	0.00301056	-0.00284448	-0.00614595	0.00842111	0.024444		60.19	-1.18224	-1.16671	-1.25009	-1.37164	-1.41304	-1.32038
60.39	0.00345136	-0.00246108	-0.00260397	0.00401605	0.00564469	0.031805		60.39	-1.18642	-1.17218	-1.24985	-1.36148	-1.41582	-1.31302
60.59	0.00546593	0.00192213	-0.00352177	-0.00333036	0.00619265	0.0261089		60.59	-1.18441	-1.1678	-1.25077	-1.36882	-1.41527	-1.31871
60.79	0.00490795	-0.00092308	-0.00578598	-0.00279938	0.00800147	0.0267321		60.79	-1.18496	-1.17064	-1.25303	-1.36829	-1.41346	-1.31809
61	0.00345413	-0.00142832	-0.00344251	-0.00371586	0.00782101	0.028775		61	-1.18642	-1.17115	-1.25069	-1.36921	-1.41364	-1.31604
61.19	0.0050947	-0.00333728	-0.00576848	-0.00124114	0.00494674	0.027214		61.19	-1.18478	-1.17306	-1.25302	-1.36674	-1.41652	-1.31761
61.39	0.00143288	-0.00155496	0.00225048	-0.00074736	0.00347744	0.0290446		61.39	-1.18844	-1.17128	-1.245	-1.36624	-1.41799	-1.31578
61.59	0.00451534	0.00071569	-0.00620978	-0.00218769	0.00686178	0.0287073		61.59	-1.18536	-1.16901	-1.25346	-1.36768	-1.4146	-1.31611
61.79	0.00801183	-0.00061708	-0.00432257	-0.00141252	0.00428395	0.0289315		61.79	-1.18186	-1.17034	-1.25157	-1.36691	-1.41718	-1.31589
61.99	0.00277256	-0.00225953	-0.00216965	-0.00171989	0.00727952	0.0257572		61.99	-1.1871	-1.17198	-1.24942	-1.36721	-1.41418	-1.31906
62.19	0.00663084	-0.00019343	-0.00272159	-0.00424501	0.00623178	0.0251021		62.19	-1.18324	-1.16991	-1.24997	-1.36974	-1.41523	-1.31972
62.39	0.00192787	-0.00344828	-0.00237791	-0.00373583	0.00685493	0.0260391		62.39	-1.18794	-1.17317	-1.24962	-1.36923	-1.41461	-1.31878
62.59	0.00443367	0.00035631	-0.0031145	-0.00010909	0.00917156	0.031253		62.59	-1.18544	-1.16937	-1.25036	-1.3656	-1.41229	-1.31357
62.79	0.00497395	-0.00194396	-0.00650991	-0.00026824	0.00673179	0.0262335		62.79	-1.1849	-1.17167	-1.25376	-1.36576	-1.41473	-1.31859
62.99	0.00419551	-0.00275432	-0.00767249	3.666e-05	0.00703521	0.0268092		62.99	-1.18568	-1.17248	-1.25492	-1.36546	-1.41443	-1.31801
63.19	0.00341504	-0.00048431	-0.00475867	0.00202863	0.0051827	0.0322605		63.19	-1.18646	-1.17021	-1.25201	-1.36347	-1.41628	-1.31256
63.39	0.00138808	-0.0014885	-0.00266194	-0.00419607	0.0106976	0.0322318		63.39	-1.18848	-1.17121	-1.24991	-1.36969	-1.41076	-1.31259
63.59	0.00267736	-0.00228961	-0.00251281	-0.00401303	0.00682385	0.0290202		63.59	-1.18719	-1.17201	-1.24976	-1.36951	-1.41464	-1.3158
63.79	0.00426651	-0.0029401	-0.00637288	-0.00176241	0.00507443	0.0289492		63.79	-1.18561	-1.17266	-1.25362	-1.36726	-1.41639	-1.31587
63.99	0.00541049	-0.00043492	-0.00142592	-0.00201171	0.00888136	0.0274873		63.99	-1.18446	-1.17016	-1.24867	-1.36751	-1.41258	-1.31733
64.19	0.00510421	-0.00306537	-0.00530644	-0.00120355	0.00417027	0.0312769		64.19	-1.18477	-1.17279	-1.25255	-1.3667	-1.41729	-1.31354
64.39	0.00426644	-0.00629872	-0.00584394	-0.00088691	0.00790295	0.031542		64.39	-1.18561	-1.17602	-1.25309	-1.36638	-1.41356	-1.31328
64.59	0.00648491	-0.00364201	-0.00292925	0.00016387	0.0080565	0.0312968		64.59	-1.18339	-1.17336	-1.25018	-1.36533	-1.41341	-1.31352
64.79	0.00551503	-0.00255115	-0.00242559	-0.00185392	0.00553228	0.0296602		64.79	-1.18436	-1.17227	-1.24967	-1.36735	-1.41593	-1.31516
64.99	0.00418084	-0.00189334	-0.00306141	-0.00632134	0.00793082	0.0256847		64.99	-1.18569	-1.17161	-1.25031	-1.37182	-1.41353	-1.31914
65.19	0.00718771	-0.0031887	-0.00349542	-0.002495	0.00493079	0.0264322		65.19	-1.18268	-1.17291	-1.25074	-1.36799	-1.41653	-1.31839
65.39	0.00261228	-0.00289116	-0.00450626	0.00030423	0.00660842	0.0336649		65.39	-1.18726	-1.17261	-1.25175	-1.36519	-1.41485	-1.31116
65.6	0.00355704	-0.00145861	-0.00422893	-0.00155609	0.00739054	0.0332873		65.6	-1.18632	-1.17118	-1.25148	-1.36705	-1.41407	-1.31153
65.79	0.0041401	-0.00354922	-0.00389987	-0.00140959	0.0117395	0.0314095		65.79	-1.18573	-1.17327	-1.25115	-1.3669	-1.40972	-1.31341
65.99	0.00730972	0.00175298	-0.00490812	-0.0017745	0.00933411	0.0318504		65.99	-1.18256	-1.16797	-1.25215	-1.36727	-1.41213	-1.31297
66.19	0.00101717	-0.00282081	-0.00511797	-0.00540652	0.00774591	0.0275169		66.19	-1.18886	-1.17254	-1.25236	-1.3709	-1.41372	-1.3173
66.39	0.00755308	-0.00445201	-0.00515774	-0.00543985	0.00556948	0.0307866		66.39	-1.18232	-1.17417	-1.2524	-1.37093	-1.41589	-1.31403
66.59	0.00660778	0.0001223	-0.00492724	-0.00568488	0.00966821	0.0311315		66.59	-1.18326	-1.1696	-1.25217	-1.37118	-1.41179	-1.31369
66.79	0.00147117	-0.00215499	-0.00461757	-0.00645278	0.00968194	0.0250271		66.79	-1.1884	-1.17188	-1.25186	-1.37195	-1.41178	-1.31979
66.99	0.00672896	-0.00262531	-0.00574824	-0.00344475	0.006321	0.0292343		66.99	-1.18314	-1.17235	-1.25299	-1.36894	-1.41514	-1.31559
67.19	0.00448958	0.00145048	-0.00200191	-0.00289855	0.0045383	0.0298002		67.19	-1.18538	-1.16827	-1.24925	-1.36839	-1.41692	-1.31502
67.4	0.00387002	-0.00092476	-0.00449521	-0.00025877	0.0093772	0.0299727		67.4	-1.186	-1.17065	-1.25174	-1.36575	-1.41209	-1.31485
67.6	0.00543137	-0.00159128	-0.00517981	-0.00391045	0.00740007	0.0320011		67.6	-1.18444	-1.17131	-1.25243	-1.3694	-1.41406	-1.31282
67.8	0.00407605	-0.002524	-0.00658789	-0.00462296	0.0107502	0.0354908		67.8	-1.1858	-1.17225	-1.25383	-1.37012	-1.41071	-1.30933
68	0.00338304	-0.00393035	-0.00516147	-0.00228616	0.0103733	0.0248767		68	-1.18649	-1.17365	-1.25241	-1.36778	-1.41109	-1.31994
68.19	0.00232415	0.00212383	-0.00362234	-0.00087494	0.00575368	0.0300551		68.19	-1.18755	-1.1676	-1.25087	-1.36637	-1.41571	-1.31476
68.4	0.00208363	-0.00106038	-0.00677885	-0.00061628	0.00855055	0.0275848		68.4	-1.18779	-1.17078	-1.25403	-1.36611	-1.41291	-1.31724
68.6	0.00519208	-0.00690753	-0.00182266	-0.00635717	0.00313044	0.0289036		68.6	-1.18468	-1.17663	-1.24907	-1.37185	-1.41833	-1.31592
68.8	0.00279968	-0.00051688	-0.00403832	-0.00351066	0.00980172	0.0343018		68.8	-1.18707	-1.17024	-1.25129	-1.369	-1.41166	-1.31052
69	0.00515103	-0.00501594	-0.00580645	-0.00389491	0.00686258	0.0297009		69	-1.18472	-1.17474	-1.25305	-1.36939	-1.4146	-1.31512
69.19	0.00448364	-0.00347255	-0.00694675	-0.00172869	0.010315	0.0306021		69.19	-1.18539	-1.17319	-1.25419	-1.36722	-1.41115	-1.31422
69.4	0.00715517	-0.0006386	-0.00388412	-0.00193084	0.00865145	0.0291424		69.4	-1.18272	-1.17036	-1.25113	-1.36743	-1.41281	-1.31568
69.6	0.00381644	0.00078993	-0.00432883	-0.00283443	0.00390602	0.0283377		69.6	-1.18606	-1.16893	-1.25158	-1.36833	-1.41756	-1.31648
69.8	0.00703104	-0.00291238	-0.00431892	-0.00293644	0.00964319	0.0280572		69.8	-1.18284	-1.17263	-1.25157	-1.36843	-1.41182	-1.31676
70	0.00587959	0.0006658	-0.00601631	-0.00388375	0.00755035	0.032308		70	-1.18399	-1.16906	-1.25326	-1.36938	-1.41391	-1.31251
70.19	0.00393545	-0.00299112	-0.00367427	-0.00559953	0.00687736	0.0305941		70.19	-1.18594	-1.17271	-1.25092	-1.37109	-1.41459	-1.31423
70.4	0.00691881	-0.00244812	-0.00395487	-0.00243358	0.0051323	0.0310287		70.4	-1.18295	-1.17217	-1.2512	-1.36793	-1.41633	-1.31379
70.6	0.00346971	-0.00587244	-0.00431668	-0.00259214	0.0125265	0.0321215		70.6	-1.1864	-1.17559	-1.25156	-1.36809	-1.40894	-1.3127
70.8	0.00237161	-0.00253656	-0.00438503	-0.00202581	0.0068554	0.0266033		70.8	-1.1875	-1.17226	-1.25163	-1.36752	-1.41461	-1.31822
71	0.0037821	0.00020288	-0.00386405	-0.00455456	0.00975983	0.0318358		71	-1.18609	-1.16952	-1.25111	-1.37005	-1.4117	-1.31298
71.19	0.00615132	-0.00177313	-0.0041959	-0.00322649	0.00517124	0.0340985		71.19	-1.18372	-1.17149	-1.25144	-1.36872	-1.41629	-1.31072
71.4	0.00635426	-0.0037367	-0.00554539	-0.0019148	0.00486801	0.029129		71.4	-1.18352	-1.17346	-1.25279	-1.36741	-1.41659	-1.31569
71.6	0.010576	-0.00388695	-0.00602927	-0.00017074	0.00828001	0.0304928		71.6	-1.1793	-1.17361	-1.25328	-1.36566	-1.41318	-1.31433
71.79	0.00354609	0.0003233	-0.00371902	-0.00447288	0.00885795	0.0320899		71.79	-1.18633	-1.1694	-1.25097	-1.36997	-1.4126	-1.31273
72	0.00315631	-0.00460538	-0.00332486	-0.00155717	0.00659285	0.0321929		72	-1.18672	-1.17433	-1.25057	-1.36705	-1.41487	-1.31263
72.19	0.00285401	-0.0002772	-0.00678742	-0.00333846	0.00507685	0.0347898		72.19	-1.18702	-1.17	-1.25403	-1.36883	-1.41639	-1.31003
72.4	0.00313846	-0.00206676	-0.00134518	-0.00079515	0.00996844	0.0355057		72.4	-1.18673	-1.17179	-1.24859	-1.36629	-1.41149	-1.30931
72.59	0.00688051	-0.00295262	-0.00791944	-0.00297582	0.00729001	0.0341313		72.59	-1.18299	-1.17267	-1.25517	-1.36847	-1.41417	-1.31069
72.8	0.00711752	-0.00422404	-0.00656815	-0.00213325	0.00836006	0.0297764		72.8	-1.18275	-1.17395	-1.25381	-1.36763	-1.4131	-1.31504
73	0.00214618	-0.00128216	-0.00427352	-0.00406339	0.00591764	0.0282331		73	-1.18773	-1.171	-1.25152	-1.36956	-1.41554	-1.31659
73.19	0.00684451	-0.00219205	-0.00425635	-0.00378889	0.00838555	0.0277081		73.19	-1.18303	-1.17191	-1.2515	-1.36928	-1.41308	-1.31711
73.39	0.00409863	-0.0012661	-0.00333895	-0.00316272	0.00748646	0.0280299		73.39	-1.18577	-1.17099	-1.25059	-1.36866	-1.41398	-1.31679
73.59	0.00117924	7.086e-05	-0.00570033	-0.00489241	0.0126315	0.0305979		73.59	-1.18869	-1.16965	-1.25295	-1.37039	-1.40883	-1.31422
73.8	0.00626845	-0.0024781	-0.00521287	-0.00575034	0.00583417	0.0272374		73.8	-1.1836	-1.1722	-1.25246	-1.37124	-1.41563	-1.31758
74	0.00732386	-0.00266483	-0.00572332	-0.00336253	0.00823177	0.0275262		74	-1.18255	-1.17239	-1.25297	-1.36886	-1.41323	-1.31729
74.19	0.00430356	0.00027998	-0.00454581	-0.00677573	0.00907531	0.0341162		74.19	-1.18557	-1.16944	-1.25179	-1.37227	-1.41239	-1.3107
74.39	0.00393322	-0.00285575	-0.00407251	-0.00347397	0.0116089	0.0276897		74.39	-1.18594	-1.17258	-1.25132	-1.36897	-1.40985	-1.31713
74.59	0.00555267	-0.00075129	-0.00403637	-0.00178808	0.00632112	0.0312394		74.59	-1.18432	-1.17047	-1.25128	-1.36728	-1.41514	-1.31358
74.8	0.00539689	-0.00228256	-0.00390678	-0.00375553	0.00526063	0.0324092		74.8	-1.18448	-1.172	-1.25115	-1.36925	-1.4162	-1.31241
75	0.0042562	-0.00245618	-0.00421447	-0.0007138	0.00627792	0.0338717		75	-1.18562	-1.17218	-1.25146	-1.36621	-1.41518	-1.31095
75.19	0.00468977	-0.00388363	-0.00668124	-0.00378971	0.00907833	0.0290658		75.19	-1.18518	-1.1736	-1.25393	-1.36928	-1.41238	-1.31575
75.4	0.00664435	0.00102795	-0.00557698	0.00038019	0.00917906	0.0301551		75.4	-1.18323	-1.16869	-1.25282	-1.36511	-1.41228	-1.31466
75.6	0.00280705	-0.00187895	-0.00749055	-0.0047732	0.00464913	0.0311191		75.6	-1.18707	-1.1716	-1.25474	-1.37027	-1.41681	-1.3137
75.8	0.00357823	-0.00180799	-0.00583367	-0.00613834	0.00936663	0.0317556		75.8	-1.18629	-1.17153	-1.25308	-1.37163	-1.4121	-1.31306
76	0.00549513	-0.00136673	-0.0048772	-0.00161562	0.00497984	0.0313637		76	-1.18438	-1.17109	-1.25212	-1.36711	-1.41648	-1.31346
76.19	0.00361786	-0.00334462	-0.00413461	-0.00164716	0.00467752	0.0352385		76.19	-1.18625	-1.17307	-1.25138	-1.36714	-1.41679	-1.30958
76.4	0.00846911	-0.00323615	-0.00271886	-0.00499085	0.00943226	0.0334028		76.4	-1.1814	-1.17296	-1.24997	-1.37049	-1.41203	-1.31142
76.6	0.00490251	-0.00177563	-0.0046162	-0.00140677	0.00586895	0.0336868		76.6	-1.18497	-1.1715	-1.25186	-1.3669	-1.41559	-1.31113
76.79	0.0042789	0.00341706	-0.00410246	-0.00348662	0.00865192	0.0347306		76.79	-1.18559	-1.1663	-1.25135	-1.36898	-1.41281	-1.31009
76.99	0.005061	-0.00358733	-0.00249196	-0.00537731	0.00453587	0.0338097		76.99	-1.18481	-1.17331	-1.24974	-1.37087	-1.41693	-1.31101
77.19	0.00332351	9.865e-05	-0.00307487	-0.00470784	0.0035458	0.030053		77.19	-1.18655	-1.16962	-1.25032	-1.3702	-1.41792	-1.31477
77.4	0.00467146	-0.00369737	-0.0045493	-0.00402151	0.00907754	0.0327549		77.4	-1.1852	-1.17342	-1.2518	-1.36952	-1.41239	-1.31207
77.6	0.00226325	-0.00084474	-0.00295972	-0.00215251	0.00791791	0.0310597		77.6	-1.18761	-1.17057	-1.25021	-1.36765	-1.41354	-1.31376
77.79	0.00246504	-0.00435392	-0.0040048	-0.00286091	0.00762722	0.0324761		77.79	-1.18741	-1.17408	-1.25125	-1.36836	-1.41384	-1.31234
78	0.0056121	-0.00121931	-0.00540179	-0.00209821	0.00632974	0.0337637		78	-1.18426	-1.17094	-1.25265	-1.36759	-1.41513	-1.31106
78.19	0.00683488	0.00333812	-0.00627545	-0.00133279	0.00486017	0.0315967		78.19	-1.18304	-1.16638	-1.25352	-1.36683	-1.4166	-1.31322
78.4	0.00528399	-0.00217743	-0.0060688	-0.00152373	0.00149017	0.0307626		78.4	-1.18459	-1.1719	-1.25332	-1.36702	-1.41997	-1.31406
78.59	0.00264364	-0.00029175	-0.00310976	-0.00199694	0.00768874	0.0297296		78.59	-1.18723	-1.17001	-1.25036	-1.36749	-1.41377	-1.31509
78.8	0.00612139	-0.00265551	-0.0047408	-0.00235489	0.0115248	0.0333305		78.8	-1.18375	-1.17238	-1.25199	-1.36785	-1.40994	-1.31149
79	0.0045121	-0.00372346	-0.00503221	-0.00484977	0.00543761	0.0329735		79	-1.18536	-1.17344	-1.25228	-1.37034	-1.41602	-1.31185
79.19	0.00163126	-0.00270238	-0.00321646	-0.00215879	0.00926599	0.0286569		79.19	-1.18824	-1.17242	-1.25046	-1.36765	-1.4122	-1.31616
79.4	0.00596163	-0.00282789	-0.00445248	-0.00203917	0.0076297	0.0353897		79.4	-1.18391	-1.17255	-1.2517	-1.36753	-1.41383	-1.30943
79.6	0.0079814	0.0009728	-0.00618553	-0.00161122	0.0077976	0.0332804		79.6	-1.18189	-1.16875	-1.25343	-1.36711	-1.41366	-1.31154
79.8	0.00414808	-0.00094001	-0.00567349	-0.00163827	0.00651463	0.0337593		79.8	-1.18572	-1.17066	-1.25292	-1.36713	-1.41495	-1.31106
80	0.00900907	0.0001601	-0.00375049	-0.00787044	0.00285584	0.0320151		80	-1.18086	-1.16956	-1.251	-1.37336	-1.41861	-1.3128
80.19	0.00483641	-0.00297945	-0.00610094	-0.00417306	0.0100872	0.0342193		80.19	-1.18504	-1.1727	-1.25335	-1.36967	-1.41138	-1.3106
80.39	0.00510192	-0.00037266	-0.00080658	-0.00319262	0.00745061	0.0341377		80.39	-1.18477	-1.17009	-1.24805	-1.36869	-1.41401	-1.31068
80.6	0.00539261	-0.00218874	-0.00574281	-0.0017375	0.00740171	0.0294993		80.6	-1.18448	-1.17191	-1.25299	-1.36723	-1.41406	-1.31532
80.79	0.00180573	-0.00066096	-0.00494135	-0.00052328	0.00948379	0.0301861		80.79	-1.18807	-1.17038	-1.25219	-1.36602	-1.41198	-1.31463
80.99	0.00593261	-0.00265246	-0.00144333	-0.00456339	0.00956681	0.0326776		80.99	-1.18394	-1.17237	-1.24869	-1.37006	-1.4119	-1.31214
81.19	0.00625486	-0.0037831	-0.00435651	-0.00433349	0.00954205	0.0263954		81.19	-1.18362	-1.1735	-1.2516	-1.36983	-1.41192	-1.31842
81.4	0.00266782	-0.00271182	-0.00516013	-0.00342664	0.00975424	0.030816		81.4	-1.1872	-1.17243	-1.25241	-1.36892	-1.41171	-1.314
81.6	0.00058042	0.00045171	-0.00747009	-0.00319289	0.00684562	0.032671		81.6	-1.18929	-1.16927	-1.25472	-1.36869	-1.41462	-1.31215
81.79	0.0054094	-0.00095437	-0.00677649	-0.00417712	0.00792907	0.029876		81.79	-1.18446	-1.17068	-1.25402	-1.36967	-1.41353	-1.31494
82	0.00552011	-0.00049184	-0.00266581	-0.00065521	0.0113192	0.0309465		82	-1.18435	-1.17021	-1.24991	-1.36615	-1.41014	-1.31387
82.19	0.00359245	-0.00313443	-0.00323027	-0.00253911	0.00899305	0.0333754		82.19	-1.18628	-1.17286	-1.25048	-1.36803	-1.41247	-1.31144
82.39	0.00022331	-0.00572525	-0.00629382	-0.00121319	0.00656085	0.0319897		82.39	-1.18965	-1.17545	-1.25354	-1.36671	-1.4149	-1.31283
82.6	0.00506872	-0.0041069	-0.00332526	-0.00653834	0.00584166	0.0313962		82.6	-1.1848	-1.17383	-1.25057	-1.37203	-1.41562	-1.31342
82.79	0.00290127	-0.00282776	-0.0055198	0.0011061	0.00611927	0.0338213		82.79	-1.18697	-1.17255	-1.25277	-1.36439	-1.41534	-1.311
83	0.00473119	-0.00148494	-0.00281041	-0.00594614	0.00685212	0.0315028		83	-1.18514	-1.17121	-1.25006	-1.37144	-1.41461	-1.31332
83.19	0.00411581	-0.00485459	-0.00436873	0.00047789	0.00734955	0.0283695		83.19	-1.18576	-1.17458	-1.25162	-1.36502	-1.41411	-1.31645
83.39	0.00688422	-0.00282964	-0.00886165	-0.00632788	0.0061478	0.0301533		83.39	-1.18299	-1.17255	-1.25611	-1.37182	-1.41531	-1.31467
83.59	0.00684651	-0.00266967	-0.00448513	-0.00388192	0.00751803	0.0319042		83.59	-1.18303	-1.17239	-1.25173	-1.36938	-1.41394	-1.31292
83.8	0.00896235	-0.00076898	-0.00558935	-0.00229046	0.00467813	0.0347007		83.8	-1.18091	-1.17049	-1.25284	-1.36778	-1.41678	-1.31012
84	0.00460682	-0.00236675	-0.00478587	-0.00371808	0.00619745	0.0296261		84	-1.18527	-1.17209	-1.25203	-1.36921	-1.41527	-1.31519
84.19	0.00293454	-0.00365266	-0.00526682	-0.00155059	0.00916855	0.0323347		84.19	-1.18694	-1.17337	-1.25251	-1.36704	-1.41229	-1.31249
84.39	0.00564337	-0.00506951	-0.00611174	-0.0008902	0.0116605	0.0300857		84.39	-1.18423	-1.17479	-1.25336	-1.36638	-1.4098	-1.31473
84.59	0.0057972	-0.00401202	-0.00592366	-0.00144189	0.005482	0.0326045		84.59	-1.18408	-1.17373	-1.25317	-1.36694	-1.41598	-1.31222
84.8	0.00165916	-0.00215425	-0.00366587	-0.00288363	0.00723111	0.033987		84.8	-1.18821	-1.17188	-1.25091	-1.36838	-1.41423	-1.31083
84.99	0.0053567	-0.00194884	-0.00493386	-0.00344906	0.0110075	0.0312768		84.99	-1.18452	-1.17167	-1.25218	-1.36894	-1.41046	-1.31354
85.19	0.00272306	-0.00068686	-0.00507769	-0.0044029	0.00365857	0.0300408		85.19	-1.18715	-1.17041	-1.25232	-1.3699	-1.4178	-1.31478
85.39	0.00192326	-0.00056803	-0.00620528	-0.00292855	0.00750078	0.0348958		85.39	-1.18795	-1.17029	-1.25345	-1.36842	-1.41396	-1.30992
85.59	0.00365215	0.00108206	-0.00579243	-0.00421624	0.00468895	0.0311205		85.59	-1.18622	-1.16864	-1.25304	-1.36971	-1.41677	-1.3137
85.79	0.0083838	-0.00573879	-0.00677433	-0.00469622	0.00928973	0.031231		85.79	-1.18149	-1.17546	-1.25402	-1.37019	-1.41217	-1.31359
85.99	0.00248697	-0.00452735	-0.00796842	-0.0026767	0.00780859	0.0293006		85.99	-1.18739	-1.17425	-1.25522	-1.36817	-1.41365	-1.31552
86.19	0.00798621	-0.00257127	-0.00308533	-0.00386461	0.00774463	0.0329025		86.19	-1.18189	-1.17229	-1.25033	-1.36936	-1.41372	-1.31192
86.4	0.00786958	-0.00143184	-0.004367	-0.00432962	0.0110458	0.0326288		86.4	-1.182	-1.17115	-1.25161	-1.36982	-1.41042	-1.31219
86.59	0.00582351	-0.00087065	-0.00600616	-0.00480691	0.00839576	0.0315792		86.59	-1.18405	-1.17059	-1.25325	-1.3703	-1.41307	-1.31324
86.79	0.00571081	-0.00359126	-0.00496265	-0.00396037	0.0121444	0.0336872		86.79	-1.18416	-1.17331	-1.25221	-1.36945	-1.40932	-1.31113
87	0.00122969	-0.00374375	-0.00564971	-0.0051369	0.00608528	0.0306028		87	-1.18864	-1.17347	-1.2529	-1.37063	-1.41538	-1.31422
87.19	0.00453393	-0.00117419	-0.00458774	-0.00369192	0.0107232	0.0304389		87.19	-1.18534	-1.1709	-1.25183	-1.36919	-1.41074	-1.31438
87.39	0.00588548	-0.00311438	-0.00751257	-0.00306395	0.0101605	0.030642		87.39	-1.18399	-1.17284	-1.25476	-1.36856	-1.4113	-1.31418
87.59	0.00278532	-0.00034916	-0.0057663	-0.00223022	0.00262651	0.0301094		87.59	-1.18709	-1.17007	-1.25301	-1.36772	-1.41884	-1.31471
87.79	0.00570047	-0.00144223	-0.0048262	-0.0072949	0.00862926	0.0350907		87.79	-1.18417	-1.17116	-1.25207	-1.37279	-1.41283	-1.30973
87.99	0.00349678	-0.00433893	-0.00591365	-0.00115824	0.0057851	0.0327149		87.99	-1.18638	-1.17406	-1.25316	-1.36665	-1.41568	-1.31211
88.19	0.00282572	-0.00329551	-0.00715299	-0.00538672	0.0117249	0.0313788		88.19	-1.18705	-1.17302	-1.2544	-1.37088	-1.40974	-1.31344
88.39	0.00884723	-0.00097645	-0.00667494	-0.00507438	0.00759217	0.0288691		88.39	-1.18103	-1.1707	-1.25392	-1.37057	-1.41387	-1.31595
88.6	0.00402676	-0.00502716	-0.00459201	-0.00584282	0.00625138	0.0328075		88.6	-1.18585	-1.17475	-1.25184	-1.37134	-1.41521	-1.31201
88.8	0.00410341	-0.00241567	-0.00449241	-0.0029974	0.00934527	0.0285671		88.8	-1.18577	-1.17214	-1.25174	-1.36849	-1.41212	-1.31625
89	0.00266757	-0.00033025	-0.00357646	-0.00739417	0.00566653	0.028235		89	-1.1872	-1.17005	-1.25082	-1.37289	-1.4158	-1.31658
89.19	0.00771667	-0.0031426	-0.00504875	-0.00401811	0.00802475	0.0291709		89.19	-1.18216	-1.17286	-1.2523	-1.36951	-1.41344	-1.31565
89.39	0.00718827	-0.00398099	-0.00363868	-0.00792233	0.0128299	0.0324304		89.39	-1.18268	-1.1737	-1.25089	-1.37342	-1.40863	-1.31239
89.59	0.00504063	-0.00185738	-0.0058354	-0.00615675	0.00538088	0.034816		89.59	-1.18483	-1.17158	-1.25308	-1.37165	-1.41608	-1.31
89.79	0.00502271	-0.00260713	-0.00324331	-0.00671368	0.00632908	0.0276984		89.79	-1.18485	-1.17233	-1.25049	-1.37221	-1.41513	-1.31712
90	0.00633637	0.00012009	-0.00581809	-0.00529585	0.00664617	0.034205		90	-1.18354	-1.1696	-1.25306	-1.37079	-1.41482	-1.31061
90.19	0.00801771	-0.00238795	-0.00517728	-0.00104245	0.00769186	0.0339617		90.19	-1.18185	-1.17211	-1.25242	-1.36654	-1.41377	-1.31086
90.39	0.00372059	-0.00346684	-0.00627015	-0.00124027	0.00707747	0.0284696		90.39	-1.18615	-1.17319	-1.25352	-1.36673	-1.41439	-1.31635
90.59	0.00858229	-0.00278112	-0.00691085	-0.00522666	0.00694091	0.0322597		90.59	-1.18129	-1.1725	-1.25416	-1.37072	-1.41452	-1.31256
90.79	0.00568338	-0.00160073	-0.00412464	-0.00532447	0.0144698	0.0340905		90.79	-1.18419	-1.17132	-1.25137	-1.37082	-1.40699	-1.31073
90.99	0.0037469	-0.00217986	-0.00576377	-0.00131389	0.00968025	0.0332143		90.99	-1.18613	-1.1719	-1.25301	-1.36681	-1.41178	-1.31161
91.19	0.00922185	-0.00232064	-0.00486463	-0.00453078	0.00798879	0.0299135		91.19	-1.18065	-1.17204	-1.25211	-1.37003	-1.41347	-1.31491
91.39	-0.0029166	-0.00121048	-0.00422769	0.00024031	0.00224115	0.0345488		91.39	-1.19279	-1.17093	-1.25147	-1.36525	-1.41922	-1.31027
91.6	0.00513137	-0.00130196	-0.00592043	-0.00315563	0.00660599	0.0298623		91.6	-1.18474	-1.17102	-1.25317	-1.36865	-1.41486	-1.31496
91.79	0.00427991	-0.00228873	-0.00450734	-0.00704743	0.0105419	0.0315772		91.79	-1.18559	-1.17201	-1.25175	-1.37254	-1.41092	-1.31324
91.99	0.00539452	-0.0054102	-0.00792601	-0.00393767	0.00649308	0.0332694		91.99	-1.18448	-1.17513	-1.25517	-1.36943	-1.41497	-1.31155
92.19	0.00550926	-0.00352585	-0.00364778	-0.00604786	0.00561571	0.0317021		92.19	-1.18436	-1.17325	-1.25089	-1.37154	-1.41585	-1.31312
92.39	0.0048806	1.345e-05	-0.00613057	-0.0016002	0.00246269	0.0309432		92.39	-1.18499	-1.16971	-1.25338	-1.36709	-1.419	-1.31388
92.59	0.00514838	-0.00519494	-0.00549345	-0.00487019	0.00536346	0.0351501		92.59	-1.18472	-1.17492	-1.25274	-1.37036	-1.4161	-1.30967
92.79	0.00545826	-0.00332285	-0.00644703	-0.00230092	0.00511513	0.0340126		92.79	-1.18441	-1.17304	-1.25369	-1.3678	-1.41635	-1.31081
92.99	0.00379182	-0.00517048	-0.00610454	-0.00554284	0.00226112	0.0313302		92.99	-1.18608	-1.17489	-1.25335	-1.37104	-1.4192	-1.31349
93.19	0.00670709	-0.00382488	-0.00711108	-0.00131949	0.00557129	0.0347414		93.19	-1.18317	-1.17355	-1.25436	-1.36681	-1.41589	-1.31008
93.39	0.00636163	-0.00086913	-0.00575303	-0.00181139	0.0104977	0.0308498		93.39	-1.18351	-1.17059	-1.253	-1.36731	-1.41096	-1.31397
93.59	0.00618375	-0.00152597	-0.00399506	-0.00346971	0.00365503	0.0343166		93.59	-1.18369	-1.17125	-1.25124	-1.36896	-1.41781	-1.3105
93.8	0.00232665	0.00142613	-0.00209316	-0.00019444	0.00591722	0.0349653		93.8	-1.18755	-1.1683	-1.24934	-1.36569	-1.41555	-1.30985
94	0.00190273	-0.00311643	-0.00669634	-0.00838781	0.00920281	0.0299692		94	-1.18797	-1.17284	-1.25394	-1.37388	-1.41226	-1.31485
94.19	0.00501968	-0.00169155	-0.00712221	-0.00516921	0.00549678	0.0314112		94.19	-1.18485	-1.17141	-1.25437	-1.37066	-1.41597	-1.31341
94.4	0.0027783	-4.481e-05	-0.00073957	-0.00642819	0.00515361	0.0343842		94.4	-1.18709	-1.16977	-1.24799	-1.37192	-1.41631	-1.31044
94.6	0.00524227	-0.00227524	-0.0069027	-0.00400603	0.00011899	0.0356347		94.6	-1.18463	-1.172	-1.25415	-1.3695	-1.42134	-1.30919
94.8	0.00196992	-0.00354504	-0.00549485	0.00014706	0.00547787	0.0366725		94.8	-1.1879	-1.17327	-1.25274	-1.36535	-1.41598	-1.30815
95	0.00290127	-0.00161181	-0.00864617	-0.00097599	0.00776628	0.031806		95	-1.18697	-1.17133	-1.25589	-1.36647	-1.4137	-1.31301
95.19	0.0058665	0.00026614	-0.00748617	0.00212175	0.00756618	0.0327686		95.19	-1.18401	-1.16946	-1.25473	-1.36337	-1.4139	-1.31205
95.4	0.00414036	-0.00078508	-0.00540043	-0.00500091	0.00506299	0.0329805		95.4	-1.18573	-1.17051	-1.25265	-1.3705	-1.4164	-1.31184
95.6	0.00629958	-0.00401063	-0.00521589	-0.00556888	0.0073275	0.0315094		95.6	-1.18357	-1.17373	-1.25246	-1.37106	-1.41414	-1.31331
95.8	0.0038551	0.00086718	-0.00597172	-0.00734173	0.00868823	0.0322969		95.8	-1.18602	-1.16885	-1.25322	-1.37284	-1.41277	-1.31252
96	0.00618549	-0.00174542	-0.00996708	-0.00408574	0.00619704	0.0332865		96	-1.18369	-1.17147	-1.25721	-1.36958	-1.41527	-1.31153
96.19	0.00314253	0.00058229	-0.00346466	-0.00377743	0.00785549	0.0373024		96.19	-1.18673	-1.16914	-1.25071	-1.36927	-1.41361	-1.30752
96.4	0.00796112	-0.00390805	-0.0059991	-0.00797961	0.00722131	0.0348016		96.4	-1.18191	-1.17363	-1.25325	-1.37347	-1.41424	-1.31002
96.6	0.00429107	-0.00148099	-0.0066774	9.632e-05	0.0101586	0.0292731		96.6	-1.18558	-1.1712	-1.25392	-1.3654	-1.4113	-1.31555
96.8	0.0046709	-0.00444154	-0.00715107	-0.0030875	0.0115135	0.0319514		96.8	-1.1852	-1.17416	-1.2544	-1.36858	-1.40995	-1.31287
97	0.00509075	-0.0029619	-0.0049287	-0.00340884	0.00558248	0.033479		97	-1.18478	-1.17268	-1.25218	-1.3689	-1.41588	-1.31134
97.19	0.0039035	-0.00343123	-0.00897639	-0.00246409	0.00554159	0.032529		97.19	-1.18597	-1.17315	-1.25622	-1.36796	-1.41592	-1.31229
97.4	0.00126406	-0.00177288	-0.00754646	-0.00365142	0.00984504	0.0326074		97.4	-1.18861	-1.17149	-1.25479	-1.36915	-1.41162	-1.31221
97.6	0.0039262	-0.00088725	-0.0093989	-0.00310988	0.00775018	0.0341755		97.6	-1.18595	-1.17061	-1.25665	-1.3686	-1.41371	-1.31064
97.8	0.00659741	-0.00475428	-0.00426606	-0.00575569	0.00589869	0.0324005		97.8	-1.18327	-1.17448	-1.25151	-1.37125	-1.41556	-1.31242
97.99	0.00641751	-0.00270468	-0.00816728	-0.00680122	0.00722436	0.03381		97.99	-1.18345	-1.17243	-1.25541	-1.3723	-1.41424	-1.31101
98.19	0.00227844	-0.00374038	-0.00699662	-0.00583064	0.00744129	0.030767		98.19	-1.18759	-1.17346	-1.25424	-1.37132	-1.41402	-1.31405
98.4	0.00480703	-0.00368536	-0.00921179	-0.00461124	0.00982271	0.0317791		98.4	-1.18507	-1.17341	-1.25646	-1.37011	-1.41164	-1.31304
98.6	0.0023994	-0.00454702	-0.00761003	-0.00148678	0.00894892	0.0343183		98.6	-1.18747	-1.17427	-1.25486	-1.36698	-1.41251	-1.3105
98.8	0.00484669	-0.00218961	-0.00494289	-0.00770017	0.00815656	0.0333896		98.8	-1.18503	-1.17191	-1.25219	-1.37319	-1.41331	-1.31143
99	0.00388681	-0.0027998	-0.0101164	-0.00257471	0.00596099	0.0283002		99	-1.18599	-1.17252	-1.25736	-1.36807	-1.4155	-1.31652
99.19	0.00079707	-0.00303444	-0.00774059	-0.00227631	0.00678297	0.0343806		99.19	-1.18908	-1.17276	-1.25499	-1.36777	-1.41468	-1.31044
99.4	0.00164979	-0.0021622	-0.00460817	0.00040516	0.00737866	0.0348813		99.4	-1.18822	-1.17188	-1.25185	-1.36509	-1.41408	-1.30994
99.6	0.00326001	-0.00150125	-0.00566087	0.0011727	0.00567603	0.0307531		99.6	-1.18661	-1.17122	-1.25291	-1.36432	-1.41579	-1.31407
99.8	0.00323297	-0.00371484	-0.00550983	-0.00349519	0.00798152	0.0332986		99.8	-1.18664	-1.17344	-1.25276	-1.36899	-1.41348	-1.31152
100	0.00382996	-0.00614404	-0.00689457	-0.00336351	0.00999199	0.034673		100	-1.18604	-1.17587	-1.25414	-1.36886	-1.41147	-1.31015
100.19	0.00507498	-0.00231069	-0.00932983	-0.00578784	0.0089847	0.0343681		100.19	-1.1848	-1.17203	-1.25658	-1.37128	-1.41248	-1.31045
100.4	0.00502671	-0.00109215	-0.00785422	-0.00409189	0.00692949	0.0339899		100.4	-1.18485	-1.17081	-1.2551	-1.36959	-1.41453	-1.31083
100.6	0.00788785	-0.0031222	-0.00593855	-0.00612338	0.00500087	0.0340116		100.6	-1.18198	-1.17284	-1.25319	-1.37162	-1.41646	-1.31081
100.8	0.00281348	-8.256e-05	-0.00410637	-0.00457249	0.0103488	0.0334164		100.8	-1.18706	-1.1698	-1.25135	-1.37007	-1.41111	-1.3114
101	0.00325049	-0.0009147	-0.00540164	-0.00514724	0.00978404	0.0309729		101	-1.18662	-1.17064	-1.25265	-1.37064	-1.41168	-1.31385
101.19	0.00326664	-0.00235108	-0.00598529	-0.0044491	0.00623023	0.0301135		101.19	-1.18661	-1.17207	-1.25323	-1.36994	-1.41523	-1.31471
101.4	0.00292886	-0.00300825	-0.00575563	-0.00373082	0.00542448	0.0313433		101.4	-1.18694	-1.17273	-1.253	-1.36923	-1.41604	-1.31348
101.6	0.00489475	-0.00760996	-0.00522516	-0.00595916	0.00678963	0.031476		101.6	-1.18498	-1.17733	-1.25247	-1.37145	-1.41467	-1.31334
101.8	0.0051542	-0.00446303	-0.00490908	-0.00406731	0.00586499	0.0319838		101.8	-1.18472	-1.17418	-1.25216	-1.36956	-1.4156	-1.31284
101.99	0.00678995	-0.00180793	-0.00719405	-0.00088764	0.00777747	0.0332168		101.99	-1.18308	-1.17153	-1.25444	-1.36638	-1.41369	-1.3116
102.19	0.00369421	-0.00359332	-0.00758889	-0.00417439	0.00778273	0.0328155		102.19	-1.18618	-1.17331	-1.25484	-1.36967	-1.41368	-1.312
102.4	0.00492588	-0.00423672	-0.00711187	-0.00387083	0.00818601	0.0346275		102.4	-1.18495	-1.17396	-1.25436	-1.36937	-1.41328	-1.31019
102.6	0.00474755	-0.00383168	-0.00576777	-0.00722294	0.00289839	0.033491		102.6	-1.18512	-1.17355	-1.25301	-1.37272	-1.41856	-1.31133
102.8	0.00735511	-0.0056924	-0.00579506	-0.00307957	0.00899973	0.0337131		102.8	-1.18252	-1.17541	-1.25304	-1.36857	-1.41246	-1.31111
103	0.00559811	-0.00452588	-0.00969995	-0.00815329	0.00808679	0.0319004		103	-1.18427	-1.17425	-1.25695	-1.37365	-1.41338	-1.31292
103.19	0.00479609	0.00092676	-0.00467095	-0.00253682	0.011383	0.0344211		103.19	-1.18508	-1.16879	-1.25192	-1.36803	-1.41008	-1.3104
103.4	0.0051013	-0.00138414	-0.00426594	-0.00766819	0.00701302	0.0317077		103.4	-1.18477	-1.17111	-1.25151	-1.37316	-1.41445	-1.31311
103.6	0.00412918	-0.00174443	-0.00722081	-0.00473807	0.00728645	0.0315329		103.6	-1.18574	-1.17147	-1.25447	-1.37023	-1.41418	-1.31329
103.8	0.00747073	-0.00116729	-0.0075146	-0.0047973	0.0116728	0.0357938		103.8	-1.1824	-1.17089	-1.25476	-1.37029	-1.40979	-1.30903
104	0.00470658	-0.00127545	-0.00737831	-0.00723032	0.00621994	0.0365001		104	-1.18517	-1.171	-1.25463	-1.37272	-1.41524	-1.30832
104.19	0.00904732	-0.00456703	-0.00717727	-0.00556126	0.00652459	0.0363609		104.19	-1.18082	-1.17429	-1.25442	-1.37106	-1.41494	-1.30846
104.4	0.00411466	-0.00035734	-0.00756534	-0.00238271	0.0118856	0.0345724		104.4	-1.18576	-1.17008	-1.25481	-1.36788	-1.40958	-1.31025
104.59	0.00570072	-0.00269573	-0.00452319	-0.00067009	0.0109833	0.0337184		104.59	-1.18417	-1.17242	-1.25177	-1.36616	-1.41048	-1.3111
104.79	0.00508591	-0.00026617	-0.00587855	-0.00850024	0.00898719	0.0377903		104.79	-1.18479	-1.16999	-1.25313	-1.37399	-1.41248	-1.30703
104.99	0.00592918	-0.00175014	-0.00534793	-0.00898331	0.00234741	0.0352544		104.99	-1.18394	-1.17147	-1.25259	-1.37448	-1.41912	-1.30957
105.19	0.00396177	-0.00278177	-0.00523248	-0.00676959	0.00794322	0.0354365		105.19	-1.18591	-1.1725	-1.25248	-1.37226	-1.41352	-1.30938
105.4	0.00765732	-0.00490857	-0.00939265	-0.00716591	0.00999563	0.0326446		105.4	-1.18221	-1.17463	-1.25664	-1.37266	-1.41147	-1.31218
105.6	0.00467955	-0.00395935	-0.00465259	-0.00769632	0.00803294	0.0344625		105.6	-1.18519	-1.17368	-1.2519	-1.37319	-1.41343	-1.31036
105.8	0.0056061	-0.00299112	-0.00640418	-0.00160232	0.00999546	0.0325651		105.8	-1.18427	-1.17271	-1.25365	-1.3671	-1.41147	-1.31225
106	0.00678919	-0.00434414	-0.00533596	-0.00804381	0.00552888	0.0342079		106	-1.18308	-1.17407	-1.25258	-1.37354	-1.41593	-1.31061
106.19	0.00648099	-0.00153379	-0.00730964	-0.00386179	0.0085599	0.0328223		106.19	-1.18339	-1.17126	-1.25456	-1.36936	-1.4129	-1.312
106.4	0.00639693	-0.00242833	-0.00611642	-0.00390606	0.00669116	0.0323708		106.4	-1.18348	-1.17215	-1.25336	-1.3694	-1.41477	-1.31245
106.6	0.00490184	-0.0021359	-0.00269446	-0.00680507	0.00761596	0.0316929		106.6	-1.18497	-1.17186	-1.24994	-1.3723	-1.41385	-1.31313
106.8	0.00458374	0.00186386	-0.00808359	-0.0027286	0.00673744	0.0318944		106.8	-1.18529	-1.16786	-1.25533	-1.36822	-1.41473	-1.31293
106.99	0.00569328	0.0008287	-0.00356703	-0.0082357	0.00321856	0.0320533		106.99	-1.18418	-1.16889	-1.25081	-1.37373	-1.41824	-1.31277
107.19	0.0047386	-0.00188118	-0.00721213	-0.00480697	0.00625484	0.032824		107.19	-1.18513	-1.1716	-1.25446	-1.3703	-1.41521	-1.312
107.4	0.00656351	-0.00096725	-0.00820389	-0.00366012	0.00607511	0.0370146		107.4	-1.18331	-1.17069	-1.25545	-1.36915	-1.41539	-1.30781
107.6	0.00234985	-0.00295166	-0.00687515	-0.00640227	0.00715901	0.0357454		107.6	-1.18752	-1.17267	-1.25412	-1.3719	-1.4143	-1.30907
107.8	0.0053947	-0.00336683	-0.0065506	-0.00441805	0.00633605	0.035781		107.8	-1.18448	-1.17309	-1.2538	-1.36991	-1.41513	-1.30904
107.99	0.00539944	-0.00146022	-0.00351284	-0.00635913	0.00645878	0.0306028		107.99	-1.18447	-1.17118	-1.25076	-1.37185	-1.415	-1.31422
108.19	0.00691772	-0.00600623	-0.00846062	-0.0032884	0.00479554	0.0344272		108.19	-1.18295	-1.17573	-1.25571	-1.36878	-1.41667	-1.31039
108.4	0.0074725	-3.127e-05	-0.00892284	-0.00203111	0.0112293	0.0338571		108.4	-1.1824	-1.16975	-1.25617	-1.36753	-1.41023	-1.31096
108.59	0.00461771	-0.00274276	-0.00771463	-0.00169177	0.00698682	0.0345052		108.59	-1.18525	-1.17246	-1.25496	-1.36719	-1.41448	-1.31031
108.8	0.00354966	0.00070967	-0.00505762	-0.0105835	0.00969912	0.034184		108.8	-1.18632	-1.16901	-1.2523	-1.37608	-1.41176	-1.31064
109	0.00394912	-0.00113964	-0.00829909	-0.00064691	0.0121983	0.0331999		109	-1.18592	-1.17086	-1.25555	-1.36614	-1.40926	-1.31162
109.19	0.00328261	-0.00420159	-0.00877239	-0.002641	0.0111205	0.0349305		109.19	-1.18659	-1.17392	-1.25602	-1.36814	-1.41034	-1.30989
109.39	0.00368884	-0.00481976	-0.00461203	-0.00283885	0.00802028	0.0325465		109.39	-1.18618	-1.17454	-1.25186	-1.36833	-1.41344	-1.31227
109.6	0.00558579	-0.00251936	-0.00478774	-0.00417626	0.00731414	0.0352303		109.6	-1.18429	-1.17224	-1.25203	-1.36967	-1.41415	-1.30959
109.8	0.00339756	-0.00339268	-0.00801449	-0.0071628	0.00952198	0.0345929		109.8	-1.18647	-1.17311	-1.25526	-1.37266	-1.41194	-1.31023
110	0.00260418	-0.00518373	-0.00874588	-0.00468203	0.0064375	0.036011		110	-1.18727	-1.17491	-1.25599	-1.37018	-1.41503	-1.30881
110.19	0.00367054	-0.00225523	-0.00550465	-0.0043854	0.00614088	0.0355458		110.19	-1.1862	-1.17198	-1.25275	-1.36988	-1.41532	-1.30927
110.39	0.00480777	-0.00222758	-0.00528486	-0.008328	0.00637529	0.0312587		110.39	-1.18506	-1.17195	-1.25253	-1.37382	-1.41509	-1.31356
110.59	0.0052329	-0.00312034	-0.00594126	-0.00545916	0.00956112	0.0311936		110.59	-1.18464	-1.17284	-1.25319	-1.37095	-1.4119	-1.31363
110.8	0.00266618	-0.00357679	-0.00503989	-0.00836691	0.00857467	0.0304233		110.8	-1.18721	-1.1733	-1.25229	-1.37386	-1.41289	-1.3144
110.99	0.00122849	-0.00114	-0.00870799	-0.00519968	0.00700359	0.0331754		110.99	-1.18864	-1.17086	-1.25595	-1.37069	-1.41446	-1.31164
111.19	0.00014165	-0.00260906	-0.00828906	-0.00501658	0.0119261	0.0325425		111.19	-1.18973	-1.17233	-1.25554	-1.37051	-1.40954	-1.31228
111.39	0.00680996	-0.0020969	-0.0071243	-0.0007831	0.00697649	0.0344199		111.39	-1.18306	-1.17182	-1.25437	-1.36628	-1.41449	-1.3104
111.59	0.00232953	-0.00224615	-0.0091261	-0.00551404	0.00710724	0.0340096		111.59	-1.18754	-1.17197	-1.25637	-1.37101	-1.41436	-1.31081
111.8	0.00696166	-0.00278285	-0.00754949	-0.00876177	0.00837429	0.0348498		111.8	-1.18291	-1.1725	-1.2548	-1.37426	-1.41309	-1.30997
111.99	0.00248238	-0.0053951	-0.0064464	-0.0043712	0.00893421	0.0308939		111.99	-1.18739	-1.17512	-1.25369	-1.36987	-1.41253	-1.31393
112.19	0.00608838	-0.00300541	-0.00647944	-0.00564729	0.00624845	0.0337026		112.19	-1.18378	-1.17273	-1.25373	-1.37114	-1.41521	-1.31112
112.39	0.00530783	-0.00230504	-0.00531899	-0.00540149	0.0111778	0.0344126		112.39	-1.18456	-1.17203	-1.25257	-1.3709	-1.41028	-1.31041
112.59	0.00371026	-0.00467855	-0.00637359	-0.00758411	0.0105821	0.0351494		112.59	-1.18616	-1.1744	-1.25362	-1.37308	-1.41088	-1.30967
112.79	0.00397291	-0.00129312	-0.00677618	-0.0024513	0.00725126	0.0284549		112.79	-1.1859	-1.17101	-1.25402	-1.36795	-1.41421	-1.31637
112.99	0.00511489	-0.00429592	-0.00734379	-0.00421878	0.00750618	0.0326701		112.99	-1.18476	-1.17402	-1.25459	-1.36971	-1.41396	-1.31215
113.19	0.00317302	-0.00462606	-0.0103137	-0.004205	0.0106714	0.0301981		113.19	-1.1867	-1.17435	-1.25756	-1.3697	-1.41079	-1.31462
113.39	0.00456156	-0.00462353	-0.00608899	-0.00809452	0.00887275	0.0324866		113.39	-1.18531	-1.17434	-1.25334	-1.37359	-1.41259	-1.31233
113.6	0.00422192	-0.00366568	-0.00947636	-0.00424339	0.00628907	0.0307536		113.6	-1.18565	-1.17339	-1.25672	-1.36974	-1.41517	-1.31407
113.79	0.00481207	0.00081246	-0.00831681	-0.00463258	0.0073639	0.0328448		113.79	-1.18506	-1.16891	-1.25556	-1.37013	-1.4141	-1.31198
113.99	0.00183127	-0.00324772	-0.00663335	-0.00616025	0.0104619	0.0289022		113.99	-1.18804	-1.17297	-1.25388	-1.37165	-1.411	-1.31592
114.19	0.00585474	-0.00351258	-0.00422852	-0.00392472	0.00604649	0.0365095		114.19	-1.18402	-1.17323	-1.25148	-1.36942	-1.41542	-1.30831
114.39	0.00307258	0.00056595	-0.0100771	-0.00538151	0.00763074	0.0311272		114.39	-1.1868	-1.16916	-1.25732	-1.37088	-1.41383	-1.31369
114.59	0.00295993	-1.135e-05	-0.010876	-0.00644509	0.0059778	0.0356806		114.59	-1.18691	-1.16973	-1.25812	-1.37194	-1.41548	-1.30914
114.79	0.00574851	-0.00347211	-0.00957944	-0.00716205	0.00525767	0.0325675		114.79	-1.18412	-1.17319	-1.25683	-1.37266	-1.4162	-1.31225
115	0.00603402	-0.00080518	-0.0084842	-0.0001754	0.0108745	0.0305197		115	-1.18384	-1.17053	-1.25573	-1.36567	-1.41059	-1.3143
115.19	0.00362588	-0.00313565	-0.00895287	-0.00694684	0.0091046	0.032722		115.19	-1.18625	-1.17286	-1.2562	-1.37244	-1.41236	-1.3121
115.39	0.00392996	-0.00281907	-0.00617801	-0.00677067	0.0079377	0.0327425		115.39	-1.18594	-1.17254	-1.25342	-1.37226	-1.41352	-1.31208
115.59	0.00095639	-0.00294649	-0.00724751	-0.00137872	0.00457168	0.0305865		115.59	-1.18892	-1.17267	-1.25449	-1.36687	-1.41689	-1.31423
115.8	0.00201596	-0.00680071	-0.00930937	-0.00584649	0.00687111	0.0302656		115.8	-1.18786	-1.17652	-1.25656	-1.37134	-1.41459	-1.31455
116	0.00567804	-0.00537961	-0.00677321	-0.00723791	0.00525585	0.0366565		116	-1.18419	-1.1751	-1.25402	-1.37273	-1.41621	-1.30816
116.19	0.00264931	-0.00560408	-0.00811765	-0.00494224	0.00771862	0.031314		116.19	-1.18722	-1.17533	-1.25536	-1.37044	-1.41374	-1.31351
116.39	2.77e-05	-0.00169164	-0.0102899	-0.00853156	0.00822445	0.0367318		116.39	-1.18984	-1.17141	-1.25754	-1.37403	-1.41324	-1.30809
116.59	0.00809948	-0.00504856	-0.005619	-0.00591652	0.00455045	0.0333672		116.59	-1.18177	-1.17477	-1.25287	-1.37141	-1.41691	-1.31145
116.8	0.00674345	-0.00246691	-0.00660057	-0.00867788	0.0104659	0.0299433		116.8	-1.18313	-1.17219	-1.25385	-1.37417	-1.411	-1.31488
116.99	0.00412755	-0.00341501	-0.00777344	-0.00579372	0.00507079	0.0318017		116.99	-1.18574	-1.17314	-1.25502	-1.37129	-1.41639	-1.31302
117.19	0.0045196	-0.00375086	-0.00708772	-0.00736732	0.00862172	0.0323486		117.19	-1.18535	-1.17347	-1.25433	-1.37286	-1.41284	-1.31247
117.39	0.00157164	-0.00496076	-0.00455747	-0.00363078	0.00874741	0.0335446		117.39	-1.1883	-1.17468	-1.2518	-1.36913	-1.41272	-1.31128
117.59	0.00572059	0.00013032	-0.00695355	-0.00515621	0.0106759	0.0343085		117.59	-1.18415	-1.16959	-1.2542	-1.37065	-1.41079	-1.31051
117.79	0.00518311	-0.00467702	-0.00722909	-0.00657546	0.00542671	0.0346677		117.79	-1.18469	-1.1744	-1.25448	-1.37207	-1.41604	-1.31015
117.99	0.0073829	-9.863e-05	-0.00545291	-0.00454988	0.00951639	0.0325868		117.99	-1.18249	-1.16982	-1.2527	-1.37004	-1.41195	-1.31223
118.19	0.00460853	-0.00322239	-0.00504924	-0.00421958	0.00650748	0.0348019		118.19	-1.18526	-1.17294	-1.2523	-1.36971	-1.41496	-1.31002
118.39	0.00507594	-0.00268822	-0.00716262	-0.00058516	0.00696444	0.0328471		118.39	-1.1848	-1.17241	-1.25441	-1.36608	-1.4145	-1.31197
118.59	0.00780516	-0.00040145	-0.00671125	-0.00385999	0.00966442	0.0325665		118.59	-1.18207	-1.17012	-1.25396	-1.36935	-1.4118	-1.31225
118.79	0.00384156	0.00024698	-0.00876517	-0.00613132	0.00901332	0.037614		118.79	-1.18603	-1.16947	-1.25601	-1.37163	-1.41245	-1.30721
118.99	0.00052313	-0.00563121	-0.0103691	-0.00806671	0.00527129	0.0340701		118.99	-1.18935	-1.17535	-1.25762	-1.37356	-1.41619	-1.31075
119.19	0.00570581	-0.00445233	-0.011534	-0.00549827	0.00842403	0.0351105		119.19	-1.18417	-1.17417	-1.25878	-1.37099	-1.41304	-1.30971
119.39	0.0048645	-0.0023684	-0.00921659	-0.00540897	0.00807529	0.035633		119.39	-1.18501	-1.17209	-1.25646	-1.3709	-1.41339	-1.30919
119.59	0.00176944	-0.0035602	-0.00686435	-0.00389298	0.00537391	0.035971		119.59	-1.1881	-1.17328	-1.25411	-1.36939	-1.41609	-1.30885
119.79	0.00228899	-0.00216095	-0.00866951	-0.00614578	0.0103685	0.0346284		119.79	-1.18758	-1.17188	-1.25592	-1.37164	-1.41109	-1.31019
119.99	0.00486188	-0.00489938	-0.00791925	-0.00668649	0.0109465	0.0373034		119.99	-1.18501	-1.17462	-1.25517	-1.37218	-1.41052	-1.30752
120.19	0.00435049	-0.00367122	-0.0102987	-0.00721282	0.00633373	0.0313954		120.19	-1.18552	-1.17339	-1.25755	-1.37271	-1.41513	-1.31342
120.4	0.00352373	-0.0050138	-0.0049587	-0.00698783	0.00922189	0.0340693		120.4	-1.18635	-1.17474	-1.25221	-1.37248	-1.41224	-1.31075
120.6	0.00242903	-0.00319456	-0.00651523	-0.00248476	0.00815678	0.0347843		120.6	-1.18744	-1.17292	-1.25376	-1.36798	-1.41331	-1.31004
120.8	0.00530242	-0.00092317	-0.00987952	-0.00643714	0.0119384	0.035587		120.8	-1.18457	-1.17064	-1.25713	-1.37193	-1.40952	-1.30923
121	0.00446287	-0.0036975	-0.00873033	-0.00956326	0.00823378	0.0325842		121	-1.18541	-1.17342	-1.25598	-1.37506	-1.41323	-1.31224
121.19	0.0029092	-0.00258254	-0.00328828	-0.00765366	0.00869756	0.0357729		121.19	-1.18696	-1.1723	-1.25054	-1.37315	-1.41276	-1.30905
121.4	0.00564921	-0.00153942	-0.00860638	-0.00560875	0.00942068	0.0340114		121.4	-1.18422	-1.17126	-1.25585	-1.3711	-1.41204	-1.31081
121.6	0.00433577	-0.00400125	-0.00962186	-0.0049457	0.00873704	0.0340001		121.6	-1.18554	-1.17372	-1.25687	-1.37044	-1.41273	-1.31082
121.8	0.00408582	-0.00341818	-0.00872082	-0.0059392	0.00819061	0.0307756		121.8	-1.18579	-1.17314	-1.25597	-1.37143	-1.41327	-1.31404
121.99	0.0025127	-0.0054292	-0.00744208	-0.00354787	0.00808257	0.0346848		121.99	-1.18736	-1.17515	-1.25469	-1.36904	-1.41338	-1.31014
122.19	0.00440258	-0.00467102	-0.0073375	-0.00665407	0.00695579	0.0342145		122.19	-1.18547	-1.17439	-1.25458	-1.37215	-1.41451	-1.31061
122.4	0.00386343	0.00035814	-0.00959381	-0.00517138	0.00379308	0.0345265		122.4	-1.18601	-1.16936	-1.25684	-1.37067	-1.41767	-1.31029
122.6	0.00351213	-0.0038069	-0.00595623	-0.00674215	0.00816313	0.0345312		122.6	-1.18636	-1.17353	-1.2532	-1.37224	-1.4133	-1.31029
122.8	0.0024919	-0.0004312	-0.0103369	-0.0054617	0.00555303	0.0320579		122.8	-1.18738	-1.17015	-1.25758	-1.37096	-1.41591	-1.31276
123	0.0041861	-0.00330325	-0.00958099	-0.00572141	0.00977951	0.0338466		123	-1.18569	-1.17302	-1.25683	-1.37122	-1.41168	-1.31097
123.19	0.00731778	-0.00267487	-0.0107594	-0.00778751	0.00687362	0.0316186		123.19	-1.18255	-1.1724	-1.25801	-1.37328	-1.41459	-1.3132
123.4	0.00722474	-0.00473947	-0.00744288	-0.00719508	0.00548096	0.0341779		123.4	-1.18265	-1.17446	-1.25469	-1.37269	-1.41598	-1.31064
123.6	0.00405658	-0.00711701	-0.00675763	-0.0103131	0.00684569	0.032287		123.6	-1.18582	-1.17684	-1.254	-1.37581	-1.41462	-1.31253
123.8	0.00589175	-0.00163021	-0.00461227	-0.00700839	0.0081311	0.0319854		123.8	-1.18398	-1.17135	-1.25186	-1.3725	-1.41333	-1.31283
124	0.00431179	-0.00571203	-0.00732538	-0.00515884	0.00820734	0.0371532		124	-1.18556	-1.17543	-1.25457	-1.37065	-1.41326	-1.30767
124.19	0.00519819	-0.0043953	-0.00561316	-0.00489348	0.00611621	0.0331198		124.19	-1.18467	-1.17412	-1.25286	-1.37039	-1.41535	-1.3117
124.4	0.00575248	-0.00478907	-0.00945865	-0.00905144	0.0105924	0.0303103		124.4	-1.18412	-1.17451	-1.25671	-1.37455	-1.41087	-1.31451
124.6	0.00274372	-0.00148918	-0.00604542	-0.00666305	0.00440635	0.0342256		124.6	-1.18713	-1.17121	-1.25329	-1.37216	-1.41706	-1.31059
124.8	0.00379254	-0.0040457	-0.0107916	-0.00569029	0.00700061	0.0326983		124.8	-1.18608	-1.17377	-1.25804	-1.37118	-1.41446	-1.31212
125	0.00635368	-0.00380478	-0.00782612	-0.00691537	0.00622657	0.0348444		125	-1.18352	-1.17353	-1.25507	-1.37241	-1.41524	-1.30998
125.19	0.00672889	-0.0019867	-0.0093385	-0.00427984	0.00606051	0.0330611		125.19	-1.18314	-1.17171	-1.25659	-1.36977	-1.4154	-1.31176
125.4	0.00304148	-0.00212872	-0.0103386	-0.00786254	0.00733897	0.0321893		125.4	-1.18683	-1.17185	-1.25759	-1.37336	-1.41412	-1.31263
125.6	0.0004397	-0.00470468	-0.00588466	-0.00501321	0.00924348	0.0359712		125.6	-1.18943	-1.17443	-1.25313	-1.37051	-1.41222	-1.30885
125.79	0.00265496	-0.00652704	-0.00528607	-0.0038561	0.0104424	0.0345596		125.79	-1.18722	-1.17625	-1.25253	-1.36935	-1.41102	-1.31026
126	0.00606597	-0.00710379	-0.00901475	-0.00728886	0.00240148	0.0353667		126	-1.18381	-1.17683	-1.25626	-1.37278	-1.41906	-1.30945
126.19	0.00535966	-0.00074006	-0.00630983	-0.00358061	0.00466355	0.0355124		126.19	-1.18451	-1.17046	-1.25356	-1.36907	-1.4168	-1.30931
126.4	0.0038285	-0.00334993	-0.011057	-0.0029542	0.00598448	0.0345826		126.4	-1.18604	-1.17307	-1.2583	-1.36845	-1.41548	-1.31024
126.6	0.00894514	-0.00345398	-0.00618168	-0.00763846	0.00681367	0.034249		126.6	-1.18093	-1.17318	-1.25343	-1.37313	-1.41465	-1.31057
126.8	0.00381491	-0.00348428	-0.00759364	-0.00378642	0.00871496	0.0345447		126.8	-1.18606	-1.17321	-1.25484	-1.36928	-1.41275	-1.31028
127	0.00456515	-0.00396507	-0.0103426	-0.00597798	0.00376035	0.0351671		127	-1.18531	-1.17369	-1.25759	-1.37147	-1.4177	-1.30965
127.19	0.00376864	-0.00495961	-0.00861658	-0.00637901	0.00542755	0.0346454		127.19	-1.1861	-1.17468	-1.25586	-1.37187	-1.41603	-1.31017
127.4	0.00547258	-0.00511877	-0.00580238	-0.00672743	0.00895668	0.0352002		127.4	-1.1844	-1.17484	-1.25305	-1.37222	-1.41251	-1.30962
127.6	0.00359296	-0.00483712	-0.0085445	-0.00564972	0.0103748	0.0348856		127.6	-1.18628	-1.17456	-1.25579	-1.37114	-1.41109	-1.30993
127.8	0.00058379	-0.00655767	-0.00725862	-0.00670971	0.00264618	0.0329981		127.8	-1.18929	-1.17628	-1.25451	-1.3722	-1.41882	-1.31182
128	0.00388847	-0.00328066	-0.00436234	-0.00334423	0.00729974	0.0347992		128	-1.18598	-1.173	-1.25161	-1.36884	-1.41416	-1.31002
128.19	0.00299413	-0.00488918	-0.010379	-0.00212388	0.0089593	0.0335146		128.19	-1.18688	-1.17461	-1.25763	-1.36762	-1.4125	-1.31131
128.39	0.00597744	-0.00422616	-0.0073043	-0.00644609	0.00570397	0.0344575		128.39	-1.18389	-1.17395	-1.25455	-1.37194	-1.41576	-1.31036
128.6	0.00352771	-0.00177434	-0.00520553	-0.0038083	0.00586285	0.0354913		128.6	-1.18634	-1.1715	-1.25245	-1.3693	-1.4156	-1.30933
128.79	0.00284696	-0.0030058	-0.00942189	-0.006254	0.00659722	0.0343846		128.79	-1.18703	-1.17273	-1.25667	-1.37175	-1.41487	-1.31044
128.99	0.00371126	-0.0024319	-0.0103364	-0.00827051	0.00847284	0.0325609		128.99	-1.18616	-1.17215	-1.25758	-1.37376	-1.41299	-1.31226
129.19	0.00519461	-0.00303867	-0.00686266	-0.00300008	0.00501516	0.0315095		129.19	-1.18468	-1.17276	-1.25411	-1.36849	-1.41645	-1.31331
129.39	0.00723869	-0.00507731	-0.0100612	-0.00650338	0.0107207	0.0328846		129.39	-1.18263	-1.1748	-1.25731	-1.372	-1.41074	-1.31194
129.6	0.00264084	-0.00542052	-0.0130907	-0.00636043	0.00729483	0.0346561		129.6	-1.18723	-1.17514	-1.26034	-1.37185	-1.41417	-1.31016
129.79	0.00266666	-0.00334649	-0.0099434	-0.00819976	0.00927775	0.0342623		129.79	-1.18721	-1.17307	-1.25719	-1.37369	-1.41218	-1.31056
129.99	0.00519689	-0.00558462	-0.00993586	-0.00628069	0.00423232	0.0343112		129.99	-1.18468	-1.17531	-1.25718	-1.37177	-1.41723	-1.31051
130.19	0.00586706	-0.0030589	-0.00931954	-0.00846937	0.00867341	0.0344198		130.19	-1.18401	-1.17278	-1.25657	-1.37396	-1.41279	-1.3104
130.39	0.00380539	-0.00449905	-0.00971237	-0.00196985	0.00636537	0.0356456		130.39	-1.18607	-1.17422	-1.25696	-1.36746	-1.4151	-1.30917
130.6	0.00708325	-0.00449657	-0.0100312	-0.00386585	0.00578555	0.0338229		130.6	-1.18279	-1.17422	-1.25728	-1.36936	-1.41568	-1.311
130.79	0.00476716	-0.00581879	-0.00665355	-0.00321273	0.00777016	0.033971		130.79	-1.18511	-1.17554	-1.2539	-1.36871	-1.41369	-1.31085
130.99	0.005052	-0.00280651	-0.0118303	-0.0103275	0.00800276	0.0362338		130.99	-1.18482	-1.17253	-1.25908	-1.37582	-1.41346	-1.30859
131.19	0.00329074	-0.00194934	-0.0104588	-0.00436633	0.0101092	0.0372498		131.19	-1.18658	-1.17167	-1.25771	-1.36986	-1.41135	-1.30757
131.39	0.00631021	-0.00241732	-0.00824249	-0.00996993	0.0112463	0.035575		131.39	-1.18356	-1.17214	-1.25549	-1.37546	-1.41022	-1.30925
131.6	0.00394046	-0.008111	-0.00593439	-0.00317888	0.00882367	0.0283092		131.6	-1.18593	-1.17783	-1.25318	-1.36867	-1.41264	-1.31651
131.79	0.00462715	-0.00294558	-0.00949641	-0.00368187	0.00774497	0.0337606		131.79	-1.18525	-1.17267	-1.25674	-1.36918	-1.41372	-1.31106
131.99	0.00186285	-0.0025174	-0.00779295	-0.00956494	0.0048554	0.032682		131.99	-1.18801	-1.17224	-1.25504	-1.37506	-1.41661	-1.31214
132.19	0.00411234	-0.0013929	-0.00843989	-0.00555926	0.00971511	0.0273514		132.19	-1.18576	-1.17111	-1.25569	-1.37105	-1.41175	-1.31747
132.39	0.00308715	-0.00327253	-0.0099431	-0.00802124	0.00913572	0.0333272		132.39	-1.18679	-1.17299	-1.25719	-1.37352	-1.41233	-1.31149
132.6	0.00449224	-0.00438993	-0.00948365	-0.00569678	0.00648505	0.0274907		132.6	-1.18538	-1.17411	-1.25673	-1.37119	-1.41498	-1.31733
132.79	0.00295416	-0.00270673	-0.00631904	-0.00475361	0.00928234	0.0310898		132.79	-1.18692	-1.17243	-1.25357	-1.37025	-1.41218	-1.31373
132.99	0.00506741	-0.00330382	-0.0102719	-0.00449663	0.00982591	0.0294359		132.99	-1.1848	-1.17303	-1.25752	-1.36999	-1.41164	-1.31538
133.19	0.00226453	-0.00045247	-0.0106602	-0.00996483	0.00419229	0.0320709		133.19	-1.18761	-1.17017	-1.25791	-1.37546	-1.41727	-1.31275
133.39	0.00168186	-0.00559179	-0.00993911	-0.0084387	0.00716487	0.0325645		133.39	-1.18819	-1.17531	-1.25719	-1.37393	-1.4143	-1.31226
133.6	0.00286723	-0.00450729	-0.0098112	-0.0034912	0.00762027	0.0334006		133.6	-1.18701	-1.17423	-1.25706	-1.36899	-1.41384	-1.31142
133.79	0.00394896	6.376e-05	-0.0100157	-0.00936957	0.00492758	0.0343878		133.79	-1.18592	-1.16966	-1.25726	-1.37486	-1.41653	-1.31043
133.99	0.00690772	-0.00210307	-0.0100501	-0.0091993	0.00712861	0.0327976		133.99	-1.18296	-1.17182	-1.2573	-1.37469	-1.41433	-1.31202
134.19	0.00267553	-0.00330698	-0.00863778	-0.00298387	0.00897418	0.0327406		134.19	-1.1872	-1.17303	-1.25588	-1.36848	-1.41249	-1.31208
134.39	0.00440804	-0.00476139	-0.00897949	-0.00540983	0.010185	0.033771		134.39	-1.18546	-1.17448	-1.25623	-1.3709	-1.41128	-1.31105
134.6	0.00354771	-0.00700259	-0.00814501	-0.00620593	0.00396058	0.0345471		134.6	-1.18632	-1.17672	-1.25539	-1.3717	-1.4175	-1.31027
134.79	0.00822846	-0.00453166	-0.00901818	-0.00843315	0.00953677	0.0366839		134.79	-1.18164	-1.17425	-1.25626	-1.37393	-1.41193	-1.30814
134.99	0.00664192	-0.00081599	-0.00915524	-0.00809579	0.0106544	0.0360285		134.99	-1.18323	-1.17054	-1.2564	-1.37359	-1.41081	-1.30879
135.19	0.00103204	-0.0015667	-0.00781799	-0.00647878	0.00519735	0.0367108		135.19	-1.18884	-1.17129	-1.25506	-1.37197	-1.41627	-1.30811
135.39	0.00428001	-0.00179752	-0.00792084	-0.00589455	0.0101086	0.0340746		135.39	-1.18559	-1.17152	-1.25517	-1.37139	-1.41135	-1.31075
135.59	0.00208392	0.00058718	-0.00888454	-0.00735091	0.00536605	0.0372047		135.59	-1.18779	-1.16913	-1.25613	-1.37285	-1.4161	-1.30762
135.79	0.00636306	-0.00389718	-0.00879902	-0.00311098	0.00698571	0.0346081		135.79	-1.18351	-1.17362	-1.25605	-1.36861	-1.41448	-1.31021
135.99	0.00404457	-0.00190217	-0.00924458	-0.0053382	0.00800064	0.0374284		135.99	-1.18583	-1.17162	-1.25649	-1.37083	-1.41346	-1.30739
136.19	0.00246795	-0.00148307	-0.00565401	-0.00163516	0.00637499	0.0369354		136.19	-1.1874	-1.1712	-1.2529	-1.36713	-1.41509	-1.30788
136.39	0.00467685	-0.00600798	-0.00772413	-0.0099243	0.00757041	0.0405542		136.39	-1.1852	-1.17573	-1.25497	-1.37542	-1.41389	-1.30427
136.59	0.00233925	-0.00594348	-0.0100283	-0.0081284	0.00522494	0.0346479		136.59	-1.18753	-1.17566	-1.25728	-1.37362	-1.41624	-1.31017
136.79	0.00559119	-0.00544832	-0.00993941	-0.00443958	0.00802862	0.0337119		136.79	-1.18428	-1.17517	-1.25719	-1.36993	-1.41343	-1.31111
136.99	0.0018047	-0.0053504	-0.00729295	-0.00648333	0.00798532	0.0306029		136.99	-1.18807	-1.17507	-1.25454	-1.37198	-1.41348	-1.31422
137.19	0.00389194	-0.00201454	-0.00807419	-0.00523675	0.00341303	0.0357203		137.19	-1.18598	-1.17174	-1.25532	-1.37073	-1.41805	-1.3091
137.39	0.00448914	-0.00197609	-0.00859025	-0.00569826	0.00627108	0.0383653		137.39	-1.18538	-1.1717	-1.25584	-1.37119	-1.41519	-1.30645
137.59	0.00275171	-0.00400871	-0.0106576	-0.00772664	0.00962804	0.0326445		137.59	-1.18712	-1.17373	-1.2579	-1.37322	-1.41183	-1.31218
137.79	0.00469105	-0.00594204	-0.00942261	-0.0080012	0.0068979	0.0333941		137.79	-1.18518	-1.17566	-1.25667	-1.3735	-1.41456	-1.31143
137.99	0.00208694	-0.00081998	-0.00845302	-0.00519119	0.00995009	0.0301635		137.99	-1.18779	-1.17054	-1.2557	-1.37069	-1.41151	-1.31466
138.19	0.00433409	-0.00295233	-0.00633013	-0.00680191	0.0100288	0.0350793		138.19	-1.18554	-1.17267	-1.25358	-1.3723	-1.41143	-1.30974
138.39	0.00543425	-0.00520655	-0.00885663	-0.00885314	0.00395647	0.0365809		138.39	-1.18444	-1.17493	-1.2561	-1.37435	-1.41751	-1.30824
138.59	0.00627546	-0.00545567	-0.0100171	-0.00501551	0.00951106	0.0341039		138.59	-1.1836	-1.17518	-1.25726	-1.37051	-1.41195	-1.31072
138.79	0.00345117	-0.00184459	-0.00677163	-0.00350316	0.00566927	0.0356789		138.79	-1.18642	-1.17157	-1.25402	-1.369	-1.41579	-1.30914
138.99	0.0015222	-0.00554012	-0.00774373	-0.0087616	0.00718331	0.0324249		138.99	-1.18835	-1.17526	-1.25499	-1.37426	-1.41428	-1.3124
139.19	0.00293261	-0.00397943	-0.0124864	-0.00948732	0.00239106	0.0352248		139.19	-1.18694	-1.1737	-1.25973	-1.37498	-1.41907	-1.3096
139.39	0.00387597	-1.08e-05	-0.00981947	-0.00337439	0.0073227	0.0304094		139.39	-1.186	-1.16973	-1.25707	-1.36887	-1.41414	-1.31441
139.59	0.00414668	-0.00357606	-0.00725083	-0.0102825	0.0062179	0.0326591		139.59	-1.18573	-1.1733	-1.2545	-1.37578	-1.41524	-1.31216
139.79	0.00547098	-0.00333611	-0.00682182	-0.00653899	0.00298663	0.0343899		139.79	-1.1844	-1.17306	-1.25407	-1.37203	-1.41848	-1.31043
139.99	0.00321499	-0.00209745	-0.00493988	-0.0072151	0.0077326	0.0327172		139.99	-1.18666	-1.17182	-1.25219	-1.37271	-1.41373	-1.3121
140.19	0.00423115	-0.00727165	-0.00771926	-0.0035716	0.00869909	0.0325636		140.19	-1.18564	-1.17699	-1.25497	-1.36907	-1.41276	-1.31226
140.39	0.00625525	-0.00485314	-0.0100982	-0.00681234	0.00775591	0.0330362		140.39	-1.18362	-1.17457	-1.25734	-1.37231	-1.41371	-1.31178
140.59	0.0067781	-0.00383734	-0.00992098	-0.00601851	0.00834913	0.0378805		140.59	-1.18309	-1.17356	-1.25717	-1.37151	-1.41311	-1.30694
140.79	0.004162	-0.00342675	-0.0105927	-0.00473165	0.00947301	0.0302057		140.79	-1.18571	-1.17315	-1.25784	-1.37023	-1.41199	-1.31461
140.99	0.0014155	0.00240088	-0.0121244	-0.00669106	0.00806781	0.032921		140.99	-1.18846	-1.16732	-1.25937	-1.37219	-1.41339	-1.3119
141.19	0.00287198	-0.00411082	-0.00702608	-0.00718205	0.00267032	0.0315471		141.19	-1.187	-1.17383	-1.25427	-1.37268	-1.41879	-1.31327
141.39	0.00559027	-0.0031471	-0.0103847	-0.00610558	0.00713997	0.0334352		141.39	-1.18428	-1.17287	-1.25763	-1.3716	-1.41432	-1.31138
141.59	0.00036854	-0.00324864	-0.00890924	-0.00205967	0.00723292	0.0306197		141.59	-1.1895	-1.17297	-1.25616	-1.36755	-1.41423	-1.3142
141.79	0.00224328	-0.00377209	-0.00697263	-0.00866459	0.0073729	0.0346635		141.79	-1.18763	-1.17349	-1.25422	-1.37416	-1.41409	-1.31016
141.99	0.00469043	-0.00650539	-0.00999846	-0.003946	0.00625894	0.0316441		141.99	-1.18518	-1.17623	-1.25725	-1.36944	-1.4152	-1.31318
142.19	0.00248623	-0.00390017	-0.00967892	-0.00918687	0.00632081	0.0312253		142.19	-1.18739	-1.17362	-1.25693	-1.37468	-1.41514	-1.31359
142.39	0.00172496	-0.00617397	-0.00909319	-0.00493255	0.00697226	0.0345691		142.39	-1.18815	-1.1759	-1.25634	-1.37043	-1.41449	-1.31025
142.59	0.00695974	-0.00471272	-0.00786472	-0.00699449	0.00416599	0.0335745		142.59	-1.18291	-1.17443	-1.25511	-1.37249	-1.4173	-1.31125
142.79	0.00377943	-0.00615402	-0.00838112	-0.00636196	0.00735578	0.0321577		142.79	-1.18609	-1.17588	-1.25563	-1.37186	-1.41411	-1.31266
142.99	0.00273306	-0.0044346	-0.00837996	-0.00499076	0.00830242	0.0325098		142.99	-1.18714	-1.17416	-1.25563	-1.37049	-1.41316	-1.31231
143.19	0.00183911	-0.00387192	-0.00900075	-0.00750416	0.00532221	0.0338212		143.19	-1.18803	-1.17359	-1.25625	-1.373	-1.41614	-1.311
143.39	0.00192291	-0.00847814	-0.00969687	-0.0100138	0.00523988	0.036162		143.39	-1.18795	-1.1782	-1.25694	-1.37551	-1.41622	-1.30866
143.59	0.00357176	-0.00399545	-0.0114073	-0.00785374	0.0073111	0.035379		143.59	-1.1863	-1.17372	-1.25865	-1.37335	-1.41415	-1.30944
143.79	0.0057271	-0.00217251	-0.00859289	-0.0042331	0.00779823	0.0310853		143.79	-1.18415	-1.17189	-1.25584	-1.36973	-1.41366	-1.31373
143.99	0.00231562	-0.0047887	-0.00775413	-0.00842757	0.00827655	0.0343697		143.99	-1.18756	-1.17451	-1.255	-1.37392	-1.41319	-1.31045
144.19	0.00311229	-0.00629822	-0.0088322	-0.00813678	0.00824397	0.0319202		144.19	-1.18676	-1.17602	-1.25608	-1.37363	-1.41322	-1.3129
144.39	0.00295338	-0.00166039	-0.00846065	-0.00915923	0.0051054	0.0335074		144.39	-1.18692	-1.17138	-1.25571	-1.37465	-1.41636	-1.31131
144.59	0.00943114	-0.00328228	-0.00977364	-0.0105525	0.0101305	0.0311853		144.59	-1.18044	-1.173	-1.25702	-1.37605	-1.41133	-1.31363
144.79	-0.0015865	-0.00507273	-0.0093465	-0.00952484	0.0113372	0.0323574		144.79	-1.19146	-1.17479	-1.25659	-1.37502	-1.41013	-1.31246
144.99	0.00333767	-0.00515126	-0.00675689	-0.00789085	0.00666019	0.0311309		144.99	-1.18653	-1.17487	-1.254	-1.37339	-1.4148	-1.31369
145.19	0.00463229	-0.00494797	-0.00789776	-0.0075463	0.00746463	0.0330635		145.19	-1.18524	-1.17467	-1.25514	-1.37304	-1.414	-1.31176
145.39	0.00385387	-0.00248315	-0.0103813	-0.00390337	0.0088992	0.0295897		145.39	-1.18602	-1.1722	-1.25763	-1.3694	-1.41256	-1.31523
145.59	0.00204817	-0.00509852	-0.00841657	-0.00983598	0.00840989	0.0328519		145.59	-1.18782	-1.17482	-1.25566	-1.37533	-1.41305	-1.31197
145.79	0.00200875	-0.00757965	-0.0109275	-0.00719287	0.00586872	0.0312681		145.79	-1.18786	-1.1773	-1.25817	-1.37269	-1.41559	-1.31355
145.99	0.0052329	-0.00367774	-0.00873959	-0.00546744	0.00502775	0.0312137		145.99	-1.18464	-1.1734	-1.25599	-1.37096	-1.41643	-1.31361
146.19	0.00603589	-0.0035273	-0.0095787	-0.00633127	0.00777996	0.0327203		146.19	-1.18384	-1.17325	-1.25683	-1.37183	-1.41368	-1.3121
146.39	0.0068657	-0.00627904	-0.00960011	-0.0029861	0.0041572	0.032281		146.39	-1.18301	-1.176	-1.25685	-1.36848	-1.41731	-1.31254
146.6	0.00546586	-0.00381987	-0.00970692	-0.00900611	0.00780009	0.035085		146.6	-1.18441	-1.17354	-1.25695	-1.3745	-1.41366	-1.30974
146.79	0.00478265	-0.0050009	-0.00836837	-0.00870704	0.00710825	0.033072		146.79	-1.18509	-1.17472	-1.25562	-1.3742	-1.41435	-1.31175
146.99	-2.041e-05	-0.00473757	-0.00986384	-0.00686926	0.00547251	0.0324644		146.99	-1.18989	-1.17446	-1.25711	-1.37236	-1.41599	-1.31236
147.19	0.00314816	-0.00442578	-0.00839914	-0.0072853	0.0046702	0.0319861		147.19	-1.18672	-1.17415	-1.25565	-1.37278	-1.41679	-1.31283
147.39	0.00469684	-0.00215161	-0.0119018	-0.00807017	0.00795639	0.0293556		147.39	-1.18518	-1.17187	-1.25915	-1.37356	-1.41351	-1.31546
147.6	0.00397572	-0.00559294	-0.00974823	-0.0100757	0.00524652	0.0352296		147.6	-1.1859	-1.17531	-1.25699	-1.37557	-1.41622	-1.30959
147.79	0.00393196	-0.00619503	-0.00750001	-0.0103099	0.00649443	0.0329204		147.79	-1.18594	-1.17592	-1.25475	-1.3758	-1.41497	-1.3119
147.99	0.00494365	-0.00481297	-0.008996	-0.010526	0.00492632	0.033256		147.99	-1.18493	-1.17453	-1.25624	-1.37602	-1.41654	-1.31156
148.19	0.00152869	-0.00439318	-0.00794744	-0.00780208	0.00895928	0.0348669		148.19	-1.18834	-1.17411	-1.25519	-1.3733	-1.4125	-1.30995
148.39	0.0030596	-0.00041129	-0.00870097	-0.00692375	0.00562837	0.0329135		148.39	-1.18681	-1.17013	-1.25595	-1.37242	-1.41583	-1.31191
148.6	0.00262564	-0.00464924	-0.00513522	-0.0101977	0.00928368	0.0323379		148.6	-1.18725	-1.17437	-1.25238	-1.37569	-1.41218	-1.31248
148.79	0.00418643	-0.00236066	-0.0108195	-0.00667713	0.00910459	0.0349456		148.79	-1.18569	-1.17208	-1.25807	-1.37217	-1.41236	-1.30987
148.99	0.00022437	-0.00488398	-0.0100223	-0.0076726	0.00690831	0.033307		148.99	-1.18965	-1.17461	-1.25727	-1.37317	-1.41455	-1.31151
149.19	0.00259535	-0.00354901	-0.0102735	-0.0106224	0.00766477	0.0354431		149.19	-1.18728	-1.17327	-1.25752	-1.37612	-1.4138	-1.30938
149.39	0.00583865	-0.00411455	-0.00902145	-0.00597292	0.00290166	0.0307877		149.39	-1.18403	-1.17384	-1.25627	-1.37147	-1.41856	-1.31403
149.6	0.00605178	-0.00228375	-0.010447	-0.00812275	0.00727918	0.0364526		149.6	-1.18382	-1.17201	-1.25769	-1.37362	-1.41418	-1.30837
149.79	0.0014213	-0.00514856	-0.0087251	-0.00633901	0.00666364	0.0354503		149.79	-1.18845	-1.17487	-1.25597	-1.37183	-1.4148	-1.30937
149.99	0.00441215	-0.00318201	-0.00608439	-0.0077518	0.00555598	0.0347385		149.99	-1.18546	-1.1729	-1.25333	-1.37325	-1.41591	-1.31008
150.19	0.00477117	-0.00575506	-0.0109119	-0.0104352	0.00458997	0.0318932		150.19	-1.1851	-1.17548	-1.25816	-1.37593	-1.41687	-1.31293
150.39	0.00236033	-0.00294451	-0.00931366	-0.00904487	0.008489	0.033297		150.39	-1.18751	-1.17267	-1.25656	-1.37454	-1.41297	-1.31152
150.6	0.00160869	-0.0049548	-0.00754975	-0.00606547	0.0030083	0.0326285		150.6	-1.18826	-1.17468	-1.2548	-1.37156	-1.41845	-1.31219
150.79	0.00160263	-0.00328234	-0.0104837	-0.00622462	0.00491013	0.0328236		150.79	-1.18827	-1.173	-1.25773	-1.37172	-1.41655	-1.312
150.99	0.00094873	-0.00503505	-0.00840508	-0.00770715	0.00896323	0.0330492		150.99	-1.18892	-1.17476	-1.25565	-1.3732	-1.4125	-1.31177
151.19	0.00562907	-0.00348032	-0.0136222	-0.00824045	0.00651835	0.0344587		151.19	-1.18424	-1.1732	-1.26087	-1.37373	-1.41494	-1.31036
151.39	0.00405681	-0.0040607	-0.0126643	-0.00713427	0.00513245	0.0317156		151.39	-1.18582	-1.17378	-1.25991	-1.37263	-1.41633	-1.3131
151.6	0.00633103	-0.00508587	-0.0110623	-0.010674	0.00431641	0.0298687		151.6	-1.18354	-1.17481	-1.25831	-1.37617	-1.41715	-1.31495
151.79	0.00413563	-0.00220167	-0.00788949	-0.0076321	0.00706511	0.0355017		151.79	-1.18574	-1.17192	-1.25514	-1.37313	-1.4144	-1.30932
151.99	0.00160234	-0.00470473	-0.0110341	-0.00662103	0.00500517	0.0355538		151.99	-1.18827	-1.17443	-1.25828	-1.37212	-1.41646	-1.30927
152.19	0.00326696	-0.0070361	-0.0124794	-0.00921549	0.00911952	0.0328421		152.19	-1.18661	-1.17676	-1.25973	-1.37471	-1.41234	-1.31198
152.39	0.00321757	-0.00635917	-0.00984729	-0.00722084	0.0075383	0.0373537		152.39	-1.18665	-1.17608	-1.25709	-1.37272	-1.41392	-1.30747
152.6	0.00270581	-0.00467743	-0.00785542	-0.00882592	0.0100106	0.034543		152.6	-1.18717	-1.1744	-1.2551	-1.37432	-1.41145	-1.31028
152.79	0.00187933	-0.00437505	-0.0126567	-0.00754856	0.00945327	0.0342865		152.79	-1.18799	-1.1741	-1.2599	-1.37304	-1.41201	-1.31053
152.99	0.00039603	-0.00484855	-0.0113864	-0.00618942	0.00762192	0.0342228		152.99	-1.18948	-1.17457	-1.25863	-1.37168	-1.41384	-1.3106
153.19	0.00451319	-0.00751895	-0.0129307	-0.00898037	0.0068344	0.0338711		153.19	-1.18536	-1.17724	-1.26018	-1.37447	-1.41463	-1.31095
153.39	0.00723569	-0.00429632	-0.0100927	-0.0135439	0.00661523	0.0337082		153.39	-1.18264	-1.17402	-1.25734	-1.37904	-1.41485	-1.31111
153.6	0.0038998	-0.00397631	-0.00913833	-0.0116345	0.00492325	0.0356298		153.6	-1.18597	-1.1737	-1.25639	-1.37713	-1.41654	-1.30919
153.79	0.00022992	-0.00338949	-0.0101381	-0.00703906	0.00715326	0.034647		153.79	-1.18964	-1.17311	-1.25738	-1.37253	-1.41431	-1.31017
153.99	0.00289949	-0.00459763	-0.00813317	-0.0069824	0.00747863	0.0348079		153.99	-1.18697	-1.17432	-1.25538	-1.37248	-1.41398	-1.31001
154.19	0.00493029	-0.0065859	-0.00981055	-0.00447984	0.00889002	0.0328117		154.19	-1.18494	-1.17631	-1.25706	-1.36997	-1.41257	-1.31201
154.39	0.00509832	-0.00901011	-0.00686913	-0.00830441	0.00940012	0.029642		154.39	-1.18477	-1.17873	-1.25412	-1.3738	-1.41206	-1.31518
154.6	0.00255361	-0.0059858	-0.0100075	-0.0075154	0.0046036	0.0370963		154.6	-1.18732	-1.17571	-1.25725	-1.37301	-1.41686	-1.30772
154.79	0.0047553	-0.00473373	-0.0128931	-0.0108016	0.0034835	0.0324991		154.79	-1.18512	-1.17446	-1.26014	-1.3763	-1.41798	-1.31232
154.99	0.00360959	-0.0047362	-0.0098022	-0.00581532	0.00961758	0.0372105		154.99	-1.18626	-1.17446	-1.25705	-1.37131	-1.41184	-1.30761
155.19	0.00490899	-0.00010899	-0.0127089	-0.00697562	0.00266645	0.0332767		155.19	-1.18496	-1.16983	-1.25996	-1.37247	-1.4188	-1.31154
155.4	0.00034034	-0.00379946	-0.00812789	-0.00640729	0.0082608	0.036255		155.4	-1.18953	-1.17352	-1.25537	-1.3719	-1.4132	-1.30857
155.6	0.00174421	-0.00514156	-0.00563766	-0.00771847	0.00887665	0.0308281		155.6	-1.18813	-1.17486	-1.25288	-1.37321	-1.41259	-1.31399
155.79	0.00586579	-0.00478914	-0.0101675	-0.00401965	0.00839416	0.0367117		155.79	-1.18401	-1.17451	-1.25741	-1.36951	-1.41307	-1.30811
155.99	0.00125404	-0.00587935	-0.0106253	-0.00978697	0.00658037	0.0327679		155.99	-1.18862	-1.1756	-1.25787	-1.37528	-1.41488	-1.31205
156.19	0.00068669	-0.00683564	-0.0104472	-0.00752015	0.00934454	0.0341161		156.19	-1.18919	-1.17656	-1.25769	-1.37301	-1.41212	-1.3107
156.39	0.00709217	-0.00434502	-0.008971	-0.00895383	0.00736316	0.0329508		156.39	-1.18278	-1.17407	-1.25622	-1.37445	-1.4141	-1.31187
156.59	0.00253777	-0.00459757	-0.009681	-0.0124322	0.00938857	0.032735		156.59	-1.18733	-1.17432	-1.25693	-1.37793	-1.41207	-1.31209
156.79	0.00500633	-0.00383886	-0.00821592	-0.00924412	0.00719177	0.0354662		156.79	-1.18487	-1.17356	-1.25546	-1.37474	-1.41427	-1.30935
156.99	-0.00010852	-0.00758691	-0.0110639	-0.00756845	0.00698721	0.0349888		156.99	-1.18998	-1.17731	-1.25831	-1.37306	-1.41448	-1.30983
157.19	0.00203235	-0.00561228	-0.0072755	-0.00821223	0.00778577	0.0308141		157.19	-1.18784	-1.17533	-1.25452	-1.37371	-1.41368	-1.31401
157.39	0.00169949	-0.00246225	-0.0105665	-0.00742199	0.0108491	0.0393535		157.39	-1.18817	-1.17218	-1.25781	-1.37292	-1.41061	-1.30547
157.6	0.00384113	-0.0041236	-0.00843789	-0.00779202	0.00966332	0.0324358		157.6	-1.18603	-1.17384	-1.25568	-1.37329	-1.4118	-1.31238
157.79	0.00266369	-0.00537166	-0.00802643	-0.00859305	0.00833436	0.0384734		157.79	-1.18721	-1.17509	-1.25527	-1.37409	-1.41313	-1.30635
157.99	0.00028891	-0.00710402	-0.0102901	-0.00917798	0.00606273	0.0349099		157.99	-1.18958	-1.17683	-1.25754	-1.37467	-1.4154	-1.30991
158.19	0.00250986	-0.00577902	-0.0119256	-0.00850768	0.00786098	0.0311365		158.19	-1.18736	-1.1755	-1.25917	-1.374	-1.4136	-1.31368
158.39	0.00447601	-0.00728149	-0.0111996	-0.00902204	0.00860308	0.0355625		158.39	-1.1854	-1.177	-1.25845	-1.37452	-1.41286	-1.30926
158.59	0.00309713	-0.00668339	-0.0107246	-0.00592911	0.00602357	0.0324917		158.59	-1.18678	-1.1764	-1.25797	-1.37142	-1.41544	-1.31233
158.79	0.00427492	-0.00389953	-0.00960697	-0.00780524	0.0071727	0.0355687		158.79	-1.1856	-1.17362	-1.25685	-1.3733	-1.41429	-1.30925
158.99	0.00428179	-0.00372552	-0.00897506	-0.00576927	0.00579836	0.0358251		158.99	-1.18559	-1.17345	-1.25622	-1.37126	-1.41566	-1.30899
159.19	0.00250024	-0.00478225	-0.0135945	-0.0058361	0.00696127	0.0377765		159.19	-1.18737	-1.1745	-1.26084	-1.37133	-1.4145	-1.30704
159.39	0.00223481	-0.00460514	-0.00807706	-0.0123722	0.00555923	0.0328162		159.39	-1.18764	-1.17433	-1.25532	-1.37787	-1.4159	-1.312
159.59	0.00396118	-0.00383483	-0.0126309	-0.0109597	0.00769157	0.0390917		159.59	-1.18591	-1.17356	-1.25988	-1.37645	-1.41377	-1.30573
159.79	0.00544365	-0.00522637	-0.0100087	-0.00642486	0.00966481	0.0363602		159.79	-1.18443	-1.17495	-1.25726	-1.37192	-1.4118	-1.30846
159.99	0.00253314	-0.00295386	-0.0111201	-0.0068986	0.00598039	0.0295965		159.99	-1.18734	-1.17268	-1.25837	-1.37239	-1.41548	-1.31522
160.2	0.00201279	-0.00416039	-0.012033	-0.00694285	0.00750878	0.0344188		160.2	-1.18786	-1.17388	-1.25928	-1.37244	-1.41395	-1.3104
160.39	0.00304657	-0.00352591	-0.0090027	-0.00878431	0.00583747	0.0311825		160.39	-1.18683	-1.17325	-1.25625	-1.37428	-1.41563	-1.31364
160.59	-4.68e-05	-0.00542251	-0.0128211	-0.0107323	0.00840401	0.0369993		160.59	-1.18992	-1.17514	-1.26007	-1.37623	-1.41306	-1.30782
160.79	0.00099007	-0.00783047	-0.00994873	-0.0107829	0.00901592	0.033871		160.79	-1.18888	-1.17755	-1.2572	-1.37628	-1.41245	-1.31095
160.99	0.00587566	-0.00647984	-0.010605	-0.00826543	0.00626211	0.0347239		160.99	-1.184	-1.1762	-1.25785	-1.37376	-1.4152	-1.3101
161.19	-0.00071334	-0.00350291	-0.0145638	-0.00998184	0.00744529	0.0306342		161.19	-1.19059	-1.17322	-1.26181	-1.37548	-1.41402	-1.31419
161.39	0.00477936	-0.00570651	-0.0107986	-0.00898567	0.00921308	0.0371609		161.39	-1.18509	-1.17543	-1.25805	-1.37448	-1.41225	-1.30766
161.59	0.00275933	-0.00886065	-0.012998	-0.00538951	0.00711316	0.0353384		161.59	-1.18711	-1.17858	-1.26024	-1.37088	-1.41435	-1.30948
161.79	0.0048311	-0.00301159	-0.00994513	-0.00579525	0.00291724	0.0339526		161.79	-1.18504	-1.17273	-1.25719	-1.37129	-1.41855	-1.31087
161.99	0.00302869	-0.00299844	-0.0107291	-0.00977435	0.00356282	0.034645		161.99	-1.18684	-1.17272	-1.25798	-1.37527	-1.4179	-1.31017
162.19	0.00243804	-0.00595758	-0.0100961	-0.00728049	0.00554411	0.0319508		162.19	-1.18743	-1.17568	-1.25734	-1.37277	-1.41592	-1.31287
162.39	-0.00017689	-0.00707229	-0.00898411	-0.0105527	0.00475412	0.0342761		162.39	-1.19005	-1.17679	-1.25623	-1.37605	-1.41671	-1.31054
162.6	0.00027082	-0.00575827	-0.0098501	-0.011128	0.00618623	0.0322436		162.6	-1.1896	-1.17548	-1.2571	-1.37662	-1.41528	-1.31258
162.79	-0.0017982	-0.00366644	-0.0109847	-0.00925099	0.00107739	0.0351737		162.79	-1.19167	-1.17339	-1.25823	-1.37475	-1.42039	-1.30965
162.99	0.00076632	-0.00809247	-0.0141239	-0.00587356	0.00776249	0.0339182		162.99	-1.18911	-1.17781	-1.26137	-1.37137	-1.4137	-1.3109
163.19	0.00403278	-0.00345471	-0.0114067	-0.00875281	0.00549941	0.0336165		163.19	-1.18584	-1.17318	-1.25865	-1.37425	-1.41596	-1.3112
163.39	0.00590553	-0.00196508	-0.0122678	-0.00799436	0.00679973	0.0355322		163.39	-1.18397	-1.17169	-1.25951	-1.37349	-1.41466	-1.30929
163.59	0.00452327	-0.00503656	-0.0106926	-0.00890462	0.00516901	0.0365717		163.59	-1.18535	-1.17476	-1.25794	-1.3744	-1.41629	-1.30825
163.79	0.00601242	-0.00620738	-0.011823	-0.00943503	0.00736939	0.0305948		163.79	-1.18386	-1.17593	-1.25907	-1.37493	-1.41409	-1.31423
163.99	0.00377435	-0.00557266	-0.0105347	-0.00526589	0.0111849	0.0357592		163.99	-1.1861	-1.17529	-1.25778	-1.37076	-1.41028	-1.30906
164.19	0.00312221	-0.00781404	-0.00896011	-0.00715516	0.00775482	0.0366591		164.19	-1.18675	-1.17754	-1.25621	-1.37265	-1.41371	-1.30816
164.39	0.00502766	-0.00504244	-0.00785537	-0.00654201	0.00741479	0.0338917		164.39	-1.18484	-1.17476	-1.2551	-1.37204	-1.41405	-1.31093
164.59	0.0020112	-0.00764297	-0.00987855	-0.008129	0.00351476	0.0353941		164.59	-1.18786	-1.17736	-1.25713	-1.37362	-1.41795	-1.30943
164.79	0.00546939	-0.00348032	-0.0109753	-0.00620839	0.00716213	0.0336834		164.79	-1.1844	-1.1732	-1.25822	-1.3717	-1.4143	-1.31114
165	0.00485034	-0.00600598	-0.0108827	-0.0076147	0.00714822	0.035762		165	-1.18502	-1.17573	-1.25813	-1.37311	-1.41431	-1.30906
165.19	0.00279043	-0.00492912	-0.0085852	-0.0101434	0.00157547	0.0338009		165.19	-1.18708	-1.17465	-1.25583	-1.37564	-1.41989	-1.31102
165.39	0.00302969	-0.00748466	-0.0103041	-0.00599489	0.00715566	0.0355694		165.39	-1.18684	-1.17721	-1.25755	-1.37149	-1.41431	-1.30925
165.59	0.0041182	-0.00536614	-0.00994995	-0.0100292	0.00692953	0.0340349		165.59	-1.18575	-1.17509	-1.2572	-1.37552	-1.41453	-1.31079
165.79	0.00360011	-0.00419544	-0.00820218	-0.00754472	0.00720325	0.0328386		165.79	-1.18627	-1.17392	-1.25545	-1.37304	-1.41426	-1.31198
165.99	0.00464662	-0.00646462	-0.0113984	-0.0101222	0.00723579	0.0343058		165.99	-1.18523	-1.17619	-1.25865	-1.37562	-1.41423	-1.31051
166.19	0.00034647	-0.00356472	-0.00719605	-0.00907665	0.00634215	0.0329612		166.19	-1.18953	-1.17329	-1.25444	-1.37457	-1.41512	-1.31186
166.39	0.00371295	-0.00404264	-0.0120286	-0.0116014	0.00732327	0.0364457		166.39	-1.18616	-1.17376	-1.25928	-1.3771	-1.41414	-1.30837
166.59	0.00268688	-0.0055746	-0.0115223	-0.00613392	0.0105391	0.0328907		166.59	-1.18719	-1.1753	-1.25877	-1.37163	-1.41092	-1.31193
166.79	0.00331166	-0.00590557	-0.0118398	-0.00483085	0.00569002	0.0352915		166.79	-1.18656	-1.17563	-1.25909	-1.37033	-1.41577	-1.30953
166.99	0.00214001	-0.00383052	-0.0104023	-0.00760949	0.00695206	0.033791		166.99	-1.18773	-1.17355	-1.25765	-1.3731	-1.41451	-1.31103
167.19	0.0029307	-0.00575231	-0.00836331	-0.0093199	0.00720495	0.0339586		167.19	-1.18694	-1.17547	-1.25561	-1.37481	-1.41426	-1.31086
167.39	0.00259443	-0.00662145	-0.00957475	-0.00974749	0.00729814	0.0334136		167.39	-1.18728	-1.17634	-1.25682	-1.37524	-1.41416	-1.31141
167.59	-0.00172744	-0.00439894	-0.0085381	-0.00604425	0.006265	0.0341593		167.59	-1.1916	-1.17412	-1.25578	-1.37154	-1.4152	-1.31066
167.79	0.0007346	-0.00060784	-0.0109321	-0.0109081	0.00491164	0.0353511		167.79	-1.18914	-1.17033	-1.25818	-1.3764	-1.41655	-1.30947
167.99	0.00429475	-0.00708265	-0.0107615	-0.00801149	0.00533548	0.0363172		167.99	-1.18558	-1.1768	-1.25801	-1.37351	-1.41613	-1.3085
168.19	0.00476966	-0.0051934	-0.00969188	-0.00945995	0.00880519	0.0366937		168.19	-1.1851	-1.17491	-1.25694	-1.37495	-1.41266	-1.30813
168.39	0.00475565	-0.00416096	-0.0104407	-0.00280024	0.00989716	0.034756		168.39	-1.18512	-1.17388	-1.25769	-1.36829	-1.41157	-1.31006
168.59	0.00620086	-0.00550269	-0.0123602	-0.00672438	0.00713477	0.0318681		168.59	-1.18367	-1.17522	-1.25961	-1.37222	-1.41433	-1.31295
168.79	0.00389962	-0.00724508	-0.0110592	-0.0070378	0.00393324	0.0381296		168.79	-1.18597	-1.17697	-1.25831	-1.37253	-1.41753	-1.30669
168.99	0.00285135	-0.00383616	-0.0113407	-0.00974431	0.00587459	0.0344983		168.99	-1.18702	-1.17356	-1.25859	-1.37524	-1.41559	-1.31032
169.19	0.00305811	-0.00112706	-0.0101835	-0.00398285	0.00561255	0.0332616		169.19	-1.18681	-1.17085	-1.25743	-1.36948	-1.41585	-1.31156
169.39	0.00380092	-0.00678867	-0.0104643	-0.00610617	0.00450735	0.0327312		169.39	-1.18607	-1.17651	-1.25771	-1.3716	-1.41696	-1.31209
169.59	0.00214488	-0.00137717	-0.0115817	-0.00892768	0.00469345	0.0341227		169.59	-1.18773	-1.1711	-1.25883	-1.37442	-1.41677	-1.3107
169.79	-0.00081477	-0.00449191	-0.0145781	-0.00516698	0.0107183	0.033011		169.79	-1.19069	-1.17421	-1.26182	-1.37066	-1.41074	-1.31181
169.99	0.00163331	-0.00710398	-0.009812	-0.00611682	0.00661343	0.0351056		169.99	-1.18824	-1.17683	-1.25706	-1.37161	-1.41485	-1.30971
170.19	-0.00089907	-0.00530522	-0.0134607	-0.00993407	0.00637779	0.0296809		170.19	-1.19077	-1.17503	-1.26071	-1.37543	-1.41508	-1.31514
170.39	0.00674091	-0.00711286	-0.0125238	-0.00924888	0.00569002	0.0350696		170.39	-1.18313	-1.17683	-1.25977	-1.37474	-1.41577	-1.30975
170.59	0.00165285	-0.00715729	-0.0117464	-0.0133281	0.00734722	0.0334129		170.59	-1.18822	-1.17688	-1.25899	-1.37882	-1.41412	-1.31141
170.79	-0.00139676	-0.00406131	-0.0103851	-0.00597211	0.00342548	0.0317711		170.79	-1.19127	-1.17378	-1.25763	-1.37147	-1.41804	-1.31305
170.99	0.00476742	-0.0072064	-0.0093556	-0.00555135	0.00798228	0.030583		170.99	-1.1851	-1.17693	-1.2566	-1.37105	-1.41348	-1.31424
171.19	0.00236228	-0.00669173	-0.0126572	-0.00653598	0.00637464	0.0369746		171.19	-1.18751	-1.17641	-1.2599	-1.37203	-1.41509	-1.30785
171.39	0.00287819	-0.00535503	-0.00789045	-0.00948756	0.0096298	0.0320864		171.39	-1.18699	-1.17508	-1.25514	-1.37498	-1.41183	-1.31273
171.59	0.00250119	-0.0077761	-0.0087218	-0.00785629	0.00928355	0.0310016		171.59	-1.18737	-1.1775	-1.25597	-1.37335	-1.41218	-1.31382
171.79	0.00513314	-0.00418391	-0.010852	-0.0103028	0.00951558	0.0317001		171.79	-1.18474	-1.17391	-1.2581	-1.3758	-1.41195	-1.31312
171.99	0.00072937	-0.0034352	-0.0105147	-0.011718	0.00958976	0.0334864		171.99	-1.18914	-1.17316	-1.25776	-1.37721	-1.41187	-1.31133
172.19	0.00369961	-0.00489721	-0.0114786	-0.00561233	0.00788452	0.0337447		172.19	-1.18617	-1.17462	-1.25873	-1.37111	-1.41358	-1.31108
172.39	0.00244233	-0.00532688	-0.008845	-0.0155784	0.00900631	0.0336225		172.39	-1.18743	-1.17505	-1.25609	-1.38107	-1.41246	-1.3112
172.59	0.00266207	-0.00645823	-0.00896467	-0.00656695	0.00833073	0.0342558		172.59	-1.18721	-1.17618	-1.25621	-1.37206	-1.41313	-1.31056
172.79	-0.00069923	-0.00336334	-0.0107356	-0.00763356	0.00344294	0.0341179		172.79	-1.19057	-1.17308	-1.25798	-1.37313	-1.41802	-1.3107
172.99	0.0016817	-0.00652426	-0.0115433	-0.00897413	0.00570016	0.0329936		172.99	-1.18819	-1.17625	-1.25879	-1.37447	-1.41576	-1.31183
173.19	0.00391283	-0.00492866	-0.0115505	-0.0118534	0.00583049	0.0338497		173.19	-1.18596	-1.17465	-1.2588	-1.37735	-1.41563	-1.31097
173.39	-0.00199853	-0.0050258	-0.0118051	-0.00542084	0.00353987	0.0333857		173.39	-1.19187	-1.17475	-1.25905	-1.37092	-1.41792	-1.31143
173.6	0.00220853	-0.00551241	-0.0077414	-0.0095489	0.00660386	0.034017		173.6	-1.18766	-1.17523	-1.25499	-1.37504	-1.41486	-1.3108
173.79	0.00422952	-0.00542641	-0.00995844	-0.00883125	0.0075248	0.0351786		173.79	-1.18564	-1.17515	-1.25721	-1.37433	-1.41394	-1.30964
173.99	0.00120723	-0.0102301	-0.0126332	-0.00549369	0.00454569	0.031717		173.99	-1.18867	-1.17995	-1.25988	-1.37099	-1.41692	-1.3131
174.19	0.00267588	0.00024704	-0.0108218	-0.00695002	0.00787018	0.0343897		174.19	-1.1872	-1.16947	-1.25807	-1.37244	-1.41359	-1.31043
174.39	0.003718	-0.00925681	-0.0125114	-0.00730652	0.00829624	0.0339764		174.39	-1.18615	-1.17898	-1.25976	-1.3728	-1.41317	-1.31084
174.6	-0.00042766	-0.00700877	-0.00975082	-0.00845109	0.00701682	0.0324817		174.6	-1.1903	-1.17673	-1.257	-1.37395	-1.41445	-1.31234
174.79	0.00215783	-0.00368524	-0.012744	-0.00722866	0.00389101	0.0338127		174.79	-1.18771	-1.17341	-1.25999	-1.37272	-1.41757	-1.31101
174.99	0.00293107	-0.00429241	-0.010217	-0.0137527	0.00659183	0.0333698		174.99	-1.18694	-1.17401	-1.25746	-1.37925	-1.41487	-1.31145
175.19	-0.00144493	-0.00908508	-0.0081468	-0.0104553	0.0100958	0.0323526		175.19	-1.19132	-1.17881	-1.25539	-1.37595	-1.41137	-1.31247
175.39	0.00384227	-0.00380066	-0.0120307	-0.00810374	0.00409726	0.0318432		175.39	-1.18603	-1.17352	-1.25928	-1.3736	-1.41737	-1.31298
175.6	-0.00032252	-0.00659244	-0.0147809	-0.00736678	0.00500692	0.0302517		175.6	-1.19019	-1.17631	-1.26203	-1.37286	-1.41646	-1.31457
175.79	-0.00103104	-0.00719167	-0.00975738	-0.00656957	0.00528934	0.0346687		175.79	-1.1909	-1.17691	-1.257	-1.37206	-1.41617	-1.31015
175.99	0.00607387	-0.00269173	-0.00820891	-0.00995628	0.00289529	0.0322138		175.99	-1.1838	-1.17241	-1.25546	-1.37545	-1.41857	-1.31261
176.19	0.00203926	-0.00535523	-0.0115408	-0.00530205	0.00893491	0.0367401		176.19	-1.18783	-1.17508	-1.25879	-1.3708	-1.41253	-1.30808
176.39	0.00368752	-0.00259639	-0.00791419	-0.00946436	0.011294	0.0338488		176.39	-1.18618	-1.17232	-1.25516	-1.37496	-1.41017	-1.31097
176.6	0.00427917	-0.00775327	-0.00994784	-0.0114395	0.00653491	0.0341336		176.6	-1.18559	-1.17747	-1.25719	-1.37693	-1.41493	-1.31069
176.79	0.00195086	-0.00358135	-0.00846789	-0.00688947	0.00553471	0.0304476		176.79	-1.18792	-1.1733	-1.25571	-1.37238	-1.41593	-1.31437
177.02	0.00290582	-0.00485125	-0.0100976	-0.00852051	0.0043294	0.0361976		177.02	-1.18697	-1.17457	-1.25734	-1.37401	-1.41713	-1.30862
177.19	0.00354385	-0.00713601	-0.0131907	-0.00865282	0.00853437	0.0359949		177.19	-1.18633	-1.17686	-1.26044	-1.37415	-1.41293	-1.30883
177.39	0.00304161	-0.0040841	-0.0102429	-0.00801584	0.00459011	0.0332112		177.39	-1.18683	-1.17381	-1.25749	-1.37351	-1.41687	-1.31161
177.6	0.00192678	-0.00535375	-0.0113544	-0.0115079	0.0056103	0.033671		177.6	-1.18795	-1.17508	-1.2586	-1.377	-1.41585	-1.31115
177.79	-0.00090926	-0.00549838	-0.0131069	-0.00653386	0.0039686	0.0288675		177.79	-1.19078	-1.17522	-1.26035	-1.37203	-1.41749	-1.31595
177.99	0.00154824	-0.00392981	-0.010522	-0.00798725	0.00615389	0.0336487		177.99	-1.18832	-1.17365	-1.25777	-1.37348	-1.41531	-1.31117
178.19	0.00500319	-0.00566205	-0.00971179	-0.0110776	0.00603989	0.0300301		178.19	-1.18487	-1.17538	-1.25696	-1.37657	-1.41542	-1.31479
178.39	0.00292049	-0.0041525	-0.0105351	-0.0129487	0.00519411	0.0345461		178.39	-1.18695	-1.17387	-1.25778	-1.37844	-1.41627	-1.31027
178.6	0.00110515	-0.00922886	-0.0103549	-0.0114459	0.00511988	0.0333853		178.6	-1.18877	-1.17895	-1.2576	-1.37694	-1.41634	-1.31143
178.79	0.003771	-0.00518115	-0.0131142	-0.00975431	0.00446163	0.031198		178.79	-1.1861	-1.1749	-1.26036	-1.37525	-1.417	-1.31362
178.99	0.0018939	-0.00867127	-0.0115546	-0.0113804	0.00719826	0.0335721		178.99	-1.18798	-1.17839	-1.2588	-1.37687	-1.41426	-1.31125
179.19	0.00114959	-0.00703168	-0.00808107	-0.0121502	0.00720328	0.0334263		179.19	-1.18872	-1.17675	-1.25533	-1.37764	-1.41426	-1.31139
179.39	0.00120633	-0.00877553	-0.0114433	-0.00841907	0.00488255	0.0308724		179.39	-1.18867	-1.1785	-1.25869	-1.37391	-1.41658	-1.31395
179.6	0.00300138	-0.00541928	-0.00977194	-0.0104002	0.00672634	0.0347535		179.6	-1.18687	-1.17514	-1.25702	-1.37589	-1.41474	-1.31007
179.79	0.00073216	-0.00679557	-0.00788148	-0.011168	0.00880672	0.033209		179.79	-1.18914	-1.17652	-1.25513	-1.37666	-1.41266	-1.31161
179.99	-0.00031732	-0.00315197	-0.0107562	-0.0119282	0.00344231	0.0357609		179.99	-1.19019	-1.17287	-1.258	-1.37742	-1.41802	-1.30906
180.19	0.0046278	-0.00536211	-0.0112816	-0.00762373	0.00377635	0.0340466		180.19	-1.18524	-1.17508	-1.25853	-1.37312	-1.41769	-1.31077
180.39	0.00318472	-0.00579538	-0.0110784	-0.00805145	0.00607553	0.0278315		180.39	-1.18669	-1.17552	-1.25833	-1.37355	-1.41539	-1.31699
180.6	0.00403792	-0.00630436	-0.0144511	-0.00708547	0.0090313	0.0344798		180.6	-1.18583	-1.17603	-1.2617	-1.37258	-1.41243	-1.31034
180.79	0.00232324	-0.00899911	-0.0119265	-0.00752882	0.00463204	0.0315594		180.79	-1.18755	-1.17872	-1.25917	-1.37302	-1.41683	-1.31326
180.99	0.00258156	-0.00452497	-0.00809735	-0.00837648	0.00706824	0.0345907		180.99	-1.18729	-1.17425	-1.25534	-1.37387	-1.41439	-1.31023
181.19	0.00158696	-0.00627039	-0.00935548	-0.0100879	0.00443844	0.0345435		181.19	-1.18829	-1.17599	-1.2566	-1.37558	-1.41702	-1.31028
181.39	0.00032595	-0.00691848	-0.0104063	-0.00720398	0.00561219	0.0340295		181.39	-1.18955	-1.17664	-1.25765	-1.3727	-1.41585	-1.31079
181.59	0.00250474	-0.00282037	-0.00829563	-0.00871688	0.00296417	0.0384606		181.59	-1.18737	-1.17254	-1.25554	-1.37421	-1.4185	-1.30636
181.79	0.00092591	-0.0045768	-0.0106376	-0.0103986	0.00961731	0.0333033		181.79	-1.18895	-1.1743	-1.25788	-1.37589	-1.41185	-1.31152
181.99	0.00354837	-0.00479315	-0.0120607	-0.0103618	0.00561899	0.0308239		181.99	-1.18632	-1.17451	-1.25931	-1.37586	-1.41584	-1.314
182.19	0.00068927	-0.00229526	-0.0112328	-0.0141645	0.00286762	0.0352293		182.19	-1.18918	-1.17202	-1.25848	-1.37966	-1.41859	-1.30959
182.39	0.00288025	-0.00749121	-0.00927886	-0.00716357	0.00491836	0.0313267		182.39	-1.18699	-1.17721	-1.25653	-1.37266	-1.41654	-1.31349
182.6	-0.00128002	-0.00503184	-0.0119389	-0.00605652	0.00499885	0.0344514		182.6	-1.19115	-1.17475	-1.25919	-1.37155	-1.41646	-1.31037
182.79	-0.00024709	-0.00523359	-0.00733034	-0.0108027	0.00873123	0.0339584		182.79	-1.19012	-1.17495	-1.25458	-1.3763	-1.41273	-1.31086
182.99	0.00199732	-0.00513294	-0.00735201	-0.0112771	0.00743662	0.0349059		182.99	-1.18787	-1.17485	-1.2546	-1.37677	-1.41403	-1.30991
183.19	0.00249681	-0.00675793	-0.0110906	-0.0107672	0.00314789	0.0344851		183.19	-1.18738	-1.17648	-1.25834	-1.37626	-1.41831	-1.31033
183.39	0.00189446	-0.00775661	-0.00958209	-0.00825593	0.00940798	0.0351277		183.39	-1.18798	-1.17748	-1.25683	-1.37375	-1.41205	-1.30969
183.6	0.00236541	-0.00364298	-0.01151	-0.0113748	0.00499203	0.0323473		183.6	-1.18751	-1.17336	-1.25876	-1.37687	-1.41647	-1.31247
183.79	0.00276474	-0.00783116	-0.0140225	-0.0101563	0.00291752	0.034554		183.79	-1.18711	-1.17755	-1.26127	-1.37565	-1.41855	-1.31027
183.99	0.00417823	-0.00748609	-0.0139823	-0.00712875	0.00618674	0.0343541		183.99	-1.18569	-1.17721	-1.26123	-1.37262	-1.41528	-1.31047
184.19	0.00145903	-0.00402232	-0.0109695	-0.00755561	0.00844255	0.0351223		184.19	-1.18841	-1.17374	-1.25822	-1.37305	-1.41302	-1.3097
184.39	-0.00022931	-0.00989128	-0.0110539	-0.0091508	0.00483708	0.036962		184.39	-1.1901	-1.17961	-1.2583	-1.37465	-1.41663	-1.30786
184.59	-2.201e-05	-0.00623059	-0.0128697	-0.009586	0.00530641	0.0362157		184.59	-1.18989	-1.17595	-1.26012	-1.37508	-1.41616	-1.3086
184.79	0.00377261	-0.00666693	-0.0114037	-0.0124222	0.00580244	0.0363245		184.79	-1.1861	-1.17639	-1.25865	-1.37792	-1.41566	-1.3085
184.99	0.00306686	-0.00263887	-0.00927302	-0.0114161	0.0042492	0.0323851		184.99	-1.18681	-1.17236	-1.25652	-1.37691	-1.41721	-1.31243
185.19	0.00337666	-0.00136823	-0.00962794	-0.00851967	0.00819905	0.0340995		185.19	-1.1865	-1.17109	-1.25687	-1.37401	-1.41326	-1.31072
185.39	0.00384378	-0.0050023	-0.0113396	-0.00819572	0.00323886	0.0360873		185.39	-1.18603	-1.17472	-1.25859	-1.37369	-1.41822	-1.30873
185.6	-0.00035844	-0.00543573	-0.00997574	-0.0102326	0.0100202	0.0317341		185.6	-1.19023	-1.17516	-1.25722	-1.37573	-1.41144	-1.31309
185.79	0.00564391	-0.00674457	-0.00809118	-0.00801822	0.00734283	0.0325954		185.79	-1.18423	-1.17647	-1.25534	-1.37351	-1.41412	-1.31222
185.99	0.00052035	-0.00628466	-0.0133759	-0.0081892	0.00234439	0.0339394		185.99	-1.18935	-1.17601	-1.26062	-1.37368	-1.41912	-1.31088
186.19	0.0008165	-0.00287338	-0.00881118	-0.00948793	0.00273861	0.0308221		186.19	-1.18906	-1.17259	-1.25606	-1.37498	-1.41872	-1.314
186.39	0.00178592	-0.00709722	-0.00859812	-0.0058079	0.0100786	0.0353216		186.39	-1.18809	-1.17682	-1.25584	-1.3713	-1.41138	-1.3095
186.6	0.00178623	-0.00361623	-0.00865618	-0.00683966	0.00627511	0.032835		186.6	-1.18809	-1.17334	-1.2559	-1.37233	-1.41519	-1.31199
186.79	0.00182356	-0.00303656	-0.0103244	-0.0102618	0.00216655	0.034796		186.79	-1.18805	-1.17276	-1.25757	-1.37576	-1.4193	-1.31002
186.99	0.00353949	-0.00579992	-0.0111228	-0.00998955	0.0088228	0.0301399		186.99	-1.18633	-1.17552	-1.25837	-1.37548	-1.41264	-1.31468
187.19	0.0018723	-0.00438523	-0.0117333	-0.00867408	0.00608946	0.0355571		187.19	-1.188	-1.17411	-1.25898	-1.37417	-1.41537	-1.30926
187.39	0.00135993	-0.00218057	-0.0120243	-0.00558215	0.00157061	0.0390566		187.39	-1.18851	-1.1719	-1.25927	-1.37108	-1.41989	-1.30576
187.6	-0.00025727	-0.00962893	-0.0110125	-0.0109545	0.00261713	0.0318836		187.6	-1.19013	-1.17935	-1.25826	-1.37645	-1.41885	-1.31294
187.79	0.00243485	-0.00716169	-0.00903718	-0.0106994	0.00308505	0.0324642		187.79	-1.18744	-1.17688	-1.25628	-1.37619	-1.41838	-1.31236
188	0.00030835	-0.00710065	-0.0126108	-0.0123713	0.00729855	0.0325361		188	-1.18956	-1.17682	-1.25986	-1.37787	-1.41416	-1.31228
188.19	0.00144136	-0.00335609	-0.00800025	-0.0084492	0.00737564	0.0357027		188.19	-1.18843	-1.17308	-1.25525	-1.37394	-1.41409	-1.30912
188.39	0.00312378	-0.00415706	-0.0116192	-0.00840222	0.00457569	0.0298551		188.39	-1.18675	-1.17388	-1.25887	-1.3739	-1.41689	-1.31496
188.6	0.00352197	-0.00575053	-0.0130828	-0.00464082	0.00480129	0.0348512		188.6	-1.18635	-1.17547	-1.26033	-1.37014	-1.41666	-1.30997
188.79	0.00232672	-0.00540457	-0.0104536	-0.00889114	0.00531176	0.0339313		188.79	-1.18755	-1.17513	-1.2577	-1.37439	-1.41615	-1.31089
188.99	0.00152223	-0.00567509	-0.015151	-0.00909181	0.00202349	0.0347903		188.99	-1.18835	-1.1754	-1.2624	-1.37459	-1.41944	-1.31003
189.19	0.00296152	-0.00602064	-0.011162	-0.00682312	0.00588301	0.0313804		189.19	-1.18691	-1.17574	-1.25841	-1.37232	-1.41558	-1.31344
189.39	3.22e-06	-0.00681826	-0.0119972	-0.00956486	0.00537782	0.0376698		189.39	-1.18987	-1.17654	-1.25924	-1.37506	-1.41608	-1.30715
189.59	0.00078883	-0.00397417	-0.0111718	-0.0115798	0.00612894	0.0354348		189.59	-1.18908	-1.1737	-1.25842	-1.37707	-1.41533	-1.30939
189.79	0.00132926	-0.00455641	-0.0124088	-0.0062864	0.00825664	0.031259		189.79	-1.18854	-1.17428	-1.25966	-1.37178	-1.41321	-1.31356
189.99	0.00266795	-0.00494168	-0.00953201	-0.00905608	0.00454628	0.0343118		189.99	-1.1872	-1.17466	-1.25678	-1.37455	-1.41692	-1.31051
190.19	0.00420032	-0.00503102	-0.0107002	-0.010504	0.00408266	0.0328289		190.19	-1.18567	-1.17475	-1.25795	-1.376	-1.41738	-1.31199
190.39	0.00052207	-0.00472396	-0.0106074	-0.00533009	0.00305356	0.0367316		190.39	-1.18935	-1.17445	-1.25785	-1.37082	-1.41841	-1.30809
190.6	0.00193014	-0.00687702	-0.0108753	-0.00755613	0.00691112	0.031436		190.6	-1.18794	-1.1766	-1.25812	-1.37305	-1.41455	-1.31338
190.79	0.00532999	-0.00835618	-0.00947764	-0.00975347	0.00447868	0.0317655		190.79	-1.18454	-1.17808	-1.25672	-1.37525	-1.41698	-1.31305
190.99	0.00108055	-0.00572192	-0.0126909	-0.0113816	0.00278429	0.0337095		190.99	-1.18879	-1.17544	-1.25994	-1.37688	-1.41868	-1.31111
191.19	0.00143386	-0.00457268	-0.0135563	-0.00341928	0.00528081	0.0305541		191.19	-1.18844	-1.17429	-1.2608	-1.36891	-1.41618	-1.31427
191.39	-0.00104787	-0.00711784	-0.0112757	-0.0105336	0.00801794	0.0378077		191.39	-1.19092	-1.17684	-1.25852	-1.37603	-1.41344	-1.30701
191.59	0.00275038	-0.00837915	-0.0126176	-0.00487829	0.00733994	0.0325318		191.59	-1.18712	-1.1781	-1.25986	-1.37037	-1.41412	-1.31229
191.79	0.00493548	-0.00369857	-0.0128464	-0.0108352	0.00652192	0.0319846		191.79	-1.18494	-1.17342	-1.26009	-1.37633	-1.41494	-1.31284
191.99	-0.00054357	-0.00735396	-0.0128176	-0.0123204	0.00659832	0.0354549		191.99	-1.19042	-1.17708	-1.26006	-1.37781	-1.41486	-1.30937
192.19	0.00235651	-0.00372878	-0.0108911	-0.0116524	0.00301813	0.0320231		192.19	-1.18752	-1.17345	-1.25814	-1.37715	-1.41844	-1.3128
192.39	0.00395957	-0.00775052	-0.00929082	-0.0116248	0.00496231	0.0341041		192.39	-1.18591	-1.17747	-1.25654	-1.37712	-1.4165	-1.31072
192.59	0.00111983	-0.00664719	-0.0100141	-0.00679181	0.00180177	0.0325518		192.59	-1.18875	-1.17637	-1.25726	-1.37229	-1.41966	-1.31227
192.8	0.00075811	-0.0064215	-0.0112993	-0.00834654	0.00460411	0.0331018		192.8	-1.18911	-1.17614	-1.25855	-1.37384	-1.41686	-1.31172
192.99	-0.00113062	-0.00486249	-0.0111933	-0.0110335	0.00599821	0.0373704		192.99	-1.191	-1.17458	-1.25844	-1.37653	-1.41546	-1.30745
193.19	0.00450576	-0.00872503	-0.0136809	-0.00822016	0.00524372	0.0344382		193.19	-1.18537	-1.17845	-1.26093	-1.37371	-1.41622	-1.31038
193.39	-0.00096793	-0.00757123	-0.0126249	-0.0116745	0.00557141	0.0346523		193.39	-1.19084	-1.17729	-1.25987	-1.37717	-1.41589	-1.31017
193.59	0.00275989	-0.00434734	-0.00938476	-0.0113899	0.00708616	0.0343742		193.59	-1.18711	-1.17407	-1.25663	-1.37688	-1.41438	-1.31045
193.79	0.00323136	-0.00483544	-0.00981153	-0.0123591	0.00527313	0.0335061		193.79	-1.18664	-1.17456	-1.25706	-1.37785	-1.41619	-1.31131
193.99	0.00657596	-0.00707936	-0.010407	-0.0125595	0.00668165	0.0332097		193.99	-1.1833	-1.1768	-1.25765	-1.37805	-1.41478	-1.31161
194.19	0.00246148	-0.00295135	-0.0117872	-0.00708205	0.00256703	0.0356554		194.19	-1.18741	-1.17267	-1.25903	-1.37258	-1.4189	-1.30916
194.39	0.00436066	-0.00809124	-0.00856167	-0.00686685	0.00999413	0.0355418		194.39	-1.18551	-1.17781	-1.25581	-1.37236	-1.41147	-1.30928
194.59	0.00326129	-0.00270218	-0.0127731	-0.00262708	0.00205205	0.0308819		194.59	-1.18661	-1.17242	-1.26002	-1.36812	-1.41941	-1.31394
194.79	-7.777e-05	-0.00963978	-0.0129189	-0.0129342	0.00230544	0.0405891		194.79	-1.18995	-1.17936	-1.26017	-1.37843	-1.41916	-1.30423
194.99	0.00048677	-0.00745373	-0.0124897	-0.011608	0.00717209	0.0336625		194.99	-1.18939	-1.17718	-1.25974	-1.3771	-1.41429	-1.31116
195.19	0.0015639	-0.00641734	-0.0134678	-0.00804529	0.00334655	0.0333898		195.19	-1.18831	-1.17614	-1.26071	-1.37354	-1.41812	-1.31143
195.39	0.00460585	-0.00587085	-0.0142301	-0.0102032	0.0055105	0.0346267		195.39	-1.18527	-1.17559	-1.26148	-1.3757	-1.41595	-1.31019
195.6	-0.00055622	-0.00531132	-0.0130267	-0.0141795	0.0104586	0.033889		195.6	-1.19043	-1.17503	-1.26027	-1.37967	-1.411	-1.31093
195.79	0.0011394	-0.0069734	-0.011619	-0.00960879	0.00480984	0.0332777		195.79	-1.18873	-1.17669	-1.25887	-1.3751	-1.41665	-1.31154
195.99	0.00193182	-0.00637813	-0.0111791	-0.00727767	0.00524434	0.0366542		195.99	-1.18794	-1.1761	-1.25843	-1.37277	-1.41622	-1.30817
196.19	0.00154629	-0.00562119	-0.0113551	-0.0152617	0.00393449	0.0356383		196.19	-1.18833	-1.17534	-1.2586	-1.38076	-1.41753	-1.30918
196.39	-0.0005619	-0.00575443	-0.0123817	-0.0127199	0.00736829	0.0345718		196.39	-1.19043	-1.17548	-1.25963	-1.37821	-1.41409	-1.31025
196.59	0.0021518	-0.00593263	-0.0130039	-0.00640298	0.00294625	0.0309776		196.59	-1.18772	-1.17565	-1.26025	-1.3719	-1.41852	-1.31384
196.79	-0.00294794	-0.00695322	-0.0116356	-0.0152292	0.00881501	0.0341513		196.79	-1.19282	-1.17667	-1.25888	-1.38072	-1.41265	-1.31067
196.99	0.00095577	-0.00496836	-0.0113653	-0.00639768	0.00347993	0.0377245		196.99	-1.18892	-1.17469	-1.25861	-1.37189	-1.41798	-1.3071
197.19	0.00124876	-0.00520042	-0.0107436	-0.00516583	0.00631647	0.0348894		197.19	-1.18862	-1.17492	-1.25799	-1.37066	-1.41515	-1.30993
197.39	0.00485044	-0.00836723	-0.0128486	-0.0077703	0.00604067	0.0361256		197.39	-1.18502	-1.17809	-1.2601	-1.37326	-1.41542	-1.30869
197.6	0.00333802	-0.00565955	-0.00990541	-0.00956548	0.00561275	0.0373798		197.6	-1.18653	-1.17538	-1.25715	-1.37506	-1.41585	-1.30744
197.79	0.00353174	-0.00303291	-0.0108153	-0.0109222	0.00579794	0.0371694		197.79	-1.18634	-1.17275	-1.25806	-1.37642	-1.41566	-1.30765
197.99	-0.00031124	-0.00763947	-0.00952158	-0.00676997	0.00260658	0.0352993		197.99	-1.19018	-1.17736	-1.25677	-1.37226	-1.41886	-1.30952
198.19	0.00208818	-0.00725434	-0.013122	-0.00665193	0.00296789	0.0320363		198.19	-1.18778	-1.17698	-1.26037	-1.37215	-1.41849	-1.31278
198.39	0.00262635	-0.00734297	-0.00925266	-0.0131353	0.00344523	0.0364382		198.39	-1.18725	-1.17706	-1.2565	-1.37863	-1.41802	-1.30838
198.59	0.00155299	-0.00596271	-0.0114386	-0.0102778	0.00595139	0.0338083		198.59	-1.18832	-1.17568	-1.25869	-1.37577	-1.41551	-1.31101
198.79	0.00168982	-0.00986701	-0.0114675	-0.00936739	0.00595074	0.0361561		198.79	-1.18818	-1.17959	-1.25871	-1.37486	-1.41551	-1.30866
198.99	0.00085961	-0.00570757	-0.0116846	-0.00803822	0.00493122	0.0349132		198.99	-1.18901	-1.17543	-1.25893	-1.37353	-1.41653	-1.30991
199.19	0.00398097	-0.00738051	-0.0111788	-0.0105135	0.0017242	0.0348247		199.19	-1.18589	-1.1771	-1.25843	-1.37601	-1.41974	-1.31
199.39	-0.00068088	-0.00582781	-0.0125922	-0.0103222	0.00176794	0.0370438		199.39	-1.19055	-1.17555	-1.25984	-1.37582	-1.41969	-1.30778
199.6	0.00336547	-0.00527113	-0.0106134	-0.00993335	0.00195653	0.0360699		199.6	-1.18651	-1.17499	-1.25786	-1.37543	-1.41951	-1.30875
199.79	0.00219642	-0.00516395	-0.0132211	-0.0107327	0.00723963	0.0325293		199.79	-1.18768	-1.17489	-1.26047	-1.37623	-1.41422	-1.31229
200	0.00542064	-0.0045513	-0.0103027	0.00815121	0.0085796	0.0473138		200	-1.18445	-1.17427	-1.25755	-1.35734	-1.41288	-1.29751
200.19	0.00911921	0.00202915	-0.0072744	0.0106648	0.0183921	0.0542098		200.19	-1.18075	-1.16769	-1.25452	-1.35483	-1.40307	-1.29061
200.39	0.0103517	0.00166803	-0.00468528	0.0143133	0.0118644	0.0583552		200.39	-1.17952	-1.16805	-1.25193	-1.35118	-1.4096	-1.28646
200.59	0.0120533	0.00378124	-0.00408607	0.0175343	0.0176673	0.0568888		200.59	-1.17782	-1.16594	-1.25133	-1.34796	-1.4038	-1.28793
200.79	0.0150813	0.00277647	-0.00212939	0.0189608	0.018853	0.059118		200.79	-1.17479	-1.16694	-1.24938	-1.34653	-1.40261	-1.2857
200.99	0.0172627	0.005478	0.00274779	0.021007	0.0215463	0.0587318		200.99	-1.17261	-1.16424	-1.2445	-1.34449	-1.39992	-1.28609
201.19	0.0153945	0.00901491	0.00194398	0.0214182	0.0184947	0.0605661		201.19	-1.17448	-1.16071	-1.2453	-1.34408	-1.40297	-1.28425
201.39	0.0166916	0.00531866	0.0023331	0.0236402	0.0200406	0.0631418		201.39	-1.17318	-1.1644	-1.24491	-1.34185	-1.40142	-1.28168
201.6	0.0187174	0.00888066	0.00340628	0.0221724	0.0229113	0.0645595		201.6	-1.17115	-1.16084	-1.24384	-1.34332	-1.39855	-1.28026
201.79	0.0172658	0.0088226	0.00045982	0.0234647	0.0239577	0.063911		201.79	-1.17261	-1.1609	-1.24679	-1.34203	-1.3975	-1.28091
201.99	0.0144148	0.0101609	0.00622902	0.0278086	0.0262401	0.0641699		201.99	-1.17546	-1.15956	-1.24102	-1.33769	-1.39522	-1.28065
202.19	0.0229046	0.0124915	0.00571282	0.0264823	0.0251387	0.066826		202.19	-1.16697	-1.15723	-1.24153	-1.33901	-1.39632	-1.27799
202.39	0.0223912	0.0129561	0.00467609	0.0285378	0.0272448	0.0687572		202.39	-1.16748	-1.15677	-1.24257	-1.33696	-1.39422	-1.27606
202.6	0.022805	0.0123888	0.0083866	0.0248995	0.0301279	0.0684446		202.6	-1.16707	-1.15733	-1.23886	-1.34059	-1.39133	-1.27638
202.79	0.0258349	0.0123901	0.00901481	0.0321592	0.0285685	0.0708094		202.79	-1.16404	-1.15733	-1.23823	-1.33334	-1.39289	-1.27401
202.99	0.0243017	0.0155737	0.00889053	0.0287634	0.0310097	0.0676741		202.99	-1.16557	-1.15415	-1.23836	-1.33673	-1.39045	-1.27715
203.19	0.0238951	0.0179412	0.00708547	0.0330261	0.0301244	0.0734526		203.19	-1.16598	-1.15178	-1.24016	-1.33247	-1.39134	-1.27137
203.39	0.028281	0.0177688	0.0141032	0.0296535	0.0333712	0.0687936		203.39	-1.16159	-1.15195	-1.23314	-1.33584	-1.38809	-1.27603
203.6	0.0293118	0.0153405	0.00968093	0.035111	0.0313177	0.074352		203.6	-1.16056	-1.15438	-1.23757	-1.33038	-1.39014	-1.27047
203.79	0.0300417	0.0188803	0.0147399	0.0324728	0.0358584	0.0743496		203.79	-1.15983	-1.15084	-1.23251	-1.33302	-1.3856	-1.27047
203.99	0.0330864	0.0205987	0.0184129	0.0356755	0.0325188	0.0768239		203.99	-1.15679	-1.14912	-1.22883	-1.32982	-1.38894	-1.268
204.19	0.0323529	0.0207874	0.0155319	0.0361806	0.0377122	0.0764568		204.19	-1.15752	-1.14893	-1.23171	-1.32931	-1.38375	-1.26836
204.39	0.0310924	0.0215121	0.0161173	0.0353403	0.0390971	0.0804207		204.39	-1.15878	-1.14821	-1.23113	-1.33015	-1.38237	-1.2644
204.59	0.0334958	0.0211772	0.0186105	0.0355357	0.0409988	0.0782031		204.59	-1.15638	-1.14854	-1.22864	-1.32996	-1.38046	-1.26662
204.79	0.0318401	0.0255263	0.0160545	0.0439561	0.039381	0.0762433		204.79	-1.15803	-1.1442	-1.23119	-1.32154	-1.38208	-1.26858
204.99	0.0306897	0.0221989	0.0178868	0.0394198	0.0401762	0.0825775		204.99	-1.15918	-1.14752	-1.22936	-1.32607	-1.38129	-1.26224
205.19	0.0386076	0.0237719	0.022183	0.042894	0.0402734	0.0790468		205.19	-1.15126	-1.14595	-1.22506	-1.3226	-1.38119	-1.26577
205.39	0.0405745	0.0260858	0.0209759	0.0427557	0.0438986	0.0805415		205.39	-1.1493	-1.14364	-1.22627	-1.32274	-1.37756	-1.26428
205.6	0.0334106	0.0260034	0.0227035	0.0424819	0.0405017	0.0810631		205.6	-1.15646	-1.14372	-1.22454	-1.32301	-1.38096	-1.26376
205.79	0.0362654	0.0289105	0.0195823	0.0418109	0.0418714	0.0828992		205.79	-1.15361	-1.14081	-1.22766	-1.32368	-1.37959	-1.26192
205.99	0.0411107	0.0310078	0.0226819	0.0465917	0.0427873	0.0900342		205.99	-1.14876	-1.13871	-1.22456	-1.3189	-1.37868	-1.25479
206.19	0.0374597	0.0307841	0.0249858	0.0426902	0.043173	0.0834347		206.19	-1.15241	-1.13894	-1.22226	-1.3228	-1.37829	-1.26139
206.39	0.0397506	0.0276648	0.0259798	0.0469891	0.0464222	0.0805967		206.39	-1.15012	-1.14206	-1.22127	-1.31851	-1.37504	-1.26422
206.6	0.0403171	0.0297552	0.0256129	0.0458677	0.0489142	0.0857719		206.6	-1.14956	-1.13997	-1.22163	-1.31963	-1.37255	-1.25905
206.79	0.0406723	0.0334608	0.0268756	0.0471524	0.0449777	0.0904921		206.79	-1.1492	-1.13626	-1.22037	-1.31834	-1.37648	-1.25433
206.99	0.0465045	0.0348392	0.02802	0.0514077	0.0493309	0.0921738		206.99	-1.14337	-1.13488	-1.21923	-1.31409	-1.37213	-1.25265
207.19	0.0401656	0.033919	0.0282888	0.0499481	0.0517338	0.0912238		207.19	-1.14971	-1.1358	-1.21896	-1.31555	-1.36973	-1.2536
207.39	0.041898	0.0359339	0.0285612	0.0545659	0.0524132	0.090975		207.39	-1.14797	-1.13379	-1.21869	-1.31093	-1.36905	-1.25385
207.6	0.0446597	0.0351162	0.0307951	0.0511453	0.0495586	0.0903925		207.6	-1.14521	-1.13461	-1.21645	-1.31435	-1.3719	-1.25443
207.79	0.045036	0.0372776	0.0307549	0.0508909	0.051952	0.0920836		207.79	-1.14484	-1.13244	-1.21649	-1.3146	-1.36951	-1.25274
207.99	0.0489317	0.0394542	0.0328303	0.0545488	0.0543725	0.0976836		207.99	-1.14094	-1.13027	-1.21442	-1.31095	-1.36709	-1.24714
208.19	0.0465673	0.0389927	0.0318739	0.0547295	0.0525748	0.0955218		208.19	-1.1433	-1.13073	-1.21537	-1.31076	-1.36889	-1.2493
208.39	0.0450187	0.0354389	0.0375879	0.0569398	0.0552127	0.0960669		208.39	-1.14485	-1.13428	-1.20966	-1.30855	-1.36625	-1.24875
208.59	0.0506156	0.0412838	0.0366341	0.057686	0.0552986	0.0936873		208.59	-1.13926	-1.12844	-1.21061	-1.30781	-1.36616	-1.25113
208.79	0.049809	0.0369636	0.0369601	0.0562385	0.0615704	0.0988848		208.79	-1.14006	-1.13276	-1.21029	-1.30926	-1.35989	-1.24594
208.99	0.049975	0.0433835	0.0346298	0.0587806	0.0595389	0.0980454		208.99	-1.1399	-1.12634	-1.21262	-1.30671	-1.36192	-1.24677
209.19	0.0493816	0.0458986	0.0370721	0.0613077	0.0582243	0.102144		209.19	-1.14049	-1.12382	-1.21017	-1.30419	-1.36324	-1.24268
209.39	0.0487752	0.0457756	0.0402392	0.0564825	0.0553401	0.0984838		209.39	-1.1411	-1.12395	-1.20701	-1.30901	-1.36612	-1.24634
209.59	0.0567683	0.0408495	0.0385678	0.0586518	0.0591932	0.0974593		209.59	-1.1331	-1.12887	-1.20868	-1.30684	-1.36227	-1.24736
209.79	0.0522858	0.0450074	0.0391016	0.0667651	0.0647386	0.102496		209.79	-1.13759	-1.12471	-1.20815	-1.29873	-1.35672	-1.24232
209.99	0.0582847	0.0441405	0.0410796	0.0614959	0.0658674	0.104107		209.99	-1.13159	-1.12558	-1.20617	-1.304	-1.3556	-1.24071
210.19	0.056292	0.0482213	0.0437094	0.0655132	0.064789	0.0992874		210.19	-1.13358	-1.1215	-1.20354	-1.29998	-1.35667	-1.24553
210.39	0.0544656	0.0464921	0.0426219	0.0678164	0.0631813	0.106008		210.39	-1.13541	-1.12323	-1.20462	-1.29768	-1.35828	-1.23881
210.59	0.0581622	0.0461597	0.0458312	0.0653864	0.0683683	0.103966		210.59	-1.13171	-1.12356	-1.20142	-1.30011	-1.35309	-1.24085
210.79	0.0592924	0.047214	0.0460428	0.0677498	0.0665891	0.110115		210.79	-1.13058	-1.12251	-1.2012	-1.29774	-1.35487	-1.23471
210.99	0.0582574	0.0511358	0.0471861	0.067424	0.0695189	0.10697		210.99	-1.13161	-1.11859	-1.20006	-1.29807	-1.35194	-1.23785
211.19	0.0610781	0.0497266	0.0485584	0.0685668	0.0735025	0.110907		211.19	-1.12879	-1.11999	-1.19869	-1.29693	-1.34796	-1.23391
211.39	0.0599966	0.048843	0.0471449	0.0695283	0.0737003	0.109378		211.39	-1.12988	-1.12088	-1.2001	-1.29597	-1.34776	-1.23544
211.6	0.0620415	0.0551353	0.0492448	0.0671953	0.0733642	0.116925		211.6	-1.12783	-1.11459	-1.198	-1.2983	-1.3481	-1.2279
211.79	0.064898	0.0567394	0.0493299	0.0700237	0.0716777	0.109566		211.79	-1.12497	-1.11298	-1.19792	-1.29547	-1.34978	-1.23525
211.99	0.0639023	0.0519317	0.0473017	0.0749273	0.0689149	0.115625		211.99	-1.12597	-1.11779	-1.19995	-1.29057	-1.35255	-1.2292
212.19	0.063487	0.0571985	0.0507582	0.0707978	0.0714652	0.115522		212.19	-1.12639	-1.11252	-1.19649	-1.2947	-1.35	-1.2293
212.39	0.0642687	0.0541066	0.0496807	0.0749072	0.0738397	0.11627		212.39	-1.1256	-1.11561	-1.19757	-1.29059	-1.34762	-1.22855
212.59	0.0662575	0.053337	0.0510913	0.0718841	0.0762317	0.117793		212.59	-1.12361	-1.11638	-1.19616	-1.29361	-1.34523	-1.22703
212.79	0.0676477	0.0576049	0.0559938	0.0739544	0.0771247	0.118668		212.79	-1.12222	-1.11212	-1.19125	-1.29154	-1.34434	-1.22615
212.99	0.0643381	0.0608839	0.0525511	0.0797093	0.0763829	0.116874		212.99	-1.12553	-1.10884	-1.1947	-1.28578	-1.34508	-1.22795
213.19	0.0693641	0.0591244	0.0574962	0.0772338	0.0821034	0.117688		213.19	-1.12051	-1.1106	-1.18975	-1.28826	-1.33936	-1.22713
213.39	0.0665393	0.0567122	0.0560558	0.0760355	0.077617	0.120452		213.39	-1.12333	-1.11301	-1.19119	-1.28946	-1.34385	-1.22437
213.59	0.0692101	0.0613326	0.0594679	0.077923	0.0803203	0.118588		213.59	-1.12066	-1.10839	-1.18778	-1.28757	-1.34114	-1.22623
213.79	0.070796	0.0612687	0.0586594	0.081394	0.0799339	0.123842		213.79	-1.11908	-1.10845	-1.18859	-1.2841	-1.34153	-1.22098
213.99	0.0712124	0.0653222	0.0635788	0.0822053	0.0817354	0.119859		213.99	-1.11866	-1.1044	-1.18367	-1.28329	-1.33973	-1.22496
214.19	0.0730556	0.0606783	0.0607985	0.0794663	0.0813026	0.126589		214.19	-1.11682	-1.10904	-1.18645	-1.28603	-1.34016	-1.21823
214.39	0.071318	0.062734	0.0627108	0.083188	0.0819867	0.122645		214.39	-1.11855	-1.10699	-1.18454	-1.28231	-1.33948	-1.22218
214.59	0.074865	0.0650516	0.0595496	0.0856555	0.0860823	0.124212		214.59	-1.11501	-1.10467	-1.1877	-1.27984	-1.33538	-1.22061
214.79	0.0776703	0.0676084	0.0638662	0.0871912	0.0859327	0.125937		214.79	-1.1122	-1.10211	-1.18338	-1.2783	-1.33553	-1.21888
214.99	0.0745407	0.0691761	0.0656289	0.0896145	0.0849489	0.124686		214.99	-1.11533	-1.10055	-1.18162	-1.27588	-1.33651	-1.22013
215.19	0.0782213	0.0667762	0.0637254	0.0865455	0.0858808	0.127842		215.19	-1.11165	-1.10295	-1.18352	-1.27895	-1.33558	-1.21698
215.39	0.074777	0.0690057	0.0695101	0.088494	0.0873482	0.122023		215.39	-1.1151	-1.10072	-1.17774	-1.277	-1.33411	-1.2228
215.59	0.0787029	0.0709197	0.0663107	0.0907221	0.0929895	0.131104		215.59	-1.11117	-1.0988	-1.18094	-1.27477	-1.32847	-1.21372
215.79	0.0782021	0.074312	0.0660773	0.0908594	0.0857861	0.130718		215.79	-1.11167	-1.09541	-1.18117	-1.27463	-1.33568	-1.2141
215.99	0.0812002	0.0701585	0.0699337	0.0928405	0.0916705	0.126978		215.99	-1.10867	-1.09956	-1.17731	-1.27265	-1.32979	-1.21784
216.19	0.0795945	0.0700597	0.0690851	0.0896715	0.0910813	0.12526		216.19	-1.11028	-1.09966	-1.17816	-1.27582	-1.33038	-1.21956
216.39	0.0795817	0.0735738	0.0692652	0.0945516	0.0964026	0.130219		216.39	-1.11029	-1.09615	-1.17798	-1.27094	-1.32506	-1.2146
216.6	0.0837051	0.0719536	0.0683738	0.0917244	0.0929242	0.132306		216.6	-1.10617	-1.09777	-1.17887	-1.27377	-1.32854	-1.21251
216.79	0.0824902	0.0737443	0.07173	0.0940422	0.0970988	0.13444		216.79	-1.10738	-1.09598	-1.17552	-1.27145	-1.32436	-1.21038
216.99	0.0845203	0.0741665	0.0707569	0.0989003	0.0947541	0.135196		216.99	-1.10535	-1.09555	-1.17649	-1.26659	-1.32671	-1.20962
217.19	0.0849324	0.0742379	0.0744229	0.0971034	0.0931267	0.135639		217.19	-1.10494	-1.09548	-1.17282	-1.26839	-1.32834	-1.20918
217.39	0.0862946	0.0769451	0.0727792	0.0989631	0.100335	0.137458		217.39	-1.10358	-1.09278	-1.17447	-1.26653	-1.32113	-1.20736
217.59	0.0875175	0.0776255	0.0772124	0.0945517	0.100567	0.141677		217.59	-1.10235	-1.0921	-1.17003	-1.27094	-1.3209	-1.20314
217.79	0.089341	0.0809603	0.0775982	0.0995927	0.0986179	0.141229		217.79	-1.10053	-1.08876	-1.16965	-1.2659	-1.32284	-1.20359
217.99	0.0874673	0.0767859	0.0763109	0.100378	0.0978908	0.138167		217.99	-1.1024	-1.09294	-1.17094	-1.26512	-1.32357	-1.20665
218.19	0.0901312	0.0789746	0.0778841	0.098833	0.102534	0.142525		218.19	-1.09974	-1.09075	-1.16936	-1.26666	-1.31893	-1.20229
218.39	0.0891797	0.0837161	0.0819027	0.104929	0.104467	0.141898		218.39	-1.10069	-1.08601	-1.16534	-1.26057	-1.317	-1.20292
218.59	0.0887481	0.0818454	0.0784758	0.102779	0.103464	0.140299		218.59	-1.10112	-1.08788	-1.16877	-1.26271	-1.318	-1.20452
218.79	0.0888369	0.0804512	0.0803896	0.100982	0.105297	0.143607		218.79	-1.10104	-1.08927	-1.16686	-1.26451	-1.31617	-1.20121
218.99	0.0898233	0.0867274	0.0826564	0.107332	0.10512	0.146182		218.99	-1.10005	-1.08299	-1.16459	-1.25816	-1.31634	-1.19864
219.19	0.0927558	0.08434	0.0818559	0.10484	0.105562	0.144262		219.19	-1.09712	-1.08538	-1.16539	-1.26065	-1.3159	-1.20056
219.39	0.0952429	0.0862692	0.0828918	0.106999	0.10724	0.143394		219.39	-1.09463	-1.08345	-1.16435	-1.2585	-1.31422	-1.20143
219.59	0.0960285	0.087199	0.0872205	0.108793	0.107904	0.14882		219.59	-1.09384	-1.08252	-1.16003	-1.2567	-1.31356	-1.196
219.79	0.0981769	0.084562	0.0876605	0.107147	0.105695	0.14585		219.79	-1.0917	-1.08516	-1.15959	-1.25835	-1.31577	-1.19897
219.99	0.097939	0.0866187	0.0848475	0.110883	0.113282	0.14931		219.99	-1.09193	-1.0831	-1.1624	-1.25461	-1.30818	-1.19551
220.19	0.0960714	0.0873382	0.0850329	0.113472	0.111133	0.145467		220.19	-1.0938	-1.08238	-1.16221	-1.25202	-1.31033	-1.19935
220.39	0.0987724	0.0888874	0.0882108	0.110254	0.113271	0.147512		220.39	-1.0911	-1.08083	-1.15904	-1.25524	-1.30819	-1.19731
220.6	0.097739	0.0900743	0.0898551	0.113316	0.111581	0.149033		220.6	-1.09213	-1.07965	-1.15739	-1.25218	-1.30988	-1.19579
220.79	0.0987755	0.094914	0.0905637	0.112678	0.116484	0.150305		220.79	-1.0911	-1.07481	-1.15668	-1.25282	-1.30498	-1.19451
220.99	0.101696	0.0926001	0.092316	0.113998	0.114437	0.152586		220.99	-1.08818	-1.07712	-1.15493	-1.2515	-1.30703	-1.19223
221.19	0.104123	0.0898993	0.0896925	0.112523	0.1158	0.155912		221.19	-1.08575	-1.07982	-1.15755	-1.25297	-1.30566	-1.18891
221.39	0.101608	0.0930244	0.0927885	0.11884	0.115885	0.153545		221.39	-1.08826	-1.0767	-1.15446	-1.24665	-1.30558	-1.19128
221.6	0.103877	0.0952546	0.0970831	0.120214	0.117441	0.155771		221.6	-1.086	-1.07447	-1.15016	-1.24528	-1.30402	-1.18905
221.79	0.105339	0.0958509	0.093316	0.120113	0.118742	0.159805		221.79	-1.08453	-1.07387	-1.15393	-1.24538	-1.30272	-1.18501
221.99	0.109424	0.0963607	0.098278	0.115994	0.119208	0.160393		221.99	-1.08045	-1.07336	-1.14897	-1.2495	-1.30225	-1.18443
222.19	0.106328	0.096982	0.0946624	0.118151	0.121186	0.161193		222.19	-1.08354	-1.07274	-1.15258	-1.24734	-1.30028	-1.18363
222.39	0.105996	0.0981655	0.0992897	0.120444	0.123551	0.160267		222.39	-1.08388	-1.07156	-1.14796	-1.24505	-1.29791	-1.18455
222.6	0.109363	0.100693	0.0978186	0.120389	0.122771	0.160352		222.6	-1.08051	-1.06903	-1.14943	-1.24511	-1.29869	-1.18447
222.79	0.110089	0.10158	0.101012	0.121559	0.122704	0.162718		222.79	-1.07978	-1.06814	-1.14624	-1.24394	-1.29876	-1.1821
222.99	0.110135	0.103812	0.102341	0.124619	0.125806	0.1628		222.99	-1.07974	-1.06591	-1.14491	-1.24087	-1.29566	-1.18202
223.19	0.10512	0.102707	0.103725	0.124158	0.124082	0.161123		223.19	-1.08475	-1.06701	-1.14352	-1.24134	-1.29738	-1.1837
223.39	0.111158	0.103433	0.100184	0.127298	0.125512	0.166279		223.39	-1.07871	-1.06629	-1.14706	-1.2382	-1.29595	-1.17854
223.6	0.112742	0.103944	0.105032	0.125333	0.129206	0.162849		223.6	-1.07713	-1.06578	-1.14222	-1.24016	-1.29226	-1.18197
223.79	0.110706	0.104841	0.103445	0.126922	0.127841	0.16576		223.79	-1.07917	-1.06488	-1.1438	-1.23857	-1.29362	-1.17906
223.99	0.112978	0.104191	0.109826	0.1279	0.124875	0.166068		223.99	-1.07689	-1.06553	-1.13742	-1.23759	-1.29659	-1.17875
224.19	0.116346	0.108146	0.103824	0.130636	0.128555	0.170671		224.19	-1.07353	-1.06158	-1.14342	-1.23486	-1.29291	-1.17415
224.39	0.116178	0.108266	0.110742	0.125948	0.129799	0.166409		224.39	-1.07369	-1.06146	-1.1365	-1.23955	-1.29166	-1.17841
224.6	0.116115	0.104531	0.107402	0.129923	0.133355	0.1704		224.6	-1.07376	-1.06519	-1.13984	-1.23557	-1.28811	-1.17442
224.79	0.118503	0.109798	0.10684	0.130393	0.134974	0.17164		224.79	-1.07137	-1.05992	-1.14041	-1.2351	-1.28649	-1.17318
224.99	0.117352	0.110598	0.109755	0.137108	0.135703	0.172143		224.99	-1.07252	-1.05912	-1.13749	-1.22839	-1.28576	-1.17268
225.19	0.116273	0.110176	0.111234	0.133157	0.134611	0.173165		225.19	-1.0736	-1.05955	-1.13601	-1.23234	-1.28685	-1.17165
225.39	0.116883	0.110757	0.110775	0.135404	0.133038	0.169178		225.39	-1.07299	-1.05896	-1.13647	-1.23009	-1.28842	-1.17564
225.6	0.123719	0.115102	0.113553	0.136252	0.137743	0.175346		225.6	-1.06615	-1.05462	-1.13369	-1.22924	-1.28372	-1.16947
225.79	0.117688	0.112581	0.111457	0.139286	0.139242	0.176257		225.79	-1.07218	-1.05714	-1.13579	-1.22621	-1.28222	-1.16856
225.99	0.122047	0.113576	0.114522	0.138617	0.140115	0.174322		225.99	-1.06783	-1.05615	-1.13272	-1.22688	-1.28135	-1.1705
226.19	0.122001	0.117266	0.114686	0.138046	0.137088	0.174519		226.19	-1.06787	-1.05246	-1.13256	-1.22745	-1.28437	-1.1703
226.39	0.12474	0.119783	0.117647	0.137954	0.141275	0.174857		226.39	-1.06513	-1.04994	-1.1296	-1.22754	-1.28019	-1.16996
226.6	0.123549	0.118047	0.116847	0.143904	0.142096	0.182446		226.6	-1.06632	-1.05167	-1.1304	-1.22159	-1.27937	-1.16237
226.79	0.125255	0.116072	0.113443	0.142551	0.144749	0.181095		226.79	-1.06462	-1.05365	-1.1338	-1.22294	-1.27671	-1.16373
226.99	0.123888	0.118542	0.119153	0.140467	0.145967	0.182848		226.99	-1.06598	-1.05118	-1.12809	-1.22503	-1.2755	-1.16197
227.19	0.123783	0.116801	0.118181	0.146489	0.143868	0.179398		227.19	-1.06609	-1.05292	-1.12907	-1.21901	-1.27759	-1.16542
227.39	0.127182	0.120257	0.118874	0.143751	0.143872	0.184232		227.39	-1.06269	-1.04946	-1.12837	-1.22174	-1.27759	-1.16059
227.6	0.134371	0.121578	0.119346	0.146741	0.14879	0.180977		227.6	-1.0555	-1.04814	-1.1279	-1.21875	-1.27267	-1.16384
227.79	0.128462	0.123188	0.121772	0.146313	0.140304	0.183664		227.79	-1.06141	-1.04653	-1.12547	-1.21918	-1.28116	-1.16116
227.99	0.128996	0.120585	0.123613	0.14672	0.146503	0.186041		227.99	-1.06088	-1.04914	-1.12363	-1.21877	-1.27496	-1.15878
228.19	0.132018	0.123269	0.124227	0.14988	0.146772	0.189848		228.19	-1.05785	-1.04645	-1.12302	-1.21561	-1.27469	-1.15497
228.39	0.133567	0.123877	0.125825	0.146995	0.149598	0.187649		228.39	-1.05631	-1.04584	-1.12142	-1.2185	-1.27186	-1.15717
228.6	0.134392	0.124732	0.127623	0.150505	0.150308	0.188982		228.6	-1.05548	-1.04499	-1.11962	-1.21499	-1.27115	-1.15584
228.79	0.13885	0.123842	0.123762	0.155142	0.152056	0.189527		228.79	-1.05102	-1.04588	-1.12349	-1.21035	-1.26941	-1.15529
228.99	0.134168	0.128679	0.126712	0.1512	0.150803	0.19153		228.99	-1.0557	-1.04104	-1.12053	-1.21429	-1.27066	-1.15329
229.19	0.137335	0.126779	0.12824	0.149672	0.154559	0.18988		229.19	-1.05254	-1.04294	-1.11901	-1.21582	-1.2669	-1.15494
229.39	0.138118	0.124749	0.130159	0.153967	0.154838	0.190358		229.39	-1.05175	-1.04497	-1.11709	-1.21153	-1.26662	-1.15446
229.6	0.133327	0.128571	0.129723	0.151186	0.152015	0.191781		229.6	-1.05655	-1.04115	-1.11752	-1.21431	-1.26945	-1.15304
229.79	0.138732	0.129874	0.132664	0.154503	0.154444	0.196842		229.79	-1.05114	-1.03985	-1.11458	-1.21099	-1.26702	-1.14798
229.99	0.141135	0.130114	0.134632	0.155328	0.160776	0.193173		229.99	-1.04874	-1.03961	-1.11261	-1.21017	-1.26069	-1.15165
230.19	0.144411	0.132397	0.13322	0.154329	0.155986	0.194471		230.19	-1.04546	-1.03732	-1.11403	-1.21117	-1.26548	-1.15035
230.39	0.143116	0.133974	0.134128	0.153488	0.158596	0.195095		230.39	-1.04676	-1.03575	-1.11312	-1.21201	-1.26287	-1.14972
230.6	0.143985	0.134381	0.134144	0.158339	0.160324	0.195643		230.6	-1.04589	-1.03534	-1.1131	-1.20716	-1.26114	-1.14918
230.79	0.140983	0.13527	0.135337	0.161494	0.163607	0.199396		230.79	-1.04889	-1.03445	-1.11191	-1.204	-1.25786	-1.14542
230.99	0.144769	0.134252	0.136257	0.162606	0.161831	0.198595		230.99	-1.0451	-1.03547	-1.11099	-1.20289	-1.25963	-1.14622
231.19	0.146399	0.136768	0.135771	0.163373	0.163139	0.202933		231.19	-1.04347	-1.03295	-1.11148	-1.20212	-1.25832	-1.14189
231.39	0.148642	0.136959	0.137501	0.164443	0.163131	0.204707		231.39	-1.04123	-1.03276	-1.10975	-1.20105	-1.25833	-1.14011
231.59	0.14627	0.13653	0.138389	0.160184	0.164246	0.202436		231.59	-1.0436	-1.03319	-1.10886	-1.20531	-1.25722	-1.14238
231.79	0.147176	0.138816	0.140063	0.162194	0.166093	0.202456		231.79	-1.0427	-1.03091	-1.10718	-1.2033	-1.25537	-1.14236
231.99	0.145471	0.13993	0.139653	0.167262	0.164049	0.203572		231.99	-1.0444	-1.02979	-1.10759	-1.19823	-1.25741	-1.14125
232.19	0.150329	0.139079	0.142765	0.166595	0.167308	0.205484		232.19	-1.03954	-1.03064	-1.10448	-1.1989	-1.25415	-1.13934
232.39	0.150744	0.142947	0.1435	0.163904	0.167578	0.204236		232.39	-1.03913	-1.02677	-1.10375	-1.20159	-1.25389	-1.14058
232.6	0.151307	0.143794	0.145439	0.16892	0.168636	0.207736		232.6	-1.03856	-1.02593	-1.10181	-1.19657	-1.25283	-1.13708
232.79	0.153774	0.139459	0.145427	0.168293	0.169027	0.207394		232.79	-1.0361	-1.03026	-1.10182	-1.1972	-1.25244	-1.13743
232.99	0.152237	0.142801	0.146085	0.166975	0.170954	0.207981		232.99	-1.03763	-1.02692	-1.10116	-1.19852	-1.25051	-1.13684
233.19	0.152068	0.145931	0.143272	0.172755	0.171292	0.211807		233.19	-1.0378	-1.02379	-1.10397	-1.19274	-1.25017	-1.13301
233.39	0.155041	0.146967	0.150363	0.169695	0.174408	0.211466		233.39	-1.03483	-1.02275	-1.09688	-1.1958	-1.24705	-1.13335
233.6	0.154509	0.145366	0.14976	0.178579	0.174177	0.207133		233.6	-1.03536	-1.02436	-1.09749	-1.18692	-1.24729	-1.13769
233.79	0.158546	0.148152	0.150966	0.175326	0.178771	0.211185		233.79	-1.03133	-1.02157	-1.09628	-1.19017	-1.24269	-1.13364
233.99	0.158029	0.148117	0.154269	0.176186	0.177736	0.213668		233.99	-1.03184	-1.0216	-1.09298	-1.18931	-1.24373	-1.13115
234.19	0.155537	0.150652	0.147961	0.174069	0.176524	0.210067		234.19	-1.03434	-1.01907	-1.09929	-1.19143	-1.24494	-1.13475
234.39	0.158272	0.15055	0.154945	0.177071	0.178458	0.212014		234.39	-1.0316	-1.01917	-1.0923	-1.18842	-1.24301	-1.13281
234.6	0.158205	0.150566	0.15272	0.175943	0.183778	0.213796		234.6	-1.03167	-1.01916	-1.09453	-1.18955	-1.23768	-1.13102
234.79	0.159974	0.151819	0.152666	0.177459	0.180439	0.214305		234.79	-1.0299	-1.0179	-1.09458	-1.18804	-1.24102	-1.13052
234.99	0.162108	0.152539	0.158989	0.18183	0.181336	0.218395		234.99	-1.02776	-1.01718	-1.08826	-1.18366	-1.24013	-1.12642
235.19	0.159428	0.154184	0.155976	0.178544	0.182843	0.218392		235.19	-1.03044	-1.01554	-1.09127	-1.18695	-1.23862	-1.12643
235.39	0.165419	0.151325	0.158126	0.183572	0.186222	0.217968		235.39	-1.02445	-1.0184	-1.08912	-1.18192	-1.23524	-1.12685
235.6	0.164778	0.155668	0.160586	0.180668	0.185512	0.219338		235.6	-1.02509	-1.01405	-1.08666	-1.18483	-1.23595	-1.12548
235.79	0.165626	0.151216	0.158508	0.184299	0.183151	0.222479		235.79	-1.02425	-1.01851	-1.08874	-1.1812	-1.23831	-1.12234
235.99	0.166074	0.161169	0.162165	0.183203	0.187946	0.218723		235.99	-1.0238	-1.00855	-1.08508	-1.18229	-1.23352	-1.1261
236.19	0.169742	0.161385	0.159734	0.185263	0.183321	0.225557		236.19	-1.02013	-1.00834	-1.08751	-1.18023	-1.23814	-1.11926
236.39	0.164483	0.15897	0.163118	0.186107	0.189578	0.221381		236.39	-1.02539	-1.01075	-1.08413	-1.17939	-1.23188	-1.12344
236.59	0.167243	0.160009	0.161932	0.185141	0.189624	0.227152		236.59	-1.02263	-1.00971	-1.08531	-1.18035	-1.23184	-1.11767
236.79	0.168158	0.162005	0.165765	0.186173	0.188304	0.226062		236.79	-1.02171	-1.00772	-1.08148	-1.17932	-1.23316	-1.11876
236.99	0.169107	0.162469	0.164141	0.18689	0.187777	0.226189		236.99	-1.02077	-1.00725	-1.08311	-1.1786	-1.23369	-1.11863
237.19	0.169915	0.16068	0.164746	0.188508	0.189494	0.228822		237.19	-1.01996	-1.00904	-1.0825	-1.17699	-1.23197	-1.116
237.39	0.170472	0.161335	0.16654	0.190247	0.194128	0.227698		237.39	-1.0194	-1.00839	-1.08071	-1.17525	-1.22733	-1.11712
237.6	0.174186	0.164102	0.163599	0.192134	0.193083	0.225826		237.6	-1.01569	-1.00562	-1.08365	-1.17336	-1.22838	-1.11899
237.79	0.174279	0.16277	0.166906	0.189277	0.19102	0.22808		237.79	-1.01559	-1.00695	-1.08034	-1.17622	-1.23044	-1.11674
237.99	0.175596	0.165887	0.167789	0.194765	0.199082	0.228089		237.99	-1.01428	-1.00383	-1.07946	-1.17073	-1.22238	-1.11673
238.19	0.174026	0.165522	0.172277	0.196476	0.19445	0.23298		238.19	-1.01585	-1.0042	-1.07497	-1.16902	-1.22701	-1.11184
238.39	0.17779	0.164978	0.174058	0.198988	0.196452	0.229332		238.39	-1.01208	-1.00474	-1.07319	-1.16651	-1.22501	-1.11549
238.6	0.174289	0.169249	0.175491	0.194949	0.195544	0.236661		238.6	-1.01558	-1.00047	-1.07176	-1.17055	-1.22592	-1.10816
238.79	0.179466	0.17246	0.173434	0.197628	0.199583	0.23308		238.79	-1.01041	-0.997261	-1.07381	-1.16787	-1.22188	-1.11174
238.99	0.178527	0.16761	0.175128	0.200476	0.198163	0.23471		238.99	-1.01135	-1.00211	-1.07212	-1.16502	-1.2233	-1.11011
239.19	0.18068	0.173412	0.174834	0.196347	0.200524	0.236932		239.19	-1.00919	-0.996309	-1.07241	-1.16915	-1.22094	-1.10789
239.39	0.181625	0.169893	0.17591	0.19959	0.198727	0.237193		239.39	-1.00825	-0.999828	-1.07134	-1.1659	-1.22274	-1.10763
239.59	0.180779	0.171028	0.176337	0.206673	0.203937	0.234181		239.59	-1.00909	-0.998693	-1.07091	-1.15882	-1.21753	-1.11064
239.79	0.181187	0.172886	0.175141	0.202171	0.201374	0.240275		239.79	-1.00869	-0.996836	-1.07211	-1.16332	-1.22009	-1.10455
239.99	0.182936	0.171453	0.179485	0.203483	0.205499	0.238375		239.99	-1.00694	-0.998269	-1.06776	-1.16201	-1.21596	-1.10644
240.19	0.184255	0.178605	0.178113	0.203988	0.202672	0.237047		240.19	-1.00562	-0.991116	-1.06913	-1.16151	-1.21879	-1.10777
240.39	0.18687	0.176583	0.180278	0.204534	0.208657	0.239391		240.39	-1.003	-0.993139	-1.06697	-1.16096	-1.21281	-1.10543
240.6	0.18608	0.177831	0.183961	0.204685	0.20453	0.244345		240.6	-1.00379	-0.991891	-1.06329	-1.16081	-1.21693	-1.10048
240.79	0.18804	0.176783	0.182203	0.205285	0.208897	0.245329		240.79	-1.00183	-0.992939	-1.06504	-1.16021	-1.21257	-1.09949
240.99	0.188566	0.177111	0.185961	0.205862	0.206761	0.244012		240.99	-1.00131	-0.99261	-1.06129	-1.15963	-1.2147	-1.10081
241.19	0.187301	0.178847	0.183994	0.207004	0.209037	0.248625		241.19	-1.00257	-0.990874	-1.06325	-1.15849	-1.21243	-1.0962
241.39	0.189805	0.180137	0.185359	0.211665	0.209718	0.246438		241.39	-1.00007	-0.989585	-1.06189	-1.15383	-1.21174	-1.09838
241.59	0.185098	0.182375	0.189859	0.211477	0.210414	0.248065		241.59	-1.00477	-0.987346	-1.05739	-1.15402	-1.21105	-1.09675
241.79	0.18889	0.186856	0.184765	0.21111	0.211085	0.247926		241.79	-1.00098	-0.982866	-1.06248	-1.15438	-1.21038	-1.09689
241.99	0.190505	0.185463	0.18497	0.213282	0.21354	0.246203		241.99	-0.999367	-0.984259	-1.06228	-1.15221	-1.20792	-1.09862
242.19	0.194655	0.18444	0.189897	0.210232	0.213233	0.247513		242.19	-0.995217	-0.985281	-1.05735	-1.15526	-1.20823	-1.09731
242.39	0.193745	0.18324	0.1913	0.214762	0.214848	0.25347		242.39	-0.996128	-0.986481	-1.05595	-1.15073	-1.20661	-1.09135
242.59	0.193019	0.185482	0.19089	0.215387	0.214027	0.254995		242.59	-0.996853	-0.984239	-1.05636	-1.15011	-1.20744	-1.08983
242.79	0.195878	0.187374	0.191568	0.218284	0.214339	0.255405		242.79	-0.993995	-0.982347	-1.05568	-1.14721	-1.20712	-1.08941
242.99	0.196556	0.187914	0.188355	0.218443	0.219649	0.252793		242.99	-0.993317	-0.981807	-1.05889	-1.14705	-1.20181	-1.09203
243.19	0.193674	0.189494	0.195942	0.219291	0.218492	0.25249		243.19	-0.996199	-0.980227	-1.0513	-1.1462	-1.20297	-1.09233
243.39	0.199037	0.187905	0.19466	0.214244	0.222864	0.255184		243.39	-0.990835	-0.981817	-1.05259	-1.15125	-1.1986	-1.08964
243.59	0.201368	0.193519	0.198514	0.219199	0.220486	0.260751		243.59	-0.988504	-0.976202	-1.04873	-1.1463	-1.20098	-1.08407
243.79	0.199974	0.194205	0.196132	0.224181	0.224951	0.257436		243.79	-0.989898	-0.975517	-1.05111	-1.14131	-1.19651	-1.08738
243.99	0.19971	0.192291	0.195635	0.225435	0.218981	0.257277		243.99	-0.990162	-0.97743	-1.05161	-1.14006	-1.20248	-1.08754
244.19	0.201588	0.192907	0.198423	0.221785	0.22516	0.25757		244.19	-0.988284	-0.976814	-1.04882	-1.14371	-1.1963	-1.08725
244.39	0.202673	0.195711	0.202121	0.225709	0.224359	0.259422		244.39	-0.9872	-0.97401	-1.04513	-1.13978	-1.1971	-1.0854
244.59	0.203998	0.195971	0.197884	0.227624	0.225261	0.261891		244.59	-0.985875	-0.97375	-1.04936	-1.13787	-1.1962	-1.08293
244.79	0.207233	0.193492	0.19927	0.225358	0.227823	0.259549		244.79	-0.982639	-0.97623	-1.04798	-1.14014	-1.19364	-1.08527
244.99	0.205291	0.198227	0.203537	0.225395	0.22554	0.264199		244.99	-0.984581	-0.971494	-1.04371	-1.1401	-1.19592	-1.08062
245.19	0.208237	0.198584	0.203394	0.230563	0.227956	0.264109		245.19	-0.981635	-0.971137	-1.04385	-1.13493	-1.19351	-1.08071
245.39	0.207278	0.200156	0.20707	0.229544	0.226713	0.264575		245.39	-0.982595	-0.969565	-1.04018	-1.13595	-1.19475	-1.08024
245.59	0.206566	0.199464	0.206197	0.228409	0.23154	0.264324		245.59	-0.983306	-0.970258	-1.04105	-1.13709	-1.18992	-1.0805
245.79	0.210214	0.201427	0.204198	0.233308	0.232871	0.266337		245.79	-0.979659	-0.968295	-1.04305	-1.13219	-1.18859	-1.07848
245.99	0.209085	0.200184	0.207241	0.229441	0.231016	0.269765		245.99	-0.980788	-0.969537	-1.04001	-1.13605	-1.19045	-1.07506
246.19	0.210676	0.204493	0.205886	0.231012	0.235715	0.267915		246.19	-0.979196	-0.965228	-1.04136	-1.13448	-1.18575	-1.0769
246.39	0.213838	0.203034	0.208963	0.234787	0.236147	0.269283		246.39	-0.976034	-0.966687	-1.03828	-1.13071	-1.18532	-1.07554
246.59	0.214108	0.20501	0.208467	0.232368	0.234382	0.271994		246.59	-0.975764	-0.964712	-1.03878	-1.13313	-1.18708	-1.07283
246.79	0.214947	0.204866	0.209357	0.240048	0.236621	0.274866		246.79	-0.974926	-0.964856	-1.03789	-1.12545	-1.18484	-1.06995
246.99	0.216563	0.204984	0.212563	0.235856	0.239365	0.274486		246.99	-0.97331	-0.964737	-1.03468	-1.12964	-1.1821	-1.07033
247.19	0.21384	0.205468	0.209809	0.235137	0.2389	0.27054		247.19	-0.976032	-0.964253	-1.03744	-1.13036	-1.18256	-1.07428
247.39	0.218298	0.208727	0.215089	0.23977	0.243051	0.275293		247.39	-0.971574	-0.960995	-1.03216	-1.12572	-1.17841	-1.06953
247.6	0.2178	0.211212	0.214984	0.238514	0.240324	0.275344		247.6	-0.972072	-0.958509	-1.03226	-1.12698	-1.18114	-1.06948
247.79	0.215178	0.206016	0.215804	0.243063	0.244298	0.276698		247.79	-0.974694	-0.963705	-1.03144	-1.12243	-1.17716	-1.06812
247.99	0.21676	0.209594	0.216985	0.245358	0.242746	0.276548		247.99	-0.973113	-0.960127	-1.03026	-1.12014	-1.17872	-1.06827
248.19	0.217559	0.211373	0.21777	0.242655	0.244343	0.281317		248.19	-0.972313	-0.958348	-1.02948	-1.12284	-1.17712	-1.0635
248.39	0.218811	0.212806	0.219041	0.24625	0.24099	0.276549		248.39	-0.971061	-0.956915	-1.02821	-1.11924	-1.18047	-1.06827
248.6	0.221098	0.211662	0.219758	0.246256	0.245825	0.28094		248.6	-0.968774	-0.958059	-1.02749	-1.11924	-1.17564	-1.06388
248.79	0.22329	0.213265	0.22069	0.246117	0.246655	0.282833		248.79	-0.966582	-0.956457	-1.02656	-1.11938	-1.17481	-1.06199
248.99	0.219936	0.215644	0.220409	0.246752	0.252097	0.280446		248.99	-0.969936	-0.954078	-1.02684	-1.11874	-1.16937	-1.06437
249.19	0.222319	0.216481	0.224341	0.247344	0.252891	0.285031		249.19	-0.967554	-0.95324	-1.02291	-1.11815	-1.16857	-1.05979
249.39	0.226054	0.218326	0.225999	0.249866	0.249848	0.280959		249.39	-0.963818	-0.951395	-1.02125	-1.11563	-1.17161	-1.06386
249.6	0.229626	0.216791	0.223914	0.248568	0.256636	0.289003		249.6	-0.960247	-0.95293	-1.02333	-1.11693	-1.16483	-1.05582
249.79	0.227826	0.218017	0.224348	0.250447	0.25029	0.284095		249.79	-0.962047	-0.951704	-1.0229	-1.11505	-1.17117	-1.06072
249.99	0.227719	0.221225	0.228012	0.252763	0.256004	0.285496		249.99	-0.962153	-0.948497	-1.01924	-1.11273	-1.16546	-1.05932
250.19	0.226764	0.21871	0.227772	0.251398	0.256246	0.285305		250.19	-0.963108	-0.951011	-1.01948	-1.1141	-1.16522	-1.05952
250.39	0.232536	0.223858	0.231582	0.253397	0.25753	0.291106		250.39	-0.957336	-0.945863	-1.01566	-1.1121	-1.16393	-1.05371
250.6	0.230303	0.221719	0.229216	0.253142	0.255309	0.287819		250.6	-0.959569	-0.948003	-1.01803	-1.11235	-1.16615	-1.057
250.79	0.231722	0.218472	0.229598	0.258621	0.259257	0.293006		250.79	-0.95815	-0.951249	-1.01765	-1.10687	-1.16221	-1.05181
250.99	0.231931	0.220819	0.230819	0.25834	0.25901	0.295206		250.99	-0.957942	-0.948902	-1.01643	-1.10715	-1.16245	-1.04961
251.19	0.230521	0.224571	0.232337	0.259409	0.255403	0.296816		251.19	-0.959351	-0.945151	-1.01491	-1.10609	-1.16606	-1.048
251.39	0.235399	0.225838	0.233302	0.256058	0.259196	0.295105		251.39	-0.954473	-0.943883	-1.01394	-1.10944	-1.16227	-1.04971
251.6	0.235015	0.227107	0.236825	0.257696	0.264562	0.294441		251.6	-0.954857	-0.942614	-1.01042	-1.1078	-1.1569	-1.05038
251.79	0.233376	0.227531	0.236872	0.258372	0.264516	0.29619		251.79	-0.956496	-0.94219	-1.01038	-1.10712	-1.15695	-1.04863
251.99	0.235309	0.231787	0.236309	0.260614	0.26394	0.294809		251.99	-0.954563	-0.937934	-1.01094	-1.10488	-1.15752	-1.05001
252.19	0.240366	0.229396	0.240259	0.265343	0.262986	0.295262		252.19	-0.949506	-0.940326	-1.00699	-1.10015	-1.15848	-1.04956
252.39	0.239714	0.229237	0.23943	0.259386	0.262715	0.298698		252.39	-0.950158	-0.940485	-1.00782	-1.10611	-1.15875	-1.04612
252.6	0.24311	0.232082	0.236626	0.262824	0.266078	0.303637		252.6	-0.946762	-0.93764	-1.01062	-1.10267	-1.15538	-1.04118
252.79	0.241319	0.233962	0.242612	0.267853	0.267056	0.300366		252.79	-0.948553	-0.935759	-1.00463	-1.09764	-1.15441	-1.04445
252.99	0.236604	0.233879	0.239638	0.265988	0.26662	0.299825		252.99	-0.953268	-0.935843	-1.00761	-1.09951	-1.15484	-1.045
253.19	0.242477	0.231875	0.243201	0.266714	0.268562	0.306637		253.19	-0.947395	-0.937846	-1.00405	-1.09878	-1.1529	-1.03818
253.39	0.243654	0.235364	0.24214	0.265597	0.270008	0.308148		253.39	-0.946219	-0.934357	-1.00511	-1.0999	-1.15145	-1.03667
253.59	0.243665	0.235175	0.241933	0.264132	0.271076	0.305435		253.59	-0.946207	-0.934546	-1.00531	-1.10136	-1.15039	-1.03939
253.79	0.244943	0.237974	0.245904	0.27282	0.274416	0.306444		253.79	-0.944929	-0.931748	-1.00134	-1.09267	-1.14705	-1.03838
253.99	0.245451	0.241531	0.243821	0.268399	0.271897	0.307317		253.99	-0.944422	-0.92819	-1.00343	-1.09709	-1.14957	-1.0375
254.19	0.24951	0.23913	0.249678	0.276392	0.273549	0.309346		254.19	-0.940362	-0.930592	-0.997568	-1.0891	-1.14791	-1.03547
254.39	0.246257	0.238472	0.250687	0.27369	0.276522	0.309129		254.39	-0.943615	-0.93125	-0.99656	-1.0918	-1.14494	-1.03569
254.6	0.246291	0.236437	0.251559	0.273815	0.276954	0.3155		254.6	-0.943581	-0.933284	-0.995687	-1.09168	-1.14451	-1.02932
254.79	0.249902	0.239388	0.251669	0.276249	0.279729	0.310077		254.79	-0.93997	-0.930334	-0.995578	-1.08924	-1.14173	-1.03474
254.99	0.247726	0.241356	0.249671	0.276417	0.274125	0.314003		254.99	-0.942146	-0.928365	-0.997575	-1.08908	-1.14734	-1.03082
255.19	0.248735	0.241331	0.253141	0.277308	0.275268	0.311022		255.19	-0.941137	-0.92839	-0.994105	-1.08819	-1.14619	-1.0338
255.39	0.252259	0.242832	0.251246	0.279842	0.278134	0.3127		255.39	-0.937614	-0.926889	-0.996001	-1.08565	-1.14333	-1.03212
255.6	0.255949	0.24529	0.255298	0.276288	0.275842	0.317238		255.6	-0.933924	-0.924432	-0.991949	-1.08921	-1.14562	-1.02758
255.79	0.257282	0.244026	0.254582	0.281958	0.281513	0.318383		255.79	-0.93259	-0.925695	-0.992665	-1.08354	-1.13995	-1.02644
255.99	0.257384	0.244403	0.257604	0.281964	0.281722	0.313511		255.99	-0.932489	-0.925318	-0.989643	-1.08353	-1.13974	-1.03131
256.2	0.255863	0.24239	0.256951	0.279582	0.281826	0.313277		256.2	-0.934009	-0.927331	-0.990295	-1.08591	-1.13964	-1.03154
256.39	0.254652	0.249302	0.259666	0.281984	0.282935	0.318228		256.39	-0.93522	-0.92042	-0.987581	-1.08351	-1.13853	-1.02659
256.6	0.254626	0.249692	0.25563	0.284721	0.283392	0.316546		256.6	-0.935246	-0.920029	-0.991616	-1.08077	-1.13807	-1.02827
256.79	0.257868	0.248663	0.260574	0.285185	0.28632	0.31807		256.79	-0.932005	-0.921059	-0.986673	-1.08031	-1.13514	-1.02675
256.99	0.259382	0.249232	0.262417	0.289436	0.286451	0.318115		256.99	-0.93049	-0.920489	-0.984829	-1.07606	-1.13501	-1.0267
257.2	0.262818	0.250561	0.263107	0.285798	0.289231	0.321675		257.2	-0.927054	-0.91916	-0.984139	-1.0797	-1.13223	-1.02314
257.39	0.259649	0.252485	0.264385	0.285981	0.289741	0.323615		257.39	-0.930224	-0.917236	-0.982862	-1.07951	-1.13172	-1.02121
257.6	0.262569	0.251585	0.260809	0.28908	0.29247	0.32498		257.6	-0.927303	-0.918137	-0.986438	-1.07641	-1.12899	-1.01984
257.79	0.266896	0.254011	0.263675	0.289041	0.291731	0.327448		257.79	-0.922976	-0.91571	-0.983572	-1.07645	-1.12973	-1.01737
257.99	0.266948	0.254926	0.266439	0.290332	0.29101	0.326603		257.99	-0.922925	-0.914795	-0.980807	-1.07516	-1.13045	-1.01822
258.2	0.264193	0.259104	0.268764	0.292932	0.296444	0.325221		258.2	-0.925679	-0.910617	-0.978483	-1.07256	-1.12502	-1.0196
258.39	0.266793	0.258025	0.267892	0.29521	0.295977	0.32998		258.39	-0.92308	-0.911696	-0.979355	-1.07028	-1.12549	-1.01484
258.59	0.269893	0.258277	0.268103	0.293793	0.297126	0.329611		258.59	-0.919979	-0.911444	-0.979144	-1.0717	-1.12434	-1.01521
258.79	0.266801	0.260487	0.270446	0.295821	0.292977	0.331821		258.79	-0.923071	-0.909234	-0.976801	-1.06967	-1.12849	-1.013
258.99	0.268597	0.261166	0.269192	0.297045	0.298887	0.330741		258.99	-0.921275	-0.908556	-0.978055	-1.06845	-1.12258	-1.01408
259.2	0.268804	0.258885	0.271501	0.29922	0.295952	0.328774		259.2	-0.921069	-0.910836	-0.975746	-1.06627	-1.12551	-1.01605
259.39	0.270241	0.26418	0.272784	0.303141	0.299508	0.332401		259.39	-0.919631	-0.905542	-0.974462	-1.06235	-1.12195	-1.01242
259.59	0.271671	0.264061	0.273224	0.299824	0.303832	0.334244		259.59	-0.918202	-0.90566	-0.974023	-1.06567	-1.11763	-1.01058
259.79	0.272861	0.264059	0.275864	0.298796	0.300875	0.335499		259.79	-0.917011	-0.905662	-0.971383	-1.0667	-1.12059	-1.00932
259.99	0.272068	0.26784	0.275893	0.304897	0.304545	0.336619		259.99	-0.917804	-0.901881	-0.971354	-1.0606	-1.11692	-1.0082
260.19	0.275236	0.26788	0.278549	0.300387	0.299899	0.335467		260.19	-0.914637	-0.901841	-0.968698	-1.06511	-1.12156	-1.00935
260.39	0.276084	0.265944	0.276882	0.305473	0.304641	0.336282		260.39	-0.913788	-0.903777	-0.970365	-1.06002	-1.11682	-1.00854
260.6	0.277035	0.266623	0.278703	0.302842	0.305749	0.336814		260.6	-0.912837	-0.903099	-0.968544	-1.06265	-1.11571	-1.00801
260.79	0.280678	0.267582	0.281758	0.306566	0.30572	0.342153		260.79	-0.909194	-0.902139	-0.965489	-1.05893	-1.11574	-1.00267
260.99	0.276702	0.267738	0.280236	0.307773	0.308146	0.341262		260.99	-0.91317	-0.901983	-0.967011	-1.05772	-1.11332	-1.00356
261.2	0.27963	0.273092	0.281705	0.3121	0.310403	0.340203		261.2	-0.910242	-0.896629	-0.965541	-1.05339	-1.11106	-1.00462
261.39	0.282302	0.271217	0.283506	0.308738	0.307799	0.340728		261.39	-0.90757	-0.898505	-0.963741	-1.05676	-1.11366	-1.00409
261.6	0.283974	0.269362	0.284914	0.31062	0.311622	0.344651		261.6	-0.905898	-0.900359	-0.962333	-1.05487	-1.10984	-1.00017
261.79	0.281283	0.275845	0.283662	0.312656	0.310888	0.344218		261.79	-0.908589	-0.893876	-0.963585	-1.05284	-1.11057	-1.0006
261.99	0.2815	0.274229	0.286774	0.312336	0.308857	0.344981		261.99	-0.908372	-0.895492	-0.960473	-1.05316	-1.11261	-0.999839
262.19	0.288077	0.27131	0.287605	0.312356	0.314955	0.34699		262.19	-0.901795	-0.898411	-0.959642	-1.05314	-1.10651	-0.99783
262.39	0.285845	0.276163	0.291531	0.312041	0.313641	0.346716		262.39	-0.904028	-0.893558	-0.955716	-1.05345	-1.10782	-0.998104
262.6	0.284202	0.280269	0.289099	0.314134	0.316614	0.347107		262.6	-0.90567	-0.889453	-0.958147	-1.05136	-1.10485	-0.997713
262.79	0.285528	0.27771	0.292556	0.315692	0.317437	0.348191		262.79	-0.904344	-0.892011	-0.954691	-1.0498	-1.10403	-0.996629
262.99	0.286842	0.279066	0.292895	0.31624	0.315187	0.350387		262.99	-0.90303	-0.890656	-0.954352	-1.04925	-1.10628	-0.994433
263.2	0.287717	0.278684	0.292643	0.318614	0.315007	0.352134		263.2	-0.902155	-0.891037	-0.954604	-1.04688	-1.10646	-0.992686
263.39	0.290454	0.28071	0.292265	0.317078	0.317706	0.351134		263.39	-0.899418	-0.889011	-0.954982	-1.04842	-1.10376	-0.993686
263.59	0.288939	0.282895	0.297549	0.321292	0.319981	0.349608		263.59	-0.900933	-0.886826	-0.949697	-1.0442	-1.10148	-0.995212
263.79	0.293631	0.283517	0.295934	0.319608	0.317717	0.35171		263.79	-0.896241	-0.886205	-0.951313	-1.04589	-1.10375	-0.99311
263.99	0.295124	0.283884	0.296766	0.324405	0.322524	0.354926		263.99	-0.894748	-0.885838	-0.95048	-1.04109	-1.09894	-0.989895
264.19	0.294862	0.284026	0.296346	0.322403	0.324576	0.360354		264.19	-0.89501	-0.885695	-0.950901	-1.04309	-1.09689	-0.984466
264.39	0.291041	0.283252	0.298774	0.325197	0.32131	0.354175		264.39	-0.898831	-0.886469	-0.948473	-1.0403	-1.10015	-0.990645
264.59	0.294078	0.284282	0.299106	0.327324	0.327177	0.357259		264.59	-0.895795	-0.885439	-0.948141	-1.03817	-1.09429	-0.987561
264.79	0.296829	0.28878	0.30143	0.330901	0.325886	0.358967		264.79	-0.893043	-0.880941	-0.945816	-1.03459	-1.09558	-0.985853
264.99	0.296115	0.28701	0.300318	0.326424	0.32901	0.361434		264.99	-0.893758	-0.882712	-0.946929	-1.03907	-1.09245	-0.983386
265.19	0.294219	0.284069	0.304638	0.327187	0.328408	0.356746		265.19	-0.895653	-0.885652	-0.942609	-1.03831	-1.09306	-0.988074
265.39	0.299354	0.288144	0.304831	0.330029	0.328584	0.365029		265.39	-0.890518	-0.881577	-0.942416	-1.03547	-1.09288	-0.979791
265.6	0.296388	0.291647	0.306715	0.333323	0.330063	0.361082		265.6	-0.893484	-0.878074	-0.940532	-1.03217	-1.0914	-0.983738
265.79	0.303899	0.293121	0.303332	0.332187	0.335761	0.362659		265.79	-0.885973	-0.876601	-0.943915	-1.03331	-1.0857	-0.982161
265.99	0.30275	0.293874	0.307198	0.332234	0.332128	0.365898		265.99	-0.887122	-0.875847	-0.940048	-1.03326	-1.08933	-0.978922
266.19	0.301382	0.291843	0.307784	0.335677	0.33471	0.36856		266.19	-0.888491	-0.877878	-0.939462	-1.02982	-1.08675	-0.97626
266.39	0.305704	0.290904	0.307293	0.333507	0.335044	0.369027		266.39	-0.884168	-0.878817	-0.939953	-1.03199	-1.08642	-0.975793
266.6	0.303988	0.294751	0.309103	0.336492	0.334265	0.369222		266.6	-0.885884	-0.87497	-0.938144	-1.029	-1.0872	-0.975598
266.79	0.30721	0.294604	0.307992	0.337847	0.33466	0.371032		266.79	-0.882662	-0.875117	-0.939255	-1.02765	-1.0868	-0.973788
266.99	0.306071	0.296322	0.31021	0.338798	0.336743	0.375095		266.99	-0.883802	-0.8734	-0.937037	-1.0267	-1.08472	-0.969725
267.19	0.308548	0.297839	0.313849	0.339492	0.338918	0.371513		267.19	-0.881325	-0.871882	-0.933397	-1.026	-1.08255	-0.973307
267.39	0.308748	0.300323	0.31397	0.339084	0.340365	0.37122		267.39	-0.881124	-0.869398	-0.933277	-1.02641	-1.0811	-0.9736
267.59	0.310494	0.299991	0.314088	0.342508	0.342136	0.372337		267.59	-0.879379	-0.86973	-0.933159	-1.02299	-1.07933	-0.972483
267.79	0.310128	0.302205	0.313592	0.342738	0.341802	0.373062		267.79	-0.879745	-0.867516	-0.933655	-1.02276	-1.07966	-0.971758
267.99	0.31073	0.303207	0.316671	0.341141	0.338626	0.372885		267.99	-0.879142	-0.866514	-0.930576	-1.02435	-1.08284	-0.971935
268.2	0.310722	0.304867	0.316484	0.346938	0.344329	0.37853		268.2	-0.879151	-0.864854	-0.930763	-1.01856	-1.07713	-0.96629
268.39	0.316833	0.304434	0.318448	0.344188	0.345682	0.375865		268.39	-0.873039	-0.865287	-0.928799	-1.02131	-1.07578	-0.968955
268.59	0.313394	0.304562	0.320541	0.344933	0.343849	0.38055		268.59	-0.876478	-0.865159	-0.926705	-1.02056	-1.07761	-0.96427
268.79	0.31462	0.304369	0.322012	0.348209	0.346739	0.380727		268.79	-0.875252	-0.865352	-0.925235	-1.01729	-1.07472	-0.964093
268.99	0.315155	0.306697	0.325205	0.349439	0.34836	0.383099		268.99	-0.874717	-0.863024	-0.922042	-1.01606	-1.0731	-0.961721
269.19	0.315751	0.308969	0.323794	0.349385	0.348309	0.379648		269.19	-0.874121	-0.860753	-0.923453	-1.01611	-1.07315	-0.965172
269.39	0.318922	0.311299	0.32236	0.35023	0.352384	0.381044		269.39	-0.870951	-0.858422	-0.924886	-1.01526	-1.06908	-0.963776
269.59	0.322488	0.313381	0.327435	0.351035	0.34894	0.382058		269.59	-0.867384	-0.856341	-0.919811	-1.01446	-1.07252	-0.962762
269.79	0.320549	0.311108	0.326542	0.355968	0.354502	0.3841		269.79	-0.869324	-0.858614	-0.920704	-1.00953	-1.06696	-0.96072
269.99	0.321613	0.309989	0.3267	0.349868	0.356601	0.384607		269.99	-0.868259	-0.859732	-0.920547	-1.01563	-1.06486	-0.960213
270.19	0.320508	0.313872	0.330068	0.354067	0.351965	0.389559		270.19	-0.869364	-0.85585	-0.917179	-1.01143	-1.0695	-0.955261
270.39	0.321883	0.315776	0.330413	0.35655	0.35647	0.389458		270.39	-0.867989	-0.853945	-0.916834	-1.00894	-1.06499	-0.955362
270.59	0.325143	0.315294	0.331598	0.354874	0.356084	0.390479		270.59	-0.864729	-0.854427	-0.915649	-1.01062	-1.06538	-0.954341
270.79	0.324449	0.313743	0.332772	0.362519	0.355356	0.388383		270.79	-0.865424	-0.855979	-0.914474	-1.00298	-1.06611	-0.956437
270.99	0.325542	0.314445	0.335534	0.359144	0.35399	0.392025		270.99	-0.86433	-0.855276	-0.911713	-1.00635	-1.06747	-0.952795
271.19	0.325587	0.315684	0.334972	0.361067	0.360822	0.392911		271.19	-0.864285	-0.854037	-0.912275	-1.00443	-1.06064	-0.951909
271.39	0.329084	0.31882	0.332107	0.361872	0.359222	0.391324		271.39	-0.860788	-0.850901	-0.91514	-1.00362	-1.06224	-0.953496
271.59	0.332178	0.31709	0.3372	0.360915	0.361538	0.393516		271.59	-0.857694	-0.852631	-0.910046	-1.00458	-1.05992	-0.951304
271.79	0.330553	0.318128	0.336074	0.365165	0.358257	0.396817		271.79	-0.859319	-0.851594	-0.911173	-1.00033	-1.06321	-0.948003
271.99	0.330932	0.322418	0.337205	0.362813	0.361013	0.398585		271.99	-0.85894	-0.847303	-0.910042	-1.00268	-1.06045	-0.946235
272.19	0.334322	0.324175	0.338153	0.365069	0.363738	0.39799		272.19	-0.85555	-0.845546	-0.909094	-1.00043	-1.05772	-0.946831
272.39	0.335383	0.321928	0.338377	0.36242	0.361528	0.395792		272.39	-0.854489	-0.847794	-0.908869	-1.00307	-1.05993	-0.949028
272.59	0.334889	0.325022	0.340108	0.36451	0.365509	0.399065		272.59	-0.854983	-0.8447	-0.907139	-1.00098	-1.05595	-0.945755
272.79	0.333816	0.326997	0.339574	0.369169	0.364895	0.400101		272.79	-0.856057	-0.842724	-0.907673	-0.996325	-1.05657	-0.944719
272.99	0.337476	0.325843	0.345108	0.370022	0.366859	0.403122		272.99	-0.852396	-0.843878	-0.902139	-0.995472	-1.0546	-0.941698
273.19	0.336807	0.324066	0.344412	0.369633	0.368337	0.401873		273.19	-0.853066	-0.845655	-0.902835	-0.995862	-1.05313	-0.942947
273.39	0.334619	0.330869	0.345843	0.372076	0.369983	0.404569		273.39	-0.855253	-0.838852	-0.901403	-0.993419	-1.05148	-0.940251
273.6	0.341384	0.325671	0.348035	0.373141	0.372287	0.404511		273.6	-0.848488	-0.84405	-0.899212	-0.992354	-1.04918	-0.940309
273.79	0.339908	0.329936	0.345893	0.375927	0.373227	0.405402		273.79	-0.849965	-0.839786	-0.901354	-0.989567	-1.04824	-0.939418
274	0.340154	0.330743	0.349371	0.372128	0.368384	0.406678		274	-0.849719	-0.838978	-0.897876	-0.993366	-1.05308	-0.938142
274.2	0.339997	0.335594	0.348012	0.373662	0.375559	0.407683		274.2	-0.849875	-0.834127	-0.899234	-0.991833	-1.0459	-0.937137
274.39	0.340585	0.331563	0.352372	0.379535	0.378284	0.406286		274.39	-0.849287	-0.838158	-0.894874	-0.985959	-1.04318	-0.938534
274.6	0.345404	0.33073	0.351304	0.376251	0.375142	0.409255		274.6	-0.844468	-0.838992	-0.895943	-0.989243	-1.04632	-0.935565
274.79	0.347625	0.334664	0.349555	0.376482	0.377207	0.409455		274.79	-0.842247	-0.835057	-0.897692	-0.989013	-1.04426	-0.935365
274.99	0.346462	0.336125	0.354442	0.382465	0.379162	0.412092		274.99	-0.84341	-0.833596	-0.892804	-0.983029	-1.0423	-0.932728
275.2	0.345325	0.333461	0.356492	0.38063	0.380024	0.414427		275.2	-0.844547	-0.836261	-0.890755	-0.984864	-1.04144	-0.930393
275.39	0.348393	0.338783	0.354992	0.380387	0.381298	0.414924		275.39	-0.841479	-0.830938	-0.892254	-0.985107	-1.04017	-0.929897
275.6	0.347591	0.341521	0.359908	0.382774	0.382284	0.411487		275.6	-0.842281	-0.828201	-0.887339	-0.98272	-1.03918	-0.933333
275.79	0.350872	0.337559	0.35588	0.383561	0.382422	0.413681		275.79	-0.839	-0.832162	-0.891367	-0.981933	-1.03904	-0.931139
275.99	0.352585	0.3414	0.355187	0.385249	0.381649	0.415475		275.99	-0.837287	-0.828322	-0.89206	-0.980245	-1.03981	-0.929345
276.2	0.352276	0.344046	0.360125	0.388656	0.384561	0.416384		276.2	-0.837596	-0.825676	-0.887122	-0.976838	-1.0369	-0.928436
276.39	0.350975	0.342382	0.360886	0.38655	0.386308	0.416222		276.39	-0.838898	-0.82734	-0.886361	-0.978944	-1.03515	-0.928598
276.59	0.35294	0.341886	0.363062	0.387599	0.384671	0.420543		276.59	-0.836932	-0.827836	-0.884185	-0.977896	-1.03679	-0.924277
276.79	0.356987	0.344207	0.363242	0.390209	0.387828	0.425687		276.79	-0.832885	-0.825514	-0.884005	-0.975285	-1.03363	-0.919133
276.99	0.358532	0.34497	0.366468	0.39326	0.386952	0.424161		276.99	-0.831341	-0.824751	-0.880779	-0.972235	-1.03451	-0.920659
277.2	0.356719	0.347805	0.363908	0.388486	0.389914	0.418705		277.2	-0.833153	-0.821916	-0.883338	-0.977008	-1.03155	-0.926115
277.39	0.358803	0.348111	0.36511	0.390056	0.391539	0.421723		277.39	-0.831069	-0.82161	-0.882136	-0.975438	-1.02992	-0.923097
277.6	0.359133	0.349252	0.36757	0.394099	0.388613	0.422063		277.6	-0.830739	-0.82047	-0.879676	-0.971396	-1.03285	-0.922757
277.79	0.361291	0.349211	0.368496	0.396165	0.392469	0.420946		277.79	-0.828582	-0.82051	-0.878751	-0.96933	-1.02899	-0.923874
277.99	0.362671	0.351863	0.370634	0.396829	0.397159	0.425943		277.99	-0.827201	-0.817859	-0.876613	-0.968665	-1.0243	-0.918877
278.2	0.361126	0.354004	0.367752	0.39753	0.396932	0.425456		278.2	-0.828746	-0.815717	-0.879495	-0.967965	-1.02453	-0.919364
278.39	0.36458	0.352907	0.371176	0.400581	0.39612	0.427751		278.39	-0.825292	-0.816814	-0.87607	-0.964914	-1.02534	-0.917069
278.6	0.365384	0.355123	0.371753	0.401583	0.395314	0.424556		278.6	-0.824488	-0.814598	-0.875494	-0.963911	-1.02615	-0.920264
278.79	0.363846	0.352621	0.374221	0.400552	0.398717	0.430589		278.79	-0.826026	-0.817101	-0.873025	-0.964943	-1.02275	-0.914231
278.99	0.364975	0.352904	0.37559	0.400401	0.403164	0.433381		278.99	-0.824897	-0.816817	-0.871657	-0.965093	-1.0183	-0.911439
279.2	0.361841	0.355373	0.373495	0.404423	0.401414	0.432787		279.2	-0.828031	-0.814348	-0.873752	-0.961071	-1.02005	-0.912033
279.39	0.367077	0.357591	0.377023	0.407282	0.402219	0.43707		279.39	-0.822795	-0.812131	-0.870224	-0.958213	-1.01924	-0.90775
279.6	0.367962	0.359851	0.378384	0.408243	0.400142	0.434686		279.6	-0.82191	-0.809871	-0.868862	-0.957251	-1.02132	-0.910134
279.79	0.367254	0.359961	0.379866	0.408102	0.403733	0.435209		279.79	-0.822619	-0.809761	-0.86738	-0.957393	-1.01773	-0.909611
279.99	0.370206	0.364458	0.380274	0.408725	0.407231	0.433059		279.99	-0.819666	-0.805263	-0.866972	-0.95677	-1.01423	-0.911761
280.2	0.368328	0.358559	0.38108	0.409579	0.404539	0.4389		280.2	-0.821544	-0.811163	-0.866167	-0.955916	-1.01692	-0.90592
280.39	0.369626	0.363903	0.379788	0.410045	0.408223	0.439725		280.39	-0.820247	-0.805819	-0.867459	-0.955449	-1.01324	-0.905095
280.6	0.371624	0.365437	0.384594	0.405929	0.409167	0.436408		280.6	-0.818248	-0.804285	-0.862652	-0.959566	-1.0123	-0.908412
280.79	0.374976	0.365902	0.381197	0.414163	0.407683	0.44002		280.79	-0.814896	-0.80382	-0.86605	-0.951332	-1.01378	-0.9048
280.99	0.378635	0.363633	0.386835	0.413472	0.406243	0.440176		280.99	-0.811238	-0.806089	-0.860411	-0.952022	-1.01522	-0.904644
281.2	0.375556	0.365265	0.385644	0.413195	0.413327	0.443514		281.2	-0.814316	-0.804456	-0.861602	-0.952299	-1.00814	-0.901306
281.39	0.377144	0.366196	0.386055	0.41233	0.409089	0.445069		281.39	-0.812729	-0.803526	-0.861191	-0.953164	-1.01237	-0.899751
281.6	0.380635	0.3694	0.389003	0.413301	0.412162	0.4483		281.6	-0.809237	-0.800322	-0.858244	-0.952193	-1.0093	-0.89652
281.79	0.376866	0.369152	0.392143	0.417694	0.415257	0.445527		281.79	-0.813006	-0.800569	-0.855104	-0.9478	-1.00621	-0.899293
281.99	0.380031	0.371317	0.39256	0.418638	0.416087	0.449911		281.99	-0.809841	-0.798405	-0.854687	-0.946856	-1.00538	-0.894909
282.2	0.376942	0.370413	0.393869	0.422362	0.413187	0.446891		282.2	-0.81293	-0.799309	-0.853377	-0.943132	-1.00828	-0.897929
282.39	0.385677	0.369959	0.393218	0.420585	0.418143	0.450431		282.39	-0.804196	-0.799762	-0.854029	-0.944909	-1.00332	-0.894389
282.6	0.385161	0.372012	0.397937	0.418725	0.414318	0.451637		282.6	-0.804711	-0.797709	-0.84931	-0.94677	-1.00714	-0.893183
282.79	0.38374	0.374343	0.397172	0.423242	0.419252	0.450597		282.79	-0.806132	-0.795378	-0.850075	-0.942253	-1.00221	-0.894223
282.99	0.385145	0.379375	0.394695	0.422915	0.419308	0.453712		282.99	-0.804727	-0.790346	-0.852551	-0.94258	-1.00215	-0.891108
283.2	0.385362	0.375086	0.395456	0.424779	0.418933	0.454221		283.2	-0.80451	-0.794636	-0.851791	-0.940715	-1.00253	-0.890599
283.39	0.38739	0.377372	0.400093	0.418364	0.423931	0.455277		283.39	-0.802482	-0.79235	-0.847153	-0.94713	-0.997531	-0.889543
283.6	0.388542	0.37593	0.400584	0.43173	0.42469	0.454224		283.6	-0.80133	-0.793791	-0.846662	-0.933765	-0.996773	-0.890596
283.79	0.390022	0.381116	0.40152	0.42812	0.425145	0.4569		283.79	-0.79985	-0.788606	-0.845727	-0.937375	-0.996317	-0.88792
283.99	0.389065	0.380516	0.401301	0.432297	0.427253	0.459173		283.99	-0.800807	-0.789205	-0.845945	-0.933197	-0.994209	-0.885647
284.19	0.38967	0.380955	0.404591	0.429551	0.426125	0.457061		284.19	-0.800202	-0.788766	-0.842656	-0.935944	-0.995337	-0.887759
284.39	0.391558	0.381424	0.404927	0.428203	0.424714	0.464745		284.39	-0.798315	-0.788297	-0.84232	-0.937291	-0.996748	-0.880075
284.6	0.393689	0.380541	0.403426	0.432881	0.426014	0.462557		284.6	-0.796183	-0.789181	-0.843821	-0.932613	-0.995448	-0.882263
284.79	0.391644	0.385693	0.406434	0.434991	0.428958	0.460514		284.79	-0.798228	-0.784029	-0.840812	-0.930504	-0.992504	-0.884306
284.99	0.395361	0.385743	0.409202	0.435614	0.432137	0.464678		284.99	-0.794511	-0.783978	-0.838045	-0.92988	-0.989325	-0.880142
285.2	0.396599	0.386565	0.410783	0.436284	0.434942	0.464026		285.2	-0.793273	-0.783157	-0.836464	-0.929211	-0.98652	-0.880794
285.39	0.392669	0.382161	0.409684	0.436774	0.435927	0.46173		285.39	-0.797203	-0.78756	-0.837562	-0.92872	-0.985535	-0.88309
285.6	0.398273	0.391432	0.408688	0.43712	0.436019	0.467562		285.6	-0.791599	-0.77829	-0.838559	-0.928374	-0.985443	-0.877258
285.79	0.4018	0.388258	0.410723	0.439825	0.434867	0.469306		285.79	-0.788072	-0.781464	-0.836524	-0.925669	-0.986595	-0.875514
285.99	0.399768	0.388743	0.409177	0.439956	0.43907	0.470546		285.99	-0.790104	-0.780979	-0.83807	-0.925539	-0.982393	-0.874274
286.2	0.399948	0.390738	0.411277	0.440524	0.436497	0.469699		286.2	-0.789924	-0.778984	-0.835969	-0.924971	-0.984966	-0.875121
286.39	0.399471	0.39339	0.416164	0.439038	0.440031	0.47152		286.39	-0.790401	-0.776331	-0.831083	-0.926456	-0.981432	-0.8733
286.59	0.401602	0.392758	0.414743	0.442655	0.437246	0.472447		286.59	-0.788271	-0.776963	-0.832504	-0.922839	-0.984216	-0.872373
286.79	0.404593	0.391685	0.417977	0.446458	0.446542	0.471817		286.79	-0.785279	-0.778036	-0.82927	-0.919037	-0.97492	-0.873003
286.99	0.406636	0.395045	0.415816	0.44885	0.442183	0.476394		286.99	-0.783237	-0.774676	-0.831431	-0.916645	-0.97928	-0.868426
287.2	0.407747	0.396893	0.418083	0.451306	0.44349	0.47656		287.2	-0.782125	-0.772829	-0.829164	-0.914189	-0.977973	-0.86826
287.39	0.40812	0.398733	0.420852	0.452022	0.446651	0.475139		287.39	-0.781752	-0.770988	-0.826395	-0.913472	-0.974812	-0.869681
287.6	0.413591	0.39965	0.42014	0.446716	0.445125	0.476637		287.6	-0.776281	-0.770072	-0.827106	-0.918778	-0.976338	-0.868183
287.79	0.409992	0.399715	0.425577	0.451818	0.443273	0.48117		287.79	-0.77988	-0.770006	-0.82167	-0.913677	-0.978189	-0.86365
287.99	0.410667	0.403184	0.42241	0.450955	0.446527	0.480198		287.99	-0.779206	-0.766537	-0.824837	-0.914539	-0.974935	-0.864622
288.19	0.409821	0.397706	0.424173	0.456643	0.447367	0.481339		288.19	-0.780052	-0.772016	-0.823074	-0.908851	-0.974095	-0.863481
288.39	0.413253	0.406029	0.425951	0.452647	0.451491	0.4805		288.39	-0.776619	-0.763693	-0.821296	-0.912847	-0.969972	-0.86432
288.6	0.415465	0.402431	0.426245	0.454276	0.454443	0.482984		288.6	-0.774407	-0.76729	-0.821002	-0.911218	-0.96702	-0.861836
288.79	0.413965	0.405998	0.428222	0.451957	0.450444	0.483105		288.79	-0.775907	-0.763724	-0.819025	-0.913537	-0.971018	-0.861715
288.99	0.41652	0.404821	0.428234	0.455197	0.447655	0.484858		288.99	-0.773353	-0.764901	-0.819013	-0.910297	-0.973807	-0.859962
289.19	0.415114	0.407231	0.430652	0.459386	0.452136	0.485297		289.19	-0.774759	-0.76249	-0.816595	-0.906108	-0.969326	-0.859523
289.39	0.418967	0.407648	0.432715	0.459882	0.452015	0.488234		289.39	-0.770906	-0.762073	-0.814532	-0.905612	-0.969447	-0.856586
289.59	0.417608	0.40478	0.43673	0.460419	0.457194	0.487223		289.59	-0.772264	-0.764942	-0.810516	-0.905075	-0.964269	-0.857598
289.79	0.417782	0.40935	0.430768	0.460514	0.457539	0.487492		289.79	-0.772091	-0.760371	-0.816478	-0.90498	-0.963924	-0.857328
289.99	0.422518	0.410187	0.435734	0.464994	0.461016	0.486928		289.99	-0.767354	-0.759535	-0.811513	-0.9005	-0.960447	-0.857892
290.19	0.422633	0.413935	0.43657	0.459897	0.459333	0.489603		290.19	-0.767239	-0.755786	-0.810677	-0.905597	-0.962129	-0.855217
290.39	0.422961	0.410378	0.437037	0.462356	0.453564	0.492146		290.39	-0.766911	-0.759343	-0.81021	-0.903138	-0.967899	-0.852674
290.59	0.426313	0.414804	0.438531	0.466563	0.460902	0.493129		290.59	-0.76356	-0.754917	-0.808716	-0.898931	-0.960561	-0.851691
290.79	0.425312	0.411692	0.438727	0.468944	0.460856	0.4968		290.79	-0.76456	-0.75803	-0.80852	-0.896551	-0.960606	-0.84802
290.99	0.425291	0.415298	0.438667	0.473156	0.463578	0.497243		290.99	-0.764581	-0.754424	-0.80858	-0.892339	-0.957884	-0.847577
291.2	0.43058	0.414206	0.441861	0.468481	0.462846	0.493656		291.2	-0.759293	-0.755515	-0.805385	-0.897013	-0.958617	-0.851164
291.39	0.42991	0.413623	0.441741	0.469032	0.463639	0.49851		291.39	-0.759962	-0.756098	-0.805505	-0.896462	-0.957823	-0.84631
291.59	0.428864	0.418348	0.445164	0.473443	0.467225	0.499548		291.59	-0.761009	-0.751374	-0.802082	-0.892051	-0.954237	-0.845272
291.79	0.433398	0.419232	0.445964	0.47463	0.470418	0.499718		291.79	-0.756474	-0.750489	-0.801282	-0.890864	-0.951045	-0.845102
291.99	0.429133	0.418253	0.448074	0.475701	0.471385	0.498829		291.99	-0.76074	-0.751468	-0.799173	-0.889793	-0.950077	-0.845991
292.19	0.432006	0.423878	0.448793	0.475917	0.470284	0.503724		292.19	-0.757866	-0.745844	-0.798453	-0.889577	-0.951179	-0.841096
292.39	0.432468	0.421877	0.447828	0.476642	0.471409	0.502609		292.39	-0.757404	-0.747845	-0.799418	-0.888852	-0.950053	-0.842211
292.59	0.433048	0.423925	0.444584	0.475036	0.47367	0.502982		292.59	-0.756825	-0.745797	-0.802662	-0.890458	-0.947792	-0.841838
292.79	0.438998	0.423058	0.449442	0.480947	0.47113	0.506438		292.79	-0.750874	-0.746663	-0.797805	-0.884547	-0.950332	-0.838382
292.99	0.434645	0.425877	0.450713	0.477042	0.472783	0.503256		292.99	-0.755227	-0.743845	-0.796534	-0.888452	-0.94868	-0.841564
293.19	0.437331	0.425596	0.44731	0.483634	0.475579	0.508452		293.19	-0.752541	-0.744125	-0.799936	-0.88186	-0.945883	-0.836368
293.39	0.43914	0.426371	0.451323	0.482254	0.478771	0.505996		293.39	-0.750732	-0.74335	-0.795924	-0.883241	-0.942692	-0.838824
293.6	0.438836	0.427987	0.45065	0.480066	0.479114	0.507079		293.6	-0.751036	-0.741735	-0.796597	-0.885429	-0.942349	-0.837741
293.79	0.437288	0.427693	0.456479	0.480578	0.479074	0.508564		293.79	-0.752584	-0.742028	-0.790768	-0.884916	-0.942389	-0.836256
293.99	0.441707	0.430674	0.455247	0.484547	0.477958	0.512929		293.99	-0.748165	-0.739048	-0.792	-0.880948	-0.943505	-0.831891
294.19	0.441707	0.430673	0.456434	0.486291	0.481998	0.511445		294.19	-0.748166	-0.739048	-0.790812	-0.879203	-0.939464	-0.833375
294.39	0.442755	0.432335	0.454796	0.490072	0.482144	0.510862		294.39	-0.747118	-0.737387	-0.792451	-0.875423	-0.939319	-0.833958
294.59	0.447958	0.431928	0.459353	0.488475	0.481686	0.517907		294.59	-0.741915	-0.737793	-0.787894	-0.877019	-0.939776	-0.826913
294.79	0.44881	0.434434	0.460825	0.486292	0.485315	0.513623		294.79	-0.741062	-0.735287	-0.786421	-0.879202	-0.936147	-0.831197
294.99	0.443984	0.43549	0.460798	0.491088	0.486974	0.519428		294.99	-0.745888	-0.734232	-0.786448	-0.874406	-0.934488	-0.825392
295.2	0.44639	0.434838	0.463521	0.496637	0.48437	0.516434		295.2	-0.743482	-0.734883	-0.783726	-0.868857	-0.937092	-0.828386
295.39	0.447198	0.439589	0.462461	0.49381	0.490876	0.517067		295.39	-0.742675	-0.730132	-0.784786	-0.871684	-0.930586	-0.827753
295.59	0.451284	0.438708	0.466238	0.491095	0.486698	0.518417		295.59	-0.738588	-0.731013	-0.781009	-0.8744	-0.934765	-0.826403
295.79	0.448918	0.440718	0.470062	0.495659	0.488927	0.520536		295.79	-0.740954	-0.729003	-0.777185	-0.869836	-0.932535	-0.824284
295.99	0.454517	0.444473	0.465518	0.49556	0.489292	0.52648		295.99	-0.735356	-0.725248	-0.781729	-0.869934	-0.932171	-0.81834
296.19	0.449174	0.44312	0.472288	0.493994	0.488663	0.524304		296.19	-0.740698	-0.726602	-0.774958	-0.8715	-0.932799	-0.820516
296.39	0.454556	0.443054	0.469008	0.497965	0.495978	0.522474		296.39	-0.735316	-0.726667	-0.778238	-0.867529	-0.925484	-0.822347
296.59	0.454604	0.44566	0.470988	0.496943	0.494537	0.52263		296.59	-0.735268	-0.724061	-0.776259	-0.868551	-0.926925	-0.82219
296.79	0.459117	0.446736	0.468886	0.499295	0.494216	0.527055		296.79	-0.730755	-0.722985	-0.778361	-0.8662	-0.927247	-0.817765
296.99	0.458169	0.444819	0.474668	0.497468	0.496972	0.526512		296.99	-0.731704	-0.724903	-0.772579	-0.868026	-0.924491	-0.818308
297.19	0.457248	0.446447	0.47295	0.500687	0.495481	0.531948		297.19	-0.732624	-0.723275	-0.774297	-0.864808	-0.925982	-0.812872
297.39	0.457508	0.447927	0.475793	0.505887	0.498172	0.532624		297.39	-0.732364	-0.721795	-0.771454	-0.859608	-0.92329	-0.812196
297.6	0.460896	0.449715	0.473918	0.504973	0.502155	0.531423		297.6	-0.728976	-0.720006	-0.773328	-0.860522	-0.919308	-0.813397
297.79	0.458758	0.453795	0.476311	0.507382	0.499603	0.530915		297.79	-0.731114	-0.715926	-0.770936	-0.858112	-0.921859	-0.813905
297.99	0.462869	0.449552	0.482552	0.509181	0.50192	0.53315		297.99	-0.727004	-0.72017	-0.764694	-0.856313	-0.919542	-0.81167
298.19	0.460411	0.452279	0.480701	0.509773	0.501981	0.535009		298.19	-0.729462	-0.717442	-0.766545	-0.855721	-0.919481	-0.809811
298.39	0.46064	0.454043	0.480913	0.507542	0.505634	0.532817		298.39	-0.729233	-0.715679	-0.766334	-0.857952	-0.915829	-0.812003
298.59	0.465984	0.452301	0.478851	0.514236	0.50431	0.53512		298.59	-0.723888	-0.717421	-0.768396	-0.851259	-0.917152	-0.8097
298.79	0.468031	0.453799	0.484268	0.511093	0.507028	0.540983		298.79	-0.721842	-0.715922	-0.762979	-0.854402	-0.914435	-0.803837
298.99	0.466839	0.455928	0.483355	0.513243	0.507713	0.53901		298.99	-0.723034	-0.713793	-0.763892	-0.852252	-0.91375	-0.80581
299.19	0.46737	0.457585	0.486848	0.516067	0.51149	0.53832		299.19	-0.722502	-0.712136	-0.760398	-0.849427	-0.909972	-0.8065
299.39	0.47112	0.459399	0.484968	0.515489	0.507827	0.540212		299.39	-0.718752	-0.710322	-0.762279	-0.850006	-0.913636	-0.804608
299.59	0.467876	0.458293	0.487743	0.518467	0.514485	0.540447		299.59	-0.721996	-0.711429	-0.759504	-0.847027	-0.906977	-0.804373
299.79	0.470611	0.461238	0.489475	0.518033	0.512408	0.545332		299.79	-0.719261	-0.708483	-0.757772	-0.847462	-0.909055	-0.799488
299.99	0.470328	0.463046	0.493264	0.517925	0.510568	0.543951		299.99	-0.719544	-0.706676	-0.753982	-0.847569	-0.910894	-0.800869
300.2	0.473272	0.463229	0.490436	0.521567	0.511048	0.548529		300.2	-0.7166	-0.706492	-0.756811	-0.843928	-0.910414	-0.796291
300.39	0.473433	0.463784	0.491956	0.523567	0.512041	0.548187		300.39	-0.71644	-0.705938	-0.755291	-0.841927	-0.909422	-0.796633
300.6	0.476436	0.46643	0.492891	0.526468	0.51333	0.549834		300.6	-0.713436	-0.703292	-0.754356	-0.839026	-0.908132	-0.794986
300.79	0.477521	0.464026	0.495867	0.521875	0.520015	0.548998		300.79	-0.712351	-0.705696	-0.751379	-0.843619	-0.901447	-0.795822
300.99	0.477924	0.470802	0.493542	0.526854	0.516915	0.550054		300.99	-0.711948	-0.698919	-0.753705	-0.83864	-0.904548	-0.794766
301.2	0.47844	0.467929	0.495883	0.524115	0.516502	0.547364		301.2	-0.711432	-0.701793	-0.751364	-0.841379	-0.90496	-0.797457
301.39	0.48134	0.466534	0.497923	0.528138	0.521322	0.552471		301.39	-0.708532	-0.703187	-0.749324	-0.837356	-0.900141	-0.792349
301.6	0.481214	0.467709	0.497686	0.526723	0.524903	0.554011		301.6	-0.708659	-0.702013	-0.749561	-0.838771	-0.896559	-0.790809
301.79	0.483878	0.46894	0.498306	0.530844	0.523411	0.551929		301.79	-0.705994	-0.700782	-0.748941	-0.83465	-0.898051	-0.792891
301.99	0.485446	0.472193	0.501274	0.533623	0.523859	0.555986		301.99	-0.704427	-0.697529	-0.745973	-0.831871	-0.897604	-0.788834
302.2	0.477858	0.473613	0.500588	0.533218	0.523284	0.558618		302.2	-0.712014	-0.696109	-0.746659	-0.832276	-0.898178	-0.786202
302.39	0.482035	0.474773	0.50383	0.537263	0.525202	0.558273		302.39	-0.707837	-0.694948	-0.743417	-0.828232	-0.89626	-0.786547
302.6	0.484647	0.475141	0.504761	0.534701	0.530148	0.558769		302.6	-0.705226	-0.694581	-0.742485	-0.830793	-0.891314	-0.786051
302.79	0.487046	0.475917	0.503139	0.536038	0.529069	0.560778		302.79	-0.702827	-0.693805	-0.744108	-0.829456	-0.892394	-0.784042
302.99	0.483289	0.479118	0.50428	0.5354	0.527457	0.559976		302.99	-0.706584	-0.690603	-0.742967	-0.830094	-0.894006	-0.784844
303.2	0.491214	0.473051	0.50781	0.536868	0.535154	0.561835		303.2	-0.698659	-0.696671	-0.739437	-0.828627	-0.886309	-0.782985
303.39	0.493231	0.478074	0.506497	0.54405	0.531205	0.563316		303.39	-0.696641	-0.691647	-0.74075	-0.821444	-0.890257	-0.781504
303.59	0.492311	0.479124	0.511402	0.541049	0.53355	0.560934		303.59	-0.697561	-0.690597	-0.735844	-0.824446	-0.887913	-0.783886
303.79	0.488443	0.480101	0.511581	0.541332	0.534195	0.563688		303.79	-0.701429	-0.68962	-0.735666	-0.824162	-0.887267	-0.781132
303.99	0.492322	0.480277	0.507771	0.543574	0.536256	0.567986		303.99	-0.69755	-0.689444	-0.739475	-0.82192	-0.885206	-0.776834
304.2	0.495754	0.482581	0.511686	0.545989	0.536862	0.571885		304.2	-0.694118	-0.68714	-0.735561	-0.819506	-0.8846	-0.772935
304.39	0.496768	0.483136	0.514961	0.544717	0.53896	0.567187		304.39	-0.693104	-0.686585	-0.732286	-0.820777	-0.882502	-0.777633
304.6	0.497642	0.482106	0.51344	0.548098	0.538305	0.572444		304.6	-0.69223	-0.687616	-0.733807	-0.817396	-0.883158	-0.772376
304.79	0.493946	0.483136	0.518561	0.543117	0.540543	0.568173		304.79	-0.695926	-0.686585	-0.728686	-0.822377	-0.880919	-0.776647
304.99	0.502241	0.488981	0.517872	0.549726	0.540046	0.572652		304.99	-0.687631	-0.680741	-0.729375	-0.815768	-0.881416	-0.772168
305.2	0.500787	0.48862	0.518728	0.549396	0.542304	0.570912		305.2	-0.689085	-0.681102	-0.728518	-0.816099	-0.879159	-0.773908
305.39	0.503211	0.493939	0.519863	0.549077	0.541492	0.580968		305.39	-0.686661	-0.675782	-0.727384	-0.816417	-0.87997	-0.763852
305.6	0.502554	0.489204	0.520796	0.552752	0.543623	0.574379		305.6	-0.687318	-0.680518	-0.726451	-0.812742	-0.877839	-0.770441
305.79	0.502123	0.493149	0.523072	0.554164	0.547067	0.575784		305.79	-0.687749	-0.676573	-0.724175	-0.81133	-0.874396	-0.769036
305.99	0.506592	0.491743	0.524725	0.555642	0.547797	0.578795		305.99	-0.68328	-0.677978	-0.722522	-0.809852	-0.873665	-0.766025
306.2	0.503221	0.49705	0.525854	0.559174	0.552009	0.579795		306.2	-0.686651	-0.672672	-0.721393	-0.80632	-0.869454	-0.765025
306.39	0.50553	0.496993	0.528758	0.555343	0.549561	0.579139		306.39	-0.684342	-0.672729	-0.718489	-0.810151	-0.871901	-0.765681
306.6	0.505845	0.498425	0.526965	0.555667	0.550813	0.582376		306.6	-0.684027	-0.671296	-0.720282	-0.809827	-0.870649	-0.762444
306.79	0.509004	0.496436	0.528731	0.562836	0.553944	0.582403		306.79	-0.680869	-0.673285	-0.718516	-0.802658	-0.867518	-0.762417
306.99	0.508774	0.497776	0.532696	0.562713	0.552597	0.584587		306.99	-0.681098	-0.671945	-0.714551	-0.802781	-0.868865	-0.760233
307.2	0.508402	0.498898	0.532683	0.56226	0.556225	0.588634		307.2	-0.681471	-0.670824	-0.714564	-0.803234	-0.865238	-0.756186
307.39	0.513322	0.500001	0.531866	0.560266	0.557758	0.587363		307.39	-0.67655	-0.66972	-0.715381	-0.805228	-0.863704	-0.757457
307.59	0.513104	0.501979	0.534519	0.565982	0.55414	0.588543		307.59	-0.676769	-0.667742	-0.712728	-0.799512	-0.867322	-0.756277
307.8	0.551549	0.54244	0.571496	0.600068	0.599807	0.61563		307.8	-0.638323	-0.627282	-0.675751	-0.765426	-0.821656	-0.72919
307.99	0.549037	0.538574	0.574473	0.601139	0.598632	0.62042		307.99	-0.640836	-0.631147	-0.672773	-0.764355	-0.82283	-0.7244
308.19	0.552679	0.537254	0.574779	0.597298	0.598123	0.614288		308.19	-0.637194	-0.632468	-0.672468	-0.768196	-0.82334	-0.730532
308.39	0.548848	0.540507	0.574985	0.594837	0.597501	0.614077		308.39	-0.641025	-0.629214	-0.672262	-0.770658	-0.823961	-0.730743
308.59	0.552215	0.540896	0.572706	0.596471	0.6006	0.615895		308.59	-0.637657	-0.628825	-0.674541	-0.769024	-0.820862	-0.728925
308.79	0.554286	0.541274	0.575468	0.59729	0.604876	0.617357		308.79	-0.635586	-0.628447	-0.671778	-0.768204	-0.816587	-0.727463
308.99	0.553937	0.545462	0.575095	0.599678	0.598965	0.618806		308.99	-0.635936	-0.624259	-0.672151	-0.765816	-0.822497	-0.726014
309.19	0.558442	0.543577	0.581137	0.601784	0.601251	0.620982		309.19	-0.63143	-0.626144	-0.66611	-0.76371	-0.820212	-0.723838
309.39	0.556045	0.54654	0.580452	0.600337	0.605053	0.623799		309.39	-0.633828	-0.623181	-0.666795	-0.765157	-0.816409	-0.721021
309.59	0.557844	0.545441	0.578427	0.599432	0.604668	0.619399		309.59	-0.632028	-0.62428	-0.668819	-0.766062	-0.816794	-0.725421
309.79	0.556874	0.545349	0.584189	0.603845	0.60631	0.623904		309.79	-0.632998	-0.624372	-0.663058	-0.761649	-0.815152	-0.720916
309.99	0.559037	0.547335	0.583143	0.602521	0.605567	0.620565		309.99	-0.630835	-0.622386	-0.664103	-0.762973	-0.815896	-0.724255
310.19	0.560627	0.549635	0.587096	0.606893	0.606255	0.623775		310.19	-0.629245	-0.620086	-0.660151	-0.758601	-0.815208	-0.721045
310.39	0.560968	0.548412	0.587899	0.605809	0.606628	0.626207		310.39	-0.628904	-0.62131	-0.659348	-0.759685	-0.814835	-0.718613
310.59	0.562027	0.55051	0.583016	0.609705	0.610359	0.631711		310.59	-0.627846	-0.619211	-0.66423	-0.755789	-0.811104	-0.713109
310.79	0.568	0.553973	0.58963	0.613405	0.611812	0.627138		310.79	-0.621872	-0.615748	-0.657616	-0.752089	-0.809651	-0.717682
310.99	0.564968	0.554586	0.592374	0.609204	0.618083	0.628611		310.99	-0.624904	-0.615135	-0.654873	-0.75629	-0.80338	-0.716209
311.19	0.565537	0.556931	0.590487	0.614298	0.616708	0.632127		311.19	-0.624335	-0.61279	-0.65676	-0.751197	-0.804754	-0.712693
311.39	0.568911	0.552458	0.595301	0.615083	0.616471	0.635088		311.39	-0.620961	-0.617264	-0.651946	-0.750411	-0.804991	-0.709732
311.59	0.571728	0.557717	0.595773	0.615785	0.622312	0.636242		311.59	-0.618144	-0.612004	-0.651474	-0.749709	-0.79915	-0.708578
311.79	0.574586	0.55597	0.601924	0.621008	0.621006	0.635056		311.79	-0.615286	-0.613752	-0.645322	-0.744486	-0.800456	-0.709764
311.99	0.575647	0.563384	0.598404	0.619907	0.622512	0.636649		311.99	-0.614225	-0.606337	-0.648843	-0.745587	-0.798951	-0.708171
312.19	0.575738	0.561223	0.599463	0.624827	0.626082	0.637784		312.19	-0.614134	-0.608499	-0.647784	-0.740667	-0.79538	-0.707036
312.39	0.575415	0.563329	0.603273	0.621874	0.625016	0.643507		312.39	-0.614458	-0.606392	-0.643974	-0.74362	-0.796447	-0.701313
312.59	0.580093	0.562187	0.607278	0.625826	0.63252	0.644104		312.59	-0.609779	-0.607534	-0.639969	-0.739668	-0.788943	-0.700716
312.79	0.577294	0.566963	0.608783	0.628384	0.628319	0.642232		312.79	-0.612578	-0.602758	-0.638463	-0.73711	-0.793143	-0.702588
312.99	0.584068	0.565742	0.606389	0.631749	0.630522	0.649662		312.99	-0.605804	-0.603979	-0.640858	-0.733746	-0.79094	-0.695158
313.19	0.586215	0.56929	0.608825	0.62976	0.633165	0.650176		313.19	-0.603657	-0.600431	-0.638422	-0.735734	-0.788297	-0.694644
313.39	0.583997	0.57205	0.612947	0.634945	0.633682	0.646791		313.39	-0.605875	-0.597671	-0.634299	-0.730549	-0.787781	-0.698029
313.59	0.586264	0.572688	0.612156	0.635757	0.636567	0.650385		313.59	-0.603608	-0.597033	-0.635091	-0.729737	-0.784896	-0.694435
313.79	0.592658	0.576036	0.61262	0.637692	0.638513	0.654283		313.79	-0.597214	-0.593686	-0.634627	-0.727802	-0.782949	-0.690537
313.99	0.591949	0.577499	0.615238	0.637643	0.640781	0.656666		313.99	-0.597924	-0.592223	-0.632009	-0.727851	-0.780682	-0.688154
314.19	0.593122	0.577918	0.620217	0.638173	0.642485	0.659062		314.19	-0.59675	-0.591803	-0.62703	-0.727321	-0.778978	-0.685758
314.39	0.595421	0.580349	0.621731	0.642469	0.648838	0.657346		314.39	-0.594451	-0.589372	-0.625516	-0.723025	-0.772625	-0.687474
314.59	0.600888	0.582239	0.623532	0.648481	0.645617	0.665589		314.59	-0.588985	-0.587483	-0.623715	-0.717013	-0.775846	-0.679231
314.79	0.599075	0.581274	0.624397	0.646338	0.648635	0.662345		314.79	-0.590798	-0.588447	-0.62285	-0.719156	-0.772828	-0.682475
314.99	0.601009	0.586012	0.62971	0.644988	0.652524	0.669307		314.99	-0.588863	-0.583709	-0.617536	-0.720506	-0.768938	-0.675513
315.19	0.599554	0.588289	0.631818	0.651399	0.648172	0.671826		315.19	-0.590318	-0.581432	-0.615429	-0.714095	-0.773291	-0.672994
315.39	0.602208	0.587985	0.63217	0.650753	0.655867	0.670163		315.39	-0.587664	-0.581736	-0.615077	-0.714741	-0.765596	-0.674657
315.59	0.606147	0.589244	0.635105	0.652575	0.656536	0.671454		315.59	-0.583725	-0.580477	-0.612142	-0.71292	-0.764927	-0.673366
315.79	0.609448	0.592782	0.63494	0.656659	0.66513	0.676752		315.79	-0.580424	-0.576939	-0.612307	-0.708836	-0.756333	-0.668068
315.99	0.610371	0.590445	0.636575	0.658298	0.661855	0.678092		315.99	-0.579501	-0.579277	-0.610671	-0.707196	-0.759607	-0.666728
316.19	0.612149	0.597488	0.639341	0.663847	0.661856	0.678669		316.19	-0.577723	-0.572234	-0.607905	-0.701648	-0.759607	-0.666152
316.39	0.614052	0.600697	0.640422	0.656522	0.664222	0.679931		316.39	-0.57582	-0.569025	-0.606825	-0.708972	-0.757241	-0.664889
316.59	0.612536	0.599554	0.644133	0.664793	0.665061	0.680783		316.59	-0.577336	-0.570167	-0.603114	-0.700701	-0.756402	-0.664037
316.79	0.61536	0.6015	0.640605	0.663679	0.66958	0.685025		316.79	-0.574512	-0.568221	-0.606642	-0.701815	-0.751882	-0.659796
316.99	0.614893	0.599831	0.645498	0.667132	0.672908	0.685235		316.99	-0.574979	-0.56989	-0.601749	-0.698362	-0.748555	-0.659585
317.19	0.621312	0.605615	0.646383	0.666757	0.670054	0.687619		317.19	-0.568561	-0.564106	-0.600864	-0.698737	-0.751409	-0.657201
317.39	0.618614	0.604602	0.649612	0.668231	0.674478	0.681291		317.39	-0.571258	-0.565119	-0.597634	-0.697264	-0.746984	-0.663529
317.59	0.621094	0.606853	0.647025	0.67228	0.676925	0.68676		317.59	-0.568779	-0.562868	-0.600221	-0.693214	-0.744538	-0.65806
317.79	0.621458	0.605984	0.651516	0.669096	0.675724	0.688044		317.79	-0.568414	-0.563737	-0.59573	-0.696399	-0.745738	-0.656776
317.99	0.624668	0.608624	0.654386	0.676109	0.681754	0.695824		317.99	-0.565205	-0.561097	-0.592861	-0.689385	-0.739709	-0.648996
318.19	0.623758	0.607403	0.655684	0.675201	0.678819	0.69824		318.19	-0.566114	-0.562318	-0.591563	-0.690294	-0.742644	-0.64658
318.39	0.628909	0.610212	0.654584	0.674904	0.680312	0.697286		318.39	-0.560963	-0.55951	-0.592662	-0.69059	-0.74115	-0.647534
318.59	0.62756	0.609871	0.656241	0.677271	0.681643	0.702086		318.59	-0.562312	-0.559851	-0.591005	-0.688224	-0.73982	-0.642734
318.79	0.625929	0.610954	0.657092	0.678637	0.680515	0.698877		318.79	-0.563943	-0.558768	-0.590155	-0.686857	-0.740948	-0.645943
318.99	0.628493	0.611119	0.658331	0.676999	0.682932	0.700433		318.99	-0.561379	-0.558603	-0.588916	-0.688496	-0.73853	-0.644387
319.19	0.627812	0.614079	0.661601	0.679891	0.687469	0.699557		319.19	-0.562061	-0.555642	-0.585646	-0.685603	-0.733994	-0.645263
319.39	0.631081	0.615839	0.663319	0.680774	0.686277	0.699176		319.39	-0.558792	-0.553882	-0.583928	-0.68472	-0.735185	-0.645644
319.59	0.63135	0.612893	0.662035	0.680135	0.688947	0.699031		319.59	-0.558522	-0.556829	-0.585212	-0.685359	-0.732515	-0.645789
319.79	0.632616	0.616039	0.662482	0.680811	0.691904	0.703866		319.79	-0.557256	-0.553682	-0.584764	-0.684683	-0.729558	-0.640954
319.99	0.631996	0.61637	0.665103	0.68226	0.692044	0.7058		319.99	-0.557877	-0.553352	-0.582144	-0.683235	-0.729419	-0.63902
320.19	0.635963	0.619112	0.666274	0.688062	0.694162	0.707579		320.19	-0.553909	-0.55061	-0.580973	-0.677433	-0.7273	-0.637241
320.39	0.63539	0.620953	0.667569	0.683584	0.691875	0.703724		320.39	-0.554482	-0.548769	-0.579678	-0.681911	-0.729587	-0.641096
320.59	0.635965	0.619407	0.668325	0.687834	0.693153	0.708154		320.59	-0.553907	-0.550314	-0.578922	-0.67766	-0.72831	-0.636666
320.79	0.640091	0.619109	0.669683	0.688342	0.693765	0.706948		320.79	-0.549781	-0.550612	-0.577564	-0.677152	-0.727697	-0.637872
320.99	0.63642	0.625134	0.667231	0.685996	0.690314	0.710894		320.99	-0.553453	-0.544587	-0.580015	-0.679498	-0.731149	-0.633926
321.19	0.638789	0.622893	0.671593	0.690549	0.700043	0.705115		321.19	-0.551083	-0.546828	-0.575654	-0.674945	-0.72142	-0.639705
321.39	0.639937	0.624342	0.671826	0.689094	0.699294	0.709737		321.39	-0.549936	-0.54538	-0.575421	-0.6764	-0.722169	-0.635083
321.59	0.638372	0.622308	0.671787	0.691475	0.698283	0.707742		321.59	-0.5515	-0.547414	-0.57546	-0.674019	-0.72318	-0.637078
321.79	0.640573	0.624395	0.67132	0.68761	0.696247	0.70832		321.79	-0.5493	-0.545327	-0.575927	-0.677885	-0.725216	-0.6365
321.99	0.640721	0.624886	0.672814	0.690048	0.699734	0.709394		321.99	-0.549152	-0.544836	-0.574433	-0.675446	-0.721728	-0.635426
322.19	0.640678	0.623573	0.674696	0.689938	0.69682	0.714016		322.19	-0.549194	-0.546149	-0.57255	-0.675556	-0.724642	-0.630804
322.39	0.642599	0.623059	0.673355	0.69099	0.698843	0.714066		322.39	-0.547274	-0.546663	-0.573891	-0.674505	-0.722619	-0.630754
322.59	0.640536	0.625405	0.674944	0.690158	0.702107	0.713049		322.59	-0.549336	-0.544316	-0.572302	-0.675336	-0.719356	-0.631771
322.79	0.640204	0.627158	0.675302	0.689786	0.702575	0.717126		322.79	-0.549668	-0.542564	-0.571944	-0.675708	-0.718887	-0.627694
322.99	0.641767	0.629433	0.677938	0.694963	0.703223	0.712717		322.99	-0.548105	-0.540289	-0.569309	-0.670531	-0.718239	-0.632103
323.19	0.644182	0.629141	0.677931	0.694284	0.699919	0.714201		323.19	-0.54569	-0.54058	-0.569316	-0.67121	-0.721543	-0.630619
323.39	0.642157	0.629813	0.67419	0.689342	0.703679	0.715225		323.39	-0.547715	-0.539908	-0.573057	-0.676152	-0.717784	-0.629595
323.59	0.643045	0.627285	0.676187	0.693184	0.704959	0.709934		323.59	-0.546827	-0.542437	-0.571059	-0.67231	-0.716504	-0.634886
323.79	0.64729	0.626562	0.676147	0.696517	0.705137	0.717762		323.79	-0.542583	-0.54316	-0.5711	-0.668978	-0.716326	-0.627058
323.99	0.64473	0.62912	0.67667	0.696395	0.703379	0.713878		323.99	-0.545143	-0.540601	-0.570577	-0.6691	-0.718084	-0.630942
324.19	0.649491	0.630276	0.678675	0.691244	0.707505	0.716474		324.19	-0.540381	-0.539446	-0.568572	-0.67425	-0.713957	-0.628346
324.39	0.641169	0.629068	0.680163	0.694228	0.70579	0.718118		324.39	-0.548703	-0.540653	-0.567084	-0.671266	-0.715673	-0.626702
324.59	0.64594	0.635532	0.680507	0.691709	0.702675	0.716691		324.59	-0.543932	-0.534189	-0.56674	-0.673785	-0.718787	-0.628129
324.79	0.644733	0.630781	0.679876	0.693428	0.707062	0.715205		324.79	-0.54514	-0.53894	-0.567371	-0.672066	-0.7144	-0.629615
324.99	0.642856	0.634158	0.679604	0.693497	0.705958	0.717197		324.99	-0.547016	-0.535563	-0.567643	-0.671997	-0.715504	-0.627623
325.19	0.644255	0.632235	0.679338	0.694452	0.708111	0.719201		325.19	-0.545617	-0.537487	-0.567909	-0.671042	-0.713351	-0.625619
325.39	0.643632	0.629786	0.680863	0.693218	0.707993	0.721681		325.39	-0.54624	-0.539935	-0.566383	-0.672277	-0.713469	-0.623139
325.59	0.643722	0.6319	0.682632	0.696779	0.704535	0.722945		325.59	-0.54615	-0.537821	-0.564615	-0.668715	-0.716928	-0.621875
325.79	0.650055	0.63113	0.681718	0.69757	0.707708	0.716986		325.79	-0.539817	-0.538591	-0.565529	-0.667924	-0.713755	-0.627834
325.99	0.649269	0.630612	0.681494	0.695949	0.706358	0.721452		325.99	-0.540604	-0.539109	-0.565753	-0.669545	-0.715104	-0.623368
326.19	0.650776	0.635265	0.679774	0.697138	0.704134	0.715314		326.19	-0.539096	-0.534456	-0.567473	-0.668356	-0.717329	-0.629506
326.39	0.650218	0.633522	0.682421	0.698334	0.70878	0.724192		326.39	-0.539654	-0.536199	-0.564826	-0.667161	-0.712683	-0.620628
326.59	0.647117	0.630148	0.682927	0.694824	0.708671	0.72028		326.59	-0.542755	-0.539573	-0.56432	-0.67067	-0.712791	-0.62454
326.79	0.646614	0.634866	0.682835	0.70091	0.708045	0.721592		326.79	-0.543258	-0.534856	-0.564412	-0.664584	-0.713418	-0.623228
326.99	0.650297	0.634415	0.682129	0.696951	0.714292	0.720597		326.99	-0.539575	-0.535307	-0.565118	-0.668544	-0.707171	-0.624223
327.19	0.647974	0.63377	0.685304	0.697747	0.709716	0.726352		327.19	-0.541898	-0.535952	-0.561943	-0.667748	-0.711746	-0.618468
327.39	0.654442	0.635103	0.680976	0.695405	0.712447	0.720419		327.39	-0.53543	-0.534618	-0.56627	-0.670089	-0.709016	-0.624401
327.59	0.651192	0.629522	0.682655	0.701687	0.713987	0.722941		327.59	-0.53868	-0.540199	-0.564592	-0.663807	-0.707476	-0.621879
327.79	0.653078	0.636382	0.683225	0.700009	0.710436	0.722515		327.79	-0.536794	-0.533339	-0.564022	-0.665485	-0.711026	-0.622305
327.99	0.651301	0.635549	0.685615	0.698267	0.710101	0.724504		327.99	-0.538571	-0.534172	-0.561632	-0.667227	-0.711362	-0.620316
328.19	0.652198	0.631627	0.68379	0.700262	0.708109	0.723174		328.19	-0.537674	-0.538094	-0.563457	-0.665232	-0.713354	-0.621646
328.39	0.650976	0.633954	0.68341	0.699405	0.707832	0.721443		328.39	-0.538896	-0.535767	-0.563837	-0.666089	-0.71363	-0.623377
328.59	0.652108	0.631147	0.680725	0.699291	0.710028	0.724244		328.59	-0.537764	-0.538574	-0.566522	-0.666204	-0.711434	-0.620576
328.79	0.650675	0.632292	0.685307	0.700161	0.71358	0.721611		328.79	-0.539197	-0.53743	-0.56194	-0.665333	-0.707882	-0.623209
328.99	0.650121	0.634902	0.684157	0.701205	0.709776	0.720285		328.99	-0.539751	-0.53482	-0.563089	-0.664289	-0.711687	-0.624535
329.19	0.652185	0.636653	0.685465	0.70155	0.707771	0.723336		329.19	-0.537687	-0.533068	-0.561782	-0.663944	-0.713692	-0.621484
329.39	0.652446	0.635359	0.685842	0.701064	0.714772	0.723366		329.39	-0.537426	-0.534362	-0.561405	-0.664431	-0.70669	-0.621454
329.59	0.653073	0.638048	0.685166	0.703762	0.711826	0.724354		329.59	-0.5368	-0.531674	-0.562081	-0.661732	-0.709637	-0.620466
329.79	0.65331	0.634678	0.684736	0.701479	0.713332	0.724777		329.79	-0.536562	-0.535043	-0.56251	-0.664015	-0.708131	-0.620043
329.99	0.651718	0.636466	0.685949	0.69903	0.714234	0.723294		329.99	-0.538154	-0.533255	-0.561298	-0.666464	-0.707228	-0.621526
330.19	0.650734	0.63604	0.689161	0.702149	0.711563	0.722379		330.19	-0.539138	-0.533682	-0.558086	-0.663345	-0.7099	-0.622441
330.39	0.652414	0.634076	0.685097	0.697404	0.712807	0.721872		330.39	-0.537458	-0.535645	-0.56215	-0.66809	-0.708656	-0.622948
330.59	0.652153	0.63644	0.687804	0.701179	0.715576	0.723314		330.59	-0.537719	-0.533282	-0.559442	-0.664315	-0.705886	-0.621506
330.79	0.652927	0.636039	0.684217	0.699479	0.713015	0.728498		330.79	-0.536945	-0.533683	-0.563029	-0.666015	-0.708448	-0.616322
330.99	0.652128	0.63893	0.689203	0.700004	0.715965	0.725571		330.99	-0.537744	-0.530791	-0.558043	-0.665491	-0.705498	-0.619249
331.19	0.650556	0.640181	0.68382	0.69871	0.715842	0.727014		331.19	-0.539317	-0.529541	-0.563426	-0.666784	-0.705621	-0.617806
331.39	0.654566	0.635359	0.687357	0.701784	0.71408	0.728426		331.39	-0.535306	-0.534362	-0.559889	-0.66371	-0.707382	-0.616394
331.59	0.653241	0.635571	0.689944	0.698829	0.714186	0.725247		331.59	-0.536631	-0.534151	-0.557303	-0.666666	-0.707277	-0.619573
331.79	0.654258	0.639245	0.686354	0.698811	0.707393	0.727116		331.79	-0.535614	-0.530476	-0.560893	-0.666683	-0.71407	-0.617704
331.99	0.657455	0.635894	0.687375	0.703078	0.710103	0.725837		331.99	-0.532418	-0.533827	-0.559872	-0.662417	-0.71136	-0.618983
332.19	0.655458	0.637375	0.68762	0.701228	0.715882	0.726884		332.19	-0.534415	-0.532346	-0.559626	-0.664266	-0.70558	-0.617936
332.39	0.653912	0.638766	0.688221	0.703616	0.716059	0.724379		332.39	-0.53596	-0.530955	-0.559026	-0.661879	-0.705403	-0.620441
332.59	0.653072	0.639484	0.685487	0.703689	0.713216	0.725268		332.59	-0.536801	-0.530237	-0.56176	-0.661805	-0.708246	-0.619552
332.79	0.652189	0.638776	0.68589	0.70259	0.714642	0.728315		332.79	-0.537683	-0.530945	-0.561357	-0.662904	-0.706821	-0.616506
332.99	0.65657	0.638124	0.68862	0.702316	0.717894	0.727553		332.99	-0.533302	-0.531598	-0.558627	-0.663179	-0.703569	-0.617267
333.19	0.656087	0.637428	0.690578	0.701707	0.718444	0.727839		333.19	-0.533786	-0.532293	-0.556669	-0.663787	-0.703019	-0.616981
333.39	0.655097	0.637128	0.686507	0.708174	0.717155	0.726069		333.39	-0.534776	-0.532594	-0.56074	-0.65732	-0.704308	-0.618751
333.59	0.656408	0.639838	0.68775	0.703399	0.715106	0.732808		333.59	-0.533464	-0.529884	-0.559497	-0.662095	-0.706357	-0.612012
333.79	0.654051	0.636377	0.68656	0.703369	0.714905	0.723766		333.79	-0.535822	-0.533344	-0.560686	-0.662125	-0.706557	-0.621054
333.99	0.65497	0.637825	0.687255	0.70671	0.713606	0.726829		333.99	-0.534903	-0.531896	-0.559992	-0.658784	-0.707857	-0.617991
334.19	0.656924	0.637695	0.6885	0.701438	0.719068	0.725621		334.19	-0.532948	-0.532026	-0.558747	-0.664056	-0.702395	-0.619199
334.39	0.655762	0.636689	0.689728	0.705199	0.71451	0.726756		334.39	-0.53411	-0.533032	-0.557519	-0.660295	-0.706953	-0.618064
334.59	0.656131	0.63926	0.68585	0.705823	0.716879	0.726859		334.59	-0.533742	-0.530462	-0.561397	-0.659672	-0.704583	-0.617961
334.79	0.657577	0.636458	0.691992	0.70566	0.718126	0.726645		334.79	-0.532295	-0.533263	-0.555255	-0.659835	-0.703337	-0.618175
334.99	0.65417	0.642637	0.689114	0.700068	0.718717	0.723585		334.99	-0.535702	-0.527084	-0.558133	-0.665426	-0.702746	-0.621235
335.19	0.654917	0.637797	0.686224	0.700731	0.712017	0.732605		335.19	-0.534956	-0.531924	-0.561023	-0.664763	-0.709445	-0.612215
335.39	0.656344	0.641396	0.686839	0.703354	0.711926	0.727668		335.39	-0.533529	-0.528326	-0.560407	-0.66214	-0.709537	-0.617152
335.59	0.654939	0.638051	0.691995	0.703437	0.716595	0.727548		335.59	-0.534933	-0.531671	-0.555252	-0.662058	-0.704868	-0.617272
335.79	0.657374	0.638384	0.690074	0.708471	0.718138	0.728094		335.79	-0.532499	-0.531337	-0.557173	-0.657024	-0.703325	-0.616726
335.99	0.661032	0.637321	0.690887	0.703778	0.716001	0.727088		335.99	-0.52884	-0.532401	-0.556359	-0.661717	-0.705461	-0.617732
336.19	0.658911	0.642785	0.687037	0.703001	0.715734	0.727475		336.19	-0.530961	-0.526936	-0.56021	-0.662493	-0.705729	-0.617345
336.39	0.65711	0.637595	0.688426	0.701797	0.718077	0.727759		336.39	-0.532763	-0.532126	-0.558821	-0.663698	-0.703385	-0.617061
336.59	0.656891	0.638855	0.690081	0.704516	0.716719	0.727599		336.59	-0.532981	-0.530866	-0.557165	-0.660979	-0.704744	-0.617221
336.79	0.656527	0.638964	0.688821	0.704024	0.714274	0.727903		336.79	-0.533345	-0.530758	-0.558426	-0.66147	-0.707188	-0.616917
336.99	0.657178	0.639695	0.690267	0.705974	0.714359	0.725562		336.99	-0.532694	-0.530027	-0.55698	-0.659521	-0.707103	-0.619258
337.19	0.655387	0.636197	0.690809	0.705091	0.722045	0.726108		337.19	-0.534486	-0.533524	-0.556438	-0.660403	-0.699417	-0.618712
337.39	0.658955	0.641981	0.690731	0.703122	0.724009	0.728656		337.39	-0.530917	-0.52774	-0.556515	-0.662373	-0.697453	-0.616164
337.59	0.658033	0.638	0.689805	0.708585	0.715561	0.726679		337.59	-0.531839	-0.531721	-0.557442	-0.656909	-0.705902	-0.618141
337.79	0.657539	0.640711	0.689268	0.703875	0.714447	0.730347		337.79	-0.532334	-0.529011	-0.557978	-0.661619	-0.707016	-0.614473
337.99	0.655911	0.639992	0.689346	0.705832	0.722642	0.728517		337.99	-0.533961	-0.52973	-0.5579	-0.659662	-0.698821	-0.616303
338.19	0.658863	0.638637	0.691169	0.705478	0.720157	0.730708		338.19	-0.53101	-0.531084	-0.556078	-0.660016	-0.701306	-0.614112
338.39	0.657976	0.640017	0.694976	0.706762	0.719763	0.730212		338.39	-0.531896	-0.529705	-0.552271	-0.658732	-0.7017	-0.614608
338.59	0.6565	0.642194	0.693066	0.709496	0.717814	0.729012		338.59	-0.533373	-0.527527	-0.554181	-0.655998	-0.703648	-0.615808
338.79	0.658424	0.641107	0.69228	0.70531	0.718885	0.724923		338.79	-0.531448	-0.528615	-0.554966	-0.660184	-0.702577	-0.619897
338.99	0.656878	0.640922	0.691974	0.705763	0.720549	0.729922		338.99	-0.532995	-0.528799	-0.555273	-0.659731	-0.700913	-0.614898
339.19	0.657746	0.641895	0.688905	0.709955	0.718798	0.727381		339.19	-0.532126	-0.527827	-0.558342	-0.655539	-0.702665	-0.617439
339.39	0.656838	0.64362	0.690356	0.704826	0.719261	0.728645		339.39	-0.533035	-0.526101	-0.556891	-0.660668	-0.702201	-0.616175
339.59	0.655285	0.64198	0.690075	0.702132	0.720457	0.730342		339.59	-0.534587	-0.527741	-0.557172	-0.663362	-0.701005	-0.614478
339.79	0.659335	0.641183	0.691055	0.704761	0.719679	0.731049		339.79	-0.530538	-0.528538	-0.556192	-0.660734	-0.701783	-0.613771
339.99	0.658889	0.640187	0.690652	0.707456	0.721445	0.731601		339.99	-0.530984	-0.529535	-0.556594	-0.658039	-0.700018	-0.613219
340.19	0.660164	0.639494	0.692097	0.708791	0.720793	0.730957		340.19	-0.529708	-0.530227	-0.55515	-0.656703	-0.70067	-0.613863
340.39	0.657996	0.639829	0.69027	0.705799	0.720076	0.725991		340.39	-0.531877	-0.529892	-0.556976	-0.659695	-0.701386	-0.618829
340.59	0.656775	0.638634	0.690445	0.708667	0.71894	0.732613		340.59	-0.533098	-0.531088	-0.556802	-0.656827	-0.702522	-0.612207
340.79	0.659207	0.640116	0.695112	0.706807	0.723758	0.73039		340.79	-0.530665	-0.529605	-0.552135	-0.658687	-0.697704	-0.61443
340.99	0.659592	0.638739	0.691767	0.704888	0.720186	0.732448		340.99	-0.53028	-0.530982	-0.55548	-0.660606	-0.701277	-0.612372
341.19	0.657116	0.640995	0.692192	0.707524	0.719447	0.732586		341.19	-0.532756	-0.528726	-0.555054	-0.657971	-0.702015	-0.612234
341.39	0.658315	0.643391	0.69062	0.708454	0.719844	0.728573		341.39	-0.531558	-0.52633	-0.556627	-0.65704	-0.701619	-0.616247
341.59	0.656551	0.639808	0.693285	0.705857	0.728165	0.727141		341.59	-0.533322	-0.529913	-0.553962	-0.659638	-0.693297	-0.617679
341.79	0.662524	0.64185	0.689441	0.706062	0.718913	0.728693		341.79	-0.527349	-0.527871	-0.557805	-0.659432	-0.70255	-0.616127
341.99	0.658949	0.645337	0.695045	0.707393	0.718939	0.729544		341.99	-0.530923	-0.524385	-0.552201	-0.658102	-0.702524	-0.615276
342.19	0.660786	0.640439	0.694863	0.70585	0.721051	0.729127		342.19	-0.529087	-0.529282	-0.552384	-0.659644	-0.700412	-0.615693
342.39	0.658583	0.640452	0.692708	0.705656	0.724016	0.727301		342.39	-0.531289	-0.52927	-0.554539	-0.659838	-0.697447	-0.617519
342.59	0.660027	0.640594	0.691713	0.709874	0.721474	0.728918		342.59	-0.529845	-0.529128	-0.555534	-0.65562	-0.699989	-0.615902
342.79	0.660508	0.639379	0.695485	0.705626	0.718727	0.729031		342.79	-0.529365	-0.530343	-0.551761	-0.659869	-0.702736	-0.615789
342.99	0.658134	0.645023	0.693434	0.70857	0.721276	0.732449		342.99	-0.531739	-0.524698	-0.553813	-0.656924	-0.700187	-0.612371
343.19	0.659489	0.641842	0.694769	0.704049	0.722565	0.727934		343.19	-0.530384	-0.527879	-0.552478	-0.661445	-0.698898	-0.616886
343.39	0.659476	0.64216	0.694249	0.705211	0.720631	0.727777		343.39	-0.530396	-0.527561	-0.552998	-0.660283	-0.700832	-0.617043
343.59	0.660384	0.644584	0.692558	0.707334	0.719849	0.731587		343.59	-0.529488	-0.525137	-0.554689	-0.658161	-0.701613	-0.613233
343.79	0.661424	0.642327	0.690185	0.706513	0.720799	0.733108		343.79	-0.528448	-0.527394	-0.557062	-0.658981	-0.700664	-0.611712
343.99	0.65832	0.640681	0.69326	0.709863	0.717321	0.726137		343.99	-0.531552	-0.529041	-0.553987	-0.655631	-0.704142	-0.618683
344.19	0.658789	0.641472	0.695013	0.711277	0.718008	0.734202		344.19	-0.531083	-0.528249	-0.552234	-0.654217	-0.703454	-0.610618
344.39	0.659326	0.64433	0.692945	0.705329	0.723813	0.728602		344.39	-0.530546	-0.525392	-0.554302	-0.660165	-0.697649	-0.616218
344.59	0.657936	0.644571	0.695594	0.711487	0.719226	0.734612		344.59	-0.531937	-0.525151	-0.551653	-0.654007	-0.702237	-0.610208
344.79	0.65828	0.642125	0.696882	0.706506	0.719696	0.730917		344.79	-0.531592	-0.527596	-0.550365	-0.658988	-0.701767	-0.613903
344.99	0.658562	0.642947	0.693382	0.7044	0.722727	0.730928		344.99	-0.53131	-0.526774	-0.553865	-0.661095	-0.698736	-0.613892
345.19	0.661111	0.642441	0.693298	0.70771	0.72212	0.734474		345.19	-0.528761	-0.527281	-0.553949	-0.657784	-0.699343	-0.610346
345.39	0.659854	0.644879	0.692239	0.707632	0.718311	0.730123		345.39	-0.530019	-0.524842	-0.555008	-0.657862	-0.703152	-0.614697
345.59	0.660782	0.641605	0.693612	0.710038	0.723228	0.734896		345.59	-0.52909	-0.528116	-0.553634	-0.655456	-0.698234	-0.609924
345.79	0.657988	0.643984	0.693054	0.707706	0.724084	0.732036		345.79	-0.531885	-0.525738	-0.554193	-0.657788	-0.697379	-0.612784
345.99	0.659596	0.641123	0.69169	0.707543	0.726315	0.732447		345.99	-0.530276	-0.528599	-0.555556	-0.657951	-0.695148	-0.612373
346.19	0.659803	0.644511	0.691242	0.709313	0.725121	0.73326		346.19	-0.530069	-0.52521	-0.556004	-0.656182	-0.696342	-0.61156
346.39	0.663913	0.645301	0.697435	0.707431	0.723116	0.731215		346.39	-0.525959	-0.524421	-0.549812	-0.658063	-0.698346	-0.613605
346.59	0.661593	0.641351	0.691419	0.706279	0.719368	0.729347		346.59	-0.52828	-0.528371	-0.555828	-0.659215	-0.702094	-0.615473
346.79	0.661327	0.642619	0.695646	0.708569	0.722643	0.732127		346.79	-0.528545	-0.527102	-0.551601	-0.656925	-0.69882	-0.612693
346.99	0.660903	0.642795	0.692829	0.713254	0.721384	0.735579		346.99	-0.528969	-0.526926	-0.554418	-0.65224	-0.700078	-0.609241
347.19	0.66196	0.644228	0.692449	0.710424	0.722986	0.729009		347.19	-0.527912	-0.525493	-0.554797	-0.65507	-0.698477	-0.615811
347.39	0.661337	0.640781	0.692687	0.707694	0.722069	0.735991		347.39	-0.528535	-0.52894	-0.55456	-0.6578	-0.699394	-0.608829
347.59	0.659467	0.644502	0.694756	0.706953	0.725879	0.732401		347.59	-0.530406	-0.525219	-0.552491	-0.658541	-0.695584	-0.612419
347.79	0.660115	0.644776	0.693201	0.707844	0.722711	0.733799		347.79	-0.529757	-0.524946	-0.554045	-0.657651	-0.698752	-0.611021
347.99	0.65863	0.641351	0.694994	0.709738	0.721448	0.735902		347.99	-0.531243	-0.52837	-0.552253	-0.655756	-0.700015	-0.608918
348.19	0.665625	0.645555	0.695079	0.710671	0.724189	0.735378		348.19	-0.524247	-0.524167	-0.552168	-0.654823	-0.697274	-0.609442
348.39	0.660331	0.644637	0.69153	0.710973	0.725871	0.73626		348.39	-0.529541	-0.525084	-0.555717	-0.654521	-0.695592	-0.60856
348.59	0.66356	0.644887	0.696398	0.710965	0.721623	0.733678		348.59	-0.526312	-0.524835	-0.550848	-0.65453	-0.699839	-0.611142
348.79	0.660734	0.645841	0.695355	0.709921	0.723193	0.730981		348.79	-0.529138	-0.523881	-0.551891	-0.655573	-0.69827	-0.613839
348.99	0.660176	0.645109	0.692999	0.71095	0.721918	0.73477		348.99	-0.529696	-0.524613	-0.554248	-0.654544	-0.699544	-0.61005
349.19	0.661773	0.640411	0.693233	0.709172	0.724789	0.734714		349.19	-0.528099	-0.52931	-0.554014	-0.656322	-0.696673	-0.610106
349.39	0.660661	0.642848	0.695031	0.70807	0.724663	0.730977		349.39	-0.529211	-0.526874	-0.552216	-0.657425	-0.6968	-0.613843
349.59	0.660177	0.643206	0.693519	0.708693	0.721194	0.734137		349.59	-0.529695	-0.526515	-0.553728	-0.656801	-0.700269	-0.610683
349.79	0.663737	0.646933	0.694165	0.706858	0.724048	0.733038		349.79	-0.526136	-0.522788	-0.553082	-0.658637	-0.697414	-0.611782
349.99	0.660854	0.644532	0.695749	0.71505	0.727512	0.733782		349.99	-0.529018	-0.52519	-0.551498	-0.650444	-0.69395	-0.611038
350.19	0.662055	0.643797	0.693039	0.708422	0.721799	0.730871		350.19	-0.527817	-0.525924	-0.554208	-0.657072	-0.699663	-0.613949
350.39	0.659969	0.647352	0.696317	0.708843	0.725065	0.733925		350.39	-0.529903	-0.522369	-0.55093	-0.656651	-0.696398	-0.610895
350.59	0.661825	0.644775	0.694781	0.707457	0.725241	0.732972		350.59	-0.528047	-0.524947	-0.552465	-0.658037	-0.696221	-0.611848
350.79	0.660955	0.645372	0.696667	0.709733	0.722053	0.733784		350.79	-0.528917	-0.524349	-0.55058	-0.655761	-0.69941	-0.611036
350.99	0.663676	0.643564	0.69429	0.7082	0.722765	0.734947		350.99	-0.526196	-0.526157	-0.552957	-0.657294	-0.698698	-0.609873
351.19	0.662551	0.644286	0.695074	0.708838	0.725772	0.732924		351.19	-0.527322	-0.525436	-0.552172	-0.656656	-0.695691	-0.611896
351.39	0.662468	0.642164	0.693955	0.707673	0.721147	0.734717		351.39	-0.527404	-0.527557	-0.553292	-0.657821	-0.700316	-0.610103
351.59	0.663068	0.644712	0.696686	0.70963	0.722349	0.731702		351.59	-0.526804	-0.525009	-0.550561	-0.655864	-0.699114	-0.613118
351.79	0.660462	0.641714	0.694993	0.709781	0.7232	0.734151		351.79	-0.52941	-0.528007	-0.552253	-0.655714	-0.698262	-0.610669
351.99	0.661255	0.645361	0.695936	0.710523	0.723915	0.734475		351.99	-0.528617	-0.524361	-0.55131	-0.654972	-0.697548	-0.610345
352.19	0.662254	0.644489	0.699086	0.707436	0.726718	0.731871		352.19	-0.527618	-0.525232	-0.548161	-0.658058	-0.694745	-0.612949
352.39	0.659628	0.639897	0.697489	0.708906	0.727405	0.735772		352.39	-0.530244	-0.529824	-0.549757	-0.656588	-0.694058	-0.609048
352.59	0.660771	0.639085	0.695521	0.711679	0.72422	0.733748		352.59	-0.529101	-0.530637	-0.551726	-0.653815	-0.697243	-0.611072
352.79	0.661336	0.643589	0.692789	0.71008	0.722481	0.733091		352.79	-0.528536	-0.526132	-0.554458	-0.655414	-0.698982	-0.611729
352.99	0.662082	0.643614	0.695403	0.708673	0.727338	0.733246		352.99	-0.52779	-0.526107	-0.551844	-0.656821	-0.694124	-0.611574
353.19	0.665543	0.64438	0.695553	0.706478	0.723461	0.733034		353.19	-0.524329	-0.525342	-0.551693	-0.659017	-0.698002	-0.611786
353.39	0.6607	0.644448	0.69483	0.709955	0.726761	0.733649		353.39	-0.529172	-0.525273	-0.552417	-0.655539	-0.694701	-0.611171
353.59	0.66367	0.646769	0.698328	0.712404	0.724414	0.734014		353.59	-0.526203	-0.522953	-0.548919	-0.653091	-0.697049	-0.610806
353.79	0.662253	0.643701	0.697055	0.706236	0.724732	0.731857		353.79	-0.527619	-0.52602	-0.550192	-0.659259	-0.696731	-0.612963
353.99	0.661227	0.645079	0.696115	0.707961	0.726614	0.736197		353.99	-0.528645	-0.524642	-0.551131	-0.657534	-0.694848	-0.608623
354.19	0.664759	0.643893	0.695995	0.70634	0.726167	0.733339		354.19	-0.525113	-0.525829	-0.551252	-0.659154	-0.695295	-0.611481
354.39	0.662975	0.649034	0.69724	0.710199	0.724571	0.736557		354.39	-0.526898	-0.520687	-0.550007	-0.655296	-0.696892	-0.608263
354.59	0.661599	0.644724	0.69342	0.708784	0.722534	0.733532		354.59	-0.528273	-0.524998	-0.553827	-0.65671	-0.698929	-0.611288
354.79	0.659392	0.645728	0.694718	0.709883	0.725806	0.733206		354.79	-0.530481	-0.523993	-0.552529	-0.655612	-0.695656	-0.611614
354.99	0.664638	0.642031	0.692772	0.711087	0.727774	0.733012		354.99	-0.525234	-0.52769	-0.554475	-0.654407	-0.693689	-0.611808
355.19	0.666689	0.644764	0.697481	0.708988	0.726324	0.737819		355.19	-0.523183	-0.524957	-0.549765	-0.656507	-0.695139	-0.607001
355.39	0.662309	0.644876	0.696896	0.712119	0.724549	0.73262		355.39	-0.527563	-0.524845	-0.550351	-0.653375	-0.696913	-0.612201
355.59	0.662856	0.644421	0.693455	0.708989	0.729879	0.733801		355.59	-0.527016	-0.5253	-0.553792	-0.656505	-0.691583	-0.611019
355.79	0.662021	0.643311	0.697108	0.710315	0.722849	0.735714		355.79	-0.527852	-0.52641	-0.550138	-0.655179	-0.698613	-0.609106
355.99	0.663607	0.643977	0.698249	0.709008	0.728206	0.7368		355.99	-0.526266	-0.525745	-0.548998	-0.656486	-0.693257	-0.60802
356.19	0.663519	0.645289	0.696752	0.704481	0.729672	0.736197		356.19	-0.526353	-0.524432	-0.550494	-0.661013	-0.69179	-0.608623
356.39	0.664638	0.644586	0.696303	0.712581	0.72838	0.734539		356.39	-0.525234	-0.525135	-0.550944	-0.652914	-0.693082	-0.610281
356.59	0.662238	0.645531	0.69616	0.712822	0.722927	0.739697		356.59	-0.527635	-0.52419	-0.551087	-0.652673	-0.698536	-0.605123
356.79	0.659285	0.64276	0.697223	0.711601	0.727441	0.735695		356.79	-0.530587	-0.526961	-0.550024	-0.653894	-0.694021	-0.609125
356.99	0.664172	0.64582	0.696092	0.710544	0.726991	0.735004		356.99	-0.5257	-0.523901	-0.551155	-0.654951	-0.694472	-0.609816
357.19	0.662487	0.647469	0.697133	0.71271	0.727849	0.734597		357.19	-0.527386	-0.522253	-0.550113	-0.652784	-0.693613	-0.610223
357.39	0.665389	0.644939	0.695953	0.712959	0.723248	0.735782		357.39	-0.524483	-0.524782	-0.551294	-0.652535	-0.698214	-0.609038
357.59	0.663706	0.646272	0.693082	0.71308	0.722847	0.736288		357.59	-0.526166	-0.523449	-0.554164	-0.652415	-0.698615	-0.608532
357.79	0.66487	0.645734	0.69366	0.710415	0.7234	0.733701		357.79	-0.525002	-0.523987	-0.553586	-0.655079	-0.698062	-0.611119
357.99	0.664401	0.648727	0.695328	0.711863	0.724631	0.737661		357.99	-0.525471	-0.520994	-0.551919	-0.653631	-0.696831	-0.607159
358.19	0.664629	0.641474	0.69651	0.713904	0.723907	0.735925		358.19	-0.525243	-0.528248	-0.550737	-0.65159	-0.697556	-0.608895
358.39	0.662484	0.640001	0.698311	0.711986	0.724573	0.73225		358.39	-0.527388	-0.529721	-0.548935	-0.653508	-0.696889	-0.61257
358.59	0.664523	0.646909	0.696641	0.713673	0.727823	0.733258		358.59	-0.525349	-0.522812	-0.550606	-0.651821	-0.693639	-0.611562
358.79	0.662982	0.646657	0.694316	0.714811	0.725375	0.733807		358.79	-0.52689	-0.523065	-0.552931	-0.650683	-0.696087	-0.611013
358.99	0.662661	0.644113	0.698235	0.710933	0.728507	0.739127		358.99	-0.527211	-0.525608	-0.549012	-0.654561	-0.692956	-0.605693
359.19	0.664434	0.645372	0.696914	0.713586	0.723574	0.734382		359.19	-0.525439	-0.52435	-0.550333	-0.651908	-0.697889	-0.610438
359.39	0.662966	0.645012	0.69651	0.710527	0.724307	0.738017		359.39	-0.526907	-0.52471	-0.550736	-0.654967	-0.697155	-0.606803
359.59	0.662777	0.646249	0.698805	0.710503	0.727463	0.735053		359.59	-0.527095	-0.523472	-0.548442	-0.654991	-0.693999	-0.609767
359.79	0.659644	0.646779	0.697567	0.710248	0.72189	0.735225		359.79	-0.530228	-0.522942	-0.54968	-0.655246	-0.699572	-0.609595
359.99	0.660447	0.646304	0.695196	0.709914	0.726336	0.73627		359.99	-0.529425	-0.523418	-0.552051	-0.65558	-0.695126	-0.60855
360.19	0.662221	0.644565	0.697354	0.711513	0.729721	0.736928		360.19	-0.527651	-0.525157	-0.549892	-0.653982	-0.691742	-0.607892
360.39	0.66725	0.645049	0.694261	0.711209	0.727966	0.734173		360.39	-0.522623	-0.524673	-0.552986	-0.654285	-0.693497	-0.610647
360.59	0.664589	0.646135	0.695808	0.714376	0.723246	0.732897		360.59	-0.525283	-0.523586	-0.551439	-0.651119	-0.698216	-0.611923
360.79	0.661923	0.645175	0.694994	0.713632	0.72679	0.734078		360.79	-0.527949	-0.524547	-0.552252	-0.651862	-0.694673	-0.610742
360.99	0.665607	0.645315	0.696481	0.708798	0.728162	0.732769		360.99	-0.524266	-0.524407	-0.550765	-0.656696	-0.6933	-0.612051
361.19	0.661054	0.641035	0.699575	0.711708	0.727599	0.737784		361.19	-0.528818	-0.528687	-0.547672	-0.653787	-0.693863	-0.607036
361.39	0.662463	0.645705	0.697573	0.710725	0.729293	0.742289		361.39	-0.52741	-0.524017	-0.549674	-0.65477	-0.69217	-0.602531
361.59	0.666425	0.6476	0.696083	0.710779	0.728022	0.739108		361.59	-0.523447	-0.522121	-0.551164	-0.654715	-0.69344	-0.605712
361.79	0.66219	0.645462	0.69718	0.70989	0.724399	0.734665		361.79	-0.527682	-0.524259	-0.550066	-0.655605	-0.697064	-0.610155
361.99	0.660508	0.645957	0.696726	0.71062	0.726646	0.733868		361.99	-0.529365	-0.523765	-0.550521	-0.654874	-0.694817	-0.610952
362.19	0.665135	0.645673	0.699047	0.708989	0.72322	0.736812		362.19	-0.524737	-0.524049	-0.5482	-0.656506	-0.698242	-0.608008
362.39	0.664781	0.646308	0.697004	0.712362	0.726269	0.736936		362.39	-0.525092	-0.523414	-0.550243	-0.653133	-0.695194	-0.607884
362.59	0.666612	0.646673	0.697584	0.708606	0.726022	0.736011		362.59	-0.523261	-0.523048	-0.549663	-0.656888	-0.69544	-0.608809
362.79	0.666073	0.646051	0.69893	0.711444	0.729565	0.736885		362.79	-0.523799	-0.52367	-0.548317	-0.65405	-0.691897	-0.607935
362.99	0.664583	0.647931	0.696577	0.711218	0.726421	0.738517		362.99	-0.525289	-0.52179	-0.55067	-0.654276	-0.695042	-0.606303
363.19	0.665006	0.648092	0.694155	0.710974	0.72785	0.742038		363.19	-0.524866	-0.521629	-0.553092	-0.65452	-0.693612	-0.602782
363.39	0.663001	0.643493	0.699708	0.716114	0.72555	0.739153		363.39	-0.526872	-0.526229	-0.547538	-0.64938	-0.695912	-0.605667
363.59	0.664704	0.64591	0.697794	0.713381	0.72967	0.74034		363.59	-0.525168	-0.523812	-0.549453	-0.652113	-0.691792	-0.60448
363.79	0.661429	0.649092	0.694687	0.708184	0.726441	0.73713		363.79	-0.528443	-0.520629	-0.55256	-0.65731	-0.695022	-0.60769
363.99	0.665973	0.649266	0.699277	0.712964	0.724562	0.73686		363.99	-0.5239	-0.520455	-0.547969	-0.652531	-0.696901	-0.60796
364.19	0.664178	0.644743	0.698838	0.713984	0.726306	0.740465		364.19	-0.525694	-0.524979	-0.548409	-0.651511	-0.695156	-0.604355
364.39	0.662962	0.644338	0.699961	0.710548	0.724635	0.7375		364.39	-0.52691	-0.525383	-0.547285	-0.654946	-0.696828	-0.60732
364.59	0.664381	0.647479	0.697054	0.711445	0.723551	0.733569		364.59	-0.525492	-0.522242	-0.550192	-0.65405	-0.697911	-0.611251
364.79	0.66557	0.643937	0.698161	0.712241	0.724343	0.737692		364.79	-0.524302	-0.525784	-0.549086	-0.653254	-0.69712	-0.607128
364.99	0.660421	0.648661	0.698144	0.71163	0.729559	0.735309		364.99	-0.529452	-0.52106	-0.549103	-0.653864	-0.691903	-0.609511
365.19	0.661485	0.648127	0.69876	0.711204	0.725879	0.73382		365.19	-0.528387	-0.521594	-0.548487	-0.65429	-0.695583	-0.611
365.39	0.662663	0.646882	0.696479	0.71308	0.726478	0.736947		365.39	-0.527209	-0.52284	-0.550768	-0.652414	-0.694985	-0.607873
365.59	0.664496	0.64554	0.697584	0.711505	0.726769	0.735495		365.59	-0.525376	-0.524182	-0.549663	-0.653989	-0.694694	-0.609325
365.79	0.663783	0.648648	0.698006	0.711523	0.726729	0.734495		365.79	-0.52609	-0.521074	-0.549241	-0.653971	-0.694734	-0.610325
365.99	0.663286	0.647549	0.698265	0.710107	0.725611	0.735683		365.99	-0.526586	-0.522172	-0.548982	-0.655387	-0.695852	-0.609137
366.19	0.665064	0.647009	0.696648	0.713737	0.727987	0.737141		366.19	-0.524808	-0.522713	-0.550599	-0.651758	-0.693476	-0.607679
366.39	0.665951	0.651146	0.697588	0.710622	0.725203	0.735277		366.39	-0.523921	-0.518575	-0.549658	-0.654873	-0.69626	-0.609543
366.59	0.666407	0.650633	0.695984	0.711593	0.727954	0.738073		366.59	-0.523466	-0.519088	-0.551263	-0.653901	-0.693509	-0.606747
366.79	0.66242	0.644873	0.703099	0.710817	0.729443	0.739631		366.79	-0.527452	-0.524848	-0.544148	-0.654677	-0.69202	-0.605189
366.99	0.662287	0.648616	0.697531	0.710504	0.728286	0.738544		366.99	-0.527586	-0.521106	-0.549716	-0.65499	-0.693177	-0.606276
367.19	0.663478	0.64981	0.698469	0.711469	0.729281	0.734209		367.19	-0.526394	-0.519912	-0.548778	-0.654025	-0.692181	-0.610611
367.39	0.66451	0.648068	0.700086	0.71265	0.721342	0.737512		367.39	-0.525363	-0.521653	-0.54716	-0.652844	-0.70012	-0.607308
367.59	0.667705	0.645728	0.697817	0.709011	0.724817	0.736803		367.59	-0.522167	-0.523993	-0.54943	-0.656483	-0.696646	-0.608017
367.79	0.65983	0.645535	0.694	0.713299	0.723698	0.740616		367.79	-0.530043	-0.524187	-0.553247	-0.652195	-0.697765	-0.604204
367.99	0.664249	0.647553	0.698312	0.712735	0.731903	0.740154		367.99	-0.525623	-0.522168	-0.548935	-0.65276	-0.689559	-0.604666
368.19	0.663067	0.647113	0.700425	0.717154	0.726462	0.736177		368.19	-0.526805	-0.522608	-0.546822	-0.64834	-0.695001	-0.608643
368.39	0.662395	0.647857	0.700887	0.711317	0.726011	0.739196		368.39	-0.527477	-0.521864	-0.54636	-0.654177	-0.695451	-0.605624
368.59	0.664355	0.644927	0.697196	0.715623	0.726223	0.737293		368.59	-0.525517	-0.524795	-0.550051	-0.649871	-0.69524	-0.607527
368.79	0.664828	0.648062	0.699863	0.713553	0.727189	0.735481		368.79	-0.525044	-0.52166	-0.547384	-0.651942	-0.694273	-0.609339
368.99	0.665165	0.651605	0.699673	0.712473	0.728511	0.741523		368.99	-0.524707	-0.518116	-0.547574	-0.653021	-0.692951	-0.603297
369.19	0.663244	0.64718	0.701597	0.712641	0.730008	0.74034		369.19	-0.526628	-0.522542	-0.54565	-0.652853	-0.691455	-0.60448
369.39	0.667485	0.647269	0.697168	0.711591	0.732076	0.734417		369.39	-0.522388	-0.522452	-0.550079	-0.653903	-0.689387	-0.610403
369.59	0.664818	0.645103	0.701204	0.712607	0.729145	0.736768		369.59	-0.525055	-0.524618	-0.546043	-0.652887	-0.692317	-0.608052
369.79	0.668866	0.646058	0.700929	0.709138	0.728346	0.737582		369.79	-0.521006	-0.523663	-0.546318	-0.656356	-0.693116	-0.607238
369.99	0.665833	0.644905	0.698035	0.715121	0.726897	0.732858		369.99	-0.524039	-0.524816	-0.549212	-0.650373	-0.694565	-0.611962
370.19	0.664528	0.647633	0.699596	0.709727	0.730343	0.736758		370.19	-0.525344	-0.522089	-0.54765	-0.655767	-0.69112	-0.608062
370.39	0.663235	0.643875	0.698883	0.712066	0.728084	0.73788		370.39	-0.526637	-0.525846	-0.548364	-0.653428	-0.693378	-0.60694
370.59	0.66183	0.64986	0.695917	0.71217	0.725604	0.736526		370.59	-0.528042	-0.519862	-0.55133	-0.653324	-0.695858	-0.608294
370.79	0.665026	0.646821	0.697948	0.71786	0.730079	0.736205		370.79	-0.524847	-0.5229	-0.549299	-0.647634	-0.691383	-0.608615
370.99	0.666512	0.646386	0.699702	0.713054	0.727666	0.738538		370.99	-0.52336	-0.523335	-0.547545	-0.652441	-0.693797	-0.606282
371.19	0.66321	0.646458	0.702418	0.710095	0.722794	0.737225		371.19	-0.526663	-0.523263	-0.544828	-0.6554	-0.698669	-0.607595
371.39	0.665493	0.64572	0.698827	0.714866	0.725348	0.7423		371.39	-0.524379	-0.524002	-0.54842	-0.650629	-0.696114	-0.60252
371.59	0.664228	0.643346	0.697574	0.713665	0.726568	0.741205		371.59	-0.525644	-0.526375	-0.549673	-0.651829	-0.694895	-0.603615
371.79	0.665416	0.648382	0.700415	0.709515	0.729598	0.740918		371.79	-0.524457	-0.521339	-0.546831	-0.655979	-0.691865	-0.603902
371.99	0.665164	0.648798	0.699355	0.716948	0.730038	0.738529		371.99	-0.524708	-0.520924	-0.547892	-0.648546	-0.691425	-0.606291
372.19	0.665687	0.646866	0.699115	0.712306	0.728693	0.740558		372.19	-0.524185	-0.522856	-0.548131	-0.653188	-0.69277	-0.604262
372.39	0.666366	0.65047	0.701572	0.711707	0.730633	0.738525		372.39	-0.523506	-0.519251	-0.545675	-0.653787	-0.69083	-0.606295
372.59	0.666667	0.647129	0.698073	0.709144	0.728902	0.739212		372.59	-0.523205	-0.522592	-0.549174	-0.656351	-0.692561	-0.605608
372.79	0.662886	0.650824	0.699893	0.714293	0.729147	0.737286		372.79	-0.526986	-0.518897	-0.547354	-0.651201	-0.692315	-0.607534
372.99	0.664936	0.649253	0.698731	0.712037	0.733238	0.740812		372.99	-0.524936	-0.520468	-0.548516	-0.653457	-0.688225	-0.604008
373.19	0.664612	0.650114	0.69855	0.713107	0.727665	0.737683		373.19	-0.525261	-0.519607	-0.548696	-0.652387	-0.693797	-0.607137
373.39	0.666995	0.648592	0.696874	0.713607	0.729165	0.740698		373.39	-0.522878	-0.521129	-0.550372	-0.651887	-0.692298	-0.604122
373.59	0.668384	0.648827	0.69998	0.715823	0.728881	0.74049		373.59	-0.521488	-0.520894	-0.547267	-0.649672	-0.692581	-0.60433
373.79	0.667133	0.646853	0.701388	0.712225	0.729209	0.739859		373.79	-0.522739	-0.522868	-0.545859	-0.65327	-0.692254	-0.604961
373.99	0.666031	0.648077	0.697555	0.714191	0.729862	0.741948		373.99	-0.523841	-0.521645	-0.549692	-0.651303	-0.691601	-0.602872
374.19	0.66769	0.647607	0.700528	0.71199	0.726659	0.738879		374.19	-0.522182	-0.522115	-0.546719	-0.653504	-0.694804	-0.605941
374.39	0.665285	0.646412	0.701356	0.717113	0.729808	0.740879		374.39	-0.524587	-0.523309	-0.54589	-0.648382	-0.691655	-0.603941
374.59	0.668508	0.646463	0.701173	0.711081	0.726192	0.741081		374.59	-0.521364	-0.523259	-0.546073	-0.654413	-0.69527	-0.603739
374.79	0.663148	0.64846	0.701083	0.716199	0.728015	0.736463		374.79	-0.526725	-0.521262	-0.546164	-0.649295	-0.693448	-0.608357
374.99	0.666241	0.648423	0.698742	0.716483	0.728649	0.738364		374.99	-0.523631	-0.521298	-0.548505	-0.649011	-0.692813	-0.606456
375.19	0.668525	0.649323	0.700824	0.716892	0.727827	0.741057		375.19	-0.521347	-0.520398	-0.546423	-0.648602	-0.693636	-0.603764
375.39	0.66341	0.650615	0.701242	0.716213	0.726939	0.73701		375.39	-0.526463	-0.519106	-0.546005	-0.649281	-0.694524	-0.60781
375.59	0.664523	0.651072	0.700385	0.711679	0.73312	0.737324		375.59	-0.525349	-0.51865	-0.546862	-0.653815	-0.688342	-0.607496
375.79	0.667246	0.64905	0.698829	0.711094	0.728503	0.738251		375.79	-0.522626	-0.520672	-0.548418	-0.6544	-0.692959	-0.606569
375.99	0.669152	0.64645	0.700383	0.714309	0.730277	0.738162		375.99	-0.52072	-0.523271	-0.546864	-0.651186	-0.691185	-0.606658
376.19	0.66329	0.653075	0.700834	0.713406	0.727601	0.738465		376.19	-0.526582	-0.516646	-0.546413	-0.652088	-0.693861	-0.606355
376.39	0.663142	0.648914	0.698039	0.711106	0.72934	0.737426		376.39	-0.52673	-0.520808	-0.549208	-0.654388	-0.692123	-0.607394
376.59	0.667686	0.648633	0.697584	0.716046	0.732974	0.737933		376.59	-0.522186	-0.521089	-0.549663	-0.649449	-0.688489	-0.606887
376.79	0.664421	0.647587	0.699554	0.715218	0.728189	0.739852		376.79	-0.525451	-0.522135	-0.547693	-0.650276	-0.693274	-0.604968
376.99	0.665362	0.650485	0.69901	0.716539	0.728545	0.737022		376.99	-0.52451	-0.519236	-0.548237	-0.648956	-0.692917	-0.607798
377.19	0.664264	0.645251	0.696519	0.717021	0.728072	0.742225		377.19	-0.525608	-0.52447	-0.550728	-0.648473	-0.69339	-0.602595
377.39	0.661642	0.650179	0.698509	0.712138	0.731745	0.742164		377.39	-0.528231	-0.519542	-0.548737	-0.653356	-0.689717	-0.602656
377.59	0.668056	0.648495	0.698204	0.71858	0.728399	0.736148		377.59	-0.521817	-0.521226	-0.549043	-0.646914	-0.693064	-0.608672
377.79	0.665753	0.648954	0.697299	0.714867	0.728297	0.738751		377.79	-0.52412	-0.520767	-0.549948	-0.650628	-0.693166	-0.606069
377.99	0.669869	0.650257	0.701003	0.709854	0.733789	0.738543		377.99	-0.520003	-0.519465	-0.546244	-0.65564	-0.687674	-0.606277
378.19	0.665092	0.64687	0.698737	0.710381	0.728461	0.74084		378.19	-0.52478	-0.522852	-0.54851	-0.655113	-0.693001	-0.60398
378.39	0.665151	0.643878	0.701166	0.715649	0.729325	0.745107		378.39	-0.524721	-0.525844	-0.546081	-0.649845	-0.692137	-0.599713
378.59	0.665921	0.645039	0.701556	0.7126	0.726698	0.739333		378.59	-0.523951	-0.524682	-0.545691	-0.652895	-0.694765	-0.605487
378.79	0.665763	0.649427	0.700514	0.714766	0.729702	0.736945		378.79	-0.52411	-0.520294	-0.546732	-0.650729	-0.69176	-0.607875
378.99	0.667536	0.648772	0.701878	0.712774	0.728418	0.743634		378.99	-0.522337	-0.520949	-0.545369	-0.65272	-0.693044	-0.601186
379.19	0.668409	0.648854	0.699893	0.710315	0.727263	0.737085		379.19	-0.521464	-0.520867	-0.547354	-0.65518	-0.6942	-0.607735
379.39	0.667609	0.650856	0.702649	0.712467	0.731299	0.737343		379.39	-0.522263	-0.518866	-0.544598	-0.653027	-0.690164	-0.607477
379.59	0.668258	0.648772	0.699443	0.715948	0.72753	0.743552		379.59	-0.521614	-0.52095	-0.547803	-0.649547	-0.693932	-0.601268
379.79	0.666382	0.645465	0.699232	0.713502	0.728674	0.739935		379.79	-0.52349	-0.524257	-0.548015	-0.651992	-0.692789	-0.604885
379.99	0.670383	0.647654	0.698193	0.714809	0.732066	0.743698		379.99	-0.519489	-0.522068	-0.549053	-0.650685	-0.689396	-0.601122
380.19	0.667817	0.648843	0.700753	0.720775	0.731109	0.739234		380.19	-0.522056	-0.520878	-0.546494	-0.644719	-0.690354	-0.605586
380.39	0.670097	0.64745	0.699045	0.717374	0.728029	0.735988		380.39	-0.519776	-0.522272	-0.548202	-0.648121	-0.693433	-0.608832
380.59	0.666413	0.647795	0.700322	0.715496	0.72847	0.74389		380.59	-0.523459	-0.521926	-0.546924	-0.649999	-0.692992	-0.60093
380.79	0.666562	0.647191	0.698395	0.71352	0.730819	0.741763		380.79	-0.52331	-0.52253	-0.548852	-0.651974	-0.690643	-0.603057
380.99	0.666487	0.647396	0.698392	0.716208	0.729361	0.741316		380.99	-0.523385	-0.522326	-0.548854	-0.649286	-0.692102	-0.603504
381.19	0.667085	0.646926	0.696504	0.717007	0.732182	0.734711		381.19	-0.522788	-0.522796	-0.550743	-0.648488	-0.68928	-0.610109
381.39	0.668983	0.646581	0.699579	0.712834	0.730615	0.739232		381.39	-0.520889	-0.523141	-0.547668	-0.65266	-0.690847	-0.605588
381.59	0.66704	0.64934	0.701675	0.717506	0.732442	0.744854		381.59	-0.522832	-0.520382	-0.545572	-0.647989	-0.689021	-0.599966
381.79	0.668827	0.648866	0.699392	0.713099	0.730134	0.735523		381.79	-0.521045	-0.520855	-0.547855	-0.652395	-0.691329	-0.609297
381.99	0.66574	0.65096	0.698518	0.713257	0.731034	0.738509		381.99	-0.524132	-0.518762	-0.548729	-0.652237	-0.690429	-0.606311
382.19	0.665376	0.651089	0.698923	0.714028	0.729587	0.740737		382.19	-0.524496	-0.518633	-0.548324	-0.651466	-0.691876	-0.604083
382.39	0.670659	0.648752	0.698997	0.716319	0.730369	0.738576		382.39	-0.519214	-0.520969	-0.54825	-0.649175	-0.691094	-0.606244
382.59	0.665676	0.648823	0.701428	0.715908	0.733686	0.741594		382.59	-0.524197	-0.520898	-0.545819	-0.649587	-0.687777	-0.603226
382.79	0.668575	0.650652	0.70255	0.712837	0.732092	0.741073		382.79	-0.521297	-0.51907	-0.544697	-0.652658	-0.68937	-0.603747
382.99	0.665028	0.647053	0.699032	0.719165	0.729903	0.73943		382.99	-0.524845	-0.522669	-0.548215	-0.646329	-0.69156	-0.60539
383.19	0.668379	0.648639	0.698997	0.713179	0.729715	0.7375		383.19	-0.521493	-0.521082	-0.54825	-0.652315	-0.691747	-0.60732
383.39	0.665424	0.649552	0.696893	0.711584	0.729365	0.738815		383.39	-0.524448	-0.520169	-0.550354	-0.653911	-0.692097	-0.606005
383.59	0.666514	0.646659	0.698225	0.713191	0.733026	0.740616		383.59	-0.523358	-0.523062	-0.549022	-0.652303	-0.688436	-0.604204
383.79	0.666939	0.643709	0.696936	0.71617	0.732008	0.74336		383.79	-0.522934	-0.526012	-0.550311	-0.649324	-0.689455	-0.60146
383.99	0.666176	0.649691	0.700746	0.714205	0.727932	0.737986		383.99	-0.523696	-0.520031	-0.546501	-0.651289	-0.693531	-0.606834
384.19	0.66732	0.648442	0.700965	0.716198	0.728606	0.742704		384.19	-0.522552	-0.52128	-0.546281	-0.649296	-0.692856	-0.602116
384.39	0.665722	0.652699	0.69995	0.717309	0.730873	0.740003		384.39	-0.52415	-0.517023	-0.547297	-0.648185	-0.69059	-0.604817
384.59	0.667012	0.649355	0.698223	0.714708	0.727328	0.741567		384.59	-0.522861	-0.520366	-0.549024	-0.650786	-0.694134	-0.603253
384.79	0.664704	0.651326	0.702869	0.715614	0.731822	0.744461		384.79	-0.525168	-0.518395	-0.544378	-0.64988	-0.689641	-0.600359
384.99	0.664819	0.647903	0.701181	0.717506	0.730862	0.740054		384.99	-0.525053	-0.521818	-0.546066	-0.647988	-0.690601	-0.604766
385.19	0.668207	0.649839	0.69954	0.71319	0.729241	0.740891		385.19	-0.521666	-0.519882	-0.547706	-0.652304	-0.692221	-0.603929
385.39	0.667898	0.648296	0.700496	0.714477	0.725221	0.735721		385.39	-0.521974	-0.521426	-0.546751	-0.651018	-0.696242	-0.609099
385.59	0.667355	0.647507	0.700639	0.713909	0.730243	0.74003		385.59	-0.522517	-0.522214	-0.546608	-0.651585	-0.69122	-0.60479
385.79	0.665359	0.649551	0.699822	0.717387	0.729316	0.73753		385.79	-0.524513	-0.52017	-0.547425	-0.648107	-0.692147	-0.60729
385.99	0.665951	0.650097	0.698082	0.714685	0.730208	0.740555		385.99	-0.523921	-0.519624	-0.549165	-0.650809	-0.691255	-0.604265
386.19	0.663877	0.647383	0.697698	0.715012	0.733056	0.745649		386.19	-0.525995	-0.522338	-0.549549	-0.650482	-0.688406	-0.599172
386.39	0.663789	0.646421	0.699341	0.717362	0.728254	0.738535		386.39	-0.526083	-0.523301	-0.547906	-0.648133	-0.693208	-0.606285
386.59	0.671956	0.65125	0.700394	0.716552	0.729987	0.738079		386.59	-0.517916	-0.518471	-0.546853	-0.648942	-0.691476	-0.606741
386.79	0.669082	0.649951	0.70107	0.715262	0.728561	0.743174		386.79	-0.52079	-0.51977	-0.546177	-0.650233	-0.692901	-0.601646
386.99	0.666377	0.644085	0.702347	0.717833	0.732125	0.741513		386.99	-0.523496	-0.525636	-0.5449	-0.647661	-0.689337	-0.603307
387.19	0.667658	0.648838	0.705935	0.720224	0.731803	0.744097		387.19	-0.522214	-0.520884	-0.541312	-0.64527	-0.689659	-0.600723
387.39	0.669866	0.649107	0.70289	0.714396	0.730083	0.739741		387.39	-0.520006	-0.520614	-0.544357	-0.651098	-0.69138	-0.605079
387.59	0.666378	0.647458	0.700129	0.714726	0.732432	0.739931		387.59	-0.523494	-0.522263	-0.547117	-0.650769	-0.68903	-0.604889
387.79	0.670035	0.648983	0.697249	0.714648	0.732575	0.74034		387.79	-0.519837	-0.520738	-0.549997	-0.650846	-0.688888	-0.60448
388	0.666717	0.640509	0.699622	0.716708	0.720891	0.745538		388	-0.523156	-0.529212	-0.547624	-0.648786	-0.700571	-0.599282
388.19	0.660646	0.639434	0.695091	0.720181	0.717505	0.739927		388.19	-0.529226	-0.530287	-0.552156	-0.645313	-0.703958	-0.604893
388.39	0.660237	0.6348	0.697382	0.719447	0.720348	0.736745		388.39	-0.529635	-0.534922	-0.549865	-0.646047	-0.701114	-0.608075
388.59	0.660551	0.636091	0.69659	0.716741	0.716923	0.736026		388.59	-0.529321	-0.533631	-0.550656	-0.648754	-0.70454	-0.608794
388.79	0.658017	0.634592	0.696241	0.717377	0.713012	0.736985		388.79	-0.531856	-0.535129	-0.551006	-0.648118	-0.708451	-0.607835
388.99	0.658835	0.639608	0.694904	0.718496	0.71584	0.743824		388.99	-0.531037	-0.530113	-0.552343	-0.646998	-0.705622	-0.600996
389.19	0.65765	0.639016	0.69188	0.716143	0.713126	0.738962		389.19	-0.532222	-0.530705	-0.555367	-0.649351	-0.708337	-0.605858
389.39	0.655709	0.633587	0.692232	0.717808	0.71698	0.73746		389.39	-0.534163	-0.536134	-0.555014	-0.647686	-0.704482	-0.60736
389.59	0.654875	0.634877	0.691793	0.71209	0.7161	0.741707		389.59	-0.534997	-0.534844	-0.555453	-0.653404	-0.705362	-0.603113
389.79	0.65775	0.634019	0.691247	0.712126	0.713274	0.739727		389.79	-0.532122	-0.535702	-0.556	-0.653369	-0.708188	-0.605093
389.99	0.657733	0.630526	0.690815	0.714973	0.711985	0.741318		389.99	-0.53214	-0.539196	-0.556432	-0.650522	-0.709478	-0.603502
390.19	0.652902	0.635399	0.689783	0.714346	0.712431	0.73694		390.19	-0.536971	-0.534323	-0.557464	-0.651148	-0.709032	-0.60788
390.39	0.657307	0.634806	0.689527	0.711042	0.711139	0.734297		390.39	-0.532565	-0.534915	-0.55772	-0.654452	-0.710324	-0.610523
390.59	0.653721	0.629797	0.688517	0.712807	0.712057	0.735942		390.59	-0.536151	-0.539924	-0.55873	-0.652687	-0.709406	-0.608878
390.79	0.654694	0.634643	0.68686	0.71243	0.713977	0.735652		390.79	-0.535178	-0.535078	-0.560387	-0.653065	-0.707486	-0.609168
390.99	0.654664	0.633594	0.687924	0.715529	0.710102	0.737275		390.99	-0.535209	-0.536127	-0.559322	-0.649965	-0.71136	-0.607545
391.19	0.650558	0.635373	0.687579	0.710591	0.714049	0.734436		391.19	-0.539314	-0.534349	-0.559667	-0.654903	-0.707414	-0.610384
391.39	0.654098	0.631712	0.687589	0.709656	0.711847	0.733892		391.39	-0.535774	-0.53801	-0.559657	-0.655838	-0.709616	-0.610928
391.59	0.654958	0.633152	0.689351	0.713313	0.707153	0.733366		391.59	-0.534915	-0.536569	-0.557896	-0.652182	-0.714309	-0.611454
391.79	0.652143	0.630257	0.686649	0.709887	0.712857	0.733376		391.79	-0.537729	-0.539465	-0.560598	-0.655607	-0.708606	-0.611444
391.99	0.653171	0.632191	0.687861	0.712245	0.710622	0.73541		391.99	-0.536701	-0.53753	-0.559385	-0.653249	-0.71084	-0.60941
392.19	0.650556	0.632955	0.687407	0.707041	0.709694	0.735995		392.19	-0.539316	-0.536767	-0.559839	-0.658453	-0.711768	-0.608825
392.39	0.651574	0.629607	0.686533	0.710973	0.706497	0.733718		392.39	-0.538299	-0.540115	-0.560714	-0.654521	-0.714965	-0.611102
392.59	0.651194	0.632521	0.687828	0.708891	0.704652	0.733257		392.59	-0.538679	-0.537201	-0.559418	-0.656603	-0.716811	-0.611563
392.79	0.652243	0.629654	0.682197	0.707784	0.707671	0.731719		392.79	-0.537629	-0.540067	-0.56505	-0.65771	-0.713792	-0.613101
392.99	0.653138	0.628497	0.683858	0.711227	0.703621	0.730507		392.99	-0.536734	-0.541224	-0.563389	-0.654267	-0.717841	-0.614313
393.19	0.647915	0.631193	0.684621	0.708819	0.707664	0.728284		393.19	-0.541957	-0.538528	-0.562626	-0.656675	-0.713798	-0.616536
393.39	0.652142	0.633413	0.68654	0.708293	0.706837	0.730398		393.39	-0.537731	-0.536308	-0.560707	-0.657201	-0.714625	-0.614422
393.59	0.648834	0.627876	0.684914	0.707705	0.706736	0.731526		393.59	-0.541039	-0.541845	-0.562333	-0.657789	-0.714727	-0.613294
393.79	0.651457	0.632118	0.684918	0.710399	0.708431	0.733569		393.79	-0.538415	-0.537603	-0.562329	-0.655096	-0.713032	-0.611251
393.99	0.64863	0.627125	0.683992	0.710804	0.703093	0.730406		393.99	-0.541243	-0.542596	-0.563255	-0.654691	-0.718369	-0.614414
394.19	0.6527	0.630542	0.683477	0.70846	0.703327	0.73148		394.19	-0.537172	-0.539179	-0.56377	-0.657034	-0.718135	-0.61334
394.39	0.649475	0.630683	0.683601	0.710172	0.70682	0.729887		394.39	-0.540397	-0.539038	-0.563645	-0.655323	-0.714642	-0.614933
394.59	0.650108	0.628479	0.685753	0.70695	0.704888	0.729388		394.59	-0.539765	-0.541242	-0.561493	-0.658544	-0.716575	-0.615432
394.79	0.650901	0.630547	0.684327	0.709123	0.707455	0.731669		394.79	-0.538971	-0.539174	-0.56292	-0.656371	-0.714008	-0.613151
394.99	0.647394	0.627844	0.687704	0.711266	0.707278	0.729558		394.99	-0.542478	-0.541878	-0.559543	-0.654228	-0.714185	-0.615262
395.19	0.649371	0.629887	0.679837	0.704863	0.706019	0.728797		395.19	-0.540501	-0.539834	-0.567409	-0.660632	-0.715443	-0.616023
395.39	0.649004	0.629644	0.684039	0.70668	0.706919	0.727024		395.39	-0.540868	-0.540078	-0.563207	-0.658814	-0.714544	-0.617796
395.59	0.648095	0.630215	0.681557	0.710525	0.703858	0.732378		395.59	-0.541777	-0.539507	-0.56569	-0.654969	-0.717604	-0.612442
395.79	0.647202	0.629988	0.681586	0.709308	0.702724	0.731637		395.79	-0.542671	-0.539733	-0.56566	-0.656187	-0.718739	-0.613183
395.99	0.648422	0.626842	0.681455	0.708285	0.705343	0.730705		395.99	-0.54145	-0.542879	-0.565791	-0.657209	-0.716119	-0.614115
396.19	0.649374	0.628401	0.68224	0.705025	0.704421	0.72737		396.19	-0.540499	-0.54132	-0.565007	-0.660469	-0.717041	-0.61745
396.39	0.648714	0.628754	0.683516	0.70456	0.703222	0.727636		396.39	-0.541158	-0.540967	-0.563731	-0.660934	-0.718241	-0.617184
396.59	0.650095	0.630592	0.68298	0.704563	0.705733	0.73025		396.59	-0.539778	-0.539129	-0.564267	-0.660932	-0.71573	-0.61457
396.79	0.647654	0.628859	0.678806	0.703822	0.705111	0.731647		396.79	-0.542219	-0.540863	-0.56844	-0.661672	-0.716352	-0.613173
396.99	0.648433	0.629337	0.68061	0.704092	0.705692	0.729109		396.99	-0.541439	-0.540385	-0.566637	-0.661402	-0.715771	-0.615711
397.19	0.649353	0.627944	0.679669	0.704661	0.705345	0.729472		397.19	-0.540519	-0.541777	-0.567578	-0.660833	-0.716117	-0.615348
397.39	0.647902	0.630704	0.681739	0.706274	0.701988	0.729851		397.39	-0.54197	-0.539018	-0.565508	-0.659221	-0.719474	-0.614969
397.59	0.646262	0.631027	0.684259	0.705809	0.698524	0.732521		397.59	-0.54361	-0.538694	-0.562988	-0.659685	-0.722938	-0.612299
397.79	0.648534	0.62662	0.681503	0.709783	0.700921	0.727757		397.79	-0.541338	-0.543101	-0.565744	-0.655711	-0.720542	-0.617063
397.99	0.6511	0.62988	0.684568	0.705121	0.707156	0.731083		397.99	-0.538772	-0.539842	-0.562679	-0.660373	-0.714306	-0.613737
398.19	0.647178	0.624987	0.684552	0.708554	0.707979	0.7308		398.19	-0.542694	-0.544734	-0.562695	-0.65694	-0.713483	-0.61402
398.39	0.648414	0.629859	0.684942	0.706428	0.704005	0.729398		398.39	-0.541458	-0.539863	-0.562304	-0.659066	-0.717458	-0.615422
398.59	0.649918	0.627996	0.683913	0.707146	0.705618	0.729565		398.59	-0.539955	-0.541725	-0.563334	-0.658349	-0.715845	-0.615255
398.79	0.650889	0.628967	0.683283	0.707323	0.704596	0.733247		398.79	-0.538983	-0.540754	-0.563963	-0.658172	-0.716866	-0.611573
398.99	0.64831	0.630947	0.685019	0.707315	0.702007	0.726815		398.99	-0.541562	-0.538774	-0.562228	-0.658179	-0.719455	-0.618005
399.19	0.649668	0.631486	0.682136	0.708596	0.70187	0.727313		399.19	-0.540204	-0.538235	-0.56511	-0.656899	-0.719592	-0.617507
[truncated: 27,008 more rows]

## Sheet: Exp_2
Binding raw data (nm)									Normalised to baseline step
Time (s)	Mg + ATP -> Mg + ATP	Mg + Ca + ATP -> Mg + ATP	Mg + ATP -> Mg + Ca + ATP	JQPD + Mg + ATP -> Mg + ATP	Mg + ATP -> Mg + ADP	Mg + ATP -> Ca + ATP			Time (s)	Mg + ATP -> Mg + ATP	Mg + Ca + ATP -> Mg + ATP	Mg + ATP -> Mg + Ca + ATP	JQPD + Mg + ATP -> Mg + ATP	Mg + ATP -> Mg + ADP	Mg + ATP -> Ca + ATP
0	0	0	0	0	0	0			0	-1.21922	-1.09115	-1.36629	-1.42128	-1.3276	-1.23592
0.19	0.00537495	-0.00190744	0.0012567	-0.00078203	-0.00459284	-0.0021867			0.19	-1.21385	-1.09306	-1.36503	-1.42206	-1.3322	-1.2381
0.39	-0.00015601	-0.00545047	-0.00278695	-0.00453495	-0.0013905	-0.00288283			0.39	-1.21938	-1.0966	-1.36908	-1.42582	-1.329	-1.2388
0.59	0.00232091	-0.00639016	-0.00248019	0.00178887	0.00153546	-0.00487192			0.59	-1.2169	-1.09754	-1.36877	-1.41949	-1.32607	-1.24079
0.79	0.00232807	-0.00770349	-0.00189252	-0.00209648	-0.00123655	-0.00328422			0.79	-1.21689	-1.09885	-1.36818	-1.42338	-1.32884	-1.2392
0.99	0.00096011	-0.00495707	-0.00169203	-2.631e-05	-0.00056921	-0.0026981			0.99	-1.21826	-1.09611	-1.36798	-1.42131	-1.32817	-1.23861
1.19	0.00157642	-0.00286263	-0.00137381	0.00443075	-0.00313616	-0.00605152			1.19	-1.21765	-1.09401	-1.36766	-1.41685	-1.33074	-1.24197
1.39	0.00250438	-0.00559932	0.000567	-0.00182886	-0.00216953	-0.00048144			1.39	-1.21672	-1.09675	-1.36572	-1.42311	-1.32977	-1.2364
1.59	0.00129123	-0.00627394	0.00094798	-0.00059478	-0.00185774	-0.00235499			1.59	-1.21793	-1.09742	-1.36534	-1.42188	-1.32946	-1.23827
1.79	0.00391664	-0.00237687	0.00289242	0.00114112	-0.00584873	-0.00476552			1.79	-1.21531	-1.09353	-1.3634	-1.42014	-1.33345	-1.24068
1.99	0.00458273	-0.00214896	-0.00017264	0.00118565	-0.005286	-0.00182444			1.99	-1.21464	-1.0933	-1.36646	-1.42009	-1.33289	-1.23774
2.19	0.00284893	-0.00515663	-0.00178859	-0.0024858	-0.00073736	-0.00301012			2.19	-1.21637	-1.09631	-1.36808	-1.42377	-1.32834	-1.23893
2.39	0.0037024	-0.00381022	0.0008496	9.66e-05	1.09e-06	-0.00479977			2.39	-1.21552	-1.09496	-1.36544	-1.42118	-1.3276	-1.24072
2.59	0.00323657	-0.00258076	-0.00043566	0.00357428	0.00279526	0.00042523			2.59	-1.21599	-1.09373	-1.36672	-1.41771	-1.32481	-1.23549
2.79	0.00463066	-0.00142603	-0.00166161	-0.00129398	-0.0011874	-0.00061524			2.79	-1.21459	-1.09257	-1.36795	-1.42257	-1.32879	-1.23653
2.99	0.00416823	-0.00387195	0.00046301	-0.00092044	0.00230815	-0.0016149			2.99	-1.21505	-1.09502	-1.36583	-1.4222	-1.3253	-1.23753
3.19	0.00585872	-0.0022253	-0.00097501	-4.957e-05	-0.000475	0.00142254			3.19	-1.21336	-1.09337	-1.36726	-1.42133	-1.32808	-1.23449
3.39	0.00486725	-0.00259204	0.0005447	-0.00247645	0.0007424	-0.00141218			3.39	-1.21436	-1.09374	-1.36574	-1.42376	-1.32686	-1.23733
3.59	0.00482098	-0.00520404	0.0003143	-0.00190764	0.00235586	0.00341448			3.59	-1.2144	-1.09635	-1.36597	-1.42319	-1.32525	-1.2325
3.79	0.00458204	-0.00392975	0.00012443	-0.00052356	0.00185703	-0.00095925			3.79	-1.21464	-1.09508	-1.36616	-1.4218	-1.32575	-1.23688
3.99	0.00388986	-0.00346005	0.00122453	-0.00065336	0.00138338	0.00039266			3.99	-1.21533	-1.09461	-1.36506	-1.42193	-1.32622	-1.23552
4.19	0.00318445	-0.00124611	0.00275904	-0.00081377	0.00295401	-5.167e-05			4.19	-1.21604	-1.09239	-1.36353	-1.42209	-1.32465	-1.23597
4.39	0.00789048	-0.00163796	0.00152852	0.00132407	-0.00183089	-0.00080106			4.39	-1.21133	-1.09279	-1.36476	-1.41996	-1.32944	-1.23672
4.59	0.00798318	-0.00200689	0.00032829	-0.00088699	0.00447644	-0.00176015			4.59	-1.21124	-1.09316	-1.36596	-1.42217	-1.32313	-1.23768
4.79	0.00744676	-0.00226701	-0.00150075	0.00175125	0.0006095	-0.00522799			4.79	-1.21178	-1.09342	-1.36779	-1.41953	-1.327	-1.24114
4.99	0.00573982	-0.00334089	-6.445e-05	-0.00157634	0.0005907	-0.00023859			4.99	-1.21348	-1.09449	-1.36635	-1.42286	-1.32701	-1.23615
5.19	0.00734067	-0.00657305	0.0030256	0.00283091	0.00366428	0.00180162			5.19	-1.21188	-1.09772	-1.36326	-1.41845	-1.32394	-1.23411
5.39	0.00449458	-0.00437662	-3.123e-05	-0.0005145	-0.00311288	-0.00035143			5.39	-1.21473	-1.09553	-1.36632	-1.42179	-1.33072	-1.23627
5.59	0.00525003	-0.00298883	0.00265693	0.00141392	-0.00028162	-0.00047739			5.59	-1.21397	-1.09414	-1.36363	-1.41987	-1.32789	-1.23639
5.8	0.0073273	-0.00268336	0.00230831	0.00026116	0.00395633	-0.00109869			5.8	-1.2119	-1.09383	-1.36398	-1.42102	-1.32365	-1.23701
5.99	0.00214009	-0.00012683	0.00011722	-0.00120392	0.00247468	0.00154069			5.99	-1.21708	-1.09128	-1.36617	-1.42248	-1.32513	-1.23438
6.19	0.00494688	-0.00180688	-0.00124025	0.00363239	0.00208769	-0.00232148			6.19	-1.21428	-1.09296	-1.36753	-1.41765	-1.32552	-1.23824
6.39	0.00803456	-0.00244558	-0.00044765	0.00362698	-0.00115897	-0.00232064			6.39	-1.21119	-1.09359	-1.36674	-1.41765	-1.32876	-1.23824
6.59	0.00392546	-0.00399815	-0.00057785	-0.00010201	0.00325548	0.00334699			6.59	-1.2153	-1.09515	-1.36687	-1.42138	-1.32435	-1.23257
6.79	0.00741658	-0.00405091	0.00053243	0.00127193	0.00344687	-0.00161899			6.79	-1.21181	-1.0952	-1.36576	-1.42001	-1.32416	-1.23754
6.99	0.00796472	-0.004112	0.000269	-0.00076349	0.00515969	0.00121409			6.99	-1.21126	-1.09526	-1.36602	-1.42204	-1.32245	-1.2347
7.19	0.00679073	-0.00359	-0.00075385	0.00066366	0.00317427	-0.00287979			7.19	-1.21243	-1.09474	-1.36704	-1.42062	-1.32443	-1.2388
7.39	0.00937843	-0.00125838	0.00367736	-0.00311296	-0.0003999	-7.208e-05			7.39	-1.20984	-1.09241	-1.36261	-1.42439	-1.328	-1.23599
7.59	0.0072784	-0.00690709	0.00070616	-0.00220904	0.00257553	-0.00099169			7.59	-1.21194	-1.09806	-1.36558	-1.42349	-1.32503	-1.23691
7.8	0.00617307	-0.00221569	8.383e-05	0.00162485	0.00176562	-0.00279031			7.8	-1.21305	-1.09336	-1.3662	-1.41966	-1.32584	-1.23871
7.99	0.00394384	-0.00054151	0.00134453	-0.00285507	0.00581928	-0.00122361			7.99	-1.21528	-1.09169	-1.36494	-1.42414	-1.32179	-1.23714
8.19	0.00630661	-0.00359074	-0.00162277	0.00356813	0.00292567	-0.00171111			8.19	-1.21292	-1.09474	-1.36791	-1.41771	-1.32468	-1.23763
8.39	0.00854615	-0.00683556	0.00095702	-0.0001737	0.00361163	-0.00276663			8.39	-1.21068	-1.09798	-1.36533	-1.42145	-1.32399	-1.23868
8.6	0.00499373	-0.00232877	0.00019586	0.00155049	0.00536235	0.00098805			8.6	-1.21423	-1.09348	-1.36609	-1.41973	-1.32224	-1.23493
8.8	0.00387985	-0.00670343	0.00184163	-0.00479309	-0.00100076	-0.0019517			8.8	-1.21534	-1.09785	-1.36445	-1.42607	-1.32861	-1.23787
8.99	0.00501992	-0.00343165	0.00188668	-0.00052317	0.00175396	-0.00570309			8.99	-1.2142	-1.09458	-1.3644	-1.4218	-1.32585	-1.24162
9.19	0.00588664	-0.0050419	0.00166679	0.00091184	0.00135536	-0.00275025			9.19	-1.21334	-1.09619	-1.36462	-1.42037	-1.32625	-1.23867
9.39	0.00839474	-0.00394039	0.00111311	-0.00381976	0.00429709	-0.00284473			9.39	-1.21083	-1.09509	-1.36518	-1.4251	-1.32331	-1.23876
9.59	0.00664423	-0.00181332	-0.00065208	9.464e-05	0.00287576	0.00159515			9.59	-1.21258	-1.09296	-1.36694	-1.42119	-1.32473	-1.23432
9.8	0.00660428	-0.00266144	-0.00541675	-0.00278705	0.00384863	0.00103903			9.8	-1.21262	-1.09381	-1.3717	-1.42407	-1.32376	-1.23488
9.99	0.00638452	-0.00247857	0.00052689	-0.00049056	0.00167376	-0.00260962			9.99	-1.21284	-1.09363	-1.36576	-1.42177	-1.32593	-1.23853
10.19	0.00700695	-0.00380613	0.0003168	-0.00279894	0.00393171	-0.00278093			10.19	-1.21222	-1.09495	-1.36597	-1.42408	-1.32367	-1.2387
10.39	0.00944576	-0.00349677	-0.00082938	0.0035308	-0.00143747	-0.0013627			10.39	-1.20978	-1.09465	-1.36712	-1.41775	-1.32904	-1.23728
10.59	0.00686017	-0.0041514	-0.00145506	0.00106492	0.00126442	5.439e-05			10.59	-1.21236	-1.0953	-1.36774	-1.42022	-1.32634	-1.23586
10.8	0.0105062	-0.00405808	-0.00266649	0.00278261	0.00717123	0.00380476			10.8	-1.20872	-1.09521	-1.36895	-1.4185	-1.32043	-1.23211
10.99	0.00902486	-0.0074828	-0.00066935	-0.00163441	0.00483664	0.00319806			10.99	-1.2102	-1.09863	-1.36696	-1.42291	-1.32277	-1.23272
11.19	0.00889781	-0.00779076	0.00212643	0.00207322	0.00174755	0.00122535			11.19	-1.21032	-1.09894	-1.36416	-1.41921	-1.32586	-1.23469
11.39	0.00932164	-0.00293598	0.00070838	0.00010605	0.00374807	0.00060788			11.39	-1.2099	-1.09408	-1.36558	-1.42117	-1.32386	-1.23531
11.6	0.0052659	-0.00621293	-0.00108114	0.00309999	0.0014089	-0.00061639			11.6	-1.21396	-1.09736	-1.36737	-1.41818	-1.3262	-1.23653
11.79	0.00634083	-0.0078026	-0.00432372	-0.00426834	0.002555	-0.0010772			11.79	-1.21288	-1.09895	-1.37061	-1.42555	-1.32505	-1.23699
11.99	0.00822945	-0.0065813	-0.00031343	0.00150256	0.00337029	-0.00173471			11.99	-1.21099	-1.09773	-1.3666	-1.41978	-1.32423	-1.23765
12.19	0.00782197	-0.00686639	0.00115977	-0.00221701	0.00398932	-0.0010243			12.19	-1.2114	-1.09802	-1.36513	-1.4235	-1.32362	-1.23694
12.39	0.0100647	-0.00144615	-0.00126103	-0.00108206	0.00481994	-0.00022484			12.39	-1.20916	-1.09259	-1.36755	-1.42236	-1.32278	-1.23614
12.59	0.00703436	-0.0041572	-0.00567974	-0.00055721	0.00366684	0.0008843			12.59	-1.21219	-1.09531	-1.37197	-1.42184	-1.32394	-1.23503
12.8	0.00930805	-0.00629778	-0.00177192	0.00255433	0.00197967	-0.00094188			12.8	-1.20991	-1.09745	-1.36806	-1.41873	-1.32563	-1.23686
12.99	0.00808618	-0.00511815	0.00109384	-0.00088066	0.00332851	-0.00122879			12.99	-1.21114	-1.09627	-1.36519	-1.42216	-1.32428	-1.23714
13.19	0.00732363	-0.0047952	0.00121091	0.00124891	0.00284933	0.00027732			13.19	-1.2119	-1.09594	-1.36508	-1.42003	-1.32476	-1.23564
13.39	0.00693106	-0.0014003	-0.00090328	0.00221276	0.00076855	0.00366369			13.39	-1.21229	-1.09255	-1.36719	-1.41907	-1.32684	-1.23225
13.6	0.0109682	-0.00609283	-0.00066625	0.00149427	0.00956087	-0.0018112			13.6	-1.20825	-1.09724	-1.36695	-1.41979	-1.31804	-1.23773
13.8	0.0124238	-0.00473722	-0.00433439	-0.00422235	0.00561049	-0.00088463			13.8	-1.2068	-1.09589	-1.37062	-1.4255	-1.32199	-1.2368
13.99	0.00650887	-0.00526543	0.00189132	0.00203532	0.00173079	-0.0009186			13.99	-1.21271	-1.09641	-1.3644	-1.41924	-1.32587	-1.23683
14.19	0.0110531	-0.00287841	-0.00310915	-0.00200579	0.0074654	-0.00136907			14.19	-1.20817	-1.09403	-1.3694	-1.42329	-1.32014	-1.23729
14.39	0.00545714	-0.00253071	-0.00245202	-0.00044233	0.00593541	-0.00040942			14.39	-1.21377	-1.09368	-1.36874	-1.42172	-1.32167	-1.23633
14.6	0.0117964	-0.00268085	-0.00219417	-0.00172278	0.00517114	-0.00187552			14.6	-1.20743	-1.09383	-1.36848	-1.423	-1.32243	-1.23779
14.8	0.00816937	-0.00351154	-0.00022385	0.00066336	0.00247755	-0.0014636			14.8	-1.21105	-1.09466	-1.36651	-1.42062	-1.32513	-1.23738
14.99	0.0076655	-0.00681796	-0.00128692	8.116e-05	0.00288885	-0.00019185			14.99	-1.21156	-1.09797	-1.36758	-1.4212	-1.32472	-1.23611
15.19	0.00805118	-0.00334592	-0.00103449	0.00303364	0.00497377	-0.0011945			15.19	-1.21117	-1.09449	-1.36732	-1.41825	-1.32263	-1.23711
15.39	0.00721008	-0.00368678	-0.00144415	-0.00336137	0.00642115	-0.00104874			15.39	-1.21201	-1.09484	-1.36773	-1.42464	-1.32118	-1.23696
15.6	0.00953841	-0.00595029	0.00254062	0.00290593	0.00392756	0.00261613			15.6	-1.20968	-1.0971	-1.36375	-1.41837	-1.32368	-1.2333
15.79	0.00954973	-0.00214173	-8.008e-05	4.694e-05	0.0047515	-0.00374604			15.79	-1.20967	-1.09329	-1.36637	-1.42123	-1.32285	-1.23966
15.99	0.00829184	-0.00885431	-0.00057191	0.00189251	0.00323665	-0.00105437			15.99	-1.21093	-1.1	-1.36686	-1.41939	-1.32437	-1.23697
16.19	0.00816966	-0.00211684	-0.00048279	-0.00589683	0.00346016	0.00281483			16.19	-1.21105	-1.09327	-1.36677	-1.42718	-1.32414	-1.2331
16.4	0.010997	-0.00197534	-0.00118203	-0.00711126	0.00685794	0.00049046			16.4	-1.20823	-1.09312	-1.36747	-1.42839	-1.32075	-1.23543
16.59	0.010806	-0.00504994	0.00036222	0.0014232	0.00478203	-0.00079731			16.59	-1.20842	-1.0962	-1.36593	-1.41986	-1.32282	-1.23671
16.79	0.00669442	-0.003699	0.00170951	0.00101132	0.00713795	-0.00187491			16.79	-1.21253	-1.09485	-1.36458	-1.42027	-1.32047	-1.23779
16.99	0.0115983	-0.00385266	0.0005934	-0.00042201	0.00176181	-0.00240631			16.99	-1.20762	-1.095	-1.36569	-1.4217	-1.32584	-1.23832
17.2	0.0113098	-0.00414917	-0.00060799	-0.00050218	0.00447278	0.00202631			17.2	-1.20791	-1.0953	-1.3669	-1.42178	-1.32313	-1.23389
17.39	0.00899475	-0.00348706	0.0014801	-2.524e-05	0.00595273	-0.00119148			17.39	-1.21023	-1.09464	-1.36481	-1.42131	-1.32165	-1.23711
17.6	0.0090238	-0.00474142	-0.00346265	-0.00027302	0.00577396	0.00161721			17.6	-1.2102	-1.09589	-1.36975	-1.42155	-1.32183	-1.2343
17.8	0.0101222	-0.00503516	0.0007327	-0.00300185	0.00476608	0.00125712			17.8	-1.2091	-1.09618	-1.36556	-1.42428	-1.32284	-1.23466
18	0.0117219	-0.00399911	-0.00175591	0.00306295	0.00701782	-0.00085112			18	-1.2075	-1.09515	-1.36804	-1.41822	-1.32059	-1.23677
18.19	0.0123074	-0.00299497	-0.00041874	-0.00188549	0.00451321	-0.00216498			18.19	-1.20692	-1.09414	-1.36671	-1.42317	-1.32309	-1.23808
18.4	0.0121777	-0.00549312	0.00020719	-0.00106639	0.00812388	0.00151565			18.4	-1.20705	-1.09664	-1.36608	-1.42235	-1.31948	-1.2344
18.59	0.0126526	-0.0044398	-0.00197276	0.00230895	0.00748026	0.00030289			18.59	-1.20657	-1.09559	-1.36826	-1.41897	-1.32012	-1.23561
18.8	0.00941319	-0.00599506	-0.00312082	-0.00182466	0.00765463	-0.00111032			18.8	-1.20981	-1.09714	-1.36941	-1.4231	-1.31995	-1.23703
19	0.0107059	-0.00196753	-0.00117589	0.00066298	0.00457961	0.00116622			19	-1.20852	-1.09312	-1.36746	-1.42062	-1.32303	-1.23475
19.2	0.0119802	-0.00470203	-0.00224876	-0.00015818	0.00670211	0.00054293			19.2	-1.20724	-1.09585	-1.36854	-1.42144	-1.3209	-1.23537
19.39	0.0122142	-0.00069739	-0.00331807	-0.00263835	0.00732674	-0.00148272			19.39	-1.20701	-1.09185	-1.36961	-1.42392	-1.32028	-1.2374
19.59	0.012898	-0.00524486	0.00010522	-0.00015907	0.0045168	-0.00034921			19.59	-1.20632	-1.09639	-1.36618	-1.42144	-1.32309	-1.23627
19.79	0.011715	-0.00319449	-0.00399752	0.00198155	0.00234476	0.00075705			19.79	-1.20751	-1.09434	-1.37029	-1.4193	-1.32526	-1.23516
19.99	0.0120548	-0.00486568	8.843e-05	-0.00438321	0.00367501	0.00102174			19.99	-1.20717	-1.09601	-1.3662	-1.42566	-1.32393	-1.23489
20.2	0.0131366	-0.00689231	-0.00203904	-0.00442348	0.00764491	-0.00509603			20.2	-1.20609	-1.09804	-1.36833	-1.4257	-1.31996	-1.24101
20.4	0.0119323	-0.00252542	-0.00482392	-0.00160777	0.00350717	-0.00174001			20.4	-1.20729	-1.09367	-1.37111	-1.42289	-1.3241	-1.23766
20.6	0.0128212	-0.00757462	-0.0022421	-0.00213937	0.00371911	3.986e-05			20.6	-1.2064	-1.09872	-1.36853	-1.42342	-1.32389	-1.23588
20.79	0.0127958	-0.00346449	0.00090797	0.00102357	0.00725387	-0.00072499			20.79	-1.20643	-1.09461	-1.36538	-1.42026	-1.32035	-1.23664
20.99	0.0143594	-0.00382579	-0.00113047	-0.00597317	0.00254259	0.00029723			20.99	-1.20486	-1.09497	-1.36742	-1.42725	-1.32506	-1.23562
21.2	0.00985032	-0.00486257	-0.0033823	0.00105209	0.00847789	-0.00059846			21.2	-1.20937	-1.09601	-1.36967	-1.42023	-1.31913	-1.23651
21.39	0.0121219	-0.00501934	-0.00172956	-0.00056593	0.00613652	0.0038729			21.39	-1.2071	-1.09617	-1.36802	-1.42185	-1.32147	-1.23204
21.59	0.00942716	-0.00752044	-0.00210904	0.00069552	0.00387134	0.00137879			21.59	-1.2098	-1.09867	-1.3684	-1.42058	-1.32373	-1.23454
21.79	0.0120748	-0.00530616	-0.00101741	-0.00173805	0.00551094	-0.00092367			21.79	-1.20715	-1.09645	-1.36731	-1.42302	-1.32209	-1.23684
21.99	0.00702072	-0.00441745	0.00078605	-0.00159073	0.00881107	-0.00149703			21.99	-1.2122	-1.09557	-1.3655	-1.42287	-1.31879	-1.23741
22.2	0.0132184	-0.00475578	-0.00209863	0.00190953	0.00807572	0.00250731			22.2	-1.206	-1.0959	-1.36839	-1.41937	-1.31953	-1.23341
22.39	0.0110207	-0.00473471	-0.00088434	-0.00104115	0.00638985	0.00019163			22.39	-1.2082	-1.09588	-1.36717	-1.42232	-1.32121	-1.23572
22.59	0.0131405	-0.00478339	-0.00225202	-0.00174743	0.0044607	-0.00106001			22.59	-1.20608	-1.09593	-1.36854	-1.42303	-1.32314	-1.23698
22.79	0.0155181	-0.005654	0.00142019	-0.00134573	0.00435545	-0.00234418			22.79	-1.2037	-1.0968	-1.36487	-1.42263	-1.32325	-1.23826
22.99	0.0134083	-0.00655665	-0.00025851	0.00014504	0.00378034	0.00254954			22.99	-1.20581	-1.09771	-1.36655	-1.42114	-1.32382	-1.23337
23.19	0.0119318	-0.00444099	-0.00427809	0.00171348	0.00581596	0.00119049			23.19	-1.20729	-1.09559	-1.37057	-1.41957	-1.32179	-1.23473
23.4	0.0148712	-0.00510512	-0.00115964	0.00189226	0.00841165	0.00249576			23.4	-1.20435	-1.09625	-1.36745	-1.41939	-1.31919	-1.23342
23.59	0.0145828	-0.00310948	-0.00011165	-0.00364653	0.00629083	-0.00080442			23.59	-1.20464	-1.09426	-1.3664	-1.42493	-1.32131	-1.23672
23.8	0.00965242	-0.00630339	0.00018643	0.00436949	0.011419	5.077e-05			23.8	-1.20957	-1.09745	-1.3661	-1.41691	-1.31619	-1.23587
23.99	0.0111439	-0.00361124	-0.00198323	-0.00281284	0.00711432	-0.00260329			23.99	-1.20808	-1.09476	-1.36827	-1.42409	-1.32049	-1.23852
24.19	0.0131532	-0.00449926	0.00113188	0.00319798	0.00436284	-0.00052329			24.19	-1.20607	-1.09565	-1.36516	-1.41808	-1.32324	-1.23644
24.39	0.0120308	-0.00599305	-0.00245606	0.00114583	0.00982161	0.0010236			24.39	-1.20719	-1.09714	-1.36874	-1.42013	-1.31778	-1.23489
24.59	0.0123716	-0.00360373	-0.00300833	-0.00226062	0.00702726	-0.00279657			24.59	-1.20685	-1.09475	-1.3693	-1.42354	-1.32058	-1.23871
24.79	0.0124379	-0.00409104	-0.00282858	-0.00167374	0.00491871	0.00121821			24.79	-1.20678	-1.09524	-1.36912	-1.42295	-1.32269	-1.2347
24.99	0.0143722	-0.00255941	-0.0024688	0.00111161	0.00851354	0.00292749			24.99	-1.20485	-1.09371	-1.36876	-1.42017	-1.31909	-1.23299
25.2	0.00949473	-0.007328	-0.00288275	0.00025953	0.00915301	-0.0017249			25.2	-1.20973	-1.09848	-1.36917	-1.42102	-1.31845	-1.23764
25.39	0.0105517	-0.00655044	-0.00567011	0.00326726	0.0079476	-0.00393489			25.39	-1.20867	-1.0977	-1.37196	-1.41801	-1.31966	-1.23985
25.6	0.011255	-0.00357825	-0.00280131	-0.00449614	0.00350919	-0.00317341			25.6	-1.20797	-1.09473	-1.36909	-1.42578	-1.3241	-1.23909
25.79	0.013875	-0.00448726	-0.00266756	-0.0025031	0.00721751	0.00102993			25.79	-1.20535	-1.09564	-1.36896	-1.42378	-1.32039	-1.23489
25.99	0.0149411	-0.0036849	-0.00241536	-9.15e-06	0.00880916	-0.00310753			25.99	-1.20428	-1.09483	-1.3687	-1.42129	-1.3188	-1.23902
26.19	0.0121619	-0.00490849	-0.00205498	-0.00380295	0.00941225	0.00210325			26.19	-1.20706	-1.09606	-1.36834	-1.42508	-1.31819	-1.23381
26.39	0.0131615	-0.00215517	-0.00519678	-0.00253189	0.00443996	0.00165837			26.39	-1.20606	-1.0933	-1.37148	-1.42381	-1.32316	-1.23426
26.59	0.011681	-0.00515337	-0.00304278	-0.00051046	0.0104251	0.00165656			26.59	-1.20754	-1.0963	-1.36933	-1.42179	-1.31718	-1.23426
26.79	0.012792	-0.00498651	-0.00166544	-0.00307354	0.00910848	-0.00112599			26.79	-1.20643	-1.09614	-1.36795	-1.42435	-1.3185	-1.23704
26.99	0.0135674	-0.00153232	-0.00071675	-0.00319433	0.00630622	-0.00249077			26.99	-1.20566	-1.09268	-1.367	-1.42447	-1.3213	-1.23841
27.2	0.0100609	-0.00469003	-0.00371372	-0.0007037	0.00938414	0.00027693			27.2	-1.20916	-1.09584	-1.37	-1.42198	-1.31822	-1.23564
27.39	0.0142963	-0.00488042	-0.00237249	-0.00147958	0.0059016	-0.00494914			27.39	-1.20493	-1.09603	-1.36866	-1.42276	-1.3217	-1.24087
27.59	0.00980634	-0.00465511	-0.00444682	-0.00226855	0.00711338	0.00043769			27.59	-1.20942	-1.0958	-1.37074	-1.42355	-1.32049	-1.23548
27.79	0.00944866	-0.0063163	-0.00441058	-0.00374852	0.00834068	0.00114665			27.79	-1.20977	-1.09746	-1.3707	-1.42503	-1.31926	-1.23477
27.99	0.0151928	-0.0061881	-0.00285288	-0.00398284	0.00626355	-0.00085249			27.99	-1.20403	-1.09734	-1.36914	-1.42526	-1.32134	-1.23677
28.19	0.0154541	-0.00536553	-0.00143993	0.00011794	0.00525266	0.00307673			28.19	-1.20377	-1.09651	-1.36773	-1.42116	-1.32235	-1.23284
28.39	0.013998	-0.00771798	-0.00404976	-0.00068518	0.00664497	-0.00319423			28.39	-1.20522	-1.09887	-1.37034	-1.42197	-1.32096	-1.23911
28.59	0.0110603	-0.00588794	-0.0012301	0.00032592	0.0110962	0.00027036			28.59	-1.20816	-1.09704	-1.36752	-1.42095	-1.31651	-1.23565
28.79	0.00783373	-0.00401244	-0.00272778	-0.00155648	0.00651587	-0.00165789			28.79	-1.21139	-1.09516	-1.36902	-1.42284	-1.32109	-1.23757
28.99	0.0117122	-0.00807516	-0.00223649	-0.00220404	0.00620525	-0.00094575			28.99	-1.20751	-1.09922	-1.36852	-1.42348	-1.3214	-1.23686
29.19	0.0107528	-0.00550196	-0.00534353	-0.00046252	0.00893388	-0.00571436			29.19	-1.20847	-1.09665	-1.37163	-1.42174	-1.31867	-1.24163
29.4	0.0133642	-0.00856273	-0.00353427	-0.00480246	0.00455581	-0.00085044			29.4	-1.20586	-1.09971	-1.36982	-1.42608	-1.32305	-1.23677
29.6	0.00997643	-0.00420855	-0.00270191	-0.00251102	0.00549075	-0.00218878			29.6	-1.20925	-1.09536	-1.36899	-1.42379	-1.32211	-1.2381
29.8	0.0130665	-0.0066784	-0.00571375	0.00022269	0.00714573	-0.00102322			29.8	-1.20616	-1.09783	-1.372	-1.42106	-1.32046	-1.23694
30	0.0129717	-0.00424532	-0.00349028	-0.00286134	0.00708718	-0.00286384			30	-1.20625	-1.09539	-1.36978	-1.42414	-1.32052	-1.23878
30.2	0.0137684	-0.00846961	9.337e-05	-0.00422436	0.00691869	0.00149231			30.2	-1.20545	-1.09962	-1.36619	-1.4255	-1.32069	-1.23442
30.4	0.0116912	-0.00581254	-0.00330622	-0.003783	0.00666462	-0.00058501			30.4	-1.20753	-1.09696	-1.36959	-1.42506	-1.32094	-1.2365
30.6	0.0109651	-0.00846296	0.00022167	-0.00153214	0.00623341	-0.00453581			30.6	-1.20826	-1.09961	-1.36607	-1.42281	-1.32137	-1.24045
30.8	0.0113926	-0.00515832	-0.00217087	-0.00087116	0.011099	-0.00221913			30.8	-1.20783	-1.09631	-1.36846	-1.42215	-1.31651	-1.23814
31	0.0131624	-0.0046903	-0.00178771	-0.00286903	0.00968305	-0.00189604			31	-1.20606	-1.09584	-1.36808	-1.42415	-1.31792	-1.23781
31.2	0.0178776	-0.005031	-0.00453674	-0.0042086	0.00705992	0.00291756			31.2	-1.20135	-1.09618	-1.37082	-1.42549	-1.32054	-1.233
31.4	0.0127418	-0.00800645	-0.00300602	-0.00416382	0.0124859	-0.00331578			31.4	-1.20648	-1.09916	-1.36929	-1.42544	-1.31512	-1.23923
31.6	0.011105	-0.00452199	-0.00190294	-0.00038337	0.00399123	-0.00172445			31.6	-1.20812	-1.09567	-1.36819	-1.42166	-1.32361	-1.23764
31.8	0.0134879	-0.00551473	-0.00297069	-0.00125546	0.0053997	0.00031155			31.8	-1.20573	-1.09666	-1.36926	-1.42254	-1.32221	-1.2356
32	0.012445	-0.00702411	-0.00356803	-0.00559265	0.00776396	-0.00196292			32	-1.20678	-1.09817	-1.36986	-1.42687	-1.31984	-1.23788
32.19	0.013727	-0.00408245	-0.00415095	-0.00084905	0.00695219	-0.0008588			32.19	-1.2055	-1.09523	-1.37044	-1.42213	-1.32065	-1.23677
32.39	0.0118374	-0.00555985	-0.00288808	-0.00208986	0.0063117	0.00011489			32.39	-1.20739	-1.09671	-1.36918	-1.42337	-1.32129	-1.2358
32.59	0.0169594	-0.00585157	-0.00267784	0.00132047	0.00777092	-0.00109204			32.59	-1.20226	-1.097	-1.36897	-1.41996	-1.31983	-1.23701
32.79	0.0135237	-0.003405	-0.00356917	-0.00435325	0.00913305	0.0002991			32.79	-1.2057	-1.09455	-1.36986	-1.42563	-1.31847	-1.23562
32.99	0.0162584	-0.00739269	-0.00359807	-0.00570627	0.00681117	-0.00136787			32.99	-1.20296	-1.09854	-1.36989	-1.42699	-1.32079	-1.23728
33.19	0.00946131	-0.00852141	-0.0017926	-0.00293141	0.00897787	0.00258539			33.19	-1.20976	-1.09967	-1.36808	-1.42421	-1.31863	-1.23333
33.4	0.0110237	-0.00451036	-0.00353574	-0.00040657	0.00356946	-0.00020911			33.4	-1.2082	-1.09566	-1.36982	-1.42169	-1.32404	-1.23613
33.59	0.0107392	-0.0121648	-0.00458201	-0.00041559	0.0117742	-0.00034203			33.59	-1.20848	-1.10331	-1.37087	-1.4217	-1.31583	-1.23626
33.79	0.0139917	-0.00946919	-0.00423311	-0.00404721	0.0100142	0.00239192			33.79	-1.20523	-1.10062	-1.37052	-1.42533	-1.31759	-1.23352
33.99	0.0135844	-0.00586145	-0.00339658	-0.00585053	0.00750766	0.00045355			33.99	-1.20564	-1.09701	-1.36968	-1.42713	-1.3201	-1.23546
34.19	0.0103825	-0.00488488	-0.00201356	0.00432449	0.00849917	-0.00363234			34.19	-1.20884	-1.09603	-1.3683	-1.41696	-1.31911	-1.23955
34.4	0.0148373	-0.00771912	-0.00162287	-0.00551874	0.00770379	-0.00095388			34.4	-1.20439	-1.09887	-1.36791	-1.4268	-1.3199	-1.23687
34.59	0.0128638	-0.00758472	-0.00333119	-0.00375591	0.00720139	-0.00127008			34.59	-1.20636	-1.09873	-1.36962	-1.42504	-1.3204	-1.23719
34.79	0.015786	-0.00782098	-0.00354782	-0.00068891	0.00514686	0.00197864			34.79	-1.20344	-1.09897	-1.36984	-1.42197	-1.32246	-1.23394
34.99	0.0152345	-0.00923796	-0.00602372	-0.00652491	0.00464401	-0.00344723			34.99	-1.20399	-1.10039	-1.37231	-1.42781	-1.32296	-1.23936
35.19	0.0119504	-0.00713915	-0.00123816	0.00177255	0.0063278	0.00019011			35.19	-1.20727	-1.09829	-1.36753	-1.41951	-1.32128	-1.23573
35.39	0.0103233	-0.00694901	-0.00407581	0.00013069	0.0064626	0.00157086			35.39	-1.2089	-1.0981	-1.37036	-1.42115	-1.32114	-1.23435
35.59	0.0124894	-0.00680829	-0.00104918	0.00129961	0.00648348	-0.00026731			35.59	-1.20673	-1.09796	-1.36734	-1.41998	-1.32112	-1.23618
35.79	0.0139827	-0.0055096	-0.00426061	-0.00502542	0.00961015	-0.0005007			35.79	-1.20524	-1.09666	-1.37055	-1.42631	-1.31799	-1.23642
35.99	0.0152628	-0.0100141	-0.00160994	-0.00301076	0.00881494	1.003e-05			35.99	-1.20396	-1.10116	-1.3679	-1.42429	-1.31879	-1.23591
36.19	0.0143381	-0.00648929	-0.00258695	-0.00477222	0.00627931	-0.00023142			36.19	-1.20488	-1.09764	-1.36888	-1.42605	-1.32133	-1.23615
36.4	0.0144093	-0.00500735	-0.00436582	0.00229926	0.00682891	-0.00092536			36.4	-1.20481	-1.09616	-1.37065	-1.41898	-1.32078	-1.23684
36.59	0.0138138	-0.00703244	-0.00155837	-0.00124059	0.00584651	-0.00419394			36.59	-1.20541	-1.09818	-1.36785	-1.42252	-1.32176	-1.24011
36.79	0.0144095	-0.00390083	-0.0021567	-0.0029755	0.00632157	-0.0031102			36.79	-1.20481	-1.09505	-1.36844	-1.42426	-1.32128	-1.23903
36.99	0.01328	-0.00184826	-0.00537286	-0.00239162	0.00687659	0.00014663			36.99	-1.20594	-1.093	-1.37166	-1.42367	-1.32073	-1.23577
37.19	0.00976555	-0.0069316	-0.00019072	-0.00216945	0.00701282	-0.00213877			37.19	-1.20946	-1.09808	-1.36648	-1.42345	-1.32059	-1.23805
37.4	0.0115443	-0.0069697	-0.00309523	-8.6e-07	0.00727779	-0.00249149			37.4	-1.20768	-1.09812	-1.36938	-1.42128	-1.32033	-1.23841
37.59	0.0116178	-0.00512907	-0.0024216	-0.0018272	0.00874349	-0.00121675			37.59	-1.2076	-1.09628	-1.36871	-1.42311	-1.31886	-1.23713
37.79	0.0128707	-0.00194163	-0.00157567	-0.00572101	0.00824687	0.00335237			37.79	-1.20635	-1.09309	-1.36786	-1.427	-1.31936	-1.23256
37.99	0.0157105	-0.00661752	-0.00307651	-0.0043063	0.00955218	-0.0009281			37.99	-1.20351	-1.09777	-1.36936	-1.42559	-1.31805	-1.23684
38.19	0.0143156	-0.00667686	-0.00531107	-0.00472062	0.00622878	-0.00225598			38.19	-1.20491	-1.09783	-1.3716	-1.426	-1.32138	-1.23817
38.4	0.0175493	-0.00667172	-0.00316028	-0.0017284	0.0070472	-0.00278059			38.4	-1.20167	-1.09782	-1.36945	-1.42301	-1.32056	-1.2387
38.59	0.0113026	-0.0064899	-0.00092007	-0.00091744	0.00647729	0.00403578			38.59	-1.20792	-1.09764	-1.36721	-1.4222	-1.32113	-1.23188
38.79	0.0144297	-0.0102606	-0.00519731	-0.00272625	0.00851736	-0.00512384			38.79	-1.20479	-1.10141	-1.37149	-1.42401	-1.31909	-1.24104
38.99	0.0125526	-0.00537857	-0.00325865	-0.00418245	0.0064286	0.00128108			38.99	-1.20667	-1.09653	-1.36955	-1.42546	-1.32118	-1.23463
39.19	0.011432	-0.0070862	-0.00420649	-0.00082118	0.0105691	-0.00011187			39.19	-1.20779	-1.09823	-1.37049	-1.4221	-1.31704	-1.23603
39.4	0.0120661	-0.00756965	-0.00398277	-0.00360398	0.00892902	0.00022522			39.4	-1.20716	-1.09872	-1.37027	-1.42488	-1.31868	-1.23569
39.59	0.0145287	-0.00863113	-0.00674619	7.328e-05	0.0104819	0.00283938			39.59	-1.20469	-1.09978	-1.37303	-1.42121	-1.31712	-1.23308
39.79	0.0124671	-0.00532031	-0.00600806	-1.228e-05	0.0101293	0.00309164			39.79	-1.20676	-1.09647	-1.3723	-1.42129	-1.31748	-1.23282
39.99	0.0128452	-0.00757538	-0.00202768	-0.00361185	0.00854616	-0.0014809			39.99	-1.20638	-1.09872	-1.36832	-1.42489	-1.31906	-1.2374
40.19	0.0112027	-0.00725851	-0.00539488	0.00316982	0.00980207	-0.00266647			40.19	-1.20802	-1.09841	-1.37168	-1.41811	-1.3178	-1.23858
40.39	0.0146779	-0.00723742	-0.00069742	-0.00343739	0.00802544	-0.00153524			40.39	-1.20454	-1.09839	-1.36699	-1.42472	-1.31958	-1.23745
40.59	0.0137932	-0.0056728	-0.0008967	-0.00339001	0.0110399	0.00128572			40.59	-1.20543	-1.09682	-1.36718	-1.42467	-1.31656	-1.23463
40.79	0.011597	-0.00714949	-0.00728349	-0.00367791	0.00946597	-0.00010284			40.79	-1.20763	-1.0983	-1.37357	-1.42496	-1.31814	-1.23602
40.99	0.0141269	-0.0104677	-0.00609305	-0.00260175	0.0108689	-0.00020745			40.99	-1.2051	-1.10162	-1.37238	-1.42388	-1.31674	-1.23612
41.19	0.0126517	-0.0104506	1.403e-05	-0.00314192	0.00418555	-0.00136357			41.19	-1.20657	-1.1016	-1.36627	-1.42442	-1.32342	-1.23728
41.4	0.0121307	-0.00915282	-0.00335368	-0.00397485	0.00667649	0.00028266			41.4	-1.20709	-1.1003	-1.36964	-1.42526	-1.32093	-1.23563
41.59	0.0116403	-0.0078354	-0.00195561	-0.00322041	0.0107003	0.00050324			41.59	-1.20758	-1.09898	-1.36824	-1.4245	-1.3169	-1.23541
41.79	0.0145333	-0.00709526	-0.00346071	-0.00356867	0.00984752	0.00857322			41.79	-1.20469	-1.09824	-1.36975	-1.42485	-1.31776	-1.22734
41.99	0.0106484	-0.00904731	-0.00589502	0.00081114	0.00745376	-0.00132719			41.99	-1.20857	-1.1002	-1.37218	-1.42047	-1.32015	-1.23724
42.19	0.0154253	-0.0065968	-0.00447297	-0.00214624	0.0101096	-0.00256782			42.19	-1.2038	-1.09775	-1.37076	-1.42343	-1.3175	-1.23848
42.4	0.0153269	-0.00830691	-0.00507797	-0.00178975	0.00882615	-0.00397009			42.4	-1.2039	-1.09946	-1.37137	-1.42307	-1.31878	-1.23989
42.59	0.0136836	-0.00709814	-0.00504136	-0.00272354	0.00939485	-0.00036992			42.59	-1.20554	-1.09825	-1.37133	-1.424	-1.31821	-1.23629
42.79	0.0158833	-0.00909009	-0.00527595	-0.00350834	0.00733441	-0.00362737			42.79	-1.20334	-1.10024	-1.37156	-1.42479	-1.32027	-1.23954
42.99	0.0138422	-0.00750265	-0.00326826	-0.0025844	0.0130202	-1.39e-06			42.99	-1.20538	-1.09865	-1.36956	-1.42386	-1.31458	-1.23592
43.19	0.0139159	-0.00530634	-0.00586987	-0.00269586	0.00742739	-0.00013333			43.19	-1.20531	-1.09645	-1.37216	-1.42398	-1.32018	-1.23605
43.4	0.0120591	-0.00846819	-0.00471446	-0.0025171	0.00493128	0.00052597			43.4	-1.20716	-1.09962	-1.371	-1.4238	-1.32267	-1.23539
43.59	0.0109388	-0.0104438	-0.00676185	-0.00056978	0.00593692	-0.00262401			43.59	-1.20828	-1.10159	-1.37305	-1.42185	-1.32167	-1.23854
43.79	0.0152935	-0.00936312	-0.0076793	0.00074759	0.00587997	-0.00045157			43.79	-1.20393	-1.10051	-1.37397	-1.42053	-1.32172	-1.23637
43.99	0.016532	-0.00921702	0.00127774	-0.00090091	0.00677407	-0.00345284			43.99	-1.20269	-1.10037	-1.36501	-1.42218	-1.32083	-1.23937
44.19	0.014128	-0.00909317	-0.00223971	-0.00322457	0.00837649	0.0040307			44.19	-1.20509	-1.10024	-1.36853	-1.4245	-1.31923	-1.23189
44.39	0.0106697	-0.00945334	-0.00553073	-0.0026645	0.00499973	0.00435658			44.39	-1.20855	-1.1006	-1.37182	-1.42394	-1.32261	-1.23156
44.59	0.0156146	-0.00646213	-0.0073118	-0.00327075	0.00897036	-0.00123574			44.59	-1.20361	-1.09761	-1.3736	-1.42455	-1.31863	-1.23715
44.79	0.0167105	-0.0103646	-0.00709992	-0.00305511	0.0106243	-0.00056444			44.79	-1.20251	-1.10151	-1.37339	-1.42434	-1.31698	-1.23648
44.99	0.0171187	-0.00350136	-0.00497003	-0.00517827	0.00563956	-0.00116074			44.99	-1.2021	-1.09465	-1.37126	-1.42646	-1.32197	-1.23708
45.19	0.0104717	-0.0113981	-0.00512638	-0.0030354	0.00832467	0.0003617			45.19	-1.20875	-1.10255	-1.37141	-1.42432	-1.31928	-1.23555
45.39	0.0156517	-0.00737915	-0.00360065	-0.00343567	0.0113867	-0.00221366			45.39	-1.20357	-1.09853	-1.36989	-1.42472	-1.31622	-1.23813
45.59	0.0150719	-0.00509602	-0.00418374	-0.00421297	0.00431458	-0.00308189			45.59	-1.20415	-1.09624	-1.37047	-1.42549	-1.32329	-1.239
45.8	0.015876	-0.00979838	-0.00546488	-0.00294236	0.00817877	-0.00396438			45.8	-1.20335	-1.10095	-1.37175	-1.42422	-1.31943	-1.23988
45.99	0.0118673	-0.00626884	-0.00063802	-0.00732899	0.00897699	0.00320073			45.99	-1.20736	-1.09742	-1.36693	-1.42861	-1.31863	-1.23272
46.19	0.0160059	-0.00673387	-0.00460008	-0.00752463	0.0104713	-0.00378067			46.19	-1.20322	-1.09788	-1.37089	-1.4288	-1.31713	-1.2397
46.4	0.0161336	-0.00814142	-0.00625294	0.00066055	0.00938183	-0.00240978			46.4	-1.20309	-1.09929	-1.37254	-1.42062	-1.31822	-1.23833
46.59	0.0144681	-0.00786625	-0.00368382	-0.00509856	0.00885896	-0.00032768			46.59	-1.20475	-1.09901	-1.36997	-1.42638	-1.31875	-1.23624
46.79	0.0136638	-0.00756439	-0.00262781	-0.00098729	0.0083326	-0.0012793			46.79	-1.20556	-1.09871	-1.36892	-1.42227	-1.31927	-1.2372
46.99	0.0146833	-0.0100765	-0.00612578	-0.00072749	0.00729573	-0.00534227			46.99	-1.20454	-1.10123	-1.37241	-1.42201	-1.32031	-1.24126
47.19	0.0141805	-0.00859882	-0.0046091	-0.00645427	0.00974594	-0.0007802			47.19	-1.20504	-1.09975	-1.3709	-1.42773	-1.31786	-1.2367
47.4	0.019146	-0.0066501	-0.00576687	-0.00437206	0.0058548	-0.00380846			47.4	-1.20008	-1.0978	-1.37206	-1.42565	-1.32175	-1.23972
47.59	0.012048	-0.00654257	-0.0026003	-0.00251286	0.00703798	0.00395645			47.59	-1.20717	-1.09769	-1.36889	-1.42379	-1.32057	-1.23196
47.79	0.0169549	-0.00467864	-0.00627087	-0.00340525	0.00865171	-0.0012118			47.79	-1.20227	-1.09583	-1.37256	-1.42469	-1.31895	-1.23713
47.99	0.0166874	-0.00606522	-0.00453448	-0.00472886	0.0121201	-0.00445			47.99	-1.20254	-1.09721	-1.37082	-1.42601	-1.31548	-1.24037
48.19	0.0126332	-0.00519363	-0.00811742	-0.00526312	0.00660076	-0.00047982			48.19	-1.20659	-1.09634	-1.37441	-1.42654	-1.321	-1.2364
48.39	0.0123796	-0.00833425	-0.0031539	-0.00497404	0.0119256	-0.00357495			48.39	-1.20684	-1.09948	-1.36944	-1.42625	-1.31568	-1.23949
48.59	0.017771	-0.00637924	-0.00364746	-0.00209958	0.00712613	-0.00071535			48.59	-1.20145	-1.09753	-1.36994	-1.42338	-1.32048	-1.23663
48.79	0.0195217	-0.00942118	-0.00367779	-0.0060385	0.00800768	0.00017859			48.79	-1.1997	-1.10057	-1.36997	-1.42732	-1.3196	-1.23574
48.99	0.0193518	-0.00650705	-0.00378344	-0.00099016	0.011575	-0.00394251			48.99	-1.19987	-1.09766	-1.37007	-1.42227	-1.31603	-1.23986
49.19	0.0134455	-0.00844771	-0.00915292	-0.00474676	0.0074422	-0.00428541			49.19	-1.20578	-1.0996	-1.37544	-1.42603	-1.32016	-1.2402
49.39	0.0146504	-0.00926146	-0.00365294	-0.00334253	0.00918521	-0.00425375			49.39	-1.20457	-1.10041	-1.36994	-1.42462	-1.31842	-1.24017
49.59	0.0157926	-0.00748208	-0.00410903	-0.0043882	0.0123195	-0.00132747			49.59	-1.20343	-1.09863	-1.3704	-1.42567	-1.31529	-1.23724
49.79	0.0163511	-0.0100311	-0.00606953	-0.00376116	0.00778343	0.00295705			49.79	-1.20287	-1.10118	-1.37236	-1.42504	-1.31982	-1.23296
49.99	0.0150172	-0.00888058	-0.00462197	-0.00685355	0.0101511	-0.00260088			49.99	-1.20421	-1.10003	-1.37091	-1.42813	-1.31745	-1.23852
50.19	0.0125904	-0.0123899	-0.00423262	-0.00470125	0.0111914	-0.00439687			50.19	-1.20663	-1.10354	-1.37052	-1.42598	-1.31641	-1.24031
50.39	0.0142995	-0.0114184	-0.00844413	-0.00299233	0.0112117	-0.00271556			50.39	-1.20492	-1.10257	-1.37473	-1.42427	-1.31639	-1.23863
50.59	0.0145322	-0.00941087	-0.0059884	-0.00064445	0.0105547	-0.00317187			50.59	-1.20469	-1.10056	-1.37228	-1.42192	-1.31705	-1.23909
50.79	0.0175064	-0.00915791	-0.00369082	-0.00527984	0.0112993	-0.00288979			50.79	-1.20172	-1.10031	-1.36998	-1.42656	-1.31631	-1.23881
50.99	0.016398	-0.010926	-0.00844631	-0.00079305	0.0114886	-0.0008513			50.99	-1.20282	-1.10207	-1.37473	-1.42207	-1.31612	-1.23677
51.19	0.0147163	-0.00905258	-0.00492784	-0.00211112	0.0104055	-0.00436543			51.19	-1.20451	-1.1002	-1.37122	-1.42339	-1.3172	-1.24028
51.39	0.0142164	-0.00826914	-0.0063844	-0.00599424	0.00461595	-0.00065723			51.39	-1.20501	-1.09942	-1.37267	-1.42727	-1.32299	-1.23657
51.59	0.0178216	-0.00884599	-0.00412932	-0.0026458	0.00771048	-0.00372801			51.59	-1.2014	-1.09999	-1.37042	-1.42393	-1.31989	-1.23964
51.79	0.0138399	-0.0107882	-0.00471916	-0.00128476	0.00744416	0.00039058			51.79	-1.20538	-1.10194	-1.37101	-1.42257	-1.32016	-1.23553
51.99	0.0148973	-0.0102041	-0.00690278	-0.00362993	0.0109885	-0.00417938			51.99	-1.20433	-1.10135	-1.37319	-1.42491	-1.31662	-1.2401
52.19	0.0175697	-0.00742317	-0.00228245	-0.00553622	0.00889636	6.984e-05			52.19	-1.20165	-1.09857	-1.36857	-1.42682	-1.31871	-1.23585
52.39	0.0150957	-0.00742898	-0.00700999	-0.00576535	0.0132893	0.00052619			52.39	-1.20413	-1.09858	-1.3733	-1.42705	-1.31432	-1.23539
52.59	0.0166168	-0.0104195	-0.00361908	-0.00248032	0.00808389	-0.00316204			52.59	-1.20261	-1.10157	-1.36991	-1.42376	-1.31952	-1.23908
52.79	0.0178261	-0.00729718	-0.00252911	-0.00171145	0.00616346	-0.00091357			52.79	-1.2014	-1.09845	-1.36882	-1.42299	-1.32144	-1.23683
52.99	0.0126841	-0.00871673	-0.0043896	-0.0051865	0.0103537	-0.00135061			52.99	-1.20654	-1.09987	-1.37068	-1.42647	-1.31725	-1.23727
53.19	0.0142613	-0.00634528	-0.00609015	-0.00622025	0.0109663	-0.00274015			53.19	-1.20496	-1.09749	-1.37238	-1.4275	-1.31664	-1.23866
53.39	0.0137499	-0.00869818	-0.00349346	-0.00732738	0.0107363	0.00193267			53.39	-1.20547	-1.09985	-1.36978	-1.42861	-1.31687	-1.23398
53.59	0.0140771	-0.00843792	-0.00516312	-0.00151621	0.0111746	-0.00395278			53.59	-1.20515	-1.09959	-1.37145	-1.4228	-1.31643	-1.23987
53.79	0.0159131	-0.00851249	-0.00253174	-0.0053921	0.00839487	-0.00066695			53.79	-1.20331	-1.09966	-1.36882	-1.42667	-1.31921	-1.23658
53.99	0.0116721	-0.0103119	-0.00747216	-0.00334529	0.010774	-0.00071588			53.99	-1.20755	-1.10146	-1.37376	-1.42463	-1.31683	-1.23663
54.19	0.0148296	-0.00897317	-0.00648605	-0.00466739	0.00470378	-0.00289538			54.19	-1.20439	-1.10012	-1.37277	-1.42595	-1.3229	-1.23881
54.4	0.019094	-0.0110162	-0.00331223	-0.0026878	0.00660427	0.00010978			54.4	-1.20013	-1.10216	-1.3696	-1.42397	-1.321	-1.23581
54.59	0.0138359	-0.0107306	-0.00233266	0.00016266	0.00995024	-0.00139536			54.59	-1.20539	-1.10188	-1.36862	-1.42112	-1.31765	-1.23731
54.79	0.0184742	-0.00887435	-0.00507128	-0.0012491	0.0100111	-0.00265244			54.79	-1.20075	-1.10002	-1.37136	-1.42253	-1.31759	-1.23857
54.99	0.0155085	-0.00834294	-0.00608503	-0.00234205	0.0100818	-0.00199482			54.99	-1.20371	-1.09949	-1.37237	-1.42362	-1.31752	-1.23791
55.19	0.0129945	-0.00942377	-0.00395592	-0.00468364	0.00696267	-0.00086306			55.19	-1.20623	-1.10057	-1.37024	-1.42596	-1.32064	-1.23678
55.4	0.0160828	-0.0092367	-0.00881785	-0.00159793	0.010433	-0.00307871			55.4	-1.20314	-1.10039	-1.37511	-1.42288	-1.31717	-1.23899
55.59	0.0158765	-0.00823749	-0.00271781	-0.00330383	0.00784845	-0.00157937			55.59	-1.20335	-1.09939	-1.36901	-1.42458	-1.31976	-1.2375
55.79	0.0150398	-0.00577281	-0.00687307	-0.00470783	0.00844338	-0.00614395			55.79	-1.20418	-1.09692	-1.37316	-1.42599	-1.31916	-1.24206
55.99	0.0163058	-0.00975062	-0.0042302	-0.00407738	0.0101745	0.00121147			55.99	-1.20292	-1.1009	-1.37052	-1.42536	-1.31743	-1.2347
56.19	0.0138852	-0.00553548	-0.00590838	-0.00886365	0.00944135	-0.00070172			56.19	-1.20534	-1.09668	-1.3722	-1.43014	-1.31816	-1.23662
56.4	0.0155844	-0.00886933	-0.00581371	-0.008074	0.00987033	0.00075497			56.4	-1.20364	-1.10002	-1.3721	-1.42935	-1.31773	-1.23516
56.59	0.0111096	-0.00648462	-0.00436016	-0.001292	0.00631425	-0.00278571			56.59	-1.20811	-1.09763	-1.37065	-1.42257	-1.32129	-1.2387
56.79	0.015849	-0.0103648	-0.00337539	-0.00422738	0.0132567	-0.00119531			56.79	-1.20337	-1.10151	-1.36966	-1.42551	-1.31435	-1.23711
56.99	0.0124175	-0.00784563	-0.00882123	-0.00656614	0.00867132	-0.00317759			56.99	-1.20681	-1.09899	-1.37511	-1.42785	-1.31893	-1.23909
57.19	0.0141077	-0.00739357	-0.00554107	-0.00669263	0.0081683	-0.00512597			57.19	-1.20512	-1.09854	-1.37183	-1.42797	-1.31944	-1.24104
57.4	0.0142812	-0.0111162	-0.00686807	-0.00259388	0.00913015	-0.00038526			57.4	-1.20494	-1.10226	-1.37316	-1.42387	-1.31847	-1.2363
57.59	0.0142296	-0.0108798	-0.00442474	-0.00154833	0.010253	-0.00110832			57.59	-1.20499	-1.10203	-1.37071	-1.42283	-1.31735	-1.23702
57.79	0.0158441	-0.00969473	-0.0032722	-0.00488557	0.00765137	-0.00202897			57.79	-1.20338	-1.10084	-1.36956	-1.42617	-1.31995	-1.23794
57.99	0.0161639	-0.00780145	-0.0048876	-0.00475472	0.00884086	-0.00095724			57.99	-1.20306	-1.09895	-1.37118	-1.42603	-1.31876	-1.23687
58.19	0.0159557	-0.011493	-0.0070494	-0.00433713	0.0124609	-7.403e-05			58.19	-1.20327	-1.10264	-1.37334	-1.42562	-1.31514	-1.23599
58.4	0.0127647	-0.0108034	-0.00697449	-0.00301441	0.0112723	-0.0025877			58.4	-1.20646	-1.10195	-1.37326	-1.42429	-1.31633	-1.2385
58.59	0.0173718	-0.00969601	-0.00711715	-0.00055396	0.00925576	-0.00256092			58.59	-1.20185	-1.10084	-1.37341	-1.42183	-1.31835	-1.23848
58.79	0.0149158	-0.00970502	-0.00584868	-0.00373619	0.0105631	-0.00306136			58.79	-1.20431	-1.10085	-1.37214	-1.42502	-1.31704	-1.23898
58.99	0.0145199	-0.010152	-0.00986751	-0.00669951	0.010649	0.00038928			58.99	-1.2047	-1.1013	-1.37616	-1.42798	-1.31696	-1.23553
59.19	0.0151229	-0.0135484	-0.00639694	-0.00283232	0.0103812	0.00128886			59.19	-1.2041	-1.1047	-1.37269	-1.42411	-1.31722	-1.23463
59.4	0.0125197	-0.00927332	-0.00843629	-0.00557515	0.0097791	-0.00104968			59.4	-1.2067	-1.10042	-1.37472	-1.42686	-1.31783	-1.23697
59.59	0.0139969	-0.00639891	-0.00629747	-0.0061958	0.013009	0.00297337			59.59	-1.20523	-1.09755	-1.37259	-1.42748	-1.3146	-1.23294
59.79	0.0143801	-0.00702595	-0.00491505	-0.00634437	0.011045	0.00231808			59.79	-1.20484	-1.09817	-1.3712	-1.42762	-1.31656	-1.2336
59.99	0.0163059	-0.00865432	-0.00653873	-0.00652877	0.0113752	0.00324938			59.99	-1.20292	-1.0998	-1.37283	-1.42781	-1.31623	-1.23267
60.19	0.0159597	-0.0102875	-0.00683318	-0.00371413	0.0127902	-0.00053439			60.19	-1.20326	-1.10144	-1.37312	-1.42499	-1.31481	-1.23645
60.4	0.0170999	-0.0126468	-0.00665615	0.00021623	0.0105007	-0.00488914			60.4	-1.20212	-1.1038	-1.37294	-1.42106	-1.3171	-1.24081
60.59	0.0137555	-0.00929955	-0.00505643	0.00125643	0.0135395	-0.00344115			60.59	-1.20547	-1.10045	-1.37134	-1.42002	-1.31407	-1.23936
60.79	0.012672	-0.00843782	-0.00616556	-0.00361845	0.00934345	-0.00255391			60.79	-1.20655	-1.09959	-1.37245	-1.4249	-1.31826	-1.23847
60.99	0.0149069	-0.00839458	-0.00887316	-0.00235245	0.00942239	-0.00178681			60.99	-1.20432	-1.09954	-1.37516	-1.42363	-1.31818	-1.2377
61.19	0.0130078	-0.0119522	-0.00737634	-0.00302305	0.0135048	-0.00161073			61.19	-1.20621	-1.1031	-1.37366	-1.4243	-1.3141	-1.23753
61.4	0.014637	-0.00894024	-0.00759835	-0.0038769	0.00957724	0.00174769			61.4	-1.20459	-1.10009	-1.37389	-1.42516	-1.31803	-1.23417
61.59	0.017757	-0.0078985	-0.00608776	-0.00546687	0.0129209	0.00060777			61.59	-1.20147	-1.09905	-1.37238	-1.42675	-1.31468	-1.23531
61.79	0.0153914	-0.00782445	-0.00641474	-0.00601406	0.00563667	0.00143904			61.79	-1.20383	-1.09897	-1.3727	-1.42729	-1.32197	-1.23448
61.99	0.0136698	-0.00946972	-0.00633604	-0.00325365	0.0102857	-0.00189953			61.99	-1.20555	-1.10062	-1.37262	-1.42453	-1.31732	-1.23782
62.19	0.0132373	-0.00981685	-0.00866735	-0.00619023	0.00735202	-0.00144049			62.19	-1.20599	-1.10097	-1.37496	-1.42747	-1.32025	-1.23736
62.4	0.0117675	-0.01208	-0.00712002	-0.00389811	0.00934347	-0.00159113			62.4	-1.20746	-1.10323	-1.37341	-1.42518	-1.31826	-1.23751
62.59	0.0137424	-0.00953339	-0.00863172	-0.0045797	0.00669645	-0.00298735			62.59	-1.20548	-1.10068	-1.37492	-1.42586	-1.32091	-1.2389
62.79	0.0147495	-0.00572212	-0.00753434	-0.00670636	0.0104006	-0.00220365			62.79	-1.20447	-1.09687	-1.37382	-1.42799	-1.3172	-1.23812
62.99	0.0119463	-0.0117771	-0.00744195	-0.00398167	0.00887512	-0.00255292			62.99	-1.20728	-1.10293	-1.37373	-1.42526	-1.31873	-1.23847
63.19	0.0156711	-0.00947656	-0.0059841	-0.00287137	0.0115988	0.00137822			63.19	-1.20355	-1.10063	-1.37227	-1.42415	-1.31601	-1.23454
63.4	0.016353	-0.0122361	-0.0046479	-0.0048072	0.0125647	5.763e-05			63.4	-1.20287	-1.10338	-1.37094	-1.42609	-1.31504	-1.23586
63.59	0.0139055	-0.00744694	-0.0066773	-0.00363921	0.0142581	-0.00823888			63.59	-1.20532	-1.0986	-1.37297	-1.42492	-1.31335	-1.24415
63.79	0.0134595	-0.0135254	-0.00540398	-0.0062589	0.0109421	0.00072693			63.79	-1.20576	-1.10467	-1.37169	-1.42754	-1.31666	-1.23519
63.99	0.0167917	-0.00918397	-0.00754573	-0.00353769	0.00643302	-0.00200799			63.99	-1.20243	-1.10033	-1.37383	-1.42482	-1.32117	-1.23792
64.19	0.0138684	-0.0124621	-0.00454478	-0.00433524	0.012825	-0.00091349			64.19	-1.20535	-1.10361	-1.37083	-1.42562	-1.31478	-1.23683
64.4	0.0140111	-0.0109714	-0.00816831	-0.00492693	0.00759794	-4.02e-06			64.4	-1.20521	-1.10212	-1.37446	-1.42621	-1.32001	-1.23592
64.59	0.015543	-0.00795898	-0.00716026	-0.00596221	0.00874636	-0.00200686			64.59	-1.20368	-1.09911	-1.37345	-1.42724	-1.31886	-1.23792
64.79	0.0137698	-0.00776397	-0.00650573	-0.00725649	0.00621366	-0.00152134			64.79	-1.20545	-1.09891	-1.37279	-1.42854	-1.32139	-1.23744
64.99	0.0165293	-0.00758183	-0.00871766	-0.00662196	0.010034	-0.003084			64.99	-1.20269	-1.09873	-1.37501	-1.4279	-1.31757	-1.239
65.19	0.0165407	-0.00662832	-0.00689879	-0.00597036	0.00923853	-0.00143109			65.19	-1.20268	-1.09778	-1.37319	-1.42725	-1.31837	-1.23735
65.4	0.016654	-0.00816255	-0.00495214	-0.0032425	0.006934	-0.00240352			65.4	-1.20257	-1.09931	-1.37124	-1.42452	-1.32067	-1.23832
65.6	0.0113299	-0.0106272	-0.0093226	-0.007394	0.0141207	-0.00308439			65.6	-1.20789	-1.10178	-1.37561	-1.42867	-1.31348	-1.239
65.8	0.016727	-0.00993432	-0.0102451	-0.00404906	0.00706072	-0.00203275			65.8	-1.2025	-1.10108	-1.37653	-1.42533	-1.32054	-1.23795
66	0.0134363	-0.0129095	-0.00833479	-0.00773434	0.0109383	-0.00035933			66	-1.20579	-1.10406	-1.37462	-1.42901	-1.31667	-1.23628
66.19	0.0102606	-0.0132744	-0.00686598	-0.0047877	0.00939849	4.324e-05			66.19	-1.20896	-1.10442	-1.37315	-1.42607	-1.31821	-1.23587
66.4	0.0120966	-0.0102518	-0.00626637	-0.00263182	0.00968522	0.00408696			66.4	-1.20713	-1.1014	-1.37255	-1.42391	-1.31792	-1.23183
66.59	0.0153005	-0.00775577	-0.00611964	-0.00454611	0.00809188	0.00090409			66.59	-1.20392	-1.0989	-1.37241	-1.42583	-1.31951	-1.23501
66.8	0.0139015	-0.0105772	-0.00436622	-0.00232301	0.00983281	-0.00603438			66.8	-1.20532	-1.10173	-1.37065	-1.4236	-1.31777	-1.24195
67	0.015758	-0.0103956	-0.0124762	-0.00373545	0.00301981	0.00147486			67	-1.20346	-1.10154	-1.37876	-1.42502	-1.32458	-1.23444
67.19	0.0181432	-0.00828831	-0.00263516	-0.00227446	0.00697938	0.00304956			67.19	-1.20108	-1.09944	-1.36892	-1.42355	-1.32063	-1.23287
67.4	0.0154861	-0.00877175	-0.00745959	-0.00634466	0.00703511	-0.00016925			67.4	-1.20374	-1.09992	-1.37375	-1.42762	-1.32057	-1.23609
67.59	0.0113146	-0.0125151	-0.00929177	-0.00498259	0.0103395	-0.00106341			67.59	-1.20791	-1.10366	-1.37558	-1.42626	-1.31727	-1.23698
67.79	0.017094	-0.00686304	-0.00654646	-0.00467422	0.00809419	-0.00096747			67.79	-1.20213	-1.09801	-1.37283	-1.42595	-1.31951	-1.23688
67.99	0.0160773	-0.0118393	-0.00558061	-0.00775966	0.00908375	-0.00148685			67.99	-1.20315	-1.10299	-1.37187	-1.42904	-1.31852	-1.2374
68.19	0.0173884	-0.00599459	-0.00593511	-0.00692945	0.00741541	-0.00039603			68.19	-1.20183	-1.09714	-1.37222	-1.42821	-1.32019	-1.23631
68.4	0.0135786	-0.00713951	-0.00891239	-0.00548511	0.00905577	-0.0021272			68.4	-1.20564	-1.09829	-1.3752	-1.42677	-1.31855	-1.23804
68.6	0.0139414	-0.00780195	-0.00519165	-0.00510446	0.00684904	-0.00300166			68.6	-1.20528	-1.09895	-1.37148	-1.42638	-1.32076	-1.23892
68.8	0.0157248	-0.00803737	-0.00844099	-0.00535361	0.0113083	-0.0020301			68.8	-1.2035	-1.09919	-1.37473	-1.42663	-1.3163	-1.23795
68.99	0.0185098	-0.0112006	-0.00571198	0.0001975	0.0107079	-0.00592026			68.99	-1.20071	-1.10235	-1.372	-1.42108	-1.3169	-1.24184
69.19	0.0140207	-0.00993534	-0.00596841	-0.00702328	0.00965563	-0.00297356			69.19	-1.2052	-1.10108	-1.37226	-1.4283	-1.31795	-1.23889
69.4	0.0110103	-0.00869688	-0.007878	-0.00873812	0.0100779	0.00246559			69.4	-1.20821	-1.09985	-1.37417	-1.43002	-1.31753	-1.23345
69.59	0.0145353	-0.0109865	-0.00942315	-0.00720123	0.00696978	-0.00164531			69.59	-1.20469	-1.10214	-1.37571	-1.42848	-1.32063	-1.23756
69.79	0.0146676	-0.00924246	-0.00904843	-0.00571795	0.011074	-0.00300394			69.79	-1.20456	-1.10039	-1.37534	-1.427	-1.31653	-1.23892
69.99	0.0144727	-0.0090869	-0.00617363	-0.00222038	0.00869208	-0.00050374			69.99	-1.20475	-1.10024	-1.37246	-1.4235	-1.31891	-1.23642
70.19	0.0167367	-0.00660731	-0.00794941	-0.00855084	0.0100363	-0.00111626			70.19	-1.20249	-1.09776	-1.37424	-1.42983	-1.31757	-1.23703
70.4	0.016909	-0.00748696	-0.00730501	-0.00694434	0.0114396	0.00034679			70.4	-1.20231	-1.09864	-1.37359	-1.42822	-1.31617	-1.23557
70.6	0.0127117	-0.00834609	-0.0094009	-0.00153391	0.00923072	-0.00339425			70.6	-1.20651	-1.09949	-1.37569	-1.42281	-1.31837	-1.23931
70.79	0.0155375	-0.00650255	-0.00702324	-0.00451347	0.0112164	-0.00339789			70.79	-1.20369	-1.09765	-1.37331	-1.42579	-1.31639	-1.23931
70.99	0.0144351	-0.0113858	-0.0111281	-0.00374328	0.00960321	-0.00170203			70.99	-1.20479	-1.10253	-1.37742	-1.42502	-1.318	-1.23762
71.19	0.0137101	-0.0115264	-0.00607556	-0.00572796	0.00973005	-0.00268019			71.19	-1.20551	-1.10267	-1.37236	-1.42701	-1.31787	-1.2386
71.39	0.0195427	-0.010834	-0.0074336	-0.00435338	0.0106194	-0.00384098			71.39	-1.19968	-1.10198	-1.37372	-1.42563	-1.31699	-1.23976
71.6	0.0193386	-0.00951066	-0.00742745	-0.00031104	0.00964627	-0.00122718			71.6	-1.19988	-1.10066	-1.37372	-1.42159	-1.31796	-1.23714
71.79	0.0151398	-0.0103605	-0.0105684	-0.0058932	0.0132873	-0.00241544			71.79	-1.20408	-1.10151	-1.37686	-1.42717	-1.31432	-1.23833
71.99	0.0160115	-0.0130423	-0.0077053	-0.00355156	0.00951385	0.00047602			71.99	-1.20321	-1.10419	-1.37399	-1.42483	-1.31809	-1.23544
72.19	0.0140797	-0.0110374	-0.00781555	-0.00770298	0.00523613	-0.00514082			72.19	-1.20514	-1.10219	-1.3741	-1.42898	-1.32237	-1.24106
72.39	0.0160959	-0.0131022	-0.00905497	-0.00717551	0.00866923	-0.00307043			72.39	-1.20313	-1.10425	-1.37534	-1.42846	-1.31894	-1.23899
72.59	0.0178902	-0.00875381	-0.00918253	-0.00536784	0.00721825	-0.00396797			72.59	-1.20133	-1.0999	-1.37547	-1.42665	-1.32039	-1.23988
72.79	0.0143562	-0.010125	-0.00712867	-0.0102767	0.0113989	0.00097875			72.79	-1.20487	-1.10127	-1.37342	-1.43156	-1.31621	-1.23494
72.99	0.0164266	-0.00921598	-0.0072111	-0.0074344	0.0127461	-0.00089112			72.99	-1.2028	-1.10036	-1.3735	-1.42871	-1.31486	-1.23681
73.19	0.0141463	-0.0129711	-0.00777149	-0.00748402	0.0103544	-0.00342122			73.19	-1.20508	-1.10412	-1.37406	-1.42876	-1.31725	-1.23934
73.4	0.013704	-0.00938773	-0.0056552	-0.00284862	0.0082662	0.00124184			73.4	-1.20552	-1.10054	-1.37194	-1.42413	-1.31934	-1.23467
73.6	0.009583	-0.0122712	-0.00979902	-0.00440881	0.00966875	-0.00231269			73.6	-1.20964	-1.10342	-1.37609	-1.42569	-1.31794	-1.23823
73.8	0.0158917	-0.0098224	-0.00979741	-0.00558205	0.0124835	-0.00405887			73.8	-1.20333	-1.10097	-1.37609	-1.42686	-1.31512	-1.23997
73.99	0.0133194	-0.0102982	-0.0102583	-0.00670796	0.00650677	-0.00270919			73.99	-1.2059	-1.10145	-1.37655	-1.42799	-1.3211	-1.23863
74.19	0.0154276	-0.010492	-0.0101461	-0.00416132	0.00863863	-0.00338782			74.19	-1.2038	-1.10164	-1.37643	-1.42544	-1.31897	-1.2393
74.39	0.0173285	-0.0108158	-0.00640436	-0.00458224	0.00981129	-0.00111628			74.39	-1.20189	-1.10196	-1.37269	-1.42586	-1.31779	-1.23703
74.6	0.0169481	-0.0103233	-0.00721099	-0.00605329	0.00847303	-0.00125129			74.6	-1.20227	-1.10147	-1.3735	-1.42733	-1.31913	-1.23717
74.79	0.0150486	-0.0115519	-0.00608607	-0.00441518	0.00802671	-0.0005171			74.79	-1.20417	-1.1027	-1.37237	-1.4257	-1.31958	-1.23643
74.99	0.0135327	-0.00935275	-0.00723052	-0.00722327	0.00852831	-0.00208103			74.99	-1.20569	-1.1005	-1.37352	-1.4285	-1.31908	-1.238
75.19	0.0178729	-0.0106207	-0.00905938	-0.0084204	0.00763697	-0.00538498			75.19	-1.20135	-1.10177	-1.37535	-1.4297	-1.31997	-1.2413
75.39	0.0175501	-0.0131337	-0.010161	-0.0051815	0.00721748	-0.00339542			75.39	-1.20167	-1.10428	-1.37645	-1.42646	-1.32039	-1.23931
75.6	0.0137295	-0.00907712	-0.00834801	-0.00688311	0.00945437	-0.00266257			75.6	-1.20549	-1.10023	-1.37464	-1.42816	-1.31815	-1.23858
75.79	0.0158125	-0.010872	-0.0081273	-0.00337809	0.00899554	-0.00211854			75.79	-1.20341	-1.10202	-1.37442	-1.42466	-1.31861	-1.23803
75.99	0.0145135	-0.0110123	-0.00614728	-0.00899198	0.0119963	-0.00184782			75.99	-1.20471	-1.10216	-1.37244	-1.43027	-1.31561	-1.23776
76.19	0.0141138	-0.00970658	-0.0071492	-0.0055914	0.00841407	-0.00242814			76.19	-1.20511	-1.10086	-1.37344	-1.42687	-1.31919	-1.23834
76.39	0.0131644	-0.00905434	-0.00961183	-0.00843719	0.0105547	-0.00723128			76.39	-1.20606	-1.1002	-1.3759	-1.42972	-1.31705	-1.24315
76.59	0.0148455	-0.00863032	-0.00662474	-0.00711353	0.0114078	-0.00512391			76.59	-1.20438	-1.09978	-1.37291	-1.42839	-1.3162	-1.24104
76.79	0.0139788	-0.0112742	-0.00490997	-0.0065635	0.0102033	5.573e-05			76.79	-1.20524	-1.10242	-1.3712	-1.42784	-1.3174	-1.23586
76.99	0.012246	-0.0125077	-0.0100553	-0.0031772	0.0104549	-0.0038488			76.99	-1.20698	-1.10366	-1.37634	-1.42446	-1.31715	-1.23976
77.19	0.0147875	-0.0112469	-0.00508073	-0.00624966	0.014588	-0.00303905			77.19	-1.20444	-1.1024	-1.37137	-1.42753	-1.31302	-1.23896
77.39	0.0156412	-0.0111951	-0.00353178	-0.00491013	0.0105136	-0.00312993			77.39	-1.20358	-1.10234	-1.36982	-1.42619	-1.31709	-1.23905
77.59	0.0151495	-0.0125217	-0.00746959	-0.00838551	0.00931326	-0.00450863			77.59	-1.20407	-1.10367	-1.37376	-1.42967	-1.31829	-1.24042
77.79	0.0158361	-0.00607989	-0.00669906	-0.00800621	0.0104696	-0.00069205			77.79	-1.20339	-1.09723	-1.37299	-1.42929	-1.31714	-1.23661
78	0.0135834	-0.00998917	-0.0112817	-0.00812242	0.00781749	-0.00275498			78	-1.20564	-1.10114	-1.37757	-1.4294	-1.31979	-1.23867
78.19	0.0124682	-0.0102131	-0.00579052	-0.00174913	0.00513174	0.00026417			78.19	-1.20675	-1.10136	-1.37208	-1.42303	-1.32247	-1.23565
78.4	0.0170093	-0.0121089	-0.00523135	-0.00712206	0.0105565	-0.00638436			78.4	-1.20221	-1.10326	-1.37152	-1.4284	-1.31705	-1.2423
78.6	0.0193761	-0.014132	-0.00651772	-0.00456936	0.0115964	-0.00481741			78.6	-1.19985	-1.10528	-1.37281	-1.42585	-1.31601	-1.24073
78.8	0.0137173	-0.0105948	-0.0118651	-0.0067755	0.00946694	-0.00353489			78.8	-1.20551	-1.10174	-1.37815	-1.42806	-1.31814	-1.23945
79	0.0132303	-0.0139874	-0.00857438	-0.00383744	0.0107902	-0.0025628			79	-1.20599	-1.10514	-1.37486	-1.42512	-1.31681	-1.23848
79.19	0.0155234	-0.00809024	-0.00857889	-0.00155509	0.0120242	-0.00254166			79.19	-1.2037	-1.09924	-1.37487	-1.42284	-1.31558	-1.23846
79.4	0.0138633	-0.00980053	-0.00864691	-0.00488189	0.00991738	-0.00097403			79.4	-1.20536	-1.10095	-1.37494	-1.42616	-1.31769	-1.23689
79.6	0.010865	-0.0100168	-0.00593346	-0.00667684	0.0103982	-0.00483581			79.6	-1.20836	-1.10117	-1.37222	-1.42796	-1.31721	-1.24075
79.8	0.0139374	-0.00766626	-0.0104034	-0.00730947	0.00957138	-0.00217822			79.8	-1.20529	-1.09881	-1.37669	-1.42859	-1.31803	-1.23809
80	0.0156279	-0.0114671	-0.00657788	-0.00878632	0.00615667	-0.00803746			80	-1.20359	-1.10262	-1.37287	-1.43007	-1.32145	-1.24395
80.19	0.01334	-0.0102477	-0.00772341	-0.0062238	0.00845141	-0.00020438			80.19	-1.20588	-1.1014	-1.37401	-1.4275	-1.31915	-1.23612
80.39	0.0167845	-0.012035	-0.00779985	-0.00464552	0.00941609	-0.00308726			80.39	-1.20244	-1.10318	-1.37409	-1.42593	-1.31819	-1.239
80.6	0.0158156	-0.0116319	-0.00944779	-0.00764746	0.00873961	-0.00116246			80.6	-1.20341	-1.10278	-1.37574	-1.42893	-1.31887	-1.23708
80.8	0.0166907	-0.0113275	-0.00839905	-0.00550523	0.00704503	0.00136189			80.8	-1.20253	-1.10248	-1.37469	-1.42679	-1.32056	-1.23455
81	0.0154283	-0.012728	-0.00925294	-0.00386138	0.0103973	-0.00298534			81	-1.20379	-1.10388	-1.37554	-1.42514	-1.31721	-1.2389
81.19	0.0124175	-0.0116381	-0.00690868	-0.00967096	0.011631	-0.00176913			81.19	-1.20681	-1.10279	-1.3732	-1.43095	-1.31597	-1.23769
81.4	0.0151405	-0.00961818	-0.00784297	-0.00709572	0.00709853	0.00129738			81.4	-1.20408	-1.10077	-1.37413	-1.42838	-1.32051	-1.23462
81.59	0.0109695	-0.00788846	-0.00980412	-0.00793109	0.0126233	-0.00223985			81.59	-1.20825	-1.09904	-1.37609	-1.42921	-1.31498	-1.23816
81.8	0.0196282	-0.0114323	-0.00921808	-0.00366546	0.00929978	-0.00360823			81.8	-1.19959	-1.10258	-1.37551	-1.42495	-1.3183	-1.23952
82	0.0120289	-0.0112706	-0.0107616	-0.00702942	0.00791479	-0.00214814			82	-1.20719	-1.10242	-1.37705	-1.42831	-1.31969	-1.23806
82.19	0.01461	-0.00988821	-0.00966612	-0.00431747	0.00859495	-0.0035276			82.19	-1.20461	-1.10104	-1.37595	-1.4256	-1.31901	-1.23944
82.4	0.0140993	-0.00872672	-0.0079271	-0.00594086	0.00589206	-0.00127029			82.4	-1.20512	-1.09988	-1.37422	-1.42722	-1.32171	-1.23719
82.6	0.0135583	-0.0122806	-0.00952995	-0.0053371	0.0109532	-0.0037879			82.6	-1.20566	-1.10343	-1.37582	-1.42662	-1.31665	-1.2397
82.8	0.0158438	-0.0136032	-0.00702129	-0.00944841	0.0121358	0.00033469			82.8	-1.20338	-1.10475	-1.37331	-1.43073	-1.31547	-1.23558
83	0.0117259	-0.0127327	-0.00969607	-0.00297437	0.0103764	-0.00494701			83	-1.2075	-1.10388	-1.37598	-1.42425	-1.31723	-1.24086
83.19	0.0157858	-0.0120351	-0.00868818	-0.00375002	0.0104129	-0.00093556			83.19	-1.20344	-1.10318	-1.37498	-1.42503	-1.31719	-1.23685
83.39	0.0140615	-0.0123833	-0.0114126	-0.00764544	0.00973052	0.00084833			83.39	-1.20516	-1.10353	-1.3777	-1.42893	-1.31787	-1.23507
83.6	0.0154125	-0.0121753	-0.00897656	-0.00280662	0.0106639	-0.0040492			83.6	-1.20381	-1.10332	-1.37526	-1.42409	-1.31694	-1.23997
83.79	0.0132365	-0.00992871	-0.00638138	-0.00737031	0.0125604	0.00027115			83.79	-1.20599	-1.10108	-1.37267	-1.42865	-1.31504	-1.23564
84	0.0113953	-0.010543	-0.00802048	-0.00545776	0.00822737	-0.00033318			84	-1.20783	-1.10169	-1.37431	-1.42674	-1.31938	-1.23625
84.19	0.0193699	-0.012835	-0.010364	-0.00492682	0.00886775	-0.00103134			84.19	-1.19985	-1.10398	-1.37665	-1.42621	-1.31874	-1.23695
84.4	0.0146675	-0.0157032	-0.010762	-0.00776214	0.00865168	-0.00258723			84.4	-1.20456	-1.10685	-1.37705	-1.42904	-1.31895	-1.2385
84.6	0.0128086	-0.0114568	-0.0102019	-0.00551797	0.00769021	-0.00607584			84.6	-1.20641	-1.10261	-1.37649	-1.4268	-1.31991	-1.24199
84.8	0.0137545	-0.0117465	-0.0083549	-0.0113414	0.0136042	-0.00716091			84.8	-1.20547	-1.1029	-1.37464	-1.43262	-1.314	-1.24308
85	0.0129267	-0.0125989	-0.00953786	-0.00797033	0.00971234	-0.00328988			85	-1.2063	-1.10375	-1.37583	-1.42925	-1.31789	-1.23921
85.19	0.0145792	-0.0130622	-0.00625158	-0.00850531	0.0105664	-0.001208			85.19	-1.20464	-1.10421	-1.37254	-1.42979	-1.31704	-1.23712
85.4	0.0133734	-0.0118849	-0.00758886	-0.00341225	0.00972334	-0.00377457			85.4	-1.20585	-1.10303	-1.37388	-1.42469	-1.31788	-1.23969
85.6	0.0114586	-0.0104095	-0.00638067	-0.00507488	0.0104041	-0.00325494			85.6	-1.20776	-1.10156	-1.37267	-1.42636	-1.3172	-1.23917
85.8	0.0173332	-0.0106444	-0.00671234	-0.0109502	0.00789184	-0.00323817			85.8	-1.20189	-1.10179	-1.373	-1.43223	-1.31971	-1.23915
86	0.0173493	-0.00946897	-0.00592441	-0.00945321	0.0114676	-0.0021871			86	-1.20187	-1.10062	-1.37221	-1.43073	-1.31614	-1.2381
86.19	0.0144545	-0.0125763	-0.0103331	-0.00639961	0.0102695	-0.00197267			86.19	-1.20477	-1.10372	-1.37662	-1.42768	-1.31734	-1.23789
86.4	0.0144268	-0.0106989	-0.0114138	-0.00536337	0.00863224	-0.00435047			86.4	-1.2048	-1.10185	-1.3777	-1.42664	-1.31897	-1.24027
86.6	0.011686	-0.0100293	-0.00609819	-0.00725917	0.00674295	-0.00290442			86.6	-1.20754	-1.10118	-1.37239	-1.42854	-1.32086	-1.23882
86.8	0.0127256	-0.0117211	-0.00950699	-0.00490915	0.0109419	-0.00336481			86.8	-1.2065	-1.10287	-1.3758	-1.42619	-1.31666	-1.23928
86.99	0.0123809	-0.0150851	-0.00910662	-0.00839436	0.0127678	-0.00434585			86.99	-1.20684	-1.10623	-1.37539	-1.42967	-1.31484	-1.24026
87.19	0.0127229	-0.0106367	-0.00697188	-0.00869613	0.00663074	-0.00422732			87.19	-1.2065	-1.10179	-1.37326	-1.42998	-1.32097	-1.24014
87.4	0.0134061	-0.0121437	-0.00501923	-0.00660256	0.0092657	-0.00268873			87.4	-1.20582	-1.10329	-1.37131	-1.42788	-1.31834	-1.2386
87.6	0.0142653	-0.0151534	-0.00920847	-0.00517697	0.0109279	-0.00394742			87.6	-1.20496	-1.1063	-1.3755	-1.42646	-1.31668	-1.23986
87.8	0.017504	-0.0148556	-0.0116977	-0.0079782	0.0105785	-0.00793927			87.8	-1.20172	-1.106	-1.37799	-1.42926	-1.31703	-1.24386
88	0.016037	-0.0143875	-0.0116346	-0.00638181	0.00995584	-0.00554716			88	-1.20319	-1.10554	-1.37792	-1.42766	-1.31765	-1.24146
88.19	0.0139724	-0.0120217	-0.00947851	-0.00773876	0.00628375	-0.0052857			88.19	-1.20525	-1.10317	-1.37577	-1.42902	-1.32132	-1.2412
88.4	0.0162157	-0.0120367	-0.00667588	-0.00809837	0.00622848	-0.00576708			88.4	-1.20301	-1.10319	-1.37296	-1.42938	-1.32138	-1.24168
88.59	0.0097703	-0.0107645	-0.0081001	-0.00757918	0.0100955	-0.00338464			88.59	-1.20945	-1.10191	-1.37439	-1.42886	-1.31751	-1.2393
88.8	0.0195498	-0.014231	-0.0113646	-0.00864351	0.013029	-0.00406891			88.8	-1.19967	-1.10538	-1.37765	-1.42992	-1.31458	-1.23998
89	0.0152402	-0.0103827	-0.00999819	-0.00904686	0.0144063	-0.00613077			89	-1.20398	-1.10153	-1.37629	-1.43033	-1.3132	-1.24205
89.19	0.0152766	-0.00957783	-0.0105198	-0.00765419	0.00900364	-0.00311565			89.19	-1.20395	-1.10073	-1.37681	-1.42893	-1.3186	-1.23903
89.4	0.0160411	-0.0105545	-0.00697555	-0.00605407	0.0110639	-0.00222942			89.4	-1.20318	-1.1017	-1.37326	-1.42733	-1.31654	-1.23815
89.6	0.0137109	-0.0123476	-0.0106258	-0.00787848	0.010414	-0.00466766			89.6	-1.20551	-1.1035	-1.37691	-1.42916	-1.31719	-1.24058
89.8	0.0168178	-0.015208	-0.00835742	-0.00757047	0.0120764	-0.00174792			89.8	-1.2024	-1.10636	-1.37465	-1.42885	-1.31553	-1.23766
90	0.0134035	-0.0123009	-0.0113597	-0.00620688	0.00731414	-0.00169687			90	-1.20582	-1.10345	-1.37765	-1.42749	-1.32029	-1.23761
90.19	0.0146858	-0.0122407	-0.00722533	-0.00750857	0.0078345	-0.00288569			90.19	-1.20454	-1.10339	-1.37351	-1.42879	-1.31977	-1.2388
90.4	0.0182096	-0.0152328	-0.0118579	-0.00422269	0.0092516	-0.00468213			90.4	-1.20101	-1.10638	-1.37815	-1.4255	-1.31835	-1.2406
90.59	0.0121638	-0.00957655	-0.00780826	-0.00828427	0.00858959	-0.00790551			90.59	-1.20706	-1.10073	-1.3741	-1.42956	-1.31902	-1.24382
90.79	0.0137255	-0.0070993	-0.0101698	-0.00881195	0.00743451	-0.00181155			90.79	-1.2055	-1.09825	-1.37646	-1.43009	-1.32017	-1.23773
91	0.0159567	-0.0102614	-0.0104373	-0.00805546	0.0122983	-0.00095814			91	-1.20327	-1.10141	-1.37673	-1.42934	-1.31531	-1.23687
91.19	0.0178102	-0.0107231	-0.00859141	-0.0107666	0.0104748	-0.00223276			91.19	-1.20141	-1.10187	-1.37488	-1.43205	-1.31713	-1.23815
91.39	0.0121333	-0.0111193	-0.0080871	-0.00934242	0.0106035	-0.00535474			91.39	-1.20709	-1.10227	-1.37438	-1.43062	-1.317	-1.24127
91.59	0.0142546	-0.0116487	-0.00753732	-0.00559736	0.00839201	-0.00449732			91.59	-1.20497	-1.1028	-1.37383	-1.42688	-1.31921	-1.24041
91.79	0.0136942	-0.0113985	-0.00852449	-0.00451176	0.00961139	-0.00047243			91.79	-1.20553	-1.10255	-1.37481	-1.42579	-1.31799	-1.23639
91.99	0.0166186	-0.0122599	-0.00745837	-0.00905072	0.0094336	-0.00369915			91.99	-1.2026	-1.10341	-1.37375	-1.43033	-1.31817	-1.23962
92.19	0.0133128	-0.0118462	-0.0098999	-0.0114628	0.0102227	-0.00397729			92.19	-1.20591	-1.10299	-1.37619	-1.43274	-1.31738	-1.23989
92.4	0.016623	-0.0122646	-0.00766335	-0.00711546	0.00866139	-0.00257711			92.4	-1.2026	-1.10341	-1.37395	-1.4284	-1.31894	-1.23849
92.6	0.0138577	-0.0116288	-0.007764	-0.0062391	0.0100612	-0.00178019			92.6	-1.20537	-1.10278	-1.37405	-1.42752	-1.31754	-1.2377
92.8	0.0146928	-0.0123418	-0.010973	-0.00538106	0.00926604	-0.0063439			92.8	-1.20453	-1.10349	-1.37726	-1.42666	-1.31834	-1.24226
92.99	0.0132299	-0.0134304	-0.00863204	-0.0101367	0.00937847	-0.00319569			92.99	-1.20599	-1.10458	-1.37492	-1.43142	-1.31823	-1.23911
93.19	0.0142579	-0.0138982	-0.0121546	-0.00542916	0.00908921	-0.00542658			93.19	-1.20496	-1.10505	-1.37844	-1.42671	-1.31852	-1.24134
93.39	0.0114844	-0.0131135	-0.00896041	-0.00688169	0.0113707	-0.00708163			93.39	-1.20774	-1.10426	-1.37525	-1.42816	-1.31623	-1.243
93.59	0.0151743	-0.00935706	-0.00763111	-0.00629943	0.00957945	-0.00575972			93.59	-1.20405	-1.10051	-1.37392	-1.42758	-1.31803	-1.24168
93.79	0.0138745	-0.0139976	-0.00949565	-0.00512653	0.0128198	-0.00269656			93.79	-1.20535	-1.10515	-1.37578	-1.42641	-1.31478	-1.23861
93.99	0.0139372	-0.0112947	-0.00930444	-0.0102918	0.00829991	-0.00162542			93.99	-1.20529	-1.10244	-1.37559	-1.43157	-1.3193	-1.23754
94.19	0.0129553	-0.0126291	-0.0126881	-0.00652737	0.0060945	-0.00328592			94.19	-1.20627	-1.10378	-1.37898	-1.42781	-1.32151	-1.2392
94.39	0.0119696	-0.0139679	-0.0146464	-0.00809637	0.00879486	-0.00375352			94.39	-1.20725	-1.10512	-1.38093	-1.42938	-1.31881	-1.23967
94.59	0.00930697	-0.0132642	-0.0109029	-0.00687564	0.00413799	-0.00284969			94.59	-1.20992	-1.10441	-1.37719	-1.42816	-1.32347	-1.23877
94.8	0.0133289	-0.0118078	-0.00955542	-0.00902141	0.0057836	-0.00254437			94.8	-1.20589	-1.10296	-1.37584	-1.4303	-1.32182	-1.23846
94.99	0.0144752	-0.0140213	-0.0109196	-0.0101857	0.0107408	-0.00835459			94.99	-1.20475	-1.10517	-1.37721	-1.43147	-1.31686	-1.24427
95.19	0.0125048	-0.0135503	-0.0128676	-0.007002	0.010298	-0.00440338			95.19	-1.20672	-1.1047	-1.37916	-1.42828	-1.31731	-1.24032
95.39	0.0155072	-0.012252	-0.00630273	-0.00706749	0.00914544	-0.00486882			95.39	-1.20372	-1.1034	-1.37259	-1.42835	-1.31846	-1.24078
95.59	0.011068	-0.0131051	-0.01041	-0.00678363	0.00758937	-0.0061741			95.59	-1.20815	-1.10425	-1.3767	-1.42806	-1.32002	-1.24209
95.79	0.0128129	-0.0117456	-0.011162	-0.00909781	0.0132106	-0.00366577			95.79	-1.20641	-1.10289	-1.37745	-1.43038	-1.31439	-1.23958
95.99	0.0135372	-0.0108059	-0.00849383	-0.00904924	0.00679926	-0.00531738			95.99	-1.20569	-1.10195	-1.37478	-1.43033	-1.32081	-1.24123
96.19	0.0124273	-0.01018	-0.00766629	-0.0109329	0.00985693	-0.00510063			96.19	-1.2068	-1.10133	-1.37395	-1.43221	-1.31775	-1.24102
96.4	0.0118732	-0.0110946	-0.00919788	-0.0120247	0.00757972	-0.00257854			96.4	-1.20735	-1.10224	-1.37549	-1.43331	-1.32003	-1.23849
96.6	0.0125995	-0.00996403	-0.0117425	-0.0087141	0.00640064	-0.00613763			96.6	-1.20662	-1.10111	-1.37803	-1.42999	-1.3212	-1.24205
96.79	0.0123692	-0.0149328	-0.00930717	-0.00415154	0.00789271	-0.00474544			96.79	-1.20685	-1.10608	-1.3756	-1.42543	-1.31971	-1.24066
96.99	0.0116095	-0.0104119	-0.00920972	-0.00538417	0.00963853	-0.00667259			96.99	-1.20761	-1.10156	-1.3755	-1.42666	-1.31797	-1.24259
97.19	0.013675	-0.0108672	-0.00957079	-0.00418593	0.00879182	-0.00307938			97.19	-1.20555	-1.10202	-1.37586	-1.42547	-1.31881	-1.239
97.4	0.0130251	-0.0142367	-0.0072877	-0.00325693	0.00740306	-0.00301803			97.4	-1.2062	-1.10539	-1.37358	-1.42454	-1.3202	-1.23893
97.6	0.0121245	-0.0122606	-0.00934487	-0.00710501	0.0114664	-0.0049466			97.6	-1.2071	-1.10341	-1.37563	-1.42839	-1.31614	-1.24086
97.79	0.0171865	-0.0124517	-0.00648606	-0.0109271	0.00753917	-0.00128447			97.79	-1.20204	-1.1036	-1.37277	-1.43221	-1.32007	-1.2372
97.99	0.0141143	-0.0120459	-0.0112394	-0.00780957	0.0123421	-0.00230517			97.99	-1.20511	-1.10319	-1.37753	-1.42909	-1.31526	-1.23822
98.19	0.0167934	-0.0110619	-0.00985836	-0.0114859	0.0131889	-0.00144695			98.19	-1.20243	-1.10221	-1.37615	-1.43277	-1.31442	-1.23736
98.39	0.0147352	-0.0122002	-0.0108471	-0.00867621	0.010104	-0.00395536			98.39	-1.20449	-1.10335	-1.37714	-1.42996	-1.3175	-1.23987
98.59	0.0139321	-0.0104905	-0.0102798	-0.00743798	0.0109052	-0.0075131			98.59	-1.20529	-1.10164	-1.37657	-1.42872	-1.3167	-1.24343
98.79	0.0116364	-0.00983815	-0.00976658	-0.00749153	0.0108865	-0.00563545			98.79	-1.20759	-1.10099	-1.37605	-1.42877	-1.31672	-1.24155
98.99	0.018209	-0.0130007	-0.00883909	-0.00913703	0.0085727	-0.00414816			98.99	-1.20101	-1.10415	-1.37513	-1.43042	-1.31903	-1.24006
99.19	0.0163839	-0.0139187	-0.0096535	-0.00728332	0.00975553	-0.00412597			99.19	-1.20284	-1.10507	-1.37594	-1.42856	-1.31785	-1.24004
99.39	0.0136907	-0.0110178	-0.0122007	-0.00739355	0.0113931	-0.00448235			99.39	-1.20553	-1.10217	-1.37849	-1.42867	-1.31621	-1.2404
99.59	0.0110005	-0.00764604	-0.0103902	-0.00940817	0.00935706	-0.00466563			99.59	-1.20822	-1.09879	-1.37668	-1.43069	-1.31825	-1.24058
99.79	0.0141737	-0.0135454	-0.0129395	-0.0123548	0.00844053	-0.0080316			99.79	-1.20505	-1.10469	-1.37923	-1.43364	-1.31916	-1.24395
99.99	0.01266	-0.0132316	-0.00997914	-0.00981049	0.00971684	-0.00360894			99.99	-1.20656	-1.10438	-1.37627	-1.43109	-1.31789	-1.23952
100.19	0.0135321	-0.0142543	-0.011342	-0.00535951	0.011046	-0.00591522			100.19	-1.20569	-1.1054	-1.37763	-1.42664	-1.31656	-1.24183
100.39	0.0159795	-0.0109848	-0.0101257	-0.00631563	0.0110563	-0.00488296			100.39	-1.20324	-1.10213	-1.37641	-1.4276	-1.31655	-1.2408
100.59	0.013317	-0.0123974	-0.0105045	-0.00847918	0.00828077	-0.00450018			100.59	-1.20591	-1.10355	-1.37679	-1.42976	-1.31932	-1.24042
100.79	0.0131833	-0.0133536	-0.00790509	-0.0123946	0.00837654	-0.00725506			100.79	-1.20604	-1.1045	-1.37419	-1.43367	-1.31923	-1.24317
100.99	0.0144771	-0.012011	-0.00909882	-0.0112985	0.0147979	-0.00344587			100.99	-1.20475	-1.10316	-1.37539	-1.43258	-1.31281	-1.23936
101.19	0.0148314	-0.0132979	-0.0123764	-0.00929836	0.00850701	-0.00675549			101.19	-1.20439	-1.10445	-1.37866	-1.43058	-1.3191	-1.24267
101.39	0.0137024	-0.0107726	-0.012627	-0.00787201	0.0107977	-0.00376934			101.39	-1.20552	-1.10192	-1.37892	-1.42915	-1.31681	-1.23969
101.59	0.0107793	-0.0112852	-0.00893964	-0.00732058	0.0109712	-0.00556278			101.59	-1.20844	-1.10243	-1.37523	-1.4286	-1.31663	-1.24148
101.79	0.0141402	-0.0127311	-0.0124514	-0.0064653	0.00700897	-0.00487301			101.79	-1.20508	-1.10388	-1.37874	-1.42775	-1.3206	-1.24079
101.99	0.0157673	-0.0148951	-0.0113986	-0.00987388	0.0067422	-0.00506439			101.99	-1.20346	-1.10604	-1.37769	-1.43115	-1.32086	-1.24098
102.19	0.0131279	-0.0126446	-0.0111954	-0.0119579	0.00731355	-0.00466394			102.19	-1.20609	-1.10379	-1.37748	-1.43324	-1.32029	-1.24058
102.4	0.0110978	-0.0103729	-0.0129561	-0.0109636	0.00736211	-0.00716278			102.4	-1.20812	-1.10152	-1.37924	-1.43224	-1.32024	-1.24308
102.6	0.0126429	-0.0139082	-0.0121552	-0.00586863	0.00735974	-0.00407792			102.6	-1.20658	-1.10506	-1.37844	-1.42715	-1.32025	-1.23999
102.8	0.0115615	-0.0126701	-0.00987707	-0.0116317	0.00914093	-0.00420743			102.8	-1.20766	-1.10382	-1.37617	-1.43291	-1.31846	-1.24012
103	0.00948377	-0.010516	-0.0154694	-0.0122022	0.00694877	-0.00208184			103	-1.20974	-1.10166	-1.38176	-1.43348	-1.32066	-1.238
103.19	0.0122154	-0.0122986	-0.00813563	-0.012291	0.00955938	-0.00725693			103.19	-1.20701	-1.10345	-1.37442	-1.43357	-1.31805	-1.24317
103.4	0.0120913	-0.0136129	-0.00895996	-0.00869533	0.0114339	-0.00389326			103.4	-1.20713	-1.10476	-1.37525	-1.42998	-1.31617	-1.23981
103.6	0.0129577	-0.010029	-0.0115947	-0.00605796	0.00933124	-0.00555024			103.6	-1.20627	-1.10118	-1.37788	-1.42734	-1.31827	-1.24147
103.8	0.012754	-0.0124901	-0.0115363	-0.00592644	0.0126741	-0.00221885			103.8	-1.20647	-1.10364	-1.37782	-1.42721	-1.31493	-1.23813
104	0.0154432	-0.01404	-0.0136716	-0.00762374	0.00948094	-0.00757519			104	-1.20378	-1.10519	-1.37996	-1.4289	-1.31812	-1.24349
104.19	0.0140195	-0.016156	-0.0118751	-0.00406603	0.0100388	-0.00351375			104.19	-1.2052	-1.1073	-1.37816	-1.42535	-1.31757	-1.23943
104.4	0.0162882	-0.0139045	-0.0100319	-0.00884289	0.00929122	-0.00525904			104.4	-1.20293	-1.10505	-1.37632	-1.43012	-1.31831	-1.24118
104.6	0.00783837	-0.0118234	-0.0110566	-0.0136572	0.00773469	-0.00363203			104.6	-1.21138	-1.10297	-1.37734	-1.43494	-1.31987	-1.23955
104.8	0.0125287	-0.0163618	-0.0117758	-0.00653641	0.00669217	-0.0097902			104.8	-1.20669	-1.10751	-1.37806	-1.42782	-1.32091	-1.24571
105	0.0115763	-0.0117777	-0.0123016	-0.00698022	0.00873623	-0.0053234			105	-1.20765	-1.10293	-1.37859	-1.42826	-1.31887	-1.24124
105.19	0.009943	-0.017483	-0.0119397	-0.0117118	0.00857606	-0.00133641			105.19	-1.20928	-1.10863	-1.37823	-1.43299	-1.31903	-1.23725
105.4	0.015822	-0.0147063	-0.011277	-0.00630788	0.00802362	-0.00575605			105.4	-1.2034	-1.10585	-1.37757	-1.42759	-1.31958	-1.24167
105.6	0.010843	-0.0136186	-0.0100858	-0.0109033	0.010922	-0.00733333			105.6	-1.20838	-1.10477	-1.37637	-1.43218	-1.31668	-1.24325
105.8	0.00779832	-0.0126658	-0.0110042	-0.0086889	0.00835679	-0.00451365			105.8	-1.21142	-1.10381	-1.37729	-1.42997	-1.31925	-1.24043
106	0.0154476	-0.0165071	-0.00981402	-0.0142264	0.00603189	-0.00618101			106	-1.20378	-1.10766	-1.3761	-1.43551	-1.32157	-1.2421
106.19	0.00970693	-0.0151222	-0.00839204	-0.00941084	0.00747541	-0.00383904			106.19	-1.20952	-1.10627	-1.37468	-1.43069	-1.32013	-1.23976
106.4	0.0155109	-0.0123223	-0.00989527	-0.00918448	0.010097	-0.00347597			106.4	-1.20371	-1.10347	-1.37618	-1.43046	-1.31751	-1.23939
106.6	0.010494	-0.0120725	-0.00891192	-0.00689623	0.00749911	-0.00627547			106.6	-1.20873	-1.10322	-1.3752	-1.42818	-1.32011	-1.24219
106.8	0.0166709	-0.0147715	-0.00981702	-0.00755247	0.00644983	-0.0030167			106.8	-1.20255	-1.10592	-1.37611	-1.42883	-1.32115	-1.23893
107	0.0125173	-0.0159096	-0.0138945	-0.00667256	0.0106609	-0.00817896			107	-1.20671	-1.10706	-1.38018	-1.42795	-1.31694	-1.24409
107.19	0.0146548	-0.0151742	-0.0115205	-0.0104467	0.00700152	-0.00458418			107.19	-1.20457	-1.10632	-1.37781	-1.43173	-1.3206	-1.2405
107.4	0.0159443	-0.0140597	-0.0112788	-0.00943997	0.00450556	-0.004951			107.4	-1.20328	-1.10521	-1.37757	-1.43072	-1.3231	-1.24087
107.59	0.0122858	-0.00854809	-0.0143597	-0.0111418	0.00682045	-0.00406232			107.59	-1.20694	-1.0997	-1.38065	-1.43242	-1.32078	-1.23998
107.8	0.010888	-0.0129961	-0.0124187	-0.00938974	0.0111012	-0.00662942			107.8	-1.20833	-1.10414	-1.37871	-1.43067	-1.3165	-1.24255
108	0.0139001	-0.0101762	-0.0107846	-0.00891401	0.00951434	-0.00378026			108	-1.20532	-1.10132	-1.37707	-1.43019	-1.31809	-1.2397
108.19	0.0128453	-0.0111242	-0.00794649	-0.00657143	0.00944315	-0.00521552			108.19	-1.20638	-1.10227	-1.37423	-1.42785	-1.31816	-1.24113
108.4	0.0109549	-0.0183085	-0.0108051	-0.00567366	0.00867593	-0.00936441			108.4	-1.20827	-1.10946	-1.37709	-1.42695	-1.31893	-1.24528
108.6	0.0114448	-0.0115903	-0.0134744	-0.00864116	0.00802668	-0.00471804			108.6	-1.20778	-1.10274	-1.37976	-1.42992	-1.31958	-1.24063
108.8	0.013918	-0.0126938	-0.0126417	-0.00855082	0.00750964	-0.00392584			108.8	-1.2053	-1.10384	-1.37893	-1.42983	-1.3201	-1.23984
109	0.0140671	-0.0144419	-0.011233	-0.0106171	0.00744765	-0.00470896			109	-1.20516	-1.10559	-1.37752	-1.4319	-1.32016	-1.24062
109.19	0.013262	-0.0151182	-0.0127231	-0.00960504	0.0106221	-0.00584369			109.19	-1.20596	-1.10627	-1.37901	-1.43089	-1.31698	-1.24176
109.4	0.011539	-0.0136732	-0.0097497	-0.00910251	0.00879464	-0.00374202			109.4	-1.20768	-1.10482	-1.37604	-1.43038	-1.31881	-1.23966
109.6	0.0159453	-0.0114826	-0.0120115	-0.0088772	0.011979	-0.00841081			109.6	-1.20328	-1.10263	-1.3783	-1.43016	-1.31563	-1.24433
109.8	0.00952574	-0.0135297	-0.0109968	-0.00683695	0.0083343	-0.00306203			109.8	-1.2097	-1.10468	-1.37728	-1.42812	-1.31927	-1.23898
110	0.0116707	-0.0156724	-0.00973788	-0.00897796	0.0105173	-0.00229478			110	-1.20755	-1.10682	-1.37603	-1.43026	-1.31709	-1.23821
110.19	0.0110016	-0.0124526	-0.00992596	-0.0072291	0.00836491	-0.00909777			110.19	-1.20822	-1.1036	-1.37621	-1.42851	-1.31924	-1.24501
110.4	0.0152984	-0.0142717	-0.0115442	-0.0106706	0.00547635	-0.00488712			110.4	-1.20392	-1.10542	-1.37783	-1.43195	-1.32213	-1.2408
110.6	0.01241	-0.0116259	-0.008046	-0.0102836	0.010425	-0.00961984			110.6	-1.20681	-1.10277	-1.37433	-1.43156	-1.31718	-1.24554
110.8	0.0117791	-0.0148571	-0.00594228	-0.00922622	0.0119436	-0.00067628			110.8	-1.20744	-1.10601	-1.37223	-1.43051	-1.31566	-1.23659
110.99	0.0145931	-0.0148068	-0.0115302	-0.00677356	0.010763	-0.00340787			110.99	-1.20463	-1.10596	-1.37782	-1.42805	-1.31684	-1.23932
111.19	0.0145546	-0.0144972	-0.0111621	-0.0131927	0.00771838	-0.00688547			111.19	-1.20467	-1.10565	-1.37745	-1.43447	-1.31989	-1.2428
111.4	0.0141753	-0.0109679	-0.00959085	-0.0114072	0.00900727	-0.00546002			111.4	-1.20505	-1.10212	-1.37588	-1.43269	-1.3186	-1.24138
111.6	0.00848673	-0.013169	-0.0128707	-0.00835582	0.00712769	-0.00623785			111.6	-1.21074	-1.10432	-1.37916	-1.42964	-1.32048	-1.24215
111.8	0.0122622	-0.0136573	-0.0106495	-0.00996971	0.00632711	-0.00887854			111.8	-1.20696	-1.10481	-1.37694	-1.43125	-1.32128	-1.24479
112	0.0153436	-0.0152942	-0.0100271	-0.012933	0.009584	-0.00225421			112	-1.20388	-1.10644	-1.37632	-1.43421	-1.31802	-1.23817
112.19	0.0145919	-0.0130284	-0.0135718	-0.00774997	0.0103996	-0.00671883			112.19	-1.20463	-1.10418	-1.37986	-1.42903	-1.31721	-1.24263
112.39	0.0132103	-0.0139876	-0.0126148	-0.00556667	0.0141367	-0.00228469			112.39	-1.20601	-1.10514	-1.3789	-1.42685	-1.31347	-1.2382
112.6	0.0151036	-0.015763	-0.00840691	-0.00813012	0.00742497	-0.00713685			112.6	-1.20412	-1.10691	-1.3747	-1.42941	-1.32018	-1.24305
112.79	0.0137061	-0.0130018	-0.0109862	-0.0135665	0.00630156	-0.00438503			112.79	-1.20552	-1.10415	-1.37727	-1.43485	-1.3213	-1.2403
112.99	0.00990181	-0.0150777	-0.0114651	-0.0136113	0.00753687	-0.00569718			112.99	-1.20932	-1.10623	-1.37775	-1.43489	-1.32007	-1.24161
113.19	0.00933128	-0.0163554	-0.00954732	-0.00816142	0.00752678	-0.00272923			113.19	-1.20989	-1.1075	-1.37584	-1.42944	-1.32008	-1.23865
113.4	0.009954	-0.013746	-0.0142252	-0.00904967	0.00677504	-0.00611193			113.4	-1.20927	-1.10489	-1.38051	-1.43033	-1.32083	-1.24203
113.6	0.0113669	-0.0135701	-0.010467	-0.0114348	0.0101498	-0.00418417			113.6	-1.20786	-1.10472	-1.37676	-1.43272	-1.31745	-1.2401
113.8	0.011697	-0.0144575	-0.00944863	-0.0107906	0.00317069	-0.0101079			113.8	-1.20753	-1.10561	-1.37574	-1.43207	-1.32443	-1.24602
114	0.0107809	-0.0144688	-0.0136253	-0.00751178	0.00229633	-0.00361416			114	-1.20844	-1.10562	-1.37991	-1.42879	-1.32531	-1.23953
114.19	0.0150434	-0.0113893	-0.0107908	-0.00903428	0.00629211	-0.00469531			114.19	-1.20418	-1.10254	-1.37708	-1.43031	-1.32131	-1.24061
114.4	0.0114649	-0.0181708	-0.0116286	-0.00977821	0.00759209	-0.00450172			114.4	-1.20776	-1.10932	-1.37792	-1.43106	-1.32001	-1.24042
114.6	0.0120482	-0.013517	-0.0143265	-0.0112453	0.00938073	-0.00317803			114.6	-1.20717	-1.10467	-1.38061	-1.43253	-1.31822	-1.23909
114.79	0.0155706	-0.012595	-0.0121466	-0.0119452	0.0091845	-0.00504331			114.79	-1.20365	-1.10374	-1.37843	-1.43323	-1.31842	-1.24096
115	0.0108082	-0.0150313	-0.0125335	-0.0130065	0.00519708	-0.00751742			115	-1.20841	-1.10618	-1.37882	-1.43429	-1.32241	-1.24343
115.19	0.0100415	-0.0148627	-0.0123443	-0.012328	0.00720934	-0.00981134			115.19	-1.20918	-1.10601	-1.37863	-1.43361	-1.3204	-1.24573
115.39	0.0129044	-0.0132076	-0.010341	-0.00404984	0.00981369	-0.00866833			115.39	-1.20632	-1.10436	-1.37663	-1.42533	-1.31779	-1.24458
115.59	0.0150551	-0.0142446	-0.0110439	-0.00814626	0.00951649	-0.00654614			115.59	-1.20417	-1.10539	-1.37733	-1.42943	-1.31809	-1.24246
115.79	0.0171203	-0.0144553	-0.00959541	-0.011749	0.00812099	-0.00349934			115.79	-1.2021	-1.1056	-1.37588	-1.43303	-1.31948	-1.23942
115.99	0.00991666	-0.0116823	-0.0127208	-0.0085851	0.0132601	-0.00918995			115.99	-1.20931	-1.10283	-1.37901	-1.42987	-1.31434	-1.24511
116.19	0.0102586	-0.0176994	-0.00903582	-0.00645293	0.00881353	-0.00608274			116.19	-1.20896	-1.10885	-1.37532	-1.42773	-1.31879	-1.242
116.4	0.0120611	-0.0134812	-0.010349	-0.00642844	0.0111822	-0.00228904			116.4	-1.20716	-1.10463	-1.37664	-1.42771	-1.31642	-1.23821
116.6	0.0116105	-0.0190713	-0.00908482	-0.00425225	0.00619375	-0.0084647			116.6	-1.20761	-1.11022	-1.37537	-1.42553	-1.32141	-1.24438
116.8	0.0102034	-0.0135202	-0.0115841	-0.0112097	0.0085419	-0.00401251			116.8	-1.20902	-1.10467	-1.37787	-1.43249	-1.31906	-1.23993
116.99	0.0127379	-0.0189927	-0.00950509	-0.0057336	0.00732554	-0.00450366			116.99	-1.20648	-1.11014	-1.37579	-1.42701	-1.32028	-1.24042
117.19	0.0115057	-0.0118843	-0.0106279	-0.0118825	0.00832588	-0.00382398			117.19	-1.20772	-1.10303	-1.37692	-1.43316	-1.31928	-1.23974
117.39	0.0113011	-0.0168005	-0.0114698	-0.00873595	0.00643912	-0.00440637			117.39	-1.20792	-1.10795	-1.37776	-1.43002	-1.32117	-1.24032
117.59	0.0118327	-0.0160492	-0.0128052	-0.0121307	0.0108058	-0.00443302			117.59	-1.20739	-1.1072	-1.37909	-1.43341	-1.3168	-1.24035
117.8	0.012672	-0.0169841	-0.0154429	-0.00977017	0.0097333	-0.00300293			117.8	-1.20655	-1.10813	-1.38173	-1.43105	-1.31787	-1.23892
117.99	0.0105816	-0.0155773	-0.0123348	-0.0140466	0.00906355	-0.0073485			117.99	-1.20864	-1.10673	-1.37862	-1.43533	-1.31854	-1.24326
118.19	0.0131189	-0.0163453	-0.0159783	-0.00924881	0.00809209	-0.00492094			118.19	-1.2061	-1.10749	-1.38227	-1.43053	-1.31951	-1.24084
118.39	0.0113769	-0.0158771	-0.011864	-0.0102261	0.0033126	-0.0020448			118.39	-1.20785	-1.10703	-1.37815	-1.43151	-1.32429	-1.23796
118.59	0.0133418	-0.0154914	-0.0122228	-0.00604891	0.00917894	-0.00080255			118.59	-1.20588	-1.10664	-1.37851	-1.42733	-1.31843	-1.23672
118.79	0.0157803	-0.0159908	-0.0108985	-0.00882107	0.00699273	-0.00567609			118.79	-1.20344	-1.10714	-1.37719	-1.4301	-1.32061	-1.24159
118.99	0.0153985	-0.0157234	-0.0112767	-0.0118314	0.00867976	-0.00742445			118.99	-1.20382	-1.10687	-1.37756	-1.43311	-1.31893	-1.24334
119.19	0.0135578	-0.0141813	-0.012733	-0.00993262	0.00878765	-0.00387815			119.19	-1.20567	-1.10533	-1.37902	-1.43121	-1.31882	-1.23979
119.39	0.0132128	-0.0163391	-0.0111399	-0.0131489	0.00607023	-0.00221867			119.39	-1.20601	-1.10749	-1.37743	-1.43443	-1.32153	-1.23813
119.6	0.00803171	-0.01272	-0.0108903	-0.00648915	0.00991098	-0.0058104			119.6	-1.21119	-1.10387	-1.37718	-1.42777	-1.31769	-1.24173
119.79	0.0102176	-0.0110982	-0.0117859	-0.0133104	0.0118804	-0.00703933			119.79	-1.20901	-1.10225	-1.37807	-1.43459	-1.31572	-1.24296
119.99	0.0128998	-0.0152721	-0.0127329	-0.00982863	0.0101368	-0.00799877			119.99	-1.20632	-1.10642	-1.37902	-1.43111	-1.31747	-1.24391
120.19	0.0103157	-0.0138361	-0.0129627	-0.0119898	0.0102368	-0.00470848			120.19	-1.20891	-1.10498	-1.37925	-1.43327	-1.31737	-1.24062
120.39	0.00935049	-0.0128133	-0.0134482	-0.00995272	0.00400123	-0.00696154			120.39	-1.20987	-1.10396	-1.37974	-1.43123	-1.3236	-1.24288
120.59	0.0117331	-0.0108011	-0.00986491	-0.00846251	0.00676116	-0.00610023			120.59	-1.20749	-1.10195	-1.37615	-1.42974	-1.32084	-1.24202
120.79	0.0123294	-0.0175325	-0.0102949	-0.00909399	0.0127826	-0.00812784			120.79	-1.20689	-1.10868	-1.37658	-1.43037	-1.31482	-1.24404
120.99	0.0144601	-0.0143137	-0.0102669	-0.00982417	0.00620958	-0.00776812			120.99	-1.20476	-1.10546	-1.37656	-1.4311	-1.3214	-1.24368
121.19	0.0121609	-0.0128279	-0.00877809	-0.00964162	0.00917102	-0.00744474			121.19	-1.20706	-1.10398	-1.37507	-1.43092	-1.31843	-1.24336
121.39	0.012237	-0.0153747	-0.0126096	-0.0090634	0.00975316	-0.0071144			121.39	-1.20699	-1.10652	-1.3789	-1.43034	-1.31785	-1.24303
121.6	0.010048	-0.0161514	-0.0119874	-0.00746712	0.00909209	-0.00444021			121.6	-1.20917	-1.1073	-1.37828	-1.42875	-1.31851	-1.24036
121.8	0.0171963	-0.0140867	-0.0131687	-0.00700773	0.00587487	-0.0105039			121.8	-1.20203	-1.10524	-1.37946	-1.42829	-1.32173	-1.24642
121.99	0.0131486	-0.0193249	-0.0100344	-0.0142907	0.0086697	-0.00754929			121.99	-1.20607	-1.11047	-1.37632	-1.43557	-1.31894	-1.24347
122.19	0.014411	-0.0151935	-0.0132096	-0.0135875	0.00995294	-0.00773651			122.19	-1.20481	-1.10634	-1.3795	-1.43487	-1.31765	-1.24365
122.39	0.012017	-0.0135006	-0.0119412	-0.0126812	0.00617955	-0.00547057			122.39	-1.20721	-1.10465	-1.37823	-1.43396	-1.32143	-1.24139
122.59	0.0149407	-0.0148323	-0.0132424	-0.010491	0.00641501	-0.0041314			122.59	-1.20428	-1.10598	-1.37953	-1.43177	-1.32119	-1.24005
122.8	0.0109405	-0.0136389	-0.0120994	-0.00892184	0.0119546	-0.00363524			122.8	-1.20828	-1.10479	-1.37839	-1.4302	-1.31565	-1.23955
122.99	0.0107939	-0.015812	-0.0100312	-0.0108923	0.0116043	-0.00984276			122.99	-1.20843	-1.10696	-1.37632	-1.43217	-1.316	-1.24576
123.19	0.0134539	-0.0136743	-0.0129989	-0.0102703	0.00674454	-0.00296672			123.19	-1.20577	-1.10482	-1.37929	-1.43155	-1.32086	-1.23888
123.39	0.0108729	-0.01985	-0.0127996	-0.0101921	0.00900841	-0.0061716			123.39	-1.20835	-1.111	-1.37909	-1.43147	-1.3186	-1.24209
123.6	0.0143351	-0.0161311	-0.0126329	-0.0121753	0.00696053	-0.00784084			123.6	-1.20489	-1.10728	-1.37892	-1.43346	-1.32064	-1.24376
123.79	0.0126246	-0.0120625	-0.0113717	-0.0117664	0.0098569	-0.00755816			123.79	-1.2066	-1.10321	-1.37766	-1.43305	-1.31775	-1.24347
123.99	0.0106484	-0.0144937	-0.0137012	-0.0125076	0.00616486	-0.00948194			123.99	-1.20857	-1.10564	-1.37999	-1.43379	-1.32144	-1.2454
124.19	0.00706389	-0.0160781	-0.00925372	-0.0111244	0.00988844	-0.00358564			124.19	-1.21216	-1.10723	-1.37554	-1.4324	-1.31772	-1.2395
124.39	0.010294	-0.0168123	-0.0139834	-0.00823513	0.00755318	-0.00666067			124.39	-1.20893	-1.10796	-1.38027	-1.42952	-1.32005	-1.24258
124.59	0.00929328	-0.0187564	-0.0119901	-0.00990113	0.0103783	-0.00501983			124.59	-1.20993	-1.10991	-1.37828	-1.43118	-1.31723	-1.24094
124.79	0.0107868	-0.0133614	-0.0143437	-0.0111208	0.00608921	-0.00432913			124.79	-1.20844	-1.10451	-1.38063	-1.4324	-1.32152	-1.24025
124.99	0.012859	-0.0144399	-0.0150164	-0.0151939	0.00730937	-0.00494433			124.99	-1.20636	-1.10559	-1.3813	-1.43647	-1.3203	-1.24086
125.19	0.0116938	-0.0154801	-0.012231	-0.0077863	0.00546895	-0.00180698			125.19	-1.20753	-1.10663	-1.37852	-1.42907	-1.32214	-1.23772
125.39	0.0155523	-0.0163723	-0.009109	-0.0117532	0.00390925	-0.00487822			125.39	-1.20367	-1.10752	-1.3754	-1.43303	-1.3237	-1.24079
125.59	0.0128115	-0.0173832	-0.0115661	-0.0089662	0.00760306	-0.00536505			125.59	-1.20641	-1.10853	-1.37785	-1.43025	-1.32	-1.24128
125.79	0.0146027	-0.0172166	-0.0127433	-0.0111907	0.00738495	-0.0062827			125.79	-1.20462	-1.10837	-1.37903	-1.43247	-1.32022	-1.2422
125.99	0.0112452	-0.0158315	-0.014188	-0.0132526	0.00597469	-0.00740803			125.99	-1.20798	-1.10698	-1.38048	-1.43453	-1.32163	-1.24332
126.19	0.013651	-0.0157478	-0.0117088	-0.0105628	0.00496286	-0.00437918			126.19	-1.20557	-1.1069	-1.378	-1.43184	-1.32264	-1.2403
126.39	0.0133064	-0.0176806	-0.0118555	-0.00785519	0.0132767	-0.00530335			126.39	-1.20592	-1.10883	-1.37814	-1.42914	-1.31433	-1.24122
126.6	0.0155945	-0.017084	-0.0137491	-0.0143219	0.0100964	-0.00843734			126.6	-1.20363	-1.10823	-1.38004	-1.4356	-1.31751	-1.24435
126.8	0.0120944	-0.0177962	-0.0122877	-0.0107037	0.00924075	-0.00466294			126.8	-1.20713	-1.10894	-1.37858	-1.43198	-1.31836	-1.24058
127	0.0144207	-0.0192213	-0.0150364	-0.00932109	0.00506091	-0.00727289			127	-1.2048	-1.11037	-1.38132	-1.4306	-1.32254	-1.24319
127.19	0.0134663	-0.014832	-0.0137063	-0.00911956	0.00980479	-0.00278058			127.19	-1.20576	-1.10598	-1.37999	-1.4304	-1.3178	-1.2387
127.4	0.00781718	-0.0155663	-0.0112299	-0.00755076	0.00957648	-0.00603295			127.4	-1.21141	-1.10671	-1.37752	-1.42883	-1.31803	-1.24195
127.6	0.0118424	-0.0162886	-0.013015	-0.011072	0.00844655	-0.00478074			127.6	-1.20738	-1.10744	-1.3793	-1.43235	-1.31916	-1.2407
127.8	0.00985536	-0.0165056	-0.0107151	-0.0121413	0.00442715	-0.0065417			127.8	-1.20937	-1.10765	-1.377	-1.43342	-1.32318	-1.24246
128	0.0110983	-0.0156657	-0.0169043	-0.0109384	0.00716116	-0.00552484			128	-1.20812	-1.10681	-1.38319	-1.43222	-1.32044	-1.24144
128.19	0.00962196	-0.015916	-0.0128387	-0.0103617	0.00938622	-0.00668375			128.19	-1.2096	-1.10706	-1.37913	-1.43164	-1.31822	-1.2426
128.39	0.0143373	-0.0155883	-0.0100089	-0.00851258	0.00714478	-0.00891321			128.39	-1.20489	-1.10674	-1.3763	-1.42979	-1.32046	-1.24483
128.59	0.0154399	-0.0150544	-0.0163622	-0.00573186	0.0116346	-0.00978425			128.59	-1.20378	-1.1062	-1.38265	-1.42701	-1.31597	-1.2457
128.79	0.0151867	-0.0166139	-0.0142057	-0.00952072	0.00885974	-0.0063005			128.79	-1.20404	-1.10776	-1.38049	-1.4308	-1.31875	-1.24222
128.99	0.0123077	-0.0137477	-0.0106495	-0.0105696	0.00671413	-0.00302557			128.99	-1.20692	-1.1049	-1.37694	-1.43185	-1.32089	-1.23894
129.19	0.010185	-0.0150052	-0.0111798	-0.00964291	0.00881209	-0.0055574			129.19	-1.20904	-1.10615	-1.37747	-1.43092	-1.31879	-1.24147
129.39	0.0122041	-0.0180881	-0.00952866	-0.00846048	0.00769141	-0.00463253			129.39	-1.20702	-1.10924	-1.37582	-1.42974	-1.31991	-1.24055
129.6	0.0159447	-0.0170236	-0.00974804	-0.00946929	0.00738326	-0.00925151			129.6	-1.20328	-1.10817	-1.37604	-1.43075	-1.32022	-1.24517
129.79	0.0136645	-0.0113296	-0.0136781	-0.00958558	0.00702908	-0.00584737			129.79	-1.20556	-1.10248	-1.37997	-1.43087	-1.32058	-1.24176
129.99	0.00760726	-0.0192362	-0.0102501	-0.00979714	0.0108829	-0.00690307			129.99	-1.21162	-1.11038	-1.37654	-1.43108	-1.31672	-1.24282
130.19	0.0126553	-0.0120148	-0.0131657	-0.011259	0.00752066	-0.00970748			130.19	-1.20657	-1.10316	-1.37945	-1.43254	-1.32008	-1.24562
130.39	0.00754552	-0.0174955	-0.0116174	-0.00962854	0.00914719	-0.00659317			130.39	-1.21168	-1.10864	-1.37791	-1.43091	-1.31846	-1.24251
130.6	0.011917	-0.0137989	-0.0119444	-0.00814154	0.00787235	-0.00867922			130.6	-1.20731	-1.10495	-1.37823	-1.42942	-1.31973	-1.2446
130.79	0.0135101	-0.0129425	-0.0145032	-0.0171847	0.00737438	-0.00700301			130.79	-1.20571	-1.10409	-1.38079	-1.43847	-1.32023	-1.24292
130.99	0.00884445	-0.0157626	-0.0161947	-0.0108493	0.00652863	-0.00572739			130.99	-1.21038	-1.10691	-1.38248	-1.43213	-1.32108	-1.24164
131.19	0.00962088	-0.0175141	-0.0131832	-0.0102645	0.00504266	-0.00466616			131.19	-1.2096	-1.10866	-1.37947	-1.43154	-1.32256	-1.24058
131.39	0.0121725	-0.0158917	-0.00991701	-0.0130806	0.00692706	-0.0106904			131.39	-1.20705	-1.10704	-1.37621	-1.43436	-1.32068	-1.24661
131.6	0.0103366	-0.0146794	-0.0145116	-0.0123376	0.00768812	-0.00457273			131.6	-1.20889	-1.10583	-1.3808	-1.43362	-1.31992	-1.24049
131.79	0.0110044	-0.0126536	-0.0123868	-0.00763529	0.00743134	-0.00982211			131.79	-1.20822	-1.1038	-1.37868	-1.42892	-1.32017	-1.24574
131.99	0.00916092	-0.0153446	-0.0170714	-0.00807868	0.00789081	-0.00415719			131.99	-1.21006	-1.10649	-1.38336	-1.42936	-1.31971	-1.24007
132.19	0.0131416	-0.0184874	-0.0120667	-0.0130311	0.00764972	-0.00503132			132.19	-1.20608	-1.10964	-1.37835	-1.43431	-1.31996	-1.24095
132.39	0.0119695	-0.0186828	-0.011795	-0.0107317	0.00925276	-0.0100535			132.39	-1.20725	-1.10983	-1.37808	-1.43201	-1.31835	-1.24597
132.59	0.0115248	-0.0176134	-0.0113679	-0.0126648	0.00784237	-0.00327262			132.59	-1.2077	-1.10876	-1.37766	-1.43395	-1.31976	-1.23919
132.79	0.0110527	-0.0184113	-0.0134493	-0.00874115	0.00518042	-0.0116435			132.79	-1.20817	-1.10956	-1.37974	-1.43002	-1.32242	-1.24756
132.99	0.012134	-0.0107493	-0.0121903	-0.0142241	0.00730744	-0.0072486			132.99	-1.20709	-1.1019	-1.37848	-1.4355	-1.3203	-1.24316
133.19	0.0119339	-0.0140695	-0.0170564	-0.0102171	0.00888258	-0.00759596			133.19	-1.20729	-1.10522	-1.38334	-1.4315	-1.31872	-1.24351
133.39	0.0131401	-0.0188009	-0.0130285	-0.0140346	0.00430989	-0.00828661			133.39	-1.20608	-1.10995	-1.37932	-1.43531	-1.32329	-1.2442
133.59	0.00927995	-0.0188421	-0.0135287	-0.0130756	0.00487145	-0.00873877			133.59	-1.20994	-1.10999	-1.37982	-1.43436	-1.32273	-1.24465
133.79	0.0134365	-0.0185875	-0.0146216	-0.0126208	0.00968992	-0.00749594			133.79	-1.20579	-1.10974	-1.38091	-1.4339	-1.31791	-1.24341
133.99	0.0105615	-0.0165133	-0.0113867	-0.0105327	0.00693117	-0.00900338			133.99	-1.20866	-1.10766	-1.37767	-1.43181	-1.32067	-1.24492
134.19	0.0127188	-0.017277	-0.0121639	-0.0124242	0.0101436	-0.00912845			134.19	-1.2065	-1.10843	-1.37845	-1.4337	-1.31746	-1.24504
134.39	0.0118889	-0.0160019	-0.0120747	-0.0103389	0.00818331	-0.00649502			134.39	-1.20733	-1.10715	-1.37836	-1.43162	-1.31942	-1.24241
134.6	0.0159755	-0.0208291	-0.0124961	-0.0106297	0.00675063	-0.00881865			134.6	-1.20325	-1.11198	-1.37878	-1.43191	-1.32085	-1.24473
134.79	0.0110507	-0.0174663	-0.0128161	-0.00840922	0.00895679	-0.00545623			134.79	-1.20817	-1.10861	-1.3791	-1.42969	-1.31865	-1.24137
134.99	0.013075	-0.015912	-0.0123811	-0.0127103	0.00740866	-0.00775173			134.99	-1.20615	-1.10706	-1.37867	-1.43399	-1.3202	-1.24367
135.19	0.0140025	-0.0167822	-0.0146077	-0.0129009	0.00307644	-0.0102179			135.19	-1.20522	-1.10793	-1.3809	-1.43418	-1.32453	-1.24613
135.39	0.00915715	-0.0196827	-0.0143763	-0.0103291	0.00785382	-0.00909174			135.39	-1.21007	-1.11083	-1.38066	-1.43161	-1.31975	-1.24501
135.6	0.0122224	-0.0166257	-0.015102	-0.011568	0.0089512	-0.00896016			135.6	-1.207	-1.10777	-1.38139	-1.43285	-1.31865	-1.24488
135.79	0.0103514	-0.0183199	-0.0143816	-0.00953017	0.00448646	-0.00720092			135.79	-1.20887	-1.10947	-1.38067	-1.43081	-1.32312	-1.24312
135.99	0.0126417	-0.0147037	-0.0116393	-0.0133907	0.0124029	-0.00885387			135.99	-1.20658	-1.10585	-1.37793	-1.43467	-1.3152	-1.24477
136.19	0.0120378	-0.0164697	-0.0153829	-0.0140312	0.00905084	-0.00675572			136.19	-1.20719	-1.10762	-1.38167	-1.43531	-1.31855	-1.24267
136.39	0.0138949	-0.0182562	-0.0112794	-0.0143	0.00641207	-0.0086209			136.39	-1.20533	-1.1094	-1.37757	-1.43558	-1.32119	-1.24454
136.6	0.0104132	-0.0186401	-0.0136439	-0.00806646	0.00672797	-0.00648918			136.6	-1.20881	-1.10979	-1.37993	-1.42935	-1.32088	-1.24241
136.79	0.0126609	-0.0160895	-0.0150158	-0.0122142	0.0101216	-0.00783213			136.79	-1.20656	-1.10724	-1.3813	-1.43349	-1.31748	-1.24375
136.99	0.0123763	-0.017468	-0.0130806	-0.0140929	0.00951942	-0.00834508			136.99	-1.20685	-1.10862	-1.37937	-1.43537	-1.31809	-1.24426
137.19	0.0123562	-0.0197649	-0.0137529	-0.0108932	0.00767106	-0.00911549			137.19	-1.20687	-1.11091	-1.38004	-1.43217	-1.31993	-1.24503
137.39	0.0100455	-0.0156054	-0.0125148	-0.0128898	0.00904063	-0.00413596			137.39	-1.20918	-1.10675	-1.3788	-1.43417	-1.31856	-1.24005
137.59	0.00954417	-0.0154089	-0.0139019	-0.0107171	0.010414	-0.00924683			137.59	-1.20968	-1.10656	-1.38019	-1.432	-1.31719	-1.24516
137.79	0.011596	-0.0197142	-0.0125574	-0.0114684	0.00592263	-0.00531486			137.79	-1.20763	-1.11086	-1.37885	-1.43275	-1.32168	-1.24123
137.99	0.0109545	-0.0194939	-0.0113797	-0.0114665	0.00713701	-0.00835785			137.99	-1.20827	-1.11064	-1.37767	-1.43275	-1.32047	-1.24427
138.19	0.0122651	-0.0172558	-0.0130791	-0.00822471	0.00394538	-0.00719388			138.19	-1.20696	-1.1084	-1.37937	-1.4295	-1.32366	-1.24311
138.39	0.0076623	-0.0197018	-0.015447	-0.0115709	0.00584709	-0.00797199			138.39	-1.21156	-1.11085	-1.38174	-1.43285	-1.32176	-1.24389
138.59	0.0127826	-0.016777	-0.0144987	-0.00699454	0.00414145	-0.0117016			138.59	-1.20644	-1.10793	-1.38079	-1.42827	-1.32346	-1.24762
138.79	0.0116858	-0.0171739	-0.013152	-0.00907584	0.00551467	-0.0101005			138.79	-1.20754	-1.10832	-1.37944	-1.43036	-1.32209	-1.24602
138.99	0.0102129	-0.0173787	-0.0131359	-0.00909139	0.00847504	-0.00880471			138.99	-1.20901	-1.10853	-1.37942	-1.43037	-1.31913	-1.24472
139.19	0.0127641	-0.0158828	-0.0160455	-0.00811515	0.00764564	-0.0114168			139.19	-1.20646	-1.10703	-1.38233	-1.4294	-1.31996	-1.24733
139.39	0.00972999	-0.0135206	-0.0131282	-0.0103839	0.00354905	-0.0119697			139.39	-1.20949	-1.10467	-1.37942	-1.43166	-1.32406	-1.24789
139.6	0.0131776	-0.0168153	-0.0114779	-0.0101038	0.0055319	-0.00647763			139.6	-1.20605	-1.10796	-1.37777	-1.43138	-1.32207	-1.24239
139.79	0.0131809	-0.0165595	-0.0138626	-0.0123548	0.00340854	-0.00861055			139.79	-1.20604	-1.10771	-1.38015	-1.43364	-1.3242	-1.24453
139.99	0.00923664	-0.0173442	-0.0123398	-0.0100371	0.00503974	-0.00375658			139.99	-1.20999	-1.10849	-1.37863	-1.43132	-1.32257	-1.23967
140.19	0.00870619	-0.0143188	-0.0109736	-0.0109206	0.00433821	-0.00732561			140.19	-1.21052	-1.10547	-1.37726	-1.4322	-1.32327	-1.24324
140.39	0.0150534	-0.0197689	-0.0129581	-0.0121409	0.0100459	-0.00890879			140.39	-1.20417	-1.11092	-1.37925	-1.43342	-1.31756	-1.24482
140.6	0.00848981	-0.0155359	-0.0126915	-0.0164773	0.00822038	-0.0104655			140.6	-1.21073	-1.10668	-1.37898	-1.43776	-1.31938	-1.24638
140.79	0.0102006	-0.0195455	-0.0141834	-0.012932	0.0132708	-0.00496992			140.79	-1.20902	-1.11069	-1.38047	-1.43421	-1.31433	-1.24089
140.99	0.0105585	-0.018873	-0.015433	-0.011596	0.00663432	-0.00637038			140.99	-1.20866	-1.11002	-1.38172	-1.43288	-1.32097	-1.24229
141.19	0.00970687	-0.0156607	-0.0137017	-0.00953044	0.00498162	-0.00987466			141.19	-1.20952	-1.10681	-1.37999	-1.43081	-1.32262	-1.24579
141.39	0.010933	-0.0152279	-0.0115322	-0.0101805	0.0072239	-0.00912137			141.39	-1.20829	-1.10638	-1.37782	-1.43146	-1.32038	-1.24504
141.59	0.00783259	-0.0167193	-0.0135473	-0.0142291	0.0082464	-0.00773548			141.59	-1.21139	-1.10787	-1.37984	-1.43551	-1.31936	-1.24365
141.79	0.00993372	-0.0144253	-0.0134442	-0.0152446	0.0106936	-0.0083066			141.79	-1.20929	-1.10557	-1.37973	-1.43652	-1.31691	-1.24422
141.99	0.00785706	-0.015777	-0.0134012	-0.0153772	0.00547908	-0.00908853			141.99	-1.21137	-1.10693	-1.37969	-1.43666	-1.32213	-1.245
142.19	0.0111019	-0.0154003	-0.0131163	-0.00985771	0.00227718	-0.0104982			142.19	-1.20812	-1.10655	-1.3794	-1.43114	-1.32533	-1.24641
142.39	0.0108143	-0.0163126	-0.00902693	-0.0128939	0.0108692	-0.00901448			142.39	-1.20841	-1.10746	-1.37532	-1.43417	-1.31674	-1.24493
142.59	0.0136765	-0.0156544	-0.0143349	-0.0133051	0.00679195	-0.00474979			142.59	-1.20555	-1.1068	-1.38062	-1.43459	-1.32081	-1.24067
142.79	0.0106511	-0.0196452	-0.0162795	-0.0153463	0.00500267	-0.00727909			142.79	-1.20857	-1.11079	-1.38257	-1.43663	-1.3226	-1.2432
142.99	0.00941852	-0.0161492	-0.0131989	-0.00810104	0.0104825	-0.00525418			142.99	-1.2098	-1.1073	-1.37949	-1.42938	-1.31712	-1.24117
143.19	0.0101954	-0.0175867	-0.0156114	-0.0124616	0.0101738	-0.00764007			143.19	-1.20903	-1.10874	-1.3819	-1.43374	-1.31743	-1.24356
143.39	0.0108739	-0.0181858	-0.0138366	-0.0127871	0.00608913	-0.00685249			143.39	-1.20835	-1.10933	-1.38012	-1.43407	-1.32152	-1.24277
143.6	0.0111212	-0.0198197	-0.0143386	-0.0107719	0.00838252	-0.00928165			143.6	-1.2081	-1.11097	-1.38063	-1.43205	-1.31922	-1.2452
143.79	0.00989107	-0.0160494	-0.0147449	-0.016016	0.00791811	-0.013102			143.79	-1.20933	-1.1072	-1.38103	-1.4373	-1.31969	-1.24902
143.99	0.0110427	-0.01924	-0.0143706	-0.0114737	0.00711192	-0.0072929			143.99	-1.20818	-1.11039	-1.38066	-1.43275	-1.32049	-1.24321
144.19	0.0101002	-0.015723	-0.0116244	-0.014042	0.00762965	-0.00875734			144.19	-1.20912	-1.10687	-1.37791	-1.43532	-1.31998	-1.24467
144.39	0.0124285	-0.0192392	-0.0156574	-0.0149357	0.00507454	-0.0110069			144.39	-1.20679	-1.11039	-1.38195	-1.43622	-1.32253	-1.24692
144.6	0.0122747	-0.0153604	-0.0133404	-0.0106527	0.00985688	-0.00915232			144.6	-1.20695	-1.10651	-1.37963	-1.43193	-1.31775	-1.24507
144.79	0.0112917	-0.0149926	-0.0115561	-0.0117497	0.00760494	-0.00926765			144.79	-1.20793	-1.10614	-1.37784	-1.43303	-1.32	-1.24518
144.99	0.0111441	-0.0157973	-0.0121806	-0.0136153	0.00918667	-0.0083333			144.99	-1.20808	-1.10695	-1.37847	-1.4349	-1.31842	-1.24425
145.19	0.0101882	-0.0188983	-0.0126213	-0.0142862	0.0106828	-0.00642718			145.19	-1.20903	-1.11005	-1.37891	-1.43557	-1.31692	-1.24234
145.39	0.0120064	-0.0170788	-0.0122082	-0.0122446	0.00401239	-0.00872007			145.39	-1.20722	-1.10823	-1.3785	-1.43352	-1.32359	-1.24464
145.6	0.0112026	-0.0187481	-0.0156492	-0.0118748	0.00740069	-0.00865395			145.6	-1.20802	-1.1099	-1.38194	-1.43316	-1.3202	-1.24457
145.79	0.00988238	-0.0141852	-0.012716	-0.0120653	0.01018	-0.00719125			145.79	-1.20934	-1.10533	-1.379	-1.43335	-1.31742	-1.24311
145.99	0.0109087	-0.0214375	-0.0141318	-0.0103988	0.0107008	-0.0106251			145.99	-1.20831	-1.11259	-1.38042	-1.43168	-1.3169	-1.24654
146.19	0.0135348	-0.0177071	-0.0171556	-0.0128601	0.00526036	-0.00563736			146.19	-1.20569	-1.10886	-1.38344	-1.43414	-1.32234	-1.24155
146.39	0.0126594	-0.0186881	-0.0128681	-0.0123198	0.0092708	-0.0028462			146.39	-1.20656	-1.10984	-1.37916	-1.4336	-1.31833	-1.23876
146.59	0.00905924	-0.0206995	-0.0154895	-0.0156528	0.00524175	-0.0124844			146.59	-1.21016	-1.11185	-1.38178	-1.43693	-1.32236	-1.2484
146.79	0.0100623	-0.0185868	-0.0174167	-0.0121423	0.00389252	-0.0132589			146.79	-1.20916	-1.10974	-1.3837	-1.43342	-1.32371	-1.24917
146.99	0.00652054	-0.0163599	-0.016538	-0.0172159	0.0105366	-0.0111808			146.99	-1.2127	-1.10751	-1.38283	-1.4385	-1.31707	-1.2471
147.19	0.0102503	-0.0155515	-0.014026	-0.0107297	0.00452536	-0.00918479			147.19	-1.20897	-1.1067	-1.38031	-1.43201	-1.32308	-1.2451
147.39	0.0124416	-0.0183212	-0.0172139	-0.0134663	0.00960563	-0.00932275			147.39	-1.20678	-1.10947	-1.3835	-1.43475	-1.318	-1.24524
147.59	0.00838777	-0.0162827	-0.0108688	-0.0111733	0.00876076	-0.0082911			147.59	-1.21084	-1.10743	-1.37716	-1.43245	-1.31884	-1.24421
147.79	0.0071683	-0.0151403	-0.015384	-0.0123487	0.00686016	-0.00763775			147.79	-1.21205	-1.10629	-1.38167	-1.43363	-1.32074	-1.24355
147.99	0.012296	-0.0148483	-0.0155019	-0.00919006	0.00695913	-0.00503496			147.99	-1.20693	-1.106	-1.38179	-1.43047	-1.32065	-1.24095
148.19	0.00997482	-0.0161496	-0.0168803	-0.00962287	0.00399703	-0.0113399			148.19	-1.20925	-1.1073	-1.38317	-1.4309	-1.32361	-1.24726
148.39	0.00866122	-0.0180825	-0.0142691	-0.00848893	0.00628685	-0.010213			148.39	-1.21056	-1.10923	-1.38056	-1.42977	-1.32132	-1.24613
148.59	0.00757674	-0.0175831	-0.0146894	-0.0091647	0.00590679	-0.00497777			148.59	-1.21165	-1.10873	-1.38098	-1.43044	-1.3217	-1.24089
148.79	0.00992187	-0.015913	-0.0153755	-0.0120711	0.00626263	-0.00444959			148.79	-1.2093	-1.10706	-1.38166	-1.43335	-1.32134	-1.24037
148.99	0.0127358	-0.0171256	-0.0179837	-0.0136396	0.00674985	-0.00744549			148.99	-1.20649	-1.10827	-1.38427	-1.43492	-1.32085	-1.24336
149.19	0.00772289	-0.0180996	-0.0159054	-0.011748	0.00357516	-0.00785898			149.19	-1.2115	-1.10925	-1.38219	-1.43303	-1.32403	-1.24377
149.39	0.00729355	-0.0164058	-0.0146051	-0.0126551	0.00497421	-0.0118836			149.39	-1.21193	-1.10755	-1.38089	-1.43394	-1.32263	-1.2478
149.59	0.0118165	-0.0213433	-0.0143307	-0.0133105	0.00184858	-0.00730236			149.59	-1.20741	-1.11249	-1.38062	-1.43459	-1.32576	-1.24322
149.79	0.00767237	-0.0176351	-0.0168585	-0.0142079	0.00677693	-0.00808425			149.79	-1.21155	-1.10878	-1.38315	-1.43549	-1.32083	-1.244
149.99	0.00937311	-0.0134039	-0.0156744	-0.0166445	0.00499508	-0.0116316			149.99	-1.20985	-1.10455	-1.38196	-1.43792	-1.32261	-1.24755
150.19	0.00763151	-0.0150573	-0.0113485	-0.0121321	0.00517	-0.00816525			150.19	-1.21159	-1.10621	-1.37764	-1.43341	-1.32243	-1.24408
150.39	0.0148144	-0.0191937	-0.0155139	-0.0136616	0.00255691	-0.0108332			150.39	-1.20441	-1.11034	-1.3818	-1.43494	-1.32505	-1.24675
150.59	0.0101783	-0.016694	-0.0170708	-0.0144711	0.00568835	-0.00487511			150.59	-1.20904	-1.10784	-1.38336	-1.43575	-1.32192	-1.24079
150.79	0.00763662	-0.0178432	-0.0168915	-0.0135481	0.00211241	-0.00439415			150.79	-1.21159	-1.10899	-1.38318	-1.43483	-1.32549	-1.24031
150.99	0.0101609	-0.0198347	-0.0139326	-0.0105839	0.00578915	-0.00650613			150.99	-1.20906	-1.11098	-1.38022	-1.43186	-1.32182	-1.24242
151.19	0.00898642	-0.0179242	-0.013466	-0.0137206	0.00806254	-0.00875512			151.19	-1.21024	-1.10907	-1.37975	-1.435	-1.31954	-1.24467
151.39	0.0111059	-0.0147211	-0.0142016	-0.0134845	0.00818209	-0.0093471			151.39	-1.20812	-1.10587	-1.38049	-1.43476	-1.31942	-1.24526
151.6	0.00695051	-0.018091	-0.0126463	-0.0137652	0.00275899	-0.00828509			151.6	-1.21227	-1.10924	-1.37893	-1.43505	-1.32485	-1.2442
151.79	0.0116897	-0.0172682	-0.0171411	-0.0172005	0.00439083	-0.00923764			151.79	-1.20753	-1.10842	-1.38343	-1.43848	-1.32321	-1.24515
151.99	0.0113884	-0.0188933	-0.0144459	-0.0145881	0.00884293	-0.0109918			151.99	-1.20783	-1.11004	-1.38073	-1.43587	-1.31876	-1.24691
152.19	0.00911239	-0.0185938	-0.0141955	-0.0113723	0.00791077	-0.00840755			152.19	-1.21011	-1.10974	-1.38048	-1.43265	-1.31969	-1.24432
152.39	0.00789446	-0.0187701	-0.0167395	-0.0132338	0.00623953	-0.0105206			152.39	-1.21133	-1.10992	-1.38303	-1.43451	-1.32137	-1.24644
152.6	0.00916455	-0.0156951	-0.0152791	-0.0110607	0.00641426	-0.0117447			152.6	-1.21006	-1.10684	-1.38157	-1.43234	-1.32119	-1.24766
152.79	0.00801318	-0.0177084	-0.0135387	-0.0167671	0.00742366	-0.00732497			152.79	-1.21121	-1.10886	-1.37983	-1.43805	-1.32018	-1.24324
152.99	0.00670339	-0.0177553	-0.0156043	-0.0150938	0.00320727	-0.0100414			152.99	-1.21252	-1.1089	-1.38189	-1.43637	-1.3244	-1.24596
153.19	0.0105857	-0.0181626	-0.0146662	-0.0134359	0.00798753	-0.00955585			153.19	-1.20864	-1.10931	-1.38095	-1.43472	-1.31962	-1.24547
153.39	0.00916648	-0.0175258	-0.0135081	-0.00943788	0.00478604	-0.00778381			153.39	-1.21006	-1.10867	-1.3798	-1.43072	-1.32282	-1.2437
153.6	0.00831051	-0.0157254	-0.0149112	-0.0146736	0.00525914	-0.0137777			153.6	-1.21091	-1.10687	-1.3812	-1.43595	-1.32235	-1.24969
153.79	0.00613935	-0.0154014	-0.016085	-0.0131425	0.00817184	-0.00991746			153.79	-1.21308	-1.10655	-1.38237	-1.43442	-1.31943	-1.24583
153.99	0.0120705	-0.019469	-0.0157647	-0.0155758	0.00741971	-0.00930693			153.99	-1.20715	-1.11062	-1.38205	-1.43686	-1.32019	-1.24522
154.19	0.0105218	-0.0172825	-0.017908	-0.0132122	0.00708662	-0.0085462			154.19	-1.2087	-1.10843	-1.3842	-1.43449	-1.32052	-1.24446
154.39	0.00750104	-0.0179073	-0.0126414	-0.0137142	0.00620618	-0.00757294			154.39	-1.21172	-1.10906	-1.37893	-1.43499	-1.3214	-1.24349
154.59	0.0110526	-0.0199995	-0.0157351	-0.0132914	0.00661096	-0.0101219			154.59	-1.20817	-1.11115	-1.38202	-1.43457	-1.32099	-1.24604
154.79	0.00800783	-0.0156856	-0.0130718	-0.0107078	0.00877934	-0.0115927			154.79	-1.21121	-1.10683	-1.37936	-1.43199	-1.31883	-1.24751
154.99	0.00745745	-0.0176806	-0.0163224	-0.0153374	0.00809183	-0.00965225			154.99	-1.21177	-1.10883	-1.38261	-1.43662	-1.31951	-1.24557
155.19	0.010265	-0.019228	-0.0166119	-0.0148326	0.00492919	-0.00782865			155.19	-1.20896	-1.11038	-1.3829	-1.43611	-1.32268	-1.24374
155.39	0.00802525	-0.0172754	-0.0138698	-0.0124222	0.00504361	-0.00894698			155.39	-1.2112	-1.10842	-1.38016	-1.4337	-1.32256	-1.24486
155.59	0.00869908	-0.0174539	-0.015707	-0.0136124	0.00719094	-0.00933575			155.59	-1.21052	-1.1086	-1.382	-1.43489	-1.32041	-1.24525
155.79	0.00916916	-0.018156	-0.0148757	-0.0141549	0.00636986	-0.0103268			155.79	-1.21005	-1.1093	-1.38116	-1.43544	-1.32123	-1.24624
155.99	0.00781571	-0.0158486	-0.0152057	-0.0134191	0.00466767	-0.0075523			155.99	-1.21141	-1.107	-1.38149	-1.4347	-1.32294	-1.24347
156.19	0.00761121	-0.0195892	-0.0133266	-0.0157787	0.00814546	-0.0111027			156.19	-1.21161	-1.11074	-1.37961	-1.43706	-1.31946	-1.24702
156.39	0.00824485	-0.0220933	-0.018749	-0.0168668	0.00347301	-0.00956385			156.39	-1.21098	-1.11324	-1.38504	-1.43815	-1.32413	-1.24548
156.6	0.0102593	-0.0185717	-0.0134539	-0.0112768	0.0088852	-0.00897484			156.6	-1.20896	-1.10972	-1.37974	-1.43256	-1.31872	-1.24489
156.79	0.00329405	-0.0174602	-0.0141493	-0.0155577	0.00579897	-0.0100465			156.79	-1.21593	-1.10861	-1.38044	-1.43684	-1.32181	-1.24596
156.99	0.0101763	-0.0177664	-0.0154274	-0.0155538	0.00640604	-0.0113031			156.99	-1.20905	-1.10892	-1.38172	-1.43683	-1.3212	-1.24722
157.19	0.00826246	-0.0200111	-0.0155766	-0.0147756	0.00333	-0.00864265			157.19	-1.21096	-1.11116	-1.38186	-1.43606	-1.32427	-1.24456
157.39	0.0110486	-0.0208342	-0.0184195	-0.0120236	0.0107342	-0.00896245			157.39	-1.20817	-1.11198	-1.38471	-1.4333	-1.31687	-1.24488
157.6	0.0092551	-0.0221176	-0.0165919	-0.0119198	0.00497057	-0.00881855			157.6	-1.20997	-1.11327	-1.38288	-1.4332	-1.32263	-1.24473
157.79	0.00656903	-0.0196635	-0.0138126	-0.0119189	0.00565797	-0.00900377			157.79	-1.21265	-1.11081	-1.3801	-1.4332	-1.32195	-1.24492
157.99	0.00694756	-0.016117	-0.0165862	-0.0167706	0.00745069	-0.00993658			157.99	-1.21228	-1.10727	-1.38287	-1.43805	-1.32015	-1.24585
158.19	0.0107553	-0.0173192	-0.019225	-0.0148605	0.00529641	-0.00917117			158.19	-1.20847	-1.10847	-1.38551	-1.43614	-1.32231	-1.24509
158.39	0.00731606	-0.0187004	-0.0167197	-0.0123462	0.00769506	-0.0105512			158.39	-1.21191	-1.10985	-1.38301	-1.43363	-1.31991	-1.24647
158.6	0.00961085	-0.0214495	-0.0138352	-0.0159836	0.0075027	-0.00980486			158.6	-1.20961	-1.1126	-1.38012	-1.43726	-1.3201	-1.24572
158.79	0.00825405	-0.0215593	-0.0155565	-0.0132815	0.00958433	-0.00819165			158.79	-1.21097	-1.11271	-1.38184	-1.43456	-1.31802	-1.24411
158.99	0.00910215	-0.019166	-0.0163043	-0.0138491	0.00860394	-0.0138227			158.99	-1.21012	-1.11031	-1.38259	-1.43513	-1.319	-1.24974
159.19	0.0065417	-0.0179839	-0.013612	-0.0137337	0.00885637	-0.00842283			159.19	-1.21268	-1.10913	-1.3799	-1.43501	-1.31875	-1.24434
159.39	0.0112182	-0.022087	-0.0176645	-0.0120744	0.00816234	-0.011255			159.39	-1.208	-1.11324	-1.38395	-1.43335	-1.31944	-1.24717
159.6	0.00880856	-0.0188022	-0.0152222	-0.0166301	0.00519779	-0.0100109			159.6	-1.21041	-1.10995	-1.38151	-1.43791	-1.32241	-1.24593
159.79	0.00752229	-0.0172754	-0.0165068	-0.0133172	0.003611	-0.0101446			159.79	-1.2117	-1.10842	-1.38279	-1.4346	-1.32399	-1.24606
159.99	0.00646388	-0.0198875	-0.0178492	-0.0152121	0.00281444	-0.00773745			159.99	-1.21276	-1.11104	-1.38414	-1.43649	-1.32479	-1.24365
160.19	0.00762398	-0.0210778	-0.0183149	-0.0132362	0.00541208	-0.00974342			160.19	-1.2116	-1.11223	-1.3846	-1.43452	-1.32219	-1.24566
160.39	0.0106626	-0.0188951	-0.0131346	-0.010428	0.00514004	-0.0132401			160.39	-1.20856	-1.11004	-1.37942	-1.43171	-1.32246	-1.24916
160.59	0.0115977	-0.0196017	-0.0150542	-0.0143514	0.0076566	-0.00940255			160.59	-1.20763	-1.11075	-1.38134	-1.43563	-1.31995	-1.24532
160.79	0.0107297	-0.0194973	-0.0133852	-0.0173806	0.00311576	-0.0112338			160.79	-1.20849	-1.11065	-1.37967	-1.43866	-1.32449	-1.24715
160.99	0.00613424	-0.0227014	-0.0156591	-0.0109496	0.00941291	-0.00840521			160.99	-1.21309	-1.11385	-1.38195	-1.43223	-1.31819	-1.24432
161.19	0.00976695	-0.0192392	-0.0147015	-0.0145526	0.0109747	-0.00935358			161.19	-1.20946	-1.11039	-1.38099	-1.43583	-1.31663	-1.24527
161.39	0.00898508	-0.0175056	-0.0168579	-0.0155055	0.00666184	-0.00717003			161.39	-1.21024	-1.10865	-1.38315	-1.43679	-1.32094	-1.24309
161.59	0.0106212	-0.0210085	-0.0178551	-0.0143161	0.00626155	-0.00512628			161.59	-1.2086	-1.11216	-1.38414	-1.4356	-1.32134	-1.24104
161.79	0.0124405	-0.0180741	-0.0161355	-0.0167147	0.00567254	-0.0104522			161.79	-1.20678	-1.10922	-1.38242	-1.43799	-1.32193	-1.24637
161.99	0.0106804	-0.0183289	-0.0148381	-0.0142399	0.00727126	-0.0106752			161.99	-1.20854	-1.10948	-1.38113	-1.43552	-1.32033	-1.24659
162.19	0.00740001	-0.0217276	-0.0113667	-0.0144549	0.00732544	-0.00712502			162.19	-1.21182	-1.11288	-1.37765	-1.43574	-1.32028	-1.24304
162.39	0.0100538	-0.0182337	-0.0165195	-0.0217387	0.00744253	-0.0122285			162.39	-1.20917	-1.10938	-1.38281	-1.44302	-1.32016	-1.24814
162.6	0.0102682	-0.0212182	-0.0179892	-0.0141492	0.00335447	-0.0133579			162.6	-1.20895	-1.11237	-1.38428	-1.43543	-1.32425	-1.24927
162.79	0.0120099	-0.0204128	-0.0154187	-0.0161538	0.00822125	-0.00768454			162.79	-1.20721	-1.11156	-1.38171	-1.43743	-1.31938	-1.2436
162.99	0.0106867	-0.0186662	-0.0164152	-0.0136005	0.00614264	-0.00603827			162.99	-1.20854	-1.10981	-1.3827	-1.43488	-1.32146	-1.24195
163.19	0.00722417	-0.0171297	-0.0180322	-0.0139003	0.00335665	-0.0106149			163.19	-1.212	-1.10828	-1.38432	-1.43518	-1.32425	-1.24653
163.39	0.00924804	-0.0204492	-0.0149547	-0.0142359	0.0076352	-0.00885215			163.39	-1.20997	-1.1116	-1.38124	-1.43552	-1.31997	-1.24477
163.59	0.00989364	-0.0208459	-0.0167638	-0.00909407	0.00427859	-0.00869002			163.59	-1.20933	-1.11199	-1.38305	-1.43037	-1.32333	-1.24461
163.79	0.00600681	-0.0225845	-0.0178745	-0.0153358	0.00603946	-0.0047053			163.79	-1.21322	-1.11373	-1.38416	-1.43662	-1.32157	-1.24062
163.99	0.0121916	-0.019068	-0.0137009	-0.0154856	0.00406224	-0.00877707			163.99	-1.20703	-1.11022	-1.37999	-1.43677	-1.32354	-1.24469
164.19	0.0107257	-0.0184888	-0.0163482	-0.0132741	0.00577343	-0.0098364			164.19	-1.2085	-1.10964	-1.38264	-1.43455	-1.32183	-1.24575
164.39	0.00810256	-0.0212571	-0.0121008	-0.0154841	0.00939099	-0.0110478			164.39	-1.21112	-1.11241	-1.37839	-1.43676	-1.31821	-1.24696
164.6	0.0093958	-0.0173233	-0.0153151	-0.0132841	0.00724267	-0.00897669			164.6	-1.20983	-1.10847	-1.3816	-1.43456	-1.32036	-1.24489
164.79	0.0123814	-0.0201379	-0.0167226	-0.0153428	0.00829205	-0.012221			164.79	-1.20684	-1.11129	-1.38301	-1.43662	-1.31931	-1.24814
164.99	0.00941312	-0.01869	-0.0135676	-0.0150052	0.00244925	-0.00983011			164.99	-1.20981	-1.10984	-1.37986	-1.43629	-1.32516	-1.24575
165.19	0.00731998	-0.0196819	-0.0144705	-0.0172485	0.00677967	-0.0113402			165.19	-1.2119	-1.11083	-1.38076	-1.43853	-1.32083	-1.24726
165.39	0.00782922	-0.0170462	-0.0175216	-0.014806	0.00784112	-0.00941282			165.39	-1.21139	-1.10819	-1.38381	-1.43609	-1.31976	-1.24533
165.59	0.00451788	-0.0194773	-0.0171929	-0.014355	0.00767629	-0.0105722			165.59	-1.2147	-1.11063	-1.38348	-1.43564	-1.31993	-1.24649
165.79	0.00693225	-0.0182238	-0.0170841	-0.0169312	0.00632553	-0.0101594			165.79	-1.21229	-1.10937	-1.38337	-1.43821	-1.32128	-1.24608
165.99	0.0121759	-0.0164631	-0.0155712	-0.0168213	0.00359099	-0.00849598			165.99	-1.20705	-1.10761	-1.38186	-1.4381	-1.32401	-1.24441
166.19	0.00929594	-0.0181749	-0.0176188	-0.01351	0.00329853	-0.00726144			166.19	-1.20993	-1.10932	-1.38391	-1.43479	-1.32431	-1.24318
166.39	0.0106989	-0.0178238	-0.0158284	-0.0117115	0.00607377	-0.00700379			166.39	-1.20852	-1.10897	-1.38212	-1.43299	-1.32153	-1.24292
166.59	0.00871892	-0.0184395	-0.0174252	-0.0159043	0.00828838	-0.0088769			166.59	-1.2105	-1.10959	-1.38371	-1.43718	-1.31932	-1.24479
166.79	0.00978441	-0.0176387	-0.0197522	-0.0160881	0.00739879	-0.0110321			166.79	-1.20944	-1.10879	-1.38604	-1.43737	-1.32021	-1.24695
166.99	0.00336687	-0.0203484	-0.0126895	-0.015262	0.00623116	-0.0100667			166.99	-1.21586	-1.1115	-1.37898	-1.43654	-1.32137	-1.24598
167.19	0.00379363	-0.0201896	-0.0159198	-0.0136514	0.00317784	-0.00903592			167.19	-1.21543	-1.11134	-1.38221	-1.43493	-1.32443	-1.24495
167.39	0.00930975	-0.0214631	-0.0192981	-0.014403	0.0057833	-0.010133			167.39	-1.20991	-1.11261	-1.38559	-1.43568	-1.32182	-1.24605
167.59	0.0108196	-0.0178519	-0.0156072	-0.0134002	0.00222355	-0.0142595			167.59	-1.2084	-1.109	-1.3819	-1.43468	-1.32538	-1.25018
167.79	0.00628408	-0.0216944	-0.0136526	-0.0161548	0.00104241	-0.0128189			167.79	-1.21294	-1.11284	-1.37994	-1.43744	-1.32656	-1.24873
167.99	0.0108141	-0.0202182	-0.0153044	-0.0161183	0.00247583	-0.0108096			167.99	-1.20841	-1.11137	-1.38159	-1.4374	-1.32513	-1.24673
168.19	0.00933886	-0.0208102	-0.0146736	-0.0134116	0.0024535	-0.00866752			168.19	-1.20988	-1.11196	-1.38096	-1.43469	-1.32515	-1.24458
168.39	0.00495468	-0.020494	-0.0177814	-0.018027	0.00395738	-0.010762			168.39	-1.21427	-1.11164	-1.38407	-1.43931	-1.32365	-1.24668
168.59	0.00533095	-0.0195414	-0.0162334	-0.0147837	0.00709452	-0.012622			168.59	-1.21389	-1.11069	-1.38252	-1.43606	-1.32051	-1.24854
168.79	0.008247	-0.0202018	-0.0166442	-0.0134993	0.00536608	-0.00768183			168.79	-1.21098	-1.11135	-1.38293	-1.43478	-1.32224	-1.2436
168.99	0.00297057	-0.0189143	-0.0148126	-0.0145589	0.0011636	-0.0095595			168.99	-1.21625	-1.11006	-1.3811	-1.43584	-1.32644	-1.24548
169.19	0.00644492	-0.0180206	-0.0175415	-0.0168997	0.0025359	-0.0116496			169.19	-1.21278	-1.10917	-1.38383	-1.43818	-1.32507	-1.24757
169.39	0.00709276	-0.0232269	-0.018109	-0.0193084	0.00606236	-0.00990984			169.39	-1.21213	-1.11438	-1.3844	-1.44059	-1.32154	-1.24583
169.59	0.0107847	-0.0199015	-0.0154702	-0.0141331	0.00737428	-0.00947657			169.59	-1.20844	-1.11105	-1.38176	-1.43541	-1.32023	-1.24539
169.79	0.00574578	-0.0205457	-0.0178124	-0.0133867	0.00569256	-0.0111518			169.79	-1.21348	-1.11169	-1.3841	-1.43467	-1.32191	-1.24707
169.99	0.00650679	-0.0168173	-0.0165816	-0.0126602	0.00795243	-0.00678647			169.99	-1.21272	-1.10797	-1.38287	-1.43394	-1.31965	-1.2427
170.19	0.00797769	-0.0170683	-0.0188805	-0.0155623	0.00270855	-0.00790908			170.19	-1.21125	-1.10822	-1.38517	-1.43684	-1.3249	-1.24383
170.39	0.00972651	-0.0196045	-0.0149715	-0.0168303	0.00698518	-0.00880536			170.39	-1.2095	-1.11075	-1.38126	-1.43811	-1.32062	-1.24472
170.59	0.0068876	-0.0201217	-0.0135604	-0.0166997	0.00405273	-0.0120988			170.59	-1.21234	-1.11127	-1.37985	-1.43798	-1.32355	-1.24801
170.79	0.0055009	-0.0222501	-0.0172986	-0.0144017	0.00443771	-0.011441			170.79	-1.21372	-1.1134	-1.38359	-1.43568	-1.32317	-1.24736
170.99	0.00681466	-0.0198124	-0.0159555	-0.0171656	0.00616694	-0.0103229			170.99	-1.21241	-1.11096	-1.38224	-1.43845	-1.32144	-1.24624
171.19	0.00397265	-0.0176994	-0.0137371	-0.020336	0.00290092	-0.0106386			171.19	-1.21525	-1.10885	-1.38003	-1.44162	-1.3247	-1.24655
171.39	0.00480668	-0.0188301	-0.0191611	-0.0140979	0.0044983	-0.00790845			171.39	-1.21442	-1.10998	-1.38545	-1.43538	-1.32311	-1.24382
171.59	0.00312449	-0.0189072	-0.016843	-0.0145924	0.00350799	-0.0115947			171.59	-1.2161	-1.11006	-1.38313	-1.43587	-1.3241	-1.24751
171.79	0.00752421	-0.0189599	-0.0198443	-0.0138378	0.00388148	-0.013733			171.79	-1.2117	-1.11011	-1.38613	-1.43512	-1.32372	-1.24965
171.99	0.00474252	-0.0218121	-0.0162773	-0.0172385	0.00069466	-0.0129515			171.99	-1.21448	-1.11296	-1.38257	-1.43852	-1.32691	-1.24887
172.19	0.00800622	-0.0167617	-0.0168897	-0.0175542	0.00629807	-0.0119016			172.19	-1.21122	-1.10791	-1.38318	-1.43883	-1.32131	-1.24782
172.39	0.00855214	-0.0188112	-0.0172883	-0.0164793	0.00791817	-0.0129746			172.39	-1.21067	-1.10996	-1.38358	-1.43776	-1.31969	-1.24889
172.59	0.00677949	-0.0218026	-0.0186424	-0.0113808	0.00631687	-0.0118849			172.59	-1.21244	-1.11295	-1.38493	-1.43266	-1.32129	-1.2478
172.79	0.00823807	-0.0199998	-0.0154666	-0.014923	0.00433492	-0.0103363			172.79	-1.21098	-1.11115	-1.38175	-1.4362	-1.32327	-1.24625
172.99	0.00736676	-0.0232886	-0.0155496	-0.0143034	0.00498568	-0.011631			172.99	-1.21186	-1.11444	-1.38184	-1.43558	-1.32262	-1.24755
173.19	0.00628932	-0.0193385	-0.0188225	-0.0171417	0.00481669	-0.0107963			173.19	-1.21293	-1.11049	-1.38511	-1.43842	-1.32279	-1.24671
173.39	0.00618995	-0.018535	-0.0156886	-0.0163643	0.00919693	-0.0103315			173.39	-1.21303	-1.10968	-1.38198	-1.43764	-1.31841	-1.24625
173.59	0.00706798	-0.0219955	-0.0157649	-0.0158969	0.00614276	-0.00736913			173.59	-1.21215	-1.11314	-1.38205	-1.43718	-1.32146	-1.24329
173.79	0.00959007	-0.0207415	-0.0164716	-0.0131309	0.00356758	-0.0105253			173.79	-1.20963	-1.11189	-1.38276	-1.43441	-1.32404	-1.24644
173.99	0.00656637	-0.0199442	-0.0167566	-0.0145964	0.0025808	-0.00633961			173.99	-1.21266	-1.11109	-1.38304	-1.43588	-1.32502	-1.24226
174.19	0.00875191	-0.0193402	-0.0167669	-0.0138216	0.00167359	-0.00942054			174.19	-1.21047	-1.11049	-1.38306	-1.4351	-1.32593	-1.24534
174.39	0.00473654	-0.0194267	-0.0195997	-0.0133717	0.004514	-0.0105551			174.39	-1.21449	-1.11058	-1.38589	-1.43465	-1.32309	-1.24647
174.59	0.00852219	-0.0206415	-0.0167051	-0.0125486	0.00510281	-0.0116156			174.59	-1.2107	-1.11179	-1.38299	-1.43383	-1.3225	-1.24753
174.79	0.00434583	-0.0199848	-0.0160034	-0.0159643	0.0015633	-0.0101884			174.79	-1.21488	-1.11113	-1.38229	-1.43724	-1.32604	-1.2461
174.99	0.00515911	-0.0180128	-0.0175968	-0.015941	0.00503496	-0.00805818			174.99	-1.21406	-1.10916	-1.38388	-1.43722	-1.32257	-1.24397
175.19	0.00752614	-0.0206647	-0.0206733	-0.0151174	0.00662951	-0.0114182			175.19	-1.2117	-1.11181	-1.38696	-1.4364	-1.32098	-1.24733
175.39	0.00578694	-0.0186082	-0.015948	-0.0181824	0.00154368	-0.0128762			175.39	-1.21344	-1.10976	-1.38224	-1.43946	-1.32606	-1.24879
175.6	0.00831301	-0.0186166	-0.0168293	-0.0146476	0.00318186	-0.0105185			175.6	-1.21091	-1.10977	-1.38312	-1.43593	-1.32442	-1.24643
175.79	0.00793626	-0.0191433	-0.0169841	-0.0163179	0.00144807	-0.00849523			175.79	-1.21129	-1.11029	-1.38327	-1.4376	-1.32616	-1.24441
175.99	0.00644631	-0.0196411	-0.0191198	-0.0158247	0.0046667	-0.0116011			175.99	-1.21278	-1.11079	-1.38541	-1.4371	-1.32294	-1.24752
176.19	0.0068419	-0.0206999	-0.0155159	-0.0145743	0.00159705	-0.00993192			176.19	-1.21238	-1.11185	-1.3818	-1.43585	-1.32601	-1.24585
176.39	0.00669988	-0.020144	-0.0147052	-0.0136302	0.00363894	-0.0136109			176.39	-1.21252	-1.11129	-1.38099	-1.43491	-1.32397	-1.24953
176.6	0.00573386	-0.0185936	-0.0148609	-0.0164359	0.00489183	-0.011024			176.6	-1.21349	-1.10974	-1.38115	-1.43772	-1.32271	-1.24694
176.79	0.00571038	-0.0198667	-0.0144816	-0.016905	0.00434707	-0.00961195			176.79	-1.21351	-1.11102	-1.38077	-1.43819	-1.32326	-1.24553
176.99	0.00795191	-0.0191903	-0.0185711	-0.0146932	0.00760809	-0.00817387			176.99	-1.21127	-1.11034	-1.38486	-1.43597	-1.32	-1.24409
177.19	0.00651995	-0.0236706	-0.0152961	-0.0143708	0.00519503	-0.00541704			177.19	-1.2127	-1.11482	-1.38158	-1.43565	-1.32241	-1.24133
177.39	0.0121075	-0.0218581	-0.0155903	-0.0161385	0.00616078	-0.0132197			177.39	-1.20712	-1.11301	-1.38188	-1.43742	-1.32144	-1.24914
177.6	0.00599255	-0.0188094	-0.0161228	-0.0159122	0.00335482	-0.011649			177.6	-1.21323	-1.10996	-1.38241	-1.43719	-1.32425	-1.24757
177.79	0.006999	-0.0171167	-0.0156115	-0.0148377	0.00841466	-0.010288			177.79	-1.21222	-1.10827	-1.3819	-1.43612	-1.31919	-1.2462
177.99	0.00322789	-0.0181965	-0.0171621	-0.0166253	0.00102725	-0.0121103			177.99	-1.21599	-1.10935	-1.38345	-1.43791	-1.32658	-1.24803
178.19	0.00782817	-0.0205648	-0.0169904	-0.0160949	0.00446101	-0.0119328			178.19	-1.21139	-1.11171	-1.38328	-1.43738	-1.32314	-1.24785
178.39	0.00382912	-0.0203502	-0.0199809	-0.0165008	0.0074568	-0.0100693			178.39	-1.21539	-1.1115	-1.38627	-1.43778	-1.32015	-1.24599
178.6	0.00607276	-0.0241766	-0.0162448	-0.015689	0.00576946	-0.0104532			178.6	-1.21315	-1.11533	-1.38253	-1.43697	-1.32184	-1.24637
178.79	0.00317266	-0.0183857	-0.0198952	-0.0180326	0.00265482	-0.00924095			178.79	-1.21605	-1.10953	-1.38618	-1.43931	-1.32495	-1.24516
178.99	0.00618688	-0.0209188	-0.0172061	-0.0156482	0.00448527	-0.0102269			178.99	-1.21304	-1.11207	-1.38349	-1.43693	-1.32312	-1.24614
179.19	0.0108894	-0.0189596	-0.0174412	-0.0153028	0.00437626	-0.0121374			179.19	-1.20833	-1.11011	-1.38373	-1.43658	-1.32323	-1.24805
179.39	0.00366789	-0.0220609	-0.0184356	-0.0158241	0.00237266	-0.0110165			179.39	-1.21555	-1.11321	-1.38472	-1.4371	-1.32523	-1.24693
179.6	0.00567501	-0.0227309	-0.0199438	-0.0132176	0.00517312	-0.00955222			179.6	-1.21355	-1.11388	-1.38623	-1.4345	-1.32243	-1.24547
179.79	0.00759306	-0.0214581	-0.0176897	-0.0134448	0.0041569	-0.00899542			179.79	-1.21163	-1.11261	-1.38398	-1.43473	-1.32345	-1.24491
179.99	0.0055749	-0.019824	-0.0161003	-0.017449	0.00091989	-0.0107298			179.99	-1.21365	-1.11097	-1.38239	-1.43873	-1.32668	-1.24665
180.19	0.00369694	-0.0212101	-0.0186348	-0.0185034	0.00296314	-0.00818662			180.19	-1.21553	-1.11236	-1.38492	-1.43978	-1.32464	-1.2441
180.39	0.0050655	-0.0233056	-0.0189389	-0.0138822	0.00319287	-0.013073			180.39	-1.21416	-1.11445	-1.38523	-1.43516	-1.32441	-1.24899
180.6	0.00401797	-0.0190298	-0.0167692	-0.0180955	0.00588649	-0.00962135			180.6	-1.2152	-1.11018	-1.38306	-1.43938	-1.32172	-1.24554
180.79	0.00775702	-0.024116	-0.017474	-0.0177914	0.00773082	-0.00972243			180.79	-1.21147	-1.11526	-1.38376	-1.43907	-1.31987	-1.24564
180.99	0.00598112	-0.0210857	-0.0155782	-0.022056	0.00337975	-0.0124085			180.99	-1.21324	-1.11223	-1.38187	-1.44334	-1.32423	-1.24832
181.19	0.00138249	-0.0194305	-0.0186879	-0.0187224	0.00843584	-0.00769718			181.19	-1.21784	-1.11058	-1.38498	-1.44	-1.31917	-1.24361
181.39	0.00778529	-0.0190716	-0.0182991	-0.0204573	0.00327928	-0.0124812			181.39	-1.21144	-1.11022	-1.38459	-1.44174	-1.32433	-1.2484
181.6	0.00423277	-0.0219149	-0.0188421	-0.0145658	0.00375039	-0.00824545			181.6	-1.21499	-1.11306	-1.38513	-1.43585	-1.32385	-1.24416
181.79	0.00726445	-0.0193996	-0.0172296	-0.0182667	0.00367683	-0.00986281			181.79	-1.21196	-1.11055	-1.38352	-1.43955	-1.32393	-1.24578
181.99	0.00779998	-0.0239567	-0.0168196	-0.0146021	0.00298607	-0.0116019			181.99	-1.21142	-1.11511	-1.38311	-1.43588	-1.32462	-1.24752
182.19	0.00555142	-0.0183856	-0.0155268	-0.0189178	0.00532409	-0.0090848			182.19	-1.21367	-1.10953	-1.38181	-1.4402	-1.32228	-1.245
182.39	0.00465733	-0.0199194	-0.0203624	-0.0181704	0.00470675	-0.00720588			182.39	-1.21457	-1.11107	-1.38665	-1.43945	-1.3229	-1.24312
182.6	0.00884937	-0.0219396	-0.0167751	-0.0123462	0.00354693	-0.00851194			182.6	-1.21037	-1.11309	-1.38306	-1.43363	-1.32406	-1.24443
182.79	0.00867989	-0.019162	-0.0189009	-0.0169642	0.00381821	-0.0103115			182.79	-1.21054	-1.11031	-1.38519	-1.43824	-1.32379	-1.24623
182.99	0.00710024	-0.0190074	-0.0177246	-0.0170327	0.00355935	-0.013428			182.99	-1.21212	-1.11016	-1.38401	-1.43831	-1.32405	-1.24934
183.19	0.00601161	-0.0228885	-0.0177006	-0.0181763	0.00469778	-0.0128997			183.19	-1.21321	-1.11404	-1.38399	-1.43946	-1.32291	-1.24882
183.39	0.00514378	-0.0240424	-0.0143236	-0.0176797	0.00262716	-0.00904763			183.39	-1.21408	-1.11519	-1.38061	-1.43896	-1.32498	-1.24496
183.6	0.00638622	-0.021623	-0.0179705	-0.0163024	0.00418197	-0.0102816			183.6	-1.21284	-1.11277	-1.38426	-1.43758	-1.32342	-1.2462
183.79	0.0070211	-0.0197603	-0.0173986	-0.0163894	0.00554642	-0.0128416			183.79	-1.2122	-1.11091	-1.38369	-1.43767	-1.32206	-1.24876
183.99	0.0101103	-0.0230892	-0.0155953	-0.0158157	0.00500291	-0.0092362			183.99	-1.20911	-1.11424	-1.38188	-1.4371	-1.3226	-1.24515
184.19	0.0060019	-0.0196473	-0.0191885	-0.0183409	0.00410962	-0.0123174			184.19	-1.21322	-1.1108	-1.38548	-1.43962	-1.3235	-1.24823
184.39	0.00624493	-0.0237742	-0.0168504	-0.012634	0.00647042	-0.0112347			184.39	-1.21298	-1.11492	-1.38314	-1.43391	-1.32113	-1.24715
184.6	0.00775683	-0.0227691	-0.0176972	-0.0166678	0.00080518	-0.00886004			184.6	-1.21147	-1.11392	-1.38399	-1.43795	-1.3268	-1.24478
184.79	0.00578112	-0.0216109	-0.019781	-0.0162848	0.00482668	-0.014638			184.79	-1.21344	-1.11276	-1.38607	-1.43757	-1.32278	-1.25055
184.99	0.00695181	-0.0205827	-0.0164834	-0.0160331	0.00468011	-0.0106285			184.99	-1.21227	-1.11173	-1.38277	-1.43731	-1.32292	-1.24654
185.19	0.00679933	-0.0199466	-0.0200095	-0.0187163	0.0048189	-0.0116102			185.19	-1.21242	-1.1111	-1.3863	-1.44	-1.32279	-1.24753
185.39	0.00810345	-0.0212455	-0.0177528	-0.0158248	8.363e-05	-0.0119791			185.39	-1.21112	-1.11239	-1.38404	-1.43711	-1.32752	-1.2479
185.6	0.00381683	-0.0201963	-0.0160479	-0.0136625	0.00436371	-0.0130435			185.6	-1.21541	-1.11134	-1.38234	-1.43494	-1.32324	-1.24896
185.79	0.00587551	-0.022099	-0.0162406	-0.0195379	0.00394649	-0.0119592			185.79	-1.21335	-1.11325	-1.38253	-1.44082	-1.32366	-1.24788
185.99	0.00493527	-0.0230738	-0.0174582	-0.0166647	0.00326608	-0.0108113			185.99	-1.21429	-1.11422	-1.38375	-1.43794	-1.32434	-1.24673
186.19	0.00678241	-0.0230043	-0.0193024	-0.018416	0.00388152	-0.0115065			186.19	-1.21244	-1.11415	-1.38559	-1.4397	-1.32372	-1.24742
186.39	0.00936447	-0.022815	-0.0151275	-0.0157692	0.00351844	-0.0113136			186.39	-1.20986	-1.11396	-1.38142	-1.43705	-1.32409	-1.24723
186.6	0.00981086	-0.0188033	-0.0157192	-0.0142922	0.00446925	-0.0135071			186.6	-1.20941	-1.10995	-1.38201	-1.43557	-1.32314	-1.24942
186.79	0.00547299	-0.0213673	-0.0161792	-0.0144616	0.00431706	-0.00928006			186.79	-1.21375	-1.11252	-1.38247	-1.43574	-1.32329	-1.2452
186.99	0.00703452	-0.023454	-0.0154142	-0.0108634	0.00637553	-0.0106444			186.99	-1.21219	-1.1146	-1.3817	-1.43214	-1.32123	-1.24656
187.19	0.00636952	-0.0234009	-0.018158	-0.0169127	0.00557158	-0.0102491			187.19	-1.21285	-1.11455	-1.38445	-1.43819	-1.32203	-1.24617
187.39	0.00298109	-0.0195631	-0.018324	-0.0175397	0.00257694	-0.0147818			187.39	-1.21624	-1.11071	-1.38461	-1.43882	-1.32503	-1.2507
187.59	0.00802904	-0.0235343	-0.0191756	-0.0126967	0.00182115	-0.0111268			187.59	-1.21119	-1.11468	-1.38546	-1.43398	-1.32578	-1.24704
187.79	0.00847982	-0.0198456	-0.0189032	-0.01473	0.00222325	-0.0110584			187.79	-1.21074	-1.11099	-1.38519	-1.43601	-1.32538	-1.24697
187.99	0.00484112	-0.0209342	-0.0188	-0.0180723	0.00342505	-0.0121797			187.99	-1.21438	-1.11208	-1.38509	-1.43935	-1.32418	-1.2481
188.19	0.00303547	-0.0204921	-0.0115281	-0.0177725	0.004338	-0.00854536			188.19	-1.21619	-1.11164	-1.37782	-1.43905	-1.32327	-1.24446
188.39	0.00697741	-0.0219107	-0.0152051	-0.0134156	0.0043816	-0.0143077			188.39	-1.21225	-1.11306	-1.38149	-1.4347	-1.32322	-1.25022
188.6	0.0074715	-0.0181711	-0.0176005	-0.0181345	0.00424115	-0.0114186			188.6	-1.21175	-1.10932	-1.38389	-1.43941	-1.32336	-1.24733
188.79	0.00963233	-0.0201656	-0.0165496	-0.0141638	0.00614305	-0.00973699			188.79	-1.20959	-1.11131	-1.38284	-1.43544	-1.32146	-1.24565
188.99	0.0036527	-0.0221406	-0.0192538	-0.0155648	0.00522167	-0.0136684			188.99	-1.21557	-1.11329	-1.38554	-1.43685	-1.32238	-1.24958
189.19	0.0039448	-0.0202983	-0.0198889	-0.0184185	0.00287681	-0.0139216			189.19	-1.21528	-1.11145	-1.38618	-1.4397	-1.32473	-1.24984
189.39	0.0057276	-0.0214492	-0.0140266	-0.0168043	0.00516914	-0.0119028			189.39	-1.2135	-1.1126	-1.38031	-1.43808	-1.32244	-1.24782
189.59	0.00638641	-0.0234766	-0.0158837	-0.020477	0.00383461	-0.0115015			189.59	-1.21284	-1.11463	-1.38217	-1.44176	-1.32377	-1.24742
189.79	0.00448482	-0.0228753	-0.0206501	-0.0173041	0.00275778	-0.0084487			189.79	-1.21474	-1.11402	-1.38694	-1.43858	-1.32485	-1.24436
189.99	0.00148391	-0.0201527	-0.0169779	-0.0183013	0.00369772	-0.0129404			189.99	-1.21774	-1.1113	-1.38327	-1.43958	-1.32391	-1.24886
190.19	0.00464157	-0.0237331	-0.0161641	-0.0189688	0.00445151	-0.0114579			190.19	-1.21458	-1.11488	-1.38245	-1.44025	-1.32315	-1.24737
190.39	0.00413644	-0.021065	-0.0176044	-0.0147458	0.00209235	-0.0106623			190.39	-1.21509	-1.11221	-1.38389	-1.43603	-1.32551	-1.24658
190.6	0.00334637	-0.0225575	-0.0177197	-0.0138698	0.00515937	-0.0102127			190.6	-1.21588	-1.11371	-1.38401	-1.43515	-1.32245	-1.24613
190.79	0.0025685	-0.023028	-0.0164091	-0.0144436	0.00301924	-0.0112029			190.79	-1.21665	-1.11418	-1.3827	-1.43572	-1.32459	-1.24712
190.99	0.00342175	-0.0197571	-0.0174985	-0.0164073	0.00259687	-0.00961711			190.99	-1.2158	-1.11091	-1.38379	-1.43769	-1.32501	-1.24553
191.19	0.00201372	-0.0222825	-0.0174068	-0.0156936	0.00570414	-0.00840757			191.19	-1.21721	-1.11343	-1.38369	-1.43697	-1.3219	-1.24432
191.39	0.00273448	-0.0238773	-0.0147491	-0.0158298	0.00671017	-0.0152384			191.39	-1.21649	-1.11503	-1.38104	-1.43711	-1.32089	-1.25115
191.59	0.00364773	-0.0213373	-0.0176458	-0.0148591	0.00696532	-0.0056388			191.59	-1.21558	-1.11249	-1.38393	-1.43614	-1.32064	-1.24155
191.79	0.00916567	-0.0219984	-0.0169175	-0.0189399	0.00335683	-0.0116319			191.79	-1.21006	-1.11315	-1.38321	-1.44022	-1.32425	-1.24755
191.99	0.00215032	-0.0189327	-0.0170661	-0.0182266	0.00238161	-0.00968919			191.99	-1.21707	-1.11008	-1.38335	-1.43951	-1.32522	-1.24561
192.19	0.00534769	-0.0227395	-0.0175794	-0.0161943	0.00447223	-0.0126431			192.19	-1.21388	-1.11389	-1.38387	-1.43747	-1.32313	-1.24856
192.39	0.00497087	-0.0157675	-0.0156606	-0.02054	0.00082083	-0.0128811			192.39	-1.21425	-1.10692	-1.38195	-1.44182	-1.32678	-1.2488
192.59	0.0079349	-0.0237033	-0.018161	-0.0182499	0.00225836	-0.0128712			192.59	-1.21129	-1.11485	-1.38445	-1.43953	-1.32535	-1.24879
192.79	0.00407765	-0.0221342	-0.0167344	-0.0156716	0.00261891	-0.00928131			192.79	-1.21515	-1.11328	-1.38302	-1.43695	-1.32499	-1.2452
192.99	0.00441062	-0.0210829	-0.0200278	-0.017251	0.00452639	-0.0152867			192.99	-1.21481	-1.11223	-1.38632	-1.43853	-1.32308	-1.2512
193.19	0.00620481	-0.024404	-0.0168855	-0.015978	0.00195615	-0.0111737			193.19	-1.21302	-1.11555	-1.38317	-1.43726	-1.32565	-1.24709
193.39	0.00994577	-0.0193002	-0.020108	-0.0181311	0.00260939	-0.00906644			193.39	-1.20928	-1.11045	-1.3864	-1.43941	-1.325	-1.24498
193.59	0.00596211	-0.022588	-0.0208122	-0.0186667	0.00619577	-0.00835572			193.59	-1.21326	-1.11374	-1.3871	-1.43995	-1.32141	-1.24427
193.79	0.00468162	-0.0241123	-0.0164559	-0.0199263	0.00435563	-0.0124625			193.79	-1.21454	-1.11526	-1.38274	-1.44121	-1.32325	-1.24838
193.99	0.00210814	-0.0214392	-0.0180983	-0.0191754	0.003902	-0.0130421			193.99	-1.21711	-1.11259	-1.38439	-1.44046	-1.3237	-1.24896
194.19	0.00469658	-0.0200674	-0.0137255	-0.0156439	0.00117209	-0.00945868			194.19	-1.21453	-1.11122	-1.38001	-1.43692	-1.32643	-1.24537
194.39	0.00199468	-0.0230698	-0.0176009	-0.0151817	0.00594014	-0.0126698			194.39	-1.21723	-1.11422	-1.38389	-1.43646	-1.32166	-1.24859
194.59	0.00463291	-0.0224255	-0.0176354	-0.0156741	0.00260972	-0.00995262			194.59	-1.21459	-1.11357	-1.38392	-1.43695	-1.325	-1.24587
194.79	0.00341089	-0.0271391	-0.0184815	-0.0125435	0.0051823	-0.0125138			194.79	-1.21581	-1.11829	-1.38477	-1.43382	-1.32242	-1.24843
194.99	0.00540207	-0.0230956	-0.018358	-0.0184842	-0.00059137	-0.0130628			194.99	-1.21382	-1.11424	-1.38465	-1.43976	-1.3282	-1.24898
195.19	0.00537338	-0.0227828	-0.0138269	-0.0207409	0.00030672	-0.0133485			195.19	-1.21385	-1.11393	-1.38012	-1.44202	-1.3273	-1.24926
195.39	0.00581801	-0.0223073	-0.0167585	-0.0163404	0.00342391	-0.0128033			195.39	-1.2134	-1.11346	-1.38305	-1.43762	-1.32418	-1.24872
195.59	0.00451303	-0.0262603	-0.016024	-0.0139164	-0.00034793	-0.0110493			195.59	-1.21471	-1.11741	-1.38231	-1.4352	-1.32795	-1.24697
195.79	0.00543878	-0.0237919	-0.0179175	-0.0144718	0.00104607	-0.0144346			195.79	-1.21378	-1.11494	-1.38421	-1.43575	-1.32656	-1.25035
195.99	0.0091094	-0.0221709	-0.0166525	-0.0189677	-0.00140362	-0.0124474			195.99	-1.21011	-1.11332	-1.38294	-1.44025	-1.32901	-1.24836
196.19	0.00287785	-0.0249466	-0.018221	-0.0172224	-3.595e-05	-0.0104791			196.19	-1.21634	-1.1161	-1.38451	-1.4385	-1.32764	-1.2464
196.39	0.00602008	-0.0241066	-0.015867	-0.0166109	0.00391533	-0.0143254			196.39	-1.2132	-1.11526	-1.38216	-1.43789	-1.32369	-1.25024
196.59	0.00604798	-0.0216507	-0.017975	-0.0156448	0.00203023	-0.0113807			196.59	-1.21317	-1.1128	-1.38426	-1.43693	-1.32557	-1.2473
196.79	0.00481397	-0.0252401	-0.0183666	-0.0156628	0.00030866	-0.0105626			196.79	-1.21441	-1.11639	-1.38465	-1.43694	-1.3273	-1.24648
196.99	0.0062403	-0.0242392	-0.0183598	-0.0156136	0.00298719	-0.0112426			196.99	-1.21298	-1.11539	-1.38465	-1.43689	-1.32462	-1.24716
197.19	0.0040989	-0.0208254	-0.0175443	-0.0208824	0.00177557	-0.0109141			197.19	-1.21512	-1.11197	-1.38383	-1.44216	-1.32583	-1.24683
197.39	0.00568706	-0.0221462	-0.0176406	-0.018032	0.00472307	-0.0147626			197.39	-1.21354	-1.11329	-1.38393	-1.43931	-1.32288	-1.25068
197.59	0.00301399	-0.0265713	-0.0161046	-0.0165425	0.00771026	-0.0110356			197.59	-1.21621	-1.11772	-1.38239	-1.43782	-1.31989	-1.24695
197.79	0.00358965	-0.023947	-0.0167672	-0.0195631	0.00373676	-0.0097295			197.79	-1.21563	-1.1151	-1.38306	-1.44084	-1.32387	-1.24565
197.99	0.00379929	-0.0243245	-0.019538	-0.0181111	0.00718142	-0.0130463			197.99	-1.21542	-1.11547	-1.38583	-1.43939	-1.32042	-1.24896
198.19	0.00594695	-0.0230402	-0.0197166	-0.0220312	0.00326423	-0.0112659			198.19	-1.21328	-1.11419	-1.386	-1.44331	-1.32434	-1.24718
198.39	0.00610721	-0.0187548	-0.0183705	-0.0178912	-8.48e-06	-0.0110459			198.39	-1.21312	-1.1099	-1.38466	-1.43917	-1.32761	-1.24696
198.59	0.00454864	-0.0234145	-0.0189654	-0.0206455	0.00098163	-0.0148086			198.59	-1.21467	-1.11456	-1.38525	-1.44193	-1.32662	-1.25072
198.79	0.00503431	-0.0225896	-0.0175899	-0.0221884	0.00588144	-0.00916669			198.79	-1.21419	-1.11374	-1.38388	-1.44347	-1.32172	-1.24508
198.99	0.00709976	-0.0214482	-0.0181898	-0.0199123	0.00186768	-0.0121827			198.99	-1.21212	-1.1126	-1.38448	-1.44119	-1.32574	-1.2481
199.19	0.00523489	-0.0236081	-0.0184407	-0.0143361	0.002438	-0.0131138			199.19	-1.21399	-1.11476	-1.38473	-1.43562	-1.32517	-1.24903
199.39	0.00386085	-0.0250574	-0.0170755	-0.0144086	0.00250251	-0.013914			199.39	-1.21536	-1.11621	-1.38336	-1.43569	-1.3251	-1.24983
199.6	0.00572356	-0.020922	-0.0186542	-0.0150101	0.00519463	-0.0132562			199.6	-1.2135	-1.11207	-1.38494	-1.43629	-1.32241	-1.24917
199.79	0.00568307	-0.0242292	-0.0196407	-0.0172126	0.00187649	-0.0113155			199.79	-1.21354	-1.11538	-1.38593	-1.43849	-1.32573	-1.24723
200	0.0116641	-0.0146078	-0.010078	0.0172796	0.0384119	8.543e-05			200	-1.20756	-1.10576	-1.37637	-1.404	-1.28919	-1.23583
200.19	0.0160483	-0.0153721	-0.00547681	0.025485	0.0434616	0.00038853			200.19	-1.20317	-1.10652	-1.37176	-1.3958	-1.28414	-1.23553
200.39	0.0175719	-0.0129791	-0.00311049	0.0304935	0.0486398	-0.00133797			200.39	-1.20165	-1.10413	-1.3694	-1.39079	-1.27896	-1.23725
200.59	0.0192172	-0.00825513	-0.00348161	0.0382959	0.0518174	0.00521549			200.59	-1.20001	-1.0994	-1.36977	-1.38298	-1.27579	-1.2307
200.79	0.0221034	-0.00576221	0.00262378	0.0453062	0.0584576	0.00255747			200.79	-1.19712	-1.09691	-1.36366	-1.37597	-1.26915	-1.23336
200.99	0.0214861	-0.00726729	0.00200849	0.0476338	0.0612205	0.00441439			200.99	-1.19774	-1.09842	-1.36428	-1.37365	-1.26638	-1.2315
201.19	0.0246645	-0.00472843	0.00225334	0.0478312	0.0640509	0.00918634			201.19	-1.19456	-1.09588	-1.36403	-1.37345	-1.26355	-1.22673
201.39	0.0246159	-0.00140919	0.00268968	0.0507181	0.0644672	0.0113927			201.39	-1.19461	-1.09256	-1.3636	-1.37056	-1.26314	-1.22452
201.6	0.027768	-0.00423485	0.00886879	0.053818	0.0626308	0.0143719			201.6	-1.19145	-1.09538	-1.35742	-1.36746	-1.26497	-1.22154
201.79	0.0272029	0.00439085	0.00947105	0.0520544	0.0682506	0.0115666			201.79	-1.19202	-1.08676	-1.35682	-1.36923	-1.25935	-1.22435
201.99	0.0290236	0.00054649	0.0130665	0.0568797	0.0674802	0.0163042			201.99	-1.1902	-1.0906	-1.35322	-1.3644	-1.26012	-1.21961
202.19	0.0307902	0.00033265	0.00998029	0.0529675	0.0693176	0.0190632			202.19	-1.18843	-1.09082	-1.35631	-1.36831	-1.25829	-1.21685
202.39	0.0309736	0.00271945	0.0113678	0.0575894	0.0749132	0.0156624			202.39	-1.18825	-1.08843	-1.35492	-1.36369	-1.25269	-1.22025
[truncated: 45,275 more rows]

## Sheet: Exp_3
Binding raw data (nm)									Normalised to baseline step
[truncated: 46,244 more rows]

## Sheet: Dissociation_fit
Source data: Figure 4A
	One-phase decay model in Prism 8
[truncated: 7 more rows]
