# Supplementary material for: Calcium depletion challenges endoplasmic reticulum proteostasis by destabilising BiP-substrate complexes
Source: eLife. 2020 Dec 9;9:e62601. doi: 10.7554/eLife.62601 (PMC7758071; doi:10.7554/eLife.62601)
Supplement: Figure 4—source data 2. [file elife-62601-fig4-data2.xlsx]

## Sheet: Exp_1
Sorce data: Figure 4B
Raw BLI data (nm)										Normalised to baseline
Time (s)	BiP + Mg + ATP	Mg + Ca + ATP	Mg + ATP + ADP	Mg + Ca + ATP + ADP	Mg + ADP	Ca + ADP	JQPD -> Mg + ADP			Time (s)	BiP + Mg + ATP	Mg + Ca + ATP	Mg + ATP + ADP	Mg + Ca + ATP + ADP	Mg + ADP	Ca + ADP	JQPD -> Mg + ADP
0	0	0	0	0	0	0	0			0	-1.21669	-1.30746	-1.30515	-1.05475	-1.12917	-1.14496	-1.19995
0.2	-0.00053611	-0.00461623	-0.0011251	-0.00168302	-0.00597472	-0.00200663	-0.00025381			0.2	-1.21722	-1.31208	-1.30628	-1.05643	-1.13515	-1.14697	-1.2002
0.39	-0.00223557	-0.00070916	0.00081746	-0.0015362	-0.00189474	-0.00012937	0.00126341			0.39	-1.21892	-1.30817	-1.30433	-1.05628	-1.13107	-1.14509	-1.19869
0.59	0.0006392	-0.00071093	-0.00357754	-0.00402001	-0.00490181	0.00023103	0.00040662			0.59	-1.21605	-1.30818	-1.30873	-1.05877	-1.13407	-1.14473	-1.19954
0.8	-0.00111258	-0.00320649	-0.0037814	-0.00339814	-0.0048116	0.00017084	-0.00150611			0.8	-1.2178	-1.31067	-1.30893	-1.05814	-1.13398	-1.14479	-1.20146
0.99	-0.00134312	0.0015029	-0.00103017	-0.0004131	-0.00306698	-0.00049249	-0.00282545			0.99	-1.21803	-1.30596	-1.30618	-1.05516	-1.13224	-1.14545	-1.20278
1.19	-0.00045184	0.00098186	-0.00203578	-0.00130332	-0.00514463	9.899e-05	-0.00251089			1.19	-1.21714	-1.30648	-1.30719	-1.05605	-1.13431	-1.14486	-1.20246
1.39	-0.00197281	-0.00011311	0.00053664	-0.00382483	-0.00259186	-0.00086648	-0.00200891			1.39	-1.21866	-1.30758	-1.30461	-1.05857	-1.13176	-1.14583	-1.20196
1.59	-0.00077798	-0.00216477	-0.00070402	-0.00059063	-0.005032	0.00373618	0.00072818			1.59	-1.21747	-1.30963	-1.30585	-1.05534	-1.1342	-1.14122	-1.19922
1.79	-0.0012886	-0.00387907	-0.00108914	-0.00264989	-0.00400201	0.00450322	6.424e-05			1.79	-1.21798	-1.31134	-1.30624	-1.0574	-1.13317	-1.14046	-1.19989
1.99	-0.00137345	-0.00154827	0.00184182	0.00164851	-0.00237214	0.00221538	-0.00012647			1.99	-1.21806	-1.30901	-1.30331	-1.0531	-1.13154	-1.14274	-1.20008
2.19	-0.00318422	-0.00166932	0.00171059	-0.0020387	-0.00359193	-0.00070789	0.0018818			2.19	-1.21987	-1.30913	-1.30344	-1.05679	-1.13276	-1.14567	-1.19807
2.39	-0.00245962	0.00084771	-0.00194902	-0.0030686	-0.00479919	0.00041814	-0.00296197			2.39	-1.21915	-1.30662	-1.3071	-1.05782	-1.13397	-1.14454	-1.20291
2.59	0.00260277	-0.00172496	0.00324026	-0.00333911	-0.00104787	-0.00093491	-0.00338439			2.59	-1.21408	-1.30919	-1.30191	-1.05809	-1.13022	-1.14589	-1.20333
2.79	0.00326389	-0.00035581	0.0008374	0.00029042	-0.00229965	0.00298031	-0.00288514			2.79	-1.21342	-1.30782	-1.30431	-1.05446	-1.13147	-1.14198	-1.20283
2.99	4.373e-05	-0.00044612	-0.00011856	-0.00161774	-0.00127828	0.00181887	-0.00071226			2.99	-1.21664	-1.30791	-1.30527	-1.05636	-1.13045	-1.14314	-1.20066
3.19	0.00282762	0.0022081	-0.00125306	-0.00169026	-0.0033003	-0.0012097	-0.0004585			3.19	-1.21386	-1.30526	-1.3064	-1.05644	-1.13247	-1.14617	-1.20041
3.39	-0.00106618	0.00270297	0.0009714	0.00010807	-0.00182721	0.00199897	-0.00135413			3.39	-1.21775	-1.30476	-1.30418	-1.05464	-1.131	-1.14296	-1.2013
3.59	-0.0029882	0.00372941	-0.00115562	0.00056689	-0.00177041	0.00711219	-0.00438084			3.59	-1.21968	-1.30373	-1.30631	-1.05418	-1.13094	-1.13785	-1.20433
3.79	0.00019771	0.00141076	0.00130257	-0.00100822	-0.00211883	0.0033697	0.00115136			3.79	-1.21649	-1.30605	-1.30385	-1.05575	-1.13129	-1.14159	-1.1988
3.99	-0.00040855	0.00193783	-0.00103044	0.00020252	-0.0026431	0.00688511	0.00445466			3.99	-1.2171	-1.30553	-1.30618	-1.05454	-1.13181	-1.13807	-1.19549
4.19	-0.001156	-0.00083598	0.00104248	-0.00323511	-0.00271236	0.00121407	9.612e-05			4.19	-1.21784	-1.3083	-1.30411	-1.05798	-1.13188	-1.14375	-1.19985
4.39	0.00289294	0.0003929	-0.00177508	-0.00482344	-0.00107637	0.0011016	0.0003612			4.39	-1.21379	-1.30707	-1.30693	-1.05957	-1.13025	-1.14386	-1.19959
4.59	-0.00115478	-2.435e-05	0.00117924	0.0014299	-0.00256786	0.00807885	-0.00261834			4.59	-1.21784	-1.30749	-1.30397	-1.05332	-1.13174	-1.13688	-1.20257
4.79	-0.00339308	0.00016421	0.00084599	0.00206517	-0.00472605	0.00429835	-0.00164846			4.79	-1.22008	-1.3073	-1.3043	-1.05268	-1.1339	-1.14066	-1.2016
4.99	0.00043953	-0.00074526	0.00045145	0.00038133	-0.00075279	0.0056306	-0.00237059			4.99	-1.21625	-1.30821	-1.3047	-1.05437	-1.12992	-1.13933	-1.20232
5.19	-0.00201067	-0.00095052	-0.00079282	0.00048745	-0.00402098	0.00301024	-0.00022549			5.19	-1.2187	-1.30841	-1.30594	-1.05426	-1.13319	-1.14195	-1.20018
5.39	-0.00116936	0.00035638	0.00015929	-0.00151863	-0.00063166	0.00672752	-0.00425332			5.39	-1.21786	-1.30711	-1.30499	-1.05627	-1.1298	-1.13823	-1.2042
5.59	-0.00114664	0.00298126	0.00073532	0.0008891	-0.00589646	0.00187553	-0.00147778			5.59	-1.21783	-1.30448	-1.30442	-1.05386	-1.13507	-1.14308	-1.20143
5.8	9.814e-05	0.00080422	0.00151744	0.00145598	-0.00272603	0.00174442	-0.00260312			5.8	-1.21659	-1.30666	-1.30363	-1.05329	-1.1319	-1.14322	-1.20255
5.99	-0.00232665	0.00036409	0.00173978	-0.00014262	-0.00094757	0.00361286	0.00179711			5.99	-1.21901	-1.3071	-1.30341	-1.05489	-1.13012	-1.14135	-1.19815
6.19	-0.00032808	0.00224647	-0.00010397	0.00084149	-0.00086606	0.00704097	0.00123728			6.19	-1.21702	-1.30522	-1.30525	-1.05391	-1.13004	-1.13792	-1.19871
6.39	-0.0045371	0.0011931	0.00449647	0.00171866	-0.00176333	0.0060884	-0.00212471			6.39	-1.22122	-1.30627	-1.30065	-1.05303	-1.13093	-1.13887	-1.20207
6.59	-0.00226119	-0.00121467	0.00225715	0.00350543	-0.00379122	0.00411677	-0.00577747			6.59	-1.21895	-1.30868	-1.30289	-1.05124	-1.13296	-1.14084	-1.20573
6.79	0.00087756	-0.00246052	0.00340916	0.0010489	-0.00337201	0.00396418	-0.00038739			6.79	-1.21581	-1.30992	-1.30174	-1.0537	-1.13254	-1.141	-1.20034
6.99	-0.00077721	-0.00137651	0.00049217	0.00177706	-0.00358068	0.00434882	-0.0033719			6.99	-1.21746	-1.30884	-1.30466	-1.05297	-1.13275	-1.14061	-1.20332
7.19	-0.001941	-0.00111459	0.00028134	-0.00019334	-0.00421514	0.00449494	-0.00315911			7.19	-1.21863	-1.30858	-1.30487	-1.05494	-1.13339	-1.14046	-1.20311
7.39	0.00152704	0.00126247	0.00083677	-0.00315867	-0.00489622	0.00807938	-0.00201581			7.39	-1.21516	-1.3062	-1.30431	-1.05791	-1.13407	-1.13688	-1.20197
7.59	-0.00111771	-0.00289941	-0.00041296	0.00164896	-0.00091754	0.00709446	-0.00396976			7.59	-1.21781	-1.31036	-1.30556	-1.0531	-1.13009	-1.13786	-1.20392
7.79	-0.00287511	0.00061212	0.00028097	0.00246753	-0.00539229	0.00444034	-0.00403935			7.79	-1.21956	-1.30685	-1.30487	-1.05228	-1.13456	-1.14052	-1.20399
7.99	-0.0027682	-0.00038034	0.00281039	-0.00052147	0.00033128	0.00305584	-0.00281932			7.99	-1.21946	-1.30784	-1.30234	-1.05527	-1.12884	-1.1419	-1.20277
8.19	-0.00229234	-0.00345009	4.29e-05	0.00037622	-0.00207538	0.00892768	-0.00282075			8.19	-1.21898	-1.31091	-1.30511	-1.05437	-1.13125	-1.13603	-1.20277
8.39	0.00027183	-0.00441845	0.00394798	0.00202988	-0.00538147	0.00671935	0.00189681			8.39	-1.21642	-1.31188	-1.3012	-1.05272	-1.13455	-1.13824	-1.19805
8.59	-0.00238809	0.00123499	0.00015075	0.00124528	-0.00443333	0.00977952	-9.062e-05			8.59	-1.21908	-1.30623	-1.305	-1.0535	-1.1336	-1.13518	-1.20004
8.79	-0.00210495	-0.00055694	0.00194171	-0.00133624	-0.00163969	0.00948754	-0.00387341			8.79	-1.21879	-1.30802	-1.30321	-1.05608	-1.13081	-1.13547	-1.20382
8.99	-0.00267406	0.00103916	0.00121156	0.00441219	-0.00379843	0.00956499	-0.00259723			8.99	-1.21936	-1.30643	-1.30394	-1.05033	-1.13297	-1.13539	-1.20255
9.19	-0.00236688	0.00259167	0.00687043	-0.00064504	-0.00258373	0.00735772	-0.00493567			9.19	-1.21905	-1.30487	-1.29828	-1.05539	-1.13175	-1.1376	-1.20489
9.39	-0.00285077	-0.00225474	0.00324038	-0.00395509	-0.0040263	0.00613086	-0.00144579			9.39	-1.21954	-1.30972	-1.30191	-1.0587	-1.1332	-1.13883	-1.2014
9.59	-0.00099024	0.00072916	0.00250686	-0.00014729	0.00015229	0.00740191	-0.00149105			9.59	-1.21768	-1.30674	-1.30264	-1.05489	-1.12902	-1.13756	-1.20144
9.8	-0.0018393	0.00351736	0.00202802	-0.00055374	-0.00196207	0.00658033	-0.00460628			9.8	-1.21853	-1.30395	-1.30312	-1.0553	-1.13113	-1.13838	-1.20456
9.99	-0.00228886	-0.00056905	0.00188898	-0.0014348	-0.00400641	0.00778081	-0.00456531			9.99	-1.21898	-1.30803	-1.30326	-1.05618	-1.13318	-1.13718	-1.20451
10.19	0.00367468	0.0026549	0.00275072	-0.00051686	-0.00043854	0.0106937	-0.00028279			10.19	-1.21301	-1.30481	-1.3024	-1.05526	-1.12961	-1.13427	-1.20023
10.39	0.001598	0.00200677	0.00062368	-0.00033462	0.00125775	0.00941591	-0.00192324			10.39	-1.21509	-1.30546	-1.30453	-1.05508	-1.12791	-1.13554	-1.20187
10.59	0.00175863	0.00124991	-0.00085206	0.0009717	-0.00429334	0.0064934	-0.00217615			10.59	-1.21493	-1.30621	-1.306	-1.05378	-1.13346	-1.13847	-1.20213
10.79	-0.00245778	-0.00041128	0.00284971	0.004373	-0.00120425	0.0110585	-0.00279312			10.79	-1.21915	-1.30788	-1.3023	-1.05037	-1.13037	-1.1339	-1.20274
10.99	-0.00434776	-0.00073474	0.00067647	0.00140259	0.00052168	0.00904066	-0.0053202			10.99	-1.22104	-1.3082	-1.30447	-1.05334	-1.12865	-1.13592	-1.20527
11.19	-0.00220227	-0.00054071	0.00157058	0.00122452	0.00083421	0.00753688	-0.00201773			11.19	-1.21889	-1.30801	-1.30358	-1.05352	-1.12834	-1.13742	-1.20197
11.39	-0.00298579	-0.00361209	0.00365644	0.00067345	-0.00315929	0.00822155	-0.00194604			11.39	-1.21967	-1.31108	-1.30149	-1.05407	-1.13233	-1.13674	-1.2019
11.6	0.00082947	0.00134432	-0.00124361	-0.00201564	0.00048257	0.00733856	-0.00388001			11.6	-1.21586	-1.30612	-1.30639	-1.05676	-1.12869	-1.13762	-1.20383
11.8	-0.00323485	-0.00099896	0.00072485	0.00060122	-0.00334269	0.00581584	0.0003903			11.8	-1.21992	-1.30846	-1.30443	-1.05415	-1.13251	-1.13914	-1.19956
11.99	-0.00013449	0.00239993	0.00121534	0.0024976	0.00207946	0.00885979	-0.00481146			11.99	-1.21682	-1.30506	-1.30394	-1.05225	-1.12709	-1.1361	-1.20476
12.19	0.00144601	-0.00494002	0.00107994	-0.00155628	-0.0020232	0.00709247	0.00032077			12.19	-1.21524	-1.3124	-1.30407	-1.0563	-1.13119	-1.13787	-1.19963
12.39	-0.00362517	0.0028315	0.0009619	0.00240101	-0.00084048	0.00691167	-0.00292453			12.39	-1.22031	-1.30463	-1.30419	-1.05235	-1.13001	-1.13805	-1.20287
12.6	-0.00499649	-0.00055393	0.00552346	0.00102032	0.0016128	0.0102609	-0.00685927			12.6	-1.22168	-1.30802	-1.29963	-1.05373	-1.12756	-1.1347	-1.20681
12.8	-0.00297441	0.00276712	0.00468262	-0.00180118	-0.00291564	0.010908	-0.00450474			12.8	-1.21966	-1.3047	-1.30047	-1.05655	-1.13209	-1.13405	-1.20445
12.99	-0.00195968	0.00155549	0.00204064	0.00321272	-0.00115206	0.00897033	-0.0065407			12.99	-1.21865	-1.30591	-1.30311	-1.05153	-1.13032	-1.13599	-1.20649
13.19	-0.00176805	0.00206628	0.00306281	-0.00142544	-0.0003019	0.00821741	-0.00028326			13.19	-1.21846	-1.3054	-1.30209	-1.05617	-1.12947	-1.13674	-1.20023
13.39	-0.00033352	0.00365344	0.00261196	-0.00073053	-0.00105936	0.0118549	-0.00487341			13.39	-1.21702	-1.30381	-1.30254	-1.05548	-1.13023	-1.1331	-1.20482
13.6	-0.0015596	0.00283763	0.00492857	0.00191618	-0.00035477	0.0119109	-0.00387544			13.6	-1.21825	-1.30463	-1.30022	-1.05283	-1.12953	-1.13305	-1.20383
13.8	-0.00021723	-0.00029569	0.00744464	0.00115619	-0.00220668	0.0100068	-0.00298652			13.8	-1.2169	-1.30776	-1.29771	-1.05359	-1.13138	-1.13495	-1.20294
13.99	-0.00240049	0.00238082	0.00191708	-0.00030503	-0.0019728	0.0116447	-0.00378937			13.99	-1.21909	-1.30508	-1.30323	-1.05505	-1.13114	-1.13331	-1.20374
14.19	0.00073539	0.00117667	0.00288528	-0.00054832	-0.00265599	0.010726	-0.00144122			14.19	-1.21595	-1.30629	-1.30227	-1.0553	-1.13183	-1.13423	-1.20139
14.39	-0.00040497	0.00442624	0.0057861	-0.0007187	-0.00196608	0.0110753	-0.00721141			14.39	-1.21709	-1.30304	-1.29936	-1.05547	-1.13114	-1.13388	-1.20716
14.6	-0.00052672	0.00298378	-0.00139262	0.00298896	0.00029358	0.0117518	-0.00309352			14.6	-1.21721	-1.30448	-1.30654	-1.05176	-1.12888	-1.13321	-1.20304
14.8	0.00109458	-0.00015386	0.00571501	-0.00046988	-0.00125891	0.00969457	-0.00833805			14.8	-1.21559	-1.30762	-1.29944	-1.05522	-1.13043	-1.13526	-1.20829
14.99	-0.00330685	0.00398637	-0.00149934	0.00040455	-0.00116339	0.0101823	-0.00188518			14.99	-1.21999	-1.30348	-1.30665	-1.05434	-1.13033	-1.13478	-1.20183
15.19	-0.00689229	0.00098319	0.00174175	0.00352076	0.00110126	0.0080941	-0.00055595			15.19	-1.22358	-1.30648	-1.30341	-1.05123	-1.12807	-1.13687	-1.20051
15.39	0.00182765	0.00405699	0.0066943	0.00186092	-0.00120056	0.00938369	-0.00428119			15.39	-1.21486	-1.30341	-1.29846	-1.05289	-1.13037	-1.13558	-1.20423
15.6	-0.00062351	0.00112002	-0.00033187	0.0028368	0.00187836	0.0098119	-0.0053259			15.6	-1.21731	-1.30634	-1.30548	-1.05191	-1.12729	-1.13515	-1.20528
15.8	-0.0046488	-0.00332734	0.00347036	-0.00012827	0.00102988	0.00898497	-0.00519754			15.8	-1.22134	-1.31079	-1.30168	-1.05488	-1.12814	-1.13597	-1.20515
15.99	-0.00137372	0.00151564	0.00148326	0.00294491	0.00140979	0.00996008	0.00035375			15.99	-1.21806	-1.30595	-1.30367	-1.0518	-1.12776	-1.135	-1.1996
16.2	-0.00093576	0.00178088	0.00082298	-0.00028285	-0.00082841	0.0137877	-0.00806977			16.2	-1.21762	-1.30568	-1.30433	-1.05503	-1.13	-1.13117	-1.20802
16.4	-0.00297621	0.0003425	0.00412657	0.00031176	-0.00036638	0.00815677	-0.00333237			16.4	-1.21966	-1.30712	-1.30102	-1.05443	-1.12954	-1.1368	-1.20328
16.6	-0.00076222	0.00535898	0.00870283	0.00393511	-4.287e-05	0.0114654	-0.00187694			16.6	-1.21745	-1.30211	-1.29645	-1.05081	-1.12921	-1.13349	-1.20183
16.8	-0.00105302	-0.00012874	0.00530202	-0.00210963	0.00106169	0.00918958	-0.00531553			16.8	-1.21774	-1.30759	-1.29985	-1.05686	-1.12811	-1.13577	-1.20527
17	0.00113608	-0.00215485	0.00118964	-5.202e-05	0.00057802	0.0136158	-0.00533226			17	-1.21555	-1.30962	-1.30396	-1.0548	-1.12859	-1.13134	-1.20528
17.2	-0.00059939	0.00247076	0.00605754	0.00089863	-0.00316614	0.0139814	-0.00238681			17.2	-1.21729	-1.30499	-1.29909	-1.05385	-1.13234	-1.13098	-1.20234
17.4	0.00140305	-0.00060648	0.00688832	0.0033336	0.00056869	0.00963323	-0.00182171			17.4	-1.21528	-1.30807	-1.29826	-1.05141	-1.1286	-1.13533	-1.20177
17.59	-0.00015797	0.00370862	0.00276716	0.00201162	0.00062619	0.00851468	-0.00120784			17.59	-1.21685	-1.30376	-1.30238	-1.05274	-1.12854	-1.13644	-1.20116
17.79	-0.00363871	-0.00030349	0.00257985	0.00360453	0.00019542	0.00830033	-0.00872039			17.79	-1.22033	-1.30777	-1.30257	-1.05114	-1.12897	-1.13666	-1.20867
18	-0.00162593	0.00283496	-0.00140731	0.00244471	-0.00200567	0.0127782	-0.00196691			18	-1.21831	-1.30463	-1.30656	-1.0523	-1.13118	-1.13218	-1.20192
18.2	0.00223401	0.0009198	0.00768214	0.00472198	-0.00374518	0.010338	-0.00486218			18.2	-1.21445	-1.30654	-1.29747	-1.05002	-1.13292	-1.13462	-1.20481
18.4	-0.00038074	-0.00228256	0.00492427	0.00370141	-0.000428	0.0117508	0.00283088			18.4	-1.21707	-1.30975	-1.30023	-1.05105	-1.1296	-1.13321	-1.19712
18.6	-0.00074405	0.00015684	0.00444516	0.00426398	5.545e-05	0.0120327	-0.00350252			18.6	-1.21743	-1.30731	-1.30071	-1.05048	-1.12911	-1.13293	-1.20345
18.8	0.00036947	0.00057223	0.00284547	0.00145121	-0.00057677	0.0120278	-0.00417071			18.8	-1.21632	-1.30689	-1.30231	-1.0533	-1.12975	-1.13293	-1.20412
18.99	-0.00080497	0.00325438	0.00225045	-0.00191352	0.00043049	0.0133192	-0.00527062			18.99	-1.21749	-1.30421	-1.3029	-1.05666	-1.12874	-1.13164	-1.20522
19.2	0.00131654	0.00238112	-0.00285859	0.00317042	-0.00088973	0.0151841	-0.00278446			19.2	-1.21537	-1.30508	-1.30801	-1.05158	-1.13006	-1.12978	-1.20273
19.39	0.00110726	0.00087723	0.006604	0.00292926	0.0033885	0.0158415	-0.00565537			19.39	-1.21558	-1.30659	-1.29855	-1.05182	-1.12578	-1.12912	-1.2056
19.6	-0.00142011	0.00259792	0.00587159	-0.0001706	0.00184257	0.0101095	-0.00895206			19.6	-1.21811	-1.30487	-1.29928	-1.05492	-1.12733	-1.13485	-1.2089
19.8	-0.00112263	0.00011616	0.00468847	0.00090061	0.00358211	0.0113586	-0.00610259			19.8	-1.21781	-1.30735	-1.30046	-1.05385	-1.12559	-1.1336	-1.20605
19.99	0.0010464	0.00278486	0.00721638	0.00058157	0.00035971	0.012696	-0.00254901			19.99	-1.21564	-1.30468	-1.29793	-1.05417	-1.12881	-1.13226	-1.2025
20.2	0.00021013	0.00323946	0.00323631	0.0003297	-0.00194067	0.0134254	-0.00219836			20.2	-1.21648	-1.30422	-1.30191	-1.05442	-1.13111	-1.13153	-1.20215
20.4	0.00111833	-0.00314358	0.00040411	-0.00039906	0.00049023	0.0108909	-0.00156607			20.4	-1.21557	-1.31061	-1.30475	-1.05515	-1.12868	-1.13407	-1.20152
20.6	0.0014007	0.00081869	0.00477472	0.00214448	0.00033531	0.0129389	-0.00510186			20.6	-1.21529	-1.30665	-1.30038	-1.0526	-1.12883	-1.13202	-1.20505
20.8	-0.00236071	0.00025667	0.00387776	0.00024619	0.00074775	0.0116898	-0.00903649			20.8	-1.21905	-1.30721	-1.30127	-1.0545	-1.12842	-1.13327	-1.20899
20.99	-0.00070583	-0.00193843	0.0044554	0.00236112	-0.0014592	0.0140684	-0.00682347			20.99	-1.21739	-1.3094	-1.3007	-1.05239	-1.13063	-1.13089	-1.20677
21.2	-0.00194596	0.0003384	0.00631533	-9.744e-05	0.00235527	0.0143791	-0.00339601			21.2	-1.21863	-1.30713	-1.29884	-1.05484	-1.12682	-1.13058	-1.20335
21.4	-0.00039959	-0.00103903	0.00338177	-0.00028468	-0.00170538	0.0132612	-0.00283478			21.4	-1.21709	-1.3085	-1.30177	-1.05503	-1.13088	-1.1317	-1.20278
21.6	-0.00051445	0.00044632	0.00158188	0.00184162	0.00212307	0.0142394	-0.00623678			21.6	-1.2172	-1.30702	-1.30357	-1.05291	-1.12705	-1.13072	-1.20619
21.8	-0.00069986	0.00380347	0.00492023	0.0031593	0.00336626	0.0131405	-0.00438923			21.8	-1.21739	-1.30366	-1.30023	-1.05159	-1.1258	-1.13182	-1.20434
22	0.00032201	0.00237952	0.0028501	0.00166141	0.00062864	0.0141692	-0.00175983			22	-1.21637	-1.30508	-1.3023	-1.05309	-1.12854	-1.13079	-1.20171
22.2	-0.00080562	0.00237095	0.00276165	0.00196746	-0.00093753	0.0177939	-0.0038982			22.2	-1.21749	-1.30509	-1.30239	-1.05278	-1.13011	-1.12717	-1.20385
22.4	-0.00179131	0.00159817	0.0066101	-0.00062337	0.00108869	0.0115156	-0.00335674			22.4	-1.21848	-1.30587	-1.29854	-1.05537	-1.12808	-1.13344	-1.20331
22.59	0.00056593	0.00283825	0.00434415	0.00332439	-0.00029329	0.0148268	-0.00623496			22.59	-1.21612	-1.30463	-1.30081	-1.05142	-1.12946	-1.13013	-1.20618
22.8	-0.00095309	-0.00047323	0.00725275	0.0038402	-0.00201598	0.013053	-0.00616863			22.8	-1.21764	-1.30794	-1.2979	-1.05091	-1.13119	-1.13191	-1.20612
22.99	-0.00154011	0.00177552	0.00806787	0.00432213	0.00121924	0.0154289	-0.00201669			22.99	-1.21823	-1.30569	-1.29708	-1.05042	-1.12795	-1.12953	-1.20197
23.2	-0.00281928	-0.00096674	0.00358611	0.00136805	0.00156665	0.0119421	-0.00572133			23.2	-1.21951	-1.30843	-1.30156	-1.05338	-1.1276	-1.13302	-1.20567
23.4	-0.00256106	0.00086235	0.00500842	-0.0016602	-0.00022289	0.0131128	-0.00877857			23.4	-1.21925	-1.3066	-1.30014	-1.05641	-1.12939	-1.13185	-1.20873
23.6	-0.00216462	-0.00029003	0.00451217	0.00089129	0.00219183	0.014595	-0.00472179			23.6	-1.21885	-1.30775	-1.30064	-1.05386	-1.12698	-1.13036	-1.20467
23.8	-0.00089349	0.00272549	0.00483848	0.00264447	0.00313571	0.0165598	-0.00192611			23.8	-1.21758	-1.30474	-1.30031	-1.0521	-1.12603	-1.1284	-1.20188
24	-0.00221874	-0.00136856	0.00092672	0.0004161	0.00181141	0.0177343	-0.00780666			24	-1.21891	-1.30883	-1.30422	-1.05433	-1.12736	-1.12723	-1.20776
24.19	-0.00320727	0.00015807	0.00622199	0.00146715	0.00416229	0.0166465	-0.00268198			24.19	-1.21989	-1.30731	-1.29893	-1.05328	-1.12501	-1.12831	-1.20263
24.39	-0.00439275	0.0006148	0.00569926	0.00252294	0.00020926	0.0147493	-0.00605314			24.39	-1.22108	-1.30685	-1.29945	-1.05222	-1.12896	-1.13021	-1.206
24.6	0.00305202	0.00237611	0.00475947	0.00309672	0.00175182	0.0145456	-0.00753963			24.6	-1.21364	-1.30509	-1.30039	-1.05165	-1.12742	-1.13041	-1.20749
24.8	-0.00024435	0.00221028	0.0034387	0.00375211	0.00632357	0.0162633	-0.00214715			24.8	-1.21693	-1.30525	-1.30171	-1.05099	-1.12285	-1.1287	-1.2021
25	-0.00099823	0.00144534	0.00632478	0.00576102	0.00229365	0.0151259	-0.00320505			25	-1.21769	-1.30602	-1.29883	-1.04899	-1.12688	-1.12983	-1.20315
25.2	-0.00082227	0.00017328	0.00658905	0.00094295	0.0003837	0.0129605	-0.00346277			25.2	-1.21751	-1.30729	-1.29856	-1.0538	-1.12879	-1.132	-1.20341
25.39	-0.00150295	0.00582802	0.00394525	0.00233655	0.00173539	0.0182914	-0.00716368			25.39	-1.21819	-1.30164	-1.30121	-1.05241	-1.12743	-1.12667	-1.20711
25.6	-0.00052314	-0.00055478	0.0083314	-4.337e-05	-0.00091574	0.0152453	-0.00219029			25.6	-1.21721	-1.30802	-1.29682	-1.05479	-1.13009	-1.12971	-1.20214
25.8	-0.00106413	-0.00157592	0.00872872	0.0007901	-0.00106047	0.01621	-0.00806363			25.8	-1.21775	-1.30904	-1.29642	-1.05396	-1.13023	-1.12875	-1.20801
25.99	-0.00199133	0.00112589	0.00556602	0.00301026	0.00239448	0.0148094	-0.00596575			25.99	-1.21868	-1.30634	-1.29958	-1.05174	-1.12678	-1.13015	-1.20592
26.2	-0.00103723	0.00456217	0.00427038	0.00398692	0.00273289	0.0116353	-0.00555567			26.2	-1.21772	-1.3029	-1.30088	-1.05076	-1.12644	-1.13332	-1.20551
26.4	0.00030158	0.0041961	0.0018153	0.00476401	0.00280337	0.0134701	-0.00231208			26.4	-1.21639	-1.30327	-1.30334	-1.04998	-1.12637	-1.13149	-1.20226
26.6	-0.00375925	0.00298593	0.00711629	0.0038804	0.00012723	0.0163874	-0.00424101			26.6	-1.22045	-1.30448	-1.29803	-1.05087	-1.12904	-1.12857	-1.20419
26.79	-0.00072177	0.00380055	0.00729076	-3.813e-05	0.00079175	0.0136441	-0.00364974			26.79	-1.21741	-1.30366	-1.29786	-1.05478	-1.12838	-1.13132	-1.2036
27	-0.0014858	0.00108827	0.00592442	0.00421593	0.00170593	0.0203093	-0.00656431			27	-1.21817	-1.30638	-1.29923	-1.05053	-1.12746	-1.12465	-1.20651
27.19	0.00267077	0.00424817	0.00375759	0.001729	-0.00069472	0.0156098	-0.00476203			27.19	-1.21402	-1.30322	-1.30139	-1.05302	-1.12987	-1.12935	-1.20471
27.39	0.00036942	0.00022214	0.00788304	0.00209915	1.306e-05	0.0118831	-0.00674625			27.39	-1.21632	-1.30724	-1.29727	-1.05265	-1.12916	-1.13308	-1.2067
27.59	-0.00428347	-0.00175826	0.0068072	0.00261725	0.00062933	0.0130804	-0.00517342			27.59	-1.22097	-1.30922	-1.29834	-1.05213	-1.12854	-1.13188	-1.20512
27.79	-0.00082356	-0.00103338	0.00534063	0.00156645	0.0042848	0.0155135	-0.00785062			27.79	-1.21751	-1.3085	-1.29981	-1.05318	-1.12489	-1.12945	-1.2078
27.99	-0.00392128	0.00132906	0.00509677	0.00393486	0.00170518	0.0164047	-0.00727629			27.99	-1.22061	-1.30614	-1.30005	-1.05081	-1.12747	-1.12855	-1.20723
28.2	-0.00139819	0.00148715	0.00857206	0.00307756	0.00110381	0.014509	-0.00651246			28.2	-1.21809	-1.30598	-1.29658	-1.05167	-1.12807	-1.13045	-1.20646
28.4	-0.00404242	0.00338516	0.00205984	0.00292001	0.00109923	0.0158363	-0.00407729			28.4	-1.22073	-1.30408	-1.30309	-1.05183	-1.12807	-1.12912	-1.20403
28.6	0.0017619	0.00351899	0.00770275	0.00155189	0.00138727	0.0184889	-0.0031792			28.6	-1.21493	-1.30395	-1.29745	-1.05319	-1.12778	-1.12647	-1.20313
28.8	0.0005457	0.0040542	0.00815721	0.00442241	0.00180872	0.0195461	-0.00414224			28.8	-1.21614	-1.30341	-1.29699	-1.05032	-1.12736	-1.12541	-1.20409
28.99	0.00132583	0.00368691	0.00562643	0.00463369	0.00016776	0.0138227	-0.00345944			28.99	-1.21536	-1.30378	-1.29952	-1.05011	-1.129	-1.13114	-1.20341
29.19	0.00041061	0.00259241	0.00740854	5.973e-05	-5.224e-05	0.0150944	-0.00735503			29.19	-1.21628	-1.30487	-1.29774	-1.05469	-1.12922	-1.12987	-1.2073
29.39	-0.00059037	0.00199806	0.0083869	0.00451403	0.00138071	0.0155725	-0.00548717			29.39	-1.21728	-1.30547	-1.29676	-1.05023	-1.12779	-1.12939	-1.20544
29.6	-0.00022603	0.00149297	0.00276046	0.00411728	0.00209815	0.0168981	-0.00110461			29.6	-1.21691	-1.30597	-1.30239	-1.05063	-1.12707	-1.12806	-1.20105
29.79	-0.00184746	0.00515541	0.00781161	0.00219619	0.00164977	0.015225	-0.0066742			29.79	-1.21853	-1.30231	-1.29734	-1.05255	-1.12752	-1.12973	-1.20662
29.99	-0.00265387	0.00603121	0.00620507	0.00266715	0.00312825	0.0170774	-0.00511671			29.99	-1.21934	-1.30143	-1.29895	-1.05208	-1.12604	-1.12788	-1.20507
30.19	-0.00298298	0.00830068	0.00589006	0.00299984	0.00071306	0.0167178	-0.00472774			30.19	-1.21967	-1.29916	-1.29926	-1.05175	-1.12846	-1.12824	-1.20468
30.39	-0.00099445	0.00256378	0.00683484	0.00337851	0.00022154	0.0163562	-0.00242101			30.39	-1.21768	-1.3049	-1.29832	-1.05137	-1.12895	-1.1286	-1.20237
30.6	-0.00069086	0.00155474	0.00507551	0.00499793	0.0007154	0.0175334	-0.00778499			30.6	-1.21738	-1.30591	-1.30008	-1.04975	-1.12845	-1.12743	-1.20773
30.79	-0.00101178	0.00104425	0.00696771	0.00488133	0.00254184	0.0137854	-0.00631908			30.79	-1.2177	-1.30642	-1.29818	-1.04987	-1.12663	-1.13117	-1.20627
30.99	-0.00119785	0.00150378	0.00791918	0.00567983	0.00126023	0.0148748	-0.00869476			30.99	-1.21789	-1.30596	-1.29723	-1.04907	-1.12791	-1.13008	-1.20864
31.19	-0.00175389	0.00631671	0.00681614	0.00300368	0.00133722	0.0186593	-0.00897222			31.19	-1.21844	-1.30115	-1.29833	-1.05174	-1.12783	-1.1263	-1.20892
31.4	-0.00145552	0.00110285	0.00861984	0.00524205	0.0005606	0.0156778	-0.00442936			31.4	-1.21814	-1.30636	-1.29653	-1.0495	-1.12861	-1.12928	-1.20438
31.59	-0.00161455	0.00490861	0.00654384	0.00139514	0.00073895	0.0151946	-0.00360671			31.59	-1.2183	-1.30256	-1.29861	-1.05335	-1.12843	-1.12976	-1.20356
31.8	-0.00180741	-0.00093992	0.00462669	0.00183633	0.00291623	0.0173636	-0.00659013			31.8	-1.21849	-1.3084	-1.30052	-1.05291	-1.12625	-1.1276	-1.20654
31.99	-0.00293488	0.00260064	0.00441785	0.00806323	0.00202231	0.0141915	-0.00717859			31.99	-1.21962	-1.30486	-1.30073	-1.04668	-1.12715	-1.13077	-1.20713
32.19	-0.00231445	0.00349833	0.00301792	0.00409008	0.0023706	0.0201936	-0.00578219			32.19	-1.219	-1.30397	-1.30213	-1.05066	-1.1268	-1.12477	-1.20573
32.39	-0.00019432	0.0007871	0.00726389	0.00263802	0.00074759	0.0194166	-0.00815866			32.39	-1.21688	-1.30668	-1.29789	-1.05211	-1.12842	-1.12554	-1.20811
32.59	-0.00367847	0.00343178	0.00753468	0.00046671	0.00068323	0.0186828	-0.00372078			32.59	-1.22037	-1.30403	-1.29762	-1.05428	-1.12849	-1.12628	-1.20367
32.79	-0.0024513	0.00116898	0.00544998	0.00312516	0.00302321	0.0184902	-0.00414703			32.79	-1.21914	-1.3063	-1.2997	-1.05162	-1.12615	-1.12647	-1.2041
32.99	-0.00432566	0.00166377	0.00406168	0.00450718	0.00484422	0.0187983	-0.0047826			32.99	-1.22101	-1.3058	-1.30109	-1.05024	-1.12433	-1.12616	-1.20473
33.19	-3.52e-05	-0.00112543	0.00689643	0.0030816	0.00243726	0.0148215	-0.00847925			33.19	-1.21672	-1.30859	-1.29825	-1.05167	-1.12673	-1.13014	-1.20843
33.39	-0.00310189	0.0013301	0.0080957	0.00421289	0.00161245	0.0187578	-0.00828774			33.39	-1.21979	-1.30613	-1.29705	-1.05053	-1.12756	-1.1262	-1.20824
33.59	0.00275499	0.00373436	0.0073295	0.0039053	0.00113441	0.0171208	0.00067745			33.59	-1.21393	-1.30373	-1.29782	-1.05084	-1.12804	-1.12784	-1.19927
33.79	-0.00153324	0.00153105	0.010777	0.00239605	0.00459329	0.0136745	-0.00173273			33.79	-1.21822	-1.30593	-1.29437	-1.05235	-1.12458	-1.13128	-1.20168
33.99	-0.00103097	-0.00096272	0.00878064	0.00376502	0.00186973	0.0185987	-0.00774716			33.99	-1.21772	-1.30843	-1.29637	-1.05098	-1.1273	-1.12636	-1.2077
34.19	-0.0006099	0.00228603	0.00556028	0.00830873	-0.00191513	0.0184547	-0.00533733			34.19	-1.2173	-1.30518	-1.29959	-1.04644	-1.13109	-1.1265	-1.20529
34.39	-0.00261115	0.00163424	0.00912454	0.00432457	0.00233191	0.0176298	-0.00954212			34.39	-1.2193	-1.30583	-1.29603	-1.05042	-1.12684	-1.12733	-1.20949
34.59	-0.00267042	0.00260189	0.00450455	0.00413949	0.00167745	0.0175584	-0.00485986			34.59	-1.21936	-1.30486	-1.30065	-1.05061	-1.12749	-1.1274	-1.20481
34.79	0.0014779	0.00284222	0.00873346	0.00561453	-0.00014343	0.0183076	-0.00848894			34.79	-1.21521	-1.30462	-1.29642	-1.04913	-1.12931	-1.12665	-1.20844
34.99	-0.00068612	0.00201608	0.00831084	0.00483002	0.00426954	0.019134	-0.00571422			34.99	-1.21737	-1.30545	-1.29684	-1.04992	-1.1249	-1.12583	-1.20566
35.19	-0.00094114	0.00517063	0.00200742	0.00401655	0.00302387	0.0186749	-0.00909141			35.19	-1.21763	-1.30229	-1.30314	-1.05073	-1.12615	-1.12628	-1.20904
35.39	-0.00251574	0.00021181	0.00437455	0.00108441	-0.00169779	0.0164046	-0.0035613			35.39	-1.2192	-1.30725	-1.30078	-1.05366	-1.13087	-1.12855	-1.20351
35.59	-0.00193165	-0.00100199	0.0107754	0.00709653	0.00331717	0.0175743	-0.00759329			35.59	-1.21862	-1.30847	-1.29438	-1.04765	-1.12585	-1.12739	-1.20754
35.79	-0.0037832	0.00033644	0.010116	0.00420038	0.00026993	0.0155173	-0.0068596			35.79	-1.22047	-1.30713	-1.29503	-1.05055	-1.1289	-1.12944	-1.20681
35.99	-0.0016749	0.00389161	0.00618787	0.00047541	0.00394608	0.0171349	-0.0105025			35.99	-1.21836	-1.30357	-1.29896	-1.05427	-1.12522	-1.12782	-1.21045
36.19	6.086e-05	-0.00037553	0.0069727	0.00076258	0.00281105	0.0184794	-0.00479454			36.19	-1.21663	-1.30784	-1.29818	-1.05398	-1.12636	-1.12648	-1.20474
36.39	-0.00098426	0.00182041	0.00745422	0.00113875	0.0052167	0.0184244	-0.00406575			36.39	-1.21767	-1.30564	-1.2977	-1.05361	-1.12395	-1.12654	-1.20402
36.59	0.00115846	0.00414074	0.00637119	0.00225839	-0.00067786	0.0203122	-0.00706658			36.59	-1.21553	-1.30332	-1.29878	-1.05249	-1.12985	-1.12465	-1.20702
36.79	-0.00322074	0.00169402	0.00518537	0.0044764	0.00144241	0.0181857	-0.00690565			36.79	-1.21991	-1.30577	-1.29997	-1.05027	-1.12773	-1.12677	-1.20686
36.99	-0.00099529	0.00297417	0.0085431	0.00296483	0.00429807	0.0195395	-0.00394481			36.99	-1.21768	-1.30449	-1.29661	-1.05178	-1.12487	-1.12542	-1.20389
37.19	-0.00280603	0.00108653	0.00473538	0.0058608	-7.779e-05	0.0188519	-0.00320013			37.19	-1.21949	-1.30638	-1.30042	-1.04889	-1.12925	-1.12611	-1.20315
37.39	0.0005349	0.00415092	0.00734522	0.00302624	0.00288807	0.0188703	-0.00751164			37.39	-1.21615	-1.30331	-1.29781	-1.05172	-1.12628	-1.12609	-1.20746
37.59	-0.00648481	0.00130467	0.0103615	-0.00061748	0.0020508	0.015553	-0.00546745			37.59	-1.22317	-1.30616	-1.29479	-1.05536	-1.12712	-1.12941	-1.20542
37.79	-0.00221018	0.00082267	0.00575033	0.00132681	0.00509227	0.0164525	-0.00749794			37.79	-1.2189	-1.30664	-1.2994	-1.05342	-1.12408	-1.12851	-1.20745
37.99	-0.00174335	0.00372267	0.00619832	0.00531545	0.00467077	0.0213699	-0.010759			37.99	-1.21843	-1.30374	-1.29895	-1.04943	-1.1245	-1.12359	-1.21071
38.19	0.00013866	-0.00083214	0.00859192	0.00490362	0.00211247	0.0183479	-0.00461736			38.19	-1.21655	-1.3083	-1.29656	-1.04984	-1.12706	-1.12661	-1.20457
38.4	0.00150097	0.00206698	0.00957362	0.00076978	0.00164786	0.0182704	-0.00746668			38.4	-1.21519	-1.3054	-1.29558	-1.05398	-1.12752	-1.12669	-1.20742
38.59	-0.00187315	0.00327323	0.00773436	0.00414508	-0.00023654	0.0150643	-0.00489998			38.59	-1.21856	-1.30419	-1.29742	-1.0506	-1.12941	-1.1299	-1.20485
38.79	-0.00308429	0.00189917	0.00745671	0.0017977	0.00210048	0.0189516	-0.00617657			38.79	-1.21977	-1.30557	-1.29769	-1.05295	-1.12707	-1.12601	-1.20613
38.99	0.00041241	0.00112843	0.00717943	0.0017855	0.00225621	0.0205628	-0.00473451			38.99	-1.21627	-1.30634	-1.29797	-1.05296	-1.12691	-1.1244	-1.20468
39.19	-0.00321842	0.00145431	0.00750466	0.00303991	0.00070532	0.0198122	-0.00633675			39.19	-1.21991	-1.30601	-1.29765	-1.05171	-1.12846	-1.12515	-1.20629
39.4	-0.00212888	0.00279736	0.00601522	0.00327702	0.00237801	0.0222185	-0.00550863			39.4	-1.21882	-1.30467	-1.29914	-1.05147	-1.12679	-1.12274	-1.20546
39.59	-0.00133605	0.00130657	0.00470815	0.00246184	0.00293709	0.0175491	-0.00831287			39.59	-1.21802	-1.30616	-1.30044	-1.05228	-1.12623	-1.12741	-1.20826
39.79	-0.00184346	0.00092331	0.00709104	0.00570426	9.7e-06	0.0189293	-0.00739322			39.79	-1.21853	-1.30654	-1.29806	-1.04904	-1.12916	-1.12603	-1.20734
39.99	-0.00066497	0.00144058	0.00818467	0.00248821	0.00307847	0.0223125	-0.00998338			39.99	-1.21735	-1.30602	-1.29697	-1.05226	-1.12609	-1.12265	-1.20993
40.19	-0.00133709	-0.00016703	0.00766454	0.00378005	0.00254818	0.0226224	-0.0055426			40.19	-1.21802	-1.30763	-1.29749	-1.05097	-1.12662	-1.12234	-1.20549
40.4	-0.00206823	-0.00023489	0.00413428	0.00482129	0.00373848	0.0196521	-0.00494727			40.4	-1.21876	-1.3077	-1.30102	-1.04993	-1.12543	-1.12531	-1.2049
40.59	-0.00048949	-0.00095733	0.00669395	0.00478336	0.0038259	0.0178049	-0.00497322			40.59	-1.21718	-1.30842	-1.29846	-1.04996	-1.12534	-1.12715	-1.20492
40.79	-0.00228152	0.00120381	0.00732921	0.00279089	0.0060364	0.0182395	-0.00867606			40.79	-1.21897	-1.30626	-1.29782	-1.05196	-1.12313	-1.12672	-1.20863
40.99	-0.00226115	0.00249173	0.00967754	0.00237723	0.00235347	0.019445	-0.00645538			40.99	-1.21895	-1.30497	-1.29547	-1.05237	-1.12682	-1.12551	-1.2064
41.19	-0.0026457	-0.00212	0.010898	0.00521656	0.0019754	0.0208139	-0.00505482			41.19	-1.21933	-1.30958	-1.29425	-1.04953	-1.12719	-1.12415	-1.205
41.4	-0.00277958	0.00369895	0.00773859	0.00364278	0.00262966	0.0209449	-0.00240181			41.4	-1.21947	-1.30377	-1.29741	-1.0511	-1.12654	-1.12401	-1.20235
41.59	0.00102315	0.00432695	0.00261452	0.00176743	0.0030077	0.0206003	-0.00887229			41.59	-1.21566	-1.30314	-1.30254	-1.05298	-1.12616	-1.12436	-1.20882
41.79	-0.00318264	0.0016029	0.0111062	0.00166326	0.00363023	0.0200535	-0.010073			41.79	-1.21987	-1.30586	-1.29404	-1.05308	-1.12554	-1.12491	-1.21002
41.99	0.00012578	0.00048082	0.00697155	0.0032933	0.00072498	0.0189536	-0.0050962			41.99	-1.21656	-1.30698	-1.29818	-1.05145	-1.12845	-1.12601	-1.20505
42.19	-0.00251815	0.0015331	0.0067402	0.00329643	0.00341981	0.0215728	-0.00985091			42.19	-1.21921	-1.30593	-1.29841	-1.05145	-1.12575	-1.12339	-1.2098
42.4	-0.0017013	0.00040572	0.00768447	0.00302463	0.00491989	0.0241961	-0.00572228			42.4	-1.21839	-1.30706	-1.29747	-1.05172	-1.12425	-1.12076	-1.20567
42.59	-0.00105356	0.00453689	0.00788713	0.00448663	0.00504944	0.020362	-0.00812611			42.59	-1.21774	-1.30293	-1.29726	-1.05026	-1.12412	-1.1246	-1.20808
42.79	0.00087415	0.00086582	0.00892859	0.0053685	0.00240934	0.0216666	-0.00846255			42.79	-1.21581	-1.3066	-1.29622	-1.04938	-1.12676	-1.12329	-1.20841
42.99	0.00053965	0.00169976	0.00994852	0.004305	-0.00120479	0.0195214	-0.0100905			42.99	-1.21615	-1.30576	-1.2952	-1.05044	-1.13038	-1.12544	-1.21004
43.19	-0.00013209	0.0049808	0.00722452	0.00663543	-4.509e-05	0.0231875	-0.00583945			43.19	-1.21682	-1.30248	-1.29793	-1.04811	-1.12922	-1.12177	-1.20579
43.39	-0.00267234	0.00395998	0.00794344	0.00019575	0.0053186	0.0196298	-0.00811889			43.39	-1.21936	-1.3035	-1.29721	-1.05455	-1.12385	-1.12533	-1.20807
43.59	-0.00307425	-0.00159962	0.00424416	0.00426596	0.00100168	0.0204886	-0.0102421			43.59	-1.21976	-1.30906	-1.30091	-1.05048	-1.12817	-1.12447	-1.21019
43.79	-0.00084201	0.00408393	0.00842095	0.00357499	0.00330299	0.0203281	-0.00999169			43.79	-1.21753	-1.30338	-1.29673	-1.05117	-1.12587	-1.12463	-1.20994
43.99	-0.00229264	0.00474483	0.00956856	0.00531335	0.0037852	0.0201341	-0.0057471			43.99	-1.21898	-1.30272	-1.29558	-1.04943	-1.12539	-1.12483	-1.2057
44.19	-0.00354417	0.00329031	0.0102105	0.00333633	0.00357027	0.0197771	-0.00781295			44.19	-1.22023	-1.30417	-1.29494	-1.05141	-1.1256	-1.12518	-1.20776
44.4	-0.00097877	-0.00173245	0.00976764	0.00331747	-0.00026186	0.0198022	-0.00534563			44.4	-1.21767	-1.3092	-1.29538	-1.05143	-1.12943	-1.12516	-1.2053
44.59	-0.00033661	0.00261042	0.00939283	0.0031577	0.00111477	0.0183987	-0.00867353			44.59	-1.21702	-1.30485	-1.29576	-1.05159	-1.12806	-1.12656	-1.20862
44.79	0.00143647	0.00101956	0.00598648	0.00629695	0.00425597	0.0230591	-0.00865893			44.79	-1.21525	-1.30644	-1.29916	-1.04845	-1.12491	-1.1219	-1.20861
44.99	-0.00384184	0.00345112	0.00779181	0.00529958	0.00498319	0.0199186	-0.00619029			44.99	-1.22053	-1.30401	-1.29736	-1.04945	-1.12419	-1.12504	-1.20614
45.19	-0.00554607	-8.27e-06	0.00743001	0.00538382	0.00020282	0.0250741	-0.00615058			45.19	-1.22223	-1.30747	-1.29772	-1.04936	-1.12897	-1.11989	-1.2061
45.4	-0.00394885	7.072e-05	0.00956019	0.00015681	0.00381441	0.0209394	-0.00785598			45.4	-1.22064	-1.30739	-1.29559	-1.05459	-1.12536	-1.12402	-1.20781
45.59	0.00014209	-0.00021872	0.00862304	0.00506311	0.00420042	0.0194554	-0.00511587			45.59	-1.21655	-1.30768	-1.29653	-1.04968	-1.12497	-1.1255	-1.20507
45.79	0.00029158	0.00083091	0.00997003	0.00485338	0.00550433	0.0201787	-0.00578035			45.79	-1.2164	-1.30663	-1.29518	-1.04989	-1.12367	-1.12478	-1.20573
45.99	-0.00221944	0.00454512	0.00994876	0.00465734	0.00551599	0.0204314	-0.00462243			45.99	-1.21891	-1.30292	-1.2952	-1.05009	-1.12365	-1.12453	-1.20457
46.19	-0.00183934	0.00168697	0.0109709	0.00303207	0.00406756	0.0195301	-0.0107514			46.19	-1.21853	-1.30578	-1.29418	-1.05171	-1.1251	-1.12543	-1.2107
46.39	-0.00140086	0.00251275	0.00899932	0.00447532	0.00115829	0.0237502	-0.00640624			46.39	-1.21809	-1.30495	-1.29615	-1.05027	-1.12801	-1.12121	-1.20636
46.59	-0.00078584	0.00390327	0.00748957	0.00280606	0.00448009	0.0220992	-0.00737921			46.59	-1.21747	-1.30356	-1.29766	-1.05194	-1.12469	-1.12286	-1.20733
46.79	-0.00221398	0.00014403	0.0113976	0.00408419	0.00087678	0.0234484	-0.00560908			46.79	-1.2189	-1.30732	-1.29375	-1.05066	-1.12829	-1.12151	-1.20556
46.99	-0.00089586	0.00079671	0.00628033	0.00474761	0.00388277	0.0213536	-0.00808616			46.99	-1.21758	-1.30667	-1.29887	-1.05	-1.12529	-1.12361	-1.20804
47.19	-0.00292043	0.00340501	0.00932087	0.0038642	0.00204147	0.0185072	-0.00641146			47.19	-1.21961	-1.30406	-1.29583	-1.05088	-1.12713	-1.12645	-1.20636
47.4	-0.00131357	-0.00219805	0.00883867	0.00261687	0.003777	0.0226011	-0.00689286			47.4	-1.218	-1.30966	-1.29631	-1.05213	-1.12539	-1.12236	-1.20684
47.59	-0.0015869	0.00335432	0.00557035	0.00313472	0.00419975	0.0188245	-0.00771206			47.59	-1.21827	-1.30411	-1.29958	-1.05161	-1.12497	-1.12613	-1.20766
47.79	0.00169045	0.00424393	0.0127646	0.00379041	0.00688948	0.0214013	-0.0107214			47.79	-1.215	-1.30322	-1.29239	-1.05096	-1.12228	-1.12356	-1.21067
47.99	-0.00336028	0.00246518	0.00918172	0.00577305	0.0033185	0.0197922	-0.00646743			47.99	-1.22005	-1.305	-1.29597	-1.04897	-1.12585	-1.12517	-1.20642
48.19	-0.00278779	-0.00123504	0.010048	0.00275921	0.00436709	0.0210461	-0.00654097			48.19	-1.21948	-1.3087	-1.2951	-1.05199	-1.1248	-1.12391	-1.20649
48.4	-0.00352335	0.00338295	0.00669402	0.00573441	0.00407239	0.0221836	-0.00718792			48.4	-1.22021	-1.30408	-1.29846	-1.04901	-1.1251	-1.12278	-1.20714
48.59	-0.00297836	0.00161977	0.0075619	0.00390274	0.00360672	0.0211534	-0.00839776			48.59	-1.21967	-1.30584	-1.29759	-1.05084	-1.12556	-1.12381	-1.20835
48.79	-0.00387972	0.00086203	0.00724134	0.00271912	0.00410729	0.0225537	-0.0067215			48.79	-1.22057	-1.3066	-1.29791	-1.05203	-1.12506	-1.12241	-1.20667
48.99	-0.00186211	0.00511145	0.00388062	0.0063389	0.00446332	0.021533	-0.00504122			48.99	-1.21855	-1.30235	-1.30127	-1.04841	-1.12471	-1.12343	-1.20499
49.19	-0.00232625	0.00233244	0.0103359	0.00554957	0.00145561	0.0229197	-0.00378509			49.19	-1.21901	-1.30513	-1.29481	-1.0492	-1.12771	-1.12204	-1.20373
49.4	-0.00242644	0.00108455	0.00924713	0.00251868	0.00187303	0.0227909	-0.00764338			49.4	-1.21911	-1.30638	-1.2959	-1.05223	-1.1273	-1.12217	-1.20759
49.59	-0.00182693	0.00308516	0.00743009	0.003533	0.00172519	0.0227017	-0.00475523			49.59	-1.21851	-1.30438	-1.29772	-1.05121	-1.12745	-1.12226	-1.2047
49.79	-0.00028375	0.00561276	0.00923272	0.00258852	0.00481963	0.0217432	-0.00725111			49.79	-1.21697	-1.30185	-1.29592	-1.05216	-1.12435	-1.12322	-1.2072
49.99	-0.00176508	0.00492596	0.0106116	0.00211149	0.00212094	0.0231637	-0.00432772			49.99	-1.21845	-1.30254	-1.29454	-1.05264	-1.12705	-1.1218	-1.20428
50.19	-0.00117088	0.00107744	0.00688778	0.00281481	0.00424428	0.0219643	-0.00920342			50.19	-1.21786	-1.30639	-1.29826	-1.05193	-1.12493	-1.123	-1.20915
50.39	-0.00064068	0.00243554	0.00875086	0.00215103	0.00276709	0.0210968	-0.00843179			50.39	-1.21733	-1.30503	-1.2964	-1.0526	-1.1264	-1.12386	-1.20838
50.59	-0.00320848	-0.00033603	0.00528386	0.00221398	0.00156532	0.0222862	-0.00716039			50.59	-1.2199	-1.3078	-1.29987	-1.05253	-1.1276	-1.12267	-1.20711
50.79	-0.00537552	0.00289044	0.00516176	0.00360601	0.00210183	0.0195216	-0.00490664			50.79	-1.22206	-1.30457	-1.29999	-1.05114	-1.12707	-1.12544	-1.20486
50.99	0.00073423	0.00532973	0.0110143	0.00344469	0.00611044	0.0200329	-0.00719902			50.99	-1.21595	-1.30213	-1.29414	-1.0513	-1.12306	-1.12493	-1.20715
51.19	-0.00317385	-0.00137726	0.00701225	0.00624009	0.00380869	0.0219484	-0.00493568			51.19	-1.21986	-1.30884	-1.29814	-1.04851	-1.12536	-1.12301	-1.20489
51.39	0.0006998	-0.00287495	0.0083184	0.00247743	0.00306979	0.0204186	-0.00196471			51.39	-1.21599	-1.31034	-1.29683	-1.05227	-1.1261	-1.12454	-1.20191
51.59	-0.00140561	0.00555236	0.0126268	0.00482357	0.00395142	0.0197973	-0.00901922			51.59	-1.21809	-1.30191	-1.29252	-1.04992	-1.12522	-1.12516	-1.20897
51.79	-0.00011209	0.00369506	0.00938253	0.00332711	0.0023417	0.0215812	-0.00504301			51.79	-1.2168	-1.30377	-1.29577	-1.05142	-1.12683	-1.12338	-1.20499
51.99	-0.00135856	0.00452485	0.0113161	0.00187988	0.00172581	0.0211664	-0.00448104			51.99	-1.21805	-1.30294	-1.29383	-1.05287	-1.12744	-1.12379	-1.20443
52.19	-0.00206313	0.0006524	0.0091463	0.00279551	0.00289055	0.0240872	-0.00509375			52.19	-1.21875	-1.30681	-1.296	-1.05195	-1.12628	-1.12087	-1.20504
52.4	-0.00153559	0.00323291	0.00862151	0.00270755	0.00518596	0.023052	-0.0152451			52.4	-1.21822	-1.30423	-1.29653	-1.05204	-1.12398	-1.12191	-1.21519
52.59	-0.00208808	-0.00084925	0.00823264	0.00525825	0.00688374	0.0238114	-0.00889234			52.59	-1.21878	-1.30831	-1.29692	-1.04949	-1.12229	-1.12115	-1.20884
52.79	-0.00129517	0.00329605	0.00806681	0.00437006	0.00454409	0.0231037	-0.00988781			52.79	-1.21798	-1.30417	-1.29708	-1.05038	-1.12463	-1.12186	-1.20984
52.99	-0.0031059	0.00282874	0.00599445	0.00465728	0.0054037	0.021657	-0.0078715			52.99	-1.21979	-1.30464	-1.29916	-1.05009	-1.12377	-1.1233	-1.20782
53.19	-0.0037333	-0.00068498	0.00607374	0.00516094	0.00383408	0.0214654	-0.00693507			53.19	-1.22042	-1.30815	-1.29908	-1.04959	-1.12534	-1.12349	-1.20688
53.4	-0.00064944	0.00358355	0.00998561	0.00154498	0.00656748	0.0205897	-0.00551538			53.4	-1.21734	-1.30388	-1.29516	-1.0532	-1.1226	-1.12437	-1.20547
53.59	-0.00197056	-6.688e-05	0.0108525	0.00579306	0.00284112	0.0226679	-0.00864199			53.59	-1.21866	-1.30753	-1.2943	-1.04895	-1.12633	-1.12229	-1.20859
53.79	-0.00399871	-0.00481438	0.00375403	0.00742139	0.00466842	0.0232418	-0.00707663			53.79	-1.22069	-1.31228	-1.3014	-1.04733	-1.1245	-1.12172	-1.20703
53.99	-0.00182385	0.00479286	0.0090384	0.00170339	0.00277346	0.0247501	-0.00758777			53.99	-1.21851	-1.30267	-1.29611	-1.05304	-1.1264	-1.12021	-1.20754
54.19	-0.00464475	0.00055004	0.0120617	0.00307733	0.00070953	0.0220345	-0.00721017			54.19	-1.22133	-1.30691	-1.29309	-1.05167	-1.12846	-1.12292	-1.20716
54.4	-0.00246619	0.0052658	0.0118768	0.0051616	0.0042613	0.0219394	-0.00790569			54.4	-1.21915	-1.3022	-1.29327	-1.04959	-1.12491	-1.12302	-1.20786
54.59	-0.00280693	0.0039528	0.0102058	0.00459352	0.00465804	0.0224828	-0.00701687			54.59	-1.21949	-1.30351	-1.29494	-1.05015	-1.12451	-1.12248	-1.20697
54.79	-0.0030092	0.00306738	0.00641345	0.00420018	0.00427126	0.0230098	-0.0123557			54.79	-1.2197	-1.3044	-1.29874	-1.05055	-1.1249	-1.12195	-1.21231
54.99	-0.00046016	0.00190255	0.00625769	0.00345235	0.00317947	0.0257645	-0.00582726			54.99	-1.21715	-1.30556	-1.29889	-1.05129	-1.12599	-1.11919	-1.20578
55.19	-0.00403599	-0.0006996	0.00855166	0.00344656	0.00286628	0.0175377	-0.00649655			55.19	-1.22072	-1.30816	-1.2966	-1.0513	-1.1263	-1.12742	-1.20645
55.4	-0.00267624	0.00164375	0.00707702	0.00226564	0.00285006	0.0198683	-0.0106694			55.4	-1.21936	-1.30582	-1.29807	-1.05248	-1.12632	-1.12509	-1.21062
55.59	-0.00181386	0.00098622	0.0131454	-0.00129213	0.00242597	0.024116	-0.0072524			55.59	-1.2185	-1.30648	-1.29201	-1.05604	-1.12674	-1.12084	-1.2072
55.79	-0.00484327	0.00445162	0.011484	0.0029893	0.00618433	0.0208565	-0.0084378			55.79	-1.22153	-1.30301	-1.29367	-1.05176	-1.12299	-1.1241	-1.20839
55.99	0.00073176	0.00125949	0.00767029	0.00501828	0.00310045	0.0249954	-0.00714901			55.99	-1.21596	-1.3062	-1.29748	-1.04973	-1.12607	-1.11996	-1.2071
56.19	-0.00013575	0.00506761	0.00982262	0.00112874	0.00640127	0.0248618	-0.00935142			56.19	-1.21682	-1.3024	-1.29533	-1.05362	-1.12277	-1.1201	-1.2093
56.39	-0.0021829	0.00574357	0.0064097	0.00431562	0.0039174	0.0257652	-0.00963403			56.39	-1.21887	-1.30172	-1.29874	-1.05043	-1.12525	-1.11919	-1.20958
56.59	-0.00173868	0.00118954	0.0101586	0.00099494	0.00353691	0.0240495	-0.0106659			56.59	-1.21843	-1.30627	-1.29499	-1.05375	-1.12563	-1.12091	-1.21062
56.79	-0.00137529	0.00061758	0.0112834	0.00248428	0.00474381	0.0245102	-0.00802598			56.79	-1.21806	-1.30685	-1.29387	-1.05226	-1.12443	-1.12045	-1.20798
56.99	-0.00188767	0.00387591	0.0103579	0.00242195	0.00598266	0.024543	-0.00840233			56.99	-1.21857	-1.30359	-1.29479	-1.05232	-1.12319	-1.12042	-1.20835
57.19	-0.00121166	0.00054165	0.00615046	0.00485206	0.00323644	0.0235633	-0.00666058			57.19	-1.2179	-1.30692	-1.299	-1.04989	-1.12593	-1.1214	-1.20661
57.39	-0.00210989	0.00109708	0.00461511	0.00369625	0.00503473	0.0202497	-0.0106116			57.39	-1.2188	-1.30637	-1.30054	-1.05105	-1.12414	-1.12471	-1.21056
57.59	-0.00409338	0.00094644	0.0107854	0.00046447	0.00549573	0.0249945	-0.0053417			57.59	-1.22078	-1.30652	-1.29437	-1.05428	-1.12367	-1.11996	-1.20529
57.79	0.00279612	0.00330469	0.00831306	0.00628945	0.00586861	0.0222465	-0.0100108			57.79	-1.21389	-1.30416	-1.29684	-1.04846	-1.1233	-1.12271	-1.20996
57.99	0.00160341	0.00160711	0.0111798	0.00700972	0.00479	0.024299	-0.0102788			57.99	-1.21508	-1.30586	-1.29397	-1.04774	-1.12438	-1.12066	-1.21023
58.19	-0.00142464	-9.633e-05	0.0085761	0.00396968	0.00617854	0.0217502	-0.00854183			58.19	-1.21811	-1.30756	-1.29657	-1.05078	-1.12299	-1.12321	-1.20849
58.39	-0.00153961	0.00117219	0.00589182	0.00658122	0.00347789	0.0261158	-0.00463463			58.39	-1.21823	-1.30629	-1.29926	-1.04817	-1.12569	-1.11884	-1.20458
58.59	-0.00017185	0.00104576	0.0105226	0.00491671	0.00211101	0.0233086	-0.0104717			58.59	-1.21686	-1.30642	-1.29463	-1.04983	-1.12706	-1.12165	-1.21042
58.79	-0.00329142	6.499e-05	0.0104017	0.00607033	0.00892549	0.0248998	-0.0102175			58.79	-1.21998	-1.3074	-1.29475	-1.04868	-1.12024	-1.12006	-1.21017
58.99	-0.0023832	0.00335661	0.0109178	0.00200642	0.00311572	0.0242872	-0.00955517			58.99	-1.21907	-1.30411	-1.29423	-1.05274	-1.12605	-1.12067	-1.2095
59.19	-0.00194556	0.00356621	0.00694792	0.00466803	0.00596842	0.0207265	-0.0082973			59.19	-1.21863	-1.3039	-1.2982	-1.05008	-1.1232	-1.12423	-1.20825
59.4	-0.00328956	0.00066638	0.00835459	0.00326679	0.00608285	0.022811	-0.0088485			59.4	-1.21998	-1.3068	-1.2968	-1.05148	-1.12309	-1.12215	-1.2088
59.59	0.00099211	0.00263532	0.00565229	0.0046144	0.00250579	0.0216703	-0.010714			59.59	-1.2157	-1.30483	-1.2995	-1.05013	-1.12666	-1.12329	-1.21066
59.79	-0.00121024	0.00042527	0.0111058	0.0013981	0.00581881	0.0234214	-0.0089972			59.79	-1.2179	-1.30704	-1.29404	-1.05335	-1.12335	-1.12154	-1.20895
59.99	-0.00127902	0.00308585	0.00943791	0.00543385	0.00419126	0.0213307	-0.0120744			59.99	-1.21797	-1.30438	-1.29571	-1.04931	-1.12498	-1.12363	-1.21202
60.19	-0.00441453	-0.0033843	0.0119261	0.00333126	0.00182945	0.0226612	-0.0106452			60.19	-1.2211	-1.31085	-1.29322	-1.05142	-1.12734	-1.1223	-1.21059
60.39	-0.00342549	0.00202143	0.00870264	0.00190751	0.00067596	0.0276317	-0.00716903			60.39	-1.22011	-1.30544	-1.29645	-1.05284	-1.12849	-1.11733	-1.20712
60.59	-0.00064197	-0.00100291	0.00902481	0.00643397	0.00498734	0.0234395	-0.00624488			60.59	-1.21733	-1.30847	-1.29613	-1.04831	-1.12418	-1.12152	-1.20619
60.79	-0.00029174	0.00350526	0.0108155	0.00576131	0.00151269	0.0254173	-0.0115152			60.79	-1.21698	-1.30396	-1.29434	-1.04899	-1.12766	-1.11954	-1.21146
60.99	-0.00270825	-0.00125123	0.0117783	0.00287727	0.00238512	0.0230168	-0.00943112			60.99	-1.2194	-1.30872	-1.29337	-1.05187	-1.12679	-1.12194	-1.20938
61.19	-0.00421097	0.00420214	0.0109884	0.00191185	0.00499197	0.0224081	-0.00859709			61.19	-1.2209	-1.30326	-1.29416	-1.05283	-1.12418	-1.12255	-1.20855
61.39	-0.00332007	-9e-06	0.008509	0.00261486	0.00357169	0.0255126	-0.0077769			61.39	-1.22001	-1.30747	-1.29664	-1.05213	-1.1256	-1.11945	-1.20773
61.59	-0.0050656	0.00016984	0.0049718	0.00361407	0.00193536	0.0234468	-0.00762164			61.59	-1.22175	-1.30729	-1.30018	-1.05113	-1.12723	-1.12151	-1.20757
61.79	-0.00520622	0.00380676	0.00983022	0.00533714	0.00185117	0.0241077	-0.00881185			61.79	-1.22189	-1.30366	-1.29532	-1.04941	-1.12732	-1.12085	-1.20876
61.99	0.00091715	0.00432527	0.0107513	0.00587898	0.0081133	0.0232631	-0.00701464			61.99	-1.21577	-1.30314	-1.2944	-1.04887	-1.12106	-1.1217	-1.20696
62.19	-0.00117827	0.00035156	0.00790754	0.00425971	0.00477014	0.0222835	-0.0122921			62.19	-1.21787	-1.30711	-1.29724	-1.05049	-1.1244	-1.12268	-1.21224
62.39	0.00017513	-0.00246865	0.00988858	0.00648226	0.00778497	0.0250315	-0.0104863			62.39	-1.21651	-1.30993	-1.29526	-1.04826	-1.12139	-1.11993	-1.21044
62.59	-0.00334672	0.0041953	0.0108587	0.00450059	0.00795891	0.026973	-0.00899477			62.59	-1.22003	-1.30327	-1.29429	-1.05025	-1.12121	-1.11799	-1.20894
62.79	-0.00192	0.00391685	0.00919044	0.00433485	0.00750565	0.0257493	-0.00788868			62.79	-1.21861	-1.30355	-1.29596	-1.05041	-1.12166	-1.11921	-1.20784
62.99	0.00146751	0.00078556	0.0083401	0.00162207	0.00375633	0.0284205	-0.005701			62.99	-1.21522	-1.30668	-1.29681	-1.05312	-1.12541	-1.11654	-1.20565
63.19	-0.00635594	0.00193544	0.0106934	0.00568532	0.0019055	0.0250466	-0.00975212			63.19	-1.22304	-1.30553	-1.29446	-1.04906	-1.12726	-1.11991	-1.2097
63.39	-0.00148074	-0.00201595	0.0117106	0.00169334	0.00176392	0.0215998	-0.00687866			63.39	-1.21817	-1.30948	-1.29344	-1.05305	-1.12741	-1.12336	-1.20683
63.59	-0.00346966	0.00272922	0.00970309	0.00481292	0.00815766	0.0241792	-0.0075456			63.59	-1.22016	-1.30474	-1.29545	-1.04993	-1.12101	-1.12078	-1.2075
63.79	-0.00246952	0.00248789	0.00979932	0.00819953	0.00444811	0.0230193	-0.00964587			63.79	-1.21916	-1.30498	-1.29535	-1.04655	-1.12472	-1.12194	-1.2096
63.99	-0.00272471	0.00313902	0.00917398	0.00636396	0.00612028	0.0237664	-0.00730365			63.99	-1.21941	-1.30433	-1.29598	-1.04838	-1.12305	-1.12119	-1.20725
64.19	-0.00378856	0.00056222	0.0067083	-0.00158462	-0.00125316	0.0235233	-0.00661769			64.19	-1.22048	-1.3069	-1.29844	-1.05633	-1.13042	-1.12144	-1.20657
64.4	-0.00328854	0.00326578	0.00837558	0.00484082	0.00516682	0.0228203	-0.00822142			64.4	-1.21998	-1.3042	-1.29677	-1.04991	-1.124	-1.12214	-1.20817
64.6	-0.00173706	-0.00048332	0.00726282	0.00702345	0.00388018	0.0231023	-0.00610961			64.6	-1.21842	-1.30795	-1.29789	-1.04772	-1.12529	-1.12186	-1.20606
64.8	-0.00350242	0.00188203	0.0114271	0.00776467	0.00380433	0.0256357	-0.00723078			64.8	-1.22019	-1.30558	-1.29372	-1.04698	-1.12537	-1.11932	-1.20718
65	-0.00253142	0.00361159	0.0085746	0.00312576	0.00464659	0.0272742	-0.00681059			65	-1.21922	-1.30385	-1.29658	-1.05162	-1.12452	-1.11769	-1.20676
65.19	-0.00309504	0.00351273	0.00988405	0.00356068	0.00690192	0.0274739	-0.0131367			65.19	-1.21978	-1.30395	-1.29527	-1.05119	-1.12227	-1.11749	-1.21309
65.4	-0.00294489	0.00401208	0.0140255	0.00459261	0.00465325	0.02532	-0.00798336			65.4	-1.21963	-1.30345	-1.29113	-1.05015	-1.12452	-1.11964	-1.20793
65.6	-0.00278449	0.00166995	0.00570091	-0.00067471	0.00400506	0.0267168	-0.0128541			65.6	-1.21947	-1.30579	-1.29945	-1.05542	-1.12517	-1.11824	-1.2128
65.8	-0.00111384	0.00274374	0.0104	0.00456775	0.00376431	0.0249344	-0.00913405			65.8	-1.2178	-1.30472	-1.29475	-1.05018	-1.12541	-1.12003	-1.20908
66	-0.0027999	0.00124369	0.007524	0.00565403	0.00428004	0.0261566	-0.00682144			66	-1.21949	-1.30622	-1.29763	-1.04909	-1.12489	-1.1188	-1.20677
66.19	-0.00512932	0.00153122	0.00862983	0.00588595	0.00420866	0.0270898	-0.00616098			66.19	-1.22182	-1.30593	-1.29652	-1.04886	-1.12496	-1.11787	-1.20611
66.4	0.00029195	0.00445474	0.0109539	0.0025566	0.00197986	0.0231758	-0.00700982			66.4	-1.2164	-1.30301	-1.2942	-1.05219	-1.12719	-1.12178	-1.20696
66.6	-0.00421477	0.00214816	0.00741827	0.00251499	0.00577903	0.0216997	-0.0110289			66.6	-1.2209	-1.30532	-1.29773	-1.05223	-1.12339	-1.12326	-1.21098
66.8	-0.00258278	0.00249357	0.0106344	0.00162375	0.00339912	0.0218888	-0.00908869			66.8	-1.21927	-1.30497	-1.29452	-1.05312	-1.12577	-1.12307	-1.20904
67	-0.00517674	0.00354406	0.00925406	0.00505646	0.00219524	0.0234888	-0.0124069			67	-1.22186	-1.30392	-1.2959	-1.04969	-1.12698	-1.12147	-1.21236
67.19	-0.00270501	0.00588775	0.0109127	0.00318881	0.00290954	0.0226631	-0.00995902			67.19	-1.21939	-1.30158	-1.29424	-1.05156	-1.12626	-1.1223	-1.20991
67.4	-0.00097341	-0.00092983	0.00959799	0.0028668	0.00254479	0.0251115	-0.0112452			67.4	-1.21766	-1.30839	-1.29555	-1.05188	-1.12663	-1.11985	-1.21119
67.6	-0.00084227	0.0030488	0.00837154	0.00284801	0.00673969	0.0253818	-0.0061641			67.6	-1.21753	-1.30442	-1.29678	-1.0519	-1.12243	-1.11958	-1.20611
67.8	-0.00155356	0.00488707	0.00684962	0.00459869	0.00726058	0.0230634	-0.00877157			67.8	-1.21824	-1.30258	-1.2983	-1.05015	-1.12191	-1.1219	-1.20872
68	-0.00504585	0.00316665	0.0112745	0.00036133	0.00683206	0.0281587	-0.00863282			68	-1.22173	-1.3043	-1.29388	-1.05439	-1.12234	-1.1168	-1.20858
68.19	-0.00187776	0.00163255	0.0140969	0.00231555	0.00576469	0.0253078	-0.00946125			68.19	-1.21857	-1.30583	-1.29105	-1.05243	-1.12341	-1.11965	-1.20941
68.4	-0.00299182	0.00253065	0.00565895	0.00435051	0.00315226	0.0240141	-0.00937349			68.4	-1.21968	-1.30493	-1.29949	-1.0504	-1.12602	-1.12095	-1.20932
68.6	-0.00304034	1.999e-05	0.00739721	0.00415585	0.0070672	0.0234764	-0.0116324			68.6	-1.21973	-1.30744	-1.29775	-1.05059	-1.1221	-1.12148	-1.21158
68.8	-0.00094579	0.00213946	0.0101515	0.00625491	0.00503468	0.0248282	-0.00952138			68.8	-1.21763	-1.30532	-1.295	-1.04849	-1.12414	-1.12013	-1.20947
69	-0.00652624	0.00165253	0.00923638	0.00649126	0.00434178	0.0242352	-0.00965747			69	-1.22321	-1.30581	-1.29591	-1.04826	-1.12483	-1.12072	-1.20961
69.19	-0.00841567	0.002902	0.00798877	0.00448954	0.00199615	0.0278518	-0.00821682			69.19	-1.2251	-1.30456	-1.29716	-1.05026	-1.12717	-1.11711	-1.20817
69.4	-0.00323966	0.00064141	0.0113196	0.00068739	0.00555849	0.0200702	-0.00746377			69.4	-1.21993	-1.30682	-1.29383	-1.05406	-1.12361	-1.12489	-1.20741
69.6	-0.00405395	0.00656526	0.0115986	0.00311091	0.00328396	0.0251278	-0.00747509			69.6	-1.22074	-1.3009	-1.29355	-1.05164	-1.12589	-1.11983	-1.20742
69.8	-0.00193387	0.00076276	0.00771381	0.00393201	0.00098247	0.022267	-0.0073835			69.8	-1.21862	-1.3067	-1.29744	-1.05081	-1.12819	-1.12269	-1.20733
70	-0.00310991	0.00303075	0.0113459	0.00441869	0.00486889	0.0291758	-0.00857244			70	-1.2198	-1.30443	-1.2938	-1.05033	-1.1243	-1.11578	-1.20852
70.19	-0.00211669	0.00290324	0.0127206	0.00125196	0.00526781	0.0256823	-0.00630309			70.19	-1.2188	-1.30456	-1.29243	-1.05349	-1.1239	-1.11928	-1.20625
70.39	-0.00099895	0.00174159	0.011271	0.00222107	0.00349302	0.0257908	-0.00852842			70.39	-1.21769	-1.30572	-1.29388	-1.05253	-1.12568	-1.11917	-1.20848
70.6	-0.0016592	0.00440637	0.0116037	0.00185424	0.00536398	0.025999	-0.0058529			70.6	-1.21835	-1.30306	-1.29355	-1.05289	-1.12381	-1.11896	-1.2058
70.79	-0.00124598	0.00146631	0.011769	0.00436378	0.00952449	0.0254064	-0.00244531			70.79	-1.21793	-1.306	-1.29338	-1.05038	-1.11965	-1.11955	-1.20239
71	-0.00124843	0.00189365	0.0108639	0.00365685	0.00286969	0.0224883	-0.00932121			71	-1.21794	-1.30557	-1.29429	-1.05109	-1.1263	-1.12247	-1.20927
71.19	-0.00222432	0.00375106	0.0107396	0.00576392	0.00414563	0.0239458	-0.00935686			71.19	-1.21891	-1.30371	-1.29441	-1.04898	-1.12502	-1.12101	-1.20931
71.4	-0.00516151	0.00736611	0.00761024	0.00487644	0.00768188	0.024354	-0.00806245			71.4	-1.22185	-1.3001	-1.29754	-1.04987	-1.12149	-1.12061	-1.20801
71.6	-0.00265095	0.0038959	0.0111728	0.00472661	0.00547852	0.0228571	-0.0115367			71.6	-1.21934	-1.30357	-1.29398	-1.05002	-1.12369	-1.1221	-1.21149
71.8	-0.00391871	0.00227929	0.011213	0.00558435	0.00577223	0.0230941	-0.0125396			71.8	-1.22061	-1.30519	-1.29394	-1.04916	-1.1234	-1.12187	-1.21249
72	-0.00069227	0.00066321	0.00958552	0.00231608	0.00792741	0.0231044	-0.00959415			72	-1.21738	-1.3068	-1.29556	-1.05243	-1.12124	-1.12186	-1.20954
72.19	-0.00387232	0.00020658	0.00946183	0.00586978	0.00381651	0.0263703	-0.00679438			72.19	-1.22056	-1.30726	-1.29569	-1.04888	-1.12535	-1.11859	-1.20674
72.39	-0.00401369	0.00661355	0.00919046	0.00315814	0.00595158	0.0277207	-0.0122417			72.39	-1.2207	-1.30085	-1.29596	-1.05159	-1.12322	-1.11724	-1.21219
72.59	0.00010586	0.00178475	0.00726676	0.0060797	0.00557239	0.0222722	-0.0119069			72.59	-1.21658	-1.30568	-1.29788	-1.04867	-1.1236	-1.12269	-1.21186
72.8	-0.00130962	0.00141755	0.0111056	0.00223362	0.00358057	0.0265313	-0.00918353			72.8	-1.218	-1.30605	-1.29404	-1.05251	-1.12559	-1.11843	-1.20913
73	-0.00266404	0.00422584	0.0108699	0.00174582	0.00510297	0.0258717	-0.0081419			73	-1.21935	-1.30324	-1.29428	-1.053	-1.12407	-1.11909	-1.20809
73.19	-0.00286461	0.00323943	0.00935651	0.0009335	0.00152655	0.0252128	-0.0110154			73.19	-1.21955	-1.30422	-1.29579	-1.05381	-1.12764	-1.11975	-1.21097
73.4	-0.00040321	0.00491822	0.0114518	0.00577719	0.00330226	0.0250723	-0.00929395			73.4	-1.21709	-1.30255	-1.2937	-1.04897	-1.12587	-1.11989	-1.20924
73.59	-0.00107475	0.00214742	0.0111188	0.00613316	0.00117453	0.0245572	-0.0069007			73.59	-1.21776	-1.30532	-1.29403	-1.04861	-1.128	-1.1204	-1.20685
73.8	-0.0023594	-2.487e-05	0.00980938	0.00333587	0.00433257	0.0259521	-0.00901222			73.8	-1.21905	-1.30749	-1.29534	-1.05141	-1.12484	-1.11901	-1.20896
74	-0.00087874	0.00457635	0.00971204	0.00421696	0.00377063	0.0265631	-0.0115426			74	-1.21757	-1.30289	-1.29544	-1.05053	-1.1254	-1.1184	-1.21149
74.19	-0.00165682	0.00263179	0.00459974	0.0020052	0.00403201	0.025467	-0.00834173			74.19	-1.21834	-1.30483	-1.30055	-1.05274	-1.12514	-1.11949	-1.20829
74.39	-0.00258691	0.00018684	0.00890398	0.00649701	0.00406826	0.0240897	-0.0110379			74.39	-1.21927	-1.30728	-1.29625	-1.04825	-1.1251	-1.12087	-1.21099
74.6	-0.00176193	0.00430885	0.00515397	0.002911	0.00342449	0.0211614	-0.0137254			74.6	-1.21845	-1.30316	-1.3	-1.05184	-1.12575	-1.1238	-1.21367
74.8	-0.00282106	0.000496	0.0100733	0.00287043	0.00439001	0.0239627	-0.00681216			74.8	-1.21951	-1.30697	-1.29508	-1.05188	-1.12478	-1.121	-1.20676
75	-0.00395548	0.00144908	0.0133832	0.00465287	0.00497187	0.0237907	-0.0126951			75	-1.22064	-1.30602	-1.29177	-1.05009	-1.1242	-1.12117	-1.21264
75.19	-0.00128471	0.00289249	0.00926729	0.00504724	0.00539267	0.0257775	-0.00529288			75.19	-1.21797	-1.30457	-1.29588	-1.0497	-1.12378	-1.11918	-1.20524
75.4	-0.00246329	0.00120112	0.00754779	0.00413332	0.00623287	0.0263768	-0.012878			75.4	-1.21915	-1.30626	-1.2976	-1.05061	-1.12294	-1.11858	-1.21283
75.6	-0.00462713	0.00492194	0.0139443	0.00604654	0.0063721	0.0257702	-0.0114684			75.6	-1.22131	-1.30254	-1.29121	-1.0487	-1.1228	-1.11919	-1.21142
75.79	-0.00350821	0.00273607	0.00989636	0.00238497	0.00273134	0.0249333	-0.010875			75.79	-1.2202	-1.30473	-1.29525	-1.05236	-1.12644	-1.12003	-1.21082
75.99	-0.00150617	-0.00015207	0.00760205	0.00704585	0.00589221	0.0285749	-0.00722955			75.99	-1.21819	-1.30762	-1.29755	-1.0477	-1.12328	-1.11638	-1.20718
76.19	-0.00285214	0.00693061	0.0109056	0.00012934	0.00338984	0.025548	-0.00938827			76.19	-1.21954	-1.30053	-1.29424	-1.05462	-1.12578	-1.11941	-1.20934
76.4	-0.0010183	0.00025284	0.0113813	0.00339949	0.00674701	0.0268398	-0.0112134			76.4	-1.21771	-1.30721	-1.29377	-1.05135	-1.12242	-1.11812	-1.21116
76.6	-0.00338166	0.00123085	0.00653994	0.00435298	0.00384576	0.0264182	-0.0110213			76.6	-1.22007	-1.30623	-1.29861	-1.05039	-1.12532	-1.11854	-1.21097
76.8	-0.00252933	0.00562177	0.0100107	0.00566947	0.00220352	0.0251746	-0.00501373			76.8	-1.21922	-1.30184	-1.29514	-1.04908	-1.12697	-1.11978	-1.20496
77	-0.0022449	0.00685897	0.00951629	0.00016929	0.00629527	0.0242564	-0.00852931			77	-1.21893	-1.30061	-1.29563	-1.05458	-1.12288	-1.1207	-1.20848
77.19	-0.00296971	0.0051937	0.00910835	0.00189182	0.0063204	0.0272006	-0.00991815			77.19	-1.21966	-1.30227	-1.29604	-1.05285	-1.12285	-1.11776	-1.20987
77.4	-0.00289606	0.00201763	0.00915542	0.00504182	0.0053231	0.0271847	-0.00619719			77.4	-1.21958	-1.30545	-1.296	-1.0497	-1.12385	-1.11777	-1.20615
77.59	-0.00335646	0.00590699	0.00871094	0.00659618	0.00325903	0.0266928	-0.0102883			77.59	-1.22004	-1.30156	-1.29644	-1.04815	-1.12591	-1.11827	-1.21024
77.8	-0.00365672	0.00651469	0.00614202	0.00753801	0.00515617	0.0265679	-0.00616304			77.8	-1.22034	-1.30095	-1.29901	-1.04721	-1.12401	-1.11839	-1.20611
78	-0.00312115	0.00370191	0.00916552	0.00737314	0.00418443	0.027831	-0.010686			78	-1.21981	-1.30376	-1.29598	-1.04737	-1.12499	-1.11713	-1.21064
78.19	-0.00084544	0.0006555	0.00899798	0.00384368	0.00275536	0.02489	-0.00770459			78.19	-1.21753	-1.30681	-1.29615	-1.0509	-1.12641	-1.12007	-1.20765
78.4	-0.00531167	0.00094494	0.0104443	0.00446189	0.00387786	0.0252504	-0.00741156			78.4	-1.222	-1.30652	-1.29471	-1.05028	-1.12529	-1.11971	-1.20736
78.6	-0.00247075	0.00504959	0.0121404	0.00418064	0.0021601	0.0260023	-0.00774122			78.6	-1.21916	-1.30241	-1.29301	-1.05057	-1.12701	-1.11896	-1.20769
78.8	-0.00609175	0.00502854	0.00994423	-0.00027818	0.00583556	0.0269046	-0.00993953			78.8	-1.22278	-1.30244	-1.29521	-1.05502	-1.12333	-1.11805	-1.20989
79	-0.00194146	0.0005215	0.00937856	0.00438452	0.00421376	0.0249856	-0.00721906			79	-1.21863	-1.30694	-1.29577	-1.05036	-1.12496	-1.11997	-1.20717
79.19	-0.00346336	0.00305758	0.0111163	0.00669396	0.00501938	0.0254878	-0.00979545			79.19	-1.22015	-1.30441	-1.29403	-1.04805	-1.12415	-1.11947	-1.20975
79.39	-0.00071784	0.00412067	0.00992153	0.00193382	0.00254944	0.0243768	-0.0123351			79.39	-1.21741	-1.30334	-1.29523	-1.05281	-1.12662	-1.12058	-1.21228
79.6	-0.00154555	0.0031462	0.00783964	0.00513294	0.00532645	0.0271398	-0.012261			79.6	-1.21823	-1.30432	-1.29731	-1.04961	-1.12384	-1.11782	-1.21221
79.79	-0.00328629	0.00069479	0.00788678	0.00318117	0.00252033	0.0276067	-0.00972979			79.79	-1.21997	-1.30677	-1.29726	-1.05157	-1.12665	-1.11735	-1.20968
80	-0.00310136	0.00424572	0.00987563	0.00623564	0.00459301	0.0277787	-0.0119817			80	-1.21979	-1.30322	-1.29527	-1.04851	-1.12458	-1.11718	-1.21193
80.19	-0.00180948	0.00100226	0.0109375	0.00439507	0.00540548	0.0265698	-0.00935664			80.19	-1.2185	-1.30646	-1.29421	-1.05035	-1.12376	-1.11839	-1.20931
80.39	-0.00191871	0.00348775	0.0116507	0.00656398	0.00667984	0.0274452	-0.00874108			80.39	-1.21861	-1.30398	-1.2935	-1.04818	-1.12249	-1.11751	-1.20869
80.6	-0.00418731	0.00270758	0.00974576	0.00270896	0.00646435	0.0258099	-0.0104282			80.6	-1.22087	-1.30476	-1.2954	-1.05204	-1.12271	-1.11915	-1.21038
80.79	-0.00737253	0.00320552	0.00924195	0.00196204	0.00677742	0.0229219	-0.0119142			80.79	-1.22406	-1.30426	-1.29591	-1.05278	-1.12239	-1.12204	-1.21186
80.99	-0.00491069	0.00563999	0.00928864	0.00943179	0.00230322	0.027382	-0.00560749			80.99	-1.2216	-1.30182	-1.29586	-1.04531	-1.12687	-1.11758	-1.20556
81.19	-0.00199113	0.0032837	0.00949859	0.00279203	-0.00038863	0.026109	-0.0102891			81.19	-1.21868	-1.30418	-1.29565	-1.05195	-1.12956	-1.11885	-1.21024
81.4	-0.00397753	0.00285221	0.00674904	0.00293803	0.00583775	0.0264873	-0.00996737			81.4	-1.22066	-1.30461	-1.2984	-1.05181	-1.12333	-1.11847	-1.20992
81.6	0.00118699	0.00175897	0.00735989	0.0060299	0.00855482	0.0262705	-0.00613803			81.6	-1.2155	-1.30571	-1.29779	-1.04872	-1.12062	-1.11869	-1.20609
81.8	-0.00245842	0.00114225	0.00827133	0.00425439	0.00495329	0.0248757	-0.00689974			81.8	-1.21915	-1.30632	-1.29688	-1.05049	-1.12422	-1.12008	-1.20685
81.99	-0.00186335	0.0040295	0.00991619	0.00655247	0.00554066	0.0238914	-0.00803893			81.99	-1.21855	-1.30343	-1.29523	-1.04819	-1.12363	-1.12107	-1.20799
82.19	-0.00157242	0.00797664	0.00988545	0.00627888	0.00149396	0.0274118	-0.00844326			82.19	-1.21826	-1.29949	-1.29527	-1.04847	-1.12768	-1.11755	-1.20839
82.4	-0.00272113	0.00343907	0.00948479	0.00675008	0.00483179	0.021497	-0.00883585			82.4	-1.21941	-1.30403	-1.29567	-1.048	-1.12434	-1.12346	-1.20879
82.59	-0.00041214	0.00358607	0.00934824	0.00827549	0.00421058	0.0254879	-0.0108801			82.59	-1.2171	-1.30388	-1.2958	-1.04647	-1.12496	-1.11947	-1.21083
82.8	-0.00362029	0.00629909	0.00901199	0.00416884	0.00510403	0.0258435	-0.0101554			82.8	-1.22031	-1.30117	-1.29614	-1.05058	-1.12407	-1.11912	-1.21011
82.99	-0.00392911	0.00322805	0.0115117	0.00573723	0.0034774	0.0224543	-0.00636292			82.99	-1.22062	-1.30424	-1.29364	-1.04901	-1.12569	-1.12251	-1.20631
83.19	-0.0042434	0.00541139	0.00941352	0.00135677	0.00672568	0.0260581	-0.0103167			83.19	-1.22093	-1.30205	-1.29574	-1.05339	-1.12244	-1.1189	-1.21027
83.4	-0.00214918	0.00248604	0.00982211	0.00435119	0.0041075	0.0250928	-0.0114009			83.4	-1.21884	-1.30498	-1.29533	-1.0504	-1.12506	-1.11987	-1.21135
83.59	-0.00186541	0.00100661	0.00859447	0.00343888	0.00674285	0.0291635	-0.0127014			83.59	-1.21855	-1.30646	-1.29656	-1.05131	-1.12243	-1.1158	-1.21265
83.79	-0.00172578	0.00316737	0.0147076	0.00210813	0.00532813	0.0277382	-0.0104378			83.79	-1.21841	-1.3043	-1.29044	-1.05264	-1.12384	-1.11722	-1.21039
83.99	0.00077595	0.00196608	0.00974079	0.00554642	0.00666066	0.0281259	-0.00989561			83.99	-1.21591	-1.3055	-1.29541	-1.0492	-1.12251	-1.11683	-1.20985
84.19	-0.00150803	0.00703845	0.0108412	0.00506402	0.00529256	0.0233877	-0.0107302			84.19	-1.2182	-1.30043	-1.29431	-1.04968	-1.12388	-1.12157	-1.21068
84.39	-0.006722	0.00270245	0.0113697	0.00342592	0.00343635	0.0271734	-0.00972581			84.39	-1.22341	-1.30476	-1.29378	-1.05132	-1.12573	-1.11779	-1.20968
84.6	-0.00573276	0.00327263	0.00840458	0.00459164	0.00500152	0.0275905	-0.00858717			84.6	-1.22242	-1.30419	-1.29675	-1.05016	-1.12417	-1.11737	-1.20854
84.79	-0.00429612	0.00186427	0.0102477	0.00402753	0.00435328	0.0262498	-0.00937798			84.79	-1.22098	-1.3056	-1.2949	-1.05072	-1.12482	-1.11871	-1.20933
84.99	0.00269562	0.00121448	0.0100185	0.00605826	0.006073	0.0282419	-0.0114925			84.99	-1.21399	-1.30625	-1.29513	-1.04869	-1.1231	-1.11672	-1.21144
85.19	-0.00374517	0.00641589	0.0093451	0.004238	0.00324351	0.0257344	-0.0100949			85.19	-1.22043	-1.30105	-1.29581	-1.05051	-1.12593	-1.11923	-1.21004
85.39	0.00036775	0.00362978	0.00860555	0.00242727	0.00530071	0.0236375	-0.00907129			85.39	-1.21632	-1.30383	-1.29654	-1.05232	-1.12387	-1.12132	-1.20902
85.59	5.373e-05	0.00341768	0.00739563	0.00405478	0.00862792	0.0245085	-0.00980095			85.59	-1.21663	-1.30405	-1.29775	-1.05069	-1.12054	-1.12045	-1.20975
85.79	-0.00142721	0.00533157	0.00798552	0.00621993	0.0067694	0.0261159	-0.00822555			85.79	-1.21811	-1.30213	-1.29716	-1.04853	-1.1224	-1.11884	-1.20818
85.99	-0.00195636	0.00499407	0.00867655	0.00331664	0.00562432	0.0239014	-0.0124097			85.99	-1.21864	-1.30247	-1.29647	-1.05143	-1.12355	-1.12106	-1.21236
86.19	-0.00123179	0.00368839	0.00772699	0.00542316	0.00720463	0.0281085	-0.0095669			86.19	-1.21792	-1.30378	-1.29742	-1.04932	-1.12197	-1.11685	-1.20952
86.39	-0.00214053	0.00485123	0.0118386	0.00290132	0.00468299	0.0255461	-0.00856611			86.39	-1.21883	-1.30261	-1.29331	-1.05185	-1.12449	-1.11941	-1.20852
86.59	-0.00202993	-0.00069436	0.00814122	0.00419338	0.00455483	0.0257774	-0.00618608			86.59	-1.21872	-1.30816	-1.29701	-1.05055	-1.12462	-1.11918	-1.20614
86.79	-0.0049935	0.00269213	0.0105514	0.00360514	0.0061126	0.0262821	-0.00785358			86.79	-1.22168	-1.30477	-1.2946	-1.05114	-1.12306	-1.11868	-1.2078
86.99	0.00049804	0.0044662	0.0053317	0.00288955	0.00351453	0.0255925	-0.0149918			86.99	-1.21619	-1.303	-1.29982	-1.05186	-1.12566	-1.11937	-1.21494
87.19	-0.00298262	0.00981928	0.00855354	0.00513096	0.00641884	0.0287305	-0.01587			87.19	-1.21967	-1.29765	-1.2966	-1.04962	-1.12275	-1.11623	-1.21582
87.39	-0.00384306	0.00354013	0.013032	0.00141456	0.00421843	0.0274282	-0.00558213			87.39	-1.22053	-1.30392	-1.29212	-1.05333	-1.12495	-1.11753	-1.20553
87.59	-0.00479618	0.00497352	0.0142017	0.00061254	0.00195722	0.0305795	-0.00932877			87.59	-1.22148	-1.30249	-1.29095	-1.05413	-1.12721	-1.11438	-1.20928
87.79	-0.00372845	0.003441	0.00767421	0.00504451	0.0058834	0.0279224	-0.00934929			87.79	-1.22042	-1.30402	-1.29748	-1.0497	-1.12329	-1.11704	-1.2093
87.99	-0.0043989	0.00164286	0.00694078	-0.00102447	0.00180394	0.0266248	-0.00924129			87.99	-1.22109	-1.30582	-1.29821	-1.05577	-1.12737	-1.11833	-1.20919
88.19	-0.00179601	0.00240957	0.00933217	0.00451399	0.00360045	0.0300026	-0.0103129			88.19	-1.21848	-1.30505	-1.29582	-1.05023	-1.12557	-1.11496	-1.21026
88.39	-0.0048783	0.00396755	0.00930087	0.00435974	0.00742795	0.0236793	-0.00814533			88.39	-1.22157	-1.3035	-1.29585	-1.05039	-1.12174	-1.12128	-1.20809
88.59	-0.00271308	0.00202463	0.0118529	0.00303262	0.00586188	0.0271671	-0.0100701			88.59	-1.2194	-1.30544	-1.2933	-1.05171	-1.12331	-1.11779	-1.21002
88.79	-0.00396458	0.00406273	0.00747114	0.00517756	0.0035238	0.0244769	-0.00687281			88.79	-1.22065	-1.3034	-1.29768	-1.04957	-1.12565	-1.12048	-1.20682
88.99	-0.00251697	0.00311275	0.0068058	0.00555528	0.00530528	0.0286501	-0.00928173			88.99	-1.2192	-1.30435	-1.29834	-1.04919	-1.12387	-1.11631	-1.20923
89.19	-0.00143804	0.00277786	0.00652109	0.00440204	0.00647274	0.0299931	-0.0119687			89.19	-1.21813	-1.30469	-1.29863	-1.05034	-1.1227	-1.11497	-1.21192
89.39	-0.00482446	0.00237725	0.0117902	0.00690666	0.00426889	0.0246686	-0.0104854			89.39	-1.22151	-1.30509	-1.29336	-1.04784	-1.1249	-1.12029	-1.21044
89.6	-0.00231902	0.00178509	0.0130307	0.00451155	0.00487916	0.0296601	-0.0112138			89.6	-1.21901	-1.30568	-1.29212	-1.05024	-1.12429	-1.1153	-1.21116
89.79	-0.00462522	0.00388148	0.00951262	0.00176669	0.00325151	0.026171	-0.00924052			89.79	-1.22131	-1.30358	-1.29564	-1.05298	-1.12592	-1.11879	-1.20919
89.99	-0.00353278	0.00297654	0.00387473	0.00248965	0.00454974	0.0272893	-0.00596455			89.99	-1.22022	-1.30449	-1.30128	-1.05226	-1.12462	-1.11767	-1.20591
90.19	-0.00433684	0.00235331	0.0112982	0.00300581	0.00669856	0.0276641	-0.0112923			90.19	-1.22102	-1.30511	-1.29385	-1.05174	-1.12247	-1.1173	-1.21124
90.39	-0.00358522	0.00070748	0.0112938	0.00462146	0.00781713	0.0246355	-0.00929163			90.39	-1.22027	-1.30676	-1.29386	-1.05013	-1.12135	-1.12032	-1.20924
90.59	-0.00155841	0.00202337	0.00877665	0.00854357	0.00320257	0.0275006	-0.0104549			90.59	-1.21825	-1.30544	-1.29637	-1.0462	-1.12597	-1.11746	-1.2104
90.79	-0.00112647	0.00143028	0.00852206	0.00165249	0.00404868	0.0296164	-0.0134912			90.79	-1.21781	-1.30603	-1.29663	-1.05309	-1.12512	-1.11534	-1.21344
91	-0.00212302	0.00257016	0.00829316	0.00107376	0.00054252	0.02925	-0.0125194			91	-1.21881	-1.30489	-1.29686	-1.05367	-1.12863	-1.11571	-1.21247
91.19	-0.00099327	0.00462961	0.0101006	0.00219304	0.00213255	0.0306825	-0.00731934			91.19	-1.21768	-1.30283	-1.29505	-1.05255	-1.12704	-1.11428	-1.20727
91.4	-0.00339757	0.00502233	0.0130849	0.00436234	0.00601794	0.0297616	-0.0102029			91.4	-1.22008	-1.30244	-1.29207	-1.05038	-1.12315	-1.1152	-1.21015
91.6	-0.00486443	0.00451166	0.0096134	0.00451792	0.0031587	0.0268083	-0.00627856			91.6	-1.22155	-1.30295	-1.29554	-1.05023	-1.12601	-1.11815	-1.20623
91.8	-0.0022421	0.00451585	0.0116094	0.00927784	0.00735135	0.027415	-0.00975676			91.8	-1.21893	-1.30295	-1.29354	-1.04547	-1.12182	-1.11754	-1.20971
92	-0.00466902	0.00188685	0.00374434	0.00138283	0.00246754	0.0291318	-0.0095311			92	-1.22136	-1.30558	-1.30141	-1.05336	-1.1267	-1.11583	-1.20948
92.19	-0.00236993	0.00429968	0.0122062	0.00531827	0.00495932	0.0256376	-0.0108859			92.19	-1.21906	-1.30316	-1.29294	-1.04943	-1.12421	-1.11932	-1.21084
92.4	-0.00522614	0.00315623	0.0105137	0.00338769	0.00720585	0.032081	-0.0117951			92.4	-1.22191	-1.30431	-1.29464	-1.05136	-1.12196	-1.11288	-1.21174
92.6	-0.00529904	0.00318557	0.014208	0.00489265	0.00442336	0.0260036	-0.0141173			92.6	-1.22199	-1.30428	-1.29094	-1.04985	-1.12475	-1.11896	-1.21407
92.8	-0.00138065	0.00137902	0.010855	0.00265328	0.00615443	0.0252475	-0.00887992			92.8	-1.21807	-1.30609	-1.2943	-1.05209	-1.12302	-1.11971	-1.20883
93	-0.00310784	0.00280169	0.00656	0.00357291	0.0089157	0.0275648	-0.00904093			93	-1.2198	-1.30466	-1.29859	-1.05117	-1.12025	-1.11739	-1.20899
93.19	-0.00199418	0.00176397	0.00946017	0.00348608	0.00513354	0.0275967	-0.0079993			93.19	-1.21868	-1.3057	-1.29569	-1.05126	-1.12404	-1.11736	-1.20795
93.4	-0.00521156	0.00269817	0.00667566	0.00210193	0.00481304	0.0279526	-0.00980398			93.4	-1.2219	-1.30477	-1.29847	-1.05264	-1.12436	-1.11701	-1.20975
93.6	-0.00465524	0.00249898	0.011409	0.00351895	0.00688	0.0262339	-0.00954414			93.6	-1.22134	-1.30497	-1.29374	-1.05123	-1.12229	-1.11873	-1.20949
93.8	-0.00108177	0.00299175	0.0157215	0.00509168	0.00425987	0.0273444	-0.0118468			93.8	-1.21777	-1.30447	-1.28943	-1.04966	-1.12491	-1.11762	-1.2118
94	-0.00121313	0.00209327	0.00837318	0.00539444	0.00430571	0.0265357	-0.0119206			94	-1.2179	-1.30537	-1.29678	-1.04935	-1.12486	-1.11842	-1.21187
94.19	-0.00527619	0.00460889	0.011729	0.00293031	0.00474033	0.029528	-0.0111964			94.19	-1.22196	-1.30286	-1.29342	-1.05182	-1.12443	-1.11543	-1.21115
94.4	-0.00213348	0.00562463	0.00566178	0.00407024	0.00614411	0.026454	-0.0116885			94.4	-1.21882	-1.30184	-1.29949	-1.05068	-1.12303	-1.11851	-1.21164
94.59	-0.00415262	0.00248158	0.0109269	0.00252461	0.00164449	0.0287015	-0.010005			94.59	-1.22084	-1.30498	-1.29422	-1.05222	-1.12753	-1.11626	-1.20995
94.79	-0.00293046	0.00514265	0.00930582	0.00318686	0.00528565	0.027644	-0.00836328			94.79	-1.21962	-1.30232	-1.29584	-1.05156	-1.12388	-1.11732	-1.20831
95	-0.0004959	0.00292718	0.0112304	0.00310977	0.0046478	0.0274966	-0.00856156			95	-1.21718	-1.30454	-1.29392	-1.05164	-1.12452	-1.11746	-1.20851
95.19	-0.00487408	0.00431407	0.0104712	0.00560901	0.0079224	0.0276129	-0.0129539			95.19	-1.22156	-1.30315	-1.29468	-1.04914	-1.12125	-1.11735	-1.2129
95.4	-0.00269389	0.00665425	0.0115158	0.00243912	0.00328084	0.0289986	-0.00808124			95.4	-1.21938	-1.30081	-1.29363	-1.05231	-1.12589	-1.11596	-1.20803
95.6	-0.00284501	0.00531957	0.0120514	0.00229783	0.0055512	0.0273818	-0.00974052			95.6	-1.21953	-1.30214	-1.2931	-1.05245	-1.12362	-1.11758	-1.20969
95.8	-0.00438607	0.00011758	0.0151598	0.00054475	0.00654338	0.0243982	-0.00972065			95.8	-1.22107	-1.30735	-1.28999	-1.0542	-1.12263	-1.12056	-1.20967
96	-0.00126805	0.00346697	0.0136566	0.00260378	0.00361813	0.0281139	-0.00933472			96	-1.21796	-1.304	-1.29149	-1.05214	-1.12555	-1.11685	-1.20928
96.19	-0.00338375	-3.105e-05	0.0128494	0.00517856	0.00677183	0.0276237	-0.0111137			96.19	-1.22007	-1.3075	-1.2923	-1.04957	-1.1224	-1.11734	-1.21106
96.39	-0.00407861	0.00029741	0.0103717	0.00466358	0.00403576	0.0222385	-0.0129443			96.39	-1.22077	-1.30717	-1.29478	-1.05008	-1.12513	-1.12272	-1.21289
96.6	-0.00284059	0.00758866	0.0109252	0.00431356	0.00228723	0.0293705	-0.010623			96.6	-1.21953	-1.29988	-1.29423	-1.05043	-1.12688	-1.11559	-1.21057
96.8	-0.0010631	0.00083296	0.00944182	0.00491257	0.00465461	0.029643	-0.011733			96.8	-1.21775	-1.30663	-1.29571	-1.04983	-1.12452	-1.11532	-1.21168
97	-0.00096329	0.00457482	0.00958648	0.00367757	0.00314848	0.0249814	-0.00637035			97	-1.21765	-1.30289	-1.29556	-1.05107	-1.12602	-1.11998	-1.20632
97.19	-0.00202719	0.00060932	0.0140678	0.00246229	0.00516601	0.0300104	-0.0100717			97.19	-1.21871	-1.30686	-1.29108	-1.05228	-1.124	-1.11495	-1.21002
97.4	0.00113603	0.00207615	0.00807928	0.00527676	0.00490917	0.025636	-0.00503212			97.4	-1.21555	-1.30539	-1.29707	-1.04947	-1.12426	-1.11932	-1.20498
97.6	-0.0043293	0.00366887	0.00581054	0.00370305	0.00516315	0.0243767	-0.00870744			97.6	-1.22102	-1.3038	-1.29934	-1.05104	-1.12401	-1.12058	-1.20866
97.8	-0.00554455	0.00197995	0.00932744	0.00540818	0.00504629	0.0272662	-0.0113724			97.8	-1.22223	-1.30548	-1.29582	-1.04934	-1.12412	-1.11769	-1.21132
98	-0.00628297	0.00333679	0.00984727	0.00556962	-0.00017179	0.0246279	-0.0110675			98	-1.22297	-1.30413	-1.2953	-1.04918	-1.12934	-1.12033	-1.21102
98.19	-0.0036955	-0.00033007	0.00846848	0.00370767	0.00436419	0.022241	-0.0120122			98.19	-1.22038	-1.30779	-1.29668	-1.05104	-1.12481	-1.12272	-1.21196
98.4	-0.00362475	0.00376399	0.010882	0.00396619	0.00313971	0.0244118	-0.00930591			98.4	-1.22031	-1.3037	-1.29427	-1.05078	-1.12603	-1.12055	-1.20926
98.59	-0.00306223	0.00043008	0.0102777	0.00389883	0.00386413	0.0307491	-0.00746942			98.59	-1.21975	-1.30703	-1.29487	-1.05085	-1.12531	-1.11421	-1.20742
98.8	-0.00674359	0.0030212	0.0097933	0.00271884	0.00355058	0.0259301	-0.0095433			98.8	-1.22343	-1.30444	-1.29536	-1.05203	-1.12562	-1.11903	-1.20949
99	-0.00202366	0.00231975	0.011618	0.00330434	0.00684905	0.0267361	-0.00916802			99	-1.21871	-1.30514	-1.29353	-1.05144	-1.12232	-1.11822	-1.20912
99.19	-0.00543573	-0.00142686	0.0111043	0.00324422	0.00294702	0.0300127	-0.0127969			99.19	-1.22212	-1.30889	-1.29405	-1.0515	-1.12622	-1.11495	-1.21275
99.4	-0.00205551	0.0047527	0.0112878	0.00686155	0.0035563	0.0264946	-0.00863872			99.4	-1.21874	-1.30271	-1.29386	-1.04789	-1.12561	-1.11846	-1.20859
99.59	-0.00545383	0.00148611	0.0100265	0.00525662	0.00649712	0.0295454	-0.0127271			99.59	-1.22214	-1.30598	-1.29512	-1.04949	-1.12267	-1.11541	-1.21268
99.79	-0.00572613	0.00700369	0.00779263	0.00398727	0.00594302	0.023621	-0.0105669			99.79	-1.22241	-1.30046	-1.29736	-1.05076	-1.12323	-1.12134	-1.21052
100	-0.0022851	0.00442651	0.0123081	0.00376339	0.00646497	0.0285665	-0.0118548			100	-1.21897	-1.30304	-1.29284	-1.05098	-1.12271	-1.11639	-1.2118
100.19	-0.0034291	0.00296067	0.0115863	0.00080819	0.0036958	0.0336734	-0.00910372			100.19	-1.22012	-1.3045	-1.29356	-1.05394	-1.12547	-1.11129	-1.20905
100.4	-0.00344308	0.00367301	0.0101304	0.00252458	0.00063647	0.0280352	-0.0109974			100.4	-1.22013	-1.30379	-1.29502	-1.05222	-1.12853	-1.11692	-1.21095
100.59	-0.00180811	0.00074354	0.0119388	0.00286901	0.00420322	0.0267489	-0.0122917			100.59	-1.2185	-1.30672	-1.29321	-1.05188	-1.12497	-1.11821	-1.21224
100.8	-0.00336615	0.00016429	0.00900369	0.00624784	0.00636848	0.0261692	-0.0103612			100.8	-1.22005	-1.3073	-1.29615	-1.0485	-1.1228	-1.11879	-1.21031
101	-0.0035187	0.00266342	0.0108416	0.00253686	0.00711638	0.0277399	-0.00900187			101	-1.22021	-1.3048	-1.29431	-1.05221	-1.12205	-1.11722	-1.20895
101.19	-0.00330656	0.002495	0.0128993	0.00592277	0.00764091	0.0270602	-0.00989365			101.19	-1.21999	-1.30497	-1.29225	-1.04882	-1.12153	-1.1179	-1.20984
101.39	-0.00239183	0.00452424	0.00868698	0.00556664	0.00380548	0.0289806	-0.0109201			101.39	-1.21908	-1.30294	-1.29646	-1.04918	-1.12536	-1.11598	-1.21087
101.6	-0.00397195	0.00094298	0.00954243	0.00459753	0.00355606	0.0274688	-0.0123164			101.6	-1.22066	-1.30652	-1.29561	-1.05015	-1.12561	-1.11749	-1.21227
101.8	-0.00477956	0.00506013	0.0105206	0.00521074	0.0051831	0.0246105	-0.0096539			101.8	-1.22147	-1.3024	-1.29463	-1.04954	-1.12399	-1.12035	-1.2096
102	-0.00252597	0.00373439	0.0104924	0.00336806	0.00381005	0.0256496	-0.0103003			102	-1.21921	-1.30373	-1.29466	-1.05138	-1.12536	-1.11931	-1.21025
102.19	-0.00278031	0.00508637	0.00802655	0.00351992	0.00124207	0.0265109	-0.0106947			102.19	-1.21947	-1.30238	-1.29712	-1.05123	-1.12793	-1.11845	-1.21064
102.4	-0.00091314	0.00067463	0.0135892	0.0009268	0.00626736	0.0291871	-0.0124901			102.4	-1.2176	-1.30679	-1.29156	-1.05382	-1.1229	-1.11577	-1.21244
102.6	-0.00222398	0.00190772	0.012245	0.00214991	0.00455964	0.0288899	-0.0110997			102.6	-1.21891	-1.30556	-1.29291	-1.0526	-1.12461	-1.11607	-1.21105
102.8	-0.00405075	0.00480955	0.013894	0.00458691	0.00736191	0.0232285	-0.0109906			102.8	-1.22074	-1.30265	-1.29126	-1.05016	-1.12181	-1.12173	-1.21094
103	0.00027898	0.00767737	0.0115299	0.00372027	0.00513734	0.0269411	-0.01036			103	-1.21641	-1.29979	-1.29362	-1.05103	-1.12403	-1.11802	-1.21031
103.19	-0.00304668	0.00306648	0.00893313	0.00439652	0.00194233	0.0295938	-0.011212			103.19	-1.21973	-1.3044	-1.29622	-1.05035	-1.12723	-1.11537	-1.21116
103.4	-0.0068418	0.00314384	0.00715771	0.00324209	0.0040509	0.0294252	-0.0133125			103.4	-1.22353	-1.30432	-1.29799	-1.0515	-1.12512	-1.11553	-1.21326
103.59	-0.00523139	0.00187817	0.0110528	0.00615706	0.00787135	0.0296058	-0.0137898			103.59	-1.22192	-1.30559	-1.2941	-1.04859	-1.1213	-1.11535	-1.21374
103.79	-0.00181488	0.00514742	0.0109132	0.0011934	0.00599097	0.0271187	-0.0100774			103.79	-1.2185	-1.30232	-1.29424	-1.05355	-1.12318	-1.11784	-1.21003
103.99	-0.00720195	0.00433237	0.0048148	0.00363513	0.00613412	0.0287494	-0.0114889			103.99	-1.22389	-1.30313	-1.30034	-1.05111	-1.12304	-1.11621	-1.21144
104.19	-0.00415181	-0.00062267	0.0123738	0.00544473	0.00361794	0.0278275	-0.00988744			104.19	-1.22084	-1.30809	-1.29278	-1.0493	-1.12555	-1.11713	-1.20984
104.4	-0.00619946	0.00128064	0.0113674	0.00652782	0.00479911	0.0262257	-0.0103525			104.4	-1.22289	-1.30618	-1.29378	-1.04822	-1.12437	-1.11873	-1.2103
104.59	-0.00753835	-0.00258722	0.0138253	0.00372512	0.00456648	0.0257673	-0.00819848			104.59	-1.22423	-1.31005	-1.29133	-1.05102	-1.1246	-1.11919	-1.20815
104.79	0.00129208	0.00315457	0.00908835	0.00580834	0.00314502	0.0281111	-0.0118086			104.79	-1.2154	-1.30431	-1.29606	-1.04894	-1.12603	-1.11685	-1.21176
105	-0.00492366	0.00215447	0.0122852	0.00253961	0.00448182	0.027829	-0.0101962			105	-1.22161	-1.30531	-1.29287	-1.05221	-1.12469	-1.11713	-1.21015
105.19	-0.00496506	0.00522775	0.0105171	0.00076763	0.00108395	0.0272415	-0.014033			105.19	-1.22165	-1.30224	-1.29463	-1.05398	-1.12809	-1.11772	-1.21398
105.4	-0.0034902	0.00344446	0.00997323	0.00414521	0.00489474	0.030711	-0.0100085			105.4	-1.22018	-1.30402	-1.29518	-1.0506	-1.12428	-1.11425	-1.20996
105.59	-0.0040929	0.0029813	0.0102623	0.00649088	0.00496705	0.028616	-0.00906848			105.59	-1.22078	-1.30448	-1.29489	-1.04826	-1.1242	-1.11634	-1.20902
105.8	-0.00490368	0.00102376	0.0108948	0.00195862	0.0059562	0.0274263	-0.00615389			105.8	-1.22159	-1.30644	-1.29426	-1.05279	-1.12321	-1.11753	-1.2061
106	-0.00248238	0.00255982	0.0105698	0.00360339	0.00350332	0.0247688	-0.010775			106	-1.21917	-1.3049	-1.29458	-1.05114	-1.12567	-1.12019	-1.21072
106.19	-0.00218621	0.00093725	0.0156107	0.00049198	0.00416409	0.0269273	-0.0166055			106.19	-1.21887	-1.30653	-1.28954	-1.05425	-1.12501	-1.11803	-1.21656
106.39	-0.00053554	0.0022043	0.00962072	0.00531679	0.00352461	0.0267732	-0.0142725			106.39	-1.21722	-1.30526	-1.29553	-1.04943	-1.12565	-1.11819	-1.21422
106.59	-0.00289506	0.00355576	0.00909856	0.00648615	0.0043666	0.0287714	-0.0129299			106.59	-1.21958	-1.30391	-1.29605	-1.04826	-1.1248	-1.11619	-1.21288
106.79	-0.00643913	0.00308673	0.00775157	0.0044699	0.00614169	0.028314	-0.00984092			106.79	-1.22313	-1.30438	-1.2974	-1.05028	-1.12303	-1.11665	-1.20979
107	-0.00110247	0.00384918	0.00719507	0.00456856	0.00517444	0.0283292	-0.0121844			107	-1.21779	-1.30362	-1.29796	-1.05018	-1.124	-1.11663	-1.21213
107.19	-0.00245312	0.00415267	0.011117	0.00341503	0.00865893	0.0280481	-0.00830005			107.19	-1.21914	-1.30331	-1.29403	-1.05133	-1.12051	-1.11691	-1.20825
107.4	-0.00054306	0.00115695	0.0109566	0.00319848	0.0050495	0.0304714	-0.0121112			107.4	-1.21723	-1.30631	-1.29419	-1.05155	-1.12412	-1.11449	-1.21206
107.6	-0.0008049	0.00338949	0.010678	0.0038219	0.00353784	0.0301803	-0.0120686			107.6	-1.21749	-1.30407	-1.29447	-1.05092	-1.12563	-1.11478	-1.21202
107.8	-0.00472981	0.0041997	0.0106668	0.0038471	0.0058868	0.0275469	-0.0147153			107.8	-1.22142	-1.30326	-1.29448	-1.0509	-1.12328	-1.11741	-1.21466
107.99	-0.00542733	0.00190324	0.00617167	0.00023895	0.00449646	0.0280788	-0.0151957			107.99	-1.22211	-1.30556	-1.29898	-1.05451	-1.12467	-1.11688	-1.21515
108.19	-0.00719701	0.00145988	0.0100877	0.00137551	0.00291129	0.0274269	-0.0118065			108.19	-1.22388	-1.306	-1.29506	-1.05337	-1.12626	-1.11753	-1.21176
108.4	-0.00253034	-0.00111847	0.00877978	0.00546474	0.00379643	0.0273636	-0.0121045			108.4	-1.21922	-1.30858	-1.29637	-1.04928	-1.12537	-1.1176	-1.21205
108.59	-0.00601287	0.00151654	0.0143136	0.00333322	0.00722784	0.022336	-0.0139745			108.59	-1.2227	-1.30595	-1.29084	-1.05141	-1.12194	-1.12262	-1.21392
108.79	-0.00310474	0.0047749	0.0122595	0.00466454	0.00550571	0.0249716	-0.016849			108.79	-1.21979	-1.30269	-1.29289	-1.05008	-1.12366	-1.11999	-1.2168
108.99	-0.00400936	0.00321625	0.00833382	0.00395517	0.00364392	0.0274578	-0.0131448			108.99	-1.2207	-1.30425	-1.29682	-1.05079	-1.12553	-1.1175	-1.21309
109.19	-0.00335591	0.00263079	0.0117986	0.00010289	0.00457594	0.0227141	-0.0131195			109.19	-1.22004	-1.30483	-1.29335	-1.05464	-1.12459	-1.12225	-1.21307
109.4	-0.00168935	0.00071173	0.0104735	0.00262952	0.00478149	0.0256459	-0.00880331			109.4	-1.21838	-1.30675	-1.29468	-1.05212	-1.12439	-1.11931	-1.20875
109.59	-0.00184243	0.00659332	0.008087	-0.00042056	0.00605025	0.0247547	-0.010589			109.59	-1.21853	-1.30087	-1.29706	-1.05517	-1.12312	-1.1202	-1.21054
109.79	-0.00444457	0.00023266	0.00800621	0.00051349	0.00150831	0.0283314	-0.0135065			109.79	-1.22113	-1.30723	-1.29714	-1.05423	-1.12766	-1.11663	-1.21346
109.99	-0.00294633	0.00567532	0.00703646	-0.00067253	0.00081323	0.0279527	-0.0117916			109.99	-1.21963	-1.30179	-1.29811	-1.05542	-1.12836	-1.11701	-1.21174
110.19	-0.00548798	-0.00040246	0.010495	0.00122113	0.00406312	0.0295679	-0.011438			110.19	-1.22218	-1.30787	-1.29466	-1.05353	-1.12511	-1.11539	-1.21139
110.39	-0.00507187	0.00066218	0.00948402	0.00164237	0.00425827	0.0266999	-0.00973369			110.39	-1.22176	-1.3068	-1.29567	-1.0531	-1.12491	-1.11826	-1.20968
110.59	-0.00473547	-0.00401402	0.00741361	0.00118158	0.00155953	0.0252235	-0.0117315			110.59	-1.22142	-1.31148	-1.29774	-1.05357	-1.12761	-1.11974	-1.21168
110.79	-0.0047596	0.00134259	0.0127122	0.00141664	0.00558548	0.0267412	-0.0131813			110.79	-1.22145	-1.30612	-1.29244	-1.05333	-1.12358	-1.11822	-1.21313
111	-0.00206874	0.00399695	0.0111245	0.00600095	0.00651901	0.0264854	-0.00800804			111	-1.21876	-1.30347	-1.29403	-1.04875	-1.12265	-1.11847	-1.20796
111.19	-0.00246006	-0.00356521	0.00682101	0.00177491	0.00260679	0.0228329	-0.0149987			111.19	-1.21915	-1.31103	-1.29833	-1.05297	-1.12656	-1.12213	-1.21495
111.39	-0.00561545	0.00334637	0.00924125	0.00452004	0.00216529	0.0242382	-0.00972373			111.39	-1.2223	-1.30412	-1.29591	-1.05023	-1.12701	-1.12072	-1.20967
111.59	-0.00370699	0.00315508	0.0138623	0.00423374	0.00319061	0.0288334	-0.0124826			111.59	-1.22039	-1.30431	-1.29129	-1.05051	-1.12598	-1.11613	-1.21243
111.79	-0.00262471	0.00151661	0.0091965	0.00513453	0.00310963	0.0288746	-0.0148937			111.79	-1.21931	-1.30595	-1.29595	-1.04961	-1.12606	-1.11608	-1.21484
111.99	-0.00181109	0.00184594	0.00730111	0.00433891	0.00025018	0.0282071	-0.0112583			111.99	-1.2185	-1.30562	-1.29785	-1.05041	-1.12892	-1.11675	-1.21121
112.19	-0.00575283	0.00331046	0.00984065	0.00279041	0.00342704	0.0264047	-0.0111714			112.19	-1.22244	-1.30415	-1.29531	-1.05196	-1.12574	-1.11855	-1.21112
112.39	-0.00429515	0.00404566	0.0095587	0.00405138	0.00372181	0.0279195	-0.0124642			112.39	-1.22098	-1.30342	-1.29559	-1.0507	-1.12545	-1.11704	-1.21241
112.59	-0.00440571	0.00058428	0.0127656	0.00452302	0.0046139	0.0288161	-0.0141181			112.59	-1.22109	-1.30688	-1.29238	-1.05022	-1.12456	-1.11614	-1.21407
112.79	-0.00294792	-0.00105541	0.00857463	0.00299335	0.00311288	0.029351	-0.00690653			112.79	-1.21964	-1.30852	-1.29658	-1.05175	-1.12606	-1.11561	-1.20686
112.99	-0.00473452	0.00502232	0.00914725	0.00185398	0.00424499	0.0282573	-0.010948			112.99	-1.22142	-1.30244	-1.296	-1.05289	-1.12493	-1.1167	-1.2109
113.19	-0.00150814	0.00331338	0.00860631	0.00179534	0.00342996	0.0270958	-0.0137545			113.19	-1.2182	-1.30415	-1.29654	-1.05295	-1.12574	-1.11786	-1.2137
113.4	-0.00625554	0.00103757	0.00927528	0.00349978	0.00626797	0.0295355	-0.0121904			113.4	-1.22294	-1.30643	-1.29588	-1.05125	-1.1229	-1.11542	-1.21214
113.59	-0.00278223	0.00237005	0.00784641	0.00070058	0.00730423	0.0302771	-0.0105444			113.59	-1.21947	-1.30509	-1.2973	-1.05405	-1.12187	-1.11468	-1.21049
113.79	-0.00837997	0.00565691	0.0118088	0.00168669	0.00582938	0.0275198	-0.00857893			113.79	-1.22507	-1.30181	-1.29334	-1.05306	-1.12334	-1.11744	-1.20853
113.99	-0.0038407	0.00210627	0.0148631	0.00614794	0.010046	0.0247025	-0.0127512			113.99	-1.22053	-1.30536	-1.29029	-1.0486	-1.11912	-1.12026	-1.2127
114.19	-0.00270925	0.00483326	0.00839612	0.00142765	0.00179182	0.0262554	-0.014418			114.19	-1.2194	-1.30263	-1.29675	-1.05332	-1.12738	-1.1187	-1.21437
114.4	-0.00749267	0.00266686	0.0103719	0.00262544	0.00294859	0.0270492	-0.00902026			114.4	-1.22418	-1.3048	-1.29478	-1.05212	-1.12622	-1.11791	-1.20897
114.59	-0.00441147	0.00134353	0.00961727	0.00381734	0.00187884	0.0270248	-0.0127421			114.59	-1.2211	-1.30612	-1.29553	-1.05093	-1.12729	-1.11793	-1.21269
114.79	-0.00300891	0.00432265	0.00796956	0.00420675	0.00459696	0.0282235	-0.00989466			114.79	-1.2197	-1.30314	-1.29718	-1.05054	-1.12457	-1.11674	-1.20984
114.99	-0.00149932	0.00107932	0.0068878	0.00524826	0.00444825	0.028532	-0.0152061			114.99	-1.21819	-1.30639	-1.29826	-1.0495	-1.12472	-1.11643	-1.21516
115.19	-0.00448873	0.00157291	0.0106823	0.00434027	0.00782931	0.0302263	-0.0111593			115.19	-1.22118	-1.30589	-1.29447	-1.05041	-1.12134	-1.11473	-1.21111
115.39	-0.00616353	0.00534242	0.00909171	0.00111713	0.00453687	0.0273454	-0.0121282			115.39	-1.22285	-1.30212	-1.29606	-1.05363	-1.12463	-1.11761	-1.21208
115.59	-0.00551002	0.00301128	0.0105816	0.00474113	0.00722466	0.0261627	-0.0132483			115.59	-1.2222	-1.30445	-1.29457	-1.05001	-1.12195	-1.1188	-1.2132
115.79	-0.00297368	0.00092202	0.011483	0.00515885	0.00428625	0.0264329	-0.00903495			115.79	-1.21966	-1.30654	-1.29367	-1.04959	-1.12488	-1.11853	-1.20898
116	-0.00347912	0.00393507	0.0120361	0.00413981	0.00344084	0.0271827	-0.0161373			116	-1.22017	-1.30353	-1.29311	-1.05061	-1.12573	-1.11778	-1.21609
116.19	-0.00546904	0.00433141	0.00869887	0.00480975	0.00425876	0.0251225	-0.012664			116.19	-1.22216	-1.30313	-1.29645	-1.04994	-1.12491	-1.11984	-1.21261
116.39	-0.00131386	-0.00050399	0.00719718	0.00449555	0.00565803	0.0267393	-0.013847			116.39	-1.218	-1.30797	-1.29795	-1.05025	-1.12351	-1.11822	-1.2138
116.59	-0.00706802	0.00179093	0.0111801	0.0032793	0.00664756	0.0274727	-0.0114076			116.59	-1.22376	-1.30567	-1.29397	-1.05147	-1.12252	-1.11749	-1.21136
116.79	-0.00465566	0.00350518	0.0121026	0.00354526	0.00433089	0.0278312	-0.0123556			116.79	-1.22134	-1.30396	-1.29305	-1.0512	-1.12484	-1.11713	-1.21231
117	-0.00470401	-0.00027538	0.0134196	0.00202599	0.00411226	0.0303656	-0.0106738			117	-1.22139	-1.30774	-1.29173	-1.05272	-1.12506	-1.11459	-1.21062
117.19	-0.00639021	0.00034932	0.00699197	0.00259037	0.00464339	0.0283316	-0.0138365			117.19	-1.22308	-1.30712	-1.29816	-1.05216	-1.12453	-1.11663	-1.21379
117.4	-0.00331368	0.00414094	0.00893662	0.00416809	0.00300129	0.0291144	-0.0118959			117.4	-1.22	-1.30332	-1.29621	-1.05058	-1.12617	-1.11585	-1.21185
117.6	-0.00160204	0.00368569	0.00753142	1.16e-06	0.00600994	0.0285565	-0.0119304			117.6	-1.21829	-1.30378	-1.29762	-1.05475	-1.12316	-1.1164	-1.21188
117.8	-0.00565359	-0.00133927	0.00553246	0.00074493	0.00266812	0.0233508	-0.0141539			117.8	-1.22234	-1.3088	-1.29962	-1.054	-1.1265	-1.12161	-1.2141
118	-0.00607365	0.00296758	0.0128141	0.00181162	0.00518043	0.0284764	-0.01372			118	-1.22276	-1.3045	-1.29234	-1.05294	-1.12399	-1.11648	-1.21367
118.19	-0.00442051	-0.00289987	0.0135511	0.00277263	0.00529964	0.0280688	-0.0104664			118.19	-1.22111	-1.31036	-1.2916	-1.05197	-1.12387	-1.11689	-1.21042
118.4	-0.0035101	0.00519363	0.0121243	0.00193745	0.00380454	0.0287087	-0.0127569			118.4	-1.2202	-1.30227	-1.29303	-1.05281	-1.12537	-1.11625	-1.21271
118.6	-0.00135013	0.00487832	0.00825502	0.00394978	0.00686068	0.0270421	-0.012317			118.6	-1.21804	-1.30259	-1.2969	-1.0508	-1.12231	-1.11792	-1.21227
118.8	-0.0044509	0.00010539	0.0146135	0.00298869	0.00348276	0.0294047	-0.0143951			118.8	-1.22114	-1.30736	-1.29054	-1.05176	-1.12569	-1.11555	-1.21434
119	-0.00321482	0.00508322	0.0114912	0.00440701	0.00502847	0.0259127	-0.0129428			119	-1.2199	-1.30238	-1.29366	-1.05034	-1.12414	-1.11905	-1.21289
119.19	-0.00373465	-0.00098303	0.0111918	0.00519719	0.00545468	0.0273127	-0.0130511			119.19	-1.22042	-1.30845	-1.29396	-1.04955	-1.12372	-1.11765	-1.213
119.4	-0.00530765	0.00285735	0.0088866	0.00248252	0.00492705	0.0248121	-0.0109317			119.4	-1.22199	-1.30461	-1.29626	-1.05226	-1.12424	-1.12015	-1.21088
119.6	-0.00420897	0.00220913	0.0106946	0.0034303	0.00379282	0.0265397	-0.0123744			119.6	-1.2209	-1.30526	-1.29446	-1.05132	-1.12538	-1.11842	-1.21232
119.8	-0.00081293	0.0029154	0.0118497	0.00480365	0.00144037	0.0292802	-0.0112257			119.8	-1.2175	-1.30455	-1.2933	-1.04994	-1.12773	-1.11568	-1.21118
120	-0.00201201	0.00468276	0.00772466	0.00590642	0.00245295	0.0253628	-0.00995738			120	-1.2187	-1.30278	-1.29743	-1.04884	-1.12672	-1.1196	-1.20991
120.19	-0.00142069	0.00141573	0.00845756	0.00502725	0.00730786	0.0313309	-0.0138028			120.19	-1.21811	-1.30605	-1.29669	-1.04972	-1.12186	-1.11363	-1.21375
120.4	-0.00373752	0.00329864	0.00879659	0.00066182	0.00311847	0.0286765	-0.0149063			120.4	-1.22042	-1.30417	-1.29635	-1.05408	-1.12605	-1.11628	-1.21486
120.6	-0.005229	0.00183829	0.00585212	0.00422532	0.00679493	0.0295523	-0.00913661			120.6	-1.22192	-1.30563	-1.2993	-1.05052	-1.12238	-1.11541	-1.20909
120.8	-0.00532314	0.00300653	0.00846388	0.00215809	0.00445153	0.0285268	-0.0113292			120.8	-1.22201	-1.30446	-1.29669	-1.05259	-1.12472	-1.11643	-1.21128
121	-0.00192837	0.00506297	0.0118258	0.00402465	0.00318202	0.0262967	-0.0129118			121	-1.21862	-1.3024	-1.29332	-1.05072	-1.12599	-1.11866	-1.21286
121.19	-0.0043484	-0.00191258	0.00978883	0.00355243	0.00577319	0.030014	-0.0177659			121.19	-1.22104	-1.30938	-1.29536	-1.05119	-1.1234	-1.11495	-1.21772
121.4	-0.0041539	0.00327257	0.00506909	0.00354646	0.00528874	0.0284811	-0.0151742			121.4	-1.22084	-1.30419	-1.30008	-1.0512	-1.12388	-1.11648	-1.21512
121.6	-0.00377296	0.00094802	0.0115095	0.00468694	0.00260535	0.0277722	-0.0162052			121.6	-1.22046	-1.30652	-1.29364	-1.05006	-1.12656	-1.11719	-1.21615
121.8	-0.00347072	-0.00300684	0.0115286	0.00251807	0.00590344	0.0280651	-0.0158219			121.8	-1.22016	-1.31047	-1.29362	-1.05223	-1.12327	-1.11689	-1.21577
122	-0.00479168	0.00587253	0.00822002	0.00319998	0.00443785	0.0272293	-0.0188349			122	-1.22148	-1.30159	-1.29693	-1.05155	-1.12473	-1.11773	-1.21878
122.19	-0.00552931	0.00082762	0.0085724	-0.00010225	0.00440988	0.0265982	-0.0150747			122.19	-1.22222	-1.30664	-1.29658	-1.05485	-1.12476	-1.11836	-1.21502
122.4	-0.00374843	0.00109114	0.0108531	0.00288928	0.00177681	0.0283775	-0.00985373			122.4	-1.22044	-1.30637	-1.2943	-1.05186	-1.12739	-1.11658	-1.2098
122.6	-0.00442373	0.00061724	0.00449148	0.00094523	0.00209651	0.0276453	-0.0128941			122.6	-1.22111	-1.30685	-1.30066	-1.0538	-1.12707	-1.11731	-1.21284
122.8	-0.00351568	0.00384416	0.00672158	0.0050497	0.00171127	0.0265942	-0.0151404			122.8	-1.2202	-1.30362	-1.29843	-1.0497	-1.12746	-1.11837	-1.21509
123	-0.00428139	-0.00075176	0.0117359	0.00384463	0.00507484	0.0265813	-0.01517			123	-1.22097	-1.30822	-1.29341	-1.0509	-1.1241	-1.11838	-1.21512
123.19	-0.00041401	0.00237572	0.0117173	0.00156959	0.00373126	0.0278713	-0.0123042			123.19	-1.2171	-1.30509	-1.29343	-1.05318	-1.12544	-1.11709	-1.21225
123.39	-0.00547434	-0.0016559	0.00726507	0.00188162	0.00168629	0.0254146	-0.0150932			123.39	-1.22216	-1.30912	-1.29789	-1.05287	-1.12748	-1.11954	-1.21504
123.59	-0.00368597	0.00036697	0.0117779	0.00086538	0.00549714	0.0282562	-0.0136698			123.59	-1.22037	-1.3071	-1.29337	-1.05388	-1.12367	-1.1167	-1.21362
123.8	-0.00387236	0.0025021	0.0107586	0.00346777	0.00562798	0.0302832	-0.0121321			123.8	-1.22056	-1.30496	-1.29439	-1.05128	-1.12354	-1.11468	-1.21208
124	-0.00272196	-0.00185928	0.00801352	0.00085557	0.00313472	0.0251392	-0.0118001			124	-1.21941	-1.30932	-1.29714	-1.05389	-1.12604	-1.11982	-1.21175
124.19	-0.00418778	-0.00134583	0.01461	0.006216	0.00291507	0.0286225	-0.0110572			124.19	-1.22088	-1.30881	-1.29054	-1.04853	-1.12626	-1.11634	-1.21101
124.39	-0.00489184	0.00184199	0.0111194	0.00266137	0.00684133	0.0299513	-0.011388			124.39	-1.22158	-1.30562	-1.29403	-1.05209	-1.12233	-1.11501	-1.21134
124.6	-0.00541701	0.00109769	0.00777257	0.003583	0.0019165	0.0275624	-0.0110841			124.6	-1.2221	-1.30637	-1.29738	-1.05116	-1.12725	-1.1174	-1.21103
124.8	-0.00216083	0.00181113	0.0107407	0.00556433	0.00345324	0.026638	-0.0157938			124.8	-1.21885	-1.30565	-1.29441	-1.04918	-1.12572	-1.11832	-1.21574
125	-0.00272549	-0.00050167	0.00909557	0.00212864	0.00315519	0.0322072	-0.0132157			125	-1.21941	-1.30797	-1.29605	-1.05262	-1.12602	-1.11275	-1.21317
125.19	-0.00375607	0.00053614	0.0102753	0.00304138	0.00140608	0.0250867	-0.0158339			125.19	-1.22044	-1.30693	-1.29488	-1.05171	-1.12776	-1.11987	-1.21578
125.4	-0.00790007	0.00414182	0.0135879	0.00345032	0.00341667	0.0268976	-0.0115925			125.4	-1.22459	-1.30332	-1.29156	-1.0513	-1.12575	-1.11806	-1.21154
125.6	-0.00271924	0.0052167	0.00776779	0.00168343	0.00261195	0.0262413	-0.0149263			125.6	-1.21941	-1.30225	-1.29738	-1.05306	-1.12656	-1.11872	-1.21488
125.8	-0.00577644	0.00457896	0.011626	0.00265156	0.00418311	0.028361	-0.0149632			125.8	-1.22246	-1.30289	-1.29352	-1.0521	-1.12499	-1.1166	-1.21491
125.99	-0.00376827	0.00170582	0.00829271	0.00466611	0.00545871	0.0252394	-0.015011			125.99	-1.22046	-1.30576	-1.29686	-1.05008	-1.12371	-1.11972	-1.21496
126.19	-0.00460265	9.86e-05	0.00796407	0.0047806	0.00265123	0.0288329	-0.010504			126.19	-1.22129	-1.30737	-1.29719	-1.04997	-1.12652	-1.11613	-1.21045
126.4	-0.00236444	-0.0012606	0.00810645	0.00240512	0.00214059	0.0293153	-0.0140626			126.4	-1.21905	-1.30872	-1.29704	-1.05234	-1.12703	-1.11564	-1.21401
126.6	-0.00389525	0.00407508	0.0132791	0.00354243	0.00583182	0.0277223	-0.0175998			126.6	-1.22058	-1.30339	-1.29187	-1.0512	-1.12334	-1.11724	-1.21755
126.8	-0.00326963	0.00428647	0.00806693	0.00479161	0.00617412	0.0321412	-0.015654			126.8	-1.21996	-1.30318	-1.29708	-1.04996	-1.123	-1.11282	-1.2156
126.99	-0.00157906	-0.00012406	0.00822014	0.00126858	0.00391944	0.0262075	-0.0139926			126.99	-1.21827	-1.30759	-1.29693	-1.05348	-1.12525	-1.11875	-1.21394
127.19	-0.00273152	-0.00092599	0.00962519	0.00131765	0.00307474	0.0296854	-0.0107551			127.19	-1.21942	-1.30839	-1.29553	-1.05343	-1.1261	-1.11527	-1.2107
127.39	-0.00293847	0.00154585	0.0105297	0.00249739	0.00267307	0.0243392	-0.010703			127.39	-1.21963	-1.30592	-1.29462	-1.05225	-1.1265	-1.12062	-1.21065
127.6	-0.0079497	0.00067987	0.0114195	0.00021251	0.0041729	0.0259928	-0.0111211			127.6	-1.22464	-1.30678	-1.29373	-1.05453	-1.125	-1.11897	-1.21107
127.8	-0.00429641	-0.00146029	0.00976479	0.00420921	0.00390924	0.0249965	-0.00856987			127.8	-1.22098	-1.30892	-1.29539	-1.05054	-1.12526	-1.11996	-1.20852
127.99	-0.00382671	0.00425404	0.00611606	0.00153327	0.00389376	0.0260409	-0.0161765			127.99	-1.22051	-1.30321	-1.29903	-1.05321	-1.12528	-1.11892	-1.21613
128.19	-0.00266443	0.00313279	0.00905929	0.00320505	0.00355209	0.0300254	-0.0114769			128.19	-1.21935	-1.30433	-1.29609	-1.05154	-1.12562	-1.11493	-1.21143
128.39	-0.00926104	0.00158083	0.00889943	0.00067346	0.0016258	0.0268267	-0.0155119			128.39	-1.22595	-1.30588	-1.29625	-1.05407	-1.12754	-1.11813	-1.21546
128.6	-0.00962144	-0.00217691	0.0101906	0.00442978	0.00550146	0.0280058	-0.0118742			128.6	-1.22631	-1.30964	-1.29496	-1.05032	-1.12367	-1.11695	-1.21182
128.79	-0.00783153	0.00045471	0.00863767	0.00112111	0.00488421	0.0275934	-0.0150499			128.79	-1.22452	-1.30701	-1.29651	-1.05363	-1.12429	-1.11737	-1.215
128.99	-0.00158723	-0.0007734	0.00925113	0.00187945	0.00397014	0.0285967	-0.0120796			128.99	-1.21827	-1.30824	-1.2959	-1.05287	-1.1252	-1.11636	-1.21203
129.19	-0.00258433	0.00695283	0.00948693	0.00152554	0.00349863	0.0292119	-0.0119592			129.19	-1.21927	-1.30051	-1.29566	-1.05322	-1.12567	-1.11575	-1.21191
129.39	-0.00407218	-0.00213638	0.00987134	-0.00095461	0.00473192	0.0245881	-0.0131081			129.39	-1.22076	-1.3096	-1.29528	-1.0557	-1.12444	-1.12037	-1.21306
129.6	-0.0029015	0.00502892	0.0109218	0.00358642	0.00656063	0.0299667	-0.0128192			129.6	-1.21959	-1.30244	-1.29423	-1.05116	-1.12261	-1.11499	-1.21277
129.79	-0.00279383	0.0047064	0.00935481	0.00203649	0.00647799	0.0279521	-0.015708			129.79	-1.21948	-1.30276	-1.2958	-1.05271	-1.12269	-1.11701	-1.21566
129.99	-0.00537579	-0.00215543	0.00886952	0.00117875	0.00708062	0.0270151	-0.0107584			129.99	-1.22206	-1.30962	-1.29628	-1.05357	-1.12209	-1.11794	-1.21071
130.19	-0.00207419	0.00181892	0.010893	0.00291617	0.00433623	0.0296734	-0.0158523			130.19	-1.21876	-1.30565	-1.29426	-1.05183	-1.12483	-1.11529	-1.2158
130.39	-0.004445	-0.00042257	0.0078796	0.00275301	0.00292482	0.0251784	-0.0134758			130.39	-1.22113	-1.30789	-1.29727	-1.05199	-1.12625	-1.11978	-1.21343
130.6	-0.00802224	0.00123523	0.00922993	0.00247948	0.00192232	0.0287797	-0.00821229			130.6	-1.22471	-1.30623	-1.29592	-1.05227	-1.12725	-1.11618	-1.20816
130.79	-0.00564327	0.00255351	0.0110981	0.00344559	0.00850664	0.0293989	-0.00937276			130.79	-1.22233	-1.30491	-1.29405	-1.0513	-1.12066	-1.11556	-1.20932
130.99	-0.00419674	0.00244482	0.0119374	0.00123178	0.00312644	0.0268201	-0.012081			130.99	-1.22088	-1.30502	-1.29321	-1.05351	-1.12604	-1.11814	-1.21203
131.19	-0.00768409	0.00503383	0.00900325	0.0041391	0.00595576	0.0279414	-0.0135042			131.19	-1.22437	-1.30243	-1.29615	-1.05061	-1.12321	-1.11702	-1.21345
131.39	-0.00400823	0.00105769	0.00769034	0.00420679	0.00712813	0.0300853	-0.0144454			131.39	-1.2207	-1.30641	-1.29746	-1.05054	-1.12204	-1.11487	-1.2144
131.6	-0.00411579	0.00124349	0.0054088	0.00259063	0.00433861	0.0293613	-0.0170963			131.6	-1.2208	-1.30622	-1.29974	-1.05216	-1.12483	-1.1156	-1.21705
131.79	0.00022254	-0.00088485	0.00670237	0.00237345	0.00012152	0.0283373	-0.011764			131.79	-1.21646	-1.30835	-1.29845	-1.05237	-1.12905	-1.11662	-1.21171
131.99	-0.00251517	0.00210952	0.00640585	-9.054e-05	0.00335568	0.0257344	-0.017605			131.99	-1.2192	-1.30535	-1.29874	-1.05484	-1.12581	-1.11922	-1.21755
132.19	-0.002129	0.00562925	0.0115388	0.0018115	0.00570296	0.0300527	-0.014812			132.19	-1.21882	-1.30184	-1.29361	-1.05294	-1.12347	-1.11491	-1.21476
132.39	-0.00025549	-0.00115151	0.00964905	-0.00055422	0.00249989	0.027241	-0.0148999			132.39	-1.21694	-1.30862	-1.2955	-1.0553	-1.12667	-1.11772	-1.21485
132.59	-0.00254886	0.00206799	0.00868369	0.00052084	0.00511481	0.0258017	-0.015731			132.59	-1.21924	-1.3054	-1.29647	-1.05423	-1.12406	-1.11916	-1.21568
132.79	-0.00303022	0.0002529	0.0105179	0.00038782	0.00298049	0.0309189	-0.0145377			132.79	-1.21972	-1.30721	-1.29463	-1.05436	-1.12619	-1.11404	-1.21449
132.99	-0.00250048	0.00175841	0.0083475	0.00233952	0.00523567	0.0265337	-0.0155185			132.99	-1.21919	-1.30571	-1.2968	-1.05241	-1.12393	-1.11843	-1.21547
133.19	-0.00555205	0.00155163	0.012296	0.00469391	0.00295283	0.0297942	-0.0139581			133.19	-1.22224	-1.30591	-1.29285	-1.05005	-1.12622	-1.11517	-1.21391
133.39	-0.00498789	0.00319792	0.0127876	0.00116777	0.00541089	0.0261112	-0.0118614			133.39	-1.22168	-1.30427	-1.29236	-1.05358	-1.12376	-1.11885	-1.21181
133.59	-0.00292906	-0.00094053	0.00954878	0.00314058	0.00478168	0.0303205	-0.0170319			133.59	-1.21962	-1.3084	-1.2956	-1.05161	-1.12439	-1.11464	-1.21698
133.79	-0.00255482	0.00074531	0.00904935	0.00326404	0.00444063	0.0299615	-0.0156582			133.79	-1.21924	-1.30672	-1.2961	-1.05148	-1.12473	-1.115	-1.21561
133.99	-0.0046253	0.00309489	0.00987036	0.00213406	0.00323084	0.0257281	-0.0110688			133.99	-1.22131	-1.30437	-1.29528	-1.05261	-1.12594	-1.11923	-1.21102
134.19	-0.00101675	0.00010107	0.00925557	-0.00035681	0.00359992	0.0294475	-0.0137244			134.19	-1.2177	-1.30736	-1.29589	-1.0551	-1.12557	-1.11551	-1.21367
134.39	-0.00342991	0.00146247	0.013545	-0.00038936	0.00196595	0.0240907	-0.0114771			134.39	-1.22012	-1.306	-1.29161	-1.05514	-1.1272	-1.12087	-1.21143
134.59	-0.00442468	0.00425742	0.0106515	0.00313291	0.00312365	0.02796	-0.00767112			134.59	-1.22111	-1.30321	-1.2945	-1.05161	-1.12605	-1.117	-1.20762
134.79	-0.00444451	0.005434	0.0145824	0.00068037	0.00477078	0.0281689	-0.0126374			134.79	-1.22113	-1.30203	-1.29057	-1.05407	-1.1244	-1.11679	-1.21259
134.99	-0.00055423	0.00372919	0.0147283	0.00466356	0.00096302	0.0286882	-0.00921219			134.99	-1.21724	-1.30374	-1.29042	-1.05008	-1.12821	-1.11627	-1.20916
135.19	-0.00480682	0.00254608	0.0114206	-0.00078925	0.00370349	0.0240404	-0.0124179			135.19	-1.22149	-1.30492	-1.29373	-1.05554	-1.12547	-1.12092	-1.21237
135.39	-0.00782335	0.00314922	0.00634578	0.00443108	0.0051748	0.0299818	-0.01775			135.39	-1.22451	-1.30432	-1.2988	-1.05032	-1.124	-1.11498	-1.2177
135.59	-0.00709754	0.0018442	0.00956613	0.000935	0.00482741	0.028259	-0.0135518			135.59	-1.22378	-1.30562	-1.29558	-1.05381	-1.12434	-1.1167	-1.2135
135.79	-0.00455358	0.00050365	0.00595862	0.00343813	0.00682475	0.0286363	-0.0129508			135.79	-1.22124	-1.30696	-1.29919	-1.05131	-1.12235	-1.11632	-1.2129
135.99	-0.00711797	0.00241917	0.0112468	-0.00051552	0.00268809	0.0260383	-0.0157582			135.99	-1.22381	-1.30505	-1.2939	-1.05526	-1.12648	-1.11892	-1.21571
136.19	-0.00352221	0.00347856	0.00915674	0.00065651	0.00707545	0.0264348	-0.0109132			136.19	-1.22021	-1.30399	-1.29599	-1.05409	-1.12209	-1.11852	-1.21086
136.39	-0.00392122	0.00126007	0.00703082	0.00377467	0.00546746	0.026566	-0.0169096			136.39	-1.22061	-1.3062	-1.29812	-1.05097	-1.1237	-1.11839	-1.21686
136.59	-0.00329692	-0.0016683	0.00932467	0.00278969	0.00433842	0.0308441	-0.0111037			136.59	-1.21998	-1.30913	-1.29583	-1.05196	-1.12483	-1.11412	-1.21105
136.79	-0.0080734	0.00438787	0.010742	0.00574542	0.00416604	0.0281888	-0.0119698			136.79	-1.22476	-1.30308	-1.29441	-1.049	-1.125	-1.11677	-1.21192
136.99	-0.00157853	0.00059507	0.00723387	0.00012806	0.00474792	0.0307786	-0.011663			136.99	-1.21827	-1.30687	-1.29792	-1.05462	-1.12442	-1.11418	-1.21161
137.19	-0.0062524	0.0024087	0.00798193	0.00336389	0.00569451	0.0290916	-0.0132721			137.19	-1.22294	-1.30506	-1.29717	-1.05138	-1.12348	-1.11587	-1.21322
137.39	-0.00401074	-0.00034956	0.0116409	0.00141251	0.0035438	0.0280124	-0.0124329			137.39	-1.2207	-1.30781	-1.29351	-1.05333	-1.12563	-1.11695	-1.21238
137.59	-0.00733837	-0.00078785	0.00747261	0.00153897	0.00316917	0.0288221	-0.0126245			137.59	-1.22403	-1.30825	-1.29768	-1.05321	-1.126	-1.11614	-1.21257
137.79	-0.00289906	-0.00059172	0.00537837	0.00384517	0.00253778	0.0296703	-0.0135138			137.79	-1.21959	-1.30806	-1.29977	-1.0509	-1.12663	-1.11529	-1.21346
137.99	-0.00410365	0.00199591	0.00747776	0.00268659	0.00652962	0.0283217	-0.0143404			137.99	-1.22079	-1.30547	-1.29767	-1.05206	-1.12264	-1.11664	-1.21429
138.19	-0.00229662	0.00494162	0.0113122	0.00233391	0.00058686	0.0298173	-0.0119258			138.19	-1.21898	-1.30252	-1.29384	-1.05241	-1.12858	-1.11514	-1.21188
138.39	-0.00396393	0.00085226	0.00803738	0.0037227	0.00504831	0.0283193	-0.0182014			138.39	-1.22065	-1.30661	-1.29711	-1.05102	-1.12412	-1.11664	-1.21815
138.59	-0.00537636	0.00235214	0.00896425	0.00433912	0.00417199	0.0277508	-0.0158091			138.59	-1.22206	-1.30511	-1.29619	-1.05041	-1.125	-1.11721	-1.21576
138.79	-0.00410446	0.00245877	0.00924319	0.00088016	0.0052345	0.0311565	-0.0139445			138.79	-1.22079	-1.30501	-1.29591	-1.05387	-1.12394	-1.1138	-1.21389
138.99	-0.00396705	0.00195335	0.0101294	0.00377795	0.005285	0.0306706	-0.0159272			138.99	-1.22065	-1.30551	-1.29502	-1.05097	-1.12389	-1.11429	-1.21588
139.19	-0.00439873	0.00096726	0.00826866	0.0005387	0.00480824	0.0281929	-0.0112918			139.19	-1.22109	-1.3065	-1.29688	-1.05421	-1.12436	-1.11677	-1.21124
139.39	-0.00407212	0.00177005	0.0135476	0.00402816	0.00284665	0.0268739	-0.0178354			139.39	-1.22076	-1.30569	-1.2916	-1.05072	-1.12632	-1.11809	-1.21779
139.6	-0.00426245	-0.00105271	0.00909011	0.0016673	0.00305208	0.0276747	-0.012421			139.6	-1.22095	-1.30852	-1.29606	-1.05308	-1.12612	-1.11728	-1.21237
139.79	-0.00051352	0.00371852	0.0091318	0.0042886	0.00546291	0.0298084	-0.0156856			139.79	-1.2172	-1.30375	-1.29602	-1.05046	-1.12371	-1.11515	-1.21564
139.99	0.0002907	0.00162196	0.00522305	0.00563097	0.00425705	0.024926	-0.0118588			139.99	-1.2164	-1.30584	-1.29993	-1.04912	-1.12491	-1.12003	-1.21181
140.19	-0.00379042	0.00305338	0.00871409	0.0013888	0.0038351	0.027141	-0.0167769			140.19	-1.22048	-1.30441	-1.29644	-1.05336	-1.12534	-1.11782	-1.21673
140.39	-0.00640858	-0.00120917	0.00935336	-0.0019714	0.0042481	0.0239264	-0.0150767			140.39	-1.2231	-1.30867	-1.2958	-1.05672	-1.12492	-1.12103	-1.21503
140.59	-0.00248181	0.00158642	0.00611656	0.00379501	0.00693201	0.0298092	-0.0086524			140.59	-1.21917	-1.30588	-1.29903	-1.05095	-1.12224	-1.11515	-1.2086
140.79	-0.00428714	0.00462582	0.0119808	0.00167473	0.00474805	0.0287152	-0.0143175			140.79	-1.22097	-1.30284	-1.29317	-1.05307	-1.12442	-1.11624	-1.21427
140.99	-0.00745773	0.00460619	0.00839784	0.00139245	0.00451629	0.0280499	-0.0143357			140.99	-1.22415	-1.30286	-1.29675	-1.05335	-1.12465	-1.11691	-1.21429
141.19	-0.00741728	0.00376817	0.0107928	0.00058003	0.00443885	0.0281296	-0.0180944			141.19	-1.2241	-1.3037	-1.29436	-1.05417	-1.12473	-1.11683	-1.21804
141.39	-0.00403026	0.0006426	0.00679684	0.00082175	0.00571359	0.0303921	-0.0138794			141.39	-1.22072	-1.30682	-1.29835	-1.05393	-1.12346	-1.11457	-1.21383
141.59	-0.00801789	-0.00061689	0.0101917	-0.00027642	0.00310107	0.0265074	-0.0119969			141.59	-1.22471	-1.30808	-1.29496	-1.05502	-1.12607	-1.11845	-1.21195
141.79	-0.00620599	0.0015375	0.00894177	0.00285095	0.0045459	0.0269529	-0.0138841			141.79	-1.22289	-1.30593	-1.29621	-1.0519	-1.12462	-1.11801	-1.21383
141.99	-0.00256161	0.00122357	0.0138738	0.00207782	0.00208016	0.0294417	-0.0162569			141.99	-1.21925	-1.30624	-1.29128	-1.05267	-1.12709	-1.11552	-1.21621
142.19	-0.00179841	0.00240058	0.00651537	0.0037738	0.00476475	0.0289526	-0.0163778			142.19	-1.21849	-1.30506	-1.29864	-1.05097	-1.12441	-1.11601	-1.21633
142.39	-0.00596911	0.0026601	0.0109372	-0.00336593	0.00381848	0.0282221	-0.0129442			142.39	-1.22266	-1.3048	-1.29421	-1.05811	-1.12535	-1.11674	-1.21289
142.59	-0.0076405	0.00163428	0.0105851	0.00208147	0.00493194	0.0286531	-0.0103364			142.59	-1.22433	-1.30583	-1.29457	-1.05267	-1.12424	-1.11631	-1.21029
142.79	-0.00716914	3.093e-05	0.00788522	0.00561667	0.00578532	0.0275726	-0.0206224			142.79	-1.22386	-1.30743	-1.29727	-1.04913	-1.12338	-1.11739	-1.22057
142.99	-0.00673307	-0.0006777	0.00979036	0.00416474	0.00692168	0.0300602	-0.0152254			142.99	-1.22342	-1.30814	-1.29536	-1.05058	-1.12225	-1.1149	-1.21518
143.19	-0.00478098	-0.0004448	0.00836227	-0.00050064	0.00267988	0.025796	-0.0125147			143.19	-1.22147	-1.30791	-1.29679	-1.05525	-1.12649	-1.11916	-1.21246
143.39	-0.00547062	0.00438396	0.0105955	0.00263307	0.0061258	0.0306761	-0.0155377			143.39	-1.22216	-1.30308	-1.29455	-1.05211	-1.12304	-1.11428	-1.21549
143.59	-0.0043614	0.00276974	0.00717086	0.00196704	0.00575679	0.0255135	-0.015821			143.59	-1.22105	-1.30469	-1.29798	-1.05278	-1.12341	-1.11945	-1.21577
143.79	-0.00205651	0.00083964	0.00621998	0.00081421	0.00634386	0.0237712	-0.0147576			143.79	-1.21874	-1.30662	-1.29893	-1.05393	-1.12283	-1.12119	-1.21471
143.99	-0.00012119	0.00386991	0.00476914	0.00146611	0.00335162	0.0304955	-0.0150672			143.99	-1.21681	-1.30359	-1.30038	-1.05328	-1.12582	-1.11446	-1.21502
144.19	-0.0060013	0.00326257	0.00909839	0.00342743	0.00513562	0.0289499	-0.0145028			144.19	-1.22269	-1.3042	-1.29605	-1.05132	-1.12403	-1.11601	-1.21445
144.39	-0.0051448	0.00171565	0.00954787	0.0037385	0.00504617	0.0270453	-0.0147611			144.39	-1.22183	-1.30575	-1.2956	-1.05101	-1.12412	-1.11791	-1.21471
144.6	-0.00659264	0.00153095	0.00763934	0.00242556	0.00554372	0.0274653	-0.0129117			144.6	-1.22328	-1.30593	-1.29751	-1.05232	-1.12363	-1.11749	-1.21286
144.79	-0.0058013	0.00202775	0.00785487	-0.00012474	0.00519877	0.0263942	-0.0169358			144.79	-1.22249	-1.30544	-1.2973	-1.05487	-1.12397	-1.11857	-1.21689
144.99	-0.00270275	0.00251899	0.00893428	0.00573478	0.00381158	0.0272349	-0.0131716			144.99	-1.21939	-1.30495	-1.29622	-1.04901	-1.12536	-1.11772	-1.21312
145.19	-0.0043909	0.00649865	0.00945541	-0.00022067	0.00646411	0.0286232	-0.0152583			145.19	-1.22108	-1.30097	-1.2957	-1.05497	-1.12271	-1.11634	-1.21521
145.39	-0.00834381	0.00232333	0.0062374	-0.00086042	0.00456068	0.0257938	-0.0138556			145.39	-1.22503	-1.30514	-1.29891	-1.05561	-1.12461	-1.11917	-1.21381
145.6	-0.00589145	0.00186115	0.00592	-0.00027473	0.00334192	0.0258104	-0.012386			145.6	-1.22258	-1.3056	-1.29923	-1.05502	-1.12583	-1.11915	-1.21234
145.79	-0.00724533	-0.00050405	0.0107215	0.00084875	0.00395786	0.0288601	-0.0116602			145.79	-1.22393	-1.30797	-1.29443	-1.0539	-1.12521	-1.1161	-1.21161
145.99	-0.00334324	0.00232942	0.0107445	0.00095359	0.00593548	0.0303523	-0.0161926			145.99	-1.22003	-1.30513	-1.29441	-1.05379	-1.12323	-1.11461	-1.21614
146.19	-0.00342635	-0.00144516	0.00973415	0.00203755	0.00124665	0.0261488	-0.0177643			146.19	-1.22011	-1.30891	-1.29542	-1.05271	-1.12792	-1.11881	-1.21771
146.39	-0.00325398	-0.00088565	0.0113831	0.00192547	0.00349407	0.0265013	-0.0137115			146.39	-1.21994	-1.30835	-1.29377	-1.05282	-1.12568	-1.11846	-1.21366
146.6	-0.00424307	0.00370362	0.00848132	0.00262696	0.00384793	0.0286387	-0.0122058			146.6	-1.22093	-1.30376	-1.29667	-1.05212	-1.12532	-1.11632	-1.21216
146.79	-0.00087567	0.00165626	0.00586759	0.00578153	0.0046348	0.0285935	-0.0122268			146.79	-1.21756	-1.30581	-1.29928	-1.04897	-1.12454	-1.11637	-1.21218
146.99	-0.00442457	0.00459565	0.00634703	0.00490799	0.00989578	0.0251731	-0.0128747			146.99	-1.22111	-1.30287	-1.2988	-1.04984	-1.11927	-1.11979	-1.21282
147.19	-0.00539552	-9.402e-05	0.011179	0.00192897	0.00504364	0.029519	-0.0159921			147.19	-1.22208	-1.30756	-1.29397	-1.05282	-1.12413	-1.11544	-1.21594
147.39	-0.0048702	0.00538764	0.00662464	0.00297392	0.00364343	0.0312223	-0.0140637			147.39	-1.22156	-1.30208	-1.29853	-1.05177	-1.12553	-1.11374	-1.21401
147.6	-0.0063771	-0.00091204	0.0102041	0.00258413	0.0026082	0.0286011	-0.0103433			147.6	-1.22306	-1.30838	-1.29495	-1.05216	-1.12656	-1.11636	-1.21029
147.79	-0.00504711	-0.00025076	0.00993169	0.00384445	0.00414826	0.0288199	-0.016467			147.79	-1.22173	-1.30772	-1.29522	-1.0509	-1.12502	-1.11614	-1.21642
147.99	-0.00528212	-0.00124906	0.00852741	0.00338713	0.00132184	0.0280705	-0.0134572			147.99	-1.22197	-1.30871	-1.29662	-1.05136	-1.12785	-1.11689	-1.21341
148.19	-0.00298188	0.00149835	0.0110748	0.00376906	0.00574388	0.0258441	-0.0201787			148.19	-1.21967	-1.30597	-1.29408	-1.05098	-1.12343	-1.11912	-1.22013
148.39	-0.00747663	6.058e-05	0.00693388	0.00054922	0.00409685	0.0268555	-0.0152248			148.39	-1.22416	-1.3074	-1.29822	-1.0542	-1.12507	-1.1181	-1.21517
148.6	-0.00769265	0.00011425	0.00519505	-3.688e-05	0.00280989	0.0261682	-0.0174687			148.6	-1.22438	-1.30735	-1.29996	-1.05478	-1.12636	-1.11879	-1.21742
148.79	-0.00233683	0.00155532	0.0116667	0.00061202	0.00409137	0.0277548	-0.0147217			148.79	-1.21902	-1.30591	-1.29348	-1.05413	-1.12508	-1.1172	-1.21467
148.99	-0.00538623	0.00544947	0.0113951	0.0051739	0.00343703	0.0269923	-0.0105101			148.99	-1.22207	-1.30201	-1.29376	-1.04957	-1.12573	-1.11797	-1.21046
149.19	-0.00770439	0.00115827	0.0105658	-0.00078255	0.0018848	0.0293416	-0.014578			149.19	-1.22439	-1.30631	-1.29458	-1.05553	-1.12729	-1.11562	-1.21453
149.39	-0.00507001	0.00202434	0.00512703	0.00392881	0.00263404	0.0258231	-0.0193339			149.39	-1.22176	-1.30544	-1.30002	-1.05082	-1.12654	-1.11914	-1.21928
149.6	-0.00629357	0.00391842	0.00969775	0.00249817	0.00143709	0.0268712	-0.0190597			149.6	-1.22298	-1.30355	-1.29545	-1.05225	-1.12773	-1.11809	-1.21901
149.79	-0.00923643	0.00074912	0.00834764	0.00371219	0.00233256	0.0250822	-0.0157169			149.79	-1.22592	-1.30672	-1.2968	-1.05103	-1.12684	-1.11988	-1.21567
149.99	-0.00301346	6.322e-05	0.00485726	0.0015724	0.00362679	0.0311924	-0.0141717			149.99	-1.2197	-1.3074	-1.30029	-1.05317	-1.12554	-1.11377	-1.21412
150.19	-0.00653175	0.00368256	0.00935229	0.00358435	0.00740375	0.0258135	-0.0164206			150.19	-1.22322	-1.30378	-1.2958	-1.05116	-1.12177	-1.11915	-1.21637
150.39	-0.00678278	-0.00015595	0.0112597	0.00056794	0.00127632	0.0279189	-0.0120806			150.39	-1.22347	-1.30762	-1.29389	-1.05418	-1.12789	-1.11704	-1.21203
150.6	-0.00580773	0.00138405	0.012631	-0.00078478	0.00209293	0.0262665	-0.0194843			150.6	-1.2225	-1.30608	-1.29252	-1.05553	-1.12708	-1.11869	-1.21943
150.79	-0.00710291	0.00135452	0.00850911	0.0028521	0.00455957	0.028342	-0.015821			150.79	-1.22379	-1.30611	-1.29664	-1.05189	-1.12461	-1.11662	-1.21577
150.99	-0.0072581	-0.00068414	0.00529213	0.00130326	0.00473268	0.0273461	-0.0179741			150.99	-1.22395	-1.30815	-1.29986	-1.05344	-1.12444	-1.11761	-1.21792
151.19	-0.00599747	-0.00112074	0.00464174	0.00234622	0.00161304	0.0246618	-0.0179492			151.19	-1.22268	-1.30859	-1.30051	-1.0524	-1.12756	-1.1203	-1.2179
151.39	-0.00570559	0.00084418	0.00928019	0.00208534	0.00362683	0.030611	-0.0132072			151.39	-1.22239	-1.30662	-1.29587	-1.05266	-1.12554	-1.11435	-1.21316
151.6	-0.00452265	-0.00274791	0.00911475	0.00141688	0.00447232	0.0269262	-0.016082			151.6	-1.22121	-1.31021	-1.29604	-1.05333	-1.1247	-1.11803	-1.21603
151.79	-0.00329818	-0.00089609	0.0106839	-0.00269353	0.00392633	0.0318121	-0.0160815			151.79	-1.21999	-1.30836	-1.29447	-1.05744	-1.12524	-1.11315	-1.21603
151.99	-0.00543478	-0.00166038	0.012849	5.268e-05	0.00090153	0.0239351	-0.0152282			151.99	-1.22212	-1.30912	-1.2923	-1.05469	-1.12827	-1.12102	-1.21518
152.19	-0.00780518	0.00030372	0.00779308	0.00086533	0.00305402	0.0277756	-0.0178483			152.19	-1.22449	-1.30716	-1.29736	-1.05388	-1.12612	-1.11718	-1.2178
152.39	-0.0108593	-0.00259083	0.00667237	0.00358505	0.00080212	0.0288143	-0.0165888			152.39	-1.22755	-1.31006	-1.29848	-1.05116	-1.12837	-1.11615	-1.21654
152.6	-0.00579198	0.00204747	0.0100971	0.00330621	0.00466759	0.0273712	-0.0120794			152.6	-1.22248	-1.30542	-1.29505	-1.05144	-1.1245	-1.11759	-1.21203
152.79	-0.00223891	-0.00068408	0.00739231	0.00558576	0.00258841	0.0258884	-0.0182892			152.79	-1.21893	-1.30815	-1.29776	-1.04916	-1.12658	-1.11907	-1.21824
152.99	0.00051555	-1.506e-05	0.00896798	0.00204782	0.00145041	0.0264677	-0.0143855			152.99	-1.21617	-1.30748	-1.29618	-1.0527	-1.12772	-1.11849	-1.21434
153.19	-0.00465513	0.00500165	0.00968576	0.00190097	0.00284846	0.030051	-0.0158634			153.19	-1.22134	-1.30246	-1.29546	-1.05285	-1.12632	-1.11491	-1.21581
153.39	-0.00449543	0.00429341	0.01037	0.0043572	0.00330718	0.0236435	-0.0164549			153.39	-1.22118	-1.30317	-1.29478	-1.05039	-1.12586	-1.12132	-1.2164
153.59	-0.00247848	0.00203214	0.0107003	0.00285799	0.00275691	0.0285633	-0.0166098			153.59	-1.21917	-1.30543	-1.29445	-1.05189	-1.12641	-1.1164	-1.21656
153.79	-0.00648858	0.00170859	0.00873918	-0.00099194	0.00495205	0.0276808	-0.0178865			153.79	-1.22318	-1.30576	-1.29641	-1.05574	-1.12422	-1.11728	-1.21784
153.99	-0.00266069	-0.00023743	0.00744233	-0.00177945	0.00283313	0.0254544	-0.0115708			153.99	-1.21935	-1.3077	-1.29771	-1.05653	-1.12634	-1.11951	-1.21152
154.19	-0.00656203	-0.00131016	0.00650159	0.00188842	0.00218566	0.0278496	-0.0122165			154.19	-1.22325	-1.30877	-1.29865	-1.05286	-1.12698	-1.11711	-1.21217
154.39	-0.00662267	0.00324075	0.0115464	0.003041	0.00240236	0.0267882	-0.0197667			154.39	-1.22331	-1.30422	-1.2936	-1.05171	-1.12677	-1.11817	-1.21972
154.59	-0.00597398	-0.00216248	0.0121812	0.00356562	0.00039273	0.0300552	-0.0121637			154.59	-1.22266	-1.30963	-1.29297	-1.05118	-1.12878	-1.1149	-1.21211
154.79	-0.00704022	0.0013687	0.00950577	0.00281973	0.00384379	0.0293865	-0.0200087			154.79	-1.22373	-1.3061	-1.29564	-1.05193	-1.12533	-1.11557	-1.21996
154.99	-0.00490992	-0.00357086	0.00698506	0.00187631	0.00374737	0.0264778	-0.015331			154.99	-1.2216	-1.31104	-1.29817	-1.05287	-1.12542	-1.11848	-1.21528
155.19	-0.00815387	0.00226992	0.0073719	0.00124885	0.00479703	0.0274561	-0.0170043			155.19	-1.22484	-1.30519	-1.29778	-1.0535	-1.12437	-1.1175	-1.21695
155.39	-0.00280163	0.00227543	0.0074449	0.00290177	0.00215097	0.0271136	-0.0145121			155.39	-1.21949	-1.30519	-1.29771	-1.05184	-1.12702	-1.11785	-1.21446
155.6	-0.00562167	0.00371441	0.0130202	0.00272649	0.0027529	0.0304337	-0.0159616			155.6	-1.22231	-1.30375	-1.29213	-1.05202	-1.12642	-1.11453	-1.21591
155.79	-0.00291306	0.00251351	0.0119485	0.00079748	0.00334352	0.0271334	-0.0124253			155.79	-1.2196	-1.30495	-1.2932	-1.05395	-1.12583	-1.11783	-1.21237
155.99	-0.00269636	0.0019184	0.0108666	0.00301354	0.00297373	0.0267154	-0.0179843			155.99	-1.21938	-1.30555	-1.29428	-1.05173	-1.1262	-1.11824	-1.21793
156.19	-0.00675467	0.0036842	0.00856925	-0.00020037	0.00306194	0.0256104	-0.0151182			156.19	-1.22344	-1.30378	-1.29658	-1.05495	-1.12611	-1.11935	-1.21507
156.39	-0.00305595	0.00174116	0.00821698	0.00250172	0.00308696	0.0295206	-0.0153484			156.39	-1.21974	-1.30572	-1.29693	-1.05225	-1.12608	-1.11544	-1.2153
156.6	-0.00185784	-0.00115406	0.0077762	-0.00096871	0.00327875	0.0269042	-0.0145266			156.6	-1.21855	-1.30862	-1.29737	-1.05572	-1.12589	-1.11806	-1.21448
156.79	-0.00618462	0.0046626	0.00655788	0.00363199	0.00359315	0.0279451	-0.0172064			156.79	-1.22287	-1.3028	-1.29859	-1.05111	-1.12558	-1.11701	-1.21716
156.99	-0.00322206	0.00435136	0.00756711	0.00265806	0.00523429	0.0271331	-0.0188207			156.99	-1.21991	-1.30311	-1.29758	-1.05209	-1.12394	-1.11783	-1.21877
157.19	-0.00228421	-0.00175494	0.0125119	0.00397628	0.00531961	0.0281536	-0.0117045			157.19	-1.21897	-1.30922	-1.29264	-1.05077	-1.12385	-1.11681	-1.21165
157.39	-0.0056988	0.00090294	0.00544845	-0.00114367	0.00331688	0.0286811	-0.00982			157.39	-1.22239	-1.30656	-1.2997	-1.05589	-1.12585	-1.11628	-1.20977
157.6	-0.00911894	-0.0009838	0.0082072	0.00060697	0.00527737	0.0285403	-0.0105804			157.6	-1.22581	-1.30845	-1.29694	-1.05414	-1.12389	-1.11642	-1.21053
157.79	-0.00634725	0.00029964	0.00515187	-0.00015438	0.00413549	0.0288031	-0.0160717			157.79	-1.22303	-1.30716	-1.3	-1.0549	-1.12503	-1.11616	-1.21602
157.99	-0.00527485	0.0024659	0.00940632	0.00320905	0.00483165	0.0278105	-0.0146034			157.99	-1.22196	-1.305	-1.29574	-1.05154	-1.12434	-1.11715	-1.21455
158.19	-0.0037896	0.00095371	0.00852877	0.00155908	0.00073001	0.027087	-0.0173224			158.19	-1.22048	-1.30651	-1.29662	-1.05319	-1.12844	-1.11787	-1.21727
158.39	-0.00427933	0.00359547	0.00705283	0.00425771	0.00463178	0.0270602	-0.0140048			158.39	-1.22097	-1.30387	-1.2981	-1.05049	-1.12454	-1.1179	-1.21395
158.6	-0.0064125	0.0006255	0.00419185	-0.0007676	0.00448016	0.0240147	-0.015529			158.6	-1.2231	-1.30684	-1.30096	-1.05551	-1.12469	-1.12094	-1.21548
158.79	-0.00236873	0.00312001	0.00420352	0.00048544	0.00290615	0.0267641	-0.0143691			158.79	-1.21906	-1.30434	-1.30095	-1.05426	-1.12626	-1.1182	-1.21432
158.99	-0.00677208	0.00190301	0.00770227	0.00124643	0.00362196	0.028284	-0.0192411			158.99	-1.22346	-1.30556	-1.29745	-1.0535	-1.12555	-1.11668	-1.21919
159.19	-0.00162763	0.00338936	0.00571674	0.0002204	0.00156545	0.027431	-0.0163214			159.19	-1.21831	-1.30408	-1.29943	-1.05453	-1.1276	-1.11753	-1.21627
159.39	-0.00366796	-0.00196383	0.0093693	0.00426647	0.0048911	0.0298735	-0.0127539			159.39	-1.22036	-1.30943	-1.29578	-1.05048	-1.12428	-1.11509	-1.2127
159.59	-0.00666402	0.00310645	0.00764044	0.00222465	0.00182341	0.0299017	-0.0163394			159.59	-1.22335	-1.30436	-1.29751	-1.05252	-1.12735	-1.11506	-1.21629
159.79	-0.00582002	0.00306338	0.00468987	-0.00074316	0.00320791	0.0284028	-0.0124334			159.79	-1.22251	-1.3044	-1.30046	-1.05549	-1.12596	-1.11656	-1.21238
159.99	-0.00539836	0.00522622	0.00519389	0.00404544	0.0044018	0.0288723	-0.0165008			159.99	-1.22209	-1.30224	-1.29996	-1.0507	-1.12477	-1.11609	-1.21645
160.19	-0.00394644	0.00134117	0.00514927	0.0034418	0.00150447	0.0288918	-0.0155106			160.19	-1.22063	-1.30612	-1.3	-1.0513	-1.12767	-1.11607	-1.21546
160.39	-0.00734634	6.971e-05	0.00978755	0.00052816	0.00337362	0.0282242	-0.0169154			160.39	-1.22403	-1.30739	-1.29536	-1.05422	-1.1258	-1.11674	-1.21687
160.6	-0.00369974	0.00251947	0.00639954	0.00387723	0.0025992	0.0261336	-0.0175667			160.6	-1.22039	-1.30494	-1.29875	-1.05087	-1.12657	-1.11883	-1.21752
160.79	-0.00765913	-0.00180001	0.00815389	-0.00011768	0.00391984	0.0273429	-0.0143625			160.79	-1.22435	-1.30926	-1.297	-1.05486	-1.12525	-1.11762	-1.21431
160.99	-0.00802428	0.0011567	0.0072543	0.0009813	0.00338266	0.0275776	-0.0143993			160.99	-1.22471	-1.30631	-1.2979	-1.05377	-1.12579	-1.11738	-1.21435
161.19	-0.00665053	-0.00204494	0.00744597	0.00136987	0.00379515	0.0269504	-0.0148122			161.19	-1.22334	-1.30951	-1.2977	-1.05338	-1.12538	-1.11801	-1.21476
161.39	-0.00583372	0.00487793	0.00897288	0.0017919	0.00223428	0.0284958	-0.018151			161.39	-1.22252	-1.30259	-1.29618	-1.05295	-1.12694	-1.11646	-1.2181
161.6	-0.0035894	-0.00189286	0.00694973	0.00462369	0.00356603	0.0265203	-0.0142478			161.6	-1.22028	-1.30936	-1.2982	-1.05012	-1.1256	-1.11844	-1.2142
161.79	-0.00760056	0.00097727	0.00874207	0.0029726	0.00270762	0.0281776	-0.0159293			161.79	-1.22429	-1.30649	-1.29641	-1.05177	-1.12646	-1.11678	-1.21588
161.99	-0.00529791	0.00129726	0.00661055	-0.00051888	0.00291492	0.0293274	-0.016607			161.99	-1.22199	-1.30617	-1.29854	-1.05527	-1.12626	-1.11563	-1.21656
162.19	-0.00608634	0.00041976	0.00751787	0.00027344	0.00204029	0.028577	-0.0138693			162.19	-1.22277	-1.30704	-1.29763	-1.05447	-1.12713	-1.11638	-1.21382
162.39	-0.00356044	0.00309535	0.0087444	0.00756325	0.00312557	0.0234006	-0.0163407			162.39	-1.22025	-1.30437	-1.29641	-1.04718	-1.12604	-1.12156	-1.21629
162.6	-0.00190396	0.00087717	0.00736147	0.00055962	0.00677375	0.0241201	-0.0124654			162.6	-1.21859	-1.30659	-1.29779	-1.05419	-1.1224	-1.12084	-1.21241
162.79	-0.0065225	-0.00099285	0.00857581	0.00029582	0.00571624	0.0290146	-0.0149412			162.79	-1.22321	-1.30846	-1.29657	-1.05445	-1.12345	-1.11594	-1.21489
162.99	-0.00255873	0.00304276	0.0083061	0.00343505	0.00321557	0.0274781	-0.0134626			162.99	-1.21925	-1.30442	-1.29684	-1.05131	-1.12595	-1.11748	-1.21341
163.19	-0.00402278	0.00317423	0.0041646	0.00134417	0.00258474	0.0285011	-0.0153789			163.19	-1.22071	-1.30429	-1.30099	-1.0534	-1.12659	-1.11646	-1.21533
163.39	-0.00590768	-0.00297863	0.0100894	0.00246296	0.00032373	0.0293146	-0.0192137			163.39	-1.22259	-1.31044	-1.29506	-1.05228	-1.12885	-1.11564	-1.21916
163.59	-0.0071248	0.00023718	0.00975979	0.00175005	0.00629592	0.0299305	-0.0159567			163.59	-1.22381	-1.30723	-1.29539	-1.053	-1.12287	-1.11503	-1.21591
163.79	-0.0077572	0.00257016	0.010522	-0.00010851	0.00229769	0.028115	-0.0180263			163.79	-1.22444	-1.30489	-1.29463	-1.05486	-1.12687	-1.11684	-1.21798
163.99	-0.0052934	-0.00396564	0.0110394	0.00128531	0.00183577	0.0274946	-0.0206634			163.99	-1.22198	-1.31143	-1.29411	-1.05346	-1.12733	-1.11746	-1.22061
164.19	-0.00511954	0.00201832	0.00677356	0.00190097	0.00212062	0.0278619	-0.0146752			164.19	-1.22181	-1.30545	-1.29838	-1.05285	-1.12705	-1.1171	-1.21462
164.39	-0.00505747	0.00253699	0.00617831	-9.77e-06	0.00492581	0.0289815	-0.0110285			164.39	-1.22174	-1.30493	-1.29897	-1.05476	-1.12424	-1.11598	-1.21098
164.59	-0.00513311	0.00274188	0.0120512	0.00430674	0.00321268	0.0266069	-0.0135338			164.59	-1.22182	-1.30472	-1.2931	-1.05044	-1.12596	-1.11835	-1.21348
164.79	-0.0068079	0.00248127	0.00597753	-0.00075635	-0.00071825	0.0248527	-0.0129114			164.79	-1.2235	-1.30498	-1.29917	-1.0555	-1.12989	-1.12011	-1.21286
164.99	-0.00715551	0.00464326	0.00441703	0.00263246	0.00189933	0.0260415	-0.0149173			164.99	-1.22384	-1.30282	-1.30073	-1.05211	-1.12727	-1.11892	-1.21487
165.19	-0.00262701	0.00061791	0.00916605	0.00041214	0.00198768	0.0265345	-0.0159119			165.19	-1.21931	-1.30685	-1.29598	-1.05433	-1.12718	-1.11842	-1.21586
165.39	-0.00650892	0.00409406	0.00648099	0.00218971	0.00135616	0.0254324	-0.0151997			165.39	-1.2232	-1.30337	-1.29867	-1.05256	-1.12781	-1.11953	-1.21515
165.59	-0.00472196	0.0017999	0.00936733	0.00165851	0.00317581	0.0239686	-0.013873			165.59	-1.22141	-1.30566	-1.29578	-1.05309	-1.12599	-1.12099	-1.21382
165.79	-0.00571024	0.0015712	0.00948334	-2.753e-05	0.00370414	0.0226249	-0.0169789			165.79	-1.2224	-1.30589	-1.29567	-1.05477	-1.12547	-1.12233	-1.21693
165.99	-0.00721902	0.00181049	0.00822867	0.00232049	0.00131712	0.0282783	-0.0183033			165.99	-1.22391	-1.30565	-1.29692	-1.05243	-1.12785	-1.11668	-1.21825
166.19	-0.0073338	0.00342491	0.00788095	-0.00096916	0.00334384	0.0295598	-0.0120437			166.19	-1.22402	-1.30404	-1.29727	-1.05572	-1.12583	-1.1154	-1.21199
166.39	-0.00585017	0.00028283	0.00762486	-0.00035445	0.00427576	0.0318488	-0.015336			166.39	-1.22254	-1.30718	-1.29753	-1.0551	-1.12489	-1.11311	-1.21529
166.6	-0.00752168	-0.0001773	0.00856089	0.00240973	0.0037583	0.025253	-0.0113856			166.6	-1.22421	-1.30764	-1.29659	-1.05234	-1.12541	-1.11971	-1.21134
166.79	-0.00363834	-0.00194255	0.00808904	0.0002325	0.00490345	0.0268979	-0.0158704			166.79	-1.22033	-1.30941	-1.29706	-1.05451	-1.12427	-1.11806	-1.21582
166.99	-0.00418094	0.00226452	0.00987348	0.00060713	0.00397936	0.0270747	-0.0158512			166.99	-1.22087	-1.3052	-1.29528	-1.05414	-1.12519	-1.11788	-1.2158
167.19	-0.00914341	0.0045214	0.01038	0.00454257	0.00017522	0.0271438	-0.0126231			167.19	-1.22583	-1.30294	-1.29477	-1.0502	-1.129	-1.11782	-1.21257
167.39	-0.00808917	-0.000863	0.00722815	-0.00180964	0.00301672	0.0273205	-0.016631			167.39	-1.22478	-1.30833	-1.29792	-1.05656	-1.12615	-1.11764	-1.21658
167.59	-0.00507206	0.00097073	0.00460822	0.00031252	0.00268329	0.0273349	-0.0161578			167.59	-1.22176	-1.30649	-1.30054	-1.05443	-1.12649	-1.11762	-1.21611
167.79	-0.0048865	-0.0009419	0.00793495	-0.00133747	0.00333874	0.0265606	-0.015731			167.79	-1.22157	-1.30841	-1.29722	-1.05608	-1.12583	-1.1184	-1.21568
167.99	-0.00466337	0.00020747	0.00764765	0.00156411	0.00263786	0.0268951	-0.0160797			167.99	-1.22135	-1.30726	-1.2975	-1.05318	-1.12653	-1.11806	-1.21603
168.19	-0.00470716	-0.00258199	0.00989865	0.00143719	0.00165597	0.0272965	-0.0164785			168.19	-1.22139	-1.31005	-1.29525	-1.05331	-1.12751	-1.11766	-1.21643
168.39	-0.00699229	0.00155085	0.00780352	0.00101523	0.00218163	0.0281518	-0.0194922			168.39	-1.22368	-1.30591	-1.29735	-1.05373	-1.12699	-1.11681	-1.21944
168.59	-0.00338163	-0.00236505	0.00900811	0.00189651	4.529e-05	0.0272579	-0.0137518			168.59	-1.22007	-1.30983	-1.29614	-1.05285	-1.12913	-1.1177	-1.2137
168.79	-0.0094105	0.00165904	0.00721183	0.00050499	0.00464427	0.0251327	-0.0168247			168.79	-1.2261	-1.30581	-1.29794	-1.05424	-1.12453	-1.11983	-1.21677
168.99	-0.00438273	0.00584562	0.00593499	0.00354458	0.00427171	0.0307927	-0.0173654			168.99	-1.22107	-1.30162	-1.29922	-1.0512	-1.1249	-1.11417	-1.21732
169.19	-0.0055393	0.00133031	0.00956556	0.00370904	0.00246767	0.0294488	-0.0114923			169.19	-1.22223	-1.30613	-1.29558	-1.05104	-1.1267	-1.11551	-1.21144
169.39	-0.00358737	-0.00369777	0.0077942	0.00341562	0.00323185	0.02975	-0.0168024			169.39	-1.22027	-1.31116	-1.29736	-1.05133	-1.12594	-1.11521	-1.21675
169.59	-0.00574516	0.00263643	0.00669303	-0.00042123	0.00325141	0.026823	-0.00985949			169.59	-1.22243	-1.30483	-1.29846	-1.05517	-1.12592	-1.11814	-1.20981
169.79	-0.00605896	0.00106833	0.0113305	0.00438533	0.00052973	0.0263932	-0.0180044			169.79	-1.22275	-1.3064	-1.29382	-1.05036	-1.12864	-1.11857	-1.21795
169.99	-0.00969986	0.00043924	0.00930177	0.00119081	0.00097999	0.0282884	-0.0179149			169.99	-1.22639	-1.30703	-1.29585	-1.05356	-1.12819	-1.11667	-1.21786
170.19	-0.00614631	-0.0028424	0.00850811	0.00027113	0.00484649	0.0280506	-0.0119025			170.19	-1.22283	-1.31031	-1.29664	-1.05448	-1.12432	-1.11691	-1.21185
170.39	-0.0034788	-0.00293659	0.00886435	0.00526576	0.00099661	0.0261003	-0.0193804			170.39	-1.22017	-1.3104	-1.29629	-1.04948	-1.12817	-1.11886	-1.21933
170.6	-0.00267461	-0.00093514	0.00976469	0.00156397	0.00464968	0.0271948	-0.013632			170.6	-1.21936	-1.3084	-1.29539	-1.05318	-1.12452	-1.11776	-1.21358
170.79	-0.00738815	0.00120977	0.0122812	0.00086217	0.00093916	0.0257389	-0.0171862			170.79	-1.22408	-1.30625	-1.29287	-1.05388	-1.12823	-1.11922	-1.21714
170.99	-0.00738671	-0.00081564	0.00981762	0.00015234	0.00039908	0.0282191	-0.0174742			170.99	-1.22407	-1.30828	-1.29533	-1.05459	-1.12877	-1.11674	-1.21742
171.19	-0.00583116	-0.0011176	0.00498617	0.00012007	0.00421599	0.0278383	-0.0160989			171.19	-1.22252	-1.30858	-1.30016	-1.05463	-1.12495	-1.11712	-1.21605
171.39	-0.00577289	0.00265147	0.00925162	-0.00175103	0.0059211	0.0287051	-0.020539			171.39	-1.22246	-1.30481	-1.2959	-1.0565	-1.12325	-1.11625	-1.22049
171.6	-0.00525629	0.00082831	0.00990451	0.00025479	0.00201027	0.0268693	-0.0156104			171.6	-1.22194	-1.30664	-1.29525	-1.05449	-1.12716	-1.11809	-1.21556
171.79	-0.00592074	0.00135023	0.00576726	-0.00060504	0.00521246	0.0247772	-0.0179284			171.79	-1.22261	-1.30611	-1.29938	-1.05535	-1.12396	-1.12018	-1.21788
171.99	-0.00358918	-0.0023242	0.00516452	-0.00058692	0.00153573	0.0269533	-0.019038			171.99	-1.22028	-1.30979	-1.29999	-1.05533	-1.12763	-1.11801	-1.21899
172.19	-0.00457069	-0.00328722	0.00862245	-0.00224284	-0.00023176	0.0296454	-0.0167248			172.19	-1.22126	-1.31075	-1.29653	-1.05699	-1.1294	-1.11531	-1.21667
172.39	-0.00460203	0.0004714	0.00796089	0.00108087	0.00417122	0.0307755	-0.0154646			172.39	-1.22129	-1.30699	-1.29719	-1.05367	-1.125	-1.11418	-1.21541
172.6	-0.00568966	-0.00174533	0.00850175	0.00174864	0.00276197	0.0274988	-0.0154384			172.6	-1.22238	-1.30921	-1.29665	-1.053	-1.12641	-1.11746	-1.21539
172.79	-0.00513452	0.00236375	0.00832331	0.00206862	0.00324601	0.0262957	-0.0129396			172.79	-1.22182	-1.3051	-1.29683	-1.05268	-1.12592	-1.11866	-1.21289
172.99	-0.00509106	0.00026935	0.01012	0.00224011	0.00405011	0.026859	-0.0127802			172.99	-1.22178	-1.3072	-1.29503	-1.05251	-1.12512	-1.1181	-1.21273
173.19	-0.00752411	0.00010571	0.00474502	-0.001182	0.00106728	0.0301252	-0.0190658			173.19	-1.22421	-1.30736	-1.30041	-1.05593	-1.1281	-1.11483	-1.21902
173.39	-0.00585712	0.00375875	0.00752169	0.00179618	0.00073947	0.0255207	-0.0179402			173.39	-1.22254	-1.30371	-1.29763	-1.05295	-1.12843	-1.11944	-1.21789
173.6	-0.00551807	8.662e-05	0.0113251	0.00116472	0.00273021	0.0316186	-0.0126055			173.6	-1.22221	-1.30738	-1.29383	-1.05358	-1.12644	-1.11334	-1.21256
173.79	-0.00777205	0.00139928	0.00891819	0.00194698	0.00021404	0.0282934	-0.0161296			173.79	-1.22446	-1.30607	-1.29623	-1.0528	-1.12896	-1.11667	-1.21608
173.99	-0.00838654	-0.001727	0.00864296	-0.00055507	0.00301042	0.0270203	-0.014813			173.99	-1.22507	-1.30919	-1.29651	-1.0553	-1.12616	-1.11794	-1.21476
174.19	-0.00764513	-0.00300107	0.00547891	-0.00162191	0.00400076	0.0291915	-0.0168695			174.19	-1.22433	-1.31047	-1.29967	-1.05637	-1.12517	-1.11577	-1.21682
174.39	-0.00583389	-0.00127119	0.00884762	0.00233034	0.00232044	0.0261638	-0.015793			174.39	-1.22252	-1.30874	-1.2963	-1.05242	-1.12685	-1.1188	-1.21574
174.6	-0.00386194	0.00046974	0.00905365	0.00156614	0.00164876	0.0235321	-0.0141446			174.6	-1.22055	-1.30699	-1.2961	-1.05318	-1.12752	-1.12143	-1.21409
174.79	-0.00630616	-0.00126719	0.00844311	0.0001729	0.00336053	0.0272748	-0.0127927			174.79	-1.22299	-1.30873	-1.29671	-1.05457	-1.12581	-1.11768	-1.21274
174.99	-0.0057491	-0.00475881	0.00614269	0.00122608	0.00404925	0.0289578	-0.0171097			174.99	-1.22244	-1.31222	-1.29901	-1.05352	-1.12512	-1.116	-1.21706
175.19	-0.00384099	-0.00104929	0.010901	-0.00254912	0.00393664	0.02641	-0.0178058			175.19	-1.22053	-1.30851	-1.29425	-1.0573	-1.12523	-1.11855	-1.21776
175.39	-0.00613738	-0.00168708	0.00968805	-0.00068073	0.00346428	0.0283983	-0.0143466			175.39	-1.22282	-1.30915	-1.29546	-1.05543	-1.12571	-1.11656	-1.2143
175.6	-0.00586343	-0.00090797	0.00826288	-0.00017749	0.00186952	0.0276562	-0.0177077			175.6	-1.22255	-1.30837	-1.29689	-1.05492	-1.1273	-1.1173	-1.21766
175.79	-0.00548913	0.00157193	0.00586084	0.00288614	0.00064056	0.0273323	-0.0162842			175.79	-1.22218	-1.30589	-1.29929	-1.05186	-1.12853	-1.11763	-1.21623
175.99	-0.00900066	-0.00351638	0.00990674	0.0034973	0.00272587	0.0289944	-0.0141755			175.99	-1.22569	-1.31098	-1.29524	-1.05125	-1.12644	-1.11597	-1.21413
176.19	-0.00540563	0.00355071	0.00925521	0.00016306	0.00304796	0.0304328	-0.0143112			176.19	-1.22209	-1.30391	-1.2959	-1.05458	-1.12612	-1.11453	-1.21426
176.39	-0.00324273	-0.00200998	0.00885089	6.335e-05	0.00424422	0.0281945	-0.0203091			176.39	-1.21993	-1.30947	-1.2963	-1.05468	-1.12493	-1.11676	-1.22026
176.6	-0.00405494	-0.00014504	0.00929961	0.00116756	-0.00025148	0.0261052	-0.015532			176.6	-1.22074	-1.30761	-1.29585	-1.05358	-1.12942	-1.11885	-1.21548
176.79	-0.0064252	-0.00243129	0.00843267	0.00292569	0.00551087	0.0263121	-0.019436			176.79	-1.22311	-1.3099	-1.29672	-1.05182	-1.12366	-1.11865	-1.21939
176.99	-0.00747481	-0.00090409	0.00781013	0.00090572	0.00086554	0.0248196	-0.017265			176.99	-1.22416	-1.30837	-1.29734	-1.05384	-1.1283	-1.12014	-1.21721
177.19	-0.00490101	-0.00072691	0.00700836	0.00069235	0.00373267	0.0287874	-0.0155206			177.19	-1.22159	-1.30819	-1.29814	-1.05405	-1.12544	-1.11617	-1.21547
177.39	-0.00500246	0.0027683	0.00330293	0.0008736	0.00029	0.0276667	-0.0164862			177.39	-1.22169	-1.3047	-1.30185	-1.05387	-1.12888	-1.11729	-1.21644
177.6	-0.0045381	0.00216136	0.00717269	0.0012548	0.00073221	0.0270009	-0.0158021			177.6	-1.22123	-1.3053	-1.29798	-1.05349	-1.12844	-1.11796	-1.21575
177.79	-0.00360195	0.00522297	0.00798048	0.00359558	0.00390306	0.0297464	-0.0148138			177.79	-1.22029	-1.30224	-1.29717	-1.05115	-1.12527	-1.11521	-1.21476
177.99	-0.00482312	0.00319629	0.00713749	0.00056058	0.00437978	0.0293735	-0.0135866			177.99	-1.22151	-1.30427	-1.29801	-1.05419	-1.12479	-1.11559	-1.21354
178.19	-0.00401606	-0.0020191	0.0114769	0.00214824	0.00551503	0.0291641	-0.0168727			178.19	-1.2207	-1.30948	-1.29367	-1.0526	-1.12366	-1.1158	-1.21682
178.39	-0.00371144	-0.00150702	0.00893986	0.00163595	0.00266374	0.0274866	-0.0168605			178.39	-1.2204	-1.30897	-1.29621	-1.05311	-1.12651	-1.11747	-1.21681
178.6	-0.00545599	-0.00288607	0.010832	-4.04e-06	0.00413508	0.0288469	-0.0172784			178.6	-1.22214	-1.31035	-1.29432	-1.05475	-1.12504	-1.11611	-1.21723
178.79	-0.0056699	-0.00149073	0.00970191	0.00525568	0.00541567	0.0303603	-0.0148765			178.79	-1.22236	-1.30896	-1.29545	-1.04949	-1.12375	-1.1146	-1.21483
178.99	-0.0053472	-0.00014656	0.00820265	0.00169563	-0.00048339	0.0270506	-0.0178965			178.99	-1.22203	-1.30761	-1.29695	-1.05305	-1.12965	-1.11791	-1.21785
179.19	-0.0017046	0.00058132	0.0073998	-0.00221553	-0.00076476	0.0274525	-0.0129264			179.19	-1.21839	-1.30688	-1.29775	-1.05696	-1.12994	-1.11751	-1.21288
179.39	-0.00732629	0.00243131	0.00641299	-0.00024768	0.00024239	0.0317826	-0.0163138			179.39	-1.22401	-1.30503	-1.29874	-1.05499	-1.12893	-1.11318	-1.21626
179.6	-0.00642465	0.00226516	0.00644164	0.00291203	0.00739512	0.026885	-0.0172374			179.6	-1.22311	-1.3052	-1.29871	-1.05183	-1.12178	-1.11807	-1.21719
179.79	-0.00531351	-0.00261361	0.00682172	0.00455335	0.00378595	0.0280671	-0.0137108			179.79	-1.222	-1.31008	-1.29833	-1.05019	-1.12538	-1.11689	-1.21366
179.99	-0.0081208	0.00309857	0.010029	0.00174616	-0.00050909	0.0283185	-0.0161806			179.99	-1.22481	-1.30437	-1.29512	-1.053	-1.12968	-1.11664	-1.21613
180.19	-0.00638593	0.002003	0.00592013	0.00285865	0.00255263	0.0285734	-0.0187258			180.19	-1.22307	-1.30546	-1.29923	-1.05189	-1.12662	-1.11639	-1.21868
180.39	-0.00469241	0.00136772	0.0075652	-0.00039612	0.00775505	0.0240265	-0.0143847			180.39	-1.22138	-1.3061	-1.29759	-1.05514	-1.12142	-1.12093	-1.21433
180.6	-0.00364087	0.00083454	0.00699095	-0.00026705	0.00403058	0.0305844	-0.0165279			180.6	-1.22033	-1.30663	-1.29816	-1.05501	-1.12514	-1.11438	-1.21648
180.79	-0.00385385	-0.002698	0.00755024	0.00108258	0.00628162	0.0243492	-0.0189952			180.79	-1.22054	-1.31016	-1.2976	-1.05366	-1.12289	-1.12061	-1.21894
180.99	-0.00538963	0.00083603	0.00921232	-0.00106061	0.00522065	0.0266848	-0.018688			180.99	-1.22208	-1.30663	-1.29594	-1.05581	-1.12395	-1.11827	-1.21864
181.19	-0.00610818	-0.00240135	0.0061168	0.00300405	0.00178146	0.0260844	-0.019172			181.19	-1.2228	-1.30987	-1.29903	-1.05174	-1.12739	-1.11888	-1.21912
181.39	-0.0008399	-0.0031868	0.00831025	-0.00030223	0.00261504	0.0246184	-0.0193932			181.39	-1.21753	-1.31065	-1.29684	-1.05505	-1.12656	-1.12034	-1.21934
181.59	-0.00407871	-0.00210999	0.00808301	0.00342615	0.00191191	0.0285926	-0.0153085			181.59	-1.22077	-1.30957	-1.29707	-1.05132	-1.12726	-1.11637	-1.21526
181.79	-0.00823602	-0.00035042	0.00865903	0.00039782	0.00364951	0.0257609	-0.0142349			181.79	-1.22492	-1.30781	-1.29649	-1.05435	-1.12552	-1.1192	-1.21418
181.99	-0.00285837	-0.00052417	0.00984569	0.00420306	0.00265305	0.0274997	-0.0162745			181.99	-1.21955	-1.30799	-1.2953	-1.05054	-1.12652	-1.11746	-1.21622
182.19	-0.00792733	0.00023729	0.00938723	6.675e-05	0.00165494	0.0272135	-0.0184854			182.19	-1.22461	-1.30723	-1.29576	-1.05468	-1.12752	-1.11775	-1.21844
182.39	-0.0044434	-0.00109828	0.00926373	-0.00039984	0.00340735	0.0295459	-0.0174784			182.39	-1.22113	-1.30856	-1.29589	-1.05515	-1.12576	-1.11541	-1.21743
182.6	-0.00802029	0.00018865	0.00846396	-1.032e-05	0.00598281	0.0235574	-0.0146986			182.6	-1.22471	-1.30728	-1.29669	-1.05476	-1.12319	-1.1214	-1.21465
182.79	-0.00797602	0.00064629	0.00793961	0.00136834	0.00400932	0.0268752	-0.0178266			182.79	-1.22466	-1.30682	-1.29721	-1.05338	-1.12516	-1.11808	-1.21778
182.99	-0.00416958	0.00200322	0.00990681	0.002415	0.00192118	0.025307	-0.0170624			182.99	-1.22086	-1.30546	-1.29524	-1.05233	-1.12725	-1.11965	-1.21701
183.19	-0.0092019	0.00442001	0.00795885	0.00211569	0.00248009	0.0271276	-0.0201999			183.19	-1.22589	-1.30304	-1.29719	-1.05263	-1.12669	-1.11783	-1.22015
183.39	-0.00373244	-0.00082412	0.0110552	0.00144886	0.00358813	0.0295158	-0.0181404			183.39	-1.22042	-1.30829	-1.2941	-1.0533	-1.12558	-1.11544	-1.21809
183.6	-0.00356357	0.00058047	0.00503687	0.00011965	0.00101229	0.0296976	-0.018455			183.6	-1.22025	-1.30688	-1.30011	-1.05463	-1.12816	-1.11526	-1.2184
183.79	-0.00365289	3.049e-05	0.00616044	0.00342143	0.00582784	0.024725	-0.0183465			183.79	-1.22034	-1.30743	-1.29899	-1.05133	-1.12334	-1.12023	-1.2183
183.99	-0.00598525	0.00404199	0.00544605	0.0035271	0.00024825	0.0240501	-0.0174413			183.99	-1.22267	-1.30342	-1.2997	-1.05122	-1.12892	-1.12091	-1.21739
184.19	-0.00731241	0.00147768	0.00232841	0.00047275	0.00265609	0.0305131	-0.0163099			184.19	-1.224	-1.30599	-1.30282	-1.05427	-1.12651	-1.11445	-1.21626
184.39	-0.00664499	-0.00327881	0.00639172	0.00099137	0.00613483	0.0324192	-0.0171206			184.39	-1.22333	-1.31074	-1.29876	-1.05376	-1.12304	-1.11254	-1.21707
184.6	-0.00452026	0.0010004	0.0101638	0.00130432	0.00450953	0.0310345	-0.0157684			184.6	-1.22121	-1.30646	-1.29499	-1.05344	-1.12466	-1.11393	-1.21572
184.79	-0.00691745	-0.00280701	0.00433803	0.00252165	0.00769741	0.0319888	-0.0129292			184.79	-1.2236	-1.31027	-1.30081	-1.05223	-1.12147	-1.11297	-1.21288
184.99	-0.00497142	-0.00203266	0.00787558	0.00250487	0.00206556	0.0274717	-0.0159505			184.99	-1.22166	-1.3095	-1.29727	-1.05224	-1.1271	-1.11749	-1.2159
185.19	-0.00744933	0.00232903	0.00891057	0.00233867	0.00421073	0.0289973	-0.017565			185.19	-1.22414	-1.30514	-1.29624	-1.05241	-1.12496	-1.11596	-1.21751
185.39	-0.00721538	-0.00132081	0.00845742	-0.00172126	-0.00022007	0.0293054	-0.0173412			185.39	-1.2239	-1.30879	-1.29669	-1.05647	-1.12939	-1.11565	-1.21729
185.6	-0.00184966	0.00093314	0.00788124	-3.056e-05	0.00460525	0.0275313	-0.0156809			185.6	-1.21854	-1.30653	-1.29727	-1.05478	-1.12457	-1.11743	-1.21563
185.79	-0.00738455	-0.0030803	0.00555272	0.00141856	0.00190091	0.029452	-0.0153605			185.79	-1.22407	-1.31054	-1.2996	-1.05333	-1.12727	-1.11551	-1.21531
185.99	-0.00294906	0.00065741	0.00476012	0.00143359	0.00411765	0.0244591	-0.0187529			185.99	-1.21964	-1.30681	-1.30039	-1.05331	-1.12505	-1.1205	-1.2187
186.19	-0.00601157	-0.00398534	0.00608095	0.00342574	7.958e-05	0.0290387	-0.0144906			186.19	-1.2227	-1.31145	-1.29907	-1.05132	-1.12909	-1.11592	-1.21444
186.39	-0.00248349	0.00710952	0.00632458	0.00033671	0.00286785	0.0293782	-0.0168703			186.39	-1.21917	-1.30035	-1.29883	-1.05441	-1.1263	-1.11558	-1.21682
186.59	-0.00698072	-0.00292557	0.00605595	-0.00221157	0.00322965	0.0309264	-0.0197155			186.59	-1.22367	-1.31039	-1.29909	-1.05696	-1.12594	-1.11403	-1.21967
186.79	-0.0062341	0.00210413	0.00509926	0.00444339	0.00164949	0.0268999	-0.0159885			186.79	-1.22292	-1.30536	-1.30005	-1.0503	-1.12752	-1.11806	-1.21594
186.99	-0.00813682	-0.00182036	0.00843393	-0.00261555	0.00487537	0.0237546	-0.0128644			186.99	-1.22482	-1.30928	-1.29672	-1.05736	-1.12429	-1.1212	-1.21281
187.19	-0.00653081	0.00202074	0.010146	-0.00069214	0.0022355	0.0297915	-0.0171052			187.19	-1.22322	-1.30544	-1.295	-1.05544	-1.12693	-1.11517	-1.21705
187.39	-0.00384413	-0.00185693	0.00599192	0.00296456	0.00145284	0.0254879	-0.0196148			187.39	-1.22053	-1.30932	-1.29916	-1.05178	-1.12772	-1.11947	-1.21956
187.6	-0.00676646	0.00079949	0.00924879	-0.00129756	0.00300763	0.0271624	-0.0190272			187.6	-1.22345	-1.30666	-1.2959	-1.05604	-1.12616	-1.1178	-1.21898
187.79	-0.00770564	0.0016777	0.00583215	-0.00383246	0.00346168	0.0259694	-0.0149159			187.79	-1.22439	-1.30579	-1.29932	-1.05858	-1.12571	-1.11899	-1.21487
187.99	-0.00721691	-0.0009365	0.00739999	-0.00069809	0.00319204	0.0256919	-0.0181484			187.99	-1.2239	-1.3084	-1.29775	-1.05544	-1.12598	-1.11927	-1.2181
188.19	-0.00737725	0.00210879	0.00352761	0.00201204	0.00234199	0.0264471	-0.0158751			188.19	-1.22406	-1.30536	-1.30162	-1.05273	-1.12683	-1.11851	-1.21582
188.39	-0.00571895	-0.00041393	0.00735063	0.00128803	0.00278351	0.0264978	-0.0166888			188.39	-1.22241	-1.30788	-1.2978	-1.05346	-1.12639	-1.11846	-1.21664
188.6	-0.00578327	0.00427677	0.00615618	0.00030846	0.00066645	0.0249912	-0.0161562			188.6	-1.22247	-1.30319	-1.29899	-1.05444	-1.1285	-1.11997	-1.21611
188.79	-0.00823649	-0.00354483	0.0047132	-0.00044204	0.00376243	0.0274386	-0.0170855			188.79	-1.22492	-1.31101	-1.30044	-1.05519	-1.12541	-1.11752	-1.21704
188.99	-0.005062	0.00372682	0.010622	0.00107399	0.00540073	0.0235162	-0.013411			188.99	-1.22175	-1.30374	-1.29453	-1.05367	-1.12377	-1.12144	-1.21336
189.19	-0.00621525	-0.0018505	0.00674079	0.00198898	0.00196456	0.0266182	-0.0132635			189.19	-1.2229	-1.30931	-1.29841	-1.05276	-1.12721	-1.11834	-1.21321
189.39	-0.00964809	0.00160512	0.00589664	0.0007964	0.0021053	0.0271635	-0.014927			189.39	-1.22634	-1.30586	-1.29925	-1.05395	-1.12706	-1.1178	-1.21488
189.59	-0.00905881	-0.00497104	0.0102888	0.00198067	0.00180737	0.0266208	-0.0164078			189.59	-1.22575	-1.31244	-1.29486	-1.05277	-1.12736	-1.11834	-1.21636
189.79	-0.00965662	0.00588856	0.00908046	0.00082968	0.00354359	0.0236759	-0.0182874			189.79	-1.22634	-1.30158	-1.29607	-1.05392	-1.12563	-1.12128	-1.21824
189.99	-0.00401198	-0.00177975	0.00903301	0.00068176	0.0028993	0.0271477	-0.0154985			189.99	-1.2207	-1.30924	-1.29612	-1.05406	-1.12627	-1.11781	-1.21545
190.19	-0.00864371	-0.00156754	0.00702945	0.00383144	0.0005392	0.0268976	-0.0186188			190.19	-1.22533	-1.30903	-1.29812	-1.05092	-1.12863	-1.11806	-1.21857
190.39	-0.00464276	-0.00098816	0.00892237	-0.00221281	0.00186942	0.0288431	-0.0176046			190.39	-1.22133	-1.30845	-1.29623	-1.05696	-1.1273	-1.11612	-1.21755
190.6	-0.00908644	-0.00135769	0.00595819	0.00068483	0.00522467	0.0240697	-0.0150853			190.6	-1.22577	-1.30882	-1.29919	-1.05406	-1.12395	-1.12089	-1.21503
190.79	-0.00645677	-0.00025917	0.00811495	-2.032e-05	0.00218542	0.0271531	-0.0140422			190.79	-1.22314	-1.30772	-1.29704	-1.05477	-1.12698	-1.11781	-1.21399
190.99	-0.00513363	-0.00421325	0.0122638	0.00228856	0.00412816	0.024823	-0.0172749			190.99	-1.22182	-1.31168	-1.29289	-1.05246	-1.12504	-1.12014	-1.21722
191.19	-0.00620303	0.00239921	0.00953539	0.00188362	0.00131916	0.0284234	-0.0194382			191.19	-1.22289	-1.30507	-1.29562	-1.05286	-1.12785	-1.11654	-1.21939
191.39	-0.00442631	8.114e-05	0.0088484	-0.00243079	0.00415398	0.0279809	-0.0172916			191.39	-1.22111	-1.30738	-1.2963	-1.05718	-1.12502	-1.11698	-1.21724
191.59	-0.00644528	0.00289125	0.00865486	0.00108076	0.00230741	0.0305146	-0.018117			191.59	-1.22313	-1.30457	-1.2965	-1.05367	-1.12686	-1.11444	-1.21807
191.79	-0.00587464	-0.0018216	0.01073	-0.00080034	0.00243857	0.0274514	-0.018049			191.79	-1.22256	-1.30929	-1.29442	-1.05555	-1.12673	-1.11751	-1.218
191.99	-0.00378726	0.00277778	0.0116165	-0.00062068	0.00157883	0.0252143	-0.0190868			191.99	-1.22047	-1.30469	-1.29353	-1.05537	-1.12759	-1.11975	-1.21904
192.19	-0.0025416	0.00105289	0.00598252	0.00164285	0.00132153	0.0264006	-0.017515			192.19	-1.21923	-1.30641	-1.29917	-1.0531	-1.12785	-1.11856	-1.21746
192.39	-0.00461914	0.00529601	0.00536301	0.00035037	0.00645169	0.0285762	-0.0195271			192.39	-1.22131	-1.30217	-1.29979	-1.0544	-1.12272	-1.11638	-1.21948
192.59	-0.00521151	-0.00070326	0.00833803	0.00082044	0.00401075	0.031653	-0.0181625			192.59	-1.2219	-1.30817	-1.29681	-1.05393	-1.12516	-1.11331	-1.21811
192.79	-0.00768129	-0.00098802	0.00620793	-1.397e-05	0.00246662	0.0242291	-0.0167313			192.79	-1.22437	-1.30845	-1.29894	-1.05476	-1.1267	-1.12073	-1.21668
192.99	-0.011512	-0.00082159	0.00761989	0.00241694	0.00332992	0.028556	-0.019309			192.99	-1.2282	-1.30829	-1.29753	-1.05233	-1.12584	-1.1164	-1.21926
193.19	-0.00538627	0.00207005	0.00619996	-0.00105715	0.00482552	0.0294655	-0.0185699			193.19	-1.22207	-1.30539	-1.29895	-1.0558	-1.12434	-1.11549	-1.21852
193.39	-0.00588514	0.003742	0.0060238	-0.00072516	0.00305382	0.0299136	-0.0155644			193.39	-1.22257	-1.30372	-1.29913	-1.05547	-1.12612	-1.11505	-1.21551
193.6	-0.00380902	0.00154945	0.00498222	4.29e-06	0.00610199	0.0266976	-0.0127614			193.6	-1.2205	-1.30591	-1.30017	-1.05474	-1.12307	-1.11826	-1.21271
193.79	-0.00587246	-0.00168143	0.00830287	0.00138233	0.0008077	0.0283866	-0.0170354			193.79	-1.22256	-1.30915	-1.29685	-1.05336	-1.12836	-1.11657	-1.21699
193.99	-0.00546925	0.00139071	0.00430852	0.00205905	0.00293028	0.0259526	-0.0146044			193.99	-1.22216	-1.30607	-1.30084	-1.05269	-1.12624	-1.11901	-1.21455
194.19	-0.00561557	0.00297395	0.00803907	0.00351928	0.0038767	0.0262843	-0.0152574			194.19	-1.2223	-1.30449	-1.29711	-1.05123	-1.12529	-1.11868	-1.21521
194.39	-0.00608019	0.00165408	0.00736815	0.00017118	0.00256112	0.0296343	-0.0189834			194.39	-1.22277	-1.30581	-1.29778	-1.05458	-1.12661	-1.11533	-1.21893
194.59	-0.00970469	0.00073161	0.0066643	0.00146263	0.00120981	0.0298492	-0.0182743			194.59	-1.22639	-1.30673	-1.29849	-1.05328	-1.12796	-1.11511	-1.21822
194.79	-0.00579981	0.00072815	0.00796415	-0.00197741	0.00083157	0.0268121	-0.019151			194.79	-1.22249	-1.30674	-1.29719	-1.05672	-1.12834	-1.11815	-1.2191
194.99	-0.00582362	0.00039632	0.00942016	0.00090137	0.00156436	0.0290406	-0.0173195			194.99	-1.22251	-1.30707	-1.29573	-1.05385	-1.12761	-1.11592	-1.21727
195.19	-0.00417239	-0.00028342	0.0100518	0.00065176	0.00324497	0.027295	-0.0147724			195.19	-1.22086	-1.30775	-1.2951	-1.05409	-1.12593	-1.11766	-1.21472
195.39	-0.00535462	-0.00160919	0.0113938	0.00117089	-0.00301608	0.0280901	-0.018621			195.39	-1.22204	-1.30907	-1.29376	-1.05358	-1.13219	-1.11687	-1.21857
195.59	-0.00679593	-0.00143511	0.00633885	0.00291334	0.00405385	0.0256854	-0.0153662			195.59	-1.22348	-1.3089	-1.29881	-1.05183	-1.12512	-1.11927	-1.21532
195.79	-0.00259669	-0.00452705	0.0103054	0.00021905	0.00279556	0.0276054	-0.0182632			195.79	-1.21928	-1.31199	-1.29485	-1.05453	-1.12637	-1.11735	-1.21821
195.99	-0.00764817	1.294e-05	0.0105271	0.00542743	0.00244093	0.0277547	-0.0186592			195.99	-1.22434	-1.30745	-1.29462	-1.04932	-1.12673	-1.1172	-1.21861
196.19	-0.00457461	-0.00087439	0.00692863	0.00088244	0.00295214	0.0255228	-0.0175524			196.19	-1.22126	-1.30834	-1.29822	-1.05386	-1.12622	-1.11944	-1.2175
196.39	-0.0039794	-0.00672373	0.00959955	0.00063355	0.00304838	0.0287308	-0.0163505			196.39	-1.22067	-1.31419	-1.29555	-1.05411	-1.12612	-1.11623	-1.2163
196.59	-0.00373419	-0.00296178	0.00519647	-0.00237745	0.00074621	0.0269012	-0.0208104			196.59	-1.22042	-1.31043	-1.29995	-1.05712	-1.12842	-1.11806	-1.22076
196.79	-0.00510878	0.00228369	0.00776777	0.00175212	0.00279547	0.0228814	-0.0168053			196.79	-1.2218	-1.30518	-1.29738	-1.05299	-1.12637	-1.12208	-1.21675
196.99	-0.00441095	-0.00361618	0.00731858	-0.00142949	-0.00010712	0.0274837	-0.0202753			196.99	-1.2211	-1.31108	-1.29783	-1.05618	-1.12928	-1.11748	-1.22022
197.2	-0.00525214	0.0024267	0.00556616	0.0007425	0.00328927	0.026808	-0.0168371			197.2	-1.22194	-1.30504	-1.29958	-1.054	-1.12588	-1.11815	-1.21679
197.39	-0.00374707	-0.00260637	0.00498059	-0.00219529	-0.00095271	0.026146	-0.0150167			197.39	-1.22043	-1.31007	-1.30017	-1.05694	-1.13012	-1.11881	-1.21497
197.6	-0.00517494	-0.00137809	0.0129763	0.00072041	0.00230272	0.0254233	-0.0178155			197.6	-1.22186	-1.30884	-1.29217	-1.05403	-1.12687	-1.11954	-1.21777
197.79	-0.00594201	-0.00361708	0.00728104	0.00473738	0.00409207	0.0287866	-0.0185621			197.79	-1.22263	-1.31108	-1.29787	-1.05001	-1.12508	-1.11617	-1.21851
197.99	-0.00600547	-0.00181177	0.00334425	-0.00062402	0.00316656	0.0261115	-0.0174287			197.99	-1.22269	-1.30928	-1.30181	-1.05537	-1.126	-1.11885	-1.21738
198.19	-0.00847436	-0.00183517	0.00665073	0.00208108	0.00440158	0.0245068	-0.0181333			198.19	-1.22516	-1.3093	-1.2985	-1.05267	-1.12477	-1.12045	-1.21808
198.39	-0.00787266	-0.00012839	0.00721973	0.00042582	0.00251206	0.0307125	-0.0173645			198.39	-1.22456	-1.30759	-1.29793	-1.05432	-1.12666	-1.11425	-1.21731
198.6	-0.00475912	-0.00452019	0.00957346	0.00187718	0.00363297	0.0262798	-0.0153061			198.6	-1.22145	-1.31198	-1.29558	-1.05287	-1.12554	-1.11868	-1.21526
198.79	-0.00614359	0.00252871	0.0104305	-8.786e-05	0.00373012	0.0248627	-0.0140901			198.79	-1.22283	-1.30494	-1.29472	-1.05483	-1.12544	-1.1201	-1.21404
198.99	-0.0055419	0.00087943	0.00891746	-0.00121146	0.00365139	0.030175	-0.0215154			198.99	-1.22223	-1.30658	-1.29623	-1.05596	-1.12552	-1.11478	-1.22146
199.19	-0.00677418	-0.00040689	0.00575717	-0.00032359	0.0031584	0.030373	-0.0218043			199.19	-1.22346	-1.30787	-1.29939	-1.05507	-1.12601	-1.11459	-1.22175
199.39	-0.00507	0.00439032	0.00499181	0.00080109	0.00101505	0.0290874	-0.0148568			199.39	-1.22176	-1.30307	-1.30016	-1.05395	-1.12816	-1.11587	-1.21481
199.6	-0.00589614	0.00321103	0.00724139	0.00126962	0.00297823	0.0259782	-0.0176274			199.6	-1.22258	-1.30425	-1.29791	-1.05348	-1.12619	-1.11898	-1.21758
199.79	-0.00524415	0.00019941	0.0114287	0.00173865	0.00332332	0.0278802	-0.0167802			199.79	-1.22193	-1.30726	-1.29372	-1.05301	-1.12585	-1.11708	-1.21673
200	-0.00269147	0.00818767	0.0252115	0.00243328	0.00959324	0.0366465	-0.00252251			200	-1.21938	-1.29928	-1.27994	-1.05231	-1.11958	-1.10831	-1.20247
200.19	0.0014569	0.00539072	0.0313555	0.00630428	0.0105639	0.0422406	0.00112743			200.19	-1.21523	-1.30207	-1.2738	-1.04844	-1.11861	-1.10272	-1.19882
200.39	0.00643287	0.0108175	0.0383639	0.00715024	0.0126458	0.0423909	0.00111392			200.39	-1.21025	-1.29665	-1.26679	-1.0476	-1.11652	-1.10257	-1.19884
200.6	0.00939192	0.0119639	0.0430159	0.0101012	0.015427	0.0427303	0.00237291			200.6	-1.2073	-1.2955	-1.26213	-1.04465	-1.11374	-1.10223	-1.19758
200.79	0.0121561	0.013183	0.0466829	0.011146	0.0154841	0.0461495	0.00355914			200.79	-1.20453	-1.29428	-1.25847	-1.0436	-1.11369	-1.09881	-1.19639
200.99	0.00823053	0.0168252	0.0476597	0.0108599	0.0182561	0.0471022	0.00374824			200.99	-1.20846	-1.29064	-1.25749	-1.04389	-1.11091	-1.09786	-1.1962
201.19	0.0127764	0.013809	0.0490469	0.0177866	0.0186186	0.0503099	0.00966251			201.19	-1.20391	-1.29366	-1.2561	-1.03696	-1.11055	-1.09465	-1.19029
201.39	0.0120402	0.012617	0.0489053	0.0122137	0.0248877	0.0470008	0.00550197			201.39	-1.20465	-1.29485	-1.25625	-1.04253	-1.10428	-1.09796	-1.19445
201.59	0.0183702	0.0189054	0.0524671	0.0155638	0.0202553	0.0497906	0.0110858			201.59	-1.19832	-1.28856	-1.25268	-1.03918	-1.10891	-1.09517	-1.18886
201.79	0.0182788	0.0210929	0.0560963	0.0172151	0.0252862	0.0523785	0.0129484			201.79	-1.19841	-1.28637	-1.24905	-1.03753	-1.10388	-1.09258	-1.187
201.99	0.0169064	0.0211104	0.0561759	0.0186728	0.02675	0.0535274	0.0119749			201.99	-1.19978	-1.28635	-1.24897	-1.03607	-1.10242	-1.09143	-1.18797
202.19	0.0156776	0.0256666	0.0592548	0.0194851	0.0231409	0.0569529	0.0131641			202.19	-1.20101	-1.2818	-1.2459	-1.03526	-1.10603	-1.08801	-1.18679
202.39	0.0169559	0.0279594	0.0605855	0.0200478	0.0287125	0.0585068	0.0164631			202.39	-1.19973	-1.2795	-1.24456	-1.0347	-1.10046	-1.08645	-1.18349
202.6	0.0214782	0.026509	0.0573174	0.0229265	0.0284169	0.0576608	0.0155288			202.6	-1.19521	-1.28096	-1.24783	-1.03182	-1.10075	-1.0873	-1.18442
202.79	0.0218072	0.0245893	0.0610684	0.0247171	0.0306581	0.0559184	0.0137949			202.79	-1.19488	-1.28288	-1.24408	-1.03003	-1.09851	-1.08904	-1.18615
202.99	0.0197986	0.0257789	0.0647485	0.0194962	0.0304548	0.0614054	0.0190391			202.99	-1.19689	-1.28169	-1.2404	-1.03525	-1.09872	-1.08355	-1.18091
203.19	0.0218923	0.0307136	0.0646353	0.0247729	0.0324939	0.0577395	0.0183229			203.19	-1.1948	-1.27675	-1.24052	-1.02997	-1.09668	-1.08722	-1.18163
203.39	0.0236577	0.0287535	0.0658124	0.0213084	0.0315979	0.0611169	0.0178398			203.39	-1.19303	-1.27871	-1.23934	-1.03344	-1.09757	-1.08384	-1.18211
203.6	0.0235366	0.0297739	0.0651732	0.0266224	0.0344488	0.0627166	0.0213			203.6	-1.19315	-1.27769	-1.23998	-1.02812	-1.09472	-1.08224	-1.17865
203.79	0.0320932	0.0285487	0.0651003	0.02682	0.0320307	0.0638965	0.0212964			203.79	-1.18459	-1.27892	-1.24005	-1.02793	-1.09714	-1.08106	-1.17865
203.99	0.0269584	0.0294743	0.0677053	0.0273768	0.0346471	0.0600326	0.022715			203.99	-1.18973	-1.27799	-1.23745	-1.02737	-1.09452	-1.08493	-1.17723
204.19	0.0252636	0.0352765	0.0697052	0.0303581	0.0377336	0.0620069	0.0233373			204.19	-1.19142	-1.27219	-1.23545	-1.02439	-1.09144	-1.08295	-1.17661
204.39	0.0280984	0.0344103	0.0691625	0.0319949	0.035839	0.0645917	0.0171671			204.39	-1.18859	-1.27305	-1.23599	-1.02275	-1.09333	-1.08037	-1.18278
204.6	0.0295331	0.0333798	0.0717952	0.0310439	0.0380472	0.0659294	0.0280824			204.6	-1.18715	-1.27408	-1.23336	-1.0237	-1.09112	-1.07903	-1.17187
204.79	0.0273086	0.0373379	0.0689938	0.0310421	0.039542	0.0690795	0.0241866			204.79	-1.18938	-1.27013	-1.23616	-1.0237	-1.08963	-1.07588	-1.17576
204.99	0.0282022	0.0382086	0.0781041	0.0337534	0.0375752	0.064571	0.0231306			204.99	-1.18849	-1.26926	-1.22705	-1.02099	-1.0916	-1.08039	-1.17682
205.19	0.0367458	0.0360336	0.0709768	0.0352102	0.040936	0.0647337	0.0247287			205.19	-1.17994	-1.27143	-1.23417	-1.01954	-1.08823	-1.08023	-1.17522
205.39	0.0323646	0.0397447	0.0771496	0.0349642	0.0427205	0.0681914	0.0289124			205.39	-1.18432	-1.26772	-1.228	-1.01978	-1.08645	-1.07677	-1.17104
205.6	0.033541	0.0380578	0.0785686	0.0358221	0.0413951	0.0690299	0.0268884			205.6	-1.18315	-1.26941	-1.22658	-1.01892	-1.08778	-1.07593	-1.17306
205.79	0.0348414	0.0394004	0.0792982	0.036475	0.0462024	0.0687307	0.0314156			205.79	-1.18185	-1.26806	-1.22585	-1.01827	-1.08297	-1.07623	-1.16853
205.99	0.0389167	0.037548	0.074854	0.0335851	0.0437414	0.0746533	0.031917			205.99	-1.17777	-1.26992	-1.2303	-1.02116	-1.08543	-1.07031	-1.16803
206.19	0.041643	0.0443919	0.0770148	0.0386596	0.0431286	0.0731133	0.0282624			206.19	-1.17504	-1.26307	-1.22814	-1.01609	-1.08604	-1.07185	-1.17169
206.39	0.0327294	0.0444272	0.0793255	0.0380071	0.048814	0.0733571	0.0315781			206.39	-1.18396	-1.26304	-1.22583	-1.01674	-1.08036	-1.0716	-1.16837
206.59	0.0379539	0.046003	0.0822569	0.0359138	0.0442598	0.0774249	0.0345222			206.59	-1.17873	-1.26146	-1.22289	-1.01883	-1.08491	-1.06753	-1.16543
206.79	0.0389138	0.0445831	0.0856577	0.0391073	0.0477862	0.0746149	0.0369761			206.79	-1.17777	-1.26288	-1.21949	-1.01564	-1.08138	-1.07034	-1.16297
206.99	0.0393171	0.050498	0.0839837	0.035331	0.0485939	0.0763187	0.0382079			206.99	-1.17737	-1.25697	-1.22117	-1.01942	-1.08058	-1.06864	-1.16174
207.19	0.0408703	0.0457033	0.0840009	0.0388796	0.0450786	0.0789425	0.0328878			207.19	-1.17582	-1.26176	-1.22115	-1.01587	-1.08409	-1.06602	-1.16706
207.39	0.0419557	0.043768	0.0866904	0.0409165	0.0476269	0.074078	0.036408			207.39	-1.17473	-1.2637	-1.21846	-1.01383	-1.08154	-1.07088	-1.16354
207.59	0.0425638	0.0469905	0.0890844	0.0394143	0.0511057	0.0776602	0.0355123			207.59	-1.17412	-1.26047	-1.21607	-1.01533	-1.07806	-1.0673	-1.16444
207.79	0.0428082	0.0509833	0.0851304	0.0392281	0.0506531	0.0783601	0.0379603			207.79	-1.17388	-1.25648	-1.22002	-1.01552	-1.07852	-1.0666	-1.16199
207.99	0.0443962	0.050432	0.0912078	0.0430163	0.0525842	0.0785124	0.037842			207.99	-1.17229	-1.25703	-1.21394	-1.01173	-1.07659	-1.06645	-1.16211
208.19	0.0461444	0.0516944	0.088044	0.0434506	0.0539808	0.0826475	0.0433735			208.19	-1.17054	-1.25577	-1.21711	-1.0113	-1.07519	-1.06231	-1.15658
208.39	0.0447669	0.0532205	0.0924851	0.0470184	0.0553234	0.0840348	0.0403063			208.39	-1.17192	-1.25424	-1.21267	-1.00773	-1.07385	-1.06092	-1.15964
208.6	0.0473408	0.0536657	0.0894999	0.0457261	0.0568535	0.0814608	0.0404942			208.6	-1.16935	-1.2538	-1.21565	-1.00902	-1.07232	-1.0635	-1.15946
208.79	0.0464539	0.056554	0.094514	0.0465162	0.0551684	0.0842384	0.0437692			208.79	-1.17023	-1.25091	-1.21064	-1.00823	-1.074	-1.06072	-1.15618
208.99	0.0493171	0.0556051	0.0924614	0.0488776	0.0563883	0.086593	0.0432927			208.99	-1.16737	-1.25186	-1.21269	-1.00587	-1.07278	-1.05837	-1.15666
209.19	0.0516588	0.0573445	0.0891996	0.0521546	0.0600521	0.0866293	0.0470133			209.19	-1.16503	-1.25012	-1.21595	-1.00259	-1.06912	-1.05833	-1.15294
209.39	0.0540514	0.0540667	0.0961691	0.0496782	0.0572226	0.0870939	0.0454131			209.39	-1.16264	-1.2534	-1.20898	-1.00507	-1.07195	-1.05787	-1.15454
209.59	0.0521359	0.0594371	0.0983717	0.0502288	0.0596775	0.0849355	0.0458593			209.59	-1.16455	-1.24803	-1.20678	-1.00452	-1.06949	-1.06002	-1.15409
209.79	0.0519619	0.0597842	0.0965349	0.0515397	0.0624777	0.0877773	0.0490177			209.79	-1.16473	-1.24768	-1.20862	-1.00321	-1.06669	-1.05718	-1.15093
209.99	0.0552211	0.0603801	0.0945337	0.0545754	0.0632382	0.0881706	0.0507296			209.99	-1.16147	-1.24708	-1.21062	-1.00017	-1.06593	-1.05679	-1.14922
210.19	0.0532234	0.0596482	0.0989861	0.0523926	0.0642248	0.0897029	0.0475687			210.19	-1.16346	-1.24782	-1.20616	-1.00235	-1.06495	-1.05526	-1.15238
210.39	0.0541818	0.0626844	0.101632	0.0579423	0.0624665	0.0915893	0.0489353			210.39	-1.16251	-1.24478	-1.20352	-0.996804	-1.0667	-1.05337	-1.15101
210.6	0.0585944	0.0640339	0.0989719	0.0550735	0.0657826	0.0902033	0.054645			210.6	-1.15809	-1.24343	-1.20618	-0.999673	-1.06339	-1.05476	-1.1453
210.79	0.057476	0.066596	0.104332	0.0565969	0.0652842	0.0939731	0.0520866			210.79	-1.15921	-1.24087	-1.20082	-0.99815	-1.06389	-1.05099	-1.14786
210.99	0.0578301	0.0657854	0.102341	0.0590634	0.0641775	0.0958928	0.0542483			210.99	-1.15886	-1.24168	-1.20281	-0.995683	-1.06499	-1.04907	-1.1457
211.19	0.0584316	0.0646642	0.102055	0.0578936	0.0676487	0.0950449	0.0552825			211.19	-1.15826	-1.2428	-1.2031	-0.996853	-1.06152	-1.04991	-1.14467
211.39	0.0602418	0.0683807	0.106117	0.0574035	0.066767	0.0939632	0.0540396			211.39	-1.15645	-1.23908	-1.19903	-0.997343	-1.0624	-1.051	-1.14591
211.59	0.0611963	0.0651959	0.108827	0.05684	0.0671919	0.093804	0.0573387			211.59	-1.15549	-1.24227	-1.19632	-0.997907	-1.06198	-1.05116	-1.14261
211.79	0.0623038	0.0676171	0.106223	0.0612204	0.065981	0.103276	0.0570923			211.79	-1.15438	-1.23985	-1.19893	-0.993526	-1.06319	-1.04168	-1.14286
211.99	0.0646344	0.0733658	0.108058	0.0614538	0.069324	0.0985736	0.0574628			211.99	-1.15205	-1.2341	-1.19709	-0.993293	-1.05985	-1.04639	-1.14249
212.19	0.0618429	0.0706248	0.108031	0.060553	0.0702696	0.10173	0.0520584			212.19	-1.15484	-1.23684	-1.19712	-0.994194	-1.0589	-1.04323	-1.14789
212.39	0.066062	0.0735651	0.109035	0.0624347	0.0718808	0.101545	0.0583603			212.39	-1.15063	-1.2339	-1.19612	-0.992312	-1.05729	-1.04341	-1.14159
212.59	0.06848	0.0740815	0.113094	0.0602473	0.0765384	0.0983655	0.056141			212.59	-1.14821	-1.23338	-1.19206	-0.994499	-1.05263	-1.04659	-1.14381
212.79	0.0658917	0.0747701	0.109563	0.060464	0.0762368	0.10369	0.0617103			212.79	-1.1508	-1.23269	-1.19559	-0.994283	-1.05293	-1.04127	-1.13824
212.99	0.0651492	0.0740946	0.112268	0.0622802	0.0758804	0.102206	0.0598807			212.99	-1.15154	-1.23337	-1.19288	-0.992467	-1.05329	-1.04275	-1.14007
213.19	0.0667526	0.0777018	0.111165	0.0641419	0.0777593	0.105817	0.0632615			213.19	-1.14993	-1.22976	-1.19399	-0.990605	-1.05141	-1.03914	-1.13669
213.39	0.0682175	0.0758207	0.113067	0.0678573	0.0765268	0.106544	0.0612144			213.39	-1.14847	-1.23164	-1.19208	-0.986889	-1.05264	-1.03842	-1.13874
213.59	0.0710402	0.0788344	0.116301	0.0678793	0.0764084	0.10642	0.0671306			213.59	-1.14565	-1.22863	-1.18885	-0.986867	-1.05276	-1.03854	-1.13282
213.79	0.0693545	0.0790361	0.112403	0.06624	0.0803517	0.110618	0.0673667			213.79	-1.14733	-1.22843	-1.19275	-0.988507	-1.04882	-1.03434	-1.13258
213.99	0.0672115	0.080813	0.114474	0.0687085	0.0783636	0.108543	0.0644492			213.99	-1.14948	-1.22665	-1.19068	-0.986038	-1.05081	-1.03642	-1.1355
214.19	0.0707679	0.085037	0.117844	0.0689921	0.0795729	0.108058	0.0670774			214.19	-1.14592	-1.22243	-1.18731	-0.985755	-1.0496	-1.0369	-1.13287
214.39	0.0720418	0.0821445	0.118344	0.0742508	0.0813319	0.111223	0.0690559			214.39	-1.14465	-1.22532	-1.18681	-0.980496	-1.04784	-1.03374	-1.13089
214.59	0.0770085	0.0805765	0.118312	0.0731396	0.0827618	0.114262	0.0688755			214.59	-1.13968	-1.22689	-1.18684	-0.981607	-1.04641	-1.0307	-1.13107
214.79	0.0754329	0.0816623	0.121273	0.0731441	0.084707	0.113087	0.0715753			214.79	-1.14125	-1.2258	-1.18388	-0.981603	-1.04446	-1.03187	-1.12837
214.99	0.073407	0.0874939	0.122744	0.0726589	0.0835052	0.113869	0.0704778			214.99	-1.14328	-1.21997	-1.18241	-0.982088	-1.04567	-1.03109	-1.12947
215.19	0.0774552	0.0880004	0.117721	0.0762554	0.0851809	0.11126	0.0743767			215.19	-1.13923	-1.21946	-1.18743	-0.978491	-1.04399	-1.0337	-1.12557
215.39	0.077017	0.0850928	0.126374	0.0696226	0.0859401	0.114277	0.0734288			215.39	-1.13967	-1.22237	-1.17878	-0.985124	-1.04323	-1.03068	-1.12652
215.59	0.0767608	0.0850513	0.125265	0.0749615	0.0888681	0.113939	0.076173			215.59	-1.13993	-1.22241	-1.17989	-0.979785	-1.0403	-1.03102	-1.12378
215.79	0.0773276	0.0903462	0.12174	0.0777541	0.087737	0.119328	0.0755427			215.79	-1.13936	-1.21712	-1.18341	-0.976993	-1.04143	-1.02563	-1.12441
215.99	0.083578	0.0897054	0.125663	0.0789355	0.0899478	0.116869	0.0758198			215.99	-1.13311	-1.21776	-1.17949	-0.975811	-1.03922	-1.02809	-1.12413
216.19	0.0826822	0.0917768	0.127721	0.078001	0.0886918	0.114981	0.0778333			216.19	-1.13401	-1.21569	-1.17743	-0.976746	-1.04048	-1.02998	-1.12212
216.39	0.0824399	0.0894587	0.127653	0.0814044	0.0891765	0.120425	0.0734475			216.39	-1.13425	-1.21801	-1.1775	-0.973342	-1.03999	-1.02453	-1.1265
216.59	0.0835262	0.0969165	0.128276	0.0785217	0.0934638	0.120721	0.0816667			216.59	-1.13316	-1.21055	-1.17687	-0.976225	-1.03571	-1.02424	-1.11828
216.79	0.0846307	0.0925417	0.131478	0.077943	0.0914256	0.120745	0.0790336			216.79	-1.13206	-1.21492	-1.17367	-0.976804	-1.03774	-1.02421	-1.12092
216.99	0.085211	0.0928659	0.130521	0.0792033	0.0930119	0.121233	0.0794465			216.99	-1.13148	-1.2146	-1.17463	-0.975543	-1.03616	-1.02373	-1.1205
217.19	0.0855822	0.0984331	0.131843	0.0832198	0.0931197	0.120095	0.0803361			217.19	-1.13111	-1.20903	-1.17331	-0.971527	-1.03605	-1.02486	-1.11961
217.39	0.0869433	0.0940712	0.133495	0.0830669	0.0940395	0.119815	0.0821401			217.39	-1.12974	-1.21339	-1.17166	-0.97168	-1.03513	-1.02514	-1.11781
217.59	0.0881496	0.0952021	0.133113	0.0805262	0.0949024	0.121367	0.0839588			217.59	-1.12854	-1.21226	-1.17204	-0.974221	-1.03427	-1.02359	-1.11599
217.79	0.0876299	0.0968107	0.13411	0.0830074	0.0964229	0.124393	0.0835522			217.79	-1.12906	-1.21065	-1.17104	-0.971739	-1.03275	-1.02057	-1.1164
217.99	0.0931073	0.0954076	0.134565	0.0856129	0.097304	0.125329	0.0827878			217.99	-1.12358	-1.21206	-1.17059	-0.969134	-1.03187	-1.01963	-1.11716
218.19	0.0914192	0.0994686	0.138448	0.0878325	0.0995287	0.124541	0.0843841			218.19	-1.12527	-1.208	-1.1667	-0.966914	-1.02964	-1.02042	-1.11557
218.39	0.0899478	0.0961592	0.139442	0.085891	0.0982329	0.124504	0.0854373			218.39	-1.12674	-1.21131	-1.16571	-0.968856	-1.03094	-1.02046	-1.11451
218.6	0.0922507	0.10311	0.138554	0.0863291	0.099232	0.129474	0.0888609			218.6	-1.12444	-1.20435	-1.1666	-0.968418	-1.02994	-1.01549	-1.11109
218.79	0.0945612	0.104192	0.139758	0.0879802	0.0992849	0.132143	0.0890677			218.79	-1.12213	-1.20327	-1.16539	-0.966767	-1.02989	-1.01282	-1.11088
218.99	0.0929679	0.101147	0.139428	0.0908165	0.103465	0.127549	0.0908136			218.99	-1.12372	-1.20632	-1.16572	-0.96393	-1.02571	-1.01741	-1.10914
219.2	0.0948651	0.104861	0.135917	0.0890108	0.105209	0.132976	0.0945654			219.2	-1.12182	-1.2026	-1.16923	-0.965736	-1.02396	-1.01198	-1.10538
219.39	0.0960832	0.106416	0.139377	0.0901626	0.103883	0.129126	0.0913814			219.39	-1.1206	-1.20105	-1.16577	-0.964584	-1.02529	-1.01583	-1.10857
219.6	0.0942157	0.107447	0.142041	0.0894955	0.104796	0.131849	0.0912498			219.6	-1.12247	-1.20002	-1.16311	-0.965251	-1.02437	-1.01311	-1.1087
219.79	0.101856	0.10514	0.142874	0.0915079	0.103933	0.134118	0.0913804			219.79	-1.11483	-1.20232	-1.16228	-0.963239	-1.02524	-1.01084	-1.10857
219.99	0.0968954	0.105563	0.144437	0.0954291	0.108102	0.132406	0.095764			219.99	-1.11979	-1.2019	-1.16071	-0.959318	-1.02107	-1.01255	-1.10419
220.19	0.10002	0.108675	0.144326	0.0926724	0.10514	0.134647	0.0939683			220.19	-1.11667	-1.19879	-1.16082	-0.962074	-1.02403	-1.01031	-1.10598
220.39	0.0997267	0.111609	0.146392	0.0955225	0.106639	0.134304	0.0969193			220.39	-1.11696	-1.19586	-1.15876	-0.959224	-1.02253	-1.01066	-1.10303
220.6	0.103001	0.112924	0.147078	0.0939928	0.109449	0.138563	0.0951625			220.6	-1.11369	-1.19454	-1.15807	-0.960754	-1.01972	-1.0064	-1.10479
220.79	0.101443	0.111945	0.142538	0.0995075	0.106185	0.139626	0.1017			220.79	-1.11524	-1.19552	-1.16261	-0.955239	-1.02299	-1.00533	-1.09825
220.99	0.101224	0.11372	0.149175	0.0947392	0.109534	0.138307	0.0989587			220.99	-1.11546	-1.19374	-1.15598	-0.960008	-1.01964	-1.00665	-1.10099
221.19	0.103867	0.113812	0.146228	0.0987182	0.111364	0.138973	0.0992644			221.19	-1.11282	-1.19365	-1.15892	-0.956029	-1.01781	-1.00599	-1.10069
221.39	0.107297	0.115575	0.148246	0.0990937	0.112387	0.138038	0.100215			221.39	-1.10939	-1.19189	-1.1569	-0.955653	-1.01678	-1.00692	-1.09973
221.6	0.106917	0.115433	0.155256	0.102048	0.111399	0.143743	0.0969193			221.6	-1.10977	-1.19203	-1.14989	-0.952699	-1.01777	-1.00122	-1.10303
221.79	0.10761	0.116871	0.154475	0.099838	0.11352	0.143412	0.101172			221.79	-1.10908	-1.19059	-1.15068	-0.954909	-1.01565	-1.00155	-1.09878
221.99	0.105791	0.118391	0.152693	0.100087	0.113795	0.143364	0.100456			221.99	-1.1109	-1.18907	-1.15246	-0.95466	-1.01538	-1.0016	-1.09949
222.19	0.10932	0.118113	0.15508	0.10348	0.115146	0.142523	0.103148			222.19	-1.10737	-1.18935	-1.15007	-0.951267	-1.01402	-1.00244	-1.0968
222.39	0.107351	0.121562	0.160353	0.100638	0.116622	0.147042	0.103519			222.39	-1.10934	-1.1859	-1.1448	-0.954109	-1.01255	-0.997918	-1.09643
222.6	0.110997	0.118466	0.155464	0.103342	0.116885	0.145327	0.102958			222.6	-1.10569	-1.189	-1.14969	-0.951404	-1.01229	-0.999633	-1.09699
222.79	0.112898	0.120312	0.15562	0.107689	0.119391	0.148047	0.102224			222.79	-1.10379	-1.18715	-1.14953	-0.947058	-1.00978	-0.996912	-1.09773
222.99	0.10964	0.119813	0.157108	0.104593	0.118062	0.145215	0.104306			222.99	-1.10705	-1.18765	-1.14804	-0.950154	-1.01111	-0.999744	-1.09564
223.19	0.112648	0.120052	0.16066	0.107661	0.122527	0.145379	0.108066			223.19	-1.10404	-1.18741	-1.14449	-0.947085	-1.00664	-0.99958	-1.09188
223.39	0.114927	0.124362	0.16007	0.108248	0.121383	0.14651	0.110158			223.39	-1.10176	-1.1831	-1.14508	-0.946499	-1.00779	-0.998449	-1.08979
223.6	0.112097	0.121143	0.160326	0.105186	0.121056	0.152708	0.111808			223.6	-1.10459	-1.18632	-1.14482	-0.94956	-1.00811	-0.992251	-1.08814
223.79	0.111315	0.122384	0.160363	0.111954	0.122923	0.149674	0.109013			223.79	-1.10537	-1.18508	-1.14479	-0.942792	-1.00625	-0.995285	-1.09094
223.99	0.113626	0.128223	0.160318	0.110487	0.122943	0.149749	0.11054			223.99	-1.10306	-1.17924	-1.14483	-0.94426	-1.00623	-0.995211	-1.08941
224.19	0.119433	0.12722	0.16267	0.110932	0.126537	0.151728	0.113614			224.19	-1.09725	-1.18024	-1.14248	-0.943815	-1.00263	-0.993231	-1.08634
224.39	0.112505	0.128992	0.162347	0.111832	0.129817	0.1532	0.112516			224.39	-1.10418	-1.17847	-1.1428	-0.942915	-0.999353	-0.99176	-1.08743
224.6	0.117403	0.127622	0.163415	0.113203	0.122345	0.153077	0.114319			224.6	-1.09928	-1.17984	-1.14174	-0.941544	-1.00683	-0.991883	-1.08563
224.79	0.118837	0.129516	0.1666	0.11286	0.127681	0.15383	0.111736			224.79	-1.09785	-1.17795	-1.13855	-0.941886	-1.00149	-0.991129	-1.08821
224.99	0.118753	0.132254	0.167336	0.1146	0.126314	0.158032	0.118577			224.99	-1.09793	-1.17521	-1.13781	-0.940146	-1.00286	-0.986928	-1.08137
225.19	0.119302	0.133476	0.168871	0.114907	0.12796	0.156375	0.11801			225.19	-1.09738	-1.17399	-1.13628	-0.93984	-1.00121	-0.988584	-1.08194
225.39	0.11977	0.131797	0.169939	0.117128	0.127226	0.160169	0.117092			225.39	-1.09692	-1.17567	-1.13521	-0.937619	-1.00194	-0.984791	-1.08286
225.6	0.120958	0.134533	0.172272	0.116097	0.134229	0.157138	0.115505			225.6	-1.09573	-1.17293	-1.13288	-0.93865	-0.994941	-0.987821	-1.08444
225.79	0.124512	0.131884	0.171613	0.115158	0.131098	0.15878	0.120963			225.79	-1.09218	-1.17558	-1.13354	-0.939589	-0.998072	-0.986179	-1.07899
225.99	0.12077	0.134237	0.171808	0.118	0.133456	0.162607	0.121985			225.99	-1.09592	-1.17323	-1.13334	-0.936747	-0.995714	-0.982352	-1.07796
226.19	0.126709	0.136752	0.171825	0.117726	0.135633	0.161365	0.122752			226.19	-1.08998	-1.17071	-1.13333	-0.937021	-0.993537	-0.983594	-1.0772
226.39	0.127726	0.136711	0.176416	0.123147	0.133832	0.161864	0.121254			226.39	-1.08896	-1.17075	-1.12873	-0.9316	-0.995338	-0.983095	-1.0787
226.6	0.126651	0.133834	0.176799	0.116953	0.134634	0.163801	0.122594			226.6	-1.09004	-1.17363	-1.12835	-0.937793	-0.994536	-0.981158	-1.07736
226.79	0.128351	0.143385	0.176966	0.118959	0.136405	0.161285	0.122375			226.79	-1.08834	-1.16408	-1.12818	-0.935788	-0.992765	-0.983674	-1.07757
226.99	0.127983	0.1398	0.176602	0.122555	0.13586	0.161819	0.12547			226.99	-1.0887	-1.16766	-1.12855	-0.932192	-0.993311	-0.983141	-1.07448
227.19	0.133853	0.136044	0.176199	0.122906	0.136527	0.166064	0.127761			227.19	-1.08283	-1.17142	-1.12895	-0.931841	-0.992644	-0.978895	-1.07219
227.39	0.134789	0.138291	0.181131	0.124919	0.138907	0.165535	0.129564			227.39	-1.0819	-1.16917	-1.12402	-0.929828	-0.990263	-0.979424	-1.07039
227.6	0.135021	0.144436	0.176739	0.127719	0.142669	0.16458	0.131004			227.6	-1.08167	-1.16303	-1.12841	-0.927027	-0.986501	-0.980379	-1.06895
227.79	0.130934	0.145107	0.184141	0.122901	0.139535	0.171288	0.129678			227.79	-1.08575	-1.16236	-1.12101	-0.931846	-0.989636	-0.973671	-1.07027
227.99	0.133117	0.145743	0.186676	0.128187	0.142431	0.165976	0.130943			227.99	-1.08357	-1.16172	-1.11847	-0.926559	-0.98674	-0.978983	-1.06901
228.19	0.135697	0.14459	0.184898	0.127129	0.141731	0.172072	0.130698			228.19	-1.08099	-1.16287	-1.12025	-0.927618	-0.987439	-0.972887	-1.06925
228.39	0.134923	0.145822	0.181724	0.129262	0.142758	0.171361	0.131809			228.39	-1.08176	-1.16164	-1.12343	-0.925485	-0.986413	-0.973599	-1.06814
228.59	0.137707	0.144763	0.181042	0.126857	0.145112	0.174644	0.133987			228.59	-1.07898	-1.1627	-1.12411	-0.927889	-0.984058	-0.970316	-1.06596
228.79	0.136072	0.149222	0.180289	0.129454	0.147002	0.172929	0.134217			228.79	-1.08062	-1.15824	-1.12486	-0.925292	-0.982168	-0.97203	-1.06573
228.99	0.139307	0.151634	0.18607	0.128824	0.148112	0.173535	0.133496			228.99	-1.07738	-1.15583	-1.11908	-0.925922	-0.981058	-0.971425	-1.06645
229.19	0.141934	0.153268	0.186134	0.131791	0.148828	0.175578	0.135337			229.19	-1.07475	-1.1542	-1.11902	-0.922956	-0.980342	-0.969381	-1.06461
229.39	0.138882	0.153224	0.189234	0.131073	0.147567	0.176299	0.136766			229.39	-1.07781	-1.15424	-1.11592	-0.923674	-0.981603	-0.968661	-1.06318
229.6	0.138739	0.154413	0.185809	0.134676	0.150762	0.17885	0.137869			229.6	-1.07795	-1.15305	-1.11934	-0.920071	-0.978408	-0.966109	-1.06208
229.79	0.14092	0.153695	0.18674	0.136665	0.150702	0.179116	0.14075			229.79	-1.07577	-1.15377	-1.11841	-0.918082	-0.978468	-0.965843	-1.0592
229.99	0.145432	0.154111	0.188648	0.137322	0.150696	0.178126	0.141086			229.99	-1.07125	-1.15335	-1.1165	-0.917425	-0.978474	-0.966834	-1.05886
230.19	0.146116	0.154281	0.192687	0.134579	0.15011	0.179064	0.14166			230.19	-1.07057	-1.15318	-1.11246	-0.920168	-0.97906	-0.965896	-1.05829
230.39	0.143774	0.155467	0.194353	0.137231	0.15091	0.181899	0.141331			230.39	-1.07291	-1.152	-1.1108	-0.917516	-0.978261	-0.963061	-1.05862
230.6	0.140624	0.155894	0.194324	0.135898	0.152913	0.182509	0.144471			230.6	-1.07606	-1.15157	-1.11083	-0.918848	-0.976257	-0.962451	-1.05548
230.79	0.145489	0.157179	0.195457	0.137159	0.159052	0.182804	0.141583			230.79	-1.0712	-1.15029	-1.10969	-0.917588	-0.970118	-0.962155	-1.05837
230.99	0.146595	0.162414	0.198986	0.137775	0.160479	0.183095	0.143952			230.99	-1.07009	-1.14505	-1.10616	-0.916972	-0.968692	-0.961864	-1.056
231.19	0.146642	0.159902	0.198658	0.140297	0.159767	0.180616	0.149071			231.19	-1.07005	-1.14756	-1.10649	-0.91445	-0.969403	-0.964343	-1.05088
231.39	0.147935	0.16432	0.191879	0.142978	0.156775	0.187908	0.14545			231.39	-1.06875	-1.14314	-1.11327	-0.911768	-0.972395	-0.957051	-1.0545
231.6	0.14923	0.160446	0.201164	0.142568	0.157165	0.187554	0.146614			231.6	-1.06746	-1.14702	-1.10399	-0.912179	-0.972005	-0.957406	-1.05334
231.79	0.152301	0.162447	0.197841	0.144864	0.162952	0.185017	0.146987			231.79	-1.06439	-1.14502	-1.10731	-0.909883	-0.966218	-0.959942	-1.05296
231.99	0.146868	0.162168	0.196279	0.140812	0.157098	0.18947	0.14626			231.99	-1.06982	-1.1453	-1.10887	-0.913935	-0.972072	-0.95549	-1.05369
232.19	0.150668	0.162432	0.197892	0.142804	0.15917	0.191189	0.150131			232.19	-1.06602	-1.14503	-1.10726	-0.911943	-0.97	-0.953771	-1.04982
232.39	0.153313	0.166101	0.201029	0.145042	0.162633	0.189569	0.151555			232.39	-1.06337	-1.14136	-1.10412	-0.909705	-0.966538	-0.955391	-1.0484
232.59	0.154377	0.16628	0.203618	0.145047	0.161274	0.190581	0.152123			232.59	-1.06231	-1.14118	-1.10153	-0.9097	-0.967897	-0.954378	-1.04783
232.79	0.15412	0.165953	0.204901	0.146278	0.164719	0.186454	0.153735			232.79	-1.06257	-1.14151	-1.10025	-0.908469	-0.964452	-0.958505	-1.04621
232.99	0.154434	0.164872	0.206688	0.148493	0.166582	0.191623	0.156828			232.99	-1.06225	-1.14259	-1.09846	-0.906253	-0.962589	-0.953337	-1.04312
233.19	0.158105	0.171105	0.206855	0.144836	0.167487	0.192289	0.153492			233.19	-1.05858	-1.13636	-1.0983	-0.90991	-0.961683	-0.95267	-1.04646
233.39	0.156394	0.172523	0.206802	0.146592	0.166441	0.193277	0.157182			233.39	-1.06029	-1.13494	-1.09835	-0.908155	-0.96273	-0.951683	-1.04277
233.59	0.159593	0.170583	0.207056	0.148343	0.167436	0.193862	0.161163			233.59	-1.05709	-1.13688	-1.09809	-0.906404	-0.961735	-0.951097	-1.03879
233.79	0.163257	0.173122	0.209646	0.15232	0.163363	0.195713	0.159296			233.79	-1.05343	-1.13434	-1.0955	-0.902426	-0.965807	-0.949246	-1.04065
233.99	0.16125	0.175571	0.208261	0.154679	0.168327	0.198436	0.156553			233.99	-1.05544	-1.13189	-1.09689	-0.900068	-0.960843	-0.946523	-1.0434
234.19	0.161837	0.17728	0.211898	0.151518	0.168378	0.199577	0.157984			234.19	-1.05485	-1.13018	-1.09325	-0.903229	-0.960793	-0.945382	-1.04197
234.39	0.161514	0.176978	0.21327	0.150579	0.171479	0.195541	0.157171			234.39	-1.05517	-1.13049	-1.09188	-0.904167	-0.957692	-0.949418	-1.04278
234.59	0.163402	0.174061	0.211586	0.154696	0.176146	0.200024	0.158976			234.59	-1.05329	-1.1334	-1.09356	-0.900051	-0.953024	-0.944936	-1.04097
234.79	0.165722	0.185375	0.207915	0.153374	0.172818	0.199601	0.160568			234.79	-1.05097	-1.12209	-1.09724	-0.901373	-0.956352	-0.945359	-1.03938
234.99	0.162397	0.178281	0.214593	0.159416	0.172705	0.201901	0.162658			234.99	-1.05429	-1.12918	-1.09056	-0.89533	-0.956465	-0.943059	-1.03729
235.19	0.168698	0.180371	0.216041	0.152521	0.173172	0.204149	0.161673			235.19	-1.04799	-1.12709	-1.08911	-0.902226	-0.955999	-0.94081	-1.03828
235.39	0.168493	0.184223	0.217256	0.158505	0.174535	0.204338	0.167373			235.39	-1.04819	-1.12324	-1.08789	-0.896242	-0.954636	-0.940622	-1.03258
235.59	0.168258	0.180632	0.215983	0.15356	0.17239	0.204004	0.165411			235.59	-1.04843	-1.12683	-1.08917	-0.901187	-0.95678	-0.940956	-1.03454
235.79	0.166001	0.181175	0.218837	0.160101	0.177594	0.204261	0.166569			235.79	-1.05069	-1.12629	-1.08631	-0.894645	-0.951576	-0.940699	-1.03338
235.99	0.165932	0.179069	0.219582	0.161925	0.179362	0.208773	0.169535			235.99	-1.05076	-1.12839	-1.08557	-0.892821	-0.949809	-0.936186	-1.03042
236.19	0.170291	0.186844	0.220514	0.163305	0.18473	0.209307	0.170149			236.19	-1.0464	-1.12062	-1.08464	-0.891441	-0.944441	-0.935652	-1.0298
236.39	0.173452	0.186037	0.217347	0.161709	0.177514	0.207663	0.168231			236.39	-1.04324	-1.12143	-1.0878	-0.893037	-0.951656	-0.937297	-1.03172
236.6	0.174053	0.185564	0.222226	0.163686	0.181567	0.207151	0.167271			236.6	-1.04263	-1.1219	-1.08292	-0.89106	-0.947603	-0.937808	-1.03268
236.79	0.176971	0.185378	0.222056	0.164075	0.182191	0.210207	0.172926			236.79	-1.03972	-1.12209	-1.08309	-0.890672	-0.94698	-0.934752	-1.02702
236.99	0.172939	0.186634	0.223244	0.166293	0.182662	0.2125	0.170742			236.99	-1.04375	-1.12083	-1.08191	-0.888454	-0.946508	-0.93246	-1.02921
237.19	0.174307	0.191758	0.227658	0.162089	0.184292	0.209928	0.171635			237.19	-1.04238	-1.11571	-1.07749	-0.892657	-0.944878	-0.935031	-1.02831
237.39	0.175311	0.190324	0.223218	0.169884	0.186788	0.213706	0.17314			237.39	-1.04138	-1.11714	-1.08193	-0.884863	-0.942383	-0.931254	-1.02681
237.59	0.174317	0.193802	0.22282	0.166908	0.187566	0.210801	0.17668			237.59	-1.04237	-1.11366	-1.08233	-0.887838	-0.941604	-0.934158	-1.02327
237.79	0.175986	0.193891	0.231993	0.170308	0.188198	0.212927	0.179704			237.79	-1.0407	-1.11357	-1.07316	-0.884439	-0.940972	-0.932033	-1.02025
237.99	0.180936	0.193913	0.230553	0.168502	0.187445	0.212723	0.178806			237.99	-1.03575	-1.11355	-1.0746	-0.886245	-0.941725	-0.932236	-1.02114
238.19	0.175878	0.19294	0.231487	0.167232	0.186402	0.212779	0.17596			238.19	-1.04081	-1.11452	-1.07366	-0.887515	-0.942768	-0.93218	-1.02399
238.39	0.180709	0.197673	0.234179	0.170825	0.190659	0.21772	0.176413			238.39	-1.03598	-1.10979	-1.07097	-0.883922	-0.938511	-0.927239	-1.02354
238.59	0.181552	0.192235	0.229385	0.171351	0.190113	0.218907	0.177191			238.59	-1.03514	-1.11523	-1.07577	-0.883395	-0.939057	-0.926052	-1.02276
238.79	0.181496	0.198168	0.233689	0.171994	0.192153	0.223257	0.180828			238.79	-1.03519	-1.1093	-1.07146	-0.882753	-0.937018	-0.921703	-1.01912
238.99	0.183976	0.197115	0.230018	0.173607	0.193291	0.219989	0.182319			238.99	-1.03271	-1.11035	-1.07513	-0.88114	-0.935879	-0.92497	-1.01763
239.19	0.183429	0.193428	0.237195	0.173494	0.192471	0.219055	0.181094			239.19	-1.03326	-1.11404	-1.06796	-0.881253	-0.936699	-0.925904	-1.01886
239.39	0.184694	0.200525	0.233552	0.173789	0.192408	0.21959	0.182101			239.39	-1.03199	-1.10694	-1.0716	-0.880958	-0.936762	-0.92537	-1.01785
239.59	0.185161	0.202386	0.234822	0.176622	0.192211	0.221035	0.183673			239.59	-1.03153	-1.10508	-1.07033	-0.878125	-0.93696	-0.923925	-1.01628
239.79	0.191129	0.203884	0.232249	0.174684	0.197599	0.222855	0.186204			239.79	-1.02556	-1.10358	-1.0729	-0.880062	-0.931571	-0.922105	-1.01375
239.99	0.191125	0.198728	0.237696	0.177364	0.193232	0.225673	0.185029			239.99	-1.02556	-1.10874	-1.06745	-0.877382	-0.935938	-0.919286	-1.01492
240.19	0.190637	0.203876	0.239664	0.181207	0.197793	0.221732	0.183593			240.19	-1.02605	-1.10359	-1.06549	-0.87354	-0.931377	-0.923227	-1.01636
240.39	0.189429	0.205213	0.239709	0.180247	0.199383	0.223105	0.186499			240.39	-1.02726	-1.10225	-1.06544	-0.874499	-0.929787	-0.921855	-1.01345
240.59	0.194875	0.205351	0.237913	0.18235	0.199974	0.225835	0.185404			240.59	-1.02181	-1.10211	-1.06724	-0.872396	-0.929196	-0.919124	-1.01455
240.79	0.190796	0.208343	0.243864	0.182447	0.197182	0.228244	0.19092			240.79	-1.02589	-1.09912	-1.06129	-0.8723	-0.931988	-0.916716	-1.00903
240.99	0.193312	0.206744	0.241237	0.180517	0.201238	0.225189	0.1886			240.99	-1.02338	-1.10072	-1.06391	-0.87423	-0.927932	-0.91977	-1.01135
241.19	0.194276	0.209033	0.244238	0.182656	0.203856	0.227462	0.194171			241.19	-1.02241	-1.09843	-1.06091	-0.872091	-0.925314	-0.917498	-1.00578
241.39	0.189677	0.212816	0.245751	0.182436	0.203815	0.230097	0.194734			241.39	-1.02701	-1.09465	-1.0594	-0.872311	-0.925355	-0.914862	-1.00522
241.6	0.196494	0.214801	0.244652	0.182761	0.20169	0.233621	0.194157			241.6	-1.02019	-1.09266	-1.0605	-0.871986	-0.92748	-0.911339	-1.00579
241.79	0.197357	0.212397	0.245839	0.183035	0.203989	0.235255	0.194432			241.79	-1.01933	-1.09507	-1.05931	-0.871712	-0.925181	-0.909704	-1.00552
241.99	0.194089	0.214559	0.249937	0.185519	0.204448	0.233551	0.193726			241.99	-1.0226	-1.09291	-1.05521	-0.869228	-0.924722	-0.911408	-1.00622
242.19	0.197032	0.214	0.246239	0.187223	0.209301	0.232503	0.195004			242.19	-1.01965	-1.09346	-1.05891	-0.867524	-0.919869	-0.912456	-1.00495
242.39	0.200706	0.216494	0.249431	0.188858	0.206242	0.235917	0.197443			242.39	-1.01598	-1.09097	-1.05572	-0.865889	-0.922928	-0.909042	-1.00251
242.59	0.198249	0.218141	0.24791	0.189624	0.207863	0.236045	0.196198			242.59	-1.01844	-1.08932	-1.05724	-0.865122	-0.921308	-0.908914	-1.00375
242.79	0.201064	0.219168	0.249769	0.190512	0.208359	0.238112	0.194867			242.79	-1.01562	-1.0883	-1.05538	-0.864235	-0.920812	-0.906847	-1.00508
242.99	0.204539	0.218779	0.249809	0.192777	0.213416	0.236533	0.200708			242.99	-1.01215	-1.08869	-1.05534	-0.86197	-0.915755	-0.908427	-0.999241
243.19	0.204256	0.218025	0.255835	0.189042	0.213018	0.23815	0.199315			243.19	-1.01243	-1.08944	-1.04932	-0.865705	-0.916152	-0.906809	-1.00063
243.39	0.207889	0.220065	0.254133	0.194641	0.21447	0.23889	0.20484			243.39	-1.0088	-1.0874	-1.05102	-0.860106	-0.914701	-0.906069	-0.99511
243.59	0.205013	0.223592	0.252591	0.191431	0.213792	0.241903	0.201622			243.59	-1.01167	-1.08387	-1.05256	-0.863315	-0.915378	-0.903057	-0.998328
243.79	0.206874	0.223472	0.258901	0.196115	0.215784	0.237389	0.204259			243.79	-1.00981	-1.08399	-1.04625	-0.858632	-0.913386	-0.90757	-0.99569
243.99	0.203483	0.219816	0.254737	0.193533	0.2165	0.240222	0.205416			243.99	-1.0132	-1.08765	-1.05041	-0.861214	-0.91267	-0.904737	-0.994534
244.19	0.205896	0.225279	0.260028	0.198093	0.216084	0.242829	0.205063			244.19	-1.01079	-1.08219	-1.04512	-0.856653	-0.913086	-0.90213	-0.994887
244.39	0.20622	0.225276	0.256962	0.197783	0.21739	0.243995	0.209655			244.39	-1.01047	-1.08219	-1.04819	-0.856964	-0.91178	-0.900965	-0.990295
244.6	0.207262	0.229442	0.258138	0.198686	0.216843	0.246945	0.208237			244.6	-1.00943	-1.07802	-1.04701	-0.85606	-0.912327	-0.898014	-0.991713
244.79	0.211441	0.230328	0.257731	0.197665	0.217848	0.244732	0.205789			244.79	-1.00525	-1.07714	-1.04742	-0.857082	-0.911322	-0.900227	-0.99416
244.99	0.212475	0.229457	0.259953	0.201058	0.217637	0.240959	0.206709			244.99	-1.00421	-1.07801	-1.0452	-0.853688	-0.911533	-0.904	-0.993241
245.19	0.214363	0.229638	0.262639	0.196428	0.216372	0.245302	0.209718			245.19	-1.00232	-1.07783	-1.04251	-0.858319	-0.912799	-0.899657	-0.990232
245.39	0.212508	0.231929	0.263351	0.199924	0.223182	0.245931	0.209045			245.39	-1.00418	-1.07554	-1.0418	-0.854823	-0.905988	-0.899029	-0.990905
245.6	0.21199	0.230918	0.264164	0.203526	0.222872	0.248914	0.209932			245.6	-1.0047	-1.07655	-1.04099	-0.851221	-0.906298	-0.896046	-0.990017
245.79	0.212779	0.232145	0.266464	0.204488	0.224017	0.250663	0.212263			245.79	-1.00391	-1.07532	-1.03869	-0.850258	-0.905153	-0.894297	-0.987687
245.99	0.214412	0.231378	0.267483	0.202209	0.226826	0.248969	0.212965			245.99	-1.00228	-1.07609	-1.03767	-0.852538	-0.902345	-0.89599	-0.986985
246.19	0.218839	0.232138	0.27014	0.206989	0.227919	0.252362	0.214601			246.19	-0.997849	-1.07533	-1.03501	-0.847758	-0.901251	-0.892598	-0.985348
246.39	0.217478	0.23695	0.268043	0.203095	0.228283	0.25104	0.220874			246.39	-0.99921	-1.07051	-1.03711	-0.851652	-0.900887	-0.89392	-0.979076
246.59	0.214654	0.235862	0.266238	0.207824	0.228017	0.25462	0.217382			246.59	-1.00203	-1.0716	-1.03891	-0.846922	-0.901153	-0.89034	-0.982568
246.79	0.215483	0.234677	0.272155	0.209434	0.230027	0.253095	0.214611			246.79	-1.0012	-1.07279	-1.033	-0.845313	-0.899143	-0.891864	-0.985338
246.99	0.218769	0.239383	0.269291	0.208938	0.229931	0.25678	0.2227			246.99	-0.997918	-1.06808	-1.03586	-0.845809	-0.899239	-0.88818	-0.977249
247.19	0.222649	0.239962	0.272965	0.211429	0.231498	0.258594	0.222301			247.19	-0.994039	-1.0675	-1.03219	-0.843317	-0.897672	-0.886366	-0.977649
247.39	0.218643	0.240365	0.274213	0.210592	0.229476	0.256167	0.221005			247.39	-0.998045	-1.0671	-1.03094	-0.844155	-0.899694	-0.888793	-0.978944
247.6	0.22418	0.24365	0.276219	0.21086	0.232544	0.256243	0.220721			247.6	-0.992507	-1.06381	-1.02893	-0.843887	-0.896626	-0.888716	-0.979228
247.79	0.224272	0.238974	0.273853	0.213928	0.231679	0.257326	0.224623			247.79	-0.992416	-1.06849	-1.0313	-0.840819	-0.897491	-0.887633	-0.975327
247.99	0.223888	0.245833	0.275767	0.217731	0.232191	0.262624	0.225221			247.99	-0.992799	-1.06163	-1.02938	-0.837016	-0.896979	-0.882335	-0.974728
248.19	0.228279	0.241737	0.275532	0.214266	0.235625	0.264611	0.222036			248.19	-0.988408	-1.06573	-1.02962	-0.840481	-0.893545	-0.880348	-0.977914
248.39	0.227502	0.243359	0.274869	0.211309	0.236623	0.262861	0.223144			248.39	-0.989185	-1.06411	-1.03028	-0.843437	-0.892547	-0.882099	-0.976806
248.6	0.230852	0.246265	0.280365	0.216212	0.235943	0.264008	0.224318			248.6	-0.985836	-1.0612	-1.02479	-0.838535	-0.893227	-0.880951	-0.975632
248.79	0.22738	0.248492	0.277371	0.216258	0.236485	0.264481	0.225933			248.79	-0.989307	-1.05897	-1.02778	-0.838489	-0.892686	-0.880479	-0.974016
248.99	0.229371	0.247509	0.280206	0.216666	0.236753	0.264561	0.227113			248.99	-0.987316	-1.05996	-1.02494	-0.838081	-0.892418	-0.880399	-0.972837
249.19	0.232088	0.249252	0.282459	0.217615	0.23572	0.264545	0.227862			249.19	-0.984599	-1.05821	-1.02269	-0.837132	-0.89345	-0.880415	-0.972088
249.39	0.231007	0.252822	0.282602	0.225604	0.240901	0.266597	0.231827			249.39	-0.98568	-1.05464	-1.02255	-0.829143	-0.888269	-0.878363	-0.968122
249.6	0.232903	0.245483	0.280916	0.223776	0.238855	0.270672	0.232771			249.6	-0.983784	-1.06198	-1.02423	-0.830971	-0.890315	-0.874288	-0.967179
249.79	0.2335	0.25553	0.286225	0.221988	0.243485	0.267843	0.231347			249.79	-0.983187	-1.05193	-1.01893	-0.832759	-0.885685	-0.877116	-0.968602
249.99	0.23268	0.254285	0.286608	0.221642	0.241154	0.272036	0.230589			249.99	-0.984008	-1.05318	-1.01854	-0.833105	-0.888017	-0.872924	-0.96936
250.19	0.241037	0.259239	0.289553	0.221201	0.245251	0.271462	0.235962			250.19	-0.97565	-1.04822	-1.0156	-0.833545	-0.883919	-0.873497	-0.963988
250.39	0.238194	0.257813	0.291739	0.225349	0.245499	0.268334	0.234013			250.39	-0.978494	-1.04965	-1.01341	-0.829398	-0.883672	-0.876625	-0.965937
250.59	0.236155	0.256744	0.288571	0.225235	0.246257	0.270476	0.235339			250.59	-0.980532	-1.05072	-1.01658	-0.829511	-0.882914	-0.874484	-0.964611
250.79	0.239752	0.258501	0.283985	0.223654	0.248676	0.27439	0.238328			250.79	-0.976936	-1.04896	-1.02117	-0.831093	-0.880494	-0.87057	-0.961622
250.99	0.239772	0.25689	0.289414	0.224114	0.247041	0.273562	0.234001			250.99	-0.976915	-1.05057	-1.01574	-0.830633	-0.882129	-0.871398	-0.965948
251.19	0.240207	0.257413	0.293375	0.226466	0.247846	0.27195	0.239066			251.19	-0.976481	-1.05005	-1.01178	-0.82828	-0.881324	-0.873009	-0.960884
251.39	0.237035	0.265102	0.292723	0.228803	0.249166	0.277774	0.240159			251.39	-0.979652	-1.04236	-1.01243	-0.825944	-0.880004	-0.867185	-0.95979
251.59	0.246062	0.260425	0.293961	0.22937	0.24915	0.279983	0.242644			251.59	-0.970625	-1.04704	-1.01119	-0.825377	-0.88002	-0.864976	-0.957305
251.79	0.242909	0.260501	0.295789	0.230922	0.251781	0.276068	0.243651			251.79	-0.973778	-1.04696	-1.00936	-0.823825	-0.877389	-0.868891	-0.956299
251.99	0.244092	0.260172	0.295569	0.230304	0.252358	0.278377	0.238439			251.99	-0.972595	-1.04729	-1.00958	-0.824443	-0.876812	-0.866583	-0.96151
252.19	0.247484	0.264432	0.297733	0.232532	0.254128	0.280028	0.245938			252.19	-0.969204	-1.04303	-1.00742	-0.822215	-0.875042	-0.864932	-0.954012
252.39	0.242333	0.265059	0.300283	0.234143	0.255514	0.282684	0.247329			252.39	-0.974354	-1.04241	-1.00487	-0.820604	-0.873656	-0.862276	-0.952621
252.6	0.246306	0.267176	0.297081	0.231786	0.256858	0.278535	0.240645			252.6	-0.970381	-1.04029	-1.00807	-0.822961	-0.872312	-0.866425	-0.959305
252.79	0.247546	0.263683	0.301753	0.232349	0.256511	0.27938	0.244819			252.79	-0.969142	-1.04378	-1.0034	-0.822398	-0.872659	-0.86558	-0.95513
252.99	0.249825	0.266826	0.301768	0.235895	0.255654	0.282364	0.245253			252.99	-0.966862	-1.04064	-1.00338	-0.818852	-0.873516	-0.862596	-0.954696
253.19	0.251656	0.269851	0.300864	0.233637	0.25984	0.282477	0.25193			253.19	-0.965031	-1.03761	-1.00429	-0.821109	-0.86933	-0.862483	-0.94802
253.39	0.251396	0.269909	0.300208	0.235987	0.259377	0.28549	0.248788			253.39	-0.965291	-1.03756	-1.00494	-0.81876	-0.869793	-0.859469	-0.951161
253.6	0.250419	0.268968	0.300885	0.237785	0.258385	0.2835	0.246306			253.6	-0.966269	-1.0385	-1.00427	-0.816962	-0.870785	-0.861459	-0.953644
253.79	0.250385	0.268476	0.306373	0.234662	0.263146	0.290606	0.254369			253.79	-0.966303	-1.03899	-0.998778	-0.820085	-0.866024	-0.854353	-0.945581
253.99	0.250647	0.269769	0.306413	0.23864	0.262268	0.287446	0.255394			253.99	-0.966041	-1.0377	-0.998738	-0.816107	-0.866902	-0.857513	-0.944556
254.19	0.248904	0.273604	0.306026	0.243525	0.266066	0.289258	0.253821			254.19	-0.967783	-1.03386	-0.999124	-0.811222	-0.863104	-0.855702	-0.946129
254.39	0.257321	0.274537	0.306894	0.238917	0.263865	0.291945	0.25348			254.39	-0.959367	-1.03293	-0.998256	-0.815829	-0.865305	-0.853015	-0.94647
254.6	0.251271	0.281192	0.31003	0.244681	0.265438	0.293296	0.252852			254.6	-0.965417	-1.02627	-0.995121	-0.810066	-0.863733	-0.851664	-0.947097
254.79	0.25427	0.282057	0.311249	0.247678	0.267678	0.291141	0.256536			254.79	-0.962417	-1.02541	-0.993901	-0.807069	-0.861493	-0.853818	-0.943413
254.99	0.259002	0.27783	0.309237	0.242339	0.264545	0.291351	0.255756			254.99	-0.957685	-1.02963	-0.995914	-0.812408	-0.864625	-0.853608	-0.944194
255.19	0.25586	0.278063	0.308676	0.243261	0.265541	0.292718	0.262034			255.19	-0.960828	-1.0294	-0.996474	-0.811486	-0.863629	-0.852241	-0.937916
255.39	0.258316	0.280435	0.306508	0.240936	0.268893	0.297429	0.26109			255.39	-0.958371	-1.02703	-0.998643	-0.813811	-0.860278	-0.84753	-0.93886
255.6	0.257252	0.28393	0.311736	0.246532	0.274083	0.292825	0.261956			255.6	-0.959436	-1.02353	-0.993414	-0.808215	-0.855087	-0.852134	-0.937994
255.79	0.260327	0.282494	0.307922	0.247561	0.270944	0.295314	0.263718			255.79	-0.956361	-1.02497	-0.997228	-0.807185	-0.858226	-0.849645	-0.936232
255.99	0.264522	0.283647	0.315499	0.251208	0.27253	0.298479	0.25982			255.99	-0.952165	-1.02382	-0.989652	-0.803539	-0.85664	-0.846481	-0.940129
256.19	0.262893	0.286241	0.314995	0.249516	0.271221	0.29796	0.263724			256.19	-0.953795	-1.02122	-0.990156	-0.805231	-0.85795	-0.847	-0.936226
256.39	0.262972	0.289212	0.319712	0.24974	0.273782	0.298341	0.264089			256.39	-0.953715	-1.01825	-0.985438	-0.805007	-0.855388	-0.846618	-0.93586
256.59	0.264899	0.287055	0.312776	0.250811	0.273928	0.298268	0.268288			256.59	-0.951788	-1.02041	-0.992374	-0.803936	-0.855242	-0.846691	-0.931662
256.79	0.268873	0.288214	0.316027	0.249415	0.275197	0.299562	0.268839			256.79	-0.947814	-1.01925	-0.989124	-0.805332	-0.853974	-0.845397	-0.931111
256.99	0.266638	0.288489	0.322264	0.252962	0.274385	0.302819	0.26889			256.99	-0.95005	-1.01898	-0.982887	-0.801785	-0.854785	-0.84214	-0.93106
257.2	0.266498	0.289814	0.321941	0.25247	0.278039	0.303836	0.26529			257.2	-0.950189	-1.01765	-0.98321	-0.802277	-0.851132	-0.841123	-0.93466
257.39	0.270168	0.289972	0.321396	0.255244	0.277069	0.307201	0.273492			257.39	-0.946519	-1.01749	-0.983754	-0.799503	-0.852102	-0.837759	-0.926457
257.6	0.27268	0.289563	0.323382	0.252341	0.278936	0.305056	0.269457			257.6	-0.944007	-1.0179	-0.981769	-0.802406	-0.850234	-0.839903	-0.930492
257.79	0.270477	0.292754	0.325353	0.255658	0.279704	0.306644	0.271616			257.79	-0.946211	-1.01471	-0.979798	-0.799089	-0.849466	-0.838316	-0.928333
257.99	0.270958	0.294751	0.326407	0.256169	0.282203	0.310597	0.276332			257.99	-0.945729	-1.01271	-0.978744	-0.798578	-0.846967	-0.834362	-0.923618
258.2	0.271285	0.299527	0.323939	0.257683	0.286111	0.307601	0.271785			258.2	-0.945403	-1.00794	-0.981211	-0.797063	-0.84306	-0.837358	-0.928164
258.39	0.275111	0.297021	0.326791	0.258509	0.28181	0.308408	0.274977			258.39	-0.941576	-1.01044	-0.97836	-0.796238	-0.847361	-0.836551	-0.924972
258.6	0.276488	0.295343	0.32472	0.260787	0.287004	0.313308	0.27537			258.6	-0.9402	-1.01212	-0.980431	-0.79396	-0.842166	-0.831652	-0.92458
258.79	0.274437	0.294208	0.328328	0.259917	0.284045	0.313186	0.277382			258.79	-0.942251	-1.01326	-0.976822	-0.794829	-0.845125	-0.831774	-0.922568
258.99	0.277571	0.298683	0.331946	0.26045	0.287045	0.310101	0.279086			258.99	-0.939117	-1.00878	-0.973205	-0.794297	-0.842126	-0.834858	-0.920864
259.19	0.279508	0.300512	0.330453	0.264874	0.285474	0.310563	0.280357			259.19	-0.93718	-1.00695	-0.974697	-0.789873	-0.843696	-0.834396	-0.919592
259.39	0.278298	0.301064	0.331668	0.263203	0.287656	0.316577	0.279711			259.39	-0.938389	-1.0064	-0.973483	-0.791543	-0.841515	-0.828383	-0.920238
259.59	0.281015	0.301852	0.332233	0.266086	0.287033	0.315364	0.281011			259.59	-0.935672	-1.00561	-0.972917	-0.78866	-0.842137	-0.829595	-0.918939
259.79	0.27913	0.302648	0.332321	0.266189	0.290551	0.31767	0.282598			259.79	-0.937557	-1.00482	-0.97283	-0.788558	-0.838619	-0.82729	-0.917352
259.99	0.282305	0.304229	0.335503	0.264041	0.290395	0.31368	0.283286			259.99	-0.934383	-1.00324	-0.969647	-0.790706	-0.838775	-0.831279	-0.916664
260.19	0.282993	0.303047	0.335169	0.26726	0.293845	0.318544	0.288293			260.19	-0.933695	-1.00442	-0.969982	-0.787487	-0.835325	-0.826416	-0.911657
260.39	0.28426	0.306008	0.330631	0.265404	0.290549	0.314568	0.282083			260.39	-0.932428	-1.00146	-0.974519	-0.789342	-0.838621	-0.830391	-0.917867
260.59	0.282616	0.312075	0.335161	0.265906	0.294075	0.323463	0.281556			260.59	-0.934071	-0.995389	-0.969989	-0.788841	-0.835095	-0.821496	-0.918394
260.79	0.283326	0.304054	0.337866	0.269439	0.292648	0.31916	0.283846			260.79	-0.933362	-1.00341	-0.967284	-0.785308	-0.836522	-0.825799	-0.916104
260.99	0.283821	0.306338	0.334924	0.268422	0.296424	0.321259	0.288094			260.99	-0.932866	-1.00113	-0.970226	-0.786325	-0.832746	-0.8237	-0.911855
261.2	0.285576	0.309393	0.341052	0.269128	0.296341	0.321621	0.28548			261.2	-0.931111	-0.998071	-0.964098	-0.785619	-0.832829	-0.823339	-0.91447
261.41	0.285648	0.308792	0.341104	0.273569	0.295663	0.321865	0.291997			261.41	-0.931039	-0.998672	-0.964046	-0.781177	-0.833508	-0.823095	-0.907952
261.6	0.288034	0.30988	0.339415	0.272045	0.295782	0.325374	0.291772			261.6	-0.928653	-0.997585	-0.965736	-0.782702	-0.833389	-0.819586	-0.908178
261.79	0.289213	0.312011	0.345923	0.274589	0.29756	0.322318	0.289638			261.79	-0.927474	-0.995453	-0.959227	-0.780157	-0.83161	-0.822641	-0.910311
261.99	0.288177	0.31327	0.339665	0.274833	0.299932	0.324202	0.289787			261.99	-0.92851	-0.994194	-0.965485	-0.779914	-0.829239	-0.820758	-0.910163
262.19	0.295142	0.310412	0.347908	0.276702	0.30233	0.324899	0.291258			262.19	-0.921545	-0.997052	-0.957243	-0.778045	-0.82684	-0.82006	-0.908692
262.39	0.295779	0.315266	0.344973	0.277001	0.300859	0.330356	0.292815			262.39	-0.920908	-0.992198	-0.960178	-0.777746	-0.828311	-0.814604	-0.907135
262.59	0.29615	0.313694	0.344398	0.281591	0.307033	0.328439	0.29479			262.59	-0.920538	-0.993771	-0.960753	-0.773156	-0.822138	-0.816521	-0.90516
262.79	0.295063	0.311987	0.349875	0.278825	0.30865	0.331756	0.294833			262.79	-0.921624	-0.995477	-0.955275	-0.775922	-0.82052	-0.813204	-0.905117
262.99	0.295951	0.313745	0.348445	0.280384	0.303958	0.327281	0.29763			262.99	-0.920736	-0.993719	-0.956705	-0.774363	-0.825212	-0.817679	-0.902319
263.19	0.298543	0.314478	0.352152	0.282716	0.305338	0.331113	0.299538			263.19	-0.918144	-0.992986	-0.952998	-0.772031	-0.823832	-0.813847	-0.900412
263.39	0.299075	0.318857	0.357846	0.284423	0.30781	0.333739	0.299922			263.39	-0.917612	-0.988607	-0.947304	-0.770324	-0.82136	-0.811221	-0.900027
263.6	0.298095	0.321118	0.348002	0.283163	0.309753	0.335924	0.301179			263.6	-0.918593	-0.986346	-0.957149	-0.771584	-0.819417	-0.809036	-0.89877
263.79	0.299323	0.319851	0.35107	0.281755	0.309533	0.337325	0.30195			263.79	-0.917364	-0.987613	-0.954081	-0.772992	-0.819638	-0.807634	-0.897999
263.99	0.298763	0.32596	0.353715	0.28328	0.311226	0.339428	0.30446			263.99	-0.917924	-0.981504	-0.951436	-0.771466	-0.817944	-0.805531	-0.89549
264.19	0.301565	0.325935	0.351922	0.284781	0.310458	0.336393	0.301161			264.19	-0.915122	-0.981529	-0.953229	-0.769965	-0.818712	-0.808567	-0.898789
264.39	0.302967	0.327625	0.356274	0.287668	0.312948	0.339035	0.307694			264.39	-0.91372	-0.979839	-0.948877	-0.767079	-0.816222	-0.805924	-0.892255
264.59	0.307189	0.33037	0.355233	0.290289	0.314408	0.338156	0.30279			264.59	-0.909498	-0.977094	-0.949917	-0.764458	-0.814762	-0.806803	-0.897159
264.79	0.306011	0.328779	0.354791	0.29285	0.314884	0.340772	0.305022			264.79	-0.910676	-0.978685	-0.95036	-0.761897	-0.814286	-0.804188	-0.894927
264.99	0.303077	0.326888	0.356243	0.288459	0.314851	0.339605	0.30439			264.99	-0.91361	-0.980576	-0.948908	-0.766288	-0.814319	-0.805355	-0.89556
265.19	0.307829	0.327075	0.361263	0.293924	0.319571	0.343962	0.307243			265.19	-0.908858	-0.98039	-0.943888	-0.760823	-0.809599	-0.800997	-0.892707
265.39	0.308987	0.331848	0.359596	0.292947	0.318535	0.341065	0.309116			265.39	-0.907701	-0.975616	-0.945555	-0.761799	-0.810635	-0.803895	-0.890834
265.59	0.308252	0.32866	0.36	0.294659	0.317064	0.345469	0.30793			265.59	-0.908436	-0.978805	-0.945151	-0.760088	-0.812107	-0.799491	-0.89202
265.79	0.311942	0.332428	0.359619	0.293386	0.320026	0.346187	0.311832			265.79	-0.904745	-0.975037	-0.945531	-0.76136	-0.809145	-0.798773	-0.888118
265.99	0.309701	0.332452	0.360156	0.295286	0.32027	0.344091	0.311118			265.99	-0.906986	-0.975012	-0.944995	-0.759461	-0.808901	-0.800869	-0.888832
266.19	0.311552	0.335694	0.366922	0.293759	0.323663	0.344186	0.314196			266.19	-0.905136	-0.97177	-0.938229	-0.760987	-0.805508	-0.800773	-0.885754
266.39	0.312731	0.334546	0.365894	0.294895	0.320822	0.346915	0.31422			266.39	-0.903957	-0.972918	-0.939257	-0.759852	-0.808348	-0.798044	-0.88573
266.6	0.316949	0.339664	0.367979	0.297736	0.322813	0.350189	0.313738			266.6	-0.899738	-0.967801	-0.937172	-0.757011	-0.806358	-0.79477	-0.886211
266.79	0.31751	0.339075	0.368765	0.29717	0.323757	0.350238	0.314715			266.79	-0.899177	-0.968389	-0.936386	-0.757577	-0.805413	-0.794722	-0.885234
266.99	0.313143	0.343809	0.368257	0.30028	0.327935	0.347914	0.317825			266.99	-0.903544	-0.963655	-0.936893	-0.754467	-0.801235	-0.797045	-0.882125
267.19	0.317192	0.339744	0.368437	0.302169	0.327608	0.354318	0.319359			267.19	-0.899496	-0.96772	-0.936713	-0.752578	-0.801562	-0.790642	-0.880591
267.39	0.316136	0.342018	0.367267	0.298251	0.329967	0.349552	0.320316			267.39	-0.900551	-0.965446	-0.937883	-0.756495	-0.799204	-0.795408	-0.879634
267.59	0.318922	0.343814	0.367914	0.298492	0.329895	0.354473	0.322919			267.59	-0.897765	-0.96365	-0.937237	-0.756255	-0.799276	-0.790486	-0.877031
267.79	0.319141	0.340938	0.373218	0.299746	0.333118	0.358164	0.323246			267.79	-0.897546	-0.966527	-0.931932	-0.755	-0.796052	-0.786795	-0.876704
267.99	0.323937	0.342698	0.374328	0.30234	0.329573	0.355856	0.323377			267.99	-0.892751	-0.964766	-0.930822	-0.752407	-0.799597	-0.789104	-0.876573
268.19	0.319201	0.343805	0.372706	0.300313	0.330015	0.359887	0.324028			268.19	-0.897486	-0.96366	-0.932445	-0.754434	-0.799156	-0.785073	-0.875922
268.39	0.320927	0.348977	0.376236	0.303091	0.334282	0.355214	0.321479			268.39	-0.89576	-0.958487	-0.928915	-0.751656	-0.794888	-0.789746	-0.87847
268.59	0.324753	0.349429	0.375853	0.306118	0.333843	0.35885	0.326326			268.59	-0.891935	-0.958035	-0.929297	-0.748629	-0.795327	-0.786109	-0.873623
268.79	0.324053	0.350226	0.375337	0.307769	0.336122	0.360041	0.324849			268.79	-0.892635	-0.957239	-0.929813	-0.746977	-0.793048	-0.784919	-0.875101
268.99	0.32215	0.348013	0.380611	0.307536	0.335726	0.364577	0.331746			268.99	-0.894537	-0.959451	-0.92454	-0.747211	-0.793444	-0.780382	-0.868204
269.19	0.324836	0.350242	0.381316	0.308792	0.337846	0.360672	0.326168			269.19	-0.891851	-0.957222	-0.923834	-0.745954	-0.791325	-0.784287	-0.873782
269.39	0.327614	0.353054	0.383678	0.310102	0.338253	0.36206	0.327972			269.39	-0.889073	-0.954411	-0.921472	-0.744645	-0.790918	-0.782899	-0.871978
269.59	0.32727	0.354615	0.377505	0.309276	0.342197	0.360485	0.331299			269.59	-0.889418	-0.95285	-0.927646	-0.745471	-0.786973	-0.784474	-0.86865
269.79	0.328488	0.358078	0.38237	0.309593	0.343198	0.363419	0.331981			269.79	-0.8882	-0.949387	-0.922781	-0.745154	-0.785973	-0.78154	-0.867969
269.99	0.328232	0.355531	0.387173	0.31029	0.338567	0.3637	0.334513			269.99	-0.888455	-0.951933	-0.917978	-0.744456	-0.790603	-0.78126	-0.865437
270.19	0.329086	0.355675	0.386287	0.313123	0.342894	0.365325	0.331478			270.19	-0.887601	-0.95179	-0.918863	-0.741623	-0.786276	-0.779635	-0.868472
270.39	0.333907	0.358831	0.384934	0.315556	0.341138	0.367601	0.333482			270.39	-0.88278	-0.948634	-0.920216	-0.73919	-0.788032	-0.777358	-0.866467
270.59	0.334286	0.358215	0.385784	0.316857	0.34501	0.366052	0.336682			270.59	-0.882401	-0.94925	-0.919366	-0.73789	-0.78416	-0.778907	-0.863267
270.79	0.33204	0.358951	0.383488	0.314097	0.342855	0.368946	0.332668			270.79	-0.884647	-0.948514	-0.921662	-0.74065	-0.786316	-0.776014	-0.867282
270.99	0.334608	0.359629	0.390851	0.316648	0.343708	0.367352	0.338277			270.99	-0.88208	-0.947836	-0.9143	-0.738099	-0.785463	-0.777608	-0.861672
271.2	0.334955	0.361179	0.391635	0.317913	0.346964	0.371825	0.33966			271.2	-0.881733	-0.946285	-0.913516	-0.736834	-0.782207	-0.773135	-0.86029
271.39	0.332406	0.360269	0.390925	0.318499	0.345692	0.374713	0.34317			271.39	-0.884282	-0.947195	-0.914225	-0.736248	-0.783479	-0.770246	-0.85678
271.6	0.341209	0.360911	0.393365	0.319875	0.347612	0.373406	0.340294			271.6	-0.875478	-0.946553	-0.911786	-0.734871	-0.781558	-0.771553	-0.859656
271.79	0.342018	0.363708	0.394749	0.320875	0.350011	0.373885	0.34392			271.79	-0.874669	-0.943757	-0.910401	-0.733872	-0.77916	-0.771074	-0.85603
271.99	0.338512	0.365705	0.392091	0.316653	0.351723	0.375186	0.343624			271.99	-0.878176	-0.941759	-0.913059	-0.738094	-0.777447	-0.769773	-0.856325
272.2	0.34024	0.367647	0.392281	0.323708	0.353802	0.375162	0.344536			272.2	-0.876447	-0.939818	-0.912869	-0.731039	-0.775368	-0.769798	-0.855413
272.39	0.340723	0.365461	0.398777	0.324899	0.351149	0.373249	0.346124			272.39	-0.875964	-0.942004	-0.906374	-0.729848	-0.778022	-0.771711	-0.853826
272.6	0.3437	0.366087	0.399693	0.322265	0.356696	0.377631	0.349201			272.6	-0.872987	-0.941377	-0.905457	-0.732482	-0.772474	-0.767328	-0.850749
272.79	0.34426	0.372716	0.396509	0.32582	0.355593	0.3815	0.347366			272.79	-0.872427	-0.934748	-0.908642	-0.728927	-0.773578	-0.76346	-0.852584
272.99	0.34491	0.368351	0.396742	0.325746	0.354155	0.383662	0.343993			272.99	-0.871777	-0.939113	-0.908408	-0.729001	-0.775016	-0.761297	-0.855957
273.2	0.345592	0.369043	0.402467	0.329097	0.360654	0.379369	0.346139			273.2	-0.871096	-0.938422	-0.902683	-0.72565	-0.768516	-0.76559	-0.85381
273.39	0.344936	0.373291	0.400434	0.33287	0.359289	0.383365	0.351566			273.39	-0.871751	-0.934174	-0.904716	-0.721876	-0.769881	-0.761594	-0.848384
273.59	0.348025	0.371668	0.399078	0.328679	0.355824	0.383031	0.355616			273.59	-0.868662	-0.935797	-0.906072	-0.726067	-0.773346	-0.761928	-0.844333
273.79	0.34804	0.373702	0.405846	0.331051	0.361193	0.385368	0.349784			273.79	-0.868647	-0.933762	-0.899304	-0.723696	-0.767978	-0.759592	-0.850166
273.99	0.349839	0.375279	0.40551	0.332956	0.364239	0.386232	0.351508			273.99	-0.866848	-0.932185	-0.89964	-0.721791	-0.764932	-0.758727	-0.848442
274.2	0.349087	0.375029	0.403313	0.330062	0.366149	0.387587	0.352561			274.2	-0.867601	-0.932435	-0.901837	-0.724685	-0.763021	-0.757372	-0.847389
274.39	0.355992	0.38037	0.405587	0.334375	0.361824	0.387256	0.353577			274.39	-0.860695	-0.927094	-0.899564	-0.720371	-0.767347	-0.757704	-0.846372
274.6	0.355352	0.37719	0.409012	0.332763	0.36418	0.385278	0.360056			274.6	-0.861335	-0.930274	-0.896139	-0.721983	-0.76499	-0.759681	-0.839894
274.79	0.35032	0.376977	0.406573	0.336622	0.366337	0.387988	0.358936			274.79	-0.866367	-0.930487	-0.898577	-0.718124	-0.762833	-0.756972	-0.841014
274.99	0.3564	0.380421	0.410418	0.337783	0.366269	0.388726	0.364512			274.99	-0.860287	-0.927043	-0.894733	-0.716964	-0.762902	-0.756233	-0.835438
275.2	0.356819	0.381258	0.409992	0.335662	0.365958	0.388658	0.355621			275.2	-0.859868	-0.926206	-0.895158	-0.719084	-0.763212	-0.756302	-0.844329
275.39	0.357117	0.380403	0.415112	0.34104	0.367251	0.3946	0.363516			275.39	-0.85957	-0.927061	-0.890039	-0.713706	-0.761919	-0.75036	-0.836433
275.6	0.357039	0.388263	0.409503	0.338934	0.370578	0.3915	0.365791			275.6	-0.859648	-0.919202	-0.895647	-0.715813	-0.758592	-0.75346	-0.834159
275.79	0.357854	0.383324	0.410524	0.340189	0.369492	0.395735	0.364455			275.79	-0.858834	-0.92414	-0.894627	-0.714558	-0.759678	-0.749225	-0.835495
275.99	0.360763	0.386129	0.413186	0.343963	0.373618	0.395621	0.363297			275.99	-0.855925	-0.921336	-0.891964	-0.710783	-0.755552	-0.749339	-0.836652
276.2	0.362189	0.386545	0.41633	0.343577	0.371079	0.39589	0.366152			276.2	-0.854498	-0.920919	-0.88882	-0.71117	-0.758092	-0.74907	-0.833798
276.39	0.359207	0.390603	0.41635	0.341009	0.375475	0.402007	0.362799			276.39	-0.85748	-0.916861	-0.888801	-0.713738	-0.753695	-0.742953	-0.837151
276.6	0.363199	0.392887	0.421394	0.343939	0.37302	0.396873	0.368474			276.6	-0.853488	-0.914577	-0.883757	-0.710808	-0.756151	-0.748087	-0.831476
276.79	0.364625	0.389355	0.418369	0.346717	0.377314	0.401966	0.367809			276.79	-0.852062	-0.918109	-0.886781	-0.70803	-0.751856	-0.742993	-0.832141
276.99	0.365385	0.3931	0.418343	0.344995	0.375248	0.398884	0.371853			276.99	-0.851302	-0.914364	-0.886808	-0.709752	-0.753922	-0.746075	-0.828097
277.2	0.364109	0.393781	0.421846	0.343503	0.380287	0.40096	0.372186			277.2	-0.852578	-0.913684	-0.883305	-0.711243	-0.748883	-0.744	-0.827763
277.39	0.368012	0.393567	0.418556	0.349774	0.377049	0.402852	0.371369			277.39	-0.848676	-0.913898	-0.886594	-0.704973	-0.752121	-0.742107	-0.82858
277.6	0.366349	0.395427	0.42044	0.351363	0.376567	0.40109	0.375169			277.6	-0.850338	-0.912037	-0.88471	-0.703384	-0.752603	-0.743869	-0.82478
277.79	0.370886	0.394624	0.426251	0.346433	0.382372	0.406814	0.372526			277.79	-0.845801	-0.912841	-0.8789	-0.708314	-0.746798	-0.738146	-0.827423
277.99	0.371556	0.399232	0.422422	0.34979	0.381562	0.403111	0.377445			277.99	-0.845131	-0.908232	-0.882729	-0.704956	-0.747608	-0.741849	-0.822505
278.2	0.374124	0.401401	0.421879	0.353347	0.384208	0.407982	0.371371			278.2	-0.842563	-0.906063	-0.883271	-0.7014	-0.744963	-0.736978	-0.828579
278.39	0.371474	0.396009	0.428029	0.349718	0.383513	0.406182	0.380391			278.39	-0.845214	-0.911456	-0.877121	-0.705028	-0.745657	-0.738777	-0.819558
278.59	0.373903	0.397732	0.425321	0.351951	0.38556	0.41069	0.376749			278.59	-0.842784	-0.909732	-0.879829	-0.702796	-0.74361	-0.734269	-0.823201
278.79	0.372148	0.402065	0.428042	0.354546	0.383463	0.408771	0.378802			278.79	-0.84454	-0.9054	-0.877109	-0.700201	-0.745707	-0.736188	-0.821148
278.99	0.377139	0.401256	0.43339	0.356524	0.386608	0.406543	0.37693			278.99	-0.839549	-0.906208	-0.87176	-0.698223	-0.742562	-0.738417	-0.82302
279.2	0.374813	0.406014	0.432189	0.3587	0.390056	0.410758	0.385328			279.2	-0.841874	-0.90145	-0.872961	-0.696047	-0.739115	-0.734201	-0.814621
279.39	0.374427	0.40534	0.430729	0.356613	0.389676	0.412737	0.384608			279.39	-0.842261	-0.902124	-0.874422	-0.698133	-0.739495	-0.732223	-0.815341
279.59	0.379875	0.406126	0.431444	0.35871	0.391031	0.413866	0.387726			279.59	-0.836813	-0.901338	-0.873707	-0.696037	-0.73814	-0.731094	-0.812224
279.79	0.376431	0.403739	0.43384	0.35772	0.392696	0.413178	0.381096			279.79	-0.840256	-0.903725	-0.87131	-0.697026	-0.736474	-0.731781	-0.818854
279.99	0.379569	0.407544	0.431305	0.358943	0.396248	0.417814	0.388531			279.99	-0.837118	-0.89992	-0.873846	-0.695803	-0.732922	-0.727146	-0.811418
280.2	0.380925	0.410502	0.435222	0.363399	0.394142	0.415694	0.386753			280.2	-0.835762	-0.896963	-0.869929	-0.691348	-0.735029	-0.729265	-0.813196
280.39	0.379554	0.414209	0.437479	0.360465	0.39615	0.419179	0.387063			280.39	-0.837133	-0.893256	-0.867672	-0.694282	-0.733021	-0.72578	-0.812886
280.6	0.384119	0.411388	0.438375	0.362189	0.399324	0.416535	0.388248			280.6	-0.832569	-0.896076	-0.866775	-0.692558	-0.729846	-0.728424	-0.811701
280.79	0.384596	0.4164	0.438083	0.363752	0.393298	0.418856	0.386646			280.79	-0.832091	-0.891064	-0.867068	-0.690995	-0.735872	-0.726104	-0.813304
280.99	0.385797	0.412675	0.439588	0.365274	0.397362	0.419017	0.390592			280.99	-0.83089	-0.89479	-0.865563	-0.689473	-0.731808	-0.725943	-0.809358
281.2	0.386494	0.416503	0.44392	0.367505	0.400144	0.421997	0.393013			281.2	-0.830194	-0.890961	-0.861231	-0.687242	-0.729027	-0.722962	-0.806936
281.39	0.387981	0.417474	0.44427	0.368473	0.398772	0.417932	0.392217			281.39	-0.828706	-0.889991	-0.86088	-0.686274	-0.730398	-0.727027	-0.807732
281.6	0.386304	0.419903	0.4446	0.371006	0.398272	0.42321	0.398771			281.6	-0.830383	-0.887561	-0.860551	-0.683741	-0.730899	-0.721749	-0.801179
281.79	0.389575	0.416585	0.443237	0.368798	0.399835	0.420303	0.39385			281.79	-0.827112	-0.890879	-0.861914	-0.685948	-0.729335	-0.724656	-0.806099
281.99	0.391507	0.418478	0.442501	0.371064	0.40446	0.427248	0.400779			281.99	-0.825181	-0.888987	-0.862649	-0.683683	-0.72471	-0.717712	-0.799171
282.19	0.390736	0.422396	0.445587	0.3705	0.404436	0.425835	0.39851			282.19	-0.825951	-0.885068	-0.859563	-0.684247	-0.724734	-0.719124	-0.80144
282.39	0.390611	0.42205	0.447642	0.372933	0.403045	0.427135	0.397346			282.39	-0.826077	-0.885415	-0.857509	-0.681814	-0.726125	-0.717824	-0.802604
282.6	0.392481	0.422942	0.452839	0.373577	0.407275	0.427292	0.39815			282.6	-0.824206	-0.884522	-0.852311	-0.681169	-0.721895	-0.717668	-0.801799
282.79	0.393419	0.425714	0.451336	0.373872	0.405265	0.432226	0.397665			282.79	-0.823269	-0.881751	-0.853814	-0.680874	-0.723906	-0.712733	-0.802285
282.99	0.394676	0.422799	0.452126	0.377625	0.407408	0.431341	0.397848			282.99	-0.822012	-0.884665	-0.853024	-0.677122	-0.721762	-0.713619	-0.802102
283.19	0.393829	0.426884	0.452788	0.377301	0.411165	0.428376	0.403177			283.19	-0.822858	-0.88058	-0.852362	-0.677446	-0.718005	-0.716583	-0.796772
283.39	0.401238	0.427244	0.455792	0.375366	0.40888	0.432099	0.402998			283.39	-0.815449	-0.880221	-0.849359	-0.67938	-0.72029	-0.712861	-0.796952
283.59	0.399798	0.430745	0.45253	0.3796	0.412981	0.429262	0.404233			283.59	-0.816889	-0.876719	-0.852621	-0.675147	-0.716189	-0.715698	-0.795717
283.79	0.39714	0.426042	0.453083	0.381694	0.409922	0.43636	0.402909			283.79	-0.819547	-0.881422	-0.852068	-0.673053	-0.719248	-0.708599	-0.797041
283.99	0.400255	0.431018	0.45691	0.380201	0.416057	0.435808	0.406837			283.99	-0.816432	-0.876446	-0.848241	-0.674546	-0.713113	-0.709152	-0.793113
284.2	0.400105	0.43108	0.455429	0.379597	0.414104	0.43656	0.40418			284.2	-0.816583	-0.876384	-0.849722	-0.675149	-0.715067	-0.7084	-0.79577
284.39	0.404798	0.431398	0.455942	0.382572	0.417099	0.438959	0.409172			284.39	-0.811889	-0.876066	-0.849208	-0.672175	-0.712072	-0.706	-0.790778
284.59	0.404573	0.43182	0.459392	0.384805	0.415259	0.442157	0.411893			284.59	-0.812114	-0.875644	-0.845759	-0.669942	-0.713911	-0.702802	-0.788056
284.79	0.40484	0.434003	0.460824	0.387448	0.415317	0.438992	0.410246			284.79	-0.811847	-0.873462	-0.844327	-0.667298	-0.713853	-0.705968	-0.789704
284.99	0.404133	0.433129	0.459513	0.383973	0.416563	0.443005	0.415149			284.99	-0.812554	-0.874336	-0.845638	-0.670774	-0.712607	-0.701954	-0.784801
285.2	0.409461	0.439475	0.460447	0.381861	0.421333	0.441661	0.414602			285.2	-0.807226	-0.867989	-0.844703	-0.672886	-0.707837	-0.703299	-0.785348
285.39	0.404482	0.438222	0.465355	0.384884	0.419857	0.44367	0.411927			285.39	-0.812205	-0.869242	-0.839795	-0.669862	-0.709314	-0.701289	-0.788022
285.6	0.406232	0.438105	0.46227	0.387699	0.421173	0.445209	0.41613			285.6	-0.810456	-0.86936	-0.84288	-0.667048	-0.707998	-0.699751	-0.783819
285.79	0.40913	0.440414	0.466897	0.388847	0.420786	0.443371	0.41622			285.79	-0.807558	-0.867051	-0.838253	-0.6659	-0.708384	-0.701588	-0.78373
285.99	0.411525	0.442329	0.466451	0.388138	0.423094	0.444062	0.415977			285.99	-0.805162	-0.865136	-0.838699	-0.666609	-0.706076	-0.700898	-0.783972
286.2	0.412606	0.440579	0.471038	0.392907	0.427239	0.445362	0.420152			286.2	-0.804081	-0.866886	-0.834113	-0.66184	-0.701932	-0.699597	-0.779797
286.39	0.4125	0.443848	0.466893	0.39133	0.426308	0.446311	0.421922			286.39	-0.804187	-0.863616	-0.838257	-0.663416	-0.702862	-0.698648	-0.778028
286.6	0.413483	0.444661	0.468612	0.394643	0.426144	0.447139	0.418245			286.6	-0.803204	-0.862804	-0.836539	-0.660103	-0.703026	-0.69782	-0.781705
286.79	0.417752	0.443	0.467939	0.395178	0.426961	0.448516	0.424848			286.79	-0.798935	-0.864464	-0.837212	-0.659569	-0.70221	-0.696443	-0.775102
286.99	0.414051	0.447267	0.472845	0.394532	0.429672	0.451415	0.422979			286.99	-0.802636	-0.860198	-0.832306	-0.660215	-0.699498	-0.693544	-0.776971
287.19	0.4182	0.447591	0.472375	0.394343	0.427907	0.449755	0.422662			287.19	-0.798487	-0.859873	-0.832776	-0.660404	-0.701263	-0.695205	-0.777287
287.39	0.420146	0.446639	0.478323	0.396433	0.428207	0.451101	0.425806			287.39	-0.796541	-0.860825	-0.826828	-0.658314	-0.700963	-0.693858	-0.774144
287.59	0.41739	0.450176	0.473603	0.397105	0.429648	0.454716	0.43			287.59	-0.799298	-0.857289	-0.831548	-0.657642	-0.699522	-0.690243	-0.76995
287.79	0.420433	0.453202	0.476615	0.40123	0.429095	0.454632	0.429368			287.79	-0.796254	-0.854263	-0.828535	-0.653517	-0.700075	-0.690327	-0.770582
287.99	0.420399	0.450143	0.478919	0.399156	0.433829	0.452725	0.425876			287.99	-0.796288	-0.857322	-0.826232	-0.655591	-0.695341	-0.692234	-0.774074
288.19	0.422859	0.453812	0.478812	0.39922	0.433866	0.457719	0.430789			288.19	-0.793828	-0.853652	-0.826338	-0.655526	-0.695304	-0.68724	-0.76916
288.39	0.425951	0.452753	0.476633	0.404255	0.437519	0.455917	0.430751			288.39	-0.790737	-0.854711	-0.828517	-0.650492	-0.691651	-0.689043	-0.769199
288.59	0.425089	0.453705	0.475954	0.402591	0.43708	0.456752	0.43176			288.59	-0.791599	-0.85376	-0.829197	-0.652156	-0.69209	-0.688208	-0.76819
288.79	0.42153	0.454223	0.481166	0.403055	0.435991	0.461592	0.433856			288.79	-0.795157	-0.853241	-0.823985	-0.651692	-0.693179	-0.683367	-0.766094
288.99	0.4267	0.454301	0.484172	0.403458	0.441155	0.462427	0.431432			288.99	-0.789987	-0.853164	-0.820978	-0.651289	-0.688015	-0.682532	-0.768518
289.2	0.424619	0.456168	0.480022	0.405653	0.440088	0.466213	0.432853			289.2	-0.792068	-0.851297	-0.825128	-0.649094	-0.689082	-0.678746	-0.767096
289.39	0.429332	0.462613	0.482347	0.404949	0.443598	0.463719	0.437296			289.39	-0.787356	-0.844851	-0.822803	-0.649798	-0.685572	-0.68124	-0.762653
289.6	0.427418	0.459738	0.48619	0.406719	0.442075	0.464261	0.441657			289.6	-0.789269	-0.847726	-0.81896	-0.648028	-0.687095	-0.680699	-0.758293
289.79	0.430667	0.455557	0.485532	0.409788	0.445527	0.465244	0.439334			289.79	-0.78602	-0.851908	-0.819618	-0.644959	-0.683643	-0.679715	-0.760616
289.99	0.4304	0.462991	0.486807	0.409777	0.444439	0.467101	0.440339			289.99	-0.786288	-0.844474	-0.818343	-0.64497	-0.684731	-0.677859	-0.759611
290.2	0.431864	0.460217	0.486803	0.411926	0.44438	0.466117	0.442089			290.2	-0.784823	-0.847247	-0.818348	-0.64282	-0.684791	-0.678843	-0.757861
290.39	0.435553	0.461522	0.489505	0.413048	0.445101	0.47204	0.441718			290.39	-0.781134	-0.845942	-0.815645	-0.641698	-0.68407	-0.67292	-0.758231
290.6	0.431894	0.466066	0.489624	0.411145	0.446249	0.469917	0.444274			290.6	-0.784793	-0.841398	-0.815527	-0.643602	-0.682922	-0.675043	-0.755675
290.8	0.467518	0.50043	0.524874	0.450523	0.484669	0.500871	0.472005			290.8	-0.749169	-0.807034	-0.780277	-0.604224	-0.644501	-0.644089	-0.727945
290.99	0.47105	0.500887	0.525464	0.448143	0.488763	0.497081	0.473059			290.99	-0.745638	-0.806577	-0.779686	-0.606604	-0.640407	-0.647878	-0.726891
291.2	0.469714	0.504871	0.519313	0.449004	0.48332	0.501155	0.476834			291.2	-0.746973	-0.802594	-0.785837	-0.605743	-0.64585	-0.643804	-0.723116
291.4	0.468141	0.502231	0.522948	0.449765	0.485088	0.498762	0.474399			291.4	-0.748546	-0.805234	-0.782203	-0.604982	-0.644082	-0.646197	-0.72555
291.6	0.468627	0.504904	0.520934	0.445862	0.487281	0.499166	0.472927			291.6	-0.74806	-0.80256	-0.784217	-0.608884	-0.641889	-0.645793	-0.727023
291.8	0.471266	0.50197	0.521411	0.44827	0.486643	0.497553	0.475346			291.8	-0.745422	-0.805494	-0.78374	-0.606477	-0.642528	-0.647407	-0.724604
292	0.472996	0.501683	0.524103	0.448697	0.487167	0.502586	0.472444			292	-0.743692	-0.805782	-0.781047	-0.60605	-0.642004	-0.642373	-0.727505
292.2	0.475134	0.502503	0.519736	0.450878	0.486174	0.502143	0.476428			292.2	-0.741553	-0.804961	-0.785414	-0.603869	-0.642997	-0.642816	-0.723521
292.4	0.473269	0.504625	0.520764	0.452082	0.486486	0.505532	0.47424			292.4	-0.743419	-0.802839	-0.784386	-0.602665	-0.642685	-0.639428	-0.725709
292.6	0.471095	0.508597	0.521497	0.455465	0.489771	0.505532	0.481315			292.6	-0.745593	-0.798867	-0.783653	-0.599282	-0.639399	-0.639427	-0.718634
292.8	0.474057	0.509761	0.519393	0.454443	0.489621	0.504559	0.480619			292.8	-0.74263	-0.797704	-0.785757	-0.600304	-0.639549	-0.640401	-0.71933
293	0.480386	0.511166	0.521061	0.45409	0.492646	0.507062	0.480911			293	-0.736301	-0.796298	-0.78409	-0.600656	-0.636524	-0.637897	-0.719039
293.19	0.47765	0.508012	0.52215	0.460517	0.495993	0.51017	0.482957			293.19	-0.739037	-0.799452	-0.783	-0.59423	-0.633177	-0.634789	-0.716993
293.4	0.480501	0.51354	0.523316	0.454931	0.495172	0.509057	0.484164			293.4	-0.736187	-0.793924	-0.781834	-0.599815	-0.633998	-0.635903	-0.715786
293.6	0.482036	0.511904	0.522465	0.461325	0.494627	0.510584	0.483168			293.6	-0.734651	-0.79556	-0.782685	-0.593422	-0.634544	-0.634375	-0.716781
293.8	0.484556	0.512545	0.525363	0.457021	0.498021	0.515648	0.483646			293.8	-0.732131	-0.794919	-0.779787	-0.597726	-0.63115	-0.629311	-0.716304
294	0.486326	0.514581	0.523544	0.461384	0.500466	0.513024	0.487689			294	-0.730361	-0.792883	-0.781606	-0.593363	-0.628705	-0.631935	-0.712261
294.2	0.489217	0.517109	0.530367	0.460703	0.498361	0.51625	0.489975			294.2	-0.727471	-0.790355	-0.774784	-0.594044	-0.630809	-0.628709	-0.709975
294.4	0.487157	0.522586	0.525275	0.463404	0.501041	0.518694	0.496597			294.4	-0.72953	-0.784879	-0.779876	-0.591343	-0.628129	-0.626265	-0.703352
294.59	0.489471	0.520189	0.529651	0.465576	0.504716	0.519894	0.496713			294.59	-0.727216	-0.787275	-0.7755	-0.589171	-0.624455	-0.625066	-0.703236
294.8	0.491776	0.523139	0.530425	0.46788	0.507197	0.523423	0.497763			294.8	-0.724912	-0.784325	-0.774726	-0.586867	-0.621973	-0.621537	-0.702187
294.99	0.494215	0.521172	0.530772	0.467856	0.506549	0.523909	0.498591			294.99	-0.722472	-0.786292	-0.774379	-0.586891	-0.622621	-0.62105	-0.701358
295.2	0.495393	0.526472	0.529587	0.471649	0.50855	0.524099	0.493889			295.2	-0.721294	-0.780992	-0.775563	-0.583097	-0.62062	-0.62086	-0.706061
295.4	0.497628	0.528797	0.534204	0.47148	0.513632	0.527702	0.505912			295.4	-0.71906	-0.778667	-0.770947	-0.583267	-0.615538	-0.617258	-0.694038
295.6	0.499385	0.530356	0.535856	0.47787	0.515448	0.526327	0.50319			295.6	-0.717302	-0.777108	-0.769295	-0.576876	-0.613722	-0.618632	-0.696759
295.8	0.501369	0.53848	0.535272	0.474962	0.514172	0.532153	0.50761			295.8	-0.715318	-0.768984	-0.769878	-0.579785	-0.614998	-0.612806	-0.692339
296	0.503318	0.535189	0.536694	0.475547	0.513448	0.532478	0.507765			296	-0.71337	-0.772276	-0.768456	-0.5792	-0.615723	-0.612481	-0.692184
296.2	0.50325	0.536458	0.542131	0.480232	0.520569	0.536422	0.511012			296.2	-0.713438	-0.771007	-0.763019	-0.574514	-0.608601	-0.608537	-0.688937
296.4	0.509227	0.535273	0.542985	0.483419	0.521215	0.534974	0.510847			296.4	-0.70746	-0.772192	-0.762165	-0.571328	-0.607956	-0.609986	-0.689103
296.6	0.512544	0.538674	0.545451	0.481958	0.52509	0.537368	0.514492			296.6	-0.704143	-0.76879	-0.759699	-0.572788	-0.60408	-0.607592	-0.685458
296.79	0.510632	0.540793	0.544855	0.485686	0.524813	0.538811	0.51675			296.79	-0.706055	-0.766671	-0.760295	-0.569061	-0.604357	-0.606148	-0.6832
297	0.513315	0.543024	0.547311	0.48831	0.525549	0.542051	0.515014			297	-0.703373	-0.76444	-0.757839	-0.566437	-0.603621	-0.602908	-0.684935
297.2	0.515626	0.543016	0.547865	0.488079	0.527624	0.540629	0.52073			297.2	-0.701061	-0.764449	-0.757286	-0.566668	-0.601546	-0.60433	-0.67922
297.4	0.518083	0.549818	0.555062	0.492082	0.532259	0.545054	0.520603			297.4	-0.698605	-0.757647	-0.750089	-0.562664	-0.596911	-0.599906	-0.679346
297.6	0.515028	0.553031	0.551174	0.493752	0.532634	0.54467	0.523725			297.6	-0.701659	-0.754433	-0.753976	-0.560994	-0.596537	-0.60029	-0.676224
297.8	0.521551	0.554139	0.555537	0.493777	0.535187	0.552008	0.525431			297.8	-0.695136	-0.753326	-0.749614	-0.56097	-0.593983	-0.592951	-0.674519
298	0.521109	0.555482	0.558117	0.493836	0.535522	0.548199	0.52399			298	-0.695578	-0.751983	-0.747033	-0.56091	-0.593648	-0.59676	-0.67596
298.19	0.5258	0.555592	0.559985	0.49629	0.540572	0.54871	0.526778			298.19	-0.690887	-0.751872	-0.745166	-0.558457	-0.588599	-0.59625	-0.673172
298.4	0.526698	0.556237	0.559844	0.497205	0.542561	0.555346	0.529451			298.4	-0.689989	-0.751227	-0.745306	-0.557542	-0.58661	-0.589613	-0.670498
298.6	0.529925	0.564024	0.563921	0.499124	0.541367	0.553558	0.530458			298.6	-0.686762	-0.74344	-0.741229	-0.555623	-0.587803	-0.591402	-0.669492
298.8	0.528911	0.565318	0.562274	0.504575	0.539528	0.556397	0.53461			298.8	-0.687776	-0.742147	-0.742876	-0.550172	-0.589642	-0.588563	-0.665339
299	0.531121	0.566617	0.561499	0.502784	0.542524	0.558224	0.531238			299	-0.685566	-0.740847	-0.743651	-0.551963	-0.586646	-0.586736	-0.668711
299.19	0.532513	0.568167	0.562547	0.500873	0.546634	0.553905	0.536824			299.19	-0.684174	-0.739298	-0.742604	-0.553874	-0.582537	-0.591055	-0.663126
299.4	0.535371	0.565213	0.566649	0.505108	0.54783	0.563315	0.538755			299.4	-0.681316	-0.742252	-0.738501	-0.549639	-0.58134	-0.581645	-0.661195
299.59	0.532238	0.569191	0.566434	0.503509	0.549348	0.562085	0.540414			299.59	-0.684449	-0.738273	-0.738717	-0.551238	-0.579823	-0.582874	-0.659536
299.8	0.537582	0.568513	0.568313	0.507513	0.547515	0.56186	0.536658			299.8	-0.679105	-0.738951	-0.736837	-0.547233	-0.581655	-0.5831	-0.663292
299.99	0.538318	0.56789	0.571634	0.505754	0.551086	0.563922	0.539965			299.99	-0.67837	-0.739575	-0.733516	-0.548993	-0.578085	-0.581038	-0.659985
300.2	0.539235	0.571448	0.571581	0.505817	0.552994	0.564533	0.544501			300.2	-0.677452	-0.736016	-0.73357	-0.548929	-0.576176	-0.580427	-0.655449
300.4	0.542954	0.574015	0.578778	0.511266	0.552905	0.564998	0.537259			300.4	-0.673733	-0.733449	-0.726372	-0.54348	-0.576266	-0.579962	-0.66269
300.6	0.543337	0.57502	0.574598	0.51558	0.556408	0.565416	0.542763			300.6	-0.67335	-0.732444	-0.730552	-0.539167	-0.572762	-0.579544	-0.657186
300.8	0.547056	0.571943	0.577153	0.508143	0.562274	0.568485	0.540466			300.8	-0.669632	-0.735522	-0.727998	-0.546604	-0.566896	-0.576475	-0.659483
301	0.545073	0.579258	0.579452	0.51059	0.555964	0.568328	0.543606			301	-0.671615	-0.728206	-0.725698	-0.544157	-0.573206	-0.576631	-0.656343
301.2	0.549993	0.578888	0.58267	0.511993	0.556016	0.569784	0.542051			301.2	-0.666694	-0.728577	-0.72248	-0.542754	-0.573155	-0.575175	-0.657898
301.4	0.546888	0.578415	0.584596	0.514523	0.560777	0.571509	0.54406			301.4	-0.669799	-0.729049	-0.720554	-0.540223	-0.568393	-0.57345	-0.65589
301.59	0.548727	0.578349	0.581497	0.514842	0.556896	0.570772	0.542316			301.59	-0.66796	-0.729116	-0.723654	-0.539905	-0.572275	-0.574187	-0.657634
301.8	0.551832	0.582506	0.58294	0.515262	0.55915	0.572515	0.548568			301.8	-0.664855	-0.724959	-0.722211	-0.539485	-0.57002	-0.572445	-0.651381
302	0.550932	0.581706	0.585125	0.517641	0.557677	0.575443	0.549481			302	-0.665755	-0.725758	-0.720026	-0.537106	-0.571493	-0.569517	-0.650468
302.19	0.555374	0.582482	0.587211	0.519124	0.560016	0.5723	0.546558			302.19	-0.661314	-0.724982	-0.717939	-0.535623	-0.569154	-0.572659	-0.653391
302.4	0.551442	0.581727	0.587501	0.518489	0.560186	0.575148	0.549745			302.4	-0.665246	-0.725738	-0.717649	-0.536257	-0.568984	-0.569812	-0.650204
302.59	0.554534	0.58242	0.583212	0.517005	0.563257	0.574237	0.547324			302.59	-0.662153	-0.725044	-0.721939	-0.537742	-0.565914	-0.570722	-0.652625
302.79	0.553636	0.589911	0.588011	0.513458	0.564008	0.575994	0.550942			302.79	-0.663051	-0.717553	-0.71714	-0.541289	-0.565162	-0.568965	-0.649007
303	0.554775	0.587778	0.587309	0.520989	0.565391	0.5765	0.551272			303	-0.661912	-0.719687	-0.717841	-0.533758	-0.56378	-0.568459	-0.648678
303.19	0.554188	0.584743	0.589976	0.519835	0.562771	0.577042	0.552958			303.19	-0.662499	-0.722721	-0.715174	-0.534912	-0.5664	-0.567918	-0.646991
303.39	0.554975	0.590281	0.588451	0.520976	0.566047	0.577822	0.553352			303.39	-0.661712	-0.717183	-0.7167	-0.53377	-0.563123	-0.567137	-0.646598
303.59	0.553997	0.589197	0.589121	0.518143	0.56647	0.57735	0.552577			303.59	-0.662691	-0.718267	-0.71603	-0.536604	-0.5627	-0.567609	-0.647372
303.8	0.560022	0.588427	0.594537	0.520913	0.567438	0.580673	0.548753			303.8	-0.656665	-0.719038	-0.710614	-0.533834	-0.561732	-0.564287	-0.651197
304	0.553161	0.588772	0.592852	0.522139	0.567761	0.581809	0.550253			304	-0.663527	-0.718692	-0.712299	-0.532608	-0.561409	-0.563151	-0.649696
304.19	0.560733	0.58896	0.590015	0.5237	0.569191	0.582757	0.551888			304.19	-0.655954	-0.718504	-0.715136	-0.531047	-0.559979	-0.562202	-0.648062
304.39	0.559405	0.591147	0.591946	0.523406	0.569598	0.584533	0.553405			304.39	-0.657283	-0.716318	-0.713204	-0.531341	-0.559573	-0.560426	-0.646544
304.6	0.560151	0.587535	0.595292	0.523976	0.568844	0.578134	0.552079			304.6	-0.656536	-0.719929	-0.709858	-0.530771	-0.560327	-0.566825	-0.64787
304.8	0.559486	0.589265	0.596679	0.522805	0.567624	0.579665	0.550336			304.8	-0.657202	-0.718199	-0.708471	-0.531942	-0.561546	-0.565295	-0.649614
304.99	0.558256	0.589459	0.588979	0.524674	0.572861	0.579802	0.553669			304.99	-0.658431	-0.718005	-0.716172	-0.530072	-0.556309	-0.565157	-0.646281
305.2	0.560419	0.590046	0.59695	0.524221	0.568569	0.584034	0.555477			305.2	-0.656269	-0.717418	-0.7082	-0.530525	-0.560602	-0.560925	-0.644473
305.4	0.561328	0.594163	0.596624	0.527661	0.571478	0.581913	0.557742			305.4	-0.655359	-0.713302	-0.708526	-0.527086	-0.557693	-0.563047	-0.642207
305.6	0.563427	0.591777	0.599254	0.527724	0.570034	0.581506	0.555482			305.6	-0.65326	-0.715687	-0.705897	-0.527022	-0.559136	-0.563454	-0.644468
305.79	0.557963	0.594025	0.598692	0.525497	0.57092	0.584835	0.557996			305.79	-0.658724	-0.713439	-0.706458	-0.529249	-0.55825	-0.560124	-0.641953
306	0.562807	0.594712	0.602819	0.526101	0.570003	0.585526	0.553733			306	-0.65388	-0.712753	-0.702331	-0.528645	-0.559168	-0.559434	-0.646217
306.2	0.565989	0.592474	0.597514	0.524615	0.571966	0.581842	0.554788			306.2	-0.650699	-0.714991	-0.707637	-0.530131	-0.557204	-0.563118	-0.645162
306.4	0.566054	0.598019	0.600473	0.524176	0.571162	0.584212	0.555808			306.4	-0.650633	-0.709446	-0.704677	-0.530571	-0.558009	-0.560748	-0.644141
306.59	0.563128	0.595886	0.599792	0.527579	0.573813	0.582386	0.555863			306.59	-0.65356	-0.711579	-0.705358	-0.527167	-0.555357	-0.562574	-0.644086
306.79	0.565277	0.591252	0.601175	0.526137	0.57527	0.583267	0.558629			306.79	-0.65141	-0.716212	-0.703976	-0.52861	-0.5539	-0.561692	-0.641321
307	0.563223	0.591699	0.601638	0.528503	0.57319	0.588211	0.556858			307	-0.653464	-0.715765	-0.703513	-0.526244	-0.55598	-0.556749	-0.643092
307.19	0.564658	0.597648	0.603437	0.526253	0.572794	0.585217	0.555638			307.19	-0.652029	-0.709817	-0.701714	-0.528494	-0.556377	-0.559743	-0.644312
307.39	0.566818	0.596669	0.597615	0.525169	0.573569	0.584688	0.55738			307.39	-0.649869	-0.710795	-0.707535	-0.529578	-0.555601	-0.560272	-0.64257
307.59	0.562369	0.596731	0.596541	0.529995	0.571957	0.584696	0.558261			307.59	-0.654319	-0.710733	-0.70861	-0.524752	-0.557213	-0.560264	-0.641688
307.79	0.563575	0.599522	0.60236	0.526575	0.575553	0.586801	0.556819			307.79	-0.653112	-0.707942	-0.70279	-0.528171	-0.553618	-0.558159	-0.643131
308	0.565592	0.598763	0.601551	0.527465	0.574284	0.585358	0.55588			308	-0.651096	-0.708701	-0.7036	-0.527281	-0.554887	-0.559601	-0.64407
308.19	0.565331	0.596646	0.604301	0.530667	0.571971	0.583668	0.556677			308.19	-0.651357	-0.710818	-0.700849	-0.524079	-0.557199	-0.561291	-0.643273
308.4	0.56479	0.597528	0.602644	0.52857	0.576002	0.590054	0.560694			308.4	-0.651898	-0.709936	-0.702507	-0.526177	-0.553168	-0.554906	-0.639256
308.59	0.566938	0.596198	0.607204	0.531635	0.574332	0.587931	0.557457			308.59	-0.649749	-0.711266	-0.697946	-0.523111	-0.554838	-0.557028	-0.642493
308.8	0.567835	0.596643	0.60352	0.531959	0.577612	0.587725	0.556942			308.8	-0.648852	-0.710821	-0.701631	-0.522788	-0.551558	-0.557234	-0.643007
309	0.566368	0.593203	0.602048	0.527811	0.576591	0.587355	0.554192			309	-0.650319	-0.714261	-0.703103	-0.526936	-0.55258	-0.557605	-0.645757
309.19	0.570973	0.597932	0.603672	0.528179	0.578795	0.587386	0.560456			309.19	-0.645714	-0.709532	-0.701479	-0.526568	-0.550376	-0.557574	-0.639494
309.39	0.568826	0.598047	0.603568	0.527776	0.576698	0.589263	0.557382			309.39	-0.647862	-0.709418	-0.701583	-0.526971	-0.552472	-0.555696	-0.642568
309.59	0.565811	0.600481	0.599789	0.526996	0.574815	0.587816	0.559218			309.59	-0.650876	-0.706983	-0.705361	-0.527751	-0.554356	-0.557144	-0.640732
309.79	0.565853	0.598117	0.604372	0.529942	0.577349	0.590736	0.558615			309.79	-0.650834	-0.709348	-0.700778	-0.524805	-0.551821	-0.554223	-0.641335
309.99	0.566948	0.600292	0.60168	0.527786	0.577033	0.585077	0.557153			309.99	-0.64974	-0.707172	-0.703471	-0.526961	-0.552137	-0.559882	-0.642796
310.19	0.568784	0.600083	0.606782	0.526054	0.576951	0.587392	0.557756			310.19	-0.647904	-0.707381	-0.698368	-0.528692	-0.552219	-0.557567	-0.642194
310.39	0.568097	0.598444	0.604254	0.529596	0.576882	0.590926	0.561372			310.39	-0.64859	-0.70902	-0.700896	-0.525151	-0.552288	-0.554033	-0.638578
310.59	0.567654	0.597825	0.606715	0.527627	0.577867	0.591524	0.559209			310.59	-0.649033	-0.709639	-0.698436	-0.52712	-0.551304	-0.553436	-0.640741
310.79	0.570269	0.600676	0.60248	0.528362	0.577001	0.587716	0.55806			310.79	-0.646418	-0.706788	-0.70267	-0.526384	-0.552169	-0.557243	-0.641889
310.99	0.568624	0.598704	0.604764	0.527356	0.578003	0.589301	0.561231			310.99	-0.648063	-0.70876	-0.700386	-0.527391	-0.551168	-0.555658	-0.638719
311.2	0.569666	0.595806	0.60988	0.528873	0.579321	0.587309	0.558888			311.2	-0.647021	-0.711658	-0.69527	-0.525873	-0.549849	-0.557651	-0.641061
311.39	0.567771	0.598459	0.604948	0.529458	0.577116	0.591829	0.560426			311.39	-0.648916	-0.709005	-0.700203	-0.525289	-0.552054	-0.553131	-0.639524
311.59	0.566843	0.599017	0.597671	0.528627	0.579676	0.588411	0.560481			311.59	-0.649845	-0.708448	-0.707479	-0.52612	-0.549494	-0.556548	-0.639469
311.79	0.567872	0.603823	0.608087	0.52549	0.578822	0.592545	0.559011			311.79	-0.648815	-0.703641	-0.697063	-0.529257	-0.550348	-0.552415	-0.640939
312	0.572774	0.597316	0.607115	0.529538	0.580737	0.593051	0.559854			312	-0.643913	-0.710149	-0.698035	-0.525209	-0.548433	-0.551909	-0.640096
312.19	0.571124	0.599048	0.601633	0.529472	0.579185	0.586563	0.562849			312.19	-0.645564	-0.708416	-0.703518	-0.525275	-0.549985	-0.558397	-0.637101
312.39	0.570915	0.601029	0.604599	0.530132	0.575347	0.588934	0.559686			312.39	-0.645772	-0.706435	-0.700552	-0.524614	-0.553823	-0.556025	-0.640264
312.59	0.569291	0.599156	0.606384	0.53436	0.577344	0.59041	0.561971			312.59	-0.647396	-0.708308	-0.698766	-0.520387	-0.551827	-0.554549	-0.637978
312.79	0.568705	0.600583	0.605732	0.525665	0.579222	0.587898	0.55927			312.79	-0.647982	-0.706882	-0.699418	-0.529082	-0.549949	-0.557062	-0.640679
312.99	0.569115	0.599064	0.602815	0.531273	0.579872	0.589213	0.562017			312.99	-0.647573	-0.7084	-0.702336	-0.523474	-0.549298	-0.555747	-0.637933
313.19	0.570435	0.602372	0.602839	0.530926	0.577898	0.589118	0.558262			313.19	-0.646252	-0.705093	-0.702311	-0.523821	-0.551273	-0.555842	-0.641688
313.39	0.57372	0.604131	0.60455	0.532095	0.579217	0.59274	0.559561			313.39	-0.642967	-0.703334	-0.700601	-0.522651	-0.549953	-0.55222	-0.640389
313.59	0.571901	0.602056	0.60738	0.530496	0.576953	0.591786	0.559604			313.59	-0.644787	-0.705409	-0.69777	-0.524251	-0.552218	-0.553173	-0.640346
313.79	0.572362	0.599578	0.605775	0.531181	0.579594	0.591039	0.561541			313.79	-0.644325	-0.707887	-0.699375	-0.523565	-0.549576	-0.55392	-0.638408
314	0.571735	0.60152	0.607	0.529571	0.578597	0.590169	0.560423			314	-0.644953	-0.705945	-0.698151	-0.525176	-0.550574	-0.55479	-0.639527
314.19	0.572389	0.603521	0.607734	0.533504	0.576345	0.592734	0.560689			314.19	-0.644298	-0.703944	-0.697416	-0.521243	-0.552826	-0.552226	-0.639261
314.39	0.571805	0.601683	0.604353	0.530719	0.580557	0.59013	0.561302			314.39	-0.644882	-0.705781	-0.700798	-0.524028	-0.548613	-0.554829	-0.638648
314.59	0.571457	0.603908	0.605657	0.530082	0.579996	0.590161	0.561399			314.59	-0.645231	-0.703556	-0.699494	-0.524665	-0.549175	-0.554798	-0.63855
314.79	0.571858	0.604306	0.608246	0.531791	0.577877	0.58986	0.559771			314.79	-0.64483	-0.703159	-0.696904	-0.522956	-0.551293	-0.5551	-0.640179
314.99	0.570434	0.608013	0.609002	0.529021	0.578536	0.592397	0.564962			314.99	-0.646253	-0.699451	-0.696149	-0.525726	-0.550635	-0.552562	-0.634988
315.19	0.571086	0.600958	0.608977	0.529033	0.577498	0.592113	0.56434			315.19	-0.645601	-0.706506	-0.696174	-0.525713	-0.551673	-0.552846	-0.635609
315.39	0.572369	0.604523	0.606342	0.528236	0.582938	0.588658	0.560412			315.39	-0.644318	-0.702941	-0.698809	-0.52651	-0.546232	-0.556301	-0.639537
315.6	0.572176	0.605671	0.608782	0.530539	0.581354	0.59305	0.559293			315.6	-0.644512	-0.701793	-0.696369	-0.524208	-0.547816	-0.55191	-0.640657
315.8	0.571997	0.598068	0.610101	0.533384	0.579682	0.590746	0.564042			315.8	-0.64469	-0.709397	-0.69505	-0.521363	-0.549488	-0.554214	-0.635908
316	0.572937	0.601021	0.607814	0.535576	0.580308	0.591926	0.562539			316	-0.643751	-0.706443	-0.697337	-0.51917	-0.548863	-0.553033	-0.637411
316.2	0.57651	0.60287	0.606933	0.534053	0.581906	0.591065	0.561162			316.2	-0.640177	-0.704594	-0.698218	-0.520693	-0.547264	-0.553894	-0.638788
316.4	0.574432	0.606843	0.606855	0.534644	0.580181	0.591572	0.561266			316.4	-0.642255	-0.700621	-0.698296	-0.520103	-0.548989	-0.553387	-0.638683
316.6	0.572441	0.599759	0.607079	0.531428	0.581375	0.590168	0.564937			316.6	-0.644247	-0.707706	-0.698071	-0.523319	-0.547795	-0.554791	-0.635012
316.8	0.574597	0.600606	0.605804	0.534048	0.580915	0.58908	0.56195			316.8	-0.64209	-0.706859	-0.699346	-0.520699	-0.548256	-0.55588	-0.638
316.99	0.569282	0.602462	0.614493	0.53048	0.580602	0.595941	0.558515			316.99	-0.647406	-0.705002	-0.690657	-0.524267	-0.548568	-0.549019	-0.641435
317.19	0.571851	0.602599	0.609849	0.530255	0.580391	0.592573	0.561413			317.19	-0.644837	-0.704865	-0.695301	-0.524492	-0.54878	-0.552386	-0.638537
317.39	0.572648	0.602324	0.611184	0.530279	0.581091	0.590244	0.565327			317.39	-0.64404	-0.70514	-0.693966	-0.524468	-0.548079	-0.554716	-0.634623
317.6	0.574224	0.605113	0.611822	0.532029	0.582283	0.593756	0.56534			317.6	-0.642464	-0.702351	-0.693329	-0.522718	-0.546887	-0.551204	-0.63461
317.8	0.572328	0.603049	0.609697	0.535072	0.581463	0.591405	0.563776			317.8	-0.644359	-0.704415	-0.695454	-0.519674	-0.547707	-0.553554	-0.636174
318	0.572718	0.602694	0.610504	0.532954	0.584238	0.593458	0.562786			318	-0.64397	-0.70477	-0.694646	-0.521793	-0.544932	-0.551501	-0.637163
318.2	0.573079	0.601758	0.609359	0.532929	0.581239	0.592064	0.565782			318.2	-0.643608	-0.705707	-0.695792	-0.521818	-0.547931	-0.552896	-0.634167
318.4	0.570787	0.60425	0.611125	0.532974	0.581941	0.592843	0.565897			318.4	-0.6459	-0.703215	-0.694026	-0.521773	-0.547229	-0.552116	-0.634053
318.6	0.572573	0.600669	0.60977	0.535024	0.58064	0.592592	0.563374			318.6	-0.644114	-0.706795	-0.69538	-0.519722	-0.548531	-0.552368	-0.636576
318.79	0.575392	0.604557	0.61128	0.532168	0.581585	0.593261	0.563633			318.79	-0.641295	-0.702907	-0.693871	-0.522578	-0.547585	-0.551698	-0.636316
319	0.571473	0.603756	0.607101	0.535866	0.58476	0.59261	0.566349			319	-0.645214	-0.703708	-0.69805	-0.518881	-0.544411	-0.55235	-0.633601
319.2	0.573932	0.602825	0.605903	0.532219	0.581121	0.596327	0.562847			319.2	-0.642756	-0.704639	-0.699248	-0.522528	-0.54805	-0.548633	-0.637103
319.4	0.575155	0.603865	0.611603	0.532492	0.582515	0.592709	0.563693			319.4	-0.641533	-0.7036	-0.693547	-0.522255	-0.546656	-0.552251	-0.636257
319.6	0.574928	0.606567	0.607376	0.535566	0.581566	0.593823	0.56016			319.6	-0.641759	-0.700898	-0.697775	-0.519181	-0.547604	-0.551136	-0.639789
319.8	0.572659	0.601112	0.610105	0.535729	0.580673	0.589864	0.563802			319.8	-0.644028	-0.706352	-0.695046	-0.519018	-0.548497	-0.555096	-0.636148
320	0.574175	0.608061	0.611474	0.535067	0.584023	0.593635	0.565577			320	-0.642512	-0.699403	-0.693677	-0.51968	-0.545147	-0.551324	-0.634372
320.2	0.573785	0.601803	0.611272	0.535245	0.585098	0.59335	0.565525			320.2	-0.642902	-0.705661	-0.693879	-0.519502	-0.544072	-0.551609	-0.634424
320.4	0.573746	0.602422	0.609214	0.532002	0.581957	0.59117	0.560794			320.4	-0.642941	-0.705042	-0.695937	-0.522745	-0.547213	-0.55379	-0.639156
320.6	0.572999	0.60385	0.614249	0.533868	0.582166	0.591323	0.56491			320.6	-0.643689	-0.703614	-0.690901	-0.520879	-0.547004	-0.553636	-0.63504
320.8	0.575571	0.606154	0.606366	0.532347	0.580866	0.593752	0.56542			320.8	-0.641117	-0.701311	-0.698784	-0.5224	-0.548304	-0.551208	-0.63453
321	0.57486	0.608297	0.608961	0.532196	0.583881	0.591776	0.570071			321	-0.641828	-0.699167	-0.69619	-0.52255	-0.54529	-0.553184	-0.629879
321.19	0.575588	0.605203	0.611697	0.535979	0.583285	0.592491	0.564157			321.19	-0.641099	-0.702262	-0.693453	-0.518767	-0.545885	-0.552468	-0.635793
321.4	0.573281	0.602511	0.608966	0.534523	0.582013	0.598305	0.566714			321.4	-0.643406	-0.704953	-0.696185	-0.520224	-0.547157	-0.546655	-0.633236
321.6	0.573618	0.607116	0.609509	0.534016	0.580485	0.591059	0.563894			321.6	-0.643069	-0.700349	-0.695641	-0.52073	-0.548685	-0.5539	-0.636056
321.8	0.575319	0.608502	0.610068	0.535122	0.582467	0.592994	0.564019			321.8	-0.641368	-0.698962	-0.695082	-0.519625	-0.546703	-0.551966	-0.63593
321.99	0.572041	0.602433	0.610067	0.535092	0.583099	0.598787	0.562458			321.99	-0.644646	-0.705031	-0.695084	-0.519655	-0.546071	-0.546173	-0.637492
322.19	0.577172	0.60402	0.607723	0.535923	0.582433	0.59183	0.562988			322.19	-0.639515	-0.703445	-0.697428	-0.518824	-0.546737	-0.553129	-0.636961
322.4	0.577899	0.604059	0.609427	0.534835	0.581248	0.594232	0.564661			322.4	-0.638789	-0.703405	-0.695724	-0.519912	-0.547922	-0.550727	-0.635288
322.6	0.576221	0.607619	0.610815	0.533211	0.586049	0.597267	0.560696			322.6	-0.640466	-0.699845	-0.694335	-0.521535	-0.543121	-0.547692	-0.639254
322.79	0.57257	0.604374	0.611089	0.536687	0.580806	0.594532	0.566659			322.79	-0.644118	-0.70309	-0.694062	-0.51806	-0.548364	-0.550427	-0.63329
322.99	0.578321	0.606884	0.611586	0.536761	0.582582	0.593067	0.564396			322.99	-0.638366	-0.70058	-0.693565	-0.517985	-0.546588	-0.551892	-0.635554
323.2	0.572547	0.604183	0.608529	0.535255	0.583862	0.591175	0.562826			323.2	-0.644141	-0.703281	-0.696621	-0.519491	-0.545309	-0.553785	-0.637124
323.4	0.574916	0.609915	0.613572	0.534145	0.581233	0.595298	0.567218			323.4	-0.641771	-0.697549	-0.691578	-0.520602	-0.547937	-0.549661	-0.632731
323.59	0.575089	0.605194	0.611381	0.538755	0.582196	0.594071	0.561877			323.59	-0.641599	-0.702271	-0.69377	-0.515992	-0.546974	-0.550888	-0.638072
323.8	0.571958	0.605089	0.609615	0.534972	0.583981	0.597761	0.567266			323.8	-0.64473	-0.702375	-0.695536	-0.519775	-0.545189	-0.547198	-0.632684
323.99	0.577235	0.606851	0.610199	0.534378	0.588361	0.590463	0.561609			323.99	-0.639452	-0.700614	-0.694952	-0.520368	-0.540809	-0.554497	-0.63834
324.2	0.574809	0.603532	0.611296	0.537068	0.582786	0.592216	0.564694			324.2	-0.641878	-0.703932	-0.693854	-0.517679	-0.546384	-0.552744	-0.635256
324.4	0.573994	0.606019	0.610103	0.536069	0.584346	0.593877	0.568259			324.4	-0.642693	-0.701446	-0.695047	-0.518678	-0.544824	-0.551083	-0.63169
324.6	0.57705	0.611123	0.613396	0.533027	0.584034	0.594077	0.563756			324.6	-0.639638	-0.696341	-0.691754	-0.52172	-0.545136	-0.550882	-0.636194
324.8	0.575177	0.608595	0.61139	0.533693	0.585045	0.594152	0.565412			324.8	-0.64151	-0.698869	-0.693761	-0.521054	-0.544125	-0.550808	-0.634537
325	0.579165	0.606797	0.609079	0.537221	0.584426	0.593713	0.564971			325	-0.637523	-0.700667	-0.696071	-0.517526	-0.544745	-0.551246	-0.634978
325.2	0.577155	0.60554	0.609145	0.532751	0.586326	0.593545	0.563356			325.2	-0.639532	-0.701924	-0.696006	-0.521996	-0.542845	-0.551415	-0.636594
325.4	0.574767	0.60948	0.608503	0.535086	0.582443	0.593712	0.564226			325.4	-0.641921	-0.697984	-0.696648	-0.519661	-0.546728	-0.551247	-0.635724
325.6	0.575606	0.609446	0.614602	0.532918	0.585702	0.594422	0.56696			325.6	-0.641081	-0.698018	-0.690549	-0.521828	-0.543469	-0.550537	-0.63299
325.8	0.576408	0.605395	0.609747	0.53595	0.587261	0.595147	0.563356			325.8	-0.640279	-0.702069	-0.695404	-0.518797	-0.541909	-0.549812	-0.636593
326	0.575122	0.605636	0.611463	0.534274	0.585372	0.597445	0.565699			326	-0.641565	-0.701828	-0.693687	-0.520473	-0.543798	-0.547515	-0.63425
326.19	0.575506	0.607356	0.613713	0.533621	0.584901	0.592803	0.561581			326.19	-0.641181	-0.700108	-0.691438	-0.521126	-0.54427	-0.552156	-0.638368
326.39	0.578763	0.608802	0.612057	0.536714	0.585342	0.590884	0.567404			326.39	-0.637925	-0.698662	-0.693094	-0.518033	-0.543829	-0.554076	-0.632546
326.6	0.574579	0.609134	0.615638	0.53597	0.585771	0.592331	0.563261			326.6	-0.642108	-0.698331	-0.689513	-0.518777	-0.5434	-0.552628	-0.636689
326.8	0.578041	0.604291	0.613968	0.536405	0.583582	0.597388	0.565882			326.8	-0.638646	-0.703173	-0.691182	-0.518341	-0.545589	-0.547571	-0.634068
326.99	0.576093	0.605766	0.610965	0.532575	0.585377	0.596336	0.568634			326.99	-0.640594	-0.701698	-0.694185	-0.522172	-0.543793	-0.548624	-0.631315
327.19	0.576494	0.612	0.612383	0.534131	0.5847	0.5953	0.568009			327.19	-0.640194	-0.695464	-0.692767	-0.520616	-0.54447	-0.549659	-0.63194
327.39	0.577123	0.607769	0.610113	0.535051	0.583783	0.594669	0.566368			327.39	-0.639564	-0.699695	-0.695038	-0.519696	-0.545388	-0.550291	-0.633581
327.6	0.574943	0.605215	0.611646	0.539162	0.584345	0.593003	0.564555			327.6	-0.641744	-0.702249	-0.693505	-0.515585	-0.544825	-0.551957	-0.635395
327.8	0.577578	0.605529	0.615095	0.535328	0.584485	0.595815	0.563477			327.8	-0.639109	-0.701935	-0.690056	-0.519418	-0.544686	-0.549144	-0.636473
327.99	0.576987	0.608738	0.608764	0.536606	0.584206	0.5977	0.56584			327.99	-0.6397	-0.698727	-0.696387	-0.51814	-0.544965	-0.54726	-0.634109
328.2	0.574373	0.606355	0.609341	0.533639	0.585919	0.596156	0.568833			328.2	-0.642315	-0.701109	-0.69581	-0.521108	-0.543252	-0.548804	-0.631117
328.4	0.578747	0.609661	0.613833	0.539378	0.58525	0.598182	0.564093			328.4	-0.63794	-0.697803	-0.691317	-0.515368	-0.54392	-0.546777	-0.635857
328.59	0.573968	0.609471	0.614559	0.535522	0.586684	0.59076	0.568282			328.59	-0.642719	-0.697993	-0.690591	-0.519225	-0.542486	-0.5542	-0.631668
328.8	0.577582	0.605658	0.61407	0.535867	0.584797	0.598083	0.568156			328.8	-0.639106	-0.701806	-0.69108	-0.51888	-0.544373	-0.546877	-0.631794
328.99	0.577901	0.609098	0.614235	0.535659	0.582308	0.594412	0.566952			328.99	-0.638786	-0.698366	-0.690915	-0.519088	-0.546862	-0.550547	-0.632998
329.2	0.578902	0.609285	0.615076	0.535937	0.584368	0.596641	0.56807			329.2	-0.637785	-0.69818	-0.690075	-0.518809	-0.544802	-0.548319	-0.631879
329.39	0.575619	0.608397	0.611796	0.534601	0.587354	0.595233	0.562982			329.39	-0.641068	-0.699067	-0.693355	-0.520146	-0.541816	-0.549726	-0.636967
329.59	0.578044	0.610857	0.610159	0.538652	0.583467	0.594924	0.569738			329.59	-0.638643	-0.696608	-0.694991	-0.516094	-0.545703	-0.550036	-0.630212
329.79	0.576219	0.607896	0.610047	0.537991	0.585115	0.592849	0.56414			329.79	-0.640468	-0.699569	-0.695104	-0.516756	-0.544055	-0.55211	-0.63581
330	0.578228	0.606867	0.613262	0.538767	0.588865	0.595467	0.56648			330	-0.638459	-0.700597	-0.691888	-0.51598	-0.540305	-0.549492	-0.63347
330.2	0.57603	0.61014	0.612295	0.537398	0.585625	0.596874	0.567744			330.2	-0.640657	-0.697324	-0.692856	-0.517349	-0.543546	-0.548086	-0.632205
330.4	0.57664	0.604657	0.612843	0.539143	0.584274	0.598147	0.563982			330.4	-0.640047	-0.702807	-0.692308	-0.515604	-0.544896	-0.546812	-0.635968
330.59	0.578155	0.609096	0.609744	0.536206	0.589779	0.595796	0.569124			330.59	-0.638533	-0.698368	-0.695406	-0.518541	-0.539391	-0.549164	-0.630826
330.8	0.576072	0.606283	0.616869	0.538506	0.58361	0.592547	0.567962			330.8	-0.640615	-0.701181	-0.688282	-0.516241	-0.54556	-0.552412	-0.631988
331	0.578124	0.610237	0.613023	0.53837	0.5864	0.596475	0.568522			331	-0.638564	-0.697227	-0.692127	-0.516376	-0.54277	-0.548485	-0.631428
331.19	0.578634	0.607937	0.611153	0.53797	0.585389	0.59387	0.563786			331.19	-0.638053	-0.699527	-0.693998	-0.516777	-0.543781	-0.551089	-0.636164
331.4	0.575751	0.607772	0.61507	0.534265	0.58319	0.594063	0.570195			331.4	-0.640936	-0.699692	-0.690081	-0.520482	-0.545981	-0.550897	-0.629755
331.6	0.581002	0.608495	0.609707	0.534201	0.58584	0.597828	0.568721			331.6	-0.635685	-0.698969	-0.695444	-0.520546	-0.54333	-0.547132	-0.631228
331.79	0.579154	0.608923	0.613986	0.534885	0.5893	0.594405	0.566948			331.79	-0.637533	-0.698542	-0.691165	-0.519862	-0.53987	-0.550554	-0.633002
331.99	0.577116	0.609537	0.612705	0.536156	0.587208	0.596761	0.568192			331.99	-0.639572	-0.697927	-0.692446	-0.518591	-0.541962	-0.548199	-0.631758
332.19	0.580705	0.610731	0.610298	0.535499	0.587092	0.593813	0.562671			332.19	-0.635982	-0.696733	-0.694852	-0.519248	-0.542078	-0.551147	-0.637278
332.4	0.576527	0.612363	0.614392	0.541295	0.585816	0.59743	0.562762			332.4	-0.640161	-0.695101	-0.690758	-0.513452	-0.543354	-0.547529	-0.637187
332.59	0.577925	0.605019	0.614142	0.536753	0.585156	0.600362	0.567064			332.59	-0.638763	-0.702445	-0.691009	-0.517994	-0.544014	-0.544597	-0.632886
332.79	0.575408	0.608085	0.614844	0.535828	0.589428	0.596867	0.568128			332.79	-0.641279	-0.69938	-0.690306	-0.518918	-0.539742	-0.548093	-0.631822
332.99	0.579561	0.60666	0.614077	0.538754	0.585475	0.595894	0.568728			332.99	-0.637126	-0.700805	-0.691074	-0.515993	-0.543695	-0.549065	-0.631222
333.19	0.57964	0.610542	0.613103	0.541266	0.587232	0.601922	0.565545			333.19	-0.637048	-0.696922	-0.692048	-0.51348	-0.541938	-0.543038	-0.634405
333.39	0.573445	0.608837	0.616175	0.536365	0.587852	0.59753	0.568003			333.39	-0.643242	-0.698627	-0.688976	-0.518382	-0.541319	-0.54743	-0.631947
333.59	0.57718	0.612933	0.618309	0.53795	0.585378	0.593136	0.566527			333.59	-0.639507	-0.694531	-0.686842	-0.516797	-0.543793	-0.551823	-0.633423
333.79	0.580149	0.610157	0.612993	0.535678	0.588169	0.599275	0.569142			333.79	-0.636538	-0.697307	-0.692157	-0.519068	-0.541001	-0.545684	-0.630808
334	0.577786	0.613271	0.612398	0.534476	0.587645	0.597375	0.565643			334	-0.638901	-0.694193	-0.692752	-0.52027	-0.541526	-0.547585	-0.634306
334.2	0.579723	0.607969	0.614738	0.536361	0.588162	0.600587	0.566892			334.2	-0.636964	-0.699495	-0.690412	-0.518386	-0.541008	-0.544373	-0.633057
334.39	0.578461	0.609732	0.614123	0.536367	0.586049	0.600711	0.566607			334.39	-0.638226	-0.697732	-0.691027	-0.51838	-0.543121	-0.544248	-0.633342
334.59	0.579157	0.607168	0.615724	0.537512	0.58422	0.59826	0.567797			334.59	-0.637531	-0.700297	-0.689426	-0.517235	-0.544951	-0.546699	-0.632153
334.79	0.578708	0.609871	0.612124	0.540669	0.585235	0.599416	0.565862			334.79	-0.637979	-0.697593	-0.693027	-0.514078	-0.543935	-0.545544	-0.634088
334.99	0.577648	0.608694	0.611357	0.537584	0.58802	0.594974	0.567376			334.99	-0.63904	-0.69877	-0.693793	-0.517163	-0.54115	-0.549985	-0.632573
335.19	0.576751	0.608737	0.61169	0.534833	0.586529	0.597544	0.566003			335.19	-0.639937	-0.698727	-0.69346	-0.519914	-0.542641	-0.547416	-0.633946
335.4	0.578071	0.61056	0.613715	0.539965	0.585043	0.596865	0.570721			335.4	-0.638616	-0.696904	-0.691435	-0.514782	-0.544127	-0.548095	-0.629229
335.59	0.579282	0.611411	0.611279	0.539743	0.588631	0.595536	0.56502			335.59	-0.637406	-0.696053	-0.693872	-0.515004	-0.540539	-0.549424	-0.634929
335.8	0.57991	0.607263	0.615406	0.538555	0.585874	0.596699	0.562331			335.8	-0.636777	-0.700202	-0.689745	-0.516192	-0.543297	-0.54826	-0.637619
335.99	0.578528	0.607461	0.614605	0.539486	0.588213	0.59433	0.570785			335.99	-0.638159	-0.700003	-0.690546	-0.515261	-0.540957	-0.550629	-0.629164
336.19	0.57763	0.611952	0.613289	0.539783	0.586334	0.598552	0.571568			336.19	-0.639057	-0.695512	-0.691861	-0.514964	-0.542837	-0.546408	-0.628381
336.39	0.577762	0.609933	0.614291	0.53524	0.588859	0.598019	0.567961			336.39	-0.638926	-0.697531	-0.69086	-0.519507	-0.540311	-0.54694	-0.631988
336.59	0.57793	0.608273	0.614599	0.538099	0.58728	0.598479	0.571105			336.59	-0.638758	-0.699192	-0.690552	-0.516648	-0.541891	-0.546481	-0.628844
336.79	0.575288	0.60776	0.617188	0.538777	0.585783	0.598279	0.564767			336.79	-0.641399	-0.699704	-0.687963	-0.51597	-0.543387	-0.54668	-0.635183
336.99	0.580255	0.611956	0.614203	0.535706	0.586209	0.598661	0.563831			336.99	-0.636432	-0.695508	-0.690948	-0.519041	-0.542961	-0.546299	-0.636118
337.19	0.581091	0.610297	0.614337	0.537084	0.587351	0.599579	0.570388			337.19	-0.635596	-0.697168	-0.690814	-0.517663	-0.541819	-0.54538	-0.629561
337.4	0.580046	0.609853	0.610492	0.537811	0.589989	0.592936	0.569724			337.4	-0.636641	-0.697611	-0.694659	-0.516936	-0.539181	-0.552023	-0.630225
337.59	0.582523	0.60937	0.615054	0.537129	0.58736	0.598785	0.56639			337.59	-0.634165	-0.698094	-0.690097	-0.517618	-0.54181	-0.546174	-0.63356
337.79	0.580324	0.610019	0.614811	0.53807	0.587329	0.600026	0.569016			337.79	-0.636363	-0.697445	-0.69034	-0.516676	-0.541841	-0.544933	-0.630934
337.99	0.579076	0.614216	0.612127	0.541011	0.589023	0.599342	0.568825			337.99	-0.637611	-0.693249	-0.693024	-0.513736	-0.540147	-0.545617	-0.631125
338.19	0.580405	0.606508	0.612804	0.540339	0.584944	0.59861	0.569815			338.19	-0.636283	-0.700956	-0.692347	-0.514407	-0.544227	-0.546349	-0.630135
338.39	0.577156	0.609475	0.61267	0.538968	0.588045	0.597157	0.563942			338.39	-0.639531	-0.69799	-0.692481	-0.515779	-0.541126	-0.547802	-0.636008
338.59	0.578484	0.609093	0.611049	0.536936	0.588724	0.596992	0.569396			338.59	-0.638203	-0.698371	-0.694101	-0.51781	-0.540446	-0.547967	-0.630553
338.79	0.583082	0.606409	0.616645	0.536871	0.585202	0.599189	0.565968			338.79	-0.633605	-0.701056	-0.688505	-0.517876	-0.543969	-0.54577	-0.633982
338.99	0.578614	0.611475	0.61486	0.539371	0.58716	0.596741	0.56861			338.99	-0.638074	-0.69599	-0.690291	-0.515375	-0.54201	-0.548219	-0.63134
339.19	0.578668	0.609636	0.614254	0.539758	0.589765	0.598065	0.568499			339.19	-0.63802	-0.697828	-0.690897	-0.514989	-0.539405	-0.546895	-0.631451
339.39	0.576806	0.607715	0.611	0.54054	0.590023	0.599335	0.565575			339.39	-0.639881	-0.699749	-0.694151	-0.514207	-0.539148	-0.545624	-0.634375
339.59	0.583126	0.610432	0.616493	0.536413	0.58694	0.597339	0.570841			339.59	-0.633561	-0.697033	-0.688657	-0.518334	-0.54223	-0.547621	-0.629108
339.79	0.578888	0.603555	0.614326	0.539691	0.584793	0.599583	0.567634			339.79	-0.637799	-0.703909	-0.690825	-0.515056	-0.544377	-0.545376	-0.632315
339.99	0.579136	0.61165	0.613794	0.536617	0.586799	0.601578	0.56871			339.99	-0.637551	-0.695814	-0.691357	-0.51813	-0.542371	-0.543381	-0.63124
340.19	0.580305	0.609464	0.617205	0.536081	0.58746	0.597137	0.567547			340.19	-0.636383	-0.698	-0.687945	-0.518666	-0.541711	-0.547822	-0.632403
340.39	0.57554	0.61109	0.613959	0.538357	0.587591	0.595161	0.568148			340.39	-0.641147	-0.696374	-0.691192	-0.51639	-0.54158	-0.549798	-0.631802
340.59	0.579102	0.610297	0.614324	0.538067	0.589907	0.597853	0.564507			340.59	-0.637585	-0.697167	-0.690827	-0.51668	-0.539264	-0.547106	-0.635442
340.79	0.582578	0.610175	0.616307	0.538652	0.58448	0.595565	0.574321			340.79	-0.634109	-0.697289	-0.688843	-0.516095	-0.54469	-0.549395	-0.625628
340.99	0.579703	0.608787	0.613815	0.541044	0.585488	0.596167	0.567948			340.99	-0.636984	-0.698677	-0.691336	-0.513703	-0.543682	-0.548793	-0.632002
341.19	0.582248	0.612027	0.614457	0.54004	0.58945	0.596655	0.571892			341.19	-0.634439	-0.695437	-0.690694	-0.514706	-0.539721	-0.548304	-0.628058
341.39	0.579121	0.6097	0.618151	0.540731	0.586871	0.598668	0.569776			341.39	-0.637566	-0.697764	-0.686999	-0.514016	-0.542299	-0.546291	-0.630174
341.59	0.578985	0.611994	0.614887	0.540549	0.587864	0.598971	0.568354			341.59	-0.637703	-0.69547	-0.690264	-0.514198	-0.541306	-0.545989	-0.631595
341.79	0.579591	0.610154	0.617647	0.541066	0.588329	0.595643	0.571448			341.79	-0.637097	-0.69731	-0.687503	-0.513681	-0.540841	-0.549317	-0.628502
342	0.58091	0.612947	0.617653	0.53819	0.58857	0.59814	0.565394			342	-0.635777	-0.694518	-0.687497	-0.516557	-0.5406	-0.546819	-0.634555
342.2	0.579959	0.609324	0.612806	0.539466	0.590718	0.600596	0.567771			342.2	-0.636729	-0.698141	-0.692344	-0.51528	-0.538452	-0.544364	-0.632178
342.4	0.582069	0.60874	0.614668	0.538389	0.589511	0.597347	0.56901			342.4	-0.634619	-0.698725	-0.690483	-0.516358	-0.539659	-0.547612	-0.630939
342.6	0.581175	0.609473	0.613846	0.535728	0.59056	0.602039	0.567655			342.6	-0.635513	-0.697992	-0.691305	-0.519019	-0.538611	-0.542921	-0.632295
342.8	0.582517	0.61184	0.611856	0.538967	0.587415	0.599608	0.569716			342.8	-0.63417	-0.695624	-0.693294	-0.515779	-0.541756	-0.545351	-0.630234
343	0.582504	0.615402	0.612977	0.541832	0.589333	0.59722	0.56467			343	-0.634184	-0.692062	-0.692174	-0.512914	-0.539837	-0.54774	-0.635279
343.2	0.583529	0.610939	0.610889	0.541322	0.586661	0.597804	0.569152			343.2	-0.633159	-0.696526	-0.694262	-0.513425	-0.542509	-0.547155	-0.630797
343.4	0.585042	0.614942	0.617081	0.540293	0.58554	0.598154	0.56822			343.4	-0.631645	-0.692523	-0.68807	-0.514454	-0.54363	-0.546805	-0.63173
343.6	0.583679	0.613901	0.613953	0.537705	0.588685	0.601788	0.571699			343.6	-0.633008	-0.693564	-0.691197	-0.517042	-0.540485	-0.543172	-0.628251
343.8	0.579077	0.610885	0.617877	0.539007	0.588571	0.599374	0.569568			343.8	-0.63761	-0.696579	-0.687273	-0.51574	-0.5406	-0.545585	-0.630382
344	0.581194	0.612227	0.617398	0.535679	0.58556	0.600567	0.569408			344	-0.635494	-0.695238	-0.687753	-0.519068	-0.54361	-0.544392	-0.630542
344.2	0.58146	0.61076	0.612044	0.539567	0.588243	0.601425	0.571712			344.2	-0.635228	-0.696705	-0.693106	-0.51518	-0.540928	-0.543535	-0.628238
344.4	0.580374	0.610841	0.615044	0.538905	0.59044	0.595908	0.568505			344.4	-0.636314	-0.696623	-0.690107	-0.515842	-0.53873	-0.549051	-0.631445
344.6	0.583205	0.61085	0.614932	0.540677	0.590042	0.598678	0.570725			344.6	-0.633482	-0.696614	-0.690218	-0.51407	-0.539128	-0.546282	-0.629224
344.8	0.581897	0.612338	0.619542	0.542249	0.589043	0.599343	0.570295			344.8	-0.63479	-0.695127	-0.685609	-0.512498	-0.540127	-0.545617	-0.629654
344.99	0.578114	0.615545	0.613818	0.538595	0.588055	0.596633	0.569824			344.99	-0.638574	-0.69192	-0.691333	-0.516152	-0.541115	-0.548326	-0.630125
345.2	0.584743	0.609128	0.614259	0.543174	0.588709	0.601581	0.57023			345.2	-0.631945	-0.698336	-0.690891	-0.511572	-0.540462	-0.543379	-0.62972
345.4	0.582571	0.610754	0.613208	0.538095	0.589196	0.599604	0.568424			345.4	-0.634116	-0.69671	-0.691943	-0.516652	-0.539974	-0.545355	-0.631526
345.6	0.580989	0.614213	0.612046	0.538089	0.58852	0.599229	0.566626			345.6	-0.635699	-0.693251	-0.693104	-0.516658	-0.54065	-0.54573	-0.633323
345.79	0.579871	0.612285	0.618598	0.541643	0.58525	0.599777	0.570908			345.79	-0.636816	-0.695179	-0.686553	-0.513104	-0.543921	-0.545183	-0.629041
345.99	0.582696	0.612269	0.612753	0.539304	0.591762	0.598532	0.568111			345.99	-0.633991	-0.695195	-0.692398	-0.515443	-0.537408	-0.546427	-0.631838
346.2	0.582999	0.609271	0.613676	0.54074	0.589945	0.599016	0.56586			346.2	-0.633689	-0.698193	-0.691475	-0.514006	-0.539226	-0.545944	-0.63409
346.4	0.585126	0.611686	0.613813	0.540456	0.588667	0.599428	0.571361			346.4	-0.631562	-0.695778	-0.691337	-0.514291	-0.540503	-0.545531	-0.628588
346.6	0.583071	0.610931	0.613951	0.540516	0.586736	0.598352	0.568971			346.6	-0.633616	-0.696533	-0.6912	-0.514231	-0.542434	-0.546608	-0.630978
346.8	0.580976	0.610713	0.614378	0.538464	0.58852	0.600275	0.570014			346.8	-0.635711	-0.696752	-0.690773	-0.516283	-0.54065	-0.544685	-0.629936
347	0.582181	0.614372	0.61558	0.539248	0.590286	0.603345	0.572991			347	-0.634506	-0.693092	-0.689571	-0.515499	-0.538884	-0.541615	-0.626959
347.2	0.579607	0.614679	0.613906	0.540483	0.586921	0.599394	0.571294			347.2	-0.637081	-0.692785	-0.691245	-0.514264	-0.54225	-0.545565	-0.628656
347.39	0.579718	0.612139	0.615044	0.538281	0.588172	0.59883	0.570713			347.39	-0.636969	-0.695325	-0.690107	-0.516466	-0.540998	-0.54613	-0.629237
347.6	0.581433	0.612468	0.61702	0.537987	0.590362	0.600099	0.569207			347.6	-0.635254	-0.694997	-0.688131	-0.51676	-0.538809	-0.54486	-0.630742
347.8	0.584227	0.616062	0.611877	0.540724	0.586119	0.601125	0.571894			347.8	-0.63246	-0.691403	-0.693273	-0.514022	-0.543052	-0.543835	-0.628056
348	0.580387	0.608759	0.60888	0.538451	0.586012	0.600576	0.569592			348	-0.6363	-0.698705	-0.69627	-0.516295	-0.543159	-0.544383	-0.630358
348.2	0.58113	0.610745	0.614252	0.544431	0.591136	0.602322	0.570344			348.2	-0.635557	-0.696719	-0.690899	-0.510316	-0.538035	-0.542637	-0.629605
348.39	0.580642	0.609345	0.616955	0.539774	0.590298	0.600265	0.572147			348.39	-0.636045	-0.698119	-0.688196	-0.514973	-0.538872	-0.544695	-0.627803
348.6	0.581532	0.613803	0.61275	0.542525	0.58761	0.60217	0.571592			348.6	-0.635155	-0.693662	-0.692401	-0.512222	-0.54156	-0.54279	-0.628358
348.8	0.581837	0.609601	0.614292	0.540708	0.594566	0.601069	0.568575			348.8	-0.634851	-0.697863	-0.690859	-0.514039	-0.534604	-0.543891	-0.631375
349	0.582005	0.610381	0.615739	0.542643	0.588962	0.601517	0.568757			349	-0.634682	-0.697083	-0.689412	-0.512104	-0.540208	-0.543443	-0.631193
349.2	0.582678	0.613119	0.612584	0.542184	0.590345	0.603488	0.569797			349.2	-0.634009	-0.694346	-0.692567	-0.512563	-0.538825	-0.541471	-0.630153
349.4	0.586474	0.610708	0.613402	0.53969	0.589941	0.596477	0.572332			349.4	-0.630213	-0.696756	-0.691748	-0.515057	-0.53923	-0.548482	-0.627617
349.6	0.581652	0.610655	0.614629	0.538092	0.590321	0.599572	0.572581			349.6	-0.635035	-0.69681	-0.690522	-0.516655	-0.53885	-0.545387	-0.627369
349.8	0.577994	0.612049	0.618006	0.54046	0.58644	0.596448	0.574375			349.8	-0.638693	-0.695416	-0.687145	-0.514287	-0.54273	-0.548512	-0.625575
350	0.580285	0.607694	0.613622	0.543047	0.587964	0.601116	0.571511			350	-0.636402	-0.69977	-0.691528	-0.5117	-0.541206	-0.543843	-0.628439
350.2	0.581224	0.610223	0.616608	0.540078	0.591799	0.602554	0.570215			350.2	-0.635464	-0.697242	-0.688543	-0.514669	-0.537371	-0.542405	-0.629734
350.4	0.583656	0.612424	0.617442	0.54399	0.591118	0.6008	0.56654			350.4	-0.633032	-0.69504	-0.687709	-0.510757	-0.538053	-0.54416	-0.633409
350.59	0.580092	0.610257	0.617579	0.539795	0.590901	0.601078	0.571826			350.59	-0.636596	-0.697207	-0.687571	-0.514952	-0.538269	-0.543881	-0.628124
350.8	0.57787	0.605647	0.606493	0.535013	0.585971	0.606331	0.577481			350.8	-0.638817	-0.701818	-0.698658	-0.519734	-0.543199	-0.538629	-0.622469
350.99	0.576035	0.601414	0.605051	0.529531	0.586011	0.606825	0.575761			350.99	-0.640652	-0.70605	-0.7001	-0.525216	-0.543159	-0.538134	-0.624188
351.19	0.574857	0.60312	0.604775	0.532751	0.58549	0.605569	0.579118			351.19	-0.64183	-0.704345	-0.700375	-0.521996	-0.543681	-0.539391	-0.620832
351.39	0.576858	0.603032	0.602735	0.53262	0.582563	0.604879	0.569148			351.39	-0.63983	-0.704433	-0.702415	-0.522127	-0.546607	-0.54008	-0.630802
351.59	0.575086	0.603255	0.604153	0.53498	0.588025	0.605133	0.572295			351.59	-0.641601	-0.704209	-0.700997	-0.519767	-0.541145	-0.539826	-0.627654
351.79	0.577538	0.604155	0.604259	0.531965	0.586058	0.604691	0.576196			351.79	-0.639149	-0.703309	-0.700892	-0.522782	-0.543112	-0.540268	-0.623753
351.99	0.574173	0.604288	0.60307	0.533301	0.583981	0.60457	0.574691			351.99	-0.642514	-0.703176	-0.702081	-0.521446	-0.545189	-0.540389	-0.625259
352.19	0.576689	0.602364	0.604408	0.532415	0.581962	0.601985	0.572285			352.19	-0.639999	-0.7051	-0.700742	-0.522331	-0.547208	-0.542974	-0.627665
352.39	0.574926	0.598807	0.604047	0.533077	0.588407	0.604221	0.579358			352.39	-0.641762	-0.708657	-0.701104	-0.521669	-0.540763	-0.540738	-0.620592
352.59	0.573636	0.603946	0.605586	0.53	0.583813	0.597598	0.577448			352.59	-0.643051	-0.703519	-0.699565	-0.524747	-0.545357	-0.547362	-0.622502
352.79	0.572441	0.59891	0.599582	0.534937	0.583521	0.605209	0.57231			352.79	-0.644246	-0.708554	-0.705568	-0.51981	-0.545649	-0.53975	-0.62764
352.99	0.572698	0.600561	0.605971	0.531901	0.581534	0.603491	0.575085			352.99	-0.643989	-0.706903	-0.69918	-0.522846	-0.547636	-0.541469	-0.624865
353.19	0.571942	0.600988	0.606374	0.533782	0.585969	0.599994	0.57339			353.19	-0.644745	-0.706477	-0.698776	-0.520965	-0.543201	-0.544965	-0.626559
353.39	0.568811	0.60371	0.60512	0.531561	0.583624	0.605048	0.571248			353.39	-0.647876	-0.703755	-0.70003	-0.523185	-0.545547	-0.539911	-0.628702
353.59	0.572431	0.603395	0.603588	0.530049	0.58279	0.604131	0.573982			353.59	-0.644256	-0.70407	-0.701563	-0.524698	-0.54638	-0.540828	-0.625967
353.79	0.57271	0.603869	0.600663	0.5307	0.58505	0.600184	0.573923			353.79	-0.643978	-0.703596	-0.704487	-0.524046	-0.54412	-0.544775	-0.626027
353.99	0.572397	0.60323	0.603079	0.532561	0.586388	0.602558	0.57407			353.99	-0.644291	-0.704234	-0.702071	-0.522185	-0.542783	-0.542401	-0.62588
354.19	0.575564	0.601234	0.605315	0.533811	0.58057	0.608127	0.572575			354.19	-0.641123	-0.706231	-0.699835	-0.520936	-0.5486	-0.536833	-0.627374
354.39	0.572454	0.603002	0.604541	0.529471	0.584595	0.600412	0.574688			354.39	-0.644233	-0.704462	-0.700609	-0.525275	-0.544575	-0.544547	-0.625261
354.59	0.570927	0.604135	0.606116	0.533499	0.581396	0.604776	0.574748			354.59	-0.645761	-0.703329	-0.699035	-0.521248	-0.547775	-0.540184	-0.625202
354.79	0.575483	0.600849	0.604032	0.534511	0.5834	0.605237	0.572775			354.79	-0.641205	-0.706615	-0.701118	-0.520236	-0.54577	-0.539722	-0.627175
354.99	0.574406	0.603943	0.603658	0.530888	0.585035	0.599973	0.572233			354.99	-0.642281	-0.703522	-0.701493	-0.523859	-0.544135	-0.544986	-0.627716
355.19	0.573656	0.602807	0.603778	0.532934	0.582496	0.602766	0.573807			355.19	-0.643031	-0.704658	-0.701372	-0.521813	-0.546674	-0.542194	-0.626143
355.39	0.575405	0.603993	0.599372	0.535091	0.581041	0.605246	0.577008			355.39	-0.641282	-0.703471	-0.705779	-0.519655	-0.548129	-0.539713	-0.622942
355.59	0.574582	0.60153	0.606929	0.53356	0.581981	0.605621	0.5714			355.59	-0.642105	-0.705935	-0.698222	-0.521187	-0.54719	-0.539338	-0.62855
355.79	0.57275	0.60142	0.60137	0.53392	0.583649	0.607367	0.573275			355.79	-0.643937	-0.706044	-0.703781	-0.520826	-0.545522	-0.537593	-0.626675
355.99	0.573869	0.603974	0.602813	0.536141	0.583105	0.602531	0.576076			355.99	-0.642819	-0.70349	-0.702338	-0.518605	-0.546065	-0.542428	-0.623874
356.19	0.576237	0.605387	0.606246	0.535841	0.585696	0.607164	0.574395			356.19	-0.640451	-0.702078	-0.698905	-0.518905	-0.543474	-0.537795	-0.625555
356.39	0.575337	0.603984	0.606949	0.53414	0.584595	0.604265	0.576949			356.39	-0.641351	-0.703481	-0.698201	-0.520607	-0.544575	-0.540694	-0.623001
356.59	0.572962	0.605811	0.606091	0.533517	0.588154	0.604605	0.58025			356.59	-0.643726	-0.701653	-0.69906	-0.521229	-0.541017	-0.540355	-0.6197
356.79	0.577498	0.604198	0.607128	0.532789	0.585298	0.605314	0.575728			356.79	-0.639189	-0.703266	-0.698022	-0.521958	-0.543872	-0.539645	-0.624221
356.99	0.573833	0.604224	0.608493	0.533392	0.587629	0.60935	0.578821			356.99	-0.642855	-0.70324	-0.696658	-0.521355	-0.541542	-0.535609	-0.621128
357.19	0.57345	0.608006	0.609326	0.534815	0.586397	0.604006	0.579242			357.19	-0.643238	-0.699458	-0.695824	-0.519932	-0.542774	-0.540954	-0.620708
357.39	0.577487	0.60106	0.605238	0.53556	0.585498	0.606109	0.580237			357.39	-0.639201	-0.706404	-0.699912	-0.519187	-0.543672	-0.53885	-0.619713
357.59	0.575296	0.608931	0.605396	0.538036	0.584816	0.605252	0.574692			357.59	-0.641392	-0.698533	-0.699755	-0.51671	-0.544354	-0.539708	-0.625258
357.79	0.571874	0.605804	0.603349	0.533258	0.587141	0.605298	0.577014			357.79	-0.644813	-0.70166	-0.701801	-0.521489	-0.542029	-0.539662	-0.622936
357.99	0.578259	0.607615	0.60891	0.5417	0.587469	0.607603	0.577438			357.99	-0.638428	-0.69985	-0.696241	-0.513047	-0.541702	-0.537357	-0.622512
358.19	0.57404	0.609909	0.60961	0.533302	0.587935	0.609882	0.583249			358.19	-0.642647	-0.697555	-0.69554	-0.521445	-0.541235	-0.535077	-0.616701
358.39	0.575585	0.605746	0.607204	0.537102	0.588301	0.606141	0.579703			358.39	-0.641103	-0.701718	-0.697947	-0.517644	-0.540869	-0.538818	-0.620247
358.59	0.578844	0.609843	0.609933	0.540344	0.588378	0.608336	0.582389			358.59	-0.637843	-0.697622	-0.695218	-0.514402	-0.540792	-0.536624	-0.61756
358.79	0.577794	0.604387	0.608913	0.540839	0.592803	0.607879	0.580101			358.79	-0.638893	-0.703078	-0.696237	-0.513908	-0.536368	-0.53708	-0.619849
358.99	0.580167	0.610749	0.613659	0.537976	0.591173	0.612079	0.579598			358.99	-0.636521	-0.696715	-0.691492	-0.51677	-0.537997	-0.532881	-0.620351
359.19	0.578247	0.608763	0.605972	0.539912	0.589	0.61438	0.576822			359.19	-0.63844	-0.698702	-0.699179	-0.514835	-0.54017	-0.530579	-0.623128
359.39	0.579336	0.610239	0.611529	0.540796	0.591782	0.612713	0.583114			359.39	-0.637352	-0.697226	-0.693621	-0.513951	-0.537388	-0.532246	-0.616835
359.59	0.578074	0.605835	0.60565	0.541409	0.589079	0.6139	0.582826			359.59	-0.638613	-0.70163	-0.699501	-0.513338	-0.540092	-0.531059	-0.617124
359.79	0.578424	0.60564	0.610838	0.539317	0.590084	0.612863	0.582521			359.79	-0.638264	-0.701824	-0.694313	-0.51543	-0.539087	-0.532096	-0.617428
359.99	0.581562	0.608247	0.612969	0.540024	0.591249	0.614243	0.580153			359.99	-0.635125	-0.699217	-0.692182	-0.514723	-0.537922	-0.530717	-0.619797
360.19	0.578964	0.608461	0.613484	0.539692	0.593676	0.613515	0.585896			360.19	-0.637723	-0.699003	-0.691666	-0.515054	-0.535494	-0.531444	-0.614054
360.39	0.582813	0.614733	0.616126	0.542524	0.593682	0.61167	0.583492			360.39	-0.633874	-0.692732	-0.689024	-0.512222	-0.535489	-0.533289	-0.616458
360.59	0.582773	0.613793	0.613233	0.540946	0.592709	0.610961	0.586081			360.59	-0.633915	-0.693672	-0.691918	-0.513801	-0.536461	-0.533999	-0.613869
360.79	0.583114	0.60976	0.612072	0.543955	0.597406	0.615221	0.587395			360.79	-0.633573	-0.697704	-0.693079	-0.510792	-0.531764	-0.529738	-0.612555
360.99	0.581617	0.615064	0.614794	0.541296	0.593134	0.614156	0.585874			360.99	-0.63507	-0.6924	-0.690356	-0.513451	-0.536037	-0.530803	-0.614075
361.19	0.583653	0.617655	0.611586	0.541396	0.596215	0.618705	0.588403			361.19	-0.633034	-0.68981	-0.693564	-0.513351	-0.532956	-0.526254	-0.611547
361.39	0.582521	0.611305	0.612403	0.543862	0.599494	0.608905	0.591436			361.39	-0.634167	-0.696159	-0.692747	-0.510885	-0.529676	-0.536055	-0.608514
361.59	0.583532	0.614596	0.614769	0.548793	0.596778	0.615549	0.59182			361.59	-0.633155	-0.692869	-0.690381	-0.505953	-0.532392	-0.52941	-0.608129
361.79	0.579723	0.617725	0.612726	0.545277	0.596672	0.614584	0.590176			361.79	-0.636965	-0.68974	-0.692425	-0.50947	-0.532498	-0.530375	-0.609774
361.99	0.584775	0.610939	0.618755	0.547628	0.595393	0.620903	0.593065			361.99	-0.631912	-0.696525	-0.686395	-0.507119	-0.533777	-0.524056	-0.606884
362.19	0.585158	0.614008	0.613449	0.54582	0.59854	0.619696	0.588531			362.19	-0.63153	-0.693456	-0.691702	-0.508927	-0.53063	-0.525263	-0.611418
362.39	0.586627	0.613883	0.613688	0.544557	0.597808	0.618174	0.589743			362.39	-0.63006	-0.693581	-0.691462	-0.51019	-0.531362	-0.526786	-0.610206
362.59	0.5869	0.615559	0.618271	0.544551	0.595803	0.616684	0.591353			362.59	-0.629788	-0.691906	-0.686879	-0.510195	-0.533367	-0.528275	-0.608597
362.79	0.587091	0.614667	0.617713	0.544641	0.595688	0.618805	0.596461			362.79	-0.629596	-0.692797	-0.687438	-0.510106	-0.533483	-0.526154	-0.603489
362.99	0.586728	0.61754	0.619015	0.547965	0.59881	0.622653	0.588432			362.99	-0.629959	-0.689925	-0.686136	-0.506782	-0.53036	-0.522306	-0.611517
363.19	0.584484	0.617868	0.618543	0.549258	0.595914	0.622269	0.595106			363.19	-0.632203	-0.689597	-0.686607	-0.505489	-0.533257	-0.522691	-0.604844
363.39	0.588174	0.619461	0.61623	0.550485	0.600582	0.623787	0.595627			363.39	-0.628513	-0.688003	-0.68892	-0.504262	-0.528589	-0.521172	-0.604322
363.59	0.587263	0.620502	0.6166	0.548579	0.599651	0.622667	0.597231			363.59	-0.629424	-0.686962	-0.688551	-0.506167	-0.529519	-0.522292	-0.602719
363.79	0.587167	0.619843	0.617476	0.549095	0.599778	0.620848	0.593702			363.79	-0.629521	-0.687622	-0.687674	-0.505651	-0.529392	-0.524111	-0.606248
363.99	0.587609	0.621235	0.621669	0.549786	0.604461	0.621402	0.593566			363.99	-0.629078	-0.686229	-0.683482	-0.50496	-0.524709	-0.523557	-0.606383
364.19	0.587377	0.620802	0.616311	0.550053	0.601727	0.627265	0.597717			364.19	-0.62931	-0.686662	-0.688839	-0.504694	-0.527443	-0.517694	-0.602233
364.39	0.589501	0.6267	0.617679	0.553151	0.601825	0.624604	0.596539			364.39	-0.627187	-0.680765	-0.687472	-0.501596	-0.527346	-0.520356	-0.603411
364.59	0.590528	0.621822	0.62228	0.552994	0.60209	0.624045	0.595665			364.59	-0.626159	-0.685642	-0.68287	-0.501753	-0.52708	-0.520914	-0.604285
364.79	0.590336	0.622173	0.625851	0.552429	0.601105	0.624023	0.60168			364.79	-0.626351	-0.685292	-0.679299	-0.502317	-0.528065	-0.520937	-0.598269
364.99	0.590934	0.623	0.622863	0.555675	0.603639	0.620983	0.596371			364.99	-0.625753	-0.684464	-0.682287	-0.499071	-0.525531	-0.523976	-0.603579
365.19	0.58992	0.626224	0.624256	0.554637	0.605502	0.625267	0.598723			365.19	-0.626767	-0.681241	-0.680894	-0.50011	-0.523668	-0.519693	-0.601227
365.39	0.591555	0.628207	0.620927	0.554511	0.605405	0.62445	0.597531			365.39	-0.625133	-0.679258	-0.684223	-0.500235	-0.523765	-0.520509	-0.602418
365.59	0.592529	0.62381	0.62533	0.556179	0.605525	0.63308	0.599222			365.59	-0.624159	-0.683654	-0.679821	-0.498568	-0.523645	-0.51188	-0.600727
365.79	0.591239	0.624205	0.626927	0.557381	0.608697	0.63087	0.597347			365.79	-0.625449	-0.68326	-0.678224	-0.497366	-0.520474	-0.51409	-0.602602
365.99	0.593483	0.627297	0.625352	0.558448	0.607808	0.624219	0.599884			365.99	-0.623204	-0.680168	-0.679799	-0.496299	-0.521362	-0.52074	-0.600066
366.19	0.592912	0.628255	0.626898	0.558943	0.606383	0.627939	0.605001			366.19	-0.623775	-0.679209	-0.678252	-0.495804	-0.522787	-0.51702	-0.594948
366.39	0.592636	0.626842	0.624104	0.557473	0.609648	0.626576	0.599778			366.39	-0.624051	-0.680622	-0.681046	-0.497273	-0.519522	-0.518384	-0.600172
366.59	0.594661	0.628455	0.625695	0.556668	0.610184	0.627766	0.60304			366.59	-0.622026	-0.679009	-0.679455	-0.498078	-0.518986	-0.517193	-0.596909
366.79	0.596182	0.634146	0.625352	0.560326	0.612956	0.632648	0.608596			366.79	-0.620505	-0.673319	-0.679799	-0.494421	-0.516214	-0.512312	-0.591353
366.99	0.599126	0.633389	0.629161	0.556379	0.612836	0.631986	0.607088			366.99	-0.617561	-0.674076	-0.67599	-0.498368	-0.516334	-0.512973	-0.592861
367.19	0.599837	0.630258	0.629857	0.559588	0.61138	0.630868	0.607893			367.19	-0.61685	-0.677207	-0.675293	-0.495159	-0.51779	-0.514091	-0.592057
367.39	0.596544	0.628843	0.631503	0.557707	0.611499	0.634191	0.605939			367.39	-0.620143	-0.678621	-0.673647	-0.497039	-0.517671	-0.510769	-0.594011
367.59	0.59824	0.635879	0.630488	0.559407	0.610936	0.635579	0.609392			367.59	-0.618448	-0.671585	-0.674663	-0.49534	-0.518234	-0.50938	-0.590557
367.79	0.599684	0.636886	0.629991	0.56346	0.614234	0.632289	0.61174			367.79	-0.617003	-0.670579	-0.67516	-0.491287	-0.514936	-0.51267	-0.588209
367.99	0.599374	0.633575	0.632673	0.564375	0.613983	0.632179	0.608848			367.99	-0.617313	-0.67389	-0.672478	-0.490372	-0.515187	-0.51278	-0.591102
368.19	0.601224	0.635396	0.632557	0.564781	0.612136	0.633452	0.60803			368.19	-0.615464	-0.672068	-0.672593	-0.489966	-0.517035	-0.511507	-0.59192
368.39	0.598666	0.635961	0.634004	0.56316	0.614772	0.637067	0.614628			368.39	-0.618021	-0.671503	-0.671147	-0.491587	-0.514398	-0.507893	-0.585321
368.59	0.600285	0.634229	0.639303	0.566517	0.618157	0.639708	0.612414			368.59	-0.616402	-0.673236	-0.665847	-0.48823	-0.511013	-0.505251	-0.587535
368.79	0.600694	0.638934	0.633396	0.565316	0.616011	0.639262	0.609855			368.79	-0.615993	-0.66853	-0.671755	-0.489431	-0.51316	-0.505697	-0.590094
368.99	0.601979	0.637267	0.636246	0.566404	0.616473	0.63621	0.615339			368.99	-0.614708	-0.670197	-0.668905	-0.488343	-0.512697	-0.50875	-0.584611
369.19	0.605048	0.640317	0.635877	0.567113	0.617941	0.640895	0.614472			369.19	-0.611639	-0.667148	-0.669273	-0.487634	-0.51123	-0.504064	-0.585478
369.39	0.603793	0.641436	0.636497	0.56635	0.618235	0.640024	0.617097			369.39	-0.612894	-0.666029	-0.668653	-0.488396	-0.510935	-0.504936	-0.582852
369.59	0.606963	0.639504	0.634532	0.564671	0.617733	0.641548	0.613308			369.59	-0.609724	-0.66796	-0.670619	-0.490076	-0.511437	-0.503411	-0.586641
369.79	0.605395	0.640393	0.636632	0.564114	0.619035	0.642616	0.613982			369.79	-0.611292	-0.667071	-0.668519	-0.490632	-0.510135	-0.502343	-0.585967
369.99	0.605677	0.639852	0.635645	0.568311	0.622559	0.640575	0.619459			369.99	-0.611011	-0.667612	-0.669505	-0.486436	-0.506611	-0.504385	-0.580491
370.19	0.605066	0.643831	0.638375	0.566639	0.622263	0.64296	0.613591			370.19	-0.611622	-0.663634	-0.666776	-0.488108	-0.506907	-0.501999	-0.586358
370.39	0.606282	0.639359	0.640395	0.567197	0.620554	0.641648	0.619981			370.39	-0.610405	-0.668106	-0.664756	-0.48755	-0.508616	-0.503311	-0.579969
370.59	0.610676	0.642815	0.635627	0.570289	0.621114	0.64469	0.616558			370.59	-0.606011	-0.664649	-0.669523	-0.484458	-0.508056	-0.50027	-0.583391
370.79	0.610572	0.645282	0.64154	0.573409	0.624603	0.643994	0.621608			370.79	-0.606115	-0.662182	-0.66361	-0.481338	-0.504567	-0.500966	-0.578342
370.99	0.611136	0.641261	0.637996	0.570449	0.626406	0.642753	0.619557			370.99	-0.605552	-0.666203	-0.667154	-0.484298	-0.502764	-0.502206	-0.580392
371.19	0.615319	0.647415	0.639918	0.574149	0.624075	0.645853	0.620536			371.19	-0.601369	-0.660049	-0.665232	-0.480597	-0.505095	-0.499106	-0.579414
371.39	0.612505	0.650571	0.638414	0.57641	0.626001	0.649049	0.617717			371.39	-0.604182	-0.656894	-0.666736	-0.478336	-0.50317	-0.495911	-0.582233
371.59	0.609251	0.646635	0.644279	0.573295	0.625717	0.648169	0.625918			371.59	-0.607436	-0.660829	-0.660871	-0.481452	-0.503453	-0.49679	-0.574031
371.79	0.611827	0.646811	0.643417	0.57264	0.625076	0.648577	0.628093			371.79	-0.60486	-0.660654	-0.661733	-0.482107	-0.504094	-0.496383	-0.571857
371.99	0.612026	0.64696	0.643438	0.575515	0.624893	0.64933	0.622086			371.99	-0.604661	-0.660505	-0.661712	-0.479232	-0.504277	-0.49563	-0.577864
372.19	0.611799	0.646892	0.647106	0.577917	0.629476	0.650767	0.627544			372.19	-0.604889	-0.660572	-0.658044	-0.47683	-0.499695	-0.494192	-0.572406
372.39	0.614471	0.649672	0.649821	0.576045	0.627651	0.647187	0.623684			372.39	-0.602216	-0.657793	-0.655329	-0.478701	-0.501519	-0.497773	-0.576266
372.59	0.615744	0.648969	0.648266	0.576046	0.628258	0.648142	0.62696			372.59	-0.600943	-0.658495	-0.656885	-0.478701	-0.500912	-0.496817	-0.57299
372.79	0.616686	0.648096	0.65088	0.577658	0.632003	0.655808	0.629477			372.79	-0.600002	-0.659369	-0.65427	-0.477089	-0.497167	-0.489151	-0.570472
372.99	0.615076	0.651215	0.646548	0.577654	0.630959	0.655407	0.628572			372.99	-0.601611	-0.656249	-0.658602	-0.477092	-0.498211	-0.489552	-0.571377
373.19	0.614951	0.656079	0.651015	0.579286	0.632265	0.652528	0.630619			373.19	-0.601736	-0.651385	-0.654135	-0.475461	-0.496906	-0.492432	-0.56933
373.39	0.621159	0.653089	0.650098	0.582856	0.631677	0.649898	0.632034			373.39	-0.595529	-0.654375	-0.655052	-0.47189	-0.497493	-0.495061	-0.567915
373.59	0.615424	0.65373	0.650089	0.581397	0.633715	0.65206	0.62813			373.59	-0.601264	-0.653734	-0.655062	-0.47335	-0.495456	-0.4929	-0.57182
373.79	0.620762	0.657019	0.64895	0.578624	0.631901	0.655639	0.627477			373.79	-0.595926	-0.650445	-0.6562	-0.476123	-0.497269	-0.489321	-0.572472
373.99	0.621145	0.655908	0.652352	0.580427	0.633045	0.65393	0.631786			373.99	-0.595542	-0.651556	-0.652798	-0.47432	-0.496125	-0.49103	-0.568163
374.19	0.622444	0.65524	0.650752	0.580234	0.635375	0.653193	0.62978			374.19	-0.594243	-0.652224	-0.654398	-0.474512	-0.493795	-0.491766	-0.57017
374.39	0.617411	0.657132	0.653441	0.582273	0.635444	0.654379	0.636662			374.39	-0.599276	-0.650333	-0.65171	-0.472474	-0.493727	-0.49058	-0.563288
374.59	0.623942	0.659268	0.655216	0.583284	0.635813	0.659663	0.632772			374.59	-0.592745	-0.648196	-0.649934	-0.471463	-0.493357	-0.485297	-0.567178
374.79	0.620693	0.657994	0.652742	0.584712	0.635914	0.657687	0.634857			374.79	-0.595994	-0.64947	-0.652408	-0.470034	-0.493257	-0.487273	-0.565092
374.99	0.621738	0.655134	0.652746	0.584613	0.635016	0.660454	0.634013			374.99	-0.59495	-0.652331	-0.652404	-0.470134	-0.494154	-0.484505	-0.565937
375.19	0.62396	0.662124	0.653146	0.581812	0.637494	0.661347	0.634847			375.19	-0.592728	-0.64534	-0.652005	-0.472935	-0.491676	-0.483613	-0.565103
375.39	0.62407	0.663298	0.658371	0.587852	0.638374	0.66061	0.638113			375.39	-0.592617	-0.644167	-0.646779	-0.466894	-0.490796	-0.48435	-0.561837
375.59	0.624041	0.66184	0.659481	0.587968	0.640447	0.661443	0.635627			375.59	-0.592646	-0.645624	-0.645669	-0.466779	-0.488723	-0.483517	-0.564322
375.79	0.624098	0.664668	0.659814	0.586439	0.642474	0.664286	0.637031			375.79	-0.592589	-0.642796	-0.645336	-0.468308	-0.486697	-0.480673	-0.562918
375.99	0.624532	0.66454	0.656048	0.589881	0.63983	0.661645	0.640525			375.99	-0.592156	-0.642924	-0.649102	-0.464865	-0.48934	-0.483315	-0.559424
376.19	0.626154	0.666721	0.658117	0.588963	0.642927	0.666292	0.640185			376.19	-0.590533	-0.640743	-0.647034	-0.465784	-0.486243	-0.478667	-0.559765
376.39	0.627603	0.668864	0.656927	0.591921	0.642125	0.663818	0.642323			376.39	-0.589084	-0.638601	-0.648224	-0.462826	-0.487046	-0.481141	-0.557627
376.59	0.628518	0.666045	0.662571	0.590483	0.644053	0.668138	0.642285			376.59	-0.58817	-0.641419	-0.64258	-0.464264	-0.485117	-0.476822	-0.557665
376.79	0.628402	0.662088	0.659701	0.588649	0.642406	0.667309	0.641711			376.79	-0.588285	-0.645376	-0.64545	-0.466097	-0.486765	-0.47765	-0.558239
376.99	0.63062	0.669516	0.657987	0.589886	0.646698	0.670818	0.641878			376.99	-0.586068	-0.637948	-0.647163	-0.464861	-0.482472	-0.474141	-0.558072
377.19	0.630477	0.664694	0.660692	0.590907	0.646631	0.667808	0.645172			377.19	-0.58621	-0.64277	-0.644458	-0.46384	-0.482539	-0.477152	-0.554778
377.39	0.630136	0.667907	0.668215	0.594047	0.646504	0.668411	0.644338			377.39	-0.586551	-0.639558	-0.636936	-0.4607	-0.482666	-0.476549	-0.555612
377.59	0.631117	0.67204	0.662357	0.591528	0.647354	0.666708	0.647541			377.59	-0.58557	-0.635424	-0.642794	-0.463219	-0.481816	-0.478252	-0.552408
377.79	0.634757	0.666969	0.666422	0.594147	0.650386	0.668294	0.647501			377.79	-0.58193	-0.640495	-0.638729	-0.4606	-0.478785	-0.476665	-0.552449
377.99	0.637328	0.674205	0.667593	0.592298	0.65089	0.671874	0.647364			377.99	-0.57936	-0.63326	-0.637557	-0.462449	-0.47828	-0.473085	-0.552585
378.19	0.638125	0.672803	0.663421	0.595563	0.65113	0.66699	0.646546			378.19	-0.578562	-0.634661	-0.641729	-0.459184	-0.47804	-0.477969	-0.553403
378.39	0.634667	0.672646	0.664704	0.598311	0.648622	0.669683	0.649627			378.39	-0.58202	-0.634818	-0.640446	-0.456435	-0.480548	-0.475276	-0.550322
378.59	0.638754	0.673474	0.666954	0.59794	0.651662	0.672558	0.648631			378.59	-0.577933	-0.63399	-0.638197	-0.456807	-0.477508	-0.472401	-0.551319
378.79	0.635465	0.67391	0.67133	0.595574	0.649868	0.672656	0.651263			378.79	-0.581222	-0.633554	-0.63382	-0.459173	-0.479303	-0.472304	-0.548686
378.99	0.632556	0.674093	0.666797	0.597134	0.652075	0.6714	0.651308			378.99	-0.584132	-0.633371	-0.638353	-0.457613	-0.477096	-0.473559	-0.548642
379.19	0.637401	0.673765	0.673482	0.598894	0.652217	0.675462	0.655647			379.19	-0.579286	-0.633699	-0.631669	-0.455853	-0.476954	-0.469497	-0.544302
379.39	0.640004	0.676094	0.672748	0.600632	0.653674	0.67201	0.652651			379.39	-0.576683	-0.631371	-0.632402	-0.454115	-0.475496	-0.47295	-0.547299
379.59	0.636346	0.675109	0.673131	0.596649	0.655281	0.675159	0.652913			379.59	-0.580341	-0.632355	-0.632019	-0.458098	-0.473889	-0.4698	-0.547037
379.79	0.637389	0.672711	0.669232	0.601454	0.652656	0.674402	0.654773			379.79	-0.579298	-0.634753	-0.635918	-0.453292	-0.476515	-0.470558	-0.545177
379.99	0.640563	0.67608	0.672038	0.600371	0.655703	0.674434	0.653756			379.99	-0.576124	-0.631385	-0.633113	-0.454376	-0.473467	-0.470526	-0.546193
380.19	0.636755	0.682018	0.673304	0.601282	0.655319	0.677834	0.656515			380.19	-0.579932	-0.625446	-0.631846	-0.453465	-0.473852	-0.467125	-0.543435
380.39	0.64029	0.68061	0.67632	0.602894	0.655362	0.678148	0.654951			380.39	-0.576398	-0.626854	-0.628831	-0.451853	-0.473808	-0.466811	-0.544999
380.59	0.639826	0.679107	0.676527	0.605178	0.657316	0.679435	0.656964			380.59	-0.576861	-0.628357	-0.628624	-0.449569	-0.471855	-0.465525	-0.542986
380.79	0.63908	0.679845	0.677377	0.601494	0.657322	0.680066	0.658362			380.79	-0.577607	-0.627619	-0.627774	-0.453253	-0.471849	-0.464893	-0.541588
380.99	0.641057	0.684484	0.676118	0.604388	0.657119	0.683548	0.655864			380.99	-0.57563	-0.622981	-0.629032	-0.450359	-0.472051	-0.461412	-0.544085
381.19	0.645222	0.684021	0.676478	0.609277	0.660592	0.682471	0.655409			381.19	-0.571465	-0.623443	-0.628673	-0.44547	-0.468579	-0.462489	-0.54454
381.39	0.645716	0.684399	0.677615	0.605726	0.661007	0.682221	0.66055			381.39	-0.570972	-0.623065	-0.627536	-0.449021	-0.468163	-0.462739	-0.539399
381.59	0.644532	0.683736	0.67656	0.608822	0.661861	0.684966	0.657939			381.59	-0.572156	-0.623729	-0.62859	-0.445925	-0.467309	-0.459993	-0.54201
381.79	0.649787	0.688146	0.680538	0.606637	0.663003	0.684562	0.660569			381.79	-0.566901	-0.619319	-0.624613	-0.448109	-0.466167	-0.460397	-0.539381
381.99	0.647232	0.686556	0.67628	0.610298	0.663117	0.685312	0.66313			381.99	-0.569455	-0.620908	-0.62887	-0.444449	-0.466053	-0.459648	-0.536819
382.19	0.646108	0.68962	0.684199	0.607654	0.666557	0.683051	0.663535			382.19	-0.570579	-0.617844	-0.620952	-0.447092	-0.462614	-0.461908	-0.536415
382.39	0.646996	0.687951	0.67932	0.610474	0.666322	0.682742	0.664149			382.39	-0.569691	-0.619514	-0.625831	-0.444273	-0.462848	-0.462218	-0.535801
382.59	0.649974	0.690023	0.683383	0.609157	0.662924	0.686512	0.663511			382.59	-0.566713	-0.617441	-0.621767	-0.44559	-0.466246	-0.458448	-0.536438
382.79	0.650598	0.69061	0.681352	0.610174	0.664529	0.684697	0.666908			382.79	-0.56609	-0.616854	-0.623798	-0.444573	-0.464641	-0.460263	-0.533041
382.99	0.654262	0.687386	0.681588	0.610513	0.665708	0.686846	0.667585			382.99	-0.562425	-0.620078	-0.623562	-0.444233	-0.463462	-0.458113	-0.532364
383.19	0.651169	0.687648	0.687486	0.609915	0.667814	0.689402	0.668015			383.19	-0.565518	-0.619816	-0.617665	-0.444831	-0.461356	-0.455557	-0.531934
383.39	0.651439	0.690833	0.687588	0.614743	0.66652	0.689326	0.667585			383.39	-0.565248	-0.616632	-0.617562	-0.440004	-0.46265	-0.455634	-0.532365
383.59	0.655872	0.687689	0.686385	0.612366	0.666084	0.69294	0.670978			383.59	-0.560815	-0.619775	-0.618766	-0.44238	-0.463087	-0.452019	-0.528971
383.79	0.654197	0.68993	0.688914	0.613948	0.669318	0.69016	0.671452			383.79	-0.56249	-0.617534	-0.616236	-0.440799	-0.459853	-0.4548	-0.528498
383.99	0.656376	0.689827	0.685074	0.617804	0.672148	0.687626	0.670225			383.99	-0.560312	-0.617637	-0.620076	-0.436942	-0.457022	-0.457334	-0.529725
384.19	0.654705	0.692333	0.68883	0.616059	0.67045	0.691738	0.672338			384.19	-0.561983	-0.615131	-0.61632	-0.438688	-0.45872	-0.453222	-0.527612
384.39	0.65761	0.695481	0.687908	0.616829	0.676297	0.691972	0.673231			384.39	-0.559077	-0.611984	-0.617243	-0.437917	-0.452874	-0.452988	-0.526719
384.59	0.655006	0.696976	0.690017	0.619182	0.671604	0.693737	0.675395			384.59	-0.561681	-0.610489	-0.615134	-0.435565	-0.457566	-0.451222	-0.524555
384.79	0.656987	0.702014	0.690586	0.616246	0.677435	0.694917	0.676024			384.79	-0.5597	-0.60545	-0.614565	-0.438501	-0.451735	-0.450043	-0.523926
384.99	0.660033	0.697862	0.691288	0.618866	0.676805	0.692292	0.673859			384.99	-0.556655	-0.609602	-0.613863	-0.435881	-0.452366	-0.452668	-0.52609
385.19	0.662066	0.698787	0.694309	0.621065	0.674285	0.696553	0.673989			385.19	-0.554621	-0.608678	-0.610841	-0.433681	-0.454886	-0.448406	-0.525961
385.39	0.660643	0.701429	0.696081	0.620262	0.673595	0.696327	0.676715			385.39	-0.556045	-0.606035	-0.60907	-0.434485	-0.455575	-0.448632	-0.523234
385.59	0.661709	0.699772	0.694425	0.618721	0.67643	0.696605	0.675779			385.59	-0.554978	-0.607692	-0.610725	-0.436025	-0.45274	-0.448355	-0.524171
385.79	0.662353	0.700959	0.692153	0.620234	0.676883	0.698155	0.67849			385.79	-0.554335	-0.606505	-0.612998	-0.434512	-0.452288	-0.446804	-0.52146
385.99	0.660059	0.698024	0.694127	0.623238	0.680573	0.695514	0.676884			385.99	-0.556629	-0.60944	-0.611024	-0.431509	-0.448597	-0.449446	-0.523065
386.19	0.662338	0.699689	0.695152	0.62216	0.677488	0.70238	0.677787			386.19	-0.55435	-0.607776	-0.609999	-0.432586	-0.451682	-0.44258	-0.522163
386.39	0.663371	0.702023	0.696318	0.623761	0.682321	0.698846	0.678872			386.39	-0.553316	-0.605442	-0.608833	-0.430986	-0.44685	-0.446114	-0.521078
386.59	0.666657	0.701804	0.694187	0.623757	0.678799	0.700958	0.68437			386.59	-0.55003	-0.605661	-0.610964	-0.43099	-0.450371	-0.444002	-0.51558
386.79	0.664662	0.704061	0.699351	0.625183	0.67968	0.698183	0.681296			386.79	-0.552025	-0.603403	-0.605799	-0.429564	-0.44949	-0.446776	-0.518654
386.99	0.669767	0.703187	0.697233	0.624271	0.680304	0.703542	0.680669			386.99	-0.54692	-0.604277	-0.607917	-0.430475	-0.448866	-0.441417	-0.51928
387.19	0.666441	0.705091	0.698005	0.627269	0.681955	0.702362	0.683114			387.19	-0.550246	-0.602373	-0.607145	-0.427478	-0.447216	-0.442598	-0.516835
387.39	0.668952	0.70573	0.699235	0.626829	0.681632	0.702491	0.687478			387.39	-0.547735	-0.601734	-0.605916	-0.427918	-0.447538	-0.442468	-0.512471
387.59	0.669938	0.707917	0.703411	0.628108	0.685646	0.702917	0.682275			387.59	-0.546749	-0.599547	-0.60174	-0.426638	-0.443524	-0.442042	-0.517675
387.79	0.670215	0.713934	0.70042	0.63052	0.683077	0.705628	0.684436			387.79	-0.546473	-0.59353	-0.604731	-0.424227	-0.446093	-0.439332	-0.515514
387.99	0.669801	0.709765	0.700198	0.629338	0.686638	0.70672	0.688147			387.99	-0.546887	-0.597699	-0.604952	-0.425409	-0.442532	-0.438239	-0.511803
388.19	0.671062	0.708675	0.703887	0.63076	0.684018	0.703928	0.685581			388.19	-0.545626	-0.59879	-0.601264	-0.423986	-0.445153	-0.441032	-0.514369
388.39	0.671459	0.713099	0.700607	0.631939	0.68703	0.707649	0.688361			388.39	-0.545228	-0.594365	-0.604543	-0.422807	-0.44214	-0.437311	-0.511589
388.59	0.672197	0.707058	0.706017	0.632007	0.687777	0.708188	0.692436			388.59	-0.544491	-0.600406	-0.599134	-0.42274	-0.441393	-0.436772	-0.507514
388.79	0.672571	0.712276	0.705544	0.631356	0.694609	0.708322	0.689898			388.79	-0.544116	-0.595188	-0.599606	-0.423391	-0.434561	-0.436637	-0.510051
388.99	0.675907	0.713021	0.710729	0.632781	0.688404	0.708096	0.689717			388.99	-0.540781	-0.594443	-0.594422	-0.421966	-0.440766	-0.436864	-0.510233
389.19	0.673305	0.713049	0.709612	0.634794	0.691596	0.710776	0.69326			389.19	-0.543382	-0.594415	-0.595539	-0.419953	-0.437574	-0.434184	-0.50669
389.39	0.67392	0.715045	0.710482	0.633177	0.68747	0.711925	0.689772			389.39	-0.542767	-0.592419	-0.594668	-0.421569	-0.4417	-0.433034	-0.510178
389.59	0.677309	0.716941	0.711606	0.640204	0.693794	0.709005	0.695174			389.59	-0.539378	-0.590524	-0.593544	-0.414543	-0.435376	-0.435954	-0.504776
389.79	0.676089	0.716597	0.712229	0.635423	0.693028	0.710652	0.693994			389.79	-0.540598	-0.590867	-0.592921	-0.419323	-0.436142	-0.434307	-0.505956
389.99	0.676039	0.721074	0.711972	0.633295	0.690462	0.711074	0.694094			389.99	-0.540649	-0.58639	-0.593179	-0.421451	-0.438708	-0.433886	-0.505855
390.19	0.680947	0.720397	0.711828	0.637009	0.694729	0.712813	0.691495			390.19	-0.53574	-0.587067	-0.593323	-0.417738	-0.434441	-0.432146	-0.508455
390.39	0.67835	0.717704	0.71263	0.638451	0.693797	0.71378	0.691356			390.39	-0.538337	-0.58976	-0.59252	-0.416296	-0.435373	-0.431179	-0.508593
390.59	0.678685	0.723718	0.712675	0.637397	0.694232	0.713818	0.697882			390.59	-0.538002	-0.583747	-0.592475	-0.41735	-0.434938	-0.431142	-0.502067
390.79	0.681313	0.719436	0.713439	0.639497	0.69597	0.716477	0.701628			390.79	-0.535375	-0.588028	-0.591712	-0.41525	-0.4332	-0.428483	-0.498321
390.99	0.68378	0.723451	0.718181	0.637022	0.69903	0.715072	0.697447			390.99	-0.532907	-0.584013	-0.58697	-0.417725	-0.43014	-0.429888	-0.502502
391.19	0.68165	0.724721	0.712296	0.642439	0.694829	0.716453	0.699444			391.19	-0.535037	-0.582744	-0.592854	-0.412308	-0.434341	-0.428506	-0.500505
391.39	0.679231	0.724084	0.71692	0.644808	0.696002	0.717929	0.698857			391.39	-0.537456	-0.58338	-0.58823	-0.409939	-0.433168	-0.42703	-0.501092
391.59	0.683111	0.721484	0.712215	0.643074	0.698447	0.72185	0.700232			391.59	-0.533577	-0.58598	-0.592935	-0.411672	-0.430723	-0.42311	-0.499718
391.79	0.683653	0.721531	0.716781	0.643139	0.699593	0.715739	0.704223			391.79	-0.533035	-0.585933	-0.58837	-0.411607	-0.429577	-0.42922	-0.495727
391.99	0.684423	0.725638	0.71661	0.64345	0.700179	0.720561	0.704983			391.99	-0.532265	-0.581826	-0.588541	-0.411297	-0.428991	-0.424399	-0.494967
392.19	0.689233	0.726449	0.719586	0.645324	0.699246	0.720949	0.702986			392.19	-0.527454	-0.581016	-0.585564	-0.409423	-0.429924	-0.424011	-0.496963
392.39	0.684012	0.730744	0.721439	0.641949	0.701258	0.719346	0.705106			392.39	-0.532676	-0.57672	-0.583712	-0.412798	-0.427913	-0.425613	-0.494844
392.59	0.690216	0.729095	0.720959	0.644806	0.702829	0.72336	0.707301			392.59	-0.526471	-0.578369	-0.584192	-0.409941	-0.426341	-0.4216	-0.492648
392.79	0.688927	0.733178	0.723529	0.643296	0.702214	0.724972	0.703588			392.79	-0.527761	-0.574286	-0.581621	-0.411451	-0.426956	-0.419987	-0.496362
392.99	0.687337	0.729169	0.722869	0.646361	0.70508	0.724077	0.706491			392.99	-0.52935	-0.578296	-0.582281	-0.408385	-0.42409	-0.420883	-0.493459
393.19	0.692151	0.729648	0.724698	0.650437	0.70566	0.729245	0.706064			393.19	-0.524536	-0.577816	-0.580453	-0.404309	-0.42351	-0.415714	-0.493885
393.39	0.688546	0.733953	0.724999	0.647905	0.708492	0.727787	0.706352			393.39	-0.528141	-0.573511	-0.580152	-0.406842	-0.420678	-0.417172	-0.493597
393.59	0.688798	0.72995	0.727755	0.649705	0.709525	0.724985	0.707301			393.59	-0.52789	-0.577514	-0.577396	-0.405042	-0.419645	-0.419975	-0.492649
393.79	0.690825	0.735359	0.731155	0.650424	0.70863	0.727511	0.708699			393.79	-0.525862	-0.572105	-0.573996	-0.404323	-0.42054	-0.417449	-0.49125
393.99	0.691135	0.731828	0.729472	0.650693	0.706757	0.730458	0.713262			393.99	-0.525553	-0.575636	-0.575678	-0.404053	-0.422414	-0.414501	-0.486688
394.19	0.694889	0.733937	0.727231	0.651679	0.709653	0.730361	0.707787			394.19	-0.521798	-0.573527	-0.577919	-0.403068	-0.419517	-0.414598	-0.492163
394.39	0.691821	0.740906	0.72951	0.651549	0.710644	0.729186	0.712581			394.39	-0.524867	-0.566559	-0.575641	-0.403197	-0.418526	-0.415773	-0.487369
394.59	0.699168	0.738259	0.727459	0.650328	0.711567	0.727263	0.713082			394.59	-0.517519	-0.569205	-0.577691	-0.404419	-0.417603	-0.417696	-0.486868
394.79	0.699995	0.737235	0.732861	0.65437	0.712532	0.729131	0.714536			394.79	-0.516692	-0.570229	-0.57229	-0.400377	-0.416638	-0.415828	-0.485413
394.99	0.696397	0.737356	0.729666	0.657427	0.708252	0.732641	0.713371			394.99	-0.52029	-0.570108	-0.575485	-0.39732	-0.420919	-0.412319	-0.486579
395.19	0.697525	0.739446	0.727709	0.649961	0.714646	0.735771	0.715357			395.19	-0.519162	-0.568019	-0.577441	-0.404785	-0.414524	-0.409188	-0.484593
395.39	0.699409	0.740609	0.729038	0.655597	0.711511	0.729023	0.715754			395.39	-0.517278	-0.566855	-0.576112	-0.399149	-0.41766	-0.415937	-0.484195
395.59	0.697168	0.740026	0.7299	0.654947	0.716416	0.731354	0.716286			395.59	-0.519519	-0.567438	-0.575251	-0.3998	-0.412754	-0.413605	-0.483663
395.79	0.703639	0.741568	0.736133	0.655878	0.713902	0.736307	0.71935			395.79	-0.513049	-0.565896	-0.569017	-0.398869	-0.415269	-0.408652	-0.4806
395.99	0.701892	0.742593	0.732052	0.6507	0.715293	0.73452	0.717422			395.99	-0.514795	-0.564871	-0.573099	-0.404047	-0.413877	-0.410439	-0.482528
396.19	0.698408	0.746955	0.735032	0.657832	0.716405	0.736722	0.722983			396.19	-0.51828	-0.560509	-0.570119	-0.396914	-0.412765	-0.408237	-0.476966
396.39	0.70086	0.744668	0.735958	0.65868	0.712966	0.737275	0.719279			396.39	-0.515827	-0.562796	-0.569193	-0.396067	-0.416204	-0.407685	-0.48067
396.59	0.700561	0.741645	0.73706	0.66111	0.718267	0.738419	0.718754			396.59	-0.516126	-0.56582	-0.56809	-0.393637	-0.410903	-0.406541	-0.481195
396.79	0.704112	0.748927	0.738769	0.657801	0.717377	0.738832	0.71952			396.79	-0.512575	-0.558537	-0.566382	-0.396946	-0.411793	-0.406128	-0.48043
396.99	0.706247	0.74591	0.739651	0.660716	0.721536	0.739235	0.7239			396.99	-0.51044	-0.561555	-0.565499	-0.394031	-0.407634	-0.405725	-0.47605
397.19	0.706451	0.748416	0.73675	0.663246	0.718195	0.74005	0.72396			397.19	-0.510236	-0.559048	-0.5684	-0.391501	-0.410975	-0.404909	-0.475989
397.39	0.704244	0.746418	0.740576	0.661361	0.72316	0.740177	0.722945			397.39	-0.512443	-0.561047	-0.564574	-0.393386	-0.40601	-0.404783	-0.477004
397.59	0.705666	0.745323	0.741788	0.660949	0.720498	0.741468	0.725662			397.59	-0.511021	-0.562142	-0.563362	-0.393798	-0.408672	-0.403491	-0.474288
397.79	0.7074	0.751362	0.740508	0.664856	0.724204	0.742627	0.723486			397.79	-0.509288	-0.556102	-0.564642	-0.389891	-0.404966	-0.402332	-0.476464
397.99	0.709557	0.750791	0.745097	0.665129	0.72151	0.743453	0.729391			397.99	-0.507131	-0.556673	-0.560053	-0.389618	-0.40766	-0.401506	-0.470558
398.19	0.709436	0.750048	0.742021	0.667521	0.724284	0.741656	0.725439			398.19	-0.507251	-0.557416	-0.563129	-0.387226	-0.404887	-0.403304	-0.474511
398.39	0.710013	0.75126	0.743861	0.669237	0.725517	0.744139	0.728018			398.39	-0.506674	-0.556204	-0.56129	-0.38551	-0.403653	-0.40082	-0.471931
398.59	0.709241	0.752239	0.748418	0.667188	0.724616	0.740787	0.729005			398.59	-0.507446	-0.555225	-0.556732	-0.387559	-0.404555	-0.404172	-0.470945
398.79	0.711333	0.752483	0.746337	0.668195	0.725056	0.747749	0.731634			398.79	-0.505355	-0.554982	-0.558814	-0.386552	-0.404114	-0.397211	-0.468315
398.99	0.714186	0.753842	0.750419	0.665288	0.728119	0.745803	0.731477			398.99	-0.502501	-0.553622	-0.554732	-0.389459	-0.401052	-0.399157	-0.468473
399.19	0.70995	0.755484	0.745203	0.667382	0.727848	0.749639	0.731245			399.19	-0.506737	-0.55198	-0.559948	-0.387365	-0.401323	-0.395321	-0.468704
[truncated: 29,258 more rows]

## Sheet: Exp_2
Raw BLI data (nm)										Normalised to baseline
Time (s)	Mg + ATP	Mg + Ca + ATP	Mg + ATP + ADP	Mg + Ca + ATP + ADP	Mg + ADP	Ca + ADP	Mg + ATP			Time (s)	Mg + ATP	Mg + Ca + ATP	Mg + ATP + ADP	Mg + Ca + ATP + ADP	Mg + ADP	Ca + ADP	Mg + ATP
0	0	0	0	0	0	0	0			0	-1.18784	-1.09313	-1.3278	-1.22482	-1.27981	-1.29084	-1.16077
0.19	-0.00387975	-0.00350039	-0.00036314	0.00037252	-0.00514133	0.0011637	0.00123634			0.19	-1.19172	-1.09663	-1.32816	-1.22444	-1.28495	-1.28968	-1.15953
0.4	0.00056946	-0.00312302	-0.00404817	0.00356529	-0.00120426	0.00135484	0.00153827			0.4	-1.18727	-1.09626	-1.33185	-1.22125	-1.28102	-1.28949	-1.15923
0.6	0.00018258	0.00015458	-0.00405071	0.00304415	-0.00112927	0.00265956	3.332e-05			0.6	-1.18766	-1.09298	-1.33185	-1.22177	-1.28094	-1.28818	-1.16074
0.8	-0.00631044	-0.00257638	-0.00315601	0.00483109	-0.00405579	0.00039063	-0.00166318			0.8	-1.19415	-1.09571	-1.33095	-1.21999	-1.28387	-1.29045	-1.16243
1	-0.00213295	0.00388007	0.00064152	-0.00202885	-0.00441994	-0.00061362	0.00494495			1	-1.18997	-1.08925	-1.32716	-1.22685	-1.28423	-1.29146	-1.15583
1.2	-0.00244392	0.00071862	-0.00028204	-0.00220594	-0.00323954	8.514e-05	0.0023747			1.2	-1.19028	-1.09241	-1.32808	-1.22702	-1.28305	-1.29076	-1.1584
1.39	-0.00460901	9.895e-05	-0.00088285	0.00255633	-0.00446415	0.001999	-0.00304793			1.39	-1.19245	-1.09303	-1.32868	-1.22226	-1.28428	-1.28884	-1.16382
1.6	-0.00142279	0.00311651	-0.00251722	0.0004917	-0.00243657	0.00121357	-0.00307436			1.6	-1.18926	-1.09002	-1.33032	-1.22432	-1.28225	-1.28963	-1.16384
1.79	-0.00303441	0.00016154	-0.0007866	-0.0001233	0.00062715	3.58e-05	0.00196785			1.79	-1.19087	-1.09297	-1.32858	-1.22494	-1.27918	-1.29081	-1.1588
2	-0.00828323	-0.00372578	-0.00196587	0.00033838	-0.00036989	-0.00021638	-0.00133392			2	-1.19612	-1.09686	-1.32976	-1.22448	-1.28018	-1.29106	-1.1621
2.19	-0.00048258	0.00117303	-0.00369999	0.00388762	-0.00295171	0.00501739	0.0012398			2.19	-1.18832	-1.09196	-1.3315	-1.22093	-1.28276	-1.28582	-1.15953
2.39	-0.00057493	0.00283246	-0.00296481	0.00216129	8.653e-05	0.00250241	0.00070888			2.39	-1.18841	-1.0903	-1.33076	-1.22265	-1.27973	-1.28834	-1.16006
2.59	-0.00503772	0.00079493	-0.00438941	0.00251667	-0.00362763	0.00414865	-0.00169707			2.59	-1.19288	-1.09234	-1.33219	-1.2223	-1.28344	-1.28669	-1.16247
2.79	-0.00400065	0.00184245	-0.00571075	0.00454929	-0.00308026	0.00342585	0.00265375			2.79	-1.19184	-1.09129	-1.33351	-1.22027	-1.28289	-1.28742	-1.15812
2.99	-0.00318576	0.00303479	-0.00333776	0.00332595	-0.0004368	0.00026827	0.00133523			2.99	-1.19102	-1.0901	-1.33114	-1.22149	-1.28025	-1.29057	-1.15943
3.19	-0.00045465	-0.00044428	0.00082741	-0.00021013	-0.00345984	0.00480757	0.00575394			3.19	-1.18829	-1.09358	-1.32697	-1.22503	-1.28327	-1.28603	-1.15502
3.39	-0.00208408	-0.00390372	-0.00181066	0.00253465	-0.0045551	0.00340596	-0.0033053			3.39	-1.18992	-1.09704	-1.32961	-1.22228	-1.28437	-1.28744	-1.16408
3.59	-0.00192298	0.00175031	-0.00146042	0.00343521	-0.00378863	0.00331589	-0.00171911			3.59	-1.18976	-1.09138	-1.32926	-1.22138	-1.2836	-1.28753	-1.16249
3.79	-0.00698296	0.00033806	0.00041099	6.208e-05	0.00083795	0.00524267	-0.00015313			3.79	-1.19482	-1.09279	-1.32739	-1.22475	-1.27897	-1.2856	-1.16092
3.99	-0.00384458	-0.00128972	-0.00378878	0.00272469	-0.00236896	0.00333684	-0.00492803			3.99	-1.19168	-1.09442	-1.33159	-1.22209	-1.28218	-1.28751	-1.1657
4.19	-0.00367216	-0.00072841	-0.00144763	0.00154327	2.933e-05	0.00510741	-0.00165484			4.19	-1.19151	-1.09386	-1.32925	-1.22327	-1.27978	-1.28573	-1.16243
4.39	0.00105831	-0.00015152	-0.0046025	0.00474948	-0.00446409	0.00506206	-0.00019585			4.39	-1.18678	-1.09328	-1.3324	-1.22007	-1.28428	-1.28578	-1.16097
4.59	-0.00271105	0.00126473	-0.00011529	0.00252379	0.00101728	0.00267653	0.00174093			4.59	-1.19055	-1.09187	-1.32791	-1.22229	-1.27879	-1.28817	-1.15903
4.8	-0.00227185	0.00125336	-0.00124946	0.00349433	-0.00496801	0.00403745	0.00043161			4.8	-1.19011	-1.09188	-1.32905	-1.22132	-1.28478	-1.2868	-1.16034
4.99	-0.00320722	0.00170379	-0.00340354	0.00339536	-0.00080828	0.00564372	0.00196453			4.99	-1.19104	-1.09143	-1.3312	-1.22142	-1.28062	-1.2852	-1.15881
5.19	-0.00328733	0.00491271	-0.0026757	0.00346131	-0.00338103	0.00725157	0.00241796			5.19	-1.19112	-1.08822	-1.33047	-1.22135	-1.28319	-1.28359	-1.15835
5.39	0.00244254	0.00571864	-0.00386523	0.00477106	-0.00145801	0.00382941	0.00437986			5.39	-1.1854	-1.08741	-1.33166	-1.22005	-1.28127	-1.28701	-1.15639
5.59	-0.00146603	0.00223048	-0.00597515	0.00688327	-0.00059527	0.00441229	-0.00282581			5.59	-1.1893	-1.0909	-1.33377	-1.21793	-1.28041	-1.28643	-1.1636
5.8	-0.00112071	0.00370355	-0.00096711	0.00373186	-0.0036488	0.00852026	-0.00125272			5.8	-1.18896	-1.08943	-1.32876	-1.22108	-1.28346	-1.28232	-1.16202
5.99	-0.00533768	0.00363316	-0.00529121	0.00600425	-0.00671005	0.00531437	1.083e-05			5.99	-1.19318	-1.0895	-1.33309	-1.21881	-1.28652	-1.28553	-1.16076
6.19	-0.00407474	0.00378218	-0.00012775	0.00750398	-0.00363167	0.00570621	-0.00146192			6.19	-1.19191	-1.08935	-1.32793	-1.21731	-1.28344	-1.28514	-1.16223
6.39	-0.00163444	0.0014912	0.00205134	0.00233795	-0.00283749	0.0014879	0.00215093			6.39	-1.18947	-1.09164	-1.32575	-1.22248	-1.28265	-1.28935	-1.15862
6.59	-0.00801297	0.00181449	-0.00255883	0.00193448	-0.00228237	0.00592231	0.00218674			6.59	-1.19585	-1.09132	-1.33036	-1.22288	-1.28209	-1.28492	-1.15858
6.79	0.00186591	0.00032576	-0.00130592	0.00203352	-0.00059865	0.0039283	0.00173193			6.79	-1.18597	-1.09281	-1.3291	-1.22278	-1.28041	-1.28691	-1.15904
6.99	-0.00087995	0.00193853	-0.00300158	0.00500261	-0.00615988	0.00571603	0.00247085			6.99	-1.18872	-1.09119	-1.3308	-1.21981	-1.28597	-1.28513	-1.1583
7.19	-0.00262649	0.00128875	0.00063594	0.00593228	-0.00019196	0.00483851	0.00200584			7.19	-1.19046	-1.09184	-1.32716	-1.21888	-1.28	-1.286	-1.15876
7.39	-0.00322829	0.00268556	-0.00403704	0.00387236	-0.00510801	0.00681813	-0.00174618			7.39	-1.19107	-1.09045	-1.33183	-1.22094	-1.28492	-1.28402	-1.16252
7.59	-0.00363652	0.006629	-0.00419872	0.00583268	-0.00101578	0.00706727	-0.00174994			7.59	-1.19147	-1.0865	-1.332	-1.21898	-1.28083	-1.28377	-1.16252
7.8	-0.00353699	0.00613675	-0.00479059	0.00218044	-0.00315329	0.00693006	-0.00032928			7.8	-1.19137	-1.087	-1.33259	-1.22264	-1.28296	-1.28391	-1.1611
7.99	-0.00630802	0.00464712	0.00179758	0.00653405	0.00011474	0.00356059	0.00223478			7.99	-1.19415	-1.08849	-1.326	-1.21828	-1.2797	-1.28728	-1.15854
8.19	-0.00227892	0.00766952	-0.00259716	0.00143482	-0.00464573	0.00691021	-0.00144593			8.19	-1.19012	-1.08546	-1.3304	-1.22338	-1.28446	-1.28393	-1.16222
8.39	-0.00773319	0.0011711	-0.00222139	0.00523399	-0.00145727	0.00318228	-0.00293971			8.39	-1.19557	-1.09196	-1.33002	-1.21958	-1.28127	-1.28766	-1.16371
8.59	-0.00150284	0.00275723	-0.00015822	0.00669661	-0.00160768	0.00728395	-0.00022472			8.59	-1.18934	-1.09038	-1.32796	-1.21812	-1.28142	-1.28356	-1.16099
8.8	-0.00294097	0.00137198	-0.00288552	0.00579132	-0.00101522	0.00834964	-0.00076147			8.8	-1.19078	-1.09176	-1.33068	-1.21902	-1.28083	-1.28249	-1.16153
8.99	-0.00377042	0.00498589	0.00088251	0.00216829	-0.00191796	0.00769068	0.00540975			8.99	-1.19161	-1.08815	-1.32692	-1.22265	-1.28173	-1.28315	-1.15536
9.19	-0.00468155	0.00103519	-0.00670049	0.00636149	-0.00635929	0.00503983	0.0001576			9.19	-1.19252	-1.0921	-1.3345	-1.21845	-1.28617	-1.2858	-1.16061
9.39	-0.0060804	0.00574586	-0.00603948	0.00923485	-0.00404711	0.00801138	-0.00480807			9.39	-1.19392	-1.08739	-1.33384	-1.21558	-1.28386	-1.28283	-1.16558
9.6	-0.00014172	0.002262	-0.00229097	0.00595947	-0.00289708	0.00732532	-0.00253697			9.6	-1.18798	-1.09087	-1.33009	-1.21886	-1.28271	-1.28352	-1.16331
9.8	-0.00123981	0.001145	-0.00227939	0.00498699	-0.00277988	0.00562995	0.00257643			9.8	-1.18908	-1.09199	-1.33008	-1.21983	-1.28259	-1.28521	-1.15819
9.99	-0.00505608	0.00613592	0.00085006	0.00458715	-0.0053754	0.00508132	-0.0022808			9.99	-1.19289	-1.087	-1.32695	-1.22023	-1.28519	-1.28576	-1.16305
10.19	-0.00305824	0.00793027	-0.00399747	0.00578813	-0.00516736	0.00506553	-0.00260945			10.19	-1.1909	-1.0852	-1.3318	-1.21903	-1.28498	-1.28578	-1.16338
10.39	-0.00289255	0.00862459	-0.00400874	0.00385951	-0.00476422	0.00630696	0.00052367			10.39	-1.19073	-1.08451	-1.33181	-1.22096	-1.28458	-1.28453	-1.16025
10.6	-0.00150213	0.0032753	-0.00518184	0.00463054	-0.0044868	0.00436298	0.00039293			10.6	-1.18934	-1.08986	-1.33298	-1.22019	-1.2843	-1.28648	-1.16038
10.79	-0.00278936	0.0079397	-0.00556965	0.00732145	-0.00444218	0.00745408	0.00057967			10.79	-1.19063	-1.08519	-1.33337	-1.21749	-1.28425	-1.28339	-1.16019
10.99	-0.00264886	0.00639296	-0.00348814	0.0079531	-0.00429832	0.00808125	-0.00094973			10.99	-1.19049	-1.08674	-1.33129	-1.21686	-1.28411	-1.28276	-1.16172
11.19	-0.00129678	0.00614201	-0.0033804	0.00746419	-0.00341484	0.00769835	-0.00309723			11.19	-1.18913	-1.08699	-1.33118	-1.21735	-1.28323	-1.28314	-1.16387
11.39	-0.00126971	0.00464847	-0.00547759	0.00780087	-0.00410138	0.00585326	0.00420157			11.39	-1.18911	-1.08848	-1.33328	-1.21702	-1.28391	-1.28499	-1.15657
11.6	-0.00239795	0.00588974	0.00308715	0.00740969	-0.00290017	0.00641224	-0.00493422			11.6	-1.19024	-1.08724	-1.32471	-1.21741	-1.28271	-1.28443	-1.1657
11.79	-0.0018162	0.00461751	-0.00388941	0.00839256	-0.0059874	0.0103088	0.00341447			11.79	-1.18965	-1.08852	-1.33169	-1.21642	-1.2858	-1.28053	-1.15736
11.99	-0.00562671	0.0066238	-0.00348306	0.00682767	-0.00437699	0.0060158	-0.00042502			11.99	-1.19346	-1.08651	-1.33128	-1.21799	-1.28419	-1.28483	-1.1612
12.19	-0.00071221	0.00353353	-0.00322678	0.00621093	-0.00308351	0.00432166	-0.00309406			12.19	-1.18855	-1.0896	-1.33102	-1.21861	-1.2829	-1.28652	-1.16386
12.39	-0.00364924	0.00934362	-0.0017254	0.00677132	0.00053365	0.0108981	0.00147707			12.39	-1.19149	-1.08379	-1.32952	-1.21804	-1.27928	-1.27994	-1.15929
12.59	-0.00294375	0.00145071	-0.00083836	0.00663647	-0.00185653	0.00479497	-0.00208781			12.59	-1.19078	-1.09168	-1.32864	-1.21818	-1.28167	-1.28605	-1.16286
12.79	-0.00598771	0.00559137	-0.00387023	0.00732223	-0.0046183	0.00656731	-0.00125697			12.79	-1.19383	-1.08754	-1.33167	-1.21749	-1.28443	-1.28427	-1.16203
12.99	-0.00435283	0.00901957	-0.00186135	0.0114997	-0.00040951	0.00908968	-0.00105422			12.99	-1.19219	-1.08411	-1.32966	-1.21332	-1.28022	-1.28175	-1.16182
13.19	-0.00269938	0.00837458	-0.00177947	0.0059307	-0.0049701	0.0105629	-0.00036444			13.19	-1.19054	-1.08476	-1.32958	-1.21889	-1.28478	-1.28028	-1.16113
13.39	-0.00211887	0.00605807	-0.00155946	0.0050484	-0.0019717	0.0103396	-0.00162595			13.39	-1.18996	-1.08707	-1.32936	-1.21977	-1.28178	-1.2805	-1.1624
13.59	-0.00382888	0.00595871	-4.39e-06	0.00305213	-0.00351821	0.00748038	0.00636933			13.59	-1.19167	-1.08717	-1.3278	-1.22176	-1.28333	-1.28336	-1.1544
13.8	-0.00504534	0.00394524	-0.00546977	0.00797557	-0.00247987	0.00626726	0.000861			13.8	-1.19288	-1.08919	-1.33327	-1.21684	-1.28229	-1.28457	-1.15991
13.99	-0.00626115	0.00521731	-0.00373216	0.00804507	-0.0021444	0.00919955	0.00133038			13.99	-1.1941	-1.08792	-1.33153	-1.21677	-1.28196	-1.28164	-1.15944
14.19	-0.00534443	0.00458607	-0.00235779	0.00740867	-0.00366359	0.00736423	-0.00527439			14.19	-1.19318	-1.08855	-1.33016	-1.21741	-1.28348	-1.28348	-1.16604
14.39	-0.00673619	0.00446747	-0.00231719	0.00595056	-0.00363745	0.0118254	-0.00330175			14.39	-1.19457	-1.08867	-1.33012	-1.21887	-1.28345	-1.27902	-1.16407
14.6	-0.00340336	0.00568932	-0.00591528	0.00994993	-0.00603342	0.0105859	7.785e-05			14.6	-1.19124	-1.08744	-1.33371	-1.21487	-1.28585	-1.28026	-1.16069
14.8	-0.00308407	0.00581507	-0.00138884	0.00755249	-0.00474724	0.00429331	-0.00453691			14.8	-1.19092	-1.08732	-1.32919	-1.21726	-1.28456	-1.28655	-1.16531
14.99	-0.00163915	0.0068313	-0.00328756	0.0106712	-0.00187788	0.00567093	-0.00389319			14.99	-1.18948	-1.0863	-1.33109	-1.21414	-1.28169	-1.28517	-1.16466
15.19	-0.00156738	0.00613349	-0.0014041	0.00711717	-0.00434696	0.00858247	0.00205159			15.19	-1.1894	-1.087	-1.3292	-1.2177	-1.28416	-1.28226	-1.15872
15.39	-0.00425286	0.00843544	-0.0037262	0.00661851	-0.0053922	0.00768678	0.00141505			15.39	-1.19209	-1.0847	-1.33152	-1.2182	-1.2852	-1.28316	-1.15936
15.6	-0.00619648	0.00565124	-0.00378556	0.00758988	-0.00267324	0.00623324	-0.00318409			15.6	-1.19403	-1.08748	-1.33158	-1.21723	-1.28248	-1.28461	-1.16395
15.79	-0.00028729	0.0079476	-0.00267784	0.00790612	-0.00598423	0.00684053	0.00025316			15.79	-1.18812	-1.08519	-1.33048	-1.21691	-1.2858	-1.284	-1.16052
15.99	-0.00447977	0.00422496	-0.00045208	0.00942001	-0.00663228	0.00948245	-0.0033692			15.99	-1.19232	-1.08891	-1.32825	-1.2154	-1.28644	-1.28136	-1.16414
16.19	-0.00166106	0.00829785	-0.00422022	0.00816973	-0.00272888	0.0113628	0.00241611			16.19	-1.1895	-1.08484	-1.33202	-1.21665	-1.28254	-1.27948	-1.15835
16.39	-0.00338909	0.00466234	-0.00118754	0.010003	-0.00471922	0.00365782	-0.00290104			16.39	-1.19123	-1.08847	-1.32899	-1.21481	-1.28453	-1.28718	-1.16367
16.59	-0.00390832	0.0110972	-0.00250842	0.00888673	-0.00270905	0.00534805	0.0002756			16.59	-1.19175	-1.08204	-1.33031	-1.21593	-1.28252	-1.28549	-1.16049
16.79	-0.00129028	0.00595847	-0.00334808	0.00766758	-0.00517291	0.0084501	-0.00560495			16.79	-1.18913	-1.08717	-1.33115	-1.21715	-1.28498	-1.28239	-1.16638
16.99	-0.00603244	0.00484075	-0.00770871	0.0114089	-0.00520119	0.0119243	-0.00113895			16.99	-1.19387	-1.08829	-1.33551	-1.21341	-1.28501	-1.27892	-1.16191
17.2	-0.0011462	0.00288399	-0.00489018	0.0105596	-0.005912	0.00824385	-0.00338818			17.2	-1.18898	-1.09025	-1.33269	-1.21426	-1.28572	-1.2826	-1.16416
17.39	-0.00497644	0.00702975	-0.00351704	0.00925654	-0.00563593	0.00696502	-0.0007841			17.39	-1.19281	-1.0861	-1.33131	-1.21556	-1.28545	-1.28388	-1.16155
17.59	-0.00818033	0.00844027	-0.00326771	0.00991654	-0.00777806	0.0119627	-0.00228764			17.59	-1.19602	-1.08469	-1.33107	-1.2149	-1.28759	-1.27888	-1.16306
17.79	-0.00275366	0.00596539	-0.00676193	0.00509957	-0.00600862	0.00637215	-0.00202144			17.79	-1.19059	-1.08717	-1.33456	-1.21972	-1.28582	-1.28447	-1.16279
18	-0.00684447	0.00847767	-0.00448845	0.00523548	-0.0039086	0.0075374	-0.00130001			18	-1.19468	-1.08466	-1.33229	-1.21958	-1.28372	-1.2833	-1.16207
18.19	-0.00139823	0.00499616	-0.00149034	0.0097878	-0.00107845	0.00640655	-0.00312194			18.19	-1.18924	-1.08814	-1.32929	-1.21503	-1.28089	-1.28444	-1.16389
18.39	-0.00337405	0.00835429	-0.0036669	0.00935564	-0.00494085	0.0103567	-0.00500626			18.39	-1.19121	-1.08478	-1.33146	-1.21546	-1.28475	-1.28049	-1.16578
18.59	-0.00417129	0.00569767	-0.00502612	0.0118816	-0.00179609	0.0103132	-0.00316961			18.59	-1.19201	-1.08744	-1.33282	-1.21293	-1.28161	-1.28053	-1.16394
18.79	-0.00545431	0.01085	-0.00636931	0.0104644	-0.00373388	0.012631	-0.0010384			18.79	-1.19329	-1.08228	-1.33417	-1.21435	-1.28355	-1.27821	-1.16181
18.99	-0.00418923	0.0055968	-0.00178601	0.0102436	-0.00657533	0.0105284	-6.815e-05			18.99	-1.19203	-1.08754	-1.32958	-1.21457	-1.28639	-1.28031	-1.16084
19.19	-0.00560926	0.00682416	-0.00224789	0.00724045	-0.00341838	0.00796471	-0.00643982			19.19	-1.19345	-1.08631	-1.33005	-1.21758	-1.28323	-1.28288	-1.16721
19.39	-0.00639861	0.006443	2.429e-05	0.0102615	-0.00617253	0.011306	-0.00073459			19.39	-1.19424	-1.08669	-1.32777	-1.21455	-1.28598	-1.27954	-1.1615
19.59	-0.00316295	0.00811904	-0.00442871	0.00763102	-0.00752869	0.00894936	0.00163441			19.59	-1.191	-1.08501	-1.33223	-1.21719	-1.28734	-1.28189	-1.15914
19.79	-0.00462412	0.00835296	-0.0070196	0.0123912	-0.00227611	0.00921765	0.00097613			19.79	-1.19246	-1.08478	-1.33482	-1.21242	-1.28209	-1.28162	-1.15979
19.99	-0.00068737	0.00745888	-0.00055263	0.00929603	-0.00436014	0.0102736	-0.00153471			19.99	-1.18852	-1.08567	-1.32835	-1.21552	-1.28417	-1.28057	-1.1623
20.19	-0.00595822	0.00446862	-0.00535343	0.0103415	-0.00363244	0.00946053	-0.00325865			20.19	-1.1938	-1.08866	-1.33315	-1.21447	-1.28344	-1.28138	-1.16403
20.39	-0.00179533	0.00803926	-0.00490892	0.011714	-0.00434422	0.0121879	0.00053837			20.39	-1.18963	-1.08509	-1.33271	-1.2131	-1.28416	-1.27865	-1.16023
20.59	-0.00426463	0.00442704	-0.00057146	0.00863867	-0.00255795	0.0122173	-0.00259879			20.59	-1.1921	-1.08871	-1.32837	-1.21618	-1.28237	-1.27862	-1.16337
20.79	-0.00192929	0.0127813	-0.00595502	0.01082	-0.00404304	0.0114636	-4.37e-05			20.79	-1.18977	-1.08035	-1.33375	-1.214	-1.28385	-1.27938	-1.16081
20.99	-0.00651715	0.00732563	-0.0029027	0.011458	-0.00555352	0.0080612	-0.0014225			20.99	-1.19435	-1.08581	-1.3307	-1.21336	-1.28537	-1.28278	-1.16219
21.19	-0.00616219	0.00955444	-0.00265898	0.0081375	-0.00669907	0.00587632	0.00693166			21.19	-1.194	-1.08358	-1.33046	-1.21668	-1.28651	-1.28497	-1.15384
21.4	-0.00599551	0.00763138	-0.00459994	0.00850335	-0.00553652	0.0115219	-0.00521738			21.4	-1.19383	-1.0855	-1.3324	-1.21631	-1.28535	-1.27932	-1.16599
21.6	-0.00838779	0.00967431	-0.00887906	0.0117766	-0.00608582	0.0102546	-0.00107936			21.6	-1.19623	-1.08346	-1.33668	-1.21304	-1.2859	-1.28059	-1.16185
21.8	-0.00376107	0.012997	-0.00295977	0.0106324	-0.00205954	0.0100013	-0.00072853			21.8	-1.1916	-1.08014	-1.33076	-1.21418	-1.28187	-1.28084	-1.1615
22	-0.00270096	0.00714215	-0.00473318	0.0140151	-0.00572356	0.0122318	-0.00384326			22	-1.19054	-1.08599	-1.33253	-1.2108	-1.28554	-1.27861	-1.16461
22.19	-0.00285668	0.00904278	-0.00662906	0.00974	-0.00398775	0.0108283	-0.00033503			22.19	-1.19069	-1.08409	-1.33443	-1.21508	-1.2838	-1.28001	-1.16111
22.4	-0.00522334	0.00858568	-0.00359618	0.0107767	-0.00482324	0.00848941	-0.00060318			22.4	-1.19306	-1.08455	-1.33139	-1.21404	-1.28463	-1.28235	-1.16137
22.6	-0.00754535	0.00789701	-0.00147204	0.0108009	-0.00456665	0.0115373	-0.00202466			22.6	-1.19538	-1.08524	-1.32927	-1.21402	-1.28438	-1.2793	-1.16279
22.8	-0.0043429	0.00676427	-0.00401062	0.0141247	-0.00934475	0.0144666	0.00042457			22.8	-1.19218	-1.08637	-1.33181	-1.21069	-1.28916	-1.27638	-1.16035
23	-0.00532024	0.00831367	-0.0100315	0.0134619	-0.00669433	0.0097253	-0.00209429			23	-1.19316	-1.08482	-1.33783	-1.21135	-1.28651	-1.28112	-1.16286
23.2	-0.00344278	0.00953674	-0.00458939	0.00939821	-0.00426211	0.0115007	-0.00176997			23.2	-1.19128	-1.0836	-1.33239	-1.21542	-1.28407	-1.27934	-1.16254
23.4	-0.00215617	0.0102321	0.0005949	0.0113456	-0.00538001	0.00961574	-0.00272353			23.4	-1.18999	-1.0829	-1.3272	-1.21347	-1.28519	-1.28123	-1.16349
23.6	-0.0063718	0.00862758	-0.00302017	0.0139948	-0.00781081	0.00998921	-0.00111501			23.6	-1.19421	-1.08451	-1.33082	-1.21082	-1.28762	-1.28085	-1.16189
23.79	-0.00354413	0.00564644	-0.0078998	0.0115969	-0.00489619	0.0129831	-0.00250894			23.79	-1.19138	-1.08749	-1.3357	-1.21322	-1.28471	-1.27786	-1.16328
24	-0.00488126	0.00773808	-0.00569088	0.0110841	-0.0066432	0.0114728	-0.00346397			24	-1.19272	-1.08539	-1.33349	-1.21373	-1.28645	-1.27937	-1.16423
24.19	-0.00496919	0.00666187	-0.00761414	0.012602	-0.00396163	0.0091483	-0.00515204			24.19	-1.19281	-1.08647	-1.33541	-1.21221	-1.28377	-1.28169	-1.16592
24.4	-0.00046673	0.00663843	-0.00335306	0.0114294	-0.00339492	0.0117234	0.00078126			24.4	-1.1883	-1.08649	-1.33115	-1.21339	-1.28321	-1.27912	-1.15999
24.6	-0.00292238	0.00886018	-0.00572994	0.00814613	-0.0042134	0.011042	-0.00273393			24.6	-1.19076	-1.08427	-1.33353	-1.21667	-1.28403	-1.2798	-1.1635
24.79	-0.00295627	0.00892329	-0.00613993	0.0148497	-0.00280919	0.0114509	-0.00732529			24.79	-1.19079	-1.08421	-1.33394	-1.20997	-1.28262	-1.27939	-1.1681
25	-0.00211044	0.00926584	-0.00472303	0.0124094	-0.00782094	0.011737	-0.00727959			25	-1.18995	-1.08387	-1.33252	-1.21241	-1.28763	-1.2791	-1.16805
25.2	-0.00596785	0.0104261	-0.00808472	0.0122795	-0.00638683	0.0115868	0.00141214			25.2	-1.19381	-1.08271	-1.33588	-1.21254	-1.2862	-1.27926	-1.15936
25.4	-0.0036769	0.0105221	-0.00513062	0.0146255	-0.0065005	0.0104506	-0.00382997			25.4	-1.19151	-1.08261	-1.33293	-1.21019	-1.28631	-1.28039	-1.1646
25.59	-0.00601422	0.00971107	-0.00791758	0.0110168	-0.00669389	0.00748949	-0.00301238			25.59	-1.19385	-1.08342	-1.33572	-1.2138	-1.28651	-1.28335	-1.16378
25.8	-0.0064924	0.00727578	-0.00544847	0.010597	-0.00286288	0.0110185	-0.00195518			25.8	-1.19433	-1.08586	-1.33325	-1.21422	-1.28267	-1.27982	-1.16273
26	-0.00208435	0.00681977	-0.00716672	0.0124322	-0.00272674	0.0125242	-0.00247357			26	-1.18992	-1.08631	-1.33496	-1.21238	-1.28254	-1.27832	-1.16324
26.2	-0.0028448	0.00852269	-0.00346731	0.0117795	-0.00628644	0.0102493	0.00259459			26.2	-1.19068	-1.08461	-1.33127	-1.21304	-1.2861	-1.28059	-1.15818
26.4	-0.00435833	0.00930558	-0.00179924	0.0116826	-0.00383136	0.0117023	0.00103397			26.4	-1.1922	-1.08383	-1.3296	-1.21313	-1.28364	-1.27914	-1.15974
26.6	-0.00309701	0.00902682	-0.00245908	0.015211	-0.00543488	0.0120692	-0.00426404			26.6	-1.19093	-1.08411	-1.33026	-1.20961	-1.28525	-1.27877	-1.16503
26.8	-0.00698294	0.00610374	-0.00382435	0.0109698	-0.00493989	0.00927352	-9.617e-05			26.8	-1.19482	-1.08703	-1.33162	-1.21385	-1.28475	-1.28157	-1.16087
26.99	-0.00623247	0.01135	-0.00754367	0.0098754	-0.00591537	0.00750506	-0.00181749			26.99	-1.19407	-1.08178	-1.33534	-1.21494	-1.28573	-1.28334	-1.16259
27.2	-0.00528597	0.0113323	-0.00476576	0.0110812	-0.00488156	0.013375	-0.00089765			27.2	-1.19312	-1.0818	-1.33256	-1.21374	-1.28469	-1.27747	-1.16167
27.4	-0.00835171	0.0114349	-0.00428781	0.0122017	-0.00382398	0.0141712	-0.00137056			27.4	-1.19619	-1.0817	-1.33209	-1.21261	-1.28364	-1.27667	-1.16214
27.6	-0.00780399	0.00598725	-0.00604201	0.00892684	-0.00418088	0.0110784	-0.00682289			27.6	-1.19564	-1.08715	-1.33384	-1.21589	-1.28399	-1.27976	-1.16759
27.8	-0.00527028	0.00945772	-0.00203616	0.0137966	-0.00394148	0.0111756	-0.00147179			27.8	-1.19311	-1.08368	-1.32983	-1.21102	-1.28375	-1.27967	-1.16224
27.99	-0.00512472	0.0115231	2.738e-05	0.013217	-0.00334879	0.0129154	-0.00490676			27.99	-1.19296	-1.08161	-1.32777	-1.2116	-1.28316	-1.27793	-1.16568
28.2	-0.00343496	0.00892287	-0.0104496	0.0116422	-0.00897871	0.0123653	-0.00163438			28.2	-1.19127	-1.08421	-1.33825	-1.21317	-1.28879	-1.27848	-1.1624
28.39	-0.00301366	0.00941993	-0.00682843	0.0102373	-0.00548843	0.013658	0.0020179			28.39	-1.19085	-1.08371	-1.33463	-1.21458	-1.2853	-1.27718	-1.15875
28.6	-0.00645373	0.0137039	-0.00445828	0.0123185	-0.00442875	0.00891182	-0.00271749			28.6	-1.19429	-1.07943	-1.33226	-1.2125	-1.28424	-1.28193	-1.16349
28.79	-0.00463114	0.00978254	-0.00585334	0.0146584	-0.00847621	0.00942108	-0.00191525			28.79	-1.19247	-1.08335	-1.33365	-1.21016	-1.28829	-1.28142	-1.16269
28.99	-0.0025209	0.0054359	-0.00526848	0.0131938	-0.00592345	0.0142028	-0.00236696			28.99	-1.19036	-1.0877	-1.33307	-1.21162	-1.28574	-1.27664	-1.16314
29.2	-0.00494626	0.0100773	-0.00530214	0.0143106	-0.00528468	0.0115441	-0.00514992			29.2	-1.19278	-1.08306	-1.3331	-1.21051	-1.2851	-1.2793	-1.16592
29.4	-0.00554896	0.0143509	-0.00390284	0.0147613	-0.00820345	0.0140223	-0.00044066			29.4	-1.19339	-1.07878	-1.3317	-1.21005	-1.28802	-1.27682	-1.16121
29.6	-0.00421073	0.0110775	-0.00199845	0.0112308	-0.00930299	0.011285	-0.00678488			29.6	-1.19205	-1.08206	-1.3298	-1.21359	-1.28911	-1.27956	-1.16756
29.79	-0.0065542	0.00963706	-0.00409775	0.00886367	-0.00369594	0.0105399	-0.00611433			29.79	-1.19439	-1.0835	-1.3319	-1.21595	-1.28351	-1.2803	-1.16688
30	-0.00411517	0.00603872	-0.0058116	0.0129544	-0.00456202	0.0134018	0.00166256			30	-1.19195	-1.08709	-1.33361	-1.21186	-1.28437	-1.27744	-1.15911
30.2	-0.00727076	0.00899007	-0.00702465	0.00993516	-0.011134	0.0107431	-0.00385752			30.2	-1.19511	-1.08414	-1.33482	-1.21488	-1.29095	-1.2801	-1.16463
30.4	-0.00612436	0.0116318	-0.00561386	0.0107271	-0.00419329	0.0113447	-0.00288239			30.4	-1.19396	-1.0815	-1.33341	-1.21409	-1.284	-1.2795	-1.16365
30.59	-0.00636496	0.00741198	-0.00717962	0.0122406	-0.00807913	0.0121933	-0.00110466			30.59	-1.1942	-1.08572	-1.33498	-1.21258	-1.28789	-1.27865	-1.16187
30.8	-0.00360859	0.0119505	-0.00591007	0.013709	-0.00649576	0.0155863	-0.00440301			30.8	-1.19145	-1.08118	-1.33371	-1.21111	-1.28631	-1.27526	-1.16517
31	-0.0071304	0.0102682	-0.0072452	0.0122709	-0.00342428	0.0103866	-0.00216456			31	-1.19497	-1.08286	-1.33504	-1.21255	-1.28324	-1.28046	-1.16293
31.2	-0.00438999	0.0110213	-0.00943702	0.0107193	-0.00415101	0.0115431	-0.00463125			31.2	-1.19223	-1.08211	-1.33723	-1.2141	-1.28396	-1.2793	-1.1654
31.4	-0.00494549	0.00646269	-0.0078255	0.0137489	-0.00663124	0.0100504	0.00095478			31.4	-1.19278	-1.08667	-1.33562	-1.21107	-1.28644	-1.28079	-1.15982
31.6	-0.00386135	0.0100295	-0.00800174	0.0146961	-0.00527958	0.0131302	-0.0046005			31.6	-1.1917	-1.0831	-1.3358	-1.21012	-1.28509	-1.27771	-1.16537
31.8	-0.00840548	0.0111508	-0.00342732	0.0149484	-0.00719323	0.00847598	-0.00141662			31.8	-1.19624	-1.08198	-1.33123	-1.20987	-1.287	-1.28237	-1.16219
32	-0.00680727	0.0121156	-0.00560933	0.0122535	-0.00689726	0.010023	-0.00510301			32	-1.19464	-1.08102	-1.33341	-1.21256	-1.28671	-1.28082	-1.16587
32.19	-0.00462123	0.00901829	-0.00693273	0.00895967	-0.00465523	0.0125251	-0.00068424			32.19	-1.19246	-1.08411	-1.33473	-1.21586	-1.28447	-1.27832	-1.16145
32.39	-0.00310744	0.0106702	-0.00838562	0.013271	-0.00576873	0.0129347	-0.00372772			32.39	-1.19095	-1.08246	-1.33618	-1.21155	-1.28558	-1.27791	-1.1645
32.59	-0.0018616	0.0117462	-0.00920062	0.0140589	-0.00620248	0.0103375	-0.00289681			32.59	-1.1897	-1.08139	-1.337	-1.21076	-1.28601	-1.2805	-1.16367
32.79	-0.00606159	0.0050446	-0.00842469	0.0137416	-0.00525677	0.0130058	-0.0102555			32.79	-1.1939	-1.08809	-1.33622	-1.21107	-1.28507	-1.27784	-1.17103
32.99	-0.00276641	0.00798451	-0.00638531	0.0139068	-0.00626711	0.0120221	-0.00191228			32.99	-1.1906	-1.08515	-1.33418	-1.21091	-1.28608	-1.27882	-1.16268
33.19	-0.00573535	0.01332	-0.00669782	0.0161153	-0.00384259	0.0129396	-0.00211133			33.19	-1.19357	-1.07981	-1.3345	-1.2087	-1.28365	-1.2779	-1.16288
33.4	-0.00846843	0.0143905	-0.00464576	0.0140257	-0.00352167	0.0127824	-0.00241707			33.4	-1.19631	-1.07874	-1.33244	-1.21079	-1.28333	-1.27806	-1.16319
33.59	-0.00758571	0.00758235	-0.0057387	0.0129377	-0.00756507	0.0108252	-0.00649429			33.59	-1.19542	-1.08555	-1.33354	-1.21188	-1.28738	-1.28002	-1.16726
33.79	-0.00779873	0.0105642	-0.00537422	0.0118086	-0.00636074	0.0109347	-0.00337162			33.79	-1.19564	-1.08257	-1.33317	-1.21301	-1.28617	-1.27991	-1.16414
33.99	-0.00400909	0.0116749	-0.00813582	0.0167074	-0.00511559	0.0136721	-0.00745387			33.99	-1.19185	-1.08146	-1.33593	-1.20811	-1.28493	-1.27717	-1.16822
34.19	-0.00395576	0.0125254	-0.00564762	0.013584	-0.00533118	0.0146488	-0.00418369			34.19	-1.19179	-1.08061	-1.33345	-1.21123	-1.28514	-1.27619	-1.16495
34.39	-0.00516063	0.00970423	-0.00464457	0.0103594	-0.00781812	0.0154049	-0.00271749			34.39	-1.193	-1.08343	-1.33244	-1.21446	-1.28763	-1.27544	-1.16349
34.59	-0.00451455	0.00795238	-0.00851073	0.0137914	-0.00751471	0.0116087	-0.00420167			34.59	-1.19235	-1.08518	-1.33631	-1.21102	-1.28733	-1.27923	-1.16497
34.79	-0.00876952	0.0129842	-0.00392985	0.0117322	-0.00723962	0.0135459	-0.00535401			34.79	-1.19661	-1.08015	-1.33173	-1.21308	-1.28705	-1.2773	-1.16612
34.99	-0.00652141	0.00938478	-0.00227079	0.0128886	-0.00655497	0.0155511	0.000533			34.99	-1.19436	-1.08375	-1.33007	-1.21193	-1.28637	-1.27529	-1.16024
35.19	-0.00853985	0.011029	-0.00559405	0.0162334	-0.00759806	0.0151561	-0.00386316			35.19	-1.19638	-1.0821	-1.33339	-1.20858	-1.28741	-1.27569	-1.16463
35.39	-0.00787779	0.00764571	-0.00476566	0.0124632	-0.00311378	0.0160744	-0.00444425			35.39	-1.19572	-1.08549	-1.33256	-1.21235	-1.28293	-1.27477	-1.16521
35.59	-0.00737995	0.0077529	-0.0067722	0.0123323	-0.005186	0.013072	-0.00601944			35.59	-1.19522	-1.08538	-1.33457	-1.21248	-1.285	-1.27777	-1.16679
35.79	-0.00685259	0.0116617	-0.00620286	0.0132725	-0.00759955	0.0136427	-0.00513261			35.79	-1.19469	-1.08147	-1.334	-1.21154	-1.28741	-1.2772	-1.1659
35.99	-0.00763392	0.0133078	-0.00815721	0.0137223	-0.00903761	0.0122308	-0.00349594			35.99	-1.19547	-1.07983	-1.33596	-1.21109	-1.28885	-1.27861	-1.16427
36.19	-0.00799358	0.00928537	-0.00872846	0.0122838	-0.00511859	0.012763	-0.00455501			36.19	-1.19583	-1.08385	-1.33653	-1.21253	-1.28493	-1.27808	-1.16533
36.39	-0.00674012	0.0101127	-0.00932614	0.0121581	-0.00344457	0.0125471	-0.00575397			36.39	-1.19458	-1.08302	-1.33712	-1.21266	-1.28326	-1.27829	-1.16652
36.59	-0.00512757	0.00754962	-0.00673515	0.0125739	-0.00494255	0.010847	-0.00236203			36.59	-1.19297	-1.08558	-1.33453	-1.21224	-1.28475	-1.27999	-1.16313
36.79	-0.00460764	0.0119039	-0.00791139	0.0151655	-0.0101204	0.0128314	-0.00623699			36.79	-1.19245	-1.08123	-1.33571	-1.20965	-1.28993	-1.27801	-1.16701
36.99	-0.00616702	0.0110145	-0.00794624	0.0142717	-0.010057	0.0131184	-0.00442959			36.99	-1.194	-1.08212	-1.33574	-1.21054	-1.28987	-1.27772	-1.1652
37.19	-0.00576231	0.00985503	-0.00976808	0.00978275	-0.00770381	0.0150223	-0.00325301			37.19	-1.1936	-1.08328	-1.33757	-1.21503	-1.28752	-1.27582	-1.16402
37.39	-0.00711694	0.00881829	-0.00590392	0.0129211	-0.00917232	0.0149114	-0.00353661			37.39	-1.19495	-1.08431	-1.3337	-1.2119	-1.28898	-1.27593	-1.16431
37.59	-0.00776566	0.00959669	-0.00833493	0.0145562	-0.00880409	0.0142994	-0.00277166			37.59	-1.1956	-1.08354	-1.33613	-1.21026	-1.28862	-1.27654	-1.16354
37.79	-0.00256092	0.0106617	-0.00869985	0.008704	-0.00796789	0.0116175	-0.00819858			37.79	-1.1904	-1.08247	-1.3365	-1.21611	-1.28778	-1.27922	-1.16897
37.99	-0.00568222	0.00525238	-0.0078602	0.0152908	-0.00308761	0.0144448	-0.00423657			37.99	-1.19352	-1.08788	-1.33566	-1.20953	-1.2829	-1.2764	-1.16501
38.19	-0.00386617	0.00487711	-0.00592364	0.014255	-0.00788474	0.0106293	-0.00337664			38.19	-1.1917	-1.08826	-1.33372	-1.21056	-1.2877	-1.28021	-1.16415
38.39	-0.00670171	0.0135629	-0.00808545	0.0108855	-0.00633851	0.0127076	-0.0030632			38.39	-1.19454	-1.07957	-1.33588	-1.21393	-1.28615	-1.27813	-1.16383
38.59	-0.00589817	0.00722429	-0.00581446	0.0113221	-0.0059248	0.017299	-0.00428518			38.59	-1.19374	-1.08591	-1.33361	-1.21349	-1.28574	-1.27354	-1.16506
38.79	-0.00749301	0.0109196	-0.00698741	0.0125089	-0.00816609	0.0136131	-0.0047485			38.79	-1.19533	-1.08221	-1.33479	-1.21231	-1.28798	-1.27723	-1.16552
38.99	-0.00462109	0.00787325	-0.00708201	0.0152347	-0.00565476	0.0113666	-0.00539423			38.99	-1.19246	-1.08526	-1.33488	-1.20958	-1.28547	-1.27948	-1.16616
39.19	-0.00600584	0.0107728	-0.00930915	0.00893882	-0.00675538	0.0174755	-0.00448335			39.19	-1.19384	-1.08236	-1.33711	-1.21588	-1.28657	-1.27337	-1.16525
39.39	-0.00537644	0.011364	-0.00678906	0.0114715	-0.00627222	0.0126068	-0.00181606			39.39	-1.19321	-1.08177	-1.33459	-1.21334	-1.28608	-1.27824	-1.16259
39.59	-0.00930655	0.011077	-0.00924369	0.0124943	-0.00858661	0.0136767	-0.00728646			39.59	-1.19714	-1.08206	-1.33704	-1.21232	-1.2884	-1.27717	-1.16806
39.79	-0.00833203	0.00739104	-0.0102397	0.0135819	-0.0072729	0.0113748	-0.00541433			39.79	-1.19617	-1.08574	-1.33804	-1.21123	-1.28708	-1.27947	-1.16618
39.99	-0.00868209	0.0125852	-0.00931163	0.0102985	-0.00520285	0.0141481	-0.00423676			39.99	-1.19652	-1.08055	-1.33711	-1.21452	-1.28501	-1.27669	-1.16501
40.19	-0.00809177	0.00842487	-0.00956721	0.0129976	-0.00789226	0.0139799	-0.0089893			40.19	-1.19593	-1.08471	-1.33737	-1.21182	-1.2877	-1.27686	-1.16976
40.39	-0.0051267	0.00882338	-0.00929764	0.00960084	-0.00757365	0.0149994	-0.00620246			40.39	-1.19296	-1.08431	-1.3371	-1.21522	-1.28739	-1.27584	-1.16697
40.59	-0.00781821	0.0107238	-0.00579333	0.010235	-0.00575313	0.011925	-0.00285781			40.59	-1.19566	-1.08241	-1.33359	-1.21458	-1.28556	-1.27892	-1.16363
40.79	-0.0102245	0.00849129	-0.00955477	0.0166309	-0.00809467	0.0121802	-0.00423305			40.79	-1.19806	-1.08464	-1.33735	-1.20819	-1.28791	-1.27866	-1.165
40.99	-0.0107792	0.0107629	-0.0110281	0.0151888	-0.00769489	0.0178161	-0.00281468			40.99	-1.19862	-1.08237	-1.33883	-1.20963	-1.28751	-1.27303	-1.16358
41.19	-0.00513977	0.0103883	-0.00480524	0.0109852	-0.00619166	0.0160353	-0.00629657			41.19	-1.19298	-1.08274	-1.3326	-1.21383	-1.286	-1.27481	-1.16707
41.39	-0.00483972	0.0105521	-0.00656826	0.00984178	-0.00887587	0.0149837	-0.00708086			41.39	-1.19268	-1.08258	-1.33437	-1.21497	-1.28869	-1.27586	-1.16785
41.59	-0.00263492	0.0105033	-0.00914559	0.0124986	-0.0101135	0.0138868	0.00105532			41.59	-1.19047	-1.08263	-1.33694	-1.21232	-1.28993	-1.27696	-1.15971
41.79	-0.00988828	0.0079913	-0.00555298	0.0118075	-0.00761856	0.0135177	-0.00544864			41.79	-1.19773	-1.08514	-1.33335	-1.21301	-1.28743	-1.27732	-1.16622
41.99	-0.00881605	0.00503213	-0.010501	0.0114548	-0.00900317	0.00990271	-0.00508957			41.99	-1.19665	-1.0881	-1.3383	-1.21336	-1.28881	-1.28094	-1.16586
42.19	-0.00670337	0.0135972	-0.00987332	0.0164799	-0.00662525	0.0142377	-0.00442321			42.19	-1.19454	-1.07954	-1.33767	-1.20834	-1.28644	-1.2766	-1.16519
42.4	-0.00523586	0.0125604	-0.006349	0.0147728	-0.00520569	0.0134024	-0.00592121			42.4	-1.19307	-1.08057	-1.33415	-1.21004	-1.28502	-1.27744	-1.16669
42.59	-0.0101412	0.0124245	-0.00644034	0.0147128	-0.00827225	0.0151039	-0.00344864			42.59	-1.19798	-1.08071	-1.33424	-1.2101	-1.28808	-1.27574	-1.16422
42.79	-0.010121	0.00971124	-0.0118892	0.0110516	-0.00916086	0.0108889	-0.0107254			42.79	-1.19796	-1.08342	-1.33969	-1.21376	-1.28897	-1.27995	-1.1715
42.99	-0.00572716	0.0101268	-0.00993279	0.0144254	-0.00794391	0.0153153	-0.00494264			42.99	-1.19356	-1.08301	-1.33773	-1.21039	-1.28776	-1.27553	-1.16571
43.19	-0.00851857	0.0104319	-0.00691862	0.0123155	-0.00740379	0.0143996	-0.00457779			43.19	-1.19636	-1.0827	-1.33472	-1.2125	-1.28722	-1.27644	-1.16535
43.4	-0.00954553	0.0110637	-0.00400301	0.0118643	-0.00994907	0.015069	-0.00522938			43.4	-1.19738	-1.08207	-1.3318	-1.21295	-1.28976	-1.27577	-1.166
43.59	-0.00569852	0.0112407	-0.0082199	0.012866	-0.00713219	0.0123877	-0.00359022			43.59	-1.19354	-1.08189	-1.33602	-1.21195	-1.28694	-1.27845	-1.16436
43.79	-0.00654906	0.0116424	-0.00865876	0.01409	-0.00715208	0.0166712	-0.00095108			43.79	-1.19439	-1.08149	-1.33646	-1.21073	-1.28696	-1.27417	-1.16172
43.99	-0.00767056	0.0112574	-0.00883858	0.0149284	-0.00750548	0.0139731	-0.00431181			43.99	-1.19551	-1.08188	-1.33664	-1.20989	-1.28732	-1.27687	-1.16508
44.19	-0.00826093	0.0129622	-0.00521006	0.0182438	-0.00772556	0.0158605	-0.00545687			44.19	-1.1961	-1.08017	-1.33301	-1.20657	-1.28754	-1.27498	-1.16623
44.4	-0.00769759	0.0092984	-0.00772003	0.0156626	-0.00937361	0.0120187	-0.00640841			44.4	-1.19554	-1.08383	-1.33552	-1.20915	-1.28919	-1.27882	-1.16718
44.59	-0.00827152	0.00936941	-0.00825459	0.0135723	-0.00704926	0.0189555	-0.00341874			44.59	-1.19611	-1.08376	-1.33605	-1.21124	-1.28686	-1.27189	-1.16419
44.79	-0.00598584	0.0126344	-0.00688445	0.0153937	-0.00758112	0.0113491	-0.00775829			44.79	-1.19382	-1.0805	-1.33468	-1.20942	-1.28739	-1.27949	-1.16853
44.99	-0.00888767	0.011652	-0.00911343	0.0156183	-0.00854997	0.0180515	-0.00329671			44.99	-1.19673	-1.08148	-1.33691	-1.2092	-1.28836	-1.27279	-1.16407
45.19	-0.00764116	0.0128362	-0.00995008	0.0146333	-0.0089347	0.0166056	-0.00639116			45.19	-1.19548	-1.0803	-1.33775	-1.21018	-1.28875	-1.27424	-1.16716
45.4	-0.00689775	0.0103779	-0.0108911	0.013183	-0.00786228	0.0116187	-0.00844423			45.4	-1.19474	-1.08276	-1.33869	-1.21163	-1.28767	-1.27922	-1.16921
45.59	-0.00743789	0.0115812	-0.00759191	0.0173418	-0.00943946	0.0140034	-0.00089048			45.59	-1.19528	-1.08155	-1.33539	-1.20747	-1.28925	-1.27684	-1.16166
45.79	-0.0084619	0.0076039	-0.00885912	0.0149389	-0.00998168	0.0145371	-0.00674856			45.79	-1.1963	-1.08553	-1.33666	-1.20988	-1.28979	-1.2763	-1.16752
45.99	-0.0088054	0.0120741	-0.00884743	0.0144253	-0.00634195	0.0152285	0.00523691			45.99	-1.19664	-1.08106	-1.33665	-1.21039	-1.28615	-1.27561	-1.15553
46.19	-0.00859054	0.0123506	-0.00510947	0.0151313	-0.00928409	0.0154389	-0.00585217			46.19	-1.19643	-1.08078	-1.33291	-1.20968	-1.2891	-1.2754	-1.16662
46.4	-0.0090418	0.0105216	-0.0091984	0.0154761	-0.010382	0.0160148	-0.0053587			46.4	-1.19688	-1.08261	-1.337	-1.20934	-1.29019	-1.27483	-1.16613
46.59	-0.00778306	0.00886987	-0.00840284	0.0148364	-0.00668039	0.0180929	-0.00742786			46.59	-1.19562	-1.08426	-1.3362	-1.20998	-1.28649	-1.27275	-1.1682
46.79	-0.00729464	0.0110342	-0.00620602	0.0136755	-0.0100818	0.0150422	-0.00338415			46.79	-1.19513	-1.0821	-1.334	-1.21114	-1.28989	-1.2758	-1.16415
46.99	-0.00712064	0.0116407	-0.00962481	0.0157086	-0.00947782	0.017223	-0.00798986			46.99	-1.19496	-1.08149	-1.33742	-1.20911	-1.28929	-1.27362	-1.16876
47.19	-0.0072589	0.00550599	-0.00713209	0.0137827	-0.00991817	0.0144685	-0.00514486			47.19	-1.1951	-1.08763	-1.33493	-1.21103	-1.28973	-1.27637	-1.16592
47.4	-0.0111027	0.0107561	-0.00589306	0.0162026	-0.0070525	0.0145945	-0.00870225			47.4	-1.19894	-1.08238	-1.33369	-1.20861	-1.28686	-1.27625	-1.16947
47.59	-0.00808828	0.0097286	-0.00737911	0.0137993	-0.0106167	0.0148023	-0.00412051			47.59	-1.19593	-1.0834	-1.33518	-1.21102	-1.29043	-1.27604	-1.16489
47.79	-0.0116471	0.00750288	-0.00733913	0.010937	-0.0111059	0.0155808	-0.00649373			47.79	-1.19948	-1.08563	-1.33514	-1.21388	-1.29092	-1.27526	-1.16726
47.99	-0.00667745	0.00971733	-0.0108575	0.0150477	-0.0093221	0.012024	-0.00681726			47.99	-1.19452	-1.08342	-1.33866	-1.20977	-1.28913	-1.27882	-1.16759
48.19	-0.00777144	0.00894511	-0.00979107	0.0113282	-0.00696995	0.0163006	-0.00602313			48.19	-1.19561	-1.08419	-1.33759	-1.21349	-1.28678	-1.27454	-1.16679
48.39	-0.00910731	0.00943497	-0.0111735	0.0145157	-0.005369	0.0177112	-0.00566108			48.39	-1.19694	-1.0837	-1.33897	-1.2103	-1.28518	-1.27313	-1.16643
48.59	-0.00924182	0.00770884	-0.00789891	0.0164306	-0.00908822	0.0148313	-0.00597125			48.59	-1.19708	-1.08542	-1.3357	-1.20839	-1.2889	-1.27601	-1.16674
48.79	-0.00893137	0.0108851	-0.00960224	0.0166005	-0.0113181	0.0169331	-0.00526998			48.79	-1.19677	-1.08225	-1.3374	-1.20822	-1.29113	-1.27391	-1.16604
48.99	-0.00623871	0.0119336	-0.00795261	0.0149281	-0.00636601	0.0143545	-0.00358701			48.99	-1.19408	-1.0812	-1.33575	-1.20989	-1.28618	-1.27649	-1.16436
49.19	-0.00746971	0.00911801	-0.0114149	0.0135013	-0.00626837	0.0122375	-0.00152421			49.19	-1.19531	-1.08401	-1.33921	-1.21131	-1.28608	-1.2786	-1.16229
49.39	-0.00936244	0.0108004	-0.00936178	0.0148723	-0.00668273	0.0134477	-0.00799299			49.39	-1.1972	-1.08233	-1.33716	-1.20994	-1.28649	-1.27739	-1.16876
49.59	-0.0140711	0.0119592	-0.0105132	0.014663	-0.00888181	0.013339	-0.0114795			49.59	-1.20191	-1.08117	-1.33831	-1.21015	-1.28869	-1.2775	-1.17225
49.79	-0.00570326	0.0148728	-0.00880998	0.0149459	-0.0105003	0.0145363	-0.0077137			49.79	-1.19354	-1.07826	-1.33661	-1.20987	-1.29031	-1.27631	-1.16848
49.99	-0.0122241	0.01049	-0.00989756	0.0108702	-0.00826865	0.0135703	-0.00687852			49.99	-1.20006	-1.08264	-1.3377	-1.21395	-1.28808	-1.27727	-1.16765
50.19	-0.00787108	0.0107437	-0.00926551	0.0146835	-0.00969854	0.0168046	-0.00329855			50.19	-1.19571	-1.08239	-1.33706	-1.21013	-1.28951	-1.27404	-1.16407
50.4	-0.00492594	0.0102293	-0.0111507	0.0143951	-0.0117186	0.0144413	-0.00900876			50.4	-1.19276	-1.0829	-1.33895	-1.21042	-1.29153	-1.2764	-1.16978
50.59	-0.00612125	0.0129513	-0.0108678	0.0149313	-0.00629528	0.0169901	-0.00542098			50.59	-1.19396	-1.08018	-1.33867	-1.20988	-1.28611	-1.27385	-1.16619
50.79	-0.00748431	0.0148116	-0.00905773	0.0116614	-0.00863239	0.0189214	-0.00755537			50.79	-1.19532	-1.07832	-1.33686	-1.21315	-1.28844	-1.27192	-1.16833
50.99	-0.00794844	0.0123345	-0.0104876	0.0169952	-0.0103897	0.015006	-0.00801806			50.99	-1.19579	-1.0808	-1.33829	-1.20782	-1.2902	-1.27584	-1.16879
51.19	-0.00747707	0.0110801	-0.0063065	0.0139777	-0.00976378	0.016187	-0.00659215			51.19	-1.19531	-1.08205	-1.3341	-1.21084	-1.28958	-1.27465	-1.16736
51.4	-0.00583167	0.0151565	-0.0116536	0.0162496	-0.0102781	0.0146824	-0.00741934			51.4	-1.19367	-1.07798	-1.33945	-1.20857	-1.29009	-1.27616	-1.16819
51.59	-0.00928839	0.00991411	-0.00776815	0.0143816	-0.0119144	0.012115	-0.00757721			51.59	-1.19713	-1.08322	-1.33557	-1.21043	-1.29173	-1.27873	-1.16835
51.79	-0.00575908	0.00992705	-0.00677693	0.0170488	-0.0102264	0.0167791	-0.0058089			51.79	-1.1936	-1.08321	-1.33457	-1.20777	-1.29004	-1.27406	-1.16658
51.99	-0.00752072	0.00828731	-0.00657941	0.0154667	-0.00857575	0.0147898	-0.00537593			51.99	-1.19536	-1.08485	-1.33438	-1.20935	-1.28839	-1.27605	-1.16615
52.19	-0.00982508	0.0140261	-0.0101252	0.0116864	-0.00886695	0.0155224	-0.00852017			52.19	-1.19766	-1.07911	-1.33792	-1.21313	-1.28868	-1.27532	-1.16929
52.4	-0.0119385	0.00962098	-0.0120903	0.0181174	-0.00881331	0.0145769	-0.00456389			52.4	-1.19978	-1.08351	-1.33989	-1.2067	-1.28862	-1.27627	-1.16533
52.59	-0.00696309	0.01059	-0.0104233	0.0181566	-0.00735718	0.0120018	-0.0059256			52.59	-1.1948	-1.08254	-1.33822	-1.20666	-1.28717	-1.27884	-1.1667
52.79	-0.010425	0.013534	-0.006407	0.0157564	-0.00920817	0.0180377	-0.00855574			52.79	-1.19826	-1.0796	-1.3342	-1.20906	-1.28902	-1.2728	-1.16933
52.99	-0.00928746	0.0126419	-0.00562375	0.0144854	-0.00776172	0.0141895	-0.00674651			52.99	-1.19713	-1.08049	-1.33342	-1.21033	-1.28757	-1.27665	-1.16752
53.19	-0.00795134	0.00899444	-0.0056917	0.0136799	-0.0108699	0.0150087	-0.00266962			53.19	-1.19579	-1.08414	-1.33349	-1.21114	-1.29068	-1.27583	-1.16344
53.4	-0.0107421	0.0142788	-0.0107049	0.015157	-0.00794934	0.0144328	-0.00451351			53.4	-1.19858	-1.07885	-1.3385	-1.20966	-1.28776	-1.27641	-1.16528
53.59	-0.00748904	0.00705097	-0.0112305	0.0156198	-0.00691976	0.0147798	-0.0094064			53.59	-1.19533	-1.08608	-1.33903	-1.2092	-1.28673	-1.27606	-1.17018
53.79	-0.00896244	0.00670661	-0.00492301	0.0152347	-0.00783575	0.0204945	-0.00295384			53.79	-1.1968	-1.08643	-1.33272	-1.20958	-1.28765	-1.27035	-1.16372
53.99	-0.00817945	0.0141765	-0.0106858	0.0151714	-0.00922187	0.0197028	-0.00593413			53.99	-1.19602	-1.07896	-1.33848	-1.20964	-1.28903	-1.27114	-1.1667
54.19	-0.00666637	0.0107093	-0.0101629	0.016905	-0.0098409	0.0175406	-0.00790589			54.19	-1.1945	-1.08242	-1.33796	-1.20791	-1.28965	-1.2733	-1.16868
54.39	-0.00933736	0.0148925	-0.0110072	0.014916	-0.00996227	0.0140974	-0.00468358			54.39	-1.19717	-1.07824	-1.33881	-1.2099	-1.28977	-1.27674	-1.16545
54.59	-0.00756399	0.0075992	-0.0106571	0.0142636	-0.0106032	0.0144531	-0.00547872			54.59	-1.1954	-1.08553	-1.33846	-1.21055	-1.29041	-1.27639	-1.16625
54.79	-0.00606058	0.0108185	-0.0116661	0.0165868	-0.0108051	0.0141901	-0.00231429			54.79	-1.1939	-1.08231	-1.33946	-1.20823	-1.29062	-1.27665	-1.16308
54.99	-0.00650953	0.00877673	-0.0106181	0.0154572	-0.0124864	0.0175262	-0.00768837			54.99	-1.19435	-1.08436	-1.33842	-1.20936	-1.2923	-1.27332	-1.16846
55.19	-0.00854833	0.0107279	-0.0076984	0.0177286	-0.0109179	0.0164985	-0.00594018			55.19	-1.19639	-1.08241	-1.3355	-1.20709	-1.29073	-1.27434	-1.16671
55.4	-0.0124881	0.0086086	-0.011261	0.0174614	-0.00938741	0.0177005	-0.0065844			55.4	-1.20033	-1.08452	-1.33906	-1.20735	-1.2892	-1.27314	-1.16735
55.59	-0.00891773	0.0123504	-0.0110747	0.0143206	-0.0108995	0.0125608	-0.00862947			55.59	-1.19676	-1.08078	-1.33887	-1.2105	-1.29071	-1.27828	-1.1694
55.79	-0.00843858	0.00804756	-0.00926556	0.0156646	-0.00884442	0.0171974	-0.00870914			55.79	-1.19628	-1.08509	-1.33706	-1.20915	-1.28866	-1.27364	-1.16948
55.99	-0.0122691	0.00901126	-0.0131961	0.0122742	-0.00805005	0.0193815	-0.00775607			55.99	-1.20011	-1.08412	-1.34099	-1.21254	-1.28786	-1.27146	-1.16853
56.19	-0.0122697	0.0119205	-0.0106156	0.0173083	-0.00776819	0.0117961	-0.00470701			56.19	-1.20011	-1.08121	-1.33841	-1.20751	-1.28758	-1.27905	-1.16548
56.4	-0.0104644	0.013593	-0.0114717	0.01413	-0.00962227	0.0119499	-0.00742811			56.4	-1.1983	-1.07954	-1.33927	-1.21069	-1.28943	-1.27889	-1.1682
56.59	-0.0078435	0.010762	-0.00995633	0.018646	-0.0107388	0.0192014	-0.0054961			56.59	-1.19568	-1.08237	-1.33775	-1.20617	-1.29055	-1.27164	-1.16627
56.79	-0.00737641	0.0125713	-0.0129557	0.01297	-0.00875378	0.0138039	-0.00535477			56.79	-1.19521	-1.08056	-1.34075	-1.21185	-1.28857	-1.27704	-1.16612
56.99	-0.0088604	0.010043	-0.0102782	0.0165915	-0.0107598	0.0180073	-0.00887823			56.99	-1.1967	-1.08309	-1.33808	-1.20822	-1.29057	-1.27283	-1.16965
57.19	-0.0101065	0.0134812	-0.00887612	0.0171007	-0.00954571	0.0149136	-0.00474786			57.19	-1.19794	-1.07965	-1.33667	-1.20772	-1.28936	-1.27593	-1.16552
57.4	-0.00890773	0.0115815	-0.0114964	0.0148925	-0.00982998	0.0179038	-0.00349579			57.4	-1.19675	-1.08155	-1.33929	-1.20992	-1.28964	-1.27294	-1.16427
57.59	-0.0134981	0.0116096	-0.0106911	0.0112316	-0.0073426	0.0148331	-0.0131048			57.59	-1.20134	-1.08152	-1.33849	-1.21358	-1.28715	-1.27601	-1.17388
57.79	-0.00837832	0.00639712	-0.0127887	0.0118267	-0.00667264	0.0190213	-0.00792976			57.79	-1.19622	-1.08674	-1.34059	-1.21299	-1.28648	-1.27182	-1.1687
57.99	-0.00972233	0.011695	-0.00956873	0.0180941	-0.00931428	0.0120411	-0.00671894			57.99	-1.19756	-1.08144	-1.33737	-1.20672	-1.28913	-1.2788	-1.16749
58.19	-0.00856582	0.0144818	-0.0109877	0.015301	-0.00984319	0.0170646	-0.00331236			58.19	-1.1964	-1.07865	-1.33879	-1.20952	-1.28965	-1.27378	-1.16408
58.4	-0.00938443	0.0110522	-0.011238	0.0183747	-0.00860091	0.0193287	-0.00599698			58.4	-1.19722	-1.08208	-1.33904	-1.20644	-1.28841	-1.27151	-1.16677
58.59	-0.0107703	0.00938198	-0.00940977	0.00986827	-0.00936522	0.0173138	-0.00687399			58.59	-1.19861	-1.08375	-1.33721	-1.21495	-1.28918	-1.27353	-1.16764
58.79	-0.011904	0.0101262	-0.0131733	0.0138781	-0.0138374	0.015049	-0.00756023			58.79	-1.19974	-1.08301	-1.34097	-1.21094	-1.29365	-1.27579	-1.16833
58.99	-0.0108236	0.0113465	-0.00852912	0.0144061	-0.011231	0.0174697	-0.00761621			58.99	-1.19866	-1.08179	-1.33633	-1.21041	-1.29104	-1.27337	-1.16839
59.19	-0.0100506	0.0127175	-0.00953936	0.0163129	-0.0106927	0.0161282	-0.0051605			59.19	-1.19789	-1.08042	-1.33734	-1.2085	-1.2905	-1.27471	-1.16593
59.39	-0.00892492	0.00617174	-0.0107046	0.0168689	-0.0120838	0.0201328	-0.00750015			59.39	-1.19676	-1.08696	-1.3385	-1.20795	-1.2919	-1.27071	-1.16827
59.59	-0.0109321	0.00877925	-0.0109557	0.019069	-0.0131641	0.0139982	-0.0111022			59.59	-1.19877	-1.08435	-1.33875	-1.20575	-1.29298	-1.27684	-1.17187
59.79	-0.00767087	0.00618654	-0.0116253	0.014155	-0.0113366	0.0166457	-0.00885202			59.79	-1.19551	-1.08695	-1.33942	-1.21066	-1.29115	-1.2742	-1.16962
59.99	-0.0118861	0.00975609	-0.0116469	0.0118339	-0.00986087	0.0141221	-0.00852675			59.99	-1.19972	-1.08338	-1.33944	-1.21298	-1.28967	-1.27672	-1.1693
60.19	-0.00933713	0.0112339	-0.0141896	0.0184915	-0.00951276	0.0185935	-0.00508864			60.19	-1.19717	-1.0819	-1.34199	-1.20632	-1.28932	-1.27225	-1.16586
60.39	-0.0101048	0.0116785	-0.00953795	0.0143529	-0.0103321	0.0150475	-0.00624513			60.39	-1.19794	-1.08145	-1.33734	-1.21046	-1.29014	-1.27579	-1.16702
60.59	-0.0101818	0.00866028	-0.00770035	0.014833	-0.0102229	0.0107784	-0.0130477			60.59	-1.19802	-1.08447	-1.3355	-1.20998	-1.29003	-1.28006	-1.17382
60.79	-0.00981497	0.0126871	-0.0114812	0.0161702	-0.0143451	0.016316	-0.00849973			60.79	-1.19765	-1.08045	-1.33928	-1.20865	-1.29416	-1.27453	-1.16927
60.99	-0.0107498	0.0111497	-0.0141038	0.0140243	-0.0132294	0.0177139	-0.00640019			60.99	-1.19859	-1.08198	-1.3419	-1.21079	-1.29304	-1.27313	-1.16717
61.19	-0.00938871	0.00675436	-0.0131308	0.0152845	-0.0112237	0.0138623	-0.0101168			61.19	-1.19723	-1.08638	-1.34093	-1.20953	-1.29104	-1.27698	-1.17089
61.39	-0.0091138	0.00994113	-0.0094522	0.0164245	-0.00917946	0.0154251	-0.00778253			61.39	-1.19695	-1.08319	-1.33725	-1.20839	-1.28899	-1.27542	-1.16855
61.59	-0.00994576	0.00877437	-0.00896697	0.0156837	-0.00948482	0.0140834	-0.00609479			61.59	-1.19778	-1.08436	-1.33676	-1.20913	-1.2893	-1.27676	-1.16686
61.79	-0.00899972	0.00885171	-0.0110633	0.0173277	-0.0126457	0.0170997	-0.00750127			61.79	-1.19684	-1.08428	-1.33886	-1.20749	-1.29246	-1.27374	-1.16827
61.99	-0.00942245	0.00838527	-0.012454	0.0145138	-0.00758699	0.0184042	-0.0076888			61.99	-1.19726	-1.08475	-1.34025	-1.2103	-1.2874	-1.27244	-1.16846
62.19	-0.0119994	0.00829595	-0.00728239	0.0166267	-0.0121442	0.01577	-0.00980496			62.19	-1.19984	-1.08484	-1.33508	-1.20819	-1.29196	-1.27507	-1.17058
62.39	-0.010293	0.0106729	-0.0127099	0.0166001	-0.0109096	0.0175766	-0.00554237			62.39	-1.19813	-1.08246	-1.34051	-1.20822	-1.29072	-1.27327	-1.16631
62.59	-0.0134567	0.0130766	-0.0115398	0.0180397	-0.00953096	0.0171119	-0.0074259			62.59	-1.20129	-1.08006	-1.33934	-1.20678	-1.28934	-1.27373	-1.1682
62.79	-0.00688869	0.0151606	-0.0100966	0.0140741	-0.0102208	0.0144568	-0.0102282			62.79	-1.19473	-1.07797	-1.33789	-1.21074	-1.29003	-1.27639	-1.171
62.99	-0.0134577	0.0112102	-0.0130253	0.0155174	-0.0116611	0.0152376	-0.00397346			62.99	-1.2013	-1.08192	-1.34082	-1.2093	-1.29147	-1.2756	-1.16474
63.19	-0.00732313	0.0118164	-0.00995427	0.0155921	-0.00979103	0.0164884	-0.00953426			63.19	-1.19516	-1.08132	-1.33775	-1.20922	-1.2896	-1.27435	-1.1703
63.4	-0.00897969	0.0106955	-0.0117436	0.0129501	-0.0121002	0.0159223	-0.00956873			63.4	-1.19682	-1.08244	-1.33954	-1.21187	-1.29191	-1.27492	-1.17034
63.59	-0.0118187	0.00754631	-0.0123172	0.0149042	-0.0115476	0.0204418	-0.00642634			63.59	-1.19966	-1.08559	-1.34012	-1.20991	-1.29136	-1.2704	-1.1672
63.79	-0.00871745	0.00519727	-0.0140459	0.0176874	-0.0114529	0.0190738	-0.00616533			63.79	-1.19656	-1.08794	-1.34184	-1.20713	-1.29126	-1.27177	-1.16694
63.99	-0.00894042	0.00725089	-0.0115646	0.0196502	-0.0113916	0.014884	-0.00677596			63.99	-1.19678	-1.08588	-1.33936	-1.20517	-1.2912	-1.27596	-1.16755
64.19	-0.0122284	0.00952533	-0.0113025	0.0173265	-0.00946454	0.016831	-0.0105538			64.19	-1.20007	-1.08361	-1.3391	-1.20749	-1.28928	-1.27401	-1.17132
64.4	-0.0112872	0.0094335	-0.0134251	0.0167014	-0.0092933	0.0178264	-0.00551792			64.4	-1.19912	-1.0837	-1.34122	-1.20811	-1.2891	-1.27302	-1.16629
64.6	-0.0131211	0.0116344	-0.0127788	0.015143	-0.00882803	0.018342	-0.00854377			64.6	-1.20096	-1.0815	-1.34058	-1.20967	-1.28864	-1.2725	-1.16931
64.8	-0.0120831	0.00648188	-0.0115809	0.0177154	-0.0120782	0.0176575	-0.0109895			64.8	-1.19992	-1.08665	-1.33938	-1.2071	-1.29189	-1.27318	-1.17176
65	-0.00944827	0.0081689	-0.0112463	0.0141192	-0.00958302	0.0175691	-0.00824903			65	-1.19729	-1.08496	-1.33904	-1.2107	-1.28939	-1.27327	-1.16902
65.19	-0.0137861	0.0120556	-0.0140715	0.0154368	-0.0128025	0.015214	-0.00673189			65.19	-1.20162	-1.08108	-1.34187	-1.20938	-1.29261	-1.27563	-1.1675
65.4	-0.0115519	0.00838936	-0.00993487	0.013584	-0.00975917	0.0155048	-0.010116			65.4	-1.19939	-1.08474	-1.33773	-1.21123	-1.28957	-1.27534	-1.17089
65.59	-0.0123852	0.00562882	-0.0132311	0.0138165	-0.0116218	0.0186298	-0.00843761			65.59	-1.20022	-1.0875	-1.34103	-1.211	-1.29143	-1.27221	-1.16921
65.8	-0.0123642	0.0123425	-0.0160032	0.0145641	-0.00943487	0.0140703	-0.00960473			65.8	-1.2002	-1.08079	-1.3438	-1.21025	-1.28925	-1.27677	-1.17037
66	-0.0127115	0.00879236	-0.0135426	0.0170229	-0.0115854	0.0190254	-0.0116645			66	-1.20055	-1.08434	-1.34134	-1.20779	-1.2914	-1.27182	-1.17243
66.19	-0.0119258	0.00632689	-0.0131265	0.0156109	-0.0122153	0.0172439	-0.00842288			66.19	-1.19976	-1.08681	-1.34092	-1.20921	-1.29203	-1.2736	-1.16919
66.4	-0.017555	0.00990507	-0.0156477	0.0156593	-0.0100769	0.0153172	-0.00876631			66.4	-1.20539	-1.08323	-1.34345	-1.20916	-1.28989	-1.27552	-1.16954
66.6	-0.0123424	0.00978819	-0.0128847	0.0155563	-0.0132035	0.016637	-0.012624			66.6	-1.20018	-1.08334	-1.34068	-1.20926	-1.29302	-1.2742	-1.17339
66.8	-0.0126108	0.0127899	-0.0161571	0.0140871	-0.0115659	0.0138289	-0.00535058			66.8	-1.20045	-1.08034	-1.34396	-1.21073	-1.29138	-1.27701	-1.16612
67	-0.0121924	0.00767921	-0.0141464	0.0129271	-0.0110688	0.0155537	-0.0130306			67	-1.20003	-1.08545	-1.34194	-1.21189	-1.29088	-1.27529	-1.1738
67.19	-0.0136368	0.0104291	-0.0111244	0.0158527	-0.0131025	0.0176838	-0.00953552			67.19	-1.20147	-1.0827	-1.33892	-1.20896	-1.29291	-1.27316	-1.17031
67.4	-0.0101426	0.0055637	-0.0134172	0.0159731	-0.011064	0.0148956	-0.00811124			67.4	-1.19798	-1.08757	-1.34122	-1.20884	-1.29088	-1.27595	-1.16888
67.6	-0.0100063	0.00996675	-0.0147272	0.0153395	-0.0109726	0.0158317	-0.00786989			67.6	-1.19784	-1.08317	-1.34253	-1.20948	-1.29078	-1.27501	-1.16864
67.8	-0.013342	0.00941765	-0.0115785	0.0179908	-0.0128623	0.0168331	-0.00638316			67.8	-1.20118	-1.08372	-1.33938	-1.20683	-1.29267	-1.27401	-1.16715
68	-0.0136576	0.00952477	-0.0133207	0.0155327	-0.00968154	0.0152454	-0.0116704			68	-1.2015	-1.08361	-1.34112	-1.20928	-1.28949	-1.2756	-1.17244
68.19	-0.0161442	0.00893242	-0.0167671	0.0172453	-0.0153743	0.0130846	-0.00999414			68.19	-1.20398	-1.0842	-1.34456	-1.20757	-1.29519	-1.27776	-1.17076
68.4	-0.0141883	0.0078376	-0.0100317	0.0162967	-0.00814784	0.0187432	-0.00929445			68.4	-1.20203	-1.0853	-1.33783	-1.20852	-1.28796	-1.2721	-1.17006
68.6	-0.010853	0.00839786	-0.0143764	0.016554	-0.0090776	0.0141847	-0.00739306			68.6	-1.19869	-1.08474	-1.34217	-1.20826	-1.28889	-1.27666	-1.16816
68.79	-0.0110402	0.0107868	-0.0135884	0.015942	-0.00909297	0.0145237	-0.00692463			68.79	-1.19888	-1.08235	-1.34139	-1.20887	-1.2889	-1.27632	-1.16769
69	-0.0116467	0.00795509	-0.0126308	0.0149875	-0.0131432	0.0145563	-0.00862417			69	-1.19948	-1.08518	-1.34043	-1.20983	-1.29295	-1.27629	-1.16939
69.19	-0.0143334	0.00585989	-0.0129697	0.0164058	-0.0134666	0.0184216	-0.00989838			69.19	-1.20217	-1.08727	-1.34077	-1.20841	-1.29328	-1.27242	-1.17067
69.4	-0.0135017	0.00868046	-0.0113598	0.0141992	-0.0138252	0.0129914	-0.00880668			69.4	-1.20134	-1.08445	-1.33916	-1.21062	-1.29364	-1.27785	-1.16958
69.6	-0.0148415	0.0113556	-0.0151915	0.0159175	-0.0119545	0.0170386	-0.012284			69.6	-1.20268	-1.08178	-1.34299	-1.2089	-1.29177	-1.2738	-1.17305
69.8	-0.0120447	0.0105177	-0.0150495	0.0167864	-0.00809728	0.014154	-0.0107476			69.8	-1.19988	-1.08262	-1.34285	-1.20803	-1.28791	-1.27669	-1.17152
70	-0.0124304	0.0115933	-0.0172988	0.0135989	-0.00981834	0.0139951	-0.00923494			70	-1.20027	-1.08154	-1.3451	-1.21122	-1.28963	-1.27685	-1.17001
70.19	-0.0142827	0.00936793	-0.0124949	0.0164898	-0.0157226	0.0144278	-0.00713661			70.19	-1.20212	-1.08377	-1.34029	-1.20833	-1.29553	-1.27641	-1.16791
70.4	-0.0125666	0.00879528	-0.013075	0.0124884	-0.0113606	0.0175436	-0.0105312			70.4	-1.2004	-1.08434	-1.34087	-1.21233	-1.29117	-1.2733	-1.1713
70.59	-0.0137306	0.00853415	-0.0134322	0.0160151	-0.00982745	0.0147756	-0.0120195			70.59	-1.20157	-1.0846	-1.34123	-1.2088	-1.28964	-1.27607	-1.17279
70.8	-0.00846677	0.0109988	-0.0118081	0.0167295	-0.00846057	0.0145651	-0.00734715			70.8	-1.1963	-1.08213	-1.33961	-1.20809	-1.28827	-1.27628	-1.16812
70.99	-0.0157533	0.00673164	-0.0125383	0.0165318	-0.0124058	0.0132334	-0.00473463			70.99	-1.20359	-1.0864	-1.34034	-1.20828	-1.29222	-1.27761	-1.1655
71.19	-0.0128239	0.0117422	-0.0135197	0.0136057	-0.0133815	0.0186256	-0.0114625			71.19	-1.20066	-1.08139	-1.34132	-1.21121	-1.29319	-1.27222	-1.17223
71.39	-0.011483	0.00862187	-0.0136412	0.0149283	-0.0111766	0.0183641	-0.012468			71.39	-1.19932	-1.08451	-1.34144	-1.20989	-1.29099	-1.27248	-1.17324
71.59	-0.0135379	0.00761906	-0.0136757	0.0130513	-0.0127997	0.0151709	-0.0111765			71.59	-1.20138	-1.08551	-1.34147	-1.21176	-1.29261	-1.27567	-1.17195
71.8	-0.0129025	0.00849947	-0.016058	0.0172121	-0.0132273	0.0145134	-0.00845			71.8	-1.20074	-1.08463	-1.34386	-1.2076	-1.29304	-1.27633	-1.16922
71.99	-0.0129985	0.00721491	-0.0131537	0.0167578	-0.0131331	0.0158531	-0.0110685			71.99	-1.20084	-1.08592	-1.34095	-1.20806	-1.29294	-1.27499	-1.17184
72.19	-0.0118783	0.0045321	-0.0147138	0.0152357	-0.0139315	0.0125802	-0.0121493			72.19	-1.19972	-1.0886	-1.34251	-1.20958	-1.29374	-1.27826	-1.17292
72.39	-0.0168268	0.0064073	-0.0145927	0.0184519	-0.0145852	0.0164389	-0.00865534			72.39	-1.20466	-1.08673	-1.34239	-1.20636	-1.2944	-1.2744	-1.16943
72.6	-0.0108754	0.0112148	-0.0114815	0.0133393	-0.0145994	0.0192931	-0.011571			72.6	-1.19871	-1.08192	-1.33928	-1.21148	-1.29441	-1.27155	-1.17234
72.8	-0.0107039	0.0120117	-0.0126222	0.0151543	-0.0101342	0.0156295	-0.0117373			72.8	-1.19854	-1.08112	-1.34042	-1.20966	-1.28995	-1.27521	-1.17251
73	-0.0110756	0.00858859	-0.0146914	0.012666	-0.0134367	0.0175414	-0.0102071			73	-1.19891	-1.08454	-1.34249	-1.21215	-1.29325	-1.2733	-1.17098
73.19	-0.0138798	0.00651375	-0.0137134	0.0163596	-0.0101718	0.0155355	-0.00726497			73.19	-1.20172	-1.08662	-1.34151	-1.20846	-1.28998	-1.27531	-1.16804
73.4	-0.0118278	0.00689494	-0.0153472	0.0129648	-0.0120726	0.0194732	-0.00880035			73.4	-1.19967	-1.08624	-1.34315	-1.21185	-1.29188	-1.27137	-1.16957
73.6	-0.016167	0.0135228	-0.0169093	0.0157015	-0.0100404	0.0168197	-0.00863615			73.6	-1.204	-1.07961	-1.34471	-1.20911	-1.28985	-1.27402	-1.16941
73.79	-0.0115669	0.0116907	-0.0141357	0.0157877	-0.0129471	0.0152209	-0.00946773			73.79	-1.1994	-1.08144	-1.34193	-1.20903	-1.29276	-1.27562	-1.17024
74	-0.0146071	0.00797751	-0.0158674	0.0150272	-0.0122603	0.0137953	-0.00762731			74	-1.20244	-1.08516	-1.34367	-1.20979	-1.29207	-1.27705	-1.1684
74.19	-0.0112349	0.0118747	-0.016757	0.0119718	-0.0118795	0.0161232	-0.0095232			74.19	-1.19907	-1.08126	-1.34455	-1.21284	-1.29169	-1.27472	-1.17029
74.4	-0.0132763	0.0127763	-0.0134586	0.0121469	-0.015541	0.0191609	-0.00991722			74.4	-1.20111	-1.08036	-1.34126	-1.21267	-1.29535	-1.27168	-1.17069
74.6	-0.00931699	0.0102122	-0.0147051	0.0172082	-0.011682	0.0152131	-0.0144563			74.6	-1.19715	-1.08292	-1.3425	-1.20761	-1.29149	-1.27563	-1.17523
74.79	-0.015354	0.0064414	-0.012922	0.0170653	-0.0135252	0.0157133	-0.0118238			74.79	-1.20319	-1.08669	-1.34072	-1.20775	-1.29334	-1.27513	-1.17259
74.99	-0.0153852	0.0124917	-0.016854	0.0134978	-0.0155838	0.016337	-0.00967639			74.99	-1.20322	-1.08064	-1.34465	-1.21132	-1.2954	-1.2745	-1.17045
75.19	-0.0133317	0.0121066	-0.0144288	0.0147643	-0.00978143	0.0156321	-0.013718			75.19	-1.20117	-1.08103	-1.34223	-1.21005	-1.28959	-1.27521	-1.17449
75.4	-0.0121384	0.00829364	-0.0118184	0.0161911	-0.0109854	0.0177558	-0.01017			75.4	-1.19998	-1.08484	-1.33962	-1.20863	-1.2908	-1.27309	-1.17094
75.59	-0.0129961	0.00704828	-0.0165609	0.0152908	-0.00710756	0.01351	-0.0101785			75.59	-1.20083	-1.08608	-1.34436	-1.20953	-1.28692	-1.27733	-1.17095
75.8	-0.0104334	0.00855943	-0.0109865	0.0186796	-0.0126512	0.01432	-0.0135439			75.8	-1.19827	-1.08457	-1.33878	-1.20614	-1.29246	-1.27652	-1.17431
75.99	-0.0108326	0.00804668	-0.0144498	0.0170633	-0.0139533	0.017852	-0.010832			75.99	-1.19867	-1.08509	-1.34225	-1.20775	-1.29376	-1.27299	-1.1716
76.19	-0.0128495	0.0156427	-0.0157955	0.0158759	-0.0133292	0.0160726	-0.00875904			76.19	-1.20069	-1.07749	-1.34359	-1.20894	-1.29314	-1.27477	-1.16953
76.39	-0.0163323	0.0110674	-0.0126113	0.0148584	-0.0158328	0.017218	-0.0119746			76.39	-1.20417	-1.08207	-1.34041	-1.20996	-1.29564	-1.27362	-1.17274
76.59	-0.0147495	0.011811	-0.0164964	0.0172256	-0.0158227	0.0146264	-0.0157786			76.59	-1.20259	-1.08132	-1.34429	-1.20759	-1.29563	-1.27622	-1.17655
76.8	-0.0128302	0.0105293	-0.0133698	0.0130522	-0.013981	0.0189496	-0.0129029			76.8	-1.20067	-1.0826	-1.34117	-1.21176	-1.29379	-1.27189	-1.17367
76.99	-0.0152248	0.00703648	-0.013398	0.0161229	-0.012168	0.0165168	-0.00953446			76.99	-1.20306	-1.0861	-1.3412	-1.20869	-1.29198	-1.27433	-1.1703
77.19	-0.0130224	0.0136593	-0.0140018	0.0136168	-0.0120352	0.0165197	-0.0112953			77.19	-1.20086	-1.07947	-1.3418	-1.2112	-1.29185	-1.27432	-1.17207
77.4	-0.0161229	0.00782712	-0.0150395	0.0135346	-0.0145871	0.0181598	-0.010082			77.4	-1.20396	-1.08531	-1.34284	-1.21128	-1.2944	-1.27268	-1.17085
77.6	-0.0145679	0.00798358	-0.0154109	0.0138326	-0.0149579	0.0152627	-0.0119933			77.6	-1.20241	-1.08515	-1.34321	-1.21098	-1.29477	-1.27558	-1.17276
77.79	-0.0105295	0.00573622	-0.01274	0.0181834	-0.0137444	0.0188028	-0.0108612			77.79	-1.19837	-1.0874	-1.34054	-1.20663	-1.29356	-1.27204	-1.17163
77.99	-0.0116163	0.0092347	-0.0127825	0.0157567	-0.0160843	0.0133507	-0.0114238			77.99	-1.19945	-1.0839	-1.34058	-1.20906	-1.2959	-1.27749	-1.17219
78.19	-0.014547	0.00885556	-0.0149934	0.015431	-0.0118877	0.0171616	-0.0113519			78.19	-1.20238	-1.08428	-1.34279	-1.20939	-1.2917	-1.27368	-1.17212
78.39	-0.0154581	0.00903207	-0.0160415	0.0139113	-0.00928372	0.0191422	-0.0126706			78.39	-1.2033	-1.0841	-1.34384	-1.2109	-1.2891	-1.2717	-1.17344
78.6	-0.0108019	0.0094376	-0.0171899	0.0147093	-0.0163125	0.0166066	-0.0131093			78.6	-1.19864	-1.0837	-1.34499	-1.21011	-1.29612	-1.27424	-1.17388
78.79	-0.0127339	0.00130628	-0.0169807	0.0158467	-0.0116311	0.0161688	-0.0130136			78.79	-1.20057	-1.09183	-1.34478	-1.20897	-1.29144	-1.27467	-1.17378
78.99	-0.0132704	0.00736708	-0.011972	0.0155096	-0.011539	0.0157528	-0.00932578			78.99	-1.20111	-1.08577	-1.33977	-1.20931	-1.29135	-1.27509	-1.1701
79.19	-0.0166943	0.00931127	-0.0110899	0.0141306	-0.0145332	0.0159808	-0.00839805			79.19	-1.20453	-1.08382	-1.33889	-1.21069	-1.29434	-1.27486	-1.16917
79.4	-0.0108076	0.0101673	-0.0139676	0.0196857	-0.0111663	0.0166838	-0.00712483			79.4	-1.19865	-1.08297	-1.34177	-1.20513	-1.29098	-1.27416	-1.1679
79.6	-0.0178337	0.00957065	-0.0133694	0.0156034	-0.0130689	0.0150736	-0.00979121			79.6	-1.20567	-1.08356	-1.34117	-1.20921	-1.29288	-1.27577	-1.17056
79.79	-0.0140404	0.00602366	-0.0149609	0.0179326	-0.0145092	0.0120354	-0.0141862			79.79	-1.20188	-1.08711	-1.34276	-1.20688	-1.29432	-1.27881	-1.17496
79.99	-0.0145528	0.0108332	-0.0133088	0.0177945	-0.013374	0.0157365	-0.0164115			79.99	-1.20239	-1.0823	-1.34111	-1.20702	-1.29319	-1.27511	-1.17718
80.19	-0.0116694	0.00611787	-0.0160011	0.0163164	-0.0134943	0.014802	-0.0116096			80.19	-1.19951	-1.08702	-1.3438	-1.2085	-1.29331	-1.27604	-1.17238
80.39	-0.0158282	0.00732583	-0.0153207	0.0163003	-0.0149472	0.0179236	-0.0104818			80.39	-1.20367	-1.08581	-1.34312	-1.20852	-1.29476	-1.27292	-1.17125
80.59	-0.0148774	0.00830468	-0.0174393	0.0141296	-0.013604	0.0158912	-0.0111367			80.59	-1.20271	-1.08483	-1.34524	-1.21069	-1.29342	-1.27495	-1.17191
80.8	-0.0125408	0.0108898	-0.0137247	0.0137669	-0.0151249	0.016271	-0.0126719			80.8	-1.20038	-1.08224	-1.34152	-1.21105	-1.29494	-1.27457	-1.17344
80.99	-0.014916	0.0107331	-0.0136849	0.0162322	-0.0130607	0.0166721	-0.00783492			80.99	-1.20275	-1.0824	-1.34148	-1.20858	-1.29287	-1.27417	-1.16861
81.19	-0.0112492	0.00910376	-0.0185981	0.0144977	-0.0144595	0.0161025	-0.0137418			81.19	-1.19909	-1.08403	-1.3464	-1.21032	-1.29427	-1.27474	-1.17451
81.39	-0.0109451	0.00732424	-0.016674	0.0204075	-0.0128815	0.016951	-0.0151789			81.39	-1.19878	-1.08581	-1.34447	-1.20441	-1.29269	-1.27389	-1.17595
81.59	-0.0138886	0.00401585	-0.0212422	0.0157848	-0.0156234	0.0183375	-0.0128003			81.59	-1.20173	-1.08912	-1.34904	-1.20903	-1.29544	-1.2725	-1.17357
81.79	-0.0140787	0.00352293	-0.0156115	0.0150567	-0.0111252	0.0163818	-0.0107158			81.79	-1.20192	-1.08961	-1.34341	-1.20976	-1.29094	-1.27446	-1.17149
81.99	-0.0141344	0.00888399	-0.0155595	0.0153746	-0.0149787	0.0164601	-0.0103833			81.99	-1.20197	-1.08425	-1.34336	-1.20944	-1.29479	-1.27438	-1.17115
82.19	-0.0127785	0.00844025	-0.020267	0.0165005	-0.0155223	0.0144442	-0.0130254			82.19	-1.20062	-1.08469	-1.34806	-1.20832	-1.29533	-1.2764	-1.1738
82.39	-0.0147373	0.00724727	-0.0174744	0.0165591	-0.0124412	0.0144631	-0.0054751			82.39	-1.20257	-1.08589	-1.34527	-1.20826	-1.29225	-1.27638	-1.16625
82.6	-0.0130681	0.00651154	-0.0157465	0.0143332	-0.0168048	0.0154664	-0.0112203			82.6	-1.20091	-1.08662	-1.34354	-1.21048	-1.29662	-1.27538	-1.17199
82.79	-0.0158747	0.00878713	-0.0172739	0.0168723	-0.0126192	0.0158862	-0.0111949			82.79	-1.20371	-1.08435	-1.34507	-1.20794	-1.29243	-1.27496	-1.17197
82.99	-0.0166959	0.00999014	-0.0141629	0.0176515	-0.0164911	0.0148806	-0.00968417			82.99	-1.20453	-1.08314	-1.34196	-1.20716	-1.2963	-1.27596	-1.17045
83.19	-0.0163911	0.00862456	-0.0157077	0.0149448	-0.0113592	0.0182088	-0.00830334			83.19	-1.20423	-1.08451	-1.34351	-1.20987	-1.29117	-1.27263	-1.16907
83.39	-0.017629	0.011232	-0.0136685	0.0131422	-0.0115944	0.0158979	-0.0139852			83.39	-1.20547	-1.0819	-1.34147	-1.21167	-1.29141	-1.27494	-1.17476
83.59	-0.017679	0.0106017	-0.0176327	0.0153279	-0.0161109	0.0137344	-0.0101944			83.59	-1.20552	-1.08253	-1.34543	-1.20949	-1.29592	-1.27711	-1.17096
83.79	-0.0150931	0.00543545	-0.0170097	0.0124023	-0.0145273	0.0150099	-0.0112647			83.79	-1.20293	-1.0877	-1.34481	-1.21241	-1.29434	-1.27583	-1.17203
83.99	-0.0129552	0.00780896	-0.0154356	0.0163396	-0.014961	0.0172056	-0.0118162			83.99	-1.20079	-1.08532	-1.34323	-1.20848	-1.29477	-1.27364	-1.17259
84.19	-0.0156344	0.00877179	-0.0165914	0.0128225	-0.0164167	0.0117301	-0.0118104			84.19	-1.20347	-1.08436	-1.34439	-1.21199	-1.29623	-1.27911	-1.17258
84.4	-0.0130042	0.00764902	-0.018871	0.0163059	-0.0162691	0.0158627	-0.00690726			84.4	-1.20084	-1.08548	-1.34667	-1.20851	-1.29608	-1.27498	-1.16768
84.6	-0.0155605	0.00837827	-0.0127749	0.0147612	-0.0149175	0.0169829	-0.0136094			84.6	-1.2034	-1.08475	-1.34057	-1.21005	-1.29473	-1.27386	-1.17438
84.8	-0.0145243	0.0095387	-0.0206427	0.0170369	-0.0149043	0.0159913	-0.0137087			84.8	-1.20236	-1.08359	-1.34844	-1.20778	-1.29472	-1.27485	-1.17448
85	-0.0126913	0.0129659	-0.0129184	0.0162677	-0.0145899	0.0136083	-0.0107985			85	-1.20053	-1.08017	-1.34072	-1.20855	-1.2944	-1.27723	-1.17157
85.19	-0.016632	0.00757611	-0.0188988	0.0157465	-0.0158045	0.0144155	-0.0115803			85.19	-1.20447	-1.08556	-1.3467	-1.20907	-1.29562	-1.27643	-1.17235
85.4	-0.013199	0.00750022	-0.0122145	0.0127578	-0.0175401	0.0120821	-0.0115725			85.4	-1.20104	-1.08563	-1.34001	-1.21206	-1.29735	-1.27876	-1.17234
85.6	-0.0138407	0.00766977	-0.0139844	0.0171331	-0.0183435	0.0130691	-0.0127315			85.6	-1.20168	-1.08546	-1.34178	-1.20768	-1.29816	-1.27777	-1.1735
85.8	-0.0142609	0.00561274	-0.017272	0.0163566	-0.0126465	0.0152627	-0.0121508			85.8	-1.2021	-1.08752	-1.34507	-1.20846	-1.29246	-1.27558	-1.17292
86	-0.0156067	0.0108866	-0.014296	0.0125492	-0.0153583	0.0170633	-0.01178			86	-1.20344	-1.08225	-1.34209	-1.21227	-1.29517	-1.27378	-1.17255
86.19	-0.0156591	0.0104298	-0.0178468	0.0156025	-0.0156499	0.0166051	-0.0120747			86.19	-1.2035	-1.0827	-1.34564	-1.20921	-1.29546	-1.27424	-1.17284
86.4	-0.014974	0.00885656	-0.01745	0.0130675	-0.0143535	0.0119563	-0.0120434			86.4	-1.20281	-1.08428	-1.34525	-1.21175	-1.29417	-1.27889	-1.17281
86.6	-0.0169753	0.00642437	-0.0192059	0.0138844	-0.014529	0.0188005	-0.0104986			86.6	-1.20481	-1.08671	-1.347	-1.21093	-1.29434	-1.27204	-1.17127
86.8	-0.0160281	0.0062994	-0.0170423	0.0148036	-0.0159336	0.0160301	-0.0136465			86.8	-1.20387	-1.08683	-1.34484	-1.21001	-1.29575	-1.27481	-1.17442
87	-0.0144937	0.0083994	-0.0186845	0.0162734	-0.0134683	0.0122804	-0.00784595			87	-1.20233	-1.08473	-1.34648	-1.20854	-1.29328	-1.27856	-1.16862
87.19	-0.0171597	0.0073434	-0.0147078	0.0141156	-0.0130469	0.0164311	-0.0112432			87.19	-1.205	-1.08579	-1.34251	-1.2107	-1.29286	-1.27441	-1.17201
87.4	-0.0143508	0.00905492	-0.0163565	0.016419	-0.0141055	0.0125536	-0.0142477			87.4	-1.20219	-1.08408	-1.34415	-1.2084	-1.29392	-1.27829	-1.17502
87.6	-0.013804	0.00563278	-0.0154045	0.0172996	-0.0134151	0.015298	-0.0141049			87.6	-1.20164	-1.0875	-1.3432	-1.20752	-1.29323	-1.27554	-1.17488
87.79	-0.014679	0.00806084	-0.0147342	0.014481	-0.0151038	0.0174353	-0.011271			87.79	-1.20252	-1.08507	-1.34253	-1.21034	-1.29492	-1.27341	-1.17204
88	-0.0200819	0.00591321	-0.0151662	0.015502	-0.0132893	0.0146951	-0.00949898			88	-1.20792	-1.08722	-1.34296	-1.20931	-1.2931	-1.27615	-1.17027
88.19	-0.0143545	0.00600404	-0.017372	0.0131766	-0.0144275	0.0183765	-0.0117007			88.19	-1.20219	-1.08713	-1.34517	-1.21164	-1.29424	-1.27247	-1.17247
88.4	-0.0112301	0.0096495	-0.0176751	0.0157352	-0.0152311	0.0179508	-0.0131869			88.4	-1.19907	-1.08348	-1.34547	-1.20908	-1.29504	-1.27289	-1.17396
88.6	-0.0160514	0.00483394	-0.0173223	0.0148585	-0.0141085	0.0164371	-0.00954032			88.6	-1.20389	-1.0883	-1.34512	-1.20996	-1.29392	-1.2744	-1.17031
88.8	-0.0119662	0.0070643	-0.0189465	0.0170426	-0.0141365	0.0166326	-0.0133523			88.8	-1.1998	-1.08607	-1.34674	-1.20777	-1.29395	-1.27421	-1.17412
89	-0.0151512	0.00636839	-0.0172804	0.0147548	-0.013018	0.0153619	-0.0104356			89	-1.20299	-1.08676	-1.34508	-1.21006	-1.29283	-1.27548	-1.17121
89.19	-0.0143684	0.00695446	-0.0173427	0.0135344	-0.0120468	0.0107679	-0.016009			89.19	-1.20221	-1.08618	-1.34514	-1.21128	-1.29186	-1.28007	-1.17678
89.39	-0.014781	0.0059484	-0.0124662	0.0128223	-0.0151437	0.012708	-0.0170216			89.39	-1.20262	-1.08718	-1.34026	-1.21199	-1.29496	-1.27813	-1.17779
89.6	-0.0190678	0.00574288	-0.0132243	0.0151092	-0.0176116	0.0187114	-0.0133271			89.6	-1.20691	-1.08739	-1.34102	-1.20971	-1.29742	-1.27213	-1.1741
89.8	-0.014744	0.00758901	-0.0157899	0.0153618	-0.0148804	0.0154834	-0.0128028			89.8	-1.20258	-1.08554	-1.34359	-1.20945	-1.29469	-1.27536	-1.17357
90	-0.0169257	0.00618533	-0.0150627	0.0156531	-0.0152201	0.0153645	-0.015294			90	-1.20476	-1.08695	-1.34286	-1.20916	-1.29503	-1.27548	-1.17606
90.19	-0.0164794	0.0053089	-0.0163346	0.0163101	-0.0155073	0.0155821	-0.0147423			90.19	-1.20432	-1.08782	-1.34413	-1.20851	-1.29532	-1.27526	-1.17551
90.4	-0.0130421	0.0100859	-0.0190605	0.0177149	-0.0147952	0.0165435	-0.0146433			90.4	-1.20088	-1.08305	-1.34686	-1.2071	-1.29461	-1.2743	-1.17541
90.6	-0.0156895	0.00734143	-0.0189036	0.0153412	-0.016425	0.0187381	-0.0109645			90.6	-1.20353	-1.08579	-1.3467	-1.20948	-1.29624	-1.2721	-1.17173
90.8	-0.0173087	0.00630312	-0.0216955	0.0159638	-0.0182626	0.017773	-0.0107484			90.8	-1.20515	-1.08683	-1.34949	-1.20885	-1.29807	-1.27307	-1.17152
91	-0.0167859	0.00345639	-0.0161536	0.0136264	-0.0118616	0.0145455	-0.0132675			91	-1.20462	-1.08968	-1.34395	-1.21119	-1.29167	-1.2763	-1.17404
91.19	-0.0162059	0.00382937	-0.01545	0.0131448	-0.0163105	0.0162124	-0.00963298			91.19	-1.20404	-1.0893	-1.34325	-1.21167	-1.29612	-1.27463	-1.1704
91.4	-0.016459	0.00370281	-0.0178304	0.0161052	-0.0133418	0.0140302	-0.0149626			91.4	-1.2043	-1.08943	-1.34563	-1.20871	-1.29315	-1.27681	-1.17573
91.6	-0.0160928	0.00861647	-0.0175399	0.014011	-0.0181982	0.0177299	-0.0162307			91.6	-1.20393	-1.08452	-1.34534	-1.21081	-1.29801	-1.27311	-1.177
91.8	-0.0139633	0.00956266	-0.0155582	0.0111471	-0.0171962	0.0170337	-0.0119948			91.8	-1.2018	-1.08357	-1.34336	-1.21367	-1.29701	-1.27381	-1.17276
92	-0.0175201	0.00750083	-0.0197905	0.0134379	-0.0147031	0.0136824	-0.0119457			92	-1.20536	-1.08563	-1.34759	-1.21138	-1.29451	-1.27716	-1.17272
92.19	-0.0186345	0.00740495	-0.0184182	0.0127494	-0.0151445	0.0150586	-0.0120134			92.19	-1.20647	-1.08573	-1.34622	-1.21207	-1.29496	-1.27578	-1.17278
92.4	-0.0171706	0.00280371	-0.0185935	0.0119743	-0.0136221	0.0157404	-0.0102848			92.4	-1.20501	-1.09033	-1.34639	-1.21284	-1.29343	-1.2751	-1.17105
92.59	-0.0146049	0.00870773	-0.0185595	0.014609	-0.0165974	0.0153703	-0.0129615			92.59	-1.20244	-1.08443	-1.34636	-1.21021	-1.29641	-1.27547	-1.17373
92.8	-0.0170899	0.00656135	-0.0169385	0.0165872	-0.0170168	0.013753	-0.0114794			92.8	-1.20493	-1.08657	-1.34474	-1.20823	-1.29683	-1.27709	-1.17225
93	-0.0154043	0.0100817	-0.0187937	0.017971	-0.0163602	0.0149939	-0.0113834			93	-1.20324	-1.08305	-1.34659	-1.20685	-1.29617	-1.27585	-1.17215
93.19	-0.0179763	0.00772626	-0.0174385	0.0168262	-0.015766	0.0141401	-0.0117648			93.19	-1.20581	-1.08541	-1.34524	-1.20799	-1.29558	-1.2767	-1.17253
93.4	-0.0170958	0.00735768	-0.013292	0.012388	-0.0150539	0.0157576	-0.0177735			93.4	-1.20493	-1.08578	-1.34109	-1.21243	-1.29487	-1.27508	-1.17854
93.6	-0.0150451	0.00400288	-0.016169	0.0127176	-0.0151417	0.0133549	-0.0121939			93.6	-1.20288	-1.08913	-1.34397	-1.2121	-1.29495	-1.27749	-1.17296
93.8	-0.0158184	0.00672738	-0.0206636	0.0140482	-0.0162314	0.0162663	-0.0146846			93.8	-1.20366	-1.08641	-1.34846	-1.21077	-1.29604	-1.27458	-1.17545
93.99	-0.0154516	0.00834224	-0.0161553	0.0159826	-0.0177706	0.0132518	-0.00901036			93.99	-1.20329	-1.08479	-1.34395	-1.20883	-1.29758	-1.27759	-1.16978
94.19	-0.019482	0.00395816	-0.0160452	0.0133688	-0.0145103	0.0176033	-0.0132478			94.19	-1.20732	-1.08917	-1.34384	-1.21145	-1.29432	-1.27324	-1.17402
94.39	-0.015087	0.00728839	-0.014051	0.0130225	-0.0137313	0.0133591	-0.009117			94.39	-1.20292	-1.08584	-1.34185	-1.21179	-1.29354	-1.27748	-1.16989
94.6	-0.0129584	0.00020981	-0.0187827	0.0168706	-0.0149147	0.0148347	-0.0126226			94.6	-1.2008	-1.09292	-1.34658	-1.20795	-1.29473	-1.27601	-1.17339
94.79	-0.0190111	0.00714661	-0.0194898	0.0138005	-0.0162928	0.0146874	-0.0130146			94.79	-1.20685	-1.08599	-1.34729	-1.21102	-1.2961	-1.27615	-1.17378
95	-0.0164041	0.00540255	-0.0186996	0.012926	-0.0163131	0.0184696	-0.0112604			95	-1.20424	-1.08773	-1.3465	-1.21189	-1.29612	-1.27237	-1.17203
95.19	-0.0174067	0.00767476	-0.0190902	0.0172255	-0.0181846	0.0138873	-0.0102787			95.19	-1.20524	-1.08546	-1.34689	-1.20759	-1.298	-1.27695	-1.17105
95.4	-0.0189255	0.00371241	-0.0179068	0.0126896	-0.0206809	0.0144418	-0.0129371			95.4	-1.20676	-1.08942	-1.3457	-1.21213	-1.30049	-1.2764	-1.17371
95.6	-0.0172601	0.0104502	-0.0175385	0.0178329	-0.0126066	0.0149686	-0.0121499			95.6	-1.2051	-1.08268	-1.34534	-1.20698	-1.29242	-1.27587	-1.17292
95.79	-0.0146599	0.00676998	-0.0177548	0.0125334	-0.0150623	0.0148918	-0.0133871			95.79	-1.2025	-1.08636	-1.34555	-1.21228	-1.29487	-1.27595	-1.17416
95.99	-0.0180875	0.00702928	-0.0175957	0.0165655	-0.0169485	0.0186467	-0.0120611			95.99	-1.20593	-1.0861	-1.34539	-1.20825	-1.29676	-1.2722	-1.17283
96.19	-0.0193257	0.00619208	-0.0190902	0.0159567	-0.0209501	0.0158836	-0.0135932			96.19	-1.20716	-1.08694	-1.34689	-1.20886	-1.30076	-1.27496	-1.17436
96.4	-0.0153404	0.00838104	-0.0161776	0.0164907	-0.0190394	0.0154709	-0.0143781			96.4	-1.20318	-1.08475	-1.34398	-1.20833	-1.29885	-1.27537	-1.17515
96.59	-0.0166839	0.00694802	-0.017692	0.0164615	-0.0147308	0.0151496	-0.0150662			96.59	-1.20452	-1.08618	-1.34549	-1.20835	-1.29454	-1.27569	-1.17584
96.8	-0.0219124	0.00854831	-0.0192022	0.0146249	-0.0159301	0.0127471	-0.0160291			96.8	-1.20975	-1.08458	-1.347	-1.21019	-1.29574	-1.27809	-1.1768
96.99	-0.020299	0.00552272	-0.019675	0.0154467	-0.0202135	0.0132555	-0.0155638			96.99	-1.20814	-1.08761	-1.34747	-1.20937	-1.30003	-1.27759	-1.17633
97.19	-0.0161007	0.0092812	-0.0178258	0.0109153	-0.0174325	0.0170681	-0.0152052			97.19	-1.20394	-1.08385	-1.34562	-1.2139	-1.29724	-1.27377	-1.17598
97.4	-0.0180575	0.0043441	-0.0187572	0.0162855	-0.0141118	0.0118044	-0.0155183			97.4	-1.2059	-1.08879	-1.34656	-1.20853	-1.29392	-1.27904	-1.17629
97.59	-0.0190392	0.00573108	-0.0134749	0.0132402	-0.0164154	0.0134375	-0.0134098			97.59	-1.20688	-1.0874	-1.34127	-1.21158	-1.29623	-1.2774	-1.17418
97.8	-0.0181081	0.00264963	-0.0218017	0.015447	-0.0135631	0.0156559	-0.0121775			97.8	-1.20595	-1.09048	-1.3496	-1.20937	-1.29337	-1.27519	-1.17295
97.99	-0.0143314	0.00381301	-0.0163183	0.0115632	-0.0160609	0.0156729	-0.0160535			97.99	-1.20217	-1.08932	-1.34412	-1.21325	-1.29587	-1.27517	-1.17682
98.19	-0.0164439	0.00858563	-0.0159598	0.0149353	-0.0146143	0.0160635	-0.0184377			98.19	-1.20428	-1.08455	-1.34376	-1.20988	-1.29443	-1.27478	-1.17921
98.39	-0.0146018	0.00818784	-0.0204263	0.0126528	-0.0153879	0.0156296	-0.016137			98.39	-1.20244	-1.08495	-1.34822	-1.21216	-1.2952	-1.27521	-1.17691
98.6	-0.0158734	0.00576412	-0.0203594	0.0168096	-0.0166902	0.0156825	-0.0179765			98.6	-1.20371	-1.08737	-1.34816	-1.20801	-1.2965	-1.27516	-1.17875
98.79	-0.0206568	0.00882154	-0.0230365	0.0134397	-0.0158272	0.0143372	-0.0159524			98.79	-1.20849	-1.08431	-1.35083	-1.21138	-1.29564	-1.2765	-1.17672
98.99	-0.0170015	0.0042407	-0.0205653	0.0164114	-0.0184107	0.0149089	-0.017219			98.99	-1.20484	-1.08889	-1.34836	-1.2084	-1.29822	-1.27593	-1.17799
99.19	-0.0195372	0.0049843	-0.019888	0.0155355	-0.0178331	0.0167975	-0.0142618			99.19	-1.20737	-1.08815	-1.34769	-1.20928	-1.29764	-1.27404	-1.17503
99.39	-0.0178295	0.00109471	-0.0202064	0.0109719	-0.0182038	0.0140109	-0.0162714			99.39	-1.20567	-1.09204	-1.348	-1.21384	-1.29802	-1.27683	-1.17704
99.6	-0.0190826	0.00603703	-0.0187626	0.0143418	-0.0161492	0.0161123	-0.0157674			99.6	-1.20692	-1.0871	-1.34656	-1.21047	-1.29596	-1.27473	-1.17654
99.79	-0.0209038	0.00789416	-0.0169622	0.0145372	-0.0181425	0.0177353	-0.0157801			99.79	-1.20874	-1.08524	-1.34476	-1.21028	-1.29795	-1.27311	-1.17655
100	-0.0175035	0.00470836	-0.0135991	0.0125446	-0.0150485	0.0148407	-0.0183789			100	-1.20534	-1.08842	-1.3414	-1.21227	-1.29486	-1.276	-1.17915
100.19	-0.0163821	0.00757866	-0.0214112	0.0164939	-0.016776	0.0138742	-0.0152593			100.19	-1.20422	-1.08555	-1.34921	-1.20832	-1.29659	-1.27697	-1.17603
100.39	-0.0168453	0.00812763	-0.0234448	0.0141727	-0.0158878	0.014915	-0.0137652			100.39	-1.20468	-1.08501	-1.35124	-1.21064	-1.2957	-1.27593	-1.17454
100.59	-0.0182051	0.00746994	-0.0200404	0.0141852	-0.0161146	0.0146136	-0.0141587			100.59	-1.20604	-1.08566	-1.34784	-1.21063	-1.29593	-1.27623	-1.17493
100.79	-0.0157072	0.00910237	-0.0168321	0.0116494	-0.0177995	0.0158634	-0.0146354			100.79	-1.20354	-1.08403	-1.34463	-1.21317	-1.29761	-1.27498	-1.17541
100.99	-0.0186929	0.00307003	-0.0188947	0.015398	-0.0182816	0.0173873	-0.0144905			100.99	-1.20653	-1.09006	-1.34669	-1.20942	-1.29809	-1.27345	-1.17526
101.19	-0.0177204	0.00641819	-0.0206828	0.0114819	-0.0171483	0.0139565	-0.0119068			101.19	-1.20556	-1.08671	-1.34848	-1.21333	-1.29696	-1.27689	-1.17268
101.39	-0.0180277	0.00871915	-0.020046	0.0166453	-0.0198773	0.0114708	-0.0138506			101.39	-1.20587	-1.08441	-1.34784	-1.20817	-1.29969	-1.27937	-1.17462
101.6	-0.0186853	0.0046866	-0.0205752	0.0162191	-0.0186627	0.0146198	-0.012288			101.6	-1.20652	-1.08845	-1.34837	-1.2086	-1.29847	-1.27622	-1.17306
101.79	-0.0165046	0.00925248	-0.0177834	0.012719	-0.0180659	0.015766	-0.0145516			101.79	-1.20434	-1.08388	-1.34558	-1.2121	-1.29788	-1.27508	-1.17532
101.99	-0.0170101	0.00478003	-0.0184819	0.0121137	-0.0174655	0.0129015	-0.0168473			101.99	-1.20485	-1.08835	-1.34628	-1.2127	-1.29728	-1.27794	-1.17762
102.19	-0.0164574	0.00298396	-0.0204671	0.0151002	-0.0178933	0.0140551	-0.0128887			102.19	-1.20429	-1.09015	-1.34827	-1.20972	-1.2977	-1.27679	-1.17366
102.39	-0.0210556	0.00543356	-0.0174227	0.0126742	-0.015808	0.0151783	-0.0160267			102.39	-1.20889	-1.0877	-1.34522	-1.21214	-1.29562	-1.27566	-1.1768
102.59	-0.0197698	0.00437341	-0.021794	0.0140016	-0.016228	0.0144454	-0.0136881			102.59	-1.20761	-1.08876	-1.34959	-1.21081	-1.29604	-1.2764	-1.17446
102.79	-0.0186922	0.00636578	-0.0211691	0.0142949	-0.0205062	0.0170951	-0.0153653			102.79	-1.20653	-1.08677	-1.34897	-1.21052	-1.30032	-1.27375	-1.17614
102.99	-0.0193011	0.00404774	-0.0198284	0.0140552	-0.0142911	0.0175836	-0.0186441			102.99	-1.20714	-1.08909	-1.34763	-1.21076	-1.2941	-1.27326	-1.17941
103.19	-0.0203499	0.00817079	-0.0216706	0.0139567	-0.0206298	0.0149711	-0.0160713			103.19	-1.20819	-1.08496	-1.34947	-1.21086	-1.30044	-1.27587	-1.17684
103.39	-0.0190436	0.00593794	-0.0169096	0.0166661	-0.0169514	0.0152898	-0.0119854			103.39	-1.20688	-1.0872	-1.34471	-1.20815	-1.29676	-1.27555	-1.17276
103.59	-0.0204785	0.0060627	-0.0207291	0.0152925	-0.0169622	0.0159011	-0.0123442			103.59	-1.20832	-1.08707	-1.34853	-1.20952	-1.29677	-1.27494	-1.17311
103.79	-0.0197164	0.0041135	-0.0150287	0.0126247	-0.0164946	0.0150588	-0.0167111			103.79	-1.20755	-1.08902	-1.34283	-1.21219	-1.29631	-1.27578	-1.17748
103.99	-0.0220996	0.00705167	-0.0169186	0.0141245	-0.0155552	0.0168297	-0.0142262			103.99	-1.20994	-1.08608	-1.34472	-1.21069	-1.29537	-1.27401	-1.175
104.19	-0.0214133	0.00674219	-0.01982	0.0122658	-0.0185914	0.0166867	-0.0145435			104.19	-1.20925	-1.08639	-1.34762	-1.21255	-1.2984	-1.27416	-1.17531
104.39	-0.0197808	0.00125488	-0.0173945	0.0156065	-0.0177733	0.0153038	-0.0160017			104.39	-1.20762	-1.09188	-1.34519	-1.20921	-1.29758	-1.27554	-1.17677
104.59	-0.0159064	0.00596679	-0.0193304	0.0143432	-0.0164348	0.0182211	-0.0155317			104.59	-1.20374	-1.08717	-1.34713	-1.21047	-1.29625	-1.27262	-1.1763
104.79	-0.0211214	0.00477552	-0.0184035	0.014072	-0.0178157	0.0142143	-0.0109406			104.79	-1.20896	-1.08836	-1.3462	-1.21074	-1.29763	-1.27663	-1.17171
104.99	-0.0201379	0.00978	-0.0177068	0.0124553	-0.0175287	0.0146072	-0.013441			104.99	-1.20798	-1.08335	-1.3455	-1.21236	-1.29734	-1.27623	-1.17421
105.19	-0.0206971	0.0051597	-0.0170645	0.0138669	-0.0176616	0.0128224	-0.0143672			105.19	-1.20853	-1.08797	-1.34486	-1.21095	-1.29747	-1.27802	-1.17514
105.4	-0.019829	0.00802628	-0.0196333	0.0140275	-0.0168217	0.0159817	-0.0164765			105.4	-1.20767	-1.08511	-1.34743	-1.21079	-1.29663	-1.27486	-1.17725
105.6	-0.0177109	0.0108759	-0.0199692	0.010486	-0.0192132	0.0164679	-0.0144531			105.6	-1.20555	-1.08226	-1.34777	-1.21433	-1.29902	-1.27437	-1.17522
105.8	-0.0183286	0.00772686	-0.0208562	0.0153139	-0.0182593	0.0136163	-0.0145346			105.8	-1.20617	-1.08541	-1.34865	-1.2095	-1.29807	-1.27723	-1.1753
106	-0.0213933	0.00345272	-0.0217967	0.0153053	-0.017471	0.0157339	-0.0125467			106	-1.20923	-1.08968	-1.34959	-1.20951	-1.29728	-1.27511	-1.17332
106.19	-0.015155	0.00472865	-0.0175537	0.0129182	-0.018377	0.015686	-0.0152347			106.19	-1.20299	-1.0884	-1.34535	-1.2119	-1.29819	-1.27516	-1.176
106.4	-0.0155156	0.00698613	-0.0184636	0.0152778	-0.0210086	0.0162891	-0.0152926			106.4	-1.20335	-1.08615	-1.34626	-1.20954	-1.30082	-1.27455	-1.17606
106.6	-0.0171593	0.00977326	-0.0217677	0.0104473	-0.014218	0.0144284	-0.0150591			106.6	-1.205	-1.08336	-1.34957	-1.21437	-1.29403	-1.27641	-1.17583
106.8	-0.0193077	0.00968034	-0.0226766	0.0153006	-0.0189639	0.0152225	-0.0148453			106.8	-1.20715	-1.08345	-1.35047	-1.20952	-1.29878	-1.27562	-1.17562
107	-0.0171706	0.00414463	-0.0211155	0.00961775	-0.0206292	0.016545	-0.0169275			107	-1.20501	-1.08899	-1.34891	-1.2152	-1.30044	-1.2743	-1.1777
107.21	-0.0195244	0.00655134	-0.0198543	0.0100824	-0.0181225	0.0149397	-0.0186217			107.21	-1.20736	-1.08658	-1.34765	-1.21473	-1.29793	-1.2759	-1.17939
107.4	-0.0189013	0.00690362	-0.0222051	0.0125144	-0.0160313	0.0125525	-0.0123946			107.4	-1.20674	-1.08623	-1.35	-1.2123	-1.29584	-1.27829	-1.17316
107.6	-0.0228278	0.00741422	-0.0210312	0.0140584	-0.018195	0.0163106	-0.0141039			107.6	-1.21067	-1.08572	-1.34883	-1.21076	-1.29801	-1.27453	-1.17487
107.8	-0.0220351	0.00600746	-0.0232813	0.015637	-0.0200524	0.0146624	-0.0158931			107.8	-1.20987	-1.08713	-1.35108	-1.20918	-1.29986	-1.27618	-1.17666
108	-0.016387	0.0109	-0.0221275	0.0115004	-0.0181267	0.0149081	-0.0147221			108	-1.20422	-1.08223	-1.34993	-1.21332	-1.29794	-1.27593	-1.17549
108.19	-0.0210396	0.00505786	-0.0196803	0.0132688	-0.0184392	0.0143995	-0.0140671			108.19	-1.20888	-1.08808	-1.34748	-1.21155	-1.29825	-1.27644	-1.17484
108.4	-0.0181869	0.0068092	-0.0194831	0.0112043	-0.0181009	0.0187425	-0.0130471			108.4	-1.20602	-1.08632	-1.34728	-1.21361	-1.29791	-1.2721	-1.17382
108.59	-0.0166936	0.0020247	-0.0157515	0.0127972	-0.0185838	0.0164017	-0.0138506			108.59	-1.20453	-1.09111	-1.34355	-1.21202	-1.2984	-1.27444	-1.17462
108.8	-0.0224292	0.00531726	-0.022366	0.00881445	-0.0214985	0.0190403	-0.0170443			108.8	-1.21027	-1.08782	-1.35016	-1.216	-1.30131	-1.2718	-1.17781
109	-0.0224343	0.00717232	-0.0211735	0.0161212	-0.0158473	0.0174148	-0.0149236			109	-1.21027	-1.08596	-1.34897	-1.2087	-1.29566	-1.27343	-1.17569
109.19	-0.020489	0.00193395	-0.0176146	0.0156547	-0.015565	0.0143365	-0.017727			109.19	-1.20833	-1.0912	-1.34541	-1.20916	-1.29538	-1.27651	-1.1785
109.4	-0.0224135	0.00926217	-0.0171618	0.0133176	-0.0146529	0.0160354	-0.0163432			109.4	-1.21025	-1.08387	-1.34496	-1.2115	-1.29446	-1.27481	-1.17711
109.6	-0.0229214	0.00787255	-0.0195432	0.010898	-0.0180063	0.0151395	-0.0149678			109.6	-1.21076	-1.08526	-1.34734	-1.21392	-1.29782	-1.2757	-1.17574
109.8	-0.0168802	0.00387874	-0.0186318	0.0119617	-0.0196757	0.0120861	-0.0143909			109.8	-1.20472	-1.08925	-1.34643	-1.21285	-1.29949	-1.27876	-1.17516
110	-0.0214819	0.00906164	-0.0231289	0.0103412	-0.0162604	0.0134347	-0.0192161			110	-1.20932	-1.08407	-1.35093	-1.21447	-1.29607	-1.27741	-1.17999
110.19	-0.0196563	0.00330774	-0.0180127	0.0156954	-0.0187629	0.0173222	-0.0169022			110.19	-1.20749	-1.08983	-1.34581	-1.20912	-1.29857	-1.27352	-1.17767
110.4	-0.0186224	0.00267031	-0.0219995	0.0159006	-0.0183537	0.0134164	-0.0176619			110.4	-1.20646	-1.09046	-1.3498	-1.20892	-1.29817	-1.27743	-1.17843
110.6	-0.0202006	0.00377046	-0.0206422	0.00928895	-0.0198453	0.0162635	-0.0147754			110.6	-1.20804	-1.08936	-1.34844	-1.21553	-1.29966	-1.27458	-1.17555
110.8	-0.0188669	0.00653701	-0.0218153	0.0144373	-0.0196838	0.0149818	-0.0172903			110.8	-1.2067	-1.0866	-1.34961	-1.21038	-1.2995	-1.27586	-1.17806
111	-0.0194447	0.00578723	-0.0220948	0.0147289	-0.0192424	0.0157468	-0.0146158			111	-1.20728	-1.08735	-1.34989	-1.21009	-1.29905	-1.2751	-1.17539
111.19	-0.0174365	0.00694396	-0.0220025	0.011171	-0.016716	0.0160553	-0.0131995			111.19	-1.20527	-1.08619	-1.3498	-1.21365	-1.29653	-1.27479	-1.17397
111.39	-0.0207537	0.00677038	-0.0214535	0.0132002	-0.0161676	0.0145991	-0.0164215			111.39	-1.20859	-1.08636	-1.34925	-1.21162	-1.29598	-1.27624	-1.17719
111.6	-0.0193732	0.00561979	-0.0223089	0.0150302	-0.0200232	0.0155944	-0.0141304			111.6	-1.20721	-1.08751	-1.35011	-1.20979	-1.29983	-1.27525	-1.1749
111.8	-0.0197856	0.00739051	-0.0204067	0.0136651	-0.0174792	0.0138961	-0.017284			111.8	-1.20762	-1.08574	-1.3482	-1.21115	-1.29729	-1.27695	-1.17805
112	-0.0191889	0.00715732	-0.019541	0.012827	-0.0155647	0.0170244	-0.0167744			112	-1.20703	-1.08598	-1.34734	-1.21199	-1.29538	-1.27382	-1.17754
112.19	-0.0201671	0.00430243	-0.0227875	0.0129073	-0.0193989	0.0180921	-0.0138914			112.19	-1.208	-1.08883	-1.35059	-1.21191	-1.29921	-1.27275	-1.17466
112.39	-0.0217721	0.00358633	-0.0192261	0.0112481	-0.0183744	0.0157423	-0.0181243			112.39	-1.20961	-1.08955	-1.34702	-1.21357	-1.29819	-1.2751	-1.17889
112.6	-0.0189202	0.00427633	-0.0215765	0.0160093	-0.0187074	0.0146707	-0.0164716			112.6	-1.20676	-1.08886	-1.34937	-1.20881	-1.29852	-1.27617	-1.17724
112.8	-0.020252	0.00506552	-0.0183637	0.0120991	-0.0198307	0.0143804	-0.0193811			112.8	-1.20809	-1.08807	-1.34616	-1.21272	-1.29964	-1.27646	-1.18015
113	-0.0195147	0.00791726	-0.0211718	0.0147046	-0.0224428	0.0155531	-0.0147185			113	-1.20735	-1.08522	-1.34897	-1.21011	-1.30225	-1.27529	-1.17549
113.19	-0.0216053	0.00707176	-0.0228156	0.0143643	-0.0160817	0.0169589	-0.0166675			113.19	-1.20944	-1.08606	-1.35061	-1.21045	-1.29589	-1.27388	-1.17744
113.4	-0.0158585	0.00413522	-0.0235483	0.0147148	-0.0198497	0.0114355	-0.0159739			113.4	-1.2037	-1.089	-1.35135	-1.2101	-1.29966	-1.27941	-1.17674
113.6	-0.0198458	0.00526679	-0.0209928	0.0132402	-0.0181464	0.0156785	-0.0159645			113.6	-1.20768	-1.08787	-1.34879	-1.21158	-1.29796	-1.27516	-1.17673
113.8	-0.0179653	0.00585089	-0.0194058	0.0126681	-0.0170756	0.0155893	-0.0194696			113.8	-1.2058	-1.08728	-1.3472	-1.21215	-1.29689	-1.27525	-1.18024
114	-0.0202489	0.0028767	-0.0252407	0.00865339	-0.0191504	0.0167255	-0.0158591			114	-1.20809	-1.09026	-1.35304	-1.21616	-1.29896	-1.27412	-1.17663
114.19	-0.0215638	0.00291837	-0.0193163	0.0120193	-0.0169796	0.0160206	-0.011685			114.19	-1.2094	-1.09021	-1.34711	-1.2128	-1.29679	-1.27482	-1.17246
114.4	-0.0210266	0.00318959	-0.0221778	0.0111783	-0.0191663	0.0189328	-0.0134028			114.4	-1.20886	-1.08994	-1.34998	-1.21364	-1.29898	-1.27191	-1.17417
114.59	-0.0238209	0.00219301	-0.0202366	0.0101299	-0.0196145	0.0122236	-0.0165845			114.59	-1.21166	-1.09094	-1.34803	-1.21469	-1.29943	-1.27862	-1.17735
114.79	-0.0212781	0.00698726	-0.019719	0.013245	-0.0164107	0.0147689	-0.0182286			114.79	-1.20912	-1.08615	-1.34752	-1.21157	-1.29622	-1.27607	-1.179
115	-0.0198293	0.00290637	-0.0193206	0.00964938	-0.019354	0.0145278	-0.0200442			115	-1.20767	-1.09023	-1.34712	-1.21517	-1.29917	-1.27631	-1.18081
115.19	-0.0219227	-0.00025627	-0.0182591	0.0141641	-0.01748	0.0131859	-0.0220831			115.19	-1.20976	-1.09339	-1.34606	-1.21065	-1.29729	-1.27766	-1.18285
115.39	-0.0195276	0.00214165	-0.0223949	0.0147051	-0.0205593	0.0197299	-0.0155275			115.39	-1.20737	-1.09099	-1.35019	-1.21011	-1.30037	-1.27111	-1.1763
115.6	-0.0197904	0.00473453	-0.023985	0.014645	-0.0177086	0.015045	-0.0152227			115.6	-1.20763	-1.0884	-1.35178	-1.21017	-1.29752	-1.2758	-1.17599
115.8	-0.020906	0.00554137	-0.0186826	0.015994	-0.0205753	0.0136647	-0.018243			115.8	-1.20874	-1.08759	-1.34648	-1.20882	-1.30039	-1.27718	-1.17901
116	-0.0213063	0.00972198	-0.0203342	0.0125225	-0.0188782	0.0127093	-0.0188119			116	-1.20914	-1.08341	-1.34813	-1.21229	-1.29869	-1.27813	-1.17958
116.19	-0.022334	0.00555638	-0.0221026	0.0143595	-0.0176267	0.0103543	-0.0178544			116.19	-1.21017	-1.08758	-1.3499	-1.21046	-1.29744	-1.28049	-1.17862
116.39	-0.0222805	0.00549016	-0.0209526	0.0117218	-0.0179895	0.0166215	-0.0182488			116.39	-1.21012	-1.08764	-1.34875	-1.21309	-1.2978	-1.27422	-1.17902
116.6	-0.0196446	0.00502944	-0.0222302	0.0109976	-0.0175709	0.0174976	-0.0173371			116.6	-1.20748	-1.0881	-1.35003	-1.21382	-1.29738	-1.27334	-1.17811
116.79	-0.0224393	0.00299902	-0.0222006	0.0135501	-0.0205107	0.0114272	-0.0138309			116.79	-1.21028	-1.09013	-1.35	-1.21127	-1.30032	-1.27941	-1.1746
117	-0.0210019	0.00453751	-0.0239613	0.0124323	-0.0139388	0.015634	-0.0179248			117	-1.20884	-1.0886	-1.35176	-1.21238	-1.29375	-1.27521	-1.1787
117.19	-0.0195946	0.00570303	-0.0187371	0.0125426	-0.0199183	0.0129688	-0.0188084			117.19	-1.20743	-1.08743	-1.34654	-1.21227	-1.29973	-1.27787	-1.17958
117.4	-0.0211156	0.00060556	-0.0214842	0.011825	-0.0225791	0.0146703	-0.0186149			117.4	-1.20895	-1.09253	-1.34928	-1.21299	-1.30239	-1.27617	-1.17939
117.6	-0.0227609	0.00223301	-0.023365	0.00936013	-0.0210076	0.0164173	-0.0171717			117.6	-1.2106	-1.0909	-1.35116	-1.21546	-1.30082	-1.27442	-1.17794
117.8	-0.0178236	0.00632671	-0.0190439	0.00899964	-0.0194051	0.0130581	-0.0212826			117.8	-1.20566	-1.08681	-1.34684	-1.21582	-1.29922	-1.27778	-1.18205
118	-0.0189424	0.00716005	-0.0227992	0.0121505	-0.021284	0.0165151	-0.0150859			118	-1.20678	-1.08597	-1.3506	-1.21267	-1.3011	-1.27433	-1.17586
118.19	-0.0227618	0.00695049	-0.0215265	0.0101411	-0.0188966	0.0158144	-0.0141372			118.19	-1.2106	-1.08618	-1.34932	-1.21468	-1.29871	-1.27503	-1.17491
118.4	-0.0216618	0.00627472	-0.022243	0.0100183	-0.0183098	0.0133847	-0.0165149			118.4	-1.2095	-1.08686	-1.35004	-1.2148	-1.29812	-1.27746	-1.17729
118.59	-0.0203185	0.00618248	-0.0207769	0.0169416	-0.020851	0.0151984	-0.0218158			118.59	-1.20816	-1.08695	-1.34857	-1.20787	-1.30066	-1.27564	-1.18259
118.79	-0.022242	0.00387998	-0.0226679	0.0149971	-0.0186266	0.0142323	-0.0222393			118.79	-1.21008	-1.08925	-1.35047	-1.20982	-1.29844	-1.27661	-1.18301
118.99	-0.0223183	0.00095834	-0.0234092	0.0117162	-0.0204488	0.0133657	-0.0158816			118.99	-1.21016	-1.09217	-1.35121	-1.2131	-1.30026	-1.27748	-1.17665
119.19	-0.0207897	-0.00105803	-0.0219549	0.0156219	-0.019751	0.0174427	-0.0149403			119.19	-1.20863	-1.09419	-1.34975	-1.20919	-1.29956	-1.2734	-1.17571
119.4	-0.022717	0.0048213	-0.0232884	0.0146428	-0.0204347	0.0149122	-0.0168142			119.4	-1.21055	-1.08831	-1.35109	-1.21017	-1.30025	-1.27593	-1.17758
119.59	-0.0206418	0.00256958	-0.0201116	0.0143288	-0.0213353	0.0132548	-0.0194667			119.59	-1.20848	-1.09056	-1.34791	-1.21049	-1.30115	-1.27759	-1.18024
119.79	-0.0210363	0.00447401	-0.0202177	0.0121619	-0.0163255	0.0138259	-0.0194599			119.79	-1.20887	-1.08866	-1.34802	-1.21265	-1.29614	-1.27702	-1.18023
119.99	-0.0220181	0.00251136	-0.0220166	0.00832248	-0.0225691	0.0137132	-0.0172113			119.99	-1.20986	-1.09062	-1.34981	-1.21649	-1.30238	-1.27713	-1.17798
120.19	-0.0244636	0.00713951	-0.020626	0.0144474	-0.0223063	0.0156785	-0.0143865			120.19	-1.2123	-1.08599	-1.34842	-1.21037	-1.30212	-1.27516	-1.17516
120.39	-0.0224392	0.00117203	-0.023235	0.0103129	-0.023497	0.0163314	-0.0166235			120.39	-1.21028	-1.09196	-1.35103	-1.2145	-1.30331	-1.27451	-1.17739
120.59	-0.021435	0.00327944	-0.0228849	0.0122555	-0.0200079	0.0111964	-0.0185069			120.59	-1.20927	-1.08985	-1.35068	-1.21256	-1.29982	-1.27965	-1.17928
120.79	-0.0228146	0.00713128	-0.0225268	0.0147044	-0.0200068	0.0123866	-0.0180284			120.79	-1.21065	-1.086	-1.35032	-1.21011	-1.29982	-1.27846	-1.1788
120.99	-0.0211655	0.00505787	-0.0252638	0.0113872	-0.0208597	0.0177881	-0.0216608			120.99	-1.209	-1.08808	-1.35306	-1.21343	-1.30067	-1.27305	-1.18243
121.19	-0.0214693	0.00496226	-0.0221656	0.0131188	-0.0231762	0.0154753	-0.0173026			121.19	-1.20931	-1.08817	-1.34996	-1.2117	-1.30299	-1.27537	-1.17807
121.39	-0.0213164	0.00486028	-0.0214172	0.0117768	-0.0194841	0.0141945	-0.0178746			121.39	-1.20915	-1.08827	-1.34922	-1.21304	-1.2993	-1.27665	-1.17864
121.6	-0.019604	0.00517329	-0.0242738	0.0152439	-0.0216924	0.0163221	-0.0152106			121.6	-1.20744	-1.08796	-1.35207	-1.20957	-1.3015	-1.27452	-1.17598
121.79	-0.0211861	0.00645056	-0.0224686	0.0101841	-0.0190293	0.0150262	-0.0159218			121.79	-1.20902	-1.08668	-1.35027	-1.21463	-1.29884	-1.27582	-1.17669
122	-0.0211211	0.00590235	-0.0242268	0.0136371	-0.0204842	0.0114717	-0.0180915			122	-1.20896	-1.08723	-1.35202	-1.21118	-1.3003	-1.27937	-1.17886
122.19	-0.0228249	0.00640699	-0.0248673	0.0152597	-0.020325	0.0159566	-0.015751			122.19	-1.21066	-1.08673	-1.35267	-1.20956	-1.30014	-1.27489	-1.17652
122.39	-0.0232959	0.00499978	-0.0215159	0.0123727	-0.0204951	0.00951602	-0.0175264			122.39	-1.21113	-1.08813	-1.34931	-1.21244	-1.30031	-1.28133	-1.1783
122.59	-0.0230582	0.00259308	-0.0206179	0.0143721	-0.0206827	0.0183375	-0.0162264			122.59	-1.2109	-1.09054	-1.34842	-1.21044	-1.30049	-1.2725	-1.177
122.79	-0.0240839	0.00669541	-0.0191085	0.0109085	-0.0184028	0.0147875	-0.0157973			122.79	-1.21192	-1.08644	-1.34691	-1.21391	-1.29821	-1.27605	-1.17657
123	-0.0229584	0.00560568	-0.0218819	0.016194	-0.0192272	0.0152914	-0.0172027			123	-1.2108	-1.08753	-1.34968	-1.20862	-1.29904	-1.27555	-1.17797
123.19	-0.0232559	0.00622658	-0.025301	0.0130322	-0.019542	0.013471	-0.0213594			123.19	-1.21109	-1.08691	-1.3531	-1.21178	-1.29935	-1.27737	-1.18213
123.4	-0.0199897	0.00415641	-0.0199052	0.0118794	-0.0211829	0.0139818	-0.014433			123.4	-1.20783	-1.08898	-1.3477	-1.21294	-1.30099	-1.27686	-1.1752
123.59	-0.0263765	0.00500364	-0.0218607	0.0099933	-0.0219614	0.0170067	-0.0136813			123.59	-1.21421	-1.08813	-1.34966	-1.21482	-1.30177	-1.27384	-1.17445
123.79	-0.025045	0.00430855	-0.0241617	0.0154169	-0.0162277	0.0155525	-0.0207725			123.79	-1.21288	-1.08882	-1.35196	-1.2094	-1.29604	-1.27529	-1.18154
123.99	-0.0241224	0.00845215	-0.0215703	0.0118421	-0.0212831	0.014322	-0.0198831			123.99	-1.21196	-1.08468	-1.34937	-1.21297	-1.30109	-1.27652	-1.18065
124.19	-0.0207401	0.00797901	-0.0215619	0.0126513	-0.0200739	0.013543	-0.0213755			124.19	-1.20858	-1.08515	-1.34936	-1.21216	-1.29989	-1.2773	-1.18215
124.39	-0.0240817	0.00362095	-0.0228727	0.0107251	-0.0194187	0.0138039	-0.0182451			124.39	-1.21192	-1.08951	-1.35067	-1.21409	-1.29923	-1.27704	-1.17902
124.59	-0.0236785	0.00413763	-0.0176999	0.0122837	-0.021166	0.0113334	-0.0184912			124.59	-1.21152	-1.089	-1.3455	-1.21253	-1.30098	-1.27951	-1.17926
124.79	-0.0211268	0.00281486	-0.0221463	0.0127997	-0.0198476	0.0119674	-0.0164197			124.79	-1.20896	-1.09032	-1.34994	-1.21202	-1.29966	-1.27887	-1.17719
124.99	-0.0229168	0.00673176	-0.0223644	0.0166	-0.0224386	0.0135426	-0.0217024			124.99	-1.21075	-1.0864	-1.35016	-1.20822	-1.30225	-1.2773	-1.18247
125.19	-0.0225789	0.0043632	-0.0242181	0.0117878	-0.0199325	0.0137769	-0.0184777			125.19	-1.21042	-1.08877	-1.35202	-1.21303	-1.29974	-1.27707	-1.17925
125.39	-0.020497	0.00287134	-0.0203158	0.0115528	-0.0182311	0.0150079	-0.0159302			125.39	-1.20833	-1.09026	-1.34811	-1.21326	-1.29804	-1.27583	-1.1767
125.59	-0.0181052	0.00268942	-0.020388	0.0135211	-0.0189391	0.0163932	-0.0171114			125.59	-1.20594	-1.09044	-1.34819	-1.2113	-1.29875	-1.27445	-1.17788
125.79	-0.0207872	0.00808499	-0.0242569	0.0106268	-0.0218213	0.0139852	-0.0156326			125.79	-1.20862	-1.08505	-1.35205	-1.21419	-1.30163	-1.27686	-1.1764
125.99	-0.02292	0.00349152	-0.0210314	0.0119244	-0.0204069	0.0102504	-0.017609			125.99	-1.21076	-1.08964	-1.34883	-1.21289	-1.30022	-1.28059	-1.17838
126.19	-0.0263389	0.00356033	-0.0239581	0.0104091	-0.018103	0.0171009	-0.0195685			126.19	-1.21418	-1.08957	-1.35176	-1.21441	-1.29791	-1.27374	-1.18034
126.4	-0.0243021	0.00646707	-0.0214183	0.0130989	-0.019566	0.0134175	-0.0221535			126.4	-1.21214	-1.08667	-1.34922	-1.21172	-1.29938	-1.27742	-1.18292
126.6	-0.0219192	0.00397102	-0.0265767	0.0107252	-0.0236073	0.0124472	-0.0181964			126.6	-1.20976	-1.08916	-1.35437	-1.21409	-1.30342	-1.27839	-1.17897
126.8	-0.024326	0.00594756	-0.0231379	0.0107271	-0.0156868	0.0142494	-0.0191828			126.8	-1.21216	-1.08719	-1.35094	-1.21409	-1.2955	-1.27659	-1.17995
127	-0.0239957	0.00370642	-0.0240832	0.0149983	-0.0215478	0.0157011	-0.0199655			127	-1.21183	-1.08943	-1.35188	-1.20982	-1.30136	-1.27514	-1.18074
127.19	-0.0206744	0.00623599	-0.0210464	0.0109541	-0.0209453	0.0127577	-0.0172807			127.19	-1.20851	-1.0869	-1.34884	-1.21386	-1.30076	-1.27808	-1.17805
[truncated: 33,018 more rows]

## Sheet: Exp_3
Raw BLI data (nm)										Normalised to baseline
[truncated: 36,302 more rows]

## Sheet: Rates_fit
Sorce data: Figure 4B
	One-phase decay model in Prism 8
[truncated: 18 more rows]
