# Supplementary material for: Calcium depletion challenges endoplasmic reticulum proteostasis by destabilising BiP-substrate complexes
Source: eLife. 2020 Dec 9;9:e62601. doi: 10.7554/eLife.62601 (PMC7758071; doi:10.7554/eLife.62601)
Supplement: Figure 4—source data 3. [file elife-62601-fig4-data3.xlsx]

## Sheet: Exp_1
Sorce data: Figure 4C
		Binding raw data (nm)						Normalised to baseline step
		Time (s)	None	Ca	Grp170	Ca + Grp170		Time (s)	None	Ca	Grp170	Ca + Grp170
		0	0	0	0	0		0	-1.29152	-1.57386	-1.48238	-1.35176
		0.2	0.00437129	0.00173058	-0.00119638	0.00206193		0.2	-1.28714	-1.57213	-1.48357	-1.3497
		0.4	0.00370109	-0.00107387	-0.00017667	-0.00276505		0.4	-1.28781	-1.57493	-1.48255	-1.35452
		0.6	0.00033714	0.0003533	0.00257519	0.00228111		0.6	-1.29118	-1.57351	-1.4798	-1.34948
		0.8	0.00150778	0.00071445	-0.0012306	-0.00014937		0.8	-1.29001	-1.57314	-1.48361	-1.35191
		1	0.00525422	0.00391745	-0.00229714	-0.00180035		1	-1.28626	-1.56994	-1.48467	-1.35356
		1.2	0.00205568	-0.00045961	0.00293588	0.00178491		1.2	-1.28946	-1.57432	-1.47944	-1.34997
		1.39	-0.0002964	0.00339584	-0.0004805	-0.00221212		1.39	-1.29181	-1.57046	-1.48286	-1.35397
		1.6	0.00142621	0.0010781	0.00281919	-0.00182654		1.6	-1.29009	-1.57278	-1.47956	-1.35359
		1.79	0.00076771	0.00240813	-0.00533823	8.011e-05		1.79	-1.29075	-1.57145	-1.48771	-1.35168
		2	0.00141038	0.00260718	-0.001052	-0.00318011		2	-1.2901	-1.57125	-1.48343	-1.35494
		2.19	0.00302679	0.00449939	-0.00297338	0.00082757		2.19	-1.28849	-1.56936	-1.48535	-1.35093
		2.39	0.00095875	0.00063743	-0.00402397	-0.00104227		2.39	-1.29056	-1.57322	-1.4864	-1.3528
		2.59	-0.00040391	0.00247183	-3.445e-05	0.00448906		2.59	-1.29192	-1.57139	-1.48241	-1.34727
		2.79	-0.00251367	0.00484015	-0.00183636	0.00181702		2.79	-1.29403	-1.56902	-1.48421	-1.34994
		2.99	0.00793139	0.00042363	-0.00071578	-0.00123818		2.99	-1.28358	-1.57343	-1.48309	-1.353
		3.19	0.00321621	0.0021221	-0.00497694	0.00291187		3.19	-1.2883	-1.57174	-1.48735	-1.34885
		3.39	0.00229776	0.00063977	-0.00240215	0.00376259		3.39	-1.28922	-1.57322	-1.48478	-1.348
		3.59	0.00014979	-0.00168551	-0.00296437	0.00408354		3.59	-1.29137	-1.57554	-1.48534	-1.34768
		3.79	-0.00052792	0.00093389	-0.00294519	-0.00166122		3.79	-1.29204	-1.57292	-1.48532	-1.35342
		3.99	0.00584573	0.00518546	-0.00247232	0.00385688		3.99	-1.28567	-1.56867	-1.48485	-1.3479
		4.19	6.218e-05	0.00412204	0.00068906	0.002954		4.19	-1.29145	-1.56974	-1.48169	-1.34881
		4.39	0.00207351	0.00597897	0.00118927	0.00428168		4.39	-1.28944	-1.56788	-1.48119	-1.34748
		4.59	0.00195808	-0.00141867	-0.00263468	0.0022471		4.59	-1.28956	-1.57528	-1.48501	-1.34951
		4.8	0.00072651	0.00318335	0.00154892	0.00029689		4.8	-1.29079	-1.57068	-1.48083	-1.35146
		4.99	0.00209028	0.00302013	-0.00236954	0.00417221		4.99	-1.28942	-1.57084	-1.48475	-1.34759
		5.19	-0.00075267	0.00328357	0.00037522	0.00138328		5.19	-1.29227	-1.57058	-1.482	-1.35038
		5.39	0.0019121	0.00786641	-0.00173392	0.00186412		5.39	-1.2896	-1.56599	-1.48411	-1.3499
		5.59	0.00205502	0.00516842	0.00136906	0.00411504		5.59	-1.28946	-1.56869	-1.48101	-1.34764
		5.8	0.00382829	0.00168929	0.00052562	0.00366417		5.8	-1.28769	-1.57217	-1.48185	-1.3481
		5.99	0.00554822	-0.00053962	0.00228644	0.00243092		5.99	-1.28597	-1.5744	-1.48009	-1.34933
		6.19	0.00128234	0.00347901	-0.00059024	0.00027221		6.19	-1.29023	-1.57038	-1.48297	-1.35149
		6.39	0.00354874	0.00300246	0.00181894	0.00416237		6.39	-1.28797	-1.57086	-1.48056	-1.3476
		6.59	0.00387625	0.00416186	-0.00306748	0.00715095		6.59	-1.28764	-1.5697	-1.48544	-1.34461
		6.8	0.00207524	0.00276476	-0.0046169	0.00097167		6.8	-1.28944	-1.57109	-1.48699	-1.35079
		6.99	0.00308176	0.00293487	0.00303949	0.00620963		6.99	-1.28843	-1.57092	-1.47934	-1.34555
		7.19	0.00218428	0.00461503	-0.00152947	0.00489961		7.19	-1.28933	-1.56924	-1.48391	-1.34686
		7.39	0.00263111	0.00430382	-0.00442382	0.00514142		7.39	-1.28888	-1.56955	-1.4868	-1.34662
		7.59	0.00406482	0.00373105	-0.00185004	0.003988		7.59	-1.28745	-1.57013	-1.48423	-1.34777
		7.79	0.00371889	0.00242264	0.00059382	0.00261352		7.79	-1.2878	-1.57144	-1.48178	-1.34915
		7.99	0.00274252	0.00344823	-0.00340156	0.00151254		7.99	-1.28877	-1.57041	-1.48578	-1.35025
		8.19	0.00327078	0.00515043	-0.00137949	0.00444701		8.19	-1.28824	-1.56871	-1.48376	-1.34731
		8.39	0.00351499	0.00419547	-0.00409314	0.00253441		8.39	-1.288	-1.56966	-1.48647	-1.34923
		8.59	0.00471311	0.00530354	-9.422e-05	0.00110772		8.59	-1.2868	-1.56856	-1.48247	-1.35065
		8.8	0.00435927	0.00530327	0.0035631	0.00615303		8.8	-1.28716	-1.56856	-1.47881	-1.34561
		8.99	0.00231229	0.00534525	0.00478979	0.00480282		8.99	-1.2892	-1.56851	-1.47759	-1.34696
		9.19	0.00194261	0.00450039	0.00012427	0.0042235		9.19	-1.28957	-1.56936	-1.48225	-1.34754
		9.39	0.00476737	0.00805698	0.00117127	0.00691887		9.39	-1.28675	-1.5658	-1.48121	-1.34484
		9.59	0.00757249	0.00191722	0.00210013	0.00787634		9.59	-1.28394	-1.57194	-1.48028	-1.34388
		9.8	0.00353926	0.00507804	0.00070588	0.00580822		9.8	-1.28798	-1.56878	-1.48167	-1.34595
		9.99	0.00819383	0.00952928	-0.00282498	0.00599593		9.99	-1.28332	-1.56433	-1.4852	-1.34576
		10.19	0.00359725	0.00378708	0.00040318	0.00567798		10.19	-1.28792	-1.57007	-1.48197	-1.34608
		10.39	0.0034015	0.00549373	0.00202581	0.00907215		10.39	-1.28811	-1.56836	-1.48035	-1.34269
		10.6	0.00141116	0.0101512	0.00067614	0.00311811		10.6	-1.2901	-1.56371	-1.4817	-1.34864
		10.8	9.22e-05	0.00667232	-0.00469279	0.0045173		10.8	-1.29142	-1.56719	-1.48707	-1.34724
		10.99	0.00369689	0.00420501	-0.00212154	0.00866849		10.99	-1.28782	-1.56965	-1.4845	-1.34309
		11.19	0.00718986	0.0044587	-0.00228479	0.0065063		11.19	-1.28433	-1.5694	-1.48466	-1.34525
		11.39	0.00143998	0.00087832	-0.00426429	0.00823882		11.39	-1.29008	-1.57298	-1.48664	-1.34352
		11.6	0.00729088	0.00932442	-0.00262197	0.00743767		11.6	-1.28422	-1.56453	-1.485	-1.34432
		11.79	0.00604307	0.00745518	0.00189413	0.00502515		11.79	-1.28547	-1.5664	-1.48048	-1.34673
		11.99	0.00422737	0.00893123	0.00180538	0.00804731		11.99	-1.28729	-1.56493	-1.48057	-1.34371
		12.19	0.00542611	-9.01e-06	-0.00180142	0.00502013		12.19	-1.28609	-1.57387	-1.48418	-1.34674
		12.39	0.00465833	0.00799908	0.00183579	0.004108		12.39	-1.28686	-1.56586	-1.48054	-1.34765
		12.6	0.00441817	0.0019014	0.00318467	0.010826		12.6	-1.2871	-1.57196	-1.47919	-1.34093
		12.79	0.00655815	0.00763235	0.00152612	0.00496018		12.79	-1.28496	-1.56623	-1.48085	-1.3468
		12.99	0.00613617	0.00734767	0.00077357	0.00868546		12.99	-1.28538	-1.56651	-1.4816	-1.34307
		13.19	0.00433219	0.00425137	-0.00166238	0.0045739		13.19	-1.28718	-1.56961	-1.48404	-1.34719
		13.39	0.00472163	0.00439936	0.00059035	0.00801097		13.39	-1.28679	-1.56946	-1.48179	-1.34375
		13.59	0.00187694	0.0055683	0.00021233	0.00607341		13.59	-1.28964	-1.56829	-1.48216	-1.34569
		13.79	0.00427909	0.00438914	0.00242932	0.0125526		13.79	-1.28724	-1.56947	-1.47995	-1.33921
		13.99	0.00484667	-0.0008429	0.00092722	0.00666509		13.99	-1.28667	-1.5747	-1.48145	-1.34509
		14.19	0.00500695	0.00613149	0.00103541	0.00954784		14.19	-1.28651	-1.56773	-1.48134	-1.34221
		14.39	0.00388032	0.00592411	-0.00501004	0.00781233		14.39	-1.28763	-1.56793	-1.48739	-1.34395
		14.59	0.00504777	0.0004798	-0.00139867	0.00685401		14.59	-1.28647	-1.57338	-1.48378	-1.34491
		14.79	0.00395717	0.00485632	0.00248961	0.00823857		14.79	-1.28756	-1.569	-1.47989	-1.34352
		14.99	0.00551638	0.00587958	0.00554537	0.00837796		14.99	-1.286	-1.56798	-1.47683	-1.34338
		15.19	0.00307538	0.00353028	0.00031883	0.00769619		15.19	-1.28844	-1.57033	-1.48206	-1.34406
		15.39	0.0023838	0.00183133	0.00259966	0.0101251		15.39	-1.28913	-1.57203	-1.47978	-1.34163
		15.6	0.00949381	0.00761697	0.00134965	0.0118012		15.6	-1.28202	-1.56624	-1.48103	-1.33996
		15.79	0.00440019	0.00798981	0.00015782	0.0099668		15.79	-1.28711	-1.56587	-1.48222	-1.34179
		15.99	0.00601741	0.00352033	0.000496	0.00919534		15.99	-1.2855	-1.57034	-1.48188	-1.34256
		16.19	0.00736231	0.00811453	0.00214828	0.00928151		16.19	-1.28415	-1.56574	-1.48023	-1.34248
		16.4	0.0037154	0.00613624	-0.00194166	0.00922528		16.4	-1.2878	-1.56772	-1.48432	-1.34253
		16.6	0.00919766	0.0037971	-0.00221588	0.00955313		16.6	-1.28232	-1.57006	-1.48459	-1.34221
		16.79	0.00741574	0.00058327	-0.0030704	0.00651833		16.79	-1.2841	-1.57328	-1.48545	-1.34524
		16.99	-0.00051664	0.00417012	0.00175103	0.00977284		16.99	-1.29203	-1.56969	-1.48063	-1.34199
		17.19	0.00680979	0.0056619	0.00093448	0.00987782		17.19	-1.28471	-1.5682	-1.48144	-1.34188
		17.4	0.0048788	0.00711477	0.0018071	0.00941996		17.4	-1.28664	-1.56674	-1.48057	-1.34234
		17.59	0.00434166	0.00734413	-0.00223728	0.00835424		17.59	-1.28717	-1.56651	-1.48461	-1.34341
		17.79	0.00707483	0.00573675	-0.00212788	0.011268		17.79	-1.28444	-1.56812	-1.4845	-1.34049
		17.99	0.0038375	0.00318008	-0.00150632	0.00708412		17.99	-1.28768	-1.57068	-1.48388	-1.34468
		18.19	0.00451115	0.00341503	0.00022792	0.0116183		18.19	-1.287	-1.57044	-1.48215	-1.34014
		18.4	0.00557485	0.00688066	0.00058856	0.00757807		18.4	-1.28594	-1.56698	-1.48179	-1.34418
		18.59	0.00537018	0.0081744	-0.00074372	0.00951149		18.59	-1.28614	-1.56568	-1.48312	-1.34225
		18.79	0.00450085	0.00395571	0.00037293	0.0104816		18.79	-1.28701	-1.5699	-1.482	-1.34128
		18.99	0.00777772	0.00568383	-0.00166909	0.0140573		18.99	-1.28374	-1.56817	-1.48405	-1.3377
		19.19	0.00559268	0.00310504	0.00065969	0.00970893		19.19	-1.28592	-1.57075	-1.48172	-1.34205
		19.39	0.00689144	0.00980089	0.00058801	0.00729933		19.39	-1.28462	-1.56406	-1.48179	-1.34446
		19.59	0.00470601	0.00762146	0.00100153	0.00973537		19.59	-1.28681	-1.56624	-1.48137	-1.34202
		19.79	0.00647534	0.00730762	0.00063063	0.0111096		19.79	-1.28504	-1.56655	-1.48175	-1.34065
		19.99	0.00907795	0.00288667	0.00210717	0.0099527		19.99	-1.28244	-1.57097	-1.48027	-1.34181
		20.19	0.00813679	0.0065964	0.00186998	0.0129381		20.19	-1.28338	-1.56726	-1.48051	-1.33882
		20.39	0.0042535	0.00643946	-0.00044056	0.00676371		20.39	-1.28726	-1.56742	-1.48282	-1.345
		20.59	0.00521642	0.00587033	0.00352491	0.0128841		20.59	-1.2863	-1.56799	-1.47885	-1.33888
		20.8	0.00634657	0.00677894	0.00150102	0.00839413		20.8	-1.28517	-1.56708	-1.48088	-1.34337
		21	0.0100381	0.00415754	0.00129458	0.00953573		21	-1.28148	-1.5697	-1.48108	-1.34222
		21.2	0.00549484	0.00644597	-0.00057132	0.00676616		21.2	-1.28602	-1.56741	-1.48295	-1.34499
		21.4	0.0036783	0.00754174	0.00182347	0.00977935		21.4	-1.28784	-1.56632	-1.48055	-1.34198
		21.6	0.00943942	0.00529322	0.00317825	0.0127265		21.6	-1.28208	-1.56857	-1.4792	-1.33903
		21.8	0.00544127	0.00333817	-0.00061566	0.00938022		21.8	-1.28607	-1.57052	-1.48299	-1.34238
		22	0.00525137	0.0072952	0.00047985	0.013227		22	-1.28626	-1.56656	-1.4819	-1.33853
		22.2	0.0107149	0.00651195	0.00365652	0.0147415		22.2	-1.2808	-1.56735	-1.47872	-1.33702
		22.4	0.00484867	0.0078638	0.00297115	0.00924109		22.4	-1.28667	-1.56599	-1.47941	-1.34252
		22.6	0.00819669	0.00978575	0.00406114	0.0101073		22.6	-1.28332	-1.56407	-1.47832	-1.34165
		22.8	0.00696577	0.00649402	0.00342277	0.0129627		22.8	-1.28455	-1.56736	-1.47895	-1.3388
		23	0.00442625	0.00286977	0.00447096	0.00955815		23	-1.28709	-1.57099	-1.47791	-1.3422
		23.2	0.00941057	0.00459673	0.00224803	0.015312		23.2	-1.2821	-1.56926	-1.48013	-1.33645
		23.4	0.00706066	0.00534299	0.00610276	0.0115499		23.4	-1.28445	-1.56852	-1.47627	-1.34021
		23.6	0.00706105	0.00839041	-0.00178187	0.0109091		23.6	-1.28445	-1.56547	-1.48416	-1.34085
		23.8	0.0085184	0.00422983	0.00347014	0.0185505		23.8	-1.283	-1.56963	-1.47891	-1.33321
		24	0.0060695	0.00687998	-0.0026643	0.0130018		24	-1.28545	-1.56698	-1.48504	-1.33876
		24.19	0.0086989	0.00548152	0.00547904	0.0105764		24.19	-1.28282	-1.56838	-1.4769	-1.34118
		24.4	0.00818545	0.00317899	-0.00120726	0.0129957		24.4	-1.28333	-1.57068	-1.48358	-1.33876
		24.6	0.00598017	0.00956356	0.00690293	0.0111022		24.6	-1.28553	-1.5643	-1.47547	-1.34066
		24.8	0.00801286	0.00658745	0.00466878	0.0158108		24.8	-1.2835	-1.56727	-1.47771	-1.33595
		25	0.00814006	0.0104112	0.00169293	0.0108047		25	-1.28338	-1.56345	-1.48068	-1.34096
		25.2	0.00818384	0.00622584	0.00085393	0.0134307		25.2	-1.28333	-1.56763	-1.48152	-1.33833
		25.4	0.0072014	0.00800809	0.00390068	0.0128722		25.4	-1.28431	-1.56585	-1.47848	-1.33889
		25.59	0.00825057	0.0075925	0.00532821	0.0138368		25.59	-1.28326	-1.56627	-1.47705	-1.33792
		25.8	0.00661927	0.00728044	0.00212127	0.0125928		25.8	-1.2849	-1.56658	-1.48026	-1.33917
		26	0.00665858	0.0043425	0.00306758	0.0107502		26	-1.28486	-1.56952	-1.47931	-1.34101
		26.2	0.00240138	0.00231671	0.00282437	0.0110021		26.2	-1.28911	-1.57154	-1.47955	-1.34076
		26.4	0.00771925	0.00733405	0.00281664	0.0130114		26.4	-1.2838	-1.56652	-1.47956	-1.33875
		26.6	0.00247386	0.00720417	0.00127292	0.0120255		26.6	-1.28904	-1.56665	-1.4811	-1.33973
		26.8	0.0102372	0.00801377	0.00134896	0.0145154		26.8	-1.28128	-1.56584	-1.48103	-1.33724
		27	0.0107779	0.00499318	0.0019624	0.0175018		27	-1.28074	-1.56887	-1.48041	-1.33426
		27.2	0.00771256	0.00833036	0.00413487	0.0146854		27.2	-1.2838	-1.56553	-1.47824	-1.33707
		27.39	0.00197426	0.00584971	0.00385232	0.0119215		27.39	-1.28954	-1.56801	-1.47852	-1.33984
		27.6	0.0051565	0.007296	0.00297859	0.0166369		27.6	-1.28636	-1.56656	-1.4794	-1.33512
		27.8	0.00878178	0.00708098	0.00402287	0.0132351		27.8	-1.28273	-1.56678	-1.47835	-1.33852
		27.99	0.00934388	0.00624224	0.00748556	0.0140371		27.99	-1.28217	-1.56762	-1.47489	-1.33772
		28.2	0.00722457	0.00804107	0.00208852	0.0113848		28.2	-1.28429	-1.56582	-1.48029	-1.34038
		28.39	0.00719841	0.00741794	0.00433152	0.0107096		28.39	-1.28432	-1.56644	-1.47804	-1.34105
		28.6	0.00426005	0.00591397	0.00340671	0.0171836		28.6	-1.28726	-1.56794	-1.47897	-1.33458
		28.8	0.00851861	0.00519403	-0.00072756	0.0150311		28.8	-1.283	-1.56866	-1.4831	-1.33673
		29	0.00722001	0.003981	0.00200688	0.0154853		29	-1.2843	-1.56988	-1.48037	-1.33627
		29.19	0.00739816	0.00667872	0.00428564	0.0108647		29.19	-1.28412	-1.56718	-1.47809	-1.3409
		29.4	0.00575102	0.00652335	0.00325791	0.0129085		29.4	-1.28576	-1.56734	-1.47912	-1.33885
		29.6	0.00779007	0.00712503	0.00411986	0.0112266		29.6	-1.28373	-1.56673	-1.47826	-1.34053
		29.8	0.00820649	0.00917334	0.00467156	0.0133409		29.8	-1.28331	-1.56469	-1.4777	-1.33842
		30	0.0069876	0.00775326	0.00047975	0.0134554		30	-1.28453	-1.56611	-1.4819	-1.3383
		30.19	0.00865561	0.00645459	0.00213555	0.0145393		30.19	-1.28286	-1.5674	-1.48024	-1.33722
		30.4	0.00595763	0.00129058	8.7e-06	0.0117275		30.4	-1.28556	-1.57257	-1.48237	-1.34003
		30.59	0.00763666	0.00347584	0.00203017	0.0125254		30.59	-1.28388	-1.57038	-1.48035	-1.33923
		30.8	0.00465882	0.00395265	0.00197899	0.0133021		30.8	-1.28686	-1.56991	-1.4804	-1.33846
		30.99	0.00580654	0.00746828	-0.0016104	0.0124335		30.99	-1.28571	-1.56639	-1.48399	-1.33933
		31.2	0.00272428	0.00525765	0.00069235	0.0188625		31.2	-1.28879	-1.5686	-1.48168	-1.3329
		31.4	0.00899058	0.00546838	-0.0003994	0.0141701		31.4	-1.28252	-1.56839	-1.48278	-1.33759
		31.59	0.00926795	0.00529919	0.00347486	0.0188946		31.59	-1.28225	-1.56856	-1.4789	-1.33287
		31.8	0.00682348	0.00995015	0.00383557	0.0113759		31.8	-1.28469	-1.56391	-1.47854	-1.34038
		31.99	0.00559722	0.00570564	0.00093925	0.0113972		31.99	-1.28592	-1.56815	-1.48144	-1.34036
		32.19	0.00862974	0.00520342	-0.00101457	0.0176905		32.19	-1.28289	-1.56866	-1.48339	-1.33407
		32.39	0.00943611	0.00925115	0.00416915	0.0145862		32.39	-1.28208	-1.56461	-1.47821	-1.33717
		32.59	0.0065413	0.00583661	0.00563495	0.0145726		32.59	-1.28497	-1.56802	-1.47674	-1.33719
		32.79	0.00516867	0.0034981	0.00487508	0.0152185		32.79	-1.28635	-1.57036	-1.4775	-1.33654
		32.99	0.00770197	0.00342641	0.0017537	0.0156116		32.99	-1.28381	-1.57043	-1.48062	-1.33615
		33.19	0.00810192	0.0101493	0.00095295	0.0130769		33.19	-1.28341	-1.56371	-1.48142	-1.33868
		33.39	0.00759472	0.0109707	-0.00245838	0.0149884		33.39	-1.28392	-1.56289	-1.48483	-1.33677
		33.59	0.00879162	0.0096029	0.00203584	0.0145348		33.59	-1.28272	-1.56426	-1.48034	-1.33723
		33.79	0.0106805	0.00276816	-0.001957	0.0142755		33.79	-1.28083	-1.57109	-1.48433	-1.33748
		33.99	0.00700449	0.00283405	0.00424233	0.0103682		33.99	-1.28451	-1.57102	-1.47813	-1.34139
		34.19	0.00877422	0.00309685	0.00364724	0.0170571		34.19	-1.28274	-1.57076	-1.47873	-1.3347
		34.4	0.00380188	0.00570545	0.00622928	0.0157849		34.4	-1.28771	-1.56815	-1.47615	-1.33598
		34.59	0.00581638	0.00719782	0.0001564	0.0161026		34.59	-1.2857	-1.56666	-1.48222	-1.33566
		34.79	0.00872222	0.0103528	0.0043776	0.0167105		34.79	-1.28279	-1.56351	-1.478	-1.33505
		34.99	0.00605607	0.00376268	-0.00127801	0.0186494		34.99	-1.28546	-1.5701	-1.48365	-1.33311
		35.19	0.00911008	0.00811319	0.00046831	0.0150114		35.19	-1.28241	-1.56575	-1.48191	-1.33675
		35.39	0.00797727	0.00325056	0.00512487	0.0160525		35.39	-1.28354	-1.57061	-1.47725	-1.33571
		35.59	0.00828339	0.00349651	0.00124915	0.0120538		35.59	-1.28323	-1.57036	-1.48113	-1.33971
		35.79	0.00844807	0.00566393	0.00307637	0.0139684		35.79	-1.28307	-1.56819	-1.4793	-1.33779
		35.99	0.00908188	0.00534627	-0.0001259	0.0172803		35.99	-1.28243	-1.56851	-1.4825	-1.33448
		36.19	0.007469	0.00967591	0.00185306	0.0139846		36.19	-1.28405	-1.56418	-1.48052	-1.33778
		36.39	0.0065251	0.00864553	-0.00230234	0.014633		36.39	-1.28499	-1.56521	-1.48468	-1.33713
		36.59	0.00714564	0.00617772	0.00205871	0.0152328		36.59	-1.28437	-1.56768	-1.48032	-1.33653
		36.79	0.00803901	0.00380943	0.00128361	0.0180049		36.79	-1.28348	-1.57005	-1.48109	-1.33375
		36.99	0.00780974	0.00639367	0.00136481	0.0168751		36.99	-1.28371	-1.56746	-1.48101	-1.33488
		37.19	0.00717869	0.00743376	-0.00088996	0.0159458		37.19	-1.28434	-1.56642	-1.48327	-1.33581
		37.39	0.00825282	0.00790982	0.00135141	0.0168451		37.39	-1.28326	-1.56595	-1.48103	-1.33491
		37.59	0.00941524	0.00302796	0.00421661	0.0162689		37.59	-1.2821	-1.57083	-1.47816	-1.33549
		37.79	0.00949768	0.00538772	0.00235787	0.0190699		37.79	-1.28202	-1.56847	-1.48002	-1.33269
		37.99	0.0083535	0.00744685	0.00097909	0.0149471		37.99	-1.28316	-1.56641	-1.4814	-1.33681
		38.21	0.00552855	0.00931797	0.00465751	0.0158234		38.21	-1.28599	-1.56454	-1.47772	-1.33594
		38.39	0.00634599	0.00958397	0.00333614	0.0142237		38.39	-1.28517	-1.56427	-1.47904	-1.33754
		38.59	0.00867784	0.00548775	0.00022295	0.0152883		38.59	-1.28284	-1.56837	-1.48215	-1.33647
		38.79	0.0116268	0.00755346	0.00277063	0.0150268		38.79	-1.27989	-1.56631	-1.47961	-1.33673
		38.99	0.00643894	0.00744899	0.0007408	0.0154279		38.99	-1.28508	-1.56641	-1.48164	-1.33633
		39.19	0.00731338	0.00562438	0.00536815	0.0162738		39.19	-1.2842	-1.56823	-1.47701	-1.33549
		39.39	0.00989668	0.00430616	-0.00021167	0.0166774		39.39	-1.28162	-1.56955	-1.48259	-1.33508
		39.59	0.00477625	0.00524545	-0.00303813	0.0166836		39.59	-1.28674	-1.56861	-1.48541	-1.33508
		39.79	0.00566178	0.00688909	-0.00118115	0.0145957		39.79	-1.28585	-1.56697	-1.48356	-1.33716
		39.99	0.00935208	0.00589506	-0.00406383	0.0167845		39.99	-1.28216	-1.56796	-1.48644	-1.33498
		40.19	0.00680658	0.00706814	0.00315773	0.0165931		40.19	-1.28471	-1.56679	-1.47922	-1.33517
		40.39	0.0065673	0.00323396	0.00056807	0.0176763		40.39	-1.28495	-1.57062	-1.48181	-1.33408
		40.59	0.00981281	0.00406598	0.00221087	0.0165074		40.59	-1.2817	-1.56979	-1.48017	-1.33525
		40.79	0.00574396	0.00545048	0.00271142	0.0158167		40.79	-1.28577	-1.56841	-1.47967	-1.33594
		40.99	0.00837958	0.0020885	0.00225978	0.0170493		40.99	-1.28314	-1.57177	-1.48012	-1.33471
		41.19	0.00790206	0.00465175	0.00014724	0.0162774		41.19	-1.28361	-1.56921	-1.48223	-1.33548
		41.39	0.00780701	0.0061414	0.00188074	0.0161973		41.39	-1.28371	-1.56772	-1.4805	-1.33556
		41.59	0.00591145	0.0064285	0.00594301	0.0181619		41.59	-1.2856	-1.56743	-1.47643	-1.3336
		41.8	0.00768126	0.0104856	0.0023832	0.017264		41.8	-1.28383	-1.56337	-1.47999	-1.3345
		41.99	0.00989313	0.00403038	-0.00243494	0.0169749		41.99	-1.28162	-1.56983	-1.48481	-1.33479
		42.19	0.00806861	0.00471106	-0.00012447	0.0171039		42.19	-1.28345	-1.56915	-1.4825	-1.33466
		42.4	0.00722145	0.00652533	0.00244727	0.0158056		42.4	-1.28429	-1.56733	-1.47993	-1.33595
		42.59	0.00711934	0.00368239	0.00318559	0.0153879		42.59	-1.2844	-1.57018	-1.47919	-1.33637
		42.79	0.00688104	0.00453973	0.00368584	0.0145879		42.79	-1.28463	-1.56932	-1.47869	-1.33717
		42.99	0.00511781	0.00229083	0.00194743	0.0155154		42.99	-1.2864	-1.57157	-1.48043	-1.33624
		43.19	0.010174	0.00738342	0.00571884	0.0127524		43.19	-1.28134	-1.56648	-1.47666	-1.33901
		43.4	0.0119329	0.00622595	0.0017023	0.0166245		43.4	-1.27958	-1.56763	-1.48067	-1.33514
		43.59	0.0091739	0.00317833	-0.00052321	0.0181955		43.59	-1.28234	-1.57068	-1.4829	-1.33356
		43.79	0.00730944	0.00560503	0.00343111	0.0162578		43.79	-1.28421	-1.56825	-1.47895	-1.3355
		43.99	0.00580916	0.00346974	0.00336094	0.0130811		43.99	-1.28571	-1.57039	-1.47902	-1.33868
		44.19	0.0077387	0.00829538	-0.00335415	0.0181487		44.19	-1.28378	-1.56556	-1.48573	-1.33361
		44.4	0.0031122	0.0107031	0.00451816	0.0160004		44.4	-1.2884	-1.56316	-1.47786	-1.33576
		44.59	0.0111579	0.00529205	0.00198441	0.0184549		44.59	-1.28036	-1.56857	-1.48039	-1.3333
		44.79	0.00495283	0.0075512	0.0015928	0.0164773		44.79	-1.28656	-1.56631	-1.48078	-1.33528
		44.99	0.00701519	0.00250407	-0.00252055	0.015277		44.99	-1.2845	-1.57135	-1.4849	-1.33648
		45.19	0.00916919	0.00467929	0.00247119	0.0173152		45.19	-1.28235	-1.56918	-1.47991	-1.33444
		45.39	0.00688726	0.00462554	0.00298801	0.0210217		45.39	-1.28463	-1.56923	-1.47939	-1.33074
		45.59	0.0052169	0.0103216	0.00370915	0.0204546		45.59	-1.2863	-1.56354	-1.47867	-1.33131
		45.79	0.0106643	0.00563752	0.00302984	0.0171242		45.79	-1.28085	-1.56822	-1.47935	-1.33464
		45.99	0.00632342	0.0113633	-0.0023124	0.014805		45.99	-1.28519	-1.5625	-1.48469	-1.33695
		46.19	0.00753053	0.00303213	0.00731351	0.0171726		46.19	-1.28398	-1.57083	-1.47506	-1.33459
		46.4	0.00647328	0.00645741	-0.00100445	0.0183395		46.4	-1.28504	-1.5674	-1.48338	-1.33342
		46.59	0.00354041	0.00430136	-0.00183591	0.0218977		46.59	-1.28797	-1.56956	-1.48421	-1.32986
		46.79	0.00893444	0.00347581	0.00031639	0.017756		46.79	-1.28258	-1.57038	-1.48206	-1.334
		46.99	0.00457182	0.00663898	0.00537934	0.0212076		46.99	-1.28694	-1.56722	-1.477	-1.33055
		47.19	0.00507675	0.0045436	0.00273937	0.0160192		47.19	-1.28644	-1.56932	-1.47964	-1.33574
		47.4	0.00975618	0.00271631	-0.00153269	0.0170992		47.4	-1.28176	-1.57114	-1.48391	-1.33466
		47.59	0.00401273	0.00409501	0.00044917	0.0194312		47.59	-1.2875	-1.56976	-1.48193	-1.33233
		47.79	0.00580291	0.00742961	0.00255166	0.0153941		47.79	-1.28571	-1.56643	-1.47982	-1.33637
		47.99	0.0081382	0.00533988	0.00032973	0.0192374		47.99	-1.28338	-1.56852	-1.48205	-1.33252
		48.19	0.0063503	0.00502636	0.00491062	0.0178727		48.19	-1.28516	-1.56883	-1.47747	-1.33389
		48.4	0.00733178	0.00540798	-0.00398428	0.0199376		48.4	-1.28418	-1.56845	-1.48636	-1.33182
		48.59	0.00853575	0.00403201	-0.00030013	0.0214875		48.59	-1.28298	-1.56983	-1.48268	-1.33027
		48.79	0.00407824	0.00222969	0.00154077	0.01984		48.79	-1.28744	-1.57163	-1.48084	-1.33192
		48.99	0.00739311	0.00764012	0.00138025	0.0182667		48.99	-1.28412	-1.56622	-1.481	-1.33349
		49.19	0.00612188	0.0056429	0.00037389	0.0171899		49.19	-1.28539	-1.56822	-1.482	-1.33457
		49.4	0.0070701	0.00527058	0.00225496	0.019526		49.4	-1.28445	-1.56859	-1.48012	-1.33223
		49.59	0.00513477	0.00444376	0.00418261	0.0185049		49.59	-1.28638	-1.56941	-1.47819	-1.33326
		49.79	0.00698585	0.00224367	-0.00160013	0.0187621		49.79	-1.28453	-1.57161	-1.48398	-1.333
		49.99	0.0103809	0.00419557	0.00500742	0.0187316		49.99	-1.28113	-1.56966	-1.47737	-1.33303
		50.19	0.0098469	0.00580621	0.00096801	0.0168669		50.19	-1.28167	-1.56805	-1.48141	-1.33489
		50.39	0.00589413	0.00562609	0.0026504	0.0176979		50.39	-1.28562	-1.56823	-1.47973	-1.33406
		50.59	0.00626831	0.00325461	0.00480523	0.0195869		50.59	-1.28525	-1.5706	-1.47757	-1.33217
		50.79	0.00807077	0.00305382	-0.00235585	0.0190518		50.79	-1.28344	-1.5708	-1.48473	-1.33271
		50.99	0.00987623	0.00768573	0.00034532	0.0202221		50.99	-1.28164	-1.56617	-1.48203	-1.33154
		51.19	0.00577207	0.00509655	0.00425195	0.0216367		51.19	-1.28574	-1.56876	-1.47812	-1.33012
		51.4	0.00742682	0.00297775	-0.00073597	0.0213351		51.4	-1.28409	-1.57088	-1.48311	-1.33042
		51.59	0.00542799	0.004598	0.0008187	0.0172942		51.59	-1.28609	-1.56926	-1.48156	-1.33447
		51.79	0.00873697	0.00865237	0.00218453	0.0208779		51.79	-1.28278	-1.56521	-1.48019	-1.33088
		51.99	0.00640178	0.00511193	0.00014605	0.0213918		51.99	-1.28511	-1.56875	-1.48223	-1.33037
		52.19	0.00899702	0.0048452	0.00328237	0.0187611		52.19	-1.28252	-1.56901	-1.47909	-1.333
		52.4	0.00558543	0.00459842	0.00446678	0.0226015		52.4	-1.28593	-1.56926	-1.47791	-1.32916
		52.59	0.0089508	0.00529311	-0.0003019	0.0186633		52.59	-1.28256	-1.56857	-1.48268	-1.3331
		52.79	0.00597549	0.0044202	-0.0005217	0.0227797		52.79	-1.28554	-1.56944	-1.4829	-1.32898
		52.99	0.00548114	0.00603367	-5.187e-05	0.019336		52.99	-1.28603	-1.56782	-1.48243	-1.33242
		53.19	0.00748948	0.00480212	0.00077012	0.0174515		53.19	-1.28403	-1.56906	-1.48161	-1.33431
		53.4	0.00989563	0.00522857	0.00034996	0.0214725		53.4	-1.28162	-1.56863	-1.48203	-1.33029
		53.59	0.00748418	0.00498653	0.00442332	0.0180231		53.59	-1.28403	-1.56887	-1.47795	-1.33374
		53.79	0.00800002	0.00049954	0.00239452	0.0177331		53.79	-1.28352	-1.57336	-1.47998	-1.33403
		53.99	0.00476294	0.0073457	0.0012392	0.0174956		53.99	-1.28675	-1.56651	-1.48114	-1.33426
		54.19	0.00493785	0.00382133	0.00335793	0.0196842		54.19	-1.28658	-1.57004	-1.47902	-1.33208
		54.39	0.00996671	0.003386	-0.00247341	0.0214779		54.39	-1.28155	-1.57047	-1.48485	-1.33028
		54.59	0.00924601	0.0052103	0.00081739	0.0190086		54.59	-1.28227	-1.56865	-1.48156	-1.33275
		54.79	0.0120941	0.00639128	0.00334795	0.0192108		54.79	-1.27942	-1.56747	-1.47903	-1.33255
		54.99	0.00708682	0.00343979	0.00298147	0.0226152		54.99	-1.28443	-1.57042	-1.47939	-1.32914
		55.19	0.00842653	0.00251493	-0.00656675	0.0168789		55.19	-1.28309	-1.57134	-1.48894	-1.33488
		55.39	0.00733248	0.00356192	-0.00123184	0.0232186		55.39	-1.28418	-1.5703	-1.48361	-1.32854
		55.59	0.0110226	0.00239332	0.0008469	0.019809		55.59	-1.28049	-1.57147	-1.48153	-1.33195
		55.79	0.010244	0.00592737	0.00256577	0.0237463		55.79	-1.28127	-1.56793	-1.47981	-1.32801
		55.99	0.00901604	0.00337509	-0.00326755	0.0193932		55.99	-1.2825	-1.57048	-1.48564	-1.33237
		56.19	0.00956904	0.00544935	-0.00105863	0.0209107		56.19	-1.28195	-1.56841	-1.48344	-1.33085
		56.39	0.00857776	0.00628409	0.00096796	0.0210683		56.39	-1.28294	-1.56757	-1.48141	-1.33069
		56.59	0.00507236	0.00277971	-0.00144743	0.0195917		56.59	-1.28644	-1.57108	-1.48382	-1.33217
		56.79	0.00745525	0.00204618	0.00407795	0.0209812		56.79	-1.28406	-1.57181	-1.4783	-1.33078
		56.99	0.00930362	0.00211519	0.00135647	0.0189197		56.99	-1.28221	-1.57174	-1.48102	-1.33284
		57.19	0.00864149	0.00438993	0.00175285	0.0209054		57.19	-1.28287	-1.56947	-1.48062	-1.33085
		57.4	0.00917294	0.00324509	-1.494e-05	0.0204056		57.4	-1.28234	-1.57061	-1.48239	-1.33135
		57.59	0.010646	0.00566668	0.00023059	0.021297		57.59	-1.28087	-1.56819	-1.48215	-1.33046
		57.79	0.00757737	0.00321298	0.00568486	0.0189532		57.79	-1.28394	-1.57065	-1.47669	-1.33281
		57.99	0.00477361	0.00225804	0.00062729	0.0190602		57.99	-1.28674	-1.5716	-1.48175	-1.3327
		58.19	0.00767733	0.00630828	-0.00125305	0.017011		58.19	-1.28384	-1.56755	-1.48363	-1.33475
		58.4	0.00676748	0.00544651	-0.00343968	0.0240045		58.4	-1.28475	-1.56841	-1.48582	-1.32776
		58.59	0.00723164	0.00499206	5.871e-05	0.0185177		58.59	-1.28428	-1.56887	-1.48232	-1.33324
		58.79	0.0095394	0.00082292	-0.00044444	0.0248841		58.79	-1.28198	-1.57304	-1.48282	-1.32688
		58.99	0.00913307	0.00447729	0.00126875	0.0219718		58.99	-1.28238	-1.56938	-1.48111	-1.32979
		59.19	0.00735825	0.00304731	0.00294938	0.0175858		59.19	-1.28416	-1.57081	-1.47943	-1.33417
		59.39	0.00912536	0.00622326	0.0015848	0.0216334		59.39	-1.28239	-1.56764	-1.48079	-1.33013
		59.59	0.00664257	0.0065279	-0.0009354	0.0241725		59.59	-1.28487	-1.56733	-1.48331	-1.32759
		59.79	0.0108529	0.00544561	0.00434309	0.0213869		59.79	-1.28066	-1.56841	-1.47803	-1.33037
		59.99	0.00583204	0.00548062	-0.00368735	0.0184588		59.99	-1.28568	-1.56838	-1.48606	-1.3333
		60.19	0.00981283	0.00179101	0.00321386	0.0212652		60.19	-1.2817	-1.57207	-1.47916	-1.33049
		60.39	0.00523697	0.00189318	0.0044417	0.0187428		60.39	-1.28628	-1.57197	-1.47793	-1.33302
		60.59	0.00623267	0.00292221	0.00036096	0.0216226		60.59	-1.28528	-1.57094	-1.48202	-1.33014
		60.79	0.00552072	0.00346431	0.00531645	0.021558		60.79	-1.28599	-1.57039	-1.47706	-1.3302
		60.99	0.00726494	0.00367408	0.0028743	0.0239046		60.99	-1.28425	-1.57018	-1.4795	-1.32786
		61.19	0.00782642	0.00273702	8.864e-05	0.0227278		61.19	-1.28369	-1.57112	-1.48229	-1.32903
		61.39	0.00580992	-0.00092768	-0.0002445	0.0223804		61.39	-1.28571	-1.57479	-1.48262	-1.32938
		61.59	0.00861564	0.00607087	0.00072648	0.0205594		61.59	-1.2829	-1.56779	-1.48165	-1.3312
		61.79	0.0104583	-0.00020308	0.00436325	0.0195129		61.79	-1.28106	-1.57406	-1.47801	-1.33225
		61.99	0.00579981	-0.00186076	0.00224281	0.0228096		61.99	-1.28572	-1.57572	-1.48013	-1.32895
		62.19	0.00607581	0.00041705	-0.0012805	0.0219035		62.19	-1.28544	-1.57344	-1.48366	-1.32986
		62.39	0.0108209	0.00507339	-0.00175517	0.0215075		62.39	-1.28069	-1.56879	-1.48413	-1.33025
		62.59	0.0077936	0.00868973	-0.00031871	0.0249194		62.59	-1.28372	-1.56517	-1.4827	-1.32684
		62.79	0.00423114	0.00524442	-0.00077313	0.0186695		62.79	-1.28728	-1.56861	-1.48315	-1.33309
		62.99	0.00505085	0.0026085	-0.00334458	0.0180708		62.99	-1.28646	-1.57125	-1.48572	-1.33369
		63.19	0.0036015	0.00142884	-0.00041019	0.0200739		63.19	-1.28791	-1.57243	-1.48279	-1.33169
		63.39	0.00799262	0.00341384	0.00191585	0.0196566		63.39	-1.28352	-1.57044	-1.48046	-1.3321
		63.59	0.00704023	0.00174397	0.00200098	0.0204757		63.59	-1.28447	-1.57211	-1.48038	-1.33128
		63.79	0.00814954	-1.706e-05	-0.00298292	0.0208482		63.79	-1.28337	-1.57388	-1.48536	-1.33091
		63.99	0.00936561	0.00295753	-0.00342142	0.0223183		63.99	-1.28215	-1.5709	-1.4858	-1.32944
		64.19	0.00892592	0.00136143	0.00172809	0.0228758		64.19	-1.28259	-1.5725	-1.48065	-1.32888
		64.4	0.00916003	0.00094479	0.00272398	0.022302		64.4	-1.28236	-1.57291	-1.47965	-1.32946
		64.6	0.0126086	0.00147396	0.00066875	0.0226303		64.6	-1.27891	-1.57238	-1.48171	-1.32913
		64.8	0.00571608	0.00115342	-0.00150025	0.0229216		64.8	-1.2858	-1.57271	-1.48388	-1.32884
		65	0.00494331	0.00521264	-0.00288777	0.0220074		65	-1.28657	-1.56865	-1.48526	-1.32975
		65.19	0.00645699	0.0030485	0.00352591	0.0222256		65.19	-1.28506	-1.57081	-1.47885	-1.32953
		65.4	0.0101299	0.00420671	0.00440726	0.0212501		65.4	-1.28139	-1.56965	-1.47797	-1.33051
		65.59	0.00578803	0.0010224	-0.00021967	0.0206017		65.59	-1.28573	-1.57284	-1.4826	-1.33116
		65.8	0.00588551	-0.00030949	-0.00205553	0.0234626		65.8	-1.28563	-1.57417	-1.48443	-1.3283
		66	0.00821308	-0.00095537	0.00173841	0.0221943		66	-1.2833	-1.57481	-1.48064	-1.32957
		66.19	0.0111209	0.00077331	-0.00039431	0.0222835		66.19	-1.28039	-1.57309	-1.48277	-1.32948
		66.4	0.00734046	-0.00205763	0.00120892	0.018754		66.4	-1.28417	-1.57592	-1.48117	-1.33301
		66.59	0.00743745	0.00334582	-0.00025251	0.0230988		66.59	-1.28408	-1.57051	-1.48263	-1.32866
		66.8	0.0117772	-6.042e-05	-0.0006043	0.0207644		66.8	-1.27974	-1.57392	-1.48298	-1.331
		67	0.00852063	3.313e-05	0.00312314	0.0209333		67	-1.28299	-1.57383	-1.47925	-1.33083
		67.19	0.00724388	-0.00161778	0.00073458	0.0209472		67.19	-1.28427	-1.57548	-1.48164	-1.33081
		67.4	0.0083116	0.00055134	-0.00287731	0.0211134		67.4	-1.2832	-1.57331	-1.48525	-1.33065
		67.6	0.00697456	0.00013795	-0.00036987	0.0186198		67.6	-1.28454	-1.57372	-1.48275	-1.33314
		67.8	0.00813096	0.00043276	-0.00054262	0.0231888		67.8	-1.28338	-1.57343	-1.48292	-1.32857
		68	0.00936516	-0.00486628	0.00148608	0.0212447		68	-1.28215	-1.57872	-1.48089	-1.33052
		68.19	0.00933893	0.00168386	-0.000578	0.02324		68.19	-1.28218	-1.57217	-1.48295	-1.32852
		68.4	0.00638316	0.00153715	-0.00102924	0.0222891		68.4	-1.28513	-1.57232	-1.48341	-1.32947
		68.6	0.00340615	0.00182444	-0.00366823	0.0243399		68.6	-1.28811	-1.57203	-1.48604	-1.32742
		68.8	0.00813697	-0.00255469	-0.00062673	0.0221678		68.8	-1.28338	-1.57641	-1.483	-1.32959
		68.99	0.00940316	0.00220966	0.00190782	0.0211384		68.99	-1.28211	-1.57165	-1.48047	-1.33062
		69.19	0.00577681	-0.00061672	-0.00016404	0.0206619		69.19	-1.28574	-1.57448	-1.48254	-1.3311
		69.4	0.0113186	-0.00029631	-0.00353288	0.0229492		69.4	-1.2802	-1.57415	-1.48591	-1.32881
		69.6	0.00696733	-0.00482991	0.00175523	0.0265762		69.6	-1.28455	-1.57869	-1.48062	-1.32518
		69.79	0.00682719	0.00260823	0.00046627	0.0216428		69.79	-1.28469	-1.57125	-1.48191	-1.33012
		70	0.00581164	0.00160133	0.00252783	0.0226951		70	-1.2857	-1.57226	-1.47985	-1.32906
		70.19	0.00608609	-0.00182947	0.00319631	0.0256414		70.19	-1.28543	-1.57569	-1.47918	-1.32612
		70.4	0.00771964	-0.00025301	0.00111844	0.0255655		70.4	-1.2838	-1.57411	-1.48126	-1.32619
		70.59	0.00772296	0.00260937	0.0038513	0.0230204		70.59	-1.28379	-1.57125	-1.47853	-1.32874
		70.8	0.00633584	-0.0003008	0.00080042	0.0218376		70.8	-1.28518	-1.57416	-1.48158	-1.32992
		71	0.00362416	0.00364499	0.00221698	0.0266646		71	-1.28789	-1.57021	-1.48016	-1.3251
		71.19	0.00732086	0.00245193	8.666e-05	0.0241408		71.19	-1.28419	-1.57141	-1.48229	-1.32762
		71.4	0.00686662	-0.00197014	-0.00120085	0.0238367		71.4	-1.28465	-1.57583	-1.48358	-1.32792
		71.59	0.0059592	-0.00048097	-0.00095797	0.0232357		71.59	-1.28556	-1.57434	-1.48333	-1.32852
		71.8	0.00828505	-0.00500843	-0.00362636	0.0234611		71.8	-1.28323	-1.57887	-1.486	-1.3283
		72	0.00683069	-0.00485764	-0.00048105	0.0241342		72	-1.28468	-1.57872	-1.48286	-1.32763
		72.19	0.00811123	0.00210087	-0.00090629	0.0272037		72.19	-1.2834	-1.57176	-1.48328	-1.32456
		72.39	0.010295	0.00105508	-0.00185441	0.0236477		72.39	-1.28122	-1.5728	-1.48423	-1.32811
		72.6	0.00754774	0.00152906	-0.00208507	0.0242464		72.6	-1.28397	-1.57233	-1.48446	-1.32751
		72.8	0.00349734	0.0002749	0.00391946	0.0270475		72.8	-1.28802	-1.57358	-1.47846	-1.32471
		72.99	0.00663551	0.00161608	-0.0028766	0.022611		72.99	-1.28488	-1.57224	-1.48525	-1.32915
		73.19	0.00542704	-3.188e-05	-0.00170777	0.0221289		73.19	-1.28609	-1.57389	-1.48408	-1.32963
		73.4	0.0101394	0.00133441	0.0001867	0.0222882		73.4	-1.28138	-1.57252	-1.48219	-1.32947
		73.6	0.00454783	-0.00287632	-0.00285552	0.0235338		73.6	-1.28697	-1.57673	-1.48523	-1.32823
		73.79	0.00768917	0.00040306	-0.00445459	0.020776		73.79	-1.28383	-1.57346	-1.48683	-1.33098
		73.99	0.00620143	0.00042883	-0.0036856	0.0240207		73.99	-1.28531	-1.57343	-1.48606	-1.32774
		74.19	0.00795932	-0.00303412	-0.00030631	0.0283109		74.19	-1.28356	-1.57689	-1.48268	-1.32345
		74.4	0.00747416	-0.00428855	-0.00105092	0.0239297		74.4	-1.28404	-1.57815	-1.48343	-1.32783
		74.6	0.00941835	-0.00441907	0.0040612	0.0229309		74.6	-1.2821	-1.57828	-1.47832	-1.32883
		74.79	0.00779958	0.00103903	-0.00178903	0.0255835		74.79	-1.28372	-1.57282	-1.48417	-1.32618
		75	0.00771614	0.0001462	-0.00407223	0.0258098		75	-1.2838	-1.57371	-1.48645	-1.32595
		75.19	0.00643365	0.00014616	-0.00242711	0.0289473		75.19	-1.28508	-1.57371	-1.4848	-1.32281
		75.4	0.00755409	-0.00107967	-0.00134467	0.0233148		75.4	-1.28396	-1.57494	-1.48372	-1.32845
		75.59	0.00571613	0.0006939	0.00121638	0.0234852		75.59	-1.2858	-1.57316	-1.48116	-1.32827
		75.8	0.00387599	0.00057638	0.00068448	0.0256204		75.8	-1.28764	-1.57328	-1.48169	-1.32614
		75.99	0.00843009	-0.00200714	-0.00249571	0.0250542		75.99	-1.28309	-1.57587	-1.48487	-1.32671
		76.19	0.00575758	0.00014645	-0.00104672	0.0281196		76.19	-1.28576	-1.57371	-1.48342	-1.32364
		76.39	0.00465555	-0.00488944	-0.00077353	0.0234713		76.39	-1.28686	-1.57875	-1.48315	-1.32829
		76.59	0.00827344	-0.0039934	-0.00158289	0.0250204		76.59	-1.28324	-1.57785	-1.48396	-1.32674
		76.8	0.00465942	-0.00344616	-0.00177115	0.0262629		76.8	-1.28686	-1.5773	-1.48415	-1.3255
		77	0.00728388	0.00119513	-0.00177843	0.0269804		77	-1.28423	-1.57266	-1.48415	-1.32478
		77.19	0.00688036	0.00276466	-0.00124774	0.025147		77.19	-1.28463	-1.57109	-1.48362	-1.32661
		77.39	0.0074179	-0.00297273	-0.00040463	0.0230025		77.39	-1.2841	-1.57683	-1.48278	-1.32876
		77.6	0.0102609	-0.00305906	0.00080966	0.0239467		77.6	-1.28125	-1.57692	-1.48157	-1.32781
		77.8	0.0115893	-0.00246634	-0.00522285	0.0284915		77.8	-1.27993	-1.57632	-1.4876	-1.32327
		77.99	0.0060275	-0.00215552	-0.00394154	0.0235701		77.99	-1.28549	-1.57601	-1.48632	-1.32819
		78.19	0.0081533	0.00123579	-0.00031364	0.0228099		78.19	-1.28336	-1.57262	-1.48269	-1.32895
		78.4	0.012122	-0.00152403	-0.00321048	0.0263984		78.4	-1.27939	-1.57538	-1.48559	-1.32536
		78.6	0.00642713	-0.00128014	-0.00371633	0.0221665		78.6	-1.28509	-1.57514	-1.48609	-1.32959
		78.79	0.0114576	-0.00390599	-0.00150257	0.024474		78.79	-1.28006	-1.57776	-1.48388	-1.32729
		78.99	0.00708676	-0.0001966	-0.0019005	0.0247131		78.99	-1.28443	-1.57406	-1.48428	-1.32705
		79.19	0.00453416	-0.00141319	-0.00216003	0.0275476		79.19	-1.28698	-1.57527	-1.48454	-1.32421
		79.4	0.00587073	-7.619e-05	-2.616e-05	0.0255467		79.4	-1.28564	-1.57393	-1.4824	-1.32621
		79.6	0.00687488	-0.00060848	-0.00389732	0.0253118		79.6	-1.28464	-1.57447	-1.48627	-1.32645
		79.79	0.00669663	-0.00363624	-0.00072659	0.0263818		79.79	-1.28482	-1.57749	-1.4831	-1.32538
		79.99	0.00679587	0.00013045	0.00079307	0.0249874		79.99	-1.28472	-1.57373	-1.48158	-1.32677
		80.19	0.00979054	-0.00170759	-0.00083213	0.0235947		80.19	-1.28172	-1.57557	-1.48321	-1.32817
		80.4	0.00706755	-0.00268549	0.00100401	0.0249164		80.4	-1.28445	-1.57654	-1.48137	-1.32684
		80.59	0.00795986	0.00131766	0.0005365	0.0274047		80.59	-1.28356	-1.57254	-1.48184	-1.32436
		80.79	0.0110212	-0.00454122	-0.00688964	0.0268465		80.79	-1.28049	-1.5784	-1.48927	-1.32491
		80.99	0.00418941	-0.00093274	-0.001028	0.0238335		80.99	-1.28733	-1.57479	-1.4834	-1.32793
		81.19	0.00832213	-0.00047509	-0.00081502	0.0243057		81.19	-1.28319	-1.57433	-1.48319	-1.32745
		81.39	0.00746819	-0.00337951	0.00148669	0.0235802		81.39	-1.28405	-1.57724	-1.48089	-1.32818
		81.59	0.00478957	0.00151163	-0.00357959	0.0214758		81.59	-1.28673	-1.57235	-1.48596	-1.33028
		81.79	0.0039966	-0.00439118	-0.00506376	0.0268196		81.79	-1.28752	-1.57825	-1.48744	-1.32494
		81.99	0.00590708	-0.00077681	-0.00249802	0.0251325		81.99	-1.28561	-1.57464	-1.48487	-1.32663
		82.19	0.00700641	-0.00405664	0.00347536	0.026203		82.19	-1.28451	-1.57792	-1.4789	-1.32556
		82.39	0.00741431	0.00205238	-0.00373362	0.0228064		82.39	-1.2841	-1.57181	-1.48611	-1.32895
		82.59	0.00434049	0.0048397	-0.00054566	0.0270731		82.59	-1.28717	-1.56902	-1.48292	-1.32469
		82.8	0.00543724	-0.00013258	-0.00257666	0.0272627		82.8	-1.28608	-1.57399	-1.48495	-1.3245
		82.99	0.00366257	-0.00403624	-0.00028171	0.0245044		82.99	-1.28785	-1.57789	-1.48266	-1.32726
		83.19	0.00936213	-0.00447378	-0.00165745	0.0234893		83.19	-1.28215	-1.57833	-1.48403	-1.32827
		83.4	0.00415176	-0.00160873	0.00029277	0.0229517		83.4	-1.28736	-1.57547	-1.48208	-1.32881
		83.59	0.00617665	-0.00230588	-0.0019252	0.0239263		83.59	-1.28534	-1.57616	-1.4843	-1.32783
		83.8	0.00723583	-0.00150849	-0.00022747	0.029246		83.8	-1.28428	-1.57537	-1.4826	-1.32251
		84	0.00348891	-0.00425496	-0.00272064	0.0224869		84	-1.28803	-1.57811	-1.4851	-1.32927
		84.19	0.00662074	-0.00533207	-0.00467133	0.0240481		84.19	-1.28489	-1.57919	-1.48705	-1.32771
		84.4	0.00671963	-0.00597777	-0.00184098	0.0218902		84.4	-1.2848	-1.57984	-1.48422	-1.32987
		84.6	0.00827528	-0.00543489	-0.00493118	0.0246996		84.6	-1.28324	-1.57929	-1.48731	-1.32706
		84.8	0.00699233	-0.00554204	-0.00196334	0.0274694		84.8	-1.28452	-1.5794	-1.48434	-1.32429
		85	0.00564781	0.00193308	-0.00232038	0.0267878		85	-1.28587	-1.57193	-1.4847	-1.32497
		85.19	0.00732888	-0.00419973	-0.00376208	0.0259621		85.19	-1.28419	-1.57806	-1.48614	-1.3258
		85.39	0.00719154	-0.0029134	0.00040995	0.0279592		85.39	-1.28432	-1.57677	-1.48197	-1.3238
		85.6	0.00905851	-0.0071121	-0.0023064	0.0228372		85.6	-1.28246	-1.58097	-1.48468	-1.32892
		85.8	0.0103759	-0.0009283	0.00272808	0.0253363		85.8	-1.28114	-1.57479	-1.47965	-1.32642
		86	0.00694758	-0.00460264	-0.00456575	0.024616		86	-1.28457	-1.57846	-1.48694	-1.32714
		86.19	0.00571376	-0.00359935	-0.00044109	0.0273255		86.19	-1.2858	-1.57746	-1.48282	-1.32443
		86.4	0.00969634	-0.00161223	-0.00606961	0.0283674		86.4	-1.28182	-1.57547	-1.48845	-1.32339
		86.6	0.00291339	-0.00136113	-0.00406746	0.0262285		86.6	-1.2886	-1.57522	-1.48644	-1.32553
		86.8	0.00604447	-0.00130879	-0.00488336	0.0253642		86.8	-1.28547	-1.57517	-1.48726	-1.3264
		87	0.00376152	-0.00035737	-0.00315577	0.0257925		87	-1.28775	-1.57422	-1.48553	-1.32597
		87.19	0.00684598	-0.00491062	0.00087792	0.0259245		87.19	-1.28467	-1.57877	-1.4815	-1.32584
		87.4	0.00761909	-0.00154206	-4.157e-05	0.0236895		87.4	-1.2839	-1.5754	-1.48242	-1.32807
		87.6	0.00494302	-0.00242112	-6.659e-05	0.0266142		87.6	-1.28657	-1.57628	-1.48244	-1.32515
		87.8	0.0058622	-0.00298487	0.00073899	0.0295208		87.8	-1.28565	-1.57684	-1.48164	-1.32224
		88	0.00806574	-0.0034144	-0.00037515	0.0217097		88	-1.28345	-1.57727	-1.48275	-1.33005
		88.19	0.00178533	-0.00539167	-0.00404166	0.022877		88.19	-1.28973	-1.57925	-1.48642	-1.32888
		88.4	0.00790787	-0.00347941	-0.00338815	0.0233347		88.4	-1.28361	-1.57734	-1.48576	-1.32843
		88.59	0.00595846	-0.00171093	-0.00206878	0.0267121		88.59	-1.28556	-1.57557	-1.48445	-1.32505
		88.8	0.00779501	-0.00561455	-0.00231933	0.025239		88.8	-1.28372	-1.57947	-1.4847	-1.32652
		89	0.00838996	-0.00526565	-0.00209243	0.0250627		89	-1.28313	-1.57912	-1.48447	-1.3267
		89.19	0.00657285	-0.00688714	0.00113191	0.0259899		89.19	-1.28494	-1.58075	-1.48124	-1.32577
		89.39	0.00668747	0.0002295	-0.00203364	0.0245803		89.39	-1.28483	-1.57363	-1.48441	-1.32718
		89.6	0.00410526	-0.0069812	0.00262952	0.0249869		89.6	-1.28741	-1.58084	-1.47975	-1.32677
		89.8	0.00442944	-0.00311535	-0.00014448	0.0262712		89.8	-1.28709	-1.57697	-1.48252	-1.32549
		90	0.00548079	-0.00551465	-0.00373984	0.023914		90	-1.28603	-1.57937	-1.48612	-1.32785
		90.19	0.00589902	-0.00801798	-0.00403291	0.0248866		90.19	-1.28562	-1.58188	-1.48641	-1.32687
		90.39	0.00449009	-0.00516522	-0.00448942	0.0288788		90.39	-1.28703	-1.57902	-1.48687	-1.32288
		90.6	0.00720608	-0.00181358	0.00016674	0.0248064		90.6	-1.28431	-1.57567	-1.48221	-1.32695
		90.8	0.00754384	-0.00317122	0.00146209	0.0288599		90.8	-1.28397	-1.57703	-1.48091	-1.3229
		91	0.009175	-0.00860118	-0.0055035	0.0199688		91	-1.28234	-1.58246	-1.48788	-1.33179
		91.19	0.00771538	-0.002997	0.00108329	0.0261085		91.19	-1.2838	-1.57686	-1.48129	-1.32565
		91.4	0.00676516	-0.0082755	-0.00324785	0.0241519		91.4	-1.28475	-1.58213	-1.48562	-1.32761
		91.6	0.0053071	-0.00188438	-0.00237572	0.0258123		91.6	-1.28621	-1.57574	-1.48475	-1.32595
		91.79	0.00441119	-0.00752227	-0.00049085	0.0280692		91.79	-1.2871	-1.58138	-1.48287	-1.32369
		92	0.00290087	-0.00356292	-0.00713507	0.0250617		92	-1.28861	-1.57742	-1.48951	-1.3267
		92.19	0.00405929	-0.00988221	0.00016575	0.0278485		92.19	-1.28746	-1.58374	-1.48221	-1.32391
		92.4	0.00971591	-0.00882373	-0.00356616	0.0273655		92.4	-1.2818	-1.58268	-1.48594	-1.32439
		92.59	0.00654211	-0.00404775	-0.00773978	0.0248795		92.59	-1.28497	-1.57791	-1.49012	-1.32688
		92.79	0.007424	-0.00609957	-0.00191006	0.0262943		92.79	-1.28409	-1.57996	-1.48429	-1.32547
		93	0.00844546	-0.00204193	0.00101102	0.0235632		93	-1.28307	-1.5759	-1.48137	-1.3282
		93.19	0.00637177	-0.00162793	-0.00301917	0.0258717		93.19	-1.28514	-1.57549	-1.4854	-1.32589
		93.4	0.00664131	-0.00761068	-0.00439824	0.0243837		93.4	-1.28487	-1.58147	-1.48677	-1.32738
		93.59	0.00650962	-0.00347727	-0.00446458	0.0255869		93.59	-1.28501	-1.57734	-1.48684	-1.32617
		93.8	0.00944683	-0.00763752	-0.00223456	0.0247408		93.8	-1.28207	-1.5815	-1.48461	-1.32702
		94	0.00351452	-0.00878481	-0.00409979	0.029056		94	-1.288	-1.58264	-1.48648	-1.3227
		94.19	0.00815094	-0.00602176	-0.00460912	0.0225721		94.19	-1.28336	-1.57988	-1.48699	-1.32919
		94.39	0.00894824	-0.00741949	-0.00120278	0.0262423		94.39	-1.28257	-1.58128	-1.48358	-1.32552
		94.6	0.00690396	-0.00583842	-0.00181643	0.025805		94.6	-1.28461	-1.5797	-1.48419	-1.32595
		94.8	-0.00034711	-0.00665448	-0.00134333	0.0276668		94.8	-1.29186	-1.58051	-1.48372	-1.32409
		94.99	0.00190852	-0.00766403	-0.0055829	0.0297013		94.99	-1.28961	-1.58152	-1.48796	-1.32206
		95.19	0.00588391	-0.00784005	-0.00446626	0.0261131		95.19	-1.28563	-1.5817	-1.48684	-1.32565
		95.39	0.00822998	0.00118426	-0.00200266	0.0273012		95.39	-1.28329	-1.57267	-1.48438	-1.32446
		95.6	0.00465862	-0.00643846	-0.00343836	0.0274351		95.6	-1.28686	-1.5803	-1.48581	-1.32432
		95.8	0.00526724	-0.00446274	-0.00490546	0.0279375		95.8	-1.28625	-1.57832	-1.48728	-1.32382
		95.99	0.00742894	-0.00593884	-0.00412962	0.0255898		95.99	-1.28409	-1.5798	-1.48651	-1.32617
		96.19	0.00768115	-0.00887395	-0.00519451	0.0281542		96.19	-1.28383	-1.58273	-1.48757	-1.32361
		96.4	0.00511148	-0.00502858	0.00020879	0.0247033		96.4	-1.2864	-1.57889	-1.48217	-1.32706
		96.6	0.00563174	-0.0116321	-0.0046494	0.0302543		96.6	-1.28588	-1.58549	-1.48703	-1.32151
		96.79	0.00768998	-0.00318084	-0.00141286	0.0268875		96.79	-1.28383	-1.57704	-1.48379	-1.32487
		97	0.00508438	-0.0123308	-0.00180321	0.0251837		97	-1.28643	-1.58619	-1.48418	-1.32658
		97.19	0.00807188	-0.00630851	-0.00286037	0.0276431		97.19	-1.28344	-1.58017	-1.48524	-1.32412
		97.4	0.00907559	-0.00414802	-0.0025436	0.0278574		97.4	-1.28244	-1.57801	-1.48492	-1.3239
		97.59	0.00526518	-0.00400172	-0.00369603	0.0286552		97.59	-1.28625	-1.57786	-1.48607	-1.3231
		97.79	0.00363951	-0.0064748	-0.00278396	0.0295625		97.79	-1.28788	-1.58033	-1.48516	-1.3222
		97.99	0.0104895	-0.00652369	-0.00305171	0.0286302		97.99	-1.28103	-1.58038	-1.48543	-1.32313
		98.19	0.00374241	-0.00834398	-0.00175147	0.0293865		98.19	-1.28777	-1.5822	-1.48413	-1.32237
		98.39	0.00904336	-0.00328744	-0.00207731	0.0261772		98.39	-1.28247	-1.57715	-1.48445	-1.32558
		98.59	0.00917289	-0.0111211	-0.00304246	0.0267361		98.59	-1.28234	-1.58498	-1.48542	-1.32502
		98.8	0.00612252	-0.00319884	-0.00159214	0.0256874		98.8	-1.28539	-1.57706	-1.48397	-1.32607
		98.99	0.00896767	-0.00467533	-0.00189491	0.0278113		98.99	-1.28255	-1.57853	-1.48427	-1.32395
		99.19	0.00712104	-0.00568908	0.00045972	0.0262549		99.19	-1.28439	-1.57955	-1.48192	-1.3255
		99.39	0.006656	-0.0101693	-0.00695139	0.0255555		99.39	-1.28486	-1.58403	-1.48933	-1.3262
		99.59	0.00945274	-0.00752862	-7.381e-05	0.0271365		99.59	-1.28206	-1.58139	-1.48245	-1.32462
		99.79	0.00547148	-0.00779432	-0.00575469	0.0239747		99.79	-1.28604	-1.58165	-1.48813	-1.32779
		99.99	0.00695615	-0.00651672	-0.0042679	0.0301686		99.99	-1.28456	-1.58038	-1.48664	-1.32159
		100.19	0.00486111	-0.00898775	-0.00454578	0.0288677		100.19	-1.28665	-1.58285	-1.48692	-1.32289
		100.39	0.00571521	-0.00908587	-0.00037731	0.0295529		100.39	-1.2858	-1.58294	-1.48275	-1.32221
		100.6	0.00793996	-0.00984891	-0.00436368	0.0292653		100.6	-1.28358	-1.58371	-1.48674	-1.32249
		100.8	0.00877158	-0.0112219	-0.00518897	0.0233189		100.8	-1.28274	-1.58508	-1.48757	-1.32844
		100.99	0.00548973	-0.00733623	-0.00326683	0.0229914		100.99	-1.28603	-1.58119	-1.48564	-1.32877
		101.19	0.0078455	-0.00622953	-0.00345934	0.0290865		101.19	-1.28367	-1.58009	-1.48584	-1.32267
		101.4	0.00468644	-0.00635352	-0.00392986	0.0274336		101.4	-1.28683	-1.58021	-1.48631	-1.32433
		101.6	0.00426833	-0.0119729	-0.00458134	0.0268183		101.6	-1.28725	-1.58583	-1.48696	-1.32494
		101.79	0.00471498	-0.00805408	-0.00713647	0.0247942		101.79	-1.2868	-1.58191	-1.48951	-1.32697
		101.99	0.00486329	-0.00674365	-0.00305862	0.0265539		101.99	-1.28665	-1.5806	-1.48544	-1.32521
		102.19	0.00936893	-0.0125707	-0.00124883	0.0277851		102.19	-1.28215	-1.58643	-1.48363	-1.32397
		102.39	0.00670059	-0.00575841	-0.00187183	0.0294307		102.39	-1.28481	-1.57962	-1.48425	-1.32233
		102.59	0.00579135	-0.0112905	-0.00239598	0.025357		102.59	-1.28572	-1.58515	-1.48477	-1.3264
		102.79	0.00301391	-0.0100975	-0.00470207	0.0283659		102.79	-1.2885	-1.58396	-1.48708	-1.32339
		102.99	0.00487865	-0.00897604	-0.00306281	0.0305304		102.99	-1.28664	-1.58283	-1.48544	-1.32123
		103.19	0.00777298	-0.00848167	-0.00550772	0.0236185		103.19	-1.28374	-1.58234	-1.48788	-1.32814
		103.39	0.00456559	-0.00877612	-0.00094043	0.0262756		103.39	-1.28695	-1.58263	-1.48332	-1.32548
		103.59	0.00894471	-0.00462956	-0.00186064	0.0268637		103.59	-1.28257	-1.57849	-1.48424	-1.3249
		103.79	0.0058165	-0.0084907	-0.00382401	0.0291823		103.79	-1.2857	-1.58235	-1.4862	-1.32258
		103.99	0.00871031	-0.00602732	-0.00466634	0.0296757		103.99	-1.2828	-1.57989	-1.48704	-1.32208
		104.19	0.00635909	-0.0094525	0.00039896	0.0294633		104.19	-1.28516	-1.58331	-1.48198	-1.3223
		104.4	0.00600125	-0.00864679	-0.00459576	0.0276232		104.4	-1.28551	-1.58251	-1.48697	-1.32414
		104.59	0.00793431	-0.0116288	-0.00389978	0.0245713		104.59	-1.28358	-1.58549	-1.48628	-1.32719
		104.8	0.00646317	-0.00641991	-0.00408495	0.0290491		104.8	-1.28505	-1.58028	-1.48646	-1.32271
		105	0.00648077	-0.00506956	-0.00282771	0.025476		105	-1.28503	-1.57893	-1.4852	-1.32628
		105.19	0.00571156	-0.0111483	-0.00208632	0.0276066		105.19	-1.2858	-1.58501	-1.48446	-1.32415
		105.4	0.00467139	-0.0123872	-0.00163068	0.0268036		105.4	-1.28684	-1.58625	-1.48401	-1.32496
		105.6	0.00505805	-0.00935708	-0.00241051	0.0242842		105.6	-1.28646	-1.58322	-1.48479	-1.32748
		105.8	0.00559962	-0.0109247	-0.00289575	0.0277356		105.8	-1.28592	-1.58478	-1.48527	-1.32402
		106	0.00529854	-0.0106204	-0.00418847	0.0307504		106	-1.28622	-1.58448	-1.48656	-1.32101
		106.19	0.00154393	-0.0100214	-0.00467856	0.0264678		106.19	-1.28997	-1.58388	-1.48706	-1.32529
		106.4	0.00878051	-0.0124881	-0.00588472	0.0287465		106.4	-1.28273	-1.58635	-1.48826	-1.32301
		106.6	0.00516648	-0.0120465	-0.00054478	0.029399		106.6	-1.28635	-1.58591	-1.48292	-1.32236
		106.8	0.00044555	-0.0113591	-0.00904751	0.025818		106.8	-1.29107	-1.58522	-1.49142	-1.32594
		107	0.00307419	-0.00991254	-0.0034191	0.0272246		107	-1.28844	-1.58377	-1.4858	-1.32454
		107.19	0.00421107	-0.00950874	-0.00534931	0.0254019		107.19	-1.2873	-1.58337	-1.48773	-1.32636
		107.4	0.00517465	-0.0105803	-0.00365131	0.0272046		107.4	-1.28634	-1.58444	-1.48603	-1.32456
		107.6	0.00861666	-0.0136572	-0.00840767	0.0285153		107.6	-1.2829	-1.58752	-1.49078	-1.32324
		107.8	0.00379225	-0.0155393	-0.00538704	0.0257202		107.8	-1.28772	-1.5894	-1.48776	-1.32604
		108	0.00653703	-0.00973579	-0.00019398	0.0284547		108	-1.28498	-1.58359	-1.48257	-1.32331
		108.19	0.00651927	-0.00984243	-0.00337619	0.0283754		108.19	-1.285	-1.5837	-1.48575	-1.32338
		108.4	0.00659065	-0.00769433	-0.00132841	0.0315668		108.4	-1.28492	-1.58155	-1.4837	-1.32019
		108.6	0.00874362	-0.0141691	-0.00117175	0.0294229		108.6	-1.28277	-1.58803	-1.48355	-1.32234
		108.8	0.00300562	-0.010064	-0.00492692	0.0280181		108.8	-1.28851	-1.58392	-1.4873	-1.32374
		108.99	0.00314328	-0.0103555	-0.00551435	0.0291045		108.99	-1.28837	-1.58421	-1.48789	-1.32266
		109.19	0.00730909	-0.0174729	-0.00281067	0.0297949		109.19	-1.28421	-1.59133	-1.48519	-1.32197
		109.4	0.00744405	-0.0150289	-0.00517418	0.0301842		109.4	-1.28407	-1.58889	-1.48755	-1.32158
		109.6	0.00220333	-0.00861741	-0.00142668	0.0302913		109.6	-1.28931	-1.58248	-1.4838	-1.32147
		109.8	0.00528474	-0.0118713	-0.00150934	0.0319544		109.8	-1.28623	-1.58573	-1.48389	-1.31981
		110	0.00328705	-0.0115327	-0.00294122	0.0294692		110	-1.28823	-1.58539	-1.48532	-1.32229
		110.19	0.00641153	-0.00971302	-0.00431181	0.0289345		110.19	-1.2851	-1.58357	-1.48669	-1.32283
		110.4	0.0057473	-0.012369	7.483e-05	0.0286522		110.4	-1.28577	-1.58623	-1.4823	-1.32311
		110.59	0.00544139	-0.0129564	-0.00483768	0.0263623		110.59	-1.28607	-1.58682	-1.48721	-1.3254
		110.8	0.00682462	-0.0153217	-0.00600913	0.0319535		110.8	-1.28469	-1.58918	-1.48839	-1.31981
		111	0.00707009	-0.00992927	-0.00704016	0.0272325		111	-1.28445	-1.58379	-1.48942	-1.32453
		111.19	0.00537515	-0.0124633	-0.00261517	0.0322995		111.19	-1.28614	-1.58632	-1.48499	-1.31946
		111.39	0.00358755	-0.0135437	-0.00284275	0.0291781		111.39	-1.28793	-1.5874	-1.48522	-1.32258
		111.6	0.00555272	-0.0130019	-0.00073448	0.0290838		111.6	-1.28596	-1.58686	-1.48311	-1.32268
		111.8	0.00384848	-0.00826844	-0.00599636	0.0281564		111.8	-1.28767	-1.58213	-1.48837	-1.3236
		111.99	0.00725927	-0.0123349	-0.00589945	0.029331		111.99	-1.28426	-1.58619	-1.48828	-1.32243
		112.19	0.00634157	-0.0128176	-0.00327476	0.0266507		112.19	-1.28517	-1.58668	-1.48565	-1.32511
		112.4	0.00391081	-0.0132326	-0.00568638	0.0280678		112.4	-1.2876	-1.58709	-1.48806	-1.32369
		112.6	0.00144549	-0.0145004	-0.00422331	0.0291972		112.6	-1.29007	-1.58836	-1.4866	-1.32256
		112.79	0.00511939	-0.0140579	-0.00023085	0.0260565		112.79	-1.2864	-1.58792	-1.48261	-1.3257
		113	0.00793013	-0.0123179	-0.00279651	0.0269108		113	-1.28358	-1.58618	-1.48517	-1.32485
		113.19	0.00745988	-0.0117957	-0.00496711	0.0271958		113.19	-1.28406	-1.58565	-1.48734	-1.32456
		113.4	0.00315183	-0.0100299	-0.00543393	0.0287819		113.4	-1.28836	-1.58389	-1.48781	-1.32298
		113.6	0.0037849	-0.0134949	-0.00437065	0.0299187		113.6	-1.28773	-1.58735	-1.48675	-1.32184
		113.79	0.00445085	-0.00815293	-0.00147322	0.0317882		113.79	-1.28706	-1.58201	-1.48385	-1.31997
		114	0.00591512	-0.0117561	-0.001369	0.0300701		114	-1.2856	-1.58561	-1.48375	-1.32169
		114.19	0.0067611	-0.0136823	-0.00216111	0.0296894		114.19	-1.28475	-1.58754	-1.48454	-1.32207
		114.4	0.00260212	-0.0130352	-0.00506775	0.0262341		114.4	-1.28891	-1.58689	-1.48744	-1.32553
		114.6	0.0071273	-0.0114326	-0.00763463	0.0267905		114.6	-1.28439	-1.58529	-1.49001	-1.32497
		114.79	0.00700336	-0.00834648	-0.00273727	0.0277184		114.79	-1.28451	-1.58221	-1.48511	-1.32404
		114.99	0.00327514	-0.0133812	-0.00669107	0.0281053		114.99	-1.28824	-1.58724	-1.48907	-1.32365
		115.19	0.0064517	-0.0149917	-0.00469795	0.0292322		115.19	-1.28506	-1.58885	-1.48707	-1.32253
		115.4	0.00286971	-0.0139297	-0.00295123	0.0289976		115.4	-1.28865	-1.58779	-1.48533	-1.32276
		115.59	0.00692238	-0.0123255	-0.00234304	0.0290631		115.59	-1.28459	-1.58618	-1.48472	-1.3227
		115.8	0.00580708	-0.0132795	-0.00397649	0.0291519		115.8	-1.28571	-1.58714	-1.48635	-1.32261
		115.99	0.00513212	-0.0130949	-0.0032606	0.0290895		115.99	-1.28638	-1.58695	-1.48564	-1.32267
		116.19	0.00649885	-0.0135201	-0.00205991	0.0305772		116.19	-1.28502	-1.58738	-1.48444	-1.32118
		116.39	0.00856962	-0.0142014	-0.00363094	0.0280713		116.39	-1.28295	-1.58806	-1.48601	-1.32369
		116.59	0.00577559	-0.0132087	-0.00667625	0.0303325		116.59	-1.28574	-1.58707	-1.48905	-1.32143
		116.79	0.00633706	-0.0125628	-0.00401963	0.027484		116.79	-1.28518	-1.58642	-1.4864	-1.32428
		117	0.00485589	-0.0124951	-0.00563529	0.028459		117	-1.28666	-1.58635	-1.48801	-1.3233
		117.19	0.00399721	-0.0128815	-0.00046113	0.0281103		117.19	-1.28752	-1.58674	-1.48284	-1.32365
		117.39	0.0060028	-0.0144387	-0.00463152	0.0324184		117.39	-1.28551	-1.5883	-1.48701	-1.31934
		117.59	0.00312249	-0.0131256	-0.00804603	0.0277897		117.59	-1.28839	-1.58698	-1.49042	-1.32397
		117.8	0.00454353	-0.0148984	-0.00517577	0.0265341		117.8	-1.28697	-1.58876	-1.48755	-1.32523
		118	0.0035353	-0.0140583	-0.00879936	0.0292119		118	-1.28798	-1.58792	-1.49118	-1.32255
		118.19	0.00381468	-0.0149684	-0.00711626	0.0277385		118.19	-1.2877	-1.58883	-1.48949	-1.32402
		118.4	0.00411194	-0.0124297	-0.00661579	0.0313076		118.4	-1.2874	-1.58629	-1.48899	-1.32045
		118.59	0.00596801	-0.0142682	-0.00611401	0.0307439		118.59	-1.28555	-1.58813	-1.48849	-1.32102
		118.79	0.00417722	-0.0141296	-0.00757157	0.0289649		118.79	-1.28734	-1.58799	-1.48995	-1.3228
		118.99	0.00727467	-0.0152108	-0.00613988	0.0282371		118.99	-1.28424	-1.58907	-1.48852	-1.32352
		119.19	0.00195131	-0.0147666	-0.00563829	0.0320706		119.19	-1.28956	-1.58863	-1.48801	-1.31969
		119.4	0.00766931	-0.0162329	-0.00464346	0.0288718		119.4	-1.28385	-1.59009	-1.48702	-1.32289
		119.6	0.00478273	-0.0163958	-0.0051566	0.0293208		119.6	-1.28673	-1.59025	-1.48753	-1.32244
		119.79	0.00501748	-0.0110072	-0.00528041	0.0270838		119.79	-1.2865	-1.58487	-1.48766	-1.32468
		119.99	0.00570835	-0.0114979	-0.00160586	0.0317212		119.99	-1.28581	-1.58536	-1.48398	-1.32004
		120.19	0.00405266	-0.0141982	-0.00548234	0.0270077		120.19	-1.28746	-1.58806	-1.48786	-1.32475
		120.39	0.00848336	-0.0139301	-0.00562792	0.026861		120.39	-1.28303	-1.58779	-1.488	-1.3249
		120.59	0.00255894	-0.0138853	-0.00529324	0.0273011		120.59	-1.28896	-1.58774	-1.48767	-1.32446
		120.79	0.0044329	-0.0149793	-0.00481433	0.03054		120.79	-1.28708	-1.58884	-1.48719	-1.32122
		120.99	0.0059955	-0.0108506	-0.00520316	0.0307755		120.99	-1.28552	-1.58471	-1.48758	-1.32098
		121.19	0.00282545	-0.0149892	-0.00184667	0.029555		121.19	-1.28869	-1.58885	-1.48422	-1.3222
		121.39	0.00529686	-0.0174109	-0.00429724	0.0318627		121.39	-1.28622	-1.59127	-1.48667	-1.3199
		121.6	0.0060548	-0.0121319	-0.00319257	0.0284365		121.6	-1.28546	-1.58599	-1.48557	-1.32332
		121.79	0.00682316	-0.0157106	-0.00322333	0.0309393		121.79	-1.28469	-1.58957	-1.4856	-1.32082
		121.99	0.0100278	-0.0162185	-0.0066792	0.0314093		121.99	-1.28149	-1.59008	-1.48906	-1.32035
		122.19	0.00783037	-0.019108	-0.00624391	0.0317566		122.19	-1.28368	-1.59297	-1.48862	-1.32
		122.39	0.00498009	-0.0172084	-0.00663437	0.031474		122.39	-1.28654	-1.59107	-1.48901	-1.32029
		122.6	0.00939979	-0.0109609	-0.0076342	0.0285365		122.6	-1.28212	-1.58482	-1.49001	-1.32322
		122.79	-0.00138893	-0.0143507	-0.00694139	0.0270189		122.79	-1.2929	-1.58821	-1.48932	-1.32474
		122.99	0.00346513	-0.0180591	-0.00684839	0.0278718		122.99	-1.28805	-1.59192	-1.48922	-1.32389
		123.19	0.00532778	-0.0181344	-0.00605581	0.0286946		123.19	-1.28619	-1.59199	-1.48843	-1.32307
		123.39	0.00122852	-0.0138144	-0.00758404	0.0318445		123.39	-1.29029	-1.58767	-1.48996	-1.31992
		123.59	0.00027128	-0.0134085	-0.00567787	0.0319525		123.59	-1.29124	-1.58727	-1.48805	-1.31981
		123.79	0.00107352	-0.0143665	-0.00326757	0.0336478		123.79	-1.29044	-1.58823	-1.48564	-1.31811
		124.01	0.00461116	-0.0142295	-0.00378657	0.0294782		124.01	-1.2869	-1.58809	-1.48616	-1.32228
		124.19	0.00443557	-0.0165687	-0.00739321	0.0285873		124.19	-1.28708	-1.59043	-1.48977	-1.32317
		124.39	0.00791365	-0.0187414	-0.00439325	0.0319027		124.39	-1.2836	-1.5926	-1.48677	-1.31986
		124.6	0.00282587	-0.0132885	-0.00985185	0.0311077		124.6	-1.28869	-1.58715	-1.49223	-1.32065
		124.79	0.00317095	-0.0125373	-0.00830466	0.0315129		124.79	-1.28834	-1.5864	-1.49068	-1.32025
		124.99	0.00394946	-0.0129239	-0.00663203	0.031817		124.99	-1.28757	-1.58678	-1.48901	-1.31994
		125.19	0.0080189	-0.0170812	-0.00707552	0.0289145		125.19	-1.2835	-1.59094	-1.48945	-1.32285
		125.4	0.0032171	-0.0151305	-0.00668147	0.0296306		125.4	-1.2883	-1.58899	-1.48906	-1.32213
		125.6	0.00655958	-0.0177488	-0.00418273	0.0322768		125.6	-1.28496	-1.59161	-1.48656	-1.31948
		125.8	0.00791233	-0.0173778	-0.00302584	0.0318991		125.8	-1.2836	-1.59124	-1.4854	-1.31986
		126	0.00331613	-0.0155373	-0.0017141	0.0300936		126	-1.2882	-1.5894	-1.48409	-1.32167
		126.19	0.0007569	-0.0177889	-0.00275367	0.0276805		126.19	-1.29076	-1.59165	-1.48513	-1.32408
		126.41	0.00233633	-0.0187653	-0.00123699	0.0312567		126.41	-1.28918	-1.59262	-1.48361	-1.3205
		126.6	0.00655989	-0.0190696	-0.00848431	0.0320249		126.6	-1.28496	-1.59293	-1.49086	-1.31974
		126.8	0.00542981	-0.0162545	-0.0041205	0.0281665		126.8	-1.28609	-1.59011	-1.4865	-1.32359
		127	0.00580182	-0.0161124	-0.0121716	0.0295168		127	-1.28571	-1.58997	-1.49455	-1.32224
		127.19	0.00502162	-0.0131175	-0.00655976	0.0306664		127.19	-1.28649	-1.58698	-1.48894	-1.32109
		127.4	0.00502956	-0.0195853	-0.00451802	0.032293		127.4	-1.28649	-1.59344	-1.48689	-1.31947
		127.59	0.00153672	-0.0138201	-0.00606958	0.0291029		127.59	-1.28998	-1.58768	-1.48845	-1.32266
		127.8	0.0077771	-0.0138307	-0.0061194	0.0311798		127.8	-1.28374	-1.58769	-1.4885	-1.32058
		128	0.00686775	-0.0120366	-0.00464094	0.0317278		128	-1.28465	-1.5859	-1.48702	-1.32003
		128.19	-0.0011613	-0.0165659	-0.0091611	0.029163		128.19	-1.29268	-1.59042	-1.49154	-1.3226
		128.39	0.00576334	-0.018941	-0.0101478	0.0300035		128.39	-1.28575	-1.5928	-1.49252	-1.32176
		128.59	0.00397337	-0.0156096	-0.00815257	0.0299989		128.59	-1.28754	-1.58947	-1.49053	-1.32176
		128.79	0.00352322	-0.0190441	-0.0041318	0.032343		128.79	-1.28799	-1.5929	-1.48651	-1.31942
		128.99	0.00615532	-0.0167426	-0.00811455	0.0290839		128.99	-1.28536	-1.5906	-1.49049	-1.32268
		129.19	0.00830102	-0.016142	-0.00870113	0.028822		129.19	-1.28321	-1.59	-1.49108	-1.32294
		129.39	0.00541729	-0.0165317	-0.00495776	0.0317504		129.39	-1.2861	-1.59039	-1.48733	-1.32001
		129.6	0.00340138	-0.0163989	-0.00452657	0.028498		129.6	-1.28811	-1.59026	-1.4869	-1.32326
		129.79	0.00597333	-0.0187574	-0.00764621	0.0319957		129.79	-1.28554	-1.59262	-1.49002	-1.31976
		129.99	0.00541777	-0.0171296	-0.00729796	0.0311322		129.99	-1.2861	-1.59099	-1.48967	-1.32063
		130.19	0.00516097	-0.0195583	-0.00766939	0.0324711		130.19	-1.28635	-1.59342	-1.49005	-1.31929
		130.39	0.0031789	-0.0118457	-0.00758642	0.0316562		130.39	-1.28834	-1.5857	-1.48996	-1.3201
		130.6	0.00357692	-0.0176421	-0.00488915	0.0294534		130.6	-1.28794	-1.5915	-1.48727	-1.32231
		130.79	0.00328315	-0.0143256	-0.00423237	0.0312769		130.79	-1.28823	-1.58818	-1.48661	-1.32048
		130.99	0.0050794	-0.0185594	-0.00745963	0.0331057		130.99	-1.28644	-1.59242	-1.48984	-1.31865
		131.19	0.00497187	-0.0143853	-0.00641929	0.0322772		131.19	-1.28654	-1.58824	-1.4888	-1.31948
		131.39	0.00424291	-0.0188813	-0.0026393	0.032499		131.39	-1.28727	-1.59274	-1.48502	-1.31926
		131.6	0.00617965	-0.0151427	-0.0028723	0.0306891		131.6	-1.28534	-1.589	-1.48525	-1.32107
		131.79	0.00615267	-0.0146146	-0.0025587	0.0312499		131.79	-1.28536	-1.58847	-1.48494	-1.32051
		131.99	0.00190503	-0.0158803	-0.00720676	0.0333497		131.99	-1.28961	-1.58974	-1.48958	-1.31841
		132.19	0.00578894	-0.0190929	-0.00536089	0.028833		132.19	-1.28573	-1.59295	-1.48774	-1.32293
		132.39	0.006958	-0.0159675	-0.00770749	0.0322279		132.39	-1.28456	-1.58983	-1.49008	-1.31953
		132.59	0.00529942	-0.0144754	-0.0038848	0.0314326		132.59	-1.28622	-1.58833	-1.48626	-1.32033
		132.79	0.00543252	-0.0166037	-0.00594795	0.0312718		132.79	-1.28608	-1.59046	-1.48832	-1.32049
		132.99	0.0060397	-0.0138601	-0.00203283	0.0316938		132.99	-1.28548	-1.58772	-1.48441	-1.32007
		133.19	0.00569878	-0.0161081	-0.00734599	0.0290875		133.19	-1.28582	-1.58997	-1.48972	-1.32267
		133.39	0.00382059	-0.019999	-0.0076358	0.0339278		133.39	-1.28769	-1.59386	-1.49001	-1.31783
		133.59	0.00432934	-0.0199268	-0.00723838	0.0332564		133.59	-1.28719	-1.59379	-1.48961	-1.3185
		133.79	0.00722591	-0.0201596	-0.0040415	0.0294378		133.79	-1.28429	-1.59402	-1.48642	-1.32232
		133.99	0.00671911	-0.0192895	-0.00601378	0.0309215		133.99	-1.2848	-1.59315	-1.48839	-1.32084
		134.19	0.00664344	-0.019161	-0.00863883	0.0295627		134.19	-1.28487	-1.59302	-1.49102	-1.3222
		134.39	0.00324905	-0.0231837	-0.00275351	0.0325591		134.39	-1.28827	-1.59704	-1.48513	-1.3192
		134.6	0.00387658	-0.0172344	-0.00835841	0.0326714		134.6	-1.28764	-1.59109	-1.49073	-1.31909
		134.79	0.00755112	-0.0159037	-0.00555846	0.0300041		134.79	-1.28396	-1.58976	-1.48793	-1.32176
		134.99	0.00284867	-0.0180251	-0.00961959	0.0310332		134.99	-1.28867	-1.59188	-1.492	-1.32073
		135.19	0.0060317	-0.0178586	-0.00730412	0.0333408		135.19	-1.28548	-1.59172	-1.48968	-1.31842
		135.39	0.0057326	-0.0233074	-0.00513346	0.0289301		135.39	-1.28578	-1.59717	-1.48751	-1.32283
		135.6	0.0021893	-0.017072	-0.00655343	0.0303985		135.6	-1.28933	-1.59093	-1.48893	-1.32136
		135.79	0.00070769	-0.0182372	-0.00834707	0.0312104		135.79	-1.29081	-1.5921	-1.49072	-1.32055
		135.99	0.00326948	-0.0212137	-0.00408311	0.0288032		135.99	-1.28825	-1.59507	-1.48646	-1.32296
		136.19	0.00180489	-0.0258318	-0.0022321	0.0338968		136.19	-1.28971	-1.59969	-1.48461	-1.31786
		136.39	0.00143883	-0.0179942	-0.00703885	0.0310559		136.39	-1.29008	-1.59185	-1.48942	-1.3207
		136.6	0.00831282	-0.020058	-0.00535858	0.0333059		136.6	-1.2832	-1.59392	-1.48774	-1.31845
		136.79	0.00392239	-0.0170127	-0.0110914	0.0294802		136.79	-1.28759	-1.59087	-1.49347	-1.32228
		136.99	0.00684633	-0.022239	-0.00356365	0.0288228		136.99	-1.28467	-1.5961	-1.48594	-1.32294
		137.19	0.0048626	-0.0209669	-0.00778059	0.0327684		137.19	-1.28665	-1.59483	-1.49016	-1.31899
		137.39	0.00350593	-0.0188651	-0.008117	0.030784		137.39	-1.28801	-1.59272	-1.49049	-1.32098
		137.59	0.00425827	-0.0224657	-0.00520497	0.0335366		137.59	-1.28726	-1.59632	-1.48758	-1.31822
		137.79	0.0087441	-0.0203672	-0.00607043	0.0319076		137.79	-1.28277	-1.59423	-1.48845	-1.31985
		137.99	0.00712944	-0.0200128	-0.00593526	0.0319507		137.99	-1.28439	-1.59387	-1.48831	-1.31981
		138.19	0.00538225	-0.0211767	-0.00892026	0.0333905		138.19	-1.28613	-1.59504	-1.4913	-1.31837
		138.39	0.00516596	-0.0228692	-0.0108425	0.0338253		138.39	-1.28635	-1.59673	-1.49322	-1.31793
		138.59	0.00652222	-0.0239458	-0.00815853	0.0332885		138.59	-1.28499	-1.5978	-1.49053	-1.31847
		138.79	0.00494098	-0.0219428	-0.00711175	0.0334246		138.79	-1.28657	-1.5958	-1.48949	-1.31834
		138.99	0.00440261	-0.0189496	-0.00747037	0.0312004		138.99	-1.28711	-1.59281	-1.48985	-1.32056
		139.19	0.0065261	-0.0186935	-0.00577412	0.0314107		139.19	-1.28499	-1.59255	-1.48815	-1.32035
		139.39	0.00115613	-0.018563	-0.00895195	0.0306788		139.39	-1.29036	-1.59242	-1.49133	-1.32108
		139.6	0.00469423	-0.0234916	-0.00834432	0.0333432		139.6	-1.28682	-1.59735	-1.49072	-1.31842
		139.79	0.0030725	-0.0234588	-0.00651884	0.0329193		139.79	-1.28844	-1.59732	-1.4889	-1.31884
		139.99	0.00348135	-0.0201754	-0.0083603	0.0327064		139.99	-1.28803	-1.59403	-1.49074	-1.31905
		140.19	0.00333423	-0.0194109	-0.00613569	0.0318124		140.19	-1.28818	-1.59327	-1.48851	-1.31995
		140.39	0.0033943	-0.0218154	-0.00853772	0.0315363		140.39	-1.28812	-1.59567	-1.49091	-1.32022
		140.6	0.00374851	-0.0208625	-0.00855247	0.0329296		140.6	-1.28777	-1.59472	-1.49093	-1.31883
		140.79	0.00574962	-0.0232106	-0.00871473	0.0338734		140.79	-1.28577	-1.59707	-1.49109	-1.31789
		140.99	0.00417983	-0.0235503	-0.00650417	0.033168		140.99	-1.28734	-1.59741	-1.48888	-1.31859
		141.19	0.00087567	-0.0239137	-0.00472693	0.0320501		141.19	-1.29064	-1.59777	-1.4871	-1.31971
		141.39	0.00135816	-0.0233884	-0.00680338	0.0322396		141.39	-1.29016	-1.59725	-1.48918	-1.31952
		141.59	0.00349333	-0.0189043	-0.00705942	0.03323		141.59	-1.28802	-1.59276	-1.48944	-1.31853
		141.79	0.00628868	-0.0240078	-0.00744948	0.031704		141.79	-1.28523	-1.59787	-1.48983	-1.32006
		141.99	0.00376261	-0.0236899	-0.00209407	0.0278592		141.99	-1.28775	-1.59755	-1.48447	-1.3239
		142.19	0.00333797	-0.0249089	-0.0069492	0.0314415		142.19	-1.28818	-1.59877	-1.48933	-1.32032
		142.39	0.00190821	-0.0222456	-0.00711019	0.0383611		142.39	-1.28961	-1.5961	-1.48949	-1.3134
		142.59	0.0050968	-0.0221074	-0.00767812	0.0324877		142.59	-1.28642	-1.59597	-1.49005	-1.31927
		142.79	0.0028588	-0.0239421	-0.00783088	0.0319788		142.79	-1.28866	-1.5978	-1.49021	-1.31978
		142.99	0.0072887	-0.0224129	-0.00569415	0.037291		142.99	-1.28423	-1.59627	-1.48807	-1.31447
		143.19	-0.00144357	-0.0244624	-0.0130545	0.0327723		143.19	-1.29296	-1.59832	-1.49543	-1.31899
		143.39	0.00251434	-0.020165	-0.00857495	0.0316671		143.39	-1.289	-1.59402	-1.49095	-1.32009
		143.59	0.00287345	-0.0203727	-0.00621036	0.0321026		143.59	-1.28864	-1.59423	-1.48859	-1.31966
		143.79	0.00697356	-0.0230663	-0.00743327	0.0318481		143.79	-1.28454	-1.59692	-1.48981	-1.31991
		143.99	0.0020646	-0.0215941	-0.00536292	0.0295565		143.99	-1.28945	-1.59545	-1.48774	-1.3222
		144.19	0.00319821	-0.0213532	-0.00566391	0.0329241		144.19	-1.28832	-1.59521	-1.48804	-1.31884
		144.39	0.00137307	-0.0245987	-0.0049249	0.0327451		144.39	-1.29014	-1.59846	-1.4873	-1.31901
		144.6	0.00688631	-0.0252547	-0.00495398	0.0351775		144.6	-1.28463	-1.59911	-1.48733	-1.31658
		144.79	0.0046132	-0.0201978	-0.0110296	0.0344281		144.79	-1.2869	-1.59406	-1.49341	-1.31733
		144.99	0.00450508	-0.0216849	-0.0100465	0.0307716		144.99	-1.28701	-1.59554	-1.49242	-1.32099
		145.19	0.00409545	-0.0215532	-0.00759759	0.0322035		145.19	-1.28742	-1.59541	-1.48997	-1.31956
		145.39	0.00368859	-0.0234333	-0.0049206	0.033747		145.39	-1.28783	-1.59729	-1.4873	-1.31801
		145.59	0.00237231	-0.0238176	-0.00324758	0.0308172		145.59	-1.28914	-1.59768	-1.48562	-1.32094
		145.79	0.00404741	-0.0216567	-0.00647821	0.0346058		145.79	-1.28747	-1.59552	-1.48885	-1.31715
		145.99	0.00242496	-0.0249406	-0.0103333	0.0339881		145.99	-1.28909	-1.5988	-1.49271	-1.31777
		146.19	0.00061944	-0.0290753	-0.00748058	0.0296667		146.19	-1.2909	-1.60293	-1.48986	-1.32209
		146.39	0.00243373	-0.0278417	-0.00737215	0.0359543		146.39	-1.28908	-1.6017	-1.48975	-1.31581
		146.6	0.00192465	-0.0233328	-0.0103518	0.0313967		146.6	-1.28959	-1.59719	-1.49273	-1.32036
		146.79	0.00181614	-0.0233133	-0.0061378	0.0310857		146.79	-1.2897	-1.59717	-1.48851	-1.32067
		146.99	0.00479623	-0.0261991	-0.0093099	0.0324419		146.99	-1.28672	-1.60006	-1.49169	-1.31932
		147.19	0.00499695	-0.0270849	-0.0066499	0.0355893		147.19	-1.28652	-1.60094	-1.48903	-1.31617
		147.39	0.00399778	-0.0254334	-0.0111034	0.0364956		147.39	-1.28752	-1.59929	-1.49348	-1.31526
		147.6	0.0051624	-0.0220339	-0.00371125	0.0331871		147.6	-1.28635	-1.59589	-1.48609	-1.31857
		147.79	0.00328326	-0.0241395	-0.0104503	0.0266963		147.79	-1.28823	-1.598	-1.49283	-1.32506
		147.99	0.00022403	-0.020834	-0.00552445	0.0314635		147.99	-1.29129	-1.59469	-1.4879	-1.3203
		148.19	0.00020272	-0.0238629	-0.00831889	0.0348807		148.19	-1.29131	-1.59772	-1.4907	-1.31688
		148.39	0.00513852	-0.0238599	-0.00668659	0.0313797		148.39	-1.28638	-1.59772	-1.48906	-1.32038
		148.6	0.00616162	-0.0252913	-0.00753692	0.0307169		148.6	-1.28535	-1.59915	-1.48991	-1.32104
		148.79	0.00303128	-0.0276963	-0.00856288	0.0319602		148.79	-1.28848	-1.60155	-1.49094	-1.3198
		148.99	0.0064643	-0.0222554	-0.0060084	0.030724		148.99	-1.28505	-1.59611	-1.48838	-1.32104
		149.19	0.00729747	-0.0233224	-0.00847853	0.0345789		149.19	-1.28422	-1.59718	-1.49085	-1.31718
		149.39	0.00426368	-0.0234907	-0.00623955	0.0321008		149.39	-1.28725	-1.59735	-1.48862	-1.31966
		149.6	0.00206801	-0.0259904	-0.00753152	0.0334821		149.6	-1.28945	-1.59985	-1.48991	-1.31828
		149.79	0.00599925	-0.0228853	-0.00705318	0.0310423		149.79	-1.28552	-1.59674	-1.48943	-1.32072
		149.99	0.00304123	-0.0267731	-0.00655922	0.0356441		149.99	-1.28847	-1.60063	-1.48894	-1.31612
		150.19	0.00346476	-0.0238916	-0.00424719	0.0338914		150.19	-1.28805	-1.59775	-1.48662	-1.31787
		150.39	0.00448561	-0.0213147	-0.00768955	0.0293419		150.39	-1.28703	-1.59517	-1.49007	-1.32242
		150.6	0.00409712	-0.0249348	-0.0048699	0.0329814		150.6	-1.28742	-1.59879	-1.48725	-1.31878
		150.79	0.00193775	-0.0269761	-0.0054737	0.0321091		150.79	-1.28958	-1.60083	-1.48785	-1.31965
		150.99	0.00703555	-0.0286441	-0.00701505	0.0338432		150.99	-1.28448	-1.6025	-1.48939	-1.31792
		151.19	0.0033603	-0.0295339	-0.00974648	0.0349854		151.19	-1.28815	-1.60339	-1.49212	-1.31677
		151.39	0.00238065	-0.0266906	-0.0110163	0.0306683		151.39	-1.28913	-1.60055	-1.49339	-1.32109
		151.6	5.773e-05	-0.0231026	-0.0106031	0.0329129		151.6	-1.29146	-1.59696	-1.49298	-1.31885
		151.79	0.00431422	-0.0254906	-0.0102456	0.0310848		151.79	-1.2872	-1.59935	-1.49262	-1.32068
		151.99	0.00203111	-0.0279744	-0.00930088	0.0283137		151.99	-1.28948	-1.60183	-1.49168	-1.32345
		152.19	6.29e-05	-0.0270858	-0.00626685	0.0339438		152.19	-1.29145	-1.60094	-1.48864	-1.31782
		152.39	0.00503619	-0.0278649	-0.0120321	0.029037		152.39	-1.28648	-1.60172	-1.49441	-1.32272
		152.6	0.00166975	-0.0291269	-0.00728726	0.0342964		152.6	-1.28985	-1.60299	-1.48966	-1.31746
		152.79	0.00274106	-0.0267359	-0.0100296	0.030258		152.79	-1.28877	-1.60059	-1.49241	-1.3215
		152.99	-0.00063774	-0.0263709	-0.0068956	0.0345288		152.99	-1.29215	-1.60023	-1.48927	-1.31723
		153.19	0.00417378	-0.0267258	-0.00477129	0.0311648		153.19	-1.28734	-1.60058	-1.48715	-1.3206
		153.39	-0.00013759	-0.0242564	-0.0114258	0.0280536		153.39	-1.29165	-1.59811	-1.4938	-1.32371
		153.6	0.00391215	-0.0271938	-0.00634207	0.0322248		153.6	-1.2876	-1.60105	-1.48872	-1.31954
		153.79	0.00300311	-0.02322	-0.00813933	0.0339814		153.79	-1.28851	-1.59708	-1.49052	-1.31778
		153.99	0.00405524	-0.025219	-0.00802325	0.0318507		153.99	-1.28746	-1.59908	-1.4904	-1.31991
		154.19	0.00142311	-0.0232584	-0.00969455	0.0350918		154.19	-1.29009	-1.59712	-1.49207	-1.31667
		154.39	0.00117664	-0.0206447	-0.00852064	0.0342591		154.39	-1.29034	-1.5945	-1.4909	-1.3175
		154.59	0.00085062	-0.0298748	-0.00876357	0.0329822		154.59	-1.29066	-1.60373	-1.49114	-1.31878
		154.79	0.00094549	-0.02868	-0.00439694	0.0356147		154.79	-1.29057	-1.60254	-1.48677	-1.31615
		154.99	-0.0008338	-0.0266315	-0.00762156	0.0326608		154.99	-1.29235	-1.60049	-1.49	-1.3191
		155.19	0.00274052	-0.0293559	-0.0109669	0.034343		155.19	-1.28877	-1.60321	-1.49334	-1.31742
		155.39	0.00074138	-0.028065	-0.00925522	0.0326545		155.39	-1.29077	-1.60192	-1.49163	-1.31911
		155.59	0.0020635	-0.0244679	-0.0115748	0.0323164		155.59	-1.28945	-1.59833	-1.49395	-1.31944
		155.79	0.00108687	-0.0274351	-0.00739348	0.0346241		155.79	-1.29043	-1.60129	-1.48977	-1.31714
		155.99	-0.00115435	-0.0285632	-0.0121309	0.0294946		155.99	-1.29267	-1.60242	-1.49451	-1.32227
		156.19	-0.00048303	-0.0291071	-0.0109329	0.0321051		156.19	-1.292	-1.60297	-1.49331	-1.31965
		156.39	0.00396479	-0.0249108	-0.00625294	0.0354413		156.39	-1.28755	-1.59877	-1.48863	-1.31632
		156.6	-0.0001093	-0.0309233	-0.0137587	0.0339653		156.6	-1.29162	-1.60478	-1.49614	-1.31779
		156.79	0.00178531	-0.0284157	-0.0100377	0.0335309		156.79	-1.28973	-1.60227	-1.49241	-1.31823
		156.99	0.00057035	-0.0284847	-0.0116655	0.0324805		156.99	-1.29094	-1.60234	-1.49404	-1.31928
		157.19	0.00385281	-0.023682	-0.00672221	0.0356327		157.19	-1.28766	-1.59754	-1.4891	-1.31613
		157.39	0.00396901	-0.0252839	-0.00952573	0.0358988		157.39	-1.28755	-1.59914	-1.4919	-1.31586
		157.6	0.0001521	-0.0258356	-0.00978833	0.0345364		157.6	-1.29136	-1.59969	-1.49216	-1.31722
		157.79	0.00070852	-0.0251663	-0.0108415	0.0323323		157.79	-1.29081	-1.59902	-1.49322	-1.31943
		157.99	0.00248432	-0.0308925	-0.00827838	0.0351671		157.99	-1.28903	-1.60475	-1.49065	-1.31659
		158.19	0.00107216	-0.0293766	-0.00871195	0.0343344		158.19	-1.29044	-1.60324	-1.49109	-1.31743
		158.39	-0.00083407	-0.0262304	-0.0123643	0.03434		158.39	-1.29235	-1.60009	-1.49474	-1.31742
		158.6	0.00335062	-0.0264539	-0.0104439	0.0330915		158.6	-1.28816	-1.60031	-1.49282	-1.31867
		158.79	0.00065872	-0.0214861	-0.00985886	0.0333015		158.79	-1.29086	-1.59534	-1.49224	-1.31846
		158.99	-0.00041013	-0.0305851	-0.00914314	0.0350172		158.99	-1.29193	-1.60444	-1.49152	-1.31674
		159.19	0.00229765	-0.0272774	-0.0105515	0.0315177		159.19	-1.28922	-1.60114	-1.49293	-1.32024
		159.39	0.00052779	-0.0290826	-0.0116101	0.030021		159.39	-1.29099	-1.60294	-1.49399	-1.32174
		159.59	0.00276051	-0.0307838	-0.00886113	0.0311265		159.59	-1.28875	-1.60464	-1.49124	-1.32063
		159.79	0.00535087	-0.0237371	-0.00831149	0.0314328		159.79	-1.28616	-1.5976	-1.49069	-1.32033
		159.99	0.0013784	-0.0286734	-0.00925916	0.0362802		159.99	-1.29014	-1.60253	-1.49164	-1.31548
		160.19	0.00114523	-0.0259309	-0.00603084	0.0352742		160.19	-1.29037	-1.59979	-1.48841	-1.31649
		160.39	0.00396436	-0.0313753	-0.00916085	0.0332342		160.39	-1.28755	-1.60523	-1.49154	-1.31853
		160.59	0.00264936	-0.0260291	-0.008255	0.0328709		160.59	-1.28887	-1.59989	-1.49063	-1.31889
		160.79	0.00203804	-0.0300926	-0.00776383	0.0348892		160.79	-1.28948	-1.60395	-1.49014	-1.31687
		160.99	0.00010211	-0.0239595	-0.0108537	0.0337682		160.99	-1.29141	-1.59782	-1.49323	-1.31799
		161.19	0.00336592	-0.0311287	-0.00861516	0.0322527		161.19	-1.28815	-1.60499	-1.49099	-1.31951
		161.39	0.00225882	-0.0290554	-0.00557718	0.0306108		161.39	-1.28926	-1.60291	-1.48795	-1.32115
		161.6	0.00023383	-0.0261229	-0.00948695	0.0341475		161.6	-1.29128	-1.59998	-1.49186	-1.31761
		161.79	-0.00365306	-0.0241054	-0.00982551	0.0284737		161.79	-1.29517	-1.59796	-1.4922	-1.32329
		161.99	-5.944e-05	-0.0284494	-0.00940734	0.0327967		161.99	-1.29157	-1.60231	-1.49178	-1.31896
		162.19	0.00099918	-0.0281437	-0.00773652	0.0311113		162.19	-1.29052	-1.602	-1.49011	-1.32065
		162.39	0.00326922	-0.0275496	-0.0115335	0.0316821		162.39	-1.28825	-1.60141	-1.49391	-1.32008
		162.6	0.00148047	-0.0250546	-0.0106043	0.034291		162.6	-1.29003	-1.59891	-1.49298	-1.31747
		162.79	0.000878	-0.0268761	-0.0102436	0.0359847		162.79	-1.29064	-1.60073	-1.49262	-1.31578
		162.99	0.00718166	-0.0304184	-0.0100653	0.033562		162.99	-1.28433	-1.60428	-1.49244	-1.3182
		163.19	0.00232844	-0.0268031	-0.00835363	0.0364106		163.19	-1.28919	-1.60066	-1.49073	-1.31535
		163.39	0.0024197	-0.031649	-0.00793124	0.0338656		163.39	-1.2891	-1.60551	-1.49031	-1.31789
		163.59	0.00272087	-0.0295715	-0.00872206	0.0325662		163.59	-1.28879	-1.60343	-1.4911	-1.31919
		163.79	0.00258155	-0.0300688	-0.0121225	0.0342215		163.79	-1.28893	-1.60393	-1.4945	-1.31754
		163.99	0.00135491	-0.0297719	-0.0115713	0.0352797		163.99	-1.29016	-1.60363	-1.49395	-1.31648
		164.19	0.00321548	-0.0289269	-0.00693662	0.0349208		164.19	-1.2883	-1.60279	-1.48931	-1.31684
		164.39	0.00240334	-0.0317981	-0.00554638	0.0354477		164.39	-1.28911	-1.60566	-1.48792	-1.31631
		164.59	0.0021035	-0.0311594	-0.00901856	0.0351083		164.59	-1.28941	-1.60502	-1.4914	-1.31665
		164.79	0.00308524	-0.02744	-0.0134324	0.0319895		164.79	-1.28843	-1.6013	-1.49581	-1.31977
		164.99	-2.63e-06	-0.0320061	-0.0101958	0.0354321		164.99	-1.29152	-1.60586	-1.49257	-1.31633
		165.19	0.0028289	-0.0310804	-0.0114437	0.0328721		165.19	-1.28869	-1.60494	-1.49382	-1.31889
		165.39	0.00195154	-0.0287982	-0.0103697	0.0301124		165.39	-1.28956	-1.60266	-1.49275	-1.32165
		165.59	0.00244151	-0.0316442	-0.0169519	0.0344382		165.59	-1.28907	-1.6055	-1.49933	-1.31732
		165.79	0.00166728	-0.0285709	-0.0130006	0.0327789		165.79	-1.28985	-1.60243	-1.49538	-1.31898
		165.99	0.00085913	-0.0262404	-0.004136	0.0341712		165.99	-1.29066	-1.6001	-1.48651	-1.31759
		166.19	0.00377013	-0.0338596	-0.0133042	0.0330618		166.19	-1.28774	-1.60772	-1.49568	-1.3187
		166.39	-0.00129347	-0.0309349	-0.0110531	0.0314331		166.39	-1.29281	-1.60479	-1.49343	-1.32033
		166.59	-0.00131969	-0.0318336	-0.00942011	0.0347266		166.59	-1.29283	-1.60569	-1.4918	-1.31703
		166.79	0.00108756	-0.0270657	-0.00740446	0.0391164		166.79	-1.29043	-1.60092	-1.48978	-1.31264
		166.99	-0.00035063	-0.0339547	-0.00591369	0.0361955		166.99	-1.29187	-1.60781	-1.48829	-1.31556
		167.19	0.00272278	-0.0327098	-0.00860859	0.0338444		167.19	-1.28879	-1.60657	-1.49099	-1.31792
		167.39	0.00439303	-0.0311049	-0.0106112	0.0343494		167.39	-1.28712	-1.60496	-1.49299	-1.31741
		167.6	0.00188437	-0.034423	-0.00942316	0.0337338		167.6	-1.28963	-1.60828	-1.4918	-1.31803
		167.79	0.00068596	-0.0317235	-0.0148925	0.0345725		167.79	-1.29083	-1.60558	-1.49727	-1.31719
		167.99	0.00056855	-0.0291365	-0.00676712	0.0329947		167.99	-1.29095	-1.603	-1.48914	-1.31877
		168.19	0.00177493	-0.0293563	-0.0126282	0.0375668		168.19	-1.28974	-1.60321	-1.495	-1.31419
		168.39	0.00013155	-0.032733	-0.01087	0.0344902		168.39	-1.29138	-1.60659	-1.49325	-1.31727
		168.6	0.00137502	-0.0308166	-0.014645	0.0361625		168.6	-1.29014	-1.60468	-1.49702	-1.3156
		168.79	0.00043012	-0.0345468	-0.0087042	0.0368312		168.79	-1.29108	-1.60841	-1.49108	-1.31493
		168.99	0.00103374	-0.033501	-0.0117581	0.0343367		168.99	-1.29048	-1.60736	-1.49413	-1.31742
		169.19	-0.00262351	-0.0284504	-0.00920943	0.0329492		169.19	-1.29414	-1.60231	-1.49159	-1.31881
		169.39	0.00277007	-0.0376645	-0.0101394	0.0338137		169.39	-1.28875	-1.61152	-1.49252	-1.31795
		169.6	0.00128086	-0.0262896	-0.0117973	0.0351637		169.6	-1.29023	-1.60015	-1.49417	-1.3166
		169.79	-0.00173856	-0.0308488	-0.00916714	0.0329897		169.79	-1.29325	-1.60471	-1.49154	-1.31877
		169.99	0.00017939	-0.0315005	-0.0106715	0.0341821		169.99	-1.29134	-1.60536	-1.49305	-1.31758
		170.19	-7.648e-05	-0.031948	-0.0144969	0.0333481		170.19	-1.29159	-1.60581	-1.49687	-1.31841
		170.39	0.00131888	-0.0381574	-0.00947203	0.0362288		170.39	-1.2902	-1.61202	-1.49185	-1.31553
		170.6	-0.00118132	-0.0280689	-0.00877291	0.0345611		170.6	-1.2927	-1.60193	-1.49115	-1.3172
		170.79	0.00108366	-0.0351753	-0.00828022	0.0359496		170.79	-1.29043	-1.60903	-1.49066	-1.31581
		170.99	-0.00011225	-0.0309945	-0.0134359	0.0382548		170.99	-1.29163	-1.60485	-1.49581	-1.31351
		171.19	0.00072053	-0.0332741	-0.00972893	0.0360202		171.19	-1.29079	-1.60713	-1.49211	-1.31574
		171.39	0.0027686	-0.0281483	-0.00838395	0.0377724		171.39	-1.28875	-1.60201	-1.49076	-1.31399
		171.6	-0.00108163	-0.0349187	-0.0100459	0.0358316		171.6	-1.2926	-1.60878	-1.49242	-1.31593
		171.79	0.00566611	-0.0342467	-0.00891154	0.0380591		171.79	-1.28585	-1.60811	-1.49129	-1.3137
		171.99	-0.00064422	-0.0314158	-0.0114526	0.0360649		171.99	-1.29216	-1.60527	-1.49383	-1.31569
		172.19	-0.002598	-0.03423	-0.00953618	0.0338849		172.19	-1.29411	-1.60809	-1.49191	-1.31788
		172.39	-0.00100545	-0.033037	-0.0137646	0.034157		172.39	-1.29252	-1.6069	-1.49614	-1.3176
		172.6	0.0008707	-0.0351315	-0.010936	0.0360201		172.6	-1.29064	-1.60899	-1.49331	-1.31574
		172.79	0.00355278	-0.0336505	-0.010803	0.038189		172.79	-1.28796	-1.60751	-1.49318	-1.31357
		172.99	0.00268563	-0.0328702	-0.0105326	0.0356894		172.99	-1.28883	-1.60673	-1.49291	-1.31607
		173.19	-0.00318071	-0.0344156	-0.0119774	0.0348569		173.19	-1.2947	-1.60827	-1.49435	-1.3169
		173.39	-0.00178671	-0.0388539	-0.0162025	0.0358401		173.39	-1.2933	-1.61271	-1.49858	-1.31592
		173.59	0.00131102	-0.0325075	-0.0134918	0.0344436		173.59	-1.2902	-1.60637	-1.49587	-1.31732
		173.79	-0.00143546	-0.0333806	-0.0118376	0.0382389		173.79	-1.29295	-1.60724	-1.49421	-1.31352
		173.99	5.572e-05	-0.0301132	-0.00778264	0.0346039		173.99	-1.29146	-1.60397	-1.49016	-1.31716
		174.19	0.00145414	-0.0326545	-0.0135951	0.0339894		174.19	-1.29006	-1.60651	-1.49597	-1.31777
		174.39	-0.00151321	-0.0346922	-0.00971317	0.0335538		174.39	-1.29303	-1.60855	-1.49209	-1.31821
		174.6	-0.0001811	-0.0389265	-0.010433	0.0344594		174.6	-1.2917	-1.61279	-1.49281	-1.3173
		174.79	0.00012876	-0.0311249	-0.012798	0.0345227		174.79	-1.29139	-1.60498	-1.49517	-1.31724
		174.99	0.00205645	-0.036326	-0.0118227	0.0353535		174.99	-1.28946	-1.61018	-1.4942	-1.31641
		175.19	0.00162754	-0.0342652	-0.0140044	0.0377025		175.19	-1.28989	-1.60812	-1.49638	-1.31406
		175.39	0.00434941	-0.0328797	-0.0154868	0.0361657		175.39	-1.28717	-1.60674	-1.49786	-1.31559
		175.6	-0.00230716	-0.0333745	-0.00947707	0.0347436		175.6	-1.29382	-1.60723	-1.49185	-1.31702
		175.79	0.00146055	-0.0317186	-0.00754914	0.0384341		175.79	-1.29005	-1.60558	-1.48993	-1.31333
		175.99	-0.00123621	-0.0352174	-0.00724278	0.033473		175.99	-1.29275	-1.60908	-1.48962	-1.31829
		176.19	0.00027994	-0.0354105	-0.0124679	0.0344576		176.19	-1.29124	-1.60927	-1.49484	-1.3173
		176.39	-0.00064237	-0.0380882	-0.00968627	0.0336151		176.39	-1.29216	-1.61195	-1.49206	-1.31814
		176.6	0.00233098	-0.0336181	-0.00676537	0.0373598		176.6	-1.28918	-1.60748	-1.48914	-1.3144
		176.79	-0.00029813	-0.0347096	-0.0108292	0.0384492		176.79	-1.29181	-1.60857	-1.49321	-1.31331
		176.99	-0.00190408	-0.0335214	-0.00974751	0.0353612		176.99	-1.29342	-1.60738	-1.49212	-1.3164
		177.19	-0.00266992	-0.0343094	-0.010994	0.0354214		177.19	-1.29419	-1.60817	-1.49337	-1.31634
		177.39	-0.00058943	-0.0345142	-0.013599	0.0318693		177.39	-1.2921	-1.60837	-1.49598	-1.31989
		177.59	0.00071873	-0.0355097	-0.0123843	0.0337913		177.59	-1.2908	-1.60937	-1.49476	-1.31797
		177.79	-0.0009682	-0.0367415	-0.0114619	0.034524		177.79	-1.29248	-1.6106	-1.49384	-1.31724
		177.99	0.00325487	-0.0354723	-0.0122685	0.0302865		177.99	-1.28826	-1.60933	-1.49465	-1.32147
		178.19	0.00049987	-0.036235	-0.011596	0.0373087		178.19	-1.29102	-1.61009	-1.49397	-1.31445
		178.39	0.00032982	-0.0362389	-0.0117993	0.0368111		178.39	-1.29119	-1.6101	-1.49418	-1.31495
		178.59	0.00050779	-0.0391626	-0.00962513	0.0375557		178.59	-1.29101	-1.61302	-1.492	-1.3142
		178.79	0.0015208	-0.038586	-0.0122066	0.0366662		178.79	-1.28999	-1.61244	-1.49458	-1.31509
		178.99	-0.0007819	-0.0337149	-0.00804802	0.0342885		178.99	-1.2923	-1.60757	-1.49042	-1.31747
		179.19	-0.00272936	-0.0358132	-0.0127548	0.0350734		179.19	-1.29424	-1.60967	-1.49513	-1.31669
		179.39	0.00031425	-0.033251	-0.0141041	0.0318477		179.39	-1.2912	-1.60711	-1.49648	-1.31991
		179.6	0.00335449	-0.0330469	-0.0162118	0.035125		179.6	-1.28816	-1.60691	-1.49859	-1.31663
		179.79	0.00298653	-0.0357154	-0.0082023	0.0361676		179.79	-1.28853	-1.60957	-1.49058	-1.31559
		179.99	0.00337909	-0.0311441	-0.00765973	0.0357642		179.99	-1.28814	-1.605	-1.49004	-1.316
		180.19	0.00142709	-0.0353246	-0.0121455	0.0389437		180.19	-1.29009	-1.60918	-1.49452	-1.31282
		180.39	0.00037863	-0.035844	-0.0140643	0.0354821		180.39	-1.29114	-1.6097	-1.49644	-1.31628
		180.6	-0.00017852	-0.0343974	-0.00963707	0.0340529		180.6	-1.29169	-1.60826	-1.49201	-1.31771
		180.79	0.00090657	-0.0283121	-0.0165107	0.0354012		180.79	-1.29061	-1.60217	-1.49889	-1.31636
		180.99	-0.00127272	-0.0352956	-0.0117775	0.0360681		180.99	-1.29279	-1.60915	-1.49415	-1.31569
		181.19	0.00325433	-0.0369008	-0.0118683	0.0320062		181.19	-1.28826	-1.61076	-1.49424	-1.31975
		181.39	0.00232176	-0.0379096	-0.0154564	0.0397601		181.39	-1.28919	-1.61177	-1.49783	-1.312
		181.6	0.00258238	-0.0359044	-0.0111568	0.0345761		181.6	-1.28893	-1.60976	-1.49353	-1.31718
		181.79	0.00016754	-0.0307528	-0.0107118	0.0333359		181.79	-1.29135	-1.60461	-1.49309	-1.31842
		181.99	0.00116126	-0.0380217	-0.0111345	0.0362184		181.99	-1.29035	-1.61188	-1.49351	-1.31554
		182.19	-0.00210746	-0.0347475	-0.0114268	0.0344044		182.19	-1.29362	-1.60861	-1.4938	-1.31736
		182.39	3.089e-05	-0.0353247	-0.0120368	0.0339347		182.39	-1.29148	-1.60918	-1.49441	-1.31783
		182.59	0.00147706	-0.0349917	-0.0107592	0.038685		182.59	-1.29004	-1.60885	-1.49314	-1.31307
		182.79	-0.00033715	-0.039546	-0.00981295	0.0339243		182.79	-1.29185	-1.6134	-1.49219	-1.31784
		182.99	0.00193951	-0.0346711	-0.0131061	0.036546		182.99	-1.28958	-1.60853	-1.49548	-1.31521
		183.19	0.00205934	-0.0320591	-0.0144157	0.0364208		183.19	-1.28946	-1.60592	-1.49679	-1.31534
		183.39	0.00097256	-0.0352122	-0.0122507	0.0389057		183.39	-1.29054	-1.60907	-1.49463	-1.31285
		183.59	0.00160372	-0.0387434	-0.0152897	0.0343036		183.59	-1.28991	-1.6126	-1.49767	-1.31746
		183.79	-0.00137428	-0.0365444	-0.00740742	0.0324039		183.79	-1.29289	-1.6104	-1.48978	-1.31936
		183.99	0.00149008	-0.0377077	-0.0127342	0.034163		183.99	-1.29003	-1.61157	-1.49511	-1.3176
		184.19	0.00036454	-0.0403916	-0.0120495	0.0350438		184.19	-1.29115	-1.61425	-1.49443	-1.31672
		184.39	0.00073738	-0.0400898	-0.010793	0.0363557		184.39	-1.29078	-1.61395	-1.49317	-1.3154
		184.59	0.00148662	-0.0363365	-0.00840939	0.033972		184.59	-1.29003	-1.6102	-1.49079	-1.31779
		184.79	-0.00019433	-0.0352138	-0.0147759	0.0327236		184.79	-1.29171	-1.60907	-1.49715	-1.31904
		184.99	-0.00360093	-0.0380605	-0.0105638	0.0342717		184.99	-1.29512	-1.61192	-1.49294	-1.31749
		185.19	0.00039157	-0.0392142	-0.0140894	0.0366613		185.19	-1.29112	-1.61307	-1.49647	-1.3151
		185.39	-0.00088433	-0.0410633	-0.0111222	0.0357511		185.39	-1.2924	-1.61492	-1.4935	-1.31601
		185.59	0.00175514	-0.0402612	-0.0125252	0.0364813		185.59	-1.28976	-1.61412	-1.4949	-1.31528
		185.79	0.00059517	-0.0342366	-0.0133419	0.0389548		185.79	-1.29092	-1.6081	-1.49572	-1.31281
		185.99	0.00406027	-0.0373235	-0.0107466	0.0352054		185.99	-1.28745	-1.61118	-1.49312	-1.31655
		186.19	0.00042426	-0.0368095	-0.012903	0.0358175		186.19	-1.29109	-1.61067	-1.49528	-1.31594
		186.39	-0.00103614	-0.0429559	-0.0086186	0.0337849		186.39	-1.29255	-1.61681	-1.491	-1.31797
		186.59	0.00073233	-0.0327841	-0.0132579	0.0342275		186.59	-1.29078	-1.60664	-1.49563	-1.31753
		186.79	-0.00033818	-0.0374093	-0.0143154	0.0337612		186.79	-1.29185	-1.61127	-1.49669	-1.318
		186.99	0.0007104	-0.0329652	-0.0108657	0.0354473		186.99	-1.2908	-1.60682	-1.49324	-1.31631
		187.19	-0.00071392	-0.0352157	-0.0118932	0.0353832		187.19	-1.29223	-1.60907	-1.49427	-1.31638
		187.39	0.0036368	-0.0422124	-0.0102654	0.0367743		187.39	-1.28788	-1.61607	-1.49264	-1.31499
		187.59	0.00112693	-0.0358312	-0.0140507	0.0361571		187.59	-1.29039	-1.60969	-1.49643	-1.3156
		187.79	0.00097815	-0.0347702	-0.0124925	0.0387184		187.79	-1.29054	-1.60863	-1.49487	-1.31304
		187.99	0.00414366	-0.0384812	-0.00980554	0.0351984		187.99	-1.28737	-1.61234	-1.49218	-1.31656
		188.19	-0.00029785	-0.0350005	-0.00959544	0.0379976		188.19	-1.29181	-1.60886	-1.49197	-1.31376
		188.39	0.00365049	-0.0404703	-0.0136122	0.0356106		188.39	-1.28786	-1.61433	-1.49599	-1.31615
		188.6	-0.00039725	-0.0386945	-0.0136238	0.0350417		188.6	-1.29191	-1.61255	-1.496	-1.31672
		188.79	0.00227937	-0.0429933	-0.015911	0.0371511		188.79	-1.28924	-1.61685	-1.49829	-1.31461
		188.99	0.00164213	-0.037611	-0.0108413	0.0393409		188.99	-1.28987	-1.61147	-1.49322	-1.31242
		189.19	0.00157087	-0.0431525	-0.0102369	0.0369338		189.19	-1.28994	-1.61701	-1.49261	-1.31483
		189.39	-0.0003838	-0.0400679	-0.0118813	0.0345454		189.39	-1.2919	-1.61393	-1.49426	-1.31721
		189.6	0.00208472	-0.0370041	-0.0122222	0.0379405		189.6	-1.28943	-1.61086	-1.4946	-1.31382
		189.79	0.00090142	-0.0424422	-0.0113984	0.0367833		189.79	-1.29061	-1.6163	-1.49377	-1.31498
		189.99	0.00056987	-0.0414007	-0.0130295	0.0358609		189.99	-1.29095	-1.61526	-1.49541	-1.3159
		190.19	0.00284373	-0.0410048	-0.01471	0.0375629		190.19	-1.28867	-1.61486	-1.49709	-1.3142
		190.39	0.00108107	-0.0417811	-0.0156473	0.0361705		190.39	-1.29043	-1.61564	-1.49802	-1.31559
		190.6	0.00221716	-0.0416315	-0.0109858	0.0359074		190.6	-1.2893	-1.61549	-1.49336	-1.31585
		190.79	0.00286777	-0.0411628	-0.012817	0.0373404		190.79	-1.28865	-1.61502	-1.49519	-1.31442
		190.99	0.00174962	-0.0368184	-0.0101868	0.0367684		190.99	-1.28977	-1.61068	-1.49256	-1.31499
		191.19	0.00150244	-0.0371144	-0.00842796	0.0371056		191.19	-1.29001	-1.61097	-1.4908	-1.31465
		191.39	0.00196996	-0.038117	-0.0108179	0.0360281		191.39	-1.28955	-1.61198	-1.49319	-1.31573
		191.6	0.00242255	-0.0390059	-0.0110066	0.0371081		191.6	-1.28909	-1.61286	-1.49338	-1.31465
		191.79	0.00096526	-0.0369204	-0.010508	0.0371729		191.79	-1.29055	-1.61078	-1.49288	-1.31459
		191.99	0.00383187	-0.0414681	-0.013606	0.0357937		191.99	-1.28768	-1.61533	-1.49598	-1.31597
		192.19	0.00108616	-0.0379464	-0.0104411	0.0359609		192.19	-1.29043	-1.61181	-1.49282	-1.3158
		192.39	-0.00033851	-0.038276	-0.0131072	0.0346336		192.39	-1.29185	-1.61213	-1.49548	-1.31713
		192.6	0.00344133	-0.0407297	-0.0107776	0.0370717		192.6	-1.28807	-1.61459	-1.49315	-1.31469
		192.79	-0.0006277	-0.0394564	-0.0152286	0.0366339		192.79	-1.29214	-1.61332	-1.49761	-1.31513
		192.99	0.00096151	-0.0374123	-0.0150094	0.0385678		192.99	-1.29055	-1.61127	-1.49739	-1.31319
		193.19	0.00071541	-0.0444711	-0.0113367	0.0358222		193.19	-1.2908	-1.61833	-1.49371	-1.31594
		193.39	0.0005689	-0.0399116	-0.0141641	0.0363631		193.39	-1.29095	-1.61377	-1.49654	-1.3154
		193.6	0.0019896	-0.0418608	-0.0124893	0.0368397		193.6	-1.28953	-1.61572	-1.49487	-1.31492
		193.79	0.00316183	-0.0415775	-0.0118844	0.034113		193.79	-1.28835	-1.61544	-1.49426	-1.31765
		193.99	0.00402634	-0.0434328	-0.00767473	0.035382		193.99	-1.28749	-1.61729	-1.49005	-1.31638
		194.19	-0.0012242	-0.0423297	-0.0097391	0.0384722		194.19	-1.29274	-1.61619	-1.49212	-1.31329
		194.39	0.00211971	-0.038238	-0.0108849	0.0370362		194.39	-1.2894	-1.6121	-1.49326	-1.31472
		194.6	0.0035297	-0.0442416	-0.0109778	0.0389255		194.6	-1.28799	-1.6181	-1.49335	-1.31283
		194.79	0.00246343	-0.039737	-0.0110492	0.0387814		194.79	-1.28905	-1.6136	-1.49343	-1.31298
		194.99	0.00117164	-0.0394175	-0.01212	0.0361056		194.99	-1.29034	-1.61328	-1.4945	-1.31565
		195.19	0.00408043	-0.0413294	-0.0110439	0.0370287		195.19	-1.28743	-1.61519	-1.49342	-1.31473
		195.39	-0.00035432	-0.0396614	-0.0131106	0.0381514		195.39	-1.29187	-1.61352	-1.49549	-1.31361
		195.59	0.00131997	-0.0446416	-0.0116127	0.0344124		195.59	-1.2902	-1.6185	-1.49399	-1.31735
		195.79	-0.00182618	-0.0374398	-0.00890069	0.0359376		195.79	-1.29334	-1.6113	-1.49128	-1.31582
		195.99	-0.00195034	-0.0404954	-0.009355	0.0397694		195.99	-1.29347	-1.61435	-1.49173	-1.31199
		196.19	-0.00050327	-0.041487	-0.0171689	0.0361029		196.19	-1.29202	-1.61535	-1.49955	-1.31566
		196.39	-0.00315366	-0.0396297	-0.0107985	0.0381771		196.39	-1.29467	-1.61349	-1.49317	-1.31358
		196.6	0.00187853	-0.0429795	-0.0158093	0.0368567		196.6	-1.28964	-1.61684	-1.49819	-1.3149
		196.79	-0.00036081	-0.0394829	-0.0142636	0.0386177		196.79	-1.29188	-1.61334	-1.49664	-1.31314
		196.99	0.00150307	-0.0422208	-0.011181	0.0352199		196.99	-1.29001	-1.61608	-1.49356	-1.31654
		197.19	-0.00469455	-0.0428107	-0.0131716	0.0397062		197.19	-1.29621	-1.61667	-1.49555	-1.31205
		197.39	-0.00173678	-0.0430009	-0.0138922	0.0353894		197.39	-1.29325	-1.61686	-1.49627	-1.31637
		197.6	-0.00053373	-0.0405017	-0.0124328	0.0390634		197.6	-1.29205	-1.61436	-1.49481	-1.3127
		197.79	0.00182623	-0.042809	-0.00766252	0.0376359		197.79	-1.28969	-1.61667	-1.49004	-1.31412
		197.99	0.00322726	-0.0407747	-0.0139354	0.0377802		197.99	-1.28829	-1.61463	-1.49631	-1.31398
		198.19	0.00217751	-0.0411766	-0.0136633	0.0387029		198.19	-1.28934	-1.61504	-1.49604	-1.31306
		198.39	0.00182351	-0.0393618	-0.0108725	0.0351461		198.39	-1.28969	-1.61322	-1.49325	-1.31661
		198.6	-0.00137283	-0.0411288	-0.0117386	0.0364229		198.6	-1.29289	-1.61499	-1.49412	-1.31534
		198.79	-0.0020655	-0.0401431	-0.0142579	0.0361846		198.79	-1.29358	-1.614	-1.49663	-1.31558
		198.99	-0.00017411	-0.0455272	-0.0122275	0.0386879		198.99	-1.29169	-1.61939	-1.4946	-1.31307
		199.19	0.00244107	-0.0435307	-0.0133635	0.0372411		199.19	-1.28907	-1.61739	-1.49574	-1.31452
		199.39	0.00268536	-0.0439915	-0.0176135	0.0396699		199.39	-1.28883	-1.61785	-1.49999	-1.31209
		199.59	0.00030105	-0.0459789	-0.0103539	0.0383825		199.59	-1.29121	-1.61984	-1.49273	-1.31338
		199.79	-0.00041243	-0.0438224	-0.0127439	0.0367576		199.79	-1.29193	-1.61768	-1.49512	-1.315
		200	0.0196686	-0.0276394	0.00300605	0.0529081		200	-1.27185	-1.6015	-1.47937	-1.29885
		200.19	0.0244147	-0.0231606	0.00673205	0.0614624		200.19	-1.2671	-1.59702	-1.47564	-1.2903
		200.39	0.0236838	-0.0257959	0.0108709	0.0588652		200.39	-1.26783	-1.59965	-1.47151	-1.29289
		200.59	0.0212296	-0.0218165	0.0122626	0.0633608		200.59	-1.27029	-1.59568	-1.47011	-1.2884
		200.79	0.0247775	-0.0219633	0.00790833	0.0639011		200.79	-1.26674	-1.59582	-1.47447	-1.28786
		200.99	0.0277743	-0.0180133	0.0120936	0.0636484		200.99	-1.26374	-1.59187	-1.47028	-1.28811
		201.19	0.0259848	-0.0185571	0.0142118	0.0644282		201.19	-1.26553	-1.59242	-1.46816	-1.28733
		201.39	0.0278214	-0.0163232	0.014777	0.0643494		201.39	-1.26369	-1.59018	-1.4676	-1.28741
		201.59	0.0299861	-0.013682	0.0143016	0.0666629		201.59	-1.26153	-1.58754	-1.46807	-1.2851
		201.79	0.032775	-0.0157106	0.0192016	0.0674		201.79	-1.25874	-1.58957	-1.46317	-1.28436
		201.99	0.0282305	-0.0106918	0.0140833	0.0641759		201.99	-1.26328	-1.58455	-1.46829	-1.28758
		202.19	0.0323358	-0.0123523	0.0165892	0.0678012		202.19	-1.25918	-1.58621	-1.46579	-1.28396
		202.39	0.0328753	-0.0110098	0.0175379	0.0718012		202.39	-1.25864	-1.58487	-1.46484	-1.27996
		202.59	0.0343095	-0.0141487	0.0172154	0.0724055		202.59	-1.25721	-1.58801	-1.46516	-1.27935
		202.79	0.0376088	-0.00872594	0.0207046	0.0722508		202.79	-1.25391	-1.58258	-1.46167	-1.27951
		202.99	0.0344303	-0.0046762	0.020111	0.0720623		202.99	-1.25708	-1.57853	-1.46227	-1.2797
		203.19	0.0393402	-0.00493285	0.0208745	0.0742236		203.19	-1.25217	-1.57879	-1.4615	-1.27754
		203.39	0.0385549	-0.00728938	0.0235287	0.0767441		203.39	-1.25296	-1.58115	-1.45885	-1.27502
		203.59	0.0375646	-0.0050511	0.0254706	0.073392		203.59	-1.25395	-1.57891	-1.45691	-1.27837
		203.79	0.0401089	-0.00327016	0.0261681	0.076978		203.79	-1.25141	-1.57713	-1.45621	-1.27478
		203.99	0.0388696	-0.00181063	0.0247768	0.0803431		203.99	-1.25265	-1.57567	-1.4576	-1.27142
		204.19	0.0406434	-0.00270275	0.027777	0.0788765		204.19	-1.25087	-1.57656	-1.4546	-1.27288
		204.39	0.0435633	-0.00159127	0.0280131	0.0799517		204.39	-1.24795	-1.57545	-1.45436	-1.27181
		204.6	0.0423038	0.00172342	0.0262894	0.0802947		204.6	-1.24921	-1.57214	-1.45609	-1.27147
		204.79	0.0424135	-0.0010568	0.0315758	0.0775425		204.79	-1.2491	-1.57492	-1.4508	-1.27422
		204.99	0.0423177	0.00302599	0.0321991	0.0798867		204.99	-1.2492	-1.57083	-1.45018	-1.27187
		205.19	0.0429715	0.00158253	0.0283338	0.0852668		205.19	-1.24854	-1.57228	-1.45404	-1.26649
		205.39	0.0437078	0.00086575	0.0338899	0.0825123		205.39	-1.24781	-1.57299	-1.44849	-1.26925
		205.6	0.0446446	0.00342179	0.0373605	0.085672		205.6	-1.24687	-1.57044	-1.44502	-1.26609
		205.79	0.045368	0.0016869	0.0307781	0.083271		205.79	-1.24615	-1.57217	-1.4516	-1.26849
		205.99	0.0457795	0.00519239	0.0326259	0.0874123		205.99	-1.24574	-1.56867	-1.44975	-1.26435
		206.19	0.0519524	0.00354204	0.0388605	0.0887346		206.19	-1.23956	-1.57032	-1.44352	-1.26303
		206.39	0.0510369	0.00841872	0.0405758	0.0831948		206.39	-1.24048	-1.56544	-1.4418	-1.26857
		206.6	0.0553822	0.00478933	0.035788	0.091057		206.6	-1.23613	-1.56907	-1.44659	-1.2607
		206.79	0.0520338	0.0106482	0.0406135	0.0930042		206.79	-1.23948	-1.56321	-1.44176	-1.25876
		206.99	0.0515844	0.0119764	0.0393266	0.0891072		206.99	-1.23993	-1.56188	-1.44305	-1.26265
		207.19	0.0512353	0.00884537	0.0403827	0.0920294		207.19	-1.24028	-1.56501	-1.44199	-1.25973
		207.39	0.0560895	0.0128971	0.0423583	0.093535		207.39	-1.23543	-1.56096	-1.44002	-1.25822
		207.59	0.0572282	0.0159789	0.0433946	0.091377		207.59	-1.23429	-1.55788	-1.43898	-1.26038
		207.79	0.0556254	0.0126963	0.0460446	0.0952096		207.79	-1.23589	-1.56116	-1.43633	-1.25655
		207.99	0.0593826	0.0180053	0.0440322	0.0965649		207.99	-1.23213	-1.55585	-1.43834	-1.25519
		208.19	0.0564679	0.0181569	0.0458823	0.0933698		208.19	-1.23505	-1.5557	-1.43649	-1.25839
		208.39	0.0543232	0.0200499	0.0441474	0.0972396		208.39	-1.23719	-1.55381	-1.43823	-1.25452
		208.59	0.0618612	0.0186993	0.0498498	0.0976449		208.59	-1.22965	-1.55516	-1.43253	-1.25411
		208.79	0.0588731	0.020206	0.0479158	0.0985941		208.79	-1.23264	-1.55365	-1.43446	-1.25317
		208.99	0.0620218	0.0167882	0.0480258	0.101511		208.99	-1.22949	-1.55707	-1.43435	-1.25025
		209.19	0.0606855	0.0174859	0.0530732	0.0995547		209.19	-1.23083	-1.55637	-1.4293	-1.25221
		209.39	0.0638584	0.0187187	0.0568991	0.103774		209.39	-1.22766	-1.55514	-1.42548	-1.24799
		209.59	0.0655624	0.0180967	0.0528243	0.106253		209.59	-1.22595	-1.55576	-1.42955	-1.24551
		209.79	0.0624883	0.0205689	0.0542627	0.101583		209.79	-1.22903	-1.55329	-1.42811	-1.25018
		209.99	0.0620199	0.0186834	0.0608371	0.0993477		209.99	-1.2295	-1.55518	-1.42154	-1.25241
		210.19	0.0603825	0.0264901	0.0548913	0.10351		210.19	-1.23113	-1.54737	-1.42749	-1.24825
		210.39	0.0659205	0.0283027	0.0545601	0.108754		210.39	-1.22559	-1.54556	-1.42782	-1.24301
		210.6	0.0688162	0.0287445	0.0585537	0.108393		210.6	-1.2227	-1.54511	-1.42382	-1.24337
		210.79	0.0683096	0.0241217	0.0535373	0.107487		210.79	-1.22321	-1.54974	-1.42884	-1.24427
		210.99	0.0682513	0.028552	0.0588373	0.108507		210.99	-1.22326	-1.54531	-1.42354	-1.24325
		211.19	0.0665634	0.0293678	0.0608959	0.108542		211.19	-1.22495	-1.54449	-1.42148	-1.24322
		211.39	0.0699212	0.0315645	0.0620994	0.10803		211.39	-1.22159	-1.54229	-1.42028	-1.24373
		211.6	0.0722989	0.0309332	0.0586091	0.109673		211.6	-1.21922	-1.54293	-1.42377	-1.24209
		211.79	0.0729463	0.0310882	0.0593458	0.110403		211.79	-1.21857	-1.54277	-1.42303	-1.24136
		211.99	0.0721673	0.0300388	0.0635269	0.109381		211.99	-1.21935	-1.54382	-1.41885	-1.24238
		212.19	0.0733652	0.0358489	0.0663442	0.112397		212.19	-1.21815	-1.53801	-1.41603	-1.23936
		212.39	0.0734159	0.0341323	0.0667696	0.11327		212.39	-1.2181	-1.53973	-1.41561	-1.23849
		212.6	0.0746421	0.0342088	0.0651074	0.115488		212.6	-1.21687	-1.53965	-1.41727	-1.23627
		212.79	0.0796265	0.0375401	0.0691815	0.112159		212.79	-1.21189	-1.53632	-1.41319	-1.2396
		212.99	0.0790834	0.0372132	0.066548	0.115052		212.99	-1.21243	-1.53665	-1.41583	-1.23671
		213.19	0.077487	0.0412462	0.0701762	0.118471		213.19	-1.21403	-1.53261	-1.4122	-1.23329
		213.39	0.0782386	0.0433259	0.0702339	0.118775		213.39	-1.21328	-1.53053	-1.41214	-1.23299
		213.59	0.0787472	0.0380403	0.0708096	0.117844		213.59	-1.21277	-1.53582	-1.41157	-1.23392
		213.79	0.0783053	0.040025	0.0719456	0.118381		213.79	-1.21321	-1.53383	-1.41043	-1.23338
		213.99	0.0797563	0.045025	0.0766721	0.118185		213.99	-1.21176	-1.52883	-1.4057	-1.23358
		214.19	0.0831924	0.0428106	0.0729447	0.124343		214.19	-1.20832	-1.53105	-1.40943	-1.22742
		214.39	0.0813992	0.0422314	0.0719209	0.122195		214.39	-1.21012	-1.53163	-1.41046	-1.22956
		214.59	0.081009	0.0460674	0.0805145	0.12337		214.59	-1.21051	-1.52779	-1.40186	-1.22839
		214.79	0.0826064	0.045877	0.0769219	0.121916		214.79	-1.20891	-1.52798	-1.40545	-1.22984
		214.99	0.0843575	0.0474308	0.0790509	0.126198		214.99	-1.20716	-1.52643	-1.40333	-1.22556
		215.19	0.0878286	0.0443311	0.0761525	0.124199		215.19	-1.20369	-1.52953	-1.40622	-1.22756
		215.39	0.0852346	0.0496473	0.0798403	0.121176		215.39	-1.20628	-1.52421	-1.40254	-1.23058
		215.6	0.0903666	0.0473122	0.0786699	0.128877		215.6	-1.20115	-1.52655	-1.40371	-1.22288
		215.79	0.0917293	0.0473605	0.0810604	0.133827		215.79	-1.19979	-1.5265	-1.40132	-1.21793
		215.99	0.0889584	0.0511933	0.0805174	0.128613		215.99	-1.20256	-1.52267	-1.40186	-1.22315
		216.19	0.0881076	0.0492484	0.083411	0.130448		216.19	-1.20341	-1.52461	-1.39897	-1.22131
		216.39	0.0892603	0.0486773	0.0890563	0.13026		216.39	-1.20225	-1.52518	-1.39332	-1.2215
		216.6	0.0924613	0.0529999	0.087151	0.133836		216.6	-1.19905	-1.52086	-1.39523	-1.21792
		216.79	0.0996464	0.0546627	0.0866124	0.133327		216.79	-1.19187	-1.5192	-1.39576	-1.21843
		216.99	0.0916425	0.0546806	0.0887645	0.137778		216.99	-1.19987	-1.51918	-1.39361	-1.21398
		217.19	0.0932142	0.0566042	0.0877554	0.134574		217.19	-1.1983	-1.51725	-1.39462	-1.21719
		217.39	0.0949542	0.0622292	0.0922576	0.134911		217.39	-1.19656	-1.51163	-1.39012	-1.21685
		217.6	0.100402	0.0570158	0.0891884	0.137003		217.6	-1.19111	-1.51684	-1.39319	-1.21476
		217.79	0.09932	0.0590543	0.0913953	0.134192		217.79	-1.1922	-1.5148	-1.39098	-1.21757
		217.99	0.096654	0.064752	0.0881968	0.133283		217.99	-1.19486	-1.50911	-1.39418	-1.21848
		218.19	0.096286	0.0576932	0.0917427	0.137156		218.19	-1.19523	-1.51617	-1.39063	-1.2146
		218.39	0.099601	0.0602796	0.0930442	0.141728		218.39	-1.19191	-1.51358	-1.38933	-1.21003
		218.59	0.104767	0.0596255	0.0962377	0.140278		218.59	-1.18675	-1.51423	-1.38614	-1.21148
		218.79	0.100863	0.0626076	0.0915053	0.140672		218.79	-1.19065	-1.51125	-1.39087	-1.21109
		218.99	0.0990053	0.0649828	0.0953678	0.145432		218.99	-1.19251	-1.50888	-1.38701	-1.20633
		219.19	0.104067	0.0666745	0.0960951	0.142104		219.19	-1.18745	-1.50718	-1.38628	-1.20966
		219.39	0.101977	0.0656131	0.0984267	0.144327		219.39	-1.18954	-1.50825	-1.38395	-1.20743
		219.59	0.107725	0.0671903	0.100155	0.143273		219.59	-1.18379	-1.50667	-1.38222	-1.20849
		219.79	0.101885	0.0686956	0.0974693	0.145783		219.79	-1.18963	-1.50516	-1.38491	-1.20598
		219.99	0.105296	0.0673917	0.100192	0.148448		219.99	-1.18622	-1.50647	-1.38218	-1.20331
		220.19	0.107489	0.0673109	0.100909	0.147424		220.19	-1.18403	-1.50655	-1.38147	-1.20434
		220.39	0.108908	0.0723735	0.106702	0.147224		220.39	-1.18261	-1.50149	-1.37567	-1.20454
		220.6	0.106054	0.0700049	0.105815	0.151336		220.6	-1.18546	-1.50385	-1.37656	-1.20042
		220.79	0.10873	0.0728822	0.104359	0.146787		220.79	-1.18279	-1.50098	-1.37802	-1.20497
		220.99	0.113606	0.0684263	0.102665	0.151754		220.99	-1.17791	-1.50543	-1.37971	-1.20001
		221.19	0.111458	0.0717583	0.107389	0.153068		221.19	-1.18006	-1.5021	-1.37499	-1.19869
		221.39	0.116024	0.0730116	0.107589	0.149694		221.39	-1.17549	-1.50085	-1.37479	-1.20207
		221.6	0.110647	0.080334	0.108542	0.153433		221.6	-1.18087	-1.49352	-1.37383	-1.19833
		221.79	0.115933	0.0770544	0.108446	0.15818		221.79	-1.17558	-1.4968	-1.37393	-1.19358
		221.99	0.11533	0.0754513	0.108512	0.155849		221.99	-1.17618	-1.49841	-1.37386	-1.19591
		222.19	0.114285	0.0759651	0.111987	0.161691		222.19	-1.17723	-1.49789	-1.37039	-1.19007
		222.39	0.116606	0.0764083	0.110928	0.155644		222.39	-1.17491	-1.49745	-1.37145	-1.19612
		222.6	0.119245	0.0829408	0.11118	0.161689		222.6	-1.17227	-1.49092	-1.3712	-1.19007
		222.79	0.117484	0.0805057	0.111755	0.15882		222.79	-1.17403	-1.49335	-1.37062	-1.19294
		222.99	0.116591	0.0800498	0.114771	0.162049		222.99	-1.17492	-1.49381	-1.36761	-1.18971
		223.19	0.117956	0.0807328	0.113541	0.161748		223.19	-1.17356	-1.49313	-1.36884	-1.19001
		223.39	0.119421	0.0804669	0.115247	0.165798		223.39	-1.17209	-1.49339	-1.36713	-1.18596
		223.59	0.124229	0.0846325	0.113728	0.164941		223.59	-1.16729	-1.48923	-1.36865	-1.18682
		223.79	0.122546	0.0875114	0.121791	0.163306		223.79	-1.16897	-1.48635	-1.36059	-1.18845
		223.99	0.119929	0.0846415	0.121757	0.167172		223.99	-1.17159	-1.48922	-1.36062	-1.18459
		224.19	0.125479	0.0861736	0.120398	0.166666		224.19	-1.16604	-1.48768	-1.36198	-1.18509
		224.39	0.124069	0.088877	0.122399	0.163271		224.39	-1.16745	-1.48498	-1.35998	-1.18849
		224.59	0.125223	0.0862846	0.122766	0.166828		224.59	-1.16629	-1.48757	-1.35961	-1.18493
		224.79	0.125952	0.0945495	0.121764	0.165834		224.79	-1.16556	-1.47931	-1.36061	-1.18593
		224.99	0.126578	0.0897117	0.122958	0.167715		224.99	-1.16494	-1.48415	-1.35942	-1.18404
		225.19	0.127867	0.0922684	0.125263	0.175916		225.19	-1.16365	-1.48159	-1.35711	-1.17584
		225.39	0.126675	0.0915764	0.126786	0.169759		225.39	-1.16484	-1.48228	-1.35559	-1.182
		225.6	0.126796	0.0933311	0.128917	0.172347		225.6	-1.16472	-1.48053	-1.35346	-1.17941
		225.79	0.131605	0.0932033	0.125719	0.172909		225.79	-1.15991	-1.48066	-1.35666	-1.17885
		225.99	0.135793	0.10023	0.126766	0.177288		225.99	-1.15572	-1.47363	-1.35561	-1.17447
		226.19	0.130953	0.0998523	0.129246	0.174798		226.19	-1.16056	-1.47401	-1.35313	-1.17696
		226.39	0.134353	0.0996994	0.130436	0.179839		226.39	-1.15716	-1.47416	-1.35194	-1.17192
		226.59	0.132711	0.0998277	0.132726	0.176904		226.59	-1.1588	-1.47403	-1.34965	-1.17486
		226.79	0.136151	0.103113	0.133472	0.179546		226.79	-1.15536	-1.47075	-1.3489	-1.17221
		226.99	0.134743	0.0997436	0.133832	0.179822		226.99	-1.15677	-1.47412	-1.34854	-1.17194
		227.19	0.136952	0.102729	0.136159	0.1801		227.19	-1.15456	-1.47113	-1.34622	-1.17166
		227.39	0.137859	0.107665	0.134423	0.182172		227.39	-1.15366	-1.46619	-1.34795	-1.16959
		227.59	0.137943	0.105984	0.135317	0.180519		227.59	-1.15357	-1.46787	-1.34706	-1.17124
		227.79	0.137245	0.105219	0.13461	0.182254		227.79	-1.15427	-1.46864	-1.34777	-1.16951
		227.99	0.137755	0.104355	0.143958	0.184358		227.99	-1.15376	-1.4695	-1.33842	-1.1674
		228.19	0.144448	0.107754	0.139008	0.184138		228.19	-1.14707	-1.46611	-1.34337	-1.16762
		228.39	0.142776	0.107017	0.140112	0.18396		228.39	-1.14874	-1.46684	-1.34226	-1.1678
		228.6	0.142071	0.113715	0.139704	0.190672		228.6	-1.14944	-1.46014	-1.34267	-1.16109
		228.79	0.142639	0.11013	0.14293	0.189926		228.79	-1.14888	-1.46373	-1.33945	-1.16183
		228.99	0.147215	0.106686	0.144177	0.190407		228.99	-1.1443	-1.46717	-1.3382	-1.16135
		229.19	0.145383	0.11278	0.143018	0.186201		229.19	-1.14613	-1.46108	-1.33936	-1.16556
		229.39	0.145337	0.109291	0.143315	0.191677		229.39	-1.14618	-1.46457	-1.33906	-1.16008
		229.6	0.145655	0.10865	0.147947	0.189417		229.6	-1.14586	-1.46521	-1.33443	-1.16234
		229.79	0.148701	0.115893	0.144071	0.193715		229.79	-1.14281	-1.45797	-1.33831	-1.15805
		229.99	0.152603	0.114584	0.147701	0.194267		229.99	-1.13891	-1.45927	-1.33468	-1.15749
		230.19	0.149378	0.110081	0.148262	0.194248		230.19	-1.14214	-1.46378	-1.33411	-1.15751
		230.39	0.149723	0.117737	0.154959	0.192527		230.39	-1.14179	-1.45612	-1.32742	-1.15923
		230.6	0.151949	0.118132	0.150847	0.196209		230.6	-1.13957	-1.45573	-1.33153	-1.15555
		230.79	0.150944	0.118507	0.152529	0.195867		230.79	-1.14057	-1.45535	-1.32985	-1.15589
		230.99	0.153387	0.116843	0.154228	0.197234		230.99	-1.13813	-1.45702	-1.32815	-1.15453
		231.19	0.152125	0.118487	0.15056	0.197937		231.19	-1.13939	-1.45537	-1.33182	-1.15382
		231.39	0.15578	0.117522	0.152339	0.199755		231.39	-1.13574	-1.45634	-1.33004	-1.15201
		231.59	0.156856	0.119732	0.157033	0.198573		231.59	-1.13466	-1.45413	-1.32534	-1.15319
		231.79	0.15621	0.124762	0.158807	0.200194		231.79	-1.13531	-1.4491	-1.32357	-1.15157
		231.99	0.157123	0.125839	0.159444	0.199994		231.99	-1.13439	-1.44802	-1.32293	-1.15177
		232.19	0.159101	0.124094	0.158653	0.203302		232.19	-1.13241	-1.44976	-1.32372	-1.14846
		232.39	0.157636	0.127005	0.159518	0.202402		232.39	-1.13388	-1.44685	-1.32286	-1.14936
		232.59	0.158007	0.129479	0.166046	0.20497		232.59	-1.13351	-1.44438	-1.31633	-1.14679
		232.79	0.160719	0.129623	0.164767	0.206792		232.79	-1.1308	-1.44424	-1.31761	-1.14497
		232.99	0.16253	0.129261	0.166481	0.209185		232.99	-1.12898	-1.4446	-1.3159	-1.14258
		233.19	0.160319	0.130526	0.163102	0.20995		233.19	-1.1312	-1.44333	-1.31927	-1.14181
		233.39	0.164456	0.131791	0.166411	0.209076		233.39	-1.12706	-1.44207	-1.31597	-1.14268
		233.6	0.162741	0.135334	0.162449	0.212375		233.6	-1.12877	-1.43852	-1.31993	-1.13938
		233.79	0.162544	0.132673	0.166422	0.205099		233.79	-1.12897	-1.44119	-1.31595	-1.14666
		233.99	0.164596	0.13417	0.16648	0.211296		233.99	-1.12692	-1.43969	-1.3159	-1.14046
		234.19	0.162425	0.135648	0.164654	0.209354		234.19	-1.12909	-1.43821	-1.31772	-1.14241
		234.39	0.166972	0.139128	0.171728	0.214596		234.39	-1.12454	-1.43473	-1.31065	-1.13716
		234.6	0.16951	0.134147	0.166923	0.216139		234.6	-1.122	-1.43971	-1.31545	-1.13562
		234.79	0.168125	0.139431	0.172029	0.212154		234.79	-1.12339	-1.43443	-1.31035	-1.13961
		234.99	0.171287	0.140002	0.172323	0.215172		234.99	-1.12023	-1.43386	-1.31005	-1.13659
		235.19	0.170241	0.144167	0.171994	0.219209		235.19	-1.12127	-1.42969	-1.31038	-1.13255
		235.39	0.166605	0.141373	0.17412	0.214098		235.39	-1.12491	-1.43249	-1.30826	-1.13766
		235.6	0.172848	0.141787	0.17375	0.218025		235.6	-1.11867	-1.43207	-1.30863	-1.13373
		235.79	0.17701	0.145065	0.176441	0.218995		235.79	-1.1145	-1.42879	-1.30594	-1.13277
		235.99	0.17525	0.146512	0.176787	0.222338		235.99	-1.11626	-1.42735	-1.30559	-1.12942
		236.19	0.175208	0.146689	0.173999	0.223383		236.19	-1.11631	-1.42717	-1.30838	-1.12838
		236.39	0.175192	0.151286	0.179646	0.22133		236.39	-1.11632	-1.42257	-1.30273	-1.13043
		236.59	0.175185	0.148682	0.18047	0.224585		236.59	-1.11633	-1.42518	-1.30191	-1.12717
		236.79	0.174917	0.15216	0.178175	0.226809		236.79	-1.1166	-1.4217	-1.3042	-1.12495
		236.99	0.174838	0.150739	0.184395	0.226169		236.99	-1.11668	-1.42312	-1.29798	-1.12559
		237.19	0.173573	0.150893	0.183305	0.22521		237.19	-1.11794	-1.42297	-1.29907	-1.12655
		237.39	0.1804	0.154488	0.188035	0.225792		237.39	-1.11112	-1.41937	-1.29434	-1.12597
		237.59	0.176254	0.157568	0.19059	0.226924		237.59	-1.11526	-1.41629	-1.29179	-1.12484
		237.79	0.181359	0.156059	0.187967	0.228225		237.79	-1.11016	-1.4178	-1.29441	-1.12353
		237.99	0.182226	0.151606	0.184595	0.228983		237.99	-1.10929	-1.42225	-1.29778	-1.12278
		238.19	0.180439	0.155743	0.185388	0.228495		238.19	-1.11108	-1.41812	-1.29699	-1.12327
		238.39	0.182721	0.156149	0.189374	0.235299		238.39	-1.10879	-1.41771	-1.293	-1.11646
		238.6	0.185174	0.160263	0.190699	0.230507		238.6	-1.10634	-1.4136	-1.29168	-1.12125
		238.79	0.18562	0.159376	0.189504	0.23512		238.79	-1.1059	-1.41448	-1.29287	-1.11664
		238.99	0.187668	0.156749	0.192725	0.233727		238.99	-1.10385	-1.41711	-1.28965	-1.11803
		239.19	0.187639	0.162617	0.194191	0.235738		239.19	-1.10388	-1.41124	-1.28819	-1.11602
		239.39	0.190992	0.159751	0.191104	0.236148		239.39	-1.10052	-1.41411	-1.29127	-1.11561
		239.6	0.191521	0.159585	0.193199	0.237418		239.6	-1.09999	-1.41427	-1.28918	-1.11434
		239.79	0.190245	0.162668	0.198152	0.239111		239.79	-1.10127	-1.41119	-1.28422	-1.11265
		239.99	0.19234	0.164182	0.196767	0.240409		239.99	-1.09917	-1.40968	-1.28561	-1.11135
		240.19	0.193263	0.167742	0.196527	0.243		240.19	-1.09825	-1.40612	-1.28585	-1.10876
		240.39	0.192191	0.170331	0.197287	0.240465		240.39	-1.09932	-1.40353	-1.28509	-1.11129
		240.6	0.194228	0.166888	0.200226	0.242436		240.6	-1.09729	-1.40697	-1.28215	-1.10932
		240.79	0.193133	0.166972	0.203279	0.245839		240.79	-1.09838	-1.40689	-1.2791	-1.10592
		240.99	0.193335	0.170644	0.198604	0.240109		240.99	-1.09818	-1.40321	-1.28377	-1.11165
		241.19	0.197616	0.171029	0.20279	0.245775		241.19	-1.0939	-1.40283	-1.27959	-1.10598
		241.39	0.196437	0.170332	0.203045	0.240673		241.39	-1.09508	-1.40353	-1.27933	-1.11109
		241.59	0.196306	0.172562	0.204553	0.246922		241.59	-1.09521	-1.4013	-1.27782	-1.10484
		241.79	0.195572	0.173833	0.205276	0.25264		241.79	-1.09594	-1.40003	-1.2771	-1.09912
		241.99	0.200642	0.177747	0.208216	0.249532		241.99	-1.09087	-1.39611	-1.27416	-1.10223
		242.19	0.201774	0.174104	0.208207	0.249987		242.19	-1.08974	-1.39975	-1.27417	-1.10177
		242.39	0.20035	0.175459	0.208116	0.24922		242.39	-1.09117	-1.3984	-1.27426	-1.10254
		242.59	0.202669	0.177679	0.21063	0.251063		242.59	-1.08885	-1.39618	-1.27175	-1.1007
		242.79	0.198798	0.182854	0.213462	0.249848		242.79	-1.09272	-1.39101	-1.26891	-1.10191
		242.99	0.202246	0.177193	0.210732	0.251232		242.99	-1.08927	-1.39667	-1.27164	-1.10053
		243.19	0.204674	0.18033	0.215033	0.255499		243.19	-1.08684	-1.39353	-1.26734	-1.09626
		243.39	0.204792	0.179157	0.214313	0.252933		243.39	-1.08672	-1.3947	-1.26806	-1.09883
		243.6	0.206952	0.183646	0.212513	0.258052		243.6	-1.08456	-1.39021	-1.26986	-1.09371
		243.79	0.20741	0.184522	0.216103	0.253128		243.79	-1.08411	-1.38934	-1.26627	-1.09863
		243.99	0.208199	0.183535	0.216918	0.262244		243.99	-1.08332	-1.39032	-1.26546	-1.08952
		244.19	0.207571	0.185306	0.215733	0.257385		244.19	-1.08394	-1.38855	-1.26664	-1.09438
		244.39	0.212435	0.183805	0.221785	0.256995		244.39	-1.07908	-1.39005	-1.26059	-1.09477
		244.6	0.212051	0.187133	0.221808	0.262608		244.6	-1.07946	-1.38673	-1.26057	-1.08915
		244.79	0.21781	0.185797	0.218451	0.259465		244.79	-1.0737	-1.38806	-1.26393	-1.09229
		244.99	0.210983	0.186957	0.219958	0.262428		244.99	-1.08053	-1.3869	-1.26242	-1.08933
		245.19	0.215693	0.189317	0.221265	0.265096		245.19	-1.07582	-1.38454	-1.26111	-1.08666
		245.39	0.214782	0.189841	0.224027	0.266225		245.39	-1.07673	-1.38402	-1.25835	-1.08554
		245.59	0.216575	0.192157	0.224002	0.262386		245.59	-1.07494	-1.3817	-1.25837	-1.08937
		245.79	0.221015	0.192311	0.22619	0.264993		245.79	-1.0705	-1.38155	-1.25619	-1.08677
		245.99	0.217838	0.19056	0.231623	0.268879		245.99	-1.07368	-1.3833	-1.25075	-1.08288
		246.19	0.220637	0.195299	0.229185	0.265492		246.19	-1.07088	-1.37856	-1.25319	-1.08627
		246.39	0.223043	0.197071	0.231447	0.27198		246.39	-1.06847	-1.37679	-1.25093	-1.07978
		246.6	0.223432	0.196344	0.227762	0.273769		246.6	-1.06808	-1.37751	-1.25461	-1.07799
		246.79	0.218922	0.195233	0.233276	0.269906		246.79	-1.07259	-1.37863	-1.2491	-1.08185
		246.99	0.225241	0.201155	0.232151	0.271257		246.99	-1.06627	-1.3727	-1.25023	-1.0805
		247.19	0.219004	0.198609	0.231023	0.274322		247.19	-1.07251	-1.37525	-1.25135	-1.07744
		247.39	0.226815	0.201233	0.230904	0.27457		247.39	-1.0647	-1.37263	-1.25147	-1.07719
		247.6	0.224427	0.198308	0.236341	0.274819		247.6	-1.06709	-1.37555	-1.24604	-1.07694
		247.79	0.223507	0.202972	0.23547	0.273863		247.79	-1.06801	-1.37089	-1.24691	-1.0779
		247.99	0.225248	0.202046	0.234512	0.274714		247.99	-1.06627	-1.37181	-1.24786	-1.07705
		248.19	0.230793	0.206899	0.239797	0.278446		248.19	-1.06072	-1.36696	-1.24258	-1.07331
		248.39	0.23181	0.208471	0.239949	0.280221		248.39	-1.05971	-1.36539	-1.24243	-1.07154
		248.6	0.231343	0.206185	0.238373	0.279753		248.6	-1.06017	-1.36767	-1.244	-1.07201
		248.79	0.228115	0.208219	0.24099	0.279381		248.79	-1.0634	-1.36564	-1.24139	-1.07238
		248.99	0.227429	0.20938	0.243834	0.283766		248.99	-1.06409	-1.36448	-1.23854	-1.06799
		249.19	0.231259	0.211564	0.239819	0.281198		249.19	-1.06026	-1.3623	-1.24256	-1.07056
		249.39	0.23108	0.213298	0.244357	0.284526		249.39	-1.06043	-1.36056	-1.23802	-1.06723
		249.59	0.233091	0.214287	0.24432	0.282977		249.59	-1.05842	-1.35957	-1.23806	-1.06878
		249.79	0.237168	0.212191	0.246988	0.286207		249.79	-1.05435	-1.36167	-1.23539	-1.06555
		249.99	0.236636	0.216207	0.248826	0.29041		249.99	-1.05488	-1.35765	-1.23355	-1.06135
		250.19	0.234034	0.212732	0.245501	0.284204		250.19	-1.05748	-1.36113	-1.23688	-1.06756
		250.39	0.239315	0.216651	0.249613	0.287848		250.39	-1.0522	-1.35721	-1.23276	-1.06391
		250.6	0.240013	0.218171	0.248602	0.288526		250.6	-1.0515	-1.35569	-1.23377	-1.06323
		250.79	0.240138	0.219014	0.252515	0.288784		250.79	-1.05138	-1.35484	-1.22986	-1.06298
		250.99	0.243125	0.221183	0.252724	0.290265		250.99	-1.04839	-1.35268	-1.22965	-1.06149
		251.19	0.239653	0.221877	0.251109	0.292703		251.19	-1.05186	-1.35198	-1.23127	-1.05906
		251.39	0.240135	0.220342	0.255891	0.292441		251.39	-1.05138	-1.35352	-1.22649	-1.05932
		251.59	0.243882	0.22335	0.256075	0.292071		251.59	-1.04763	-1.35051	-1.2263	-1.05969
		251.79	0.242072	0.224553	0.254899	0.296714		251.79	-1.04944	-1.34931	-1.22748	-1.05505
		251.99	0.246427	0.222207	0.258197	0.293431		251.99	-1.04509	-1.35165	-1.22418	-1.05833
		252.19	0.248025	0.219751	0.257519	0.297186		252.19	-1.04349	-1.35411	-1.22486	-1.05457
		252.39	0.246857	0.223079	0.259333	0.297136		252.39	-1.04466	-1.35078	-1.22304	-1.05462
		252.6	0.245455	0.22611	0.261521	0.297839		252.6	-1.04606	-1.34775	-1.22086	-1.05392
		252.79	0.247927	0.231444	0.260901	0.301226		252.79	-1.04359	-1.34241	-1.22148	-1.05053
		252.99	0.248184	0.232328	0.260568	0.301034		252.99	-1.04333	-1.34153	-1.22181	-1.05073
		253.19	0.247967	0.229458	0.26202	0.300903		253.19	-1.04355	-1.3444	-1.22036	-1.05086
		253.39	0.251123	0.231651	0.265562	0.298989		253.39	-1.04039	-1.34221	-1.21681	-1.05277
		253.59	0.253191	0.232832	0.263683	0.307729		253.59	-1.03832	-1.34103	-1.21869	-1.04403
		253.79	0.254013	0.231915	0.267016	0.303962		253.79	-1.0375	-1.34194	-1.21536	-1.0478
		253.99	0.252221	0.232623	0.266877	0.306992		253.99	-1.03929	-1.34124	-1.2155	-1.04477
		254.19	0.252709	0.235902	0.268338	0.305751		254.19	-1.03881	-1.33796	-1.21404	-1.04601
		254.39	0.253518	0.236369	0.267666	0.304784		254.39	-1.038	-1.33749	-1.21471	-1.04698
		254.59	0.254152	0.234026	0.266461	0.309838		254.59	-1.03736	-1.33983	-1.21592	-1.04192
		254.79	0.26329	0.237368	0.268436	0.312073		254.79	-1.02822	-1.33649	-1.21394	-1.03969
		254.99	0.260004	0.239532	0.26906	0.312512		254.99	-1.03151	-1.33433	-1.21332	-1.03925
		255.19	0.258221	0.243848	0.273715	0.309532		255.19	-1.03329	-1.33001	-1.20866	-1.04223
		255.39	0.263706	0.241892	0.276007	0.312293		255.39	-1.02781	-1.33197	-1.20637	-1.03947
		255.6	0.263405	0.244799	0.276491	0.316123		255.6	-1.02811	-1.32906	-1.20589	-1.03564
		255.79	0.261755	0.243432	0.277991	0.317294		255.79	-1.02976	-1.33043	-1.20439	-1.03447
		255.99	0.268278	0.245768	0.277775	0.318969		255.99	-1.02324	-1.32809	-1.2046	-1.03279
		256.2	0.264103	0.242858	0.27883	0.314638		256.2	-1.02741	-1.331	-1.20355	-1.03712
		256.39	0.267452	0.248736	0.279796	0.317895		256.39	-1.02406	-1.32512	-1.20258	-1.03387
		256.6	0.265629	0.243979	0.282092	0.319884		256.6	-1.02589	-1.32988	-1.20028	-1.03188
		256.79	0.26861	0.246876	0.280366	0.321664		256.79	-1.02291	-1.32698	-1.20201	-1.0301
		256.99	0.269494	0.253571	0.282995	0.322262		256.99	-1.02202	-1.32029	-1.19938	-1.0295
		257.19	0.267476	0.255817	0.280293	0.321142		257.19	-1.02404	-1.31804	-1.20208	-1.03062
		257.39	0.269433	0.253298	0.285117	0.321582		257.39	-1.02208	-1.32056	-1.19726	-1.03018
		257.6	0.26788	0.256427	0.289299	0.323127		257.6	-1.02364	-1.31743	-1.19308	-1.02863
		257.79	0.269462	0.254775	0.284902	0.321522		257.79	-1.02205	-1.31908	-1.19747	-1.03024
		257.99	0.271624	0.255995	0.287108	0.330748		257.99	-1.01989	-1.31786	-1.19527	-1.02101
		258.19	0.269935	0.25671	0.288911	0.327084		258.19	-1.02158	-1.31715	-1.19347	-1.02468
		258.39	0.273061	0.260346	0.290283	0.328296		258.39	-1.01845	-1.31351	-1.19209	-1.02346
		258.59	0.273751	0.259575	0.291514	0.328855		258.59	-1.01776	-1.31428	-1.19086	-1.02291
		258.79	0.273568	0.258878	0.287391	0.329114		258.79	-1.01795	-1.31498	-1.19499	-1.02265
		258.99	0.273398	0.260411	0.291645	0.330112		258.99	-1.01812	-1.31345	-1.19073	-1.02165
		259.19	0.278991	0.259378	0.294317	0.327441		259.19	-1.01252	-1.31448	-1.18806	-1.02432
		259.39	0.278713	0.26362	0.291495	0.332298		259.39	-1.0128	-1.31024	-1.19088	-1.01946
		259.59	0.281763	0.261783	0.296115	0.333441		259.59	-1.00975	-1.31208	-1.18626	-1.01832
		259.79	0.276631	0.264328	0.296254	0.332356		259.79	-1.01488	-1.30953	-1.18612	-1.0194
		259.99	0.280443	0.266507	0.295705	0.335845		259.99	-1.01107	-1.30735	-1.18667	-1.01591
		260.2	0.280586	0.271491	0.299258	0.341533		260.2	-1.01093	-1.30237	-1.18312	-1.01023
		260.39	0.281764	0.269711	0.298219	0.338318		260.39	-1.00975	-1.30415	-1.18416	-1.01344
		260.6	0.283827	0.26886	0.300684	0.337286		260.6	-1.00769	-1.305	-1.18169	-1.01447
		260.79	0.284382	0.268363	0.301793	0.339306		260.79	-1.00713	-1.3055	-1.18058	-1.01245
		260.99	0.285727	0.273253	0.303534	0.341677		260.99	-1.00579	-1.30061	-1.17884	-1.01008
		261.19	0.284046	0.275268	0.302704	0.337207		261.19	-1.00747	-1.29859	-1.17967	-1.01455
		261.39	0.285534	0.275449	0.307279	0.341598		261.39	-1.00598	-1.29841	-1.1751	-1.01016
		261.59	0.289166	0.276063	0.306486	0.345103		261.59	-1.00235	-1.2978	-1.17589	-1.00666
		261.79	0.288887	0.274242	0.306972	0.344107		261.79	-1.00263	-1.29962	-1.1754	-1.00765
		261.99	0.287962	0.275825	0.308001	0.346814		261.99	-1.00355	-1.29803	-1.17438	-1.00495
		262.19	0.289909	0.275785	0.307774	0.345248		262.19	-1.00161	-1.29807	-1.1746	-1.00651
		262.39	0.290596	0.278733	0.312881	0.343786		262.39	-1.00092	-1.29513	-1.1695	-1.00797
		262.6	0.29203	0.275736	0.31306	0.346508		262.6	-0.999485	-1.29812	-1.16932	-1.00525
		262.79	0.292306	0.284015	0.312425	0.346806		262.79	-0.999209	-1.28984	-1.16995	-1.00495
		262.99	0.293853	0.280429	0.315089	0.350519		262.99	-0.997662	-1.29343	-1.16729	-1.00124
		263.19	0.29613	0.282793	0.316845	0.351449		263.19	-0.995385	-1.29107	-1.16553	-1.00031
		263.39	0.29599	0.282469	0.317777	0.352463		263.39	-0.995525	-1.29139	-1.1646	-0.999297
		263.59	0.298319	0.285217	0.31817	0.353247		263.59	-0.993196	-1.28864	-1.16421	-0.998513
		263.79	0.299188	0.284825	0.314111	0.354616		263.79	-0.992327	-1.28903	-1.16827	-0.997144
		263.99	0.299178	0.284341	0.316813	0.352302		263.99	-0.992337	-1.28952	-1.16556	-0.999458
		264.19	0.298629	0.28837	0.322937	0.353748		264.19	-0.992886	-1.28549	-1.15944	-0.998012
		264.39	0.30241	0.290183	0.320427	0.354424		264.39	-0.989105	-1.28368	-1.16195	-0.997336
		264.59	0.303282	0.289174	0.317427	0.356157		264.59	-0.988233	-1.28468	-1.16495	-0.995603
		264.79	0.300235	0.289712	0.319353	0.357262		264.79	-0.99128	-1.28415	-1.16302	-0.994498
		264.99	0.307778	0.288413	0.321033	0.361087		264.99	-0.983737	-1.28545	-1.16134	-0.990673
		265.19	0.308018	0.29512	0.327293	0.359488		265.19	-0.983497	-1.27874	-1.15508	-0.992272
		265.39	0.306659	0.295108	0.327323	0.362127		265.39	-0.984856	-1.27875	-1.15505	-0.989633
		265.59	0.308703	0.295387	0.327345	0.36464		265.59	-0.982812	-1.27847	-1.15503	-0.987119
		265.79	0.30765	0.29367	0.324389	0.366346		265.79	-0.983865	-1.28019	-1.15799	-0.985414
		265.99	0.309111	0.301041	0.327084	0.363623		265.99	-0.982404	-1.27282	-1.15529	-0.988137
		266.19	0.310298	0.297759	0.331545	0.367487		266.19	-0.981217	-1.2761	-1.15083	-0.984272
		266.39	0.309767	0.305807	0.331635	0.367994		266.39	-0.981748	-1.26805	-1.15074	-0.983766
		266.59	0.31243	0.300886	0.332139	0.367841		266.59	-0.979085	-1.27297	-1.15024	-0.983919
		266.79	0.316183	0.304082	0.333697	0.372291		266.79	-0.975332	-1.26978	-1.14868	-0.979468
		266.99	0.313476	0.300316	0.336765	0.372424		266.99	-0.978039	-1.27354	-1.14561	-0.979336
		267.2	0.31516	0.304316	0.33688	0.367674		267.2	-0.976355	-1.26954	-1.1455	-0.984086
		267.39	0.317815	0.30812	0.335948	0.374262		267.39	-0.9737	-1.26574	-1.14643	-0.977498
		267.6	0.315607	0.308251	0.338532	0.370281		267.6	-0.975908	-1.26561	-1.14384	-0.981478
		267.79	0.319198	0.310466	0.33868	0.372234		267.79	-0.972317	-1.26339	-1.1437	-0.979526
		267.99	0.315618	0.305973	0.335999	0.37571		267.99	-0.975897	-1.26789	-1.14638	-0.97605
		268.2	0.321291	0.308423	0.343343	0.377007		268.2	-0.970224	-1.26544	-1.13903	-0.974753
		268.39	0.321807	0.308721	0.340181	0.377287		268.39	-0.969708	-1.26514	-1.1422	-0.974473
		268.6	0.320832	0.308742	0.339254	0.379566		268.6	-0.970683	-1.26512	-1.14312	-0.972194
		268.79	0.318585	0.314157	0.342228	0.380738		268.79	-0.97293	-1.2597	-1.14015	-0.971022
		268.99	0.320703	0.313205	0.346201	0.376847		268.99	-0.970812	-1.26065	-1.13618	-0.974913
		269.2	0.323868	0.314727	0.341661	0.37996		269.2	-0.967647	-1.25913	-1.14072	-0.9718
		269.39	0.326599	0.317759	0.344695	0.383165		269.39	-0.964916	-1.2561	-1.13768	-0.968595
		269.6	0.325599	0.318263	0.348236	0.380128		269.6	-0.965916	-1.2556	-1.13414	-0.971632
		269.79	0.325127	0.316269	0.343361	0.382156		269.79	-0.966388	-1.25759	-1.13902	-0.969604
		269.99	0.327381	0.31991	0.353311	0.387736		269.99	-0.964134	-1.25395	-1.12907	-0.964023
		270.2	0.327689	0.31842	0.352878	0.385051		270.2	-0.963826	-1.25544	-1.1295	-0.966709
		270.39	0.326557	0.319502	0.352157	0.387703		270.39	-0.964959	-1.25436	-1.13022	-0.964057
		270.59	0.329605	0.320416	0.356246	0.39047		270.59	-0.96191	-1.25344	-1.12613	-0.961289
		270.79	0.333172	0.321764	0.355206	0.387558		270.79	-0.958343	-1.25209	-1.12717	-0.964202
		270.99	0.333683	0.325076	0.353841	0.393121		270.99	-0.957832	-1.24878	-1.12853	-0.958639
		271.2	0.334363	0.327063	0.363256	0.390865		271.2	-0.957152	-1.2468	-1.11912	-0.960895
		271.39	0.3356	0.32569	0.357384	0.389044		271.39	-0.955916	-1.24817	-1.12499	-0.962716
		271.59	0.338202	0.329724	0.35762	0.390884		271.59	-0.953313	-1.24413	-1.12476	-0.960876
		271.79	0.338413	0.327926	0.358819	0.396408		271.79	-0.953102	-1.24593	-1.12356	-0.955352
		271.99	0.3348	0.332977	0.358962	0.395381		271.99	-0.956715	-1.24088	-1.12341	-0.956379
		272.2	0.341806	0.32906	0.365115	0.398728		272.2	-0.949709	-1.2448	-1.11726	-0.953032
		272.39	0.336813	0.331461	0.361515	0.39739		272.39	-0.954702	-1.2424	-1.12086	-0.95437
		272.6	0.340531	0.330927	0.36399	0.397193		272.6	-0.950984	-1.24293	-1.11839	-0.954567
		272.79	0.34178	0.335062	0.364513	0.400853		272.79	-0.949735	-1.2388	-1.11786	-0.950907
		272.99	0.343321	0.332971	0.367009	0.400352		272.99	-0.948194	-1.24089	-1.11537	-0.951408
		273.2	0.340252	0.337634	0.365074	0.397901		273.2	-0.951263	-1.23622	-1.1173	-0.953859
		273.39	0.345356	0.335078	0.367158	0.401546		273.39	-0.946159	-1.23878	-1.11522	-0.950214
		273.6	0.345369	0.337473	0.367026	0.406357		273.6	-0.946146	-1.23639	-1.11535	-0.945403
		273.79	0.345512	0.336152	0.368453	0.398229		273.79	-0.946003	-1.23771	-1.11392	-0.953531
		273.99	0.346737	0.336061	0.368375	0.407275		273.99	-0.944779	-1.2378	-1.114	-0.944484
		274.2	0.34645	0.347133	0.371081	0.404035		274.2	-0.945065	-1.22673	-1.1113	-0.947725
		274.39	0.347828	0.345564	0.373993	0.408673		274.39	-0.943687	-1.22829	-1.10838	-0.943087
		274.6	0.350714	0.341797	0.377856	0.406418		274.6	-0.940801	-1.23206	-1.10452	-0.945342
		274.79	0.350966	0.342398	0.376691	0.408401		274.79	-0.940549	-1.23146	-1.10569	-0.943359
		274.99	0.350442	0.346874	0.373823	0.409124		274.99	-0.941073	-1.22698	-1.10855	-0.942636
		275.19	0.354247	0.347617	0.374758	0.415383		275.19	-0.937268	-1.22624	-1.10762	-0.936377
		275.39	0.351079	0.348402	0.379683	0.410701		275.39	-0.940436	-1.22546	-1.10269	-0.941059
		275.59	0.356258	0.347177	0.377821	0.41345		275.59	-0.935258	-1.22668	-1.10456	-0.93831
		275.79	0.357038	0.356048	0.382542	0.408662		275.79	-0.934477	-1.21781	-1.09983	-0.943097
		275.99	0.352624	0.349926	0.381617	0.414161		275.99	-0.938891	-1.22393	-1.10076	-0.937599
		276.2	0.357923	0.35533	0.382336	0.419476		276.2	-0.933592	-1.21853	-1.10004	-0.932284
		276.39	0.354417	0.35551	0.38216	0.418449		276.39	-0.937098	-1.21835	-1.10022	-0.933311
		276.59	0.355165	0.354527	0.381727	0.415239		276.59	-0.93635	-1.21933	-1.10065	-0.93652
		276.79	0.359511	0.357682	0.386352	0.417927		276.79	-0.932004	-1.21618	-1.09602	-0.933833
		276.99	0.36133	0.356898	0.388595	0.418506		276.99	-0.930185	-1.21696	-1.09378	-0.933254
		277.2	0.357896	0.359717	0.38771	0.424941		277.2	-0.933619	-1.21414	-1.09467	-0.926819
		277.39	0.36401	0.357619	0.388151	0.420141		277.39	-0.927505	-1.21624	-1.09422	-0.931619
		277.6	0.361071	0.361333	0.391426	0.421408		277.6	-0.930444	-1.21253	-1.09095	-0.930352
		277.79	0.360792	0.361878	0.388754	0.423068		277.79	-0.930723	-1.21198	-1.09362	-0.928692
		277.99	0.367547	0.36711	0.393722	0.42701		277.99	-0.923969	-1.20675	-1.08865	-0.92475
		278.19	0.367955	0.359882	0.394881	0.423459		278.19	-0.92356	-1.21398	-1.0875	-0.9283
		278.39	0.365763	0.364045	0.393707	0.424734		278.39	-0.925752	-1.20981	-1.08867	-0.927026
		278.6	0.366589	0.367597	0.398755	0.426655		278.6	-0.924926	-1.20626	-1.08362	-0.925105
		278.79	0.369499	0.364801	0.399027	0.427152		278.79	-0.922016	-1.20906	-1.08335	-0.924608
		278.99	0.370528	0.366691	0.397818	0.429149		278.99	-0.920987	-1.20717	-1.08456	-0.922611
		279.19	0.371803	0.371901	0.400712	0.430897		279.19	-0.919712	-1.20196	-1.08166	-0.920863
		279.39	0.370248	0.371727	0.402647	0.427667		279.39	-0.921267	-1.20213	-1.07973	-0.924093
		279.6	0.373422	0.367961	0.400443	0.429449		279.6	-0.918094	-1.2059	-1.08193	-0.922311
		279.79	0.374615	0.373349	0.401434	0.437079		279.79	-0.9169	-1.20051	-1.08094	-0.914681
		279.99	0.373986	0.372263	0.402661	0.433433		279.99	-0.917529	-1.2016	-1.07972	-0.918327
		280.19	0.375428	0.376537	0.405146	0.436551		280.19	-0.916087	-1.19732	-1.07723	-0.915209
		280.39	0.375384	0.373686	0.406243	0.437745		280.39	-0.916131	-1.20017	-1.07613	-0.914015
		280.59	0.378913	0.375761	0.403739	0.439068		280.59	-0.912602	-1.1981	-1.07864	-0.912692
		280.79	0.380634	0.380138	0.408476	0.438264		280.79	-0.910881	-1.19372	-1.0739	-0.913496
		280.99	0.381295	0.383301	0.40706	0.43955		280.99	-0.91022	-1.19056	-1.07532	-0.91221
		281.19	0.378322	0.379237	0.411507	0.438306		281.19	-0.913193	-1.19462	-1.07087	-0.913454
		281.39	0.381562	0.382035	0.410531	0.443783		281.39	-0.909953	-1.19182	-1.07185	-0.907977
		281.59	0.384024	0.380429	0.409508	0.444216		281.59	-0.907491	-1.19343	-1.07287	-0.907544
		281.79	0.382127	0.380779	0.412232	0.4413		281.79	-0.909388	-1.19308	-1.07014	-0.91046
		281.99	0.387175	0.387747	0.414185	0.447677		281.99	-0.90434	-1.18611	-1.06819	-0.904083
		282.19	0.385406	0.386213	0.416884	0.44291		282.19	-0.906109	-1.18765	-1.06549	-0.90885
		282.39	0.383207	0.389359	0.413502	0.449379		282.39	-0.908308	-1.1845	-1.06887	-0.902381
		282.6	0.386743	0.388508	0.41603	0.446748		282.6	-0.904772	-1.18535	-1.06635	-0.905012
		282.79	0.38955	0.391692	0.4161	0.448716		282.79	-0.901965	-1.18217	-1.06628	-0.903044
		282.99	0.388418	0.390288	0.417044	0.452039		282.99	-0.903097	-1.18357	-1.06533	-0.89972
		283.19	0.390099	0.391514	0.418109	0.450708		283.19	-0.901417	-1.18234	-1.06427	-0.901052
		283.39	0.393477	0.394176	0.421011	0.449935		283.39	-0.898039	-1.17968	-1.06137	-0.901825
		283.6	0.394917	0.394439	0.423093	0.455283		283.6	-0.896598	-1.17942	-1.05928	-0.896477
		283.79	0.395302	0.395375	0.424511	0.452965		283.79	-0.896213	-1.17848	-1.05787	-0.898795
		283.99	0.394471	0.394234	0.420234	0.453134		283.99	-0.897044	-1.17962	-1.06214	-0.898626
		284.19	0.394456	0.396467	0.42621	0.459831		284.19	-0.89706	-1.17739	-1.05617	-0.891929
		284.39	0.395704	0.401377	0.427813	0.456493		284.39	-0.895811	-1.17248	-1.05456	-0.895267
		284.6	0.399348	0.403002	0.428389	0.460137		284.6	-0.892167	-1.17086	-1.05399	-0.891623
		284.79	0.399168	0.398843	0.430376	0.457387		284.79	-0.892348	-1.17502	-1.052	-0.894373
		284.99	0.399846	0.397433	0.425782	0.455221		284.99	-0.89167	-1.17643	-1.05659	-0.896539
		285.19	0.398878	0.406474	0.431531	0.462568		285.19	-0.892637	-1.16738	-1.05085	-0.889192
		285.39	0.400809	0.404798	0.430236	0.463558		285.39	-0.890706	-1.16906	-1.05214	-0.888202
		285.59	0.398692	0.40178	0.433186	0.463424		285.59	-0.892823	-1.17208	-1.04919	-0.888336
		285.79	0.406017	0.408394	0.431549	0.466481		285.79	-0.885498	-1.16546	-1.05083	-0.885279
		285.99	0.404067	0.408946	0.434018	0.465762		285.99	-0.887448	-1.16491	-1.04836	-0.885998
		286.19	0.402989	0.410616	0.435484	0.46834		286.19	-0.888526	-1.16324	-1.04689	-0.88342
		286.39	0.409739	0.407951	0.438884	0.46733		286.39	-0.881776	-1.16591	-1.04349	-0.88443
		286.59	0.400781	0.410577	0.437528	0.467305		286.59	-0.890734	-1.16328	-1.04485	-0.884454
		286.79	0.408741	0.417019	0.435459	0.469974		286.79	-0.882774	-1.15684	-1.04692	-0.881786
		286.99	0.414351	0.416343	0.44101	0.468859		286.99	-0.877164	-1.15752	-1.04137	-0.882901
		287.19	0.409257	0.412181	0.440414	0.471115		287.19	-0.882258	-1.16168	-1.04196	-0.880644
		287.39	0.41161	0.420102	0.440165	0.470417		287.39	-0.879905	-1.15376	-1.04221	-0.881343
		287.59	0.412234	0.415875	0.443576	0.474909		287.59	-0.879281	-1.15798	-1.0388	-0.876851
		287.79	0.412954	0.416317	0.444897	0.471641		287.79	-0.878561	-1.15754	-1.03748	-0.880119
		287.99	0.414744	0.418338	0.441674	0.473686		287.99	-0.876771	-1.15552	-1.0407	-0.878074
		288.2	0.415803	0.418326	0.445506	0.47604		288.2	-0.875712	-1.15553	-1.03687	-0.87572
		288.39	0.416551	0.419833	0.448434	0.478129		288.39	-0.874964	-1.15403	-1.03394	-0.873631
		288.6	0.42024	0.421826	0.449091	0.481497		288.6	-0.871275	-1.15203	-1.03329	-0.870263
		288.79	0.420015	0.423957	0.449629	0.477837		288.79	-0.871501	-1.1499	-1.03275	-0.873923
		288.99	0.41865	0.422509	0.450972	0.48112		288.99	-0.872865	-1.15135	-1.0314	-0.87064
		289.2	0.418637	0.424419	0.450647	0.482874		289.2	-0.872878	-1.14944	-1.03173	-0.868886
		289.39	0.422577	0.426692	0.455495	0.482172		289.39	-0.868938	-1.14717	-1.02688	-0.869588
		289.59	0.42156	0.430935	0.454775	0.482037		289.59	-0.869955	-1.14292	-1.0276	-0.869723
		289.79	0.424528	0.426504	0.45509	0.486755		289.79	-0.866987	-1.14735	-1.02729	-0.865005
		289.99	0.426251	0.430875	0.448816	0.485458		289.99	-0.865264	-1.14298	-1.03356	-0.866302
		290.2	0.427777	0.431175	0.458642	0.486337		290.2	-0.863738	-1.14268	-1.02373	-0.865423
		290.39	0.422252	0.430518	0.461283	0.486624		290.39	-0.869263	-1.14334	-1.02109	-0.865136
		290.6	0.428298	0.434982	0.461442	0.489831		290.6	-0.863217	-1.13888	-1.02093	-0.861929
		290.79	0.429326	0.438709	0.462716	0.486494		290.79	-0.862189	-1.13515	-1.01966	-0.865266
		290.99	0.426357	0.436312	0.462917	0.4898		290.99	-0.865158	-1.13755	-1.01946	-0.86196
		291.2	0.430075	0.437946	0.465674	0.492998		291.2	-0.86144	-1.13591	-1.0167	-0.858762
		291.39	0.428704	0.436486	0.464523	0.492496		291.39	-0.862811	-1.13737	-1.01785	-0.859263
		291.6	0.432788	0.444253	0.465483	0.492826		291.6	-0.858727	-1.12961	-1.01689	-0.858934
		291.79	0.43183	0.439501	0.470999	0.496002		291.79	-0.859685	-1.13436	-1.01138	-0.855758
		291.99	0.432654	0.443341	0.465415	0.496075		291.99	-0.858861	-1.13052	-1.01696	-0.855685
		292.2	0.438206	0.443983	0.469671	0.493741		292.2	-0.853309	-1.12988	-1.01271	-0.858019
		292.39	0.436503	0.442711	0.474832	0.497493		292.39	-0.855012	-1.13115	-1.00754	-0.854267
		292.59	0.434915	0.442873	0.472608	0.499985		292.59	-0.8566	-1.13099	-1.00977	-0.851775
		292.79	0.436366	0.448449	0.473821	0.497054		292.79	-0.85515	-1.12541	-1.00856	-0.854706
		292.99	0.439747	0.445249	0.471826	0.501033		292.99	-0.851768	-1.12861	-1.01055	-0.850727
		293.2	0.439565	0.448395	0.474595	0.501144		293.2	-0.85195	-1.12546	-1.00778	-0.850616
		293.39	0.438363	0.452166	0.475752	0.507259		293.39	-0.853152	-1.12169	-1.00662	-0.844501
		293.59	0.442216	0.450166	0.476454	0.501972		293.59	-0.849299	-1.12369	-1.00592	-0.849788
		293.79	0.439919	0.44914	0.479337	0.505337		293.79	-0.851596	-1.12472	-1.00304	-0.846423
		293.99	0.446319	0.45047	0.475166	0.504809		293.99	-0.845196	-1.12339	-1.00721	-0.846951
		294.2	0.445258	0.455647	0.476642	0.508903		294.2	-0.846258	-1.11821	-1.00573	-0.842857
		294.39	0.447596	0.456336	0.481848	0.507938		294.39	-0.843919	-1.11752	-1.00053	-0.843822
		294.59	0.447409	0.458057	0.480166	0.505983		294.59	-0.844106	-1.1158	-1.00221	-0.845777
		294.79	0.446976	0.459758	0.481597	0.508658		294.79	-0.844539	-1.1141	-1.00078	-0.843102
		294.99	0.448444	0.455186	0.483373	0.512601		294.99	-0.843071	-1.11867	-0.999003	-0.839159
		295.2	0.450968	0.462007	0.484872	0.510502		295.2	-0.840547	-1.11185	-0.997505	-0.841258
		295.39	0.454106	0.462506	0.488406	0.512774		295.39	-0.837409	-1.11135	-0.993971	-0.838986
		295.6	0.451626	0.46289	0.484921	0.517735		295.6	-0.839889	-1.11097	-0.997456	-0.834024
		295.79	0.458794	0.465699	0.486658	0.51361		295.79	-0.832721	-1.10816	-0.995719	-0.83815
		295.99	0.451591	0.464551	0.489063	0.518178		295.99	-0.839924	-1.10931	-0.993314	-0.833582
		296.19	0.454158	0.464086	0.490296	0.516758		296.19	-0.837357	-1.10977	-0.992081	-0.835002
		296.39	0.460386	0.467293	0.491366	0.519286		296.39	-0.831129	-1.10657	-0.99101	-0.832474
		296.6	0.457889	0.46987	0.495803	0.5184		296.6	-0.833626	-1.10399	-0.986574	-0.83336
		296.79	0.458123	0.46901	0.495536	0.519209		296.79	-0.833392	-1.10485	-0.98684	-0.832551
		296.99	0.457931	0.47243	0.495647	0.520877		296.99	-0.833584	-1.10143	-0.98673	-0.830883
		297.2	0.461188	0.470858	0.496917	0.523419		297.2	-0.830327	-1.103	-0.98546	-0.828341
		297.39	0.45782	0.47271	0.495141	0.523905		297.39	-0.833695	-1.10115	-0.987235	-0.827855
		297.6	0.46329	0.474121	0.50006	0.525943		297.6	-0.828225	-1.09974	-0.982316	-0.825817
		297.79	0.466953	0.473656	0.49763	0.525573		297.79	-0.824563	-1.1002	-0.984747	-0.826187
		297.99	0.463169	0.480324	0.500639	0.523574		297.99	-0.828346	-1.09353	-0.981737	-0.828186
		298.19	0.465982	0.479057	0.499109	0.527937		298.19	-0.825534	-1.0948	-0.983267	-0.823823
		298.39	0.464167	0.478591	0.50428	0.526927		298.39	-0.827348	-1.09527	-0.978096	-0.824833
		298.59	0.467326	0.47436	0.507388	0.527696		298.59	-0.824189	-1.0995	-0.974988	-0.824064
		298.79	0.469051	0.47645	0.506183	0.530361		298.79	-0.822464	-1.09741	-0.976194	-0.821399
		298.99	0.467214	0.478981	0.506328	0.532095		298.99	-0.824301	-1.09488	-0.976049	-0.819665
		299.2	0.467206	0.484592	0.505911	0.533773		299.2	-0.824309	-1.08927	-0.976466	-0.817987
		299.39	0.47158	0.481708	0.507274	0.53358		299.39	-0.819935	-1.09215	-0.975102	-0.81818
		299.59	0.472323	0.489416	0.508605	0.533636		299.59	-0.819193	-1.08444	-0.973771	-0.818124
		299.79	0.47459	0.489134	0.513704	0.531603		299.79	-0.816925	-1.08472	-0.968672	-0.820157
		299.99	0.480531	0.484059	0.512241	0.537764		299.99	-0.810985	-1.0898	-0.970136	-0.813996
		300.2	0.475232	0.4884	0.514704	0.536965		300.2	-0.816283	-1.08546	-0.967673	-0.814795
		300.39	0.4737	0.488585	0.515029	0.539877		300.39	-0.817815	-1.08527	-0.967347	-0.811883
		300.6	0.482507	0.489706	0.51753	0.537642		300.6	-0.809008	-1.08415	-0.964847	-0.814118
		300.79	0.479328	0.489444	0.520532	0.540779		300.79	-0.812187	-1.08442	-0.961844	-0.810981
		300.99	0.476366	0.490898	0.517396	0.54012		300.99	-0.815149	-1.08296	-0.964981	-0.81164
		301.19	0.479561	0.497127	0.518425	0.544011		301.19	-0.811954	-1.07673	-0.963951	-0.807749
		301.39	0.480733	0.49456	0.521144	0.542263		301.39	-0.810782	-1.0793	-0.961232	-0.809497
		301.59	0.484187	0.497821	0.524341	0.547149		301.59	-0.807329	-1.07604	-0.958035	-0.804611
		301.79	0.481256	0.497199	0.524461	0.545498		301.79	-0.810259	-1.07666	-0.957915	-0.806262
		301.99	0.487424	0.497566	0.522082	0.54935		301.99	-0.804091	-1.07629	-0.960294	-0.80241
		302.19	0.486605	0.501782	0.523643	0.548326		302.19	-0.80491	-1.07208	-0.958733	-0.803433
		302.39	0.488986	0.501918	0.526182	0.555569		302.39	-0.802529	-1.07194	-0.956194	-0.79619
		302.59	0.488474	0.506284	0.52758	0.549315		302.59	-0.803041	-1.06757	-0.954796	-0.802445
		302.79	0.488344	0.503942	0.529816	0.550878		302.79	-0.803171	-1.06992	-0.952561	-0.800882
		302.99	0.48762	0.503994	0.524961	0.555499		302.99	-0.803895	-1.06986	-0.957416	-0.796261
		303.19	0.48983	0.509027	0.530085	0.553796		303.19	-0.801685	-1.06483	-0.952291	-0.797964
		303.39	0.491748	0.511142	0.531886	0.556114		303.39	-0.799767	-1.06272	-0.95049	-0.795646
		303.59	0.49309	0.508543	0.529349	0.556644		303.59	-0.798425	-1.06532	-0.953028	-0.795116
		303.79	0.493509	0.508238	0.534507	0.558927		303.79	-0.798006	-1.06562	-0.947869	-0.792833
		303.99	0.497102	0.509335	0.533834	0.556436		303.99	-0.794413	-1.06452	-0.948542	-0.795324
		304.19	0.493213	0.510616	0.53734	0.556761		304.19	-0.798302	-1.06324	-0.945037	-0.794999
		304.39	0.497051	0.515	0.537745	0.558706		304.39	-0.794464	-1.05886	-0.944632	-0.793054
		304.59	0.498211	0.51704	0.539295	0.559028		304.59	-0.793304	-1.05682	-0.943081	-0.792732
		304.79	0.498999	0.515811	0.538838	0.562711		304.79	-0.792516	-1.05805	-0.943539	-0.789049
		304.99	0.504375	0.516897	0.542798	0.558845		304.99	-0.78714	-1.05696	-0.939579	-0.792915
		305.19	0.500608	0.52032	0.540116	0.56213		305.19	-0.790907	-1.05354	-0.942261	-0.78963
		305.39	0.500373	0.520763	0.546002	0.564049		305.39	-0.791143	-1.0531	-0.936375	-0.787711
		305.6	0.497566	0.521827	0.54296	0.565933		305.6	-0.793949	-1.05203	-0.939416	-0.785827
		305.79	0.508805	0.522442	0.542531	0.565102		305.79	-0.78271	-1.05142	-0.939845	-0.786658
		305.99	0.502682	0.523649	0.547625	0.568776		305.99	-0.788833	-1.05021	-0.934751	-0.782984
		306.19	0.508638	0.524953	0.549626	0.569114		306.19	-0.782877	-1.04891	-0.932751	-0.782646
		306.39	0.508176	0.524088	0.548466	0.566625		306.39	-0.783339	-1.04977	-0.933911	-0.785135
		306.59	0.508685	0.530719	0.545592	0.573881		306.59	-0.782831	-1.04314	-0.936784	-0.777879
		306.79	0.506688	0.524278	0.550908	0.574868		306.79	-0.784827	-1.04958	-0.931468	-0.776892
		306.99	0.509983	0.527921	0.552463	0.573768		306.99	-0.781532	-1.04594	-0.929914	-0.777992
		307.19	0.512492	0.53152	0.5527	0.575282		307.19	-0.779023	-1.04234	-0.929677	-0.776478
		307.39	0.514081	0.531255	0.554302	0.571683		307.39	-0.777434	-1.0426	-0.928075	-0.780077
		307.59	0.514346	0.534115	0.556996	0.574407		307.59	-0.777169	-1.03974	-0.925381	-0.777353
		307.79	0.515001	0.533528	0.557909	0.577761		307.79	-0.776515	-1.04033	-0.924467	-0.773999
		307.99	0.514756	0.535241	0.558354	0.57878		307.99	-0.776759	-1.03862	-0.924023	-0.77298
		308.19	0.519143	0.536431	0.56212	0.580551		308.19	-0.772372	-1.03743	-0.920256	-0.771209
		308.39	0.517999	0.540823	0.561166	0.581596		308.39	-0.773516	-1.03304	-0.921211	-0.770163
		308.59	0.520276	0.539405	0.562754	0.582527		308.59	-0.771239	-1.03445	-0.919622	-0.769233
		308.79	0.519328	0.536996	0.564516	0.583153		308.79	-0.772187	-1.03686	-0.91786	-0.768607
		308.99	0.520443	0.540177	0.560424	0.580126		308.99	-0.771072	-1.03368	-0.921952	-0.771634
		309.2	0.519951	0.543495	0.566595	0.586614		309.2	-0.771564	-1.03036	-0.915781	-0.765146
		309.39	0.523629	0.54511	0.568477	0.584576		309.39	-0.767886	-1.02875	-0.913899	-0.767184
		309.6	0.525251	0.546463	0.563353	0.582804		309.6	-0.766264	-1.0274	-0.919024	-0.768956
		309.79	0.526799	0.544732	0.567515	0.589666		309.79	-0.764716	-1.02913	-0.914861	-0.762094
		309.99	0.529492	0.544124	0.569087	0.590305		309.99	-0.762023	-1.02974	-0.91329	-0.761455
		310.2	0.525102	0.547448	0.566559	0.593069		310.2	-0.766413	-1.02641	-0.915817	-0.758691
		310.39	0.526613	0.549383	0.572423	0.588373		310.39	-0.764902	-1.02448	-0.909954	-0.763386
		310.6	0.526076	0.551121	0.569718	0.592846		310.6	-0.765439	-1.02274	-0.912659	-0.758914
		310.8	0.558652	0.585864	0.606385	0.626821		310.8	-0.732863	-0.987994	-0.875991	-0.724939
		311	0.562978	0.592162	0.612232	0.628401		311	-0.728537	-0.981697	-0.870144	-0.723359
		311.19	0.568121	0.594824	0.615784	0.635253		311.19	-0.723394	-0.979034	-0.866592	-0.716507
		311.39	0.565185	0.599132	0.615768	0.633441		311.39	-0.72633	-0.974727	-0.866609	-0.718319
		311.59	0.56771	0.593674	0.616699	0.632068		311.59	-0.723805	-0.980184	-0.865677	-0.719692
		311.8	0.567909	0.598995	0.618634	0.632353		311.8	-0.723607	-0.974863	-0.863742	-0.719407
		311.99	0.564558	0.597477	0.620609	0.629514		311.99	-0.726957	-0.976381	-0.861767	-0.722246
		312.2	0.567481	0.596528	0.618776	0.633702		312.2	-0.724034	-0.977331	-0.863601	-0.718058
		312.4	0.567593	0.594963	0.614186	0.630444		312.4	-0.723922	-0.978895	-0.86819	-0.721316
		312.59	0.5653	0.594075	0.616606	0.630043		312.59	-0.726215	-0.979784	-0.86577	-0.721717
		312.79	0.565183	0.594095	0.614542	0.631793		312.79	-0.726332	-0.979764	-0.867835	-0.719967
		313	0.566488	0.591633	0.615493	0.628854		313	-0.725027	-0.982225	-0.866883	-0.722906
		313.2	0.565799	0.59386	0.61567	0.631191		313.2	-0.725716	-0.979998	-0.866707	-0.720569
		313.39	0.562888	0.588202	0.61336	0.63115		313.39	-0.728627	-0.985656	-0.869016	-0.72061
		313.59	0.56589	0.58869	0.614402	0.629606		313.59	-0.725626	-0.985169	-0.867974	-0.722154
		313.79	0.564106	0.591219	0.619086	0.632348		313.79	-0.727409	-0.98264	-0.86329	-0.719412
		314	0.563114	0.589865	0.614765	0.629109		314	-0.728402	-0.983993	-0.867612	-0.722651
		314.19	0.563997	0.590938	0.616383	0.62773		314.19	-0.727518	-0.982921	-0.865993	-0.72403
		314.39	0.563294	0.59267	0.614732	0.630907		314.39	-0.728221	-0.981188	-0.867644	-0.720853
		314.59	0.561313	0.59251	0.615347	0.626961		314.59	-0.730202	-0.981349	-0.86703	-0.724798
		314.79	0.565531	0.588481	0.612557	0.625761		314.79	-0.725984	-0.985377	-0.86982	-0.725999
		315	0.564962	0.591942	0.615028	0.628962		315	-0.726553	-0.981917	-0.867348	-0.722798
		315.19	0.563456	0.58889	0.615244	0.624727		315.19	-0.728059	-0.984968	-0.867132	-0.727033
		315.4	0.563808	0.591291	0.615594	0.623959		315.4	-0.727707	-0.982567	-0.866782	-0.727801
		315.59	0.563493	0.590192	0.615197	0.629744		315.59	-0.728022	-0.983667	-0.86718	-0.722015
		315.8	0.564316	0.590178	0.613463	0.629526		315.8	-0.727199	-0.983681	-0.868914	-0.722234
		315.99	0.566007	0.588641	0.6146	0.629321		315.99	-0.725508	-0.985218	-0.867776	-0.722439
		316.19	0.561218	0.590001	0.612657	0.625101		316.19	-0.730297	-0.983858	-0.86972	-0.726658
		316.39	0.56629	0.590841	0.612725	0.626918		316.39	-0.725225	-0.983018	-0.869651	-0.724842
		316.59	0.565619	0.587242	0.612392	0.627624		316.59	-0.725896	-0.986616	-0.869984	-0.724136
		316.79	0.565646	0.588916	0.61419	0.627543		316.79	-0.725869	-0.984943	-0.868187	-0.724217
		316.99	0.563124	0.593313	0.612755	0.626706		316.99	-0.728391	-0.980546	-0.869622	-0.725054
		317.2	0.562292	0.588875	0.613815	0.624539		317.2	-0.729223	-0.984984	-0.868562	-0.727221
		317.39	0.562267	0.59568	0.612237	0.626649		317.39	-0.729248	-0.978179	-0.870139	-0.725111
		317.59	0.563759	0.591705	0.610407	0.627462		317.59	-0.727756	-0.982154	-0.871969	-0.724298
		317.79	0.56594	0.59591	0.613863	0.625819		317.79	-0.725575	-0.977948	-0.868513	-0.725941
		318	0.563041	0.588528	0.613665	0.630525		318	-0.728474	-0.98533	-0.868711	-0.721235
		318.19	0.562746	0.591939	0.614485	0.623876		318.19	-0.728769	-0.98192	-0.867891	-0.727884
		318.39	0.564423	0.593426	0.610912	0.625419		318.39	-0.727092	-0.980433	-0.871465	-0.72634
		318.59	0.565756	0.589379	0.613922	0.628015		318.59	-0.725759	-0.984479	-0.868454	-0.723745
		318.79	0.565348	0.591237	0.61755	0.629122		318.79	-0.726167	-0.982621	-0.864826	-0.722637
		318.99	0.560457	0.589461	0.610207	0.627751		318.99	-0.731059	-0.984398	-0.872169	-0.724009
		319.19	0.565047	0.589288	0.615476	0.627343		319.19	-0.726468	-0.984571	-0.8669	-0.724417
		319.39	0.560223	0.591873	0.612594	0.626323		319.39	-0.731292	-0.981986	-0.869783	-0.725437
		319.59	0.562085	0.59377	0.610318	0.624999		319.59	-0.72943	-0.980089	-0.872058	-0.726761
		319.79	0.562599	0.589268	0.610225	0.627723		319.79	-0.728916	-0.98459	-0.872151	-0.724037
		319.99	0.564387	0.592595	0.610125	0.628056		319.99	-0.727128	-0.981264	-0.872252	-0.723703
		320.19	0.566989	0.592797	0.615278	0.631256		320.19	-0.724527	-0.981062	-0.867099	-0.720504
		320.4	0.56803	0.59195	0.612769	0.628648		320.4	-0.723485	-0.981909	-0.869608	-0.723112
		320.59	0.564643	0.590362	0.613778	0.625953		320.59	-0.726872	-0.983496	-0.868599	-0.725807
		320.79	0.561869	0.592365	0.612962	0.625941		320.79	-0.729646	-0.981494	-0.869414	-0.725819
		320.99	0.56166	0.586646	0.609914	0.627636		320.99	-0.729855	-0.987213	-0.872462	-0.724123
		321.19	0.565506	0.592819	0.610554	0.629633		321.19	-0.726009	-0.98104	-0.871822	-0.722127
		321.39	0.567433	0.594723	0.611332	0.630741		321.39	-0.724082	-0.979136	-0.871045	-0.721019
		321.59	0.567656	0.597875	0.61302	0.631306		321.59	-0.723859	-0.975984	-0.869357	-0.720454
		321.8	0.564579	0.595475	0.616695	0.631143		321.8	-0.726936	-0.978383	-0.865682	-0.720617
		322	0.565456	0.595147	0.614384	0.630724		322	-0.726059	-0.978712	-0.867992	-0.721036
		322.2	0.565553	0.5924	0.614032	0.628916		322.2	-0.725962	-0.981459	-0.868344	-0.722843
		322.4	0.565911	0.595924	0.616896	0.628107		322.4	-0.725604	-0.977934	-0.86548	-0.723653
		322.6	0.564547	0.594458	0.614356	0.629129		322.6	-0.726968	-0.979401	-0.86802	-0.722631
		322.8	0.566203	0.592807	0.614002	0.629543		322.8	-0.725312	-0.981052	-0.868375	-0.722216
		322.99	0.567077	0.592644	0.613362	0.630589		322.99	-0.724438	-0.981214	-0.869014	-0.721171
		323.2	0.571173	0.589312	0.613297	0.633307		323.2	-0.720342	-0.984546	-0.86908	-0.718453
		323.4	0.570387	0.592109	0.618472	0.632734		323.4	-0.721128	-0.981749	-0.863905	-0.719026
		323.6	0.568347	0.59568	0.612212	0.628524		323.6	-0.723168	-0.978179	-0.870165	-0.723235
		323.8	0.570222	0.595922	0.616983	0.632074		323.8	-0.721293	-0.977937	-0.865394	-0.719686
		324	0.567144	0.596946	0.613242	0.634277		324	-0.724371	-0.976913	-0.869134	-0.717483
		324.2	0.567651	0.594805	0.623727	0.631635		324.2	-0.723864	-0.979053	-0.85865	-0.720125
		324.4	0.567073	0.596938	0.616618	0.633232		324.4	-0.724442	-0.97692	-0.865759	-0.718528
		324.6	0.567755	0.591557	0.613281	0.63073		324.6	-0.72376	-0.982301	-0.869095	-0.72103
		324.8	0.571748	0.597166	0.616872	0.633447		324.8	-0.719767	-0.976693	-0.865504	-0.718313
		324.99	0.570238	0.595795	0.621979	0.634435		324.99	-0.721277	-0.978064	-0.860397	-0.717325
		325.2	0.568374	0.597299	0.617539	0.63256		325.2	-0.723141	-0.97656	-0.864838	-0.7192
		325.4	0.573834	0.596681	0.61547	0.635289		325.4	-0.717682	-0.977178	-0.866907	-0.716471
		325.6	0.572556	0.593728	0.616873	0.631939		325.6	-0.718959	-0.980131	-0.865504	-0.719821
		325.8	0.568013	0.594571	0.618712	0.630799		325.8	-0.723503	-0.979287	-0.863664	-0.720961
		326	0.57189	0.599356	0.620001	0.635586		326	-0.719626	-0.974503	-0.862375	-0.716174
		326.2	0.571888	0.600625	0.620004	0.635053		326.2	-0.719627	-0.973234	-0.862372	-0.716707
		326.4	0.570812	0.601611	0.617598	0.637443		326.4	-0.720703	-0.972248	-0.864779	-0.714317
		326.6	0.56912	0.601146	0.619813	0.631177		326.6	-0.722395	-0.972712	-0.862564	-0.720583
		326.8	0.573202	0.599267	0.618841	0.633179		326.8	-0.718313	-0.974591	-0.863536	-0.718581
		327	0.573781	0.60033	0.617599	0.635116		327	-0.717734	-0.973529	-0.864778	-0.716644
		327.2	0.572361	0.599576	0.623284	0.636108		327.2	-0.719154	-0.974282	-0.859092	-0.715652
		327.4	0.574363	0.603412	0.617287	0.637271		327.4	-0.717152	-0.970447	-0.865089	-0.714489
		327.59	0.568927	0.599875	0.621771	0.635205		327.59	-0.722588	-0.973984	-0.860605	-0.716555
		327.8	0.578181	0.599247	0.625911	0.639524		327.8	-0.713334	-0.974612	-0.856465	-0.712236
		327.99	0.573373	0.60092	0.624838	0.637967		327.99	-0.718142	-0.972939	-0.857539	-0.713792
		328.19	0.57362	0.60434	0.622848	0.636556		328.19	-0.717895	-0.969518	-0.859529	-0.715204
		328.4	0.574362	0.603443	0.627409	0.637805		328.4	-0.717153	-0.970416	-0.854967	-0.713955
		328.59	0.574564	0.604914	0.621802	0.637784		328.59	-0.716951	-0.968944	-0.860574	-0.713976
		328.8	0.574797	0.60188	0.627599	0.640221		328.8	-0.716718	-0.971978	-0.854778	-0.711539
		328.99	0.575111	0.601581	0.625647	0.638294		328.99	-0.716404	-0.972277	-0.85673	-0.713466
		329.2	0.577724	0.604523	0.622119	0.63954		329.2	-0.713791	-0.969335	-0.860257	-0.71222
		329.4	0.574102	0.600829	0.624078	0.64045		329.4	-0.717413	-0.97303	-0.858299	-0.711309
		329.6	0.575028	0.60252	0.628922	0.640765		329.6	-0.716487	-0.971338	-0.853455	-0.710995
		329.79	0.574304	0.600992	0.62514	0.636556		329.79	-0.717211	-0.972867	-0.857236	-0.715204
		330	0.57425	0.603452	0.627399	0.639933		330	-0.717265	-0.970407	-0.854978	-0.711827
		330.2	0.573488	0.603412	0.625407	0.641091		330.2	-0.718027	-0.970446	-0.856969	-0.710669
		330.39	0.577395	0.608467	0.626478	0.643545		330.39	-0.71412	-0.965392	-0.855898	-0.708215
		330.6	0.572265	0.607215	0.627995	0.639221		330.6	-0.719251	-0.966644	-0.854382	-0.712539
		330.8	0.583683	0.605561	0.628392	0.641066		330.8	-0.707832	-0.968297	-0.853984	-0.710694
		331	0.579556	0.602912	0.628028	0.641112		331	-0.711959	-0.970947	-0.854349	-0.710648
		331.2	0.578535	0.605725	0.626381	0.641921		331.2	-0.71298	-0.968134	-0.855996	-0.709839
		331.4	0.574755	0.605586	0.627731	0.640048		331.4	-0.71676	-0.968273	-0.854646	-0.711712
		331.6	0.580904	0.603944	0.629605	0.642064		331.6	-0.710611	-0.969915	-0.852772	-0.709696
		331.8	0.577655	0.607317	0.624992	0.64496		331.8	-0.71386	-0.966541	-0.857385	-0.7068
		332	0.579097	0.607848	0.62542	0.639036		332	-0.712418	-0.96601	-0.856956	-0.712724
		332.19	0.581393	0.606061	0.627296	0.641635		332.19	-0.710122	-0.967798	-0.85508	-0.710125
		332.4	0.57527	0.607751	0.630501	0.648208		332.4	-0.716246	-0.966108	-0.851875	-0.703552
		332.59	0.580309	0.607769	0.629395	0.642339		332.59	-0.711206	-0.96609	-0.852982	-0.709421
		332.8	0.578994	0.605884	0.630123	0.645689		332.8	-0.712521	-0.967974	-0.852253	-0.706071
		332.99	0.581317	0.609851	0.628786	0.643991		332.99	-0.710198	-0.964008	-0.85359	-0.707769
		333.19	0.577093	0.608704	0.632328	0.644352		333.19	-0.714422	-0.965155	-0.850049	-0.707408
		333.4	0.581403	0.611917	0.627362	0.642334		333.4	-0.710112	-0.961941	-0.855014	-0.709426
		333.59	0.580418	0.61423	0.63088	0.645884		333.59	-0.711097	-0.959628	-0.851496	-0.705876
		333.8	0.584512	0.613578	0.629796	0.642119		333.8	-0.707003	-0.960281	-0.852581	-0.709641
		333.99	0.581995	0.611458	0.627507	0.646042		333.99	-0.70952	-0.962401	-0.85487	-0.705718
		334.2	0.581457	0.609242	0.631138	0.644551		334.2	-0.710058	-0.964617	-0.851238	-0.707209
		334.39	0.576919	0.609947	0.6282	0.644776		334.39	-0.714596	-0.963912	-0.854177	-0.706984
		334.59	0.582895	0.609095	0.634649	0.644764		334.59	-0.70862	-0.964764	-0.847727	-0.706995
		334.79	0.585588	0.61035	0.627898	0.644948		334.79	-0.705927	-0.963509	-0.854479	-0.706812
		335	0.582748	0.614939	0.633479	0.64532		335	-0.708767	-0.958919	-0.848898	-0.70644
		335.2	0.582107	0.613342	0.633504	0.646324		335.2	-0.709408	-0.960516	-0.848873	-0.705436
		335.39	0.58365	0.615084	0.634788	0.645424		335.39	-0.707865	-0.958775	-0.847589	-0.706335
		335.6	0.585179	0.608847	0.634525	0.648455		335.6	-0.706336	-0.965012	-0.847851	-0.703305
		335.79	0.585021	0.610712	0.629725	0.647514		335.79	-0.706494	-0.963147	-0.852652	-0.704246
		336	0.584696	0.610793	0.632779	0.646172		336	-0.706819	-0.963066	-0.849597	-0.705588
		336.19	0.583032	0.612256	0.634826	0.647073		336.19	-0.708483	-0.961603	-0.84755	-0.704687
		336.4	0.581727	0.612006	0.631915	0.647049		336.4	-0.709788	-0.961853	-0.850461	-0.704711
		336.59	0.580671	0.615103	0.63477	0.649107		336.59	-0.710844	-0.958756	-0.847607	-0.702653
		336.8	0.583248	0.616792	0.631852	0.648156		336.8	-0.708267	-0.957067	-0.850525	-0.703604
		337	0.585284	0.613439	0.632071	0.650693		337	-0.706231	-0.96042	-0.850306	-0.701066
		337.19	0.580227	0.615746	0.633427	0.648712		337.19	-0.711288	-0.958112	-0.848949	-0.703047
		337.4	0.581546	0.61608	0.638382	0.648582		337.4	-0.709969	-0.957778	-0.843995	-0.703178
		337.59	0.586237	0.619462	0.632677	0.650744		337.59	-0.705278	-0.954397	-0.8497	-0.701016
		337.79	0.58612	0.6118	0.630266	0.649598		337.79	-0.705396	-0.962059	-0.85211	-0.702161
		337.99	0.586419	0.61362	0.636034	0.647846		337.99	-0.705096	-0.960239	-0.846342	-0.703914
		338.19	0.580869	0.614941	0.635426	0.649682		338.19	-0.710646	-0.958917	-0.846951	-0.702078
		338.39	0.5875	0.611815	0.634286	0.652612		338.39	-0.704015	-0.962044	-0.84809	-0.699148
		338.59	0.586087	0.61889	0.637978	0.648532		338.59	-0.705428	-0.954968	-0.844399	-0.703228
		338.79	0.586077	0.614446	0.638421	0.651791		338.79	-0.705438	-0.959413	-0.843956	-0.699969
		338.99	0.583242	0.620113	0.634138	0.652828		338.99	-0.708273	-0.953746	-0.848238	-0.698932
		339.2	0.585564	0.617338	0.633505	0.650941		339.2	-0.705951	-0.95652	-0.848871	-0.700819
		339.39	0.587473	0.619311	0.634945	0.647884		339.39	-0.704042	-0.954548	-0.847432	-0.703876
		339.59	0.585509	0.617289	0.637876	0.649152		339.59	-0.706006	-0.95657	-0.844501	-0.702608
		339.79	0.587126	0.616716	0.640118	0.651885		339.79	-0.704389	-0.957143	-0.842259	-0.699875
		339.99	0.585203	0.620093	0.636892	0.649936		339.99	-0.706312	-0.953766	-0.845484	-0.701823
		340.2	0.585634	0.617664	0.634921	0.652756		340.2	-0.705881	-0.956195	-0.847456	-0.699003
		340.39	0.585274	0.620846	0.638615	0.647901		340.39	-0.706241	-0.953012	-0.843761	-0.703859
		340.59	0.586081	0.618665	0.639658	0.65407		340.59	-0.705434	-0.955194	-0.842719	-0.69769
		340.79	0.588314	0.61595	0.638131	0.651594		340.79	-0.703201	-0.957908	-0.844245	-0.700166
		341	0.589658	0.618914	0.641918	0.652683		341	-0.701857	-0.954944	-0.840458	-0.699077
		341.19	0.588605	0.61987	0.639877	0.651076		341.19	-0.70291	-0.953988	-0.8425	-0.700684
		341.39	0.587387	0.614606	0.63915	0.655253		341.39	-0.704128	-0.959252	-0.843226	-0.696507
		341.59	0.584428	0.623465	0.634249	0.650696		341.59	-0.707087	-0.950394	-0.848127	-0.701064
		341.79	0.589123	0.61829	0.639042	0.654412		341.79	-0.702392	-0.955568	-0.843335	-0.697348
		341.99	0.594287	0.621637	0.636654	0.652414		341.99	-0.697228	-0.952222	-0.845723	-0.699346
		342.19	0.588381	0.620119	0.639483	0.653228		342.19	-0.703134	-0.95374	-0.842894	-0.698532
		342.39	0.587219	0.621382	0.638459	0.653552		342.39	-0.704296	-0.952476	-0.843918	-0.698208
		342.59	0.587211	0.621884	0.638103	0.650642		342.59	-0.704304	-0.951974	-0.844273	-0.701118
		342.8	0.588652	0.619007	0.642029	0.654162		342.8	-0.702863	-0.954852	-0.840348	-0.697598
		343	0.587524	0.621431	0.63864	0.655354		343	-0.703991	-0.952427	-0.843736	-0.696406
		343.2	0.583471	0.626219	0.636924	0.653297		343.2	-0.708044	-0.94764	-0.845452	-0.698463
		343.4	0.590118	0.623312	0.63991	0.653417		343.4	-0.701397	-0.950547	-0.842466	-0.698343
		343.6	0.590802	0.620088	0.637281	0.654269		343.6	-0.700713	-0.95377	-0.845096	-0.697491
		343.8	0.587298	0.619111	0.642214	0.653214		343.8	-0.704217	-0.954747	-0.840162	-0.698546
		344	0.59146	0.625989	0.638844	0.654256		344	-0.700056	-0.94787	-0.843532	-0.697504
		344.2	0.590477	0.622583	0.641278	0.656269		344.2	-0.701038	-0.951276	-0.841098	-0.695491
		344.4	0.587811	0.618583	0.640305	0.654521		344.4	-0.703704	-0.955276	-0.842071	-0.697239
		344.6	0.587405	0.622024	0.641003	0.654164		344.6	-0.70411	-0.951834	-0.841373	-0.697595
		344.8	0.591479	0.623699	0.64056	0.654518		344.8	-0.700036	-0.950159	-0.841816	-0.697242
		345	0.589182	0.626017	0.640841	0.656678		345	-0.702333	-0.947842	-0.841535	-0.695082
		345.2	0.586465	0.623938	0.640486	0.655284		345.2	-0.70505	-0.94992	-0.841891	-0.696476
		345.4	0.587528	0.620975	0.640557	0.653791		345.4	-0.703987	-0.952884	-0.841819	-0.697969
		345.6	0.591064	0.620111	0.641857	0.655108		345.6	-0.700451	-0.953748	-0.84052	-0.696652
		345.8	0.588846	0.625065	0.638858	0.655346		345.8	-0.702669	-0.948793	-0.843519	-0.696414
		346	0.590491	0.62443	0.639891	0.657101		346	-0.701024	-0.949429	-0.842485	-0.694659
		346.2	0.592863	0.62608	0.640735	0.660122		346.2	-0.698652	-0.947778	-0.841641	-0.691638
		346.4	0.593089	0.625115	0.640744	0.655313		346.4	-0.698426	-0.948744	-0.841632	-0.696446
		346.6	0.590873	0.625034	0.638402	0.657633		346.6	-0.700642	-0.948825	-0.843975	-0.694127
		346.79	0.593975	0.62643	0.643277	0.659261		346.79	-0.69754	-0.947429	-0.8391	-0.692499
		346.99	0.589538	0.62287	0.639736	0.654501		346.99	-0.701977	-0.950989	-0.842641	-0.697259
		347.2	0.590681	0.620583	0.64331	0.658921		347.2	-0.700834	-0.953276	-0.839067	-0.692839
		347.4	0.586134	0.624333	0.639936	0.655339		347.4	-0.705381	-0.949526	-0.842441	-0.696421
		347.6	0.589172	0.629966	0.645108	0.656566		347.6	-0.702343	-0.943893	-0.837269	-0.695194
		347.8	0.592601	0.625524	0.640382	0.65547		347.8	-0.698915	-0.948335	-0.841994	-0.69629
		348	0.59452	0.624554	0.643483	0.655302		348	-0.696995	-0.949305	-0.838894	-0.696458
		348.2	0.59301	0.62485	0.646375	0.654909		348.2	-0.698505	-0.949009	-0.836001	-0.696851
		348.4	0.591189	0.625644	0.642169	0.658648		348.4	-0.700326	-0.948214	-0.840207	-0.693112
		348.6	0.58988	0.629006	0.642697	0.65883		348.6	-0.701635	-0.944853	-0.83968	-0.69293
		348.79	0.592065	0.62657	0.643063	0.658507		348.79	-0.69945	-0.947289	-0.839313	-0.693253
		349	0.593004	0.625417	0.641799	0.658312		349	-0.698512	-0.948441	-0.840578	-0.693448
		349.19	0.589087	0.626035	0.640521	0.65928		349.19	-0.702428	-0.947823	-0.841856	-0.69248
		349.4	0.593686	0.625463	0.642189	0.658724		349.4	-0.69783	-0.948396	-0.840188	-0.693036
		349.6	0.590136	0.628114	0.643095	0.661812		349.6	-0.701379	-0.945745	-0.839282	-0.689948
		349.8	0.591141	0.629969	0.644156	0.656882		349.8	-0.700374	-0.943889	-0.838221	-0.694878
		350	0.593746	0.626451	0.640164	0.657078		350	-0.697769	-0.947408	-0.842212	-0.694682
		350.19	0.589369	0.624984	0.646244	0.658204		350.19	-0.702146	-0.948875	-0.836132	-0.693556
		350.4	0.589584	0.626835	0.644395	0.660001		350.4	-0.701931	-0.947023	-0.837982	-0.691759
		350.6	0.593119	0.619673	0.644178	0.660545		350.6	-0.698396	-0.954185	-0.838199	-0.691215
		350.8	0.591479	0.624462	0.640249	0.658105		350.8	-0.700036	-0.949396	-0.842127	-0.693655
		350.99	0.590718	0.626122	0.642051	0.654952		350.99	-0.700797	-0.947737	-0.840325	-0.696808
		351.2	0.591351	0.626276	0.646408	0.660144		351.2	-0.700164	-0.947583	-0.835968	-0.691616
		351.4	0.592276	0.628333	0.646882	0.657282		351.4	-0.699239	-0.945525	-0.835495	-0.694478
		351.6	0.593896	0.623227	0.642251	0.656234		351.6	-0.697619	-0.950631	-0.840126	-0.695526
		351.8	0.593742	0.625724	0.64737	0.660744		351.8	-0.697773	-0.948135	-0.835006	-0.691016
		351.99	0.593013	0.627965	0.648218	0.659544		351.99	-0.698502	-0.945894	-0.834159	-0.692215
		352.2	0.591187	0.627049	0.641545	0.658901		352.2	-0.700328	-0.94681	-0.840832	-0.692859
		352.4	0.59261	0.627443	0.642079	0.660206		352.4	-0.698906	-0.946415	-0.840297	-0.691554
		352.6	0.59528	0.62633	0.642453	0.66043		352.6	-0.696235	-0.947528	-0.839923	-0.69133
		352.79	0.593271	0.624782	0.647294	0.659931		352.79	-0.698244	-0.949077	-0.835082	-0.691829
		353	0.590017	0.626237	0.644875	0.660707		353	-0.701499	-0.947622	-0.837501	-0.691053
		353.2	0.59697	0.624762	0.648554	0.659612		353.2	-0.694545	-0.949096	-0.833823	-0.692148
		353.39	0.595733	0.628439	0.645275	0.6595		353.39	-0.695782	-0.94542	-0.837102	-0.69226
		353.6	0.593107	0.626507	0.644775	0.659083		353.6	-0.698408	-0.947351	-0.837601	-0.692677
		353.79	0.596792	0.627894	0.646945	0.658682		353.79	-0.694723	-0.945965	-0.835431	-0.693078
		354	0.595435	0.625384	0.647569	0.660161		354	-0.69608	-0.948475	-0.834808	-0.691599
		354.19	0.591097	0.629728	0.644863	0.657429		354.19	-0.700418	-0.94413	-0.837514	-0.694331
		354.39	0.588618	0.627104	0.645575	0.662974		354.39	-0.702897	-0.946755	-0.836801	-0.688786
		354.59	0.593786	0.62774	0.643363	0.661652		354.59	-0.697729	-0.946118	-0.839013	-0.690108
		354.8	0.591326	0.628101	0.64564	0.655668		354.8	-0.700189	-0.945757	-0.836736	-0.696092
		355	0.59033	0.628889	0.646824	0.65928		355	-0.701185	-0.94497	-0.835553	-0.692479
		355.19	0.59377	0.62853	0.645092	0.663113		355.19	-0.697746	-0.945329	-0.837284	-0.688647
		355.4	0.591523	0.630618	0.648069	0.661551		355.4	-0.699992	-0.943241	-0.834307	-0.690209
		355.59	0.593482	0.631029	0.643406	0.659186		355.59	-0.698034	-0.942829	-0.83897	-0.692574
		355.8	0.590652	0.626217	0.649001	0.663754		355.8	-0.700863	-0.947642	-0.833376	-0.688006
		355.99	0.596115	0.631139	0.65086	0.661202		355.99	-0.6954	-0.94272	-0.831517	-0.690558
		356.2	0.593472	0.628876	0.642501	0.660549		356.2	-0.698044	-0.944983	-0.839875	-0.691211
		356.4	0.598793	0.632439	0.648102	0.660045		356.4	-0.692722	-0.941419	-0.834274	-0.691715
		356.59	0.591838	0.62925	0.642423	0.661934		356.59	-0.699677	-0.944608	-0.839953	-0.689826
		356.79	0.59705	0.627824	0.643166	0.657858		356.79	-0.694465	-0.946034	-0.839211	-0.693902
		356.99	0.596967	0.625286	0.649526	0.664702		356.99	-0.694548	-0.948573	-0.83285	-0.687057
		357.2	0.593874	0.627201	0.64385	0.659591		357.2	-0.697641	-0.946657	-0.838527	-0.692169
		357.39	0.59457	0.63015	0.646337	0.664967		357.39	-0.696945	-0.943708	-0.836039	-0.686793
		357.59	0.59296	0.629835	0.646039	0.659559		357.59	-0.698555	-0.944024	-0.836337	-0.692201
		357.79	0.594129	0.62951	0.641575	0.662159		357.79	-0.697386	-0.944348	-0.840802	-0.689601
		358	0.596309	0.630547	0.643252	0.660569		358	-0.695206	-0.943312	-0.839124	-0.691191
		358.19	0.594781	0.629401	0.64551	0.662169		358.19	-0.696734	-0.944458	-0.836866	-0.689591
		358.39	0.592484	0.633213	0.647247	0.662093		358.39	-0.699031	-0.940646	-0.83513	-0.689667
		358.59	0.593799	0.632403	0.646867	0.663131		358.59	-0.697716	-0.941455	-0.835509	-0.688629
		358.8	0.589824	0.631153	0.648248	0.660745		358.8	-0.701691	-0.942705	-0.834128	-0.691015
		359	0.593959	0.631789	0.646738	0.658465		359	-0.697556	-0.94207	-0.835639	-0.693294
		359.19	0.599352	0.628768	0.651499	0.663908		359.19	-0.692163	-0.94509	-0.830877	-0.687852
		359.39	0.596498	0.631513	0.644937	0.663258		359.39	-0.695017	-0.942346	-0.83744	-0.688502
		359.59	0.595285	0.629752	0.649227	0.661788		359.59	-0.69623	-0.944107	-0.83315	-0.689972
		359.79	0.593393	0.629491	0.643862	0.664818		359.79	-0.698122	-0.944367	-0.838514	-0.686942
		359.99	0.596606	0.627754	0.645221	0.6641		359.99	-0.694909	-0.946104	-0.837155	-0.68766
		360.19	0.595161	0.629395	0.644402	0.662423		360.19	-0.696354	-0.944464	-0.837974	-0.689337
		360.39	0.592817	0.62994	0.648148	0.662453		360.39	-0.698698	-0.943919	-0.834229	-0.689307
		360.59	0.596691	0.631386	0.648844	0.66174		360.59	-0.694824	-0.942473	-0.833532	-0.690019
		360.8	0.592343	0.628224	0.646173	0.659388		360.8	-0.699172	-0.945635	-0.836204	-0.692372
		360.99	0.598156	0.631025	0.647369	0.664713		360.99	-0.693359	-0.942833	-0.835008	-0.687047
		361.2	0.598562	0.627627	0.649582	0.66192		361.2	-0.692953	-0.946231	-0.832795	-0.68984
		361.39	0.596415	0.628641	0.645105	0.667997		361.39	-0.6951	-0.945218	-0.837272	-0.683763
		361.59	0.593269	0.629816	0.645182	0.667244		361.59	-0.698246	-0.944042	-0.837194	-0.684516
		361.79	0.595595	0.630156	0.644617	0.666273		361.79	-0.69592	-0.943703	-0.837759	-0.685487
		361.99	0.596569	0.628613	0.648505	0.66401		361.99	-0.694946	-0.945246	-0.833872	-0.68775
		362.19	0.595923	0.628233	0.647162	0.66453		362.19	-0.695592	-0.945626	-0.835215	-0.68723
		362.39	0.598711	0.628799	0.648308	0.662283		362.39	-0.692804	-0.94506	-0.834069	-0.689477
		362.59	0.598117	0.630991	0.646559	0.664565		362.59	-0.693398	-0.942867	-0.835818	-0.687195
		362.79	0.596602	0.628663	0.647628	0.662597		362.79	-0.694913	-0.945195	-0.834749	-0.689163
		362.99	0.594522	0.630507	0.647031	0.663012		362.99	-0.696993	-0.943351	-0.835345	-0.688748
		363.19	0.596626	0.631624	0.646179	0.663269		363.19	-0.694889	-0.942235	-0.836197	-0.688491
		363.39	0.595867	0.633918	0.648918	0.66561		363.39	-0.695648	-0.93994	-0.833459	-0.68615
		363.6	0.59678	0.634402	0.646561	0.665633		363.6	-0.694735	-0.939457	-0.835816	-0.686127
		363.8	0.596368	0.629796	0.645405	0.665161		363.8	-0.695147	-0.944062	-0.836972	-0.686599
		364	0.595971	0.631336	0.650541	0.664893		364	-0.695544	-0.942523	-0.831836	-0.686867
		364.2	0.596487	0.631837	0.649675	0.664823		364.2	-0.695028	-0.942021	-0.832701	-0.686937
		364.4	0.593877	0.629787	0.648191	0.66384		364.4	-0.697638	-0.944071	-0.834185	-0.68792
		364.6	0.595052	0.631822	0.648191	0.661472		364.6	-0.696463	-0.942036	-0.834186	-0.690288
		364.8	0.595043	0.631476	0.648614	0.664446		364.8	-0.696472	-0.942382	-0.833762	-0.687314
		364.99	0.59932	0.63379	0.645469	0.665727		364.99	-0.692196	-0.940068	-0.836908	-0.686033
		365.2	0.595282	0.63245	0.648059	0.663063		365.2	-0.696233	-0.941408	-0.834317	-0.688697
		365.4	0.596129	0.628525	0.648159	0.665086		365.4	-0.695386	-0.945333	-0.834217	-0.686674
		365.6	0.597164	0.629348	0.644408	0.660973		365.6	-0.694351	-0.94451	-0.837968	-0.690787
		365.79	0.594876	0.635252	0.644076	0.662514		365.79	-0.696639	-0.938607	-0.8383	-0.689246
		366	0.594521	0.631942	0.64505	0.662972		366	-0.696994	-0.941917	-0.837326	-0.688788
		366.2	0.594567	0.629666	0.650816	0.668468		366.2	-0.696948	-0.944192	-0.83156	-0.683292
		366.4	0.595009	0.63129	0.648356	0.662468		366.4	-0.696506	-0.942569	-0.834021	-0.689292
		366.59	0.595348	0.634662	0.64695	0.663186		366.59	-0.696167	-0.939197	-0.835427	-0.688574
		366.8	0.600717	0.63417	0.651663	0.663289		366.8	-0.690798	-0.939688	-0.830713	-0.688471
		367	0.595231	0.634135	0.647833	0.662077		367	-0.696284	-0.939724	-0.834543	-0.689683
		367.19	0.60064	0.634911	0.651911	0.664099		367.19	-0.690875	-0.938948	-0.830465	-0.687661
		367.4	0.593842	0.630258	0.643611	0.663385		367.4	-0.697673	-0.943601	-0.838766	-0.688375
		367.6	0.595575	0.631472	0.647256	0.667014		367.6	-0.69594	-0.942387	-0.835121	-0.684746
		367.8	0.592942	0.634447	0.647562	0.666921		367.8	-0.698573	-0.939411	-0.834814	-0.684839
		367.99	0.598629	0.633911	0.649235	0.667163		367.99	-0.692886	-0.939947	-0.833141	-0.684597
		368.2	0.59657	0.631684	0.649343	0.66326		368.2	-0.694945	-0.942175	-0.833033	-0.6885
		368.4	0.598025	0.634105	0.650697	0.665927		368.4	-0.69349	-0.939754	-0.83168	-0.685833
		368.6	0.593778	0.632075	0.64873	0.662145		368.6	-0.697737	-0.941783	-0.833647	-0.689615
		368.8	0.595164	0.634817	0.642878	0.665615		368.8	-0.696351	-0.939041	-0.839499	-0.686145
		368.99	0.597713	0.637197	0.649904	0.665594		368.99	-0.693802	-0.936661	-0.832472	-0.686166
		369.2	0.597494	0.629404	0.647831	0.663426		369.2	-0.694021	-0.944455	-0.834545	-0.688334
		369.4	0.600281	0.63348	0.650237	0.665802		369.4	-0.691234	-0.940379	-0.83214	-0.685958
		369.6	0.595266	0.635492	0.650208	0.665878		369.6	-0.696249	-0.938367	-0.832168	-0.685882
		369.79	0.598274	0.629724	0.648975	0.665335		369.79	-0.693241	-0.944134	-0.833402	-0.686425
		370	0.601173	0.63524	0.647543	0.666862		370	-0.690342	-0.938619	-0.834833	-0.684898
		370.2	0.596075	0.637754	0.6527	0.667095		370.2	-0.695441	-0.936105	-0.829676	-0.684665
		370.4	0.599117	0.633632	0.649102	0.669203		370.4	-0.692398	-0.940227	-0.833274	-0.682557
		370.6	0.595395	0.631865	0.648519	0.667316		370.6	-0.69612	-0.941994	-0.833857	-0.684444
		370.79	0.59758	0.638442	0.642895	0.66687		370.79	-0.693936	-0.935417	-0.839482	-0.68489
		371	0.598314	0.629786	0.646715	0.663737		371	-0.693201	-0.944073	-0.835662	-0.688022
		371.19	0.597316	0.635906	0.648992	0.66832		371.19	-0.694199	-0.937953	-0.833384	-0.68344
		371.4	0.597968	0.633575	0.649775	0.666426		371.4	-0.693547	-0.940284	-0.832602	-0.685334
		371.59	0.59942	0.633043	0.649079	0.665324		371.59	-0.692095	-0.940815	-0.833298	-0.686436
		371.8	0.597741	0.633676	0.651468	0.666867		371.8	-0.693774	-0.940183	-0.830909	-0.684893
		372	0.59937	0.630052	0.645375	0.668791		372	-0.692145	-0.943807	-0.837001	-0.682969
		372.2	0.596257	0.634316	0.647605	0.664842		372.2	-0.695258	-0.939543	-0.834771	-0.686918
		372.39	0.600813	0.637946	0.650321	0.667568		372.39	-0.690703	-0.935912	-0.832055	-0.684192
		372.59	0.59789	0.635261	0.651116	0.669628		372.59	-0.693625	-0.938597	-0.83126	-0.682132
		372.8	0.597332	0.634009	0.645827	0.667628		372.8	-0.694183	-0.93985	-0.836549	-0.684132
		373	0.597012	0.636812	0.650876	0.666059		373	-0.694503	-0.937047	-0.8315	-0.685701
		373.2	0.595695	0.63248	0.651079	0.669015		373.2	-0.69582	-0.941379	-0.831297	-0.682745
		373.4	0.597263	0.635141	0.649957	0.667487		373.4	-0.694252	-0.938718	-0.832419	-0.684273
		373.6	0.596304	0.636181	0.64623	0.665406		373.6	-0.695211	-0.937677	-0.836146	-0.686353
		373.8	0.599185	0.64059	0.650094	0.670824		373.8	-0.69233	-0.933268	-0.832282	-0.680936
		373.99	0.598373	0.639915	0.646722	0.669005		373.99	-0.693142	-0.933944	-0.835655	-0.682755
		374.19	0.601186	0.637408	0.652074	0.664703		374.19	-0.690329	-0.93645	-0.830302	-0.687056
		374.39	0.597437	0.635377	0.648581	0.66818		374.39	-0.694079	-0.938482	-0.833796	-0.68358
		374.6	0.601212	0.633541	0.648264	0.668064		374.6	-0.690303	-0.940318	-0.834113	-0.683696
		374.79	0.596332	0.634629	0.651956	0.668172		374.79	-0.695183	-0.939229	-0.83042	-0.683588
		374.99	0.600816	0.630224	0.651055	0.666952		374.99	-0.690699	-0.943634	-0.831321	-0.684808
		375.2	0.599062	0.63492	0.65039	0.667258		375.2	-0.692453	-0.938938	-0.831987	-0.684502
		375.39	0.596904	0.636111	0.649528	0.66641		375.39	-0.694611	-0.937748	-0.832848	-0.68535
		375.59	0.59944	0.64356	0.647492	0.66547		375.59	-0.692075	-0.930299	-0.834885	-0.68629
		375.79	0.598838	0.638538	0.652132	0.662452		375.79	-0.692677	-0.93532	-0.830244	-0.689308
		375.99	0.599647	0.636744	0.655882	0.669332		375.99	-0.691868	-0.937115	-0.826495	-0.682428
		376.19	0.599299	0.635955	0.649874	0.667529		376.19	-0.692216	-0.937904	-0.832503	-0.684231
		376.4	0.598158	0.634968	0.653792	0.6693		376.4	-0.693357	-0.938891	-0.828584	-0.682459
		376.59	0.597584	0.633807	0.650747	0.668171		376.59	-0.693931	-0.940052	-0.831629	-0.683589
		376.8	0.597229	0.635256	0.646985	0.665801		376.8	-0.694286	-0.938603	-0.835391	-0.685959
		376.99	0.601467	0.636481	0.649679	0.669176		376.99	-0.690048	-0.937377	-0.832697	-0.682584
		377.19	0.60095	0.642031	0.652845	0.669493		377.19	-0.690565	-0.931828	-0.829531	-0.682267
		377.39	0.599707	0.638699	0.650086	0.670348		377.39	-0.691808	-0.935159	-0.832291	-0.681412
		377.59	0.599278	0.634093	0.649376	0.665903		377.59	-0.692237	-0.939766	-0.833	-0.685857
		377.8	0.597574	0.635771	0.652177	0.668576		377.8	-0.693941	-0.938087	-0.830199	-0.683184
		377.99	0.59802	0.637391	0.647992	0.669058		377.99	-0.693495	-0.936467	-0.834385	-0.682702
		378.19	0.600017	0.638165	0.649925	0.668214		378.19	-0.691498	-0.935693	-0.832452	-0.683546
		378.39	0.600052	0.638703	0.651971	0.668498		378.39	-0.691463	-0.935155	-0.830406	-0.683262
		378.6	0.599268	0.636609	0.652075	0.665156		378.6	-0.692247	-0.937249	-0.830301	-0.686604
		378.8	0.599186	0.640209	0.653388	0.666613		378.8	-0.692329	-0.93365	-0.828989	-0.685147
		378.99	0.598302	0.635847	0.647307	0.666843		378.99	-0.693213	-0.938011	-0.835069	-0.684917
		379.19	0.600989	0.634651	0.647619	0.670646		379.19	-0.690527	-0.939207	-0.834758	-0.681113
		379.39	0.599838	0.633921	0.650093	0.666328		379.39	-0.691677	-0.939938	-0.832284	-0.685432
		379.59	0.597759	0.639283	0.652845	0.668962		379.59	-0.693756	-0.934576	-0.829531	-0.682798
		379.79	0.601627	0.635324	0.650213	0.668361		379.79	-0.689888	-0.938534	-0.832164	-0.683399
		379.99	0.597641	0.631396	0.65146	0.668631		379.99	-0.693874	-0.942462	-0.830916	-0.683129
		380.19	0.599714	0.637152	0.656065	0.663614		380.19	-0.691801	-0.936707	-0.826311	-0.688146
		380.39	0.599575	0.636049	0.650547	0.672048		380.39	-0.69194	-0.93781	-0.83183	-0.679712
		380.59	0.601129	0.639611	0.652503	0.66808		380.59	-0.690386	-0.934248	-0.829873	-0.68368
		380.79	0.599775	0.636458	0.649793	0.666321		380.79	-0.69174	-0.9374	-0.832584	-0.685439
		380.99	0.599638	0.640566	0.652185	0.67259		380.99	-0.691877	-0.933292	-0.830192	-0.67917
		381.19	0.600201	0.634458	0.652089	0.669428		381.19	-0.691314	-0.9394	-0.830288	-0.682332
		381.39	0.595883	0.639855	0.654381	0.666825		381.39	-0.695632	-0.934004	-0.827996	-0.684935
		381.59	0.598443	0.637415	0.650258	0.667713		381.59	-0.693072	-0.936443	-0.832119	-0.684047
		381.79	0.599061	0.637201	0.647114	0.668493		381.79	-0.692454	-0.936657	-0.835263	-0.683267
		381.99	0.596936	0.636688	0.651342	0.667491		381.99	-0.694579	-0.93717	-0.831034	-0.684268
		382.19	0.59687	0.638802	0.650528	0.668736		382.19	-0.694645	-0.935057	-0.831848	-0.683024
		382.39	0.599109	0.639772	0.648006	0.671509		382.39	-0.692406	-0.934086	-0.83437	-0.680251
		382.59	0.60208	0.636835	0.65484	0.668375		382.59	-0.689435	-0.937024	-0.827537	-0.683385
		382.79	0.600142	0.638068	0.655088	0.671978		382.79	-0.691373	-0.935791	-0.827289	-0.679782
		382.99	0.601436	0.638786	0.652118	0.671164		382.99	-0.690079	-0.935072	-0.830259	-0.680596
		383.19	0.600683	0.639508	0.651498	0.669298		383.19	-0.690832	-0.934351	-0.830878	-0.682462
		383.39	0.596802	0.637275	0.651868	0.669358		383.39	-0.694713	-0.936584	-0.830509	-0.682402
		383.59	0.601247	0.639653	0.651503	0.670985		383.59	-0.690269	-0.934206	-0.830874	-0.680775
		383.79	0.602081	0.639702	0.649127	0.666399		383.79	-0.689434	-0.934157	-0.83325	-0.685361
		383.99	0.602379	0.636911	0.647313	0.66698		383.99	-0.689136	-0.936947	-0.835063	-0.68478
		384.19	0.601828	0.636639	0.652445	0.668043		384.19	-0.689688	-0.937219	-0.829932	-0.683716
		384.39	0.600934	0.639429	0.653528	0.66707		384.39	-0.690581	-0.934429	-0.828848	-0.68469
		384.6	0.598113	0.639584	0.65133	0.673795		384.6	-0.693402	-0.934274	-0.831046	-0.677965
		384.8	0.603111	0.638278	0.648403	0.673431		384.8	-0.688404	-0.935581	-0.833974	-0.678329
		384.99	0.601783	0.641306	0.650463	0.67297		384.99	-0.689732	-0.932553	-0.831914	-0.67879
		385.2	0.601792	0.637847	0.652761	0.672418		385.2	-0.689724	-0.936011	-0.829616	-0.679342
		385.4	0.601221	0.639063	0.647685	0.66806		385.4	-0.690294	-0.934795	-0.834692	-0.6837
		385.6	0.601424	0.637258	0.650752	0.668656		385.6	-0.690091	-0.936601	-0.831625	-0.683104
		385.8	0.601825	0.638551	0.649844	0.667587		385.8	-0.68969	-0.935308	-0.832532	-0.684173
		385.99	0.602864	0.637386	0.651579	0.671535		385.99	-0.688651	-0.936473	-0.830797	-0.680225
		386.2	0.603458	0.638781	0.65061	0.668856		386.2	-0.688057	-0.935078	-0.831767	-0.682904
		386.4	0.595344	0.639126	0.654309	0.669356		386.4	-0.696171	-0.934732	-0.828067	-0.682404
		386.6	0.602895	0.634332	0.64886	0.669365		386.6	-0.688621	-0.939527	-0.833517	-0.682395
		386.8	0.601156	0.635691	0.650603	0.66954		386.8	-0.69036	-0.938168	-0.831773	-0.68222
		386.99	0.598499	0.638734	0.653596	0.671441		386.99	-0.693016	-0.935125	-0.828781	-0.680319
		387.2	0.599632	0.641749	0.653216	0.66809		387.2	-0.691883	-0.93211	-0.829161	-0.68367
		387.4	0.600409	0.63991	0.653461	0.671118		387.4	-0.691106	-0.933948	-0.828915	-0.680642
		387.6	0.600702	0.639603	0.650383	0.670819		387.6	-0.690813	-0.934255	-0.831993	-0.680941
		387.8	0.599481	0.64255	0.649298	0.67281		387.8	-0.692034	-0.931309	-0.833079	-0.678949
		387.99	0.60103	0.640101	0.653279	0.671436		387.99	-0.690485	-0.933757	-0.829097	-0.680324
		388.2	0.600806	0.636933	0.649812	0.669635		388.2	-0.690709	-0.936926	-0.832565	-0.682125
		388.4	0.602343	0.644081	0.653186	0.671137		388.4	-0.689172	-0.929778	-0.82919	-0.680623
		388.6	0.603072	0.638161	0.648604	0.671861		388.6	-0.688444	-0.935697	-0.833772	-0.679899
		388.8	0.605216	0.640987	0.652987	0.669278		388.8	-0.686299	-0.932872	-0.82939	-0.682482
		388.99	0.602753	0.646344	0.650006	0.671633		388.99	-0.688762	-0.927515	-0.832371	-0.680127
		389.19	0.60077	0.641616	0.649434	0.672285		389.19	-0.690745	-0.932243	-0.832942	-0.679475
		389.4	0.601685	0.642084	0.651952	0.669242		389.4	-0.68983	-0.931775	-0.830424	-0.682518
		389.6	0.601513	0.640174	0.655601	0.674911		389.6	-0.690002	-0.933684	-0.826776	-0.676849
		389.8	0.599041	0.642409	0.6556	0.669385		389.8	-0.692474	-0.931449	-0.826776	-0.682375
		389.99	0.602549	0.636169	0.646393	0.669693		389.99	-0.688966	-0.93769	-0.835983	-0.682067
		390.2	0.600351	0.64011	0.649031	0.675697		390.2	-0.691165	-0.933748	-0.833345	-0.676063
		390.4	0.603533	0.642133	0.653951	0.672787		390.4	-0.687982	-0.931726	-0.828425	-0.678973
		390.6	0.604128	0.639314	0.648002	0.670666		390.6	-0.687387	-0.934545	-0.834375	-0.681094
		390.8	0.604591	0.641906	0.650427	0.672332		390.8	-0.686925	-0.931952	-0.831949	-0.679428
		390.99	0.600854	0.644697	0.651752	0.672839		390.99	-0.690662	-0.929161	-0.830624	-0.678921
		391.2	0.60447	0.638686	0.649072	0.6694		391.2	-0.687045	-0.935173	-0.833304	-0.68236
		391.4	0.602545	0.637755	0.655385	0.672046		391.4	-0.68897	-0.936103	-0.826991	-0.679714
		391.6	0.599924	0.635507	0.651615	0.672068		391.6	-0.691591	-0.938351	-0.830761	-0.679692
		391.8	0.60341	0.639266	0.654118	0.676407		391.8	-0.688106	-0.934592	-0.828259	-0.675352
		391.99	0.601956	0.639205	0.653352	0.674034		391.99	-0.689559	-0.934653	-0.829024	-0.677726
		392.2	0.602356	0.635533	0.649435	0.6735		392.2	-0.689159	-0.938325	-0.832941	-0.67826
		392.4	0.59906	0.639772	0.652909	0.670542		392.4	-0.692455	-0.934086	-0.829467	-0.681218
		392.6	0.602289	0.640648	0.653142	0.676818		392.6	-0.689226	-0.93321	-0.829235	-0.674942
		392.79	0.600975	0.64323	0.648978	0.668829		392.79	-0.69054	-0.930629	-0.833399	-0.68293
		392.99	0.599826	0.643346	0.651454	0.675717		392.99	-0.691689	-0.930513	-0.830923	-0.676043
		393.2	0.603679	0.63889	0.650613	0.668986		393.2	-0.687836	-0.934968	-0.831764	-0.682774
		393.39	0.602617	0.640736	0.650279	0.67022		393.39	-0.688898	-0.933122	-0.832097	-0.68154
		393.6	0.603904	0.641485	0.649142	0.672318		393.6	-0.687612	-0.932374	-0.833234	-0.679442
		393.8	0.603866	0.6404	0.655807	0.672321		393.8	-0.687649	-0.933458	-0.826569	-0.679439
		393.99	0.603126	0.642818	0.654874	0.672295		393.99	-0.688389	-0.93104	-0.827503	-0.679465
		394.19	0.604266	0.638703	0.65604	0.671135		394.19	-0.687249	-0.935155	-0.826336	-0.680625
		394.4	0.601402	0.639353	0.654453	0.674715		394.4	-0.690113	-0.934506	-0.827924	-0.677045
		394.59	0.600791	0.641826	0.652529	0.669868		394.59	-0.690725	-0.932033	-0.829848	-0.681892
		394.8	0.603199	0.64228	0.651852	0.670473		394.8	-0.688316	-0.931579	-0.830525	-0.681287
		394.99	0.605207	0.64125	0.653005	0.668535		394.99	-0.686308	-0.932609	-0.829372	-0.683225
		395.19	0.604236	0.640568	0.654695	0.672606		395.19	-0.687279	-0.93329	-0.827682	-0.679154
		395.39	0.604792	0.640057	0.651627	0.668268		395.39	-0.686723	-0.933801	-0.830749	-0.683492
		395.6	0.604369	0.643024	0.651826	0.669521		395.6	-0.687146	-0.930834	-0.83055	-0.682239
		395.8	0.603185	0.640719	0.653205	0.66959		395.8	-0.68833	-0.93314	-0.829171	-0.68217
		395.99	0.602144	0.643323	0.649988	0.673047		395.99	-0.689371	-0.930535	-0.832389	-0.678713
		396.2	0.605135	0.645087	0.653008	0.671973		396.2	-0.68638	-0.928771	-0.829368	-0.679787
		396.39	0.603255	0.646589	0.653408	0.669964		396.39	-0.68826	-0.92727	-0.828969	-0.681796
		396.6	0.603582	0.642638	0.65455	0.672621		396.6	-0.687933	-0.931221	-0.827826	-0.679138
		396.79	0.604046	0.642044	0.652027	0.672309		396.79	-0.687469	-0.931814	-0.83035	-0.679451
		396.99	0.60283	0.640648	0.652342	0.670069		396.99	-0.688685	-0.933211	-0.830034	-0.681691
		397.2	0.602522	0.642876	0.651909	0.670019		397.2	-0.688993	-0.930982	-0.830467	-0.681741
		397.39	0.604526	0.641852	0.648904	0.672233		397.39	-0.686989	-0.932007	-0.833473	-0.679527
		397.6	0.60199	0.644293	0.651229	0.672709		397.6	-0.689525	-0.929566	-0.831147	-0.679051
		397.79	0.600482	0.639702	0.656008	0.674567		397.79	-0.691033	-0.934157	-0.826369	-0.677193
		397.99	0.601396	0.644436	0.651907	0.671911		397.99	-0.69012	-0.929422	-0.83047	-0.679848
		398.2	0.602123	0.643875	0.656733	0.668721		398.2	-0.689392	-0.929983	-0.825644	-0.683039
		398.39	0.600847	0.645643	0.65451	0.67382		398.39	-0.690669	-0.928216	-0.827867	-0.67794
		398.59	0.60386	0.644823	0.651103	0.671247		398.59	-0.687655	-0.929035	-0.831274	-0.680513
		398.8	0.602055	0.642672	0.653462	0.672046		398.8	-0.68946	-0.931187	-0.828914	-0.679714
		398.99	0.604975	0.646119	0.656794	0.674986		398.99	-0.68654	-0.92774	-0.825582	-0.676774
		399.19	0.602551	0.639016	0.652677	0.674107		399.19	-0.688964	-0.934843	-0.8297	-0.677653
[truncated: 27,557 more rows]

## Sheet: Exp_2
		Binding raw data (nm)						Normalised to baseline step
		Time (s)	None	Ca	Grp170	Ca + Grp170		Time (s)	None	Ca	Grp170	Ca + Grp170
		0	0	0	0	0		0	-1.24429	-1.27981	-1.1418	-1.30184
		0.19	3.44e-06	0.00190321	0.00354076	-0.00040599		0.19	-1.24429	-1.27791	-1.13826	-1.30225
		0.39	-0.00118956	0.00137577	-0.00363874	-0.0005077		0.39	-1.24548	-1.27844	-1.14544	-1.30235
		0.59	-0.00011567	0.00026254	-0.00297355	-0.00014595		0.59	-1.24441	-1.27955	-1.14478	-1.30199
		0.79	0.00063848	-0.00324438	-0.00447905	-0.0001794		0.79	-1.24365	-1.28306	-1.14628	-1.30202
		0.99	-0.00172268	-0.00337903	-0.00424399	-0.00728592		0.99	-1.24602	-1.28319	-1.14605	-1.30913
		1.19	-0.00126023	-0.00079632	-0.00363037	0.00238468		1.19	-1.24555	-1.28061	-1.14543	-1.29945
		1.39	0.0023816	-0.00055292	-0.00326392	0.00169127		1.39	-1.24191	-1.28036	-1.14507	-1.30015
		1.59	0.0005226	-0.00083613	-0.00295134	-0.00480601		1.59	-1.24377	-1.28065	-1.14475	-1.30665
		1.79	-0.00217703	-0.0016667	-0.00349429	0.00249842		1.79	-1.24647	-1.28148	-1.1453	-1.29934
		1.99	0.00058249	-0.00296219	-0.00432253	-0.00302585		1.99	-1.24371	-1.28277	-1.14612	-1.30487
		2.19	-0.00123959	-0.00315995	-0.00793423	0.0001689		2.19	-1.24553	-1.28297	-1.14974	-1.30167
		2.39	-0.00383874	0.00025851	-0.00636872	0.00027603		2.39	-1.24813	-1.27955	-1.14817	-1.30156
		2.59	-0.00053177	0.00149554	-0.00210275	0.00151041		2.59	-1.24482	-1.27832	-1.1439	-1.30033
		2.79	0.00197852	-0.00319576	0.00017041	0.00458011		2.79	-1.24231	-1.28301	-1.14163	-1.29726
		2.99	0.00108311	0.00067394	-0.00028028	0.00401894		2.99	-1.24321	-1.27914	-1.14208	-1.29782
		3.19	-0.00346116	-0.00236142	-0.00100069	0.00220093		3.19	-1.24775	-1.28217	-1.1428	-1.29964
		3.39	0.00181743	7.489e-05	-0.00030332	0.00417056		3.39	-1.24248	-1.27974	-1.14211	-1.29767
		3.59	0.00192892	0.00426576	-0.00076989	-0.00122565		3.59	-1.24236	-1.27555	-1.14257	-1.30307
		3.79	-0.00253913	0.00384927	-0.00397784	0.00532972		3.79	-1.24683	-1.27596	-1.14578	-1.29651
		3.99	-0.0005911	-0.00094162	-0.00246133	0.00344994		3.99	-1.24488	-1.28075	-1.14426	-1.29839
		4.19	0.0016765	-0.00037468	-0.00121959	0.00098448		4.19	-1.24262	-1.28019	-1.14302	-1.30085
		4.39	0.0006492	0.00210837	-0.00200435	0.00645289		4.39	-1.24364	-1.2777	-1.14381	-1.29539
		4.59	0.00331531	0.0040632	-0.00364366	0.00536343		4.59	-1.24098	-1.27575	-1.14545	-1.29648
		4.79	-0.00026759	0.00080711	0.0019504	0.00436706		4.79	-1.24456	-1.279	-1.13985	-1.29747
		4.99	0.00102184	0.00177984	0.00160797	0.00486093		4.99	-1.24327	-1.27803	-1.14019	-1.29698
		5.19	0.00069257	0.00268422	-0.00648985	0.0101567		5.19	-1.2436	-1.27713	-1.14829	-1.29168
		5.39	0.00064434	0.0009563	-0.00612665	0.00476396		5.39	-1.24365	-1.27886	-1.14793	-1.29708
		5.59	0.00150373	0.00043077	-0.00180001	0.00138157		5.59	-1.24279	-1.27938	-1.1436	-1.30046
		5.79	0.00229889	0.00241158	0.00043218	0.00600686		5.79	-1.24199	-1.2774	-1.14137	-1.29583
		5.99	-0.00229142	0.00031073	-0.00257737	0.00410999		5.99	-1.24658	-1.2795	-1.14438	-1.29773
		6.19	0.00250796	0.00095959	0.00260347	0.00199504		6.19	-1.24179	-1.27885	-1.1392	-1.29984
		6.39	-0.00259614	0.00157862	-0.00290216	0.00535676		6.39	-1.24689	-1.27823	-1.1447	-1.29648
		6.59	0.00035269	0.00210713	-0.0010873	0.00895073		6.59	-1.24394	-1.2777	-1.14289	-1.29289
		6.79	0.0009685	0.00286853	0.00048082	0.00837686		6.79	-1.24332	-1.27694	-1.14132	-1.29346
		6.99	0.00132478	0.00530601	-0.00224718	0.00362026		6.99	-1.24297	-1.27451	-1.14405	-1.29822
		7.19	-0.00103184	0.0040821	-1.447e-05	0.00742507		7.19	-1.24533	-1.27573	-1.14182	-1.29441
		7.39	0.00127846	0.00282823	8.748e-05	0.00618212		7.39	-1.24301	-1.27698	-1.14171	-1.29566
		7.59	0.0023908	0.00464867	0.00155259	0.0104124		7.59	-1.2419	-1.27516	-1.14025	-1.29143
		7.79	-0.00012346	0.00447888	0.0026299	0.00690333		7.79	-1.24442	-1.27533	-1.13917	-1.29494
		7.99	0.00159282	0.00500122	-0.00310277	0.00172341		7.99	-1.2427	-1.27481	-1.1449	-1.30012
		8.19	0.00194584	0.00724306	-0.0011241	0.00762092		8.19	-1.24235	-1.27257	-1.14293	-1.29422
		8.39	0.0060748	0.00447968	-0.00595289	0.00750677		8.39	-1.23822	-1.27533	-1.14775	-1.29433
		8.59	0.00590154	0.00291499	0.00059188	0.00696723		8.59	-1.23839	-1.2769	-1.14121	-1.29487
		8.79	0.00092376	0.00343501	-0.00269251	0.0045049		8.79	-1.24337	-1.27638	-1.14449	-1.29733
		8.99	7.857e-05	0.00472515	0.00092432	0.00879089		8.99	-1.24421	-1.27509	-1.14088	-1.29305
		9.19	-0.00015461	0.0065797	-0.0012023	0.00574119		9.19	-1.24445	-1.27323	-1.143	-1.2961
		9.39	0.00277803	0.00574892	-0.00595317	0.00527707		9.39	-1.24152	-1.27406	-1.14775	-1.29656
		9.59	0.00404919	0.00587601	0.00089839	0.00615195		9.59	-1.24024	-1.27394	-1.1409	-1.29569
		9.79	0.00351827	0.00797935	-0.00062877	0.00685405		9.79	-1.24077	-1.27183	-1.14243	-1.29499
		9.99	0.00143196	0.00594408	-0.00264642	0.0170291		9.99	-1.24286	-1.27387	-1.14445	-1.28481
		10.19	0.00172175	0.00223176	0.00285501	0.00441399		10.19	-1.24257	-1.27758	-1.13895	-1.29743
		10.39	0.00225967	0.00548777	-0.00347324	0.0107342		10.39	-1.24203	-1.27432	-1.14527	-1.29111
		10.59	0.00194632	0.00140923	-0.00226703	0.0093139		10.59	-1.24235	-1.2784	-1.14407	-1.29253
		10.79	-0.00090667	0.00363715	0.00231623	0.00977409		10.79	-1.2452	-1.27617	-1.13949	-1.29207
		10.99	0.00261118	0.00768246	0.0002819	0.0111555		10.99	-1.24168	-1.27213	-1.14152	-1.29068
		11.19	0.00232888	0.0046645	-0.00597188	0.0082873		11.19	-1.24196	-1.27515	-1.14777	-1.29355
		11.39	0.00161896	0.00874086	0.00129628	0.0114955		11.39	-1.24267	-1.27107	-1.14051	-1.29034
		11.59	0.0016885	0.0045148	0.00067464	0.0129397		11.59	-1.2426	-1.2753	-1.14113	-1.2889
		11.79	0.00203209	0.00736352	-0.00063278	0.0124244		11.79	-1.24226	-1.27245	-1.14243	-1.28941
		11.99	0.00351407	0.00872932	0.00145325	0.0175809		11.99	-1.24078	-1.27108	-1.14035	-1.28426
		12.19	0.00599925	0.0039751	0.00374395	0.0142927		12.19	-1.23829	-1.27584	-1.13806	-1.28755
		12.39	0.00521219	0.00431238	-0.00189763	0.0151394		12.39	-1.23908	-1.2755	-1.1437	-1.2867
		12.59	0.00254599	0.00516331	-0.00143874	0.0114172		12.59	-1.24175	-1.27465	-1.14324	-1.29042
		12.79	0.00247071	0.00406754	-0.00187947	0.0123888		12.79	-1.24182	-1.27574	-1.14368	-1.28945
		12.99	0.00235103	0.0065503	0.00464332	0.0124161		12.99	-1.24194	-1.27326	-1.13716	-1.28942
		13.19	0.00757121	0.00900883	0.00328291	0.00669623		13.19	-1.23672	-1.2708	-1.13852	-1.29514
		13.39	0.00473012	0.00304902	-0.00071624	0.0157092		13.39	-1.23956	-1.27676	-1.14252	-1.28613
		13.59	0.00111313	0.0098186	-0.00061379	0.00943652		13.59	-1.24318	-1.26999	-1.14242	-1.2924
		13.79	0.00192608	0.0070241	0.00264218	0.0165484		13.79	-1.24237	-1.27279	-1.13916	-1.28529
		13.99	0.00400327	0.00812438	-0.00188138	0.0140871		13.99	-1.24029	-1.27169	-1.14368	-1.28775
		14.19	0.00276788	0.00446151	0.00252967	0.0128357		14.19	-1.24153	-1.27535	-1.13927	-1.289
		14.39	0.0050637	0.0105311	0.00640561	0.0120368		14.39	-1.23923	-1.26928	-1.1354	-1.2898
		14.59	0.00600896	0.00478342	0.00217053	0.0134129		14.59	-1.23828	-1.27503	-1.13963	-1.28843
		14.79	0.00412034	0.00323721	0.00345907	0.0161959		14.79	-1.24017	-1.27657	-1.13834	-1.28564
		14.99	0.00186337	0.0109442	-0.00244422	0.014904		14.99	-1.24243	-1.26887	-1.14425	-1.28694
		15.19	0.0054243	0.00910565	0.00073399	0.0170759		15.19	-1.23887	-1.27071	-1.14107	-1.28476
		15.39	0.00253666	0.0124151	-0.0004298	0.013035		15.39	-1.24176	-1.2674	-1.14223	-1.2888
		15.59	0.00472438	0.00705161	0.00126422	0.0118269		15.59	-1.23957	-1.27276	-1.14054	-1.29001
		15.79	0.00311972	0.00839463	0.00577511	0.0142525		15.79	-1.24117	-1.27142	-1.13603	-1.28759
		15.99	0.00441698	0.0123768	-0.00199477	0.0122904		15.99	-1.23988	-1.26744	-1.1438	-1.28955
		16.19	0.0026225	0.00676462	-0.00073738	0.0142887		16.19	-1.24167	-1.27305	-1.14254	-1.28755
		16.39	0.00623306	0.00842955	-0.00286655	0.0123463		16.39	-1.23806	-1.27138	-1.14467	-1.28949
		16.59	0.003248	0.00989481	0.00172974	0.0141078		16.59	-1.24105	-1.26992	-1.14007	-1.28773
		16.79	0.00582041	0.0124031	0.00091726	0.0188102		16.79	-1.23847	-1.26741	-1.14088	-1.28303
		16.99	0.00737786	0.00514351	-0.0032789	0.0171952		16.99	-1.23692	-1.27467	-1.14508	-1.28464
		17.19	-0.00034084	0.00858445	0.00064385	0.0144319		17.19	-1.24463	-1.27123	-1.14116	-1.28741
		17.39	0.00586676	0.0100374	-0.00084931	0.0132244		17.39	-1.23843	-1.26977	-1.14265	-1.28861
		17.59	0.00523915	0.00915106	0.00352728	0.0165586		17.59	-1.23905	-1.27066	-1.13827	-1.28528
		17.79	0.00326757	0.00988556	0.0011373	0.0159812		17.79	-1.24103	-1.26993	-1.14066	-1.28586
		17.99	0.0041167	0.0103687	0.00105465	0.0238339		17.99	-1.24018	-1.26944	-1.14075	-1.27801
		18.19	0.00755605	0.00641172	0.00295994	0.0164265		18.19	-1.23674	-1.2734	-1.13884	-1.28541
		18.39	0.0028853	0.0129366	0.00311181	0.0160899		18.39	-1.24141	-1.26688	-1.13869	-1.28575
		18.59	0.00533879	0.0104532	0.00177717	0.0186407		18.59	-1.23895	-1.26936	-1.14002	-1.2832
		18.79	0.00588717	0.00793979	0.00489452	0.01786		18.79	-1.23841	-1.27187	-1.13691	-1.28398
		18.99	0.00678441	0.00785652	0.0026575	0.0194144		18.99	-1.23751	-1.27196	-1.13914	-1.28242
		19.19	0.00360194	0.0103614	0.00541003	0.0216973		19.19	-1.24069	-1.26945	-1.13639	-1.28014
		19.39	0.00294498	0.0124519	0.00434429	0.0193185		19.39	-1.24135	-1.26736	-1.13746	-1.28252
		19.59	0.00333459	0.0109078	0.00244924	0.0193539		19.59	-1.24096	-1.2689	-1.13935	-1.28249
		19.79	0.00704668	0.00963474	0.00280972	0.0152748		19.79	-1.23725	-1.27018	-1.13899	-1.28656
		19.99	0.00556661	0.0110498	-2.649e-05	0.0198109		19.99	-1.23873	-1.26876	-1.14183	-1.28203
		20.19	0.00513082	0.0112859	0.00392298	0.0218389		20.19	-1.23916	-1.26853	-1.13788	-1.28
		20.39	0.00413311	0.0117871	-0.00112698	0.0202925		20.39	-1.24016	-1.26802	-1.14293	-1.28155
		20.59	0.00586599	0.00944918	0.00197536	0.0194056		20.59	-1.23843	-1.27036	-1.13983	-1.28243
		20.79	0.00616541	0.0159947	0.00031961	0.021893		20.79	-1.23813	-1.26382	-1.14148	-1.27995
		20.99	0.00565364	0.0106883	0.00196254	0.0212411		20.99	-1.23864	-1.26912	-1.13984	-1.2806
		21.19	0.00142116	0.0111115	0.00250311	0.01625		21.19	-1.24287	-1.2687	-1.1393	-1.28559
		21.39	0.00425847	0.0115354	-0.00050403	0.0171271		21.39	-1.24003	-1.26828	-1.14231	-1.28471
		21.59	0.00514266	0.0133998	0.00223195	0.0215218		21.59	-1.23915	-1.26641	-1.13957	-1.28032
		21.79	0.00737869	0.0121239	-7.938e-05	0.0197419		21.79	-1.23691	-1.26769	-1.14188	-1.2821
		21.99	0.0085882	0.0145927	0.0018521	0.0214655		21.99	-1.23571	-1.26522	-1.13995	-1.28037
		22.19	0.00448088	0.0135956	0.00307681	0.020765		22.19	-1.23981	-1.26622	-1.13872	-1.28107
		22.39	0.00324808	0.0103605	0.00250948	0.0262079		22.39	-1.24105	-1.26945	-1.13929	-1.27563
		22.59	0.00694233	0.0119214	0.00360168	0.0228491		22.59	-1.23735	-1.26789	-1.1382	-1.27899
		22.79	0.00404928	0.0119045	0.00123118	0.020221		22.79	-1.24024	-1.26791	-1.14057	-1.28162
		22.99	0.00360734	0.0108756	0.00017037	0.0233614		22.99	-1.24069	-1.26894	-1.14163	-1.27848
		23.19	0.00603865	0.00910295	0.00105287	0.0201417		23.19	-1.23825	-1.27071	-1.14075	-1.2817
		23.39	0.00912246	0.0124173	0.00431164	0.0243072		23.39	-1.23517	-1.26739	-1.13749	-1.27753
		23.59	0.0075319	0.0149044	0.00495536	0.0220765		23.59	-1.23676	-1.26491	-1.13685	-1.27976
		23.79	0.00421792	0.0107539	0.00268177	0.0238173		23.79	-1.24008	-1.26906	-1.13912	-1.27802
		23.99	0.00572721	0.0149095	0.00275489	0.0198742		23.99	-1.23857	-1.2649	-1.13905	-1.28197
		24.19	0.00351813	0.0121786	0.00478862	0.0196584		24.19	-1.24078	-1.26763	-1.13701	-1.28218
		24.39	0.00566112	0.0136041	0.00219224	0.0204218		24.39	-1.23863	-1.26621	-1.13961	-1.28142
		24.59	0.00876941	0.0122279	0.00179893	0.0262878		24.59	-1.23552	-1.26758	-1.14	-1.27555
		24.79	0.00910836	0.0177995	0.00062558	0.0185537		24.79	-1.23518	-1.26201	-1.14118	-1.28329
		24.99	0.00608315	0.0119719	0.00239482	0.0240004		24.99	-1.23821	-1.26784	-1.13941	-1.27784
		25.19	0.00919518	0.0169268	0.00160942	0.0182306		25.19	-1.2351	-1.26289	-1.14019	-1.28361
		25.39	0.00598437	0.016588	0.00342489	0.0203928		25.39	-1.23831	-1.26322	-1.13838	-1.28145
		25.59	0.0088707	0.0154835	0.00265474	0.0205257		25.59	-1.23542	-1.26433	-1.13915	-1.28131
		25.79	0.00508428	0.0151889	0.00081968	0.0237392		25.79	-1.23921	-1.26462	-1.14098	-1.2781
		25.99	0.00863928	0.0156974	0.0031097	0.020568		25.99	-1.23565	-1.26411	-1.13869	-1.28127
		26.19	0.00726181	0.0149296	0.00319596	0.0212797		26.19	-1.23703	-1.26488	-1.13861	-1.28056
		26.39	0.00628456	0.0116294	0.0072713	0.0220115		26.39	-1.23801	-1.26818	-1.13453	-1.27983
		26.59	0.00574569	0.0124774	0.00315727	0.0333429		26.59	-1.23855	-1.26733	-1.13864	-1.2685
		26.79	0.00648607	0.0142306	0.00093241	0.0311565		26.79	-1.23781	-1.26558	-1.14087	-1.27068
		26.99	0.00912223	0.0185762	0.0057737	0.0261775		26.99	-1.23517	-1.26124	-1.13603	-1.27566
		27.19	0.00850854	0.0137055	0.00132869	0.0258566		27.19	-1.23578	-1.26611	-1.14047	-1.27598
		27.39	0.00531189	0.0150705	0.00288146	0.0234276		27.39	-1.23898	-1.26474	-1.13892	-1.27841
		27.59	0.00910225	0.0145929	0.0074762	0.0184402		27.59	-1.23519	-1.26522	-1.13433	-1.2834
		27.79	0.00671562	0.0112357	0.00391185	0.0239945		27.79	-1.23758	-1.26858	-1.13789	-1.27784
		27.99	0.00772755	0.0186563	0.00726447	0.0275311		27.99	-1.23657	-1.26116	-1.13454	-1.27431
		28.19	0.00924562	0.0156895	0.00536713	0.0249795		28.19	-1.23505	-1.26412	-1.13643	-1.27686
		28.39	0.00667891	0.0140811	-0.00034732	0.0226456		28.39	-1.23761	-1.26573	-1.14215	-1.27919
		28.59	0.00759081	0.0160458	0.00491724	0.0273623		28.59	-1.2367	-1.26377	-1.13688	-1.27448
		28.79	0.00799631	0.0173489	0.00351512	0.0222528		28.79	-1.2363	-1.26246	-1.13829	-1.27959
		28.99	0.00350858	0.0160111	0.00301541	0.0250072		28.99	-1.24078	-1.2638	-1.13879	-1.27683
		29.19	0.00663359	0.017538	0.00077191	0.0278056		29.19	-1.23766	-1.26227	-1.14103	-1.27403
		29.39	0.00938893	0.0145669	0.0053938	0.0227918		29.39	-1.2349	-1.26524	-1.13641	-1.27905
		29.59	0.00863822	0.0156706	0.00163368	0.0281447		29.59	-1.23565	-1.26414	-1.14017	-1.27369
		29.79	0.00668461	0.0138777	0.00045595	0.0263904		29.79	-1.23761	-1.26593	-1.14135	-1.27545
		29.99	0.00758752	0.0155804	0.00223326	0.0261357		29.99	-1.23671	-1.26423	-1.13957	-1.2757
		30.19	0.00389704	0.0151781	0.00368521	0.0238686		30.19	-1.2404	-1.26463	-1.13812	-1.27797
		30.39	0.00701669	0.0162122	0.00547712	0.0239213		30.39	-1.23728	-1.2636	-1.13632	-1.27792
		30.59	0.00799612	0.0182735	0.00411608	0.0253941		30.59	-1.2363	-1.26154	-1.13769	-1.27645
		30.79	0.00585563	0.0138425	0.00196746	0.0278945		30.79	-1.23844	-1.26597	-1.13983	-1.27394
		30.99	0.00723385	0.0179746	0.008985	0.0263394		30.99	-1.23706	-1.26184	-1.13282	-1.2755
		31.19	0.00664311	0.0200074	0.00397288	0.0235004		31.19	-1.23765	-1.2598	-1.13783	-1.27834
		31.39	0.00617509	0.0149832	0.00425961	0.0285203		31.39	-1.23812	-1.26483	-1.13754	-1.27332
		31.59	0.00904814	0.0142698	0.00120811	0.029165		31.59	-1.23525	-1.26554	-1.14059	-1.27267
		31.79	0.0066919	0.0146798	0.0064015	0.0286506		31.79	-1.2376	-1.26513	-1.1354	-1.27319
		31.99	0.0056052	0.0152052	0.00641863	0.0268935		31.99	-1.23869	-1.26461	-1.13538	-1.27495
		32.19	0.00773997	0.0182146	0.00789116	0.0269025		32.19	-1.23655	-1.2616	-1.13391	-1.27494
		32.39	0.00952605	0.0160732	0.00493961	0.0301024		32.39	-1.23477	-1.26374	-1.13686	-1.27174
		32.59	0.0085181	0.0148997	0.00382007	0.0245908		32.59	-1.23578	-1.26491	-1.13798	-1.27725
		32.79	0.00627014	0.0183056	0.00144423	0.0289687		32.79	-1.23802	-1.26151	-1.14036	-1.27287
		32.99	0.00787787	0.0164611	0.00602922	0.0239833		32.99	-1.23642	-1.26335	-1.13577	-1.27786
		33.19	0.00671531	0.015932	0.00595701	0.0239617		33.19	-1.23758	-1.26388	-1.13584	-1.27788
		33.39	0.00709208	0.0152876	0.00235162	0.0273159		33.39	-1.2372	-1.26452	-1.13945	-1.27452
		33.59	0.00927766	0.0167319	-0.00010888	0.0249333		33.59	-1.23502	-1.26308	-1.14191	-1.27691
		33.79	0.00849226	0.0182515	0.00454104	0.0275003		33.79	-1.2358	-1.26156	-1.13726	-1.27434
		33.99	0.0102463	0.0185697	0.00444095	0.0288641		33.99	-1.23405	-1.26124	-1.13736	-1.27298
		34.19	0.0100123	0.0151424	0.00018397	0.0283319		34.19	-1.23428	-1.26467	-1.14162	-1.27351
		34.39	0.00874943	0.0184143	0.00527693	0.0291962		34.39	-1.23554	-1.2614	-1.13652	-1.27264
		34.59	0.00535232	0.0207447	0.00664759	0.028278		34.59	-1.23894	-1.25907	-1.13515	-1.27356
		34.79	0.00712658	0.0168976	0.0029081	0.0298259		34.79	-1.23717	-1.26291	-1.13889	-1.27201
		34.99	0.010579	0.0210588	0.0054709	0.0248457		34.99	-1.23371	-1.25875	-1.13633	-1.27699
		35.19	0.00827631	0.0151207	0.00413763	0.0324354		35.19	-1.23602	-1.26469	-1.13766	-1.2694
		35.39	0.00715406	0.0205867	0.00533869	0.0288061		35.39	-1.23714	-1.25923	-1.13646	-1.27303
		35.59	0.011124	0.0166833	0.00436736	0.0283064		35.59	-1.23317	-1.26313	-1.13743	-1.27353
		35.79	0.00914255	0.0138017	0.00644681	0.0256656		35.79	-1.23515	-1.26601	-1.13535	-1.27617
		35.99	0.00490199	0.0208761	0.00387102	0.0298159		35.99	-1.23939	-1.25894	-1.13793	-1.27202
		36.19	0.01104	0.0192605	0.00424823	0.0250447		36.19	-1.23325	-1.26055	-1.13755	-1.27679
		36.39	0.00878121	0.0186472	0.00342391	0.0260338		36.39	-1.23551	-1.26116	-1.13838	-1.27581
		36.59	0.00892111	0.0214206	0.00270875	0.0283221		36.59	-1.23537	-1.25839	-1.13909	-1.27352
		36.79	0.00833316	0.0160627	0.00277732	0.0251627		36.79	-1.23596	-1.26375	-1.13902	-1.27668
		36.99	0.0139875	0.0155336	0.00845544	0.0268658		36.99	-1.23031	-1.26428	-1.13335	-1.27497
		37.19	0.00819608	0.0153544	0.00416823	0.0264252		37.19	-1.2361	-1.26446	-1.13763	-1.27541
		37.39	0.0079363	0.0179955	0.00715155	0.0295457		37.39	-1.23636	-1.26182	-1.13465	-1.27229
		37.59	0.00907946	0.0165726	0.00492151	0.0303242		37.59	-1.23521	-1.26324	-1.13688	-1.27152
		37.79	0.0102774	0.0167128	0.00561876	0.0286874		37.79	-1.23402	-1.2631	-1.13618	-1.27315
		37.99	0.00790422	0.0200501	0.00842395	0.0333031		37.99	-1.23639	-1.25976	-1.13338	-1.26854
		38.19	0.00759946	0.0190052	0.0065827	0.0253684		38.19	-1.23669	-1.26081	-1.13522	-1.27647
		38.39	0.00926766	0.0235286	0.00642829	0.0330439		38.39	-1.23503	-1.25628	-1.13537	-1.2688
		38.59	0.00939882	0.0138604	0.00536268	0.0318716		38.59	-1.23489	-1.26595	-1.13644	-1.26997
		38.79	0.00789758	0.0160421	0.00381756	0.0261954		38.79	-1.2364	-1.26377	-1.13798	-1.27564
		38.99	0.00988447	0.0176246	0.00584953	0.0273016		38.99	-1.23441	-1.26219	-1.13595	-1.27454
		39.19	0.00762002	0.0155889	0.00046194	0.0334047		39.19	-1.23667	-1.26422	-1.14134	-1.26843
		39.39	0.00940446	0.0214827	0.00582482	0.0316216		39.39	-1.23489	-1.25833	-1.13598	-1.27022
		39.59	0.0135348	0.0177218	0.00528932	0.0296253		39.59	-1.23076	-1.26209	-1.13651	-1.27221
		39.79	0.0118851	0.0160838	0.00426684	0.0267685		39.79	-1.23241	-1.26373	-1.13753	-1.27507
		39.99	0.00860428	0.0176622	0.00739249	0.0317802		39.99	-1.23569	-1.26215	-1.13441	-1.27006
		40.19	0.00903532	0.01554	0.0094734	0.0339487		40.19	-1.23526	-1.26427	-1.13233	-1.26789
		40.39	0.0100838	0.0182861	0.00615913	0.0287714		40.39	-1.23421	-1.26153	-1.13564	-1.27307
		40.59	0.00989071	0.0193076	0.00546894	0.0325155		40.59	-1.2344	-1.2605	-1.13633	-1.26932
		40.79	0.0124379	0.0189009	0.00699076	0.0338326		40.79	-1.23186	-1.26091	-1.13481	-1.26801
		40.99	0.00862655	0.0223967	0.00539442	0.0313261		40.99	-1.23567	-1.25742	-1.13641	-1.27051
		41.19	0.0079221	0.0174906	0.00258471	0.0307899		41.19	-1.23637	-1.26232	-1.13922	-1.27105
		41.39	0.0151384	0.018317	0.00261216	0.0329665		41.39	-1.22915	-1.26149	-1.13919	-1.26887
		41.59	0.00980556	0.0191273	0.00291307	0.0284431		41.59	-1.23449	-1.26068	-1.13889	-1.2734
		41.79	0.00938409	0.0199305	0.00599974	0.0274106		41.79	-1.23491	-1.25988	-1.1358	-1.27443
		41.99	0.00569974	0.0188053	0.00533972	0.0312147		41.99	-1.23859	-1.26101	-1.13646	-1.27062
		42.19	0.00932185	0.0206734	0.00562263	0.0309474		42.19	-1.23497	-1.25914	-1.13618	-1.27089
		42.39	0.00775567	0.0207285	0.00294533	0.0285384		42.39	-1.23654	-1.25908	-1.13886	-1.2733
		42.59	0.00788033	0.018498	0.00214384	0.0350283		42.59	-1.23641	-1.26131	-1.13966	-1.26681
		42.79	0.0082785	0.0178258	0.00170725	0.0304916		42.79	-1.23601	-1.26199	-1.14009	-1.27135
		42.99	0.00807908	0.0198425	0.00553573	0.03207		42.99	-1.23621	-1.25997	-1.13627	-1.26977
		43.19	0.00574574	0.0203199	0.00584355	0.0311773		43.19	-1.23855	-1.25949	-1.13596	-1.27066
		43.39	0.010033	0.0205154	0.00429707	0.0334346		43.39	-1.23426	-1.2593	-1.1375	-1.2684
		43.59	0.00802974	0.0199562	0.00489726	0.0322725		43.59	-1.23626	-1.25986	-1.1369	-1.26957
		43.79	0.00765539	0.0198011	0.00505247	0.0324385		43.79	-1.23664	-1.26001	-1.13675	-1.2694
		43.99	0.0128091	0.0192241	0.00487179	0.0330393		43.99	-1.23148	-1.26059	-1.13693	-1.2688
		44.19	0.00994467	0.0207901	0.00514271	0.0376781		44.19	-1.23435	-1.25902	-1.13666	-1.26416
		44.39	0.0112049	0.0182239	0.00480284	0.0317175		44.39	-1.23309	-1.26159	-1.137	-1.27012
		44.59	0.00917795	0.0181662	0.00428974	0.0325002		44.59	-1.23512	-1.26165	-1.13751	-1.26934
		44.79	0.00999759	0.0209308	0.00490323	0.029941		44.79	-1.2343	-1.25888	-1.1369	-1.2719
		44.99	0.0124561	0.0203052	0.00884753	0.0338832		44.99	-1.23184	-1.25951	-1.13295	-1.26796
		45.19	0.00894465	0.0168578	0.00439884	0.0275018		45.19	-1.23535	-1.26295	-1.1374	-1.27434
		45.39	0.00942085	0.0198357	0.00297071	0.0314042		45.39	-1.23487	-1.25998	-1.13883	-1.27044
		45.59	0.0111408	0.0209478	0.00749129	0.0353142		45.59	-1.23315	-1.25886	-1.13431	-1.26653
		45.79	0.00832568	0.0192238	0.0048771	0.0327826		45.79	-1.23597	-1.26059	-1.13692	-1.26906
		45.99	0.011484	0.0203112	0.00353139	0.0330463		45.99	-1.23281	-1.2595	-1.13827	-1.26879
		46.19	0.00723909	0.0201278	0.00624209	0.0312689		46.19	-1.23705	-1.25968	-1.13556	-1.27057
		46.39	0.00841855	0.0188169	0.00758203	0.0321636		46.39	-1.23587	-1.26099	-1.13422	-1.26968
		46.59	0.00770614	0.0219473	0.00403478	0.03518		46.59	-1.23659	-1.25786	-1.13777	-1.26666
		46.79	0.00656467	0.0227166	0.00115908	0.0355093		46.79	-1.23773	-1.2571	-1.14064	-1.26633
		46.99	0.00976193	0.0182929	0.00698272	0.0341305		46.99	-1.23453	-1.26152	-1.13482	-1.26771
		47.19	0.00857553	0.0213732	0.00652965	0.0301496		47.19	-1.23572	-1.25844	-1.13527	-1.27169
		47.39	0.0109092	0.0243926	0.00429823	0.0331091		47.39	-1.23338	-1.25542	-1.1375	-1.26873
		47.59	0.00749001	0.0206295	0.00578222	0.0332262		47.59	-1.2368	-1.25918	-1.13602	-1.26861
		47.79	0.00844764	0.022996	0.00559603	0.0349938		47.79	-1.23585	-1.25682	-1.13621	-1.26685
		47.99	0.00689875	0.0227878	-0.00046515	0.0340665		47.99	-1.23739	-1.25702	-1.14227	-1.26777
		48.19	0.0110181	0.0220157	0.0078628	0.0344119		48.19	-1.23328	-1.2578	-1.13394	-1.26743
		48.39	0.0109699	0.0196556	0.00197842	0.0348726		48.39	-1.23332	-1.26016	-1.13982	-1.26697
		48.59	0.0105887	0.0198048	0.00826011	0.0345497		48.59	-1.2337	-1.26001	-1.13354	-1.26729
		48.79	0.00834582	0.0186079	0.00253481	0.0351918		48.79	-1.23595	-1.2612	-1.13927	-1.26665
		48.99	0.00903482	0.0213078	0.00327638	0.0325594		48.99	-1.23526	-1.2585	-1.13853	-1.26928
		49.19	0.0112092	0.0222468	0.00288161	0.0362189		49.19	-1.23308	-1.25757	-1.13892	-1.26562
		49.39	0.0130162	0.0218294	0.00679457	0.0363896		49.39	-1.23128	-1.25798	-1.13501	-1.26545
		49.59	0.00779727	0.0205012	0.00561892	0.0373125		49.59	-1.2365	-1.25931	-1.13618	-1.26453
		49.79	0.00811236	0.0205515	0.00242903	0.0313362		49.79	-1.23618	-1.25926	-1.13937	-1.2705
		49.99	0.00907977	0.0215931	0.00649898	0.0376411		49.99	-1.23521	-1.25822	-1.1353	-1.2642
		50.19	0.0116401	0.0213394	0.00748193	0.0348005		50.19	-1.23265	-1.25847	-1.13432	-1.26704
		50.39	0.0114752	0.0233051	0.00540889	0.0377109		50.39	-1.23282	-1.25651	-1.13639	-1.26413
		50.59	0.00932797	0.0221607	0.00841206	0.0339841		50.59	-1.23497	-1.25765	-1.13339	-1.26786
		50.79	0.0112854	0.0202583	-0.00135628	0.0371468		50.79	-1.23301	-1.25955	-1.14316	-1.26469
		50.99	0.00801208	0.0248295	0.00338727	0.0380386		50.99	-1.23628	-1.25498	-1.13841	-1.2638
		51.19	0.011301	0.0256907	0.00020305	0.0354664		51.19	-1.23299	-1.25412	-1.1416	-1.26637
		51.39	0.00787575	0.0234049	0.00489829	0.0385381		51.39	-1.23642	-1.25641	-1.1369	-1.2633
		51.59	0.012021	0.0219699	0.00754461	0.0329171		51.59	-1.23227	-1.25784	-1.13426	-1.26892
		51.79	0.01302	0.0215151	0.0053593	0.0340645		51.79	-1.23127	-1.2583	-1.13644	-1.26777
		51.99	0.00947398	0.0219049	0.00477431	0.0336633		51.99	-1.23482	-1.25791	-1.13703	-1.26818
		52.19	0.0108971	0.0220715	0.0079194	0.0348809		52.19	-1.2334	-1.25774	-1.13388	-1.26696
		52.39	0.00983078	0.0211266	0.00597507	0.0304326		52.39	-1.23446	-1.25869	-1.13583	-1.27141
		52.59	0.009227	0.0230955	0.0075227	0.0349691		52.59	-1.23507	-1.25672	-1.13428	-1.26687
		52.79	0.0145095	0.0228279	0.00850503	0.037066		52.79	-1.22978	-1.25698	-1.1333	-1.26477
		52.99	0.0098608	0.018909	0.00478035	0.0363389		52.99	-1.23443	-1.2609	-1.13702	-1.2655
		53.19	0.011362	0.0213331	0.00531403	0.0341461		53.19	-1.23293	-1.25848	-1.13649	-1.26769
		53.39	0.0116087	0.0201544	0.00614946	0.0340139		53.39	-1.23268	-1.25966	-1.13565	-1.26783
		53.59	0.0128645	0.0230837	0.00427582	0.0369787		53.59	-1.23143	-1.25673	-1.13753	-1.26486
		53.79	0.012178	0.0240833	0.00779843	0.0396047		53.79	-1.23212	-1.25573	-1.134	-1.26223
		53.99	0.0106322	0.0204442	0.00772521	0.0353581		53.99	-1.23366	-1.25937	-1.13408	-1.26648
		54.19	0.0124278	0.0215073	0.00503529	0.0409326		54.19	-1.23187	-1.2583	-1.13677	-1.26091
		54.39	0.0090694	0.0203919	0.00656712	0.0349853		54.39	-1.23522	-1.25942	-1.13523	-1.26685
		54.59	0.00912206	0.021115	0.00748492	0.0331041		54.59	-1.23517	-1.2587	-1.13432	-1.26874
		54.79	0.00989382	0.0226102	0.00620926	0.0388586		54.79	-1.2344	-1.2572	-1.13559	-1.26298
		54.99	0.0126003	0.0218945	0.00435523	0.0352973		54.99	-1.23169	-1.25792	-1.13745	-1.26654
		55.19	0.00911843	0.0224878	0.00583773	0.0374368		55.19	-1.23517	-1.25732	-1.13596	-1.2644
		55.39	0.00656317	0.024047	0.00597362	0.0371897		55.39	-1.23773	-1.25576	-1.13583	-1.26465
		55.59	0.00872307	0.0219546	0.00929097	0.0352728		55.59	-1.23557	-1.25786	-1.13251	-1.26657
		55.79	0.011395	0.0226555	0.0062502	0.03267		55.79	-1.2329	-1.25716	-1.13555	-1.26917
		55.99	0.012073	0.0194777	0.00363145	0.033784		55.99	-1.23222	-1.26033	-1.13817	-1.26806
		56.19	0.00969414	0.0206074	0.00505963	0.0356656		56.19	-1.2346	-1.2592	-1.13674	-1.26617
		56.39	0.0103908	0.0231672	0.00375017	0.0422495		56.39	-1.2339	-1.25664	-1.13805	-1.25959
		56.59	0.0119279	0.0216624	0.00651508	0.040036		56.59	-1.23237	-1.25815	-1.13529	-1.2618
		56.79	0.00871669	0.0228291	0.00598007	0.0363921		56.79	-1.23558	-1.25698	-1.13582	-1.26545
		56.99	0.00743681	0.0182852	0.0087123	0.033087		56.99	-1.23686	-1.26153	-1.13309	-1.26875
		57.19	0.00960106	0.0238561	0.00596647	0.0360748		57.19	-1.23469	-1.25596	-1.13584	-1.26576
		57.39	0.010146	0.0220574	0.00124467	0.0365259		57.39	-1.23415	-1.25775	-1.14056	-1.26531
		57.59	0.0107711	0.0198516	0.00204476	0.0353964		57.59	-1.23352	-1.25996	-1.13976	-1.26644
		57.79	0.00816798	0.0232201	0.00463548	0.0334934		57.79	-1.23613	-1.25659	-1.13717	-1.26835
		57.99	0.0125196	0.0221499	0.00755463	0.0360491		57.99	-1.23177	-1.25766	-1.13425	-1.26579
		58.19	0.0118847	0.0216062	0.0072451	0.0334348		58.19	-1.23241	-1.25821	-1.13456	-1.2684
		58.39	0.00985537	0.021761	0.00320817	0.0386601		58.39	-1.23444	-1.25805	-1.13859	-1.26318
		58.59	0.0126777	0.0246891	0.00360181	0.0381172		58.59	-1.23162	-1.25512	-1.1382	-1.26372
		58.79	0.00933079	0.0212118	0.00309579	0.0369697		58.79	-1.23496	-1.2586	-1.13871	-1.26487
		58.99	0.0123822	0.0226619	0.00742152	0.0319792		58.99	-1.23191	-1.25715	-1.13438	-1.26986
		59.19	0.00917533	0.0225108	0.00881007	0.0380389		59.19	-1.23512	-1.2573	-1.13299	-1.2638
		59.39	0.00991116	0.0199905	0.00142825	0.0339008		59.39	-1.23438	-1.25982	-1.14037	-1.26794
		59.59	0.00926251	0.0220577	0.00616863	0.0369773		59.59	-1.23503	-1.25775	-1.13563	-1.26486
		59.79	0.0108504	0.0256651	0.00456422	0.0358881		59.79	-1.23344	-1.25415	-1.13724	-1.26595
		59.99	0.00932891	0.022607	0.00734326	0.0353973		59.99	-1.23496	-1.2572	-1.13446	-1.26644
		60.19	0.0148023	0.023987	0.00352212	0.0387034		60.19	-1.22949	-1.25582	-1.13828	-1.26314
		60.39	0.0102807	0.0222231	0.00092763	0.0366132		60.39	-1.23401	-1.25759	-1.14087	-1.26523
		60.59	0.0071808	0.0222153	0.0052814	0.0362426		60.59	-1.23711	-1.2576	-1.13652	-1.2656
		60.79	0.0122988	0.0229045	0.00328028	0.0366671		60.79	-1.23199	-1.25691	-1.13852	-1.26517
		60.99	0.0098313	0.0246785	0.00595399	0.0386865		60.99	-1.23446	-1.25513	-1.13585	-1.26315
		61.19	0.0113914	0.0223828	0.00223814	0.0339082		61.19	-1.2329	-1.25743	-1.13956	-1.26793
		61.39	0.0106394	0.0244489	0.00774872	0.0374699		61.39	-1.23365	-1.25536	-1.13405	-1.26437
		61.59	0.00835729	0.0225269	0.00807834	0.0358826		61.59	-1.23594	-1.25728	-1.13372	-1.26596
		61.79	0.0118412	0.0243027	0.00693212	0.0399698		61.79	-1.23245	-1.25551	-1.13487	-1.26187
		61.99	0.00931456	0.0263298	0.00435264	0.037277		61.99	-1.23498	-1.25348	-1.13745	-1.26456
		62.19	0.0119395	0.021317	0.00691678	0.0392021		62.19	-1.23235	-1.25849	-1.13488	-1.26264
		62.39	0.0136651	0.0237037	0.00157272	0.0398521		62.39	-1.23063	-1.25611	-1.14023	-1.26199
		62.59	0.0099692	0.0223808	0.00524673	0.0413359		62.59	-1.23432	-1.25743	-1.13655	-1.2605
		62.79	0.00886594	0.0240989	0.00513004	0.0378417		62.79	-1.23543	-1.25571	-1.13667	-1.264
		62.99	0.00956211	0.0227863	0.00517943	0.0375375		62.99	-1.23473	-1.25703	-1.13662	-1.2643
		63.19	0.0106957	0.0228753	0.00835758	0.0376871		63.19	-1.2336	-1.25694	-1.13344	-1.26415
		63.39	0.00775516	0.0206175	0.00295847	0.0415428		63.39	-1.23654	-1.25919	-1.13884	-1.2603
		63.59	0.0127976	0.0241179	0.00254063	0.0370873		63.59	-1.2315	-1.25569	-1.13926	-1.26475
		63.79	0.0108277	0.022181	0.00346145	0.0354958		63.79	-1.23347	-1.25763	-1.13834	-1.26634
		63.99	0.0103745	0.0270279	0.00583627	0.0381672		63.99	-1.23392	-1.25278	-1.13597	-1.26367
		64.19	0.0101554	0.0256242	0.00474358	0.0436183		64.19	-1.23414	-1.25419	-1.13706	-1.25822
		64.39	0.0103953	0.0209938	0.00521476	0.0369652		64.39	-1.2339	-1.25882	-1.13659	-1.26487
		64.59	0.0119302	0.0224515	0.00124302	0.0387589		64.59	-1.23236	-1.25736	-1.14056	-1.26308
		64.79	0.0118458	0.0240233	0.00443431	0.0393932		64.79	-1.23245	-1.25579	-1.13737	-1.26245
		64.99	0.0100302	0.0241248	0.00638161	0.0359756		64.99	-1.23426	-1.25569	-1.13542	-1.26586
		65.19	0.0140951	0.0241266	0.00395621	0.0364747		65.19	-1.2302	-1.25569	-1.13785	-1.26536
		65.39	0.0114201	0.0250809	0.00772247	0.0363655		65.39	-1.23287	-1.25473	-1.13408	-1.26547
		65.59	0.013034	0.0225479	0.00339885	0.0365506		65.59	-1.23126	-1.25726	-1.1384	-1.26529
		65.79	0.0116802	0.0239164	0.00553978	0.035349		65.79	-1.23261	-1.2559	-1.13626	-1.26649
		65.99	0.0142244	0.0259292	0.00574211	0.0382363		65.99	-1.23007	-1.25388	-1.13606	-1.2636
		66.19	0.0096375	0.0245571	0.00823552	0.0396834		66.19	-1.23466	-1.25525	-1.13357	-1.26216
		66.39	0.0108435	0.0234773	0.00269153	0.0425502		66.39	-1.23345	-1.25633	-1.13911	-1.25929
		66.59	0.0114746	0.0262503	0.00512373	0.0409394		66.59	-1.23282	-1.25356	-1.13668	-1.2609
		66.79	0.010691	0.0244019	0.00239992	0.0357997		66.79	-1.2336	-1.25541	-1.1394	-1.26604
		66.99	0.0106437	0.0225523	0.0078825	0.0399399		66.99	-1.23365	-1.25726	-1.13392	-1.2619
		67.19	0.012178	0.0213658	0.00243919	0.0403184		67.19	-1.23212	-1.25845	-1.13936	-1.26152
		67.39	0.00876313	0.0262025	0.00772441	0.0379819		67.39	-1.23553	-1.25361	-1.13408	-1.26386
		67.59	0.0148871	0.0251524	0.00574131	0.0399221		67.59	-1.22941	-1.25466	-1.13606	-1.26192
		67.79	0.0109641	0.0223964	0.00635418	0.0406806		67.79	-1.23333	-1.25742	-1.13545	-1.26116
		67.99	0.0107245	0.0253176	0.00772654	0.0389786		67.99	-1.23357	-1.25449	-1.13408	-1.26286
		68.19	0.0089533	0.0233958	0.00438108	0.0412294		68.19	-1.23534	-1.25642	-1.13742	-1.26061
		68.39	0.0123944	0.0269713	0.0059725	0.0382075		68.39	-1.2319	-1.25284	-1.13583	-1.26363
		68.59	0.00974633	0.0251066	0.00752638	0.0392194		68.59	-1.23455	-1.25471	-1.13428	-1.26262
		68.79	0.0115238	0.0261332	0.00137645	0.0404047		68.79	-1.23277	-1.25368	-1.14043	-1.26143
		68.99	0.00981481	0.0225154	0.00620043	0.041396		68.99	-1.23448	-1.2573	-1.1356	-1.26044
		69.19	0.00828089	0.024541	0.00338562	0.039698		69.19	-1.23601	-1.25527	-1.13842	-1.26214
		69.39	0.012088	0.0261108	0.00279169	0.0417913		69.39	-1.23221	-1.2537	-1.13901	-1.26005
		69.59	0.0150234	0.0231797	0.00449166	0.0407011		69.59	-1.22927	-1.25663	-1.13731	-1.26114
		69.79	0.0116779	0.0281762	0.00427548	0.0362991		69.79	-1.23262	-1.25164	-1.13753	-1.26554
		69.99	0.01046	0.0238171	0.00556982	0.0387065		69.99	-1.23383	-1.25599	-1.13623	-1.26313
		70.19	0.0137069	0.0251676	0.00520708	0.0400567		70.19	-1.23059	-1.25464	-1.13659	-1.26178
		70.39	0.0102058	0.022763	0.00453662	0.0407764		70.39	-1.23409	-1.25705	-1.13727	-1.26106
		70.59	0.0105749	0.0246281	0.00171199	0.0425369		70.59	-1.23372	-1.25518	-1.14009	-1.2593
		70.79	0.00969412	0.0233203	0.0054141	0.043045		70.79	-1.2346	-1.25649	-1.13639	-1.25879
		70.99	0.013941	0.0204794	0.00519786	0.0380655		70.99	-1.23035	-1.25933	-1.1366	-1.26377
		71.19	0.00982815	0.0256218	0.00905647	0.0429906		71.19	-1.23447	-1.25419	-1.13275	-1.25885
		71.39	0.00958105	0.0260374	0.00384471	0.0465387		71.39	-1.23471	-1.25377	-1.13796	-1.2553
		71.59	0.00805278	0.0197812	0.00462948	0.0386931		71.59	-1.23624	-1.26003	-1.13717	-1.26315
		71.79	0.00895404	0.0247672	0.00347976	0.0384299		71.79	-1.23534	-1.25504	-1.13832	-1.26341
		71.99	0.00988462	0.0227992	0.00642364	0.0400799		71.99	-1.23441	-1.25701	-1.13538	-1.26176
		72.19	0.0111252	0.0257051	0.00556738	0.0418018		72.19	-1.23317	-1.25411	-1.13623	-1.26004
		72.39	0.0144594	0.0258529	0.00756863	0.0384915		72.39	-1.22983	-1.25396	-1.13423	-1.26335
		72.59	0.0101531	0.0241828	0.00420792	0.0382187		72.59	-1.23414	-1.25563	-1.13759	-1.26362
		72.79	0.011121	0.0243745	0.00429035	0.0451652		72.79	-1.23317	-1.25544	-1.13751	-1.25667
		72.99	0.0112493	0.0261274	0.00821881	0.0404121		72.99	-1.23304	-1.25368	-1.13358	-1.26143
		73.19	0.0108026	0.0233348	0.0079294	0.0398704		73.19	-1.23349	-1.25648	-1.13387	-1.26197
		73.39	0.0107632	0.025502	0.00519267	0.0381372		73.39	-1.23353	-1.25431	-1.13661	-1.2637
		73.59	0.00897157	0.0228423	0.00651045	0.0448773		73.59	-1.23532	-1.25697	-1.13529	-1.25696
		73.79	0.0149919	0.0222907	0.00495781	0.0422172		73.79	-1.2293	-1.25752	-1.13684	-1.25962
		73.99	0.00963031	0.0236011	0.00150707	0.0358644		73.99	-1.23466	-1.25621	-1.14029	-1.26598
		74.19	0.0122958	0.0226148	0.00592544	0.0415504		74.19	-1.232	-1.2572	-1.13588	-1.26029
		74.39	0.01132	0.025038	0.00760723	0.0370901		74.39	-1.23297	-1.25477	-1.13419	-1.26475
		74.59	0.0106295	0.0255092	0.00420048	0.0371923		74.59	-1.23366	-1.2543	-1.1376	-1.26465
		74.79	0.00899179	0.0255452	0.00517989	0.0427558		74.79	-1.2353	-1.25427	-1.13662	-1.25908
		74.99	0.0119172	0.0231195	0.00646142	0.038722		74.99	-1.23238	-1.25669	-1.13534	-1.26312
		75.19	0.00983285	0.0232022	0.00547943	0.04155		75.19	-1.23446	-1.25661	-1.13632	-1.26029
		75.39	0.0113373	0.0227569	0.00570203	0.0447829		75.39	-1.23296	-1.25705	-1.1361	-1.25706
		75.59	0.00790475	0.0263943	0.00339779	0.0455508		75.59	-1.23639	-1.25342	-1.1384	-1.25629
		75.79	0.011866	0.0287023	0.00678197	0.0408428		75.79	-1.23243	-1.25111	-1.13502	-1.261
		75.99	0.0112864	0.0259202	0.00788931	0.0419295		75.99	-1.23301	-1.25389	-1.13391	-1.25991
		76.19	0.0107528	0.0231653	0.00341062	0.040624		76.19	-1.23354	-1.25665	-1.13839	-1.26122
		76.39	0.0106149	0.0228807	0.00375355	0.039763		76.39	-1.23368	-1.25693	-1.13805	-1.26208
		76.59	0.0124253	0.0231045	0.00252761	0.0402521		76.59	-1.23187	-1.25671	-1.13927	-1.26159
		76.79	0.0129016	0.0258231	0.00472755	0.0423802		76.79	-1.23139	-1.25399	-1.13707	-1.25946
		76.99	0.00888682	0.0211738	0.0037824	0.0443226		76.99	-1.23541	-1.25864	-1.13802	-1.25752
		77.19	0.00880402	0.0227932	0.0031261	0.0405003		77.19	-1.23549	-1.25702	-1.13868	-1.26134
		77.39	0.0130979	0.0224204	0.00456886	0.0368		77.39	-1.2312	-1.25739	-1.13723	-1.26504
		77.59	0.0096277	0.0196151	0.00804675	0.0388852		77.59	-1.23467	-1.2602	-1.13375	-1.26295
		77.79	0.0120594	0.023318	0.00603699	0.0410063		77.79	-1.23223	-1.25649	-1.13576	-1.26083
		77.99	0.00897826	0.0261468	0.00253935	0.0440995		77.99	-1.23531	-1.25367	-1.13926	-1.25774
		78.19	0.0107088	0.0304397	0.00628176	0.0395248		78.19	-1.23358	-1.24937	-1.13552	-1.26231
		78.39	0.0111808	0.0257964	-0.00118691	0.0437407		78.39	-1.23311	-1.25402	-1.14299	-1.2581
		78.59	0.00667229	0.0258193	0.00391077	0.0405329		78.59	-1.23762	-1.25399	-1.13789	-1.26131
		78.79	0.0115669	0.0215335	0.00393878	0.0403775		78.79	-1.23273	-1.25828	-1.13786	-1.26146
		78.99	0.0117777	0.0262797	0.00420131	0.0440806		78.99	-1.23252	-1.25353	-1.1376	-1.25776
		79.19	0.0129942	0.0263438	0.00601466	0.0450782		79.19	-1.2313	-1.25347	-1.13579	-1.25676
		79.39	0.0134427	0.0250962	0.00425316	0.0415201		79.39	-1.23085	-1.25472	-1.13755	-1.26032
		79.59	0.0113492	0.0264668	0.00561161	0.0430416		79.59	-1.23294	-1.25335	-1.13619	-1.2588
		79.79	0.0106731	0.0264342	0.00393774	0.0405171		79.79	-1.23362	-1.25338	-1.13786	-1.26132
		79.99	0.0076023	0.0293803	0.00551534	0.040593		79.99	-1.23669	-1.25043	-1.13629	-1.26125
		80.19	0.00975027	0.0268595	0.00668147	0.0477226		80.19	-1.23454	-1.25295	-1.13512	-1.25412
		80.39	0.0112337	0.0237734	0.00425935	0.0430962		80.39	-1.23306	-1.25604	-1.13754	-1.25874
		80.59	0.0114036	0.0285538	0.00376066	0.0427722		80.59	-1.23289	-1.25126	-1.13804	-1.25907
		80.79	0.0108718	0.0257431	0.00628796	0.041354		80.79	-1.23342	-1.25407	-1.13551	-1.26049
		80.99	0.0105246	0.0241364	0.00499964	0.0417613		80.99	-1.23377	-1.25568	-1.1368	-1.26008
		81.19	0.00911918	0.026367	0.00703439	0.0394725		81.19	-1.23517	-1.25344	-1.13477	-1.26237
		81.39	0.00914798	0.0225801	0.00444538	0.0404065		81.39	-1.23515	-1.25723	-1.13736	-1.26143
		81.59	0.0145089	0.0247241	0.00315751	0.0418771		81.59	-1.22978	-1.25509	-1.13864	-1.25996
		81.79	0.0112485	0.0261631	0.00314423	0.0433992		81.79	-1.23304	-1.25365	-1.13866	-1.25844
		81.99	0.00824045	0.0249853	0.00736256	0.0392529		81.99	-1.23605	-1.25483	-1.13444	-1.26259
		82.19	0.00924227	0.0244579	0.00431736	0.0384116		82.19	-1.23505	-1.25535	-1.13748	-1.26343
		82.39	0.0103914	0.02168	0.00088853	0.0410868		82.39	-1.2339	-1.25813	-1.14091	-1.26075
		82.59	0.0105944	0.0239003	0.0044062	0.0448439		82.59	-1.2337	-1.25591	-1.1374	-1.257
		82.79	0.0107914	0.0265786	0.00168332	0.0428025		82.79	-1.2335	-1.25323	-1.14012	-1.25904
		82.99	0.0114493	0.0218232	0.00337094	0.0410321		82.99	-1.23284	-1.25799	-1.13843	-1.26081
		83.19	0.00843559	0.0268213	0.0054426	0.0417578		83.19	-1.23586	-1.25299	-1.13636	-1.26008
		83.39	0.0138607	0.0233346	0.00258495	0.0443808		83.39	-1.23043	-1.25648	-1.13922	-1.25746
		83.59	0.00779602	0.0253802	0.00345077	0.0410106		83.59	-1.2365	-1.25443	-1.13835	-1.26083
		83.79	0.00653028	0.0246907	0.00456828	0.037367		83.79	-1.23776	-1.25512	-1.13723	-1.26447
		83.99	0.00976433	0.0240026	0.00628043	0.0435348		83.99	-1.23453	-1.25581	-1.13552	-1.2583
		84.19	0.013694	0.0250329	0.00139007	0.0397226		84.19	-1.2306	-1.25478	-1.14041	-1.26212
		84.39	0.0111739	0.0235584	0.00695754	0.0402259		84.39	-1.23312	-1.25625	-1.13484	-1.26161
		84.59	0.0117044	0.0251864	0.00792463	0.0430386		84.59	-1.23259	-1.25463	-1.13388	-1.2588
		84.79	0.00974799	0.0260041	0.00796612	0.0459032		84.79	-1.23455	-1.25381	-1.13384	-1.25594
		84.99	0.0132173	0.0247649	0.00937736	0.0378607		84.99	-1.23108	-1.25505	-1.13242	-1.26398
		85.19	0.00757947	0.025539	0.0103433	0.0414411		85.19	-1.23671	-1.25427	-1.13146	-1.2604
		85.39	0.0094226	0.0272481	0.00630605	0.0388357		85.39	-1.23487	-1.25256	-1.1355	-1.263
		85.59	0.010281	0.0275531	0.00956223	0.0416936		85.59	-1.23401	-1.25226	-1.13224	-1.26015
		85.79	0.00971081	0.0262317	0.00475898	0.0377306		85.79	-1.23458	-1.25358	-1.13704	-1.26411
		85.99	0.0094372	0.0227037	0.00765606	0.0416653		85.99	-1.23486	-1.25711	-1.13415	-1.26017
		86.19	0.00829737	0.0256414	0.00186614	0.04217		86.19	-1.236	-1.25417	-1.13994	-1.25967
		86.39	0.0136262	0.0245101	0.00122651	0.0421337		86.39	-1.23067	-1.2553	-1.14058	-1.25971
		86.59	0.0114491	0.0259906	0.00551356	0.0363065		86.59	-1.23284	-1.25382	-1.13629	-1.26553
		86.79	0.0112662	0.0270575	0.00237871	0.0388767		86.79	-1.23303	-1.25275	-1.13942	-1.26296
		86.99	0.0108087	0.0268698	0.00465572	0.0400503		86.99	-1.23348	-1.25294	-1.13715	-1.26179
		87.19	0.00935244	0.024754	0.00806422	0.0413944		87.19	-1.23494	-1.25506	-1.13374	-1.26044
		87.39	0.0111977	0.0232024	0.00316076	0.0431792		87.39	-1.2331	-1.25661	-1.13864	-1.25866
		87.59	0.0100996	0.0245103	0.00639536	0.0384676		87.59	-1.23419	-1.2553	-1.13541	-1.26337
		87.79	0.0104336	0.0229476	0.00426377	0.0405776		87.79	-1.23386	-1.25686	-1.13754	-1.26126
		87.99	0.0111805	0.0230991	0.00693585	0.0453591		87.99	-1.23311	-1.25671	-1.13487	-1.25648
		88.19	0.00727596	0.0265412	0.0025405	0.0403645		88.19	-1.23702	-1.25327	-1.13926	-1.26147
		88.39	0.0107168	0.0257666	0.00636045	0.0440142		88.39	-1.23358	-1.25405	-1.13544	-1.25783
		88.59	0.0118752	0.0248625	0.006599	0.0399684		88.59	-1.23242	-1.25495	-1.1352	-1.26187
		88.79	0.00847265	0.0232303	0.00692006	0.0403036		88.79	-1.23582	-1.25658	-1.13488	-1.26154
		88.99	0.0104525	0.0233231	0.00596483	0.0426807		88.99	-1.23384	-1.25649	-1.13584	-1.25916
		89.19	0.00996193	0.0268315	0.00509355	0.0402301		89.19	-1.23433	-1.25298	-1.13671	-1.26161
		89.39	0.0101564	0.0260628	0.00691848	0.0445827		89.39	-1.23414	-1.25375	-1.13488	-1.25726
		89.59	0.00849098	0.0264896	0.00426225	0.0419233		89.59	-1.2358	-1.25332	-1.13754	-1.25992
		89.79	0.0119846	0.0252721	0.00427797	0.042895		89.79	-1.23231	-1.25454	-1.13752	-1.25894
		89.99	0.0124427	0.0240271	0.00540323	0.0399818		89.99	-1.23185	-1.25578	-1.1364	-1.26186
		90.19	0.0130578	0.0281059	0.00585315	0.0445392		90.19	-1.23124	-1.25171	-1.13595	-1.2573
		90.39	0.0146588	0.0218588	0.00520149	0.0452212		90.39	-1.22963	-1.25795	-1.1366	-1.25662
		90.59	0.013187	0.0234183	0.00537084	0.042993		90.59	-1.23111	-1.25639	-1.13643	-1.25885
		90.79	0.006671	0.0280802	0.00721047	0.0459866		90.79	-1.23762	-1.25173	-1.13459	-1.25585
		90.99	0.0105105	0.0306272	0.0058388	0.0355958		90.99	-1.23378	-1.24918	-1.13596	-1.26624
		91.19	0.0114225	0.0259967	0.00260319	0.0424094		91.19	-1.23287	-1.25382	-1.1392	-1.25943
		91.39	0.00985989	0.0254173	0.00480279	0.0446527		91.39	-1.23443	-1.25439	-1.137	-1.25719
		91.59	0.0122206	0.0201043	0.00187703	0.0376166		91.59	-1.23207	-1.25971	-1.13992	-1.26422
		91.79	0.0115269	0.0258238	0.00864494	0.0413474		91.79	-1.23277	-1.25399	-1.13316	-1.26049
		91.99	0.0101751	0.0247641	0.00350127	0.0412066		91.99	-1.23412	-1.25505	-1.1383	-1.26063
		92.19	0.0111653	0.022486	0.00332056	0.0439103		92.19	-1.23313	-1.25733	-1.13848	-1.25793
		92.39	0.0125009	0.0269048	0.00128538	0.0423439		92.39	-1.23179	-1.25291	-1.14052	-1.2595
		92.59	0.00865879	0.0225113	0.00269412	0.0461528		92.59	-1.23563	-1.2573	-1.13911	-1.25569
		92.79	0.00959008	0.0264175	0.00676497	0.0423434		92.79	-1.2347	-1.25339	-1.13504	-1.2595
		92.99	0.00785377	0.0278754	0.00381814	0.0438797		92.99	-1.23644	-1.25194	-1.13798	-1.25796
		93.19	0.013465	0.0252072	0.00477824	0.0472195		93.19	-1.23083	-1.2546	-1.13702	-1.25462
		93.39	0.010829	0.025855	0.00810607	0.043541		93.39	-1.23346	-1.25396	-1.1337	-1.2583
		93.59	0.00981084	0.0249999	0.00686495	0.0415004		93.59	-1.23448	-1.25481	-1.13494	-1.26034
		93.79	0.00833147	0.0251405	0.00495244	0.0390905		93.79	-1.23596	-1.25467	-1.13685	-1.26275
		93.99	0.00992013	0.0271154	-0.00046339	0.0399521		93.99	-1.23437	-1.2527	-1.14227	-1.26189
		94.19	0.0124319	0.0219809	0.00717769	0.0450627		94.19	-1.23186	-1.25783	-1.13462	-1.25678
		94.39	0.0109038	0.0270025	-0.00025447	0.0406137		94.39	-1.23339	-1.25281	-1.14206	-1.26123
		94.59	0.0145613	0.0219813	0.00594311	0.0408151		94.59	-1.22973	-1.25783	-1.13586	-1.26102
		94.79	0.013031	0.0269411	0.00432019	0.0437135		94.79	-1.23126	-1.25287	-1.13748	-1.25813
		94.99	0.0131353	0.0301994	0.00683953	0.0417762		94.99	-1.23116	-1.24961	-1.13496	-1.26006
		95.19	0.00983792	0.0284965	0.00826954	0.0437237		95.19	-1.23446	-1.25132	-1.13353	-1.25812
		95.39	0.00922516	0.0252203	0.00556669	0.0430522		95.39	-1.23507	-1.25459	-1.13624	-1.25879
		95.59	0.0104816	0.0211585	0.0028009	0.0426295		95.59	-1.23381	-1.25865	-1.139	-1.25921
		95.79	0.0105859	0.0266204	0.00599646	0.0434936		95.79	-1.23371	-1.25319	-1.13581	-1.25835
		95.99	0.00964877	0.0248084	0.00359968	0.0394733		95.99	-1.23464	-1.255	-1.1382	-1.26237
		96.19	0.0132217	0.0229183	0.0050227	0.0482888		96.19	-1.23107	-1.25689	-1.13678	-1.25355
		96.39	0.00972748	0.0263832	0.00459913	0.0427123		96.39	-1.23457	-1.25343	-1.1372	-1.25913
		96.59	0.0141752	0.0290254	0.00606211	0.0411254		96.59	-1.23012	-1.25079	-1.13574	-1.26071
		96.79	0.0109198	0.0238114	0.0059738	0.0504452		96.79	-1.23337	-1.256	-1.13583	-1.25139
		96.99	0.0128892	0.026236	0.008943	0.0434424		96.99	-1.2314	-1.25358	-1.13286	-1.2584
		97.19	0.0110434	0.0244676	0.00581334	0.0435214		97.19	-1.23325	-1.25534	-1.13599	-1.25832
		97.39	0.0104394	0.0243745	0.0002159	0.0434238		97.39	-1.23385	-1.25544	-1.14159	-1.25842
		97.59	0.0108723	0.0254138	0.00786329	0.0419963		97.59	-1.23342	-1.2544	-1.13394	-1.25984
		97.79	0.0126019	0.0204393	0.005556	0.0400413		97.79	-1.23169	-1.25937	-1.13625	-1.2618
		97.99	0.00769408	0.0288818	0.00668045	0.0418425		97.99	-1.2366	-1.25093	-1.13512	-1.26
		98.19	0.00761921	0.0251488	0.00760999	0.0408734		98.19	-1.23667	-1.25466	-1.13419	-1.26097
		98.39	0.0101944	0.0295269	0.00547675	0.0429988		98.39	-1.2341	-1.25028	-1.13632	-1.25884
		98.59	0.00659814	0.0246687	0.0067645	0.0445998		98.59	-1.2377	-1.25514	-1.13504	-1.25724
		98.79	0.0114404	0.0254614	0.00537057	0.0395066		98.79	-1.23285	-1.25435	-1.13643	-1.26233
		98.99	0.00928731	0.0283371	0.0052671	0.0406182		98.99	-1.23501	-1.25147	-1.13653	-1.26122
		99.19	0.0075664	0.0273376	0.00562701	0.043556		99.19	-1.23673	-1.25247	-1.13617	-1.25828
		99.39	0.00882169	0.0263734	0.00575215	0.0432769		99.39	-1.23547	-1.25344	-1.13605	-1.25856
		99.59	0.0139891	0.0279087	0.00797281	0.0405975		99.59	-1.2303	-1.2519	-1.13383	-1.26124
		99.79	0.0105644	0.0259903	0.00286706	0.0402201		99.79	-1.23373	-1.25382	-1.13893	-1.26162
		99.99	0.0110987	0.0313678	0.00763124	0.0421154		99.99	-1.23319	-1.24844	-1.13417	-1.25972
		100.19	0.00751433	0.0251663	0.00611806	0.0468498		100.19	-1.23678	-1.25465	-1.13568	-1.25499
		100.39	0.0096728	0.0262983	0.00667866	0.0405844		100.39	-1.23462	-1.25351	-1.13512	-1.26125
		100.59	0.0108075	0.0237034	0.00547115	0.0414484		100.59	-1.23349	-1.25611	-1.13633	-1.26039
		100.79	0.0115518	0.0267509	0.00669101	0.0454699		100.79	-1.23274	-1.25306	-1.13511	-1.25637
		100.99	0.0122879	0.0258093	0.00374756	0.0443685		100.99	-1.23201	-1.254	-1.13805	-1.25747
		101.19	0.00998071	0.0253972	0.00304917	0.0410769		101.19	-1.23431	-1.25441	-1.13875	-1.26076
		101.39	0.0121706	0.0267097	0.00533858	0.042684		101.39	-1.23212	-1.2531	-1.13646	-1.25916
		101.59	0.00888711	0.0277081	0.00451974	0.0451521		101.59	-1.23541	-1.2521	-1.13728	-1.25669
		101.79	0.0105803	0.02416	0.00846496	0.0420162		101.79	-1.23371	-1.25565	-1.13334	-1.25982
		101.99	0.0116499	0.0301289	0.0038392	0.0433242		101.99	-1.23264	-1.24968	-1.13796	-1.25852
		102.19	0.0141725	0.0311042	0.00433264	0.042722		102.19	-1.23012	-1.24871	-1.13747	-1.25912
		102.39	0.00864323	0.0239185	0.00045047	0.0422058		102.39	-1.23565	-1.25589	-1.14135	-1.25963
		102.59	0.0137471	0.0253416	0.0117149	0.0469158		102.59	-1.23055	-1.25447	-1.13009	-1.25492
		102.79	0.0111609	0.0284467	0.00634996	0.0507414		102.79	-1.23313	-1.25137	-1.13545	-1.2511
		102.99	0.0135482	0.0288893	0.00424549	0.043226		102.99	-1.23075	-1.25092	-1.13756	-1.25861
		103.19	0.0129656	0.0255115	0.00518395	0.0445209		103.19	-1.23133	-1.2543	-1.13662	-1.25732
		103.39	0.0123248	0.0266626	0.00350739	0.0429613		103.39	-1.23197	-1.25315	-1.13829	-1.25888
		103.59	0.00794053	0.0263697	0.00747709	0.0444721		103.59	-1.23635	-1.25344	-1.13432	-1.25737
		103.79	0.012333	0.0272946	0.00459836	0.0419075		103.79	-1.23196	-1.25252	-1.1372	-1.25993
		103.99	0.0110694	0.0234952	0.00536396	0.0427311		103.99	-1.23322	-1.25632	-1.13644	-1.25911
		104.19	0.0102491	0.025586	0.00370273	0.0391351		104.19	-1.23404	-1.25423	-1.1381	-1.2627
		104.39	0.0100976	0.028628	0.00441683	0.041822		104.39	-1.2342	-1.25118	-1.13738	-1.26002
		104.59	0.0107351	0.026703	0.00828092	0.0405116		104.59	-1.23356	-1.25311	-1.13352	-1.26133
		104.79	0.0115439	0.0316763	0.00328909	0.0416615		104.79	-1.23275	-1.24814	-1.13851	-1.26018
		104.99	0.014057	0.0236824	0.00511132	0.045123		104.99	-1.23024	-1.25613	-1.13669	-1.25672
		105.19	0.00996948	0.0260964	0.00582928	0.0469342		105.19	-1.23432	-1.25372	-1.13597	-1.25491
		105.39	0.00822749	0.0265698	0.00550344	0.0431898		105.39	-1.23607	-1.25324	-1.1363	-1.25865
		105.59	0.0105651	0.027754	0.00442294	0.0443494		105.59	-1.23373	-1.25206	-1.13738	-1.25749
		105.79	0.0118983	0.023717	0.00598489	0.0413967		105.79	-1.23239	-1.25609	-1.13582	-1.26044
		105.99	0.0115437	0.0228973	0.00784014	0.04616		105.99	-1.23275	-1.25691	-1.13396	-1.25568
		106.19	0.0139215	0.0243098	0.00536766	0.0396817		106.19	-1.23037	-1.2555	-1.13643	-1.26216
		106.39	0.00691789	0.0264175	0.00748378	0.0469203		106.39	-1.23738	-1.25339	-1.13432	-1.25492
		106.59	0.00833772	0.0243288	0.0092108	0.0478467		106.59	-1.23596	-1.25548	-1.13259	-1.25399
		106.79	0.0127622	0.0295826	0.00942414	0.0415568		106.79	-1.23153	-1.25023	-1.13238	-1.26028
		106.99	0.00849407	0.025501	0.0034351	0.0442987		106.99	-1.2358	-1.25431	-1.13837	-1.25754
		107.19	0.0108481	0.0281006	0.00734809	0.0435094		107.19	-1.23345	-1.25171	-1.13445	-1.25833
		107.39	0.0117536	0.0282552	0.00634641	0.0479101		107.39	-1.23254	-1.25156	-1.13546	-1.25393
		107.59	0.00896885	0.0273915	0.00560221	0.0425722		107.59	-1.23532	-1.25242	-1.1362	-1.25927
		107.79	0.0125911	0.0243617	0.00598942	0.0428012		107.79	-1.2317	-1.25545	-1.13581	-1.25904
		107.99	0.0118387	0.0256746	0.00132551	0.0471939		107.99	-1.23245	-1.25414	-1.14048	-1.25465
		108.19	0.00808965	0.027807	0.00356934	0.042018		108.19	-1.2362	-1.252	-1.13823	-1.25982
		108.39	0.00850147	0.0203734	0.00104943	0.0423571		108.39	-1.23579	-1.25944	-1.14075	-1.25948
		108.59	0.00811926	0.0260223	0.00602647	0.0399186		108.59	-1.23617	-1.25379	-1.13578	-1.26192
		108.79	0.0108077	0.0266709	0.00307623	0.0488159		108.79	-1.23349	-1.25314	-1.13873	-1.25302
		108.99	0.0110714	0.0233096	0.00587137	0.0436878		108.99	-1.23322	-1.2565	-1.13593	-1.25815
		109.19	0.0110202	0.0255758	0.00500786	0.0443847		109.19	-1.23327	-1.25424	-1.13679	-1.25745
		109.39	0.0106283	0.0260397	0.00587758	0.0485307		109.39	-1.23366	-1.25377	-1.13592	-1.25331
		109.59	0.00924446	0.0303657	0.00422865	0.0413104		109.59	-1.23505	-1.24945	-1.13757	-1.26053
		109.79	0.0122547	0.0241336	0.00343331	0.0481535		109.79	-1.23204	-1.25568	-1.13837	-1.25369
		109.99	0.0112756	0.0251029	0.00180322	0.0429833		109.99	-1.23302	-1.25471	-1.14	-1.25886
		110.19	0.0104494	0.0285997	0.00512338	0.0440916		110.19	-1.23384	-1.25121	-1.13668	-1.25775
		110.39	0.0113627	0.0243261	0.00173648	0.0454851		110.39	-1.23293	-1.25549	-1.14007	-1.25635
		110.59	0.00955839	0.0259764	0.00650829	0.0447779		110.59	-1.23473	-1.25384	-1.13529	-1.25706
		110.79	0.0135231	0.0291031	0.00145352	0.0411325		110.79	-1.23077	-1.25071	-1.14035	-1.26071
		110.99	0.00912256	0.0251887	0.00343396	0.0425622		110.99	-1.23517	-1.25462	-1.13837	-1.25928
		111.19	0.0136241	0.0241424	0.00629966	0.0484379		111.19	-1.23067	-1.25567	-1.1355	-1.2534
		111.39	0.0144378	0.0242387	0.00408663	0.0429926		111.39	-1.22986	-1.25557	-1.13772	-1.25885
		111.59	0.0115155	0.0272423	0.0035362	0.042743		111.59	-1.23278	-1.25257	-1.13827	-1.2591
		111.79	0.0094443	0.0254684	0.00963646	0.0434989		111.79	-1.23485	-1.25434	-1.13217	-1.25834
		111.99	0.0107431	0.0257977	0.00205739	0.0436833		111.99	-1.23355	-1.25401	-1.13974	-1.25816
		112.19	0.00757901	0.0241417	0.00410878	0.0450566		112.19	-1.23671	-1.25567	-1.13769	-1.25678
		112.39	0.00845998	0.027435	0.00583114	0.0447019		112.39	-1.23583	-1.25238	-1.13597	-1.25714
		112.59	0.0107509	0.0238459	0.00307578	0.0430958		112.59	-1.23354	-1.25597	-1.13873	-1.25874
		112.79	0.0108729	0.0258168	0.00460344	0.0414303		112.79	-1.23342	-1.254	-1.1372	-1.26041
		112.99	0.0134689	0.0249928	0.00302507	0.0407954		112.99	-1.23082	-1.25482	-1.13878	-1.26104
		113.19	0.0123887	0.0267303	0.00445665	0.0479209		113.19	-1.2319	-1.25308	-1.13735	-1.25392
		113.39	0.00966902	0.0252361	0.00342726	0.0434393		113.39	-1.23462	-1.25458	-1.13837	-1.2584
		113.59	0.0103946	0.0291771	0.00261701	0.0461448		113.59	-1.2339	-1.25063	-1.13918	-1.25569
		113.79	0.00784921	0.0290773	0.00162325	0.0453207		113.79	-1.23644	-1.25073	-1.14018	-1.25652
		113.99	0.0110672	0.0271772	0.00361109	0.0411433		113.99	-1.23323	-1.25263	-1.13819	-1.2607
		114.19	0.0124062	0.0269072	0.00572386	0.0418361		114.19	-1.23189	-1.2529	-1.13608	-1.26
		114.39	0.0115249	0.0260621	0.00302549	0.0435214		114.39	-1.23277	-1.25375	-1.13878	-1.25832
		114.59	0.00932255	0.0252472	0.0014328	0.0470087		114.59	-1.23497	-1.25456	-1.14037	-1.25483
		114.79	0.012229	0.0269266	0.00479263	0.0446895		114.79	-1.23206	-1.25289	-1.13701	-1.25715
		114.99	0.0110254	0.0270624	0.00369056	0.0461535		114.99	-1.23327	-1.25275	-1.13811	-1.25569
		115.19	0.0125015	0.0271428	0.00277895	0.0421525		115.19	-1.23179	-1.25267	-1.13902	-1.25969
		115.39	0.0101783	0.0233808	-0.00146187	0.0438059		115.39	-1.23411	-1.25643	-1.14326	-1.25803
		115.59	0.0100841	0.0245455	0.00164289	0.0417503		115.59	-1.23421	-1.25527	-1.14016	-1.26009
		115.79	0.00892158	0.0219645	0.00388166	0.0485324		115.79	-1.23537	-1.25785	-1.13792	-1.25331
		115.99	0.00747247	0.0254868	0.00736317	0.0443858		115.99	-1.23682	-1.25433	-1.13444	-1.25745
		116.19	0.0116971	0.0222089	0.00487581	0.0435524		116.19	-1.2326	-1.2576	-1.13693	-1.25829
		116.39	0.0107171	0.0230336	0.00620899	0.0422778		116.39	-1.23358	-1.25678	-1.13559	-1.25956
		116.59	0.0113046	0.0242025	0.00231631	0.040686		116.59	-1.23299	-1.25561	-1.13949	-1.26115
		116.79	0.010823	0.0286668	0.00602538	0.0468798		116.79	-1.23347	-1.25115	-1.13578	-1.25496
		116.99	0.0103467	0.0246271	0.00501697	0.044838		116.99	-1.23395	-1.25518	-1.13678	-1.257
		117.19	0.010315	0.0278285	0.00470595	0.044902		117.19	-1.23398	-1.25198	-1.1371	-1.25694
		117.39	0.0126214	0.026354	0.00384328	0.0435139		117.39	-1.23167	-1.25346	-1.13796	-1.25833
		117.59	0.00904377	0.0269449	0.00293561	0.0445734		117.59	-1.23525	-1.25287	-1.13887	-1.25727
		117.79	0.00815093	0.0278027	0.00606772	0.0457644		117.79	-1.23614	-1.25201	-1.13573	-1.25607
		117.99	0.0141889	0.0258543	0.00505842	0.0414545		117.99	-1.2301	-1.25396	-1.13674	-1.26038
		118.19	0.0121988	0.0221279	0.00752007	0.0433428		118.19	-1.23209	-1.25768	-1.13428	-1.2585
		118.39	0.0122678	0.0277774	0.0076268	0.0423709		118.39	-1.23203	-1.25203	-1.13417	-1.25947
		118.59	0.0113107	0.0235565	0.00272266	0.0431716		118.59	-1.23298	-1.25626	-1.13908	-1.25867
		118.79	0.00996059	0.0268806	0.00391412	0.0455686		118.79	-1.23433	-1.25293	-1.13789	-1.25627
		118.99	0.0115186	0.0293536	0.00446569	0.0449684		118.99	-1.23277	-1.25046	-1.13734	-1.25687
		119.19	0.0106564	0.021403	0.00183433	0.0459601		119.19	-1.23364	-1.25841	-1.13997	-1.25588
		119.39	0.0121076	0.0261276	0.00264349	0.0449056		119.39	-1.23219	-1.25368	-1.13916	-1.25693
		119.59	0.0122315	0.0252605	0.00511841	0.0454915		119.59	-1.23206	-1.25455	-1.13668	-1.25635
		119.79	0.0117763	0.025343	0.00526496	0.0429895		119.79	-1.23252	-1.25447	-1.13654	-1.25885
		119.99	0.0115309	0.0261483	0.0100846	0.0447101		119.99	-1.23276	-1.25366	-1.13172	-1.25713
		120.19	0.00974572	0.0257024	0.00347901	0.0452781		120.19	-1.23455	-1.25411	-1.13832	-1.25656
		120.39	0.0119028	0.0245621	0.00282949	0.0399174		120.39	-1.23239	-1.25525	-1.13897	-1.26192
		120.59	0.0107604	0.0277845	0.00806154	0.042129		120.59	-1.23353	-1.25203	-1.13374	-1.25971
		120.79	0.0118379	0.0284231	0.00445968	0.0465159		120.79	-1.23246	-1.25139	-1.13734	-1.25532
		120.99	0.00925152	0.0235406	0.00338384	0.0434844		120.99	-1.23504	-1.25627	-1.13842	-1.25835
		121.19	0.0105205	0.02797	0.00613781	0.0457076		121.19	-1.23377	-1.25184	-1.13566	-1.25613
		121.39	0.0125118	0.0276034	0.00654869	0.0458795		121.39	-1.23178	-1.25221	-1.13525	-1.25596
		121.59	0.0106035	0.0241224	0.00272271	0.0433745		121.59	-1.23369	-1.25569	-1.13908	-1.25846
		121.79	0.0124247	0.0282014	0.00613079	0.0463723		121.79	-1.23187	-1.25161	-1.13567	-1.25547
		121.99	0.00911216	0.0262144	0.00513044	0.0421407		121.99	-1.23518	-1.2536	-1.13667	-1.2597
		122.19	0.0104104	0.0260159	0.00342031	0.042554		122.19	-1.23388	-1.2538	-1.13838	-1.25929
		122.39	0.0115767	0.0283749	-0.0028726	0.0425002		122.39	-1.23272	-1.25144	-1.14467	-1.25934
		122.59	0.00899281	0.0258014	0.00315432	0.0404252		122.59	-1.2353	-1.25401	-1.13865	-1.26141
		122.79	0.0112797	0.0253226	0.00592199	0.0419806		122.79	-1.23301	-1.25449	-1.13588	-1.25986
		122.99	0.012538	0.0254575	0.00494715	0.0426721		122.99	-1.23176	-1.25435	-1.13685	-1.25917
		123.19	0.0110702	0.0202743	0.00173703	0.0500428		123.19	-1.23322	-1.25954	-1.14006	-1.2518
		123.39	0.0123643	0.0249304	0.00579572	0.0505328		123.39	-1.23193	-1.25488	-1.13601	-1.25131
		123.59	0.0104532	0.0274468	0.00548488	0.0455752		123.59	-1.23384	-1.25237	-1.13632	-1.25626
		123.79	0.0129934	0.0242037	0.0081136	0.0439357		123.79	-1.2313	-1.25561	-1.13369	-1.2579
		123.99	0.013018	0.0268608	0.00761611	0.0494283		123.99	-1.23128	-1.25295	-1.13419	-1.25241
		124.19	0.0109944	0.0270027	-8.112e-05	0.042362		124.19	-1.2333	-1.25281	-1.14188	-1.25948
		124.39	0.00983322	0.0262816	0.00207254	0.0437901		124.39	-1.23446	-1.25353	-1.13973	-1.25805
		124.59	0.0085909	0.0251157	0.00715362	0.0448142		124.59	-1.2357	-1.2547	-1.13465	-1.25703
		124.79	0.0123518	0.0250374	0.00729065	0.0438645		124.79	-1.23194	-1.25477	-1.13451	-1.25797
		124.99	0.0110573	0.0261789	0.0020777	0.0437256		124.99	-1.23324	-1.25363	-1.13972	-1.25811
		125.19	0.0103641	0.0239581	0.00289282	0.0470686		125.19	-1.23393	-1.25585	-1.13891	-1.25477
		125.39	0.00955726	0.0224972	0.00359477	0.0471098		125.39	-1.23474	-1.25731	-1.13821	-1.25473
		125.59	0.00912132	0.0261508	0.00285117	0.044032		125.59	-1.23517	-1.25366	-1.13895	-1.25781
		125.79	0.0117292	0.0224966	0.00069272	0.0462875		125.79	-1.23256	-1.25732	-1.14111	-1.25555
		125.99	0.00954445	0.025495	0.00671929	0.0426137		125.99	-1.23475	-1.25432	-1.13508	-1.25923
		126.19	0.0140215	0.0224325	0.00455837	0.048127		126.19	-1.23027	-1.25738	-1.13724	-1.25371
		126.39	0.0086047	0.0242784	0.00260984	0.045745		126.39	-1.23569	-1.25553	-1.13919	-1.25609
		126.59	0.00851254	0.0285318	0.00514501	0.0445656		126.59	-1.23578	-1.25128	-1.13666	-1.25727
		126.79	0.00969344	0.0269356	0.00613495	0.0465694		126.79	-1.2346	-1.25288	-1.13567	-1.25527
		126.99	0.0104085	0.0285998	0.00883865	0.0414333		126.99	-1.23388	-1.25121	-1.13296	-1.26041
		127.19	0.0123621	0.0257662	0.00113984	0.0469146		127.19	-1.23193	-1.25405	-1.14066	-1.25492
		127.39	0.0108829	0.0209417	0.00405558	0.0456882		127.39	-1.23341	-1.25887	-1.13775	-1.25615
		127.59	0.00982043	0.0261673	0.00467239	0.0441671		127.59	-1.23447	-1.25364	-1.13713	-1.25767
		127.79	0.00927401	0.0236266	0.00270682	0.0447186		127.79	-1.23502	-1.25619	-1.13909	-1.25712
		127.99	0.00747932	0.024477	-0.00167868	0.0457798		127.99	-1.23681	-1.25533	-1.14348	-1.25606
		128.19	0.00950565	0.024918	0.00277469	0.0434968		128.19	-1.23479	-1.25489	-1.13903	-1.25834
		128.39	0.00931749	0.0261436	0.00310156	0.0437232		128.39	-1.23498	-1.25367	-1.1387	-1.25812
		128.59	0.00704514	0.0266739	0.00152409	0.0446046		128.59	-1.23725	-1.25314	-1.14028	-1.25723
		128.79	0.0102147	0.0255462	0.00612227	0.0423832		128.79	-1.23408	-1.25427	-1.13568	-1.25946
		128.99	0.00869855	0.0271384	0.00064061	0.0416708		128.99	-1.23559	-1.25267	-1.14116	-1.26017
		129.19	0.00793394	0.0251021	0.00154711	0.0428465		129.19	-1.23636	-1.25471	-1.14025	-1.25899
		129.39	0.00923001	0.0247068	0.00631886	0.0484238		129.39	-1.23506	-1.25511	-1.13548	-1.25342
		129.59	0.0103476	0.0235684	0.00311738	0.0466745		129.59	-1.23395	-1.25624	-1.13868	-1.25516
		129.79	0.0106931	0.0253012	0.00309005	0.0423087		129.79	-1.2336	-1.25451	-1.13871	-1.25953
		129.99	0.0109194	0.0269277	0.00357248	0.0422746		129.99	-1.23337	-1.25288	-1.13823	-1.25956
		130.19	0.0139305	0.0237074	0.00050845	0.0460619		130.19	-1.23036	-1.2561	-1.14129	-1.25578
		130.39	0.0102193	0.0256212	0.00752654	0.0476551		130.39	-1.23407	-1.25419	-1.13428	-1.25418
		130.59	0.0138168	0.0237571	0.00256762	0.0454731		130.59	-1.23048	-1.25605	-1.13923	-1.25637
		130.79	0.00691821	0.0255298	0.00099416	0.0478194		130.79	-1.23737	-1.25428	-1.14081	-1.25402
		130.99	0.011355	0.0269299	0.00563622	0.0452012		130.99	-1.23294	-1.25288	-1.13617	-1.25664
		131.19	0.0118597	0.0281689	0.0054595	0.0479026		131.19	-1.23243	-1.25164	-1.13634	-1.25394
		131.39	0.0107765	0.024301	0.00451468	0.0447721		131.39	-1.23352	-1.25551	-1.13729	-1.25707
		131.59	0.0114292	0.0229223	0.00014065	0.0431714		131.59	-1.23286	-1.25689	-1.14166	-1.25867
		131.79	0.0131033	0.0247801	0.00266051	0.0442809		131.79	-1.23119	-1.25503	-1.13914	-1.25756
		131.99	0.00939261	0.0258073	-0.00124597	0.0437986		131.99	-1.2349	-1.254	-1.14305	-1.25804
		132.19	0.00947607	0.0237804	0.00419073	0.046943		132.19	-1.23482	-1.25603	-1.13761	-1.2549
		132.39	0.00876141	0.0238757	0.00414137	0.0454654		132.39	-1.23553	-1.25594	-1.13766	-1.25637
		132.59	0.00643358	0.0227066	0.00539874	0.0480006		132.59	-1.23786	-1.25711	-1.1364	-1.25384
		132.79	0.0126666	0.0238858	0.00382385	0.0435239		132.79	-1.23163	-1.25593	-1.13798	-1.25832
		132.99	0.0119696	0.024562	-0.00022663	0.0435955		132.99	-1.23232	-1.25525	-1.14203	-1.25824
		133.19	0.00715148	0.0248709	0.00078157	0.0491715		133.19	-1.23714	-1.25494	-1.14102	-1.25267
		133.39	0.0114635	0.0234205	0.00087259	0.0428265		133.39	-1.23283	-1.25639	-1.14093	-1.25901
		133.59	0.00938472	0.0246874	0.00318671	0.0435025		133.59	-1.23491	-1.25512	-1.13861	-1.25834
		133.79	0.0106628	0.0229086	0.0037243	0.045756		133.79	-1.23363	-1.2569	-1.13808	-1.25608
		133.99	0.00968494	0.0251587	0.00393177	0.0430397		133.99	-1.23461	-1.25465	-1.13787	-1.2588
		134.19	0.010811	0.0248156	-0.00142098	0.0509785		134.19	-1.23348	-1.255	-1.14322	-1.25086
		134.39	0.00883823	0.0253316	0.00333358	0.0467486		134.39	-1.23545	-1.25448	-1.13847	-1.25509
		134.59	0.00755495	0.0256848	0.0045857	0.0451618		134.59	-1.23674	-1.25413	-1.13722	-1.25668
		134.79	0.00979834	0.0249208	-0.001817	0.0472567		134.79	-1.23449	-1.25489	-1.14362	-1.25458
		134.99	0.0101721	0.0248867	0.00451884	0.0453259		134.99	-1.23412	-1.25493	-1.13728	-1.25651
		135.19	0.0110627	0.0259503	0.00232778	0.0393751		135.19	-1.23323	-1.25386	-1.13947	-1.26246
		135.39	0.01128	0.023051	0.00171742	0.047937		135.39	-1.23301	-1.25676	-1.14008	-1.2539
		135.59	0.00962935	0.0307553	0.00198069	0.0409701		135.59	-1.23466	-1.24906	-1.13982	-1.26087
		135.79	0.0078712	0.0255792	0.00540139	0.0444753		135.79	-1.23642	-1.25423	-1.1364	-1.25736
		135.99	0.00883576	0.0256203	0.00487084	0.0443195		135.99	-1.23546	-1.25419	-1.13693	-1.25752
		136.19	0.011944	0.02334	0.00147331	0.0455901		136.19	-1.23235	-1.25647	-1.14033	-1.25625
		136.39	0.00861831	0.0295014	0.00512382	0.0423953		136.39	-1.23567	-1.25031	-1.13668	-1.25944
		136.59	0.0125915	0.0288772	0.00235672	0.0442951		136.59	-1.2317	-1.25093	-1.13944	-1.25754
		136.79	0.0106354	0.0228432	0.00307323	0.0463302		136.79	-1.23366	-1.25697	-1.13873	-1.25551
		136.99	0.00673806	0.029765	0.00011403	0.0442766		136.99	-1.23756	-1.25005	-1.14169	-1.25756
		137.19	0.0106627	0.0258275	0.00429571	0.0479493		137.19	-1.23363	-1.25398	-1.13751	-1.25389
		137.39	0.00913707	0.0250638	0.0009114	0.0456635		137.39	-1.23516	-1.25475	-1.14089	-1.25618
		137.59	0.0106158	0.0274882	0.00689724	0.0407755		137.59	-1.23368	-1.25232	-1.1349	-1.26106
		137.79	0.0107211	0.0262162	0.00347791	0.0458248		137.79	-1.23357	-1.2536	-1.13832	-1.25601
		137.99	0.0117878	0.0231112	0.00452206	0.0442542		137.99	-1.23251	-1.2567	-1.13728	-1.25759
		138.19	0.00991189	0.0211972	0.00337911	0.0427872		138.19	-1.23438	-1.25861	-1.13842	-1.25905
		138.39	0.00879312	0.0243056	0.00052688	0.0429081		138.39	-1.2355	-1.25551	-1.14127	-1.25893
		138.59	0.0115351	0.0260771	0.00336565	0.048074		138.59	-1.23276	-1.25373	-1.13844	-1.25377
		138.79	0.0100008	0.025154	0.00249888	0.0453497		138.79	-1.23429	-1.25466	-1.1393	-1.25649
		138.99	0.0111175	0.0263021	0.00158024	0.0477725		138.99	-1.23318	-1.25351	-1.14022	-1.25407
		139.19	0.0116807	0.026688	0.00482693	0.0500131		139.19	-1.23261	-1.25312	-1.13697	-1.25183
		139.39	0.00863987	0.0265641	0.00343955	0.041331		139.39	-1.23565	-1.25325	-1.13836	-1.26051
		139.59	0.0108318	0.0249838	0.00138805	0.0479311		139.59	-1.23346	-1.25483	-1.14041	-1.25391
		139.79	0.0123678	0.0235545	0.00095826	0.0472557		139.79	-1.23193	-1.25626	-1.14084	-1.25458
		139.99	0.0113988	0.0244544	0.00366049	0.0423437		139.99	-1.23289	-1.25536	-1.13814	-1.2595
		140.19	0.0113679	0.0261892	0.001712	0.0448278		140.19	-1.23293	-1.25362	-1.14009	-1.25701
		140.39	0.0119431	0.0269172	-0.00157247	0.0437009		140.39	-1.23235	-1.25289	-1.14337	-1.25814
		140.59	0.0109172	0.0286829	0.00544631	0.0414972		140.59	-1.23338	-1.25113	-1.13636	-1.26034
		140.79	0.00916775	0.0261228	0.0103814	0.0424991		140.79	-1.23513	-1.25369	-1.13142	-1.25934
		140.99	0.00920907	0.0263727	0.00346548	0.0457577		140.99	-1.23508	-1.25344	-1.13834	-1.25608
		141.19	0.0109841	0.0243971	0.00350028	0.0443834		141.19	-1.23331	-1.25541	-1.1383	-1.25746
		141.39	0.00764456	0.0282813	0.00059166	0.0406024		141.39	-1.23665	-1.25153	-1.14121	-1.26124
		141.59	0.0122743	0.0240954	0.00551193	0.0450478		141.59	-1.23202	-1.25572	-1.13629	-1.25679
		141.79	0.00976081	0.024448	0.00286336	0.045176		141.79	-1.23453	-1.25536	-1.13894	-1.25666
		141.99	0.0081235	0.0257247	0.00267573	0.0459984		141.99	-1.23617	-1.25409	-1.13913	-1.25584
		142.19	0.0108293	0.0267446	0.00514186	0.0450477		142.19	-1.23346	-1.25307	-1.13666	-1.25679
		142.39	0.011371	0.0242369	0.0013026	0.042059		142.39	-1.23292	-1.25557	-1.1405	-1.25978
		142.59	0.00905482	0.0222263	0.00205441	0.0467962		142.59	-1.23524	-1.25759	-1.13975	-1.25504
		142.79	0.01317	0.0265551	0.00349181	0.0442207		142.79	-1.23112	-1.25326	-1.13831	-1.25762
		142.99	0.00704057	0.0222218	0.00297761	0.0464022		142.99	-1.23725	-1.25759	-1.13882	-1.25544
		143.19	0.0122098	0.0261457	0.00353069	0.0444444		143.19	-1.23208	-1.25367	-1.13827	-1.25739
		143.39	0.0104234	0.0240744	0.00283969	0.0444586		143.39	-1.23387	-1.25574	-1.13896	-1.25738
		143.59	0.0100767	0.0254124	0.00010813	0.0446468		143.59	-1.23422	-1.2544	-1.14169	-1.25719
		143.79	0.00974288	0.0219744	0.00032078	0.0433289		143.79	-1.23455	-1.25784	-1.14148	-1.25851
		143.99	0.0123194	0.0287122	0.00151253	0.0443474		143.99	-1.23197	-1.2511	-1.14029	-1.25749
		144.19	0.00822338	0.0266109	0.0018964	0.0446789		144.19	-1.23607	-1.2532	-1.13991	-1.25716
		144.39	0.00673398	0.0231144	0.00658584	0.0438164		144.39	-1.23756	-1.2567	-1.13522	-1.25802
		144.59	0.0102888	0.0209847	0.00331843	0.0424823		144.59	-1.234	-1.25883	-1.13848	-1.25936
		144.79	0.0103842	0.0311707	-0.00260996	0.0470223		144.79	-1.23391	-1.24864	-1.14441	-1.25482
		144.99	0.00816711	0.0250163	0.00236957	0.0515662		144.99	-1.23613	-1.2548	-1.13943	-1.25027
		145.19	0.0114463	0.0231921	0.00163022	0.0459162		145.19	-1.23285	-1.25662	-1.14017	-1.25592
		145.39	0.0100827	0.0267329	0.004961	0.0487355		145.39	-1.23421	-1.25308	-1.13684	-1.2531
		145.59	0.0113292	0.0250648	-0.00287162	0.0462642		145.59	-1.23296	-1.25475	-1.14467	-1.25558
		145.79	0.00577932	0.0239132	0.00104721	0.0436417		145.79	-1.23851	-1.2559	-1.14075	-1.2582
		145.99	0.0108051	0.0222238	0.0048134	0.0462892		145.99	-1.23349	-1.25759	-1.13699	-1.25555
		146.19	0.00613384	0.0249676	0.00351215	0.0460601		146.19	-1.23816	-1.25484	-1.13829	-1.25578
		146.39	0.00796383	0.0215602	0.00086044	0.0447443		146.39	-1.23633	-1.25825	-1.14094	-1.2571
		146.59	0.0100492	0.0231328	0.00309788	0.0479544		146.59	-1.23424	-1.25668	-1.1387	-1.25388
		146.79	0.00878102	0.024755	0.00320447	0.0443052		146.79	-1.23551	-1.25506	-1.1386	-1.25753
		146.99	0.00870258	0.0294548	-0.00099497	0.0476792		146.99	-1.23559	-1.25036	-1.1428	-1.25416
		147.19	0.0121421	0.0243801	0.00120472	0.0468056		147.19	-1.23215	-1.25543	-1.1406	-1.25503
		147.39	0.0103695	0.0226841	0.00094423	0.0440587		147.39	-1.23392	-1.25713	-1.14086	-1.25778
		147.59	0.00817021	0.0245859	-0.00381128	0.045315		147.59	-1.23612	-1.25523	-1.14561	-1.25652
		147.79	0.00848582	0.0241186	0.0030431	0.0445627		147.79	-1.23581	-1.25569	-1.13876	-1.25728
		147.99	0.01064	0.0262004	0.00293905	0.0468709		147.99	-1.23365	-1.25361	-1.13886	-1.25497
		148.19	0.00536396	0.0267809	0.00233951	0.0472348		148.19	-1.23893	-1.25303	-1.13946	-1.2546
		148.39	0.0123927	0.0255977	0.00291802	0.041676		148.39	-1.2319	-1.25421	-1.13888	-1.26016
		148.59	0.00917802	0.0267377	0.00706472	0.0418394		148.59	-1.23512	-1.25307	-1.13474	-1.26
		148.79	0.00488826	0.0242017	0.00095644	0.0534842		148.79	-1.2394	-1.25561	-1.14085	-1.24836
		148.99	0.00524862	0.0261278	0.00232508	0.0426764		148.99	-1.23904	-1.25368	-1.13948	-1.25916
		149.19	0.0112506	0.0253246	0.0011624	0.0474289		149.19	-1.23304	-1.25449	-1.14064	-1.25441
		149.39	0.00889926	0.0249316	0.00085293	0.0448069		149.39	-1.23539	-1.25488	-1.14095	-1.25703
		149.59	0.00973775	0.0283885	-0.00156327	0.0495899		149.59	-1.23456	-1.25142	-1.14336	-1.25225
		149.79	0.0113563	0.0263376	0.00129852	0.0468324		149.79	-1.23294	-1.25347	-1.1405	-1.25501
		149.99	0.0108934	0.0272687	0.00364926	0.047212		149.99	-1.2334	-1.25254	-1.13815	-1.25463
		150.19	0.00880819	0.0269822	0.00207892	0.0486435		150.19	-1.23549	-1.25283	-1.13972	-1.2532
		150.39	0.00964476	0.0303824	-0.00011807	0.0484618		150.39	-1.23465	-1.24943	-1.14192	-1.25338
		150.59	0.00860508	0.0214046	0.00266704	0.0391667		150.59	-1.23569	-1.25841	-1.13913	-1.26267
		150.79	0.0117655	0.0257071	0.00045738	0.0462266		150.79	-1.23253	-1.2541	-1.14134	-1.25561
		150.99	0.00968884	0.0217039	0.00382534	0.0463158		150.99	-1.2346	-1.25811	-1.13798	-1.25552
		151.19	0.0116715	0.0297156	0.00275523	0.0461026		151.19	-1.23262	-1.2501	-1.13905	-1.25574
		151.39	0.00885711	0.0298711	0.00607979	0.0467121		151.39	-1.23544	-1.24994	-1.13572	-1.25513
		151.59	0.0119956	0.0239195	0.00203218	0.0463306		151.59	-1.2323	-1.25589	-1.13977	-1.25551
		151.79	0.00741163	0.0295567	0.00125187	0.0445002		151.79	-1.23688	-1.25026	-1.14055	-1.25734
		151.99	0.0109705	0.0244078	0.00089288	0.0445249		151.99	-1.23332	-1.2554	-1.14091	-1.25731
		152.19	0.00946074	0.0261438	0.00082821	0.0451305		152.19	-1.23483	-1.25367	-1.14097	-1.25671
		152.39	0.00663994	0.0254232	0.00332773	0.0454774		152.39	-1.23765	-1.25439	-1.13847	-1.25636
		152.59	0.0100486	0.0259394	2.867e-05	0.0434417		152.59	-1.23424	-1.25387	-1.14177	-1.2584
		152.79	0.00833673	0.0250713	0.00096331	0.0475734		152.79	-1.23596	-1.25474	-1.14084	-1.25427
		152.99	0.00848617	0.0263543	0.00099573	0.0471538		152.99	-1.23581	-1.25346	-1.14081	-1.25469
		153.19	0.00924134	0.0258751	-8.652e-05	0.04548		153.19	-1.23505	-1.25394	-1.14189	-1.25636
		153.39	0.00954274	0.0250978	0.00145396	0.0459125		153.39	-1.23475	-1.25471	-1.14035	-1.25593
		153.59	0.00899148	0.0243547	0.00213015	0.0430792		153.59	-1.2353	-1.25546	-1.13967	-1.25876
		153.79	0.00976442	0.0245104	0.00477778	0.0464488		153.79	-1.23453	-1.2553	-1.13702	-1.25539
		153.99	0.012703	0.0271619	0.00098118	0.0454716		153.99	-1.23159	-1.25265	-1.14082	-1.25637
		154.19	0.00713471	0.0250792	-0.00246907	0.0458696		154.19	-1.23716	-1.25473	-1.14427	-1.25597
		154.39	0.0078771	0.0273744	-0.00067614	0.0455535		154.39	-1.23642	-1.25244	-1.14248	-1.25629
		154.59	0.007792	0.0213108	-0.00152572	0.0415497		154.59	-1.2365	-1.2585	-1.14333	-1.26029
		154.79	0.00755907	0.0245678	0.000271	0.0452297		154.79	-1.23673	-1.25524	-1.14153	-1.25661
		154.99	0.0127592	0.0248598	3.522e-05	0.0491801		154.99	-1.23153	-1.25495	-1.14177	-1.25266
		155.19	0.00654237	0.0265756	0.00384949	0.0470326		155.19	-1.23775	-1.25324	-1.13795	-1.25481
		155.39	0.0093538	0.0241429	0.00023813	0.0462868		155.39	-1.23494	-1.25567	-1.14156	-1.25555
		155.59	0.0115965	0.0290719	0.0100072	0.0421209		155.59	-1.2327	-1.25074	-1.13179	-1.25972
		155.79	0.0124825	0.0255906	0.00284428	0.0497892		155.79	-1.23181	-1.25422	-1.13896	-1.25205
		155.99	0.0078043	0.0220112	-0.00128811	0.0472562		155.99	-1.23649	-1.2578	-1.14309	-1.25458
		156.19	0.011379	0.0246161	0.00196743	0.0487508		156.19	-1.23291	-1.2552	-1.13983	-1.25309
		156.39	0.00717648	0.0261839	0.00648896	0.0427331		156.39	-1.23712	-1.25363	-1.13531	-1.25911
		156.59	0.00913837	0.0253217	7.49e-06	0.0472797		156.59	-1.23515	-1.25449	-1.14179	-1.25456
		156.79	0.0106175	0.0244689	-0.00036477	0.0437557		156.79	-1.23368	-1.25534	-1.14217	-1.25808
		156.99	0.00751803	0.0225844	0.00139574	0.0465956		156.99	-1.23678	-1.25723	-1.14041	-1.25524
		157.19	0.00857283	0.0274909	0.00137731	0.0468246		157.19	-1.23572	-1.25232	-1.14042	-1.25501
		157.39	0.010447	0.0252759	0.00068973	0.0442185		157.39	-1.23385	-1.25454	-1.14111	-1.25762
		157.59	0.00871806	0.0262926	0.00204454	0.0479183		157.59	-1.23558	-1.25352	-1.13976	-1.25392
		157.79	0.00920439	0.0251862	0.00378949	0.0446209		157.79	-1.23509	-1.25463	-1.13801	-1.25722
		157.99	0.0108405	0.0254003	0.00049366	0.0421454		157.99	-1.23345	-1.25441	-1.14131	-1.25969
		158.19	0.0121889	0.0277911	0.00784813	0.0458077		158.19	-1.2321	-1.25202	-1.13395	-1.25603
		158.39	0.00727689	0.0238015	-0.00124738	0.0447521		158.39	-1.23702	-1.25601	-1.14305	-1.25709
		158.59	0.0075725	0.0276553	0.00094661	0.0449561		158.59	-1.23672	-1.25216	-1.14086	-1.25688
		158.79	0.00911714	0.0301957	-0.00068409	0.046297		158.79	-1.23518	-1.24962	-1.14249	-1.25554
		158.99	0.00914481	0.0280775	-0.00018325	0.0439831		158.99	-1.23515	-1.25173	-1.14198	-1.25786
		159.19	0.0104765	0.0278457	0.0042266	0.0467169		159.19	-1.23382	-1.25197	-1.13758	-1.25512
		159.39	0.0116831	0.0252036	-0.00078436	0.0459536		159.39	-1.23261	-1.25461	-1.14259	-1.25589
		159.59	0.0087329	0.0263034	0.00109042	0.0505689		159.59	-1.23556	-1.25351	-1.14071	-1.25127
		159.79	0.00896777	0.0279474	0.00651365	0.0450113		159.79	-1.23533	-1.25186	-1.13529	-1.25683
		159.99	0.00650833	0.0268061	0.00028331	0.0442448		159.99	-1.23778	-1.25301	-1.14152	-1.25759
		160.19	0.00689888	0.0256228	0.0002703	0.0480961		160.19	-1.23739	-1.25419	-1.14153	-1.25374
		160.39	0.0101065	0.0278707	0.00028567	0.0485566		160.39	-1.23419	-1.25194	-1.14152	-1.25328
		160.59	0.0100134	0.0282894	0.00206459	0.0390938		160.59	-1.23428	-1.25152	-1.13974	-1.26275
		160.79	0.00792741	0.0228099	-0.00089201	0.0487397		160.79	-1.23637	-1.257	-1.14269	-1.2531
		160.99	0.00676052	0.0262801	0.00085248	0.0482608		160.99	-1.23753	-1.25353	-1.14095	-1.25358
		161.19	0.00820165	0.0265678	-0.00031736	0.0507156		161.19	-1.23609	-1.25324	-1.14212	-1.25112
		161.39	0.0132172	0.0273324	0.00386243	0.0446286		161.39	-1.23108	-1.25248	-1.13794	-1.25721
		161.59	0.00987755	0.0257791	-0.0022021	0.0418791		161.59	-1.23442	-1.25403	-1.144	-1.25996
		161.79	0.00959122	0.0253319	0.00296711	0.0465959		161.79	-1.2347	-1.25448	-1.13883	-1.25524
		161.99	0.00962643	0.0262676	0.00167723	0.0466456		161.99	-1.23467	-1.25354	-1.14012	-1.25519
		162.19	0.0068148	0.0248356	0.00447761	0.0453014		162.19	-1.23748	-1.25498	-1.13732	-1.25654
		162.39	0.00992807	0.024333	-0.00293506	0.0443468		162.39	-1.23437	-1.25548	-1.14474	-1.25749
		162.59	0.00936418	0.022467	6.06e-05	0.0458077		162.59	-1.23493	-1.25734	-1.14174	-1.25603
		162.79	0.0117508	0.0238821	0.00189052	0.0451843		162.79	-1.23254	-1.25593	-1.13991	-1.25666
		162.99	0.00963479	0.0308258	0.00021289	0.046839		162.99	-1.23466	-1.24899	-1.14159	-1.255
		163.19	0.0095747	0.0230047	0.00192026	0.046083		163.19	-1.23472	-1.25681	-1.13988	-1.25576
		163.39	0.0103949	0.023364	-0.00105312	0.0464327		163.39	-1.2339	-1.25645	-1.14285	-1.25541
		163.59	0.0110784	0.0253011	-0.00021165	0.0469955		163.59	-1.23321	-1.25451	-1.14201	-1.25484
		163.79	0.00748767	0.027705	0.00242321	0.0470865		163.79	-1.23681	-1.25211	-1.13938	-1.25475
		163.99	0.00971489	0.0293992	-0.0008235	0.0472941		163.99	-1.23458	-1.25041	-1.14263	-1.25455
		164.19	0.00917051	0.0259414	0.00550679	0.0491632		164.19	-1.23512	-1.25387	-1.13629	-1.25268
		164.39	0.00900038	0.0252422	0.00291785	0.0460396		164.39	-1.23529	-1.25457	-1.13888	-1.2558
		164.59	0.00893461	0.0243719	-0.00253285	0.0423977		164.59	-1.23536	-1.25544	-1.14433	-1.25944
		164.79	0.00512992	0.0255659	0.00073624	0.0424759		164.79	-1.23916	-1.25425	-1.14107	-1.25936
		164.99	0.00794098	0.0273172	-0.00209445	0.0436263		164.99	-1.23635	-1.25249	-1.1439	-1.25821
		165.19	0.00603434	0.0253554	-0.00075802	0.0479228		165.19	-1.23826	-1.25446	-1.14256	-1.25392
		165.39	0.00831025	0.0269439	-0.00478748	0.0504935		165.39	-1.23598	-1.25287	-1.14659	-1.25135
		165.59	0.00872842	0.0275326	-0.0018037	0.0454656		165.59	-1.23556	-1.25228	-1.14361	-1.25637
		165.79	0.00922044	0.0257334	0.00568492	0.0439812		165.79	-1.23507	-1.25408	-1.13612	-1.25786
		165.99	0.011625	0.0244963	0.00168204	0.0484997		165.99	-1.23267	-1.25532	-1.14012	-1.25334
		166.19	0.00713082	0.0253913	0.00098814	0.0442367		166.19	-1.23716	-1.25442	-1.14081	-1.2576
		166.39	0.0108198	0.0247945	0.0026237	0.0468612		166.39	-1.23347	-1.25502	-1.13918	-1.25498
		166.59	0.00996978	0.0224162	0.00054646	0.0440192		166.59	-1.23432	-1.2574	-1.14126	-1.25782
		166.79	0.00915685	0.0238907	0.00551054	0.0419326		166.79	-1.23514	-1.25592	-1.13629	-1.25991
		166.99	0.00979515	0.0273422	0.00015171	0.0486233		166.99	-1.2345	-1.25247	-1.14165	-1.25322
		167.19	0.008002	0.0264747	0.00167206	0.0460675		167.19	-1.23629	-1.25334	-1.14013	-1.25577
		167.39	0.0113117	0.0240209	-0.0017635	0.046768		167.39	-1.23298	-1.25579	-1.14357	-1.25507
		167.59	0.00594848	0.02638	0.00140198	0.0420152		167.59	-1.23834	-1.25343	-1.1404	-1.25982
		167.79	0.0113615	0.0272681	0.00052988	0.0460873		167.79	-1.23293	-1.25254	-1.14127	-1.25575
		167.99	0.00991284	0.025937	0.00085031	0.0448334		167.99	-1.23438	-1.25387	-1.14095	-1.25701
		168.19	0.0100001	0.0250732	0.00356129	0.048151		168.19	-1.23429	-1.25474	-1.13824	-1.25369
		168.39	0.0121945	0.0234002	0.00128183	0.0464392		168.39	-1.2321	-1.25641	-1.14052	-1.2554
		168.59	0.00710644	0.0274181	0.00400796	0.0494915		168.59	-1.23719	-1.25239	-1.13779	-1.25235
		168.79	0.00921963	0.0235471	-0.00127345	0.0469304		168.79	-1.23507	-1.25626	-1.14308	-1.25491
		168.99	0.00641203	0.0269509	-0.00057687	0.0462727		168.99	-1.23788	-1.25286	-1.14238	-1.25557
		169.19	0.0114644	0.0231463	-0.0040652	0.044574		169.19	-1.23283	-1.25667	-1.14587	-1.25727
		169.39	0.0107078	0.0256728	0.00136793	0.0493949		169.39	-1.23359	-1.25414	-1.14043	-1.25244
		169.59	0.0102212	0.024036	0.00047283	0.0526595		169.59	-1.23407	-1.25578	-1.14133	-1.24918
		169.79	0.00961092	0.0248926	0.00055438	0.0424265		169.79	-1.23468	-1.25492	-1.14125	-1.25941
		169.99	0.00682978	0.0264423	0.00076673	0.0453163		169.99	-1.23746	-1.25337	-1.14103	-1.25652
		170.19	0.00802802	0.025298	0.00262969	0.0438339		170.19	-1.23627	-1.25451	-1.13917	-1.25801
		170.39	0.00909168	0.0268175	-0.00036782	0.042799		170.39	-1.2352	-1.25299	-1.14217	-1.25904
		170.59	0.00872845	0.0264603	0.00174946	0.0427298		170.59	-1.23556	-1.25335	-1.14005	-1.25911
		170.79	0.0063904	0.022864	-0.00259439	0.048212		170.79	-1.2379	-1.25695	-1.1444	-1.25363
		170.99	0.00705648	0.025367	-0.00035412	0.0447985		170.99	-1.23724	-1.25444	-1.14216	-1.25704
		171.19	0.00728721	0.0251403	0.00256652	0.0465828		171.19	-1.23701	-1.25467	-1.13924	-1.25526
		171.39	0.00860496	0.0294689	-0.0006797	0.0445897		171.39	-1.23569	-1.25034	-1.14248	-1.25725
		171.59	0.010113	0.0252959	0.0034573	0.0513008		171.59	-1.23418	-1.25452	-1.13834	-1.25054
		171.79	0.00894606	0.0249657	-0.00018212	0.0491858		171.79	-1.23535	-1.25485	-1.14198	-1.25265
		171.99	0.0110257	0.0244481	0.00192388	0.0417804		171.99	-1.23327	-1.25536	-1.13988	-1.26006
		172.19	0.0117404	0.0250862	-0.00186583	0.0475959		172.19	-1.23255	-1.25473	-1.14367	-1.25424
		172.39	0.00872096	0.0258861	-0.00373641	0.0463296		172.39	-1.23557	-1.25393	-1.14554	-1.25551
		172.59	0.0127693	0.0258987	-0.00019565	0.0489242		172.59	-1.23152	-1.25391	-1.142	-1.25292
		172.79	0.0091766	0.0216841	-0.00016568	0.0463401		172.79	-1.23512	-1.25813	-1.14197	-1.2555
		172.99	0.0079263	0.0258191	0.00097143	0.0464221		172.99	-1.23637	-1.25399	-1.14083	-1.25542
		173.19	0.00855301	0.0241002	-0.00102958	0.0438289		173.19	-1.23574	-1.25571	-1.14283	-1.25801
		173.39	0.0102486	0.0239138	0.00284967	0.0461541		173.39	-1.23404	-1.2559	-1.13895	-1.25569
		173.59	0.00928823	0.0255472	-0.0018789	0.0470684		173.59	-1.235	-1.25426	-1.14368	-1.25477
		173.79	0.0108748	0.0293411	-0.00306055	0.0462299		173.79	-1.23342	-1.25047	-1.14486	-1.25561
		173.99	0.00810783	0.0243565	0.00014832	0.0425546		173.99	-1.23619	-1.25546	-1.14165	-1.25928
		174.19	0.0111664	0.0298208	0.00067826	0.0447606		174.19	-1.23313	-1.24999	-1.14112	-1.25708
		174.39	0.00920055	0.0247401	0.00178502	0.0455021		174.39	-1.23509	-1.25507	-1.14002	-1.25634
		174.59	0.00682735	0.0222153	0.00238023	0.0465076		174.59	-1.23747	-1.2576	-1.13942	-1.25533
		174.79	0.00796932	0.0241372	0.0005445	0.0426577		174.79	-1.23632	-1.25567	-1.14126	-1.25918
		174.99	0.0122048	0.0250385	0.00164878	0.0469217		174.99	-1.23209	-1.25477	-1.14015	-1.25492
		175.19	0.010125	0.0231779	-0.00144496	0.0412941		175.19	-1.23417	-1.25663	-1.14325	-1.26055
		175.39	0.0071474	0.022569	-0.00041176	0.0491902		175.39	-1.23715	-1.25724	-1.14221	-1.25265
		175.59	0.00798712	0.0256459	0.0040721	0.0439818		175.59	-1.23631	-1.25417	-1.13773	-1.25786
		175.79	0.00911308	0.0244449	2.164e-05	0.0474847		175.79	-1.23518	-1.25537	-1.14178	-1.25435
		175.99	0.00971133	0.0253504	-0.00226081	0.0478424		175.99	-1.23458	-1.25446	-1.14406	-1.254
		176.19	0.0106	0.0266579	0.00228244	0.0490671		176.19	-1.23369	-1.25315	-1.13952	-1.25277
		176.39	0.00548666	0.0222062	0.00106444	0.0451598		176.39	-1.23881	-1.25761	-1.14074	-1.25668
		176.59	0.00867645	0.0255642	7.658e-05	0.0478355		176.59	-1.23562	-1.25425	-1.14173	-1.254
		176.79	0.0081665	0.0246216	0.00114296	0.0462876		176.79	-1.23613	-1.25519	-1.14066	-1.25555
		176.99	0.00620693	0.024342	0.00058082	0.0447093		176.99	-1.23809	-1.25547	-1.14122	-1.25713
		177.19	0.00625066	0.0240988	0.00190507	0.0455033		177.19	-1.23804	-1.25571	-1.1399	-1.25634
		177.39	0.00507725	0.0272446	0.00248198	0.0449406		177.39	-1.23922	-1.25257	-1.13932	-1.2569
		177.59	0.0102883	0.0258547	-0.00146254	0.0441035		177.59	-1.234	-1.25396	-1.14326	-1.25774
		177.79	0.00657402	0.0239765	0.00190423	0.0480501		177.79	-1.23772	-1.25584	-1.1399	-1.25379
		177.99	0.00818071	0.026618	-0.00455795	0.0489764		177.99	-1.23611	-1.25319	-1.14636	-1.25286
		178.19	0.00843182	0.0238033	0.00218969	0.0460177		178.19	-1.23586	-1.25601	-1.13961	-1.25582
		178.39	0.00883608	0.0247595	0.0032379	0.0469045		178.39	-1.23546	-1.25505	-1.13856	-1.25493
		178.59	0.00474291	0.0257181	2.957e-05	0.0514124		178.59	-1.23955	-1.25409	-1.14177	-1.25043
		178.79	0.0101662	0.027328	0.00592674	0.0451968		178.79	-1.23413	-1.25248	-1.13587	-1.25664
		178.99	0.00751107	0.0240387	0.00448693	0.0450184		178.99	-1.23678	-1.25577	-1.13731	-1.25682
		179.19	0.0114478	0.0188765	0.00274142	0.0432991		179.19	-1.23285	-1.26094	-1.13906	-1.25854
		179.39	0.00863248	0.0225544	-0.00048185	0.0438768		179.39	-1.23566	-1.25726	-1.14228	-1.25796
		179.59	0.0122158	0.0214388	-0.00097094	0.0495315		179.59	-1.23208	-1.25837	-1.14277	-1.25231
		179.79	0.00648707	0.0228585	0.00041909	0.0455341		179.79	-1.23781	-1.25695	-1.14138	-1.25631
		179.99	0.00728961	0.0244567	-0.00073995	0.0459229		179.99	-1.237	-1.25536	-1.14254	-1.25592
		180.19	0.0106894	0.0226462	0.0023783	0.0445508		180.19	-1.2336	-1.25717	-1.13942	-1.25729
		180.39	0.00947783	0.0245906	0.00122328	0.0426606		180.39	-1.23482	-1.25522	-1.14058	-1.25918
		180.59	0.00932049	0.026885	0.00082257	0.0420503		180.59	-1.23497	-1.25293	-1.14098	-1.25979
		180.79	0.00651709	0.02562	-0.00165994	0.0458223		180.79	-1.23778	-1.25419	-1.14346	-1.25602
		180.99	0.00695483	0.0276196	0.00116558	0.046534		180.99	-1.23734	-1.25219	-1.14064	-1.25531
		181.19	0.00878582	0.0256481	0.0009931	0.0478716		181.19	-1.23551	-1.25416	-1.14081	-1.25397
		181.39	0.0103877	0.0230247	0.00155843	0.0479056		181.39	-1.23391	-1.25679	-1.14024	-1.25393
		181.59	0.0108392	0.0222279	-0.0014235	0.0487863		181.59	-1.23345	-1.25758	-1.14323	-1.25305
		181.79	0.0107969	0.0235725	0.00034777	0.0484496		181.79	-1.2335	-1.25624	-1.14145	-1.25339
		181.99	0.00597512	0.0250955	0.00053617	0.0458932		181.99	-1.23832	-1.25472	-1.14127	-1.25595
		182.19	0.00927904	0.0242123	-0.00037649	0.0490125		182.19	-1.23501	-1.2556	-1.14218	-1.25283
		182.39	0.00918032	0.0274902	0.00015109	0.047808		182.39	-1.23511	-1.25232	-1.14165	-1.25403
		182.59	0.00753611	0.0231711	-9.818e-05	0.043254		182.59	-1.23676	-1.25664	-1.1419	-1.25859
		182.79	0.00709809	0.0243888	0.00202026	0.0444871		182.79	-1.2372	-1.25542	-1.13978	-1.25735
		182.99	0.00625957	0.0222531	0.00300441	0.0485353		182.99	-1.23803	-1.25756	-1.1388	-1.2533
		183.19	0.00850166	0.0249796	-0.00202874	0.0463539		183.19	-1.23579	-1.25483	-1.14383	-1.25549
		183.39	0.00658628	0.0243993	-0.00163564	0.0440704		183.39	-1.23771	-1.25541	-1.14344	-1.25777
		183.59	0.0121907	0.0230561	5.12e-05	0.0518263		183.59	-1.2321	-1.25676	-1.14175	-1.25001
		183.79	0.0089565	0.0220585	0.00230524	0.0426723		183.79	-1.23534	-1.25775	-1.1395	-1.25917
		183.99	0.0105753	0.0242961	0.00294004	0.0450226		183.99	-1.23372	-1.25552	-1.13886	-1.25682
		184.19	0.00909874	0.0245661	-0.00323888	0.0468863		184.19	-1.23519	-1.25525	-1.14504	-1.25495
		184.39	0.00859277	0.0247917	0.00247902	0.0472847		184.39	-1.2357	-1.25502	-1.13932	-1.25455
		184.59	0.00855609	0.0204916	0.00017546	0.0435673		184.59	-1.23574	-1.25932	-1.14163	-1.25827
		184.79	0.00667731	0.0238762	0.0022295	0.0457404		184.79	-1.23762	-1.25594	-1.13957	-1.2561
		184.99	0.00965762	0.0270465	-0.00207239	0.0485859		184.99	-1.23464	-1.25277	-1.14387	-1.25325
		185.19	0.00717677	0.0265459	-0.00082097	0.0489332		185.19	-1.23712	-1.25327	-1.14262	-1.25291
		185.39	0.00754699	0.0277174	0.00270542	0.0485376		185.39	-1.23675	-1.25209	-1.1391	-1.2533
		185.59	0.00858717	0.0217614	-0.00273083	0.0451843		185.59	-1.23571	-1.25805	-1.14453	-1.25666
		185.79	0.00843375	0.0253943	0.00244518	0.0467875		185.79	-1.23586	-1.25442	-1.13936	-1.25505
		185.99	0.00924845	0.0266099	-0.00083786	0.0403127		185.99	-1.23504	-1.2532	-1.14264	-1.26153
		186.19	0.00556712	0.0260768	-0.00088558	0.0472315		186.19	-1.23873	-1.25374	-1.14269	-1.25461
		186.39	0.0092109	0.0228924	0.00324569	0.0461767		186.39	-1.23508	-1.25692	-1.13856	-1.25566
		186.59	0.00573635	0.0241417	-0.00083329	0.044668		186.59	-1.23856	-1.25567	-1.14264	-1.25717
		186.79	0.00815649	0.0251319	0.00142597	0.0460263		186.79	-1.23614	-1.25468	-1.14038	-1.25581
		186.99	0.00954478	0.0226898	0.00161284	0.0432495		186.99	-1.23475	-1.25712	-1.14019	-1.25859
		187.19	0.00766423	0.0254169	-0.00310112	0.0474045		187.19	-1.23663	-1.25439	-1.1449	-1.25443
		187.39	0.00641539	0.0244862	-0.0008734	0.0475933		187.39	-1.23788	-1.25533	-1.14268	-1.25425
		187.59	0.00756169	0.0250024	0.00616183	0.0473806		187.59	-1.23673	-1.25481	-1.13564	-1.25446
		187.79	0.0082295	0.0222386	-0.00285217	0.0509249		187.79	-1.23606	-1.25757	-1.14465	-1.25091
		187.99	0.0103266	0.0234598	0.00531663	0.0488055		187.99	-1.23397	-1.25635	-1.13649	-1.25303
		188.19	0.0069462	0.0271134	-0.00120981	0.0482767		188.19	-1.23735	-1.2527	-1.14301	-1.25356
		188.39	0.0105619	0.0239678	-0.00333743	0.049081		188.39	-1.23373	-1.25584	-1.14514	-1.25276
		188.59	0.00704149	0.0262629	0.00370989	0.0480345		188.59	-1.23725	-1.25355	-1.13809	-1.2538
		188.79	0.00766706	0.0226562	0.00140457	0.0460575		188.79	-1.23663	-1.25716	-1.1404	-1.25578
		188.99	0.00965629	0.0276548	0.00337307	0.0467739		188.99	-1.23464	-1.25216	-1.13843	-1.25507
		189.19	0.00779796	0.0217346	0.00118147	0.0446212		189.19	-1.2365	-1.25808	-1.14062	-1.25722
		189.39	0.00775685	0.0201847	0.00371685	0.0534963		189.39	-1.23654	-1.25963	-1.13808	-1.24834
		189.59	0.00765559	0.0259701	0.00313189	0.0449539		189.59	-1.23664	-1.25384	-1.13867	-1.25689
		189.79	0.00946474	0.0244573	0.00155293	0.0437595		189.79	-1.23483	-1.25535	-1.14025	-1.25808
		189.99	0.00700754	0.0281339	0.00440941	0.0456694		189.99	-1.23729	-1.25168	-1.13739	-1.25617
		190.19	0.013748	0.0264659	-0.00135662	0.0491377		190.19	-1.23055	-1.25335	-1.14316	-1.2527
		190.39	0.00909937	0.0226683	-0.00110063	0.0469149		190.39	-1.23519	-1.25714	-1.1429	-1.25492
		190.59	0.0101762	0.026123	0.00093098	0.0448463		190.59	-1.23412	-1.25369	-1.14087	-1.25699
		190.79	0.0117044	0.0245479	0.0027966	0.048227		190.79	-1.23259	-1.25526	-1.13901	-1.25361
		190.99	0.00824596	0.0244605	0.00031607	0.0469217		190.99	-1.23605	-1.25535	-1.14149	-1.25492
		191.19	0.00838353	0.0253678	0.00313286	0.0485398		191.19	-1.23591	-1.25444	-1.13867	-1.2533
		191.39	0.00960656	0.0279505	-0.00407652	0.0471441		191.39	-1.23469	-1.25186	-1.14588	-1.2547
		191.59	0.0101325	0.0214473	-0.00136578	0.0470859		191.59	-1.23416	-1.25836	-1.14317	-1.25475
		191.79	0.0107742	0.0248928	0.00551093	0.0499089		191.79	-1.23352	-1.25492	-1.13629	-1.25193
		191.99	0.00732001	0.0232621	0.00075917	0.0510832		191.99	-1.23697	-1.25655	-1.14104	-1.25076
		192.19	0.00577355	0.0265291	-0.00026291	0.0493086		192.19	-1.23852	-1.25328	-1.14206	-1.25253
		192.39	0.00694354	0.0252663	0.0003308	0.0477352		192.39	-1.23735	-1.25455	-1.14147	-1.2541
		192.59	0.00825864	0.0241158	-0.00046811	0.0481714		192.59	-1.23603	-1.2557	-1.14227	-1.25367
		192.79	0.00589757	0.0249646	0.00219244	0.0493179		192.79	-1.2384	-1.25485	-1.13961	-1.25252
		192.99	0.00809504	0.0241946	-0.00170493	0.0513694		192.99	-1.2362	-1.25562	-1.14351	-1.25047
		193.19	0.0095357	0.0218957	-0.00235208	0.0446284		193.19	-1.23476	-1.25792	-1.14415	-1.25721
		193.39	0.00835964	0.026475	-0.00330274	0.0488448		193.39	-1.23593	-1.25334	-1.1451	-1.25299
		193.59	0.0101552	0.0279824	-0.00102306	0.0488304		193.59	-1.23414	-1.25183	-1.14282	-1.25301
		193.79	0.00537554	0.0276111	-0.00072832	0.0446206		193.79	-1.23892	-1.2522	-1.14253	-1.25722
		193.99	0.00716123	0.0258724	0.00341731	0.0505088		193.99	-1.23713	-1.25394	-1.13838	-1.25133
		194.19	0.00884806	0.0250163	0.00059851	0.0500532		194.19	-1.23545	-1.2548	-1.1412	-1.25179
		194.39	0.00919598	0.0237234	0.00110555	0.0460419		194.39	-1.2351	-1.25609	-1.1407	-1.2558
		194.59	0.0070615	0.029113	-0.00184694	0.04647		194.59	-1.23723	-1.2507	-1.14365	-1.25537
		194.79	0.00924587	0.0254565	0.00189472	0.0451662		194.79	-1.23505	-1.25436	-1.13991	-1.25667
		194.99	0.00530803	0.0254145	0.00126769	0.0496789		194.99	-1.23899	-1.2544	-1.14053	-1.25216
		195.19	0.0110783	0.0245637	0.00445546	0.0455991		195.19	-1.23321	-1.25525	-1.13735	-1.25624
		195.39	0.00866644	0.0234965	0.00356847	0.0457739		195.39	-1.23563	-1.25632	-1.13823	-1.25607
		195.59	0.00682377	0.0283423	-0.00481215	0.0440604		195.59	-1.23747	-1.25147	-1.14661	-1.25778
		195.79	0.00909783	0.0232416	0.00267478	0.0547891		195.79	-1.2352	-1.25657	-1.13913	-1.24705
		195.99	0.0115029	0.0244308	0.0043562	0.0500608		195.99	-1.23279	-1.25538	-1.13745	-1.25178
		196.19	0.0109485	0.0259748	0.00024175	0.0498427		196.19	-1.23334	-1.25384	-1.14156	-1.252
		196.39	0.00997035	0.0224757	-0.00239093	0.0480975		196.39	-1.23432	-1.25734	-1.14419	-1.25374
		196.59	0.00658362	0.0265476	-0.00397388	0.0461049		196.59	-1.23771	-1.25326	-1.14578	-1.25573
		196.79	0.0115626	0.0249926	0.00012411	0.0498355		196.79	-1.23273	-1.25482	-1.14168	-1.252
		196.99	0.00999613	0.0244209	0.00211474	0.0469495		196.99	-1.2343	-1.25539	-1.13969	-1.25489
		197.19	0.00729661	0.0243174	-0.00222163	0.0501795		197.19	-1.237	-1.25549	-1.14402	-1.25166
		197.39	0.00987991	0.0218423	8.09e-05	0.0440147		197.39	-1.23441	-1.25797	-1.14172	-1.25782
		197.59	0.00665891	0.0222281	0.00098514	0.0469578		197.59	-1.23763	-1.25758	-1.14082	-1.25488
		197.79	0.00548438	0.0270177	-0.00068376	0.0451884		197.79	-1.23881	-1.25279	-1.14249	-1.25665
		197.99	0.00952725	0.0242543	0.00033235	0.0516948		197.99	-1.23477	-1.25556	-1.14147	-1.25014
		198.19	0.00824395	0.0265441	0.00061077	0.0478948		198.19	-1.23605	-1.25327	-1.14119	-1.25394
		198.39	0.00918517	0.0246302	-0.00069859	0.0487254		198.39	-1.23511	-1.25518	-1.1425	-1.25311
		198.59	0.00753404	0.0229008	0.00253446	0.0471491		198.59	-1.23676	-1.25691	-1.13927	-1.25469
		198.79	0.0078443	0.021765	0.0038255	0.048191		198.79	-1.23645	-1.25805	-1.13798	-1.25365
		198.99	0.00779679	0.0239345	-0.00081207	0.047978		198.99	-1.2365	-1.25588	-1.14261	-1.25386
		199.19	0.0091304	0.0259089	0.00029172	0.0514407		199.19	-1.23516	-1.2539	-1.14151	-1.2504
		199.39	0.0123427	0.021495	0.00412232	0.0457302		199.39	-1.23195	-1.25832	-1.13768	-1.25611
		199.59	0.00786028	0.0282779	-0.00359492	0.04538		199.59	-1.23643	-1.25153	-1.1454	-1.25646
		199.79	0.00910394	0.024985	-0.0013014	0.0457109		199.79	-1.23519	-1.25483	-1.1431	-1.25613
		200	0.0319735	0.0462113	0.0251037	0.0691541		200	-1.21232	-1.2336	-1.1167	-1.23269
		200.19	0.0329004	0.0461269	0.0231219	0.0719155		200.19	-1.21139	-1.23368	-1.11868	-1.22992
		200.39	0.0305807	0.0507648	0.0264232	0.0681177		200.39	-1.21371	-1.22905	-1.11538	-1.23372
		200.59	0.0339957	0.0540282	0.0266617	0.0720505		200.59	-1.2103	-1.22578	-1.11514	-1.22979
		200.79	0.0335991	0.0514849	0.032367	0.0756878		200.79	-1.21069	-1.22833	-1.10943	-1.22615
		200.99	0.0382682	0.0535047	0.0328007	0.0739626		200.99	-1.20602	-1.22631	-1.109	-1.22788
		201.19	0.0359973	0.0547334	0.034925	0.0749651		201.19	-1.2083	-1.22508	-1.10688	-1.22687
		201.39	0.0342905	0.0540384	0.0332243	0.0764451		201.39	-1.21	-1.22577	-1.10858	-1.22539
		201.59	0.0436256	0.0626422	0.0350304	0.0779369		201.59	-1.20067	-1.21717	-1.10677	-1.2239
		201.79	0.0415694	0.0545575	0.031912	0.0810434		201.79	-1.20272	-1.22525	-1.10989	-1.2208
		201.99	0.0405492	0.0560075	0.0404567	0.0860223		201.99	-1.20374	-1.2238	-1.10135	-1.21582
		202.19	0.0399519	0.0582405	0.0408879	0.0827869		202.19	-1.20434	-1.22157	-1.10091	-1.21905
		202.39	0.0403309	0.0638463	0.0386184	0.0844616		202.39	-1.20396	-1.21597	-1.10318	-1.21738
		202.59	0.0438057	0.0617885	0.039956	0.0816544		202.59	-1.20049	-1.21802	-1.10185	-1.22018
		202.79	0.0462308	0.0648584	0.0427425	0.0865974		202.79	-1.19806	-1.21495	-1.09906	-1.21524
		202.99	0.0452826	0.0621685	0.044131	0.0899606		202.99	-1.19901	-1.21764	-1.09767	-1.21188
		203.19	0.0462928	0.0656737	0.0447106	0.0855615		203.19	-1.198	-1.21414	-1.09709	-1.21628
		203.39	0.0472713	0.0649223	0.0453788	0.0913423		203.39	-1.19702	-1.21489	-1.09642	-1.2105
		203.59	0.0482695	0.0694897	0.0454091	0.0915605		203.59	-1.19602	-1.21032	-1.09639	-1.21028
		203.79	0.0511498	0.0692652	0.0440246	0.0883643		203.79	-1.19314	-1.21055	-1.09778	-1.21348
		203.99	0.0536492	0.0685052	0.0498025	0.0921037		203.99	-1.19064	-1.21131	-1.092	-1.20974
		204.19	0.0534092	0.0693911	0.0480358	0.090484		204.19	-1.19088	-1.21042	-1.09377	-1.21136
		204.39	0.0550444	0.0708782	0.0505767	0.0975665		204.39	-1.18925	-1.20893	-1.09122	-1.20427
		204.59	0.0582714	0.0744935	0.0459289	0.094118		204.59	-1.18602	-1.20532	-1.09587	-1.20772
		204.79	0.056697	0.0737948	0.0483785	0.089866		204.79	-1.1876	-1.20602	-1.09342	-1.21197
		204.99	0.0568351	0.0728618	0.0528686	0.0967106		204.99	-1.18746	-1.20695	-1.08893	-1.20513
		205.19	0.0605246	0.0782017	0.0532619	0.0996324		205.19	-1.18377	-1.20161	-1.08854	-1.20221
		205.39	0.0550544	0.0774073	0.0550378	0.0973337		205.39	-1.18924	-1.2024	-1.08676	-1.20451
		205.59	0.0594114	0.0765982	0.0515149	0.0995187		205.59	-1.18488	-1.20321	-1.09029	-1.20232
		205.79	0.0603674	0.0759082	0.0548095	0.0980044		205.79	-1.18393	-1.2039	-1.08699	-1.20383
		205.99	0.0601806	0.0771822	0.0597242	0.0999946		205.99	-1.18411	-1.20263	-1.08208	-1.20184
		206.19	0.0629688	0.0793645	0.0555165	0.105813		206.19	-1.18132	-1.20045	-1.08629	-1.19603
		206.39	0.0641816	0.083389	0.0630269	0.103337		206.39	-1.18011	-1.19642	-1.07877	-1.1985
		206.59	0.0642155	0.0846338	0.0582964	0.106484		206.59	-1.18008	-1.19518	-1.08351	-1.19536
		206.79	0.0660806	0.0868479	0.0604496	0.104814		206.79	-1.17821	-1.19296	-1.08135	-1.19703
		206.99	0.0664544	0.083615	0.0622663	0.102003		206.99	-1.17784	-1.1962	-1.07954	-1.19984
		207.19	0.0714195	0.0829683	0.0619106	0.106565		207.19	-1.17287	-1.19684	-1.07989	-1.19527
		207.39	0.0679696	0.0886887	0.059762	0.111418		207.39	-1.17632	-1.19112	-1.08204	-1.19042
		207.59	0.0691317	0.0866173	0.0645464	0.104832		207.59	-1.17516	-1.19319	-1.07726	-1.19701
		207.79	0.068422	0.0844032	0.0602138	0.108875		207.79	-1.17587	-1.19541	-1.08159	-1.19296
		207.99	0.0713739	0.0865286	0.0665511	0.110859		207.99	-1.17292	-1.19328	-1.07525	-1.19098
		208.19	0.0739469	0.0900145	0.0697206	0.114483		208.19	-1.17035	-1.1898	-1.07208	-1.18736
		208.39	0.0755014	0.0877519	0.0704464	0.111293		208.39	-1.16879	-1.19206	-1.07136	-1.19055
		208.59	0.0770707	0.0935841	0.0712442	0.118411		208.59	-1.16722	-1.18623	-1.07056	-1.18343
		208.79	0.0725023	0.092181	0.0730071	0.110196		208.79	-1.17179	-1.18763	-1.06879	-1.19164
		208.99	0.0732802	0.0953685	0.072873	0.115853		208.99	-1.17101	-1.18444	-1.06893	-1.18599
		209.19	0.0754653	0.0919742	0.0715682	0.116243		209.19	-1.16883	-1.18784	-1.07023	-1.1856
		209.39	0.0772949	0.094226	0.0749485	0.121757		209.39	-1.167	-1.18559	-1.06685	-1.18008
		209.59	0.0772812	0.097198	0.0759358	0.120204		209.59	-1.16701	-1.18261	-1.06587	-1.18164
		209.79	0.0761575	0.0921562	0.0770152	0.119408		209.79	-1.16814	-1.18766	-1.06479	-1.18243
		209.99	0.0817182	0.0968785	0.0748089	0.118759		209.99	-1.16257	-1.18293	-1.06699	-1.18308
		210.19	0.0812979	0.0984164	0.0766541	0.123311		210.19	-1.163	-1.1814	-1.06515	-1.17853
		210.39	0.083221	0.100097	0.0824445	0.121441		210.39	-1.16107	-1.17971	-1.05936	-1.1804
		210.59	0.0822816	0.100153	0.0772095	0.125281		210.59	-1.16201	-1.17966	-1.06459	-1.17656
		210.79	0.0868604	0.101489	0.0817202	0.121067		210.79	-1.15743	-1.17832	-1.06008	-1.18077
		210.99	0.0857338	0.103255	0.0854267	0.129688		210.99	-1.15856	-1.17656	-1.05637	-1.17215
		211.19	0.0854453	0.107205	0.0846333	0.126173		211.19	-1.15885	-1.17261	-1.05717	-1.17567
		211.39	0.0862023	0.103485	0.0796764	0.130563		211.39	-1.15809	-1.17633	-1.06213	-1.17128
		211.59	0.0858229	0.102549	0.0896713	0.127316		211.59	-1.15847	-1.17726	-1.05213	-1.17452
		211.79	0.0890673	0.106807	0.0866937	0.129744		211.79	-1.15523	-1.173	-1.05511	-1.1721
		211.99	0.0883986	0.105027	0.0822589	0.129281		211.99	-1.15589	-1.17479	-1.05954	-1.17256
		212.19	0.0889869	0.108396	0.0853391	0.126483		212.19	-1.15531	-1.17142	-1.05646	-1.17536
		212.39	0.0917652	0.11312	0.0889213	0.132589		212.39	-1.15253	-1.16669	-1.05288	-1.16925
		212.59	0.0945672	0.108916	0.0886634	0.135003		212.59	-1.14973	-1.1709	-1.05314	-1.16684
		212.79	0.094477	0.113881	0.089929	0.134618		212.79	-1.14982	-1.16593	-1.05187	-1.16722
		212.99	0.0967112	0.110308	0.0912482	0.133046		212.99	-1.14758	-1.1695	-1.05055	-1.16879
		213.19	0.0936928	0.115218	0.0923997	0.133738		213.19	-1.1506	-1.16459	-1.0494	-1.1681
		213.39	0.0971662	0.11554	0.0940798	0.136714		213.39	-1.14713	-1.16427	-1.04772	-1.16513
		213.59	0.0977561	0.114872	0.0948734	0.13483		213.59	-1.14654	-1.16494	-1.04693	-1.16701
		213.79	0.097393	0.116104	0.0972027	0.141369		213.79	-1.1469	-1.16371	-1.0446	-1.16047
		213.99	0.100947	0.126297	0.10147	0.135477		213.99	-1.14335	-1.15351	-1.04033	-1.16636
		214.19	0.10284	0.118438	0.0993768	0.139077		214.19	-1.14145	-1.16137	-1.04242	-1.16276
		214.39	0.102906	0.11871	0.0992891	0.143246		214.39	-1.14139	-1.1611	-1.04251	-1.15859
		214.59	0.101231	0.12209	0.0993384	0.142165		214.59	-1.14306	-1.15772	-1.04246	-1.15967
		214.79	0.106079	0.121847	0.0989752	0.144712		214.79	-1.13821	-1.15796	-1.04283	-1.15713
		214.99	0.103523	0.121511	0.100761	0.142751		214.99	-1.14077	-1.1583	-1.04104	-1.15909
		215.19	0.104527	0.125194	0.0985852	0.145259		215.19	-1.13977	-1.15462	-1.04322	-1.15658
		215.39	0.104535	0.1225	0.100207	0.147693		215.39	-1.13976	-1.15731	-1.04159	-1.15415
		215.59	0.10583	0.12214	0.105557	0.145111		215.59	-1.13846	-1.15767	-1.03625	-1.15673
		215.79	0.10946	0.1269	0.107369	0.147154		215.79	-1.13483	-1.15291	-1.03443	-1.15468
		215.99	0.106753	0.125924	0.109686	0.154121		215.99	-1.13754	-1.15389	-1.03212	-1.14772
		216.19	0.111403	0.13093	0.105531	0.152935		216.19	-1.13289	-1.14888	-1.03627	-1.1489
		216.39	0.108948	0.128309	0.108163	0.150446		216.39	-1.13535	-1.1515	-1.03364	-1.15139
		216.59	0.11061	0.128642	0.109968	0.14949		216.59	-1.13368	-1.15117	-1.03183	-1.15235
		216.79	0.111917	0.13256	0.110021	0.155997		216.79	-1.13238	-1.14725	-1.03178	-1.14584
		216.99	0.112924	0.132369	0.110049	0.154378		216.99	-1.13137	-1.14744	-1.03175	-1.14746
		217.19	0.113893	0.133211	0.110198	0.151498		217.19	-1.1304	-1.1466	-1.0316	-1.15034
		217.39	0.116204	0.133361	0.1132	0.154031		217.39	-1.12809	-1.14645	-1.0286	-1.14781
		217.59	0.114747	0.138016	0.11273	0.156973		217.59	-1.12955	-1.1418	-1.02907	-1.14487
		217.79	0.115416	0.133265	0.116781	0.160273		217.79	-1.12888	-1.14655	-1.02502	-1.14157
		217.99	0.117197	0.139841	0.115532	0.160717		217.99	-1.1271	-1.13997	-1.02627	-1.14112
		218.19	0.120882	0.135683	0.120005	0.159748		218.19	-1.12341	-1.14413	-1.0218	-1.14209
		218.39	0.121844	0.134863	0.119459	0.162242		218.39	-1.12245	-1.14495	-1.02234	-1.1396
		218.59	0.122301	0.140481	0.122441	0.16415		218.59	-1.12199	-1.13933	-1.01936	-1.13769
		218.79	0.12217	0.14058	0.119069	0.164372		218.79	-1.12212	-1.13923	-1.02273	-1.13747
		218.99	0.12161	0.140525	0.118713	0.163135		218.99	-1.12268	-1.13929	-1.02309	-1.1387
		219.19	0.126602	0.140628	0.124649	0.165277		219.19	-1.11769	-1.13918	-1.01715	-1.13656
		219.39	0.126527	0.141333	0.124496	0.170182		219.39	-1.11777	-1.13848	-1.01731	-1.13166
		219.59	0.124817	0.141791	0.118636	0.166761		219.59	-1.11948	-1.13802	-1.02317	-1.13508
		219.79	0.126793	0.142842	0.124263	0.166219		219.79	-1.1175	-1.13697	-1.01754	-1.13562
		219.99	0.126985	0.148686	0.126606	0.167875		219.99	-1.11731	-1.13113	-1.0152	-1.13396
		220.19	0.130048	0.145628	0.132206	0.16758		220.19	-1.11425	-1.13418	-1.0096	-1.13426
		220.39	0.128833	0.145567	0.126707	0.172213		220.39	-1.11546	-1.13424	-1.01509	-1.12963
		220.59	0.131924	0.147001	0.128439	0.169722		220.59	-1.11237	-1.13281	-1.01336	-1.13212
		220.79	0.132407	0.147923	0.1323	0.171459		220.79	-1.11189	-1.13189	-1.0095	-1.13038
		220.99	0.132622	0.151365	0.131711	0.171431		220.99	-1.11167	-1.12845	-1.01009	-1.13041
		221.19	0.135826	0.150708	0.134817	0.174408		221.19	-1.10847	-1.1291	-1.00699	-1.12743
		221.39	0.134282	0.156864	0.132518	0.177352		221.39	-1.11001	-1.12295	-1.00928	-1.12449
		221.59	0.136351	0.156119	0.133473	0.1745		221.59	-1.10794	-1.12369	-1.00833	-1.12734
		221.79	0.138906	0.154847	0.134367	0.181157		221.79	-1.10539	-1.12496	-1.00743	-1.12068
		221.99	0.140618	0.154743	0.137769	0.177597		221.99	-1.10368	-1.12507	-1.00403	-1.12424
		222.19	0.14065	0.160534	0.137362	0.178408		222.19	-1.10364	-1.11928	-1.00444	-1.12343
		222.39	0.138976	0.157656	0.140629	0.183106		222.39	-1.10532	-1.12216	-1.00117	-1.11873
		222.59	0.142172	0.156356	0.139436	0.181199		222.59	-1.10212	-1.12346	-1.00237	-1.12064
		222.79	0.142784	0.158374	0.141787	0.182252		222.79	-1.10151	-1.12144	-1.00001	-1.11959
		222.99	0.138894	0.161056	0.141824	0.187953		222.99	-1.1054	-1.11876	-0.999977	-1.11389
		223.19	0.144742	0.16151	0.139537	0.191897		223.19	-1.09955	-1.1183	-1.00226	-1.10994
		223.39	0.143918	0.165513	0.143693	0.187744		223.39	-1.10038	-1.1143	-0.998109	-1.1141
		223.59	0.146152	0.164086	0.144011	0.183597		223.59	-1.09814	-1.11573	-0.997791	-1.11824
		223.79	0.148583	0.166342	0.146292	0.184736		223.79	-1.09571	-1.11347	-0.995509	-1.1171
		223.99	0.149767	0.1645	0.147008	0.189224		223.99	-1.09453	-1.11531	-0.994794	-1.11262
		224.19	0.150496	0.163707	0.147694	0.194445		224.19	-1.0938	-1.1161	-0.994108	-1.10739
		224.39	0.150164	0.169238	0.148594	0.190134		224.39	-1.09413	-1.11057	-0.993208	-1.1117
		224.59	0.15041	0.170437	0.150122	0.19626		224.59	-1.09388	-1.10937	-0.99168	-1.10558
		224.79	0.152502	0.166293	0.150857	0.192843		224.79	-1.09179	-1.11352	-0.990945	-1.109
		224.99	0.154158	0.172152	0.151438	0.19725		224.99	-1.09014	-1.10766	-0.990364	-1.10459
		225.19	0.155315	0.171848	0.155722	0.195401		225.19	-1.08898	-1.10796	-0.98608	-1.10644
		225.39	0.15432	0.173739	0.153905	0.19541		225.39	-1.08997	-1.10607	-0.987897	-1.10643
		225.59	0.154353	0.17134	0.15586	0.194143		225.59	-1.08994	-1.10847	-0.985942	-1.1077
		225.79	0.156465	0.174412	0.155639	0.196245		225.79	-1.08783	-1.1054	-0.986163	-1.10559
		225.99	0.157689	0.177667	0.156856	0.199748		225.99	-1.0866	-1.10215	-0.984945	-1.10209
		226.19	0.159654	0.182515	0.155604	0.19889		226.19	-1.08464	-1.0973	-0.986198	-1.10295
		226.39	0.160829	0.178793	0.15958	0.200987		226.39	-1.08346	-1.10102	-0.982221	-1.10085
		226.59	0.15753	0.182426	0.158803	0.202572		226.59	-1.08676	-1.09739	-0.982999	-1.09927
		226.79	0.159134	0.182533	0.163905	0.204077		226.79	-1.08516	-1.09728	-0.977897	-1.09776
		226.99	0.162006	0.180419	0.159617	0.20293		226.99	-1.08229	-1.09939	-0.982185	-1.09891
		227.19	0.160719	0.184155	0.170371	0.206315		227.19	-1.08357	-1.09566	-0.971431	-1.09552
		227.39	0.1631	0.182443	0.162779	0.205217		227.39	-1.08119	-1.09737	-0.979022	-1.09662
		227.59	0.165644	0.186225	0.167426	0.205515		227.59	-1.07865	-1.09359	-0.974375	-1.09632
		227.79	0.166433	0.186852	0.16642	0.208331		227.79	-1.07786	-1.09296	-0.975382	-1.09351
		227.99	0.166825	0.185528	0.169659	0.209757		227.99	-1.07747	-1.09428	-0.972143	-1.09208
		228.19	0.166883	0.187313	0.168558	0.206717		228.19	-1.07741	-1.0925	-0.973244	-1.09512
		228.39	0.167238	0.186949	0.168839	0.208374		228.39	-1.07706	-1.09286	-0.972962	-1.09347
		228.59	0.167389	0.190675	0.169127	0.213662		228.59	-1.0769	-1.08914	-0.972674	-1.08818
		228.79	0.170261	0.19036	0.169247	0.214304		228.79	-1.07403	-1.08945	-0.972554	-1.08754
		228.99	0.172316	0.190597	0.167155	0.214539		228.99	-1.07198	-1.08921	-0.974646	-1.0873
		229.19	0.173307	0.19173	0.173314	0.217971		229.19	-1.07099	-1.08808	-0.968488	-1.08387
		229.39	0.177511	0.193688	0.176972	0.21956		229.39	-1.06678	-1.08612	-0.964829	-1.08228
		229.59	0.173152	0.192176	0.174752	0.215752		229.59	-1.07114	-1.08764	-0.96705	-1.08609
		229.79	0.170966	0.19818	0.177775	0.216461		229.79	-1.07333	-1.08163	-0.964026	-1.08538
		229.99	0.173216	0.197229	0.17626	0.219769		229.99	-1.07108	-1.08258	-0.965542	-1.08207
		230.19	0.178298	0.197448	0.17871	0.217028		230.19	-1.066	-1.08236	-0.963092	-1.08481
		230.39	0.180017	0.201068	0.177771	0.222019		230.39	-1.06428	-1.07874	-0.964031	-1.07982
		230.59	0.177505	0.202493	0.181174	0.225822		230.59	-1.06679	-1.07732	-0.960628	-1.07602
		230.79	0.180428	0.19442	0.178201	0.222309		230.79	-1.06387	-1.08539	-0.963601	-1.07953
		230.99	0.181559	0.199763	0.184549	0.225065		230.99	-1.06273	-1.08005	-0.957253	-1.07677
		231.19	0.18422	0.202385	0.186752	0.222707		231.19	-1.06007	-1.07743	-0.95505	-1.07913
		231.39	0.183839	0.203191	0.183489	0.225305		231.39	-1.06045	-1.07662	-0.958312	-1.07653
		231.59	0.184057	0.205989	0.186278	0.224313		231.59	-1.06024	-1.07382	-0.955524	-1.07753
		231.79	0.184583	0.20445	0.186713	0.226734		231.79	-1.05971	-1.07536	-0.955089	-1.07511
		231.99	0.187812	0.207372	0.187844	0.232545		231.99	-1.05648	-1.07244	-0.953958	-1.06929
		232.19	0.186618	0.205022	0.187756	0.227748		232.19	-1.05768	-1.07479	-0.954046	-1.07409
		232.39	0.185398	0.209315	0.189454	0.234018		232.39	-1.0589	-1.0705	-0.952348	-1.06782
		232.59	0.190442	0.20904	0.192375	0.237115		232.59	-1.05385	-1.07077	-0.949427	-1.06472
		232.79	0.191944	0.211879	0.191366	0.234713		232.79	-1.05235	-1.06793	-0.950435	-1.06713
		232.99	0.192959	0.211615	0.194609	0.233453		232.99	-1.05133	-1.0682	-0.947192	-1.06839
		233.19	0.194614	0.211319	0.191289	0.232721		233.19	-1.04968	-1.06849	-0.950513	-1.06912
		233.39	0.191873	0.215723	0.1938	0.235865		233.39	-1.05242	-1.06409	-0.948002	-1.06597
		233.59	0.194218	0.213167	0.194646	0.238612		233.59	-1.05007	-1.06665	-0.947156	-1.06323
		233.79	0.196777	0.217298	0.193174	0.236927		233.79	-1.04752	-1.06251	-0.948627	-1.06491
		233.99	0.195993	0.215292	0.195722	0.239227		233.99	-1.0483	-1.06452	-0.946079	-1.06261
		234.19	0.195871	0.217036	0.200606	0.238737		234.19	-1.04842	-1.06278	-0.941195	-1.0631
		234.39	0.196695	0.220602	0.205361	0.2425		234.39	-1.0476	-1.05921	-0.936441	-1.05934
		234.59	0.200574	0.219029	0.204173	0.24131		234.59	-1.04372	-1.06078	-0.937629	-1.06053
		234.79	0.202787	0.219558	0.201516	0.243464		234.79	-1.04151	-1.06025	-0.940286	-1.05838
		234.99	0.200935	0.220483	0.202751	0.244936		234.99	-1.04336	-1.05933	-0.939051	-1.0569
		235.19	0.203579	0.219957	0.202115	0.244112		235.19	-1.04071	-1.05985	-0.939686	-1.05773
		235.39	0.202531	0.222524	0.20649	0.243139		235.39	-1.04176	-1.05729	-0.935311	-1.0587
		235.59	0.203562	0.220027	0.205897	0.248415		235.59	-1.04073	-1.05979	-0.935904	-1.05342
		235.79	0.20552	0.223752	0.204295	0.245729		235.79	-1.03877	-1.05606	-0.937507	-1.05611
		235.99	0.208294	0.225173	0.210039	0.246883		235.99	-1.036	-1.05464	-0.931763	-1.05496
		236.19	0.207607	0.226896	0.210498	0.248416		236.19	-1.03669	-1.05292	-0.931304	-1.05342
		236.39	0.208653	0.228184	0.206822	0.251549		236.39	-1.03564	-1.05163	-0.93498	-1.05029
		236.59	0.210224	0.228595	0.213264	0.254086		236.59	-1.03407	-1.05122	-0.928538	-1.04775
		236.79	0.209696	0.230747	0.209386	0.25378		236.79	-1.0346	-1.04906	-0.932416	-1.04806
		236.99	0.211133	0.234761	0.208806	0.255347		236.99	-1.03316	-1.04505	-0.932996	-1.04649
		237.19	0.213423	0.234544	0.217042	0.254176		237.19	-1.03087	-1.04527	-0.924759	-1.04766
		237.39	0.210108	0.233879	0.215243	0.260222		237.39	-1.03418	-1.04593	-0.926558	-1.04162
		237.59	0.215853	0.234612	0.217751	0.257573		237.59	-1.02844	-1.0452	-0.924051	-1.04427
		237.79	0.213802	0.237757	0.218623	0.261019		237.79	-1.03049	-1.04205	-0.923178	-1.04082
		237.99	0.213824	0.234696	0.216539	0.260561		237.99	-1.03047	-1.04512	-0.925263	-1.04128
		238.19	0.215857	0.235797	0.220033	0.260827		238.19	-1.02844	-1.04402	-0.921768	-1.04101
		238.39	0.214962	0.238672	0.219898	0.259603		238.39	-1.02933	-1.04114	-0.921904	-1.04224
		238.59	0.218568	0.239541	0.222038	0.258258		238.59	-1.02573	-1.04027	-0.919763	-1.04358
		238.79	0.217032	0.240574	0.223441	0.267477		238.79	-1.02726	-1.03924	-0.918361	-1.03436
		238.99	0.220003	0.236204	0.222727	0.262995		238.99	-1.02429	-1.04361	-0.919074	-1.03884
		239.19	0.22085	0.241333	0.22373	0.268982		239.19	-1.02344	-1.03848	-0.918071	-1.03286
		239.39	0.220049	0.242588	0.227309	0.263835		239.39	-1.02424	-1.03722	-0.914492	-1.038
		239.59	0.223453	0.245766	0.227285	0.26302		239.59	-1.02084	-1.03405	-0.914517	-1.03882
		239.79	0.22608	0.245779	0.22518	0.268052		239.79	-1.01821	-1.03403	-0.916622	-1.03379
		239.99	0.223508	0.248741	0.229483	0.266041		239.99	-1.02079	-1.03107	-0.912319	-1.0358
		240.19	0.22735	0.250645	0.231989	0.267161		240.19	-1.01694	-1.02917	-0.909813	-1.03468
		240.39	0.228209	0.250482	0.234155	0.268623		240.39	-1.01608	-1.02933	-0.907647	-1.03322
		240.59	0.228098	0.252122	0.232745	0.270328		240.59	-1.0162	-1.02769	-0.909056	-1.03151
		240.79	0.226176	0.249233	0.232418	0.272607		240.79	-1.01812	-1.03058	-0.909384	-1.02923
		240.99	0.230535	0.251584	0.235335	0.276212		240.99	-1.01376	-1.02823	-0.906467	-1.02563
		241.19	0.232408	0.251691	0.235669	0.273276		241.19	-1.01189	-1.02812	-0.906133	-1.02856
		241.39	0.230875	0.248933	0.232503	0.276055		241.39	-1.01342	-1.03088	-0.909298	-1.02578
		241.59	0.235578	0.251775	0.233053	0.276845		241.59	-1.00872	-1.02804	-0.908748	-1.02499
		241.79	0.233956	0.256308	0.236013	0.281529		241.79	-1.01034	-1.0235	-0.905788	-1.02031
		241.99	0.233858	0.254876	0.240297	0.277468		241.99	-1.01044	-1.02494	-0.901505	-1.02437
		242.19	0.232332	0.25909	0.238111	0.275456		242.19	-1.01196	-1.02072	-0.903691	-1.02638
		242.39	0.237685	0.258255	0.241852	0.281832		242.39	-1.00661	-1.02156	-0.899949	-1.02001
		242.59	0.238636	0.259229	0.239424	0.284276		242.59	-1.00566	-1.02058	-0.902377	-1.01756
		242.79	0.235394	0.260107	0.243148	0.284003		242.79	-1.0089	-1.0197	-0.898654	-1.01784
		242.99	0.239313	0.26264	0.246237	0.282333		242.99	-1.00498	-1.01717	-0.895565	-1.01951
		243.19	0.239087	0.264649	0.248083	0.284445		243.19	-1.00521	-1.01516	-0.893719	-1.01739
		243.39	0.242854	0.261137	0.244318	0.28841		243.39	-1.00144	-1.01867	-0.897483	-1.01343
		243.59	0.243906	0.261764	0.244814	0.288502		243.59	-1.00039	-1.01805	-0.896987	-1.01334
		243.79	0.24608	0.270558	0.251584	0.291157		243.79	-0.998213	-1.00925	-0.890217	-1.01068
		243.99	0.243294	0.26719	0.245179	0.290918		243.99	-1.001	-1.01262	-0.896623	-1.01092
		244.19	0.240907	0.269495	0.250295	0.292257		244.19	-1.00339	-1.01032	-0.891506	-1.00958
		244.39	0.247613	0.27089	0.25196	0.289277		244.39	-0.99668	-1.00892	-0.889842	-1.01256
		244.59	0.245372	0.272016	0.254378	0.292198		244.59	-0.998921	-1.0078	-0.887424	-1.00964
		244.79	0.249403	0.269051	0.257027	0.294261		244.79	-0.99489	-1.01076	-0.884774	-1.00758
		244.99	0.249031	0.27037	0.251468	0.294775		244.99	-0.995262	-1.00944	-0.890334	-1.00706
		245.19	0.253676	0.270401	0.255062	0.289995		245.19	-0.990617	-1.00941	-0.88674	-1.01184
		245.39	0.252652	0.274079	0.259412	0.297695		245.39	-0.991641	-1.00573	-0.88239	-1.00414
		245.59	0.250688	0.274283	0.25713	0.295874		245.59	-0.993605	-1.00553	-0.884671	-1.00597
		245.79	0.253376	0.272563	0.256904	0.294951		245.79	-0.990917	-1.00725	-0.884897	-1.00689
		245.99	0.255263	0.277794	0.25862	0.300669		245.99	-0.989031	-1.00202	-0.883182	-1.00117
		246.19	0.252747	0.279606	0.264145	0.300347		246.19	-0.991546	-1.00021	-0.877657	-1.00149
		246.39	0.25583	0.281462	0.260692	0.29896		246.39	-0.988463	-0.99835	-0.88111	-1.00288
		246.59	0.258106	0.277663	0.26351	0.306183		246.59	-0.986187	-1.00215	-0.878291	-0.995657
		246.79	0.25729	0.281518	0.263554	0.306685		246.79	-0.987003	-0.998294	-0.878248	-0.995154
		246.99	0.258692	0.282111	0.267344	0.305528		246.99	-0.985601	-0.997701	-0.874458	-0.996311
		247.19	0.261661	0.281296	0.262644	0.304542		247.19	-0.982633	-0.998516	-0.879158	-0.997297
		247.39	0.263905	0.284502	0.265514	0.307141		247.39	-0.980388	-0.995309	-0.876288	-0.994698
		247.59	0.261814	0.284777	0.270854	0.308427		247.59	-0.982479	-0.995035	-0.870948	-0.993412
		247.79	0.265313	0.286415	0.268347	0.311078		247.79	-0.978981	-0.993397	-0.873455	-0.990761
		247.99	0.264831	0.284434	0.27058	0.308617		247.99	-0.979462	-0.995378	-0.871222	-0.993222
		248.19	0.264775	0.287764	0.266087	0.309489		248.19	-0.979518	-0.992048	-0.875715	-0.99235
		248.39	0.266418	0.288784	0.271681	0.31339		248.39	-0.977875	-0.991027	-0.870121	-0.988449
		248.59	0.268492	0.287716	0.274707	0.314525		248.59	-0.975802	-0.992096	-0.867095	-0.987314
		248.79	0.269165	0.295245	0.273774	0.319188		248.79	-0.975129	-0.984567	-0.868028	-0.982651
		248.99	0.274012	0.294275	0.276768	0.313631		248.99	-0.970282	-0.985536	-0.865034	-0.988208
		249.19	0.272431	0.295752	0.272289	0.316289		249.19	-0.971863	-0.98406	-0.869513	-0.98555
		249.39	0.273369	0.294758	0.275278	0.314375		249.39	-0.970924	-0.985054	-0.866524	-0.987464
		249.59	0.273743	0.291064	0.280012	0.32035		249.59	-0.97055	-0.988748	-0.861789	-0.981489
		249.79	0.272576	0.296932	0.278944	0.321435		249.79	-0.971718	-0.98288	-0.862858	-0.980404
		249.99	0.276451	0.298891	0.28162	0.318841		249.99	-0.967842	-0.980921	-0.860182	-0.982998
		250.19	0.274831	0.295569	0.282108	0.324871		250.19	-0.969462	-0.984243	-0.859694	-0.976968
		250.39	0.276724	0.299301	0.279364	0.323889		250.39	-0.967569	-0.980511	-0.862437	-0.977951
		250.59	0.279776	0.300052	0.283599	0.322415		250.59	-0.964518	-0.97976	-0.858203	-0.979425
		250.79	0.27866	0.301811	0.286159	0.324346		250.79	-0.965633	-0.978001	-0.855642	-0.977493
		250.99	0.280272	0.30224	0.285319	0.329524		250.99	-0.964022	-0.977572	-0.856483	-0.972316
		251.19	0.282811	0.304461	0.285894	0.32655		251.19	-0.961482	-0.975351	-0.855908	-0.975289
		251.39	0.281005	0.303389	0.28785	0.325036		251.39	-0.963288	-0.976423	-0.853951	-0.976803
		251.59	0.280971	0.307392	0.288295	0.328671		251.59	-0.963322	-0.97242	-0.853507	-0.973168
		251.79	0.285679	0.308273	0.290376	0.329295		251.79	-0.958614	-0.971539	-0.851426	-0.972544
		251.99	0.288623	0.307525	0.289465	0.331264		251.99	-0.95567	-0.972287	-0.852337	-0.970575
		252.19	0.287637	0.305434	0.291738	0.332445		252.19	-0.956656	-0.974378	-0.850063	-0.969394
		252.39	0.287974	0.310838	0.289893	0.334517		252.39	-0.956319	-0.968974	-0.851909	-0.967323
		252.59	0.289335	0.312112	0.295396	0.33322		252.59	-0.954958	-0.9677	-0.846406	-0.968619
		252.79	0.291755	0.307862	0.293622	0.333157		252.79	-0.952539	-0.97195	-0.848179	-0.968682
		252.99	0.29295	0.312354	0.29484	0.334877		252.99	-0.951344	-0.967458	-0.846962	-0.966963
		253.19	0.290316	0.310439	0.302602	0.336861		253.19	-0.953977	-0.969373	-0.839199	-0.964979
		253.39	0.29012	0.310818	0.294378	0.337533		253.39	-0.954174	-0.968994	-0.847424	-0.964307
		253.59	0.294157	0.318413	0.302724	0.337603		253.59	-0.950136	-0.961399	-0.839077	-0.964236
		253.79	0.289513	0.317629	0.301459	0.341076		253.79	-0.954781	-0.962183	-0.840343	-0.960764
		253.99	0.291287	0.313683	0.300044	0.345761		253.99	-0.953006	-0.966129	-0.841758	-0.956078
		254.19	0.297465	0.318637	0.300802	0.343511		254.19	-0.946828	-0.961175	-0.840999	-0.958328
		254.39	0.295705	0.321402	0.303752	0.337393		254.39	-0.948588	-0.95841	-0.838049	-0.964447
		254.59	0.300299	0.319051	0.306995	0.345712		254.59	-0.943994	-0.960761	-0.834807	-0.956127
		254.79	0.297953	0.322107	0.302842	0.342312		254.79	-0.94634	-0.957705	-0.83896	-0.959527
		254.99	0.298019	0.325474	0.31009	0.347579		254.99	-0.946274	-0.954338	-0.831712	-0.954261
		255.19	0.301308	0.325931	0.306813	0.35059		255.19	-0.942985	-0.953881	-0.834989	-0.95125
		255.39	0.30147	0.323586	0.310797	0.346057		255.39	-0.942823	-0.956226	-0.831005	-0.955782
		255.59	0.29945	0.327037	0.31242	0.347447		255.59	-0.944844	-0.952775	-0.829382	-0.954392
		255.79	0.303664	0.322574	0.312486	0.350525		255.79	-0.940629	-0.957237	-0.829316	-0.951314
		255.99	0.304521	0.326848	0.311482	0.347625		255.99	-0.939772	-0.952964	-0.83032	-0.954214
		256.19	0.308929	0.328477	0.31505	0.353969		256.19	-0.935364	-0.951335	-0.826752	-0.94787
		256.39	0.310038	0.328611	0.317881	0.351111		256.39	-0.934255	-0.951201	-0.823921	-0.950728
		256.59	0.308925	0.329078	0.316823	0.352976		256.59	-0.935368	-0.950734	-0.824978	-0.948863
		256.79	0.311806	0.331285	0.31759	0.358597		256.79	-0.932487	-0.948527	-0.824212	-0.943243
		256.99	0.311068	0.33302	0.317841	0.355574		256.99	-0.933225	-0.946792	-0.82396	-0.946266
		257.19	0.308185	0.332651	0.318955	0.357679		257.19	-0.936108	-0.947161	-0.822847	-0.94416
		257.39	0.312498	0.332797	0.323307	0.357709		257.39	-0.931795	-0.947014	-0.818495	-0.94413
		257.59	0.311995	0.337004	0.321343	0.358301		257.59	-0.932298	-0.942808	-0.820459	-0.943539
		257.79	0.313992	0.337244	0.32086	0.358129		257.79	-0.930301	-0.942567	-0.820942	-0.943711
		257.99	0.312179	0.338905	0.325214	0.358827		257.99	-0.932114	-0.940906	-0.816587	-0.943012
		258.19	0.316361	0.343599	0.322853	0.366412		258.19	-0.927933	-0.936213	-0.818949	-0.935427
		258.39	0.317665	0.343081	0.325094	0.366004		258.39	-0.926629	-0.936731	-0.816708	-0.935835
		258.59	0.319656	0.341401	0.328181	0.366145		258.59	-0.924637	-0.938411	-0.813621	-0.935695
		258.79	0.319917	0.340783	0.326952	0.368081		258.79	-0.924376	-0.939029	-0.81485	-0.933759
		258.99	0.318212	0.343882	0.329654	0.365291		258.99	-0.926081	-0.93593	-0.812148	-0.936548
		259.19	0.318812	0.347001	0.328723	0.366759		259.19	-0.925481	-0.932811	-0.813078	-0.93508
		259.39	0.324162	0.344086	0.328493	0.365516		259.39	-0.920131	-0.935726	-0.813309	-0.936323
		259.59	0.325746	0.349247	0.333599	0.369007		259.59	-0.918547	-0.930564	-0.808203	-0.932833
		259.79	0.325065	0.347148	0.337497	0.373016		259.79	-0.919228	-0.932664	-0.804305	-0.928823
		259.99	0.328111	0.35072	0.33201	0.369206		259.99	-0.916182	-0.929092	-0.809791	-0.932634
		260.19	0.325219	0.351205	0.335113	0.37298		260.19	-0.919074	-0.928607	-0.806688	-0.928859
		260.39	0.327952	0.354012	0.341167	0.373551		260.39	-0.916341	-0.9258	-0.800634	-0.928289
		260.59	0.326036	0.354292	0.338821	0.373438		260.59	-0.918257	-0.92552	-0.802981	-0.928402
		260.79	0.329378	0.353365	0.339919	0.374132		260.79	-0.914916	-0.926447	-0.801882	-0.927707
		260.99	0.331888	0.349389	0.343635	0.381419		260.99	-0.912405	-0.930422	-0.798167	-0.92042
		261.19	0.331063	0.353238	0.343329	0.379386		261.19	-0.91323	-0.926574	-0.798472	-0.922454
		261.39	0.332579	0.354933	0.33823	0.378525		261.39	-0.911714	-0.924879	-0.803572	-0.923314
		261.59	0.333194	0.355879	0.345523	0.380209		261.59	-0.911099	-0.923932	-0.796279	-0.921631
		261.79	0.333197	0.355596	0.34591	0.386641		261.79	-0.911097	-0.924216	-0.795892	-0.915198
		261.99	0.331996	0.359651	0.345018	0.382226		261.99	-0.912297	-0.920161	-0.796784	-0.919614
		262.19	0.334427	0.35831	0.34512	0.382944		262.19	-0.909866	-0.921502	-0.796681	-0.918895
		262.39	0.337993	0.35982	0.347874	0.38753		262.39	-0.9063	-0.919992	-0.793928	-0.91431
		262.59	0.339839	0.362125	0.348323	0.384332		262.59	-0.904454	-0.917686	-0.793479	-0.917507
		262.79	0.342132	0.36369	0.351993	0.38321		262.79	-0.902161	-0.916122	-0.789808	-0.918629
		262.99	0.339956	0.360475	0.350254	0.387502		262.99	-0.904338	-0.919337	-0.791547	-0.914337
		263.19	0.343603	0.361138	0.350279	0.387967		263.19	-0.90069	-0.918674	-0.791523	-0.913872
		263.39	0.34266	0.365835	0.35349	0.390498		263.39	-0.901633	-0.913977	-0.788311	-0.911341
		263.59	0.338576	0.36853	0.356852	0.390685		263.59	-0.905718	-0.911281	-0.78495	-0.911155
		263.79	0.342397	0.370605	0.356527	0.390682		263.79	-0.901897	-0.909207	-0.785274	-0.911157
		263.99	0.343157	0.371731	0.353529	0.394913		263.99	-0.901136	-0.908081	-0.788273	-0.906926
		264.19	0.347564	0.369401	0.357724	0.395635		264.19	-0.896729	-0.910411	-0.784078	-0.906204
		264.39	0.345345	0.37115	0.357509	0.393525		264.39	-0.898949	-0.908662	-0.784293	-0.908314
		264.59	0.344693	0.371243	0.362795	0.396281		264.59	-0.8996	-0.908569	-0.779007	-0.905559
		264.79	0.352691	0.37303	0.358832	0.396523		264.79	-0.891602	-0.906782	-0.782969	-0.905316
		264.99	0.351675	0.372973	0.363565	0.396659		264.99	-0.892619	-0.906839	-0.778236	-0.905181
		265.19	0.351785	0.374451	0.365241	0.401823		265.19	-0.892508	-0.905361	-0.77656	-0.900016
		265.39	0.353705	0.376372	0.367542	0.403282		265.39	-0.890589	-0.90344	-0.77426	-0.898557
		265.59	0.353186	0.378147	0.370096	0.401231		265.59	-0.891107	-0.901664	-0.771706	-0.900608
		265.79	0.350587	0.381602	0.37107	0.408884		265.79	-0.893707	-0.89821	-0.770732	-0.892955
		265.99	0.355218	0.379447	0.368068	0.403871		265.99	-0.889075	-0.900365	-0.773734	-0.897968
		266.19	0.357868	0.378472	0.369088	0.408431		266.19	-0.886425	-0.901339	-0.772714	-0.893409
		266.39	0.357071	0.383345	0.37079	0.404713		266.39	-0.887222	-0.896467	-0.771012	-0.897126
		266.59	0.359862	0.382168	0.372392	0.406702		266.59	-0.884431	-0.897644	-0.76941	-0.895137
		266.79	0.357363	0.382513	0.374216	0.407931		266.79	-0.88693	-0.897299	-0.767586	-0.893909
		266.99	0.363677	0.388679	0.370325	0.409276		266.99	-0.880616	-0.891132	-0.771476	-0.892563
		267.19	0.362334	0.386614	0.373338	0.408352		267.19	-0.881959	-0.893198	-0.768464	-0.893487
		267.39	0.364378	0.387336	0.376241	0.409666		267.39	-0.879915	-0.892476	-0.76556	-0.892173
		267.59	0.365483	0.388487	0.38024	0.412574		267.59	-0.878811	-0.891325	-0.761561	-0.889265
		267.79	0.367265	0.388597	0.377354	0.419058		267.79	-0.877028	-0.891215	-0.764447	-0.882782
		267.99	0.365733	0.391669	0.379007	0.412071		267.99	-0.87856	-0.888143	-0.762794	-0.889768
		268.19	0.363704	0.392748	0.379629	0.413684		268.19	-0.880589	-0.887063	-0.762173	-0.888155
		268.39	0.368468	0.39224	0.383223	0.420927		268.39	-0.875825	-0.887572	-0.758578	-0.880912
		268.59	0.371297	0.392237	0.382771	0.415953		268.59	-0.872996	-0.887575	-0.759031	-0.885887
		268.79	0.369844	0.395615	0.385585	0.421168		268.79	-0.874449	-0.884197	-0.756217	-0.880672
		268.99	0.373549	0.395769	0.378701	0.417477		268.99	-0.870744	-0.884043	-0.763101	-0.884363
		269.19	0.370379	0.398401	0.385779	0.422157		269.19	-0.873914	-0.881411	-0.756023	-0.879682
		269.39	0.371402	0.398449	0.386918	0.420308		269.39	-0.872892	-0.881363	-0.754884	-0.881531
		269.59	0.370494	0.399846	0.386902	0.421171		269.59	-0.873799	-0.879966	-0.7549	-0.880668
		269.79	0.374668	0.403176	0.38735	0.422328		269.79	-0.869625	-0.876636	-0.754451	-0.879511
		269.99	0.374968	0.404212	0.389654	0.423837		269.99	-0.869325	-0.8756	-0.752148	-0.878003
		270.19	0.377156	0.403651	0.394427	0.42547		270.19	-0.867138	-0.876161	-0.747375	-0.87637
		270.39	0.381547	0.402759	0.390388	0.426963		270.39	-0.862746	-0.877053	-0.751414	-0.874877
		270.59	0.379965	0.402551	0.38987	0.431686		270.59	-0.864328	-0.877261	-0.751932	-0.870154
		270.79	0.381336	0.407063	0.394088	0.430567		270.79	-0.862957	-0.872749	-0.747714	-0.871273
		270.99	0.380106	0.408977	0.39563	0.430952		270.99	-0.864188	-0.870835	-0.746171	-0.870888
		271.19	0.383459	0.410088	0.392524	0.435093		271.19	-0.860834	-0.869724	-0.749278	-0.866747
		271.39	0.386085	0.410286	0.398828	0.435449		271.39	-0.858208	-0.869526	-0.742974	-0.866391
		271.59	0.384529	0.411884	0.40009	0.435875		271.59	-0.859764	-0.867927	-0.741712	-0.865964
		271.79	0.383826	0.413907	0.39784	0.43549		271.79	-0.860467	-0.865905	-0.743961	-0.86635
		271.99	0.381942	0.41445	0.402771	0.435818		271.99	-0.862351	-0.865362	-0.739031	-0.866022
		272.19	0.389438	0.411711	0.40349	0.435351		272.19	-0.854856	-0.868101	-0.738312	-0.866488
		272.39	0.38959	0.41379	0.405609	0.438916		272.39	-0.854703	-0.866022	-0.736193	-0.862924
		272.59	0.388701	0.414526	0.404948	0.440474		272.59	-0.855592	-0.865286	-0.736854	-0.861365
		272.79	0.392573	0.415208	0.404627	0.4383		272.79	-0.85172	-0.864604	-0.737174	-0.863539
		272.99	0.390741	0.419541	0.406611	0.441529		272.99	-0.853552	-0.860271	-0.735191	-0.86031
		273.19	0.392235	0.416743	0.406044	0.447553		273.19	-0.852058	-0.863069	-0.735758	-0.854287
		273.39	0.394428	0.419743	0.409286	0.445919		273.39	-0.849865	-0.860069	-0.732516	-0.85592
		273.59	0.399466	0.423837	0.409154	0.446369		273.59	-0.844827	-0.855975	-0.732647	-0.85547
		273.79	0.393352	0.422602	0.416627	0.446217		273.79	-0.850941	-0.85721	-0.725175	-0.855623
		273.99	0.397366	0.425152	0.413961	0.446019		273.99	-0.846928	-0.85466	-0.727841	-0.855821
		274.19	0.399388	0.426324	0.412955	0.447638		274.19	-0.844905	-0.853488	-0.728846	-0.854201
		274.39	0.40018	0.424925	0.413979	0.446355		274.39	-0.844114	-0.854887	-0.727822	-0.855485
		274.59	0.402969	0.426361	0.413328	0.451693		274.59	-0.841325	-0.853451	-0.728474	-0.850146
		274.79	0.403177	0.427074	0.417759	0.45416		274.79	-0.841116	-0.852738	-0.724043	-0.847679
		274.99	0.401623	0.429052	0.417272	0.454513		274.99	-0.842671	-0.85076	-0.72453	-0.847327
		275.19	0.404843	0.430126	0.416492	0.445851		275.19	-0.83945	-0.849686	-0.725309	-0.855988
		275.39	0.402518	0.43392	0.421786	0.455386		275.39	-0.841775	-0.845892	-0.720016	-0.846453
		275.59	0.405941	0.43334	0.422307	0.458424		275.59	-0.838352	-0.846472	-0.719495	-0.843415
		275.79	0.405289	0.435424	0.422331	0.456452		275.79	-0.839005	-0.844388	-0.71947	-0.845388
		275.99	0.40856	0.436855	0.424431	0.460185		275.99	-0.835734	-0.842957	-0.717371	-0.841655
		276.19	0.408515	0.434558	0.424392	0.457767		276.19	-0.835778	-0.845254	-0.71741	-0.844072
		276.39	0.410664	0.436921	0.426117	0.461001		276.39	-0.833629	-0.842891	-0.715685	-0.840839
		276.59	0.410096	0.439378	0.425451	0.458898		276.59	-0.834197	-0.840434	-0.716351	-0.842941
		276.79	0.413954	0.439488	0.429464	0.461539		276.79	-0.83034	-0.840324	-0.712337	-0.840301
		276.99	0.414391	0.439089	0.427245	0.459324		276.99	-0.829902	-0.840723	-0.714556	-0.842515
		277.19	0.41572	0.441455	0.430454	0.468033		277.19	-0.828574	-0.838357	-0.711347	-0.833806
		277.39	0.41206	0.442276	0.432939	0.46177		277.39	-0.832234	-0.837536	-0.708862	-0.840069
		277.59	0.413913	0.439651	0.432373	0.469906		277.59	-0.83038	-0.840161	-0.709429	-0.831933
		277.79	0.41794	0.442689	0.433971	0.467857		277.79	-0.826353	-0.837123	-0.707831	-0.833982
		277.99	0.417513	0.444251	0.435594	0.469635		277.99	-0.826781	-0.835561	-0.706208	-0.832205
		278.19	0.418438	0.443598	0.438755	0.468343		278.19	-0.825855	-0.836214	-0.703047	-0.833496
		278.39	0.420479	0.44797	0.438431	0.472151		278.39	-0.823814	-0.831842	-0.703371	-0.829689
		278.59	0.423606	0.450291	0.436302	0.471596		278.59	-0.820687	-0.829521	-0.7055	-0.830244
		278.79	0.421231	0.452191	0.434507	0.476946		278.79	-0.823062	-0.827621	-0.707295	-0.824893
		278.99	0.42234	0.450125	0.442126	0.471173		278.99	-0.821953	-0.829687	-0.699675	-0.830667
		279.19	0.426156	0.45073	0.448112	0.476685		279.19	-0.818137	-0.829081	-0.693689	-0.825154
		279.39	0.424413	0.450966	0.446568	0.478671		279.39	-0.81988	-0.828846	-0.695234	-0.823168
		279.59	0.424969	0.454719	0.439219	0.47588		279.59	-0.819324	-0.825093	-0.702583	-0.82596
		279.79	0.424653	0.454691	0.446718	0.479131		279.79	-0.819641	-0.825121	-0.695083	-0.822708
		279.99	0.426981	0.453482	0.448626	0.479703		279.99	-0.817312	-0.82633	-0.693175	-0.822136
		280.19	0.430763	0.45887	0.446176	0.475764		280.19	-0.81353	-0.820942	-0.695626	-0.826076
		280.39	0.433117	0.457494	0.446654	0.482043		280.39	-0.811177	-0.822317	-0.695148	-0.819796
		280.59	0.433099	0.460219	0.448987	0.481554		280.59	-0.811194	-0.819593	-0.692814	-0.820285
		280.79	0.433978	0.460872	0.448314	0.482476		280.79	-0.810315	-0.81894	-0.693488	-0.819364
		280.99	0.433843	0.462592	0.45205	0.485037		280.99	-0.81045	-0.81722	-0.689751	-0.816803
		281.19	0.437988	0.460974	0.449639	0.491269		281.19	-0.806305	-0.818838	-0.692163	-0.810571
		281.39	0.435171	0.465321	0.456493	0.490977		281.39	-0.809122	-0.814491	-0.685309	-0.810863
		281.59	0.439985	0.469287	0.451943	0.488452		281.59	-0.804308	-0.810524	-0.689859	-0.813387
		281.79	0.435317	0.463393	0.456399	0.490142		281.79	-0.808976	-0.816419	-0.685403	-0.811697
		281.99	0.438476	0.467349	0.459254	0.485899		281.99	-0.805818	-0.812463	-0.682547	-0.81594
		282.19	0.44091	0.471084	0.457942	0.492691		282.19	-0.803384	-0.808728	-0.68386	-0.809148
		282.39	0.44203	0.469547	0.463213	0.496308		282.39	-0.802263	-0.810265	-0.678588	-0.805532
		282.59	0.443121	0.471451	0.460065	0.496671		282.59	-0.801172	-0.80836	-0.681737	-0.805168
		282.79	0.442343	0.470998	0.458861	0.493181		282.79	-0.80195	-0.808814	-0.682941	-0.808658
		282.99	0.447085	0.472574	0.465247	0.499102		282.99	-0.797208	-0.807237	-0.676554	-0.802737
		283.19	0.447459	0.471864	0.464673	0.496798		283.19	-0.796835	-0.807948	-0.677128	-0.805041
		283.39	0.449666	0.475854	0.464006	0.4988		283.39	-0.794627	-0.803958	-0.677796	-0.803039
		283.59	0.450524	0.473814	0.462847	0.501455		283.59	-0.79377	-0.805998	-0.678955	-0.800384
		283.79	0.45236	0.475796	0.466616	0.504231		283.79	-0.791933	-0.804016	-0.675186	-0.797609
		283.99	0.447821	0.477267	0.470117	0.501639		283.99	-0.796472	-0.802545	-0.671685	-0.800201
		284.19	0.450547	0.47772	0.473614	0.504402		284.19	-0.793746	-0.802092	-0.668188	-0.797437
		284.39	0.450798	0.477138	0.472755	0.505332		284.39	-0.793495	-0.802674	-0.669047	-0.796508
		284.59	0.456958	0.481809	0.470767	0.505875		284.59	-0.787335	-0.798003	-0.671035	-0.795965
		284.79	0.453768	0.48239	0.476679	0.504917		284.79	-0.790525	-0.797422	-0.665123	-0.796923
		284.99	0.455714	0.483968	0.475306	0.5119		284.99	-0.788579	-0.795843	-0.666496	-0.789939
		285.19	0.455924	0.481515	0.478219	0.508539		285.19	-0.788369	-0.798296	-0.663582	-0.7933
		285.39	0.457452	0.484839	0.475827	0.512632		285.39	-0.786841	-0.794973	-0.665975	-0.789207
		285.59	0.4581	0.488884	0.476236	0.508295		285.59	-0.786194	-0.790928	-0.665566	-0.793544
		285.79	0.462676	0.487801	0.476014	0.511998		285.79	-0.781617	-0.79201	-0.665787	-0.789841
		285.99	0.458801	0.490799	0.480477	0.512758		285.99	-0.785492	-0.789013	-0.661325	-0.789082
		286.19	0.459524	0.488366	0.478862	0.515035		286.19	-0.784769	-0.791445	-0.66294	-0.786804
		286.39	0.462183	0.49015	0.485576	0.514718		286.39	-0.78211	-0.789662	-0.656226	-0.787121
		286.59	0.461653	0.489463	0.486965	0.520792		286.59	-0.78264	-0.790349	-0.654837	-0.781047
		286.79	0.464007	0.492425	0.486114	0.51878		286.79	-0.780286	-0.787387	-0.655688	-0.78306
		286.99	0.467346	0.494375	0.488252	0.514609		286.99	-0.776948	-0.785437	-0.65355	-0.78723
		287.19	0.46909	0.492869	0.484974	0.516327		287.19	-0.775203	-0.786943	-0.656828	-0.785512
		287.39	0.471634	0.494453	0.488724	0.518783		287.39	-0.772659	-0.785359	-0.653078	-0.783057
		287.59	0.467819	0.495865	0.488946	0.524959		287.59	-0.776475	-0.783947	-0.652856	-0.77688
		287.79	0.471932	0.5014	0.491602	0.526731		287.79	-0.772361	-0.778412	-0.6502	-0.775108
		287.99	0.47586	0.501528	0.488866	0.528619		287.99	-0.768433	-0.778284	-0.652936	-0.77322
		288.19	0.473192	0.502523	0.493203	0.528287		288.19	-0.771101	-0.777288	-0.648599	-0.773553
		288.39	0.471031	0.501534	0.493147	0.526783		288.39	-0.773262	-0.778278	-0.648655	-0.775057
		288.59	0.477212	0.504674	0.493281	0.528013		288.59	-0.767081	-0.775138	-0.648521	-0.773827
		288.79	0.475787	0.501774	0.500813	0.531588		288.79	-0.768506	-0.778038	-0.640989	-0.770252
		288.99	0.477934	0.505799	0.501862	0.52765		288.99	-0.766359	-0.774013	-0.63994	-0.774189
		289.19	0.474597	0.50724	0.496513	0.529216		289.19	-0.769697	-0.772572	-0.645289	-0.772623
		289.39	0.483434	0.508622	0.501291	0.530931		289.39	-0.760859	-0.77119	-0.64051	-0.770909
		289.59	0.481833	0.509381	0.502934	0.532167		289.59	-0.76246	-0.770431	-0.638868	-0.769673
		289.79	0.480437	0.509313	0.506534	0.533479		289.79	-0.763856	-0.770498	-0.635267	-0.768361
		289.99	0.481464	0.510913	0.50088	0.537531		289.99	-0.762829	-0.768899	-0.640922	-0.764308
		290.19	0.481358	0.507824	0.50252	0.53964		290.19	-0.762935	-0.771987	-0.639281	-0.762199
		290.39	0.485355	0.511857	0.507051	0.537487		290.39	-0.758938	-0.767955	-0.63475	-0.764353
		290.59	0.485837	0.515319	0.509918	0.539773		290.59	-0.758456	-0.764493	-0.631884	-0.762066
		290.79	0.487815	0.515877	0.509294	0.539241		290.79	-0.756479	-0.763935	-0.632508	-0.762598
		290.99	0.487097	0.515363	0.509327	0.541775		290.99	-0.757196	-0.764449	-0.632474	-0.760065
		291.19	0.489635	0.518174	0.512134	0.539124		291.19	-0.754658	-0.761638	-0.629667	-0.762715
		291.39	0.492638	0.518212	0.514123	0.544697		291.39	-0.751655	-0.7616	-0.627678	-0.757142
		291.59	0.491313	0.516524	0.513722	0.547525		291.59	-0.75298	-0.763288	-0.628079	-0.754314
		291.79	0.493888	0.520156	0.515809	0.544533		291.79	-0.750405	-0.759655	-0.625993	-0.757306
		291.99	0.492078	0.523856	0.518094	0.550393		291.99	-0.752215	-0.755956	-0.623707	-0.751446
		292.19	0.494413	0.524038	0.517619	0.549657		292.19	-0.74988	-0.755773	-0.624183	-0.752182
		292.39	0.493545	0.523167	0.517722	0.549335		292.39	-0.750749	-0.756645	-0.62408	-0.752504
		292.59	0.494413	0.5252	0.520483	0.55032		292.59	-0.74988	-0.754611	-0.621319	-0.75152
		292.79	0.498203	0.528955	0.519552	0.556608		292.79	-0.74609	-0.750857	-0.62225	-0.745232
		292.99	0.502285	0.528635	0.523502	0.552323		292.99	-0.742008	-0.751177	-0.618299	-0.749516
		293.19	0.502605	0.530558	0.520136	0.554557		293.19	-0.741688	-0.749254	-0.621665	-0.747282
		293.39	0.503484	0.534376	0.52382	0.555721		293.39	-0.740809	-0.745436	-0.617982	-0.746118
		293.59	0.501099	0.530324	0.527953	0.556144		293.59	-0.743194	-0.749488	-0.613849	-0.745695
		293.79	0.502576	0.529416	0.526657	0.557382		293.79	-0.741717	-0.750396	-0.615145	-0.744457
		293.99	0.503128	0.533718	0.525302	0.563498		293.99	-0.741166	-0.746094	-0.6165	-0.738341
		294.19	0.506672	0.534742	0.528563	0.562977		294.19	-0.737621	-0.74507	-0.613239	-0.738862
		294.39	0.505266	0.534756	0.531306	0.561557		294.39	-0.739027	-0.745056	-0.610496	-0.740283
		294.59	0.505443	0.537118	0.533417	0.56149		294.59	-0.73885	-0.742694	-0.608384	-0.74035
		294.79	0.50997	0.536795	0.528933	0.561244		294.79	-0.734323	-0.743017	-0.612869	-0.740596
		294.99	0.509632	0.537185	0.532812	0.56412		294.99	-0.734661	-0.742627	-0.60899	-0.737719
		295.19	0.512724	0.539953	0.534363	0.564178		295.19	-0.731569	-0.739859	-0.607439	-0.737661
		295.39	0.511021	0.539466	0.535213	0.573557		295.39	-0.733272	-0.740346	-0.606588	-0.728283
		295.59	0.512292	0.544086	0.536216	0.569566		295.59	-0.732002	-0.735726	-0.605586	-0.732274
		295.79	0.517435	0.542532	0.536274	0.572836		295.79	-0.726858	-0.73728	-0.605528	-0.729004
		295.99	0.513523	0.550175	0.537307	0.566194		295.99	-0.730771	-0.729637	-0.604495	-0.735646
		296.19	0.517089	0.543907	0.540403	0.578012		296.19	-0.727204	-0.735905	-0.601399	-0.723827
		296.39	0.51725	0.54517	0.539498	0.573573		296.39	-0.727043	-0.734642	-0.602304	-0.728267
		296.59	0.520941	0.550848	0.54693	0.573168		296.59	-0.723352	-0.728964	-0.594872	-0.728672
		296.79	0.518891	0.548649	0.544497	0.57557		296.79	-0.725402	-0.731162	-0.597304	-0.726269
		296.99	0.519539	0.550296	0.543566	0.573706		296.99	-0.724754	-0.729516	-0.598236	-0.728133
		297.19	0.521134	0.553306	0.542048	0.572717		297.19	-0.723159	-0.726506	-0.599754	-0.729122
		297.39	0.522052	0.553864	0.544166	0.575034		297.39	-0.722242	-0.725948	-0.597635	-0.726806
		297.59	0.523528	0.557956	0.546141	0.578282		297.59	-0.720765	-0.721856	-0.59566	-0.723558
		297.79	0.527334	0.555002	0.548864	0.579919		297.79	-0.716959	-0.724809	-0.592938	-0.72192
		297.99	0.525138	0.558252	0.554889	0.581809		297.99	-0.719155	-0.721559	-0.586913	-0.72003
		298.19	0.52922	0.559628	0.551396	0.578854		298.19	-0.715073	-0.720184	-0.590405	-0.722986
		298.39	0.528342	0.557747	0.554695	0.582744		298.39	-0.715952	-0.722065	-0.587106	-0.719095
		298.59	0.525875	0.559586	0.555109	0.582605		298.59	-0.718418	-0.720226	-0.586693	-0.719235
		298.79	0.532103	0.559684	0.555635	0.587281		298.79	-0.71219	-0.720128	-0.586167	-0.714558
		298.99	0.533692	0.563909	0.558568	0.586837		298.99	-0.710601	-0.715903	-0.583234	-0.715003
		299.19	0.531796	0.562125	0.555713	0.586551		299.19	-0.712497	-0.717687	-0.586089	-0.715288
		299.39	0.537933	0.566462	0.557386	0.58658		299.39	-0.706361	-0.71335	-0.584416	-0.715259
		299.59	0.536632	0.568139	0.558238	0.591205		299.59	-0.707662	-0.711673	-0.583563	-0.710635
		299.79	0.53322	0.566686	0.564411	0.595382		299.79	-0.711073	-0.713126	-0.577391	-0.706457
		299.99	0.539805	0.572396	0.564755	0.596875		299.99	-0.704488	-0.707416	-0.577047	-0.704964
		300.19	0.53811	0.571988	0.566252	0.588593		300.19	-0.706183	-0.707824	-0.57555	-0.713246
		300.39	0.538946	0.569973	0.564192	0.5979		300.39	-0.705347	-0.709839	-0.577609	-0.703939
		300.59	0.539948	0.57354	0.568356	0.592436		300.59	-0.704345	-0.706272	-0.573446	-0.709403
		300.79	0.544167	0.570477	0.57126	0.596608		300.79	-0.700127	-0.709335	-0.570542	-0.705231
		300.99	0.540641	0.570638	0.566177	0.595204		300.99	-0.703652	-0.709173	-0.575624	-0.706636
		301.2	0.570382	0.600668	0.597938	0.627559		301.2	-0.673911	-0.679144	-0.543863	-0.67428
		301.39	0.56891	0.601104	0.594508	0.622399		301.39	-0.675383	-0.678708	-0.547293	-0.679441
		301.59	0.568016	0.599363	0.594578	0.627148		301.59	-0.676277	-0.680449	-0.547224	-0.674691
		301.79	0.567559	0.602195	0.596169	0.625493		301.79	-0.676734	-0.677617	-0.545632	-0.676347
		301.99	0.568003	0.606489	0.595764	0.628983		301.99	-0.67629	-0.673323	-0.546038	-0.672856
		302.19	0.56694	0.604755	0.597436	0.627126		302.19	-0.677353	-0.675057	-0.544366	-0.674713
		302.39	0.570208	0.604393	0.598325	0.626587		302.39	-0.674086	-0.675419	-0.543477	-0.675252
		302.59	0.570327	0.602004	0.599566	0.628008		302.59	-0.673966	-0.677808	-0.542236	-0.673831
		302.79	0.571289	0.601667	0.594708	0.629501		302.79	-0.673004	-0.678145	-0.547094	-0.672338
		302.99	0.570492	0.602693	0.595799	0.626934		302.99	-0.673801	-0.677119	-0.546003	-0.674905
		303.19	0.569539	0.603096	0.596091	0.626498		303.19	-0.674755	-0.676716	-0.545711	-0.675342
		303.39	0.567096	0.601754	0.59491	0.62625		303.39	-0.677197	-0.678057	-0.546891	-0.67559
		303.59	0.569737	0.600898	0.596428	0.626458		303.59	-0.674556	-0.678914	-0.545373	-0.675382
		303.79	0.568919	0.603441	0.598399	0.632433		303.79	-0.675375	-0.676371	-0.543403	-0.669407
		303.99	0.569991	0.605328	0.598121	0.631286		303.99	-0.674302	-0.674484	-0.54368	-0.670553
		304.19	0.570264	0.60248	0.595482	0.631076		304.19	-0.674029	-0.677332	-0.54632	-0.670763
		304.39	0.570175	0.601561	0.597775	0.627674		304.39	-0.674118	-0.678251	-0.544027	-0.674165
		304.59	0.572697	0.602676	0.597406	0.630961		304.59	-0.671596	-0.677135	-0.544396	-0.670878
		304.79	0.567872	0.605753	0.597502	0.62845		304.79	-0.676421	-0.674059	-0.5443	-0.67339
		304.99	0.571835	0.603362	0.59915	0.63006		304.99	-0.672458	-0.67645	-0.542652	-0.67178
		305.19	0.570154	0.602959	0.597144	0.633646		305.19	-0.674139	-0.676852	-0.544658	-0.668193
		305.39	0.571129	0.602666	0.597012	0.631236		305.39	-0.673164	-0.677146	-0.54479	-0.670603
		305.59	0.569239	0.607498	0.596197	0.628403		305.59	-0.675055	-0.672314	-0.545605	-0.673436
		305.79	0.571466	0.600032	0.597681	0.628216		305.79	-0.672827	-0.67978	-0.544121	-0.673624
		305.99	0.571714	0.606418	0.596168	0.634727		305.99	-0.672579	-0.673394	-0.545634	-0.667112
		306.19	0.571732	0.602623	0.599163	0.629225		306.19	-0.672561	-0.677189	-0.542638	-0.672614
		306.39	0.572967	0.605859	0.599336	0.632482		306.39	-0.671327	-0.673953	-0.542465	-0.669357
		306.59	0.57326	0.606134	0.599562	0.633798		306.59	-0.671033	-0.673678	-0.54224	-0.668041
		306.79	0.567862	0.604379	0.599954	0.629768		306.79	-0.676432	-0.675432	-0.541848	-0.672071
		306.99	0.570935	0.608739	0.599164	0.627313		306.99	-0.673358	-0.671073	-0.542637	-0.674527
		307.19	0.571206	0.605431	0.599347	0.631073		307.19	-0.673087	-0.674381	-0.542455	-0.670766
		307.39	0.571305	0.608348	0.600086	0.629764		307.39	-0.672988	-0.671464	-0.541716	-0.672076
		307.59	0.572147	0.605843	0.601228	0.62908		307.59	-0.672146	-0.673969	-0.540574	-0.672759
		307.79	0.574278	0.604204	0.603396	0.628814		307.79	-0.670015	-0.675608	-0.538406	-0.673025
		307.99	0.575446	0.609249	0.601179	0.634832		307.99	-0.668848	-0.670563	-0.540622	-0.667007
		308.19	0.575722	0.602565	0.600654	0.629259		308.19	-0.668571	-0.677247	-0.541148	-0.67258
		308.39	0.573218	0.609803	0.601759	0.627575		308.39	-0.671075	-0.670009	-0.540043	-0.674264
		308.59	0.575786	0.606371	0.600828	0.632864		308.59	-0.668508	-0.673441	-0.540973	-0.668975
		308.79	0.574245	0.608556	0.605723	0.632403		308.79	-0.670049	-0.671256	-0.536079	-0.669436
		308.99	0.573575	0.607041	0.600569	0.633661		308.99	-0.670719	-0.672771	-0.541233	-0.668178
		309.19	0.575418	0.603208	0.602439	0.633007		309.19	-0.668876	-0.676603	-0.539363	-0.668833
		309.39	0.57427	0.604286	0.607635	0.635628		309.39	-0.670023	-0.675526	-0.534167	-0.666211
		309.59	0.574989	0.608174	0.6018	0.632522		309.59	-0.669304	-0.671638	-0.540002	-0.669317
		309.79	0.572439	0.610098	0.606201	0.637836		309.79	-0.671854	-0.669714	-0.535601	-0.664003
		309.99	0.576002	0.612725	0.605347	0.635404		309.99	-0.668291	-0.667087	-0.536454	-0.666436
		310.19	0.57338	0.607434	0.605678	0.635978		310.19	-0.670913	-0.672378	-0.536124	-0.665862
		310.39	0.578563	0.608525	0.601309	0.636575		310.39	-0.66573	-0.671287	-0.540493	-0.665264
		310.59	0.576263	0.608963	0.606413	0.636093		310.59	-0.66803	-0.670848	-0.535389	-0.665747
		310.79	0.580922	0.614209	0.607526	0.640078		310.79	-0.663371	-0.665602	-0.534275	-0.661762
		310.99	0.580707	0.612135	0.608	0.631865		310.99	-0.663587	-0.667677	-0.533802	-0.669975
		311.19	0.581054	0.612296	0.607328	0.638981		311.19	-0.663239	-0.667516	-0.534474	-0.662859
		311.39	0.576344	0.608918	0.608912	0.637989		311.39	-0.667949	-0.670893	-0.53289	-0.663851
		311.59	0.580273	0.609577	0.603525	0.641917		311.59	-0.664021	-0.670235	-0.538277	-0.659922
		311.79	0.579371	0.617397	0.610225	0.641879		311.79	-0.664922	-0.662415	-0.531577	-0.659961
		311.99	0.581247	0.613406	0.606079	0.643046		311.99	-0.663046	-0.666405	-0.535722	-0.658793
		312.19	0.575737	0.61421	0.604317	0.636965		312.19	-0.668556	-0.665602	-0.537485	-0.664874
		312.39	0.580877	0.608899	0.606647	0.639556		312.39	-0.663416	-0.670913	-0.535155	-0.662283
		312.59	0.58282	0.611762	0.609383	0.64014		312.59	-0.661473	-0.66805	-0.532419	-0.661699
		312.79	0.580949	0.6177	0.60896	0.640107		312.79	-0.663344	-0.662112	-0.532842	-0.661732
		312.99	0.583334	0.608241	0.612094	0.636948		312.99	-0.660959	-0.671571	-0.529708	-0.664891
		313.19	0.584671	0.613183	0.612209	0.64476		313.19	-0.659622	-0.666629	-0.529593	-0.65708
		313.39	0.583127	0.615358	0.615108	0.641608		313.39	-0.661166	-0.664454	-0.526694	-0.660232
		313.59	0.579985	0.615196	0.611973	0.64083		313.59	-0.664308	-0.664616	-0.529828	-0.661009
		313.79	0.585302	0.615011	0.609968	0.643328		313.79	-0.658991	-0.664801	-0.531834	-0.658511
		313.99	0.582936	0.617507	0.614826	0.644444		313.99	-0.661358	-0.662305	-0.526976	-0.657395
		314.19	0.584866	0.615662	0.609417	0.643918		314.19	-0.659428	-0.66415	-0.532384	-0.657921
		314.39	0.585147	0.61547	0.610875	0.645132		314.39	-0.659146	-0.664342	-0.530926	-0.656707
		314.59	0.583615	0.616074	0.612836	0.64463		314.59	-0.660678	-0.663738	-0.528966	-0.657209
		314.79	0.583496	0.617824	0.611829	0.641729		314.79	-0.660797	-0.661988	-0.529972	-0.66011
		314.99	0.58522	0.617985	0.615114	0.645494		314.99	-0.659073	-0.661827	-0.526688	-0.656345
		315.19	0.584606	0.616579	0.619493	0.646806		315.19	-0.659687	-0.663233	-0.522309	-0.655034
		315.39	0.58367	0.618288	0.613403	0.645331		315.39	-0.660623	-0.661524	-0.528399	-0.656508
		315.59	0.584677	0.618834	0.613385	0.643156		315.59	-0.659616	-0.660978	-0.528417	-0.658684
		315.79	0.585153	0.618221	0.615778	0.644079		315.79	-0.65914	-0.661591	-0.526023	-0.657761
		315.99	0.585995	0.61515	0.612333	0.645331		315.99	-0.658298	-0.664662	-0.529468	-0.656508
		316.19	0.585262	0.61996	0.614058	0.649771		316.19	-0.659031	-0.659852	-0.527744	-0.652069
		316.39	0.589884	0.619191	0.612728	0.647954		316.39	-0.654409	-0.66062	-0.529074	-0.653885
		316.59	0.587697	0.623542	0.613133	0.649371		316.59	-0.656596	-0.656269	-0.528668	-0.652468
		316.79	0.588559	0.618408	0.611157	0.646726		316.79	-0.655734	-0.661404	-0.530645	-0.655114
		316.99	0.5904	0.619315	0.615006	0.645412		316.99	-0.653893	-0.660497	-0.526795	-0.656427
		317.19	0.590953	0.61851	0.616928	0.651981		317.19	-0.653341	-0.661302	-0.524874	-0.649858
		317.39	0.588873	0.622251	0.614666	0.647292		317.39	-0.65542	-0.657561	-0.527135	-0.654547
		317.59	0.588581	0.621562	0.618158	0.647704		317.59	-0.655712	-0.65825	-0.523643	-0.654135
		317.79	0.589349	0.618574	0.613827	0.647861		317.79	-0.654944	-0.661238	-0.527975	-0.653978
		317.99	0.589473	0.623492	0.616695	0.64996		317.99	-0.65482	-0.65632	-0.525107	-0.651879
		318.19	0.591413	0.623346	0.61925	0.646182		318.19	-0.652881	-0.656466	-0.522552	-0.655658
		318.39	0.586769	0.621615	0.620972	0.652481		318.39	-0.657524	-0.658197	-0.520829	-0.649358
		318.59	0.588994	0.621842	0.614841	0.65027		318.59	-0.655299	-0.65797	-0.52696	-0.651569
		318.79	0.591402	0.623892	0.615894	0.646529		318.79	-0.652891	-0.655919	-0.525908	-0.65531
		318.99	0.590362	0.622505	0.620514	0.653547		318.99	-0.653932	-0.657306	-0.521288	-0.648292
		319.19	0.588589	0.625034	0.622219	0.654289		319.19	-0.655704	-0.654778	-0.519583	-0.64755
		319.39	0.594255	0.626321	0.619382	0.652785		319.39	-0.650038	-0.65349	-0.52242	-0.649054
		319.59	0.590562	0.62589	0.621123	0.654151		319.59	-0.653732	-0.653922	-0.520679	-0.647688
		319.79	0.589858	0.619979	0.61996	0.654865		319.79	-0.654435	-0.659832	-0.521841	-0.646975
		319.99	0.592268	0.62387	0.618259	0.655506		319.99	-0.652026	-0.655942	-0.523543	-0.646334
		320.19	0.591737	0.62845	0.62263	0.652675		320.19	-0.652557	-0.651362	-0.519172	-0.649164
		320.39	0.591559	0.62385	0.620727	0.655047		320.39	-0.652734	-0.655962	-0.521075	-0.646792
		320.59	0.590883	0.625955	0.6206	0.656443		320.59	-0.65341	-0.653857	-0.521201	-0.645396
		320.79	0.594845	0.624998	0.619197	0.654176		320.79	-0.649448	-0.654814	-0.522605	-0.647663
		320.99	0.592587	0.62511	0.621313	0.653988		320.99	-0.651707	-0.654702	-0.520489	-0.647851
		321.19	0.596636	0.629722	0.62318	0.654675		321.19	-0.647657	-0.65009	-0.518622	-0.647164
		321.39	0.59625	0.622914	0.619107	0.658198		321.39	-0.648044	-0.656898	-0.522695	-0.643642
		321.59	0.592854	0.631025	0.62514	0.65534		321.59	-0.651439	-0.648786	-0.516661	-0.646499
		321.79	0.599815	0.627041	0.625415	0.656301		321.79	-0.644479	-0.65277	-0.516387	-0.645538
		321.99	0.595453	0.625827	0.619786	0.65698		321.99	-0.64884	-0.653985	-0.522015	-0.644859
		322.19	0.59507	0.629167	0.62503	0.657586		322.19	-0.649224	-0.650645	-0.516772	-0.644253
		322.39	0.595522	0.629531	0.625404	0.657491		322.39	-0.648771	-0.650281	-0.516398	-0.644349
		322.59	0.598009	0.629512	0.629557	0.654691		322.59	-0.646285	-0.650299	-0.512245	-0.647149
		322.79	0.594728	0.630517	0.623568	0.655199		322.79	-0.649565	-0.649295	-0.518234	-0.64664
		322.99	0.593534	0.630713	0.624646	0.658156		322.99	-0.650759	-0.649099	-0.517156	-0.643683
		323.19	0.594266	0.627894	0.626375	0.661709		323.19	-0.650027	-0.651918	-0.515426	-0.640131
		323.39	0.597984	0.629636	0.626543	0.655279		323.39	-0.646309	-0.650176	-0.515259	-0.646561
		323.59	0.596062	0.630551	0.628711	0.656514		323.59	-0.648231	-0.649261	-0.51309	-0.645325
		323.79	0.599858	0.632999	0.623752	0.660801		323.79	-0.644435	-0.646813	-0.51805	-0.641038
		323.99	0.597436	0.628266	0.622974	0.66267		323.99	-0.646857	-0.651546	-0.518828	-0.63917
		324.19	0.599512	0.62852	0.623046	0.657861		324.19	-0.644782	-0.651291	-0.518755	-0.643978
		324.39	0.600596	0.631476	0.627491	0.653348		324.39	-0.643698	-0.648336	-0.514311	-0.648492
		324.59	0.598922	0.633811	0.627089	0.656199		324.59	-0.645371	-0.646001	-0.514712	-0.64564
		324.79	0.602071	0.633609	0.626965	0.657177		324.79	-0.642222	-0.646202	-0.514837	-0.644662
		324.99	0.602983	0.632545	0.623269	0.66084		324.99	-0.641311	-0.647266	-0.518533	-0.640999
		325.19	0.598663	0.634353	0.629223	0.65646		325.19	-0.64563	-0.645459	-0.512578	-0.645379
		325.39	0.600003	0.630612	0.628448	0.656084		325.39	-0.64429	-0.649199	-0.513354	-0.645755
		325.59	0.604147	0.633089	0.62818	0.661306		325.59	-0.640146	-0.646723	-0.513622	-0.640533
		325.79	0.604461	0.630765	0.628127	0.657395		325.79	-0.639833	-0.649047	-0.513674	-0.644444
		325.99	0.599307	0.630883	0.626816	0.661031		325.99	-0.644986	-0.648929	-0.514986	-0.640808
		326.19	0.597984	0.630218	0.629434	0.656919		326.19	-0.64631	-0.649594	-0.512368	-0.644921
		326.39	0.603234	0.633016	0.629389	0.663762		326.39	-0.64106	-0.646796	-0.512413	-0.638077
		326.59	0.600493	0.63454	0.629727	0.657727		326.59	-0.643801	-0.645272	-0.512074	-0.644113
		326.79	0.603	0.636684	0.625271	0.659024		326.79	-0.641294	-0.643128	-0.516531	-0.642816
		326.99	0.601777	0.632988	0.62751	0.660595		326.99	-0.642516	-0.646824	-0.514292	-0.641244
		327.19	0.602588	0.636564	0.626366	0.659814		327.19	-0.641705	-0.643248	-0.515436	-0.642025
		327.39	0.604225	0.633619	0.625598	0.65964		327.39	-0.640068	-0.646193	-0.516204	-0.642199
		327.59	0.600706	0.636394	0.629798	0.664803		327.59	-0.643587	-0.643418	-0.512004	-0.637036
		327.79	0.600085	0.636707	0.629021	0.661215		327.79	-0.644209	-0.643105	-0.512781	-0.640625
		327.99	0.601176	0.634928	0.628713	0.661357		327.99	-0.643118	-0.644884	-0.513089	-0.640483
		328.19	0.601923	0.633219	0.632102	0.659594		328.19	-0.642371	-0.646592	-0.5097	-0.642246
		328.39	0.600819	0.634184	0.629915	0.661472		328.39	-0.643474	-0.645628	-0.511887	-0.640368
		328.59	0.601044	0.634177	0.629784	0.661939		328.59	-0.643249	-0.645634	-0.512017	-0.639901
		328.79	0.601181	0.634294	0.630013	0.659837		328.79	-0.643112	-0.645518	-0.511789	-0.642002
		328.99	0.603942	0.636849	0.631228	0.660428		328.99	-0.640351	-0.642963	-0.510573	-0.641411
		329.19	0.605583	0.634003	0.630411	0.663811		329.19	-0.63871	-0.645809	-0.511391	-0.638028
		329.39	0.602022	0.633861	0.63295	0.664036		329.39	-0.642271	-0.645951	-0.508851	-0.637803
		329.59	0.606513	0.636628	0.625283	0.666958		329.59	-0.63778	-0.643184	-0.516519	-0.634882
		329.79	0.604933	0.637853	0.630576	0.664989		329.79	-0.63936	-0.641959	-0.511226	-0.636851
		329.99	0.605059	0.636483	0.630826	0.668305		329.99	-0.639234	-0.643329	-0.510975	-0.633535
		330.19	0.604308	0.636885	0.632207	0.661785		330.19	-0.639986	-0.642927	-0.509594	-0.640054
		330.39	0.602445	0.638033	0.632389	0.663591		330.39	-0.641849	-0.641779	-0.509413	-0.638249
		330.59	0.603636	0.639992	0.633063	0.660757		330.59	-0.640657	-0.63982	-0.508739	-0.641083
		330.79	0.604568	0.639732	0.62995	0.65937		330.79	-0.639726	-0.64008	-0.511852	-0.642469
		330.99	0.603132	0.638447	0.635371	0.665028		330.99	-0.641161	-0.641365	-0.50643	-0.636811
		331.19	0.604736	0.636168	0.633728	0.664249		331.19	-0.639558	-0.643644	-0.508074	-0.63759
		331.39	0.605218	0.638995	0.628413	0.663249		331.39	-0.639075	-0.640817	-0.513388	-0.63859
		331.59	0.604799	0.637913	0.634942	0.664799		331.59	-0.639494	-0.641899	-0.50686	-0.63704
		331.79	0.603677	0.636038	0.63504	0.664888		331.79	-0.640616	-0.643774	-0.506761	-0.636952
		331.99	0.604439	0.638095	0.63797	0.664893		331.99	-0.639854	-0.641716	-0.503832	-0.636947
		332.19	0.604987	0.641531	0.633544	0.664903		332.19	-0.639306	-0.638281	-0.508258	-0.636936
		332.39	0.603296	0.639161	0.635522	0.667448		332.39	-0.640997	-0.640651	-0.50628	-0.634391
		332.59	0.606549	0.635426	0.629455	0.662756		332.59	-0.637744	-0.644386	-0.512347	-0.639084
		332.79	0.605762	0.634915	0.631178	0.663063		332.79	-0.638531	-0.644897	-0.510624	-0.638776
		332.99	0.608899	0.639363	0.633609	0.66902		332.99	-0.635394	-0.640449	-0.508193	-0.632819
		333.19	0.60382	0.638431	0.631738	0.669572		333.19	-0.640473	-0.641381	-0.510064	-0.632267
		333.39	0.606051	0.63368	0.635315	0.666599		333.39	-0.638242	-0.646131	-0.506487	-0.63524
		333.59	0.604627	0.639188	0.63459	0.666903		333.59	-0.639666	-0.640624	-0.507212	-0.634937
		333.79	0.607379	0.639523	0.633114	0.669349		333.79	-0.636914	-0.640289	-0.508687	-0.63249
		333.99	0.606541	0.638307	0.634146	0.663536		333.99	-0.637752	-0.641505	-0.507656	-0.638304
		334.19	0.610593	0.638602	0.635953	0.664485		334.19	-0.6337	-0.641209	-0.505849	-0.637355
		334.39	0.605426	0.636053	0.634928	0.667324		334.39	-0.638868	-0.643759	-0.506874	-0.634515
		334.59	0.607617	0.639396	0.630548	0.663085		334.59	-0.636676	-0.640416	-0.511253	-0.638754
		334.79	0.606514	0.6438	0.632616	0.665877		334.79	-0.637779	-0.636012	-0.509185	-0.635962
		334.99	0.604554	0.640464	0.631316	0.667912		334.99	-0.639739	-0.639347	-0.510486	-0.633927
		335.19	0.60469	0.638769	0.635239	0.668415		335.19	-0.639603	-0.641042	-0.506563	-0.633424
		335.39	0.607383	0.638905	0.634027	0.665323		335.39	-0.63691	-0.640907	-0.507775	-0.636516
		335.59	0.606606	0.640554	0.639916	0.663137		335.59	-0.637687	-0.639258	-0.501886	-0.638702
		335.79	0.609469	0.639611	0.630754	0.668309		335.79	-0.634824	-0.640201	-0.511048	-0.633531
		335.99	0.609335	0.635601	0.635665	0.667176		335.99	-0.634958	-0.644211	-0.506136	-0.634664
		336.19	0.60699	0.641512	0.634271	0.667474		336.19	-0.637303	-0.6383	-0.507531	-0.634366
		336.39	0.60671	0.637529	0.632357	0.66865		336.39	-0.637583	-0.642283	-0.509445	-0.633189
		336.59	0.606219	0.639634	0.635808	0.667128		336.59	-0.638074	-0.640178	-0.505994	-0.634711
		336.79	0.606004	0.641289	0.630782	0.668343		336.79	-0.63829	-0.638523	-0.51102	-0.633496
		336.99	0.612231	0.640234	0.638757	0.669772		336.99	-0.632062	-0.639578	-0.503044	-0.632068
		337.19	0.606758	0.64919	0.634483	0.667037		337.19	-0.637535	-0.630622	-0.507319	-0.634803
		337.39	0.607007	0.639872	0.633605	0.665693		337.39	-0.637286	-0.639939	-0.508197	-0.636146
		337.59	0.608619	0.640807	0.636555	0.668647		337.59	-0.635674	-0.639005	-0.505246	-0.633193
		337.79	0.612672	0.639543	0.630382	0.666542		337.79	-0.631621	-0.640269	-0.51142	-0.635297
		337.99	0.609264	0.638908	0.636437	0.667794		337.99	-0.635029	-0.640904	-0.505365	-0.634045
		338.19	0.609707	0.639277	0.639688	0.670163		338.19	-0.634586	-0.640535	-0.502114	-0.631676
		338.39	0.607575	0.638991	0.639273	0.669098		338.39	-0.636718	-0.640821	-0.502529	-0.632741
		338.59	0.610683	0.639498	0.633819	0.668716		338.59	-0.63361	-0.640314	-0.507983	-0.633123
		338.79	0.607437	0.642401	0.63164	0.671818		338.79	-0.636856	-0.637411	-0.510162	-0.630022
		338.99	0.607249	0.640238	0.634908	0.668519		338.99	-0.637044	-0.639573	-0.506894	-0.63332
		339.19	0.606997	0.640644	0.630558	0.668223		339.19	-0.637297	-0.639167	-0.511244	-0.633616
		339.39	0.609266	0.643743	0.636116	0.668373		339.39	-0.635027	-0.636069	-0.505686	-0.633467
		339.59	0.60509	0.639788	0.638347	0.671019		339.59	-0.639203	-0.640023	-0.503454	-0.63082
		339.79	0.606311	0.640833	0.636714	0.666086		339.79	-0.637982	-0.638979	-0.505087	-0.635754
		339.99	0.608151	0.641882	0.637717	0.673746		339.99	-0.636143	-0.63793	-0.504085	-0.628093
		340.19	0.607733	0.640651	0.630425	0.670197		340.19	-0.63656	-0.639161	-0.511376	-0.631643
		340.39	0.6082	0.642469	0.635452	0.671104		340.39	-0.636093	-0.637343	-0.506349	-0.630735
		340.59	0.607877	0.644701	0.638896	0.665692		340.59	-0.636416	-0.635111	-0.502906	-0.636147
		340.79	0.61171	0.641628	0.635872	0.66876		340.79	-0.632583	-0.638184	-0.50593	-0.633079
		340.99	0.608929	0.637367	0.635671	0.672037		340.99	-0.635364	-0.642445	-0.506131	-0.629802
		341.19	0.611443	0.641295	0.637101	0.671878		341.19	-0.63285	-0.638516	-0.504701	-0.629962
		341.39	0.610465	0.640245	0.634793	0.67549		341.39	-0.633828	-0.639567	-0.507009	-0.626349
		341.59	0.61134	0.640752	0.637735	0.670784		341.59	-0.632953	-0.63906	-0.504067	-0.631055
		341.79	0.603583	0.640007	0.633552	0.673764		341.79	-0.64071	-0.639805	-0.508249	-0.628075
		341.99	0.6042	0.641826	0.640364	0.669125		341.99	-0.640093	-0.637986	-0.501438	-0.632714
		342.19	0.609317	0.641249	0.635006	0.670181		342.19	-0.634976	-0.638563	-0.506795	-0.631658
		342.39	0.608759	0.642216	0.63867	0.666294		342.39	-0.635535	-0.637596	-0.503132	-0.635545
		342.59	0.610069	0.642629	0.637826	0.671376		342.59	-0.634224	-0.637183	-0.503975	-0.630463
		342.79	0.611609	0.642556	0.639637	0.667468		342.79	-0.632684	-0.637256	-0.502164	-0.634372
		342.99	0.607972	0.64257	0.63416	0.670772		342.99	-0.636321	-0.637242	-0.507642	-0.631067
		343.19	0.608066	0.644457	0.638275	0.667621		343.19	-0.636227	-0.635355	-0.503526	-0.634218
		343.39	0.608323	0.641523	0.63645	0.670026		343.39	-0.63597	-0.638288	-0.505352	-0.631813
		343.59	0.609963	0.638266	0.633199	0.672054		343.59	-0.63433	-0.641545	-0.508603	-0.629786
		343.79	0.61049	0.638366	0.634743	0.671071		343.79	-0.633803	-0.641446	-0.507058	-0.630768
		343.99	0.608565	0.642679	0.637145	0.672321		343.99	-0.635728	-0.637133	-0.504657	-0.629518
		344.19	0.608309	0.641037	0.635451	0.670897		344.19	-0.635984	-0.638775	-0.506351	-0.630942
		344.39	0.609563	0.646019	0.634545	0.672338		344.39	-0.634731	-0.633793	-0.507257	-0.629501
		344.59	0.610354	0.647014	0.636282	0.676611		344.59	-0.633939	-0.632798	-0.50552	-0.625229
		344.79	0.607845	0.64256	0.638212	0.666866		344.79	-0.636448	-0.637252	-0.50359	-0.634973
		344.99	0.610178	0.64298	0.639723	0.673535		344.99	-0.634116	-0.636832	-0.502079	-0.628305
		345.19	0.611286	0.641973	0.637653	0.670081		345.19	-0.633007	-0.637839	-0.504148	-0.631758
		345.39	0.609291	0.64627	0.635565	0.672592		345.39	-0.635002	-0.633542	-0.506236	-0.629248
		345.59	0.608649	0.638963	0.633337	0.677676		345.59	-0.635644	-0.640849	-0.508464	-0.624164
		345.79	0.607695	0.645173	0.637517	0.665408		345.79	-0.636598	-0.634639	-0.504285	-0.636432
		345.99	0.610322	0.638957	0.635892	0.670816		345.99	-0.633971	-0.640855	-0.50591	-0.631023
		346.19	0.61057	0.638693	0.636132	0.671465		346.19	-0.633723	-0.641119	-0.505669	-0.630374
		346.39	0.614036	0.645629	0.63393	0.67141		346.39	-0.630257	-0.634183	-0.507872	-0.630429
		346.59	0.610189	0.644907	0.636373	0.670005		346.59	-0.634104	-0.634905	-0.505428	-0.631834
		346.79	0.609004	0.639621	0.634288	0.672223		346.79	-0.635289	-0.640191	-0.507513	-0.629616
		346.99	0.608966	0.644022	0.635106	0.675583		346.99	-0.635328	-0.63579	-0.506696	-0.626257
		347.19	0.607909	0.649827	0.638513	0.670226		347.19	-0.636384	-0.629984	-0.503289	-0.631614
		347.39	0.605818	0.642959	0.641423	0.669946		347.39	-0.638475	-0.636853	-0.500378	-0.631894
		347.59	0.612499	0.640665	0.632458	0.675638		347.59	-0.631794	-0.639147	-0.509344	-0.626202
		347.79	0.609423	0.643072	0.636731	0.670976		347.79	-0.63487	-0.636739	-0.505071	-0.630863
		347.99	0.608146	0.643568	0.633773	0.672436		347.99	-0.636147	-0.636244	-0.508029	-0.629403
		348.19	0.60907	0.642561	0.635771	0.671169		348.19	-0.635223	-0.637251	-0.50603	-0.630671
		348.39	0.611563	0.642259	0.638844	0.668761		348.39	-0.63273	-0.637553	-0.502957	-0.633079
		348.59	0.606492	0.640645	0.634931	0.66839		348.59	-0.637801	-0.639167	-0.506871	-0.633449
		348.79	0.608425	0.639446	0.634144	0.673424		348.79	-0.635868	-0.640366	-0.507657	-0.628416
		348.99	0.615995	0.644533	0.631851	0.675192		348.99	-0.628298	-0.635279	-0.509951	-0.626647
		349.19	0.608297	0.641726	0.639096	0.671487		349.19	-0.635996	-0.638085	-0.502706	-0.630353
		349.39	0.609874	0.640405	0.639955	0.670584		349.39	-0.63442	-0.639407	-0.501846	-0.631255
		349.59	0.611088	0.643951	0.639825	0.671663		349.59	-0.633205	-0.635861	-0.501977	-0.630177
		349.79	0.606953	0.644163	0.637395	0.667861		349.79	-0.63734	-0.635649	-0.504407	-0.633978
		349.99	0.610554	0.643218	0.637415	0.673109		349.99	-0.63374	-0.636593	-0.504387	-0.628731
		350.19	0.613436	0.643643	0.636532	0.671932		350.19	-0.630857	-0.636169	-0.50527	-0.629907
		350.39	0.613268	0.640548	0.634452	0.672817		350.39	-0.631025	-0.639264	-0.50735	-0.629023
		350.59	0.609922	0.644507	0.639691	0.670417		350.59	-0.634372	-0.635305	-0.502111	-0.631422
		350.79	0.613549	0.639834	0.6367	0.675395		350.79	-0.630744	-0.639978	-0.505101	-0.626444
		350.99	0.610323	0.641216	0.638089	0.672632		350.99	-0.63397	-0.638596	-0.503713	-0.629208
		351.19	0.607852	0.641407	0.637525	0.675091		351.19	-0.636441	-0.638404	-0.504277	-0.626748
		351.39	0.608874	0.641745	0.637471	0.671812		351.39	-0.635419	-0.638067	-0.50433	-0.630027
		351.59	0.610832	0.645942	0.636129	0.675734		351.59	-0.633461	-0.63387	-0.505673	-0.626106
		351.79	0.614862	0.644587	0.638349	0.677723		351.79	-0.629432	-0.635225	-0.503453	-0.624116
		351.99	0.609382	0.646648	0.635054	0.673474		351.99	-0.634912	-0.633164	-0.506748	-0.628365
		352.19	0.611875	0.643545	0.636938	0.673428		352.19	-0.632418	-0.636267	-0.504864	-0.628411
		352.39	0.610031	0.646368	0.635942	0.670611		352.39	-0.634262	-0.633444	-0.50586	-0.631229
		352.59	0.611723	0.646118	0.638272	0.674151		352.59	-0.632571	-0.633694	-0.50353	-0.627689
		352.79	0.610481	0.644785	0.639877	0.672772		352.79	-0.633813	-0.635027	-0.501925	-0.629068
		352.99	0.607572	0.64783	0.638561	0.677941		352.99	-0.636721	-0.631982	-0.503241	-0.623898
		353.19	0.608429	0.643135	0.638725	0.668705		353.19	-0.635865	-0.636677	-0.503076	-0.633134
		353.39	0.614295	0.643092	0.640445	0.67195		353.39	-0.629998	-0.63672	-0.501357	-0.629889
		353.59	0.611291	0.644222	0.63895	0.671132		353.59	-0.633002	-0.63559	-0.502851	-0.630708
		353.79	0.609928	0.647249	0.636941	0.669419		353.79	-0.634366	-0.632563	-0.504861	-0.632421
		353.99	0.611698	0.644853	0.640505	0.672533		353.99	-0.632595	-0.634958	-0.501296	-0.629306
		354.19	0.610735	0.643076	0.637525	0.672836		354.19	-0.633558	-0.636736	-0.504277	-0.629003
		354.39	0.610585	0.644818	0.636287	0.670862		354.39	-0.633708	-0.634994	-0.505515	-0.630978
		354.59	0.613854	0.643524	0.641746	0.674997		354.59	-0.630439	-0.636288	-0.500056	-0.626842
		354.79	0.610358	0.643831	0.633046	0.670206		354.79	-0.633935	-0.635981	-0.508756	-0.631633
		354.99	0.612072	0.646376	0.640556	0.672438		354.99	-0.632221	-0.633436	-0.501246	-0.629401
		355.19	0.611471	0.645414	0.641116	0.669784		355.19	-0.632822	-0.634398	-0.500686	-0.632055
		355.39	0.609891	0.643141	0.637855	0.67211		355.39	-0.634402	-0.636671	-0.503947	-0.629729
		355.59	0.610591	0.649294	0.639179	0.674163		355.59	-0.633703	-0.630518	-0.502623	-0.627676
		355.79	0.614481	0.646248	0.634665	0.669273		355.79	-0.629813	-0.633564	-0.507137	-0.632567
		355.99	0.609257	0.646816	0.641509	0.673207		355.99	-0.635036	-0.632996	-0.500293	-0.628632
		356.19	0.610508	0.646126	0.636556	0.671512		356.19	-0.633786	-0.633686	-0.505246	-0.630327
		356.39	0.614626	0.641917	0.636346	0.671573		356.39	-0.629668	-0.637895	-0.505456	-0.630266
		356.59	0.61213	0.645608	0.641722	0.674614		356.59	-0.632164	-0.634204	-0.50008	-0.627225
		356.79	0.61288	0.644007	0.63948	0.673295		356.79	-0.631413	-0.635805	-0.502322	-0.628544
		356.99	0.610095	0.643697	0.6417	0.675084		356.99	-0.634198	-0.636115	-0.500102	-0.626756
		357.19	0.613389	0.643828	0.637349	0.678295		357.19	-0.630905	-0.635984	-0.504453	-0.623544
		357.39	0.613122	0.638525	0.639723	0.671682		357.39	-0.631171	-0.641286	-0.502079	-0.630157
		357.59	0.609666	0.646389	0.639676	0.676943		357.59	-0.634628	-0.633423	-0.502125	-0.624896
		357.79	0.613101	0.646639	0.639008	0.668873		357.79	-0.631192	-0.633173	-0.502793	-0.632966
		357.99	0.612176	0.642354	0.637809	0.675667		357.99	-0.632117	-0.637458	-0.503992	-0.626172
		358.19	0.613203	0.639215	0.635998	0.674416		358.19	-0.631091	-0.640597	-0.505803	-0.627424
		358.39	0.608598	0.647208	0.639415	0.674632		358.39	-0.635696	-0.632604	-0.502387	-0.627208
		358.59	0.61168	0.645978	0.642451	0.676285		358.59	-0.632613	-0.633834	-0.499351	-0.625554
		358.79	0.611932	0.644486	0.635065	0.673818		358.79	-0.632361	-0.635326	-0.506736	-0.628022
		358.99	0.613728	0.64216	0.642016	0.674747		358.99	-0.630566	-0.637652	-0.499785	-0.627092
		359.19	0.607744	0.647958	0.638571	0.679092		359.19	-0.636549	-0.631854	-0.503231	-0.622747
		359.39	0.612289	0.646706	0.638087	0.674592		359.39	-0.632004	-0.633105	-0.503715	-0.627248
		359.59	0.613295	0.647061	0.641137	0.672796		359.59	-0.630998	-0.632751	-0.500665	-0.629044
		359.79	0.611062	0.644448	0.639285	0.676541		359.79	-0.633231	-0.635364	-0.502516	-0.625299
		359.99	0.614239	0.647135	0.641175	0.672452		359.99	-0.630054	-0.632677	-0.500627	-0.629387
		360.19	0.612127	0.65014	0.640862	0.675773		360.19	-0.632166	-0.629672	-0.50094	-0.626067
		360.39	0.612167	0.649866	0.63681	0.676843		360.39	-0.632126	-0.629946	-0.504991	-0.624996
		360.59	0.613816	0.646301	0.644457	0.675456		360.59	-0.630478	-0.633511	-0.497345	-0.626384
		360.79	0.609396	0.64691	0.639783	0.671822		360.79	-0.634897	-0.632902	-0.502019	-0.630018
		360.99	0.609172	0.651807	0.639481	0.675799		360.99	-0.635121	-0.628005	-0.50232	-0.62604
		361.19	0.609818	0.648244	0.636707	0.676708		361.19	-0.634475	-0.631568	-0.505094	-0.625131
		361.39	0.613292	0.64772	0.637568	0.672849		361.39	-0.631001	-0.632092	-0.504234	-0.62899
		361.59	0.613357	0.646855	0.636792	0.675307		361.59	-0.630936	-0.632957	-0.50501	-0.626532
		361.79	0.613174	0.645611	0.640682	0.672574		361.79	-0.631119	-0.634201	-0.50112	-0.629265
		361.99	0.612011	0.645391	0.637754	0.675901		361.99	-0.632282	-0.634421	-0.504048	-0.625939
		362.19	0.611668	0.644431	0.637247	0.6753		362.19	-0.632625	-0.635381	-0.504555	-0.626539
		362.39	0.611903	0.646545	0.642329	0.675157		362.39	-0.632391	-0.633267	-0.499472	-0.626683
		362.59	0.615762	0.644552	0.639928	0.673109		362.59	-0.628531	-0.63526	-0.501873	-0.62873
		362.79	0.614244	0.645734	0.641632	0.676872		362.79	-0.630049	-0.634078	-0.50017	-0.624967
		362.99	0.612382	0.644722	0.639246	0.673011		362.99	-0.631911	-0.63509	-0.502555	-0.628828
		363.19	0.609332	0.644622	0.639395	0.672917		363.19	-0.634961	-0.63519	-0.502407	-0.628922
		363.39	0.609883	0.650649	0.640265	0.673243		363.39	-0.63441	-0.629163	-0.501536	-0.628596
		363.59	0.613202	0.645406	0.638033	0.671902		363.59	-0.631091	-0.634405	-0.503769	-0.629937
		363.79	0.614248	0.642419	0.638838	0.678482		363.79	-0.630045	-0.637393	-0.502964	-0.623357
		363.99	0.60978	0.645285	0.63927	0.677782		363.99	-0.634513	-0.634527	-0.502532	-0.624058
		364.19	0.613788	0.647876	0.642914	0.674073		364.19	-0.630505	-0.631936	-0.498888	-0.627766
		364.39	0.609613	0.641577	0.635872	0.682738		364.39	-0.63468	-0.638235	-0.50593	-0.619101
		364.59	0.610948	0.647254	0.641088	0.67406		364.59	-0.633345	-0.632558	-0.500713	-0.627779
		364.79	0.611629	0.648362	0.63807	0.673302		364.79	-0.632664	-0.63145	-0.503732	-0.628537
		364.99	0.612424	0.647876	0.637475	0.674556		364.99	-0.631869	-0.631936	-0.504327	-0.627284
		365.19	0.614686	0.642137	0.642628	0.670431		365.19	-0.629607	-0.637675	-0.499174	-0.631408
		365.39	0.613283	0.644686	0.641889	0.676253		365.39	-0.63101	-0.635126	-0.499913	-0.625586
		365.59	0.611833	0.647537	0.637333	0.674255		365.59	-0.63246	-0.632275	-0.504469	-0.627585
		365.79	0.611589	0.650212	0.641414	0.678541		365.79	-0.632704	-0.6296	-0.500387	-0.623298
		365.99	0.614051	0.646897	0.642305	0.673227		365.99	-0.630242	-0.632915	-0.499496	-0.628613
		366.19	0.61204	0.649613	0.641665	0.676962		366.19	-0.632253	-0.630199	-0.500137	-0.624878
		366.39	0.612831	0.646879	0.639006	0.679857		366.39	-0.631462	-0.632932	-0.502796	-0.621983
		366.59	0.614181	0.644282	0.639884	0.677585		366.59	-0.630112	-0.63553	-0.501918	-0.624254
		366.79	0.611342	0.646686	0.640298	0.677571		366.79	-0.632951	-0.633126	-0.501504	-0.624268
		366.99	0.612412	0.644265	0.638932	0.675336		366.99	-0.631881	-0.635547	-0.502869	-0.626503
		367.19	0.611413	0.646229	0.640097	0.675591		367.19	-0.63288	-0.633583	-0.501705	-0.626249
		367.39	0.614741	0.648	0.640591	0.675658		367.39	-0.629552	-0.631811	-0.501211	-0.626181
		367.59	0.610087	0.640583	0.642963	0.675978		367.59	-0.634206	-0.639229	-0.498839	-0.625861
		367.79	0.611438	0.649645	0.640348	0.675005		367.79	-0.632856	-0.630167	-0.501454	-0.626834
		367.99	0.610909	0.641326	0.639019	0.673779		367.99	-0.633385	-0.638486	-0.502782	-0.62806
		368.19	0.615794	0.645687	0.641107	0.672545		368.19	-0.6285	-0.634125	-0.500695	-0.629294
		368.39	0.610572	0.645579	0.639394	0.678132		368.39	-0.633722	-0.634233	-0.502408	-0.623707
		368.59	0.610944	0.648007	0.635501	0.680283		368.59	-0.633349	-0.631805	-0.506301	-0.621556
		368.79	0.612246	0.644999	0.642871	0.675356		368.79	-0.632047	-0.634813	-0.498931	-0.626483
		368.99	0.61298	0.646518	0.643285	0.669912		368.99	-0.631313	-0.633293	-0.498516	-0.631927
		369.19	0.614842	0.644878	0.640122	0.679718		369.19	-0.629451	-0.634933	-0.501679	-0.622122
		369.39	0.610445	0.648471	0.636389	0.679411		369.39	-0.633848	-0.631341	-0.505413	-0.622428
		369.59	0.612019	0.646469	0.638796	0.679282		369.59	-0.632274	-0.633343	-0.503006	-0.622557
		369.79	0.611367	0.649811	0.63884	0.677546		369.79	-0.632926	-0.630001	-0.502962	-0.624293
		369.99	0.61271	0.644363	0.640432	0.6746		369.99	-0.631583	-0.635449	-0.501369	-0.62724
		370.19	0.61429	0.6461	0.644077	0.682507		370.19	-0.630003	-0.633712	-0.497724	-0.619333
		370.39	0.611977	0.644491	0.638219	0.676074		370.39	-0.632316	-0.635321	-0.503583	-0.625765
		370.59	0.611556	0.647495	0.636491	0.675726		370.59	-0.632737	-0.632317	-0.505311	-0.626114
		370.79	0.609952	0.647675	0.639491	0.679748		370.79	-0.634341	-0.632137	-0.502311	-0.622092
		370.99	0.614491	0.64885	0.643583	0.67636		370.99	-0.629802	-0.630962	-0.498218	-0.625479
		371.19	0.616089	0.647691	0.643693	0.678157		371.19	-0.628204	-0.632121	-0.498108	-0.623683
		371.39	0.609764	0.643268	0.638598	0.678608		371.39	-0.634529	-0.636544	-0.503203	-0.623231
		371.59	0.617207	0.648194	0.642397	0.67607		371.59	-0.627087	-0.631618	-0.499404	-0.625769
		371.79	0.615594	0.646573	0.639713	0.675296		371.79	-0.628699	-0.633239	-0.502089	-0.626543
		371.99	0.611116	0.645411	0.64115	0.679506		371.99	-0.633178	-0.634401	-0.500652	-0.622333
		372.19	0.610471	0.645193	0.639924	0.677534		372.19	-0.633822	-0.634619	-0.501878	-0.624305
		372.39	0.612314	0.64815	0.641911	0.674993		372.39	-0.63198	-0.631662	-0.49989	-0.626846
		372.59	0.610595	0.644889	0.640139	0.675445		372.59	-0.633698	-0.634923	-0.501663	-0.626395
		372.79	0.613955	0.648748	0.636191	0.679699		372.79	-0.630338	-0.631064	-0.505611	-0.62214
		372.99	0.616451	0.645699	0.641278	0.675321		372.99	-0.627842	-0.634113	-0.500524	-0.626519
		373.19	0.612282	0.645717	0.640587	0.677022		373.19	-0.632012	-0.634095	-0.501214	-0.624818
		373.39	0.614284	0.647099	0.642462	0.673895		373.39	-0.630009	-0.632713	-0.49934	-0.627944
		373.59	0.610952	0.644362	0.64126	0.682331		373.59	-0.633341	-0.63545	-0.500542	-0.619508
		373.79	0.612303	0.64726	0.639608	0.678119		373.79	-0.63199	-0.632551	-0.502194	-0.62372
		373.99	0.616093	0.646268	0.639632	0.67695		373.99	-0.6282	-0.633544	-0.50217	-0.624889
		374.19	0.61278	0.649994	0.639676	0.680471		374.19	-0.631513	-0.629818	-0.502126	-0.621368
		374.39	0.61232	0.648139	0.642288	0.674066		374.39	-0.631974	-0.631673	-0.499514	-0.627774
		374.59	0.615429	0.647004	0.635823	0.678695		374.59	-0.628864	-0.632808	-0.505979	-0.623145
		374.79	0.613328	0.648239	0.640091	0.678443		374.79	-0.630965	-0.631572	-0.50171	-0.623396
		374.99	0.613894	0.644402	0.638944	0.681678		374.99	-0.630399	-0.63541	-0.502858	-0.620162
		375.19	0.614922	0.642946	0.640263	0.681919		375.19	-0.629372	-0.636866	-0.501539	-0.619921
		375.39	0.612956	0.64993	0.640444	0.678364		375.39	-0.631338	-0.629882	-0.501358	-0.623476
		375.59	0.616224	0.644864	0.64123	0.681623		375.59	-0.628069	-0.634948	-0.500572	-0.620217
		375.79	0.613534	0.650182	0.639405	0.67792		375.79	-0.630759	-0.62963	-0.502397	-0.623919
		375.99	0.61332	0.645556	0.642322	0.677045		375.99	-0.630974	-0.634256	-0.49948	-0.624794
		376.19	0.61408	0.646352	0.639386	0.680453		376.19	-0.630213	-0.633459	-0.502416	-0.621386
		376.39	0.615093	0.646154	0.639408	0.681546		376.39	-0.6292	-0.633658	-0.502394	-0.620293
		376.59	0.614071	0.643263	0.639543	0.68134		376.59	-0.630223	-0.636549	-0.502259	-0.6205
		376.79	0.613204	0.647129	0.638534	0.68201		376.79	-0.631089	-0.632683	-0.503268	-0.619829
		376.99	0.614559	0.64719	0.638186	0.677657		376.99	-0.629734	-0.632622	-0.503615	-0.624182
		377.19	0.612765	0.646672	0.640137	0.675392		377.19	-0.631528	-0.63314	-0.501665	-0.626447
		377.39	0.611961	0.645652	0.639301	0.677994		377.39	-0.632332	-0.63416	-0.502501	-0.623845
		377.59	0.61289	0.645423	0.639508	0.679905		377.59	-0.631403	-0.634388	-0.502294	-0.621934
		377.79	0.611476	0.647307	0.642584	0.681751		377.79	-0.632817	-0.632505	-0.499218	-0.620089
		377.99	0.610274	0.644167	0.640029	0.676067		377.99	-0.634019	-0.635645	-0.501773	-0.625772
		378.19	0.612597	0.648534	0.641633	0.677915		378.19	-0.631697	-0.631277	-0.500169	-0.623924
		378.39	0.610163	0.644691	0.638622	0.676022		378.39	-0.63413	-0.635121	-0.50318	-0.625817
		378.59	0.610672	0.651016	0.641891	0.6795		378.59	-0.633621	-0.628796	-0.49991	-0.622339
		378.79	0.61359	0.644504	0.639557	0.67912		378.79	-0.630704	-0.635308	-0.502245	-0.622719
		378.99	0.61454	0.643439	0.637354	0.677469		378.99	-0.629754	-0.636373	-0.504448	-0.62437
		379.19	0.612564	0.645583	0.641231	0.678769		379.19	-0.631729	-0.634229	-0.50057	-0.62307
		379.39	0.61306	0.649676	0.638995	0.680948		379.39	-0.631233	-0.630136	-0.502807	-0.620891
		379.59	0.613332	0.652531	0.637188	0.675334		379.59	-0.630961	-0.627281	-0.504613	-0.626505
		379.79	0.614548	0.646037	0.63792	0.682966		379.79	-0.629745	-0.633775	-0.503882	-0.618874
		379.99	0.613044	0.646162	0.644428	0.680447		379.99	-0.631249	-0.63365	-0.497374	-0.621392
		380.19	0.613101	0.649995	0.646628	0.676972		380.19	-0.631192	-0.629817	-0.495174	-0.624867
		380.39	0.611641	0.648543	0.641242	0.678001		380.39	-0.632653	-0.631269	-0.500559	-0.623839
		380.59	0.612599	0.646769	0.644165	0.680519		380.59	-0.631694	-0.633043	-0.497637	-0.62132
		380.79	0.617146	0.644463	0.637403	0.678128		380.79	-0.627148	-0.635349	-0.504399	-0.623712
		380.99	0.612069	0.647858	0.642691	0.680832		380.99	-0.632224	-0.631954	-0.49911	-0.621007
		381.19	0.614919	0.646031	0.643103	0.68155		381.19	-0.629374	-0.633781	-0.498698	-0.62029
		381.39	0.614111	0.65084	0.642986	0.678622		381.39	-0.630182	-0.628972	-0.498816	-0.623217
		381.59	0.613786	0.644593	0.646833	0.684551		381.59	-0.630508	-0.635218	-0.494969	-0.617288
		381.79	0.613175	0.645741	0.639018	0.680275		381.79	-0.631118	-0.634071	-0.502784	-0.621564
		381.99	0.609786	0.645337	0.64792	0.679205		381.99	-0.634507	-0.634474	-0.493882	-0.622635
		382.19	0.616612	0.648749	0.641733	0.674631		382.19	-0.627681	-0.631063	-0.500068	-0.627209
		382.39	0.61832	0.646822	0.641992	0.674229		382.39	-0.625973	-0.63299	-0.499809	-0.62761
		382.59	0.611204	0.648803	0.640428	0.681351		382.59	-0.633089	-0.631009	-0.501373	-0.620488
		382.79	0.613292	0.648715	0.643901	0.674034		382.79	-0.631001	-0.631097	-0.4979	-0.627805
		382.99	0.615135	0.645417	0.643353	0.677584		382.99	-0.629158	-0.634395	-0.498449	-0.624255
		383.19	0.613843	0.649267	0.64238	0.676077		383.19	-0.63045	-0.630545	-0.499422	-0.625763
		383.39	0.617059	0.647864	0.643604	0.678253		383.39	-0.627235	-0.631948	-0.498198	-0.623587
		383.59	0.612561	0.648867	0.638634	0.677558		383.59	-0.631732	-0.630944	-0.503168	-0.624281
		383.79	0.611178	0.649496	0.635766	0.680752		383.79	-0.633115	-0.630316	-0.506036	-0.621087
		383.99	0.616074	0.649496	0.640055	0.6794		383.99	-0.628219	-0.630316	-0.501747	-0.622439
		384.19	0.61459	0.646516	0.64166	0.681302		384.19	-0.629704	-0.633296	-0.500142	-0.620537
		384.39	0.61383	0.645703	0.635134	0.678033		384.39	-0.630463	-0.634109	-0.506668	-0.623807
		384.59	0.613558	0.646352	0.642595	0.676222		384.59	-0.630735	-0.63346	-0.499206	-0.625617
		384.79	0.608387	0.648478	0.641701	0.675036		384.79	-0.635906	-0.631334	-0.500101	-0.626803
		384.99	0.611531	0.64433	0.644605	0.682302		384.99	-0.632763	-0.635482	-0.497196	-0.619538
		385.19	0.612252	0.648823	0.642975	0.682128		385.19	-0.632041	-0.630989	-0.498826	-0.619712
		385.39	0.615922	0.645445	0.642988	0.677371		385.39	-0.628371	-0.634366	-0.498814	-0.624468
		385.59	0.614504	0.649882	0.640206	0.680445		385.59	-0.629789	-0.62993	-0.501596	-0.621395
		385.79	0.612771	0.645771	0.640183	0.677165		385.79	-0.631522	-0.634041	-0.501619	-0.624675
		385.99	0.611668	0.649109	0.641681	0.680188		385.99	-0.632625	-0.630703	-0.500121	-0.621651
		386.19	0.614554	0.643056	0.638157	0.676842		386.19	-0.62974	-0.636756	-0.503645	-0.624997
		386.39	0.613304	0.644585	0.63967	0.678183		386.39	-0.630989	-0.635226	-0.502132	-0.623656
		386.59	0.614104	0.644323	0.639993	0.677317		386.59	-0.630189	-0.635489	-0.501809	-0.624523
		386.79	0.616609	0.645355	0.636674	0.680464		386.79	-0.627684	-0.634457	-0.505128	-0.621375
		386.99	0.614318	0.648772	0.647984	0.678484		386.99	-0.629975	-0.63104	-0.493818	-0.623355
		387.19	0.615533	0.651798	0.641532	0.677964		387.19	-0.62876	-0.628013	-0.500269	-0.623875
		387.39	0.612209	0.650212	0.639298	0.676561		387.39	-0.632084	-0.6296	-0.502504	-0.625279
		387.59	0.614805	0.646442	0.639907	0.678963		387.59	-0.629488	-0.63337	-0.501895	-0.622876
		387.79	0.614408	0.647495	0.638862	0.682036		387.79	-0.629885	-0.632317	-0.50294	-0.619803
		387.99	0.614877	0.648192	0.638583	0.67853		387.99	-0.629417	-0.63162	-0.503219	-0.623309
		388.19	0.612405	0.645295	0.639374	0.682372		388.19	-0.631888	-0.634517	-0.502428	-0.619468
		388.39	0.618042	0.647736	0.643297	0.675816		388.39	-0.626251	-0.632076	-0.498505	-0.626023
		388.59	0.615521	0.643214	0.641447	0.678354		388.59	-0.628772	-0.636598	-0.500355	-0.623485
		388.79	0.614621	0.647372	0.642774	0.677554		388.79	-0.629672	-0.63244	-0.499028	-0.624285
		388.99	0.613271	0.647462	0.639085	0.680216		388.99	-0.631022	-0.63235	-0.502716	-0.621623
		389.19	0.614934	0.648134	0.644074	0.679542		389.19	-0.62936	-0.631678	-0.497728	-0.622298
		389.39	0.614757	0.648947	0.643063	0.676112		389.39	-0.629536	-0.630865	-0.498739	-0.625727
		389.59	0.61581	0.644348	0.644583	0.677152		389.59	-0.628483	-0.635464	-0.497219	-0.624687
		389.79	0.612579	0.64644	0.64058	0.678049		389.79	-0.631714	-0.633371	-0.501222	-0.62379
		389.99	0.615039	0.646697	0.638622	0.67653		389.99	-0.629254	-0.633115	-0.503179	-0.625309
		390.19	0.617165	0.646595	0.64272	0.679298		390.19	-0.627128	-0.633217	-0.499082	-0.622541
		390.39	0.610275	0.6468	0.639662	0.678588		390.39	-0.634018	-0.633012	-0.50214	-0.623251
		390.59	0.614199	0.644854	0.639134	0.683486		390.59	-0.630095	-0.634958	-0.502667	-0.618353
		390.79	0.614614	0.64601	0.644356	0.676849		390.79	-0.629679	-0.633802	-0.497445	-0.624991
		390.99	0.614729	0.65305	0.641055	0.682751		390.99	-0.629564	-0.626761	-0.500747	-0.619088
		391.19	0.613547	0.648798	0.63704	0.678971		391.19	-0.630747	-0.631014	-0.504762	-0.622868
		391.39	0.610218	0.647937	0.640732	0.680693		391.39	-0.634076	-0.631875	-0.50107	-0.621147
		391.59	0.610863	0.652428	0.640779	0.678186		391.59	-0.63343	-0.627384	-0.501022	-0.623654
		391.79	0.61237	0.647954	0.636942	0.67903		391.79	-0.631924	-0.631858	-0.504859	-0.622809
		391.99	0.613734	0.648032	0.639752	0.676983		391.99	-0.630559	-0.63178	-0.50205	-0.624856
		392.19	0.614534	0.64869	0.641031	0.685619		392.19	-0.629759	-0.631121	-0.50077	-0.616221
		392.39	0.611566	0.647636	0.63819	0.679155		392.39	-0.632727	-0.632176	-0.503611	-0.622685
		392.59	0.614228	0.64508	0.637994	0.680548		392.59	-0.630065	-0.634732	-0.503807	-0.621292
		392.79	0.61489	0.647493	0.641763	0.688309		392.79	-0.629403	-0.632319	-0.500038	-0.61353
		392.99	0.614893	0.646949	0.645858	0.6773		392.99	-0.6294	-0.632863	-0.495944	-0.624539
		393.19	0.611119	0.642655	0.642607	0.681519		393.19	-0.633174	-0.637157	-0.499195	-0.62032
		393.39	0.615203	0.647849	0.638584	0.678921		393.39	-0.629091	-0.631963	-0.503218	-0.622918
		393.59	0.615752	0.64717	0.640779	0.676938		393.59	-0.628541	-0.632642	-0.501023	-0.624901
		393.79	0.61397	0.64766	0.642155	0.67903		393.79	-0.630324	-0.632151	-0.499647	-0.62281
		393.99	0.612594	0.650304	0.640772	0.678011		393.99	-0.631699	-0.629508	-0.50103	-0.623828
		394.19	0.612709	0.647513	0.644371	0.683397		394.19	-0.631584	-0.632299	-0.497431	-0.618442
		394.39	0.611559	0.649231	0.639787	0.676996		394.39	-0.632734	-0.630581	-0.502015	-0.624843
		394.59	0.611946	0.65047	0.634826	0.681961		394.59	-0.632347	-0.629342	-0.506976	-0.619878
		394.79	0.613842	0.647412	0.64127	0.690106		394.79	-0.630451	-0.6324	-0.500531	-0.611733
		394.99	0.618192	0.647505	0.641014	0.685164		394.99	-0.626101	-0.632307	-0.500788	-0.616676
		395.19	0.61164	0.652266	0.641021	0.677751		395.19	-0.632654	-0.627546	-0.500781	-0.624088
		395.39	0.612086	0.646021	0.641101	0.676803		395.39	-0.632207	-0.633791	-0.500701	-0.625036
		395.59	0.612001	0.648502	0.641883	0.675609		395.59	-0.632293	-0.63131	-0.499919	-0.62623
		395.79	0.616312	0.649768	0.636586	0.678911		395.79	-0.627981	-0.630044	-0.505216	-0.622929
		395.99	0.61301	0.647156	0.639996	0.676887		395.99	-0.631283	-0.632656	-0.501806	-0.624952
		396.19	0.611337	0.646791	0.641844	0.683704		396.19	-0.632956	-0.633021	-0.499957	-0.618136
		396.39	0.611321	0.646181	0.642831	0.68057		396.39	-0.632972	-0.633631	-0.498971	-0.621269
		396.59	0.61733	0.653069	0.641641	0.679914		396.59	-0.626963	-0.626743	-0.500161	-0.621926
		396.79	0.618654	0.642765	0.643461	0.681595		396.79	-0.625639	-0.637046	-0.498341	-0.620245
		396.99	0.614156	0.650332	0.643936	0.680246		396.99	-0.630138	-0.629479	-0.497866	-0.621593
		397.19	0.614004	0.646634	0.639353	0.679831		397.19	-0.630289	-0.633178	-0.502449	-0.622008
		397.39	0.615244	0.646254	0.641863	0.681004		397.39	-0.629049	-0.633558	-0.499938	-0.620836
		397.59	0.615177	0.645442	0.639282	0.679847		397.59	-0.629116	-0.63437	-0.502519	-0.621993
		397.79	0.612281	0.644001	0.638214	0.67902		397.79	-0.632013	-0.635811	-0.503587	-0.62282
		397.99	0.612501	0.647502	0.6417	0.682164		397.99	-0.631792	-0.63231	-0.500101	-0.619675
		398.19	0.61136	0.648076	0.642433	0.678352		398.19	-0.632933	-0.631736	-0.499369	-0.623488
		398.39	0.613399	0.645399	0.643518	0.682742		398.39	-0.630894	-0.634413	-0.498284	-0.619097
		398.59	0.613566	0.647738	0.646283	0.683566		398.59	-0.630727	-0.632074	-0.495519	-0.618274
		398.79	0.617615	0.648631	0.646899	0.678927		398.79	-0.626678	-0.631181	-0.494903	-0.622913
		398.99	0.616842	0.648574	0.641739	0.680271		398.99	-0.627451	-0.631238	-0.500063	-0.621569
		399.19	0.61415	0.6486	0.643191	0.681859		399.19	-0.630143	-0.631212	-0.498611	-0.61998
		399.39	0.613172	0.648358	0.643932	0.684052		399.39	-0.631121	-0.631454	-0.49787	-0.617787
[truncated: 27,508 more rows]

## Sheet: Exp_3
		Binding raw data (nm)						Normalised to baseline step
		Time (s)	None	Ca	Grp170	Ca + Grp170		Time (s)	None	Ca	Grp170	Ca + Grp170
		0	0	0	0	0		0	-1.36904	-1.08437	-1.25745	-1.24756
		0.19	-0.00261173	-0.0012197	0.00423953	-0.00279168		0.19	-1.37165	-1.08559	-1.25321	-1.25035
		0.39	0.00288507	0.00012421	0.00415086	-0.00068559		0.39	-1.36615	-1.08425	-1.25329	-1.24825
		0.59	-0.00322503	-0.00111686	-0.00316115	-0.00654045		0.59	-1.37226	-1.08549	-1.26061	-1.2541
		0.79	0.0001001	-0.00011332	0.00072435	-0.00915884		0.79	-1.36894	-1.08449	-1.25672	-1.25672
		0.99	-0.00242143	0.00054051	-8.646e-05	-0.00099092		0.99	-1.37146	-1.08383	-1.25753	-1.24855
		1.19	-0.00068792	-0.00118804	-0.00060467	-0.00559188		1.19	-1.36972	-1.08556	-1.25805	-1.25315
		1.39	-0.00015591	-0.00207808	-0.00027659	-0.00297763		1.39	-1.36919	-1.08645	-1.25772	-1.25054
		1.59	0.00267228	-0.00316593	-0.00030233	-0.00532591		1.59	-1.36636	-1.08754	-1.25775	-1.25289
		1.79	-0.00016842	0.00011162	-0.00096254	-0.00196682		1.79	-1.3692	-1.08426	-1.25841	-1.24953
		1.99	0.00050972	0.00112634	0.00140197	-0.00506445		1.99	-1.36853	-1.08325	-1.25604	-1.25262
		2.19	-0.00228681	0.0018988	0.00188244	-0.00391869		2.19	-1.37132	-1.08248	-1.25556	-1.25148
		2.39	0.00525104	0.00033692	0.00318976	-0.00347264		2.39	-1.36378	-1.08404	-1.25426	-1.25103
		2.59	-0.00278257	0.00107459	-0.00244826	-0.00332621		2.59	-1.37182	-1.0833	-1.25989	-1.25089
		2.79	0.00200327	0.00344022	0.00213305	-0.00415847		2.79	-1.36703	-1.08093	-1.25531	-1.25172
		2.99	-0.00259735	0.00268052	0.0014178	-0.00566312		2.99	-1.37163	-1.08169	-1.25603	-1.25322
		3.19	0.0009977	0.00391982	0.00133299	-0.00082938		3.19	-1.36804	-1.08045	-1.25611	-1.24839
		3.39	-0.00181853	0.00611913	0.00111909	-0.00368217		3.39	-1.37085	-1.07826	-1.25633	-1.25124
		3.59	0.00466859	0.00433537	0.00338628	-0.00377299		3.59	-1.36437	-1.08004	-1.25406	-1.25133
		3.79	0.00178729	0.00446445	0.00303221	-0.00094621		3.79	-1.36725	-1.07991	-1.25441	-1.24851
		3.99	-0.0019173	-0.00097032	0.00197876	-0.00243264		3.99	-1.37095	-1.08534	-1.25547	-1.24999
		4.19	-0.00153635	0.00041128	0.00168239	-0.00503301		4.19	-1.37057	-1.08396	-1.25576	-1.25259
		4.39	0.00053343	0.00424913	0.0041529	-0.00288934		4.39	-1.3685	-1.08013	-1.25329	-1.25045
		4.59	-0.00192847	0.00523363	0.00268116	-0.00014243		4.59	-1.37096	-1.07914	-1.25476	-1.2477
		4.79	-0.00184905	0.00231011	0.00235037	-0.00228844		4.79	-1.37088	-1.08206	-1.2551	-1.24985
		4.99	0.00155978	0.00169366	0.00063722	0.00023899		4.99	-1.36748	-1.08268	-1.25681	-1.24732
		5.19	-0.00026895	0.00575872	0.00172799	-0.00717292		5.19	-1.3693	-1.07862	-1.25572	-1.25473
		5.39	-0.00060448	0.00730852	-0.00050244	0.00039493		5.39	-1.36964	-1.07707	-1.25795	-1.24716
		5.59	0.00407551	0.00459454	0.0016851	-0.00174835		5.59	-1.36496	-1.07978	-1.25576	-1.24931
		5.79	-0.0016879	0.00636022	0.004039	-0.00204133		5.79	-1.37072	-1.07801	-1.25341	-1.2496
		5.99	0.00208001	0.00521258	-0.00036821	-0.00423952		5.99	-1.36696	-1.07916	-1.25781	-1.2518
		6.19	-8.128e-05	0.00427007	0.00389132	-0.00252397		6.19	-1.36912	-1.0801	-1.25355	-1.25008
		6.39	-0.00161159	0.00691903	0.00439916	-0.00101156		6.39	-1.37065	-1.07746	-1.25305	-1.24857
		6.59	0.00617052	0.00259129	0.00346716	-0.00086334		6.59	-1.36287	-1.08178	-1.25398	-1.24842
		6.79	0.00179579	0.00589002	0.00505975	-0.00133644		6.79	-1.36724	-1.07848	-1.25239	-1.2489
		6.99	0.00074184	0.00429713	0.00304678	-0.00441032		6.99	-1.36829	-1.08008	-1.2544	-1.25197
		7.19	0.00188607	0.0060332	0.00517103	0.00226177		7.19	-1.36715	-1.07834	-1.25227	-1.2453
		7.39	0.00382128	0.00438103	0.00278899	-0.00010323		7.39	-1.36521	-1.07999	-1.25466	-1.24766
		7.59	0.00153924	0.00418892	0.00602406	-0.00361718		7.59	-1.3675	-1.08019	-1.25142	-1.25118
		7.79	0.00371006	0.00337048	0.0080947	-0.00075477		7.79	-1.36533	-1.081	-1.24935	-1.24831
		7.99	0.00489311	0.00672987	0.001258	0.00012649		7.99	-1.36414	-1.07764	-1.25619	-1.24743
		8.19	0.00623716	0.00674063	0.00496325	-0.0025988		8.19	-1.3628	-1.07763	-1.25248	-1.25016
		8.39	0.00598074	0.00501687	0.00628105	-0.00108712		8.39	-1.36305	-1.07936	-1.25116	-1.24865
		8.59	0.00347866	0.00035856	0.00416047	0.00098859		8.59	-1.36556	-1.08402	-1.25328	-1.24657
		8.79	0.00491285	0.0060983	0.0027997	0.00090761		8.79	-1.36412	-1.07828	-1.25465	-1.24665
		8.99	0.0015748	0.00900698	0.00367742	-0.00206559		8.99	-1.36746	-1.07537	-1.25377	-1.24963
		9.19	0.0024319	0.00463585	0.00332695	-0.00231759		9.19	-1.3666	-1.07974	-1.25412	-1.24988
		9.39	0.00366291	0.0046742	0.00666597	0.00237813		9.39	-1.36537	-1.0797	-1.25078	-1.24518
		9.59	0.00224536	0.00473552	0.0018502	-0.00118549		9.59	-1.36679	-1.07964	-1.2556	-1.24874
		9.79	0.00197705	0.00593447	0.00533441	0.00176811		9.79	-1.36706	-1.07844	-1.25211	-1.24579
		9.99	0.00087171	0.00764296	0.00569277	0.00316135		9.99	-1.36816	-1.07673	-1.25175	-1.2444
		10.19	0.00200688	0.00439669	0.00764993	-0.00102888		10.19	-1.36703	-1.07998	-1.2498	-1.24859
		10.39	0.00429651	0.00801106	0.0045369	-0.0020061		10.39	-1.36474	-1.07636	-1.25291	-1.24957
		10.59	0.00733541	0.00809717	0.00544925	-0.00067475		10.59	-1.3617	-1.07628	-1.252	-1.24823
		10.79	0.00357992	0.00751445	0.00661157	0.00203223		10.79	-1.36546	-1.07686	-1.25083	-1.24553
		10.99	-0.00049691	0.0096803	0.00722051	0.00057465		10.99	-1.36953	-1.07469	-1.25022	-1.24698
		11.19	0.00560765	0.00829525	0.00559275	0.00335255		11.19	-1.36343	-1.07608	-1.25185	-1.24421
		11.39	0.00373863	0.00577583	0.00527306	0.00093523		11.39	-1.3653	-1.0786	-1.25217	-1.24662
		11.59	0.00434957	0.00848333	0.00563291	-0.00126965		11.59	-1.36469	-1.07589	-1.25181	-1.24883
		11.79	0.00612187	0.00569035	0.00790593	0.00263349		11.79	-1.36291	-1.07868	-1.24954	-1.24493
		11.99	0.0106973	0.00828519	0.00584488	0.00212761		11.99	-1.35834	-1.07609	-1.2516	-1.24543
		12.19	0.00590406	0.00935004	0.00649421	0.00220233		12.19	-1.36313	-1.07502	-1.25095	-1.24536
		12.39	0.00669143	0.00815949	0.00378403	0.00435995		12.39	-1.36234	-1.07621	-1.25366	-1.2432
		12.59	0.00301298	0.00587834	0.00428116	0.00151684		12.59	-1.36602	-1.0785	-1.25316	-1.24604
		12.79	0.00726195	0.00963752	0.00661343	0.00060536		12.79	-1.36177	-1.07474	-1.25083	-1.24695
		12.99	0.00683144	0.00881797	0.00976748	0.00425636		12.99	-1.3622	-1.07556	-1.24768	-1.2433
		13.19	0.00575139	0.00894745	0.0075553	0.00235932		13.19	-1.36328	-1.07543	-1.24989	-1.2452
		13.39	0.00334936	0.0083487	0.00801674	0.00342334		13.39	-1.36569	-1.07603	-1.24943	-1.24414
		13.59	0.00342029	0.0125823	0.00585001	0.00194982		13.59	-1.36562	-1.07179	-1.2516	-1.24561
		13.79	0.00465993	0.00985454	0.00780966	0.00271064		13.79	-1.36438	-1.07452	-1.24964	-1.24485
		13.99	0.00814903	0.010084	0.00729434	0.00080261		13.99	-1.36089	-1.07429	-1.25015	-1.24676
		14.19	0.00593803	0.00725084	0.00570294	0.00136861		14.19	-1.3631	-1.07712	-1.25174	-1.24619
		14.39	0.00461765	0.00979766	0.0092258	0.0033493		14.39	-1.36442	-1.07458	-1.24822	-1.24421
		14.59	0.00477835	0.0116592	0.00501036	0.00224023		14.59	-1.36426	-1.07271	-1.25244	-1.24532
		14.79	0.0081602	0.0114457	0.009712	0.0014809		14.79	-1.36088	-1.07293	-1.24773	-1.24608
		14.99	0.00417367	0.00843553	0.0093281	0.00421001		14.99	-1.36486	-1.07594	-1.24812	-1.24335
		15.19	0.005998	0.0117371	0.00808971	0.00219246		15.19	-1.36304	-1.07264	-1.24936	-1.24537
		15.39	0.00763779	0.0109985	0.00918488	0.00430132		15.39	-1.3614	-1.07338	-1.24826	-1.24326
		15.59	0.00816327	0.0116487	0.0123019	0.00139044		15.59	-1.36087	-1.07273	-1.24514	-1.24617
		15.79	0.0080188	0.0139312	0.00787424	0.00554962		15.79	-1.36102	-1.07044	-1.24957	-1.24201
		15.99	0.00939179	0.00973485	0.0109978	0.00201875		15.99	-1.35964	-1.07464	-1.24645	-1.24554
		16.19	0.00759065	0.0133029	0.00676359	0.00225241		16.19	-1.36145	-1.07107	-1.25068	-1.24531
		16.39	0.00759808	0.00982843	0.0101314	0.00445738		16.39	-1.36144	-1.07455	-1.24731	-1.2431
		16.59	0.00977125	0.00991776	0.0104367	-0.0008084		16.59	-1.35926	-1.07446	-1.24701	-1.24837
		16.79	0.00709378	0.00928508	0.00980279	0.00464604		16.79	-1.36194	-1.07509	-1.24764	-1.24291
		16.99	0.0096716	0.00833147	0.00685225	0.00084736		16.99	-1.35936	-1.07604	-1.25059	-1.24671
		17.19	0.00577398	0.00912074	0.00746159	0.0024794		17.19	-1.36326	-1.07525	-1.24998	-1.24508
		17.39	0.00464053	0.00709551	0.01013	0.00177741		17.39	-1.3644	-1.07728	-1.24732	-1.24578
		17.59	0.0138859	0.0145574	0.00687857	0.00512403		17.59	-1.35515	-1.06982	-1.25057	-1.24244
		17.79	0.0129393	0.0106262	0.0103901	0.00351901		17.79	-1.3561	-1.07375	-1.24706	-1.24404
		17.99	0.00588223	0.0116911	0.00752957	0.00529566		17.99	-1.36315	-1.07268	-1.24992	-1.24226
		18.19	0.00785463	0.0122237	0.0110904	0.00432478		18.19	-1.36118	-1.07215	-1.24636	-1.24323
		18.39	0.00635864	0.00932608	0.00614106	0.00213545		18.39	-1.36268	-1.07505	-1.2513	-1.24542
		18.59	0.00596216	0.0136224	0.00883299	0.00191429		18.59	-1.36307	-1.07075	-1.24861	-1.24565
		18.79	0.00706578	0.00780916	0.00713786	0.00263523		18.79	-1.36197	-1.07657	-1.25031	-1.24492
		18.99	0.00832253	0.0129605	0.00932273	0.00678023		18.99	-1.36071	-1.07141	-1.24812	-1.24078
		19.19	0.00866966	0.0114576	0.00796368	0.00302735		19.19	-1.36037	-1.07292	-1.24948	-1.24453
		19.39	0.00888389	0.0132166	0.0104989	0.00327315		19.39	-1.36015	-1.07116	-1.24695	-1.24429
		19.59	0.00669344	0.0157578	0.0122966	0.00734127		19.59	-1.36234	-1.06862	-1.24515	-1.24022
		19.79	0.00871168	0.0122099	0.0100429	0.00247195		19.79	-1.36032	-1.07216	-1.2474	-1.24509
		19.99	0.00971664	0.0154449	0.0116788	0.00260941		19.99	-1.35932	-1.06893	-1.24577	-1.24495
		20.19	0.00857141	0.0144896	0.00921608	0.00520577		20.19	-1.36046	-1.06988	-1.24823	-1.24235
		20.39	0.0130484	0.0150225	0.0100804	0.00777493		20.39	-1.35599	-1.06935	-1.24737	-1.23978
		20.59	0.0104037	0.0121173	0.00923875	0.00565822		20.59	-1.35863	-1.07226	-1.24821	-1.2419
		20.79	0.0121249	0.0117596	0.0106894	0.00345801		20.79	-1.35691	-1.07261	-1.24676	-1.2441
		20.99	0.00835504	0.0120204	0.0127625	0.00695839		20.99	-1.36068	-1.07235	-1.24468	-1.2406
		21.19	0.0110424	0.0135672	0.00836382	0.00478532		21.19	-1.35799	-1.07081	-1.24908	-1.24277
		21.39	0.0100881	0.0133372	0.0105056	0.00529333		21.39	-1.35895	-1.07104	-1.24694	-1.24227
		21.59	0.0119017	0.0119162	0.00690438	0.00776943		21.59	-1.35713	-1.07246	-1.25054	-1.23979
		21.79	0.0104074	0.0176667	0.00984306	0.00286478		21.79	-1.35863	-1.06671	-1.2476	-1.24469
		21.99	0.00911272	0.0113066	0.0100233	0.00650822		21.99	-1.35992	-1.07307	-1.24742	-1.24105
		22.19	0.00936506	0.0124971	0.0098705	0.00431375		22.19	-1.35967	-1.07188	-1.24757	-1.24325
		22.39	0.00925169	0.0124594	0.0129728	0.00387926		22.39	-1.35978	-1.07191	-1.24447	-1.24368
		22.59	0.00803753	0.0119956	0.0115962	0.00405244		22.59	-1.361	-1.07238	-1.24585	-1.24351
		22.79	0.0127442	0.0144002	0.010281	0.00416127		22.79	-1.35629	-1.06997	-1.24716	-1.2434
		22.99	0.0121282	0.0134425	0.00904792	0.00481285		22.99	-1.35691	-1.07093	-1.2484	-1.24275
		23.19	0.0120012	0.0174825	0.0129954	0.0057697		23.19	-1.35703	-1.06689	-1.24445	-1.24179
		23.39	0.00953088	0.0100974	0.0125946	0.00529556		23.39	-1.3595	-1.07428	-1.24485	-1.24226
		23.59	0.00896277	0.0131803	0.0151349	0.00144699		23.59	-1.36007	-1.07119	-1.24231	-1.24611
		23.79	0.0134523	0.0195307	0.00832619	0.00570694		23.79	-1.35558	-1.06484	-1.24912	-1.24185
		23.99	0.0137926	0.0178666	0.00885408	0.00565798		23.99	-1.35524	-1.06651	-1.24859	-1.2419
		24.19	0.0134518	0.0147257	0.0118109	0.0060889		24.19	-1.35558	-1.06965	-1.24563	-1.24147
		24.39	0.0139695	0.0157418	0.00939552	0.00652894		24.39	-1.35507	-1.06863	-1.24805	-1.24103
		24.59	0.0117302	0.0158181	0.0123505	0.00584892		24.59	-1.35731	-1.06856	-1.24509	-1.24171
		24.79	0.0117634	0.0162762	0.0105446	0.00594456		24.79	-1.35727	-1.0681	-1.2469	-1.24161
		24.99	0.0154726	0.0154	0.0139066	0.00507817		24.99	-1.35356	-1.06897	-1.24354	-1.24248
		25.19	0.00853061	0.01632	0.00991195	0.00786149		25.19	-1.36051	-1.06805	-1.24753	-1.2397
		25.39	0.0162045	0.0156544	0.0113231	0.00573309		25.39	-1.35283	-1.06872	-1.24612	-1.24183
		25.59	0.0125771	0.0153373	0.0109477	0.00846891		25.59	-1.35646	-1.06904	-1.2465	-1.23909
		25.79	0.011145	0.0164879	0.0157814	0.00444593		25.79	-1.35789	-1.06789	-1.24166	-1.24311
		25.99	0.0109946	0.0156252	0.0119478	0.00848891		25.99	-1.35804	-1.06875	-1.2455	-1.23907
		26.19	0.0126672	0.0161219	0.0106846	0.00986277		26.19	-1.35637	-1.06825	-1.24676	-1.2377
		26.39	0.0149581	0.0145247	0.0119416	0.00350097		26.39	-1.35408	-1.06985	-1.2455	-1.24406
		26.59	0.0129565	0.014758	0.0124018	0.00897507		26.59	-1.35608	-1.06962	-1.24504	-1.23858
		26.79	0.0122597	0.0168819	0.0119497	0.00714572		26.79	-1.35678	-1.06749	-1.2455	-1.24041
		26.99	0.01029	0.0144958	0.0133674	0.00624522		26.99	-1.35875	-1.06988	-1.24408	-1.24131
		27.19	0.0113437	0.0192358	0.0150133	0.0103376		27.19	-1.35769	-1.06514	-1.24243	-1.23722
		27.39	0.00954444	0.0165166	0.00964734	0.0077158		27.39	-1.35949	-1.06786	-1.2478	-1.23984
		27.59	0.0145744	0.0175127	0.013243	0.00808413		27.59	-1.35446	-1.06686	-1.2442	-1.23948
		27.79	0.0140688	0.0179291	0.0112127	0.00697546		27.79	-1.35497	-1.06645	-1.24623	-1.24058
		27.99	0.0153393	0.0157613	0.0156099	0.00707334		27.99	-1.3537	-1.06861	-1.24184	-1.24049
		28.19	0.0099146	0.0182053	0.0131276	0.0077269		28.19	-1.35912	-1.06617	-1.24432	-1.23983
		28.39	0.0129303	0.0144814	0.0122694	0.00725018		28.39	-1.35611	-1.06989	-1.24518	-1.24031
		28.59	0.0109345	0.0133385	0.0107063	0.00712708		28.59	-1.3581	-1.07104	-1.24674	-1.24043
		28.79	0.0106945	0.0180363	0.0141632	0.00747133		28.79	-1.35834	-1.06634	-1.24328	-1.24009
		28.99	0.017346	0.0145411	0.0153079	0.00742537		28.99	-1.35169	-1.06983	-1.24214	-1.24013
		29.19	0.0151805	0.0190283	0.0134257	0.00587343		29.19	-1.35386	-1.06535	-1.24402	-1.24169
		29.39	0.0143153	0.0143574	0.013919	0.00821406		29.39	-1.35472	-1.07002	-1.24353	-1.23935
		29.59	0.0209874	0.0163431	0.0144963	0.00948015		29.59	-1.34805	-1.06803	-1.24295	-1.23808
		29.79	0.0144122	0.0153166	0.0141508	0.00807625		29.79	-1.35462	-1.06906	-1.24329	-1.23948
		29.99	0.0141148	0.015643	0.0133687	0.00777026		29.99	-1.35492	-1.06873	-1.24408	-1.23979
		30.19	0.0112553	0.0159797	0.0162205	0.00883367		30.19	-1.35778	-1.06839	-1.24122	-1.23873
		30.39	0.0146442	0.0175793	0.013746	0.00704176		30.39	-1.35439	-1.06679	-1.2437	-1.24052
		30.59	0.014552	0.0207491	0.0122886	0.00720277		30.59	-1.35448	-1.06363	-1.24516	-1.24036
		30.79	0.012555	0.0210972	0.0163187	0.00786391		30.79	-1.35648	-1.06328	-1.24113	-1.2397
		30.99	0.0143281	0.0172595	0.0127845	0.00783081		30.99	-1.35471	-1.06711	-1.24466	-1.23973
		31.19	0.0149934	0.0188488	0.016884	0.00658799		31.19	-1.35404	-1.06553	-1.24056	-1.24097
		31.39	0.0123677	0.016412	0.0118889	0.00817166		31.39	-1.35667	-1.06796	-1.24556	-1.23939
		31.59	0.0114962	0.0182438	0.0115848	0.00849139		31.59	-1.35754	-1.06613	-1.24586	-1.23907
		31.79	0.0168264	0.0176092	0.0127797	0.00811886		31.79	-1.35221	-1.06676	-1.24467	-1.23944
		31.99	0.0117913	0.017887	0.0136108	0.0104062		31.99	-1.35724	-1.06649	-1.24383	-1.23715
		32.19	0.0136124	0.0154856	0.0142239	0.00819624		32.19	-1.35542	-1.06889	-1.24322	-1.23936
		32.39	0.012759	0.0148691	0.0171393	0.0105818		32.39	-1.35628	-1.06951	-1.24031	-1.23698
		32.59	0.015088	0.0188204	0.0151731	0.0109779		32.59	-1.35395	-1.06555	-1.24227	-1.23658
		32.79	0.0179245	0.0178778	0.0122539	0.00862257		32.79	-1.35111	-1.0665	-1.24519	-1.23894
		32.99	0.0169923	0.0184883	0.0161869	0.00958083		32.99	-1.35204	-1.06589	-1.24126	-1.23798
		33.19	0.0156881	0.0202937	0.0115637	0.00860159		33.19	-1.35335	-1.06408	-1.24588	-1.23896
		33.39	0.016525	0.017703	0.0141528	0.00773232		33.39	-1.35251	-1.06667	-1.24329	-1.23983
		33.59	0.0138287	0.0209354	0.0140059	0.00795524		33.59	-1.35521	-1.06344	-1.24344	-1.2396
		33.79	0.0142639	0.016519	0.0162605	0.0104384		33.79	-1.35477	-1.06786	-1.24118	-1.23712
		33.99	0.0157285	0.0195249	0.0179835	0.00775194		33.99	-1.35331	-1.06485	-1.23946	-1.23981
		34.19	0.0179084	0.0162504	0.012944	0.0107988		34.19	-1.35113	-1.06812	-1.2445	-1.23676
		34.39	0.0150624	0.0200562	0.0164341	0.0079779		34.39	-1.35397	-1.06432	-1.24101	-1.23958
		34.59	0.0172436	0.0205125	0.0132231	0.0135062		34.59	-1.35179	-1.06386	-1.24422	-1.23405
		34.79	0.0150092	0.0179325	0.0172887	0.0113516		34.79	-1.35403	-1.06644	-1.24016	-1.23621
		34.99	0.0123124	0.0231767	0.0160807	0.0092402		34.99	-1.35672	-1.0612	-1.24136	-1.23832
		35.19	0.0143615	0.0189281	0.0172153	0.012151		35.19	-1.35467	-1.06545	-1.24023	-1.23541
		35.39	0.0182343	0.0210752	0.0148094	0.0111933		35.39	-1.3508	-1.0633	-1.24264	-1.23637
		35.59	0.0161896	0.0173528	0.0127732	0.0118387		35.59	-1.35285	-1.06702	-1.24467	-1.23572
		35.79	0.0128886	0.0198722	0.0154967	0.00807334		35.79	-1.35615	-1.0645	-1.24195	-1.23949
		35.99	0.0162367	0.0172429	0.0159783	0.00796039		35.99	-1.3528	-1.06713	-1.24147	-1.2396
		36.19	0.0178194	0.0222715	0.0150442	0.00900176		36.19	-1.35122	-1.0621	-1.2424	-1.23856
		36.39	0.0157814	0.017838	0.0130409	0.00659894		36.39	-1.35325	-1.06654	-1.2444	-1.24096
		36.59	0.0165819	0.0177322	0.0166099	0.00974457		36.59	-1.35245	-1.06664	-1.24084	-1.23781
		36.79	0.0121284	0.0191306	0.017476	0.0117049		36.79	-1.35691	-1.06524	-1.23997	-1.23585
		36.99	0.0175037	0.018473	0.0138599	0.00861064		36.99	-1.35153	-1.0659	-1.24359	-1.23895
		37.19	0.0174866	0.014376	0.0113253	0.0105867		37.19	-1.35155	-1.07	-1.24612	-1.23697
		37.39	0.0193836	0.0215817	0.0161049	0.011758		37.39	-1.34965	-1.06279	-1.24134	-1.2358
		37.59	0.0159838	0.0234309	0.0162117	0.00962698		37.59	-1.35305	-1.06094	-1.24123	-1.23793
		37.79	0.0162933	0.0214295	0.0137932	0.00933283		37.79	-1.35274	-1.06294	-1.24365	-1.23823
		37.99	0.014271	0.0182897	0.0154178	0.0102194		37.99	-1.35476	-1.06608	-1.24203	-1.23734
		38.19	0.0159694	0.0185634	0.0175032	0.00721262		38.19	-1.35307	-1.06581	-1.23994	-1.24035
		38.39	0.0172181	0.0190565	0.0170374	0.0100994		38.39	-1.35182	-1.06532	-1.24041	-1.23746
		38.59	0.0151276	0.0221042	0.0171413	0.00991224		38.59	-1.35391	-1.06227	-1.2403	-1.23765
		38.79	0.0183064	0.0172208	0.0155371	0.00984443		38.79	-1.35073	-1.06715	-1.24191	-1.23771
		38.99	0.0169161	0.0197406	0.0164621	0.00895824		38.99	-1.35212	-1.06463	-1.24098	-1.2386
		39.19	0.0153786	0.0196098	0.0136883	0.00881014		39.19	-1.35366	-1.06476	-1.24376	-1.23875
		39.39	0.0154889	0.0186204	0.0147648	0.00793845		39.39	-1.35355	-1.06575	-1.24268	-1.23962
		39.59	0.0166972	0.0230368	0.0115726	0.0111089		39.59	-1.35234	-1.06134	-1.24587	-1.23645
		39.79	0.0202356	0.0213447	0.0149424	0.00797037		39.79	-1.3488	-1.06303	-1.2425	-1.23959
		39.99	0.0148243	0.0251166	0.0160422	0.00695369		39.99	-1.35421	-1.05926	-1.2414	-1.24061
		40.19	0.0160932	0.0199195	0.017425	0.00827091		40.19	-1.35294	-1.06445	-1.24002	-1.23929
		40.39	0.0186756	0.0224796	0.0133188	0.00975178		40.39	-1.35036	-1.06189	-1.24413	-1.23781
		40.59	0.0123861	0.0151684	0.0127043	0.00875564		40.59	-1.35665	-1.06921	-1.24474	-1.2388
		40.79	0.0148071	0.0225203	0.0154662	0.00937597		40.79	-1.35423	-1.06185	-1.24198	-1.23818
		40.99	0.01817	0.0185658	0.0144605	0.0118008		40.99	-1.35087	-1.06581	-1.24298	-1.23576
		41.19	0.0104416	0.0175188	0.0152727	0.00724525		41.19	-1.35859	-1.06686	-1.24217	-1.24031
		41.39	0.0189607	0.0205444	0.0145427	0.0112271		41.39	-1.35008	-1.06383	-1.2429	-1.23633
		41.59	0.0150032	0.0186845	0.0185952	0.0137651		41.59	-1.35403	-1.06569	-1.23885	-1.23379
		41.79	0.01686	0.017278	0.015965	0.0108635		41.79	-1.35218	-1.0671	-1.24148	-1.2367
		41.99	0.014321	0.0228548	0.015269	0.00702252		41.99	-1.35471	-1.06152	-1.24218	-1.24054
		42.19	0.0160367	0.0199332	0.0160018	0.00869639		42.19	-1.353	-1.06444	-1.24144	-1.23886
		42.39	0.0158602	0.0218344	0.0188919	0.00932226		42.39	-1.35318	-1.06254	-1.23855	-1.23824
		42.59	0.0145516	0.0228694	0.0189477	0.0088069		42.59	-1.35448	-1.0615	-1.2385	-1.23875
		42.79	0.0202511	0.0217312	0.0175556	0.0106768		42.79	-1.34878	-1.06264	-1.23989	-1.23688
		42.99	0.0192022	0.0209018	0.0192146	0.0120568		42.99	-1.34983	-1.06347	-1.23823	-1.2355
		43.19	0.0187951	0.0215325	0.0175511	0.0126853		43.19	-1.35024	-1.06284	-1.23989	-1.23487
		43.39	0.0193539	0.0221578	0.0157416	0.0122852		43.39	-1.34968	-1.06222	-1.2417	-1.23527
		43.59	0.0152192	0.0220199	0.0164431	0.0127548		43.59	-1.35382	-1.06235	-1.241	-1.2348
		43.79	0.0191491	0.0226669	0.0173202	0.0120078		43.79	-1.34989	-1.06171	-1.24013	-1.23555
		43.99	0.0192417	0.0229213	0.0139419	0.00927067		43.99	-1.34979	-1.06145	-1.2435	-1.23829
		44.19	0.0216929	0.0211411	0.0177939	0.0100278		44.19	-1.34734	-1.06323	-1.23965	-1.23753
		44.39	0.0187026	0.0218292	0.0160006	0.0129532		44.39	-1.35033	-1.06254	-1.24144	-1.23461
		44.59	0.0181425	0.0204576	0.0154714	0.0123287		44.59	-1.35089	-1.06392	-1.24197	-1.23523
		44.79	0.0147318	0.02287	0.0145571	0.0110421		44.79	-1.3543	-1.0615	-1.24289	-1.23652
		44.99	0.0148406	0.0225883	0.0222803	0.0111527		44.99	-1.3542	-1.06179	-1.23517	-1.23641
		45.19	0.0162771	0.0263014	0.019043	0.0105608		45.19	-1.35276	-1.05807	-1.2384	-1.237
		45.39	0.019142	0.0238885	0.018626	0.0106551		45.39	-1.34989	-1.06049	-1.23882	-1.2369
		45.59	0.0162463	0.0264042	0.0170048	0.0109183		45.59	-1.35279	-1.05797	-1.24044	-1.23664
		45.79	0.0167598	0.0242137	0.0167485	0.0121685		45.79	-1.35228	-1.06016	-1.2407	-1.23539
		45.99	0.0174792	0.0214198	0.0154635	0.0115884		45.99	-1.35156	-1.06295	-1.24198	-1.23597
		46.19	0.017004	0.0226882	0.0165669	0.00766344		46.19	-1.35203	-1.06169	-1.24088	-1.2399
		46.39	0.0168876	0.0224936	0.0201653	0.00966192		46.39	-1.35215	-1.06188	-1.23728	-1.2379
		46.59	0.0150369	0.0196095	0.0160945	0.0103222		46.59	-1.354	-1.06476	-1.24135	-1.23724
		46.79	0.0171061	0.0233401	0.0133718	0.0102192		46.79	-1.35193	-1.06103	-1.24407	-1.23734
		46.99	0.0179782	0.0201705	0.0144109	0.0106447		46.99	-1.35106	-1.0642	-1.24303	-1.23691
		47.19	0.0191784	0.0234214	0.0151603	0.0101885		47.19	-1.34986	-1.06095	-1.24229	-1.23737
		47.39	0.0185952	0.0209678	0.0155529	0.00969182		47.39	-1.35044	-1.06341	-1.24189	-1.23787
		47.59	0.0210764	0.0268396	0.0153297	0.00886162		47.59	-1.34796	-1.05753	-1.24212	-1.2387
		47.79	0.0157427	0.0252592	0.0126463	0.00864752		47.79	-1.35329	-1.05912	-1.2448	-1.23891
		47.99	0.0213745	0.0239921	0.0151444	0.0123621		47.99	-1.34766	-1.06038	-1.2423	-1.2352
		48.19	0.019366	0.0191819	0.0139118	0.0145923		48.19	-1.34967	-1.06519	-1.24353	-1.23297
		48.39	0.0191559	0.0187562	0.0146511	0.0104694		48.39	-1.34988	-1.06562	-1.24279	-1.23709
		48.59	0.0180665	0.0236343	0.017564	0.0146382		48.59	-1.35097	-1.06074	-1.23988	-1.23292
		48.79	0.0176222	0.0209129	0.0154812	0.0110237		48.79	-1.35141	-1.06346	-1.24196	-1.23654
		48.99	0.0180481	0.0226422	0.0179506	0.0101918		48.99	-1.35099	-1.06173	-1.23949	-1.23737
		49.19	0.0200594	0.0248093	0.0156267	0.0108724		49.19	-1.34898	-1.05956	-1.24182	-1.23669
		49.39	0.021139	0.0230553	0.0147953	0.0106928		49.39	-1.3479	-1.06132	-1.24265	-1.23687
		49.59	0.0145739	0.0230923	0.0144105	0.00959711		49.59	-1.35446	-1.06128	-1.24303	-1.23796
		49.79	0.0233652	0.025331	0.0163252	0.0104453		49.79	-1.34567	-1.05904	-1.24112	-1.23711
		49.99	0.0210322	0.0182628	0.0195491	0.0108809		49.99	-1.348	-1.06611	-1.2379	-1.23668
		50.19	0.0174766	0.0214004	0.0180123	0.00997989		50.19	-1.35156	-1.06297	-1.23943	-1.23758
		50.39	0.0136823	0.0234067	0.0197659	0.0114062		50.39	-1.35535	-1.06097	-1.23768	-1.23615
		50.59	0.0219487	0.0237884	0.0195901	0.0092926		50.59	-1.34709	-1.06059	-1.23786	-1.23827
		50.79	0.0189914	0.0231243	0.0176682	0.00791188		50.79	-1.35004	-1.06125	-1.23978	-1.23965
		50.99	0.0189982	0.024247	0.018894	0.00787998		50.99	-1.35004	-1.06013	-1.23855	-1.23968
		51.19	0.0207381	0.0197568	0.0184516	0.0108929		51.19	-1.3483	-1.06462	-1.23899	-1.23667
		51.39	0.0215232	0.0232112	0.0180204	0.00850361		51.39	-1.34751	-1.06116	-1.23943	-1.23906
		51.59	0.0183911	0.0256748	0.0174421	0.0124846		51.59	-1.35064	-1.0587	-1.24	-1.23507
		51.79	0.0183347	0.0249818	0.0190952	0.0127179		51.79	-1.3507	-1.05939	-1.23835	-1.23484
		51.99	0.0172677	0.0238832	0.0164672	0.0110337		51.99	-1.35177	-1.06049	-1.24098	-1.23653
		52.19	0.0211728	0.0233924	0.0162176	0.0142664		52.19	-1.34786	-1.06098	-1.24123	-1.23329
		52.39	0.0174263	0.0274804	0.0195211	0.0120354		52.39	-1.35161	-1.05689	-1.23792	-1.23552
		52.59	0.0178083	0.0228974	0.0197365	0.0114066		52.59	-1.35123	-1.06148	-1.23771	-1.23615
		52.79	0.0248073	0.0244389	0.0187878	0.0100659		52.79	-1.34423	-1.05994	-1.23866	-1.23749
		52.99	0.0172468	0.0233429	0.0193565	0.00780813		52.99	-1.35179	-1.06103	-1.23809	-1.23975
		53.19	0.0155165	0.0224005	0.0168626	0.00841533		53.19	-1.35352	-1.06197	-1.24058	-1.23914
		53.39	0.0171289	0.0248481	0.0184656	0.0116857		53.39	-1.35191	-1.05953	-1.23898	-1.23587
		53.59	0.024016	0.0219643	0.0195602	0.0106694		53.59	-1.34502	-1.06241	-1.23789	-1.23689
		53.79	0.0180259	0.023282	0.017889	0.011633		53.79	-1.35101	-1.06109	-1.23956	-1.23593
		53.99	0.0193897	0.0267234	0.017207	0.00959222		53.99	-1.34965	-1.05765	-1.24024	-1.23797
		54.19	0.0205387	0.0257918	0.0158514	0.00973924		54.19	-1.3485	-1.05858	-1.24159	-1.23782
		54.39	0.0218828	0.0232266	0.0200033	0.00939344		54.39	-1.34715	-1.06115	-1.23744	-1.23817
		54.59	0.0175403	0.0231617	0.0189913	0.00934026		54.59	-1.3515	-1.06121	-1.23845	-1.23822
		54.79	0.0198235	0.0251647	0.0157894	0.0101452		54.79	-1.34921	-1.05921	-1.24166	-1.23741
		54.99	0.018447	0.0215006	0.0196288	0.0131103		54.99	-1.35059	-1.06287	-1.23782	-1.23445
		55.19	0.0197083	0.0251546	0.0166477	0.00867507		55.19	-1.34933	-1.05922	-1.2408	-1.23888
		55.39	0.022252	0.0224331	0.0178731	0.0128729		55.39	-1.34678	-1.06194	-1.23957	-1.23469
		55.59	0.0229011	0.0236023	0.0163469	0.00857903		55.59	-1.34613	-1.06077	-1.2411	-1.23898
		55.79	0.0170156	0.02418	0.0186258	0.0128143		55.79	-1.35202	-1.06019	-1.23882	-1.23475
		55.99	0.0175599	0.0231633	0.0210183	0.0102113		55.99	-1.35148	-1.06121	-1.23643	-1.23735
		56.19	0.0136048	0.025112	0.0176125	0.01169		56.19	-1.35543	-1.05926	-1.23983	-1.23587
		56.39	0.0199999	0.0234151	0.0188118	0.00847181		56.39	-1.34904	-1.06096	-1.23863	-1.23909
		56.59	0.0168508	0.0281532	0.0182628	0.00971998		56.59	-1.35218	-1.05622	-1.23918	-1.23784
		56.79	0.0199468	0.0229429	0.0178955	0.0099339		56.79	-1.34909	-1.06143	-1.23955	-1.23763
		56.99	0.0177078	0.0219813	0.0208355	0.0130827		56.99	-1.35133	-1.06239	-1.23661	-1.23448
		57.19	0.0186775	0.0222321	0.0168758	0.0121131		57.19	-1.35036	-1.06214	-1.24057	-1.23545
		57.39	0.0181813	0.0258808	0.0169087	0.0108972		57.39	-1.35085	-1.05849	-1.24054	-1.23666
		57.59	0.0202935	0.0221793	0.0215408	0.0108264		57.59	-1.34874	-1.06219	-1.2359	-1.23673
		57.79	0.0213506	0.0211688	0.0197143	0.0104628		57.79	-1.34769	-1.06321	-1.23773	-1.2371
		57.99	0.0244584	0.0242447	0.017181	0.0115193		57.99	-1.34458	-1.06013	-1.24026	-1.23604
		58.19	0.0174526	0.0261953	0.0177841	0.0113244		58.19	-1.35158	-1.05818	-1.23966	-1.23624
		58.39	0.0202581	0.0241708	0.020372	0.0105421		58.39	-1.34878	-1.0602	-1.23707	-1.23702
		58.59	0.0245418	0.0254111	0.0176732	0.0119826		58.59	-1.34449	-1.05896	-1.23977	-1.23558
		58.79	0.0178062	0.0255636	0.0185337	0.0151538		58.79	-1.35123	-1.05881	-1.23891	-1.23241
		58.99	0.0205444	0.0212833	0.0214106	0.0126544		58.99	-1.34849	-1.06309	-1.23603	-1.23491
[truncated: 29,270 more rows]

## Sheet: Dissociation_fit
Sorce data: Figure 4C
	One-phase decay model in Prism 8
[truncated: 7 more rows]
