# Supplementary material for: Calcium depletion challenges endoplasmic reticulum proteostasis by destabilising BiP-substrate complexes
Source: eLife. 2020 Dec 9;9:e62601. doi: 10.7554/eLife.62601 (PMC7758071; doi:10.7554/eLife.62601)
Supplement: Figure 5—source data 1. [file elife-62601-fig5-data1.xlsx]

## Sheet: ALL_DATA
Sorce data: Figure 5A
	Fitting method: Prism --> One phase decay (no constraints). Data of BiP, DnaK, and dBiP (slow kinetics) were fitted over the entire data range. Data for Hsp70 and Hsc70 (fast kinetics) were fitted only over the 50 seconds.
			BiP_173	BiP_173_+Ca	BiP_173	BiP_173_+Ca	BiP_173	BiP_173_+Ca	BiP_173	BiP_173_+Ca	DnaK_2243	DnaK_2243_Ca	DnaK_2243	DnaK_2243_Ca	DnaK_2243	DnaK_2243_Ca	DnaK_2243	DnaK_2243_Ca	dBiP_2354	dBiP_2354_Ca	dBiP_2354	dBiP_2354_Ca	dBiP_2354	dBiP_2354_Ca	dBiP_2354	dBiP_2354_Ca	Hsp70_2510	Hsp70_2510_Ca	Hsp70_2510	Hsp70_2510_Ca	Hsp70_2510	Hsp70_2510_Ca	Hsp70_2510	Hsp70_2510_Ca	Hsc70_2511	Hsc70_2511_Ca	Hsc70_2511	Hsc70_2511_Ca	Hsc70_2511	Hsc70_2511_Ca	Hsc70_2511	Hsc70_2511_Ca
		K (sec-1)	0.0663	0.0111	0.0778	0.01625	0.07782	0.01779	0.07323	0.01656	0.01595	0.01055	0.02078	0.01294	0.0187	0.01415	0.01883	0.0142	0.0771	0.01554	0.1096	0.01793	0.1	0.01941	0.1238	0.01987	0.1839	0.1055	0.1616	0.1067	0.1756	0.1213	0.2123	0.1277	0.183	0.06721	0.2069	0.09149	0.184	0.1099	0.1442	0.09019
		R2	0.987	0.9975	0.987	0.9958	0.9775	0.9944	0.9715	0.992	0.9992	0.9992	0.9994	0.9988	0.9985	0.9984	0.9987	0.9984	0.9821	0.9938	0.9647	0.9897	0.9487	0.9899	0.9475	0.9887	0.9674	0.981	0.9569	0.9725	0.9257	0.9413	0.9199	0.9455	0.9613	0.9905	0.9462	0.9752	0.9012	0.9585	0.933	0.9457
	FL data		Experiment 1		Experiment 2		Experiment 3		Experiment 4		Experiment 1		Experiment 2		Experiment 3		Experiment 4		Experiment 1		Experiment 2		Experiment 3		Experiment 4		Experiment 1		Experiment 2		Experiment 3		Experiment 4		Experiment 1		Experiment 2		Experiment 3		Experiment 4
		Time (s)	BiP_173	BiP_173_+Ca	BiP_173	BiP_173_+Ca	BiP_173	BiP_173_+Ca	BiP_173	BiP_173_+Ca	DnaK_2243	DnaK_2243_Ca	DnaK_2243	DnaK_2243_Ca	DnaK_2243	DnaK_2243_Ca	DnaK_2243	DnaK_2243_Ca	dBiP_2354	dBiP_2354_Ca	dBiP_2354	dBiP_2354_Ca	dBiP_2354	dBiP_2354_Ca	dBiP_2354	dBiP_2354_Ca	Hsp70_2510	Hsp70_2510_Ca	Hsp70_2510	Hsp70_2510_Ca	Hsp70_2510	Hsp70_2510_Ca	Hsp70_2510	Hsp70_2510_Ca	Hsc70_2511	Hsc70_2511_Ca	Hsc70_2511	Hsc70_2511_Ca	Hsc70_2511	Hsc70_2511_Ca	Hsc70_2511	Hsc70_2511_Ca
		0	173.402	194.785	123.381	119.486	123.422	135.237	99.952	124.557	221.344	219.321	212.254	160.436	167.843	168.588	168.457	154.63	128.008	152.404	106.56	115.513	100.133	112.61	102.109	109.048	114.994	114.828	92.8104	100.668	102.645	84.6357	83.6827	88.5737	126.677	140.231	106.331	99.6577	89.9923	92.7332	93.3032	80.7275
		0.1	173.354	195.177	122.973	119.746	123.958	136.129	99.8871	122.997	220.749	218.864	212.283	160.585	167.032	168.566	169.307	154.012	127.806	152.059	106.564	115.632	99.2651	112.818	101.761	108.474	114.993	115.193	92.5865	99.9842	101.649	84.152	84.3083	88.5978	126.534	139.561	106.392	99.0298	90.1905	92.2403	93.8389	80.317
		0.2	173.436	195.41	122.572	120.031	124.263	137.077	99.8439	122.376	220.399	218.237	212.201	160.628	166.885	168.618	169.971	153.667	127.572	151.755	106.564	115.683	98.7757	112.3	101.336	107.789	114.735	115.475	92.5013	99.4274	100.819	83.7654	84.2433	88.8656	126.431	139.1	106.633	98.6771	90.2112	92.1177	94.1169	80.1008
		0.3	173.512	195.42	122.325	120.293	124.499	137.896	99.8773	122.388	219.864	217.578	212.009	160.347	167.361	169.103	170.292	153.151	127.25	151.39	106.61	115.536	98.6332	111.495	100.93	107.379	114.403	115.501	92.4071	98.9309	100.22	83.2454	83.9661	89.2711	126.262	138.612	107.106	98.3674	89.9493	92.2304	94.2586	79.7769
		0.4	173.544	195.465	122.209	120.503	124.74	138.284	99.6341	123.12	219.384	216.995	211.919	160.037	168.197	169.554	170.056	153.161	126.908	151.123	106.54	115.298	98.5687	111.342	100.658	107.882	113.983	115.298	92.1919	98.4966	100.504	82.967	83.2484	89.4938	126.018	138.1	107.274	98.2609	89.5443	92.2778	94.2736	79.4587
		0.5	173.373	195.419	121.93	120.396	125.272	138.029	99.1891	123.328	218.866	216.151	211.895	159.7	168.896	169.898	170.066	153.396	126.412	150.853	106.262	115.113	98.3834	112.09	100.589	108.823	113.534	115.054	91.9981	98.3667	101.002	82.6096	82.9627	89.1782	125.788	137.684	107.516	98.3825	89.1716	91.9559	94.3911	78.9779
		0.6	173.072	195.186	121.781	120.025	125.599	138.061	98.56	122.637	218.418	215.561	211.731	159.467	168.974	169.749	170.194	153.966	125.94	150.679	105.937	115.097	97.821	113.236	100.388	109.502	113.063	114.772	91.6771	98.3656	101.173	82.5953	82.9038	88.698	125.583	137.57	107.62	98.5301	89.1398	91.2631	94.2103	78.3886
		0.7	172.53	194.809	121.46	119.574	125.071	137.992	98.2673	121.984	217.939	215.293	211.469	159.564	168.768	169.797	170.178	154.401	125.445	150.568	105.609	115.156	97.7408	113.668	100.306	109.272	112.688	114.477	91.2251	98.3074	100.985	82.2516	83.0932	88.4524	125.381	137.645	107.275	98.6261	89.0227	90.718	93.7582	78.2951
		0.8	171.907	194.49	120.886	119.103	123.471	138.244	97.961	121.804	217.747	215.165	211.017	159.637	168.073	170.03	170.021	154.422	124.963	150.641	105.315	115.32	97.9376	113.267	100.025	108.564	112.428	114.204	90.9597	98.0985	100.782	81.9398	83.0568	88.4132	125.216	137.75	107.062	98.4253	88.5843	90.7989	93.0667	78.5487
		0.9	171.167	194.145	120.586	118.852	121.845	138.043	97.7127	122.345	217.691	214.858	210.432	159.666	167.407	169.837	170.28	154.102	124.49	150.685	105.21	115.593	98.3876	112.846	99.8226	107.812	112.228	114.063	90.7364	97.8848	100.839	81.3759	83.1273	88.0837	125.2	137.939	106.609	98.1081	87.6857	91.184	92.5411	79.2179
		1	170.548	193.857	120.209	118.894	121.005	137.875	97.6649	123.016	217.587	214.682	210.044	159.636	166.909	169.237	170.262	153.525	124.107	150.656	105.186	115.678	98.4162	112.662	99.3298	107.151	111.992	113.89	90.6314	97.665	101.081	81.1371	83.2957	87.589	125.19	137.945	105.96	97.5903	87.0358	91.5816	92.2947	79.5049
		1.1	170.025	193.7	119.945	118.895	121.175	137.41	98.258	123.203	217.548	214.385	209.884	159.498	167.099	168.258	169.935	153.626	123.825	150.594	105.102	115.822	98.1204	113.019	98.8692	106.591	111.691	113.654	90.6734	97.4034	101.27	80.8486	83.4131	87.0973	125.14	137.738	105.457	97.1914	86.8387	91.5287	92.2244	79.3886
		1.2	169.58	193.673	119.809	118.978	121.633	137.115	99.052	122.925	217.499	214.049	209.882	159.45	167.391	167.812	169.064	153.734	123.691	150.357	105.177	115.817	97.5432	113.034	98.2446	106.278	111.487	113.5	90.3418	97.2151	101.141	80.7804	83.1537	87.1093	124.939	137.276	104.915	97.0208	86.9052	91.4202	92.4397	78.9543
		1.3	169.264	193.625	119.512	119.118	121.888	136.921	99.3681	122.104	217.373	213.737	209.879	159.354	167.597	167.902	168.955	154.131	123.639	149.964	105.249	115.444	97.1773	113.014	97.8596	106.591	111.197	113.395	90.0908	96.9659	100.554	80.8413	82.6424	87.2192	124.692	136.789	104.352	96.8189	86.6879	91.3794	92.258	78.6407
		1.4	169.117	193.546	119.219	119.154	122.025	137.354	98.9821	121.493	217.095	213.75	209.804	159.252	167.34	168.234	169.059	153.896	123.669	149.587	105.207	115.075	96.9702	112.824	97.588	107.277	110.817	113.221	89.6961	96.5696	99.7334	81.1188	82.3416	87.2163	124.23	136.162	103.864	96.8711	86.5514	91.405	92.058	78.4996
		1.5	168.95	193.445	118.948	119.421	122.14	137.761	98.2791	120.883	216.969	213.828	209.6	159.007	167.022	168.87	169.056	153.755	123.769	149.454	105.12	114.661	96.958	112.737	97.4629	107.652	110.552	113.135	89.1943	96.3449	99.0103	81.4177	82.0572	86.7423	123.725	135.576	103.504	96.8951	86.5836	91.2883	91.4454	78.4993
		1.6	168.8	193.288	118.68	119.673	122.187	138.107	97.7833	120.668	216.925	214.028	209.33	158.695	166.953	168.889	168.554	153.614	123.683	149.36	104.791	114.305	96.6489	112.542	97.2438	107.306	110.264	113.021	89.2912	96.2669	98.559	81.7277	81.7099	86.063	123.251	135.211	103.174	96.7946	86.7201	91.0366	91.164	78.4929
		1.7	168.663	193.04	118.575	119.797	121.944	138.011	97.4568	120.372	216.882	214.175	209.152	158.356	167.17	168.895	168.057	153.361	123.352	149.471	104.345	114.217	96.099	112.016	96.8688	106.531	109.851	112.862	89.4173	96.2094	98.4917	81.8803	81.3302	85.6207	123.006	134.988	102.987	96.8152	86.4103	90.7069	90.9111	78.5988
		1.8	168.388	192.791	118.396	119.836	121.4	137.838	97.3009	120.387	216.903	214.097	209.086	157.931	167.533	168.418	168.01	153.074	122.98	149.624	104.026	114.435	95.396	111.569	96.5146	105.783	109.423	112.843	89.7652	96.4119	98.6184	81.6843	81.1122	85.6994	122.817	134.943	102.915	96.7342	85.9756	90.429	90.9473	78.4738
		1.9	168.008	192.544	118.074	119.601	120.99	137.77	97.0011	120.365	216.942	213.77	209.092	157.839	167.707	168.169	167.925	152.442	122.621	149.736	103.72	114.688	94.9112	111.12	96.2	105.501	109.115	112.941	90.2315	96.5437	98.6693	80.949	80.9311	85.8881	122.794	135.045	102.659	96.7161	85.5488	90.2286	90.9837	78.2499
		2	167.574	192.554	117.946	119.379	120.363	137.903	96.4816	120.694	216.778	213.517	209.06	157.755	167.46	167.773	167.481	152.116	122.156	149.521	103.482	115.055	94.5889	110.99	96.0237	105.466	108.653	113.011	90.173	96.5608	98.4329	80.0227	80.4181	85.9933	122.818	135.274	102.456	96.8274	85.0966	90.198	90.9884	77.6673
		2.1	167.173	192.403	117.696	119.191	119.998	138.221	96.0704	120.776	216.427	213.323	208.887	157.84	167.157	167.288	166.647	151.911	121.733	149.392	103.405	115.354	94.4689	110.977	95.8023	105.687	108.429	113.18	89.9428	96.672	98.0487	79.2902	79.9219	85.7481	122.812	135.464	102.452	96.9923	84.3794	90.0347	90.9988	77.17
		2.2	166.935	192.324	117.531	119.139	119.215	138.434	95.7618	120.66	215.965	213.246	208.68	158.103	167.016	166.727	165.93	151.993	121.478	149.257	103.27	115.303	94.4664	111.047	95.8021	105.797	108.395	113.206	89.5089	96.5533	98.0473	79.2943	79.5447	85.6727	122.699	135.708	102.341	97.1061	83.8904	90.0746	91.1449	77.0657
		2.3	166.696	192.38	117.335	119.166	118.982	138.43	95.7506	120.095	215.15	213.413	208.316	157.954	167.42	166.727	165.879	151.986	121.216	149.186	103.171	115.014	94.6447	111.165	95.9677	105.795	108.443	112.984	88.9176	96.3401	98.3228	79.8484	79.5717	85.7339	122.577	135.727	102.398	97.0517	83.9738	90.1423	91.2413	77.4691
		2.4	166.275	192.582	116.805	119.126	118.535	138.409	95.5699	119.834	214.226	213.712	207.826	157.772	167.785	167.614	166.353	151.857	120.85	149.185	103.153	114.737	94.6291	111.018	96.1388	105.58	108.533	112.614	88.5744	96.0773	98.54	80.6681	79.6033	85.8751	122.444	135.667	102.425	96.889	84.5981	90.5272	91.1137	78.1066
		2.5	165.857	192.362	116.345	119.108	118.459	138.366	95.3894	120.021	213.281	213.728	207.442	157.451	167.842	168.854	166.907	151.573	120.535	149.397	103.032	114.441	94.2904	110.83	95.845	105.051	108.747	112.259	88.3148	95.6664	98.2496	80.9617	79.8178	85.9408	122.233	135.437	102.195	96.5688	85.2114	90.6918	90.6806	78.0219
		2.6	165.275	192.322	115.838	118.964	118.16	138.557	95.2831	120.65	212.42	213.507	207.085	157.113	167.12	169.531	166.798	151.141	120.381	149.454	102.78	114.26	93.8547	110.69	95.1324	104.523	108.728	111.751	88.1555	95.2039	97.3067	80.6738	79.9639	85.7296	121.995	135.195	102.215	96.3051	85.473	90.898	90.435	77.5241
		2.7	164.446	192.378	115.696	118.857	118.104	138.703	95.047	121.053	211.737	213.075	207.025	157.077	165.972	169.244	166.15	150.515	120.298	149.371	102.387	114.415	93.795	110.78	94.4293	104.143	108.475	111.319	88.1041	94.8566	96.4406	80.0902	80.1016	85.4161	121.72	134.798	102.301	96.1348	85.2949	90.8721	90.3583	76.6262
		2.8	163.667	192.329	115.732	118.706	118.009	138.847	94.7384	121.126	211.34	212.616	207.367	157.195	164.968	168.912	165.594	150.314	120.263	149.364	102.013	114.412	94.2124	111.138	94.061	104.228	108.239	110.955	87.9524	94.6451	96.0231	79.7688	79.8907	84.803	121.418	134.576	102.365	95.9267	84.8148	90.7922	90.3604	76.2102
		2.9	163.184	192.052	115.77	118.405	117.78	138.466	94.1119	120.717	210.967	212.089	207.709	157.619	164.46	168.702	165.476	150.452	120.221	149.309	101.564	114.421	94.3921	111.166	94.059	104.438	107.905	110.7	87.7957	94.6173	96.5274	79.9347	79.3349	84.4853	121.041	134.418	102.443	95.8271	84.4137	90.3289	90.1128	76.1107
		3	162.749	191.919	115.871	118.2	117.544	138.046	93.7423	120.173	210.907	211.79	207.944	158.102	164.34	168.914	165.854	151.231	120.183	149.113	101.239	114.371	94.1248	111.132	94.1829	104.86	107.558	110.369	87.5379	94.7309	97.162	80.1644	78.8292	84.4088	120.715	134.382	102.21	95.7767	84.3694	89.8297	89.8902	76.4781
		3.1	162.419	191.686	115.62	117.961	117.464	137.459	93.5527	119.485	210.756	211.585	207.996	158.574	164.184	168.905	166.108	151.42	119.896	148.882	101.144	114.142	93.5159	110.768	94.1736	105.144	107.246	110.251	87.3101	95.0064	97.4613	79.9486	78.6402	84.6833	120.439	134.3	101.827	95.6468	84.6044	89.1701	89.6872	76.8203
		3.2	162.147	191.295	115.338	117.681	117.53	137.289	93.8244	118.992	210.381	211.41	207.735	158.895	164.487	169.073	166.32	151.599	119.405	148.628	101.04	113.86	93.3149	110.487	94.0608	105.311	107.017	110.263	87.072	95.1886	97.1983	79.3553	79.0182	84.9063	120.265	134.415	101.342	95.7344	84.9442	88.6051	89.436	76.7684
		3.3	161.843	190.901	114.944	117.444	117.516	137.061	94.124	118.894	210.09	211.113	207.24	158.711	165.021	169.013	166.144	151.324	118.88	148.216	101.103	113.691	93.4274	110.014	93.695	105.044	106.721	110.442	86.7264	95.1848	96.8456	78.87	79.4896	85.1198	120.076	134.515	100.97	95.8954	84.7916	88.2767	89.1644	76.5562
		3.4	161.508	190.721	114.574	116.955	117.31	137.345	94.4522	119.092	209.968	210.852	206.678	158.194	165.776	168.903	165.765	151.688	118.493	147.877	101.177	113.769	93.8279	109.603	93.3624	104.911	106.438	110.691	86.4549	95.3629	96.5978	78.9271	79.7786	85.1981	119.905	134.463	100.798	95.9613	84.4914	88.3231	89.0662	76.3462
		3.5	161.261	190.553	114.37	116.395	116.964	137.56	94.4163	119.332	209.665	210.587	205.848	157.545	165.696	168.631	164.999	151.957	118.136	147.731	101.13	114.076	93.9073	109.309	92.8503	104.942	106.166	111.065	86.079	95.1971	96.3231	79.1577	79.833	85.0884	119.836	134.324	100.534	96.0889	84.1688	88.7943	89.2628	76.7089
		3.6	160.944	190.464	114.143	116.02	116.191	137.721	94.329	119.244	209.575	210.367	204.883	157.029	165.556	168.337	164.014	152.205	118.061	147.713	100.882	114.58	93.7116	109.227	92.5162	105.228	105.962	111.326	85.7468	94.9624	95.8309	79.1664	79.738	84.6659	119.822	134.151	100.605	96.0123	84.4371	89.0131	89.1687	76.9913
		3.7	160.731	190.557	114.003	115.957	115.129	137.304	94.2692	118.702	209.841	210.281	204.398	156.814	164.775	168.098	163.332	151.623	118.271	147.778	100.465	114.918	93.2254	109.172	91.8753	105.42	105.82	111.35	85.5076	94.8988	95.0979	78.9781	79.5778	84.1653	119.835	133.824	100.643	95.6728	84.7423	89.0536	88.7813	77.3281
		3.8	160.521	190.696	113.868	116.21	114.266	137.042	94.4048	118.031	210.02	210.286	204.123	156.952	164.422	167.921	163.058	150.843	118.565	147.734	100.009	114.865	92.7914	109.554	91.2536	105.382	105.693	111.253	85.2255	94.6537	94.5216	78.9126	79.015	83.8031	120.025	133.431	100.667	95.2872	84.918	88.7598	88.3541	77.3179
		3.9	160.064	190.686	113.773	116.708	113.959	136.978	94.5241	117.531	210.072	210.28	204.068	157.319	163.948	167.982	163.254	150.077	118.86	147.551	99.6398	114.419	92.682	110.016	90.6157	105.122	105.651	110.942	85.08	94.6398	94.2101	78.8971	78.4256	83.5898	120.232	133.284	100.892	94.7864	84.7069	88.637	88.4634	77.2963
		4	159.365	190.863	113.745	117.074	113.963	137.256	94.3411	117.585	210.056	210.272	204.312	157.58	164.323	168.137	163.254	149.788	119.148	147.198	99.4366	113.934	92.6483	110.642	90.6387	104.867	105.581	110.603	85.0307	94.8135	94.1798	78.995	77.99	83.4809	120.221	133.223	100.799	94.1807	84.6716	88.7424	88.7068	77.1133
		4.1	158.692	191.048	113.698	117.065	113.943	137.516	94.0091	118.011	209.992	210.306	204.014	157.77	164.54	168.202	163.083	149.613	119.254	146.758	99.3986	113.445	92.9932	110.628	91.0729	104.765	105.471	110.243	85.0632	94.7933	94.1497	78.9549	78.0721	83.2353	120.067	133.25	100.707	93.7431	84.3733	88.8364	88.6761	76.8987
		4.2	157.934	190.983	113.498	116.939	113.818	138.145	93.3632	118.378	209.59	210.359	203.375	157.75	164.954	168.432	162.909	149.416	119.08	146.32	99.316	113.065	93.0519	110.35	91.6631	104.913	105.454	110.031	85.0838	94.6856	94.1801	79.0951	77.9008	83.2331	119.746	133.208	100.534	93.5449	84.0636	88.8369	88.1776	76.3308
		4.3	157.271	190.868	113.137	116.631	113.819	138.547	92.5069	118.743	209.106	210.472	203.062	157.48	165.099	168.73	163.086	149.194	118.744	146.121	99.2244	112.891	93.0241	109.83	91.9406	104.887	105.547	109.756	84.9518	94.3327	94.5794	78.986	77.6206	83.4368	119.315	133.083	100.25	93.5815	83.1679	88.6127	87.5853	75.6954
		4.4	156.856	190.762	112.776	116.423	113.884	138.68	91.7971	118.801	208.77	210.643	202.761	157.191	165.122	168.797	163.563	149.15	118.249	146.053	99.1503	112.614	92.5663	109.536	91.9483	104.865	105.558	109.69	84.8267	93.7783	94.9907	78.6738	77.4018	83.5361	118.806	132.782	100.079	93.9358	82.5707	88.3922	87.1564	75.3102
		4.5	156.629	190.395	112.357	116.278	114.148	138.132	91.5134	118.927	208.568	210.75	202.857	156.834	164.787	168.423	163.758	149.179	117.758	146.087	98.7691	112.576	92.1304	109.762	91.8668	104.421	105.622	109.51	84.6076	93.2928	95.2469	78.0894	77.6861	83.3573	118.465	132.525	99.9207	94.3136	82.1902	88.2672	87.1271	75.6703
		4.6	156.706	190.038	111.879	116.132	114.477	137.859	91.9047	118.615	208.286	210.784	203.346	156.562	164.202	167.709	163.71	149.305	117.297	146.203	98.4452	112.8	91.7568	110.274	91.7157	103.932	105.742	109.275	84.5393	92.8836	94.7417	77.6092	77.8652	82.8813	118.246	132.29	99.8094	94.5309	82.3583	87.9387	87.338	76.441
		4.7	156.881	189.888	111.521	115.749	114.42	137.95	92.0712	118.28	208.231	210.611	203.565	156.206	164.051	167.261	163.297	149.458	116.895	146.363	97.9914	113.021	91.2857	110.801	91.6178	103.144	105.648	109.066	84.5617	92.8301	94.4361	77.3207	77.5967	82.7516	118.133	132.174	99.7356	94.6711	82.4851	87.8389	87.8727	76.7794
		4.8	157.009	189.777	111.116	115.198	113.892	138.298	92.1934	117.787	208.206	210.316	203.673	155.886	164.03	166.937	163.214	149.623	116.648	146.352	97.4986	113.23	91.1153	110.676	91.35	103.021	105.436	109.041	84.3259	92.9189	94.1412	77.4066	77.074	82.8501	117.906	132.222	99.6857	94.7669	82.7158	87.6706	87.9576	76.6278
		4.9	157.179	189.704	110.842	114.82	113.224	138.18	91.8391	117.177	208.104	209.955	203.632	155.754	164.202	166.881	162.927	149.95	116.489	146.298	97.3044	113.264	91.0627	110.08	91.2199	103.311	105.301	108.921	84.045	93.0402	94.4602	77.776	77.0072	83.1869	117.879	132.314	99.6132	94.8051	82.6871	87.9453	87.862	75.9472
		5	157.387	189.736	110.947	114.54	112.889	137.579	91.5778	116.77	207.957	209.59	203.403	155.733	164.026	167.029	162.921	150.212	116.18	146.186	97.2119	113.058	91.3728	109.318	91.0367	103.878	105.14	108.946	83.6579	93.2139	94.3034	78.0813	77.2417	83.5874	117.851	132.256	99.5667	94.721	82.6807	87.9754	87.4621	75.534
		5.1	157.222	189.589	111.001	114.712	112.777	136.739	91.3234	116.483	207.831	209.179	203.223	155.969	163.912	167.172	162.732	150.642	115.989	145.996	97.2804	112.962	91.3429	108.769	91.0106	104.165	104.996	109.146	83.4301	93.1993	94.2259	78.067	77.3713	83.7212	117.809	132.027	99.5757	94.6488	82.3426	87.894	88.0269	75.4144
		5.2	156.978	189.219	110.895	114.968	112.612	136.42	91.4074	116.866	207.631	208.935	202.853	156.092	163.625	167.791	162.648	150.72	115.924	145.829	97.3659	113.012	91.3711	108.748	90.8808	104.228	104.95	109.293	83.5649	93.1762	93.9994	77.6504	77.1384	83.538	117.772	131.82	99.6211	94.3301	82.3594	87.2979	88.8401	75.6463
		5.3	156.692	188.677	110.657	114.993	112.566	136.539	91.6707	116.947	207.41	208.786	202.256	155.986	163.651	168.086	162.292	150.338	115.708	145.823	97.3706	112.994	91.123	108.946	90.7719	104.502	104.989	109.247	84.0324	93.1085	94.2988	77.6016	77.0172	82.6776	117.934	131.598	99.7379	94.0869	82.5941	86.6802	89.619	75.8162
		5.4	156.212	188.098	110.085	114.816	112.589	136.94	91.4408	116.705	207.133	208.517	201.771	155.527	163.68	168.565	161.725	149.57	115.472	145.767	97.3502	112.9	91.1943	109.169	90.4704	104.691	104.915	109.126	84.6441	93.1118	94.5419	77.6597	77.1043	81.9309	117.975	131.277	99.9151	94.0484	83.0426	85.9443	89.2849	75.6982
		5.5	155.658	187.559	109.529	114.389	112.339	137.131	90.8933	116.13	206.705	208.324	201.116	155.012	163.994	168.184	161.101	148.66	115.347	145.716	97.2125	112.445	91.1868	108.909	90.0164	104.601	104.735	108.841	84.9065	93.0817	94.7386	77.9501	77.0849	81.6601	118.018	131.024	100.061	93.9674	83.1112	85.55	88.6918	75.3313
		5.6	155.275	187.231	109.153	114.156	111.793	137.141	90.1402	115.912	206.28	208.311	200.564	154.649	164.019	168.083	160.651	147.972	115.018	145.734	97.0454	111.984	91.444	108.533	89.4218	104.024	104.465	108.404	84.9408	93.0214	94.5407	77.7733	76.6996	82.0871	118.081	130.918	100.169	94.0016	82.7876	85.3087	88.1844	74.9199
		5.7	154.963	187.108	108.784	114.241	111.078	136.875	90.1301	116.074	205.701	208.337	200.455	154.425	163.851	167.618	160.376	147.524	114.629	145.576	97.0453	111.543	91.1653	108.119	89.0591	103.415	104.27	107.901	84.7253	92.9901	94.2061	77.605	76.2752	82.5682	118.223	130.609	100.216	93.81	82.2897	85.6424	87.9224	74.7512
		5.8	154.595	187.239	108.609	114.41	110.568	136.064	90.4058	116.272	205.135	208.27	200.102	154.472	163.493	167.24	160.636	147.328	114.301	145.329	96.9266	111.389	90.6581	108.085	89.2146	103.077	104.03	107.443	84.3293	92.59	93.5542	77.3908	75.7824	82.5944	118.203	130.099	99.9738	93.3418	81.8367	85.9767	87.6408	74.9004
		5.9	154.207	187.469	108.347	114.636	110.213	135.024	90.6831	116.208	204.527	208.377	199.756	154.519	163.032	166.481	160.605	147.474	114.1	145.176	96.7928	111.656	89.8176	107.831	89.5684	102.947	103.862	107.137	84.1327	92.2676	92.9158	77.3959	75.4113	82.5821	118.162	129.741	99.7438	92.7273	81.6377	86.0626	87.1222	75.5169
		6	153.758	187.689	108.041	114.489	110.184	134.451	90.3611	116.197	204.234	208.432	199.523	154.632	162.643	166.273	160.791	147.715	113.969	145.041	96.6374	111.921	89.5546	107.634	89.9827	102.73	103.738	106.923	83.9641	91.9148	92.5429	77.2208	75.275	82.4263	118.052	129.367	99.3901	92.2289	81.5328	85.7218	86.7599	76.0716
		6.1	153.071	187.71	107.873	114.085	110.326	134.754	89.8559	116.144	204.004	208.296	198.979	154.748	162.205	166.665	160.698	148.215	114.058	144.945	96.1586	112.314	89.529	107.249	89.8238	102.528	103.618	106.767	83.6896	91.7128	92.6532	76.9916	75.8226	82.5159	117.947	129.029	98.9004	92.0535	81.7454	85.3777	86.5237	76.2402
		6.2	152.176	187.662	107.561	113.669	110.643	135.116	89.513	116.489	204.066	207.984	198.574	154.847	162.122	167.322	161.095	148.432	114.204	144.987	95.6979	112.564	89.8581	107.084	89.3967	102.487	103.395	106.842	83.5247	91.9861	93.0828	76.8272	76.707	82.5371	117.679	128.966	98.7373	92.2122	81.9257	85.4984	86.5944	75.8792
		6.3	151.415	187.557	107.29	113.279	111.004	135.334	89.4937	116.657	204.079	207.646	198.149	154.698	162.282	167.635	161.199	148.495	114.485	145.026	95.3309	112.477	89.7991	106.938	88.6034	102.431	103.171	107.006	83.3674	92.2438	93.4012	77.1636	77.4967	82.8628	117.468	129.125	98.42	92.6693	82.1518	85.8962	86.7323	75.4856
		6.4	150.851	187.318	107.152	113.198	111.395	135.386	89.4583	116.786	204.275	207.25	197.759	154.318	162.686	167.239	160.791	147.925	114.603	144.991	95.0927	112.317	89.7166	106.894	87.8318	102.217	102.972	107.167	83.1319	92.5221	93.4567	77.3667	77.7766	83.107	117.38	129.369	98.3306	93.0834	82.2156	86.3139	86.9234	75.4699
		6.5	150.454	186.965	106.995	113.204	111.474	135.74	89.3598	116.493	204.327	206.814	197.606	153.901	162.999	166.851	159.924	147.441	114.705	144.95	95.1399	112.143	89.7048	107.427	87.1981	102.05	102.922	107.328	82.9108	92.6304	93.4332	77.5479	77.7827	83.2301	117.382	129.698	98.4261	93.3528	82.3842	86.3183	86.9796	75.4451
		6.6	150.255	186.864	106.869	113.37	111.186	135.545	89.0209	116.276	204.416	206.484	197.507	153.443	162.874	166.477	159.009	146.874	114.695	144.743	95.3423	111.814	90.0059	108.07	86.6024	102.23	102.956	107.432	82.6099	92.4161	93.3966	77.3193	77.4166	83.0364	117.275	130.015	98.2594	93.5027	82.5004	85.9957	86.9761	75.5023
		6.7	150.31	186.905	106.797	113.474	110.901	134.97	88.8527	116.361	204.38	206.313	197.699	153.332	162.403	166.655	158.912	146.652	114.525	144.543	95.5938	111.652	90.1478	108.903	86.5609	102.58	102.965	107.328	82.4065	92.0211	93.2263	77.4021	77.2513	82.7641	117.218	130.308	98.2868	93.4971	82.5158	85.5928	86.7931	75.4073
		6.8	150.36	186.925	106.535	113.482	110.645	134.4	88.6698	116.322	204.509	206.3	197.959	153.462	161.79	166.64	159.188	146.573	114.218	144.395	95.7553	111.468	89.7964	108.877	86.6918	102.455	102.861	107.226	82.4152	91.4116	92.9346	77.2912	77.0523	82.3384	117.281	130.552	98.1878	93.3739	82.0779	85.3532	86.6909	75.731
		6.9	150.335	186.994	106.212	113.505	110.555	134.238	88.7559	115.766	204.423	206.256	198.077	153.613	161.419	166.757	159.661	146.898	113.942	144.202	95.7841	111.216	89.505	108.831	87.0412	101.921	102.637	107.03	82.656	90.7194	92.8874	77.1897	77.0331	82.1858	117.252	130.611	98.0283	93.2629	81.585	85.1801	86.6068	75.8872
		7	150.146	187.113	106.17	113.352	110.147	134.386	88.5234	114.745	204.301	206.255	197.904	153.607	160.988	166.84	159.456	147.53	113.597	144.001	95.5896	111.184	89.3627	108.431	86.8792	101.327	102.291	106.939	82.9978	89.9831	93.3138	76.9011	76.7401	82.116	117.13	130.676	98.1686	93.1168	81.1579	84.9622	86.7327	75.9071
		7.1	150.031	187.012	106.255	113.375	109.776	134.404	88.2071	113.962	204.03	206.206	197.383	153.357	160.515	167.246	159.123	147.908	113.212	143.949	95.2824	111.186	89.6223	108.631	86.6504	101.249	101.846	106.947	83.2693	89.5228	93.35	76.6371	76.5237	82.0957	117.207	130.635	98.4082	92.9759	81.3124	84.6448	86.7451	75.1884
		7.2	149.804	186.697	106.477	113.404	108.801	134.687	87.9229	113.962	203.876	206.136	196.722	152.791	160.22	167.394	158.954	147.794	113	143.849	94.9926	111.027	89.5009	108.535	86.5213	101.533	101.457	107.086	83.3646	89.6126	92.9801	76.3874	76.2509	81.6927	117.383	130.488	98.5359	92.9953	81.7246	84.4521	86.8811	74.4324
		7.3	149.507	186.317	106.683	113.437	107.942	134.992	88.0039	113.997	203.77	205.872	196.046	152.163	160.306	167.112	159.199	147.188	112.812	143.638	94.5824	110.823	89.3343	108.427	86.4538	101.713	101.317	107.171	83.3855	90.0314	92.1806	76.2088	76.01	81.3948	117.403	130.36	98.5268	93.0002	82.2497	84.4737	86.7621	74.0483
		7.4	149.165	185.971	106.412	113.461	107.114	135.55	88.2052	114.198	203.743	205.726	195.752	151.971	160.77	166.561	159.178	146.758	112.613	143.479	94.2501	110.532	88.9914	107.745	86.3033	101.635	101.369	107.339	83.2723	90.7656	92.0542	75.9526	75.8996	81.177	117.395	130.317	98.2825	92.9901	82.5571	84.8136	86.8596	74.3259
		7.5	148.965	185.688	105.848	113.357	106.97	135.726	88.2254	114.126	203.645	205.646	195.818	151.964	160.96	165.81	158.697	146.633	112.455	143.378	94.024	110.245	88.8936	107.441	86.0996	101.442	101.458	107.321	83.1006	91.2734	92.086	75.8683	76.0697	81.2912	117.514	130.157	97.8544	92.9639	82.5059	85.1694	86.8184	74.6299
		7.6	148.864	185.456	105.38	113.354	106.987	135.686	88.0972	114.413	203.582	205.645	195.962	152.202	160.816	165.081	157.732	146.71	112.334	143.287	93.7421	110.306	88.6593	107.49	86.4517	101.615	101.632	107.178	82.9267	91.3711	92.2348	75.8079	76.5687	81.4181	117.5	129.999	97.7501	92.7776	82.089	85.3706	86.9236	74.5463
		7.7	148.92	185.261	104.893	113.242	107.173	135.14	87.8349	114.632	203.32	205.608	196.254	152.657	160.114	164.241	157.019	146.594	112.051	143.185	93.679	110.395	88.2777	108.021	86.8856	101.785	101.825	106.971	82.4759	91.0764	92.1523	76.1007	76.8681	81.8778	117.416	129.757	98.0891	92.544	81.4842	85.2728	86.7264	74.2173
		7.8	149.066	185.045	104.644	113.27	107.364	134.909	87.7958	114.692	202.906	205.916	196.377	152.715	159.529	164.079	156.889	146.471	111.796	143.238	93.7299	110.594	87.6513	108.226	87.3347	102.066	101.75	106.794	82.1051	90.4969	92.0809	76.3726	77.0029	82.477	117.437	129.437	98.5202	92.4038	80.9904	85.1792	86.3144	73.877
		7.9	149.221	184.808	104.608	113.25	107.361	135.047	87.6456	114.389	202.658	206.236	196.301	152.683	159.122	164.452	157.201	146.309	111.563	143.326	93.7257	110.78	87.3023	108.087	87.0162	101.95	101.581	106.518	81.6985	90.1175	92.2358	76.7287	76.9199	82.9983	117.501	129.063	98.8781	92.2628	81.0439	85.1404	85.7609	73.5321
		8	149.339	184.512	104.366	113.178	107.381	135.586	87.5813	113.81	202.522	206.517	196.065	152.656	159.009	165.175	157.658	146.232	111.349	143.177	93.8068	110.716	87.5226	107.671	86.5711	101.693	101.497	106.436	81.4729	89.7681	92.2528	77.1001	76.9591	82.942	117.398	128.669	98.8727	92.116	81.5617	85.1018	85.2663	73.3416
		8.1	149.145	184.254	104.222	113.127	107.562	135.867	86.8712	113.576	202.366	206.777	195.772	152.342	158.997	165.406	157.492	145.858	111.068	143.007	93.8378	110.61	88.018	107.271	85.8321	100.947	101.363	106.523	81.6152	89.6738	92.3251	77.2818	76.8567	82.378	117.245	128.47	98.4785	91.9704	82.2218	85.1587	85.0206	73.4522
		8.2	148.701	184.149	104.236	112.931	108.157	135.173	86.2391	113.681	202.174	207.05	195.597	152.214	158.869	165.109	157.291	145.478	110.932	142.945	93.8231	110.299	88.5201	106.75	85.5624	100.291	101.165	106.573	81.831	89.9018	92.1454	77.2257	76.5314	81.387	117.013	128.515	98.0316	91.8133	82.462	85.2876	84.9663	73.9111
		8.3	148.168	184.115	104.155	112.687	108.341	133.879	85.5139	114.048	201.962	206.934	195.223	152.086	158.518	164.77	156.894	144.991	110.784	142.654	93.5944	109.842	88.3007	106.35	85.3866	99.8924	101.249	106.503	82.1434	90.0548	92.377	76.9297	75.8728	80.7897	116.776	128.619	97.6542	91.7171	82.2413	85.5719	84.9793	74.1066
		8.4	147.65	184.136	104.152	112.317	107.913	132.302	85.5077	114.006	201.686	206.642	194.726	151.914	157.854	164.809	157.028	144.612	110.783	142.38	93.2306	109.464	87.7686	106.452	85.3208	99.9002	101.406	106.504	82.3915	90.4341	92.5794	76.8092	75.3308	80.3914	116.609	128.732	97.6089	91.8925	81.9729	85.583	84.847	73.8208
		8.5	147.078	184.364	104.28	112.129	106.888	131.767	85.583	113.872	201.363	206.2	193.965	152.006	157.576	165.263	157.302	144.668	110.808	142.569	92.8638	109.23	87.0722	106.939	85.0966	100.023	101.496	106.392	82.5228	90.8729	92.795	76.6844	75.1206	80.6639	116.502	129.013	97.7706	92.2731	81.6007	85.481	84.7223	73.3226
		8.6	146.686	184.696	104.32	112.038	106.251	131.634	86.0429	113.712	201.015	205.589	193.106	151.95	158.112	165.31	157.582	145.105	111.045	142.726	92.4093	109.272	86.819	107.475	84.8531	100.334	101.659	106.241	82.6383	91.0151	92.566	76.3394	75.2413	80.9843	116.377	129.032	97.8583	92.5328	81.2362	85.1176	84.7108	73.2571
		8.7	146.478	184.812	104.443	112.018	106.23	132.165	86.0764	113.833	200.825	204.934	192.778	151.816	159.061	164.91	157.457	145.754	111.162	142.831	92.2471	109.558	86.9129	107.025	84.9092	100.656	101.944	106.21	82.8769	91.0614	92.2423	75.8388	75.3338	81.5639	116.354	128.844	98.0383	92.6553	80.7827	84.8342	84.9664	73.8682
		8.8	146.319	184.773	104.64	111.986	106.515	132.312	86.2496	114.024	200.728	204.578	192.774	151.627	159.906	164.365	157.063	145.712	111.27	143.164	92.2615	109.808	86.7214	106.462	84.7616	100.89	102.042	106.344	83.0373	90.6714	91.922	75.4394	75.1811	81.8134	116.172	128.603	97.8911	92.4229	80.7202	84.1312	85.2467	74.5926
		8.9	146.279	184.658	104.484	111.702	106.306	132.306	86.0383	114.049	200.529	204.298	192.941	151.341	159.908	164.148	156.58	145.335	111.244	143.468	92.1293	109.877	86.4117	105.774	84.6014	100.794	102.039	106.397	83.0599	89.8531	91.6561	75.4246	74.9697	81.5396	115.916	128.38	97.489	91.9418	81.0707	83.7857	85.3376	74.8413
		9	146.283	184.291	104.199	111.215	105.88	131.62	86.1589	113.824	200.415	204.14	193.185	151.246	159.636	164.336	156.113	144.848	111.098	143.44	91.9521	109.689	85.8893	106.262	84.1713	100.67	101.92	106.472	83.0366	89.0904	91.5304	75.6761	74.7123	81.0098	115.675	128.031	97.2312	91.4708	81.5583	83.5559	85.201	74.477
		9.1	146.353	183.911	103.974	110.772	105.826	130.92	85.9692	113.635	200.524	204.196	192.94	151.366	159.161	164.46	155.766	144.522	110.741	143.349	91.5341	109.181	86.065	106.639	84.1284	100.559	101.758	106.543	82.8064	88.5461	91.5914	76.0242	74.58	80.5881	115.632	127.879	96.8912	91.0931	81.8292	84.0938	84.7904	73.7051
		9.2	146.346	183.629	103.519	110.493	106.319	130.596	85.6914	113.644	200.557	204.236	192.694	151.707	158.898	164.614	155.953	144.506	110.528	143.204	91.2019	108.859	86.3166	106.768	84.5641	100.395	101.575	106.516	82.6406	88.3626	91.8258	76.3666	74.4313	80.5278	115.625	127.893	96.7948	90.8217	81.4733	84.3948	84.5084	73.139
		9.3	146.314	183.634	103.205	110.447	106.381	130.813	85.2769	113.706	200.61	204.017	192.645	151.992	158.467	164.297	156.587	144.451	110.356	142.933	91.0736	108.679	86.8298	106.25	85.2702	100.067	101.506	106.532	82.5018	88.7134	92.0119	76.3653	74.4316	80.3009	115.82	127.933	96.8659	90.6718	80.588	84.759	84.3521	72.9454
		9.4	146.166	183.616	102.994	110.667	105.853	131.242	85.1346	113.252	200.651	203.904	192.434	152.079	158.051	164.041	156.844	144.832	110.141	142.554	91.1902	108.51	86.8299	106.043	85.8447	99.7303	101.439	106.612	82.2427	89.2318	92.0498	76.2951	74.5762	79.7771	116.006	127.894	97.0588	90.6131	79.5421	84.6052	84.789	73.281
		9.5	145.931	183.631	102.559	110.967	105.123	131.226	85.4079	112.483	200.642	203.988	192.147	151.922	157.837	163.945	156.107	144.861	110.101	142.221	91.6458	108.583	86.6549	106.332	85.9456	99.3538	101.557	106.517	81.8912	89.5946	92.0498	76.0412	74.6868	79.4128	116.272	127.879	97.2336	90.4534	79.236	84.5692	85.363	73.948
		9.6	145.44	183.511	102.332	111.24	104.687	131.047	85.7499	111.894	200.455	203.954	191.64	151.631	158.148	164.012	154.999	144.837	110.217	142.068	91.8362	108.486	86.2759	106.751	85.685	99.1318	101.691	106.26	81.529	89.9381	92.0668	76.131	74.8738	79.8069	116.404	127.771	97.2241	90.3993	79.7777	84.3119	85.8804	74.517
		9.7	144.916	183.477	102.045	111.279	104.413	130.56	85.8726	111.567	200.22	204.026	190.828	151.315	158.191	164	154.351	144.676	110.251	141.875	92.0397	108.287	86.1542	106.814	85.2289	98.9233	101.77	105.938	81.3361	89.9287	91.7873	76.1774	75.1761	80.589	116.519	127.404	97.1421	90.3552	80.7903	84.2676	85.7362	74.7808
		9.8	144.49	183.387	101.489	111.112	103.872	130.575	86.114	111.465	199.698	204.344	190.175	151.147	157.543	163.427	154.409	144.878	110.273	141.816	92.1418	108.313	86.0986	106.829	84.5448	99.0407	101.786	105.376	81.1853	89.6621	91.3019	76.3001	75.6911	81.5152	116.531	127.035	96.8354	90.3913	81.2473	84.137	85.421	74.6264
		9.9	144.29	183.371	101.116	110.737	103.658	130.814	86.3681	111.164	199.215	204.569	189.95	150.957	156.235	163.232	154.352	145.358	110.335	141.953	91.9513	108.271	86.1951	106.661	83.9833	99.3642	101.799	104.827	81.2126	89.3931	90.7037	76.0998	76.0397	81.8756	116.544	126.89	96.5784	90.7189	81.0113	84.0183	85.0881	74.196
		10	144.248	183.439	100.805	110.064	103.774	131.199	86.682	110.949	198.564	204.607	190.066	150.555	155.271	163.049	154.421	145.372	110.219	142.075	91.8489	108.211	86.5379	106.642	83.6472	99.6313	101.742	104.605	81.0828	89.0636	90.7309	75.8818	75.7892	82.2213	116.466	126.829	96.3674	91.0234	80.4334	83.8939	85.1118	73.9301
		10.1	144.435	183.5	100.809	109.614	104.496	131.663	86.3366	110.734	197.946	204.7	190.224	150.174	155.2	163.136	154.317	145.047	110.083	141.987	91.5773	108.321	87.1603	106.588	83.504	99.638	101.782	104.599	80.9157	88.9989	91.2188	75.6629	75.1142	82.1747	116.39	126.791	96.2438	91.2175	79.8818	83.8538	85.0547	73.5477
		10.2	144.726	183.405	101.198	109.501	104.85	131.747	85.6657	110.748	197.41	204.765	190.099	149.771	155.692	162.832	154.568	144.12	110.031	141.969	91.1802	108.17	87.4627	106.635	83.402	99.3344	101.86	104.762	80.8711	89.1503	92.1121	75.7106	74.6166	81.9119	116.268	127.004	96.2149	91.1663	79.8316	83.9402	85.0258	73.3591
		10.3	144.983	183.074	101.575	109.513	104.517	131.681	84.8119	110.928	197.245	204.586	189.763	149.69	156.074	162.548	154.476	143.536	110.01	141.794	90.9121	108.082	86.9612	106.375	83.1094	99.3481	101.907	104.986	80.8008	89.3927	92.7032	75.7634	74.7533	81.2224	116.181	127.325	96.2653	90.7324	80.1616	83.9432	84.5286	73.1002
		10.4	144.87	182.68	101.725	109.889	103.678	131.06	84.1156	111.292	197.187	204.48	189.233	149.968	155.869	162.343	154.748	142.795	110.082	141.466	90.7138	108.118	86.2938	105.469	82.9248	99.8646	102.047	105.196	80.9434	89.5154	92.9531	75.7614	75.1662	80.28	116.081	127.447	96.4638	90.2788	80.7653	83.8471	84.2601	73.1677
		10.5	144.771	182.233	101.741	110.124	103.075	130.464	83.8099	111.573	197.36	204.333	188.866	150.166	155.38	162.075	155.067	142.538	110.197	141.103	90.5373	108.144	85.7113	104.495	83.0029	100.311	102.101	105.13	81.0994	89.4289	92.7342	75.5621	75.3186	79.4482	116.004	127.453	96.7581	89.9275	81.0832	83.5356	84.0641	73.3878
		10.6	144.725	181.712	101.659	110.012	103.327	130.344	83.6619	111.573	197.349	204.095	189.002	150.324	155.09	162.021	155.19	142.449	110.226	140.921	90.5834	108.293	85.705	103.797	83.2853	100.583	102.003	104.791	81.1251	89.3433	92.6959	75.3689	75.0701	78.9738	116.096	127.497	97.2658	89.881	80.6487	83.3269	84.5886	73.5553
		10.7	144.6	181.325	101.454	109.927	103.984	130.457	83.6747	111.396	197.357	203.829	189.293	150.511	154.869	161.934	154.894	142.795	110.168	140.781	90.7194	108.374	85.6276	103.88	83.4623	100.086	101.837	104.224	81.2265	88.9323	92.3682	75.3494	74.5287	79.0588	116.129	127.408	97.8013	90.1267	80.0603	83.1616	84.9318	73.5704
		10.8	144.259	181.254	101.267	109.823	104.567	131.141	83.6291	111.414	197.147	203.721	189.128	150.449	154.714	162.297	154.266	143.325	109.941	140.772	90.8262	108.251	85.6183	104.24	83.1942	99.8721	101.643	103.794	81.2675	88.7449	92.0706	75.1447	74.0324	79.4932	116.087	127.207	98.3098	90.4896	79.6447	83.3812	85.4532	73.316
		10.9	144.065	181.287	100.842	109.836	104.406	131.316	84.0072	111.619	196.806	203.46	188.869	150.627	154.499	162.426	153.886	143.161	109.551	140.86	91.0653	107.844	85.346	104.772	82.8618	99.5053	101.362	103.278	81.11	88.7326	91.1921	75.0036	73.7473	79.8966	116.191	127.156	98.4813	90.9341	79.9642	83.7243	85.7352	72.9898
		11	143.663	181.283	100.401	110.153	103.919	131.501	84.7911	111.65	196.316	203.255	188.284	150.877	154.795	162.592	153.706	142.769	109.261	141.004	91.0332	107.525	84.8661	105.191	82.5144	99.4482	101.128	102.88	81.2048	88.6062	90.7437	74.5586	73.9916	79.9917	116.309	127.086	98.1828	91.2079	80.425	84.1844	86.0924	72.7162
		11.1	143.042	181.533	100.072	110.478	103.407	131.151	85.3047	111.435	196.228	203.319	187.639	150.709	154.866	162.401	153.406	141.872	108.96	141.06	90.8363	107.181	84.5996	105.626	82.3497	99.0027	100.908	102.78	81.2391	88.9938	90.5081	74.5608	74.3877	79.7631	116.198	126.964	97.5813	91.4259	80.9222	84.2593	86.0457	72.5777
		11.2	142.555	181.698	99.9148	110.82	103.655	130.829	85.2779	111.38	196.154	203.333	187.944	150.579	154.469	162.135	153.358	141.646	108.685	141.074	90.5024	107.048	84.6068	105.811	82.1288	98.3777	100.81	102.912	81.2032	89.2651	90.6784	74.3894	74.596	79.3597	116.278	126.868	96.8163	91.4599	80.9459	83.935	85.5979	72.5439
		11.3	142.322	181.576	100.015	111.067	104.156	130.545	84.4746	111.532	196.104	203.186	188.558	150.312	153.56	161.985	153.263	141.471	108.711	141.016	90.0916	107.172	84.9719	105.701	82.1337	97.8994	100.861	102.918	81.5174	89.3111	90.7608	74.4701	74.5019	78.6487	116.469	126.68	96.3364	91.2906	80.5524	83.3803	85.0876	72.6052
		11.4	142.142	181.41	100.056	110.928	104.773	130.325	84.0434	111.636	196.116	203.094	189.347	149.818	153.191	161.854	153.6	141.621	108.824	140.934	89.849	107.127	85.2168	105.092	82.2824	97.77	100.898	103.198	81.7196	89.2928	90.6679	74.4923	74.3471	78.0807	116.447	126.323	96.0879	91.1654	79.8496	83.3149	84.699	72.6999
		11.5	142.081	181.229	99.9566	110.671	104.467	130.708	83.9149	111.401	196.254	202.841	190.065	149.45	153.402	161.957	153.505	141.565	108.892	140.969	89.6339	107.115	85.1809	104.462	82.4783	98.1851	101.015	103.504	81.9033	88.928	90.719	74.817	74.334	77.5848	116.427	126.111	96.0268	90.9594	79.5333	83.7642	84.5999	72.8953
		11.6	142.097	180.897	99.8361	110.2	103.684	131.126	84.4697	111.343	196.166	202.321	190.049	149.056	153.865	161.978	152.891	141.372	109.014	140.963	89.5715	107.124	84.8493	103.851	82.3593	98.5954	101.131	103.725	82.2268	88.5393	90.8471	75.1668	74.5221	77.6212	116.491	125.903	96.0821	90.7425	79.9794	84.2908	84.4168	72.8274
		11.7	141.971	180.604	99.6154	109.797	102.499	131.734	84.7409	111.534	195.966	202.083	189.528	148.605	153.981	162.178	151.873	141.104	109.045	141.021	89.6896	107.168	84.4546	103.676	82.0069	98.9291	100.976	103.788	82.1904	88.1414	90.9319	75.3891	74.5518	77.4597	116.43	125.85	96.0616	90.6009	80.6828	84.1536	84.1102	72.7803
		11.8	141.817	180.491	99.4076	109.748	101.946	131.795	84.7667	111.889	195.956	202.221	188.913	148.487	154.126	162.019	150.972	141.035	108.787	141.094	89.9684	107.379	84.0876	103.758	81.6749	98.8758	100.643	103.995	81.924	87.8704	90.8941	75.2761	74.4903	77.5956	116.219	126.055	96.0288	90.3498	81.2313	83.547	84.0417	72.7864
		11.9	141.648	180.324	99.3944	109.701	101.933	131.651	84.4928	112.223	195.975	202.425	188.28	148.582	154.213	161.786	150.728	141.563	108.485	141.262	90.3418	107.636	83.9711	104.015	81.6353	98.7824	100.371	103.924	81.6821	87.7531	90.6149	74.8701	74.3488	77.8192	116.074	126.349	96.0943	90.2027	81.113	83.0618	84.2236	73.209
		12	141.493	180.451	99.3046	109.564	102.145	131.086	84.5612	112.256	195.851	202.892	187.861	148.667	154.553	161.852	150.635	142.183	108.154	141.346	90.581	107.656	83.7124	104.021	81.5496	98.8887	100.029	103.795	81.3224	87.6216	90.6017	74.3568	74.4799	78.5738	115.875	126.426	96.1665	90.1893	81.0709	83.3089	84.7404	73.569
		12.1	141.38	180.649	99.1509	109.375	102.245	130.672	84.7642	112.067	195.749	203.425	187.893	148.849	154.528	162.391	150.986	142.674	107.786	141.599	90.328	107.522	83.823	103.872	81.7084	99.1039	99.7398	103.685	81.1872	87.7061	90.3693	74.2431	74.6534	79.0191	115.677	126.548	96.1155	90.1383	80.9233	83.983	85.0828	73.7724
		12.2	141.371	180.818	98.711	109.024	102.065	130.211	84.7319	111.467	195.841	203.616	188.031	148.895	154.095	162.65	151.534	142.435	107.486	141.746	89.6292	107.278	83.885	103.664	81.7884	99.086	99.7606	103.709	81.2156	87.718	90.5566	74.552	74.4728	79.2036	115.422	126.568	96.0881	90.0169	80.8019	84.7526	85.2146	73.6854
		12.3	141.33	180.941	98.1708	108.842	102.197	130.026	84.242	110.754	195.762	203.451	188.098	148.691	153.332	162.131	152.278	142.264	107.264	141.899	88.8163	107.193	84.1632	103.52	81.9947	98.6628	99.8318	103.742	81.1274	87.6816	90.7039	75.1777	74.0402	78.7104	115.296	126.376	95.9001	89.7768	80.3189	84.8429	85.0781	73.6174
		12.4	141.285	181.161	97.5863	109.174	102.188	129.582	83.722	110.368	195.594	203.231	188.023	148.641	152.53	161.472	152.469	141.784	107.172	141.819	88.0736	107.439	84.2299	103.517	81.6481	98.1584	99.8358	103.872	81.0573	87.6554	91.4144	75.4337	73.8026	78.3836	115.257	126.046	95.5926	89.4883	79.9001	84.608	84.8638	73.5388
		12.5	141.314	180.983	97.0119	109.468	102.227	129.582	83.539	110.128	195.579	202.917	187.507	148.667	151.945	161.287	151.886	141.698	107.147	141.713	87.8473	107.683	84.3423	103.567	81.3092	98.08	99.798	104.055	80.8838	87.4774	91.6349	75.2144	74.1887	78.1523	115.163	125.856	95.4497	89.4221	79.8471	83.948	84.8386	73.3887
		12.6	141.369	180.738	96.8933	109.698	101.891	129.63	83.5581	110.003	195.486	202.705	186.693	148.71	151.431	161.475	151.38	141.132	107.307	141.378	88.0892	107.898	84.5392	104.069	81.1509	98.153	99.7633	104.155	80.7767	87.5019	91.8274	74.5789	74.8907	78.4372	114.976	125.658	95.3813	89.58	79.9057	83.4478	84.8823	73.4103
		12.7	141.255	180.536	96.8198	109.708	101.789	130.234	83.5679	109.772	195.194	202.669	186.005	148.912	151.138	161.343	151.022	140.835	107.528	141.119	88.5398	107.888	84.389	104.448	81.4837	98.1938	99.5449	104.196	80.7564	87.5521	91.4649	74.2613	75.157	78.8306	114.803	125.377	95.3809	89.7974	79.6928	82.8159	84.7231	73.4139
		12.8	141.157	180.299	96.7951	109.327	101.757	130.362	83.4397	109.654	194.909	202.696	185.794	149.006	151.241	160.817	151.195	140.442	107.851	140.847	89.2666	107.562	83.9879	104.818	81.4967	97.7777	99.4667	104.052	80.8404	87.7671	91.517	74.3922	74.7634	79.1751	114.618	125.206	95.4953	90.1158	79.3637	82.3588	84.5099	73.5856
		12.9	140.962	179.948	96.7712	108.991	101.983	130.457	83.4219	109.965	194.722	202.698	186.019	148.84	151.644	160.354	151.279	140.292	108.172	140.676	89.8498	107.466	83.441	104.715	81.0381	97.3156	99.5545	104	81.0268	88.1889	91.4108	74.7348	73.8882	79.2024	114.293	125.251	95.7021	90.2488	79.445	82.141	84.1934	73.535
		13	140.512	179.944	96.7427	108.839	102.044	130.025	83.3341	110.187	194.516	202.546	186.341	148.482	152.391	159.928	151.435	139.989	108.415	140.409	90.1171	107.723	83.5614	104.472	80.2776	96.9959	99.7614	103.932	81.191	88.3436	91.4071	74.6641	73.4237	78.8694	114.151	125.3	95.8678	90.3444	80.0882	82.2168	84.1441	73.6549
		13.1	139.945	179.996	96.9193	108.848	102.028	129.985	83.3656	110.376	194.403	202.153	186.573	147.985	152.89	159.847	151.478	139.389	108.303	140.206	90.0065	108.056	84.089	103.893	79.8476	96.8886	99.8957	103.934	81.2821	88.4954	91.0881	74.4051	73.3656	78.5824	114.195	125.34	96.206	90.4328	80.7042	82.3643	83.7088	73.3993
		13.2	139.522	180.016	97.2053	108.776	101.818	129.811	83.2097	110.229	194.516	201.716	186.231	147.568	153.067	159.706	150.937	139.079	108.181	139.949	89.4703	108.562	84.6333	103.155	80.1068	96.8274	100.22	103.92	81.1951	88.5283	90.7433	74.1852	73.7933	78.6159	114.301	125.41	96.616	90.2123	80.9071	82.305	83.6782	73.1023
		13.3	139.054	180.101	97.5454	108.659	101.501	129.779	83.4101	110.124	194.707	201.336	185.514	147.449	152.581	159.977	150.221	139.184	107.924	139.682	88.7594	108.678	84.6818	102.58	80.7016	96.9928	100.423	104.017	80.8559	88.4626	90.431	74.3854	74.1963	79.006	114.432	125.387	96.8545	90.1036	80.8657	82.1106	83.5621	72.6023
		13.4	138.745	180.284	97.6593	108.359	101.416	129.417	83.4393	109.949	194.733	201.016	184.797	147.567	151.975	160.109	149.359	139.754	107.384	139.451	88.1367	108.217	84.5714	102.672	81.3833	97.3396	100.421	103.989	80.4143	88.492	90.265	74.3898	74.6177	79.5133	114.678	125.323	97.0532	89.9764	80.8188	81.8547	84.0463	72.5583
		13.5	138.67	180.281	97.3454	107.9	101.282	129.464	83.276	109.718	194.624	200.933	184.064	147.872	151.654	160.351	149.275	139.964	106.812	139.345	87.8769	107.587	84.3526	103.331	81.6298	97.8138	100.424	103.941	80.2453	88.4092	90.3227	74.2176	74.9259	79.8651	114.867	125.336	97.0461	89.8531	81.0127	81.8043	84.1642	72.4734
		13.6	138.648	180.195	96.9039	107.594	101.31	129.639	82.6579	109.179	194.388	201.073	183.601	148.184	151.72	160.465	149.633	139.638	106.578	139.338	87.8217	106.913	84.3046	104.077	81.4817	97.7157	100.406	103.801	80.2571	88.2292	90.609	73.7633	74.8104	79.7887	114.956	125.365	96.9787	90.01	81.1693	81.8048	84.558	72.5072
		13.7	138.589	180.145	96.4344	107.365	100.696	129.665	82.1521	108.723	193.854	201.154	183.35	148.269	152.023	160.629	150.211	139.437	106.292	139.305	87.9394	106.501	84.1811	104.424	81.3376	97.2553	100.178	103.633	80.6299	87.8933	91.1053	73.6044	74.5688	79.13	115.048	125.461	97.0046	89.9251	81.1974	81.7818	84.8841	72.5426
		13.8	138.489	180.054	96.0109	107.291	100.103	128.773	82.2767	108.315	193.252	201.207	183.232	148.376	152.15	160.545	150.197	139.556	106.172	139.29	88.0636	106.419	83.9818	104.239	81.2376	96.4182	100.009	103.417	81.0958	87.5133	91.5028	73.7816	74.2333	78.304	115.081	125.563	96.9689	89.8454	81.1056	81.5754	85.268	72.6198
		13.9	138.296	179.818	95.7813	107.632	99.4278	127.706	82.4878	108.505	192.832	201.168	183.399	148.524	152.382	160.014	149.473	139.825	106.338	139.23	88.0416	106.301	83.4879	103.866	81.3746	95.5913	99.994	103.179	81.1993	87.2381	91.7512	74.1477	74.309	77.7617	115.089	125.509	96.8343	89.7998	81.081	81.6208	85.4481	72.6514
		14	137.975	179.499	95.7113	108.055	99.3392	127.091	82.6598	108.882	192.649	201.05	183.58	148.536	152.156	159.081	148.517	139.434	106.642	139.217	88.1766	106.194	82.7997	103.47	80.957	95.1793	99.7771	102.922	81.2574	87.1242	91.7569	74.7129	73.9801	78.066	114.982	125.349	96.5667	89.7207	80.9398	82.0999	85.2181	72.3403
		14.1	137.697	179.261	95.8047	108.488	99.5122	127.28	82.3742	109.366	192.738	200.87	183.607	148.548	151.435	158.141	148.338	138.624	106.881	139.168	88.2758	106.002	82.2541	103.249	80.296	95.2767	99.6259	102.753	81.0293	87.2454	91.582	74.9848	73.3373	78.4616	114.918	125.116	96.2988	89.7862	80.4636	82.7716	84.873	72.2747
		14.2	137.388	178.909	96.0301	108.748	99.7073	127.491	81.9573	109.732	193.022	200.74	183.513	148.451	150.066	157.557	148.765	138.152	107.078	139.289	88.3863	105.727	82.2216	102.835	79.3173	95.7947	99.5712	102.699	80.8013	87.4451	91.2018	75.0212	72.4561	78.972	114.862	124.711	96.2388	89.6759	79.7669	83.032	84.4248	72.265
		14.3	137.192	178.57	96.2116	108.505	99.8986	127.517	81.4456	109.564	193.252	200.586	183.177	148.259	149.367	157.743	149.236	138.088	106.979	139.407	88.4776	105.772	82.2446	102.514	79.0337	96.2153	99.4209	102.748	80.8361	87.5866	90.5846	74.4097	72.1929	78.778	114.89	124.43	96.3428	89.4117	79.5083	82.7758	84.097	72.6936
		14.4	137.073	178.371	96.1254	108.252	99.7426	127.542	81.0933	109.2	193.459	200.59	182.664	148.261	149.191	158.121	148.598	138.684	106.802	139.56	88.4919	105.815	82.6109	102.482	79.2527	96.5744	99.204	102.877	80.8555	87.6337	90.2653	73.8626	72.5508	78.6216	114.944	124.388	96.4548	89.025	79.8094	82.4302	84.0904	73.0159
		14.5	137.082	178.289	95.8216	108.167	99.8182	127.805	81.2032	108.355	193.479	200.591	182.213	148.372	149.733	158.608	147.919	139.28	106.441	139.517	88.5224	105.863	82.6188	102.776	80.0221	97.1031	99.1994	103.057	81.1919	87.4816	90.0177	73.4403	73.1929	78.1276	115.252	124.381	96.348	88.6004	80.0861	82.2931	84.2172	73.1426
		14.6	137.051	178.194	95.3398	108.261	99.2899	128.241	81.572	108.087	193.26	200.569	181.95	148.49	149.872	158.552	147.435	140.042	105.925	139.354	88.5439	105.994	82.6442	102.988	80.4724	97.3929	99.2912	103.273	81.3732	87.3911	89.9491	73.2596	73.8019	78.0124	115.615	124.461	96.1819	88.4841	79.9973	82.7431	84.7699	72.9167
		14.7	137.068	178.325	95.0636	108.492	99.0221	128.496	81.8499	108.057	192.816	200.466	181.727	148.511	150.058	158.934	147.758	140.118	105.445	139.107	88.6001	106.005	82.3272	102.997	80.6846	97.3952	99.4608	103.338	81.4704	87.3347	89.7697	73.046	73.9559	77.8826	115.941	124.769	95.9252	88.6288	79.5036	82.9834	85.0687	72.7407
		14.8	137.077	178.428	94.9685	108.651	98.481	128.428	82.0276	108.283	192.392	200.594	181.667	148.293	150.118	159.404	147.864	139.739	105.265	138.952	88.2891	106.058	82.0776	102.886	80.5012	97.0139	99.7018	103.201	81.53	87.191	89.7903	73.1763	73.9311	77.6498	116.13	124.943	95.8729	88.8081	79.2463	83.1911	85.223	72.8536
		14.9	137.013	178.504	95.1629	108.402	98.692	128.142	82.1814	108.306	191.757	200.795	181.818	147.888	150.656	160.286	147.82	139.091	105.062	138.933	87.8303	106.331	82.1788	102.583	80.3042	96.6066	99.8997	103.057	81.1938	87.1486	89.8533	73.6228	73.7361	77.246	116.272	124.878	95.9978	88.8844	79.1268	82.594	84.9719	72.9852
		15	136.87	178.609	95.6298	108.136	98.585	127.83	82.1877	108.327	191.098	200.99	181.773	147.341	151.104	160.12	147.598	138.771	105.028	139.082	87.2935	106.429	82.2734	101.898	80.1411	96.182	99.8875	102.978	81.0869	86.9324	89.8399	74.3313	73.6558	77.2237	116.19	124.815	95.8601	88.6857	79.2483	82.2479	84.9922	72.906
		15.1	136.889	178.556	96.0723	107.969	98.4026	127.87	81.877	108.608	190.401	201.19	181.645	146.849	150.907	159.407	147.196	138.783	104.974	139.329	86.5881	106.274	82.2877	101.435	80.0506	95.9661	99.7564	102.83	80.9351	86.7159	89.6483	74.4531	73.7348	77.9733	115.862	124.677	95.8562	88.317	79.4616	82.0163	85.3348	72.625
		15.2	136.989	178.208	96.4924	107.659	97.9714	127.933	81.2183	108.754	189.975	201.513	181.463	146.582	149.957	157.938	147.078	138.624	104.915	139.456	86.261	105.788	82.0854	101.603	80.1486	95.9584	99.422	102.777	80.587	86.6843	89.8347	74.3462	73.9303	78.7014	115.426	124.392	95.8958	88.1208	79.437	82.251	85.5708	72.338
		15.3	136.916	177.83	96.4638	107.56	98.0022	127.992	80.7327	108.788	189.603	201.55	181.068	146.627	148.968	157.216	147.123	138.354	104.788	139.378	86.2361	104.871	81.9268	102.281	80.2369	96.0213	99.1166	102.923	80.4841	86.7091	90.0684	73.8104	74.2617	78.9023	115.038	124.193	95.9208	88.2513	79.182	82.5544	85.6029	72.0583
		15.4	136.891	177.422	96.1362	107.348	98.5262	127.955	80.5916	108.562	189.515	201.369	180.792	146.922	148.623	156.869	147.498	138.065	104.675	138.918	86.4784	104.183	82.1226	102.559	80.481	95.8804	98.8619	103.039	80.1972	86.99	90.4447	73.6059	74.6074	78.5072	114.679	124.169	96.0526	88.5518	78.7441	82.7791	85.134	71.8842
		15.5	136.899	176.832	95.6406	107.116	99.1174	128.251	80.8951	108.527	189.447	201.146	180.549	147.215	148.286	157.334	147.727	138.209	104.408	138.446	87.0156	103.977	82.4096	102.275	80.4639	95.8301	98.8503	102.963	79.8569	87.246	90.4323	73.4151	74.628	78.0989	114.348	124.127	96.0569	88.8188	78.859	82.9257	84.8373	72.012
		15.6	136.779	176.512	95.2062	107.063	99.1791	128.611	81.355	108.41	189.492	200.916	180.37	147.349	147.969	157.556	147.817	138.266	104.257	137.922	87.3873	104.269	82.7228	101.782	80.1137	95.9506	98.8571	102.793	79.8175	87.4161	90.3692	73.6711	74.5054	77.5224	114.124	124.175	95.8051	88.9901	79.452	82.8466	84.3793	72.2433
		15.7	136.443	176.528	95.1254	106.953	98.4747	128.789	81.404	108.575	189.402	200.616	180.239	147.39	147.59	157.643	148.071	137.786	104.19	137.497	87.4571	104.818	82.7658	101.629	79.4708	96.2562	99.0702	102.585	79.6616	87.3084	90.335	73.9854	73.9674	76.8914	114.097	124.397	95.5915	89.0346	79.9264	82.6644	84.3824	72.3368
		15.8	136.394	176.707	95.2266	106.808	97.505	128.236	81.0997	108.715	189.334	200.489	180.097	147.307	147.849	156.943	148.154	137.027	104.138	137.321	87.342	105.088	82.5552	101.638	79.0612	96.3703	99.2053	102.218	79.6694	87.0519	90.1932	74.1866	73.8277	76.5826	114.153	124.557	95.5616	89.0866	80.1993	82.5256	84.5187	71.9993
		15.9	136.439	176.969	95.3402	106.581	97.089	127.337	80.4387	109.058	189.079	200.425	180.188	147.195	148.276	156.114	148.267	136.391	104.033	137.591	87.0456	104.922	82.3404	101.612	78.9027	96.406	99.3061	101.888	79.9786	86.9058	90.2506	73.8272	73.781	76.9638	114.184	124.635	95.6269	89.2716	80.1404	82.5006	84.739	71.5979
		16	136.545	177.416	95.3413	106.268	97.2928	126.103	80.195	108.974	188.921	200.37	180.334	147.136	148.431	156.01	148.067	136.677	104.014	137.805	86.7343	104.432	82.1386	101.51	79.0551	96.1847	99.303	101.668	80.2769	86.7065	90.2014	73.1799	73.4727	77.4669	114.305	124.665	95.9252	89.2436	80.4488	82.569	84.5527	71.2613
		16.1	136.505	177.751	95.2666	105.992	97.9206	125.53	80.2336	108.642	188.712	200.282	180.42	146.802	148.248	156.54	147.768	136.96	103.924	138.145	86.5323	103.96	82.1629	101.664	79.2229	96.0434	99.323	101.519	80.7496	86.8034	90.2992	72.7491	72.8766	77.4869	114.594	124.567	96.2016	89.1394	80.5814	82.4659	84.1787	71.3188
		16.2	136.655	177.885	95.0741	105.8	98.4484	125.566	80.7286	108.193	188.585	200.147	180.472	146.548	147.814	157.265	147.159	137.371	103.835	138.415	86.2806	103.825	81.988	101.716	79.6918	96.158	99.2006	101.386	81.1972	86.7948	90.4447	72.9676	72.1952	76.8888	114.829	124.299	96.3481	88.9578	80.6071	82.3549	84.2206	71.4861
		16.3	136.616	177.837	94.9688	105.68	98.8083	126.23	81.2193	107.792	188.358	199.715	180.264	146.333	147.264	157.096	146.643	136.972	103.715	138.351	86.0657	103.939	82.0238	101.408	80.1381	96.5569	99.1064	101.425	81.3495	86.7508	90.5082	73.249	72.6088	76.3243	115.009	124.003	96.4214	88.6789	80.2416	82.3564	84.3981	71.8234
		16.4	136.21	177.655	95.096	105.648	98.6204	126.846	81.4151	107.528	188.265	199.264	179.88	146.065	146.67	156.778	146.273	136.611	103.705	138.005	85.8893	104.201	81.8978	100.792	80.4076	96.8706	99.0956	101.444	81.3058	86.9039	90.3294	73.2204	73.2698	75.9128	115.181	123.689	96.2528	88.7009	79.88	82.5629	84.6416	72.1409
		16.5	135.669	177.386	95.2578	105.688	98.3561	127.088	81.3159	106.871	188.007	198.802	179.526	146.182	146.114	156.655	146.248	136.284	103.759	137.716	85.6009	104.575	82.0844	100.466	80.5083	96.6161	99.0947	101.552	80.8847	86.9631	89.6048	72.6307	74.0587	75.9647	115.233	123.447	96.0911	88.8734	79.6801	82.4866	84.3001	72.2957
		16.6	135.323	177.104	95.4725	105.799	98.1029	127.103	80.9977	106.356	187.901	198.406	179.026	146.076	146.126	156.684	145.94	136.657	104.081	137.341	85.3333	104.695	81.9791	100.728	80.2627	96.006	99.114	101.736	80.3095	87.0769	89.0041	72.1051	74.1444	76.2021	115.183	123.29	95.8934	89.0682	79.8641	81.8542	83.9322	71.9778
		16.7	134.92	176.754	95.4858	106.047	98.2793	126.672	80.8081	105.922	187.679	198.064	178.525	145.851	146.209	156.472	145.619	137.011	104.271	137.009	85.1627	104.815	82.072	100.969	80	95.4881	99.1944	101.972	79.7936	87.0982	88.8577	71.9059	73.8894	77.0209	115.089	123.067	95.7442	89.2479	80.0827	81.0418	83.4726	71.1524
		16.8	134.661	176.489	95.0281	106.284	98.2302	126.495	80.7694	106.069	187.481	197.979	177.99	145.738	146.419	155.812	145.481	137.049	104.267	136.98	85.1079	104.992	81.7972	101.074	79.5053	95.3938	99.1823	102.239	79.2667	86.9703	89.263	72.2553	73.4877	77.6353	114.942	122.889	95.7011	89.2684	80.2649	80.6827	83.4036	70.6101
		16.9	134.846	176.481	94.4138	106.413	98.2817	126.541	80.6539	106.141	187.135	197.936	177.326	145.411	146.533	155.141	145.753	136.451	104.19	136.946	85.2995	104.948	81.3626	100.908	79.357	95.6062	99.0565	102.429	79.1208	86.7724	89.6813	73.1139	73.312	77.8823	114.77	122.821	95.6217	89.0517	80.0848	81.0426	83.6291	70.6439
		17	135.078	176.554	93.7501	106.465	97.8837	126.993	80.6937	106.26	187.063	198.042	176.766	145.335	146.613	154.67	146.03	136.194	104.059	136.814	85.6375	105.071	80.6307	100.582	79.0988	95.6262	99.027	102.467	78.9802	86.6904	89.9087	73.9921	73.5884	77.494	114.647	122.74	95.6871	88.8472	80.0953	81.7271	84.1096	71.3607
		17.1	135.294	176.569	93.1403	106.18	97.434	127.19	80.7433	106.558	186.788	198.096	176.348	145.414	146.347	154.435	145.566	136.278	103.688	136.735	85.9028	105.153	80.2446	100.29	78.9914	95.3432	98.9791	102.415	78.8831	86.5733	89.7696	74.6156	74.0726	77.1213	114.436	122.638	95.7964	88.6809	80.1407	82.2444	84.3753	71.832
		17.2	135.489	176.675	93.0174	105.693	96.4649	127.15	81.1011	107.215	186.595	198.208	176.276	145.458	145.894	154.363	144.66	136.739	103.367	136.704	86.1906	105.018	80.2328	99.9773	78.685	94.8054	98.91	102.333	79.0875	86.4029	89.4378	74.5928	74.4002	77.0276	114.254	122.687	95.8446	88.5188	80.2823	82.1811	84.4482	71.981
		17.3	135.513	176.812	93.0226	105.286	95.9331	126.802	81.2776	107.633	186.582	198.413	176.387	145.617	145.701	154.596	143.885	137.061	103.379	136.601	86.4965	104.95	80.6397	99.9514	78.686	94.2313	98.9814	101.998	79.2098	86.3619	89.171	74.2978	74.2367	77.0697	114.098	122.881	95.7526	88.4743	80.0626	81.7538	84.3936	71.7946
		17.4	135.313	176.636	93.2393	104.894	95.6226	126.323	81.128	107.361	186.678	198.614	176.719	145.758	146.052	155.225	143.748	137.341	103.473	136.782	86.7005	104.782	80.9018	99.9842	78.7568	93.691	99.1182	101.793	79.4595	86.3401	89.4462	73.9307	73.7841	77.0929	113.982	122.994	95.4499	88.3448	79.846	81.3307	84.3262	71.9774
		17.5	135.135	176.358	93.7004	104.725	96.0227	125.682	80.9004	106.86	186.536	198.597	176.967	145.936	146.401	155.895	143.927	137.398	103.584	137.148	86.9412	104.425	81.0472	100.139	78.9649	93.4913	99.097	101.625	79.7098	86.3729	89.9418	73.476	73.3034	77.0721	113.871	123.082	95.1688	88.1233	79.939	81.367	84.4033	72.3581
		17.6	134.988	176.171	94.0022	104.738	96.5461	125.137	80.8906	106.618	186.566	198.546	176.881	145.936	146.619	156.296	143.975	137.171	103.693	137.45	87.0627	104.123	80.7286	100.513	79.1253	93.7426	99.0004	101.531	79.7978	86.416	90.1657	73.1334	73.1588	77.2464	113.948	123.152	95.0712	87.9741	80.1124	81.5334	84.2216	72.7996
		17.7	134.88	176.06	94.4298	104.706	97.0248	124.544	81.1689	106.697	186.666	198.53	176.878	145.831	146.471	156.514	143.568	136.368	103.854	137.784	86.9919	103.628	80.623	100.823	79.1111	94.2537	98.9312	101.344	79.8506	86.3768	89.925	72.7153	73.3793	77.6599	114.016	123.309	95.3319	87.9539	80.0681	81.8331	84.0979	72.9832
		17.8	134.828	175.864	94.6281	104.651	97.276	124.146	81.1883	106.711	186.616	198.243	176.732	145.592	146.589	156.738	143.378	135.673	103.838	138.107	86.9353	103.157	80.7957	101.342	78.7853	94.7212	98.9016	101.357	79.9286	86.2301	89.7307	72.7237	73.8182	78.0012	114.101	123.322	95.6107	88.0546	79.6014	81.757	83.6327	72.8182
		17.9	134.822	175.759	94.6288	104.485	96.9782	124.11	80.9133	106.739	186.654	197.846	176.644	145.225	146.36	156.665	143.538	134.904	103.745	138.119	86.7083	102.866	81.6208	101.545	78.1949	94.9901	98.8439	101.292	79.984	86.2156	89.9014	72.8853	74.1501	78.0418	114.33	123.359	95.7429	88.4308	79.3919	81.5217	83.3116	72.3501
		18	134.719	175.85	94.6105	104.473	96.7733	124.358	80.5686	107.165	186.766	197.501	176.744	145.159	146.483	155.912	144.004	134.85	103.631	137.969	86.4453	102.724	82.239	101.675	77.6959	95.2323	98.7799	101.245	79.9926	86.207	90.0999	73.4189	74.2023	77.4292	114.548	123.331	95.6794	88.8103	79.5479	80.9923	83.1761	71.6686
		18.1	134.379	175.838	94.1273	104.409	96.1106	124.714	80.2073	107.767	186.741	197.161	176.636	145.016	146.186	154.816	144.122	134.982	103.578	137.766	86.2173	102.959	82.5348	101.038	77.6081	95.2757	98.7656	101.123	79.8964	86.237	89.9269	73.7932	74.2718	76.9253	114.528	123.377	95.2892	88.9382	79.8811	80.8733	83.1787	71.5497
		18.2	133.926	175.704	93.5581	104.478	95.9281	124.477	79.4754	108.51	186.715	196.771	176.343	144.975	146.161	154.156	143.54	135.609	103.499	137.41	85.892	103.26	82.2294	100.577	77.7319	95.3724	98.7634	101.097	79.6647	86.1216	89.4293	74.0441	74.4837	76.4816	114.518	123.249	95.1836	88.9813	80.2443	80.9192	83.314	71.8214
		18.3	133.505	175.661	92.9566	104.787	95.6627	124.339	78.4682	108.826	186.784	196.542	175.836	145.064	145.754	154.258	143.058	136.083	103.472	137.013	85.5975	103.494	81.7387	100.415	77.8499	95.4949	98.682	100.91	79.3717	85.8105	88.8341	73.8448	74.8609	76.5598	114.577	123.057	95.3198	88.9231	80.3217	81.2129	83.2466	72.2546
		18.4	133.061	175.591	92.2707	104.856	95.8347	124.098	77.8964	108.746	186.543	196.451	175.198	145.028	145.516	154.64	142.911	136.144	103.368	136.716	85.2683	103.795	81.3108	101.036	77.8203	95.7609	98.5908	100.71	79.1281	85.6121	88.6287	73.7666	74.9758	76.5414	114.411	122.856	95.7339	88.7794	80.2932	81.2887	83.4216	72.2512
		18.5	132.767	175.3	91.9523	105.004	95.5714	124.437	78.2109	107.852	186.343	196.405	174.818	145.208	145.55	154.626	143.394	135.609	103.16	136.542	85.0677	104.055	81.0647	101.247	77.8848	95.7297	98.5841	100.537	79.1145	85.4205	88.6194	73.4931	74.7076	76.7028	114.345	122.813	96.4474	88.7837	80.1836	81.6269	83.603	72.0701
		18.6	132.751	175.153	91.6967	105.012	95.2199	124.836	79.007	106.94	186.247	196.51	174.661	145.168	145.738	154.058	143.693	134.748	102.952	136.53	84.9179	104.282	81.1992	100.953	78.0162	95.5328	98.6141	100.446	79.1915	85.3522	89.0567	73.2021	74.0793	76.8972	114.486	122.745	96.9662	88.7827	80.4037	81.7894	83.6047	71.7709
		18.7	132.889	174.921	91.5301	104.895	94.8014	125.146	79.491	106.248	185.958	196.451	174.791	144.911	145.783	153.774	143.382	134.305	102.729	136.534	84.9052	104.621	81.1982	100.4	77.9683	95.1582	98.6516	100.403	79.3064	85.4122	89.4379	72.685	73.4118	77.2188	114.581	122.643	97.0638	88.4621	80.7038	81.9071	83.1534	71.4418
		18.8	132.991	174.508	91.3777	104.955	94.644	125.135	79.6938	106.414	185.58	196.312	174.969	144.711	145.237	153.715	142.494	134.361	102.574	136.609	85.066	104.686	81.1726	100.347	77.7316	94.9397	98.6999	100.54	79.4427	85.4796	89.805	72.5608	73.0949	77.3047	114.557	122.569	96.8791	88.1907	80.8206	81.5729	82.6972	71.3394
		18.9	133.017	174.216	91.4846	104.987	94.8547	124.947	79.7124	106.449	185.396	196.122	175.097	144.338	144.46	154.308	141.681	134.747	102.509	136.826	84.9424	104.495	80.6799	100.631	77.5771	94.6938	98.8647	100.815	79.4718	85.6363	90.0351	72.9243	72.9644	77.2636	114.644	122.492	96.4078	87.7789	80.4528	81.1286	82.8783	71.7364
		19	132.997	174.117	91.8759	104.895	95.2988	124.723	80.0454	106.582	185.123	195.95	175.129	144.174	143.859	154.994	141.787	134.772	102.581	136.886	84.7643	104.307	80.2111	100.726	77.8767	94.5361	99.0254	101.157	79.5102	86.0569	90.3312	73.1487	73.1688	77.1849	114.607	122.353	95.9049	87.483	80.1513	80.5707	83.7147	72.1992
		19.1	132.852	174.014	92.2181	104.568	95.7473	124.43	80.276	106.232	184.742	195.722	175.028	144.116	143.665	155.793	142.29	134.567	102.649	136.739	84.5923	103.97	79.6253	100.578	78.5951	94.475	99.2142	101.455	79.6698	86.5142	91.0079	72.9264	73.3846	77.3413	114.496	122.236	95.7981	87.5451	79.9266	80.3481	84.2794	72.4247
		19.2	132.656	174.267	92.7152	104.126	95.8157	123.861	80.4416	106.213	184.505	195.671	175.128	143.84	143.784	156.079	142.804	134.055	102.768	136.721	84.4546	103.77	79.5218	100.484	79.2026	94.7411	99.3477	101.703	79.8586	86.8908	91.581	72.3542	73.9089	77.5399	114.458	122.3	95.7604	87.5838	79.9421	80.2414	84.1693	71.9443
		19.3	132.466	174.756	92.7711	103.844	95.6791	123.398	80.0607	106.21	184.214	195.744	174.9	143.473	144.144	155.364	142.792	133.665	102.7	136.568	84.5681	103.811	79.3869	100.703	79.2701	95.0446	99.444	101.911	79.9304	87.0096	91.6943	72.384	74.243	77.6307	114.512	122.586	95.8328	87.8244	79.6981	80.3776	83.7881	71.4281
		19.4	132.42	175.195	92.775	103.897	95.697	122.911	79.6323	106.496	184.081	195.893	174.699	143.115	144.315	154.677	142.846	133.263	102.711	136.124	84.9066	103.942	79.4307	101.18	78.6572	95.1189	99.4373	101.956	79.9322	86.6917	91.2009	72.8926	74.3788	77.8469	114.514	122.863	95.9824	87.8924	79.4029	80.6831	83.9056	70.6182
		19.5	132.298	175.445	92.8871	104.449	95.8816	122.811	79.4484	106.675	184.032	196.167	174.693	142.926	144.342	154.321	142.669	133.292	102.749	135.754	85.2323	104.233	79.5308	101.463	78.148	94.7671	99.3027	101.73	79.9109	86.2563	90.4722	73.4932	74.3127	77.9511	114.475	123.097	95.9283	87.7861	78.9224	81.4124	84.6236	70.0053
		19.6	132.222	175.515	92.8441	104.926	95.7392	122.717	79.5397	106.685	184.087	196.356	174.393	143.033	143.58	154.649	142.337	133.856	102.705	135.685	85.2643	104.746	80.1856	101.34	78.0137	94.4044	99.1494	101.569	79.899	85.9326	90.4731	73.7557	74.1462	77.9021	114.344	123.31	95.8958	87.7256	78.7834	82.1898	84.9452	69.6619
		19.7	132.053	175.368	92.8449	104.945	95.5263	122.942	79.6553	106.313	184.269	196.542	174.299	143.389	142.899	154.945	141.756	134.549	102.574	135.65	85.2177	105.06	80.9816	100.853	78.214	94.3084	99.035	101.364	80.1054	85.8461	90.7386	73.8422	73.939	77.1776	114.21	123.527	95.8373	87.656	78.6641	82.654	84.9093	69.9286
		19.8	131.9	175.092	92.4847	104.602	95.068	123.02	79.3328	105.707	184.409	196.768	174.053	143.785	142.275	154.785	141.29	134.947	102.487	135.742	85.0574	105.052	81.346	100.596	78.084	94.3983	98.9262	101.121	80.527	85.9919	91.4317	73.6434	73.5896	76.367	114.074	123.568	95.7621	87.8301	79.0109	82.6293	84.5713	70.3802
		19.9	131.672	174.845	91.9943	103.919	94.913	123.142	79.0776	105.19	184.233	196.886	173.331	143.983	142.405	154.643	140.782	134.714	102.331	135.979	84.8723	104.895	81.1204	100.614	77.8772	94.8404	98.9092	101.059	80.7896	86.2963	91.577	73.4344	73.3664	75.6649	113.959	123.591	95.5846	87.9994	79.4381	82.5159	84.592	70.7378
		20	131.459	174.648	91.5758	103.486	94.3534	123.209	78.5042	105.253	183.997	196.659	172.59	143.836	142.553	154.188	140.488	134.368	102.178	136.26	84.9555	104.269	80.6953	100.624	77.6653	95.0976	99.0852	101.217	80.8285	86.5421	91.6143	73.298	73.2406	75.5671	114.033	123.692	95.3235	88.1553	79.9651	82.2009	84.7267	70.8286
		20.1	131.155	174.668	91.3894	103.471	94.1933	123.507	78.231	105.67	183.636	196.488	172.073	143.551	142.646	154.201	140.642	133.643	102.119	136.327	85.1151	103.54	80.672	100.065	77.7057	95.2289	99.1853	101.269	80.7269	86.5983	91.2274	73.7448	73.3478	75.8168	114.278	123.773	95.0931	88.1663	80.1437	82.0904	84.3491	70.8869
		20.2	130.975	174.699	91.4851	103.644	94.0988	123.858	77.7457	105.992	182.83	196.378	172.089	143.097	142.449	154.151	140.983	132.756	102.142	136.351	85.1695	102.963	80.9074	99.407	77.666	94.8463	99.2156	101.307	80.3371	86.5955	90.6463	74.1748	73.5278	76.3956	114.434	123.656	94.7529	87.9214	80.2301	81.7618	83.6081	70.9113
		20.3	130.844	174.67	91.7054	103.694	94.6096	124.205	77.6777	105.828	182.338	196.121	172.562	142.714	142.308	154.014	141.226	131.895	102.27	136.346	85.2029	102.624	81.2206	98.8787	77.6463	94.5353	99.3446	101.23	80.0469	86.3036	89.7837	74.5616	73.9853	76.7517	114.51	123.45	94.5214	87.879	80.346	81.7267	82.788	70.7481
		20.4	130.79	174.571	91.7083	103.564	94.9321	124.436	77.5756	105.264	182.087	195.896	173.235	142.475	142.147	153.366	141.131	131.702	102.442	136.361	85.2476	102.606	81.0127	99.0883	77.7699	94.3981	99.3304	100.842	79.8426	85.9341	89.0664	74.7219	74.0419	77.0796	114.603	123.282	94.4659	87.7626	80.6041	81.4102	82.5424	70.6397
		20.5	130.922	174.565	91.4842	103.336	95.2797	124.618	77.7871	104.674	181.963	195.928	173.697	142.273	142.005	152.571	141.087	131.8	102.404	136.271	85.126	102.729	80.6364	99.2861	77.8244	94.2724	99.1143	100.407	79.5925	85.6299	88.928	74.6239	74.0414	77.278	114.545	122.952	94.4109	87.7445	80.3777	81.4343	82.8116	70.4467
		20.6	131.25	174.445	91.3214	103.198	95.2118	124.353	78.226	104.332	182.006	196.083	173.611	142.174	141.796	152.085	141.308	131.886	102.362	136.118	85.0335	102.931	80.001	99.6727	77.7276	93.9968	98.8868	100.055	79.4587	85.4278	89.1852	74.1798	73.5309	77.548	114.402	122.534	94.5565	87.868	80.056	81.1763	83.3209	70.5778
		20.7	131.545	174.225	91.0931	103.281	94.9033	123.524	78.7883	104.251	182.573	196.222	173.245	142.024	141.765	151.944	141.881	132.222	102.272	135.755	84.9887	102.811	80.0872	99.6081	77.2071	93.5904	98.7337	99.7937	79.2346	85.4358	89.418	73.4172	73.3833	77.4054	114.284	122.12	94.8373	87.8068	79.5513	81.32	83.889	70.7561
		20.8	131.764	174.138	91.2299	103.436	94.4654	122.262	79.3586	104.496	182.779	196.321	172.701	142.004	142.004	151.534	142.581	132.863	102.05	135.293	84.6587	102.518	80.1177	99.8701	76.9476	93.4346	98.4591	99.7083	79.0769	85.3696	89.1662	72.9504	73.2583	76.9957	114.195	121.792	94.9608	87.9076	79.4378	81.3181	84.4136	70.8999
		20.9	131.883	174.037	91.4399	103.627	94.1558	121.37	79.4381	104.811	182.847	196.448	172.06	142.163	142.059	151.24	142.824	133.485	101.828	134.724	84.4394	102.414	80.1614	100.081	76.8443	93.6918	98.2615	99.9164	79.034	85.4011	88.7352	72.7187	73.5626	76.734	114.179	121.431	95.1723	87.9603	79.3266	81.8088	84.4746	70.7298
		21	131.812	173.732	91.5188	103.538	94.2381	120.954	79.1481	105.114	182.71	196.524	171.529	142.284	142.02	150.968	142.038	133.244	101.812	134.219	84.3761	102.381	79.4354	100.485	76.966	94.1492	98.3217	100.113	79.1123	85.3504	88.5966	72.6338	74.0267	76.9087	114.266	121.166	95.3363	88.0522	79.2287	81.9428	84.2436	70.5504
		21.1	131.435	173.347	91.6927	103.27	94.5394	121.307	78.4054	105.06	182.526	196.384	171.374	142.423	141.954	151.369	140.728	132.525	101.76	133.812	84.3649	102.487	78.9863	100.361	76.7887	94.5438	98.4456	100.262	79.3188	85.3152	89.1438	72.5358	74.347	77.327	114.246	121.021	95.4168	88.2568	79.3244	81.9027	83.6953	70.5596
		21.2	130.962	173.157	91.7504	102.847	94.9722	121.877	77.8461	104.887	182.015	196.008	171.366	142.454	142.345	151.575	139.492	131.866	101.737	133.679	84.7304	102.763	78.8222	99.9153	76.6707	94.7114	98.457	100.367	79.6455	85.2292	90.3352	72.3119	74.7836	77.7209	114.187	121.033	95.5778	88.3136	79.4446	81.2539	83.3863	71.0162
		21.3	130.512	172.985	91.8084	102.315	95.1046	122.371	77.3987	104.846	181.745	195.758	171.477	142.18	142.577	151.455	139.01	131.688	101.768	133.65	85.1053	102.856	78.9583	99.2379	76.5108	94.6167	98.4334	100.458	79.8349	85.0381	91.4902	72.3601	74.6366	77.9903	114.049	121.159	95.5614	88.3583	79.6296	80.9793	83.205	71.0416
		21.4	130.139	172.858	91.8139	102.006	94.9469	122.35	77.4389	105.057	181.467	195.466	171.537	142.065	142.307	150.876	139.108	131.954	101.664	133.862	85.3404	102.822	78.824	98.8327	76.5958	94.5651	98.4664	100.482	79.7824	84.9334	91.9402	72.6452	74.5154	78.0742	113.726	121.393	95.4637	88.2618	79.4709	81.0057	83.1547	71.1512
		21.5	129.801	172.947	91.7129	102.024	94.715	121.892	77.5874	105.186	181.088	195.22	171.372	142.024	141.677	150.127	139.615	132.257	101.706	134.186	85.3928	102.936	78.6184	98.622	76.7989	94.4408	98.2881	100.601	79.7191	84.6923	91.506	73.193	73.7996	77.9757	113.269	121.731	95.3831	87.9526	79.051	81.6031	82.9037	70.9724
		21.6	129.78	173.18	91.6359	102.264	94.7729	121.725	77.9598	105.179	180.692	195.196	171.197	141.98	141.141	149.96	140.239	132.34	101.767	134.538	85.0904	102.95	78.4443	98.603	77.3122	94.6551	98.0076	100.789	79.364	84.8148	90.578	73.4893	73.5353	77.6158	113.014	122.167	95.4052	87.486	78.4224	81.9262	82.9014	71.2547
		21.7	129.942	173.284	91.5852	102.731	94.7487	121.515	78.0849	104.888	180.535	195.346	171.155	142.123	140.898	150.344	140.576	132.017	101.82	134.713	84.6189	102.989	78.4198	98.5892	77.9652	94.612	97.8042	101.004	79.1594	85.0084	89.9451	73.4973	73.6077	77.3179	112.794	122.662	95.5941	87.0292	78.0739	81.9006	82.937	71.1104
		21.8	130.02	173.297	91.6079	103.436	94.5548	121.345	78.0489	104.534	180.313	195.48	171.263	142.083	140.692	151.314	140.615	131.439	101.96	134.874	84.2496	103.027	78.3666	98.639	78.3339	94.4731	97.6623	101.065	79.0588	85.0637	89.7317	73.4217	74.2637	77.1376	112.657	122.951	95.7998	86.6171	78.2254	81.6962	83.4821	70.9473
		21.9	130.097	173.361	91.5536	103.851	94.1532	120.896	77.8088	104.101	180.231	195.809	171.367	142.015	140.974	151.709	140.61	130.947	102.232	134.833	83.9481	102.868	78.6329	98.7748	78.5298	93.9423	97.3641	101.072	78.779	85.3767	89.7956	73.6612	74.6239	77.2039	112.667	123.026	95.973	86.492	78.9703	81.4709	83.9356	70.6603
		22	130.257	173.427	91.4181	104.011	94.2604	120.467	77.5906	104.052	180.576	196.075	171.416	142.205	141.433	151.436	140.529	130.537	102.162	134.533	83.8866	102.683	79.1882	98.8783	78.2604	93.7407	97.1506	101.069	78.8656	85.6068	89.8002	73.7956	74.5317	77.4892	112.774	123.003	95.9567	86.6503	79.5611	81.4334	84.2631	70.701
		22.1	130.303	173.412	91.2614	103.841	94.3097	120.691	77.3808	104.307	180.854	196.017	171.343	142.288	141.879	150.878	140.022	130.501	102.074	134.129	84.1066	102.498	79.7436	99.1337	78.1927	93.6817	97.1626	101.03	79.0251	85.7669	89.7161	73.8579	73.9896	77.7188	112.744	122.756	95.9761	86.9032	80.1529	81.239	84.3284	70.802
		22.2	130.266	173.375	91.1373	103.204	94.5147	121.222	77.4733	104.836	180.856	195.92	171.152	142.241	141.622	150.824	139.083	130.158	102.098	133.821	84.339	102.315	79.7806	99.498	78.0073	93.7931	97.3254	100.943	79.0416	85.9952	89.6856	73.3812	74.1753	77.9162	112.84	122.289	96.0238	87.1991	80.3704	81.0211	83.8576	70.9571
		22.3	130.452	173.389	91.2804	102.774	94.5219	122.012	77.4486	105.132	180.834	195.657	170.587	142.078	141.234	151.075	138.148	129.767	102.115	133.499	84.6264	102.164	79.4766	100.262	77.7534	93.6968	97.5049	100.987	79.1548	85.8956	89.6696	72.8373	74.587	77.9099	113.032	121.927	95.9351	87.3567	80.484	80.8249	83.4683	71.0487
		22.4	130.631	173.486	91.3549	102.446	94.7636	121.773	77.2911	105.175	180.803	194.99	169.993	141.54	141.098	151.005	137.894	129.188	102.087	133.317	84.7402	102.076	79.2826	100.744	77.0171	93.3933	97.7303	100.98	79.0318	85.6069	89.8776	72.1563	74.9024	77.7188	113.156	121.693	95.8739	87.5624	80.3121	80.3817	82.9039	71.0707
		22.5	130.796	173.435	91.4774	102.41	94.7879	121.357	76.6741	104.885	180.565	194.258	169.012	140.994	140.976	150.458	137.977	129.581	102.197	133.408	84.679	102.064	79.5957	100.934	76.4442	93.2654	97.8132	100.742	78.6335	85.5056	90.1572	71.8086	74.1606	77.3898	113.193	121.367	95.4531	87.5781	80.2593	80.262	82.6962	71.2147
		22.6	130.854	173.288	91.5313	102.744	94.2829	121.311	76.3422	104.782	180.345	193.62	168.254	140.725	140.565	150.112	138.345	130.258	102.402	133.717	84.4781	102.115	79.9559	100.453	76.5888	93.2261	97.7243	100.464	78.5213	85.3638	90.4469	72.0963	73.2314	76.8418	113.341	121.081	95.0199	87.685	80.41	80.2889	82.4403	71.1683
		22.7	130.919	173.179	91.4524	102.921	93.6703	121.705	76.3776	104.518	180.38	192.848	168.036	140.703	139.8	150.165	138.148	130.817	102.485	134.005	84.2159	102.066	80.2799	99.925	77.2662	93.3572	97.48	100.261	78.6262	85.3231	90.114	72.8307	72.7917	76.6926	113.367	120.939	95.0222	87.8264	80.5602	80.9744	82.222	71.2191
		22.8	130.776	173.138	91.4958	103.169	93.2324	121.516	76.6901	104.294	180.449	192.232	167.969	140.996	139.636	150.49	137.831	130.681	102.538	134.265	84.105	102.024	80.2214	99.373	77.5789	93.128	97.2904	100.196	78.7484	85.4113	89.6244	73.2374	73.0197	76.7013	113.339	120.9	95.0878	87.8911	80.6198	81.6671	82.2633	71.025
		22.9	130.544	172.901	91.5323	103.328	93.5727	120.604	77.0254	103.907	180.417	191.846	168.319	141.531	139.703	150.634	137.122	130.594	102.595	134.457	84.2187	101.912	80.0799	99.1374	77.2731	92.7816	97.2604	100.272	79.0323	85.3835	89.1063	72.6702	73.4163	77.1697	113.384	120.955	95.4409	88.1981	80.6706	82.2216	82.4502	71.053
		23	130.086	172.743	91.523	103.144	94.2568	120.18	77.1627	103.948	180.296	191.607	168.251	142.01	140.005	150.652	136.786	130.774	102.685	134.409	84.4067	101.772	80.0303	99.1611	76.75	92.6372	97.4496	100.537	79.2254	85.5211	89.0714	71.6973	73.6439	77.381	113.584	121.222	95.7164	88.3658	80.5636	81.9963	82.9083	71.105
		23.1	129.715	172.76	91.4452	103.057	94.9542	120.408	77.4039	103.953	180.285	191.606	168.016	142.35	139.866	150.744	136.116	130.969	102.61	134.11	84.815	101.959	79.8536	99.0244	76.5548	92.9203	97.6824	100.834	79.1044	85.9403	89.1816	71.0997	73.9431	77.5181	113.692	121.613	95.7373	88.4961	80.4322	81.0747	83.1562	70.9819
		23.2	129.302	172.857	91.1979	102.995	95.0434	121.001	77.4828	103.526	179.977	191.951	167.641	142.457	140.008	150.646	135.925	130.653	102.489	133.773	85.3145	102.12	79.6354	98.6317	76.7186	93.2819	97.9712	101.096	78.9618	86.304	89.3033	71.2368	74.5986	76.9754	113.867	121.963	95.8065	88.5563	79.7822	80.0689	83.2696	70.7476
		23.3	129.08	172.783	90.7788	102.883	94.6251	121.299	77.7299	102.731	179.502	192.325	167.431	142.515	139.977	150.415	136.187	130.042	102.307	133.511	85.492	102.211	79.291	98.2326	76.9401	93.4416	98.1853	101.08	78.6984	86.5176	89.4709	71.427	75.2257	76.3229	113.988	122.146	95.7803	88.4393	79.1682	80.0069	83.2588	70.3852
		23.4	128.976	172.696	90.5416	102.891	94.0612	121.659	77.8156	102.129	178.995	192.649	167.637	142.6	140.007	150.025	137.394	129.544	102.075	133.034	85.6622	102.29	79.613	98.5776	76.9426	93.0814	98.252	101.013	78.3878	86.4754	89.5806	71.647	75.4743	75.8076	114.123	122.111	95.7449	88.333	78.4948	80.5594	83.1988	70.4119
		23.5	129.124	172.689	90.3318	102.699	93.6327	121.799	77.8078	102.26	178.665	192.816	167.707	142.703	139.525	149.851	138.131	129.633	101.709	132.722	85.5028	102.079	80.2507	99.6481	76.6561	92.6064	98.257	100.942	78.3886	86.1095	89.6807	71.9067	75.2321	76.1273	114.148	121.829	95.4143	88.0101	78.4516	81.3593	83.412	70.3052
		23.6	129.214	172.605	90.3827	102.444	93.593	121.661	77.6777	103	178.18	192.904	167.779	142.797	139.205	149.773	138.122	130.033	101.405	132.424	85.1116	101.725	80.8013	100.445	76.5104	92.165	98.3605	100.831	78.4528	85.7383	89.7207	72.2443	74.7671	76.844	114.087	121.523	94.8125	87.6798	78.7389	81.6734	83.544	70.2654
		23.7	129.341	172.269	90.5546	102.179	93.6258	121.151	77.6796	103.956	177.757	192.701	167.717	142.431	139.123	149.517	137.401	130.481	101.029	132.104	84.9893	101.382	80.6846	100.537	76.6339	91.8356	98.6123	100.603	78.7147	85.4603	89.8559	72.3781	74.1293	77.4446	113.97	121.165	94.3428	87.4108	79.2344	81.7234	83.5376	70.0579
		23.8	129.293	171.932	90.6058	102.088	93.8987	120.791	77.8324	104.299	177.574	192.36	167.47	142.03	139.152	149.35	137.232	130.771	100.672	131.797	84.8806	101.172	80.014	99.6006	77.0481	91.7912	98.8977	100.425	79.0093	85.3928	90.0497	72.3024	73.3219	77.523	113.843	120.896	93.919	87.0533	79.4081	81.4218	82.9301	70.3334
		23.9	129.108	171.68	90.4936	102.226	93.8969	120.326	77.9413	103.943	177.492	192.011	167.272	141.623	138.951	149.357	137.085	130.666	100.456	131.931	84.8478	100.91	79.0709	98.6197	77.2291	91.8033	99.2058	100.218	78.9813	85.4073	89.8153	72.5213	72.9622	76.9773	113.534	120.813	93.788	87.029	79.1036	80.6639	82.1563	70.5604
		24	128.858	171.238	90.1392	102.131	93.964	120.25	77.8008	103.345	177.331	191.78	166.997	141.331	138.099	149.952	136.541	130.388	100.417	132.018	84.8608	100.841	78.4277	97.8074	77.1444	92.1486	99.4802	100.095	78.848	85.3809	89.2184	72.8616	73.163	76.3482	113.155	120.978	93.9328	87.0281	78.4361	80.2787	81.5787	70.6184
		24.1	128.722	170.836	89.7502	101.909	93.7338	120.2	77.3353	103.325	177.431	191.402	166.428	141.36	137.355	150.046	135.472	129.811	100.305	132.288	84.7131	100.881	78.301	97.515	76.6879	92.2142	99.5986	100.02	78.674	85.3646	88.665	73.0671	73.7196	76.045	112.926	121.097	93.9431	87.0395	77.9782	80.1547	81.675	70.2161
		24.2	128.625	170.548	89.3339	101.55	93.3561	120.68	76.6398	103.744	177.671	191.193	165.921	141.166	136.782	149.986	135.032	130.01	100.411	132.655	84.5985	100.544	78.606	97.6268	76.2218	92.0263	99.2878	100.07	78.5141	85.251	88.9008	72.8892	73.9124	76.2832	112.617	121.289	94.1705	87.2371	78.204	80.7529	82.29	69.8853
		24.3	128.468	170.362	89.3165	101.054	92.687	120.578	76.1236	103.908	177.67	191.175	165.696	140.766	136.743	149.26	135.673	130.396	100.543	132.919	84.7469	100.407	78.8534	98.0206	75.9896	91.652	98.9886	100.285	78.6235	85.2024	89.4952	72.8517	73.9178	76.798	112.365	121.42	94.5459	87.354	78.9347	81.0086	82.8786	70.0387
		24.4	128.416	170.242	89.4963	100.88	92.4492	120.414	75.9383	103.59	177.641	191.389	165.667	140.305	136.93	148.911	136.483	131.116	100.61	132.962	84.8081	100.228	78.8224	98.8978	76.0082	91.3907	98.6572	100.444	78.9049	85.154	89.6932	72.8462	73.7414	77.2266	112.322	121.542	94.9105	87.5785	79.5984	81.1751	82.8309	70.28
		24.5	128.352	170.262	89.8505	100.969	92.7276	120.155	75.8582	103.232	177.589	191.662	165.737	140.025	137.074	148.357	136.759	131.114	100.614	133.14	84.6651	100.014	78.7574	99.5423	76.4623	91.4557	98.2621	100.485	79.0766	85.1276	89.2659	73.038	73.8837	77.4207	112.405	121.571	95.3376	87.6373	80.0441	81.2038	82.2293	70.6067
		24.6	128.247	170.413	90.2609	100.926	93.5207	120.508	75.5581	103.132	177.199	192.063	165.838	140.112	137.138	148.215	136.422	130.714	100.805	133.383	84.3216	99.9561	78.5097	99.5214	76.9003	91.6242	97.8165	100.471	79.2547	85.2302	88.7544	73.2229	73.8657	77.1597	112.51	121.548	95.6117	87.5903	80.0331	81.1671	81.8439	70.7581
		24.7	128.077	170.7	90.4039	101.043	93.6989	120.712	75.438	103.48	176.847	192.38	165.748	140.382	136.891	148.087	136.24	130.125	100.939	133.657	83.6407	99.8408	78.2711	98.5217	77.2072	92.0822	97.6402	100.424	79.3093	85.3213	88.6571	73.7469	74.0533	76.6921	112.845	121.464	95.645	87.6817	80.0038	80.9138	82.0798	71.0432
		24.8	128.041	170.896	90.4063	101.219	93.3163	120.566	75.5379	103.292	176.756	192.556	165.581	140.481	136.793	148.11	136.094	129.582	101.023	134.008	83.2186	99.7841	78.1258	97.5487	76.786	92.4949	97.4829	100.241	79.3037	85.6514	88.8919	73.812	74.1059	76.2966	113.181	121.4	95.6812	87.6251	79.4662	79.8848	82.8442	71.0197
		24.9	127.984	171.048	90.1451	101.308	92.4953	120.223	76.1224	103.012	176.712	192.501	165.589	140.183	136.628	147.696	135.824	128.986	101.007	134.33	83.215	99.5893	78.5956	97.0884	76.4243	92.7982	97.4764	100.114	79.2853	86.1904	89.416	73.4621	74.3796	76.4529	113.403	121.27	95.8747	87.7263	79.0227	79.1309	83.4509	70.5554
		25	128.046	171.23	89.9009	101.524	92.203	120.056	76.5419	102.479	176.537	192.206	165.487	139.569	136.512	147.291	135.197	128.357	100.972	134.416	83.4093	99.6239	79.2661	97.3943	76.5318	92.3802	97.5991	99.8769	79.2146	86.55	90.1616	72.6601	74.521	76.7379	113.559	121.121	96.0559	87.8525	78.5009	78.5826	83.837	69.9382
		25.1	128.012	171.172	89.6219	101.609	92.3129	120.105	77.1194	102.347	176.559	191.61	165.459	138.911	136.404	146.623	134.62	128.019	100.909	134.256	83.7716	99.6849	79.735	97.7674	77.2932	91.9334	97.7713	99.7399	79.1869	86.8584	90.9438	72.4709	74.4048	76.8018	113.605	121.028	96.2766	87.5864	78.5772	79.1777	83.8662	69.5734
		25.2	127.932	171.038	89.4296	101.402	92.4987	119.991	77.4888	102.222	176.63	190.93	165.385	138.516	136.168	146.383	134.349	128.165	100.856	134.047	84.1365	99.7648	79.321	98.0787	77.593	91.4812	97.9303	99.6727	79.2475	86.6676	91.1354	72.5319	74.0621	76.3819	113.437	121.038	96.4226	87.2061	78.8378	79.6463	83.5863	69.4317
		25.3	127.913	171.002	89.4343	101.218	92.5437	119.85	77.5467	102.012	176.453	190.242	165.13	138.453	136.251	145.819	134.341	128.314	100.958	133.822	84.2447	100.112	78.945	98.1301	77.1618	91.7497	98.0467	99.7161	79.4071	86.0006	90.7007	72.6853	73.8332	75.814	113.244	121.055	96.2849	86.7635	79.1472	80.2317	83.2857	69.2549
		25.4	127.853	170.861	89.3388	101.106	92.6232	119.7	77.1238	101.709	176.143	189.643	164.911	138.602	136.012	145.959	134.074	128.271	101.175	133.534	84.3874	100.465	78.2221	98.163	76.3356	91.8899	97.9796	99.8994	79.6739	85.4703	89.8217	72.5462	73.7511	75.7164	113.085	121.026	95.9516	86.3382	78.9639	80.0729	82.9507	68.7643
		25.5	127.56	170.457	89.3148	101.004	93.1033	119.385	76.5677	101.481	176.015	189.25	164.711	138.758	136.169	145.852	133.851	128.17	101.334	133.378	84.4416	100.865	77.912	98.4224	76.0036	91.9924	97.8363	100.311	79.8688	84.9808	89.2409	72.4237	73.5627	76.0912	112.961	120.91	95.5828	86.1517	78.6513	79.7414	82.9111	68.5384
		25.6	127.32	170.053	89.2294	101.273	93.7356	119.052	76.5379	101.395	175.894	189.317	164.525	138.836	135.799	146.216	133.735	128.018	101.359	133.283	84.2172	101.188	77.4486	98.8032	76.0888	91.6644	97.8314	100.655	79.8929	84.9192	89.0537	72.6437	73.188	76.848	112.955	120.789	95.1341	86.3615	78.4467	79.4019	82.678	68.7658
		25.7	127.149	169.768	89.1419	101.466	93.8473	118.586	76.9749	101.657	175.612	189.458	164.581	138.806	135.763	146.169	133.88	127.874	101.347	133.024	84.1164	101.253	77.6356	99.267	76.3553	91.2886	97.8812	100.779	79.8748	85.1891	89.1928	72.7236	72.7344	77.3633	113.202	120.43	94.7765	86.6429	78.6611	79.5062	82.683	69.5111
		25.8	126.904	169.46	89.1711	101.577	93.5434	118.674	77.5153	101.851	175.697	189.599	164.654	138.708	135.51	146.029	133.743	127.734	101.127	132.816	83.9618	101.081	77.7651	99.2829	76.4251	91.2694	97.8421	100.761	79.5319	85.2981	89.4423	72.6874	72.6344	77.5934	113.543	120.113	94.7695	86.8023	79.0361	79.8863	82.8142	70.0523
		25.9	126.75	169.286	89.2791	101.613	93.0087	118.736	77.7143	102.159	175.851	189.655	164.501	138.784	135.68	145.483	133.249	128.062	100.863	132.663	84.1213	100.792	77.968	98.8852	76.4247	91.4761	97.8727	100.593	79.0548	85.3068	89.66	72.502	72.8088	77.2907	113.874	119.942	94.8467	86.7729	79.3328	80.0777	83.104	69.992
		26	126.633	169.421	89.3666	101.305	93.2981	118.725	77.7357	102.319	175.854	189.716	164.413	138.85	135.89	144.944	132.666	128.447	100.698	132.369	84.5079	100.513	78.0159	97.944	76.2688	91.6748	97.9145	100.274	78.5719	85.1696	89.9869	72.8641	73.607	76.9297	114.215	119.883	95.1506	86.2976	79.3001	80.0787	83.13	69.4337
		26.1	126.422	169.681	89.4001	100.892	93.4248	118.454	77.4392	103.03	175.951	189.674	164.289	138.993	135.895	145.074	132.172	128.593	100.563	132.132	84.8782	100.558	78.2314	97.075	76.0067	91.5068	97.8776	99.9282	78.1903	85.0751	90.1186	73.3261	74.4208	76.6168	114.468	119.813	95.5887	85.9702	79.1598	80.0017	82.9841	68.9018
		26.2	126.127	169.803	89.3784	100.397	93.1268	118.416	76.9337	103.736	176.094	189.632	164.173	139.024	135.796	145.501	132.029	128.226	100.339	132.108	85.1893	100.765	78.2403	96.3774	75.9534	91.3512	97.6676	99.8493	78.1939	85.2014	90.4091	73.5987	74.7632	76.9447	114.415	120.044	95.8239	85.7606	78.9401	80.0751	82.9052	68.7563
		26.3	125.692	169.883	89.1339	100.054	92.2159	118.994	76.079	104.256	175.853	189.68	164.17	138.642	135.436	146.006	132.388	127.939	100.213	132.015	84.9659	100.905	78.0364	96.1682	76.0843	91.4827	97.5772	99.861	78.6189	85.5466	90.5724	73.2731	74.1664	77.5554	114.148	120.292	96.2007	85.7248	79.124	80.1394	83.0642	68.9963
		26.4	125.176	169.84	89.0796	99.8201	91.8736	119.362	75.6153	103.794	175.645	189.9	164.156	138.212	135.407	146.07	132.822	128.072	100.052	131.951	84.5429	100.885	77.9411	96.6084	76.2566	91.7291	97.5368	99.91	79.1394	86.071	90.8409	72.9878	73.2537	78.1171	113.856	120.383	96.2308	85.8718	79.1871	80.2309	83.2447	69.3082
		26.5	124.945	169.73	88.963	99.7893	92.4896	119.294	75.3902	102.924	175.621	189.965	163.897	137.508	135.25	146.061	133.034	128.426	99.8366	132.142	84.0033	100.548	78.263	97.5724	76.2316	91.6041	97.5243	99.9541	79.5183	86.5604	90.7046	72.5144	72.817	78.1963	113.543	120.427	95.9462	85.8331	79.4104	80.1827	83.2743	69.5762
		26.6	124.995	169.479	88.8539	100.038	93.3567	118.409	75.6778	102.156	175.185	189.861	163.666	136.934	135.163	146.041	132.782	128.391	99.6982	132.287	83.3559	100.094	78.6784	98.4942	76.519	91.1573	97.5831	100.097	79.9025	86.9333	90.3313	72.1312	72.7589	77.8759	113.246	120.534	95.6324	85.9876	79.0718	79.9562	83.2734	69.8699
		26.7	125.223	169.166	88.9364	100.158	94.0133	117.825	75.5843	101.735	174.709	189.915	163.498	137.005	134.756	146.268	132.417	127.853	99.5832	132.345	83.0669	99.8461	78.8253	98.5278	77.2648	90.491	97.7594	99.9849	79.9889	87.1655	89.6889	71.5747	72.8668	77.4198	113.11	120.534	95.0124	86.2602	78.7689	79.5137	83.39	70.4461
		26.8	125.683	168.853	88.8137	100.334	94.0343	117.752	75.847	101.541	174.438	189.896	163.307	137.229	134.285	146.508	132.268	126.997	99.4646	132.421	82.9348	99.9864	78.3226	97.8576	77.818	90.402	97.9193	99.8908	80.0116	86.9871	88.964	71.5421	72.8111	76.9658	113.1	120.439	94.7038	86.6316	78.2596	79.2149	83.5506	70.9517
		26.9	126.215	168.629	88.7494	100.532	93.7258	118.35	75.8681	101.219	174.124	189.685	163.392	137.626	133.903	146.708	132.473	126.366	99.4175	132.636	83.0211	100.344	77.9342	96.9861	77.6708	90.7221	98.1006	99.8377	80.1204	86.6269	88.4268	72.0474	73.147	76.7746	113.108	120.46	94.7591	86.9468	78.16	79.2084	83.3839	71.2294
		27	126.462	168.336	88.7076	100.562	92.9586	118.843	76.4112	101.198	173.743	189.643	163.506	137.875	133.596	146.463	133.156	125.919	99.3906	132.632	83.3193	100.844	77.5438	96.8928	77.0539	91.3023	98.254	99.9172	79.8748	86.2784	88.3522	72.5418	73.5877	76.888	113.132	120.558	94.8516	87.0006	77.9433	79.6207	82.8342	70.6966
		27.1	126.516	168.296	88.6924	100.729	92.3092	118.824	76.5514	101.048	173.752	189.591	163.407	137.782	133.835	145.747	133.973	125.717	99.2694	132.623	83.6174	101.289	77.6744	97.2693	76.7584	91.2672	98.3005	99.8175	79.7024	85.8538	88.9813	72.7548	73.9874	77.014	113.201	120.641	95.0262	87.0683	77.6808	80.0442	82.2818	70.2303
		27.2	126.425	168.514	88.7758	100.798	92.1167	118.431	76.7749	101.04	173.858	189.318	163.157	137.627	133.99	145.103	134.521	125.841	99.3176	132.646	83.8808	101.505	77.7519	97.757	76.9059	91.0269	98.4326	99.8465	79.5565	85.713	89.9362	72.1957	74.0364	76.7784	113.265	120.554	95.0104	87.0784	77.4404	80.3646	81.9847	69.6916
		27.3	126.335	168.968	88.8238	100.608	92.4176	118.035	76.8991	100.726	173.847	189.165	162.826	137.632	134.338	144.789	134.571	126.032	99.3511	132.515	83.9636	101.639	77.8524	97.547	77.2617	90.6988	98.5983	99.7325	79.3578	85.6668	90.5538	71.9393	74.0639	76.3213	113.227	120.456	94.7457	86.9866	77.8394	80.1104	82.0538	69.661
		27.4	126.245	169.429	88.7796	100.251	92.7262	118.058	77.1407	100.759	173.836	189.058	162.346	137.971	134.064	145.386	134.345	126.415	99.3457	132.143	83.8945	101.612	77.8396	97.3743	77.6083	90.6113	98.7337	99.5302	79.4476	85.5626	90.3512	71.8681	74.2997	76.1576	113.227	120.271	94.5523	86.831	78.569	79.8556	82.2119	69.5212
		27.5	126.21	169.847	88.7673	99.8693	92.7821	118.303	77.0802	100.742	173.784	188.845	162.098	138.305	133.794	145.574	134.203	126.448	99.2912	131.905	83.6659	101.521	77.5114	97.3861	77.7026	90.4713	98.77	99.2286	79.5506	85.585	89.6166	72.1571	74.4939	76.4949	113.337	120	94.3524	86.5669	79.1007	79.5481	82.5129	69.6064
		27.6	126.265	170.115	88.7928	99.4759	92.694	118.188	76.4476	101.032	173.795	188.717	161.996	138.444	133.44	145.37	133.947	126.48	99.3697	131.775	83.5759	101.278	77.3499	97.5558	77.4189	90.3908	98.788	99.1246	79.6673	85.6951	89.3853	72.0333	74.4031	76.9167	113.434	119.73	94.2148	86.3663	79.0434	79.5073	82.5589	69.763
		27.7	126.464	170.163	88.9215	99.3457	92.7644	117.749	75.6963	101.002	173.781	188.692	161.854	138.582	133.389	144.695	133.461	126.231	99.3181	131.7	83.4928	100.863	77.2792	97.092	76.7193	90.6357	98.6626	99.1751	79.8361	85.6684	89.6443	71.4637	73.8767	77.1142	113.509	119.71	94.1668	86.5183	78.7379	79.3722	82.5298	69.9569
		27.8	126.532	169.781	89.1839	99.6146	92.8073	117.086	75.5187	101.006	173.923	188.532	162.018	138.585	133.296	144.686	132.657	126.07	99.3438	131.907	83.5496	100.676	77.4919	96.5919	76.055	90.4923	98.4505	99.4239	79.8308	85.5248	90.1714	71.0341	73.3603	76.9121	113.834	119.676	94.0079	86.9056	78.4557	79.2439	82.2551	69.8549
		27.9	126.587	169.333	89.208	99.6877	92.8563	117.058	75.9298	100.601	174.12	188.419	162.076	138.439	133.114	145.007	132.096	126.072	99.4031	132.256	83.7804	100.467	77.7123	96.2242	75.7871	90.318	98.1408	99.7534	79.7129	85.1882	89.9989	71.1676	73.1487	76.7667	114.172	119.71	94.0265	87.1516	78.3416	79.3439	82.2861	69.5247
		28	126.64	169.008	88.9704	99.9242	92.5819	117.168	76.4716	100.636	174.433	188.33	162.193	138.53	132.735	145.392	131.523	126.27	99.6321	132.558	83.8221	100.293	77.8582	96.4952	75.7882	89.9421	97.9912	100.072	79.6844	84.7724	89.8986	71.9943	73.2587	76.6483	114.311	119.822	94.3198	87.2316	78.4961	79.2308	82.3473	69.2208
		28.1	126.624	168.649	88.6756	99.9646	92.2562	117.38	76.667	100.598	174.427	188.152	162.164	138.285	132.716	145.503	131.065	126.501	99.8209	132.814	83.902	100.37	78.2226	96.5837	75.8176	90.2649	98.0396	100.306	79.5969	84.7361	89.6828	72.9897	73.5179	76.7166	114.412	119.889	94.7269	87.2291	78.786	79.1143	82.9106	69.3004
		28.2	126.471	168.373	88.4427	99.4953	91.8368	117.418	76.8476	100.837	174.34	187.92	161.672	137.805	133.037	145.698	130.47	126.457	100.053	132.986	83.8723	100.119	78.1801	96.8719	75.5407	90.5442	98.161	100.304	79.5977	84.9426	89.5721	73.5484	73.6902	76.6396	114.52	119.882	95.3094	86.9884	78.9501	79.0736	83.3319	69.656
		28.3	126.346	168.444	88.3915	99.1541	91.5552	117.567	76.8654	100.632	174.18	187.669	161.368	137.524	133.513	145.747	130.43	126.572	100.157	133.077	83.8045	100.078	77.9847	96.8736	75.4221	90.8868	98.4013	100.088	79.7917	85.3941	89.3313	73.7281	73.9438	76.4773	114.462	119.999	95.8262	86.9338	78.9018	79.5507	83.7061	70.0384
		28.4	126.117	168.531	88.555	98.6883	91.4116	117.706	76.7578	100.38	173.955	187.167	161.038	137.104	133.119	145.3	130.855	127.02	100.238	133.14	83.7773	100.206	77.4174	97.071	75.5571	90.9786	98.8113	99.7481	79.8529	85.77	89.421	73.3094	74.0022	76.3326	114.22	120.003	96.2019	86.9089	78.9367	80.1649	83.3927	70.2416
		28.5	125.926	168.59	88.6676	98.2671	91.3539	117.705	76.1183	100.007	173.447	186.654	160.92	136.973	132.448	144.683	131.735	127.536	100.208	133.065	83.6704	100.24	77.1671	96.7679	75.9787	91.0389	99.054	99.4102	79.8779	85.7898	89.8593	73.1539	74.1036	76.495	114.007	119.959	96.5823	86.6862	79.3009	80.3208	82.9968	70.3174
		28.6	125.624	168.654	88.6543	98.2664	91.5147	117.326	75.3107	99.7699	173.062	186.442	161.291	137.013	132.07	144.496	132.237	127.542	100.137	132.891	83.7307	100.455	77.0396	96.4959	76.3693	90.828	98.9835	99.0323	79.9918	85.5771	89.9262	72.8103	74.0888	76.9871	113.803	119.898	96.8644	86.696	79.7728	80.0853	82.7856	70.5782
		28.7	125.34	168.607	88.6461	98.3648	91.5659	116.795	74.7866	99.6289	172.728	186.364	161.252	136.88	132.287	145.241	132.415	126.744	99.9224	132.603	83.628	100.362	77.1239	95.9649	76.5372	90.375	98.8034	98.8231	80.0213	85.1594	89.3552	72.8072	74.4171	77.2584	113.563	119.859	97.0906	86.5933	79.8853	79.8097	82.932	70.7811
		28.8	124.997	168.454	88.5276	98.4804	91.7138	116.239	74.9721	99.589	172.438	186.495	161.217	136.958	132.566	145.945	132.22	125.797	99.7572	132.253	83.6129	100.239	77.2748	95.8579	76.9236	90.2336	98.3549	98.8039	80.0497	84.8649	88.5978	72.3313	74.8298	76.8696	113.338	119.754	97.0818	86.6299	79.7792	79.8124	83.0559	70.681
		28.9	124.775	168.426	88.2308	98.7627	91.6738	116.456	75.9192	99.2971	172.199	187.145	161.157	136.907	132.019	145.884	131.912	124.982	99.5524	131.821	83.7556	100.044	77.3613	95.9749	77.1818	90.2287	97.6905	98.9236	80.084	84.6803	88.3576	71.9229	75.1514	75.8118	113.295	119.87	96.7641	86.6413	79.4799	80.0692	83.0959	70.1407
		29	124.642	168.529	87.6622	99.0064	91.8751	117.014	76.546	99.1918	172.229	188.012	160.68	136.8	131.648	144.812	131.457	124.652	99.3848	131.616	83.7053	99.9953	77.3709	96.2966	77.606	90.4104	97.2789	99.0948	79.9858	84.8624	88.7082	71.5209	75.0486	75.251	113.348	120.041	96.4356	86.5068	79.6692	80.3256	83.1743	69.4868
		29.1	124.815	168.753	86.7248	99.3583	92.0784	117.581	76.6047	99.014	172.146	188.687	160.355	136.938	131.205	143.828	131.1	124.895	99.1852	131.469	83.7699	99.9304	77.4012	96.658	77.4971	90.3722	97.0954	99.3691	79.6659	85.3739	89.461	71.9016	74.4942	75.573	113.461	120.336	96.1322	86.3373	79.7003	80.8204	83.1984	69.5028
		29.2	125.109	169.113	85.9441	99.7356	92.2001	117.332	76.1648	99.3657	172.025	189.097	159.897	136.955	131.541	143.375	131.063	125.224	99.1794	131.471	83.6889	99.6693	77.5873	96.8352	77.3152	90.359	97.1224	99.6236	79.3409	85.7904	89.9077	72.642	73.8919	76.8982	113.659	120.552	96.0259	86.0268	79.7099	80.8109	82.9463	69.6633
		29.3	125.61	169.406	85.5483	99.9509	92.008	116.669	76.1778	99.4292	171.76	189.37	159.385	137.023	131.654	143.574	131.004	125.476	99.2464	131.386	83.4603	99.4649	77.642	97.2273	76.7439	90.3819	97.4289	99.8422	79.1743	86.2328	89.8963	73.2426	73.6838	77.6932	113.879	120.745	96.2461	86.0521	79.3176	80.629	82.3079	69.914
		29.4	126.118	169.417	85.6811	100.01	91.5416	116.252	76.6427	99.4401	171.514	189.184	159.274	137.23	131.968	143.673	130.795	125.201	99.3112	131.38	83.4776	98.954	77.5893	97.4739	76.4718	90.1824	97.9333	99.9248	79.0068	86.4911	89.2019	73.0813	73.9769	77.7711	114.096	120.812	96.4979	86.1383	79.0213	79.9171	82.177	69.3929
		29.5	126.501	168.968	86.3309	99.7308	91.1723	116.172	76.9984	99.0082	171.131	188.628	159.636	137.117	132.1	143.64	130.588	125.194	99.299	131.22	83.5719	98.6701	77.4853	97.5774	76.0879	90.0868	98.2454	99.9243	79.1189	86.2938	88.7606	72.4258	74.379	77.2	114.295	120.8	96.6564	86.4269	78.824	79.8394	82.1797	69.0211
		29.6	126.605	168.416	87.0077	99.4137	91.2878	116.71	76.8173	98.9176	170.898	187.962	160.115	136.797	132.104	143.524	130.632	125.448	99.3622	131.048	83.689	98.6983	77.4121	97.1668	76.1204	90.1362	98.4062	99.9311	79.4177	86.0411	89.0933	71.9483	74.4008	76.7094	114.363	120.7	96.6454	86.8984	78.6471	79.8812	82.6227	68.7642
		29.7	126.585	167.866	87.5892	99.0924	91.7306	116.779	76.0973	99.2473	170.713	187.502	160.577	136.419	131.569	143.684	130.265	125.985	99.473	131.003	83.9554	98.7256	77.4826	96.6789	75.8313	90.5188	98.3575	99.901	79.6061	85.881	89.7778	71.7632	74.0808	76.3981	114.251	120.576	96.3475	87.1696	78.5446	80.1746	82.5748	69.0151
		29.8	126.338	167.254	87.7989	98.7398	92.1926	117.22	75.4854	99.934	170.594	187.092	160.628	135.987	130.509	144.266	129.73	126.113	99.625	131.12	83.9382	98.9633	77.4657	96.38	76.2339	90.6302	98.2811	99.8281	79.7583	85.6203	90.2594	72.013	73.6972	76.0251	114.091	120.509	95.9133	87.528	78.7942	80.1731	82.6272	69.0962
		29.9	125.984	166.918	87.9522	98.6184	92.2384	117.251	75.0767	100.479	170.386	187.01	160.129	135.884	129.898	144.78	129.051	126.024	99.9187	131.206	83.7923	99.102	77.5923	96.4283	76.42	90.1484	98.112	99.8958	79.6386	85.6029	90.047	71.969	73.3497	75.931	113.927	120.283	95.5617	87.7406	78.8941	80.2808	82.4128	69.1033
		30	125.626	167.005	88.1082	98.5468	92.2714	117.987	74.8829	100.849	170.315	186.973	159.605	136.167	129.812	144.875	129.128	125.488	100.184	131.306	83.6121	98.8791	77.5538	96.3047	76.7539	89.0234	98.0083	99.982	79.1954	85.5916	89.6372	72.0203	73.2213	76.0527	113.676	120.032	95.3074	87.7003	79.0179	80.4781	82.3174	68.9071
		30.1	125.322	166.996	88.2262	98.5959	92.1872	118.008	74.7207	100.827	170.324	186.95	159.072	136.497	130.422	144.306	129.371	125.373	100.426	131.493	83.2911	98.5239	77.5543	96.4346	76.5018	88.2052	98.0532	99.8388	78.7164	85.2548	89.2569	71.8904	73.2974	76.1867	113.515	119.724	95.3269	87.475	78.7728	80.5693	82.3841	68.8069
		30.2	125.085	166.908	88.5714	98.7569	91.8291	117.902	74.5348	100.577	170.399	187.036	158.672	136.65	130.377	143.478	129.959	125.223	100.391	131.419	83.0636	98.0304	77.7576	96.4971	76.2984	88.1321	98.2218	99.6676	78.3344	84.9066	88.7896	71.9238	73.8779	76.3829	113.451	119.455	95.4682	87.0573	78.9542	80.5299	82.688	68.8444
		30.3	124.972	167.08	88.5521	98.7207	90.9684	117.331	74.8831	99.9079	170.361	186.839	158.667	136.452	130.432	142.956	130.209	125.05	100.218	131.277	82.8986	97.6074	78.0388	97.0676	76.3877	89.0088	98.1857	99.5741	78.1293	84.6814	88.6911	71.5676	74.3913	76.5399	113.38	119.204	95.6014	86.604	78.9999	80.5138	83.0939	69.0384
		30.4	124.967	167.148	88.3193	98.7491	90.4022	117.206	75.2732	99.4678	170.408	186.482	158.659	136.074	130.088	142.595	130.168	124.475	99.9282	131.227	82.9344	97.3945	78.397	97.135	76.454	89.7461	98.0119	99.4699	78.1749	84.6365	88.7767	70.919	74.553	76.9673	113.329	119.297	95.7104	86.4038	79.1893	80.7669	83.4036	69.3698
		30.5	125.034	167.043	88.1074	98.838	90.4457	117.167	76.0641	99.0854	170.359	186.381	158.799	135.82	130.555	142.665	129.715	123.843	99.7244	131.343	83.1393	97.4082	78.4273	97.1919	76.5906	90.1938	97.8026	99.4644	78.2806	84.8724	89.3031	70.4793	73.9712	77.0604	113.316	119.412	95.7246	86.4932	79.0818	81.0443	83.3802	69.8029
		30.6	125.297	167.109	87.5426	98.7639	91.0167	117.025	76.2301	99.0012	170.245	186.396	159.029	135.819	130.313	142.363	129.655	123.935	99.5524	131.327	83.3176	97.6441	78.2001	96.8884	76.5396	90.2384	97.4402	99.605	78.4361	85.2687	89.3796	70.5342	73.2239	77.0819	113.322	119.516	95.7694	86.6721	78.9899	80.9702	83.2149	70.073
		30.7	125.532	167.152	87.1927	98.7501	91.4123	116.653	76.0908	99.035	169.942	186.085	158.907	136.185	130.008	142.226	129.673	124.194	99.6992	131.435	83.4072	97.897	78.0077	96.7556	76.7136	90.1521	97.0159	99.6602	78.6812	85.486	89.2028	71.0513	72.9388	77.1112	113.46	119.629	95.8201	86.908	78.6887	80.6812	82.9783	69.9998
		30.8	125.698	167.06	87.0563	98.5604	91.48	116.073	75.412	99.2458	169.754	186.04	158.918	136.442	128.838	141.924	129.365	124.387	99.87	131.5	83.1814	98.4302	78.1158	96.5481	76.8807	89.8566	96.8256	99.5496	78.7316	85.5262	89.0626	71.5753	73.1161	77.2416	113.746	119.725	95.7978	87.169	78.6103	80.4292	83.1102	69.5594
		30.9	125.891	166.97	86.8467	98.0614	91.501	115.733	74.7563	99.6257	169.466	185.9	158.595	136.659	128.292	142.13	128.602	124.335	99.9512	131.421	82.8141	98.9685	78.4754	96.1407	76.9683	89.6172	96.8389	99.3036	78.8081	85.6176	89.2711	71.8551	73.502	77.2358	113.966	119.568	95.6514	87.3385	78.7474	80.5166	82.882	69.4269
		31	126.091	166.928	87.0115	97.7751	91.2827	115.515	74.389	99.7407	169.238	185.58	158.169	136.851	128.246	142.492	128.349	124.267	99.9962	131.136	82.6214	99.2514	78.4671	95.6859	76.6107	89.7143	96.7965	99.0504	78.6548	85.5431	89.5411	71.9113	73.4223	77.087	114.176	119.581	95.3914	87.4808	79.1272	80.5071	82.347	69.717
		31.1	126.047	166.841	87.205	97.5639	91.0926	115.725	74.6394	99.7918	168.889	185.184	157.804	136.852	128.866	143.004	128.95	124.68	99.9413	130.869	82.5674	99.5891	78.1926	95.1938	75.9338	90.2192	96.9966	98.8885	78.2854	85.4326	89.3752	71.8944	73.1581	76.8376	114.299	119.796	95.1664	87.7059	79.337	80.4152	81.3997	70.2747
		31.2	125.908	166.833	87.2488	97.3682	90.657	115.735	75.0571	99.5973	168.729	184.847	157.013	136.949	129.178	143.134	129.608	124.621	99.5719	130.389	82.8311	99.5709	77.9968	95.2454	75.2087	90.487	97.287	98.979	78.165	85.2383	89.0662	71.765	72.7022	76.6342	114.258	120.068	95.0836	87.534	79.2671	79.6883	80.8578	70.3696
		31.3	125.827	166.708	87.2964	97.3678	90.6083	115.842	75.5278	99.8399	168.68	184.521	156.721	136.916	129.063	142.493	129.653	124.492	99.211	129.917	83.1004	99.4758	78.2571	95.5393	75.0736	90.5259	97.5423	99.2494	77.8924	84.8328	88.8264	71.716	72.5532	76.3466	114.013	120.32	95.139	87.3918	78.7901	79.3164	80.483	70.2218
		31.4	125.51	166.659	87.3185	97.3531	90.9438	115.9	75.4621	99.9118	168.851	184.393	156.646	136.605	128.75	141.306	129.203	124.054	99.036	129.554	83.1184	99.3624	78.4863	95.9552	75.3658	89.851	97.8432	99.7025	77.8748	84.4987	88.7748	71.1498	72.5523	76.2257	113.71	120.673	95.2911	87.2036	78.4108	78.8521	80.4061	69.779
		31.5	125.011	166.713	87.4574	97.4667	91.3598	116.009	75.4796	100.029	168.945	184.433	156.679	136.291	128.555	140.404	128.708	123.977	98.8294	129.267	83.1664	98.9411	78.4779	96.0687	75.9638	89.1386	98.3224	100.1	78.2183	84.3444	88.7112	70.8686	73.0381	76.0884	113.421	120.751	95.4138	86.806	78.271	79.3408	80.6894	69.6273
		31.6	124.648	166.668	87.5958	97.8934	91.6189	115.873	75.5748	99.7201	169.25	184.331	157.082	136.036	128.593	140.155	128.233	124.113	98.6284	129.113	83.0413	98.6227	78.309	95.8408	76.2658	88.4559	98.5788	100.4	78.4204	84.3972	88.4513	70.4212	73.6347	76.014	113.195	120.673	95.5199	86.6166	78.5118	79.6141	81.3563	69.506
		31.7	124.323	166.502	87.8323	98.3958	91.2707	115.546	75.7661	99.6239	169.405	184.564	157.138	135.711	128.65	140.382	127.811	124.191	98.6429	129.41	82.8968	98.1883	78.1442	95.5399	76.2222	88.4869	98.6538	100.457	78.707	84.5666	88.278	70.6247	74.251	76.2488	113.092	120.48	95.5993	86.0658	78.7413	80.0698	82.1412	69.8157
		31.8	123.96	166.534	87.7812	98.7335	91.1153	115.162	75.7474	99.4956	169.405	184.633	157.071	135.647	129.147	140.442	127.699	124.435	98.6664	129.759	82.89	97.9078	78.0553	95.1998	75.8576	88.879	98.6588	100.399	78.8828	84.6057	88.3186	70.8329	74.4621	76.8604	113.069	120.325	95.5872	85.6571	78.706	79.907	82.3884	70.1221
		31.9	123.85	166.508	87.524	98.9032	90.8119	114.958	75.3613	99.4706	169.139	184.516	156.939	135.573	129.898	140.627	127.863	124.45	98.5886	130.005	82.863	97.8263	77.8313	94.9946	75.5619	89.2731	98.6204	100.348	78.6735	84.4829	88.5541	71.3007	74.4498	77.5376	113.124	120.096	95.5076	85.3584	78.4463	79.7758	82.1406	70.3983
		32	123.994	166.354	87.4669	98.6456	90.9692	114.831	74.971	99.6027	169.018	184.302	156.787	135.143	130.694	140.911	128.539	124.434	98.6271	130.323	82.9656	97.5609	77.9147	94.8806	75.6232	89.7876	98.5636	100.382	78.5673	84.3905	88.5499	71.253	74.394	77.484	113.296	120.101	95.4626	85.19	77.9171	79.6221	81.612	70.3553
		32.1	124.056	166.34	87.2568	98.1226	91.2859	114.698	74.7661	99.9508	168.819	184.444	156.719	134.706	130.932	141.573	129.137	124.203	98.7825	130.511	83.2034	97.3995	77.9648	94.8698	76.0364	90.3579	98.6206	100.389	78.561	84.2723	88.1053	71.2173	74.4661	77.1992	113.516	120.049	95.2732	85.6063	77.6344	79.7811	81.3099	70.1862
		32.2	124.278	166.551	87.1743	97.7677	91.955	114.427	74.7153	100.283	168.787	184.324	156.624	134.005	130.492	142.263	129.804	124.406	98.9751	130.303	83.3803	97.3206	78.0161	95.0164	76.6929	91.1137	98.8824	100.426	78.4994	84.2278	87.8289	71.2691	74.243	76.8726	113.639	120.069	95.0412	85.9931	77.8521	79.902	81.4779	69.9074
		32.3	124.519	166.597	87.1341	97.2206	92.2819	114.166	74.6074	100.116	168.879	184.273	156.585	133.429	129.647	142.746	129.894	124.617	99.2542	130.062	83.2708	97.2705	77.958	95.0096	77.0967	91.6052	99.0766	100.44	78.6074	84.1837	88.275	71.8153	73.9613	77.2091	113.773	119.975	94.8948	86.5726	78.8688	80.1584	82.089	69.4839
		32.4	124.544	166.441	86.7413	97.0326	92.0673	114.474	74.7712	99.6017	169.18	184.227	156.564	133.19	128.945	142.604	129.896	124.707	99.5659	129.859	82.9473	97.473	78.0827	95.0992	77.2152	91.7028	99.127	100.262	78.4538	83.9439	89.2373	72.1983	73.5364	77.3981	113.872	119.828	94.6069	87.2018	79.952	80.2581	82.6802	69.2051
		32.5	124.44	166.329	86.3286	97.1894	91.5889	115.265	75.2506	99.0937	169.345	184.015	156.487	133.071	128.284	141.919	129.833	124.258	99.7879	129.546	82.6504	97.6772	78.58	95.0697	77.0119	91.3682	99.0406	99.8294	78.1409	83.4888	90.2201	72.0792	73.5622	77.4753	113.885	119.55	94.5148	87.5174	80.3653	80.4588	82.9234	69.1749
		32.6	124.446	166.349	86.1468	97.1382	91.4647	116.247	75.675	98.8419	169.376	183.559	156.316	133.296	127.723	141.267	129.75	123.685	99.9543	129.237	82.4682	97.8098	78.5733	95.4501	76.8256	90.3872	98.9606	99.4885	77.9963	83.1402	90.4906	72.0011	73.5972	76.9433	113.807	119.417	94.6968	87.7654	79.9939	80.1758	82.6466	69.4124
		32.7	124.405	166.267	85.9519	97.3351	91.797	116.663	75.249	98.7661	169.253	183.107	156.13	133.395	127.425	140.858	129.549	123.635	99.9672	129.106	82.4184	97.7349	78.2938	95.612	76.4228	89.3107	98.8022	99.1775	77.8701	82.9503	90.443	72.062	73.4289	76.269	113.766	119.3	94.8411	87.8056	79.3897	79.6607	82.4496	69.4847
		32.8	124.251	166.32	86.1224	97.322	92.2958	116.406	74.3579	98.8006	169.114	182.857	155.782	133.778	127.646	140.94	129.284	123.86	99.7164	128.933	82.5948	97.4193	77.5639	95.836	75.9771	88.7191	98.7337	98.8951	78.0161	82.8326	89.8071	72.6504	73.164	75.6044	113.736	119.227	95.0389	87.5508	79.1449	78.9784	82.4866	69.4116
		32.9	124.275	166.641	86.4843	97.1725	92.4169	115.896	73.9	98.8947	168.826	182.891	155.343	134.238	128.414	141.195	129.251	124.358	99.399	128.708	82.5834	96.9975	77.3181	95.6802	75.5021	88.7958	98.7126	98.6689	78.2864	83.1995	89.1269	72.9024	73.0092	75.1334	113.814	119.385	95.2593	87.2102	79.0329	78.609	82.6058	69.2132
		33	124.348	166.923	86.841	97.3623	92.2194	115.244	74.2056	98.9324	168.637	183.245	154.887	134.601	128.775	141.589	129.313	124.164	99.0971	128.573	82.6761	96.3407	77.0383	95.5214	75.539	89.4756	98.7228	98.6934	78.3774	83.7158	88.6063	72.9358	73.2781	75.297	113.856	119.573	95.2891	86.8778	78.8727	78.7452	82.4471	68.96
		33.1	124.32	166.85	87.2659	97.7096	91.8152	114.845	74.7096	99.0214	168.571	183.63	154.439	134.947	128.995	141.528	129.109	124.066	98.6688	128.567	83.0939	95.8858	76.7761	95.5567	75.8103	89.6757	98.5902	98.7713	78.4751	84.0089	88.8328	72.5332	73.5598	75.7761	113.825	119.682	95.4429	86.5014	78.5919	78.877	82.2542	68.7592
		33.2	124.044	166.72	87.3753	98.081	91.7716	114.478	74.7683	99.0699	168.659	184.197	154.111	134.67	128.66	141.449	128.549	123.995	98.2364	128.59	83.3839	95.7868	76.4761	95.6208	76.6171	89.7693	98.4819	99	78.508	84.4575	89.5417	71.9746	73.9494	76.7298	113.709	119.71	95.6625	86.2381	78.503	78.9221	82.2764	68.7298
		33.3	123.879	166.441	87.3458	98.5001	91.7413	114.554	74.4787	99.0636	168.576	184.613	154.151	134.364	128.498	141.434	127.935	123.923	98.0372	128.827	83.6161	95.9244	76.7568	95.9586	77.1339	89.3346	98.3794	99.245	78.4364	84.7629	90.1	71.5962	74.2328	77.2107	113.589	119.827	95.7668	86.2012	78.9191	78.8609	82.7266	68.9236
		33.4	123.71	166.019	86.8823	98.7028	91.5949	114.81	74.3728	98.5778	168.598	184.658	154.365	133.845	128.198	141.721	127.283	123.294	98.0293	129.266	83.4759	96.4062	77.2939	95.8043	77.4248	89.2233	98.3055	99.4931	78.3922	84.8757	90.0906	71.5642	74.4246	77.4923	113.347	119.761	95.8952	86.0456	79.5446	79.2982	83.0696	69.145
		33.5	123.462	165.65	86.4433	98.7259	91.3603	115.035	74.7928	98.23	168.509	184.492	154.653	133.275	128.218	141.231	126.816	122.427	98.0997	129.639	82.9379	96.9501	77.7314	95.3452	76.9097	89.3207	98.3006	99.5704	78.2598	85.1614	89.7952	71.8243	74.2636	77.3866	113.092	119.633	95.767	85.9614	79.8912	79.9956	83.0686	69.3023
		33.6	123.186	165.507	86.1492	98.652	91.4913	114.951	75.2913	98.1691	168.457	184.477	155.024	133.065	128.219	140.156	126.477	121.837	98.3544	129.84	82.3744	97.1917	77.4182	94.475	76.2941	89.6	98.3954	99.4734	78.1344	85.1947	89.5296	71.97	74.2232	77.2394	113.061	119.528	95.664	85.9468	79.4137	80.4356	82.367	69.6204
		33.7	123.244	165.424	85.8986	98.3941	92.1792	114.447	75.4127	98.8202	168.278	184.276	155.135	132.859	128.115	138.969	126.429	121.635	98.6066	129.895	81.9535	97.3376	77.0177	93.9467	75.6317	89.621	98.275	99.1453	78.1796	84.8368	89.2376	72.0197	74.2578	76.8366	113.188	119.433	95.6021	85.8122	78.5206	80.4046	81.6341	69.6253
		33.8	123.444	165.512	85.9742	97.9982	92.7298	114.227	74.8922	99.3762	168.171	184.028	155.183	132.639	127.722	138.783	126.304	121.564	98.7856	129.739	81.7121	97.3767	76.6071	93.883	75.4344	89.1302	98.0449	98.8555	78.4019	84.4934	88.4298	71.994	74.185	76.551	113.373	119.105	95.578	86.0074	77.8001	80.2432	81.3854	69.6014
		33.9	123.655	165.671	86.1355	97.5841	92.961	114.397	74.4942	99.9099	167.829	183.914	155.112	132.501	127.118	139.562	125.865	121.675	98.6263	129.335	81.7648	97.3913	76.8597	94.4352	75.4457	88.7408	97.7991	98.6274	78.7437	84.117	87.5373	72.3536	73.9773	76.5471	113.539	118.766	95.8693	86.3724	77.9262	80.0737	81.8348	69.1307
		34	123.947	165.69	86.2717	97.2514	92.6894	115.054	74.2546	100.147	167.564	183.859	154.817	132.302	126.753	140.668	125.63	121.85	98.2303	129.013	81.9943	97.5798	77.2344	95.0594	75.6223	88.4726	97.474	98.6028	79.043	83.9013	87.219	72.6636	73.6736	76.7719	113.736	118.474	96.0102	86.6868	78.7176	80.0251	82.4212	69.0078
		34.1	124.269	165.511	86.3128	97.2247	92.3027	115.411	74.3477	100.458	167.165	183.653	154.483	131.88	126.552	141.267	125.942	121.859	97.7704	128.847	82.2983	97.7819	77.5127	95.7344	75.7007	88.71	97.1163	98.619	79.2428	84.1328	87.8039	73.0052	73.7012	76.7198	113.741	118.166	95.9899	86.9967	79.6696	79.8858	82.8156	68.9076
		34.2	124.314	165.224	86.1939	97.5434	91.8042	115.317	74.2434	100.565	166.714	183.495	154.048	131.911	126.617	140.891	126.803	121.654	97.4361	128.821	82.6893	98.0152	77.5183	95.8808	75.7324	88.736	97.0209	98.844	79.3582	84.2451	88.8527	72.5033	73.4893	76.282	113.612	117.931	95.9072	86.9766	79.9824	80.1502	82.7786	69.2201
		34.3	124.182	164.929	85.7353	97.8019	91.3474	114.742	74.3613	100.294	166.343	183.284	153.583	132.083	126.43	139.998	127.697	121.435	97.0868	128.901	82.8689	98.0386	77.5468	95.8059	75.7311	88.901	97.1806	99.0615	79.2754	84.4001	89.5969	71.6151	73.3051	76.0934	113.451	118.003	95.4609	86.7116	79.6221	80.3147	82.6073	69.6654
		34.4	123.936	164.662	85.4064	98.0154	90.8729	114.231	74.452	99.7167	166.309	183.147	153.36	132.393	126.517	139.491	127.913	121.633	97.03	129.188	82.9358	97.9533	77.9683	95.5346	75.5942	88.7683	97.4525	99.2904	79.0296	84.4244	89.7377	70.6679	73.2378	76.0711	113.459	118.112	95.0657	86.5159	78.9052	80.7174	82.3336	70.0997
		34.5	123.592	164.494	85.2676	97.8142	90.5944	113.747	74.3898	98.889	166.32	182.812	153.241	133.113	126.573	139.604	127.78	121.946	97.15	129.398	82.8783	97.9398	78.4511	95.5313	75.6026	88.7777	97.6556	99.3896	78.79	84.1637	89.5379	70.4708	73.4898	76.6088	113.499	118.183	94.8324	86.3143	78.2737	80.641	82.4434	70.0376
		34.6	123.219	164.406	85.3249	97.2441	90.4477	113.691	74.1232	98.349	166.493	182.601	153.314	133.556	126.844	139.901	127.157	122.333	97.2206	129.541	82.6345	97.9084	78.5614	95.642	75.7027	88.8761	97.9721	99.5331	78.4526	84.0352	88.9179	71.1006	74.0272	77.0064	113.695	118.236	94.5984	86.2654	77.8496	80.3677	82.8964	69.5788
		34.7	123.024	164.396	85.6601	96.8911	90.5321	113.702	73.6013	98.191	166.765	182.373	153.518	133.887	126.72	139.41	126.942	122.505	97.1911	129.634	82.4056	98.1951	78.3443	95.8704	76.0023	89.1599	98.1934	99.5813	78.3345	83.6943	88.6821	72.1514	74.3548	77.4141	114.103	118.361	94.6583	86.238	77.7089	79.7489	83.4318	69.0864
		34.8	122.881	164.286	85.9071	96.7146	90.1958	114.14	73.5156	98.7786	166.861	182.261	153.62	133.911	126.844	138.51	126.911	122.66	97.3286	129.659	82.1768	98.5699	77.7698	95.9141	75.923	89.348	98.2029	99.5872	78.4753	83.5581	88.3978	72.8611	74.5234	77.1133	114.385	118.33	94.8776	86.1594	77.7361	79.2809	83.625	69.0694
		34.9	122.834	164.166	85.9667	96.6723	89.7666	114.528	73.5903	99.4172	166.675	182.068	153.64	133.638	126.639	138.02	126.78	122.812	97.3927	129.541	82.2726	98.5731	77.2267	95.7402	75.6956	89.1087	98.1117	99.5231	78.705	83.7651	88.7799	73.1013	74.1919	76.4607	114.49	118.35	95.1784	86.1983	77.8668	79.3153	83.1476	69.2584
		35	122.936	164.148	86.0102	96.8119	89.4068	114.5	74.0187	99.7288	166.25	182.155	153.383	133.364	126.418	138.199	126.455	122.836	97.4586	129.432	82.5151	98.3855	76.8803	95.3086	75.2347	88.7306	98.2229	99.4764	79.2044	83.9856	88.9801	72.7361	73.9921	75.8389	114.609	118.521	95.3989	86.2354	78.0121	79.4837	82.82	69.541
		35.1	123.129	164.344	85.8824	96.5172	89.6282	113.882	74.3699	99.4208	165.496	182.103	152.934	133.103	125.785	138.517	126.174	122.889	97.6002	129.167	82.8151	98.0178	76.8141	94.9701	74.9284	88.3062	98.2748	99.3927	79.6088	84.3813	89.1147	72.2714	73.8443	75.4073	114.639	118.719	95.5374	86.3531	78.2522	79.6501	82.9933	69.8296
		35.2	123.365	164.427	85.8147	96.1062	90.0181	112.961	74.4403	99.1582	164.785	182.15	152.265	133.13	125.868	138.36	126.324	122.558	97.7894	128.917	82.9825	97.5173	77.0211	94.8639	74.6953	88.0251	98.3798	99.1962	79.9165	84.6694	89.138	71.7167	73.7164	75.1629	114.371	118.793	95.6621	86.5733	78.4976	79.5643	83.7133	70.2407
		35.3	123.657	164.416	86.1066	95.8278	90.2988	112.516	74.6446	98.8447	164.312	182.354	151.684	133.296	126.059	138.135	126.304	122.173	97.6317	128.738	82.6873	97.3861	76.9359	95.0709	75.0093	87.9407	98.5452	99.0044	80.1477	84.6166	89.4832	71.454	73.2206	74.8857	114.289	118.85	95.7076	86.8457	78.7139	79.4981	83.8383	70.9866
		35.4	123.918	164.413	86.3059	95.5359	90.4518	112.177	74.9071	98.5167	164.001	182.71	151.452	133.333	126.214	138.188	125.903	121.636	97.5009	128.733	82.4666	97.4556	76.633	95.2333	75.4804	88.3777	98.6495	98.8504	79.8781	84.4961	90.0353	71.5069	72.7808	75.046	114.335	118.797	95.8999	87.112	78.962	79.4777	83.1166	71.1264
		35.5	124.065	164.337	86.6704	95.6116	90.5488	112.118	75.0569	98.0524	163.916	183.007	151.538	133.329	125.934	138.468	125.4	121.51	97.4691	128.704	82.4031	97.6375	76.5588	95.1256	75.9661	88.8129	98.6529	98.7373	79.5414	84.4813	90.3112	71.66	72.7002	75.2998	114.326	118.671	95.9641	87.3115	79.121	79.5627	82.0473	71.1127
		35.6	124.197	164.052	86.9466	95.7662	90.8207	112.496	74.4957	97.8239	164.199	183.443	151.833	132.982	125.522	138.619	125.196	121.741	97.3974	128.911	82.6731	97.8938	76.8946	94.8333	76.0129	88.9329	98.5954	98.7753	79.2341	84.4481	90.2113	71.6997	73.0177	75.842	114.365	118.549	95.6334	87.4098	79.1541	79.8183	81.5172	70.1877
		35.7	124.193	163.922	86.9644	96.0513	91.2476	113.547	73.6483	97.7848	164.442	183.68	152.044	132.275	125.061	138.667	125.147	122.441	97.3407	128.943	83.1136	98.0803	77.6051	94.4933	75.9064	88.4579	98.524	99.0497	78.7567	84.4174	89.9267	71.6267	73.2608	76.2031	114.558	118.407	95.4601	87.2757	79.0678	80.1426	81.7307	69.8359
		35.8	124.055	163.926	87.0842	96.4576	91.5122	114.132	73.18	97.7204	164.641	183.643	152.056	131.714	124.629	138.278	124.975	123.192	97.6373	128.8	83.6406	98.3028	77.7989	94.3449	75.613	88.4938	98.4626	99.3974	78.6749	84.4057	89.56	71.7121	73.6553	76.6599	114.613	118.37	95.3535	87.1791	79.2076	80.1606	82.2178	69.5761
		35.9	123.868	163.839	87.1375	96.8128	91.474	113.6	73.7284	97.6892	164.791	183.51	151.641	131.167	124.548	137.902	124.873	123.524	97.8984	128.517	83.9041	98.3842	77.4548	93.9067	75.2946	88.571	98.5795	99.6756	78.794	84.0467	89.3239	72.0099	73.776	76.6752	114.536	118.471	95.4016	87.2238	79.4593	79.9964	82.2547	69.9124
		36	123.664	163.587	87.2758	97.0689	90.7747	112.593	74.6	97.5891	164.894	183.217	151.396	130.847	125.236	137.371	124.936	122.595	98.0905	128.221	83.7421	98.5586	76.9474	93.4093	75.2226	88.9908	98.6852	99.81	78.9129	83.5824	89.352	72.4879	73.9791	76.7407	114.406	118.456	95.9256	87.1861	79.6006	79.9312	82.004	70.0466
		36.1	123.321	163.307	87.2967	97.0288	90.0956	112.411	75.5023	97.6686	164.738	182.783	151.264	131.149	126.011	137.523	125.525	121.249	98.3042	127.806	83.4783	98.5651	76.677	93.0762	75.5299	88.9813	98.8942	99.7823	79.1994	83.2069	89.6222	72.651	73.8252	76.5262	114.201	118.324	96.1036	87.1432	79.5794	80.0522	81.921	69.563
		36.2	123.002	162.977	87.3656	96.6896	89.2483	112.737	75.7244	97.513	164.709	182.481	151.175	131.61	126.673	137.945	125.744	120.569	98.536	127.646	82.691	98.2906	76.9179	93.2947	75.9454	89.2472	99.0747	99.5678	79.4	82.8745	89.9406	72.4339	73.7916	76.5919	113.996	118.326	96.0014	86.9839	79.5654	80.0406	82.5229	68.8487
		36.3	122.625	162.575	87.5974	96.3554	89.1908	112.865	75.5681	97.5091	164.55	182.159	151.423	132.269	126.799	138.541	125.575	121.093	98.5564	127.635	81.951	97.8851	77.2488	93.7263	76.1402	89.136	99.2198	99.3652	79.4938	82.8674	90.0662	71.8002	73.7746	76.4711	113.835	118.351	95.9683	86.6651	79.7818	79.6589	83.0092	68.3404
		36.4	122.3	162.21	87.8326	96.1112	89.3236	112.507	75.1582	97.2604	164.244	181.671	151.337	133.175	126.68	138.528	124.952	121.813	98.462	127.603	81.6399	97.1914	77.6324	93.9352	76.18	88.8671	99.1664	99.3582	79.4614	83.1485	90.1254	71.5719	73.9178	76.5563	113.779	118.298	95.7263	86.4815	79.947	79.5919	83.2188	68.4717
		36.5	122.085	162.038	88.4401	95.8925	90.0598	112.48	74.7437	97.2446	163.79	181.349	151.199	133.547	126.647	137.922	124.856	121.6	98.2309	127.686	81.5178	96.7032	77.62	93.9852	76.2303	88.0801	99.2392	99.5722	79.3904	83.5836	89.904	71.6122	73.9529	76.6852	113.815	118.362	95.6972	86.3278	79.7649	79.7514	83.1929	68.8073
		36.6	122.088	161.994	88.7084	95.8528	90.5017	112.891	74.3354	97.0993	163.597	181.008	151.048	133.565	126.545	137.294	125.322	120.777	97.9981	127.782	81.9131	96.4268	77.5636	93.9029	76.3348	87.443	99.2568	99.9214	79.2995	83.8898	89.5767	72.0408	73.6768	76.8499	113.847	118.618	95.8025	86.2371	79.163	80.3539	83.3802	68.7562
		36.7	122.148	161.998	88.7181	95.8257	90.9752	113.229	73.9414	97.1148	163.282	180.475	150.725	133.202	126.328	137.076	126.031	120.042	97.6778	127.701	82.4432	96.4786	77.4326	93.916	76.2886	87.3259	99.3177	100.41	79.0773	83.95	89.3051	72.0514	72.9851	76.9394	113.833	118.674	95.5741	86.1846	78.5741	80.6826	83.5586	68.7447
		36.8	122.508	162.241	88.6824	95.808	91.1397	113.217	73.7519	97.2194	162.97	180.093	150.441	132.381	126.143	137.388	126.494	120.427	97.4727	127.611	82.6687	96.8017	77.8238	93.8749	75.9499	87.7699	99.442	100.829	78.9894	83.8186	89.2371	72.0322	72.4513	76.5866	113.852	118.592	95.2941	86.0618	78.6589	81.1084	83.6036	68.8001
		36.9	122.762	162.52	88.184	96.0156	91.373	112.852	73.7961	97.343	162.97	179.91	149.992	131.747	126.049	137.315	126.561	121.547	97.4839	127.556	82.9265	96.9077	77.9634	94.0014	75.7024	88.1883	99.709	101.021	78.8586	83.5513	89.2126	71.8157	72.3043	76.2183	113.847	118.487	95.0106	86.039	79.2431	81.2519	83.5673	69.275
		37	122.97	162.831	87.8787	96.2002	91.3676	112.794	73.7522	97.5724	163.089	179.701	149.554	131.125	126.106	137.081	126.323	122.185	97.5632	127.363	83.0502	96.9706	77.9032	94.1653	75.5987	88.0624	99.7642	101.04	78.6251	83.5689	89.032	71.8069	72.616	76.1487	113.909	118.382	94.8763	86.0084	79.9499	81.098	83.2889	69.6617
		37.1	123.152	163.218	87.7553	96.1618	91.3541	112.871	73.5263	97.2859	162.917	179.492	149.435	130.622	125.501	136.646	125.811	121.473	97.6245	127.17	83.1919	96.7787	77.1294	94.468	75.9846	87.9979	99.7186	100.941	78.4651	83.9409	88.8617	71.6747	72.9793	76.5421	114.025	118.112	95.0446	85.973	80.2673	80.4649	82.7676	69.9002
		37.2	123.171	163.485	87.6702	95.9159	90.7183	113.32	73.3884	97.1087	162.735	179.563	149.796	130.299	124.806	136.668	125.326	120.349	97.7211	127.15	83.5911	96.5304	76.6008	94.5836	76.2316	88.4172	99.556	100.662	78.2364	84.3356	89.1032	71.5076	73.1872	76.9022	114.255	117.97	95.2818	85.9294	80.2922	79.8572	82.1483	70.1423
		37.3	122.826	163.372	87.7375	95.5	90.0959	113.535	73.9136	96.819	162.683	179.546	150.493	129.993	124.475	136.855	124.919	119.856	97.7412	127.152	83.898	96.4536	76.3251	94.417	76.4792	88.9459	99.2938	100.338	78.1107	84.7714	89.5554	71.2852	73.4324	76.9029	114.436	117.862	95.3753	85.8656	79.8787	79.4684	82.0341	70.3112
		37.4	122.719	163.283	87.9867	95.2499	89.1561	113.654	74.9043	97.1772	162.53	179.448	151.312	130.052	124.617	137.11	124.717	120.43	97.6646	127.229	84.0478	96.6194	76.4839	93.9254	76.4136	89.0482	98.906	100.148	78.2284	84.9831	90.0848	71.4784	73.5993	76.9368	114.554	117.854	95.2306	85.8903	79.3744	79.5253	82.3858	70.3974
		37.5	122.55	163.135	87.9568	95.3531	89.1109	113.41	75.5964	97.4922	162.527	179.288	151.652	130.261	124.685	137.196	124.495	120.914	97.6064	127.44	83.9938	97.0134	76.5487	93.5809	76.3264	88.6622	98.4896	100.125	78.4699	84.8386	90.2719	72.0156	73.974	77.3294	114.558	117.879	94.9913	86.0492	79.0332	79.3418	82.9632	69.9882
		37.6	122.243	162.691	87.5651	95.6732	89.3217	113.318	75.5063	97.7196	162.756	179.244	151.342	130.548	124.488	137.034	124.002	121.363	97.6072	127.698	83.6681	97.4586	76.3373	93.5391	75.7622	88.3018	98.1008	100.035	78.8711	84.5341	90.692	72.7759	74.0219	77.6586	114.677	118.09	94.7692	86.2953	79.4854	79.2988	83.0378	69.4344
		37.7	122.06	162.453	87.1634	95.9238	89.8778	113.437	74.752	97.4946	162.834	179.116	150.776	130.902	124.271	136.706	123.483	121.23	97.6747	127.879	83.1943	97.8769	76.2467	93.7538	75.2143	88.1052	97.767	100.078	79.1528	84.0836	91.0048	73.3409	74.0199	77.4923	114.722	118.292	94.7379	86.513	80.0489	78.8091	82.7769	69.0863
		37.8	122.186	162.498	86.5273	95.9811	89.7133	113.453	73.9913	97.1212	162.86	179.087	149.99	130.977	124.226	136.343	123.057	120.929	97.8182	128.014	82.9066	98.0092	76.2948	94.0573	74.4658	87.7516	97.4639	100.152	79.1358	83.6719	91.1959	73.5497	73.5059	76.5619	114.896	118.431	94.9688	86.6802	80.3849	78.5661	82.6099	69.1642
		37.9	122.057	162.478	86.2477	95.7444	89.623	113.252	73.5878	96.9213	162.886	179.175	149.474	130.79	124.092	135.986	123.189	120.222	97.7496	128.016	82.7438	98.0415	76.8106	94.5533	74.4304	87.6094	97.2326	100.149	79.0037	83.5675	90.8324	73.6027	73.0582	75.8502	115.192	118.444	95.3288	86.6212	80.2782	78.4471	82.967	69.6197
		38	121.898	162.306	86.3969	95.4003	89.7709	112.68	73.7182	96.9553	162.762	179.365	149.147	130.578	123.721	135.687	123.485	120.211	97.6174	127.911	82.6769	97.9856	77.3821	95.0462	74.4558	87.3963	97.1464	99.9178	78.6336	83.9193	90.3971	73.3637	72.7533	75.3944	115.462	118.261	95.71	86.3856	80.1557	78.9992	83.5497	69.8916
		38.1	121.887	162.369	86.5714	95.1971	90.4243	112.497	74.1981	97.0901	162.516	179.416	148.822	130.205	123.371	135.372	123.829	120.395	97.4153	127.805	82.8268	97.8528	77.8669	95.285	74.9869	87.6831	97.2411	99.7392	78.3208	84.4018	90.1924	73.085	73.0512	75.758	115.497	117.944	95.8908	86.1608	80.2286	79.9584	83.6384	69.9091
		38.2	122.103	162.341	86.5784	95.0081	90.7177	112.491	74.4636	96.8942	162.557	179.443	148.469	130.039	122.894	135.132	123.803	120.819	97.0953	127.707	82.7895	97.7739	78.0772	95.0168	75.2418	87.6002	97.4303	99.5024	78.21	85.0073	90.1636	72.6633	73.5152	76.0092	115.485	117.715	95.9496	85.8944	79.8913	80.449	83.2759	69.5362
		38.3	122.174	162.207	86.2814	94.9633	90.4106	112.68	74.3231	96.4414	162.61	179.385	148.188	130.381	122.863	135.094	124	120.327	96.8275	127.652	82.769	97.5673	77.8804	94.3852	75.2838	87.4078	97.7486	99.3114	78.1208	85.4268	90.1466	72.4956	73.6792	76.4353	115.13	117.714	95.9234	85.9343	79.5387	80.2862	82.7458	69.3677
		38.4	122.473	162.045	86.0016	95.0033	89.9222	112.569	73.987	96.2478	162.49	179.327	148.199	130.799	122.533	135.689	124.225	119.779	96.9209	127.716	82.5917	97.2374	77.868	93.4702	74.8446	87.0046	98.2234	99.1366	78.2231	85.4698	89.9969	72.4262	73.0528	76.4847	114.536	117.773	96.0116	86.2831	79.2998	79.8254	82.4304	69.5494
		38.5	122.888	162.185	85.8567	94.9098	89.2947	112.235	73.881	96.8307	162.383	179.259	148.519	131.405	122.557	136.802	124.264	119.241	97.1091	127.894	82.1884	96.9729	77.9257	92.6818	74.4047	87.2171	98.7104	99.0592	78.472	85.6313	89.8098	72.4621	72.1216	76.4579	114.019	118.03	96.3675	86.7857	79.5714	79.775	82.1904	70.3459
		38.6	123.195	162.262	85.9863	94.9783	88.8452	112.345	74.1458	97.8614	162.459	179.48	149.143	131.776	122.47	137.947	123.47	119.37	97.3026	128.121	81.9848	96.6018	78.1176	92.2494	74.3252	87.719	99.032	99.176	78.7304	85.4564	89.8368	72.2783	71.568	76.2276	113.644	118.332	96.4473	87.3834	79.7518	79.939	82.0748	70.8494
		38.7	123.136	162.231	86.2176	95.0265	88.4541	112.774	74.2359	98.4307	162.473	179.804	149.452	131.783	123.195	137.815	122.815	119.727	97.6876	128.238	81.7437	96.2529	77.8877	92.3293	74.7076	88.1269	99.2648	99.304	78.9394	85.3093	89.8929	72.1718	71.8658	76.2203	113.277	118.427	96.2582	87.6298	79.5101	79.6601	82.2927	71.0293
		38.8	123.11	162.258	86.1338	95.0141	88.486	113.729	74.1356	98.0054	162.363	180.214	149.461	131.542	123.942	137.031	122.786	120.063	97.9768	128.378	81.7839	96.1152	77.5574	92.6688	75.1161	88.2223	99.285	99.3252	79.1123	85.0364	89.8059	72.0216	72.6808	76.8872	113.23	118.227	95.8043	87.4853	78.97	79.2222	82.8394	70.5206
		38.9	122.895	162.362	85.7908	95.1999	88.8671	113.962	73.8258	97.1014	162.389	180.5	149.277	130.992	124.372	135.959	123.252	120.013	98.0348	128.495	82.0747	95.8615	77.327	93.1122	75.5391	88.3359	99.0385	99.4115	79.1524	84.3421	89.5303	72.1413	73.4549	77.7476	113.442	118.07	95.1942	87.0513	78.3318	79.2824	83.1584	70.3367
		39	122.652	162.248	85.4762	95.2593	89.024	113.824	73.8298	96.512	162.466	180.702	148.876	130.708	124.153	135.862	123.336	119.768	98.0647	128.544	82.2939	95.6653	77.3286	93.7742	75.5284	88.3598	98.8265	99.5137	79.1645	83.8545	89.3504	72.0906	73.8361	78.0597	113.644	118.02	94.9651	86.3963	77.7914	79.9096	83.3557	70.0596
		39.1	122.413	162.074	85.1213	95.2579	89.0851	113.098	74.1754	96.4954	162.268	180.768	148.824	130.517	123.733	135.826	123.297	119.628	98.1124	128.533	82.5348	95.5361	77.1744	94.2512	75.4753	88.0904	98.6518	99.3596	79.1779	83.4104	89.6741	71.9463	73.8306	77.5476	113.772	117.955	95.0954	85.9501	77.7571	80.6457	83.3157	69.8556
		39.2	122.446	161.882	84.8187	95.1649	89.1396	112.521	74.5069	96.709	161.93	180.674	148.843	130.532	123.937	135.897	123.47	119.454	97.861	128.606	82.6433	95.4179	76.8191	94.5518	75.2393	87.5751	98.5402	99.2149	79.1751	83.3527	89.8179	71.3499	73.6578	76.8956	114.006	117.953	95.2124	85.9528	78.1314	80.8297	83.5122	69.5906
		39.3	122.489	161.603	84.8558	94.9618	89.676	112.385	74.8986	96.78	161.676	180.51	148.564	130.954	123.997	135.681	123.711	119.143	97.4669	128.536	82.4787	95.6161	76.2859	94.4377	75.2673	87.1627	98.5755	99.2605	79.1333	83.7631	89.5934	70.9222	73.5386	76.6804	114.143	118.057	95.3699	86.0726	78.7836	80.7473	83.2831	69.682
		39.4	122.681	161.311	84.7721	94.8669	90.112	112.175	74.9742	96.634	161.418	180.427	148.226	131.132	123.967	135.327	123.615	118.344	97.1649	128.381	82.2239	95.9629	76.3232	94.6	75.3713	87.0259	98.7022	99.1276	78.8794	84.2264	89.2511	70.7081	73.6063	76.5677	114.153	118.1	95.4253	86.3131	78.8308	80.42	83.12	70.0901
		39.5	122.956	161.136	84.9014	94.8253	90.2282	111.955	74.7763	96.5776	161.029	180.272	147.756	131.058	123.574	134.761	123.1	117.87	96.981	128.21	81.8999	96.3109	76.6736	94.776	75.3902	87.168	98.631	98.9633	78.7199	84.5838	89.4911	71.0896	73.6983	76.4199	114.097	117.953	95.2924	86.4701	78.6109	80.045	82.8087	70.3251
		39.6	123.221	161.203	85.0909	94.9874	89.6313	111.459	74.0741	96.6351	160.758	179.851	147.52	130.925	123.399	134.229	122.741	117.695	96.8629	127.985	81.6049	96.4631	77.4887	94.7774	75.1071	87.3558	98.5677	98.8461	78.3642	84.7777	90.055	71.4277	73.7601	76.4008	114.071	117.902	95.306	86.2703	78.0036	79.3479	82.729	70.2361
		39.7	123.221	161.46	85.0206	95.2768	88.8749	111.545	73.1811	96.6557	160.618	179.523	147.599	130.794	123.502	134.089	122.449	118.369	97.0293	127.753	81.5492	96.3416	77.7642	94.1646	74.6288	87.2619	98.4538	98.699	77.9398	84.7374	90.1317	71.8322	73.7743	76.6652	113.863	117.952	95.3029	86.1369	77.8388	78.9623	82.4539	69.9964
		39.8	123.087	161.806	85.0736	95.4246	88.1607	111.727	72.8278	96.4012	160.641	179.318	147.745	130.858	123.573	134.254	122.398	118.917	97.4026	127.58	81.6203	96.1475	77.5943	93.4891	74.208	86.8604	98.3727	98.3887	77.685	84.5444	89.5132	71.9228	73.5809	76.98	113.692	118.037	95.2497	86.104	77.8436	78.9219	82.285	69.7176
		39.9	122.874	162.112	84.9235	95.6554	87.9491	111.822	72.9114	96.0702	160.622	179.108	147.909	131.414	123.482	134.406	122.365	119.293	97.7713	127.46	81.8414	95.9476	76.8891	93.5074	74.3439	86.5422	98.4353	98.2599	77.4194	84.4929	88.8768	72.0714	73.5983	76.915	113.6	118.15	95.3026	86.1361	78.4348	79.4163	82.3462	69.7042
		40	122.576	162.312	85.0507	95.698	88.0982	111.571	73.5513	96.1382	160.812	178.918	147.713	131.981	123.202	134.278	122.733	118.878	97.9304	127.316	82.0604	96.0479	76.2743	94.0697	74.9613	86.7589	98.7041	98.271	77.4593	84.3451	88.686	72.0308	73.7234	76.7079	113.585	118.212	95.3068	86.1064	78.4966	79.5897	82.7739	69.4907
		40.1	122.294	162.203	85.1906	95.4646	88.2031	111.645	73.9552	96.3343	161.118	178.876	147.431	132.149	122.861	134.336	123.415	118.576	97.9268	127.176	82.1738	96.2187	76.2622	94.5853	75.9728	87.378	98.9693	98.3266	77.6633	84.2652	89.1318	72.1238	74.4064	76.64	113.641	118.231	95.2219	85.9452	78.364	79.611	83.1989	69.3857
		40.2	122.136	161.974	85.099	95.2476	88.2743	112.227	73.928	96.4703	161.292	178.744	147.365	132.093	122.98	134.593	124.231	118.308	97.7769	127.024	82.3751	96.2433	76.6369	94.1243	76.5676	88.1904	99.1308	98.4904	78.0212	84.3956	89.6321	72.1097	74.5733	76.6041	113.909	118.331	95.1206	85.6094	77.9551	79.8181	83.1557	69.5136
		40.3	122.066	161.765	85.0514	94.9839	88.3299	112.617	73.6241	96.4963	161.256	178.412	147.239	131.492	122.866	135.439	124.523	118.511	97.5948	126.864	82.4328	96.273	76.9724	93.6547	76.6298	88.6071	99.1001	98.7273	78.3403	84.1812	89.9553	72.2186	74.3957	76.5614	114.184	118.509	95.0231	85.1738	78.168	80.4246	82.791	69.8774
		40.4	121.894	161.57	84.7316	94.7388	88.9531	112.583	73.447	96.7453	161.383	178.017	147.314	130.804	122.891	136.093	124.169	118.534	97.4324	126.729	82.6517	95.9622	76.9426	93.44	76.029	88.7018	98.9027	99.0442	78.4876	83.8944	90.0349	72.4003	73.4401	76.5888	114.358	118.617	95.0834	85.1929	78.642	81.1607	82.5719	70.0743
		40.5	121.578	161.344	84.415	94.6941	89.6512	111.834	73.7557	97.1136	161.197	177.748	147.339	130.303	122.65	136.275	123.248	118.604	97.3359	126.735	82.9166	95.711	76.9629	93.7178	75.6188	88.3979	98.5373	99.193	78.6512	83.5944	90.0893	72.8754	72.8761	76.9269	114.469	118.764	95.1519	85.3897	78.9762	81.3798	82.5097	69.5376
		40.6	121.322	161.226	84.4306	94.5978	90.3412	111.626	73.8662	97.0642	160.791	177.594	147.113	129.916	122.652	135.729	122.312	118.567	97.3202	126.759	82.8219	95.803	77.1727	93.6432	75.2477	88.0119	98.1565	99.397	78.6896	83.2148	90.1249	73.2346	72.5366	77.4017	114.489	118.669	95.4101	85.5429	79.298	81.0436	82.3142	68.9933
		40.7	121.126	161.07	84.6808	94.4049	90.5469	111.834	73.6121	96.8098	160.529	177.501	147.04	129.914	122.358	135.035	121.676	118.43	97.263	126.905	82.7969	96.0241	77.4998	93.233	75.2568	87.7646	97.9238	99.504	78.7857	83.1085	89.9358	73.5153	73.1376	77.2254	114.326	118.303	95.5656	85.7379	79.3556	80.2886	81.9669	68.7023
		40.8	120.993	160.873	85.098	94.3521	90.6564	112.343	73.3283	96.5288	160.393	177.506	146.846	130.073	121.804	134.876	121.621	118.153	97.0564	127.02	82.4948	96.4856	77.8262	93.0538	75.0587	87.5699	97.7657	99.5993	78.9859	83.4976	89.7398	73.3908	73.7206	76.676	114.146	117.883	95.6133	85.6737	79.5784	79.7448	82.0839	68.943
		40.9	120.941	160.743	85.6538	94.3183	90.4522	112.327	73.2218	96.7469	160.121	177.463	147.005	130.234	121.354	134.938	121.718	117.975	96.7674	127.161	82.2351	96.8114	78.2687	93.007	75.056	87.4482	97.6526	99.4807	78.9929	83.987	89.6281	72.964	74.0806	76.0006	114.113	117.55	95.8049	85.6261	79.3427	79.903	82.4553	69.2779
		41	121.092	160.643	85.9522	94.4036	90.3044	111.802	73.5901	97.2007	160.147	177.524	147.393	130.412	121.314	135.078	121.235	118.092	96.4852	127.152	82.3359	96.7765	78.4237	93.3033	75.1861	87.1829	97.6984	99.534	78.8887	84.3207	89.5303	72.1683	73.5121	76.046	114.12	117.306	95.7801	85.9433	79.1886	80.6577	82.4401	69.9042
		41.1	121.104	160.628	85.8791	94.5893	90.0988	111.073	73.6582	97.6296	160.192	177.562	147.558	130.561	121.31	135.19	120.048	118.297	96.1672	127.091	82.3905	96.6691	77.7682	93.3498	75.5519	86.906	97.7842	99.5564	78.5599	84.6108	89.0408	71.3729	72.8347	76.4814	114.154	117.323	95.6719	86.4249	78.7581	81.4066	82.1418	70.2607
		41.2	121.009	160.619	85.5898	94.7088	90.1309	110.583	73.7062	97.6934	160.161	177.542	147.839	130.386	121.189	135.532	118.999	118.392	95.9576	126.892	82.5464	96.3493	76.701	93.4052	75.7158	86.7348	97.8361	99.5876	77.9797	84.3821	88.5462	71.1437	72.5968	76.6731	114.273	117.519	95.3854	86.6716	78.6148	81.5712	82.0122	70.2104
		41.3	120.848	160.558	85.1174	94.7089	90.0682	110.253	73.4553	97.464	160.051	177.417	147.624	130.197	120.732	135.584	119.084	118.536	96.0128	126.922	82.7483	96.1921	75.8749	93.2218	75.3986	86.3202	98.0181	99.5692	77.5361	83.942	88.3423	71.1599	72.899	76.3548	114.272	117.656	94.9791	86.65	78.3959	81.0461	82.5071	69.628
		41.4	120.784	160.474	84.6617	94.6265	89.812	110.392	73.1846	97.15	159.856	177.437	147.13	129.977	120.541	134.926	120.048	118.678	96.1223	126.997	82.7658	96.3018	75.9353	92.9214	75.1098	86.1023	98.2065	99.6013	77.3482	83.6173	88.6798	71.3401	73.1738	75.8674	114.184	117.734	94.6936	86.4143	78.6868	80.4077	82.8032	69.4651
		41.5	120.692	160.501	84.487	94.4882	89.6492	110.693	72.9397	97.1287	159.399	177.332	146.618	129.644	120.31	133.968	120.875	118.499	96.2999	127.1	82.8341	96.1763	76.5847	92.9594	75.2196	86.2947	98.3389	99.4052	77.4465	83.4429	88.8876	71.4496	73.1579	75.743	114.024	117.667	94.8019	85.9983	78.9881	79.857	83.3612	69.7682
		41.6	120.807	160.348	84.5573	94.4119	89.6316	111.186	72.7751	97.1307	159.134	177.115	145.994	129.56	120.098	133.459	120.973	118.014	96.503	127.374	82.951	96.2506	77.3903	93.2918	75.7971	87.0212	98.4648	99.1503	77.7811	83.6331	88.6913	71.7313	73.1012	75.9139	113.729	117.554	95.1787	85.7155	79.5914	79.8777	83.5254	70.032
		41.7	121.054	160.278	84.9463	94.4764	90.1182	111.486	73.1158	97.3306	158.744	177.064	145.714	129.532	120.033	133.745	120.686	117.511	96.593	127.624	82.7685	96.2427	78.0267	94.213	76.134	87.4529	98.6046	98.9361	78.0581	83.9534	88.0156	71.9968	73.1014	76.0021	113.528	117.426	95.5746	85.6211	79.8796	79.9618	84.0453	70.1667
		41.8	121.253	160.268	85.5287	94.6633	90.265	111.56	73.5208	97.376	158.413	177.188	145.639	129.404	120.161	133.876	120.48	117.508	96.4454	127.713	82.4949	95.9891	78.0132	94.6998	76.2846	87.2579	98.6818	98.7807	78.1158	84.3643	87.3228	72.0458	73.1396	76.061	113.443	117.343	95.8268	85.5003	80.1416	80.4268	83.8446	70.119
		41.9	121.443	160.304	85.9058	94.7839	90.34	111.47	73.853	97.6143	158.251	177.339	145.761	129.235	120.719	133.601	120.774	117.638	96.2532	127.655	82.128	96.0108	77.7652	94.623	76.3063	86.6932	98.848	98.7324	78.0376	84.7812	86.9384	71.9667	73.3117	76.1303	113.332	117.393	95.6174	85.4531	79.8079	80.6371	83.8623	70.3706
		42	121.583	160.303	86.2134	94.7731	89.7616	111.2	73.5931	97.4499	158.369	177.358	146.03	129.144	121.219	132.898	120.94	118.013	95.848	127.595	81.7604	96.0503	77.5308	93.852	76.321	86.5051	98.9224	98.8914	77.9634	84.9154	86.8248	71.9862	73.6267	76.319	113.377	117.577	95.311	85.5391	79.4967	80.7339	83.4923	70.1256
		42.1	121.51	160.493	86.3529	94.6245	89.427	111.206	73.4213	97.1174	158.355	177.463	146.136	129.04	121.484	132.812	121.079	118.004	95.5884	127.449	81.6259	96.1465	77.5488	92.8801	76.219	86.5618	98.9363	99.225	78.1748	84.884	87.3968	72.1974	74.0741	76.3662	113.712	117.66	95.1636	85.6837	79.1039	80.1742	83.1602	69.9928
		42.2	121.325	160.713	86.3339	94.3292	89.116	111.29	73.3809	96.2766	158.566	177.44	146.078	129.068	121.043	133.345	120.703	117.965	95.5522	127.397	81.7399	96.4484	77.6261	92.3453	76.0276	87.0082	98.9758	99.5641	78.5597	84.8579	88.2466	72.4947	74.1786	76.2402	113.934	117.754	95.2664	85.7583	79.4222	79.6596	82.663	69.5884
		42.3	121.432	160.916	86.3938	94.2032	89.1466	111.61	73.7731	95.8724	158.641	177.305	145.935	129.046	120.272	134.206	120.442	117.619	95.6874	127.311	81.9784	96.6025	77.6246	92.1314	76.0169	87.3312	98.953	99.9691	79.0266	84.6656	89.3214	72.6459	74.2048	76.153	114.101	117.828	95.6246	85.8049	79.6273	79.3593	82.4111	69.6291
		42.4	121.479	161.065	86.089	94.2248	89.0163	111.503	73.9148	95.8718	158.531	176.976	145.8	129.045	119.61	134.724	120.216	117.585	95.9271	127.272	82.2056	96.5596	77.7564	92.6249	75.6999	87.5941	98.7586	100.284	79.4176	84.5485	89.7353	72.3893	73.9328	76.2554	114.229	117.772	95.8799	85.8333	79.7141	79.7632	82.4352	69.543
		42.5	121.511	161.182	85.6624	94.2318	88.7228	111.225	73.8784	96.2462	158.245	176.755	145.565	129.031	119.777	134.907	120.156	117.716	96.5668	127.235	82.5597	96.3126	77.5814	93.0432	75.3323	87.4462	98.6297	100.446	79.5603	84.6517	89.9373	71.9696	73.7247	76.6022	114.159	117.63	95.8996	85.7636	79.3131	80.2487	82.37	69.7106
		42.6	121.758	161.226	85.229	94.1836	88.5516	110.739	73.5954	96.2483	158.012	176.559	145.427	128.994	120.281	134.826	120.481	118.138	97.1198	127.114	82.9072	95.9239	77.1648	93.5554	74.8564	86.9621	98.5796	100.437	79.5406	84.5414	90.0467	71.7187	73.3862	76.9728	113.89	117.58	95.7134	85.906	78.7044	80.5622	82.3244	69.7832
		42.7	122.095	161.15	84.8349	94.0645	88.4659	110.315	73.446	95.8343	157.705	176.463	145.321	129.187	120.64	134.7	120.995	118.271	97.4406	126.815	83.2179	95.5062	76.6506	93.5738	75.1253	86.4257	98.45	100.461	79.4476	84.4011	90.1123	71.9406	73.3177	77.3109	113.597	117.594	95.5819	86.1087	78.1124	80.3216	82.5419	69.7838
		42.8	122.209	161.001	84.7735	93.7513	88.848	110.032	73.3969	95.4078	157.546	176.507	144.985	129.13	120.225	134.441	121.204	118.224	97.6588	126.478	83.3558	95.1199	76.6459	93.7924	75.5157	86.0334	98.42	100.425	79.4258	84.3302	89.9686	72.2122	73.2049	77.6819	113.442	117.69	95.4886	86.3149	77.7702	79.9898	83.2744	69.7617
		42.9	122.251	160.789	84.5878	93.6474	89.3398	109.47	73.3472	95.5894	157.703	176.676	144.862	129.116	119.554	133.858	120.672	117.752	97.8038	126.093	83.2231	94.8618	76.908	93.5902	75.8464	85.9817	98.4551	100.302	79.4284	84.1968	89.5732	72.3164	73.2064	77.7407	113.288	117.828	95.4216	86.4724	77.8092	79.5901	83.7688	69.7183
		43	122.427	160.545	84.4759	93.7294	90.0856	109.031	73.2239	96.0679	157.967	176.831	144.691	129.222	119.378	133.382	119.643	117.457	97.6571	125.789	82.8935	94.8049	76.9256	93.3598	75.6138	85.8693	98.6413	100.276	79.4892	84.2925	89.4266	72.1736	73.3757	77.7587	113.304	118.041	95.4575	86.4789	78.105	79.4047	83.7429	69.7948
		43.1	122.441	160.272	84.4393	93.7836	90.5154	109.108	73.1783	96.7782	158.216	176.858	144.391	129.269	119.517	132.905	119.015	116.902	97.4294	125.684	82.6093	94.9287	76.7932	93.0517	75.3573	85.6363	98.8394	100.21	79.6483	84.3036	89.2848	72.1282	73.8551	77.4478	113.347	118.239	95.4269	86.3748	78.3129	79.2051	83.3684	69.7541
		43.2	122.341	160.027	84.5259	94.1095	90.2268	109.897	73.0861	96.8608	158.393	176.632	144.182	129.476	119.408	132.742	118.969	116.514	97.3486	125.851	82.5651	95.1949	76.6353	92.9611	75.1664	85.3666	99.094	99.9305	79.7517	84.1501	89.4256	72.2023	74.3532	77.3438	113.384	118.137	95.6363	86.0744	78.5242	79.2967	83.1111	69.744
		43.3	122.129	159.859	84.9551	94.1871	89.5033	110.897	72.9184	96.6402	158.484	176.254	143.834	129.636	118.644	132.312	119.258	116.031	97.2958	126.125	82.6872	95.4977	76.8968	93.1857	74.9983	85.5173	99.307	99.448	79.6558	83.96	89.3592	72.4817	74.368	77.124	113.353	117.986	95.9291	85.8041	78.553	79.437	83.2517	69.9142
		43.4	122.023	159.768	85.267	94.2117	88.7243	110.985	72.6001	96.1466	158.28	175.841	143.595	129.663	118.241	131.836	119.901	115.921	97.2521	126.389	83.0135	95.6099	76.8082	92.9232	74.8214	86.0326	99.5513	99.1444	79.4796	83.6283	89.3232	72.7667	74.2407	76.9408	113.455	117.873	96.0157	85.5506	78.1898	79.3331	83.4184	70.2766
		43.5	121.718	159.648	85.4443	94.1926	88.673	110.46	72.5857	95.978	158.078	175.523	143.596	129.527	118.57	131.455	120.385	115.807	97.2602	126.545	83.126	95.7287	76.52	92.7432	74.7098	86.5438	99.588	98.8101	79.1299	83.706	89.1362	72.7479	74.2976	76.6886	113.49	117.751	95.923	85.3676	77.7892	78.973	83.6546	70.419
		43.6	121.522	159.611	85.4606	93.9125	89.0631	109.771	72.8312	96.1932	158	175.407	143.996	129.318	119.228	131.325	120.893	115.629	97.3872	126.483	83.0364	95.8443	76.0639	92.1883	75.0154	86.4743	99.466	98.655	78.7744	83.882	89.2008	72.4622	74.3928	76.2579	113.616	117.745	95.5608	85.4912	77.4946	78.4484	83.4893	70.2024
		43.7	121.387	159.778	85.2919	93.7694	89.2559	109.726	73.318	96.2941	157.953	175.459	144.635	129.042	119.238	131.7	120.99	115.435	97.3764	126.225	82.7744	96.077	75.9609	92.0667	75.1338	86.2229	99.2978	98.6549	78.6901	84.0653	89.5058	72.0893	74.2821	75.8104	113.847	118.03	95.1601	85.7014	78.0282	78.0521	82.8551	69.8228
		43.8	121.407	160.033	85.2559	93.5402	89.268	110.026	73.3691	96.0496	157.868	175.503	145.125	128.806	118.617	132.412	120.996	115.494	97.2945	125.988	82.2341	96.2481	76.3502	92.0589	75.2337	85.6541	99.002	98.856	78.5078	84.3083	89.7238	72.1013	73.7962	75.3001	114.034	118.239	94.9624	85.9015	78.6344	77.8859	82.1709	69.7932
		43.9	121.491	160.213	85.2111	93.4072	89.1619	110.437	73.073	95.6211	157.878	175.551	145.438	128.575	118.016	132.999	120.84	115.847	97.1826	125.882	82.0394	96.1828	77.0741	92.2171	75.0487	85.3629	98.6928	98.9061	78.4574	84.2644	89.869	72.3528	73.6962	74.9573	114.081	118.267	95.015	86.1209	79.3212	77.9667	81.6837	70.0514
		44	121.69	160.537	85.2212	93.2855	89.6602	110.483	72.4638	95.3719	157.823	175.443	145.179	128.273	117.756	133.355	120.406	116.05	97.0663	125.916	81.9966	95.9083	78.0338	92.1171	75.2299	84.9888	98.4742	98.999	78.5776	84.3147	89.7813	72.7062	73.7279	74.8687	114.135	118.32	95.1867	86.1788	79.5199	78.8027	82.0326	70.2489
		44.1	121.831	160.822	85.4116	93.1554	90.2063	110.521	72.3833	95.3021	157.537	175.234	144.735	128.071	118.036	133.326	119.633	115.844	96.8204	126.019	82.0982	95.3566	78.5286	91.7481	75.541	84.8781	98.4365	99.089	78.7864	84.4465	89.6651	72.9869	73.9499	74.8162	114.091	118.253	95.4176	86.1328	79.5062	79.5947	82.4577	70.0867
		44.2	121.973	160.792	85.6069	93.2172	90.3442	110.314	72.7726	95.1439	157.295	175.117	144.206	127.838	118.301	133.617	119.082	115.671	96.657	126.26	82.4503	95.0482	78.4217	91.5148	75.5782	84.7838	98.397	99.2608	79.3446	84.5082	89.2021	72.9747	74.0021	74.843	113.842	118.145	95.5869	86.078	79.2458	80.3518	83.0888	69.5628
		44.3	122.035	160.553	85.9236	93.1634	89.8932	110.308	73.2594	94.8846	157.216	175.119	143.649	127.795	118.622	133.413	118.796	115.703	96.5429	126.413	82.4255	94.9448	77.9252	91.6286	75.2941	84.552	98.5825	99.5338	79.8433	84.6286	88.6468	72.5942	73.8673	74.759	113.557	118.152	95.6824	85.9525	78.8268	80.3008	83.1546	69.1303
		44.4	122.008	160.299	86.1839	93.3465	89.3213	110.363	73.447	94.7234	157.234	175.196	143.477	128.112	118.832	133.094	118.883	116.36	96.5274	126.51	82.4661	95.0498	77.3653	91.8547	74.6928	84.5036	98.8854	99.9424	79.9236	84.7346	88.054	72.0081	73.6009	75.0291	113.501	118.262	95.6932	85.8504	78.5134	80.316	83.1583	69.1011
		44.5	122.007	159.928	86.3056	93.5206	89.1047	110.278	73.2599	94.407	157.301	175.305	143.23	128.385	118.587	132.119	118.602	116.545	96.5351	126.553	82.5981	95.3349	77.1236	92.0914	74.6699	84.4883	99.1621	100.2	79.6388	84.7324	87.7146	71.6344	73.3634	75.6617	113.518	118.269	95.7276	85.8264	78.0634	80.5099	82.8268	69.3127
		44.6	121.953	159.502	86.4558	93.4246	89.3012	110.222	73.2087	94.258	157.397	175.451	143.218	128.687	118.025	131.416	118.213	116.558	96.5986	126.752	82.6559	95.227	76.9172	92.3053	74.7926	85.0589	99.4078	100.244	79.1515	84.7679	87.6676	71.6297	73.7726	76.2523	113.535	118.235	95.8359	85.9148	77.9403	81.0462	82.5944	69.7022
		44.7	122.033	159.165	86.4783	93.4169	89.4201	110.136	73.2254	94.3301	157.369	175.446	143.372	128.844	116.969	130.814	117.993	115.891	96.7145	127.001	82.9209	95.029	77.1029	92.7031	75.0548	85.6489	99.7098	100.247	78.6636	84.7037	88.0218	71.8708	74.1626	76.4554	113.775	118.03	95.8449	86.129	78.1847	81.4253	82.2099	69.8591
		44.8	122.213	158.834	86.5051	93.3129	89.6181	110.647	73.3734	94.851	157.242	175.415	143.377	128.614	116.539	131.113	117.969	115.705	96.9812	127.317	82.9471	94.9206	77.1394	92.9801	75.0033	86.3983	99.7584	100.104	78.619	84.4544	88.5043	72.1134	74.3396	76.1622	114.061	117.716	95.9577	86.4681	79.0463	81.3398	82.06	69.9756
		44.9	122.293	158.635	86.3967	93.0969	89.6911	110.811	73.4919	95.5322	156.876	175.223	143.431	128.336	116.493	131.599	118.006	115.598	97.1536	127.529	82.8009	94.7826	77.1498	93.0237	75.1577	86.6802	99.5317	99.9724	78.8552	84.2178	88.7347	72.3232	74.1059	75.9828	114.131	117.509	96.1419	86.9318	80.0026	80.7569	81.9646	69.6333
		45	122.239	158.557	86.0445	93.1149	90.2129	110.665	73.5083	95.8168	156.422	175.053	143.503	127.822	116.898	132.164	117.592	115.895	97.2237	127.498	82.6356	95.1231	77.0373	92.9663	75.6771	86.6191	99.3366	100.011	79.2176	84.1551	88.533	72.1846	74.2729	76.354	114	117.395	96.2727	87.2269	80.618	79.9133	82.0421	69.2453
		45.1	122.192	158.543	85.5016	93.0871	90.5469	109.954	73.6392	95.7518	156.173	174.769	143.627	127.384	117.386	132.168	117.077	115.992	97.309	127.131	82.3622	95.3984	76.8937	93.0236	76.2327	86.4449	98.9782	100.021	79.5726	84.2366	88.1802	72.0891	74.6697	76.8689	113.945	117.327	96.3792	87.2717	80.7501	79.4457	81.8694	69.0346
		45.2	121.959	158.572	84.8193	92.9662	90.6912	109.848	73.9457	95.3841	156.204	174.512	143.619	127.054	117.844	132.114	116.605	116.342	97.283	126.474	82.2977	95.3593	76.6342	93.1394	76.489	86.3283	98.5503	99.8786	79.7702	84.5244	88.1412	72.0428	74.9372	77.2207	113.845	117.426	96.3394	87.0228	80.3172	79.5127	81.9214	69.1646
		45.3	121.671	158.848	84.2938	93.0799	90.334	109.981	74.3717	95.4057	156.298	174.128	143.684	126.793	118.284	132.132	116.756	116.615	97.0579	125.698	82.1621	95.3542	76.1924	93.169	76.099	86.4929	98.3692	99.6861	79.7143	84.7825	88.4187	72.6001	74.8789	76.816	113.82	117.58	96.0741	86.5156	79.6074	79.8779	81.9972	69.4578
		45.4	121.38	158.994	83.9909	93.162	90.1679	110.333	74.4767	95.5359	156.539	173.898	143.729	126.924	118.629	132.319	116.95	116.752	96.728	125.199	81.8908	95.1691	76.1418	93.0707	75.7836	86.6599	98.4127	99.3335	79.4156	84.7975	88.7968	73.0316	74.8344	76.3951	113.839	117.659	95.8112	86.0421	79.3094	79.6326	82.4544	69.4201
		45.5	121.129	158.965	83.8467	93.2623	90.226	109.892	73.981	95.2712	156.724	173.675	143.481	127.011	118.856	132.507	117.227	116.529	96.5146	125.08	81.7476	95.179	76.3266	93.3471	75.674	86.8652	98.4475	98.8891	79.2319	84.6589	88.69	73.1877	74.7412	76.2721	114.018	117.643	95.7662	85.7629	79.5541	79.2212	82.6967	69.4328
		45.6	120.94	158.821	83.9247	93.3938	90.4789	109.53	73.1716	94.7963	156.707	173.64	143.356	127.29	118.958	132.268	117.184	116.183	96.2399	125.302	81.7576	95.3778	76.777	93.5463	76.1407	86.9996	98.67	98.6771	78.9364	84.3754	88.5872	72.8787	74.74	76.563	114.075	117.532	95.8199	85.6414	79.8798	79.1131	82.6368	69.3217
		45.7	120.849	158.796	84.1556	93.4831	90.1414	109.212	72.4544	94.4123	156.4	173.775	142.953	127.493	118.911	131.697	117.393	116.027	96.0992	125.727	81.9215	95.5833	76.9288	93.8773	76.6991	86.9464	98.8366	98.6132	78.8387	84.2333	88.4561	72.64	74.6432	76.884	114.041	117.437	95.9848	85.5013	79.5884	79.8009	82.2903	69.6117
		45.8	120.706	158.555	84.2608	93.5904	89.6009	109.56	72.2771	94.6611	155.925	173.976	142.067	127.364	118.823	131.075	117.747	115.704	96.1357	126.26	82.3116	95.8111	77.1587	93.6804	77.1308	86.7867	98.7711	98.6939	78.8522	84.0751	88.7217	72.8543	74.5949	76.9816	113.868	117.412	96.1063	85.3506	79.1523	80.3859	81.6846	69.8274
		45.9	120.767	158.426	84.7611	93.9959	88.7781	109.757	72.2072	94.9302	155.528	173.998	141.211	127.218	118.65	131.105	118.278	115.49	96.4487	126.502	82.7092	95.8755	76.98	93.5951	76.9414	86.6157	98.4565	99.0048	78.6808	83.9909	88.7327	73.0372	74.0874	76.784	113.655	117.429	96.0511	85.1823	78.7443	80.2069	81.4194	70.3876
		46	120.983	158.408	85.279	94.3755	88.5684	110.064	72.3916	95.0821	155.383	174.168	140.438	126.869	118.555	131.546	119.002	115.161	96.735	126.472	82.6668	95.7284	76.5462	93.3856	76.6757	86.3784	98.028	99.3219	78.5288	84.1315	88.6683	73.1374	73.4452	76.5476	113.404	117.569	96.0801	85.2148	78.6509	79.5377	81.4499	70.8047
		46.1	121.285	158.59	85.5807	94.6144	88.2269	110.276	72.397	95.2554	155.259	174.234	140.007	126.695	118.657	132.142	119.652	115.325	97.18	126.26	82.5588	95.2697	76.036	93.337	76.361	86.0269	97.5884	99.5392	78.3266	84.2466	88.4391	72.7068	72.8257	76.2754	113.263	117.893	96.0543	85.4944	78.7992	79.0592	82.1547	71.3102
		46.2	121.507	158.717	86.0239	94.7666	88.3199	110.601	72.6968	95.4614	155.18	174.145	140.178	126.855	118.889	132.151	120.134	115.129	97.5137	126.061	82.4069	94.6269	75.6581	93.1127	76.6557	85.6531	97.36	99.6844	78.3167	84.5289	88.4386	72.6318	72.657	76.4172	113.213	118.023	95.9966	85.9657	79.1996	79.4244	82.7679	71.5187
		46.3	121.86	159.023	86.1447	94.4937	88.528	110.524	72.8819	95.7733	155.283	174.202	140.677	127.051	118.742	131.921	119.967	115.104	97.5968	125.93	82.2961	94.0991	75.863	92.7612	76.7386	85.3088	97.4244	99.6568	78.4371	84.8989	88.616	72.6603	72.7086	76.7571	113.259	118.04	95.9645	86.3951	79.7019	80.0406	82.8701	71.278
		46.4	122.109	159.247	86.0445	94.2579	89.2341	110.157	73.0722	95.5407	155.203	174.421	141.205	127.308	118.172	131.253	118.894	114.61	97.5028	126.028	82.6273	94.0218	76.2546	92.0079	77.2099	85.2986	97.8334	99.3505	78.7483	84.8727	88.6341	73.0893	73.1407	77.024	113.431	118.031	95.7525	86.3534	79.6896	80.4051	82.3529	70.8448
		46.5	122.291	159.519	85.9218	94.0414	89.5473	109.561	73.2149	95.0667	154.909	174.416	141.752	127.431	117.39	130.564	117.72	114.424	97.436	126.239	82.9798	94.4121	77.0896	91.4164	77.5616	85.1732	98.4519	99.0408	79.2214	84.7599	88.3074	73.0099	73.5143	77.0604	113.656	118.016	95.4826	86.1176	79.6158	80.0982	82.0743	70.258
		46.6	122.351	159.587	85.7162	93.6888	89.3569	109.174	73.3071	94.4001	154.707	174.215	142.214	127.181	117.105	129.8	117.166	114.038	97.1052	126.552	83.1917	95.0252	77.5749	90.9548	77.7263	85.2833	99.0154	98.7081	79.5383	84.5198	87.6616	72.8607	73.546	77.086	113.799	117.874	95.2608	85.7399	79.387	79.8322	82.5219	70.3046
		46.7	122.492	159.493	85.4897	93.2865	88.8406	108.92	73.5457	94.1784	154.574	173.946	142.484	126.942	117.311	129.36	117.538	113.803	96.7367	126.772	83.2456	95.5211	77.6343	91.2034	77.2331	85.4046	99.4245	98.4106	79.7519	84.1538	87.4089	72.457	73.2159	77.2426	113.897	117.858	95.1963	85.4943	79.2397	79.6613	83.2618	70.4196
		46.8	122.403	159.194	85.4021	92.859	88.5517	108.822	73.5536	94.0422	154.355	173.496	142.501	126.543	117.805	129.546	117.689	113.847	96.5811	126.836	82.8322	95.7198	77.172	91.5043	76.3249	85.4897	99.5369	98.301	79.8645	84.0947	87.5402	72.4701	73.1873	77.5471	113.973	117.857	95.2839	85.6693	79.0711	79.9102	83.5654	70.6032
		46.9	122.195	158.927	85.3997	92.4849	88.5188	108.756	73.7501	94.0122	154.267	173.067	142.365	126.062	117.803	129.952	116.985	114.133	96.4674	126.648	82.5258	95.6684	76.5836	92.0042	75.7154	85.8089	99.4488	98.3772	79.7191	83.9722	87.959	72.7513	73.673	77.5153	113.945	117.768	95.5167	85.8759	79.0974	79.9151	82.8844	70.4157
		47	121.896	158.513	85.2636	92.3499	88.7544	109.068	73.9183	94.1076	154.134	172.815	142.006	125.879	117.586	130.546	116.188	114.779	96.3433	126.352	82.4186	95.5114	76.2589	92.1726	75.4848	85.7739	99.0864	98.5556	79.4466	83.9038	88.1088	73.2127	74.0432	77.3854	113.834	117.545	95.7942	86.0326	79.2074	80.1612	81.8817	70.1428
		47.1	121.603	158.278	85.0547	92.3012	89.1832	109.339	74.1871	94.3472	153.867	172.986	141.647	125.62	117.353	130.665	115.813	114.955	96.3833	125.891	82.2721	95.5751	76.628	92.4049	75.5171	86.0266	98.6498	98.9715	79.237	83.7591	88.1196	73.5423	73.9474	76.8244	113.831	117.322	95.7858	86.0942	79.0079	80.2652	81.2562	69.8706
		47.2	121.185	158.309	84.7989	92.2713	89.4977	109.603	74.0238	94.6697	153.68	173.358	141.451	125.338	117.07	130.394	116.188	115.022	96.516	125.416	82.3769	95.6053	77.4934	92.5787	75.4086	86.2132	98.1933	99.3654	78.8691	83.4964	88.3679	73.421	73.6579	76.254	113.797	117.125	95.5931	85.9568	78.5362	80.1506	81.4511	69.4379
		47.3	120.927	158.439	84.6491	92.1356	89.5454	108.979	73.6661	94.63	153.525	173.897	141.234	125.156	116.497	129.637	116.759	114.902	96.5697	125.095	82.299	95.5241	78.2464	92.8048	74.9266	86.6858	97.9312	99.623	78.4593	83.1949	88.8352	73.1237	73.6242	75.779	113.745	116.987	95.3086	86.0177	78.2082	79.8436	81.8963	68.8502
		47.4	120.791	158.561	84.6809	91.9282	89.3063	108.407	73.4251	94.5711	153.331	174.396	141.088	125	115.829	129.122	117.229	115.388	96.5989	124.936	82.0306	95.3663	78.3228	92.8382	74.5024	87.031	97.6764	99.8709	78.3564	82.8628	89.1674	72.564	73.7579	75.6842	113.753	116.923	94.9532	86.2696	78.347	79.4538	82.0088	68.3387
		47.5	120.689	158.793	84.7929	92.0123	89.4048	108.233	73.3247	94.5269	153.259	174.755	140.718	124.866	115.889	129.239	117.684	115.993	96.5798	124.986	81.9843	94.8699	77.9674	92.481	74.3972	86.7403	97.6226	100.071	78.3644	82.7927	88.7681	72.2188	73.6071	75.8226	113.69	116.908	94.7413	86.4059	78.7667	79.3889	81.9997	68.4648
		47.6	120.545	158.889	84.9661	92.0825	89.7164	108.864	73.1414	94.4331	153.426	174.892	140.14	125.087	116.73	129.866	117.669	116.565	96.6666	125.219	81.9125	94.5268	77.5993	92.0399	74.7963	86.3479	97.6976	100.084	78.5932	82.8027	88.3538	72.0851	73.4196	76.1569	113.461	116.929	94.6732	86.5343	79.0246	79.1626	82.428	69.1693
		47.7	120.488	158.701	84.9709	92.2184	89.8329	109.689	72.6932	94.4974	153.37	174.903	139.586	125.401	117.496	130.27	117.662	116.784	96.8175	125.579	82.1016	94.4634	77.226	91.7781	74.8076	85.9044	97.9344	100.162	79.1574	83.0834	88.4533	72.2159	73.3377	76.2812	113.412	116.974	94.8243	86.3948	79.1759	79.1522	83.4249	70.0394
		47.8	120.436	158.58	84.9639	92.2483	89.4903	109.97	72.4218	94.5721	153.253	174.708	139.173	125.358	117.798	130.243	117.085	116.79	96.9571	125.808	82.4579	94.5506	76.8784	91.9586	74.3346	85.747	98.077	100.277	79.2567	83.4493	89.2909	72.181	73.7279	76.2086	113.436	116.999	95.0854	85.9494	79.3953	79.2719	83.9804	70.1678
		47.9	120.466	158.559	85.0569	92.0895	88.8989	110.063	72.4911	94.9292	153.205	174.389	139.072	125.486	117.177	129.843	116.707	116.66	96.9986	126.009	82.7258	94.8189	76.4978	92.1279	73.5872	85.5832	98.3242	100.366	78.9536	83.5898	89.9701	72.0098	74.2693	75.654	113.371	117.076	95.4208	85.6097	79.7492	79.5896	83.7496	69.5989
		48	120.637	158.59	85.0365	91.973	88.8449	109.784	72.8632	94.9729	153.185	174.109	139.384	125.395	116.398	129.486	116.252	116.257	97.1189	125.934	82.9724	94.8708	76.2102	91.8361	73.3826	85.1793	98.6103	100.385	78.3763	83.8227	90.172	71.8438	74.5604	75.4418	113.433	117.277	95.8524	85.4952	79.8794	79.6431	82.6658	68.7606
		48.1	120.832	158.584	84.9154	92.0483	89.0408	109.73	72.9157	94.8437	153.072	173.603	139.78	125.291	115.682	129.169	116.412	115.739	97.156	125.675	83.0176	94.8407	75.8538	91.3984	73.448	84.988	98.8768	100.194	77.5246	84.0433	89.9093	71.8387	74.1842	75.5372	113.673	117.478	95.9488	85.5964	79.4283	79.5588	82.0881	68.6323
		48.2	121.024	158.663	84.8017	92.2398	89.5677	109.616	72.7566	94.8913	153.249	173.107	139.816	125.608	115.604	129.012	116.362	115.23	97.0206	125.334	82.9798	94.7796	75.5512	91.182	73.4524	84.8093	99.0109	99.8699	77.1255	84.4494	89.7271	71.7418	73.5691	76.1954	113.667	117.484	95.9911	85.9519	78.9263	79.6536	82.1451	69.1194
		48.3	121.168	158.621	84.5953	92.3896	89.9612	109.698	72.586	94.9689	153.614	172.658	139.694	125.912	115.901	128.929	116.251	114.717	96.8942	125.043	82.7633	94.8303	75.5842	91.6671	73.4178	85.1234	99.2548	99.5818	77.2147	85.0206	89.5583	71.8234	72.9333	76.9079	113.607	117.429	95.9736	86.2414	78.7346	79.9624	82.698	69.7319
		48.4	121.114	158.403	84.4533	92.4186	90.4442	109.247	72.8967	95.3572	153.929	172.411	139.31	126.414	116.154	129.123	115.632	114.397	96.8626	124.796	82.4531	95.137	76.0586	91.9959	73.7271	85.2666	99.3888	99.241	77.5631	85.5326	89.6389	71.8444	72.7278	77.4696	113.619	117.283	95.6889	86.2789	78.9611	80.395	83.0233	69.8371
		48.5	120.783	158.006	84.5889	92.1958	90.7328	108.722	73.2378	95.2701	154.199	172.137	138.79	126.703	116.142	129.248	115.545	114.253	96.8531	124.735	82.1567	95.4951	76.7583	92.2484	74.47	85.4388	99.3542	98.9134	77.9648	85.7126	89.8673	71.9564	72.1643	77.6507	113.649	116.947	95.6059	86.3326	79.2239	80.3844	83.1136	69.6996
		48.6	120.563	157.749	84.7766	91.9936	90.9082	108.338	73.2473	95.2923	154.369	172.071	138.793	126.66	116.04	128.916	115.777	114.473	96.6996	124.762	81.9724	95.8845	77.1557	91.9606	74.8819	85.4239	99.1995	98.8651	78.2026	85.3326	90.2596	71.9951	72.1261	77.3357	113.649	116.669	95.4133	86.3779	79.3243	80.3088	83.2382	69.7757
		48.7	120.334	157.461	84.9242	92.1026	90.7353	108.899	72.8121	94.9417	154.3	171.981	138.815	126.464	115.868	128.057	116.49	114.795	96.7608	124.927	81.8801	96.0563	77.2936	91.6817	74.9209	85.4004	99.023	98.9454	78.2479	84.831	90.5513	72.24	72.3013	76.8063	113.769	116.598	95.1865	86.5323	79.3172	79.9566	83.4609	70.1207
		48.8	120.222	157.282	85.0276	92.4274	90.6981	109.525	72.2111	94.6522	153.881	171.99	138.975	126.089	115.57	127.182	116.436	115.029	96.9075	125.042	81.9931	95.8846	77.0532	91.3518	74.609	85.6222	98.6194	99.0103	78.4375	84.1039	90.4204	72.5956	72.956	76.4053	113.853	116.681	95.0015	86.6583	79.0514	79.9843	83.6539	70.4216
		48.9	120.247	157.232	84.8294	92.6944	90.3964	109.865	72.1316	94.1488	153.382	171.853	139.456	125.985	115.426	127.341	115.974	115.082	97.179	125.004	82.1613	95.4274	76.9272	91.1647	74.6189	85.7249	98.1927	99.146	78.765	83.6449	90.3763	72.6266	72.9626	76.1722	113.917	116.815	94.8793	86.4189	78.576	79.8317	83.787	70.3378
		49	120.422	157.159	84.4481	93.1023	90.4149	109.789	72.5696	93.7984	152.988	171.825	139.775	126.114	115.549	128.377	114.99	114.868	97.3227	125.024	82.2361	94.779	76.7024	91.3903	74.7121	85.7832	97.9203	99.3763	79.0979	83.6341	90.3013	72.63	73.0892	76.1903	113.971	117.017	94.9103	85.9472	78.0212	79.9818	83.5857	70.0079
		49.1	120.512	156.968	84.2861	93.0048	89.9486	109.436	73.3908	93.8092	152.696	171.912	140.321	126.016	115.942	129.628	114.585	114.658	97.6284	125.028	82.2636	94.1559	76.7809	91.8073	74.8457	85.2782	97.783	99.6069	79.5656	83.8224	90.4634	72.5704	73.3708	75.8487	113.884	117.138	95.0049	85.4876	77.8641	80.0846	83.1059	69.6464
		49.2	120.657	156.975	84.3688	92.7386	89.6652	109.13	73.5361	94.3077	152.588	171.986	140.773	125.868	116.016	130.333	114.375	114.516	97.7154	124.836	82.2368	93.8821	76.5297	92.4674	74.5209	84.9147	97.6468	99.7835	79.6834	84.1789	90.0974	72.7082	74.347	75.5167	113.769	117.295	95.2754	85.2039	78.0978	80.2458	82.633	69.3723
		49.3	120.754	156.861	84.5374	92.6889	89.3799	108.386	73.4712	94.7067	152.736	171.954	140.885	125.567	116.014	130.432	114.429	114.563	97.6611	124.571	82.0596	93.9828	76.106	92.8987	74.4386	84.3861	97.639	99.8577	79.8087	84.5839	89.4656	72.4716	74.6584	75.0061	113.752	117.287	95.3524	85.1549	78.6611	80.2766	82.457	69.168
		49.4	120.811	156.523	84.7728	92.4073	89.4211	108.079	73.2589	94.9792	152.951	171.98	140.685	125.203	116.095	130.48	114.36	114.517	97.4514	124.402	81.8231	94.284	75.6743	92.8092	74.5148	84.1981	97.6732	99.7742	79.8841	84.9237	88.6922	72.2519	74.9656	74.9381	113.752	117.256	95.3944	85.314	79.0709	80.0979	82.5161	69.0823
		49.5	120.91	156.455	84.8043	92.4396	89.6773	107.95	73.7949	94.8218	152.907	171.953	140.234	125.201	116.098	130.419	114.276	114.464	97.2132	124.094	81.8743	94.671	75.8731	92.414	74.942	83.923	97.5578	99.6136	79.7008	85.0266	88.5008	72.1958	74.641	74.7264	113.624	117.288	95.3062	85.4212	79.1856	80.1123	82.4788	69.092
		49.6	120.934	156.539	84.6582	92.5302	89.6668	108.613	74.1114	94.8588	152.781	171.893	139.762	125.22	115.714	130.184	114.261	114.18	96.8442	123.859	81.819	94.7215	76.5752	91.5856	75.2361	84.5452	97.3714	99.3964	79.5869	85.2018	88.7282	72.5708	74.6628	74.9337	113.568	117.344	95.2912	85.4329	79.1011	80.1004	82.2958	69.3544
		49.7	120.845	156.525	84.8888	92.5369	89.7901	109.012	74.1107	94.502	152.605	171.86	139.529	125.152	114.889	129.634	114.339	113.642	96.4715	123.749	81.9006	94.4177	77.0714	91.0024	75.4783	85.4348	97.2863	99.3628	79.2381	85.0373	89.55	73.0079	73.9811	74.9656	113.557	117.298	95.4418	85.5959	79.0859	80.2943	82.0664	69.4432
		49.8	120.651	156.707	85.1476	92.5066	89.6568	109.048	73.4022	94.147	152.472	171.815	139.681	124.733	114.443	129.061	114.652	113.014	96.1029	123.906	82.0941	93.9678	77.2699	90.4791	76.0354	86.2493	97.2302	99.5105	78.9448	84.6671	90.0587	73.3734	73.4483	75.472	113.476	117.374	95.6688	85.9064	79.3918	80.6044	81.9513	69.5907
		49.9	120.494	157.139	85.214	92.4294	89.645	108.112	72.8163	93.7263	152.288	171.613	140.004	124.171	114.587	128.706	114.985	112.758	95.8535	124.161	82.0948	93.5676	77.1079	90.4532	76.2069	86.1462	97.2679	99.8539	78.8833	84.2174	90.5797	73.5878	73.0762	75.7084	113.398	117.46	96.089	86.2255	79.729	80.8198	82.3296	69.8684
		50	120.302	157.392	85.1444	92.4254	89.2719	107.378	72.5153	93.4923	152.444	171.367	140.291	123.743	115.246	128.541	115.151	112.902	95.7825	124.501	82.2046	93.4372	76.9846	90.5736	76.3117	85.316	97.531	100.269	78.9693	83.5918	90.4292	73.4359	73.1749	76.1742	113.585	117.532	96.3852	86.5641	79.7801	80.9278	83.0546	70.7037
		50.1	120.13	157.557	84.5897	92.3833	88.9954	107.383	72.294	93.3434	152.701	170.96	140.339	123.532	115.713	128.265	115.2	112.954	95.9355	124.735	82.1683	93.6087	76.4677	90.7258	76.0256	84.7428	97.9457	100.551	79.1781	83.3044	90.2777	72.8176	73.3973	76.1419	113.851	117.656	96.63	86.6948	79.5087	80.7224	83.7421	71.4362
		50.2	119.965	157.569	84.0089	92.5014	88.8036	108.139	71.8872	93.037	152.947	170.689	139.79	123.783	115.656	128.036	115.408	112.478	96.3639	124.81	81.8628	93.9204	76.0871	90.6854	76.2238	84.3691	98.3932	100.581	79.4079	83.3471	89.6923	71.8152	73.4274	75.7358	114.016	117.74	96.6906	86.5108	79.2166	80.6064	83.8031	71.621
		50.3	119.854	157.295	83.8351	92.5409	88.7894	108.628	71.5901	92.9413	153.06	170.712	139.074	124.222	115.397	127.953	115.899	112.285	96.9222	124.731	81.6854	94.1025	75.7458	90.318	76.461	84.1699	98.9504	100.505	79.3449	83.4452	89.3659	70.9569	73.722	75.141	114.194	117.657	96.5723	86.2861	79.2592	80.3893	83.294	70.9822
		50.4	119.737	157.005	83.9936	92.3966	88.9039	108.493	71.8724	92.934	153.2	171.055	138.382	124.501	114.923	128.323	115.99	112.623	97.3578	124.492	81.5963	94.2558	76.262	90.1714	76.5821	83.5896	99.4762	100.353	79.201	83.6189	89.3258	70.3953	74.067	75.349	114.46	117.672	96.452	86.0911	79.563	80.3006	82.8141	70.14
		50.5	119.644	156.794	84.5275	92.1796	89.1041	108.261	72.6899	93.0142	153.066	171.376	137.601	124.691	114.663	128.568	115.461	113.539	97.6473	124.196	81.7725	94.2386	76.6424	90.3592	76.1042	83.2473	99.9606	99.9897	79.2239	83.6804	89.9138	70.3089	74.1619	76.2732	114.436	117.681	96.2503	85.8749	79.8911	80.2423	82.6327	69.3591
		50.6	119.806	156.532	85.1743	91.7284	89.4343	108.361	73.3476	93.3641	152.702	171.882	137.474	124.848	114.114	128.577	114.498	113.946	97.7592	124.134	82.2923	94.0526	77.0033	90.9687	75.2464	83.6254	100.35	99.6226	79.059	83.5019	90.3388	70.6879	73.9204	77.4042	114.433	117.696	96.0441	85.619	79.9111	80.1898	82.7822	69.0169
		50.7	120.084	156.473	85.5972	91.4206	89.51	108.379	73.6058	93.765	152.149	172.226	137.209	124.707	113.781	128.24	113.916	113.738	97.6241	124.223	82.5583	94.1006	76.5443	91.1799	74.5804	84.438	100.575	99.2206	79.2071	83.6789	90.4986	71.7138	73.573	77.6139	114.509	117.803	96.0057	85.3283	79.2607	80.1604	82.6878	68.9662
		50.8	120.328	156.707	85.5886	91.3013	89.0378	108.388	73.1812	94.3822	151.533	172.237	137.089	124.642	113.562	128.045	113.871	113.413	97.4276	124.154	82.6377	94.2636	76.4484	90.6332	74.2604	85.0427	100.538	98.8138	79.2824	83.88	89.8727	73.0129	73.3707	77.2527	114.482	118.089	95.8413	85.0902	78.2968	80.1731	82.3037	69.0036
		50.9	120.597	156.902	85.3184	91.4366	88.4981	108.02	72.619	94.3933	150.944	172.052	137.228	124.492	113.634	128.015	114.157	113.094	97.232	124.185	82.5534	94.4387	76.6341	90.1531	74.204	85.0398	100.33	98.463	79.1543	84.0508	89.2606	73.7002	73.4348	76.4652	114.192	118.176	95.7276	85.0522	77.5371	80.551	82.0977	68.9594
		51	120.862	156.904	84.9793	91.7824	88.1051	107.489	71.969	94.129	150.456	171.933	137.13	124.169	113.651	127.824	114.228	113.042	97.0806	124.419	82.4873	94.7667	77.2067	90.1813	74.4024	84.5882	99.8813	98.3612	79.23	84.2289	88.6537	73.4149	73.6429	75.7916	114.002	118.218	95.8314	85.3064	77.2781	80.7421	82.2457	68.8239
		51.1	120.842	156.929	84.6246	91.9933	88.2221	106.455	71.7457	93.5832	150.327	171.51	137.299	124.148	113.905	127.387	114.405	112.824	96.8631	124.455	82.6833	94.8998	77.3229	91.0336	75.3332	84.2306	99.2966	98.4222	79.1675	84.1478	88.8991	72.3124	74.1841	75.2871	113.636	118.088	95.8608	85.7374	77.4094	80.9193	82.7289	68.8196
		51.2	120.691	156.835	84.6318	92.2216	88.3352	105.75	71.7927	93.4302	150.375	170.935	137.319	124.03	114.468	126.511	114.37	113.041	96.6662	124.523	83.0291	94.6396	76.8532	91.3087	76.9126	84.301	98.8011	98.6105	79.3304	84.1019	89.2283	71.6799	74.7117	75.1493	113.301	117.784	96.0214	86.1111	77.4986	80.7811	82.7553	68.9504
		51.3	120.602	156.497	84.7756	92.2324	88.5379	105.737	71.9309	93.3583	150.531	170.476	137.49	124.031	114.972	126.018	114.424	113.046	96.4957	124.863	83.244	94.2567	75.959	90.8688	77.7333	84.6317	98.5344	98.7783	79.4772	84.1109	89.7251	71.7046	75.2481	75.5003	113.134	117.398	96.3181	86.4269	77.7982	80.8112	82.4066	69.352
		51.4	120.336	156.08	84.7635	92.3009	88.9399	106.602	72.0676	93.3018	150.681	170.013	137.607	124.063	114.69	125.915	114.126	112.917	96.4714	125.164	83.1001	93.7255	75.4678	90.1104	77.4119	84.9442	98.455	98.8538	79.5543	84.1861	89.7249	72.319	75.6586	75.9556	113.198	117.043	96.4197	86.7435	78.3814	80.5558	82.0021	69.7202
		51.5	119.987	155.825	84.8165	92.3551	89.2521	107.357	72.3	93.1582	150.779	169.514	137.504	123.974	113.772	126.335	113.587	112.456	96.4178	125.203	82.7786	93.1478	76.038	90.1149	76.0857	84.7917	98.5029	98.7675	79.5924	84.2256	90.2602	72.4336	75.5428	76.227	113.299	116.687	96.5283	86.9694	79.072	80.2516	82.0049	69.9048
		51.6	119.764	155.555	84.7872	92.0653	89.155	107.932	72.8652	93.3957	150.572	169.164	137.471	124.161	113.339	126.644	112.911	112.786	96.5598	125.207	82.3985	92.9618	77.3413	90.4921	75.2703	84.7832	98.7128	98.6658	79.4445	84.2149	90.5217	71.9619	74.8326	76.4024	113.512	116.579	96.6008	87.1905	79.7902	79.9029	82.1873	69.9461
		51.7	119.689	155.358	84.7055	91.9084	88.7442	107.914	73.3117	93.9843	150.364	169.021	136.891	124.229	113.743	126.929	112.403	113.52	96.7967	125.114	82.2963	93.1086	78.5264	90.8892	74.8139	84.7818	99.0156	98.5978	79.3751	84.0984	90.7817	71.2072	73.8624	76.5089	113.706	116.695	96.4563	87.2002	79.9312	79.9978	82.3772	70.0289
		51.8	119.597	155.283	84.7115	91.4684	88.7662	108.003	73.2917	94.3769	150.334	168.833	136.539	124.439	114.279	127.216	112.295	114.225	96.9916	124.897	82.2891	93.4273	78.4203	90.6101	74.8949	84.8478	99.2396	98.6448	79.3868	83.9647	90.3344	71.1289	72.9927	76.4523	113.768	116.709	96.3446	86.9808	79.83	80.3604	82.3531	70.1192
		51.9	119.617	155.275	84.6705	90.9516	89.5307	108.168	72.8971	94.408	150.402	168.65	136.754	124.641	114.357	127.443	112.537	113.953	97.0868	124.638	82.2828	93.9457	77.6897	90.5408	75.1727	84.6577	99.3109	98.7522	79.3513	83.9345	90.2649	71.8387	72.9109	76.1083	113.703	116.817	96.0983	86.7349	79.5203	80.8556	82.5808	69.9722
		52	119.714	155.319	84.3804	90.6676	90.3033	108.468	72.8143	94.0508	150.541	168.448	136.98	124.525	113.784	127.403	112.507	113.257	97.3054	124.309	82.1411	94.2661	76.4083	90.0906	75.5727	84.3263	99.3986	98.9655	79.1763	83.9463	90.2191	72.8219	73.0939	76.0629	113.73	117.106	95.8714	86.4002	79.373	80.9542	82.7791	69.7137
		52.1	119.804	155.582	83.9257	90.4315	90.521	108.525	73.3128	93.7238	150.802	168.403	137.776	124.387	113.488	127.347	112.631	112.444	97.2658	124.11	81.7308	94.3224	75.8426	89.9418	75.7313	84.0291	99.4261	99.0972	78.9747	84.1394	90.2691	73.2528	73.6427	76.5437	113.782	117.357	95.8149	86.2016	79.4874	80.8289	82.8188	69.6184
		52.2	119.817	155.813	83.5727	90.457	90.2707	108.21	73.7734	93.6413	151.083	168.577	138.237	124.17	113.196	127.437	112.481	112.295	97.1516	123.905	81.5171	94.3759	75.7828	89.6446	75.4872	83.9243	99.2953	99.2156	78.7189	84.3492	90.1299	73.048	73.758	76.9168	113.755	117.404	95.7815	86.1951	79.4259	80.4332	82.5671	69.655
		52.3	119.914	156.091	83.3464	90.6405	90.2644	107.873	73.6777	93.8008	151.125	168.858	137.936	123.925	113.173	127.589	112.847	112.407	96.9666	123.763	81.3339	94.2679	76.3239	89.9973	75.3946	84.138	99.1356	99.3054	78.6513	84.3785	90.0313	72.4689	73.5764	76.6336	113.92	117.625	95.848	86.1537	79.4107	80.2514	82.1676	69.889
		52.4	120.159	156.276	83.3544	91.0687	90.5649	107.714	72.9191	94.098	151.091	169.181	137.398	123.789	112.867	127.63	113.033	113.064	96.6449	123.736	81.2453	94.4627	76.7278	90.2559	75.3151	84.4584	99.1477	99.4525	78.7958	84.4064	89.7842	72.17	73.5409	75.7128	114.148	117.848	95.8949	86.2069	79.2922	80.0682	82.0853	69.7571
		52.5	120.366	156.313	83.4893	91.2035	90.7746	107.781	72.5153	94.0413	150.958	169.523	136.493	123.945	112.863	127.352	113.51	113.234	96.184	123.941	81.4218	94.8137	76.8016	90.4552	75.2751	84.5746	99.1367	99.4802	78.9367	84.2804	89.0962	72.0944	73.6802	75.1759	114.156	117.792	95.7876	86.4078	79.447	80.0568	82.0711	69.4772
		52.6	120.49	156.097	83.6666	91.006	90.2571	107.827	72.4092	93.7961	150.869	169.791	135.755	124.054	113.013	127.074	113.726	113.367	95.9083	123.989	81.6416	94.9382	76.8356	90.415	74.9883	84.2671	99.0406	99.545	78.9831	84.0666	88.1418	72.5004	74.1626	75.0647	114.066	117.539	95.6616	86.5017	79.8021	80.2117	82.4234	69.079
		52.7	120.567	155.783	83.7879	90.7274	89.6	107.776	72.6613	93.403	150.772	169.72	135.46	124.085	113.473	126.446	113.684	112.872	95.6553	124.066	81.9731	94.9764	76.8843	90.7714	75.0158	83.9996	99.0169	99.5617	79.0123	83.9912	87.4999	72.7263	74.1284	75.4479	114.119	117.54	95.5652	86.6497	79.9631	80.5917	82.5232	69.4112
		52.8	120.516	155.395	84.0809	90.1516	88.7839	107.458	72.6421	93.1513	150.657	169.522	135.394	124.255	113.79	126.041	113.453	112.489	95.5714	123.996	82.4197	94.5876	76.9456	91.2757	75.4457	83.9319	99.021	99.4496	78.9918	83.8959	87.8098	72.84	73.7579	75.4972	114.017	117.522	95.4644	86.8078	79.9541	81.0774	82.8221	69.9754
		52.9	120.232	155.19	84.478	90.0265	88.597	106.953	72.8226	93.1816	150.532	169.357	135.347	124.183	114.004	125.4	113.102	112.202	95.7048	123.89	82.7216	94.0728	77.0541	91.8943	75.8047	84.1262	98.9155	99.1546	78.9174	83.9154	88.9319	72.5286	73.4434	75.513	113.941	117.526	95.4483	86.9469	79.7226	80.9939	82.8716	70.5237
		53	120.101	155.203	84.6696	90.4262	88.5609	106.566	73.0597	93.3447	150.656	169.263	135.222	123.98	114.12	125.237	113.144	112.47	95.8691	123.731	82.8565	93.6963	77.3072	91.8582	75.8821	84.3349	98.8324	98.9657	78.9357	84.0293	90.2452	72.3648	73.518	75.3727	114.1	117.688	95.5886	86.9311	79.5622	80.5782	83.2369	70.0789
		53.1	120.087	155.273	84.7676	91.1085	89.0492	106.471	73.3286	93.694	150.742	169.149	134.818	123.985	114.05	124.997	113.291	113.028	96.1233	123.509	82.8291	93.3416	77.8017	91.7476	75.661	84.4602	98.923	98.8576	78.7785	84.2289	90.8241	72.4637	74.3001	75.5086	114.337	117.923	95.7758	87.0066	79.2431	79.7701	83.4404	69.4244
		53.2	120.189	155.661	84.5423	91.8546	89.6458	106.806	73.2016	93.6034	150.728	169.261	134.401	123.688	113.874	125.277	113.467	113.608	96.4148	123.266	82.5929	92.8861	78.1697	91.5088	75.5152	84.4318	98.9726	98.7119	78.8466	84.2235	90.5411	72.6377	74.7743	75.7884	114.452	117.943	96.0687	87.2048	78.6939	79.7096	83.4473	68.7751
		53.3	120.372	156.13	84.3228	92.1949	90.136	107.037	73.0466	93.2752	150.861	169.419	134.069	123.205	113.777	125.279	113.341	113.691	96.5738	123.108	82.4552	92.4284	78.0281	91.4353	75.6824	84.374	98.9217	98.6528	79.0037	84.0666	89.8682	72.5018	75.1904	76.1454	114.491	117.913	96.3512	87.151	78.2489	79.8859	83.0898	68.8076
		53.4	120.807	156.392	84.3491	92.2419	90.1222	107.044	73.1827	92.7531	150.863	169.506	133.784	122.939	113.98	125.502	113.11	113.41	96.7295	122.931	82.3971	92.032	77.1806	91.0999	75.8837	84.3223	98.9192	98.7276	79.2253	83.9923	89.4902	72.0582	74.9852	76.6352	114.318	117.785	96.4361	87.3431	78.0558	80.3547	82.5297	69.0003
		53.5	121.136	156.404	84.5776	91.9944	89.7346	106.689	73.6042	92.4441	150.488	169.455	133.736	122.458	114.205	125.836	112.922	112.525	97.0546	122.667	82.4416	91.7047	76.0512	90.3647	76.2196	84.5632	99.0093	98.7721	79.6205	83.7695	89.6531	71.8009	74.8396	76.6297	113.95	117.592	96.5277	87.2757	78.0392	80.2747	82.2301	69.0454
		53.6	121.403	156.512	84.8892	91.6853	89.5833	106.189	74.2256	92.3972	150.034	169.34	133.602	122.221	114.03	126.544	113.192	111.607	97.3508	122.63	82.5898	91.6929	75.6018	89.8633	76.3343	84.5431	98.9224	98.7737	79.6343	83.8431	90.0751	71.9597	74.7547	76.4061	113.618	117.451	96.3811	86.9962	78.2227	79.896	82.3157	69.0706
		53.7	121.517	156.26	85.0618	91.4897	89.7392	105.953	74.2269	92.3851	149.657	168.959	133.653	122.269	113.408	126.958	113.468	110.695	97.525	122.52	82.5134	91.5876	75.7904	89.7123	76.3259	84.5388	98.8903	98.9075	79.732	84.09	90.036	72.208	74.8273	75.914	113.295	117.376	96.0632	86.8969	78.2317	79.4583	82.7277	69.2652
		53.8	121.594	155.831	84.9964	91.1589	89.9077	105.785	73.905	92.3564	149.225	168.621	133.819	122.269	112.828	126.555	113.579	110.451	97.7068	122.387	82.2841	91.4043	76.3592	90.1876	76.1947	84.7034	99.0324	99.1283	79.7157	84.2506	89.5253	72.6021	74.904	76.0229	113.104	117.219	95.8216	86.7121	78.282	79.1791	82.9893	69.6541
		53.9	121.408	155.629	84.7666	91.0146	89.6136	105.493	73.148	92.4432	148.845	168.302	134.13	122.264	112.87	125.94	112.987	110.429	97.8232	122.222	82.0641	91.5501	76.6857	90.8594	75.9462	84.9968	99.1322	99.3996	79.5531	84.5279	88.6066	73.0943	74.6543	76.2422	113.231	117.042	95.3376	86.6181	78.0032	79.0222	83.1864	69.7942
		54	121.119	155.542	84.5756	90.9896	89.5873	105.002	72.5948	92.4927	148.717	168.141	134.641	122.353	113.423	125.618	112.246	110.663	97.6846	122.161	82.0031	91.8523	77.2877	91.3418	75.7423	85.1559	99.1418	99.7934	79.5763	84.6663	87.9383	73.7249	74.3436	76.2858	113.372	116.806	94.968	86.3791	78.2759	79.0791	82.9699	69.8284
		54.1	120.88	155.226	84.407	91.0796	89.7147	104.364	72.2014	92.7262	148.544	168.191	135.093	122.466	113.884	126.054	111.42	110.691	97.3148	122.186	82.0266	92.3555	78.0244	91.2352	75.7752	84.791	99.294	100.05	79.3109	84.7437	87.5666	74.0677	74.0256	76.1536	113.417	116.503	94.8595	86.0166	78.79	79.0663	82.5623	69.8799
		54.2	120.752	155.019	84.499	91.342	89.7819	104.212	71.8561	93.0451	148.444	168.466	135.566	122.543	113.677	126.465	110.902	110.947	97.0301	122.448	82.1509	93.0703	78.3652	90.4546	76.0816	84.5147	99.3428	100.149	79.1039	84.8505	87.7497	73.7849	73.903	76.3222	113.461	116.305	94.5884	85.7266	79.5232	79.5981	81.8521	70.2902
		54.3	120.6	155.077	84.6741	91.4282	89.4379	104.152	71.8894	93.468	148.218	168.663	135.813	122.759	113.006	126.607	110.386	111.083	96.7677	122.74	82.3635	93.4173	78.1519	89.7711	76.6419	84.298	99.216	100.181	79.1821	84.9802	88.1084	73.1448	73.9283	77.197	113.543	116.222	94.5361	85.4948	79.7199	80.0586	81.5728	70.4377
		54.4	120.6	154.918	85.0462	91.2837	89.0478	105.023	72.0162	93.6738	148.252	168.965	135.799	122.572	112.702	125.948	110.404	111.219	96.4743	123.092	82.4088	93.4808	77.4897	89.4598	77.0027	84.2042	99.0972	100.068	79.2364	85.2114	88.6952	72.3811	74.2334	78.1577	113.518	116.17	94.578	85.5731	79.6306	80.8481	82.07	70.5102
		54.5	120.642	154.583	85.6088	91.0724	89.0049	105.98	72.4567	93.1192	148.305	169.295	135.587	122.287	112.664	124.944	110.509	111.217	96.3097	123.353	82.6816	93.6064	77.3354	89.5514	76.9486	84.2869	99.0562	99.631	79.5017	85.2757	88.764	72.0491	74.4461	78.6764	113.593	116.303	94.5019	85.7334	79.3501	80.9283	82.7914	70.1188
		54.6	120.592	154.425	86.0513	90.8844	88.8024	107.195	72.7079	92.6052	148.488	169.433	135.281	122.186	113.036	124.203	111.034	111.086	96.4127	123.394	83.0287	93.6196	77.2537	89.4281	76.3022	84.346	98.9072	99.3466	79.7255	85.2045	89.1278	72.0958	74.5457	78.2011	113.739	116.619	94.6684	85.716	78.9899	80.9953	83.3947	69.6508
		54.7	120.513	154.271	86.3183	90.6764	88.8736	107.17	72.8997	92.0696	148.471	169.493	135.081	121.996	112.741	124.373	111.313	110.745	96.5556	123.237	83.0758	93.6787	77.1902	89.3633	75.5382	84.6171	98.7478	99.1594	79.5498	84.9428	89.2587	72.4258	74.1848	77.0573	113.91	116.66	94.7297	85.8466	78.6536	80.8123	83.3241	69.2296
		54.8	120.55	153.907	86.2151	90.6574	89.0126	106.417	72.8804	92.3434	148.67	169.564	135.098	122.092	112.497	125.09	111.382	110.469	96.7234	123.01	83.0492	93.8001	77.035	89.7302	75.0846	84.4497	98.6602	98.9196	79.503	84.4483	89.8439	72.787	73.7827	75.8887	114.032	116.712	94.7859	85.9384	78.4848	81.0026	83.099	69.2771
		54.9	120.569	153.61	85.8823	90.5491	89.372	105.211	72.8729	92.2342	148.773	169.363	135.188	122.253	111.737	125.532	111.028	110.713	96.9	122.698	82.8294	93.8931	76.9733	90.5637	75.2819	84.445	98.7128	98.7048	79.4159	84.1319	89.9757	73.4481	73.0463	75.12	113.988	116.897	94.9827	85.9849	78.6393	80.7377	82.7206	69.7094
		55	120.632	153.554	85.2371	90.413	89.2351	105.083	72.9392	92.3557	148.821	168.959	135.233	122.213	111.635	125.283	110.668	111.414	97.059	122.549	82.6383	93.8336	77.09	91.4792	75.6394	84.1351	98.5774	98.8262	79.3131	83.8646	90.0293	74.021	72.2289	74.8423	113.916	116.948	95.172	86.1927	78.7879	80.2461	82.5044	70.0451
		55.1	120.702	153.601	84.7518	90.5107	88.8268	105.769	72.8559	92.2371	148.842	168.502	135.081	122.286	111.724	124.601	110.851	111.965	96.9799	122.393	82.6276	93.8461	76.8311	91.6857	75.7754	84.2062	98.5964	98.9531	79.3986	83.7084	89.9156	74.3336	71.7321	74.8664	113.736	116.795	95.433	86.1322	78.8408	79.6531	82.4479	69.7907
		55.2	120.746	153.773	84.5325	90.5212	88.6199	106.809	72.501	92.3747	149.07	168.007	134.968	122.441	112.446	124.036	111.073	111.986	96.8136	122.31	82.6994	94.0483	76.5916	91.535	75.6901	84.3183	98.9081	99.0466	79.1442	83.8736	89.6973	73.7757	71.9124	75.2952	113.578	116.878	95.5422	85.919	78.6913	79.7018	82.5094	69.1336
		55.3	120.665	153.998	84.4174	90.4783	88.6352	107.092	71.9312	92.174	149.198	167.432	134.913	122.642	112.92	123.833	111.452	111.719	96.6663	122.492	82.6711	94.1474	76.3581	91.0994	75.6893	84.3792	99.3645	99.149	78.6839	83.9938	89.6199	73.148	72.8238	75.9591	113.337	116.889	95.516	85.7801	78.5112	80.0823	82.6107	68.442
		55.4	120.575	154.33	84.6243	90.3478	88.9731	106.91	71.6822	91.6866	149.08	167.001	134.921	122.888	113.327	123.879	111.414	111.483	96.4691	122.791	82.4714	94.2576	76.4509	91.0561	76.1368	84.2344	99.5269	99.3707	78.2787	84.1608	89.3369	72.7294	73.1839	76.4366	113.228	116.816	95.3977	85.5736	78.2338	80.5554	82.5258	68.3573
		55.5	120.475	154.662	84.6928	89.8581	89.1111	106.682	71.6462	91.445	148.94	166.726	135.044	123.122	113.327	123.711	111.291	111.282	96.2784	123.114	82.2584	94.1719	76.3703	91.0086	76.476	83.809	99.7423	99.4858	77.9209	84.3226	89.4112	72.6521	73.1784	76.2667	113.099	116.842	95.2836	85.5935	78.2117	80.5189	82.5446	68.9094
		55.6	120.5	154.786	84.6479	89.455	89.3828	106.638	71.9424	91.5174	148.795	166.671	134.93	123.329	113.292	123.485	110.713	110.913	96.221	123.578	81.9821	93.8064	76.3126	90.9809	76.1563	83.6497	99.8	99.6374	77.7388	84.3853	89.3651	72.3454	72.6276	75.4958	113.075	116.841	95.2228	85.7495	78.3677	80.388	82.6701	69.6222
		55.7	120.545	154.814	84.5601	89.1898	89.5329	106.916	72.131	91.8107	148.626	166.764	134.831	123.305	112.946	123.388	110.293	110.091	96.1982	124.005	81.8321	93.4862	76.199	90.8233	75.4119	83.4921	99.5631	99.806	77.9996	84.587	89.6066	71.8153	72.5097	74.7399	113.035	116.768	95.3746	85.9078	78.7669	80.1664	82.9146	70.2208
		55.8	120.539	154.845	84.5558	88.9853	89.7296	106.803	72.5616	91.8651	148.476	167.217	134.649	123.226	112.165	123.731	110.46	109.28	96.1036	124.084	81.7068	93.2487	76.401	90.8262	74.871	83.0742	99.0864	99.9894	78.1541	84.8989	89.8257	71.7574	72.2644	74.6534	113.129	116.741	95.6773	86.0052	78.9068	80.1631	82.8306	70.3673
		55.9	120.438	154.872	84.7411	89.1597	89.8	106.907	72.8039	91.3753	148.49	167.867	134.413	123.024	111.242	123.947	110.959	108.861	96.0192	124.078	81.6186	93.2319	76.6866	90.9876	75.1787	82.7221	98.8163	100.051	78.1006	85.1896	90.1961	72.0361	72.0447	74.9649	113.313	116.694	96.0061	85.8861	78.9007	80.2999	82.5659	70.6098
		56	120.395	154.945	85.0081	89.3533	89.7487	106.776	72.844	90.9504	148.467	168.399	134.252	122.554	110.529	124.02	111.091	109.201	95.8127	123.83	81.6331	93.5044	76.8186	91.0841	75.6386	82.8642	98.6314	99.9813	78.0936	85.5274	90.502	72.6759	71.8903	75.311	113.556	116.538	96.2916	85.7601	78.9904	80.258	82.2877	70.5376
		56.1	120.223	155.141	85.3171	89.5248	89.7967	107.033	72.2651	90.8019	148.499	168.746	133.867	122.111	110.914	123.847	110.882	109.51	95.6367	123.446	81.6961	93.6623	76.881	90.9713	75.8983	83.946	98.5604	99.6198	77.9824	85.6486	90.4287	72.7776	72.1571	75.212	113.846	116.508	96.0287	85.5735	79.2103	80.3058	82.4474	70.4177
		56.2	120.114	155.372	85.3726	89.8689	89.766	107.221	71.7656	91.4671	148.346	169.109	133.542	121.607	111.522	123.864	110.683	109.449	95.544	123.075	81.8476	93.7309	76.7343	90.6107	75.7728	84.8883	98.5837	99.0789	78.0267	85.5419	89.9573	72.8003	72.6753	75.2832	114.198	116.435	95.5291	85.5246	79.3453	79.7257	82.8174	69.9692
		56.3	120.112	155.657	85.2586	90.0008	89.5339	107.492	71.5126	92.0732	148.051	169.241	133.26	121.144	112.168	123.895	110.752	109.196	95.5402	122.812	81.8307	93.8264	76.6766	90.3307	75.5886	85.2481	98.7244	98.4617	78.2568	85.427	89.09	72.3058	73.3049	75.4943	114.529	116.252	94.9184	85.7331	79.3413	79.0896	83.3058	69.6452
		56.4	120.11	155.834	84.8891	90.2091	88.989	107.606	72.0648	92.2364	147.753	169.229	133.032	121.045	112.294	124.025	110.646	109.51	95.7143	122.527	81.9686	93.591	76.2236	90.0569	75.4967	84.829	98.8436	97.8947	78.5944	85.0464	88.5517	71.8637	73.8992	75.7693	114.761	116.022	94.7068	85.8674	79.2153	78.2247	83.2546	69.3809
		56.5	119.981	155.723	84.3836	90.6581	88.4979	107.153	72.444	91.9911	147.474	169.38	133.04	121.192	112.278	124.191	110.49	110.164	96.1006	122.232	82.1566	93.3968	75.9091	90.1509	75.5932	84.0741	99.019	97.5066	78.6369	84.9071	88.5053	71.5388	74.3686	75.4554	114.939	115.907	95.0855	86.0105	79.4719	78.3284	82.7448	69.2422
		56.6	119.911	155.543	84.0783	90.8475	88.3231	106.15	72.9586	91.7332	147.172	169.473	132.963	121.667	111.894	124.1	110.676	110.607	96.4128	121.924	82.3013	93.4132	75.7374	90.2174	75.7837	83.3309	99.0903	97.4644	78.7176	84.9083	88.8682	71.6983	74.3158	75.1891	114.999	115.83	95.6099	86.0951	79.5561	79.0767	82.1037	69.1157
		56.7	119.841	155.141	83.7894	90.9964	88.2686	104.8	73.3236	91.4943	146.976	169.284	132.988	122.254	111.199	123.95	111.169	110.56	96.6682	121.663	82.7368	93.2038	76.1149	90.3424	75.6494	82.678	99.1659	97.7778	78.9949	84.8879	89.4823	72.1511	73.8428	75.3927	115.019	115.855	96.2103	85.8994	79.7972	80.0129	81.8978	69.3361
		56.8	119.7	154.64	83.7883	91.0815	88.3318	103.975	73.843	91.1494	146.934	168.949	133.08	122.665	110.696	123.854	111.567	110.138	96.9064	121.556	82.8815	92.9768	76.6734	89.9526	75.122	82.4746	99.3027	98.3278	79.2483	84.9493	89.6951	72.4281	73.2136	76.3851	114.956	116.052	96.2006	85.7176	79.6831	80.2189	82.0063	69.6978
		56.9	119.836	154.151	84.0096	90.8413	88.5452	103.983	74.1501	90.9851	146.882	168.428	133.119	122.91	110.832	124.176	111.254	109.846	96.9771	121.57	82.7243	92.9286	77.009	89.5278	74.2387	82.4372	99.4217	98.8893	79.6779	84.6581	89.9749	72.3591	72.9083	76.9652	114.924	116.317	95.8518	85.6423	79.5894	79.901	82.2143	70.0338
		57	120.08	153.83	84.0344	90.6594	88.7803	104.631	73.8021	91.5868	146.808	167.667	133.301	122.707	111.217	124.401	110.705	109.822	96.9564	121.721	82.5036	92.7753	76.9968	89.2089	73.7462	82.7131	99.3718	99.3441	79.8887	84.4213	89.6238	71.8997	73.0004	76.954	114.872	116.404	95.4775	85.5094	79.4372	79.7057	82.38	69.7617
		57.1	120.32	153.525	84.2148	90.4711	88.9314	105.248	73.458	92.7379	146.73	167.109	133.347	122.376	111.374	124.233	110.261	110.435	97.006	121.949	81.9691	92.7328	76.9334	89.2668	73.5864	83.3206	99.3494	99.5538	79.7036	84.2843	89.7973	71.7746	73.3611	76.6574	114.834	116.407	95.1128	85.5035	79.2478	79.8833	82.5373	69.3709
		57.2	120.549	153.415	84.2997	90.0448	88.6632	105.281	73.0461	93.7909	146.794	166.761	133.336	122.089	111.024	124.184	110.426	111.061	96.898	122.137	81.5034	92.9183	77.4142	89.4043	73.9019	83.7352	99.3315	99.4082	79.2938	84.1675	89.901	72.0378	73.4971	76.8102	114.711	116.386	95.1146	85.5462	79.0966	80.0212	82.6014	69.273
		57.3	120.939	153.356	84.2288	89.5926	88.6529	105.349	72.989	94.0002	146.781	166.628	133.514	121.907	110.501	124.404	110.518	111.22	96.6981	122.275	81.4294	92.8522	78.1976	89.7494	74.0372	84.0372	99.2003	99.0298	78.9242	84.177	90.2226	72.5968	73.5724	77.1557	114.576	116.282	95.1614	85.5818	78.9434	79.9894	82.6369	69.7097
		57.4	121.049	153.15	84.4454	89.2139	88.5341	105.618	73.2008	93.2972	146.679	166.731	133.73	122.1	110.001	124.596	110.679	110.604	96.4788	122.418	81.5794	92.5914	78.3419	89.9594	74.1983	83.2563	99.105	98.6784	78.5713	84.0063	90.2636	72.8023	73.6961	76.9973	114.383	116.184	95.1066	85.8386	79.0356	79.9114	82.5122	70.2262
		57.5	121.099	152.991	84.5123	88.9443	88.6924	106.219	73.8919	92.2859	146.719	167.019	134.118	122.375	109.499	124.245	110.751	110.017	96.2372	122.559	82.0204	92.3646	77.819	90.0083	74.2121	82.9684	99.0288	98.3813	78.522	83.8361	90.4621	72.8573	74.3859	76.3767	114.173	116.233	95.0522	86.2597	79.0702	79.8007	82.4013	70.4604
		57.6	121.075	152.83	84.4462	88.9101	88.3926	106.59	74.7916	91.2579	146.708	167.152	134.385	122.522	109.159	123.827	111.07	109.937	95.8999	122.774	82.5266	92.2342	76.7158	89.634	74.3754	82.7644	99.0485	98.2243	78.7091	83.9296	91.1463	72.7399	74.9216	75.608	113.973	116.337	94.9695	86.6691	79.0567	79.4207	82.3098	70.3972
		57.7	120.941	152.715	84.3089	89.0679	88.1476	106.609	75.0456	90.8726	146.567	167.143	134.224	122.538	109.145	123.802	111.113	110.572	95.9086	123.005	82.7058	92.3623	75.9453	89.1172	74.5694	83.4323	99.0002	98.383	78.9491	84.2541	91.4821	72.414	74.9622	75.0341	113.87	116.462	94.8948	86.9436	78.8853	78.8154	82.4131	70.3824
		57.8	120.624	152.601	83.9274	89.1191	87.6433	106.513	74.4629	90.8916	146.611	167.038	133.88	122.32	109.669	123.761	110.764	110.991	95.9298	123.228	82.5843	92.7901	75.6264	88.5471	74.795	83.6656	99.0318	98.6238	79.4692	84.634	91.3161	71.8449	74.2694	74.7734	113.759	116.5	94.8756	86.9239	78.874	78.765	82.2491	70.5762
		57.9	120.327	152.787	83.6711	89.1304	87.5292	106.188	73.5881	91.4276	146.805	166.907	133.311	122.155	110.513	123.49	110.058	110.731	96.0842	123.205	82.2449	93.1448	76.0074	87.9866	75.0646	83.6148	98.9349	98.7988	79.8331	84.7896	90.6218	71.4387	73.5571	74.8293	113.669	116.487	94.8937	86.6683	78.8821	79.1477	81.7066	70.7832
		58	120.05	152.858	83.6118	89.1569	87.4928	105.951	72.9297	91.8522	146.875	166.741	132.845	122.024	111.121	122.945	109.591	109.936	96.157	123.12	81.9317	93.3229	76.6759	87.9271	75.15	83.4888	98.8883	98.9949	79.8551	84.7044	90.285	71.4678	73.5407	75.433	113.677	116.488	94.867	86.3123	79.0706	79.6102	80.9686	70.5103
		58.1	119.906	152.941	83.6804	89.1882	87.9571	105.883	72.615	92.0198	147.131	166.608	132.699	121.913	111.301	122.792	109.185	109.391	96.2613	123.046	81.9896	93.0892	77.042	88.3564	75.3731	83.2676	98.7475	99.2686	79.639	84.3111	90.2619	71.7352	73.9352	76.0794	113.626	116.569	94.8764	85.9667	79.4244	79.5374	80.7776	69.765
		58.2	119.768	152.878	83.8454	89.368	88.3218	105.772	72.3488	91.9197	147.336	166.488	132.666	122.025	111.129	122.905	109.397	109.586	96.0738	123.007	82.2619	92.73	76.8993	89.2298	75.53	83.1677	98.6494	99.4346	79.1728	84.0929	90.2462	71.9134	74.4426	76.3103	113.412	116.59	94.8966	85.8156	79.7339	79.424	81.169	69.236
		58.3	119.685	152.746	84.0719	89.7077	88.7243	105.603	72.3906	91.8019	147.22	166.294	132.725	122.084	111.07	123.156	109.343	110.293	95.9978	122.865	82.6552	92.5599	76.6374	90.053	75.7091	82.8227	98.4533	99.6732	78.6941	84.0894	90.1674	71.9846	74.3277	76.2341	113.309	116.793	94.9119	85.6364	79.7951	79.6369	81.9846	69.0654
		58.4	119.741	152.592	84.2956	90.0149	88.9153	105.506	72.6688	91.8353	147.027	166.004	132.835	122.154	110.502	123.16	109.616	110.697	95.7832	122.925	82.8194	92.3936	76.5436	90.4511	75.6609	82.7204	98.3976	99.9786	78.732	84.1213	90.2539	72.0346	74.1366	75.8708	113.266	117.045	94.8696	85.5934	79.3613	80.0121	82.4421	69.1507
		58.5	119.836	152.546	84.5814	90.1378	89.1464	105.788	72.7861	91.7354	146.906	165.594	132.919	122.211	109.808	122.629	109.46	110.434	95.8267	123.106	82.5583	92.636	76.9291	90.6567	75.605	82.6209	98.398	100.205	79.0731	84.4871	90.5897	72.3581	73.8178	75.7709	113.137	117.27	94.9589	85.6518	78.9389	80.2258	82.8141	69.0812
		58.6	119.785	152.589	84.8488	90.0804	89.1841	106.166	72.4511	91.4852	146.522	165.176	132.866	121.891	108.74	122.188	109.612	109.578	95.9486	123.11	82.1396	92.9259	77.4187	90.3942	75.8054	82.6518	98.3798	100.253	79.3713	84.7431	90.9511	72.7663	73.5734	75.4838	113.191	117.247	95.2553	85.6781	78.7866	80.0522	82.932	69.4002
		58.7	119.782	152.815	84.8427	89.8666	88.8972	105.902	71.9176	91.3232	146.347	164.932	132.699	121.45	108.646	122.208	109.387	108.84	96.1314	122.992	81.6289	93.0331	77.8227	90.4596	75.9824	82.7034	98.3799	100.215	79.8037	85.0512	90.7218	73.2268	73.3937	75.4981	113.466	117.323	95.4708	85.813	79.0396	80.1639	83.4467	69.8074
		58.8	119.739	153.109	84.7534	89.6426	88.3921	105.256	71.9667	91.6059	146.365	164.883	132.285	121.189	108.88	122.483	108.797	108.91	96.2195	122.777	81.4339	93.0613	77.5702	90.4393	76.0719	82.7876	98.4685	100.117	79.8171	85.5226	90.1901	73.1722	73.2184	75.4059	113.728	117.392	95.7318	85.8943	79.5361	80.3963	83.6796	70.1262
		58.9	119.62	153.195	84.6051	89.6511	88.2714	104.739	72.406	92.1	146.47	164.896	131.697	121.103	109.261	122.598	107.908	109.105	96.4417	122.496	81.4414	93.0603	77.3109	90.8374	75.9248	82.7556	98.4684	99.9397	79.4728	85.7791	89.4528	73.0057	73.291	75.4664	113.926	117.482	95.7674	86.0283	79.8591	80.9253	83.9599	69.8652
		59	119.404	153.262	84.4103	89.9071	88.5679	104.895	72.9547	92.0968	146.503	165.018	131.337	121.44	109.269	122.476	107.383	109.374	96.4606	122.106	81.6163	93.0324	77.1386	90.9111	75.6706	82.6027	98.3307	99.7213	79.2635	85.8918	89.1618	72.6203	73.3313	75.3397	114.099	117.552	95.4716	86.0873	79.9173	80.9458	83.9256	69.5947
		59.1	119.27	153.2	84.4162	90.1147	89.2631	105.37	73.2043	91.5552	146.568	165.336	131.108	121.668	108.922	122.575	107.694	108.896	96.3876	121.811	81.9192	93.0409	77.3836	90.7143	75.35	82.6157	98.2666	99.4657	78.8666	85.8609	89.0401	72.3813	73.4227	75.5989	114.197	117.817	95.2399	86.1733	79.8018	80.5994	83.964	69.8048
		59.2	119.189	153.067	84.5492	90.2596	89.4861	105.858	73.4109	91.0568	146.356	165.463	131.131	121.659	108.753	122.753	108.274	108.449	96.3608	121.674	82.1496	93.172	77.4227	89.9557	74.802	82.83	98.2396	99.2891	78.5473	85.439	89.144	72.0389	73.3709	75.8656	114.239	117.899	95.1536	86.3654	79.6494	79.9323	83.965	70.3982
		59.3	119.432	152.933	84.7676	90.1664	89.379	106.028	73.7018	91.2699	146.199	165.353	131.198	121.43	108.415	122.497	108.816	107.969	96.4282	121.753	82.4348	93.0859	77.239	89.0751	74.518	83.2742	98.1967	98.9892	78.4473	85.0418	89.2056	71.841	73.3372	76.6107	114.211	117.781	95.5388	86.343	79.2378	79.5579	83.7759	70.9944
		59.4	119.687	152.964	85.1289	89.7975	88.5731	106.303	73.6728	91.489	145.774	165.249	131.07	120.802	108.437	122.292	108.744	107.877	96.3923	121.931	82.6727	92.8683	76.8329	88.4117	74.4954	83.5087	98.3092	98.6626	78.3869	84.8924	89.3187	71.9499	73.5329	77.0904	114.132	117.631	96.2114	86.3588	78.4028	79.762	83.6657	71.0583
		59.5	119.945	152.946	85.3686	89.5662	88.2873	106.18	73.674	91.338	145.286	165.211	131	120.532	108.477	122.012	108.716	107.845	96.3418	122.168	82.7013	92.7418	76.5176	88.0358	74.5939	83.6156	98.5891	98.4263	78.3029	84.6744	89.4483	72.0281	73.981	77.6404	114.126	117.534	96.8799	86.4573	77.8592	80.0121	83.2998	70.6474
		59.6	120.202	152.906	85.3762	89.3929	88.1118	105.89	73.3792	90.8413	144.964	164.952	131.091	120.352	108.91	122.001	108.638	107.874	96.3994	122.454	82.7351	92.6821	76.65	88.0931	74.5794	83.5226	98.799	98.3548	78.2974	84.5545	89.7064	72.1283	74.5121	77.5891	114.082	117.342	97.4006	86.3934	78.3192	80.112	83.2254	70.4046
		59.7	120.318	152.804	85.2138	89.3063	88.5847	105.248	73.2819	91.0002	144.926	164.843	131.255	120.291	109.305	121.919	108.723	107.893	96.5442	122.651	82.8585	92.6981	76.9748	88.4506	74.5061	83.3874	98.9134	98.2603	78.2998	84.3316	90.0454	71.8393	74.8057	77.5138	113.956	117.451	97.367	86.3495	79.6711	79.5009	82.8934	70.2934
		59.8	119.949	152.713	84.9399	89.4069	88.8031	105.002	72.8239	91.4846	144.701	164.876	131.485	120.609	109.768	122.122	108.898	108.259	96.6484	122.813	82.9471	92.6623	77.0041	89.0352	74.7062	83.1967	99.1014	98.2652	78.1962	83.8562	90.2156	71.7208	74.925	77.3541	113.88	117.785	97.0516	86.3413	80.7316	79.0399	82.7847	70.6023
		59.9	119.494	152.531	84.7644	89.3623	89.226	104.836	72.7148	91.6168	144.738	164.867	131.598	120.528	109.983	122.284	109.095	108.674	96.9045	122.835	83.2061	92.5948	76.6122	89.1832	74.7824	83.2548	99.1202	98.4147	78.3219	83.5797	90.0003	71.495	74.7502	77.5274	113.906	118.129	96.6707	86.1067	80.9564	78.7661	82.5134	70.5621
		60	119.169	152.405	84.6858	89.3246	89.63	104.411	72.9991	91.2402	144.902	164.743	131.128	120.356	110.148	122.122	109.365	108.85	97.2868	122.703	83.1418	92.4624	76.2987	88.8292	74.6739	83.509	99.0884	98.5196	78.4714	83.5767	89.5011	71.4533	74.4362	77.4629	113.952	118.354	96.3102	85.7387	80.2192	79.2023	82.616	70.3811
		60.1	118.899	152.309	84.6418	89.4534	89.6742	103.746	73.5401	91.114	144.981	164.751	130.739	120.195	109.993	121.089	109.161	108.547	97.5597	122.411	82.7071	92.4074	76.6383	88.4378	74.5992	83.8624	99.1292	98.5969	78.6127	83.6758	89.1423	71.5704	73.8056	77.3312	114.009	118.569	96.0836	85.3936	79.3571	79.5856	83.1362	70.0901
		60.2	118.845	152.214	84.4393	89.5134	89.328	103.358	73.5478	91.7747	144.768	164.803	130.445	119.941	109.856	119.938	108.975	108.166	97.6773	122.178	82.3249	92.6425	77.4727	88.4682	74.8772	83.883	99.1736	98.6652	78.8943	83.8059	89.0923	71.9107	73.2742	76.8329	114.192	118.418	96.0445	85.0184	78.6621	79.8326	83.6408	69.7726
		60.3	119.065	152.087	84.0244	89.6792	88.5852	103.621	72.9594	92.4864	144.753	164.889	130.14	120.224	109.645	119.071	108.966	107.93	97.724	121.92	81.9452	92.7453	78.574	88.5974	75.2328	83.5716	99.1945	98.6873	79.0048	83.6973	89.13	72.4008	72.9228	76.5126	114.358	118.118	96.0512	84.7974	78.6468	79.8212	83.8614	69.8767
		60.4	119.355	151.975	83.6136	89.6844	88.2302	103.949	72.5826	92.4542	144.691	165.094	130.221	120.741	109.887	119.629	109.272	108.041	97.5758	121.792	81.8628	92.7835	79.0521	88.5649	75.2853	83.0457	99.3721	98.5892	79.0234	83.5022	89.1621	72.6191	72.7916	76.0929	114.519	117.78	96.0214	84.9487	78.7824	79.8219	83.3744	70.0421
		60.5	119.51	151.84	83.3028	89.4038	88.3358	104.345	72.605	91.9158	144.643	165.418	130.187	121.149	109.977	120.819	109.206	107.912	97.3229	121.916	82.0445	92.7436	78.9524	88.5413	74.8108	82.4946	99.59	98.5719	78.973	83.3238	89.3306	72.6612	72.7876	75.9613	114.617	117.49	96.0611	85.2614	78.9352	80.0373	83.1446	70.723
		60.6	119.587	151.846	83.3361	89.1188	88.8209	104.509	72.9012	91.7993	144.479	165.582	130.082	121.414	110.142	121.942	108.468	107.95	97.0959	122.242	82.2466	92.6851	78.3234	88.7401	74.5152	82.3242	99.8552	98.4849	78.9059	83.3953	89.4114	72.7374	73.1341	75.9966	114.653	117.344	96.0339	85.4634	78.7666	80.1897	83.1864	70.8864
		60.7	119.513	151.875	83.7122	88.7672	89.3268	104.639	73.0337	92.2023	144.447	165.601	130.214	121.237	110.099	121.989	107.584	107.474	97.0059	122.382	82.4349	92.8315	78.0691	89.1116	74.5868	82.5944	100.189	98.4095	78.9602	83.7689	89.2808	73.0409	73.7922	76.2199	114.531	117.403	95.8895	85.5468	78.5438	80.3047	83.3666	70.8921
		60.8	119.392	152.007	84.1643	88.5214	89.3628	104.419	73.2743	92.2323	144.355	165.405	130.406	120.913	110.273	121.602	107.13	107.626	96.9191	122.456	82.5603	93.0704	77.8539	89.245	75.314	82.9342	100.302	98.4884	79.0731	84.0841	88.8211	73.5868	74.5152	76.3472	114.335	117.52	95.7461	85.3474	78.504	80.1717	83.0604	70.2681
		60.9	119.308	152.088	84.5906	88.4141	89.1484	104.47	73.6402	91.5321	144.437	165.053	130.456	120.953	110.157	121.356	107.597	107.792	96.958	122.36	82.7123	93.4029	77.4799	89.4009	76.0107	83.0688	100.138	98.6099	79.0642	84.4658	88.7373	73.9321	74.9307	76.4498	114.089	117.627	95.6058	85.0465	78.7497	79.9871	82.3908	69.8371
		61	119.276	152.138	84.7821	88.289	88.6658	104.749	74.0044	90.8582	144.479	164.581	130.259	121.248	109.686	121.293	108.327	108.658	97.1045	122.119	82.7339	93.5621	76.832	89.3052	76.3969	82.9609	99.8661	98.6456	78.8479	84.6662	89.083	74.0196	75.2066	76.4097	113.857	117.76	95.4384	84.9348	79.2177	79.9546	82.1553	69.3892
		61.1	119.275	152.128	84.8841	88.0984	88.3539	105.375	74.1161	90.7401	144.636	164.346	129.839	121.642	108.906	121.06	108.543	108.758	97.2514	121.674	82.8148	93.5513	76.4373	89.1529	76.3658	83.247	99.4424	98.7216	78.4476	84.6431	89.9102	73.6638	75.0874	76.3507	113.708	117.683	95.4203	84.9143	79.566	79.9789	82.5731	69.3463
		61.2	119.357	152.259	84.9931	88.0203	88.0983	105.661	73.9286	90.8386	144.773	164.159	129.305	121.863	108.487	120.64	107.821	108.35	97.1386	121.397	82.9329	93.3909	76.3402	89.042	76.0694	83.5029	98.9484	98.8382	78.2007	84.6169	90.6209	73.2239	74.6586	75.9486	113.694	117.622	95.5201	84.9679	79.7357	80.1682	83.3487	69.455
		61.3	119.472	152.342	85.0422	87.8795	87.8048	105.916	73.5064	90.7322	144.87	164.302	129.041	121.61	108.515	120.504	107.092	107.211	97.0496	121.231	82.8499	93.121	76.3663	89.1932	75.857	83.4734	98.6941	98.916	78.3705	84.4286	91.281	72.6669	74.1852	75.7062	113.69	117.522	95.5134	85.0376	79.702	80.1653	83.7966	69.6333
		61.4	119.536	152.598	85.0983	87.8644	87.6906	105.928	72.9436	90.7483	144.635	164.563	129.38	120.902	108.959	120.435	107.132	106.492	96.8394	121.264	82.7174	92.8593	76.4751	89.6136	75.4758	82.9422	98.5945	99.0263	78.673	84.2558	90.9252	72.4459	74.2264	75.5732	113.627	117.441	95.5268	85.1757	79.5342	80.1488	83.7628	69.636
		61.5	119.698	152.924	84.9093	87.9516	87.6032	105.755	72.5652	91.1082	144.377	164.881	129.827	120.302	109.035	120.545	107.798	106.324	96.4692	121.37	82.5472	92.5413	76.745	90.0227	74.9607	82.2733	98.5825	99.1774	79.1383	84.1904	89.9912	72.2771	74.4507	75.539	113.589	117.406	95.4531	85.4391	79.3957	80.1483	83.6942	69.5323
		61.6	119.825	153.055	84.7015	87.9779	87.8336	105.107	72.5213	91.5041	144.24	164.949	130.428	120.026	108.759	120.278	108.166	106.774	96.043	121.631	82.4274	92.4012	77.2123	90.2553	74.3152	82.2417	98.631	99.2715	79.2591	84.1806	88.501	72.4847	74.4592	75.6301	113.531	117.576	95.2958	85.8402	79.3112	80.2563	83.7917	69.4613
		61.7	119.853	153.065	84.3203	88.2211	88.1602	104.141	73.1328	91.2894	144.216	164.989	130.926	120.054	108.301	120.282	108.263	107.556	95.8556	121.853	82.5521	92.4764	77.5037	90.3836	74.1917	82.6113	98.8752	99.283	78.9419	84.3974	87.9356	72.5036	74.2471	75.707	113.404	117.62	95.3866	86.2884	79.5548	80.2427	84.2284	69.228
		61.8	119.794	153.041	84.0831	88.2491	88.5972	103.512	73.7478	90.763	144.15	164.876	130.777	120.595	108.063	120.135	108.415	108.379	95.7148	121.996	82.7383	92.727	77.5313	90.073	74.589	83.4739	99.1016	99.2046	78.7078	84.4798	88.0303	72.8192	74.0239	76.381	113.391	117.671	95.3796	86.4052	79.8998	80.1166	84.3871	68.9908
		61.9	119.698	152.821	84.1569	88.272	89.288	103.383	73.8743	90.3961	144.127	164.634	130.619	121.163	107.97	120.488	108.751	108.853	95.5148	122.023	82.7494	93.2739	77.2916	89.8723	75.2071	83.5783	99.384	99.0402	78.4461	84.5419	88.7357	72.8569	73.9988	76.8963	113.541	117.819	95.4835	86.3151	80.3448	79.8253	84.2811	68.6777
		62	119.5	152.474	84.0904	88.1849	89.7208	103.812	73.2559	90.3979	144.133	164.432	130.348	121.509	107.792	120.86	108.924	108.669	95.4274	121.883	82.6318	93.7047	76.936	89.6523	75.614	83.113	99.5372	98.891	78.4556	84.5489	89.3516	73.0607	73.8467	77.5036	113.728	117.851	95.5948	86.1231	80.4299	79.415	83.6507	68.7928
		62.1	119.198	152.286	84.3001	87.8538	89.9743	104.007	72.4888	90.4373	143.899	164.349	130.234	121.466	107.627	121.213	108.974	107.936	95.5376	121.75	82.3011	93.8167	76.7519	89.6353	75.6454	82.1143	99.6577	98.8952	78.7946	84.2995	89.8848	73.032	73.9178	77.4347	114.009	117.677	95.4994	85.9164	80.2017	78.9863	83.0384	68.8503
		62.2	119.018	152.005	84.2971	87.6753	89.6164	104.045	72.2278	90.178	143.588	164.356	130.537	120.962	107.567	121.089	109.043	107.268	95.6373	121.698	82.1579	93.7689	76.7942	89.3071	75.4278	81.6786	99.5602	98.8997	78.9078	84.2333	90.1196	73.2546	73.7759	76.9321	114.28	117.655	95.3697	85.9036	79.8686	78.689	82.6781	68.7618
		62.3	118.876	151.677	84.109	87.5855	88.9649	104.067	72.6598	90.1468	143.323	164.276	130.711	120.079	107.648	120.918	109.155	107.208	95.7388	121.786	82.0646	93.3552	77.0923	88.663	75.0602	81.682	99.3523	98.9476	78.9614	84.0596	90.1881	73.2406	73.8032	76.0566	114.446	117.753	95.0832	85.9639	79.6531	78.8344	83.1543	68.3849
		62.4	118.848	151.41	83.9991	87.6656	88.5077	104.29	73.6691	90.3049	143.291	164.277	130.627	119.187	108.089	121.105	109.199	107.496	96.09	121.917	82.0409	92.9353	77.5081	88.34	74.9326	82.17	99.223	99.0145	78.898	83.8414	90.2103	73.1971	73.7656	75.4097	114.482	117.721	94.7329	85.9491	79.6654	78.9191	83.9181	68.551
		62.5	118.781	151.218	83.8989	87.9558	88.3594	104.37	74.3638	90.5791	143.308	164.142	130.475	118.608	108.436	121.462	109.028	107.839	96.453	122.21	82.0963	92.6486	77.8238	88.4671	75.0667	82.4632	99.3046	99.0527	78.6604	83.7588	90.0793	73.2284	74.0238	75.4231	114.381	117.82	94.5253	85.8624	79.87	79.0417	84.5061	69.3643
		62.6	118.967	151.073	83.9801	88.2448	88.9621	104.147	74.2898	90.4551	143.44	164.086	130.235	118.243	108.673	121.281	108.808	107.823	96.6442	122.384	81.9744	92.3544	78.1469	88.9049	75.2306	82.8947	99.5124	98.9086	78.6696	83.5605	89.738	73.4941	74.0183	75.6838	114.17	118.052	94.9221	85.7847	80.1108	79.1952	84.3519	70.3842
		62.7	119.075	151.045	84.0708	88.3416	89.4098	103.873	73.3846	90.2607	143.391	163.831	130.054	118.391	108.683	120.79	108.509	107.815	96.7044	122.35	82.1093	92.3169	78.29	89.0362	75.2859	82.9779	99.8015	98.8811	78.7594	83.6449	89.2463	73.6963	73.856	76.1094	114.051	118.126	95.6761	85.8134	80.2712	79.4523	83.8291	70.6531
		62.8	119.169	151.019	84.1993	88.3611	89.8701	103.778	72.6673	90.2664	143.318	163.704	130.313	118.807	108.727	120.382	108.523	107.902	96.745	122.073	82.3026	92.1453	77.9976	89.03	75.2512	83.1426	100.132	98.843	78.8971	83.7519	88.9829	73.6304	73.7646	76.4348	114.028	118.028	96.6074	85.9771	80.1271	79.7119	83.3531	70.2917
		62.9	119.246	151.052	84.2563	88.0977	89.5763	103.825	72.4738	90.4867	143.075	163.553	130.217	119.386	108.556	120.55	108.584	107.58	96.7699	121.707	82.5434	92.0678	77.4793	89.0041	75.3719	83.097	100.265	98.8679	79.0297	83.8767	89.0521	73.4677	73.9024	76.7823	114.029	118.067	97.3565	86.0455	79.8462	79.8266	83.0574	69.6861
		63	119.461	151.105	84.42	87.8471	89.196	103.872	72.4989	90.6054	142.745	163.534	129.905	120.038	107.987	120.747	108.411	107.163	96.8717	121.37	82.7025	91.953	76.7713	89.1563	75.7932	83.3333	100.15	98.9339	78.9815	84.2801	89.3757	73.3257	74.2919	76.842	114.126	118.012	97.4896	86.0629	79.9118	79.9197	83.0952	69.3866
		63.1	119.588	151.1	84.6651	87.643	88.5472	104.252	72.363	90.6077	142.513	163.261	129.591	120.292	107.509	120.817	107.95	106.77	96.9603	121.135	82.5806	91.6402	76.6083	89.3381	76.1938	83.537	99.8276	99.1686	78.9263	84.4744	89.8896	73.1166	74.3524	76.7686	114.143	117.923	97.1631	85.8556	80.366	79.9173	83.0556	69.2162
		63.2	119.765	151.127	84.913	87.4341	88.3821	104.773	72.009	90.618	142.627	163.209	128.955	120.237	107.529	120.866	107.482	107.147	97.0663	121.074	82.2252	91.6954	76.3234	89.5056	76.493	83.599	99.3638	99.2513	78.837	84.6287	90.4312	72.6978	74.4806	76.8599	113.905	117.982	96.6053	85.5506	81.0173	79.6343	82.9517	69.2961
		63.3	120.039	151.315	85.0516	87.6446	88.2014	105.372	72.0359	90.6166	142.855	163.043	128.598	119.846	107.744	120.675	107.502	107.743	97.1137	121.216	81.7827	91.6359	76.0868	89.4983	76.2991	83.2774	98.8549	99.1444	78.9163	84.6994	90.4873	72.2579	74.2113	77.35	113.522	118.023	96.1496	85.522	81.1428	79.4961	82.5937	69.3396
		63.4	120.142	151.375	85.0392	87.7296	88.1301	105.244	72.3579	90.6737	143.153	162.833	128.422	119.448	107.584	120.412	107.655	107.872	96.9717	121.419	81.6468	91.9242	75.8922	89.1142	76.1542	82.6824	98.4449	98.9926	79.1465	84.3251	90.1192	72.0917	73.9609	77.6963	113.24	117.893	95.8179	85.5843	80.7944	79.4983	82.3789	69.5898
		63.5	120.11	151.437	85.028	87.9135	88.0303	104.984	72.6659	90.5894	143.444	162.521	128.427	119.359	107.249	120.049	107.601	107.381	96.5388	121.413	81.617	92.4414	75.9753	88.7289	75.9416	82.0186	98.264	98.802	79.3908	83.7779	89.4317	72.3176	73.5437	77.7248	112.929	117.847	95.7289	85.9587	80.3504	79.5714	82.4132	69.6708
		63.6	119.901	151.561	85.0145	88.1259	88.2234	104.68	72.5363	90.611	143.52	162.636	128.619	119.319	106.933	119.906	107.385	106.278	96.1856	121.403	81.7951	92.8124	76.3016	88.3403	75.9373	81.7098	98.4071	98.4579	79.6918	83.3746	89.6443	72.7473	73.7113	77.3249	112.718	117.881	95.6806	86.3753	79.9702	79.3842	82.7807	69.854
		63.7	119.502	151.564	85.165	87.8102	89.0324	104.678	72.0833	90.4667	143.432	162.724	128.929	119.467	107.279	120.236	107.195	105.513	95.9939	121.419	82.0533	93.3675	76.5251	88.3701	75.8197	81.8194	98.7662	98.1049	79.8256	83.0182	90.2346	72.7514	73.887	76.6672	112.885	117.75	95.6952	86.5257	79.6004	79.0917	82.9863	69.8454
		63.8	119.003	151.391	85.0193	87.6926	89.6271	104.688	71.848	90.4307	143.301	162.982	129.32	119.605	107.586	120.297	107.245	105.169	95.9286	121.403	82.1211	93.4421	76.8072	88.4934	75.6547	82.112	99.2038	98.0542	79.7775	83.1664	90.8243	72.4054	74.1269	76.1881	113.209	117.747	95.752	86.4934	79.1333	79.306	82.8386	69.8379
		63.9	118.73	151.36	84.7486	87.5366	90.0476	104.712	72.0191	90.6944	143.06	163.323	129.481	119.635	108.02	120.468	107.067	105.526	95.9262	121.457	82.2306	93.3406	77.0971	88.9284	75.4554	82.1194	99.5986	97.9599	79.6998	83.5976	90.4973	71.8454	73.9361	75.9077	113.37	117.875	95.7079	86.0588	78.6638	79.6372	82.3096	69.8711
		64	118.594	151.388	84.4146	87.325	89.7679	104.995	72.4403	91.0952	142.696	163.82	129.548	119.868	108.023	119.694	106.607	106.036	96.0832	121.653	82.3661	93.1269	77.1949	89.1844	75.2722	81.9908	99.8396	97.7936	79.7022	83.969	89.8688	71.8209	74.0914	76.4461	113.494	117.879	95.8528	85.6282	78.3388	80.2113	81.6734	70.1697
		64.1	118.747	151.322	83.9707	87.5044	89.7659	105	72.5184	91.3797	142.369	163.941	129.538	119.95	108.217	119.17	106.103	106.539	96.1928	121.821	82.5428	92.7239	77.288	89.0859	75.3661	82.0266	99.7684	97.6796	79.7582	84.3846	89.3569	72.1074	74.2747	77.0286	113.664	117.701	95.8041	85.313	77.8386	80.2981	81.3088	70.6503
		64.2	119.064	151.337	83.999	87.4675	89.6266	104.788	72.2303	90.7269	142.081	163.954	129.422	119.966	108.31	118.534	105.872	106.766	96.1499	121.824	82.7774	92.6691	77.124	88.5998	75.3113	82.2139	99.6319	97.7236	79.9809	84.5356	89.4007	72.5374	74.4561	77.3236	113.607	117.749	95.7239	85.3819	77.6714	80.6162	81.3338	70.77
		64.3	119.38	151.317	84.2888	87.325	89.1433	104.073	71.7742	89.9899	141.679	163.727	129.293	119.743	108.445	118.818	105.925	106.81	96.0383	121.782	82.9456	92.8409	76.8942	88.3678	75.3472	82.4518	99.5049	97.7296	80.1299	84.5696	89.8994	72.8461	74.4954	77.1102	113.501	117.779	95.7631	85.8325	77.9047	80.3158	81.7231	70.4181
		64.4	119.601	151.234	84.7971	87.2671	88.1904	103.67	71.9128	89.2312	141.34	163.563	129.225	119.328	108	119.281	106.117	106.451	96.021	121.732	82.9273	92.9368	76.6199	88.9437	75.2757	82.6119	99.4334	97.9288	80.0791	84.6948	90.5601	73.0972	74.6397	76.707	113.527	117.767	95.6598	86.2611	78.9818	80.1686	81.8883	69.8618
		64.5	119.667	151.127	85.3503	87.158	87.6064	103.249	72.4379	89.3971	141.28	163.227	129.017	118.832	107.15	119.703	106.247	106.103	96.1129	121.754	82.7124	92.8923	76.7229	89.8929	75.4868	83.1407	99.3981	98.2078	79.9	84.8731	90.9878	73.3519	74.7476	76.7871	113.646	117.856	95.6379	86.6859	79.8957	79.6802	81.562	69.5272
		64.6	119.597	150.97	85.7324	87.1275	88.1169	103.402	72.7964	89.7028	141.384	162.996	128.593	118.315	106.239	119.738	106.386	105.981	96.2524	121.783	82.2568	92.6099	77.2747	90.2781	75.8112	83.24	99.4362	98.5437	79.673	84.991	91.1657	73.2294	74.6359	76.7648	113.69	118.115	95.6633	86.6424	80.2583	79.427	81.1612	69.5788
		64.7	119.741	150.718	85.7787	87.2823	89.2031	103.66	72.5741	90.3158	141.314	162.859	128.154	118.21	105.866	119.339	106.193	106.285	96.4796	121.92	81.9363	92.0303	77.6687	89.6542	76.1166	82.9363	99.3036	98.7629	79.6374	85.1728	91.0771	73.0624	74.189	76.6701	113.769	118.162	95.576	86.3306	79.7703	79.0427	81.3002	69.8519
		64.8	119.996	150.705	85.3383	87.4666	89.9901	104.06	72.1386	90.3679	141.345	162.871	127.614	118.213	106.1	118.985	106.117	106.412	96.571	121.952	81.8038	91.6936	77.7122	88.3984	76.5361	81.8881	99.075	98.9028	79.6718	85.1768	90.6251	72.6992	73.8842	76.2002	113.767	118.156	95.4426	86.0431	79.2772	78.6336	82.1284	70.2188
		64.9	120.272	150.84	84.8763	87.5245	90.3671	103.884	72.2119	90.2544	141.507	162.746	126.998	118.643	106.563	118.756	106.061	106.476	96.475	121.915	81.9092	91.6191	77.4476	87.6494	76.5037	81.2398	98.7448	98.7361	79.7595	84.9437	89.7127	72.5044	73.5902	75.9279	113.748	118.084	95.4047	85.8769	79.0539	78.7367	82.9299	70.5089
		65	120.627	150.869	84.4212	87.6164	90.5229	103.157	72.4949	90.1152	141.557	162.68	126.82	119.044	107.2	118.84	106.322	106.597	96.2379	121.781	82.3437	91.6626	77.3054	87.3766	76.419	81.2193	98.3551	98.585	79.7561	84.679	89.0146	72.3676	73.5782	76.0344	113.667	118.001	95.3972	86.0254	78.994	78.9431	82.9926	70.7432
		65.1	120.811	150.947	84.023	87.5837	90.7606	102.683	72.5698	90.5283	141.557	162.546	127.047	119.165	108.177	118.831	106.391	107.006	95.9847	121.552	82.5636	91.8215	77.2647	88.0589	75.9643	81.6311	97.8808	98.2577	79.3915	84.3223	88.712	72.4677	73.5648	76.2738	113.488	117.853	95.5952	86.0395	78.7992	79.4979	82.5974	70.9413
		65.2	120.619	151.095	84.1242	87.2494	90.5313	102.522	72.0834	90.8491	141.825	162.33	127.504	119.141	109.186	118.546	106.3	106.874	95.7049	121.376	82.7241	91.7811	77.1014	88.5991	75.9346	82.1791	97.5533	98.0223	79.0593	84.0788	88.918	72.9348	73.831	76.6553	113.18	117.772	96.0376	86.0049	78.6399	79.5696	82.2177	71.1309
		65.3	120.216	150.948	84.2636	86.9389	89.8379	103.037	71.6101	90.7	142.054	162.177	128.376	118.697	109.93	118.052	106.158	106.295	95.6729	121.313	82.7381	91.5713	76.7287	89.0926	75.7173	82.1716	97.2446	97.7508	78.7643	84.146	89.0858	73.2796	74.0169	76.8621	112.934	117.782	96.399	85.7169	78.6858	79.5849	82.5479	71.0164
		65.4	119.727	150.529	84.2162	86.5673	89.1639	103.11	71.3866	89.841	142.17	162.03	129.039	118.298	109.862	117.9	106.029	105.374	95.8587	121.17	82.5138	91.1621	76.3557	88.9369	75.5934	82.2727	97.0122	97.7217	78.5444	84.4013	89.4214	73.723	74.1276	77.0799	112.575	117.883	96.6958	85.2876	79.0424	79.2459	82.9257	70.7953
		65.5	119.177	150.141	84.2769	86.2926	88.5212	103.322	71.7212	89.0842	142.188	161.755	129.244	117.898	109.313	118.278	106.312	104.822	96.1416	121.04	82.366	90.7748	76.0786	88.7506	75.531	82.0527	96.9366	97.7251	78.7353	84.7429	89.6841	73.8211	74.0652	76.9614	112.319	117.914	96.6755	85.4033	79.2521	79.2276	83.0062	70.515
		65.6	118.942	149.898	84.2373	86.338	88.4191	103.211	72.3343	88.7779	142.06	161.564	129.172	117.628	108.304	118.853	106.51	104.768	96.4971	121.055	82.1598	90.4686	75.967	88.4136	76.0523	82.2184	97.1354	97.9888	78.7416	84.8334	90.1882	73.7719	73.9042	76.5102	112.267	117.95	96.2529	85.6782	79.4929	79.6192	82.3436	70.3808
		65.7	118.905	149.648	84.1804	86.6203	88.3848	103.181	72.9083	89.3932	141.644	161.403	128.668	117.714	107.554	118.917	106.679	105.07	96.7653	120.94	82.0253	90.3746	75.9706	88.0761	76.8063	81.9409	97.5469	98.201	78.8159	84.6971	90.4081	73.3924	73.8829	75.7616	112.468	117.931	95.9284	86.1672	79.5816	80.1482	81.4717	70.3962
		65.8	119.071	149.738	84.4031	86.9595	88.7731	102.771	73.0479	89.9981	141.305	161.127	128.103	117.838	107.041	118.258	106.544	105.361	96.841	120.861	82.1013	90.5868	76.0899	87.8171	77.3389	81.9259	98.0432	98.4538	78.8736	84.3371	90.4561	72.9936	73.8852	75.2088	112.714	117.83	95.674	86.621	79.5743	80.0769	81.1502	70.2381
		65.9	119.308	149.933	84.6751	87.3121	88.9748	102.42	72.8726	90.5007	140.865	160.969	127.653	118.068	107.138	117.436	106.432	105.298	96.8944	120.958	82.2416	90.8601	76.0996	88.0821	77.3094	81.8113	98.5964	98.6496	78.7513	83.8974	89.8461	72.6922	74.0613	75.0408	113.046	117.647	95.4862	86.5757	79.547	79.2994	81.5177	70.2449
		66	119.643	150.144	84.742	87.6401	89.0639	102.462	72.7418	89.8751	140.494	161.039	127.43	118.161	107.381	116.842	106.589	105.235	96.8948	120.907	82.4843	91.1891	76.009	88.5252	76.8802	81.9052	99.0972	98.7967	78.9442	83.9432	89.1909	72.3397	74.2032	75.5128	113.282	117.395	95.6195	86.2423	79.3778	78.6903	82.3709	70.0082
		66.1	119.781	150.265	84.6166	87.6911	89.202	102.88	72.5261	89.7064	140.319	161.141	127.582	117.731	107.677	116.723	106.461	105.261	96.7392	120.748	82.7076	91.2061	75.9967	88.9974	76.4384	81.5709	99.5046	98.7512	79.2111	84.0481	88.5329	72.0114	74.3316	76.1997	113.352	117.099	95.6422	85.6505	79.3171	78.9269	82.9461	69.9338
		66.2	119.856	150.388	84.2209	87.7762	89.4717	103.241	71.976	89.2703	140.36	161.21	127.706	117.225	107.228	116.677	106.234	105.176	96.8138	120.628	82.9245	91.0156	76.0996	89.0498	76.0331	81.3697	99.5866	98.6484	79.5298	84.4965	88.472	71.9641	74.4902	76.9108	113.3	116.947	95.584	85.1499	79.1842	79.792	83.19	69.9464
		66.3	119.752	150.229	83.7673	87.7086	89.9456	103.389	71.6889	89.7322	140.228	161.37	128.03	116.785	106.301	117.094	105.546	104.88	97.1133	120.484	83.1999	90.7349	76.2867	88.9779	75.9497	81.5168	99.6564	98.5276	79.8538	84.9538	88.4844	72.2589	74.4614	76.986	113.214	116.818	95.7414	84.8502	79.3183	80.6407	82.9008	70.2658
		66.4	119.656	150.154	83.5787	87.4134	89.9463	103.499	71.9963	89.5331	140.251	161.485	128.301	116.563	105.298	117.841	105.123	104.532	97.2497	120.233	83.3729	90.4789	76.3138	88.7147	76.1389	81.9784	99.6187	98.3191	80.1299	85.0648	88.5816	72.665	74.4689	76.5868	113.228	116.704	95.7427	84.7523	79.5466	80.8728	82.3063	70.8514
		66.5	119.463	150.064	83.7861	87.1026	89.9003	103.81	72.8759	89.6327	140.491	161.577	128.356	116.801	105.346	118.746	104.907	104.546	97.3598	120.339	83.4425	90.503	76.3622	88.7154	76.5188	82.0069	99.3863	98.0344	80.2567	84.9596	88.3858	72.7666	74.1633	76.1643	113.277	116.747	95.7513	85.0783	79.5452	80.7582	81.6369	70.9961
		66.6	119.293	149.914	84.2941	86.7033	89.5366	104.015	73.0577	89.4494	140.678	161.638	128.616	116.996	105.976	119.018	105.08	104.815	97.5669	120.59	83.1943	90.6923	76.3841	89.0163	76.7261	81.78	98.9088	97.7754	80.3122	84.6534	88.4732	72.6788	73.8458	76.2343	113.529	116.793	95.7059	85.3498	79.3012	80.2618	81.3302	70.9344
		66.7	119.113	149.742	84.8271	86.4478	89.3211	104.264	72.8803	89.6013	140.849	161.762	128.454	116.963	106.807	118.72	105.016	105.395	97.5268	120.803	82.6819	90.8001	76.348	89.4267	76.5143	81.8436	98.4827	97.5917	80.2956	84.5561	88.7926	72.4119	73.3212	76.4066	113.701	116.739	95.5368	85.642	79.0464	80.0053	81.5409	70.588
		66.8	119.111	149.668	85.1627	86.4999	88.9487	104.39	72.3481	89.9243	141.257	161.878	128.072	116.86	106.571	118.381	104.792	105.811	97.2246	120.913	82.3336	90.6488	76.2703	89.624	76.1334	82.4587	97.9669	97.5178	79.9306	84.5881	89.0971	72.5294	72.916	76.3214	113.893	116.629	95.5588	85.7751	78.921	79.7916	81.9916	70.5064
		66.9	119.129	149.551	85.2463	86.7194	88.4642	104.513	72.2686	90.1233	141.658	162.023	127.757	116.634	105.922	118.146	104.45	106.031	97.1198	120.976	82.1051	90.4626	76.0624	89.4654	75.8292	82.9479	97.4974	97.6667	79.5608	84.9603	89.0879	72.5061	72.9739	75.7837	113.897	116.628	95.5894	85.5771	78.6401	79.7758	82.3999	70.1762
		67	119.266	149.544	85.0951	87.1118	88.2311	104.368	72.0494	90.2361	141.73	162.181	127.224	116.76	104.907	117.792	104.621	105.815	97.0079	120.72	82.1191	90.1345	75.9238	89.2824	75.4917	83.1498	97.1961	97.948	79.2543	85.0919	88.8384	72.5403	73.4834	75.2228	113.891	116.582	95.8159	85.4775	78.3442	79.6859	82.3726	69.6906
		67.1	119.403	149.597	84.8165	87.5181	88.1612	104.059	72.2951	89.9171	141.643	162.347	127.042	116.983	104.496	117.168	104.788	105.524	96.7154	120.287	82.3519	89.9861	75.9716	88.764	75.2753	83.1613	97.1532	98.3086	79.0458	85.1151	88.9458	72.2558	74.3841	74.7022	113.679	116.656	95.9605	85.3053	78.1154	79.6392	81.9153	68.9794
		67.2	119.482	149.715	84.6136	87.6959	88.332	103.919	72.5581	90.042	141.384	162.479	127.101	117.2	104.36	116.796	104.978	105.039	96.4928	120.013	82.3674	90.1363	75.9318	88.3667	74.8468	83.3352	97.2498	98.6651	79.3168	85.0271	89.305	72.3318	74.9356	74.5424	113.689	116.811	95.8993	85.4389	78.5231	79.5571	81.323	68.7566
		67.3	119.436	149.82	84.4593	87.7498	88.4509	103.711	73.0282	90.3877	140.93	162.453	126.964	117.566	104.638	116.741	104.618	104.862	96.2886	119.864	82.3221	90.2483	75.8769	87.928	74.6827	83.5122	97.4906	98.8213	79.5246	84.8786	89.9979	72.2753	75.0772	74.8954	113.769	117.018	95.9363	85.7978	78.9532	79.6766	81.4887	69.025
		67.4	119.276	149.844	84.231	87.5589	88.6852	103.497	73.0306	90.7444	140.396	162.315	126.912	117.496	105.137	117.04	104.395	104.933	95.8517	119.843	82.254	90.3188	75.6794	87.8756	74.7954	83.4647	97.8318	98.7781	79.5987	85.0281	90.6181	71.9991	74.6347	75.7599	114.017	117.112	95.7581	86.1416	79.6611	79.8386	82.298	69.9236
		67.5	119.032	149.805	84.1512	87.1105	89.1346	103.106	72.8653	90.5538	139.966	162.036	126.746	117.463	105.571	117.366	104.131	105.776	95.4584	119.886	82.0418	90.2186	75.951	87.5972	75.4221	83.0486	98.2756	98.7546	79.6692	85.0142	91.0863	71.5249	73.919	76.4078	114.195	117.215	95.7613	86.4521	80.0093	80.4129	83.4693	70.6513
		67.6	118.784	149.689	84.0605	86.6885	89.4678	102.902	72.4102	89.976	139.586	161.759	126.525	117.313	105.53	117.891	104.296	106.493	95.3257	120.004	81.887	90.0785	76.4724	87.174	76.1117	82.191	98.6657	98.7411	79.298	84.8468	91.2001	71.4231	73.2974	76.7524	114.399	117.257	95.6358	86.4586	80.4248	80.6488	83.57	70.7737
		67.7	118.617	149.533	84.0245	86.4476	89.6648	103.014	72.1233	89.827	139.354	161.493	126.488	116.855	104.796	118.231	104.475	106.924	95.292	119.992	81.8637	89.9288	77.1414	86.8753	76.4472	81.3861	99.0268	98.7074	79.0078	84.3429	90.6871	71.7456	73.0518	76.3657	114.378	117.218	95.2482	86.0271	80.3691	80.5438	83.5534	70.1881
		67.8	118.544	149.495	84.4354	86.4174	89.6131	103.185	71.9691	89.8923	139.284	161.435	126.571	116.745	103.949	118.344	105.107	106.145	95.465	119.963	81.8448	90.0941	77.1787	87.0571	76.4381	81.0109	99.3104	98.906	78.9102	83.7857	89.8812	72.3141	73.0994	76.1781	114.163	117.223	94.9438	85.4779	79.9876	79.9514	83.09	69.4788
		67.9	118.577	149.631	84.7881	86.6834	89.5977	103.591	72.083	90.255	139.297	161.328	126.752	116.667	103.754	118.195	105.981	105.069	95.7414	119.795	82.0881	90.4979	76.835	87.6429	76.1359	81.1486	99.3678	99.1414	78.7427	83.3583	88.6332	72.7518	73.254	75.8293	113.892	117.328	94.5874	85.129	79.3856	79.5837	83.3383	69.151
		68	118.666	149.779	84.9939	86.8571	89.6187	103.726	72.0566	90.4332	139.402	161.14	126.91	116.722	104.406	117.977	106.968	104.416	95.9798	119.737	82.5033	90.9014	76.4121	88.1344	75.7324	81.4354	99.3194	99.2516	78.8427	83.2356	88.0628	72.7313	73.3013	75.8516	113.714	117.527	94.604	84.7787	79.5586	79.6989	83.1274	69.1399
		68.1	118.828	150.14	85.0286	86.7262	89.6421	103.904	72.1701	90.8297	139.758	160.903	127.051	117.019	105.229	117.515	107.274	104.919	96.1934	119.639	82.7399	91.3473	76.6247	88.3342	75.2657	81.6476	99.3675	99.2569	79.0194	83.5715	88.0841	72.2056	73.4722	75.7088	113.669	117.697	94.9809	84.8048	80.158	80.0063	83.1567	69.4404
		68.2	118.963	150.454	84.5867	86.4086	89.6128	103.838	72.3614	90.919	140.182	160.733	127.09	117.16	105.443	116.809	106.697	105.722	96.3533	119.669	82.9839	91.5102	77.0794	88.4476	75.2047	81.7628	99.331	99.1705	79.0411	83.8286	88.9348	71.5309	73.3344	75.6084	113.784	117.838	95.5525	84.7878	80.5682	80.2377	83.1301	69.7201
		68.3	119.077	150.5	84.2478	85.8165	89.2019	103.678	72.7946	90.4953	140.326	160.512	126.947	117.329	105.082	116.081	105.32	106.107	96.3592	119.607	82.9825	91.5267	77.2833	88.4829	75.4166	81.9278	99.3226	98.8503	79.1104	84.0594	89.416	71.3092	73.4321	75.5361	114.029	117.885	95.9342	84.5048	80.0558	80.3529	83.4126	70.1491
		68.4	119.238	150.339	84.131	85.4679	88.6438	103.444	72.902	89.6377	140.32	160.436	126.769	117.365	104.689	115.963	103.863	105.859	96.4478	119.689	82.8273	91.3663	77.1912	88.6847	75.7368	82.118	99.4768	98.4132	79.0681	84.1328	89.5316	71.4097	73.713	75.3292	114.222	117.828	96.0679	84.4887	79.4317	80.442	83.3917	70.3289
		68.5	119.271	150.138	84.1761	85.3602	88.0814	103.153	72.9716	89.0312	140.182	160.621	126.691	117.296	104.418	116.385	103.087	105.277	96.7055	119.726	82.8133	91.1464	76.8272	88.6153	75.6009	82.4733	99.6409	97.99	79.0331	84.0456	89.0887	71.7543	74.1992	75.1884	114.388	117.597	95.8684	84.4129	79.3168	80.3196	82.7221	70.4149
		68.6	119.32	149.737	84.5207	85.4224	87.8708	103.217	72.8908	89.2332	139.65	160.887	126.599	117.239	104.094	116.808	103.244	104.569	96.8513	119.866	82.7594	91.0063	76.5497	88.6913	75.0803	82.35	99.621	97.6811	79.0713	84.2738	88.949	71.8751	74.2782	74.9847	114.472	117.37	95.4366	84.4933	79.3518	80.0218	81.7394	70.1882
		68.7	119.589	149.466	84.753	85.7623	87.778	103.366	72.7914	89.3234	138.967	161.024	126.582	116.894	103.599	116.714	103.907	103.577	96.9043	119.87	82.7956	90.8295	76.518	88.6999	74.6469	82.0502	99.6498	97.506	78.9654	84.5686	88.8828	72.0877	73.9601	75.394	114.458	117.278	95.2166	84.6796	79.2152	79.7724	81.045	70.1691
		68.8	119.835	149.487	84.9928	86.0517	87.8708	103.378	72.5249	89.2571	138.549	160.933	126.653	116.695	103.523	116.323	104.294	102.803	96.9857	119.965	82.7883	90.767	76.8866	88.9558	74.4398	81.4886	99.5963	97.3938	78.9449	85.0069	89.2803	72.1203	73.6783	76.0008	114.409	117.273	95.1546	84.7196	78.9469	79.8486	81.0854	70.2838
		68.9	120.03	149.76	85.1665	86.236	88.0179	102.941	72.2693	88.66	138.23	160.799	126.502	116.481	103.475	116.064	104.112	102.392	96.9923	120.042	82.6978	90.6464	77.6422	89.1274	74.4749	81.4224	99.5356	97.4497	78.7579	85.2761	89.5604	72.1868	73.5006	76.578	114.313	117.269	95.3673	84.7858	78.9427	80.0156	81.7542	70.3622
		69	120.297	149.963	85.3015	86.3112	88.3833	102.546	72.3853	88.7572	138.016	160.469	126.202	116.02	103.775	116.019	103.964	102.567	96.8819	120.027	82.5869	90.6126	77.7539	88.8377	74.2966	81.6432	99.3985	97.4335	78.6099	85.1495	89.9139	72.012	73.3607	76.5751	114.174	117.349	95.5759	84.7688	79.0403	80.0986	82.7753	70.1963
		69.1	120.457	150.226	85.4616	86.3139	88.5218	102.394	72.7234	88.7608	138.152	160.042	126.026	115.859	103.803	116.016	104.063	102.974	96.8163	119.901	82.5372	90.7225	77.8411	88.2688	74.3628	82.052	99.2471	97.2942	78.76	84.7566	89.9004	72.0059	73.4712	76.3696	114.105	117.311	95.6318	84.7967	79.0782	79.9406	83.8539	69.9096
		69.2	120.373	150.359	85.4121	86.3127	88.5309	102.602	73.1272	88.7034	138.498	159.561	125.783	115.506	104.38	116.026	104.468	103.557	96.8267	119.74	82.5131	90.8011	77.5573	87.5092	74.6691	82.3661	98.9968	97.1462	78.9739	84.2009	89.8007	72.2082	73.8893	76.4646	114.044	117.128	95.6534	84.8861	79.1754	79.7702	84.6934	69.9116
		69.3	120.3	150.295	85.1901	86.5444	88.4217	102.403	73.256	88.0404	138.748	159.28	125.656	115.246	105.031	116.087	104.287	104.385	96.9709	119.55	82.4864	90.9358	78.0578	87.3554	74.894	82.1772	98.7155	97.0488	79.2903	83.9366	89.6123	72.442	74.2742	76.7513	113.968	116.926	95.6489	85.0993	79.3782	79.3596	84.9528	69.8743
		69.4	120.179	150.046	84.7864	86.8054	88.5636	102.097	73.1612	87.9744	138.982	159.046	125.838	115.374	105.85	116.144	103.924	105.241	97.1235	119.332	82.5439	90.8686	78.5694	87.4504	75.0123	81.8416	98.3663	96.9972	79.3342	83.8135	89.8313	72.3634	74.2292	76.6577	113.971	116.834	95.7907	85.5795	79.5426	79.1736	84.8996	69.962
		69.5	120.073	149.807	84.2694	86.9646	88.9497	101.815	72.949	88.2431	139.129	158.931	125.968	115.53	106.205	116.561	103.741	105.545	97.1766	119.275	82.3421	90.6627	79.2202	87.4511	75.3459	81.6391	98.0889	97.128	78.9954	83.9108	90.16	72.1367	73.8353	75.9961	114.026	116.731	96.0309	86.1471	79.377	79.0894	84.6203	69.9762
		69.6	120.024	149.455	83.9049	87.0083	88.9304	102.086	72.9947	88.679	139.047	158.79	126.107	115.83	105.962	117.242	104.238	105.358	97.236	119.336	82.1671	90.5875	79.1727	87.0832	76.4556	81.6862	97.9771	97.3132	78.5363	84.1734	90.4426	72.053	73.4941	75.2656	114.073	116.879	96.2227	86.5106	79.1487	79.4408	84.519	70.1994
		69.7	119.939	149.29	83.9036	86.6667	88.528	102.652	73.0487	88.4872	138.766	158.798	126.095	116.066	105.357	118.145	104.679	104.781	97.3563	119.558	82.0103	90.4656	78.4092	86.6243	77.3823	81.7542	98.0614	97.411	78.2033	84.2675	90.3932	72.209	73.3113	75.2456	114.064	117.132	96.2683	86.5005	78.7614	79.6003	84.0682	70.3548
		69.8	119.871	149.195	84.0149	86.2623	87.6703	102.965	73.0957	88.2407	138.609	158.828	125.895	116.187	104.647	118.225	104.688	104.409	97.3079	119.908	81.8247	90.4284	77.0394	86.7076	77.7067	81.5257	98.3004	97.5638	78.2844	84.2272	90.095	72.3451	73.0681	75.6727	114.06	117.392	96.1724	86.2294	78.6443	79.4576	83.6033	70.2469
		69.9	119.835	149.144	84.2648	85.8578	87.6507	103.026	72.6923	88.2026	138.516	158.823	125.651	116.199	104.356	117.712	104.102	103.97	97.2694	120.289	81.8928	90.4822	75.7696	87.1166	77.024	81.3624	98.607	97.5946	78.6912	84.1963	89.7922	72.5343	72.8327	76.2528	114.025	117.551	96.1195	85.9926	78.5498	78.9074	82.762	70.0063
		70	119.825	149.275	84.3544	85.6533	87.9677	102.694	72.3008	88.458	138.588	158.792	125.413	116.154	104.34	116.897	103.53	103.794	97.3187	120.608	82.0204	90.3372	75.0473	87.674	76.1016	81.0683	98.8994	97.6248	79.0305	84.1046	89.4897	72.8281	72.4903	76.7072	113.943	117.685	96.0763	85.8818	78.8283	78.516	82.447	69.6037
		70.1	119.708	149.571	84.1041	85.8329	88.6623	102.682	71.9503	88.6498	138.934	158.914	125.491	115.847	104.864	116.508	103.167	103.677	97.2763	120.918	81.9679	90.4535	75.2213	87.9221	75.372	80.8558	99.0741	97.7731	79.1489	83.9867	89.4159	73.0833	72.6089	76.9681	113.673	117.654	96.153	85.7743	79.2321	78.5323	82.2326	69.3714
		70.2	119.58	149.61	83.8076	86.1888	88.8507	102.843	71.8174	88.6674	139.27	159.137	125.715	115.375	105.309	116.504	103.182	103.694	97.0894	121.21	81.7585	90.7634	75.8134	88.0779	75.2432	80.8701	99.1264	98.1024	79.0708	84.0874	89.1692	72.932	73.0034	77.2826	113.46	117.491	96.2807	85.487	79.8284	78.8927	82.6052	69.3558
		70.3	119.427	149.707	83.4495	86.6388	89.1657	103.051	71.7139	88.6113	139.385	159.513	125.742	114.787	105.737	116.556	103.335	103.718	96.9158	121.349	81.5112	90.9617	76.8273	87.9687	75.7231	81.2596	99.0716	98.393	78.9227	84.2167	89.0533	72.5769	73.836	77.1739	113.19	117.211	96.4194	84.8555	80.1016	79.2977	82.7089	69.493
		70.4	119.283	149.785	83.2269	86.8818	89.3901	103.041	71.6808	88.678	139.424	160.03	125.674	114.304	105.578	116.665	103.455	103.778	96.7034	121.378	81.1668	91.3104	77.451	87.7943	76.0798	81.5441	98.9942	98.7269	78.9047	84.1494	88.5787	72.2746	74.2532	77.0947	112.928	117.017	96.5278	84.2494	80.0267	79.1708	82.8378	69.9588
		70.5	119.212	149.87	83.4226	86.8367	89.7886	102.704	71.8112	89.0396	139.319	160.491	125.24	114.389	105.338	116.59	103.674	103.727	96.5189	121.412	81.1937	91.3856	78.0282	87.2432	76.346	81.7434	99.0018	98.8672	78.9591	84.082	88.3777	72.2946	74.515	76.3352		116.839	96.5148	84.005	79.3204	79.336	82.6543	70.2282
		70.6	119.378	149.84	83.8359	86.7079	89.9312	102.49	72.1179	89.3134	138.949	160.852	124.53	114.707	104.942	116.497	103.942	103.409	96.4905	121.29	81.4105	91.2212	77.6728	86.7774	76.1823	81.678	99.0365	98.8204	79.0311	83.9473	87.9143	72.1743	74.6026	75.5692		116.723	96.4014	84.0416	78.7011	79.1891	82.5863	70.6333
		70.7	119.787	149.962	84.4021	86.7041	90.2238	102.125	72.4417	89.4634	138.734	160.911	124.25	115.377	104.583	116.216	104.537	103.192	96.5638	120.963	81.4611	91.1803	77.3946	86.4916	76.2031	81.8644	99.0883	98.611	79.1078	83.6742	88.2242	71.8588	74.767	74.8421		116.742	96.1083	84.2693	78.507	79.3533	82.3859	70.5923
		70.8	120.183	149.98	84.9664	86.8076	90.3719	102.057	72.6179	89.2541	138.748	160.562	124.129	116.09	104.153	116.074	104.903	103.484	96.7249	120.593	81.6369	90.9893	76.8856	86.8787	76.2257	81.8277	99.26	98.3488	79.0295	83.6933	88.7403	71.5288	74.6026	75.021		116.91	95.8383	84.5459	79.0248	78.8132	82.4892	70.4339
		70.9	120.472	150.006	85.0933	87.0571	90.2111	102.161	72.4417	89.0704	138.852	159.995	124.149	116.42	103.689	116.148	105.121	104.112	96.8827	120.26	81.5946	90.7316	77.0458	87.456	76.5616	81.827	99.408	97.9963	78.8469	83.8276	89.8664	71.3278	73.8083	75.6056		117.031	95.5833	84.7161	79.7693	78.7132	82.4296	69.8977
		71	120.455	149.787	84.8889	87.311	89.5828	102.708	71.9289	88.8506	138.84	159.451	124.404	116.539	103.733	116.475	104.701	104.668	96.9819	119.712	81.5786	90.6114	77.1758	87.7414	76.9286	81.6612	99.397	97.795	78.5969	84.0478	90.3253	71.4413	73.155	76.0017		117.084	95.6374	84.9676	80.0082	79.0928	82.274	69.5847
		71.1	120.145	149.65	84.3707	87.2723	88.7647	103.124	71.3426	88.5497	139.005	158.929	124.312	116.435	103.971	116.268	104.082	104.622	96.959	119.165	81.7589	90.2744	77.3289	87.4609	77.168	81.1099	99.4078	97.7988	78.2403	84.419	90.4931	71.827	72.8663	75.5991		117.047	95.6549	85.3379	79.5899	79.8124	81.8739	69.4419
		71.2	119.602	149.512	83.8296	87.1244	88.3416	103.195	71.1352	88.4683	138.976	158.635	124.213	116.14	104.505	115.558	103.322	104.802	96.9196	118.771	81.7468	90.251	77.233	86.8379	76.9591	80.402	99.3879	97.9279	78.0726	84.6797	90.1168	72.5458	73.7688	74.6318		116.953	95.6516	85.6501	78.7337	80.4424	81.8883	69.5731
		71.3	119.002	149.484	83.329	86.9657	88.2802	103.234	71.3199	88.5401	138.784	158.64	124.198	115.937	104.569	114.814	102.722	104.797	96.7343	118.466	81.6504	90.5648	76.902	86.3047	76.494	79.7264	99.3346	98.1684	78.2149	84.7893	89.8612	72.933	74.7627	73.9063		116.699	95.5051	85.9047	78.074	80.5029	82.358	69.4182
		71.4	118.599	149.496	82.9764	86.6486	88.4268	103.262	71.6078	88.7024	138.415	158.608	124.056	115.794	104.689	114.924	102.296	104.94	96.5694	118.186	81.4374	90.7421	76.5119	86.1829	75.6281	79.8516	99.3358	98.6236	78.4623	84.7194	89.8139	72.6148	75.4123	73.8257		116.328	94.7981	85.9035	77.9358	80.4508	82.95	69.2702
		71.5	118.499	149.723	82.7892	86.5069	88.5617	103.355	71.6994	88.6349	138.24	158.563	124.209	115.52	104.837	115.578	102.087	104.415	96.4723	118.185	81.2043	91.2628	76.1798	86.5687	75.0688	80.3491	99.4633	99.0737	78.8001	84.5247	89.9647	71.9709	74.7531	74.6547		116.095	94.3744	85.7041	78.0338	79.9503	83.2659	69.006
		71.6	118.502	149.918	82.5978	86.4744	88.5124	102.876	71.8584	88.4156	137.837	158.487	124.242	115.401	105.402	116.233	102.293	103.97	96.4124	118.383	81.1858	91.4158	76.1806	87.2367	74.7421	81.1253	99.589	99.2228	78.9234	84.4657	90.0567	71.4734	73.6891	75.6202		116.02	93.9758	85.5844	78.3	79.5389	83.1151	69.2362
		71.7	118.648	150.038	82.7458	86.2839	88.1984	102.341	72.2221	88.401	137.5	158.421	124.386	115.313	105.658	116.55	102.672	103.628	96.3082	118.66	81.4513	91.3326	76.3651	87.6434	74.9424	81.5618	99.736	99.1159	78.7778	84.443	89.9536	71.6373	72.9443	76.3378		115.938	94.1135	85.6051	78.8243	79.3498	82.8537	69.6898
		71.8	118.955	150.024	83.0681	86.3226	87.7356	101.945	72.5707	88.2822	137.315	158.223	124.573	115.34	105.325	116.409	102.705	103.37	96.3214	118.991	82.0041	91.2185	76.6282	87.5808	74.9614	81.779	99.7428	98.867	78.5628	84.4752	89.4617	72.012	72.8211	76.3434		116.08	94.7243	85.7358	79.548	79.5456	82.8058	70.2809
		71.9	119.06	149.991	83.5929	86.1406	87.0074	102.111	72.531	88.1071	137.201	158.187	124.421	115.62	104.449	115.959	102.27	103.114	96.3722	119.371	82.6393	90.8881	76.766	87.4444	74.8178	81.703	99.6743	98.5106	78.3233	84.6271	89.257	72.8708	72.9021	76.1533		116.41	95.2514	86.0688	80.2486	79.8086	83.0968	70.4606
		72	119.046	149.854	84.1041	85.8069	86.6134	102.347	72.0558	88.0176	137.014	158.175	124.313	115.859	103.784	115.261	101.798	102.89	96.3109	119.791	83.1205	90.7102	76.8259	87.0494	74.6601	81.5361	99.4809	98.0598	78.383	84.2795	89.0313	73.3382	73.0634	75.9496		116.712	95.7086	86.2421	80.1982	79.9273	83.2489	70.168
		72.1	119.183	149.736	84.2989	85.5986	86.192	102.545	71.788	88.3872	136.924	158.294	123.984	116.034	103.881	114.822	101.767	103.013	96.3197	120.169	83.3678	90.4612	76.9399	86.8806	74.7148	81.2396	99.2662	97.7881	78.4896	83.8124	89.1446	73.3231	73.4456	76.1156		116.952	95.5518	86.1734	79.9607	79.8346	83.0571	69.7444
		72.2	119.151	149.696	84.2161	85.3626	86.5146	102.437	71.9819	89.052	136.917	158.291	123.711	116.168	104.412	114.796	101.862	103.083	96.4058	120.345	83.3198	90.6562	77.11	86.5543	75.1512	80.8503	99.0968	97.7423	78.7219	83.3696	89.2089	72.7849	74.0683	76.2844		117.308	95.427	86.1387	79.52	79.5561	82.6836	69.4759
		72.3	119.053	149.738	83.9344	85.3937	86.9203	102.181	72.523	89.4602	136.956	158.303	123.592	115.983	105.019	115.276	101.94	102.784	96.4621	120.373	83.1756	90.9261	76.9437	86.7271	75.8478	80.407	98.994	97.7672	79.0092	82.8991	89.4087	72.4809	74.5119	76.4412		117.525	95.271	86.0269	79.5244	79.4107	82.3891	69.5798
		72.4	119.053	149.803	83.8724	85.6683	87.605	101.825	72.8281	89.9409	137.184	158.113	123.508	115.594	104.979	115.724	102.256	102.314	96.511	120.216	83.2184	91.1989	76.3658	86.8796	76.6799	79.9909	98.9572	97.7088	79.1428	82.9184	89.7236	72.8114	74.6654	76.3099		117.662	95.2059	86.1066	79.3587	79.5417	82.2658	69.779
		72.5	119.213	149.827	84.2341	86.0978	88.1244	101.536	72.8781	90.1484	137.477	157.973	123.497	115.21	104.682	115.785	102.718	101.954	96.6422	119.823	83.4127	91.7208	75.6071	87.198	77.1502	79.6483	99.0466	97.8301	79.3816	83.3596	89.7874	73.0812	74.5748	76.2119		117.621	95.528	86.4405	79.4516	79.5303	82.2753	70.0129
		72.6	119.223	149.793	84.6649	86.562	88.6899	101.446	72.9734	90.3646	137.89	157.607	123.488	114.665	103.921	115.307	103.158	102.206	96.6334	119.385	83.6243	91.7442	75.3588	87.1862	77.0313	79.5691	99.1665	97.9884	79.5947	83.7545	89.8244	72.9964	74.4876	76.0253		117.452	95.6414	86.6898	79.4078	79.2333	82.662	69.8502
		72.7	119.35	149.691	85.1175	86.877	89.374	101.57	73.0866	89.7808	138.161	157.28	123.581	114.227	103.317	114.758	103.005	102.576	96.5957	119.025	83.7395	91.5271	75.6426	86.9473	76.557	79.8982	99.2346	98.047	79.7408	83.8585	89.53	72.4007	74.5423	76.0936		117.231	95.764	86.8655	79.5787	79.0026	83.114	69.7839
		72.8	119.268	149.568	85.1618	86.8979	89.8286	101.781	73.058	89.2889	138.051	157.057	123.702	113.835	102.689	114.414	103.05	102.872	96.6264	118.741	83.6273	91.3396	76.203	86.3579	75.9717	80.132	99.3582	98.1178	79.8958	83.8723	89.4034	71.8757	74.5492	76.1829		117.054	95.8677	86.7369	79.4547	79.3671	83.5784	69.6134
		72.9	119.126	149.294	84.8181	86.5332	89.772	102.032	72.5154	88.7497	137.744	157.085	123.883	113.302	102.473	114.537	103.173	102.874	96.628	118.807	83.3929	91.042	76.6163	86.1428	75.7247	80.3533	99.4538	98.2702	80.0203	83.6087	89.1186	72.0011	74.5372	76.8864		116.928	95.7079	86.1874	79.2327	79.8498	83.664	69.7366
		73	118.721	148.971	84.4738	85.9319	89.2039	102.147	72.0521	88.9523	137.37	157.07	124.097	113.062	102.553	115.157	103.511	102.622	96.5512	119.046	83.0284	90.8439	76.726	86.3628	75.7404	80.3548	99.6391	98.2982	80.0078	83.3531	89.2646	72.2833	74.3414	77.3041		117.008	95.6553	85.7695	78.8847	80.002	83.4511	69.6664
		73.1	118.418	148.552	84.1635	85.4711	88.3472	102.192	71.6524	89.2502	136.921	157.227	124.207	113.209	102.71	115.563	103.312	102.549	96.513	119.127	82.5484	91.0421	76.4968	86.8384	76.0689	80.7813	99.8098	98.2878	79.8723	83.5468	89.4673	72.5609	74.3379	77.4914		117.271	95.4961	85.2575	78.8047	79.7702	82.9054	69.6194
		73.2	118.168	148	84.0873	85.1882	87.7999	102.335	71.5158	89.9133	136.55	157.309	124.258	113.471	102.921	115.697	102.81	102.676	96.4188	119.337	82.0838	91.2827	76.3253	87.0678	76.315	81.1882	99.9355	98.3757	79.7103	83.5986	89.6209	72.3622	74.3196	76.8303		117.36	95.3614	85.1146	78.7514	79.6749	82.4174	69.3771
		73.3	118.234	147.273	83.9171	85.1851	87.6953	102.507	71.5451	90.0353	136.434	157.306	124.255	113.962	102.805	115.354	102.123	103.277	96.1771	119.37	81.6019	91.5395	76.4059	87.1809	76.3031	81.3242	99.952	98.3324	79.415	83.6619	89.5588	72.0084	74.5372	76.2921		117.278	95.4896	85.4219	79.0714	79.4851	82.1987	69.2091
		73.4	118.521	146.624	83.8609	85.1208	87.9118	102.462	71.7963	89.9528	136.367	157.355	123.954	114.214	102.696	115.443	101.525	104.153	96.0091	119.142	81.3375	91.8835	77.0902	87.2492	76.5353	81.4239	99.9705	98.2524	79.0206	83.8856	89.2974	71.627	74.3614	75.9958		117.104	95.5554	85.5768	79.3683	79.2427	82.439	69.2747
		73.5	118.98	146.252	83.8141	84.813	88.2959	102.094	72.5716	89.6161	136.337	157.365	123.32	114.083	102.51	115.46	101.058	104.729	96.0432	118.802	81.3226	91.8371	77.6098	87.054	76.8606	81.1922	99.7658	98.2179	78.8597	83.9962	89.1468	71.2801	73.9466	75.954			95.7558	85.8177	79.9689	78.5194	82.6307	69.6007
		73.6	119.322	146.191	83.8102	84.6018	88.2603	101.902	73.2714	89.5331	136.279	157.339	122.656	114.115	102.693	115.653	100.638	104.699	96.2051	118.552	81.5397	91.617	77.6742	86.6842	77.1296	81.2612	99.4857	98.1999	78.6299	84.2504	89.0301	71.3279	73.0669	75.9038			95.9726	85.7769	80.0973	78.0842	82.6469	69.7808
		73.7	119.575	146.441	84.0879	84.3337	88.3139	102.057	74.0768	89.6137	136.184	157.471	121.901	114.224	103.165	115.784	100.56	103.605	96.4006	118.189	81.8183	91.2108	77.0761	86.4822	76.6054	80.6962	99.2506	98.1533	78.3877	84.6233	89.1247	71.8171	72.7619	75.5371			95.9976	85.6026	79.934	78.0444	82.4367	69.5802
		73.8	119.603	147.041	84.0834	84.4903	87.96	102.482	74.2961	89.6862	136.188	157.664	121.44	114.375	103.521	115.84	100.921	102.474	96.7211	118.238	82.067	90.7696	76.6918	86.8617	75.7906	80.5371	99.1667	98.3348	78.3436	84.8818	89.2232	72.3362	72.8849	75.42			95.8957	85.6835	79.4434	78.7792	82.2601	69.3116
		73.9	119.412	147.645	83.8568	84.9966	87.8892	102.174	74.1113	89.6379	136.09	157.564	121.523	114.387	103.596	115.312	101.808	101.788	96.9707	118.354	82.3111	90.5901	76.467	87.4074	75.2754	80.1811	99.0834	98.5765	78.1898	85.009	89.2553	72.6029	73.4926	75.5221			95.6453	86.1315	79.1427	79.6042	82.2079	69.411
		74	119.083	147.911	83.6047	85.4764	88.0032	101.556	73.4563	89.535	135.958	157.479	121.631	114.307	103.387	114.077	102.812	101.992	97.0112	118.581	82.2693	90.5369	76.6836	88.0502	75.151	80.2931	99.0681	98.7608	78.0948	85.1159	89.3247	72.671	73.9436	76.2629			95.3601	86.6926	78.9872	80.201	82.1043	69.6488
		74.1	118.743	147.862	83.1427	85.9934	88.7041	100.702	72.9059	89.3859	135.884	157.453	122.082	113.927	103.254	113.286	103.21	102.09	96.818	119.044	82.3535	90.5529	76.8049	88.4337	75.1479	80.2037	99.104	98.8486	78.2184	84.9556	89.874	72.6237	74.4171	76.97			95.208	87.0697	78.8787	80.5076	81.9712	69.9192
		74.2	118.479	147.667	83.0561	86.0747	89.3968	100.903	72.7022	89.6438	136.094	157.435	122.599	113.667	103.199	113.067	102.742	101.883	96.7002	119.528	82.4924	90.4781	77.2116	88.6884	75.0876	80.2946	99.2006	98.857	78.3064	84.7243	90.528	72.6656	74.6232	77.0958			95.3988	87.1505	78.5429	80.6758	82.0524	70.0586
		74.3	118.37	147.293	83.2182	85.7703	89.4162	101.406	72.6553	89.7279	136.279	157.433	122.93	113.799	103.294	113.571	101.524	101.448	96.6077	119.784	82.5021	90.4611	77.3393	88.5422	75.1853	80.4139	99.2261	98.704	78.4348	84.4084	90.7438	72.3163	74.5722	76.6171			95.6898	86.9273	78.285	80.7183	82.3739	70.3388
		74.4	118.261	146.869	83.3936	85.2121	89.2308	102.192	72.4977	89.6677	136.58	157.628	123.3	113.748	103.602	113.95	100.633	101.172	96.4741	119.997	82.7264	90.4945	77.3423	88.2827	75.2652	80.6919	99.2783	98.585	78.6158	84.1951	90.2104	72.3432	74.3412	76.2711			95.9078	86.6353	78.2733	80.4762	82.8659	70.3563
		74.5	118.341	146.573	83.8492	84.5288	88.7272	102.325	72.2099	89.0438	136.861	157.952	123.308	114.105	103.952	114.265	100.548	101.347	96.3609	120.139	82.5443	90.8143	77.2707	88.0684	74.9356	80.7404	99.355	98.4924	78.5628	84.1958	89.2169	72.5537	74.4249	76.5827			95.9884	86.5226	78.6398	79.9782	82.9431	70.1366
		74.6	118.627	146.5	84.2143	84.1585	88.7259	102.263	72.1794	88.5853	137.008	158.164	123.1	114.41	104.165	114.309	101.266	101.695	96.4865	120.073	82.1618	91.3786	77.4591	88.059	74.3497	80.5637	99.4826	98.547	78.5753	84.2923	88.7687	73.0598	74.5623	76.9946			95.8423	86.5062	78.8074	79.5409	82.4982	69.7774
		74.7	118.897	146.535	84.4964	84.2068	88.1598	101.901	72.1712	88.0789	136.879	158.236	122.906	114.642	104.004	114.37	101.821	102.354	96.487	120.03	81.9195	91.6744	77.7743	88.0084	73.9914	79.92	99.6015	98.7331	78.5739	84.591	88.7884	73.1422	74.8144	76.6282			95.7036	86.2724	78.6051	79.3133	82.1374	69.8127
		74.8	119.134	146.601	84.7875	84.4416	88.0081	101.807	72.0791	87.8729	136.459	158.154	122.825	115.046	103.682	114.52	102.135	102.444	96.315	119.95	81.6273	91.8182	77.9737	87.6842	74.3322	79.5479	99.6692	99.0114	78.613	84.6495	89.61	72.9273	74.6727	75.9352			95.6808	86.2187	78.1856	79.3889	82.0121	69.7327
		74.9	119.544	146.894	84.7678	84.8583	87.4577	101.623	71.7636	87.9197	136.118	158.045	122.828	114.992	103.241	114.747	102.147	102.174	96.2359	119.948	81.8126	91.5231	77.6534	87.1074	75.0032	79.3906	99.6106	99.0649	78.9363	84.6529	90.2513	72.6862	74.5517	75.5697			95.7568	86.1048	78.3803	79.701	82.267	69.7778
		75	119.914	147.288	84.7013	85.0049	87.7051	101.178	71.7228	88.5396	135.917	157.863	122.756	114.922	103.142	114.257	102.329	101.29	96.3473	119.845	82.126	90.9436	77.327	86.5424	75.6434	80.0323	99.5096	99.1215	79.1731	84.6069	90.6416	72.7052	74.1654	76.1303			95.7366	86.0394	78.9419	80.0418	82.0777	69.4799
		75.1	120.099	147.734	84.6655	84.7138	87.6779	100.171	72.0334	89.1331	135.838	157.728	122.735	114.764	103.071	113.76	102.326	100.746	96.3308	119.661	82.4347	90.4766	76.7444	86.1514	75.8244	80.67	99.3556	99.2277	79.3798	84.4649	90.4346	72.5711	74.1353	76.7779			95.8122	86.134	79.5899	80.2914	81.9119	69.6602
		75.2	120.262	148.031	84.4464	84.4152	88.1228	99.524	72.4571	89.1188	135.61	157.603	122.368	114.606	103.473	113.371	102.4	100.177	96.3511	119.432	82.6996	89.9724	76.4761	86.0506	75.8928	81.3097	99.0478	99.3044	79.4671	84.3767	89.8429	72.2764	73.9891	76.8689			95.6671	85.9393	79.4927	80.1281	81.9378	69.831
		75.3	120.501	148.321	84.2945	83.9963	88.0032	99.3644	72.9353	88.4654	135.616	157.593	121.936	114.702	103.478	113.897	102.432	100.361	96.4206	119.209	82.6819	89.6744	76.3369	86.4217	75.957	81.5238	98.8068	99.3375	79.3657	84.2875	89.2141	71.7663	73.8832	76.335			95.68	85.6638	79.1088	79.9097	82.5501	70.1553
		75.4	120.542	148.394	84.0133	83.8703	88.3853	99.8568	73.0994	87.6674	135.351	157.439	121.721	114.782	103.301	114.137	102.446	100.471	96.4318	118.825	82.6226	89.4258	76.4653	86.9889	76.0672	81.4878	98.7891	99.5976	79.2375	84.202	88.5357	71.5972	73.6542	75.7851			95.9114	85.1503	78.8144	79.8276	83.158	70.3079
		75.5	120.439	148.446	83.6718	84.1689	88.8156	100.192	72.8762	86.9576	134.88	157.101	121.304	114.662	102.658	114.168	101.89	101.126	96.1696	118.616	82.4306	89.2087	76.8593	87.661	75.8071	81.2557		99.8724	79.1036	84.2673	88.3329	71.8759	73.6313	75.9761			95.9154	84.6411	78.9846	80.0891	83.474	70.3351
		75.6	120.361	148.236	83.3132	84.5434	89.2256	100.671	72.3106	86.7583	134.418	156.653	121.212	114.299	102.122	113.645	101.129	101.558	95.992	118.473	82.2641	89.2151	76.8283	87.7569	75.2532	80.6903		99.8626	78.9869	84.505	88.4901	72.3266	73.7567	76.207			96.1756	84.3384	79.3596	80.4548	83.2508	70.1057
		75.7	120.142	148.021	83.0051	84.9149	88.838	101.304	71.9189	86.8292	134.162	156.12	121.314	113.871	102.003	113.152	100.496	102.072	95.8267	118.419	82.1527	89.3307	76.9229	87.5023	75.0279	80.3108		99.6806	78.8044	84.588	89.1451	72.6606	73.6401	76.3248			96.1511	84.2417	79.5923	80.5818	83.0867	69.636
		75.8	119.779	147.848	82.7535	85.0954	88.0913	101.902	72.087	87.37	133.786	155.492	121.349	113.295	101.67	112.875	100.691	102.036	95.7873	118.469	82.1491	89.7099	76.8701	86.7696	75.3956	80.1477		99.4898	78.6003	84.6748	89.5492	72.7993	73.778	76.0898			96.0216	84.3136	79.4557	80.3742	83.1007	69.2912
		75.9	119.435	147.809	82.5007	84.9744	87.5511	102.246	72.372	87.4791	133.859	154.992	121.635	113.032	101.803	112.888	101.221	101.571	95.6826	118.643	82.1596	90.2258	77.06	86.208	76.1717	80.6402		99.2803	78.3271	84.4951	89.7369	72.8396	73.7986	76.363			95.9691	84.5315	79.0944	79.7681	83.4963	69.3708
		76	119.099	147.669	82.6703	84.5609	87.5997	102.034	72.6338	87.2484	134.12	154.726	121.815	112.982	101.861	113.286	101.929	101.15	95.7668	118.733	82.1074	90.5851	77.2478	86.0317	76.5043	80.9121		99.087	78.0825	84.2133	89.5294	72.7297	74.1618	76.6679			95.9321	84.7924	78.8161	79.2222	83.5852	69.7337
		76.1	118.786	147.638	82.9968	84.2226	87.7407	102.026	72.4504	86.8438	134.436	154.654	121.78	112.958	102.504	113.746	102.045	101.307	95.7354	118.919	82.1301	90.9421	77.3802	86.0697	76.4657	81.0029		99.1398	77.9422	84.1153	89.4846	72.1936	74.2472	76.9502			95.9134	84.9758	78.8092	78.9136	83.4083	69.6672
		76.2	118.63	147.647	83.4899	83.889	87.932	101.878	71.9561	86.6311	134.685	154.796	121.775	113.082	102.635	114.189	101.764	101.901	95.7364	119.032	82.0259	91.0009	77.6216	86.0981	76.1454	80.459		99.4135	77.9678	84.0162	89.2287	71.8887	74.4233	76.7911			95.9306	85.2393	79.1208	79.1741	82.9038	69.0144
		76.3	118.357	147.483	83.9981	83.8144	87.8454	101.567	71.3832	86.7813	135.007	154.971	121.653	112.985	102.653	114.438	100.972	102.29	95.6994	119.034	82.0417	90.7303	77.672	86.111	76.0546	80.1984		99.6821	78.3413	84.2386	89.2178	71.8473	74.4074	76.7859			96.0354	85.3298	79.2962	79.7333	82.5451	68.2294
		76.4	118.165	147.191	84.0481	84.2363	87.8667	100.669	70.9048	86.8567	134.876	155.056	121.606	113.043	102.398	114.446	100.386	102.431	95.8663	119.085	82.0532	90.5012	77.4543	86.7536	75.7413	80.1146		99.8343	78.7846	84.4044	89.0823	72.3221	74.0419	76.5799			95.8688	85.2998	79.3468	80.3871	82.231	67.9123
		76.5	118.194	146.972	83.9248	84.588	87.72	100.033	70.9059	87.1211	134.654	155.064	121.737	113.233	102.386	114.454	100.116	102.336	95.947	119.179	82.1054	90.0662	77.1399	87.7594	75.564	80.5289		99.8868	79.2606	84.607	89.0882	72.6509	73.6699	76.3524			95.7456	85.2312	79.2166	80.7999	82.1594	68.3421
		76.6	118.305	146.793	83.6328	85.0305	87.7309	99.9367	70.8906	87.4049	134.252	154.9	121.811	113.626	102.647	114.162	100.683	102.344	96.1339	119.252	82.2777	89.6735	76.9348	88.6483	75.1897	80.9991		99.867	79.5852	84.8046	88.8674	72.9292	73.382	76.1449			95.5396	85.2543	79.0849	81.0752	82.1473	68.9738
		76.7	118.344	146.647	83.5182	85.2573	87.8452	100.131	71.2409	87.8894	133.976	154.655	121.804	114.34	103.197	113.884	101.313	102.213	96.3617	119.236	82.2628	89.4623	77.3082	88.5816	75.1601	81.4719		99.7636	79.4803	84.7626	88.9931	72.9949	73.8791	76.1543			95.1597	85.452	79.0872	81.3948	82.2971	69.7051
		76.8	118.598	146.696	83.6029	85.1359	88.3103	100.047	71.7052	88.0601	133.884	154.602	121.778	114.876	103.652	113.682	101.742	102.237	96.5258	119.179	82.3481	89.2418	77.6553	87.7182	74.8989	81.6997		99.7111	79.3346	84.6586	89.4788	73.0539	74.4597	76.5641			94.9498	85.8111	79.0421	81.6141	82.2433	70.3389
		76.9	118.813	146.775	83.6086	85.1132	88.9384	99.692	72.2593	87.8337	134.076	154.595	121.51	115.15	103.621	113.802	101.123	102.396	96.5697	118.992	82.2246	89.3158	77.9221	86.6362	74.9831	81.5053		99.5309	79.2659	84.5104	90.3281	73.0523	74.864	76.9108			94.6746	86.261	79.0688	81.415	81.9934	70.8056
		77	118.829	146.857	83.5865	85.0423	89.4296	99.5759	72.1807	87.4458	134.256	154.534	121.485	115.042	102.977	114.02	100.541	102.201	96.6678	118.852	81.9343	89.6503	77.8456	85.8877	75.1302	81.1764		99.3904	79.2182	84.3848	90.9117	73.166	74.5431	77.1018			94.4171	86.5234	78.9643	80.6183	81.95	71.009
		77.1	118.748	146.938	83.4314	84.8716	89.8568	99.8511	71.6912	87.4818	134.674	154.538	121.623	114.5	102.181	113.91	100.095	101.613	96.7352	118.706	81.8123	90.0901	77.831	85.643	75.3569	81.1793		99.085	79.2356	84.2458	90.8491	73.2837	74.3162	76.9322			94.2986	86.5156	79.0769	79.7736	82.3389	70.7198
		77.2	118.787	146.939	83.3105	84.7101	89.9187	100.214	71.2743	87.9871	134.969	154.511	121.549	113.858	101.489	113.876	100.593	100.471	96.7927	118.752	81.7552	90.5649	77.8819	85.4569	75.2778	81.9254		98.7119	79.1833	84.3516	90.4537	73.3042	74.4221	76.6233			94.3178	86.2238	79.2684	79.4091	83.3104	70.3684
		77.3	118.742	146.793	83.3613	84.4785	89.6001	100.664	71.4831	88.6047	134.971	154.327	121.571	113.263	101.31	113.602	101.094	99.8667	96.9206	118.916	81.7786	90.6018	78.1621	85.3959	74.8164	82.4519		98.3511	78.868	84.5999	90.1129	72.9121	74.7178	76.4254			94.6867	85.8282	79.337	79.7874	83.94	70.0791
		77.4	118.763	146.789	83.6767	84.2784	88.8066	100.851	72.0364	88.8522	134.844	154.208	121.183	112.813	101.396	113.492	101.503	99.6496	96.9842	119.154	81.8822	90.268	78.5142	85.1083	74.5241	82.3516		98.248	78.6483	85.0288	90.4028	72.4689	74.8632	76.2696			95.1612	85.4756	78.865	80.3032	84.1059	70.0431
		77.5	118.84	146.808	84.01	84.3119	87.871	101.282	72.4517	88.7651	134.762	154.138	120.782	112.555	101.62	113.335	101.164	100.124	97.0719	119.178	81.9534	89.7819	78.7643	85.1107	74.5668	81.3226		98.1412	78.7052	85.6401	90.5582	72.31	74.6866	76.504			95.6318	85.3709	78.4543	80.6966	83.84	69.911
		77.6	118.873	146.861	84.3534	84.3306	87.2382	101.322	72.7142	88.0493	134.449	154.235	120.855	112.487	101.82	113.322	100.955	100.493	97.1069	119.06	81.8297	89.2566	78.3964	85.3454	75.4214	80.6236		98.2855	78.8268	86.0713	90.4843	72.4378	74.7413	76.9944			95.9294	85.4298	78.5548	80.8741	83.6008	69.7616
		77.7	118.778	147.067	84.7994	84.3169	87.1109	101.269	72.6623	87.029	134.212	154.378	121.13	112.455	101.967	113.315	100.966	101.008	97.0254	118.808	81.7062	89.1663	77.8888	86.288	76.3761	80.2533		98.5341	78.9666	86.1801	90.0062	72.7777	74.64	77.4579			95.9032	85.4331	79.4064	81.2112	83.4811	69.8022
		77.8	118.722	147.302	85.201	84.3319	87.4903	100.637	72.3312	86.0749	134.003	154.462	121.466	112.559	102.443	113.11	101.319	101.005	96.914	118.489	81.6819	89.2709	77.3641	87.065	77.0582	80.3099		98.7244	78.9858	85.9212	89.6898	72.6638	74.8476	77.4348			95.5805	85.3398	79.9718	81.3382	83.1904	70.2116
		77.9	118.659	147.348	85.5118	84.1874	88.0059	100.236	71.6384	86.1483	133.709	154.532	121.538	112.664	102.513	113.215	101.262	100.616	96.7893	118.14	81.8139	89.3926	77.18	87.3788	77.0101	80.0547		98.8966	78.6751	85.477	89.6	72.6129	74.8719	77.0061			95.2217	85.0856	80.2579	81.0307	83.0529	70.5468
		78	118.556	147.296	85.7046	84.2594	88.2377	100.004	71.1011	87.1616	133.383	154.612	121.208	112.562	102.542	113.535	101.105	99.7213	96.5982	117.95	82.0806	89.3158	76.9254	86.851	76.8104	79.7871		99.0758	78.2427	84.9303	89.1849	72.1196	74.9588	76.9764			94.9256	84.9799	79.9901	80.2876	82.8054	70.6013
		78.1	118.576	147.131	85.5753	84.2969	88.4534	100.46	71.2734	88.118	133.085	154.596	120.866	112.636	101.996	114.148	101.247	99.2588	96.4002	117.905	82.2689	88.9207	76.9209	86.2901	76.7203	79.8473		99.2093	78.0725	84.5169	88.6706	71.8449	74.6061	76.6797			94.6458	85.1194	79.623	79.7284	82.9988	70.2951
		78.2	118.644	146.783	84.9921	84.2076	89.007	100.854	72.1138	88.3959	132.864	154.599	121.032	112.562	102.104	114.544	101.581	99.3303	96.2481	117.945	82.3485	88.7276	77.3732	86.0692	76.7149	80.4243		99.2256	77.9759	84.1386	88.1978	71.4803	74.0444	76.3007			94.7932	85.3896	79.1957	79.3997	83.2079	70.2434
		78.3	118.798	146.531	84.3706	84.2392	89.6762	101.108	73.0874	87.8171	132.795	154.821	121.413	112.658	102.255	114.524	101.418	99.8043	96.0754	118.1	82.0566	88.6971	78.0373	86.4837	76.6258	81.1843		99.1411	78.1384	83.7918	88.5669	71.5437	73.5157	75.585			94.9819	85.9031	78.956	79.2313	83.6312	70.3311
		78.4	118.996	146.315	83.8335	84.0496	89.9939	100.902	73.6441	87.3609	132.85	155.151	121.766	112.931	102.816	113.929	101.168	100.085	96.0871	118.302	81.6801	89.14	78.6343	87.1316	76.4043	81.6456		98.843	78.4214	83.5593	89.1446	71.7112	73.1399	75.5618			95.0468	86.1286	79.0436	79.1167	83.5734	70.7394
		78.5	119.236	146.087	83.6658	83.9788	89.5409	100.775	73.7794	86.9726	132.937	155.465	121.877	113.021	102.883	112.986	100.967	100.279	95.9817	118.541	81.632	89.8193	78.7048	87.1372	76.0846	81.8191			78.449	83.3178	89.2048	72.0057	73.0284	75.8339			95.1184	86.102	78.9712	79.2258	83.0221	70.7152
		78.6	119.29	145.937	83.9246	84.0181	88.9801	100.939	73.5958	86.9207	133.083	155.648	121.421	113.055	102.857	111.92	101.338	100.161	95.9467	118.808	81.7141	90.1103	78.7162	86.8427	75.7154	81.5644			78.3974	83.4276	88.5718	71.9741	73.019	76.0556			95.0036	86.0621	78.7953	79.4737	82.5027	70.3469
		78.7	119.405	145.915	84.1554	84.0686	88.6681	101.107	73.3333	86.6514	133.03	155.788	120.894	112.795	102.433	111.051	101.437	99.826	95.9089	118.816	82.2181	90.1725	78.6299	86.4738	74.8703	80.7773			78.1995	83.6036	88.0752	71.9557	73.4748	76.2943			95.1297	85.7731	78.5172	79.4138	82.5551	69.6501
		78.8	119.376	145.762	84.3982	84.1765	88.8088	101.308	72.9591	86.4954	132.949	155.764	120.397	112.474	101.98	110.275	101.183	99.1817	95.8429	118.664	82.7704	89.9114	78.5898	86.8418	74.3553	79.9297			77.9509	83.9622	88.191	71.899	74.1877	76.3212			95.3409	85.6178	78.4997	79.199	83.4038	69.2354
		78.9	119.206	145.655	84.3506	84.2715	88.8999	101.301	72.6281	86.1662	132.881	155.508	120.001	112.243	101.552	110.05	100.534	98.7702	95.6754	118.468	83.1309	89.5526	78.377	87.2689	74.0364	79.5088			77.9929	84.4313	88.9188	72.1137	74.9351	76.3113			95.5404	85.4992	78.5999	79.1547	84.2864	69.3786
		79	119.1	145.633	84.1149	84.4078	88.6331	101.225	72.4544	86.3168	132.827	155.343	119.941	112.3	101.277	110.283	99.3529	98.8103	95.7703	118.144	83.3078	89.4548	78.0158	87.374	74.6883	79.6496			78.2081	84.7381	89.6451	72.4132	74.9667	75.8902			95.6697	85.4524	79.0671	79.2291	84.5454	69.7959
		79.1	119.206	145.618	84.2642	84.3854	88.0371	101.002	72.539	86.5571	132.799	155.2	120.101	112.602	101.132	111.075	98.6176	99.2131	95.8223	117.606	83.0063	89.5354	77.3943	87.1358	75.2501	79.757			78.5481	85.0689	90.3164	72.7679	74.6089	75.632			95.4155	85.4798	79.7904	79.1511	84.2372	70.2811
		79.2	119.131	145.592	84.4173	84.3158	87.6393	100.89	73.0436	87.1683	132.884	155.116	120.49	112.918	101.178	111.815	98.6578	99.9028	95.8942	117.381	82.6505	89.7219	76.7754	86.7076	75.7833	79.5783			78.9326	85.1251	90.8771	73.199	73.9278	75.6132			95.2936	85.5698	80.5438	78.8023	83.6178	70.4049
		79.3	119.207	145.696	84.5218	84.1919	87.5318	100.874	73.6336	87.2781	132.991	154.923	121.003	113.287	101.377	111.983	99.2936	100.627	95.9907	117.363	82.2158	89.9806	76.3386	86.5296	75.9004	79.5313			79.1307	84.9431	91.0283	73.4554	73.6128	75.8974			95.5197	85.7481	80.8012	78.9051	83.2769	70.3009
		79.4	119.321	145.799	84.7513	83.8432	87.6798	101.169	73.8592	87.1974	133.131	154.699	121.241	113.393	101.663	111.448	99.6089	100.999	96.0513	117.448	82.0084	90.3101	76.4508	86.6627	76.0691	79.7358			79.2382	84.6424	90.958	73.6003	73.1401	76.423			95.7676	85.7728	80.2322	79.1742	83.0589	69.9988
		79.5	119.256	145.921	84.725	83.4816	87.8713	101.411	73.7202	86.978	133.243	154.183	121.247	113.317	101.495	110.898	99.2414	100.895	95.9985	117.631	82.0128	90.4994	76.714	86.9571	76.1782	79.9014			79.2644	84.2379	90.6823	73.29	73.1032	76.9784			96.1803	85.8648	79.6502	79.4941	83.1207	69.9859
		79.6	119.07	146.077	84.6366	83.1786	88.2678	102.145	73.2996	87.0134	133.361	153.756	121.051	113.118	101.044	110.851	99.0476	100.266	96.0416	117.967	82.0531	90.4308	76.7612	87.0801	76.2611	79.6638			79.2719	83.9237	90.7273	73.1009	73.2898	77.212			96.4828	85.9719	79.4763	79.2813	83.5089	70.2721
		79.7	119.106	146.208	84.7923	82.8837	88.5868	102.328	72.8537	87.245	133.472	153.288	120.593	112.555	100.154	111.218	99.4882	99.9726	96.1845	118.236	82.0591	90.2569	76.6737	86.897	75.9501	79.1567			79.1185	83.7765	90.6837	72.5917	73.6907	77.1109			96.3861	85.9894	79.9413	79.4354	84.1107	70.7171
		79.8	118.902	146.422	85.0378	82.7651	88.4494	102.329	72.3198	87.3167	133.543	153.027	120.215	111.943	99.8502	111.274	100.034	99.81	96.3982	118.296	81.6932	89.776	76.7193	86.5124	75.418	78.9272			78.8297	83.7106	90.5076	72.1938	73.7102	76.6121			96.4241	86.1171	80.1282	79.5714	84.6283	70.8887
		79.9	118.635	146.652	85.1763	83.0036	87.8309	101.523	71.9594	87.3036	133.664	153.055	119.756	111.437	99.9919	111.433	100.494	100.124	96.6377	118.172	81.3832	89.3262	77.2621	86.4918	74.8277	78.9354			78.5251	83.7748	90.1643	71.6088	73.4553	76.1733			96.3458	86.2021	79.9336	79.8379	84.6467	70.7844
		80	118.539	146.853	85.2353	83.2808	87.0764	100.739	72.0392	87.0594	133.82	153.62	119.394	111.43	100.586	111.927	100.13	100.103	96.9341	117.99	81.0946	89.1838	77.6349	86.5114	74.8036	79.2052			78.3383	83.883	90.2361	71.3948	73.7106	75.8148			96.1498	86.1648	79.4872	79.9623	83.9964	70.5324
		80.1	118.646	146.948	85.0899	83.3707	86.8421	99.9814	72.3837	86.9902	133.918	154.275	119.537	111.835	100.449	112.603	99.9786	100.433	97.095	117.876	80.8488	89.0821	77.8522	86.8521	75.1009	79.4701			78.286	84.069	90.2638	71.2491	74.4096	75.5653			96.1307	86.216	79.2006	80.1987	83.0916	70.2722
		80.2	118.548	147.031	84.7213	83.5695	86.8206	99.758	72.6902	87.0487	133.951	154.8	119.951	112.429	99.9703	112.722	99.6547	100.393	96.9792	117.863	80.9508	89.0048	77.5693	86.724	75.5684	79.7857			78.2951	84.1514	90.325	71.3191	75.0542	75.6107			95.9281	86.1699	78.732	80.6786	82.3253	70.0007
		80.3	118.555	146.95	84.4843	83.3861	87.0123	100.037	72.8831	87.3264	134.005	155.11	120.558	113.051	99.6841	112.071	99.7226	100.709	96.8401	117.989	81.1222	89.0356	77.3749	86.7572	75.5687	79.6437			78.31	83.9816	90.061	71.5172	75.0291	75.6871			95.7116	85.9848	78.4381	80.6651	82.1562	69.8794
		80.4	118.702	146.9	84.3533	83.1852	87.1891	100.467	72.8396	87.3984	133.867	155.268	121.087	112.961	100.18	111.413	99.4407	100.506	96.7972	118.162	81.2119	89.0263	76.897	86.6166	75.6773	79.2964			78.1515	83.8368	90.047	71.9682	74.353	76.1631			95.5821	85.6523	78.4581	80.463	82.137	69.9147
		80.5	118.801	146.799	84.2715	83.3799	87.3626	100.597	72.4492	87.1748	133.695	154.828	121.039	112.747	100.874	110.642	99.2918	100.306	96.6826	118.405	81.4645	88.9147	76.6523	86.8417	75.9508	78.9133			78.127	83.6078	90.0957	72.0646	73.7291	76.5132			95.2991	85.2214	78.8963	80.1386	82.0903	70.1143
		80.6	118.518	146.708	84.3594	83.5217	87.6567	100.302	72.12	86.9414	133.611	154.108	120.659	112.557	101.101	110.378	99.3624	100.034	96.58	118.618	81.5406	89.0855	76.4663	86.8024	76.2719	79.4443			78.3059	83.5698	90.3343	72.3094	73.3714	76.5516			95.218	84.946	79.1302	80.2426	82.096	70.5991
		80.7	118.358	146.534	84.3221	83.9389	87.6878	99.9362	71.9882	86.6082	133.777	153.506	120.388	112.386	100.943	110.214	99.6371	100.057	96.7869	118.494	81.4964	89.2216	76.7473	86.5729	76.2271	80.322			78.562	83.8435	90.3728	72.593	73.471	76.4538			95.2744	84.8432	79.1434	80.1691	82.2178	70.7988
		80.8	118.249	146.317	84.3153	84.4681	87.826	100.022	72.621	86.506	133.895	152.989	120.231	112.583	100.659	110.648	99.6483	100.332	96.9332	118.165	81.7629	89.2938	76.9856	85.9586	75.8176	81.2733			78.8336	84.1518	90.3486	73.1918	73.6758	76.2516			95.4401	85.1268	79.1428	80.1262	82.3226	70.7033
		80.9	118.051	145.848	84.3708	84.8929	87.8926	100.188	72.974	86.3643	134.094	152.412	120.308	112.649	100.31	111.11	99.1704	100.337	96.8433	118.017	81.8663	89.6353	77.1059	85.3256	75.6983	81.2431			79.0359	84.4421	90.1048	73.4193	73.8344	76.5598			95.6733	85.7211	79.2199	79.7403	81.986	69.8984
		81	117.799	145.436	84.1854	85.0947	87.9111	100.579	73.1934	86.4812	134.158	152.198	120.537	112.566	99.8077	111.404	98.7794	100.289	96.6975	117.916	82.1422	89.8009	77.2409	84.9676	75.5547	80.889			79.1011	84.6946	89.8602	73.5617	74.068	76.5213			95.7364	86.2134	79.1576	79.8092	81.7448	69.2369
		81.1	117.765	145.112	84.1039	85.0718	87.879	100.491	72.8794	86.7623	134.089	152.152	120.443	112.306	99.4859	111.47	98.5431	100.353	96.6053	117.778	82.6612	89.8929	77.3648	85.2529	75.4439	80.7454			79.1117	84.8154	89.5329	73.4801	74.3223	76.3304			95.8534	86.5815	78.8	80.0411	81.9117	69.1434
		81.2	117.723	144.768	83.9761	84.8263	87.8058	100.865	72.5372	86.8418	133.759	152.295	120.22	112.024	99.6147	111.517	98.5403	100.683	96.3563	117.823	82.8183	90.0416	77.6378	86.1033	75.6301	81.1273			79.2586	84.5839	89.0584	73.2533	74.5347	75.6442			95.7474	86.7389	78.7472	80.3178	82.5296	69.6242
		81.3	117.635	144.39	83.8397	84.3899	88.1388	101.112	72.1388	86.8319	133.47	152.48	120.094	112.003	99.8209	111.82	98.5241	100.698	96.1806	118.08	82.9409	89.8306	77.5193	86.9613	76.1491	81.4052			79.3149	84.4112	88.7177	72.6184	74.3783	75.0928			95.6489	86.6291	79.088	80.3083	83.1673	70.2859
		81.4	117.51	144.398	83.7051	84.1651	88.5364	101.382	71.7977	86.7243	133.236	152.874	119.872	112.019	99.6671	112.267	98.8366	100.087	96.1352	118.149	82.7118	89.6089	77.271	87.3391	76.5508	80.9372			79.2239	84.1124	88.4068	72.0507	74.1827	74.7603			95.5484	86.5417	79.5373	79.6072	83.3778	70.3069
		81.5	117.461	144.397	83.612	84.1576	88.9659	100.908	71.7409	86.7731	133.199	153.129	119.826	112.188	99.3023	112.47	99.4036	99.3213	96.0761	118.065	82.1196	89.4634	76.7892	87.2373	76.0439	80.0582			79.1386	83.9519	88.4867	71.8552	73.9836	74.6394			95.2714	86.4882	79.4411	79.1816	83.6119	70.276
		81.6	117.51	144.253	83.5299	84.3624	89.1142	100.257	71.5531	87.0239	133.237	153.392	119.708	112.377	99.1379	112.247	99.9006	98.3658	96.1	117.964	81.6499	89.2431	76.4092	87.2834	75.241	79.3994			78.8561	84.1584	88.6619	72.0198	74.1737	74.6609			95.2164	86.407	78.5726	79.0651	83.5903	70.1776
		81.7	117.623	144.351	83.4263	84.7404	89.3772	100.07	71.4126	87.0371	133.321	153.405	119.49	112.293	99.0629	111.789	100.164	97.9369	96.198	117.999	81.3911	89.4377	76.4416	87.2268	74.782	78.9694			78.6168	84.2855	88.9601	72.2667	74.1063	75.0072			95.271	86.2127	78.0534	79.6746	83.5053	70.9877
		81.8	117.845	144.684	83.4956	85.0743	89.4831	100.442	71.4408	86.9403	133.437	153.525	119.158	112.198	98.9206	111.24	100.335	97.684	96.1316	117.915	81.5002	89.7921	76.9666	87.0948	75.1139	78.8771			78.6312	84.6653	89.3713	72.4166	74.184	75.6069			95.4625	85.8143	77.7098	80.3617	83.0198	71.2722
		81.9	118.231	144.802	83.3742	85.1154	89.3182	100.992	72.0966	86.7129	133.432	153.546	118.806	112.008	98.7834	111.088	100.586	98.2213	96.1713	117.825	81.7493	90.1564	77.7759	86.358	75.9914	78.7377			78.7019	84.6371	89.6502	72.6454	73.8853	76.3431			95.7436	85.5677	78.0518	80.7019	82.4996	71.4823
		82	118.497	144.899	83.0423	84.8887	88.5233	100.954	72.8951	86.4624	133.354	153.608	118.659	111.739	99.1596	111.057	100.392	98.582	96.4258	117.884	81.9075	90.6143	78.1419	85.6953	76.7578	78.852			78.9384	84.4869	89.8617	72.9979	73.8074	76.6337			95.9963	85.3675	78.0426	80.5374	82.4473	70.7378
		82.1	118.652	145.022	82.7179	84.6271	87.6514	100.705	73.134	86.3194	133.32	153.643	118.295	111.641	100.028	111.51	99.7194	98.7391	96.4923	117.946	81.8939	90.7662	77.9947	85.3572	76.8849	78.8873			79.2491	84.364	89.6033	73.1596	73.4441	76.6637			96.3023	85.2791	78.2799	79.8118	82.5389	70.3089
		82.2	118.702	145.111	82.4689	84.3742	87.2786	100.244	72.6411	86.0928	133.235	153.871	118.29	111.684	100.836	111.61	98.9042	98.86	96.5186	117.892	81.7939	90.7334	77.3978	85.684	76.2309	78.9006			79.3046	83.8644	89.311	73.3206	73.1417	76.273			96.4792	85.3753	78.4799	79.2172	82.7049	69.8082
		82.3	118.587	145.103	82.4993	84.4492	87.6483	100.232	71.9851	85.869	132.919	153.999	118.257	111.713	100.961	111.408	98.7669	98.9304	96.7693	117.865	81.8073	90.5326	77.127	86.4581	75.4771	79.0817			79.1276	83.7504	89.151	73.294	72.852	76.1494			96.5447	85.3654	78.7867	78.9949	82.2124	69.8274
		82.4	118.35	145.126	82.9439	84.7534	88.0159	100.161	71.7506	85.5884	132.558	154.021	117.919	111.631	100.279	110.709	98.99	98.8984	96.9384	117.874	81.9678	90.2763	77.0718	86.9071	75.5342	79.3881			78.9058	83.8465	89.3814	73.25	72.9621	76.2454			96.4233	85.4855	79.113	79.2934	81.932	69.9646
		82.5	118.293	145.297	83.5071	84.9856	88.2616	100.212	72.5178	85.4104	132.09	154.087	118.067	111.352	99.4522	110.355	99.1392	98.079	96.8421	117.711	82.2494	90.0439	77.2789	86.7267	76.0248	79.5926			78.5411	84.0128	89.723	72.864	73.2013	76.6417			95.9341	85.5931	79.384	79.7439	81.8798	70.2236
		82.6	118.208	145.6	83.9897	84.9981	87.9972	99.7003	73.3499	85.4114	131.499	154.089	118.178	110.855	98.8863	110.582	98.7558	97.5999	96.8182	117.555	82.4537	89.7736	77.4392	86.1229	76.5371	79.4481			78.3292	84.4941	89.9114	72.7274	73.2879	76.5448			95.4868	85.7226	79.7673	80.0152	82.3671	70.1829
		82.7	118.172	145.667	84.2976	84.6426	87.9529	99.0782	74.0887	85.6119	130.971	153.691	118.29	110.389	98.7662	111.024	98.4106	97.6629	96.7457	117.301	82.4545	89.5928	77.4983	85.6047	76.3503	79.1784			78.1921	84.9311	89.9829	72.9252	73.0266	76.1158			95.0726	85.6734	79.7836	80.063	82.6857	70.2251
		82.8	118.368	145.652	84.4368	84.1885	87.6287	98.5299	73.4381	86.0436	130.636	153.209	118.871	110.181	98.5473	111.315	98.1233	98.6371	96.6701	117.163	82.2816	89.369	77.5469	85.7239	76.3043	79.372			77.8926	85.1019	90.0127	73.474	73.157	75.714			94.8521	85.3574	79.6797	79.9968	82.8918	70.5791
		82.9	118.707	145.671	84.3749	83.7625	87.6018	98.5627	72.7427	86.523	130.422	152.7	119.099	110.286	98.4868	111.121	98.3308	99.275	96.5166	117.047	82.0154	89.1632	77.1226	86.0239	76.4306	79.7886			77.7611	85.1579	90.1952	73.5534	73.5662	75.911			94.8929	85.2159	79.3827	79.946	82.9597	71.0728
		83	119.013	145.385	84.4146	83.5739	87.5242	99.0318	71.8129	86.8142	130.357	152.13	118.873	110.593	98.4063	111.044	98.6763	99.2876	96.5369	117.045	81.8543	89.1658	76.5498	86.5936	76.8306	79.9901			77.7534	84.9239	90.037	73.2946	74.0912	76.3641			94.9521	85.1484	79.3289	79.8187	82.7431	71.5553
		83.1	119.434	145.121	84.4529	83.7156	87.7446	99.467	72.081	86.5916	130.417	151.733	118.786	110.96	98.5994	111.027	99.3586	98.5449	96.6316	117.047	81.9436	89.2269	76.2748	86.7287	76.9578	79.6493			77.9426	84.5313	89.8018	72.7392	73.8271	76.5217			95.3855	85.3856	78.9983	79.6172	82.3131	71.5456
		83.2	119.749	145.07	84.4189	83.8073	87.7499	99.8772	72.0691	86.4993	130.547	151.734	118.467	111.218	98.8433	111.246	99.9593	97.9374	96.7764	117.196	82.3304	89.2626	76.5646	86.4721	76.8308	79.3226			78.4003	84.3239	89.3224	72.6144	73.3259	76.5372			95.7981	85.8421	78.4743	79.4778	81.8872	71.4749
		83.3	119.811	145.1	84.4531	83.8031	88.1238	100.025	72.0944	86.64	130.729	151.801	118.314	111.311	99.1839	111.121	100.044	97.8102	96.7014	117.215	82.7254	89.3673	77.332	85.9763	76.4401	79.2443			78.845	84.1589	89.4324	72.7821	72.8359	76.5322			96.1662	86.1594	77.8446	79.6819	81.8559	70.9257
		83.4	119.579	145.045	84.4296	83.6803	88.431	100.027	71.415	87.1909	130.936	151.983	118.72	111.153	99.5279	110.74	99.591	98.2801	96.6613	117.306	83.185	89.4331	77.6143	85.7459	76.0933	79.6899			79.0585	84.2636	89.7459	73.0932	73.1589	76.6904			96.4243	86.1984	77.8401	79.826	81.9442	70.4163
		83.5	119.16	145.222	84.448	83.4098	89.1418	99.815	71.1947	87.7138	131.153	152.245	119.151	110.889	99.5719	110.132	98.881	98.9126	96.5266	117.519	83.4338	89.5011	77.6948	86.1747	75.8138	79.8949			79.3144	84.4454	90.0802	73.3681	73.8977	76.6764			96.0628	86.1302	78.3951	79.714	81.9379	69.7599
		83.6	118.551	145.211	84.4251	83.2884	89.0871	99.6674	71.5366	87.8496	131.302	152.424	119.63	110.464	99.4966	110.016	98.6927	99.2564	96.3635	117.796	83.4651	89.7699	77.5708	86.5246	75.554	80.3688			79.4178	84.6613	89.6329	73.4294	74.4247	76.6577			95.5183	85.9669	79.3944	79.2693	81.966	69.7908
		83.7	118.135	145.037	84.4385	83.3228	88.7822	99.8089	72.1477	87.5977	131.288	152.436	119.841	109.97	99.4122	110.279	98.7644	99.1339	96.203	118.027	83.4794	90.0218	77.5192	87.0001	75.3387	80.4827			79.3342	84.8843	89.111	73.5916	74.3758	76.639			94.9874	85.8108	79.9422	78.815	82.3414	69.8472
		83.8	117.917	144.861	84.2736	83.6486	87.9119	99.6511	72.657	86.8203	131.16	152.47	119.464	109.824	99.4629	110.658	98.6023	98.7419	96.1659	118.354	83.1319	90.1002	77.4996	86.9287	75.2108	80.8864			79.4772	84.8641	89.0289	73.5753	73.8189	76.5304			94.6092	85.9987	80.3497	78.6927	82.8198	70.3306
		83.9	118.04	144.755	84.1468	84.0249	87.5733	99.2452	73.0428	86.5874	130.933	152.294	118.74	109.959	99.8061	110.5	97.8204	98.6961	96.1839	118.618	82.7821	90.1836	77.2472	87.0448	75.4809	80.8499			79.4052	84.8863	89.9203	73.5698	73.673	76.193			94.8899	86.2604	80.1326	78.7292	83.2164	70.0882
		84	118.491	144.577	84.0603	84.3744	87.7383	98.5814	73.1779	86.786	130.632	151.892	117.877	110.465	100.205	109.918	96.7767	99.2331	96.23	118.624	82.5416	90.0329	77.2423	86.8174	75.5821	80.5473			79.4033	84.5531	90.719	73.2634	73.6562	75.8149			95.3273	86.5859	80.0311	79.1927	83.1224	70.0159
		84.1	119.19	144.403	84.1891	84.6982	88.2044	98.5751	73.158	87.61	130.422	151.368	117.418	111.108	100.805	109.741	96.2132	99.9788	96.2712	118.512	82.2685	89.9815	77.0106	86.7536	75.7394	79.9297			79.5307	84.2523	90.9132	72.894	73.7534	75.5377			95.8213	86.8905	79.6154	79.5072	82.9464	69.3918
		84.2	119.792	144.397	84.3811	84.6915	88.3817	99.0618	72.2964	87.7667	130.382	150.917	117.434	111.453	100.69	110.081	96.1113	100.277	96.2298	118.403	82.4216	90.0161	76.9904	86.6067	75.7121	79.3333			79.3136	84.3253	90.3066	72.6829	73.9874	75.2537			96.2928	87.0911	79.553	79.7458	82.6942	69.3794
		84.3	120.354	144.307	84.5538	84.6028	88.198	99.651	71.9083	87.5844	130.309	150.557	117.952	111.48	100.295	110.873	96.4974	100.232	96.1458	118.108	82.5955	89.6977	76.8871	86.1353	76.0847	79.162			79.1651	84.2927	89.3854	72.67	74.4217	75.2014			96.2514	87.2216	79.52	79.4264	82.6803	69.453
		84.4	120.692	144.077	84.8314	84.3654	88.2276	99.6194	71.7258	87.0799	130.439	150.495	118.563	111.188	99.1368	110.985	96.9426	100.018	96.0604	117.855	82.5267	89.3873	77.069	85.7656	76.4991	79.4038			78.9205	84.4391	88.8876	72.7223	74.9876	75.2724			96.2521	87.3118	79.6524	79.3548	82.593	70.2241
		84.5	120.798	143.907	84.5572	84.0283	88.4793	99.1199	72.2517	86.9756	130.504	150.748	118.788	110.741	98.3616	110.863	97.6221	100.113	96.0001	117.736	82.5678	88.8648	77.3149	85.3972	76.8132	79.7057			78.6924	84.5106	88.7963	72.582	75.1003	75.7158			96.0647	87.3725	79.6159	79.4986	82.3459	71.0901
		84.6	120.645	143.946	84.302	83.6473	88.8062	98.8827	72.5526	86.9798	130.508	151.158	118.867	110.422	97.8949	110.447	98.3212	99.652	95.8761	117.707	82.2678	88.3629	77.5227	85.6467	76.7696	79.8542			78.7829	84.2487	89.324	72.5129	75.0543	76.1246			95.9239	87.2609	79.641	80.0102	82.0064	71.6608
		84.7	120.46	143.899	83.8793	83.2388	88.9269	99.4439	72.6963	87.0561	130.392	151.536	118.554	110.29	98.1833	110.526	98.6651	99.2224	95.8644	117.678	82.0874	88.3943	77.6962	85.7082	76.3059	79.487			78.7982	83.9818	89.711	72.4728	75.0477	76.4203			95.9298	87.0923	79.7611	80.0664	82.0167	71.9571
		84.8	120.188	143.878	83.3854	82.7676	89.0527	100.381	72.6557	87.0399	130.318	151.712	118.369	110.205	98.3771	110.228	98.8473	98.6042	95.8548	117.831	82.052	88.5766	77.5177	85.5882	75.851	79.3827			78.9693	83.7441	90.1573	72.5058	75.0341	76.5327			95.7241	86.7334	79.9164	79.6869	82.3197	71.7708
		84.9	120.01	144.065	83.2994	82.3797	89.0283	100.772	72.6013	86.7366	130.066	151.76	118.493	110.168	98.1288	109.775	98.7696	98.7844	95.906	117.972	82.0298	88.8175	77.3437	84.9147	75.7458	79.3059			79.1709	83.5328	90.4989	72.3822	75.031	76.5721			95.7259	86.3997	80.1736	79.2913	82.6883	71.4638
		85	119.818	144.148	83.3043	82.2346	88.7347	100.563	72.6773	86.1752	130.016	151.687	118.703	110.065	97.8753	108.837	99.071	98.8263	95.9652	118.085	82.1875	89.0511	76.9856	84.3947	76.0284	79.426			79.2371	83.2976	90.9907	72.2813	74.8919	76.5458			95.6012	86.1541	80.1924	79.3181	82.7476	70.787
		85.1	119.791	144.121	83.6785	82.352	88.2486	99.9673	72.8814	85.4304	129.912	151.594	118.901	109.853	98.024	108.459	98.9736	98.837	96.0317	118.121	82.3336	89.156	77.1807	84.1088	76.5374	79.2936			79.2488	83.2112	91.2282	72.261	74.7733	76.3644			95.4479	85.8408	80.3262	79.8937	82.7807	70.0826
		85.2	119.837	144.008	84.0948	82.6238	87.9592	99.7782	73.2416	85.4294	129.902	151.511	118.789	109.949	98.8569	108.569	98.6456	98.242	96.0498	118.102	82.5142	89.2632	77.2126	84.7859	76.652	79.0768			79.1526	83.1736	91.1377	72.3937	74.7167	76.001			95.4978	85.8209	80.0077	80.234	82.8044	69.9501
		85.3	119.917	144.017	84.3634	82.8029	88.0186	99.7128	73.4228	85.935	130.04	151.557	118.539	110.117	99.4538	109.072	97.8843	98.2108	96.23	117.991	82.5358	89.4882	77.5394	85.5003	76.5573	78.925			78.8963	83.1427	90.4261	72.513	74.8271	75.708			95.4236	85.8663	79.8168	80.1884	82.814	70.3377
		85.4	120.03	143.856	84.5556	83.0273	88.3274	99.5943	73.1859	86.4356	130.347	151.629	118.099	110.293	99.8563	109.516	97.6307	98.1676	96.2542	117.808	82.5838	89.6937	77.3412	86.397	76.2087	79.0076			78.6794	83.3516	89.8177	72.4629	75.0276	75.8047			95.3183	85.9021	79.5338	79.701	82.8177	71.1202
		85.5	120.164	143.749	84.3008	82.8584	88.5202	99.4032	72.2698	86.2167	130.478	151.564	117.843	110.503	99.9274	109.682	97.6142	98.6541	96.339	117.571	82.5562	89.7272	77.6572	86.3108	75.8496	79.5506			78.7058	83.5113	89.3528	72.4303	75.0984	76.1808			95.3605	86.0501	79.6238	79.3181	83.024	71.4457
		85.6	120.199	143.567	84.0524	82.9301	88.357	98.8076	71.4284	85.6763	130.567	151.548	117.837	110.458	99.6958	109.806	97.7234	98.3104	96.5516	117.325	82.6139	89.6512	77.8679	85.7308	75.5696	80.2221			78.7039	83.4818	89.7019	72.3928	74.9669	76.7764			95.3395	85.989	79.7834	79.4651	83.2747	71.1952
		85.7	120.119	143.494	83.7845	83.1969	87.7628	98.6323	71.1968	85.8223	130.514	151.548	117.942	110.547	99.3474	109.541	97.4809	98.2964	96.7782	117.183	82.9438	89.5274	78.4594	84.8482	75.142	80.6736			78.7719	83.4921	89.8026	72.4904	74.606	77.0602			95.1964	85.7396	79.987	79.9587	83.3794	70.5767
		85.8	119.872	143.225	83.5376	83.2831	86.9428	98.3221	71.9088	86.2419	130.182	151.542	118.275	110.887	98.8964	109.421	97.3961	98.0302	96.8006	117.072	83.2903	89.4118	78.3729	84.3492	74.6933	80.7012			78.8834	83.3391	89.6628	72.347	73.8938	77.0814			95.1053	85.5381	80.0041	80.3832	83.212	70.0779
		85.9	119.488	143.196	83.5889	83.7051	86.4708	98.6061	72.7886	86.5968	129.66	151.516	118.436	111.268	98.9329	109.229	97.5818	97.8399	96.8091	116.983	83.5563	89.5113	78.1444	84.5039	74.2821	80.6356			78.973	83.0626	88.9794	72.4754	73.1069	76.7584			94.7951	85.2985	79.7881	80.3981	83.2544	70.1363
		86	119.182	143.244	83.4354	83.7728	86.2187	98.916	73.2424	86.435	129.152	151.617	118.376	111.728	99.0909	109.144	97.5491	97.3676	96.6666	116.95	83.6749	89.6218	77.6517	84.7953	74.2321	80.4682			79.1296	83.0822	88.7583	73.013	72.5319	76.7073			94.6117	85.174	79.2063	79.9048	83.3311	70.1484
		86.1	119.005	143.397	83.4381	83.6419	86.5618	99.4592	73.0284	86.3511	128.81	151.533	118.076	111.881	99.4644	108.569	97.2384	96.954	96.485	116.973	83.3289	89.5932	77.3518	85.3002	74.7307	80.2339			79.3535	83.0295	88.968	74.0756	72.4503	76.6493			94.9236	85.2263	78.6713	79.7828	83.2076	70.2284
		86.2	119.007	143.495	83.4863	83.4891	86.9198	99.9153	72.3754	86.4058	128.652	151.304	117.542	111.817	99.8817	108.185	96.4456	97.0511	96.3474	116.9	82.7398	89.5456	77.0961	85.8804	75.3953	79.8239			79.3956	83.0578	89.7191	74.8023	72.4021	76.6848			95.3799	85.4009	78.3122	79.5278	82.9599	70.0822
		86.3	119.165	143.699	83.5164	83.2571	87.5962	99.9438	71.8728	86.4438	128.797	150.986	117.069	111.707	99.9587	108.305	96.1112	97.2338	96.2741	116.952	82.3931	89.0858	76.8588	86.3291	75.9024	79.6783			79.2223	83.3758	90.4341	74.6239	72.455	76.314			95.8522	85.7067	78.2277	79.6313	82.8832	70.3559
		86.4	119.358	143.705	83.7556	83.1076	87.8756	99.6644	71.7426	86.3238	129.02	150.556	116.738	111.205	99.4578	109.193	96.0236	97.6224	96.2891	116.938	82.218	88.7489	76.7989	86.7147	75.969	79.7206			78.9764	83.4654	91.1218	73.678	72.4384	76.2457			96.0469	86.0199	78.4548	79.2916	83.2437	70.3799
		86.5	119.386	143.541	83.7246	83.0376	88.155	99.3433	72.0288	86.0043	129.286	150.234	116.396	111.017	98.795	109.886	96.4648	98.2316	96.3502	116.988	82.4753	88.5802	76.6734	86.5666	75.8483	79.9851			78.7431	83.7353	91.0547	72.9039	72.6936	76.5643			95.8468	86.2871	78.5701	79.3878	83.3082	70.2718
		86.6	119.263	143.336	83.5594	82.9171	88.1228	99.531	72.4533	85.7418	129.465	150.084	116.132	110.629	98.5779	110.103	96.7687	98.8954	96.3048	117.097	82.9641	88.5594	76.6783	86.4666	75.785	80.0728			78.7053	84.1558	90.7811	72.8014	73.1438	77.1036			95.6061	86.3216	79.1047	79.6233	83.0554	69.9449
		86.7	118.904	143.182	83.3493	82.7386	88.2576	99.7794	72.6626	85.7382	129.67	150.074	116.024	110.325	99.0371	109.691	96.8553	98.9461	96.2164	117.317	83.2773	88.9692	76.5669	86.0473	75.8327	79.8228			78.805	84.3632	90.3462	73.259	74.0064	77.1328			95.6483	86.0933	79.2413	80.0798	82.6563	69.9334
		86.8	118.599	143.052	83.1172	82.5998	88.2556	99.9293	72.8517	86.0616	129.787	150.132	115.972	110.621	98.9809	108.889	96.8604	98.2101	96.0467	117.269	83.4846	89.1562	76.5938	85.8378	75.8781	79.5339			78.9866	84.9041	90.3264	73.2738	74.8528	76.6133			95.9114	85.8815	79.4338	80.0364	82.7694	70.2336
		86.9	118.336	142.924	83.2276	82.2952	88.4214	99.6469	72.624	86.3018	129.95	150.361	116.21	110.532	98.7964	108.152	97.0628	97.2653	95.9483	117.482	83.5343	89.3236	76.5581	85.9604	75.758	79.3921			79.0414	85.2187	90.1118	72.9621	75.2832	76.0611			96.1295	85.8307	79.1431	79.804	83.4071	70.644
		87	118.312	143.014	83.4492	82.2946	88.735	99.633	72.3394	86.1736	130.285	150.381	116.571	110.796	98.3838	107.683	97.7023	96.9128	95.9918	117.706	83.3849	89.3706	76.704	86.2507	75.5574	79.7731			78.8511	85.1078	89.6614	72.1883	75.0369	76.102			96.2291	85.9067	78.9147	79.7572	84.17	70.9178
		87.1	118.267	143.182	83.5821	82.2204	88.971	99.5487	71.7724	85.7262	130.721	150.326	116.819	110.863	98.7947	107.814	97.9266	96.987	96.0475	117.8	83.2815	89.2144	76.7186	86.6842	75.392	80.1691			78.5748	84.9919	89.3374	71.8989	74.6773	76.3608			96.1629	86.2385	78.8326	80.1263	84.563	70.7554
		87.2	118.41	143.377	83.7473	82.2656	88.6804	99.655	71.6293	85.4741	130.907	150.258	116.856	110.393	99.1563	107.893	98.0552	97.0551	96.0304	117.743	83.1452	89.2689	76.7424	86.6201	75.2801	80.1302			78.0898	84.6186	89.403	71.7351	74.618	76.6586			96.1031	86.5419	78.8184	80.5096	84.4612	70.3593
		87.3	118.566	143.575	83.9455	82.5626	87.9083	99.4913	71.8359	85.5182	130.939	150.165	116.636	110.196	99.3911	107.857	97.5538	97.0154	96.2194	117.899	83.0017	89.2815	76.6026	86.5878	75.4329	79.8931			77.6953	84.4529	90.0068	71.9611	74.6722	76.5917			96.2603	86.7741	78.6142	80.4064	84.2768	70.1906
		87.4	118.766	143.801	84.2268	82.5274	87.2402	99.2112	72.5407	85.8714	130.821	150.175	116.474	109.903	99.3237	107.695	97.4739	97.157	96.3732	117.754	83.0582	89.2829	76.5852	86.2176	75.4704	79.526			77.5346	84.6281	90.4848	72.2029	74.5559	76.4718			96.3226	86.9204	78.2423	80.2724	84.3008	70.5943
		87.5	118.797	143.889	84.5904	82.6025	87.0178	98.9109	73.1212	85.7373	130.35	150.315	116.359	110.009	99.0122	107.95	97.387	97.576	96.2818	117.477	82.9489	89.554	76.618	86.077	75.7739	79.6172			77.5845	84.7738	90.3638	72.499	74.1492	76.2679			96.2754	86.8546	78.0072	80.0468	84.7488	71.132
		87.6	119.017	143.878	84.8422	82.4944	87.2153	98.72	73.4294	85.2342	129.642	150.303	116.614	110.424	99.0089	108.472	98.0704	98.0414	96.2564	117.235	82.6958	89.8406	76.9209	85.8197	75.6677	79.2042			77.9549	84.7906	89.91	72.8219	73.8003	76.4128			96.1964	86.7996	78.1494	79.8961	85.0778	71.1554
		87.7	119.118	143.836	84.8583	82.3281	87.7059	98.941	73.2233	84.4836	129.057	150.252	117.266	110.638	99.0554	109.021	98.4856	98.2079	96.2903	117.07	82.4361	90.1891	77.3163	86.0386	75.7841	78.6438			78.2478	84.6913	89.7556	73.1617	73.4573	76.588			96.0211	86.2365	78.4434	79.6479	85.0517	70.7102
		87.8	119.058	143.792	84.6488	82.4403	88.4137	98.8886	73.06	84.562	128.621	150.218	117.681	110.641	99.2084	108.969	98.7787	98.051	96.1768	116.728	82.0984	90.3446	77.4237	86.1856	75.6712	78.1108			78.5499	84.4876	90.5108	73.4303	73.0694	76.6443			95.9303	85.6619	78.7029	79.6007	84.2618	70.5322
		87.9	118.869	143.724	84.4896	82.6083	89.1244	98.6162	72.9219	85.2998	128.354	149.921	118.002	110.053	98.6702	108.464	98.2421	97.4319	95.9567	116.428	81.9766	89.9048	77.0449	86.3966	75.7824	78.336			78.6521	84.4303	91.3569	73.5331	72.8334	76.155			95.8773	85.2584	78.6249	79.9582	83.4341	71.1597
		88	118.617	143.567	84.4321	82.8295	89.3269	98.0536	73.2007	86.4878	128.392	149.517	118.07	109.465	97.5178	108.036	97.9456	96.9367	95.9032	116.152	82.0323	89.1785	76.5906	86.0697	75.9869	78.9486			78.5734	84.4899	91.4472	73.3432	72.8018	75.7499			95.7058	84.8468	78.4609	80.0148	83.1766	71.7784
		88.1	118.214	143.452	84.4651	83.099	89.2339	97.6587	73.2919	86.9321	128.703	149.366	117.837	109.056	96.5646	108.157	97.6647	96.726	95.7649	115.891	82.0969	88.4343	76.5733	85.4284	76.3996	79.5318			78.6406	84.4857	90.9192	73.1291	72.9091	75.7101			95.5953	84.9238	78.2641	79.8243	83.6238	71.7817
		88.2	117.915	143.269	84.6757	83.1648	88.799	97.4387	73.149	86.7439	129.063	149.37	117.647	109.034	96.1187	108.331	97.7956	97.215	95.679	115.583	81.9892	88.1686	76.7926	84.5957	76.5534	79.9361			78.7122	84.4516	90.1519	73.1642	72.9748	76.2352			95.6835	85.1664	78.6496	79.404	84.0749	70.9069
		88.3	117.781	143.109	84.8191	83.1839	88.4371	97.3548	72.3274	86.0596	129.341	149.458	117.482	109.439	96.4632	108.101	97.695	97.8068	95.7321	115.531	81.8736	88.4642	77.1372	83.9966	76.0429	80.0233			78.9726	84.3741	89.7048	73.2512	72.9576	76.6348			96.0054	85.4479	79.2621	79.2399	83.9632	70.3263
		88.4	117.765	143.055	84.8394	83.1841	88.3614	97.6003	71.2894	85.784	129.546	149.644	117.356	109.806	96.8469	107.553	97.8738	98.316	95.8383	115.643	81.8089	88.9575	77.4281	83.7607	75.677	79.7613			79.2333	84.5356	89.3154	73.3889	73.3034	76.8011			96.5077	85.5951	79.9483	79.1451	83.628	69.9238
		88.5	117.999	143.161	84.7589	83.0588	88.5178	98.0763	70.5764	85.8808	129.554	149.895	117.232	110.276	97.2927	107.722	98.2489	98.2352	95.9529	115.874	81.7383	89.3026	77.8634	83.6257	75.7916	78.9898			79.3446	84.7398	89.3047	73.2344	73.7937	76.4072			96.8733	85.8753	80.3529	78.9444	83.4024	69.7274
		88.6	118.34	143.225	84.6331	82.9681	89.0126	98.629	70.384	86.2272	129.431	150.108	117.238	110.425	97.5314	108.351	98.6147	97.8854	96.218	116.204	82.0448	89.4189	77.9399	83.4408	76.5638	78.4617			79.2749	84.9241	89.7779	72.9939	73.963	76.3861			96.9644	86.2273	80.6304	79.0246	83.3823	69.1922
		88.7	118.629	143.445	84.5812	82.7404	88.9701	98.8549	70.7939	86.6251	129.361	150.14	117.386	110.432	97.4693	108.848	98.2562	97.651	96.438	116.635	82.4138	89.3896	77.6833	83.4968	76.4698	78.3477			79.0161	84.8356	90.2469	72.6322	73.6698	76.2957			96.8584	86.497	80.8361	79.4363	83.3381	69.1729
		88.8	118.884	143.477	84.5834	82.5309	88.8473	98.9192	71.2437	86.823	129.342	150.145	117.368	110.292	97.5261	108.469	97.408	97.7488	96.5271	116.779	82.6376	89.3534	77.2677	84.0266	75.9648	78.8297			78.8658	84.3013	90.4823	72.1268	73.2883	76.6052			96.4735	86.9604	80.7763	80.0186	83.1784	69.3929
		88.9	119.18	143.256	84.5297	82.4074	88.5729	98.631	71.4964	86.5567	129.263	150.171	117.18	109.865	97.4347	107.566	96.8983	97.889	96.7462	116.851	83.0323	89.3869	76.9133	85.0433	75.1423	79.3794			78.9474	83.8158	90.3563	71.659	73.788	76.3197			96.1171	87.1876	80.3293	80.3162	83.1273	69.9514
		89	119.265	142.842	84.4436	82.4713	88.9754	98.2841	71.1421	85.8099	129.3	150.249	116.794	109.504	97.7097	106.86	97.0648	97.9188	96.8331	116.8	83.2539	89.2843	76.8754	85.599	74.9549	79.7227			79.2158	83.4143	90.3102	71.3174	74.6193	76.4698			95.9694	87.0575	79.4137	80.1142	83.1407	70.0117
		89.1	119.277	142.425	84.2626	82.6138	89.5997	97.7438	70.5538	85.0144	129.282	150.191	116.302	109.349	97.465	106.582	97.3262	97.9216	96.8504	116.591	83.2368	88.9848	77.083	85.4828	75.2718	80.0677			79.5001	83.3639	90.2718	71.4888	75.0774	76.7498			95.7164	86.6476	78.6156	80.0888	83.1263	69.985
		89.2	119.309	141.718	84.1672	82.7296	89.8881	97.391	70.2949	84.734	129.103	150.098	116.024	109.569	97.5091	106.679	97.3069	98.1521	96.8664	116.302	83.3699	88.7487	77.6739	84.4041	75.6408	80.1467			79.7307	83.6014	90.1079	72.0587	74.5694	77.4043			95.6981	86.1558	78.0498	80.1359	83.1228	69.8397
		89.3	119.333	141.06	84.211	82.7575	89.404	97.5809	70.4918	84.8243	128.981	149.825	115.936	110.041	97.2162	106.798	97.2508	98.2589	96.8493	116.118	83.3159	88.6112	78.1421	83.9586	76.0246	80.3468			79.7513	83.7478	89.9691	72.8383	73.5958	77.5519			95.5871	85.7613	78.0146	80.5667	82.8396	69.8123
		89.4	119.22	140.684	84.2567	82.45	88.4674	98.2736	70.7362	85.1089	129.083	149.532	115.953	110.733	97.4084	107.021	97.4532	98.0982	96.6867	115.95	83.1088	88.4049	78.1761	84.1272	75.9931	80.2712			79.6728	83.9629	89.839	73.2104	72.9821	77.2481			95.4346	85.6359	78.0497	80.5031	82.5963	70.0198
		89.5	119.205	140.525	84.1796	82.0531	88.0609	99.2143	70.7506	85.4329	129.239	149.13	115.738	111.192	97.4768	107.584	97.2387	97.6787	96.719	115.873	83.0374	88.3628	77.7987	85.2987	76.0707	80.2849			79.6469	84.0772	89.6546	73.1657	72.9443	76.9609			95.4196	85.9684	78.2232	80.5412	82.3689	70.3006
		89.6	119.261	140.41	84.0056	81.6136	88.1592	99.731	70.8422	85.8834	129.516	148.823	115.522	111.179	97.748	108.398	96.7227	97.3001	96.7077	115.865	82.8499	88.1891	77.3983	85.9373	76.1546	80.0001			79.5494	84.2421	89.4422	72.7821	73.3038	76.5578			95.2528	86.2806	78.3517	80.6282	82.5226	70.6539
		89.7	119.329	140.553	83.7362	81.3787	88.4714	99.8673	71.3218	86.363	129.945	148.679	115.451	110.974	97.7073	108.686	96.2426	96.897	96.6537	115.936	82.6014	87.8459	77.2233	86.286	76.4222	79.6516			79.4977	84.5972	89.1481	72.5836	73.5871	76.237			95.2087	86.5476	78.4003	81.0117	82.7997	70.6163
		89.8	119.298	140.943	83.5265	81.3809	88.3126	99.7384	71.94	86.3539	130.194	148.633	115.529	110.415	97.3698	108.287	96.7212	96.5373	96.7038	116.278	82.4871	87.8217	76.9336	86.3033	76.7469	79.3478			79.5704	84.8041	89.2112	72.6576	73.9313	75.4256			94.9203	86.5259	78.2202	81.087	82.7242	70.403
		89.9	119.389	141.079	83.5941	81.471	87.9033	99.4776	72.0632	86.0212	130.189	148.511	115.822	109.772	97.2477	107.595	97.3744	96.2332	96.7794	116.617	82.3767	87.9845	76.6263	86.1738	76.6446	79.1261			79.6017	85.0763	89.5212	73.06	74.0708	75.2288			94.6935	86.2134	78.022	80.4791	82.2383	70.0641
		90	119.41	141.193	83.6069	81.584	87.4661	99.3591	71.9012	85.4698	130.024	148.585	116.013	109.407	97.4964	107.314	97.6398	96.4458	96.6499	116.913	82.3654	88.1194	76.2221	86.089	76.0984	78.9634			79.7388	85.2638	90.0187	73.4318	74.1458	75.3947			94.6299	85.982	77.9742	79.9403	81.7507	69.9184
		90.1	119.384	141.341	83.809	81.3764	87.2494	99.1839	71.528	85.3381	129.704	148.684	115.943	109.192	98.2299	107.162	97.1711	96.7668	96.5223	117.264	82.4697	88.3843	76.3509	85.6306	75.4706	78.6088			79.8909	85.3998	90.1238	73.5497	73.6922	76.2077			94.6683	85.7816	78.1919	79.6189	81.9944	69.8827
		90.2	119.315	141.405	84.0023	81.2068	87.2962	99.0062	71.66	85.2827	129.259	148.636	115.784	109.059	98.6699	106.841	96.4554	97.1299	96.4323	117.593	82.5347	88.4374	76.4616	85.4711	75.4214	78.4289			79.7189	85.5676	89.7036	72.9786	73.3472	76.6851			95.0968	86.0051	78.4883	80.2089	83.0483	69.9854
		90.3	119.457	141.296	84.1821	81.244	87.4917	98.3784	71.7778	85.2983	128.93	148.669	115.785	109.056	98.5228	106.773	96.2001	97.1078	96.2222	117.684	82.5191	88.1557	76.7254	85.3907	75.832	78.5511			79.7179	85.7197	89.2861	72.5147	73.015	76.7646			95.3611	86.2948	78.9113	80.3641	84.3296	70.1149
		90.4	119.565	141.484	84.4511	81.38	87.6537	97.8379	72.1397	85.1792	128.534	148.78	115.914	108.917	97.8118	107.263	96.1059	96.9513	95.989	117.703	82.2726	88.0064	76.8186	85.5562	75.9351	79.0034			79.7006	85.8998	89.4718	72.3013	73.3732	76.3722			95.6819	86.457	79.2262	80.4743	84.7879	70.1699
		90.5	119.735	141.516	84.5003	81.6529	87.5396	97.5418	71.9449	84.9954	128.107	148.703	116.232	108.647	96.8863	108.176	96.0021	96.6304	95.8941	117.666	82.1379	87.9289	77.0474	85.6483	75.76	79.3418			79.5791	85.9411	90.1352	72.8646	73.9159	75.8373			95.9379	86.5317	79.6176	79.9487	84.6161	70.1663
		90.6	119.894	141.474	84.5067	81.757	87.2866	97.4731	71.5644	84.7872	127.729	148.609	116.277	108.609	96.4377	108.554	95.5068	96.3764	95.8257	117.541	82.2804	87.9332	77.018	85.4034	75.2423	79.1828			79.6416	85.9131	90.6871	72.9221	74.479	75.7462			95.8661	86.2169	79.9659	79.8339	84.0978	70.0357
		90.7	120.105	141.536	84.318	81.7828	87.0456	97.353	71.048	84.6954	127.298	148.744	116.307	108.79	96.3672	108.2	95.1444	96.3627	95.8672	117.417	82.6391	88.0976	76.7778	84.9424	75.076	78.6974			79.2856	85.5776	90.791	72.7876	74.4897	76.1124			95.8791	85.8564	80.5141	79.8543	83.9364	70.069
		90.8	120.144	141.649	84.1305	81.8903	87.2877	97.3169	71.2317	84.895	126.755	148.895	116.448	109.117	96.7581	107.395	95.4257	96.5259	96.1015	117.227	83.2045	88.2866	76.5272	84.5547	74.9921	78.4771			78.7601	84.9586	90.6447	72.2314	74.4189	76.6542			95.5951	85.6178	80.5549	80.1258	83.779	70.2922
		90.9	120.002	141.618	84.0927	81.9349	87.6443	97.6689	71.893	85.3078	126.361	149.025	116.718	109.583	96.9134	107.247	96.0003	96.7311	96.3477	117.132	83.4574	88.4326	76.5611	84.4539	75.379	78.5573			78.3121	84.3824	90.5616	72.1582	74.5008	76.7424			95.1314	85.4184	80.0842	80.4367	83.5673	70.7861
		91	119.927	141.792	84.0261	81.9996	87.865	98.4479	72.6487	85.5378	125.987	149.109	117.352	109.684	96.9629	107.802	96.792	96.8741	96.5868	116.984	83.3126	88.6091	76.665	84.8419	76.0041	78.791			78.1757	83.9691	90.5554	72.132	74.7618	76.7869			94.996	85.4573	79.4229	80.3482	83.3484	71.0089
		91.1	119.919	141.984	83.9904	81.8396	87.5	98.931	73.0433	85.4987	125.691	149.046	117.595	109.472	96.8443	108.667	97.3218	96.9049	96.8459	116.889	82.8782	88.6589	76.4033	85.1342	76.5651	78.8546			78.4869	83.9588	90.5392	72.2359	74.5869	77.1499			95.0382	85.8044	79.3103	80.1293	83.1686	70.7658
		91.2	119.839	142.049	84.0893	81.6088	86.9272	99.2596	72.9123	85.307	125.629	148.817	117.489	109.359	97.0702	108.681	97.6161	96.7509	96.9842	116.746	82.6366	88.583	76.4448	84.9483	76.6441	79.1582			78.9133	84.2793	90.4476	72.3741	74.4679	77.7494			95.2853	86.1479	79.7814	79.6432	83.0821	70.1914
		91.3	119.776	142.094	84.0318	81.9105	86.6597	98.8902	72.3386	85.0182	125.881	148.557	116.851	109.133	97.3979	108.089	97.5253	96.7613	96.931	116.554	82.6692	88.3414	76.6724	84.3917	76.2128	79.6176			79.4135	84.5143	90.2277	72.7856	74.2783	77.9491			95.7359	86.5596	80.0259	79.433	82.8996	69.6497
		91.4	120.022	142.163	83.9494	82.3078	86.6429	98.6492	71.6393	84.658	126.35	148.341	115.965	109.206	97.5433	107.251	97.0324	97.1268	96.913	116.175	82.89	87.7793	77.5581	84.0333	75.6642	80.1114			79.4911	84.7958	89.9721	73.4851	74.6466	77.662			95.8724	86.9476	80.0701	79.4571	82.8299	69.433
		91.5	120.077	142.196	83.8904	82.7802	86.8633	97.978	71.2241	84.3104	127.043	148.219	115.34	109.323	97.1787	106.835	96.7039	97.923	96.859	115.987	83.1208	87.3789	77.8444	84.2676	75.4957	80.0948			79.3394	84.8848	89.8026	73.9517	74.7781	77.3499			95.5466	86.9854	79.6413	79.4673	82.6808	69.3189
		91.6	119.985	142.248	83.5989	82.9824	86.8302	98.1758	71.5048	84.3404	127.617	148.404	114.732	109.011	96.7036	106.631	96.3238	98.087	96.7772	115.772	82.9676	87.0268	77.9954	84.8756	75.4328	79.7727			79.101	84.9061	89.7166	74.025	74.8529	77.561			95.268	86.953	79.365	79.5028	82.772	69.5428
		91.7	119.909	142.249	83.6966	82.4823	86.5798	98.4952	72.0938	84.723	127.952	148.479	114.622	108.546	96.4654	106.657	96.1753	97.7182	96.6816	115.531	82.7426	86.8383	77.719	85.2584	75.4073	79.0247			78.6473	85.0811	89.5727	73.5696	74.3857	77.9057			94.9277	86.7588	78.8446	79.4451	82.63	69.7141
		91.8	119.805	142.147	83.9056	81.8881	86.2296	99.2376	72.5797	84.9959	128.042	148.506	114.649	107.918	96.7011	106.517	95.9523	96.792	96.798	115.526	82.3197	87.2013	77.3953	85.636	75.2252	78.2972			78.2091	85.0928	89.3834	73.3457	73.9738	77.9103			94.747	86.4636	78.7436	79.8802	82.6077	69.9378
		91.9	119.411	142.025	84.1294	81.3668	86.2181	99.3027	72.6037	85.2957	127.977	148.592	114.772	107.485	96.7687	106.18	96.0726	96.1994	96.8977	115.695	82.1649	87.5683	77.0146	85.8157	75.2537	77.8729			77.7773	85.1568	89.1392	73.1557	73.8491	77.0847			95.0513	86.3865	78.8727	80.5602	82.3323	69.965
		92	119.081	141.728	84.3845	81.0457	87.2247	99.1423	72.6162	85.4702	127.785	148.742	115.184	107.335	96.5953	105.83	96.3338	95.9352	96.9912	115.647	82.2789	87.9764	76.5323	86.3033	75.3421	78.107			77.506	85.3096	89.1393	73.4056	74.33	76.0138			95.2231	86.2573	79.4583	81.0562	82.462	70.1063
		92.1	118.866	141.516	84.3888	81.0709	88.5063	99.0603	72.7174	85.6578	127.715	148.573	115.451	107.581	96.145	106.078	96.4882	95.974	97.0591	115.544	82.2272	88.174	76.377	86.4837	75.2707	78.7964			77.5896	85.4838	89.175	73.5974	74.6428	75.2667			95.4553	86.3795	79.8368	81.2323	82.8361	70.4637
		92.2	118.633	141.451	84.4049	81.2746	89.6369	98.8366	73.2493	85.4301	127.805	148.613	115.757	107.903	96.0463	107.045	96.3781	95.9249	97.0346	115.485	82.4739	87.9246	76.1993	86.4664	74.9437	79.0706			77.8944	85.5844	89.333	74.0713	74.5274	75.1107			95.6808	86.5699	80.0561	80.7992	83.4342	70.7051
		92.3	118.411	141.498	84.4883	81.3901	89.428	98.7169	73.4809	85.0571	127.866	148.653	115.827	107.885	96.0739	108.031	96.1327	95.6372	96.743	115.229	82.5569	87.6656	76.219	86.2478	74.857	78.8478			78.3157	85.5463	89.4471	74.018	74.052	75.4994			95.8497	86.5864	79.9639	80.4083	83.8869	70.8922
		92.4	118.318	141.552	84.7213	81.6901	88.5379	98.175	73.5932	85.2147	127.709	148.659	115.653	107.999	96.4183	108.475	96.0889	95.3722	96.3608	114.998	82.3718	87.4871	76.4608	86.0586	75.0778	78.3221			78.7339	85.3937	89.508	73.72	74.101	76.1016			96.1826	86.6656	79.8827	79.9378	84.0561	70.8206
		92.5	118.341	141.709	84.842	81.671	87.5843	98.1626	72.9818	85.7586	127.465	148.604	115.379	108.016	96.9009	108.184	95.9566	95.5306	95.929	115.056	82.3625	87.5797	76.9746	85.8547	75.3107	78.16			78.8929	85.1734	89.3907	72.9817	74.6564	76.5547			96.4766	86.4585	80.088	79.739	84.2613	70.8451
		92.6	118.311	141.685	84.7221	81.4238	87.6901	98.2664	72.4199	86.7742	127.209	148.561	114.856	108.107	97.5328	107.853	95.5907	95.9261	95.5044	115.22	82.1289	87.8527	77.5582	85.3483	75.2382	78.4937			78.9196	85.1791	89.3214	72.6722	75.0278	76.7044			96.7319	86.2119	80.344	79.53	84.5872	70.5561
		92.7	118.311	141.742	84.4626	81.2263	88.8689	98.6997	71.9451	86.8609	127.057	148.455	114.402	108.534	97.7711	107.612	95.2542	96.1287	95.3672	115.449	81.8333	88.0549	77.86	84.8886	75.2018	78.8636			78.9481	85.2948	88.9961	72.5068	74.7541	76.5989			96.726	85.9643	80.2156	79.2242	84.6353	69.8187
		92.8	118.335	141.873	84.0703	80.8494	90.0261	98.7744	72.1799	86.4711	126.96	148.289	114.166	108.825	97.4159	107.498	95.5359	96.0411	95.4717	115.724	81.7688	88.0449	78.0644	84.5239	75.2472	79.1548			78.8486	85.2323	88.8869	72.6481	74.3081	76.5316			96.4411	85.7576	79.4618	78.9344	84.1499	68.8718
		92.9	118.322	141.928	83.6571	80.7838	90.0992	98.4714	72.3958	85.5251	127.104	147.961	114.162	108.945	96.9221	107.314	96.1807	96.0642	95.7877	115.888	81.846	87.9533	78.1087	84.3924	75.5708	78.8422			78.7458	84.9898	88.5979	72.6771	74.059	76.4051			95.9919	85.6955	78.8929	78.7287	82.9754	68.2202
		93	118.207	141.906	83.498	80.8816	89.1423	97.882	72.7769	85.1713	127.364	147.549	114.416	109.014	96.5683	107.059	96.6239	96.4302	96.1903	115.995	81.9936	87.9326	78.0794	84.3959	75.4724	78.476			78.8379	84.6377	88.6863	72.6178	73.8764	76.1634			95.4181	85.814	79.0027	78.7789	82.1424	68.4909
		93.1	118.152	142.069	83.4695	80.9932	88.0222	97.5161	72.6978	85.3712	127.581	147.382	114.768	108.869	96.6342	106.751	96.3194	96.8167	96.5597	116.011	82.3136	87.8963	77.7558	84.4372	75.7054	78.2357			78.9791	84.2949	88.9328	72.5212	73.6271	76.0204			94.9767	86.0551	79.4694	79.0329	82.0041	69.2027
		93.2	118.221	142.081	83.5563	81.1168	87.786	97.5043	72.8338	85.8902	127.459	147.257	114.93	108.714	96.5299	106.171	95.9668	96.8206	96.6428	115.934	82.5469	88.1157	77.4877	84.536	75.816	78.3126			79.2884	84.1131	89.3337	72.3992	73.7651	76.3126			94.7734	86.3323	79.9164	79.3349	82.5068	69.8399
		93.3	118.288	142.032	83.8548	81.2097	87.8087	98.0166	72.5774	86.257	127.385	147.341	114.872	108.746	96.4882	105.72	95.8879	96.4873	96.5224	115.945	82.4048	88.3318	77.3222	84.717	76.4062	78.5723			79.7333	84.2211	89.7012	72.5194	74.5574	76.8644			94.7771	86.6348	80.0382	79.4854	83.041	69.8143
		93.4	118.45	142.133	84.2938	81.058	88.1323	98.4792	72.4752	86.0481	127.241	147.529	114.658	108.73	96.5986	105.422	96.2938	96.1358	96.3038	116.128	82.3898	88.5038	77.0986	85.0913	76.7223	78.6557			79.8991	84.371	89.5019	72.5431	75.4634	77.1962			95.0329	86.6058	80.0554	79.4823	82.9981	69.6562
		93.5	118.562	142.448	84.742	80.9623	87.7511	98.881	72.3696	85.242	127.087	147.837	114.45	108.923	97.0147	105.507	96.5541	95.9304	96.0829	116.096	82.298	88.9013	76.647	85.4186	76.8909	78.7614			79.8136	84.4919	89.0886	72.5128	75.8396	77.0916			95.2733	86.4784	79.8181	79.5208	83.0369	69.7478
		93.6	118.577	142.6	85.1686	80.8508	87.5871	98.918	72.5372	84.611	126.929	147.968	114.255	109.154	97.3894	105.615	96.1987	95.7096	95.9456	116.098	82.2753	89.042	76.0271	85.3354	76.6814	78.8972			79.5693	84.6707	88.8121	72.2962	75.3019	76.6599			95.4169	86.1869	79.66	79.5842	83.0516	70.2286
		93.7	118.446	142.716	85.4853	80.6229	87.3387	98.5528	72.6532	84.4154	126.96	147.929	114.111	109.051	97.2178	106.065	95.2823	95.5876	96.0076	116.157	82.4704	89.1421	76.0076	85.0117	76.3594	79.0162			79.2338	84.8399	89.2221	72.1954	74.3632	76.7363			95.6001	85.8542	79.5312	79.4842	83.7211	70.6442
		93.8	118.371	142.712	85.3275	80.7716	87.7867	98.2801	72.6179	84.7573	126.93	147.749	114.16	108.896	96.5038	106.738	94.5353	95.7219	96.1674	116.153	82.5576	89.0444	76.3027	84.905	76.0884	79.069			78.9739	84.8321	90.0739	72.12	73.7399	76.722			95.6381	85.7362	79.592	79.3669	84.0778	71.0083
		93.9	118.176	142.593	85.0239	80.9056	88.3149	97.8113	72.7358	84.9698	126.808	147.556	114.36	108.506	95.4682	107.089	94.6848	96.1733	96.2516	115.981	82.542	88.6009	76.6317	84.7701	76.0498	78.8263			78.8617	84.9319	90.6037	72.1263	73.8673	76.9973			95.6477	85.7909	79.6944	79.3297	84.5012	71.1702
		94	118.177	142.304	84.4621	81.0464	89.1454	97.896	72.8242	85.076	126.671	147.248	114.887	107.996	94.6681	106.911	95.2716	96.5049	96.3621	116.028	82.4022	88.2821	76.4426	84.8256	76.2004	78.4404			78.7796	85.0333	90.582	72.1107	74.4344	76.655			95.6142	85.9533	80.0326	79.593	84.1134	71.0651
		94.1	118.293	142.11	83.7461	81.4068	89.7917	97.6498	72.8093	85.181	126.569	147.012	115.357	107.75	94.5598	106.24	95.4646	96.5181	96.5456	116.255	82.2379	88.0305	76.2088	84.4981	76.2141	78.1432			78.7913	84.9845	90.0483	71.8982	74.9396	76.262			95.4541	86.1302	80.2567	79.4989	83.719	70.5961
		94.2	118.423	141.935	83.4661	81.6809	90.3627	97.7236	72.2517	85.229	126.579	146.93	115.777	107.634	94.8681	106.13	94.9573	96.3048	96.6531	116.455	81.9426	88.0793	76.0041	84.5226	76.2103	77.9881			78.9094	85.1181	89.5153	71.3978	74.9922	75.8829			95.2548	86.3374	80.2339	79.119	83.2951	70.4232
		94.3	118.484	141.862	83.4272	81.9997	90.1784	97.7346	71.9907	85.1753	126.713	146.787	115.996	107.733	95.1691	105.924	94.593	95.8916	96.7951	116.643	81.8603	88.3147	75.9349	84.3048	75.8863	78.3463			78.9076	85.2411	89.1401	71.1061	74.777	75.8422			95.1312	86.1873	79.7766	78.7097	83.5784	70.8791
		94.4	118.719	141.844	83.6573	82.5623	89.6833	97.8782	72.1528	85.27	126.85	146.703	115.843	107.986	95.3951	105.666	94.9167	95.8264	97.0711	116.773	81.9756	88.5521	75.5521	84.192	75.9172	78.7748			78.9501	85.1931	88.9526	71.5074	74.4081	76.3392			95.1786	86.1329	79.1207	78.9301	83.9236	71.6233
		94.5	118.9	141.772	84.0424	82.9864	88.7498	97.8319	72.7916	85.6103	126.828	146.808	115.875	108.103	95.4969	104.73	95.9353	96.0603	97.2608	116.717	82.2204	88.7144	75.1977	83.9636	75.5263	79.0996			78.9213	85.0196	88.9433	72.4003	74.3664	76.6101			95.2811	85.9765	78.6982	79.7146	83.929	71.7176
		94.6	119.115	141.698	84.1594	83.0678	88.1127	97.4884	72.9672	85.879	126.846	146.959	115.962	108.086	95.9544	104.403	96.8516	96.5714	97.2874	116.378	82.76	88.4965	74.7878	83.6973	75.3296	78.9728			78.8852	84.6558	89.2416	72.732	74.2071	76.6436			95.4433	85.5498	78.5228	80.0469	83.5066	71.1909
		94.7	119.37	141.666	83.9603	82.8129	87.4821	97.2756	72.6376	85.6966	126.742	147.107	115.852	107.877	96.1424	104.793	97.0638	96.5654	97.3269	115.974	83.1529	88.2288	74.9184	83.7324	74.9119	78.6321			79.0846	84.1571	89.7049	72.4849	73.8684	75.8433			95.4554	85.4803	78.8239	79.9712	83.211	70.6098
		94.8	119.64	141.591	83.6426	82.0461	87.2843	97.3259	71.9133	85.0736	126.51	147.293	115.711	107.379	96.2256	105.997	96.7007	96.02	97.2835	115.561	83.3769	87.8384	75.5046	83.8077	74.9736	78.7812			79.2024	83.7564	89.9407	71.7818	73.4238	75.1862			95.2934	85.2711	79.0578	79.6442	83.0461	70.7558
		94.9	119.781	141.548	83.3638	81.1866	87.3626	97.5748	71.6568	84.7167	126.531	147.423	115.241	106.878	95.9081	106.851	96.2564	95.5977	97.065	115.349	83.497	87.4145	76.3601	83.9421	75.2548	79.1626			79.1226	83.6866	89.693	71.6374	73.066	74.93			95.0738	85.1929	79.5291	79.8934	83.044	71.0199
		95	119.791	141.672	83.1724	80.6449	87.711	97.7112	71.8389	84.6633	126.764	147.283	114.531	106.578	95.7092	106.909	96.0866	95.53	96.8117	115.207	83.5531	87.3242	76.8659	83.8457	75.5174	79.6929			78.9939	83.9748	89.3693	71.8078	73.2286	75.7874			94.9304	85.5066	79.6343	80.1594	82.9167	71.3242
		95.1	119.731	141.722	83.2025	80.5394	88.0943	97.5461	72.4053	84.9778	126.835	146.991	114.128	106.268	95.9344	106.406	95.6369	95.8549	96.6584	115.227	83.5101	87.1008	76.7556	84.085	75.5737	79.5129			78.7293	84.2453	89.521	72.7609	73.4661	76.7286			95.1127	85.5723	79.7426	80.0078	83.0459	71.0703
		95.2	119.602	141.772	83.3772	80.7593	88.4316	97.4701	72.3996	85.216	126.979	146.563	113.962	106.3	96.1722	105.862	94.9528	95.9323	96.3926	115.391	83.3224	87.0599	76.5907	84.6432	75.344	79.2562			78.5437	84.6244	90.28	73.6936	74.3427	77.3562			95.4526	85.5965	79.357	79.6256	83.254	71.078
		95.3	119.517	141.772	83.5064	81.1027	88.5169	97.4297	71.9611	85.12	126.954	146.143	114.122	106.65	96.1877	105.485	94.2158	95.6377	96.1614	115.609	83.0728	87.0767	76.7119	85.0556	75.4489	78.804			78.7104	84.7978	91.1203	74.3973	74.8252	77.4063			95.8456	85.5632	79.2577	79.1167	83.4084	70.804
		95.4	119.518	141.627	83.5223	81.3858	88.3402	97.9144	71.3193	84.7238	126.649	145.798	114.359	106.864	95.7721	105.35	94.2301	95.2492	95.9233	115.649	82.6476	86.8789	77.0996	84.8627	75.7946	78.7928			78.8111	84.7093	91.7614	74.0643	75.1134	77.5793			96.0863	85.3498	79.0699	78.9556	83.494	70.6606
		95.5	119.55	141.395	83.4534	81.5011	87.9049	98.41	71.086	84.2004	126.191	145.694	114.329	107.21	95.4429	105.374	94.5873	94.8689	95.7336	115.733	82.4209	86.9434	77.4983	84.4687	76.2387	78.7553			78.9177	84.6387	91.7922	73.4838	74.9086	77.8661			95.9954	85.4776	79.2902	78.5789	83.3234	70.138
		95.6	119.47	141.138	83.2758	81.4782	87.6872	98.8394	70.9766	84.1724	125.901	145.663	114.113	107.448	95.208	106.152	95.2844	94.9604	95.496	115.767	82.3909	86.9551	77.6089	84.528	76.1363	78.9129			79.1001	84.3844	91.5604	72.8254	74.794	77.93			95.7908	85.7211	79.2979	78.6873	83.1306	69.9727
		95.7	119.365	140.832	83.2738	81.4218	87.8113	98.7156	71.2217	84.5574	125.506	145.798	113.896	107.525	94.955	106.748	95.4838	94.9346	95.4844	115.779	82.4237	86.9613	77.4589	84.7737	75.7733	78.9819			79.0741	84.208	91.0604	72.6886	74.4539	77.5626			95.4873	86.0757	79.4309	79.0011	82.755	69.753
		95.8	119.155	140.687	83.6279	81.3626	88.3522	98.1348	71.6919	85.0487	125.393	145.934	113.942	107.523	94.7389	107.245	95.3233	95.1639	95.532	115.808	82.3455	87.2041	77.0386	85.0054	75.6551	79.1766			79.0565	83.8248	90.7052	72.6517	73.7582	77.1646			95.2882	86.4186	79.3882	79.5687	82.3044	69.9411
		95.9	118.878	140.594	83.9803	81.2951	88.9903	97.8358	72.2957	85.2089	125.452	145.904	114.313	107.592	95.0018	106.641	94.9193	95.2266	95.7841	115.955	82.1284	87.5259	76.9584	84.9173	75.8546	79.5262			78.8111	83.4153	90.3897	72.6747	73.1882	76.7573			95.1254	86.4068	79.4942	79.8118	81.6991	69.9772
		96	118.676	140.42	84.2853	81.3969	89.2572	97.6416	72.3887	85.0583	125.698	145.867	114.82	107.629	95.8112	105.772	94.5994	95.6286	96.1902	116.161	82.0894	87.7952	77.2891	84.7971	76.3929	79.9067			78.5588	83.2485	90.016	72.5139	73.1953	76.4509			94.9806	86.3288	79.5606	79.6567	81.2627	70.5786
		96.1	118.553	140.44	84.2554	81.4743	89.0317	97.9114	71.8687	84.9369	125.779	145.806	115.089	107.38	96.6504	104.951	94.5577	95.7382	96.6264	116.319	82.1234	88.0548	77.81	84.8589	76.6543	79.9688			78.2524	83.1091	89.3756	72.0698	73.6473	76.0639			94.8443	86.0154	79.691	79.7602	81.4882	71.0126
		96.2	118.636	140.47	83.9371	81.4338	88.6596	97.7206	71.4327	85.0041	125.742	145.622	114.895	107.195	96.9336	104.832	94.2113	95.8551	96.7584	116.382	82.5152	88.259	78.0969	84.9801	76.9451	79.6361			78.1887	83.464	88.6621	71.692	73.918	76.1741			94.8846	85.6637	79.6849	80.1288	82.273	71.4281
		96.3	118.739	140.369	83.7218	81.3601	88.2826	97.4564	71.4582	85.1329	125.694	145.569	114.57	106.839	96.7012	105.525	93.8494	95.6344	96.772	116.321	82.9503	88.3883	78.2089	85.4259	76.9232	79.1143			78.5457	84.1616	88.3896	71.8141	73.9603	76.5702			95.1038	85.5897	79.9504	80.752	83.0424	71.1768
		96.4	118.782	140.31	83.5295	81.1993	88.3398	97.0294	72.0453	85.1031	125.649	145.702	114.188	106.532	96.5746	106.333	93.5243	95.4561	96.7018	116.168	83.0758	88.5613	78.2424	85.3999	77.0073	78.6509			78.6994	84.7287	88.6361	72.2928	73.864	76.9874			95.3867	85.3871	80.139	80.8979	83.0249	70.6088
		96.5	118.708	140.488	83.3909	81.0674	88.2781	97.0331	72.4624	84.832	125.519	145.681	113.903	106.553	96.6181	106.724	93.6828	95.4726	96.4492	115.824	82.8748	88.8126	78.1307	85.1561	77.1258	78.2057			78.9861	85.2067	89.2119	72.9458	73.9918	77.1138			95.8356	85.4227	80.3183	80.5796	82.656	69.9197
		96.6	118.642	140.471	83.2761	81.0189	88.4914	97.4036	72.7096	84.7451	125.726	145.78	113.745	106.644	96.6911	106.207	94.0273	95.6002	96.1616	115.547	82.2726	89.0361	78.0134	84.6504	77.176	78.2152			79.0028	85.4881	89.5619	73.0431	74.0461	77.1129			96.0988	85.4513	80.1798	79.9609	82.1059	69.5294
		96.7	118.344	140.422	83.0841	80.9571	88.2584	98.0629	72.8082	84.9017	126.248	145.818	113.485	106.872	96.3994	105.256	94.6614	95.9269	96.0865	115.311	81.7433	88.8446	78.0319	84.4398	76.8891	78.4708			78.865	85.5043	89.8188	73.1816	74.1157	77.2914			96.2153	85.2313	80.0377	79.414	81.9926	69.5337
		96.8	118.12	140.488	83.0644	80.9535	88.2911	98.4292	72.8308	85.0806	126.508	145.733	113.224	107.04	95.943	104.616	95.3287	95.8412	96.1094	115.205	81.3674	88.5812	78.3158	84.4494	76.4581	78.9378			78.907	85.4521	90.1167	73.0828	74.0167	77.4216			96.2332	85.2977	79.8123	79.145	82.0246	69.6531
		96.9	117.98	140.52	83.3648	80.9539	88.3084	98.4309	72.5547	84.9716	126.578	145.634	113.104	106.971	96.0113	104.486	95.8118	95.784	96.0777	115.2	81.3331	88.288	78.4496	84.7307	76.0567	79.077			79.0284	85.3141	90.448	73.1773	73.9372	77.3671			96.2299	85.3743	79.4026	79.4167	82.4254	69.7454
		97	117.954	140.341	83.662	81.0884	88.4799	97.966	72.1663	84.5973	126.507	145.703	113.19	106.949	96.2878	104.513	95.564	95.234	96.025	115.318	81.6279	88.0457	78.1781	85.4897	76.111	79.1787			79.2423	85.1306	90.5624	72.8891	73.9754	77.0936			96.1813	85.4503	78.7786	79.767	82.9841	69.8243
		97.1	117.94	140.261	84.0481	81.2041	88.6326	97.6338	72.181	84.2762	126.107	145.658	113.295	107.078	96.7459	104.403	94.9271	94.6772	95.9834	115.502	81.8083	88.0533	77.61	86.3284	76.0007	79.2253			79.4529	84.8801	90.4521	72.7909	74.1647	76.7808			96.2018	85.5588	78.5519	79.8423	83.4438	69.9227
		97.2	118.062	140.267	84.3846	81.3531	88.7131	97.4203	72.5287	83.8467	125.551	145.885	113.51	107.35	96.0683	104.248	94.5374	93.7004	95.9996	115.622	81.9588	88.0869	77.146	86.4492	76.0167	79.1747			79.5682	84.6289	90.4956	72.8991	74.4626	76.5866			96.1363	85.5154	78.8492	79.3986	83.6393	69.8538
		97.3	118.23	140.033	84.4451	81.6491	88.8401	97.7301	72.9876	83.6818	125.152	146.094	113.617	107.687	95.2557	104.127	94.7816	93.365	95.9667	115.757	82.0119	87.9661	77.064	85.6687	75.4623	79.0556			79.2901	84.6088	90.7616	73.1954	74.712	76.2917			95.9143	85.2677	79.8389	79.0892	83.353	69.7516
		97.4	118.311	139.846	84.6079	81.9117	88.8791	98.1791	73.2367	83.7886	124.807	146.043	113.681	107.801	94.4326	104.033	95.2979	93.248	95.9147	115.916	82.0594	87.4873	76.939	84.802	74.9794	79.0683			78.7431	84.4816	90.559	73.0496	74.632	76.0052			95.6324	85.1277	80.4706	79.1367	82.7933	69.8838
		97.5	118.335	139.675	84.6128	82.3704	88.891	98.407	73.4388	84.381	124.725	145.794	113.923	107.585	94.6306	104.131	95.515	93.7972	95.9466	116.078	82.2275	87.0356	76.7258	84.6906	74.5354	79.147			78.0554	84.4746	89.8092	72.4979	74.504	75.6911			95.2891	85.1038	81.0041	79.3899	82.288	70.4126
		97.6	118.251	139.435	84.3395	82.7082	88.9132	97.8963	73.3123	84.7939	124.742	145.606	114	107.121	95.1263	104.711	95.2706	93.9907	96.0028	116.052	82.4074	86.5592	76.4628	85.0462	74.7144	79.2114			77.4562	84.5415	88.9868	71.9434	74.8206	75.6921			95.2014	85.1468	80.9467	79.5617	82.019	71.103
		97.7	118.182	139.245	84.1466	82.7662	88.4492	97.2078	72.9801	84.8034	124.787	145.217	114.291	106.854	95.3031	105.356	94.5239	94.2917	95.8776	116.028	82.608	86.2774	76.51	84.9846	75.1818	78.9763			77.2356	84.5111	89.0244	71.9227	75.4126	76.169			95.0193	85.4444	81.0489	79.519	81.8703	71.5153
		97.8	118.075	139.351	83.8674	82.6089	87.8934	96.9988	72.5588	84.6084	125.038	144.836	114.595	106.947	95.0261	105.736	93.8921	94.4112	95.8051	115.909	82.5477	86.2653	76.7602	84.3099	75.8333	78.8646			77.4649	84.5923	89.6678	72.1408	75.8576	76.6826			94.9834	85.9409	80.4661	79.3126	81.4164	71.5149
		97.9	118.134	139.517	83.6201	82.3058	87.2609	97.3672	72.553	84.3788	125.479	144.701	114.87	107.005	94.4639	105.611	93.2363	94.5671	95.8874	115.648	82.4058	86.3396	77.109	83.6223	76.3102	78.866			77.9508	84.6372	90.3221	72.4063	75.2524	77.0993			94.9823	86.5826	79.9812	79.0391	81.0286	71.205
		98	118.135	139.769	83.7384	82.0026	86.8857	98.0429	72.4696	84.4712	125.579	144.7	115.227	107.198	94.2772	105.13	93.0893	94.555	95.9398	115.229	82.1974	86.4868	77.622	83.6317	76.723	79.2956			78.3966	84.7058	90.4991	72.3799	74.4863	76.8608			94.7851	87.161	79.1874	79.2223	81.0954	70.8136
		98.1	118.361	140.044	83.9183	81.7956	86.4786	98.3988	72.4967	84.3976	125.63	144.571	115.156	107.403	94.3766	104.596	92.8132	94.4027	95.9711	114.844	82.0513	86.4714	78.0363	83.94	76.6754	79.3749			78.8383	84.5755	90.1622	72.3334	73.773	76.886			95.0029	87.4443	78.847	80.0747	82.0569	70.7467
		98.2	118.535	140.204	84.0393	81.7484	86.2807	98.7438	72.254	84.4	125.643	144.503	115.027	107.148	94.6299	104.124	92.822	94.2697	96.1814	114.535	82.2178	86.3761	78.2081	84.1253	76.7422	78.9494			79.0596	84.6266	89.6377	72.3694	73.578	76.8064			95.0693	87.2322	78.2999	81.0346	83.0106	70.6242
		98.3	118.74	140.188	84.0694	81.6792	86.7323	98.5621	72.3084	84.1871	125.522	144.385	114.637	107.075	94.8272	104.126	92.9741	94.0824	96.3369	114.269	82.379	86.2801	78.1239	84.2329	76.5901	77.9792			79.0326	84.6419	89.2019	72.4454	73.6318	76.8427			95.1257	86.6741	77.9363	81.54	83.6702	70.6241
		98.4	118.79	139.993	83.8884	81.5236	87.6028	98.6603	72.0767	83.7137	125.305	144.299	114.153	106.963	94.6321	104.637	93.4689	93.769	96.3594	114.126	82.5533	86.2826	78.1512	84.4859	76.5281	77.5142			79.0366	84.4906	89.0963	72.429	73.7734	76.4003			95.3401	86.2166	77.6259	81.3079	83.5556	70.2434
		98.5	118.919	139.736	83.6576	81.292	88.4273	98.6091	71.8097	83.0683	125.402	144.187	113.879	106.636	94.2779	105.301	94.0343	93.5984	96.4423	114.24	82.4112	86.4978	78.334	84.7259	76.0298	77.6933			78.9749	84.6933	89.5098	72.2232	74.0597	76.1969			95.3405	85.8691	77.6882	80.9514	83.2381	70.1988
		98.6	118.983	139.604	83.575	80.9868	88.8422	98.7992	71.3326	82.5566	125.584	144.275	113.49	106.803	93.9279	105.857	94.3022	93.5133	96.565	114.475	82.0609	86.9681	78.4144	84.3253	75.8748	78.3567			78.9175	84.5903	89.8792	72.0447	74.0348	76.4352			95.5651	85.6777	78.0752	80.2924	82.9347	70.2174
		98.7	119.012	139.466	83.7859	80.7274	88.7769	98.8044	71.139	82.7919	125.724	144.406	113.252	106.987	94.1599	105.55	94.2034	93.6372	96.5508	114.769	81.8479	87.2524	78.3349	83.9881	75.9888	78.7579			78.9688	84.5838	90.1857	72.033	73.8303	76.8551			95.8383	85.569	78.3858	79.8817	82.7661	70.3576
		98.8	118.871	139.424	84.0077	80.8222	88.3667	98.4972	71.167	83.564	125.722	144.788	113.064	107.161	94.5889	104.886	93.7629	93.442	96.6515	114.958	81.7107	87.3282	78.1437	83.7651	76.2496	78.9136			78.8008	84.6588	90.0587	72.4166	73.648	77.0517			96.0759	85.2877	78.6013	79.506	82.8842	70.2836
		98.9	118.846	139.4	84.0452	81.0853	87.8078	97.9044	71.4346	84.4691	125.599	145.117	112.791	107.314	95.086	103.938	92.9699	93.4192	96.6971	115.102	81.8502	87.1739	77.8153	84.2199	75.9051	78.6301			78.6148	84.5995	89.7072	73.0092	74.0898	76.9202			96.1889	85.0171	78.5252	79.6207	83.1724	70.1544
		99	118.951	139.365	84.0016	81.5277	87.5613	97.0803	71.6531	84.9637	125.253	145.555	112.776	107.052	94.9891	103.291	92.6034	93.2523	96.6509	115.14	82.0808	86.7026	77.449	84.4734	75.345	78.5413			78.5128	84.6706	89.3069	73.4267	75.0407	76.7532			96.1201	85.0049	78.792	79.6884	83.5656	70.2367
		99.1	118.995	139.212	83.9721	81.7839	87.9189	96.7394	71.8153	85.0378	124.939	145.871	112.753	106.729	94.7034	103.058	92.6451	93.4894	96.5074	115.191	82.1861	86.4828	77.096	84.8321	75.0846	78.407			78.3974	84.6089	88.8656	73.2166	75.9058	76.4086			96.0531	85.2329	79.2208	79.7242	83.8104	70.086
		99.2	119.166	139.097	84.1309	81.7027	88.465	96.8376	71.8981	84.8539	124.639	146.023	112.607	106.428	94.2064	103.155	93.4542	93.9531	96.3955	115.128	82.2738	86.3036	76.9256	84.7127	75.3638	78.5321			78.3902	84.6394	89.1071	72.7539	75.9688	76.0712			95.8985	85.56	79.604	79.5217	83.7983	70.0218
		99.3	119.428	138.849	84.54	81.5111	88.8944	97.4203	72.0723	84.6127	124.463	145.889	112.615	106.035	94.0192	103.379	94.3366	94.893	96.0961	115.14	82.2758	86.354	76.7692	84.6692	75.871	78.2339			78.2749	84.6463	89.626	72.3299	75.7133	75.9147			95.7642	85.8034	79.5734	78.9013	83.3778	70.0153
		99.4	119.551	138.847	84.9492	81.1389	89.0339	97.7369	72.0586	84.2483	124.587	145.699	112.465	105.676	94.2334	103.34	95.4453	95.3842	95.8421	115.056	82.3835	86.5238	76.8552	84.6369	75.9691	77.8692			78.0598	84.6343	90.2562	72.6531	75.5519	75.9603			95.7099	85.8916	79.152	77.9689	82.8173	70.6202
		99.5	119.547	138.949	85.0941	81.0143	88.6884	97.8814	72.0589	83.8237	124.959	145.425	112.23	105.284	94.5237	103.225	96.1324	94.9298	95.7315	114.934	82.5229	86.467	77.1912	84.8593	75.9171	77.4309			77.8131	84.6631	90.5129	73.1622	75.8908	76.0187			95.6461	85.8709	78.9678	77.2332	81.976	71.0426
		99.6	119.472	138.947	84.9942	81.0098	88.4473	97.4198	71.8466	83.7026	125.154	145.1	112.239	104.906	94.9997	103.367	96.1566	94.2007	95.6457	114.801	82.6429	86.6241	77.4823	84.8283	75.6789	77.4951			77.794	84.7642	90.1049	73.7869	75.7761	76.0146			95.6617	85.7879	79.1337	76.9688	81.8076	71.1233
		99.7	119.203	138.935	84.9882	81.1971	88.2741	96.9053	72.3127	83.9136	125.368	144.874	112.149	104.968	94.8961	103.697	95.2446	93.9236	95.5531	114.668	82.9383	86.5831	77.4362	84.5599	75.9144	77.9572			78.0144	84.7828	89.5258	73.7133	75.1963	76.2279			95.8033	85.9564	79.6353	77.3074	82.07	70.6923
		99.8	119.059	139.036	84.8199	81.5285	88.9457	96.4137	72.7622	84.3858	125.513	144.746	112.002	105.284	94.7068	104.048	94.4896	94.4807	95.5526	114.583	82.9759	86.6098	77.0842	84.4414	76.3539	78.7867			78.3994	84.8358	88.5934	73.1449	74.3586	76.551			95.7491	86.1011	79.8739	77.5876	82.8924	70.4689
		99.9	118.974	138.82	84.7273	81.8216	89.0376	96.3851	73.2416	84.5236	125.24	144.744	112.085	105.721	94.155	104.024	93.9857	95.0163	95.6737	114.66	83.0138	86.8101	77.0924	84.5368	77.0307	79.4059			78.8692	85.0555	88.2277	72.4516	74.0426	76.9143			95.586	86.1157	79.8571	78.5092	83.28	70.4051
		100	118.85	138.561	84.8643	81.9981	88.5681	96.9989	72.8587	84.2662	124.739	144.618	112.043	106.27	94.0846	104.174	93.9563	95.2689	95.6082	114.647	83.0114	86.7776	77.3053	84.5342	77.3727	79.5548			79.1628	85.235	88.1359	72.0226	74.1374	77.2971			95.2983	86.2248	79.7036	79.4122	83.2214	70.6298
		100.1	118.801	138.54	84.6635	81.9318	87.4529	97.7871	72.3904	83.6007	124.433	144.579	112.016	106.473	94.1781	104.422	93.6858	95.0599	95.5172	114.448	82.9035	86.8974	77.6578	84.1043	77.2552	79.3261			79.4157	85.4557	88.4387	71.9967	74.4944	77.761			94.9336	86.2583	79.664	80.4103	82.9679	70.6449
		100.2	118.868	138.542	84.8025	81.7153	87.1826	98.279	72.0453	83.231	124.123	144.613	112.008	106.537	94.4078	104.562	93.4764	94.653	95.4567	114.315	82.9928	87.0874	77.7821	83.6848	76.6521	78.8642			79.5335	85.5811	88.607	71.9524	74.5913	78.077			94.8544	86.1616	79.4947	80.5177	82.687	70.7464
		100.3	118.828	138.575	84.9959	81.6203	87.6682	97.9393	72.3618	83.4111	123.939	144.684	111.814	106.64	94.4803	104.131	93.3557	94.4133	95.4307	114.213	82.8641	87.1826	77.9658	83.5483	76.008	78.5846			79.6141	85.3961	88.9688	71.8961	74.5814	78.0941			94.91	86.1527	79.3193	80.3378	82.4458	70.641
		100.4	118.871	138.779	84.9761	81.7697	88.3444	97.3888	73.0177	84.0864	124.051	144.563	111.906	106.775	94.626	103.402	93.3827	94.2664	95.3651	114.08	82.7333	87.4644	78.0034	83.7017	75.7171	78.1536			79.8608	85.0353	89.432	72.0142	74.3646	77.7514			95.09	86.1759	79.0884	80.2986	82.0664	70.8173
		100.5	118.879	138.972	85.0166	81.9828	88.6413	96.9392	73.7749	84.7193	124.318	144.621	111.903	106.985	94.604	103.164	93.3121	94.1644	95.3972	114.137	82.456	87.6428	77.8714	83.7156	75.8752	78.0447			79.8846	84.7204	90.1642	72.097	74.4174	77.305			95.2572	85.9792	79.1511	80.4036	81.8981	70.6636
		100.6	118.829	138.933	84.7084	82.1919	88.6498	96.6746	74.0978	84.7014	124.392	144.751	112.038	107.031	94.5389	103.182	93.2544	93.7471	95.6302	114.321	82.1409	87.6126	77.6099	83.7636	76.3944	78.1424			79.8669	84.4549	90.4272	72.3334	74.4333	76.5178			95.2743	85.9592	79.1409	80.4249	82.162	70.3691
		100.7	118.809	138.897	84.2592	82.0238	88.5893	96.4983	73.9733	84.5304	124.503	144.721	112.252	106.735	94.5993	103.247	93.2703	93.3571	95.8633	114.557	82.0879	87.5603	77.4233	83.7098	76.5741	78.56			79.8774	84.3327	90.3647	72.5211	74.3722	76.1099			95.2932	86.0285	79.422	79.8706	82.6349	69.9428
		100.8	118.807	138.866	83.7732	81.53	88.0366	96.6169	73.5407	84.1581	124.555	144.754	111.966	106.029	95.0062	103.093	93.4439	93.046	96.0768	114.714	82.2336	87.2493	77.3487	83.9898	76.2204	78.3974			79.6318	84.305	90.0608	73.0663	73.9294	76.0368			95.2868	86.1636	79.817	79.4099	82.8683	69.9661
		100.9	118.665	138.919	83.3834	81.0608	87.3009	96.9952	73.0398	84.0449	124.509	144.873	111.826	105.294	95.3972	103.317	93.5653	92.9644	96.2114	114.687	82.5829	86.9473	77.1057	84.1792	75.4071	77.9184			79.484	84.2084	89.9487	73.2752	73.6759	76.8644			95.2578	86.5022	80.5713	79.1496	82.607	70.4858
		101	118.62	138.876	83.1693	80.6794	86.4537	97.104	72.6003	83.5444	124.373	144.745	111.553	105.003	95.4497	103.537	93.6157	93.2157	96.3666	114.525	82.7269	86.7206	76.7056	84.4407	75.2664	77.2526			79.4898	84.0783	90.0232	73.0011	73.3631	77.145			95.1874	86.8539	80.9628	79.36	82.3234	70.7606
		101.1	118.564	139.034	83.1146	80.4702	86.6491	96.9019	72.2282	82.9361	124.36	144.222	111.243	105.199	95.2477	103.614	94.0109	93.7279	96.4327	114.285	82.7508	86.5171	76.1306	84.5061	75.5717	77.3827			79.395	84.0376	89.878	72.3459	73.4731	77.0804			94.8567	86.9319	80.7891	79.8591	82.3747	70.5412
		101.2	118.404	139.198	83.2821	80.6081	87.3037	96.5242	72.0958	82.6066	124.288	143.799	111.245	105.841	94.995	103.238	94.147	94.1404	96.4701	113.892	82.5271	86.506	75.847	84.497	76.0518	77.574			79.226	83.9297	89.7417	72.2612	73.3164	76.3024			94.5739	86.5978	80.1448	80.38	82.4441	70.0968
		101.3	118.168	139.161	83.5329	80.8358	88.5326	96.3148	71.9942	82.8836	124.181	143.198	111.382	106.46	95.1252	102.982	94.0108	94.3047	96.4394	113.58	82.2232	86.5009	76.2443	84.3937	75.8144	77.843			79.0696	83.9169	89.5309	72.5849	73.4424	75.9998			94.4706	86.1799	79.4308	80.7933	82.2586	69.9409
		101.4	118.049	139.06	83.9754	81.0891	89.0048	95.9351	71.9979	83.3642	124.027	142.637	111.568	106.672	95.2209	102.924	92.9098	94.0349	96.4477	113.456	82.1417	86.5109	76.9999	84.0116	75.593	77.8883			78.7203	84.1296	89.7203	73.1739	73.5822	76.1179			94.5499	85.5814	78.6844	80.645	81.749	70.5813
		101.5	117.861	139.145	84.3438	81.3731	88.906	95.636	72.1737	83.6724	123.99	142.288	111.757	106.526	95.5439	102.978	92.1032	94.1008	96.456	113.517	82.3068	86.6884	77.5283	83.7992	75.3916	77.828			78.3868	84.2633	89.7734	73.4301	73.8566	76.667			94.9694	85.1735	77.8612	80.2892	81.6173	71.2364
		101.6	117.91	139.001	84.4867	81.3137	88.4214	95.5041	72.3594	83.9592	123.953	142.41	111.898	106.193	95.1034	103.42	91.8888	94.0006	96.4366	113.789	82.5788	86.9328	77.4089	83.7041	75.6273	77.6737			78.4804	84.5781	89.7868	73.4679	74.2312	77.1984			95.1686	85.2559	77.3528	79.464	81.8487	71.9216
		101.7	118.124	138.898	84.4209	81.1091	88.2862	95.7153	72.4897	84.21	123.971	142.583	111.893	106.114	94.9749	103.788	92.6401	93.9002	96.528	114.142	82.7734	87.1923	77.1763	84.0458	75.7927	77.3993			78.5503	84.9803	89.5526	73.3983	74.3182	77.278			95.3107	85.4429	77.4504	78.9267	82.5321	71.7617
		101.8	118.416	139.036	84.1535	80.7329	88.1801	95.8824	72.1156	84.5823	124.086	142.875	111.921	106.236	94.616	104.217	93.4577	93.3388	96.7005	114.415	82.9653	87.4168	77.1554	83.9567	75.6948	77.5576			78.6703	85.1337	89.6157	72.9769	74.5956	77.0453			95.3757	85.7021	78.1062	78.5917	83.0184	71.2834
		101.9	118.742	139.095	83.9354	80.4854	87.8188	95.8941	72.049	84.4867	124.397	143.15	111.975	106.423	94.6898	103.944	93.8484	92.9008	96.8589	114.611	82.9501	87.3467	77.2291	83.9379	75.2419	78.1353			78.8532	85.3147	89.9246	72.9297	74.482	76.6201			95.3612	85.9645	78.9772	79.2262	83.3787	70.5543
		102	119.125	139.097	83.7884	80.5187	87.1963	96.04	72.1078	84.434	124.598	143.382	111.923	106.514	94.4148	103.38	94.017	92.9308	96.9463	114.697	83.0272	87.0004	77.3363	83.9107	74.8971	78.8661			78.6763	85.1896	90.2631	72.9861	74.2439	76.4557			95.6008	85.8678	79.8229	79.8797	83.4528	70.3933
		102.1	119.252	139.312	83.7927	80.6776	87.2558	96.2973	72.539	84.1937	124.686	143.571	111.713	106.387	94.1846	102.754	94.1003	93.4647	96.9452	114.591	83.1745	86.6486	77.3276	84.2151	75.3546	79.271			78.6994	84.7537	90.3669	73.5824	73.7597	76.245			95.7874	85.8061	80.4083	80.5053	83.6366	70.4623
		102.2	119.146	139.469	83.7239	81.002	87.796	96.652	72.4798	84.0686	124.757	143.764	111.388	106.116	93.9957	102.568	94.2458	94.0656	96.7309	114.471	83.1724	86.3625	77.1764	84.3299	76.2684	79.2069			78.8977	84.4151	90.1182	73.6214	73.4397	76.3082			95.8666	86.0299	80.2348	80.4991	83.7529	70.6952
		102.3	119.007	139.506	83.6695	81.1071	88.4424	96.7947	72.1812	83.8568	124.656	143.912	111.011	105.823	93.8826	103.078	93.8574	94.0082	96.5806	114.456	83.1185	86.2577	77.0016	84.1682	76.9618	78.5563			79.0041	84.0691	89.7802	73.2732	73.4692	76.3483			95.7255	86.2547	79.7266	80.3979	83.8607	70.5906
		102.4	118.667	139.563	83.7483	80.9491	88.6727	96.8259	71.7469	83.6291	124.371	144.079	110.95	105.687	93.6363	103.578	93.3473	93.4868	96.4851	114.542	82.8677	86.3773	77.001	84.1382	76.7727	77.6739			79.2288	84.1027	89.2119	72.511	73.6009	76.6362			95.3302	86.6586	79.2019	80.2643	83.9691	70.6914
		102.5	118.353	139.462	83.9321	80.6169	88.293	96.9289	71.7666	83.2864	124.007	144.283	111.122	105.626	93.415	103.955	92.9674	92.955	96.4739	114.552	82.5987	86.6724	77.6109	84.1801	75.8233	76.8332			79.1542	84.3985	89.0819	72.2166	73.7824	76.7566			94.728	86.7371	79.3377	80.1001	84.0439	70.6583
		102.6	118.129	139.312	84.1678	80.0904	87.9163	97.0712	72.1928	83.1371	123.712	144.274	111.549	105.578	93.2381	103.881	93.0517	93.0494	96.5192	114.704	82.4298	86.7603	78.239	84.2289	74.868	76.8504			78.9642	84.5704	89.0607	71.9534	73.7859	76.732			94.2795	86.5634	79.7644	80.2084	84.0273	70.68
		102.7	118.085	139.186	84.1034	79.7353	87.3581	97.4611	72.5781	83.012	123.41	144.123	112.163	105.484	93.3794	103.779	93.2231	93.3589	96.8419	114.928	82.3399	86.8324	78.3342	84.1776	74.2298	77.4992			79.0313	84.7625	89.6253	71.7728	73.7153	76.806			94.1478	86.4472	80.3567	80.3433	83.9013	70.4084
		102.8	118.041	139.065	83.9561	79.464	87.2562	97.8852	72.6133	83.1774	123.039	143.887	112.6	105.248	93.6563	103.538	93.6393	93.5859	96.9899	115.017	82.343	86.8674	77.5756	84.1956	74.5112	78.4132			79.0814	84.6438	89.8861	71.3468	73.2967	76.5903			94.3041	86.2741	80.6074	80.5642	83.7983	70.2264
		102.9	118.192	138.834	83.7132	79.3546	87.375	98.0783	72.3203	83.3102	122.662	143.459	113.028	104.767	93.9577	103.451	94.3701	93.5283	97.0339	114.99	82.385	86.6563	76.7723	84.3309	75.0512	78.8336			79.2552	84.4651	89.989	71.326	72.9826	76.5173			94.8621	86.2877	80.4749	80.3858	83.6668	70.2614
		103	118.353	138.6	83.5678	79.4557	87.9847	97.8989	72.305	83.5491	122.312	142.977	113.227	104.358	93.983	103.414	95.1801	93.224	96.9994	115.087	82.5901	86.8363	76.8012	84.2318	75.8688	78.6347			79.3679	84.4041	89.6488	71.6788	72.7531	76.4282			95.3732	86.3303	80.0118	80.1668	83.3806	70.677
		103.1	118.486	138.278	83.7884	79.4193	88.7091	97.4386	72.5682	83.933	122.127	142.678	113.195	104.275	93.9482	103.526	95.1158	93.0036	96.9604	115.121	82.7657	87.1398	77.5573	83.9466	76.0643	78.2612			79.1348	84.2765	89.3461	72.2458	73.2657	76.7242			95.5761	86.3446	79.7271	80.3336	83.339	71.2362
		103.2	118.482	137.827	83.8864	79.7504	89.239	97.3316	72.9742	83.9943	122.053	142.481	112.795	104.316	93.9188	103.342	94.2441	92.5903	96.7386	115.13	82.8429	87.5081	78.1997	83.6037	76.1106	77.621			78.9601	84.2466	89.5086	72.7571	73.6429	76.9704			95.6879	86.3989	79.7433	80.6742	83.4891	71.4028
		103.3	118.469	137.367	83.8677	80.0241	89.3229	97.3067	73.2561	83.8946	122.309	142.393	112.049	104.618	94.069	103.09	92.9469	92.5056	96.5964	115.168	82.8543	87.6945	78.3937	83.4761	75.879	77.4433			78.7743	84.1006	89.8511	73.0937	73.7571	76.9139			95.5648	86.6322	79.9381	81.0449	83.6207	71.1368
		103.4	118.446	137.108	83.681	80.1246	89.291	97.5001	73.2533	83.434	122.595	142.573	111.299	104.965	93.9817	102.937	92.15	92.5316	96.4692	115.248	82.6627	87.6889	78.2991	83.6251	75.8211	77.3189			78.4801	83.9333	90.0461	73.4889	73.3223	76.7359			95.4454	86.7349	80.0103	80.7994	83.1016	70.6468
		103.5	118.304	137.009	83.4461	80.4214	89.2532	97.3779	72.7669	83.1048	123.117	142.825	110.707	105.001	93.8608	103.285	91.6932	93.0298	96.3964	115.156	82.5162	87.4007	78.4054	83.8749	75.589	77.8269			78.4229	83.7582	89.7721	73.8822	72.7863	76.7136			95.4215	86.6851	80.1752	80.4961	82.4996	70.439
		103.6	118.203	136.92	83.3169	80.4563	89.3776	97.4448	72.0498	83.133	123.406	142.985	110.591	105.044	93.8434	103.732	91.8177	93.2748	96.3331	115.09	82.4591	86.8106	78.2836	83.9114	75.2996	78.2566			78.2593	83.7603	89.3821	74.1561	72.6366	76.8518			95.2664	86.6728	80.3333	80.0791	82.2172	70.5211
		103.7	118.288	136.935	83.273	80.3746	89.3164	97.2836	71.3336	83.4033	123.507	143.091	111.075	105.045	93.8948	103.551	92.2518	93.0109	96.2744	114.921	82.3109	86.6481	77.9616	83.6346	75.1639	78.8277			78.0967	83.9118	89.1316	74.061	72.9249	76.8796			95.0939	86.5088	80.5277	79.803	82.7174	70.5267
		103.8	118.5	137.027	83.405	80.4683	89.4266	97.4248	71.0908	83.9079	123.357	143.247	111.698	104.948	93.957	102.84	92.9159	92.309	96.2001	114.792	82.0634	86.2727	77.3771	83.4084	75.1441	79.0639			78.1201	84.2388	88.8234	73.6648	73.6719	76.5779			94.7381	86.513	80.5492	79.7068	83.0638	70.3512
		103.9	118.62	137.17	83.4874	80.2599	89.5303	97.1852	71.0151	83.9467	123.344	143.253	112.211	104.937	93.717	102.138	93.2828	91.8219	96.2448	114.733	81.7528	85.9695	76.9024	83.6687	75.4816	78.8394			78.0893	84.5768	88.5193	73.1746	74.2012	75.7807			94.4794	86.5708	80.5724	79.7687	83.3637	69.7459
		104	118.746	137.411	83.8011	79.8544	89.819	96.7358	71.6318	83.7254	123.039	143.115	112.555	104.928	93.8462	102.417	93.2508	91.8728	96.3658	114.814	81.514	85.9989	76.8244	84.1882	75.9231	78.1734			78.1631	84.7266	88.4976	72.7854	74.1119	75.1576			94.3177	86.4678	80.6342	80.22	82.999	69.5973
		104.1	118.82	137.879	84.0945	79.6176	89.8742	96.0284	72.3943	83.1431	122.715	142.965	112.494	104.778	94.0979	102.872	93.0707	92.3193	96.506	114.792	81.4987	85.8443	77.098	84.5598	76.3964	77.4412			78.327	85.1504	89.3232	72.4184	73.6737	74.9423			94.2247	86.3483	80.5672	80.4722	82.9888	69.8162
		104.2	118.686	138.336	84.4254	79.4225	89.9	95.9717	72.9846	82.6433	122.472	142.905	112.311	104.752	94.629	103.44	92.9211	92.9328	96.6682	114.816	81.7806	85.9667	77.5742	84.4784	76.4886	77.3478			78.4599	85.4728	90.3851	72.6117	73.3381	75.6144			94.4556	86.182	80.5119	80.6451	82.7929	70.4907
		104.3	118.293	138.754	84.7413	79.4269	89.6271	96.324	72.6782	82.3451	122.191	142.824	111.976	104.837	94.7574	103.287	92.9822	93.4652	96.8546	114.764	82.2203	86.244	77.6816	84.2237	76.264	77.6206			78.6081	85.9353	91.0481	72.7527	73.4049	76.508			94.9051	86.1216	80.3089	80.3778	83.258	70.6706
		104.4	117.879	138.997	84.7171	79.5548	89.1476	96.8344	72.0621	82.5016	121.764	142.911	111.501	104.975	94.6423	102.914	92.9673	93.5857	97.0022	114.621	82.4674	86.2611	77.5669	84.0841	76.1154	78.2701			78.7248	86.4822	90.983	73.2382	73.7449	76.8888			95.3752	86.1971	80.0217	80.0304	83.5277	70.3494
		104.5	117.591	139.121	84.6938	79.576	88.3656	96.7149	71.8436	82.8687	121.505	143.148	110.986	105.47	94.5188	102.149	93.2018	93.3506	96.863	114.377	82.6107	86.2375	77.5251	84.2106	75.9946	78.639			78.7881	86.3721	90.4086	72.814	74.148	76.6134			95.7072	86.1133	79.5391	79.4966	83.6916	69.8537
		104.6	117.372	139.084	84.6437	79.2894	87.9223	96.8629	71.9531	83.1139	121.468	143.42	110.466	105.835	94.4961	101.543	93.5141	93.1396	96.6323	114.153	82.6076	86.2963	77.7912	84.486	75.7464	78.8502			78.9476	85.9424	89.9134	72.5972	74.6041	75.5776			95.8751	85.963	79.1653	79.2098	83.6014	69.8151
		104.7	117.315	139.148	84.5884	78.9513	87.8831	96.7152	72.3217	82.8531	121.477	143.575	110.312	106.041	94.5699	101.337	93.8696	93.4584	96.3416	113.96	82.3618	86.3756	77.8581	84.7209	75.2429	78.404			78.862	85.4422	88.9719	72.173	74.619	75.0414			95.6019	85.7175	79.242	79.0587	83.6042	70.117
		104.8	117.534	139.261	84.7062	78.734	88.7222	96.9332	72.4508	82.6216	121.763	143.668	110.483	106.125	94.4209	101.37	93.8086	93.9277	96.0316	113.897	82.3953	86.7465	77.6824	84.6947	74.9692	77.558			78.6673	84.8848	88.344	72.3294	74.8161	74.7853			95.1058	85.5536	79.6056	79.1931	83.9306	70.3898
		104.9	117.82	139.347	84.6953	78.6822	89.7457	96.8362	72.8454	82.7883	122.108	143.538	110.723	105.994	93.9682	101.577	93.0951	94.0516	95.5447	113.927	82.4222	87.2999	77.3657	84.507	74.9846	76.6832			78.3831	84.6114	87.795	72.7419	74.5567	75.109			94.8349	85.8403	80.1108	79.4811	83.7768	70.1564
		105	118.025	139.276	84.5225	79.0433	90.7298	97.1171	73.2241	83.6307	122.408	143.287	111.186	105.965	93.66	101.54	92.3152	93.6256	95.3495	114.08	82.4749	87.6348	77.3427	84.1569	75.3844	76.4418			78.0044	84.5568	88.0178	73.1538	74.4314	75.417			94.4089	86.2169	80.2129	79.9248	83.4808	69.7081
		105.1	118.239	139.128	84.4115	79.4756	90.8609	97.1907	73.8633	84.2374	122.66	142.949	111.494	105.953	93.062	101.56	91.8696	93.0358	95.3305	114.345	82.7183	87.8019	77.3207	83.95	75.4509	77.0432			78.1656	84.2604	88.6054	73.4199	73.3704	75.896			94.1544	86.6438	80.1549	80.3144	83.2088	69.3931
		105.2	118.405	138.809	84.1456	79.7497	90.4781	97.0076	74.1579	84.2654	122.929	142.635	111.637	105.938	92.9233	101.494	91.7739	92.8892	95.4309	114.684	82.8739	87.6794	77.0981	83.7972	75.0862	78.147			78.4879	83.8676	89.3309	73.2294	72.7421	76.6196			94.4113	86.9679	79.7562	80.236	83.6078	69.4917
		105.3	118.372	138.265	83.9372	79.8094	89.8191	96.5739	74.2708	83.6656	123.03	142.255	111.871	105.828	92.5808	101.483	91.8181	93.5381	95.5611	114.946	83.2188	87.5098	76.8962	83.9037	74.4096	79.2219			78.9983	83.6393	90.2286	72.9138	72.5476	77.2864			94.8117	86.9611	79.296	80.2973	83.9724	70.1497
		105.4	118.379	137.861	83.7336	79.6684	89.5047	96.3277	73.8683	83.1186	123.088	142.04	111.756	105.745	92.679	101.634	91.5	94.2268	95.9219	115.007	83.3891	87.4384	76.7983	84.0992	74.1542	79.6777			79.5097	83.5181	90.6336	72.4536	73.2202	77.7359			95.3364	87.0103	78.685	80.2272	83.9523	70.84
		105.5	118.507	137.771	83.3436	79.6369	89.3778	96.2641	73.7546	82.6599	123.15	141.986	111.674	105.826	92.7698	101.756	91.6278	94.4632	96.2304	114.945	83.3649	87.3336	77.14	84.3472	74.7854	79.5882			79.5282	83.7103	90.6989	71.8248	73.7401	77.7024			95.9774	86.9423	78.2782	80.4144	83.6599	71.2944
		105.6	118.545	137.819	83.2229	79.7771	89.2352	96.205	73.4566	82.3504	123.109	142.071	111.56	105.845	93.1962	101.984	91.8264	93.6669	96.401	114.743	82.9874	87.2897	77.621	84.5302	75.7188	79.0054			79.4498	84.0825	90.046	71.3387	73.7922	77.1368			96.2388	86.7829	78.1241	80.2723	83.541	71.1572
		105.7	118.623	137.983	83.4021	80.1619	88.581	95.7363	73.2676	82.1702	122.881	142.178	111.287	105.791	93.7972	102.138	92.3816	93.3	96.497	114.375	82.2664	86.9863	78.1399	84.6331	76.3502	78.3419			79.0905	84.1431	89.7264	71.3107	73.8051	76.4022			96.1061	86.4753	78.3496	80.4971	83.5777	70.7468
		105.8	118.814	138.427	83.5578	80.3992	87.7554	95.3003	72.5564	82.4078	122.57	142.453	111.231	105.535	94.4167	102.312	92.803	93.3171	96.5392	113.991	81.6025	86.3378	78.3662	84.5522	76.2286	77.544			78.7331	84.1036	89.5538	71.7194	74.2333	75.705			96.1542	85.9862	78.7413	80.7566	83.4726	70.3106
		105.9	118.836	138.713	83.9969	80.3636	87.3101	95.2162	72.0897	82.9134	122.381	142.686	111.143	105.033	94.1914	102.721	93.1412	93.7544	96.5396	113.816	81.1497	85.8331	78.1489	84.0941	75.7751	77.2099			78.5201	83.9593	89.7864	72.4077	74.977	75.3201			96.1079	85.6234	79.2398	80.8582	83.3297	69.9409
		106	118.584	138.689	84.199	80.0519	87.4016	95.6201	72.019	83.5218	122.177	142.791	110.992	104.685	93.3632	103.045	93.5367	93.6111	96.4046	113.792	81.2641	85.6247	77.8303	83.5791	75.5218	77.1954			78.4713	83.4401	89.872	73.0251	75.495	75.4929			96.0201	85.432	79.4514	80.4143	83.3539	69.7329
		106.1	118.465	138.436	84.2343	79.6336	87.6099	96.0537	72.1209	83.9626	121.994	142.771	110.973	104.645	92.4207	103.288	93.5728	93.25	96.2158	113.931	81.645	85.7473	77.3951	83.7281	75.6849	77.4722			78.8324	83.1976	90.1098	73.4806	75.5154	75.8583			95.9701	85.6198	79.5252	79.7146	83.587	69.6948
		106.2	118.303	138.185	84.4483	79.4631	87.5741	96.4271	72.1972	84.0999	121.935	142.737	110.984	104.844	92.5537	103.201	93.2361	93.0752	95.9911	114.135	82.203	86.4163	77.0522	84.4492	76.1444	77.4242			79.0843	83.0416	90.1883	73.7116	75.127	76.6434			95.6953	85.9011	79.4143	79.1439	83.6739	69.6684
		106.3	118.15	137.831	84.3984	79.3628	87.5966	96.7419	71.6526	83.9897	121.956	142.543	110.938	105.148	93.4338	102.87	92.6452	93.0439	95.8496	114.363	82.8483	86.9941	76.5329	85.135	76.494	77.5794			79.3733	82.8905	90.3681	73.9113	74.3986	76.7556			95.3877	86.2137	79.5011	78.9896	83.4753	69.6896
		106.4	118.201	137.715	84.3399	79.5376	87.7789	97.1094	71.4452	83.4369	121.588	142.31	111.091	105.358	94.0057	102.529	92.308	93.167	95.5673	114.468	83.1968	87.2732	76.1638	85.0073	76.6698	77.5721			79.336	83.4193	90.3352	74.2833	73.7418	76.7213			95.1557	86.2297	79.6837	79.3544	83.0166	69.7804
		106.5	118.508	137.844	84.1482	79.5196	87.8688	96.9463	71.3768	82.9271	121.221	142.038	111.113	105.371	93.8326	101.949	92.8424	93.0843	95.341	114.575	83.4448	87.3152	75.8517	84.4659	76.4638	77.846			78.9837	84.0181	90.2959	74.3481	73.5268	76.2103			95.1017	85.9592	80.0106	80.1149	82.7707	70.2584
		106.6	118.634	138.19	84.0255	79.3411	87.6788	96.5559	72.0262	82.4602	120.854	141.827	110.924	105.114	92.986	101.515	93.2859	93.4227	95.2744	114.633	83.628	87.0879	75.719	83.6803	76.1277	77.9737			78.8004	84.6033	89.706	73.7894	74.0907	75.9393			95.0979	85.6379	80.4311	80.7722	82.5589	70.6051
		106.7	118.639	138.475	83.9858	79.3108	87.2971	96.0446	72.4749	82.819	120.557	141.682	110.645	104.878	92.125	101.568	93.3442	93.7326	95.2676	114.754	83.3574	87.0019	75.7926	83.0598	75.8736	78.5423			78.6449	85.1842	89.2042	72.8178	74.6368	75.7613			95.1612	85.3318	80.5231	81.0493	82.714	70.7483
		106.8	118.611	138.614	83.9933	79.451	87.1902	95.7733	72.5991	83.3632	120.295	141.7	110.078	104.778	91.5174	101.864	92.4196	94.1561	95.1823	114.781	83.0661	87.0253	75.927	82.3572	76.2001	78.8533			78.7598	85.3183	88.7841	72.078	74.9469	75.8497			95.2849	85.2493	80.4466	80.9052	82.7372	70.5466
		106.9	118.454	138.517	84.1228	79.8716	87.4903	95.5784	72.3168	83.7598	120.487	141.648	109.676	104.803	91.6703	102.24	91.699	94.1326	95.2418	114.858	82.8639	87.1475	76.222	82.3126	76.5021	78.7241			78.8781	85.0626	88.7868	71.9696	74.9447	76.2993			95.2928	85.2917	79.9911	80.4773	83.0288	70.4766
		107	118.202	138.272	84.0948	80.2362	88.1191	95.7621	72.0489	83.6573	120.761	141.643	109.374	104.922	92.5174	101.943	91.3032	93.8868	95.374	114.866	82.5619	87.3109	76.4366	82.49	76.3806	78.275			78.8671	84.7417	88.7561	72.3408	75.1656	76.6291			95.2967	85.4879	79.7948	80.1661	83.0548	70.4711
		107.1	118.012	137.838	83.9994	80.5254	88.6046	96.3114	72.1833	83.3946	121.168	141.642	109.348	105.096	93.3973	101.764	91.1206	93.6812	95.4257	114.776	82.7329	87.312	77.0217	83.0506	75.4442	78.2067			78.7733	84.4274	88.9116	72.8382	75.3181	76.7396			95.1443	85.5183	79.4763	80.063	82.9683	70.4499
		107.2	117.972	137.387	83.9326	80.4689	88.5443	96.8113	72.3387	83.2594	121.547	141.559	109.709	105.079	93.2819	101.48	90.5663	93.403	95.4766	114.691	83.025	87.1353	77.6334	83.3232	74.7549	78.4237			78.5599	84.173	89.2616	73.1741	75.2898	76.5326			94.8157	85.6683	79.5041	80.395	83.1676	70.3508
		107.3	117.856	137.193	83.6738	80.2047	88.0623	96.67	72.5861	82.8364	122.002	141.451	110.066	104.973	92.5396	101.442	89.9068	93.333	95.5791	114.775	83.2941	86.8156	78.049	83.5861	73.9859	78.565			78.3994	84.3372	89.6408	73.1228	74.6997	76.5064			94.3788	85.9244	79.6151	80.5812	83.5176	70.282
		107.4	117.814	137.149	83.2767	80.029	87.5963	96.3358	72.6334	82.4623	122.298	141.564	110.399	104.975	91.8936	101.288	89.8238	92.7904	95.6582	114.838	83.6807	86.2686	77.789	83.9241	73.9201	78.4623			78.3918	84.6026	89.7868	72.9248	74.2613	76.4893			94.0281	86.1222	80.2012	80.6341	84.1787	70.3237
		107.5	117.652	137.07	82.9901	79.7969	87.4981	96.2049	72.5552	82.1349	122.59	141.746	110.365	104.735	92.2138	101.081	90.4826	92.139	95.6916	114.801	83.7095	85.7886	77.2646	84.126	73.9807	78.4013			78.3698	84.9291	89.7136	72.6884	73.6672	76.2901			93.8019	86.5548	80.6298	80.398	84.2842	70.4718
		107.6	117.686	137.204	82.8453	79.4883	87.6983	96.4973	72.5241	82.3511	122.667	141.932	110.036	104.482	92.7651	100.649	91.5087	91.5898	95.6835	114.781	83.527	85.7216	77.1049	84.0074	74.8629	78.2788			78.4679	85.1053	89.5322	72.6382	73.5311	76.159			93.8527	86.8296	80.679	80.3864	84.2066	70.7196
		107.7	117.767	137.462	83.0618	79.267	87.7307	96.7313	72.2574	82.7633	122.698	142.173	109.759	104.138	93.3873	100.139	92.0102	91.6291	95.6198	114.592	83.2769	85.9171	77.51	83.3183	75.4492	77.732			78.5807	84.8806	89.1366	72.64	73.2939	76.2871			94.1828	86.8178	80.4321	80.1917	83.4119	70.8596
		107.8	117.909	137.502	83.5229	79.1331	87.623	96.7002	72.2282	83.4908	122.552	142.25	109.752	103.84	93.3429	99.8148	92.2592	92.2932	95.4898	114.324	82.8981	86.3437	78.027	82.7153	75.6423	77.1463			78.5956	84.4538	88.6987	72.6414	73.5213	76.6724			94.4589	86.6304	80.0988	80.1488	82.682	70.8827
		107.9	117.986	137.425	84.0301	78.9272	87.5199	96.456	71.7797	84.0484	122.416	142.106	110.086	103.819	93.2993	99.8459	92.2747	92.8557	95.2459	114.042	82.8687	86.7565	78.0984	82.5234	75.5568	76.6614			78.7672	83.8295	88.7749	72.5578	73.8281	76.6377			94.7329	86.2184	79.9313	79.9632	82.1227	70.3289
		108	118.347	137.416	84.3005	79.0019	87.7489	96.1046	71.7296	84.5618	122.207	141.952	110.323	104.08	93.0279	99.8729	92.4211	93.095	95.051	113.74	82.9781	86.7664	77.7677	82.7823	75.5954	76.9453			78.8652	83.4194	89.4756	72.5769	74.271	76.3254			94.9165	85.7446	79.6844	80.1397	82.4582	69.6004
		108.1	118.474	137.41	84.3736	79.0708	88.0076	96.1548	71.6819	84.7122	122.147	141.788	110.406	104.405	93.1647	100.05	91.9492	92.8523	94.991	113.509	82.8743	86.5455	77.3976	83.1588	76.0448	77.1367			78.9603	83.3726	90.34	72.6638	74.2588	75.9698			95.0381	85.5238	79.533	80.1022	83.1052	68.9752
		108.2	118.506	137.364	84.3088	79.0753	88.119	96.5171	72.031	84.8801	122.138	141.709	110.257	104.59	93.2469	100.477	91.3766	92.5262	95.0844	113.447	82.8315	86.4015	77.008	83.2397	76.616	77.4868			78.9125	83.5496	90.6449	73.01	74.103	76.0638			95.0991	85.5053	79.2868	79.9666	83.8303	69.0512
		108.3	118.624	137.424	84.1353	79.1925	88.1414	96.718	72.1339	84.6232	122.203	141.935	110.012	104.74	93.1771	101.062	90.7967	92.2068	95.352	113.36	82.5678	86.3388	76.8001	83.1013	77.2423	77.0957			78.6489	84.0849	90.3642	72.9683	73.9358	76.2493			95.2404	85.4826	78.9167	79.7947	84.1984	69.3456
		108.4	118.802	137.631	84.0028	79.0509	88.1417	96.4519	72.0737	84.6411	122.225	142.321	110.056	104.555	92.8271	101.054	90.9239	92.114	95.8114	113.292	82.3418	86.3642	76.8583	82.7787	77.2983	76.9523			78.3911	84.6236	89.7276	72.6717	74.016	76.3982			95.4326	85.5544	78.3327	79.8881	84.2017	69.8242
		108.5	118.819	137.789	83.6779	78.9826	88.253	95.8639	71.9007	84.3382	122.154	142.588	109.981	104.358	92.6864	100.44	91.081	91.7509	96.233	113.471	82.4696	86.7497	77.5261	82.6696	76.8228	76.5517			78.1672	85.0066	89.1467	71.9693	74.1862	76.4574			95.6626	85.7832	78.1567	80.1267	83.8304	70.0676
		108.6	118.915	137.836	83.3257	78.9736	88.3836	95.7197	71.8596	83.8603	121.898	142.824	109.87	104.248	92.7804	99.9642	91.5527	91.625	96.62	113.535	82.7033	87.1204	78.2376	82.9556	76.3493	76.7141			78.0735	85.1316	88.9116	71.7351	74.2554	76.4299			96.2044	85.9633	78.3626	80.2993	83.3574	70.4856
		108.7	119.009	137.753	83.0806	79.0379	88.385	96.2142	72.0106	82.8659	121.527	142.884	109.814	103.989	92.8409	100.175	91.8132	91.2432	96.7986	113.571	82.911	87.3403	78.7148	83.2389	76.4166	76.606			78.0909	84.8563	89.0462	71.8751	74.5849	76.394			96.6912	86.1426	78.995	80.2441	83.0153	70.3277
		108.8	118.932	137.728	82.8967	79.3209	88.2063	96.9738	72.2774	82.1588	121.192	142.518	109.747	103.829	92.6542	100.712	92.3742	91.3116	96.7199	113.628	83.0069	87.4871	78.4861	83.4887	76.5889	76.8199			78.1328	84.4503	89.2679	72.3013	75.0334	76.1738			97.0103	86.3591	79.5311	80.0738	83.098	70.1652
		108.9	118.775	137.602	83.0206	79.4433	87.6803	97.441	72.4712	82.346	120.775	142.025	110.05	103.81	92.3447	101.029	92.7064	91.1217	96.4926	113.672	83.0118	87.1953	77.9103	83.4149	76.3328	76.7173			78.0464	84.1206	89.0973	72.6339	75.644	76.1774			97.1194	86.0946	79.5773	79.5994	83.3709	69.8519
		109	118.643	137.561	83.31	79.4932	87.4831	97.2814	72.5854	82.8423	120.472	141.549	110.507	103.818	92.379	100.988	93.0197	91.1946	96.2243	113.559	82.9758	86.7901	77.1542	83.6491	75.9194	76.8076			78.0794	83.9702	88.8668	72.9859	75.9436	76.0418			96.748	85.7112	79.0969	79.1269	83.5797	69.8743
		109.1	118.445	137.562	83.5076	79.4742	87.5167	96.7309	72.4912	82.8869	120.293	141.082	110.821	103.941	92.5837	101.182	92.6663	90.9932	95.8834	113.553	83.1198	86.4874	76.7173	83.8617	75.7511	76.6848			78.2137	83.8716	88.7087	73.3516	75.5971	76.0441			96.3187	85.4248	78.3606	78.9243	83.5282	69.697
		109.2	118.23	137.705	83.8134	79.4034	87.707	96.442	72.4244	82.1344	120.256	140.719	111.097	104.177	93.0766	101.403	91.952	91.2192	95.7986	113.544	83.174	86.3841	76.6412	84.0087	76.078	76.8676			78.2781	83.8776	88.8994	73.2962	74.8257	76.0546			95.9721	84.9659	78.1771	78.8254	83.4243	69.6059
		109.3	118.154	137.742	84.0124	79.534	87.5802	96.2749	71.8436	81.3806	120.16	140.481	111.127	104.173	93.1372	101.6	91.0487	91.4484	95.977	113.543	83.0758	86.341	76.8557	83.6998	76.0686	77.0741			78.5268	83.7071	89.1771	72.7611	74.0566	76.3346			95.686	84.6539	78.7222	78.9249	83.5073	69.4991
		109.4	118.275	137.625	83.9412	79.6319	87.5066	96.4259	71.1084	81.6729	120.288	140.256	110.988	104.01	93.0416	101.493	90.9748	91.9608	96.2257	113.541	82.9566	86.1246	76.9952	83.5466	76.1269	77.1301			78.7091	83.5849	89.3876	72.152	73.7248	76.3458			95.5761	84.4989	79.3628	78.6716	83.4909	69.7593
		109.5	118.294	137.466	83.9671	79.7631	87.6291	96.4813	70.2201	82.4879	120.368	140.091	110.784	103.869	92.5399	101.305	91.58	91.9188	96.5294	113.541	82.6553	85.9179	77.1183	83.3347	76.1492	76.9827			78.7981	83.6444	89.7369	71.9731	73.8197	76.2038			95.4234	84.475	79.6936	78.65	83.3116	69.942
		109.6	118.45	137.305	83.8026	79.8776	88.2507	96.7498	70.5711	83.1714	120.486	139.981	110.465	103.725	92.3479	101.265	92.3643	91.7922	96.7979	113.615	82.6248	85.6961	76.9536	83.2339	76.4009	76.814			79.0687	83.6014	89.7732	72.1646	74.0592	76.0187			95.3544	84.5031	79.378	78.5362	83.1218	70.2546
		109.7	118.633	137.072	83.5622	79.8472	88.4223	96.7993	71.4451	83.159	120.438	139.812	110.295	103.84	92.1182	100.923	92.2404	91.5367	96.7458	113.566	82.7958	85.8045	76.7759	82.6812	76.4639	76.829			79.4911	83.6056	89.583	72.1666	74.4641	76.0621			95.477	84.7247	79.0697	78.6518	83.4917	70.2398
		109.8	118.763	136.774	83.5116	79.9734	88.5477	96.3224	72.4719	83.1057	120.356	139.781	110.293	104.016	91.8483	100.686	91.6016	91.7208	96.5133	113.473	82.7024	86.3469	76.3969	82.6788	76.1617	76.7912			79.8772	83.47	89.0579	71.9497	74.6482	76.0363			95.7986	84.9377	79.0277	78.7629	84.1623	70.0206
		109.9	118.655	136.802	83.3885	79.9352	87.9649	95.3433	72.4402	83.2496	120.061	139.753	110.588	103.861	91.4058	100.461	91.2812	91.8103	96.3241	113.437	82.5281	86.8425	76.4772	82.8872	75.9549	76.6474			80.3569	83.303	88.6988	71.8182	74.661	75.8438			96.2206	84.9807	79.2903	78.9167	84.4554	69.7129
		110	118.576	136.843	83.4101	79.7711	87.678	94.5977	72.2599	83.3016	119.856	139.792	110.989	103.588	90.895	100.616	91.5221	91.978	96.1548	113.488	82.145	87.0258	76.8896	83.5699	75.9047	76.8168			80.6398	83.1348	88.8272	71.8944	74.5281	75.7003			96.3099	85.3829	79.6916	79.043	83.9744	69.7652
		110.1	118.418	136.887	83.5148	79.52	87.504	94.5103	72.287	82.9847	119.672	139.805	111.141	103.204	90.8898	100.942	91.6287	92.1417	96.1006	113.354	81.5931	86.8164	77.4233	83.615	76.4194	77.2211			80.5256	83.2013	88.9641	72.183	74.3246	75.8163			96.052	85.728	79.9419	79.0169	83.2096	70.1036
		110.2	118.334	136.89	83.7503	79.0143	87.9306	95.0083	72.4654	82.6639	119.802	139.904	111.018	102.817	91.0288	101.179	91.0717	92.7908	96.2974	113.378	81.41	86.3498	77.3797	83.5178	77.1057	77.795			80.3665	83.3541	89.1791	72.1488	73.8043	76.0273			95.4839	85.9624	79.9759	79.1363	82.7559	70.4
		110.3	118.318	137.059	84.0922	78.7657	88.518	95.5147	72.2578	82.5629	119.998	140.104	110.605	102.677	91.5879	101.615	90.4744	93.3357	96.5907	113.566	81.3189	85.9063	76.9442	83.304	77.5807	77.8374			79.8681	83.4562	89.1312	72.0483	73.2453	76.1851			94.8639	86.234	79.7069	79.2316	82.8084	70.3989
		110.4	118.379	137.013	84.4522	78.7162	88.867	95.9592	71.4272	82.631	120.236	140.342	110.034	102.674	91.9518	101.775	90.5227	93.398	96.7729	113.815	81.4888	85.9001	76.7026	83.5678	77.4411	77.4919			79.308	83.6675	89.1698	71.8763	73.0297	75.9731			94.6053	86.1075	79.1694	79.6576	82.9878	70.4962
		110.5	118.474	137.046	84.8155	78.8069	88.5624	96.082	70.9637	82.4832	120.462	140.397	109.638	102.578	92.3663	101.902	91.1279	92.6809	96.926	113.905	81.8019	86.0499	77.0169	83.9932	77.0217	77.0723			78.8966	83.4991	89.3597	72.122	73.5763	76.0222			94.516	85.8607	78.8263	79.98	83.1517	70.6391
		110.6	118.662	136.983	84.9721	79.1451	87.8536	96.0847	71.0048	82.3308	120.543	140.49	109.675	102.556	92.5813	101.79	91.7784	92.0866	96.9948	114.081	81.9981	86.1498	77.2552	84.0786	76.4592	77.2317			78.5666	83.354	89.544	72.6882	74.1436	76.1759			94.6184	85.7636	78.7048	80.246	83.2227	71.0426
		110.7	118.657	137.053	84.8399	79.3838	87.0486	95.6761	71.5811	82.4256	120.319	140.481	109.907	102.724	92.8838	101.867	92.0889	91.9413	96.9491	114.178	82.3508	86.1607	77.2208	83.7616	75.9028	77.8016			78.5394	83.2509	89.6747	73.1602	74.5694	76.7201			94.816	85.6588	78.8318	80.1086	83.3029	71.2166
		110.8	118.459	137.105	84.5459	79.6303	86.8391	95.2574	71.8839	82.6127	120.113	140.385	110.224	102.821	93.1564	102.036	92.2858	92.2611	96.8573	114.031	82.5102	86.0075	76.7832	83.1903	75.6704	78.1601			78.6215	83.2602	89.4428	73.2077	74.5637	76.846			94.8705	85.6417	78.765	79.7213	83.3508	71.3236
		110.9	118.269	137.269	84.4426	79.9973	87.1551	94.8011	71.9157	82.5573	120.013	140.315	110.595	103.052	93.4076	101.949	92.3887	92.0338	96.7742	113.733	82.5619	85.9676	76.7676	82.9894	75.6794	78.0423			78.7677	83.5179	89.4088	72.7477	74.6353	76.5584			95.0845	85.7313	78.5953	79.5484	83.3449	71.1763
		111	118.181	137.387	84.4473	80.1838	87.9377	95.0971	71.9626	82.3083	119.898	140.488	110.588	103.285	93.4078	101.7	92.308	91.6667	96.6326	113.489	82.6123	85.8978	76.8913	82.9416	76.0378	77.8004			79.0387	83.8503	89.5236	72.5328	74.4107	75.8427			95.305	85.7034	78.5322	79.4777	83.0873	70.9331
		111.1	118	137.695	84.6868	80.278	88.7164	95.7729	72.2237	82.334	119.998	140.603	110.521	103.477	93.2736	101.331	91.9532	91.2953	96.5695	113.239	82.747	85.9799	77.3786	82.8492	75.9363	77.8726			79.2411	84.1988	89.6327	72.5458	73.8949	75.5209			95.3654	85.655	78.675	79.6102	82.8474	70.5677
		111.2	117.999	137.85	84.9438	80.1043	88.8936	96.5032	72.4478	82.4151	120.12	140.676	110.493	103.753	93.0744	101.182	91.3281	91.612	96.4903	112.983	82.7991	85.9483	77.4993	82.5996	76.0786	78.0373			79.3498	84.5359	89.3646	72.6967	73.2152	75.5567			95.2265	85.5899	79.1512	79.5457	82.6263	70.3804
		111.3	118.234	137.959	84.7477	79.6758	88.5184	96.526	72.6592	82.196	120.238	140.667	110.411	103.997	93.0474	101.042	90.867	91.8014	96.2932	112.978	82.7223	85.7396	77.6813	82.4581	76.226	78.0772			79.2364	85.0101	89.0773	72.4639	73.0801	76.0293			94.8924	85.467	79.5741	79.5803	82.7489	70.3041
		111.4	118.623	137.957	84.4683	79.3159	88.122	96.2226	72.6607	81.5519	120.28	140.653	110.335	104.198	93.1606	100.99	90.2681	91.8979	96.1809	113.103	82.5893	85.5348	77.6226	82.825	76.6539	77.9351			78.7194	85.3845	89.1098	72.1314	73.4993	76.2668			94.3778	85.3993	79.891	79.4909	82.7546	70.186
		111.5	118.932	137.689	84.1184	79.0185	88.1342	95.8681	72.6787	81.3339	120.226	140.479	110.245	104.159	93.089	100.677	89.9937	91.676	96.1956	113.299	82.2692	85.1094	77.7006	83.3909	76.7092	77.7168			78.2339	85.6856	89.6181	72.01	74.2098	76.5674			93.9379	85.327	79.6924	79.5192	82.8653	69.8352
		111.6	119.179	137.195	83.8957	79.0024	88.6023	95.801	72.5613	81.7908	120.02	140.292	110.15	103.89	92.8153	100.388	89.9824	91.6693	96.1364	113.42	82.2017	84.9274	77.5429	84.0757	76.4042	77.4512			78.087	85.6326	90.0827	72.2943	74.2284	76.6962			93.9716	85.3454	79.1734	79.7013	82.9134	69.5006
		111.7	119.404	136.87	83.8805	79.1066	88.8186	95.5282	72.3119	82.6343	120.016	140.286	109.932	103.554	92.4181	100.024	90.539	91.6356	96.191	113.58	82.5286	85.0044	77.2368	84.1497	75.7071	76.9257			78.2106	85.2735	90.1023	72.5838	73.9238	76.5008			94.2074	85.3591	78.6048	80.0014	82.9061	69.6368
		111.8	119.518	136.594	83.7534	79.2195	88.9033	95.3062	72.0878	83.1652	119.995	140.269	109.952	103.018	92.011	99.9421	91.2813	91.5688	96.4374	113.559	82.818	85.3902	77.0399	83.9394	75.0698	76.5274			78.7563	84.7387	89.6191	72.8452	73.1362	76.2869			94.725	85.279	78.2601	79.9789	82.5447	69.7913
		111.9	119.371	136.314	83.7168	79.3222	88.7492	95.0976	71.6083	83.2751	120.01	140.22	109.943	102.624	91.4886	99.9438	91.6596	91.2401	96.5605	113.411	82.989	86.1	76.8432	83.392	74.6502	76.4489			79.3011	84.2832	89.1426	72.7347	73.0932	76.1032			95.25	85.2971	78.1387	79.8923	82.0516	69.7938
		112	119.238	136.309	83.4585	79.3656	88.7297	95.2133	71.4456	83.1072	120.17	140.1	109.83	102.325	91.0089	100.123	91.5512	91.0799	96.4908	113.142	82.9248	86.5841	76.9142	83.265	74.4933	76.5652			79.4069	84.1786	89.3047	72.7279	73.4909	76.3427			95.4772	85.3219	78.1064	80.0294	81.6383	69.3582
		112.1	119.153	136.443	83.1839	79.4907	89.1971	95.5203	71.4886	82.9339	120.324	139.928	109.625	101.89	91.3238	100.403	91.1667	91.1402	96.4463	113.15	82.628	86.6927	76.9271	83.1129	74.5711	76.4132			79.2779	84.2228	89.8584	72.454	74.5067	76.3464			95.3949	85.4793	78.1063	80.4946	81.5337	69.0504
		112.2	118.998	136.441	83.1024	79.5681	89.3629	95.8646	71.9781	82.7993	120.304	139.551	109.276	101.534	92.2329	100.497	90.8172	91.4736	96.3346	113.197	82.5055	86.4993	77.4276	82.8491	74.9714	75.9557			78.9484	84.5546	90.6013	72.4197	75.1839	76.167			95.1711	85.7219	78.5169	80.6441	81.67	68.9264
		112.3	118.86	136.364	82.8535	79.5203	89.3987	96.3457	72.5219	82.9648	120.324	139.237	109.045	101.208	93.1933	100.46	90.6047	91.7008	96.1782	113.286	82.5123	86.0655	77.7774	82.3579	75.74	75.8726			78.6818	84.7913	90.8997	72.4954	75.4824	75.9788			95.2097	85.9148	79.0116	80.3789	82.128	69.1036
		112.4	118.827	136.466	82.893	79.4186	88.5769	96.7619	73.0531	83.1203	120.497	139.05	108.839	101.147	93.1587	100.146	90.4714	91.5906	96.1314	113.389	82.5667	85.6268	77.9686	82.0982	76.1309	76.3783			78.8344	84.664	91.1334	72.8288	75.2733	75.945			95.3908	86.0154	79.5009	80.0018	82.5023	69.3316
		112.5	118.647	136.584	82.9978	79.1849	88.1539	96.8753	73.5236	83.2718	120.565	139.133	108.96	101.428	92.5381	99.8916	90.4514	91.491	96.2951	113.591	82.4985	85.5235	77.4588	82.0958	76.1733	77.0559			79.1869	84.2676	90.921	73.241	75.052	75.8433			95.9383	86.0222	79.0809	79.7481	82.7267	69.6432
		112.6	118.55	136.793	83.1121	78.9807	87.6256	96.7974	73.7786	83.0089	120.645	139.248	109.181	102.197	91.8029	99.4653	90.6031	91.1403	96.406	113.535	82.2811	85.5017	76.873	82.3272	75.7474	77.5426			79.4976	83.5928	90.5623	73.2219	74.7532	75.7141			96.5026	86.0094	78.5744	79.9309	83.2808	69.8733
		112.7	118.459	137.039	83.4387	79.0261	87.7159	96.6093	73.3152	82.7376	120.805	139.635	109.14	102.911	91.5161	99.5394	90.628	91.1968	96.5322	113.33	82.1373	85.6014	76.4048	82.5676	75.8102	77.8488			79.6325	83.1093	89.892	72.9442	74.6422	75.523			96.5511	86.0374	78.1163	80.5437	84.0227	70.2264
		112.8	118.364	137.355	83.5323	79.0609	88.0616	96.6124	72.5912	82.4117	120.972	139.935	109.459	103.294	91.6613	99.6832	90.628	91.1252	96.5342	113.154	82.0551	85.7404	76.2162	82.8894	76.1036	78.217			79.4127	82.9971	89.4927	72.2764	74.5368	75.911			96.3013	86.105	78.4927	81.2319	84.7388	70.5091
		112.9	118.209	137.564	83.577	79.1391	88.741	96.4537	71.6694	82.3909	120.81	140.044	109.637	103.568	92.0094	100.034	90.6824	91.4026	96.4973	113.09	82.2306	85.8846	76.114	83.154	76.6077	78.2879			79.2636	83.4053	89.4906	72.0784	74.5943	76.3559			95.7197	85.9934	78.8458	81.2882	84.5004	70.8497
		113	118.261	137.775	83.417	79.2414	88.8582	96.1832	71.5888	82.52	120.545	140.001	109.738	103.301	92.5677	99.8518	90.7526	91.6131	96.3228	113.04	82.5868	86.045	76.0502	83.344	76.4136	77.8568			79.2627	83.9659	89.7359	72.1309	74.6441	76.9327			95.0154	85.8742	79.3348	80.4212	84.053	70.6482
		113.1	118.222	137.757	83.0359	79.0898	88.5553	96.009	71.2314	82.9602	120.26	140.072	109.887	102.994	92.7507	99.7197	90.8568	91.4042	96.1675	113.028	82.8286	86.0353	76.219	83.3208	75.6886	77.2046			79.3426	84.1772	89.8298	72.4164	74.7959	76.9678			94.6666	85.5927	79.6572	79.5387	83.3151	70.2402
		113.2	118.112	137.716	82.8843	79.0296	88.1242	95.902	71.0236	83.3277	119.868	139.855	109.584	102.773	92.5704	99.6263	90.8029	90.7223	95.8929	113.301	83.0539	86.09	76.5434	83.0192	74.857	76.8943			79.6095	84.1907	89.8542	72.5193	74.8764	76.6044			94.6889	85.2578	80.1398	79.1806	82.946	69.791
		113.3	117.973	137.553	82.854	79.1213	88.3794	95.8423	70.5062	83.574	119.299	139.664	109.32	102.534	91.6888	99.7793	91.1124	89.8089	95.7912	113.62	82.9635	85.7809	76.9854	82.4659	74.7691	76.9839			79.7437	83.9195	89.7197	72.8682	74.8074	76.2188			94.9121	85.3093	80.2134	79.5417	82.439	69.8823
		113.4	117.953	137.325	83.0932	79.3125	88.7508	95.7032	70.7259	83.2492	118.798	139.596	109.092	102.534	91.0492	99.8038	91.3813	89.6964	95.7168	113.829	82.6813	85.5286	77.286	82.1629	75.5552	77.1868			79.7276	83.6524	89.847	73.5121	74.3371	76.1261			95.1939	85.5025	80.0443	79.8376	82.2923	70.2853
		113.5	117.894	136.863	83.4969	79.8806	89.1007	95.6961	71.2384	82.7526	118.59	139.43	109.148	102.615	90.9269	99.7584	91.6722	90.2493	95.6951	114.045	82.3976	85.4981	77.5016	82.154	76.4339	77.2207			79.6792	83.6863	89.8186	74.0697	73.6657	76.6253			95.2549	85.9598	80.0517	79.8489	82.35	70.5752
		113.6	117.824	136.488	83.6624	80.1902	88.9991	95.653	71.8453	82.4441	118.496	139.304	109.409	102.765	91.5701	99.5574	91.2887	91.0079	95.71	114.411	82.1081	85.5058	77.3264	82.7827	77.0671	77.5009			79.5089	83.8884	89.8931	74.1821	73.2159	76.7906			95.2075	86.4106	80.146	79.8204	82.9697	70.7767
		113.7	117.999	136.248	83.6974	80.1528	88.9362	95.4022	72.0059	82.713	118.406	139.4	109.499	102.776	92.0992	99.5396	90.7338	91.5897	96.0198	114.497	82.0867	85.8939	76.9614	83.4931	76.9478	77.8877			79.185	84.2118	89.8068	73.8789	73.1346	76.6893			95.0367	86.5322	80.1823	80.1086	83.5922	70.8793
		113.8	118.253	135.96	83.5462	79.783	89.2094	95.0838	72.0026	83.2049	118.417	139.675	109.509	102.635	91.9929	99.5466	90.1268	91.8529	96.2721	114.401	82.1411	86.311	76.5833	84.0633	76.7673	78.3729			78.8139	84.6256	89.4828	73.6804	73.4999	76.2326			94.9444	86.4913	79.4152	80.5721	83.5271	71.0178
		113.9	118.403	135.623	83.3087	78.9094	89.4007	94.753	72.021	83.1597	118.707	139.778	109.318	102.4	91.6763	99.7753	89.9593	91.8473	96.4007	114.436	82.1458	86.7673	76.5263	83.8566	76.3473	78.4657			78.3993	84.9746	89.1018	73.4698	74.025	76.0286			94.9806	86.1204	78.8432	80.7773	82.9269	70.8388
		114	118.526	135.528	83.2642	78.3418	89.4718	94.7893	72.3772	82.7606	118.827	139.942	109.1	102.084	91.3274	99.7063	89.9793	91.3628	96.4266	114.389	82.2691	87.1611	76.7707	83.3033	75.9964	78.4849			77.9774	85.0177	88.6022	73.3702	74.6732	76.1744			94.8944	85.8692	78.6012	80.5133	82.1611	70.4646
		114.1	118.709	135.51	83.2851	78.0396	88.8474	94.9748	72.6038	82.093	118.798	139.898	109.052	102.038	91.2684	99.3696	89.9704	90.9772	96.4735	114.148	82.3665	87.4008	77.1216	82.8747	75.5276	78.5676			77.6986	84.7524	88.5448	73.1594	75.1692	76.5694			95.0695	85.6453	78.7322	80.2357	82.2306	69.9779
		114.2	118.766	135.277	83.4358	78.0197	88.3111	95.4749	72.4397	81.7224	118.91	139.859	108.975	102.215	91.0444	98.8397	89.7832	90.9108	96.2116	114.05	82.4936	87.4979	77.4793	82.9567	75.2477	78.604			77.739	84.3984	88.6178	73.0306	75.2572	77.0387			95.3454	85.49	78.6976	79.7571	82.7171	69.8177
		114.3	118.692	135.256	83.7822	78.3331	87.409	95.6631	71.8736	81.313	119.23	139.508	108.858	102.562	91.073	98.6573	89.7886	91.2172	96.0116	114.054	82.7053	87.2288	77.6757	83.272	75.5421	78.5109			78.0277	84.0321	88.8354	72.7922	74.9356	77.0027			95.6924	85.6424	78.305	79.3259	83.5771	69.726
		114.4	118.707	135.338	84.0426	78.4371	86.9359	95.5532	71.7177	81.099	119.231	139.264	108.697	102.944	91.1264	98.835	89.7869	91.3889	95.8318	113.793	82.5787	86.9207	77.5637	83.2394	76.0066	78.2078			78.4103	83.9801	88.6139	72.6343	74.3414	76.4573			95.9934	85.659	78.192	78.8841	83.9293	69.9463
		114.5	118.619	135.412	84.091	78.5715	86.6354	95.0789	72.1634	80.9898	119.364	139.057	108.618	103.236	91.211	99.274	90.0948	91.2793	95.7926	113.462	82.4106	86.3856	77.2253	83.1223	76.4759	77.7703			78.8236	84.1246	88.4972	72.5218	73.8253	75.9812			95.9084	85.9815	78.3883	78.8707	83.7894	69.9606
		114.6	118.477	135.468	84.0317	78.8328	87.0896	94.9074	72.7857	81.1137	119.716	138.934	108.812	103.246	91.1928	99.6534	90.2022	91.0481	95.7222	113.176	82.2408	85.8164	76.9362	82.8539	76.36	77.125			78.8354	84.2114	88.7598	72.6224	73.2743	75.8589			95.6644	86.2933	78.8618	79.193	83.5197	70.1308
		114.7	118.305	135.732	83.6922	79.0729	87.3957	95.1331	72.8932	81.1599	120.011	138.458	109.141	103.049	91.3511	99.9642	90.324	90.9588	95.6792	112.826	82.1943	85.3803	76.9856	82.8622	76.1754	76.3806			78.5402	84.2524	89.2636	72.6574	73.1244	76.2743			95.3099	86.4583	79.0806	79.3372	83.6197	69.8053
		114.8	118.163	135.895	83.1716	79.4536	87.3859	96.0599	72.5133	81.2186	120.035	138.201	109.31	102.925	91.5771	100.162	90.0929	90.9509	95.4106	112.496	82.4433	84.9289	77.075	82.7147	75.8761	75.9216			78.2656	84.2184	89.485	72.8046	73.0652	76.5541			95.2296	86.8026	79.1086	79.1686	84.0893	69.501
		114.9	118.037	136.123	82.9394	79.5876	86.8973	96.6818	72.3886	81.5328	120.204	138.021	109.096	102.761	91.5459	100.227	89.4656	91.1969	95.3827	112.455	82.7933	84.7513	77.0768	82.4311	75.731	75.7447			77.9094	84.3324	89.2336	72.6767	73.5274	76.862			95.3946	86.7793	78.9932	78.9534	84.1393	69.2752
		115	118.125	136.213	82.7068	79.4192	86.4199	96.8889	72.2178	81.8891	120.114	137.852	108.554	102.886	91.2584	100.164	89.128	91.3933	95.3282	112.669	83.0199	84.6534	77.0042	82.1772	75.5967	75.791			77.8366	84.5575	89.2338	72.4837	73.6924	76.6076			95.4848	86.5599	79.2598	78.971	84.1808	69.477
		115.1	118.254	136.161	82.4915	79.0758	86.3668	96.0562	72.1261	82.2559	119.82	137.669	108.009	103.077	91.0898	99.9309	88.9562	91.5434	95.327	112.824	83.065	84.837	77.0728	82.3123	75.7597	75.9359			77.897	84.9887	89.5686	72.0378	73.7474	76.1299			95.6581	86.2082	79.54	79.3966	84.0149	70.0382
		115.2	118.321	136.011	82.4903	78.6639	86.8574	95.4437	71.7213	82.1502	119.489	137.872	107.774	103.298	91.0587	99.7117	89.469	91.4058	95.524	112.938	83.1211	85.0983	76.9748	82.7214	76.0804	76.3493			77.8123	85.4196	89.6026	71.9358	73.5829	75.3684			95.7264	85.7315	79.9826	79.7221	83.8774	70.4246
		115.3	118.44	135.85	82.4627	78.4239	87.4839	95.1317	71.7952	82.2267	119.348	138.097	107.868	103.363	91.1167	99.8913	89.9429	90.8633	95.9712	113.115	82.8941	85.3937	76.8854	82.8813	76.4272	76.9176			77.8059	85.6201	89.6597	72.1363	73.4558	74.9911			95.6815	85.4048	79.899	79.7986	83.1226	70.4772
		115.4	118.449	135.654	82.4522	78.1255	88.4136	95.2703	72.046	82.2439	119.347	138.22	108.16	103.283	90.9243	100.213	90.5281	90.4728	96.2349	113.157	82.7841	85.7957	76.7489	82.7022	76.0967	77.269			77.7503	85.6944	89.2934	72.4282	73.6637	74.9202			95.8173	85.3079	79.7081	79.6136	82.3096	70.0743
		115.5	118.271	135.54	82.5183	77.9301	88.7429	95.2702	72.1993	82.4277	119.599	138.214	108.33	103.362	90.8028	100.745	90.5898	90.1262	96.408	112.976	82.6554	85.8048	77.0281	82.2977	75.4367	77.0971			77.7831	85.3458	89.4771	72.4154	73.7992	75.3551			95.9158	85.4403	79.16	79.3734	82.1561	69.5138
		115.6	118.1	135.557	82.6303	77.7008	88.9489	95.1866	72.0042	82.7689	119.925	138.254	108.319	103.298	91.0186	100.817	90.4783	90.1844	96.4678	112.961	82.3091	85.7901	77.2691	82.6272	74.719	76.5887			78.0741	84.8514	89.2196	71.9862	73.939	75.8977			95.8273	85.4698	78.9717	79.5147	82.5254	69.424
		115.7	118.046	135.614	82.5581	77.5484	88.3964	95.4534	71.5557	83.2174	120.195	138.156	108.241	103.348	91.5003	100.636	90.4556	90.157	96.3552	113.02	82.2415	85.7413	77.8669	83.0613	74.6489	76.3061			78.4291	84.4192	89.2696	71.7103	73.78	76.5458			95.8504	85.6394	78.9349	79.5802	83.3072	69.6037
		115.8	118.048	135.777	82.741	77.7341	88.0928	95.8854	71.4862	83.5846	120.275	137.914	108.104	103.25	91.8922	100.233	90.794	90.2078	96.1566	112.901	82.0764	85.6075	78.2766	84.0239	74.7923	76.5661			78.7515	84.0959	89.3671	71.8483	73.9058	76.9772			95.6951	85.9183	79.3377	79.5921	83.2882	70.007
		115.9	118.129	135.892	83.1869	77.9765	87.9513	96.2377	71.6532	83.1512	120.107	137.693	108.08	102.912	91.5648	99.921	90.978	90.4134	95.8501	112.763	81.9995	85.7971	78.5497	84.1977	75.2042	77.0467			79.0095	84.1176	89.7569	72.3684	74.4471	77.4498			95.3557	86.1972	79.6242	79.4453	83.381	70.2199
		116	118.271	136.07	83.4559	78.2596	87.8097	95.9407	72.1036	82.1498	119.703	137.513	108.177	102.515	90.9553	99.9434	90.8127	90.7631	95.6671	112.749	82.1664	86.0588	78.1872	84.2601	75.7243	77.3358			79.0568	84.1755	90.0928	72.7189	75.0942	77.613			95.1204	86.6666	79.5282	79.7113	83.0778	70.4986
		116.1	118.367	136.236	84.0197	78.3498	87.4974	95.558	72.2453	80.8962	119.221	137.341	108.379	101.987	90.4547	99.9261	90.5982	90.8951	95.6267	112.641	82.1493	86.3434	77.9052	83.7236	76.3143	77.4533			79.0583	84.4659	90.0538	72.4852	74.9707	77.4096			94.9669	86.8216	78.9879	80.1419	83.4486	70.5331
		116.2	118.333	136.345	84.3015	78.2698	87.1499	95.0313	72.1117	80.3087	118.846	137.227	108.637	101.764	90.7637	99.89	90.7098	90.6488	95.6787	112.626	82.2991	86.5893	77.7706	83.3646	76.6338	77.4207			79.0189	84.7609	90.2282	72.2509	74.2183	76.8413			94.9993	86.7024	78.324	80.4468	83.2237	70.2254
		116.3	118.197	136.365	84.4163	78.2586	87.3749	95.1941	72.0833	80.411	118.586	137.261	108.859	101.718	91.2402	99.5577	90.8468	89.9958	95.6724	112.765	82.5233	86.7813	77.858	83.0733	76.4641	77.4907			78.9101	84.901	90.537	72.0469	73.3609	76.6103			95.3933	86.4417	78.2726	80.1312	83.0072	69.6407
		116.4	117.967	136.413	84.7646	78.3662	87.7922	95.7179	72.2808	80.995	118.505	137.392	108.992	101.702	91.8654	99.0288	90.7242	89.2167	95.977	113.013	82.7033	86.8669	77.6727	83.0352	76.2999	77.2096			78.8729	85.1084	91.0444	72.4864	73.3483	76.8336			95.817	86.1222	78.7899	79.78	82.2048	69.4351
		116.5	117.797	136.278	84.646	78.4873	88.2504	96.6984	72.7242	81.527	118.585	137.575	108.971	101.967	92.0861	98.6429	90.0742	88.6557	96.2178	113.251	82.9957	86.694	77.3091	83.1008	76.3482	76.8226			78.7566	84.7671	90.6933	72.7239	73.7314	77.2291			95.9979	86.056	79.5214	79.4577	81.7402	69.791
		116.6	117.656	136.169	84.5804	78.6653	88.5052	97.0464	72.9904	81.9843	118.78	137.663	108.909	102.085	92.1858	98.496	89.6048	88.7388	96.381	113.561	83.2363	86.4336	77.1998	83.2088	76.5154	76.4193			78.7953	84.1633	89.9938	73.1009	74.3224	77.2388			96.0498	86.1669	79.7424	79.5458	81.1274	70.2477
		116.7	117.74	136.067	84.1528	78.6432	88.7151	96.4046	73.0706	82.3183	119.002	137.57	108.756	102.015	91.8952	98.6533	89.2821	89.3584	96.4732	113.68	83.2547	86.1555	77.2663	83.157	76.3054	76.3483			78.8799	83.6053	88.9359	72.9721	74.4741	76.8581			95.8164	86.2338	79.4542	79.3097	80.872	70.4097
		116.8	118.034	135.859	83.5723	78.4028	88.5907	95.3619	72.9043	82.4502	119.097	137.397	108.575	102.007	91.3643	98.6641	89.4159	90.0879	96.4297	113.723	83.1678	85.9118	77.4371	83.3774	75.5944	76.7004			78.848	83.1648	88.6582	72.9759	74.5593	76.4177			95.6196	86.1453	78.9301	78.9873	80.702	70.1506
		116.9	118.5	135.503	83.4172	78.3438	87.9333	94.5422	72.5927	82.3234	119.079	137.238	108.413	101.765	90.67	98.4443	89.6286	90.2026	96.1229	113.686	83.0213	85.8763	77.225	83.4974	74.9462	76.895			78.8708	83.1486	88.5918	73.07	74.6576	76.1136			95.6577	85.7731	78.7811	78.3767	81.1679	70.1211
		117	118.949	135.247	83.1639	78.0846	87.2438	94.4203	72.1187	82.0456	119.028	137.245	107.961	101.35	90.2633	98.3389	90.1247	89.9316	95.8162	113.559	82.6354	85.9699	76.9292	83.7358	74.8121	77.0257			78.5969	83.3826	88.9154	73.4503	74.808	76.2071			95.7078	85.2815	79.1476	77.9686	81.6964	70.3889
		117.1	119.426	134.906	83.2739	77.9493	86.838	94.4956	71.792	81.7303	118.917	137.259	107.833	101.118	90.17	98.4527	90.7058	89.2589	95.436	113.48	82.4374	85.8176	76.6852	83.2566	75.2997	76.8776			78.4313	83.6008	88.8471	73.6332	74.7553	76.3124			95.8409	85.1068	79.6944	77.7774	82.397	70.764
		117.2	119.636	134.542	83.2717	78.0141	87.2126	94.7324	71.6837	81.4838	118.767	137.526	107.802	101.117	90.4869	99.0458	91.177	88.973	95.0311	113.474	82.3107	85.5359	76.8103	82.7699	76.0064	77.0706			78.4444	83.642	88.5066	73.3259	74.4402	76.5698			95.8791	85.3231	80.1604	78.1618	82.6647	70.734
		117.3	119.511	134.361	82.9922	77.9983	87.6427	94.9452	72.2029	81.3752	118.744	137.79	107.72	101.215	90.5932	99.3946	91.4023	88.8933	94.871	113.503	82.1665	85.1891	77.1772	82.4377	76.535	76.8932			78.4604	83.6538	88.4464	72.9946	74.0953	76.5432			95.7068	85.9896	80.1631	78.9393	82.7529	70.2089
		117.4	119.294	134.496	82.8067	78.2293	88.1684	95.0036	73.0892	81.4423	118.715	137.849	108.057	101.464	90.678	99.4612	91.117	89.2548	94.8854	113.416	82.2271	84.9142	77.7286	82.7981	76.6257	76.5821			78.7383	83.7521	88.8659	72.9392	73.9349	76.6936			95.5656	86.7074	80.2894	79.6626	82.7108	69.6846
		117.5	118.984	134.727	82.5742	78.4606	88.3951	95.0424	73.7592	81.5909	118.611	137.7	108.041	101.619	90.6947	99.0898	90.7451	89.5461	94.9345	113.334	82.2551	84.856	77.8073	83.356	76.3134	76.1537			78.9358	84.0436	89.9102	73.434	73.889	76.5034			95.5797	86.9943	80.2243	80.0101	82.5494	69.271
		117.6	118.556	134.957	82.6859	78.6801	88.7677	95.2842	73.702	81.8268	118.426	137.705	107.973	101.41	91.0967	98.9541	89.9518	89.8229	95.1144	112.863	82.2606	84.9834	77.7574	83.7952	75.6741	76.257			79.1381	84.4413	90.457	73.719	73.8171	76.2087			95.6905	86.8786	79.9784	80.3829	82.4914	69.2312
		117.7	118.257	135.175	83.1528	78.9427	88.9818	95.5897	73.1837	82.1574	118.104	137.681	108.019	101.018	91.5229	98.9403	89.2661	89.8808	95.4137	112.333	82.2472	85.2964	77.425	83.8624	75.2187	76.5169			79.2123	84.8103	90.5904	73.7866	73.8327	75.6732			95.9585	86.4007	79.2976	80.8167	82.1963	69.1029
		117.8	118.164	135.337	83.6983	79.0342	89.0533	95.5407	72.8208	82.4399	117.769	137.761	108.042	100.716	91.8923	99.1724	88.5093	89.6759	95.7391	111.754	82.3238	85.412	77.7108	83.7324	74.7029	76.6049			79.1813	85.007	90.1742	73.3578	73.7863	75.5647			96.1794	85.8283	78.7466	81.0584	82.1224	69.0572
		117.9	118.068	135.23	84.2497	79.0358	88.9427	94.7966	72.8133	82.3837	117.446	138	108.164	100.382	91.9182	99.2181	88.4029	89.3461	95.8649	111.416	82.3844	85.4878	78.0614	83.4386	74.6064	76.6097			78.9822	84.9724	89.9472	72.8113	73.9276	75.7859			96.1451	85.4986	78.5566	80.5299	81.7059	69.052
		118	118.066	135.041	84.4625	78.7888	88.7754	94.2703	72.7144	82.0314	117.358	138.321	108.248	100.24	91.716	99.4381	88.78	89.0912	96.0106	111.2	82.4403	85.5624	78.3676	83.2441	74.4718	77.0691			78.6059	84.8228	89.9309	72.1221	73.8812	76.0859			95.9278	85.3555	78.6753	79.9452	81.4947	69.1589
		118.1	118.3	134.898	84.3926	78.4103	88.8697	94.1132	72.5794	81.5372	117.588	138.514	108.412	100.506	91.3121	99.3837	89.2938	89.253	96.1082	111.304	82.6245	85.4605	78.242	83.28	74.8676	77.5863			78.3902	84.6091	89.8533	71.6888	73.7667	76.0664			95.2973	85.4323	78.8439	79.6031	81.204	69.2788
		118.2	118.622	134.855	84.2599	78.1916	88.7148	94.576	72.2939	81.2642	118.001	138.538	108.501	100.698	90.8209	99.269	89.4304	89.8417	96.2141	111.524	82.6728	85.4359	77.965	83.6982	75.2756	77.843			78.2809	84.5003	89.613	71.5421	73.6679	76.0431			94.7461	85.6148	79.2796	79.8181	81.4891	69.3823
		118.3	118.842	134.786	84.3136	78.0105	88.6449	94.6136	72.1084	81.3829	118.362	138.356	108.57	101.15	90.5928	99.0122	89.3026	90.3431	96.1461	111.936	82.8373	85.4638	77.8096	84.1147	75.6164	77.4118			78.2966	84.2939	89.2726	71.6489	73.6648	76.2621			94.4454	85.6633	79.88	79.9792	81.9289	69.6924
		118.4	119.079	134.777	84.6166	78.0195	88.2946	94.4993	71.8887	81.7388	118.711	138.1	108.709	101.563	90.6997	98.7896	89.2614	90.6516	96.2936	112.153	82.9363	85.2015	77.5319	84.0971	75.8077	76.9447			78.4574	84.0276	89.3741	71.9768	74.1217	76.9107			94.3446	85.7562	80.3512	79.8759	82.5831	69.9546
		118.5	119.332	134.728	84.8839	78.2281	88.353	94.1007	71.9941	81.9673	118.892	137.763	108.695	101.724	91.0806	98.7597	89.535	90.3848	96.3758	112.22	82.9753	84.9613	77.3781	83.6212	75.8272	76.5217			78.5913	83.7409	89.6491	72.4332	74.4543	77.5569			94.7075	85.8315	80.2496	79.5356	82.9108	70.1416
		118.6	119.266	134.68	85.0729	78.2564	88.0618	94.234	72.3604	81.705	118.785	137.537	108.404	101.992	91.305	98.642	89.9296	90.1101	96.3627	112.248	82.9771	84.7521	77.2043	83.1631	76.0996	76.3174			78.6181	83.2671	89.9609	73.0488	74.8674	78.0707			94.8791	85.9058	79.7689	79.2004	82.8994	70.1883
		118.7	119.094	134.672	84.745	78.2296	87.6513	94.3964	72.5453	81.4748	118.781	137.455	108.063	101.988	91.2118	98.7959	89.9382	89.6631	96.2656	112.152	82.6963	84.4304	77.3652	83.1143	76.1832	76.2458			78.7384	83.1058	89.8876	73.2528	74.6807	78.1621			94.7319	86.1073	79.3847	79.324	82.7281	70.4284
		118.8	119.012	134.793	84.2428	78.2241	86.9941	94.8539	72.3444	81.5189	118.855	137.428	107.899	101.805	91.0364	98.7057	89.3016	89.3728	96.2551	111.741	82.3439	84.5428	77.3621	83.464	76.3717	76.401			78.8646	83.2299	89.7391	73.0667	74.5742	77.5201			94.5978	86.1004	79.4676	79.5633	82.5663	71.0172
		118.9	118.898	134.999	83.9273	77.9359	86.9587	94.7387	72.0254	81.848	119.077	137.428	107.832	101.639	90.9792	98.7034	88.1871	88.9521	96.0136	111.421	82.0208	84.6748	77.3942	83.882	76.2232	76.4133			79.069	83.6389	89.4654	72.3387	74.2059	76.4936			94.6203	85.8167	79.9178	79.5759	82.5342	71.4693
		119	118.52	135.145	83.697	77.7156	87.3599	94.6438	72.1912	81.9734	119.113	137.5	107.937	101.233	91.2654	98.6447	87.6273	88.5907	95.8287	111.21	81.6986	84.9954	77.3007	83.9403	76.1116	76.336			79.2966	84.3491	89.4181	71.91	73.764	75.2547			95.0773	85.4728	80.4398	79.2351	82.2591	71.7544
		119.1	118.463	135.353	83.8616	77.6718	88.0442	94.0822	72.4434	82.0553	119.071	137.55	108.159	100.732	91.4126	98.8453	88.0214	88.3242	95.8856	111.04	81.4728	85.6066	77.1443	83.3721	75.7757	76.4312			79.5768	84.9271	89.581	71.9187	73.0871	75.0264			95.8379	85.1726	80.6556	79.0143	82.1027	71.1809
		119.2	118.462	135.401	84.1048	77.6134	88.4832	93.9563	72.7749	82.2186	118.697	137.41	108.152	100.495	91.307	99.0142	89.1957	88.4198	96.0376	111.121	81.4771	85.9721	76.9421	82.475	75.7366	76.8649			79.7313	85.2913	89.7468	72.4199	72.5374	75.0236			96.4228	85.0696	80.7799	79.2194	81.7931	70.3877
		119.3	118.435	135.26	84.1674	77.8847	88.6241	93.8356	72.8147	82.1412	118.27	137.363	108.139	100.163	90.636	98.8236	90.0937	88.7547	96.1649	111.404	81.4399	86.3353	76.8413	81.776	75.6227	77.6349			79.6711	85.4858	89.8278	72.832	72.5854	75.4942			96.5749	85.2408	80.5749	79.6437	81.8334	69.5173
		119.4	118.37	135.121	84.1326	78.1406	88.2483	94.1108	73.29	81.7216	117.671	137.453	108.347	99.9761	90.0874	98.3486	90.6137	89.4247	96.4394	111.722	81.6718	86.3443	77.1486	81.4542	75.5571	77.9474			79.5899	85.5198	89.3686	73.0756	73.032	75.8051			96.2868	85.6606	80.4174	79.9848	81.9749	69.3252
		119.5	118.698	135.232	83.9511	78.2354	87.8283	94.1578	73.8747	81.0271	117.384	137.505	108.597	100.12	89.8041	97.8117	90.5662	90.0197	96.5704	111.893	82.3066	86.0656	77.5349	81.5281	75.1878	78.1539			79.2433	85.4738	88.9549	73.1119	73.6298	76.446			95.7678	86.0424	79.9924	79.8583	82.2881	69.3679
		119.6	118.855	135.342	83.6003	78.3206	87.8329	93.8616	74.5034	80.8862	117.392	137.365	108.85	100.309	90.0748	97.6064	90.5748	90.5283	96.4868	111.986	82.8961	85.8705	77.9489	81.5602	75.2104	77.7552			79.0459	85.4507	88.5323	73.0699	74.2696	77.0311			95.5054	86.2904	79.6314	79.6531	82.4646	69.3178
		119.7	118.979	135.452	83.1943	77.9915	88.254	93.3088	74.5553	80.9318	117.613	137.379	108.9	100.844	90.5599	97.6492	90.1877	90.1468	96.216	111.864	83.4443	85.5489	78.1502	82.0376	75.4757	77.5101			79.0241	85.1368	88.7333	72.9074	74.4667	77.1988			95.3655	86.2295	79.2702	79.2906	82.2178	69.0068
		119.8	119.163	135.596	82.9412	77.736	88.5557	92.8451	73.868	81.0526	117.871	137.364	108.642	101.471	90.7917	97.6691	90.0004	89.402	95.9134	111.737	83.6931	85.4616	78.3183	82.4709	76.3483	77.0621			78.9706	84.6959	88.8874	72.7042	74.4761	77.0031			95.4263	85.7876	78.972	79.4096	82.3773	69.1862
		119.9	119.451	135.695	82.7623	77.7257	88.1077	93.2266	73.194	80.7709	118.11	136.95	108.161	101.985	90.8239	97.6186	89.9922	88.5719	95.6728	111.665	83.5008	85.3954	78.1029	83.0449	77.0863	76.8284			79.0413	84.2996	89.0904	72.372	73.9036	76.7014			95.6901	85.2409	78.9666	79.1989	82.7177	69.8552
		120	119.496	135.565	82.8596	77.7256	87.51	94.1917	73.0042	80.413	118.147	136.416	107.488	102.408	90.2139	97.727	90.504	88.3029	95.5881	111.854	83.1802	85.1994	77.7884	82.9253	77.751	76.7836			78.9822	83.9324	89.131	72.2277	74.0331	76.3747			95.7266	84.7563	79.1242	79.1917	83.274	70.6341
		120.1	119.409	135.32	83.2558	78.014	86.9219	95.0241	73.2953	80.0608	117.875	136.077	106.994	102.65	89.7167	97.9252	90.8367	88.4183	95.5147	112.185	82.9071	85.1369	77.1277	82.719	77.7687	77.1316			78.7679	83.9159	89.5322	72.4094	74.1291	76.1106			95.7362	84.6589	79.5634	79.0356	83.156	70.9116
		120.2	119.196	135.144	83.6066	78.3504	86.9228	95.1133	73.375	80.0777	117.409	135.76	106.697	102.675	89.2328	97.8223	90.5221	88.4872	95.6424	112.604	82.6941	85.0748	76.6373	82.6954	77.1798	77.5941			78.69	84.0501	89.9372	72.9712	74.398	75.6939			95.7453	84.7979	79.7511	79.2449	82.9123	70.8071
		120.3	118.889	135.088	83.9152	78.3512	86.9264	94.4208	73.0044	80.7057	116.901	135.432	106.668	102.623	89.3389	97.4343	89.822	88.6336	95.9204	112.977	82.4409	85.0966	76.1501	83.2632	76.4668	77.639			78.6344	84.2809	89.9524	73.317	74.1386	75.7017			95.5474	85.108	79.8351	79.2982	82.8541	70.7337
		120.4	118.585	134.985	84.0027	78.1849	87.0006	93.9904	72.7158	81.6499	116.488	135.424	106.975	102.438	89.6519	97.3454	89.3509	88.5659	95.9883	113.204	82.2102	85.3021	76.0362	83.6564	75.8468	76.9328			78.6099	84.4741	89.6443	73.1618	74.0312	75.817			95.5033	85.4264	79.4523	79.4268	83.2254	70.8526
		120.5	118.289	135.067	84.0073	78.0064	86.9776	93.9941	72.7698	82.1527	116.261	135.619	107.066	101.963	90.2898	97.8083	89.3117	88.7877	95.9392	113.32	81.9338	85.5249	76.2562	83.6876	75.8082	76			78.69	84.4979	89.2152	72.4989	74.0292	76.0326			95.5374	85.6776	79.2396	79.372	83.5091	70.8926
		120.6	118.223	135.255	83.9796	77.7424	87.4001	94.4006	72.8814	81.84	116.332	135.793	107.098	101.584	91.1606	98.1244	89.1438	88.8621	95.9812	113.297	81.833	85.5403	76.6422	83.2617	76.0077	75.4169			78.6671	84.4883	89.0783	71.8509	73.7702	75.6532			95.5474	85.9792	79.027	79.635	83.5817	70.8317
		120.7	118.346	135.492	83.9501	77.6051	87.9708	94.7243	72.8637	81.4434	116.624	135.915	106.904	101.127	91.9428	97.8791	88.8216	89.4381	95.9367	113.267	81.9215	85.4104	77.1439	83.1219	76.6923	75.751			78.5541	84.3571	88.6664	71.4722	73.5278	75.1627			95.751	85.9532	79.4061	79.9544	83.3981	70.2636
		120.8	118.441	135.685	83.9913	77.6818	88.2588	94.7156	72.5879	81.3841	116.819	136.153	106.573	100.717	92.1233	97.4462	88.8063	89.8424	95.804	113.247	82.2256	84.9848	77.3598	83.1231	77.2977	76.4323			78.6569	84.3159	88.3731	71.998	73.4209	75.0694			95.6393	85.7887	79.6707	80.6486	83.3278	69.7314
		120.9	118.343	135.865	83.9011	77.6072	87.9151	94.3742	72.4627	81.6547	116.911	136.522	106.484	100.517	91.3598	97.472	89.3001	90.4361	95.9131	113.222	82.4591	84.5068	77.561	83.401	77.5718	77.1989			78.8839	84.3074	88.1824	72.6987	73.8164	75.6266			95.4884	85.4072	79.7958	80.8783	83.3243	69.0612
		121	118.33	135.796	83.7976	77.4644	87.5258	93.965	72.5707	81.6481	116.928	137.015	106.442	100.458	90.5549	97.9129	89.3853	90.3574	96.1186	113.24	82.4053	84.2013	77.6811	83.2508	77.2189	77.5098			79.1746	84.1634	88.596	73.5714	74.1731	76.2584			95.2238	84.7736	79.2952	80.7082	83.3304	68.9564
		121.1	118.209	135.579	83.8103	77.3209	87.701	93.6034	72.9258	81.8184	116.828	137.418	106.653	100.504	89.9086	98.3184	89.009	90.2683	96.3123	113.381	82.3643	84.0753	77.887	82.8623	76.7976	77.7603			79.6874	84.1211	88.9068	73.5069	74.5843	76.5134			94.7052	84.4052	78.8433	80.2632	83.296	69.2281
		121.2	118.015	135.253	83.9761	77.0223	88.2242	93.7679	73.2209	82.0852	116.72	137.738	106.995	100.629	90.1326	98.3063	88.4216	90.0544	96.3892	113.484	82.1084	84.4065	77.8627	82.4187	76.4648	77.5377			79.7734	83.8606	88.9498	73.3768	74.7626	76.6158			94.4766	84.2192	78.6063	80.1341	83.2729	69.7262
		121.3	117.876	134.817	84.1434	76.9459	88.7028	93.8057	73.2231	82.4052	116.923	137.797	107.401	100.845	90.2772	98.089	88.6716	89.9329	96.4239	113.586	82.1288	84.8024	77.7521	82.4474	76.3367	77.0764			79.4971	83.7794	88.6751	72.9331	74.8308	76.6883			94.2373	84.2051	78.9174	80.1384	83.2841	70.2379
		121.4	117.882	134.41	84.4595	77.0416	88.4896	94.2476	72.7884	82.1374	117.362	137.606	107.768	100.869	90.5846	97.8332	89.0799	89.5036	96.3648	113.725	82.1904	85.0619	77.3149	82.5207	76.476	76.4364			78.9886	84.1026	88.5113	72.6798	74.677	76.4791			94.1084	84.3113	79.1483	80.0918	83.1446	70.6834
		121.5	117.823	134.185	84.5856	77.1448	87.8323	94.2333	72.2318	81.8472	117.717	137.195	107.937	100.999	90.3228	97.9698	89.2462	88.7976	96.3586	113.64	82.0856	85.1673	76.945	82.2974	76.8389	76.181			78.2513	84.3272	88.6482	72.4479	74.4853	76.2181			94.2467	84.4238	79.1977	80.0037	83.0082	71.4221
		121.6	117.806	134.095	84.5071	77.4853	86.9787	94.3984	71.7679	81.6707	117.984	136.905	108.023	101.123	90.0927	98.2791	89.1291	88.3612	96.3282	113.399	81.9234	84.8888	76.5371	81.4948	77.1418	76.4206			77.8349	84.8624	89.0407	72.4763	74.4659	75.9458			94.2934	84.6383	79.0076	79.9947	82.8672	71.7826
		121.7	117.73	134.176	84.6481	77.8046	86.7996	94.1494	71.3006	82.127	118.14	136.706	108.159	101.223	89.7171	98.7112	89.2158	88.2682	96.5354	113.015	81.6641	84.7249	76.5816	80.7128	76.9599	76.9196			77.8153	85.0524	89.5043	73.0906	74.3598	76.2836			94.3632	84.8293	79.215	80.1114	82.683	71.5132
		121.8	117.744	134.392	84.4307	77.9821	87.0543	94.0707	71.275	82.4828	118.108	136.686	108.409	101.36	89.5273	98.9213	89.6102	88.6047	96.7576	112.672	81.8345	84.7256	76.6421	80.1764	76.3498	77.2341			78.1077	84.851	90.0279	73.6134	74.3696	76.4381			94.4799	85.1284	79.3002	79.9868	82.2961	70.6926
		121.9	117.73	134.657	84.122	78.2021	87.7084	94.0958	71.3216	82.8483	117.877	136.778	108.798	101.228	89.2541	99.0418	89.6002	89.1867	96.8676	112.445	82.1257	84.8992	76.5457	80.4537	75.9167	77.0239			78.6345	84.5773	90.0124	73.9779	74.415	76.4992			94.5734	85.5604	79.2804	79.7668	82.0278	70.0573
		122	117.75	134.862	83.8289	78.1328	87.8438	94.1766	71.883	82.5129	117.699	136.772	109.043	101.04	89.4963	98.8732	89.1116	89.6182	96.8088	112.378	82.6099	85.2205	76.4002	81.3128	75.4866	76.2532			79.0104	84.1392	89.9162	73.5557	74.862	76.3351			94.8531	85.8966	78.8949	79.5102	82.0778	70.0283
		122.1	117.733	134.944	83.3658	77.7649	88.0356	94.3053	72.0583	82.026	117.453	136.738	108.979	100.728	90.0941	98.5703	88.6562	89.7082	96.689	112.375	82.9379	85.2224	76.571	82.2947	75.359	75.6321			79.0205	83.889	89.488	73.139	75.293	76.1297			95.2338	86.2961	79.1207	79.4737	82.5662	70.1733
		122.2	117.747	134.872	83.3289	77.3149	88.004	94.262	72.2224	81.4687	117.152	136.733	108.669	100.254	90.7427	98.2658	88.7948	89.064	96.4292	112.537	82.7428	85.1271	77.2278	82.8289	75.2912	75.613			78.9168	83.7949	89.5206	72.847	75.4379	76.2792			95.6236	86.5631	79.5712	79.8177	82.9519	70.2086
		122.3	117.585	134.606	83.7308	76.8886	88.2103	94.3186	72.3988	81.2613	116.795	136.662	108.174	100.167	90.5067	98.1901	89.4563	88.6503	96.1677	112.587	82.5258	84.8292	77.8498	82.7684	75.6252	76.1013			78.5506	83.9346	89.7074	72.9	75.1149	76.4388			95.8824	86.5267	80.0813	80.0626	83.0628	70.2694
		122.4	117.408	134.188	84.06	76.6446	88.3923	94.8051	72.6248	81.2727	116.539	136.314	107.679	100.265	89.8281	98.3819	90.2473	88.4254	96.0152	112.448	82.4148	84.4851	77.9956	82.4671	76.1801	76.3339			78.1834	84.1308	90.3427	72.8814	74.7011	76.993			95.9049	86.3378	80.023	80.2001	83.0224	70.613
		122.5	117.2	133.839	84.1023	76.7318	88.5853	95.2948	72.8469	81.3256	116.405	136.077	107.14	100.474	89.3777	98.1612	90.4363	88.8447	96.0858	112.202	82.4843	84.4128	77.7513	82.1669	76.6826	76.4039			78.1388	84.3844	90.8496	72.6657	74.3883	77.2866			95.8733	86.0055	79.5659	79.6412	83.2224	71.3256
		122.6	117.082	133.722	83.8591	77.1158	88.7748	95.638	72.4771	81.7171	116.522	135.68	106.545	101.112	89.3581	97.8223	89.955	89.2884	96.3811	111.821	82.6795	84.4348	77.5692	82.1861	77.1643	76.4372			78.1626	84.4889	90.9424	72.3792	74.133	77.2846			95.744	85.7624	78.9798	79.1301	83.4723	71.6577
		122.7	117.032	133.569	83.3211	77.4963	88.8471	95.1923	72.1882	81.9937	116.793	135.225	105.975	101.243	89.3259	97.2608	88.9993	89.9634	96.6909	111.435	82.9583	84.6696	77.8039	82.8103	77.005	76.7431			78.3345	84.5144	89.9634	72.1904	73.647	76.9808			95.5967	85.6649	78.7153	78.8654	83.5109	71.2882
		122.8	117.149	133.589	83.057	77.956	88.7079	94.617	71.7591	82.1158	117.072	134.914	105.728	101.084	88.803	97.2637	88.413	90.5103	97.017	111.17	82.9303	84.8849	78.1246	83.5811	76.5691	76.6319			78.7302	84.598	88.675	72.1086	73.2994	76.889			95.6411	85.6802	79.1162	79.2491	83.2357	70.386
		122.9	117.425	133.925	83.181	78.1485	88.5206	93.973	71.7743	81.6828	117.211	135.129	105.787	100.798	88.5679	97.1457	88.3707	90.7519	97.2801	111.01	82.8133	84.9299	78.0992	84.2683	75.8252	76.5596			79.0757	84.6277	87.6391	72.3711	73.4694	77.0321			95.7167	85.8881	79.6973	79.6859	83.0588	69.6854
		123	117.774	134.163	83.4175	78.0568	88.1448	93.6142	71.9593	81.3979	117.273	135.479	106.197	100.227	88.5557	96.9298	88.4012	90.3836	97.2093	111.056	82.9283	84.9465	77.8688	84.2964	75.6343	76.5449			79.3238	84.7578	87.7499	72.9921	74.2449	77.1664			95.9284	86.0463	80.232	79.8843	82.8071	69.5942
		123.1	118.014	134.124	83.7492	77.8238	87.9687	93.3421	72.3292	81.1556	117.28	135.983	106.62	99.9908	89.0449	96.3953	88.4193	89.6087	96.7831	111.412	83.0404	84.8411	77.3702	84.2449	75.6514	76.7289			79.5745	84.8186	88.409	73.4749	74.9619	76.913			96.2221	86.046	80.582	79.951	82.6542	69.7963
		123.2	118.23	134.205	83.9046	77.3659	87.6086	93.4144	72.6347	81.469	117.291	136.647	106.669	99.8139	88.9313	96.0808	88.1679	88.9967	96.251	111.8	83.3419	84.8174	77.0058	83.8126	75.8651	76.3618			79.4863	84.6638	89.1868	73.3044	75.0256	76.5277			96.4282	86.103	80.9857	80.0553	82.4908	70.0731
		123.3	118.305	134.312	84.1241	77.2639	87.3366	93.5817	72.4544	81.7563	117.457	137.066	106.649	99.8371	88.7658	96.1572	88.3177	88.8377	95.6655	112.212	83.6366	84.8616	76.5551	83.3359	76.134	75.638			79.2161	84.4429	89.7058	72.5522	74.775	76.0338			96.5544	85.6903	81.0753	80.289	82.4129	70.4067
		123.4	118.234	134.29	84.2998	77.2161	87.321	93.9437	71.962	82.3153	117.76	137.065	106.476	99.9309	88.6847	96.8413	88.6479	88.7962	95.0736	112.699	83.7752	84.8893	76.8836	82.6098	76.4967	75.1004			78.8368	84.1766	89.973	71.8906	74.5754	75.59			96.3838	85.3318	80.6826	80.3576	82.3872	70.7422
		123.5	118.164	134.332	84.2791	77.3288	87.8557	94.3311	71.5532	82.4971	117.908	136.926	106.373	100.105	89.144	97.7576	89.2267	88.5651	94.7479	113.098	83.8293	84.9765	77.5302	82.2158	76.8377	75.1993			78.3547	83.9629	90.1896	71.9142	74.5207	75.3067			96.2476	85.3846	80.1263	80.2553	82.4069	70.9558
		123.6	118.158	134.554	84.3491	77.5934	88.8012	94.5646	71.6893	82.7507	117.899	136.763	106.626	100.363	89.4836	98.4008	89.2968	88.2213	94.7234	113.382	83.4711	85.1551	78.2059	81.8977	76.567	75.536			78.1169	84.0796	89.9209	72.3069	74.5794	75.2454			96.0652	85.4134	79.9033	79.8384	82.4719	70.7936
		123.7	118.088	134.788	84.1411	77.551	89.3217	94.7044	72.2878	82.8019	117.833	136.29	106.767	100.431	89.4472	98.392	88.8124	88.0383	94.9214	113.654	82.9888	85.4169	78.1658	81.7989	76.2528	75.881			78.0657	84.3298	89.3821	73.1649	74.471	75.1867			95.824	85.9019	80.1893	79.4767	82.2432	70.5631
		123.8	118.061	135.008	83.7811	77.6044	89.0871	94.619	72.8277	82.752	117.593	136.093	106.995	100.479	89.2789	98.1506	88.3921	88.0368	95.2132	113.921	82.4721	85.6908	77.5128	81.7131	75.9816	76.2996			78.1962	84.8255	88.6274	73.5801	74.4249	75.0158			95.7459	86.4067	80.4454	79.1352	82.002	70.2169
		123.9	117.945	135.041	83.4847	77.6231	88.4208	94.582	72.9077	82.33	117.309	136.048	107.243	100.252	89.4024	98.0244	88.145	87.945	95.5509	113.93	81.9179	85.9765	77.0009	81.893	76.2614	76.7994			78.4113	85.2068	88.569	73.6918	74.1027	74.7973			95.6564	86.5471	80.6401	79.1064	81.7816	70.0872
		124	117.755	135.041	83.1079	77.4754	87.9918	94.5868	72.5948	81.7244	117.128	135.93	107.213	100.039	89.606	98.0833	88.2517	87.9067	95.8405	113.815	81.9348	86.0939	76.6102	82.1811	76.3217	76.9159			78.7242	85.2975	89.284	73.2581	73.7321	74.7434			95.4563	86.7041	80.5307	78.9194	81.92	70.126
		124.1	117.639	134.928	82.94	77.5057	87.9402	94.5682	71.9631	81.0663	117.08	135.772	107.262	100.1	89.8462	97.9936	87.9191	87.9457	95.9691	113.476	82.1513	86.0374	76.6227	82.373	76.2043	76.4903			78.9675	85.4112	90.4399	72.8808	73.7146	74.858			95.192	86.843	80.2914	78.798	81.9016	70.516
		124.2	117.721	134.71	83.0904	77.5728	87.6322	94.6292	71.6053	80.626	117.052	135.853	106.985	100.13	89.9594	97.6572	87.7782	88.3394	96.0362	113.004	82.4324	85.6153	76.5453	82.3982	75.9851	75.8511			79.1386	85.2578	91.2014	72.5358	73.8469	74.9713			94.9633	87.0486	79.6473	78.6333	82.0489	70.6923
		124.3	117.925	134.415	83.4268	77.6383	87.1756	94.3668	71.7571	80.5853	117.229	135.653	106.699	100.377	89.8659	97.4954	87.577	88.8377	96.1038	112.441	82.7329	84.9986	76.4526	82.0863	76.026	75.7866			79.3241	85.1898	91.1144	72.2713	74.1109	75.3764			94.7095	87.4113	78.8469	78.8057	82.4034	70.5806
		124.4	118.275	134.264	83.8996	77.8973	86.7449	94.1066	72.285	80.9857	117.415	135.455	106.511	100.516	89.2881	97.5088	87.9522	89.034	96.2362	112.183	82.6458	84.3466	76.3646	81.824	76.2683	75.9313			79.2641	85.2378	90.4718	72.242	74.2741	75.807			94.6513	87.5069	78.4163	79.0638	83.2031	69.9359
		124.5	118.655	134.13	84.1864	77.9626	86.9564	93.9897	72.6419	81.4097	117.656	135.346	106.24	100.34	88.6636	97.8086	88.0667	88.6476	96.4298	112.098	82.4792	83.7664	76.5979	81.6854	76.383	76.4541			79.148	84.9973	89.9453	72.6732	74.4802	76.2878			94.7812	87.3751	78.3621	79.5419	83.7893	69.3599
		124.6	118.934	134.139	84.2594	77.7878	87.3397	93.9347	72.5757	81.5337	117.742	135.319	106.235	100.208	88.5219	97.7263	88.2047	88.2008	96.6168	112.325	82.2264	83.8377	77.2627	81.818	76.3697	76.8953			79.0172	84.8837	90.1233	73.1784	74.8058	76.4386			95.0323	87.0349	78.5709	79.8691	83.7212	69.0622
		124.7	118.936	134.23	84.2633	77.5616	87.7013	93.6153	72.4851	81.4116	117.661	135.245	106.025	99.9405	89.0856	97.5842	88.1269	88.0483	96.7872	112.619	81.9836	84.1136	77.8276	81.8509	76.2377	77.6339			78.8698	84.7773	90.5751	73.4306	74.9117	76.4602			95.4408	86.5906	78.5311	80.3581	82.9703	69.2571
		124.8	118.728	134.216	83.9359	77.2185	87.6484	93.0598	72.5339	81.5168	117.267	135.426	105.832	99.9563	89.4866	97.5548	88.6451	88.5752	97.0031	112.832	82.0168	84.5636	77.969	81.9086	76.4156	78.1359			78.7913	84.4849	90.5748	73.4887	75.1804	76.3649			95.826	86.5099	78.637	80.4947	82.4429	69.7144
		124.9	118.549	134.093	83.9071	77.0804	87.2009	93.0603	72.3896	81.7113	116.647	135.584	105.759	100.25	89.4976	97.821	89.3306	89.1441	97.1518	112.875	82.0119	84.9533	77.7644	81.8769	76.83	78.4374			78.6839	84.4404	89.9233	73.5086	75.38	76.0782			96.1878	86.6103	78.8398	80.5699	82.094	70.0783
		125	118.418	134.022	84.0873	77.2896	86.7414	93.7576	72.1172	81.7428	115.985	135.735	105.888	100.613	89.042	98.1081	89.8134	89.4112	97.1977	112.813	82.2266	84.9119	77.5571	81.8364	77.148	78.5421			78.5881	84.2526	89.3116	73.596	75.3844	75.9378			96.2004	86.7344	79.4078	80.2933	81.9649	70.2843
		125.1	118.24	133.75	84.2651	77.4331	86.5816	94.6774	71.9227	81.2307	115.644	135.71	106.404	101.084	88.6457	97.8899	89.8084	89.1517	97.3318	112.474	82.4858	84.7786	77.4419	81.6658	76.9117	78.4084			78.5116	84.1101	89.0847	73.3357	74.9869	76.0428			95.9651	86.9461	79.6847	79.8389	81.6078	70.253
		125.2	118.181	133.392	84.7785	77.7157	87.1819	94.8626	72.4369	80.4547	115.537	135.712	106.893	101.308	88.6446	97.6541	89.8143	88.4816	97.2834	112.219	82.5648	84.3836	77.2946	81.7606	76.3346	78.1101			78.4393	84.3033	89.2779	73.0209	74.2931	76.4212			95.6543	86.9091	79.4823	79.5382	81.6852	70.2166
		125.3	118.324	133.204	84.9631	77.6681	88.0191	94.2279	72.9703	80.0749	115.664	135.657	107.368	101.254	88.8313	97.3893	89.8083	88.3801	97.032	112.049	82.787	84.1316	77.2209	82.1532	76.0084	77.5991			78.3903	84.3469	89.4547	72.8448	73.7908	76.5166			95.241	86.7497	78.6864	79.4268	82.1393	70.1224
		125.4	118.396	133.155	85.0498	77.3274	88.6786	93.3676	73.5354	80.0722	116.087	135.518	107.552	101.119	89.0706	97.6957	89.7074	88.3857	96.8472	111.82	82.8194	83.8706	76.8671	82.6321	76.2177	77.2283			78.5168	84.3865	89.7988	72.6229	73.4534	76.2878			95.2554	86.5961	78.1982	79.7551	82.7761	70.2701
		125.5	118.386	132.996	85.0905	77.2798	88.4956	92.9533	73.352	80.4927	116.576	135.365	107.434	101.101	88.7887	97.9218	89.3081	88.5142	96.7152	111.629	82.8929	83.6317	76.3607	82.9558	76.5758	77.1736			78.5853	84.2384	90.015	72.6532	73.3517	76.0947			95.2361	86.3776	78.5937	79.8423	83.1783	70.4338
		125.6	118.408	132.981	84.8123	77.1467	87.8764	93.2699	73.1258	80.5989	116.815	135.473	107.228	101.052	88.5747	97.9138	88.9088	88.1898	96.6296	111.593	83.2082	83.6182	76.0491	82.9638	76.6669	77.127			78.6163	83.6999	90.1141	72.5883	73.425	75.7371			95.3051	86.2606	79.5532	79.8221	83.404	70.6267
		125.7	118.505	133.069	84.6571	77.599	87.2502	93.7943	72.5137	80.644	117.043	135.391	106.83	101.041	88.8692	97.3092	88.5606	87.9502	96.7414	111.486	83.4695	83.6239	76.4637	82.5498	76.5406	77.2378			78.6322	83.4017	90.0208	72.9506	73.7093	75.6236			95.4944	86.3219	80.3833	79.9831	83.4708	70.6561
		125.8	118.443	133.017	84.2964	78.2493	87.2688	94.5846	72.0982	80.4949	117.23	135.126	106.394	100.967	89.5683	96.4053	88.1768	87.9856	96.893	111.469	83.5926	83.9796	77.4692	81.9083	76.4223	76.8918			78.3958	83.3625	89.9554	72.8768	74.1033	75.162			95.4939	86.4855	80.4806	80.3978	83.4739	70.4253
		125.9	118.338	132.877	83.9732	78.5189	87.7301	95.1164	71.6272	80.5637	117.433	134.985	106.036	100.596	90.0806	95.7483	88.0607	88.0287	96.8877	111.657	83.548	84.4572	78.0388	81.5508	76.7068	76.6801			78.241	83.3544	89.8953	72.9151	74.4627	75.1666			95.7034	86.6383	80.101	81.0081	83.224	70.3483
		126	118.246	132.87	84.0034	78.7907	88.1154	95.3356	71.4296	80.803	117.402	134.901	105.676	100.341	90.0338	95.6677	88.019	87.7086	96.835	111.829	83.0638	84.9896	77.969	81.8054	76.7783	76.3109			78.3348	83.4839	89.8426	72.882	74.4983	74.908			95.9421	86.7364	79.5183	81.0931	83.1038	70.1287
		126.1	118.139	132.823	83.9988	78.5373	88.1208	95.0371	71.5072	81.0084	117.28	134.629	105.343	100.148	89.9292	96.2177	88.1039	87.1534	96.6426	112.018	82.4191	85.4442	77.3598	82.243	76.9379	76.0919			78.7279	83.3964	89.8369	72.9991	74.6977	74.9889			96.2008	86.6758	79.2492	81.2591	82.88	70.203
		126.2	117.924	132.714	84.2107	78.0946	87.8888	94.5103	71.7472	81.2251	116.959	134.598	105.132	100.024	89.9182	96.9291	88.3431	86.8396	96.3648	112.181	81.9583	85.6244	77.338	82.6258	76.9403	76.0177			79.2214	83.1059	90.0196	72.7318	74.6217	75.0301			96.337	86.4629	79.3126	81.0322	82.6948	70.0542
		126.3	117.796	132.819	84.3686	77.8891	87.9317	94.0776	71.9007	81.6364	116.575	134.651	105.02	100.139	89.8628	97.2111	88.7217	87.2546	96.2129	112.292	81.5165	85.7217	77.6114	82.8706	77.2492	76.1599			79.5564	83.0466	90.2744	72.2964	74.5148	75.2937			96.3182	86.2338	79.4467	80.9049	82.3079	69.9729
		126.4	117.866	132.912	84.2318	77.5678	88.0327	93.9097	71.875	82.554	116.065	134.597	105.221	100.163	89.576	97.1147	89.0661	87.6864	96.11	112.181	81.3544	85.6403	78.0404	83.142	77.3756	76.498			79.4646	83.1598	90.2403	72.0179	73.9232	75.5636			96.1336	86.0511	79.3746	80.2376	82.3277	69.9803
[truncated: 1,736 more rows]

## Sheet: Hsp70_Hsc70_shortened
Sorce data: Figure 5A
[truncated: 3,003 more rows]

## Sheet: Rates_Average
Sorce data: Figure 5A
[truncated: 6 more rows]

## Sheet: Normalised data for figure
	Final data combined from 12.-16.02.2019 for Source data file
[truncated: 3,008 more rows]
[truncated: 36 more columns]
