# Supplementary material for: Calcium depletion challenges endoplasmic reticulum proteostasis by destabilising BiP-substrate complexes
Source: eLife. 2020 Dec 9;9:e62601. doi: 10.7554/eLife.62601 (PMC7758071; doi:10.7554/eLife.62601)
Supplement: Figure 5—source data 2. [file elife-62601-fig5-data2.xlsx]

## Sheet: Exp1
Sorce data: Figure 5B
Raw BLI data (nm)											Normalised to baseline
Time (s)	BiP	BiP + Ca	dBiP	dBiP + Ca	Hsp70	Hsp70 + Ca	Hsc70	Hsc70 + Ca			Time (s)	BiP	BiP + Ca	dBiP	dBiP + Ca	Hsp70	Hsp70 + Ca	Hsc70	Hsc70 + Ca
0	0	0	0	0	0	0	0	0			0	0	0	0	0	0	0	0	0
0.2	0.00096414	-0.00337311	0.00173261	0.00303289	-0.00415024	-0.00137761	-0.0017791	0.00263282			0.2	0.00096414	-0.00337311	0.00173261	0.00303289	-0.00415024	-0.00137761	-0.0017791	0.00263282
0.4	-0.00180109	-0.00378695	-0.00252092	0.00307118	-0.00894128	-0.00294558	-0.00355798	0.0013065			0.4	-0.00180109	-0.00378695	-0.00252092	0.00307118	-0.00894128	-0.00294558	-0.00355798	0.0013065
0.59	9.976e-05	-0.0039761	-0.00130619	0.0030151	-0.00520518	-0.0024001	-0.00358681	0.00595136			0.59	9.976e-05	-0.0039761	-0.00130619	0.0030151	-0.00520518	-0.0024001	-0.00358681	0.00595136
0.8	0.00169329	-0.00507084	-0.00052507	0.00242185	-0.0022668	-0.00210721	-0.00245528	0.00229813			0.8	0.00169329	-0.00507084	-0.00052507	0.00242185	-0.0022668	-0.00210721	-0.00245528	0.00229813
0.99	0.00074146	0.000363	0.00028621	0.0043644	-0.00318863	-0.00102379	-0.00307539	0.0031921			0.99	0.00074146	0.000363	0.00028621	0.0043644	-0.00318863	-0.00102379	-0.00307539	0.0031921
1.2	-0.00088559	-0.00647892	0.00060468	0.00216453	-0.00335962	-0.00041956	-0.00263616	-0.00054666			1.2	-0.00088559	-0.00647892	0.00060468	0.00216453	-0.00335962	-0.00041956	-0.00263616	-0.00054666
1.39	-0.00167816	-0.00405095	0.00204592	0.0015049	-0.00292648	-0.00236001	-0.00437334	0.00039023			1.39	-0.00167816	-0.00405095	0.00204592	0.0015049	-0.00292648	-0.00236001	-0.00437334	0.00039023
1.59	-0.00218493	0.00228039	-0.00282115	6.293e-05	-0.00298148	0.00162123	-0.00169223	-0.00017115			1.59	-0.00218493	0.00228039	-0.00282115	6.293e-05	-0.00298148	0.00162123	-0.00169223	-0.00017115
1.79	-0.00161999	-0.00606424	0.0010546	0.00420923	-0.00550663	0.00212797	-0.00472915	0.00277357			1.79	-0.00161999	-0.00606424	0.0010546	0.00420923	-0.00550663	0.00212797	-0.00472915	0.00277357
2	-9.865e-05	-0.00349743	0.002538	0.00260215	-0.00724496	0.00075519	-0.00345006	0.00101313			2	-9.865e-05	-0.00349743	0.002538	0.00260215	-0.00724496	0.00075519	-0.00345006	0.00101313
2.19	-0.00039739	-0.00459059	-0.00038532	0.00315378	-0.00523499	-0.00061223	0.00069871	0.00019264			2.19	-0.00039739	-0.00459059	-0.00038532	0.00315378	-0.00523499	-0.00061223	0.00069871	0.00019264
2.39	-0.00083904	-0.00593216	-0.00086888	0.00245251	-0.00581777	0.00033285	-0.00138229	0.00075361			2.39	-0.00083904	-0.00593216	-0.00086888	0.00245251	-0.00581777	0.00033285	-0.00138229	0.00075361
2.59	0.00011472	-0.00321553	-0.0005141	0.00382683	-0.00217145	-0.00157933	0.00213462	0.00235809			2.59	0.00011472	-0.00321553	-0.0005141	0.00382683	-0.00217145	-0.00157933	0.00213462	0.00235809
2.79	0.00188854	-0.0055507	0.0001999	0.00383846	-0.007015	0.00064831	-0.0005106	0.00075258			2.79	0.00188854	-0.0055507	0.0001999	0.00383846	-0.007015	0.00064831	-0.0005106	0.00075258
2.99	0.00075138	-0.00362668	0.00087694	0.00377078	-0.00507793	0.00108038	-0.00075139	0.0022777			2.99	0.00075138	-0.00362668	0.00087694	0.00377078	-0.00507793	0.00108038	-0.00075139	0.0022777
3.19	0.00092688	-0.00237457	0.00080579	0.00583366	-0.00619116	0.00241553	-0.00381428	0.00303739			3.19	0.00092688	-0.00237457	0.00080579	0.00583366	-0.00619116	0.00241553	-0.00381428	0.00303739
3.39	9.133e-05	-0.00264834	0.00489743	0.00459081	-0.00486145	-0.00029553	-0.00344099	0.0030069			3.39	9.133e-05	-0.00264834	0.00489743	0.00459081	-0.00486145	-0.00029553	-0.00344099	0.0030069
3.59	-0.00048642	-0.00174362	0.00060557	0.00253944	-0.00731078	0.00096939	0.00053008	0.00084694			3.59	-0.00048642	-0.00174362	0.00060557	0.00253944	-0.00731078	0.00096939	0.00053008	0.00084694
3.79	-0.00056706	-0.00309947	0.00354583	0.00460587	-0.00837923	0.00219351	-0.00303749	0.00433115			3.79	-0.00056706	-0.00309947	0.00354583	0.00460587	-0.00837923	0.00219351	-0.00303749	0.00433115
3.99	0.00227635	-0.00226014	0.00524461	0.00405828	-0.00720242	0.00231269	-0.0025654	0.00193995			3.99	0.00227635	-0.00226014	0.00524461	0.00405828	-0.00720242	0.00231269	-0.0025654	0.00193995
4.19	0.00102988	-0.00223023	0.00183697	0.00545187	-0.00426232	0.00248065	-0.00397504	0.00085906			4.19	0.00102988	-0.00223023	0.00183697	0.00545187	-0.00426232	0.00248065	-0.00397504	0.00085906
4.39	0.00079133	0.00161697	0.00107463	0.00060966	-0.00566613	-0.00031588	-0.00236546	0.00358344			4.39	0.00079133	0.00161697	0.00107463	0.00060966	-0.00566613	-0.00031588	-0.00236546	0.00358344
4.59	0.00039261	-0.00113108	0.00131778	0.00292547	-0.00598257	0.00178108	-0.00109776	0.00705178			4.59	0.00039261	-0.00113108	0.00131778	0.00292547	-0.00598257	0.00178108	-0.00109776	0.00705178
4.79	-0.00065477	-0.00025201	0.00535444	0.00480843	-0.00530606	0.0019591	-0.00173661	0.00155166			4.79	-0.00065477	-0.00025201	0.00535444	0.00480843	-0.00530606	0.0019591	-0.00173661	0.00155166
4.99	0.00212046	-0.00547688	-0.00212712	0.00248066	-0.00782772	0.00226418	-0.00318663	0.00792903			4.99	0.00212046	-0.00547688	-0.00212712	0.00248066	-0.00782772	0.00226418	-0.00318663	0.00792903
5.19	-0.00281844	-0.00280243	0.00428553	0.00506326	-0.00278748	0.00398934	-0.0039121	0.00336251			5.19	-0.00281844	-0.00280243	0.00428553	0.00506326	-0.00278748	0.00398934	-0.0039121	0.00336251
5.39	0.00043679	-0.00034787	0.00329435	0.00477538	-0.00522946	0.00301823	0.00123999	0.00240116			5.39	0.00043679	-0.00034787	0.00329435	0.00477538	-0.00522946	0.00301823	0.00123999	0.00240116
5.59	0.00153536	0.00306827	0.00247537	0.0069322	-0.00855367	0.00599436	-0.00212968	0.00418882			5.59	0.00153536	0.00306827	0.00247537	0.0069322	-0.00855367	0.00599436	-0.00212968	0.00418882
5.79	0.00371468	-0.00169468	0.00216942	0.00551838	-0.00502719	0.00122057	-0.00466101	0.00306012			5.79	0.00371468	-0.00169468	0.00216942	0.00551838	-0.00502719	0.00122057	-0.00466101	0.00306012
5.99	0.00339325	0.00204672	0.00242346	0.00330794	-0.00413	0.00150531	-0.00127012	0.00189609			5.99	0.00339325	0.00204672	0.00242346	0.00330794	-0.00413	0.00150531	-0.00127012	0.00189609
6.19	-0.00152645	-0.00144935	0.00223948	0.00263133	-0.00686374	0.00187626	-0.00176539	0.00450426			6.19	-0.00152645	-0.00144935	0.00223948	0.00263133	-0.00686374	0.00187626	-0.00176539	0.00450426
6.39	-0.0038898	-0.00309555	0.00401785	0.00466768	-0.00602449	0.0046497	-0.00365431	0.00381499			6.39	-0.0038898	-0.00309555	0.00401785	0.00466768	-0.00602449	0.0046497	-0.00365431	0.00381499
6.59	-0.00066525	0.00206078	0.00236374	0.0016445	-0.00893421	0.00283069	4.309e-05	0.00413548			6.59	-0.00066525	0.00206078	0.00236374	0.0016445	-0.00893421	0.00283069	4.309e-05	0.00413548
6.8	-0.00110704	0.0019433	0.00515812	0.00275117	-0.0043997	0.00655273	8.656e-05	0.00796261			6.8	-0.00110704	0.0019433	0.00515812	0.00275117	-0.0043997	0.00655273	8.656e-05	0.00796261
6.99	-0.00405051	-0.00152812	0.00129628	0.00374873	-0.0066015	0.0038591	-0.00591846	0.00464732			6.99	-0.00405051	-0.00152812	0.00129628	0.00374873	-0.0066015	0.0038591	-0.00591846	0.00464732
7.19	0.00076537	-0.00209911	0.0033331	0.00232941	-0.00634968	0.00396593	-0.00183336	0.000615			7.19	0.00076537	-0.00209911	0.0033331	0.00232941	-0.00634968	0.00396593	-0.00183336	0.000615
7.39	-0.00016924	0.00247496	0.00011853	0.00306582	-0.00356158	0.00187451	-0.0052557	0.00484726			7.39	-0.00016924	0.00247496	0.00011853	0.00306582	-0.00356158	0.00187451	-0.0052557	0.00484726
7.59	5.07e-06	-0.00304354	-0.00115454	0.00400724	-0.00320686	0.00400025	0.00040775	0.00352861			7.59	5.07e-06	-0.00304354	-0.00115454	0.00400724	-0.00320686	0.00400025	0.00040775	0.00352861
7.8	0.00333644	-0.00241693	0.00136501	0.00572765	-0.00737629	0.00314002	-0.00356393	0.00604931			7.8	0.00333644	-0.00241693	0.00136501	0.00572765	-0.00737629	0.00314002	-0.00356393	0.00604931
7.99	0.00106469	-0.00432973	0.00381954	0.00350472	-0.00612872	0.00242581	-0.00242693	0.00370229			7.99	0.00106469	-0.00432973	0.00381954	0.00350472	-0.00612872	0.00242581	-0.00242693	0.00370229
8.19	-0.00095401	-0.00163933	0.00649519	0.00335416	-0.00426145	0.00534543	0.00124851	0.00536438			8.19	-0.00095401	-0.00163933	0.00649519	0.00335416	-0.00426145	0.00534543	0.00124851	0.00536438
8.39	-2.627e-05	0.00084995	0.00256248	0.00315658	-0.00531805	0.00426782	0.00203471	0.00361784			8.39	-2.627e-05	0.00084995	0.00256248	0.00315658	-0.00531805	0.00426782	0.00203471	0.00361784
8.6	0.00286504	0.00252951	-0.00051695	0.00715258	-0.00644416	0.00612569	-0.00732246	0.00364423			8.6	0.00286504	0.00252951	-0.00051695	0.00715258	-0.00644416	0.00612569	-0.00732246	0.00364423
8.79	0.00447892	0.00030081	0.001386	0.0027546	-0.00530451	0.00408573	-0.00145956	0.00496576			8.79	0.00447892	0.00030081	0.001386	0.0027546	-0.00530451	0.00408573	-0.00145956	0.00496576
8.99	0.00147941	-0.00167564	0.00315744	0.0069653	-0.00883572	0.0035481	0.00025539	0.00547592			8.99	0.00147941	-0.00167564	0.00315744	0.0069653	-0.00883572	0.0035481	0.00025539	0.00547592
9.19	0.00230429	0.00047941	0.00082893	0.00336849	-0.00426238	0.00520664	-0.00573376	0.00697075			9.19	0.00230429	0.00047941	0.00082893	0.00336849	-0.00426238	0.00520664	-0.00573376	0.00697075
9.39	0.00188344	-0.0011751	0.00321446	0.00470908	-0.00587116	0.00573039	0.00192276	0.00630358			9.39	0.00188344	-0.0011751	0.00321446	0.00470908	-0.00587116	0.00573039	0.00192276	0.00630358
9.59	0.00213165	-0.00132772	0.00345271	0.00307615	-0.00454324	0.00749287	0.0018734	0.00236139			9.59	0.00213165	-0.00132772	0.00345271	0.00307615	-0.00454324	0.00749287	0.0018734	0.00236139
9.79	0.00181783	-0.00255116	0.00445606	0.0090111	-0.00575145	0.00448082	0.00151001	0.00492126			9.79	0.00181783	-0.00255116	0.00445606	0.0090111	-0.00575145	0.00448082	0.00151001	0.00492126
9.99	0.00091906	-0.00119341	0.00308705	0.00177613	-0.00650167	0.00248404	-0.00129732	0.00355956			9.99	0.00091906	-0.00119341	0.00308705	0.00177613	-0.00650167	0.00248404	-0.00129732	0.00355956
10.19	0.00082658	-0.00323906	0.00544702	0.00464842	-0.00413971	0.00469602	-0.00018278	0.00547423			10.19	0.00082658	-0.00323906	0.00544702	0.00464842	-0.00413971	0.00469602	-0.00018278	0.00547423
10.39	0.00096413	-0.00078037	-0.00086795	0.00433592	-0.00534942	0.00617129	-0.00391945	0.00501798			10.39	0.00096413	-0.00078037	-0.00086795	0.00433592	-0.00534942	0.00617129	-0.00391945	0.00501798
10.59	-0.0009472	0.00181446	0.00238653	0.00334461	-0.00440322	0.00626425	-0.00327418	0.00202985			10.59	-0.0009472	0.00181446	0.00238653	0.00334461	-0.00440322	0.00626425	-0.00327418	0.00202985
10.79	0.00505959	-0.0003119	0.00143934	0.00071803	-0.00585881	0.00414404	-0.00144464	0.00593507			10.79	0.00505959	-0.0003119	0.00143934	0.00071803	-0.00585881	0.00414404	-0.00144464	0.00593507
10.99	-0.00014748	-0.00229279	0.00253742	0.00310912	-0.00375409	0.00269352	-0.00069109	0.00515675			10.99	-0.00014748	-0.00229279	0.00253742	0.00310912	-0.00375409	0.00269352	-0.00069109	0.00515675
11.19	-0.0009785	-0.00035547	0.00516748	0.00510035	-0.00490845	0.00597322	-0.00092268	0.00610382			11.19	-0.0009785	-0.00035547	0.00516748	0.00510035	-0.00490845	0.00597322	-0.00092268	0.00610382
11.39	-0.00016507	0.00045319	0.00573894	0.00605598	-0.00634592	0.00899204	-0.00438699	0.00897507			11.39	-0.00016507	0.00045319	0.00573894	0.00605598	-0.00634592	0.00899204	-0.00438699	0.00897507
11.6	0.00131761	0.00170226	0.00804238	0.00611248	-0.00680633	0.0050618	-0.00130972	0.00437859			11.6	0.00131761	0.00170226	0.00804238	0.00611248	-0.00680633	0.0050618	-0.00130972	0.00437859
11.8	0.00380668	0.00336789	0.00656263	0.00273364	-0.00615551	0.00405248	0.00082662	0.00535289			11.8	0.00380668	0.00336789	0.00656263	0.00273364	-0.00615551	0.00405248	0.00082662	0.00535289
11.99	0.00169692	0.00039339	0.0024386	0.00598672	-0.00600486	0.00308297	-0.00298788	0.00753036			11.99	0.00169692	0.00039339	0.0024386	0.00598672	-0.00600486	0.00308297	-0.00298788	0.00753036
12.19	0.00200405	-0.00046485	0.00302121	0.00555381	-0.00603099	0.00917136	0.0029484	0.00534052			12.19	0.00200405	-0.00046485	0.00302121	0.00555381	-0.00603099	0.00917136	0.0029484	0.00534052
12.39	0.00286187	0.00212894	0.00317921	0.00657199	-0.00628649	0.005147	0.00087731	0.00416209			12.39	0.00286187	0.00212894	0.00317921	0.00657199	-0.00628649	0.005147	0.00087731	0.00416209
12.6	0.00103972	-0.00108641	0.00545302	0.00385766	-0.00830281	0.00682475	-0.00126658	0.00361536			12.6	0.00103972	-0.00108641	0.00545302	0.00385766	-0.00830281	0.00682475	-0.00126658	0.00361536
12.8	0.00098848	0.0034159	0.00551744	0.00576626	-0.00783833	0.00759571	-0.00021853	0.00989438			12.8	0.00098848	0.0034159	0.00551744	0.00576626	-0.00783833	0.00759571	-0.00021853	0.00989438
12.99	0.002883	-0.0008984	0.00321752	0.00526279	-0.00498147	0.00765433	-0.00137122	0.00945323			12.99	0.002883	-0.0008984	0.00321752	0.00526279	-0.00498147	0.00765433	-0.00137122	0.00945323
13.19	0.00339796	-0.00220935	0.00240404	0.00849142	-0.00588706	0.00606633	-0.00431225	0.00784428			13.19	0.00339796	-0.00220935	0.00240404	0.00849142	-0.00588706	0.00606633	-0.00431225	0.00784428
13.39	0.00295937	0.00129258	0.00488728	0.00625863	-0.00652343	0.00439377	-0.00135847	0.00532666			13.39	0.00295937	0.00129258	0.00488728	0.00625863	-0.00652343	0.00439377	-0.00135847	0.00532666
13.6	0.0027953	0.00238328	0.00711693	0.00662044	-0.00780154	0.00740946	0.00130676	0.00626965			13.6	0.0027953	0.00238328	0.00711693	0.00662044	-0.00780154	0.00740946	0.00130676	0.00626965
13.8	0.0028377	0.0001052	0.0039498	0.00544947	-0.00448093	0.00454707	-0.00180134	0.00521655			13.8	0.0028377	0.0001052	0.0039498	0.00544947	-0.00448093	0.00454707	-0.00180134	0.00521655
13.99	0.00560386	0.00171076	0.00336479	0.00508441	-0.00340646	0.0100369	3.737e-05	0.0102699			13.99	0.00560386	0.00171076	0.00336479	0.00508441	-0.00340646	0.0100369	3.737e-05	0.0102699
14.19	0.00260096	0.00258539	0.00116037	0.00847933	-0.00532051	0.0056358	-0.00112002	0.00977181			14.19	0.00260096	0.00258539	0.00116037	0.00847933	-0.00532051	0.0056358	-0.00112002	0.00977181
14.39	0.0020053	-0.00302386	0.00139331	0.00557578	-0.00488575	0.00844492	8.351e-05	0.00668483			14.39	0.0020053	-0.00302386	0.00139331	0.00557578	-0.00488575	0.00844492	8.351e-05	0.00668483
14.6	0.00433235	-0.00136801	0.00530741	0.00454952	-0.00654346	0.00950675	-1.014e-05	0.00441798			14.6	0.00433235	-0.00136801	0.00530741	0.00454952	-0.00654346	0.00950675	-1.014e-05	0.00441798
14.8	0.0032313	0.00479391	0.00248383	0.00705213	-0.00522699	0.00729734	0.00069579	0.00694187			14.8	0.0032313	0.00479391	0.00248383	0.00705213	-0.00522699	0.00729734	0.00069579	0.00694187
14.99	0.0050867	0.00129359	0.00527361	0.00738124	-0.00947135	0.00954917	-0.00179423	0.00678695			14.99	0.0050867	0.00129359	0.00527361	0.00738124	-0.00947135	0.00954917	-0.00179423	0.00678695
15.19	0.00438954	-0.00190874	0.00273788	0.00651685	-0.0049968	0.00633281	-0.00415115	0.00619453			15.19	0.00438954	-0.00190874	0.00273788	0.00651685	-0.0049968	0.00633281	-0.00415115	0.00619453
15.39	0.00436284	0.00580863	0.00465538	0.00687995	-0.00781571	0.00359209	-0.00082159	0.00618387			15.39	0.00436284	0.00580863	0.00465538	0.00687995	-0.00781571	0.00359209	-0.00082159	0.00618387
15.6	0.00514963	0.0017579	0.00173799	0.00670953	-0.00678687	0.00936343	-0.00313387	0.0075662			15.6	0.00514963	0.0017579	0.00173799	0.00670953	-0.00678687	0.00936343	-0.00313387	0.0075662
15.8	0.00217683	0.0056532	0.00345405	0.00726612	-0.00717011	0.00428209	0.00115432	0.00787602			15.8	0.00217683	0.0056532	0.00345405	0.00726612	-0.00717011	0.00428209	0.00115432	0.00787602
15.99	0.00261948	0.00217858	0.00329351	0.00581471	-0.00488273	0.00587795	-0.00301957	0.00559017			15.99	0.00261948	0.00217858	0.00329351	0.00581471	-0.00488273	0.00587795	-0.00301957	0.00559017
16.2	0.00662088	-0.00106838	0.00366101	0.00599397	-0.00481139	0.0110289	-0.00312992	0.00576582			16.2	0.00662088	-0.00106838	0.00366101	0.00599397	-0.00481139	0.0110289	-0.00312992	0.00576582
16.4	0.00248056	0.00023365	0.00667106	0.00520225	-0.00899671	0.00577815	0.00034301	0.00763035			16.4	0.00248056	0.00023365	0.00667106	0.00520225	-0.00899671	0.00577815	0.00034301	0.00763035
16.6	0.00388106	0.0022644	0.00412399	0.00839378	-0.00551432	0.008397	0.00209282	0.00375491			16.6	0.00388106	0.0022644	0.00412399	0.00839378	-0.00551432	0.008397	0.00209282	0.00375491
16.79	0.00562259	0.00036365	0.00436395	0.0036797	-0.00688223	0.0100991	0.0014843	0.00774616			16.79	0.00562259	0.00036365	0.00436395	0.0036797	-0.00688223	0.0100991	0.0014843	0.00774616
17	0.00173594	0.00084541	0.00363601	0.0074175	-0.0088876	0.0115658	-0.00301031	0.00670656			17	0.00173594	0.00084541	0.00363601	0.0074175	-0.0088876	0.0115658	-0.00301031	0.00670656
17.2	0.00755829	0.00447032	0.00044252	0.0062001	-0.00614034	0.00971797	8.263e-05	0.00885924			17.2	0.00755829	0.00447032	0.00044252	0.0062001	-0.00614034	0.00971797	8.263e-05	0.00885924
17.4	0.00287718	0.00022847	0.00513784	0.00629141	-0.00935104	0.00828499	0.00380444	0.00810399			17.4	0.00287718	0.00022847	0.00513784	0.00629141	-0.00935104	0.00828499	0.00380444	0.00810399
17.6	0.00269578	0.0025154	0.00254983	0.00602714	-0.00602827	0.0085331	0.0009238	0.00841069			17.6	0.00269578	0.0025154	0.00254983	0.00602714	-0.00602827	0.0085331	0.0009238	0.00841069
17.79	0.00584466	-0.00145507	0.00760108	0.00431635	-0.0053252	0.00595522	0.00024901	0.00839754			17.79	0.00584466	-0.00145507	0.00760108	0.00431635	-0.0053252	0.00595522	0.00024901	0.00839754
18	0.00322942	0.00382323	0.00418998	0.00584474	-0.00618386	0.00845241	-0.00039141	0.00959972			18	0.00322942	0.00382323	0.00418998	0.00584474	-0.00618386	0.00845241	-0.00039141	0.00959972
18.2	0.00413004	0.00293947	0.00772552	0.00329721	-0.00640873	0.00999859	0.0026135	0.00756783			18.2	0.00413004	0.00293947	0.00772552	0.00329721	-0.00640873	0.00999859	0.0026135	0.00756783
18.4	0.00356543	0.00165684	0.005837	0.00827001	-0.0110134	0.0104719	0.00145794	0.0074936			18.4	0.00356543	0.00165684	0.005837	0.00827001	-0.0110134	0.0104719	0.00145794	0.0074936
18.59	0.00521256	0.00307862	0.00370079	0.00682262	-0.00675955	0.0089146	-0.00423544	0.00852484			18.59	0.00521256	0.00307862	0.00370079	0.00682262	-0.00675955	0.0089146	-0.00423544	0.00852484
18.8	0.00311318	0.00711435	0.00439609	0.00642921	-0.00493604	0.00651831	-0.00147995	0.00687644			18.8	0.00311318	0.00711435	0.00439609	0.00642921	-0.00493604	0.00651831	-0.00147995	0.00687644
19	0.00340425	0.00215112	0.00339289	0.00551953	-0.00753158	0.00675955	-0.00281307	0.00606813			19	0.00340425	0.00215112	0.00339289	0.00551953	-0.00753158	0.00675955	-0.00281307	0.00606813
19.2	0.0062781	0.00187274	0.00663494	0.00590488	-0.00662267	0.00995111	0.00327163	0.00896262			19.2	0.0062781	0.00187274	0.00663494	0.00590488	-0.00662267	0.00995111	0.00327163	0.00896262
19.39	0.00523267	0.00367677	0.00357181	0.00677744	-0.00729443	0.00731749	0.002119	0.00829615			19.39	0.00523267	0.00367677	0.00357181	0.00677744	-0.00729443	0.00731749	0.002119	0.00829615
19.6	0.00765433	0.00210386	0.00354472	0.0041198	-0.00634808	0.00376661	0.00095128	0.00717935			19.6	0.00765433	0.00210386	0.00354472	0.0041198	-0.00634808	0.00376661	0.00095128	0.00717935
19.8	0.00370067	0.00319315	0.00680269	0.00258662	-0.00653724	0.0130408	-0.0006914	0.00928033			19.8	0.00370067	0.00319315	0.00680269	0.00258662	-0.00653724	0.0130408	-0.0006914	0.00928033
19.99	0.0026163	0.00094004	0.00238662	0.00363273	-0.00650878	0.0108197	-0.00071213	0.00938367			19.99	0.0026163	0.00094004	0.00238662	0.00363273	-0.00650878	0.0108197	-0.00071213	0.00938367
20.2	0.0033742	-0.00169055	0.00552652	0.00575419	-0.00858129	0.00664997	-0.00291436	0.00894155			20.2	0.0033742	-0.00169055	0.00552652	0.00575419	-0.00858129	0.00664997	-0.00291436	0.00894155
20.4	0.00278428	-0.001309	0.00670117	0.0043633	-0.00765347	0.00962936	-0.0004569	0.00618442			20.4	0.00278428	-0.001309	0.00670117	0.0043633	-0.00765347	0.00962936	-0.0004569	0.00618442
20.6	0.00456316	-0.00154201	0.00834136	0.00784233	-0.00679886	0.00728705	0.00066807	0.0100127			20.6	0.00456316	-0.00154201	0.00834136	0.00784233	-0.00679886	0.00728705	0.00066807	0.0100127
20.8	0.00712083	0.00420044	0.00713428	0.00576704	-0.00683137	0.0101096	0.00043666	0.00638123			20.8	0.00712083	0.00420044	0.00713428	0.00576704	-0.00683137	0.0101096	0.00043666	0.00638123
21	0.00657417	0.00014374	0.00140594	0.00260717	-0.00571268	0.00855538	0.00031212	0.00836992			21	0.00657417	0.00014374	0.00140594	0.00260717	-0.00571268	0.00855538	0.00031212	0.00836992
21.19	0.00759725	0.00284722	0.0042119	0.00890267	-0.00569093	0.010879	0.00102088	0.0113609			21.19	0.00759725	0.00284722	0.0042119	0.00890267	-0.00569093	0.010879	0.00102088	0.0113609
21.4	0.0037295	0.00208843	0.00146779	0.00682704	-0.00750917	0.0102003	0.00303767	0.00860343			21.4	0.0037295	0.00208843	0.00146779	0.00682704	-0.00750917	0.0102003	0.00303767	0.00860343
21.6	0.00419667	0.00140876	0.00708007	0.00922439	-0.00709593	0.00780425	0.00078276	0.00623938			21.6	0.00419667	0.00140876	0.00708007	0.00922439	-0.00709593	0.00780425	0.00078276	0.00623938
21.79	0.00646975	0.00130806	0.00544795	0.00858079	-0.0036604	0.00814733	0.00207719	0.00669013			21.79	0.00646975	0.00130806	0.00544795	0.00858079	-0.0036604	0.00814733	0.00207719	0.00669013
21.99	0.00341172	0.00128775	0.00286219	0.00716175	-0.00317026	0.0125394	-0.00095759	0.00703672			21.99	0.00341172	0.00128775	0.00286219	0.00716175	-0.00317026	0.0125394	-0.00095759	0.00703672
22.2	0.00427945	0.00585626	0.00595582	0.00646319	-0.00668791	0.00634358	-0.00254274	0.00667098			22.2	0.00427945	0.00585626	0.00595582	0.00646319	-0.00668791	0.00634358	-0.00254274	0.00667098
22.4	0.00770416	0.00394103	0.00425722	0.00765545	-0.00362192	0.0106806	0.00376009	0.0106973			22.4	0.00770416	0.00394103	0.00425722	0.00765545	-0.00362192	0.0106806	0.00376009	0.0106973
22.59	0.00401859	-0.0027628	0.00064366	0.00749164	-0.00341069	0.0116574	-0.00407343	0.00891924			22.59	0.00401859	-0.0027628	0.00064366	0.00749164	-0.00341069	0.0116574	-0.00407343	0.00891924
22.8	0.00520874	0.00087181	0.00424292	0.00889904	-0.00345862	0.010123	0.0041895	0.0140897			22.8	0.00520874	0.00087181	0.00424292	0.00889904	-0.00345862	0.010123	0.0041895	0.0140897
23	0.00766981	0.00245977	0.00541863	0.00724749	-0.00362024	0.0121128	-0.00113322	0.00539608			23	0.00766981	0.00245977	0.00541863	0.00724749	-0.00362024	0.0121128	-0.00113322	0.00539608
23.19	0.00405649	0.0017338	0.00697236	0.00519414	-0.00468981	0.00826337	0.00045835	0.00850699			23.19	0.00405649	0.0017338	0.00697236	0.00519414	-0.00468981	0.00826337	0.00045835	0.00850699
23.39	0.00654851	0.00362426	0.00530098	0.0104228	-0.00833737	0.0120501	-0.00069822	0.00949517			23.39	0.00654851	0.00362426	0.00530098	0.0104228	-0.00833737	0.0120501	-0.00069822	0.00949517
23.6	0.00703689	0.00467455	0.0064025	0.00756763	-0.00557545	0.00785149	-0.00040289	0.00696833			23.6	0.00703689	0.00467455	0.0064025	0.00756763	-0.00557545	0.00785149	-0.00040289	0.00696833
23.8	0.00497853	0.00289174	0.00256615	0.0072058	-0.00500876	0.0122014	0.0070842	0.00848018			23.8	0.00497853	0.00289174	0.00256615	0.0072058	-0.00500876	0.0122014	0.0070842	0.00848018
24	0.00467317	0.00297203	0.00345854	0.0064245	-0.00529987	0.0115393	-0.00106725	0.00629444			24	0.00467317	0.00297203	0.00345854	0.0064245	-0.00529987	0.0115393	-0.00106725	0.00629444
24.2	0.00350236	0.00011185	0.00364126	0.00504988	-0.00756273	0.0117864	0.00151416	0.00621947			24.2	0.00350236	0.00011185	0.00364126	0.00504988	-0.00756273	0.0117864	0.00151416	0.00621947
24.39	0.00295075	-0.00090204	0.00486114	0.00617237	-0.00371993	0.0132393	0.00215986	0.0064003			24.39	0.00295075	-0.00090204	0.00486114	0.00617237	-0.00371993	0.0132393	0.00215986	0.0064003
24.6	0.00496717	0.00430709	0.00442261	0.00650702	-0.00398191	0.0166737	-0.00218345	0.00866278			24.6	0.00496717	0.00430709	0.00442261	0.00650702	-0.00398191	0.0166737	-0.00218345	0.00866278
24.8	0.00431119	0.00405527	0.00620891	0.00667584	-0.0074933	0.0125341	0.00206777	0.0108434			24.8	0.00431119	0.00405527	0.00620891	0.00667584	-0.0074933	0.0125341	0.00206777	0.0108434
25	0.00638048	0.00313161	0.00331366	0.00077034	-0.00581762	0.0121816	0.00249635	0.0104944			25	0.00638048	0.00313161	0.00331366	0.00077034	-0.00581762	0.0121816	0.00249635	0.0104944
25.19	0.00355405	0.00474861	0.00502884	0.00531783	-0.0047946	0.0139807	-0.0014478	0.00978169			25.19	0.00355405	0.00474861	0.00502884	0.00531783	-0.0047946	0.0139807	-0.0014478	0.00978169
25.4	0.00473683	-0.00047982	0.00410841	0.00698771	-0.00218289	0.0118787	-0.00143121	0.0056217			25.4	0.00473683	-0.00047982	0.00410841	0.00698771	-0.00218289	0.0118787	-0.00143121	0.0056217
25.6	0.00727865	0.00177294	0.00608705	0.00762653	-0.00274424	0.0119153	-0.00012001	0.00996277			25.6	0.00727865	0.00177294	0.00608705	0.00762653	-0.00274424	0.0119153	-0.00012001	0.00996277
25.79	0.00665098	0.0006464	0.00797432	0.00575064	-0.00565709	0.0109573	5.558e-05	0.0140718			25.79	0.00665098	0.0006464	0.00797432	0.00575064	-0.00565709	0.0109573	5.558e-05	0.0140718
25.99	0.00280346	0.00109786	0.00036499	0.00889871	-0.0038675	0.0129628	0.00389641	0.00789129			25.99	0.00280346	0.00109786	0.00036499	0.00889871	-0.0038675	0.0129628	0.00389641	0.00789129
26.2	0.00792876	0.00365854	0.00353656	0.00813146	-0.00790605	0.0116027	0.00054939	0.0120077			26.2	0.00792876	0.00365854	0.00353656	0.00813146	-0.00790605	0.0116027	0.00054939	0.0120077
26.4	0.00584602	0.00440237	0.00785998	0.00813611	-0.00674541	0.0128767	-0.00058534	0.0114669			26.4	0.00584602	0.00440237	0.00785998	0.00813611	-0.00674541	0.0128767	-0.00058534	0.0114669
26.59	0.0060982	0.00100633	0.00731054	0.00443368	-0.00689186	0.0104928	0.00154619	0.00758431			26.59	0.0060982	0.00100633	0.00731054	0.00443368	-0.00689186	0.0104928	0.00154619	0.00758431
26.79	0.00696135	0.00063298	0.00583003	0.00917567	-0.00484325	0.0131834	0.00301543	0.00688778			26.79	0.00696135	0.00063298	0.00583003	0.00917567	-0.00484325	0.0131834	0.00301543	0.00688778
27	0.00660734	7.232e-05	0.00347582	0.0088549	-0.00416465	0.0110179	-0.00155498	0.0127231			27	0.00660734	7.232e-05	0.00347582	0.0088549	-0.00416465	0.0110179	-0.00155498	0.0127231
27.2	0.00413644	0.00172558	0.00647837	0.00813787	-0.00536173	0.0134896	0.00095475	0.00803294			27.2	0.00413644	0.00172558	0.00647837	0.00813787	-0.00536173	0.0134896	0.00095475	0.00803294
27.4	0.00565114	0.00472363	0.00584271	0.00609187	-0.00263116	0.015606	-0.00024618	0.00743154			27.4	0.00565114	0.00472363	0.00584271	0.00609187	-0.00263116	0.015606	-0.00024618	0.00743154
27.59	0.00775029	0.00282106	0.00596191	0.00370983	-0.00618272	0.00938794	0.0013599	0.0118467			27.59	0.00775029	0.00282106	0.00596191	0.00370983	-0.00618272	0.00938794	0.0013599	0.0118467
27.8	0.00781415	0.00035643	0.00321468	0.0103886	-0.0066634	0.0118436	0.00171065	0.00604926			27.8	0.00781415	0.00035643	0.00321468	0.0103886	-0.0066634	0.0118436	0.00171065	0.00604926
28	0.00437319	0.00159618	0.00465198	0.00665395	-0.00536328	0.0119827	0.00260245	0.0112325			28	0.00437319	0.00159618	0.00465198	0.00665395	-0.00536328	0.0119827	0.00260245	0.0112325
28.2	0.00914461	0.00095269	0.0090768	0.00913724	-0.00665225	0.0138274	0.00050167	0.00775387			28.2	0.00914461	0.00095269	0.0090768	0.00913724	-0.00665225	0.0138274	0.00050167	0.00775387
28.39	0.00648159	0.00245927	0.00686277	0.00862364	-0.00613019	0.0116262	0.0009613	0.00629984			28.39	0.00648159	0.00245927	0.00686277	0.00862364	-0.00613019	0.0116262	0.0009613	0.00629984
28.59	0.00643107	0.00277096	0.00513667	0.00739578	-0.00672834	0.007324	0.00353974	0.0108815			28.59	0.00643107	0.00277096	0.00513667	0.00739578	-0.00672834	0.007324	0.00353974	0.0108815
28.8	0.00468511	0.00373453	0.002192	0.00786082	-0.00504148	0.0120458	-0.00028028	0.00849232			28.8	0.00468511	0.00373453	0.002192	0.00786082	-0.00504148	0.0120458	-0.00028028	0.00849232
29	0.0069835	0.00192153	0.00280714	0.00590799	-0.00818396	0.0145434	0.00257989	0.00921685			29	0.0069835	0.00192153	0.00280714	0.00590799	-0.00818396	0.0145434	0.00257989	0.00921685
29.19	0.00607576	0.00531114	0.00351166	0.0137309	-0.00711269	0.00689903	0.00178151	0.00630705			29.19	0.00607576	0.00531114	0.00351166	0.0137309	-0.00711269	0.00689903	0.00178151	0.00630705
29.39	0.00177252	0.00614635	0.00855851	0.00744281	-0.00493046	0.0134479	-0.00037786	0.00649936			29.39	0.00177252	0.00614635	0.00855851	0.00744281	-0.00493046	0.0134479	-0.00037786	0.00649936
29.6	0.00743491	-6.619e-05	0.00815061	0.00959981	-0.00551481	0.0121111	3.294e-05	0.0107554			29.6	0.00743491	-6.619e-05	0.00815061	0.00959981	-0.00551481	0.0121111	3.294e-05	0.0107554
29.79	0.00595644	0.00344607	0.00467529	0.00839303	-0.00639308	0.0118459	0.00198424	0.0105296			29.79	0.00595644	0.00344607	0.00467529	0.00839303	-0.00639308	0.0118459	0.00198424	0.0105296
29.99	0.00699154	0.00335932	0.00396038	0.00519068	-0.0043759	0.0124816	-0.0010866	0.0103658			29.99	0.00699154	0.00335932	0.00396038	0.00519068	-0.0043759	0.0124816	-0.0010866	0.0103658
30.19	0.00494159	0.00360915	0.00390052	0.00839323	-0.00539275	0.0141113	0.00452419	0.00905352			30.19	0.00494159	0.00360915	0.00390052	0.00839323	-0.00539275	0.0141113	0.00452419	0.00905352
30.4	0.0067738	0.00293443	0.0071604	0.00890977	-0.00797462	0.0162806	-0.00131184	0.010905			30.4	0.0067738	0.00293443	0.0071604	0.00890977	-0.00797462	0.0162806	-0.00131184	0.010905
30.59	0.00504629	0.00335353	0.00272197	0.00569357	-0.00733224	0.0153504	-0.00067048	0.00929066			30.59	0.00504629	0.00335353	0.00272197	0.00569357	-0.00733224	0.0153504	-0.00067048	0.00929066
30.79	0.00335989	0.00376996	0.00514028	0.00561791	-0.00649222	0.0113784	-7.457e-05	0.0116376			30.79	0.00335989	0.00376996	0.00514028	0.00561791	-0.00649222	0.0113784	-7.457e-05	0.0116376
31	0.0117567	0.00401294	0.00642778	0.0104264	-0.00442951	0.0115441	0.00253335	0.0115764			31	0.0117567	0.00401294	0.00642778	0.0104264	-0.00442951	0.0115441	0.00253335	0.0115764
31.19	0.00770532	0.00677685	0.00693287	0.00873835	-0.00525078	0.0155024	-0.00106624	0.00778211			31.19	0.00770532	0.00677685	0.00693287	0.00873835	-0.00525078	0.0155024	-0.00106624	0.00778211
31.4	0.00459232	0.00125055	0.00706355	0.005988	-0.00332944	0.0144654	-0.00087071	0.00816992			31.4	0.00459232	0.00125055	0.00706355	0.005988	-0.00332944	0.0144654	-0.00087071	0.00816992
31.59	0.00751777	0.00509146	0.00525301	0.00874093	-0.00433019	0.0112655	-0.00100912	0.0049111			31.59	0.00751777	0.00509146	0.00525301	0.00874093	-0.00433019	0.0112655	-0.00100912	0.0049111
31.79	0.00608708	0.00413412	0.00669258	0.00935721	-0.00892996	0.0156686	0.00166229	0.0105436			31.79	0.00608708	0.00413412	0.00669258	0.00935721	-0.00892996	0.0156686	0.00166229	0.0105436
31.99	0.00604539	0.00051726	0.00951966	0.00908318	-0.0108051	0.0135669	0.00162118	0.00795089			31.99	0.00604539	0.00051726	0.00951966	0.00908318	-0.0108051	0.0135669	0.00162118	0.00795089
32.19	0.00920459	0.00375916	0.00763469	0.00556304	-0.0111293	0.0141983	2.585e-05	0.0113381			32.19	0.00920459	0.00375916	0.00763469	0.00556304	-0.0111293	0.0141983	2.585e-05	0.0113381
32.39	0.00478393	-0.00041767	0.0045621	0.00680838	-0.00405453	0.00885558	-0.00045323	0.0118171			32.39	0.00478393	-0.00041767	0.0045621	0.00680838	-0.00405453	0.00885558	-0.00045323	0.0118171
32.59	0.00432478	0.00566879	0.00493539	0.00716361	-0.00455139	0.0164418	0.00415702	0.00999053			32.59	0.00432478	0.00566879	0.00493539	0.00716361	-0.00455139	0.0164418	0.00415702	0.00999053
32.79	0.0101327	0.00111692	0.00730742	0.00627647	-0.00408154	0.0122572	0.00047649	0.00848028			32.79	0.0101327	0.00111692	0.00730742	0.00627647	-0.00408154	0.0122572	0.00047649	0.00848028
32.99	0.00612102	0.00213668	0.0052961	0.00673682	-0.00567713	0.0101989	0.00171429	0.0098943			32.99	0.00612102	0.00213668	0.0052961	0.00673682	-0.00567713	0.0101989	0.00171429	0.0098943
33.19	0.00621779	0.00241113	0.00399577	0.0075765	-0.00400514	0.0152432	0.00687613	0.00926051			33.19	0.00621779	0.00241113	0.00399577	0.0075765	-0.00400514	0.0152432	0.00687613	0.00926051
33.39	0.0091739	0.00367446	0.00592507	0.00939745	-0.00777111	0.0138656	0.00127897	0.011895			33.39	0.0091739	0.00367446	0.00592507	0.00939745	-0.00777111	0.0138656	0.00127897	0.011895
33.59	0.0069233	0.00385843	0.00763448	0.00719688	-0.00953963	0.0155827	0.00252747	0.00802154			33.59	0.0069233	0.00385843	0.00763448	0.00719688	-0.00953963	0.0155827	0.00252747	0.00802154
33.79	0.00753711	0.00434129	0.00168746	0.00691663	-0.00695016	0.0115727	-0.00018572	0.00631924			33.79	0.00753711	0.00434129	0.00168746	0.00691663	-0.00695016	0.0115727	-0.00018572	0.00631924
33.99	0.00672353	-0.00018853	0.00499523	0.0081482	-0.00740762	0.0124545	0.0012696	0.00916252			33.99	0.00672353	-0.00018853	0.00499523	0.0081482	-0.00740762	0.0124545	0.0012696	0.00916252
34.19	0.0127989	0.00480115	0.0037777	0.00613096	-0.00638072	0.014972	0.00534497	0.0122076			34.19	0.0127989	0.00480115	0.0037777	0.00613096	-0.00638072	0.014972	0.00534497	0.0122076
34.39	0.0054098	0.00546927	0.00600071	0.00676579	-0.00547463	0.0171632	0.00264101	0.0103958			34.39	0.0054098	0.00546927	0.00600071	0.00676579	-0.00547463	0.0171632	0.00264101	0.0103958
34.59	0.0107704	0.00208907	0.00508283	0.00872432	-0.00837198	0.0133383	0.00162569	0.0102574			34.59	0.0107704	0.00208907	0.00508283	0.00872432	-0.00837198	0.0133383	0.00162569	0.0102574
34.79	0.00643825	0.0031644	0.00738443	0.00730751	-0.00707996	0.0130592	0.00155409	0.0128898			34.79	0.00643825	0.0031644	0.00738443	0.00730751	-0.00707996	0.0130592	0.00155409	0.0128898
34.99	0.00850905	0.00460572	0.0048526	0.00697299	-0.0101605	0.0119924	0.0001969	0.00892716			34.99	0.00850905	0.00460572	0.0048526	0.00697299	-0.0101605	0.0119924	0.0001969	0.00892716
35.19	0.00526107	0.00110886	0.00139471	0.00833772	-0.00565792	0.0154821	0.00115366	0.0064794			35.19	0.00526107	0.00110886	0.00139471	0.00833772	-0.00565792	0.0154821	0.00115366	0.0064794
35.39	0.00403147	0.00225834	0.00414433	0.00796266	-0.0079324	0.0147643	0.00023952	0.00701749			35.39	0.00403147	0.00225834	0.00414433	0.00796266	-0.0079324	0.0147643	0.00023952	0.00701749
35.59	0.00624051	0.00260735	0.00435215	0.0078538	-0.00499548	0.0135356	0.00106336	0.00921829			35.59	0.00624051	0.00260735	0.00435215	0.0078538	-0.00499548	0.0135356	0.00106336	0.00921829
35.79	0.00825034	0.0021898	0.00525252	0.00781789	-0.00757262	0.0137113	0.00297079	0.00724138			35.79	0.00825034	0.0021898	0.00525252	0.00781789	-0.00757262	0.0137113	0.00297079	0.00724138
35.99	0.00761956	0.0030508	0.00833772	0.0102221	-0.00911167	0.0150653	7.303e-05	0.00726683			35.99	0.00761956	0.0030508	0.00833772	0.0102221	-0.00911167	0.0150653	7.303e-05	0.00726683
36.19	0.00719627	0.00063187	0.0020586	0.0103946	-0.00624611	0.0142488	0.00242418	0.00832741			36.19	0.00719627	0.00063187	0.0020586	0.0103946	-0.00624611	0.0142488	0.00242418	0.00832741
36.39	0.00917684	0.00219575	0.00250826	0.00676186	-0.00725567	0.0149301	0.0014696	0.00965881			36.39	0.00917684	0.00219575	0.00250826	0.00676186	-0.00725567	0.0149301	0.0014696	0.00965881
36.59	0.00625591	0.00197194	0.0088686	0.00920915	-0.00816385	0.0148814	0.00084964	0.00834532			36.59	0.00625591	0.00197194	0.0088686	0.00920915	-0.00816385	0.0148814	0.00084964	0.00834532
36.79	0.0080081	-0.00296619	0.00758298	0.00861827	-0.00536708	0.0156461	0.0010871	0.0105959			36.79	0.0080081	-0.00296619	0.00758298	0.00861827	-0.00536708	0.0156461	0.0010871	0.0105959
36.99	0.00745659	0.00328026	0.00760654	0.00382739	-0.00975455	0.0118134	0.00168813	0.00924544			36.99	0.00745659	0.00328026	0.00760654	0.00382739	-0.00975455	0.0118134	0.00168813	0.00924544
37.19	0.0104716	0.00623173	0.00409031	0.0107021	-0.00970296	0.0167463	-0.00063347	0.00669441			37.19	0.0104716	0.00623173	0.00409031	0.0107021	-0.00970296	0.0167463	-0.00063347	0.00669441
37.39	0.00888217	0.00165863	0.00694308	0.00789397	-0.00680037	0.0150504	0.00019064	0.00835843			37.39	0.00888217	0.00165863	0.00694308	0.00789397	-0.00680037	0.0150504	0.00019064	0.00835843
37.59	0.00734676	0.00449181	0.00598961	0.0112299	-0.00540242	0.0149619	0.00238555	0.0087493			37.59	0.00734676	0.00449181	0.00598961	0.0112299	-0.00540242	0.0149619	0.00238555	0.0087493
37.79	0.00703764	0.00683912	0.00702055	0.00552093	-0.00908905	0.0134751	-0.00266852	0.00891118			37.79	0.00703764	0.00683912	0.00702055	0.00552093	-0.00908905	0.0134751	-0.00266852	0.00891118
37.99	0.00726707	0.00378233	0.00748982	0.0127219	-0.00621798	0.0146245	0.00161775	0.00861927			37.99	0.00726707	0.00378233	0.00748982	0.0127219	-0.00621798	0.0146245	0.00161775	0.00861927
38.19	0.00660013	0.0031664	0.00566695	0.00977955	-0.00831545	0.0155835	0.00125862	0.00738289			38.19	0.00660013	0.0031664	0.00566695	0.00977955	-0.00831545	0.0155835	0.00125862	0.00738289
38.39	0.0103681	0.00230727	0.00816719	0.0065676	-0.00644525	0.0134383	0.00117099	0.00690732			38.39	0.0103681	0.00230727	0.00816719	0.0065676	-0.00644525	0.0134383	0.00117099	0.00690732
38.59	0.00632599	0.00357388	0.00678719	0.00834602	-0.00575021	0.0114414	0.00199028	0.0110767			38.59	0.00632599	0.00357388	0.00678719	0.00834602	-0.00575021	0.0114414	0.00199028	0.0110767
38.79	0.00705386	0.00506907	0.00871128	0.00790463	-0.00522445	0.0127361	0.00252764	0.0100888			38.79	0.00705386	0.00506907	0.00871128	0.00790463	-0.00522445	0.0127361	0.00252764	0.0100888
38.99	0.00991874	0.00565307	0.00580519	0.00871241	-0.00906801	0.0152775	0.00385363	0.00806072			38.99	0.00991874	0.00565307	0.00580519	0.00871241	-0.00906801	0.0152775	0.00385363	0.00806072
39.19	0.00861106	0.00220084	0.00489605	0.00824766	-0.00579207	0.0146493	-0.00190754	0.00902325			39.19	0.00861106	0.00220084	0.00489605	0.00824766	-0.00579207	0.0146493	-0.00190754	0.00902325
39.39	0.010743	0.00568447	0.010193	0.00649931	-0.00533861	0.0153269	-0.00070093	0.011993			39.39	0.010743	0.00568447	0.010193	0.00649931	-0.00533861	0.0153269	-0.00070093	0.011993
39.59	0.00794969	0.00408775	0.00808315	0.00326723	-0.00868276	0.0167385	-0.00413659	0.0100647			39.59	0.00794969	0.00408775	0.00808315	0.00326723	-0.00868276	0.0167385	-0.00413659	0.0100647
39.79	0.00625427	0.00652917	0.010086	0.00567536	-0.00258508	0.0138966	0.00378387	0.0115339			39.79	0.00625427	0.00652917	0.010086	0.00567536	-0.00258508	0.0138966	0.00378387	0.0115339
39.99	0.00674138	0.00568308	0.00537297	0.00901682	-0.00798895	0.0137096	0.00264779	0.0118749			39.99	0.00674138	0.00568308	0.00537297	0.00901682	-0.00798895	0.0137096	0.00264779	0.0118749
40.19	0.00847412	0.00429785	0.00201829	0.00732583	-0.00891911	0.012677	0.00080311	0.0113153			40.19	0.00847412	0.00429785	0.00201829	0.00732583	-0.00891911	0.012677	0.00080311	0.0113153
40.39	0.0082737	0.00211361	0.00599514	0.00721959	-0.00950157	0.0152899	0.00292298	0.0119342			40.39	0.0082737	0.00211361	0.00599514	0.00721959	-0.00950157	0.0152899	0.00292298	0.0119342
40.59	0.00662874	0.00513655	0.00399772	0.00640488	-0.00162686	0.0196483	0.00315101	0.00979726			40.59	0.00662874	0.00513655	0.00399772	0.00640488	-0.00162686	0.0196483	0.00315101	0.00979726
40.79	0.00564964	0.00334794	0.0069514	0.0105882	-0.00452944	0.0142846	0.00131513	0.00982881			40.79	0.00564964	0.00334794	0.0069514	0.0105882	-0.00452944	0.0142846	0.00131513	0.00982881
40.99	0.00815442	0.00684495	0.00624861	0.00707972	-0.00505776	0.0184648	0.00257894	0.00864186			40.99	0.00815442	0.00684495	0.00624861	0.00707972	-0.00505776	0.0184648	0.00257894	0.00864186
41.19	0.00933305	0.00599802	0.00761513	0.00910203	-0.00942504	0.0161919	0.00415016	0.00735995			41.19	0.00933305	0.00599802	0.00761513	0.00910203	-0.00942504	0.0161919	0.00415016	0.00735995
41.4	0.0038989	0.00403062	0.00590119	0.00769015	-0.00597427	0.0159155	0.00346465	0.0112714			41.4	0.0038989	0.00403062	0.00590119	0.00769015	-0.00597427	0.0159155	0.00346465	0.0112714
41.59	0.0058592	0.00580141	0.00534276	0.0107757	-0.00654179	0.0161945	-0.00028906	0.0115078			41.59	0.0058592	0.00580141	0.00534276	0.0107757	-0.00654179	0.0161945	-0.00028906	0.0115078
41.79	0.00801827	0.00502444	0.00765526	0.00677787	-0.00684032	0.0127326	-0.00161021	0.00923903			41.79	0.00801827	0.00502444	0.00765526	0.00677787	-0.00684032	0.0127326	-0.00161021	0.00923903
41.99	0.00692183	0.00585208	0.00524061	0.00975948	-0.00440522	0.0159286	0.00245973	0.00944652			41.99	0.00692183	0.00585208	0.00524061	0.00975948	-0.00440522	0.0159286	0.00245973	0.00944652
42.19	0.00832234	0.00519403	0.00223758	0.00523991	-0.00652663	0.0148493	0.00490884	0.00793952			42.19	0.00832234	0.00519403	0.00223758	0.00523991	-0.00652663	0.0148493	0.00490884	0.00793952
42.4	0.00881778	0.00375348	0.00358095	0.00774734	-0.00636123	0.0126147	0.0011559	0.0116895			42.4	0.00881778	0.00375348	0.00358095	0.00774734	-0.00636123	0.0126147	0.0011559	0.0116895
42.59	0.00535105	0.00231425	0.00803956	0.0073094	-0.00798631	0.0166472	0.00176581	0.00819873			42.59	0.00535105	0.00231425	0.00803956	0.0073094	-0.00798631	0.0166472	0.00176581	0.00819873
42.79	0.00738404	0.00686228	0.00995331	0.00687047	-0.0079813	0.0160935	0.00347763	0.00735773			42.79	0.00738404	0.00686228	0.00995331	0.00687047	-0.0079813	0.0160935	0.00347763	0.00735773
42.99	0.00718528	0.0101887	0.00753568	0.00919072	-0.00672746	0.0194542	0.00395761	0.0111353			42.99	0.00718528	0.0101887	0.00753568	0.00919072	-0.00672746	0.0194542	0.00395761	0.0111353
43.19	0.0054572	0.00254813	0.00724515	0.0101778	-0.00542714	0.0155667	0.00079241	0.00918202			43.19	0.0054572	0.00254813	0.00724515	0.0101778	-0.00542714	0.0155667	0.00079241	0.00918202
43.4	0.00780162	0.00486813	0.0111911	0.00931471	-0.00445601	0.0165167	0.00268543	0.00952599			43.4	0.00780162	0.00486813	0.0111911	0.00931471	-0.00445601	0.0165167	0.00268543	0.00952599
43.59	0.00867432	0.00884216	0.00870844	0.0100315	-0.00820839	0.0152663	0.00483066	0.00946427			43.59	0.00867432	0.00884216	0.00870844	0.0100315	-0.00820839	0.0152663	0.00483066	0.00946427
43.79	0.00644756	0.00254316	0.00300353	0.00904137	-0.00687797	0.0149702	0.00413958	0.00729078			43.79	0.00644756	0.00254316	0.00300353	0.00904137	-0.00687797	0.0149702	0.00413958	0.00729078
43.99	0.00872007	0.00596048	0.00804966	0.0105788	-0.00634171	0.0173221	0.00398322	0.011			43.99	0.00872007	0.00596048	0.00804966	0.0105788	-0.00634171	0.0173221	0.00398322	0.011
44.19	0.00958921	0.00680935	0.00789768	0.00960121	-0.00473873	0.015973	0.00152449	0.0111932			44.19	0.00958921	0.00680935	0.00789768	0.00960121	-0.00473873	0.015973	0.00152449	0.0111932
44.4	0.00744791	0.00310638	0.00642311	0.0110178	-0.00598737	0.0143627	0.00241345	0.0113536			44.4	0.00744791	0.00310638	0.00642311	0.0110178	-0.00598737	0.0143627	0.00241345	0.0113536
44.59	0.00737738	0.00201246	0.00788198	0.00864096	-0.00636217	0.0158934	0.00225613	0.0122411			44.59	0.00737738	0.00201246	0.00788198	0.00864096	-0.00636217	0.0158934	0.00225613	0.0122411
44.79	0.00872845	0.00907438	0.00527227	0.00767863	-0.00373657	0.0200891	0.00051785	0.00992871			44.79	0.00872845	0.00907438	0.00527227	0.00767863	-0.00373657	0.0200891	0.00051785	0.00992871
44.99	0.00898675	0.00126353	0.00576547	0.00653427	-0.00861669	0.0159989	0.00128724	0.00995559			44.99	0.00898675	0.00126353	0.00576547	0.00653427	-0.00861669	0.0159989	0.00128724	0.00995559
45.19	0.0103237	0.00581307	0.006899	0.00646483	-0.00561263	0.0119999	0.00160603	0.00749468			45.19	0.0103237	0.00581307	0.006899	0.00646483	-0.00561263	0.0119999	0.00160603	0.00749468
45.4	0.00894601	0.00635248	0.00494147	0.00862133	-0.0053623	0.0161056	-0.00216595	0.0101085			45.4	0.00894601	0.00635248	0.00494147	0.00862133	-0.0053623	0.0161056	-0.00216595	0.0101085
45.59	0.00927594	0.00457419	0.00505151	0.00817431	-0.00688788	0.0161177	0.00555644	0.00980931			45.59	0.00927594	0.00457419	0.00505151	0.00817431	-0.00688788	0.0161177	0.00555644	0.00980931
45.79	0.00746029	0.00751426	0.00754699	0.00765999	-0.00749878	0.0176962	0.00203362	0.00693231			45.79	0.00746029	0.00751426	0.00754699	0.00765999	-0.00749878	0.0176962	0.00203362	0.00693231
45.99	0.00625272	0.00231557	0.00647964	0.00771283	-0.00864188	0.0175532	0.00395979	0.0100983			45.99	0.00625272	0.00231557	0.00647964	0.00771283	-0.00864188	0.0175532	0.00395979	0.0100983
46.19	0.00935572	0.003349	0.00711889	0.00693181	-0.00664621	0.0149554	0.00031222	0.0120871			46.19	0.00935572	0.003349	0.00711889	0.00693181	-0.00664621	0.0149554	0.00031222	0.0120871
46.4	0.00911158	0.00845313	0.00911178	0.00865747	-0.00877314	0.0175895	-0.00013595	0.00977263			46.4	0.00911158	0.00845313	0.00911178	0.00865747	-0.00877314	0.0175895	-0.00013595	0.00977263
46.59	0.00857441	0.00342724	0.0100337	0.00772786	-0.0048868	0.0155268	0.002446	0.00741673			46.59	0.00857441	0.00342724	0.0100337	0.00772786	-0.0048868	0.0155268	0.002446	0.00741673
46.79	0.00798412	0.00358839	0.00450082	0.0103083	-0.00606474	0.015733	0.00103174	0.00668056			46.79	0.00798412	0.00358839	0.00450082	0.0103083	-0.00606474	0.015733	0.00103174	0.00668056
46.99	0.00752376	0.00273705	0.00705357	0.00825899	-0.00684852	0.0176939	0.00171786	0.0115536			46.99	0.00752376	0.00273705	0.00705357	0.00825899	-0.00684852	0.0176939	0.00171786	0.0115536
47.19	0.00864908	0.00551967	0.00644609	0.00579422	-0.00581469	0.0145242	0.00265686	0.0112551			47.19	0.00864908	0.00551967	0.00644609	0.00579422	-0.00581469	0.0145242	0.00265686	0.0112551
47.4	0.00535679	0.00296156	0.00872448	0.00900821	-0.00573018	0.019399	0.00375163	0.00769102			47.4	0.00535679	0.00296156	0.00872448	0.00900821	-0.00573018	0.019399	0.00375163	0.00769102
47.59	0.00742257	0.00811564	0.00862483	0.00921874	-0.0069911	0.0164356	0.00026066	0.0135658			47.59	0.00742257	0.00811564	0.00862483	0.00921874	-0.0069911	0.0164356	0.00026066	0.0135658
47.79	0.00904167	0.00327592	0.00689714	0.00882259	-0.00412074	0.0172737	0.00087645	0.0112003			47.79	0.00904167	0.00327592	0.00689714	0.00882259	-0.00412074	0.0172737	0.00087645	0.0112003
47.99	0.00814765	-0.00099075	0.00963241	0.0084137	-0.00932565	0.0157478	0.00287169	0.0098839			47.99	0.00814765	-0.00099075	0.00963241	0.0084137	-0.00932565	0.0157478	0.00287169	0.0098839
48.19	0.00980877	0.00614245	0.00711028	0.0111362	-0.00701864	0.0120247	-0.00265815	0.00971127			48.19	0.00980877	0.00614245	0.00711028	0.0111362	-0.00701864	0.0120247	-0.00265815	0.00971127
48.4	0.00899642	0.0061852	0.0025729	0.0080332	-0.0100556	0.0167716	0.00366028	0.0123895			48.4	0.00899642	0.0061852	0.0025729	0.0080332	-0.0100556	0.0167716	0.00366028	0.0123895
48.59	0.0121471	0.00775947	0.00476575	0.011039	-0.00615913	0.0139365	0.00076477	0.0109342			48.59	0.0121471	0.00775947	0.00476575	0.011039	-0.00615913	0.0139365	0.00076477	0.0109342
48.79	0.0105005	0.00553313	0.00517002	0.00941198	-0.007614	0.0192131	-1.077e-05	0.00935328			48.79	0.0105005	0.00553313	0.00517002	0.00941198	-0.007614	0.0192131	-1.077e-05	0.00935328
48.99	0.00798832	0.00359268	0.00437216	0.00653937	-0.0090191	0.0184746	0.00223599	0.0144018			48.99	0.00798832	0.00359268	0.00437216	0.00653937	-0.0090191	0.0184746	0.00223599	0.0144018
49.19	0.00625514	0.00664384	0.00706486	0.0107291	-0.00776013	0.0144208	0.00261998	0.01223			49.19	0.00625514	0.00664384	0.00706486	0.0107291	-0.00776013	0.0144208	0.00261998	0.01223
49.4	0.0108043	0.00414333	0.00869467	0.00911516	-0.00902255	0.0161542	0.00103112	0.011055			49.4	0.0108043	0.00414333	0.00869467	0.00911516	-0.00902255	0.0161542	0.00103112	0.011055
49.59	0.00785259	0.00702654	0.00480533	0.0100452	-0.00957925	0.0153468	0.00405859	0.0111622			49.59	0.00785259	0.00702654	0.00480533	0.0100452	-0.00957925	0.0153468	0.00405859	0.0111622
49.79	0.010586	0.00470575	0.00636136	0.00953681	-0.00639525	0.0190974	0.0035821	0.00907352			49.79	0.010586	0.00470575	0.00636136	0.00953681	-0.00639525	0.0190974	0.0035821	0.00907352
49.99	0.008503	0.0108702	0.00717237	0.00877345	-0.00865456	0.0192553	0.00058488	0.00993878			49.99	0.008503	0.0108702	0.00717237	0.00877345	-0.00865456	0.0192553	0.00058488	0.00993878
50.19	0.00811468	0.00694532	0.00754131	0.00570234	-0.00729598	0.0183309	0.00461273	0.00977985			50.19	0.00811468	0.00694532	0.00754131	0.00570234	-0.00729598	0.0183309	0.00461273	0.00977985
50.39	0.00758617	0.00494117	0.00765831	0.00941576	-0.00490298	0.017008	0.00323988	0.0060691			50.39	0.00758617	0.00494117	0.00765831	0.00941576	-0.00490298	0.017008	0.00323988	0.0060691
50.59	0.0123418	0.00612691	0.00804419	0.00886484	-0.00754824	0.0146547	0.00276149	0.0130178			50.59	0.0123418	0.00612691	0.00804419	0.00886484	-0.00754824	0.0146547	0.00276149	0.0130178
50.79	0.00964122	0.00542665	0.00711824	0.0101964	-0.007444	0.0206256	0.00061856	0.00726512			50.79	0.00964122	0.00542665	0.00711824	0.0101964	-0.007444	0.0206256	0.00061856	0.00726512
50.99	0.00716909	0.00855061	0.00398238	0.00874809	-0.00561316	0.0159019	0.00619924	0.00986043			50.99	0.00716909	0.00855061	0.00398238	0.00874809	-0.00561316	0.0159019	0.00619924	0.00986043
51.19	0.00733442	0.00625	0.00642028	0.0113238	-0.00775244	0.0170909	0.00159989	0.0106523			51.19	0.00733442	0.00625	0.00642028	0.0113238	-0.00775244	0.0170909	0.00159989	0.0106523
51.39	0.0116513	0.00756592	0.00514729	0.00689541	-0.00538557	0.0176723	0.00429983	0.0115815			51.39	0.0116513	0.00756592	0.00514729	0.00689541	-0.00538557	0.0176723	0.00429983	0.0115815
51.59	0.00846782	0.00522311	0.00713578	0.0123359	-0.00614484	0.0174485	0.0038554	0.013033			51.59	0.00846782	0.00522311	0.00713578	0.0123359	-0.00614484	0.0174485	0.0038554	0.013033
51.79	0.0126979	0.00630908	0.00900471	0.0123936	-0.00635625	0.0147099	0.00547276	0.011567			51.79	0.0126979	0.00630908	0.00900471	0.0123936	-0.00635625	0.0147099	0.00547276	0.011567
51.99	0.00932833	0.00543772	0.00606315	0.00886029	-0.00578867	0.0198994	0.00146133	0.00925673			51.99	0.00932833	0.00543772	0.00606315	0.00886029	-0.00578867	0.0198994	0.00146133	0.00925673
52.19	0.00857299	0.00564933	0.00726982	0.0109622	-0.00725341	0.0175819	-0.00137165	0.0123371			52.19	0.00857299	0.00564933	0.00726982	0.0109622	-0.00725341	0.0175819	-0.00137165	0.0123371
52.4	0.0088738	0.00809018	0.00467163	0.0101149	-0.00756078	0.0192633	0.0044001	0.0101705			52.4	0.0088738	0.00809018	0.00467163	0.0101149	-0.00756078	0.0192633	0.0044001	0.0101705
52.59	0.0102828	0.00222886	0.00746035	0.00585099	-0.00577833	0.0141376	0.00597201	0.0113769			52.59	0.0102828	0.00222886	0.00746035	0.00585099	-0.00577833	0.0141376	0.00597201	0.0113769
52.79	0.0103816	0.00483025	0.0068684	0.0123996	-0.00877226	0.0144387	0.00233892	0.00875931			52.79	0.0103816	0.00483025	0.0068684	0.0123996	-0.00877226	0.0144387	0.00233892	0.00875931
52.99	0.0107314	0.00136036	0.008026	0.00841374	-0.00591618	0.0170283	0.00078279	0.00773103			52.99	0.0107314	0.00136036	0.008026	0.00841374	-0.00591618	0.0170283	0.00078279	0.00773103
53.19	0.00982933	0.00370663	0.0090395	0.0134701	-0.00739441	0.0198222	0.00278363	0.00657668			53.19	0.00982933	0.00370663	0.0090395	0.0134701	-0.00739441	0.0198222	0.00278363	0.00657668
53.4	0.00809458	0.00528302	0.00417116	0.00700788	-0.00863909	0.016412	0.00527023	0.0101166			53.4	0.00809458	0.00528302	0.00417116	0.00700788	-0.00863909	0.016412	0.00527023	0.0101166
53.59	0.00717362	0.00736035	0.00765643	0.0114624	-0.00647798	0.0142559	-0.00012613	0.010891			53.59	0.00717362	0.00736035	0.00765643	0.0114624	-0.00647798	0.0142559	-0.00012613	0.010891
53.79	0.0101576	0.00851487	0.00598328	0.0104292	-0.00753307	0.0187734	0.00119541	0.0111426			53.79	0.0101576	0.00851487	0.00598328	0.0104292	-0.00753307	0.0187734	0.00119541	0.0111426
53.99	0.00636909	0.00734206	0.00302002	0.00752525	-0.00632897	0.0181324	0.00367937	0.00657581			53.99	0.00636909	0.00734206	0.00302002	0.00752525	-0.00632897	0.0181324	0.00367937	0.00657581
54.19	0.00885181	0.00371078	0.00783044	0.0086472	-0.00523401	0.0175974	0.00253316	0.0109945			54.19	0.00885181	0.00371078	0.00783044	0.0086472	-0.00523401	0.0175974	0.00253316	0.0109945
54.4	0.0127103	0.00683305	0.00717856	0.0133274	-0.00660852	0.0166947	-0.00156112	0.00926372			54.4	0.0127103	0.00683305	0.00717856	0.0133274	-0.00660852	0.0166947	-0.00156112	0.00926372
54.59	0.0102081	0.00267749	0.0101079	0.00947427	-0.00612155	0.0141332	0.00093071	0.0107757			54.59	0.0102081	0.00267749	0.0101079	0.00947427	-0.00612155	0.0141332	0.00093071	0.0107757
54.79	0.00882908	0.00645717	0.00542048	0.00895444	-0.00667628	0.0180411	0.00279199	0.0101328			54.79	0.00882908	0.00645717	0.00542048	0.00895444	-0.00667628	0.0180411	0.00279199	0.0101328
54.99	0.00982024	0.00855602	0.00682291	0.0105844	-0.0054889	0.0162753	0.00189674	0.0116934			54.99	0.00982024	0.00855602	0.00682291	0.0105844	-0.0054889	0.0162753	0.00189674	0.0116934
55.19	0.00997155	0.00891523	0.00337744	0.00932873	-0.00941117	0.0168036	0.00237764	0.0124323			55.19	0.00997155	0.00891523	0.00337744	0.00932873	-0.00941117	0.0168036	0.00237764	0.0124323
55.39	0.0113833	0.00352686	0.00585828	0.0119117	-0.0112121	0.0180845	0.00275221	0.0133006			55.39	0.0113833	0.00352686	0.00585828	0.0119117	-0.0112121	0.0180845	0.00275221	0.0133006
55.59	0.00856744	0.00404732	0.00408314	0.0112117	-0.00800619	0.017098	0.00271682	0.00965239			55.59	0.00856744	0.00404732	0.00408314	0.0112117	-0.00800619	0.017098	0.00271682	0.00965239
55.79	0.00827691	0.00754415	0.00786891	0.00991382	-0.00770113	0.015245	-0.00024275	0.010523			55.79	0.00827691	0.00754415	0.00786891	0.00991382	-0.00770113	0.015245	-0.00024275	0.010523
55.99	0.00762512	0.00651783	0.00613178	0.00944785	-0.00723615	0.016012	0.00052365	0.00801385			55.99	0.00762512	0.00651783	0.00613178	0.00944785	-0.00723615	0.016012	0.00052365	0.00801385
56.19	0.00797592	0.00473836	0.0024291	0.0116524	-0.00767017	0.0179219	0.00222391	0.0103894			56.19	0.00797592	0.00473836	0.0024291	0.0116524	-0.00767017	0.0179219	0.00222391	0.0103894
56.39	0.00675935	0.00274852	0.00673153	0.00922985	-0.00613683	0.0187442	0.00158429	0.00813849			56.39	0.00675935	0.00274852	0.00673153	0.00922985	-0.00613683	0.0187442	0.00158429	0.00813849
56.59	0.00874529	0.00459354	0.00622189	0.0125815	-0.00688205	0.0152913	0.00135846	0.00933702			56.59	0.00874529	0.00459354	0.00622189	0.0125815	-0.00688205	0.0152913	0.00135846	0.00933702
56.79	0.00990058	0.0073265	0.00414351	0.010283	-0.00605854	0.0174755	0.00206153	0.0108883			56.79	0.00990058	0.0073265	0.00414351	0.010283	-0.00605854	0.0174755	0.00206153	0.0108883
56.99	0.0088693	0.00458543	0.0078922	0.0106995	-0.00765828	0.0173022	-8.121e-05	0.0102383			56.99	0.0088693	0.00458543	0.0078922	0.0106995	-0.00765828	0.0173022	-8.121e-05	0.0102383
57.19	0.0066664	0.003477	0.00680102	0.00981852	-0.00944583	0.0170554	0.00130581	0.0112291			57.19	0.0066664	0.003477	0.00680102	0.00981852	-0.00944583	0.0170554	0.00130581	0.0112291
57.4	0.0129024	0.00272017	0.00680573	0.00833887	-0.00836859	0.0169677	0.0034066	0.010375			57.4	0.0129024	0.00272017	0.00680573	0.00833887	-0.00836859	0.0169677	0.0034066	0.010375
57.59	0.00666782	0.0045818	0.00888614	0.00637886	-0.00832282	0.0137167	0.00305984	0.0114731			57.59	0.00666782	0.0045818	0.00888614	0.00637886	-0.00832282	0.0137167	0.00305984	0.0114731
57.79	0.0120542	0.00781917	0.00514792	0.0074544	-0.00919423	0.0167149	-0.00211471	0.00998392			57.79	0.0120542	0.00781917	0.00514792	0.0074544	-0.00919423	0.0167149	-0.00211471	0.00998392
57.99	0.0091663	0.00192823	0.00893008	0.00567221	-0.0050676	0.0166494	0.00259867	0.00823479			57.99	0.0091663	0.00192823	0.00893008	0.00567221	-0.0050676	0.0166494	0.00259867	0.00823479
58.19	0.00835729	0.00614697	0.00584917	0.00836817	-0.00898438	0.0167865	0.00750861	0.00921595			58.19	0.00835729	0.00614697	0.00584917	0.00836817	-0.00898438	0.0167865	0.00750861	0.00921595
58.4	0.00855776	0.00596337	0.00772527	0.0104988	-0.00801526	0.0155628	0.00412104	0.00616118			58.4	0.00855776	0.00596337	0.00772527	0.0104988	-0.00801526	0.0155628	0.00412104	0.00616118
58.59	0.0120864	0.00209662	0.00656947	0.00781631	-0.00697548	0.0188269	0.00167917	0.0109227			58.59	0.0120864	0.00209662	0.00656947	0.00781631	-0.00697548	0.0188269	0.00167917	0.0109227
58.79	0.00902914	0.00431578	0.00803502	0.00600608	-0.00848355	0.0186418	0.00123828	0.00907138			58.79	0.00902914	0.00431578	0.00803502	0.00600608	-0.00848355	0.0186418	0.00123828	0.00907138
58.99	0.0104095	0.00433274	0.0078583	0.0110937	-0.00605534	0.0178675	0.0004872	0.0113897			58.99	0.0104095	0.00433274	0.0078583	0.0110937	-0.00605534	0.0178675	0.0004872	0.0113897
59.19	0.00383697	0.00282569	0.00604285	0.00572956	-0.0100826	0.0148466	0.00291516	0.0125621			59.19	0.00383697	0.00282569	0.00604285	0.00572956	-0.0100826	0.0148466	0.00291516	0.0125621
59.39	0.00728155	0.007993	0.00716251	0.00878047	-0.0081516	0.0175249	0.00266437	0.0108004			59.39	0.00728155	0.007993	0.00716251	0.00878047	-0.0081516	0.0175249	0.00266437	0.0108004
59.59	0.00989891	0.00701177	0.00507985	0.0087612	-0.0100454	0.0163135	0.00121746	0.00983393			59.59	0.00989891	0.00701177	0.00507985	0.0087612	-0.0100454	0.0163135	0.00121746	0.00983393
59.79	0.00833718	0.00144449	0.00844011	0.0083482	-0.00623354	0.0167204	0.00249544	0.011259			59.79	0.00833718	0.00144449	0.00844011	0.0083482	-0.00623354	0.0167204	0.00249544	0.011259
59.99	0.0131271	0.00579217	0.00627901	0.0113219	-0.00568882	0.0170081	0.00175923	0.0110691			59.99	0.0131271	0.00579217	0.00627901	0.0113219	-0.00568882	0.0170081	0.00175923	0.0110691
60.19	0.0070837	0.00515865	0.00694879	0.00907002	-0.00732933	0.0178445	0.0001841	0.00990932			60.19	0.0070837	0.00515865	0.00694879	0.00907002	-0.00732933	0.0178445	0.0001841	0.00990932
60.39	0.00881195	0.00457176	0.00256769	0.0121715	-0.00605021	0.0170324	0.00192608	0.010483			60.39	0.00881195	0.00457176	0.00256769	0.0121715	-0.00605021	0.0170324	0.00192608	0.010483
60.59	0.00815921	0.0050917	0.010369	0.00987193	-0.0076429	0.0190529	0.00351321	0.0124202			60.59	0.00815921	0.0050917	0.010369	0.00987193	-0.0076429	0.0190529	0.00351321	0.0124202
60.79	0.0113185	0.00443679	0.00583198	0.0111907	-0.00785927	0.016073	0.00227517	0.00707993			60.79	0.0113185	0.00443679	0.00583198	0.0111907	-0.00785927	0.016073	0.00227517	0.00707993
60.99	0.0088815	0.00261963	0.00293173	0.0104258	-0.00750107	0.0146053	0.00208577	0.0133449			60.99	0.0088815	0.00261963	0.00293173	0.0104258	-0.00750107	0.0146053	0.00208577	0.0133449
61.19	0.00726413	0.00268019	0.00676172	0.00854263	-0.0101425	0.0201298	0.00530121	0.00736392			61.19	0.00726413	0.00268019	0.00676172	0.00854263	-0.0101425	0.0201298	0.00530121	0.00736392
61.4	0.0112897	0.00466195	0.00607423	0.00790837	-0.00800813	0.0181245	0.0039295	0.0123547			61.4	0.0112897	0.00466195	0.00607423	0.00790837	-0.00800813	0.0181245	0.0039295	0.0123547
61.59	0.0107493	0.00427911	0.00648609	0.00696752	-0.00616453	0.0173079	0.00101305	0.0102221			61.59	0.0107493	0.00427911	0.00648609	0.00696752	-0.00616453	0.0173079	0.00101305	0.0102221
61.79	0.0100872	0.00481943	0.00338271	0.00883502	-0.00820864	0.0188012	0.00318714	0.0101473			61.79	0.0100872	0.00481943	0.00338271	0.00883502	-0.00820864	0.0188012	0.00318714	0.0101473
61.99	0.0121932	0.00675719	0.00768453	0.010097	-0.00531107	0.0235567	0.0032968	0.00912257			61.99	0.0121932	0.00675719	0.00768453	0.010097	-0.00531107	0.0235567	0.0032968	0.00912257
62.19	0.00796668	0.00807675	0.00566763	0.00898689	-0.00898711	0.0161809	0.00356204	0.010984			62.19	0.00796668	0.00807675	0.00566763	0.00898689	-0.00898711	0.0161809	0.00356204	0.010984
62.39	0.0104885	0.00361027	0.0104155	0.00828205	-0.00831249	0.0167165	0.00565634	0.00893652			62.39	0.0104885	0.00361027	0.0104155	0.00828205	-0.00831249	0.0167165	0.00565634	0.00893652
62.59	0.00827751	0.00824385	0.00666705	0.0105786	-0.00665075	0.0172624	0.00157966	0.0112721			62.59	0.00827751	0.00824385	0.00666705	0.0105786	-0.00665075	0.0172624	0.00157966	0.0112721
62.79	0.0113212	0.00295465	0.00632886	0.00915108	-0.0081584	0.014917	0.00511356	0.0092684			62.79	0.0113212	0.00295465	0.00632886	0.00915108	-0.0081584	0.014917	0.00511356	0.0092684
62.99	0.00941336	0.00928869	0.00668801	0.00852689	-0.0100099	0.0204028	0.00477312	0.0116441			62.99	0.00941336	0.00928869	0.00668801	0.00852689	-0.0100099	0.0204028	0.00477312	0.0116441
63.19	0.00953664	0.00552668	0.00845132	0.0119946	-0.00583963	0.019059	0.00020605	0.0148795			63.19	0.00953664	0.00552668	0.00845132	0.0119946	-0.00583963	0.019059	0.00020605	0.0148795
63.39	0.00645091	0.00754524	0.00504967	0.00757129	-0.00734009	0.0213423	0.00320548	0.0139996			63.39	0.00645091	0.00754524	0.00504967	0.00757129	-0.00734009	0.0213423	0.00320548	0.0139996
63.59	0.0097351	0.00870939	0.0078844	0.00847825	-0.00815744	0.0190667	-0.00451901	0.0148894			63.59	0.0097351	0.00870939	0.0078844	0.00847825	-0.00815744	0.0190667	-0.00451901	0.0148894
63.79	0.00845405	0.00447415	0.00539119	0.00930647	-0.00724169	0.0194171	-0.00125043	0.0125478			63.79	0.00845405	0.00447415	0.00539119	0.00930647	-0.00724169	0.0194171	-0.00125043	0.0125478
63.99	0.00442548	0.00489918	0.00372292	0.00650886	-0.0107072	0.0201532	0.00107942	0.013287			63.99	0.00442548	0.00489918	0.00372292	0.00650886	-0.0107072	0.0201532	0.00107942	0.013287
64.19	0.00649653	0.00469958	0.00390065	0.00708392	-0.00944836	0.0185101	0.00135591	0.00774025			64.19	0.00649653	0.00469958	0.00390065	0.00708392	-0.00944836	0.0185101	0.00135591	0.00774025
64.39	0.0033783	0.00391808	0.00740699	0.00791656	-0.00994444	0.0193955	0.0026557	0.00883843			64.39	0.0033783	0.00391808	0.00740699	0.00791656	-0.00994444	0.0193955	0.0026557	0.00883843
64.59	0.0110126	0.0037374	0.00950502	0.00829563	-0.00968982	0.014319	0.00086847	0.00905529			64.59	0.0110126	0.0037374	0.00950502	0.00829563	-0.00968982	0.014319	0.00086847	0.00905529
64.79	0.00889431	0.00496862	0.00921116	0.00928533	-0.00823642	0.0191792	-0.00272017	0.014219			64.79	0.00889431	0.00496862	0.00921116	0.00928533	-0.00823642	0.0191792	-0.00272017	0.014219
64.99	0.00891763	0.00492049	0.00795771	0.0114004	-0.00733076	0.0212303	0.00197596	0.0157861			64.99	0.00891763	0.00492049	0.00795771	0.0114004	-0.00733076	0.0212303	0.00197596	0.0157861
65.19	0.0107519	0.00389073	0.00482739	0.00752683	-0.00476774	0.0190131	0.00624698	0.00972951			65.19	0.0107519	0.00389073	0.00482739	0.00752683	-0.00476774	0.0190131	0.00624698	0.00972951
65.39	0.0112357	0.00509348	0.0074279	0.0089616	-0.0057001	0.0176977	0.00365744	0.00891995			65.39	0.0112357	0.00509348	0.0074279	0.0089616	-0.0057001	0.0176977	0.00365744	0.00891995
65.59	0.0103738	0.00378461	0.00615811	0.00858448	-0.00853093	0.0168384	0.00408041	0.0122231			65.59	0.0103738	0.00378461	0.00615811	0.00858448	-0.00853093	0.0168384	0.00408041	0.0122231
65.8	0.0112061	0.00470128	0.00724152	0.00955561	-0.00811273	0.0202589	0.00479791	0.011755			65.8	0.0112061	0.00470128	0.00724152	0.00955561	-0.00811273	0.0202589	0.00479791	0.011755
65.99	0.00948671	0.00490329	0.00634198	0.0124103	-0.00815393	0.0222663	0.00104405	0.0147972			65.99	0.00948671	0.00490329	0.00634198	0.0124103	-0.00815393	0.0222663	0.00104405	0.0147972
66.19	0.00796196	0.00575234	0.00558094	0.0112106	-0.00814282	0.0200215	0.00084563	0.0092491			66.19	0.00796196	0.00575234	0.00558094	0.0112106	-0.00814282	0.0200215	0.00084563	0.0092491
66.39	0.00904325	0.00433542	0.00924078	0.0104779	-0.00909577	0.0199933	-0.00357377	0.0135364			66.39	0.00904325	0.00433542	0.00924078	0.0104779	-0.00909577	0.0199933	-0.00357377	0.0135364
66.6	0.00826238	0.0073588	0.00817395	0.00704649	-0.00523718	0.0216039	0.00236973	0.0119935			66.6	0.00826238	0.0073588	0.00817395	0.00704649	-0.00523718	0.0216039	0.00236973	0.0119935
66.79	0.0102251	0.00244715	0.00685018	0.00849591	-0.00908634	0.0202507	0.00244105	0.0113802			66.79	0.0102251	0.00244715	0.00685018	0.00849591	-0.00908634	0.0202507	0.00244105	0.0113802
66.99	0.0079852	0.00601459	0.00370578	0.0134359	-0.00987217	0.0186515	0.00197418	0.00800453			66.99	0.0079852	0.00601459	0.00370578	0.0134359	-0.00987217	0.0186515	0.00197418	0.00800453
67.19	0.0100653	0.00493433	0.00550527	0.0111457	-0.00379808	0.0186006	0.00327472	0.0127974			67.19	0.0100653	0.00493433	0.00550527	0.0111457	-0.00379808	0.0186006	0.00327472	0.0127974
67.4	0.00814452	0.00425728	0.00592263	0.0117407	-0.00701787	0.018407	-0.00272486	0.0112508			67.4	0.00814452	0.00425728	0.00592263	0.0117407	-0.00701787	0.018407	-0.00272486	0.0112508
67.59	0.0102839	0.00859409	0.010069	0.00938387	-0.00834424	0.018903	0.00229378	0.0115045			67.59	0.0102839	0.00859409	0.010069	0.00938387	-0.00834424	0.018903	0.00229378	0.0115045
67.79	0.00504114	0.00845418	0.00733856	0.0079832	-0.0081995	0.0169532	-0.00121631	0.0124789			67.79	0.00504114	0.00845418	0.00733856	0.0079832	-0.0081995	0.0169532	-0.00121631	0.0124789
67.99	0.00721402	0.00452194	0.00462233	0.00735489	-0.00981209	0.020575	0.00447321	0.01258			67.99	0.00721402	0.00452194	0.00462233	0.00735489	-0.00981209	0.020575	0.00447321	0.01258
68.19	0.00724128	0.0117028	0.00339767	0.0107422	-0.00719557	0.0198377	0.00718349	0.0136759			68.19	0.00724128	0.0117028	0.00339767	0.0107422	-0.00719557	0.0198377	0.00718349	0.0136759
68.39	0.0118025	0.00499127	0.00500909	0.00974399	-0.00768847	0.0184364	-0.00153771	0.0127686			68.39	0.0118025	0.00499127	0.00500909	0.00974399	-0.00768847	0.0184364	-0.00153771	0.0127686
68.59	0.007812	0.00765857	0.00824533	0.00959586	-0.00617685	0.0216318	0.00136135	0.0118857			68.59	0.007812	0.00765857	0.00824533	0.00959586	-0.00617685	0.0216318	0.00136135	0.0118857
68.79	0.00872401	0.00488631	0.00707079	0.0111837	-0.0086853	0.0197976	0.00063687	0.00694473			68.79	0.00872401	0.00488631	0.00707079	0.0111837	-0.0086853	0.0197976	0.00063687	0.00694473
68.99	0.00755533	0.00601036	0.00263644	0.00854593	-0.00559057	0.0204611	0.00321637	0.0117424			68.99	0.00755533	0.00601036	0.00263644	0.00854593	-0.00559057	0.0204611	0.00321637	0.0117424
69.19	0.00811593	0.00926351	0.00602501	0.0109529	-0.00912166	0.0195555	0.00058146	0.0115347			69.19	0.00811593	0.00926351	0.00602501	0.0109529	-0.00912166	0.0195555	0.00058146	0.0115347
69.4	0.00971657	0.0041819	0.00321446	0.0102079	-0.00856124	0.0184856	-0.00222843	0.0131834			69.4	0.00971657	0.0041819	0.00321446	0.0102079	-0.00856124	0.0184856	-0.00222843	0.0131834
69.6	0.0130949	0.00430163	0.00638252	0.0086818	-0.00827794	0.0196024	0.00136713	0.0129271			69.6	0.0130949	0.00430163	0.00638252	0.0086818	-0.00827794	0.0196024	0.00136713	0.0129271
69.8	0.00880902	0.00664846	0.00273622	0.00933679	-0.00771406	0.0172039	-0.00138266	0.00872087			69.8	0.00880902	0.00664846	0.00273622	0.00933679	-0.00771406	0.0172039	-0.00138266	0.00872087
70	0.00775127	0.00514275	0.00569347	0.0128005	-0.0079185	0.0179635	0.00283253	0.0131604			70	0.00775127	0.00514275	0.00569347	0.0128005	-0.0079185	0.0179635	0.00283253	0.0131604
70.19	0.00668296	0.00521007	0.00430315	0.0107585	-0.00825868	0.0188408	0.00473235	0.00953166			70.19	0.00668296	0.00521007	0.00430315	0.0107585	-0.00825868	0.0188408	0.00473235	0.00953166
70.4	0.00806195	0.00816216	0.0063871	0.0101467	-0.00883086	0.0195876	0.00177258	0.00894824			70.4	0.00806195	0.00816216	0.0063871	0.0101467	-0.00883086	0.0195876	0.00177258	0.00894824
70.6	0.00719642	0.00540933	0.00832378	0.00564408	-0.0110563	0.0217661	0.00438845	0.00991365			70.6	0.00719642	0.00540933	0.00832378	0.00564408	-0.0110563	0.0217661	0.00438845	0.00991365
70.8	0.00814894	0.00393138	0.00364792	0.00816809	-0.0057612	0.0170708	0.00128675	0.0138459			70.8	0.00814894	0.00393138	0.00364792	0.00816809	-0.0057612	0.0170708	0.00128675	0.0138459
71	0.0088844	0.00558761	0.00279295	0.00948537	-0.00653624	0.0233928	0.00056982	0.0106734			71	0.0088844	0.00558761	0.00279295	0.00948537	-0.00653624	0.0233928	0.00056982	0.0106734
71.19	0.0100038	0.00657461	0.00593613	0.00775867	-0.00716201	0.0190453	0.00074977	0.0142456			71.19	0.0100038	0.00657461	0.00593613	0.00775867	-0.00716201	0.0190453	0.00074977	0.0142456
71.4	0.00788063	0.00418714	0.0055312	0.00924086	-0.00986173	0.0193484	0.00311609	0.0123544			71.4	0.00788063	0.00418714	0.0055312	0.00924086	-0.00986173	0.0193484	0.00311609	0.0123544
71.6	0.0115746	0.00780735	0.00770281	0.00903566	-0.00418088	0.0190999	-0.0004293	0.00977956			71.6	0.0115746	0.00780735	0.00770281	0.00903566	-0.00418088	0.0190999	-0.0004293	0.00977956
71.8	0.0123603	0.0103213	0.00594754	0.00866059	-0.00940161	0.0173016	0.0001847	0.0100468			71.8	0.0123603	0.0103213	0.00594754	0.00866059	-0.00940161	0.0173016	0.0001847	0.0100468
72	0.0125941	0.00718063	0.00709369	0.0116006	-0.00820319	0.0195123	0.001349	0.0110007			72	0.0125941	0.00718063	0.00709369	0.0116006	-0.00820319	0.0195123	0.001349	0.0110007
72.19	0.0126529	0.00906089	0.00725356	0.00851808	-0.0100269	0.0162948	0.00237954	0.00854788			72.19	0.0126529	0.00906089	0.00725356	0.00851808	-0.0100269	0.0162948	0.00237954	0.00854788
72.4	0.0113158	0.00444466	0.00495401	0.0120865	-0.00626308	0.0190251	-0.00116635	0.0146011			72.4	0.0113158	0.00444466	0.00495401	0.0120865	-0.00626308	0.0190251	-0.00116635	0.0146011
72.6	0.0102284	0.00501846	0.00582705	0.0103528	-0.00980752	0.0161787	0.00187345	0.0094136			72.6	0.0102284	0.00501846	0.00582705	0.0103528	-0.00980752	0.0161787	0.00187345	0.0094136
72.8	0.00871411	0.00510856	0.00566031	0.00931021	-0.0102124	0.0174946	0.00038341	0.00872025			72.8	0.00871411	0.00510856	0.00566031	0.00931021	-0.0102124	0.0174946	0.00038341	0.00872025
73	0.0089515	0.0116421	0.00961035	0.0105412	-0.00726405	0.01887	0.00280915	0.00731233			73	0.0089515	0.0116421	0.00961035	0.0105412	-0.00726405	0.01887	0.00280915	0.00731233
73.19	0.00954026	0.00972912	0.00847207	0.00730989	-0.0093088	0.0232191	0.00032957	0.00902108			73.19	0.00954026	0.00972912	0.00847207	0.00730989	-0.0093088	0.0232191	0.00032957	0.00902108
73.4	0.00945144	0.00419434	0.00711773	0.00943023	-0.00660604	0.0186993	0.00098126	0.0116406			73.4	0.00945144	0.00419434	0.00711773	0.00943023	-0.00660604	0.0186993	0.00098126	0.0116406
73.6	0.00853922	0.00643609	0.0100958	0.00882763	-0.00944571	0.0167859	0.00126367	0.0143383			73.6	0.00853922	0.00643609	0.0100958	0.00882763	-0.00944571	0.0167859	0.00126367	0.0143383
73.8	0.00918596	0.00761539	0.00715072	0.00638444	-0.00741248	0.0179687	0.00431239	0.0100908			73.8	0.00918596	0.00761539	0.00715072	0.00638444	-0.00741248	0.0179687	0.00431239	0.0100908
73.99	0.0107358	0.00540506	0.0077113	0.0118232	-0.00862728	0.0206102	-0.00389475	0.0101077			73.99	0.0107358	0.00540506	0.0077113	0.0118232	-0.00862728	0.0206102	-0.00389475	0.0101077
74.19	0.0114813	0.00393027	0.00607177	0.00782361	-0.00888417	0.0183095	-0.00126595	0.00893163			74.19	0.0114813	0.00393027	0.00607177	0.00782361	-0.00888417	0.0183095	-0.00126595	0.00893163
74.4	0.00987316	0.0109275	0.00685768	0.00907747	-0.00879345	0.0183919	-0.00033804	0.0120944			74.4	0.00987316	0.0109275	0.00685768	0.00907747	-0.00879345	0.0183919	-0.00033804	0.0120944
74.6	0.0108942	0.00401634	0.00735925	0.00765731	-0.00851959	0.0192298	-0.00116625	0.0126487			74.6	0.0108942	0.00401634	0.00735925	0.00765731	-0.00851959	0.0192298	-0.00116625	0.0126487
74.8	0.00557397	0.00775298	0.00438871	0.00817263	-0.00947747	0.0188225	0.003547	0.00692192			74.8	0.00557397	0.00775298	0.00438871	0.00817263	-0.00947747	0.0188225	0.003547	0.00692192
75	0.0105169	0.00615737	0.00875625	0.0123492	-0.00886407	0.0241236	-0.00045835	0.0107373			75	0.0105169	0.00615737	0.00875625	0.0123492	-0.00886407	0.0241236	-0.00045835	0.0107373
75.19	0.0118523	0.0079348	0.0083963	0.0103777	-0.00915319	0.0178867	-0.00066271	0.0125197			75.19	0.0118523	0.0079348	0.0083963	0.0103777	-0.00915319	0.0178867	-0.00066271	0.0125197
75.4	0.00745941	0.0058926	0.00715102	0.00949046	-0.00821554	0.0182623	0.00426189	0.010012			75.4	0.00745941	0.0058926	0.00715102	0.00949046	-0.00821554	0.0182623	0.00426189	0.010012
75.6	0.00686206	0.00777099	0.0075465	0.0106966	-0.00763537	0.019667	0.00169648	0.011755			75.6	0.00686206	0.00777099	0.0075465	0.0106966	-0.00763537	0.019667	0.00169648	0.011755
75.79	0.0122523	0.00656394	0.00870307	0.00939622	-0.00788714	0.0194755	-0.00026793	0.0114532			75.79	0.0122523	0.00656394	0.00870307	0.00939622	-0.00788714	0.0194755	-0.00026793	0.0114532
76	0.00916599	0.00752512	0.00682265	0.00733712	-0.00844662	0.0202433	0.00128578	0.00663777			76	0.00916599	0.00752512	0.00682265	0.00733712	-0.00844662	0.0202433	0.00128578	0.00663777
76.19	0.00976627	0.002365	0.0078215	0.00839534	-0.009475	0.0193824	-0.00067806	0.00990667			76.19	0.00976627	0.002365	0.0078215	0.00839534	-0.009475	0.0193824	-0.00067806	0.00990667
76.4	0.0128529	0.00745953	0.00435438	0.0069509	-0.00935422	0.0225311	0.0003	0.0141965			76.4	0.0128529	0.00745953	0.00435438	0.0069509	-0.00935422	0.0225311	0.0003	0.0141965
76.59	0.00993831	0.00780129	0.00736542	0.00750993	-0.00855442	0.0197907	0.00333186	0.0120213			76.59	0.00993831	0.00780129	0.00736542	0.00750993	-0.00855442	0.0197907	0.00333186	0.0120213
76.8	0.00688123	0.00898865	0.00335588	0.012989	-0.00736759	0.0240841	0.00159979	0.0135198			76.8	0.00688123	0.00898865	0.00335588	0.012989	-0.00736759	0.0240841	0.00159979	0.0135198
77	0.0111104	0.0070391	0.00392367	0.0112842	-0.0113444	0.0176265	0.00203949	0.00933298			77	0.0111104	0.0070391	0.00392367	0.0112842	-0.0113444	0.0176265	0.00203949	0.00933298
77.19	0.00926482	0.00575977	0.00661904	0.00856682	-0.00906938	0.0233847	0.00458826	0.00890133			77.19	0.00926482	0.00575977	0.00661904	0.00856682	-0.00906938	0.0233847	0.00458826	0.00890133
77.4	0.00888829	0.00859584	0.0116933	0.00852595	-0.00881039	0.020788	0.00102614	0.00838146			77.4	0.00888829	0.00859584	0.0116933	0.00852595	-0.00881039	0.020788	0.00102614	0.00838146
77.6	0.00796256	0.00752358	0.00690968	0.00903829	-0.00753258	0.0178484	0.0035537	0.0149377			77.6	0.00796256	0.00752358	0.00690968	0.00903829	-0.00753258	0.0178484	0.0035537	0.0149377
77.8	0.0114987	0.00581643	0.00825375	0.0082104	-0.00677051	0.0168583	0.00279555	0.0114234			77.8	0.0114987	0.00581643	0.00825375	0.0082104	-0.00677051	0.0168583	0.00279555	0.0114234
78	0.0110019	0.00509513	0.00735943	0.0134659	-0.00892224	0.0185389	0.00051498	0.00947607			78	0.0110019	0.00509513	0.00735943	0.0134659	-0.00892224	0.0185389	0.00051498	0.00947607
78.19	0.0103806	0.00580041	0.00537392	0.0114664	-0.00699289	0.0198556	0.0005991	0.0145133			78.19	0.0103806	0.00580041	0.00537392	0.0114664	-0.00699289	0.0198556	0.0005991	0.0145133
78.39	0.00892918	0.00480064	0.00469497	0.00850849	-0.00830516	0.0212133	0.00389282	0.0114759			78.39	0.00892918	0.00480064	0.00469497	0.00850849	-0.00830516	0.0212133	0.00389282	0.0114759
78.6	0.0106463	0.00623758	0.00611726	0.0113612	-0.00858007	0.0179884	0.00378569	0.0116454			78.6	0.0106463	0.00623758	0.00611726	0.0113612	-0.00858007	0.0179884	0.00378569	0.0116454
78.8	0.00549437	0.00430845	0.0101814	0.0082484	-0.00695051	0.0204804	-0.00433212	0.011269			78.8	0.00549437	0.00430845	0.0101814	0.0082484	-0.00695051	0.0204804	-0.00433212	0.011269
79	0.00818392	0.00751707	0.00727371	0.0112065	-0.00657122	0.0184804	0.00183448	0.0137358			79	0.00818392	0.00751707	0.00727371	0.0112065	-0.00657122	0.0184804	0.00183448	0.0137358
79.19	0.00911509	0.0066019	0.0100649	0.0115166	-0.00775795	0.0171876	0.00127191	0.0128108			79.19	0.00911509	0.0066019	0.0100649	0.0115166	-0.00775795	0.0171876	0.00127191	0.0128108
79.4	0.0112534	0.00403843	0.00696354	0.0105074	-0.00849058	0.0153795	-0.00188844	0.00884605			79.4	0.0112534	0.00403843	0.00696354	0.0105074	-0.00849058	0.0153795	-0.00188844	0.00884605
79.6	0.0115067	0.00618986	0.00451114	0.0084254	-0.00953229	0.0206575	0.00155224	0.00944711			79.6	0.0115067	0.00618986	0.00451114	0.0084254	-0.00953229	0.0206575	0.00155224	0.00944711
79.79	0.00706039	0.0038719	0.00464656	0.00554515	-0.0109292	0.0174728	0.00178876	0.00925831			79.79	0.00706039	0.0038719	0.00464656	0.00554515	-0.0109292	0.0174728	0.00178876	0.00925831
79.99	0.00774982	0.0038867	0.00645091	0.0139259	-0.00754103	0.020731	0.00260295	0.0113961			79.99	0.00774982	0.0038867	0.00645091	0.0139259	-0.00754103	0.020731	0.00260295	0.0113961
80.19	0.00894393	0.00432962	0.00983822	0.00790253	-0.0103189	0.0196101	0.00241291	0.0108015			80.19	0.00894393	0.00432962	0.00983822	0.00790253	-0.0103189	0.0196101	0.00241291	0.0108015
80.4	0.00902033	0.00733669	0.00677489	0.0116277	-0.0100446	0.0200991	0.00193326	0.0115397			80.4	0.00902033	0.00733669	0.00677489	0.0116277	-0.0100446	0.0200991	0.00193326	0.0115397
80.59	0.00738975	0.00761122	0.00549571	0.00893482	-0.00749783	0.0201042	0.00096918	0.00968108			80.59	0.00738975	0.00761122	0.00549571	0.00893482	-0.00749783	0.0201042	0.00096918	0.00968108
80.79	0.0112079	0.00784196	0.00883787	0.00958996	-0.00543106	0.0192848	0.00121122	0.0113784			80.79	0.0112079	0.00784196	0.00883787	0.00958996	-0.00543106	0.0192848	0.00121122	0.0113784
81	0.00979976	0.0067857	0.00644992	0.0120179	-0.00670717	0.0199107	0.00404079	0.0125554			81	0.00979976	0.0067857	0.00644992	0.0120179	-0.00670717	0.0199107	0.00404079	0.0125554
81.19	0.00805587	0.00600521	0.00654225	0.00650868	-0.00757283	0.0192499	-0.00102068	0.0117729			81.19	0.00805587	0.00600521	0.00654225	0.00650868	-0.00757283	0.0192499	-0.00102068	0.0117729
81.4	0.00926702	0.0053173	0.00732877	0.00923922	-0.00908329	0.0212614	3.826e-05	0.00809779			81.4	0.00926702	0.0053173	0.00732877	0.00923922	-0.00908329	0.0212614	3.826e-05	0.00809779
81.59	0.012149	0.00502879	0.00884845	0.0116624	-0.00804154	0.0170033	-0.0028073	0.0062709			81.59	0.012149	0.00502879	0.00884845	0.0116624	-0.00804154	0.0170033	-0.0028073	0.0062709
81.8	0.00790964	0.00432065	0.00536493	0.0065852	-0.00968083	0.0185777	-0.00150474	0.0109023			81.8	0.00790964	0.00432065	0.00536493	0.0065852	-0.00968083	0.0185777	-0.00150474	0.0109023
82	0.0101084	0.00548044	0.00562381	0.0107799	-0.00615452	0.0199032	-0.00268004	0.011755			82	0.0101084	0.00548044	0.00562381	0.0107799	-0.00615452	0.0199032	-0.00268004	0.011755
82.19	0.0101892	0.00632326	0.00601925	0.00800439	-0.00910533	0.0183651	0.00046226	0.011717			82.19	0.0101892	0.00632326	0.00601925	0.00800439	-0.00910533	0.0183651	0.00046226	0.011717
82.39	0.00961258	0.00754574	0.00864637	0.00777619	-0.00703996	0.0170764	-0.00084437	0.0115452			82.39	0.00961258	0.00754574	0.00864637	0.00777619	-0.00703996	0.0170764	-0.00084437	0.0115452
82.59	0.00885122	0.00583566	0.00922215	0.01222	-0.00940738	0.0214663	9.779e-05	0.0101385			82.59	0.00885122	0.00583566	0.00922215	0.01222	-0.00940738	0.0214663	9.779e-05	0.0101385
82.8	0.00887451	0.00854233	0.00657333	0.00816209	-0.00985745	0.0204961	0.00154334	0.0125529			82.8	0.00887451	0.00854233	0.00657333	0.00816209	-0.00985745	0.0204961	0.00154334	0.0125529
83	0.0112704	0.00592095	0.00688903	0.0098369	-0.0068238	0.0194953	0.00167012	0.0115291			83	0.0112704	0.00592095	0.00688903	0.0098369	-0.0068238	0.0194953	0.00167012	0.0115291
83.19	0.0077799	0.00803468	0.00837249	0.00897095	-0.00985562	0.0177329	0.00034013	0.00922187			83.19	0.0077799	0.00803468	0.00837249	0.00897095	-0.00985562	0.0177329	0.00034013	0.00922187
83.4	0.00939351	0.00419032	0.00872495	0.0103343	-0.0103995	0.0213452	0.00242734	0.0125117			83.4	0.00939351	0.00419032	0.00872495	0.0103343	-0.0103995	0.0213452	0.00242734	0.0125117
83.6	0.0092302	0.00819279	0.00865167	0.0109812	-0.0103138	0.0205554	0.00243285	0.00571454			83.6	0.0092302	0.00819279	0.00865167	0.0109812	-0.0103138	0.0205554	0.00243285	0.00571454
83.79	0.00854853	0.00533077	0.00582894	0.00799447	-0.00474379	0.0208262	0.00328194	0.0104367			83.79	0.00854853	0.00533077	0.00582894	0.00799447	-0.00474379	0.0208262	0.00328194	0.0104367
83.99	0.00564099	0.0076145	0.00498979	0.00942396	-0.0109093	0.0190642	0.00130151	0.0129391			83.99	0.00564099	0.0076145	0.00498979	0.00942396	-0.0109093	0.0190642	0.00130151	0.0129391
84.19	0.00898438	0.00509827	0.00209195	0.0126089	-0.0134996	0.0180517	-0.00088461	0.0101128			84.19	0.00898438	0.00509827	0.00209195	0.0126089	-0.0134996	0.0180517	-0.00088461	0.0101128
84.4	0.0115969	0.00494544	0.00397818	0.0101196	-0.00843119	0.015506	-0.00035941	0.0101792			84.4	0.0115969	0.00494544	0.00397818	0.0101196	-0.00843119	0.015506	-0.00035941	0.0101792
84.6	0.00897453	0.00746559	0.0042701	0.00741197	-0.0092951	0.0188147	0.00079152	0.0104284			84.6	0.00897453	0.00746559	0.0042701	0.00741197	-0.0092951	0.0188147	0.00079152	0.0104284
84.8	0.00972081	0.00711236	0.00750978	0.0110846	-0.00737012	0.0229509	0.00177311	0.0121491			84.8	0.00972081	0.00711236	0.00750978	0.0110846	-0.00737012	0.0229509	0.00177311	0.0121491
84.99	0.00655746	0.00393388	0.00489434	0.00960483	-0.0114115	0.0202647	-0.00247786	0.0123827			84.99	0.00655746	0.00393388	0.00489434	0.00960483	-0.0114115	0.0202647	-0.00247786	0.0123827
85.19	0.00889009	0.00565102	0.00993249	0.00924001	-0.0104446	0.0208841	0.00171836	0.0123686			85.19	0.00889009	0.00565102	0.00993249	0.00924001	-0.0104446	0.0208841	0.00171836	0.0123686
85.4	0.00854472	0.0110559	0.00488858	0.0128111	-0.00957639	0.0182065	-0.00202599	0.00886884			85.4	0.00854472	0.0110559	0.00488858	0.0128111	-0.00957639	0.0182065	-0.00202599	0.00886884
85.59	0.0090412	0.00436236	0.00107432	0.0122854	-0.0107397	0.0204446	0.00107268	0.0127873			85.59	0.0090412	0.00436236	0.00107432	0.0122854	-0.0107397	0.0204446	0.00107268	0.0127873
85.79	0.00742801	0.00810804	0.00613009	0.00893107	-0.00603779	0.0180212	-0.0008566	0.00800004			85.79	0.00742801	0.00810804	0.00613009	0.00893107	-0.00603779	0.0180212	-0.0008566	0.00800004
85.99	0.0106433	0.00763036	0.00630926	0.0116527	-0.00876176	0.0238413	0.0031137	0.00826197			85.99	0.0106433	0.00763036	0.00630926	0.0116527	-0.00876176	0.0238413	0.0031137	0.00826197
86.19	0.0114387	0.00621207	0.00694461	0.00923808	-0.00596546	0.0178749	0.00024615	0.0122461			86.19	0.0114387	0.00621207	0.00694461	0.00923808	-0.00596546	0.0178749	0.00024615	0.0122461
86.39	0.0108896	0.00816847	0.00339837	0.00973749	-0.0100218	0.0181969	0.0021995	0.0119382			86.39	0.0108896	0.00816847	0.00339837	0.00973749	-0.0100218	0.0181969	0.0021995	0.0119382
86.59	0.0101581	0.0032769	0.00567376	0.0119784	-0.00535376	0.0206231	0.00343739	0.0129501			86.59	0.0101581	0.0032769	0.00567376	0.0119784	-0.00535376	0.0206231	0.00343739	0.0129501
86.8	0.00917953	0.00673018	0.00585771	0.00588826	-0.00688076	0.019591	-0.00050679	0.0120804			86.8	0.00917953	0.00673018	0.00585771	0.00588826	-0.00688076	0.019591	-0.00050679	0.0120804
87	0.00952551	0.00799994	0.00595287	0.00817717	-0.00880758	0.0191545	0.0005287	0.0111106			87	0.00952551	0.00799994	0.00595287	0.00817717	-0.00880758	0.0191545	0.0005287	0.0111106
87.19	0.00954919	0.00931124	0.00727304	0.0103997	-0.00573073	0.0199514	0.00363105	0.0143267			87.19	0.00954919	0.00931124	0.00727304	0.0103997	-0.00573073	0.0199514	0.00363105	0.0143267
87.39	0.00896226	0.00750087	0.0067528	0.0122979	-0.00870486	0.019898	-0.00315102	0.00841604			87.39	0.00896226	0.00750087	0.0067528	0.0122979	-0.00870486	0.019898	-0.00315102	0.00841604
87.6	0.0080538	0.00561244	0.00496774	0.0114042	-0.00864055	0.0200488	0.00263862	0.0143566			87.6	0.0080538	0.00561244	0.00496774	0.0114042	-0.00864055	0.0200488	0.00263862	0.0143566
87.79	0.00854418	0.00616706	0.0085784	0.010911	-0.00654811	0.0250967	-0.00089454	0.00720519			87.79	0.00854418	0.00616706	0.0085784	0.010911	-0.00654811	0.0250967	-0.00089454	0.00720519
87.99	0.00910195	0.00516168	0.00369421	0.00873687	-0.00644592	0.0154057	0.00345021	0.00987095			87.99	0.00910195	0.00516168	0.00369421	0.00873687	-0.00644592	0.0154057	0.00345021	0.00987095
88.19	0.00801198	0.0063565	0.00139286	0.00946353	-0.00784098	0.0172653	0.00455304	0.0118931			88.19	0.00801198	0.0063565	0.00139286	0.00946353	-0.00784098	0.0172653	0.00455304	0.0118931
88.4	0.00829554	0.00620995	0.00632219	0.0107437	-0.00883717	0.0168809	0.00235473	0.00938174			88.4	0.00829554	0.00620995	0.00632219	0.0107437	-0.00883717	0.0168809	0.00235473	0.00938174
88.59	0.00809345	0.00337367	0.00484412	0.00861746	-0.00679917	0.0193952	0.00075494	0.0128989			88.59	0.00809345	0.00337367	0.00484412	0.00861746	-0.00679917	0.0193952	0.00075494	0.0128989
88.8	0.0101987	0.00636769	0.0087982	0.0103453	-0.00785959	0.0199441	0.00203223	0.0104879			88.8	0.0101987	0.00636769	0.0087982	0.0103453	-0.00785959	0.0199441	0.00203223	0.0104879
88.99	0.0107013	0.00657384	0.00324157	0.0119266	-0.00967722	0.0220864	-0.00014431	0.0120011			88.99	0.0107013	0.00657384	0.00324157	0.0119266	-0.00967722	0.0220864	-0.00014431	0.0120011
89.19	0.00974934	0.00502814	0.00550994	0.0123208	-0.00761908	0.0200592	0.00227043	0.0148761			89.19	0.00974934	0.00502814	0.00550994	0.0123208	-0.00761908	0.0200592	0.00227043	0.0148761
89.39	0.0083905	0.0118688	0.00810833	0.0117267	-0.00982011	0.0209291	0.0010292	0.00902138			89.39	0.0083905	0.0118688	0.00810833	0.0117267	-0.00982011	0.0209291	0.0010292	0.00902138
89.6	0.00908268	0.00414449	0.00547837	0.00852389	-0.0089088	0.0168321	0.00134606	0.0105135			89.6	0.00908268	0.00414449	0.00547837	0.00852389	-0.0089088	0.0168321	0.00134606	0.0105135
89.79	0.00787069	0.00616967	0.00205176	0.00845154	-0.00614455	0.0175133	0.00229855	0.00892829			89.79	0.00787069	0.00616967	0.00205176	0.00845154	-0.00614455	0.0175133	0.00229855	0.00892829
89.99	0.0107932	0.00562849	0.00713948	0.00715629	-0.00888233	0.0175559	0.00118494	0.0108901			89.99	0.0107932	0.00562849	0.00713948	0.00715629	-0.00888233	0.0175559	0.00118494	0.0108901
90.19	0.0105861	0.00764004	0.00567109	0.00967663	-0.00835855	0.0217221	0.00270412	0.0121432			90.19	0.0105861	0.00764004	0.00567109	0.00967663	-0.00835855	0.0217221	0.00270412	0.0121432
90.39	0.00658135	0.00326051	0.00686073	0.0102501	-0.0082169	0.0203199	0.00116073	0.00937159			90.39	0.00658135	0.00326051	0.00686073	0.0102501	-0.0082169	0.0203199	0.00116073	0.00937159
90.59	0.0105297	0.00512953	0.00550001	0.0104678	-0.00966092	0.0194456	0.00194693	0.00958936			90.59	0.0105297	0.00512953	0.00550001	0.0104678	-0.00966092	0.0194456	0.00194693	0.00958936
90.79	0.0102492	0.00821409	0.00773747	0.0152052	-0.00959276	0.0196275	0.00484874	0.0094463			90.79	0.0102492	0.00821409	0.00773747	0.0152052	-0.00959276	0.0196275	0.00484874	0.0094463
91	0.00895557	0.00551982	0.00630459	0.00754591	-0.0109233	0.0173205	0.00302821	0.00883176			91	0.00895557	0.00551982	0.00630459	0.00754591	-0.0109233	0.0173205	0.00302821	0.00883176
91.19	0.00926945	0.0064181	0.00524122	0.00835941	-0.00965625	0.0208355	-4.342e-05	0.0137101			91.19	0.00926945	0.0064181	0.00524122	0.00835941	-0.00965625	0.0208355	-4.342e-05	0.0137101
91.39	0.00497868	0.00347486	0.00747771	0.00989213	-0.00670345	0.0198389	-0.00014961	0.00970231			91.39	0.00497868	0.00347486	0.00747771	0.00989213	-0.00670345	0.0198389	-0.00014961	0.00970231
91.59	0.010378	0.00677672	0.0062559	0.00711317	-0.01109	0.0194578	-0.00230733	0.0118161			91.59	0.010378	0.00677672	0.0062559	0.00711317	-0.01109	0.0194578	-0.00230733	0.0118161
91.8	0.00760868	0.00861355	0.00718539	0.00936624	-0.00738371	0.0243545	0.00307853	0.00986392			91.8	0.00760868	0.00861355	0.00718539	0.00936624	-0.00738371	0.0243545	0.00307853	0.00986392
91.99	0.00937319	0.00625736	0.00939081	0.0100554	-0.00965338	0.0194592	0.00076115	0.0134426			91.99	0.00937319	0.00625736	0.00939081	0.0100554	-0.00965338	0.0194592	0.00076115	0.0134426
92.19	0.0104157	0.0103779	0.00937367	0.0136787	-0.00870262	0.0182484	0.00497296	0.0127034			92.19	0.0104157	0.0103779	0.00937367	0.0136787	-0.00870262	0.0182484	0.00497296	0.0127034
92.39	0.00583204	0.00416045	0.00643544	0.011321	-0.00911062	0.0206689	0.00128596	0.00563089			92.39	0.00583204	0.00416045	0.00643544	0.011321	-0.00911062	0.0206689	0.00128596	0.00563089
92.59	0.00880475	0.00444674	0.00889394	0.00837523	-0.00721252	0.0179883	0.00334549	0.0072663			92.59	0.00880475	0.00444674	0.00889394	0.00837523	-0.00721252	0.0179883	0.00334549	0.0072663
92.79	0.00967873	0.00474544	0.00934738	0.00819685	-0.0076638	0.0201948	0.0028527	0.0100136			92.79	0.00967873	0.00474544	0.00934738	0.00819685	-0.0076638	0.0201948	0.0028527	0.0100136
92.99	0.0134118	0.00446233	0.00874281	0.00812743	-0.00638381	0.0218474	-0.00051028	0.0109718			92.99	0.0134118	0.00446233	0.00874281	0.00812743	-0.00638381	0.0218474	-0.00051028	0.0109718
93.19	0.00952831	0.00837358	0.00822848	0.0117569	-0.00770572	0.020452	0.0047606	0.0118919			93.19	0.00952831	0.00837358	0.00822848	0.0117569	-0.00770572	0.020452	0.0047606	0.0118919
93.39	0.0090832	0.00498184	0.00644532	0.0089924	-0.00916079	0.0218398	0.00235946	0.0114788			93.39	0.0090832	0.00498184	0.00644532	0.0089924	-0.00916079	0.0218398	0.00235946	0.0114788
93.6	0.0111213	0.00459441	0.0087812	0.00652003	-0.0107337	0.0208984	0.00044813	0.0130922			93.6	0.0111213	0.00459441	0.0087812	0.00652003	-0.0107337	0.0208984	0.00044813	0.0130922
93.79	0.00827228	0.0040301	0.00810463	0.00882891	-0.00947603	0.0159109	0.00392308	0.0113581			93.79	0.00827228	0.0040301	0.00810463	0.00882891	-0.00947603	0.0159109	0.00392308	0.0113581
93.99	0.00932944	0.00796977	0.00529321	0.00742945	-0.0110416	0.0221837	0.00051962	0.0108725			93.99	0.00932944	0.00796977	0.00529321	0.00742945	-0.0110416	0.0221837	0.00051962	0.0108725
94.19	0.0089775	0.00580459	0.00412282	0.0121687	-0.00985525	0.0186052	0.00012451	0.00808171			94.19	0.0089775	0.00580459	0.00412282	0.0121687	-0.00985525	0.0186052	0.00012451	0.00808171
94.4	0.00608276	0.00162242	0.00647003	0.00964261	-0.00993166	0.0179468	0.00156555	0.0117023			94.4	0.00608276	0.00162242	0.00647003	0.00964261	-0.00993166	0.0179468	0.00156555	0.0117023
94.59	0.00919359	0.0097954	0.00785363	0.0102918	-0.0124707	0.02146	-0.00130013	0.0131756			94.59	0.00919359	0.0097954	0.00785363	0.0102918	-0.0124707	0.02146	-0.00130013	0.0131756
94.79	0.00604287	0.0103733	0.00288466	0.00682837	-0.00835811	0.0227457	-0.00060458	0.0129937			94.79	0.00604287	0.0103733	0.00288466	0.00682837	-0.00835811	0.0227457	-0.00060458	0.0129937
95	0.00895169	0.00887542	0.00753484	0.00944943	-0.00576328	0.0209081	0.00093142	0.0123951			95	0.00895169	0.00887542	0.00753484	0.00944943	-0.00576328	0.0209081	0.00093142	0.0123951
95.19	0.0113232	0.00847299	0.00678667	0.0120237	-0.0104197	0.0226223	0.00396216	0.0116189			95.19	0.0113232	0.00847299	0.00678667	0.0120237	-0.0104197	0.0226223	0.00396216	0.0116189
95.4	0.00761925	0.00457295	0.00237938	0.0085925	-0.00594279	0.0189646	0.00115398	0.0112667			95.4	0.00761925	0.00457295	0.00237938	0.0085925	-0.00594279	0.0189646	0.00115398	0.0112667
95.59	0.00914296	0.00705519	0.00630849	0.00869132	-0.00848176	0.0217978	-0.00087521	0.00842646			95.59	0.00914296	0.00705519	0.00630849	0.00869132	-0.00848176	0.0217978	-0.00087521	0.00842646
95.79	0.00693064	0.00967448	0.00606729	0.00923859	-0.0108129	0.0196918	-0.00019601	0.00829408			95.79	0.00693064	0.00967448	0.00606729	0.00923859	-0.0108129	0.0196918	-0.00019601	0.00829408
95.99	0.00973352	0.00276242	0.0079406	0.00856707	-0.00904763	0.0175945	0.00246549	0.0131269			95.99	0.00973352	0.00276242	0.0079406	0.00856707	-0.00904763	0.0175945	0.00246549	0.0131269
96.19	0.00850584	0.0034685	0.00696209	0.0108401	-0.00796086	0.0196796	0.00390484	0.012702			96.19	0.00850584	0.0034685	0.00696209	0.0108401	-0.00796086	0.0196796	0.00390484	0.012702
96.39	0.0119617	0.00493655	0.010377	0.0111792	-0.00792767	0.021364	-0.00020609	0.00750625			96.39	0.0119617	0.00493655	0.010377	0.0111792	-0.00792767	0.021364	-0.00020609	0.00750625
96.59	0.00989068	0.00766671	0.00954082	0.00962109	-0.00928006	0.0190771	0.00181579	0.0110222			96.59	0.00989068	0.00766671	0.00954082	0.00962109	-0.00928006	0.0190771	0.00181579	0.0110222
96.79	0.00681083	0.00732314	0.00821903	0.00854347	-0.00760658	0.0217326	0.00097487	0.0101334			96.79	0.00681083	0.00732314	0.00821903	0.00854347	-0.00760658	0.0217326	0.00097487	0.0101334
96.99	0.0102543	0.00445642	0.00918209	0.00933881	-0.00811896	0.0220128	-0.00064035	0.0107255			96.99	0.0102543	0.00445642	0.00918209	0.00933881	-0.00811896	0.0220128	-0.00064035	0.0107255
97.19	0.0103088	0.00408737	0.00563376	0.00902262	-0.00855828	0.0211419	0.0031006	0.00953908			97.19	0.0103088	0.00408737	0.00563376	0.00902262	-0.00855828	0.0211419	0.0031006	0.00953908
97.39	0.0100845	0.00851413	0.00468102	0.0113732	-0.00521262	0.0200301	-0.00257661	0.00989918			97.39	0.0100845	0.00851413	0.00468102	0.0113732	-0.00521262	0.0200301	-0.00257661	0.00989918
97.59	0.00901447	0.00577773	0.0050945	0.00772684	-0.00996322	0.0242524	-1.017e-05	0.0104843			97.59	0.00901447	0.00577773	0.0050945	0.00772684	-0.00996322	0.0242524	-1.017e-05	0.0104843
97.79	0.00934784	0.00758492	0.00493945	0.011331	-0.00762068	0.0212244	0.00226497	0.00707578			97.79	0.00934784	0.00758492	0.00493945	0.011331	-0.00762068	0.0212244	0.00226497	0.00707578
97.99	0.0101098	0.00434018	0.00592841	0.0100121	-0.00708095	0.0208675	0.00034711	0.0109662			97.99	0.0101098	0.00434018	0.00592841	0.0100121	-0.00708095	0.0208675	0.00034711	0.0109662
98.19	0.00900755	0.00586076	0.00870586	0.0104002	-0.00814075	0.0229932	0.00070621	0.00851956			98.19	0.00900755	0.00586076	0.00870586	0.0104002	-0.00814075	0.0229932	0.00070621	0.00851956
98.39	0.00654597	0.00744803	0.00405916	0.00726867	-0.01012	0.0176841	0.00054296	0.0101446			98.39	0.00654597	0.00744803	0.00405916	0.00726867	-0.01012	0.0176841	0.00054296	0.0101446
98.6	0.00716166	0.00855769	0.00723344	0.00957949	-0.0101859	0.0207888	0.00193099	0.0120639			98.6	0.00716166	0.00855769	0.00723344	0.00957949	-0.0101859	0.0207888	0.00193099	0.0120639
98.8	0.00876145	0.00735988	0.00771755	0.0100343	-0.0110324	0.0210347	0.00117989	0.00946863			98.8	0.00876145	0.00735988	0.00771755	0.0100343	-0.0110324	0.0210347	0.00117989	0.00946863
99	0.00781236	0.00384786	0.0069166	0.00976784	-0.0100149	0.0168397	-5.374e-05	0.0104173			99	0.00781236	0.00384786	0.0069166	0.00976784	-0.0100149	0.0168397	-5.374e-05	0.0104173
99.19	0.00624731	0.00556306	0.00490526	0.0107257	-0.00661331	0.021863	0.00486919	0.00755273			99.19	0.00624731	0.00556306	0.00490526	0.0107257	-0.00661331	0.021863	0.00486919	0.00755273
99.4	0.00813166	0.00590317	0.00929191	0.0105129	-0.00944584	0.0178426	0.00043964	0.0119368			99.4	0.00813166	0.00590317	0.00929191	0.0105129	-0.00944584	0.0178426	0.00043964	0.0119368
99.6	0.00762927	0.00733208	0.00189221	0.00904984	-0.0130803	0.0194292	-0.00142238	0.0127527			99.6	0.00762927	0.00733208	0.00189221	0.00904984	-0.0130803	0.0194292	-0.00142238	0.0127527
99.8	0.00778468	0.00783088	0.00757238	0.0105475	-0.0116375	0.017119	0.00025026	0.0116742			99.8	0.00778468	0.00783088	0.00757238	0.0105475	-0.0116375	0.017119	0.00025026	0.0116742
100	0.0107681	0.00479163	0.006561	0.0108409	-0.00843032	0.0210483	0.00319074	0.00966173			100	0.0107681	0.00479163	0.006561	0.0108409	-0.00843032	0.0210483	0.00319074	0.00966173
100.19	0.0115205	0.00357839	0.00728266	0.0105997	-0.0098329	0.0216015	0.00081417	0.00910823			100.19	0.0115205	0.00357839	0.00728266	0.0105997	-0.0098329	0.0216015	0.00081417	0.00910823
100.4	0.00832053	0.00797344	0.00865389	0.0132609	-0.0105709	0.0195478	0.00126728	0.00537512			100.4	0.00832053	0.00797344	0.00865389	0.0132609	-0.0105709	0.0195478	0.00126728	0.00537512
100.6	0.00813849	0.00898071	0.00379691	0.00887563	-0.00687239	0.0185094	0.00230178	0.0102755			100.6	0.00813849	0.00898071	0.00379691	0.00887563	-0.00687239	0.0185094	0.00230178	0.0102755
100.8	0.00748952	0.00795311	0.00756059	0.0112872	-0.0106525	0.0169581	0.00199366	0.00966697			100.8	0.00748952	0.00795311	0.00756059	0.0112872	-0.0106525	0.0169581	0.00199366	0.00966697
101	0.0139297	0.00592252	0.00471839	0.010848	-0.0105887	0.0179803	-0.00158214	0.0119865			101	0.0139297	0.00592252	0.00471839	0.010848	-0.0105887	0.0179803	-0.00158214	0.0119865
101.19	0.00757544	0.00615591	0.00701334	0.00650894	-0.0106071	0.0201035	-0.00097905	0.0111415			101.19	0.00757544	0.00615591	0.00701334	0.00650894	-0.0106071	0.0201035	-0.00097905	0.0111415
101.4	0.0051963	0.00934529	0.00731133	0.0119781	-0.00787646	0.018796	0.00044438	0.0141533			101.4	0.0051963	0.00934529	0.00731133	0.0119781	-0.00787646	0.018796	0.00044438	0.0141533
101.6	0.0108306	0.00954078	0.0060405	0.0126637	-0.00935202	0.0193922	0.00379049	0.0105659			101.6	0.0108306	0.00954078	0.0060405	0.0126637	-0.00935202	0.0193922	0.00379049	0.0105659
101.8	0.00693567	0.0108338	0.00913898	0.00929015	-0.00912705	0.022303	-0.00031449	0.0103137			101.8	0.00693567	0.0108338	0.00913898	0.00929015	-0.00912705	0.022303	-0.00031449	0.0103137
102	0.0110212	0.00702719	0.00588131	0.0080093	-0.00827197	0.0258436	0.00201135	0.00822925			102	0.0110212	0.00702719	0.00588131	0.0080093	-0.00827197	0.0258436	0.00201135	0.00822925
102.19	0.00670969	0.00764458	0.00626785	0.00899191	-0.01202	0.0199077	0.0015776	0.00609957			102.19	0.00670969	0.00764458	0.00626785	0.00899191	-0.01202	0.0199077	0.0015776	0.00609957
102.4	0.00994611	0.00730763	0.00862074	0.0108894	-0.00635676	0.0216844	0.00022434	0.0118418			102.4	0.00994611	0.00730763	0.00862074	0.0108894	-0.00635676	0.0216844	0.00022434	0.0118418
102.6	0.00834944	0.00231968	0.00975597	0.00785124	-0.00790785	0.0199699	-0.00049295	0.0122394			102.6	0.00834944	0.00231968	0.00975597	0.00785124	-0.00790785	0.0199699	-0.00049295	0.0122394
102.8	0.00505232	0.00449978	0.0056965	0.00902676	-0.0105491	0.0219354	0.0019748	0.0101516			102.8	0.00505232	0.00449978	0.0056965	0.00902676	-0.0105491	0.0219354	0.0019748	0.0101516
103	0.00808045	0.0063927	0.00549014	0.0106249	-0.00567072	0.0179736	0.00371176	0.0120909			103	0.00808045	0.0063927	0.00549014	0.0106249	-0.00567072	0.0179736	0.00371176	0.0120909
103.19	0.00834154	0.00698566	0.00615447	0.00934695	-0.0093007	0.0199187	0.0009862	0.00733661			103.19	0.00834154	0.00698566	0.00615447	0.00934695	-0.0093007	0.0199187	0.0009862	0.00733661
103.4	0.00874279	0.00420926	0.00732027	0.00930328	-0.00904743	0.019211	-0.00018975	0.0110168			103.4	0.00874279	0.00420926	0.00732027	0.00930328	-0.00904743	0.019211	-0.00018975	0.0110168
103.59	0.00791919	0.0040017	0.00636142	0.00707643	-0.00833247	0.019194	0.00464256	0.00911803			103.59	0.00791919	0.0040017	0.00636142	0.00707643	-0.00833247	0.019194	0.00464256	0.00911803
103.8	0.00796058	0.00674115	0.00346086	0.00935457	-0.0092874	0.0180972	0.0032087	0.0139569			103.8	0.00796058	0.00674115	0.00346086	0.00935457	-0.0092874	0.0180972	0.0032087	0.0139569
104	0.0092364	0.00366977	0.00609919	0.00815342	-0.00666027	0.0191316	0.00034836	0.0104041			104	0.0092364	0.00366977	0.00609919	0.00815342	-0.00666027	0.0191316	0.00034836	0.0104041
104.19	0.00956376	0.00851516	0.00576553	0.010437	-0.00704799	0.0196644	0.00237469	0.0121641			104.19	0.00956376	0.00851516	0.00576553	0.010437	-0.00704799	0.0196644	0.00237469	0.0121641
104.39	0.0111999	0.00472459	0.00586572	0.0107757	-0.00753549	0.0193275	0.00288688	0.00893297			104.39	0.0111999	0.00472459	0.00586572	0.0107757	-0.00753549	0.0193275	0.00288688	0.00893297
104.6	0.00598128	0.00557452	0.00700295	0.00540111	-0.00958778	0.0189177	0.00070391	0.00915969			104.6	0.00598128	0.00557452	0.00700295	0.00540111	-0.00958778	0.0189177	0.00070391	0.00915969
104.8	0.00952231	0.00337911	0.0063158	0.0101012	-0.0107153	0.0203995	-2.907e-05	0.009243			104.8	0.00952231	0.00337911	0.0063158	0.0101012	-0.0107153	0.0203995	-2.907e-05	0.009243
105	0.00641153	0.00403949	0.00485554	0.0124575	-0.00812887	0.0191877	0.00413553	0.0124483			105	0.00641153	0.00403949	0.00485554	0.0124575	-0.00812887	0.0191877	0.00413553	0.0124483
105.19	0.0101209	0.00426607	0.00595142	0.00889156	-0.00997755	0.0181487	-0.0017369	0.009027			105.19	0.0101209	0.00426607	0.00595142	0.00889156	-0.00997755	0.0181487	-0.0017369	0.009027
105.39	0.00915608	0.0075412	0.00723595	0.0076587	-0.0106518	0.0223795	0.00191917	0.0121784			105.39	0.00915608	0.0075412	0.00723595	0.0076587	-0.0106518	0.0223795	0.00191917	0.0121784
105.6	0.00738129	0.00700405	0.00422849	0.0113491	-0.00609926	0.0174296	0.00218128	0.0132178			105.6	0.00738129	0.00700405	0.00422849	0.0113491	-0.00609926	0.0174296	0.00218128	0.0132178
105.8	0.00973292	0.0100092	0.00608528	0.0107141	-0.0129899	0.0182487	0.0004332	0.0094246			105.8	0.00973292	0.0100092	0.00608528	0.0107141	-0.0129899	0.0182487	0.0004332	0.0094246
106	0.0104281	0.00747352	0.00442069	0.00905276	-0.00973434	0.0200176	0.00154308	0.012646			106	0.0104281	0.00747352	0.00442069	0.00905276	-0.00973434	0.0200176	0.00154308	0.012646
106.19	0.00937216	0.00624487	0.00674413	0.0114732	-0.00854299	0.0186563	0.00465286	0.0138904			106.19	0.00937216	0.00624487	0.00674413	0.0114732	-0.00854299	0.0186563	0.00465286	0.0138904
106.4	0.00952018	0.00674593	0.00837035	0.0086415	-0.00863762	0.0216841	0.00486069	0.01094			106.4	0.00952018	0.00674593	0.00837035	0.0086415	-0.00863762	0.0216841	0.00486069	0.01094
106.6	0.00777402	0.00392395	0.00211224	0.00779879	-0.0116653	0.0214146	-0.0009551	0.0105048			106.6	0.00777402	0.00392395	0.00211224	0.00779879	-0.0116653	0.0214146	-0.0009551	0.0105048
106.8	0.00504989	0.00669548	0.00384719	0.00905419	-0.00994203	0.0231097	-0.00030767	0.00742936			106.8	0.00504989	0.00669548	0.00384719	0.00905419	-0.00994203	0.0231097	-0.00030767	0.00742936
106.99	0.00754717	0.00663867	0.00921365	0.00841252	-0.00984615	0.0190444	0.00137814	0.0106567			106.99	0.00754717	0.00663867	0.00921365	0.00841252	-0.00984615	0.0190444	0.00137814	0.0106567
107.19	0.00968266	0.00307405	0.00621086	0.00962057	-0.00876345	0.0223798	-0.00035831	0.0107826			107.19	0.00968266	0.00307405	0.00621086	0.00962057	-0.00876345	0.0223798	-0.00035831	0.0107826
107.4	0.00593711	0.00742424	0.00699334	0.00826882	-0.010612	0.0174303	0.00085467	0.00997105			107.4	0.00593711	0.00742424	0.00699334	0.00826882	-0.010612	0.0174303	0.00085467	0.00997105
107.59	0.0103093	0.00610198	0.0066083	0.00942929	-0.0118165	0.0179725	0.00201211	0.00774831			107.59	0.0103093	0.00610198	0.0066083	0.00942929	-0.0118165	0.0179725	0.00201211	0.00774831
107.8	0.0108968	0.00793393	0.00764905	0.0098149	-0.00732782	0.0200746	0.00063471	0.010624			107.8	0.0108968	0.00793393	0.00764905	0.0098149	-0.00732782	0.0200746	0.00063471	0.010624
108	0.00646484	0.00486231	0.00610037	0.0102167	-0.00985681	0.0183265	-0.00135287	0.012178			108	0.00646484	0.00486231	0.00610037	0.0102167	-0.00985681	0.0183265	-0.00135287	0.012178
108.19	0.00680143	0.00672692	0.00789701	0.0137001	-0.00733996	0.0218094	0.00141395	0.00998385			108.19	0.00680143	0.00672692	0.00789701	0.0137001	-0.00733996	0.0218094	0.00141395	0.00998385
108.4	0.00836783	0.00393556	0.00398613	0.00797272	-0.00925675	0.0190077	-0.00279635	0.0100761			108.4	0.00836783	0.00393556	0.00398613	0.00797272	-0.00925675	0.0190077	-0.00279635	0.0100761
108.6	0.00799968	0.00845026	0.00537046	0.0104849	-0.0120169	0.0180209	0.00142055	0.00980768			108.6	0.00799968	0.00845026	0.00537046	0.0104849	-0.0120169	0.0180209	0.00142055	0.00980768
108.79	0.00666929	0.00390789	0.00561621	0.0122594	-0.00785923	0.0170583	6.342e-05	0.0109034			108.79	0.00666929	0.00390789	0.00561621	0.0122594	-0.00785923	0.0170583	6.342e-05	0.0109034
109	0.00811162	0.00671082	0.00764265	0.0106636	-0.00902022	0.0192964	-0.00105872	0.00944006			109	0.00811162	0.00671082	0.00764265	0.0106636	-0.00902022	0.0192964	-0.00105872	0.00944006
109.19	0.00827658	0.00401936	0.00732318	0.0111161	-0.00775719	0.0211455	0.00547729	0.0117325			109.19	0.00827658	0.00401936	0.00732318	0.0111161	-0.00775719	0.0211455	0.00547729	0.0117325
109.39	0.00729573	0.00697931	0.00560655	0.00780323	-0.009426	0.0171945	-0.00179051	0.0101491			109.39	0.00729573	0.00697931	0.00560655	0.00780323	-0.009426	0.0171945	-0.00179051	0.0101491
109.6	0.0107088	0.0064174	0.00635725	0.00875077	-0.00958864	0.0197537	-0.00092645	0.0115417			109.6	0.0107088	0.0064174	0.00635725	0.00875077	-0.00958864	0.0197537	-0.00092645	0.0115417
109.8	0.00911839	0.0102515	0.00659362	0.0101127	-0.00901024	0.0190078	-0.00011348	0.00981345			109.8	0.00911839	0.0102515	0.00659362	0.0101127	-0.00901024	0.0190078	-0.00011348	0.00981345
110	0.00893761	0.00856564	0.00877344	0.0113189	-0.00798788	0.0215391	0.00089817	0.0122524			110	0.00893761	0.00856564	0.00877344	0.0113189	-0.00798788	0.0215391	0.00089817	0.0122524
110.19	0.0086539	0.00500033	0.00703495	0.0123342	-0.0077961	0.0189616	-2.74e-06	0.00998285			110.19	0.0086539	0.00500033	0.00703495	0.0123342	-0.0077961	0.0189616	-2.74e-06	0.00998285
110.4	0.00675684	0.00666396	0.00915115	0.00990065	-0.0103192	0.0175215	0.00085842	0.0102902			110.4	0.00675684	0.00666396	0.00915115	0.00990065	-0.0103192	0.0175215	0.00085842	0.0102902
110.6	0.00351112	0.00605989	0.00978137	0.00677919	-0.00640543	0.0214929	-0.00089336	0.00864339			110.6	0.00351112	0.00605989	0.00978137	0.00677919	-0.00640543	0.0214929	-0.00089336	0.00864339
110.8	0.0109309	0.00643199	0.00831663	0.0101918	-0.00653268	0.0247513	0.0017085	0.0118999			110.8	0.0109309	0.00643199	0.00831663	0.0101918	-0.00653268	0.0247513	0.0017085	0.0118999
110.99	0.00991721	0.00661234	0.00457643	0.00954441	-0.00937861	0.0178058	-0.00186469	0.011352			110.99	0.00991721	0.00661234	0.00457643	0.00954441	-0.00937861	0.0178058	-0.00186469	0.011352
111.19	0.0108338	0.00538235	0.00901323	0.00928007	-0.0108141	0.0237557	0.00086682	0.00927617			111.19	0.0108338	0.00538235	0.00901323	0.00928007	-0.0108141	0.0237557	0.00086682	0.00927617
111.4	0.0107503	0.00482902	0.00850501	0.0142169	-0.0102305	0.0231306	0.00401238	0.00751387			111.4	0.0107503	0.00482902	0.00850501	0.0142169	-0.0102305	0.0231306	0.00401238	0.00751387
111.6	0.00988564	0.00859043	0.00413332	0.0118522	-0.0150371	0.0189545	-0.0003345	0.0111996			111.6	0.00988564	0.00859043	0.00413332	0.0118522	-0.0150371	0.0189545	-0.0003345	0.0111996
111.8	0.00700848	0.00661148	0.00542898	0.012209	-0.0103022	0.0202121	-0.00093796	0.00900536			111.8	0.00700848	0.00661148	0.00542898	0.012209	-0.0103022	0.0202121	-0.00093796	0.00900536
111.99	0.00589516	0.00472091	0.00883466	0.00844031	-0.00936634	0.0186156	0.00102438	0.0122072			111.99	0.00589516	0.00472091	0.00883466	0.00844031	-0.00936634	0.0186156	0.00102438	0.0122072
112.19	0.00771399	0.0065194	0.00429106	0.00908477	-0.00969831	0.0195777	-0.00084842	0.00822042			112.19	0.00771399	0.0065194	0.00429106	0.00908477	-0.00969831	0.0195777	-0.00084842	0.00822042
112.4	0.00819487	0.00649019	0.00649935	0.00955358	-0.00708129	0.0214256	-0.00140557	0.0127981			112.4	0.00819487	0.00649019	0.00649935	0.00955358	-0.00708129	0.0214256	-0.00140557	0.0127981
112.6	0.00896396	0.00685829	0.00504495	0.00905334	-0.0127057	0.018725	-0.00154986	0.00879031			112.6	0.00896396	0.00685829	0.00504495	0.00905334	-0.0127057	0.018725	-0.00154986	0.00879031
112.79	0.0105883	0.00757614	0.00523004	0.00633924	-0.0109575	0.0213183	0.00286214	0.0123367			112.79	0.0105883	0.00757614	0.00523004	0.00633924	-0.0109575	0.0213183	0.00286214	0.0123367
112.99	0.00880309	0.00415564	0.00959602	0.00327991	-0.0066249	0.0184299	-0.00092481	0.0114073			112.99	0.00880309	0.00415564	0.00959602	0.00327991	-0.0066249	0.0184299	-0.00092481	0.0114073
113.19	0.00926342	0.00782711	0.00743788	0.00498046	-0.00937076	0.0203679	0.00072971	0.00918723			113.19	0.00926342	0.00782711	0.00743788	0.00498046	-0.00937076	0.0203679	0.00072971	0.00918723
113.39	0.00650162	0.00862865	0.00599587	0.0110352	-0.00931508	0.0211576	-0.00164929	0.00984932			113.39	0.00650162	0.00862865	0.00599587	0.0110352	-0.00931508	0.0211576	-0.00164929	0.00984932
113.59	0.00765346	0.00595618	0.00673574	0.0096639	-0.00784299	0.020977	0.0026102	0.00738989			113.59	0.00765346	0.00595618	0.00673574	0.0096639	-0.00784299	0.020977	0.0026102	0.00738989
113.8	0.00661795	0.00578332	0.0060549	0.00574012	-0.00968237	0.0209491	-0.00167642	0.00884144			113.8	0.00661795	0.00578332	0.0060549	0.00574012	-0.00968237	0.0209491	-0.00167642	0.00884144
114	0.00885384	0.00275106	0.00440226	0.00889227	-0.00978523	0.0208831	-0.00043408	0.0118417			114	0.00885384	0.00275106	0.00440226	0.00889227	-0.00978523	0.0208831	-0.00043408	0.0118417
114.19	0.0107571	0.00660258	0.00815397	0.00830471	-0.0074235	0.0174363	0.00256904	0.0115781			114.19	0.0107571	0.00660258	0.00815397	0.00830471	-0.0074235	0.0174363	0.00256904	0.0115781
114.39	0.00709623	0.00887221	0.00696538	0.0121677	-0.00900622	0.0189118	0.00074415	0.0105404			114.39	0.00709623	0.00887221	0.00696538	0.0121677	-0.00900622	0.0189118	0.00074415	0.0105404
114.6	0.00806796	0.00845789	0.00768272	0.0100655	-0.00827657	0.018797	0.00093888	0.0105077			114.6	0.00806796	0.00845789	0.00768272	0.0100655	-0.00827657	0.018797	0.00093888	0.0105077
114.8	0.00843821	0.00398894	0.00578329	0.00984356	-0.00713097	0.0203886	0.00139362	0.012348			114.8	0.00843821	0.00398894	0.00578329	0.00984356	-0.00713097	0.0203886	0.00139362	0.012348
115	0.00701464	0.00546874	0.00766987	0.0123514	-0.00793758	0.0205119	-0.00066012	0.0132967			115	0.00701464	0.00546874	0.00766987	0.0123514	-0.00793758	0.0205119	-0.00066012	0.0132967
115.19	0.00721869	0.00200511	0.00468129	0.0136221	-0.0106433	0.0198404	0.00180826	0.0109757			115.19	0.00721869	0.00200511	0.00468129	0.0136221	-0.0106433	0.0198404	0.00180826	0.0109757
115.39	0.0118912	0.0080624	0.00444103	0.0112279	-0.0103043	0.0217552	0.00172622	0.00740443			115.39	0.0118912	0.0080624	0.00444103	0.0112279	-0.0103043	0.0217552	0.00172622	0.00740443
115.6	0.011883	0.00919073	0.0073337	0.00699854	-0.0103606	0.0188571	-0.0015547	0.00857061			115.6	0.011883	0.00919073	0.0073337	0.00699854	-0.0103606	0.0188571	-0.0015547	0.00857061
115.8	0.00974153	0.00656527	0.00301066	0.00730043	-0.00914768	0.0226469	-0.00494395	0.0121752			115.8	0.00974153	0.00656527	0.00301066	0.00730043	-0.00914768	0.0226469	-0.00494395	0.0121752
115.99	0.011977	0.0046429	0.00619078	0.00941069	-0.00844381	0.0226618	0.00282099	0.0097633			115.99	0.011977	0.0046429	0.00619078	0.00941069	-0.00844381	0.0226618	0.00282099	0.0097633
116.19	0.0118636	0.00665457	0.00390458	0.00820417	-0.00792646	0.0233794	0.00233063	0.0094252			116.19	0.0118636	0.00665457	0.00390458	0.00820417	-0.00792646	0.0233794	0.00233063	0.0094252
116.4	0.008433	0.0074288	0.00705444	0.01013	-0.00639771	0.023213	-8.972e-05	0.00979435			116.4	0.008433	0.0074288	0.00705444	0.01013	-0.00639771	0.023213	-8.972e-05	0.00979435
116.6	0.00915706	0.00495308	0.00616082	0.00788383	-0.00853676	0.0216245	0.00137668	0.00962427			116.6	0.00915706	0.00495308	0.00616082	0.00788383	-0.00853676	0.0216245	0.00137668	0.00962427
116.79	0.00529858	0.00493178	0.00635074	0.0140769	-0.00630537	0.0183976	0.00235774	0.0122374			116.79	0.00529858	0.00493178	0.00635074	0.0140769	-0.00630537	0.0183976	0.00235774	0.0122374
116.99	0.00967292	0.00966734	0.0119964	0.0090381	-0.00598675	0.020442	0.00147522	0.0113741			116.99	0.00967292	0.00966734	0.0119964	0.0090381	-0.00598675	0.020442	0.00147522	0.0113741
117.19	0.00739491	0.00862362	0.00584983	0.00663713	-0.0121062	0.0244775	0.00255863	0.00911085			117.19	0.00739491	0.00862362	0.00584983	0.00663713	-0.0121062	0.0244775	0.00255863	0.00911085
117.39	0.0103565	0.0116525	0.00614992	0.00958283	-0.00994193	0.0188695	0.00286865	0.0107513			117.39	0.0103565	0.0116525	0.00614992	0.00958283	-0.00994193	0.0188695	0.00286865	0.0107513
117.59	0.00655324	0.00711726	0.00496762	0.014271	-0.00778446	0.0202061	-0.0020808	0.0110326			117.59	0.00655324	0.00711726	0.00496762	0.014271	-0.00778446	0.0202061	-0.0020808	0.0110326
117.79	0.0100183	0.00279245	0.00274311	0.00945923	-0.00828076	0.0218477	-0.00043993	0.0116543			117.79	0.0100183	0.00279245	0.00274311	0.00945923	-0.00828076	0.0218477	-0.00043993	0.0116543
118	0.00749328	0.00580096	0.00753208	0.00747985	-0.00924014	0.0195769	0.00404265	0.014577			118	0.00749328	0.00580096	0.00753208	0.00747985	-0.00924014	0.0195769	0.00404265	0.014577
118.19	0.00799186	0.00514211	0.00808029	0.00835446	-0.0057663	0.0164515	-5.151e-05	0.0116541			118.19	0.00799186	0.00514211	0.00808029	0.00835446	-0.0057663	0.0164515	-5.151e-05	0.0116541
118.39	0.00343509	0.00911807	0.00313631	0.0101058	-0.00741039	0.0204011	0.00128259	0.0107844			118.39	0.00343509	0.00911807	0.00313631	0.0101058	-0.00741039	0.0204011	0.00128259	0.0107844
118.59	0.00947568	0.0055502	0.00390746	0.00964169	-0.00914174	0.0200621	0.00043506	0.0130162			118.59	0.00947568	0.0055502	0.00390746	0.00964169	-0.00914174	0.0200621	0.00043506	0.0130162
118.79	0.00853854	0.00432556	0.00481359	0.00910109	-0.0103006	0.0197972	0.00234893	0.00880883			118.79	0.00853854	0.00432556	0.00481359	0.00910109	-0.0103006	0.0197972	0.00234893	0.00880883
118.99	0.00833538	0.00926448	0.00522989	0.00920214	-0.00980236	0.0178365	0.00185626	0.00749957			118.99	0.00833538	0.00926448	0.00522989	0.00920214	-0.00980236	0.0178365	0.00185626	0.00749957
119.19	0.0100704	0.0107284	0.00917607	0.0121415	-0.00545646	0.0191384	0.00371702	0.00919152			119.19	0.0100704	0.0107284	0.00917607	0.0121415	-0.00545646	0.0191384	0.00371702	0.00919152
119.39	0.00785211	0.0128903	0.00436932	0.0114649	-0.0102567	0.0183582	0.00043058	0.00730847			119.39	0.00785211	0.0128903	0.00436932	0.0114649	-0.0102567	0.0183582	0.00043058	0.00730847
119.59	0.00949559	0.0017696	0.00755872	0.00849617	-0.0112172	0.0209438	0.00459218	0.0115511			119.59	0.00949559	0.0017696	0.00755872	0.00849617	-0.0112172	0.0209438	0.00459218	0.0115511
119.8	0.00608643	0.0121789	0.0102977	0.0127923	-0.00907273	0.0249329	-0.00312388	0.0066006			119.8	0.00608643	0.0121789	0.0102977	0.0127923	-0.00907273	0.0249329	-0.00312388	0.0066006
119.99	0.00910739	0.00831488	0.00301361	0.00799296	-0.0117851	0.0201306	-0.00210073	0.0106939			119.99	0.00910739	0.00831488	0.00301361	0.00799296	-0.0117851	0.0201306	-0.00210073	0.0106939
120.19	0.00962823	0.00593201	0.00647526	0.0069308	-0.00613362	0.0207185	0.0031421	0.0122286			120.19	0.00962823	0.00593201	0.00647526	0.0069308	-0.00613362	0.0207185	0.0031421	0.0122286
120.39	0.00306228	0.0048996	0.00555322	0.00859107	-0.00889192	0.0230321	0.00168496	0.0109777			120.39	0.00306228	0.0048996	0.00555322	0.00859107	-0.00889192	0.0230321	0.00168496	0.0109777
120.6	0.00995509	0.00474536	0.00614315	0.0107886	-0.00981528	0.0191256	0.00087643	0.00769807			120.6	0.00995509	0.00474536	0.00614315	0.0107886	-0.00981528	0.0191256	0.00087643	0.00769807
120.79	0.0068646	0.00683886	0.0073616	0.00925506	-0.0108918	0.0192399	-0.00028931	0.00975911			120.79	0.0068646	0.00683886	0.0073616	0.00925506	-0.0108918	0.0192399	-0.00028931	0.00975911
120.99	0.00865163	0.0103055	0.00828686	0.0121368	-0.00640991	0.0198673	-0.00075188	0.00848305			120.99	0.00865163	0.0103055	0.00828686	0.0121368	-0.00640991	0.0198673	-0.00075188	0.00848305
121.19	0.00596854	0.00645245	0.00327961	0.00911993	-0.00952562	0.0170333	0.00335884	0.0093317			121.19	0.00596854	0.00645245	0.00327961	0.00911993	-0.00952562	0.0170333	0.00335884	0.0093317
121.39	0.00916381	0.00923081	0.00580881	0.0102651	-0.00802364	0.0182682	-0.00156222	0.00735959			121.39	0.00916381	0.00923081	0.00580881	0.0102651	-0.00802364	0.0182682	-0.00156222	0.00735959
121.59	0.0111001	0.00779573	0.00576324	0.0117938	-0.0102372	0.019768	0.00039849	0.0129727			121.59	0.0111001	0.00779573	0.00576324	0.0117938	-0.0102372	0.019768	0.00039849	0.0129727
121.79	0.00603474	0.00702426	0.00311672	0.00932514	-0.0103101	0.0163336	0.00244201	0.00890516			121.79	0.00603474	0.00702426	0.00311672	0.00932514	-0.0103101	0.0163336	0.00244201	0.00890516
121.99	0.00888441	0.00905095	0.00827792	0.0108343	-0.0106237	0.0190682	0.00055574	0.013262			121.99	0.00888441	0.00905095	0.00827792	0.0108343	-0.0106237	0.0190682	0.00055574	0.013262
122.19	0.00297289	0.00531007	0.00757038	0.00749892	-0.0109548	0.0182983	0.000163	0.0126248			122.19	0.00297289	0.00531007	0.00757038	0.00749892	-0.0109548	0.0182983	0.000163	0.0126248
122.39	0.00906425	0.0077343	0.00570499	0.00719853	-0.00599287	0.0184984	-0.00036957	0.011369			122.39	0.00906425	0.0077343	0.00570499	0.00719853	-0.00599287	0.0184984	-0.00036957	0.011369
122.6	0.00847396	0.00939219	0.0068462	0.00614366	-0.00875744	0.0190675	-0.0002724	0.00766118			122.6	0.00847396	0.00939219	0.0068462	0.00614366	-0.00875744	0.0190675	-0.0002724	0.00766118
122.79	0.00590687	0.00726657	0.00713417	0.0102764	-0.00985277	0.0199827	-0.00440515	0.00790225			122.79	0.00590687	0.00726657	0.00713417	0.0102764	-0.00985277	0.0199827	-0.00440515	0.00790225
122.99	0.00626547	0.00650105	0.00521862	0.0100114	-0.0135024	0.0205795	-0.00178103	0.0108524			122.99	0.00626547	0.00650105	0.00521862	0.0100114	-0.0135024	0.0205795	-0.00178103	0.0108524
123.19	0.00890354	0.00760892	0.0062831	0.0106445	-0.0124839	0.0205052	-0.00159748	0.0097086			123.19	0.00890354	0.00760892	0.0062831	0.0106445	-0.0124839	0.0205052	-0.00159748	0.0097086
123.39	0.0077054	0.00524767	0.00602495	0.00984677	-0.00860118	0.0218147	-0.00119414	0.0147609			123.39	0.0077054	0.00524767	0.00602495	0.00984677	-0.00860118	0.0218147	-0.00119414	0.0147609
123.59	0.00812336	0.00530426	0.0102427	0.0104907	-0.0100013	0.0236999	-0.00094152	0.0107211			123.59	0.00812336	0.00530426	0.0102427	0.0104907	-0.0100013	0.0236999	-0.00094152	0.0107211
123.79	0.00616342	0.00696779	0.00945685	0.0113767	-0.008712	0.0201718	-0.00224694	0.011544			123.79	0.00616342	0.00696779	0.00945685	0.0113767	-0.008712	0.0201718	-0.00224694	0.011544
123.99	0.00578608	0.00987388	0.00485272	0.00825591	-0.00834081	0.0175172	0.0011496	0.012481			123.99	0.00578608	0.00987388	0.00485272	0.00825591	-0.00834081	0.0175172	0.0011496	0.012481
124.19	0.0051338	0.00606119	0.0017475	0.00785529	-0.00938821	0.020259	0.00177166	0.0102659			124.19	0.0051338	0.00606119	0.0017475	0.00785529	-0.00938821	0.020259	0.00177166	0.0102659
124.39	0.00665962	0.0107669	0.00515304	0.00962602	-0.00959974	0.0184971	0.00202526	0.0118563			124.39	0.00665962	0.0107669	0.00515304	0.00962602	-0.00959974	0.0184971	0.00202526	0.0118563
124.6	0.00781178	0.00381668	0.00668318	0.00849475	-0.00816779	0.0188109	0.00322866	0.0119588			124.6	0.00781178	0.00381668	0.00668318	0.00849475	-0.00816779	0.0188109	0.00322866	0.0119588
124.79	0.00714048	0.0109519	0.00379425	0.00682705	-0.0108501	0.0168451	-0.00053753	0.00815614			124.79	0.00714048	0.0109519	0.00379425	0.00682705	-0.0108501	0.0168451	-0.00053753	0.00815614
124.99	0.00541889	0.00865712	0.00603585	0.0102981	-0.0104699	0.0209079	-0.00262699	0.00781748			124.99	0.00541889	0.00865712	0.00603585	0.0102981	-0.0104699	0.0209079	-0.00262699	0.00781748
125.19	0.00772085	0.00928909	0.0032603	0.00624753	-0.0119752	0.0224296	-0.00266824	0.0112584			125.19	0.00772085	0.00928909	0.0032603	0.00624753	-0.0119752	0.0224296	-0.00266824	0.0112584
125.39	0.0104703	0.00671696	0.00991766	0.00941747	-0.00557945	0.0213	-0.00373799	0.010395			125.39	0.0104703	0.00671696	0.00991766	0.00941747	-0.00557945	0.0213	-0.00373799	0.010395
125.59	0.00703402	0.00529551	0.00774705	0.0101851	-0.00961494	0.0182097	-0.00034104	0.0112729			125.59	0.00703402	0.00529551	0.00774705	0.0101851	-0.00961494	0.0182097	-0.00034104	0.0112729
125.79	0.00926866	0.00330873	0.00592442	0.00778923	-0.00781087	0.0221761	-0.00237997	0.00556738			125.79	0.00926866	0.00330873	0.00592442	0.00778923	-0.00781087	0.0221761	-0.00237997	0.00556738
125.99	0.00835298	0.00774145	0.00622977	0.00839664	-0.00893151	0.0178902	0.0008697	0.0108086			125.99	0.00835298	0.00774145	0.00622977	0.00839664	-0.00893151	0.0178902	0.0008697	0.0108086
126.19	0.0109831	0.00945852	0.00442528	0.0113936	-0.0117069	0.0199952	-0.00222946	0.00879933			126.19	0.0109831	0.00945852	0.00442528	0.0113936	-0.0117069	0.0199952	-0.00222946	0.00879933
126.39	0.00847964	0.00590915	0.00490727	0.00718153	-0.0112283	0.020431	-0.00079199	0.00981622			126.39	0.00847964	0.00590915	0.00490727	0.00718153	-0.0112283	0.020431	-0.00079199	0.00981622
126.59	0.00658643	0.00687384	0.0103964	0.00893935	-0.0115843	0.0219658	-0.00184617	0.0112188			126.59	0.00658643	0.00687384	0.0103964	0.00893935	-0.0115843	0.0219658	-0.00184617	0.0112188
126.79	0.00884458	0.00744905	0.00547505	0.0107129	-0.00867347	0.0202528	-0.00070072	0.0103772			126.79	0.00884458	0.00744905	0.00547505	0.0107129	-0.00867347	0.0202528	-0.00070072	0.0103772
126.99	0.00624986	0.00822355	0.00392947	0.00686491	-0.0106228	0.0210197	-0.00026937	0.012389			126.99	0.00624986	0.00822355	0.00392947	0.00686491	-0.0106228	0.0210197	-0.00026937	0.012389
127.19	0.00876618	0.00838265	0.00791287	0.00910061	-0.00738595	0.0223188	0.00337224	0.0105866			127.19	0.00876618	0.00838265	0.00791287	0.00910061	-0.00738595	0.0223188	0.00337224	0.0105866
127.39	0.00579978	0.00672875	0.00931039	0.00974951	-0.00800486	0.0200296	-0.0002663	0.0121722			127.39	0.00579978	0.00672875	0.00931039	0.00974951	-0.00800486	0.0200296	-0.0002663	0.0121722
127.59	0.00729047	0.00868549	0.00523365	0.00837037	-0.00670903	0.0208016	0.00290767	0.0104918			127.59	0.00729047	0.00868549	0.00523365	0.00837037	-0.00670903	0.0208016	0.00290767	0.0104918
127.8	0.00831494	0.00854916	0.00421843	0.00940085	-0.00876966	0.0200205	0.00146041	0.00840268			127.8	0.00831494	0.00854916	0.00421843	0.00940085	-0.00876966	0.0200205	0.00146041	0.00840268
128	0.00962817	0.0109137	0.00655104	0.0110424	-0.00886476	0.020425	-0.0037869	0.0127507			128	0.00962817	0.0109137	0.00655104	0.0110424	-0.00886476	0.020425	-0.0037869	0.0127507
128.19	0.00409842	0.00810449	0.00610326	0.00631748	-0.0102197	0.0219333	-0.00213144	0.00890653			128.19	0.00409842	0.00810449	0.00610326	0.00631748	-0.0102197	0.0219333	-0.00213144	0.00890653
128.39	0.0075859	0.00715444	0.0110833	0.00936859	-0.00810121	0.021153	-0.00186597	0.0127438			128.39	0.0075859	0.00715444	0.0110833	0.00936859	-0.00810121	0.021153	-0.00186597	0.0127438
128.6	0.0116243	0.00591445	0.00693835	0.0113742	-0.00777084	0.0204735	-0.00355037	0.0103143			128.6	0.0116243	0.00591445	0.00693835	0.0113742	-0.00777084	0.0204735	-0.00355037	0.0103143
128.79	0.00599544	0.00826746	0.00759435	0.0114882	-0.00677049	0.0214778	-0.00286883	0.0116994			128.79	0.00599544	0.00826746	0.00759435	0.0114882	-0.00677049	0.0214778	-0.00286883	0.0116994
128.99	0.00826217	0.00907088	0.0128499	0.00994512	-0.00998493	0.0177593	0.0009042	0.00595805			128.99	0.00826217	0.00907088	0.0128499	0.00994512	-0.00998493	0.0177593	0.0009042	0.00595805
129.19	0.00622907	0.00534619	0.0051274	0.0090766	-0.00836244	0.0153393	0.00190245	0.0116089			129.19	0.00622907	0.00534619	0.0051274	0.0090766	-0.00836244	0.0153393	0.00190245	0.0116089
129.39	0.00614924	0.009318	0.00628088	0.00633302	-0.0112005	0.0211301	-1.287e-05	0.00874002			129.39	0.00614924	0.009318	0.00628088	0.00633302	-0.0112005	0.0211301	-1.287e-05	0.00874002
129.6	0.00630814	0.00750755	0.0096115	0.00803893	-0.00804043	0.0174038	0.00023817	0.0111425			129.6	0.00630814	0.00750755	0.0096115	0.00803893	-0.00804043	0.0174038	0.00023817	0.0111425
129.79	0.00514228	0.00691101	0.00631612	0.0073748	-0.0096582	0.0203579	-0.00063873	0.00705753			129.79	0.00514228	0.00691101	0.00631612	0.0073748	-0.0096582	0.0203579	-0.00063873	0.00705753
129.99	0.00620465	0.00658595	0.00661838	0.00838292	-0.0115238	0.0183745	-0.00352246	0.00931965			129.99	0.00620465	0.00658595	0.00661838	0.00838292	-0.0115238	0.0183745	-0.00352246	0.00931965
130.19	0.0103912	0.0119872	0.00362868	0.0108063	-0.00923625	0.0201321	-0.0039896	0.011049			130.19	0.0103912	0.0119872	0.00362868	0.0108063	-0.00923625	0.0201321	-0.0039896	0.011049
130.39	0.0112549	0.00500888	0.00589993	0.0105951	-0.00839655	0.0185838	-8.752e-05	0.0101881			130.39	0.0112549	0.00500888	0.00589993	0.0105951	-0.00839655	0.0185838	-8.752e-05	0.0101881
130.59	0.00587105	0.00489779	0.00627975	0.00707509	-0.00760232	0.019849	-0.00119291	0.00758938			130.59	0.00587105	0.00489779	0.00627975	0.00707509	-0.00760232	0.019849	-0.00119291	0.00758938
130.79	0.00596786	0.00804076	0.0047978	0.0110159	-0.00759214	0.018922	-0.00285235	0.00920911			130.79	0.00596786	0.00804076	0.0047978	0.0110159	-0.00759214	0.018922	-0.00285235	0.00920911
130.99	0.00729145	0.00686821	0.00668294	0.00774916	-0.00820045	0.0200695	-0.00193773	0.0103355			130.99	0.00729145	0.00686821	0.00668294	0.00774916	-0.00820045	0.0200695	-0.00193773	0.0103355
131.19	0.00531932	0.00844001	0.00949323	0.0119743	-0.00871966	0.0217272	-0.0003406	0.0102123			131.19	0.00531932	0.00844001	0.00949323	0.0119743	-0.00871966	0.0217272	-0.0003406	0.0102123
131.39	0.0063908	0.00497157	0.00423805	0.00864095	-0.010924	0.0196722	-0.0007306	0.00984375			131.39	0.0063908	0.00497157	0.00423805	0.00864095	-0.010924	0.0196722	-0.0007306	0.00984375
131.6	0.00860815	0.00848973	0.00494935	0.0085998	-0.00700056	0.0180693	-0.00084349	0.00852352			131.6	0.00860815	0.00848973	0.00494935	0.0085998	-0.00700056	0.0180693	-0.00084349	0.00852352
131.79	0.00802192	0.00687761	0.00924668	0.0143038	-0.0103311	0.022797	0.00111311	0.0126495			131.79	0.00802192	0.00687761	0.00924668	0.0143038	-0.0103311	0.022797	0.00111311	0.0126495
131.99	0.00837866	0.0104585	0.00724778	0.0086068	-0.00959038	0.0189956	-0.00316037	0.0100477			131.99	0.00837866	0.0104585	0.00724778	0.0086068	-0.00959038	0.0189956	-0.00316037	0.0100477
132.19	0.00855857	0.012012	0.00818454	0.0119957	-0.00957364	0.0215064	-0.00236934	0.0120021			132.19	0.00855857	0.012012	0.00818454	0.0119957	-0.00957364	0.0215064	-0.00236934	0.0120021
132.39	0.00965437	0.00681183	0.00529619	0.00986372	-0.0104512	0.018629	-0.0016032	0.00931374			132.39	0.00965437	0.00681183	0.00529619	0.00986372	-0.0104512	0.018629	-0.0016032	0.00931374
132.6	0.0104319	0.0067927	0.0073955	0.00936137	-0.00427262	0.020282	-0.00038351	0.0102796			132.6	0.0104319	0.0067927	0.0073955	0.00936137	-0.00427262	0.020282	-0.00038351	0.0102796
132.79	0.00601131	0.00559677	0.00367583	0.00764596	-0.0082294	0.0211222	0.00273349	0.00959417			132.79	0.00601131	0.00559677	0.00367583	0.00764596	-0.0082294	0.0211222	0.00273349	0.00959417
132.99	0.00653719	0.0115984	0.00597721	0.00998178	-0.00855177	0.0197299	-0.00316717	0.0116785			132.99	0.00653719	0.0115984	0.00597721	0.00998178	-0.00855177	0.0197299	-0.00316717	0.0116785
133.19	0.0104278	0.00741014	0.00011641	0.00771838	-0.0108956	0.021587	-0.00019667	0.0102724			133.19	0.0104278	0.00741014	0.00011641	0.00771838	-0.0108956	0.021587	-0.00019667	0.0102724
133.39	0.00648605	0.00650522	0.00877274	0.00890342	-0.00804717	0.018728	-0.00225661	0.0052705			133.39	0.00648605	0.00650522	0.00877274	0.00890342	-0.00804717	0.018728	-0.00225661	0.0052705
133.6	0.00479175	0.00564631	0.0043643	0.0130339	-0.00660601	0.0242543	0.00026114	0.0122902			133.6	0.00479175	0.00564631	0.0043643	0.0130339	-0.00660601	0.0242543	0.00026114	0.0122902
133.79	0.00639164	0.00805899	0.00762071	0.00957886	-0.0105954	0.0209271	-0.00060886	0.00925653			133.79	0.00639164	0.00805899	0.00762071	0.00957886	-0.0105954	0.0209271	-0.00060886	0.00925653
133.99	0.00849538	0.00399018	0.00446441	0.00908039	-0.011144	0.0162378	-0.00380524	0.0106525			133.99	0.00849538	0.00399018	0.00446441	0.00908039	-0.011144	0.0162378	-0.00380524	0.0106525
134.19	0.0107241	0.0083223	0.00547532	0.00967616	-0.00766432	0.01911	-0.00113647	0.00914709			134.19	0.0107241	0.0083223	0.00547532	0.00967616	-0.00766432	0.01911	-0.00113647	0.00914709
134.39	0.00793921	0.00942218	0.00921455	0.00646839	-0.0108421	0.0220745	-0.00067015	0.0105814			134.39	0.00793921	0.00942218	0.00921455	0.00646839	-0.0108421	0.0220745	-0.00067015	0.0105814
134.59	0.00626027	0.00647883	0.00432368	0.0118856	-0.00956944	0.0209243	0.00017152	0.00867495			134.59	0.00626027	0.00647883	0.00432368	0.0118856	-0.00956944	0.0209243	0.00017152	0.00867495
134.79	0.0106754	0.00612791	0.00576383	0.0112537	-0.00843815	0.019831	-0.00372931	0.0102642			134.79	0.0106754	0.00612791	0.00576383	0.0112537	-0.00843815	0.019831	-0.00372931	0.0102642
134.99	0.00820055	0.00865435	0.00302849	0.0067387	-0.00869352	0.0199868	0.00065389	0.00909694			134.99	0.00820055	0.00865435	0.00302849	0.0067387	-0.00869352	0.0199868	0.00065389	0.00909694
135.19	0.00650151	0.00702409	0.00612391	0.00961898	-0.0120835	0.0208014	-0.00069477	0.00544756			135.19	0.00650151	0.00702409	0.00612391	0.00961898	-0.0120835	0.0208014	-0.00069477	0.00544756
135.39	0.00916321	0.00782694	0.0075043	0.00670337	-0.010377	0.019441	-6.812e-05	0.0106221			135.39	0.00916321	0.00782694	0.0075043	0.00670337	-0.010377	0.019441	-6.812e-05	0.0106221
135.6	0.00846379	0.00411544	0.00735945	0.00728273	-0.00960441	0.0198627	-0.00265147	0.00981096			135.6	0.00846379	0.00411544	0.00735945	0.00728273	-0.00960441	0.0198627	-0.00265147	0.00981096
135.79	0.00897224	0.00463307	0.00532234	0.0114522	-0.0105138	0.0197243	-0.00288304	0.00994126			135.79	0.00897224	0.00463307	0.00532234	0.0114522	-0.0105138	0.0197243	-0.00288304	0.00994126
135.99	0.0083152	0.00356084	0.00684917	0.00933898	-0.0107409	0.0186194	0.00148951	0.00944237			135.99	0.0083152	0.00356084	0.00684917	0.00933898	-0.0107409	0.0186194	0.00148951	0.00944237
136.19	0.00825571	0.00792216	0.00252576	0.00942218	-0.00881577	0.0191758	0.00040849	0.00968027			136.19	0.00825571	0.00792216	0.00252576	0.00942218	-0.00881577	0.0191758	0.00040849	0.00968027
136.39	0.00705325	0.00979862	0.00682279	0.0114303	-0.00774379	0.0154748	-0.00224725	0.0097568			136.39	0.00705325	0.00979862	0.00682279	0.0114303	-0.00774379	0.0154748	-0.00224725	0.0097568
136.59	0.00675879	0.00215212	0.0041822	0.00845998	-0.0110157	0.020068	2.1e-07	0.0124391			136.59	0.00675879	0.00215212	0.0041822	0.00845998	-0.0110157	0.020068	2.1e-07	0.0124391
136.79	0.00977462	0.00486021	0.00679602	0.00462019	-0.0116718	0.0220506	0.00020206	0.00923304			136.79	0.00977462	0.00486021	0.00679602	0.00462019	-0.0116718	0.0220506	0.00020206	0.00923304
136.99	0.00927104	0.0085679	0.007171	0.00858352	-0.00863289	0.0221792	0.00036614	0.0111327			136.99	0.00927104	0.0085679	0.007171	0.00858352	-0.00863289	0.0221792	0.00036614	0.0111327
137.19	0.00857207	0.00629711	0.00458896	0.00999414	-0.00804921	0.0193541	-0.00095005	0.00811684			137.19	0.00857207	0.00629711	0.00458896	0.00999414	-0.00804921	0.0193541	-0.00095005	0.00811684
137.39	0.00469712	0.00724448	0.00481923	0.0103254	-0.0104804	0.0194511	-0.00275883	0.00958392			137.39	0.00469712	0.00724448	0.00481923	0.0103254	-0.0104804	0.0194511	-0.00275883	0.00958392
137.6	0.0090949	0.0102021	0.00993584	0.00831771	-0.00860662	0.0222881	-0.00367637	0.013238			137.6	0.0090949	0.0102021	0.00993584	0.00831771	-0.00860662	0.0222881	-0.00367637	0.013238
137.79	0.00637123	0.00711397	0.00463485	0.0100065	-0.00889999	0.0236258	-0.0019769	0.00784429			137.79	0.00637123	0.00711397	0.00463485	0.0100065	-0.00889999	0.0236258	-0.0019769	0.00784429
137.99	0.00713436	0.00603249	0.0055723	0.0092599	-0.0108916	0.0171036	-0.00030353	0.00869558			137.99	0.00713436	0.00603249	0.0055723	0.0092599	-0.0108916	0.0171036	-0.00030353	0.00869558
138.19	0.00667756	0.00787927	0.00992238	0.00884266	-0.012281	0.0215502	-0.0022502	0.00863714			138.19	0.00667756	0.00787927	0.00992238	0.00884266	-0.012281	0.0215502	-0.0022502	0.00863714
138.39	0.00801776	0.00726089	0.00384754	0.0130014	-0.00762224	0.0178302	-0.00119078	0.00678398			138.39	0.00801776	0.00726089	0.00384754	0.0130014	-0.00762224	0.0178302	-0.00119078	0.00678398
138.6	0.00559888	0.00568548	0.00561105	0.00730452	-0.00718544	0.0169086	-0.00106446	0.00810729			138.6	0.00559888	0.00568548	0.00561105	0.00730452	-0.00718544	0.0169086	-0.00106446	0.00810729
138.79	0.00982114	0.00628764	0.00875044	0.0122793	-0.0088547	0.0218973	-0.00041895	0.0101013			138.79	0.00982114	0.00628764	0.00875044	0.0122793	-0.0088547	0.0218973	-0.00041895	0.0101013
138.99	0.00603361	0.00653839	0.00553743	0.0105908	-0.00776257	0.0219799	-0.00275209	0.0101304			138.99	0.00603361	0.00653839	0.00553743	0.0105908	-0.00776257	0.0219799	-0.00275209	0.0101304
139.19	0.00997654	0.00595733	0.00127673	0.00925157	-0.00934317	0.0195829	-0.00101267	0.00938345			139.19	0.00997654	0.00595733	0.00127673	0.00925157	-0.00934317	0.0195829	-0.00101267	0.00938345
139.39	0.00917188	0.00888174	0.00649713	0.00617027	-0.0102127	0.0214401	0.00062772	0.0100383			139.39	0.00917188	0.00888174	0.00649713	0.00617027	-0.0102127	0.0214401	0.00062772	0.0100383
139.6	0.00693267	0.0050464	0.00793707	0.0108037	-0.00977975	0.0187424	-0.00249303	0.00806696			139.6	0.00693267	0.0050464	0.00793707	0.0108037	-0.00977975	0.0187424	-0.00249303	0.00806696
139.79	0.00890265	0.00350794	0.00534779	0.00630429	-0.00796211	0.0184917	-0.00367696	0.00665243			139.79	0.00890265	0.00350794	0.00534779	0.00630429	-0.00796211	0.0184917	-0.00367696	0.00665243
139.99	0.00841874	0.00887362	0.00441645	0.00878661	-0.00836354	0.0210004	-0.00155383	0.00919735			139.99	0.00841874	0.00887362	0.00441645	0.00878661	-0.00836354	0.0210004	-0.00155383	0.00919735
140.19	0.00721724	0.00912824	0.0047173	0.0107612	-0.00592136	0.0185685	-0.00475811	0.00994452			140.19	0.00721724	0.00912824	0.0047173	0.0107612	-0.00592136	0.0185685	-0.00475811	0.00994452
140.39	0.00568855	0.00662945	0.00420445	0.00890734	-0.00809174	0.0204235	-0.00179112	0.0106217			140.39	0.00568855	0.00662945	0.00420445	0.00890734	-0.00809174	0.0204235	-0.00179112	0.0106217
140.59	0.00957106	0.00886856	0.00916043	0.00739074	-0.00798543	0.0190585	0.00038293	0.00952446			140.59	0.00957106	0.00886856	0.00916043	0.00739074	-0.00798543	0.0190585	0.00038293	0.00952446
140.79	0.00609687	0.00719369	0.00811754	0.00554084	-0.00762648	0.0200109	-0.00235546	0.012201			140.79	0.00609687	0.00719369	0.00811754	0.00554084	-0.00762648	0.0200109	-0.00235546	0.012201
140.99	0.00627634	0.00585544	0.00685593	0.00767952	-0.00599386	0.0216243	-0.00343342	0.00714915			140.99	0.00627634	0.00585544	0.00685593	0.00767952	-0.00599386	0.0216243	-0.00343342	0.00714915
141.19	0.00726242	0.00798076	0.00742638	0.0116446	-0.00742427	0.0186225	-0.00509287	0.0127399			141.19	0.00726242	0.00798076	0.00742638	0.0116446	-0.00742427	0.0186225	-0.00509287	0.0127399
141.39	0.0101123	0.00854511	0.00731605	0.0111403	-0.0113063	0.0164693	0.00063995	0.00836061			141.39	0.0101123	0.00854511	0.00731605	0.0111403	-0.0113063	0.0164693	0.00063995	0.00836061
141.6	0.0085871	0.00813665	0.00516012	0.00682133	-0.0106046	0.0224264	-0.00251403	0.0130914			141.6	0.0085871	0.00813665	0.00516012	0.00682133	-0.0106046	0.0224264	-0.00251403	0.0130914
141.79	0.00644832	0.00969441	0.00648483	0.00811432	-0.00969439	0.0217985	-0.00053045	0.0074842			141.79	0.00644832	0.00969441	0.00648483	0.00811432	-0.00969439	0.0217985	-0.00053045	0.0074842
141.99	0.00627768	0.0108875	0.0065234	0.0123599	-0.0083374	0.0213249	0.00185491	0.00852829			141.99	0.00627768	0.0108875	0.0065234	0.0123599	-0.0083374	0.0213249	0.00185491	0.00852829
142.19	0.0088415	0.00636695	0.00474113	0.0100405	-0.00543029	0.021669	-0.00114603	0.00995583			142.19	0.0088415	0.00636695	0.00474113	0.0100405	-0.00543029	0.021669	-0.00114603	0.00995583
142.39	0.00691923	0.00622625	0.00598582	0.00821963	-0.00643555	0.0200557	-9.942e-05	0.00891759			142.39	0.00691923	0.00622625	0.00598582	0.00821963	-0.00643555	0.0200557	-9.942e-05	0.00891759
142.6	0.00550676	0.0138296	0.0033844	0.0100688	-0.00945402	0.0252697	-0.00056465	0.00750613			142.6	0.00550676	0.0138296	0.0033844	0.0100688	-0.00945402	0.0252697	-0.00056465	0.00750613
142.79	0.00839155	0.0046057	0.00563887	0.0101385	-0.00799826	0.0200451	0.00249668	0.0113164			142.79	0.00839155	0.0046057	0.00563887	0.0101385	-0.00799826	0.0200451	0.00249668	0.0113164
142.99	0.0095168	0.00783609	0.00556969	0.00982329	-0.0104405	0.020663	-0.00073687	0.00911898			142.99	0.0095168	0.00783609	0.00556969	0.00982329	-0.0104405	0.020663	-0.00073687	0.00911898
143.19	0.00419183	0.00931344	0.00676689	0.0127764	-0.0101928	0.018584	-0.00254335	0.0104045			143.19	0.00419183	0.00931344	0.00676689	0.0127764	-0.0101928	0.018584	-0.00254335	0.0104045
143.39	0.00914454	0.00970639	0.00934256	0.0119061	-0.00961406	0.0177047	-0.00115358	0.00891334			143.39	0.00914454	0.00970639	0.00934256	0.0119061	-0.00961406	0.0177047	-0.00115358	0.00891334
143.6	0.0090551	0.00666487	0.00639654	0.0086526	-0.0103115	0.0218702	-0.00461535	0.0105493			143.6	0.0090551	0.00666487	0.00639654	0.0086526	-0.0103115	0.0218702	-0.00461535	0.0105493
143.79	0.00833641	0.00801735	0.00368187	0.00921666	-0.0094393	0.0219644	-2.585e-05	0.00552031			143.79	0.00833641	0.00801735	0.00368187	0.00921666	-0.0094393	0.0219644	-2.585e-05	0.00552031
143.99	0.00790307	0.00682785	0.00434059	0.00701409	-0.00812271	0.020321	-0.00073138	0.0108637			143.99	0.00790307	0.00682785	0.00434059	0.00701409	-0.00812271	0.020321	-0.00073138	0.0108637
144.19	0.00780963	0.00581592	0.00473131	0.0105047	-0.00684838	0.0202798	0.00049128	0.00853152			144.19	0.00780963	0.00581592	0.00473131	0.0105047	-0.00684838	0.0202798	0.00049128	0.00853152
144.39	0.00912018	0.00644836	0.00754617	0.00930879	-0.0111573	0.0180902	-0.00032528	0.00979047			144.39	0.00912018	0.00644836	0.00754617	0.00930879	-0.0111573	0.0180902	-0.00032528	0.00979047
144.59	0.00735747	0.00761121	0.00508532	0.00778539	-0.00864215	0.0202814	-0.00143804	0.013171			144.59	0.00735747	0.00761121	0.00508532	0.00778539	-0.00864215	0.0202814	-0.00143804	0.013171
144.79	0.00573271	0.00521457	0.00975172	0.0100636	-0.00973199	0.0209398	-0.00486008	0.00772875			144.79	0.00573271	0.00521457	0.00975172	0.0100636	-0.00973199	0.0209398	-0.00486008	0.00772875
144.99	0.00956558	0.00440685	0.00107303	0.00871157	-0.0115055	0.0188423	-0.00239563	0.0106253			144.99	0.00956558	0.00440685	0.00107303	0.00871157	-0.0115055	0.0188423	-0.00239563	0.0106253
145.19	0.0107078	0.0057848	0.00698485	0.0111458	-0.0129832	0.0207563	-0.00236431	0.0108305			145.19	0.0107078	0.0057848	0.00698485	0.0111458	-0.0129832	0.0207563	-0.00236431	0.0108305
145.39	0.0105743	0.0116674	0.00357616	0.00773344	-0.00763444	0.0196762	-0.00064324	0.00985247			145.39	0.0105743	0.0116674	0.00357616	0.00773344	-0.00763444	0.0196762	-0.00064324	0.00985247
145.6	0.0129168	0.00586865	0.0079624	0.013248	-0.00606319	0.0182326	0.00164495	0.0111845			145.6	0.0129168	0.00586865	0.0079624	0.013248	-0.00606319	0.0182326	0.00164495	0.0111845
145.79	0.00887466	0.00713305	0.00863335	0.0135267	-0.0125872	0.0173684	-0.0017449	0.0116006			145.79	0.00887466	0.00713305	0.00863335	0.0135267	-0.0125872	0.0173684	-0.0017449	0.0116006
145.99	0.00880808	0.00668507	0.00667435	0.0126668	-0.011309	0.0191664	-0.00219023	0.00838921			145.99	0.00880808	0.00668507	0.00667435	0.0126668	-0.011309	0.0191664	-0.00219023	0.00838921
146.19	0.00815805	0.00631261	0.00387441	0.012638	-0.0117496	0.0217513	-0.00617632	0.00567351			146.19	0.00815805	0.00631261	0.00387441	0.012638	-0.0117496	0.0217513	-0.00617632	0.00567351
146.39	0.00976498	0.0109313	0.0056764	0.0122923	-0.0131729	0.0223703	-0.00192755	0.0104141			146.39	0.00976498	0.0109313	0.0056764	0.0122923	-0.0131729	0.0223703	-0.00192755	0.0104141
146.59	0.0076848	0.0091541	0.00526198	0.00639207	-0.00622509	0.0204487	-0.00356239	0.00825105			146.59	0.0076848	0.0091541	0.00526198	0.00639207	-0.00622509	0.0204487	-0.00356239	0.00825105
146.79	0.00578172	0.00899098	0.00891594	0.0100931	-0.0116924	0.0185498	0.00104441	0.0114597			146.79	0.00578172	0.00899098	0.00891594	0.0100931	-0.0116924	0.0185498	0.00104441	0.0114597
146.99	0.00576874	0.00540169	0.00502037	0.011777	-0.00757015	0.0227217	-0.00177538	0.0092277			146.99	0.00576874	0.00540169	0.00502037	0.011777	-0.00757015	0.0227217	-0.00177538	0.0092277
147.19	0.00944571	0.00877997	0.00653033	0.00967036	-0.00871343	0.0182461	0.00102316	0.00972224			147.19	0.00944571	0.00877997	0.00653033	0.00967036	-0.00871343	0.0182461	0.00102316	0.00972224
147.39	0.00585873	0.00846488	0.00451265	0.0101731	-0.00955934	0.0223268	-0.00153345	0.00961409			147.39	0.00585873	0.00846488	0.00451265	0.0101731	-0.00955934	0.0223268	-0.00153345	0.00961409
147.6	0.00696933	0.00476691	0.00637315	0.00916629	-0.00934615	0.0217929	0.00149581	0.010611			147.6	0.00696933	0.00476691	0.00637315	0.00916629	-0.00934615	0.0217929	0.00149581	0.010611
147.79	0.00886682	0.0102056	0.00327209	0.0116015	-0.00519368	0.0194168	-0.00366094	0.00881108			147.79	0.00886682	0.0102056	0.00327209	0.0116015	-0.00519368	0.0194168	-0.00366094	0.00881108
147.99	0.00631418	0.00624782	0.00606489	0.0109681	-0.0116208	0.0214845	-0.00165528	0.00842799			147.99	0.00631418	0.00624782	0.00606489	0.0109681	-0.0116208	0.0214845	-0.00165528	0.00842799
148.19	0.00441324	0.00786288	0.00735759	0.00789806	-0.010008	0.0176352	-0.00050221	0.0123645			148.19	0.00441324	0.00786288	0.00735759	0.00789806	-0.010008	0.0176352	-0.00050221	0.0123645
148.39	0.00712101	0.00618517	0.00630349	0.0117027	-0.00958502	0.0202897	0.0009661	0.0104169			148.39	0.00712101	0.00618517	0.00630349	0.0117027	-0.00958502	0.0202897	0.0009661	0.0104169
148.59	0.00941605	0.00939698	0.00648182	0.0122714	-0.010568	0.0203012	-0.00309636	0.00907773			148.59	0.00941605	0.00939698	0.00648182	0.0122714	-0.010568	0.0203012	-0.00309636	0.00907773
148.79	0.00602417	0.0102855	0.00324793	0.00799456	-0.00917756	0.0205644	-0.00334354	0.0105312			148.79	0.00602417	0.0102855	0.00324793	0.00799456	-0.00917756	0.0205644	-0.00334354	0.0105312
148.99	0.0119267	0.00854063	0.00574416	0.010906	-0.00637657	0.020839	-0.00171399	0.00946838			148.99	0.0119267	0.00854063	0.00574416	0.010906	-0.00637657	0.020839	-0.00171399	0.00946838
149.19	0.00503112	0.00629266	0.00597657	0.0112318	-0.0097462	0.0221835	0.0001209	0.00672433			149.19	0.00503112	0.00629266	0.00597657	0.0112318	-0.0097462	0.0221835	0.0001209	0.00672433
149.39	0.00550026	0.00693969	0.00697455	0.00975342	-0.0095848	0.0179999	-0.00524657	0.00667607			149.39	0.00550026	0.00693969	0.00697455	0.00975342	-0.0095848	0.0179999	-0.00524657	0.00667607
149.59	0.00745438	0.00416276	0.00542441	0.0105059	-0.00878946	0.0194149	-0.00040519	0.0100234			149.59	0.00745438	0.00416276	0.00542441	0.0105059	-0.00878946	0.0194149	-0.00040519	0.0100234
149.79	0.00457731	0.0069265	0.00652052	0.0103414	-0.00871715	0.0212867	-0.0014243	0.00908183			149.79	0.00457731	0.0069265	0.00652052	0.0103414	-0.00871715	0.0212867	-0.0014243	0.00908183
149.99	0.00717439	0.00229869	0.00238988	0.00499233	-0.0108751	0.0196024	-0.00111602	0.00660593			149.99	0.00717439	0.00229869	0.00238988	0.00499233	-0.0108751	0.0196024	-0.00111602	0.00660593
150.19	0.0103018	0.00538084	0.00645648	0.00996631	-0.00983804	0.0198875	-0.00234827	0.0103188			150.19	0.0103018	0.00538084	0.00645648	0.00996631	-0.00983804	0.0198875	-0.00234827	0.0103188
150.39	0.00822769	0.0068504	0.00431768	0.00877929	-0.00781588	0.0235422	-0.00082735	0.00913097			150.39	0.00822769	0.0068504	0.00431768	0.00877929	-0.00781588	0.0235422	-0.00082735	0.00913097
150.59	0.00870417	0.00751052	0.00490414	0.00941462	-0.0097676	0.0236175	0.0016001	0.0081625			150.59	0.00870417	0.00751052	0.00490414	0.00941462	-0.0097676	0.0236175	0.0016001	0.0081625
150.79	0.00973904	0.00821147	0.00671621	0.0103004	-0.00957014	0.0214725	0.00064191	0.0118641			150.79	0.00973904	0.00821147	0.00671621	0.0103004	-0.00957014	0.0214725	0.00064191	0.0118641
150.99	0.00445104	0.00521395	0.00471738	0.0108007	-0.0088965	0.0218829	-0.00207638	0.00852257			150.99	0.00445104	0.00521395	0.00471738	0.0108007	-0.0088965	0.0218829	-0.00207638	0.00852257
151.19	0.0111334	0.00753743	0.00707834	0.0106164	-0.00856605	0.0212752	-0.00185321	0.00946741			151.19	0.0111334	0.00753743	0.00707834	0.0106164	-0.00856605	0.0212752	-0.00185321	0.00946741
151.39	0.0103892	0.00728685	0.00504505	0.00680501	-0.00813169	0.0186061	-0.00146131	0.00593399			151.39	0.0103892	0.00728685	0.00504505	0.00680501	-0.00813169	0.0186061	-0.00146131	0.00593399
151.6	0.00492176	0.00628772	0.00500152	0.00928256	-0.00863535	0.019097	-0.00047842	0.0101621			151.6	0.00492176	0.00628772	0.00500152	0.00928256	-0.00863535	0.019097	-0.00047842	0.0101621
151.79	0.00461107	0.00700972	0.0045145	0.00797812	-0.00787476	0.0215744	0.00153691	0.0107987			151.79	0.00461107	0.00700972	0.0045145	0.00797812	-0.00787476	0.0215744	0.00153691	0.0107987
151.99	0.00664531	0.00808672	0.00737096	0.01248	-0.00905068	0.0199133	-0.00413716	0.0108332			151.99	0.00664531	0.00808672	0.00737096	0.01248	-0.00905068	0.0199133	-0.00413716	0.0108332
152.19	0.00737049	0.00917093	0.00898763	0.00888876	-0.010379	0.020125	0.00179043	0.0109874			152.19	0.00737049	0.00917093	0.00898763	0.00888876	-0.010379	0.020125	0.00179043	0.0109874
152.39	0.00479775	0.00286002	0.00391226	0.0102742	-0.00932637	0.0198705	0.00010519	0.00879858			152.39	0.00479775	0.00286002	0.00391226	0.0102742	-0.00932637	0.0198705	0.00010519	0.00879858
152.59	0.0061864	0.00868635	0.00125658	0.00867544	-0.0118474	0.018459	-0.0013965	0.00934646			152.59	0.0061864	0.00868635	0.00125658	0.00867544	-0.0118474	0.018459	-0.0013965	0.00934646
152.79	0.00593681	0.0104632	0.00486662	0.0102384	-0.00982499	0.0214281	0.00108553	0.00766592			152.79	0.00593681	0.0104632	0.00486662	0.0102384	-0.00982499	0.0214281	0.00108553	0.00766592
152.99	0.0083969	0.00651247	0.00547388	0.00901554	-0.00712892	0.0183721	0.0027981	0.00821266			152.99	0.0083969	0.00651247	0.00547388	0.00901554	-0.00712892	0.0183721	0.0027981	0.00821266
153.19	0.00824051	0.00830474	0.00549985	0.0124881	-0.00699784	0.0227249	0.00259843	0.0061461			153.19	0.00824051	0.00830474	0.00549985	0.0124881	-0.00699784	0.0227249	0.00259843	0.0061461
153.39	0.00486555	0.00547273	0.00530487	0.0123534	-0.0123711	0.0218128	0.00315542	0.00880403			153.39	0.00486555	0.00547273	0.00530487	0.0123534	-0.0123711	0.0218128	0.00315542	0.00880403
153.59	0.00825237	0.00615665	0.00781153	0.0122721	-0.0126441	0.0199654	-0.0026566	0.00822661			153.59	0.00825237	0.00615665	0.00781153	0.0122721	-0.0126441	0.0199654	-0.0026566	0.00822661
153.79	0.00853622	0.00986393	0.00513895	0.0138362	-0.00904146	0.0203312	-0.00090464	0.00824251			153.79	0.00853622	0.00986393	0.00513895	0.0138362	-0.00904146	0.0203312	-0.00090464	0.00824251
153.99	0.00525622	0.00798559	0.00177345	0.00662291	-0.00975669	0.0226531	-0.00167793	0.00988395			153.99	0.00525622	0.00798559	0.00177345	0.00662291	-0.00975669	0.0226531	-0.00167793	0.00988395
154.19	0.00951606	0.0102081	0.0108428	0.00978998	-0.00992305	0.0202139	-0.00222697	0.00627199			154.19	0.00951606	0.0102081	0.0108428	0.00978998	-0.00992305	0.0202139	-0.00222697	0.00627199
154.39	0.00806575	0.00615102	0.00580674	0.00926834	-0.00954775	0.0210086	-0.00043566	0.00767998			154.39	0.00806575	0.00615102	0.00580674	0.00926834	-0.00954775	0.0210086	-0.00043566	0.00767998
154.59	0.00664383	0.00672022	0.00451794	0.0104547	-0.00668344	0.0192612	-0.00428383	0.00870737			154.59	0.00664383	0.00672022	0.00451794	0.0104547	-0.00668344	0.0192612	-0.00428383	0.00870737
154.79	0.00709163	0.00367461	0.00673362	0.00629849	-0.00935057	0.0197197	0.00126893	0.00391679			154.79	0.00709163	0.00367461	0.00673362	0.00629849	-0.00935057	0.0197197	0.00126893	0.00391679
154.99	0.00915039	0.00571754	0.00688768	0.0093256	-0.0115052	0.0217885	-0.00371596	0.00844179			154.99	0.00915039	0.00571754	0.00688768	0.0093256	-0.0115052	0.0217885	-0.00371596	0.00844179
155.19	0.00664677	0.00764345	0.0104354	0.00952141	-0.0113306	0.0214716	-0.00354293	0.00840869			155.19	0.00664677	0.00764345	0.0104354	0.00952141	-0.0113306	0.0214716	-0.00354293	0.00840869
155.39	0.00537444	0.00896158	0.0077329	0.00927462	-0.00807047	0.0211542	-0.00247681	0.00943963			155.39	0.00537444	0.00896158	0.0077329	0.00927462	-0.00807047	0.0211542	-0.00247681	0.00943963
155.59	0.00514091	0.00906226	0.0029417	0.0092916	-0.00788522	0.0175859	-0.00264439	0.00528985			155.59	0.00514091	0.00906226	0.0029417	0.0092916	-0.00788522	0.0175859	-0.00264439	0.00528985
155.79	0.00618396	0.00470522	0.00461879	0.0102869	-0.0071495	0.0219863	-0.00384519	0.0107082			155.79	0.00618396	0.00470522	0.00461879	0.0102869	-0.0071495	0.0219863	-0.00384519	0.0107082
155.99	0.00991111	0.00933328	0.00687868	0.00822736	-0.00644718	0.0198397	-0.00157132	0.0112995			155.99	0.00991111	0.00933328	0.00687868	0.00822736	-0.00644718	0.0198397	-0.00157132	0.0112995
156.19	0.00883796	0.0101309	0.00517021	0.00936652	-0.00619224	0.0170365	-0.00317634	0.00825458			156.19	0.00883796	0.0101309	0.00517021	0.00936652	-0.00619224	0.0170365	-0.00317634	0.00825458
156.39	0.00763206	0.00501494	0.00520724	0.0095778	-0.0110375	0.0197429	-0.00030148	0.0109162			156.39	0.00763206	0.00501494	0.00520724	0.0095778	-0.0110375	0.0197429	-0.00030148	0.0109162
156.59	0.00225788	0.00650385	0.00965408	0.00877201	-0.00745953	0.0214463	-0.00053862	0.00888801			156.59	0.00225788	0.00650385	0.00965408	0.00877201	-0.00745953	0.0214463	-0.00053862	0.00888801
156.79	0.00596383	0.00539786	0.00388102	0.00762341	-0.0108233	0.0215497	-0.00079163	0.00964726			156.79	0.00596383	0.00539786	0.00388102	0.00762341	-0.0108233	0.0215497	-0.00079163	0.00964726
156.99	0.00606576	0.00732734	0.00441885	0.010564	-0.00780201	0.0213216	0.0011709	0.0101479			156.99	0.00606576	0.00732734	0.00441885	0.010564	-0.00780201	0.0213216	0.0011709	0.0101479
157.19	0.00794268	0.00882414	0.00572278	0.007108	-0.00871901	0.0176919	-0.00415844	0.00707176			157.19	0.00794268	0.00882414	0.00572278	0.007108	-0.00871901	0.0176919	-0.00415844	0.00707176
157.39	0.00341716	0.00594718	0.00642654	0.00740519	-0.0112738	0.0227537	-0.00269559	0.00923904			157.39	0.00341716	0.00594718	0.00642654	0.00740519	-0.0112738	0.0227537	-0.00269559	0.00923904
157.6	0.00339615	0.00827615	0.00464067	0.0101232	-0.00819985	0.0213495	-0.00157589	0.0106166			157.6	0.00339615	0.00827615	0.00464067	0.0101232	-0.00819985	0.0213495	-0.00157589	0.0106166
157.79	0.00845791	0.00734147	0.00359872	0.00535642	-0.00887845	0.0192578	-0.00547711	0.00610364			157.79	0.00845791	0.00734147	0.00359872	0.00535642	-0.00887845	0.0192578	-0.00547711	0.00610364
157.99	0.00509989	0.00812174	0.00533097	0.00558364	-0.0103007	0.0206246	-0.00281479	0.00865812			157.99	0.00509989	0.00812174	0.00533097	0.00558364	-0.0103007	0.0206246	-0.00281479	0.00865812
158.19	0.00896594	0.00456489	0.00583345	0.0106529	-0.0123309	0.0195555	-0.00304036	0.00998631			158.19	0.00896594	0.00456489	0.00583345	0.0106529	-0.0123309	0.0195555	-0.00304036	0.00998631
158.39	0.00804399	0.00646901	0.00343237	0.0117602	-0.00731972	0.0215637	-0.00345546	0.00897135			158.39	0.00804399	0.00646901	0.00343237	0.0117602	-0.00731972	0.0215637	-0.00345546	0.00897135
158.6	0.00931015	0.00711273	0.00289572	0.00828443	-0.00833411	0.0241236	-0.00104047	0.0123609			158.6	0.00931015	0.00711273	0.00289572	0.00828443	-0.00833411	0.0241236	-0.00104047	0.0123609
158.79	0.00698848	0.00563895	0.00823693	0.00908105	-0.00893557	0.0188271	0.00054405	0.0083266			158.79	0.00698848	0.00563895	0.00823693	0.00908105	-0.00893557	0.0188271	0.00054405	0.0083266
158.99	0.0100068	0.00619822	0.00753356	0.00937081	-0.00917973	0.0211641	-0.00384263	0.0106769			158.99	0.0100068	0.00619822	0.00753356	0.00937081	-0.00917973	0.0211641	-0.00384263	0.0106769
159.19	0.00796908	0.00922583	0.00446379	0.00862027	-0.0085304	0.0202206	-0.00263197	0.0085282			159.19	0.00796908	0.00922583	0.00446379	0.00862027	-0.0085304	0.0202206	-0.00263197	0.0085282
159.39	0.0108805	0.007988	0.00580464	0.00989722	-0.00944976	0.0213125	-0.00078994	0.00701789			159.39	0.0108805	0.007988	0.00580464	0.00989722	-0.00944976	0.0213125	-0.00078994	0.00701789
159.6	0.00652399	0.00664936	0.00559638	0.0119437	-0.0118108	0.0215723	-0.0041138	0.00787971			159.6	0.00652399	0.00664936	0.00559638	0.0119437	-0.0118108	0.0215723	-0.0041138	0.00787971
159.79	0.00668397	0.00671398	0.00527839	0.00876131	-0.00773986	0.0172907	-0.00355602	0.00772774			159.79	0.00668397	0.00671398	0.00527839	0.00876131	-0.00773986	0.0172907	-0.00355602	0.00772774
159.99	0.00457472	0.0102965	0.00789242	0.00933085	-0.00753558	0.0185438	0.00059634	0.0084293			159.99	0.00457472	0.0102965	0.00789242	0.00933085	-0.00753558	0.0185438	0.00059634	0.0084293
160.19	0.0127598	0.00492005	0.00628311	0.00844475	-0.00996611	0.0240873	7.456e-05	0.00715578			160.19	0.0127598	0.00492005	0.00628311	0.00844475	-0.00996611	0.0240873	7.456e-05	0.00715578
160.39	0.00490285	0.00882176	0.00560449	0.00929044	-0.00965976	0.0174178	-0.00343057	0.00974925			160.39	0.00490285	0.00882176	0.00560449	0.00929044	-0.00965976	0.0174178	-0.00343057	0.00974925
160.6	0.00546104	0.00361289	0.00625479	0.0126207	-0.0083201	0.0194698	0.00032253	0.0069801			160.6	0.00546104	0.00361289	0.00625479	0.0126207	-0.0083201	0.0194698	0.00032253	0.0069801
160.79	0.00674386	0.00654819	0.00428314	0.0124367	-0.0110248	0.0150566	-0.00061376	0.0077068			160.79	0.00674386	0.00654819	0.00428314	0.0124367	-0.0110248	0.0150566	-0.00061376	0.0077068
160.99	0.00711968	0.00694201	0.00946779	0.00628541	-0.00697152	0.0236309	-0.00093278	0.00777615			160.99	0.00711968	0.00694201	0.00946779	0.00628541	-0.00697152	0.0236309	-0.00093278	0.00777615
161.19	0.00701813	0.00405349	0.00610427	0.00905703	-0.0093219	0.0200247	-0.00244701	0.0117566			161.19	0.00701813	0.00405349	0.00610427	0.00905703	-0.0093219	0.0200247	-0.00244701	0.0117566
161.39	0.00888907	0.00494087	0.00614108	0.0109201	-0.00885456	0.0176876	-0.0015079	0.00846952			161.39	0.00888907	0.00494087	0.00614108	0.0109201	-0.00885456	0.0176876	-0.0015079	0.00846952
161.59	0.00632275	0.00994072	0.00330129	0.0105773	-0.00579733	0.018643	-0.00289221	0.0103108			161.59	0.00632275	0.00994072	0.00330129	0.0105773	-0.00579733	0.018643	-0.00289221	0.0103108
161.79	0.00641963	0.00490774	0.00662358	0.011988	-0.00948108	0.0183696	-0.00209382	0.00649701			161.79	0.00641963	0.00490774	0.00662358	0.011988	-0.00948108	0.0183696	-0.00209382	0.00649701
161.99	0.00513249	0.00883874	0.00576324	0.00703146	-0.0123004	0.0191557	0.00047779	0.00770547			161.99	0.00513249	0.00883874	0.00576324	0.00703146	-0.0123004	0.0191557	0.00047779	0.00770547
162.19	0.0054247	0.00622718	0.00561916	0.00785732	-0.00930007	0.0208153	-0.00052422	0.00851791			162.19	0.0054247	0.00622718	0.00561916	0.00785732	-0.00930007	0.0208153	-0.00052422	0.00851791
162.39	0.00549107	0.010343	0.0054892	0.00871891	-0.0102278	0.0201935	-0.001242	0.00893636			162.39	0.00549107	0.010343	0.0054892	0.00871891	-0.0102278	0.0201935	-0.001242	0.00893636
162.6	0.00553428	0.0093029	0.00748701	0.00857789	-0.00878096	0.019202	-0.00703765	0.00900568			162.6	0.00553428	0.0093029	0.00748701	0.00857789	-0.00878096	0.019202	-0.00703765	0.00900568
162.79	0.00653631	0.00762997	0.00504196	0.0106046	-0.0101908	0.0213736	8.937e-05	0.00782608			162.79	0.00653631	0.00762997	0.00504196	0.0106046	-0.0101908	0.0213736	8.937e-05	0.00782608
162.99	0.0070659	0.0106625	0.00684272	0.0118948	-0.00948599	0.0208528	-0.00186351	0.0104021			162.99	0.0070659	0.0106625	0.00684272	0.0118948	-0.00948599	0.0208528	-0.00186351	0.0104021
163.19	0.00841356	0.00746708	0.00473612	0.00896895	-0.0113177	0.018077	0.00216386	0.00933184			163.19	0.00841356	0.00746708	0.00473612	0.00896895	-0.0113177	0.018077	0.00216386	0.00933184
163.39	0.00796522	0.00689468	0.0035915	0.00941935	-0.0057228	0.0200322	-0.00363869	0.0107708			163.39	0.00796522	0.00689468	0.0035915	0.00941935	-0.0057228	0.0200322	-0.00363869	0.0107708
163.6	0.00882119	0.00458108	0.00612073	0.00994422	-0.00873239	0.0214244	-0.003682	0.00585483			163.6	0.00882119	0.00458108	0.00612073	0.00994422	-0.00873239	0.0214244	-0.003682	0.00585483
163.79	0.00699773	0.00540034	0.00537398	0.00989497	-0.0102724	0.0214214	-0.00041184	0.00546326			163.79	0.00699773	0.00540034	0.00537398	0.00989497	-0.0102724	0.0214214	-0.00041184	0.00546326
163.99	0.00756584	0.00864158	0.00753785	0.0109918	-0.0100373	0.0183065	-0.00260945	0.0105968			163.99	0.00756584	0.00864158	0.00753785	0.0109918	-0.0100373	0.0183065	-0.00260945	0.0105968
164.19	0.00881059	0.00505475	0.00873537	0.00844711	-0.00409094	0.0190802	-0.0047228	0.0105856			164.19	0.00881059	0.00505475	0.00873537	0.00844711	-0.00409094	0.0190802	-0.0047228	0.0105856
164.39	0.0071445	0.00676259	0.0067496	0.00729225	-0.00760247	0.0164542	-0.00225407	0.00772239			164.39	0.0071445	0.00676259	0.0067496	0.00729225	-0.00760247	0.0164542	-0.00225407	0.00772239
164.6	0.0103004	0.00645729	0.00764785	0.0117065	-0.0100815	0.0178983	-0.00212338	0.00884905			164.6	0.0103004	0.00645729	0.00764785	0.0117065	-0.0100815	0.0178983	-0.00212338	0.00884905
164.79	0.00854444	0.00872004	0.00670907	0.00969208	-0.00722562	0.0210543	0.0011441	0.00865897			164.79	0.00854444	0.00872004	0.00670907	0.00969208	-0.00722562	0.0210543	0.0011441	0.00865897
164.99	0.0066184	0.00855583	0.00495199	0.00738349	-0.0113782	0.0218216	-0.00599546	0.00730536			164.99	0.0066184	0.00855583	0.00495199	0.00738349	-0.0113782	0.0218216	-0.00599546	0.00730536
165.19	0.00654376	0.0111009	0.00666451	0.00867221	-0.00863774	0.0198589	-0.00418626	0.00965848			165.19	0.00654376	0.0111009	0.00666451	0.00867221	-0.00863774	0.0198589	-0.00418626	0.00965848
165.39	0.00572978	0.00638158	0.006646	0.00837181	-0.00988292	0.019984	0.00090811	0.00822639			165.39	0.00572978	0.00638158	0.006646	0.00837181	-0.00988292	0.019984	0.00090811	0.00822639
165.6	0.00834124	0.010589	0.00768941	0.00934095	-0.0109115	0.0201797	-0.00287343	0.00842177			165.6	0.00834124	0.010589	0.00768941	0.00934095	-0.0109115	0.0201797	-0.00287343	0.00842177
165.79	0.00843333	0.00532536	0.00388948	0.0111846	-0.00800823	0.0163136	-0.00436633	0.00804667			165.79	0.00843333	0.00532536	0.00388948	0.0111846	-0.00800823	0.0163136	-0.00436633	0.00804667
165.99	0.00621729	9.308e-05	0.00789659	0.0116676	-0.00961757	0.0198016	-0.00393766	0.0121353			165.99	0.00621729	9.308e-05	0.00789659	0.0116676	-0.00961757	0.0198016	-0.00393766	0.0121353
166.19	0.00419124	0.00767104	0.00461989	0.0107911	-0.0100085	0.0205242	0.00119562	0.00648724			166.19	0.00419124	0.00767104	0.00461989	0.0107911	-0.0100085	0.0205242	0.00119562	0.00648724
166.39	0.00627924	0.00972564	0.00220002	0.00939435	-0.00766287	0.0219674	-0.00760992	0.0103816			166.39	0.00627924	0.00972564	0.00220002	0.00939435	-0.00766287	0.0219674	-0.00760992	0.0103816
166.6	0.00449584	0.0085854	0.00838204	0.0109663	-0.00635872	0.0229993	-0.00224441	0.00891931			166.6	0.00449584	0.0085854	0.00838204	0.0109663	-0.00635872	0.0229993	-0.00224441	0.00891931
166.79	0.00911833	0.00843063	0.00422292	0.00956739	-0.0116694	0.0184002	0.00074395	0.00835557			166.79	0.00911833	0.00843063	0.00422292	0.00956739	-0.0116694	0.0184002	0.00074395	0.00835557
166.99	0.00627026	0.00723245	0.00448866	0.0107315	-0.0108992	0.0180314	-0.00513759	0.0103986			166.99	0.00627026	0.00723245	0.00448866	0.0107315	-0.0108992	0.0180314	-0.00513759	0.0103986
167.19	0.00457689	0.00419932	0.0057092	0.00970082	-0.0105666	0.0187142	-0.00355051	0.0108292			167.19	0.00457689	0.00419932	0.0057092	0.00970082	-0.0105666	0.0187142	-0.00355051	0.0108292
167.39	0.00605941	0.00704197	0.00473623	0.0100431	-0.00891806	0.0186882	-0.00778896	0.0110891			167.39	0.00605941	0.00704197	0.00473623	0.0100431	-0.00891806	0.0186882	-0.00778896	0.0110891
167.59	0.00510892	0.00587036	0.00406312	0.00864892	-0.0101908	0.0240566	-0.00464988	0.0107942			167.59	0.00510892	0.00587036	0.00406312	0.00864892	-0.0101908	0.0240566	-0.00464988	0.0107942
167.79	0.00838428	0.0109104	0.006404	0.0062366	-0.0120211	0.0197289	-0.00220345	0.0122308			167.79	0.00838428	0.0109104	0.006404	0.0062366	-0.0120211	0.0197289	-0.00220345	0.0122308
167.99	0.00714242	0.010065	0.00508767	0.0106428	-0.0091192	0.0234487	-0.00231392	0.00929546			167.99	0.00714242	0.010065	0.00508767	0.0106428	-0.0091192	0.0234487	-0.00231392	0.00929546
168.19	0.00716987	0.00813487	0.00513725	0.0107472	-0.0105849	0.0194496	-0.00258897	0.00674724			168.19	0.00716987	0.00813487	0.00513725	0.0107472	-0.0105849	0.0194496	-0.00258897	0.00674724
168.39	0.0104973	0.00484172	0.00643736	0.00839953	-0.00920292	0.0208692	-0.0013818	0.00759318			168.39	0.0104973	0.00484172	0.00643736	0.00839953	-0.00920292	0.0208692	-0.0013818	0.00759318
168.6	0.00598975	0.00800595	0.00663848	0.00875788	-0.00607098	0.0196855	-0.00066647	0.00609268			168.6	0.00598975	0.00800595	0.00663848	0.00875788	-0.00607098	0.0196855	-0.00066647	0.00609268
168.79	0.00754504	0.00620791	0.0064997	0.00974183	-0.00740032	0.0186735	-0.00188392	0.0101008			168.79	0.00754504	0.00620791	0.0064997	0.00974183	-0.00740032	0.0186735	-0.00188392	0.0101008
168.99	0.00433843	0.00734242	0.0047053	0.00973823	-0.00973286	0.0199787	0.00069345	0.0103758			168.99	0.00433843	0.00734242	0.0047053	0.00973823	-0.00973286	0.0199787	0.00069345	0.0103758
169.19	0.00947175	0.00812602	0.00395591	0.00801805	-0.010829	0.0199106	-0.00477164	0.0118939			169.19	0.00947175	0.00812602	0.00395591	0.00801805	-0.010829	0.0199106	-0.00477164	0.0118939
169.39	0.00845517	0.00474579	0.00671713	0.00975859	-0.00998785	0.0210701	0.00224613	0.00883267			169.39	0.00845517	0.00474579	0.00671713	0.00975859	-0.00998785	0.0210701	0.00224613	0.00883267
169.6	0.00604752	0.0064744	0.00877767	0.00780696	-0.0082984	0.0187266	-0.001147	0.00831313			169.6	0.00604752	0.0064744	0.00877767	0.00780696	-0.0082984	0.0187266	-0.001147	0.00831313
169.79	0.00850681	0.00429968	0.0042241	0.00607765	-0.00851407	0.0187669	-0.00092365	0.00613048			169.79	0.00850681	0.00429968	0.0042241	0.00607765	-0.00851407	0.0187669	-0.00092365	0.00613048
169.99	0.00504785	0.00762761	0.00766189	0.011473	-0.00869387	0.0192423	-0.00429469	0.00930608			169.99	0.00504785	0.00762761	0.00766189	0.011473	-0.00869387	0.0192423	-0.00429469	0.00930608
170.19	0.00672678	0.00505865	0.00538531	0.00649744	-0.00907601	0.0205289	-0.00400119	0.00755571			170.19	0.00672678	0.00505865	0.00538531	0.00649744	-0.00907601	0.0205289	-0.00400119	0.00755571
170.39	0.00907897	0.00986517	0.00944672	0.00670339	-0.00944098	0.0188967	-0.00610508	0.00693829			170.39	0.00907897	0.00986517	0.00944672	0.00670339	-0.00944098	0.0188967	-0.00610508	0.00693829
170.6	0.0054248	0.00513424	0.00904303	0.00915933	-0.00897545	0.018696	-0.00531914	0.00822228			170.6	0.0054248	0.00513424	0.00904303	0.00915933	-0.00897545	0.018696	-0.00531914	0.00822228
170.79	0.00743259	0.00328533	0.00520902	0.0108498	-0.0100575	0.0235362	-0.00220095	0.00789285			170.79	0.00743259	0.00328533	0.00520902	0.0108498	-0.0100575	0.0235362	-0.00220095	0.00789285
170.99	0.00417767	0.00851831	0.00536821	0.00946443	-0.00809933	0.0221414	-0.00356263	0.00958831			170.99	0.00417767	0.00851831	0.00536821	0.00946443	-0.00809933	0.0221414	-0.00356263	0.00958831
171.19	0.00623956	0.00667729	0.00655703	0.00853744	-0.00958242	0.0216947	-0.00208737	0.0117896			171.19	0.00623956	0.00667729	0.00655703	0.00853744	-0.00958242	0.0216947	-0.00208737	0.0117896
171.39	0.0059939	0.00711503	0.00441002	0.0111173	-0.00667924	0.0222334	-0.00145927	0.00806397			171.39	0.0059939	0.00711503	0.00441002	0.0111173	-0.00667924	0.0222334	-0.00145927	0.00806397
171.59	0.0078563	0.0079323	0.00949277	0.00789795	-0.00963111	0.0182238	-0.00151877	0.00810286			171.59	0.0078563	0.0079323	0.00949277	0.00789795	-0.00963111	0.0182238	-0.00151877	0.00810286
171.79	0.00659245	0.00707305	0.0057464	0.0115894	-0.0061296	0.0205438	-0.00637176	0.00622693			171.79	0.00659245	0.00707305	0.0057464	0.0115894	-0.0061296	0.0205438	-0.00637176	0.00622693
171.99	0.00692841	0.00703266	0.00057633	0.00949653	-0.00664831	0.0200713	0.00036153	0.00778974			171.99	0.00692841	0.00703266	0.00057633	0.00949653	-0.00664831	0.0200713	0.00036153	0.00778974
172.19	0.00605594	0.00794717	0.00700702	0.0113048	-0.00892521	0.0214532	-0.00149778	0.00730351			172.19	0.00605594	0.00794717	0.00700702	0.0113048	-0.00892521	0.0214532	-0.00149778	0.00730351
172.39	0.00290965	0.00574883	0.00639766	0.00964866	-0.0102537	0.019476	-0.00230853	0.00964681			172.39	0.00290965	0.00574883	0.00639766	0.00964866	-0.0102537	0.019476	-0.00230853	0.00964681
172.59	0.00678715	0.00491594	0.00684844	0.00943765	-0.0085325	0.0217159	-0.00519446	0.0104712			172.59	0.00678715	0.00491594	0.00684844	0.00943765	-0.0085325	0.0217159	-0.00519446	0.0104712
172.79	0.00473423	0.00686434	0.00743315	0.0103503	-0.00878231	0.0201797	-0.00112626	0.00746664			172.79	0.00473423	0.00686434	0.00743315	0.0103503	-0.00878231	0.0201797	-0.00112626	0.00746664
172.99	0.00589842	0.00960909	0.006593	0.00875445	-0.00881379	0.0168496	-0.00199065	0.00651091			172.99	0.00589842	0.00960909	0.006593	0.00875445	-0.00881379	0.0168496	-0.00199065	0.00651091
173.19	0.00745212	0.00733859	0.00023173	0.0105617	-0.01153	0.0178887	-0.00210472	0.00787848			173.19	0.00745212	0.00733859	0.00023173	0.0105617	-0.01153	0.0178887	-0.00210472	0.00787848
173.39	0.00609062	0.00683751	0.00504962	0.0114107	-0.00811696	0.0222932	-0.00241247	0.00980937			173.39	0.00609062	0.00683751	0.00504962	0.0114107	-0.00811696	0.0222932	-0.00241247	0.00980937
173.59	0.00222346	0.0107891	0.00812036	0.00616001	-0.0104572	0.0187827	-0.00458522	0.0103228			173.59	0.00222346	0.0107891	0.00812036	0.00616001	-0.0104572	0.0187827	-0.00458522	0.0103228
173.79	0.00668166	0.00756337	0.00398376	0.00838877	-0.0111655	0.0175623	-0.00355516	0.00529214			173.79	0.00668166	0.00756337	0.00398376	0.00838877	-0.0111655	0.0175623	-0.00355516	0.00529214
173.99	0.00530914	0.00634308	0.00248796	0.00829381	-0.00721171	0.0228757	-0.00154309	0.0100338			173.99	0.00530914	0.00634308	0.00248796	0.00829381	-0.00721171	0.0228757	-0.00154309	0.0100338
174.19	0.00723113	0.00718616	0.00449423	0.00965403	-0.00945996	0.0190524	-0.0027286	0.00808214			174.19	0.00723113	0.00718616	0.00449423	0.00965403	-0.00945996	0.0190524	-0.0027286	0.00808214
174.39	0.00525603	0.00810595	0.00887621	0.0107434	-0.00899416	0.0169502	-0.00283249	0.007964			174.39	0.00525603	0.00810595	0.00887621	0.0107434	-0.00899416	0.0169502	-0.00283249	0.007964
174.6	0.00839839	0.00573334	0.00294207	0.00522107	-0.00827599	0.0191061	-0.0012854	0.00822277			174.6	0.00839839	0.00573334	0.00294207	0.00522107	-0.00827599	0.0191061	-0.0012854	0.00822277
174.79	0.00684751	0.00851898	0.00528564	0.00872579	-0.0117059	0.0243353	-0.00206653	0.00952787			174.79	0.00684751	0.00851898	0.00528564	0.00872579	-0.0117059	0.0243353	-0.00206653	0.00952787
174.99	0.0051465	0.00390111	0.00323197	0.0112622	-0.0100038	0.0163389	-0.00367888	0.00913666			174.99	0.0051465	0.00390111	0.00323197	0.0112622	-0.0100038	0.0163389	-0.00367888	0.00913666
175.19	0.00555598	0.0089457	0.00412258	0.00963107	-0.0110282	0.0198197	0.00142721	0.00981678			175.19	0.00555598	0.0089457	0.00412258	0.00963107	-0.0110282	0.0198197	0.00142721	0.00981678
175.39	0.00749175	0.00197775	0.00361587	0.0103228	-0.0127361	0.0185979	-0.00438222	0.00631005			175.39	0.00749175	0.00197775	0.00361587	0.0103228	-0.0127361	0.0185979	-0.00438222	0.00631005
175.6	0.00678689	0.00793032	0.0059138	0.0105059	-0.0119392	0.0181961	-0.00384959	0.00809024			175.6	0.00678689	0.00793032	0.0059138	0.0105059	-0.0119392	0.0181961	-0.00384959	0.00809024
175.79	0.00856837	0.0051099	0.0049109	0.00873283	-0.00796882	0.021437	-0.00353213	0.00912693			175.79	0.00856837	0.0051099	0.0049109	0.00873283	-0.00796882	0.021437	-0.00353213	0.00912693
175.99	0.00595913	0.00896539	0.00630358	0.00913434	-0.00910689	0.0202999	-0.00368554	0.00843877			175.99	0.00595913	0.00896539	0.00630358	0.00913434	-0.00910689	0.0202999	-0.00368554	0.00843877
176.19	0.00552766	0.00575619	0.00437353	0.00810739	-0.0101734	0.0223576	-0.00476216	0.00999888			176.19	0.00552766	0.00575619	0.00437353	0.00810739	-0.0101734	0.0223576	-0.00476216	0.00999888
176.39	0.00509582	0.00486701	0.00365342	0.00648409	-0.00905862	0.0184751	-0.0027636	0.00886097			176.39	0.00509582	0.00486701	0.00365342	0.00648409	-0.00905862	0.0184751	-0.0027636	0.00886097
176.59	0.00690978	0.00707145	0.0090113	0.00957788	-0.00959649	0.0172806	-0.00452273	0.009252			176.59	0.00690978	0.00707145	0.0090113	0.00957788	-0.00959649	0.0172806	-0.00452273	0.009252
176.79	0.00567731	0.0073891	0.00540849	0.0067898	-0.0100473	0.0195063	-0.00252161	0.0105082			176.79	0.00567731	0.0073891	0.00540849	0.0067898	-0.0100473	0.0195063	-0.00252161	0.0105082
176.99	0.00403284	0.00799052	0.0047078	0.00768213	-0.00753967	0.0211359	-0.00425857	0.00692367			176.99	0.00403284	0.00799052	0.0047078	0.00768213	-0.00753967	0.0211359	-0.00425857	0.00692367
177.19	0.00871213	0.0116234	0.00224206	0.0118152	-0.00901917	0.0210809	-0.00157303	0.00603942			177.19	0.00871213	0.0116234	0.00224206	0.0118152	-0.00901917	0.0210809	-0.00157303	0.00603942
177.39	0.00599284	0.00866514	0.00386096	0.00908127	-0.0104094	0.013314	-0.0056529	0.00706929			177.39	0.00599284	0.00866514	0.00386096	0.00908127	-0.0104094	0.013314	-0.0056529	0.00706929
177.59	0.00761517	0.0089745	0.00505016	0.00781406	-0.00929597	0.019737	0.0003252	0.00652877			177.59	0.00761517	0.0089745	0.00505016	0.00781406	-0.00929597	0.019737	0.0003252	0.00652877
177.79	0.0033268	0.00439603	0.00873415	0.0101142	-0.00990708	0.0212851	-0.00223614	0.0041439			177.79	0.0033268	0.00439603	0.00873415	0.0101142	-0.00990708	0.0212851	-0.00223614	0.0041439
177.99	0.00717126	0.006955	0.00702566	0.00796761	-0.01013	0.0207946	-0.00458382	0.00620609			177.99	0.00717126	0.006955	0.00702566	0.00796761	-0.01013	0.0207946	-0.00458382	0.00620609
178.19	0.00484367	0.00615561	0.00469045	0.00829155	-0.00628214	0.0212818	0.00035427	0.00805283			178.19	0.00484367	0.00615561	0.00469045	0.00829155	-0.00628214	0.0212818	0.00035427	0.00805283
178.39	0.00464798	0.00957454	0.00390659	0.0110617	-0.00977699	0.0181856	-0.00108648	0.0118406			178.39	0.00464798	0.00957454	0.00390659	0.0110617	-0.00977699	0.0181856	-0.00108648	0.0118406
178.6	0.00552395	0.00581266	0.00425312	0.0106097	-0.00822207	0.0189852	-0.00107994	0.00636508			178.6	0.00552395	0.00581266	0.00425312	0.0106097	-0.00822207	0.0189852	-0.00107994	0.00636508
178.79	0.00787871	0.00313	0.00485205	0.00739056	-0.00976854	0.0212293	-0.00172643	0.0112137			178.79	0.00787871	0.00313	0.00485205	0.00739056	-0.00976854	0.0212293	-0.00172643	0.0112137
178.99	0.00547941	0.00733858	0.00415968	0.00790629	-0.00709477	0.0217059	-0.00104622	0.00751922			178.99	0.00547941	0.00733858	0.00415968	0.00790629	-0.00709477	0.0217059	-0.00104622	0.00751922
179.19	0.00333443	0.00732266	0.00573089	0.0104571	-0.00581479	0.0194193	-0.00418925	0.00614822			179.19	0.00333443	0.00732266	0.00573089	0.0104571	-0.00581479	0.0194193	-0.00418925	0.00614822
179.39	0.00579226	0.00357507	0.00738766	0.0119958	-0.0105527	0.0220644	-0.00258945	0.00667032			179.39	0.00579226	0.00357507	0.00738766	0.0119958	-0.0105527	0.0220644	-0.00258945	0.00667032
179.59	0.004737	0.00700669	0.00468089	0.00985733	-0.00915519	0.0189718	-0.005565	0.00718358			179.59	0.004737	0.00700669	0.00468089	0.00985733	-0.00915519	0.0189718	-0.005565	0.00718358
179.79	0.00670546	0.00774663	0.00574513	0.00823192	-0.00901689	0.0181742	-0.00115418	0.00821674			179.79	0.00670546	0.00774663	0.00574513	0.00823192	-0.00901689	0.0181742	-0.00115418	0.00821674
179.99	0.00428654	0.00633433	0.00475958	0.0100441	-0.00995321	0.019097	-0.00800705	0.00502192			179.99	0.00428654	0.00633433	0.00475958	0.0100441	-0.00995321	0.019097	-0.00800705	0.00502192
180.19	0.00620817	0.00558796	0.00358436	0.0130574	-0.00794543	0.0190209	-0.00052738	0.0078787			180.19	0.00620817	0.00558796	0.00358436	0.0130574	-0.00794543	0.0190209	-0.00052738	0.0078787
180.39	0.00549208	0.00974394	0.00587987	0.0101141	-0.00961285	0.0192833	-0.00293099	0.00878095			180.39	0.00549208	0.00974394	0.00587987	0.0101141	-0.00961285	0.0192833	-0.00293099	0.00878095
180.59	0.00239891	0.00762106	0.00525214	0.0103749	-0.00956659	0.0214528	-0.00512806	0.00623278			180.59	0.00239891	0.00762106	0.00525214	0.0103749	-0.00956659	0.0214528	-0.00512806	0.00623278
180.79	0.00519613	0.0111437	0.00505918	0.0111481	-0.00868769	0.0195238	-0.00380358	0.00998202			180.79	0.00519613	0.0111437	0.00505918	0.0111481	-0.00868769	0.0195238	-0.00380358	0.00998202
180.99	0.00713894	0.00390998	0.00441124	0.00831417	-0.0073028	0.0189929	-0.00288976	0.00667934			180.99	0.00713894	0.00390998	0.00441124	0.00831417	-0.0073028	0.0189929	-0.00288976	0.00667934
181.19	0.00731918	0.00987515	0.00727087	0.00854748	-0.0114085	0.0170415	-0.00617715	0.00749608			181.19	0.00731918	0.00987515	0.00727087	0.00854748	-0.0114085	0.0170415	-0.00617715	0.00749608
181.39	0.00747518	0.00267369	0.00451637	0.0112223	-0.0103876	0.0192762	-0.00079494	0.00735407			181.39	0.00747518	0.00267369	0.00451637	0.0112223	-0.0103876	0.0192762	-0.00079494	0.00735407
181.59	0.00713834	0.00709002	0.00884815	0.0118787	-0.010991	0.0187988	-0.00386578	0.0077851			181.59	0.00713834	0.00709002	0.00884815	0.0118787	-0.010991	0.0187988	-0.00386578	0.0077851
181.79	0.0093233	0.00962264	0.00540961	0.00971255	-0.0127951	0.0195857	-0.00385392	0.00717291			181.79	0.0093233	0.00962264	0.00540961	0.00971255	-0.0127951	0.0195857	-0.00385392	0.00717291
181.99	0.00290891	0.00467101	0.00529633	0.00883438	-0.00631451	0.022925	-0.00228085	0.0104715			181.99	0.00290891	0.00467101	0.00529633	0.00883438	-0.00631451	0.022925	-0.00228085	0.0104715
182.19	0.00310848	0.0100144	0.00264294	0.00679723	-0.0110887	0.0202578	-0.00479979	0.0101915			182.19	0.00310848	0.0100144	0.00264294	0.00679723	-0.0110887	0.0202578	-0.00479979	0.0101915
182.39	0.00453564	0.00961016	0.00608035	0.0095292	-0.0086581	0.0195332	-0.00294893	0.00694436			182.39	0.00453564	0.00961016	0.00608035	0.0095292	-0.0086581	0.0195332	-0.00294893	0.00694436
182.59	0.00465375	0.00654492	0.00196174	0.0109729	-0.0109723	0.0160458	-0.00240353	0.0095249			182.59	0.00465375	0.00654492	0.00196174	0.0109729	-0.0109723	0.0160458	-0.00240353	0.0095249
182.79	0.00380839	0.00573438	0.00407125	0.0126877	-0.00791675	0.0191841	-0.00318815	0.00657802			182.79	0.00380839	0.00573438	0.00407125	0.0126877	-0.00791675	0.0191841	-0.00318815	0.00657802
182.99	0.00650628	0.00730319	0.00231362	0.00958547	-0.00965137	0.0200802	-0.00815391	0.00669865			182.99	0.00650628	0.00730319	0.00231362	0.00958547	-0.00965137	0.0200802	-0.00815391	0.00669865
183.19	0.00592148	0.00294864	0.00691806	0.0112956	-0.0111244	0.0186891	0.00181215	0.00824999			183.19	0.00592148	0.00294864	0.00691806	0.0112956	-0.0111244	0.0186891	0.00181215	0.00824999
183.39	0.00420937	0.0049325	0.00471301	0.0154151	-0.0100951	0.0177208	-0.00430623	0.00853956			183.39	0.00420937	0.0049325	0.00471301	0.0154151	-0.0100951	0.0177208	-0.00430623	0.00853956
183.59	0.00691023	0.00721143	0.00450129	0.0131023	-0.011253	0.0174534	-0.00209007	0.00539764			183.59	0.00691023	0.00721143	0.00450129	0.0131023	-0.011253	0.0174534	-0.00209007	0.00539764
183.79	0.00286254	0.00720397	0.00610891	0.00975143	-0.00884262	0.0173211	-0.00205882	0.0075685			183.79	0.00286254	0.00720397	0.00610891	0.00975143	-0.00884262	0.0173211	-0.00205882	0.0075685
183.99	0.00571196	0.00205641	0.00348137	0.0136587	-0.00936585	0.0197939	-0.00356147	0.00834888			183.99	0.00571196	0.00205641	0.00348137	0.0136587	-0.00936585	0.0197939	-0.00356147	0.00834888
184.19	0.00572072	0.0100193	0.00650321	0.00668258	-0.0126465	0.0200101	-0.00359606	0.00661874			184.19	0.00572072	0.0100193	0.00650321	0.00668258	-0.0126465	0.0200101	-0.00359606	0.00661874
184.39	0.00548368	0.00858203	0.00802515	0.00996902	-0.0126347	0.020037	-0.00640466	0.00960357			184.39	0.00548368	0.00858203	0.00802515	0.00996902	-0.0126347	0.020037	-0.00640466	0.00960357
184.59	0.00612712	0.00780739	0.00249889	0.00973298	-0.00919636	0.0188685	-0.00223729	0.00972469			184.59	0.00612712	0.00780739	0.00249889	0.00973298	-0.00919636	0.0188685	-0.00223729	0.00972469
184.79	0.00816091	0.00739117	0.0026327	0.00775837	-0.00893544	0.021718	-0.00363615	0.00579863			184.79	0.00816091	0.00739117	0.0026327	0.00775837	-0.00893544	0.021718	-0.00363615	0.00579863
184.99	0.00520606	0.00228089	0.00560758	0.00964238	-0.00595056	0.0187095	-0.00028211	0.00845278			184.99	0.00520606	0.00228089	0.00560758	0.00964238	-0.00595056	0.0187095	-0.00028211	0.00845278
185.19	0.00582549	0.0113256	0.00483421	0.0108528	-0.0107353	0.0209566	0.00192304	0.00893646			185.19	0.00582549	0.0113256	0.00483421	0.0108528	-0.0107353	0.0209566	0.00192304	0.00893646
185.39	0.00825656	0.00547473	0.00486493	0.0110197	-0.0113115	0.0217075	-0.00300536	0.00641547			185.39	0.00825656	0.00547473	0.00486493	0.0110197	-0.0113115	0.0217075	-0.00300536	0.00641547
185.59	0.0047456	0.00578408	0.00399587	0.0116432	-0.00760934	0.0179081	-0.00208342	0.0103352			185.59	0.0047456	0.00578408	0.00399587	0.0116432	-0.00760934	0.0179081	-0.00208342	0.0103352
185.79	0.00527101	0.00891869	0.00618617	0.00953217	-0.00861396	0.0176601	-0.00403395	0.00536331			185.79	0.00527101	0.00891869	0.00618617	0.00953217	-0.00861396	0.0176601	-0.00403395	0.00536331
185.99	0.00681619	0.00666207	0.0035986	0.0109327	-0.00893722	0.0170082	-0.00431283	0.00843302			185.99	0.00681619	0.00666207	0.0035986	0.0109327	-0.00893722	0.0170082	-0.00431283	0.00843302
186.19	0.00357256	0.00738503	0.00719533	0.0136415	-0.0108098	0.0205626	-0.0042989	0.00890507			186.19	0.00357256	0.00738503	0.00719533	0.0136415	-0.0108098	0.0205626	-0.0042989	0.00890507
186.39	0.00495447	0.0112683	0.00520807	0.00737264	-0.010996	0.0206669	-0.00239098	0.00758067			186.39	0.00495447	0.0112683	0.00520807	0.00737264	-0.010996	0.0206669	-0.00239098	0.00758067
186.6	0.00422709	0.0086159	0.00469095	0.00720173	-0.00817569	0.020089	-0.00135366	0.00864724			186.6	0.00422709	0.0086159	0.00469095	0.00720173	-0.00817569	0.020089	-0.00135366	0.00864724
186.79	0.00423998	0.00586848	0.00290672	0.0088636	-0.0103901	0.022174	-0.00025537	0.00820017			186.79	0.00423998	0.00586848	0.00290672	0.0088636	-0.0103901	0.022174	-0.00025537	0.00820017
186.99	0.00889288	0.00859802	0.00631178	0.0107955	-0.00844579	0.019664	-0.00517083	0.00567539			186.99	0.00889288	0.00859802	0.00631178	0.0107955	-0.00844579	0.019664	-0.00517083	0.00567539
187.19	0.00305782	0.00702188	0.00932745	0.0116243	-0.00966381	0.0211948	-0.00288131	0.00732922			187.19	0.00305782	0.00702188	0.00932745	0.0116243	-0.00966381	0.0211948	-0.00288131	0.00732922
187.39	0.00730662	0.00812002	0.00387326	0.00881665	-0.00801811	0.020616	-0.00089056	0.00807779			187.39	0.00730662	0.00812002	0.00387326	0.00881665	-0.00801811	0.020616	-0.00089056	0.00807779
187.6	0.0025409	0.00745395	0.0049779	0.00662419	-0.00860881	0.0216373	-0.00143476	0.00708758			187.6	0.0025409	0.00745395	0.0049779	0.00662419	-0.00860881	0.0216373	-0.00143476	0.00708758
187.79	0.00737964	0.00702961	0.00543775	0.00651172	-0.0110311	0.0173759	-0.00404193	0.0120884			187.79	0.00737964	0.00702961	0.00543775	0.00651172	-0.0110311	0.0173759	-0.00404193	0.0120884
187.99	0.0065451	0.0078355	0.00427858	0.0104291	-0.00830008	0.0219227	-0.00411674	0.0106771			187.99	0.0065451	0.0078355	0.00427858	0.0104291	-0.00830008	0.0219227	-0.00411674	0.0106771
188.19	0.00414119	0.00842338	0.00576848	0.00766497	-0.00719113	0.0190411	-0.0021555	0.00797091			188.19	0.00414119	0.00842338	0.00576848	0.00766497	-0.00719113	0.0190411	-0.0021555	0.00797091
188.39	0.00596632	0.00771678	0.00499657	0.00574916	-0.00724088	0.0194397	-0.00422898	0.00978948			188.39	0.00596632	0.00771678	0.00499657	0.00574916	-0.00724088	0.0194397	-0.00422898	0.00978948
188.6	0.00694149	0.007223	0.00662982	0.0113595	-0.00720268	0.0202822	-0.0016984	0.0102169			188.6	0.00694149	0.007223	0.00662982	0.0113595	-0.00720268	0.0202822	-0.0016984	0.0102169
188.79	0.00757909	0.00613971	0.00426346	0.010214	-0.0105815	0.0241499	-0.00522801	0.0122959			188.79	0.00757909	0.00613971	0.00426346	0.010214	-0.0105815	0.0241499	-0.00522801	0.0122959
188.99	0.00344076	0.00682137	0.0110322	0.00924908	-0.00878153	0.0204298	-0.00078841	0.00766178			188.99	0.00344076	0.00682137	0.0110322	0.00924908	-0.00878153	0.0204298	-0.00078841	0.00766178
189.19	0.00491795	0.00669274	0.00469518	0.00870157	-0.00886583	0.0208796	-0.0027155	0.00769395			189.19	0.00491795	0.00669274	0.00469518	0.00870157	-0.00886583	0.0208796	-0.0027155	0.00769395
189.39	0.0082158	0.00563952	0.00386181	0.0102465	-0.0094547	0.0175802	-0.00168742	0.0085091			189.39	0.0082158	0.00563952	0.00386181	0.0102465	-0.0094547	0.0175802	-0.00168742	0.0085091
189.6	0.00604016	0.0097766	0.00472496	0.0114225	-0.00928773	0.016142	-0.00459634	0.00839218			189.6	0.00604016	0.0097766	0.00472496	0.0114225	-0.00928773	0.016142	-0.00459634	0.00839218
189.79	0.00670947	0.00918859	0.0018668	0.0119877	-0.00911861	0.0180009	-0.00038605	0.00946481			189.79	0.00670947	0.00918859	0.0018668	0.0119877	-0.00911861	0.0180009	-0.00038605	0.00946481
189.99	0.00887173	0.00640138	0.00350236	0.00786259	-0.00725381	0.0196563	-0.00251507	0.00779366			189.99	0.00887173	0.00640138	0.00350236	0.00786259	-0.00725381	0.0196563	-0.00251507	0.00779366
190.19	0.00516977	0.00779359	0.0030556	0.010589	-0.00792431	0.0174334	-0.00433229	0.0114398			190.19	0.00516977	0.00779359	0.0030556	0.010589	-0.00792431	0.0174334	-0.00433229	0.0114398
190.39	0.00492039	0.00488125	0.0053253	0.00745996	-0.0105402	0.0188997	-0.00281008	0.00616383			190.39	0.00492039	0.00488125	0.0053253	0.00745996	-0.0105402	0.0188997	-0.00281008	0.00616383
190.6	0.00266885	0.00856872	0.00404224	0.0129053	-0.00862441	0.0228454	-0.00384918	0.00418676			190.6	0.00266885	0.00856872	0.00404224	0.0129053	-0.00862441	0.0228454	-0.00384918	0.00418676
190.79	0.00825793	0.00828769	0.00709117	0.0108821	-0.00661513	0.0190154	-0.00366631	0.00955978			190.79	0.00825793	0.00828769	0.00709117	0.0108821	-0.00661513	0.0190154	-0.00366631	0.00955978
190.99	0.00750457	0.00633248	0.00204542	0.00785361	-0.00451619	0.0217255	-0.00679989	0.00588065			190.99	0.00750457	0.00633248	0.00204542	0.00785361	-0.00451619	0.0217255	-0.00679989	0.00588065
191.19	0.00562618	0.00597142	0.00243418	0.0100213	-0.0110932	0.0185333	-0.00279548	0.00962563			191.19	0.00562618	0.00597142	0.00243418	0.0100213	-0.0110932	0.0185333	-0.00279548	0.00962563
191.39	0.00754702	0.00688194	0.00731224	0.0119477	-0.00981014	0.0194034	-0.00272717	0.00872923			191.39	0.00754702	0.00688194	0.00731224	0.0119477	-0.00981014	0.0194034	-0.00272717	0.00872923
191.6	0.00559621	0.0105317	0.0046632	0.00857122	-0.00890403	0.0214972	-0.00594455	0.0106949			191.6	0.00559621	0.0105317	0.0046632	0.00857122	-0.00890403	0.0214972	-0.00594455	0.0106949
191.79	0.00784594	0.00846671	0.00375764	0.00719477	-0.0132451	0.0185182	-7.173e-05	0.00391838			191.79	0.00784594	0.00846671	0.00375764	0.00719477	-0.0132451	0.0185182	-7.173e-05	0.00391838
191.99	0.00840784	0.0097214	0.00495234	0.0124402	-0.00676772	0.0203778	-0.00380991	0.00935037			191.99	0.00840784	0.0097214	0.00495234	0.0124402	-0.00676772	0.0203778	-0.00380991	0.00935037
192.19	0.00698224	0.0076279	0.00403213	0.00986909	-0.01109	0.0216664	-0.00324216	0.00982667			192.19	0.00698224	0.0076279	0.00403213	0.00986909	-0.01109	0.0216664	-0.00324216	0.00982667
192.39	0.00604227	0.00384248	0.00509328	0.010057	-0.00869177	0.0169294	-0.00222118	0.00557139			192.39	0.00604227	0.00384248	0.00509328	0.010057	-0.00869177	0.0169294	-0.00222118	0.00557139
192.6	0.00594752	0.00678777	0.00421574	0.0123527	-0.0107715	0.0205916	-0.00282071	0.00727599			192.6	0.00594752	0.00678777	0.00421574	0.0123527	-0.0107715	0.0205916	-0.00282071	0.00727599
192.79	0.00507879	0.00919997	0.00715653	0.0114567	-0.0102106	0.0203006	-0.00278104	0.00750421			192.79	0.00507879	0.00919997	0.00715653	0.0114567	-0.0102106	0.0203006	-0.00278104	0.00750421
192.99	0.00443375	0.0105976	0.00574426	0.0121904	-0.00846789	0.0196473	-0.00322941	0.0110269			192.99	0.00443375	0.0105976	0.00574426	0.0121904	-0.00846789	0.0196473	-0.00322941	0.0110269
193.19	0.00545506	0.00936796	0.00581793	0.0107448	-0.00792455	0.0227269	-0.00172699	0.0067654			193.19	0.00545506	0.00936796	0.00581793	0.0107448	-0.00792455	0.0227269	-0.00172699	0.0067654
193.39	0.0054483	0.00692489	0.00749706	0.0107647	-0.00882376	0.020796	-0.00349604	0.00753216			193.39	0.0054483	0.00692489	0.00749706	0.0107647	-0.00882376	0.020796	-0.00349604	0.00753216
193.6	0.00453138	0.00951193	0.00901582	0.00843228	-0.0111037	0.0200304	-0.00564672	0.00767171			193.6	0.00453138	0.00951193	0.00901582	0.00843228	-0.0111037	0.0200304	-0.00564672	0.00767171
193.79	0.00496022	0.00793468	0.00519596	0.0077767	-0.00910909	0.0231394	-0.0035564	0.0115192			193.79	0.00496022	0.00793468	0.00519596	0.0077767	-0.00910909	0.0231394	-0.0035564	0.0115192
193.99	0.00601562	0.00938785	0.00578598	0.0111004	-0.0102844	0.0171475	-0.00463949	0.00428754			193.99	0.00601562	0.00938785	0.00578598	0.0111004	-0.0102844	0.0171475	-0.00463949	0.00428754
194.19	0.00352632	0.00565646	0.0092846	0.0103497	-0.0100322	0.0185739	-0.00584683	0.00675092			194.19	0.00352632	0.00565646	0.0092846	0.0103497	-0.0100322	0.0185739	-0.00584683	0.00675092
194.39	0.00411856	0.00743694	0.00505554	0.0120007	-0.0111393	0.022187	-0.00788676	0.0055373			194.39	0.00411856	0.00743694	0.00505554	0.0120007	-0.0111393	0.022187	-0.00788676	0.0055373
194.59	0.00694598	0.00676922	0.00449771	0.0112038	-0.00705084	0.017789	-0.00371605	0.00838721			194.59	0.00694598	0.00676922	0.00449771	0.0112038	-0.00705084	0.017789	-0.00371605	0.00838721
194.79	0.00754342	0.00617682	0.00516639	0.0124386	-0.0109511	0.0216737	-0.00324803	0.00895556			194.79	0.00754342	0.00617682	0.00516639	0.0124386	-0.0109511	0.0216737	-0.00324803	0.00895556
194.99	0.00678901	0.00751608	0.00508602	0.0111305	-0.011096	0.0205175	-0.00515898	0.0126429			194.99	0.00678901	0.00751608	0.00508602	0.0111305	-0.011096	0.0205175	-0.00515898	0.0126429
195.19	0.00569978	0.00555527	0.00533335	0.0112198	-0.00939602	0.0194921	-0.00257453	0.00825183			195.19	0.00569978	0.00555527	0.00533335	0.0112198	-0.00939602	0.0194921	-0.00257453	0.00825183
195.39	0.00487255	0.00242557	0.00478351	0.00991026	-0.00915618	0.0180775	-0.00564498	0.00785717			195.39	0.00487255	0.00242557	0.00478351	0.00991026	-0.00915618	0.0180775	-0.00564498	0.00785717
195.6	0.00871046	0.0094053	0.00626553	0.00899994	-0.00859304	0.0184355	-0.00164176	0.00528205			195.6	0.00871046	0.0094053	0.00626553	0.00899994	-0.00859304	0.0184355	-0.00164176	0.00528205
195.79	0.00626775	0.00621585	0.00344508	0.0137662	-0.00877017	0.0209539	-0.00264166	0.00618224			195.79	0.00626775	0.00621585	0.00344508	0.0137662	-0.00877017	0.0209539	-0.00264166	0.00618224
195.99	0.00728169	0.00834112	0.00379013	0.011057	-0.00794955	0.0177377	-0.00141625	0.00891474			195.99	0.00728169	0.00834112	0.00379013	0.011057	-0.00794955	0.0177377	-0.00141625	0.00891474
196.19	0.00654586	0.0117253	0.0055267	0.0119013	-0.00678449	0.0251823	-0.00012386	0.00968532			196.19	0.00654586	0.0117253	0.0055267	0.0119013	-0.00678449	0.0251823	-0.00012386	0.00968532
196.39	0.003905	0.00337696	0.00525549	0.00836513	-0.0116852	0.0209851	-0.00362584	0.00883867			196.39	0.003905	0.00337696	0.00525549	0.00836513	-0.0116852	0.0209851	-0.00362584	0.00883867
196.6	0.00417094	0.00603244	0.00226285	0.00959757	-0.0104516	0.0211121	0.00066289	0.00538531			196.6	0.00417094	0.00603244	0.00226285	0.00959757	-0.0104516	0.0211121	0.00066289	0.00538531
196.79	0.00502196	0.00690243	0.00294312	0.0117021	-0.0122164	0.0214296	-0.00264167	0.0095006			196.79	0.00502196	0.00690243	0.00294312	0.0117021	-0.0122164	0.0214296	-0.00264167	0.0095006
196.99	0.0044625	0.0093806	0.00542836	0.0112032	-0.0103555	0.0222526	-0.0073545	0.00372283			196.99	0.0044625	0.0093806	0.00542836	0.0112032	-0.0103555	0.0222526	-0.0073545	0.00372283
197.19	0.00629941	0.00875575	0.00639783	0.00991213	-0.00761954	0.0208577	-0.00586275	0.00361828			197.19	0.00629941	0.00875575	0.00639783	0.00991213	-0.00761954	0.0208577	-0.00586275	0.00361828
197.39	0.00258744	0.0109868	0.0069248	0.0122229	-0.00841729	0.0161886	-0.00389921	0.0116666			197.39	0.00258744	0.0109868	0.0069248	0.0122229	-0.00841729	0.0161886	-0.00389921	0.0116666
197.6	0.00202907	0.00898862	0.00390968	0.00650135	-0.00862722	0.0179921	-0.00281874	0.00710028			197.6	0.00202907	0.00898862	0.00390968	0.00650135	-0.00862722	0.0179921	-0.00281874	0.00710028
197.79	0.00498928	0.00749272	0.00875305	0.0121405	-0.0090504	0.0176019	-0.00424795	0.0119601			197.79	0.00498928	0.00749272	0.00875305	0.0121405	-0.0090504	0.0176019	-0.00424795	0.0119601
197.99	0.00679018	0.00892656	0.00453792	0.0128665	-0.00718352	0.016579	-0.00232984	0.00933714			197.99	0.00679018	0.00892656	0.00453792	0.0128665	-0.00718352	0.016579	-0.00232984	0.00933714
198.19	0.00471098	0.00464873	0.00669093	0.0134728	-0.00835395	0.0201029	-0.0026449	0.00815098			198.19	0.00471098	0.00464873	0.00669093	0.0134728	-0.00835395	0.0201029	-0.0026449	0.00815098
198.39	0.0082203	0.00715712	0.00629922	0.0103371	-0.0094427	0.0210427	0.00076628	0.00576625			198.39	0.0082203	0.00715712	0.00629922	0.0103371	-0.0094427	0.0210427	0.00076628	0.00576625
198.59	0.00556197	0.00953605	0.00385572	0.00887806	-0.00816303	0.0223357	-0.00156773	0.00721875			198.59	0.00556197	0.00953605	0.00385572	0.00887806	-0.00816303	0.0223357	-0.00156773	0.00721875
198.79	0.00370895	0.00692344	0.00581042	0.00960381	-0.0122797	0.0200631	-0.0060789	0.00738551			198.79	0.00370895	0.00692344	0.00581042	0.00960381	-0.0122797	0.0200631	-0.0060789	0.00738551
198.99	0.00655317	0.00913485	0.00294113	0.00904075	-0.0111169	0.0202556	-0.00198849	0.0105973			198.99	0.00655317	0.00913485	0.00294113	0.00904075	-0.0111169	0.0202556	-0.00198849	0.0105973
199.19	0.00690481	0.00904957	0.00489422	0.00919825	-0.0107215	0.0207259	-0.0019016	0.00951834			199.19	0.00690481	0.00904957	0.00489422	0.00919825	-0.0107215	0.0207259	-0.0019016	0.00951834
199.39	0.00710331	0.00558137	0.00528667	0.0122528	-0.00941611	0.0217574	-0.00073967	0.0123494			199.39	0.00710331	0.00558137	0.00528667	0.0122528	-0.00941611	0.0217574	-0.00073967	0.0123494
199.59	0.0044018	0.00832103	0.00637435	0.0104254	-0.00783418	0.0179333	0.00033679	0.00614562			199.59	0.0044018	0.00832103	0.00637435	0.0104254	-0.00783418	0.0179333	0.00033679	0.00614562
199.8	0.00541085	0.00651276	0.00613048	0.00974445	-0.0105755	0.0180716	-0.00265818	0.00783747			199.8	0.00541085	0.00651276	0.00613048	0.00974445	-0.0105755	0.0180716	-0.00265818	0.00783747
200	0.00127167	-0.00050232	0.00050132	0.00205941	-0.00879386	0.0219341	0.00655086	0.0202653			200	0.00127167	-0.00050232	0.00050132	0.00205941	-0.00879386	0.0219341	0.00655086	0.0202653
200.2	0.00365653	0.00590053	0.00306672	0.00860652	-0.0026705	0.0239027	0.00944085	0.0257339			200.2	0.00365653	0.00590053	0.00306672	0.00860652	-0.0026705	0.0239027	0.00944085	0.0257339
200.4	0.00756742	0.0101146	0.00632337	0.00904021	-0.00283966	0.0261017	0.0123251	0.0246477			200.4	0.00756742	0.0101146	0.00632337	0.00904021	-0.00283966	0.0261017	0.0123251	0.0246477
200.59	0.00839806	0.010834	0.00808812	0.0110209	0.0006677	0.0267791	0.0125613	0.0234709			200.59	0.00839806	0.010834	0.00808812	0.0110209	0.0006677	0.0267791	0.0125613	0.0234709
200.8	0.00728452	0.00830838	0.0110542	0.0165044	0.00218473	0.0307116	0.0130834	0.027011			200.8	0.00728452	0.00830838	0.0110542	0.0165044	0.00218473	0.0307116	0.0130834	0.027011
200.99	0.0113392	0.0139405	0.0109669	0.0132497	0.00502886	0.0321004	0.012967	0.029885			200.99	0.0113392	0.0139405	0.0109669	0.0132497	0.00502886	0.0321004	0.012967	0.029885
201.2	0.0108358	0.0116381	0.00895455	0.0126296	0.00414387	0.0280827	0.018628	0.0281515			201.2	0.0108358	0.0116381	0.00895455	0.0126296	0.00414387	0.0280827	0.018628	0.0281515
201.39	0.0145564	0.014471	0.0100952	0.0117617	0.00677484	0.0335405	0.0185582	0.0302212			201.39	0.0145564	0.014471	0.0100952	0.0117617	0.00677484	0.0335405	0.0185582	0.0302212
201.59	0.0118323	0.0154792	0.0145766	0.0125803	0.00599584	0.0335261	0.0177574	0.0328481			201.59	0.0118323	0.0154792	0.0145766	0.0125803	0.00599584	0.0335261	0.0177574	0.0328481
201.8	0.0125936	0.0125805	0.0127347	0.0158428	0.00619605	0.0340707	0.0163694	0.0334257			201.8	0.0125936	0.0125805	0.0127347	0.0158428	0.00619605	0.0340707	0.0163694	0.0334257
202	0.010733	0.020353	0.0171735	0.0156452	0.00971666	0.0375904	0.0183069	0.0314977			202	0.010733	0.020353	0.0171735	0.0156452	0.00971666	0.0375904	0.0183069	0.0314977
202.19	0.0124768	0.0174673	0.0125907	0.0185318	0.0110189	0.0363964	0.0198933	0.0332784			202.19	0.0124768	0.0174673	0.0125907	0.0185318	0.0110189	0.0363964	0.0198933	0.0332784
202.39	0.0135814	0.0157784	0.0171344	0.017669	0.00737167	0.0371567	0.0225835	0.0320922			202.39	0.0135814	0.0157784	0.0171344	0.017669	0.00737167	0.0371567	0.0225835	0.0320922
202.59	0.0138912	0.0182507	0.0150128	0.0169203	0.010305	0.0372009	0.0210334	0.0312772			202.59	0.0138912	0.0182507	0.0150128	0.0169203	0.010305	0.0372009	0.0210334	0.0312772
202.79	0.0134546	0.0167574	0.0152524	0.0233348	0.010362	0.0378302	0.0213617	0.0337959			202.79	0.0134546	0.0167574	0.0152524	0.0233348	0.010362	0.0378302	0.0213617	0.0337959
202.99	0.0152176	0.0203171	0.0188198	0.0209191	0.0113316	0.0380214	0.0238177	0.0356808			202.99	0.0152176	0.0203171	0.0188198	0.0209191	0.0113316	0.0380214	0.0238177	0.0356808
203.19	0.0148528	0.0217161	0.0196654	0.0194552	0.0108253	0.0373025	0.0215121	0.0347046			203.19	0.0148528	0.0217161	0.0196654	0.0194552	0.0108253	0.0373025	0.0215121	0.0347046
203.4	0.0183765	0.020618	0.016065	0.0205548	0.0109211	0.0395132	0.0226806	0.0349154			203.4	0.0183765	0.020618	0.016065	0.0205548	0.0109211	0.0395132	0.0226806	0.0349154
203.59	0.015779	0.0214276	0.0211448	0.0192754	0.0114287	0.0415291	0.0225386	0.0324136			203.59	0.015779	0.0214276	0.0211448	0.0192754	0.0114287	0.0415291	0.0225386	0.0324136
203.79	0.018534	0.0246192	0.0208302	0.0183584	0.0155722	0.0380276	0.0236768	0.0363497			203.79	0.018534	0.0246192	0.0208302	0.0183584	0.0155722	0.0380276	0.0236768	0.0363497
203.99	0.0207778	0.0237106	0.0188685	0.0229745	0.0122126	0.0390431	0.0254516	0.0365646			203.99	0.0207778	0.0237106	0.0188685	0.0229745	0.0122126	0.0390431	0.0254516	0.0365646
204.2	0.0151731	0.0240045	0.0211029	0.0206205	0.0128664	0.0394508	0.0271379	0.0374912			204.2	0.0151731	0.0240045	0.0211029	0.0206205	0.0128664	0.0394508	0.0271379	0.0374912
204.39	0.0199715	0.0234944	0.0189277	0.0187197	0.0113096	0.0420804	0.0224318	0.039243			204.39	0.0199715	0.0234944	0.0189277	0.0187197	0.0113096	0.0420804	0.0224318	0.039243
204.6	0.0165785	0.024645	0.0185873	0.0242039	0.0132023	0.0433462	0.0231956	0.0374135			204.6	0.0165785	0.024645	0.0185873	0.0242039	0.0132023	0.0433462	0.0231956	0.0374135
204.79	0.0216873	0.0279799	0.0207715	0.017455	0.0127687	0.0406119	0.0253906	0.03951			204.79	0.0216873	0.0279799	0.0207715	0.017455	0.0127687	0.0406119	0.0253906	0.03951
204.99	0.0210248	0.0260938	0.0161105	0.0260122	0.0148823	0.0425939	0.0287959	0.0367468			204.99	0.0210248	0.0260938	0.0161105	0.0260122	0.0148823	0.0425939	0.0287959	0.0367468
205.19	0.0216835	0.0278849	0.0232518	0.026962	0.014234	0.0390271	0.0286481	0.0379505			205.19	0.0216835	0.0278849	0.0232518	0.026962	0.014234	0.0390271	0.0286481	0.0379505
205.39	0.0207655	0.0279204	0.022322	0.0247149	0.0180393	0.0465198	0.0229829	0.0361012			205.39	0.0207655	0.0279204	0.022322	0.0247149	0.0180393	0.0465198	0.0229829	0.0361012
205.59	0.0211359	0.0243698	0.0250695	0.0222521	0.0169624	0.0445942	0.0287152	0.0365139			205.59	0.0211359	0.0243698	0.0250695	0.0222521	0.0169624	0.0445942	0.0287152	0.0365139
205.79	0.018962	0.0271209	0.0240302	0.0246062	0.0178153	0.0414442	0.0258114	0.0399124			205.79	0.018962	0.0271209	0.0240302	0.0246062	0.0178153	0.0414442	0.0258114	0.0399124
206	0.0223483	0.0257678	0.0217207	0.0229225	0.0210485	0.0445445	0.0283993	0.0419997			206	0.0223483	0.0257678	0.0217207	0.0229225	0.0210485	0.0445445	0.0283993	0.0419997
206.19	0.0214618	0.0297002	0.0223174	0.0287037	0.0179589	0.0447059	0.0271792	0.0395164			206.19	0.0214618	0.0297002	0.0223174	0.0287037	0.0179589	0.0447059	0.0271792	0.0395164
206.39	0.0200655	0.0281982	0.023143	0.0264407	0.0148556	0.0437439	0.0281504	0.0399079			206.39	0.0200655	0.0281982	0.023143	0.0264407	0.0148556	0.0437439	0.0281504	0.0399079
206.59	0.0217925	0.0298986	0.0207826	0.0264415	0.019572	0.0454938	0.0280027	0.0425643			206.59	0.0217925	0.0298986	0.0207826	0.0264415	0.019572	0.0454938	0.0280027	0.0425643
206.8	0.0216778	0.0324183	0.0219902	0.0291054	0.0156684	0.0450805	0.0334662	0.0428481			206.8	0.0216778	0.0324183	0.0219902	0.0291054	0.0156684	0.0450805	0.0334662	0.0428481
206.99	0.022278	0.031526	0.0258331	0.0315855	0.019234	0.0467301	0.0267081	0.0464819			206.99	0.022278	0.031526	0.0258331	0.0315855	0.019234	0.0467301	0.0267081	0.0464819
207.19	0.0192747	0.0284118	0.0253102	0.0273619	0.017297	0.0460269	0.0298487	0.0425653			207.19	0.0192747	0.0284118	0.0253102	0.0273619	0.017297	0.0460269	0.0298487	0.0425653
207.39	0.0236118	0.031751	0.0262294	0.0260521	0.0167459	0.0448066	0.031032	0.0401737			207.39	0.0236118	0.031751	0.0262294	0.0260521	0.0167459	0.0448066	0.031032	0.0401737
207.59	0.0235448	0.0323314	0.0233435	0.0276644	0.0195292	0.0467519	0.0340627	0.0422585			207.59	0.0235448	0.0323314	0.0233435	0.0276644	0.0195292	0.0467519	0.0340627	0.0422585
207.8	0.0241342	0.0297407	0.0235896	0.0304288	0.0216665	0.0468567	0.03208	0.0432767			207.8	0.0241342	0.0297407	0.0235896	0.0304288	0.0216665	0.0468567	0.03208	0.0432767
207.99	0.0221136	0.0303519	0.0219822	0.0293709	0.0214126	0.0492624	0.0295476	0.0444709			207.99	0.0221136	0.0303519	0.0219822	0.0293709	0.0214126	0.0492624	0.0295476	0.0444709
208.19	0.0242355	0.0347731	0.0254223	0.0257147	0.0223928	0.0506821	0.0336474	0.0434893			208.19	0.0242355	0.0347731	0.0254223	0.0257147	0.0223928	0.0506821	0.0336474	0.0434893
208.39	0.0257383	0.0368839	0.0238744	0.0272372	0.0200479	0.046458	0.0341441	0.0483715			208.39	0.0257383	0.0368839	0.0238744	0.0272372	0.0200479	0.046458	0.0341441	0.0483715
208.59	0.0200524	0.0344001	0.0273577	0.0282672	0.021955	0.0478159	0.0356373	0.0456401			208.59	0.0200524	0.0344001	0.0273577	0.0282672	0.021955	0.0478159	0.0356373	0.0456401
208.79	0.0253835	0.0310121	0.0263818	0.0334882	0.0244212	0.0467086	0.0355124	0.0448044			208.79	0.0253835	0.0310121	0.0263818	0.0334882	0.0244212	0.0467086	0.0355124	0.0448044
209	0.0273808	0.0384251	0.0293006	0.0301783	0.0224395	0.0479888	0.0303875	0.0445791			209	0.0273808	0.0384251	0.0293006	0.0301783	0.0224395	0.0479888	0.0303875	0.0445791
209.19	0.0276227	0.0377052	0.0298897	0.0314435	0.0246794	0.0493036	0.0353456	0.044407			209.19	0.0276227	0.0377052	0.0298897	0.0314435	0.0246794	0.0493036	0.0353456	0.044407
209.39	0.02711	0.0356561	0.031814	0.0328879	0.0253902	0.0501356	0.0312424	0.0464048			209.39	0.02711	0.0356561	0.031814	0.0328879	0.0253902	0.0501356	0.0312424	0.0464048
209.6	0.0268342	0.0377106	0.0290364	0.029927	0.0213898	0.0499146	0.0326311	0.0471441			209.6	0.0268342	0.0377106	0.0290364	0.029927	0.0213898	0.0499146	0.0326311	0.0471441
209.8	0.0287716	0.0336753	0.0319241	0.0308559	0.0267094	0.0550296	0.0335074	0.0479158			209.8	0.0287716	0.0336753	0.0319241	0.0308559	0.0267094	0.0550296	0.0335074	0.0479158
210	0.0325243	0.0405083	0.0254983	0.0332698	0.025383	0.0486699	0.0392358	0.0514476			210	0.0325243	0.0405083	0.0254983	0.0332698	0.025383	0.0486699	0.0392358	0.0514476
210.2	0.0309242	0.0394999	0.032234	0.0336368	0.0290237	0.0525041	0.0331462	0.0477895			210.2	0.0309242	0.0394999	0.032234	0.0336368	0.0290237	0.0525041	0.0331462	0.0477895
210.4	0.0288111	0.0429777	0.0295708	0.0350756	0.0269855	0.0483624	0.0363097	0.0522677			210.4	0.0288111	0.0429777	0.0295708	0.0350756	0.0269855	0.0483624	0.0363097	0.0522677
210.6	0.0273816	0.0359231	0.0305644	0.0346647	0.0272887	0.0560626	0.0394659	0.0487248			210.6	0.0273816	0.0359231	0.0305644	0.0346647	0.0272887	0.0560626	0.0394659	0.0487248
210.8	0.0314043	0.0387191	0.0312526	0.0330334	0.0242823	0.05433	0.0360269	0.0497085			210.8	0.0314043	0.0387191	0.0312526	0.0330334	0.0242823	0.05433	0.0360269	0.0497085
211	0.0289645	0.0383057	0.0287162	0.0330487	0.0271664	0.0513188	0.0398526	0.0498506			211	0.0289645	0.0383057	0.0287162	0.0330487	0.0271664	0.0513188	0.0398526	0.0498506
211.19	0.0305054	0.0387368	0.0339229	0.0362477	0.0293067	0.0533408	0.0376446	0.0540723			211.19	0.0305054	0.0387368	0.0339229	0.0362477	0.0293067	0.0533408	0.0376446	0.0540723
211.4	0.0326265	0.0360581	0.0311898	0.0334458	0.0275807	0.0555833	0.0383691	0.0533344			211.4	0.0326265	0.0360581	0.0311898	0.0334458	0.0275807	0.0555833	0.0383691	0.0533344
211.6	0.02614	0.0382995	0.0347812	0.0374892	0.0279884	0.0576798	0.0407215	0.051796			211.6	0.02614	0.0382995	0.0347812	0.0374892	0.0279884	0.0576798	0.0407215	0.051796
211.8	0.0322476	0.0372477	0.0357617	0.0335207	0.0303999	0.0583445	0.0399786	0.0525856			211.8	0.0322476	0.0372477	0.0357617	0.0335207	0.0303999	0.0583445	0.0399786	0.0525856
212	0.0344715	0.0390173	0.0364259	0.0368853	0.0285302	0.0537647	0.0383714	0.0523359			212	0.0344715	0.0390173	0.0364259	0.0368853	0.0285302	0.0537647	0.0383714	0.0523359
212.2	0.0297789	0.0378008	0.0362727	0.037899	0.0295539	0.054206	0.0420417	0.0552485			212.2	0.0297789	0.0378008	0.0362727	0.037899	0.0295539	0.054206	0.0420417	0.0552485
212.4	0.0308178	0.0398153	0.0360672	0.0340036	0.0265156	0.0567684	0.0439224	0.0560446			212.4	0.0308178	0.0398153	0.0360672	0.0340036	0.0265156	0.0567684	0.0439224	0.0560446
212.6	0.0316748	0.0459684	0.0352743	0.0376667	0.0294456	0.058127	0.0432559	0.0544861			212.6	0.0316748	0.0459684	0.0352743	0.0376667	0.0294456	0.058127	0.0432559	0.0544861
212.8	0.0349704	0.0438557	0.0370646	0.0350877	0.0298697	0.056007	0.04545	0.0509071			212.8	0.0349704	0.0438557	0.0370646	0.0350877	0.0298697	0.056007	0.04545	0.0509071
213	0.0305696	0.0440353	0.0383459	0.0380148	0.0304698	0.0535501	0.0453482	0.0542721			213	0.0305696	0.0440353	0.0383459	0.0380148	0.0304698	0.0535501	0.0453482	0.0542721
213.2	0.034126	0.0415085	0.0385424	0.040362	0.028472	0.0586691	0.0459321	0.052931			213.2	0.034126	0.0415085	0.0385424	0.040362	0.028472	0.0586691	0.0459321	0.052931
213.39	0.0352092	0.0428364	0.037432	0.0366522	0.0334834	0.0581239	0.0445839	0.0554872			213.39	0.0352092	0.0428364	0.037432	0.0366522	0.0334834	0.0581239	0.0445839	0.0554872
213.6	0.0298664	0.0467339	0.0349208	0.0385064	0.0338105	0.0577339	0.0435708	0.0551706			213.6	0.0298664	0.0467339	0.0349208	0.0385064	0.0338105	0.0577339	0.0435708	0.0551706
213.8	0.0346235	0.041524	0.0376837	0.0400948	0.0325956	0.0574632	0.044391	0.0587842			213.8	0.0346235	0.041524	0.0376837	0.0400948	0.0325956	0.0574632	0.044391	0.0587842
214	0.032992	0.0428468	0.0397923	0.0397387	0.0328083	0.0605946	0.0408687	0.0569288			214	0.032992	0.0428468	0.0397923	0.0397387	0.0328083	0.0605946	0.0408687	0.0569288
214.2	0.03491	0.0485959	0.0352478	0.0418995	0.0313961	0.0566275	0.0457556	0.0599442			214.2	0.03491	0.0485959	0.0352478	0.0418995	0.0313961	0.0566275	0.0457556	0.0599442
214.4	0.0345706	0.0470372	0.0371704	0.0407073	0.0313819	0.0593903	0.0442047	0.0582088			214.4	0.0345706	0.0470372	0.0371704	0.0407073	0.0313819	0.0593903	0.0442047	0.0582088
214.59	0.034318	0.0461446	0.0382339	0.0398432	0.0354574	0.0593489	0.0462356	0.0570899			214.59	0.034318	0.0461446	0.0382339	0.0398432	0.0354574	0.0593489	0.0462356	0.0570899
214.8	0.0364692	0.046973	0.0399794	0.0377136	0.0350884	0.0593753	0.0452921	0.0580456			214.8	0.0364692	0.046973	0.0399794	0.0377136	0.0350884	0.0593753	0.0452921	0.0580456
215	0.0329651	0.0476986	0.03963	0.0400286	0.0295359	0.0601752	0.046998	0.0572806			215	0.0329651	0.0476986	0.03963	0.0400286	0.0295359	0.0601752	0.046998	0.0572806
215.2	0.0361701	0.0459468	0.0422694	0.0414934	0.0375722	0.0603908	0.0499918	0.0613291			215.2	0.0361701	0.0459468	0.0422694	0.0414934	0.0375722	0.0603908	0.0499918	0.0613291
215.4	0.038442	0.0470563	0.0399492	0.0429207	0.0340475	0.0633671	0.0462984	0.0581169			215.4	0.038442	0.0470563	0.0399492	0.0429207	0.0340475	0.0633671	0.0462984	0.0581169
215.6	0.0413548	0.0494089	0.0432289	0.0450384	0.0342234	0.0645856	0.0519335	0.0580776			215.6	0.0413548	0.0494089	0.0432289	0.0450384	0.0342234	0.0645856	0.0519335	0.0580776
215.8	0.038795	0.0484974	0.043064	0.0445125	0.0323421	0.0622915	0.0478813	0.0579397			215.8	0.038795	0.0484974	0.043064	0.0445125	0.0323421	0.0622915	0.0478813	0.0579397
215.99	0.0390293	0.0470879	0.0432577	0.0450087	0.0350942	0.06156	0.0465283	0.0600605			215.99	0.0390293	0.0470879	0.0432577	0.0450087	0.0350942	0.06156	0.0465283	0.0600605
216.2	0.0367439	0.0493094	0.0418755	0.0440364	0.0356614	0.0656149	0.0507121	0.0579879			216.2	0.0367439	0.0493094	0.0418755	0.0440364	0.0356614	0.0656149	0.0507121	0.0579879
216.4	0.0384824	0.0501012	0.0440513	0.0431725	0.039495	0.067653	0.0512552	0.0608543			216.4	0.0384824	0.0501012	0.0440513	0.0431725	0.039495	0.067653	0.0512552	0.0608543
216.6	0.0410346	0.0483619	0.0430394	0.0460714	0.0348327	0.0648556	0.0476935	0.0613695			216.6	0.0410346	0.0483619	0.0430394	0.0460714	0.0348327	0.0648556	0.0476935	0.0613695
216.79	0.0369112	0.0528729	0.0470092	0.0441931	0.0388335	0.0644685	0.0491682	0.0579521			216.79	0.0369112	0.0528729	0.0470092	0.0441931	0.0388335	0.0644685	0.0491682	0.0579521
217	0.0394846	0.0511451	0.0478195	0.043432	0.0351388	0.0636781	0.0475215	0.0624844			217	0.0394846	0.0511451	0.0478195	0.043432	0.0351388	0.0636781	0.0475215	0.0624844
217.2	0.0409489	0.0504959	0.0455892	0.0444882	0.0381324	0.0660907	0.0485411	0.0616574			217.2	0.0409489	0.0504959	0.0455892	0.0444882	0.0381324	0.0660907	0.0485411	0.0616574
217.39	0.0426414	0.0521512	0.0444579	0.0437715	0.0366315	0.0659645	0.0486033	0.0607887			217.39	0.0426414	0.0521512	0.0444579	0.0437715	0.0366315	0.0659645	0.0486033	0.0607887
217.6	0.0418562	0.0513047	0.047897	0.0479743	0.0389079	0.067758	0.0519422	0.0639536			217.6	0.0418562	0.0513047	0.047897	0.0479743	0.0389079	0.067758	0.0519422	0.0639536
217.8	0.0401746	0.0519883	0.0443416	0.0484343	0.0437165	0.0676717	0.0533632	0.064354			217.8	0.0401746	0.0519883	0.0443416	0.0484343	0.0437165	0.0676717	0.0533632	0.064354
217.99	0.0439602	0.0538159	0.0463033	0.0480898	0.0383402	0.0664567	0.0518976	0.0614464			217.99	0.0439602	0.0538159	0.0463033	0.0480898	0.0383402	0.0664567	0.0518976	0.0614464
218.2	0.0432744	0.056697	0.0481339	0.0489856	0.0418305	0.0672594	0.0514738	0.0650374			218.2	0.0432744	0.056697	0.0481339	0.0489856	0.0418305	0.0672594	0.0514738	0.0650374
218.4	0.0431993	0.0549393	0.0465562	0.0522098	0.0407589	0.0695125	0.0522859	0.0661807			218.4	0.0431993	0.0549393	0.0465562	0.0522098	0.0407589	0.0695125	0.0522859	0.0661807
218.59	0.0414396	0.0563859	0.0431269	0.0492591	0.0369751	0.0690851	0.0542369	0.0696805			218.59	0.0414396	0.0563859	0.0431269	0.0492591	0.0369751	0.0690851	0.0542369	0.0696805
218.79	0.04423	0.0548586	0.0486468	0.0521763	0.0384431	0.0680408	0.0578837	0.0657988			218.79	0.04423	0.0548586	0.0486468	0.0521763	0.0384431	0.0680408	0.0578837	0.0657988
219	0.0421615	0.0549328	0.0466641	0.0518024	0.0427398	0.0667651	0.0531536	0.0687532			219	0.0421615	0.0549328	0.0466641	0.0518024	0.0427398	0.0667651	0.0531536	0.0687532
219.2	0.0439597	0.0554248	0.0503817	0.0484861	0.0404405	0.0692862	0.0560002	0.0677238			219.2	0.0439597	0.0554248	0.0503817	0.0484861	0.0404405	0.0692862	0.0560002	0.0677238
219.39	0.0452027	0.0527174	0.0459374	0.0509376	0.0448828	0.0701024	0.0585498	0.0661361			219.39	0.0452027	0.0527174	0.0459374	0.0509376	0.0448828	0.0701024	0.0585498	0.0661361
219.6	0.0468853	0.0603713	0.0480599	0.0506684	0.0436538	0.0692838	0.0573922	0.0695545			219.6	0.0468853	0.0603713	0.0480599	0.0506684	0.0436538	0.0692838	0.0573922	0.0695545
219.8	0.0475134	0.0555605	0.0491122	0.052656	0.0460541	0.0708543	0.0518193	0.0665319			219.8	0.0475134	0.0555605	0.0491122	0.052656	0.0460541	0.0708543	0.0518193	0.0665319
219.99	0.0467063	0.0576662	0.0516609	0.051119	0.0455176	0.0718104	0.0558667	0.0690724			219.99	0.0467063	0.0576662	0.0516609	0.051119	0.0455176	0.0718104	0.0558667	0.0690724
220.2	0.0445682	0.0574918	0.0484002	0.0525086	0.0434691	0.072877	0.0557988	0.0710557			220.2	0.0445682	0.0574918	0.0484002	0.0525086	0.0434691	0.072877	0.0557988	0.0710557
220.4	0.0479319	0.057509	0.0504505	0.0501283	0.0433668	0.0755354	0.0598449	0.070507			220.4	0.0479319	0.057509	0.0504505	0.0501283	0.0433668	0.0755354	0.0598449	0.070507
220.6	0.0453443	0.0561529	0.0505579	0.050995	0.0436025	0.0723526	0.0564457	0.0684904			220.6	0.0453443	0.0561529	0.0505579	0.050995	0.0436025	0.0723526	0.0564457	0.0684904
220.8	0.0451121	0.0615058	0.0556963	0.0517961	0.0476631	0.072735	0.0580265	0.0695605			220.8	0.0451121	0.0615058	0.0556963	0.0517961	0.0476631	0.072735	0.0580265	0.0695605
221	0.046007	0.0574649	0.0534322	0.0485046	0.0485712	0.0748305	0.0591948	0.0704363			221	0.046007	0.0574649	0.0534322	0.0485046	0.0485712	0.0748305	0.0591948	0.0704363
221.19	0.0483751	0.058159	0.0534986	0.0536191	0.0452946	0.0725595	0.0587382	0.0705137			221.19	0.0483751	0.058159	0.0534986	0.0536191	0.0452946	0.0725595	0.0587382	0.0705137
221.4	0.0511316	0.0569588	0.0505885	0.0520785	0.0503262	0.0735576	0.0606278	0.0714117			221.4	0.0511316	0.0569588	0.0505885	0.0520785	0.0503262	0.0735576	0.0606278	0.0714117
221.6	0.0488518	0.0593052	0.0539978	0.0549612	0.0439976	0.0734596	0.0583948	0.0697443			221.6	0.0488518	0.0593052	0.0539978	0.0549612	0.0439976	0.0734596	0.0583948	0.0697443
221.79	0.0481142	0.0627357	0.0556507	0.0548839	0.048529	0.0726579	0.0591141	0.0730334			221.79	0.0481142	0.0627357	0.0556507	0.0548839	0.048529	0.0726579	0.0591141	0.0730334
221.99	0.0500926	0.061497	0.0535278	0.0563841	0.0478275	0.0728452	0.0578707	0.0719346			221.99	0.0500926	0.061497	0.0535278	0.0563841	0.0478275	0.0728452	0.0578707	0.0719346
222.2	0.0515168	0.0629882	0.0513805	0.0571608	0.0448774	0.0791294	0.0626812	0.0751678			222.2	0.0515168	0.0629882	0.0513805	0.0571608	0.0448774	0.0791294	0.0626812	0.0751678
222.4	0.0516308	0.0635873	0.0542766	0.05443	0.0510178	0.0748781	0.0605772	0.0716893			222.4	0.0516308	0.0635873	0.0542766	0.05443	0.0510178	0.0748781	0.0605772	0.0716893
222.59	0.0510295	0.064818	0.0535939	0.0579581	0.0474376	0.077792	0.0582242	0.0766341			222.59	0.0510295	0.064818	0.0535939	0.0579581	0.0474376	0.077792	0.0582242	0.0766341
222.79	0.0511595	0.0658156	0.054241	0.0539819	0.048435	0.0783509	0.0630678	0.0725075			222.79	0.0511595	0.0658156	0.054241	0.0539819	0.048435	0.0783509	0.0630678	0.0725075
223	0.0485604	0.0647688	0.0549699	0.0549876	0.0533137	0.0763374	0.0628247	0.0731885			223	0.0485604	0.0647688	0.0549699	0.0549876	0.0533137	0.0763374	0.0628247	0.0731885
223.2	0.0494269	0.0621631	0.0536674	0.0595692	0.0489103	0.0782649	0.0612253	0.0733688			223.2	0.0494269	0.0621631	0.0536674	0.0595692	0.0489103	0.0782649	0.0612253	0.0733688
223.39	0.050179	0.0681139	0.0568044	0.0571668	0.0477295	0.0815405	0.0638075	0.0746419			223.39	0.050179	0.0681139	0.0568044	0.0571668	0.0477295	0.0815405	0.0638075	0.0746419
223.6	0.0511703	0.0680841	0.057561	0.0575326	0.0531262	0.0773836	0.0653072	0.079111			223.6	0.0511703	0.0680841	0.057561	0.0575326	0.0531262	0.0773836	0.0653072	0.079111
223.8	0.0494974	0.0670217	0.0569332	0.0581785	0.0509474	0.078954	0.0601092	0.0807638			223.8	0.0494974	0.0670217	0.0569332	0.0581785	0.0509474	0.078954	0.0601092	0.0807638
224	0.0536181	0.0658922	0.0569258	0.0586423	0.0549555	0.0823114	0.0627468	0.0799235			224	0.0536181	0.0658922	0.0569258	0.0586423	0.0549555	0.0823114	0.0627468	0.0799235
224.2	0.053413	0.0641505	0.0577788	0.0561601	0.053102	0.0792359	0.0647275	0.0763443			224.2	0.053413	0.0641505	0.0577788	0.0561601	0.053102	0.0792359	0.0647275	0.0763443
224.39	0.0509587	0.0689555	0.0608817	0.0569228	0.0520315	0.0813445	0.0648026	0.0773064			224.39	0.0509587	0.0689555	0.0608817	0.0569228	0.0520315	0.0813445	0.0648026	0.0773064
224.6	0.0515664	0.0671504	0.0616136	0.0600159	0.0515935	0.0781504	0.06725	0.0817105			224.6	0.0515664	0.0671504	0.0616136	0.0600159	0.0515935	0.0781504	0.06725	0.0817105
224.8	0.0565683	0.0680146	0.0585766	0.0591826	0.0540398	0.0794839	0.0667709	0.0775014			224.8	0.0565683	0.0680146	0.0585766	0.0591826	0.0540398	0.0794839	0.0667709	0.0775014
225	0.052712	0.0676108	0.0577087	0.061533	0.0500601	0.0799436	0.0697817	0.0787196			225	0.052712	0.0676108	0.0577087	0.061533	0.0500601	0.0799436	0.0697817	0.0787196
225.19	0.0586984	0.0632148	0.0571631	0.0609629	0.0531398	0.0795456	0.068973	0.0776336			225.19	0.0586984	0.0632148	0.0571631	0.0609629	0.0531398	0.0795456	0.068973	0.0776336
225.39	0.0543686	0.0710482	0.058901	0.0612869	0.0545565	0.076641	0.0681011	0.081901			225.39	0.0543686	0.0710482	0.058901	0.0612869	0.0545565	0.076641	0.0681011	0.081901
225.6	0.0553687	0.0700743	0.0590635	0.0619605	0.0536313	0.0829045	0.0643702	0.0813013			225.6	0.0553687	0.0700743	0.0590635	0.0619605	0.0536313	0.0829045	0.0643702	0.0813013
225.79	0.0565507	0.0699984	0.058869	0.0584636	0.0538448	0.0818559	0.0703604	0.0788776			225.79	0.0565507	0.0699984	0.058869	0.0584636	0.0538448	0.0818559	0.0703604	0.0788776
225.99	0.0564845	0.0692634	0.0595286	0.0607114	0.0552657	0.0832482	0.0683482	0.0791606			225.99	0.0564845	0.0692634	0.0595286	0.0607114	0.0552657	0.0832482	0.0683482	0.0791606
226.2	0.0553157	0.0687531	0.062598	0.0633586	0.0529124	0.0853281	0.0702639	0.0788997			226.2	0.0553157	0.0687531	0.062598	0.0633586	0.0529124	0.0853281	0.0702639	0.0788997
226.4	0.0532038	0.069974	0.0617494	0.0644473	0.0571458	0.0835543	0.0676156	0.0848882			226.4	0.0532038	0.069974	0.0617494	0.0644473	0.0571458	0.0835543	0.0676156	0.0848882
226.59	0.0593286	0.0700535	0.0586379	0.0627819	0.0561651	0.0801878	0.0697957	0.0819327			226.59	0.0593286	0.0700535	0.0586379	0.0627819	0.0561651	0.0801878	0.0697957	0.0819327
226.79	0.0596494	0.0741423	0.0622641	0.0628353	0.0553196	0.0842866	0.0696195	0.0816231			226.79	0.0596494	0.0741423	0.0622641	0.0628353	0.0553196	0.0842866	0.0696195	0.0816231
227	0.0594112	0.0710481	0.059339	0.0595351	0.0561466	0.0850098	0.0694215	0.0814157			227	0.0594112	0.0710481	0.059339	0.0595351	0.0561466	0.0850098	0.0694215	0.0814157
227.2	0.0573021	0.0687491	0.0635897	0.0648453	0.0566882	0.0829089	0.069158	0.085522			227.2	0.0573021	0.0687491	0.0635897	0.0648453	0.0566882	0.0829089	0.069158	0.085522
227.4	0.0567108	0.0755147	0.0597553	0.0638572	0.0560243	0.0884285	0.0715454	0.0833703			227.4	0.0567108	0.0755147	0.0597553	0.0638572	0.0560243	0.0884285	0.0715454	0.0833703
227.6	0.0599177	0.0706888	0.0619601	0.0643517	0.059615	0.0871732	0.0704271	0.0844432			227.6	0.0599177	0.0706888	0.0619601	0.0643517	0.059615	0.0871732	0.0704271	0.0844432
227.79	0.0616275	0.0747604	0.0669181	0.0685223	0.0592302	0.0866636	0.0691214	0.0832879			227.79	0.0616275	0.0747604	0.0669181	0.0685223	0.0592302	0.0866636	0.0691214	0.0832879
227.99	0.0633094	0.0717834	0.0595468	0.0636471	0.0614949	0.0889647	0.0754446	0.0841306			227.99	0.0633094	0.0717834	0.0595468	0.0636471	0.0614949	0.0889647	0.0754446	0.0841306
228.2	0.0613047	0.0747542	0.0640032	0.0654619	0.0563198	0.0858977	0.0722743	0.082654			228.2	0.0613047	0.0747542	0.0640032	0.0654619	0.0563198	0.0858977	0.0722743	0.082654
228.39	0.0605155	0.0727052	0.0649068	0.0669396	0.0626584	0.0886935	0.0719918	0.0856355			228.39	0.0605155	0.0727052	0.0649068	0.0669396	0.0626584	0.0886935	0.0719918	0.0856355
228.59	0.0615951	0.0780463	0.0676831	0.0665316	0.0583053	0.0875659	0.0724519	0.0877421			228.59	0.0615951	0.0780463	0.0676831	0.0665316	0.0583053	0.0875659	0.0724519	0.0877421
228.79	0.060391	0.0739464	0.0651508	0.0699835	0.0617742	0.0891416	0.0743479	0.0834533			228.79	0.060391	0.0739464	0.0651508	0.0699835	0.0617742	0.0891416	0.0743479	0.0834533
229	0.0642989	0.0761468	0.0636549	0.0650904	0.0639912	0.0895434	0.0752017	0.0897786			229	0.0642989	0.0761468	0.0636549	0.0650904	0.0639912	0.0895434	0.0752017	0.0897786
229.19	0.0595093	0.0758242	0.0701657	0.068234	0.0612771	0.0910582	0.0748306	0.0850409			229.19	0.0595093	0.0758242	0.0701657	0.068234	0.0612771	0.0910582	0.0748306	0.0850409
229.39	0.0608214	0.0735555	0.0661634	0.0667163	0.0612623	0.0899069	0.0789769	0.0859178			229.39	0.0608214	0.0735555	0.0661634	0.0667163	0.0612623	0.0899069	0.0789769	0.0859178
229.59	0.0628129	0.0733	0.0659469	0.0679799	0.0662455	0.0901497	0.077288	0.0872831			229.59	0.0628129	0.0733	0.0659469	0.0679799	0.0662455	0.0901497	0.077288	0.0872831
229.8	0.0628117	0.0770925	0.0704884	0.069191	0.0656689	0.0928072	0.075575	0.0896259			229.8	0.0628117	0.0770925	0.0704884	0.069191	0.0656689	0.0928072	0.075575	0.0896259
229.99	0.0628544	0.0779328	0.0669032	0.0692289	0.0634767	0.0913224	0.0789107	0.0865129			229.99	0.0628544	0.0779328	0.0669032	0.0692289	0.0634767	0.0913224	0.0789107	0.0865129
230.19	0.0643218	0.0792116	0.0714694	0.0684435	0.0613722	0.0900626	0.0768777	0.0912132			230.19	0.0643218	0.0792116	0.0714694	0.0684435	0.0613722	0.0900626	0.0768777	0.0912132
230.4	0.0635112	0.0796595	0.0697914	0.0693803	0.0656492	0.0931494	0.0770996	0.0885506			230.4	0.0635112	0.0796595	0.0697914	0.0693803	0.0656492	0.0931494	0.0770996	0.0885506
230.59	0.0651403	0.0798973	0.0722678	0.0688762	0.0651448	0.0947138	0.0786772	0.0926177			230.59	0.0651403	0.0798973	0.0722678	0.0688762	0.0651448	0.0947138	0.0786772	0.0926177
230.79	0.0650455	0.0782946	0.0708417	0.0726832	0.0644497	0.0935503	0.0753188	0.0896535			230.79	0.0650455	0.0782946	0.0708417	0.0726832	0.0644497	0.0935503	0.0753188	0.0896535
230.99	0.0674105	0.0809895	0.0737285	0.0736904	0.0665762	0.0930283	0.0805481	0.0912403			230.99	0.0674105	0.0809895	0.0737285	0.0736904	0.0665762	0.0930283	0.0805481	0.0912403
231.2	0.0669962	0.0788759	0.0704007	0.0713277	0.0646764	0.0966023	0.0803379	0.0946521			231.2	0.0669962	0.0788759	0.0704007	0.0713277	0.0646764	0.0966023	0.0803379	0.0946521
231.39	0.0668626	0.0740079	0.0694417	0.0718981	0.0713802	0.0930888	0.07809	0.0937429			231.39	0.0668626	0.0740079	0.0694417	0.0718981	0.0713802	0.0930888	0.07809	0.0937429
231.6	0.0675373	0.0816331	0.0735234	0.072731	0.0640171	0.0930801	0.0808207	0.0940316			231.6	0.0675373	0.0816331	0.0735234	0.072731	0.0640171	0.0930801	0.0808207	0.0940316
231.79	0.0624729	0.08053	0.0695666	0.0771139	0.0674685	0.097754	0.0790012	0.0893971			231.79	0.0624729	0.08053	0.0695666	0.0771139	0.0674685	0.097754	0.0790012	0.0893971
231.99	0.0676539	0.0784992	0.0699628	0.0783043	0.0678688	0.0942129	0.0788449	0.0920381			231.99	0.0676539	0.0784992	0.0699628	0.0783043	0.0678688	0.0942129	0.0788449	0.0920381
232.2	0.06925	0.0836678	0.0722078	0.0738748	0.0672051	0.0954018	0.0800321	0.0919178			232.2	0.06925	0.0836678	0.0722078	0.0738748	0.0672051	0.0954018	0.0800321	0.0919178
232.39	0.0676299	0.0783882	0.0723944	0.0733851	0.0676158	0.09565	0.0790451	0.0937563			232.39	0.0676299	0.0783882	0.0723944	0.0733851	0.0676158	0.09565	0.0790451	0.0937563
232.59	0.0683269	0.0823737	0.071487	0.0721292	0.0664524	0.0975677	0.0817803	0.0957454			232.59	0.0683269	0.0823737	0.071487	0.0721292	0.0664524	0.0975677	0.0817803	0.0957454
232.79	0.0653749	0.083081	0.0738306	0.0724744	0.0675229	0.0988763	0.0829143	0.0959579			232.79	0.0653749	0.083081	0.0738306	0.0724744	0.0675229	0.0988763	0.0829143	0.0959579
233	0.0699075	0.0813287	0.0748504	0.0789684	0.0704028	0.0976222	0.0862454	0.0941245			233	0.0699075	0.0813287	0.0748504	0.0789684	0.0704028	0.0976222	0.0862454	0.0941245
233.19	0.067542	0.0803728	0.0734627	0.0727931	0.0673838	0.0978302	0.0855279	0.100175			233.19	0.067542	0.0803728	0.0734627	0.0727931	0.0673838	0.0978302	0.0855279	0.100175
233.39	0.0677	0.0822069	0.0739835	0.0711397	0.069261	0.0953856	0.0850971	0.0973905			233.39	0.0677	0.0822069	0.0739835	0.0711397	0.069261	0.0953856	0.0850971	0.0973905
233.59	0.0738747	0.0866595	0.0743057	0.0764501	0.0725682	0.0985335	0.0864671	0.0951844			233.59	0.0738747	0.0866595	0.0743057	0.0764501	0.0725682	0.0985335	0.0864671	0.0951844
233.8	0.0691158	0.0814396	0.0753947	0.0745457	0.0687506	0.0957399	0.0877046	0.0927112			233.8	0.0691158	0.0814396	0.0753947	0.0745457	0.0687506	0.0957399	0.0877046	0.0927112
233.99	0.0708306	0.0850397	0.0803511	0.0732904	0.0716418	0.0986469	0.086422	0.0983801			233.99	0.0708306	0.0850397	0.0803511	0.0732904	0.0716418	0.0986469	0.086422	0.0983801
234.19	0.0687147	0.0839385	0.0750067	0.0762751	0.0696093	0.103222	0.0832618	0.0963048			234.19	0.0687147	0.0839385	0.0750067	0.0762751	0.0696093	0.103222	0.0832618	0.0963048
234.39	0.0705897	0.0852284	0.0776417	0.0790958	0.0706039	0.102156	0.08422	0.0992193			234.39	0.0705897	0.0852284	0.0776417	0.0790958	0.0706039	0.102156	0.08422	0.0992193
234.59	0.0722076	0.0858952	0.0778154	0.0760332	0.069714	0.100927	0.0817321	0.0995047			234.59	0.0722076	0.0858952	0.0778154	0.0760332	0.069714	0.100927	0.0817321	0.0995047
234.79	0.0718508	0.0875337	0.0754668	0.0764698	0.0700337	0.102364	0.0870111	0.0973543			234.79	0.0718508	0.0875337	0.0754668	0.0764698	0.0700337	0.102364	0.0870111	0.0973543
234.99	0.0734304	0.0892034	0.0751417	0.078932	0.0717294	0.100212	0.0875557	0.0971414			234.99	0.0734304	0.0892034	0.0751417	0.078932	0.0717294	0.100212	0.0875557	0.0971414
235.19	0.0717441	0.0864045	0.0780256	0.0763454	0.073013	0.101588	0.086672	0.0999381			235.19	0.0717441	0.0864045	0.0780256	0.0763454	0.073013	0.101588	0.086672	0.0999381
235.39	0.0734131	0.086722	0.0755137	0.0776505	0.0713391	0.102841	0.0872209	0.0990877			235.39	0.0734131	0.086722	0.0755137	0.0776505	0.0713391	0.102841	0.0872209	0.0990877
235.59	0.0765967	0.0889391	0.0796923	0.0790608	0.0748946	0.102652	0.0870234	0.1024			235.59	0.0765967	0.0889391	0.0796923	0.0790608	0.0748946	0.102652	0.0870234	0.1024
235.79	0.0731162	0.0870395	0.0807764	0.0768884	0.0735559	0.102818	0.0896321	0.101952			235.79	0.0731162	0.0870395	0.0807764	0.0768884	0.0735559	0.102818	0.0896321	0.101952
235.99	0.0739459	0.0867926	0.0824625	0.0789229	0.0748738	0.102789	0.0829219	0.102356			235.99	0.0739459	0.0867926	0.0824625	0.0789229	0.0748738	0.102789	0.0829219	0.102356
236.19	0.0741853	0.0910046	0.0792599	0.0787029	0.0751983	0.099557	0.0895954	0.0977818			236.19	0.0741853	0.0910046	0.0792599	0.0787029	0.0751983	0.099557	0.0895954	0.0977818
236.39	0.0761519	0.0894679	0.0845242	0.0789043	0.0765658	0.100619	0.089257	0.101888			236.39	0.0761519	0.0894679	0.0845242	0.0789043	0.0765658	0.100619	0.089257	0.101888
236.59	0.0760455	0.0922433	0.0826762	0.0793708	0.0745185	0.10274	0.0891346	0.103158			236.59	0.0760455	0.0922433	0.0826762	0.0793708	0.0745185	0.10274	0.0891346	0.103158
236.79	0.0751416	0.0920205	0.0822878	0.0832331	0.0746495	0.105692	0.0908033	0.101722			236.79	0.0751416	0.0920205	0.0822878	0.0832331	0.0746495	0.105692	0.0908033	0.101722
236.99	0.0757224	0.0914812	0.0829879	0.0812719	0.0777439	0.107013	0.090918	0.101355			236.99	0.0757224	0.0914812	0.0829879	0.0812719	0.0777439	0.107013	0.090918	0.101355
237.19	0.0768394	0.0918598	0.0844672	0.0838803	0.0778323	0.106886	0.0914793	0.0989518			237.19	0.0768394	0.0918598	0.0844672	0.0838803	0.0778323	0.106886	0.0914793	0.0989518
237.39	0.0776555	0.0891286	0.0794243	0.0785086	0.0794613	0.106559	0.0926564	0.0999676			237.39	0.0776555	0.0891286	0.0794243	0.0785086	0.0794613	0.106559	0.0926564	0.0999676
237.59	0.0789133	0.0918381	0.0830236	0.0829115	0.0771544	0.106034	0.0913057	0.104503			237.59	0.0789133	0.0918381	0.0830236	0.0829115	0.0771544	0.106034	0.0913057	0.104503
237.79	0.0760262	0.0915239	0.0830247	0.081824	0.0822418	0.104793	0.0946505	0.106995			237.79	0.0760262	0.0915239	0.0830247	0.081824	0.0822418	0.104793	0.0946505	0.106995
237.99	0.0760268	0.0917365	0.0839021	0.0809881	0.0774713	0.111642	0.0920157	0.105746			237.99	0.0760268	0.0917365	0.0839021	0.0809881	0.0774713	0.111642	0.0920157	0.105746
238.2	0.0787085	0.0954234	0.0796823	0.08238	0.0776748	0.108431	0.0959838	0.10635			238.2	0.0787085	0.0954234	0.0796823	0.08238	0.0776748	0.108431	0.0959838	0.10635
238.39	0.0785629	0.0919785	0.085246	0.0871905	0.076434	0.107704	0.0942055	0.103209			238.39	0.0785629	0.0919785	0.085246	0.0871905	0.076434	0.107704	0.0942055	0.103209
238.59	0.0786606	0.0924748	0.0856587	0.0845365	0.0783933	0.107076	0.0953266	0.106829			238.59	0.0786606	0.0924748	0.0856587	0.0845365	0.0783933	0.107076	0.0953266	0.106829
238.8	0.0795217	0.0970518	0.087107	0.0842966	0.0787555	0.106937	0.0920755	0.105586			238.8	0.0795217	0.0970518	0.087107	0.0842966	0.0787555	0.106937	0.0920755	0.105586
239	0.0777921	0.092847	0.0865652	0.0832117	0.0808905	0.108678	0.095601	0.108519			239	0.0777921	0.092847	0.0865652	0.0832117	0.0808905	0.108678	0.095601	0.108519
239.2	0.0807579	0.0921247	0.0888937	0.0852094	0.0788327	0.113061	0.0941317	0.107763			239.2	0.0807579	0.0921247	0.0888937	0.0852094	0.0788327	0.113061	0.0941317	0.107763
239.4	0.0790467	0.095857	0.0869782	0.0852785	0.0815493	0.10832	0.093868	0.106166			239.4	0.0790467	0.095857	0.0869782	0.0852785	0.0815493	0.10832	0.093868	0.106166
239.6	0.0820237	0.0983487	0.0878935	0.0879079	0.0813808	0.112043	0.0970607	0.110799			239.6	0.0820237	0.0983487	0.0878935	0.0879079	0.0813808	0.112043	0.0970607	0.110799
239.8	0.0786078	0.095158	0.0894343	0.0861339	0.0829249	0.110836	0.0938204	0.111774			239.8	0.0786078	0.095158	0.0894343	0.0861339	0.0829249	0.110836	0.0938204	0.111774
240	0.0796735	0.0939216	0.0883185	0.0847194	0.0809026	0.109548	0.0957683	0.108948			240	0.0796735	0.0939216	0.0883185	0.0847194	0.0809026	0.109548	0.0957683	0.108948
240.2	0.0797682	0.0985331	0.08801	0.0835472	0.0817562	0.108594	0.099512	0.108784			240.2	0.0797682	0.0985331	0.08801	0.0835472	0.0817562	0.108594	0.099512	0.108784
240.39	0.0838411	0.0982687	0.0865794	0.0855453	0.0827114	0.113403	0.0955718	0.109854			240.39	0.0838411	0.0982687	0.0865794	0.0855453	0.0827114	0.113403	0.0955718	0.109854
240.6	0.0825937	0.101626	0.0884314	0.0913243	0.0798976	0.111291	0.0984366	0.107985			240.6	0.0825937	0.101626	0.0884314	0.0913243	0.0798976	0.111291	0.0984366	0.107985
240.8	0.0826557	0.0966433	0.0853101	0.089269	0.0842745	0.113116	0.0961858	0.108456			240.8	0.0826557	0.0966433	0.0853101	0.089269	0.0842745	0.113116	0.0961858	0.108456
241	0.0801956	0.0962077	0.0905607	0.0896482	0.0848849	0.111717	0.101672	0.113626			241	0.0801956	0.0962077	0.0905607	0.0896482	0.0848849	0.111717	0.101672	0.113626
241.2	0.0826413	0.097239	0.0860144	0.087313	0.0854516	0.113323	0.0974822	0.111372			241.2	0.0826413	0.097239	0.0860144	0.087313	0.0854516	0.113323	0.0974822	0.111372
241.4	0.0822527	0.0968904	0.088164	0.0876105	0.0831691	0.113444	0.0997116	0.111833			241.4	0.0822527	0.0968904	0.088164	0.0876105	0.0831691	0.113444	0.0997116	0.111833
241.59	0.0841349	0.101615	0.0920409	0.0901353	0.0861719	0.111871	0.101153	0.114813			241.59	0.0841349	0.101615	0.0920409	0.0901353	0.0861719	0.111871	0.101153	0.114813
241.8	0.0838035	0.0980371	0.0879055	0.0884299	0.0834875	0.116229	0.101508	0.112172			241.8	0.0838035	0.0980371	0.0879055	0.0884299	0.0834875	0.116229	0.101508	0.112172
242	0.0848189	0.101539	0.0938348	0.0875462	0.0879073	0.110914	0.101512	0.112492			242	0.0848189	0.101539	0.0938348	0.0875462	0.0879073	0.110914	0.101512	0.112492
242.2	0.0858787	0.099407	0.0922175	0.0916735	0.0887584	0.112379	0.102199	0.112345			242.2	0.0858787	0.099407	0.0922175	0.0916735	0.0887584	0.112379	0.102199	0.112345
242.4	0.0842923	0.100063	0.087741	0.0914083	0.0847606	0.113591	0.101855	0.111098			242.4	0.0842923	0.100063	0.087741	0.0914083	0.0847606	0.113591	0.101855	0.111098
242.6	0.0850238	0.102729	0.0960138	0.0903518	0.0889692	0.114267	0.100395	0.113291			242.6	0.0850238	0.102729	0.0960138	0.0903518	0.0889692	0.114267	0.100395	0.113291
242.8	0.085959	0.102731	0.0936058	0.088282	0.0872737	0.115397	0.105731	0.10886			242.8	0.085959	0.102731	0.0936058	0.088282	0.0872737	0.115397	0.105731	0.10886
242.99	0.0906356	0.100768	0.0915958	0.0917768	0.0866616	0.115994	0.101573	0.113383			242.99	0.0906356	0.100768	0.0915958	0.0917768	0.0866616	0.115994	0.101573	0.113383
243.2	0.0854361	0.105091	0.0912375	0.0928721	0.0870181	0.118995	0.102778	0.114612			243.2	0.0854361	0.105091	0.0912375	0.0928721	0.0870181	0.118995	0.102778	0.114612
243.4	0.0883299	0.106921	0.093918	0.092356	0.0892244	0.116169	0.102325	0.113199			243.4	0.0883299	0.106921	0.093918	0.092356	0.0892244	0.116169	0.102325	0.113199
243.6	0.0898118	0.104012	0.093437	0.0928813	0.0854682	0.120086	0.102989	0.115735			243.6	0.0898118	0.104012	0.093437	0.0928813	0.0854682	0.120086	0.102989	0.115735
243.8	0.0846273	0.106745	0.0959604	0.0921576	0.0896743	0.121101	0.107461	0.11847			243.8	0.0846273	0.106745	0.0959604	0.0921576	0.0896743	0.121101	0.107461	0.11847
244	0.0872794	0.0999064	0.0942569	0.0911875	0.0903478	0.119885	0.104201	0.11553			244	0.0872794	0.0999064	0.0942569	0.0911875	0.0903478	0.119885	0.104201	0.11553
244.2	0.0903202	0.108038	0.0940976	0.0954217	0.0892199	0.118764	0.103882	0.114236			244.2	0.0903202	0.108038	0.0940976	0.0954217	0.0892199	0.118764	0.103882	0.114236
244.4	0.0847933	0.104702	0.0929565	0.0940024	0.0876755	0.119996	0.105038	0.1178			244.4	0.0847933	0.104702	0.0929565	0.0940024	0.0876755	0.119996	0.105038	0.1178
244.6	0.0879469	0.106085	0.0942509	0.0968872	0.0894487	0.119902	0.101353	0.1176			244.6	0.0879469	0.106085	0.0942509	0.0968872	0.0894487	0.119902	0.101353	0.1176
244.79	0.0919491	0.106409	0.0964342	0.0950043	0.0927581	0.1204	0.105787	0.119721			244.79	0.0919491	0.106409	0.0964342	0.0950043	0.0927581	0.1204	0.105787	0.119721
245	0.0886951	0.105215	0.0965213	0.0940284	0.0902552	0.117609	0.106532	0.116226			245	0.0886951	0.105215	0.0965213	0.0940284	0.0902552	0.117609	0.106532	0.116226
245.2	0.0899217	0.107026	0.10047	0.0938925	0.0897567	0.118118	0.10605	0.116012			245.2	0.0899217	0.107026	0.10047	0.0938925	0.0897567	0.118118	0.10605	0.116012
245.4	0.090642	0.107205	0.0987696	0.0972248	0.0906603	0.118252	0.105259	0.119042			245.4	0.090642	0.107205	0.0987696	0.0972248	0.0906603	0.118252	0.105259	0.119042
245.59	0.0930559	0.105137	0.0962039	0.0947639	0.0958387	0.119846	0.107388	0.119969			245.59	0.0930559	0.105137	0.0962039	0.0947639	0.0958387	0.119846	0.107388	0.119969
245.8	0.0896002	0.106042	0.0977238	0.0950175	0.091139	0.119242	0.110318	0.121825			245.8	0.0896002	0.106042	0.0977238	0.0950175	0.091139	0.119242	0.110318	0.121825
246	0.0892986	0.105601	0.0995435	0.0970779	0.0929228	0.120815	0.109453	0.118737			246	0.0892986	0.105601	0.0995435	0.0970779	0.0929228	0.120815	0.109453	0.118737
246.19	0.0912142	0.107544	0.0963592	0.0986661	0.0943631	0.121697	0.106666	0.121195			246.19	0.0912142	0.107544	0.0963592	0.0986661	0.0943631	0.121697	0.106666	0.121195
246.39	0.0915192	0.109032	0.0990964	0.0962147	0.0920357	0.123241	0.110529	0.121031			246.39	0.0915192	0.109032	0.0990964	0.0962147	0.0920357	0.123241	0.110529	0.121031
246.6	0.0954727	0.109525	0.102286	0.100535	0.0963075	0.120871	0.110395	0.118869			246.6	0.0954727	0.109525	0.102286	0.100535	0.0963075	0.120871	0.110395	0.118869
246.8	0.0932499	0.109351	0.0995811	0.0977581	0.0939351	0.123755	0.111996	0.123404			246.8	0.0932499	0.109351	0.0995811	0.0977581	0.0939351	0.123755	0.111996	0.123404
246.99	0.0913203	0.109463	0.0963167	0.101178	0.0927186	0.122491	0.108529	0.122115			246.99	0.0913203	0.109463	0.0963167	0.101178	0.0927186	0.122491	0.108529	0.122115
247.19	0.0931201	0.111146	0.0971591	0.0992821	0.0935857	0.122307	0.110839	0.125906			247.19	0.0931201	0.111146	0.0971591	0.0992821	0.0935857	0.122307	0.110839	0.125906
247.4	0.0934346	0.113522	0.101884	0.103217	0.0960811	0.123428	0.114105	0.121072			247.4	0.0934346	0.113522	0.101884	0.103217	0.0960811	0.123428	0.114105	0.121072
247.6	0.0952071	0.111499	0.104233	0.0987095	0.0975744	0.125004	0.112489	0.126243			247.6	0.0952071	0.111499	0.104233	0.0987095	0.0975744	0.125004	0.112489	0.126243
247.8	0.0972893	0.10896	0.101863	0.10439	0.0949508	0.123893	0.111472	0.121384			247.8	0.0972893	0.10896	0.101863	0.10439	0.0949508	0.123893	0.111472	0.121384
248	0.0955403	0.114157	0.106691	0.101206	0.094863	0.127199	0.110869	0.125674			248	0.0955403	0.114157	0.106691	0.101206	0.094863	0.127199	0.110869	0.125674
248.19	0.0974383	0.110892	0.0994943	0.101848	0.0981923	0.124525	0.115437	0.125575			248.19	0.0974383	0.110892	0.0994943	0.101848	0.0981923	0.124525	0.115437	0.125575
248.4	0.0916728	0.112075	0.104603	0.101878	0.0988006	0.12539	0.114267	0.128332			248.4	0.0916728	0.112075	0.104603	0.101878	0.0988006	0.12539	0.114267	0.128332
248.6	0.0970178	0.112105	0.104274	0.10579	0.0973169	0.124404	0.117556	0.125164			248.6	0.0970178	0.112105	0.104274	0.10579	0.0973169	0.124404	0.117556	0.125164
248.8	0.0976727	0.114327	0.104921	0.100048	0.0986164	0.129193	0.118986	0.125814			248.8	0.0976727	0.114327	0.104921	0.100048	0.0986164	0.129193	0.118986	0.125814
248.99	0.094315	0.116374	0.10742	0.103229	0.0986274	0.124891	0.116728	0.124835			248.99	0.094315	0.116374	0.10742	0.103229	0.0986274	0.124891	0.116728	0.124835
249.2	0.0977536	0.114221	0.104572	0.103373	0.0995106	0.125519	0.109726	0.126742			249.2	0.0977536	0.114221	0.104572	0.103373	0.0995106	0.125519	0.109726	0.126742
249.4	0.099881	0.115573	0.104833	0.104826	0.0954794	0.128102	0.113623	0.126261			249.4	0.099881	0.115573	0.104833	0.104826	0.0954794	0.128102	0.113623	0.126261
249.59	0.0978269	0.117243	0.107271	0.103148	0.100487	0.126669	0.118782	0.12887			249.59	0.0978269	0.117243	0.107271	0.103148	0.100487	0.126669	0.118782	0.12887
249.8	0.0974007	0.114666	0.104869	0.105317	0.100884	0.130379	0.114769	0.128698			249.8	0.0974007	0.114666	0.104869	0.105317	0.100884	0.130379	0.114769	0.128698
250	0.099019	0.117432	0.103518	0.10511	0.100816	0.129191	0.11473	0.130468			250	0.099019	0.117432	0.103518	0.10511	0.100816	0.129191	0.11473	0.130468
250.19	0.0987406	0.116109	0.105065	0.103518	0.0999232	0.130831	0.115716	0.12614			250.19	0.0987406	0.116109	0.105065	0.103518	0.0999232	0.130831	0.115716	0.12614
250.39	0.0980022	0.115666	0.10755	0.104149	0.104145	0.129762	0.120644	0.1296			250.39	0.0980022	0.115666	0.10755	0.104149	0.104145	0.129762	0.120644	0.1296
250.6	0.102316	0.118818	0.109192	0.108699	0.102257	0.130858	0.112767	0.130058			250.6	0.102316	0.118818	0.109192	0.108699	0.102257	0.130858	0.112767	0.130058
250.8	0.101074	0.115542	0.107319	0.104307	0.102722	0.13026	0.117476	0.13201			250.8	0.101074	0.115542	0.107319	0.104307	0.102722	0.13026	0.117476	0.13201
251	0.0996399	0.117577	0.108395	0.105126	0.102316	0.129799	0.118291	0.129452			251	0.0996399	0.117577	0.108395	0.105126	0.102316	0.129799	0.118291	0.129452
251.2	0.102335	0.117988	0.105124	0.108838	0.106115	0.130032	0.119088	0.13118			251.2	0.102335	0.117988	0.105124	0.108838	0.106115	0.130032	0.119088	0.13118
251.39	0.100187	0.116831	0.104867	0.106315	0.102903	0.133393	0.121492	0.130108			251.39	0.100187	0.116831	0.104867	0.106315	0.102903	0.133393	0.121492	0.130108
251.59	0.101232	0.120123	0.108998	0.108183	0.102394	0.132894	0.122507	0.135285			251.59	0.101232	0.120123	0.108998	0.108183	0.102394	0.132894	0.122507	0.135285
251.8	0.103482	0.117094	0.104051	0.109215	0.104639	0.134893	0.120894	0.130758			251.8	0.103482	0.117094	0.104051	0.109215	0.104639	0.134893	0.120894	0.130758
252	0.103356	0.123262	0.108183	0.108727	0.104327	0.131983	0.120923	0.131512			252	0.103356	0.123262	0.108183	0.108727	0.104327	0.131983	0.120923	0.131512
252.19	0.104778	0.121343	0.112329	0.105705	0.107052	0.132011	0.121631	0.135211			252.19	0.104778	0.121343	0.112329	0.105705	0.107052	0.132011	0.121631	0.135211
252.39	0.0999648	0.120779	0.111907	0.110922	0.105848	0.136257	0.12035	0.132629			252.39	0.0999648	0.120779	0.111907	0.110922	0.105848	0.136257	0.12035	0.132629
252.6	0.10204	0.115819	0.111206	0.111005	0.106503	0.132853	0.124311	0.135799			252.6	0.10204	0.115819	0.111206	0.111005	0.106503	0.132853	0.124311	0.135799
252.79	0.104625	0.121963	0.116053	0.1114	0.106915	0.133036	0.120454	0.131531			252.79	0.104625	0.121963	0.116053	0.1114	0.106915	0.133036	0.120454	0.131531
252.99	0.103281	0.121593	0.112718	0.111195	0.107654	0.133389	0.12343	0.137121			252.99	0.103281	0.121593	0.112718	0.111195	0.107654	0.133389	0.12343	0.137121
253.2	0.106953	0.120867	0.109143	0.112564	0.108873	0.137913	0.119545	0.133141			253.2	0.106953	0.120867	0.109143	0.112564	0.108873	0.137913	0.119545	0.133141
253.4	0.104821	0.121837	0.117607	0.111144	0.11063	0.133369	0.120531	0.132557			253.4	0.104821	0.121837	0.117607	0.111144	0.11063	0.133369	0.120531	0.132557
253.59	0.104265	0.126218	0.115532	0.113669	0.108658	0.135362	0.124042	0.133906			253.59	0.104265	0.126218	0.115532	0.113669	0.108658	0.135362	0.124042	0.133906
253.79	0.107309	0.122459	0.115206	0.109363	0.108284	0.136015	0.124034	0.133651			253.79	0.107309	0.122459	0.115206	0.109363	0.108284	0.136015	0.124034	0.133651
254	0.107949	0.122893	0.112607	0.113807	0.110801	0.134657	0.128163	0.135995			254	0.107949	0.122893	0.112607	0.113807	0.110801	0.134657	0.128163	0.135995
254.2	0.105222	0.124537	0.110762	0.114531	0.107322	0.137951	0.122991	0.135463			254.2	0.105222	0.124537	0.110762	0.114531	0.107322	0.137951	0.122991	0.135463
254.4	0.106906	0.121856	0.116773	0.111887	0.10931	0.137376	0.126723	0.138394			254.4	0.106906	0.121856	0.116773	0.111887	0.10931	0.137376	0.126723	0.138394
254.6	0.105699	0.126277	0.115851	0.116462	0.110175	0.137677	0.125338	0.137453			254.6	0.105699	0.126277	0.115851	0.116462	0.110175	0.137677	0.125338	0.137453
254.79	0.103286	0.125408	0.113462	0.112764	0.108441	0.140136	0.124672	0.135667			254.79	0.103286	0.125408	0.113462	0.112764	0.108441	0.140136	0.124672	0.135667
254.99	0.10623	0.124294	0.115959	0.114245	0.106812	0.136753	0.126581	0.140701			254.99	0.10623	0.124294	0.115959	0.114245	0.106812	0.136753	0.126581	0.140701
255.2	0.110238	0.130726	0.118036	0.113802	0.111629	0.140461	0.129021	0.140731			255.2	0.110238	0.130726	0.118036	0.113802	0.111629	0.140461	0.129021	0.140731
255.4	0.106947	0.124886	0.117911	0.113886	0.109406	0.14083	0.127659	0.142629			255.4	0.106947	0.124886	0.117911	0.113886	0.109406	0.14083	0.127659	0.142629
255.59	0.108698	0.126151	0.11544	0.114005	0.113439	0.13777	0.127228	0.13741			255.59	0.108698	0.126151	0.11544	0.114005	0.113439	0.13777	0.127228	0.13741
255.8	0.111977	0.127058	0.116427	0.116651	0.112905	0.141106	0.129124	0.142519			255.8	0.111977	0.127058	0.116427	0.116651	0.112905	0.141106	0.129124	0.142519
256	0.110019	0.131979	0.116348	0.117531	0.112555	0.143539	0.127098	0.139909			256	0.110019	0.131979	0.116348	0.117531	0.112555	0.143539	0.127098	0.139909
256.19	0.108053	0.128621	0.120144	0.11864	0.113076	0.143576	0.126283	0.140696			256.19	0.108053	0.128621	0.120144	0.11864	0.113076	0.143576	0.126283	0.140696
256.39	0.107494	0.133885	0.115739	0.116015	0.110376	0.142557	0.125693	0.142722			256.39	0.107494	0.133885	0.115739	0.116015	0.110376	0.142557	0.125693	0.142722
256.6	0.109594	0.131174	0.119019	0.113928	0.112972	0.143714	0.133276	0.143639			256.6	0.109594	0.131174	0.119019	0.113928	0.112972	0.143714	0.133276	0.143639
256.8	0.108024	0.129862	0.12104	0.118968	0.114986	0.141032	0.132638	0.142134			256.8	0.108024	0.129862	0.12104	0.118968	0.114986	0.141032	0.132638	0.142134
256.99	0.110427	0.125909	0.120084	0.114123	0.116214	0.143496	0.129657	0.139911			256.99	0.110427	0.125909	0.120084	0.114123	0.116214	0.143496	0.129657	0.139911
257.19	0.110245	0.129851	0.11943	0.119431	0.114489	0.146944	0.133339	0.142416			257.19	0.110245	0.129851	0.11943	0.119431	0.114489	0.146944	0.133339	0.142416
257.4	0.111139	0.128795	0.121749	0.117161	0.114279	0.144406	0.135749	0.142768			257.4	0.111139	0.128795	0.121749	0.117161	0.114279	0.144406	0.135749	0.142768
257.59	0.112928	0.128718	0.120928	0.117304	0.113206	0.142876	0.132343	0.141187			257.59	0.112928	0.128718	0.120928	0.117304	0.113206	0.142876	0.132343	0.141187
257.79	0.110742	0.131087	0.121145	0.116149	0.11474	0.141818	0.130291	0.144382			257.79	0.110742	0.131087	0.121145	0.116149	0.11474	0.141818	0.130291	0.144382
258	0.114733	0.132137	0.126068	0.121436	0.115249	0.144441	0.133446	0.14199			258	0.114733	0.132137	0.126068	0.121436	0.115249	0.144441	0.133446	0.14199
258.19	0.110483	0.130263	0.117058	0.120791	0.114396	0.144318	0.130987	0.148325			258.19	0.110483	0.130263	0.117058	0.120791	0.114396	0.144318	0.130987	0.148325
258.39	0.110408	0.131121	0.123735	0.119041	0.115021	0.145317	0.131244	0.142654			258.39	0.110408	0.131121	0.123735	0.119041	0.115021	0.145317	0.131244	0.142654
258.6	0.112868	0.132015	0.125082	0.120094	0.117395	0.144995	0.132023	0.146512			258.6	0.112868	0.132015	0.125082	0.120094	0.117395	0.144995	0.132023	0.146512
258.79	0.111523	0.133435	0.123061	0.122963	0.11855	0.144809	0.133039	0.144479			258.79	0.111523	0.133435	0.123061	0.122963	0.11855	0.144809	0.133039	0.144479
258.99	0.114979	0.13471	0.119273	0.122773	0.117818	0.14852	0.133836	0.147334			258.99	0.114979	0.13471	0.119273	0.122773	0.117818	0.14852	0.133836	0.147334
259.2	0.115791	0.129311	0.125089	0.119117	0.117784	0.145004	0.133714	0.149105			259.2	0.115791	0.129311	0.125089	0.119117	0.117784	0.145004	0.133714	0.149105
259.39	0.115639	0.13485	0.123527	0.124004	0.116919	0.146766	0.130155	0.149756			259.39	0.115639	0.13485	0.123527	0.124004	0.116919	0.146766	0.130155	0.149756
259.59	0.118151	0.135379	0.124718	0.122209	0.119041	0.147515	0.135239	0.147639			259.59	0.118151	0.135379	0.124718	0.122209	0.119041	0.147515	0.135239	0.147639
259.79	0.116175	0.134396	0.125747	0.122987	0.122569	0.150308	0.134177	0.153438			259.79	0.116175	0.134396	0.125747	0.122987	0.122569	0.150308	0.134177	0.153438
260	0.118677	0.136309	0.127636	0.123872	0.119659	0.14799	0.138252	0.1488			260	0.118677	0.136309	0.127636	0.123872	0.119659	0.14799	0.138252	0.1488
260.19	0.118579	0.132486	0.12444	0.124586	0.120642	0.147349	0.137431	0.145378			260.19	0.118579	0.132486	0.12444	0.124586	0.120642	0.147349	0.137431	0.145378
260.39	0.119808	0.133708	0.125355	0.123194	0.122214	0.147252	0.137543	0.147174			260.39	0.119808	0.133708	0.125355	0.123194	0.122214	0.147252	0.137543	0.147174
260.59	0.116761	0.136629	0.127842	0.125779	0.120075	0.149482	0.138977	0.149856			260.59	0.116761	0.136629	0.127842	0.125779	0.120075	0.149482	0.138977	0.149856
260.8	0.119975	0.137733	0.125656	0.122812	0.123405	0.151264	0.137027	0.153587			260.8	0.119975	0.137733	0.125656	0.122812	0.123405	0.151264	0.137027	0.153587
260.99	0.117513	0.134379	0.125419	0.124165	0.120986	0.151172	0.138454	0.1515			260.99	0.117513	0.134379	0.125419	0.124165	0.120986	0.151172	0.138454	0.1515
261.19	0.118081	0.136006	0.124953	0.129654	0.119267	0.150693	0.14097	0.152058			261.19	0.118081	0.136006	0.124953	0.129654	0.119267	0.150693	0.14097	0.152058
261.4	0.11939	0.140112	0.124182	0.123494	0.122427	0.151854	0.142271	0.151666			261.4	0.11939	0.140112	0.124182	0.123494	0.122427	0.151854	0.142271	0.151666
261.59	0.123101	0.137286	0.131188	0.125622	0.126018	0.152243	0.137442	0.149834			261.59	0.123101	0.137286	0.131188	0.125622	0.126018	0.152243	0.137442	0.149834
261.8	0.116611	0.139846	0.129505	0.122747	0.122794	0.150395	0.141671	0.15362			261.8	0.116611	0.139846	0.129505	0.122747	0.122794	0.150395	0.141671	0.15362
261.99	0.11941	0.141034	0.130193	0.127753	0.121844	0.152719	0.140141	0.150626			261.99	0.11941	0.141034	0.130193	0.127753	0.121844	0.152719	0.140141	0.150626
262.19	0.119376	0.142797	0.129249	0.125093	0.124551	0.150997	0.141779	0.148957			262.19	0.119376	0.142797	0.129249	0.125093	0.124551	0.150997	0.141779	0.148957
262.39	0.120376	0.140425	0.129135	0.12363	0.126672	0.154078	0.14263	0.155067			262.39	0.120376	0.140425	0.129135	0.12363	0.126672	0.154078	0.14263	0.155067
262.6	0.123446	0.137948	0.130239	0.127296	0.126101	0.148794	0.141183	0.153314			262.6	0.123446	0.137948	0.130239	0.127296	0.126101	0.148794	0.141183	0.153314
262.79	0.117492	0.140922	0.131427	0.12612	0.128046	0.152864	0.141162	0.154307			262.79	0.117492	0.140922	0.131427	0.12612	0.128046	0.152864	0.141162	0.154307
262.99	0.119431	0.140085	0.133541	0.12647	0.125628	0.152781	0.142362	0.157544			262.99	0.119431	0.140085	0.133541	0.12647	0.125628	0.152781	0.142362	0.157544
263.19	0.122567	0.139713	0.133733	0.127552	0.126154	0.154718	0.142028	0.154353			263.19	0.122567	0.139713	0.133733	0.127552	0.126154	0.154718	0.142028	0.154353
263.39	0.122184	0.138594	0.132113	0.129342	0.125231	0.151996	0.142545	0.154893			263.39	0.122184	0.138594	0.132113	0.129342	0.125231	0.151996	0.142545	0.154893
263.59	0.121595	0.14678	0.133015	0.130527	0.127087	0.154994	0.140173	0.157595			263.59	0.121595	0.14678	0.133015	0.130527	0.127087	0.154994	0.140173	0.157595
263.79	0.122306	0.142208	0.130648	0.129282	0.125323	0.156449	0.142083	0.15572			263.79	0.122306	0.142208	0.130648	0.129282	0.125323	0.156449	0.142083	0.15572
264	0.121467	0.14345	0.1301	0.131459	0.127459	0.154233	0.142163	0.157035			264	0.121467	0.14345	0.1301	0.131459	0.127459	0.154233	0.142163	0.157035
264.19	0.1265	0.144925	0.134084	0.131159	0.127182	0.154113	0.142659	0.158438			264.19	0.1265	0.144925	0.134084	0.131159	0.127182	0.154113	0.142659	0.158438
264.39	0.12078	0.143208	0.133184	0.130684	0.126456	0.156162	0.143786	0.15893			264.39	0.12078	0.143208	0.133184	0.130684	0.126456	0.156162	0.143786	0.15893
264.59	0.124104	0.146242	0.134461	0.131304	0.131043	0.160435	0.147656	0.155274			264.59	0.124104	0.146242	0.134461	0.131304	0.131043	0.160435	0.147656	0.155274
264.8	0.12487	0.145866	0.1325	0.131961	0.131003	0.158145	0.143874	0.159624			264.8	0.12487	0.145866	0.1325	0.131961	0.131003	0.158145	0.143874	0.159624
264.99	0.124861	0.14322	0.132359	0.134037	0.126143	0.158506	0.148004	0.158598			264.99	0.124861	0.14322	0.132359	0.134037	0.126143	0.158506	0.148004	0.158598
265.2	0.127717	0.142241	0.133746	0.133998	0.129537	0.161947	0.145248	0.156475			265.2	0.127717	0.142241	0.133746	0.133998	0.129537	0.161947	0.145248	0.156475
265.39	0.126325	0.148739	0.136723	0.132628	0.130111	0.156874	0.143698	0.156729			265.39	0.126325	0.148739	0.136723	0.132628	0.130111	0.156874	0.143698	0.156729
265.59	0.125397	0.145374	0.135605	0.133395	0.130234	0.161036	0.149573	0.160624			265.59	0.125397	0.145374	0.135605	0.133395	0.130234	0.161036	0.149573	0.160624
265.79	0.126325	0.144898	0.137082	0.136194	0.133584	0.161853	0.144899	0.16057			265.79	0.126325	0.144898	0.137082	0.136194	0.133584	0.161853	0.144899	0.16057
265.99	0.127492	0.148679	0.138448	0.136212	0.132822	0.156984	0.148535	0.157349			265.99	0.127492	0.148679	0.138448	0.136212	0.132822	0.156984	0.148535	0.157349
266.19	0.130232	0.150816	0.136784	0.13749	0.132221	0.163138	0.147126	0.16049			266.19	0.130232	0.150816	0.136784	0.13749	0.132221	0.163138	0.147126	0.16049
266.39	0.127707	0.149045	0.136573	0.13605	0.130693	0.161645	0.150579	0.160946			266.39	0.127707	0.149045	0.136573	0.13605	0.130693	0.161645	0.150579	0.160946
266.59	0.130512	0.15021	0.136234	0.133775	0.134253	0.161717	0.147934	0.16028			266.59	0.130512	0.15021	0.136234	0.133775	0.134253	0.161717	0.147934	0.16028
266.79	0.125287	0.150047	0.141677	0.134852	0.131766	0.162411	0.146771	0.160301			266.79	0.125287	0.150047	0.141677	0.134852	0.131766	0.162411	0.146771	0.160301
266.99	0.126986	0.14924	0.139584	0.13799	0.131852	0.158996	0.146991	0.163337			266.99	0.126986	0.14924	0.139584	0.13799	0.131852	0.158996	0.146991	0.163337
267.19	0.128517	0.145539	0.134403	0.138052	0.136114	0.164708	0.150699	0.163728			267.19	0.128517	0.145539	0.134403	0.138052	0.136114	0.164708	0.150699	0.163728
267.39	0.128741	0.149055	0.139942	0.132165	0.132746	0.164778	0.148342	0.164921			267.39	0.128741	0.149055	0.139942	0.132165	0.132746	0.164778	0.148342	0.164921
267.59	0.129616	0.147565	0.138882	0.134867	0.13154	0.160478	0.149383	0.162505			267.59	0.129616	0.147565	0.138882	0.134867	0.13154	0.160478	0.149383	0.162505
267.79	0.12905	0.150795	0.136253	0.141349	0.135789	0.165497	0.14933	0.165005			267.79	0.12905	0.150795	0.136253	0.141349	0.135789	0.165497	0.14933	0.165005
268	0.129132	0.151326	0.14209	0.137172	0.136058	0.159876	0.15026	0.167073			268	0.129132	0.151326	0.14209	0.137172	0.136058	0.159876	0.15026	0.167073
268.2	0.130868	0.155142	0.142057	0.140875	0.135526	0.16658	0.152315	0.16489			268.2	0.130868	0.155142	0.142057	0.140875	0.135526	0.16658	0.152315	0.16489
268.4	0.131842	0.151596	0.141661	0.13857	0.136216	0.162984	0.154321	0.166865			268.4	0.131842	0.151596	0.141661	0.13857	0.136216	0.162984	0.154321	0.166865
268.6	0.13007	0.153655	0.139933	0.140349	0.136627	0.16595	0.152549	0.162968			268.6	0.13007	0.153655	0.139933	0.140349	0.136627	0.16595	0.152549	0.162968
268.8	0.133818	0.153274	0.144002	0.137431	0.136916	0.166983	0.151042	0.165817			268.8	0.133818	0.153274	0.144002	0.137431	0.136916	0.166983	0.151042	0.165817
269	0.133069	0.15207	0.145546	0.138227	0.13516	0.162862	0.156534	0.16586			269	0.133069	0.15207	0.145546	0.138227	0.13516	0.162862	0.156534	0.16586
269.2	0.131114	0.151569	0.143269	0.140636	0.138009	0.163353	0.154801	0.16225			269.2	0.131114	0.151569	0.143269	0.140636	0.138009	0.163353	0.154801	0.16225
269.4	0.130508	0.160121	0.144341	0.137277	0.134184	0.164784	0.153245	0.167375			269.4	0.130508	0.160121	0.144341	0.137277	0.134184	0.164784	0.153245	0.167375
269.6	0.133623	0.155877	0.14684	0.14042	0.136784	0.165956	0.158742	0.169241			269.6	0.133623	0.155877	0.14684	0.14042	0.136784	0.165956	0.158742	0.169241
269.8	0.131914	0.153791	0.139789	0.140408	0.139722	0.166474	0.158595	0.166092			269.8	0.131914	0.153791	0.139789	0.140408	0.139722	0.166474	0.158595	0.166092
270	0.133294	0.156545	0.144302	0.140612	0.139561	0.165243	0.155445	0.167151			270	0.133294	0.156545	0.144302	0.140612	0.139561	0.165243	0.155445	0.167151
270.2	0.132936	0.155342	0.143023	0.140476	0.14157	0.168201	0.1565	0.171587			270.2	0.132936	0.155342	0.143023	0.140476	0.14157	0.168201	0.1565	0.171587
270.4	0.132601	0.155742	0.146573	0.139392	0.141937	0.171085	0.156879	0.166163			270.4	0.132601	0.155742	0.146573	0.139392	0.141937	0.171085	0.156879	0.166163
270.6	0.136845	0.156273	0.146306	0.142282	0.137647	0.167507	0.160872	0.169173			270.6	0.136845	0.156273	0.146306	0.142282	0.137647	0.167507	0.160872	0.169173
270.8	0.131968	0.157936	0.145241	0.145445	0.137808	0.167739	0.153513	0.167299			270.8	0.131968	0.157936	0.145241	0.145445	0.137808	0.167739	0.153513	0.167299
271	0.132609	0.157616	0.14459	0.146274	0.136539	0.170527	0.157665	0.170729			271	0.132609	0.157616	0.14459	0.146274	0.136539	0.170527	0.157665	0.170729
271.2	0.138912	0.156597	0.145325	0.139343	0.143283	0.168431	0.156548	0.170078			271.2	0.138912	0.156597	0.145325	0.139343	0.143283	0.168431	0.156548	0.170078
271.39	0.135378	0.15623	0.146989	0.143565	0.146669	0.171171	0.156699	0.171169			271.39	0.135378	0.15623	0.146989	0.143565	0.146669	0.171171	0.156699	0.171169
271.6	0.134107	0.160356	0.146197	0.142472	0.140238	0.169956	0.162977	0.171068			271.6	0.134107	0.160356	0.146197	0.142472	0.140238	0.169956	0.162977	0.171068
271.79	0.133947	0.158474	0.147115	0.1434	0.140286	0.167587	0.161228	0.173055			271.79	0.133947	0.158474	0.147115	0.1434	0.140286	0.167587	0.161228	0.173055
272	0.140975	0.158703	0.149037	0.14506	0.142343	0.172676	0.160062	0.171679			272	0.140975	0.158703	0.149037	0.14506	0.142343	0.172676	0.160062	0.171679
272.2	0.13816	0.158097	0.149793	0.146222	0.143806	0.169691	0.158519	0.17429			272.2	0.13816	0.158097	0.149793	0.146222	0.143806	0.169691	0.158519	0.17429
272.4	0.138166	0.160714	0.147833	0.146193	0.14663	0.173199	0.160697	0.174563			272.4	0.138166	0.160714	0.147833	0.146193	0.14663	0.173199	0.160697	0.174563
272.59	0.136046	0.161313	0.146507	0.144725	0.143781	0.175332	0.161251	0.173693			272.59	0.136046	0.161313	0.146507	0.144725	0.143781	0.175332	0.161251	0.173693
272.8	0.1388	0.158703	0.149207	0.146421	0.144292	0.171031	0.160406	0.172906			272.8	0.1388	0.158703	0.149207	0.146421	0.144292	0.171031	0.160406	0.172906
273	0.139547	0.158788	0.147488	0.148628	0.146766	0.17465	0.162572	0.176702			273	0.139547	0.158788	0.147488	0.148628	0.146766	0.17465	0.162572	0.176702
273.2	0.138488	0.163338	0.150438	0.147159	0.142591	0.172077	0.162293	0.175205			273.2	0.138488	0.163338	0.150438	0.147159	0.142591	0.172077	0.162293	0.175205
273.39	0.141303	0.162873	0.153804	0.150876	0.146482	0.176586	0.1632	0.174601			273.39	0.141303	0.162873	0.153804	0.150876	0.146482	0.176586	0.1632	0.174601
273.6	0.140213	0.15992	0.148841	0.146038	0.14593	0.173521	0.16395	0.175009			273.6	0.140213	0.15992	0.148841	0.146038	0.14593	0.173521	0.16395	0.175009
273.8	0.139629	0.161352	0.155144	0.149759	0.145624	0.17767	0.167748	0.178051			273.8	0.139629	0.161352	0.155144	0.149759	0.145624	0.17767	0.167748	0.178051
273.99	0.140056	0.167146	0.154442	0.149802	0.147413	0.171283	0.159087	0.176537			273.99	0.140056	0.167146	0.154442	0.149802	0.147413	0.171283	0.159087	0.176537
274.2	0.140962	0.161985	0.151118	0.151053	0.148946	0.175966	0.165141	0.173408			274.2	0.140962	0.161985	0.151118	0.151053	0.148946	0.175966	0.165141	0.173408
274.4	0.141128	0.165941	0.152789	0.147968	0.147276	0.177993	0.163888	0.177705			274.4	0.141128	0.165941	0.152789	0.147968	0.147276	0.177993	0.163888	0.177705
274.6	0.143988	0.166458	0.153141	0.147816	0.147716	0.1766	0.16492	0.176365			274.6	0.143988	0.166458	0.153141	0.147816	0.147716	0.1766	0.16492	0.176365
274.8	0.141844	0.16675	0.153626	0.153429	0.150449	0.175787	0.165931	0.175901			274.8	0.141844	0.16675	0.153626	0.153429	0.150449	0.175787	0.165931	0.175901
275	0.138604	0.164658	0.155527	0.154526	0.146017	0.177441	0.167531	0.178102			275	0.138604	0.164658	0.155527	0.154526	0.146017	0.177441	0.167531	0.178102
275.19	0.144316	0.167622	0.153583	0.152927	0.147934	0.17666	0.168263	0.18466			275.19	0.144316	0.167622	0.153583	0.152927	0.147934	0.17666	0.168263	0.18466
275.4	0.141867	0.164791	0.153941	0.148728	0.148914	0.183734	0.169258	0.17832			275.4	0.141867	0.164791	0.153941	0.148728	0.148914	0.183734	0.169258	0.17832
275.6	0.142001	0.16967	0.15388	0.154581	0.150771	0.180493	0.17039	0.178049			275.6	0.142001	0.16967	0.15388	0.154581	0.150771	0.180493	0.17039	0.178049
275.79	0.144968	0.165561	0.150573	0.153673	0.150538	0.180113	0.16962	0.179615			275.79	0.144968	0.165561	0.150573	0.153673	0.150538	0.180113	0.16962	0.179615
275.99	0.144845	0.166739	0.152826	0.152473	0.15112	0.180647	0.166824	0.180011			275.99	0.144845	0.166739	0.152826	0.152473	0.15112	0.180647	0.166824	0.180011
276.2	0.142197	0.164336	0.156203	0.15369	0.151605	0.183781	0.167947	0.183138			276.2	0.142197	0.164336	0.156203	0.15369	0.151605	0.183781	0.167947	0.183138
276.4	0.143388	0.170192	0.156821	0.152427	0.150054	0.180547	0.171057	0.179882			276.4	0.143388	0.170192	0.156821	0.152427	0.150054	0.180547	0.171057	0.179882
276.59	0.142105	0.164597	0.156074	0.153112	0.150576	0.180927	0.168832	0.1805			276.59	0.142105	0.164597	0.156074	0.153112	0.150576	0.180927	0.168832	0.1805
276.8	0.146525	0.166957	0.15842	0.155706	0.152611	0.183753	0.166145	0.182524			276.8	0.146525	0.166957	0.15842	0.155706	0.152611	0.183753	0.166145	0.182524
277	0.145589	0.166001	0.159377	0.154706	0.154179	0.183392	0.168025	0.182109			277	0.145589	0.166001	0.159377	0.154706	0.154179	0.183392	0.168025	0.182109
277.2	0.145278	0.168313	0.16101	0.152793	0.151179	0.181304	0.169798	0.18158			277.2	0.145278	0.168313	0.16101	0.152793	0.151179	0.181304	0.169798	0.18158
277.39	0.145752	0.166931	0.157331	0.155733	0.149828	0.181779	0.170316	0.185747			277.39	0.145752	0.166931	0.157331	0.155733	0.149828	0.181779	0.170316	0.185747
277.6	0.148322	0.173816	0.156731	0.155833	0.155133	0.182804	0.173843	0.181331			277.6	0.148322	0.173816	0.156731	0.155833	0.155133	0.182804	0.173843	0.181331
277.8	0.148258	0.16992	0.159905	0.155076	0.155511	0.18586	0.173665	0.180266			277.8	0.148258	0.16992	0.159905	0.155076	0.155511	0.18586	0.173665	0.180266
277.99	0.146841	0.171664	0.161684	0.156272	0.152905	0.186784	0.173353	0.187779			277.99	0.146841	0.171664	0.161684	0.156272	0.152905	0.186784	0.173353	0.187779
278.19	0.145166	0.17306	0.159192	0.158924	0.15052	0.18302	0.167918	0.185584			278.19	0.145166	0.17306	0.159192	0.158924	0.15052	0.18302	0.167918	0.185584
278.4	0.14523	0.171499	0.161372	0.152637	0.155265	0.183608	0.170965	0.185449			278.4	0.14523	0.171499	0.161372	0.152637	0.155265	0.183608	0.170965	0.185449
278.59	0.146851	0.171167	0.161024	0.158557	0.156259	0.188313	0.17495	0.184802			278.59	0.146851	0.171167	0.161024	0.158557	0.156259	0.188313	0.17495	0.184802
278.8	0.146546	0.169627	0.159383	0.155281	0.154372	0.185808	0.171483	0.184565			278.8	0.146546	0.169627	0.159383	0.155281	0.154372	0.185808	0.171483	0.184565
279	0.149683	0.173379	0.161254	0.156885	0.155351	0.185418	0.173902	0.184508			279	0.149683	0.173379	0.161254	0.156885	0.155351	0.185418	0.173902	0.184508
279.19	0.15047	0.173738	0.159245	0.157545	0.157548	0.185386	0.172383	0.187988			279.19	0.15047	0.173738	0.159245	0.157545	0.157548	0.185386	0.172383	0.187988
279.39	0.149582	0.173007	0.160733	0.157218	0.156729	0.186582	0.178658	0.188926			279.39	0.149582	0.173007	0.160733	0.157218	0.156729	0.186582	0.178658	0.188926
279.6	0.147863	0.173636	0.160838	0.157763	0.154309	0.184642	0.175749	0.189653			279.6	0.147863	0.173636	0.160838	0.157763	0.154309	0.184642	0.175749	0.189653
279.79	0.149179	0.171779	0.162579	0.156347	0.155669	0.187186	0.169306	0.188935			279.79	0.149179	0.171779	0.162579	0.156347	0.155669	0.187186	0.169306	0.188935
279.99	0.151584	0.175834	0.164861	0.159172	0.159344	0.187837	0.176478	0.192293			279.99	0.151584	0.175834	0.164861	0.159172	0.159344	0.187837	0.176478	0.192293
280.2	0.153554	0.176208	0.161941	0.159155	0.157284	0.186833	0.176315	0.188617			280.2	0.153554	0.176208	0.161941	0.159155	0.157284	0.186833	0.176315	0.188617
280.4	0.155799	0.174648	0.163716	0.160043	0.160291	0.187062	0.177922	0.188896			280.4	0.155799	0.174648	0.163716	0.160043	0.160291	0.187062	0.177922	0.188896
280.59	0.150855	0.175401	0.163967	0.161554	0.159482	0.188539	0.176267	0.191946			280.59	0.150855	0.175401	0.163967	0.161554	0.159482	0.188539	0.176267	0.191946
280.79	0.153375	0.175512	0.166548	0.162431	0.15891	0.187173	0.172627	0.191086			280.79	0.153375	0.175512	0.166548	0.162431	0.15891	0.187173	0.172627	0.191086
281	0.154114	0.176329	0.161961	0.16286	0.157685	0.189709	0.179832	0.186728			281	0.154114	0.176329	0.161961	0.16286	0.157685	0.189709	0.179832	0.186728
281.2	0.151615	0.178753	0.168811	0.16155	0.159585	0.185849	0.177669	0.188191			281.2	0.151615	0.178753	0.168811	0.16155	0.159585	0.185849	0.177669	0.188191
281.4	0.154184	0.176909	0.168287	0.162373	0.160096	0.192789	0.176596	0.190827			281.4	0.154184	0.176909	0.168287	0.162373	0.160096	0.192789	0.176596	0.190827
281.6	0.148475	0.175121	0.165918	0.163906	0.16199	0.189461	0.181389	0.193311			281.6	0.148475	0.175121	0.165918	0.163906	0.16199	0.189461	0.181389	0.193311
281.79	0.155111	0.177115	0.16997	0.162953	0.160429	0.190546	0.18239	0.195753			281.79	0.155111	0.177115	0.16997	0.162953	0.160429	0.190546	0.18239	0.195753
282	0.153298	0.175449	0.16574	0.16029	0.161139	0.191779	0.179715	0.191335			282	0.153298	0.175449	0.16574	0.16029	0.161139	0.191779	0.179715	0.191335
282.2	0.156828	0.180468	0.166988	0.164954	0.161191	0.196254	0.178789	0.194274			282.2	0.156828	0.180468	0.166988	0.164954	0.161191	0.196254	0.178789	0.194274
282.4	0.156722	0.178001	0.164613	0.164558	0.16297	0.191131	0.179175	0.191168			282.4	0.156722	0.178001	0.164613	0.164558	0.16297	0.191131	0.179175	0.191168
282.59	0.156026	0.178674	0.166285	0.164199	0.162009	0.194545	0.180611	0.194932			282.59	0.156026	0.178674	0.166285	0.164199	0.162009	0.194545	0.180611	0.194932
282.8	0.154024	0.179863	0.16377	0.16443	0.164627	0.196847	0.177737	0.195732			282.8	0.154024	0.179863	0.16377	0.16443	0.164627	0.196847	0.177737	0.195732
283	0.15424	0.180801	0.1655	0.165056	0.161615	0.192345	0.181386	0.19353			283	0.15424	0.180801	0.1655	0.165056	0.161615	0.192345	0.181386	0.19353
283.19	0.157804	0.182176	0.166648	0.165237	0.162745	0.195139	0.184073	0.197651			283.19	0.157804	0.182176	0.166648	0.165237	0.162745	0.195139	0.184073	0.197651
283.39	0.160945	0.181422	0.167875	0.16492	0.163944	0.191848	0.18212	0.1939			283.39	0.160945	0.181422	0.167875	0.16492	0.163944	0.191848	0.18212	0.1939
283.6	0.15707	0.182385	0.167148	0.169015	0.164107	0.195607	0.183524	0.196491			283.6	0.15707	0.182385	0.167148	0.169015	0.164107	0.195607	0.183524	0.196491
283.79	0.158119	0.180749	0.167161	0.165856	0.166488	0.193501	0.181394	0.193485			283.79	0.158119	0.180749	0.167161	0.165856	0.166488	0.193501	0.181394	0.193485
283.99	0.159318	0.182258	0.169839	0.166473	0.163003	0.193658	0.183236	0.193239			283.99	0.159318	0.182258	0.169839	0.166473	0.163003	0.193658	0.183236	0.193239
284.19	0.156364	0.182002	0.172875	0.16659	0.167794	0.199247	0.182719	0.194477			284.19	0.156364	0.182002	0.172875	0.16659	0.167794	0.199247	0.182719	0.194477
284.4	0.159134	0.184971	0.173108	0.167054	0.165736	0.196668	0.184964	0.197927			284.4	0.159134	0.184971	0.173108	0.167054	0.165736	0.196668	0.184964	0.197927
284.6	0.162616	0.181801	0.170132	0.166876	0.167756	0.190797	0.188261	0.195555			284.6	0.162616	0.181801	0.170132	0.166876	0.167756	0.190797	0.188261	0.195555
284.8	0.160497	0.184949	0.172914	0.168754	0.165289	0.196725	0.184059	0.199268			284.8	0.160497	0.184949	0.172914	0.168754	0.165289	0.196725	0.184059	0.199268
284.99	0.162591	0.181273	0.170783	0.168824	0.169422	0.196203	0.185822	0.202037			284.99	0.162591	0.181273	0.170783	0.168824	0.169422	0.196203	0.185822	0.202037
285.19	0.159864	0.182046	0.167824	0.167217	0.170074	0.195898	0.185657	0.19928			285.19	0.159864	0.182046	0.167824	0.167217	0.170074	0.195898	0.185657	0.19928
285.39	0.158561	0.183425	0.170718	0.169944	0.169631	0.200403	0.181886	0.198412			285.39	0.158561	0.183425	0.170718	0.169944	0.169631	0.200403	0.181886	0.198412
285.6	0.160134	0.187806	0.176283	0.170493	0.170246	0.195006	0.188564	0.200991			285.6	0.160134	0.187806	0.176283	0.170493	0.170246	0.195006	0.188564	0.200991
285.79	0.160066	0.184405	0.17514	0.170601	0.169254	0.198976	0.188151	0.201404			285.79	0.160066	0.184405	0.17514	0.170601	0.169254	0.198976	0.188151	0.201404
285.99	0.161525	0.18499	0.176369	0.170665	0.167687	0.200223	0.186729	0.204892			285.99	0.161525	0.18499	0.176369	0.170665	0.167687	0.200223	0.186729	0.204892
286.2	0.161424	0.186922	0.173084	0.170559	0.168947	0.198251	0.190407	0.202407			286.2	0.161424	0.186922	0.173084	0.170559	0.168947	0.198251	0.190407	0.202407
286.39	0.160413	0.187175	0.178133	0.170444	0.173199	0.202031	0.186658	0.201135			286.39	0.160413	0.187175	0.178133	0.170444	0.173199	0.202031	0.186658	0.201135
286.59	0.16183	0.186629	0.1734	0.172584	0.170624	0.199508	0.190387	0.200471			286.59	0.16183	0.186629	0.1734	0.172584	0.170624	0.199508	0.190387	0.200471
286.79	0.161987	0.185323	0.178042	0.173338	0.169368	0.202262	0.194293	0.202912			286.79	0.161987	0.185323	0.178042	0.173338	0.169368	0.202262	0.194293	0.202912
287	0.163235	0.187891	0.174659	0.173496	0.172521	0.200475	0.190374	0.201193			287	0.163235	0.187891	0.174659	0.173496	0.172521	0.200475	0.190374	0.201193
287.19	0.162548	0.192337	0.180925	0.174764	0.173023	0.200207	0.188193	0.205272			287.19	0.162548	0.192337	0.180925	0.174764	0.173023	0.200207	0.188193	0.205272
287.39	0.166831	0.189948	0.175275	0.174525	0.171082	0.201541	0.188671	0.203774			287.39	0.166831	0.189948	0.175275	0.174525	0.171082	0.201541	0.188671	0.203774
287.59	0.160839	0.190253	0.179207	0.171682	0.171387	0.204502	0.189132	0.205224			287.59	0.160839	0.190253	0.179207	0.171682	0.171387	0.204502	0.189132	0.205224
287.8	0.165881	0.193398	0.178185	0.174463	0.172361	0.199066	0.188046	0.202843			287.8	0.165881	0.193398	0.178185	0.174463	0.172361	0.199066	0.188046	0.202843
288	0.164604	0.190459	0.177557	0.175515	0.174079	0.20148	0.194256	0.20687			288	0.164604	0.190459	0.177557	0.175515	0.174079	0.20148	0.194256	0.20687
288.19	0.163371	0.191665	0.178901	0.174589	0.174326	0.20222	0.192652	0.204781			288.19	0.163371	0.191665	0.178901	0.174589	0.174326	0.20222	0.192652	0.204781
288.4	0.164744	0.190064	0.181049	0.173104	0.173913	0.206546	0.190652	0.20783			288.4	0.164744	0.190064	0.181049	0.173104	0.173913	0.206546	0.190652	0.20783
288.59	0.163317	0.193579	0.181148	0.178955	0.176046	0.204056	0.195722	0.208578			288.59	0.163317	0.193579	0.181148	0.178955	0.176046	0.204056	0.195722	0.208578
288.8	0.166831	0.193512	0.179644	0.177936	0.175714	0.20539	0.195134	0.205525			288.8	0.166831	0.193512	0.179644	0.177936	0.175714	0.20539	0.195134	0.205525
289	0.166782	0.193462	0.184431	0.177613	0.174037	0.20777	0.19258	0.20595			289	0.166782	0.193462	0.184431	0.177613	0.174037	0.20777	0.19258	0.20595
289.19	0.167035	0.193821	0.180968	0.174806	0.172783	0.203327	0.195372	0.203894			289.19	0.167035	0.193821	0.180968	0.174806	0.172783	0.203327	0.195372	0.203894
289.39	0.16704	0.194505	0.181521	0.177432	0.176367	0.205705	0.1948	0.208633			289.39	0.16704	0.194505	0.181521	0.177432	0.176367	0.205705	0.1948	0.208633
289.6	0.167225	0.195458	0.182088	0.176774	0.175223	0.205902	0.192213	0.20461			289.6	0.167225	0.195458	0.182088	0.176774	0.175223	0.205902	0.192213	0.20461
289.79	0.170161	0.195083	0.183998	0.175714	0.177264	0.206375	0.194196	0.207758			289.79	0.170161	0.195083	0.183998	0.175714	0.177264	0.206375	0.194196	0.207758
289.99	0.167337	0.196228	0.183985	0.17778	0.17747	0.205593	0.196352	0.208686			289.99	0.167337	0.196228	0.183985	0.17778	0.17747	0.205593	0.196352	0.208686
290.19	0.169208	0.19483	0.184699	0.179284	0.177791	0.202766	0.194955	0.209124			290.19	0.169208	0.19483	0.184699	0.179284	0.177791	0.202766	0.194955	0.209124
290.39	0.170691	0.192846	0.185172	0.180703	0.177688	0.208186	0.19521	0.208079			290.39	0.170691	0.192846	0.185172	0.180703	0.177688	0.208186	0.19521	0.208079
290.59	0.168801	0.197908	0.18567	0.178874	0.178243	0.20541	0.19983	0.21199			290.59	0.168801	0.197908	0.18567	0.178874	0.178243	0.20541	0.19983	0.21199
290.79	0.168796	0.19672	0.182461	0.179785	0.179597	0.209256	0.194675	0.21178			290.79	0.168796	0.19672	0.182461	0.179785	0.179597	0.209256	0.194675	0.21178
291	0.172177	0.196424	0.180399	0.18118	0.178794	0.208605	0.196858	0.210257			291	0.172177	0.196424	0.180399	0.18118	0.178794	0.208605	0.196858	0.210257
291.19	0.170676	0.195514	0.18516	0.179781	0.179666	0.209099	0.20187	0.209248			291.19	0.170676	0.195514	0.18516	0.179781	0.179666	0.209099	0.20187	0.209248
291.39	0.172846	0.198006	0.184687	0.179757	0.181406	0.210163	0.204979	0.209362			291.39	0.172846	0.198006	0.184687	0.179757	0.181406	0.210163	0.204979	0.209362
291.59	0.173693	0.197779	0.185975	0.181517	0.180514	0.207687	0.195198	0.211346			291.59	0.173693	0.197779	0.185975	0.181517	0.180514	0.207687	0.195198	0.211346
291.8	0.172709	0.197895	0.18412	0.182832	0.181693	0.21064	0.198478	0.210796			291.8	0.172709	0.197895	0.18412	0.182832	0.181693	0.21064	0.198478	0.210796
291.99	0.171419	0.19694	0.18564	0.181404	0.183346	0.208879	0.20175	0.213898			291.99	0.171419	0.19694	0.18564	0.181404	0.183346	0.208879	0.20175	0.213898
292.19	0.171796	0.200677	0.186333	0.181848	0.180169	0.212188	0.19951	0.215305			292.19	0.171796	0.200677	0.186333	0.181848	0.180169	0.212188	0.19951	0.215305
292.39	0.173135	0.203125	0.187792	0.181515	0.180764	0.211436	0.202118	0.214826			292.39	0.173135	0.203125	0.187792	0.181515	0.180764	0.211436	0.202118	0.214826
292.59	0.177092	0.200718	0.184356	0.182321	0.180646	0.213929	0.201046	0.211997			292.59	0.177092	0.200718	0.184356	0.182321	0.180646	0.213929	0.201046	0.211997
292.79	0.17431	0.201835	0.186702	0.184777	0.181966	0.21362	0.202044	0.211692			292.79	0.17431	0.201835	0.186702	0.184777	0.181966	0.21362	0.202044	0.211692
292.99	0.173224	0.200113	0.187429	0.184918	0.181353	0.210748	0.201703	0.213585			292.99	0.173224	0.200113	0.187429	0.184918	0.181353	0.210748	0.201703	0.213585
293.19	0.174672	0.201671	0.183031	0.181131	0.181309	0.213814	0.203087	0.218626			293.19	0.174672	0.201671	0.183031	0.181131	0.181309	0.213814	0.203087	0.218626
293.39	0.171597	0.20187	0.186142	0.183317	0.181915	0.213566	0.205148	0.212777			293.39	0.171597	0.20187	0.186142	0.183317	0.181915	0.213566	0.205148	0.212777
293.6	0.171954	0.203158	0.189715	0.182113	0.182362	0.211211	0.205677	0.213539			293.6	0.171954	0.203158	0.189715	0.182113	0.182362	0.211211	0.205677	0.213539
293.79	0.176427	0.20188	0.191058	0.187176	0.184463	0.211086	0.204246	0.215713			293.79	0.176427	0.20188	0.191058	0.187176	0.184463	0.211086	0.204246	0.215713
293.99	0.175201	0.208884	0.192723	0.188082	0.185849	0.212021	0.202862	0.218566			293.99	0.175201	0.208884	0.192723	0.188082	0.185849	0.212021	0.202862	0.218566
294.19	0.175206	0.204712	0.189619	0.185109	0.185037	0.217359	0.207428	0.218176			294.19	0.175206	0.204712	0.189619	0.185109	0.185037	0.217359	0.207428	0.218176
294.4	0.174703	0.205065	0.18949	0.186718	0.181838	0.216099	0.204412	0.220103			294.4	0.174703	0.205065	0.18949	0.186718	0.181838	0.216099	0.204412	0.220103
294.59	0.178856	0.207597	0.191966	0.189324	0.188214	0.217545	0.205741	0.218937			294.59	0.178856	0.207597	0.191966	0.189324	0.188214	0.217545	0.205741	0.218937
294.79	0.177237	0.201946	0.192352	0.185409	0.184448	0.217299	0.203679	0.218186			294.79	0.177237	0.201946	0.192352	0.185409	0.184448	0.217299	0.203679	0.218186
294.99	0.17949	0.207332	0.192429	0.186275	0.187703	0.216395	0.207197	0.220984			294.99	0.17949	0.207332	0.192429	0.186275	0.187703	0.216395	0.207197	0.220984
295.19	0.179773	0.206241	0.188809	0.18605	0.189145	0.21713	0.210491	0.218991			295.19	0.179773	0.206241	0.188809	0.18605	0.189145	0.21713	0.210491	0.218991
295.39	0.178911	0.20834	0.18994	0.186798	0.186061	0.21771	0.210169	0.22055			295.39	0.178911	0.20834	0.18994	0.186798	0.186061	0.21771	0.210169	0.22055
295.59	0.18	0.207749	0.192225	0.188909	0.188415	0.217312	0.208617	0.221957			295.59	0.18	0.207749	0.192225	0.188909	0.188415	0.217312	0.208617	0.221957
295.79	0.178837	0.210481	0.196749	0.184932	0.187805	0.215707	0.207697	0.221291			295.79	0.178837	0.210481	0.196749	0.184932	0.187805	0.215707	0.207697	0.221291
295.99	0.179446	0.205631	0.19442	0.188568	0.18833	0.216315	0.20657	0.217669			295.99	0.179446	0.205631	0.19442	0.188568	0.18833	0.216315	0.20657	0.217669
296.19	0.180277	0.209132	0.191191	0.18854	0.188757	0.219702	0.204783	0.21955			296.19	0.180277	0.209132	0.191191	0.18854	0.188757	0.219702	0.204783	0.21955
296.39	0.179162	0.206175	0.196176	0.191535	0.19046	0.219758	0.206253	0.221806			296.39	0.179162	0.206175	0.196176	0.191535	0.19046	0.219758	0.206253	0.221806
296.59	0.177742	0.202793	0.195567	0.190355	0.188278	0.219401	0.207694	0.22221			296.59	0.177742	0.202793	0.195567	0.190355	0.188278	0.219401	0.207694	0.22221
296.79	0.181846	0.207628	0.196782	0.18959	0.187771	0.222551	0.207852	0.220698			296.79	0.181846	0.207628	0.196782	0.18959	0.187771	0.222551	0.207852	0.220698
297	0.180861	0.212065	0.195654	0.189719	0.190217	0.221799	0.207548	0.219028			297	0.180861	0.212065	0.195654	0.189719	0.190217	0.221799	0.207548	0.219028
297.2	0.179349	0.21236	0.196906	0.189462	0.191402	0.219705	0.210925	0.225043			297.2	0.179349	0.21236	0.196906	0.189462	0.191402	0.219705	0.210925	0.225043
297.4	0.184776	0.209214	0.19409	0.191663	0.190448	0.218895	0.211008	0.223425			297.4	0.184776	0.209214	0.19409	0.191663	0.190448	0.218895	0.211008	0.223425
297.6	0.181824	0.210209	0.192249	0.188116	0.191657	0.224343	0.212216	0.221791			297.6	0.181824	0.210209	0.192249	0.188116	0.191657	0.224343	0.212216	0.221791
297.8	0.181767	0.212101	0.196625	0.191135	0.192179	0.226556	0.211869	0.22407			297.8	0.181767	0.212101	0.196625	0.191135	0.192179	0.226556	0.211869	0.22407
298	0.185064	0.210539	0.194018	0.192067	0.190674	0.224052	0.214823	0.226137			298	0.185064	0.210539	0.194018	0.192067	0.190674	0.224052	0.214823	0.226137
298.2	0.18268	0.208684	0.194422	0.190524	0.195433	0.222442	0.211713	0.224547			298.2	0.18268	0.208684	0.194422	0.190524	0.195433	0.222442	0.211713	0.224547
298.4	0.18383	0.211872	0.197395	0.191779	0.191156	0.224149	0.209857	0.226632			298.4	0.18383	0.211872	0.197395	0.191779	0.191156	0.224149	0.209857	0.226632
298.6	0.183435	0.211474	0.196573	0.192109	0.191368	0.21909	0.212079	0.227578			298.6	0.183435	0.211474	0.196573	0.192109	0.191368	0.21909	0.212079	0.227578
298.79	0.182833	0.214406	0.197898	0.192548	0.192052	0.224959	0.214552	0.230783			298.79	0.182833	0.214406	0.197898	0.192548	0.192052	0.224959	0.214552	0.230783
299	0.183492	0.209787	0.195521	0.1918	0.19638	0.222295	0.211093	0.227568			299	0.183492	0.209787	0.195521	0.1918	0.19638	0.222295	0.211093	0.227568
299.2	0.181526	0.2108	0.196322	0.194561	0.193822	0.22233	0.210921	0.227993			299.2	0.181526	0.2108	0.196322	0.194561	0.193822	0.22233	0.210921	0.227993
299.4	0.186749	0.214146	0.198443	0.19658	0.195948	0.222834	0.216417	0.233051			299.4	0.186749	0.214146	0.198443	0.19658	0.195948	0.222834	0.216417	0.233051
299.59	0.185193	0.216874	0.199788	0.195298	0.193261	0.222824	0.213598	0.226365			299.59	0.185193	0.216874	0.199788	0.195298	0.193261	0.222824	0.213598	0.226365
299.8	0.18766	0.213245	0.198776	0.197377	0.191718	0.225353	0.215792	0.22742			299.8	0.18766	0.213245	0.198776	0.197377	0.191718	0.225353	0.215792	0.22742
300	0.187993	0.213428	0.202232	0.195346	0.19641	0.228703	0.216854	0.226501			300	0.187993	0.213428	0.202232	0.195346	0.19641	0.228703	0.216854	0.226501
300.2	0.187234	0.215181	0.199747	0.197845	0.194907	0.226991	0.215928	0.232581			300.2	0.187234	0.215181	0.199747	0.197845	0.194907	0.226991	0.215928	0.232581
300.4	0.188852	0.216479	0.197652	0.197628	0.196383	0.228446	0.217838	0.229601			300.4	0.188852	0.216479	0.197652	0.197628	0.196383	0.228446	0.217838	0.229601
300.6	0.187383	0.214924	0.20072	0.194896	0.195221	0.229154	0.217373	0.227476			300.6	0.187383	0.214924	0.20072	0.194896	0.195221	0.229154	0.217373	0.227476
300.8	0.186533	0.215284	0.203982	0.194112	0.198762	0.227258	0.217824	0.229878			300.8	0.186533	0.215284	0.203982	0.194112	0.198762	0.227258	0.217824	0.229878
301	0.186598	0.214432	0.2046	0.196318	0.198736	0.225946	0.215877	0.231509			301	0.186598	0.214432	0.2046	0.196318	0.198736	0.225946	0.215877	0.231509
301.2	0.185768	0.221572	0.204654	0.194985	0.197122	0.226077	0.215412	0.228122			301.2	0.185768	0.221572	0.204654	0.194985	0.197122	0.226077	0.215412	0.228122
301.4	0.191275	0.21543	0.205661	0.196437	0.199709	0.22683	0.218348	0.228394			301.4	0.191275	0.21543	0.205661	0.196437	0.199709	0.22683	0.218348	0.228394
301.6	0.189272	0.217096	0.207621	0.20042	0.197616	0.229687	0.220106	0.23283			301.6	0.189272	0.217096	0.207621	0.20042	0.197616	0.229687	0.220106	0.23283
301.8	0.18924	0.219533	0.206569	0.198565	0.194538	0.230738	0.215874	0.232279			301.8	0.18924	0.219533	0.206569	0.198565	0.194538	0.230738	0.215874	0.232279
302	0.190755	0.218681	0.206703	0.20158	0.20049	0.231977	0.218698	0.233069			302	0.190755	0.218681	0.206703	0.20158	0.20049	0.231977	0.218698	0.233069
302.19	0.194589	0.219369	0.209693	0.196309	0.198805	0.227558	0.218491	0.234082			302.19	0.194589	0.219369	0.209693	0.196309	0.198805	0.227558	0.218491	0.234082
302.4	0.188503	0.217077	0.205664	0.196782	0.200122	0.230926	0.220108	0.233965			302.4	0.188503	0.217077	0.205664	0.196782	0.200122	0.230926	0.220108	0.233965
302.6	0.188385	0.221544	0.206048	0.201956	0.201657	0.230907	0.218996	0.231363			302.6	0.188385	0.221544	0.206048	0.201956	0.201657	0.230907	0.218996	0.231363
302.8	0.190901	0.219199	0.205827	0.200253	0.201031	0.231551	0.216936	0.229821			302.8	0.190901	0.219199	0.205827	0.200253	0.201031	0.231551	0.216936	0.229821
302.99	0.194909	0.217634	0.205623	0.200205	0.202551	0.231563	0.225102	0.237593			302.99	0.194909	0.217634	0.205623	0.200205	0.202551	0.231563	0.225102	0.237593
303.2	0.191867	0.218526	0.207588	0.201455	0.200913	0.229144	0.2239	0.236609			303.2	0.191867	0.218526	0.207588	0.201455	0.200913	0.229144	0.2239	0.236609
303.4	0.194148	0.221715	0.209163	0.202359	0.198846	0.229169	0.223885	0.238452			303.4	0.194148	0.221715	0.209163	0.202359	0.198846	0.229169	0.223885	0.238452
303.59	0.191574	0.21783	0.206087	0.199776	0.202149	0.232773	0.220576	0.237288			303.59	0.191574	0.21783	0.206087	0.199776	0.202149	0.232773	0.220576	0.237288
303.8	0.191085	0.223427	0.210292	0.202583	0.201585	0.234234	0.223533	0.235469			303.8	0.191085	0.223427	0.210292	0.202583	0.201585	0.234234	0.223533	0.235469
304	0.190821	0.226466	0.210628	0.205138	0.204626	0.233014	0.223667	0.236922			304	0.190821	0.226466	0.210628	0.205138	0.204626	0.233014	0.223667	0.236922
304.2	0.193516	0.227502	0.206839	0.201957	0.20477	0.2375	0.224032	0.237734			304.2	0.193516	0.227502	0.206839	0.201957	0.20477	0.2375	0.224032	0.237734
304.39	0.19381	0.226031	0.210153	0.203595	0.202959	0.237807	0.224164	0.238301			304.39	0.19381	0.226031	0.210153	0.203595	0.202959	0.237807	0.224164	0.238301
304.6	0.192414	0.222853	0.206394	0.205291	0.202318	0.234202	0.224523	0.239962			304.6	0.192414	0.222853	0.206394	0.205291	0.202318	0.234202	0.224523	0.239962
304.8	0.194554	0.222797	0.207026	0.201374	0.203357	0.237042	0.230255	0.236992			304.8	0.194554	0.222797	0.207026	0.201374	0.203357	0.237042	0.230255	0.236992
305	0.19651	0.226679	0.211544	0.207178	0.205727	0.235556	0.227537	0.237825			305	0.19651	0.226679	0.211544	0.207178	0.205727	0.235556	0.227537	0.237825
305.2	0.194924	0.22297	0.210954	0.204417	0.206854	0.23403	0.22745	0.241836			305.2	0.194924	0.22297	0.210954	0.204417	0.206854	0.23403	0.22745	0.241836
305.39	0.197323	0.224986	0.214419	0.204602	0.207626	0.234446	0.226932	0.243364			305.39	0.197323	0.224986	0.214419	0.204602	0.207626	0.234446	0.226932	0.243364
305.6	0.195325	0.22531	0.210944	0.204355	0.20565	0.241026	0.22914	0.239209			305.6	0.195325	0.22531	0.210944	0.204355	0.20565	0.241026	0.22914	0.239209
305.8	0.192427	0.22537	0.212768	0.205364	0.206618	0.238441	0.226549	0.239379			305.8	0.192427	0.22537	0.212768	0.205364	0.206618	0.238441	0.226549	0.239379
306	0.19727	0.226139	0.214607	0.208771	0.208994	0.238896	0.228692	0.244126			306	0.19727	0.226139	0.214607	0.208771	0.208994	0.238896	0.228692	0.244126
306.19	0.196485	0.228862	0.213102	0.204767	0.207462	0.237426	0.225722	0.239282			306.19	0.196485	0.228862	0.213102	0.204767	0.207462	0.237426	0.225722	0.239282
306.4	0.195685	0.227396	0.213221	0.206774	0.213004	0.24048	0.224722	0.243475			306.4	0.195685	0.227396	0.213221	0.206774	0.213004	0.24048	0.224722	0.243475
306.6	0.197128	0.227894	0.21211	0.207353	0.210604	0.239389	0.229481	0.24233			306.6	0.197128	0.227894	0.21211	0.207353	0.210604	0.239389	0.229481	0.24233
306.8	0.197195	0.22934	0.211611	0.206355	0.211271	0.238264	0.230077	0.240909			306.8	0.197195	0.22934	0.211611	0.206355	0.211271	0.238264	0.230077	0.240909
306.99	0.198976	0.229427	0.213817	0.20973	0.20858	0.238063	0.230992	0.244273			306.99	0.198976	0.229427	0.213817	0.20973	0.20858	0.238063	0.230992	0.244273
307.2	0.197543	0.23114	0.213257	0.210237	0.208109	0.240244	0.2324	0.243783			307.2	0.197543	0.23114	0.213257	0.210237	0.208109	0.240244	0.2324	0.243783
307.4	0.19966	0.233673	0.213927	0.207423	0.210989	0.239682	0.233624	0.245403			307.4	0.19966	0.233673	0.213927	0.207423	0.210989	0.239682	0.233624	0.245403
307.59	0.198181	0.227442	0.213633	0.211831	0.21105	0.239062	0.231697	0.244573			307.59	0.198181	0.227442	0.213633	0.211831	0.21105	0.239062	0.231697	0.244573
307.8	0.201679	0.230485	0.215595	0.211453	0.209136	0.241814	0.232274	0.244279			307.8	0.201679	0.230485	0.215595	0.211453	0.209136	0.241814	0.232274	0.244279
308	0.200915	0.230126	0.218278	0.211671	0.211678	0.242027	0.228443	0.24132			308	0.200915	0.230126	0.218278	0.211671	0.211678	0.242027	0.228443	0.24132
308.2	0.201216	0.22974	0.217298	0.214441	0.210431	0.241758	0.231915	0.243225			308.2	0.201216	0.22974	0.217298	0.214441	0.210431	0.241758	0.231915	0.243225
308.4	0.201639	0.232571	0.219037	0.210638	0.215589	0.243178	0.236254	0.244996			308.4	0.201639	0.232571	0.219037	0.210638	0.215589	0.243178	0.236254	0.244996
308.6	0.201066	0.233523	0.217574	0.209514	0.212819	0.24632	0.231662	0.242681			308.6	0.201066	0.233523	0.217574	0.209514	0.212819	0.24632	0.231662	0.242681
308.79	0.201534	0.233595	0.218306	0.213488	0.214427	0.246618	0.231708	0.248977			308.79	0.201534	0.233595	0.218306	0.213488	0.214427	0.246618	0.231708	0.248977
309	0.204756	0.234045	0.220986	0.211683	0.213611	0.243805	0.232033	0.246196			309	0.204756	0.234045	0.220986	0.211683	0.213611	0.243805	0.232033	0.246196
309.2	0.202444	0.232203	0.220598	0.213692	0.213502	0.242112	0.235743	0.246623			309.2	0.202444	0.232203	0.220598	0.213692	0.213502	0.242112	0.235743	0.246623
309.39	0.202238	0.23183	0.217366	0.212303	0.211412	0.246794	0.239504	0.247945			309.39	0.202238	0.23183	0.217366	0.212303	0.211412	0.246794	0.239504	0.247945
309.59	0.204119	0.234236	0.220311	0.216128	0.216563	0.244978	0.232509	0.243464			309.59	0.204119	0.234236	0.220311	0.216128	0.216563	0.244978	0.232509	0.243464
309.8	0.20485	0.234489	0.216949	0.212324	0.213407	0.242537	0.234743	0.245398			309.8	0.20485	0.234489	0.216949	0.212324	0.213407	0.242537	0.234743	0.245398
310	0.202907	0.232868	0.217533	0.216195	0.215382	0.247877	0.233154	0.250409			310	0.202907	0.232868	0.217533	0.216195	0.215382	0.247877	0.233154	0.250409
310.19	0.205033	0.234967	0.215448	0.213844	0.218063	0.246878	0.234353	0.250339			310.19	0.205033	0.234967	0.215448	0.213844	0.218063	0.246878	0.234353	0.250339
310.39	0.204447	0.236024	0.225557	0.216184	0.217847	0.246093	0.239491	0.253434			310.39	0.204447	0.236024	0.225557	0.216184	0.217847	0.246093	0.239491	0.253434
310.6	0.204928	0.233547	0.221989	0.215744	0.215688	0.247649	0.235302	0.250587			310.6	0.204928	0.233547	0.221989	0.215744	0.215688	0.247649	0.235302	0.250587
310.8	0.205261	0.233165	0.221848	0.215934	0.214685	0.246775	0.23349	0.251291			310.8	0.205261	0.233165	0.221848	0.215934	0.214685	0.246775	0.23349	0.251291
310.99	0.204413	0.236553	0.219797	0.217241	0.2179	0.24726	0.23466	0.249422			310.99	0.204413	0.236553	0.219797	0.217241	0.2179	0.24726	0.23466	0.249422
311.2	0.205067	0.236035	0.222002	0.213875	0.223573	0.247446	0.239609	0.25023			311.2	0.205067	0.236035	0.222002	0.213875	0.223573	0.247446	0.239609	0.25023
311.4	0.205615	0.234973	0.221114	0.212455	0.219235	0.250347	0.238343	0.250978			311.4	0.205615	0.234973	0.221114	0.212455	0.219235	0.250347	0.238343	0.250978
311.6	0.21128	0.237005	0.224024	0.218414	0.216742	0.248472	0.238157	0.249765			311.6	0.21128	0.237005	0.224024	0.218414	0.216742	0.248472	0.238157	0.249765
311.8	0.207543	0.237034	0.2232	0.214672	0.221795	0.247189	0.243488	0.251487			311.8	0.207543	0.237034	0.2232	0.214672	0.221795	0.247189	0.243488	0.251487
311.99	0.207898	0.240676	0.224395	0.216118	0.217301	0.250167	0.240858	0.252949			311.99	0.207898	0.240676	0.224395	0.216118	0.217301	0.250167	0.240858	0.252949
312.2	0.205591	0.238936	0.224933	0.217537	0.220409	0.247074	0.237278	0.253075			312.2	0.205591	0.238936	0.224933	0.217537	0.220409	0.247074	0.237278	0.253075
312.4	0.210583	0.23749	0.226875	0.219488	0.218252	0.253169	0.242582	0.254771			312.4	0.210583	0.23749	0.226875	0.219488	0.218252	0.253169	0.242582	0.254771
312.6	0.206989	0.241743	0.227498	0.218614	0.21972	0.251919	0.243515	0.255599			312.6	0.206989	0.241743	0.227498	0.218614	0.21972	0.251919	0.243515	0.255599
312.79	0.209346	0.240486	0.22764	0.216404	0.220488	0.252273	0.245509	0.254573			312.79	0.209346	0.240486	0.22764	0.216404	0.220488	0.252273	0.245509	0.254573
312.99	0.208401	0.242286	0.22744	0.221152	0.218108	0.251596	0.242568	0.25637			312.99	0.208401	0.242286	0.22744	0.221152	0.218108	0.251596	0.242568	0.25637
313.2	0.208637	0.239016	0.225281	0.221317	0.222525	0.248983	0.242204	0.254578			313.2	0.208637	0.239016	0.225281	0.221317	0.222525	0.248983	0.242204	0.254578
313.4	0.210574	0.242956	0.22814	0.223532	0.222524	0.252222	0.246062	0.255767			313.4	0.210574	0.242956	0.22814	0.223532	0.222524	0.252222	0.246062	0.255767
313.59	0.21066	0.237993	0.224513	0.221889	0.223483	0.252686	0.242594	0.253221			313.59	0.21066	0.237993	0.224513	0.221889	0.223483	0.252686	0.242594	0.253221
313.8	0.210928	0.241216	0.227297	0.218959	0.218428	0.252845	0.242525	0.25651			313.8	0.210928	0.241216	0.227297	0.218959	0.218428	0.252845	0.242525	0.25651
314	0.211524	0.242449	0.228017	0.217765	0.224034	0.254021	0.243759	0.256095			314	0.211524	0.242449	0.228017	0.217765	0.224034	0.254021	0.243759	0.256095
314.19	0.210314	0.240277	0.22814	0.22061	0.2244	0.250957	0.244217	0.258133			314.19	0.210314	0.240277	0.22814	0.22061	0.2244	0.250957	0.244217	0.258133
314.39	0.212243	0.246229	0.230602	0.218762	0.223528	0.251619	0.243675	0.258156			314.39	0.212243	0.246229	0.230602	0.218762	0.223528	0.251619	0.243675	0.258156
314.6	0.210995	0.241667	0.229115	0.223416	0.225697	0.256678	0.244545	0.259216			314.6	0.210995	0.241667	0.229115	0.223416	0.225697	0.256678	0.244545	0.259216
314.8	0.21289	0.242417	0.227884	0.22221	0.224017	0.251871	0.24763	0.260405			314.8	0.21289	0.242417	0.227884	0.22221	0.224017	0.251871	0.24763	0.260405
315	0.209146	0.242357	0.2314	0.221602	0.227046	0.256149	0.247431	0.257292			315	0.209146	0.242357	0.2314	0.221602	0.227046	0.256149	0.247431	0.257292
315.2	0.214057	0.244492	0.230607	0.223602	0.224163	0.25719	0.246494	0.257298			315.2	0.214057	0.244492	0.230607	0.223602	0.224163	0.25719	0.246494	0.257298
315.4	0.213064	0.245674	0.226559	0.22309	0.224295	0.257389	0.245823	0.260141			315.4	0.213064	0.245674	0.226559	0.22309	0.224295	0.257389	0.245823	0.260141
315.59	0.214541	0.246526	0.226453	0.227105	0.225157	0.251392	0.249474	0.259161			315.59	0.214541	0.246526	0.226453	0.227105	0.225157	0.251392	0.249474	0.259161
315.8	0.216639	0.249047	0.231219	0.223349	0.227155	0.255552	0.247136	0.257626			315.8	0.216639	0.249047	0.231219	0.223349	0.227155	0.255552	0.247136	0.257626
315.99	0.21341	0.245809	0.234464	0.226806	0.225631	0.256934	0.2468	0.257555			315.99	0.21341	0.245809	0.234464	0.226806	0.225631	0.256934	0.2468	0.257555
316.19	0.213366	0.247141	0.233396	0.223385	0.229109	0.252067	0.251947	0.264704			316.19	0.213366	0.247141	0.233396	0.223385	0.229109	0.252067	0.251947	0.264704
316.39	0.211604	0.251956	0.233582	0.226708	0.231232	0.25785	0.252489	0.260188			316.39	0.211604	0.251956	0.233582	0.226708	0.231232	0.25785	0.252489	0.260188
316.6	0.216452	0.247956	0.232082	0.226074	0.228664	0.257774	0.246865	0.263737			316.6	0.216452	0.247956	0.232082	0.226074	0.228664	0.257774	0.246865	0.263737
316.79	0.217203	0.249181	0.234157	0.226659	0.225957	0.256819	0.244685	0.260599			316.79	0.217203	0.249181	0.234157	0.226659	0.225957	0.256819	0.244685	0.260599
316.99	0.21687	0.247775	0.232642	0.225431	0.229336	0.258966	0.250484	0.262951			316.99	0.21687	0.247775	0.232642	0.225431	0.229336	0.258966	0.250484	0.262951
317.19	0.215433	0.248051	0.2295	0.221457	0.229759	0.260905	0.250634	0.261863			317.19	0.215433	0.248051	0.2295	0.221457	0.229759	0.260905	0.250634	0.261863
317.39	0.218525	0.251329	0.234295	0.227225	0.233389	0.259519	0.249418	0.266905			317.39	0.218525	0.251329	0.234295	0.227225	0.233389	0.259519	0.249418	0.266905
317.59	0.218784	0.248633	0.233721	0.232669	0.230266	0.260051	0.251037	0.267824			317.59	0.218784	0.248633	0.233721	0.232669	0.230266	0.260051	0.251037	0.267824
317.79	0.215982	0.25109	0.232788	0.22586	0.22639	0.259141	0.253051	0.263246			317.79	0.215982	0.25109	0.232788	0.22586	0.22639	0.259141	0.253051	0.263246
318	0.222431	0.250648	0.23591	0.229483	0.230046	0.259136	0.24882	0.263031			318	0.222431	0.250648	0.23591	0.229483	0.230046	0.259136	0.24882	0.263031
318.19	0.217063	0.248867	0.238247	0.229422	0.23064	0.262609	0.254592	0.264875			318.19	0.217063	0.248867	0.238247	0.229422	0.23064	0.262609	0.254592	0.264875
318.39	0.216807	0.251158	0.237002	0.229014	0.230383	0.262046	0.253488	0.265417			318.39	0.216807	0.251158	0.237002	0.229014	0.230383	0.262046	0.253488	0.265417
318.59	0.223166	0.253383	0.237262	0.229607	0.23059	0.263866	0.252478	0.266077			318.59	0.223166	0.253383	0.237262	0.229607	0.23059	0.263866	0.252478	0.266077
318.8	0.220722	0.252566	0.233887	0.229	0.233386	0.2621	0.257005	0.264263			318.8	0.220722	0.252566	0.233887	0.229	0.233386	0.2621	0.257005	0.264263
318.99	0.220732	0.253354	0.236507	0.228637	0.230823	0.261009	0.25218	0.26584			318.99	0.220732	0.253354	0.236507	0.228637	0.230823	0.261009	0.25218	0.26584
319.2	0.222146	0.255433	0.238236	0.22971	0.232526	0.262382	0.253905	0.266192			319.2	0.222146	0.255433	0.238236	0.22971	0.232526	0.262382	0.253905	0.266192
319.39	0.220814	0.251888	0.23648	0.226704	0.23364	0.262165	0.252977	0.26591			319.39	0.220814	0.251888	0.23648	0.226704	0.23364	0.262165	0.252977	0.26591
319.59	0.221064	0.254013	0.235065	0.230918	0.233698	0.262634	0.25444	0.268406			319.59	0.221064	0.254013	0.235065	0.230918	0.233698	0.262634	0.25444	0.268406
319.8	0.222541	0.25727	0.238907	0.230062	0.234291	0.262104	0.255245	0.267851			319.8	0.222541	0.25727	0.238907	0.230062	0.234291	0.262104	0.255245	0.267851
319.99	0.220896	0.254374	0.235594	0.23221	0.235966	0.262891	0.255181	0.265863			319.99	0.220896	0.254374	0.235594	0.23221	0.235966	0.262891	0.255181	0.265863
320.19	0.22458	0.258196	0.239331	0.233869	0.234903	0.263334	0.253621	0.268595			320.19	0.22458	0.258196	0.239331	0.233869	0.234903	0.263334	0.253621	0.268595
320.39	0.224703	0.254289	0.241114	0.232381	0.232526	0.264047	0.25517	0.270976			320.39	0.224703	0.254289	0.241114	0.232381	0.232526	0.264047	0.25517	0.270976
320.6	0.221978	0.254922	0.240894	0.233329	0.236476	0.263177	0.255885	0.272215			320.6	0.221978	0.254922	0.240894	0.233329	0.236476	0.263177	0.255885	0.272215
320.79	0.220412	0.256091	0.241462	0.233053	0.235752	0.26634	0.257966	0.269748			320.79	0.220412	0.256091	0.241462	0.233053	0.235752	0.26634	0.257966	0.269748
320.99	0.225101	0.252744	0.241941	0.233805	0.237689	0.269634	0.256223	0.269104			320.99	0.225101	0.252744	0.241941	0.233805	0.237689	0.269634	0.256223	0.269104
321.19	0.225976	0.253057	0.241669	0.234708	0.234316	0.269292	0.257348	0.272063			321.19	0.225976	0.253057	0.241669	0.234708	0.234316	0.269292	0.257348	0.272063
321.39	0.22711	0.254752	0.241234	0.235708	0.238462	0.267473	0.258864	0.274986			321.39	0.22711	0.254752	0.241234	0.235708	0.238462	0.267473	0.258864	0.274986
321.59	0.226819	0.255906	0.239764	0.23525	0.236082	0.266655	0.262073	0.271219			321.59	0.226819	0.255906	0.239764	0.23525	0.236082	0.266655	0.262073	0.271219
321.79	0.226973	0.257695	0.246096	0.236915	0.239604	0.268669	0.254624	0.274694			321.79	0.226973	0.257695	0.246096	0.236915	0.239604	0.268669	0.254624	0.274694
321.99	0.224638	0.257426	0.246591	0.23434	0.238817	0.266269	0.259043	0.273248			321.99	0.224638	0.257426	0.246591	0.23434	0.238817	0.266269	0.259043	0.273248
322.19	0.225141	0.261506	0.244544	0.233863	0.238864	0.270398	0.258529	0.275723			322.19	0.225141	0.261506	0.244544	0.233863	0.238864	0.270398	0.258529	0.275723
322.39	0.222922	0.258229	0.242313	0.238591	0.237317	0.267243	0.263725	0.273334			322.39	0.222922	0.258229	0.242313	0.238591	0.237317	0.267243	0.263725	0.273334
322.59	0.225883	0.259108	0.242809	0.23594	0.238583	0.27092	0.260275	0.271199			322.59	0.225883	0.259108	0.242809	0.23594	0.238583	0.27092	0.260275	0.271199
322.79	0.224748	0.255455	0.245432	0.237644	0.238053	0.267525	0.261757	0.275798			322.79	0.224748	0.255455	0.245432	0.237644	0.238053	0.267525	0.261757	0.275798
322.99	0.227795	0.257472	0.244321	0.236772	0.239504	0.267987	0.261082	0.275044			322.99	0.227795	0.257472	0.244321	0.236772	0.239504	0.267987	0.261082	0.275044
323.19	0.225854	0.262098	0.245818	0.235877	0.239793	0.26889	0.262249	0.273453			323.19	0.225854	0.262098	0.245818	0.235877	0.239793	0.26889	0.262249	0.273453
323.39	0.22314	0.259469	0.244033	0.236077	0.239882	0.272857	0.262184	0.27713			323.39	0.22314	0.259469	0.244033	0.236077	0.239882	0.272857	0.262184	0.27713
323.59	0.228365	0.258244	0.24884	0.238114	0.241763	0.273188	0.264896	0.274054			323.59	0.228365	0.258244	0.24884	0.238114	0.241763	0.273188	0.264896	0.274054
323.79	0.230593	0.261905	0.245624	0.236874	0.243283	0.271637	0.262267	0.279469			323.79	0.230593	0.261905	0.245624	0.236874	0.243283	0.271637	0.262267	0.279469
323.99	0.229426	0.261059	0.247647	0.235806	0.241114	0.271228	0.264955	0.274952			323.99	0.229426	0.261059	0.247647	0.235806	0.241114	0.271228	0.264955	0.274952
324.19	0.230397	0.258834	0.246996	0.242356	0.244006	0.275074	0.264755	0.277284			324.19	0.230397	0.258834	0.246996	0.242356	0.244006	0.275074	0.264755	0.277284
324.39	0.230077	0.260558	0.248633	0.237743	0.242673	0.272387	0.268297	0.277172			324.39	0.230077	0.260558	0.248633	0.237743	0.242673	0.272387	0.268297	0.277172
324.59	0.230235	0.259393	0.249591	0.240264	0.242037	0.272597	0.264476	0.279258			324.59	0.230235	0.259393	0.249591	0.240264	0.242037	0.272597	0.264476	0.279258
324.79	0.231855	0.264253	0.247169	0.239125	0.244058	0.276433	0.264244	0.277029			324.79	0.231855	0.264253	0.247169	0.239125	0.244058	0.276433	0.264244	0.277029
324.99	0.23318	0.265145	0.2501	0.239688	0.245593	0.272199	0.267132	0.278236			324.99	0.23318	0.265145	0.2501	0.239688	0.245593	0.272199	0.267132	0.278236
325.19	0.230706	0.264302	0.248614	0.242267	0.245533	0.271635	0.263703	0.281907			325.19	0.230706	0.264302	0.248614	0.242267	0.245533	0.271635	0.263703	0.281907
325.39	0.23212	0.2632	0.248545	0.241356	0.245034	0.275588	0.265714	0.277789			325.39	0.23212	0.2632	0.248545	0.241356	0.245034	0.275588	0.265714	0.277789
325.59	0.22864	0.266792	0.249512	0.245027	0.245368	0.275814	0.268761	0.285294			325.59	0.22864	0.266792	0.249512	0.245027	0.245368	0.275814	0.268761	0.285294
325.79	0.229381	0.267504	0.249869	0.240858	0.248311	0.278668	0.270523	0.282249			325.79	0.229381	0.267504	0.249869	0.240858	0.248311	0.278668	0.270523	0.282249
325.99	0.235501	0.265838	0.251499	0.243313	0.245798	0.2764	0.268627	0.281221			325.99	0.235501	0.265838	0.251499	0.243313	0.245798	0.2764	0.268627	0.281221
326.2	0.234109	0.266627	0.253915	0.242554	0.244847	0.275317	0.268633	0.281551			326.2	0.234109	0.266627	0.253915	0.242554	0.244847	0.275317	0.268633	0.281551
326.4	0.232028	0.265241	0.248622	0.244797	0.245467	0.276984	0.268946	0.283954			326.4	0.232028	0.265241	0.248622	0.244797	0.245467	0.276984	0.268946	0.283954
326.6	0.2308	0.264294	0.254535	0.243353	0.246469	0.278683	0.274463	0.281966			326.6	0.2308	0.264294	0.254535	0.243353	0.246469	0.278683	0.274463	0.281966
326.8	0.234556	0.268875	0.25164	0.242239	0.245645	0.275682	0.269244	0.28205			326.8	0.234556	0.268875	0.25164	0.242239	0.245645	0.275682	0.269244	0.28205
327	0.234739	0.269811	0.254452	0.247017	0.24942	0.281229	0.270396	0.28373			327	0.234739	0.269811	0.254452	0.247017	0.24942	0.281229	0.270396	0.28373
327.2	0.234801	0.267418	0.254343	0.245097	0.247875	0.275509	0.27546	0.28313			327.2	0.234801	0.267418	0.254343	0.245097	0.247875	0.275509	0.27546	0.28313
327.4	0.234988	0.270168	0.252632	0.246901	0.248873	0.282426	0.27045	0.286013			327.4	0.234988	0.270168	0.252632	0.246901	0.248873	0.282426	0.27045	0.286013
327.6	0.236247	0.269621	0.254777	0.247435	0.246711	0.277845	0.273837	0.28377			327.6	0.236247	0.269621	0.254777	0.247435	0.246711	0.277845	0.273837	0.28377
327.8	0.236778	0.270293	0.254874	0.248449	0.250226	0.282408	0.273484	0.285209			327.8	0.236778	0.270293	0.254874	0.248449	0.250226	0.282408	0.273484	0.285209
327.99	0.234374	0.270867	0.255348	0.245014	0.249396	0.280229	0.271775	0.2864			327.99	0.234374	0.270867	0.255348	0.245014	0.249396	0.280229	0.271775	0.2864
328.2	0.235243	0.266823	0.254844	0.246403	0.250312	0.283373	0.272866	0.286463			328.2	0.235243	0.266823	0.254844	0.246403	0.250312	0.283373	0.272866	0.286463
328.4	0.236532	0.268676	0.254464	0.247758	0.25336	0.28018	0.271151	0.283343			328.4	0.236532	0.268676	0.254464	0.247758	0.25336	0.28018	0.271151	0.283343
328.6	0.235792	0.269524	0.25567	0.246368	0.253889	0.278293	0.274229	0.284014			328.6	0.235792	0.269524	0.25567	0.246368	0.253889	0.278293	0.274229	0.284014
328.8	0.237985	0.270427	0.257738	0.248633	0.254244	0.284485	0.275129	0.284054			328.8	0.237985	0.270427	0.257738	0.248633	0.254244	0.284485	0.275129	0.284054
329	0.240605	0.272723	0.255386	0.245066	0.25393	0.282427	0.276789	0.284956			329	0.240605	0.272723	0.255386	0.245066	0.25393	0.282427	0.276789	0.284956
329.2	0.234361	0.271008	0.255211	0.249998	0.252193	0.286504	0.269911	0.285511			329.2	0.234361	0.271008	0.255211	0.249998	0.252193	0.286504	0.269911	0.285511
329.4	0.237161	0.27078	0.257357	0.250055	0.251163	0.283316	0.279839	0.288414			329.4	0.237161	0.27078	0.257357	0.250055	0.251163	0.283316	0.279839	0.288414
329.6	0.237368	0.271537	0.254364	0.252031	0.254429	0.282116	0.278749	0.28685			329.6	0.237368	0.271537	0.254364	0.252031	0.254429	0.282116	0.278749	0.28685
329.8	0.23767	0.274332	0.258406	0.249129	0.253978	0.285333	0.276274	0.288728			329.8	0.23767	0.274332	0.258406	0.249129	0.253978	0.285333	0.276274	0.288728
330	0.241896	0.273135	0.25896	0.251316	0.254854	0.286038	0.276246	0.288244			330	0.241896	0.273135	0.25896	0.251316	0.254854	0.286038	0.276246	0.288244
330.2	0.24262	0.274132	0.259901	0.251251	0.255257	0.287198	0.276731	0.29063			330.2	0.24262	0.274132	0.259901	0.251251	0.255257	0.287198	0.276731	0.29063
330.4	0.238465	0.272094	0.259621	0.251168	0.252771	0.28479	0.279213	0.29152			330.4	0.238465	0.272094	0.259621	0.251168	0.252771	0.28479	0.279213	0.29152
330.59	0.24025	0.272822	0.258236	0.252058	0.252626	0.284202	0.282521	0.293728			330.59	0.24025	0.272822	0.258236	0.252058	0.252626	0.284202	0.282521	0.293728
330.8	0.241205	0.275925	0.25819	0.251595	0.254862	0.285023	0.278497	0.287917			330.8	0.241205	0.275925	0.25819	0.251595	0.254862	0.285023	0.278497	0.287917
331	0.242568	0.274578	0.26071	0.250081	0.253792	0.285385	0.279344	0.293323			331	0.242568	0.274578	0.26071	0.250081	0.253792	0.285385	0.279344	0.293323
331.2	0.241544	0.275635	0.263355	0.253206	0.258171	0.287154	0.280473	0.289832			331.2	0.241544	0.275635	0.263355	0.253206	0.258171	0.287154	0.280473	0.289832
331.4	0.239367	0.276394	0.259816	0.25238	0.257083	0.288115	0.281012	0.292479			331.4	0.239367	0.276394	0.259816	0.25238	0.257083	0.288115	0.281012	0.292479
331.6	0.243522	0.277895	0.261136	0.255084	0.257127	0.28602	0.279727	0.292584			331.6	0.243522	0.277895	0.261136	0.255084	0.257127	0.28602	0.279727	0.292584
331.8	0.243184	0.276459	0.260934	0.254145	0.256941	0.290213	0.279219	0.292579			331.8	0.243184	0.276459	0.260934	0.254145	0.256941	0.290213	0.279219	0.292579
332	0.242098	0.275124	0.263636	0.255377	0.256357	0.286194	0.276311	0.294614			332	0.242098	0.275124	0.263636	0.255377	0.256357	0.286194	0.276311	0.294614
332.2	0.244182	0.275258	0.261915	0.254391	0.255463	0.286244	0.278853	0.297992			332.2	0.244182	0.275258	0.261915	0.254391	0.255463	0.286244	0.278853	0.297992
332.39	0.244873	0.276959	0.25995	0.2552	0.256101	0.287705	0.282721	0.294036			332.39	0.244873	0.276959	0.25995	0.2552	0.256101	0.287705	0.282721	0.294036
332.6	0.24581	0.273947	0.266237	0.256256	0.262139	0.290289	0.279905	0.296048			332.6	0.24581	0.273947	0.266237	0.256256	0.262139	0.290289	0.279905	0.296048
332.8	0.239298	0.273294	0.261928	0.254237	0.259858	0.287041	0.279275	0.292356			332.8	0.239298	0.273294	0.261928	0.254237	0.259858	0.287041	0.279275	0.292356
333	0.246853	0.277925	0.264089	0.258137	0.258072	0.289368	0.281895	0.295031			333	0.246853	0.277925	0.264089	0.258137	0.258072	0.289368	0.281895	0.295031
333.2	0.244944	0.279926	0.263016	0.25373	0.260967	0.292986	0.279846	0.294521			333.2	0.244944	0.279926	0.263016	0.25373	0.260967	0.292986	0.279846	0.294521
333.39	0.24477	0.281099	0.267164	0.256622	0.258524	0.289165	0.283739	0.299443			333.39	0.24477	0.281099	0.267164	0.256622	0.258524	0.289165	0.283739	0.299443
333.6	0.246694	0.282256	0.265308	0.255018	0.260496	0.294171	0.28561	0.295505			333.6	0.246694	0.282256	0.265308	0.255018	0.260496	0.294171	0.28561	0.295505
333.79	0.246605	0.27701	0.264317	0.258231	0.259812	0.29344	0.279012	0.300003			333.79	0.246605	0.27701	0.264317	0.258231	0.259812	0.29344	0.279012	0.300003
333.99	0.246052	0.27712	0.266982	0.25512	0.263828	0.292287	0.283592	0.299167			333.99	0.246052	0.27712	0.266982	0.25512	0.263828	0.292287	0.283592	0.299167
334.2	0.247759	0.283634	0.266412	0.260166	0.261036	0.29079	0.283394	0.298133			334.2	0.247759	0.283634	0.266412	0.260166	0.261036	0.29079	0.283394	0.298133
334.4	0.247685	0.281758	0.264589	0.260557	0.26315	0.291353	0.283786	0.300203			334.4	0.247685	0.281758	0.264589	0.260557	0.26315	0.291353	0.283786	0.300203
334.59	0.247465	0.285518	0.267202	0.257225	0.262779	0.293853	0.284945	0.299542			334.59	0.247465	0.285518	0.267202	0.257225	0.262779	0.293853	0.284945	0.299542
334.79	0.246588	0.283999	0.267255	0.259174	0.26347	0.292827	0.284238	0.297808			334.79	0.246588	0.283999	0.267255	0.259174	0.26347	0.292827	0.284238	0.297808
335	0.250187	0.283672	0.267897	0.256233	0.263921	0.291773	0.284679	0.301522			335	0.250187	0.283672	0.267897	0.256233	0.263921	0.291773	0.284679	0.301522
335.2	0.248584	0.288041	0.26417	0.258224	0.266718	0.293647	0.288467	0.294939			335.2	0.248584	0.288041	0.26417	0.258224	0.266718	0.293647	0.288467	0.294939
335.4	0.252934	0.284142	0.271358	0.257268	0.26544	0.2921	0.287828	0.301542			335.4	0.252934	0.284142	0.271358	0.257268	0.26544	0.2921	0.287828	0.301542
335.6	0.251819	0.285475	0.267578	0.261481	0.264936	0.299266	0.284858	0.299423			335.6	0.251819	0.285475	0.267578	0.261481	0.264936	0.299266	0.284858	0.299423
335.79	0.250433	0.286946	0.26785	0.256559	0.263615	0.293891	0.287099	0.301444			335.79	0.250433	0.286946	0.26785	0.256559	0.263615	0.293891	0.287099	0.301444
336	0.250084	0.287833	0.269846	0.262106	0.268574	0.297122	0.28553	0.30258			336	0.250084	0.287833	0.269846	0.262106	0.268574	0.297122	0.28553	0.30258
336.2	0.248573	0.285814	0.270341	0.260186	0.266837	0.295569	0.288855	0.299254			336.2	0.248573	0.285814	0.270341	0.260186	0.266837	0.295569	0.288855	0.299254
336.4	0.252815	0.287366	0.270014	0.256563	0.264401	0.29733	0.291802	0.302848			336.4	0.252815	0.287366	0.270014	0.256563	0.264401	0.29733	0.291802	0.302848
336.59	0.252206	0.285734	0.267935	0.265349	0.265222	0.295146	0.289904	0.304459			336.59	0.252206	0.285734	0.267935	0.265349	0.265222	0.295146	0.289904	0.304459
336.8	0.252942	0.288919	0.268074	0.264848	0.26635	0.29668	0.291989	0.303427			336.8	0.252942	0.288919	0.268074	0.264848	0.26635	0.29668	0.291989	0.303427
337	0.253514	0.284767	0.274174	0.262235	0.266846	0.299585	0.289314	0.302111			337	0.253514	0.284767	0.274174	0.262235	0.266846	0.299585	0.289314	0.302111
337.2	0.253344	0.283552	0.271032	0.262334	0.268075	0.298056	0.289683	0.301922			337.2	0.253344	0.283552	0.271032	0.262334	0.268075	0.298056	0.289683	0.301922
337.4	0.252263	0.286883	0.270731	0.263945	0.267687	0.298996	0.292201	0.306541			337.4	0.252263	0.286883	0.270731	0.263945	0.267687	0.298996	0.292201	0.306541
337.6	0.252947	0.285539	0.273103	0.261333	0.269679	0.298593	0.288952	0.301379			337.6	0.252947	0.285539	0.273103	0.261333	0.269679	0.298593	0.288952	0.301379
337.8	0.252535	0.290379	0.273634	0.267468	0.265077	0.299198	0.290264	0.304761			337.8	0.252535	0.290379	0.273634	0.267468	0.265077	0.299198	0.290264	0.304761
337.99	0.254026	0.288011	0.273423	0.262487	0.269237	0.299264	0.292676	0.306055			337.99	0.254026	0.288011	0.273423	0.262487	0.269237	0.299264	0.292676	0.306055
338.2	0.25219	0.287713	0.274831	0.261372	0.268819	0.297961	0.288796	0.304992			338.2	0.25219	0.287713	0.274831	0.261372	0.268819	0.297961	0.288796	0.304992
338.4	0.254429	0.286352	0.27555	0.261488	0.270216	0.299961	0.291853	0.306096			338.4	0.254429	0.286352	0.27555	0.261488	0.270216	0.299961	0.291853	0.306096
338.6	0.254695	0.292353	0.273914	0.265082	0.271169	0.301511	0.29476	0.306669			338.6	0.254695	0.292353	0.273914	0.265082	0.271169	0.301511	0.29476	0.306669
338.8	0.258346	0.293101	0.275928	0.264182	0.270876	0.302293	0.293162	0.301014			338.8	0.258346	0.293101	0.275928	0.264182	0.270876	0.302293	0.293162	0.301014
338.99	0.256731	0.290819	0.277616	0.26776	0.271444	0.299789	0.290995	0.306188			338.99	0.256731	0.290819	0.277616	0.26776	0.271444	0.299789	0.290995	0.306188
339.2	0.258484	0.291816	0.279689	0.267836	0.273687	0.304687	0.295591	0.305131			339.2	0.258484	0.291816	0.279689	0.267836	0.273687	0.304687	0.295591	0.305131
339.4	0.258784	0.290175	0.279483	0.263592	0.271706	0.302451	0.294863	0.305741			339.4	0.258784	0.290175	0.279483	0.263592	0.271706	0.302451	0.294863	0.305741
339.6	0.259817	0.293988	0.276211	0.265042	0.273676	0.301468	0.295898	0.305603			339.6	0.259817	0.293988	0.276211	0.265042	0.273676	0.301468	0.295898	0.305603
339.79	0.255337	0.294518	0.279401	0.267522	0.269231	0.306013	0.294409	0.308956			339.79	0.255337	0.294518	0.279401	0.267522	0.269231	0.306013	0.294409	0.308956
339.99	0.262733	0.297843	0.279527	0.268807	0.270422	0.30455	0.294625	0.309268			339.99	0.262733	0.297843	0.279527	0.268807	0.270422	0.30455	0.294625	0.309268
340.2	0.256443	0.290386	0.278433	0.268732	0.276253	0.303812	0.297386	0.309053			340.2	0.256443	0.290386	0.278433	0.268732	0.276253	0.303812	0.297386	0.309053
340.39	0.257807	0.294058	0.277871	0.268041	0.273609	0.303369	0.294844	0.308511			340.39	0.257807	0.294058	0.277871	0.268041	0.273609	0.303369	0.294844	0.308511
340.59	0.257139	0.294718	0.280914	0.269464	0.27596	0.304187	0.29515	0.309925			340.59	0.257139	0.294718	0.280914	0.269464	0.27596	0.304187	0.29515	0.309925
340.8	0.258976	0.296149	0.280461	0.269592	0.273187	0.303003	0.292872	0.312306			340.8	0.258976	0.296149	0.280461	0.269592	0.273187	0.303003	0.292872	0.312306
341	0.255721	0.295994	0.278626	0.268387	0.276265	0.304085	0.297266	0.307258			341	0.255721	0.295994	0.278626	0.268387	0.276265	0.304085	0.297266	0.307258
341.2	0.260966	0.292728	0.280198	0.270369	0.274906	0.307348	0.299359	0.309132			341.2	0.260966	0.292728	0.280198	0.270369	0.274906	0.307348	0.299359	0.309132
341.39	0.256249	0.294584	0.276885	0.270404	0.274573	0.30539	0.299891	0.309956			341.39	0.256249	0.294584	0.276885	0.270404	0.274573	0.30539	0.299891	0.309956
341.6	0.260396	0.295828	0.279635	0.272075	0.276067	0.306441	0.302279	0.314762			341.6	0.260396	0.295828	0.279635	0.272075	0.276067	0.306441	0.302279	0.314762
341.8	0.262301	0.295781	0.280681	0.270957	0.275951	0.311223	0.300089	0.314023			341.8	0.262301	0.295781	0.280681	0.270957	0.275951	0.311223	0.300089	0.314023
342	0.261576	0.30082	0.282424	0.273136	0.274916	0.307024	0.301057	0.315862			342	0.261576	0.30082	0.282424	0.273136	0.274916	0.307024	0.301057	0.315862
342.2	0.261187	0.298759	0.280612	0.271801	0.274904	0.31042	0.299391	0.314723			342.2	0.261187	0.298759	0.280612	0.271801	0.274904	0.31042	0.299391	0.314723
342.39	0.258126	0.296534	0.280155	0.27329	0.277268	0.310143	0.301567	0.315644			342.39	0.258126	0.296534	0.280155	0.27329	0.277268	0.310143	0.301567	0.315644
342.59	0.26076	0.300172	0.28427	0.272558	0.282442	0.306371	0.297188	0.315861			342.59	0.26076	0.300172	0.28427	0.272558	0.282442	0.306371	0.297188	0.315861
342.8	0.261265	0.299218	0.282038	0.274036	0.279839	0.310519	0.299951	0.312695			342.8	0.261265	0.299218	0.282038	0.274036	0.279839	0.310519	0.299951	0.312695
343	0.265593	0.296523	0.285498	0.27428	0.280371	0.307317	0.302462	0.315854			343	0.265593	0.296523	0.285498	0.27428	0.280371	0.307317	0.302462	0.315854
343.2	0.264475	0.302838	0.282103	0.274453	0.27967	0.306892	0.302509	0.313397			343.2	0.264475	0.302838	0.282103	0.274453	0.27967	0.306892	0.302509	0.313397
343.39	0.26401	0.300345	0.283334	0.272638	0.28027	0.308668	0.302478	0.318985			343.39	0.26401	0.300345	0.283334	0.272638	0.28027	0.308668	0.302478	0.318985
343.6	0.261801	0.298833	0.285578	0.275308	0.280866	0.308776	0.306333	0.314441			343.6	0.261801	0.298833	0.285578	0.275308	0.280866	0.308776	0.306333	0.314441
343.79	0.262255	0.300677	0.284097	0.274807	0.277726	0.310853	0.303202	0.315853			343.79	0.262255	0.300677	0.284097	0.274807	0.277726	0.310853	0.303202	0.315853
343.99	0.265776	0.302123	0.287718	0.273216	0.28203	0.311138	0.308853	0.316509			343.99	0.265776	0.302123	0.287718	0.273216	0.28203	0.311138	0.308853	0.316509
344.2	0.264866	0.298946	0.28777	0.274545	0.281766	0.311426	0.308656	0.318306			344.2	0.264866	0.298946	0.28777	0.274545	0.281766	0.311426	0.308656	0.318306
344.4	0.267538	0.301726	0.288976	0.274905	0.280688	0.311873	0.303879	0.320589			344.4	0.267538	0.301726	0.288976	0.274905	0.280688	0.311873	0.303879	0.320589
344.59	0.26592	0.305901	0.287043	0.277032	0.277062	0.313175	0.309893	0.318468			344.59	0.26592	0.305901	0.287043	0.277032	0.277062	0.313175	0.309893	0.318468
344.79	0.267317	0.302746	0.283213	0.279778	0.28379	0.313302	0.301313	0.320269			344.79	0.267317	0.302746	0.283213	0.279778	0.28379	0.313302	0.301313	0.320269
345	0.26583	0.304116	0.285961	0.2753	0.280277	0.31432	0.304169	0.320158			345	0.26583	0.304116	0.285961	0.2753	0.280277	0.31432	0.304169	0.320158
345.2	0.264833	0.304826	0.286997	0.276672	0.284828	0.314123	0.309073	0.320193			345.2	0.264833	0.304826	0.286997	0.276672	0.284828	0.314123	0.309073	0.320193
345.39	0.267066	0.302932	0.287765	0.27617	0.284977	0.314845	0.308507	0.317892			345.39	0.267066	0.302932	0.287765	0.27617	0.284977	0.314845	0.308507	0.317892
345.6	0.263787	0.305046	0.290434	0.279681	0.284289	0.3152	0.308121	0.318784			345.6	0.263787	0.305046	0.290434	0.279681	0.284289	0.3152	0.308121	0.318784
345.79	0.265694	0.304579	0.292327	0.279975	0.282853	0.318373	0.307622	0.320447			345.79	0.265694	0.304579	0.292327	0.279975	0.282853	0.318373	0.307622	0.320447
345.99	0.266065	0.305742	0.284848	0.278646	0.282293	0.312742	0.30903	0.321422			345.99	0.266065	0.305742	0.284848	0.278646	0.282293	0.312742	0.30903	0.321422
346.2	0.267961	0.30486	0.287408	0.278231	0.285231	0.316161	0.309112	0.31722			346.2	0.267961	0.30486	0.287408	0.278231	0.285231	0.316161	0.309112	0.31722
346.39	0.268674	0.305868	0.287976	0.277639	0.281729	0.315118	0.307974	0.321206			346.39	0.268674	0.305868	0.287976	0.277639	0.281729	0.315118	0.307974	0.321206
346.59	0.269962	0.304997	0.290796	0.280591	0.283381	0.314883	0.307365	0.321935			346.59	0.269962	0.304997	0.290796	0.280591	0.283381	0.314883	0.307365	0.321935
346.8	0.26701	0.3062	0.291894	0.282959	0.285963	0.316919	0.308455	0.324752			346.8	0.26701	0.3062	0.291894	0.282959	0.285963	0.316919	0.308455	0.324752
347	0.270087	0.307126	0.28995	0.280333	0.287965	0.313308	0.30825	0.327957			347	0.270087	0.307126	0.28995	0.280333	0.287965	0.313308	0.30825	0.327957
347.2	0.272576	0.307696	0.290194	0.283802	0.28704	0.3167	0.307446	0.324159			347.2	0.272576	0.307696	0.290194	0.283802	0.28704	0.3167	0.307446	0.324159
347.39	0.272726	0.307763	0.290693	0.281762	0.285858	0.315618	0.313445	0.328292			347.39	0.272726	0.307763	0.290693	0.281762	0.285858	0.315618	0.313445	0.328292
347.6	0.271861	0.307569	0.29081	0.28161	0.288473	0.3148	0.31307	0.323985			347.6	0.271861	0.307569	0.29081	0.28161	0.288473	0.3148	0.31307	0.323985
347.79	0.270786	0.308051	0.292905	0.279951	0.286887	0.31897	0.311073	0.325312			347.79	0.270786	0.308051	0.292905	0.279951	0.286887	0.31897	0.311073	0.325312
347.99	0.272017	0.311535	0.292934	0.282574	0.289944	0.32054	0.311844	0.32894			347.99	0.272017	0.311535	0.292934	0.282574	0.289944	0.32054	0.311844	0.32894
348.2	0.27173	0.312703	0.292014	0.284689	0.287748	0.320384	0.31404	0.32518			348.2	0.27173	0.312703	0.292014	0.284689	0.287748	0.320384	0.31404	0.32518
348.4	0.273232	0.309261	0.290964	0.279168	0.284859	0.319903	0.312449	0.32858			348.4	0.273232	0.309261	0.290964	0.279168	0.284859	0.319903	0.312449	0.32858
348.59	0.272458	0.309062	0.292996	0.286218	0.288479	0.319675	0.313838	0.329583			348.59	0.272458	0.309062	0.292996	0.286218	0.288479	0.319675	0.313838	0.329583
348.79	0.271785	0.310483	0.291134	0.283018	0.29239	0.318536	0.314402	0.32516			348.79	0.271785	0.310483	0.291134	0.283018	0.29239	0.318536	0.314402	0.32516
348.99	0.277288	0.312848	0.297944	0.281535	0.290814	0.321185	0.313548	0.324986			348.99	0.277288	0.312848	0.297944	0.281535	0.290814	0.321185	0.313548	0.324986
349.2	0.275238	0.310111	0.297737	0.284972	0.290841	0.31864	0.315006	0.328604			349.2	0.275238	0.310111	0.297737	0.284972	0.290841	0.31864	0.315006	0.328604
349.4	0.272417	0.310035	0.29535	0.283982	0.292742	0.321867	0.316252	0.326631			349.4	0.272417	0.310035	0.29535	0.283982	0.292742	0.321867	0.316252	0.326631
349.59	0.276342	0.313153	0.295147	0.283745	0.29178	0.320735	0.31505	0.327246			349.59	0.276342	0.313153	0.295147	0.283745	0.29178	0.320735	0.31505	0.327246
349.79	0.271712	0.311661	0.296367	0.281968	0.292651	0.322694	0.316702	0.331067			349.79	0.271712	0.311661	0.296367	0.281968	0.292651	0.322694	0.316702	0.331067
349.99	0.27505	0.312186	0.295534	0.286345	0.294528	0.320464	0.313474	0.330746			349.99	0.27505	0.312186	0.295534	0.286345	0.294528	0.320464	0.313474	0.330746
350.2	0.277069	0.311427	0.295829	0.288924	0.291304	0.322916	0.31833	0.329119			350.2	0.277069	0.311427	0.295829	0.288924	0.291304	0.322916	0.31833	0.329119
350.39	0.27569	0.314544	0.299143	0.288284	0.28992	0.323506	0.312339	0.332213			350.39	0.27569	0.314544	0.299143	0.288284	0.28992	0.323506	0.312339	0.332213
350.59	0.276481	0.316867	0.296773	0.284928	0.291129	0.323982	0.317863	0.330532			350.59	0.276481	0.316867	0.296773	0.284928	0.291129	0.323982	0.317863	0.330532
350.79	0.275114	0.312738	0.296193	0.287256	0.293581	0.32519	0.317933	0.3308			350.79	0.275114	0.312738	0.296193	0.287256	0.293581	0.32519	0.317933	0.3308
351	0.276927	0.317068	0.298886	0.289893	0.295952	0.325684	0.319259	0.333152			351	0.276927	0.317068	0.298886	0.289893	0.295952	0.325684	0.319259	0.333152
351.2	0.275657	0.316325	0.300573	0.290249	0.293427	0.324796	0.315711	0.331503			351.2	0.275657	0.316325	0.300573	0.290249	0.293427	0.324796	0.315711	0.331503
351.39	0.280132	0.317476	0.299276	0.287672	0.295014	0.323942	0.317828	0.330016			351.39	0.280132	0.317476	0.299276	0.287672	0.295014	0.323942	0.317828	0.330016
351.6	0.279262	0.31877	0.298773	0.291269	0.294639	0.32397	0.31989	0.333299			351.6	0.279262	0.31877	0.298773	0.291269	0.294639	0.32397	0.31989	0.333299
351.79	0.279525	0.316656	0.299521	0.291931	0.297033	0.327077	0.321781	0.333553			351.79	0.279525	0.316656	0.299521	0.291931	0.297033	0.327077	0.321781	0.333553
351.99	0.279844	0.316103	0.300038	0.290246	0.295786	0.325166	0.321845	0.331591			351.99	0.279844	0.316103	0.300038	0.290246	0.295786	0.325166	0.321845	0.331591
352.2	0.277274	0.318155	0.30369	0.287754	0.293147	0.324603	0.32336	0.33404			352.2	0.277274	0.318155	0.30369	0.287754	0.293147	0.324603	0.32336	0.33404
352.4	0.2826	0.315662	0.296533	0.291744	0.295242	0.331339	0.315935	0.332419			352.4	0.2826	0.315662	0.296533	0.291744	0.295242	0.331339	0.315935	0.332419
352.59	0.279082	0.319017	0.305708	0.293254	0.295475	0.326721	0.322244	0.336026			352.59	0.279082	0.319017	0.305708	0.293254	0.295475	0.326721	0.322244	0.336026
352.8	0.28022	0.316555	0.300196	0.294089	0.299063	0.328935	0.322939	0.338231			352.8	0.28022	0.316555	0.300196	0.294089	0.299063	0.328935	0.322939	0.338231
352.99	0.281334	0.316696	0.298243	0.28777	0.299171	0.328833	0.322855	0.333637			352.99	0.281334	0.316696	0.298243	0.28777	0.299171	0.328833	0.322855	0.333637
353.2	0.284592	0.323234	0.303335	0.288053	0.298864	0.330488	0.321905	0.34066			353.2	0.284592	0.323234	0.303335	0.288053	0.298864	0.330488	0.321905	0.34066
353.39	0.280982	0.320883	0.302824	0.292514	0.298015	0.33013	0.323264	0.335299			353.39	0.280982	0.320883	0.302824	0.292514	0.298015	0.33013	0.323264	0.335299
353.59	0.282379	0.323928	0.304777	0.291976	0.300175	0.327831	0.324367	0.336462			353.59	0.282379	0.323928	0.304777	0.291976	0.300175	0.327831	0.324367	0.336462
353.79	0.280868	0.321627	0.302998	0.289406	0.301252	0.330563	0.324749	0.336674			353.79	0.280868	0.321627	0.302998	0.289406	0.301252	0.330563	0.324749	0.336674
353.99	0.283505	0.321432	0.304891	0.293677	0.302035	0.32962	0.323806	0.337444			353.99	0.283505	0.321432	0.304891	0.293677	0.302035	0.32962	0.323806	0.337444
354.2	0.281809	0.318158	0.305222	0.296912	0.301862	0.330504	0.323227	0.339144			354.2	0.281809	0.318158	0.305222	0.296912	0.301862	0.330504	0.323227	0.339144
354.39	0.282812	0.319182	0.305815	0.294756	0.302723	0.332334	0.323509	0.338725			354.39	0.282812	0.319182	0.305815	0.294756	0.302723	0.332334	0.323509	0.338725
354.59	0.28257	0.322521	0.306016	0.297585	0.301913	0.330122	0.32689	0.335496			354.59	0.28257	0.322521	0.306016	0.297585	0.301913	0.330122	0.32689	0.335496
354.79	0.282538	0.323438	0.309332	0.29747	0.298904	0.33072	0.325742	0.340551			354.79	0.282538	0.323438	0.309332	0.29747	0.298904	0.33072	0.325742	0.340551
354.99	0.284903	0.324047	0.307051	0.296313	0.300212	0.335243	0.332023	0.339053			354.99	0.284903	0.324047	0.307051	0.296313	0.300212	0.335243	0.332023	0.339053
355.2	0.28349	0.325456	0.306071	0.298506	0.303087	0.335865	0.325196	0.337839			355.2	0.28349	0.325456	0.306071	0.298506	0.303087	0.335865	0.325196	0.337839
355.4	0.282736	0.325834	0.306781	0.299975	0.302804	0.336254	0.325249	0.340468			355.4	0.282736	0.325834	0.306781	0.299975	0.302804	0.336254	0.325249	0.340468
355.6	0.284188	0.320797	0.306761	0.29876	0.305126	0.333123	0.32729	0.339611			355.6	0.284188	0.320797	0.306761	0.29876	0.305126	0.333123	0.32729	0.339611
355.8	0.285643	0.323266	0.30874	0.296466	0.302181	0.332585	0.326192	0.34256			355.8	0.285643	0.323266	0.30874	0.296466	0.302181	0.332585	0.326192	0.34256
356	0.283792	0.323789	0.307484	0.299415	0.305479	0.331261	0.327265	0.341476			356	0.283792	0.323789	0.307484	0.299415	0.305479	0.331261	0.327265	0.341476
356.2	0.285836	0.325626	0.310347	0.29847	0.306159	0.333372	0.328177	0.3409			356.2	0.285836	0.325626	0.310347	0.29847	0.306159	0.333372	0.328177	0.3409
356.4	0.285774	0.322573	0.308462	0.297521	0.303365	0.335024	0.32935	0.340513			356.4	0.285774	0.322573	0.308462	0.297521	0.303365	0.335024	0.32935	0.340513
356.6	0.288985	0.32719	0.310192	0.298039	0.304785	0.337271	0.329844	0.342772			356.6	0.288985	0.32719	0.310192	0.298039	0.304785	0.337271	0.329844	0.342772
356.8	0.285464	0.324666	0.311304	0.299843	0.304414	0.337734	0.330973	0.342949			356.8	0.285464	0.324666	0.311304	0.299843	0.304414	0.337734	0.330973	0.342949
357	0.286682	0.329167	0.309136	0.300108	0.303532	0.336819	0.326148	0.343216			357	0.286682	0.329167	0.309136	0.300108	0.303532	0.336819	0.326148	0.343216
357.2	0.2838	0.328378	0.313008	0.300407	0.308451	0.334367	0.331971	0.342579			357.2	0.2838	0.328378	0.313008	0.300407	0.308451	0.334367	0.331971	0.342579
357.4	0.286748	0.331492	0.309206	0.29676	0.308913	0.335666	0.331091	0.343266			357.4	0.286748	0.331492	0.309206	0.29676	0.308913	0.335666	0.331091	0.343266
357.6	0.289377	0.329971	0.313541	0.301263	0.307495	0.338487	0.333368	0.346429			357.6	0.289377	0.329971	0.313541	0.301263	0.307495	0.338487	0.333368	0.346429
357.8	0.287107	0.328571	0.310167	0.299942	0.306343	0.33631	0.332787	0.346792			357.8	0.287107	0.328571	0.310167	0.299942	0.306343	0.33631	0.332787	0.346792
358	0.288548	0.328132	0.309717	0.300192	0.309591	0.336545	0.333296	0.344091			358	0.288548	0.328132	0.309717	0.300192	0.309591	0.336545	0.333296	0.344091
358.2	0.289362	0.329994	0.313675	0.301572	0.309429	0.337349	0.333721	0.346281			358.2	0.289362	0.329994	0.313675	0.301572	0.309429	0.337349	0.333721	0.346281
358.4	0.288945	0.32573	0.310745	0.300076	0.305163	0.342153	0.330823	0.345927			358.4	0.288945	0.32573	0.310745	0.300076	0.305163	0.342153	0.330823	0.345927
358.6	0.291906	0.331589	0.312229	0.30141	0.309511	0.339199	0.334166	0.348923			358.6	0.291906	0.331589	0.312229	0.30141	0.309511	0.339199	0.334166	0.348923
358.8	0.290545	0.331298	0.311213	0.30585	0.310175	0.341453	0.340463	0.347372			358.8	0.290545	0.331298	0.311213	0.30585	0.310175	0.341453	0.340463	0.347372
359	0.293227	0.328751	0.317303	0.302064	0.306268	0.338391	0.333047	0.345592			359	0.293227	0.328751	0.317303	0.302064	0.306268	0.338391	0.333047	0.345592
359.2	0.293428	0.329871	0.312801	0.303241	0.310212	0.342053	0.332001	0.351743			359.2	0.293428	0.329871	0.312801	0.303241	0.310212	0.342053	0.332001	0.351743
359.4	0.2925	0.333877	0.315698	0.302314	0.310963	0.344983	0.334768	0.346836			359.4	0.2925	0.333877	0.315698	0.302314	0.310963	0.344983	0.334768	0.346836
359.6	0.29273	0.330174	0.316505	0.303017	0.310848	0.343786	0.335566	0.34981			359.6	0.29273	0.330174	0.316505	0.303017	0.310848	0.343786	0.335566	0.34981
359.8	0.293642	0.330971	0.317141	0.303295	0.312416	0.338852	0.338818	0.351892			359.8	0.293642	0.330971	0.317141	0.303295	0.312416	0.338852	0.338818	0.351892
360	0.293367	0.332317	0.317397	0.304778	0.313421	0.341044	0.33601	0.348943			360	0.293367	0.332317	0.317397	0.304778	0.313421	0.341044	0.33601	0.348943
360.2	0.291809	0.335551	0.314924	0.30549	0.314535	0.34063	0.337102	0.349356			360.2	0.291809	0.335551	0.314924	0.30549	0.314535	0.34063	0.337102	0.349356
360.4	0.295	0.332491	0.321489	0.305595	0.314091	0.345084	0.336973	0.350419			360.4	0.295	0.332491	0.321489	0.305595	0.314091	0.345084	0.336973	0.350419
360.6	0.29224	0.334143	0.31039	0.306332	0.312731	0.343564	0.337358	0.350821			360.6	0.29224	0.334143	0.31039	0.306332	0.312731	0.343564	0.337358	0.350821
360.8	0.294308	0.334611	0.316809	0.30807	0.315295	0.343668	0.335937	0.350566			360.8	0.294308	0.334611	0.316809	0.30807	0.315295	0.343668	0.335937	0.350566
360.99	0.294098	0.333717	0.315571	0.307527	0.313722	0.345491	0.336792	0.350081			360.99	0.294098	0.333717	0.315571	0.307527	0.313722	0.345491	0.336792	0.350081
361.2	0.293018	0.334753	0.320136	0.306878	0.316152	0.342062	0.337603	0.35053			361.2	0.293018	0.334753	0.320136	0.306878	0.316152	0.342062	0.337603	0.35053
361.4	0.294705	0.331266	0.318227	0.304975	0.314014	0.342172	0.338904	0.352487			361.4	0.294705	0.331266	0.318227	0.304975	0.314014	0.342172	0.338904	0.352487
361.59	0.294828	0.335716	0.32105	0.30933	0.315238	0.34256	0.34033	0.351592			361.59	0.294828	0.335716	0.32105	0.30933	0.315238	0.34256	0.34033	0.351592
361.8	0.294881	0.340952	0.318337	0.310682	0.317224	0.345818	0.341566	0.351519			361.8	0.294881	0.340952	0.318337	0.310682	0.317224	0.345818	0.341566	0.351519
362	0.296681	0.33598	0.319193	0.308655	0.315155	0.344842	0.340497	0.352341			362	0.296681	0.33598	0.319193	0.308655	0.315155	0.344842	0.340497	0.352341
362.2	0.296955	0.340778	0.321689	0.309112	0.315371	0.345137	0.342367	0.354328			362.2	0.296955	0.340778	0.321689	0.309112	0.315371	0.345137	0.342367	0.354328
362.4	0.292222	0.34053	0.320536	0.313088	0.314935	0.349783	0.342486	0.352572			362.4	0.292222	0.34053	0.320536	0.313088	0.314935	0.349783	0.342486	0.352572
362.6	0.297861	0.337329	0.319281	0.310867	0.318155	0.347442	0.342397	0.355788			362.6	0.297861	0.337329	0.319281	0.310867	0.318155	0.347442	0.342397	0.355788
362.79	0.296379	0.337816	0.318836	0.309377	0.318502	0.346087	0.338741	0.356486			362.79	0.296379	0.337816	0.318836	0.309377	0.318502	0.346087	0.338741	0.356486
363	0.300892	0.335965	0.327383	0.312606	0.317464	0.349029	0.34423	0.355507			363	0.300892	0.335965	0.327383	0.312606	0.317464	0.349029	0.34423	0.355507
363.2	0.299584	0.334683	0.324778	0.309739	0.317299	0.348391	0.341059	0.357522			363.2	0.299584	0.334683	0.324778	0.309739	0.317299	0.348391	0.341059	0.357522
363.4	0.299686	0.338179	0.32185	0.309895	0.320262	0.349572	0.340554	0.356484			363.4	0.299686	0.338179	0.32185	0.309895	0.320262	0.349572	0.340554	0.356484
363.59	0.302402	0.337472	0.3228	0.311739	0.318213	0.351803	0.343452	0.357362			363.59	0.302402	0.337472	0.3228	0.311739	0.318213	0.351803	0.343452	0.357362
363.8	0.299874	0.338742	0.324233	0.31031	0.319359	0.353286	0.341417	0.357296			363.8	0.299874	0.338742	0.324233	0.31031	0.319359	0.353286	0.341417	0.357296
364	0.303588	0.341958	0.323035	0.312358	0.317382	0.34947	0.346104	0.358034			364	0.303588	0.341958	0.323035	0.312358	0.317382	0.34947	0.346104	0.358034
364.2	0.302167	0.341447	0.325013	0.314286	0.32083	0.351958	0.343973	0.360111			364.2	0.302167	0.341447	0.325013	0.314286	0.32083	0.351958	0.343973	0.360111
364.4	0.299131	0.340811	0.324108	0.31379	0.320341	0.350225	0.346891	0.360538			364.4	0.299131	0.340811	0.324108	0.31379	0.320341	0.350225	0.346891	0.360538
364.6	0.300563	0.340954	0.32267	0.311439	0.320599	0.350706	0.34505	0.36053			364.6	0.300563	0.340954	0.32267	0.311439	0.320599	0.350706	0.34505	0.36053
364.8	0.299705	0.34063	0.32505	0.312176	0.319045	0.353433	0.351408	0.360793			364.8	0.299705	0.34063	0.32505	0.312176	0.319045	0.353433	0.351408	0.360793
364.99	0.3009	0.340737	0.328008	0.310623	0.32346	0.350044	0.346298	0.361265			364.99	0.3009	0.340737	0.328008	0.310623	0.32346	0.350044	0.346298	0.361265
365.2	0.300418	0.343509	0.326389	0.313915	0.32038	0.353622	0.347936	0.358351			365.2	0.300418	0.343509	0.326389	0.313915	0.32038	0.353622	0.347936	0.358351
365.4	0.303634	0.342443	0.322933	0.314142	0.323967	0.349454	0.347899	0.361259			365.4	0.303634	0.342443	0.322933	0.314142	0.323967	0.349454	0.347899	0.361259
365.6	0.30378	0.342769	0.323405	0.311412	0.321579	0.349704	0.347956	0.359338			365.6	0.30378	0.342769	0.323405	0.311412	0.321579	0.349704	0.347956	0.359338
365.8	0.302721	0.341713	0.327679	0.315561	0.32273	0.35211	0.349419	0.360267			365.8	0.302721	0.341713	0.327679	0.315561	0.32273	0.35211	0.349419	0.360267
365.99	0.303246	0.342633	0.326256	0.317441	0.321665	0.351223	0.349655	0.36182			365.99	0.303246	0.342633	0.326256	0.317441	0.321665	0.351223	0.349655	0.36182
366.2	0.302398	0.342763	0.329518	0.316876	0.323203	0.353809	0.349163	0.361372			366.2	0.302398	0.342763	0.329518	0.316876	0.323203	0.353809	0.349163	0.361372
366.4	0.303759	0.346197	0.329244	0.316285	0.32442	0.354436	0.349764	0.364761			366.4	0.303759	0.346197	0.329244	0.316285	0.32442	0.354436	0.349764	0.364761
366.6	0.303874	0.343918	0.327501	0.316926	0.327035	0.357286	0.350548	0.361581			366.6	0.303874	0.343918	0.327501	0.316926	0.327035	0.357286	0.350548	0.361581
366.79	0.306507	0.348377	0.326907	0.317553	0.322519	0.353251	0.351083	0.364296			366.79	0.306507	0.348377	0.326907	0.317553	0.322519	0.353251	0.351083	0.364296
366.99	0.304004	0.3443	0.330479	0.315777	0.324023	0.353763	0.348209	0.362852			366.99	0.304004	0.3443	0.330479	0.315777	0.324023	0.353763	0.348209	0.362852
367.2	0.307744	0.344077	0.327504	0.315687	0.325822	0.353789	0.351116	0.365247			367.2	0.307744	0.344077	0.327504	0.315687	0.325822	0.353789	0.351116	0.365247
367.39	0.305813	0.352684	0.327719	0.317064	0.325001	0.357001	0.349564	0.366353			367.39	0.305813	0.352684	0.327719	0.317064	0.325001	0.357001	0.349564	0.366353
367.59	0.307748	0.348601	0.33221	0.320237	0.325872	0.3586	0.352825	0.363779			367.59	0.307748	0.348601	0.33221	0.320237	0.325872	0.3586	0.352825	0.363779
367.8	0.30569	0.344147	0.327464	0.317934	0.324188	0.359288	0.350281	0.363979			367.8	0.30569	0.344147	0.327464	0.317934	0.324188	0.359288	0.350281	0.363979
368	0.311897	0.354328	0.331877	0.319151	0.325588	0.359779	0.352138	0.368934			368	0.311897	0.354328	0.331877	0.319151	0.325588	0.359779	0.352138	0.368934
368.2	0.30521	0.351535	0.330429	0.320501	0.329243	0.361244	0.351941	0.363419			368.2	0.30521	0.351535	0.330429	0.320501	0.329243	0.361244	0.351941	0.363419
368.39	0.306033	0.353281	0.333549	0.31844	0.329047	0.35939	0.354752	0.364088			368.39	0.306033	0.353281	0.333549	0.31844	0.329047	0.35939	0.354752	0.364088
368.6	0.307975	0.35029	0.334505	0.322884	0.329466	0.35928	0.351562	0.364982			368.6	0.307975	0.35029	0.334505	0.322884	0.329466	0.35928	0.351562	0.364982
368.79	0.309115	0.351556	0.332004	0.322684	0.330618	0.361808	0.357864	0.369703			368.79	0.309115	0.351556	0.332004	0.322684	0.330618	0.361808	0.357864	0.369703
368.99	0.310728	0.351619	0.329807	0.320421	0.329274	0.361131	0.356919	0.368335			368.99	0.310728	0.351619	0.329807	0.320421	0.329274	0.361131	0.356919	0.368335
369.2	0.310306	0.350554	0.335642	0.321585	0.330382	0.361203	0.356076	0.369077			369.2	0.310306	0.350554	0.335642	0.321585	0.330382	0.361203	0.356076	0.369077
369.4	0.310681	0.350981	0.33996	0.323067	0.327511	0.360896	0.3554	0.368679			369.4	0.310681	0.350981	0.33996	0.323067	0.327511	0.360896	0.3554	0.368679
369.6	0.309707	0.351407	0.335258	0.324228	0.328707	0.361017	0.357457	0.369446			369.6	0.309707	0.351407	0.335258	0.324228	0.328707	0.361017	0.357457	0.369446
369.8	0.309868	0.349888	0.333826	0.324278	0.326613	0.361555	0.35894	0.368661			369.8	0.309868	0.349888	0.333826	0.324278	0.326613	0.361555	0.35894	0.368661
369.99	0.311573	0.35136	0.335382	0.321175	0.327776	0.359988	0.358812	0.370452			369.99	0.311573	0.35136	0.335382	0.321175	0.327776	0.359988	0.358812	0.370452
370.2	0.31184	0.348721	0.337739	0.32284	0.329424	0.358543	0.356477	0.37226			370.2	0.31184	0.348721	0.337739	0.32284	0.329424	0.358543	0.356477	0.37226
370.4	0.312045	0.351789	0.340262	0.321663	0.331973	0.361176	0.357809	0.370118			370.4	0.312045	0.351789	0.340262	0.321663	0.331973	0.361176	0.357809	0.370118
370.6	0.310484	0.353382	0.337563	0.323226	0.33054	0.362135	0.362574	0.372869			370.6	0.310484	0.353382	0.337563	0.323226	0.33054	0.362135	0.362574	0.372869
370.79	0.311577	0.357385	0.336345	0.324767	0.331879	0.362688	0.359285	0.372033			370.79	0.311577	0.357385	0.336345	0.324767	0.331879	0.362688	0.359285	0.372033
370.99	0.311842	0.353178	0.33809	0.323404	0.33294	0.363455	0.358643	0.373479			370.99	0.311842	0.353178	0.33809	0.323404	0.33294	0.363455	0.358643	0.373479
371.2	0.309917	0.356731	0.339307	0.327059	0.335098	0.363171	0.359447	0.377405			371.2	0.309917	0.356731	0.339307	0.327059	0.335098	0.363171	0.359447	0.377405
371.39	0.315918	0.355419	0.337313	0.325816	0.332975	0.370468	0.362415	0.372855			371.39	0.315918	0.355419	0.337313	0.325816	0.332975	0.370468	0.362415	0.372855
371.59	0.314968	0.356167	0.339538	0.324702	0.336388	0.364097	0.36059	0.377309			371.59	0.314968	0.356167	0.339538	0.324702	0.336388	0.364097	0.36059	0.377309
371.79	0.313222	0.357135	0.336808	0.32439	0.334453	0.366447	0.360909	0.372961			371.79	0.313222	0.357135	0.336808	0.32439	0.334453	0.366447	0.360909	0.372961
372	0.317012	0.360301	0.341	0.324212	0.334111	0.367639	0.36044	0.37418			372	0.317012	0.360301	0.341	0.324212	0.334111	0.367639	0.36044	0.37418
372.2	0.315488	0.359376	0.338926	0.326909	0.33482	0.365292	0.359095	0.377759			372.2	0.315488	0.359376	0.338926	0.326909	0.33482	0.365292	0.359095	0.377759
372.4	0.315983	0.356704	0.341232	0.324698	0.333393	0.365245	0.367043	0.376194			372.4	0.315983	0.356704	0.341232	0.324698	0.333393	0.365245	0.367043	0.376194
372.59	0.317081	0.357208	0.339037	0.328552	0.334202	0.368288	0.364376	0.375037			372.59	0.317081	0.357208	0.339037	0.328552	0.334202	0.368288	0.364376	0.375037
372.8	0.317158	0.357638	0.342103	0.32619	0.338131	0.365864	0.364551	0.376456			372.8	0.317158	0.357638	0.342103	0.32619	0.338131	0.365864	0.364551	0.376456
372.99	0.317359	0.360496	0.341802	0.326389	0.338222	0.367643	0.36215	0.37759			372.99	0.317359	0.360496	0.341802	0.326389	0.338222	0.367643	0.36215	0.37759
373.2	0.315782	0.357458	0.343452	0.328033	0.339313	0.369179	0.365814	0.379139			373.2	0.315782	0.357458	0.343452	0.328033	0.339313	0.369179	0.365814	0.379139
373.39	0.315242	0.35908	0.342223	0.327459	0.337303	0.367016	0.367867	0.378569			373.39	0.315242	0.35908	0.342223	0.327459	0.337303	0.367016	0.367867	0.378569
373.59	0.318624	0.361088	0.339789	0.330634	0.338679	0.3688	0.363436	0.377857			373.59	0.318624	0.361088	0.339789	0.330634	0.338679	0.3688	0.363436	0.377857
373.8	0.321081	0.364024	0.342049	0.327111	0.339763	0.369368	0.364898	0.380192			373.8	0.321081	0.364024	0.342049	0.327111	0.339763	0.369368	0.364898	0.380192
373.99	0.316778	0.363277	0.342374	0.330808	0.338954	0.371564	0.366199	0.381066			373.99	0.316778	0.363277	0.342374	0.330808	0.338954	0.371564	0.366199	0.381066
374.2	0.317371	0.359614	0.343691	0.326985	0.340671	0.371462	0.365762	0.377135			374.2	0.317371	0.359614	0.343691	0.326985	0.340671	0.371462	0.365762	0.377135
374.39	0.321512	0.361717	0.342729	0.330568	0.338958	0.370141	0.365062	0.380616			374.39	0.321512	0.361717	0.342729	0.330568	0.338958	0.370141	0.365062	0.380616
374.6	0.323933	0.358279	0.343194	0.334231	0.337305	0.372005	0.363955	0.381625			374.6	0.323933	0.358279	0.343194	0.334231	0.337305	0.372005	0.363955	0.381625
374.79	0.320526	0.359584	0.345124	0.328965	0.339727	0.368727	0.364625	0.380212			374.79	0.320526	0.359584	0.345124	0.328965	0.339727	0.368727	0.364625	0.380212
374.99	0.319289	0.36462	0.345344	0.33149	0.341039	0.372448	0.366074	0.379627			374.99	0.319289	0.36462	0.345344	0.33149	0.341039	0.372448	0.366074	0.379627
375.2	0.320052	0.362348	0.347975	0.333882	0.342584	0.37225	0.36667	0.381319			375.2	0.320052	0.362348	0.347975	0.333882	0.342584	0.37225	0.36667	0.381319
375.39	0.320229	0.363397	0.344075	0.332476	0.341564	0.371936	0.366886	0.379171			375.39	0.320229	0.363397	0.344075	0.332476	0.341564	0.371936	0.366886	0.379171
375.59	0.318139	0.360679	0.342785	0.334405	0.343212	0.374683	0.36792	0.380274			375.59	0.318139	0.360679	0.342785	0.334405	0.343212	0.374683	0.36792	0.380274
375.79	0.318956	0.366102	0.34604	0.336411	0.342745	0.370716	0.367551	0.385066			375.79	0.318956	0.366102	0.34604	0.336411	0.342745	0.370716	0.367551	0.385066
376	0.32218	0.364993	0.347608	0.333996	0.341323	0.376089	0.369291	0.383892			376	0.32218	0.364993	0.347608	0.333996	0.341323	0.376089	0.369291	0.383892
376.2	0.321999	0.362724	0.345693	0.33307	0.342937	0.372789	0.371807	0.382285			376.2	0.321999	0.362724	0.345693	0.33307	0.342937	0.372789	0.371807	0.382285
376.4	0.320663	0.363427	0.346269	0.334187	0.340967	0.373853	0.369066	0.382542			376.4	0.320663	0.363427	0.346269	0.334187	0.340967	0.373853	0.369066	0.382542
376.59	0.326239	0.361412	0.349693	0.336262	0.345802	0.375527	0.368942	0.383997			376.59	0.326239	0.361412	0.349693	0.336262	0.345802	0.375527	0.368942	0.383997
376.79	0.326039	0.366281	0.348969	0.334426	0.343519	0.374559	0.373454	0.383976			376.79	0.326039	0.366281	0.348969	0.334426	0.343519	0.374559	0.373454	0.383976
376.99	0.324962	0.366255	0.347617	0.333746	0.342021	0.378087	0.369571	0.384487			376.99	0.324962	0.366255	0.347617	0.333746	0.342021	0.378087	0.369571	0.384487
377.2	0.325564	0.365202	0.351234	0.336549	0.34641	0.374597	0.365813	0.381158			377.2	0.325564	0.365202	0.351234	0.336549	0.34641	0.374597	0.365813	0.381158
377.39	0.324095	0.36607	0.350025	0.336932	0.346827	0.374004	0.369345	0.388129			377.39	0.324095	0.36607	0.350025	0.336932	0.346827	0.374004	0.369345	0.388129
377.59	0.323556	0.367085	0.348551	0.338264	0.345672	0.37622	0.373433	0.38823			377.59	0.323556	0.367085	0.348551	0.338264	0.345672	0.37622	0.373433	0.38823
377.79	0.326118	0.366367	0.349399	0.336969	0.344121	0.37811	0.37253	0.38632			377.79	0.326118	0.366367	0.349399	0.336969	0.344121	0.37811	0.37253	0.38632
377.99	0.325164	0.36542	0.348726	0.336714	0.345886	0.378703	0.375661	0.388277			377.99	0.325164	0.36542	0.348726	0.336714	0.345886	0.378703	0.375661	0.388277
378.2	0.326458	0.374012	0.349797	0.33644	0.347181	0.375828	0.375633	0.38723			378.2	0.326458	0.374012	0.349797	0.33644	0.347181	0.375828	0.375633	0.38723
378.39	0.326946	0.370438	0.348236	0.338421	0.350378	0.382242	0.37579	0.384057			378.39	0.326946	0.370438	0.348236	0.338421	0.350378	0.382242	0.37579	0.384057
378.6	0.326899	0.368762	0.351611	0.339775	0.349205	0.37888	0.375672	0.390678			378.6	0.326899	0.368762	0.351611	0.339775	0.349205	0.37888	0.375672	0.390678
378.79	0.329702	0.371527	0.353048	0.337675	0.349876	0.37973	0.379633	0.388238			378.79	0.329702	0.371527	0.353048	0.337675	0.349876	0.37973	0.379633	0.388238
378.99	0.328973	0.370626	0.353151	0.340038	0.349555	0.381253	0.374523	0.389471			378.99	0.328973	0.370626	0.353151	0.340038	0.349555	0.381253	0.374523	0.389471
379.2	0.325963	0.372695	0.351572	0.339202	0.354086	0.379165	0.374959	0.389511			379.2	0.325963	0.372695	0.351572	0.339202	0.354086	0.379165	0.374959	0.389511
379.39	0.328753	0.371618	0.354096	0.338215	0.351886	0.382722	0.374546	0.392223			379.39	0.328753	0.371618	0.354096	0.338215	0.351886	0.382722	0.374546	0.392223
379.59	0.332235	0.373513	0.351466	0.342578	0.348638	0.382204	0.375532	0.39009			379.59	0.332235	0.373513	0.351466	0.342578	0.348638	0.382204	0.375532	0.39009
379.79	0.327236	0.372842	0.350818	0.34033	0.352787	0.3817	0.376559	0.392462			379.79	0.327236	0.372842	0.350818	0.34033	0.352787	0.3817	0.376559	0.392462
379.99	0.329525	0.377328	0.353955	0.341337	0.349698	0.38136	0.376595	0.389975			379.99	0.329525	0.377328	0.353955	0.341337	0.349698	0.38136	0.376595	0.389975
380.2	0.329125	0.373581	0.35458	0.340108	0.349301	0.384418	0.378061	0.394483			380.2	0.329125	0.373581	0.35458	0.340108	0.349301	0.384418	0.378061	0.394483
380.39	0.330871	0.373429	0.3539	0.341435	0.353782	0.383018	0.379918	0.393153			380.39	0.330871	0.373429	0.3539	0.341435	0.353782	0.383018	0.379918	0.393153
380.59	0.330493	0.37552	0.353802	0.342758	0.353906	0.384837	0.379385	0.392011			380.59	0.330493	0.37552	0.353802	0.342758	0.353906	0.384837	0.379385	0.392011
380.79	0.330549	0.376541	0.358468	0.342349	0.350266	0.385843	0.37683	0.394659			380.79	0.330549	0.376541	0.358468	0.342349	0.350266	0.385843	0.37683	0.394659
380.99	0.332988	0.374693	0.356603	0.344477	0.354629	0.388348	0.381724	0.39265			380.99	0.332988	0.374693	0.356603	0.344477	0.354629	0.388348	0.381724	0.39265
381.2	0.330824	0.375327	0.355853	0.345811	0.350485	0.386315	0.379427	0.396175			381.2	0.330824	0.375327	0.355853	0.345811	0.350485	0.386315	0.379427	0.396175
381.39	0.328447	0.373502	0.357772	0.344212	0.351806	0.386473	0.380934	0.393119			381.39	0.328447	0.373502	0.357772	0.344212	0.351806	0.386473	0.380934	0.393119
381.59	0.329226	0.377267	0.357978	0.344983	0.356002	0.38806	0.378281	0.393289			381.59	0.329226	0.377267	0.357978	0.344983	0.356002	0.38806	0.378281	0.393289
381.79	0.331352	0.373914	0.357627	0.345637	0.354305	0.38632	0.384072	0.392953			381.79	0.331352	0.373914	0.357627	0.345637	0.354305	0.38632	0.384072	0.392953
382	0.331041	0.374651	0.358778	0.3452	0.352961	0.385627	0.374526	0.39381			382	0.331041	0.374651	0.358778	0.3452	0.352961	0.385627	0.374526	0.39381
382.2	0.329814	0.378901	0.360393	0.347831	0.353905	0.385076	0.379885	0.394896			382.2	0.329814	0.378901	0.360393	0.347831	0.353905	0.385076	0.379885	0.394896
382.39	0.335754	0.372495	0.359165	0.344731	0.357457	0.385459	0.385013	0.396369			382.39	0.335754	0.372495	0.359165	0.344731	0.357457	0.385459	0.385013	0.396369
382.59	0.331624	0.376343	0.360843	0.346383	0.356658	0.387989	0.382708	0.395541			382.59	0.331624	0.376343	0.360843	0.346383	0.356658	0.387989	0.382708	0.395541
382.79	0.335358	0.379458	0.359352	0.347472	0.356257	0.385926	0.379285	0.39595			382.79	0.335358	0.379458	0.359352	0.347472	0.356257	0.385926	0.379285	0.39595
382.99	0.335595	0.376788	0.361065	0.348427	0.355254	0.389606	0.381433	0.395103			382.99	0.335595	0.376788	0.361065	0.348427	0.355254	0.389606	0.381433	0.395103
383.2	0.337351	0.376382	0.36025	0.343789	0.359642	0.385315	0.382317	0.4009			383.2	0.337351	0.376382	0.36025	0.343789	0.359642	0.385315	0.382317	0.4009
383.39	0.33614	0.378005	0.362124	0.349655	0.356981	0.386665	0.385002	0.397036			383.39	0.33614	0.378005	0.362124	0.349655	0.356981	0.386665	0.385002	0.397036
383.59	0.336855	0.384868	0.362914	0.348218	0.356448	0.391839	0.384104	0.398306			383.59	0.336855	0.384868	0.362914	0.348218	0.356448	0.391839	0.384104	0.398306
383.79	0.336916	0.381535	0.363333	0.349163	0.35683	0.388771	0.384165	0.399126			383.79	0.336916	0.381535	0.363333	0.349163	0.35683	0.388771	0.384165	0.399126
383.99	0.336749	0.377369	0.365236	0.349976	0.355734	0.387314	0.387438	0.398937			383.99	0.336749	0.377369	0.365236	0.349976	0.355734	0.387314	0.387438	0.398937
384.2	0.337185	0.380123	0.358218	0.347008	0.360298	0.389665	0.38542	0.399076			384.2	0.337185	0.380123	0.358218	0.347008	0.360298	0.389665	0.38542	0.399076
384.4	0.335292	0.386326	0.361343	0.348274	0.35952	0.390549	0.386904	0.399405			384.4	0.335292	0.386326	0.361343	0.348274	0.35952	0.390549	0.386904	0.399405
384.6	0.341566	0.37948	0.361078	0.3493	0.358625	0.391937	0.391396	0.399147			384.6	0.341566	0.37948	0.361078	0.3493	0.358625	0.391937	0.391396	0.399147
384.8	0.337084	0.380556	0.365098	0.35161	0.360177	0.393174	0.389499	0.402793			384.8	0.337084	0.380556	0.365098	0.35161	0.360177	0.393174	0.389499	0.402793
385	0.338059	0.382348	0.368238	0.347894	0.35889	0.392467	0.391845	0.400911			385	0.338059	0.382348	0.368238	0.347894	0.35889	0.392467	0.391845	0.400911
385.2	0.336478	0.382449	0.363203	0.352225	0.359713	0.390404	0.386414	0.400657			385.2	0.336478	0.382449	0.363203	0.352225	0.359713	0.390404	0.386414	0.400657
385.4	0.338713	0.382319	0.365957	0.3487	0.360175	0.393414	0.391818	0.400275			385.4	0.338713	0.382319	0.365957	0.3487	0.360175	0.393414	0.391818	0.400275
385.6	0.340768	0.385676	0.364773	0.354638	0.361794	0.391986	0.386818	0.402608			385.6	0.340768	0.385676	0.364773	0.354638	0.361794	0.391986	0.386818	0.402608
385.8	0.340469	0.383695	0.362792	0.349688	0.362719	0.393628	0.389297	0.402283			385.8	0.340469	0.383695	0.362792	0.349688	0.362719	0.393628	0.389297	0.402283
386	0.340692	0.383752	0.364684	0.353312	0.361737	0.393689	0.388568	0.403528			386	0.340692	0.383752	0.364684	0.353312	0.361737	0.393689	0.388568	0.403528
386.2	0.343327	0.384369	0.366188	0.353866	0.365905	0.395527	0.387686	0.402463			386.2	0.343327	0.384369	0.366188	0.353866	0.365905	0.395527	0.387686	0.402463
386.39	0.340139	0.389212	0.363991	0.354071	0.362688	0.393251	0.391734	0.406301			386.39	0.340139	0.389212	0.363991	0.354071	0.362688	0.393251	0.391734	0.406301
386.6	0.342569	0.383783	0.370337	0.3509	0.363299	0.393399	0.390139	0.405352			386.6	0.342569	0.383783	0.370337	0.3509	0.363299	0.393399	0.390139	0.405352
386.8	0.34261	0.388251	0.36747	0.356679	0.367104	0.394312	0.389499	0.406686			386.8	0.34261	0.388251	0.36747	0.356679	0.367104	0.394312	0.389499	0.406686
387	0.342179	0.385998	0.366814	0.357043	0.368855	0.396966	0.395729	0.403883			387	0.342179	0.385998	0.366814	0.357043	0.368855	0.396966	0.395729	0.403883
387.2	0.343752	0.387541	0.369361	0.357342	0.360638	0.396753	0.391317	0.406604			387.2	0.343752	0.387541	0.369361	0.357342	0.360638	0.396753	0.391317	0.406604
387.4	0.342631	0.383885	0.368878	0.355541	0.366313	0.395056	0.392866	0.405639			387.4	0.342631	0.383885	0.368878	0.355541	0.366313	0.395056	0.392866	0.405639
387.6	0.343449	0.387565	0.366652	0.35465	0.367348	0.399099	0.391762	0.409609			387.6	0.343449	0.387565	0.366652	0.35465	0.367348	0.399099	0.391762	0.409609
387.8	0.341922	0.384648	0.369541	0.359031	0.369277	0.398398	0.390851	0.408827			387.8	0.341922	0.384648	0.369541	0.359031	0.369277	0.398398	0.390851	0.408827
388	0.344138	0.38446	0.369129	0.35592	0.366412	0.398018	0.392749	0.410183			388	0.344138	0.38446	0.369129	0.35592	0.366412	0.398018	0.392749	0.410183
388.2	0.345093	0.390533	0.37139	0.35693	0.366899	0.394785	0.397729	0.406051			388.2	0.345093	0.390533	0.37139	0.35693	0.366899	0.394785	0.397729	0.406051
388.4	0.342654	0.389488	0.371392	0.353054	0.367548	0.395081	0.392503	0.4111			388.4	0.342654	0.389488	0.371392	0.353054	0.367548	0.395081	0.392503	0.4111
388.6	0.346498	0.389033	0.370512	0.356868	0.369211	0.40242	0.396796	0.406378			388.6	0.346498	0.389033	0.370512	0.356868	0.369211	0.40242	0.396796	0.406378
388.8	0.344604	0.388335	0.371401	0.359463	0.371449	0.398782	0.393327	0.410424			388.8	0.344604	0.388335	0.371401	0.359463	0.371449	0.398782	0.393327	0.410424
389	0.344856	0.389867	0.375424	0.359089	0.372724	0.398974	0.395448	0.410101			389	0.344856	0.389867	0.375424	0.359089	0.372724	0.398974	0.395448	0.410101
389.2	0.345171	0.393057	0.372222	0.358787	0.371803	0.397607	0.397293	0.409988			389.2	0.345171	0.393057	0.372222	0.358787	0.371803	0.397607	0.397293	0.409988
389.4	0.347335	0.391624	0.375657	0.357575	0.369048	0.399325	0.3977	0.410327			389.4	0.347335	0.391624	0.375657	0.357575	0.369048	0.399325	0.3977	0.410327
389.6	0.347527	0.390322	0.374411	0.356715	0.368082	0.399419	0.399206	0.411661			389.6	0.347527	0.390322	0.374411	0.356715	0.368082	0.399419	0.399206	0.411661
389.79	0.346882	0.396056	0.371602	0.362208	0.370179	0.402452	0.399756	0.408582			389.79	0.346882	0.396056	0.371602	0.362208	0.370179	0.402452	0.399756	0.408582
390	0.34905	0.389552	0.371729	0.360621	0.36909	0.401274	0.395998	0.413888			390	0.34905	0.389552	0.371729	0.360621	0.36909	0.401274	0.395998	0.413888
390.2	0.34909	0.397461	0.371523	0.357194	0.372362	0.402311	0.40015	0.415552			390.2	0.34909	0.397461	0.371523	0.357194	0.372362	0.402311	0.40015	0.415552
390.4	0.351551	0.394936	0.374032	0.36192	0.369371	0.401264	0.39932	0.412645			390.4	0.351551	0.394936	0.374032	0.36192	0.369371	0.401264	0.39932	0.412645
390.59	0.345753	0.391345	0.376249	0.36254	0.371972	0.398939	0.401302	0.414557			390.59	0.345753	0.391345	0.376249	0.36254	0.371972	0.398939	0.401302	0.414557
390.8	0.347011	0.392311	0.378372	0.359957	0.372037	0.407294	0.398477	0.411108			390.8	0.347011	0.392311	0.378372	0.359957	0.372037	0.407294	0.398477	0.411108
391	0.348308	0.398934	0.373844	0.360813	0.37307	0.399614	0.403318	0.41296			391	0.348308	0.398934	0.373844	0.360813	0.37307	0.399614	0.403318	0.41296
391.2	0.347752	0.394267	0.376311	0.363944	0.373802	0.402193	0.398058	0.413665			391.2	0.347752	0.394267	0.376311	0.363944	0.373802	0.402193	0.398058	0.413665
391.4	0.351237	0.394607	0.376447	0.359728	0.372363	0.405096	0.402583	0.411216			391.4	0.351237	0.394607	0.376447	0.359728	0.372363	0.405096	0.402583	0.411216
391.6	0.346407	0.394784	0.379257	0.364225	0.374098	0.400033	0.401739	0.413296			391.6	0.346407	0.394784	0.379257	0.364225	0.374098	0.400033	0.401739	0.413296
391.8	0.350851	0.396588	0.376587	0.363356	0.374829	0.405063	0.403221	0.416452			391.8	0.350851	0.396588	0.376587	0.363356	0.374829	0.405063	0.403221	0.416452
391.99	0.351083	0.396749	0.378065	0.362723	0.374854	0.405184	0.402807	0.413664			391.99	0.351083	0.396749	0.378065	0.362723	0.374854	0.405184	0.402807	0.413664
392.2	0.352599	0.39916	0.378626	0.364381	0.375048	0.404572	0.402574	0.416495			392.2	0.352599	0.39916	0.378626	0.364381	0.375048	0.404572	0.402574	0.416495
392.4	0.350962	0.39685	0.376821	0.363806	0.376512	0.407221	0.40381	0.417336			392.4	0.350962	0.39685	0.376821	0.363806	0.376512	0.407221	0.40381	0.417336
392.6	0.354158	0.395846	0.380716	0.366203	0.37549	0.404332	0.40224	0.417392			392.6	0.354158	0.395846	0.380716	0.366203	0.37549	0.404332	0.40224	0.417392
392.8	0.353147	0.400978	0.378618	0.364766	0.378688	0.407828	0.408896	0.419322			392.8	0.353147	0.400978	0.378618	0.364766	0.378688	0.407828	0.408896	0.419322
393	0.35247	0.397899	0.378165	0.363772	0.377705	0.408052	0.404344	0.418578			393	0.35247	0.397899	0.378165	0.363772	0.377705	0.408052	0.404344	0.418578
393.2	0.352915	0.396547	0.380585	0.364788	0.37587	0.408093	0.402826	0.419521			393.2	0.352915	0.396547	0.380585	0.364788	0.37587	0.408093	0.402826	0.419521
393.4	0.350846	0.400503	0.380119	0.365424	0.376209	0.410181	0.403846	0.41936			393.4	0.350846	0.400503	0.380119	0.365424	0.376209	0.410181	0.403846	0.41936
393.6	0.354968	0.40147	0.381176	0.367507	0.379888	0.406263	0.40543	0.418304			393.6	0.354968	0.40147	0.381176	0.367507	0.379888	0.406263	0.40543	0.418304
393.79	0.354608	0.398931	0.384128	0.371187	0.375523	0.408481	0.407088	0.421737			393.79	0.354608	0.398931	0.384128	0.371187	0.375523	0.408481	0.407088	0.421737
394	0.354357	0.398497	0.37946	0.366169	0.381424	0.40988	0.407625	0.419402			394	0.354357	0.398497	0.37946	0.366169	0.381424	0.40988	0.407625	0.419402
394.2	0.354648	0.400941	0.381381	0.366928	0.377468	0.41093	0.410196	0.420122			394.2	0.354648	0.400941	0.381381	0.366928	0.377468	0.41093	0.410196	0.420122
394.4	0.357746	0.406852	0.384761	0.369114	0.378549	0.408411	0.405869	0.419367			394.4	0.357746	0.406852	0.384761	0.369114	0.378549	0.408411	0.405869	0.419367
394.59	0.353952	0.399719	0.385422	0.37136	0.382574	0.410121	0.409243	0.42377			394.59	0.353952	0.399719	0.385422	0.37136	0.382574	0.410121	0.409243	0.42377
394.8	0.356841	0.400404	0.384298	0.370805	0.380611	0.411957	0.403831	0.419928			394.8	0.356841	0.400404	0.384298	0.370805	0.380611	0.411957	0.403831	0.419928
395	0.357478	0.401388	0.3859	0.37175	0.381047	0.412631	0.40707	0.423141			395	0.357478	0.401388	0.3859	0.37175	0.381047	0.412631	0.40707	0.423141
395.2	0.359304	0.402878	0.381989	0.36702	0.382011	0.411817	0.412571	0.421371			395.2	0.359304	0.402878	0.381989	0.36702	0.382011	0.411817	0.412571	0.421371
395.39	0.358961	0.404384	0.382615	0.369985	0.380177	0.413589	0.411926	0.420705			395.39	0.358961	0.404384	0.382615	0.369985	0.380177	0.413589	0.411926	0.420705
395.6	0.357549	0.404624	0.384817	0.369143	0.382729	0.413727	0.408951	0.424165			395.6	0.357549	0.404624	0.384817	0.369143	0.382729	0.413727	0.408951	0.424165
395.8	0.358883	0.405105	0.383411	0.37001	0.384381	0.41219	0.410094	0.425061			395.8	0.358883	0.405105	0.383411	0.37001	0.384381	0.41219	0.410094	0.425061
396	0.355819	0.404864	0.385256	0.369675	0.382843	0.415206	0.407905	0.421633			396	0.355819	0.404864	0.385256	0.369675	0.382843	0.415206	0.407905	0.421633
396.2	0.358787	0.403047	0.385364	0.373626	0.384482	0.417287	0.410954	0.425306			396.2	0.358787	0.403047	0.385364	0.373626	0.384482	0.417287	0.410954	0.425306
396.39	0.355692	0.408862	0.385525	0.370941	0.386893	0.415923	0.409309	0.423057			396.39	0.355692	0.408862	0.385525	0.370941	0.386893	0.415923	0.409309	0.423057
396.6	0.361548	0.406414	0.388735	0.372793	0.38377	0.414061	0.411959	0.425412			396.6	0.361548	0.406414	0.388735	0.372793	0.38377	0.414061	0.411959	0.425412
396.8	0.361176	0.402562	0.386393	0.370195	0.385857	0.413887	0.411814	0.426486			396.8	0.361176	0.402562	0.386393	0.370195	0.385857	0.413887	0.411814	0.426486
397	0.358407	0.410519	0.385986	0.371672	0.386017	0.416443	0.413614	0.427036			397	0.358407	0.410519	0.385986	0.371672	0.386017	0.416443	0.413614	0.427036
397.2	0.362418	0.406779	0.383989	0.374883	0.389346	0.411864	0.410316	0.428869			397.2	0.362418	0.406779	0.383989	0.374883	0.389346	0.411864	0.410316	0.428869
397.4	0.358401	0.406232	0.391039	0.373192	0.38584	0.415111	0.420141	0.426093			397.4	0.358401	0.406232	0.391039	0.373192	0.38584	0.415111	0.420141	0.426093
397.6	0.358482	0.406865	0.384968	0.368523	0.386714	0.417798	0.414899	0.428456			397.6	0.358482	0.406865	0.384968	0.368523	0.386714	0.417798	0.414899	0.428456
397.79	0.360795	0.409879	0.38652	0.373379	0.381884	0.420352	0.4102	0.428037			397.79	0.360795	0.409879	0.38652	0.373379	0.381884	0.420352	0.4102	0.428037
397.99	0.366342	0.408913	0.387871	0.37483	0.386197	0.421461	0.416377	0.430385			397.99	0.366342	0.408913	0.387871	0.37483	0.386197	0.421461	0.416377	0.430385
398.2	0.360792	0.408195	0.385488	0.372829	0.386306	0.420942	0.411121	0.429626			398.2	0.360792	0.408195	0.385488	0.372829	0.386306	0.420942	0.411121	0.429626
398.4	0.361767	0.411027	0.390981	0.375899	0.389069	0.415873	0.416097	0.43367			398.4	0.361767	0.411027	0.390981	0.375899	0.389069	0.415873	0.416097	0.43367
398.59	0.363945	0.410589	0.387477	0.37475	0.384648	0.419611	0.414778	0.426203			398.59	0.363945	0.410589	0.387477	0.37475	0.384648	0.419611	0.414778	0.426203
398.8	0.364098	0.411277	0.391941	0.377649	0.385814	0.420367	0.418349	0.430225			398.8	0.364098	0.411277	0.391941	0.377649	0.385814	0.420367	0.418349	0.430225
399	0.361185	0.409238	0.391844	0.37572	0.389104	0.418386	0.414451	0.432553			399	0.361185	0.409238	0.391844	0.37572	0.389104	0.418386	0.414451	0.432553
399.2	0.363576	0.415942	0.393622	0.376271	0.387641	0.420437	0.416094	0.424748			399.2	0.363576	0.415942	0.393622	0.376271	0.387641	0.420437	0.416094	0.424748
[truncated: 27,412 more rows]

## Sheet: Exp2
Raw BLI data (nm)											Normalised to baseline
Time (s)	BiP	BiP + Ca	dBiP	dBiP + Ca	Hsp70	Hsp70 + Ca	Hsc70	Hsc70 + Ca			Time (s)	BiP	BiP + Ca	dBiP	dBiP + Ca	Hsp70	Hsp70 + Ca	Hsc70	Hsc70 + Ca
0	0	0	0	0	0	0	0	0			0	-1.2863	-1.28669	-1.25503	-1.36168	-1.45672	-1.48671	-1.59434	-1.34805
0.19	-0.00374587	0.00010088	-0.00838648	-0.00254621	-0.00200188	-0.00189781	-0.00811924	-0.00262154			0.19	-1.29005	-1.28658	-1.26342	-1.36422	-1.45872	-1.48861	-1.60246	-1.35067
0.39	-0.00506629	-0.00046129	-0.00303742	-0.00498111	0.00192378	3.509e-05	-0.00973119	-0.00036931			0.39	-1.29137	-1.28715	-1.25807	-1.36666	-1.45479	-1.48668	-1.60407	-1.34842
0.59	-0.00503302	-0.00530206	-0.00496955	-0.00142747	0.0008086	-0.00431678	-0.00830185	-0.00335053			0.59	-1.29133	-1.29199	-1.26	-1.3631	-1.45591	-1.49103	-1.60264	-1.3514
0.79	-0.00706924	-0.00442984	-0.00306741	-0.00388201	-0.00506073	0.00056299	-0.00565773	-0.00379727			0.79	-1.29337	-1.29112	-1.2581	-1.36556	-1.46178	-1.48615	-1.59999	-1.35184
0.99	-0.0060995	-0.0003824	-0.00758599	-0.00369748	-0.00579632	-0.00376934	-0.00604778	-0.0023815			0.99	-1.2924	-1.28707	-1.26262	-1.36537	-1.46251	-1.49048	-1.60039	-1.35043
1.19	-0.00451255	0.00080004	-0.00798923	-0.00384796	-0.0032157	0.00025818	-0.00879067	-0.00354889			1.19	-1.29081	-1.28589	-1.26302	-1.36553	-1.45993	-1.48646	-1.60313	-1.35159
1.39	-0.00701386	-0.00445772	-0.00501478	-0.00483869	0.0002628	-0.00132168	-0.00605214	-0.0026775			1.39	-1.29331	-1.29114	-1.26005	-1.36652	-1.45645	-1.48804	-1.60039	-1.35072
1.59	-0.00299367	0.00012619	-0.00413682	-0.00615545	-0.00325171	0.00045975	-0.00602539	0.00122711			1.59	-1.28929	-1.28656	-1.25917	-1.36783	-1.45997	-1.48625	-1.60036	-1.34682
1.79	-0.0039891	0.00128114	-0.0043668	0.0010533	-0.00241559	0.00247425	-0.00835338	-0.00165386			1.79	-1.29029	-1.2854	-1.2594	-1.36062	-1.45913	-1.48424	-1.60269	-1.3497
1.99	-0.00516892	0.0018881	0.0009141	0.00068238	-0.0022008	0.00156255	-0.00989158	0.00229701			1.99	-1.29147	-1.2848	-1.25412	-1.36099	-1.45892	-1.48515	-1.60423	-1.34575
2.19	-0.00419276	-0.00030442	-0.00629451	0.00237922	-0.00323662	0.00241544	-0.0047452	-1.038e-05			2.19	-1.29049	-1.28699	-1.26133	-1.3593	-1.45995	-1.4843	-1.59908	-1.34806
2.39	-0.00601775	-0.00049671	-0.00373512	-0.0005035	0.00056786	0.00417796	-0.00584073	-0.00166163			2.39	-1.29232	-1.28718	-1.25877	-1.36218	-1.45615	-1.48254	-1.60018	-1.34971
2.59	-0.00463741	-0.00010535	-0.00284852	0.00045713	0.00180008	0.00182795	-0.00244685	-0.00381482			2.59	-1.29094	-1.28679	-1.25788	-1.36122	-1.45492	-1.48489	-1.59678	-1.35186
2.79	-0.00382815	0.00185162	-0.0036052	-0.00216633	0.00019338	0.00034889	-0.00477509	0.00073215			2.79	-1.29013	-1.28483	-1.25864	-1.36384	-1.45652	-1.48637	-1.59911	-1.34731
2.99	-0.00268304	-0.00025503	-0.00061525	-4.299e-05	-0.00069751	0.00342218	-0.00713411	-0.00167177			2.99	-1.28898	-1.28694	-1.25565	-1.36172	-1.45741	-1.48329	-1.60147	-1.34972
3.19	-0.00263777	0.00073904	-0.00224581	-0.00190849	-0.00066873	0.00743903	-0.00830248	-0.00065113			3.19	-1.28894	-1.28595	-1.25728	-1.36359	-1.45739	-1.47928	-1.60264	-1.3487
3.39	-0.00148991	-0.00105089	0.00012021	-0.00286074	-0.00638286	0.00027811	-0.00832696	-0.003756			3.39	-1.28779	-1.28774	-1.25491	-1.36454	-1.4631	-1.48644	-1.60266	-1.3518
3.59	-0.00208092	0.00202852	-0.00119185	-0.00260978	-0.00106212	0.00064931	-0.00737024	-0.00193711			3.59	-1.28838	-1.28466	-1.25622	-1.36429	-1.45778	-1.48607	-1.60171	-1.34998
3.79	-0.00380001	0.00048115	-0.00145051	-0.00208909	9.438e-05	0.00150454	-0.0039855	-0.00010909			3.79	-1.2901	-1.2862	-1.25648	-1.36377	-1.45662	-1.48521	-1.59832	-1.34815
3.99	-0.00506683	-0.00229818	-0.00472943	-0.00048919	-0.00356246	0.00135553	-0.00317942	-0.00303526			3.99	-1.29137	-1.28898	-1.25976	-1.36217	-1.46028	-1.48536	-1.59752	-1.35108
4.19	-0.00813009	-0.00128009	-0.00372817	0.00077908	-0.00369655	0.00255928	-0.00478134	-0.00133115			4.19	-1.29443	-1.28797	-1.25876	-1.3609	-1.46041	-1.48416	-1.59912	-1.34938
4.39	-0.00248035	-0.00061099	-0.00359217	-0.00137519	0.00016202	0.00073447	-0.00504653	0.0015972			4.39	-1.28878	-1.2873	-1.25862	-1.36305	-1.45655	-1.48598	-1.59938	-1.34645
4.59	0.0003292	0.00263479	-0.00372317	0.00086003	-0.00549293	0.00308584	-0.00289038	0.00067441			4.59	-1.28597	-1.28405	-1.25875	-1.36082	-1.46221	-1.48363	-1.59723	-1.34737
4.79	-0.00640515	0.00091701	0.00081126	0.00059666	-0.00178977	-0.00056947	-0.00937589	-0.00378923			4.79	-1.29271	-1.28577	-1.25422	-1.36108	-1.45851	-1.48728	-1.60371	-1.35184
4.99	-0.00252831	-0.00014822	-0.00140795	0.00043792	0.00061878	-0.00079703	-0.00143859	-0.00225054			4.99	-1.28883	-1.28683	-1.25644	-1.36124	-1.4561	-1.48751	-1.59578	-1.3503
5.19	-0.00260109	0.00184103	-0.00222488	0.0048406	-0.00096563	-0.00257394	-0.00553762	-0.00219454			5.19	-1.2889	-1.28484	-1.25726	-1.35684	-1.45768	-1.48929	-1.59987	-1.35024
5.39	-0.00555981	-0.00026087	0.00249797	-0.00185151	-0.00411602	0.00337028	-0.0055024	-0.00054027			5.39	-1.29186	-1.28695	-1.25253	-1.36353	-1.46083	-1.48334	-1.59984	-1.34859
5.59	-0.00348818	-0.00129864	0.00310367	0.00122097	-0.00349734	0.00367924	-0.00679232	-0.00321887			5.59	-1.28979	-1.28798	-1.25193	-1.36046	-1.46021	-1.48304	-1.60113	-1.35126
5.79	-0.00430665	0.00169816	-0.00376446	-0.00099874	-0.00255828	0.00201459	-0.00463248	0.0011953			5.79	-1.29061	-1.28499	-1.2588	-1.36268	-1.45927	-1.4847	-1.59897	-1.34685
5.99	-0.00495548	0.00052996	-0.00609166	0.00177912	-0.00446612	0.00197522	-0.00807313	0.00198596			5.99	-1.29126	-1.28616	-1.26112	-1.3599	-1.46118	-1.48474	-1.60241	-1.34606
6.19	-0.00357056	-0.00021699	-0.00323282	-0.00047978	-0.00424878	-0.00019999	-0.00626632	0.00071433			6.19	-1.28987	-1.2869	-1.25826	-1.36216	-1.46097	-1.48691	-1.6006	-1.34733
6.39	-0.00247636	-0.00143504	-0.00270002	-0.00232723	-0.00012259	0.00513329	-0.00310392	-0.00218758			6.39	-1.28878	-1.28812	-1.25773	-1.364	-1.45684	-1.48158	-1.59744	-1.35023
6.59	-0.00730188	-0.00140079	-0.00168968	0.00123704	-0.00430448	0.00137732	-0.00478487	0.00216834			6.59	-1.2936	-1.28809	-1.25672	-1.36044	-1.46102	-1.48534	-1.59912	-1.34588
6.79	-0.00471274	-0.00416237	-0.00364924	-0.00297218	0.00099019	0.00091821	-0.00458112	-0.00267055			6.79	-1.29101	-1.29085	-1.25868	-1.36465	-1.45573	-1.4858	-1.59892	-1.35072
6.99	-0.00286495	-0.00156796	-0.00059108	-0.00106298	-0.000757	0.00674319	-0.00059879	-0.00029318			6.99	-1.28917	-1.28825	-1.25562	-1.36274	-1.45747	-1.47997	-1.59494	-1.34834
7.19	-0.00432101	0.00037401	0.00255405	0.00367384	0.00056007	0.00671652	-0.00225046	-0.00121391			7.19	-1.29062	-1.28631	-1.25248	-1.358	-1.45616	-1.48	-1.59659	-1.34926
7.39	-0.00265141	-0.00130337	-0.00058648	0.00129271	-0.00061892	0.00078497	-0.00387552	-0.00390971			7.39	-1.28895	-1.28799	-1.25562	-1.36038	-1.45734	-1.48593	-1.59821	-1.35196
7.59	-0.00291466	-0.00494484	-0.0018692	0.00132524	-0.00152613	0.00598427	-0.00083099	5.165e-05			7.59	-1.28921	-1.29163	-1.2569	-1.36035	-1.45824	-1.48073	-1.59517	-1.34799
7.79	-0.00618521	-0.002251	-0.00355095	-0.00102747	0.00030148	-0.00102641	-0.00973217	-0.00198211			7.79	-1.29249	-1.28894	-1.25858	-1.3627	-1.45641	-1.48774	-1.60407	-1.35003
7.99	-0.00288821	-0.00028255	-0.00187265	0.00378765	-0.00204907	0.00261381	-0.00259847	0.00200476			7.99	-1.28919	-1.28697	-1.2569	-1.35789	-1.45877	-1.4841	-1.59694	-1.34604
8.19	-0.00596531	-0.00430509	-0.00432543	6.265e-05	-0.00488904	0.00206903	-0.00413017	-0.00267262			8.19	-1.29227	-1.29099	-1.25936	-1.36161	-1.46161	-1.48465	-1.59847	-1.35072
8.39	-0.00613131	-0.00156564	-0.00593167	-0.00092691	-0.00468074	0.00204308	-0.00019243	-0.00523093			8.39	-1.29243	-1.28825	-1.26096	-1.3626	-1.4614	-1.48467	-1.59453	-1.35328
8.59	-0.0050988	-0.00386498	-0.00219241	-7.192e-05	-0.00113397	0.004339	-0.00053562	-0.00266455			8.59	-1.2914	-1.29055	-1.25722	-1.36175	-1.45785	-1.48238	-1.59487	-1.35071
8.79	-0.00699054	-0.00326595	-0.0016016	0.00161839	-0.00341922	0.00243612	-0.00241808	-0.00112712			8.79	-1.29329	-1.28995	-1.25663	-1.36006	-1.46014	-1.48428	-1.59676	-1.34917
8.99	-0.00784826	-0.00371534	-0.00297073	0.00018114	-0.00433457	0.00159612	-0.00863455	0.00231454			8.99	-1.29415	-1.2904	-1.258	-1.3615	-1.46105	-1.48512	-1.60297	-1.34573
9.19	-0.00887413	-0.00237304	-0.00100519	0.0008594	-0.00311252	0.00357687	-0.00233853	0.00032598			9.19	-1.29517	-1.28906	-1.25604	-1.36082	-1.45983	-1.48314	-1.59668	-1.34772
9.39	-0.00290678	-0.00131946	-0.0019915	0.00391461	-0.00214273	0.00661209	-0.00453161	0.00054847			9.39	-1.28921	-1.288	-1.25702	-1.35776	-1.45886	-1.4801	-1.59887	-1.3475
9.59	-0.00185234	-0.0013305	-0.00376188	0.00122217	-0.00325812	0.0060698	-0.00164649	0.00132089			9.59	-1.28815	-1.28802	-1.25879	-1.36045	-1.45997	-1.48064	-1.59598	-1.34672
9.79	-0.00208855	-0.00247251	-0.00142753	0.00212221	-0.00376344	0.00331858	-0.00326604	0.00160049			9.79	-1.28839	-1.28916	-1.25646	-1.35955	-1.46048	-1.4834	-1.5976	-1.34645
9.99	-0.00738432	-0.00293681	-4.955e-05	0.00221013	-0.00168427	0.00262004	-0.00064872	-0.00275451			9.99	-1.29368	-1.28962	-1.25508	-1.35947	-1.4584	-1.48409	-1.59499	-1.3508
10.19	-0.00600189	-0.00046699	-0.00301496	0.00143847	-0.00479911	0.00306192	-0.00370981	-0.00049345			10.19	-1.2923	-1.28715	-1.25805	-1.36024	-1.46152	-1.48365	-1.59805	-1.34854
10.39	-0.00145072	0.00010221	-0.00352378	0.00438556	0.00016046	0.00449536	-0.003555	0.00578913			10.39	-1.28775	-1.28658	-1.25855	-1.35729	-1.45656	-1.48222	-1.59789	-1.34226
10.59	-0.00135875	0.00095548	-0.00165162	0.00050623	-0.00160003	0.00446304	-0.00202815	0.00026132			10.59	-1.28766	-1.28573	-1.25668	-1.36117	-1.45832	-1.48225	-1.59637	-1.34778
10.79	-0.0054105	0.0008749	-0.00206549	0.00472416	-0.00210258	0.00497323	-0.0036528	-0.00312476			10.79	-1.29171	-1.28581	-1.2571	-1.35695	-1.45882	-1.48174	-1.59799	-1.35117
10.99	-0.00346188	-0.00185326	-0.00016886	0.00557753	-0.0013964	0.0011916	0.00155227	-0.00357903			10.99	-1.28976	-1.28854	-1.2552	-1.3561	-1.45811	-1.48552	-1.59278	-1.35162
11.19	-0.0068077	-0.00390257	-0.00320544	0.00427212	-0.00464156	0.00387611	-0.00115757	0.00162365			11.19	-1.29311	-1.29059	-1.25824	-1.3574	-1.46136	-1.48284	-1.59549	-1.34642
11.39	-0.00304164	-0.00543069	0.00016753	0.00323627	-0.00206368	0.00361719	0.00049801	-8.322e-05			11.39	-1.28934	-1.29212	-1.25486	-1.35844	-1.45878	-1.4831	-1.59384	-1.34813
11.6	-0.00409871	0.00022634	0.00189421	0.00364499	-0.00191175	0.00670851	-0.00468776	-0.00259484			11.6	-1.2904	-1.28646	-1.25314	-1.35803	-1.45863	-1.48001	-1.59902	-1.35064
11.79	-0.00331854	-0.00081045	-0.00017618	0.00591118	-0.00210845	0.00505085	-0.00174994	0.00115748			11.79	-1.28962	-1.2875	-1.25521	-1.35577	-1.45882	-1.48166	-1.59609	-1.34689
11.99	-0.00471948	-0.00269386	-0.00197544	0.00197516	-0.00282519	0.0017474	-0.00462083	-0.00038638			11.99	-1.29102	-1.28938	-1.25701	-1.3597	-1.45954	-1.48497	-1.59896	-1.34843
12.19	-0.00015663	-0.00116088	-0.00274883	0.00341394	-4.069e-05	0.00569867	-0.00035762	0.00109451			12.19	-1.28646	-1.28785	-1.25778	-1.35826	-1.45676	-1.48102	-1.59469	-1.34695
12.39	-0.00584324	-0.00397771	-0.00415067	0.00539344	-0.00260731	0.00845991	0.00061376	-0.00371794			12.39	-1.29214	-1.29066	-1.25918	-1.35628	-1.45932	-1.47825	-1.59372	-1.35176
12.59	-0.00304457	-0.0028173	0.00134782	0.0057689	-0.00285136	0.00599908	0.002795	-0.00231186			12.59	-1.28934	-1.2895	-1.25368	-1.35591	-1.45957	-1.48072	-1.59154	-1.35036
12.79	-0.00235024	-0.00358192	-0.00121899	0.00256134	-0.00157763	0.00784155	-0.00024444	0.00078295			12.79	-1.28865	-1.29027	-1.25625	-1.35912	-1.45829	-1.47887	-1.59458	-1.34726
12.99	-0.00394641	-0.00491116	0.00125907	0.00257216	-0.00033084	0.00389006	-0.00331076	-8.869e-05			12.99	-1.29025	-1.2916	-1.25377	-1.3591	-1.45705	-1.48282	-1.59765	-1.34813
13.19	-0.00426643	-0.00036868	-0.00198752	0.00581978	2.2e-05	0.00559125	-0.00318388	-0.00287899			13.19	-1.29057	-1.28705	-1.25702	-1.35586	-1.45669	-1.48112	-1.59752	-1.35092
13.39	-0.00343567	-0.00583902	-0.00385619	0.00418237	-0.00415728	0.00592904	-0.00066716	0.00067718			13.39	-1.28974	-1.29252	-1.25889	-1.35749	-1.46087	-1.48079	-1.595	-1.34737
13.59	-0.00319392	-0.00427599	-0.00031519	0.00255187	-0.00050131	0.00177903	0.00288454	0.0042753			13.59	-1.28949	-1.29096	-1.25535	-1.35913	-1.45722	-1.48494	-1.59145	-1.34377
13.79	-0.00431224	-0.00581518	0.00061155	0.00168235	-0.00522359	0.00587709	0.00034322	0.00339261			13.79	-1.29061	-1.2925	-1.25442	-1.35999	-1.46194	-1.48084	-1.59399	-1.34465
13.99	-0.00424215	-0.00159736	-1.426e-05	0.0028263	0.00228824	0.00876981	-0.00341482	-0.00185596			13.99	-1.29054	-1.28828	-1.25505	-1.35885	-1.45443	-1.47794	-1.59775	-1.3499
14.19	-0.00524337	-0.00085414	-0.00233798	0.00341467	-0.00187837	0.00330738	0.00210328	-0.00100842			14.19	-1.29154	-1.28754	-1.25737	-1.35826	-1.45859	-1.48341	-1.59223	-1.34905
14.39	-0.00666781	-0.00073592	-0.00247444	0.00220955	0.00156118	0.00699149	-0.00126538	-0.00125297			14.39	-1.29297	-1.28742	-1.25751	-1.35947	-1.45516	-1.47972	-1.5956	-1.3493
14.59	-0.00141661	-0.0001749	-0.0013768	0.00130105	-0.00348045	0.00822036	-0.00270267	-0.00079229			14.59	-1.28772	-1.28686	-1.25641	-1.36038	-1.4602	-1.47849	-1.59704	-1.34884
14.79	-0.00412386	-0.00297709	-0.00206356	0.00284922	0.0006299	0.00449313	0.00028733	-0.00352491			14.79	-1.29042	-1.28966	-1.25709	-1.35883	-1.45609	-1.48222	-1.59405	-1.35157
14.99	-0.0021363	-0.00148006	-0.00258747	0.00188246	-0.00158757	0.00829676	0.00243155	0.0009414			14.99	-1.28844	-1.28817	-1.25762	-1.35979	-1.4583	-1.47842	-1.59191	-1.3471
15.19	-0.00296772	-0.00388501	-0.00220899	0.00591152	-0.00019666	0.00412016	0.00144292	-0.00229642			15.19	-1.28927	-1.29057	-1.25724	-1.35577	-1.45691	-1.48259	-1.59289	-1.35034
15.39	-0.00462556	-0.00328511	-0.0006443	0.00343151	0.00062991	0.00730181	-0.00253858	0.00151807			15.39	-1.29093	-1.28997	-1.25568	-1.35825	-1.45609	-1.47941	-1.59688	-1.34653
15.59	-0.0034077	-0.00211749	-0.00031099	0.0017366	-0.00299299	0.00645858	-0.0018199	0.00219696			15.59	-1.28971	-1.2888	-1.25534	-1.35994	-1.45971	-1.48026	-1.59616	-1.34585
15.79	-0.0028133	-0.0014088	-0.00279626	0.00629298	-0.00193448	0.00403294	0.00012664	-0.00311986			15.79	-1.28911	-1.28809	-1.25783	-1.35538	-1.45865	-1.48268	-1.59421	-1.35117
15.99	-0.00609562	-0.00722976	-0.00234193	0.00321681	-0.00120766	0.00518845	0.00097263	0.00127891			15.99	-1.2924	-1.29392	-1.25737	-1.35846	-1.45792	-1.48153	-1.59336	-1.34677
16.19	-0.0024166	-0.00297731	-0.0028566	0.00363297	0.00068392	0.00618336	-0.00034906	0.00030907			16.19	-1.28872	-1.28966	-1.25789	-1.35804	-1.45603	-1.48053	-1.59469	-1.34774
16.39	-0.00784204	-0.00520892	-0.00160761	0.00483501	-0.00374132	0.00722573	-0.00306022	-0.00066283			16.39	-1.29414	-1.29189	-1.25664	-1.35684	-1.46046	-1.47949	-1.5974	-1.34871
16.59	-0.00358305	-0.00407621	-0.00369576	0.00635096	-0.00250032	0.0048366	-0.00139554	0.00012839			16.59	-1.28988	-1.29076	-1.25873	-1.35533	-1.45922	-1.48188	-1.59573	-1.34792
16.79	-0.00573328	-0.00413453	0.00018447	0.0010718	-0.00475933	0.00931562	0.00143033	-0.00108773			16.79	-1.29203	-1.29082	-1.25485	-1.36061	-1.46148	-1.4774	-1.59291	-1.34913
16.99	0.0006487	-0.0022095	0.00148549	0.00510206	-0.00300653	0.00896007	-0.0011352	0.00172515			16.99	-1.28565	-1.28889	-1.25355	-1.35657	-1.45972	-1.47775	-1.59547	-1.34632
17.19	-0.00293478	-0.00616606	-0.00061706	0.00522705	-0.00395502	0.00491123	0.00470456	-0.0004259			17.19	-1.28923	-1.29285	-1.25565	-1.35645	-1.46067	-1.4818	-1.58963	-1.34847
17.39	-0.0062436	-0.00029682	-0.00162441	0.00513808	-0.00304064	0.00379159	-6.336e-05	0.00142869			17.39	-1.29254	-1.28698	-1.25666	-1.35654	-1.45976	-1.48292	-1.5944	-1.34662
17.59	-0.00270745	-0.00428081	-0.001501	0.00515827	-0.00432087	0.00907699	0.00236647	-0.00658018			17.59	-1.28901	-1.29097	-1.25653	-1.35652	-1.46104	-1.47764	-1.59197	-1.35463
17.79	-0.00395547	-0.00428393	-0.00326164	0.00490393	-0.00161661	0.00557298	-0.00122441	-0.00093137			17.79	-1.29026	-1.29097	-1.25829	-1.35677	-1.45833	-1.48114	-1.59556	-1.34898
17.99	-0.00344974	-0.00606571	-0.00378254	0.00262728	-0.00039066	0.00638256	0.00220425	0.00101927			17.99	-1.28975	-1.29275	-1.25881	-1.35905	-1.45711	-1.48033	-1.59213	-1.34703
18.19	-0.00298486	-0.00439866	0.00117332	0.00481328	-0.00284485	0.00643883	0.00013339	-0.00275573			18.19	-1.28928	-1.29108	-1.25386	-1.35686	-1.45956	-1.48028	-1.5942	-1.3508
18.39	-0.00609028	-0.00753274	0.00091502	0.00670544	-0.00078642	0.00898075	-0.00141796	0.00191325			18.39	-1.29239	-1.29422	-1.25412	-1.35497	-1.4575	-1.47773	-1.59576	-1.34613
18.59	-0.00365199	-0.00403326	-0.00187184	0.00510301	-0.00169621	0.00627631	0.00185357	0.00129922			18.59	-1.28995	-1.29072	-1.2569	-1.35657	-1.45841	-1.48044	-1.59248	-1.34675
18.79	-0.00500248	-0.00770314	0.00399639	0.00718734	-0.002059	0.00760704	0.00358558	-0.00258933			18.79	-1.2913	-1.29439	-1.25103	-1.35449	-1.45878	-1.47911	-1.59075	-1.35064
18.99	-0.00416555	-0.00464679	-0.00019934	0.00453933	-0.00197598	0.00685191	0.00171701	0.00142155			18.99	-1.29047	-1.29133	-1.25523	-1.35714	-1.45869	-1.47986	-1.59262	-1.34662
19.19	-0.0030298	-0.0101964	0.00133805	0.00403687	-0.0010293	0.00906329	0.00365192	0.00120989			19.19	-1.28933	-1.29688	-1.25369	-1.35764	-1.45775	-1.47765	-1.59069	-1.34684
19.39	-0.00297849	-0.00422608	0.00047962	0.00895674	-0.00249739	0.00519958	0.00220615	0.00024622			19.39	-1.28928	-1.29091	-1.25455	-1.35272	-1.45921	-1.48151	-1.59213	-1.3478
19.59	-0.00107438	-0.00777098	-0.00268886	0.00704718	-0.00309696	0.00557438	0.00170412	-0.00088104			19.59	-1.28737	-1.29446	-1.25772	-1.35463	-1.45981	-1.48114	-1.59263	-1.34893
19.79	-0.00111961	-0.00550629	-0.00012808	0.00602497	-0.00534387	0.00682557	0.00099295	-0.00160455			19.79	-1.28742	-1.29219	-1.25516	-1.35565	-1.46206	-1.47989	-1.59334	-1.34965
19.99	-0.00668924	-0.00828815	-0.00039784	0.00506936	-0.00121384	0.00741901	0.00130901	-0.00184253			19.99	-1.29299	-1.29497	-1.25543	-1.35661	-1.45793	-1.4793	-1.59303	-1.34989
20.19	-0.00330567	-0.00865436	0.00069646	0.00346691	-0.00189243	0.0101438	0.00279463	0.00332422			20.19	-1.28961	-1.29534	-1.25433	-1.35821	-1.45861	-1.47657	-1.59154	-1.34472
20.39	-0.0022047	-0.00524963	0.00012486	0.00627614	0.00158473	0.0111596	0.00420854	0.00176196			20.39	-1.2885	-1.29194	-1.25491	-1.3554	-1.45513	-1.47555	-1.59013	-1.34628
20.59	-0.00365066	-0.00211044	-0.00152035	0.00487217	-0.00465261	0.00532209	0.00185024	0.00085174			20.59	-1.28995	-1.2888	-1.25655	-1.3568	-1.46137	-1.48139	-1.59249	-1.34719
20.79	-0.00251768	-0.00053595	0.00257295	0.00689768	-0.00360797	0.011207	0.00387817	0.00040639			20.79	-1.28882	-1.28722	-1.25246	-1.35478	-1.46032	-1.47551	-1.59046	-1.34764
20.99	-0.00162832	-0.00496742	-0.00021121	0.00560846	-8.309e-05	0.00466548	0.00318509	-0.00039481			20.99	-1.28793	-1.29165	-1.25524	-1.35607	-1.4568	-1.48205	-1.59115	-1.34844
21.19	-0.00192994	-0.00970943	6.178e-05	0.00696068	0.00033072	0.00909693	0.00129005	-0.00136983			21.19	-1.28823	-1.29639	-1.25497	-1.35472	-1.45639	-1.47762	-1.59305	-1.34942
21.39	-0.00220448	-0.00684582	-0.00267061	0.00846347	-0.00649183	0.00871388	0.00115647	-0.00448779			21.39	-1.2885	-1.29353	-1.2577	-1.35321	-1.46321	-1.478	-1.59318	-1.35253
21.59	-0.00193156	-0.00638393	-0.00013998	0.00908369	-0.00234097	0.00860138	0.00141118	0.00195126			21.59	-1.28823	-1.29307	-1.25517	-1.35259	-1.45906	-1.47811	-1.59293	-1.34609
21.79	-0.0019458	-0.007174	0.00150568	0.00649604	-0.00028503	0.00686083	0.00242749	-0.00149383			21.79	-1.28825	-1.29386	-1.25353	-1.35518	-1.457	-1.47985	-1.59191	-1.34954
21.99	-0.00300668	-0.00759939	-0.00138506	0.00696147	-0.00251614	0.00926904	0.00207054	-0.00249647			21.99	-1.28931	-1.29428	-1.25642	-1.35472	-1.45923	-1.47745	-1.59227	-1.35054
22.19	-0.00050979	-0.00364485	-0.00344761	0.00481	-0.00138585	0.00998122	-0.00340489	-0.00176544			22.19	-1.28681	-1.29033	-1.25848	-1.35687	-1.4581	-1.47673	-1.59774	-1.34981
22.39	-0.00209696	-0.0102507	0.00356978	0.00637802	-0.00244812	0.00725079	-0.00052929	0.00209484			22.39	-1.2884	-1.29694	-1.25146	-1.3553	-1.45916	-1.47946	-1.59487	-1.34595
22.59	-0.00192598	-0.00391949	0.0007928	0.00411408	-0.00382614	0.00766501	0.00449367	0.00205646			22.59	-1.28823	-1.2906	-1.25424	-1.35756	-1.46054	-1.47905	-1.58984	-1.34599
22.79	-0.00351883	-0.00773535	-0.00166228	0.00257888	-0.00342594	0.00804138	0.00705289	0.00047123			22.79	-1.28982	-1.29442	-1.25669	-1.3591	-1.46014	-1.47867	-1.58728	-1.34757
22.99	-0.00257985	-0.00830596	0.00141779	0.00229792	-0.00132905	0.00653728	0.00583841	-0.00044828			22.99	-1.28888	-1.29499	-1.25361	-1.35938	-1.45805	-1.48018	-1.5885	-1.34849
23.19	-0.00214015	-0.00794706	-0.00277609	0.00887615	-0.00028569	0.00900667	0.00242749	0.00168364			23.19	-1.28844	-1.29463	-1.25781	-1.3528	-1.457	-1.47771	-1.59191	-1.34636
23.39	-0.00526376	-0.0082865	-0.00096014	0.00493838	-0.00362089	0.0146851	0.00517021	-0.00290872			23.39	-1.29156	-1.29497	-1.25599	-1.35674	-1.46034	-1.47203	-1.58917	-1.35095
23.59	-0.00229031	-0.00935346	-0.00030974	0.010891	-0.00136077	0.00915472	0.00587362	0.00595038			23.59	-1.28859	-1.29604	-1.25534	-1.35079	-1.45808	-1.47756	-1.58846	-1.3421
23.79	-0.0018937	-0.0060762	-0.00013375	0.00696737	-0.000187	0.0090211	0.00556134	0.00714677			23.79	-1.28819	-1.29276	-1.25516	-1.35471	-1.4569	-1.47769	-1.58878	-1.3409
23.99	-0.00457989	-0.00761763	0.0019466	0.0103313	-0.00320109	0.01012	0.00375219	-0.00260445			23.99	-1.29088	-1.2943	-1.25308	-1.35135	-1.45992	-1.47659	-1.59059	-1.35065
24.19	-0.0020458	-0.00802455	0.00481897	0.0111782	0.0006453	0.00819711	0.00180787	0.0012357			24.19	-1.28835	-1.29471	-1.25021	-1.3505	-1.45607	-1.47852	-1.59253	-1.34681
24.39	-0.00072511	-0.00636814	-0.00382017	0.00556604	-0.00339282	0.0103282	0.00442282	-0.0019553			24.39	-1.28703	-1.29305	-1.25885	-1.35611	-1.46011	-1.47639	-1.58991	-1.35
24.59	-0.00401031	-0.00572398	-0.00064379	0.00735888	-0.00212844	0.00899831	0.00543199	0.00154138			24.59	-1.29031	-1.29241	-1.25567	-1.35432	-1.45884	-1.47772	-1.58891	-1.3465
24.79	-0.00277545	-0.007285	0.00034078	0.00782499	-0.00344506	0.00886373	0.00415118	0.00154109			24.79	-1.28908	-1.29397	-1.25469	-1.35385	-1.46016	-1.47785	-1.59019	-1.3465
24.99	-0.00086861	-0.00373417	-0.00257495	0.0113022	-0.00118817	0.00710766	0.00365089	-0.00186514			24.99	-1.28717	-1.29042	-1.25761	-1.35037	-1.4579	-1.47961	-1.59069	-1.34991
25.19	-0.00299214	-0.0030437	-0.00202262	0.00373834	-0.00282201	0.00771059	0.00523671	-0.00017733			25.19	-1.28929	-1.28973	-1.25705	-1.35794	-1.45954	-1.479	-1.5891	-1.34822
25.39	-0.00203105	-0.00737992	-0.00417424	0.00415021	-0.00214295	0.010712	0.0041601	0.00036882			25.39	-1.28833	-1.29407	-1.25921	-1.35753	-1.45886	-1.476	-1.59018	-1.34768
25.59	-0.0062545	-0.00711733	-0.00241934	0.00376071	0.00086785	0.00752853	0.00230117	-0.00240148			25.59	-1.29255	-1.2938	-1.25745	-1.35792	-1.45585	-1.47919	-1.59204	-1.35045
25.79	-0.00366354	-0.0102627	0.00029747	0.0121111	-0.00444087	0.00959849	0.00814208	0.00137987			25.79	-1.28996	-1.29695	-1.25473	-1.34957	-1.46116	-1.47712	-1.5862	-1.34667
25.99	-0.00367015	-0.00684385	-0.00201896	0.00742013	0.00301484	0.0131053	0.00316831	0.0004396			25.99	-1.28997	-1.29353	-1.25705	-1.35426	-1.4537	-1.47361	-1.59117	-1.34761
26.19	-0.00578585	-0.00893811	0.00077469	0.00770468	-0.00091109	0.00675507	0.00541948	0.00042534			26.19	-1.29209	-1.29562	-1.25426	-1.35397	-1.45763	-1.47996	-1.58892	-1.34762
26.39	-0.00314342	-0.00781426	0.00081405	0.00875252	0.00080711	0.00905722	0.00382471	-5.051e-05			26.39	-1.28944	-1.2945	-1.25422	-1.35292	-1.45591	-1.47766	-1.59051	-1.3481
26.59	-0.00182086	-0.00552967	0.00169665	0.00841892	-0.00054267	0.0101782	0.00533674	-0.00097244			26.59	-1.28812	-1.29222	-1.25333	-1.35326	-1.45726	-1.47654	-1.589	-1.34902
26.79	-0.00824658	-0.00612255	0.00573399	0.00654965	-0.00147106	0.0099747	0.0026668	0.00245513			26.79	-1.29455	-1.29281	-1.2493	-1.35513	-1.45819	-1.47674	-1.59167	-1.34559
26.99	-0.00055951	-0.0100577	0.0005537	0.00728777	-0.00189339	0.016095	0.0026023	0.00219758			26.99	-1.28686	-1.29674	-1.25448	-1.35439	-1.45861	-1.47062	-1.59173	-1.34585
27.19	-0.00254403	-0.00371834	0.00311391	0.00866155	-0.00163361	0.0152021	0.00701876	-0.00228865			27.19	-1.28884	-1.2904	-1.25192	-1.35302	-1.45835	-1.47151	-1.58732	-1.35033
27.39	-0.00165756	-0.00790982	0.00014639	0.00705392	-0.00695094	0.0133415	0.00280131	0.00312616			27.39	-1.28796	-1.2946	-1.25488	-1.35462	-1.46367	-1.47337	-1.59154	-1.34492
27.59	-0.00292096	-0.00388982	-0.00177361	0.00838015	-0.00196592	0.0107316	0.00611566	0.00196049			27.59	-1.28922	-1.29058	-1.2568	-1.3533	-1.45868	-1.47598	-1.58822	-1.34609
27.79	-0.003618	-0.00863448	-0.00022773	0.0073826	-0.00363441	0.010491	0.00964493	0.00297002			27.79	-1.28992	-1.29532	-1.25526	-1.35429	-1.46035	-1.47622	-1.58469	-1.34508
27.99	-0.00296539	-0.0112359	-0.00215668	0.00785291	0.00099494	0.0114747	0.011402	0.00210109			27.99	-1.28927	-1.29792	-1.25719	-1.35382	-1.45572	-1.47524	-1.58294	-1.34594
28.19	-0.00028172	-0.0116211	-0.00102836	0.0045948	-0.00350048	0.0125402	0.00143552	0.00071043			28.19	-1.28658	-1.29831	-1.25606	-1.35708	-1.46022	-1.47417	-1.5929	-1.34734
28.39	-0.00333922	-0.00977228	-0.00058754	0.00842976	-0.00421513	0.0115581	0.00754792	0.0006172			28.39	-1.28964	-1.29646	-1.25562	-1.35325	-1.46093	-1.47516	-1.58679	-1.34743
28.59	-0.00244487	-0.0118668	-0.00215291	0.010712	-0.00252458	0.0112324	0.00645857	0.00143046			28.59	-1.28874	-1.29855	-1.25718	-1.35097	-1.45924	-1.47548	-1.58788	-1.34662
28.79	-0.00229612	-0.0117707	-0.00431779	0.00713145	-0.00410341	0.011898	0.00437186	0.00534567			28.79	-1.2886	-1.29846	-1.25935	-1.35455	-1.46082	-1.47482	-1.58997	-1.3427
28.99	-0.00372596	-0.00909391	0.00081157	0.00784451	0.00033142	0.011866	0.0031946	-0.00173253			28.99	-1.29003	-1.29578	-1.25422	-1.35383	-1.45639	-1.47485	-1.59114	-1.34978
29.19	-0.00430823	-0.0108025	-0.00245469	0.00891097	-0.002912	0.0105223	0.00458844	0.00234121			29.19	-1.29061	-1.29749	-1.25749	-1.35277	-1.45963	-1.47619	-1.58975	-1.3457
29.39	-0.00163411	-0.0101265	0.00375847	0.00923911	-0.00078504	0.0126563	0.00726125	-0.00085433			29.39	-1.28793	-1.29681	-1.25127	-1.35244	-1.4575	-1.47406	-1.58708	-1.3489
29.59	-0.00280667	-0.00994888	-0.0048593	0.00994838	-0.00381156	0.0103525	0.00301996	0.00195239			29.59	-1.28911	-1.29663	-1.25989	-1.35173	-1.46053	-1.47636	-1.59132	-1.34609
29.79	-0.00437412	-0.0079202	0.00048101	0.00866086	-0.00495847	0.0125566	0.00987354	-0.00241926			29.79	-1.29067	-1.29461	-1.25455	-1.35302	-1.46167	-1.47416	-1.58446	-1.35047
29.99	-0.00128309	-0.00696515	0.00016814	0.0102559	-0.0013155	0.0105027	0.00417831	0.0013962			29.99	-1.28758	-1.29365	-1.25486	-1.35142	-1.45803	-1.47621	-1.59016	-1.34665
30.19	-0.00125743	-0.00692051	-0.00084235	0.00886326	-0.00192282	0.0128914	0.00690237	0.00359971			30.19	-1.28756	-1.29361	-1.25587	-1.35281	-1.45864	-1.47382	-1.58743	-1.34445
30.39	-0.00461691	-0.0063557	-0.00265335	0.00568408	-0.00142524	0.0122614	0.00911685	0.00183717			30.39	-1.29092	-1.29304	-1.25768	-1.35599	-1.45814	-1.47445	-1.58522	-1.34621
30.59	-0.00414443	-0.0132912	0.00065854	0.00556222	-0.00102964	0.00901641	0.00863047	0.00119816			30.59	-1.29044	-1.29998	-1.25437	-1.35611	-1.45775	-1.4777	-1.58571	-1.34685
30.79	-0.00358918	-0.00715214	0.00203817	0.0076	-0.00057147	0.0110655	0.00886359	0.0040111			30.79	-1.28989	-1.29384	-1.25299	-1.35408	-1.45729	-1.47565	-1.58547	-1.34403
30.99	-0.00216695	-0.010901	-0.00308885	0.00800781	-0.00363483	0.0108464	0.00430921	-0.00512027			30.99	-1.28847	-1.29759	-1.25812	-1.35367	-1.46035	-1.47587	-1.59003	-1.35317
31.19	-0.00121061	-0.0125953	-0.00096967	0.00899098	-0.00283281	0.00728102	0.00642309	-0.00183682			31.19	-1.28751	-1.29928	-1.256	-1.35269	-1.45955	-1.47943	-1.58791	-1.34988
31.39	-0.00111905	-0.0102166	-0.00090346	0.00888899	-0.00107733	0.0132196	0.00639691	0.00238732			31.39	-1.28742	-1.2969	-1.25593	-1.35279	-1.45779	-1.47349	-1.58794	-1.34566
31.59	-0.00250259	-0.00948364	-0.0005769	0.00631291	-0.00241335	0.0169758	0.00525286	0.00013341			31.59	-1.2888	-1.29617	-1.25561	-1.35536	-1.45913	-1.46974	-1.58908	-1.34791
31.79	-0.00401052	-0.00828791	0.00093765	0.0091177	-0.00058408	0.00744249	0.0061517	0.00155829			31.79	-1.29031	-1.29497	-1.25409	-1.35256	-1.4573	-1.47927	-1.58819	-1.34649
31.99	-0.00173978	-0.0121806	-0.00095185	0.0104206	-0.00220477	0.011389	0.0102409	0.00142181			31.99	-1.28804	-1.29887	-1.25598	-1.35126	-1.45892	-1.47533	-1.5841	-1.34662
32.19	-0.00166807	-0.0131471	-0.00146811	0.00971581	-0.00109652	0.0115712	0.006874	0.00205166			32.19	-1.28797	-1.29983	-1.2565	-1.35196	-1.45781	-1.47514	-1.58746	-1.34599
32.39	-0.00354332	-0.0114391	-0.00252606	0.0110452	-0.0021429	0.0119213	0.00386391	0.00144519			32.39	-1.28984	-1.29812	-1.25756	-1.35063	-1.45886	-1.47479	-1.59047	-1.3466
32.59	0.00083476	-0.011264	0.00287595	0.00955724	-0.00021725	0.0129062	0.00520841	-0.0006772			32.59	-1.28547	-1.29795	-1.25215	-1.35212	-1.45693	-1.47381	-1.58913	-1.34872
32.79	-0.00487305	-0.0136228	-4.768e-05	0.00644357	-0.00452197	0.0119285	0.00740784	-0.00091002			32.79	-1.29117	-1.30031	-1.25508	-1.35523	-1.46124	-1.47479	-1.58693	-1.34896
32.99	-0.00413533	-0.0175536	0.00188425	0.00903218	-0.00093949	0.011615	0.0051102	0.00106468			32.99	-1.29044	-1.30424	-1.25315	-1.35264	-1.45766	-1.4751	-1.58923	-1.34698
33.19	-0.00760229	-0.0145228	0.00021394	0.0114672	-0.0003779	0.0127222	0.00467718	0.00301988			33.19	-1.2939	-1.30121	-1.25482	-1.35021	-1.45709	-1.47399	-1.58966	-1.34503
33.39	-0.00315503	-0.0111171	0.00158366	0.010123	-0.00137931	0.0133632	0.00895976	0.00205751			33.39	-1.28946	-1.2978	-1.25345	-1.35155	-1.4581	-1.47335	-1.58538	-1.34599
33.59	-0.0009513	-0.00822644	0.00228397	0.012211	-0.00026607	0.0122932	0.0129642	-0.00025816			33.59	-1.28725	-1.29491	-1.25275	-1.34947	-1.45698	-1.47442	-1.58137	-1.3483
33.79	-0.00524305	-0.0124468	0.00424868	0.0110413	-0.00170845	0.0137687	0.00571939	0.00027318			33.79	-1.29154	-1.29913	-1.25078	-1.35064	-1.45842	-1.47295	-1.58862	-1.34777
33.99	0.00242051	-0.0126229	-0.00425708	0.0119798	-0.00151471	0.010605	0.00988828	0.00354757			33.99	-1.28388	-1.29931	-1.25929	-1.3497	-1.45823	-1.47611	-1.58445	-1.3445
34.19	-0.00605891	-0.0160688	-5.373e-05	0.00726505	-0.00093107	0.0123797	0.00773337	0.00325938			34.19	-1.29236	-1.30275	-1.25508	-1.35441	-1.45765	-1.47433	-1.5866	-1.34479
34.39	-0.00703091	-0.012694	-0.00038564	0.00893635	-0.00058911	0.00943001	0.0105557	0.00482254			34.39	-1.29333	-1.29938	-1.25542	-1.35274	-1.45731	-1.47728	-1.58378	-1.34322
34.59	-0.00197722	-0.0122297	0.00391516	0.00984784	-0.00117413	0.0102759	0.00863426	0.00228361			34.59	-1.28828	-1.29892	-1.25112	-1.35183	-1.45789	-1.47644	-1.5857	-1.34576
34.79	-0.0027496	-0.00948194	0.00050009	0.0110257	-0.00134502	0.0125482	0.00541722	-0.00077528			34.79	-1.28905	-1.29617	-1.25453	-1.35065	-1.45806	-1.47417	-1.58892	-1.34882
34.99	-0.00255846	-0.0160938	-0.00163574	0.00783997	-0.00353387	0.0135998	0.00640299	-0.00403485			34.99	-1.28886	-1.30278	-1.25667	-1.35384	-1.46025	-1.47311	-1.58793	-1.35208
35.19	-0.00372832	-0.00854425	0.00095525	0.0120875	-0.00015992	0.0101396	0.0129788	0.00240651			35.19	-1.29003	-1.29523	-1.25408	-1.34959	-1.45688	-1.47657	-1.58136	-1.34564
35.39	-0.00435793	-0.0115735	0.00071699	0.00840912	-0.00017668	0.0137794	0.0109554	-6.515e-05			35.39	-1.29066	-1.29826	-1.25431	-1.35327	-1.45689	-1.47294	-1.58338	-1.34811
35.59	-0.00405406	-0.0142527	-0.00159167	0.0107836	0.00226468	0.0148708	0.00753896	0.00509982			35.59	-1.29035	-1.30094	-1.25662	-1.35089	-1.45445	-1.47184	-1.5868	-1.34295
35.79	-0.00440724	-0.0167493	0.00198322	0.0113742	0.00216471	0.0112656	0.0110793	0.00245616			35.79	-1.29071	-1.30343	-1.25305	-1.3503	-1.45455	-1.47545	-1.58326	-1.34559
35.99	-0.00552309	-0.0129511	0.00222012	0.010176	-0.00421939	0.00990782	0.00664751	0.00241977			35.99	-1.29182	-1.29964	-1.25281	-1.3515	-1.46094	-1.47681	-1.58769	-1.34563
36.19	-0.00261934	-0.0161844	0.00351333	0.00850492	-0.00066917	0.0138755	0.00760006	-8.088e-05			36.19	-1.28892	-1.30287	-1.25152	-1.35317	-1.45739	-1.47284	-1.58674	-1.34813
36.39	-0.00688321	-0.0133285	0.00373198	0.0116242	-5.865e-05	0.0106862	0.00740091	0.00158046			36.39	-1.29318	-1.30001	-1.2513	-1.35005	-1.45678	-1.47603	-1.58694	-1.34647
36.59	-0.00541277	-0.0131392	-0.00094214	0.00976335	0.00141522	0.0130754	0.0111066	-0.00074313			36.59	-1.29171	-1.29982	-1.25597	-1.35191	-1.4553	-1.47364	-1.58323	-1.34879
36.79	0.00031565	-0.0155298	0.00076077	0.00778216	2.919e-05	0.0148272	0.0100222	-0.00177873			36.79	-1.28598	-1.30222	-1.25427	-1.35389	-1.45669	-1.47189	-1.58431	-1.34982
36.99	-0.00088581	-0.0144646	-0.00185334	0.0114953	-0.00106617	0.0134782	0.0103829	0.00383651			36.99	-1.28719	-1.30115	-1.25688	-1.35018	-1.45778	-1.47324	-1.58395	-1.34421
37.19	-0.00366878	-0.0121204	0.00048635	0.0101383	-0.00297034	0.00921688	0.0133264	0.0004465			37.19	-1.28997	-1.29881	-1.25454	-1.35154	-1.45969	-1.4775	-1.58101	-1.3476
37.39	-0.00137725	-0.0150147	0.00260372	0.0114234	-3.036e-05	0.0111132	0.00545175	0.00399638			37.39	-1.28768	-1.3017	-1.25243	-1.35025	-1.45675	-1.4756	-1.58889	-1.34405
37.59	-0.00558597	-0.0143106	-0.00079445	0.00930551	0.00014741	0.0122146	0.00883609	-0.00131726			37.59	-1.29189	-1.301	-1.25583	-1.35237	-1.45657	-1.4745	-1.5855	-1.34936
37.79	-0.0056174	-0.0145011	-0.00287284	0.0116896	-0.00141101	0.011231	0.00715918	0.00072683			37.79	-1.29192	-1.30119	-1.2579	-1.34999	-1.45813	-1.47548	-1.58718	-1.34732
37.99	-0.00393176	-0.0113523	-0.00223504	0.00943017	-0.0006188	0.0125562	0.00814926	0.00088349			37.99	-1.29023	-1.29804	-1.25727	-1.35225	-1.45734	-1.47416	-1.58619	-1.34716
38.19	-0.00475297	-0.0146768	0.00219919	0.012774	0.00144907	0.0143078	0.0125433	0.00241849			38.19	-1.29105	-1.30136	-1.25283	-1.3489	-1.45527	-1.47241	-1.58179	-1.34563
38.39	-0.00252276	-0.0129767	0.00034348	0.00730612	0.00128479	0.0103563	0.00795856	0.00201605			38.39	-1.28882	-1.29966	-1.25469	-1.35437	-1.45543	-1.47636	-1.58638	-1.34603
38.59	-0.0013028	-0.015726	-0.00112523	0.0132697	-0.00326439	0.0139856	0.00979245	0.00181717			38.59	-1.2876	-1.30241	-1.25616	-1.34841	-1.45998	-1.47273	-1.58454	-1.34623
38.79	-0.00216124	-0.0166095	-0.00058104	0.0134515	0.00041983	0.0143476	0.010076	0.00042029			38.79	-1.28846	-1.30329	-1.25561	-1.34823	-1.4563	-1.47237	-1.58426	-1.34763
38.99	-0.00570728	-0.0125165	0.00064642	0.0113642	-0.00211488	0.013783	0.0102625	0.00291966			38.99	-1.29201	-1.2992	-1.25438	-1.35031	-1.45883	-1.47293	-1.58407	-1.34513
39.19	-0.00594857	-0.0109223	0.00237181	0.0128427	-0.00182552	0.012699	0.0107594	0.00061441			39.19	-1.29225	-1.29761	-1.25266	-1.34883	-1.45854	-1.47402	-1.58358	-1.34743
39.39	-0.00282549	-0.0128522	-0.00054689	0.00978639	0.00121845	0.0127198	0.0138842	0.00436187			39.39	-1.28913	-1.29954	-1.25558	-1.35189	-1.4555	-1.47399	-1.58045	-1.34368
39.59	-0.0049977	-0.013591	0.00113143	0.0110589	3.24e-05	0.0142041	0.015751	0.00135575			39.59	-1.2913	-1.30028	-1.2539	-1.35062	-1.45668	-1.47251	-1.57859	-1.34669
39.79	-0.00413397	-0.0131185	-0.00087382	0.010352	-1.205e-05	0.0137101	0.00931011	0.00314971			39.79	-1.29043	-1.2998	-1.2559	-1.35133	-1.45673	-1.473	-1.58503	-1.3449
39.99	-0.00401095	-0.0141744	0.00331475	0.010913	-0.0036546	0.0135371	0.0116469	0.00103655			39.99	-1.29031	-1.30086	-1.25172	-1.35076	-1.46037	-1.47318	-1.58269	-1.34701
40.19	-0.00191616	-0.0164357	-0.00141315	0.0070348	0.00069174	0.0100438	0.0114524	0.00445097			40.19	-1.28822	-1.30312	-1.25644	-1.35464	-1.45602	-1.47667	-1.58288	-1.34359
40.39	-0.00022859	-0.0157402	-0.00368438	0.0141338	0.00073345	0.0117605	0.0112575	0.00343042			40.39	-1.28653	-1.30243	-1.25872	-1.34754	-1.45598	-1.47495	-1.58308	-1.34462
40.59	-0.00246641	-0.0153803	0.00039014	0.0129993	0.00176029	0.0138564	0.0089882	0.00362254			40.59	-1.28877	-1.30207	-1.25464	-1.34868	-1.45496	-1.47286	-1.58535	-1.34442
40.79	-0.00428688	-0.0150139	0.0045582	0.0100159	-0.00414485	0.00909297	0.00800277	0.00042265			40.79	-1.29059	-1.3017	-1.25047	-1.35166	-1.46086	-1.47762	-1.58633	-1.34762
40.99	-0.00166675	-0.0137862	0.00120199	0.0118393	-0.0047004	0.0125284	0.00782689	0.0013514			40.99	-1.28797	-1.30047	-1.25383	-1.34984	-1.46142	-1.47419	-1.58651	-1.34669
41.19	-0.00251774	-0.0153116	0.00452942	0.011044	0.00178857	0.0150777	0.00969213	-0.00314995			41.19	-1.28882	-1.302	-1.2505	-1.35063	-1.45493	-1.47164	-1.58465	-1.3512
41.39	-0.004971	-0.016105	0.00032171	0.0144976	-0.00196513	0.0139854	0.00950974	-0.00094184			41.39	-1.29127	-1.30279	-1.25471	-1.34718	-1.45868	-1.47273	-1.58483	-1.34899
41.59	-0.0024287	-0.0161284	-0.00307091	0.0097308	-0.0011762	0.0131767	0.0126345	0.00297782			41.59	-1.28873	-1.30281	-1.2581	-1.35195	-1.45789	-1.47354	-1.5817	-1.34507
41.79	-0.00154954	-0.0108563	-0.00334387	0.0147197	-0.00185906	0.0192608	0.0108905	-0.00040096			41.79	-1.28785	-1.29754	-1.25837	-1.34696	-1.45858	-1.46745	-1.58345	-1.34845
41.99	-0.00338092	-0.0172323	-0.00154494	0.0113984	-0.00054607	0.0163753	0.0137946	0.00405166			41.99	-1.28968	-1.30392	-1.25658	-1.35028	-1.45726	-1.47034	-1.58054	-1.34399
42.19	0.00064626	-0.0161657	0.00279378	0.0112832	-0.00324661	0.0114822	0.0120569	0.00426134			42.19	-1.28565	-1.30285	-1.25224	-1.35039	-1.45996	-1.47523	-1.58228	-1.34378
42.39	-0.00190503	-0.0159942	-0.00534117	0.0137556	-0.00287132	0.0116335	0.0143422	0.00458246			42.39	-1.28821	-1.30268	-1.26037	-1.34792	-1.45959	-1.47508	-1.57999	-1.34346
42.59	-0.00405173	-0.014508	-0.00429974	0.012375	-0.00181991	0.0130262	0.0113152	0.00108356			42.59	-1.29035	-1.30119	-1.25933	-1.3493	-1.45854	-1.47369	-1.58302	-1.34696
42.79	-0.00443071	-0.0153166	-0.00357162	0.0110009	0.00014652	0.0141998	0.0121228	0.00158141			42.79	-1.29073	-1.302	-1.2586	-1.35068	-1.45657	-1.47251	-1.58221	-1.34646
42.99	0.00210254	-0.0192385	0.00091513	0.0136809	-0.00280271	0.0153368	0.0143845	0.0019889			42.99	-1.2842	-1.30592	-1.25412	-1.348	-1.45952	-1.47138	-1.57995	-1.34606
43.19	-0.00156973	-0.0155462	-0.00025521	0.00939379	-0.00015081	0.0176458	0.0112206	-0.00110059			43.19	-1.28787	-1.30223	-1.25529	-1.35228	-1.45687	-1.46907	-1.58312	-1.34915
43.39	-0.0017545	-0.0201008	-0.0026598	0.012509	-7.935e-05	0.0144298	0.0113965	-9.079e-05			43.39	-1.28805	-1.30679	-1.25769	-1.34917	-1.4568	-1.47228	-1.58294	-1.34814
43.59	0.00131283	-0.0166004	-0.00067323	0.0124093	-0.00213805	0.0173021	0.0111577	0.00229757			43.59	-1.28499	-1.30329	-1.2557	-1.34927	-1.45885	-1.46941	-1.58318	-1.34575
43.79	-0.001906	-0.0159466	0.00126825	0.0140307	-0.00127687	0.0147047	0.0113688	0.00396664			43.79	-1.28821	-1.30263	-1.25376	-1.34765	-1.45799	-1.47201	-1.58297	-1.34408
43.99	-0.00259262	-0.0161096	0.00470858	0.0133825	0.00102108	0.0154061	0.0135645	0.00165563			43.99	-1.28889	-1.3028	-1.25032	-1.34829	-1.4557	-1.47131	-1.58077	-1.34639
44.19	-0.00207891	-0.0184076	0.00174224	0.0109643	-0.00082424	0.0177923	0.0147666	0.0016848			44.19	-1.28838	-1.30509	-1.25329	-1.35071	-1.45754	-1.46892	-1.57957	-1.34636
44.39	-0.00124156	-0.0140315	0.00055142	0.00926736	0.00026136	0.0120231	0.00713911	-0.00146696			44.39	-1.28754	-1.30072	-1.25448	-1.35241	-1.45646	-1.47469	-1.5872	-1.34951
44.59	-0.00472432	-0.0157129	0.00217763	0.0125447	0.00120662	0.0144913	0.014114	0.00271119			44.59	-1.29102	-1.3024	-1.25285	-1.34913	-1.45551	-1.47222	-1.58022	-1.34533
44.79	0.00021886	-0.0138585	-0.0026303	0.0106915	-0.00107191	0.015973	0.0153207	-0.00343878			44.79	-1.28608	-1.30054	-1.25766	-1.35099	-1.45779	-1.47074	-1.57902	-1.35148
44.99	-0.00157658	-0.0171837	-0.00027356	0.0146132	-0.0019231	0.016587	0.0120617	6.642e-05			44.99	-1.28788	-1.30387	-1.2553	-1.34706	-1.45864	-1.47013	-1.58228	-1.34798
45.19	0.00024177	-0.0183258	-0.0004443	0.0138338	-0.00022773	0.0136008	0.0150123	0.00014223			45.19	-1.28606	-1.30501	-1.25548	-1.34784	-1.45694	-1.47311	-1.57932	-1.3479
45.39	-0.00232918	-0.0156439	0.00100817	0.0139307	0.00031533	0.0168821	0.0116708	0.00055689			45.39	-1.28863	-1.30233	-1.25402	-1.34775	-1.4564	-1.46983	-1.58267	-1.34749
45.59	-0.00345829	-0.0191583	0.00248039	0.0116883	-0.00223148	0.0156695	0.0109648	0.00280429			45.59	-1.28976	-1.30584	-1.25255	-1.34999	-1.45895	-1.47104	-1.58337	-1.34524
45.79	-0.00390569	-0.0142525	-0.00097413	0.0128637	-0.00067255	0.0139126	0.0122582	0.00306867			45.79	-1.29021	-1.30094	-1.256	-1.34881	-1.45739	-1.4728	-1.58208	-1.34498
45.99	-0.0035007	-0.0171591	0.00041297	0.0134763	-0.00367398	0.018771	0.015715	0.00202906			45.99	-1.2898	-1.30384	-1.25462	-1.3482	-1.46039	-1.46794	-1.57862	-1.34602
46.19	-0.00510858	-0.0201901	0.00136183	0.00948176	9.73e-05	0.0143551	0.0136495	0.00108926			46.19	-1.29141	-1.30688	-1.25367	-1.3522	-1.45662	-1.47236	-1.58069	-1.34696
46.39	-0.00120318	-0.019776	0.00071426	0.0121629	0.00015214	0.0160001	0.0146462	0.00539923			46.39	-1.2875	-1.30646	-1.25432	-1.34951	-1.45656	-1.47071	-1.57969	-1.34265
46.59	-0.00300169	-0.0193566	0.00066988	0.0144517	0.00033064	0.0172167	0.0162673	0.00219662			46.59	-1.2893	-1.30604	-1.25436	-1.34723	-1.45639	-1.4695	-1.57807	-1.34585
46.79	0.00201427	-0.0161417	0.00096089	0.0168147	-0.00225071	0.0172821	0.0137048	0.00340616			46.79	-1.28429	-1.30283	-1.25407	-1.34486	-1.45897	-1.46943	-1.58063	-1.34464
46.99	-0.00303098	-0.0177915	0.00043332	0.0142055	0.00107231	0.0165995	0.0141796	0.00313102			46.99	-1.28933	-1.30448	-1.2546	-1.34747	-1.45564	-1.47011	-1.58016	-1.34491
47.19	-0.00323871	-0.0197595	0.00653814	0.0140309	-0.00228653	0.0170721	0.0124513	0.00284321			47.19	-1.28954	-1.30644	-1.24849	-1.34765	-1.459	-1.46964	-1.58189	-1.3452
47.39	0.001316	-0.0208894	-0.00053768	0.0138969	-0.00498482	0.0184119	0.0161819	0.0054947			47.39	-1.28498	-1.30757	-1.25557	-1.34778	-1.4617	-1.4683	-1.57816	-1.34255
47.59	-0.0034169	-0.0167617	-0.00096277	0.0159327	-0.00151877	0.012067	0.0166592	-0.00249737			47.59	-1.28972	-1.30345	-1.25599	-1.34574	-1.45824	-1.47465	-1.57768	-1.35054
47.79	-0.00046321	-0.018992	-0.00069619	0.0173745	-0.00155927	0.0126429	0.0134737	0.00146366			47.79	-1.28676	-1.30568	-1.25573	-1.3443	-1.45828	-1.47407	-1.58086	-1.34658
47.99	-0.00457184	-0.0160365	-0.00014312	0.01366	-0.00359285	0.0169203	0.0146711	0.00183885			47.99	-1.29087	-1.30272	-1.25517	-1.34802	-1.46031	-1.46979	-1.57967	-1.34621
48.2	-0.00136581	-0.0159024	0.00337607	0.0157099	-0.00158432	0.0199975	0.0144373	0.00164128			48.2	-1.28767	-1.30259	-1.25165	-1.34597	-1.4583	-1.46672	-1.5799	-1.3464
48.39	0.00013457	-0.0183643	0.00251169	0.0152793	-0.0023474	0.0151888	0.0155414	0.00446857			48.39	-1.28617	-1.30505	-1.25252	-1.3464	-1.45906	-1.47153	-1.5788	-1.34358
48.59	-0.00064119	-0.0202813	0.00210462	0.014195	-0.00155582	0.0163584	0.0135859	0.00031859			48.59	-1.28694	-1.30697	-1.25293	-1.34748	-1.45827	-1.47036	-1.58075	-1.34773
48.79	-0.00398775	-0.0177578	0.00016326	0.0157631	-0.00255623	0.0203059	0.0135955	-0.00180617			48.79	-1.29029	-1.30444	-1.25487	-1.34591	-1.45927	-1.46641	-1.58074	-1.34985
48.99	-0.00408443	-0.0196781	-0.00040045	0.0126166	-0.00230506	0.0176972	0.0114016	0.00377188			48.99	-1.29038	-1.30636	-1.25543	-1.34906	-1.45902	-1.46902	-1.58294	-1.34427
49.19	-0.00691544	-0.0195941	0.001127	0.0138184	-0.00042141	0.0176722	0.0131791	0.00345241			49.19	-1.29322	-1.30628	-1.2539	-1.34786	-1.45714	-1.46904	-1.58116	-1.34459
49.39	-0.00327201	-0.0144599	0.00116425	0.0108722	0.00074667	0.0156639	0.0161503	0.00390842			49.39	-1.28957	-1.30115	-1.25387	-1.3508	-1.45597	-1.47105	-1.57819	-1.34414
49.59	-0.00196977	-0.0167045	-0.00019366	0.0167441	-0.00108073	0.0138847	0.0140088	-0.00049857			49.59	-1.28827	-1.30339	-1.25522	-1.34493	-1.4578	-1.47283	-1.58033	-1.34854
49.79	-0.00295161	-0.0213603	0.00273992	0.0130318	0.00017364	0.0171183	0.0154629	-0.00018646			49.79	-1.28925	-1.30805	-1.25229	-1.34865	-1.45654	-1.4696	-1.57887	-1.34823
49.99	0.00169974	-0.0183599	-0.00118454	0.0142058	0.00075988	0.0151083	0.016471	0.00248926			49.99	-1.2846	-1.30505	-1.25622	-1.34747	-1.45596	-1.47161	-1.57787	-1.34556
50.19	-0.00088898	-0.0225422	0.00332316	0.0177445	0.00099043	0.0151132	0.012474	0.00461473			50.19	-1.28719	-1.30923	-1.25171	-1.34393	-1.45573	-1.4716	-1.58186	-1.34343
50.39	-0.00021405	-0.0191938	0.00192477	0.0159238	-0.00442616	0.0189359	0.0118308	0.00328553			50.39	-1.28651	-1.30588	-1.25311	-1.34575	-1.46114	-1.46778	-1.58251	-1.34476
50.59	-0.00264357	-0.0177273	0.0047314	0.0189314	-0.00245463	0.0185554	0.011174	-0.00027997			50.59	-1.28894	-1.30441	-1.2503	-1.34275	-1.45917	-1.46816	-1.58316	-1.34833
50.79	-0.00286411	-0.0202814	0.00156063	0.0122566	0.00130699	0.0171043	0.0117064	0.00190152			50.79	-1.28916	-1.30697	-1.25347	-1.34942	-1.45541	-1.46961	-1.58263	-1.34614
50.99	-0.00303848	-0.0178803	-9.436e-05	0.0155711	-0.0022027	0.0184488	0.0147074	-0.00149739			50.99	-1.28934	-1.30457	-1.25513	-1.34611	-1.45892	-1.46827	-1.57963	-1.34954
51.19	-0.00165121	-0.0222954	-0.00102208	0.0145916	0.00060183	0.0156122	0.0194333	0.00088069			51.19	-1.28795	-1.30898	-1.25605	-1.34709	-1.45611	-1.4711	-1.5749	-1.34717
51.39	-0.00238119	-0.0150293	0.00014772	0.0158414	-0.00141255	0.0145714	0.017845	0.00445503			51.39	-1.28868	-1.30171	-1.25488	-1.34584	-1.45813	-1.47214	-1.57649	-1.34359
51.59	-0.00078499	-0.0207842	0.00159849	0.0168007	0.00045218	0.0168777	0.0173857	0.0062244			51.59	-1.28709	-1.30747	-1.25343	-1.34488	-1.45626	-1.46984	-1.57695	-1.34182
51.79	-0.00237686	-0.0194166	-0.00116989	0.0159065	-0.00129377	0.0188543	0.0181329	0.00233368			51.79	-1.28868	-1.3061	-1.2562	-1.34577	-1.45801	-1.46786	-1.5762	-1.34571
51.99	-0.00140493	-0.0213278	-0.0018306	0.0166445	-0.00011034	0.018259	0.0152969	0.00045327			51.99	-1.2877	-1.30801	-1.25686	-1.34503	-1.45683	-1.46846	-1.57904	-1.34759
52.19	-0.00054819	-0.0208076	0.00436693	0.0158299	-0.00217303	0.019064	0.0129835	0.00103801			52.19	-1.28685	-1.30749	-1.25066	-1.34585	-1.45889	-1.46765	-1.58135	-1.34701
52.39	-0.0036971	-0.0182097	0.00238253	0.0127119	0.00085709	0.0198555	0.0194957	0.00189187			52.39	-1.29	-1.3049	-1.25265	-1.34897	-1.45586	-1.46686	-1.57484	-1.34615
52.59	0.00065728	-0.026817	0.00061747	0.0117777	0.00010164	0.0168695	0.0122442	0.00046421			52.59	-1.28564	-1.3135	-1.25441	-1.3499	-1.45661	-1.46984	-1.58209	-1.34758
52.79	0.00081097	-0.0247776	0.00105599	0.0151827	0.0014899	0.0189487	0.0183396	0.004751			52.79	-1.28549	-1.31146	-1.25397	-1.34649	-1.45523	-1.46777	-1.576	-1.34329
52.99	-0.00256188	-0.022609	0.00184899	0.0158737	-0.0002686	0.0177601	0.0149111	0.0013955			52.99	-1.28886	-1.30929	-1.25318	-1.3458	-1.45699	-1.46895	-1.57943	-1.34665
53.19	-0.00485766	-0.023569	0.00210031	0.0160238	0.00079621	0.018286	0.0172524	0.00414631			53.19	-1.29116	-1.31025	-1.25293	-1.34565	-1.45592	-1.46843	-1.57708	-1.3439
53.39	-0.00475887	-0.0183458	0.00056596	0.0154522	-0.00037714	0.0161388	0.0168183	0.00401995			53.39	-1.29106	-1.30503	-1.25446	-1.34622	-1.45709	-1.47058	-1.57752	-1.34403
53.59	-0.00179171	-0.0231006	0.00040078	0.0169156	0.00077669	0.0125093	0.014456	0.00281343			53.59	-1.28809	-1.30979	-1.25463	-1.34476	-1.45594	-1.47421	-1.57988	-1.34523
53.79	-0.0023197	-0.0217016	-0.00148005	0.0138703	-0.00136275	0.017268	0.014947	0.0044961			53.79	-1.28862	-1.30839	-1.25651	-1.34781	-1.45808	-1.46945	-1.57939	-1.34355
53.99	-0.00289596	-0.0220449	0.00125672	0.0150012	0.00080647	0.0195456	0.0143456	0.00011175			53.99	-1.2892	-1.30873	-1.25377	-1.34668	-1.45591	-1.46717	-1.57999	-1.34793
54.19	-0.0005479	-0.0201407	0.00309385	0.0176324	-0.00128585	0.0216949	0.0149298	0.00102717			54.19	-1.28685	-1.30683	-1.25194	-1.34404	-1.458	-1.46502	-1.57941	-1.34702
54.39	-0.00426053	-0.0220567	0.00382462	0.016061	-0.00218159	0.018255	0.0171206	0.0070392			54.39	-1.29056	-1.30874	-1.25121	-1.34562	-1.4589	-1.46846	-1.57722	-1.34101
54.59	-0.00508796	-0.0250615	0.00142645	0.0162095	-0.00273097	0.020396	0.0201124	0.00315133			54.59	-1.29139	-1.31175	-1.2536	-1.34547	-1.45945	-1.46632	-1.57422	-1.34489
54.79	-0.00187868	-0.0230268	0.00150075	0.0157019	0.00220852	0.0175879	0.016349	0.00246779			54.79	-1.28818	-1.30971	-1.25353	-1.34598	-1.45451	-1.46913	-1.57799	-1.34558
54.99	-0.00297355	-0.0208383	0.00184331	0.018067	0.00044839	0.0156609	0.0188503	0.00213117			54.99	-1.28927	-1.30752	-1.25319	-1.34361	-1.45627	-1.47105	-1.57549	-1.34591
55.19	-0.00089766	-0.0213178	0.00392967	0.0132162	0.0050884	0.0167521	0.0159989	0.00081707			55.19	-1.2872	-1.308	-1.2511	-1.34846	-1.45163	-1.46996	-1.57834	-1.34723
[truncated: 26,510 more rows]

## Sheet: Exp3
Raw BLI data (nm)											Normalised to baseline
[truncated: 26,802 more rows]

## Sheet: Rates_fit
Sorce data: Figure 5B
	One-phase decay model in Prism 8
			Dissociation
[truncated: 16 more rows]
