# Supplementary material for: Calcium depletion challenges endoplasmic reticulum proteostasis by destabilising BiP-substrate complexes
Source: eLife. 2020 Dec 9;9:e62601. doi: 10.7554/eLife.62601 (PMC7758071; doi:10.7554/eLife.62601)
Supplement: Figure 5—source data 3. [file elife-62601-fig5-data3.xlsx]

## Sheet: Exp1
Sorce data: Figure 5C
Time (s)	DnaK	DnaK + Ca			Time (s)	DnaK	DnaK + Ca
0	0	0			0	-1.10751	-0.978083
0.19	-0.00253671	0.00097585			0.19	-1.11004	-0.977107
0.39	-0.00302706	-0.0001745			0.39	-1.11053	-0.978257
0.6	-0.00113477	-0.0015539			0.6	-1.10864	-0.979637
0.79	0.00130241	-0.0023406			0.79	-1.1062	-0.980424
1	-0.00167719	-0.00190614			1	-1.10918	-0.979989
1.19	-0.00261336	-0.00207253			1.19	-1.11012	-0.980155
1.39	-2.831e-05	-0.00155809			1.39	-1.10754	-0.979641
1.59	-0.00024103	-0.00104471			1.59	-1.10775	-0.979128
1.79	0.00044129	0.00333449			1.79	-1.10707	-0.974748
2	-0.00219344	0.00040219			2	-1.1097	-0.977681
2.19	-0.00095658	0.00243702			2.19	-1.10846	-0.975646
2.39	-0.00013407	0.00178377			2.39	-1.10764	-0.976299
2.59	-0.00246567	-0.00013627			2.59	-1.10997	-0.978219
2.79	-0.00029597	-0.00021068			2.79	-1.1078	-0.978294
2.99	-0.00338181	0.00141694			2.99	-1.11089	-0.976666
3.19	-0.00229801	-0.0010874			3.19	-1.10981	-0.97917
3.39	-0.00238035	0.00150715			3.39	-1.10989	-0.976576
3.59	-0.00296384	0.00343655			3.59	-1.11047	-0.974646
3.79	0.00036693	0.00055996			3.79	-1.10714	-0.977523
3.99	-0.00174293	0.00136333			3.99	-1.10925	-0.97672
4.19	0.00020011	0.00134991			4.19	-1.10731	-0.976733
4.39	-7.219e-05	0.00036164			4.39	-1.10758	-0.977721
4.59	0.00285295	0.00226514			4.59	-1.10465	-0.975818
4.79	-0.00450202	0.00172224			4.79	-1.11201	-0.976361
4.99	0.00162001	0.00190967			4.99	-1.10589	-0.976173
5.19	-0.00021076	-0.00141879			5.19	-1.10772	-0.979502
5.39	-0.0020459	0.00381624			5.39	-1.10955	-0.974267
5.59	-0.00033219	-0.00023238			5.59	-1.10784	-0.978315
5.79	0.00011483	-0.00142766			5.79	-1.10739	-0.979511
5.99	-0.0003	0.00110184			5.99	-1.10781	-0.976981
6.19	0.00030384	0.0019887			6.19	-1.1072	-0.976094
6.39	0.00218807	0.00110919			6.39	-1.10532	-0.976974
6.59	0.00080104	-0.00143322			6.59	-1.10671	-0.979516
6.79	0.00085131	0.00146463			6.79	-1.10666	-0.976618
6.99	-0.00158946	0.00285142			6.99	-1.1091	-0.975232
7.19	-0.00026614	-0.00109081			7.19	-1.10777	-0.979174
7.39	-0.00023866	0.00217189			7.39	-1.10775	-0.975911
7.59	-0.00188171	0.00135734			7.59	-1.10939	-0.976726
7.79	0.00060539	0.0015445			7.79	-1.1069	-0.976538
7.99	0.00041423	-0.00061143			7.99	-1.10709	-0.978694
8.19	0.0013701	0.00317913			8.19	-1.10614	-0.974904
8.39	0.00182419	-0.00278009			8.39	-1.10568	-0.980863
8.59	0.00094133	0.00227436			8.59	-1.10657	-0.975809
8.79	0.00185998	0.00277722			8.79	-1.10565	-0.975306
8.99	0.00036962	0.00108216			8.99	-1.10714	-0.977001
9.19	-0.00095888	0.00284028			9.19	-1.10847	-0.975243
9.39	0.00261938	-0.00016			9.39	-1.10489	-0.978243
9.59	-0.00067434	0.00213665			9.59	-1.10818	-0.975946
9.8	-0.00030768	0.00431408			9.8	-1.10781	-0.973769
10	0.00146381	0.00293029			10	-1.10604	-0.975153
10.19	-0.0013011	0.00262359			10.19	-1.10881	-0.975459
10.39	0.00228122	0.00099123			10.39	-1.10523	-0.977092
10.6	0.00117758	0.00059405			10.6	-1.10633	-0.977489
10.8	0.0032844	0.00037207			10.8	-1.10422	-0.977711
10.99	0.00052351	0.00110066			10.99	-1.10698	-0.976982
11.19	3.979e-05	0.00112365			11.19	-1.10747	-0.976959
11.39	0.00245454	0.00059989			11.39	-1.10505	-0.977483
11.6	0.00378446	0.00099054			11.6	-1.10372	-0.977092
11.8	0.00055473	-0.00050929			11.8	-1.10695	-0.978592
11.99	0.00022979	0.00145513			11.99	-1.10728	-0.976628
12.19	0.00320841	0.00386568			12.19	-1.1043	-0.974217
12.39	-0.00010456	-0.00113742			12.39	-1.10761	-0.97922
12.6	0.00151522	0.00128686			12.6	-1.10599	-0.976796
12.8	0.00269348	0.00155201			12.8	-1.10481	-0.976531
12.99	-0.00143888	0.00261127			12.99	-1.10895	-0.975472
13.19	0.00173803	0.00048102			13.19	-1.10577	-0.977602
13.39	-0.00045559	0.00161378			13.39	-1.10796	-0.976469
13.6	0.00031757	0.00260464			13.6	-1.10719	-0.975478
13.8	0.00177943	0.00332718			13.8	-1.10573	-0.974756
13.99	0.00044747	0.00055876			13.99	-1.10706	-0.977524
14.19	0.00161555	-0.00212181			14.19	-1.10589	-0.980205
14.39	-0.00015869	0.00170284			14.39	-1.10767	-0.97638
14.6	-0.00108853	0.00242957			14.6	-1.1086	-0.975653
14.8	-0.00071962	0.0010752			14.8	-1.10823	-0.977008
14.99	0.00150082	0.00371247			14.99	-1.10601	-0.97437
15.19	-0.00024208	0.00230869			15.19	-1.10775	-0.975774
15.39	0.00301229	0.00239362			15.39	-1.10449	-0.975689
15.59	0.00411089	0.00302036			15.59	-1.1034	-0.975063
15.8	-0.00160477	0.00347118			15.8	-1.10911	-0.974612
15.99	0.00288211	0.00190528			15.99	-1.10463	-0.976178
16.2	0.00168508	0.0036491			16.2	-1.10582	-0.974434
16.4	0.00300719	0.00534217			16.4	-1.1045	-0.972741
16.59	0.00151198	0.00270678			16.59	-1.106	-0.975376
16.8	0.00206564	0.00508705			16.8	-1.10544	-0.972996
17	0.00200098	0.00407184			17	-1.10551	-0.974011
17.19	0.00091316	0.00603707			17.19	-1.10659	-0.972046
17.4	-0.00148552	0.00507121			17.4	-1.10899	-0.973012
17.6	0.00428451	0.00538211			17.6	-1.10322	-0.972701
17.8	0.00032587	0.00359707			17.8	-1.10718	-0.974486
17.99	0.00173632	0.00674426			17.99	-1.10577	-0.971339
18.19	0.00375692	0.0016769			18.19	-1.10375	-0.976406
18.4	0.00248151	0.00046344			18.4	-1.10503	-0.97762
18.6	0.00385494	0.00177312			18.6	-1.10365	-0.97631
18.8	0.00010448	0.00256872			18.8	-1.1074	-0.975514
19	0.00281516	0.00514258			19	-1.10469	-0.97294
19.2	-0.00165508	0.00388741			19.2	-1.10916	-0.974196
19.39	-0.00177956	0.00212517			19.39	-1.10929	-0.975958
19.59	-0.00147136	0.00346765			19.59	-1.10898	-0.974615
19.8	-0.00057801	0.00079288			19.8	-1.10809	-0.97729
19.99	0.00259646	0.00297008			19.99	-1.10491	-0.975113
20.2	0.0009553	0.00208487			20.2	-1.10655	-0.975998
20.4	0.00200579	0.00111897			20.4	-1.1055	-0.976964
20.6	-0.00062641	0.00275348			20.6	-1.10813	-0.975329
20.8	0.00309683	0.00248881			20.8	-1.10441	-0.975594
20.99	0.00337758	0.00053386			20.99	-1.10413	-0.977549
21.19	0.0042303	0.00331187			21.19	-1.10328	-0.974771
21.4	0.00480171	0.00333557			21.4	-1.10271	-0.974747
21.6	0.00488811	0.0037746			21.6	-1.10262	-0.974308
21.8	0.0037713	0.00252476			21.8	-1.10374	-0.975558
21.99	0.0057376	0.00444556			21.99	-1.10177	-0.973637
22.2	0.00335911	0.00284459			22.2	-1.10415	-0.975238
22.4	0.0022034	0.00419577			22.4	-1.1053	-0.973887
22.59	-0.00194382	0.00421564			22.59	-1.10945	-0.973867
22.79	0.0005933	0.00092267			22.79	-1.10691	-0.97716
23	0.00098882	0.00548637			23	-1.10652	-0.972597
23.2	0.00414525	0.00321627			23.2	-1.10336	-0.974867
23.39	0.0002252	0.0018917			23.39	-1.10728	-0.976191
23.59	0.00419525	0.00461423			23.59	-1.10331	-0.973469
23.8	0.00348962	0.00095542			23.8	-1.10402	-0.977128
23.99	0.00500024	0.00376988			23.99	-1.10251	-0.974313
24.19	0.0012646	0.00652143			24.19	-1.10624	-0.971562
24.39	0.00379986	0.0007926			24.39	-1.10371	-0.97729
24.59	0.00155837	0.00398097			24.59	-1.10595	-0.974102
24.8	0.00500898	0.00513941			24.8	-1.1025	-0.972944
24.99	0.00177458	0.00254799			24.99	-1.10573	-0.975535
25.19	0.00259071	0.00445552			25.19	-1.10492	-0.973627
25.4	0.0072183	0.00668038			25.4	-1.10029	-0.971403
25.59	0.00683733	0.00530469			25.59	-1.10067	-0.972778
25.8	0.00490943	0.00102119			25.8	-1.1026	-0.977062
25.99	0.00095539	0.00387162			25.99	-1.10655	-0.974211
26.2	0.0033468	0.00501723			26.2	-1.10416	-0.973066
26.4	0.00295469	0.00582169			26.4	-1.10455	-0.972261
26.59	0.00160804	0.00454228			26.59	-1.1059	-0.973541
26.79	0.00690372	0.00017059			26.79	-1.1006	-0.977912
27	0.00031346	0.00179853			27	-1.10719	-0.976284
27.2	0.00493001	0.00176436			27.2	-1.10258	-0.976319
27.39	0.0025275	0.00456785			27.39	-1.10498	-0.973515
27.59	0.00313155	0.00538182			27.59	-1.10438	-0.972701
27.8	0.00562692	0.00456398			27.8	-1.10188	-0.973519
27.99	0.00462396	0.00185516			27.99	-1.10288	-0.976228
28.19	0.00706224	0.00174323			28.19	-1.10044	-0.97634
28.39	0.00211405	0.00340133			28.39	-1.10539	-0.974682
28.59	0.00385738	0.00418622			28.59	-1.10365	-0.973897
28.8	0.00533571	0.00370624			28.8	-1.10217	-0.974377
28.99	0.00371812	0.00488222			28.99	-1.10379	-0.973201
29.19	0.00145582	0.00342803			29.19	-1.10605	-0.974655
29.4	0.00689468	0.00552312			29.4	-1.10061	-0.97256
29.59	0.00450103	0.00451923			29.59	-1.10301	-0.973564
29.79	0.00076449	0.00661733			29.79	-1.10674	-0.971466
29.99	0.00344697	0.00379541			29.99	-1.10406	-0.974288
30.19	0.00422138	0.00279623			30.19	-1.10329	-0.975287
30.4	0.00515972	0.00657457			30.4	-1.10235	-0.971508
30.59	0.00172574	0.00516402			30.59	-1.10578	-0.972919
30.79	0.00405412	0.00578342			30.79	-1.10345	-0.9723
30.99	0.00148441	0.00543304			30.99	-1.10602	-0.97265
31.19	0.00202785	0.00105106			31.19	-1.10548	-0.977032
31.4	0.00416233	0.00324853			31.4	-1.10334	-0.974834
31.59	0.00384872	0.00383436			31.59	-1.10366	-0.974249
31.8	0.00362375	0.0027148			31.8	-1.10388	-0.975368
31.99	0.00655011	0.00263196			31.99	-1.10096	-0.975451
32.19	0.00615858	0.00520041			32.19	-1.10135	-0.972883
32.39	0.00089789	0.00315137			32.39	-1.10661	-0.974932
32.59	0.00694447	0.00505171			32.59	-1.10056	-0.973031
32.79	0.00523001	0.00178806			32.79	-1.10228	-0.976295
32.99	0.00491727	0.0004509			32.99	-1.10259	-0.977632
33.19	0.0039998	0.00207726			33.19	-1.10351	-0.976006
33.4	0.00425462	0.00247443			33.4	-1.10325	-0.975609
33.59	0.00527179	0.00461493			33.59	-1.10224	-0.973468
33.79	0.00843947	0.00030909			33.79	-1.09907	-0.977774
33.99	0.00426615	0.0044969			33.99	-1.10324	-0.973586
34.19	0.00629542	0.00422717			34.19	-1.10121	-0.973856
34.4	0.00498575	0.00503838			34.4	-1.10252	-0.973045
34.59	0.00623979	0.00367302			34.59	-1.10127	-0.97441
34.79	0.00707851	0.00598964			34.79	-1.10043	-0.972093
34.99	0.00611375	0.00627924			34.99	-1.10139	-0.971804
35.19	0.00163575	0.00748023			35.19	-1.10587	-0.970603
35.39	-1.896e-05	0.0014168			35.39	-1.10753	-0.976666
35.59	0.00448733	0.00630085			35.59	-1.10302	-0.971782
35.79	0.00378652	0.00210298			35.79	-1.10372	-0.97598
35.99	0.00352787	0.00930046			35.99	-1.10398	-0.968782
36.19	0.00462892	0.00347519			36.19	-1.10288	-0.974608
36.39	0.0023664	0.00311666			36.39	-1.10514	-0.974966
36.59	0.00329408	0.00137884			36.59	-1.10421	-0.976704
36.79	0.0010059	0.00358375			36.79	-1.1065	-0.974499
36.99	0.00403441	0.00533153			36.99	-1.10347	-0.972751
37.19	0.0039519	0.00498638			37.19	-1.10356	-0.973097
37.39	-0.00086454	0.00531742			37.39	-1.10837	-0.972766
37.59	0.00423475	0.00450416			37.59	-1.10327	-0.973579
37.79	0.00070509	0.00135477			37.79	-1.1068	-0.976728
37.99	0.00660823	0.0022353			37.99	-1.1009	-0.975848
38.19	0.00404046	0.00209476			38.19	-1.10347	-0.975988
38.39	0.00578314	0.00498778			38.39	-1.10172	-0.973095
38.59	0.00753002	0.00700042			38.59	-1.09998	-0.971083
38.79	0.00328865	0.00604462			38.79	-1.10422	-0.972038
38.99	0.00257927	0.0044556			38.99	-1.10493	-0.973627
39.19	0.00289653	0.0014214			39.19	-1.10461	-0.976662
39.4	0.00292825	0.00406561			39.4	-1.10458	-0.974017
39.59	0.00244349	0.0048309			39.59	-1.10506	-0.973252
39.79	0.00602434	0.00234824			39.79	-1.10148	-0.975735
39.99	0.00240351	0.00215135			39.99	-1.1051	-0.975932
40.19	0.0045473	0.00214341			40.19	-1.10296	-0.97594
40.4	0.00313438	0.00395655			40.4	-1.10437	-0.974126
40.59	0.0084606	0.0043364			40.59	-1.09905	-0.973747
40.79	0.0070023	0.00325932			40.79	-1.1005	-0.974824
40.99	0.0060612	0.00224975			40.99	-1.10145	-0.975833
41.19	0.00515747	0.00273798			41.19	-1.10235	-0.975345
41.4	0.00713697	0.00626451			41.4	-1.10037	-0.971818
41.59	0.00335662	0.00522225			41.59	-1.10415	-0.972861
41.79	0.00695464	0.00383867			41.79	-1.10055	-0.974244
41.99	0.00803909	0.00469684			41.99	-1.09947	-0.973386
42.19	0.00722033	0.00449111			42.19	-1.10029	-0.973592
42.39	0.00344236	0.00495936			42.39	-1.10406	-0.973124
42.59	0.0070105	0.00480751			42.59	-1.1005	-0.973275
42.79	0.00418923	0.00556394			42.79	-1.10332	-0.972519
42.99	0.00766247	0.00128252			42.99	-1.09984	-0.9768
43.19	0.00264438	0.00599267			43.19	-1.10486	-0.97209
43.4	0.00620351	0.00700172			43.4	-1.1013	-0.971081
43.59	0.00290549	0.00621545			43.59	-1.1046	-0.971867
43.79	0.00714428	0.00713052			43.79	-1.10036	-0.970952
43.99	0.00590214	0.00638138			43.99	-1.10161	-0.971702
44.19	0.0059544	0.00285904			44.19	-1.10155	-0.975224
44.4	0.00370656	0.00592768			44.4	-1.1038	-0.972155
44.59	0.00281771	0.00078627			44.59	-1.10469	-0.977297
44.79	0.00341036	0.00274462			44.79	-1.1041	-0.975338
44.99	0.00594712	0.00350892			44.99	-1.10156	-0.974574
45.19	0.0070688	0.00211046			45.19	-1.10044	-0.975972
45.39	0.00323561	0.00404648			45.39	-1.10427	-0.974036
45.59	0.00410368	0.00774348			45.59	-1.1034	-0.970339
45.79	0.00420372	0.00593704			45.79	-1.1033	-0.972146
45.99	0.00510288	0.00500379			45.99	-1.1024	-0.973079
46.19	0.0057442	0.00266979			46.19	-1.10176	-0.975413
46.39	0.00499144	0.00599853			46.39	-1.10252	-0.972084
46.59	0.00842178	0.005441			46.59	-1.09909	-0.972642
46.79	0.00449239	0.00397304			46.79	-1.10301	-0.97411
46.99	0.00491082	0.00643983			46.99	-1.1026	-0.971643
47.19	0.00877478	0.00913286			47.19	-1.09873	-0.96895
47.4	0.00561875	0.00783086			47.4	-1.10189	-0.970252
47.59	0.00997216	0.00394273			47.59	-1.09754	-0.97414
47.79	0.00812552	0.00764974			47.79	-1.09938	-0.970433
47.99	0.00556312	0.0055118			47.99	-1.10194	-0.972571
48.19	0.00529914	0.00409766			48.19	-1.10221	-0.973985
48.39	0.00501311	0.00541161			48.39	-1.10249	-0.972671
48.59	0.00481023	0.00513198			48.59	-1.1027	-0.972951
48.79	0.00537781	0.00469413			48.79	-1.10213	-0.973389
48.99	0.00134869	0.00631394			48.99	-1.10616	-0.971769
49.19	0.00608157	0.00473743			49.19	-1.10143	-0.973346
49.39	0.00400031	0.00694527			49.39	-1.10351	-0.971138
49.59	0.00478357	0.00391315			49.59	-1.10272	-0.97417
49.79	0.00769517	0.00329125			49.79	-1.09981	-0.974792
49.99	0.00531786	0.00362137			49.99	-1.10219	-0.974462
50.19	0.0074117	0.00601646			50.19	-1.1001	-0.972066
50.39	0.00441899	0.00541458			50.39	-1.10309	-0.972668
50.59	0.00559094	0.00803983			50.59	-1.10192	-0.970043
50.79	0.00235017	0.00774181			50.79	-1.10516	-0.970341
50.99	0.00411326	0.00559623			50.99	-1.10339	-0.972487
51.19	0.00394187	0.00862917			51.19	-1.10357	-0.969454
51.4	0.00509005	0.00433277			51.4	-1.10242	-0.97375
51.59	0.00760072	0.00268871			51.59	-1.09991	-0.975394
51.79	0.00660925	0.00590118			51.79	-1.1009	-0.972182
51.99	0.00755805	0.00452067			51.99	-1.09995	-0.973562
52.19	0.00310352	0.00350686			52.19	-1.1044	-0.974576
52.39	0.00409325	0.00425545			52.39	-1.10341	-0.973827
52.59	0.00262854	0.00431398			52.59	-1.10488	-0.973769
52.79	0.00477159	0.00252218			52.79	-1.10274	-0.975561
52.99	0.00956001	0.00827713			52.99	-1.09795	-0.969806
53.19	0.00971126	0.00751404			53.19	-1.0978	-0.970569
53.39	0.00240934	0.0051788			53.39	-1.1051	-0.972904
53.59	0.00557264	0.00421082			53.59	-1.10193	-0.973872
53.79	0.00522533	0.00523021			53.79	-1.10228	-0.972853
53.99	0.0039918	0.00510763			53.99	-1.10352	-0.972975
54.19	0.00883384	0.00267396			54.19	-1.09867	-0.975409
54.4	0.0057756	0.00278134			54.4	-1.10173	-0.975302
54.59	0.00663276	0.00403122			54.59	-1.10087	-0.974052
54.79	0.0101178	0.00920726			54.79	-1.09739	-0.968876
54.99	0.00491329	0.00707695			54.99	-1.10259	-0.971006
55.19	0.00652874	0.0045226			55.19	-1.10098	-0.97356
55.39	0.00610449	0.00493205			55.39	-1.1014	-0.973151
55.59	0.0068598	0.00502503			55.59	-1.10065	-0.973058
55.79	0.00563081	0.00606689			55.79	-1.10188	-0.972016
55.99	0.00820298	0.00381822			55.99	-1.0993	-0.974265
56.19	0.00438353	0.00879747			56.19	-1.10312	-0.969285
56.39	0.00648786	0.00826093			56.39	-1.10102	-0.969822
56.59	0.00834402	0.00191146			56.59	-1.09916	-0.976171
56.79	0.00771999	0.00466669			56.79	-1.09979	-0.973416
56.99	0.00482129	0.00694501			56.99	-1.10269	-0.971138
57.19	0.0058623	0.00688103			57.19	-1.10164	-0.971202
57.39	0.00953402	0.00280863			57.39	-1.09797	-0.975274
57.59	0.00761199	0.00717712			57.59	-1.0999	-0.970906
57.79	0.00714573	0.00532331			57.79	-1.10036	-0.97276
57.99	0.00673935	0.00692859			57.99	-1.10077	-0.971154
58.19	0.00495797	0.00815006			58.19	-1.10255	-0.969933
58.39	0.00649813	0.00455715			58.39	-1.10101	-0.973526
58.59	0.00910251	0.00623516			58.59	-1.0984	-0.971848
58.79	0.00557279	0.00467901			58.79	-1.10193	-0.973404
58.99	0.00875023	0.00547403			58.99	-1.09876	-0.972609
59.19	0.00700144	0.00916284			59.19	-1.10051	-0.96892
59.39	0.00191198	0.0056247			59.39	-1.1056	-0.972458
59.59	0.00500704	0.00577941			59.59	-1.1025	-0.972304
59.79	0.00250722	0.00596623			59.79	-1.105	-0.972117
59.99	0.00488924	0.00284893			59.99	-1.10262	-0.975234
60.19	0.00976651	0.00548161			60.19	-1.09774	-0.972601
60.39	0.00941555	0.00818231			60.39	-1.09809	-0.969901
60.59	0.00676516	0.00478062			60.59	-1.10074	-0.973302
60.79	0.00529861	0.00596363			60.79	-1.10221	-0.972119
60.99	0.00481101	0.00896973			60.99	-1.1027	-0.969113
61.19	0.00653644	0.00671773			61.19	-1.10097	-0.971365
61.39	0.00418967	0.00714189			61.39	-1.10332	-0.970941
61.59	0.00584074	0.00846621			61.59	-1.10167	-0.969617
61.79	0.00720926	0.00720435			61.79	-1.1003	-0.970879
61.99	0.00621273	0.00693792			61.99	-1.10129	-0.971145
62.19	0.00703654	0.0062823			62.19	-1.10047	-0.971801
62.39	0.00926395	0.00295855			62.39	-1.09824	-0.975124
62.59	0.0065319	0.00729144			62.59	-1.10098	-0.970792
62.79	0.00360308	0.00748407			62.79	-1.1039	-0.970599
62.99	0.006217	0.00498583			62.99	-1.10129	-0.973097
63.19	0.0107108	0.00707313			63.19	-1.0968	-0.97101
63.39	0.00660112	0.00844719			63.39	-1.10091	-0.969636
63.59	0.0103457	0.00606823			63.59	-1.09716	-0.972015
63.79	0.00619328	0.00750886			63.79	-1.10131	-0.970574
63.99	0.0109138	0.00688197			63.99	-1.09659	-0.971201
64.19	0.00429231	0.00340528			64.19	-1.10321	-0.974678
64.39	0.0117853	0.00448135			64.39	-1.09572	-0.973602
64.59	0.00686165	0.00701289			64.59	-1.10065	-0.97107
64.79	0.00447036	0.00917184			64.79	-1.10304	-0.968911
64.99	0.0060806	0.00826842			64.99	-1.10143	-0.969815
65.19	0.00770623	0.00345206			65.19	-1.0998	-0.974631
65.39	0.00500123	0.004456			65.39	-1.10251	-0.973627
65.6	0.00594506	0.00580634			65.6	-1.10156	-0.972277
65.79	0.00875336	0.00778087			65.79	-1.09875	-0.970302
65.99	0.00433532	0.00620117			65.99	-1.10317	-0.971882
66.19	0.00971914	0.00714612			66.19	-1.09779	-0.970937
66.39	0.0103411	0.00462926			66.39	-1.09717	-0.973454
66.59	0.00824971	0.00415844			66.59	-1.09926	-0.973925
66.8	0.00605652	0.00677588			66.8	-1.10145	-0.971307
66.99	0.00483458	0.0068209			66.99	-1.10267	-0.971262
67.19	0.00569706	0.00644526			67.19	-1.10181	-0.971638
67.39	0.00574942	0.00269619			67.39	-1.10176	-0.975387
67.59	0.00430191	0.00456361			67.59	-1.10321	-0.973519
67.79	0.00700461	0.00834502			67.79	-1.1005	-0.969738
68	0.00455661	0.00711785			68	-1.10295	-0.970965
68.19	0.00520707	0.00785283			68.19	-1.1023	-0.97023
68.4	0.00955945	0.00429781			68.4	-1.09795	-0.973785
68.6	0.00752724	0.00951263			68.6	-1.09998	-0.96857
68.8	0.00690258	0.00907739			68.8	-1.1006	-0.969006
69	0.00942457	0.00966986			69	-1.09808	-0.968413
69.19	0.00540448	0.00728938			69.19	-1.1021	-0.970794
69.4	0.0075791	0.00530053			69.4	-1.09993	-0.972782
69.6	0.00543129	0.00691003			69.6	-1.10208	-0.971173
69.8	0.00853527	0.00784923			69.8	-1.09897	-0.970234
70	0.00824615	0.00583267			70	-1.09926	-0.97225
70.19	0.006859	0.0110986			70.19	-1.10065	-0.966984
70.4	0.00494638	0.00487211			70.4	-1.10256	-0.973211
70.6	0.00438874	0.00809119			70.6	-1.10312	-0.969992
70.8	0.00648345	0.00778503			70.8	-1.10102	-0.970298
71	0.00636425	0.00732355			71	-1.10114	-0.970759
71.19	0.00977989	0.00720271			71.19	-1.09773	-0.97088
71.4	0.00580493	0.00998032			71.4	-1.1017	-0.968103
71.6	0.00602607	0.00709848			71.6	-1.10148	-0.970984
71.8	0.00905279	0.00509386			71.8	-1.09845	-0.972989
72	0.00379317	0.00646643			72	-1.10371	-0.971617
72.19	0.00846961	0.00740979			72.19	-1.09904	-0.970673
72.39	0.0101029	0.00558347			72.39	-1.0974	-0.972499
72.6	0.00717164	0.00696406			72.6	-1.10034	-0.971119
72.8	0.00772363	0.00314208			72.8	-1.09978	-0.974941
73	0.00826838	0.00937035			73	-1.09924	-0.968713
73.19	0.00732303	0.00549541			73.19	-1.10018	-0.972588
73.4	0.0104261	0.00656225			73.4	-1.09708	-0.971521
73.59	0.00516111	0.00856606			73.59	-1.10235	-0.969517
73.79	0.00659271	0.00660711			73.79	-1.10091	-0.971476
74	0.00865198	0.00747583			74	-1.09886	-0.970607
74.19	0.00802426	0.00472409			74.19	-1.09948	-0.973359
74.4	0.00617653	0.00557536			74.4	-1.10133	-0.972508
74.59	0.00740685	0.00471519			74.59	-1.1001	-0.973368
74.79	0.00863851	0.00826464			74.79	-1.09887	-0.969818
75	0.00773936	0.00843317			75	-1.09977	-0.96965
75.19	0.0032504	0.00549561			75.19	-1.10426	-0.972587
75.4	0.00709956	0.00911762			75.4	-1.10041	-0.968965
75.6	0.00738229	0.00403339			75.6	-1.10012	-0.97405
75.8	0.00905778	0.00768947			75.8	-1.09845	-0.970393
76	0.00460627	0.00565793			76	-1.1029	-0.972425
76.19	0.00660608	0.00901074			76.19	-1.1009	-0.969072
76.4	0.00644398	0.00965854			76.4	-1.10106	-0.968424
76.6	0.0113248	0.00487342			76.6	-1.09618	-0.97321
76.8	0.00386882	0.00444393			76.8	-1.10364	-0.973639
77	0.00659625	0.00648364			77	-1.10091	-0.971599
77.19	0.00801046	0.0082887			77.19	-1.0995	-0.969794
77.4	0.00776967	0.00764818			77.4	-1.09974	-0.970435
77.59	0.00604969	0.00581818			77.59	-1.10146	-0.972265
77.79	0.00691301	0.00573136			77.79	-1.10059	-0.972352
78	0.00687312	0.00434965			78	-1.10063	-0.973733
78.19	0.00446599	0.00384175			78.19	-1.10304	-0.974241
78.4	0.00796413	0.00474995			78.4	-1.09954	-0.973333
78.59	0.00604364	0.00653048			78.59	-1.10146	-0.971552
78.79	0.00818855	0.0059272			78.79	-1.09932	-0.972156
79	0.00700083	0.00673069			79	-1.10051	-0.971352
79.19	0.0065843	0.00786033			79.19	-1.10092	-0.970223
79.39	0.00785957	0.00451715			79.39	-1.09965	-0.973566
79.6	0.00871964	0.0106201			79.6	-1.09879	-0.967463
79.8	0.00521356	0.00400513			79.8	-1.10229	-0.974078
80	0.00883449	0.00610487			80	-1.09867	-0.971978
80.19	0.00827826	0.00626816			80.19	-1.09923	-0.971815
80.39	0.0107718	0.00745521			80.39	-1.09674	-0.970628
80.6	0.00688413	0.0084925			80.6	-1.10062	-0.96959
80.79	0.00734843	0.00433844			80.79	-1.10016	-0.973745
81	0.00745602	0.00898507			81	-1.10005	-0.969098
81.19	0.00671229	0.00713318			81.19	-1.10079	-0.97095
81.4	0.00882244	0.0102998			81.4	-1.09868	-0.967783
81.59	0.0105862	0.00625016			81.59	-1.09692	-0.971833
81.79	0.00523415	0.00499256			81.79	-1.10227	-0.97309
82	0.00918691	0.00801172			82	-1.09832	-0.970071
82.19	0.00715955	0.00507079			82.19	-1.10035	-0.973012
82.4	0.00667752	0.00709216			82.4	-1.10083	-0.970991
82.59	0.00887659	0.00888106			82.59	-1.09863	-0.969202
82.79	0.00754676	0.00754469			82.79	-1.09996	-0.970538
83	0.00484499	0.00718097			83	-1.10266	-0.970902
83.19	0.00899791	0.00628615			83.19	-1.09851	-0.971797
83.39	0.00579561	0.00352993			83.39	-1.10171	-0.974553
83.6	0.00799788	0.00739984			83.6	-1.09951	-0.970683
83.8	0.00520289	0.00814767			83.8	-1.1023	-0.969935
84	0.00868618	0.00864176			84	-1.09882	-0.969441
84.19	0.011016	0.00569938			84.19	-1.09649	-0.972384
84.4	0.00856911	0.0104584			84.4	-1.09894	-0.967625
84.6	0.00668536	0.00815994			84.6	-1.10082	-0.969923
84.79	0.00912743	0.00685104			84.79	-1.09838	-0.971232
84.99	0.0100109	0.00684317			84.99	-1.0975	-0.97124
85.19	0.00636818	0.00575534			85.19	-1.10114	-0.972328
85.4	0.00728294	0.0113594			85.4	-1.10022	-0.966724
85.59	0.00808058	0.00718578			85.59	-1.09943	-0.970897
85.79	0.00765027	0.00775911			85.79	-1.09986	-0.970324
86	0.00476742	0.00695773			86	-1.10274	-0.971125
86.19	0.00524028	0.00680198			86.19	-1.10227	-0.971281
86.4	0.00953423	0.00611675			86.4	-1.09797	-0.971966
86.59	0.00505047	0.00604676			86.59	-1.10246	-0.972036
86.79	0.0104413	0.00622991			86.79	-1.09707	-0.971853
87	0.00533959	0.00574871			87	-1.10217	-0.972334
87.19	0.00657331	0.008103			87.19	-1.10093	-0.96998
87.39	0.00901797	0.00531475			87.39	-1.09849	-0.972768
87.6	0.00894138	0.00422152			87.6	-1.09857	-0.973861
87.79	0.00992103	0.00467827			87.79	-1.09759	-0.973405
88	0.0123071	0.00755638			88	-1.0952	-0.970527
88.19	0.00943818	0.0072518			88.19	-1.09807	-0.970831
88.4	0.0122832	0.00732579			88.4	-1.09522	-0.970757
88.6	0.0114614	0.00759884			88.6	-1.09605	-0.970484
88.79	0.00738028	0.00913174			88.79	-1.10013	-0.968951
88.99	0.00741226	0.00622491			88.99	-1.10009	-0.971858
89.19	0.00811755	0.00485496			89.19	-1.09939	-0.973228
89.39	0.0102684	0.00613197			89.39	-1.09724	-0.971951
89.6	0.00733875	0.00527454			89.6	-1.10017	-0.972808
89.79	0.00628231	0.00562968			89.79	-1.10122	-0.972453
90	0.0074481	0.00894163			90	-1.10006	-0.969141
90.19	0.00765842	0.0058339			90.19	-1.09985	-0.972249
90.39	0.00376342	0.00410423			90.39	-1.10374	-0.973979
90.59	0.00709199	0.0120738			90.59	-1.10042	-0.966009
90.79	0.0102191	0.00881513			90.79	-1.09729	-0.969268
90.99	0.00815559	0.00528696			90.99	-1.09935	-0.972796
91.19	0.0113097	0.00556395			91.19	-1.0962	-0.972519
91.39	0.00720886	0.00780879			91.39	-1.1003	-0.970274
91.6	0.00599133	0.00807546			91.6	-1.10152	-0.970007
91.79	0.00793001	0.003405			91.79	-1.09958	-0.974678
91.99	0.00608623	0.00987625			91.99	-1.10142	-0.968207
92.19	0.00723133	0.00607023			92.19	-1.10028	-0.972013
92.4	0.00874601	0.004267			92.4	-1.09876	-0.973816
92.59	0.00469521	0.00478418			92.59	-1.10281	-0.973299
92.79	0.0106186	0.0083745			92.79	-1.09689	-0.969708
92.99	0.0094422	0.00538446			92.99	-1.09807	-0.972698
93.19	0.00643342	0.00583571			93.19	-1.10107	-0.972247
93.39	0.0109382	0.00712239			93.39	-1.09657	-0.970961
93.59	0.00948836	0.00566378			93.59	-1.09802	-0.972419
93.79	0.00787201	0.00817528			93.79	-1.09964	-0.969908
94	0.00487192	0.00629749			94	-1.10264	-0.971785
94.19	0.00960605	0.00514209			94.19	-1.0979	-0.972941
94.39	0.00938791	0.00591925			94.39	-1.09812	-0.972164
94.59	0.0110611	0.00961905			94.59	-1.09645	-0.968464
94.79	0.00869368	0.00950215			94.79	-1.09881	-0.968581
94.99	0.00766506	0.00314864			94.99	-1.09984	-0.974934
95.19	0.00528295	0.0086437			95.19	-1.10222	-0.969439
95.39	0.00572819	0.00581623			95.39	-1.10178	-0.972267
95.59	0.00546403	0.0071775			95.59	-1.10204	-0.970905
95.79	0.00902561	0.00641264			95.79	-1.09848	-0.97167
95.99	0.00577223	0.00597149			95.99	-1.10173	-0.972111
96.19	0.00403539	0.00887573			96.19	-1.10347	-0.969207
96.39	0.0051899	0.00713068			96.39	-1.10232	-0.970952
96.59	0.00656298	0.00552493			96.59	-1.10094	-0.972558
96.79	0.010714	0.00667492			96.79	-1.09679	-0.971408
96.99	0.00872398	0.0101366			96.99	-1.09878	-0.967946
97.19	0.00627772	0.00995619			97.19	-1.10123	-0.968127
97.4	0.00917439	0.00528338			97.4	-1.09833	-0.9728
97.6	0.00557522	0.00735681			97.6	-1.10193	-0.970726
97.8	0.0107451	0.00610518			97.8	-1.09676	-0.971978
98	0.0113607	0.00686976			98	-1.09615	-0.971213
98.19	0.00605199	0.0115643			98.19	-1.10146	-0.966519
98.4	0.00803731	0.0056078			98.4	-1.09947	-0.972475
98.6	0.0095393	0.00908959			98.6	-1.09797	-0.968993
98.8	0.00932935	0.00816276			98.8	-1.09818	-0.96992
99	0.00918081	0.00556969			99	-1.09833	-0.972513
99.19	0.0103732	0.00866384			99.19	-1.09713	-0.969419
99.4	0.00924351	0.00578106			99.4	-1.09826	-0.972302
99.6	0.00596709	0.00802182			99.6	-1.10154	-0.970061
99.8	0.0133312	0.00527863			99.8	-1.09418	-0.972804
100	0.00584681	0.00968491			100	-1.10166	-0.968398
100.19	0.0083638	0.00782271			100.19	-1.09914	-0.97026
100.39	0.00527224	0.00757179			100.39	-1.10223	-0.970511
100.59	0.00773567	0.00681918			100.59	-1.09977	-0.971264
100.8	0.00841473	0.00578654			100.8	-1.09909	-0.972296
101	0.00887607	0.00832041			101	-1.09863	-0.969763
101.19	0.00847788	0.00922642			101.19	-1.09903	-0.968857
101.4	0.007153	0.0070229			101.4	-1.10035	-0.97106
101.59	0.00581057	0.00467988			101.59	-1.1017	-0.973403
101.8	0.00805958	0.00558082			101.8	-1.09945	-0.972502
101.99	0.00915651	0.00334783			101.99	-1.09835	-0.974735
102.19	0.00863049	0.00756398			102.19	-1.09888	-0.970519
102.4	0.00498327	0.00428605			102.4	-1.10252	-0.973797
102.6	0.00517701	0.00592502			102.6	-1.10233	-0.972158
102.8	0.00971329	0.00759614			102.8	-1.09779	-0.970487
102.99	0.00783445	0.00570309			102.99	-1.09967	-0.97238
103.19	0.0104966	0.006582			103.19	-1.09701	-0.971501
103.4	0.0135925	0.0108518			103.4	-1.09391	-0.967231
103.6	0.00887862	0.00740532			103.6	-1.09863	-0.970678
103.8	0.0119463	0.00755961			103.8	-1.09556	-0.970523
104	0.00831561	0.010077			104	-1.09919	-0.968006
104.19	0.0108585	0.00550589			104.19	-1.09665	-0.972577
104.39	0.00821673	0.00962038			104.39	-1.09929	-0.968463
104.59	0.00767415	0.00696895			104.59	-1.09983	-0.971114
104.8	0.00790723	0.00597779			104.8	-1.0996	-0.972105
105	0.00766535	0.00498097			105	-1.09984	-0.973102
105.19	0.00698182	0.0067828			105.19	-1.10053	-0.9713
105.39	0.0117135	0.00586771			105.39	-1.09579	-0.972215
105.59	0.00776247	0.00710892			105.59	-1.09974	-0.970974
105.8	0.00635314	0.00602866			105.8	-1.10115	-0.972054
105.99	0.00846476	0.00504392			105.99	-1.09904	-0.973039
106.19	0.00922391	0.00720036			106.19	-1.09828	-0.970883
106.4	0.00696633	0.00542577			106.4	-1.10054	-0.972657
106.6	0.00688365	0.011879			106.6	-1.10062	-0.966204
106.8	0.00470253	0.0037677			106.8	-1.1028	-0.974315
106.99	0.00741106	0.00809831			106.99	-1.1001	-0.969985
107.19	0.0091164	0.00583765			107.19	-1.09839	-0.972245
107.4	0.00921613	0.00890078			107.4	-1.09829	-0.969182
107.59	0.0105387	0.00746893			107.59	-1.09697	-0.970614
107.8	0.00761947	0.00449374			107.8	-1.09989	-0.973589
108	0.00902917	0.00966265			108	-1.09848	-0.96842
108.19	0.00981386	0.00636832			108.19	-1.09769	-0.971715
108.39	0.00935364	0.0059029			108.39	-1.09815	-0.97218
108.59	0.00808971	0.00559292			108.59	-1.09942	-0.97249
108.8	0.00699039	0.00267266			108.8	-1.10052	-0.97541
108.99	0.00899385	0.00667789			108.99	-1.09851	-0.971405
109.19	0.00894274	0.0108992			109.19	-1.09856	-0.967184
109.4	0.00932687	0.00651409			109.4	-1.09818	-0.971569
109.6	0.0129812	0.00830197			109.6	-1.09453	-0.969781
109.8	0.0112395	0.00553382			109.8	-1.09627	-0.972549
109.99	0.0082575	0.00599702			109.99	-1.09925	-0.972086
110.19	0.00447809	0.00606947			110.19	-1.10303	-0.972013
110.4	0.00672932	0.00790615			110.4	-1.10078	-0.970177
110.6	0.00815841	0.00633879			110.6	-1.09935	-0.971744
110.79	0.0116596	0.00657835			110.79	-1.09585	-0.971505
110.99	0.00945863	0.00919853			110.99	-1.09805	-0.968884
111.19	0.00768107	0.00730268			111.19	-1.09983	-0.97078
111.4	0.00769933	0.00528391			111.4	-1.09981	-0.972799
111.59	0.00671846	0.00375124			111.59	-1.10079	-0.974332
111.79	0.00463384	0.00615074			111.79	-1.10287	-0.971932
112	0.00796637	0.00894304			112	-1.09954	-0.96914
112.19	0.00953653	0.00653782			112.19	-1.09797	-0.971545
112.39	0.0130888	0.00756362			112.39	-1.09442	-0.970519
112.59	0.0120949	0.00780762			112.59	-1.09541	-0.970275
112.8	0.00652246	0.00775494			112.8	-1.10098	-0.970328
112.99	0.0072979	0.00695622			112.99	-1.10021	-0.971127
113.19	0.0090352	0.00568501			113.19	-1.09847	-0.972398
113.4	0.00627599	0.00686015			113.4	-1.10123	-0.971223
113.6	0.00778781	0.0102878			113.6	-1.09972	-0.967795
113.8	0.00855615	0.00914597			113.8	-1.09895	-0.968937
113.99	0.0084231	0.00794654			113.99	-1.09908	-0.970136
114.19	0.00799222	0.00660175			114.19	-1.09952	-0.971481
114.4	0.011386	0.00763195			114.4	-1.09612	-0.970451
114.59	0.00821226	0.00856777			114.59	-1.09929	-0.969515
114.8	0.00956601	0.00958396			114.8	-1.09794	-0.968499
114.99	0.00851254	0.00688837			114.99	-1.09899	-0.971195
115.19	0.00768242	0.00675358			115.19	-1.09982	-0.971329
115.4	0.00991555	0.00864151			115.4	-1.09759	-0.969441
115.59	0.00799352	0.00671823			115.59	-1.09951	-0.971365
115.79	0.00293883	0.00683912			115.79	-1.10457	-0.971244
115.99	0.00876518	0.0107688			115.99	-1.09874	-0.967314
116.19	0.00816863	0.0105907			116.19	-1.09934	-0.967492
116.4	0.00741175	0.00591834			116.4	-1.1001	-0.972165
116.59	0.00817902	0.00759867			116.59	-1.09933	-0.970484
116.8	0.0056154	0.00505334			116.8	-1.10189	-0.97303
116.99	0.0100607	0.00650476			116.99	-1.09745	-0.971578
117.19	0.00668473	0.007439			117.19	-1.10082	-0.970644
117.39	0.00529853	0.0105594			117.39	-1.10221	-0.967524
117.59	0.0104046	0.00457343			117.59	-1.0971	-0.97351
117.8	0.00864937	0.00955269			117.8	-1.09886	-0.96853
117.99	0.00896868	0.00864319			117.99	-1.09854	-0.96944
118.19	0.013376	0.00885359			118.19	-1.09413	-0.969229
118.4	0.00979523	0.00699406			118.4	-1.09771	-0.971089
118.59	0.00921978	0.010218			118.59	-1.09829	-0.967865
118.79	0.0114547	0.00902737			118.79	-1.09605	-0.969056
118.99	0.0100718	0.00620559			118.99	-1.09744	-0.971877
119.19	0.00569752	0.00872239			119.19	-1.10181	-0.969361
119.4	0.00988076	0.0100194			119.4	-1.09763	-0.968064
119.59	0.00874849	0.0043516			119.59	-1.09876	-0.973731
119.79	0.0102039	0.00830469			119.79	-1.0973	-0.969778
119.99	0.00420797	0.00767094			119.99	-1.1033	-0.970412
120.19	0.0073139	0.00683892			120.19	-1.10019	-0.971244
120.39	0.00949842	0.00785013			120.39	-1.09801	-0.970233
120.59	0.0105436	0.00481272			120.59	-1.09696	-0.97327
120.8	0.00778047	0.00738681			120.8	-1.09973	-0.970696
120.99	0.00928701	0.00689102			120.99	-1.09822	-0.971192
121.19	0.00764729	0.00845763			121.19	-1.09986	-0.969625
121.39	0.00613341	0.00659741			121.39	-1.10137	-0.971486
121.59	0.0127752	0.00774922			121.59	-1.09473	-0.970334
121.79	0.00881291	0.00476073			121.79	-1.09869	-0.973322
121.99	0.00980701	0.00976271			121.99	-1.0977	-0.96832
122.19	0.0107884	0.00525322			122.19	-1.09672	-0.97283
122.39	0.0135218	0.00806803			122.39	-1.09399	-0.970015
122.59	0.00719345	0.00704061			122.59	-1.10031	-0.971042
122.79	0.00658102	0.00684801			122.79	-1.10093	-0.971235
122.99	0.00963917	0.00401666			122.99	-1.09787	-0.974066
123.19	0.00948447	0.00931052			123.19	-1.09802	-0.968772
123.4	0.00869575	0.00805164			123.4	-1.09881	-0.970031
123.59	0.0107264	0.0072017			123.59	-1.09678	-0.970881
123.79	0.00735993	0.0037689			123.79	-1.10015	-0.974314
123.99	0.00896548	0.00633219			123.99	-1.09854	-0.971751
124.19	0.0078428	0.00521498			124.19	-1.09966	-0.972868
124.39	0.0111575	0.00415859			124.39	-1.09635	-0.973924
124.59	0.00848484	0.00618852			124.59	-1.09902	-0.971894
124.79	0.00797264	0.00738128			124.79	-1.09953	-0.970702
124.99	0.00999285	0.00859209			124.99	-1.09751	-0.969491
125.19	0.0110711	0.00843664			125.19	-1.09644	-0.969646
125.39	0.00875976	0.00711337			125.39	-1.09875	-0.97097
125.59	0.0092469	0.00995953			125.59	-1.09826	-0.968123
125.79	0.00745139	0.00568303			125.79	-1.10006	-0.9724
125.99	0.0111465	0.00600953			125.99	-1.09636	-0.972073
126.19	0.008894	0.00553991			126.19	-1.09861	-0.972543
126.39	0.011636	0.00770577			126.39	-1.09587	-0.970377
126.6	0.0122781	0.00186744			126.6	-1.09523	-0.976216
126.8	0.0070385	0.00835555			126.8	-1.10047	-0.969727
127	0.00872632	0.00426812			127	-1.09878	-0.973815
127.19	0.00980548	0.00699277			127.19	-1.0977	-0.97109
127.39	0.00761492	0.00765781			127.39	-1.09989	-0.970425
127.6	0.0115507	0.00775597			127.6	-1.09596	-0.970327
127.8	0.00696221	0.00776277			127.8	-1.10055	-0.97032
128	0.0103013	0.00842471			128	-1.09721	-0.969658
128.19	0.00667704	0.00490971			128.19	-1.10083	-0.973173
128.39	0.0107104	0.00708998			128.39	-1.0968	-0.970993
128.6	0.00926057	0.00798059			128.6	-1.09825	-0.970102
128.79	0.00957691	0.00879035			128.79	-1.09793	-0.969293
128.99	0.0107496	0.00633516			128.99	-1.09676	-0.971748
129.19	0.00958175	0.0085884			129.19	-1.09793	-0.969495
129.39	0.0094686	0.00618926			129.39	-1.09804	-0.971894
129.6	0.00636149	0.0108523			129.6	-1.10115	-0.967231
129.79	0.00827446	0.00869211			129.79	-1.09923	-0.969391
129.99	0.00912395	0.00670346			129.99	-1.09838	-0.971379
130.19	0.00852524	0.00600465			130.19	-1.09898	-0.972078
130.39	0.00739162	0.00722355			130.39	-1.10012	-0.970859
130.6	0.00324433	0.0038084			130.6	-1.10426	-0.974275
130.79	0.00858865	0.00759129			130.79	-1.09892	-0.970492
130.99	0.00802207	0.00839541			130.99	-1.09949	-0.969688
131.19	0.00895364	0.00483945			131.19	-1.09855	-0.973244
131.39	0.00946343	0.00730297			131.39	-1.09804	-0.97078
131.6	0.0056377	0.00981574			131.6	-1.10187	-0.968267
131.79	0.005781	0.00888039			131.79	-1.10173	-0.969203
131.99	0.0116056	0.00670793			131.99	-1.0959	-0.971375
132.19	0.00876161	0.00790703			132.19	-1.09875	-0.970176
132.39	0.0100588	0.00545852			132.39	-1.09745	-0.972624
132.6	0.0108629	0.00739101			132.6	-1.09664	-0.970692
132.79	0.0073135	0.0085688			132.79	-1.10019	-0.969514
132.99	0.00998179	0.00691769			132.99	-1.09753	-0.971165
133.19	0.00930532	0.00716139			133.19	-1.0982	-0.970922
133.39	0.00803323	0.00928471			133.39	-1.09947	-0.968798
133.6	0.0104408	0.00629824			133.6	-1.09707	-0.971785
133.79	0.00911106	0.00794526			133.79	-1.0984	-0.970138
133.99	0.0098595	0.00715084			133.99	-1.09765	-0.970932
134.19	0.00884515	0.00855981			134.19	-1.09866	-0.969523
134.39	0.0102144	0.00460014			134.39	-1.09729	-0.973483
134.6	0.0079802	0.00849791			134.6	-1.09953	-0.969585
134.79	0.00961558	0.00693841			134.79	-1.09789	-0.971145
134.99	0.0105569	0.00801949			134.99	-1.09695	-0.970063
135.19	0.00826825	0.00369833			135.19	-1.09924	-0.974385
135.39	0.0088402	0.00609255			135.39	-1.09867	-0.97199
135.6	0.00937269	0.00613369			135.6	-1.09813	-0.971949
135.79	0.00820756	0.00891382			135.79	-1.0993	-0.969169
135.99	0.00847937	0.0053316			135.99	-1.09903	-0.972751
136.19	0.0116439	0.00810812			136.19	-1.09586	-0.969975
136.39	0.0105802	0.00890601			136.39	-1.09693	-0.969177
136.6	0.0107893	0.0116051			136.6	-1.09672	-0.966478
136.79	0.0112756	0.0078721			136.79	-1.09623	-0.970211
136.99	0.00781499	0.0073906			136.99	-1.09969	-0.970692
137.19	0.00800059	0.00321553			137.19	-1.09951	-0.974867
137.39	0.00919467	0.00642556			137.39	-1.09831	-0.971657
137.59	0.0062437	0.00846749			137.59	-1.10126	-0.969615
137.79	0.0115275	0.00648573			137.79	-1.09598	-0.971597
137.99	0.00760776	0.00828437			137.99	-1.0999	-0.969799
138.19	0.0115464	0.0087565			138.19	-1.09596	-0.969326
138.39	0.00935098	0.00670842			138.39	-1.09816	-0.971375
138.59	0.0101229	0.00477518			138.59	-1.09738	-0.973308
138.79	0.00896121	0.00404416			138.79	-1.09855	-0.974039
138.99	0.0118233	0.00995303			138.99	-1.09568	-0.96813
139.19	0.008196	0.00682943			139.19	-1.09931	-0.971254
139.39	0.00635	0.00443067			139.39	-1.10116	-0.973652
139.6	0.00929087	0.0059135			139.6	-1.09822	-0.972169
139.79	0.00848528	0.00791727			139.79	-1.09902	-0.970166
139.99	0.00823877	0.00913662			139.99	-1.09927	-0.968946
140.19	0.00852471	0.00729062			140.19	-1.09898	-0.970792
140.39	0.00598482	0.00570938			140.39	-1.10152	-0.972374
140.6	0.00818244	0.0085915			140.6	-1.09932	-0.969491
140.79	0.00969941	0.00511908			140.79	-1.09781	-0.972964
140.99	0.00947537	0.00462173			140.99	-1.09803	-0.973461
141.19	0.0103207	0.00710676			141.19	-1.09719	-0.970976
141.39	0.0110484	0.00918787			141.39	-1.09646	-0.968895
141.59	0.012237	0.00917468			141.59	-1.09527	-0.968908
141.79	0.0105244	0.00848997			141.79	-1.09698	-0.969593
141.99	0.0109037	0.0124476			141.99	-1.0966	-0.965635
142.19	0.00799148	0.0062776			142.19	-1.09952	-0.971805
142.39	0.00471387	0.00819343			142.39	-1.10279	-0.96989
142.59	0.0074049	0.00581368			142.59	-1.1001	-0.972269
142.79	0.0090302	0.00857022			142.79	-1.09848	-0.969513
142.99	0.00907147	0.00876088			142.99	-1.09844	-0.969322
143.19	0.00880766	0.00855742			143.19	-1.0987	-0.969526
143.39	0.0125218	0.00648604			143.39	-1.09499	-0.971597
143.6	0.0138343	0.00680258			143.6	-1.09367	-0.97128
143.79	0.0110852	0.00684264			143.79	-1.09642	-0.97124
143.99	0.00632462	0.00934124			143.99	-1.10118	-0.968742
144.19	0.012482	0.00695318			144.19	-1.09503	-0.97113
144.39	0.0103147	0.0082147			144.39	-1.09719	-0.969868
144.59	0.0135367	0.00630807			144.59	-1.09397	-0.971775
144.79	0.00987204	0.00672893			144.79	-1.09764	-0.971354
144.99	0.00893265	0.00652409			144.99	-1.09857	-0.971559
145.19	0.0113848	0.00496658			145.19	-1.09612	-0.973116
145.39	0.0105489	0.00889495			145.39	-1.09696	-0.969188
145.59	0.00935086	0.00705636			145.59	-1.09816	-0.971027
145.79	0.00610821	0.00557163			145.79	-1.1014	-0.972511
145.99	0.00644948	0.00845469			145.99	-1.10106	-0.969628
146.19	0.00726025	0.00526727			146.19	-1.10025	-0.972816
146.39	0.00788562	0.00760417			146.39	-1.09962	-0.970479
146.6	0.0108238	0.00625732			146.6	-1.09668	-0.971826
146.79	0.00901387	0.00680656			146.79	-1.09849	-0.971276
146.99	0.0112262	0.00514768			146.99	-1.09628	-0.972935
147.19	0.011112	0.00606555			147.19	-1.0964	-0.972017
147.39	0.0106041	0.00404565			147.39	-1.0969	-0.974037
147.6	0.0112457	0.004032			147.6	-1.09626	-0.974051
147.79	0.0092256	0.0108042			147.79	-1.09828	-0.967279
147.99	0.0059407	0.00498758			147.99	-1.10157	-0.973095
148.19	0.00862261	0.00418892			148.19	-1.09888	-0.973894
148.39	0.00964072	0.00556163			148.39	-1.09787	-0.972521
148.59	0.0102828	0.00868511			148.59	-1.09722	-0.969398
148.79	0.00713539	0.00567837			148.79	-1.10037	-0.972405
148.99	0.0112883	0.00716701			148.99	-1.09622	-0.970916
149.19	0.010485	0.00752925			149.19	-1.09702	-0.970554
149.39	0.00769178	0.00730142			149.39	-1.09982	-0.970782
149.59	0.00608142	0.00548211			149.59	-1.10143	-0.972601
149.79	0.00775434	0.00573024			149.79	-1.09975	-0.972353
149.99	0.00612856	0.00735113			149.99	-1.10138	-0.970732
150.19	0.0108451	0.00991614			150.19	-1.09666	-0.968167
150.39	0.00996443	0.00844091			150.39	-1.09754	-0.969642
150.6	0.0103794	0.00723898			150.6	-1.09713	-0.970844
150.79	0.00807567	0.00737635			150.79	-1.09943	-0.970707
150.99	0.00803025	0.00648841			150.99	-1.09948	-0.971595
151.19	0.0127133	0.00628606			151.19	-1.09479	-0.971797
151.39	0.00886455	0.00909756			151.39	-1.09864	-0.968985
151.6	0.00846695	0.00409873			151.6	-1.09904	-0.973984
151.79	0.00938823	0.00521052			151.79	-1.09812	-0.972872
151.99	0.0102561	0.00470994			151.99	-1.09725	-0.973373
152.19	0.0108245	0.00786268			152.19	-1.09668	-0.97022
152.39	0.00711484	0.00436681			152.39	-1.10039	-0.973716
152.59	0.00925697	0.00587764			152.59	-1.09825	-0.972205
152.79	0.00944283	0.00736373			152.79	-1.09806	-0.970719
152.99	0.0111365	0.00893018			152.99	-1.09637	-0.969153
153.19	0.00634443	0.00676263			153.19	-1.10116	-0.97132
153.39	0.00960817	0.00757248			153.39	-1.0979	-0.97051
153.59	0.00899214	0.00591959			153.59	-1.09852	-0.972163
153.79	0.00959149	0.00888628			153.79	-1.09792	-0.969197
153.99	0.00776704	0.00670926			153.99	-1.09974	-0.971374
154.19	0.0105123	0.00758595			154.19	-1.09699	-0.970497
154.39	0.00730008	0.00814373			154.39	-1.10021	-0.969939
154.59	0.0095808	0.00577648			154.59	-1.09793	-0.972306
154.79	0.00987042	0.00833788			154.79	-1.09764	-0.969745
154.99	0.00837378	0.00762535			154.99	-1.09913	-0.970458
155.19	0.00882367	0.00678951			155.19	-1.09868	-0.971293
155.39	0.008109	0.00531844			155.39	-1.0994	-0.972765
155.6	0.00920421	0.00862994			155.6	-1.0983	-0.969453
155.79	0.00824863	0.0087201			155.79	-1.09926	-0.969363
155.99	0.0120944	0.00759722			155.99	-1.09541	-0.970486
156.19	0.0104189	0.00553175			156.19	-1.09709	-0.972551
156.39	0.00553134	0.00523894			156.39	-1.10198	-0.972844
156.6	0.00965947	0.00720188			156.6	-1.09785	-0.970881
156.79	0.00846935	0.00662862			156.79	-1.09904	-0.971454
156.99	0.00814019	0.00391305			156.99	-1.09937	-0.97417
157.19	0.00605771	0.00769456			157.19	-1.10145	-0.970388
157.39	0.0139583	0.00657169			157.39	-1.09355	-0.971511
157.6	0.0077076	0.00726475			157.6	-1.0998	-0.970818
157.79	0.0114046	0.00795492			157.79	-1.0961	-0.970128
157.99	0.00802597	0.00797481			157.99	-1.09948	-0.970108
158.19	0.0112739	0.00568752			158.19	-1.09623	-0.972395
158.39	0.0079511	0.00928921			158.39	-1.09956	-0.968794
158.6	0.010672	0.00760981			158.6	-1.09684	-0.970473
158.79	0.00883689	0.00672597			158.79	-1.09867	-0.971357
158.99	0.00855683	0.00649397			158.99	-1.09895	-0.971589
159.19	0.0106379	0.00361454			159.19	-1.09687	-0.974468
159.39	0.0123238	0.00887277			159.39	-1.09518	-0.96921
159.59	0.0105875	0.00713079			159.59	-1.09692	-0.970952
159.79	0.00867512	0.00992627			159.79	-1.09883	-0.968157
159.99	0.0106398	0.00984663			159.99	-1.09687	-0.968236
160.19	0.00552732	0.00703001			160.19	-1.10198	-0.971053
160.39	0.00905043	0.00867448			160.39	-1.09846	-0.969408
160.6	0.00654207	0.00813426			160.6	-1.10097	-0.969949
160.79	0.0126108	0.00575711			160.79	-1.0949	-0.972326
160.99	0.00980816	0.0078009			160.99	-1.0977	-0.970282
161.19	0.0101652	0.00766865			161.19	-1.09734	-0.970414
161.39	0.00804046	0.0058721			161.39	-1.09947	-0.972211
161.6	0.00787974	0.00729939			161.6	-1.09963	-0.970784
161.79	0.00942561	0.00981052			161.79	-1.09808	-0.968272
161.99	0.0118712	0.00741611			161.99	-1.09564	-0.970667
162.19	0.0120996	0.00551188			162.19	-1.09541	-0.972571
162.39	0.0113459	0.00890032			162.39	-1.09616	-0.969183
162.59	0.0131163	0.00722096			162.59	-1.09439	-0.970862
162.79	0.00753032	0.00742693			162.79	-1.09998	-0.970656
162.99	0.00951376	0.00749944			162.99	-1.09799	-0.970584
163.19	0.0109719	0.00844515			163.19	-1.09654	-0.969638
163.39	0.00917972	0.00330237			163.39	-1.09833	-0.974781
163.59	0.00918506	0.00978951			163.59	-1.09832	-0.968293
163.79	0.0113284	0.00899851			163.79	-1.09618	-0.969084
163.99	0.00744896	0.00862229			163.99	-1.10006	-0.969461
164.19	0.0144986	0.00821663			164.19	-1.09301	-0.969866
164.39	0.00824381	0.00912162			164.39	-1.09926	-0.968961
164.6	0.00978617	0.00805075			164.6	-1.09772	-0.970032
164.79	0.0126094	0.00482935			164.79	-1.0949	-0.973254
164.99	0.0081282	0.0105753			164.99	-1.09938	-0.967508
165.19	0.0118975	0.00859401			165.19	-1.09561	-0.969489
165.39	0.00787686	0.00922136			165.39	-1.09963	-0.968862
165.6	0.00972647	0.0100983			165.6	-1.09778	-0.967985
165.79	0.0138884	0.00686689			165.79	-1.09362	-0.971216
165.99	0.0122874	0.00987639			165.99	-1.09522	-0.968207
166.19	0.0105743	0.00814595			166.19	-1.09693	-0.969937
166.39	0.00841545	0.00691535			166.39	-1.09909	-0.971168
166.59	0.0132519	0.00725391			166.59	-1.09426	-0.970829
166.79	0.00885251	0.00406513			166.79	-1.09865	-0.974018
166.99	0.0109553	0.00768127			166.99	-1.09655	-0.970402
167.19	0.0120736	0.00726716			167.19	-1.09543	-0.970816
167.39	0.0104949	0.00885389			167.39	-1.09701	-0.969229
167.59	0.00901211	0.0108011			167.59	-1.0985	-0.967282
167.79	0.0113495	0.00789042			167.79	-1.09616	-0.970193
167.99	0.00759888	0.0100273			167.99	-1.09991	-0.968056
168.19	0.00675544	0.00671852			168.19	-1.10075	-0.971364
168.39	0.00970123	0.00764881			168.39	-1.09781	-0.970434
168.6	0.0101784	0.0066422			168.6	-1.09733	-0.971441
168.79	0.00844597	0.00570433			168.79	-1.09906	-0.972379
168.99	0.00688517	0.00867219			168.99	-1.10062	-0.969411
169.19	0.0113082	0.00900855			169.19	-1.0962	-0.969074
169.39	0.0111943	0.00503079			169.39	-1.09631	-0.973052
169.6	0.0112769	0.00850239			169.6	-1.09623	-0.969581
169.79	0.00790432	0.00672394			169.79	-1.0996	-0.971359
169.99	0.00890263	0.00773698			169.99	-1.0986	-0.970346
170.19	0.00856018	0.00876485			170.19	-1.09895	-0.969318
170.39	0.00760205	0.0047444			170.39	-1.09991	-0.973339
170.59	0.0118001	0.00827653			170.59	-1.09571	-0.969806
170.79	0.00957019	0.00920278			170.79	-1.09794	-0.96888
170.99	0.0148088	0.00494412			170.99	-1.0927	-0.973139
171.19	0.00878364	0.00936854			171.19	-1.09872	-0.968714
171.39	0.00739227	0.00819799			171.39	-1.10011	-0.969885
171.59	0.0108514	0.00671452			171.59	-1.09666	-0.971368
171.79	0.0150805	0.00728468			171.79	-1.09243	-0.970798
171.99	0.00556261	0.00780923			171.99	-1.10194	-0.970274
172.19	0.00806333	0.00769286			172.19	-1.09944	-0.97039
172.39	0.0105143	0.00993281			172.39	-1.09699	-0.96815
172.6	0.0102085	0.0088369			172.6	-1.0973	-0.969246
172.79	0.00966197	0.00869383			172.79	-1.09785	-0.969389
172.99	0.0126405	0.00860695			172.99	-1.09487	-0.969476
173.19	0.0109898	0.00614468			173.19	-1.09652	-0.971938
173.39	0.00813305	0.00651192			173.39	-1.09937	-0.971571
173.6	0.0120601	0.00677059			173.6	-1.09545	-0.971312
173.79	0.0095005	0.00941201			173.79	-1.09801	-0.968671
173.99	0.0089332	0.0110162			173.99	-1.09857	-0.967067
174.19	0.00835299	0.0088865			174.19	-1.09915	-0.969196
174.39	0.00814779	0.00983335			174.39	-1.09936	-0.96825
174.6	0.00905974	0.00938311			174.6	-1.09845	-0.9687
174.79	0.0102647	0.00667897			174.79	-1.09724	-0.971404
174.99	0.0104121	0.00995115			174.99	-1.0971	-0.968132
175.19	0.00802972	0.00670167			175.19	-1.09948	-0.971381
175.39	0.00834742	0.00914794			175.39	-1.09916	-0.968935
175.59	0.0105115	0.00798848			175.59	-1.097	-0.970094
175.79	0.00955782	0.00600254			175.79	-1.09795	-0.97208
175.99	0.00718061	0.00971771			175.99	-1.10033	-0.968365
176.19	0.013152	0.00772719			176.19	-1.09436	-0.970356
176.39	0.0106428	0.00971036			176.39	-1.09686	-0.968373
176.59	0.0103356	0.00790095			176.59	-1.09717	-0.970182
176.79	0.0117094	0.01058			176.79	-1.0958	-0.967503
176.99	0.0143183	0.0070669			176.99	-1.09319	-0.971016
177.19	0.0110051	0.00444575			177.19	-1.0965	-0.973637
177.39	0.0125098	0.00644439			177.39	-1.095	-0.971639
177.6	0.0102435	0.00855773			177.6	-1.09726	-0.969525
177.79	0.00982224	0.00554129			177.79	-1.09768	-0.972542
177.99	0.00965651	0.00925052			177.99	-1.09785	-0.968832
178.19	0.00832577	0.00681082			178.19	-1.09918	-0.971272
178.39	0.013215	0.00970653			178.39	-1.09429	-0.968376
178.59	0.0102025	0.00995551			178.59	-1.0973	-0.968127
178.79	0.00927405	0.0072653			178.79	-1.09823	-0.970818
178.99	0.0133358	0.00863646			178.99	-1.09417	-0.969446
179.19	0.00872732	0.00628387			179.19	-1.09878	-0.971799
179.39	0.0117853	0.00499592			179.39	-1.09572	-0.973087
179.59	0.0147499	0.00871778			179.59	-1.09276	-0.969365
179.79	0.0123541	0.00958976			179.79	-1.09515	-0.968493
179.99	0.0118032	0.0052496			179.99	-1.0957	-0.972833
180.19	0.00734988	0.00612667			180.19	-1.10016	-0.971956
180.39	0.00627792	0.00622198			180.39	-1.10123	-0.971861
180.59	0.0111164	0.00795216			180.59	-1.09639	-0.970131
180.79	0.0142759	0.00976724			180.79	-1.09323	-0.968316
180.99	0.0113865	0.00839619			180.99	-1.09612	-0.969687
181.19	0.00946075	0.0076629			181.19	-1.09805	-0.97042
181.39	0.00871012	0.00680891			181.39	-1.0988	-0.971274
181.6	0.00850781	0.00737058			181.6	-1.099	-0.970712
181.79	0.0112641	0.0098819			181.79	-1.09624	-0.968201
181.99	0.00703581	0.00761374			181.99	-1.10047	-0.970469
182.19	0.0108033	0.00564262			182.19	-1.0967	-0.97244
182.39	0.0104718	0.00421321			182.39	-1.09704	-0.97387
182.59	0.00840187	0.00695453			182.59	-1.09911	-0.971128
182.79	0.010188	0.00408393			182.79	-1.09732	-0.973999
182.99	0.00923874	0.00962099			182.99	-1.09827	-0.968462
183.19	0.0138402	0.00985969			183.19	-1.09367	-0.968223
183.39	0.0142416	0.00798785			183.39	-1.09327	-0.970095
183.59	0.0113276	0.0056433			183.59	-1.09618	-0.97244
183.79	0.00856513	0.00780452			183.79	-1.09894	-0.970278
183.99	0.0116399	0.0057888			183.99	-1.09587	-0.972294
184.19	0.00732802	0.00556192			184.19	-1.10018	-0.972521
184.39	0.0138572	0.0093838			184.39	-1.09365	-0.968699
184.59	0.0115207	0.00691072			184.59	-1.09599	-0.971172
184.79	0.0130084	0.00860738			184.79	-1.0945	-0.969476
184.99	0.0113191	0.00771076			184.99	-1.09619	-0.970372
185.19	0.0111823	0.00627029			185.19	-1.09632	-0.971813
185.39	0.00776222	0.00694678			185.39	-1.09975	-0.971136
185.6	0.00860347	0.00777928			185.6	-1.0989	-0.970304
185.79	0.00936879	0.00733441			185.79	-1.09814	-0.970749
185.99	0.0132673	0.0083528			185.99	-1.09424	-0.96973
186.19	0.00773458	0.00594679			186.19	-1.09977	-0.972136
186.39	0.0116123	0.0103909			186.39	-1.09589	-0.967692
186.6	0.011969	0.00788111			186.6	-1.09554	-0.970202
186.79	0.0106578	0.00660874			186.79	-1.09685	-0.971474
186.99	0.0074045	0.00533165			186.99	-1.1001	-0.972751
187.19	0.0087357	0.00465023			187.19	-1.09877	-0.973433
187.39	0.0115248	0.00888246			187.39	-1.09598	-0.9692
187.6	0.0106566	0.00897904			187.6	-1.09685	-0.969104
187.79	0.0137562	0.00897594			187.79	-1.09375	-0.969107
187.99	0.00934259	0.00779584			187.99	-1.09816	-0.970287
188.19	0.0092791	0.00748023			188.19	-1.09823	-0.970603
188.39	0.0083538	0.00414748			188.39	-1.09915	-0.973935
188.6	0.0116752	0.00865205			188.6	-1.09583	-0.969431
188.79	0.00834609	0.0085988			188.79	-1.09916	-0.969484
188.99	0.0113841	0.00827017			188.99	-1.09612	-0.969813
189.19	0.00821254	0.00797571			189.19	-1.09929	-0.970107
189.39	0.0124436	0.0104469			189.39	-1.09506	-0.967636
189.6	0.00885449	0.00764327			189.6	-1.09865	-0.97044
189.79	0.00941699	0.00578489			189.79	-1.09809	-0.972298
189.99	0.0114087	0.0082061			189.99	-1.0961	-0.969877
190.19	0.0102281	0.00667347			190.19	-1.09728	-0.971409
190.39	0.0114073	0.00687666			190.39	-1.0961	-0.971206
190.59	0.0136298	0.0103155			190.59	-1.09388	-0.967767
190.79	0.011239	0.0068918			190.79	-1.09627	-0.971191
190.99	0.00834728	0.00791658			190.99	-1.09916	-0.970166
191.19	0.00725232	0.00761161			191.19	-1.10025	-0.970471
191.39	0.0090079	0.00406342			191.39	-1.0985	-0.97402
191.6	0.0102058	0.00789977			191.6	-1.0973	-0.970183
191.79	0.0112397	0.00725988			191.79	-1.09627	-0.970823
191.99	0.00798828	0.00686806			191.99	-1.09952	-0.971215
192.19	0.0105677	0.010656			192.19	-1.09694	-0.967427
192.39	0.00744765	0.00985457			192.39	-1.10006	-0.968228
192.6	0.00570689	0.00892134			192.6	-1.1018	-0.969162
192.79	0.0118794	0.00601061			192.79	-1.09563	-0.972072
192.99	0.0066563	0.00394995			192.99	-1.10085	-0.974133
193.19	0.0115763	0.00707123			193.19	-1.09593	-0.971012
193.39	0.0116253	0.00470457			193.39	-1.09588	-0.973378
193.59	0.012065	0.00868345			193.59	-1.09544	-0.969399
193.79	0.011129	0.00448309			193.79	-1.09638	-0.9736
193.99	0.0119092	0.00776563			193.99	-1.0956	-0.970317
194.19	0.0105435	0.00520479			194.19	-1.09696	-0.972878
194.39	0.0111371	0.00664579			194.39	-1.09637	-0.971437
194.6	0.00675359	0.00755792			194.6	-1.10075	-0.970525
194.79	0.0121444	0.00960942			194.79	-1.09536	-0.968474
194.99	0.010674	0.00433562			194.99	-1.09683	-0.973747
195.19	0.0119357	0.00642103			195.19	-1.09557	-0.971662
195.39	0.00993966	0.00674292			195.39	-1.09757	-0.97134
195.6	0.010682	0.00706581			195.6	-1.09683	-0.971017
195.79	0.0101801	0.00538458			195.79	-1.09733	-0.972698
195.99	0.0108801	0.00657603			195.99	-1.09663	-0.971507
196.19	0.011245	0.00630848			196.19	-1.09626	-0.971774
196.39	0.00802698	0.00983538			196.39	-1.09948	-0.968248
196.59	0.0116474	0.00701344			196.59	-1.09586	-0.97107
196.79	0.00627463	0.0080189			196.79	-1.10123	-0.970064
196.99	0.0110794	0.0080421			196.99	-1.09643	-0.970041
197.19	0.0107228	0.00665653			197.19	-1.09678	-0.971426
197.39	0.0141546	0.00928322			197.39	-1.09335	-0.9688
197.59	0.0117228	0.00897519			197.59	-1.09578	-0.969108
197.79	0.0114156	0.00865484			197.79	-1.09609	-0.969428
197.99	0.013419	0.0079753			197.99	-1.09409	-0.970108
198.19	0.0095936	0.00861402			198.19	-1.09791	-0.969469
198.39	0.0099811	0.00660213			198.39	-1.09753	-0.971481
198.6	0.010594	0.00876051			198.6	-1.09691	-0.969322
198.79	0.00848748	0.00797092			198.79	-1.09902	-0.970112
198.99	0.0089589	0.00729391			198.99	-1.09855	-0.970789
199.19	0.00903361	0.00754525			199.19	-1.09847	-0.970538
199.39	0.00870281	0.00628095			199.39	-1.0988	-0.971802
199.59	0.00913069	0.00807338			199.59	-1.09838	-0.97001
199.79	0.0131652	0.0104694			199.79	-1.09434	-0.967614
200	0.00523941	0.00483356			200	-1.10227	-0.973249
200.19	0.00731784	0.00590285			200.19	-1.10019	-0.97218
200.39	0.00851141	0.00568491			200.39	-1.099	-0.972398
200.59	0.00896585	0.00960516			200.59	-1.09854	-0.968478
200.79	0.00952689	0.0100584			200.79	-1.09798	-0.968025
200.99	0.0125199	0.00779491			200.99	-1.09499	-0.970288
201.19	0.0133651	0.00901847			201.19	-1.09414	-0.969064
201.39	0.0145829	0.00948413			201.39	-1.09292	-0.968599
201.6	0.0155105	0.0124879			201.6	-1.092	-0.965595
201.79	0.0162985	0.0124063			201.79	-1.09121	-0.965677
201.99	0.0102533	0.00937245			201.99	-1.09725	-0.968711
202.19	0.0128129	0.0110571			202.19	-1.09469	-0.967026
202.39	0.0136763	0.0104469			202.39	-1.09383	-0.967636
202.59	0.0186722	0.0150293			202.59	-1.08884	-0.963054
202.79	0.0167118	0.0129387			202.79	-1.0908	-0.965144
202.99	0.0196821	0.016853			202.99	-1.08783	-0.96123
203.19	0.017679	0.0123679			203.19	-1.08983	-0.965715
203.39	0.0174078	0.0161811			203.39	-1.0901	-0.961902
203.6	0.0170552	0.0147722			203.6	-1.09045	-0.963311
203.79	0.0149014	0.0155011			203.79	-1.09261	-0.962582
203.99	0.0197866	0.0176776			203.99	-1.08772	-0.960405
204.19	0.0214301	0.0189791			204.19	-1.08608	-0.959104
204.39	0.0221854	0.0142185			204.39	-1.08532	-0.963864
204.59	0.0241315	0.0173687			204.59	-1.08338	-0.960714
204.79	0.0224689	0.0175325			204.79	-1.08504	-0.96055
204.99	0.0227256	0.0190256			204.99	-1.08478	-0.959057
205.19	0.0217966	0.0184839			205.19	-1.08571	-0.959599
205.39	0.0230225	0.0203124			205.39	-1.08448	-0.957771
205.59	0.0208046	0.0161037			205.59	-1.0867	-0.961979
205.79	0.0242727	0.0195835			205.79	-1.08323	-0.958499
205.99	0.0206105	0.0203667			205.99	-1.0869	-0.957716
206.19	0.0203762	0.019985			206.19	-1.08713	-0.958098
206.39	0.0238664	0.0194684			206.39	-1.08364	-0.958615
206.59	0.0250088	0.0217467			206.59	-1.0825	-0.956336
206.79	0.024652	0.0208693			206.79	-1.08286	-0.957214
206.99	0.0245903	0.018866			206.99	-1.08292	-0.959217
207.19	0.0252007	0.0234945			207.19	-1.08231	-0.954588
207.39	0.026026	0.0227983			207.39	-1.08148	-0.955285
207.59	0.0256239	0.0241468			207.59	-1.08188	-0.953936
207.79	0.0277652	0.0235468			207.79	-1.07974	-0.954536
207.99	0.0292703	0.0229445			207.99	-1.07824	-0.955138
208.19	0.0253809	0.027917			208.19	-1.08213	-0.950166
208.39	0.0265709	0.0246685			208.39	-1.08094	-0.953414
208.6	0.0273106	0.022841			208.6	-1.0802	-0.955242
208.79	0.0288048	0.0236211			208.79	-1.0787	-0.954462
208.99	0.0270802	0.0229353			208.99	-1.08043	-0.955148
209.19	0.0336516	0.0271286			209.19	-1.07386	-0.950954
209.39	0.0287837	0.0250232			209.39	-1.07872	-0.95306
209.6	0.0306087	0.0261012			209.6	-1.0769	-0.951982
209.79	0.0311595	0.0279874			209.79	-1.07635	-0.950096
209.99	0.0293209	0.0265503			209.99	-1.07819	-0.951533
210.19	0.0308461	0.0266802			210.19	-1.07666	-0.951403
210.39	0.0329789	0.0281112			210.39	-1.07453	-0.949972
210.59	0.0292349	0.0278317			210.59	-1.07827	-0.950251
210.79	0.0327041	0.0258173			210.79	-1.0748	-0.952266
210.99	0.0301456	0.0296457			210.99	-1.07736	-0.948437
211.19	0.0301111	0.0284268			211.19	-1.0774	-0.949656
211.39	0.0325211	0.0335354			211.39	-1.07499	-0.944548
211.6	0.0334854	0.0311746			211.6	-1.07402	-0.946908
211.79	0.0318263	0.0318899			211.79	-1.07568	-0.946193
211.99	0.0359942	0.0293401			211.99	-1.07151	-0.948743
212.19	0.0342918	0.0320059			212.19	-1.07322	-0.946077
212.39	0.034735	0.0303334			212.39	-1.07277	-0.94775
212.6	0.0345679	0.0308164			212.6	-1.07294	-0.947267
212.79	0.0330782	0.0309929			212.79	-1.07443	-0.94709
212.99	0.0322704	0.0322042			212.99	-1.07524	-0.945879
213.19	0.0365995	0.0306687			213.19	-1.07091	-0.947414
213.39	0.0368048	0.0314175			213.39	-1.0707	-0.946665
213.6	0.0372232	0.0371647			213.6	-1.07028	-0.940918
213.79	0.0370511	0.0325619			213.79	-1.07046	-0.945521
213.99	0.0338441	0.0357432			213.99	-1.07366	-0.94234
214.19	0.0400042	0.0346958			214.19	-1.0675	-0.943387
214.39	0.0395482	0.0364903			214.39	-1.06796	-0.941593
214.59	0.0356802	0.0335362			214.59	-1.07183	-0.944547
214.79	0.0357506	0.0351731			214.79	-1.07176	-0.94291
214.99	0.0387383	0.0377465			214.99	-1.06877	-0.940336
215.19	0.0401159	0.0354289			215.19	-1.06739	-0.942654
215.39	0.0441883	0.0365542			215.39	-1.06332	-0.941529
215.59	0.0378659	0.0376122			215.59	-1.06964	-0.940471
215.79	0.0404717	0.0346413			215.79	-1.06704	-0.943442
215.99	0.0406143	0.0384773			215.99	-1.06689	-0.939606
216.19	0.0389623	0.0394369			216.19	-1.06854	-0.938646
216.39	0.0398377	0.034794			216.39	-1.06767	-0.943289
216.6	0.0435342	0.0365574			216.6	-1.06397	-0.941526
216.79	0.0448263	0.0378422			216.79	-1.06268	-0.940241
216.99	0.0416988	0.0404609			216.99	-1.06581	-0.937622
217.19	0.0406955	0.0395336			217.19	-1.06681	-0.938549
217.39	0.0438013	0.0403361			217.39	-1.06371	-0.937747
217.6	0.0398257	0.042097			217.6	-1.06768	-0.935986
217.79	0.0432413	0.041167			217.79	-1.06427	-0.936916
217.99	0.0414721	0.0393633			217.99	-1.06604	-0.93872
218.19	0.0459955	0.0409833			218.19	-1.06151	-0.9371
218.39	0.04417	0.0418588			218.39	-1.06334	-0.936224
218.59	0.046487	0.0420765			218.59	-1.06102	-0.936006
218.79	0.0467083	0.0427563			218.79	-1.0608	-0.935327
218.99	0.0465265	0.0437357			218.99	-1.06098	-0.934347
219.19	0.0482126	0.0420425			219.19	-1.05929	-0.93604
219.39	0.0484427	0.044035			219.39	-1.05906	-0.934048
219.6	0.0415909	0.0434541			219.6	-1.06592	-0.934629
219.79	0.0459136	0.0436327			219.79	-1.06159	-0.93445
219.99	0.047977	0.0457239			219.99	-1.05953	-0.932359
220.19	0.0451703	0.0446281			220.19	-1.06234	-0.933455
220.39	0.046389	0.0441793			220.39	-1.06112	-0.933904
220.6	0.0458665	0.0458999			220.6	-1.06164	-0.932183
220.79	0.0484889	0.0474476			220.79	-1.05902	-0.930635
220.99	0.047918	0.0472883			220.99	-1.05959	-0.930795
221.19	0.0524609	0.0481774			221.19	-1.05505	-0.929906
221.39	0.0467837	0.0472224			221.39	-1.06072	-0.930861
221.59	0.0530796	0.0494189			221.59	-1.05443	-0.928664
221.79	0.0491254	0.0482505			221.79	-1.05838	-0.929832
221.99	0.0477054	0.0487446			221.99	-1.0598	-0.929338
222.19	0.0533392	0.0468191			222.19	-1.05417	-0.931264
222.39	0.0503489	0.046837			222.39	-1.05716	-0.931246
222.59	0.0502812	0.0500406			222.59	-1.05723	-0.928042
222.79	0.049923	0.0500408			222.79	-1.05758	-0.928042
222.99	0.0563476	0.0518476			222.99	-1.05116	-0.926235
223.19	0.0535846	0.0470273			223.19	-1.05392	-0.931056
223.39	0.055079	0.0523623			223.39	-1.05243	-0.925721
223.59	0.0534974	0.0500797			223.59	-1.05401	-0.928003
223.79	0.0542405	0.0547701			223.79	-1.05327	-0.923313
223.99	0.0552031	0.0503375			223.99	-1.0523	-0.927745
224.19	0.0583113	0.0556219			224.19	-1.0492	-0.922461
224.39	0.0567164	0.0519903			224.39	-1.05079	-0.926093
224.59	0.0560627	0.0543609			224.59	-1.05144	-0.923722
224.79	0.0563564	0.0511362			224.79	-1.05115	-0.926947
224.99	0.0590684	0.0518042			224.99	-1.04844	-0.926279
225.19	0.0564854	0.0561166			225.19	-1.05102	-0.921966
225.39	0.0523474	0.0533283			225.39	-1.05516	-0.924755
225.59	0.0578952	0.0564208			225.59	-1.04961	-0.921662
225.79	0.0587853	0.0538002			225.79	-1.04872	-0.924283
225.99	0.0600656	0.0544905			225.99	-1.04744	-0.923592
226.19	0.0572825	0.0520928			226.19	-1.05022	-0.92599
226.39	0.0600989	0.0570564			226.39	-1.04741	-0.921027
226.59	0.0586645	0.0570643			226.59	-1.04884	-0.921019
226.79	0.0605188	0.056446			226.79	-1.04699	-0.921637
226.99	0.0612833	0.0555718			226.99	-1.04622	-0.922511
227.19	0.0621721	0.0575619			227.19	-1.04534	-0.920521
227.39	0.059222	0.0604115			227.39	-1.04829	-0.917671
227.59	0.0611236	0.0562197			227.59	-1.04638	-0.921863
227.79	0.060155	0.054932			227.79	-1.04735	-0.923151
227.99	0.0633988	0.0611643			227.99	-1.04411	-0.916919
228.19	0.0603262	0.0575169			228.19	-1.04718	-0.920566
228.39	0.0604163	0.0590373			228.39	-1.04709	-0.919046
228.59	0.0608093	0.061587			228.59	-1.0467	-0.916496
228.79	0.0628925	0.0580241			228.79	-1.04461	-0.920059
228.99	0.0639394	0.0588964			228.99	-1.04357	-0.919187
229.19	0.0646136	0.0616162			229.19	-1.04289	-0.916467
229.39	0.0637166	0.0639511			229.39	-1.04379	-0.914132
229.59	0.0630138	0.0603543			229.59	-1.04449	-0.917729
229.79	0.0636211	0.0608111			229.79	-1.04389	-0.917272
229.99	0.0643548	0.0605061			229.99	-1.04315	-0.917577
230.19	0.0674623	0.0632777			230.19	-1.04004	-0.914805
230.39	0.0690679	0.0613378			230.39	-1.03844	-0.916745
230.59	0.0641055	0.0633548			230.59	-1.0434	-0.914728
230.79	0.0655244	0.0628406			230.79	-1.04198	-0.915242
230.99	0.0694291	0.0616261			230.99	-1.03808	-0.916457
231.19	0.0677349	0.0619547			231.19	-1.03977	-0.916128
231.39	0.0671227	0.0624061			231.39	-1.04038	-0.915677
231.59	0.0688495	0.0626777			231.59	-1.03866	-0.915405
231.79	0.070196	0.0698094			231.79	-1.03731	-0.908274
231.99	0.0687021	0.0653542			231.99	-1.03881	-0.912729
232.19	0.0687618	0.0638392			232.19	-1.03875	-0.914244
232.39	0.0688453	0.0665984			232.39	-1.03866	-0.911485
232.59	0.0713765	0.0651788			232.59	-1.03613	-0.912904
232.79	0.0711341	0.0684895			232.79	-1.03637	-0.909593
232.99	0.0691521	0.0688466			232.99	-1.03836	-0.909236
233.19	0.0711959	0.0672674			233.19	-1.03631	-0.910816
233.39	0.0708135	0.0700454			233.39	-1.03669	-0.908038
233.59	0.0715533	0.0668207			233.59	-1.03595	-0.911262
233.79	0.074957	0.0684639			233.79	-1.03255	-0.909619
233.99	0.0725039	0.0658502			233.99	-1.035	-0.912233
234.19	0.0734717	0.067607			234.19	-1.03404	-0.910476
234.39	0.0709361	0.0685336			234.39	-1.03657	-0.909549
234.59	0.0698247	0.0686637			234.59	-1.03768	-0.909419
234.79	0.0753565	0.0698817			234.79	-1.03215	-0.908201
234.99	0.0768163	0.0666601			234.99	-1.03069	-0.911423
235.19	0.0760264	0.0729656			235.19	-1.03148	-0.905117
235.39	0.0764485	0.070249			235.39	-1.03106	-0.907834
235.59	0.071572	0.0733735			235.59	-1.03594	-0.904709
235.79	0.0747055	0.0721712			235.79	-1.0328	-0.905912
235.99	0.0806205	0.0728166			235.99	-1.02689	-0.905266
236.19	0.0764072	0.0712312			236.19	-1.0311	-0.906852
236.39	0.0781793	0.0772415			236.39	-1.02933	-0.900841
236.59	0.0793123	0.0742989			236.59	-1.02819	-0.903784
236.79	0.0774773	0.0748491			236.79	-1.03003	-0.903234
236.99	0.077171	0.0751294			236.99	-1.03034	-0.902954
237.19	0.0775187	0.0768904			237.19	-1.02999	-0.901193
237.39	0.0780712	0.078169			237.39	-1.02944	-0.899914
237.59	0.0793256	0.0760225			237.59	-1.02818	-0.90206
237.79	0.0807024	0.0747233			237.79	-1.0268	-0.90336
237.99	0.0800076	0.0760412			237.99	-1.0275	-0.902042
238.19	0.0799013	0.0750737			238.19	-1.02761	-0.903009
238.39	0.0771102	0.076405			238.39	-1.0304	-0.901678
238.6	0.0788526	0.0769215			238.6	-1.02865	-0.901161
238.79	0.0813659	0.0755282			238.79	-1.02614	-0.902555
238.99	0.0805092	0.0787585			238.99	-1.027	-0.899324
239.19	0.0836468	0.0786666			239.19	-1.02386	-0.899416
239.39	0.0835899	0.0802113			239.39	-1.02392	-0.897872
239.6	0.0856337	0.0767532			239.6	-1.02187	-0.90133
239.79	0.0825655	0.0811988			239.79	-1.02494	-0.896884
239.99	0.0853713	0.0793633			239.99	-1.02214	-0.89872
240.19	0.0860425	0.0790719			240.19	-1.02146	-0.899011
240.39	0.0834038	0.0779694			240.39	-1.0241	-0.900114
240.6	0.0857784	0.0808592			240.6	-1.02173	-0.897224
240.79	0.0818378	0.0767905			240.79	-1.02567	-0.901292
240.99	0.0842476	0.0814802			240.99	-1.02326	-0.896603
241.19	0.0895863	0.081443			241.19	-1.01792	-0.89664
241.39	0.0923784	0.0847394			241.39	-1.01513	-0.893344
241.6	0.087381	0.0842845			241.6	-1.02013	-0.893798
241.79	0.0881015	0.0822745			241.79	-1.01941	-0.895808
241.99	0.0874879	0.0819182			241.99	-1.02002	-0.896165
242.19	0.092072	0.084504			242.19	-1.01544	-0.893579
242.39	0.0895681	0.0841865			242.39	-1.01794	-0.893896
242.6	0.0894075	0.0842465			242.6	-1.0181	-0.893836
242.79	0.0913423	0.0822122			242.79	-1.01616	-0.895871
242.99	0.0867506	0.0847532			242.99	-1.02076	-0.89333
243.19	0.0890752	0.0866083			243.19	-1.01843	-0.891475
243.39	0.0908148	0.087322			243.39	-1.01669	-0.890761
243.6	0.0925312	0.0872428			243.6	-1.01498	-0.89084
243.79	0.0918815	0.0831399			243.79	-1.01563	-0.894943
243.99	0.0884008	0.0854667			243.99	-1.01911	-0.892616
244.19	0.0910246	0.0847869			244.19	-1.01648	-0.893296
244.39	0.0926175	0.0883531			244.39	-1.01489	-0.88973
244.6	0.0962942	0.0880138			244.6	-1.01121	-0.890069
244.79	0.0940915	0.0877586			244.79	-1.01342	-0.890324
244.99	0.0932162	0.0862158			244.99	-1.01429	-0.891867
245.19	0.091508	0.0903659			245.19	-1.016	-0.887717
245.39	0.0950406	0.0884389			245.39	-1.01247	-0.889644
245.6	0.092982	0.0866593			245.6	-1.01453	-0.891424
245.79	0.0926623	0.0916583			245.79	-1.01484	-0.886425
245.99	0.0955595	0.0929094			245.99	-1.01195	-0.885174
246.19	0.0922886	0.0882673			246.19	-1.01522	-0.889816
246.39	0.0959417	0.092314			246.39	-1.01157	-0.885769
246.6	0.0959991	0.0889866			246.6	-1.01151	-0.889096
246.79	0.100234	0.0909889			246.79	-1.00727	-0.887094
246.99	0.0960832	0.0934134			246.99	-1.01142	-0.88467
247.19	0.095887	0.0941424			247.19	-1.01162	-0.883941
247.39	0.097343	0.0929627			247.39	-1.01016	-0.88512
247.6	0.0980434	0.0911707			247.6	-1.00946	-0.886912
247.79	0.0974096	0.095658			247.79	-1.0101	-0.882425
247.99	0.100332	0.0973889			247.99	-1.00718	-0.880694
248.19	0.0977469	0.0969732			248.19	-1.00976	-0.88111
248.39	0.0990348	0.0953562			248.39	-1.00847	-0.882727
248.59	0.100842	0.0963517			248.59	-1.00667	-0.881731
248.79	0.0986868	0.096269			248.79	-1.00882	-0.881814
248.99	0.0985082	0.0948856			248.99	-1.009	-0.883197
249.19	0.103267	0.0971267			249.19	-1.00424	-0.880956
249.39	0.0990053	0.0944852			249.39	-1.0085	-0.883598
249.6	0.102582	0.097839			249.6	-1.00493	-0.880244
249.79	0.102718	0.0990222			249.79	-1.00479	-0.879061
249.99	0.0993303	0.096749			249.99	-1.00818	-0.881334
250.19	0.101653	0.0965152			250.19	-1.00585	-0.881568
250.39	0.103267	0.099474			250.39	-1.00424	-0.878609
250.6	0.102635	0.0970508			250.6	-1.00487	-0.881032
250.79	0.105382	0.100839			250.79	-1.00213	-0.877244
250.99	0.103846	0.0997023			250.99	-1.00366	-0.878381
251.19	0.107243	0.0986656			251.19	-1.00026	-0.879417
251.39	0.10667	0.10314			251.39	-1.00084	-0.874943
251.6	0.104179	0.100876			251.6	-1.00333	-0.877207
251.79	0.105403	0.0979435			251.79	-1.0021	-0.880139
251.99	0.107158	0.0990747			251.99	-1.00035	-0.879008
252.19	0.106774	0.102451			252.19	-1.00073	-0.875631
252.39	0.108265	0.105862			252.39	-0.999242	-0.872221
252.59	0.108291	0.102376			252.59	-0.999216	-0.875707
252.79	0.106991	0.101375			252.79	-1.00052	-0.876708
252.99	0.106975	0.102631			252.99	-1.00053	-0.875452
253.19	0.105458	0.104421			253.19	-1.00205	-0.873662
253.39	0.109066	0.100888			253.39	-0.998441	-0.877195
253.6	0.109434	0.103139			253.6	-0.998073	-0.874944
253.79	0.110809	0.103438			253.79	-0.996699	-0.874645
253.99	0.107442	0.102814			253.99	-1.00006	-0.875268
254.19	0.109274	0.10621			254.19	-0.998233	-0.871873
254.39	0.110271	0.105538			254.39	-0.997237	-0.872545
254.6	0.111333	0.107523			254.6	-0.996174	-0.87056
254.79	0.11205	0.10754			254.79	-0.995457	-0.870543
254.99	0.109775	0.111045			254.99	-0.997732	-0.867038
255.19	0.111603	0.107391			255.19	-0.995904	-0.870692
255.39	0.116407	0.105127			255.39	-0.9911	-0.872956
255.59	0.114959	0.103685			255.59	-0.992548	-0.874398
255.79	0.111419	0.106202			255.79	-0.996088	-0.871881
255.99	0.114819	0.108656			255.99	-0.992688	-0.869427
256.2	0.111898	0.10791			256.2	-0.995609	-0.870173
256.39	0.113488	0.110172			256.39	-0.994019	-0.867911
256.59	0.113579	0.110804			256.59	-0.993929	-0.867279
256.79	0.116605	0.109457			256.79	-0.990903	-0.868626
256.99	0.115926	0.109061			256.99	-0.991581	-0.869022
257.19	0.114465	0.111621			257.19	-0.993042	-0.866462
257.39	0.112257	0.10915			257.39	-0.995251	-0.868933
257.6	0.116749	0.112608			257.6	-0.990758	-0.865475
257.79	0.1164	0.11313			257.79	-0.991107	-0.864953
257.99	0.11749	0.113346			257.99	-0.990018	-0.864737
258.2	0.115656	0.110343			258.2	-0.991851	-0.86774
258.39	0.12263	0.112331			258.39	-0.984877	-0.865752
258.59	0.11878	0.114316			258.59	-0.988727	-0.863767
258.79	0.118907	0.112499			258.79	-0.988601	-0.865584
258.99	0.119711	0.114723			258.99	-0.987796	-0.863359
259.2	0.119804	0.111399			259.2	-0.987703	-0.866684
259.39	0.121258	0.111821			259.39	-0.98625	-0.866261
259.59	0.122609	0.117108			259.59	-0.984898	-0.860975
259.79	0.121603	0.118362			259.79	-0.985905	-0.859721
259.99	0.117008	0.115041			259.99	-0.990499	-0.863042
260.2	0.121906	0.115647			260.2	-0.985602	-0.862436
260.39	0.124517	0.115403			260.39	-0.98299	-0.86268
260.6	0.12033	0.114974			260.6	-0.987178	-0.863109
260.79	0.124917	0.117754			260.79	-0.98259	-0.860329
260.99	0.122365	0.116467			260.99	-0.985142	-0.861616
261.19	0.125427	0.11652			261.19	-0.982081	-0.861563
261.39	0.124957	0.119139			261.39	-0.982551	-0.858944
261.59	0.123573	0.116578			261.59	-0.983934	-0.861505
261.79	0.126336	0.118396			261.79	-0.981171	-0.859687
261.99	0.124183	0.117223			261.99	-0.983324	-0.86086
262.2	0.126966	0.121145			262.2	-0.980541	-0.856938
262.39	0.126344	0.11947			262.39	-0.981163	-0.858613
262.59	0.129072	0.119055			262.59	-0.978435	-0.859028
262.79	0.125102	0.121465			262.79	-0.982405	-0.856618
262.99	0.129819	0.122541			262.99	-0.977688	-0.855541
263.19	0.126089	0.121217			263.19	-0.981418	-0.856866
263.39	0.128687	0.122205			263.39	-0.97882	-0.855878
263.59	0.129003	0.120303			263.59	-0.978504	-0.85778
263.79	0.130081	0.123375			263.79	-0.977426	-0.854708
263.99	0.126808	0.12116			263.99	-0.980699	-0.856923
264.19	0.127909	0.125959			264.19	-0.979598	-0.852124
264.39	0.129996	0.12069			264.39	-0.977511	-0.857393
264.6	0.128742	0.124345			264.6	-0.978765	-0.853738
264.79	0.132551	0.12415			264.79	-0.974957	-0.853933
264.99	0.127992	0.12262			264.99	-0.979516	-0.855463
265.19	0.13297	0.126851			265.19	-0.974537	-0.851232
265.39	0.132429	0.124587			265.39	-0.975078	-0.853495
265.59	0.13288	0.125159			265.59	-0.974627	-0.852924
265.79	0.132694	0.126599			265.79	-0.974813	-0.851484
265.99	0.130819	0.12338			265.99	-0.976688	-0.854703
266.19	0.13043	0.129876			266.19	-0.977077	-0.848207
266.39	0.13496	0.127306			266.39	-0.972548	-0.850776
266.59	0.131041	0.127732			266.59	-0.976466	-0.85035
266.79	0.133539	0.12611			266.79	-0.973968	-0.851973
266.99	0.136747	0.125825			266.99	-0.97076	-0.852257
267.2	0.133945	0.128543			267.2	-0.973563	-0.84954
267.39	0.134544	0.127291			267.39	-0.972963	-0.850792
267.6	0.136067	0.129786			267.6	-0.97144	-0.848297
267.79	0.13456	0.129188			267.79	-0.972947	-0.848895
267.99	0.13499	0.124909			267.99	-0.972518	-0.853174
268.2	0.136755	0.127029			268.2	-0.970752	-0.851054
268.39	0.137058	0.131646			268.39	-0.97045	-0.846437
268.59	0.136869	0.134307			268.59	-0.970638	-0.843776
268.79	0.13599	0.132731			268.79	-0.971517	-0.845352
268.99	0.138384	0.129992			268.99	-0.969123	-0.848091
269.2	0.139452	0.135315			269.2	-0.968055	-0.842768
269.39	0.136584	0.133421			269.39	-0.970923	-0.844662
269.6	0.140686	0.131164			269.6	-0.966822	-0.846919
269.79	0.142319	0.12993			269.79	-0.965188	-0.848153
269.99	0.141764	0.132387			269.99	-0.965743	-0.845696
270.2	0.140506	0.134646			270.2	-0.967002	-0.843437
270.39	0.140136	0.134855			270.39	-0.967371	-0.843227
270.6	0.145195	0.134227			270.6	-0.962313	-0.843856
270.79	0.140736	0.135617			270.79	-0.966771	-0.842466
270.99	0.139658	0.135534			270.99	-0.96785	-0.842549
271.19	0.143653	0.13774			271.19	-0.963854	-0.840343
271.39	0.14028	0.137104			271.39	-0.967228	-0.840979
271.6	0.139614	0.136991			271.6	-0.967894	-0.841092
271.79	0.144931	0.138156			271.79	-0.962576	-0.839927
271.99	0.145943	0.133847			271.99	-0.961564	-0.844236
272.19	0.144784	0.136408			272.19	-0.962723	-0.841675
272.39	0.144972	0.134517			272.39	-0.962535	-0.843566
272.59	0.149492	0.140422			272.59	-0.958015	-0.837661
272.79	0.145446	0.137382			272.79	-0.962061	-0.840701
272.99	0.145558	0.137857			272.99	-0.961949	-0.840226
273.2	0.144866	0.141111			273.2	-0.962642	-0.836972
273.39	0.144781	0.135809			273.39	-0.962726	-0.842274
273.59	0.146574	0.136796			273.59	-0.960933	-0.841287
273.79	0.149516	0.141324			273.79	-0.957991	-0.836759
273.99	0.146927	0.142274			273.99	-0.96058	-0.835809
274.19	0.147614	0.144745			274.19	-0.959893	-0.833338
274.39	0.148129	0.13897			274.39	-0.959378	-0.839113
274.6	0.147644	0.140986			274.6	-0.959863	-0.837097
274.79	0.151195	0.139528			274.79	-0.956312	-0.838555
274.99	0.147994	0.142815			274.99	-0.959513	-0.835268
275.19	0.149569	0.140928			275.19	-0.957938	-0.837155
275.39	0.149097	0.142237			275.39	-0.958411	-0.835846
275.6	0.151108	0.143663			275.6	-0.956399	-0.83442
275.79	0.150646	0.141538			275.79	-0.956861	-0.836545
275.99	0.150725	0.14285			275.99	-0.956783	-0.835233
276.19	0.150873	0.144543			276.19	-0.956635	-0.83354
276.39	0.149903	0.145866			276.39	-0.957605	-0.832217
276.59	0.15331	0.147725			276.59	-0.954197	-0.830358
276.79	0.151652	0.149835			276.79	-0.955855	-0.828248
276.99	0.152416	0.147492			276.99	-0.955091	-0.830591
277.2	0.151826	0.14579			277.2	-0.955681	-0.832293
277.39	0.156232	0.148102			277.39	-0.951275	-0.829981
277.59	0.156219	0.147033			277.59	-0.951288	-0.83105
277.79	0.152708	0.147854			277.79	-0.954799	-0.830229
277.99	0.152584	0.146045			277.99	-0.954923	-0.832038
278.19	0.155491	0.148692			278.19	-0.952016	-0.829391
278.39	0.154695	0.152255			278.39	-0.952812	-0.825828
278.6	0.155812	0.148355			278.6	-0.951695	-0.829728
278.79	0.157686	0.150704			278.79	-0.949821	-0.827379
278.99	0.15601	0.148117			278.99	-0.951498	-0.829966
279.19	0.156954	0.149348			279.19	-0.950553	-0.828735
279.39	0.15592	0.152125			279.39	-0.951587	-0.825958
279.6	0.156818	0.151781			279.6	-0.950689	-0.826301
279.79	0.156547	0.153339			279.79	-0.95096	-0.824744
279.99	0.159961	0.151702			279.99	-0.947546	-0.826381
280.19	0.1574	0.15227			280.19	-0.950107	-0.825813
280.39	0.160631	0.15265			280.39	-0.946876	-0.825433
280.59	0.16237	0.152818			280.59	-0.945138	-0.825265
280.79	0.162817	0.154797			280.79	-0.94469	-0.823286
280.99	0.160677	0.152324			280.99	-0.94683	-0.825759
281.2	0.15959	0.153268			281.2	-0.947918	-0.824815
281.39	0.159536	0.153801			281.39	-0.947971	-0.824281
281.59	0.159281	0.152689			281.59	-0.948226	-0.825394
281.79	0.163894	0.157352			281.79	-0.943613	-0.820731
281.99	0.161916	0.156085			281.99	-0.945591	-0.821998
282.19	0.162957	0.158241			282.19	-0.94455	-0.819842
282.39	0.16479	0.159205			282.39	-0.942717	-0.818878
282.6	0.166361	0.154947			282.6	-0.941146	-0.823136
282.79	0.165174	0.159846			282.79	-0.942334	-0.818237
282.99	0.163744	0.158179			282.99	-0.943764	-0.819904
283.19	0.168122	0.156895			283.19	-0.939385	-0.821188
283.39	0.166511	0.156104			283.39	-0.940996	-0.821979
283.6	0.165976	0.159536			283.6	-0.941531	-0.818547
283.79	0.165533	0.159758			283.79	-0.941974	-0.818325
283.99	0.165592	0.160319			283.99	-0.941915	-0.817764
284.19	0.168852	0.157776			284.19	-0.938655	-0.820307
284.39	0.168574	0.159617			284.39	-0.938934	-0.818466
284.59	0.168201	0.157857			284.59	-0.939306	-0.820225
284.79	0.171688	0.159746			284.79	-0.935819	-0.818337
284.99	0.165336	0.161254			284.99	-0.942171	-0.816829
285.19	0.171794	0.161756			285.19	-0.935713	-0.816327
285.39	0.169355	0.163738			285.39	-0.938153	-0.814345
285.59	0.169365	0.161198			285.59	-0.938143	-0.816885
285.79	0.168952	0.160946			285.79	-0.938555	-0.817137
285.99	0.169013	0.162886			285.99	-0.938494	-0.815197
286.19	0.169502	0.164835			286.19	-0.938005	-0.813248
286.39	0.170915	0.161804			286.39	-0.936593	-0.816279
286.59	0.170166	0.163527			286.59	-0.937341	-0.814556
286.79	0.172239	0.161817			286.79	-0.935268	-0.816266
286.99	0.170219	0.166104			286.99	-0.937289	-0.811979
287.19	0.171241	0.164529			287.19	-0.936266	-0.813554
287.39	0.174827	0.166372			287.39	-0.93268	-0.811711
287.6	0.179394	0.162178			287.6	-0.928113	-0.815905
287.79	0.176317	0.167548			287.79	-0.93119	-0.810535
287.99	0.17018	0.167026			287.99	-0.937327	-0.811057
288.19	0.171277	0.164756			288.19	-0.93623	-0.813327
288.39	0.174767	0.165391			288.39	-0.93274	-0.812692
288.59	0.171169	0.166735			288.59	-0.936338	-0.811348
288.79	0.17295	0.167702			288.79	-0.934557	-0.810381
288.99	0.173751	0.165973			288.99	-0.933757	-0.81211
289.19	0.176877	0.168524			289.19	-0.930631	-0.809559
289.39	0.17341	0.167329			289.39	-0.934098	-0.810754
289.59	0.178264	0.170357			289.59	-0.929243	-0.807726
289.79	0.17661	0.168262			289.79	-0.930897	-0.809821
289.99	0.178656	0.171011			289.99	-0.928851	-0.807072
290.19	0.179223	0.167845			290.19	-0.928284	-0.810238
290.39	0.178609	0.171521			290.39	-0.928898	-0.806562
290.59	0.177677	0.168133			290.59	-0.92983	-0.80995
290.79	0.179578	0.170785			290.79	-0.92793	-0.807298
290.99	0.180649	0.16862			290.99	-0.926858	-0.809463
291.19	0.178223	0.170876			291.19	-0.929284	-0.807207
291.39	0.180146	0.170931			291.39	-0.927361	-0.807152
291.6	0.182443	0.173799			291.6	-0.925064	-0.804284
291.79	0.182448	0.174198			291.79	-0.925059	-0.803885
291.99	0.181677	0.173501			291.99	-0.92583	-0.804582
292.19	0.180339	0.174374			292.19	-0.927169	-0.803709
292.39	0.180962	0.177287			292.39	-0.926545	-0.800796
292.59	0.178452	0.174642			292.59	-0.929055	-0.80344
292.79	0.184862	0.172898			292.79	-0.922646	-0.805185
292.99	0.183899	0.173909			292.99	-0.923608	-0.804174
293.19	0.187129	0.176266			293.19	-0.920378	-0.801817
293.39	0.18464	0.175278			293.39	-0.922867	-0.802805
293.59	0.182269	0.177527			293.59	-0.925239	-0.800556
293.79	0.188309	0.174366			293.79	-0.919198	-0.803717
293.99	0.18737	0.179589			293.99	-0.920137	-0.798494
294.19	0.187294	0.177206			294.19	-0.920213	-0.800877
294.39	0.188568	0.178211			294.39	-0.918939	-0.799872
294.59	0.188109	0.179322			294.59	-0.919398	-0.798761
294.79	0.186064	0.177871			294.79	-0.921444	-0.800212
294.99	0.186348	0.177146			294.99	-0.921159	-0.800937
295.19	0.188929	0.177894			295.19	-0.918579	-0.800189
295.39	0.186448	0.180028			295.39	-0.921059	-0.798055
295.59	0.185234	0.182515			295.59	-0.922273	-0.795568
295.79	0.187686	0.179656			295.79	-0.919822	-0.798427
295.99	0.190945	0.179534			295.99	-0.916562	-0.798549
296.2	0.190376	0.182356			296.2	-0.917131	-0.795727
296.39	0.190523	0.181361			296.39	-0.916984	-0.796721
296.6	0.192563	0.186323			296.6	-0.914944	-0.79176
296.79	0.18984	0.181663			296.79	-0.917667	-0.79642
296.99	0.191832	0.182766			296.99	-0.915676	-0.795317
297.2	0.189389	0.180949			297.2	-0.918118	-0.797134
297.39	0.190968	0.183919			297.39	-0.916539	-0.794164
297.6	0.19118	0.185457			297.6	-0.916327	-0.792626
297.79	0.195556	0.184007			297.79	-0.911952	-0.794076
297.99	0.189761	0.186466			297.99	-0.917746	-0.791616
298.19	0.194646	0.185854			298.19	-0.912861	-0.792229
298.39	0.19323	0.183381			298.39	-0.914277	-0.794702
298.6	0.196736	0.184852			298.6	-0.910772	-0.793231
298.79	0.195133	0.186688			298.79	-0.912374	-0.791395
298.99	0.195223	0.18516			298.99	-0.912285	-0.792923
299.2	0.198493	0.187508			299.2	-0.909014	-0.790575
299.39	0.194251	0.186263			299.39	-0.913256	-0.79182
299.59	0.19468	0.187703			299.59	-0.912827	-0.79038
299.79	0.194892	0.191413			299.79	-0.912616	-0.78667
299.99	0.198088	0.187766			299.99	-0.90942	-0.790317
300.2	0.196744	0.189015			300.2	-0.910763	-0.789068
300.39	0.196877	0.187374			300.39	-0.91063	-0.790709
300.6	0.195884	0.191573			300.6	-0.911623	-0.78651
300.79	0.197771	0.191969			300.79	-0.909736	-0.786114
300.99	0.196836	0.191715			300.99	-0.910671	-0.786368
301.2	0.199456	0.187976			301.2	-0.908051	-0.790107
301.39	0.199897	0.193265			301.39	-0.90761	-0.784818
301.6	0.199716	0.193177			301.6	-0.907791	-0.784906
301.79	0.198551	0.192398			301.79	-0.908957	-0.785685
301.99	0.200641	0.192051			301.99	-0.906867	-0.786032
302.19	0.20173	0.194913			302.19	-0.905777	-0.78317
302.39	0.195679	0.19386			302.39	-0.911828	-0.784223
302.59	0.202252	0.193152			302.59	-0.905255	-0.784931
302.79	0.202296	0.190388			302.79	-0.905211	-0.787695
302.99	0.20161	0.197826			302.99	-0.905897	-0.780257
303.2	0.203609	0.195265			303.2	-0.903899	-0.782818
303.39	0.203593	0.198251			303.39	-0.903915	-0.779832
303.59	0.205366	0.194915			303.59	-0.902142	-0.783168
303.79	0.203312	0.196878			303.79	-0.904195	-0.781205
303.99	0.208249	0.193697			303.99	-0.899259	-0.784386
304.2	0.205207	0.196165			304.2	-0.9023	-0.781918
304.39	0.205431	0.198717			304.39	-0.902076	-0.779366
304.6	0.20613	0.195612			304.6	-0.901378	-0.782471
304.79	0.205297	0.197462			304.79	-0.90221	-0.780621
304.99	0.207849	0.20081			304.99	-0.899658	-0.777273
305.2	0.206856	0.198654			305.2	-0.900651	-0.779429
305.39	0.209693	0.201365			305.39	-0.897814	-0.776718
305.6	0.208773	0.198163			305.6	-0.898734	-0.77992
305.79	0.205573	0.20135			305.79	-0.901934	-0.776733
305.99	0.210259	0.199349			305.99	-0.897248	-0.778734
306.19	0.206377	0.199881			306.19	-0.90113	-0.778202
306.39	0.212857	0.199562			306.39	-0.89465	-0.778521
306.59	0.206871	0.202427			306.59	-0.900636	-0.775656
306.79	0.210866	0.198265			306.79	-0.896642	-0.779818
306.99	0.207424	0.200128			306.99	-0.900083	-0.777955
307.2	0.208141	0.202275			307.2	-0.899366	-0.775808
307.39	0.210924	0.202178			307.39	-0.896583	-0.775905
307.59	0.212979	0.199957			307.59	-0.894528	-0.778126
307.79	0.210996	0.20387			307.79	-0.896511	-0.774213
307.99	0.211945	0.203441			307.99	-0.895562	-0.774642
308.2	0.210361	0.204271			308.2	-0.897146	-0.773812
308.39	0.21321	0.205742			308.39	-0.894297	-0.772341
308.6	0.21293	0.205334			308.6	-0.894578	-0.772749
308.79	0.213685	0.202488			308.79	-0.893822	-0.775595
308.99	0.216536	0.204871			308.99	-0.890971	-0.773212
309.19	0.215137	0.207828			309.19	-0.89237	-0.770255
309.39	0.216046	0.205901			309.39	-0.891462	-0.772182
309.59	0.21931	0.206235			309.59	-0.888197	-0.771848
309.79	0.217879	0.206934			309.79	-0.889629	-0.771149
309.99	0.214653	0.207178			309.99	-0.892854	-0.770905
310.2	0.218788	0.209105			310.2	-0.88872	-0.768978
310.39	0.215097	0.208252			310.39	-0.892411	-0.769831
310.59	0.217843	0.210211			310.59	-0.889664	-0.767872
310.79	0.219235	0.206318			310.79	-0.888272	-0.771765
310.99	0.216443	0.208634			310.99	-0.891064	-0.769449
311.2	0.217108	0.208474			311.2	-0.890399	-0.769609
311.39	0.214468	0.211091			311.39	-0.893039	-0.766992
311.59	0.218955	0.210184			311.59	-0.888552	-0.767899
311.79	0.216454	0.208483			311.79	-0.891053	-0.7696
311.99	0.220278	0.210255			311.99	-0.88723	-0.767828
312.19	0.222843	0.21519			312.19	-0.884664	-0.762893
312.39	0.216992	0.213202			312.39	-0.890515	-0.764881
312.59	0.21983	0.209099			312.59	-0.887677	-0.768984
312.79	0.223189	0.211757			312.79	-0.884318	-0.766326
312.99	0.224936	0.212822			312.99	-0.882572	-0.765261
313.19	0.222987	0.210945			313.19	-0.88452	-0.767138
313.39	0.225574	0.211443			313.39	-0.881933	-0.76664
313.59	0.222203	0.215478			313.59	-0.885304	-0.762605
313.79	0.224121	0.212775			313.79	-0.883386	-0.765308
313.99	0.223745	0.215565			313.99	-0.883763	-0.762518
314.2	0.226121	0.218283			314.2	-0.881386	-0.7598
314.39	0.226135	0.213946			314.39	-0.881372	-0.764137
314.59	0.227678	0.2168			314.59	-0.87983	-0.761283
314.79	0.224619	0.218233			314.79	-0.882888	-0.75985
314.99	0.226903	0.215201			314.99	-0.880605	-0.762882
315.19	0.228197	0.218749			315.19	-0.87931	-0.759334
315.39	0.227547	0.219998			315.39	-0.87996	-0.758085
315.59	0.226665	0.21775			315.59	-0.880842	-0.760333
315.79	0.228754	0.220199			315.79	-0.878753	-0.757884
315.99	0.224933	0.218383			315.99	-0.882574	-0.759699
316.19	0.229063	0.218921			316.19	-0.878444	-0.759162
316.39	0.22941	0.220463			316.39	-0.878098	-0.75762
316.59	0.230886	0.218816			316.59	-0.876622	-0.759266
316.79	0.225945	0.217978			316.79	-0.881563	-0.760105
316.99	0.230009	0.220147			316.99	-0.877498	-0.757936
317.19	0.228983	0.219164			317.19	-0.878525	-0.758919
317.39	0.232857	0.222127			317.39	-0.87465	-0.755956
317.59	0.232979	0.221208			317.59	-0.874528	-0.756875
317.79	0.23591	0.22287			317.79	-0.871597	-0.755213
317.99	0.229972	0.221106			317.99	-0.877535	-0.756977
318.19	0.233477	0.221625			318.19	-0.874031	-0.756458
318.39	0.234822	0.221244			318.39	-0.872685	-0.756839
318.59	0.236758	0.22247			318.59	-0.870749	-0.755613
318.79	0.231841	0.22471			318.79	-0.875666	-0.753373
318.99	0.233615	0.225128			318.99	-0.873892	-0.752955
319.19	0.231401	0.225497			319.19	-0.876106	-0.752586
319.39	0.234939	0.223806			319.39	-0.872569	-0.754277
319.59	0.233649	0.224491			319.59	-0.873859	-0.753592
319.79	0.235376	0.224412			319.79	-0.872131	-0.753671
319.99	0.235698	0.223493			319.99	-0.871809	-0.75459
320.19	0.237473	0.224527			320.19	-0.870034	-0.753556
320.39	0.23492	0.2257			320.39	-0.872588	-0.752383
320.59	0.236706	0.227462			320.59	-0.870801	-0.750621
320.79	0.23656	0.228499			320.79	-0.870947	-0.749584
320.99	0.235428	0.229508			320.99	-0.872079	-0.748575
321.19	0.238311	0.229702			321.19	-0.869196	-0.748381
321.39	0.234525	0.223428			321.39	-0.872982	-0.754655
321.59	0.236573	0.227517			321.59	-0.870934	-0.750566
321.79	0.237644	0.231206			321.79	-0.869864	-0.746877
321.99	0.241046	0.232522			321.99	-0.866462	-0.745561
322.19	0.238556	0.233565			322.19	-0.868951	-0.744518
322.39	0.240389	0.232419			322.39	-0.867119	-0.745664
322.59	0.243284	0.230805			322.59	-0.864224	-0.747278
322.79	0.241827	0.232184			322.79	-0.86568	-0.745899
322.99	0.239485	0.230283			322.99	-0.868022	-0.7478
323.19	0.240286	0.231403			323.19	-0.867221	-0.74668
323.39	0.245962	0.232782			323.39	-0.861546	-0.745301
323.59	0.2412	0.231564			323.59	-0.866307	-0.746518
323.79	0.248062	0.233808			323.79	-0.859446	-0.744275
323.99	0.250954	0.232122			323.99	-0.856554	-0.745961
324.19	0.243943	0.23496			324.19	-0.863565	-0.743123
324.39	0.245971	0.235508			324.39	-0.861537	-0.742575
324.59	0.243318	0.234218			324.59	-0.864189	-0.743865
324.79	0.246646	0.233004			324.79	-0.860862	-0.745079
324.99	0.244091	0.236583			324.99	-0.863416	-0.7415
325.2	0.249967	0.232081			325.2	-0.85754	-0.746002
325.39	0.244319	0.235642			325.39	-0.863188	-0.742441
325.6	0.248342	0.236356			325.6	-0.859166	-0.741727
325.79	0.246819	0.237049			325.79	-0.860688	-0.741034
325.99	0.246988	0.235206			325.99	-0.860519	-0.742877
326.2	0.251914	0.237494			326.2	-0.855593	-0.740589
326.39	0.249301	0.239282			326.39	-0.858206	-0.738801
326.6	0.249504	0.237786			326.6	-0.858003	-0.740297
326.79	0.247528	0.23868			326.79	-0.859979	-0.739403
326.99	0.247702	0.239084			326.99	-0.859805	-0.738999
327.2	0.25088	0.239494			327.2	-0.856627	-0.738589
327.39	0.249006	0.240659			327.39	-0.858501	-0.737424
327.6	0.253091	0.24001			327.6	-0.854416	-0.738073
327.79	0.25223	0.242209			327.79	-0.855277	-0.735874
327.99	0.251805	0.242208			327.99	-0.855702	-0.735875
328.2	0.252688	0.24366			328.2	-0.854819	-0.734423
328.39	0.251153	0.242298			328.39	-0.856355	-0.735785
328.6	0.250045	0.24124			328.6	-0.857463	-0.736843
328.79	0.249576	0.241155			328.79	-0.857931	-0.736928
328.99	0.253605	0.245911			328.99	-0.853902	-0.732172
329.2	0.250528	0.243907			329.2	-0.856979	-0.734176
329.39	0.2527	0.244598			329.39	-0.854807	-0.733485
329.6	0.252746	0.245607			329.6	-0.854762	-0.732476
329.79	0.254322	0.245007			329.79	-0.853186	-0.733075
329.99	0.254353	0.242495			329.99	-0.853154	-0.735588
330.2	0.253521	0.24315			330.2	-0.853986	-0.734933
330.39	0.257899	0.245245			330.39	-0.849608	-0.732838
330.6	0.257393	0.249579			330.6	-0.850114	-0.728504
330.79	0.256245	0.246298			330.79	-0.851262	-0.731785
330.99	0.257196	0.243732			330.99	-0.850311	-0.734351
331.19	0.259634	0.249266			331.19	-0.847873	-0.728817
331.39	0.256056	0.246897			331.39	-0.851451	-0.731186
331.6	0.259874	0.24824			331.6	-0.847633	-0.729843
331.79	0.256253	0.245633			331.79	-0.851254	-0.73245
331.99	0.256648	0.247769			331.99	-0.850859	-0.730314
332.19	0.25882	0.250026			332.19	-0.848687	-0.728057
332.39	0.260951	0.249917			332.39	-0.846556	-0.728166
332.6	0.259767	0.252703			332.6	-0.84774	-0.72538
332.79	0.261285	0.249311			332.79	-0.846222	-0.728772
332.99	0.26483	0.250223			332.99	-0.842677	-0.72786
333.2	0.259978	0.248517			333.2	-0.847529	-0.729566
333.39	0.262503	0.25096			333.39	-0.845004	-0.727123
333.59	0.260367	0.250243			333.59	-0.847141	-0.72784
333.79	0.263822	0.245919			333.79	-0.843685	-0.732164
333.99	0.262543	0.254307			333.99	-0.844964	-0.723776
334.19	0.263705	0.250302			334.19	-0.843802	-0.727781
334.39	0.26164	0.252185			334.39	-0.845867	-0.725898
334.6	0.260553	0.253631			334.6	-0.846954	-0.724452
334.79	0.266784	0.251807			334.79	-0.840723	-0.726276
334.99	0.263394	0.250314			334.99	-0.844113	-0.727769
335.2	0.264286	0.257557			335.2	-0.843221	-0.720526
335.39	0.263217	0.255621			335.39	-0.844291	-0.722461
335.6	0.2667	0.257053			335.6	-0.840808	-0.72103
335.79	0.266652	0.252951			335.79	-0.840856	-0.725131
335.99	0.268947	0.256628			335.99	-0.83856	-0.721455
336.2	0.264345	0.258414			336.2	-0.843162	-0.719669
336.39	0.267755	0.256226			336.39	-0.839752	-0.721857
336.6	0.266905	0.257092			336.6	-0.840603	-0.720991
336.79	0.265857	0.256844			336.79	-0.84165	-0.721239
336.99	0.267953	0.258462			336.99	-0.839554	-0.719621
337.2	0.26731	0.257634			337.2	-0.840197	-0.720449
337.39	0.267604	0.257133			337.39	-0.839904	-0.72095
337.59	0.268012	0.260702			337.59	-0.839495	-0.717381
337.79	0.269278	0.257845			337.79	-0.838229	-0.720238
337.99	0.269442	0.259839			337.99	-0.838066	-0.718244
338.2	0.274608	0.26194			338.2	-0.832899	-0.716143
338.39	0.271123	0.2593			338.39	-0.836384	-0.718783
338.6	0.271276	0.260306			338.6	-0.836231	-0.717777
338.79	0.274062	0.262886			338.79	-0.833445	-0.715197
338.99	0.271424	0.260499			338.99	-0.836083	-0.717584
339.2	0.272801	0.259743			339.2	-0.834706	-0.71834
339.39	0.273388	0.261762			339.39	-0.834119	-0.716321
339.6	0.271838	0.262508			339.6	-0.835669	-0.715575
339.79	0.274984	0.262217			339.79	-0.832524	-0.715866
339.99	0.274872	0.262298			339.99	-0.832635	-0.715785
340.2	0.277701	0.262843			340.2	-0.829806	-0.71524
340.39	0.272419	0.266959			340.39	-0.835089	-0.711124
340.59	0.275649	0.266092			340.59	-0.831858	-0.711991
340.79	0.272737	0.263089			340.79	-0.83477	-0.714994
340.99	0.277087	0.265972			340.99	-0.83042	-0.712111
341.2	0.276491	0.266017			341.2	-0.831017	-0.712066
341.39	0.277875	0.265383			341.39	-0.829632	-0.7127
341.59	0.275378	0.266595			341.59	-0.832129	-0.711488
341.79	0.279128	0.26532			341.79	-0.828379	-0.712763
341.99	0.27897	0.26769			341.99	-0.828537	-0.710393
342.2	0.27906	0.268887			342.2	-0.828448	-0.709196
342.39	0.282244	0.266015			342.39	-0.825263	-0.712068
342.6	0.284029	0.264823			342.6	-0.823479	-0.71326
342.79	0.277169	0.267305			342.79	-0.830338	-0.710778
342.99	0.284418	0.268674			342.99	-0.82309	-0.709409
343.2	0.279428	0.268557			343.2	-0.828079	-0.709526
343.39	0.282038	0.270485			343.39	-0.825469	-0.707598
343.6	0.284706	0.273878			343.6	-0.822801	-0.704205
343.79	0.281949	0.270978			343.79	-0.825558	-0.707105
343.99	0.283194	0.269906			343.99	-0.824314	-0.708177
344.2	0.281971	0.270839			344.2	-0.825537	-0.707244
344.39	0.281481	0.273572			344.39	-0.826026	-0.704511
344.59	0.281583	0.26938			344.59	-0.825924	-0.708703
344.79	0.282055	0.272838			344.79	-0.825452	-0.705245
344.99	0.283351	0.272823			344.99	-0.824156	-0.70526
345.2	0.283067	0.273309			345.2	-0.82444	-0.704774
345.39	0.284792	0.272951			345.39	-0.822715	-0.705132
345.59	0.283737	0.273495			345.59	-0.82377	-0.704588
345.79	0.283605	0.27253			345.79	-0.823903	-0.705553
345.99	0.285927	0.272224			345.99	-0.82158	-0.705859
346.19	0.285192	0.273735			346.19	-0.822315	-0.704348
346.39	0.286287	0.275948			346.39	-0.82122	-0.702135
346.6	0.285877	0.278902			346.6	-0.82163	-0.699181
346.79	0.289729	0.278808			346.79	-0.817778	-0.699275
346.99	0.289344	0.274984			346.99	-0.818164	-0.703099
347.19	0.287983	0.278679			347.19	-0.819525	-0.699404
347.39	0.287816	0.276366			347.39	-0.819691	-0.701717
347.59	0.289059	0.279667			347.59	-0.818448	-0.698416
347.79	0.288022	0.276057			347.79	-0.819485	-0.702026
347.99	0.288665	0.277402			347.99	-0.818842	-0.700681
348.2	0.290175	0.276196			348.2	-0.817333	-0.701886
348.39	0.290598	0.277599			348.39	-0.816909	-0.700484
348.59	0.290427	0.27874			348.59	-0.81708	-0.699343
348.79	0.292461	0.279164			348.79	-0.815046	-0.698919
348.99	0.291027	0.280397			348.99	-0.816481	-0.697686
349.19	0.290524	0.281689			349.19	-0.816983	-0.696394
349.39	0.288479	0.281491			349.39	-0.819028	-0.696592
349.59	0.294999	0.282201			349.59	-0.812508	-0.695882
349.79	0.294952	0.283275			349.79	-0.812555	-0.694808
349.99	0.294136	0.283574			349.99	-0.813371	-0.694509
350.19	0.29273	0.283269			350.19	-0.814777	-0.694814
350.39	0.292283	0.284376			350.39	-0.815224	-0.693707
350.6	0.293072	0.28336			350.6	-0.814435	-0.694723
350.79	0.292006	0.281868			350.79	-0.815502	-0.696215
350.99	0.292288	0.283142			350.99	-0.815219	-0.694941
351.19	0.293913	0.283663			351.19	-0.813594	-0.69442
351.39	0.295143	0.287124			351.39	-0.812364	-0.690959
351.59	0.296545	0.287535			351.59	-0.810962	-0.690548
351.79	0.299696	0.286206			351.79	-0.807812	-0.691877
351.99	0.297661	0.287855			351.99	-0.809846	-0.690228
352.2	0.296643	0.287602			352.2	-0.810865	-0.690481
352.39	0.298722	0.287486			352.39	-0.808785	-0.690597
352.59	0.298717	0.284879			352.59	-0.80879	-0.693204
352.79	0.29618	0.287177			352.79	-0.811327	-0.690906
352.99	0.298009	0.287863			352.99	-0.809498	-0.69022
353.19	0.297922	0.288196			353.19	-0.809585	-0.689887
353.39	0.300491	0.28662			353.39	-0.807017	-0.691463
353.59	0.302532	0.287491			353.59	-0.804975	-0.690592
353.79	0.303636	0.288234			353.79	-0.803872	-0.689849
353.99	0.302018	0.28932			353.99	-0.805489	-0.688763
354.19	0.302085	0.294168			354.19	-0.805422	-0.683915
354.39	0.303244	0.290572			354.39	-0.804263	-0.687511
354.6	0.300707	0.290187			354.6	-0.8068	-0.687896
354.79	0.303264	0.290313			354.79	-0.804243	-0.68777
354.99	0.308796	0.290572			354.99	-0.798711	-0.687511
355.2	0.303318	0.289188			355.2	-0.804189	-0.688895
355.39	0.303069	0.292762			355.39	-0.804438	-0.685321
355.6	0.307465	0.292109			355.6	-0.800043	-0.685974
355.79	0.302765	0.297106			355.79	-0.804742	-0.680977
355.99	0.304307	0.295341			355.99	-0.803201	-0.682742
356.19	0.308888	0.291996			356.19	-0.79862	-0.686087
356.39	0.306458	0.293548			356.39	-0.801049	-0.684535
356.6	0.306666	0.292421			356.6	-0.800842	-0.685662
356.79	0.302816	0.294602			356.79	-0.804691	-0.683481
356.99	0.308882	0.295886			356.99	-0.798625	-0.682197
357.2	0.30407	0.293336			357.2	-0.803438	-0.684747
357.39	0.307432	0.29874			357.39	-0.800076	-0.679343
357.59	0.309342	0.293568			357.59	-0.798165	-0.684514
357.79	0.309225	0.295618			357.79	-0.798282	-0.682465
357.99	0.305357	0.296269			357.99	-0.80215	-0.681814
358.2	0.310289	0.299899			358.2	-0.797218	-0.678184
358.39	0.310032	0.297092			358.39	-0.797475	-0.680991
358.6	0.310866	0.296791			358.6	-0.796641	-0.681292
358.79	0.307709	0.300293			358.79	-0.799799	-0.67779
358.99	0.31333	0.297341			358.99	-0.794177	-0.680742
359.2	0.313048	0.29884			359.2	-0.794459	-0.679243
359.39	0.311821	0.300605			359.39	-0.795686	-0.677478
359.6	0.308884	0.29924			359.6	-0.798623	-0.678843
359.79	0.309086	0.300536			359.79	-0.798421	-0.677547
359.99	0.312144	0.304371			359.99	-0.795364	-0.673712
360.19	0.311941	0.301854			360.19	-0.795567	-0.676229
360.39	0.311525	0.302759			360.39	-0.795982	-0.675324
360.6	0.311368	0.302402			360.6	-0.796139	-0.675681
360.79	0.315536	0.302016			360.79	-0.791971	-0.676067
360.99	0.314276	0.304893			360.99	-0.793231	-0.67319
361.2	0.314432	0.304215			361.2	-0.793075	-0.673868
361.39	0.316316	0.303002			361.39	-0.791191	-0.675081
361.59	0.319653	0.305984			361.59	-0.787854	-0.672099
361.79	0.313062	0.30577			361.79	-0.794445	-0.672313
361.99	0.315641	0.304765			361.99	-0.791866	-0.673318
362.2	0.316137	0.304986			362.2	-0.79137	-0.673097
362.39	0.317955	0.306068			362.39	-0.789552	-0.672015
362.6	0.321535	0.303729			362.6	-0.785972	-0.674354
362.79	0.316458	0.306343			362.79	-0.791049	-0.67174
362.99	0.322296	0.304562			362.99	-0.785211	-0.673521
363.19	0.318471	0.305532			363.19	-0.789036	-0.67255
363.39	0.320306	0.305854			363.39	-0.787201	-0.672229
363.6	0.319009	0.306872			363.6	-0.788498	-0.671211
363.79	0.320184	0.30914			363.79	-0.787323	-0.668943
363.99	0.32387	0.308821			363.99	-0.783637	-0.669262
364.19	0.322018	0.309574			364.19	-0.78549	-0.668509
364.39	0.322885	0.309711			364.39	-0.784622	-0.668372
364.6	0.320677	0.309543			364.6	-0.78683	-0.66854
364.79	0.322586	0.308892			364.79	-0.784921	-0.669191
364.99	0.321654	0.312149			364.99	-0.785853	-0.665934
365.19	0.319854	0.308009			365.19	-0.787653	-0.670073
365.39	0.325906	0.312252			365.39	-0.781601	-0.665831
365.59	0.323867	0.31334			365.59	-0.78364	-0.664743
365.79	0.326902	0.311554			365.79	-0.780606	-0.666529
365.99	0.32814	0.311103			365.99	-0.779367	-0.66698
366.19	0.326514	0.314295			366.19	-0.780993	-0.663788
366.39	0.325686	0.315425			366.39	-0.781821	-0.662658
366.6	0.323684	0.313883			366.6	-0.783823	-0.6642
366.79	0.327082	0.313179			366.79	-0.780425	-0.664904
366.99	0.324615	0.315716			366.99	-0.782892	-0.662367
367.19	0.327231	0.313373			367.19	-0.780276	-0.66471
367.39	0.32411	0.312202			367.39	-0.783397	-0.665881
367.59	0.328467	0.314414			367.59	-0.77904	-0.663669
367.79	0.327605	0.3163			367.79	-0.779902	-0.661783
367.99	0.331625	0.317256			367.99	-0.775882	-0.660827
368.19	0.333245	0.31462			368.19	-0.774262	-0.663463
368.39	0.329093	0.316576			368.39	-0.778415	-0.661507
368.6	0.32926	0.320798			368.6	-0.778247	-0.657285
368.79	0.328171	0.317446			368.79	-0.779337	-0.660637
368.99	0.333413	0.318891			368.99	-0.774094	-0.659192
369.19	0.324755	0.3175			369.19	-0.782752	-0.660583
369.39	0.330335	0.319508			369.39	-0.777172	-0.658575
369.59	0.331706	0.321532			369.59	-0.775801	-0.656551
369.79	0.330821	0.318479			369.79	-0.776686	-0.659604
369.99	0.334975	0.320706			369.99	-0.772533	-0.657377
370.19	0.332294	0.321693			370.19	-0.775214	-0.65639
370.39	0.332668	0.321286			370.39	-0.77484	-0.656797
370.59	0.337052	0.322187			370.59	-0.770456	-0.655896
370.79	0.334264	0.321942			370.79	-0.773244	-0.656141
370.99	0.331904	0.322163			370.99	-0.775603	-0.65592
371.19	0.333606	0.32451			371.19	-0.773901	-0.653573
371.39	0.33685	0.32165			371.39	-0.770657	-0.656433
371.6	0.335901	0.322316			371.6	-0.771606	-0.655767
371.79	0.33509	0.322706			371.79	-0.772417	-0.655377
371.99	0.338651	0.322099			371.99	-0.768856	-0.655984
372.19	0.335619	0.325525			372.19	-0.771889	-0.652558
372.39	0.337411	0.322472			372.39	-0.770096	-0.655611
372.6	0.341941	0.323879			372.6	-0.765566	-0.654204
372.79	0.338372	0.326183			372.79	-0.769136	-0.6519
372.99	0.337781	0.325898			372.99	-0.769726	-0.652185
373.19	0.337348	0.327232			373.19	-0.770159	-0.650851
373.39	0.337867	0.326793			373.39	-0.769641	-0.65129
373.59	0.339754	0.327438			373.59	-0.767753	-0.650645
373.79	0.336615	0.325342			373.79	-0.770893	-0.652741
373.99	0.337853	0.32844			373.99	-0.769654	-0.649643
374.19	0.341351	0.32785			374.19	-0.766156	-0.650233
374.39	0.342366	0.327993			374.39	-0.765141	-0.65009
374.59	0.341116	0.328694			374.59	-0.766391	-0.649389
374.79	0.341493	0.329378			374.79	-0.766015	-0.648705
374.99	0.338677	0.334862			374.99	-0.768831	-0.643221
375.19	0.342003	0.332077			375.19	-0.765504	-0.646006
375.39	0.342449	0.331667			375.39	-0.765058	-0.646416
375.59	0.345706	0.332488			375.59	-0.761802	-0.645594
375.79	0.345874	0.331675			375.79	-0.761633	-0.646408
375.99	0.345576	0.334096			375.99	-0.761931	-0.643987
376.19	0.344881	0.334446			376.19	-0.762626	-0.643637
376.39	0.346777	0.332539			376.39	-0.760731	-0.645544
376.6	0.345581	0.331011			376.6	-0.761926	-0.647072
376.79	0.34457	0.334969			376.79	-0.762937	-0.643114
376.99	0.346374	0.334755			376.99	-0.761134	-0.643328
377.19	0.34245	0.333564			377.19	-0.765057	-0.644519
377.39	0.34825	0.335329			377.39	-0.759257	-0.642754
377.59	0.351285	0.332468			377.59	-0.756222	-0.645615
377.79	0.349794	0.335245			377.79	-0.757714	-0.642838
377.99	0.344513	0.333788			377.99	-0.762994	-0.644295
378.19	0.34912	0.337679			378.19	-0.758388	-0.640404
378.39	0.349646	0.336065			378.39	-0.757861	-0.642018
378.59	0.346509	0.336987			378.59	-0.760998	-0.641096
378.79	0.35268	0.339223			378.79	-0.754827	-0.63886
378.99	0.349194	0.340412			378.99	-0.758313	-0.637671
379.19	0.352481	0.334825			379.19	-0.755026	-0.643258
379.39	0.35055	0.337897			379.39	-0.756957	-0.640186
379.59	0.349473	0.339384			379.59	-0.758034	-0.638699
379.79	0.350801	0.339123			379.79	-0.756707	-0.63896
379.99	0.351068	0.338117			379.99	-0.756439	-0.639966
380.19	0.354029	0.338632			380.19	-0.753478	-0.639451
380.39	0.355297	0.340012			380.39	-0.752211	-0.638071
380.59	0.355601	0.340051			380.59	-0.751906	-0.638032
380.79	0.354166	0.339394			380.79	-0.753341	-0.638689
380.99	0.352105	0.344428			380.99	-0.755402	-0.633655
381.19	0.351325	0.341475			381.19	-0.756183	-0.636608
381.39	0.353128	0.345625			381.39	-0.754379	-0.632458
381.59	0.356033	0.342405			381.59	-0.751474	-0.635678
381.79	0.35714	0.342328			381.79	-0.750367	-0.635754
381.99	0.357537	0.34291			381.99	-0.74997	-0.635173
382.19	0.3573	0.34321			382.19	-0.750207	-0.634873
382.39	0.356199	0.342902			382.39	-0.751308	-0.635181
382.59	0.359071	0.34767			382.59	-0.748436	-0.630413
382.79	0.357607	0.345206			382.79	-0.7499	-0.632877
382.99	0.359038	0.343819			382.99	-0.748469	-0.634264
383.19	0.356248	0.341306			383.19	-0.75126	-0.636777
383.39	0.358253	0.346885			383.39	-0.749254	-0.631198
383.6	0.361503	0.345485			383.6	-0.746004	-0.632597
383.79	0.357449	0.347737			383.79	-0.750058	-0.630346
383.99	0.357023	0.348269			383.99	-0.750485	-0.629814
384.2	0.360152	0.345843			384.2	-0.747356	-0.63224
384.39	0.359943	0.348679			384.39	-0.747564	-0.629404
384.6	0.360571	0.347108			384.6	-0.746936	-0.630974
384.79	0.363789	0.347779			384.79	-0.743719	-0.630304
384.99	0.363235	0.350632			384.99	-0.744272	-0.62745
385.2	0.36059	0.34753			385.2	-0.746917	-0.630553
385.39	0.363983	0.350329			385.39	-0.743524	-0.627754
385.59	0.362567	0.349845			385.59	-0.74494	-0.628238
385.79	0.361012	0.354659			385.79	-0.746495	-0.623424
385.99	0.364777	0.34809			385.99	-0.74273	-0.629993
386.2	0.364699	0.351193			386.2	-0.742808	-0.62689
386.39	0.363449	0.353048			386.39	-0.744058	-0.625035
386.6	0.3624	0.355586			386.6	-0.745107	-0.622497
386.79	0.365699	0.350739			386.79	-0.741809	-0.627344
386.99	0.367596	0.352728			386.99	-0.739911	-0.625355
387.2	0.366588	0.354956			387.2	-0.740919	-0.623127
387.39	0.368389	0.354261			387.39	-0.739118	-0.623821
387.6	0.367023	0.351014			387.6	-0.740484	-0.627069
387.79	0.368959	0.357642			387.79	-0.738548	-0.620441
387.99	0.370135	0.355112			387.99	-0.737372	-0.622971
388.2	0.367979	0.355766			388.2	-0.739528	-0.622317
388.39	0.368036	0.355805			388.39	-0.739471	-0.622278
388.59	0.370061	0.352191			388.59	-0.737446	-0.625892
388.79	0.37362	0.35785			388.79	-0.733887	-0.620233
388.99	0.368164	0.355592			388.99	-0.739343	-0.622491
389.2	0.370818	0.359735			389.2	-0.736689	-0.618348
389.39	0.370993	0.359338			389.39	-0.736514	-0.618745
389.59	0.367512	0.360192			389.59	-0.739995	-0.617891
389.79	0.370153	0.35841			389.79	-0.737355	-0.619673
389.99	0.369942	0.357837			389.99	-0.737565	-0.620246
390.19	0.372987	0.360585			390.19	-0.73452	-0.617498
390.39	0.376884	0.361615			390.39	-0.730623	-0.616468
390.6	0.372257	0.359556			390.6	-0.735251	-0.618527
390.79	0.372535	0.360629			390.79	-0.734973	-0.617454
390.99	0.375579	0.360753			390.99	-0.731928	-0.61733
391.2	0.375684	0.361347			391.2	-0.731823	-0.616736
391.39	0.372832	0.36293			391.39	-0.734675	-0.615153
391.6	0.374327	0.364002			391.6	-0.733181	-0.614081
391.79	0.374302	0.361557			391.79	-0.733205	-0.616526
391.99	0.374354	0.361262			391.99	-0.733154	-0.616821
392.2	0.377841	0.360635			392.2	-0.729666	-0.617448
392.39	0.380537	0.363169			392.39	-0.72697	-0.614914
392.59	0.375886	0.363738			392.59	-0.731621	-0.614345
392.79	0.377396	0.364772			392.79	-0.730111	-0.613311
392.99	0.376925	0.36797			392.99	-0.730582	-0.610112
393.2	0.376728	0.366835			393.2	-0.730779	-0.611248
393.39	0.378562	0.366116			393.39	-0.728945	-0.611967
393.6	0.380617	0.365283			393.6	-0.72689	-0.612799
393.79	0.37651	0.366748			393.79	-0.730997	-0.611335
393.99	0.380749	0.367355			393.99	-0.726758	-0.610728
394.19	0.379874	0.36758			394.19	-0.727633	-0.610503
394.39	0.377362	0.369448			394.39	-0.730145	-0.608635
394.6	0.381932	0.370066			394.6	-0.725575	-0.608017
394.79	0.385706	0.366204			394.79	-0.721802	-0.611879
394.99	0.380646	0.368661			394.99	-0.726861	-0.609422
395.19	0.379332	0.367983			395.19	-0.728175	-0.6101
395.39	0.38206	0.368566			395.39	-0.725448	-0.609517
395.59	0.383095	0.367549			395.59	-0.724412	-0.610534
395.79	0.381203	0.371128			395.79	-0.726304	-0.606955
395.99	0.384391	0.37165			395.99	-0.723116	-0.606433
396.2	0.386262	0.37681			396.2	-0.721245	-0.601273
396.39	0.383859	0.37266			396.39	-0.723648	-0.605423
396.59	0.390078	0.369811			396.59	-0.717429	-0.608272
396.79	0.381897	0.373161			396.79	-0.72561	-0.604921
396.99	0.384703	0.371761			396.99	-0.722804	-0.606322
397.19	0.385702	0.375188			397.19	-0.721805	-0.602895
397.39	0.386279	0.372485			397.39	-0.721228	-0.605598
397.59	0.387524	0.371936			397.59	-0.719983	-0.606147
397.79	0.38671	0.37421			397.79	-0.720797	-0.603873
397.99	0.386498	0.372845			397.99	-0.721009	-0.605238
398.19	0.387152	0.374789			398.19	-0.720355	-0.603294
398.39	0.387771	0.369495			398.39	-0.719736	-0.608588
398.6	0.387929	0.373362			398.6	-0.719579	-0.604721
398.79	0.385284	0.37945			398.79	-0.722223	-0.598633
398.99	0.387589	0.376978			398.99	-0.719918	-0.601105
399.2	0.392687	0.380178			399.2	-0.714821	-0.597905
399.39	0.38947	0.380458			399.39	-0.718038	-0.597625
[truncated: 27,392 more rows]

## Sheet: Exp2
Time (s)	DnaK	DnaK + Ca			Time (s)	DnaK	DnaK + Ca
0	0	0			0	-0.454182	-0.804376
0.19	-0.00580474	-0.00270962			0.19	-0.459986	-0.807086
0.39	-0.00471229	-0.00265174			0.39	-0.458894	-0.807028
0.59	-0.0070582	-0.00355618			0.59	-0.46124	-0.807932
0.79	-0.00914997	-0.0030575			0.79	-0.463332	-0.807434
0.99	-0.00908191	-0.004603			0.99	-0.463264	-0.808979
1.19	-0.00913843	-0.00590253			1.19	-0.46332	-0.810279
1.39	-0.00445838	-0.00504597			1.39	-0.45864	-0.809422
1.59	-0.002971	-0.00340553			1.59	-0.457153	-0.807782
1.79	-0.00609335	-0.00472115			1.79	-0.460275	-0.809097
1.99	-0.00388176	-0.00098452			1.99	-0.458063	-0.805361
2.19	-0.00562251	-0.00158901			2.19	-0.459804	-0.805965
2.39	-0.00250716	0.00029836			2.39	-0.456689	-0.804078
2.59	-0.00469618	-0.00231571			2.59	-0.458878	-0.806692
2.79	-0.00933491	-0.00175388			2.79	-0.463517	-0.80613
2.99	-0.00349758	8.391e-05			2.99	-0.457679	-0.804292
3.19	-0.00605775	-0.00012117			3.19	-0.460239	-0.804497
3.39	-0.00225749	0.00227433			3.39	-0.456439	-0.802102
3.59	-0.00334864	0.00037028			3.59	-0.45753	-0.804006
3.79	-0.00459494	-0.00098092			3.79	-0.458777	-0.805357
3.99	-0.00530124	-0.00060508			3.99	-0.459483	-0.804981
4.19	-0.00470553	-0.00064591			4.19	-0.458887	-0.805022
4.39	-0.00165444	0.00068075			4.39	-0.455836	-0.803695
4.59	-0.00574636	0.00141202			4.59	-0.459928	-0.802964
4.79	-0.00411911	-0.00299764			4.79	-0.458301	-0.807374
4.99	-0.00626963	-0.00278747			4.99	-0.460451	-0.807163
5.19	-0.00342284	-0.00165379			5.19	-0.457604	-0.80603
5.39	-0.00236651	-0.0007561			5.39	-0.456548	-0.805132
5.59	-0.00442384	-0.00032218			5.59	-0.458605	-0.804698
5.79	-0.00082549	0.00187437			5.79	-0.455007	-0.802502
5.99	-0.00768159	0.00129062			5.99	-0.461863	-0.803085
6.19	-0.00410803	-0.0009865			6.19	-0.45829	-0.805363
6.39	-0.00347786	0.00033981			6.39	-0.457659	-0.804036
6.59	-0.00118188	0.0018744			6.59	-0.455363	-0.802502
6.79	-0.00282179	-0.00184091			6.79	-0.457003	-0.806217
6.99	-0.00108388	-0.00235956			6.99	-0.455265	-0.806736
7.19	-0.00089645	-0.00128032			7.19	-0.455078	-0.805656
7.39	-0.0033867	0.00037925			7.39	-0.457568	-0.803997
7.59	-0.00315228	0.00377692			7.59	-0.457334	-0.800599
7.79	0.00046484	0.00355143			7.79	-0.453717	-0.800825
7.99	-0.00481791	-0.00080345			7.99	-0.459	-0.805179
8.19	-0.0058456	-0.00160638			8.19	-0.460027	-0.805982
8.39	-0.00566696	0.00090709			8.39	-0.459849	-0.803469
8.59	-0.00411038	0.00292149			8.59	-0.458292	-0.801455
8.79	-0.00409414	0.00109694			8.79	-0.458276	-0.803279
8.99	-0.00626823	0.00229316			8.99	-0.46045	-0.802083
9.19	-0.0042516	-0.00095074			9.19	-0.458433	-0.805327
9.39	-0.005353	0.00183529			9.39	-0.459535	-0.802541
9.59	-0.00375624	0.00235356			9.59	-0.457938	-0.802022
9.79	-0.00115482	0.00295908			9.79	-0.455336	-0.801417
9.99	-0.00204661	0.00212251			9.99	-0.456228	-0.802254
10.19	-0.0031858	0.00208072			10.19	-0.457367	-0.802295
10.39	-0.00172891	0.00310312			10.39	-0.455911	-0.801273
10.59	-0.00226729	-0.00098301			10.59	-0.456449	-0.805359
10.79	-0.00235362	0.00077586			10.79	-0.456535	-0.8036
10.99	-0.00404373	0.00405079			10.99	-0.458225	-0.800325
11.19	-0.00452967	0.00060211			11.19	-0.458711	-0.803774
11.39	-0.00596688	0.00237031			11.39	-0.460148	-0.802006
11.59	-0.00194243	0.00241334			11.59	-0.456124	-0.801963
11.79	-0.00171563	0.00385791			11.79	-0.455897	-0.800518
11.99	-0.00144403	-0.00051494			11.99	-0.455626	-0.804891
12.19	0.00047665	0.00123302			12.19	-0.453705	-0.803143
12.39	4.486e-05	0.0027721			12.39	-0.454137	-0.801604
12.59	-0.00734495	0.00330834			12.59	-0.461527	-0.801068
12.79	-0.00252157	0.00220349			12.79	-0.456703	-0.802173
12.99	-0.00025288	0.00325766			12.99	-0.454434	-0.801118
13.19	-0.00370578	0.00178883			13.19	-0.457887	-0.802587
13.39	-0.00469893	0.00465543			13.39	-0.458881	-0.799721
13.59	-0.00113453	0.00491555			13.59	-0.455316	-0.79946
13.79	-0.00183268	-0.00144306			13.79	-0.456014	-0.805819
13.99	-0.0014046	0.00554868			13.99	-0.455586	-0.798827
14.19	0.00032967	0.00269079			14.19	-0.453852	-0.801685
14.39	-0.0022489	0.00662646			14.39	-0.456431	-0.79775
14.59	-0.00293456	0.00579074			14.59	-0.457116	-0.798585
14.79	-0.00282953	0.00310663			14.79	-0.457011	-0.801269
14.99	-0.00200199	0.0003828			14.99	-0.456184	-0.803993
15.19	-0.00108736	-0.00127605			15.19	-0.455269	-0.805652
15.39	-0.00066737	0.00361002			15.39	-0.454849	-0.800766
15.59	-0.00209589	0.00199867			15.59	-0.456278	-0.802377
15.79	-0.0017576	0.00335979			15.79	-0.455939	-0.801016
15.99	-0.0052611	0.00396361			15.99	-0.459443	-0.800412
16.19	-0.00216077	0.00326584			16.19	-0.456342	-0.80111
16.39	0.00116889	0.00411803			16.39	-0.453013	-0.800258
16.59	0.00187134	0.00779614			16.59	-0.45231	-0.79658
16.79	0.00132321	0.00461534			16.79	-0.452858	-0.799761
16.99	0.00102567	0.00172039			16.99	-0.453156	-0.802656
17.19	-0.00223793	0.0034935			17.19	-0.45642	-0.800883
17.39	-0.00404111	0.00444169			17.39	-0.458223	-0.799934
17.59	-0.004488	0.00285484			17.59	-0.45867	-0.801521
17.79	-0.0035589	0.0050615			17.79	-0.457741	-0.799315
17.99	-0.00352207	0.0057168			17.99	-0.457704	-0.798659
18.19	-0.00827293	0.00484225			18.19	-0.462455	-0.799534
18.39	-0.00363853	0.00428023			18.39	-0.45782	-0.800096
18.59	0.00123575	0.00540419			18.59	-0.452946	-0.798972
18.79	-0.0009609	0.00206204			18.79	-0.455143	-0.802314
18.99	-0.00076627	0.00638068			18.99	-0.454948	-0.797995
19.19	-0.00093122	0.00658001			19.19	-0.455113	-0.797796
19.39	0.00026464	0.00546483			19.39	-0.453917	-0.798911
19.59	-0.00290003	0.00436389			19.59	-0.457082	-0.800012
19.79	-0.00730328	0.0025044			19.79	-0.461485	-0.801872
19.99	0.00139742	0.00926261			19.99	-0.452784	-0.795113
20.19	-0.00144417	0.00273805			20.19	-0.455626	-0.801638
20.39	-0.00443794	0.00327168			20.39	-0.45862	-0.801104
20.59	-0.0036637	0.00387674			20.59	-0.457845	-0.800499
20.79	-0.00186017	0.00133577			20.79	-0.456042	-0.80304
20.99	-0.00346688	0.00533912			20.99	-0.457648	-0.799037
21.19	-0.00206731	0.00700225			21.19	-0.456249	-0.797374
21.39	0.00187688	0.00368962			21.39	-0.452305	-0.800686
21.59	0.00077149	0.00563909			21.59	-0.45341	-0.798737
21.79	-0.00298964	0.00871096			21.79	-0.457171	-0.795665
21.99	0.00146161	0.0050984			21.99	-0.45272	-0.799278
22.19	-0.00201443	0.0049082			22.19	-0.456196	-0.799468
22.39	-0.00304556	0.00501187			22.39	-0.457227	-0.799364
22.59	-0.00193457	0.00609768			22.59	-0.456116	-0.798278
22.79	-0.00146923	0.00347171			22.79	-0.455651	-0.800904
22.99	0.0017611	0.00384249			22.99	-0.452421	-0.800534
23.19	0.00079548	0.00579918			23.19	-0.453386	-0.798577
23.39	-0.00098031	0.00585962			23.39	-0.455162	-0.798516
23.59	0.0034869	0.00575223			23.59	-0.450695	-0.798624
23.79	-0.00418605	0.0058612			23.79	-0.458368	-0.798515
23.99	-0.00052297	0.00618734			23.99	-0.454705	-0.798189
24.19	-0.00217065	0.00776747			24.19	-0.456352	-0.796609
24.39	-0.00181498	0.0041482			24.39	-0.455997	-0.800228
24.59	-0.00470188	0.00443286			24.59	-0.458883	-0.799943
24.79	0.00132008	0.00491683			24.79	-0.452862	-0.799459
24.99	0.00153225	0.00903219			24.99	-0.452649	-0.795344
25.19	0.00026242	0.00859286			25.19	-0.453919	-0.795783
25.39	-0.00151915	0.00475266			25.39	-0.455701	-0.799623
25.59	-0.00284103	0.00913045			25.59	-0.457023	-0.795246
25.79	-0.00152521	0.00862469			25.79	-0.455707	-0.795751
25.99	-0.00320264	0.00701825			25.99	-0.457384	-0.797358
26.19	-0.00230291	0.00555517			26.19	-0.456485	-0.798821
26.39	-0.0014709	0.00565594			26.39	-0.455653	-0.79872
26.59	-0.00290057	0.00672135			26.59	-0.457082	-0.797655
26.79	-0.00049726	0.00673616			26.79	-0.454679	-0.79764
26.99	0.00109131	0.00778662			26.99	-0.45309	-0.796589
27.19	-0.00434212	0.00816312			27.19	-0.458524	-0.796213
27.39	0.00253018	0.00691238			27.39	-0.451651	-0.797464
27.59	0.00086108	0.00766075			27.59	-0.453321	-0.796715
27.79	0.00075991	0.00704443			27.79	-0.453422	-0.797332
27.99	2.037e-05	0.00720837			27.99	-0.454161	-0.797168
28.19	0.00078195	0.00879947			28.19	-0.4534	-0.795577
28.39	0.00078235	0.00434058			28.39	-0.453399	-0.800035
28.59	-0.00322085	0.00949335			28.59	-0.457402	-0.794883
28.79	0.00339522	0.00777134			28.79	-0.450786	-0.796605
28.99	0.00287771	0.00918288			28.99	-0.451304	-0.795193
29.19	-0.00107518	0.0091905			29.19	-0.455257	-0.795186
29.39	-0.00325484	0.00546702			29.39	-0.457436	-0.798909
29.59	-0.00141512	0.00705947			29.59	-0.455597	-0.797317
29.79	-0.00360153	0.00699259			29.79	-0.457783	-0.797383
29.99	0.00030721	0.00838427			29.99	-0.453874	-0.795992
30.19	0.00164545	0.0103801			30.19	-0.452536	-0.793996
30.39	0.00188276	0.00817617			30.39	-0.452299	-0.7962
30.59	-0.0015857	0.0105744			30.59	-0.455767	-0.793802
30.79	-0.00337953	0.00831694			30.79	-0.457561	-0.796059
30.99	0.00261294	0.00917322			30.99	-0.451569	-0.795203
31.19	0.00197039	0.0104043			31.19	-0.452211	-0.793972
31.39	0.00237491	0.0123805			31.39	-0.451807	-0.791996
31.59	0.00197891	0.0081885			31.59	-0.452203	-0.796188
31.79	-0.00260612	0.00885103			31.79	-0.456788	-0.795525
31.99	0.00206869	0.00825766			31.99	-0.452113	-0.796118
32.19	0.00141732	0.0100034			32.19	-0.452764	-0.794373
32.39	0.0001086	0.00535831			32.39	-0.454073	-0.799018
32.59	0.00277029	0.00855664			32.59	-0.451411	-0.795819
32.79	-0.00114576	0.0122565			32.79	-0.455327	-0.79212
32.99	0.00073739	0.00652928			32.99	-0.453444	-0.797847
33.19	-0.00117136	0.00718361			33.19	-0.455353	-0.797192
33.39	0.00643297	0.0110165			33.39	-0.447749	-0.79336
33.59	0.00479142	0.0108334			33.59	-0.44939	-0.793543
33.79	0.0048281	0.0115845			33.79	-0.449354	-0.792791
33.99	0.00076952	0.00857795			33.99	-0.453412	-0.795798
34.19	0.00149457	0.0105522			34.19	-0.452687	-0.793824
34.39	0.00150967	0.0118727			34.39	-0.452672	-0.792503
34.59	0.00011512	0.0116199			34.59	-0.454066	-0.792756
34.79	0.00137051	0.0123542			34.79	-0.452811	-0.792022
34.99	-0.00011948	0.0165212			34.99	-0.454301	-0.787855
35.19	2.941e-05	0.0074414			35.19	-0.454152	-0.796935
35.39	-0.00182841	0.0122179			35.39	-0.45601	-0.792158
35.59	0.00211932	0.0100879			35.59	-0.452062	-0.794288
35.79	0.00186994	0.0101874			35.79	-0.452312	-0.794189
35.99	-0.00096471	0.0132697			35.99	-0.455146	-0.791106
36.19	0.00032441	0.00746164			36.19	-0.453857	-0.796914
36.39	-0.00060606	0.00970064			36.39	-0.454788	-0.794675
36.59	0.00216892	0.0101336			36.59	-0.452013	-0.794242
36.79	-0.00138708	0.00982994			36.79	-0.455569	-0.794546
36.99	0.00060061	0.0120538			36.99	-0.453581	-0.792322
37.19	0.00287787	0.0128116			37.19	-0.451304	-0.791564
37.39	0.00649462	0.0123402			37.39	-0.447687	-0.792036
37.59	0.00050933	0.00951983			37.59	-0.453672	-0.794856
37.79	0.00212516	0.00906416			37.79	-0.452056	-0.795312
37.99	0.00394284	0.0132975			37.99	-0.450239	-0.791078
38.19	0.00306576	0.013253			38.19	-0.451116	-0.791123
38.39	-0.00028599	0.0113305			38.39	-0.454468	-0.793045
38.59	0.00109853	0.0107146			38.59	-0.453083	-0.793661
38.79	0.00073318	0.0101802			38.79	-0.453448	-0.794196
38.99	0.00157267	0.0113476			38.99	-0.452609	-0.793028
39.19	0.00025491	0.0110316			39.19	-0.453927	-0.793344
39.39	0.00383848	0.0126894			39.39	-0.450343	-0.791687
39.59	3.777e-05	0.0116017			39.59	-0.454144	-0.792774
39.79	-0.00042665	0.0135587			39.79	-0.454608	-0.790817
39.99	0.00325972	0.0128155			39.99	-0.450922	-0.791561
40.19	-6.508e-05	0.0118738			40.19	-0.454247	-0.792502
40.39	0.00264381	0.0139546			40.39	-0.451538	-0.790421
40.59	0.00041091	0.0150242			40.59	-0.453771	-0.789352
40.79	0.00382033	0.00851808			40.79	-0.450361	-0.795858
40.99	0.00174468	0.0110916			40.99	-0.452437	-0.793284
41.19	0.00234184	0.0116759			41.19	-0.45184	-0.7927
41.39	0.00428136	0.0128925			41.39	-0.4499	-0.791484
41.59	0.002977	0.0121638			41.59	-0.451205	-0.792212
41.79	0.00075158	0.00870162			41.79	-0.45343	-0.795674
41.99	0.00328208	0.0132683			41.99	-0.4509	-0.791108
42.19	0.0028411	0.00821657			42.19	-0.451341	-0.796159
42.39	0.00131971	0.0179469			42.39	-0.452862	-0.786429
42.59	0.0018275	0.0145062			42.59	-0.452354	-0.78987
42.79	0.00186579	0.0136344			42.79	-0.452316	-0.790742
42.99	0.00326574	0.0145675			42.99	-0.450916	-0.789809
43.19	0.0012181	0.0127044			43.19	-0.452964	-0.791672
43.39	0.00579133	0.0109297			43.39	-0.44839	-0.793446
43.59	0.0050703	0.0122481			43.59	-0.449111	-0.792128
43.79	0.00200388	0.0146043			43.79	-0.452178	-0.789772
43.99	0.00566791	0.0137743			43.99	-0.448514	-0.790602
44.19	0.00262749	0.0127834			44.19	-0.451554	-0.791593
44.39	0.00144963	0.0130189			44.39	-0.452732	-0.791357
44.59	-0.00321389	0.0128402			44.59	-0.457396	-0.791536
44.79	0.00185547	0.0136357			44.79	-0.452326	-0.79074
44.99	0.00384423	0.012919			44.99	-0.450337	-0.791457
45.19	0.00604475	0.0169019			45.19	-0.448137	-0.787474
45.39	0.00171417	0.0111211			45.39	-0.452467	-0.793255
45.59	0.0031301	0.0126394			45.59	-0.451052	-0.791737
45.79	-0.00021184	0.0122996			45.79	-0.454393	-0.792076
45.99	0.00509208	0.0141276			45.99	-0.44909	-0.790248
46.19	0.00520112	0.0135654			46.19	-0.44898	-0.790811
46.39	0.0091729	0.0164094			46.39	-0.445009	-0.787967
46.59	0.003856	0.0127554			46.59	-0.450326	-0.791621
46.79	0.00109484	0.0133366			46.79	-0.453087	-0.791039
46.99	0.0018095	0.0130266			46.99	-0.452372	-0.791349
47.19	-0.00041609	0.0160244			47.19	-0.454598	-0.788352
47.39	0.0049346	0.0150866			47.39	-0.449247	-0.789289
47.59	0.00275051	0.0142561			47.59	-0.451431	-0.79012
47.79	0.00171031	0.0106498			47.79	-0.452471	-0.793726
47.99	0.00213493	0.0130659			47.99	-0.452047	-0.79131
48.19	0.00528643	0.0123817			48.19	-0.448895	-0.791994
48.39	0.00164104	0.0187869			48.39	-0.452541	-0.785589
48.59	0.00195188	0.0151915			48.59	-0.45223	-0.789185
48.79	0.005438	0.0142992			48.79	-0.448744	-0.790077
48.99	0.00410969	0.014759			48.99	-0.450072	-0.789617
49.19	0.00318339	0.0139145			49.19	-0.450998	-0.790462
49.39	0.00198609	0.0166145			49.39	-0.452196	-0.787762
49.59	0.00235545	0.0139674			49.59	-0.451826	-0.790409
49.79	0.00557555	0.0173124			49.79	-0.448606	-0.787064
49.99	0.00243772	0.0156684			49.99	-0.451744	-0.788708
50.19	0.00504681	0.0160297			50.19	-0.449135	-0.788346
50.39	0.00255546	0.0138009			50.39	-0.451626	-0.790575
50.59	0.0039794	0.0144308			50.59	-0.450202	-0.789945
50.79	0.00399847	0.0162626			50.79	-0.450183	-0.788113
50.99	0.00305997	0.0172482			50.99	-0.451122	-0.787128
51.19	0.00855419	0.0154911			51.19	-0.445627	-0.788885
51.39	0.00619408	0.0137563			51.39	-0.447988	-0.79062
51.59	0.00435892	0.0122306			51.59	-0.449823	-0.792145
51.79	0.00213283	0.0110982			51.79	-0.452049	-0.793278
51.99	0.00361615	0.0134225			51.99	-0.450565	-0.790954
52.19	0.00281177	0.016303			52.19	-0.45137	-0.788073
52.39	0.00524034	0.0186863			52.39	-0.448941	-0.78569
52.59	0.00637981	0.015217			52.59	-0.447802	-0.789159
52.79	-0.00107242	0.0167277			52.79	-0.455254	-0.787648
52.99	0.00027166	0.0162959			52.99	-0.45391	-0.78808
53.19	0.00432025	0.0173785			53.19	-0.449861	-0.786998
53.39	0.00273107	0.0189967			53.39	-0.451451	-0.785379
53.59	0.00247666	0.0186639			53.59	-0.451705	-0.785712
53.79	0.0040712	0.0143497			53.79	-0.45011	-0.790026
53.99	0.00432678	0.0165238			53.99	-0.449855	-0.787852
54.19	0.00316823	0.0169776			54.19	-0.451013	-0.787398
54.39	0.00239588	0.0138946			54.39	-0.451786	-0.790481
54.59	0.00502319	0.0188049			54.59	-0.449158	-0.785571
54.79	0.000106	0.019519			54.79	-0.454076	-0.784857
54.99	0.00373486	0.0184056			54.99	-0.450447	-0.78597
55.19	0.00212625	0.0168601			55.19	-0.452055	-0.787516
55.39	0.0071628	0.0193627			55.39	-0.447019	-0.785013
55.59	0.00328972	0.0166286			55.59	-0.450892	-0.787747
55.79	0.00529429	0.0178631			55.79	-0.448887	-0.786513
55.99	0.00271346	0.0219948			55.99	-0.451468	-0.782381
56.19	0.00111625	0.0160895			56.19	-0.453065	-0.788287
56.39	0.00281393	0.0133067			56.39	-0.451368	-0.791069
56.59	0.00447176	0.0150495			56.59	-0.44971	-0.789327
56.79	0.00355817	0.0149991			56.79	-0.450623	-0.789377
56.99	0.00227961	0.0157914			56.99	-0.451902	-0.788585
57.19	0.00376791	0.0181165			57.19	-0.450414	-0.78626
57.39	0.00871534	0.0188665			57.39	-0.445466	-0.78551
57.59	0.00438947	0.0189881			57.59	-0.449792	-0.785388
57.79	0.00356427	0.0125094			57.79	-0.450617	-0.791867
57.99	0.00350223	0.0227148			57.99	-0.450679	-0.781661
58.19	0.00547178	0.0136966			58.19	-0.44871	-0.790679
58.39	0.00533708	0.0193117			58.39	-0.448845	-0.785064
58.59	0.00368128	0.0183263			58.59	-0.4505	-0.78605
58.79	0.00743639	0.0185066			58.79	-0.446745	-0.785869
58.99	0.00467701	0.0153414			58.99	-0.449505	-0.789035
59.19	0.0051287	0.017751			59.19	-0.449053	-0.786625
59.39	0.00475266	0.0195909			59.39	-0.449429	-0.784785
59.59	0.00602201	0.0158942			59.59	-0.44816	-0.788482
59.79	0.00237042	0.0175951			59.79	-0.451811	-0.786781
59.99	0.00544536	0.0186563			59.99	-0.448736	-0.78572
60.19	0.00223097	0.0186111			60.19	-0.451951	-0.785765
60.39	0.00515559	0.0193766			60.39	-0.449026	-0.784999
60.59	0.00657363	0.0179281			60.59	-0.447608	-0.786448
60.79	0.00311638	0.0170295			60.79	-0.451065	-0.787347
60.99	0.0029801	0.0178486			60.99	-0.451202	-0.786527
61.19	0.00406677	0.0181129			61.19	-0.450115	-0.786263
61.39	0.00311376	0.0224043			61.39	-0.451068	-0.781972
61.59	0.00425815	0.0174912			61.59	-0.449923	-0.786885
61.79	0.00221652	0.0192207			61.79	-0.451965	-0.785155
61.99	0.00395785	0.0195673			61.99	-0.450224	-0.784809
62.19	0.00447402	0.0145761			62.19	-0.449708	-0.7898
62.39	0.00620057	0.0172626			62.39	-0.447981	-0.787113
62.59	0.00645701	0.020894			62.59	-0.447725	-0.783482
62.79	0.00295341	0.0186999			62.79	-0.451228	-0.785676
62.99	0.00704419	0.0182522			62.99	-0.447137	-0.786124
63.19	0.00592408	0.0210582			63.19	-0.448258	-0.783318
63.39	0.00542032	0.0157038			63.39	-0.448761	-0.788672
63.59	0.00446718	0.017605			63.59	-0.449714	-0.786771
63.79	0.00536057	0.0199967			63.79	-0.448821	-0.784379
63.99	0.00534523	0.0191889			63.99	-0.448836	-0.785187
64.19	0.00573504	0.0211192			64.19	-0.448447	-0.783257
64.39	0.00442874	0.0189424			64.39	-0.449753	-0.785434
64.59	0.00292857	0.0204196			64.59	-0.451253	-0.783956
64.79	0.00471098	0.0188911			64.79	-0.449471	-0.785485
64.99	0.00560946	0.0228806			64.99	-0.448572	-0.781495
65.19	0.00481235	0.0226996			65.19	-0.449369	-0.781676
65.39	0.00350441	0.0195589			65.39	-0.450677	-0.784817
65.59	0.00296979	0.0220297			65.59	-0.451212	-0.782346
65.79	0.00333234	0.0244775			65.79	-0.450849	-0.779898
65.99	0.00289533	0.0221033			65.99	-0.451286	-0.782273
66.19	0.00775899	0.01995			66.19	-0.446423	-0.784426
66.39	0.00421673	0.0200337			66.39	-0.449965	-0.784342
66.59	0.005645	0.0176274			66.59	-0.448537	-0.786749
66.79	0.00623254	0.0217832			66.79	-0.447949	-0.782593
66.99	0.00786566	0.0193609			66.99	-0.446316	-0.785015
67.19	0.00692719	0.0192615			67.19	-0.447254	-0.785115
67.39	0.00371805	0.0203459			67.39	-0.450464	-0.78403
67.59	0.00296335	0.0214087			67.59	-0.451218	-0.782967
67.79	0.00180759	0.0191687			67.79	-0.452374	-0.785207
67.99	0.00102813	0.0200956			67.99	-0.453153	-0.78428
68.19	0.0057849	0.0206003			68.19	-0.448397	-0.783776
68.39	0.00509901	0.0202019			68.39	-0.449083	-0.784174
68.59	0.00399368	0.0237338			68.59	-0.450188	-0.780642
68.79	0.00351941	0.0205705			68.79	-0.450662	-0.783806
68.99	0.00339367	0.024113			68.99	-0.450788	-0.780263
69.19	0.00336679	0.0227754			69.19	-0.450815	-0.781601
69.39	0.0080337	0.0197264			69.39	-0.446148	-0.78465
69.59	0.00519261	0.0237633			69.59	-0.448989	-0.780613
69.79	0.00384735	0.0240806			69.79	-0.450334	-0.780295
69.99	0.00163827	0.0217027			69.99	-0.452543	-0.782673
70.19	0.00680836	0.0206542			70.19	-0.447373	-0.783722
70.39	0.00475349	0.0236674			70.39	-0.449428	-0.780709
70.59	0.0101397	0.021191			70.59	-0.444042	-0.783185
70.79	0.00577698	0.0225752			70.79	-0.448405	-0.781801
70.99	0.00608248	0.0187518			70.99	-0.448099	-0.785624
71.19	0.00263544	0.0207958			71.19	-0.451546	-0.78358
71.39	0.00555136	0.0227888			71.39	-0.44863	-0.781587
71.59	0.00574174	0.022669			71.59	-0.44844	-0.781707
71.79	0.00373788	0.0244972			71.79	-0.450444	-0.779879
71.99	0.00239042	0.0241476			71.99	-0.451791	-0.780228
72.19	0.00396939	0.0205332			72.19	-0.450212	-0.783843
72.39	0.00322068	0.0218254			72.39	-0.450961	-0.782551
72.59	0.00426907	0.0235259			72.59	-0.449913	-0.78085
72.79	0.00726434	0.0188114			72.79	-0.446917	-0.785565
72.99	0.00728464	0.0231228			72.99	-0.446897	-0.781253
73.19	0.00601002	0.026356			73.19	-0.448172	-0.77802
73.39	0.00277283	0.0266152			73.39	-0.451409	-0.777761
73.59	0.00764005	0.0236056			73.59	-0.446542	-0.78077
73.79	0.0089326	0.0232446			73.79	-0.445249	-0.781131
73.99	0.00590339	0.0258067			73.99	-0.448278	-0.778569
74.19	0.007279	0.0227614			74.19	-0.446903	-0.781615
74.39	0.00748975	0.0206493			74.39	-0.446692	-0.783727
74.59	0.00763331	0.0242567			74.59	-0.446548	-0.780119
74.79	0.0083126	0.0261619			74.79	-0.445869	-0.778214
74.99	0.00917107	0.019849			74.99	-0.445011	-0.784527
75.19	0.00798129	0.0228577			75.19	-0.4462	-0.781518
75.39	0.00759344	0.0210935			75.39	-0.446588	-0.783282
75.59	0.0063246	0.0273791			75.59	-0.447857	-0.776997
75.79	0.00661287	0.02534			75.79	-0.447569	-0.779036
75.99	0.00664096	0.0262229			75.99	-0.447541	-0.778153
76.19	0.00378141	0.0236706			76.19	-0.4504	-0.780705
76.39	0.00719354	0.0236821			76.39	-0.446988	-0.780694
76.59	0.00621789	0.0192965			76.59	-0.447964	-0.78508
76.79	0.00452855	0.0243669			76.79	-0.449653	-0.780009
76.99	0.00139658	0.0264525			76.99	-0.452785	-0.777924
77.19	0.00311611	0.0228648			77.19	-0.451066	-0.781511
77.39	0.00851421	0.0273898			77.39	-0.445667	-0.776986
77.59	0.00836218	0.026112			77.59	-0.445819	-0.778264
77.79	0.00697956	0.0219317			77.79	-0.447202	-0.782444
77.99	0.0073807	0.0257478			77.99	-0.446801	-0.778628
78.19	0.00620187	0.0229511			78.19	-0.44798	-0.781425
78.39	0.00679692	0.0241886			78.39	-0.447385	-0.780187
78.59	0.0073274	0.0231771			78.59	-0.446854	-0.781199
78.79	0.00904373	0.0245595			78.79	-0.445138	-0.779817
78.99	0.0065157	0.0267017			78.99	-0.447666	-0.777674
79.19	0.00396674	0.026869			79.19	-0.450215	-0.777507
79.39	0.00723229	0.0248221			79.39	-0.446949	-0.779554
79.59	0.00523278	0.0264949			79.59	-0.448949	-0.777881
79.79	0.00434151	0.0250778			79.79	-0.44984	-0.779298
79.99	0.00645318	0.0270937			79.99	-0.447728	-0.777282
80.19	0.00644361	0.0249472			80.19	-0.447738	-0.779429
80.39	0.00363334	0.0257391			80.39	-0.450548	-0.778637
80.59	0.00378701	0.0221314			80.59	-0.450395	-0.782245
80.79	0.00816829	0.0243629			80.79	-0.446013	-0.780013
80.99	0.00981111	0.0266831			80.99	-0.444371	-0.777693
81.19	0.00737499	0.0279036			81.19	-0.446807	-0.776472
81.39	0.00609464	0.0274527			81.39	-0.448087	-0.776923
81.59	0.00529655	0.0271539			81.59	-0.448885	-0.777222
81.79	0.0106735	0.0272684			81.79	-0.443508	-0.777108
81.99	0.00993617	0.0282191			81.99	-0.444245	-0.776157
82.19	0.00412141	0.0255347			82.19	-0.45006	-0.778841
82.39	0.00560737	0.0267943			82.39	-0.448574	-0.777582
82.59	0.00248556	0.0266511			82.59	-0.451696	-0.777725
82.79	0.00643156	0.0275044			82.79	-0.44775	-0.776872
82.99	0.00378264	0.024972			82.99	-0.450399	-0.779404
83.19	0.00688475	0.0281526			83.19	-0.447297	-0.776223
83.39	0.00516553	0.0271125			83.39	-0.449016	-0.777264
83.59	0.00518178	0.0258642			83.59	-0.449	-0.778512
83.79	0.00537787	0.027204			83.79	-0.448804	-0.777172
83.99	0.00760388	0.0270982			83.99	-0.446578	-0.777278
84.19	0.00984361	0.0256592			84.19	-0.444338	-0.778717
84.39	0.00619083	0.0267876			84.39	-0.447991	-0.777588
84.59	0.00748129	0.0274234			84.59	-0.4467	-0.776953
84.79	0.00797839	0.0248935			84.79	-0.446203	-0.779483
84.99	0.00890731	0.0283137			84.99	-0.445274	-0.776062
85.19	0.00670878	0.0280886			85.19	-0.447473	-0.776287
85.39	0.00743461	0.0245396			85.39	-0.446747	-0.779836
85.59	0.00762193	0.0272788			85.59	-0.44656	-0.777097
85.79	0.00470627	0.0262071			85.79	-0.449475	-0.778169
85.99	0.00808022	0.024935			85.99	-0.446101	-0.779441
86.19	0.00913402	0.028457			86.19	-0.445048	-0.775919
86.39	0.00665914	0.030255			86.39	-0.447522	-0.774121
86.59	0.00702834	0.0248812			86.59	-0.447153	-0.779495
86.79	0.00788027	0.0291201			86.79	-0.446301	-0.775256
86.99	0.00630131	0.0265144			86.99	-0.44788	-0.777862
87.19	0.00496049	0.0280151			87.19	-0.449221	-0.776361
87.39	0.00811339	0.026696			87.39	-0.446068	-0.77768
87.59	0.00827403	0.0267758			87.59	-0.445908	-0.7776
87.79	0.0121204	0.0295776			87.79	-0.442061	-0.774798
87.99	0.00591877	0.0285932			87.99	-0.448263	-0.775783
88.19	0.00805634	0.0276245			88.19	-0.446125	-0.776752
88.39	0.0100536	0.027644			88.39	-0.444128	-0.776732
88.59	0.0048743	0.0283984			88.59	-0.449307	-0.775978
88.79	0.00890922	0.0266703			88.79	-0.445272	-0.777706
88.99	0.0048989	0.0280461			88.99	-0.449283	-0.77633
89.19	0.00754131	0.0270204			89.19	-0.44664	-0.777356
89.39	0.0104807	0.0283955			89.39	-0.443701	-0.77598
89.59	0.00902093	0.0299036			89.59	-0.445161	-0.774472
89.79	0.00909514	0.0311571			89.79	-0.445086	-0.773219
89.99	0.0093873	0.0289412			89.99	-0.444794	-0.775435
90.19	0.0100876	0.0289019			90.19	-0.444094	-0.775474
90.39	0.00911944	0.0300725			90.39	-0.445062	-0.774304
90.59	0.00599873	0.0273504			90.59	-0.448183	-0.777026
90.79	0.00762181	0.0259127			90.79	-0.44656	-0.778463
90.99	0.00499803	0.0278433			90.99	-0.449184	-0.776533
91.19	0.00654899	0.0280831			91.19	-0.447633	-0.776293
91.39	0.00594298	0.0272133			91.39	-0.448239	-0.777163
91.59	0.00945427	0.0274845			91.59	-0.444727	-0.776892
91.79	0.0113953	0.0289368			91.79	-0.442786	-0.775439
91.99	0.0114218	0.0300695			91.99	-0.44276	-0.774307
92.19	0.00487086	0.0287531			92.19	-0.449311	-0.775623
92.39	0.00877561	0.0291291			92.39	-0.445406	-0.775247
92.59	0.00962406	0.028374			92.59	-0.444558	-0.776002
92.79	0.00342868	0.0259974			92.79	-0.450753	-0.778379
92.99	0.00143325	0.0258002			92.99	-0.452748	-0.778576
93.19	0.00869394	0.0278252			93.19	-0.445488	-0.776551
93.39	0.00456147	0.0307432			93.39	-0.44962	-0.773633
93.59	0.00814166	0.0291571			93.59	-0.44604	-0.775219
93.79	0.00598801	0.0284324			93.79	-0.448194	-0.775944
93.99	0.00694178	0.0279013			93.99	-0.44724	-0.776475
94.19	0.0108175	0.0306193			94.19	-0.443364	-0.773757
94.39	0.00526887	0.0314728			94.39	-0.448913	-0.772903
94.59	0.0103927	0.0298134			94.59	-0.443789	-0.774563
94.79	0.00867827	0.0299102			94.79	-0.445503	-0.774466
94.99	0.00651966	0.0303644			94.99	-0.447662	-0.774012
95.19	0.0107866	0.0291468			95.19	-0.443395	-0.775229
95.39	0.00765243	0.0284255			95.39	-0.446529	-0.775951
95.59	0.0073397	0.0324443			95.59	-0.446842	-0.771932
95.79	0.00824119	0.0274201			95.79	-0.44594	-0.776956
95.99	0.00751344	0.0300808			95.99	-0.446668	-0.774295
96.19	0.00847384	0.0269084			96.19	-0.445708	-0.777468
96.39	0.00936439	0.0329899			96.39	-0.444817	-0.771386
96.59	0.00780707	0.0311404			96.59	-0.446375	-0.773236
96.79	0.00811092	0.0303488			96.79	-0.446071	-0.774027
96.99	0.00887736	0.0293449			96.99	-0.445304	-0.775031
97.19	0.0106561	0.0291743			97.19	-0.443526	-0.775202
97.39	0.00842265	0.0298008			97.39	-0.445759	-0.774575
97.59	0.00856008	0.0300076			97.59	-0.445622	-0.774368
97.79	0.00604801	0.0301944			97.79	-0.448134	-0.774182
97.99	0.00782778	0.0307836			97.99	-0.446354	-0.773592
98.19	0.0088259	0.0319852			98.19	-0.445356	-0.772391
98.39	0.00841224	0.0306893			98.39	-0.445769	-0.773687
98.59	0.00847816	0.0298963			98.59	-0.445703	-0.77448
98.79	0.0079416	0.0313892			98.79	-0.44624	-0.772987
98.99	0.00782863	0.0314552			98.99	-0.446353	-0.772921
99.19	0.0101608	0.0316274			99.19	-0.444021	-0.772749
99.39	0.00913679	0.0335073			99.39	-0.445045	-0.770869
99.59	0.00459732	0.0299299			99.59	-0.449584	-0.774446
99.79	0.00389321	0.0320015			99.79	-0.450288	-0.772375
99.99	0.00930873	0.0327108			99.99	-0.444873	-0.771665
100.19	0.00742612	0.0298376			100.19	-0.446755	-0.774538
100.39	0.0106897	0.0318535			100.39	-0.443492	-0.772523
100.59	0.010597	0.0325288			100.59	-0.443585	-0.771847
100.79	0.00828011	0.0301997			100.79	-0.445902	-0.774176
100.99	0.00588347	0.0299062			100.99	-0.448298	-0.77447
101.19	0.00917855	0.0309471			101.19	-0.445003	-0.773429
101.39	0.0070044	0.0306854			101.39	-0.447177	-0.773691
101.59	0.0081911	0.0321993			101.59	-0.445991	-0.772177
101.79	0.00649774	0.0320032			101.79	-0.447684	-0.772373
101.99	0.00663231	0.0347065			101.99	-0.447549	-0.76967
102.19	0.00891079	0.0321222			102.19	-0.445271	-0.772254
102.39	0.00852275	0.0325798			102.39	-0.445659	-0.771796
102.59	0.00840582	0.0293305			102.59	-0.445776	-0.775046
102.79	0.0115653	0.0341965			102.79	-0.442616	-0.77018
102.99	0.0102242	0.0300017			102.99	-0.443957	-0.774374
103.19	0.0125583	0.0325608			103.19	-0.441623	-0.771815
103.39	0.00617508	0.029811			103.39	-0.448007	-0.774565
103.59	0.010463	0.0312092			103.59	-0.443719	-0.773167
103.79	0.00661069	0.0311937			103.79	-0.447571	-0.773182
103.99	0.00961068	0.0321213			103.99	-0.444571	-0.772255
104.19	0.00839926	0.0309564			104.19	-0.445782	-0.77342
104.39	0.00828886	0.0305412			104.39	-0.445893	-0.773835
104.59	0.0115985	0.0307609			104.59	-0.442583	-0.773615
104.79	0.00754085	0.0320407			104.79	-0.446641	-0.772335
104.99	0.00672376	0.031223			104.99	-0.447458	-0.773153
105.19	0.0092258	0.032623			105.19	-0.444956	-0.771753
105.39	0.00590419	0.0322245			105.39	-0.448277	-0.772152
105.59	0.00905475	0.0303071			105.59	-0.445127	-0.774069
105.79	0.0120638	0.03378			105.79	-0.442118	-0.770596
105.99	0.00900394	0.0345962			105.99	-0.445178	-0.76978
106.19	0.0091651	0.0334022			106.19	-0.445017	-0.770974
106.39	0.0115024	0.0327292			106.39	-0.442679	-0.771647
106.59	0.0110277	0.0343171			106.59	-0.443154	-0.770059
106.79	0.00952441	0.0338078			106.79	-0.444657	-0.770568
106.99	0.00819847	0.0306719			106.99	-0.445983	-0.773704
107.19	0.00584952	0.0379548			107.19	-0.448332	-0.766421
107.39	0.00978963	0.0331853			107.39	-0.444392	-0.771191
107.59	0.00592759	0.0335002			107.59	-0.448254	-0.770876
107.79	0.0119141	0.0346929			107.79	-0.442268	-0.769683
107.99	0.00458742	0.0368438			107.99	-0.449594	-0.767532
108.19	0.00898727	0.0321615			108.19	-0.445194	-0.772214
108.39	0.00833235	0.0316303			108.39	-0.445849	-0.772746
108.59	0.0111334	0.0395308			108.59	-0.443048	-0.764845
108.79	0.00735824	0.0314931			108.79	-0.446823	-0.772883
108.99	0.00807643	0.0331536			108.99	-0.446105	-0.771222
109.19	0.00881818	0.0303691			109.19	-0.445363	-0.774007
109.39	0.0123911	0.0349974			109.39	-0.44179	-0.769379
109.59	0.0119716	0.0350176			109.59	-0.44221	-0.769358
109.79	0.00815721	0.0347181			109.79	-0.446024	-0.769658
109.99	0.00499589	0.0339239			109.99	-0.449186	-0.770452
110.19	0.00685653	0.0332402			110.19	-0.447325	-0.771136
110.39	0.00756896	0.0344018			110.39	-0.446613	-0.769974
110.59	0.00916325	0.0365955			110.59	-0.445018	-0.76778
110.79	0.00450759	0.035436			110.79	-0.449674	-0.76894
110.99	0.00932954	0.0324275			110.99	-0.444852	-0.771948
111.19	0.00766448	0.0328804			111.19	-0.446517	-0.771496
111.39	0.00951305	0.0336024			111.39	-0.444669	-0.770774
111.59	0.00585709	0.0361293			111.59	-0.448325	-0.768247
111.79	0.00660756	0.0356354			111.79	-0.447574	-0.768741
111.99	0.00640316	0.0381099			111.99	-0.447778	-0.766266
112.19	0.00782404	0.0322577			112.19	-0.446358	-0.772118
112.39	0.00984344	0.0330576			112.39	-0.444338	-0.771318
112.59	0.00906494	0.0329811			112.59	-0.445117	-0.771395
112.79	0.00569672	0.0354334			112.79	-0.448485	-0.768943
112.99	0.0127248	0.0350781			112.99	-0.441457	-0.769298
113.19	0.0098854	0.0339116			113.19	-0.444296	-0.770464
113.39	0.00771706	0.0345473			113.39	-0.446465	-0.769829
113.59	0.00584817	0.0356399			113.59	-0.448333	-0.768736
113.79	0.00926857	0.0368223			113.79	-0.444913	-0.767554
113.99	0.00920602	0.035801			113.99	-0.444976	-0.768575
114.19	0.00745041	0.038291			114.19	-0.446731	-0.766085
114.39	0.00957858	0.0335541			114.39	-0.444603	-0.770822
114.59	0.008752	0.0360462			114.59	-0.44543	-0.76833
114.79	0.00656781	0.0339899			114.79	-0.447614	-0.770386
114.99	0.00957685	0.0330167			114.99	-0.444605	-0.771359
115.19	0.00829609	0.0365561			115.19	-0.445886	-0.76782
115.39	0.00962191	0.0365156			115.39	-0.44456	-0.76786
115.59	0.00999074	0.0388832			115.59	-0.444191	-0.765493
115.79	0.00942169	0.0359242			115.79	-0.44476	-0.768452
115.99	0.00903979	0.0329336			115.99	-0.445142	-0.771442
116.19	0.00337191	0.033287			116.19	-0.45081	-0.771089
116.39	0.0104038	0.0378137			116.39	-0.443778	-0.766562
116.59	0.00448599	0.0345882			116.59	-0.449696	-0.769788
116.79	0.0110524	0.0375122			116.79	-0.443129	-0.766864
116.99	0.0093444	0.0354432			116.99	-0.444837	-0.768933
117.19	0.00748655	0.0331839			117.19	-0.446695	-0.771192
117.39	0.00652612	0.0357289			117.39	-0.447655	-0.768647
117.59	0.00955037	0.0333317			117.59	-0.444631	-0.771044
117.79	0.00822948	0.0365532			117.79	-0.445952	-0.767823
117.99	0.0101959	0.0365512			117.99	-0.443986	-0.767825
118.19	0.00862761	0.0374733			118.19	-0.445554	-0.766903
118.39	0.0121764	0.0354194			118.39	-0.442005	-0.768957
118.59	0.00530574	0.0357505			118.59	-0.448876	-0.768625
118.79	0.00902765	0.0361262			118.79	-0.445154	-0.76825
118.99	0.00701228	0.0390284			118.99	-0.447169	-0.765348
119.19	0.00917691	0.0388056			119.19	-0.445005	-0.76557
119.39	0.0056693	0.0387137			119.39	-0.448512	-0.765662
119.59	0.00953502	0.0365644			119.59	-0.444647	-0.767812
119.79	0.0107792	0.0357685			119.79	-0.443402	-0.768607
119.99	0.0143322	0.0375491			119.99	-0.439849	-0.766827
120.19	0.010959	0.035187			120.19	-0.443223	-0.769189
120.39	0.00724138	0.0382503			120.39	-0.44694	-0.766126
120.59	0.00784908	0.0385377			120.59	-0.446333	-0.765838
120.79	0.0091578	0.0407264			120.79	-0.445024	-0.76365
120.99	0.011892	0.0374514			120.99	-0.44229	-0.766925
121.19	0.00745561	0.0372456			121.19	-0.446726	-0.76713
121.39	0.00735562	0.0374263			121.39	-0.446826	-0.76695
121.59	0.0114581	0.0350977			121.59	-0.442723	-0.769278
121.79	0.00712175	0.040425			121.79	-0.44706	-0.763951
121.99	0.00996014	0.0385001			121.99	-0.444221	-0.765876
122.19	0.00767894	0.0358094			122.19	-0.446503	-0.768567
122.39	0.00455314	0.0399225			122.39	-0.449628	-0.764454
122.59	0.00951646	0.0376546			122.59	-0.444665	-0.766721
122.79	0.00852163	0.0371612			122.79	-0.44566	-0.767215
122.99	0.010236	0.0399054			122.99	-0.443946	-0.764471
123.19	0.0106578	0.0378629			123.19	-0.443524	-0.766513
123.39	0.01002	0.0361745			123.39	-0.444162	-0.768202
123.59	0.00938379	0.0379415			123.59	-0.444798	-0.766435
123.79	0.00824798	0.0411215			123.79	-0.445934	-0.763255
123.99	0.0094293	0.0400013			123.99	-0.444752	-0.764375
124.19	0.00576017	0.039741			124.19	-0.448421	-0.764635
124.39	0.00827217	0.03784			124.39	-0.445909	-0.766536
124.59	0.00412182	0.0391347			124.59	-0.45006	-0.765241
124.79	0.00738779	0.0384233			124.79	-0.446794	-0.765953
124.99	0.0102629	0.0396473			124.99	-0.443919	-0.764729
125.19	0.00992016	0.0379796			125.19	-0.444261	-0.766396
125.39	0.0126195	0.0376886			125.39	-0.441562	-0.766687
125.59	0.00642218	0.0413202			125.59	-0.447759	-0.763056
125.79	0.0123827	0.0428912			125.79	-0.441799	-0.761485
125.99	0.00985004	0.038396			125.99	-0.444332	-0.76598
126.19	0.00431002	0.0380703			126.19	-0.449872	-0.766306
126.39	0.0110135	0.0417049			126.39	-0.443168	-0.762671
126.59	0.00930775	0.0388419			126.59	-0.444874	-0.765534
126.79	0.0108939	0.0374063			126.79	-0.443288	-0.76697
126.99	0.0100158	0.0352123			126.99	-0.444166	-0.769164
127.19	0.00551503	0.0369021			127.19	-0.448667	-0.767474
127.39	0.00915832	0.0382302			127.39	-0.445023	-0.766146
127.59	0.00801824	0.0369715			127.59	-0.446163	-0.767405
127.79	0.0112645	0.0391455			127.79	-0.442917	-0.765231
127.99	0.0108717	0.039434			127.99	-0.44331	-0.764942
128.19	0.00922086	0.0398028			128.19	-0.444961	-0.764573
128.39	0.0118415	0.0383737			128.39	-0.44234	-0.766002
128.59	0.0103742	0.0380013			128.59	-0.443807	-0.766375
128.79	0.0115092	0.0413717			128.79	-0.442672	-0.763004
128.99	0.00906176	0.0405591			128.99	-0.44512	-0.763817
129.19	0.0104014	0.0433955			129.19	-0.44378	-0.760981
129.39	0.0139963	0.0386594			129.39	-0.440185	-0.765717
129.59	0.0085116	0.0443256			129.59	-0.44567	-0.76005
129.79	0.0135078	0.0421173			129.79	-0.440674	-0.762259
129.99	0.006973	0.0398164			129.99	-0.447209	-0.76456
130.19	0.00879692	0.0383333			130.19	-0.445385	-0.766043
130.39	0.00836273	0.041602			130.39	-0.445819	-0.762774
130.59	0.0103435	0.0396173			130.59	-0.443838	-0.764759
130.79	0.00592086	0.0425127			130.79	-0.448261	-0.761863
130.99	0.0107622	0.0390601			130.99	-0.443419	-0.765316
131.19	0.00939105	0.0420197			131.19	-0.444791	-0.762356
131.39	0.0080343	0.0419206			131.39	-0.446147	-0.762455
131.59	0.0102924	0.0394074			131.59	-0.443889	-0.764969
131.79	0.0103277	0.0435384			131.79	-0.443854	-0.760838
131.99	0.0110019	0.0417978			131.99	-0.44318	-0.762578
132.19	0.011079	0.0381934			132.19	-0.443103	-0.766183
132.39	0.011877	0.0436796			132.39	-0.442305	-0.760696
132.59	0.00950803	0.0398452			132.59	-0.444674	-0.764531
132.79	0.0108661	0.0401806			132.79	-0.443315	-0.764195
132.99	0.0112129	0.039733			132.99	-0.442969	-0.764643
133.19	0.0108001	0.0423711			133.19	-0.443381	-0.762005
133.39	0.0107176	0.041476			133.39	-0.443464	-0.7629
133.59	0.0138591	0.0407965			133.59	-0.440322	-0.76358
133.79	0.00969603	0.0421076			133.79	-0.444486	-0.762268
133.99	0.0119391	0.0398142			133.99	-0.442243	-0.764562
134.19	0.0123333	0.039316			134.19	-0.441848	-0.76506
134.39	0.0140925	0.0420704			134.39	-0.440089	-0.762306
134.59	0.0154842	0.0398205			134.59	-0.438697	-0.764556
134.79	0.00867676	0.0415428			134.79	-0.445505	-0.762833
134.99	0.0110633	0.0444804			134.99	-0.443118	-0.759896
135.19	0.0128436	0.0410872			135.19	-0.441338	-0.763289
135.39	0.0101952	0.0402684			135.39	-0.443986	-0.764108
135.59	0.00790884	0.041065			135.59	-0.446273	-0.763311
135.79	0.00882161	0.0428044			135.79	-0.44536	-0.761572
135.99	0.013477	0.040019			135.99	-0.440705	-0.764357
136.19	0.00671047	0.0409154			136.19	-0.447471	-0.763461
136.39	0.0101491	0.0407027			136.39	-0.444032	-0.763673
136.59	0.0117395	0.0417119			136.59	-0.442442	-0.762664
136.79	0.0112799	0.0420416			136.79	-0.442902	-0.762334
136.99	0.00853816	0.0469905			136.99	-0.445643	-0.757385
137.19	0.0138259	0.0420181			137.19	-0.440356	-0.762358
137.39	0.0152569	0.0403203			137.39	-0.438925	-0.764056
137.59	0.0110953	0.0437449			137.59	-0.443086	-0.760631
137.79	0.0113733	0.0406862			137.79	-0.442808	-0.76369
137.99	0.00647967	0.0423739			137.99	-0.447702	-0.762002
138.19	0.0125291	0.0403491			138.19	-0.441653	-0.764027
138.39	0.00946294	0.0428639			138.39	-0.444719	-0.761512
138.59	0.0102241	0.0414216			138.59	-0.443957	-0.762954
138.79	0.00804147	0.0406642			138.79	-0.44614	-0.763712
138.99	0.0132233	0.0431114			138.99	-0.440958	-0.761265
139.19	0.0117841	0.0434197			139.19	-0.442397	-0.760956
139.39	0.00950409	0.0442831			139.39	-0.444678	-0.760093
139.59	0.00807961	0.0437371			139.59	-0.446102	-0.760639
139.79	0.00748311	0.0435193			139.79	-0.446698	-0.760857
139.99	0.0141347	0.0421433			139.99	-0.440047	-0.762233
140.19	0.0106758	0.0438365			140.19	-0.443506	-0.76054
140.39	0.0118854	0.0437529			140.39	-0.442296	-0.760623
140.59	0.0150341	0.0448433			140.59	-0.439148	-0.759533
140.79	0.0108501	0.0425398			140.79	-0.443331	-0.761836
140.99	0.0108154	0.0434768			140.99	-0.443366	-0.760899
141.19	0.0126673	0.0420979			141.19	-0.441514	-0.762278
141.39	0.0122274	0.0439436			141.39	-0.441954	-0.760432
141.59	0.0116386	0.0420378			141.59	-0.442543	-0.762338
141.79	0.0135728	0.0424965			141.79	-0.440609	-0.76188
141.99	0.00992359	0.0412882			141.99	-0.444258	-0.763088
142.19	0.011358	0.0405951			142.19	-0.442824	-0.763781
142.39	0.0106386	0.0436251			142.39	-0.443543	-0.760751
142.59	0.00866822	0.0477323			142.59	-0.445513	-0.756644
142.79	0.0109344	0.0438951			142.79	-0.443247	-0.760481
142.99	0.0116114	0.0435478			142.99	-0.44257	-0.760828
143.19	0.00669942	0.0452193			143.19	-0.447482	-0.759157
143.39	0.00697556	0.0459812			143.39	-0.447206	-0.758395
143.59	0.0127495	0.0440359			143.59	-0.441432	-0.76034
143.79	0.00727627	0.0427918			143.79	-0.446905	-0.761584
143.99	0.0103319	0.0425807			143.99	-0.44385	-0.761795
144.19	0.00984357	0.0423247			144.19	-0.444338	-0.762051
144.39	0.00835282	0.0450721			144.39	-0.445829	-0.759304
144.59	0.012922	0.045942			144.59	-0.44126	-0.758434
144.79	0.0126427	0.0426229			144.79	-0.441539	-0.761753
144.99	0.00847214	0.0461825			144.99	-0.445709	-0.758194
145.19	0.0117772	0.0432446			145.19	-0.442404	-0.761131
145.39	0.00928508	0.0475934			145.39	-0.444897	-0.756783
145.59	0.0109945	0.0425579			145.59	-0.443187	-0.761818
145.79	0.0104484	0.0488646			145.79	-0.443733	-0.755511
145.99	0.0133486	0.0431556			145.99	-0.440833	-0.76122
146.19	0.0107044	0.0486917			146.19	-0.443477	-0.755684
146.39	0.0135444	0.0465342			146.39	-0.440637	-0.757842
146.59	0.00956501	0.0425373			146.59	-0.444617	-0.761839
146.79	0.0122746	0.0509139			146.79	-0.441907	-0.753462
146.99	0.0106802	0.0449055			146.99	-0.443501	-0.759471
147.19	0.00745533	0.0461434			147.19	-0.446726	-0.758233
147.39	0.014765	0.0470916			147.39	-0.439417	-0.757284
147.59	0.0119551	0.0468141			147.59	-0.442227	-0.757562
147.79	0.0104522	0.0458099			147.79	-0.443729	-0.758566
147.99	0.0132148	0.0465199			147.99	-0.440967	-0.757856
148.19	0.00940681	0.0444034			148.19	-0.444775	-0.759973
148.39	0.0129326	0.0447047			148.39	-0.441249	-0.759671
148.59	0.01269	0.046223			148.59	-0.441492	-0.758153
148.79	0.0144662	0.0472148			148.79	-0.439715	-0.757161
148.99	0.00980975	0.0478605			148.99	-0.444372	-0.756516
149.19	0.0123179	0.0469292			149.19	-0.441864	-0.757447
149.39	0.0110412	0.0447639			149.39	-0.44314	-0.759612
149.59	0.00877519	0.045503			149.59	-0.445406	-0.758873
149.79	0.012907	0.0457314			149.79	-0.441275	-0.758645
149.99	0.0138124	0.0465093			149.99	-0.440369	-0.757867
150.19	0.0091371	0.0491752			150.19	-0.445045	-0.755201
150.39	0.0140511	0.0491825			150.39	-0.440131	-0.755194
150.59	0.0116516	0.0462047			150.59	-0.44253	-0.758171
150.79	0.0118823	0.0478993			150.79	-0.442299	-0.756477
150.99	0.0115138	0.045554			150.99	-0.442668	-0.758822
151.19	0.012192	0.0481763			151.19	-0.44199	-0.7562
151.39	0.009918	0.04541			151.39	-0.444264	-0.758966
151.59	0.0149512	0.0489182			151.59	-0.43923	-0.755458
151.79	0.0103955	0.0490003			151.79	-0.443786	-0.755376
151.99	0.0139839	0.0492183			151.99	-0.440198	-0.755158
152.19	0.0137322	0.0467314			152.19	-0.440449	-0.757645
152.39	0.0125798	0.0480012			152.39	-0.441602	-0.756375
152.59	0.00971621	0.0480145			152.59	-0.444465	-0.756362
152.79	0.0119118	0.047541			152.79	-0.44227	-0.756835
152.99	0.0122314	0.050404			152.99	-0.44195	-0.753972
153.19	0.0136547	0.0473296			153.19	-0.440527	-0.757046
153.39	0.0110568	0.0479289			153.39	-0.443125	-0.756447
153.59	0.00925154	0.0457244			153.59	-0.44493	-0.758652
153.79	0.0100869	0.0458888			153.79	-0.444095	-0.758487
153.99	0.0104695	0.0473678			153.99	-0.443712	-0.757008
154.19	0.00792295	0.0508536			154.19	-0.446259	-0.753522
154.39	0.0130034	0.048257			154.39	-0.441178	-0.756119
154.59	0.0128295	0.0463684			154.59	-0.441352	-0.758008
154.79	0.0104222	0.04586			154.79	-0.443759	-0.758516
154.99	0.0147049	0.0482284			154.99	-0.439477	-0.756148
155.19	0.0154492	0.050913			155.19	-0.438732	-0.753463
155.39	0.0129673	0.0523363			155.39	-0.441214	-0.75204
155.59	0.0111779	0.0488937			155.59	-0.443004	-0.755482
155.79	0.0105426	0.0483328			155.79	-0.443639	-0.756043
155.99	0.0118387	0.0480639			155.99	-0.442343	-0.756312
156.19	0.0085137	0.0487728			156.19	-0.445668	-0.755603
156.39	0.0125576	0.0487809			156.39	-0.441624	-0.755595
156.59	0.0110244	0.0470212			156.59	-0.443157	-0.757355
156.79	0.0121954	0.0487636			156.79	-0.441986	-0.755612
156.99	0.0157436	0.0484273			156.99	-0.438438	-0.755949
157.19	0.013677	0.0487701			157.19	-0.440505	-0.755606
157.39	0.0137791	0.0496377			157.39	-0.440403	-0.754738
157.59	0.0149297	0.0494725			157.59	-0.439252	-0.754903
157.79	0.011801	0.0489001			157.79	-0.442381	-0.755476
157.99	0.0135585	0.050822			157.99	-0.440623	-0.753554
158.19	0.0123353	0.0508677			158.19	-0.441846	-0.753508
158.39	0.0125231	0.0486391			158.39	-0.441658	-0.755737
158.59	0.0126409	0.0497132			158.59	-0.441541	-0.754663
158.79	0.0108315	0.053112			158.79	-0.44335	-0.751264
158.99	0.0118771	0.0515058			158.99	-0.442304	-0.75287
159.19	0.0126055	0.050333			159.19	-0.441576	-0.754043
159.39	0.0100433	0.0486132			159.39	-0.444138	-0.755763
159.59	0.0154104	0.0485495			159.59	-0.438771	-0.755827
159.79	0.0134511	0.0503171			159.79	-0.44073	-0.754059
159.99	0.0108692	0.0472724			159.99	-0.443312	-0.757104
160.19	0.0139647	0.0515313			160.19	-0.440217	-0.752845
160.39	0.0115024	0.0489172			160.39	-0.442679	-0.755459
160.59	0.00999777	0.0498258			160.59	-0.444184	-0.75455
160.79	0.011952	0.0523709			160.79	-0.44223	-0.752005
160.99	0.00987092	0.0515281			160.99	-0.444311	-0.752848
161.19	0.00904875	0.0494571			161.19	-0.445133	-0.754919
161.39	0.0100638	0.0490219			161.39	-0.444118	-0.755354
161.59	0.0100091	0.0498334			161.59	-0.444173	-0.754543
161.79	0.0121443	0.0507671			161.79	-0.442037	-0.753609
161.99	0.0132022	0.0515478			161.99	-0.440979	-0.752828
162.19	0.00819451	0.0493118			162.19	-0.445987	-0.755064
162.39	0.0132365	0.0508362			162.39	-0.440945	-0.75354
162.59	0.00999027	0.0497697			162.59	-0.444191	-0.754606
162.79	0.0121526	0.0506708			162.79	-0.442029	-0.753705
162.99	0.0126142	0.0530424			162.99	-0.441567	-0.751334
163.19	0.0107249	0.0505248			163.19	-0.443457	-0.753851
163.39	0.0113234	0.0502431			163.39	-0.442858	-0.754133
163.59	0.00960823	0.0508238			163.59	-0.444573	-0.753552
163.79	0.0126696	0.0523781			163.79	-0.441512	-0.751998
163.99	0.0123868	0.0493202			163.99	-0.441795	-0.755056
164.19	0.0119194	0.0497541			164.19	-0.442262	-0.754622
164.39	0.0161647	0.0513933			164.39	-0.438017	-0.752983
164.59	0.0134469	0.0488959			164.59	-0.440735	-0.75548
164.79	0.0144535	0.0534913			164.79	-0.439728	-0.750885
164.99	0.00934092	0.0523064			164.99	-0.444841	-0.75207
165.19	0.00999272	0.0499795			165.19	-0.444189	-0.754397
165.39	0.00755698	0.0512496			165.39	-0.446625	-0.753126
165.59	0.0131827	0.0499929			165.59	-0.440999	-0.754383
165.79	0.0106245	0.0493294			165.79	-0.443557	-0.755047
165.99	0.0112789	0.0498584			165.99	-0.442903	-0.754518
166.19	0.016351	0.0514012			166.19	-0.437831	-0.752975
166.39	0.00761878	0.053367			166.39	-0.446563	-0.751009
166.59	0.0123996	0.0539319			166.59	-0.441782	-0.750444
166.79	0.0115067	0.0527285			166.79	-0.442675	-0.751647
166.99	0.0141161	0.0495934			166.99	-0.440066	-0.754783
167.19	0.0117883	0.0511095			167.19	-0.442393	-0.753266
167.39	0.0132413	0.0497993			167.39	-0.44094	-0.754577
167.59	0.0122611	0.0523421			167.59	-0.44192	-0.752034
167.79	0.0105635	0.0517572			167.79	-0.443618	-0.752619
167.99	0.0133276	0.0535223			167.99	-0.440854	-0.750854
168.19	0.0116638	0.047416			168.19	-0.442518	-0.75696
168.39	0.0155784	0.0523544			168.39	-0.438603	-0.752022
168.59	0.0137872	0.0536127			168.59	-0.440394	-0.750763
168.79	0.0109008	0.0541823			168.79	-0.443281	-0.750194
168.99	0.00919211	0.0546026			168.99	-0.44499	-0.749773
169.19	0.0148112	0.0546472			169.19	-0.43937	-0.749729
169.39	0.011213	0.0520617			169.39	-0.442969	-0.752314
169.59	0.0123968	0.0507488			169.59	-0.441785	-0.753627
169.79	0.0146512	0.0544951			169.79	-0.43953	-0.749881
169.99	0.0140122	0.0558081			169.99	-0.440169	-0.748568
170.19	0.0125871	0.0510513			170.19	-0.441595	-0.753325
170.39	0.0146506	0.0514859			170.39	-0.439531	-0.75289
170.59	0.0123547	0.0511795			170.59	-0.441827	-0.753197
170.79	0.0124568	0.0556664			170.79	-0.441725	-0.74871
170.99	0.0128166	0.0533154			170.99	-0.441365	-0.751061
171.19	0.0162852	0.0531919			171.19	-0.437896	-0.751184
171.39	0.0107066	0.0516591			171.39	-0.443475	-0.752717
171.59	0.0143779	0.050054			171.59	-0.439804	-0.754322
171.79	0.0119562	0.0533985			171.79	-0.442225	-0.750978
171.99	0.0136115	0.051792			171.99	-0.44057	-0.752584
172.19	0.0127726	0.0574726			172.19	-0.441409	-0.746903
172.39	0.0107952	0.0520813			172.39	-0.443386	-0.752295
172.59	0.0115222	0.0497046			172.59	-0.442659	-0.754671
172.79	0.0151792	0.0564441			172.79	-0.439002	-0.747932
172.99	0.00991405	0.0538957			172.99	-0.444268	-0.75048
173.19	0.0133452	0.0539098			173.19	-0.440836	-0.750466
173.39	0.0114542	0.0549188			173.39	-0.442727	-0.749457
173.59	0.0156347	0.0540331			173.59	-0.438547	-0.750343
173.79	0.013362	0.054975			173.79	-0.44082	-0.749401
173.99	0.0113867	0.0533489			173.99	-0.442795	-0.751027
174.19	0.0129392	0.0526453			174.19	-0.441242	-0.751731
174.39	0.0127713	0.0556563			174.39	-0.44141	-0.74872
174.59	0.0105431	0.0534884			174.59	-0.443639	-0.750888
174.79	0.014139	0.0539785			174.79	-0.440043	-0.750397
174.99	0.00908627	0.0557045			174.99	-0.445095	-0.748672
175.19	0.00651182	0.0539809			175.19	-0.44767	-0.750395
175.39	0.0100931	0.056133			175.39	-0.444089	-0.748243
175.59	0.0136709	0.0548811			175.59	-0.440511	-0.749495
175.79	0.012418	0.0525087			175.79	-0.441764	-0.751867
175.99	0.01188	0.052872			175.99	-0.442302	-0.751504
176.19	0.0160915	0.0567373			176.19	-0.43809	-0.747639
176.39	0.0139912	0.0503014			176.39	-0.44019	-0.754075
176.59	0.0121893	0.0548768			176.59	-0.441992	-0.749499
176.79	0.0127854	0.0544024			176.79	-0.441396	-0.749974
176.99	0.0127915	0.0544019			176.99	-0.44139	-0.749974
177.19	0.012567	0.0535052			177.19	-0.441615	-0.750871
177.39	0.0111063	0.0541717			177.39	-0.443075	-0.750204
177.59	0.0108782	0.0540774			177.59	-0.443303	-0.750299
177.79	0.0122929	0.0563323			177.79	-0.441889	-0.748044
177.99	0.01405	0.0550908			177.99	-0.440132	-0.749285
178.19	0.010877	0.0542882			178.19	-0.443305	-0.750088
178.39	0.0121942	0.0562502			178.39	-0.441987	-0.748126
178.59	0.0108842	0.0544541			178.59	-0.443297	-0.749922
178.79	0.0118458	0.0551317			178.79	-0.442336	-0.749244
178.99	0.0126065	0.0530843			178.99	-0.441575	-0.751292
179.19	0.015337	0.05708			179.19	-0.438845	-0.747296
179.39	0.0112331	0.0547599			179.39	-0.442948	-0.749616
179.59	0.0107411	0.0552379			179.59	-0.443441	-0.749138
179.79	0.0125499	0.0542909			179.79	-0.441632	-0.750085
179.99	0.0132234	0.0535971			179.99	-0.440958	-0.750779
180.19	0.014244	0.055121			180.19	-0.439938	-0.749255
180.39	0.0115369	0.0540459			180.39	-0.442645	-0.75033
180.59	0.00994633	0.0576153			180.59	-0.444235	-0.746761
180.79	0.011172	0.0545766			180.79	-0.44301	-0.749799
180.99	0.0159774	0.0548343			180.99	-0.438204	-0.749542
181.19	0.01111	0.0537959			181.19	-0.443072	-0.75058
181.39	0.0150718	0.0554997			181.39	-0.43911	-0.748876
181.59	0.013138	0.0567441			181.59	-0.441044	-0.747632
181.79	0.0138662	0.0559494			181.79	-0.440315	-0.748427
181.99	0.0126758	0.0595716			181.99	-0.441506	-0.744804
182.19	0.0113983	0.0553585			182.19	-0.442783	-0.749018
182.39	0.0124225	0.0551113			182.39	-0.441759	-0.749265
182.59	0.0122306	0.0540617			182.59	-0.441951	-0.750314
182.79	0.00960131	0.0570444			182.79	-0.44458	-0.747332
182.99	0.0118818	0.054783			182.99	-0.4423	-0.749593
183.19	0.0127092	0.0559339			183.19	-0.441472	-0.748442
183.39	0.0137422	0.0583222			183.39	-0.440439	-0.746054
183.59	0.0107395	0.053493			183.59	-0.443442	-0.750883
183.79	0.0122408	0.0562092			183.79	-0.441941	-0.748167
183.99	0.0148434	0.057524			183.99	-0.439338	-0.746852
184.19	0.0118218	0.0538905			184.19	-0.44236	-0.750485
184.39	0.0119475	0.0555881			184.39	-0.442234	-0.748788
184.59	0.0150767	0.0554477			184.59	-0.439105	-0.748928
184.79	0.0128053	0.058352			184.79	-0.441376	-0.746024
184.99	0.0108563	0.0574806			184.99	-0.443325	-0.746895
185.19	0.0116968	0.0560271			185.19	-0.442485	-0.748349
185.39	0.0177173	0.0590747			185.39	-0.436464	-0.745301
185.59	0.0111918	0.0581165			185.59	-0.44299	-0.74626
185.79	0.0140986	0.0581956			185.79	-0.440083	-0.74618
185.99	0.0134085	0.0553947			185.99	-0.440773	-0.748981
186.19	0.014189	0.0543834			186.19	-0.439993	-0.749993
186.39	0.0133093	0.0567203			186.39	-0.440872	-0.747656
186.59	0.0147582	0.0558166			186.59	-0.439423	-0.748559
186.79	0.0120918	0.0545871			186.79	-0.44209	-0.749789
186.99	0.0118715	0.060002			186.99	-0.44231	-0.744374
187.19	0.012899	0.0582354			187.19	-0.441283	-0.746141
187.39	0.00891329	0.0549681			187.39	-0.445268	-0.749408
187.59	0.0148535	0.0570465			187.59	-0.439328	-0.74733
187.79	0.00956072	0.0565664			187.79	-0.444621	-0.74781
187.99	0.0125561	0.0603545			187.99	-0.441625	-0.744021
188.19	0.0148599	0.0565896			188.19	-0.439322	-0.747786
188.39	0.0120192	0.0599921			188.39	-0.442162	-0.744384
188.59	0.0135763	0.060137			188.59	-0.440605	-0.744239
188.79	0.0115033	0.0589521			188.79	-0.442678	-0.745424
188.99	0.0163122	0.0577545			188.99	-0.437869	-0.746621
189.19	0.0129522	0.0567297			189.19	-0.441229	-0.747646
189.39	0.013901	0.0596398			189.39	-0.440281	-0.744736
189.59	0.0150986	0.0560736			189.59	-0.439083	-0.748302
189.79	0.0148846	0.0597105			189.79	-0.439297	-0.744666
189.99	0.0135422	0.0555679			189.99	-0.440639	-0.748808
190.19	0.0120394	0.0546926			190.19	-0.442142	-0.749683
190.39	0.0133371	0.0609585			190.39	-0.440845	-0.743417
190.59	0.012295	0.0579324			190.59	-0.441887	-0.746444
190.79	0.0128601	0.0564672			190.79	-0.441322	-0.747909
190.99	0.0130297	0.0594536			190.99	-0.441152	-0.744922
191.19	0.0116285	0.057728			191.19	-0.442553	-0.746648
191.39	0.0155424	0.0599258			191.39	-0.438639	-0.74445
191.59	0.0136532	0.0588454			191.59	-0.440528	-0.745531
191.79	0.0112126	0.0605436			191.79	-0.442969	-0.743832
191.99	0.00960639	0.0595552			191.99	-0.444575	-0.744821
192.19	0.0109756	0.0559116			192.19	-0.443206	-0.748464
192.39	0.0122404	0.0617098			192.39	-0.441941	-0.742666
192.59	0.0109972	0.0604569			192.59	-0.443184	-0.743919
192.79	0.016922	0.060221			192.79	-0.43726	-0.744155
192.99	0.0133608	0.058688			192.99	-0.440821	-0.745688
193.19	0.0131388	0.062788			193.19	-0.441043	-0.741588
193.39	0.0134441	0.061299			193.39	-0.440738	-0.743077
193.59	0.0154421	0.0596134			193.59	-0.438739	-0.744763
193.79	0.0109141	0.0593965			193.79	-0.443267	-0.74498
193.99	0.0133806	0.0567819			193.99	-0.440801	-0.747594
194.19	0.0139212	0.0587995			194.19	-0.44026	-0.745577
194.39	0.0147321	0.0574959			194.39	-0.43945	-0.74688
194.59	0.0151207	0.0590767			194.59	-0.439061	-0.745299
194.79	0.01279	0.0582031			194.79	-0.441392	-0.746173
194.99	0.0139042	0.0626012			194.99	-0.440277	-0.741775
195.19	0.0129073	0.0616815			195.19	-0.441274	-0.742695
195.39	0.0175581	0.0583371			195.39	-0.436623	-0.746039
195.59	0.0130137	0.0571433			195.59	-0.441168	-0.747233
195.79	0.0130184	0.0595649			195.79	-0.441163	-0.744811
195.99	0.014748	0.0607524			195.99	-0.439434	-0.743624
196.19	0.0092757	0.0561962			196.19	-0.444906	-0.74818
196.39	0.0119143	0.0611208			196.39	-0.442267	-0.743255
196.59	0.0179703	0.0602372			196.59	-0.436211	-0.744139
196.79	0.0126469	0.0624544			196.79	-0.441535	-0.741922
196.99	0.0139277	0.0615901			196.99	-0.440254	-0.742786
197.19	0.0141607	0.0586441			197.19	-0.440021	-0.745732
197.39	0.0148055	0.058359			197.39	-0.439376	-0.746017
197.59	0.0119873	0.0579331			197.59	-0.442194	-0.746443
197.79	0.0143478	0.0600268			197.79	-0.439834	-0.744349
197.99	0.0151816	0.0579532			197.99	-0.439	-0.746423
198.19	0.00735488	0.062761			198.19	-0.446827	-0.741615
198.39	0.0167243	0.0620442			198.39	-0.437457	-0.742332
198.59	0.0108497	0.0631886			198.59	-0.443332	-0.741187
198.79	0.0119531	0.0613197			198.79	-0.442229	-0.743056
198.99	0.0167173	0.0616892			198.99	-0.437464	-0.742687
199.19	0.0160902	0.0639167			199.19	-0.438091	-0.740459
199.39	0.0127785	0.0604841			199.39	-0.441403	-0.743892
199.59	0.0148239	0.0616319			199.59	-0.439358	-0.742744
199.79	0.0149359	0.061098			199.79	-0.439246	-0.743278
200	-0.468254	-0.445122			200	-0.922436	-1.2495
200.19	-0.452063	-0.430373			200.19	-0.906245	-1.23475
200.39	-0.435923	-0.418026			200.39	-0.890105	-1.2224
200.59	-0.425438	-0.410948			200.59	-0.879619	-1.21532
200.79	-0.420294	-0.399416			200.79	-0.874476	-1.20379
200.99	-0.4106	-0.398722			200.99	-0.864781	-1.2031
201.19	-0.410348	-0.391629			201.19	-0.86453	-1.196
201.39	-0.402726	-0.382491			201.39	-0.856908	-1.18687
201.59	-0.400884	-0.382821			201.59	-0.855065	-1.1872
201.79	-0.396079	-0.381865			201.79	-0.850261	-1.18624
201.99	-0.395765	-0.377197			201.99	-0.849947	-1.18157
202.19	-0.39238	-0.378175			202.19	-0.846562	-1.18255
202.39	-0.390061	-0.37324			202.39	-0.844243	-1.17762
202.59	-0.391339	-0.374538			202.59	-0.845521	-1.17891
202.79	-0.386124	-0.373513			202.79	-0.840305	-1.17789
202.99	-0.388401	-0.372913			202.99	-0.842582	-1.17729
203.19	-0.388143	-0.371503			203.19	-0.842325	-1.17588
203.39	-0.38809	-0.370148			203.39	-0.842272	-1.17452
203.59	-0.388503	-0.371666			203.59	-0.842684	-1.17604
203.79	-0.384779	-0.369262			203.79	-0.838961	-1.17364
203.99	-0.386312	-0.369145			203.99	-0.840494	-1.17352
204.19	-0.386366	-0.369978			204.19	-0.840547	-1.17435
204.39	-0.386383	-0.366142			204.39	-0.840564	-1.17052
204.59	-0.385634	-0.369319			204.59	-0.839815	-1.1737
204.79	-0.387063	-0.372041			204.79	-0.841245	-1.17642
204.99	-0.386388	-0.370795			204.99	-0.84057	-1.17517
205.19	-0.385332	-0.369377			205.19	-0.839514	-1.17375
205.39	-0.383261	-0.37163			205.39	-0.837442	-1.17601
205.59	-0.387635	-0.367814			205.59	-0.841817	-1.17219
205.79	-0.385384	-0.369061			205.79	-0.839566	-1.17344
205.99	-0.383973	-0.368683			205.99	-0.838155	-1.17306
206.19	-0.387313	-0.368976			206.19	-0.841494	-1.17335
206.39	-0.382675	-0.369418			206.39	-0.836857	-1.17379
206.59	-0.384152	-0.366902			206.59	-0.838334	-1.17128
206.79	-0.387038	-0.367831			206.79	-0.84122	-1.17221
206.99	-0.385012	-0.365082			206.99	-0.839194	-1.16946
207.19	-0.38507	-0.367599			207.19	-0.839251	-1.17197
207.39	-0.382495	-0.363021			207.39	-0.836676	-1.1674
207.59	-0.386272	-0.367914			207.59	-0.840454	-1.17229
207.79	-0.382911	-0.362876			207.79	-0.837092	-1.16725
207.99	-0.380727	-0.36064			207.99	-0.834909	-1.16502
208.19	-0.381017	-0.364451			208.19	-0.835199	-1.16883
208.39	-0.384187	-0.363873			208.39	-0.838369	-1.16825
208.59	-0.381846	-0.363088			208.59	-0.836027	-1.16746
208.79	-0.378064	-0.36463			208.79	-0.832245	-1.16901
208.99	-0.377913	-0.364003			208.99	-0.832095	-1.16838
209.19	-0.379777	-0.363749			209.19	-0.833959	-1.16813
209.39	-0.381137	-0.363156			209.39	-0.835319	-1.16753
209.59	-0.378292	-0.361962			209.59	-0.832474	-1.16634
209.79	-0.375014	-0.360839			209.79	-0.829196	-1.16521
209.99	-0.377043	-0.35716			209.99	-0.831225	-1.16154
210.19	-0.382713	-0.360568			210.19	-0.836895	-1.16494
210.39	-0.37401	-0.357038			210.39	-0.828192	-1.16141
210.59	-0.374471	-0.356463			210.59	-0.828653	-1.16084
210.79	-0.377127	-0.357972			210.79	-0.831309	-1.16235
210.99	-0.376661	-0.359152			210.99	-0.830843	-1.16353
211.19	-0.376001	-0.35516			211.19	-0.830183	-1.15954
211.39	-0.375279	-0.357342			211.39	-0.829461	-1.16172
211.59	-0.377604	-0.355019			211.59	-0.831786	-1.1594
211.79	-0.378106	-0.352763			211.79	-0.832288	-1.15714
211.99	-0.374635	-0.356527			211.99	-0.828817	-1.1609
212.19	-0.372697	-0.352627			212.19	-0.826878	-1.157
212.39	-0.37221	-0.354279			212.39	-0.826392	-1.15865
212.59	-0.372913	-0.351422			212.59	-0.827094	-1.1558
212.79	-0.372785	-0.352223			212.79	-0.826967	-1.1566
212.99	-0.374192	-0.347833			212.99	-0.828374	-1.15221
213.19	-0.370587	-0.349555			213.19	-0.824769	-1.15393
213.39	-0.36778	-0.351627			213.39	-0.821962	-1.156
213.59	-0.367432	-0.353879			213.59	-0.821613	-1.15825
213.79	-0.369329	-0.35103			213.79	-0.823511	-1.15541
213.99	-0.367526	-0.348923			213.99	-0.821707	-1.1533
214.19	-0.365589	-0.347257			214.19	-0.819771	-1.15163
214.39	-0.366571	-0.345965			214.39	-0.820753	-1.15034
214.59	-0.365955	-0.345705			214.59	-0.820136	-1.15008
214.79	-0.366766	-0.346487			214.79	-0.820948	-1.15086
214.99	-0.363877	-0.346008			214.99	-0.818059	-1.15038
215.19	-0.364615	-0.343545			215.19	-0.818797	-1.14792
215.39	-0.362768	-0.342015			215.39	-0.81695	-1.14639
215.59	-0.363569	-0.343187			215.59	-0.817751	-1.14756
215.79	-0.361938	-0.338921			215.79	-0.81612	-1.1433
215.99	-0.360799	-0.342123			215.99	-0.814981	-1.1465
216.19	-0.362021	-0.338947			216.19	-0.816202	-1.14332
216.39	-0.35866	-0.341109			216.39	-0.812841	-1.14549
216.59	-0.359948	-0.34494			216.59	-0.81413	-1.14932
216.79	-0.35945	-0.338297			216.79	-0.813632	-1.14267
216.99	-0.360317	-0.339064			216.99	-0.814499	-1.14344
217.19	-0.356318	-0.333968			217.19	-0.8105	-1.13834
217.39	-0.358427	-0.334503			217.39	-0.812608	-1.13888
217.59	-0.355972	-0.338124			217.59	-0.810153	-1.1425
217.79	-0.355822	-0.334109			217.79	-0.810004	-1.13848
217.99	-0.356188	-0.334568			217.99	-0.81037	-1.13894
218.19	-0.35477	-0.334132			218.19	-0.808952	-1.13851
218.39	-0.357597	-0.329834			218.39	-0.811778	-1.13421
218.59	-0.353878	-0.333845			218.59	-0.80806	-1.13822
218.79	-0.353099	-0.33241			218.79	-0.807281	-1.13679
218.99	-0.354146	-0.331958			218.99	-0.808327	-1.13633
219.19	-0.352563	-0.329393			219.19	-0.806744	-1.13377
219.39	-0.35307	-0.330137			219.39	-0.807252	-1.13451
219.59	-0.348441	-0.329212			219.59	-0.802623	-1.13359
219.79	-0.348097	-0.3277			219.79	-0.802279	-1.13208
219.99	-0.348178	-0.323618			219.99	-0.80236	-1.12799
220.19	-0.351035	-0.324962			220.19	-0.805217	-1.12934
220.39	-0.347942	-0.322629			220.39	-0.802123	-1.127
220.59	-0.353288	-0.3268			220.59	-0.807469	-1.13118
220.79	-0.347555	-0.323665			220.79	-0.801737	-1.12804
220.99	-0.345135	-0.320393			220.99	-0.799317	-1.12477
221.19	-0.346946	-0.323186			221.19	-0.801127	-1.12756
221.39	-0.343692	-0.323101			221.39	-0.797874	-1.12748
221.59	-0.33991	-0.3231			221.59	-0.794091	-1.12748
221.79	-0.3427	-0.324301			221.79	-0.796881	-1.12868
221.99	-0.341732	-0.320841			221.99	-0.795913	-1.12522
222.19	-0.339881	-0.317874			222.19	-0.794062	-1.12225
222.39	-0.342759	-0.319118			222.39	-0.796941	-1.12349
222.59	-0.340638	-0.318199			222.59	-0.79482	-1.12258
222.79	-0.335945	-0.315342			222.79	-0.790127	-1.11972
222.99	-0.339055	-0.3146			222.99	-0.793237	-1.11898
223.19	-0.334855	-0.316903			223.19	-0.789036	-1.12128
223.39	-0.338797	-0.316458			223.39	-0.792979	-1.12083
223.59	-0.336574	-0.313123			223.59	-0.790755	-1.1175
223.79	-0.337984	-0.309449			223.79	-0.792165	-1.11383
223.99	-0.334813	-0.312457			223.99	-0.788994	-1.11683
224.19	-0.336984	-0.315515			224.19	-0.791165	-1.11989
224.39	-0.334021	-0.31014			224.39	-0.788203	-1.11452
224.59	-0.336718	-0.312359			224.59	-0.7909	-1.11673
224.79	-0.330132	-0.310687			224.79	-0.784313	-1.11506
224.99	-0.331441	-0.310666			224.99	-0.785623	-1.11504
225.19	-0.332947	-0.309299			225.19	-0.787128	-1.11367
225.39	-0.332008	-0.309742			225.39	-0.78619	-1.11412
225.59	-0.329279	-0.30438			225.59	-0.783461	-1.10876
225.79	-0.332195	-0.306851			225.79	-0.786377	-1.11123
225.99	-0.330627	-0.302265			225.99	-0.784809	-1.10664
226.19	-0.329992	-0.30214			226.19	-0.784174	-1.10652
226.39	-0.327987	-0.30487			226.39	-0.782169	-1.10925
226.59	-0.329036	-0.302584			226.59	-0.783218	-1.10696
226.79	-0.326795	-0.305169			226.79	-0.780977	-1.10954
226.99	-0.329638	-0.302664			226.99	-0.78382	-1.10704
227.19	-0.325477	-0.302532			227.19	-0.779659	-1.10691
227.39	-0.323	-0.302671			227.39	-0.777182	-1.10705
227.59	-0.322254	-0.302512			227.59	-0.776435	-1.10689
227.79	-0.323669	-0.299736			227.79	-0.77785	-1.10411
227.99	-0.324266	-0.293342			227.99	-0.778447	-1.09772
228.19	-0.32307	-0.297891			228.19	-0.777252	-1.10227
228.39	-0.318581	-0.293809			228.39	-0.772763	-1.09818
228.59	-0.319228	-0.292261			228.59	-0.77341	-1.09664
228.79	-0.319241	-0.297939			228.79	-0.773423	-1.10231
228.99	-0.319509	-0.291253			228.99	-0.773691	-1.09563
229.19	-0.318362	-0.293037			229.19	-0.772543	-1.09741
229.39	-0.31753	-0.288696			229.39	-0.771712	-1.09307
229.59	-0.31666	-0.288132			229.59	-0.770842	-1.09251
229.79	-0.317671	-0.285074			229.79	-0.771852	-1.08945
229.99	-0.311906	-0.289906			229.99	-0.766088	-1.09428
230.19	-0.309722	-0.286026			230.19	-0.763904	-1.0904
230.39	-0.314259	-0.2849			230.39	-0.768441	-1.08928
230.59	-0.315571	-0.283229			230.59	-0.769752	-1.0876
230.79	-0.311084	-0.286347			230.79	-0.765266	-1.09072
230.99	-0.314105	-0.287028			230.99	-0.768287	-1.0914
231.19	-0.308779	-0.282651			231.19	-0.762961	-1.08703
231.39	-0.313207	-0.283948			231.39	-0.767389	-1.08832
231.59	-0.307191	-0.283131			231.59	-0.761373	-1.08751
231.79	-0.311865	-0.279878			231.79	-0.766047	-1.08425
231.99	-0.305768	-0.280641			231.99	-0.75995	-1.08502
232.19	-0.305031	-0.279705			232.19	-0.759213	-1.08408
232.39	-0.308481	-0.279028			232.39	-0.762663	-1.0834
232.59	-0.306307	-0.276226			232.59	-0.760489	-1.0806
232.79	-0.306879	-0.277648			232.79	-0.761061	-1.08202
232.99	-0.303262	-0.277604			232.99	-0.757443	-1.08198
233.19	-0.303892	-0.277951			233.19	-0.758074	-1.08233
233.39	-0.301536	-0.276309			233.39	-0.755718	-1.08068
233.59	-0.300155	-0.275962			233.59	-0.754337	-1.08034
233.79	-0.303379	-0.273331			233.79	-0.757561	-1.07771
233.99	-0.299286	-0.267572			233.99	-0.753468	-1.07195
234.19	-0.297379	-0.270585			234.19	-0.751561	-1.07496
234.39	-0.299	-0.269451			234.39	-0.753181	-1.07383
234.59	-0.300339	-0.268517			234.59	-0.754521	-1.07289
234.79	-0.296617	-0.270102			234.79	-0.750798	-1.07448
234.99	-0.296349	-0.268218			234.99	-0.75053	-1.07259
235.19	-0.292777	-0.268079			235.19	-0.746959	-1.07246
235.39	-0.294093	-0.268075			235.39	-0.748275	-1.07245
235.59	-0.297536	-0.264041			235.59	-0.751718	-1.06842
235.79	-0.293629	-0.265925			235.79	-0.747811	-1.0703
235.99	-0.293404	-0.264118			235.99	-0.747585	-1.06849
236.19	-0.293187	-0.263286			236.19	-0.747368	-1.06766
236.39	-0.29239	-0.260814			236.39	-0.746572	-1.06519
236.59	-0.292299	-0.259213			236.59	-0.74648	-1.06359
236.79	-0.290766	-0.260138			236.79	-0.744948	-1.06451
236.99	-0.289751	-0.260336			236.99	-0.743933	-1.06471
237.19	-0.291081	-0.258449			237.19	-0.745262	-1.06282
237.39	-0.287461	-0.260061			237.39	-0.741643	-1.06444
237.59	-0.28735	-0.255611			237.59	-0.741531	-1.05999
237.79	-0.285968	-0.254952			237.79	-0.74015	-1.05933
237.99	-0.284612	-0.25605			237.99	-0.738794	-1.06043
238.19	-0.284274	-0.257258			238.19	-0.738455	-1.06163
238.39	-0.284447	-0.25305			238.39	-0.738628	-1.05743
238.59	-0.287345	-0.251433			238.59	-0.741527	-1.05581
238.79	-0.278229	-0.25308			238.79	-0.732411	-1.05746
238.99	-0.282969	-0.249615			238.99	-0.737151	-1.05399
239.19	-0.285198	-0.247101			239.19	-0.73938	-1.05148
239.39	-0.280757	-0.250545			239.39	-0.734939	-1.05492
239.59	-0.280318	-0.251124			239.59	-0.734499	-1.0555
239.79	-0.277407	-0.249618			239.79	-0.731589	-1.05399
239.99	-0.281588	-0.246347			239.99	-0.73577	-1.05072
240.19	-0.274257	-0.246098			240.19	-0.728439	-1.05047
240.39	-0.277022	-0.245191			240.39	-0.731204	-1.04957
240.59	-0.274284	-0.245537			240.59	-0.728466	-1.04991
240.79	-0.277386	-0.245462			240.79	-0.731568	-1.04984
240.99	-0.271554	-0.242961			240.99	-0.725736	-1.04734
241.19	-0.273196	-0.24169			241.19	-0.727377	-1.04607
241.39	-0.275025	-0.242484			241.39	-0.729207	-1.04686
241.59	-0.273184	-0.241047			241.59	-0.727365	-1.04542
241.79	-0.274871	-0.240993			241.79	-0.729053	-1.04537
241.99	-0.269458	-0.239093			241.99	-0.72364	-1.04347
242.19	-0.270126	-0.237737			242.19	-0.724307	-1.04211
242.39	-0.268763	-0.238302			242.39	-0.722945	-1.04268
242.59	-0.270103	-0.236889			242.59	-0.724285	-1.04126
242.79	-0.265035	-0.238525			242.79	-0.719216	-1.0429
242.99	-0.264625	-0.233813			242.99	-0.718807	-1.03819
243.19	-0.267943	-0.232034			243.19	-0.722124	-1.03641
243.39	-0.265398	-0.233545			243.39	-0.719579	-1.03792
243.59	-0.26711	-0.232096			243.59	-0.721292	-1.03647
243.79	-0.265748	-0.229104			243.79	-0.719929	-1.03348
243.99	-0.262996	-0.227186			243.99	-0.717178	-1.03156
244.19	-0.263772	-0.23332			244.19	-0.717953	-1.0377
244.39	-0.260288	-0.2284			244.39	-0.71447	-1.03278
244.59	-0.260147	-0.226521			244.59	-0.714329	-1.0309
244.79	-0.258601	-0.226541			244.79	-0.712783	-1.03092
244.99	-0.25813	-0.223775			244.99	-0.712312	-1.02815
245.19	-0.256883	-0.226666			245.19	-0.711064	-1.03104
245.39	-0.256569	-0.222043			245.39	-0.71075	-1.02642
245.59	-0.258581	-0.223036			245.59	-0.712763	-1.02741
245.79	-0.256071	-0.223931			245.79	-0.710252	-1.02831
245.99	-0.255633	-0.223374			245.99	-0.709815	-1.02775
246.19	-0.257519	-0.220695			246.19	-0.7117	-1.02507
246.39	-0.250586	-0.217436			246.39	-0.704768	-1.02181
246.59	-0.252002	-0.217187			246.59	-0.706183	-1.02156
246.79	-0.251625	-0.220633			246.79	-0.705807	-1.02501
246.99	-0.25095	-0.217482			246.99	-0.705131	-1.02186
247.19	-0.24845	-0.214011			247.19	-0.702632	-1.01839
247.39	-0.247037	-0.217116			247.39	-0.701218	-1.02149
247.59	-0.24995	-0.214065			247.59	-0.704132	-1.01844
247.79	-0.249507	-0.213712			247.79	-0.703689	-1.01809
247.99	-0.250449	-0.211263			247.99	-0.704631	-1.01564
248.19	-0.243989	-0.211915			248.19	-0.69817	-1.01629
248.39	-0.246811	-0.210054			248.39	-0.700993	-1.01443
248.59	-0.246102	-0.212046			248.59	-0.700283	-1.01642
248.79	-0.243827	-0.212464			248.79	-0.698008	-1.01684
248.99	-0.243777	-0.207148			248.99	-0.697958	-1.01152
249.19	-0.241176	-0.211184			249.19	-0.695357	-1.01556
249.39	-0.241104	-0.207113			249.39	-0.695286	-1.01149
249.59	-0.239532	-0.205549			249.59	-0.693714	-1.00993
249.79	-0.241035	-0.20521			249.79	-0.695216	-1.00959
249.99	-0.242228	-0.205899			249.99	-0.69641	-1.01027
250.19	-0.238609	-0.205002			250.19	-0.69279	-1.00938
250.39	-0.23971	-0.204049			250.39	-0.693891	-1.00842
250.59	-0.237298	-0.20112			250.59	-0.69148	-1.0055
250.79	-0.238275	-0.20037			250.79	-0.692457	-1.00475
250.99	-0.236528	-0.201086			250.99	-0.69071	-1.00546
251.19	-0.233883	-0.197017			251.19	-0.688065	-1.00139
251.39	-0.229624	-0.197042			251.39	-0.683805	-1.00142
251.59	-0.231711	-0.198595			251.59	-0.685892	-1.00297
251.79	-0.23326	-0.194783			251.79	-0.687441	-0.999159
251.99	-0.235328	-0.192726			251.99	-0.689509	-0.997102
252.19	-0.231593	-0.19605			252.19	-0.685775	-1.00043
252.39	-0.228626	-0.193474			252.39	-0.682807	-0.99785
252.59	-0.227162	-0.19223			252.59	-0.681343	-0.996606
252.79	-0.230262	-0.191594			252.79	-0.684444	-0.99597
252.99	-0.229267	-0.190711			252.99	-0.683449	-0.995087
253.19	-0.228103	-0.192895			253.19	-0.682285	-0.997271
253.39	-0.225652	-0.188306			253.39	-0.679834	-0.992682
253.59	-0.224557	-0.188677			253.59	-0.678738	-0.993053
253.79	-0.22725	-0.187568			253.79	-0.681432	-0.991944
253.99	-0.22107	-0.185799			253.99	-0.675252	-0.990175
254.19	-0.227503	-0.182846			254.19	-0.681685	-0.987222
254.39	-0.220522	-0.184959			254.39	-0.674704	-0.989335
254.59	-0.220668	-0.181859			254.59	-0.674849	-0.986235
254.79	-0.213902	-0.18366			254.79	-0.668083	-0.988036
254.99	-0.217819	-0.180965			254.99	-0.672001	-0.985341
255.19	-0.218808	-0.181171			255.19	-0.672989	-0.985547
255.39	-0.216837	-0.179643			255.39	-0.671019	-0.984019
255.59	-0.216586	-0.176376			255.59	-0.670767	-0.980752
255.79	-0.216686	-0.177427			255.79	-0.670868	-0.981803
255.99	-0.218663	-0.177303			255.99	-0.672844	-0.981679
256.19	-0.214192	-0.175762			256.19	-0.668374	-0.980138
256.39	-0.213414	-0.176005			256.39	-0.667596	-0.980381
256.59	-0.21327	-0.174684			256.59	-0.667452	-0.97906
256.79	-0.211844	-0.172651			256.79	-0.666026	-0.977027
256.99	-0.216889	-0.175187			256.99	-0.671071	-0.979564
257.19	-0.21062	-0.173223			257.19	-0.664802	-0.977599
257.39	-0.212516	-0.173791			257.39	-0.666698	-0.978167
257.59	-0.208008	-0.169797			257.59	-0.662189	-0.974173
257.79	-0.211419	-0.167741			257.79	-0.665601	-0.972117
257.99	-0.208363	-0.170221			257.99	-0.662545	-0.974597
258.19	-0.206948	-0.164157			258.19	-0.661129	-0.968533
258.39	-0.206822	-0.165045			258.39	-0.661004	-0.969421
258.59	-0.201913	-0.166003			258.59	-0.656095	-0.970379
258.79	-0.203694	-0.162957			258.79	-0.657875	-0.967333
258.99	-0.204377	-0.163209			258.99	-0.658558	-0.967585
259.19	-0.20433	-0.163055			259.19	-0.658512	-0.967431
259.39	-0.201571	-0.158847			259.39	-0.655752	-0.963223
259.59	-0.203918	-0.1585			259.59	-0.6581	-0.962877
259.79	-0.201329	-0.159055			259.79	-0.655511	-0.963431
259.99	-0.199738	-0.15963			259.99	-0.653919	-0.964006
260.19	-0.19904	-0.159403			260.19	-0.653222	-0.963779
260.39	-0.199342	-0.154095			260.39	-0.653523	-0.958471
260.59	-0.202737	-0.159851			260.59	-0.656918	-0.964227
260.79	-0.197976	-0.152307			260.79	-0.652157	-0.956683
260.99	-0.195136	-0.153783			260.99	-0.649318	-0.958159
261.19	-0.197274	-0.153994			261.19	-0.651456	-0.95837
261.39	-0.193223	-0.150247			261.39	-0.647405	-0.954623
261.59	-0.192706	-0.149902			261.59	-0.646888	-0.954278
261.79	-0.193224	-0.150368			261.79	-0.647405	-0.954744
261.99	-0.195573	-0.151223			261.99	-0.649755	-0.955599
262.19	-0.194503	-0.150887			262.19	-0.648684	-0.955263
262.39	-0.186298	-0.146975			262.39	-0.64048	-0.951351
262.59	-0.193326	-0.146343			262.59	-0.647507	-0.950719
262.79	-0.188668	-0.143013			262.79	-0.642849	-0.947389
262.99	-0.189488	-0.147424			262.99	-0.64367	-0.9518
263.19	-0.182497	-0.144353			263.19	-0.636678	-0.948729
263.39	-0.185327	-0.144745			263.39	-0.639509	-0.949121
263.59	-0.188341	-0.145637			263.59	-0.642522	-0.950013
263.79	-0.186264	-0.142917			263.79	-0.640446	-0.947293
263.99	-0.18195	-0.140522			263.99	-0.636132	-0.944898
264.19	-0.183062	-0.140767			264.19	-0.637243	-0.945143
264.39	-0.182732	-0.137532			264.39	-0.636914	-0.941908
264.59	-0.180036	-0.141012			264.59	-0.634218	-0.945388
264.79	-0.177201	-0.138369			264.79	-0.631383	-0.942745
264.99	-0.178607	-0.136686			264.99	-0.632789	-0.941062
265.19	-0.178154	-0.136676			265.19	-0.632335	-0.941052
265.39	-0.177754	-0.136413			265.39	-0.631935	-0.940789
265.59	-0.17978	-0.137277			265.59	-0.633962	-0.941653
265.79	-0.175268	-0.13392			265.79	-0.629449	-0.938296
265.99	-0.178311	-0.131626			265.99	-0.632492	-0.936002
266.19	-0.173281	-0.129132			266.19	-0.627462	-0.933508
266.39	-0.17294	-0.129282			266.39	-0.627122	-0.933658
266.59	-0.171426	-0.12981			266.59	-0.625607	-0.934186
266.79	-0.171036	-0.128257			266.79	-0.625218	-0.932633
266.99	-0.172314	-0.126165			266.99	-0.626496	-0.930541
267.19	-0.174918	-0.121903			267.19	-0.6291	-0.926279
267.39	-0.167758	-0.124174			267.39	-0.62194	-0.92855
267.59	-0.166578	-0.125775			267.59	-0.62076	-0.930151
267.79	-0.170077	-0.125309			267.79	-0.624259	-0.929685
267.99	-0.166372	-0.123295			267.99	-0.620553	-0.927671
268.19	-0.169495	-0.119981			268.19	-0.623677	-0.924357
268.39	-0.161759	-0.12042			268.39	-0.61594	-0.924796
268.59	-0.163813	-0.122066			268.59	-0.617994	-0.926442
268.79	-0.164356	-0.118998			268.79	-0.618538	-0.923374
268.99	-0.161471	-0.121204			268.99	-0.615653	-0.92558
269.19	-0.160042	-0.118973			269.19	-0.614223	-0.923349
269.39	-0.161056	-0.119483			269.39	-0.615237	-0.923859
269.59	-0.161647	-0.1155			269.59	-0.615829	-0.919876
269.79	-0.160623	-0.114483			269.79	-0.614805	-0.918859
269.99	-0.161445	-0.110154			269.99	-0.615627	-0.91453
270.19	-0.161547	-0.113501			270.19	-0.615728	-0.917877
270.39	-0.161789	-0.110988			270.39	-0.615971	-0.915364
270.59	-0.155498	-0.11051			270.59	-0.60968	-0.914886
270.79	-0.155128	-0.111154			270.79	-0.60931	-0.91553
270.99	-0.153301	-0.107807			270.99	-0.607482	-0.912183
271.19	-0.157959	-0.107852			271.19	-0.612141	-0.912228
271.39	-0.157362	-0.105209			271.39	-0.611544	-0.909585
271.59	-0.157163	-0.105904			271.59	-0.611345	-0.91028
271.79	-0.152294	-0.104604			271.79	-0.606476	-0.90898
271.99	-0.155377	-0.107136			271.99	-0.609558	-0.911512
272.19	-0.151661	-0.107626			272.19	-0.605843	-0.912002
272.39	-0.150168	-0.103407			272.39	-0.60435	-0.907783
272.59	-0.151307	-0.0999591			272.59	-0.605488	-0.904335
272.79	-0.149791	-0.0996123			272.79	-0.603973	-0.903988
272.99	-0.142277	-0.0996131			272.99	-0.596458	-0.903989
273.19	-0.146114	-0.0966228			273.19	-0.600296	-0.900999
273.39	-0.148896	-0.0966441			273.39	-0.603078	-0.90102
273.59	-0.146202	-0.0975618			273.59	-0.600384	-0.901938
273.79	-0.143933	-0.0923433			273.79	-0.598115	-0.896719
273.99	-0.14387	-0.0930962			273.99	-0.598051	-0.897472
274.19	-0.14257	-0.0942647			274.19	-0.596751	-0.898641
274.39	-0.141039	-0.0945463			274.39	-0.595221	-0.898922
274.59	-0.139408	-0.0963778			274.59	-0.593589	-0.900754
274.79	-0.141629	-0.0940266			274.79	-0.595811	-0.898403
274.99	-0.139597	-0.0925243			274.99	-0.593779	-0.8969
275.19	-0.139775	-0.0869758			275.19	-0.593957	-0.891352
275.39	-0.138282	-0.0857656			275.39	-0.592464	-0.890142
275.59	-0.136879	-0.0894103			275.59	-0.591061	-0.893786
275.79	-0.137985	-0.0860919			275.79	-0.592166	-0.890468
275.99	-0.136415	-0.084945			275.99	-0.590597	-0.889321
276.19	-0.131054	-0.0845144			276.19	-0.585236	-0.88889
276.39	-0.137468	-0.0820184			276.39	-0.591649	-0.886394
276.59	-0.132411	-0.0871816			276.59	-0.586592	-0.891558
276.79	-0.132683	-0.080143			276.79	-0.586865	-0.884519
276.99	-0.131022	-0.0838629			276.99	-0.585204	-0.888239
277.19	-0.12927	-0.0828902			277.19	-0.583451	-0.887266
277.39	-0.130219	-0.0794476			277.39	-0.584401	-0.883824
277.59	-0.131868	-0.0769876			277.59	-0.58605	-0.881364
277.79	-0.132501	-0.0778145			277.79	-0.586682	-0.882191
277.99	-0.12871	-0.0787799			277.99	-0.582891	-0.883156
278.19	-0.127059	-0.07644			278.19	-0.581241	-0.880816
278.39	-0.125374	-0.0728218			278.39	-0.579555	-0.877198
278.59	-0.129186	-0.0745255			278.59	-0.583368	-0.878902
278.79	-0.124294	-0.0770521			278.79	-0.578476	-0.881428
278.99	-0.125885	-0.0727591			278.99	-0.580067	-0.877135
279.19	-0.124868	-0.0735827			279.19	-0.57905	-0.877959
279.39	-0.119631	-0.072375			279.39	-0.573813	-0.876751
279.59	-0.121686	-0.0726237			279.59	-0.575868	-0.877
279.79	-0.122671	-0.0712814			279.79	-0.576852	-0.875657
279.99	-0.120996	-0.0676187			279.99	-0.575177	-0.871995
280.19	-0.119664	-0.066292			280.19	-0.573846	-0.870668
280.39	-0.117288	-0.0673737			280.39	-0.57147	-0.87175
280.59	-0.116523	-0.0657462			280.59	-0.570705	-0.870122
280.79	-0.113978	-0.0659838			280.79	-0.56816	-0.87036
280.99	-0.115644	-0.0689874			280.99	-0.569825	-0.873363
281.19	-0.114555	-0.0581243			281.19	-0.568737	-0.8625
281.39	-0.116327	-0.0603952			281.39	-0.570509	-0.864771
281.59	-0.108896	-0.0600384			281.59	-0.563078	-0.864414
281.79	-0.108624	-0.0620187			281.79	-0.562806	-0.866395
281.99	-0.11274	-0.0619603			281.99	-0.566922	-0.866336
282.19	-0.113565	-0.0587089			282.19	-0.567746	-0.863085
282.39	-0.109259	-0.0581912			282.39	-0.563441	-0.862567
282.59	-0.105851	-0.0596962			282.59	-0.560033	-0.864072
282.79	-0.106151	-0.0564778			282.79	-0.560333	-0.860854
282.99	-0.103918	-0.0506828			282.99	-0.5581	-0.855059
283.19	-0.108318	-0.0522457			283.19	-0.5625	-0.856622
283.39	-0.103707	-0.0506521			283.39	-0.557888	-0.855028
283.59	-0.104553	-0.0523833			283.59	-0.558735	-0.856759
283.79	-0.102773	-0.0482045			283.79	-0.556955	-0.852581
283.99	-0.100739	-0.0507959			283.99	-0.554921	-0.855172
284.19	-0.0980195	-0.0475678			284.19	-0.552201	-0.851944
284.39	-0.100784	-0.0473198			284.39	-0.554966	-0.851696
284.59	-0.100536	-0.0465776			284.59	-0.554718	-0.850954
284.79	-0.0993796	-0.045267			284.79	-0.553561	-0.849643
284.99	-0.096474	-0.045608			284.99	-0.550656	-0.849984
285.19	-0.0996714	-0.0441391			285.19	-0.553853	-0.848515
285.39	-0.0977361	-0.0437842			285.39	-0.551918	-0.84816
285.59	-0.0962688	-0.0457034			285.59	-0.55045	-0.850079
285.79	-0.101031	-0.0446688			285.79	-0.555213	-0.849045
285.99	-0.0967432	-0.0411991			285.99	-0.550925	-0.845575
286.19	-0.0948362	-0.0426053			286.19	-0.549018	-0.846981
286.39	-0.0913521	-0.0418211			286.39	-0.545534	-0.846197
286.59	-0.0920389	-0.0413705			286.59	-0.546221	-0.845747
286.79	-0.0919566	-0.0373115			286.79	-0.546138	-0.841688
286.99	-0.0904885	-0.0361701			286.99	-0.54467	-0.840546
287.19	-0.0907957	-0.0366383			287.19	-0.544977	-0.841014
287.39	-0.0884618	-0.0331937			287.39	-0.542643	-0.83757
287.59	-0.0874565	-0.0335092			287.59	-0.541638	-0.837885
287.79	-0.0885604	-0.0296839			287.79	-0.542742	-0.83406
287.99	-0.0861932	-0.0296301			287.99	-0.540375	-0.834006
288.19	-0.0872137	-0.0277208			288.19	-0.541395	-0.832097
288.39	-0.0842805	-0.0273707			288.39	-0.538462	-0.831747
288.59	-0.0856515	-0.0275073			288.59	-0.539833	-0.831883
288.79	-0.0839762	-0.0244577			288.79	-0.538158	-0.828834
288.99	-0.0824923	-0.0243555			288.99	-0.536674	-0.828732
289.19	-0.0808847	-0.0253897			289.19	-0.535066	-0.829766
289.39	-0.0816254	-0.0245563			289.39	-0.535807	-0.828932
289.59	-0.0792358	-0.0215996			289.59	-0.533417	-0.825976
289.79	-0.0758188	-0.0217419			289.79	-0.53	-0.826118
289.99	-0.0815614	-0.0222762			289.99	-0.535743	-0.826652
290.19	-0.0763044	-0.0191575			290.19	-0.530486	-0.823533
290.39	-0.0756787	-0.0170951			290.39	-0.52986	-0.821471
290.59	-0.0756456	-0.0202036			290.59	-0.529827	-0.82458
290.79	-0.0728174	-0.0190462			290.79	-0.526999	-0.823422
290.99	-0.0734402	-0.0176945			290.99	-0.527622	-0.82207
291.19	-0.0739287	-0.0153407			291.19	-0.52811	-0.819717
291.39	-0.0730752	-0.0172049			291.39	-0.527257	-0.821581
291.59	-0.0766405	-0.0149608			291.59	-0.530822	-0.819337
291.79	-0.0729955	-0.0117913			291.79	-0.527177	-0.816167
291.99	-0.0672288	-0.0103989			291.99	-0.52141	-0.814775
292.19	-0.0693176	-0.0101494			292.19	-0.523499	-0.814525
292.39	-0.0727348	-0.00754627			292.39	-0.526916	-0.811922
292.59	-0.0701213	-0.00926355			292.59	-0.524303	-0.81364
292.79	-0.0716767	-0.0119577			292.79	-0.525858	-0.816334
292.99	-0.0651537	-0.00872867			292.99	-0.519335	-0.813105
293.19	-0.0636402	-0.00634544			293.19	-0.517822	-0.810721
293.39	-0.0656783	-0.0054318			293.39	-0.51986	-0.809808
293.59	-0.0648041	-0.00185734			293.59	-0.518986	-0.806233
293.79	-0.0633577	-0.00278987			293.79	-0.517539	-0.807166
293.99	-0.0623768	-0.00360761			293.99	-0.516558	-0.807984
294.19	-0.0628169	-0.00317482			294.19	-0.516999	-0.807551
294.39	-0.05636	0.00149792			294.39	-0.510542	-0.802878
294.6	-0.488852	-0.433385			294.6	-0.943033	-1.23776
294.79	-0.571943	-0.520782			294.79	-1.02612	-1.32516
294.99	-0.590563	-0.534934			294.99	-1.04474	-1.33931
295.19	-0.542278	-0.488943			295.19	-0.996459	-1.29332
295.39	-0.37899	-0.336926			295.39	-0.833172	-1.1413
295.59	-0.0737235	-0.0288429			295.59	-0.527905	-0.833219
295.79	0.260872	0.334252			295.79	-0.19331	-0.470124
295.99	0.305977	0.367188			295.99	-0.148204	-0.437188
296.19	0.323479	0.380105			296.19	-0.130702	-0.424271
296.39	0.33012	0.394665			296.39	-0.124062	-0.409711
296.59	0.343124	0.403279			296.59	-0.111057	-0.401097
296.79	0.349526	0.409423			296.79	-0.104655	-0.394953
296.99	0.358724	0.418131			296.99	-0.0954576	-0.386245
297.19	0.360368	0.42598			297.19	-0.0938137	-0.378396
297.39	0.364489	0.426849			297.39	-0.0896928	-0.377527
297.59	0.368426	0.432635			297.59	-0.0857551	-0.371741
297.79	0.371523	0.432489			297.79	-0.082659	-0.371887
297.99	0.375461	0.433683			297.99	-0.0787202	-0.370693
298.19	0.376167	0.439066			298.19	-0.0780148	-0.36531
298.39	0.380024	0.44265			298.39	-0.0741578	-0.361726
298.59	0.379936	0.447744			298.59	-0.0742453	-0.356632
298.79	0.381027	0.444472			298.79	-0.0731549	-0.359905
298.99	0.38839	0.447521			298.99	-0.0657913	-0.356855
299.19	0.38536	0.451653			299.19	-0.0688213	-0.352723
299.39	0.388531	0.448916			299.39	-0.0656509	-0.355461
299.59	0.393783	0.446256			299.59	-0.060399	-0.35812
299.79	0.391441	0.449591			299.79	-0.0627402	-0.354785
299.99	0.395812	0.454339			299.99	-0.0583692	-0.350037
300.19	0.395191	0.453775			300.19	-0.0589906	-0.350601
300.39	0.393222	0.455664			300.39	-0.0609601	-0.348712
300.59	0.393571	0.453064			300.59	-0.0606111	-0.351312
300.79	0.395504	0.457082			300.79	-0.0586775	-0.347294
300.99	0.395649	0.45866			300.99	-0.0585328	-0.345716
301.19	0.401848	0.460323			301.19	-0.0523337	-0.344053
301.39	0.396024	0.461199			301.39	-0.0581573	-0.343177
301.59	0.396134	0.460169			301.59	-0.0580474	-0.344207
301.79	0.401589	0.462414			301.79	-0.0525929	-0.341962
301.99	0.402031	0.461552			301.99	-0.0521504	-0.342824
302.19	0.400595	0.460555			302.19	-0.0535871	-0.343821
302.39	0.402846	0.463724			302.39	-0.0513358	-0.340652
302.59	0.404722	0.46584			302.59	-0.0494597	-0.338536
302.79	0.402206	0.467973			302.79	-0.0519753	-0.336403
302.99	0.404	0.466964			302.99	-0.0501811	-0.337412
303.19	0.406566	0.46277			303.19	-0.0476154	-0.341606
303.39	0.404242	0.463671			303.39	-0.0499398	-0.340705
303.59	0.405559	0.469558			303.59	-0.0486229	-0.334818
303.79	0.407979	0.468189			303.79	-0.0462025	-0.336187
303.99	0.405555	0.466644			303.99	-0.0486265	-0.337732
304.19	0.406133	0.469475			304.19	-0.0480482	-0.334901
304.39	0.409518	0.470331			304.39	-0.0446635	-0.334045
304.59	0.406567	0.469105			304.59	-0.0476148	-0.335271
304.79	0.405528	0.469451			304.79	-0.048654	-0.334925
304.99	0.405992	0.46864			304.99	-0.0481891	-0.335736
305.19	0.408825	0.471992			305.19	-0.0453565	-0.332384
305.39	0.407569	0.470862			305.39	-0.0466129	-0.333514
305.59	0.409862	0.472683			305.59	-0.0443199	-0.331693
305.79	0.406646	0.473575			305.79	-0.0475357	-0.330801
305.99	0.410406	0.474696			305.99	-0.0437751	-0.32968
306.19	0.411495	0.473129			306.19	-0.042687	-0.331247
306.39	0.411436	0.473064			306.39	-0.0427456	-0.331312
306.59	0.412718	0.477053			306.59	-0.0414635	-0.327323
306.79	0.413987	0.473939			306.79	-0.040195	-0.330437
306.99	0.408759	0.475482			306.99	-0.0454226	-0.328894
307.19	0.415058	0.47722			307.19	-0.0391237	-0.327156
307.39	0.416006	0.474943			307.39	-0.0381752	-0.329433
307.59	0.411901	0.477442			307.59	-0.0422804	-0.326934
307.79	0.412192	0.477393			307.79	-0.0419893	-0.326983
307.99	0.412615	0.477374			307.99	-0.0415665	-0.327002
308.19	0.415493	0.476078			308.19	-0.0386885	-0.328298
308.39	0.411251	0.479643			308.39	-0.0429307	-0.324733
308.59	0.410439	0.48276			308.59	-0.0437428	-0.321616
308.79	0.414821	0.477615			308.79	-0.0393604	-0.326761
308.99	0.414443	0.482356			308.99	-0.0397386	-0.32202
309.19	0.415232	0.482168			309.19	-0.03895	-0.322208
309.39	0.417852	0.481372			309.39	-0.0363298	-0.323004
309.59	0.415338	0.47901			309.59	-0.0388437	-0.325366
309.79	0.415774	0.479933			309.79	-0.0384081	-0.324443
309.99	0.415798	0.481214			309.99	-0.0383837	-0.323162
310.19	0.41533	0.479971			310.19	-0.0388517	-0.324405
310.39	0.41788	0.476745			310.39	-0.0363019	-0.327631
310.59	0.419766	0.480909			310.59	-0.0344155	-0.323467
310.79	0.415534	0.482208			310.79	-0.0386479	-0.322168
310.99	0.418494	0.484261			310.99	-0.0356875	-0.320115
311.19	0.419503	0.481986			311.19	-0.0346786	-0.32239
311.39	0.413932	0.482301			311.39	-0.0402493	-0.322075
311.59	0.420096	0.486118			311.59	-0.0340853	-0.318258
311.79	0.416481	0.485431			311.79	-0.0377005	-0.318945
311.99	0.4153	0.485434			311.99	-0.0388812	-0.318942
312.19	0.422375	0.480869			312.19	-0.0318065	-0.323507
312.39	0.419154	0.489688			312.39	-0.0350274	-0.314688
312.59	0.416993	0.484149			312.59	-0.0371886	-0.320227
312.79	0.423217	0.487485			312.79	-0.0309647	-0.316891
312.99	0.422494	0.486465			312.99	-0.031688	-0.317911
313.19	0.423284	0.483851			313.19	-0.0308981	-0.320525
313.39	0.422299	0.484482			313.39	-0.0318829	-0.319894
313.59	0.420042	0.486169			313.59	-0.0341397	-0.318207
313.79	0.42467	0.488997			313.79	-0.0295116	-0.315379
313.99	0.423656	0.483051			313.99	-0.0305252	-0.321325
314.19	0.422593	0.485979			314.19	-0.0315883	-0.318397
314.39	0.423925	0.487573			314.39	-0.0302569	-0.316803
314.59	0.419717	0.485483			314.59	-0.0344647	-0.318893
314.79	0.418442	0.484608			314.79	-0.0357397	-0.319768
314.99	0.421125	0.488049			314.99	-0.0330571	-0.316327
315.19	0.426207	0.488736			315.19	-0.0279742	-0.31564
315.39	0.422992	0.487632			315.39	-0.0311897	-0.316744
315.59	0.415679	0.490198			315.59	-0.0385027	-0.314178
315.79	0.422408	0.491941			315.79	-0.0317731	-0.312435
315.99	0.422874	0.492877			315.99	-0.0313073	-0.311499
316.19	0.423057	0.490759			316.19	-0.0311246	-0.313617
316.39	0.424523	0.485138			316.39	-0.0296588	-0.319238
316.59	0.41942	0.491799			316.59	-0.0347614	-0.312577
316.79	0.425295	0.489602			316.79	-0.028887	-0.314774
316.99	0.421034	0.489747			316.99	-0.0331479	-0.314629
317.19	0.423883	0.494676			317.19	-0.0302985	-0.3097
317.39	0.426056	0.492405			317.39	-0.0281259	-0.311971
317.59	0.42345	0.490301			317.59	-0.0307318	-0.314075
317.79	0.423584	0.490946			317.79	-0.0305979	-0.31343
317.99	0.423433	0.488179			317.99	-0.0307482	-0.316197
318.19	0.425982	0.492219			318.19	-0.0281995	-0.312157
318.39	0.423285	0.491318			318.39	-0.030897	-0.313058
318.59	0.426982	0.492836			318.59	-0.0271994	-0.31154
318.79	0.423875	0.491837			318.79	-0.0303066	-0.312539
318.99	0.426865	0.489638			318.99	-0.0273168	-0.314738
319.19	0.427536	0.492553			319.19	-0.026646	-0.311823
319.39	0.425899	0.491976			319.39	-0.028283	-0.3124
319.59	0.424259	0.494388			319.59	-0.0299229	-0.309988
319.79	0.423458	0.492667			319.79	-0.0307236	-0.311709
319.99	0.426562	0.495108			319.99	-0.0276194	-0.309268
320.19	0.424826	0.490964			320.19	-0.0293559	-0.313412
320.39	0.428059	0.493703			320.39	-0.0261222	-0.310673
320.59	0.424937	0.493841			320.59	-0.0292447	-0.310535
320.79	0.42759	0.491423			320.79	-0.0265917	-0.312953
320.99	0.427327	0.495605			320.99	-0.0268544	-0.308771
321.19	0.428306	0.494694			321.19	-0.0258753	-0.309682
321.39	0.42387	0.495878			321.39	-0.0303112	-0.308498
321.59	0.427033	0.494065			321.59	-0.0271485	-0.310311
321.79	0.424404	0.495105			321.79	-0.0297778	-0.309271
321.99	0.42731	0.496549			321.99	-0.0268721	-0.307827
322.19	0.427426	0.495717			322.19	-0.0267558	-0.308659
322.39	0.427373	0.496738			322.39	-0.0268088	-0.307638
322.59	0.428042	0.493305			322.59	-0.0261394	-0.311071
322.79	0.428247	0.49611			322.79	-0.0259342	-0.308266
322.99	0.427421	0.498705			322.99	-0.0267611	-0.305671
323.19	0.427499	0.497026			323.19	-0.0266825	-0.30735
323.39	0.424152	0.492563			323.39	-0.0300292	-0.311813
323.59	0.425465	0.497887			323.59	-0.0287162	-0.306489
323.79	0.423704	0.494422			323.79	-0.0304776	-0.309954
323.99	0.429028	0.499681			323.99	-0.0251533	-0.304695
324.19	0.431072	0.499502			324.19	-0.0231093	-0.304874
324.39	0.430062	0.499101			324.39	-0.02412	-0.305275
324.59	0.424797	0.500722			324.59	-0.0293851	-0.303654
324.79	0.428713	0.502123			324.79	-0.025469	-0.302253
324.99	0.427893	0.500859			324.99	-0.0262885	-0.303517
325.19	0.429529	0.499371			325.19	-0.0246526	-0.305005
325.39	0.428859	0.496454			325.39	-0.0253221	-0.307922
325.59	0.431061	0.49875			325.59	-0.0231201	-0.305626
325.79	0.429456	0.499169			325.79	-0.0247257	-0.305207
325.99	0.429601	0.496526			325.99	-0.0245809	-0.30785
326.19	0.428823	0.498717			326.19	-0.0253587	-0.305659
326.39	0.430394	0.501253			326.39	-0.0237879	-0.303123
326.59	0.433583	0.50013			326.59	-0.0205983	-0.304246
326.79	0.431815	0.49959			326.79	-0.0223663	-0.304786
326.99	0.4267	0.497999			326.99	-0.0274811	-0.306377
327.19	0.434123	0.501105			327.19	-0.0200586	-0.303271
327.39	0.428341	0.501507			327.39	-0.0258407	-0.302869
327.59	0.43176	0.499271			327.59	-0.0224212	-0.305105
327.79	0.429472	0.499953			327.79	-0.0247099	-0.304423
327.99	0.428669	0.499572			327.99	-0.0255128	-0.304804
328.19	0.429212	0.504264			328.19	-0.0249696	-0.300112
328.39	0.428096	0.5011			328.39	-0.0260852	-0.303276
328.59	0.432991	0.503399			328.59	-0.0211908	-0.300977
328.79	0.427001	0.503611			328.79	-0.0271809	-0.300765
328.99	0.429691	0.503118			328.99	-0.0244905	-0.301258
329.19	0.430148	0.503688			329.19	-0.0240338	-0.300688
329.39	0.43278	0.503655			329.39	-0.0214018	-0.300721
329.59	0.431126	0.498999			329.59	-0.0230557	-0.305377
329.79	0.436109	0.504797			329.79	-0.018073	-0.299579
329.99	0.427114	0.504244			329.99	-0.0270674	-0.300132
330.19	0.430889	0.504252			330.19	-0.0232921	-0.300124
330.39	0.432647	0.503359			330.39	-0.0215346	-0.301017
330.59	0.434045	0.507175			330.59	-0.0201367	-0.297201
330.79	0.430441	0.501248			330.79	-0.023741	-0.303128
330.99	0.431586	0.503631			330.99	-0.0225953	-0.300745
331.19	0.435058	0.505924			331.19	-0.0191241	-0.298452
331.39	0.435159	0.502347			331.39	-0.0190228	-0.302029
331.59	0.432782	0.504088			331.59	-0.0213994	-0.300288
331.79	0.433081	0.502295			331.79	-0.0211008	-0.302081
331.99	0.430971	0.505119			331.99	-0.0232104	-0.299257
332.19	0.432333	0.503328			332.19	-0.0218482	-0.301048
332.39	0.430943	0.506496			332.39	-0.0232391	-0.29788
332.59	0.430147	0.505573			332.59	-0.0240348	-0.298803
332.79	0.433106	0.507656			332.79	-0.0210752	-0.29672
332.99	0.432973	0.507786			332.99	-0.0212087	-0.29659
333.19	0.429839	0.503191			333.19	-0.024343	-0.301185
333.39	0.434254	0.507889			333.39	-0.019928	-0.296487
333.59	0.43665	0.505206			333.59	-0.017532	-0.299171
333.79	0.43331	0.505304			333.79	-0.0208717	-0.299072
333.99	0.430896	0.508176			333.99	-0.0232855	-0.2962
334.19	0.43572	0.505672			334.19	-0.0184615	-0.298704
334.39	0.43323	0.507226			334.39	-0.0209517	-0.29715
334.59	0.434387	0.505729			334.59	-0.0197943	-0.298647
334.79	0.433464	0.508778			334.79	-0.0207172	-0.295598
334.99	0.435151	0.505309			334.99	-0.0190308	-0.299067
335.19	0.432536	0.506912			335.19	-0.0216461	-0.297464
335.39	0.431917	0.510267			335.39	-0.0222645	-0.294109
335.59	0.432784	0.50556			335.59	-0.0213978	-0.298816
335.79	0.436467	0.506935			335.79	-0.0177144	-0.297441
335.99	0.434239	0.506227			335.99	-0.0199429	-0.298149
336.19	0.437117	0.508528			336.19	-0.0170645	-0.295848
336.39	0.434104	0.508626			336.39	-0.0200775	-0.29575
336.59	0.433578	0.505149			336.59	-0.0206035	-0.299227
336.79	0.431405	0.504866			336.79	-0.0227764	-0.29951
336.99	0.436882	0.509072			336.99	-0.0172996	-0.295304
337.19	0.432448	0.507397			337.19	-0.0217337	-0.296979
337.39	0.436824	0.510204			337.39	-0.0173579	-0.294172
337.59	0.434195	0.508264			337.59	-0.0199864	-0.296112
337.79	0.433708	0.509532			337.79	-0.0204739	-0.294844
337.99	0.436773	0.507964			337.99	-0.0174089	-0.296412
338.19	0.433005	0.508862			338.19	-0.021177	-0.295514
338.39	0.436437	0.505154			338.39	-0.0177445	-0.299222
338.59	0.432844	0.509451			338.59	-0.0213381	-0.294925
338.79	0.440189	0.507563			338.79	-0.013993	-0.296813
338.99	0.432255	0.511243			338.99	-0.0219262	-0.293133
339.19	0.436512	0.511589			339.19	-0.0176697	-0.292787
339.39	0.435224	0.509752			339.39	-0.018958	-0.294624
339.59	0.436524	0.511528			339.59	-0.0176574	-0.292848
339.79	0.434653	0.511485			339.79	-0.0195288	-0.292892
339.99	0.434843	0.50701			339.99	-0.0193387	-0.297366
340.19	0.432125	0.506757			340.19	-0.0220569	-0.297619
340.39	0.436778	0.51328			340.39	-0.017404	-0.291096
340.59	0.437645	0.509231			340.59	-0.0165361	-0.295145
340.79	0.435122	0.509312			340.79	-0.0190597	-0.295065
340.99	0.438847	0.510986			340.99	-0.0153346	-0.29339
341.19	0.435031	0.510166			341.19	-0.019151	-0.29421
341.39	0.435078	0.510797			341.39	-0.0191038	-0.293579
341.59	0.436633	0.513247			341.59	-0.0175484	-0.291129
341.79	0.434405	0.508754			341.79	-0.0197766	-0.295622
341.99	0.438254	0.509448			341.99	-0.0159276	-0.294928
342.19	0.435921	0.511484			342.19	-0.0182611	-0.292892
342.39	0.437398	0.512615			342.39	-0.0167837	-0.291761
342.59	0.435493	0.51117			342.59	-0.0186884	-0.293206
342.79	0.43563	0.515883			342.79	-0.0185517	-0.288493
342.99	0.434332	0.511814			342.99	-0.0198498	-0.292562
343.19	0.438177	0.511093			343.19	-0.0160049	-0.293283
343.39	0.433672	0.510038			343.39	-0.0205099	-0.294338
343.59	0.441812	0.510921			343.59	-0.0123695	-0.293455
343.79	0.439254	0.512071			343.79	-0.0149281	-0.292305
343.99	0.436126	0.514478			343.99	-0.0180554	-0.289898
344.19	0.435284	0.509311			344.19	-0.0188976	-0.295065
344.39	0.440617	0.514338			344.39	-0.0135644	-0.290038
344.59	0.440428	0.513618			344.59	-0.0137539	-0.290758
344.79	0.436845	0.51245			344.79	-0.0173363	-0.291927
344.99	0.437874	0.515803			344.99	-0.0163074	-0.288573
345.19	0.43893	0.513106			345.19	-0.0152519	-0.29127
345.39	0.436746	0.516198			345.39	-0.0174354	-0.288178
345.59	0.435157	0.513949			345.59	-0.0190247	-0.290427
345.79	0.433837	0.513388			345.79	-0.0203449	-0.290988
345.99	0.434385	0.512113			345.99	-0.0197966	-0.292263
346.19	0.438998	0.513585			346.19	-0.0151836	-0.290791
346.39	0.437006	0.51567			346.39	-0.0171757	-0.288706
346.59	0.442007	0.516961			346.59	-0.0121744	-0.287415
346.79	0.438199	0.511953			346.79	-0.0159824	-0.292423
346.99	0.44144	0.519038			346.99	-0.0127418	-0.285338
347.19	0.435954	0.514928			347.19	-0.0182279	-0.289448
347.39	0.442363	0.514719			347.39	-0.0118184	-0.289657
347.59	0.440193	0.515464			347.59	-0.0139891	-0.288912
347.79	0.437885	0.513344			347.79	-0.0162964	-0.291032
347.99	0.437032	0.515083			347.99	-0.01715	-0.289293
348.19	0.440497	0.514403			348.19	-0.0136847	-0.289973
348.39	0.439038	0.515994			348.39	-0.015144	-0.288382
348.59	0.441	0.515013			348.59	-0.0131817	-0.289363
348.79	0.43986	0.514211			348.79	-0.0143213	-0.290165
348.99	0.436612	0.517019			348.99	-0.0175695	-0.287357
349.19	0.440432	0.514361			349.19	-0.0137498	-0.290015
349.39	0.44085	0.517197			349.39	-0.0133315	-0.287179
349.59	0.440139	0.516923			349.59	-0.0140424	-0.287453
349.79	0.440943	0.516752			349.79	-0.013239	-0.287624
349.99	0.441736	0.51554			349.99	-0.0124461	-0.288836
350.19	0.437029	0.51483			350.19	-0.0171521	-0.289546
350.39	0.435588	0.513779			350.39	-0.0185936	-0.290597
350.59	0.443103	0.515874			350.59	-0.0110789	-0.288502
350.79	0.437933	0.511983			350.79	-0.0162489	-0.292393
350.99	0.437799	0.519041			350.99	-0.0163826	-0.285335
351.19	0.439376	0.520443			351.19	-0.0148059	-0.283933
351.39	0.440469	0.514924			351.39	-0.0137122	-0.289452
351.59	0.442376	0.518672			351.59	-0.0118054	-0.285704
351.79	0.440069	0.521122			351.79	-0.0141122	-0.283254
351.99	0.437896	0.519296			351.99	-0.0162856	-0.28508
352.19	0.440087	0.518378			352.19	-0.0140948	-0.285998
352.39	0.437347	0.518211			352.39	-0.0168344	-0.286165
352.59	0.439693	0.517116			352.59	-0.014489	-0.28726
352.79	0.439651	0.518134			352.79	-0.0145302	-0.286242
352.99	0.438954	0.5184			352.99	-0.0152278	-0.285976
353.19	0.439807	0.516308			353.19	-0.0143742	-0.288068
353.39	0.442543	0.520909			353.39	-0.0116388	-0.283467
353.59	0.440691	0.518932			353.59	-0.0134904	-0.285444
353.79	0.44105	0.518929			353.79	-0.0131318	-0.285447
353.99	0.43926	0.517072			353.99	-0.0149212	-0.287304
354.19	0.441876	0.517518			354.19	-0.0123061	-0.286858
354.39	0.439405	0.516843			354.39	-0.0147763	-0.287533
354.6	-0.097166	-0.0228067			354.6	-0.551348	-0.827183
354.79	-0.0745977	-0.00404183			354.79	-0.528779	-0.808418
354.99	-0.0564894	0.0110984			354.99	-0.510671	-0.793278
355.19	-0.0498383	0.0233585			355.19	-0.50402	-0.781017
355.39	-0.033968	0.0397929			355.39	-0.48815	-0.764583
355.59	-0.0262417	0.0458182			355.59	-0.480423	-0.758558
355.79	-0.0231699	0.0487336			355.79	-0.477351	-0.755642
355.99	-0.0142029	0.0578002			355.99	-0.468385	-0.746576
356.19	-0.0075023	0.0638639			356.19	-0.461684	-0.740512
356.39	-0.00577666	0.065009			356.39	-0.459958	-0.739367
356.59	-0.00125642	0.0673445			356.59	-0.455438	-0.737032
356.79	0.00162712	0.0692508			356.79	-0.452554	-0.735125
356.99	-0.00055249	0.0705623			356.99	-0.454734	-0.733814
357.19	0.0055361	0.0744162			357.19	-0.448646	-0.72996
357.39	0.00629815	0.0743023			357.39	-0.447883	-0.730074
357.59	0.00615401	0.0727885			357.59	-0.448028	-0.731588
357.79	0.00774071	0.0773933			357.79	-0.446441	-0.726983
357.99	0.00805037	0.0758265			357.99	-0.446131	-0.72855
358.19	0.00811984	0.0774808			358.19	-0.446062	-0.726895
358.39	0.00897172	0.0787352			358.39	-0.44521	-0.725641
358.59	0.00356626	0.0782584			358.59	-0.450615	-0.726118
358.79	0.00744867	0.0790567			358.79	-0.446733	-0.725319
358.99	0.00576954	0.0766428			358.99	-0.448412	-0.727733
359.19	0.00707642	0.0781983			359.19	-0.447105	-0.726178
359.39	0.0121424	0.0821924			359.39	-0.442039	-0.722184
359.59	0.00978662	0.0813405			359.59	-0.444395	-0.723036
359.79	0.0087032	0.0747933			359.79	-0.445478	-0.729583
359.99	0.0114907	0.0803415			359.99	-0.442691	-0.724035
360.19	0.00599025	0.0802918			360.19	-0.448191	-0.724084
360.39	0.00977841	0.0785824			360.39	-0.444403	-0.725794
360.59	0.0106673	0.0798851			360.59	-0.443514	-0.724491
360.79	0.0124461	0.0799272			360.79	-0.441735	-0.724449
360.99	0.0102844	0.0793112			360.99	-0.443897	-0.725065
361.19	0.00933801	0.0803177			361.19	-0.444844	-0.724058
361.39	0.0116904	0.0805623			361.39	-0.442491	-0.723814
361.59	0.0094589	0.0793485			361.59	-0.444723	-0.725028
361.79	0.0107039	0.0815301			361.79	-0.443478	-0.722846
361.99	0.00969353	0.0785979			361.99	-0.444488	-0.725778
362.19	0.0139417	0.0801582			362.19	-0.44024	-0.724218
362.39	0.0100612	0.0838157			362.39	-0.44412	-0.72056
362.59	0.0123971	0.0824125			362.59	-0.441785	-0.721964
362.79	0.0154622	0.08366			362.79	-0.438719	-0.720716
362.99	0.0134596	0.0838197			362.99	-0.440722	-0.720556
363.19	0.00877535	0.0850219			363.19	-0.445406	-0.719354
363.39	0.0126562	0.0824465			363.39	-0.441525	-0.72193
363.59	0.0102676	0.087491			363.59	-0.443914	-0.716885
363.79	0.0133079	0.0827768			363.79	-0.440874	-0.721599
363.99	0.0134063	0.0833701			363.99	-0.440775	-0.721006
364.19	0.0115938	0.0833964			364.19	-0.442588	-0.72098
364.39	0.0165041	0.0809644			364.39	-0.437677	-0.723412
364.59	0.0152653	0.0871482			364.59	-0.438916	-0.717228
364.79	0.014061	0.0877288			364.79	-0.440121	-0.716647
364.99	0.0154944	0.0868133			364.99	-0.438687	-0.717563
365.19	0.0142168	0.0862572			365.19	-0.439965	-0.718119
365.39	0.0155476	0.0859851			365.39	-0.438634	-0.718391
365.59	0.0163764	0.0877769			365.59	-0.437805	-0.716599
365.79	0.0140071	0.0876611			365.79	-0.440175	-0.716715
365.99	0.012458	0.085832			365.99	-0.441724	-0.718544
366.19	0.0142451	0.087244			366.19	-0.439937	-0.717132
366.39	0.0149551	0.0900839			366.39	-0.439226	-0.714292
366.59	0.0151518	0.0906863			366.59	-0.43903	-0.71369
366.79	0.0125372	0.0875716			366.79	-0.441644	-0.716804
366.99	0.019885	0.0867277			366.99	-0.434297	-0.717648
367.19	0.0142865	0.0918926			367.19	-0.439895	-0.712483
367.39	0.0165307	0.092636			367.39	-0.437651	-0.71174
367.59	0.0185027	0.0908251			367.59	-0.435679	-0.713551
367.79	0.0168666	0.0877346			367.79	-0.437315	-0.716641
367.99	0.0186254	0.0930609			367.99	-0.435556	-0.711315
368.19	0.0213323	0.0911103			368.19	-0.432849	-0.713266
368.39	0.0183554	0.0938204			368.39	-0.435826	-0.710556
368.59	0.0190468	0.0886433			368.59	-0.435135	-0.715733
368.79	0.0189442	0.0945326			368.79	-0.435237	-0.709843
368.99	0.0212812	0.0926052			368.99	-0.4329	-0.711771
369.19	0.0216682	0.0915735			369.19	-0.432513	-0.712803
369.39	0.021215	0.0948769			369.39	-0.432967	-0.709499
369.59	0.021348	0.0946074			369.59	-0.432834	-0.709769
369.79	0.0227529	0.0978718			369.79	-0.431429	-0.706504
369.99	0.0188604	0.0954026			369.99	-0.435321	-0.708973
370.19	0.0215828	0.0965826			370.19	-0.432599	-0.707793
370.39	0.0187396	0.0943555			370.39	-0.435442	-0.71002
370.59	0.0252239	0.0967159			370.59	-0.428958	-0.70766
370.79	0.0225261	0.100374			370.79	-0.431656	-0.704002
370.99	0.0237746	0.0953141			370.99	-0.430407	-0.709062
371.19	0.0193608	0.098188			371.19	-0.434821	-0.706188
371.39	0.0238391	0.100769			371.39	-0.430342	-0.703607
371.59	0.0235254	0.0983238			371.59	-0.430656	-0.706052
371.79	0.0241418	0.101897			371.79	-0.43004	-0.702479
371.99	0.0255307	0.099083			371.99	-0.428651	-0.705293
372.19	0.0238316	0.100812			372.19	-0.43035	-0.703564
372.39	0.0221998	0.0984544			372.39	-0.431982	-0.705922
372.59	0.0261393	0.097774			372.59	-0.428042	-0.706602
372.79	0.0290223	0.0990588			372.79	-0.425159	-0.705317
372.99	0.0223309	0.101146			372.99	-0.431851	-0.70323
373.19	0.0262163	0.101108			373.19	-0.427965	-0.703268
373.39	0.0319919	0.10173			373.39	-0.42219	-0.702646
373.59	0.0293143	0.10218			373.59	-0.424867	-0.702196
373.79	0.0291311	0.100287			373.79	-0.42505	-0.704089
373.99	0.0250306	0.104005			373.99	-0.429151	-0.700371
374.19	0.0265218	0.108794			374.19	-0.42766	-0.695582
374.39	0.0289792	0.106772			374.39	-0.425202	-0.697604
374.59	0.029732	0.107413			374.59	-0.42445	-0.696963
374.79	0.0332515	0.103892			374.79	-0.42093	-0.700484
374.99	0.0274987	0.105274			374.99	-0.426683	-0.699102
375.19	0.0277549	0.106003			375.19	-0.426427	-0.698373
375.39	0.024113	0.104445			375.39	-0.430069	-0.699931
375.59	0.0319019	0.107272			375.59	-0.42228	-0.697104
375.79	0.03029	0.106077			375.79	-0.423892	-0.698299
375.99	0.0316819	0.108385			375.99	-0.4225	-0.695991
376.19	0.0296177	0.107336			376.19	-0.424564	-0.69704
376.39	0.0341611	0.110196			376.39	-0.420021	-0.69418
376.59	0.0334575	0.109661			376.59	-0.420724	-0.694715
376.79	0.0366293	0.110357			376.79	-0.417552	-0.694019
376.99	0.035008	0.110278			376.99	-0.419174	-0.694098
377.19	0.0324077	0.108986			377.19	-0.421774	-0.69539
377.39	0.0307853	0.111913			377.39	-0.423396	-0.692463
377.59	0.0333532	0.113294			377.59	-0.420828	-0.691082
377.79	0.0352254	0.107713			377.79	-0.418956	-0.696663
377.99	0.0353776	0.114636			377.99	-0.418804	-0.68974
378.19	0.0366957	0.113805			378.19	-0.417486	-0.690571
378.39	0.0344955	0.11214			378.39	-0.419686	-0.692236
378.59	0.0349576	0.111622			378.59	-0.419224	-0.692754
378.79	0.0343495	0.11126			378.79	-0.419832	-0.693116
378.99	0.0358244	0.119381			378.99	-0.418357	-0.684995
379.19	0.0377251	0.113902			379.19	-0.416457	-0.690474
379.39	0.0349383	0.115895			379.39	-0.419243	-0.688481
379.59	0.0394212	0.11661			379.59	-0.41476	-0.687766
379.79	0.0420476	0.11832			379.79	-0.412134	-0.686056
379.99	0.0371657	0.115081			379.99	-0.417016	-0.689295
380.19	0.0413603	0.116904			380.19	-0.412821	-0.687472
380.39	0.0428345	0.117094			380.39	-0.411347	-0.687282
380.59	0.0441468	0.118498			380.59	-0.410035	-0.685878
380.79	0.0400811	0.11903			380.79	-0.414101	-0.685346
380.99	0.0388718	0.123827			380.99	-0.41531	-0.680549
381.19	0.0401547	0.119521			381.19	-0.414027	-0.684855
381.39	0.045079	0.119386			381.39	-0.409103	-0.68499
381.59	0.0425952	0.118449			381.59	-0.411586	-0.685927
381.79	0.0411709	0.119454			381.79	-0.413011	-0.684922
381.99	0.0436323	0.119094			381.99	-0.410549	-0.685282
382.19	0.0409909	0.121895			382.19	-0.413191	-0.682481
382.39	0.0441949	0.121328			382.39	-0.409987	-0.683048
382.59	0.0479994	0.121769			382.59	-0.406182	-0.682607
382.79	0.0462985	0.123185			382.79	-0.407883	-0.681191
382.99	0.0447178	0.122896			382.99	-0.409464	-0.68148
383.19	0.0457822	0.123217			383.19	-0.408399	-0.681159
383.39	0.0449112	0.125023			383.39	-0.40927	-0.679353
383.59	0.0472225	0.124965			383.59	-0.406959	-0.679411
383.79	0.0483079	0.12628			383.79	-0.405874	-0.678096
383.99	0.0502496	0.124862			383.99	-0.403932	-0.679514
384.19	0.0521046	0.128189			384.19	-0.402077	-0.676187
384.39	0.0500356	0.127661			384.39	-0.404146	-0.676715
384.59	0.0469149	0.126769			384.59	-0.407267	-0.677607
384.79	0.0484437	0.124545			384.79	-0.405738	-0.679831
384.99	0.0503234	0.131729			384.99	-0.403858	-0.672647
385.19	0.0490518	0.129816			385.19	-0.40513	-0.674561
385.39	0.0454494	0.130788			385.39	-0.408732	-0.673588
385.59	0.0507456	0.130728			385.59	-0.403436	-0.673648
385.79	0.0554734	0.132264			385.79	-0.398708	-0.672112
385.99	0.0588549	0.129712			385.99	-0.395327	-0.674664
386.19	0.052478	0.132073			386.19	-0.401704	-0.672303
386.39	0.0554164	0.130203			386.39	-0.398765	-0.674173
386.59	0.0543862	0.131648			386.59	-0.399795	-0.672728
386.79	0.0576005	0.135431			386.79	-0.396581	-0.668945
386.99	0.0567003	0.132431			386.99	-0.397481	-0.671945
387.19	0.0599268	0.135265			387.19	-0.394255	-0.669111
387.39	0.0543522	0.136423			387.39	-0.399829	-0.667953
387.59	0.0554985	0.139081			387.59	-0.398683	-0.665295
387.79	0.0602012	0.136407			387.79	-0.39398	-0.667969
387.99	0.0611894	0.133176			387.99	-0.392992	-0.6712
388.19	0.0611945	0.137391			388.19	-0.392987	-0.666985
388.39	0.056656	0.137448			388.39	-0.397526	-0.666928
388.59	0.0558857	0.13853			388.59	-0.398296	-0.665846
388.79	0.0602791	0.138746			388.79	-0.393903	-0.66563
388.99	0.0606651	0.136485			388.99	-0.393516	-0.667891
389.19	0.0628445	0.140722			389.19	-0.391337	-0.663654
389.39	0.0577242	0.141332			389.39	-0.396457	-0.663044
389.59	0.0617098	0.138282			389.59	-0.392472	-0.666094
389.79	0.0637381	0.139839			389.79	-0.390443	-0.664537
389.99	0.0592901	0.13837			389.99	-0.394891	-0.666006
390.19	0.0613475	0.142331			390.19	-0.392834	-0.662045
390.39	0.0651906	0.143826			390.39	-0.388991	-0.66055
390.59	0.0612995	0.143228			390.59	-0.392882	-0.661148
390.79	0.0621224	0.143766			390.79	-0.392059	-0.66061
390.99	0.0626541	0.144287			390.99	-0.391528	-0.660089
391.19	0.064293	0.144555			391.19	-0.389889	-0.659821
391.39	0.0647485	0.145745			391.39	-0.389433	-0.658631
391.59	0.0618569	0.144783			391.59	-0.392325	-0.659593
391.79	0.0647107	0.14878			391.79	-0.389471	-0.655596
391.99	0.0659887	0.144634			391.99	-0.388193	-0.659742
392.19	0.0632431	0.145151			392.19	-0.390939	-0.659225
392.39	0.0661387	0.147683			392.39	-0.388043	-0.656693
392.59	0.0674904	0.149839			392.59	-0.386691	-0.654537
392.79	0.0727242	0.148051			392.79	-0.381457	-0.656325
392.99	0.0708661	0.150797			392.99	-0.383316	-0.653579
393.19	0.0680183	0.149889			393.19	-0.386163	-0.654487
393.39	0.0712006	0.14959			393.39	-0.382981	-0.654786
393.59	0.0715814	0.152828			393.59	-0.3826	-0.651548
393.79	0.0709823	0.151305			393.79	-0.383199	-0.653071
393.99	0.0699301	0.152053			393.99	-0.384251	-0.652323
394.19	0.0710286	0.152107			394.19	-0.383153	-0.652269
394.39	0.0730268	0.152268			394.39	-0.381155	-0.652108
394.59	0.0728429	0.151295			394.59	-0.381339	-0.653081
394.79	0.0725339	0.15237			394.79	-0.381648	-0.652006
394.99	0.0720739	0.152018			394.99	-0.382108	-0.652358
395.19	0.0694522	0.15531			395.19	-0.384729	-0.649066
395.39	0.0706476	0.154629			395.39	-0.383534	-0.649747
395.59	0.072951	0.154852			395.59	-0.381231	-0.649524
395.79	0.076637	0.156721			395.79	-0.377545	-0.647655
395.99	0.0761453	0.15594			395.99	-0.378036	-0.648436
396.19	0.0749741	0.155942			396.19	-0.379207	-0.648434
396.39	0.0753929	0.156975			396.39	-0.378789	-0.647401
396.59	0.0794459	0.158056			396.59	-0.374736	-0.64632
396.79	0.0802847	0.155584			396.79	-0.373897	-0.648792
396.99	0.0740002	0.162394			396.99	-0.380181	-0.641982
397.19	0.0746776	0.15811			397.19	-0.379504	-0.646266
397.39	0.0789644	0.158956			397.39	-0.375217	-0.64542
397.59	0.0780504	0.163346			397.59	-0.376131	-0.64103
397.79	0.0778976	0.159645			397.79	-0.376284	-0.644731
397.99	0.0821207	0.160419			397.99	-0.372061	-0.643957
398.19	0.082542	0.163881			398.19	-0.37164	-0.640495
398.39	0.0788796	0.162504			398.39	-0.375302	-0.641872
398.59	0.0823511	0.165228			398.59	-0.371831	-0.639148
398.79	0.0773798	0.168888			398.79	-0.376802	-0.635488
398.99	0.0830595	0.163849			398.99	-0.371122	-0.640527
399.19	0.0804141	0.165484			399.19	-0.373768	-0.638892
399.39	0.0810624	0.165223			399.39	-0.373119	-0.639153
399.59	0.0837936	0.167532			399.59	-0.370388	-0.636844
[truncated: 24,274 more rows]

## Sheet: Exp3
Time (s)	DnaK	DnaK + Ca			Time (s)	DnaK	DnaK + Ca
0	0	0			0	-1.04647	-1.18569
0.2	0.0002159	0.00118731			0.2	-1.04625	-1.18451
0.4	-0.00136109	-0.00112391			0.4	-1.04783	-1.18682
0.6	-0.00513116	-0.00083436			0.6	-1.0516	-1.18653
0.8	0.00055008	-0.0063266			0.8	-1.04592	-1.19202
1	-0.00176253	4.268e-05			1	-1.04823	-1.18565
1.2	-0.00339514	-0.00220743			1.2	-1.04986	-1.1879
1.39	-0.00356763	-0.00341469			1.39	-1.05004	-1.18911
1.6	-0.00061709	-0.00594431			1.6	-1.04709	-1.19164
1.79	-0.00148533	0.00201421			1.79	-1.04795	-1.18368
2	-0.00281187	-0.001535			2	-1.04928	-1.18723
2.19	-0.0010791	0.00014127			2.19	-1.04755	-1.18555
2.39	0.00035405	0.00067453			2.39	-1.04612	-1.18502
2.59	-0.0054402	0.00302233			2.59	-1.05191	-1.18267
2.79	-0.00515247	0.00110778			2.79	-1.05162	-1.18459
2.99	-0.00051625	4.747e-05			2.99	-1.04699	-1.18565
3.19	-0.00203044	-0.0002479			3.19	-1.0485	-1.18594
3.39	-0.00391961	0.00120576			3.39	-1.05039	-1.18449
3.59	-0.00359368	-0.00199589			3.59	-1.05006	-1.18769
3.79	-0.00630719	0.00182859			3.79	-1.05278	-1.18386
3.99	-0.00173221	0.0013098			3.99	-1.0482	-1.18438
4.19	-0.00289269	0.00275613			4.19	-1.04936	-1.18294
4.39	-0.00016307	0.00148537			4.39	-1.04663	-1.18421
4.59	-0.00433142	0.00165095			4.59	-1.0508	-1.18404
4.8	-0.00293666	0.00284154			4.8	-1.04941	-1.18285
4.99	-0.00194654	0.00035139			4.99	-1.04842	-1.18534
5.19	-0.00169714	0.00099841			5.19	-1.04817	-1.18469
5.39	-0.00208853	0.00456689			5.39	-1.04856	-1.18113
5.59	-0.00291458	0.00304936			5.59	-1.04938	-1.18264
5.8	-0.00436765	0.00354682			5.8	-1.05084	-1.18215
5.99	-0.00449266	0.00156853			5.99	-1.05096	-1.18412
6.19	-0.00539385	0.00443348			6.19	-1.05186	-1.18126
6.39	-0.00128176	-0.00020637			6.39	-1.04775	-1.1859
6.59	-0.00584425	0.00296848			6.59	-1.05231	-1.18272
6.8	-0.00684261	0.00316564			6.8	-1.05331	-1.18253
6.99	-0.00242721	0.00275896			6.99	-1.0489	-1.18293
7.19	-0.00198828	0.00176483			7.19	-1.04846	-1.18393
7.39	-0.00183222	0.00344887			7.39	-1.0483	-1.18224
7.59	-7.662e-05	0.00469578			7.59	-1.04655	-1.181
7.79	-0.00294435	0.00460337			7.79	-1.04941	-1.18109
7.99	-0.0070772	0.00504766			7.99	-1.05355	-1.18065
8.19	-0.0027886	0.00170249			8.19	-1.04926	-1.18399
8.39	-0.00782696	0.00186064			8.39	-1.0543	-1.18383
8.6	-0.00046082	0.00369094			8.6	-1.04693	-1.182
8.79	-0.00352818	0.0062798			8.79	-1.05	-1.17941
8.99	-0.00327308	0.00144579			8.99	-1.04974	-1.18425
9.19	-0.00330781	0.0067138			9.19	-1.04978	-1.17898
9.39	-0.00490557	0.00334899			9.39	-1.05137	-1.18234
9.59	-0.00370306	0.00248451			9.59	-1.05017	-1.18321
9.8	-0.00381659	0.00109288			9.8	-1.05029	-1.1846
9.99	-0.00310902	0.00202654			9.99	-1.04958	-1.18367
10.19	-0.00288203	0.00560972			10.19	-1.04935	-1.18008
10.39	-0.00160742	0.00382427			10.39	-1.04808	-1.18187
10.59	-0.00473636	0.00516957			10.59	-1.05121	-1.18052
10.8	-0.00505964	0.00523881			10.8	-1.05153	-1.18045
10.99	-0.00473865	0.00808784			10.99	-1.05121	-1.17761
11.19	-0.00398605	0.00669755			11.19	-1.05046	-1.179
11.39	-0.00667456	0.0057371			11.39	-1.05314	-1.17996
11.6	-0.00617363	0.00399199			11.6	-1.05264	-1.1817
11.8	-0.00513123	0.00698321			11.8	-1.0516	-1.17871
11.99	-0.00413434	0.00298587			11.99	-1.0506	-1.18271
12.19	-0.00242769	0.00293252			12.19	-1.0489	-1.18276
12.39	-0.00415027	0.00552965			12.39	-1.05062	-1.18016
12.6	-0.00620201	0.00701534			12.6	-1.05267	-1.17868
12.79	-0.00111526	0.00372243			12.79	-1.04758	-1.18197
12.99	-0.00368741	0.00482146			12.99	-1.05016	-1.18087
13.19	-0.00353252	0.00287038			13.19	-1.05	-1.18282
13.39	-0.00530499	0.00387628			13.39	-1.05177	-1.18182
13.59	-0.00589815	0.00579609			13.59	-1.05237	-1.1799
13.79	-0.00500384	0.00283788			13.79	-1.05147	-1.18286
13.99	-0.00724438	0.00437746			13.99	-1.05371	-1.18132
14.19	-0.00695882	0.00805304			14.19	-1.05343	-1.17764
14.39	-0.00439796	0.00693096			14.39	-1.05087	-1.17876
14.59	-0.00361952	0.00592824			14.59	-1.05009	-1.17976
14.8	-0.00486721	0.00637023			14.8	-1.05134	-1.17932
14.99	-0.00451618	0.00758223			14.99	-1.05099	-1.17811
15.19	-0.00289525	0.00482718			15.19	-1.04936	-1.18087
15.39	-0.00452005	0.0094474			15.39	-1.05099	-1.17625
15.59	-0.00659016	0.00822702			15.59	-1.05306	-1.17747
15.79	-0.00428466	0.00350185			15.79	-1.05075	-1.18219
15.99	-0.0058558	0.00828458			15.99	-1.05232	-1.17741
16.19	-0.00668507	0.00602717			16.19	-1.05315	-1.17967
16.39	-0.00560122	0.00518241			16.39	-1.05207	-1.18051
16.6	-0.00643492	0.00649791			16.6	-1.0529	-1.17919
16.8	-0.00508038	0.00538178			16.8	-1.05155	-1.18031
16.99	-0.0066875	0.00619438			16.99	-1.05316	-1.1795
17.19	-0.00808982	0.00619025			17.19	-1.05456	-1.1795
17.39	-0.00449815	0.00518129			17.39	-1.05097	-1.18051
17.6	-0.00604032	0.00474362			17.6	-1.05251	-1.18095
17.79	-0.00084612	0.0105364			17.79	-1.04732	-1.17516
17.99	-0.00243866	0.00750756			17.99	-1.04891	-1.17819
18.19	-0.00901981	0.00749856			18.19	-1.05549	-1.17819
18.39	-0.0041034	0.00478157			18.39	-1.05057	-1.18091
18.59	-0.00560878	0.00554514			18.59	-1.05208	-1.18015
18.79	-0.00675594	0.00559393			18.79	-1.05323	-1.1801
18.99	-0.006596	0.00913437			18.99	-1.05307	-1.17656
19.19	-0.00374449	0.00507467			19.19	-1.05021	-1.18062
19.39	-0.00660689	0.00960063			19.39	-1.05308	-1.17609
19.59	-0.00396326	0.00515955			19.59	-1.05043	-1.18053
19.79	-0.00757756	0.00970567			19.79	-1.05405	-1.17599
19.99	-0.00631944	0.00718084			19.99	-1.05279	-1.17851
20.19	-0.00549607	0.00643097			20.19	-1.05197	-1.17926
20.39	-0.00454147	0.00906609			20.39	-1.05101	-1.17663
20.59	-0.00506222	0.00515032			20.59	-1.05153	-1.18054
20.8	-0.00603261	0.00697372			20.8	-1.0525	-1.17872
21	-0.00427785	0.0068695			21	-1.05075	-1.17882
21.2	-0.00732613	0.00850846			21.2	-1.0538	-1.17718
21.4	-0.00692791	0.00753387			21.4	-1.0534	-1.17816
21.6	-0.00591386	0.010683			21.6	-1.05238	-1.17501
21.8	-0.00546352	0.00623614			21.8	-1.05193	-1.17946
22	-0.00326727	0.00902838			22	-1.04974	-1.17666
22.2	-0.00970263	0.00639545			22.2	-1.05617	-1.1793
22.4	-0.00464454	0.00849734			22.4	-1.05111	-1.1772
22.59	-0.00585566	0.00809113			22.59	-1.05232	-1.1776
22.8	-0.00740555	0.00699973			22.8	-1.05387	-1.17869
23	-0.00919963	0.00798205			23	-1.05567	-1.17771
23.2	-0.00807564	0.0106324			23.2	-1.05454	-1.17506
23.4	-0.00604245	0.00881395			23.4	-1.05251	-1.17688
23.6	-0.00884099	0.0065526			23.6	-1.05531	-1.17914
23.8	-0.00610124	0.00476533			23.8	-1.05257	-1.18093
24	-0.0119879	0.00936549			24	-1.05846	-1.17633
24.2	-0.00946276	0.00934859			24.2	-1.05593	-1.17634
24.4	-0.00933728	0.00734455			24.4	-1.05581	-1.17835
24.6	-0.00460413	0.0095592			24.6	-1.05107	-1.17613
24.79	-0.00571527	0.00778168			24.79	-1.05218	-1.17791
24.99	-0.00671224	0.00824963			24.99	-1.05318	-1.17744
25.2	-0.00763551	0.00824893			25.2	-1.0541	-1.17744
25.4	-0.00598939	0.0105316			25.4	-1.05246	-1.17516
25.6	-0.00586605	0.00900994			25.6	-1.05234	-1.17668
25.79	-0.00765207	0.00677777			25.79	-1.05412	-1.17892
26	-0.0085754	0.00434897			26	-1.05504	-1.18134
26.2	-0.00780982	0.00941836			26.2	-1.05428	-1.17627
26.4	-0.00858553	0.00889065			26.4	-1.05505	-1.1768
26.59	-0.00516397	0.0101898			26.59	-1.05163	-1.1755
26.8	-0.00632293	0.00936719			26.8	-1.05279	-1.17633
27	-0.0080556	0.0056759			27	-1.05452	-1.18002
27.2	-0.0119643	0.00619334			27.2	-1.05843	-1.1795
27.4	-0.00751268	0.0112339			27.4	-1.05398	-1.17446
27.59	-0.00652557	0.0124508			27.59	-1.05299	-1.17324
27.8	-0.00652636	0.00826585			27.8	-1.053	-1.17743
28	-0.00690462	0.0122132			28	-1.05337	-1.17348
28.2	-0.00755741	0.00946632			28.2	-1.05403	-1.17623
28.4	-0.00893782	0.0103389			28.4	-1.05541	-1.17535
28.6	-0.00956987	0.0124685			28.6	-1.05604	-1.17322
28.8	-0.00769156	0.00756619			28.8	-1.05416	-1.17813
29	-0.00994621	0.00892192			29	-1.05642	-1.17677
29.2	-0.00288071	0.0129484			29.2	-1.04935	-1.17274
29.4	-0.00826052	0.0105346			29.4	-1.05473	-1.17516
29.6	-0.00901257	0.0086423			29.6	-1.05548	-1.17705
29.79	-0.00716538	0.00736579			29.79	-1.05363	-1.17833
29.99	-0.00730732	0.0101443			29.99	-1.05378	-1.17555
30.2	-0.00918686	0.00860991			30.2	-1.05566	-1.17708
30.4	-0.00945936	0.00939981			30.4	-1.05593	-1.17629
30.6	-0.00490416	0.00821427			30.6	-1.05137	-1.17748
30.79	-0.00908055	0.0133423			30.79	-1.05555	-1.17235
31	-0.00518978	0.00761553			31	-1.05166	-1.17808
31.2	-0.00814211	0.0115567			31.2	-1.05461	-1.17414
31.4	-0.0114641	0.00637429			31.4	-1.05793	-1.17932
31.59	-0.00978834	0.00967931			31.59	-1.05626	-1.17601
31.8	-0.00602596	0.0102871			31.8	-1.0525	-1.17541
31.99	-0.00785743	0.0110792			31.99	-1.05433	-1.17461
32.19	-0.0072713	0.00960881			32.19	-1.05374	-1.17608
32.39	-0.0104764	0.00848592			32.39	-1.05695	-1.17721
32.59	-0.00760098	0.0101524			32.59	-1.05407	-1.17554
32.79	-0.00954267	0.0106812			32.79	-1.05601	-1.17501
32.99	-0.00793654	0.0125033			32.99	-1.05441	-1.17319
33.19	-0.00790662	0.013519			33.19	-1.05438	-1.17217
33.39	-0.00677296	0.0124266			33.39	-1.05324	-1.17327
33.59	-0.0102595	0.013416			33.59	-1.05673	-1.17228
33.79	-0.00767205	0.0110589			33.79	-1.05414	-1.17463
33.99	-0.00918211	0.00841943			33.99	-1.05565	-1.17727
34.19	-0.0100952	0.0106252			34.19	-1.05656	-1.17507
34.39	-0.0131463	0.00597477			34.39	-1.05962	-1.17972
34.59	-0.0128868	0.0094627			34.59	-1.05936	-1.17623
34.79	-0.0103048	0.010093			34.79	-1.05677	-1.1756
34.99	-0.0125874	0.00956084			34.99	-1.05906	-1.17613
35.19	-0.0081691	0.0127447			35.19	-1.05464	-1.17295
35.39	-0.0119124	0.00881258			35.39	-1.05838	-1.17688
35.59	-0.00759997	0.00969043			35.59	-1.05407	-1.176
35.79	-0.00807732	0.014221			35.79	-1.05455	-1.17147
35.99	-0.0117723	0.0105733			35.99	-1.05824	-1.17512
36.19	-0.0122415	0.0114245			36.19	-1.05871	-1.17427
36.4	-0.00812465	0.00936699			36.4	-1.05459	-1.17633
36.59	-0.00963682	0.00900024			36.59	-1.05611	-1.17669
36.79	-0.00801559	0.00850016			36.79	-1.05448	-1.17719
36.99	-0.00862474	0.00846442			36.99	-1.05509	-1.17723
37.19	-0.0107257	0.0130657			37.19	-1.05719	-1.17263
37.39	-0.00987015	0.00712102			37.39	-1.05634	-1.17857
37.59	-0.00811685	0.0113449			37.59	-1.05459	-1.17435
37.79	-0.00811331	0.0123298			37.79	-1.05458	-1.17336
37.99	-0.00945065	0.00970711			37.99	-1.05592	-1.17599
38.19	-0.0104374	0.0123385			38.19	-1.05691	-1.17335
38.39	-0.00736421	0.0115382			38.39	-1.05383	-1.17415
38.59	-0.011287	0.00873859			38.59	-1.05776	-1.17695
38.79	-0.00709046	0.0101107			38.79	-1.05356	-1.17558
38.99	-0.00868968	0.0107537			38.99	-1.05516	-1.17494
39.19	-0.0100113	0.0119945			39.19	-1.05648	-1.1737
39.39	-0.00991929	0.00881683			39.39	-1.05639	-1.17688
39.59	-0.00891235	0.00909215			39.59	-1.05538	-1.1766
39.79	-0.0110916	0.0108108			39.79	-1.05756	-1.17488
39.99	-0.0122412	0.0126662			39.99	-1.05871	-1.17303
40.19	-0.00688545	0.00990671			40.19	-1.05335	-1.17579
40.39	-0.00808287	0.00840363			40.39	-1.05455	-1.17729
40.59	-0.00685471	0.01083			40.59	-1.05332	-1.17486
40.79	-0.00951453	0.00935898			40.79	-1.05598	-1.17633
40.99	-0.0106126	0.00888149			40.99	-1.05708	-1.17681
41.19	-0.011179	0.013895			41.19	-1.05765	-1.1718
41.39	-0.00981791	0.0104653			41.39	-1.05629	-1.17523
41.59	-0.00662593	0.00915862			41.59	-1.0531	-1.17653
41.79	-0.0108503	0.00767082			41.79	-1.05732	-1.17802
41.99	-0.00752519	0.00824165			41.99	-1.05399	-1.17745
42.19	-0.0116446	0.0131797			42.19	-1.05811	-1.17251
42.4	-0.0109591	0.0123733			42.4	-1.05743	-1.17332
42.59	-0.0125187	0.0126026			42.59	-1.05899	-1.17309
42.79	-0.0119107	0.0142622			42.79	-1.05838	-1.17143
42.99	-0.0112084	0.0126292			42.99	-1.05768	-1.17306
43.19	-0.00723384	0.0117356			43.19	-1.0537	-1.17396
43.4	-0.00872858	0.0120173			43.4	-1.0552	-1.17368
43.59	-0.0099637	0.0141339			43.59	-1.05643	-1.17156
43.79	-0.0105203	0.0114554			43.79	-1.05699	-1.17424
43.99	-0.0102328	0.0121373			43.99	-1.0567	-1.17356
44.19	-0.00859001	0.0122253			44.19	-1.05506	-1.17347
44.4	-0.00990779	0.0115754			44.4	-1.05638	-1.17412
44.61	-0.00792833	0.0117849			44.61	-1.0544	-1.17391
44.85	-0.0114563	0.0116863			44.85	-1.05793	-1.17401
45.05	-0.00997913	0.015629			45.05	-1.05645	-1.17006
45.2	-0.012094	0.012955			45.2	-1.05856	-1.17274
45.4	-0.0101618	0.01231			45.4	-1.05663	-1.17338
45.59	-0.0107108	0.0132412			45.59	-1.05718	-1.17245
45.79	-0.0106102	0.0124936			45.79	-1.05708	-1.1732
45.99	-0.0108049	0.0114226			45.99	-1.05727	-1.17427
46.19	-0.0135049	0.0129237			46.19	-1.05997	-1.17277
46.42	-0.0141326	0.0105035			46.42	-1.0606	-1.17519
46.61	-0.0121343	0.013166			46.61	-1.0586	-1.17253
46.79	-0.0120283	0.0120396			46.79	-1.0585	-1.17365
46.99	-0.0120354	0.00979278			46.99	-1.0585	-1.1759
47.19	-0.0121431	0.00918331			47.19	-1.05861	-1.17651
47.4	-0.00928949	0.0135332			47.4	-1.05576	-1.17216
47.59	-0.00923952	0.012075			47.59	-1.05571	-1.17362
47.79	-0.01174	0.013649			47.79	-1.05821	-1.17204
47.99	-0.0112541	0.00944413			47.99	-1.05772	-1.17625
48.19	-0.0136386	0.00939749			48.19	-1.06011	-1.1763
48.41	-0.0125876	0.0142576			48.41	-1.05906	-1.17144
48.61	-0.012088	0.0131503			48.61	-1.05856	-1.17254
48.79	-0.0111401	0.0132169			48.79	-1.05761	-1.17248
48.99	-0.0116168	0.0142178			48.99	-1.05809	-1.17148
49.19	-0.0107467	0.0140931			49.19	-1.05722	-1.1716
49.4	-0.0103062	0.0125503			49.4	-1.05678	-1.17314
49.59	-0.00961067	0.0122147			49.59	-1.05608	-1.17348
49.81	-0.0136574	0.0110115			49.81	-1.06013	-1.17468
50.02	-0.00866303	0.00812216			50.02	-1.05513	-1.17757
50.21	-0.0110872	0.011264			50.21	-1.05756	-1.17443
50.39	-0.0118621	0.0123448			50.39	-1.05833	-1.17335
50.59	-0.0118361	0.0123333			50.59	-1.05831	-1.17336
50.84	-0.0108547	0.0117409			50.84	-1.05732	-1.17395
51.01	-0.0135515	0.0120725			51.01	-1.06002	-1.17362
51.22	-0.00998836	0.0127965			51.22	-1.05646	-1.1729
51.41	-0.00895691	0.00902145			51.41	-1.05543	-1.17667
51.59	-0.0109958	0.0110838			51.59	-1.05746	-1.17461
51.84	-0.0126209	0.00880499			51.84	-1.05909	-1.17689
52.02	-0.0118129	0.0123412			52.02	-1.05828	-1.17335
52.22	-0.00933218	0.0119259			52.22	-1.0558	-1.17377
52.42	-0.0131701	0.0101083			52.42	-1.05964	-1.17558
52.6	-0.0121357	0.0121419			52.6	-1.0586	-1.17355
52.83	-0.0119284	0.0115666			52.83	-1.0584	-1.17413
53.01	-0.0133341	0.0126736			53.01	-1.0598	-1.17302
53.22	-0.0106236	0.0120426			53.22	-1.05709	-1.17365
53.42	-0.0114649	0.0127657			53.42	-1.05793	-1.17293
53.6	-0.015673	0.00979155			53.6	-1.06214	-1.1759
53.84	-0.0123064	0.0119146			53.84	-1.05878	-1.17378
54	-0.010931	0.0127644			54	-1.0574	-1.17293
54.22	-0.0113015	0.0150556			54.22	-1.05777	-1.17064
54.41	-0.0139732	0.0124041			54.41	-1.06044	-1.17329
54.59	-0.0114724	0.0104255			54.59	-1.05794	-1.17527
54.84	-0.0121353	0.0102261			54.84	-1.0586	-1.17547
55	-0.00963802	0.0134138			55	-1.05611	-1.17228
55.22	-0.013319	0.010647			55.22	-1.05979	-1.17505
55.41	-0.014311	0.0126771			55.41	-1.06078	-1.17302
55.59	-0.0150288	0.0108737			55.59	-1.0615	-1.17482
55.83	-0.0114993	0.0130695			55.83	-1.05797	-1.17262
56	-0.0119921	0.0141961			56	-1.05846	-1.1715
56.22	-0.0145912	0.00898862			56.22	-1.06106	-1.1767
56.4	-0.0129189	0.0106277			56.4	-1.05939	-1.17507
56.59	-0.0134859	0.0122015			56.59	-1.05995	-1.17349
56.83	-0.0131696	0.0123277			56.83	-1.05964	-1.17337
56.99	-0.0118967	0.0111845			56.99	-1.05837	-1.17451
57.21	-0.0111818	0.0151892			57.21	-1.05765	-1.1705
57.4	-0.0133052	0.0104663			57.4	-1.05977	-1.17523
57.59	-0.0138496	0.0148346			57.59	-1.06032	-1.17086
57.83	-0.0129229	0.0153106			57.83	-1.05939	-1.17038
57.99	-0.0119924	0.0106475			57.99	-1.05846	-1.17505
58.22	-0.0146169	0.012031			58.22	-1.06109	-1.17366
58.42	-0.0141324	0.0140831			58.42	-1.0606	-1.17161
58.59	-0.0152184	0.00939661			58.59	-1.06169	-1.1763
58.8	-0.011984	0.0157378			58.8	-1.05845	-1.16996
59	-0.0149672	0.00470253			59	-1.06144	-1.18099
59.19	-0.0153973	0.0176167			59.19	-1.06187	-1.16808
59.42	-0.0121207	0.0125476			59.42	-1.05859	-1.17315
59.67	-0.0098696	0.0118918			59.67	-1.05634	-1.1738
59.88	-0.013693	0.00921149			59.88	-1.06016	-1.17648
60.11	-0.0136509	0.0124519			60.11	-1.06012	-1.17324
60.26	-0.0130222	0.0105587			60.26	-1.05949	-1.17513
60.42	-0.011499	0.0132732			60.42	-1.05797	-1.17242
60.59	-0.0126303	0.0144481			60.59	-1.0591	-1.17124
60.79	-0.0150724	0.0140024			60.79	-1.06154	-1.17169
60.99	-0.0143158	0.0132067			60.99	-1.06078	-1.17249
61.19	-0.0124706	0.0109129			61.19	-1.05894	-1.17478
61.39	-0.0173961	0.0111988			61.39	-1.06387	-1.17449
61.59	-0.0141171	0.0106545			61.59	-1.06059	-1.17504
61.79	-0.0145637	0.00977151			61.79	-1.06103	-1.17592
61.99	-0.0116764	0.010817			61.99	-1.05815	-1.17488
62.19	-0.010495	0.0112354			62.19	-1.05696	-1.17446
62.39	-0.0133911	0.01278			62.39	-1.05986	-1.17291
62.59	-0.011563	0.0127814			62.59	-1.05803	-1.17291
62.79	-0.0154677	0.0124348			62.79	-1.06194	-1.17326
62.99	-0.0140144	0.0154774			62.99	-1.06048	-1.17022
63.19	-0.0143508	0.0136817			63.19	-1.06082	-1.17201
63.4	-0.0145596	0.00885994			63.4	-1.06103	-1.17683
63.59	-0.0134435	0.010011			63.59	-1.05991	-1.17568
63.79	-0.0120133	0.0156537			63.79	-1.05848	-1.17004
63.99	-0.0153049	0.015977			63.99	-1.06177	-1.16972
64.19	-0.0172045	0.0121914			64.19	-1.06367	-1.1735
64.4	-0.0126851	0.0106914			64.4	-1.05915	-1.175
64.6	-0.0148045	0.0123587			64.6	-1.06127	-1.17333
64.8	-0.0133449	0.013544			64.8	-1.05981	-1.17215
65	-0.0118924	0.0109551			65	-1.05836	-1.17474
65.19	-0.0130258	0.0109039			65.19	-1.05949	-1.17479
65.44	-0.0112803	0.013475			65.44	-1.05775	-1.17222
65.65	-0.0111128	0.0109089			65.65	-1.05758	-1.17478
65.81	-0.0173832	0.0102452			65.81	-1.06385	-1.17545
66.02	-0.0138268	0.0119404			66.02	-1.0603	-1.17375
66.19	-0.0128097	0.0110907			66.19	-1.05928	-1.1746
66.43	-0.0167535	0.00983701			66.43	-1.06322	-1.17586
66.62	-0.0123194	0.0123279			66.62	-1.05879	-1.17337
66.79	-0.0143887	0.0125721			66.79	-1.06086	-1.17312
67	-0.0159484	0.0123339			67	-1.06242	-1.17336
67.19	-0.017402	0.0136979			67.19	-1.06387	-1.172
67.39	-0.0122112	0.0114931			67.39	-1.05868	-1.1742
67.59	-0.0170042	0.0119415			67.59	-1.06347	-1.17375
67.8	-0.0128872	0.0148549			67.8	-1.05936	-1.17084
67.99	-0.0130259	0.0101482			67.99	-1.0595	-1.17554
68.19	-0.0164373	0.0110965			68.19	-1.06291	-1.1746
68.42	-0.0146581	0.0142242			68.42	-1.06113	-1.17147
68.6	-0.012643	0.0119539			68.6	-1.05911	-1.17374
68.8	-0.0140909	0.00817139			68.8	-1.06056	-1.17752
69	-0.0143279	0.0107041			69	-1.0608	-1.17499
69.19	-0.017196	0.0143476			69.19	-1.06367	-1.17135
69.39	-0.012271	0.0116807			69.39	-1.05874	-1.17401
69.6	-0.0174174	0.0115895			69.6	-1.06389	-1.1741
69.79	-0.0143357	0.0151218			69.79	-1.0608	-1.17057
70	-0.0145562	0.0098915			70	-1.06103	-1.1758
70.19	-0.0154635	0.0120142			70.19	-1.06193	-1.17368
70.4	-0.0137252	0.0120064			70.4	-1.06019	-1.17369
70.6	-0.0155395	0.0117064			70.6	-1.06201	-1.17399
70.79	-0.0142898	0.00870498			70.79	-1.06076	-1.17699
71	-0.0169654	0.0116858			71	-1.06343	-1.17401
71.19	-0.0155607	0.0118939			71.19	-1.06203	-1.1738
71.4	-0.0160962	0.0106599			71.4	-1.06257	-1.17503
71.59	-0.0155961	0.01377			71.59	-1.06207	-1.17192
71.8	-0.0173467	0.00888406			71.8	-1.06382	-1.17681
72	-0.0159479	0.00819978			72	-1.06242	-1.17749
72.19	-0.0155859	0.00701749			72.19	-1.06205	-1.17868
72.39	-0.015145	0.00945324			72.39	-1.06161	-1.17624
72.59	-0.0153633	0.00976032			72.59	-1.06183	-1.17593
72.8	-0.0144758	0.0141922			72.8	-1.06094	-1.1715
72.99	-0.0189832	0.0137223			72.99	-1.06545	-1.17197
73.19	-0.0124335	0.0100705			73.19	-1.0589	-1.17562
73.39	-0.0156925	0.0137224			73.39	-1.06216	-1.17197
73.6	-0.0146841	0.0117054			73.6	-1.06115	-1.17399
73.8	-0.0168899	0.0128898			73.8	-1.06336	-1.1728
73.99	-0.0164188	0.0144933			73.99	-1.06289	-1.1712
74.19	-0.0141464	0.0108734			74.19	-1.06062	-1.17482
74.39	-0.0181193	0.00963031			74.39	-1.06459	-1.17606
74.6	-0.0154379	0.0118035			74.6	-1.06191	-1.17389
74.79	-0.0128186	0.0106708			74.79	-1.05929	-1.17502
75	-0.0172229	0.0111311			75	-1.06369	-1.17456
75.19	-0.0132205	0.0117047			75.19	-1.05969	-1.17399
75.4	-0.0148164	0.0132614			75.4	-1.06129	-1.17243
75.6	-0.0172228	0.0130349			75.6	-1.06369	-1.17266
75.79	-0.0152748	0.0118304			75.79	-1.06174	-1.17386
75.99	-0.0150462	0.00797109			75.99	-1.06152	-1.17772
76.19	-0.0164958	0.0131981			76.19	-1.06296	-1.17249
76.39	-0.0160436	0.0105873			76.39	-1.06251	-1.17511
76.59	-0.0166708	0.0149808			76.59	-1.06314	-1.17071
76.8	-0.0134864	0.0123126			76.8	-1.05996	-1.17338
76.99	-0.0174132	0.0107401			76.99	-1.06388	-1.17495
77.19	-0.014249	0.0109694			77.19	-1.06072	-1.17472
77.39	-0.0212318	0.00700158			77.39	-1.0677	-1.17869
77.59	-0.0202346	0.0118475			77.59	-1.0667	-1.17385
77.8	-0.016731	0.0100697			77.8	-1.0632	-1.17562
77.99	-0.0162707	0.00979868			77.99	-1.06274	-1.17589
78.19	-0.0197133	0.0115511			78.19	-1.06618	-1.17414
78.39	-0.0166091	0.00888841			78.39	-1.06308	-1.1768
78.6	-0.0185712	0.0121779			78.6	-1.06504	-1.17352
78.8	-0.016921	0.0127543			78.8	-1.06339	-1.17294
78.99	-0.0161441	0.012181			78.99	-1.06261	-1.17351
79.19	-0.0174918	0.0100865			79.19	-1.06396	-1.17561
79.39	-0.0194356	0.0118209			79.39	-1.0659	-1.17387
79.6	-0.0163876	0.0136629			79.6	-1.06286	-1.17203
79.79	-0.0148107	0.0114546			79.79	-1.06128	-1.17424
80	-0.0161257	0.0148873			80	-1.06259	-1.17081
80.19	-0.0188599	0.0129993			80.19	-1.06533	-1.17269
80.39	-0.014663	0.00915409			80.39	-1.06113	-1.17654
80.59	-0.0184412	0.0105108			80.59	-1.06491	-1.17518
80.79	-0.0164142	0.0115393			80.79	-1.06288	-1.17415
80.99	-0.0171017	0.0096066			80.99	-1.06357	-1.17609
81.19	-0.017883	0.0084958			81.19	-1.06435	-1.1772
81.39	-0.0174174	0.00776846			81.39	-1.06389	-1.17792
81.59	-0.0156615	0.0136357			81.59	-1.06213	-1.17206
81.8	-0.0209355	0.00806453			81.8	-1.0674	-1.17763
81.99	-0.0134079	0.00950785			81.99	-1.05988	-1.17619
82.19	-0.0150604	0.0136875			82.19	-1.06153	-1.17201
82.39	-0.0148381	0.0115406			82.39	-1.06131	-1.17415
82.59	-0.0208362	0.00788887			82.59	-1.06731	-1.1778
82.79	-0.0208313	0.0119581			82.79	-1.0673	-1.17373
82.99	-0.0174822	0.00854234			82.99	-1.06395	-1.17715
83.19	-0.019407	0.011304			83.19	-1.06588	-1.17439
83.39	-0.0184246	0.0148077			83.39	-1.06489	-1.17089
83.6	-0.0171608	0.0100889			83.6	-1.06363	-1.1756
83.8	-0.0182736	0.011393			83.8	-1.06474	-1.1743
84	-0.0161666	0.00881633			84	-1.06264	-1.17688
84.19	-0.016138	0.00917624			84.19	-1.06261	-1.17652
84.4	-0.0176989	0.011725			84.4	-1.06417	-1.17397
84.6	-0.0167708	0.0100825			84.6	-1.06324	-1.17561
84.8	-0.0174602	0.0114218			84.8	-1.06393	-1.17427
85	-0.0180674	0.00911191			85	-1.06454	-1.17658
85.19	-0.0162891	0.0131733			85.19	-1.06276	-1.17252
85.4	-0.0187611	0.0131111			85.4	-1.06523	-1.17258
85.6	-0.0173917	0.00930143			85.6	-1.06386	-1.17639
85.8	-0.0206572	0.0124865			85.8	-1.06713	-1.17321
86	-0.0171306	0.0141679			86	-1.0636	-1.17152
86.19	-0.021708	0.00976723			86.19	-1.06818	-1.17593
86.4	-0.0203016	0.00955125			86.4	-1.06677	-1.17614
86.6	-0.019073	0.0124391			86.6	-1.06554	-1.17325
86.79	-0.0219361	0.0121684			86.79	-1.06841	-1.17352
87	-0.015431	0.0115048			87	-1.0619	-1.17419
87.19	-0.0174623	0.0111029			87.19	-1.06393	-1.17459
87.4	-0.0174028	0.0121764			87.4	-1.06387	-1.17352
87.6	-0.0203362	0.00883554			87.6	-1.06681	-1.17686
87.79	-0.0174893	0.00996418			87.79	-1.06396	-1.17573
88	-0.0203656	0.00957388			88	-1.06683	-1.17612
88.19	-0.016658	0.0107018			88.19	-1.06313	-1.17499
88.4	-0.0215269	0.0106243			88.4	-1.068	-1.17507
88.59	-0.0176105	0.0117739			88.59	-1.06408	-1.17392
88.8	-0.0190507	0.00984284			88.8	-1.06552	-1.17585
89	-0.0154632	0.015341			89	-1.06193	-1.17035
89.19	-0.0164299	0.0112444			89.19	-1.0629	-1.17445
89.4	-0.0188979	0.00916063			89.4	-1.06537	-1.17653
89.59	-0.0183773	0.00919574			89.59	-1.06485	-1.1765
89.8	-0.0197835	0.0122131			89.8	-1.06625	-1.17348
89.99	-0.0213535	0.0109628			89.99	-1.06782	-1.17473
90.19	-0.0201646	0.00996107			90.19	-1.06663	-1.17573
90.39	-0.0187441	0.0103599			90.39	-1.06521	-1.17533
90.6	-0.0216052	0.010033			90.6	-1.06807	-1.17566
90.79	-0.0168283	0.00920605			90.79	-1.0633	-1.17649
91	-0.0189623	0.00998152			91	-1.06543	-1.17571
91.19	-0.019213	0.0107385			91.19	-1.06568	-1.17495
91.4	-0.0215739	0.0141838			91.4	-1.06804	-1.17151
91.6	-0.0225386	0.00972879			91.6	-1.06901	-1.17596
91.79	-0.019077	0.0116446			91.79	-1.06555	-1.17405
91.99	-0.02143	0.0126052			91.99	-1.0679	-1.17309
92.19	-0.0229591	0.00815056			92.19	-1.06943	-1.17754
92.4	-0.0186083	0.0122681			92.4	-1.06508	-1.17342
92.6	-0.0183448	0.00875075			92.6	-1.06481	-1.17694
92.79	-0.0183383	0.0116933			92.79	-1.06481	-1.174
93	-0.0229689	0.00943562			93	-1.06944	-1.17626
93.19	-0.0182024	0.00877276			93.19	-1.06467	-1.17692
93.4	-0.0206443	0.0106396			93.4	-1.06711	-1.17505
93.59	-0.0198028	0.00972073			93.59	-1.06627	-1.17597
93.8	-0.0182408	0.0101448			93.8	-1.06471	-1.17555
93.99	-0.020518	0.00933902			93.99	-1.06699	-1.17635
94.19	-0.0167122	0.00966791			94.19	-1.06318	-1.17603
94.39	-0.0211732	0.00864496			94.39	-1.06764	-1.17705
94.59	-0.0221474	0.0138853			94.59	-1.06862	-1.17181
94.8	-0.0179896	0.00986655			94.8	-1.06446	-1.17583
95	-0.0200656	0.0103792			95	-1.06653	-1.17531
95.19	-0.0194687	0.0095559			95.19	-1.06594	-1.17614
95.39	-0.0195	0.0092795			95.39	-1.06597	-1.17641
95.6	-0.0186848	0.0104453			95.6	-1.06515	-1.17525
95.8	-0.0228655	0.0125376			95.8	-1.06933	-1.17316
95.99	-0.0225757	0.00869887			95.99	-1.06904	-1.17699
96.19	-0.0220362	0.00846585			96.19	-1.06851	-1.17723
96.39	-0.0205473	0.00746202			96.39	-1.06702	-1.17823
96.6	-0.0223726	0.0119464			96.6	-1.06884	-1.17375
96.79	-0.0189322	0.0102388			96.79	-1.0654	-1.17545
96.99	-0.0212087	0.0107553			96.99	-1.06768	-1.17494
97.19	-0.0188931	0.0105821			97.19	-1.06536	-1.17511
97.4	-0.0200178	0.00999697			97.4	-1.06649	-1.1757
97.6	-0.020737	0.00819662			97.6	-1.06721	-1.1775
97.79	-0.0214362	0.00937006			97.79	-1.06791	-1.17632
98	-0.0188591	0.00905943			98	-1.06533	-1.17663
98.19	-0.0193424	0.00876531			98.19	-1.06581	-1.17693
98.39	-0.0226672	0.00761847			98.39	-1.06914	-1.17807
98.6	-0.0202229	0.0069793			98.6	-1.06669	-1.17871
98.79	-0.0198492	0.00900519			98.79	-1.06632	-1.17669
98.99	-0.0237713	0.0109299			98.99	-1.07024	-1.17476
99.19	-0.0221948	0.0100534			99.19	-1.06866	-1.17564
99.39	-0.0211129	0.0110353			99.39	-1.06758	-1.17466
99.59	-0.0214285	0.00857251			99.59	-1.0679	-1.17712
99.8	-0.0238705	0.00765327			99.8	-1.07034	-1.17804
99.99	-0.0212258	0.0107388			99.99	-1.06769	-1.17495
100.19	-0.0181599	0.00965311			100.19	-1.06463	-1.17604
100.39	-0.0216012	0.0114974			100.39	-1.06807	-1.1742
100.6	-0.0206291	0.00837891			100.6	-1.0671	-1.17731
100.79	-0.0205909	0.00781954			100.79	-1.06706	-1.17787
100.99	-0.0209961	0.0114027			100.99	-1.06747	-1.17429
101.19	-0.021112	0.00886567			101.19	-1.06758	-1.17683
101.39	-0.0218966	0.00990629			101.39	-1.06837	-1.17579
101.6	-0.0228497	0.00710157			101.6	-1.06932	-1.17859
101.79	-0.0236074	0.0120205			101.79	-1.07008	-1.17367
101.99	-0.0231766	0.00945135			101.99	-1.06965	-1.17624
102.19	-0.0199316	0.0114761			102.19	-1.0664	-1.17422
102.39	-0.0199203	0.00962638			102.39	-1.06639	-1.17607
102.59	-0.0233612	0.00963619			102.59	-1.06983	-1.17606
102.79	-0.0210001	0.00784799			102.79	-1.06747	-1.17784
102.99	-0.0188936	0.010121			102.99	-1.06536	-1.17557
103.19	-0.0211315	0.00996401			103.19	-1.0676	-1.17573
103.39	-0.0202588	0.00759049			103.39	-1.06673	-1.1781
103.59	-0.0206939	0.0125478			103.59	-1.06716	-1.17315
103.79	-0.0229841	0.00958388			103.79	-1.06945	-1.17611
103.99	-0.0209119	0.0130118			103.99	-1.06738	-1.17268
104.19	-0.0223503	0.0080193			104.19	-1.06882	-1.17767
104.4	-0.0202731	0.00695094			104.4	-1.06674	-1.17874
104.6	-0.0238457	0.00789213			104.6	-1.07031	-1.1778
104.8	-0.0206721	0.00727913			104.8	-1.06714	-1.17841
105	-0.0228311	0.00660152			105	-1.0693	-1.17909
105.19	-0.0210029	0.00861889			105.19	-1.06747	-1.17707
105.4	-0.0225805	0.00707568			105.4	-1.06905	-1.17862
105.6	-0.0206448	0.00706557			105.6	-1.06711	-1.17863
105.8	-0.0207872	0.00859939			105.8	-1.06726	-1.17709
106	-0.022117	0.00805807			106	-1.06859	-1.17763
106.19	-0.0218162	0.0100749			106.19	-1.06829	-1.17562
106.4	-0.0220128	0.0102784			106.4	-1.06848	-1.17541
106.59	-0.0224615	0.00914967			106.59	-1.06893	-1.17654
106.8	-0.0204666	0.00865171			106.8	-1.06694	-1.17704
107	-0.0197406	0.00635424			107	-1.06621	-1.17934
107.19	-0.0201579	0.00610587			107.19	-1.06663	-1.17959
107.39	-0.023272	0.00630104			107.39	-1.06974	-1.17939
107.6	-0.0218642	0.0109269			107.6	-1.06833	-1.17477
107.8	-0.0252308	0.00957552			107.8	-1.0717	-1.17612
108	-0.0243159	0.00761046			108	-1.07079	-1.17808
108.19	-0.0206636	0.00810699			108.19	-1.06713	-1.17759
108.39	-0.0252351	0.0086617			108.39	-1.0717	-1.17703
108.6	-0.0192532	0.0117565			108.6	-1.06572	-1.17394
108.79	-0.0242179	0.00622988			108.79	-1.07069	-1.17946
109	-0.0240357	0.0120489			109	-1.0705	-1.17364
109.19	-0.0221218	0.00858422			109.19	-1.06859	-1.17711
109.4	-0.0232477	0.0105246			109.4	-1.06972	-1.17517
109.6	-0.0253339	0.00914111			109.6	-1.0718	-1.17655
109.79	-0.0227408	0.00677044			109.79	-1.06921	-1.17892
110	-0.0231611	0.00962876			110	-1.06963	-1.17606
110.19	-0.0225773	0.010757			110.19	-1.06905	-1.17494
110.4	-0.0195719	0.00947071			110.4	-1.06604	-1.17622
110.59	-0.024701	0.00437696			110.59	-1.07117	-1.18132
110.79	-0.0218109	0.00942956			110.79	-1.06828	-1.17626
111	-0.0212206	0.00657696			111	-1.06769	-1.17912
111.19	-0.0191443	0.00831738			111.19	-1.06561	-1.17738
111.4	-0.0247132	0.00768392			111.4	-1.07118	-1.17801
111.59	-0.0222293	0.0106817			111.59	-1.0687	-1.17501
111.8	-0.0236166	0.00911773			111.8	-1.07009	-1.17658
112	-0.0238051	0.0107426			112	-1.07027	-1.17495
112.19	-0.023936	0.0115941			112.19	-1.07041	-1.1741
112.39	-0.0224359	0.0101233			112.39	-1.0689	-1.17557
112.6	-0.0226831	0.00592888			112.6	-1.06915	-1.17976
112.8	-0.0215877	0.0104527			112.8	-1.06806	-1.17524
112.99	-0.0254208	0.0110709			112.99	-1.07189	-1.17462
113.19	-0.021829	0.0106012			113.19	-1.0683	-1.17509
113.39	-0.0233894	0.00767144			113.39	-1.06986	-1.17802
113.6	-0.0207106	0.00513313			113.6	-1.06718	-1.18056
113.8	-0.0252934	0.0104366			113.8	-1.07176	-1.17526
113.99	-0.0199088	0.00765625			113.99	-1.06638	-1.17804
114.19	-0.0267066	0.00982292			114.19	-1.07318	-1.17587
114.4	-0.02099	0.00974283			114.4	-1.06746	-1.17595
114.6	-0.0227231	0.00801983			114.6	-1.06919	-1.17767
114.79	-0.022972	0.0074124			114.79	-1.06944	-1.17828
115	-0.0231021	0.00943246			115	-1.06957	-1.17626
115.19	-0.0202366	0.00696788			115.19	-1.06671	-1.17873
115.4	-0.0216525	0.00883513			115.4	-1.06812	-1.17686
115.59	-0.0214431	0.00546252			115.59	-1.06791	-1.18023
115.79	-0.0227419	0.00901611			115.79	-1.06921	-1.17668
116	-0.022527	0.00404838			116	-1.069	-1.18164
116.19	-0.0226714	0.00758592			116.19	-1.06914	-1.17811
116.4	-0.0253008	0.00868045			116.4	-1.07177	-1.17701
116.59	-0.0194039	0.00650174			116.59	-1.06587	-1.17919
116.8	-0.0263887	0.0115003			116.8	-1.07286	-1.17419
116.99	-0.0234117	0.00659519			116.99	-1.06988	-1.1791
117.19	-0.0247569	0.00923911			117.19	-1.07123	-1.17645
117.39	-0.0239905	0.00908223			117.39	-1.07046	-1.17661
117.6	-0.0229604	0.00407059			117.6	-1.06943	-1.18162
117.8	-0.0234459	0.0049335			117.8	-1.06991	-1.18076
117.99	-0.0240409	0.00882672			117.99	-1.07051	-1.17687
118.19	-0.0230907	0.0070646			118.19	-1.06956	-1.17863
118.39	-0.0204625	0.00967153			118.39	-1.06693	-1.17602
118.6	-0.0252751	0.00482435			118.6	-1.07174	-1.18087
118.8	-0.0217344	0.00802289			118.8	-1.0682	-1.17767
118.99	-0.0254483	0.00807927			118.99	-1.07192	-1.17761
119.19	-0.0254243	0.00667155			119.19	-1.07189	-1.17902
119.4	-0.0255699	0.00837667			119.4	-1.07204	-1.17732
119.6	-0.0247133	0.00511067			119.6	-1.07118	-1.18058
119.79	-0.0224719	0.00658641			119.79	-1.06894	-1.17911
120	-0.0220446	0.00925387			120	-1.06851	-1.17644
120.19	-0.023928	0.00338141			120.19	-1.0704	-1.18231
120.4	-0.0245755	0.00795361			120.4	-1.07104	-1.17774
120.59	-0.022153	0.00428618			120.59	-1.06862	-1.18141
120.79	-0.0255393	0.00888764			120.79	-1.07201	-1.17681
120.99	-0.0239416	0.00681699			120.99	-1.07041	-1.17888
121.19	-0.0225559	0.00391354			121.19	-1.06902	-1.18178
121.4	-0.021811	0.00701575			121.4	-1.06828	-1.17868
121.59	-0.0238825	0.00897257			121.59	-1.07035	-1.17672
121.79	-0.0281225	0.00727669			121.79	-1.07459	-1.17842
121.99	-0.0225611	0.00785989			121.99	-1.06903	-1.17783
122.19	-0.0233865	0.00539219			122.19	-1.06986	-1.1803
122.39	-0.0202599	0.00911655			122.39	-1.06673	-1.17658
122.59	-0.0242193	0.00881406			122.59	-1.07069	-1.17688
122.79	-0.0216703	0.00790537			122.79	-1.06814	-1.17779
122.99	-0.0249733	0.00541709			122.99	-1.07144	-1.18028
123.19	-0.0261511	0.00683046			123.19	-1.07262	-1.17886
123.39	-0.0279574	0.00717979			123.39	-1.07443	-1.17851
123.6	-0.0257745	0.00829366			123.6	-1.07224	-1.1774
123.79	-0.0235306	0.00980238			123.79	-1.07	-1.17589
123.99	-0.0261379	0.00803662			123.99	-1.07261	-1.17766
124.19	-0.0214056	0.00777108			124.19	-1.06787	-1.17792
124.39	-0.0245137	0.0061672			124.39	-1.07098	-1.17953
124.59	-0.0216723	0.00811438			124.59	-1.06814	-1.17758
124.79	-0.0227036	0.00734404			124.79	-1.06917	-1.17835
124.99	-0.0253806	0.0100329			124.99	-1.07185	-1.17566
125.19	-0.0238588	0.00691646			125.19	-1.07033	-1.17878
125.39	-0.0256831	0.00933393			125.39	-1.07215	-1.17636
125.6	-0.0242885	0.00810104			125.6	-1.07076	-1.17759
125.8	-0.0221671	0.00643109			125.8	-1.06864	-1.17926
126	-0.0261131	0.00904569			126	-1.07258	-1.17665
126.19	-0.0242393	0.00276213			126.19	-1.07071	-1.18293
126.4	-0.022151	0.00394802			126.4	-1.06862	-1.18174
126.6	-0.0248858	0.00778317			126.6	-1.07135	-1.17791
126.79	-0.02161	0.00590756			126.79	-1.06808	-1.17979
127	-0.0235514	0.00772896			127	-1.07002	-1.17796
127.19	-0.0245631	0.00604502			127.19	-1.07103	-1.17965
127.4	-0.0263586	0.00445229			127.4	-1.07283	-1.18124
127.6	-0.0234506	0.0110248			127.6	-1.06992	-1.17467
127.8	-0.0260536	0.00574737			127.8	-1.07252	-1.17995
128	-0.0264344	0.00364897			128	-1.0729	-1.18204
128.19	-0.026401	0.00552301			128.19	-1.07287	-1.18017
128.39	-0.0284793	0.00730204			128.39	-1.07495	-1.17839
128.59	-0.023708	0.0103211			128.59	-1.07018	-1.17537
128.79	-0.0234478	0.0107682			128.79	-1.06992	-1.17492
128.99	-0.0241855	0.00779593			128.99	-1.07065	-1.1779
129.19	-0.0270926	0.00819581			129.19	-1.07356	-1.1775
129.39	-0.0222031	0.00453312			129.39	-1.06867	-1.18116
129.59	-0.0271404	0.00682991			129.59	-1.07361	-1.17886
129.79	-0.0238413	0.00787104			129.79	-1.07031	-1.17782
129.99	-0.0291936	0.00462376			129.99	-1.07566	-1.18107
130.19	-0.0263301	0.00857688			130.19	-1.0728	-1.17712
130.39	-0.0253937	0.00830104			130.39	-1.07186	-1.17739
130.6	-0.0288415	0.00928462			130.6	-1.07531	-1.17641
130.79	-0.0279177	0.00589449			130.79	-1.07439	-1.1798
130.99	-0.0252757	0.00830406			130.99	-1.07174	-1.17739
131.19	-0.0248875	0.00718273			131.19	-1.07136	-1.17851
131.39	-0.0272573	0.00694074			131.39	-1.07373	-1.17875
131.6	-0.022648	0.00301887			131.6	-1.06912	-1.18267
131.79	-0.0239806	0.00637187			131.79	-1.07045	-1.17932
131.99	-0.0272286	0.00419739			131.99	-1.0737	-1.1815
132.19	-0.0244567	0.00515109			132.19	-1.07093	-1.18054
132.39	-0.0239966	0.00149184			132.39	-1.07047	-1.1842
132.6	-0.0225433	0.00848899			132.6	-1.06901	-1.1772
132.79	-0.0228081	0.00342323			132.79	-1.06928	-1.18227
132.99	-0.0255441	0.00706556			132.99	-1.07201	-1.17863
133.19	-0.0257829	0.00853038			133.19	-1.07225	-1.17716
133.39	-0.0255693	0.00448421			133.39	-1.07204	-1.18121
133.59	-0.0230548	0.0101353			133.59	-1.06952	-1.17556
133.79	-0.0264932	0.00453712			133.79	-1.07296	-1.18116
133.99	-0.0256887	0.00615511			133.99	-1.07216	-1.17954
134.19	-0.0255455	0.00431811			134.19	-1.07201	-1.18137
134.39	-0.0285966	0.00571601			134.39	-1.07507	-1.17998
134.59	-0.0247295	0.0091061			134.59	-1.0712	-1.17659
134.79	-0.024446	0.00508505			134.79	-1.07092	-1.18061
134.99	-0.0228427	0.00678632			134.99	-1.06931	-1.17891
135.19	-0.0248778	0.00794815			135.19	-1.07135	-1.17774
135.39	-0.0241856	0.00539105			135.39	-1.07065	-1.1803
135.6	-0.0288678	0.00699425			135.6	-1.07534	-1.1787
135.79	-0.0247896	0.00809016			135.79	-1.07126	-1.1776
135.99	-0.0256297	0.00549895			135.99	-1.0721	-1.18019
136.19	-0.0284796	0.00482547			136.19	-1.07495	-1.18087
136.39	-0.0245389	0.00635069			136.39	-1.07101	-1.17934
136.6	-0.0254407	0.00442662			136.6	-1.07191	-1.18127
136.79	-0.0260276	0.00619187			136.79	-1.0725	-1.1795
136.99	-0.0272277	0.00468372			136.99	-1.0737	-1.18101
137.19	-0.0268051	0.0043207			137.19	-1.07327	-1.18137
137.39	-0.0297064	0.00748895			137.39	-1.07618	-1.1782
137.6	-0.0283593	0.00489801			137.6	-1.07483	-1.18079
137.79	-0.0285514	0.00422398			137.79	-1.07502	-1.18147
137.99	-0.0268592	0.00358028			137.99	-1.07333	-1.18211
138.19	-0.0258678	0.0039549			138.19	-1.07234	-1.18174
138.39	-0.024763	0.00274259			138.39	-1.07123	-1.18295
138.59	-0.0247027	0.00259434			138.59	-1.07117	-1.1831
138.79	-0.0232761	0.00108625			138.79	-1.06975	-1.18461
138.99	-0.0241964	0.00729196			138.99	-1.07067	-1.1784
139.19	-0.0280474	0.00473691			139.19	-1.07452	-1.18096
139.39	-0.0279191	0.0092349			139.39	-1.07439	-1.17646
139.59	-0.0265498	0.00469948			139.59	-1.07302	-1.18099
139.79	-0.0295327	0.00563843			139.79	-1.076	-1.18005
139.99	-0.028368	0.00551258			139.99	-1.07484	-1.18018
140.19	-0.0255285	0.00567643			140.19	-1.072	-1.18002
140.39	-0.0284715	0.00495488			140.39	-1.07494	-1.18074
140.6	-0.0267138	0.00662803			140.6	-1.07318	-1.17906
140.79	-0.0272977	0.00560321			140.79	-1.07377	-1.18009
140.99	-0.0283869	0.00401199			140.99	-1.07486	-1.18168
141.19	-0.0261384	0.00590743			141.19	-1.07261	-1.17979
141.39	-0.0252796	0.00319516			141.39	-1.07175	-1.1825
141.6	-0.0255215	0.00413372			141.6	-1.07199	-1.18156
141.79	-0.0254052	0.00588546			141.79	-1.07187	-1.17981
141.99	-0.0270281	0.00513095			141.99	-1.0735	-1.18056
142.19	-0.0289602	0.00411542			142.19	-1.07543	-1.18158
142.39	-0.0259719	0.00329506			142.39	-1.07244	-1.1824
142.59	-0.024764	0.00628571			142.59	-1.07123	-1.17941
142.79	-0.0249533	0.00480149			142.79	-1.07142	-1.18089
142.99	-0.029027	0.00587258			142.99	-1.0755	-1.17982
143.19	-0.0268371	0.00578481			143.19	-1.07331	-1.17991
143.39	-0.0269508	0.0033012			143.39	-1.07342	-1.18239
143.59	-0.0284047	0.00469255			143.59	-1.07487	-1.181
143.79	-0.0292365	0.00461163			143.79	-1.07571	-1.18108
143.99	-0.025687	0.00322484			143.99	-1.07216	-1.18247
144.19	-0.0250553	0.00346768			144.19	-1.07152	-1.18223
144.39	-0.0281635	0.00670347			144.39	-1.07463	-1.17899
144.59	-0.0267232	0.0050138			144.59	-1.07319	-1.18068
144.79	-0.0280636	0.00351705			144.79	-1.07453	-1.18218
144.99	-0.0260266	0.00524391			144.99	-1.0725	-1.18045
145.19	-0.0304863	0.00186746			145.19	-1.07696	-1.18383
145.39	-0.0287534	0.00465438			145.39	-1.07522	-1.18104
145.59	-0.0269747	0.0067466			145.59	-1.07344	-1.17895
145.79	-0.0290257	0.00391573			145.79	-1.07549	-1.18178
145.99	-0.0264772	0.0051764			145.99	-1.07295	-1.18052
146.19	-0.0290467	0.00474245			146.19	-1.07552	-1.18095
146.39	-0.0259568	0.00660237			146.39	-1.07243	-1.17909
146.6	-0.0287409	0.00224791			146.6	-1.07521	-1.18345
146.79	-0.0258959	0.00523014			146.79	-1.07237	-1.18046
146.99	-0.0274386	0.0044225			146.99	-1.07391	-1.18127
147.19	-0.0271013	0.0042662			147.19	-1.07357	-1.18143
147.39	-0.0252469	0.00771891			147.39	-1.07172	-1.17797
147.6	-0.0271376	0.00310481			147.6	-1.07361	-1.18259
147.79	-0.0269137	0.00390855			147.79	-1.07338	-1.18178
147.99	-0.0295837	0.0033242			147.99	-1.07605	-1.18237
148.19	-0.0271409	0.00089106			148.19	-1.07361	-1.1848
148.39	-0.0288609	0.00304306			148.39	-1.07533	-1.18265
148.6	-0.0299637	0.00334862			148.6	-1.07643	-1.18234
148.79	-0.0275834	0.00398663			148.79	-1.07405	-1.18171
148.99	-0.0291439	0.00521464			148.99	-1.07561	-1.18048
149.19	-0.0293668	0.0081051			149.19	-1.07584	-1.17759
149.39	-0.0283968	0.00322363			149.39	-1.07487	-1.18247
149.6	-0.0287478	0.00539154			149.6	-1.07522	-1.1803
149.79	-0.0261795	0.00457162			149.79	-1.07265	-1.18112
149.99	-0.0307882	0.00449645			149.99	-1.07726	-1.1812
150.19	-0.0270948	0.00555911			150.19	-1.07356	-1.18013
150.39	-0.029341	0.00371864			150.39	-1.07581	-1.18197
150.59	-0.0283121	0.00114177			150.59	-1.07478	-1.18455
150.79	-0.030631	0.00945262			150.79	-1.0771	-1.17624
150.99	-0.0287254	0.00255048			150.99	-1.07519	-1.18314
151.19	-0.0279778	0.00362372			151.19	-1.07445	-1.18207
151.39	-0.0283645	0.00122149			151.39	-1.07483	-1.18447
151.59	-0.0256274	0.0041374			151.59	-1.0721	-1.18156
151.79	-0.0288167	0.00603826			151.79	-1.07529	-1.17965
151.99	-0.0293316	0.00576845			151.99	-1.0758	-1.17992
152.19	-0.0268438	0.00369965			152.19	-1.07331	-1.18199
152.39	-0.0259416	0.0034431			152.39	-1.07241	-1.18225
152.6	-0.0292318	0.00574004			152.6	-1.0757	-1.17995
152.79	-0.0277854	0.0007863			152.79	-1.07425	-1.18491
152.99	-0.0293285	0.00440004			152.99	-1.0758	-1.18129
153.19	-0.030863	0.00216617			153.19	-1.07733	-1.18353
153.39	-0.0296681	0.00421544			153.39	-1.07614	-1.18148
153.6	-0.0263215	-0.00066464			153.6	-1.07279	-1.18636
153.79	-0.0292633	0.0047419			153.79	-1.07573	-1.18095
153.99	-0.0294075	0.00362021			153.99	-1.07588	-1.18207
154.19	-0.0263386	0.00372121			154.19	-1.07281	-1.18197
154.39	-0.0289094	0.00503823			154.39	-1.07538	-1.18065
154.6	-0.0282589	0.00561631			154.6	-1.07473	-1.18008
154.79	-0.0282373	0.0012649			154.79	-1.07471	-1.18443
154.99	-0.0283202	0.0035988			154.99	-1.07479	-1.18209
155.19	-0.0285518	0.00903882			155.19	-1.07502	-1.17665
155.39	-0.0279936	0.00291841			155.39	-1.07446	-1.18277
155.59	-0.0305116	0.00119826			155.59	-1.07698	-1.18449
155.79	-0.0300191	0.0037047			155.79	-1.07649	-1.18199
155.99	-0.0282251	0.00656973			155.99	-1.07469	-1.17912
156.19	-0.029118	0.00555356			156.19	-1.07559	-1.18014
156.39	-0.0311152	0.00256879			156.39	-1.07758	-1.18312
156.59	-0.0258248	0.00473696			156.59	-1.07229	-1.18096
156.79	-0.0300502	0.0025649			156.79	-1.07652	-1.18313
156.99	-0.0265486	0.00394116			156.99	-1.07302	-1.18175
157.19	-0.0312562	0.00688583			157.19	-1.07773	-1.17881
157.39	-0.0287401	0.00246233			157.39	-1.07521	-1.18323
157.6	-0.029811	0.00449657			157.6	-1.07628	-1.1812
157.79	-0.0317897	0.00131394			157.79	-1.07826	-1.18438
157.99	-0.0309306	0.00310827			157.99	-1.0774	-1.18258
158.19	-0.0287356	0.00202724			158.19	-1.0752	-1.18367
158.39	-0.0281339	0.00507334			158.39	-1.0746	-1.18062
158.6	-0.0273123	0.00189957			158.6	-1.07378	-1.18379
158.79	-0.0285485	0.00273468			158.79	-1.07502	-1.18296
158.99	-0.0285529	0.00195616			158.99	-1.07502	-1.18374
159.19	-0.0258444	0.00103497			159.19	-1.07231	-1.18466
159.39	-0.0300574	-0.00013349			159.39	-1.07653	-1.18583
159.6	-0.0257887	0.00483571			159.6	-1.07226	-1.18086
159.79	-0.0288388	0.00360546			159.79	-1.07531	-1.18209
159.99	-0.0304395	0.00113892			159.99	-1.07691	-1.18455
160.19	-0.0306779	0.00161947			160.19	-1.07715	-1.18407
160.39	-0.0288771	0.00120085			160.39	-1.07535	-1.18449
160.59	-0.0272087	0.00160319			160.59	-1.07368	-1.18409
160.79	-0.0293213	0.00526061			160.79	-1.07579	-1.18043
160.99	-0.0297624	0.00324615			160.99	-1.07623	-1.18245
161.19	-0.0267397	-0.00120781			161.19	-1.07321	-1.1869
161.39	-0.0298983	0.00516026			161.39	-1.07637	-1.18053
161.59	-0.0311119	0.00341093			161.59	-1.07758	-1.18228
161.79	-0.0281869	0.00111846			161.79	-1.07466	-1.18457
161.99	-0.0310618	0.00020879			161.99	-1.07753	-1.18548
162.19	-0.0297435	0.00362629			162.19	-1.07621	-1.18207
162.39	-0.0306421	0.00043487			162.39	-1.07711	-1.18526
162.6	-0.0318253	0.0013036			162.6	-1.07829	-1.18439
162.79	-0.0278912	0.00477509			162.79	-1.07436	-1.18092
162.99	-0.0332076	0.00150165			162.99	-1.07968	-1.18419
163.19	-0.0294574	0.00131232			163.19	-1.07593	-1.18438
163.39	-0.0288089	0.00634969			163.39	-1.07528	-1.17934
163.6	-0.0309347	0.00234878			163.6	-1.0774	-1.18334
163.79	-0.0275762	0.00491991			163.79	-1.07405	-1.18077
163.99	-0.0298832	0.00152388			163.99	-1.07635	-1.18417
164.19	-0.0286558	0.0041056			164.19	-1.07512	-1.18159
164.39	-0.0319997	0.00227965			164.39	-1.07847	-1.18341
164.59	-0.0301278	0.00243201			164.59	-1.0766	-1.18326
164.79	-0.0283082	0.00107186			164.79	-1.07478	-1.18462
164.99	-0.030399	0.00734641			164.99	-1.07687	-1.17835
165.19	-0.0295958	0.00540552			165.19	-1.07606	-1.18029
165.39	-0.0286126	0.00248254			165.39	-1.07508	-1.18321
165.59	-0.0291971	0.0043227			165.59	-1.07567	-1.18137
165.79	-0.0285214	0.00075452			165.79	-1.07499	-1.18494
165.99	-0.030439	0.00025931			165.99	-1.07691	-1.18543
166.19	-0.0328445	0.00372297			166.19	-1.07931	-1.18197
166.39	-0.0301285	0.00223843			166.39	-1.0766	-1.18345
166.59	-0.0303637	-0.00012096			166.59	-1.07683	-1.18581
166.79	-0.0315093	0.00111487			166.79	-1.07798	-1.18458
166.99	-0.0305314	0.00477902			166.99	-1.077	-1.18091
167.19	-0.0280079	0.00695037			167.19	-1.07448	-1.17874
167.39	-0.0319544	0.00125491			167.39	-1.07842	-1.18444
167.6	-0.0301437	0.00256181			167.6	-1.07661	-1.18313
167.79	-0.0309083	0.00456729			167.79	-1.07738	-1.18113
167.99	-0.0291489	0.00111967			167.99	-1.07562	-1.18457
168.19	-0.0340131	0.00016197			168.19	-1.08048	-1.18553
168.39	-0.0307922	0.00333456			168.39	-1.07726	-1.18236
168.59	-0.030901	0.00163838			168.59	-1.07737	-1.18405
168.79	-0.028408	0.00160009			168.79	-1.07488	-1.18409
168.99	-0.0300805	0.00206791			168.99	-1.07655	-1.18362
169.19	-0.0292231	0.00294072			169.19	-1.07569	-1.18275
169.39	-0.0308181	0.00241572			169.39	-1.07729	-1.18328
169.6	-0.0313763	0.00103953			169.6	-1.07785	-1.18465
169.79	-0.0303562	0.00023272			169.79	-1.07683	-1.18546
169.99	-0.0316615	0.00261339			169.99	-1.07813	-1.18308
170.19	-0.0294673	0.00425759			170.19	-1.07594	-1.18144
170.39	-0.0309103	0.00321385			170.39	-1.07738	-1.18248
170.6	-0.0336652	0.00144825			170.6	-1.08013	-1.18424
170.79	-0.0321618	0.00230231			170.79	-1.07863	-1.18339
170.99	-0.0286838	0.00416737			170.99	-1.07515	-1.18153
171.19	-0.0309852	-0.00099909			171.19	-1.07745	-1.18669
171.39	-0.0315441	0.0015888			171.39	-1.07801	-1.1841
171.6	-0.0317058	0.00088685			171.6	-1.07817	-1.18481
171.79	-0.0330327	0.00144758			171.79	-1.0795	-1.18425
171.99	-0.0316995	0.00477126			171.99	-1.07817	-1.18092
172.19	-0.0312743	0.00213665			172.19	-1.07774	-1.18356
172.39	-0.0295624	-0.00098334			172.39	-1.07603	-1.18668
172.59	-0.0315228	0.00386127			172.59	-1.07799	-1.18183
172.79	-0.0287885	0.00270912			172.79	-1.07526	-1.18298
172.99	-0.0331086	4.71e-05			172.99	-1.07958	-1.18565
173.19	-0.0338154	0.00121643			173.19	-1.08028	-1.18448
173.39	-0.0314181	-0.00055479			173.39	-1.07789	-1.18625
173.59	-0.0282713	0.00041782			173.59	-1.07474	-1.18528
173.79	-0.0294281	0.00455927			173.79	-1.0759	-1.18113
173.99	-0.0335531	-0.00219304			173.99	-1.08002	-1.18789
174.19	-0.0350105	0.00295604			174.19	-1.08148	-1.18274
174.39	-0.03321	-0.00226887			174.39	-1.07968	-1.18796
174.6	-0.0319616	-0.00053272			174.6	-1.07843	-1.18623
174.79	-0.0315036	0.00130514			174.79	-1.07797	-1.18439
174.99	-0.031503	0.00567599			174.99	-1.07797	-1.18002
175.19	-0.0319155	0.00240584			175.19	-1.07838	-1.18329
175.39	-0.0315512	0.00281823			175.39	-1.07802	-1.18287
175.6	-0.0331291	0.00457249			175.6	-1.0796	-1.18112
175.79	-0.0290791	0.00232663			175.79	-1.07555	-1.18337
175.99	-0.0310763	0.00376973			175.99	-1.07755	-1.18192
176.19	-0.0341767	0.00100902			176.19	-1.08065	-1.18468
176.39	-0.0325235	0.00164864			176.39	-1.07899	-1.18404
176.6	-0.0311639	0.00077627			176.6	-1.07763	-1.18492
176.79	-0.0344482	0.00266022			176.79	-1.08092	-1.18303
176.99	-0.0321615	-0.00306895			176.99	-1.07863	-1.18876
177.19	-0.0309162	8.122e-05			177.19	-1.07739	-1.18561
177.39	-0.0316613	-7.624e-05			177.39	-1.07813	-1.18577
177.59	-0.0305373	0.00157524			177.59	-1.07701	-1.18412
177.79	-0.0313483	-0.00227192			177.79	-1.07782	-1.18796
177.99	-0.0307338	0.00238131			177.99	-1.0772	-1.18331
178.19	-0.031193	0.00081552			178.19	-1.07766	-1.18488
178.39	-0.03209	0.00179363			178.39	-1.07856	-1.1839
178.59	-0.0347854	0.00165688			178.59	-1.08125	-1.18404
178.79	-0.0321596	0.00282883			178.79	-1.07863	-1.18286
178.99	-0.0349339	0.00156468			178.99	-1.0814	-1.18413
179.19	-0.0331602	0.00282571			179.19	-1.07963	-1.18287
179.39	-0.0320987	0.00041146			179.39	-1.07857	-1.18528
179.6	-0.0313039	-0.00031719			179.6	-1.07777	-1.18601
179.79	-0.032167	0.00223476			179.79	-1.07864	-1.18346
179.99	-0.0338109	0.0004735			179.99	-1.08028	-1.18522
180.19	-0.0353961	0.00302168			180.19	-1.08187	-1.18267
180.39	-0.0307783	0.00668003			180.39	-1.07725	-1.17901
180.6	-0.0327139	0.00216634			180.6	-1.07918	-1.18353
180.79	-0.0303823	0.00019174			180.79	-1.07685	-1.1855
180.99	-0.0328284	-8.176e-05			180.99	-1.0793	-1.18577
181.19	-0.033547	0.0009727			181.19	-1.08002	-1.18472
181.39	-0.0359679	0.00327813			181.39	-1.08244	-1.18241
181.59	-0.0326016	-0.00071555			181.59	-1.07907	-1.18641
181.79	-0.0326841	0.00122024			181.79	-1.07915	-1.18447
181.99	-0.033125	0.0026706			181.99	-1.07959	-1.18302
182.19	-0.0323095	0.00237929			182.19	-1.07878	-1.18331
182.39	-0.028267	-4.071e-05			182.39	-1.07474	-1.18573
182.59	-0.0317261	0.00346489			182.59	-1.0782	-1.18223
182.79	-0.0334637	0.00253536			182.79	-1.07993	-1.18316
182.99	-0.0297536	0.00264331			182.99	-1.07622	-1.18305
183.19	-0.0335495	-0.00148721			183.19	-1.08002	-1.18718
183.39	-0.0342035	-0.00081983			183.39	-1.08067	-1.18651
183.59	-0.0352651	0.00382987			183.59	-1.08173	-1.18186
183.79	-0.0327664	0.0014976			183.79	-1.07924	-1.1842
183.99	-0.0320996	0.00176593			183.99	-1.07857	-1.18393
184.19	-0.0349099	0.003521			184.19	-1.08138	-1.18217
184.39	-0.0312671	-0.00070767			184.39	-1.07774	-1.1864
184.6	-0.0332938	0.00082981			184.6	-1.07976	-1.18486
184.79	-0.0329458	0.0012954			184.79	-1.07941	-1.1844
184.99	-0.0326835	-0.00315769			184.99	-1.07915	-1.18885
185.19	-0.0349321	0.00080485			185.19	-1.0814	-1.18489
185.39	-0.0348347	-1.03e-06			185.39	-1.0813	-1.18569
185.6	-0.034478	0.0018663			185.6	-1.08095	-1.18383
185.79	-0.0316703	0.00159268			185.79	-1.07814	-1.1841
185.99	-0.0339969	-0.00101398			185.99	-1.08047	-1.18671
186.19	-0.0343456	0.00314991			186.19	-1.08081	-1.18254
186.39	-0.0312344	0.00071209			186.39	-1.0777	-1.18498
186.59	-0.0339686	0.00154759			186.59	-1.08044	-1.18415
186.79	-0.034321	-0.0019584			186.79	-1.08079	-1.18765
186.99	-0.031111	-0.00038009			186.99	-1.07758	-1.18607
187.19	-0.0336513	0.00048119			187.19	-1.08012	-1.18521
187.39	-0.0332008	0.00069173			187.39	-1.07967	-1.185
187.59	-0.0335485	0.00038144			187.59	-1.08002	-1.18531
187.79	-0.0329888	0.00115024			187.79	-1.07946	-1.18454
187.99	-0.0368076	-0.00022987			187.99	-1.08328	-1.18592
188.19	-0.0333779	0.00028897			188.19	-1.07985	-1.1854
188.39	-0.034217	-0.00221891			188.39	-1.08069	-1.18791
188.6	-0.0322247	0.00047797			188.6	-1.07869	-1.18521
188.79	-0.0371411	-0.00198967			188.79	-1.08361	-1.18768
188.99	-0.0358275	-0.00018309			188.99	-1.0823	-1.18588
189.19	-0.0351967	0.00105919			189.19	-1.08167	-1.18463
189.39	-0.034873	-0.00259342			189.39	-1.08134	-1.18829
189.6	-0.0327386	-0.00073205			189.6	-1.07921	-1.18642
189.79	-0.034417	0.00153783			189.79	-1.08089	-1.18416
189.99	-0.032844	0.00098595			189.99	-1.07931	-1.18471
190.19	-0.0360731	-0.00066044			190.19	-1.08254	-1.18635
190.39	-0.0339584	-0.00204488			190.39	-1.08043	-1.18774
190.6	-0.0356989	-0.00100039			190.6	-1.08217	-1.18669
190.79	-0.032808	-0.00322384			190.79	-1.07928	-1.18892
190.99	-0.0351035	-0.00040845			190.99	-1.08157	-1.1861
191.19	-0.034807	0.00041541			191.19	-1.08128	-1.18528
191.39	-0.0338653	0.00263433			191.39	-1.08033	-1.18306
191.6	-0.0308666	-0.00154622			191.6	-1.07734	-1.18724
191.79	-0.036227	-0.00479476			191.79	-1.0827	-1.19049
191.99	-0.0369599	0.00177567			191.99	-1.08343	-1.18392
192.19	-0.0351722	-0.00128618			192.19	-1.08164	-1.18698
192.39	-0.0337494	-0.00260603			192.39	-1.08022	-1.1883
192.6	-0.0333465	0.0034163			192.6	-1.07982	-1.18228
192.79	-0.0346062	0.00015347			192.79	-1.08108	-1.18554
192.99	-0.0368846	-0.00085152			192.99	-1.08335	-1.18654
193.19	-0.0339971	0.00140958			193.19	-1.08047	-1.18428
193.39	-0.0371176	-0.00214984			193.39	-1.08359	-1.18784
193.6	-0.0346262	0.00086504			193.6	-1.0811	-1.18483
193.79	-0.033579	0.00210834			193.79	-1.08005	-1.18358
193.99	-0.0338066	-0.0048664			193.99	-1.08028	-1.19056
194.19	-0.0311319	-0.00146014			194.19	-1.0776	-1.18715
194.39	-0.0361227	-0.00047909			194.39	-1.08259	-1.18617
194.59	-0.0308966	0.00285748			194.59	-1.07737	-1.18284
194.79	-0.0357834	-0.00296301			194.79	-1.08225	-1.18866
194.99	-0.0323626	-0.00427155			194.99	-1.07883	-1.18996
195.19	-0.0358168	0.00101226			195.19	-1.08229	-1.18468
195.39	-0.0347734	-0.00023424			195.39	-1.08124	-1.18593
195.59	-0.0351088	-0.00366508			195.59	-1.08158	-1.18936
195.79	-0.0332354	-0.00085294			195.79	-1.0797	-1.18655
195.99	-0.0345806	0.00173941			195.99	-1.08105	-1.18395
196.19	-0.0329915	-0.00031645			196.19	-1.07946	-1.18601
196.39	-0.0343399	-0.00032726			196.39	-1.08081	-1.18602
196.6	-0.0324744	-0.00190554			196.6	-1.07894	-1.1876
196.79	-0.0363584	0.00058453			196.79	-1.08283	-1.18511
196.99	-0.0336299	0.00160037			196.99	-1.0801	-1.18409
197.19	-0.0331575	-0.00540848			197.19	-1.07963	-1.1911
197.39	-0.0345519	0.0014847			197.39	-1.08102	-1.18421
197.6	-0.0349732	-0.00186423			197.6	-1.08144	-1.18756
197.79	-0.0354913	0.00108921			197.79	-1.08196	-1.1846
197.99	-0.036791	-0.00120909			197.99	-1.08326	-1.1869
198.19	-0.033096	-0.00077963			198.19	-1.07957	-1.18647
198.39	-0.0359574	0.00148124			198.39	-1.08243	-1.18421
198.6	-0.035192	-0.00493062			198.6	-1.08166	-1.19062
198.79	-0.0344395	-0.00065706			198.79	-1.08091	-1.18635
198.99	-0.0384171	-0.00066476			198.99	-1.08489	-1.18636
199.19	-0.0359138	-0.00364698			199.19	-1.08238	-1.18934
199.39	-0.0341135	0.00326373			199.39	-1.08058	-1.18243
199.59	-0.0342309	0.00082058			199.59	-1.0807	-1.18487
199.79	-0.0353821	0.00023395			199.79	-1.08185	-1.18546
200	-0.0285211	0.00900682			200	-1.07499	-1.17669
200.19	-0.03452	0.00357159			200.19	-1.08099	-1.18212
200.39	-0.0293012	0.00835515			200.39	-1.07577	-1.17734
200.59	-0.0307605	0.0112526			200.59	-1.07723	-1.17444
200.79	-0.0310204	0.00567392			200.79	-1.07749	-1.18002
200.99	-0.0279263	0.00565966			200.99	-1.0744	-1.18003
201.19	-0.0236988	0.0115155			201.19	-1.07017	-1.17418
201.39	-0.0258265	0.013786			201.39	-1.0723	-1.17191
201.59	-0.0251584	0.0128867			201.59	-1.07163	-1.17281
201.79	-0.0224411	0.016848			201.79	-1.06891	-1.16884
201.99	-0.0244385	0.0129038			201.99	-1.07091	-1.17279
202.19	-0.0215483	0.01543			202.19	-1.06802	-1.17026
202.39	-0.0197712	0.0197776			202.39	-1.06624	-1.16592
202.59	-0.0209175	0.0198551			202.59	-1.06739	-1.16584
202.79	-0.0169242	0.0189123			202.79	-1.06339	-1.16678
202.99	-0.0183153	0.0197151			202.99	-1.06478	-1.16598
203.19	-0.0190923	0.0175884			203.19	-1.06556	-1.1681
203.39	-0.0158056	0.0163525			203.39	-1.06227	-1.16934
203.59	-0.0144889	0.0227943			203.59	-1.06096	-1.1629
203.79	-0.0157061	0.0231859			203.79	-1.06218	-1.16251
203.99	-0.0115411	0.0241883			203.99	-1.05801	-1.1615
204.19	-0.0104013	0.0272968			204.19	-1.05687	-1.1584
204.39	-0.0112678	0.02552			204.39	-1.05774	-1.16017
204.59	-0.0117254	0.0275712			204.59	-1.05819	-1.15812
204.79	-0.0124414	0.0295683			204.79	-1.05891	-1.15612
204.99	-0.0111257	0.0273717			204.99	-1.05759	-1.15832
205.19	-0.00550152	0.0273428			205.19	-1.05197	-1.15835
205.39	-0.00761032	0.0317115			205.39	-1.05408	-1.15398
205.59	-0.00420778	0.0300677			205.59	-1.05068	-1.15563
205.79	-0.00635991	0.0297644			205.79	-1.05283	-1.15593
205.99	-0.0067994	0.0323225			205.99	-1.05327	-1.15337
206.19	-0.00355933	0.0318712			206.19	-1.05003	-1.15382
206.39	-0.00174286	0.0354205			206.39	-1.04821	-1.15027
206.59	-0.00071723	0.0357342			206.59	-1.04719	-1.14996
206.79	0.00193122	0.0371275			206.79	-1.04454	-1.14857
206.99	0.00047706	0.0357628			206.99	-1.04599	-1.14993
207.19	-0.00048588	0.036896			207.19	-1.04695	-1.1488
207.39	0.00057571	0.0395377			207.39	-1.04589	-1.14616
207.59	0.00231554	0.0405778			207.59	-1.04415	-1.14512
207.79	0.00426069	0.0410245			207.79	-1.04221	-1.14467
207.99	0.00333889	0.043278			207.99	-1.04313	-1.14241
208.19	0.00255622	0.0415266			208.19	-1.04391	-1.14417
208.39	0.0047288	0.0417491			208.39	-1.04174	-1.14394
208.59	0.00920515	0.0462882			208.59	-1.03726	-1.1394
208.79	0.00833793	0.0484957			208.79	-1.03813	-1.1372
208.99	0.00645993	0.0470613			208.99	-1.04001	-1.13863
209.19	0.0110509	0.0484144			209.19	-1.03542	-1.13728
209.39	0.00945031	0.0492241			209.39	-1.03702	-1.13647
209.59	0.0112127	0.0527212			209.59	-1.03526	-1.13297
209.79	0.0129298	0.0512264			209.79	-1.03354	-1.13447
209.99	0.0132465	0.0502916			209.99	-1.03322	-1.1354
210.19	0.0135779	0.0497615			210.19	-1.03289	-1.13593
210.39	0.0168513	0.0533286			210.39	-1.02962	-1.13236
210.59	0.0153634	0.0537678			210.59	-1.03111	-1.13193
210.79	0.0168748	0.0566275			210.79	-1.02959	-1.12907
210.99	0.015926	0.0556503			210.99	-1.03054	-1.13004
211.19	0.0180637	0.0556204			211.19	-1.02841	-1.13007
211.39	0.0198767	0.059068			211.39	-1.02659	-1.12662
211.59	0.019685	0.0600422			211.59	-1.02678	-1.12565
211.79	0.0221219	0.062986			211.79	-1.02435	-1.12271
211.99	0.022968	0.0621191			211.99	-1.0235	-1.12357
212.19	0.0217633	0.0613814			212.19	-1.02471	-1.12431
212.39	0.0242076	0.0648516			212.39	-1.02226	-1.12084
212.59	0.0242869	0.0630923			212.59	-1.02218	-1.1226
212.79	0.0298097	0.0647817			212.79	-1.01666	-1.12091
212.99	0.0231577	0.0643866			212.99	-1.02331	-1.12131
213.19	0.0273383	0.0690513			213.19	-1.01913	-1.11664
213.39	0.0258439	0.0669153			213.39	-1.02063	-1.11878
213.59	0.0281935	0.0682454			213.59	-1.01828	-1.11745
213.79	0.0299302	0.0681805			213.79	-1.01654	-1.11751
213.99	0.0311064	0.0672943			213.99	-1.01536	-1.1184
214.19	0.0323153	0.0718401			214.19	-1.01415	-1.11385
214.39	0.0284301	0.0707378			214.39	-1.01804	-1.11496
214.59	0.0350479	0.0729256			214.59	-1.01142	-1.11277
214.79	0.0335509	0.0747556			214.79	-1.01292	-1.11094
214.99	0.0349912	0.074568			214.99	-1.01148	-1.11112
215.19	0.0326946	0.0707286			215.19	-1.01377	-1.11496
215.39	0.0359357	0.0763424			215.39	-1.01053	-1.10935
215.59	0.0404115	0.0756536			215.59	-1.00606	-1.11004
215.79	0.0376297	0.0765125			215.79	-1.00884	-1.10918
215.99	0.0392871	0.0778376			215.99	-1.00718	-1.10786
216.19	0.0417467	0.0807887			216.19	-1.00472	-1.1049
216.39	0.0405157	0.0827486			216.39	-1.00595	-1.10294
216.59	0.0427028	0.0831996			216.59	-1.00377	-1.10249
216.79	0.0421461	0.0816429			216.79	-1.00432	-1.10405
216.99	0.0425885	0.086953			216.99	-1.00388	-1.09874
217.19	0.045145	0.0837173			217.19	-1.00132	-1.10198
217.39	0.0485192	0.0839629			217.39	-0.99795	-1.10173
217.59	0.0494796	0.0855348			217.59	-0.996989	-1.10016
217.79	0.0464754	0.0872668			217.79	-0.999994	-1.09843
217.99	0.0478782	0.0894253			217.99	-0.998591	-1.09627
218.19	0.0512731	0.0939847			218.19	-0.995196	-1.09171
218.39	0.0540991	0.0893656			218.39	-0.99237	-1.09633
218.59	0.0494353	0.0863248			218.59	-0.997034	-1.09937
218.79	0.0512116	0.0931496			218.79	-0.995257	-1.09254
218.99	0.0525745	0.0939382			218.99	-0.993895	-1.09175
219.19	0.0524388	0.0953747			219.19	-0.99403	-1.09032
219.39	0.0554644	0.0942325			219.39	-0.991005	-1.09146
219.59	0.0562095	0.0958413			219.59	-0.99026	-1.08985
219.79	0.0558061	0.0978065			219.79	-0.990663	-1.08789
219.99	0.0556618	0.0994432			219.99	-0.990807	-1.08625
220.19	0.0582503	0.0968919			220.19	-0.988219	-1.0888
220.39	0.0573618	0.0999759			220.39	-0.989107	-1.08572
220.59	0.0595156	0.0979345			220.59	-0.986953	-1.08776
220.79	0.0615166	0.100807			220.79	-0.984953	-1.08489
220.99	0.0611767	0.103396			220.99	-0.985292	-1.0823
221.19	0.0627136	0.105427			221.19	-0.983755	-1.08027
221.39	0.0662344	0.104929			221.39	-0.980235	-1.08076
221.59	0.0653949	0.104258			221.59	-0.981074	-1.08143
221.79	0.0653023	0.107414			221.79	-0.981167	-1.07828
221.99	0.0673243	0.105585			221.99	-0.979145	-1.08011
222.19	0.0663533	0.105026			222.19	-0.980116	-1.08067
222.39	0.0705583	0.108632			222.39	-0.975911	-1.07706
222.59	0.0689961	0.110345			222.59	-0.977473	-1.07535
222.79	0.0689175	0.111425			222.79	-0.977552	-1.07427
222.99	0.0704919	0.113206			222.99	-0.975977	-1.07249
223.19	0.0733212	0.116723			223.19	-0.973148	-1.06897
223.39	0.0745063	0.113955			223.39	-0.971963	-1.07174
223.59	0.0729064	0.113887			223.59	-0.973563	-1.07181
223.79	0.0739827	0.116479			223.79	-0.972486	-1.06921
223.99	0.074036	0.115361			223.99	-0.972433	-1.07033
224.19	0.075287	0.114281			224.19	-0.971182	-1.07141
224.39	0.0772135	0.117263			224.39	-0.969256	-1.06843
224.59	0.0759085	0.11856			224.59	-0.970561	-1.06713
224.79	0.0796131	0.121508			224.79	-0.966856	-1.06418
224.99	0.0785379	0.123052			224.99	-0.967931	-1.06264
225.19	0.0820562	0.123497			225.19	-0.964413	-1.0622
225.39	0.0835663	0.12036			225.39	-0.962903	-1.06533
225.59	0.081599	0.123973			225.59	-0.96487	-1.06172
225.79	0.084616	0.125007			225.79	-0.961853	-1.06069
225.99	0.0838078	0.129736			225.99	-0.962661	-1.05596
226.19	0.0798557	0.125824			226.19	-0.966613	-1.05987
226.39	0.0835015	0.130206			226.39	-0.962968	-1.05549
226.59	0.0862448	0.132922			226.59	-0.960224	-1.05277
226.79	0.0891946	0.127793			226.79	-0.957274	-1.0579
226.99	0.0897618	0.133241			226.99	-0.956707	-1.05245
227.19	0.0897552	0.132024			227.19	-0.956714	-1.05367
227.39	0.0883325	0.136489			227.39	-0.958137	-1.0492
227.59	0.0928623	0.132957			227.59	-0.953607	-1.05274
227.79	0.0913276	0.134828			227.79	-0.955141	-1.05086
227.99	0.0905864	0.135198			227.99	-0.955883	-1.05049
228.19	0.091661	0.137693			228.19	-0.954808	-1.048
228.39	0.095651	0.140283			228.39	-0.950818	-1.04541
228.59	0.0959048	0.140927			228.59	-0.950564	-1.04477
228.79	0.0956673	0.140768			228.79	-0.950802	-1.04492
228.99	0.100644	0.142585			228.99	-0.945825	-1.04311
229.19	0.102267	0.139271			229.19	-0.944202	-1.04642
229.39	0.0978619	0.140542			229.39	-0.948607	-1.04515
229.59	0.102176	0.14232			229.59	-0.944293	-1.04337
229.79	0.102668	0.144508			229.79	-0.943801	-1.04118
229.99	0.102707	0.148574			229.99	-0.943762	-1.03712
230.19	0.102146	0.145488			230.19	-0.944323	-1.0402
230.39	0.104554	0.145784			230.39	-0.941915	-1.03991
230.59	0.105984	0.149313			230.59	-0.940485	-1.03638
230.79	0.103206	0.150716			230.79	-0.943263	-1.03498
230.99	0.106539	0.150633			230.99	-0.93993	-1.03506
231.19	0.111809	0.149734			231.19	-0.93466	-1.03596
231.39	0.107959	0.150503			231.39	-0.93851	-1.03519
231.59	0.109729	0.156562			231.59	-0.93674	-1.02913
231.79	0.112864	0.154857			231.79	-0.933606	-1.03084
231.99	0.113996	0.153109			231.99	-0.932473	-1.03258
232.19	0.110563	0.152816			232.19	-0.935906	-1.03288
232.39	0.114495	0.158706			232.39	-0.931974	-1.02699
232.59	0.112422	0.157067			232.59	-0.934047	-1.02863
232.79	0.116238	0.157927			232.79	-0.930232	-1.02777
232.99	0.115836	0.159756			232.99	-0.930633	-1.02594
233.19	0.11643	0.157421			233.19	-0.930039	-1.02827
233.39	0.118114	0.160375			233.39	-0.928355	-1.02532
233.59	0.118207	0.163882			233.59	-0.928262	-1.02181
233.79	0.117812	0.162846			233.79	-0.928657	-1.02285
233.99	0.121204	0.16273			233.99	-0.925265	-1.02296
234.19	0.119572	0.167449			234.19	-0.926897	-1.01824
234.39	0.124838	0.163668			234.39	-0.921631	-1.02202
234.59	0.124949	0.163778			234.59	-0.92152	-1.02191
234.79	0.125463	0.165233			234.79	-0.921006	-1.02046
234.99	0.124902	0.167307			234.99	-0.921567	-1.01839
235.19	0.127924	0.16921			235.19	-0.918545	-1.01648
235.39	0.126715	0.170089			235.39	-0.919754	-1.0156
235.59	0.131169	0.171185			235.59	-0.915301	-1.01451
235.79	0.12819	0.174485			235.79	-0.918279	-1.01121
235.99	0.13201	0.175481			235.99	-0.914459	-1.01021
236.19	0.128016	0.176734			236.19	-0.918453	-1.00896
236.39	0.133801	0.177416			236.39	-0.912668	-1.00828
236.59	0.134043	0.177237			236.59	-0.912427	-1.00846
236.79	0.133907	0.178102			236.79	-0.912562	-1.00759
236.99	0.131626	0.178001			236.99	-0.914844	-1.00769
237.19	0.134665	0.18114			237.19	-0.911804	-1.00455
237.39	0.137685	0.182771			237.39	-0.908784	-1.00292
237.59	0.137901	0.182414			237.59	-0.908568	-1.00328
237.79	0.140621	0.179926			237.79	-0.905848	-1.00577
237.99	0.141067	0.183472			237.99	-0.905402	-1.00222
238.19	0.138248	0.180276			238.19	-0.908221	-1.00542
238.39	0.138776	0.188389			238.39	-0.907693	-0.997304
238.59	0.141365	0.188794			238.59	-0.905104	-0.996899
238.79	0.1432	0.184665			238.79	-0.903269	-1.00103
238.99	0.142133	0.188385			238.99	-0.904336	-0.997307
239.19	0.142266	0.191501			239.19	-0.904203	-0.994192
239.39	0.146503	0.191683			239.39	-0.899966	-0.99401
239.59	0.147501	0.190737			239.59	-0.898968	-0.994956
239.79	0.14655	0.194164			239.79	-0.899919	-0.991529
239.99	0.151875	0.194121			239.99	-0.894594	-0.991572
240.19	0.146575	0.191978			240.19	-0.899894	-0.993715
240.39	0.149244	0.192716			240.39	-0.897225	-0.992977
240.59	0.150577	0.198245			240.59	-0.895892	-0.987448
240.79	0.149861	0.197408			240.79	-0.896608	-0.988284
240.99	0.152297	0.1992			240.99	-0.894172	-0.986493
241.19	0.152558	0.19713			241.19	-0.893911	-0.988563
241.39	0.158022	0.193827			241.39	-0.888447	-0.991866
241.59	0.155813	0.200194			241.59	-0.890656	-0.985498
241.79	0.155372	0.197403			241.79	-0.891097	-0.988289
241.99	0.1568	0.204551			241.99	-0.889669	-0.981142
242.19	0.160699	0.204521			242.19	-0.88577	-0.981172
242.39	0.15751	0.204027			242.39	-0.888959	-0.981666
242.59	0.159276	0.204689			242.59	-0.887193	-0.981004
242.79	0.163347	0.207856			242.79	-0.883122	-0.977837
242.99	0.162863	0.206073			242.99	-0.883606	-0.97962
243.19	0.160832	0.206056			243.19	-0.885637	-0.979637
243.39	0.163836	0.206434			243.39	-0.882633	-0.979259
243.59	0.166524	0.209652			243.59	-0.879945	-0.976041
243.79	0.165245	0.211773			243.79	-0.881224	-0.97392
243.99	0.168666	0.208982			243.99	-0.877803	-0.976711
244.19	0.168096	0.215296			244.19	-0.878373	-0.970397
244.39	0.167096	0.216809			244.39	-0.879373	-0.968883
244.59	0.167824	0.212388			244.59	-0.878645	-0.973305
244.79	0.171226	0.218198			244.79	-0.875243	-0.967495
244.99	0.171017	0.213951			244.99	-0.875452	-0.971742
245.19	0.174394	0.216678			245.19	-0.872075	-0.969015
245.39	0.169602	0.215521			245.39	-0.876867	-0.970172
245.59	0.176245	0.218899			245.59	-0.870225	-0.966794
245.79	0.174427	0.220862			245.79	-0.872042	-0.964831
245.99	0.176732	0.217714			245.99	-0.869737	-0.967979
246.19	0.179304	0.224573			246.19	-0.867165	-0.96112
246.39	0.176105	0.223346			246.39	-0.870364	-0.962347
246.59	0.180137	0.222983			246.59	-0.866333	-0.96271
246.79	0.181515	0.22684			246.79	-0.864954	-0.958853
246.99	0.180118	0.226609			246.99	-0.866351	-0.959084
247.19	0.184045	0.229977			247.19	-0.862424	-0.955716
247.39	0.18574	0.230275			247.39	-0.860729	-0.955418
247.59	0.183437	0.230372			247.59	-0.863032	-0.955321
247.79	0.181474	0.230926			247.79	-0.864995	-0.954767
247.99	0.18771	0.23115			247.99	-0.858759	-0.954543
248.19	0.182902	0.229728			248.19	-0.863567	-0.955965
248.39	0.188203	0.234856			248.39	-0.858266	-0.950837
248.59	0.188819	0.232865			248.59	-0.85765	-0.952828
248.79	0.186901	0.235392			248.79	-0.859569	-0.950301
248.99	0.191141	0.237032			248.99	-0.855328	-0.948661
249.19	0.192183	0.238155			249.19	-0.854286	-0.947538
249.39	0.187669	0.239307			249.39	-0.8588	-0.946386
249.59	0.191439	0.236436			249.59	-0.85503	-0.949257
249.79	0.192997	0.241537			249.79	-0.853472	-0.944156
249.99	0.194966	0.2444			249.99	-0.851503	-0.941293
250.19	0.196756	0.24268			250.19	-0.849713	-0.943012
250.39	0.197374	0.242334			250.39	-0.849096	-0.943359
250.59	0.196016	0.239952			250.59	-0.850453	-0.945741
250.79	0.196651	0.243075			250.79	-0.849818	-0.942618
250.99	0.196314	0.247291			250.99	-0.850155	-0.938402
251.19	0.19769	0.246746			251.19	-0.848779	-0.938947
251.39	0.196878	0.246229			251.39	-0.849591	-0.939463
251.59	0.201201	0.251687			251.59	-0.845269	-0.934006
251.79	0.204553	0.250778			251.79	-0.841916	-0.934915
251.99	0.202975	0.252745			251.99	-0.843494	-0.932948
252.19	0.205127	0.250926			252.19	-0.841342	-0.934767
252.39	0.205593	0.251642			252.39	-0.840876	-0.934051
252.59	0.209185	0.254646			252.59	-0.837284	-0.931047
252.79	0.209066	0.253831			252.79	-0.837403	-0.931862
252.99	0.207779	0.252192			252.99	-0.83869	-0.933501
253.19	0.212402	0.258938			253.19	-0.834067	-0.926755
253.39	0.212139	0.260476			253.39	-0.83433	-0.925217
253.59	0.210537	0.257776			253.59	-0.835932	-0.927917
253.79	0.212636	0.262421			253.79	-0.833833	-0.923272
253.99	0.213743	0.259708			253.99	-0.832726	-0.925985
254.19	0.213505	0.262157			254.19	-0.832964	-0.923536
254.39	0.218265	0.261602			254.39	-0.828204	-0.924091
254.59	0.21605	0.266522			254.59	-0.830419	-0.919171
254.79	0.219318	0.26331			254.79	-0.827151	-0.922383
254.99	0.217995	0.266724			254.99	-0.828474	-0.918969
255.19	0.216239	0.266397			255.19	-0.830231	-0.919296
255.39	0.219952	0.264665			255.39	-0.826517	-0.921028
255.59	0.218841	0.266683			255.59	-0.827628	-0.91901
255.79	0.219052	0.269535			255.79	-0.827417	-0.916158
255.99	0.224371	0.271516			255.99	-0.822098	-0.914177
256.19	0.224283	0.270618			256.19	-0.822186	-0.915075
256.39	0.226944	0.272963			256.39	-0.819526	-0.91273
256.59	0.225588	0.269295			256.59	-0.820881	-0.916398
256.79	0.229584	0.270468			256.79	-0.816885	-0.915225
256.99	0.223039	0.279343			256.99	-0.82343	-0.90635
257.19	0.226355	0.27673			257.19	-0.820115	-0.908963
257.39	0.227913	0.280981			257.39	-0.818556	-0.904712
257.59	0.22693	0.275504			257.59	-0.819539	-0.910189
257.79	0.227802	0.281807			257.79	-0.818667	-0.903886
257.99	0.232589	0.280451			257.99	-0.813881	-0.905242
258.19	0.234332	0.281413			258.19	-0.812137	-0.90428
258.39	0.232099	0.283287			258.39	-0.81437	-0.902406
258.59	0.235737	0.286			258.59	-0.810732	-0.899693
258.79	0.231809	0.284119			258.79	-0.81466	-0.901573
258.99	0.237504	0.284643			258.99	-0.808965	-0.901049
259.19	0.240139	0.286104			259.19	-0.80633	-0.899588
259.39	0.239621	0.288708			259.39	-0.806848	-0.896985
259.59	0.238055	0.286224			259.59	-0.808414	-0.899469
259.79	0.23735	0.290918			259.79	-0.80912	-0.894775
259.99	0.24192	0.290788			259.99	-0.804549	-0.894905
260.19	0.242656	0.290869			260.19	-0.803813	-0.894824
260.39	0.243512	0.288658			260.39	-0.802957	-0.897035
260.59	0.242802	0.294124			260.59	-0.803667	-0.891568
260.79	0.244311	0.294939			260.79	-0.802158	-0.890754
260.99	0.243934	0.296341			260.99	-0.802535	-0.889352
261.19	0.245744	0.296708			261.19	-0.800725	-0.888985
261.39	0.246024	0.297194			261.39	-0.800445	-0.888499
261.59	0.247724	0.294793			261.59	-0.798745	-0.890899
261.79	0.251148	0.293218			261.79	-0.795321	-0.892475
261.99	0.251484	0.300418			261.99	-0.794985	-0.885275
262.19	0.249718	0.303			262.19	-0.796751	-0.882693
262.39	0.254314	0.302318			262.39	-0.792155	-0.883375
262.59	0.251989	0.299745			262.59	-0.79448	-0.885948
262.79	0.254048	0.303522			262.79	-0.792421	-0.882171
262.99	0.254502	0.305201			262.99	-0.791967	-0.880492
263.19	0.255823	0.306467			263.19	-0.790647	-0.879226
263.39	0.255183	0.310299			263.39	-0.791286	-0.875394
263.59	0.257516	0.304358			263.59	-0.788953	-0.881335
263.79	0.258961	0.307299			263.79	-0.787508	-0.878394
263.99	0.26251	0.306899			263.99	-0.783959	-0.878794
264.19	0.259661	0.31022			264.19	-0.786808	-0.875472
264.39	0.260812	0.313592			264.39	-0.785657	-0.872101
264.59	0.262633	0.313068			264.59	-0.783836	-0.872625
264.79	0.265168	0.310854			264.79	-0.781301	-0.874839
264.99	0.263685	0.314506			264.99	-0.782784	-0.871187
265.19	0.261422	0.315773			265.19	-0.785047	-0.86992
265.39	0.268271	0.32044			265.39	-0.778198	-0.865253
265.59	0.266843	0.317573			265.59	-0.779626	-0.86812
265.79	0.266448	0.321477			265.79	-0.780021	-0.864216
265.99	0.268325	0.318132			265.99	-0.778145	-0.867561
266.19	0.271262	0.323366			266.19	-0.775207	-0.862326
266.39	0.269586	0.322286			266.39	-0.776883	-0.863407
266.59	0.270322	0.323794			266.59	-0.776147	-0.861899
266.79	0.273689	0.326313			266.79	-0.77278	-0.85938
266.99	0.276168	0.32357			266.99	-0.770301	-0.862123
267.19	0.275677	0.323101			267.19	-0.770792	-0.862591
267.39	0.278307	0.326191			267.39	-0.768162	-0.859502
267.59	0.276087	0.329074			267.59	-0.770382	-0.856619
267.79	0.277438	0.330278			267.79	-0.769031	-0.855415
267.99	0.280852	0.33015			267.99	-0.765617	-0.855543
268.19	0.280692	0.330964			268.19	-0.765778	-0.854729
268.39	0.281499	0.331273			268.39	-0.76497	-0.85442
268.59	0.279696	0.333226			268.59	-0.766773	-0.852467
268.79	0.280852	0.333195			268.79	-0.765617	-0.852498
268.99	0.282599	0.335681			268.99	-0.76387	-0.850012
269.19	0.286781	0.338706			269.19	-0.759689	-0.846987
269.39	0.286198	0.336735			269.39	-0.760272	-0.848958
269.59	0.286694	0.343627			269.59	-0.759775	-0.842066
269.79	0.287673	0.337614			269.79	-0.758796	-0.848079
269.99	0.287626	0.339258			269.99	-0.758844	-0.846434
270.19	0.288774	0.341446			270.19	-0.757695	-0.844247
270.39	0.292161	0.341329			270.39	-0.754308	-0.844364
270.59	0.289847	0.341721			270.59	-0.756622	-0.843972
270.79	0.29415	0.343623			270.79	-0.752319	-0.84207
270.99	0.290773	0.345462			270.99	-0.755696	-0.840231
271.19	0.291269	0.346054			271.19	-0.755201	-0.839639
271.39	0.293822	0.34568			271.39	-0.752647	-0.840013
271.59	0.296468	0.347918			271.59	-0.750001	-0.837775
271.79	0.296438	0.349209			271.79	-0.750031	-0.836484
271.99	0.298938	0.349181			271.99	-0.747531	-0.836512
272.19	0.295205	0.350405			272.19	-0.751264	-0.835288
272.39	0.299864	0.351673			272.39	-0.746605	-0.83402
272.59	0.300165	0.353451			272.59	-0.746304	-0.832241
272.79	0.303332	0.349828			272.79	-0.743137	-0.835865
272.99	0.298873	0.353051			272.99	-0.747596	-0.832642
273.19	0.308291	0.355948			273.19	-0.738178	-0.829745
273.39	0.304943	0.357447			273.39	-0.741526	-0.828245
273.59	0.304229	0.35731			273.59	-0.74224	-0.828383
273.79	0.307119	0.358934			273.79	-0.73935	-0.826759
273.99	0.308233	0.360996			273.99	-0.738236	-0.824696
274.19	0.306759	0.363057			274.19	-0.73971	-0.822636
274.39	0.307018	0.365317			274.39	-0.739451	-0.820376
274.59	0.308431	0.364429			274.59	-0.738038	-0.821264
274.79	0.309979	0.36402			274.79	-0.73649	-0.821673
274.99	0.31266	0.36401			274.99	-0.733809	-0.821683
275.19	0.312397	0.366225			275.19	-0.734072	-0.819468
275.39	0.311851	0.363983			275.39	-0.734618	-0.82171
275.59	0.317081	0.367036			275.59	-0.729389	-0.818657
275.79	0.315152	0.368775			275.79	-0.731317	-0.816918
275.99	0.315575	0.375179			275.99	-0.730894	-0.810514
276.19	0.317871	0.370178			276.19	-0.728598	-0.815515
276.39	0.317167	0.373556			276.39	-0.729302	-0.812137
276.59	0.318261	0.370356			276.59	-0.728208	-0.815337
276.79	0.319391	0.372356			276.79	-0.727078	-0.813337
276.99	0.321714	0.374528			276.99	-0.724755	-0.811164
277.19	0.322885	0.376508			277.19	-0.723584	-0.809185
277.39	0.324781	0.376542			277.39	-0.721688	-0.809151
277.59	0.325594	0.377719			277.59	-0.720875	-0.807974
277.79	0.323752	0.377266			277.79	-0.722717	-0.808427
277.99	0.325565	0.381478			277.99	-0.720904	-0.804215
278.19	0.326162	0.380856			278.19	-0.720307	-0.804837
278.39	0.327901	0.384453			278.39	-0.718568	-0.80124
278.59	0.328539	0.38048			278.59	-0.71793	-0.805213
278.79	0.332315	0.385541			278.79	-0.714154	-0.800152
278.99	0.331357	0.385615			278.99	-0.715112	-0.800078
279.19	0.329154	0.390699			279.19	-0.717315	-0.794994
279.39	0.332497	0.385375			279.39	-0.713972	-0.800318
279.59	0.337734	0.38911			279.59	-0.708735	-0.796583
279.79	0.331918	0.390121			279.79	-0.714551	-0.795572
279.99	0.336207	0.390552			279.99	-0.710262	-0.795141
280.19	0.33608	0.391088			280.19	-0.710389	-0.794605
280.39	0.339116	0.39072			280.39	-0.707353	-0.794973
280.59	0.336439	0.389654			280.59	-0.71003	-0.796039
280.79	0.338674	0.391067			280.79	-0.707795	-0.794626
280.99	0.342479	0.393166			280.99	-0.70399	-0.792527
281.19	0.34099	0.397099			281.19	-0.705479	-0.788594
281.39	0.343324	0.397576			281.39	-0.703145	-0.788117
281.59	0.346541	0.39926			281.59	-0.699928	-0.786433
281.79	0.346929	0.398969			281.79	-0.69954	-0.786724
281.99	0.347234	0.400342			281.99	-0.699235	-0.785351
282.19	0.347389	0.399608			282.19	-0.69908	-0.786085
282.39	0.345571	0.402819			282.39	-0.700898	-0.782874
282.59	0.350178	0.401497			282.59	-0.696291	-0.784196
282.79	0.35152	0.402256			282.79	-0.694949	-0.783437
282.99	0.350673	0.403904			282.99	-0.695796	-0.781788
283.19	0.348041	0.40747			283.19	-0.698429	-0.778223
283.39	0.352852	0.408576			283.39	-0.693617	-0.777117
283.59	0.351806	0.406877			283.59	-0.694663	-0.778816
283.79	0.356992	0.407755			283.79	-0.689477	-0.777937
283.99	0.355287	0.407287			283.99	-0.691182	-0.778406
284.19	0.358793	0.4109			284.19	-0.687676	-0.774793
284.39	0.356764	0.414043			284.39	-0.689705	-0.77165
284.59	0.358767	0.411562			284.59	-0.687702	-0.774131
284.79	0.358997	0.414631			284.79	-0.687473	-0.771062
284.99	0.361801	0.417505			284.99	-0.684669	-0.768188
285.19	0.359894	0.416253			285.19	-0.686575	-0.76944
285.39	0.364349	0.416812			285.39	-0.68212	-0.76888
285.59	0.360449	0.417835			285.59	-0.68602	-0.767858
285.79	0.360595	0.41986			285.79	-0.685874	-0.765833
285.99	0.363518	0.420293			285.99	-0.682951	-0.7654
286.19	0.365238	0.420843			286.19	-0.681231	-0.76485
286.39	0.367087	0.420763			286.39	-0.679382	-0.76493
286.59	0.365825	0.419203			286.59	-0.680644	-0.76649
286.79	0.368505	0.423202			286.79	-0.677964	-0.762491
286.99	0.367555	0.42711			286.99	-0.678914	-0.758583
287.19	0.369447	0.428699			287.19	-0.677022	-0.756994
287.39	0.37075	0.428176			287.39	-0.675719	-0.757517
287.59	0.370269	0.430195			287.59	-0.6762	-0.755498
287.79	0.372096	0.428083			287.79	-0.674373	-0.75761
287.99	0.374321	0.432475			287.99	-0.672148	-0.753218
288.19	0.375355	0.43256			288.19	-0.671114	-0.753133
288.39	0.374418	0.432488			288.39	-0.672052	-0.753205
288.59	0.373039	0.428943			288.59	-0.673431	-0.75675
288.79	0.378657	0.435345			288.79	-0.667812	-0.750348
288.99	0.377738	0.438347			288.99	-0.668731	-0.747346
289.19	0.382609	0.437522			289.19	-0.66386	-0.748171
289.39	0.380934	0.437822			289.39	-0.665536	-0.747871
289.59	0.383391	0.438048			289.59	-0.663078	-0.747645
289.8	0.412419	0.467999			289.8	-0.63405	-0.717694
289.99	0.414681	0.471686			289.99	-0.631788	-0.714007
290.19	0.416986	0.473208			290.19	-0.629483	-0.712485
290.39	0.414809	0.470791			290.39	-0.63166	-0.714902
290.59	0.414005	0.471882			290.59	-0.632464	-0.713811
290.79	0.414389	0.469056			290.79	-0.63208	-0.716637
290.99	0.416457	0.472137			290.99	-0.630012	-0.713556
291.19	0.415764	0.470841			291.19	-0.630705	-0.714852
291.39	0.416417	0.473892			291.39	-0.630052	-0.711801
291.59	0.415705	0.472615			291.59	-0.630765	-0.713078
291.79	0.41772	0.472308			291.79	-0.628749	-0.713385
291.99	0.416871	0.475042			291.99	-0.629598	-0.710651
292.19	0.417375	0.47473			292.19	-0.629095	-0.710963
292.39	0.417161	0.473949			292.39	-0.629308	-0.711744
292.59	0.414241	0.47497			292.59	-0.632228	-0.710723
292.79	0.417675	0.474483			292.79	-0.628794	-0.711209
292.99	0.418076	0.474503			292.99	-0.628393	-0.71119
293.19	0.420299	0.476833			293.19	-0.62617	-0.70886
293.39	0.423649	0.480016			293.39	-0.62282	-0.705677
293.59	0.421318	0.476428			293.59	-0.625151	-0.709265
293.79	0.419301	0.476119			293.79	-0.627168	-0.709574
293.99	0.421069	0.478014			293.99	-0.6254	-0.707679
294.19	0.423371	0.476067			294.19	-0.623098	-0.709626
294.39	0.422964	0.477923			294.39	-0.623505	-0.70777
294.59	0.420138	0.47751			294.59	-0.626331	-0.708182
294.79	0.423244	0.474404			294.79	-0.623225	-0.711289
294.99	0.420866	0.473198			294.99	-0.625603	-0.712495
295.19	0.420158	0.478875			295.19	-0.626311	-0.706818
295.39	0.421561	0.479232			295.39	-0.624908	-0.706461
295.59	0.424839	0.484379			295.59	-0.62163	-0.701314
295.79	0.422405	0.480076			295.79	-0.624064	-0.705616
295.99	0.42369	0.482034			295.99	-0.622779	-0.703659
296.19	0.424573	0.481013			296.19	-0.621896	-0.70468
296.39	0.42527	0.482629			296.39	-0.621199	-0.703064
296.59	0.425211	0.48202			296.59	-0.621258	-0.703673
296.79	0.428165	0.485493			296.79	-0.618304	-0.7002
296.99	0.427919	0.48545			296.99	-0.61855	-0.700243
297.19	0.428695	0.478785			297.19	-0.617774	-0.706908
297.39	0.428794	0.484713			297.39	-0.617675	-0.70098
297.59	0.429882	0.485241			297.59	-0.616587	-0.700452
297.79	0.425465	0.485832			297.79	-0.621004	-0.699861
297.99	0.430941	0.487061			297.99	-0.615528	-0.698632
298.19	0.431574	0.48753			298.19	-0.614895	-0.698163
298.39	0.431779	0.487769			298.39	-0.61469	-0.697923
298.59	0.428478	0.485346			298.59	-0.617991	-0.700347
298.79	0.432355	0.485948			298.79	-0.614114	-0.699745
298.99	0.428721	0.487389			298.99	-0.617748	-0.698304
299.19	0.434728	0.487014			299.19	-0.611741	-0.698679
299.39	0.430405	0.49011			299.39	-0.616064	-0.695583
299.59	0.4341	0.491162			299.59	-0.612369	-0.694531
299.79	0.43573	0.485929			299.79	-0.610739	-0.699764
299.99	0.432966	0.492591			299.99	-0.613503	-0.693102
300.19	0.434515	0.495293			300.19	-0.611954	-0.6904
300.39	0.435271	0.491227			300.39	-0.611198	-0.694466
300.59	0.433788	0.494514			300.59	-0.612681	-0.691179
300.79	0.43814	0.492786			300.79	-0.608329	-0.692907
300.99	0.437941	0.494247			300.99	-0.608528	-0.691446
301.19	0.438572	0.491756			301.19	-0.607897	-0.693937
301.39	0.438245	0.49729			301.39	-0.608224	-0.688403
301.59	0.438737	0.498495			301.59	-0.607732	-0.687198
301.79	0.439611	0.499352			301.79	-0.606858	-0.686341
301.99	0.4397	0.496935			301.99	-0.606769	-0.688757
302.19	0.43922	0.495829			302.19	-0.607249	-0.689863
302.39	0.440195	0.496073			302.39	-0.606274	-0.689619
302.59	0.439042	0.497102			302.59	-0.607427	-0.68859
302.79	0.444017	0.500812			302.79	-0.602452	-0.684881
302.99	0.441656	0.503898			302.99	-0.604814	-0.681795
303.19	0.44059	0.499003			303.19	-0.605879	-0.68669
303.39	0.443341	0.499054			303.39	-0.603129	-0.686639
303.59	0.442448	0.501995			303.59	-0.604022	-0.683698
303.79	0.443031	0.498713			303.79	-0.603438	-0.68698
303.99	0.440029	0.5002			303.99	-0.60644	-0.685493
304.19	0.441528	0.500187			304.19	-0.604942	-0.685506
304.39	0.444049	0.506018			304.39	-0.60242	-0.679675
304.59	0.444133	0.503856			304.59	-0.602336	-0.681837
304.79	0.444565	0.503141			304.79	-0.601904	-0.682552
304.99	0.444218	0.502342			304.99	-0.602252	-0.683351
305.19	0.446417	0.505691			305.19	-0.600052	-0.680001
305.39	0.443494	0.504862			305.39	-0.602975	-0.68083
305.59	0.448227	0.50298			305.59	-0.598242	-0.682713
305.79	0.445701	0.499306			305.79	-0.600768	-0.686387
305.99	0.447485	0.50022			305.99	-0.598984	-0.685473
306.19	0.446927	0.503221			306.19	-0.599542	-0.682472
306.39	0.448987	0.503263			306.39	-0.597482	-0.68243
306.59	0.450115	0.504085			306.59	-0.596354	-0.681608
306.8	0.453349	0.501914			306.8	-0.59312	-0.683779
306.99	0.450448	0.50742			306.99	-0.596021	-0.678273
307.19	0.446401	0.507636			307.19	-0.600068	-0.678057
307.39	0.450158	0.507614			307.39	-0.596311	-0.678079
307.59	0.449459	0.505144			307.59	-0.59701	-0.680549
307.79	0.450244	0.505227			307.79	-0.596225	-0.680466
307.99	0.455135	0.506727			307.99	-0.591334	-0.678966
308.19	0.45183	0.510194			308.19	-0.594639	-0.675499
308.39	0.449085	0.507283			308.39	-0.597385	-0.67841
308.59	0.451088	0.509502			308.59	-0.595381	-0.676191
308.79	0.450612	0.509522			308.79	-0.595857	-0.676171
308.99	0.44903	0.507043			308.99	-0.597439	-0.67865
309.19	0.451774	0.507745			309.19	-0.594695	-0.677948
309.39	0.449765	0.506471			309.39	-0.596704	-0.679222
309.59	0.452788	0.507866			309.59	-0.593682	-0.677827
309.79	0.451703	0.50905			309.79	-0.594766	-0.676643
309.99	0.452663	0.505834			309.99	-0.593806	-0.679859
310.19	0.450648	0.509289			310.19	-0.595821	-0.676404
310.39	0.450576	0.507863			310.39	-0.595893	-0.67783
310.6	0.450225	0.508954			310.6	-0.596244	-0.676739
310.79	0.450552	0.507918			310.79	-0.595917	-0.677775
310.99	0.450784	0.508312			310.99	-0.595685	-0.677381
311.19	0.454188	0.507413			311.19	-0.592281	-0.67828
311.39	0.452196	0.510478			311.39	-0.594273	-0.675215
311.59	0.450337	0.506332			311.59	-0.596132	-0.679361
311.79	0.45364	0.508346			311.79	-0.592829	-0.677347
311.99	0.450686	0.509384			311.99	-0.595784	-0.676309
312.19	0.452448	0.515507			312.19	-0.594021	-0.670186
312.39	0.452725	0.510959			312.39	-0.593744	-0.674734
312.59	0.454434	0.508237			312.59	-0.592035	-0.677456
312.79	0.455676	0.513311			312.79	-0.590793	-0.672382
312.99	0.452725	0.50885			312.99	-0.593744	-0.676842
313.19	0.454626	0.509822			313.19	-0.591843	-0.675871
313.39	0.456352	0.510262			313.39	-0.590117	-0.675431
313.59	0.45381	0.512083			313.59	-0.592659	-0.67361
313.79	0.452958	0.511053			313.79	-0.593511	-0.67464
313.99	0.451447	0.512895			313.99	-0.595022	-0.672798
314.19	0.454575	0.509724			314.19	-0.591894	-0.675969
314.39	0.454033	0.512596			314.39	-0.592436	-0.673097
314.6	0.452035	0.510992			314.6	-0.594434	-0.674701
314.79	0.453534	0.512178			314.79	-0.592935	-0.673515
314.99	0.453489	0.509057			314.99	-0.592981	-0.676636
315.19	0.454087	0.51483			315.19	-0.592382	-0.670863
315.39	0.452995	0.508818			315.39	-0.593474	-0.676875
315.59	0.454224	0.512145			315.59	-0.592246	-0.673548
315.79	0.453094	0.511315			315.79	-0.593375	-0.674378
315.99	0.455784	0.511221			315.99	-0.590685	-0.674472
316.19	0.455626	0.51106			316.19	-0.590843	-0.674633
316.39	0.452387	0.51295			316.39	-0.594082	-0.672743
316.59	0.452679	0.509546			316.59	-0.593791	-0.676147
316.79	0.452063	0.510761			316.79	-0.594406	-0.674932
316.99	0.451849	0.506204			316.99	-0.59462	-0.679489
317.19	0.455518	0.513314			317.19	-0.590951	-0.672379
317.39	0.45365	0.508379			317.39	-0.592819	-0.677314
317.59	0.453392	0.513112			317.59	-0.593077	-0.67258
317.79	0.455197	0.508112			317.79	-0.591272	-0.677581
317.99	0.457592	0.516641			317.99	-0.588877	-0.669052
318.19	0.454708	0.511076			318.19	-0.591761	-0.674617
318.39	0.455814	0.511721			318.39	-0.590655	-0.673971
318.59	0.454326	0.51058			318.59	-0.592143	-0.675113
318.79	0.455302	0.509754			318.79	-0.591167	-0.675939
318.99	0.455228	0.511563			318.99	-0.591241	-0.67413
319.19	0.460313	0.512384			319.19	-0.586156	-0.673309
319.39	0.452239	0.511616			319.39	-0.59423	-0.674077
319.59	0.452987	0.512248			319.59	-0.593482	-0.673445
319.79	0.450729	0.509936			319.79	-0.59574	-0.675757
319.99	0.453613	0.512151			319.99	-0.592857	-0.673542
320.19	0.45108	0.510595			320.19	-0.595389	-0.675098
320.39	0.453598	0.515055			320.39	-0.592871	-0.670638
320.59	0.455439	0.513166			320.59	-0.59103	-0.672527
320.79	0.450427	0.513963			320.79	-0.596043	-0.67173
320.99	0.452684	0.513406			320.99	-0.593785	-0.672287
321.19	0.454421	0.512693			321.19	-0.592048	-0.673
321.39	0.458213	0.512616			321.39	-0.588256	-0.673077
321.59	0.456201	0.509528			321.59	-0.590268	-0.676165
321.79	0.455975	0.516199			321.79	-0.590494	-0.669494
321.99	0.456113	0.511106			321.99	-0.590356	-0.674587
322.19	0.453902	0.515791			322.19	-0.592567	-0.669902
322.39	0.455851	0.516981			322.39	-0.590618	-0.668712
322.59	0.453693	0.512532			322.59	-0.592776	-0.673161
322.79	0.455162	0.509232			322.79	-0.591307	-0.676461
322.99	0.451606	0.511619			322.99	-0.594863	-0.674074
323.19	0.453035	0.515365			323.19	-0.593434	-0.670328
323.39	0.454408	0.511945			323.39	-0.592061	-0.673748
323.59	0.454104	0.510769			323.59	-0.592365	-0.674924
323.79	0.451457	0.508821			323.79	-0.595012	-0.676872
323.99	0.455003	0.510473			323.99	-0.591466	-0.67522
324.19	0.450814	0.511686			324.19	-0.595655	-0.674007
324.39	0.452458	0.515317			324.39	-0.594011	-0.670375
324.59	0.454367	0.513151			324.59	-0.592102	-0.672542
324.79	0.456097	0.511363			324.79	-0.590372	-0.67433
324.99	0.452762	0.511309			324.99	-0.593707	-0.674384
325.19	0.452168	0.515438			325.19	-0.594301	-0.670255
325.39	0.456257	0.517188			325.39	-0.590212	-0.668505
325.59	0.457726	0.512838			325.59	-0.588743	-0.672855
325.79	0.450445	0.5109			325.79	-0.596024	-0.674793
325.99	0.456166	0.511945			325.99	-0.590303	-0.673748
326.19	0.455835	0.514038			326.19	-0.590634	-0.671655
326.39	0.45899	0.513562			326.39	-0.587479	-0.672131
326.59	0.452516	0.512473			326.59	-0.593953	-0.67322
326.79	0.455156	0.513048			326.79	-0.591313	-0.672644
326.99	0.457979	0.514028			326.99	-0.58849	-0.671665
327.19	0.454572	0.513576			327.19	-0.591897	-0.672117
327.39	0.453945	0.512791			327.39	-0.592524	-0.672902
327.59	0.45541	0.5143			327.59	-0.591059	-0.671393
327.79	0.455122	0.508498			327.79	-0.591347	-0.677195
327.99	0.452994	0.509902			327.99	-0.593475	-0.675791
328.19	0.457157	0.514213			328.19	-0.589312	-0.67148
328.39	0.455863	0.511942			328.39	-0.590606	-0.673751
328.59	0.454195	0.512837			328.59	-0.592274	-0.672856
328.79	0.451115	0.513326			328.79	-0.595354	-0.672367
328.99	0.458212	0.515668			328.99	-0.588257	-0.670025
329.19	0.454217	0.511273			329.19	-0.592252	-0.67442
329.39	0.455674	0.513496			329.39	-0.590795	-0.672197
329.59	0.454051	0.512457			329.59	-0.592418	-0.673236
329.79	0.454459	0.512712			329.79	-0.59201	-0.672981
329.99	0.453498	0.51166			329.99	-0.592971	-0.674033
330.19	0.453405	0.511835			330.19	-0.593064	-0.673858
330.39	0.455811	0.512755			330.39	-0.590658	-0.672938
330.59	0.45681	0.51106			330.59	-0.589659	-0.674633
330.79	0.459467	0.515395			330.79	-0.587002	-0.670298
330.99	0.455022	0.512994			330.99	-0.591448	-0.672699
331.19	0.457241	0.515262			331.19	-0.589228	-0.670431
331.39	0.456857	0.512166			331.39	-0.589612	-0.673527
331.59	0.456587	0.5157			331.59	-0.589882	-0.669993
331.79	0.455998	0.512409			331.79	-0.590471	-0.673284
331.99	0.459332	0.514991			331.99	-0.587137	-0.670702
332.19	0.454761	0.513664			332.19	-0.591708	-0.672029
332.39	0.451986	0.514595			332.39	-0.594483	-0.671098
332.59	0.455127	0.511125			332.59	-0.591342	-0.674567
332.79	0.452753	0.512805			332.79	-0.593716	-0.672888
332.99	0.454658	0.512284			332.99	-0.591811	-0.673409
333.19	0.456321	0.514411			333.19	-0.590148	-0.671281
333.39	0.455402	0.513439			333.39	-0.591067	-0.672254
333.59	0.453713	0.514207			333.59	-0.592756	-0.671486
333.79	0.454407	0.512265			333.79	-0.592062	-0.673428
333.99	0.455662	0.514751			333.99	-0.590807	-0.670942
334.19	0.455314	0.513805			334.19	-0.591155	-0.671887
334.39	0.457578	0.514467			334.39	-0.588891	-0.671226
334.59	0.453318	0.512232			334.59	-0.593151	-0.673461
334.79	0.454002	0.511735			334.79	-0.592467	-0.673958
334.99	0.456597	0.514233			334.99	-0.589872	-0.67146
335.19	0.456253	0.516007			335.19	-0.590216	-0.669686
335.39	0.453477	0.512819			335.39	-0.592992	-0.672874
335.59	0.454024	0.515055			335.59	-0.592445	-0.670638
335.79	0.45451	0.513774			335.79	-0.591959	-0.671919
335.99	0.45505	0.510333			335.99	-0.591419	-0.67536
336.19	0.45776	0.514186			336.19	-0.588709	-0.671507
336.39	0.455128	0.516539			336.39	-0.591341	-0.669154
336.59	0.456666	0.511589			336.59	-0.589803	-0.674104
336.79	0.45405	0.508121			336.79	-0.592419	-0.677572
336.99	0.454856	0.513025			336.99	-0.591613	-0.672668
337.19	0.4589	0.511656			337.19	-0.587569	-0.674037
337.39	0.455317	0.514347			337.39	-0.591152	-0.671346
337.59	0.458207	0.515141			337.59	-0.588262	-0.670552
337.79	0.454368	0.515065			337.79	-0.592102	-0.670628
337.99	0.45369	0.51382			337.99	-0.592779	-0.671873
338.19	0.457418	0.513112			338.19	-0.589051	-0.672581
338.39	0.458094	0.513519			338.39	-0.588375	-0.672174
338.59	0.457425	0.514968			338.59	-0.589044	-0.670725
338.79	0.457632	0.512656			338.79	-0.588837	-0.673037
338.99	0.457023	0.515276			338.99	-0.589446	-0.670417
339.19	0.452412	0.512495			339.19	-0.594057	-0.673198
339.39	0.456324	0.513103			339.39	-0.590145	-0.67259
339.59	0.457688	0.513999			339.59	-0.588781	-0.671694
339.79	0.455045	0.514976			339.79	-0.591424	-0.670717
339.99	0.457624	0.512676			339.99	-0.588845	-0.673017
340.19	0.457745	0.51423			340.19	-0.588724	-0.671463
340.39	0.45221	0.513578			340.39	-0.594259	-0.672115
340.59	0.453771	0.513472			340.59	-0.592698	-0.672221
340.79	0.452671	0.514558			340.79	-0.593798	-0.671134
340.99	0.456751	0.512474			340.99	-0.589718	-0.673219
341.19	0.455853	0.513055			341.19	-0.590616	-0.672638
341.39	0.456218	0.511486			341.39	-0.590251	-0.674207
341.59	0.459021	0.513083			341.59	-0.587449	-0.67261
341.79	0.457	0.512669			341.79	-0.589469	-0.673024
341.99	0.455334	0.513365			341.99	-0.591135	-0.672328
342.19	0.456591	0.515798			342.19	-0.589878	-0.669895
342.39	0.45462	0.513238			342.39	-0.591849	-0.672455
342.59	0.453647	0.515065			342.59	-0.592822	-0.670627
342.79	0.453875	0.516274			342.79	-0.592595	-0.669419
342.99	0.453494	0.516098			342.99	-0.592975	-0.669595
343.19	0.455643	0.513875			343.19	-0.590826	-0.671818
343.39	0.45865	0.514562			343.39	-0.587819	-0.671131
343.59	0.456276	0.51247			343.59	-0.590194	-0.673223
343.79	0.453547	0.51257			343.79	-0.592922	-0.673122
343.99	0.456327	0.513184			343.99	-0.590142	-0.672509
344.19	0.451731	0.51275			344.19	-0.594738	-0.672943
344.39	0.450869	0.515282			344.39	-0.5956	-0.670411
344.59	0.459122	0.512935			344.59	-0.587348	-0.672758
344.79	0.455202	0.511956			344.79	-0.591267	-0.673737
344.99	0.45577	0.512034			344.99	-0.590699	-0.673659
345.19	0.454374	0.51529			345.19	-0.592095	-0.670403
345.39	0.453498	0.515409			345.39	-0.592972	-0.670284
345.59	0.456829	0.513817			345.59	-0.58964	-0.671876
345.79	0.45429	0.513055			345.79	-0.592179	-0.672638
345.99	0.453672	0.515715			345.99	-0.592798	-0.669977
346.19	0.457978	0.513441			346.19	-0.588492	-0.672252
346.39	0.456301	0.513348			346.39	-0.590168	-0.672344
346.59	0.457011	0.514494			346.59	-0.589458	-0.671198
346.79	0.456341	0.5138			346.79	-0.590128	-0.671893
346.99	0.458626	0.514645			346.99	-0.587843	-0.671048
347.19	0.454466	0.515276			347.19	-0.592003	-0.670417
347.39	0.454099	0.51291			347.39	-0.59237	-0.672783
347.59	0.452744	0.514834			347.59	-0.593725	-0.670859
347.79	0.454685	0.513944			347.79	-0.591784	-0.671749
347.99	0.454973	0.517179			347.99	-0.591496	-0.668514
348.19	0.456749	0.5131			348.19	-0.58972	-0.672593
348.39	0.453773	0.509637			348.39	-0.592696	-0.676056
348.59	0.45602	0.513631			348.59	-0.590449	-0.672062
348.79	0.453923	0.513587			348.79	-0.592546	-0.672106
348.99	0.453316	0.5119			348.99	-0.593153	-0.673793
349.19	0.454169	0.513297			349.19	-0.5923	-0.672396
349.39	0.452844	0.511869			349.39	-0.593625	-0.673824
349.59	0.454406	0.513711			349.59	-0.592063	-0.671982
349.8	0.453889	0.514436			349.8	-0.59258	-0.671257
349.99	0.447338	0.510405			349.99	-0.599131	-0.675287
350.19	0.447447	0.511324			350.19	-0.599022	-0.674369
350.39	0.450534	0.508182			350.39	-0.595935	-0.677511
350.59	0.448373	0.50709			350.59	-0.598096	-0.678603
350.79	0.4476	0.508388			350.79	-0.598869	-0.677305
350.99	0.45039	0.50857			350.99	-0.596079	-0.677123
351.19	0.450865	0.507736			351.19	-0.595604	-0.677957
351.39	0.446174	0.507189			351.39	-0.600295	-0.678504
351.59	0.451182	0.504031			351.59	-0.595287	-0.681662
351.79	0.447982	0.510923			351.79	-0.598488	-0.67477
351.99	0.446697	0.506901			351.99	-0.599772	-0.678792
352.19	0.446399	0.507181			352.19	-0.60007	-0.678512
352.39	0.448997	0.508627			352.39	-0.597472	-0.677066
352.59	0.448062	0.508298			352.59	-0.598407	-0.677395
352.79	0.446401	0.508411			352.79	-0.600068	-0.677282
352.99	0.449515	0.504694			352.99	-0.596954	-0.680999
353.19	0.447778	0.506286			353.19	-0.598691	-0.679407
353.39	0.448754	0.507057			353.39	-0.597715	-0.678636
353.59	0.446769	0.506686			353.59	-0.5997	-0.679007
353.79	0.447212	0.508256			353.79	-0.599257	-0.677437
353.99	0.447722	0.506392			353.99	-0.598747	-0.679301
354.19	0.447775	0.506638			354.19	-0.598694	-0.679055
354.39	0.451842	0.506132			354.39	-0.594627	-0.679561
354.59	0.451173	0.510928			354.59	-0.595296	-0.674765
354.79	0.449717	0.508656			354.79	-0.596752	-0.677037
354.99	0.450675	0.508121			354.99	-0.595794	-0.677572
355.19	0.453085	0.505759			355.19	-0.593384	-0.679934
355.39	0.449743	0.509768			355.39	-0.596726	-0.675925
355.59	0.452282	0.513217			355.59	-0.594187	-0.672476
355.79	0.452738	0.508002			355.79	-0.593731	-0.677691
355.99	0.451287	0.510736			355.99	-0.595182	-0.674957
356.19	0.454738	0.512906			356.19	-0.591731	-0.672787
356.39	0.452033	0.512024			356.39	-0.594436	-0.673669
356.59	0.453015	0.512321			356.59	-0.593454	-0.673372
356.79	0.45264	0.514233			356.79	-0.593829	-0.67146
356.99	0.453674	0.513469			356.99	-0.592795	-0.672224
357.19	0.452484	0.513144			357.19	-0.593985	-0.672549
357.39	0.455615	0.511873			357.39	-0.590854	-0.67382
357.59	0.452587	0.51387			357.59	-0.593882	-0.671823
357.79	0.456089	0.51243			357.79	-0.59038	-0.673263
357.99	0.454442	0.513928			357.99	-0.592027	-0.671765
358.19	0.457222	0.516067			358.19	-0.589247	-0.669626
358.39	0.456786	0.512404			358.39	-0.589683	-0.673289
358.59	0.457859	0.514821			358.59	-0.58861	-0.670872
358.79	0.455256	0.513839			358.79	-0.591213	-0.671854
358.99	0.455184	0.51367			358.99	-0.591285	-0.672023
359.19	0.455497	0.514908			359.19	-0.590972	-0.670785
359.39	0.455589	0.516681			359.39	-0.590881	-0.669012
359.59	0.456769	0.514146			359.59	-0.5897	-0.671546
359.79	0.459777	0.517626			359.79	-0.586692	-0.668067
359.99	0.453515	0.514922			359.99	-0.592954	-0.670771
360.19	0.459767	0.517189			360.19	-0.586702	-0.668504
360.39	0.464007	0.51783			360.39	-0.582462	-0.667863
360.59	0.459989	0.515827			360.59	-0.58648	-0.669866
360.79	0.456901	0.518301			360.79	-0.589568	-0.667392
360.99	0.456073	0.517118			360.99	-0.590396	-0.668575
361.19	0.456043	0.520009			361.19	-0.590426	-0.665684
361.39	0.460174	0.518951			361.39	-0.586295	-0.666742
361.59	0.461454	0.518462			361.59	-0.585015	-0.667231
361.79	0.464179	0.521179			361.79	-0.58229	-0.664514
361.99	0.46122	0.519211			361.99	-0.585249	-0.666482
362.19	0.458242	0.519885			362.19	-0.588227	-0.665808
362.39	0.463602	0.516936			362.39	-0.582867	-0.668757
362.59	0.463012	0.523921			362.59	-0.583457	-0.661772
362.79	0.463582	0.520196			362.79	-0.582887	-0.665496
362.99	0.461804	0.521733			362.99	-0.584665	-0.663959
363.19	0.465106	0.520483			363.19	-0.581363	-0.66521
363.39	0.464721	0.521206			363.39	-0.581748	-0.664487
363.59	0.464539	0.521986			363.59	-0.58193	-0.663707
363.79	0.466911	0.520402			363.79	-0.579558	-0.665291
363.99	0.46485	0.524697			363.99	-0.581619	-0.660996
364.19	0.468494	0.525236			364.19	-0.577976	-0.660457
364.39	0.466097	0.526621			364.39	-0.580372	-0.659072
364.59	0.46751	0.521379			364.59	-0.578959	-0.664314
364.79	0.470183	0.52557			364.79	-0.576286	-0.660123
364.99	0.468946	0.52798			364.99	-0.577523	-0.657713
365.19	0.466536	0.526552			365.19	-0.579933	-0.659141
365.39	0.47103	0.525298			365.39	-0.575439	-0.660395
365.59	0.468338	0.527567			365.59	-0.578131	-0.658126
365.79	0.471551	0.526701			365.79	-0.574919	-0.658992
365.99	0.467098	0.528806			365.99	-0.579371	-0.656887
366.19	0.469643	0.529597			366.19	-0.576826	-0.656096
366.39	0.470469	0.530637			366.39	-0.576	-0.655055
366.59	0.469942	0.529577			366.59	-0.576527	-0.656116
366.79	0.470014	0.530886			366.79	-0.576455	-0.654807
366.99	0.471397	0.533077			366.99	-0.575072	-0.652616
367.19	0.471032	0.53054			367.19	-0.575437	-0.655153
367.39	0.472727	0.531999			367.39	-0.573742	-0.653694
367.59	0.474496	0.533227			367.59	-0.571973	-0.652466
367.79	0.472381	0.531892			367.79	-0.574088	-0.653801
367.99	0.474664	0.531507			367.99	-0.571805	-0.654186
368.19	0.473145	0.531859			368.19	-0.573324	-0.653834
368.39	0.47706	0.53433			368.39	-0.569409	-0.651363
368.59	0.475727	0.534192			368.59	-0.570742	-0.651501
368.79	0.477357	0.534833			368.79	-0.569112	-0.65086
368.99	0.475569	0.533345			368.99	-0.5709	-0.652348
369.19	0.474225	0.53159			369.19	-0.572244	-0.654103
369.39	0.477508	0.536332			369.39	-0.568961	-0.649361
369.59	0.474578	0.53661			369.59	-0.571891	-0.649083
369.79	0.476693	0.538152			369.79	-0.569776	-0.647541
369.99	0.478454	0.536933			369.99	-0.568015	-0.64876
370.19	0.480188	0.535874			370.19	-0.566282	-0.649819
370.39	0.479132	0.536044			370.39	-0.567337	-0.649649
370.59	0.482386	0.538497			370.59	-0.564084	-0.647196
370.79	0.478765	0.542495			370.79	-0.567704	-0.643198
370.99	0.481463	0.535716			370.99	-0.565006	-0.649977
371.19	0.484261	0.537976			371.19	-0.562208	-0.647717
371.39	0.480126	0.540379			371.39	-0.566343	-0.645314
371.59	0.484093	0.542105			371.59	-0.562376	-0.643588
371.79	0.484398	0.535111			371.79	-0.562071	-0.650582
371.99	0.484416	0.54025			371.99	-0.562053	-0.645443
372.19	0.484652	0.540469			372.19	-0.561817	-0.645223
372.39	0.481937	0.544147			372.39	-0.564532	-0.641546
372.59	0.486132	0.544181			372.59	-0.560337	-0.641512
372.79	0.486435	0.542298			372.79	-0.560034	-0.643395
372.99	0.485577	0.54424			372.99	-0.560892	-0.641453
373.19	0.49015	0.541286			373.19	-0.55632	-0.644407
373.39	0.48712	0.542261			373.39	-0.559349	-0.643432
373.59	0.486735	0.544739			373.59	-0.559734	-0.640953
373.79	0.489439	0.547959			373.79	-0.55703	-0.637734
373.99	0.485754	0.54487			373.99	-0.560715	-0.640823
374.19	0.488697	0.547296			374.19	-0.557772	-0.638397
374.39	0.489573	0.548937			374.39	-0.556896	-0.636756
374.59	0.488709	0.547403			374.59	-0.55776	-0.63829
374.79	0.491211	0.548017			374.79	-0.555258	-0.637676
374.99	0.488543	0.550047			374.99	-0.557926	-0.635646
375.19	0.490476	0.551357			375.19	-0.555993	-0.634336
375.39	0.489412	0.550236			375.39	-0.557057	-0.635457
375.59	0.492916	0.548899			375.59	-0.553553	-0.636794
375.79	0.48823	0.550224			375.79	-0.558239	-0.635469
375.99	0.492734	0.54865			375.99	-0.553735	-0.637043
376.19	0.494382	0.552545			376.19	-0.552087	-0.633148
376.39	0.493865	0.551341			376.39	-0.552605	-0.634352
376.59	0.496643	0.551737			376.59	-0.549826	-0.633956
376.79	0.491721	0.552055			376.79	-0.554748	-0.633638
376.99	0.495694	0.556842			376.99	-0.550776	-0.628851
377.19	0.497687	0.554236			377.19	-0.548782	-0.631457
377.39	0.49539	0.554149			377.39	-0.551079	-0.631544
377.59	0.497006	0.556707			377.59	-0.549463	-0.628986
377.79	0.498011	0.557805			377.79	-0.548458	-0.627888
377.99	0.495904	0.559484			377.99	-0.550565	-0.626209
378.19	0.498655	0.556536			378.19	-0.547814	-0.629157
378.39	0.501003	0.555988			378.39	-0.545466	-0.629705
378.59	0.498978	0.556733			378.59	-0.547491	-0.62896
378.79	0.498899	0.560047			378.79	-0.54757	-0.625646
378.99	0.499192	0.557923			378.99	-0.547277	-0.62777
379.19	0.503404	0.562095			379.19	-0.543065	-0.623598
379.39	0.504632	0.55894			379.39	-0.541837	-0.626753
379.59	0.501946	0.559521			379.59	-0.544523	-0.626172
379.79	0.502144	0.56143			379.79	-0.544325	-0.624263
379.99	0.504187	0.559579			379.99	-0.542282	-0.626114
380.19	0.501671	0.561248			380.19	-0.544798	-0.624445
380.39	0.504423	0.561402			380.39	-0.542046	-0.624291
380.59	0.503588	0.561383			380.59	-0.542881	-0.62431
380.79	0.505997	0.558807			380.79	-0.540472	-0.626886
380.99	0.507839	0.562276			380.99	-0.53863	-0.623417
381.19	0.508257	0.564787			381.19	-0.538212	-0.620906
381.39	0.502432	0.561203			381.39	-0.544037	-0.62449
381.59	0.5075	0.568034			381.59	-0.538969	-0.617659
381.79	0.508765	0.564753			381.79	-0.537704	-0.62094
381.99	0.507424	0.566339			381.99	-0.539045	-0.619354
382.19	0.510625	0.567724			382.19	-0.535844	-0.617969
382.39	0.509664	0.568079			382.39	-0.536805	-0.617614
382.59	0.512256	0.569665			382.59	-0.534213	-0.616028
382.79	0.511939	0.567382			382.79	-0.53453	-0.618311
382.99	0.509706	0.565655			382.99	-0.536764	-0.620038
383.19	0.509522	0.571466			383.19	-0.536947	-0.614227
383.39	0.51354	0.571195			383.39	-0.532929	-0.614498
383.59	0.511716	0.569616			383.59	-0.534753	-0.616077
383.79	0.51292	0.570539			383.79	-0.533549	-0.615154
383.99	0.517192	0.573345			383.99	-0.529277	-0.612348
384.19	0.512751	0.573576			384.19	-0.533718	-0.612117
384.39	0.515089	0.574001			384.39	-0.53138	-0.611692
384.59	0.514532	0.57674			384.59	-0.531937	-0.608953
384.79	0.514841	0.573938			384.79	-0.531628	-0.611755
384.99	0.518125	0.571111			384.99	-0.528344	-0.614582
385.19	0.518185	0.572377			385.19	-0.528284	-0.613316
385.39	0.521239	0.575833			385.39	-0.52523	-0.60986
385.59	0.516457	0.576428			385.59	-0.530012	-0.609264
385.79	0.517795	0.575772			385.79	-0.528674	-0.609921
385.99	0.520829	0.578859			385.99	-0.52564	-0.606834
386.19	0.52146	0.583185			386.19	-0.525009	-0.602507
386.39	0.517563	0.577955			386.39	-0.528907	-0.607738
386.59	0.52056	0.579508			386.59	-0.525909	-0.606185
386.79	0.520848	0.577399			386.79	-0.525622	-0.608294
386.99	0.520485	0.579391			386.99	-0.525985	-0.606302
387.19	0.52608	0.581139			387.19	-0.52039	-0.604554
387.39	0.523309	0.580247			387.39	-0.52316	-0.605446
387.59	0.52405	0.582283			387.59	-0.522419	-0.60341
387.79	0.524691	0.583864			387.79	-0.521779	-0.601829
387.99	0.523343	0.581705			387.99	-0.523126	-0.603988
388.19	0.522449	0.585328			388.19	-0.52402	-0.600365
388.39	0.52759	0.583729			388.39	-0.518879	-0.601964
388.59	0.526368	0.58581			388.59	-0.520101	-0.599883
388.79	0.528568	0.582019			388.79	-0.517901	-0.603674
388.99	0.527457	0.582787			388.99	-0.519012	-0.602906
389.19	0.525874	0.588171			389.19	-0.520595	-0.597522
389.39	0.527055	0.58314			389.39	-0.519414	-0.602553
389.59	0.531898	0.586195			389.59	-0.514571	-0.599498
389.79	0.529594	0.586346			389.79	-0.516875	-0.599346
389.99	0.529121	0.590966			389.99	-0.517348	-0.594727
390.19	0.528947	0.585338			390.19	-0.517522	-0.600354
390.39	0.531152	0.589455			390.39	-0.515317	-0.596238
390.59	0.532822	0.588982			390.59	-0.513647	-0.596711
390.79	0.531687	0.591221			390.79	-0.514782	-0.594472
390.99	0.531025	0.588024			390.99	-0.515444	-0.597668
391.19	0.535934	0.592548			391.19	-0.510535	-0.593145
391.39	0.536498	0.59047			391.39	-0.509971	-0.595223
391.59	0.528942	0.589209			391.59	-0.517527	-0.596484
391.79	0.532729	0.591018			391.79	-0.51374	-0.594675
391.99	0.533857	0.59504			391.99	-0.512613	-0.590653
392.19	0.534667	0.594725			392.19	-0.511802	-0.590968
392.39	0.53806	0.593988			392.39	-0.508409	-0.591705
392.59	0.53395	0.596017			392.59	-0.512519	-0.589676
392.79	0.532744	0.596734			392.79	-0.513725	-0.588959
392.99	0.536606	0.595145			392.99	-0.509863	-0.590548
393.19	0.540112	0.593367			393.19	-0.506357	-0.592326
393.39	0.535557	0.595065			393.39	-0.510913	-0.590628
393.59	0.540332	0.598441			393.59	-0.506137	-0.587252
393.79	0.538856	0.599492			393.79	-0.507613	-0.586201
393.99	0.542975	0.60011			393.99	-0.503494	-0.585583
394.19	0.543151	0.598347			394.19	-0.503318	-0.587346
394.39	0.542858	0.598693			394.39	-0.503611	-0.587
394.59	0.542166	0.601908			394.59	-0.504303	-0.583785
394.79	0.542595	0.60211			394.79	-0.503874	-0.583583
394.99	0.544556	0.601767			394.99	-0.501913	-0.583926
395.19	0.546534	0.600157			395.19	-0.499935	-0.585536
395.39	0.545244	0.603567			395.39	-0.501225	-0.582126
395.59	0.543616	0.604507			395.59	-0.502853	-0.581186
395.79	0.545977	0.603421			395.79	-0.500493	-0.582272
395.99	0.544933	0.607634			395.99	-0.501536	-0.578059
396.19	0.547046	0.599534			396.19	-0.499424	-0.586159
396.39	0.546017	0.605847			396.39	-0.500452	-0.579846
396.59	0.548821	0.606772			396.59	-0.497648	-0.578921
396.79	0.54831	0.607888			396.79	-0.498159	-0.577805
396.99	0.547015	0.608245			396.99	-0.499455	-0.577448
397.19	0.552973	0.608855			397.19	-0.493496	-0.576838
397.39	0.546933	0.611327			397.39	-0.499536	-0.574366
397.59	0.551877	0.60838			397.59	-0.494592	-0.577313
397.79	0.552601	0.608787			397.79	-0.493868	-0.576906
397.99	0.547661	0.611073			397.99	-0.498808	-0.57462
398.19	0.554063	0.609986			398.19	-0.492406	-0.575707
398.39	0.553105	0.610698			398.39	-0.493365	-0.574995
398.59	0.555592	0.608647			398.59	-0.490877	-0.577046
398.79	0.554559	0.615631			398.79	-0.49191	-0.570062
398.99	0.556365	0.615174			398.99	-0.490104	-0.570519
399.19	0.555901	0.610253			399.19	-0.490568	-0.57544
399.39	0.555022	0.614799			399.39	-0.491447	-0.570894
399.59	0.556064	0.615878			399.59	-0.490405	-0.569815
[truncated: 24,250 more rows]

## Sheet: Rates_fit
Sorce data: Figure 5C
		One-phase decay model in Prism 8
				Dissociation
				DnaK	DnaK + Ca
		Exp_1	Dissociation (s-1)	0.006926	0.006356
			R2	0.9924	0.9963
		Exp_2	Dissociation (s-1)	0.007764	0.006857
			R2	0.9724	0.9751
		Exp_3	Dissociation (s-1)	0.005493	0.005252
			R2	0.9804	0.9847
				Mean	SD	N
			DnaK	0.00672767	0.00114842	3
			DnaK + Ca	0.006155	0.000821162	3
