# Supplementary material for: Calcium depletion challenges endoplasmic reticulum proteostasis by destabilising BiP-substrate complexes
Source: eLife. 2020 Dec 9;9:e62601. doi: 10.7554/eLife.62601 (PMC7758071; doi:10.7554/eLife.62601)
Supplement: Figure 6—source data 1. [file elife-62601-fig6-data1.xlsx]

## Sheet: Exp1
Sorce data: Figure 6C
	Raw fluorescence values
	BiP (2039)																	Hsp70 (2532)																	Hsc70 (2533)
	Sample ID	2039_0	2039_1	2039_2	2039_3	2039_4	2039_5	2039_6	2039_7	2039_8	2039_9	2039_10	2039_11	2039_12	2039_13	2039_14	2039_15	Sample ID	2532_0	2532_1	2532_2	2532_3	2532_4	2532_5	2532_6	2532_7	2532_8	2532_9	2532_10	2532_11	2532_12	2532_13	2532_14	2532_15	Sample ID	2533_0	2533_1	2533_2	2533_3	2533_4	2533_5	2533_6	2533_7	2533_8	2533_9	2533_10	2533_11	2533_12	2533_13
	[Ca2+] (µM)	19200	9600	4800	2400	1200	600	300	150	75	37.5	18.75	9.38	4.69	2.34	1.17	0.585	[Ca2+] (µM)	19200	9600	4800	2400	1200	600	300	150	75	37.5	18.75	9.38	4.69	2.34	1.17	0.585	[Ca2+] (µM)	19200	9600	4800	2400	1200	600	300	150	75	37.5	18.75	9.38	4.69	2.34
	Time (s)	FL	FL	FL	FL	FL	FL	FL	FL	FL	FL	FL	FL	FL	FL	FL	FL	Time (s)	FL	FL	FL	FL	FL	FL	FL	FL	FL	FL	FL	FL	FL	FL	FL	FL	Time (s)	FL	FL	FL	FL	FL	FL	FL	FL	FL	FL	FL	FL	FL	FL
	0	147.821	139.263	148.001	124.583	125.503	111.34	114.341	103.17	101.788	99.75	103.329	98.53	97.6368	95.5467	103.317	83.9925	0	114.96	112.186	116.561	97.7362	116.445	91.2577	100.785	86.6907	113.472	97.8975	100.539	91.0955	79.5327	100.536	89.8987	88.6917	0	128.263	115.883	128.112	124.35	123.054	110.035	112.62	100.794	114.931	115.679	99.8133	105.785	108.243	95.5213
	0.1	147.192	139.092	148.383	125.328	125.042	111.699	113.901	104.056	101.916	98.7871	102.683	98.2238	97.8741	94.8495	102.641	83.7329	0.1	115.172	112.484	116.876	97.4021	116.382	90.7373	101.868	86.4494	111.962	97.1343	99.6504	90.9259	79.1155	100.316	88.5619	89.2413	0.1	127.8	115.471	128.097	124.121	122.989	109.819	112.344	100.72	112.683	115.448	98.9248	104.661	107.11	95.7275
	0.2	146.668	138.906	148.855	125.822	124.946	111.54	113.824	104.687	101.883	98.3402	102.17	97.8313	98.3703	94.4499	102.879	83.7869	0.2	115.333	112.934	116.628	97.1364	115.824	90.1218	101.926	86.1098	110.543	96.5682	98.6853	90.8089	78.5577	99.9869	87.3254	88.9788	0.2	127.894	114.94	127.732	123.554	122.586	109.444	111.948	100.443	111.065	115.095	98.1402	103.544	106.081	95.4453
	0.3	146.545	138.607	148.898	126.399	124.985	111.273	114.001	105.342	101.539	98.154	101.973	97.0644	98.5556	94.1096	102.92	83.7083	0.3	115.719	113.275	115.975	97.0846	114.921	89.712	101.735	85.8426	109.722	95.5278	97.4093	90.481	77.9238	99.801	85.9182	88.3439	0.3	128.036	114.699	127.811	122.895	121.637	108.352	111.206	100.002	109.165	114.181	97.0584	102.567	104.649	94.8921
	0.4	146.631	138.157	148.411	126.892	125.557	110.935	114.083	105.531	101.406	98.4166	102.019	96.4697	98.5739	94.2906	103.321	83.8716	0.4	115.656	113.467	115.206	96.9611	114.341	89.842	100.713	85.4456	109.287	94.5257	96.298	89.5554	77.0427	99.171	84.676	87.5999	0.4	127.968	114.606	128.276	122.283	120.646	106.781	110.472	99.3412	108.249	112.842	96.1036	101.848	103.53	93.639
	0.5	147.134	137.814	147.539	127.05	126.031	110.91	113.608	105.474	101.103	98.5824	101.827	95.6364	98.4661	94.217	103.138	83.8678	0.5	115.643	113.142	115.018	96.761	114.131	90.0512	99.4424	84.9094	108.464	93.3063	95.2494	88.5292	75.9144	98.3847	83.3713	87.2087	0.5	127.598	114.647	128.685	122.059	120.011	105.404	109.681	98.4679	107.649	111.414	95.4674	101.46	102.284	92.5569
	0.6	147.409	137.721	147.145	126.832	126.078	110.864	112.956	105.321	100.66	98.9477	101.247	95.2469	98.651	94.3478	103.027	83.9286	0.6	115.321	112.635	115.186	96.033	114.121	89.805	98.3476	84.0644	106.752	92.3048	94.566	87.3879	74.7381	96.9782	82.4309	86.4783	0.6	127.249	114.179	128.724	121.576	120.136	104.291	109.285	97.5202	107.588	110.487	95.0991	100.862	101.483	91.4822
	0.7	147.736	137.859	146.84	126.246	125.254	110.556	112.601	105.122	100.024	99.2351	100.548	94.9521	98.7193	94.1347	102.457	83.7474	0.7	114.927	112.063	115.303	95.3864	113.472	88.993	97.4467	83.0168	104.895	91.2881	94.1502	86.8594	73.7329	95.7762	81.8582	85.3301	0.7	127.207	113.447	128.529	120.709	120.446	103.881	109.441	96.6886	107.314	110.35	94.6828	100.536	100.827	91.0822
	0.8	147.452	137.805	146.736	125.807	124.316	110.187	112.793	104.954	99.7733	99.5769	100.386	95.3801	98.3487	94.1074	101.773	83.585	0.8	114.463	111.468	115.176	95.1201	112.27	88.0076	97.266	81.9394	103.594	90.5081	93.8088	86.004	73.269	94.7054	81.5261	84.2104	0.8	127.461	112.401	128.507	119.598	120.357	103.704	109.822	96.0116	106.657	110.738	93.5713	99.8291	100.307	90.5528
	0.9	146.572	137.37	146.308	125.569	123.957	109.672	113.105	104.727	99.8399	99.5521	100.558	95.7268	97.5598	93.6311	101.076	83.5384	0.9	113.966	110.772	114.683	95.0592	111.095	87.2724	96.9153	80.9671	102.562	89.6789	93.119	85.1408	73.0539	93.9237	81.4072	83.7631	0.9	127.388	111.613	128.365	118.882	119.533	103.742	109.939	95.234	105.194	110.782	92.3837	99.5159	99.3346	89.9146
	1	145.484	136.92	146.55	125.405	124.491	109.017	113.058	104.635	99.7862	99.267	100.261	96.1297	97.0167	93.0667	100.637	83.4511	1	113.79	109.855	114.108	94.626	110.217	86.3213	96.7904	80.3949	101.894	89.3267	92.009	83.9838	73.2909	93.0358	81.5961	83.7656	1	126.994	110.85	127.868	118.844	118.311	103.562	109.151	94.2951	103.801	110.067	91.5832	99.0251	98.4298	88.7101
	1.1	144.861	136.932	146.662	125.119	125.163	108.606	112.42	104.779	99.2157	98.7388	99.5372	95.9061	97.0457	92.3417	100.343	83.1239	1.1	113.564	109.26	113.434	93.4442	109.855	85.5979	96.0746	80.1238	101.144	89.0927	90.7238	83.287	73.2397	92.0063	81.8741	83.5762	1.1	126.022	110.127	127.041	119.316	117.399	103.153	107.797	93.3714	102.7	108.886	91.2333	98.9083	97.8448	87.8297
	1.2	145.41	137.138	147.028	124.718	125.279	108.777	111.423	104.991	98.788	97.9878	98.8186	95.3439	97.3291	91.895	99.8943	82.3374	1.2	113.309	109.002	113.151	92.3678	109.365	85.0539	95.3424	79.8254	100.527	88.8952	89.464	82.9626	72.7177	90.9064	81.7744	82.9477	1.2	125.578	109.486	126.084	119.832	116.973	102.848	106.522	92.7691	102.242	107.782	90.823	98.5534	97.405	87.2613
	1.3	146.324	137.327	146.856	124.346	124.996	109.371	110.628	104.577	98.5543	97.6344	99.1328	94.4169	97.3117	91.7592	99.6849	81.4692	1.3	112.674	109.155	113.219	91.6891	108.719	85.3887	94.3478	79.4169	99.8039	88.2687	88.5182	82.7109	71.6508	89.9792	80.8277	81.969	1.3	125.685	109.538	125.662	120.099	116.78	102.496	105.392	92.4636	101.754	107.081	90.4909	98.2589	96.9343	87.0411
	1.4	146.759	136.906	146.908	124.363	124.293	109.676	110.27	103.477	98.5589	97.4518	99.7722	93.7526	96.7682	91.7979	99.5896	80.7611	1.4	111.879	109.251	113.248	91.4836	108.062	85.5726	93.7466	78.819	99.0842	87.0954	87.9952	82.3318	70.7163	89.2863	79.5804	81.0212	1.4	126.225	109.955	125.617	119.59	116.464	102.148	104.621	92.0701	101.157	106.615	90.1092	97.7638	96.1658	86.4152
	1.5	146.053	136.391	147.154	124.569	123.529	109.652	110.463	102.331	98.0514	97.7702	100.246	93.3647	96.0286	91.6481	99.7823	80.369	1.5	111.236	109.032	112.802	91.1223	107.544	85.4007	93.4722	78.2528	98.2642	85.7763	87.7937	81.6574	70.3871	88.989	78.4641	80.0413	1.5	126.07	110.439	125.654	118.459	115.978	101.479	104.041	91.5324	100.605	106.053	89.564	97.167	95.8406	85.6603
	1.6	145.171	135.857	147.376	124.893	122.786	109.658	110.784	101.73	97.3297	97.9113	100.051	93.21	95.4042	91.3954	99.5647	80.1452	1.6	110.936	108.414	111.859	90.8628	107.267	84.754	93.2164	77.2532	97.7064	84.5523	87.6357	80.9513	70.3329	88.9834	77.9814	79.159	1.6	125.308	110.81	125.11	116.897	115.681	100.778	103.723	90.8822	100.136	105.529	88.4737	96.4588	95.2513	84.961
	1.7	144.548	135.827	147.201	124.957	122.35	109.791	111.222	101.736	96.6167	98.1978	99.4897	92.7772	94.8783	90.7232	99.2277	79.8444	1.7	110.62	107.836	111.303	90.4723	106.909	84.2432	92.7948	76.1687	97.2158	83.904	87.2133	80.1352	70.2649	88.9989	77.7303	78.4494	1.7	124.368	111.178	124.048	115.804	115.604	100.092	103.46	90.7811	99.629	104.816	87.4818	95.639	94.5219	84.611
	1.8	144.54	136.04	146.202	124.874	122.262	109.661	111.394	101.686	96.4882	98.3461	98.9991	92.1652	94.2717	90.1623	98.932	79.6027	1.8	110.161	107.582	111.504	90.3217	106.576	83.8438	91.96	75.0734	97.0742	83.4577	86.5424	79.69	69.7181	88.7717	77.3064	77.9098	1.8	124.002	111.397	123.508	115.599	115.655	99.5388	102.964	90.4444	99.0509	104.223	86.7951	94.6467	93.4234	84.425
	1.9	144.678	136.363	144.985	124.785	122.037	109.187	111.313	101.812	96.9516	98.3261	98.5693	91.5448	93.7171	89.5469	98.987	79.2976	1.9	109.766	107.906	111.777	90.0269	106.4	82.9892	91.0672	74.5994	96.5494	83.1418	85.9027	79.323	68.8063	88.283	76.6577	77.4337	1.9	124.103	111.099	123.482	115.73	115.419	99.0904	102.459	90.118	98.6379	103.006	86.3657	93.684	92.6152	84.0938
	2	144.839	136.535	144.386	124.581	122.086	108.522	110.661	101.738	97.8296	97.9377	98.3217	91.3556	93.3462	89.3987	98.8352	79.3148	2	109.751	108.115	111.388	89.8456	106.177	82.0102	90.2373	74.3682	96.001	83.089	85.4223	78.9986	67.7889	87.5452	75.8987	76.7013	2	124.124	110.72	123.913	116.068	114.751	98.7649	101.627	89.2832	98.2563	101.844	86.0798	92.7439	92.2192	83.6498
	2.1	144.919	136.448	144.625	124.506	122.281	108.427	110.201	101.62	98.1956	97.219	97.8467	91.6867	93.3011	89.2959	98.22	79.2712	2.1	109.679	108.198	110.073	89.6584	105.809	80.9962	89.588	74.4483	95.2226	83.1106	85.0264	77.9672	67.0648	86.3728	75.2912	76.237	2.1	124.194	110.658	123.584	115.952	113.658	98.6737	100.847	88.8521	97.9006	100.986	86.0176	92.0389	91.6083	82.976
	2.2	144.847	136.01	145.383	124.277	122.779	108.792	110.007	101.14	98.0633	96.7754	97.3156	92.1231	93.0132	89.2263	97.3811	79.4569	2.2	109.207	107.886	108.859	89.5047	105.206	80.5961	88.9711	74.4527	94.6504	83.0061	84.4488	76.811	66.6892	84.8892	74.5017	75.9513	2.2	123.843	110.768	123.115	116.106	112.588	98.4104	100.154	88.4723	97.374	100.889	86.1819	91.2021	90.8423	82.6714
	2.3	145.101	135.383	145.718	124.346	123.511	109.074	110.091	100.922	97.2301	96.576	96.8728	92.1871	93.1178	89.086	96.9233	79.3897	2.3	108.537	107.61	108.262	89.2333	104.736	80.2466	88.0454	74.2276	94.1836	82.1793	83.8244	75.7591	66.424	83.6888	73.6452	76.0247	2.3	123.768	111.044	122.489	115.648	111.966	97.6606	100.14	88.1324	97.0188	100.616	86.2476	90.6407	89.7952	82.7132
	2.4	145.693	135.048	145.436	124.327	123.852	108.427	109.884	100.699	96.855	96.4688	96.5427	91.7739	93.2639	89.0016	96.9531	79.5413	2.4	107.982	106.901	108.234	88.6742	104.474	79.8664	87.0081	73.6112	93.9153	81.237	83.264	75.4493	66.1897	83.3163	72.4328	75.5108	2.4	123.068	110.845	122.651	115.198	111.849	96.6153	99.954	87.6061	96.3747	99.4422	85.7779	90.1326	89.0666	83.0672
	2.5	146.229	135.147	144.979	124.383	123.848	107.166	109.48	100.615	96.348	96.1047	96.2551	91.3502	93.7581	88.6183	97.0297	79.5001	2.5	107.727	106.427	108.664	88.3051	104.188	79.4274	86.2934	72.8141	93.4313	80.424	82.9366	75.3942	65.9858	83.393	71.6048	74.6656	2.5	122.273	110.032	122.868	114.383	111.92	95.8704	99.5518	86.9799	95.8231	97.7602	85.0886	89.7924	88.4457	83.2856
	2.6	146.008	135.633	144.562	124.338	122.699	106.387	109.175	100.545	96.212	95.4493	95.8269	91.2167	93.7754	88.1518	97.0892	79.4394	2.6	107.594	105.861	108.732	88.2049	103.64	78.981	86.4779	72.1458	92.6011	80.1169	82.3806	75.1756	65.7853	83.4594	71.0477	73.3883	2.6	120.986	108.512	123.041	113.922	111.586	95.939	98.7181	86.4424	94.9256	96.5384	84.2074	89.2488	88.3066	82.9127
	2.7	144.793	136.242	144.487	124.374	121.607	106.494	108.814	100.539	95.9429	94.7769	95.542	91.017	93.7407	87.7513	96.6043	78.9856	2.7	107.755	105.681	108.88	88.334	102.814	78.8918	86.8598	71.9352	91.704	79.7281	81.7363	74.5437	65.3234	83.4137	71.1592	72.8527	2.7	120.155	106.972	122.361	113.349	111.086	95.8509	98.2181	85.8543	94.2329	96.3837	83.3578	88.6149	88.3347	82.0904
	2.8	143.355	136.356	144.05	124.517	121.09	107	108.597	100.738	96.2014	94.2729	95.3491	90.7671	93.4399	87.9547	96.0671	78.7461	2.8	108.153	105.094	108.396	88.1218	101.869	78.6682	86.8494	71.82	91.2828	79.3397	80.9819	73.9308	64.8266	83.2741	71.1974	72.6119	2.8	119.823	106.423	121.123	113.017	110.407	95.3749	98.181	85.2282	93.4019	96.7157	82.3206	88.0048	88.5318	80.7573
	2.9	142.494	135.936	143.812	124.579	121.482	107.302	108.347	100.614	96.3106	94.2753	95.2228	90.3078	93.0321	88.1173	95.1744	78.4758	2.9	108.235	104.586	107.961	87.6569	101.274	78.5607	86.0753	71.8043	91.3179	78.635	80.7589	73.884	64.4409	82.9428	71.1201	72.9937	2.9	119.701	106.499	120.395	112.869	110.035	94.3776	98.0633	84.7761	92.8898	96.6427	81.294	87.4816	87.7596	79.7077
	3	142.699	135.118	143.83	124.535	122.119	107.286	108.265	100.493	96.122	94.6608	94.8824	90.1171	92.4881	87.7524	94.6186	78.424	3	107.841	104.406	107.134	87.2542	100.912	78.2426	85.3298	71.4403	91.0159	78.1736	80.5828	74.1539	64.1846	82.1551	70.6181	72.8092	3	119.206	107.049	120.514	112.692	109.699	93.7552	97.5228	84.5018	92.1686	96.0666	80.4829	87.2693	86.8721	79.0889
	3.1	143.136	134.936	144.541	123.941	122.072	107.095	108.158	99.8936	95.4209	94.8361	94.4042	89.7373	92.3259	86.7647	94.1026	78.0913	3.1	106.877	104.501	106.238	86.9794	101.015	78.0441	84.9257	70.8389	90.3143	77.5779	80.1689	74.2549	63.9006	81.2847	69.853	72.449	3.1	118.635	107.036	121.389	112.359	109.647	93.3774	96.4847	84.4352	91.5026	95.4103	79.8336	87.1793	85.827	78.8416
	3.2	143.19	135.269	145.08	123.508	121.671	106.73	107.895	99.4263	95.1741	94.5328	93.8367	89.2949	92.3427	85.9862	93.8661	77.9444	3.2	106.008	104.434	105.222	86.7967	100.837	77.7336	84.6987	69.9958	89.492	77.0419	79.09	73.7648	63.2438	80.1701	69.1669	71.5551	3.2	118.54	107.128	121.552	111.753	109.809	93.0432	95.6634	84.1874	90.6987	95.0757	79.3748	86.9298	85.8227	78.8044
	3.3	142.464	135.879	145.55	123.313	121.183	106.179	107.5	98.9306	95.2333	94.0102	93.6533	88.7726	92.4084	85.8257	93.5557	77.5151	3.3	105.329	103.8	104.476	86.5078	100.556	77.1361	84.3139	69.1629	89.3057	76.4839	78.0922	73.0954	62.6251	79.0017	68.673	70.9284	3.3	119.002	106.97	121.15	111.381	109.883	92.6092	95.2796	84.1377	89.983	95.11	79.0916	86.3801	85.9951	78.6716
	3.4	142.182	135.999	145.36	123.799	121.075	105.964	107.169	98.7911	95.358	93.6748	94.091	88.711	92.1533	86.2759	93.641	76.9648	3.4	104.981	103.136	104.579	86.1291	99.9657	76.4826	83.6044	68.6382	89.324	76.2548	77.4134	72.3971	62.0292	78.1061	68.5926	70.3331	3.4	119.449	107.162	120.11	111.029	109.342	92.3424	95.2442	83.9832	89.2603	95.2023	79.083	85.5596	86.1567	78.6247
	3.5	142.683	135.788	145.024	123.966	121.184	106.107	107.277	98.548	94.8323	93.5913	94.7274	89.1776	91.7959	86.5076	93.8181	76.3737	3.5	104.937	102.814	105.182	85.6498	99.4202	75.7432	82.7592	68.3187	89.4521	76.3279	76.9377	71.9727	61.5873	78.0056	68.524	70.0386	3.5	119.67	107.171	119.028	110.759	108.351	92.3318	95.2114	83.8083	88.5926	95.1324	78.7904	85.1193	85.8544	78.2432
	3.6	144.034	135.267	143.783	123.925	120.942	106.517	107.741	98.2601	93.9447	93.3642	95.0938	89.8663	91.2812	86.5563	94.2547	76.3468	3.6	104.621	102.714	105.823	85.0402	98.8567	75.5338	82.1271	68.3514	89.0112	76.1746	76.4109	71.6992	61.0682	78.5156	68.467	69.6157	3.6	119.66	106.941	118.137	110.598	107.343	92.5302	94.9261	83.3236	88.5653	94.6229	78.0013	84.8097	84.8399	77.8357
	3.7	144.985	135.049	142.963	123.453	120.638	106.592	107.88	97.7457	93.0066	93.1934	94.7749	90.2083	90.8587	86.2437	94.1118	76.7684	3.7	104.139	102.478	105.683	84.5853	98.3247	75.42	81.7888	68.4928	88.3788	75.6886	75.3969	71.578	60.4743	78.6694	68.1994	69.315	3.7	119.414	106.292	117.731	110.713	107.003	92.3048	94.1211	83.0308	88.8676	93.8289	77.0456	84.8093	83.6308	77.3726
	3.8	145.093	135.055	142.381	123.045	120.072	106.206	107.805	97.4036	92.6292	92.8556	94.3554	89.8479	90.3037	86.0833	93.5627	77.2069	3.8	103.51	102.237	105.131	84.3479	97.9373	75.6548	81.6809	68.8517	87.3646	74.9416	74.8386	71.3432	60.1992	78.3468	67.637	69.1067	3.8	118.986	105.194	118.146	110.87	106.753	91.6056	93.1027	82.9236	89.2778	92.9082	76.6683	84.4037	82.6058	77.354
	3.9	144.211	135.183	142.453	122.5	119.749	105.593	107.431	97.5	92.6811	92.6092	94.0849	89.1883	90.1151	85.8639	92.7764	77.24	3.9	103.413	102.211	104.354	84.4073	97.418	75.7133	81.4129	68.9403	86.6223	74.3518	74.2847	70.9758	59.878	77.6613	66.8708	69.231	3.9	118.644	104.317	118.388	110.61	106.353	90.7686	92.3763	82.6682	88.9124	92.2354	77.0182	83.8499	82.3853	77.0357
	4	143.122	135.404	142.208	122.076	119.406	105.131	107.448	98.2333	93.1173	92.3751	93.7518	88.404	89.9399	85.7523	92.3621	76.825	4	103.428	102.271	103.812	84.5973	96.7714	75.5731	80.8788	68.7948	85.9707	73.6366	74.5041	70.6434	59.7253	77.3508	66.3461	69.3872	4	118.486	103.832	118.474	109.966	105.571	90.6788	92.0827	82.1639	88.1634	91.4657	77.3581	83.4118	82.5708	76.751
	4.1	142.677	135.408	141.971	122.024	119.702	104.836	107.255	99.2023	93.1814	92.2886	93.3018	88.141	90.229	85.6084	92.3306	76.1741	4.1	103.413	101.971	103.149	84.4157	96.0763	75.19	80.3494	68.4443	85.4782	72.787	74.6017	70.2161	59.6434	77.3122	66.2278	69.3772	4.1	118.286	103.824	117.967	109.343	104.864	90.9191	91.7909	81.4296	87.3329	91.1649	77.2232	83.4532	82.7004	75.8696
	4.2	143.052	135.409	142.111	121.98	120.359	104.937	106.765	99.9366	93.2158	92.4007	92.7477	87.8897	90.0222	85.6186	92.3717	75.7443	4.2	103.399	101.456	102.733	83.8759	95.7857	74.452	79.8648	68.11	84.8348	72.1573	74.8198	69.6964	60.0248	77.3297	66.3738	68.9871	4.2	117.937	103.924	117.483	109.251	104.457	90.8697	91.4219	81.0107	86.8837	90.6651	76.4968	83.5269	82.7923	75.28
	4.3	143.865	134.829	142.644	122.08	120.917	104.884	106.016	99.8572	93.1817	92.4133	92.5892	88.1508	89.6372	85.5912	92.3968	75.8984	4.3	103.504	101.005	102.592	82.9451	95.6364	73.6921	79.5063	67.8872	84.3313	72.0802	74.9541	69.4492	60.4602	77.1337	66.0706	68.3982	4.3	117.327	103.714	116.99	109.066	104.357	89.781	91.2252	80.486	86.465	90.377	75.91	82.8679	82.8224	74.5016
	4.4	143.951	134.205	143.068	121.631	121.017	105.118	105.383	99.186	93.3974	92.4351	92.5116	88.4334	89.0991	85.5051	92.6802	76.2846	4.4	103.537	100.648	103.024	82.4207	95.493	72.8107	78.9563	67.4214	84.0984	72.2458	74.7284	69.7242	60.3622	76.6977	65.805	67.7358	4.4	116.984	103.387	116.756	108.857	104.409	88.6012	91.3259	80.1766	86.1376	89.5418	75.8527	81.9719	82.6112	73.6971
	4.5	143.232	133.598	143.117	121.728	120.863	105.084	105.41	98.1292	93.2352	92.4159	92.0996	88.5413	89.214	85.4007	93.0904	76.368	4.5	103.052	100.299	103.294	82.1869	95.0802	72.6226	78.3888	66.8972	84.2718	72.2326	74.4717	70.3684	59.7667	76.359	65.7283	67.1492	4.5	116.41	102.931	116.818	108.274	104.572	87.8597	91.1759	79.6164	85.8609	88.8368	76.255	81.4449	81.8959	73.0307
	4.6	142.131	133.425	143.045	121.762	121.036	105.117	105.535	97.4527	92.5516	92.3398	91.453	87.9886	89.6427	85.3723	93.3692	75.9342	4.6	102.201	99.8407	103.007	82.1669	94.8406	72.7162	78.0599	66.3103	84.1948	71.9619	73.9176	70.5643	58.9797	76.0026	65.9323	66.5516	4.6	116.256	102.839	116.622	108.162	104.616	88.0381	90.5101	79.4379	85.854	88.359	76.4687	81.6891	81.0817	72.4077
	4.7	141.475	133.671	142.887	122.295	120.964	104.814	105.553	96.9686	91.499	92.3169	91.0161	86.7756	90.0623	85.3294	92.8802	75.7584	4.7	101.242	99.4454	102.242	81.8687	94.648	73.0517	77.9906	66.0361	83.9932	71.9329	73.6816	70.1971	58.4163	75.7342	65.8086	65.9652	4.7	115.663	103.055	116.352	107.694	104.369	88.2534	89.7859	79.3336	85.6303	88.0984	75.9249	81.538	80.6892	72.256
	4.8	141.741	134.063	142.829	122.186	120.726	104.438	105.157	96.8099	90.6618	92.0329	91.0721	85.9189	90.0663	85.0569	92.1969	75.8024	4.8	100.494	98.8787	101.312	81.6233	94.7843	72.6293	78.3664	66.0528	83.6782	71.8217	73.2682	69.5891	58.2052	75.5473	65.2058	65.5534	4.8	115.578	103.464	115.941	107.187	103.875	88.2459	89.3534	79.6494	85.1229	87.911	75.1392	80.8869	80.6067	71.9238
	4.9	141.93	134.439	142.767	122.013	120.098	104.208	104.62	96.6253	90.4504	91.7718	91.4993	85.5288	89.8492	84.676	91.1824	75.8766	4.9	100.135	98.1958	100.882	81.5468	94.7711	72.2004	78.5338	66.0146	83.7786	71.6596	72.668	68.9657	57.8486	75.7093	64.6587	65.4252	4.9	115.47	103.829	116.074	106.333	103.35	87.7202	89.4101	79.6202	84.4676	87.4649	74.5013	79.7929	80.4328	71.9007
	5	141.863	134.119	142.945	121.644	119.638	104.207	104.42	96.5633	90.576	91.1177	91.7984	85.6221	89.2122	84.3794	90.3704	75.5269	5	99.9711	97.6849	100.624	81.8223	94.294	71.8	78.5129	65.8131	83.753	71.336	71.8062	68.5828	57.7479	75.8592	64.1184	65.3514	5	115.875	103.615	115.841	105.928	102.9	87.2812	89.4619	79.1203	84.2251	87.0118	74.402	79.3809	80.0768	71.9928
	5.1	141.505	133.452	142.978	121.575	119.137	104.627	104.429	96.4148	91.0674	90.5119	91.995	85.4834	88.5082	84.4848	89.3881	75.3139	5.1	100.1	97.4218	100.64	81.9357	93.3753	72.0664	77.9231	64.8387	83.5063	71.2901	71.1778	68.0613	57.631	75.5061	63.6089	65.4056	5.1	116.118	103.177	115.459	105.941	102.457	86.536	89.3648	78.1642	84.5096	86.5732	74.3502	79.3597	79.875	72.0564
	5.2	141.591	132.55	142.613	121.473	118.909	105.344	104.742	96.2856	91.2879	89.9473	91.7374	85.2021	87.9957	84.937	88.9122	75.3602	5.2	100.247	97.6971	100.288	81.936	92.4063	72.0448	76.996	63.8446	83.0298	71.4389	71.2431	67.3737	57.8046	74.6009	63.1364	65.4803	5.2	116.071	102.328	114.739	106.318	102.144	85.9548	89.1341	77.5513	85.0279	86.3517	74.1001	79.6876	79.8599	71.999
	5.3	142.11	132.343	142.208	121.286	119.001	105.902	104.924	96.1208	91.4341	89.8426	91.3747	85.0648	88.0564	85.1924	88.6373	75.2938	5.3	100.581	98.1349	99.7712	81.6526	92.0344	71.8089	76.0147	63.0721	82.644	71.5641	71.8331	66.677	57.6818	73.4937	63.0129	65.8012	5.3	115.833	101.846	114.6	106.737	102.273	85.4259	88.8491	77.5207	85.1179	86.2689	73.5573	79.6462	79.4434	71.4726
	5.4	142.486	132.403	141.784	120.968	119.41	105.841	105.067	96.0718	91.1924	90.1323	91.0656	85.0839	88.1484	84.7682	88.6448	74.784	5.4	100.424	98.5499	99.1219	81.0848	91.931	71.2159	75.0297	63.1257	82.1844	71.3613	72.4696	66.2041	57.0226	72.9036	63.064	65.791	5.4	115.499	101.225	114.838	106.763	102.627	85.4897	88.6117	77.6952	84.9204	86.0518	72.7619	79.3411	78.5361	71.0476
	5.5	142.886	132.864	141.59	120.656	119.361	105.238	104.936	95.8577	91.1928	90.6828	90.9127	85.1487	88.1278	83.7124	88.465	73.9922	5.5	99.8492	98.3438	98.4886	80.1707	91.9156	70.945	74.5716	63.4672	81.6249	70.8831	72.4782	66.3094	56.1554	72.6121	62.6826	65.6111	5.5	115.245	100.923	115.094	106.329	102.769	85.6704	88.36	77.6517	84.4522	85.443	72.2103	78.8558	77.5056	70.5298
	5.6	143.288	133.229	141.157	120.673	118.622	104.797	104.793	95.7804	91.1589	90.8549	90.672	84.9412	87.8222	83.0214	88.5682	73.4064	5.6	98.8809	97.7153	97.9386	79.4711	91.8189	70.7154	74.4038	63.6613	81.0402	70.1168	72.0622	66.4487	55.461	72.5812	61.8874	65.0251	5.6	114.8	100.62	114.918	105.309	102.394	85.7629	88.0839	77.0798	84.3698	84.7734	71.9242	78.4359	77.1609	70.5193
	5.7	143.569	133.327	141.203	120.951	117.465	104.65	104.899	95.7242	90.9954	90.2972	90.2013	84.9363	87.7224	82.787	88.5879	73.0429	5.7	98.3162	97.0384	97.5433	79.4158	91.65	70.3557	74.4564	63.6298	80.7381	69.3624	71.335	66.4887	55.4913	72.3604	61.3957	64.6191	5.7	114.247	100.619	114.278	104.092	102.17	85.7534	87.9726	76.599	84.2712	84.3591	72.1418	78.156	77.2347	70.7151
	5.8	143.683	132.986	141.729	121.422	116.657	104.152	105.271	95.9901	90.6196	89.1012	89.791	84.8828	87.4393	82.9668	88.7151	72.8403	5.8	98.2177	96.709	97.2131	79.718	91.3857	69.88	74.5857	63.1147	80.5454	68.9838	70.912	66.1667	55.7601	72.2597	61.5751	64.4533	5.8	113.578	100.696	113.641	103.276	102.021	85.7278	87.6861	76.193	84.175	84.4249	72.2703	78.0739	77.3519	70.8704
	5.9	143.387	132.532	142.545	121.829	116.569	103.307	105.376	96.3223	90.4243	88.385	89.5713	85.0976	87.1306	82.9341	88.8662	72.5716	5.9	98.1046	96.272	96.9263	79.6664	91.0737	69.573	74.5531	62.447	80.4872	69.1368	70.757	65.8012	55.838	72.2033	62.2366	64.681	5.9	113.271	100.864	113.213	103.539	101.847	85.7024	87.4513	75.9874	83.7927	84.6089	72.4042	78.0839	76.9719	70.5361
	6	142.989	132.687	142.521	122.15	116.832	102.683	104.951	96.7994	90.4968	88.3662	89.7848	85.0461	86.7811	82.9949	89.2707	72.3788	6	97.81	95.7603	96.4039	79.1162	90.804	69.5604	74.3097	61.5704	80.431	69.5636	70.9777	65.4899	55.4997	72.1449	62.4887	64.7904	6	112.94	101.115	113.086	104.511	101.024	85.6781	86.7786	75.6311	83.0299	84.6559	72.2927	78.0458	76.2796	69.6304
	6.1	142.735	132.944	141.965	122.382	117.548	102.836	104.053	97.0616	90.5074	88.9718	90.189	85.0676	86.7032	82.9598	89.7083	72.0268	6.1	97.3086	95.083	95.9168	78.6202	90.5006	69.3451	73.7487	61.1552	80.69	69.6087	71.16	65.4278	55.0817	72.0191	62.3233	64.437	6.1	112.736	101.201	113.058	105.169	100.143	85.6649	86.4213	75.3311	82.2088	84.5094	72.4341	77.6908	75.6492	68.7998
	6.2	142.463	133.015	141.478	121.959	118.046	103.467	103.61	96.7538	90.5703	89.4036	90.7794	85.0031	86.7667	82.763	89.5813	71.9218	6.2	97.6254	94.5458	95.358	78.2986	89.8479	68.8644	73.2762	61.1608	80.9643	69.002	71.155	65.3653	54.97	71.7892	61.7903	63.7313	6.2	112.068	100.991	112.555	104.739	99.5584	85.7099	85.9022	75.4489	81.4637	84.3006	72.588	77.0798	75.2554	68.241
	6.3	142.251	132.645	141.828	120.968	118.347	103.754	103.527	95.9893	90.406	89.606	91.0174	85.0707	86.8904	82.2752	89.2796	71.7579	6.3	98.2942	94.1156	95.0148	78.0392	89.1293	68.2271	73.0196	61.5917	81.0403	68.2957	70.5856	65.2697	55.0176	71.593	61.532	63.3686	6.3	111.726	100.387	112.027	103.303	99.195	85.6524	85.5766	75.6322	81.0671	84.2169	72.6517	76.2866	75.1938	68.1757
	6.4	141.301	132.568	142.16	120.038	117.936	104.104	104.017	94.9446	90.2418	89.547	90.929	85.2851	86.9258	81.6474	89.111	71.9932	6.4	98.9759	93.9848	94.9163	77.5528	88.6139	67.6781	73.0319	61.9219	80.6268	67.7192	69.792	64.9136	55.2054	71.1881	61.4077	63.494	6.4	111.61	99.8099	111.637	101.849	98.9777	85.5494	84.8957	75.6791	80.7132	84.2046	72.2881	75.5348	75.0641	67.9888
	6.5	140.729	132.732	141.859	119.789	117.399	104.133	104.285	94.4971	89.6231	89.1539	90.4747	85.1157	86.9663	81.4294	89.5041	72.2347	6.5	98.5836	93.8991	95.5049	76.8946	88.5773	67.4194	73.058	61.8183	79.96	67.4724	68.8331	64.5477	55.2161	70.765	61.6806	64.0831	6.5	111.492	99.2878	111.938	100.948	98.5881	85.1782	84.5347	75.1971	80.3669	84.1249	71.6424	74.8448	75.0787	67.8711
	6.6	140.559	133.057	141.062	120.271	117.029	104.295	104.191	94.4827	89.3456	88.449	89.882	84.7539	86.9054	81.4521	89.968	72.5871	6.6	97.7653	93.8439	96.0946	76.4424	88.5137	67.2609	73.1509	61.3698	79.1937	67.2834	68.3526	64.4153	55.1811	70.3869	61.8009	64.2867	6.6	111.156	98.8797	112	101.181	98.2619	84.6739	84.3511	74.738	80.14	83.9822	71.1852	74.6421	74.8796	67.6724
	6.7	141.276	133.269	140.462	120.395	116.994	103.64	103.853	94.7911	89.2169	87.7829	89.4884	84.1423	86.8724	82.1399	90.1509	72.7187	6.7	97.0032	93.428	96.6266	76.0931	88.4056	67.3753	73.0577	60.7099	78.3364	67.2754	68.0517	64.5971	54.8106	70.1196	61.7874	64.2758	6.7	110.843	98.3336	111.619	101.811	97.5884	83.8198	84.27	74.4309	80.1449	83.7601	70.8263	74.3967	74.8813	68.0489
	6.8	141.819	133.533	140.665	120.411	116.795	102.817	103.464	94.6897	89.5446	87.3719	89.3	83.9949	86.8624	82.3531	89.7554	72.883	6.8	96.8807	93.3517	96.3794	75.8602	88.1097	67.3348	72.9651	60.2948	77.7266	67.4884	68.1248	64.6323	54.3991	69.8382	61.1294	63.9144	6.8	111.386	98.1039	110.942	102.199	97.1457	83.1438	83.9306	74.369	80.1529	83.4603	70.6317	74.5633	74.5996	68.3141
	6.9	142.271	133.42	141.156	120.288	116.903	101.934	103.393	94.1154	89.6239	87.3769	89.379	84.168	86.7661	82.5969	89.059	73.0174	6.9	96.7157	93.4176	96.2134	75.6562	88.009	67.0767	72.7271	59.9528	77.391	67.4909	68.2911	64.2774	53.8974	69.489	60.5893	63.6212	6.9	111.994	98.392	110.683	101.812	96.9949	82.4712	83.4049	74.383	79.7804	82.8833	70.1647	74.4141	74.373	68.5193
	7	142.307	133.132	141.626	120.434	117.215	101.709	103.414	93.7439	89.4827	87.4773	89.1938	84.2478	86.481	81.8809	88.1834	73.0532	7	96.5716	93.8161	95.9663	75.9291	87.8709	66.4921	72.5718	59.9992	77.3381	67.1112	68.3356	63.7199	53.8647	69.447	60.2879	63.3656	7	112.279	98.8864	110.798	100.995	97.2514	82.1537	83.1147	74.2979	79.0219	82.1627	69.9218	74.7493	73.9679	67.9752
	7.1	142.297	132.365	141.5	120.516	117.903	101.805	103.462	93.7173	88.9419	87.7822	88.9094	84.2086	86.1054	81.7824	87.6553	72.2708	7.1	96.464	93.9461	95.7141	76.6607	88.0349	65.97	72.3282	59.8264	76.9328	66.5272	68.0776	63.4798	53.9522	69.3621	60.5957	63.0307	7.1	111.882	99.0286	111.064	100.447	97.2237	82.0438	83.0572	74.0691	78.3042	81.451	69.6652	74.696	73.8049	67.2727
	7.2	141.901	132.127	140.994	120.463	118.157	102.065	103.43	93.8174	88.6149	88.1057	88.5103	83.8382	85.5718	81.5439	87.1489	70.9303	7.2	96.607	93.6704	95.259	77.1446	87.9172	65.9442	72.318	59.7252	76.4544	66.1182	67.3542	63.4626	54.2198	69.2518	60.7887	62.8003	7.2	111.796	98.6428	110.78	100.351	97.0158	81.966	83.3801	73.5853	78.0847	80.9586	69.7201	74.9986	73.9621	66.7061
	7.3	141.441	132.092	140.595	120.542	118.067	102.136	103.067	93.4519	88.5583	88.283	88.2336	83.5262	85.1673	81.7941	86.8784	69.7739	7.3	96.5848	93.1439	94.7989	76.6911	87.5949	66.3464	72.1143	59.2048	76.3407	65.8796	66.8279	63.3408	54.1662	68.6553	60.7942	62.4401	7.3	111.536	98.0104	110.157	100.487	96.7896	81.8802	83.6778	72.9436	78.2273	80.6621	69.4431	74.8288	74.0414	66.5242
	7.4	140.868	132.537	140.614	120.325	118.16	102.043	102.642	92.5197	88.6398	88.4197	88.133	83.0501	84.6686	81.5572	86.44	69.6588	7.4	95.8202	92.584	94.5486	75.6444	86.7473	66.937	71.7388	59.1354	76.7871	65.6022	66.4304	63.055	54.2429	68.1727	60.5554	62.0651	7.4	111.149	97.2631	109.119	100.566	96.6634	81.4716	83.8467	72.4996	78.2247	80.4982	69.1959	74.9623	73.7168	66.6741
	7.5	140.279	132.516	140.861	120.143	118.216	101.9	102.21	91.9876	88.4286	88.3026	88.0272	82.4314	84.7096	81.1539	86.3124	70.5748	7.5	94.8099	92.1827	94.2624	74.6817	86.0887	67.1954	71.1553	59.398	77.4809	65.5324	66.5338	62.8534	54.3131	68.0382	60.3933	61.773	7.5	109.899	96.5546	108.518	100.243	96.1724	81.1018	83.6979	72.5219	78.1126	80.3667	68.6086	74.6488	73.0479	66.5778
	7.6	139.459	132.515	140.805	120.321	117.985	102.047	102.147	91.8231	88.144	88.2063	88.1021	81.9302	84.7668	80.8607	86.1214	71.3438	7.6	93.8361	91.6964	93.9174	74.493	85.6668	67.0003	70.5076	60.2361	77.8201	65.739	66.7903	62.7999	54.4602	68.2738	60.3678	61.802	7.6	108.99	96.0808	108.239	99.8454	95.5582	80.7651	83.3384	72.8359	78.1259	80.4263	68.0526	74.4196	72.3912	66.3797
	7.7	138.8	132.436	140.3	120.991	117.206	102.441	102.036	92.3584	87.5519	87.7793	87.9448	81.6752	84.887	80.7542	86.2828	71.5531	7.7	93.748	91.0359	93.5882	74.6313	85.5961	66.631	70.0191	60.7896	77.8484	66.2771	66.9073	62.9834	54.1888	68.615	60.2601	62.1734	7.7	108.414	95.9808	108.186	99.4798	95.1434	80.4767	82.8787	73.2468	78.5218	80.6333	67.6583	73.9328	72.0686	65.9824
	7.8	138.543	132.768	139.547	121.507	116.519	102.687	102.091	92.6203	86.9346	87.2741	87.7896	81.8624	84.3883	80.8803	86.3529	71.0836	7.8	93.948	90.6691	93.3188	74.6706	85.7473	66.3184	69.7461	60.8011	77.5089	66.3977	66.7933	63.1016	53.7253	68.6809	59.9883	62.409	7.8	108.466	95.8427	107.8	99.4121	95.0187	80.3282	82.2584	73.2491	78.8344	80.7454	67.8249	73.4818	71.967	65.9298
	7.9	138.828	132.676	139.216	120.867	116.67	102.246	101.994	92.7921	86.1447	86.6159	87.347	81.8841	83.9628	80.7964	86.531	70.906	7.9	94.1548	90.6622	92.9399	74.2062	86.0403	66.2976	69.9338	60.2788	77.293	66.4187	66.1843	63.25	53.2254	68.7122	59.6271	62.0856	7.9	108.478	95.6089	106.987	99.2886	94.6888	80.3109	81.6928	73.0706	78.924	80.3433	68.4774	73.1178	71.7742	66.187
	8	138.907	132.312	138.945	119.92	117.25	101.733	102.224	92.8306	86.1003	86.1441	86.9831	81.6512	83.5956	80.5382	86.192	70.8861	8	94.0548	91.0012	92.6842	73.5666	86.3928	65.9129	70.2947	59.7903	76.9421	66.1664	65.9262	63.0169	53.0768	68.5819	59.454	61.668	8	108.155	95.2399	106.407	98.9877	94.214	80.5848	81.0259	72.455	78.5422	79.8632	68.7176	72.7456	71.6038	66.62
	8.1	138.822	131.755	139.097	118.938	117.932	101.472	102.438	92.8837	86.4579	86.0363	86.4954	80.9071	83.5202	80.292	85.3312	71.0497	8.1	93.9022	91.0649	92.9184	73.391	86.5969	65.4859	70.3236	59.4358	76.6486	66.1551	65.8916	62.6798	53.0741	68.3347	59.5942	61.0809	8.1	107.873	95.2771	106.166	98.6516	94.0059	80.6001	80.5688	71.8277	77.905	79.5546	68.3766	72.5608	71.2451	66.8777
	8.2	138.587	131.64	138.569	118.848	118.196	101.818	102.606	92.8856	86.9229	86.1871	86.3032	80.2853	83.1961	80.1828	84.2856	70.6109	8.2	94.0023	90.9189	93.3128	73.4873	86.4954	64.8748	70.0557	59.4166	76.1256	65.8947	66.6418	62.4472	53.1312	68.0401	59.4604	60.9932	8.2	107.495	95.3152	106.463	98.3433	94.5456	80.3579	80.0881	71.1691	76.9841	79.6731	67.7127	72.3271	71.2627	66.7
	8.3	138.591	131.972	138.339	119.047	118.212	101.891	102.452	92.4497	87.1159	86.2051	86.096	79.7882	82.9447	80.1047	83.3523	70.3172	8.3	93.9707	90.5079	93.2728	73.6756	85.8593	64.8437	69.7656	59.4822	75.9123	65.4513	67.116	62.5949	53.1786	67.9624	59.1254	60.7653	8.3	107.558	95.3944	106.503	97.8399	95.0852	79.9523	80.0916	70.7064	76.2766	79.5658	67.4887	71.9266	70.994	66.3489
	8.4	138.758	132.183	137.9	119.383	117.784	101.812	101.926	91.9583	86.9276	85.7682	86.1329	79.8839	82.6977	80.045	83.4037	70.1557	8.4	93.9686	90.3063	92.2806	73.5008	84.503	64.6419	69.5084	59.6391	75.8783	64.8012	67.311	62.9003	53.3181	68.0299	58.5326	60.9256	8.4	107.511	94.9657	106.696	97.4484	95.2263	79.7256	80.2094	70.406	76.0136	79.2922	67.425	71.4977	70.5862	65.8428
	8.5	138.892	132.4	138.208	119.658	116.951	101.737	101.212	91.3577	86.7969	85.3812	85.957	80.2424	82.6044	79.6411	83.6386	70.4664	8.5	93.7452	90.2952	91.1547	73.3474	83.3794	64.3522	69.191	59.6364	75.7393	64.3517	66.8397	63.0109	53.3776	67.9606	58.3782	60.8688	8.5	107.727	94.4434	106.946	97.3336	94.6543	79.3324	80.6811	70.4864	76.1683	78.6636	67.3168	71.338	69.8124	65.4948
	8.6	139.317	132.023	138.754	119.465	115.901	101.867	100.694	90.9559	86.2216	85.0638	85.741	80.6867	82.4502	79.1247	84.0933	70.3546	8.6	93.5826	90.7427	90.3351	73.2194	82.716	63.7341	68.8097	59.4657	75.405	64.3848	66.6554	63.0517	53.1712	67.9088	58.2909	60.8914	8.6	107.826	94.0829	107.477	97.7003	94.1348	78.865	80.6263	70.5591	76.5301	78.1842	67.0651	71.6986	69.5558	65.2158
	8.7	139.409	131.554	139.594	119.516	115.385	101.887	100.439	90.7623	85.8142	85.1026	85.4544	80.9467	82.2669	78.4109	83.9157	70.2057	8.7	93.4814	91.0327	90.2048	73.0123	82.9597	63.3906	68.7223	59.2171	74.9747	64.6657	66.5368	62.7463	52.9048	68.0217	58.1163	60.7944	8.7	108.154	94.1977	107.434	97.9383	93.9773	78.4448	80.4313	70.4917	76.5128	77.7124	66.9909	72.039	69.5748	65.1006
	8.8	139.434	130.879	140.163	119.099	115.3	101.448	100.761	90.6301	85.5116	84.7087	85.2808	80.8281	82.2483	78.0616	83.9879	69.8166	8.8	93.3849	91.1431	90.3272	72.5593	83.0286	63.1344	68.7761	59.0018	75.0089	65.0444	66.526	62.3059	52.7518	68.4651	57.8183	60.7376	8.8	108.467	94.4848	106.69	98.1156	94.0354	78.1897	79.9646	69.9607	76.4678	77.8108	67.0522	71.9894	69.8843	65.1889
	8.9	139.193	130.958	140.391	118.527	115.505	101.05	100.903	90.7166	85.8429	84.0042	85.3634	80.6087	82.1309	78.1639	84.4138	69.781	8.9	93.4812	90.7087	90.4407	72.1081	83.2828	62.8906	68.5497	58.9463	75.3142	65.1832	66.0969	61.6158	52.8836	68.7429	57.5966	60.6654	8.9	108.607	94.5549	105.756	97.9758	93.8871	77.8959	79.9529	69.6529	76.1627	77.9859	67.0741	71.804	69.8022	65.3352
	9	139.06	131.4	139.912	117.506	115.681	100.768	101.122	90.5	86.3421	83.226	85.5646	80.2358	82.1942	78.449	84.9326	69.3903	9	93.2806	89.863	90.242	72.029	83.1054	62.5604	67.9397	59.2033	75.7393	65.2776	65.6761	61.5794	52.7341	68.9834	57.5053	60.4798	9	107.978	94.2621	104.944	97.3404	93.5633	77.6546	80.1071	69.5092	76.0461	78.4076	67.0358	71.4418	69.8233	65.4577
	9.1	138.848	131.874	139.166	116.774	115.793	100.744	100.951	90.3443	86.4911	82.99	85.7289	80.1012	82.0839	78.9103	84.9059	69.0136	9.1	93.1699	88.9581	89.9213	72.2584	82.9594	62.4737	67.3499	59.4642	75.801	65.1739	65.2996	61.9908	52.4928	69.0024	57.5353	60.3599	9.1	106.988	94.1299	104.859	96.6134	93.1057	77.765	80.0543	69.5324	75.8039	78.3424	66.9221	71.3341	70.0223	65.3454
	9.2	138.366	131.782	138.312	116.908	115.809	100.798	100.651	90.1204	86.3049	83.6246	85.9059	79.8657	81.9131	78.9608	84.2348	68.4492	9.2	92.6076	88.3048	90.1642	72.5579	82.2902	62.6189	67.0818	59.4997	75.5268	65.1412	64.9664	62.5403	52.2804	68.9414	57.8196	60.2198	9.2	106.202	93.997	104.845	96.0861	92.5578	77.9764	79.6113	69.3892	75.5943	78.1401	66.5793	71.209	70.3791	65.0681
	9.3	138.141	131.526	137.735	117.62	115.756	100.906	99.9742	90.2401	85.9023	84.341	85.9699	79.5482	81.5769	78.8652	83.6856	67.9759	9.3	92.0298	88.2782	90.8293	72.3742	82.0636	62.7076	67.2307	59.1404	75.2388	65.1634	64.5577	62.744	52.5817	68.6366	58.217	60.1759	9.3	106.188	93.9684	105.168	96.2567	91.9262	78.1209	78.8134	69.1517	75.3949	77.9708	65.6779	71.54	70.5839	64.776
	9.4	137.835	131.392	137.398	118.906	115.822	101.066	99.2206	90.4571	85.6508	84.9409	86.1974	79.2888	81.4563	78.3124	83.6342	67.824	9.4	91.3364	88.4688	91.5906	72.0516	82.0941	62.6032	67.4458	58.8491	75.3714	65.1789	64.2609	62.652	53.1576	68.108	58.6316	60.1804	9.4	106.342	93.7471	104.994	96.2126	91.2399	77.8422	78.5106	68.9046	75.0099	78.0601	64.595	71.6439	70.3198	64.4839
	9.5	137.645	131.039	137.276	119.803	116.213	100.732	99.0634	90.6892	85.1673	85.1467	85.5658	79.2592	81.57	77.9462	83.8348	67.7422	9.5	90.964	88.8362	91.3897	71.7578	82.4128	62.2554	67.7957	58.7851	75.628	64.6963	64.3082	62.485	53.4222	67.6873	58.7271	60.2191	9.5	106.245	93.4749	104.61	96.1062	90.9432	77.7662	78.6169	68.5048	74.8437	78.1318	64.2552	71.2642	70.0464	64.2878
	9.6	137.333	130.596	137.542	120.677	116.215	100.152	99.4191	90.6857	84.6962	85.3821	84.7992	79.456	81.7334	77.6424	84.0663	68.079	9.6	90.7991	89.2612	90.7803	71.7869	82.4166	62.0956	68.0239	58.7178	75.5543	63.9889	64.3966	62.2617	53.1893	67.4229	58.7333	60.1529	9.6	105.927	93.0812	104.188	95.874	90.5298	77.5276	79.286	68.3062	74.7983	78.0268	64.9517	70.4296	69.6458	64.2604
	9.7	137.557	129.839	138.044	120.727	115.683	99.5464	99.8167	90.6396	84.2764	85.3207	83.6113	79.2637	81.3998	77.5324	84.1386	68.406	9.7	90.5128	89.496	89.9976	71.7179	82.2913	61.801	68	58.4798	75.0186	63.4584	64.3317	62.0138	52.5491	67.4808	58.5476	59.8322	9.7	105.683	92.892	104.019	95.8597	90.5379	77.3911	79.6122	68.2094	75.1833	77.7938	65.9938	69.7584	69.3881	64.1579
	9.8	137.905	129.939	138.457	120.859	114.782	99.4162	99.8211	90.5233	84.268	84.9486	83.2721	79.161	80.8912	77.1859	84.2454	68.9676	9.8	90.0127	89.4389	89.3086	71.3199	82.3521	61.6763	67.6454	58.1061	74.7372	63.5701	63.8223	61.7902	52.0406	67.5121	58.174	59.4483	9.8	105.617	92.7872	104.074	95.687	90.6133	76.9263	79.6936	68.3647	74.9433	77.7713	66.4946	69.6272	68.9754	63.8434
	9.9	137.916	130.317	138.602	120.091	114.203	99.4708	99.4811	90.471	84.1063	84.2258	83.0882	79.0388	80.4466	77.0441	83.9922	69.1643	9.9	89.4036	89.0587	89.0062	70.955	82.4706	61.4694	67.135	58.0961	74.8409	64.0731	63.4868	61.5974	51.7383	67.3822	57.829	59.0564	9.9	105.493	93.2104	103.945	95.3029	91.1771	76.6029	79.2703	68.4299	74.504	77.672	66.5152	69.532	68.9034	63.3274
	10	137.877	130.98	138.321	119.36	114.401	99.1274	99.2548	90.2718	84.1461	83.6683	83.429	79.1842	80.7209	76.8879	83.1996	68.9471	10	88.926	88.4631	89.0592	70.8393	82.4297	61.7619	66.9543	57.9682	74.9597	64.3428	63.411	61.4962	51.3484	67.2708	57.5137	58.8677	10	105.169	93.3697	103.701	94.8083	91.5636	76.7371	78.9008	68.5138	73.6904	77.652	66.5034	69.2601	69.0897	63.1703
	10.1	137.679	130.79	137.713	118.274	114.772	98.8312	98.8612	89.9609	84.0673	83.155	83.5516	79.2086	81.0494	77.0378	82.1344	68.3356	10.1	89.0166	87.5716	89.5896	71.044	81.8656	62.0872	67.1222	58.0168	74.7294	64.3846	63.8978	61.5972	51.0907	67.136	57.2597	58.8327	10.1	104.604	93.6087	103.28	94.5649	91.5964	77.2481	78.5188	68.7249	73.4704	77.5637	66.3311	68.7233	69.6037	63.4789
	10.2	137.867	130.053	136.918	117.989	115.126	98.8203	98.6096	89.6334	84.2677	82.8009	83.5478	79.0847	81.084	76.7731	81.4274	67.7912	10.2	89.0573	86.6157	89.8028	71.2468	81.2206	62.346	67.2893	57.7463	74.3383	63.9092	64.5807	61.5561	51.0562	67.2887	56.6267	58.9166	10.2	104.018	93.1684	102.962	94.739	91.227	77.8204	78.0986	68.8342	73.2188	77.7149	65.9963	68.5673	69.854	63.7858
	10.3	137.627	129.216	136.286	117.739	114.887	99.2702	98.3743	89.5156	84.0776	82.3931	83.3118	79.0577	80.4974	76.4452	81.3448	67.4631	10.3	89.3369	86.2578	89.1411	71.2076	80.4213	62.1392	67.1947	57.5489	74.1232	63.4669	65.0231	61.4584	51.4634	67.1363	55.916	59.1616	10.3	103.49	92.5337	102.721	95.041	90.8497	77.7241	77.7411	68.9677	73.3219	77.6594	65.5376	68.7104	69.9087	64.0362
	10.4	137.745	128.727	136.156	118.015	114.48	99.6386	98.4517	89.4076	83.7479	82.146	83.2332	78.7712	80.0513	76.1544	81.9766	67.5733	10.4	89.1524	86.6564	87.9509	70.9501	79.6891	61.6849	66.7664	57.0251	73.9358	62.9058	65.1534	61.2067	51.8948	67.0813	55.5527	59.4203	10.4	103.016	91.7204	102.81	95.06	90.5474	77.215	77.4111	68.6903	73.3466	77.2691	65.5029	69.0201	69.6242	63.9366
	10.5	138.18	128.83	136.556	117.991	114.298	99.6217	98.337	89.2406	83.4203	82.033	83.5598	78.5677	80.1668	76.3549	82.5191	67.5756	10.5	89.2632	87.385	86.4428	70.5051	78.6949	61.0969	66.8406	56.5482	73.9299	62.6307	64.9629	61.0226	52.009	66.6573	55.9724	59.4966	10.5	102.673	91.2599	102.771	94.5349	90.4166	76.6974	77.4708	68.4957	73.7022	76.314	65.6266	68.9733	69.3162	63.9518
	10.6	138.991	129.076	137.15	118.32	114.46	99.5946	98.2822	88.9768	83.3899	81.9756	83.799	78.2188	80.4936	76.844	82.9807	67.7492	10.6	89.3073	87.7058	85.7981	70.262	77.9836	60.6993	66.8889	56.2807	74.1007	62.531	64.7319	60.8762	52.0187	66.519	56.7593	59.2922	10.6	102.371	91.31	102.673	93.8759	90.0924	76.5594	77.158	68.1551	73.9439	75.5443	65.6917	68.7664	68.9443	63.8662
	10.7	139.507	129.143	137.68	118.116	114.783	99.2454	98.1456	88.8787	83.6136	81.9061	84.1416	78.0448	80.8441	77.3769	82.6794	67.479	10.7	89.3257	87.675	85.8656	70.2868	77.8809	60.4642	66.7503	56.1368	74.4619	62.5471	64.6886	60.5608	51.7954	66.33	57.7521	59.1367	10.7	102.331	91.4957	101.961	93.6268	89.9367	76.6349	76.8491	67.9843	74.4167	75.4088	65.2784	68.5808	68.6211	63.9819
	10.8	139.14	128.586	137.81	117.835	114.656	98.7178	98.2361	88.9131	83.5017	81.7354	84.0718	78.1136	80.6386	77.59	82.4047	67.5467	10.8	89.3067	87.2529	86.5232	70.4154	78.5108	60.5969	65.9678	56.183	74.6238	62.4827	64.5626	60.2939	51.534	66.4753	58.308	59.3176	10.8	102.682	91.4567	101.131	93.6106	89.5493	76.4348	76.3584	67.9588	74.5338	75.7786	64.6788	68.775	68.2679	64.2362
	10.9	138.572	127.521	137.45	117.167	114.383	98.0416	98.4962	89.0707	83.1023	81.5956	83.7481	78.1613	80.4187	77.4984	82.3998	67.3092	10.9	89.1294	87.1326	87.0966	70.1277	79.0631	60.6133	65.4961	56.4244	74.4352	62.4857	64.6782	60.2312	51.1846	66.31	58.352	59.6034	10.9	103.583	90.8176	100.228	93.6787	89.1759	75.8731	76.3354	67.9072	74.5311	76.0528	63.9878	69.3193	67.9082	64.2303
	11	138.151	126.86	136.746	116.422	114.146	97.7396	98.9117	89.4346	82.2833	81.4139	82.9037	78.246	79.971	77.0349	82.575	67.3369	11	89.3184	87.1203	87.2869	69.4154	79.3011	60.8284	65.6939	56.8999	73.9852	62.6223	64.5191	60.4884	50.879	65.9422	57.7221	59.5567	11	104.567	89.9536	99.9268	93.3257	88.3334	75.1733	76.4066	67.922	73.9714	75.7416	63.626	69.8767	67.5096	64.153
	11.1	138.271	127.055	135.884	115.932	114.424	98.038	99.3688	89.9321	81.8697	81.2591	82.0976	77.848	79.6957	76.5779	82.5901	67.2139	11.1	89.1977	87.4503	87.4454	68.7463	78.9319	60.8988	65.9433	57.0872	73.2949	63.1218	64.3496	60.7277	50.934	65.5864	57.028	59.374	11.1	104.743	89.2247	99.9539	93.0366	87.6333	74.822	76.5371	67.4822	73.3614	75.1344	63.5526	69.7447	67.2856	63.6052
	11.2	138.278	128.08	135.522	115.92	114.582	98.4469	99.1841	90.1956	81.8243	81.033	81.6984	77.3392	79.6312	76.3202	81.8412	67.3008	11.2	89.0528	87.3071	87.1088	68.4391	78.6259	61.1151	65.8233	56.7791	72.7384	63.5153	64.071	60.7589	51.0279	65.8213	56.7269	59.1432	11.2	104.116	89.1223	100.426	92.5707	86.9413	74.6482	76.4642	67.2558	72.815	74.739	63.7109	69.1832	67.2138	63.012
	11.3	138.277	129.189	135.675	116.439	114.352	98.5814	98.8606	89.925	82.3387	81.1566	81.6103	76.7011	79.4162	76.3121	81.5612	67.2763	11.3	88.499	86.6261	86.4473	68.3377	78.2253	60.9586	65.1	56.0746	72.0691	64.0086	63.9117	60.744	51.3888	66.3927	56.8302	59.1801	11.3	103.201	89.6212	100.814	92.2982	86.7411	74.4329	76.1642	66.9871	72.8399	74.7311	63.489	68.8831	67.6038	62.4013
	11.4	138.037	129.577	136.463	116.857	113.338	98.3257	98.4713	89.2886	82.5281	81.4582	81.6309	76.505	79.0304	76.2457	81.5337	67.2564	11.4	88.3087	85.5429	85.5743	68.0622	78.0158	60.8472	64.6213	55.6264	71.6002	63.9859	64.0209	60.9294	51.4798	66.8261	56.9292	59.1923	11.4	102.733	90.4812	101.137	91.8419	86.7163	73.9001	75.608	67.0763	73.4357	74.8692	63.1187	69.3402	68.0001	62.1452
	11.5	137.841	129.407	136.714	117.04	112.446	97.99	98.7067	88.7248	82.4957	81.8766	81.748	76.6686	78.6434	75.7927	81.9764	67.1847	11.5	88.0502	84.4671	85.1886	67.7622	77.8189	60.6868	64.3963	55.5859	71.0654	63.8154	64.2197	60.9696	51.5239	66.733	56.9337	59.4514	11.5	102.656	91.0629	100.721	91.9828	87.0856	73.3001	75.1819	67.0833	73.9121	74.9543	62.7987	69.8921	68.6408	62.436
	11.6	137.332	128.746	136.25	116.89	111.911	97.8694	98.7759	88.5831	82.0152	81.8111	82.0701	77.1904	78.8743	74.8761	81.7377	67.2591	11.6	87.9144	84.0293	85.5144	67.5479	77.9457	60.5017	64.5943	56.0501	70.883	63.2882	64.2633	60.7557	51.4083	66.5086	56.8203	59.4182	11.6	102.576	91.077	99.9401	92.3261	87.4576	72.9953	75.0637	67.0997	73.7398	75.041	63.3181	69.8236	68.9762	62.5643
	11.7	137.055	128.516	134.899	116.671	112.267	97.7098	98.7426	88.4288	81.9411	81.6632	82.4643	77.5003	79.4541	74.0683	81.2761	66.9176	11.7	87.4151	84.1173	85.728	67.4616	78.2266	59.9654	64.7739	56.2646	71.0892	63.0512	64.0328	60.5933	51.6442	66.1959	56.9493	59.1994	11.7	102.344	90.5756	99.17	92.9312	87.7871	72.7864	75.1149	66.997	72.8153	75.3819	64.0548	69.5058	69.2309	62.5382
	11.8	137.103	128.354	134.174	116.215	112.925	97.6239	98.3431	87.9968	82.0267	81.5132	82.4543	77.5233	79.7251	73.6197	80.7821	66.2927	11.8	86.9891	84.5503	85.5369	67.138	78.3978	59.4512	64.8288	56.0007	71.7848	63.0936	63.5587	60.4692	52.0206	65.9804	57.1021	58.6613	11.8	102.381	90.1308	98.9601	92.9604	87.9776	72.9117	75.1753	66.6406	71.9956	75.5667	64.5501	69.074	68.992	62.2314
	11.9	137.21	128.68	134.261	115.981	113.52	97.2291	97.9709	87.2912	82.4963	81.6864	82.1036	76.9382	79.2499	73.9612	80.5889	65.4307	11.9	86.5773	84.6516	85.2162	66.7469	77.8517	59.2406	64.6777	55.3881	72.5954	63.028	63.3738	60.2761	52.2156	65.7663	57.5589	58.3644	11.9	102.489	89.9509	98.8557	92.5192	88.1157	72.8328	75.0257	66.258	71.9166	75.4158	64.3051	68.8966	68.6597	62.2154
	12	136.929	128.913	135.45	116.116	113.797	97.0318	97.6131	86.781	82.5653	81.6651	81.4524	76.3559	78.6109	74.527	80.4116	64.9064	12	86.2881	84.2023	85.4667	66.1096	76.8566	59.4211	64.6176	55.2072	73.1427	62.9517	63.3763	59.6732	51.917	65.705	57.814	58.144	12	102.466	90.2291	98.5223	91.9046	88.0617	72.963	75.1531	65.9518	72.3977	74.958	64.0279	68.6534	68.3354	62.3426
	12.1	135.911	129.174	136.271	117.081	113.62	96.8711	97.5899	86.8188	82.2836	81.2522	81.3627	75.5666	78.1269	75.1746	80.1699	64.7991	12.1	86.2938	83.7234	86.3169	65.9809	76.0478	59.4869	64.6836	55.5691	73.4787	62.4237	63.5004	59.3869	51.2678	65.7701	57.8743	57.9144	12.1	101.7	90.5951	98.4354	91.256	87.8599	73.1419	75.1859	65.8689	73.0353	74.7237	63.9661	68.7748	68.0751	62.35
	12.2	135.265	129.068	136.49	117.677	113.625	96.9707	97.8467	87.1073	81.7669	80.5681	81.3988	75.3082	78.1907	75.1999	80.1784	65.0734	12.2	86.2889	83.4467	86.7747	65.9034	75.9871	59.5802	64.8323	56.1748	73.2863	62.105	63.5307	59.4727	50.82	65.5082	57.2574	57.8324	12.2	101.051	90.6964	98.5971	90.8294	87.8172	73.2916	75.2458	65.9932	73.2049	74.8722	64.1843	68.8329	67.8964	62.1329
	12.3	135.185	129.236	135.784	117.461	113.66	97.036	98.2199	87.372	81.4189	80.1597	81.6298	74.9553	78.4186	74.8713	80.5402	65.7867	12.3	86.3659	83.8516	86.3626	66.0953	76.4877	59.66	64.8099	56.1646	72.923	61.6048	63.3972	59.5821	50.5673	65.1282	56.511	58.0059	12.3	100.703	90.2381	98.9883	90.606	87.9552	73.3066	75.1002	66.1268	73.3853	75.3461	63.9969	68.7093	67.8287	61.7064
	12.4	135.779	129.982	135.547	116.108	113.967	97.2193	98.1486	87.0989	81.3707	80.3868	81.3329	74.9851	78.8024	74.0701	81.1186	66.1232	12.4	86.0614	84.1428	85.3169	65.9537	76.8519	59.7142	64.831	55.6592	72.0147	61.4217	63.2756	59.5552	50.6864	64.6687	56.0037	58.5644	12.4	100.755	89.4231	98.7532	90.5261	87.8713	72.942	75.0773	66.4028	73.2462	75.5973	63.5464	68.2914	68.0299	61.4326
	12.5	135.999	130.808	135.828	115.196	113.824	97.8792	97.8904	86.5226	81.3034	80.9321	81.0186	74.8463	78.9639	73.8797	81.0222	65.8589	12.5	85.9514	84.1599	84.5912	65.8601	76.8231	59.4357	64.822	54.8436	71.7023	61.3991	63.1838	59.5709	50.7767	64.6512	56.0959	58.8439	12.5	100.652	88.956	98.7289	90.641	87.195	72.7993	75.2994	66.3837	73.0917	75.667	62.84	67.96	68.353	61.2246
	12.6	135.839	131.089	136.712	115.113	113.346	98.4926	97.4447	86.1687	81.2068	81.345	80.752	75.0181	78.9121	74.0069	80.1976	64.9391	12.6	85.7576	83.3292	84.4457	65.8187	76.5073	58.7434	64.9768	54.596	71.6381	61.42	63.326	60.0871	50.7647	64.8216	56.6197	58.8891	12.6	100.595	88.8413	98.6677	90.5119	86.4829	72.6642	75.3447	66.2219	72.4758	75.3751	62.4449	67.9538	68.4319	61.0904
	12.7	135.334	130.25	137.285	115.398	112.73	99.0066	97.4294	86.2871	81.0292	81.4924	80.7922	75.2098	78.5566	74.8778	78.9339	64.3173	12.7	85.8086	82.4524	84.5247	65.7689	76.1684	58.1578	64.8724	54.5431	72.0759	61.3558	63.3237	60.501	50.5584	65.1292	56.6254	58.6621	12.7	100.58	88.7818	99.0623	90.3707	86.1073	72.6766	75.0436	65.9677	72.0182	75.0918	62.423	67.9871	68.3601	61.0631
	12.8	135.377	129.476	137.37	115.227	112.726	98.8731	97.4724	86.6053	80.8738	81.3193	80.7661	75.3488	78.2372	75.0534	78.5261	64.4828	12.8	85.7972	81.5939	84.1924	65.6119	76.0897	58.1604	64.6541	54.6374	72.341	61.1862	63.2279	60.7579	50.3781	65.5433	56.2083	58.4814	12.8	100.592	88.2446	98.9674	89.7287	86.2176	72.3133	74.4404	65.884	71.6484	74.4544	62.8588	68.1618	68.0962	61.1784
	12.9	135.557	128.875	137.014	114.798	112.889	98.8049	97.5879	86.631	81.0454	80.979	80.8559	75.2849	77.9663	75.1606	78.8534	64.8836	12.9	86.1891	81.2362	83.6422	65.269	76.1627	58.7376	64.2771	54.1976	72.503	61.2671	63.2457	60.5796	50.0731	65.6447	55.4166	58.2123	12.9	100.063	87.5757	98.8817	88.851	86.0581	71.7556	74.2026	65.9752	71.5574	73.7498	63.3738	68.1632	68.0181	61.6328
	13	136.017	129.16	136.116	114.694	112.826	98.5372	97.4594	86.5834	81.6274	80.5853	80.691	75.0164	77.796	74.8959	79.5743	65.38	13	86.4951	81.0674	83.099	65.1419	76.2983	59.4308	64.0668	53.9203	72.6968	61.706	63.5244	60.2018	49.6463	65.338	55.1538	57.5051	13	99.3743	87.2579	98.5903	88.0423	85.8289	71.0656	74.2758	65.7434	71.4342	73.2251	63.5588	68.1183	67.833	61.8702
	13.1	135.848	129.514	135.528	114.959	112.233	98.0922	97.2206	86.5091	82.4691	80.5296	80.8182	75.0324	77.4304	74.9768	79.706	65.2758	13.1	86.4526	81.3041	82.915	65.0341	76.2653	59.7551	64.0154	53.91	72.5853	62.0716	63.7723	59.7216	49.0774	64.597	55.1557	56.8073	13.1	98.6057	87.4947	98.6507	87.7739	85.1701	70.9807	74.3234	65.3619	71.298	73.3122	63.3353	67.9482	67.821	62.2558
	13.2	135.86	130.244	135.05	115.102	111.903	97.5278	97.0666	86.7187	82.9069	80.6047	80.7208	75.1953	77.1622	74.9577	79.5728	65.2471	13.2	85.8924	81.4806	82.9494	64.97	76.0612	59.5986	64.1258	54.5307	72.2191	62.0887	63.7459	59.3853	48.8747	64.147	55.4022	56.5806	13.2	98.496	88.2157	98.9027	87.9726	84.8573	71.4133	74.0067	64.9096	71.1699	73.8377	62.8798	67.7574	67.6162	62.4856
	13.3	136.09	130.658	134.98	114.915	111.86	97.1879	96.7422	86.8916	82.7564	80.8128	80.9656	75.5501	76.8736	74.4944	79.0074	65.0926	13.3	85.2623	81.4787	82.7838	64.7801	75.8273	59.069	64.2333	55.3126	71.248	61.7918	63.7696	59.376	49.1411	64.0118	55.735	57.4104	13.3	98.8574	88.9869	99.0516	88.4277	84.6547	72.133	73.6767	64.7722	71.179	74.4231	62.656	67.6306	67.316	62.7142
	13.4	136.764	130.697	134.461	115.059	111.865	97.2588	96.4329	87.1978	82.0181	80.7328	80.937	75.6377	77.0514	73.9819	78.6951	64.9469	13.4	85.0234	81.248	82.1219	64.9502	75.4616	58.1814	64.153	55.9399	70.5226	61.4538	63.9169	59.1366	49.8101	64.2546	56.1934	58.4598	13.4	99.3357	89.422	98.727	88.9808	85.1432	72.335	73.5138	64.8146	71.4304	74.6589	62.5937	67.3783	66.6533	62.352
	13.5	137.213	129.79	133.795	115.215	111.816	97.4897	96.2489	87.2681	81.1904	80.9678	80.8368	75.33	77.2271	73.3557	78.0488	64.7127	13.5	85.0644	81.1301	81.264	65.4529	75.3599	57.3551	63.6219	56.3816	70.3901	61.3167	63.6239	58.8253	50.7777	64.4938	56.4848	59.0854	13.5	99.4173	88.9781	97.9683	89.5448	85.3787	72.2457	73.4621	64.6368	71.6669	74.6004	62.6712	67.3748	66.0719	61.812
	13.6	136.887	128.889	133.334	115.575	112.031	97.3954	96.5131	87.231	80.543	81.2313	80.4416	74.9441	77.1988	73.2064	78.0858	64.405	13.6	85.1241	81.3091	81.0513	66.021	75.3359	56.9584	62.7616	56.2514	71.0599	61.1744	62.9777	58.6294	51.5887	64.783	56.4258	58.7889	13.6	98.9678	87.9148	97.3898	89.7301	85.0506	71.9751	73.4434	64.4673	71.9174	74.1608	62.6284	67.453	65.5718	61.204
	13.7	136.383	128.343	133.289	114.991	112.557	97.2321	96.9221	87.1721	80.408	81.5639	80.1652	74.627	76.7884	72.8076	78.147	64.3274	13.7	85.1579	81.4922	81.2947	66.1833	75.2634	57.2192	62.1881	55.6677	71.5732	61.0806	62.1953	59.0493	52.051	64.888	56.1436	58.241	13.7	98.6232	87.0833	97.3333	89.5466	84.2224	71.8339	73.4819	64.3582	71.727	73.954	62.5697	67.9072	65.2778	60.968
	13.8	135.799	128.569	133.633	114.371	112.729	96.8898	97.0006	87.1366	80.4546	81.2498	80.0534	74.5528	76.3183	72.5116	78.877	64.2978	13.8	84.8274	81.5256	81.489	66.0592	74.8706	57.8444	62.0223	54.6752	71.2333	61.2498	62.036	59.2346	52.0277	64.9051	55.8931	57.624	13.8	98.5754	86.8	97.429	89.4858	83.5232	71.4154	73.6117	64.8131	71.5537	73.9448	62.2652	68.3477	65.2849	60.7649
	13.9	135.527	128.659	134.038	113.74	112.265	96.7237	96.9457	87.1136	80.5993	80.4827	80.179	74.623	76.5137	72.2501	79.2783	64.0597	13.9	84.4782	81.1943	81.1871	65.7783	74.5442	58.3233	62.3041	54.1429	70.3633	61.5366	62.2173	58.991	51.8743	65.0326	55.9244	57.3238	13.9	98.6602	86.8162	97.3178	89.5528	83.6632	71.0644	73.7349	65.4161	71.1116	74.0658	61.9493	68.8902	65.5622	60.9196
	14	135.173	128.456	134.728	113.962	111.336	96.5041	96.7594	86.7354	80.6081	79.7078	80.3621	74.6671	77.0429	72.5552	79.5793	63.8014	14	83.5736	80.5661	80.9333	65.4728	74.7016	58.1807	62.4669	54.0742	69.828	62.0043	62.5371	58.3869	51.8792	65.2768	55.9889	57.423	14	98.61	86.538	96.9782	89.3543	83.9737	70.7091	73.794	65.8772	70.88	73.9649	61.6944	69.1333	66.16	61.3124
	14.1	134.763	128.011	135.24	114.583	110.607	96.2046	96.7156	86.3996	80.5839	79.3908	80.5814	74.8354	77.5967	72.7521	79.6244	63.6961	14.1	82.9628	79.7947	80.9949	65.2097	75.1808	57.6257	62.7664	54.5196	70.2367	61.9348	62.7171	58.1334	52.0392	65.493	56.2994	57.7866	14.1	98.1748	86.1692	96.8392	88.3893	84.3312	70.7576	73.6228	65.8867	70.5891	73.5138	61.631	68.8401	66.5852	61.8952
	14.2	134.242	127.685	135.426	115.533	110.743	95.6986	96.6337	86.372	80.4229	79.4202	80.4677	74.8401	77.6361	72.9466	79.5443	64.1291	14.2	82.3157	79.2381	81.1282	64.8954	75.5356	56.9466	62.7727	55.0132	70.7814	61.6807	62.598	58.3036	51.9832	65.5882	56.4993	58.2102	14.2	98.0224	86.085	96.8761	87.3438	84.2872	70.8511	73.3312	65.6204	70.6006	73.1588	61.8093	68.4134	67.1083	62.2021
	14.3	133.443	127.395	135.213	115.938	111.632	94.9018	96.7854	86.9653	80.0313	79.3676	79.9699	74.8942	77.3536	72.99	79.3966	64.6066	14.3	82.1852	79.0087	81.2803	64.5408	75.4213	56.5771	62.6681	55.396	71.0762	61.4061	62.3894	58.4383	51.8583	65.4159	56.7444	58.0972	14.3	97.6933	86.0941	96.8727	86.9254	84.5054	71.1079	73.0147	65.2784	70.6337	72.7873	62.1864	68.1622	67.3484	61.9093
	14.4	132.9	127.015	135.355	115.965	112.795	93.9883	96.9811	87.6677	79.5452	79.1234	79.3947	74.935	76.9597	73.2577	78.9643	64.8046	14.4	82.0574	79.2632	81.2049	63.9901	74.6787	56.7526	62.4664	55.2717	70.964	61.034	62.0573	58.575	51.5858	65.0253	56.4948	57.6979	14.4	97.7156	86.1988	96.383	86.9492	84.7351	71.2863	73.0202	65.0898	70.8944	73.0251	62.6539	68.6751	67.3513	61.1427
	14.5	133.172	126.771	135.516	115.659	113.573	93.6388	96.7112	87.8892	78.9413	79.0596	79.1713	74.8881	76.6787	73.3381	78.6677	64.485	14.5	82.2976	79.5731	81.1202	63.5986	73.7392	57.2473	62.8703	54.4367	71.1213	60.512	62.0994	58.4679	51.3986	64.4907	56.1463	57.0433	14.5	97.3064	86.083	95.4818	86.9437	84.8753	71.3546	72.9809	65.0398	71.0654	73.413	62.4644	68.9923	67.0451	60.2422
	14.6	134.142	127.038	135.55	115.581	113.988	93.9739	95.8884	87.5162	78.8551	78.9608	79.2606	74.7221	76.5267	72.9229	78.3097	63.7489	14.6	82.7927	80.0338	80.932	63.3562	73.1853	57.9526	63.387	53.5802	71.3819	59.7566	62.4293	58.6814	50.9459	64.1071	55.7746	56.6156	14.6	97.083	86.0443	94.3477	86.6082	84.3474	71.2967	72.6971	64.98	71.3784	73.9902	61.9814	68.9041	66.5644	59.7001
	14.7	135.229	127.785	134.728	115.449	113.788	95.0048	94.9874	86.749	79.1208	78.8279	79.1856	74.3603	76.3321	71.9222	77.9951	62.7856	14.7	83.2341	80.0378	80.922	63.193	73.2838	58.2147	63.786	53.0811	71.2886	59.806	63.0114	59.061	50.4067	64.0853	55.6271	56.7318	14.7	96.3693	85.9053	93.7421	86.5208	84.114	71.0873	72.533	64.7171	71.4692	73.9046	61.6906	68.0011	66.2628	59.8567
	14.8	135.595	128.605	133.955	115.024	113.18	96.0088	94.8919	86.4363	79.6956	78.3607	78.8743	73.9803	76.1644	70.8773	77.5159	62.1453	14.8	83.2692	80.1051	81.1186	63.1481	73.6514	58.1788	63.6204	53.3354	70.736	60.2142	62.9509	59.4283	50.1527	64.1657	55.9299	57.1912	14.8	95.5753	85.7601	93.978	86.7228	83.973	70.8663	72.8496	64.1186	71.5272	73.8272	62.3972	67.2778	66.2564	60.4441
	14.9	135.651	129.134	133.484	114.55	112.268	96.6402	95.3093	86.2901	79.8987	78.1934	78.7149	73.547	76.0143	70.4189	77.3908	62.4083	14.9	83.0229	79.8644	81.3747	63.1136	73.5748	58.0529	63.6437	53.6986	70.2684	60.8024	62.5449	59.5712	50.1273	64.2982	56.1492	57.7169	14.9	94.6012	85.5168	94.4504	86.9068	84.2212	70.6016	73.3846	63.6302	71.3059	73.7822	62.9861	66.8076	66.421	61.0609
	15	135.413	129.221	133.556	114.1	111.79	96.8886	95.9824	86.3627	79.8689	78.3412	78.9756	73.1828	75.8953	70.9846	77.6112	63.1679	15	82.8999	79.8064	81.2488	63.1684	73.1646	58.0879	63.4278	53.9121	70.2988	60.9154	62.1482	59.3506	50.2576	64.4627	56.5174	57.7927	15	94.3589	85.2334	94.8868	87.043	83.7877	70.4867	73.3879	63.538	70.6387	74.0829	63.2129	66.8214	66.607	61.0768
	15.1	135.068	128.886	133.824	114.029	111.709	96.9494	96.1294	85.9368	79.8347	78.7346	79.4188	72.7857	75.6082	71.6097	77.6952	63.8314	15.1	82.8612	79.2067	80.6372	62.6931	72.8256	58.1066	63.258	53.9777	70.8403	61.0913	62.4908	59.3724	50.1986	64.6566	56.1794	57.5676	15.1	94.8129	84.873	94.8682	86.9114	83.2094	70.3558	72.7054	63.876	69.54	74.0992	62.7243	66.9901	66.2629	60.6991
	15.2	134.469	128.579	133.708	114	111.711	97.4298	95.996	85.446	79.9828	79.1649	79.6717	72.4939	75.1739	72.0266	77.2608	63.7816	15.2	82.5361	78.6903	79.8128	62.2816	72.8707	57.8011	62.6134	53.8287	71.3659	61.4387	62.8339	59.3273	50.1711	64.881	56.0516	57.2544	15.2	96.0064	84.6708	95.1947	86.781	82.5547	70.2263	72.2338	64.2416	68.462	73.854	62.6022	67.1792	65.9746	60.3737
	15.3	133.857	128.347	133.732	114.183	111.621	97.6233	95.5506	85.0102	80.117	79.2394	79.66	72.2263	74.7298	71.8286	76.59	63.8059	15.3	81.9608	78.1091	79.3797	62.0539	73.0756	57.4093	62.372	53.7001	71.672	61.8652	63.0626	59.3566	50.3409	64.9686	55.7169	57.1172	15.3	96.8056	84.5966	95.1476	86.4909	81.9599	69.8162	71.8141	64.3208	68.2507	73.4876	62.6841	67.3343	65.6762	60.3559
	15.4	133.675	128.3	133.67	114.221	111.067	97.4358	95.1809	84.7918	79.9059	79.0319	79.5247	72.3653	74.4289	71.7431	76.5543	63.9121	15.4	81.2014	77.7729	79.6671	62.2871	72.9817	57.1361	62.4836	53.4751	71.6107	62.1896	62.9708	59.0954	50.565	65.142	55.7097	57.3917	15.4	96.9671	84.6666	95.0954	86.5536	81.5033	69.3068	71.5928	64.3326	68.7294	72.9993	62.803	67.2676	65.4999	60.5767
	15.5	133.956	128.093	133.976	114.115	110.752	96.7467	95.0511	84.9128	79.7823	78.747	79.2459	72.8789	74.3214	71.1966	76.9327	63.8901	15.5	80.4386	77.5598	80.2827	62.315	72.9183	57.0697	62.8749	53.646	71.2672	62.1711	63.0706	58.8636	50.761	65.375	55.6147	57.6694	15.5	96.3932	84.664	94.8208	86.8481	81.2579	68.7318	71.2379	64.2996	69.4066	72.8171	62.6888	67.5077	65.3479	60.5737
	15.6	134.394	127.848	133.714	114.212	110.467	96.662	94.7363	84.9866	79.7887	78.8413	78.7294	73.4419	74.6087	70.6562	77.6339	63.3223	15.6	79.6278	77.5337	80.6354	61.8712	72.7888	56.8549	63.1474	53.9709	71.0591	62.0502	63.4298	58.9459	50.5137	65.6027	55.6184	57.6376	15.6	95.8621	84.7067	95.0342	87.1042	81.567	68.633	71.5787	64.3337	69.6194	72.7206	62.3179	67.8804	65.1901	60.4074
	15.7	135.015	127.622	133.491	114.427	110.881	96.9167	94.5731	85.021	80.1744	79.2333	77.8904	73.5736	74.9239	70.0838	77.8251	62.5557	15.7	79.5194	77.8299	80.0259	61.4942	72.917	56.8454	62.9079	54.1586	70.8713	61.8517	63.6543	59.1998	50.2447	65.4896	55.6119	57.3487	15.7	95.6451	84.6862	95.1372	86.812	82.1608	68.964	72.1966	63.9632	69.5781	72.6812	62.1461	68.0957	65.328	60.2241
	15.8	135.742	127.498	132.899	115.021	111.08	97.082	94.184	84.5699	79.8897	79.3164	77.2388	73.1907	75.1577	70.3092	77.9607	62.3797	15.8	79.9006	78.1318	79.0223	61.6289	72.6319	56.9414	62.758	53.9287	70.7279	61.7752	63.5324	59.5504	50.0221	65.4553	55.4243	57.066	15.8	95.6142	84.8808	94.8681	86.1032	82.4198	69.5179	72.4821	63.5378	69.7911	72.2702	61.8627	67.6854	65.3544	60.1129
	15.9	136.321	127.52	132.99	115.447	111.36	96.6887	94.1278	84.224	79.2447	79.0997	77.1336	72.9024	75.0107	70.7586	77.5582	62.8953	15.9	80.6152	78.3316	78.2021	62.3133	72.5351	57.2371	62.3233	53.763	70.4672	61.9582	62.7373	59.5286	50.2958	65.5503	55.0774	57.0149	15.9	95.7304	84.9781	94.167	85.2924	82.511	69.7669	72.1917	63.285	70.3734	71.8372	61.7356	66.8828	65.2318	59.9511
	16	136.163	128.025	132.813	115.61	111.077	96.1609	94.0141	83.8682	78.5267	78.566	77.3758	72.7484	74.7777	71.2913	77.2803	63.3453	16	80.7638	78.4646	78.1509	62.7636	72.3122	57.0236	61.9447	54.0003	70.4778	62.0444	62.0478	59.3198	50.5763	65.8708	54.655	56.9831	16	95.9813	85.3714	93.391	84.8158	82.0517	69.595	71.6892	63.6032	70.946	71.9138	61.554	66.256	64.9113	59.8613
	16.1	135.305	128.527	132.862	115.622	110.931	95.8424	93.7924	83.7884	78.5954	78.203	77.5908	72.7048	74.4943	71.4564	77.0542	63.1171	16.1	80.7286	78.3489	78.1211	62.5376	72.316	56.9807	61.371	54.4488	70.5567	62.164	61.5411	59.2983	50.8456	65.7409	54.5749	56.9611	16.1	96.517	85.3309	92.9731	84.5807	81.8908	69.5046	71.5822	63.946	71.0056	72.3244	61.7322	65.9239	64.754	59.9547
	16.2	134.582	129.199	132.377	115.079	110.643	95.6861	93.6901	83.5841	79.1167	77.9754	77.3704	72.5974	74.4764	71.3164	77.0392	62.2558	16.2	80.4141	78	77.7378	61.9461	72.0231	57.0751	61.4964	54.4794	70.7383	61.6921	61.3597	59.3352	50.7854	65.2839	55.0753	57.1242	16.2	96.5603	85.2243	92.8216	84.4671	81.6816	69.2584	71.5996	64.0173	70.4454	72.7148	61.9739	65.9371	65.0718	60.2917
	16.3	134.192	129.065	132.13	114.726	110.42	95.7107	93.5571	84.1054	79.5019	77.68	77.415	72.6607	74.4159	71.0218	77.0321	61.6644	16.3	80.1423	77.4614	77.2862	61.4496	71.5829	57.5022	61.9692	53.9561	70.609	61.2634	61.318	59.4951	50.7473	64.9273	55.9192	57.3348	16.3	96.2898	84.6344	92.9436	84.1564	81.7849	69.0676	71.5449	64.1278	69.7418	72.9078	62.3496	65.9507	65.698	60.3503
	16.4	133.962	128.596	132.196	114.121	110.48	95.5727	93.65	84.9808	79.4043	77.3194	77.3087	72.8299	74.1717	70.7598	76.8346	61.7573	16.4	79.6818	77.161	77.4294	61.2702	71.4726	57.3624	62.503	53.3226	70.4868	60.6399	61.6202	59.2814	50.5566	64.9532	56.5863	57.6761	16.4	95.6171	83.9962	92.9022	84.0996	81.6833	68.5652	71.4589	64.4238	69.1942	73.0461	62.4353	65.9838	66.1746	60.288
	16.5	133.918	127.539	132.557	113.779	110.893	95.5067	93.473	85.9171	79.2436	76.7627	77.3002	72.9576	73.608	70.8198	77.0184	62.4108	16.5	79.4444	77.2071	78.1912	61.3482	71.4597	57.2026	62.5524	52.7182	70.2311	60.4768	62.1854	59.3152	50.2786	65.1547	56.6789	57.9701	16.5	95.3219	83.3988	92.8439	84.24	81.314	68.4217	71.217	64.8546	69.0094	73.2553	62.4961	66.0107	66.4028	60.1268
	16.6	133.923	126.835	132.862	113.218	111.543	95.3941	93.1617	85.7593	79.0619	76.8041	77.0308	72.8848	73.1839	70.7038	77.3687	63.2909	16.6	79.0336	77.2717	78.6081	61.4424	71.8833	56.8368	62.4411	52.4302	69.9939	60.5418	62.7516	59.587	49.8937	65.1027	56.3102	58.0727	16.6	95.0269	83.2789	92.8369	84.607	81.024	68.6959	71.4561	64.7309	69.0341	73.3064	62.3074	66.3483	66.5241	60.2349
	16.7	134.018	126.555	132.747	112.788	111.605	95.4373	93.5003	85.2778	79.2543	76.9691	77.2102	72.7993	73.278	70.5587	77.5393	63.8149	16.7	78.4831	77.2298	78.5244	61.6218	71.8369	56.7267	62.4447	52.1872	70.0409	60.9461	63.1483	59.7188	49.4054	64.7191	55.6964	57.8389	16.7	94.7832	83.4704	93.0266	84.5812	80.7934	69.0771	71.5508	64.243	69.0013	73.3452	62.0253	66.8251	66.7751	60.0788
	16.8	133.68	127.077	132.451	112.625	111.094	95.4557	94.112	85.07	79.3612	77.4559	77.7042	72.6153	73.5699	70.1916	76.9952	63.8081	16.8	77.9827	77.1768	78.0089	61.7701	71.9022	56.2112	62.4786	52.3353	70.1864	61.4374	63.1834	59.6171	49.0137	64.5239	55.3187	57.2716	16.8	94.665	83.3172	92.9596	84.3844	80.939	69.1727	71.8981	63.7031	69.1111	73.5046	61.5211	67.0347	66.7767	60.0018
	16.9	133.306	127.563	132.09	112.898	110.826	95.1684	95.2211	85.559	79.7829	77.311	78.1948	72.5766	73.9254	70.1451	76.1289	63.3907	16.9	77.8402	77.191	77.6966	62.031	71.537	55.9314	62.7564	52.6531	70.4381	61.652	63.0966	58.9913	48.7453	64.6189	55.1183	56.7339	16.9	94.6719	82.7136	92.4742	84.1733	80.8329	68.6468	71.7137	63.3139	69.1857	73.3601	61.0633	66.9947	66.3962	59.9174
	17	133.17	127.623	131.729	113.283	110.766	94.9982	95.3532	85.7996	79.8977	77.0659	78.2259	72.3711	74.0993	69.992	75.8614	63.0857	17	78.4627	77.2216	77.3147	62.2207	71.5602	55.7124	62.7522	53.1059	70.1617	61.6628	62.6106	58.7628	48.8952	64.9682	55.2874	56.6403	17	94.5539	82.1977	92.0421	84.2089	80.6542	67.9244	71.5951	63.3553	69.4993	73.1132	60.8924	66.8278	65.9683	60.2442
	17.1	132.841	126.993	131.486	113.597	110.781	95.2073	95.3398	85.7351	79.634	76.5991	78.046	72.2083	74.1546	69.8169	75.8017	62.9954	17.1	78.8318	76.7346	77.0718	62.1296	71.6716	55.918	62.769	53.4937	70.0892	61.4908	62.3358	58.6098	49.179	64.7722	55.1856	56.7027	17.1	94.135	81.9916	91.8732	84.4429	79.7028	67.3556	71.2224	63.2011	69.7288	72.399	61.0428	66.8799	65.7997	60.5221
	17.2	132.448	126.395	131.44	113.674	110.123	96.1378	94.8122	85.3816	78.6727	76.6951	77.9703	72.1329	74.0961	69.8597	75.7209	62.8701	17.2	79.0786	76.2016	76.9491	61.7599	72.0899	56.1411	62.3478	53.4487	70.1254	61.6126	61.8961	58.7438	49.3316	64.346	55.1968	57.0572	17.2	93.8429	81.9609	92.1348	84.5044	79.0389	67.1307	71.1983	63.1737	70.2833	72.34	61.2728	66.8543	65.8531	60.4986
	17.3	132.371	126.289	131.592	113.531	109.757	96.7814	94.65	85.1756	77.7931	77.0141	78.35	72.5669	73.8364	69.8854	75.125	62.5859	17.3	78.6706	75.4058	77	61.328	72.0639	56.1979	62.1864	53.3311	70.5081	61.5808	62.0348	58.6913	49.213	63.8926	54.983	57.0957	17.3	93.8758	81.5593	92.269	84.1871	78.7856	67.3638	71.2044	62.8553	70.6968	72.18	61.2909	66.7108	65.8036	60.2872
	17.4	133.146	126.282	131.71	113.457	109.808	96.5029	94.389	84.5714	77.5781	77.4144	78.5968	73.2569	73.8332	70.0894	74.8438	62.3689	17.4	78.7182	74.8542	77.0179	61.054	71.8453	55.9864	62.0573	53.4346	70.3907	61.3079	62.2343	58.4801	49.0422	64.0953	55.0066	57.3528	17.4	94.0736	81.3419	92.297	83.3311	79.5672	67.8412	71.5169	62.5191	70.8274	72.2134	61.3318	66.5204	65.5388	59.872
	17.5	134.036	125.998	131.488	113.404	109.787	95.2396	93.9598	83.6052	78.2517	77.5501	78.548	73.4959	73.8758	69.8894	74.6858	62.2659	17.5	78.8417	74.1641	76.796	60.9587	71.4076	55.6318	62.1519	53.9652	70.0272	60.6511	62.9097	58.3911	49.0514	64.5817	54.8224	57.5011	17.5	94.141	81.3491	92.2191	82.5507	80.342	68.347	71.4439	61.9056	70.3762	71.9057	61.4922	66.3604	65.4993	59.4898
	17.6	134.022	125.445	131.134	113.634	109.425	94.3706	93.3811	82.6143	78.9746	77.5627	77.9522	73.0296	73.9159	69.9973	74.9994	62.2502	17.6	79.2411	73.8858	76.3643	61.0434	70.8682	55.4513	62.1444	54.3319	70.0163	60.3948	63.2253	58.4863	49.1864	64.897	54.6036	57.7006	17.6	93.9518	82.1539	92.0412	82.3737	80.6283	68.6211	71.412	61.0948	69.8616	71.8116	61.9903	66.4689	65.4718	59.197
	17.7	133.225	124.651	130.895	113.781	108.78	93.965	93.1347	82.3687	79.2481	77.3779	77.3309	72.3623	73.7318	69.8042	75.3439	62.1489	17.7	79.2456	74.1572	75.8973	61.3696	70.0056	55.5221	62.0302	54.071	70.4376	60.7247	63.3249	58.9607	49.2907	64.824	54.4244	57.6629	17.7	93.7574	83.0296	91.9219	82.8312	80.5567	68.4546	71.2673	60.7662	69.6083	72.144	62.0688	66.4461	65.6039	59.3144
	17.8	132.181	124.178	130.763	114.075	109.147	94.1816	93.293	82.791	79.1503	76.8004	76.7108	72.1689	73.6156	69.5106	76.116	61.7877	17.8	79.1508	74.6809	75.7141	61.5642	69.1462	55.6193	61.8317	53.7384	71.191	61.17	63.0464	59.421	49.353	64.5006	54.257	57.4908	17.8	93.4806	83.5088	91.5729	83.2101	80.2292	68.1627	71.385	61.1326	69.7759	72.58	61.8267	66.2964	65.3041	59.8163
	17.9	131.82	123.818	130.594	114.185	109.735	94.095	93.6308	83.5212	79.0768	75.8701	76.2052	72.3947	73.7781	69.1124	76.2044	61.3404	17.9	78.7742	75.2519	76.0871	61.7031	69.0191	55.7803	61.6981	53.6351	71.2116	61.015	63.0299	59.7001	49.4361	64.3261	54.3694	57.4573	17.9	93.3533	83.0753	91.3254	83.1681	80.2362	67.8739	71.2853	62.0187	70.0464	72.8646	61.1264	65.8089	65.1354	60.4568
	18	132.11	124.287	130.433	114.143	110.122	94.3107	93.5646	83.8992	79.2706	75.012	75.9663	72.4998	73.7604	68.8899	76.1119	60.9428	18	78.4637	75.1517	76.4954	61.498	69.3593	55.7174	61.7702	53.9578	70.8489	60.5863	63.0337	59.5207	49.5417	64.2141	54.2661	57.4149	18	92.977	82.4912	91.1491	82.5579	80.2251	67.8443	71.0106	62.7471	70.3843	72.7921	61.1359	65.4327	65.3192	60.6266
	18.1	132.859	125.093	130.782	113.792	109.565	94.4023	93.4682	83.8749	78.9722	74.5574	76.2471	72.4886	73.5231	69.115	75.4459	61.3666	18.1	77.8926	74.782	76.7117	61.5391	69.8707	55.8359	62.0741	54.0414	70.0534	60.4131	62.9306	59.135	49.605	64.2742	54.3367	57.2934	18.1	92.3596	82.065	91.3106	82.1816	80.1083	67.7483	70.5152	62.8559	70.3891	72.6452	61.2546	65.3266	66.0561	60.5457
	18.2	133.135	126.158	131.547	113.336	108.898	94.4072	92.9759	83.649	78.391	74.6539	76.5422	72.3927	72.9771	69.3762	75.4303	61.9479	18.2	77.4809	73.9666	76.5671	61.3234	69.7288	55.6426	62.4694	54.1536	69.7833	60.6777	62.4724	58.8727	49.8506	64.5164	54.2892	57.1597	18.2	91.8754	81.8352	91.3403	81.8918	79.6477	67.4251	70.2089	62.8291	70.2796	72.7563	61.7003	65.6677	66.4932	60.1557
	18.3	132.888	126.851	132.251	112.873	108.88	94.1404	92.5092	83.5453	77.3514	74.9253	76.4286	72.3121	72.6889	69.8776	75.3856	62.476	18.3	77.044	73.748	76.4659	61.2074	69.3989	55.3286	62.4582	54.1832	69.8644	60.6206	62.1776	58.7316	50.094	65.1951	54.5246	57.2064	18.3	91.8832	81.6537	90.8008	81.9133	79.2522	66.813	70.1873	62.4923	69.7514	72.9218	61.4093	66.2168	66.1914	60.2047
	18.4	132.009	127.068	132.504	112.568	109.568	94.1506	91.9907	83.8558	76.8057	75.3228	75.7758	71.9101	72.6006	70.0507	75.6354	62.1431	18.4	77.2218	74.2351	76.5298	60.8411	68.8946	54.5534	61.919	54.6506	70.2734	60.225	62.245	58.5283	50.4826	65.7967	54.9156	57.7834	18.4	92.5901	81.6521	89.9091	81.6882	79.2984	66.3593	70.4666	62.2796	69.0159	73.0314	61.422	66.5976	65.4998	60.4893
	18.5	131.488	126.735	132.309	112.49	110.145	94.4787	91.9282	84.0068	76.4372	75.8068	75.4338	71.4714	72.6631	69.9582	75.3474	61.8032	18.5	77.6144	75.062	76.5303	60.6848	68.5886	54.0201	61.0938	55.0616	70.3114	59.7064	62.3443	58.1321	50.73	66.2156	55.4029	58.2701	18.5	93.127	82.0347	89.1797	81.6062	79.5022	66.3096	70.6874	61.9759	68.1887	72.8921	61.3259	66.5604	65.2868	61.052
	18.6	131.157	126.179	131.97	112.537	110.109	94.7489	92.2547	84.273	76.298	76.347	75.2749	70.9967	72.7474	69.3618	75.0112	61.4842	18.6	77.9069	75.3721	76.7142	60.5676	68.3544	53.9156	60.8192	55.4146	70.0827	59.3888	62.3642	57.758	51.1167	65.9264	55.9113	58.9472	18.6	93.0992	82.2642	89.4484	81.8104	79.6844	66.5449	70.7407	62.2694	67.9407	72.4633	61.4726	66.1186	65.4074	61.404
	18.7	131.273	125.595	131.824	112.563	109.85	94.3147	92.379	84.4741	76.0897	76.8844	75.2809	70.7529	72.6769	68.8603	74.5801	61.7851	18.7	77.6764	74.7729	76.6456	60.512	68.3404	54.2584	61.0532	55.191	69.8889	59.4969	62.1021	57.8667	51.1139	65.52	56.3596	58.7462	18.7	92.2397	82.3509	89.8478	82.1921	79.7428	66.9838	70.8262	62.7507	68.3607	72.334	61.4141	65.7941	65.461	61.4454
	18.8	130.982	125.128	131.794	112.341	109.88	93.3237	92.4172	85.0287	76.0196	76.7068	75.1749	70.5811	72.7964	68.6304	74.2999	61.8031	18.8	77.0342	74.0886	76.7063	60.3704	68.5813	54.9006	61.5004	55.0021	69.8734	59.847	61.8637	58.1427	50.7382	65.2389	56.591	58.3624	18.8	91.4303	82.4121	90.1318	82.0903	79.8682	66.9619	70.8194	63.2399	68.8919	72.2824	61.2672	65.7423	65.171	61.3711
	18.9	130.614	124.706	131.817	112.236	110.137	92.4271	92.2138	85.0437	76.1516	76.1187	75.2884	70.9048	73.0013	68.7659	74.1144	61.9176	18.9	76.5976	73.702	76.3817	60.2178	69.0862	55.3841	61.5169	54.7736	69.9066	60.4288	61.575	58.4046	50.1812	65.3663	56.4009	57.4626	18.9	91.174	82.6736	89.5077	81.477	79.5678	66.8743	70.6316	63.3606	68.9034	72.6488	61.3717	65.9553	65.1232	61.4292
	19	130.557	124.439	131.199	111.968	109.713	92.3743	92.561	84.2589	76.4414	75.3226	75.8197	71.4528	73.2632	68.9437	73.7173	61.6197	19	76.4991	73.9678	76.0297	60.1168	69.7334	55.7952	61.381	54.7652	69.6121	60.6601	61.7528	58.3904	49.8867	65.1688	55.9186	57.2187	19	91.5664	82.8854	88.743	80.8026	79.0072	66.7219	70.1593	63.3636	68.2547	72.2716	61.1394	66.2233	65.264	61.4118
	19.1	131.284	124.55	130.585	111.717	108.846	93.0493	92.7639	83.0734	76.7923	75.1409	76.262	72.0714	73.2154	69.178	73.7791	61.7863	19.1	76.6828	74.3648	75.5706	59.9691	70.312	55.5426	61.5127	54.3076	69.2282	60.5796	62.5857	58.1956	49.6954	64.3773	55.34	57.0424	19.1	91.8799	82.3438	88.041	80.672	78.4493	67.1043	70.0078	63.2654	67.9413	71.9408	60.9921	66.5851	65.4368	61.0932
	19.2	132.048	124.987	130.036	111.233	108.038	93.5228	92.7989	82.5592	77.0661	75.4336	76.49	71.8477	72.9379	69.478	73.9252	61.6687	19.2	76.7723	74.7607	75.187	59.7132	70.4383	55.0374	61.7896	53.7198	69.3041	60.3252	63.6198	58.324	49.3167	63.0821	55.0088	56.9583	19.2	91.9743	81.4774	88.0253	80.7839	78.1907	67.6001	70.0102	62.9414	68.2474	71.2649	60.3522	66.8622	65.1942	60.3173
	19.3	132.135	125.393	129.955	110.948	108.384	93.3536	92.1632	82.945	77.2061	75.909	76.1911	71.1687	72.5239	69.5931	74.6111	61.2773	19.3	76.6824	74.9112	75.3076	59.6261	70.0489	54.4347	61.9752	53.2826	69.722	60.1277	64.1101	58.4334	49.1629	62.3388	54.9043	56.743	19.3	91.7593	80.4733	88.6702	80.9429	77.9718	67.671	70.0793	62.5071	69.307	71.253	59.9961	66.7814	65.0626	59.8034
	19.4	131.449	125.26	130.02	110.897	109.628	92.661	91.6862	83.5298	76.9476	76.2032	75.985	70.4279	72.1712	69.4149	74.8148	60.3969	19.4	76.4423	74.7829	75.4518	59.7676	69.509	53.9966	61.6353	53.1892	70.2286	60.149	63.6454	58.7372	49.2556	62.4398	54.9777	56.7942	19.4	91.9342	80.2763	89.3591	80.8929	77.6868	67.4761	69.7566	62.183	69.7213	71.1342	59.7912	66.3013	65.0584	59.6159
	19.5	130.966	124.92	130.045	110.862	111.015	92.3962	91.3276	83.5974	76.6567	76.1983	75.9661	70.5257	71.7892	69.0622	74.7531	59.6833	19.5	76.0597	74.3886	75.7628	59.9133	69.1474	53.5796	61.2496	53.4293	70.1103	60.0468	62.7904	58.6181	49.7538	63.2274	55.1203	56.9439	19.5	91.9813	80.1321	89.7272	80.7192	77.9923	67.1379	69.7024	61.9551	69.5283	71.4628	60.1	65.8062	65.1866	59.9817
	19.6	131.157	124.829	130.242	110.981	111.398	92.4431	91.2978	83.1389	76.2748	75.9982	76.3628	71.0948	71.5179	68.839	74.0531	59.7667	19.6	75.5283	74.1851	75.3551	59.8549	69.1966	53.0388	60.969	53.4367	69.8186	60.2332	61.838	58.4229	49.9667	63.9592	55.1258	57.1031	19.6	92.0963	80.2063	89.7777	80.42	78.8321	67.0644	69.7811	61.8888	68.8157	71.894	60.6818	65.5433	65.2521	60.3624
	19.7	131.407	125.073	130.218	111.188	110.456	92.827	91.4629	82.7027	76.4621	75.8812	76.8159	71.4753	71.1316	68.77	73.8008	60.1426	19.7	75.0742	74.3097	74.6416	59.4143	69.2098	52.7971	60.881	53.6711	69.8586	60.4481	61.3748	58.1424	50.2291	64.2817	55.1791	57.0883	19.7	91.179	80.0992	89.8126	80.352	79.75	67.0339	70.0914	61.9792	68.7669	72.4463	61.1434	65.479	65.3992	60.4554
	19.8	131.318	125.152	130.448	111.767	108.965	93.1509	91.8641	82.3554	76.3938	76.0431	77.3972	71.2412	70.9814	69.0346	73.8457	60.6618	19.8	75.0496	74.6248	73.6898	59.2046	69.4128	52.8832	60.9339	53.9698	70.4228	60.8544	61.3667	57.8899	50.2563	64.5809	55.2492	57.5066	19.8	89.9573	79.9334	89.7998	80.5454	79.9206	67.0242	70.1834	61.9942	68.8707	72.9161	61.2061	65.6257	65.7821	60.0999
	19.9	130.434	125.02	130.58	112.063	107.963	93.3941	92.3053	82.3739	76.4846	76.3	77.5869	70.732	71.3912	69.1954	74.4896	60.6813	19.9	75.4132	74.1974	73.3036	58.9268	69.3451	53.2001	61.0417	54.446	70.8941	60.7126	61.8163	57.5133	50.3258	64.8248	55.2847	57.9748	19.9	88.7477	79.7778	89.438	81.0571	79.5402	67.0048	70.2791	61.9716	68.9287	72.9276	61.183	66.0193	65.9087	59.2667
	20	130.113	124.931	130.584	111.836	107.854	93.4009	92.4762	82.2901	75.9132	76.13	77.5146	70.1514	72.2143	69.2618	74.5183	60.5797	20	75.5638	73.6188	73.4403	59.3052	69.3246	53.6559	61.171	54.4799	70.7486	60.5938	62.1617	57.3181	50.2877	65.1756	55.4077	58.4124	20	88.6181	79.3803	88.903	81.1852	78.897	66.7587	70.4244	61.7452	68.6662	72.8031	61.1897	66.4198	65.5009	58.7019
	20.1	130.242	124.676	130.332	111.205	108.337	93.5041	92.2331	82.3446	75.4016	75.6751	77.0457	69.8312	72.6243	68.7789	74.1826	60.4573	20.1	75.2278	72.9992	74.0149	59.5034	69.1019	54.1317	61.2803	54.1459	70.109	60.7837	62.2719	57.5364	50.4607	65.2854	55.1883	58.231	20.1	89.1779	79.5687	88.2334	80.7612	78.1376	66.7331	70.5163	62.1967	68.6827	72.304	61.4279	66.4549	64.8918	58.5461
	20.2	131.094	123.991	130.385	110.612	108.554	93.548	92.0406	82.2123	74.6739	75.1782	76.5914	69.5559	72.0933	68.7616	73.2911	60.6552	20.2	74.6963	72.8754	74.2326	59.9581	69.015	54.734	61.5733	53.8624	69.6327	61.0668	62.3474	58.3294	50.7032	65.2437	54.9668	57.9378	20.2	89.802	79.9473	87.636	79.9051	77.3954	66.7527	70.2279	62.5571	68.9209	71.9216	61.4312	65.6757	64.6716	58.9336
	20.3	131.237	123.559	131.026	110.701	108.336	93.5216	91.7652	82.2443	74.5278	75.0209	76.0098	69.7247	71.2342	68.9464	73.0579	61.254	20.3	74.5111	72.4359	74.4642	59.7793	68.9817	55.2297	61.7991	53.6322	69.45	60.8221	62.4686	58.9921	50.8977	65.0372	54.4197	57.8028	20.3	89.8964	80.6452	87.1046	79.2717	77.1553	66.9877	69.6202	62.5562	68.9474	71.3243	61.1269	64.8066	65.0672	59.1243
	20.4	130.976	123.693	131.62	110.703	107.709	92.7661	92.0102	82.1538	74.7756	75.0521	75.4411	69.9336	71.0544	69.2473	73.0524	61.9838	20.4	74.6634	71.7999	74.3194	59.7922	69.0037	55.5497	62.0387	53.4429	69.5907	59.8469	62.5462	59.4116	51.0278	64.8302	54.3689	57.7139	20.4	89.5673	80.6749	86.9754	79.1728	77.3368	66.8341	69.0903	62.0613	68.4386	70.6361	60.7883	64.2064	65.2711	59.1437
	20.5	130.326	124.565	131.453	110.811	107.35	92.0909	92.0438	82.4473	75.2899	74.8407	74.965	70.0142	71.633	68.875	73.3701	62.3039	20.5	74.7388	71.3829	74.5639	59.4591	69.0573	55.404	61.8292	53.3438	70.046	59.1301	62.3737	59.2697	51.1329	65.0667	54.5436	57.4058	20.5	89.2623	80.4781	87.1799	79.3476	77.6856	66.5588	68.902	61.7743	68.0614	70.0507	60.4486	64.7208	65.141	59.0373
	20.6	130.459	124.854	130.733	110.532	107.76	91.8056	91.7938	82.8837	75.604	74.5482	74.9961	69.7928	72.2759	68.2492	73.3814	62.2147	20.6	74.9416	71.3507	74.6172	59.5763	68.8946	54.9592	61.8369	53.495	70.919	58.977	62.2299	59.0359	51.1596	65.2866	55.0368	56.7612	20.6	89.2153	80.1441	87.8381	79.2872	77.6269	66.0683	69.0839	61.9097	68.2138	70.0659	60.38	65.4656	64.775	59.1202
	20.7	131.063	124.743	130.001	110.923	108.342	92.1976	91.0552	83.7348	75.8438	74.0886	75.1788	69.6482	72.4444	67.8289	73.9921	61.6723	20.7	75.1142	71.5741	74.6344	59.5387	68.8648	54.3749	61.6914	53.7794	71.6942	59.3664	62.135	58.8751	50.7698	65.2593	55.0089	56.4722	20.7	89.3626	79.9602	88.4762	79.1086	77.5344	65.7137	69.1862	61.9514	68.7649	70.7078	60.452	66.0787	64.6176	59.1409
	20.8	132.016	123.926	129.714	111.361	108.718	92.872	90.6564	84.08	76.0989	74.1827	75.4116	69.8083	72.087	67.9517	74.5923	61.0878	20.8	75.2919	71.5801	74.2924	59.7828	68.9068	54.0739	61.7908	53.5782	71.6821	59.9306	62.3489	59.0288	49.9077	64.9607	54.6877	56.4722	20.8	89.731	79.5503	88.6556	78.747	77.2801	65.5919	69.5016	61.9742	68.7466	71.5016	60.5708	66.0271	64.455	58.9837
	20.9	132.553	123.437	129.507	111.763	107.974	93.3204	90.9253	83.9108	76.3588	74.4791	75.142	70.0906	71.7326	68.205	75.0791	60.3111	20.9	75.219	71.5771	73.9064	59.7767	69.1839	54.0484	61.6651	53.376	71.045	60.4274	62.3897	59.2298	49.2054	64.6733	54.2523	56.9393	20.9	90.0163	78.6738	88.0367	78.6037	77.12	65.7044	69.5961	62.0678	68.1457	71.958	60.7496	66.0632	64.4502	58.8621
	21	132.526	123.448	129.52	111.455	106.999	93.5221	91.1777	83.268	76.3516	74.6597	74.7299	70.3379	71.3844	68.3583	74.53	59.8758	21	74.9828	71.6206	73.6839	59.9136	69.231	54.5062	61.7036	53.3424	70.3239	60.729	62.4797	59.3523	48.8347	64.5442	54.2034	57.0108	21	90.2717	78.122	87.091	78.3666	76.6969	65.8498	69.6393	62.1199	67.5482	72.1024	60.6023	66.302	64.6669	58.776
	21.1	132.34	124.133	129.627	111.004	106.47	93.1631	90.7928	82.7886	75.8369	74.4134	74.4104	70.3871	71.4712	68.305	73.8518	59.8249	21.1	75.0822	71.8027	73.2053	59.724	69.0883	54.804	61.7282	53.5129	70.3028	60.644	62.1884	59.1543	48.8711	64.0944	54.2687	57.0533	21.1	90.0104	77.9259	86.611	78.294	76.2759	65.734	69.3193	61.957	67.6638	71.9313	60.5266	66.5203	65.0899	59.0066
	21.2	132.214	125.083	129.79	110.62	107.014	92.9002	90.228	82.7774	75.2253	74.0486	74.3157	70.2282	71.5186	68.4346	73.1157	60.0952	21.2	75.291	71.8769	72.6157	59.5301	68.932	54.8789	61.8377	53.5132	70.3668	60.4469	62.0782	58.8961	48.6949	63.9594	54.2541	56.7766	21.2	89.7926	78.6561	86.8013	78.4929	75.7406	65.4611	69.1778	61.7063	68.3409	71.7719	60.4796	66.156	65.2171	59.17
	21.3	132.372	125.787	129.631	110.765	107.964	92.636	90.2099	82.7883	74.8259	74.1068	74.4002	69.7192	71.4204	68.6748	72.8719	60.2162	21.3	75.5931	71.7767	71.927	59.2914	68.8099	54.3233	61.9288	53.0482	70.3828	60.1896	62.0107	58.3656	48.6617	64.0318	54.3886	56.8746	21.3	89.8327	79.1143	87.0613	78.9157	75.3648	65.1366	69.1238	61.4792	68.972	71.4956	60.7286	65.5413	64.8008	59.3773
	21.4	132.119	126.129	129.031	111.231	108.573	92.6474	90.7107	82.687	75.1133	74.5046	74.2367	69.2973	70.7667	68.6927	72.6919	60.4114	21.4	75.3758	71.4651	71.7788	59.3624	68.7932	54.0356	61.7838	52.8901	69.7196	60.2504	62.2552	57.7568	48.735	64.0816	54.8906	56.853	21.4	90.0587	79.3414	87.1389	79.2163	75.2609	64.8453	69.0247	61.3321	68.9578	71.4793	61.0178	65.1052	64.3726	59.2183
	21.5	131.69	126.072	128.622	112.08	108.429	92.4157	90.8351	82.4768	75.584	74.9387	74.314	69.296	70.3406	68.0968	72.6617	60.57	21.5	74.6252	71.1697	71.6544	59.3014	68.8513	53.8386	61.5141	52.9141	69.0556	60.2176	62.5152	57.3627	49.131	63.8832	55.5074	56.9202	21.5	90.2551	78.826	87.1347	79.2603	75.4611	65.0239	68.6603	61.1774	68.5418	71.4496	61.1719	65.1132	64.1072	59.0839
	21.6	131.255	125.94	128.662	112.653	108.174	92.3079	90.7314	82.4148	76.0592	75.1323	74.3473	69.6689	70.3328	67.458	72.5997	60.723	21.6	73.9654	70.868	71.7812	59.0164	69.0619	53.8263	60.9623	53.3854	68.4611	60.3026	62.6444	57.365	49.531	63.7109	55.9712	57.0331	21.6	89.8201	78.3897	87.0423	79.0431	76.0657	65.253	68.2739	61.0951	67.9581	71.3726	61.1019	65.3487	64.5258	59.0369
	21.7	131.031	125.928	129.538	112.879	107.79	92.2183	90.7378	82.4946	76.1678	75.1782	74.4379	69.8014	70.808	67.1386	72.6438	60.5164	21.7	73.5336	70.6609	71.9491	58.7743	69.0954	53.7774	60.5651	53.355	68.4281	60.1827	62.3819	58.107	50.0748	64.1039	56.0726	57.4689	21.7	89.0638	77.9559	86.9274	79.2142	76.6381	65.7014	68.0859	61.0431	67.8342	71.0657	60.9044	65.616	64.9772	59.4778
	21.8	131.045	126.141	130.362	112.637	107.724	92.3052	91.1798	81.9539	75.7952	75.1222	74.2168	69.5737	71.0597	67.4597	72.7816	60.479	21.8	73.7664	70.5399	72.4	58.5664	68.7901	53.6122	60.6993	53.0949	68.5086	60.2073	61.8953	58.5694	50.685	64.4918	55.982	57.9121	21.8	88.1362	77.9622	86.2944	79.1926	77.3142	65.7166	67.9152	60.9088	67.6663	70.8784	60.724	65.7176	65.7054	59.9222
	21.9	130.718	126.164	130.857	112.264	107.487	92.167	91.1903	81.364	75.4522	75.2562	74.0129	69.2044	71.3153	67.6374	72.8127	60.3412	21.9	73.8457	70.8834	72.4767	58.4953	68.2921	53.5932	61.2077	52.6261	68.795	60.0867	61.5658	58.9507	50.9504	64.5788	55.5771	57.8469	21.9	87.4011	78.0499	86.0534	79.1476	77.3393	65.633	68.0297	60.9699	67.5442	71.0462	60.7022	65.786	65.9693	60.2606
	22	130.36	125.922	130.714	111.92	107.668	92.1886	90.9011	80.6497	74.9493	75.1328	74.0027	69.071	71.4336	67.684	72.7181	60.1968	22	74.2567	71.2901	72.3034	58.3349	68.2934	53.5141	61.8357	52.6493	69.3046	60.0843	61.3667	58.7747	51.1182	64.2636	55.2568	57.3913	22	87.4183	78.2784	85.7729	78.5584	76.9783	65.5087	68.3598	61.121	67.2857	71.4939	60.5953	66.1006	65.8183	60.2787
	22.1	129.321	125.292	130.477	111.544	107.851	92.1934	90.4573	80.631	74.7801	74.9832	74.3197	68.9209	71.3489	67.5688	72.3498	59.6827	22.1	74.4711	71.523	71.9768	58.2444	68.5619	53.5983	61.5749	52.5946	69.8997	60.0209	61.5061	58.8339	50.9411	63.7631	54.8641	56.7834	22.1	87.7249	78.1358	86.0971	78.3574	76.1727	65.567	69.1836	61.6433	67.0853	72.1794	60.4341	66.5711	64.9407	60.0933
	22.2	128.593	125.141	130.377	111.115	108.253	92.449	90.371	80.8696	74.367	74.4267	74.7622	68.7213	71.2007	67.6306	71.9646	59.485	22.2	74.5289	71.2587	71.822	58.1269	68.6876	53.6598	61.011	52.498	70.2286	60.0369	61.6689	58.8361	50.9612	63.3972	54.7361	56.474	22.2	88.4357	77.6218	86.2152	78.3143	75.702	65.7321	69.6001	62.161	66.9547	72.5904	60.27	66.8476	64.2342	59.8671
	22.3	128.003	125.444	130.314	110.813	108.087	92.4484	90.3176	81.3783	74.3608	74.0364	74.982	68.5996	71.2357	67.6321	71.9132	59.5732	22.3	74.0998	70.9859	72.0761	58.0091	68.1683	53.6776	60.4376	52.1392	70.0211	60.0053	62.2877	58.9152	50.7546	63.2606	54.4513	56.2367	22.3	88.8479	77.0792	86.6602	78.3438	75.6326	65.5768	69.6359	62.3923	66.4467	72.7569	60.4417	66.5494	63.994	59.6283
	22.4	128.336	126.047	129.938	110.714	107.686	92.4449	90.1773	81.8783	74.8418	73.7001	74.752	68.8304	72.0986	67.578	72.4127	59.8406	22.4	73.2353	70.9852	72.1571	58.195	67.8934	53.7689	60.5028	52.2969	69.503	60.0732	62.5869	59.0172	50.6612	63.753	54.6997	55.9389	22.4	89.2368	76.9593	86.791	78.0311	75.8357	64.9486	69.2741	62.1933	66.2641	72.6584	60.7362	66.0989	64.3824	59.6771
	22.5	128.963	126.038	129.242	111.222	107.295	92.6726	90.0914	81.9117	75.5536	73.7468	74.3608	69.2711	72.7427	67.4784	73.5938	59.6643	22.5	72.4263	71.2386	72.2522	58.2801	67.9071	53.9379	61.0192	52.5176	69.1491	60.3828	62.4411	58.9379	50.401	64.3516	54.919	55.557	22.5	89.1464	77.2648	86.8194	77.8646	75.9474	64.5021	69.1056	61.855	66.4159	72.5409	60.8087	65.569	64.709	59.8036
	22.6	130.04	125.458	128.52	111.494	107.134	93.2451	90.1582	81.732	75.9936	73.9142	74.1659	69.5774	72.8339	67.4876	74.3294	59.1331	22.6	71.7756	71.6807	71.503	58.3304	68.0517	54.2187	61.4304	52.6559	68.8629	60.5968	61.9981	58.665	50.0316	64.8121	54.9821	55.3384	22.6	89.0501	77.5351	86.3266	77.9062	75.8292	64.236	69.1207	61.8801	67.1562	72.5631	60.476	65.3107	64.9579	59.8426
	22.7	130.769	124.905	128.326	111.285	107.585	93.8693	90.1694	81.381	75.7523	74.0519	74.2798	69.6552	72.177	67.2723	74.4799	58.6213	22.7	71.8803	72.084	70.9894	58.032	67.4853	54.4001	61.5738	52.5102	69.0099	60.8012	61.6049	58.4003	49.7224	64.6524	54.5217	55.6406	22.7	88.6823	77.6642	86.0239	77.9767	75.4359	64.532	69.1372	61.8268	67.6211	72.4754	59.9824	65.3132	64.7342	59.7904
	22.8	131.35	124.53	128.58	110.448	107.589	93.7976	89.7527	80.9217	75.4316	73.7434	74.4438	69.6786	71.7091	66.9963	73.6619	58.4363	22.8	72.4504	72.2381	70.7681	57.9623	67.0509	54.4517	61.4023	52.5599	69.2322	60.6702	61.5587	58.5452	49.6833	64.2619	54.0462	56.276	22.8	88.4932	77.9642	85.8186	77.7904	75.0134	64.5038	69.0784	61.7441	67.7941	72.4832	59.7863	65.7773	64.3613	59.7602
	22.9	131.095	124.424	129.376	109.672	107.652	93.3064	89.1588	80.43	75.0016	73.1586	74.361	69.5443	71.2848	66.4183	72.8613	58.5907	22.9	73.3012	71.8759	71.3097	57.7586	66.9144	54.4	61.3287	52.8853	69.385	60.7113	61.4188	58.9314	49.8913	63.9346	54.0359	56.8539	22.9	88.1131	78.3226	85.9884	77.635	74.9167	64.6077	68.8288	61.3427	67.7856	72.2252	60.0042	66.1657	63.771	60.0146
	23	130.867	123.746	129.861	109.378	106.916	92.7564	88.9008	79.8213	74.8341	72.7461	74.2087	69.2884	70.573	66.1859	72.2849	58.6756	23	73.4333	71.1674	71.9222	57.6226	67.3872	54.3892	61.609	53.1578	69.2751	60.4301	61.4873	58.9982	49.7724	63.7348	54.4496	57.3448	23	87.8307	78.346	86.1062	77.4163	74.8601	64.6891	68.6726	61.3143	68.0043	71.8648	60.823	66.0937	63.7784	60.417
	23.1	130.33	123.259	130.131	109.421	106.512	92.5902	89.252	79.8359	74.5811	72.7199	74.0086	68.9384	69.5016	65.9862	72.5901	58.9467	23.1	73.1284	70.3744	72.1001	57.54	67.604	54.3833	61.6862	53.0034	68.9198	60.2644	61.7618	58.8787	49.692	63.8944	54.8329	57.5402	23.1	87.8271	77.7359	86.0669	77.1714	74.8444	65.0428	68.5912	61.3863	68.136	71.348	61.68	65.7073	64.0816	60.6609
	23.2	130.529	122.865	129.708	109.65	105.996	92.5073	89.4554	79.9741	74.4407	72.8548	74.1221	68.8064	69.2092	66.156	73.378	59.057	23.2	72.4087	70.0253	71.7431	57.8501	67.5779	54.468	61.523	52.7654	68.9802	59.776	62.2067	58.7282	49.6741	64.1333	54.7511	57.6534	23.2	87.7217	77.0583	85.6187	76.882	74.625	65.2489	68.7411	61.6257	68.3242	71.195	62.2888	65.3588	64.6552	60.6672
	23.3	130.628	123.235	129.386	109.932	106.072	92.1919	89.239	80.4981	74.158	72.873	73.9494	68.7602	69.5358	66.1339	73.8723	59.341	23.3	72.133	70.14	71.1134	58.5111	67.3811	54.5981	60.8444	52.704	69.1191	59.6231	62.4676	58.8798	49.811	64.5569	54.2978	57.5454	23.3	87.5979	76.8078	84.9036	77.1807	74.601	64.9802	68.9586	61.6331	68.6007	71.0972	62.013	65.1677	64.8843	60.4187
	23.4	130.694	123.793	128.709	109.97	106.136	91.8696	88.5934	80.765	73.9302	72.7251	73.5357	68.6527	70.2041	66.1904	73.2939	59.2902	23.4	71.9651	70.5582	70.6924	58.6483	67.2709	54.8342	60.4924	53.1387	69.2776	59.5668	62.1814	59.0801	49.4092	64.6018	53.8681	57.4292	23.4	87.2069	76.8083	84.4381	77.796	74.6676	64.2857	69.3527	61.4758	69.0178	71.2813	61.388	64.848	64.8998	60.2711
	23.5	129.942	124.347	128.198	109.773	106.38	91.5311	88.1017	80.9678	73.9282	72.8947	72.8798	68.6046	70.2904	66.388	72.0136	59.2026	23.5	71.7858	70.753	70.5366	58.4261	67.5561	54.7853	60.6322	53.5991	68.9723	59.909	61.518	59.2394	48.7209	64.1523	53.8651	57.3264	23.5	87.0926	76.957	84.2952	78.2823	74.5553	63.4849	69.732	61.4408	69.5981	71.1502	60.7566	64.5239	64.9506	60.142
	23.6	129.701	124.311	127.803	109.556	106.309	91.8193	87.7948	80.8876	73.983	72.9814	72.6296	68.6457	70.4753	66.8456	70.9179	59.3064	23.6	71.4397	70.4937	70.4429	57.8456	67.8127	54.6377	61.1048	53.8298	68.7857	60.1576	60.9421	59.151	48.2343	63.5177	54.0332	57.0763	23.6	87.0113	76.9856	84.2384	77.7924	74.279	62.8801	69.8867	61.4729	69.6099	71.0301	60.5334	64.6053	64.9758	59.7772
	23.7	129.887	124.105	128.03	109.403	106.141	92.1396	87.5221	80.5799	73.9923	73.167	72.8388	69.0951	70.3159	67.2467	70.9549	59.6971	23.7	71.3587	69.9986	70.1711	57.6517	68.0711	54.2864	61.3384	53.8101	69.1922	60.3811	60.7324	58.8033	48.3129	63.1203	54.1954	57.0422	23.7	86.7654	77.2296	84.1818	76.9204	74.0423	62.8999	69.6581	61.7288	69.1984	70.9153	60.4711	65.1208	65.2917	59.2718
	23.8	130.729	123.971	128.479	109.966	106.005	92.5862	87.6173	80.3947	73.9021	72.7881	73.1142	69.4884	70.1941	67.1928	71.4007	60.1314	23.8	71.5603	69.5836	69.7629	57.4643	67.9816	54.0708	61.0867	53.8479	70.0523	60.492	60.8216	58.483	48.653	63.1547	54.4078	56.992	23.8	86.5613	77.1491	84.0723	76.1008	73.8734	63.3432	69.32	61.654	68.1003	71.0412	60.3392	65.7077	65.1764	59.1537
	23.9	130.724	124.29	128.346	110.445	105.867	92.4256	88.1421	80.2647	74.0636	72.3154	73.516	69.8391	69.8001	66.7051	72.4511	60.0394	23.9	71.7602	69.3383	69.5883	57.125	67.9879	53.6058	60.8603	53.9299	70.7578	60.631	60.7912	58.3704	48.9241	63.3449	54.6201	56.6764	23.9	86.236	76.9457	84.3213	76.0591	74.1116	64.3216	69.0154	61.3769	67.4197	71.2227	60.1952	65.8038	64.8571	59.4536
	24	130.334	124.375	128.102	111.37	105.779	91.9663	89.128	80.5647	74.4129	71.8757	73.7593	69.7521	69.9172	66.188	72.6642	59.633	24	71.4893	69.1568	69.6416	56.7566	68.1654	53.2694	60.9074	53.8869	70.6646	60.7418	60.912	58.4366	48.9988	63.4211	54.8371	56.1538	24	86.1948	76.6972	84.7071	76.2266	74.028	65.0381	68.5851	60.8536	67.0656	71.2346	60.1113	65.4986	64.304	59.8912
	24.1	130.022	124.398	127.729	111.114	105.571	91.2888	89.8386	80.7204	74.8962	71.7156	73.7583	69.6269	70.2219	65.7487	72.9846	59.5087	24.1	71.2799	68.9144	69.9593	56.3433	68.2979	53.0749	61.2027	53.6353	70.5268	60.7521	61.1181	58.437	49.0309	63.5508	54.8199	55.9203	24.1	85.9446	76.7524	85.2651	76.4036	74.0092	65.4957	67.9699	60.7581	67.2029	71.3943	60.1562	65.1442	64.2664	59.802
	24.2	130.245	124.245	128.262	110.759	105.355	90.5634	90.412	80.9892	75.083	72.0353	73.4043	69.265	70.3314	65.6319	72.7613	59.6689	24.2	71.4486	68.775	70.2696	56.0249	68.0284	53.3129	61.4862	53.397	70.3569	60.4662	61.7231	58.2114	49.2353	63.6427	54.9168	56.3611	24.2	85.7434	76.6636	85.5217	76.2167	73.5723	65.3924	67.1248	60.9833	67.0429	71.751	60.0952	65.0239	64.5901	59.5552
	24.3	130.371	124.246	128.733	109.977	105.645	90.3007	90.7751	81.0746	74.9898	72.2449	72.9401	68.7593	70.0909	65.2836	72.676	60.0144	24.3	71.8138	69.0104	70.5139	56.0431	67.351	53.4894	61.7413	53.185	70.6147	59.946	62.0696	57.93	49.5326	63.8681	55.2337	56.9304	24.3	85.5337	76.1469	85.0547	75.9226	73.4756	65.1179	66.5603	61.354	67.2308	72.2099	59.8282	64.9951	65.0062	59.2592
	24.4	129.968	124.138	129.172	110.146	106.033	90.4863	91.1932	81.1061	74.3964	72.5374	72.9379	68.1979	69.5468	65.1352	72.2084	59.9694	24.4	72.057	69.5067	70.8429	56.2827	66.6653	53.433	62.0601	52.9952	70.3593	59.2619	62.2628	57.679	49.7028	64.1141	55.6069	57.4604	24.4	85.5769	75.4809	84.5297	75.8369	73.5974	64.9279	66.2618	61.4804	67.5303	72.344	59.4596	64.9676	65.0071	59.08
	24.5	129.457	124.241	129.364	110.202	106.758	91.0347	91.0036	81.1282	74.1701	72.2017	72.7783	67.8538	69.3917	65.1272	71.514	59.8903	24.5	72.2822	69.9799	71.0472	56.4214	66.487	53.1684	62.1242	52.6511	69.9137	59.2316	61.7202	57.7993	49.5279	64.3413	55.7979	57.8404	24.5	85.9389	75.2114	83.9483	76.0563	73.994	64.8924	66.4412	61.6902	68.11	72.2499	59.0893	65.0439	65.0593	59.0003
	24.6	129.427	123.977	129.842	110.016	106.469	91.5839	90.7128	81.104	74.1818	72.0658	72.5998	67.8376	69.3191	65.8132	71.0661	59.7779	24.6	72.445	70.2052	71.6189	56.1768	66.3876	53.261	61.9218	52.5481	69.2009	59.4307	61.0342	58.1769	49.3384	64.3476	55.4869	58.079	24.6	86.3811	75.2911	83.8706	76.6704	74.439	65.003	66.8239	61.9242	68.2284	72.0338	58.9649	65.1591	64.867	59.0687
	24.7	129.814	123.783	130.463	109.271	105.726	91.7627	90.252	81.2864	74.5939	72.1299	72.3836	67.927	69.4941	66.9723	71.0209	59.5948	24.7	72.4188	70.2524	72.2099	56.0562	66.2741	53.7992	61.4023	52.5607	69.164	59.7514	60.6449	58.6331	49.5121	64.1927	55.1614	57.8201	24.7	86.6826	75.1742	83.4571	77.0911	74.6082	64.7579	67.4092	61.8419	67.9688	71.8066	59.0343	65.543	64.9067	59.4517
	24.8	129.922	123.676	130.579	108.69	104.49	91.9872	90.3519	80.9298	74.3538	72.8249	72.6581	68.1324	69.3812	67.7876	71.4297	58.928	24.8	72.0796	70.1753	72.6361	56.5917	65.9717	54.3369	61.1479	52.9274	69.788	59.6363	60.8262	58.7719	49.9916	63.9302	54.8796	57.2001	24.8	86.7544	74.769	83.4213	77.4191	74.5267	64.4442	67.9888	61.307	67.6452	71.4033	59.4576	65.8048	64.8267	59.7878
	24.9	129.708	124.243	130.042	108.158	103.958	91.9112	90.3648	80.6174	73.9806	73.3926	73.2048	68.3283	69.3771	67.7777	72.0576	58.2451	24.9	72.0588	70.0794	72.4399	57.0276	65.908	54.4467	60.9557	53.2593	70.6848	59.5244	61.411	58.6421	50.3688	63.8699	55.1281	56.6579	24.9	86.4332	74.4602	83.5098	77.1361	74.057	64.0936	68.3186	60.653	67.551	70.6918	60.0446	66.1781	64.9819	60.0149
	25	129.021	124.626	129.148	107.726	104.167	91.8782	90.4154	80.1116	73.6526	73.2824	73.8213	68.4417	69.2811	66.6762	72.5421	57.9931	25	71.9466	69.8827	71.8086	57.1006	66.3224	54.1929	61.0301	53.3882	70.9289	59.7801	61.5882	58.624	50.1611	63.8712	55.3816	56.4678	25	85.7784	74.4069	83.8579	77.0043	73.6897	64.1501	68.0434	60.772	67.8247	70.0576	60.3959	66.1186	65.0842	59.8219
	25.1	128.404	124.37	128.812	107.384	104.956	91.3918	90.2314	80.3988	73.8716	72.5682	74.4514	68.7478	69.4814	65.6687	72.7552	58.4883	25.1	71.7086	69.4526	71.0588	56.6956	66.8127	54.0937	61.0036	53.3939	70.3394	60.2209	61.634	58.7129	49.6231	63.9459	55.7894	56.812	25.1	85.0757	74.3994	83.5792	77.0577	73.4924	64.3223	67.7384	61.353	68.031	69.9974	60.473	66.1067	65.035	59.5166
	25.2	127.73	123.667	128.928	107.588	105.499	90.7678	89.9291	80.6863	74.23	71.7724	74.7914	68.9691	69.4923	65.2666	72.7232	58.919	25.2	71.404	68.7367	70.5051	56.709	67.2671	53.9728	61.1749	53.347	69.7873	60.7116	61.5439	58.8069	49.3957	63.7049	55.7679	57.2012	25.2	84.4308	74.1174	82.9194	77.6284	73.5633	64.5591	67.8628	62.1237	68.0813	70.5232	60.0394	66.1214	65.0072	59.0443
	25.3	127.668	123.12	129.261	108.146	105.231	90.4341	89.6139	81.0939	74.3692	71.6011	74.607	69.1216	69.6879	65.7152	72.321	59.1834	25.3	71.5561	67.9274	70.0858	57.1506	67.3897	53.6893	61.2979	53.423	69.4319	60.7752	61.6908	58.695	49.5879	63.2534	55.459	57.5581	25.3	84.1759	73.9723	81.8323	77.8223	73.8981	64.9618	68.7883	62.3267	67.9001	71.1112	59.978	66.5792	64.9179	58.5516
	25.4	128.096	122.65	129.038	108.508	104.499	90.3772	89.2806	81.0377	74.1673	71.8126	73.7498	68.8062	69.9818	66.2514	72.0098	59.2739	25.4	71.7737	67.7093	70.3173	57.6602	67.5878	52.8912	61.6057	53.4773	69.591	60.4859	62.0758	58.8206	50.1097	62.8314	54.9636	57.4017	25.4	84.0891	74.1966	81.1977	77.2996	74.614	65.5139	69.4287	62.1688	67.8102	71.343	60.169	67.1459	64.8856	58.0463
	25.5	128.904	122.327	128.593	108.674	104.208	90.3879	89.1107	80.8549	73.8627	72.1722	72.9581	68.5249	70.3472	66.7019	71.4938	59.7041	25.5	71.7598	67.5759	70.618	57.8669	67.8666	52.2381	61.5853	53.253	69.4323	60.1517	62.457	59.0804	50.3607	62.8554	54.7442	57.0477	25.5	84.3559	74.5674	81.1029	76.3477	75.5322	66.1319	69.5464	61.8457	67.8443	71.6037	60.7404	67.3753	64.5902	57.9707
	25.6	129.609	122.228	128.527	108.867	104.708	89.7652	89.0753	80.638	73.5083	72.2617	72.4761	68.1853	70.4496	66.8464	71.3753	59.8487	25.6	71.6974	67.5018	71.149	57.6967	67.9727	51.8728	61.2626	53.2374	69.4964	60.114	62.6083	59.4806	50.6576	63.2732	54.9573	56.8341	25.6	84.546	74.9464	81.7944	75.6266	75.6959	66.182	69.0074	61.6896	67.9044	71.6753	60.8898	67.1156	64.6162	58.3851
	25.7	130.104	122.777	128.881	109.539	105.254	89.4459	89.0913	80.4699	73.2903	72.3881	72.6281	67.7641	69.8909	67.0589	71.2706	59.7279	25.7	71.8128	67.1721	71.2542	57.5356	67.7813	52.14	60.7094	53.1099	69.4971	60.356	62.3917	59.4513	50.74	63.7923	54.9809	57.3028	25.7	84.4937	74.7599	82.2119	75.3173	74.765	65.5108	68.6337	61.6957	68.0091	71.6267	60.6296	66.1861	64.7829	59.3519
	25.8	130.393	123.216	128.914	110.05	105.238	89.5189	89.1416	80.5088	73.2384	72.412	72.8926	67.2788	69.4792	66.8029	71.0821	58.9452	25.8	72.1217	67.1342	70.9431	57.4171	67.1321	52.3978	60.5094	53.5512	69.6969	60.191	61.8609	59.4484	50.7799	64.145	54.7854	57.813	25.8	84.251	74.5558	82.1288	75.1819	73.4688	64.6557	68.3297	61.6296	68.222	71.0342	60.4134	65.6367	65.2592	60.0011
	25.9	130.227	123.236	128.326	110.137	105.049	90.0113	89.1104	80.4229	73.542	72.7136	73.3234	66.8968	69.3388	66.4446	71.0311	58.5967	25.9	71.8861	67.2624	70.3932	57.2656	66.6393	52.7477	60.8613	53.8633	69.7488	59.8889	61.6377	59.124	50.5426	64.2917	54.3274	58.0522	25.9	84.1468	74.0552	81.7416	75.3262	72.693	63.914	68.4168	61.3379	68.3272	70.6279	60.6861	65.4167	65.292	60.315
	26	129.913	122.772	127.555	109.761	105.245	90.2733	88.7009	80.2748	74.435	72.7403	73.2257	66.8646	69.589	65.8412	71.0249	58.5031	26	71.2627	67.1969	69.6878	56.9741	65.9794	52.7599	61.3097	54.2363	69.6149	59.6822	61.4566	58.9498	50.2794	64.2023	54.1229	57.3933	26	84.15	73.9474	81.7848	75.6142	72.7194	63.8756	68.5168	60.8947	68.2616	70.4168	60.887	65.8508	65.2254	59.8651
	26.1	129.423	122.324	127.436	108.974	105.943	90.3416	88.3448	79.917	74.9964	72.7978	72.9617	66.806	69.6309	65.4969	71.3222	59.1302	26.1	70.2357	67.0211	69.6166	56.703	65.896	52.9968	61.5307	53.9216	69.2206	59.9832	61.5994	58.4806	49.935	64.1472	54.1334	56.652	26.1	84.216	73.8548	82.1467	75.9339	72.6472	63.8146	68.6352	60.6124	67.9973	70.4384	60.8668	65.9343	64.9038	59.5276
	26.2	129.13	122.202	127.8	108.356	106.258	90.184	88.057	79.9371	75.2728	72.3318	72.3279	66.9712	69.0743	65.1216	71.1372	59.6081	26.2	69.6677	67.1363	69.5117	56.6446	65.8329	53.0152	61.2602	53.2707	69	60.43	61.5224	58.3219	49.7251	64.0403	54.3816	56.2714	26.2	84.2053	73.7083	82.3787	75.8638	72.5254	63.9743	68.2882	60.4769	68.0209	70.5859	60.6797	65.9039	64.6858	59.1203
	26.3	129.099	122.423	128.3	107.602	106.068	89.7013	88.2638	80.0861	74.8634	72.0671	72.3013	67.0569	68.5224	64.8297	70.6494	59.9	26.3	69.9296	67.8373	69.6507	56.7264	66.1124	53.0494	60.5857	52.6451	69.1691	60.5779	61.4626	58.2596	49.8468	64.126	54.8226	56.3699	26.3	84.3368	73.2989	82.4777	75.4159	72.2142	63.9636	68.0852	60.3994	68.2928	70.7994	61.022	65.7979	64.432	59.1828
	26.4	129.07	122.939	128.402	107.435	105.481	89.1757	88.1041	80.0834	74.8067	71.6618	72.5346	67.3678	68.179	64.7004	70.0893	59.6382	26.4	70.5293	68.6757	69.6979	56.5531	65.7739	52.7966	60.0437	52.5531	69.5814	60.714	61.3526	58.5619	50.1916	63.9614	55.3581	57.0929	26.4	84.2303	73.1322	82.6138	74.8038	72.1787	64.0857	67.9746	60.1783	68.5152	71.4132	61.3557	66.0548	64.1351	59.2339
	26.5	129.098	123.376	128.19	107.358	105.47	89.1499	87.7883	79.5426	74.806	71.6856	73.0934	67.4397	68.437	64.9686	69.8337	59.1164	26.5	71.2774	69.0371	69.7274	56.2376	65.4359	52.544	59.6528	52.8567	69.7521	60.6118	61.2992	59.0451	50.673	63.8819	55.6554	57.5708	26.5	84.1016	73.407	82.7348	74.1511	72.197	64.234	68.1798	60.109	68.6481	71.9538	61.4	66.2289	63.68	59.4932
	26.6	128.636	123.23	127.593	107.827	105.97	89.8993	87.0906	79.1962	74.5749	71.4394	73.5596	67.4394	68.6353	65.3706	69.964	58.6282	26.6	71.3666	68.8233	69.6222	55.8098	65.5604	52.4623	59.7329	53.095	69.5029	60.8722	61.3223	59.4338	50.8638	63.8911	55.5831	58.1581	26.6	83.7953	74.22	82.759	74.1211	72.2787	64.3693	68.0572	60.3889	68.2824	72.1119	61.1376	66.125	63.4113	59.4922
	26.7	128.251	122.511	127.305	108.286	106.692	90.7624	87.0148	79.4548	74.1154	71.2901	73.6671	67.2818	68.4526	65.5536	70.1737	58.3294	26.7	71.2827	68.7027	69.0644	55.6879	66.1468	52.7632	59.8326	53.2163	69.3339	60.8674	61.3026	59.3703	50.9308	64.272	55.0003	58.2644	26.7	83.8783	74.8949	82.4108	74.5711	72.422	64.3673	67.8869	60.9429	67.7081	71.6131	60.8396	65.7002	63.6286	59.2086
	26.8	127.865	121.512	127.095	108.611	107.097	91.5553	86.8484	79.8109	73.5974	71.0239	73.5159	67.4341	68.3716	65.4698	70.5759	58.1559	26.8	70.6936	68.8862	68.7726	55.7467	66.4921	53.4416	59.9934	53.1353	69.0007	60.8838	61.3527	58.6834	50.8011	64.6666	54.4703	58.3142	26.8	83.9836	75.4923	82.2299	75.199	72.6267	64.2738	67.6579	61.2864	67.011	70.7573	60.7706	65.3383	64.276	58.6359
	26.9	127.429	120.809	127.164	108.533	106.915	91.7356	87.3334	79.4502	73.4594	71.1847	72.8848	67.7851	68.5182	65.4012	70.919	58.4371	26.9	70.1141	69.4306	68.4836	55.8428	65.951	54.1543	60.0973	53.2658	68.6061	60.5416	61.6293	57.9379	50.4937	64.7671	53.9617	58.2528	26.9	84.2296	75.1739	82.1218	75.3219	72.9694	64.0999	67.9192	61.2647	66.8016	70.582	60.8774	65.2811	64.7153	58.3171
	27	127.086	120.661	126.683	108.511	106.489	91.5748	87.5053	78.5797	73.3906	71.5003	72.7306	68.0514	69.1397	65.6832	71.1213	58.9497	27	69.6519	69.2048	68.4721	56.1274	65.3198	53.9682	60.2029	53.2807	68.1606	60.3381	61.6964	57.5219	50.2946	64.6782	53.839	58.1906	27	84.3954	74.6457	82.3406	75.0891	73.2812	63.9164	68.2479	60.9429	67.0424	70.7886	61.2039	65.525	64.4704	58.4669
	27.1	126.731	120.801	126.188	108.428	105.757	91.0307	88.4662	78.2329	73.4538	71.61	72.7712	67.903	69.3183	66.0527	70.9369	59.7052	27.1	69.6037	68.6322	68.0312	56.3872	65.1079	53.2449	60.6523	53.331	68.1839	60.2921	61.8053	57.5102	50.1427	64.505	53.7004	58.1677	27.1	84.5568	73.5789	82.4102	75.0091	73.646	63.7194	68.5669	60.8742	67.2957	71.0524	61.425	65.9792	64.0344	58.8722
	27.2	127.057	121.141	126.084	108.613	105.417	90.4071	89.1317	78.796	73.7443	71.5602	73.0342	67.5061	69.158	66.1631	70.7659	59.8619	27.2	69.6398	67.8769	67.7442	56.7594	65.449	52.6354	61.1	53.175	68.4832	60.5601	61.7358	58.025	50.1579	64.371	53.6356	57.7863	27.2	84.6607	73.1542	82.3662	75.1056	73.7924	63.7553	68.0883	60.9264	67.5733	70.357	61.4293	66.2819	63.7892	59.143
	27.3	127.652	121.327	126.136	108.445	105.206	90.2028	89.6274	79.3203	74.037	71.5142	72.9038	67.5574	68.8746	66.0902	70.701	59.2584	27.3	69.8734	67.9934	67.508	56.896	65.8139	53.1656	61.3616	53.0996	68.5731	60.7938	62.2301	58.6824	49.8882	64.1518	53.6856	57.5097	27.3	84.4513	72.7424	82.0179	75.0652	73.6177	63.7783	67.5088	61.2558	67.8703	69.4592	61.2323	65.9942	64.3378	59.2747
	27.4	128.348	121.653	125.914	108.347	105.345	90.3284	89.1478	79.617	74.382	71.5332	72.5433	67.7063	68.8681	66.0311	71.1541	58.0491	27.4	70.0694	68.2459	67.8577	56.9131	66.1224	53.9859	61.1872	53.0829	68.3316	60.5622	62.3953	59.326	49.4443	63.8069	53.8316	57.1599	27.4	84.076	72.6623	81.8122	74.6041	73.0944	63.7346	67.1554	61.2756	68.3137	69.1998	61.2108	65.4773	64.8547	59.6993
	27.5	128.418	122.149	125.255	107.97	105.272	90.8343	88.4344	79.513	74.3722	71.6143	72.277	67.906	68.806	66.1376	71.2809	56.6123	27.5	70.4687	68.3153	68.2937	56.83	66.462	54.2868	60.8687	53.211	68.2909	59.9838	62.1384	59.1213	49.2343	63.7417	54.2536	57.2994	27.5	83.5337	72.5393	81.8201	74.0693	72.6074	63.4663	67.1037	61.2896	68.6022	69.7749	61.4133	65.2136	64.9486	60.2641
	27.6	128.109	122.46	125.381	107.828	104.752	90.9399	88.012	79.5647	74.0998	71.5546	71.819	67.5457	68.5651	66.0471	71.6374	55.9357	27.6	70.3974	67.8194	68.8029	56.5409	66.8048	53.79	60.6188	53.5372	68.6961	59.5347	61.5847	58.6852	49.4414	63.585	54.3989	57.2241	27.6	83.2136	72.709	82.0048	73.8174	72.5497	63.5757	67.3213	61.1202	68.4692	70.9276	61.4966	65.7776	64.5226	60.6768
	27.7	127.371	122.598	126.257	108.002	103.675	90.6132	87.8413	79.3813	73.6476	71.9171	71.5101	67.4333	68.3208	65.5847	71.637	55.8954	27.7	70.1071	67.421	69.1363	56.2999	66.9746	53.3434	60.1633	53.9194	69.4258	59.4669	61.2732	58.233	49.6601	63.6404	54.3473	57.3231	27.7	83.0342	73.191	82.1476	74.006	72.5538	63.767	67.1964	61.159	68.1728	71.6758	60.7737	66.0628	64.0941	60.5391
	27.8	126.916	122.545	127.321	108.197	102.442	90.151	87.6978	79.5134	73.2779	72.0414	70.8741	67.2667	68.5762	65.2057	71.9558	56.5701	27.8	69.757	67.2858	69.0768	55.9671	66.9217	53.2576	59.9512	53.8271	69.8459	59.6844	61.6254	58.5	49.6781	63.2564	54.0363	57.2156	27.8	83.0579	73.7026	81.9772	73.9247	72.478	63.9839	67.4119	61.2282	67.6912	72.2307	59.4743	66.0219	64.1283	60.1389
	27.9	126.197	122.769	127.479	107.947	101.679	90.1416	87.1412	79.8433	73.2656	72.1531	70.727	67.2901	68.896	65.0409	71.8441	57.2238	27.9	69.8249	67.7858	68.8044	55.9243	66.772	53.2522	60.1013	53.1614	69.795	59.9443	62.0126	58.828	49.3813	63.19	54.0369	57.3513	27.9	83.0417	74.0932	81.8276	73.8944	71.9642	63.8246	67.2122	61.1488	67.5302	72.0639	58.5743	65.1608	64.1859	59.9563
	28	126.015	122.857	126.913	107.335	101.75	90.2961	86.9603	80.1452	73.0424	72.0113	70.6177	66.9976	68.9148	65.1604	71.5734	57.7326	28	70.0771	68.5244	68.3003	55.5858	66.5396	52.9789	60.6513	52.5044	69.4684	60.3782	62.4811	58.9577	49.304	63.1376	54.3547	57.3276	28	83.2026	74.054	81.1771	73.5404	71.6879	63.6861	67.0306	61.0569	67.4104	71.7656	58.8394	64.8994	64.1723	60.0757
	28.1	125.932	122.326	126.12	106.82	102.579	90.1558	86.9721	79.7336	72.6388	72.1498	71.1136	67.0807	68.6301	65.0309	71.0952	58.033	28.1	69.9859	69.0763	68.0962	55.456	66.3159	52.7634	60.9508	52.5149	69.105	60.5206	62.5157	58.6118	49.141	63.1507	54.7713	57.3989	28.1	83.4528	73.5904	80.1942	73.9661	71.5377	63.682	66.6944	60.953	67.3622	71.3074	59.5892	64.8009	63.9457	60.3887
	28.2	126.519	121.517	125.795	106.867	103.627	89.8166	87.537	79.109	72.1523	72.0758	71.2353	67.0322	68.4478	64.7501	70.9056	58.3038	28.2	69.598	68.9426	68.099	55.1833	66.4394	52.7968	60.6926	53.0006	69.2282	60.438	62.284	58.2488	48.9038	63.0041	54.761	57.0922	28.2	83.559	72.9801	79.2188	74.2781	71.8343	64.0191	66.8047	61.0026	67.3208	71.093	60.172	65.3736	63.8121	60.367
	28.3	126.875	120.772	125.601	106.926	104.316	89.8856	87.7069	78.697	71.9209	71.7356	71.5718	67.19	68.3837	64.3322	71.1141	58.5466	28.3	69.128	68.4988	68.4339	55.4583	66.6687	53.1757	60.6539	53.3971	69.457	60.2017	61.8971	58.2737	48.6037	62.9707	54.4243	56.9148	28.3	83.1818	72.5691	78.9172	74.9152	72.1859	64.5291	67.2668	60.9216	67.473	70.7813	60.3507	65.6052	63.7711	60.2926
	28.4	127.358	120.587	125.398	107.018	104.409	90.2034	87.8424	78.8077	71.8513	71.2201	71.5367	66.9497	68.2294	64.2352	71.6073	58.5956	28.4	69.0524	68.3382	68.9528	55.7492	67.0202	53.481	60.9421	53.5689	69.808	60.3812	61.6352	58.5976	48.5328	63.4137	53.7711	56.6834	28.4	82.5923	72.4743	79.4398	74.8127	72.4443	65.0508	67.5786	60.5851	67.907	70.758	60.6938	65.8651	63.889	59.9407
	28.5	127.512	120.591	125.407	107.397	104.005	90.5091	87.5634	78.9759	71.6586	71.3342	72.142	66.8206	68.0716	64.5102	71.6429	58.572	28.5	69.3933	68.4083	69.3036	56.0541	66.9309	53.8783	61.4777	53.6313	69.4802	60.6327	61.6729	58.9236	48.9909	63.9533	53.3262	57.083	28.5	82.2496	72.2841	80.0466	74.574	72.2706	65.0223	67.3438	60.2796	68.3132	70.9564	60.793	65.7193	64.0263	59.6906
	28.6	127.845	120.759	125.718	108.202	103.546	90.303	87.5966	79.027	71.7853	71.7227	72.3407	66.372	67.9559	65.2082	71.1912	58.4316	28.6	69.7117	68.2433	69.173	56.0184	66.9864	54.1393	61.3343	53.452	69.1639	60.7038	61.8651	59.0838	49.861	64.2384	53.469	57.3708	28.6	82.3738	71.9311	80.7359	74.0347	71.6686	64.4582	66.9328	59.926	68.4098	71.5142	60.6467	65.633	64.2224	59.2493
	28.7	127.612	121.202	126.263	109.013	103.313	90.1403	87.6129	78.7636	72.2799	71.8857	72.6649	65.9308	67.9059	65.6402	70.4509	58.3659	28.7	69.8028	67.7729	68.587	55.4493	66.8622	54.255	60.882	53.0263	68.8118	60.4169	61.9921	59.1196	50.7381	64.37	54.0966	57.5169	28.7	82.6028	71.7017	81.1064	74.0906	71.16	63.4888	66.801	59.9113	68.4141	71.4549	60.2074	65.2789	64.2527	59.1189
	28.8	127.063	121.785	126.069	108.878	103.493	89.8731	88.034	78.365	73.0576	71.4496	72.3831	65.6762	67.6151	65.8791	70.1868	57.9308	28.8	69.4876	67.1201	68.1194	55.0259	66.8626	54.3361	60.2633	52.628	68.894	60.0322	61.7704	58.9667	51.1758	64.156	54.8977	57.3438	28.8	82.7773	71.5607	81.252	74.1147	70.7988	62.9762	67.081	59.7969	68.3479	71.0796	60.2421	65.2142	64.0819	59.0716
	28.9	126.488	122.168	126.016	107.881	103.682	90.1044	88.3099	78.1566	73.5694	70.9339	72.1972	66.1011	67.4923	65.7216	70.3346	57.9068	28.9	69.1317	66.654	68.1919	54.8216	66.4752	54.3384	60.006	52.6388	68.7727	59.7393	61.3374	58.7882	51.0071	63.7031	55.0832	57.4526	28.9	82.7078	71.8957	80.5627	74.3523	70.832	62.9994	67.1792	59.662	68.0676	70.6448	60.3688	65.0312	63.7552	59.2234
	29	126.24	121.987	125.729	106.983	103.703	90.2211	88.6004	77.9683	73.8694	70.7709	72.0022	66.7687	67.5723	66.0036	70.774	58.206	29	68.8454	66.4438	68.3346	55.2341	65.8942	54.351	59.6959	52.782	68.5281	59.4163	60.9393	58.8893	50.4202	62.937	55.0192	57.7407	29	82.5849	72.2248	79.6617	74.2881	70.8242	63.463	67.0137	59.5189	67.2598	70.7342	60.5044	65.0068	63.4646	59.3161
	29.1	126.654	121.478	125.787	106.912	103.81	90.3163	88.5233	78.1416	73.8887	70.7912	71.7466	67.1906	67.9927	66.224	71.06	58.9269	29.1	68.7516	66.6167	68.09	55.4248	65.2134	54.0208	59.7686	52.7302	68.1832	59.3961	60.9787	59.419	49.8497	62.6094	54.855	57.9051	29.1	82.5138	72.9344	78.9857	74.3814	71.3744	63.6711	66.785	59.7083	66.5646	70.807	60.5651	64.5781	63.2703	59.4526
	29.2	126.808	121.187	125.452	107.701	104.303	89.7826	88.4818	78.1256	73.5592	70.9366	71.6398	66.9414	68.2	66.8549	71.2701	59.0043	29.2	68.7551	66.865	67.3951	55.3949	64.8166	53.8162	59.9903	52.7573	67.7407	59.3816	61.3181	59.9101	49.4384	62.9922	54.9246	57.6756	29.2	82.5407	73.0613	79.0762	74.3184	71.9214	63.5946	66.7517	60.4922	66.7722	70.6729	60.7046	64.3546	63.3132	59.4113
	29.3	127.111	121.142	125.417	107.922	104.938	89.5418	88.0521	78.5664	72.643	70.7992	71.1364	66.6198	67.8971	66.9719	71.2938	58.5976	29.3	68.5994	66.6203	67.0423	55.3114	64.781	53.5706	60.6143	52.8443	67.7111	59.5638	61.737	59.9066	49.5332	63.5327	55.2009	57.4582	29.3	82.6793	72.8146	79.3842	74.0534	72.4464	63.1212	66.9542	61.0543	67.5027	70.5393	60.8476	64.1462	63.503	59.1893
	29.4	126.822	120.997	125.706	107.575	105.385	89.5171	87.5783	78.6767	71.7449	70.6968	70.9891	66.629	67.1477	66.9921	71.5156	57.9211	29.4	68.3498	66.3328	67.5771	55.4032	64.888	53.525	61.1183	53.2353	67.8258	59.3718	61.9014	59.6882	49.5849	63.985	55.5707	57.4742	29.4	82.8562	71.9439	79.5393	73.5699	72.3887	62.6629	67.0246	61.0484	67.8679	70.6887	60.6987	64.3489	63.8273	59.0374
	29.5	126.855	120.606	126.091	106.674	105.363	89.7342	86.8791	78.7868	71.2573	70.1967	70.9292	66.9819	66.4032	66.4729	71.3857	57.6148	29.5	68.2371	66.0943	68.4191	55.6136	64.988	53.2346	61.2221	53.1686	68.5129	59.5127	61.777	59.5867	49.5341	63.9452	55.891	57.6277	29.5	82.9377	71.3831	79.4922	73.1801	72.2231	62.1549	66.9724	60.2674	67.349	70.7951	60.6278	64.4164	63.9237	59.1941
	29.6	126.689	120.326	126.171	106.451	105.104	89.5907	86.859	78.7179	71.5316	70.0436	71.4153	67.1898	66.7561	66.0918	70.9791	57.4173	29.6	68.3781	66.5299	68.9228	55.7678	65.1057	53.0139	60.736	53.0697	68.9437	59.7827	61.6164	59.7107	49.1959	64.5971	55.8579	57.6701	29.6	82.9521	71.3126	79.4919	73.0391	72.1312	61.8679	67.0284	59.5458	66.7189	70.6989	60.7388	64.3649	63.9666	59.6578
	29.7	126.807	120.669	125.91	106.506	104.794	89.1244	87.018	78.6494	71.9462	69.9053	71.5978	67.2764	67.7666	65.5963	70.1236	57.5118	29.7	68.5823	66.8419	68.6913	55.8702	65.3699	52.9172	60.3559	52.7617	69.3463	60.007	61.6948	59.5409	49.1202	65.4757	55.5649	57.3028	29.7	83.0441	72.0819	79.7302	73.2543	71.8242	61.7354	67.2326	59.2733	66.3581	70.6094	61.0062	64.3127	64.0128	59.9348
	29.8	126.413	121.085	125.553	106.832	104.327	88.7444	87.2131	78.603	72.3987	70.6357	71.2603	67.1279	69.211	65.1138	69.6744	57.7377	29.8	68.3579	66.977	68.2481	56.1086	65.683	52.9604	60.292	52.9381	69.4918	59.8314	61.8626	59.1403	49.235	66.4498	55.4269	56.9738	29.8	83.1849	72.7586	79.8741	73.3107	71.208	61.9768	67.6441	59.5328	66.5414	70.8301	61.042	64.4699	64.3407	60.0519
	29.9	126.262	121.212	125.558	106.977	104.11	88.4424	87.0122	78.0276	72.3694	71.1501	70.8056	66.8658	69.3298	64.5746	69.8051	58.2172	29.9	68.175	66.6177	67.9998	56.2606	65.7748	53.1378	60.5769	53.1726	69.5087	59.492	61.8637	58.5711	49.4851	66.1768	55.6183	56.8317	29.9	83.1144	73.0222	80.0192	73.3724	70.3933	62.5017	67.621	59.9127	66.7961	71.0083	60.9484	64.765	64.3499	59.9852
	30	126.104	120.679	125.818	107.038	103.63	88.4048	86.8148	77.7129	72.2443	71.5324	70.8036	66.3674	68.9244	64.417	70.3106	58.2281	30	68.4611	66.1317	67.839	56.4964	65.4332	53.0873	60.4482	53.3073	69.329	59.6623	61.5621	58.3968	49.5034	65.2883	55.8597	57.0598	30	82.6279	72.5546	79.9116	73.2512	70.2386	63.2622	67.5272	60.2463	67.0681	70.5316	60.5621	64.9034	64.2	60.153
	30.1	126.429	120.264	126.027	107.122	103.602	88.726	86.9447	77.4578	72.0959	70.8393	71.2203	65.9243	67.9424	64.5357	70.9586	57.968	30.1	69.3424	65.8671	67.7468	56.5244	65.1332	53.2262	60.1697	52.8307	69.0258	59.8053	61.3761	58.4737	49.3903	64.3838	56.0309	57.4191	30.1	82.3009	72.208	79.7724	73.7121	70.7728	63.616	67.3306	60.6114	67.1233	70.146	60.4598	64.9206	63.796	60.2767
	30.2	126.301	120.24	125.786	107.159	103.399	89.3009	87.1587	77.7189	72.341	69.9907	71.4642	65.8969	67.7852	64.6349	71.1448	57.3819	30.2	70.257	65.73	67.5303	56.5128	64.9529	53.2574	59.7196	52.4971	68.7997	59.9533	61.542	58.8441	49.2601	64.1357	55.7481	57.4081	30.2	82.2462	72.0069	79.0463	74.1294	72.0851	63.5429	67.2428	60.9348	67.1813	69.9289	60.3906	65.284	63.8789	60.0214
	30.3	126.482	120.637	125.016	107.075	103.316	89.6583	87.3643	77.7032	72.9109	69.3277	71.2203	66.0377	67.8583	64.5094	71.1316	57.4179	30.3	70.2272	65.9537	67.6468	56.1528	65.1433	53.4921	59.2126	52.309	68.6262	59.8848	61.8351	58.9139	49.3964	64.19	55.3963	57.0659	30.3	82.4269	71.916	78.3352	74.329	73.2316	62.9051	67.308	61.1213	67.3136	70.6814	60.6401	65.6567	64.3207	59.5726
	30.4	126.812	120.859	124.619	106.76	102.922	89.487	87.4207	77.9937	73.1498	69.3557	71.0829	66.4018	68.1254	64.5654	70.8924	57.7483	30.4	69.7368	66.1403	67.7566	55.8219	64.9661	53.4618	58.8674	52.4846	68.3122	60.2032	61.8286	58.8102	49.9788	64.3247	54.5257	56.4647	30.4	82.2302	71.641	77.7887	73.5623	73.6062	62.587	67.1792	60.811	67.5634	70.8708	60.4467	65.8852	65.1529	59.1597
	30.5	127.826	120.872	124.585	106.432	102.579	88.869	87.6358	78.3251	73.251	69.7802	71.1747	66.2849	68.1471	64.8242	70.8661	58.3966	30.5	68.6577	66.3761	68.0421	55.4259	64.8352	53.2854	58.7847	52.2993	67.9513	60.6082	61.6666	58.588	50.3093	64.3914	53.7134	56.4096	30.5	81.8171	71.2734	78.1194	73.006	72.9119	62.2904	66.866	60.285	67.7267	70.9571	60.2891	65.5053	65.4796	59.5654
	30.6	128.28	120.667	124.843	106.39	102.551	88.4923	87.803	78.6869	72.7383	70.1362	71.5383	65.9182	68.0317	64.9707	70.8762	58.7406	30.6	68.1871	66.1764	67.8372	55.2801	64.6131	52.8638	58.9508	51.9248	67.805	60.961	61.6818	58.9052	50.5826	64.6138	53.2239	56.9417	30.6	81.1767	71.2157	78.6988	73.0292	71.7273	62.2573	66.4277	59.9606	67.7492	70.3683	60.1466	65.1353	65.3402	59.8911
	30.7	128.325	120.578	124.706	106.36	102.977	88.478	87.821	78.3891	72.431	70.4582	71.7166	65.1851	67.9238	64.9038	70.4438	58.8963	30.7	67.6058	65.6423	67.8829	55.1513	64.7923	52.3866	59.058	51.6538	68.0991	60.7341	61.9577	59.717	50.4923	64.9416	53.5732	57.8366	30.7	80.9034	71.1996	79.2871	73.784	71.0631	62.0878	65.9564	59.8868	67.6701	69.9911	60.4923	64.7276	64.4334	60.1149
	30.8	127.869	120.393	124.403	106.624	103.62	89.0391	87.3217	78.1534	72.0902	70.5546	71.4874	64.8958	67.7899	64.6828	69.7911	58.6738	30.8	67.6139	65.3487	67.9733	55.1717	64.95	52.2781	59.2264	51.9641	68.7656	60.1474	62.0631	60.6049	50.6194	65.3387	54.446	58.2711	30.8	80.8407	71.4876	79.3982	74.0416	70.8436	62.2571	65.8726	59.9891	67.7894	69.3941	60.7121	64.7223	64.0473	59.7159
	30.9	127.671	120.088	124.175	107.028	104.338	89.6878	86.7464	78.0569	72.0973	70.3411	71.0437	64.9257	67.8077	64.6723	69.5568	58.2561	30.9	67.3346	65.3207	68.2656	55.299	64.9568	52.4062	59.7361	52.7693	69.2023	59.4853	61.5643	61.0552	50.3484	65.3171	54.9616	58.2273	30.9	81.1301	71.3927	79.1896	74.0799	71.3152	62.5111	65.7379	59.9872	68.0704	69.1389	60.6473	64.536	63.7393	59.3186
	31	127.581	119.54	124.237	107.489	104.723	89.9437	86.4142	78.2977	72.154	69.5271	70.5884	65.491	67.9698	64.5779	70.1546	57.5494	31	67.5052	65.7809	68.1017	55.4601	64.8942	52.467	60.1267	53.4457	69.3696	59.3282	60.9101	60.7823	49.7779	65.0169	54.9631	58.2294	31	81.4897	71.4582	78.7382	74.0384	71.7007	62.909	66.1071	59.9541	68.1384	69.1576	60.5099	64.6308	63.9162	59.1421
	31.1	127.302	118.895	124.195	107.411	104.825	89.7861	86.5354	78.1879	71.8654	69.0739	70.6019	66.0426	68.1167	64.6137	70.9736	57.0501	31.1	67.3912	65.9677	67.7496	55.4723	65.0011	52.5728	60.2227	53.4569	69.418	59.5986	60.4536	60.1326	49.3004	64.5541	55.102	58.4448	31.1	81.9329	71.0641	78.276	74.3346	72.3196	63.308	66.6042	60.2182	67.875	69.6689	60.6168	64.4159	63.7323	59.1972
	31.2	126.903	118.753	124.535	106.517	104.391	89.5073	86.7971	78.0456	71.3428	69.1028	70.8453	66.5753	68.1666	64.5654	70.9746	56.7916	31.2	67.4014	66.1686	67.6417	55.342	65.5122	52.6201	60.015	53.1706	69.7181	60.113	60.5438	59.4659	49.1236	64.3943	55.491	59.0092	31.2	82.1962	70.7864	77.9887	74.182	72.5974	63.6559	67.1087	60.7321	67.4697	70.0903	61.0298	64.6711	63.7091	59.1014
	31.3	126.264	119.193	124.758	106.225	103.811	89.2366	86.9583	78.1531	70.6129	69.9549	71.2766	66.7367	68.2544	64.6356	70.1622	56.5907	31.3	67.2367	66.1894	67.6101	54.8933	65.8667	53	59.9603	52.9446	70.3388	60.5288	60.8877	58.826	49.4046	64.0972	55.9857	59.1688	31.3	82.098	70.3543	77.9303	73.734	72.7264	63.7854	67.3052	61.3309	67.7113	70.5317	61.0553	64.8169	63.8901	58.4173
	31.4	125.834	120.05	125.203	106.188	103.045	88.7462	87.0343	78.4151	70.7564	70.3909	71.4433	66.8229	68.4407	64.6119	69.1618	56.4716	31.4	67.1073	66.2594	67.3878	54.238	65.9267	52.8003	60.1059	52.7603	70.5964	60.8064	61.1588	58.6239	49.6189	63.9278	55.6938	59.3269	31.4	81.496	70.5243	78.3147	73.24	72.4679	63.6492	67.1074	61.2917	68.1806	70.9292	60.8292	65.4408	64.1082	57.6907
	31.5	125.384	120.682	124.938	107.039	102.394	88.2057	87.2298	78.774	71.3024	70.7387	71.5854	66.6007	68.5152	64.6249	68.9104	56.5459	31.5	66.8122	66.4557	67.0163	53.7141	65.6139	52.8218	60.1309	52.4828	70.7412	61.0157	61.6384	58.5096	49.8732	63.7603	55.1894	59.0344	31.5	80.6478	70.9002	78.5749	73.082	71.925	63.4758	66.9934	60.4362	68.5281	71.3003	60.5318	65.7714	64.2001	57.4631
	31.6	125.212	120.819	124.79	107.197	101.807	88.2191	87.2547	78.8441	72.0946	70.808	71.5678	66.33	68.3422	64.548	69.1947	57.1571	31.6	66.4713	66.5808	66.9164	53.7283	65.1204	52.8736	60.2932	52.0289	70.3869	61.1761	61.9652	58.6207	50.1412	63.9561	54.7951	58.6963	31.6	79.9251	71.3608	78.7476	72.9459	71.3946	62.9928	66.6544	59.446	68.1763	71.4898	60.7247	66.1993	63.6766	58.0484
	31.7	124.962	120.8	124.635	107.29	101.854	88.9544	87.1384	78.929	71.9076	71.1321	71.5287	65.8573	68.0404	64.5416	69.8608	57.8176	31.7	66.357	66.6241	67.3068	54.4476	64.4721	53.235	60.5311	52.0203	70.1588	61.1256	62.406	58.504	50.2861	64.2016	54.6004	58.1632	31.7	79.6822	71.3921	78.4842	72.7092	71.1054	62.348	66.7022	59.0691	67.7604	71.4618	60.851	66.2321	63.2271	58.7966
	31.8	124.834	120.541	124.752	107.281	102.125	89.4022	87.0108	78.7198	71.454	71.4948	71.4102	65.5829	67.6194	64.4622	70.0429	58.0287	31.8	66.6132	66.2499	67.5476	54.8878	64.0986	53.2439	60.7887	52.0776	69.8293	60.7794	62.2522	58.2862	50.1841	64.3329	54.682	57.7582	31.8	79.9664	71.2384	78.4588	72.4369	71.2457	61.6117	66.5663	59.2553	67.5466	71.3657	60.8704	65.9641	63.0563	59.3624
	31.9	125.133	120.654	124.42	107.466	102.933	89.0918	87.1333	78.3589	71.0337	71.7362	71.0677	65.6402	67.4347	64.3702	69.9664	57.8726	31.9	66.9921	66.0537	67.662	54.7494	64.3701	53.0859	60.6367	52.3517	69.6078	60.0972	62.1139	58.1751	49.6641	64.2608	54.8243	57.001	31.9	80.3997	70.903	78.5723	72.5029	71.7396	61.7228	66.6437	59.6339	67.5858	71.2833	60.4524	65.4478	63.5156	59.6459
	32	125.614	120.57	123.843	107.576	103.468	88.1086	87.3168	77.9739	71.1643	71.284	71.0689	66.0917	67.4008	64.2633	69.6021	57.4164	32	67.3274	65.9768	67.2661	54.2086	65.1334	52.936	60.0494	52.4579	69.4066	59.5721	61.872	58.0598	49.4843	63.9264	55.5026	56.3488	32	80.6961	70.8024	78.8469	72.7958	71.9657	62.2432	66.3008	59.7632	67.5728	71.2382	60.3388	64.7562	63.9062	59.6644
	32.1	126.2	120.517	123.336	107.103	104.025	87.3199	87.002	77.6957	71.6442	70.6143	71.0536	66.6594	67.8808	64.3137	69.3868	57.3493	32.1	67.6688	66.2261	67.0968	54.0368	65.6462	52.6656	59.6359	52.6453	69.1892	59.0743	61.8144	57.8602	49.4492	63.6582	55.8664	55.8973	32.1	80.6778	70.9461	78.85	73.2808	72.001	63.0749	66.2133	59.9872	67.5774	71.1257	60.7021	64.359	63.9056	59.6867
	32.2	126.136	120.163	123.647	106.491	103.818	86.9363	86.5613	77.5394	71.7756	69.6641	71.5462	67.0084	68.0281	64.4926	69.0124	57.4038	32.2	67.8191	66.1072	67.1111	54.2986	65.7069	52.4638	59.7059	52.4873	69.131	58.905	61.6189	57.6082	49.573	63.8342	55.802	56.3568	32.2	80.4888	71.3408	78.6992	73.2211	71.6163	63.3389	66.3083	60.0514	67.4791	70.8293	61.4408	64.1009	63.4582	59.76
	32.3	126.379	119.736	124.196	106.162	103.361	87.1283	86.336	77.1429	71.5273	69.5548	71.6976	66.7224	67.9674	64.7244	68.7744	57.8794	32.3	67.8178	65.8252	67.5499	54.5884	65.4389	52.1888	60.2397	51.9742	69.246	59.0298	61.3872	57.6762	49.1689	64.0719	55.2848	56.5841	32.3	80.1664	71.5207	78.5766	72.7039	71.514	63.6144	66.7326	59.9602	67.162	70.3667	61.9549	64.109	63.208	59.9646
	32.4	126.459	119.323	124.934	106.372	103.197	87.7726	86.713	76.8502	70.9548	69.4773	72.1051	66.3302	67.331	64.9097	68.7361	58.004	32.4	67.7019	65.5967	67.7837	54.6234	65.169	52.2761	60.8407	51.3433	69.3083	59.3334	61.4171	57.9557	49.2296	64.3639	55.1446	56.6378	32.4	79.696	71.2089	78.6371	71.7408	71.08	63.8811	66.7253	59.7832	66.7312	70.1979	61.7413	64.1939	63.2234	60.1339
	32.5	126.812	118.767	125.125	106.587	103.652	88.7921	86.988	76.6	70.912	69.8057	71.7359	65.8059	66.8369	65.0892	69.1237	58.0214	32.5	67.6642	65.6192	67.4662	54.5402	64.99	52.3228	61.213	51.17	69.4049	59.928	61.538	58.178	49.525	64.0987	55.3352	56.2299	32.5	78.7656	70.6948	78.7403	71.4189	71.0132	64.2906	66.4274	59.5798	66.3796	70.3334	61.3398	64.2763	63.3281	60.1629
	32.6	126.962	118.421	125.192	106.463	104.179	89.1196	86.7289	76.6158	71.3098	69.7147	71.3422	65.672	66.602	64.9699	69.6539	57.6151	32.6	67.736	65.8398	66.744	54.4383	64.9312	52.5957	61.3527	51.3232	69.4073	60.2362	61.5838	58.3751	50.1217	64.2171	55.4402	56.3866	32.6	78.0582	70.2711	78.4921	71.5852	70.7527	64.306	66.1518	59.5157	66.6186	70.8066	60.8141	64.4403	63.2116	60.2114
	32.7	127.396	118.394	124.969	105.764	103.744	88.7909	85.9227	76.6336	71.8294	69.6087	70.6033	65.5619	66.9877	64.6427	69.8406	57.5803	32.7	67.3803	65.936	65.9659	54.4571	65.1723	52.6566	61.3216	51.5176	69.686	60.8413	61.6086	58.6129	50.1716	64.1491	55.3343	56.6811	32.7	78.0344	70.5412	78.3899	72.3752	71.0221	63.6504	66.5769	59.5507	66.8186	71.1904	60.4686	64.7882	63.0253	60.0676
	32.8	127.776	118.709	124.929	105.233	102.487	87.7378	85.4428	76.8132	72.0056	69.2947	70.6943	65.5009	67.4841	64.2907	69.9994	57.6444	32.8	67.0562	66.1492	65.9521	54.6036	65.2884	52.7268	61.1166	51.6457	69.8283	61.0158	61.9883	59.1141	50.0559	63.9921	55.1298	57.1288	32.8	78.8428	71.0014	78.2609	72.6802	70.7889	62.7796	67.2373	59.9448	67.0818	71.5358	60.1054	65.1277	63.1178	59.7749
	32.9	127.63	118.962	125.169	105.079	101.523	86.9651	85.573	77.2551	72.0769	69.1193	70.9724	65.5839	68.003	64.4258	69.809	57.9698	32.9	66.4498	65.9861	66.4241	54.6386	65.2362	52.6587	60.9701	51.9526	69.6484	61.0163	62.4677	59.123	50.0423	63.1666	55.0801	57.4734	32.9	79.3979	71.4934	78.4827	72.4421	70.6406	62.2878	67.4788	60.3121	66.9139	71.599	59.9432	65.3306	63.4512	59.1928
	33	126.723	118.808	125.34	105.572	101.564	86.5424	86.0296	77.6191	71.9401	69.2701	71.2958	65.5896	67.8984	64.7109	70.0952	58.0208	33	66.1	65.5257	67.1606	54.7481	64.8139	52.6151	60.784	52.1379	69.0848	60.4311	62.4843	59.0906	50.1709	62.726	55.0177	57.9016	33	79.1136	71.4633	78.2087	71.4211	70.0914	62.4461	67.1756	60.4577	67.1396	71.491	59.9012	64.8698	63.889	58.8387
	33.1	125.727	118.509	125.109	105.789	102.546	86.7249	86.2243	77.6876	71.8032	69.8224	70.9984	65.5333	67.8076	64.8018	70.1497	58.1437	33.1	66.0209	64.6894	67.3701	54.7486	64.6301	52.5001	60.6106	52.0321	68.3436	60.0438	61.887	58.5716	50.3068	62.8014	54.9627	58.4507	33.1	78.6044	71.3263	78.0242	70.6452	69.8409	62.8612	66.6749	60.2791	67.4078	71.0972	59.6342	64.4096	64.4654	58.5911
	33.2	125.227	118.281	124.239	105.863	103.306	87.3826	86.2092	77.2419	71.5529	70.3003	70.622	65.0437	67.1767	64.3829	69.9239	58.2998	33.2	66.4067	64.155	67.237	55.0221	64.8979	52.532	60.3126	51.8381	68.1898	60.0953	61.2647	58.2604	50.3408	63.5454	55.088	58.5533	33.2	78.2809	70.995	77.9852	70.4172	69.9822	62.9466	66.4178	60.0938	67.6828	70.8924	59.2547	64.3378	64.796	58.6709
	33.3	125.378	118.467	123.637	105.862	103.74	88.2148	86.2732	76.5288	71.2906	70.3911	70.2866	64.6247	66.8306	63.9663	69.193	58.368	33.3	67.2556	63.8807	66.8268	54.9967	65.1598	52.6284	60.1787	51.8707	68.7361	60.3704	60.9217	58.1537	50.2686	63.5819	55.2398	58.2513	33.3	78.5422	70.8133	78.2377	70.8442	70.6083	62.6878	66.3354	60.1031	67.4447	70.6807	59.1673	65.0349	64.9009	58.9926
	33.4	125.118	118.764	123.725	106.423	103.794	88.8083	86.4227	76.1682	71.3137	69.9046	70.2826	64.3127	66.323	63.6612	68.8032	58.1168	33.4	67.4782	63.8957	66.6909	55.1157	65.0508	52.6937	60.2022	52.0853	69.6049	60.3939	60.9	58.5538	50.2811	63.3122	55.5443	57.5346	33.4	78.7001	70.5633	78.2318	71.2874	71.2767	62.1453	66.4133	59.9406	67.2458	70.9193	59.4404	65.8999	64.3377	59.451
	33.5	124.266	119.378	124.297	106.323	103.73	88.8226	86.4118	76.3527	71.5734	69.3031	70.0737	64.4953	66.3794	63.756	69.0953	57.6261	33.5	67.5417	64.2408	66.677	54.8593	64.7038	52.5476	60.3507	51.9716	70.0629	60.0301	61.2222	59.0671	50.2837	62.784	55.6072	56.858	33.5	79.1538	70.5123	77.7998	71.7778	71.2541	61.9082	66.6858	60.1567	67.2016	70.995	59.7156	66.2434	63.8606	59.9221
	33.6	123.294	119.825	124.432	105.571	103.391	88.461	86.2	77.0467	71.9389	68.8009	69.9519	64.791	66.6768	63.664	69.5612	57.216	33.6	67.0233	64.7951	67.2556	54.824	64.8376	52.5304	60.3639	51.9964	69.8209	59.634	61.7327	58.9426	50.4536	62.9382	55.618	56.4457	33.6	79.3011	70.5089	77.2852	72.1888	70.631	62.0341	66.9323	60.0394	67.3759	71.1559	59.6249	65.94	63.4277	59.7092
	33.7	123.093	120.201	123.593	104.379	102.812	88.0341	85.7702	77.406	71.6884	68.7434	69.7472	65.3114	67.2462	63.789	69.8677	56.9433	33.7	66.8398	65.3606	67.7164	54.4616	65.34	52.6051	60.4341	52.08	69.5662	59.302	61.987	58.288	50.7213	63.6023	55.4197	56.4869	33.7	79.5882	70.6131	77.1223	72.532	69.9918	62.533	67.342	60.2467	67.3547	70.9026	59.3982	65.0946	63.2908	59.4712
	33.8	123.518	119.899	122.768	104.4	102.195	88.0027	85.5906	77.3591	70.9609	68.872	69.7292	65.6737	67.7631	63.6331	70.1952	56.7874	33.8	66.348	65.6707	68.2314	54.7288	65.6943	52.8239	60.7237	52.7889	69.2113	59.0301	61.7924	57.4663	50.9929	64.3426	55.1871	56.9948	33.8	79.6834	70.6119	77.152	72.583	69.7737	62.921	67.7208	59.8412	67.3369	70.8693	59.5139	64.0744	63.3446	59.1468
	33.9	123.695	119.362	122.699	105.126	101.592	88.1668	85.4399	77.2943	70.8	69.0661	69.6222	65.9702	67.9748	63.9009	70.697	56.7972	33.9	66.0258	65.497	68.1142	54.903	65.5782	53.1456	61.028	53.1679	69.1254	59.1267	61.3053	56.9788	51.0708	65.1956	54.8279	57.716	33.9	79.8428	70.2431	77.2147	72.3026	69.754	62.9189	68.1883	59.7292	67.1978	70.929	59.625	63.4288	63.499	59.1354
	34	123.576	118.591	123.569	105.732	101.151	88.3894	85.5629	77.3537	71.565	69.1553	69.6437	65.7776	67.7748	63.8602	70.7963	56.6872	34	65.6263	65.1852	67.7854	55.0296	65.1439	53.7492	61.156	53.4043	68.6266	59.6774	61.1147	56.7481	50.8132	65.3163	54.5618	58.0992	34	79.8239	69.8856	76.8941	71.9554	69.4763	62.6514	68.2623	59.5556	67.1806	70.9142	59.9841	63.42	63.7581	59.0344
	34.1	123.32	118.521	124.272	105.686	101.139	88.1672	85.5593	77.4932	72.5856	69.1167	69.8017	65.0153	67.2478	63.9593	70.4991	56.2489	34.1	65.675	64.4843	67.4723	54.4837	64.8448	54.3669	60.9294	53.0029	68.5159	60.573	61.0212	56.4782	50.3824	65.2801	54.406	58.2773	34.1	79.3049	69.6163	76.6287	71.4758	69.0943	62.2786	67.9336	59.6299	67.2152	70.5539	60.2937	63.9319	63.5473	59.0804
	34.2	123.832	118.67	124.311	105.374	101.504	87.8636	85.8324	77.4868	72.8532	68.9243	69.8299	63.9826	66.8012	63.5557	69.9921	55.8119	34.2	65.8808	63.9247	67.3477	54.1313	64.9469	54.7438	60.6689	52.8199	68.3247	60.8704	60.9998	56.3923	49.9633	64.6098	54.5681	58.0319	34.2	78.7958	69.7402	76.4657	71.1059	69.1166	62.2004	67.6244	59.586	67.5569	69.9874	60.7041	64.2866	63.3423	59.4833
	34.3	124.845	118.942	123.973	105.441	102.156	87.6017	85.8776	77.5248	72.4413	68.8848	69.7643	63.4253	66.5648	63.3411	69.8032	55.6561	34.3	66.3843	63.2908	67.3668	54.2824	65.3892	54.4857	60.6967	52.9508	68.8588	60.5561	61.04	56.4949	49.5566	64.2618	54.7002	57.8438	34.3	78.3557	69.5452	76.8703	70.745	69.494	62.2286	67.4462	59.4311	67.9009	69.8967	60.7229	64.3851	63.2138	60.0707
	34.4	126.098	118.748	123.865	105.454	102.296	87.574	85.8176	77.4663	72.1407	69.3577	69.6732	63.4901	66.3318	63.15	69.4068	56.1734	34.4	66.462	63.1796	67.0682	54.9424	65.6333	53.9351	60.8871	53.2863	69.1947	59.8623	61.1157	57.1883	49.2052	64.0624	54.7373	57.4413	34.4	78.3758	69.2298	77.171	70.7559	69.7049	62.3863	67.629	59.2716	67.8852	70.004	60.4263	64.5573	63.6511	60.5223
	34.5	126.573	118.409	124.226	105.561	102.146	87.3918	85.3746	77.2541	71.6757	70.006	70.01	63.721	66.0466	63.644	69.1017	56.4331	34.5	66.6406	63.4096	66.5444	55.4632	65.492	53.2091	61.2298	53.3944	69.3013	59.7756	61.2522	57.8386	49.077	64.4086	54.6461	57.3247	34.5	78.6131	68.7364	77.5277	71.1536	69.6053	62.6168	67.4034	59.4833	67.7237	70.8518	60.0317	64.9062	64.086	60.8034
	34.6	126.399	118.261	124.612	105.377	101.404	87.0538	85.2289	77.1537	70.8983	70.2169	70.7049	64.1254	65.7886	63.8951	68.754	56.5944	34.6	66.4541	63.8938	66.0999	55.4503	65.2232	52.8609	61.3552	53.0028	68.8769	60.2839	60.7144	58.345	49.1326	64.6766	54.7087	57.1659	34.6	78.6329	68.4896	77.5019	71.7071	69.4163	62.9204	67.1273	59.9684	67.3422	71.501	59.7693	64.8839	64.3318	60.7307
	34.7	126.009	118.36	124.795	105.272	101.078	86.8727	85.2846	77.2804	69.8912	69.9401	71.3817	64.7363	65.9802	63.9689	68.8139	56.3779	34.7	66.591	64.2547	65.864	54.7906	65.2103	52.6277	61.0316	52.4256	68.6809	60.8122	60.2427	58.3623	49.1788	64.8668	55.0233	57.2306	34.7	78.6654	68.5273	77.5693	72.173	69.6891	63.079	66.8174	60.4687	67.1091	72.1934	59.6636	64.4999	64.338	60.2463
	34.8	125.921	118.892	124.413	105.248	100.745	87.324	85.5458	77.6081	69.4737	69.6089	71.6681	65.8904	66.1906	63.2829	68.9012	56.383	34.8	66.2953	64.4761	66.0444	54.1011	65.146	52.4146	60.3654	51.963	68.9854	60.8589	59.7751	58.3397	49.0736	64.5549	55.2232	57.1702	34.8	78.5966	68.5294	77.6081	72.2384	70.1274	63.0714	66.8462	60.2622	66.6499	71.639	59.7624	64.0526	64.4129	59.3297
	34.9	125.93	119.252	123.752	105.691	101.102	87.7782	85.5473	77.7803	69.6104	69.6136	71.4921	66.3739	66.4453	63.1848	69.2402	56.4691	34.9	66.241	64.7168	66.2224	53.759	64.9591	52.2828	59.5737	51.8943	69.4799	60.4672	60.2648	58.3234	48.9352	64.2474	55.4062	57.2448	34.9	78.9484	68.7326	77.5864	71.9316	70.3192	62.9857	66.6514	59.5699	66.5041	70.6266	59.8666	64.297	64.4343	58.6802
	35	125.626	119.01	122.963	106.286	101.265	87.9959	85.4613	77.8707	70.0897	69.4352	70.9941	66.3681	66.2413	63.5932	69.7421	56.6698	35	66.118	64.8267	66.3156	53.9027	64.5657	52.1607	59.5106	52.2252	69.6022	60.5373	60.5534	58.5057	49.0269	63.7593	55.3012	57.3007	35	79.2169	68.7797	77.439	71.4154	70.1226	63.0316	65.9926	58.8154	66.9498	69.7573	59.7366	64.6062	64.4199	58.6407
	35.1	125.366	118.162	122.388	106.398	101.407	87.5682	85.4193	77.7749	70.4943	69.4789	70.7453	65.4729	66.3701	64.6682	70.3593	57.0866	35.1	66.2243	65.2224	66.0574	53.7988	64.1778	52.1591	59.9642	52.6473	69.6042	60.8304	61.1492	58.6552	49.3727	63.6438	55.1649	57.4859	35.1	79.478	69.0656	76.9529	70.8023	69.7014	62.9293	65.4227	58.6861	67.6073	69.6632	59.7346	64.6881	64.1913	59.1579
	35.2	125.186	117.423	122.079	105.897	100.96	87.0827	85.5846	77.4304	71.1031	69.2092	70.4258	65.088	66.4661	65.2326	70.7179	57.3332	35.2	66.4276	65.6342	65.686	53.6131	63.9154	51.8909	60.6172	52.6149	69.489	61.1412	61.5957	58.9089	50.2341	63.4438	54.66	57.6601	35.2	79.7212	69.0249	76.6389	70.5187	69.4764	62.5001	65.3746	59.3251	68.061	70.2632	60.002	64.3561	63.9653	59.5664
	35.3	125.317	117.666	122.175	105.041	100.297	86.7612	85.6959	76.7948	71.3796	69.3171	70.3389	65.0284	66.7148	65.1678	70.3843	57.5986	35.3	66.6028	66.1157	65.0729	53.4203	63.7282	51.7343	61.0228	52.4277	69.3921	60.8703	62.14	58.8497	51.1293	63.3159	54.3374	57.7867	35.3	79.7959	68.777	76.1551	70.3926	69.3749	61.9919	65.7992	60.4289	67.5586	70.5141	60.6642	64.0474	63.5434	59.8088
	35.4	125.203	118.383	122.906	104.588	100.163	86.5234	85.8971	76.298	71.5719	69.1663	70.2156	65.4071	66.3564	64.4711	69.6071	57.316	35.4	66.8158	65.9694	64.6269	53.5731	63.8557	51.7248	60.9037	52.0884	69.0883	60.6133	61.9669	58.8167	51.5003	62.9018	54.3102	57.7459	35.4	79.5352	68.4587	76.1294	70.5301	69.5381	61.7009	65.9329	61.4112	67.0527	70.524	60.8934	64.0413	62.9967	59.6702
	35.5	124.888	119.228	123.941	104.511	100.231	86.768	85.8844	76.1568	71.6003	69.437	70.2176	65.5548	66.329	63.5552	68.6681	57.0977	35.5	66.6264	65.6194	64.2149	53.6107	64.0454	51.7704	60.4332	52.0511	69.0346	60.5288	61.079	58.5067	50.8691	62.7826	54.7799	57.6052	35.5	78.7634	68.5279	76.0294	70.7421	69.7722	61.9293	66.1026	61.5988	66.6857	70.2466	60.9638	64.0968	62.8142	59.5936
	35.6	124.624	119.25	124.78	104.787	100.799	86.8203	86.0102	76.368	71.7753	69.6563	70.1296	65.319	66.6548	62.906	68.3938	56.7647	35.6	66.3478	65.3543	64.3451	53.4562	64.1089	52.0652	59.6774	52.0277	69.3998	60.6116	60.4027	58.4606	50.017	62.8428	55.1661	57.3363	35.6	78.1512	68.8174	76.5931	70.5451	69.6723	62.1752	66.3312	61.2899	67.1697	70.2051	60.6801	64.1126	63.0256	59.4654
	35.7	124.538	118.602	124.776	104.901	100.773	87.0573	85.9427	76.487	71.9094	69.9258	69.7006	65.0666	67.1791	62.8358	68.6721	56.7999	35.7	65.8536	65.2726	64.4991	53.4237	64.1009	52.4256	59.2129	52.0488	69.8916	60.5597	60.294	58.4741	49.423	63.0982	55.407	57.1159	35.7	78.0194	68.7937	76.783	70.1767	69.3622	62.3571	66.7801	60.8174	67.4146	70.4506	60.6724	64.0954	63.7524	59.252
	35.8	124.855	117.485	124.142	104.781	101.039	86.9241	85.8843	76.9212	71.5388	69.9751	69.6911	64.744	66.9134	63.1962	69.2434	56.8531	35.8	65.4494	65.0288	64.7476	53.4797	63.8843	53.2442	59.1726	52.0943	70.2264	60.2956	60.8332	58.6453	49.2614	63.1971	55.2699	57.0961	35.8	78.0693	68.3267	76.896	69.4821	69.003	62.3461	66.8023	60.6429	67.5574	70.5971	60.612	64.3099	64.0687	58.9241
	35.9	125.087	116.796	123.584	104.777	100.837	87.1016	85.581	77.3557	71.1934	69.902	69.8614	64.6593	66.3044	63.5963	69.3701	57.0466	35.9	65.0074	64.3958	64.8936	53.816	63.8614	53.6713	59.5799	51.9562	70.0878	60.0103	61.5582	58.6628	48.9847	63.3613	55.0613	57.3818	35.9	78.2081	67.8238	76.5073	69.5049	69.1449	62.1288	66.9004	60.5984	67.1493	70.7936	60.8494	65.0441	64.0873	58.5667
	36	125.43	116.941	123.035	104.738	100.652	87.3096	85.2176	77.8322	70.7842	69.8626	70.4323	64.7014	65.9753	63.8514	68.9698	57.138	36	64.8512	63.7409	64.7833	53.9077	63.9928	53.513	59.9454	52.0302	70.1366	59.9396	62.4164	58.4662	48.9634	63.4951	54.7252	57.4631	36	77.9953	67.8806	76.2281	69.6244	69.0918	61.8184	66.8183	60.3902	67.1456	70.7562	60.9874	65.6811	63.8573	58.738
	36.1	125.173	117.616	122.802	104.731	100.223	87.461	85.0868	77.6083	70.8684	69.6436	70.1498	65.3583	66.1298	64.1944	68.9672	57.0107	36.1	64.823	63.4184	64.7253	54.2358	64.2216	52.8006	60.2143	52.293	70.4564	60.0358	63.1946	58.4507	49.014	63.3853	54.6581	57.1449	36.1	78.0261	68.0949	76.1819	69.9417	68.873	61.2843	66.753	60.4409	67.2232	70.8936	60.983	65.9877	63.8049	59.2016
	36.2	124.632	117.638	122.354	104.001	100.293	87.4514	85.0651	77.2273	70.9319	69.5697	69.6219	66.1061	66.5633	64.6341	69.3611	56.5629	36.2	65.1446	63.2133	64.5403	54.4329	64.5314	52.3657	59.9859	52.73	71.1811	60.3013	63.2408	58.5997	49.1723	62.9278	54.772	56.5412	36.2	77.9936	67.9908	76.0129	70.0747	68.4416	60.9858	66.4768	60.5078	67.4732	71.0131	60.7468	65.5459	63.7852	59.8328
	36.3	123.856	117.097	122.232	103.481	100.694	87.3881	84.9067	76.9458	70.7101	69.3213	68.7462	66.6931	66.9743	64.7706	69.9939	56.2301	36.3	65.5274	62.9489	64.8659	54.6056	64.4918	52.6922	59.8203	52.9192	71.5882	60.1662	62.5508	59.0523	48.6903	62.68	54.8756	56.5739	36.3	78.1243	67.4952	75.9598	70.3374	68.4619	60.6848	66.5646	60.8417	67.4206	71.1878	60.4163	64.8798	63.671	60.0882
	36.4	123.579	116.471	122.157	103.167	101.125	87.5191	84.4988	76.9841	70.3978	69.3288	68.641	66.4203	67.2623	64.2966	69.7592	56.4384	36.4	66.1024	62.504	65.1034	54.4869	64.4678	53.1968	59.4547	52.7966	71.317	59.9753	61.5241	59.0022	48.0026	63.2283	54.442	56.9607	36.4	78.2732	66.9826	75.6124	70.9341	68.8114	60.6827	67.049	60.688	67.3877	71.2823	60.1954	64.4733	63.6083	60.0633
	36.5	123.949	116.629	122.308	103.618	101.125	87.4382	84.2057	77.1202	70.0166	69.1616	68.8942	66.0594	67.01	63.4623	69.5272	57.01	36.5	66.4062	62.4488	65.3447	54.147	64.1003	53.1054	59.4218	52.5922	70.7693	59.5118	60.806	58.733	47.5932	64.1673	53.8886	57.4126	36.5	78.2774	67.021	75.5557	71.3653	69.3737	60.7542	67.4309	60.3742	67.3684	70.9557	60.1336	64.4166	63.7171	59.784
	36.6	124.166	117.209	122.796	104.3	100.74	87.211	84.1443	76.988	70.2203	69.3503	69.6834	65.6257	66.1814	62.9456	69.2074	57.5841	36.6	66.3027	62.7824	65.4799	53.97	63.9801	52.4618	59.3494	52.4117	70.2812	59.6033	60.7386	58.4132	48.1012	64.8352	53.4743	57.3706	36.6	78.1552	67.045	75.5263	71.5837	69.9648	60.998	67.4886	59.9521	67.5166	70.5322	60.2991	64.6774	63.8841	59.7069
	36.7	124.375	117.6	123.553	105.056	100.193	86.9364	84.0956	76.6912	70.3207	69.7479	70.1847	65.5004	65.2673	63.4012	69.2461	57.5136	36.7	65.9638	63.0082	65.5558	54.0494	64.1156	52.1939	59.6983	52.746	70.2382	59.6382	61.1348	58.828	49.343	64.5349	53.7223	57.3936	36.7	77.7988	67.4047	75.625	71.2044	70.3361	61.3237	67.0396	59.7982	67.6284	70.0289	60.5274	64.5246	63.9367	59.6048
	36.8	124.299	117.62	124.148	105.696	100.118	86.9661	84.2749	76.2471	70.6067	70.0657	70.6069	65.3781	64.7351	64.1824	68.957	57.2174	36.8	65.585	63.1082	65.7728	54.428	64.8767	52.6362	60.2446	53.3103	70.2012	59.9149	61.7286	59.3911	50.4223	63.9871	54.0349	57.365	36.8	77.6366	67.6221	75.6608	70.7126	70.2629	61.7246	66.5161	59.7292	67.5053	70.0356	60.7962	64.4322	63.874	59.4357
	36.9	124.551	117.253	124.189	105.653	100.632	87.2072	84.6294	76.0424	70.7168	69.9274	70.5471	65.2456	64.9109	64.514	69.0486	56.7752	36.9	65.2678	63.0769	65.6986	54.7373	65.449	53.3549	60.8088	53.9977	69.8752	59.8061	61.898	59.4539	50.9408	63.4813	54.4291	57.2459	36.9	77.6128	68.1964	75.4021	70.4024	69.943	62.0616	65.9057	59.8931	67.2932	70.2774	60.8789	64.3509	63.9508	58.8788
	37	124.471	116.884	123.614	105.246	101.744	87.347	85.2238	76.0239	70.744	69.3181	70.5718	65.242	65.7699	64.0664	69.0928	56.4816	37	65.0306	63.3568	65.7921	54.7704	65.475	53.2361	60.9959	53.9158	69.3328	59.915	61.5679	58.8823	50.8328	63.7532	54.6507	56.6937	37	77.5837	68.2721	75.0926	70.4113	69.7027	62.1481	66.0044	60.1969	66.8104	70.6122	60.738	64.2706	64.2558	58.3164
	37.1	124.206	116.711	122.783	104.456	102.321	87.2722	85.3173	76.371	70.4491	69.1442	70.4598	65.3337	66.6898	63.4276	69.0743	56.2073	37.1	64.9624	63.3891	65.7008	54.7348	64.9278	52.6311	60.6649	53.5388	68.9748	60.2202	61.037	58.25	50.5859	64.0627	54.9291	56.2178	37.1	77.2088	67.9498	74.6349	70.479	69.6267	61.9402	66.4872	60.8003	66.4887	70.6009	60.267	63.8837	64.3338	58.1041
	37.2	123.739	116.869	121.782	104.23	102.312	87.0569	85.2239	76.7888	70.0624	68.9488	70.2748	65.4348	67.1312	63.0638	68.4493	55.9399	37.2	65.2054	63.3919	65.7934	54.5839	64.3626	52.1137	60.0208	52.844	69.2077	60.6122	60.9353	58.2603	50.417	64.6477	55.109	55.9118	37.2	76.5326	67.1484	74.4412	70.5623	69.216	61.4514	67.1956	60.977	65.9573	69.9642	59.9718	63.5411	63.9941	58.2154
	37.3	123.589	117.126	121.039	104.147	101.528	87.003	84.9977	77.0038	70.0176	68.8406	69.928	65.1231	66.6594	62.8662	67.9527	56.1894	37.3	65.3181	63.5011	65.8072	54.464	64.0507	52.4423	59.5366	52.422	69.6893	60.8662	61.0488	58.4942	50.3317	64.5633	55.3082	56.097	37.3	76.0401	66.4766	74.2039	70.565	68.6202	61.3151	67.1157	60.9143	65.5471	69.5018	60.0933	63.9881	63.5026	58.7414
	37.4	123.671	117.483	120.831	104.278	100.791	87.3091	84.809	76.7127	70.3324	68.5778	69.3338	64.472	66.0269	62.7566	67.9016	56.4428	37.4	65.4357	63.9811	65.898	53.9796	63.9358	53.024	59.7789	52.1344	70.0606	60.7578	61.3022	59.0016	50.3101	64.5493	55.4999	56.434	37.4	76.0246	66.3509	74.3857	70.78	68.2902	61.4243	66.8399	60.1493	65.6481	69.6451	60.5593	64.7031	63.5111	59.2542
	37.5	123.46	117.49	121.213	103.854	100.325	87.5804	84.4841	76.286	70.8198	68.8697	68.988	64.1761	65.7912	62.7409	68.6012	56.7529	37.5	65.5514	64.5287	65.9323	53.6456	64.1721	53.2901	60.3773	52.4728	70.1987	60.7277	61.233	58.9162	50.119	64.3331	55.6104	56.873	37.5	76.4426	66.7344	74.8339	70.8432	68.2866	61.9169	66.6807	59.6488	66.1694	70.807	61.0792	65.1966	64.1421	59.8523
	37.6	123.159	117.071	121.855	103.257	100.066	87.5216	84.0611	75.8522	70.858	69.334	68.6078	64.4378	66.1689	62.8846	69.2447	56.7856	37.6	65.7662	64.7612	65.8736	53.521	64.7457	52.9842	60.965	53.0251	70.1468	60.8082	61.1172	58.7226	49.7267	64.5938	55.5529	57.2052	37.6	77.0394	67.4694	75.6676	71.09	68.3184	61.5073	67.0216	59.36	67.0428	71.7866	61.2201	65.5018	64.6147	60.0942
	37.7	122.871	116.425	122.273	102.594	100.212	86.8461	83.7731	75.6612	70.5967	69.4119	68.7353	64.9079	66.4141	63.1409	69.503	56.8708	37.7	66.099	64.7308	65.4603	53.9984	65.1911	52.5873	60.7864	53.615	69.9549	60.8479	60.8127	57.9119	49.376	64.8109	55.4026	57.4256	37.7	77.4311	67.9672	75.9919	71.1636	68.1137	60.7769	67.203	59.6558	67.2492	72.0301	60.943	65.7454	64.7423	59.8174
	37.8	123.54	116.047	122.39	102.732	100.383	86.237	83.8116	75.3669	70.1408	69.0273	68.9427	65.1517	66.6596	63.3236	69.1628	57.0524	37.8	66.0621	64.3773	64.6942	54.113	65.2143	52.6959	60.8539	53.6956	69.817	60.7738	60.7016	57.6507	49.1924	64.4557	55.5902	57.6453	37.8	77.4932	68.0133	75.7339	71.1282	68.1046	60.021	67.2109	59.9437	67.2442	71.4916	60.3994	65.9404	64.5234	59.2507
	37.9	124.232	116.387	122.178	103.281	100.639	85.8661	84.2783	75.3988	70.3736	68.5009	69.323	65.2303	66.5657	63.424	68.6964	56.8929	37.9	66.0127	64.0702	63.8499	53.7523	64.671	53.0369	60.6571	53.6822	69.9759	60.3279	60.7281	57.622	49.2318	63.8662	55.8218	57.6947	37.9	77.1966	67.7596	75.1612	70.9184	68.3858	60.4034	66.7646	59.931	67.0273	70.6633	59.9553	65.4512	64.313	58.7273
	38	124.332	116.884	121.909	104.174	100.406	85.88	85.1886	75.6641	70.827	68.3071	69.4128	65.1283	66.6364	63.5719	68.186	56.7909	38	65.5981	63.6279	63.6022	52.9961	64.3276	53.535	60.6587	53.5807	70.2513	60.1139	60.8129	58.3763	49.3601	63.2276	55.868	57.8952	38	76.8462	67.4878	75.0149	70.5229	68.595	61.3932	66.3833	59.7386	66.9152	69.9901	59.9661	65.0799	64.38	58.9748
	38.1	123.729	117.454	122.044	104.388	99.9139	85.7363	85.678	75.9714	71.2037	68.6083	69.2612	64.6654	66.0012	63.6976	67.5844	56.3633	38.1	65.768	63.5562	63.8419	52.4596	64.1022	53.4191	60.0828	53.6373	69.991	59.9727	60.6982	58.8313	49.6103	63.1946	55.3637	57.9649	38.1	76.6823	67.2846	75.3616	70.3752	68.8144	62.3716	65.672	59.7988	66.9566	69.6284	59.9697	64.7604	64.3779	59.2777
	38.2	122.871	117.451	122.529	104.438	99.529	85.9068	85.6168	76.081	70.7913	69.1021	69.212	64.2536	65.2512	63.9331	67.2353	56.269	38.2	65.9733	63.2692	64.1754	52.1223	64.2896	53.2608	59.8436	53.6677	69.4424	60.1118	60.7062	59.2164	49.7082	63.233	54.7317	58.0257	38.2	76.3969	67.2137	75.7298	70.04	68.8816	62.6421	65.2909	59.9943	67.0544	69.8932	60.1071	64.6342	64.5271	59.3978
	38.3	122.503	117.294	123.203	104.325	99.4269	86.2093	84.9601	75.7948	70.1251	69.7614	69.4607	64.1872	64.6589	63.9966	67.314	56.2753	38.3	65.9429	63.2133	64.1201	51.6016	64.3089	52.8809	59.8524	53.7549	69.0671	60.095	61.0516	59.1649	49.699	63.1947	54.3302	57.7098	38.3	76.0573	67.2809	75.7582	70.1344	69.3307	62.3016	65.0599	60.2094	67.326	70.5419	60.2078	64.1357	64.4413	59.1573
	38.4	122.19	116.938	123.214	104.249	99.1347	86.7748	84.5473	75.5016	69.7078	69.9064	70.1832	64.5579	65.1056	64.3252	67.9489	56.587	38.4	65.5738	62.7776	64.0008	51.376	64.7284	52.678	59.9368	53.7042	69.4612	60.2252	61.4374	59.2318	49.6209	63.2259	54.1271	57.3492	38.4	75.3973	67.5896	75.3416	70.1786	69.4981	62.054	65.4784	59.8351	67.3974	71.1067	60.3042	63.8797	64.5517	59.3218
	38.5	122.434	116.794	122.879	103.908	98.6072	87.0696	84.1758	75.3939	69.7152	70.1527	70.6742	64.7862	65.9151	64.4361	68.5629	56.958	38.5	64.9908	62.8459	63.9657	51.7177	64.9594	52.4709	59.8937	53.8194	69.9714	60.4676	61.6701	59.0814	49.7678	63.564	54.077	57.2209	38.5	74.881	67.6157	75.1197	70.5987	69.5676	62.0064	65.7867	59.4189	67.1976	71.3738	60.3532	63.9247	64.6223	59.8108
	38.6	122.754	116.584	122.533	103.222	98.2294	87.1528	83.8437	75.6834	70.0167	69.8841	70.8496	65.0423	66.6822	64.3056	69	57.1166	38.6	64.8487	62.8411	64.1338	52.8764	65.3296	52.2484	59.6491	53.964	69.9853	60.5319	61.5384	58.9937	50.019	64.187	54.1566	57.3763	38.6	74.6079	67.304	75.2357	70.6042	69.2844	62.3874	65.9807	59.0187	66.8239	71.306	60.3343	64.4423	64.6414	59.9187
	38.7	123.6	116.25	122.811	103.084	98.582	87.2277	83.5724	76.2251	70.1587	69.8357	70.7482	65.2987	66.5248	64.052	69.0716	56.9727	38.7	64.4852	63.3113	64.2907	54.0184	65.1207	52.0959	59.7494	54.1474	69.3416	60.0719	61.6678	58.9619	50.1482	64.4024	54.2839	57.7457	38.7	75.0332	66.8662	75.8726	70.4942	69.1578	62.2234	65.7373	58.9576	66.352	71.0436	60.8279	64.8493	64.3139	59.5358
	38.8	123.629	116.057	123.054	102.943	99.3711	86.9262	83.5597	76.6186	70.2776	69.4882	70.8137	65.4658	66.2467	63.9766	68.9638	56.5689	38.8	64.3419	63.733	64.7694	54.3746	64.9197	52.0178	60.1298	53.9982	68.3453	59.2809	61.69	58.9826	50.2442	63.9847	54.3379	57.85	38.8	75.828	66.7051	75.996	69.9759	69.1292	62.1207	65.6587	59.1062	66.0458	70.5526	61.301	65.2539	63.9714	59.0358
	38.9	123.418	115.985	122.962	102.964	99.9684	86.7261	83.8168	76.6499	70.3801	69.3652	70.8194	65.4643	65.794	64.1336	68.521	56.2108	38.9	64.1034	64.391	65.1356	54.0426	64.5207	52.1022	60.6447	53.5646	67.9269	59.0326	61.8544	58.8638	50.075	63.2188	54.0487	57.918	38.9	76.4742	66.6768	75.7032	69.9014	69.016	61.3388	65.7212	59.4244	65.9734	70.093	61.5749	65.2094	63.5511	59.1731
	39	122.689	116.151	122.547	102.551	100.287	86.3609	84.011	76.3444	70.5589	69.2178	70.6706	65.538	65.7938	63.8436	67.9643	56.209	39	64.1234	64.8378	65.551	53.3213	64.3523	52.1739	61.0171	53.1348	68.2223	59.2078	61.823	58.6463	50.0749	62.9231	54.0656	57.8926	39	76.5724	66.5894	75.0323	69.9406	68.7514	60.6823	66.0964	59.8999	66.2471	69.9348	61.1443	64.945	63.5091	59.5737
	39.1	122.806	116.61	122.475	102.855	100.291	86.3051	84.0969	75.9834	70.7984	68.9881	70.2332	65.8054	65.7088	63.3119	67.5947	56.2267	39.1	64.1299	64.8203	65.5562	52.979	64.3667	52.4166	60.9496	52.6276	68.998	59.5886	62.0863	58.6496	50.2131	63.1011	54.4698	58.1106	39.1	76.2791	66.5863	74.8928	70.4422	68.2252	59.8212	66.3333	60.2351	66.7422	69.7033	60.6957	64.4413	63.5951	59.8607
	39.2	123.101	117.334	122.752	103.401	100.417	86.2132	84.3444	75.9133	70.9442	68.7498	70.0968	65.8513	65.6999	62.7857	67.6248	55.8973	39.2	64.2744	64.2182	65.613	52.7522	64.7361	52.693	60.6732	52.4512	69.5563	59.7484	62.1374	58.7553	50.6274	63.5957	55.19	58.3081	39.2	76.1497	66.8214	74.9652	70.5807	67.9428	59.8406	66.3672	60.3989	67.1582	69.5156	60.4064	64.3309	64.0677	59.6918
	39.3	123.489	117.881	122.946	103.812	100.292	86.0713	84.6072	76.235	71.0924	68.5213	69.9503	65.5264	65.4651	62.8087	67.922	55.4231	39.3	64.1709	63.4917	65.3641	53.0001	65.2272	53.1214	60.2493	52.2966	69.5892	59.9384	62.2708	58.8729	50.839	63.9981	55.4396	58.4482	39.3	76.1914	67.051	74.8713	70.6881	67.69	60.3858	66.1832	60.2557	67.2167	69.533	60.7412	64.4728	64.3667	59.3713
	39.4	123.231	117.663	122.882	103.562	99.8953	85.6309	84.9487	76.8904	70.988	68.3693	70.1409	65.2103	65.6451	63.0249	67.9043	55.3189	39.4	64.0754	63.0588	65.0227	53.3523	65.6153	52.9598	59.8598	52.537	69.4356	59.9397	62.2052	58.6746	50.7899	64.1488	55.1384	58.4679	39.4	76.189	67.0474	74.2608	70.4112	67.7822	61.2487	65.9359	59.8321	67.0538	69.876	61.1156	64.4831	64.3567	59.532
	39.5	122.624	117.255	122.673	102.979	99.0564	84.9992	84.606	77.3077	70.7398	68.3242	69.7784	65.1343	65.6306	63.21	67.883	55.7656	39.5	64.0364	63.2261	64.6302	53.8688	65.5528	52.7221	59.7594	52.8127	69.2662	59.5674	62.3609	58.4891	50.4717	64.1754	54.748	58.482	39.5	76.1108	66.9908	73.8656	70.2093	68.2043	61.674	65.9226	59.4091	66.768	70.4313	61.5659	64.1599	63.9632	59.8289
	39.6	121.853	117.135	122.493	102.828	98.4304	84.778	84.2023	77.6412	70.5507	68.0939	69.5228	65.0027	66.0609	63.2329	68.1037	56.0076	39.6	64.4949	63.4672	64.4573	54.006	65.1439	52.0217	59.9781	52.9594	69.193	58.8356	62.3586	58.174	50.1863	63.9017	54.4486	58.4509	39.6	76.3864	67.1168	73.7286	69.7668	68.8966	61.6153	65.8312	59.2704	66.8182	70.6591	61.2604	63.7408	63.3733	60.0748
	39.7	121.629	117.433	122.241	102.839	98.3857	85.4561	83.7694	77.6703	70.3424	67.9712	68.8936	64.6653	66.0931	63.4009	68.6316	55.7561	39.7	65.0821	63.5791	64.4508	54.055	64.4528	51.6051	60.6403	52.7521	69.1506	58.5933	62.0861	58.1193	49.7979	63.7107	54.3093	58.1456	39.7	77.1918	67.2948	74.2627	69.341	69.5613	61.3109	66.1038	59.7048	66.8917	71.0607	60.8871	63.8736	62.9643	59.7897
	39.8	122.107	117.428	121.811	103.207	98.7022	86.6934	84.0983	77.7533	70.1026	67.8004	68.8614	64.1248	66.3487	63.7482	69.0392	55.279	39.8	65.5652	63.3468	64.4972	53.8118	64.1088	51.1018	61.1274	52.4413	69.0677	58.8624	61.7409	57.9294	49.6944	63.7502	54.0543	57.5643	39.8	77.8676	67.2796	74.751	68.8354	69.3383	61.0509	66.1651	60.0562	67.0806	71.1743	60.2136	64.3249	62.6839	59.4762
	39.9	122.928	117.654	121.467	103.35	98.7581	87.5921	84.6762	77.3176	69.353	67.8139	68.6034	64.0294	66.1099	64.1993	68.9226	55.2359	39.9	65.8899	63.0401	64.3541	53.7228	64.2833	51.2306	61.5287	52.5237	69.1903	59.4888	61.5669	57.927	49.5208	64.0933	53.847	56.9328	39.9	77.6954	67.1471	75.2893	68.5911	68.6357	61.3096	66.2337	60.274	66.9691	71.1896	60.2221	64.6221	62.6241	59.4474
	40	123.59	117.859	121.374	103.339	98.589	87.7303	85.1922	76.6319	68.7129	68.0208	68.8623	64.1154	65.918	64.6133	68.6204	55.6002	40	66.049	62.911	64.1293	53.4051	64.8009	51.7953	61.6309	52.864	69.4424	60.0356	61.8633	58.1632	49.571	64.2664	53.8007	56.6327	40	76.9554	67.0513	75.1796	68.5213	68.1478	61.7448	65.9898	60.2049	66.7861	71.0213	60.3028	64.6638	62.8162	59.6633
	40.1	123.613	118.255	121.353	102.837	98.6418	87.4604	84.7554	76.0947	68.2528	68.4171	68.8912	64.4192	65.8728	64.9611	68.0302	56.1229	40.1	66.2142	62.8471	63.9217	53.4633	64.8769	52.8153	61.8091	52.9859	69.6182	60.3618	62.3381	58.5536	49.3774	63.9412	53.7882	56.8321	40.1	76.0657	67.13	74.6604	68.5186	68.4913	61.9677	65.5826	60.1506	66.8301	70.9571	60.55	64.4256	63.0584	59.9872
	40.2	123.363	118.047	121.55	102.302	99.3472	86.9869	83.851	76.2001	68.4026	69.0121	69.2241	64.5963	66.4536	65.0086	67.6842	56.3393	40.2	65.9033	63.039	64.0467	53.2704	64.4823	53.4542	61.6209	52.8653	69.1949	60.7156	62.5618	58.896	49.3589	63.3658	54.1606	57.3808	40.2	75.8931	67.1522	74.2294	68.4877	69.3982	61.7206	65.3434	59.9382	67.1256	71.199	60.5096	64.4942	63.3279	59.9538
	40.3	122.854	117.383	121.391	102.215	99.7229	86.5454	83.012	76.2803	68.8119	69.5358	69.1451	64.9521	66.9112	64.5366	67.6343	56.57	40.3	65.6028	63.2006	64.3209	53.2043	63.9781	53.5233	61.4986	52.9202	68.3267	60.5268	62.2356	58.7187	49.4909	63.3352	54.6531	57.9758	40.3	75.8063	66.9908	74.1322	68.4332	69.8777	61.2422	65.1359	59.6426	67.5096	71.3288	60.4158	64.4069	63.1348	59.709
	40.4	122.609	116.752	121.493	102.439	99.7391	85.8202	82.6378	76.0266	68.9691	69.6604	69.1786	65.3082	66.8162	64.1166	67.9057	56.701	40.4	65.2972	63.3736	64.6424	52.8146	63.8753	52.94	61.2263	53.2191	67.6514	60.2451	61.5062	58.5367	49.7822	63.6866	55.3064	58.2634	40.4	75.7354	66.6424	74.184	68.4183	70.1763	60.917	65.5042	59.5313	67.372	71.3803	60.4362	64.4993	62.9663	59.5384
	40.5	122.386	116.1	121.101	102.583	99.268	85.6531	82.4087	75.2948	68.966	69.4472	69.3628	65.4746	65.9691	63.8202	67.909	56.8794	40.5	65.2532	63.3666	64.678	53.0361	63.7123	52.4882	61.4488	53.3588	67.626	59.7692	60.8312	58.4236	49.979	64.4116	55.5962	58.366	40.5	75.2396	66.4449	73.8682	68.3367	69.9859	60.9504	65.7921	59.8104	67.3328	71.1384	60.4483	64.3846	63.0049	59.7039
	40.6	122.213	116.16	121.295	102.4	99.1858	85.6748	82.4102	75.2857	69.0236	68.6401	69.5716	65.0097	65.2724	64.1818	67.6978	56.6314	40.6	64.9043	63.4542	64.4919	53.1491	63.6939	52.148	61.2829	53.2936	68.0243	59.7789	60.5096	58.4668	49.6306	64.613	55.5532	58.2777	40.6	75.0656	66.7086	73.4554	68.3096	69.7551	61.492	65.8659	60.3041	67.281	70.7844	60.346	64.3529	63.6266	60.02
	40.7	121.971	116.188	121.265	102.206	99.3216	86.0986	82.9901	75.5199	69.7618	68.2254	69.662	64.5811	65.3596	64.009	67.545	56.3428	40.7	64.4346	63.6656	64.0439	53.2633	63.8749	52.0568	60.7239	53.1367	68.4288	59.8684	60.2911	58.5809	49.2033	64.912	55.1236	58.1547	40.7	75.4483	66.9864	73.1784	68.4497	69.357	62.144	65.4447	60.8297	67.5888	70.548	60.1966	64.5587	64.3876	60.2071
	40.8	121.942	116.408	121.619	102.337	99.4183	86.1091	83.7304	76.2282	70.7152	67.8766	69.515	64.2211	65.9744	63.5537	67.596	56.3791	40.8	64.0769	63.8006	63.6711	52.7562	64.7196	51.8936	59.6576	53.4032	68.8828	60.0506	60.22	58.2473	48.9832	64.6504	54.5579	57.7936	40.8	76.1892	67.0452	73.2293	68.6073	69.4456	62.5659	65.3174	61.0639	67.808	70.3296	60.3041	65.02	64.935	60.3711
	40.9	121.869	116.295	121.391	102.641	99.3057	86.0497	84.0266	76.6373	71.1841	67.9182	69.4516	64.1938	66.7622	62.6016	67.7189	56.8044	40.9	64.1729	63.451	63.3663	52.4931	65.463	51.9341	58.9016	53.4318	69.3282	60.0172	60.3036	57.978	49.0638	64.4398	54.2841	57.4518	40.9	76.492	66.7546	73.5846	68.7794	69.9134	62.3892	65.8626	61.2441	68.0667	70.45	60.5624	65.3746	65.1437	60.291
	41	121.833	115.945	121.412	103.134	99.4769	85.6008	83.7093	76.9857	71.162	67.8371	69.1871	63.8734	66.8306	62.3952	67.6959	57.2382	41	64.2508	62.8037	63.2697	52.6162	65.8736	52.2209	58.874	53.3094	69.8081	60.0891	60.899	57.5763	49.0689	63.7953	54.7016	57.3278	41	76.0362	66.7742	74.1984	68.6084	70.5776	62.3728	66.7556	61.228	68.1072	70.7018	60.7773	65.3216	65.1378	60.1626
	41.1	121.775	115.544	121.265	103.308	99.7822	85.35	83.2001	76.9477	70.9082	67.8982	68.8917	63.4242	66.678	62.7916	67.8709	57.1112	41.1	64.1577	62.1889	63.335	52.8384	65.791	52.592	58.9751	52.4727	69.8872	59.9838	61.6806	57.7373	48.8558	63.736	55.4806	57.2988	41.1	75.245	66.7972	74.7042	68.4926	70.6346	62.3723	67.3341	61.0927	67.838	71.1632	60.6378	65.1006	65.2126	59.5071
	41.2	121.981	115.499	121.398	102.901	100.609	85.2004	82.6498	76.6197	70.7598	68.2348	68.6157	62.9666	66.2724	63.3448	67.9228	56.8559	41.2	64.0651	62.0357	63.5587	53.1732	65.6124	52.843	59.5063	51.8849	69.8319	59.7474	62.1144	58.0167	48.7764	64.205	56.085	57.2572	41.2	74.7521	66.718	74.7748	68.3979	70.2662	62.5782	67.2689	60.577	67.543	71.3336	60.3802	65.0098	64.9934	59.0477
	41.3	122.324	115.988	121.145	101.934	100.553	85.4763	82.2729	76.2209	70.4194	68.343	68.7327	63.0618	66.2034	63.4238	68.0087	56.651	41.3	64.083	62.5337	63.7472	53.1086	65.3789	52.8129	60.1369	51.612	69.3168	59.5016	61.9322	58.4163	49.0371	64.865	55.9474	57.0508	41.3	74.7986	66.1919	74.233	68.9063	69.1771	62.4619	66.9023	59.9964	67.3847	70.9243	60.035	64.6874	64.6296	58.588
	41.4	122.18	116.894	120.887	100.86	99.9966	85.5276	82.1017	75.6983	69.7091	68.2766	68.5944	63.7723	66.1996	63.0468	67.999	56.3986	41.4	64.4747	63.0894	63.8742	53.2572	65.0987	53.1972	61.2436	51.8234	69.0087	59.5237	61.5941	58.8002	49.3537	64.9153	55.497	57.0678	41.4	74.875	66.176	73.5297	69.6128	68.1853	62.0252	66.7014	59.7844	67.071	70.5369	60.0124	64.1467	63.9749	59.0489
	41.5	121.86	116.922	120.616	100.316	98.7244	85.3454	82.1163	75.307	69.1652	68.1668	68.5789	64.5226	66.1531	62.848	68.1762	56.3001	41.5	64.7003	63.48	64.2266	53.1014	64.6448	53.5309	61.8671	51.9303	68.3928	59.803	61.6062	59.3746	49.3823	64.3361	54.6799	57.1823	41.5	74.8231	66.3123	72.9679	70.119	67.4029	61.5017	66.7019	60.1153	66.5738	70.4564	60.3381	63.689	63.7053	59.6132
	41.6	121.378	116.521	120.684	100.343	98.247	85.1291	82.1497	75.3358	68.7013	68.5021	68.4553	64.7724	66.3808	62.7818	68.5537	56.1557	41.6	64.7133	63.0382	64.5821	53.041	64.4562	53.9041	61.8666	51.8298	68.3582	59.903	62.035	59.7748	48.9692	63.7194	54.2857	57.4089	41.6	74.8241	66.6662	72.8039	69.8379	67.4506	61.0441	66.717	60.4463	66.1752	70.872	60.8846	63.8577	63.8711	60.2168
	41.7	121.562	115.293	120.659	100.97	98.6636	84.8893	82.2696	75.8099	68.9646	69.0634	69.0052	64.2824	66.8756	63.0709	68.896	56.7076	41.7	64.3018	62.5358	64.928	52.7843	64.2393	53.2122	61.2997	51.9529	68.2231	59.9188	62.3667	60.046	48.6506	63.6309	54.0748	57.332	41.7	74.8884	66.5547	73.0649	69.4291	67.9927	61.2562	66.4124	60.4011	66.1369	70.6501	61.1239	64.4549	64.4198	60.1623
	41.8	122.046	114.971	120.667	101.582	99.3469	84.8971	82.5827	76.217	69.1881	69.3409	69.3958	64.0671	67.4222	63.174	69.0567	56.9689	41.8	63.6659	62.0143	64.5834	52.6474	64.4263	52.6637	60.3992	52.2919	68.9281	59.8794	62.3263	59.8797	48.7327	63.7256	54.3796	57.1232	41.8	74.9078	66.5226	73.7648	68.9118	68.6522	61.5472	65.9238	60.1357	66.3937	69.9116	60.9819	64.8868	64.8826	60.3811
	41.9	123.036	115.086	120.537	102.194	99.3089	84.984	82.8792	76.198	69.8241	69.2558	69.7512	63.9712	67.2292	63.1643	68.6668	57.1744	41.9	63.1536	61.9773	64.4051	52.6334	64.3309	52.0492	59.6131	52.8952	69.5102	60.2411	61.8196	60.1178	49.27	64.0117	54.5043	56.8482	41.9	74.5646	66.6634	74.4827	68.8011	69.1258	61.5803	65.6134	60.2391	66.3313	69.1492	60.719	65.042	65.0499	60.5103
	42	123.605	115.907	120.907	102.602	98.7178	85.403	83.0199	75.7476	69.8239	69.0157	69.5741	64.2468	66.5658	62.7593	68.1312	56.9792	42	63.0757	61.9244	64.0864	52.8126	64.3347	52.015	59.1809	53.3772	70.3479	60.4854	61.0706	60.2716	49.5639	64.0932	54.4184	56.956	42	74.2549	66.8823	74.672	68.4147	69.0813	61.1042	65.2561	60.3769	66.2702	69.1297	60.3786	64.7557	64.9378	60.6147
	42.1	123.577	116.298	120.784	103.217	98.3767	85.665	82.9076	75.3516	69.7661	69.0114	69.3276	64.0811	66.3009	62.4102	67.5329	56.8283	42.1	63.3902	62.0204	64.448	53.1312	64.324	51.8767	59.5912	53.7441	70.6128	60.54	60.7171	60.311	49.705	64.2857	54.2129	57.0134	42.1	74.2188	66.9858	74.1998	68.1986	68.6324	60.7323	65.3606	60.3448	66.3424	69.8104	60.0262	64.7006	64.9743	60.0758
	42.2	122.853	116.17	120.421	103.577	98.6741	85.7018	82.4406	74.9863	69.2801	69.0721	68.9261	63.8307	66.6553	62.3067	67.4278	56.8766	42.2	63.8151	62.2064	64.6626	53.5449	64.6241	51.8997	60.2681	53.8149	70.5557	60.1699	60.7953	59.7534	49.6343	64.463	54.12	56.8507	42.2	74.4741	66.6616	73.7139	68.0953	67.9609	60.8364	65.728	59.9319	66.5447	70.3481	59.6533	64.6011	65.0603	59.6873
	42.3	122.46	115.623	119.325	103.778	99.1983	85.5554	81.8682	74.9177	69.066	69.0739	68.6754	63.4039	66.9442	62.6644	67.1704	56.8914	42.3	63.7882	62.7488	65.1461	53.9109	65.0621	52.1751	60.5532	53.5812	70.1747	59.9083	61.0439	59.0529	50.0382	64.722	54.3207	56.5413	42.3	74.8539	66.1866	73.8444	68.0664	67.8643	61.1171	66.5474	59.6972	67.2779	70.6412	59.7657	64.7996	65.0499	59.28
	42.4	122.506	115.254	119.046	103.764	99.4973	85.5088	81.5853	74.846	68.9531	68.8573	68.7648	63.3361	66.5304	63.1409	66.8773	57.0802	42.4	63.3954	63.2836	65.3289	54.1311	65.3703	52.8239	60.0708	53.2669	69.6106	59.8611	60.8758	58.8942	50.4203	65.0972	54.5867	56.9116	42.4	75.3733	65.563	74.3581	68.0417	68.2948	61.3669	67.0332	59.6317	68.051	70.3496	60.0122	64.7666	64.4934	59.2009
	42.5	122.508	115.036	119.16	103.791	99.6442	85.4637	81.907	74.5803	69.1696	68.7289	68.711	63.4409	66.0973	63.7107	66.6057	57.1048	42.5	62.98	63.4082	65.592	54.1877	65.1178	53.4613	59.524	53.1608	69.1842	59.9182	60.6586	58.9567	50.5677	65.1363	54.8126	57.9378	42.5	75.8142	65.0916	74.5901	67.8059	68.82	61.4529	66.9716	59.6242	69.1147	70.2221	60.2369	64.8503	63.5312	58.8776
	42.6	121.876	114.924	119.88	103.281	99.5338	85.5606	82.3406	74.2424	69.5544	68.4493	68.63	63.5561	65.976	63.9542	66.9308	57.0853	42.6	62.7622	63.2784	65.4064	53.9461	64.8596	53.659	59.3553	53.2204	68.7789	60.1363	60.795	59.1609	50.0681	64.938	54.9999	58.9103	42.6	76.2712	64.743	74.3032	67.8284	68.8407	61.5371	66.6798	59.6592	69.5063	70.0584	60.3641	65.0166	63.0429	58.6881
	42.7	121.268	114.5	120.037	102.39	99.1652	85.8127	82.6557	74.1336	69.7272	68.325	68.3347	63.64	66.0863	63.9214	67.4924	56.8342	42.7	62.7009	63.0581	65.1368	53.4093	64.5266	53.1548	59.6374	53.3352	68.8337	60.6086	61.2692	58.7374	49.3703	64.2826	55.1796	59.018	42.7	76.0663	64.8952	74.1297	68.1726	68.4498	61.3981	66.4326	59.5272	69.1888	70.2887	60.5189	65.3652	63.3627	58.4072
	42.8	120.896	114.429	119.801	101.636	98.7944	86.1448	83.1814	74.6929	69.605	68.2318	68.7693	64.0082	65.6992	63.5438	67.868	56.4206	42.8	62.9684	63.2278	64.5987	52.8587	64.8992	52.6042	59.9983	53.2169	69.2968	61.0153	61.5672	58.3311	49.0743	63.8263	55.1987	58.436	42.8	75.7543	65.1868	74.208	68.681	68.0726	61.061	66.1362	59.4844	68.5953	70.2596	60.8201	65.6654	64.3358	58.2969
	42.9	120.866	114.728	119.375	101.689	98.6184	86.1171	84.0773	75.3153	69.036	68.6304	69.663	64.5278	65.2626	63.1314	67.8976	56.2478	42.9	63.442	63.12	64.352	52.5032	65.1367	52.4732	60.3487	53.0394	70.0177	61.0911	61.4907	57.8034	49.376	63.6234	54.9047	57.7014	42.9	74.9524	65.2344	74.4076	69.0373	68.146	61.0066	65.6212	59.4	68.116	70.2631	60.8043	65.7701	64.7857	58.243
	43	120.575	115.278	119.457	101.914	98.6202	85.7278	84.9899	75.8549	68.8311	68.8714	70.4534	64.3381	65.1462	63.0712	67.6798	56.3441	43	64.154	62.944	64.0304	52.5874	65.5019	52.7292	60.4744	52.6166	70.7247	60.7738	61.4273	57.84	49.9732	63.6268	54.3701	57.3706	43	74.3181	64.5394	73.8446	69.0762	68.5931	61.3393	65.0084	59.6153	67.954	70.2331	60.727	65.6669	64.4386	58.0456
	43.1	120.74	115.48	120.338	101.902	98.1991	85.3393	85.048	75.8148	68.8824	68.99	70.656	63.5079	65.5531	63.1522	67.3959	56.5578	43.1	64.3599	62.4471	63.8947	52.58	65.5463	52.9178	60.1463	52.6118	70.6998	60.4598	61.6386	58.0651	50.3691	63.6282	53.9731	57.0491	43.1	73.7144	64.0241	73.2723	68.9578	69.0562	61.942	64.9554	59.7649	67.641	70.7454	60.5563	65.4984	63.8486	58.0516
	43.2	121.451	115.116	120.907	101.552	97.7029	85.4034	84.3743	75.6554	69.3748	68.5999	69.9139	62.7252	66.119	63.3411	66.8854	56.4586	43.2	64.2254	62.1379	63.7616	52.9149	65.6872	52.7807	59.6867	52.6633	70.3693	60.2278	61.8088	58.4676	50.2329	63.6463	53.8037	56.9323	43.2	73.6466	64.3187	72.9417	68.7567	69.105	62.2876	65.2362	59.8613	67.2283	71.6402	60.5478	65.1638	63.482	58.0411
	43.3	122.408	114.537	120.763	101.525	97.2372	85.6148	83.5771	75.2957	69.3723	68.3498	69.0778	62.8317	66.6684	63.1283	66.6177	56.0912	43.3	63.9234	61.9666	63.7378	53.1894	65.7832	52.7712	59.1629	53.0519	69.6333	59.906	61.6821	58.4146	49.6718	63.6812	54.0179	56.7798	43.3	73.9838	65.4931	73.2904	68.7116	68.9342	62.1577	65.7882	59.6874	67.0432	72.2169	60.7054	64.941	63.3552	58.3468
	43.4	122.547	113.701	119.758	101.601	97.2827	85.728	83.3947	74.9529	69.3684	67.9757	68.2728	63.1899	66.9813	62.9206	66.6166	55.6642	43.4	63.5994	62.1066	63.8393	53.4469	65.5961	52.8466	59.039	52.9366	69.2699	59.6972	61.2406	58.2539	48.9471	63.7331	54.3869	56.9841	43.4	74.4063	66.489	73.5887	68.7613	68.7968	61.9143	66.2138	59.748	67.2837	72.4222	60.5042	64.7738	63.1371	58.4607
	43.5	122.043	113.397	119.221	101.708	97.3287	85.4637	83.8442	74.4402	69.1336	67.9469	68.2874	63.438	66.8919	62.7908	66.8412	55.4099	43.5	63.1277	62.1567	63.8519	53.4433	65.2717	53.1094	58.7322	52.9577	69.174	59.5977	61.2133	58.061	48.8593	63.5888	54.666	57.2599	43.5	74.6333	66.8346	73.5426	69.2438	68.8579	61.3291	66.7022	60.0123	67.5549	71.9633	60.3069	65.0127	62.9878	58.6748
	43.6	121.445	113.329	119.594	101.552	97.3633	85.1021	84.136	74.0378	69.3849	68.0634	68.6471	63.5267	66.5587	62.8007	67.0203	55.2779	43.6	62.5441	62.0396	63.8458	53.2971	64.8381	53.3326	58.5646	52.883	69.3226	59.8958	61.4114	58.1832	49.1797	63.7811	54.3481	57.7629	43.6	74.6838	66.5003	73.2378	69.4524	68.8714	60.9443	66.7977	60.506	67.5564	71.7782	59.9902	65.408	63.4348	59.094
	43.7	120.988	113.907	120.385	101.267	97.476	84.7664	83.8017	74.0318	69.1648	68.4668	69.1643	64.0773	66.3171	62.6768	67.0474	55.3023	43.7	62.3298	61.6974	63.4007	53.2927	65.0449	53.6354	58.521	53.0667	69.5964	60.442	61.7289	58.1898	49.6372	64.0179	53.9589	58.4166	43.7	74.6071	65.988	72.878	69.6351	68.7461	60.5593	66.3416	60.7408	67.1697	71.3141	60.3182	65.8294	64.1474	59.3987
	43.8	120.57	114.289	121.023	101.15	97.8349	84.3622	82.8804	74.2084	69.1223	69.1969	69.2903	64.6226	66.2133	62.5274	67.3314	55.2963	43.8	62.5869	61.767	62.8661	53.2832	65.8021	53.9058	58.9813	53.0296	69.5616	61.1104	61.8468	58.223	49.41	64.3877	53.8989	58.7922	43.8	74.7098	65.5749	72.591	69.0938	68.4559	60.324	65.6249	60.674	66.8723	71.102	60.5862	66.0797	64.7237	59.5893
	43.9	120.142	114.682	121.035	101.349	98.5108	84.2051	82.3913	74.2391	68.9324	69.9577	69.3976	65.2816	65.9977	62.6929	67.9112	54.9893	43.9	62.8977	61.898	62.4943	53.3859	66.6453	53.9199	59.441	53.1912	69.2623	61.5651	61.9494	58.2449	49.0931	64.1522	54.4626	58.6172	43.9	74.7977	65.3979	72.4974	68.6598	68.1527	60.3054	65.5406	60.5632	66.5717	70.5467	60.8483	65.9212	64.5567	59.0759
	44	120.405	114.576	120.938	101.606	98.5927	84.0639	82.4358	73.9604	69.452	70.4596	69.7142	65.2899	65.8478	62.7849	68.5424	54.7694	44	62.9853	61.8764	62.7037	53.5676	66.8304	53.6439	59.6999	53.2967	68.8972	61.566	62.087	58.4116	48.6901	63.7757	54.9972	58.3066	44	74.8839	65.3272	72.4309	68.2033	68.1146	60.4294	66.0437	60.6001	66.3744	70.2526	60.7327	65.7339	63.9076	59.0716
	44.1	121.139	114.136	120.741	101.784	98.242	84.4674	82.9514	74.0692	69.7102	70.0982	69.9453	65.3391	65.7646	62.4201	69.0932	54.809	44.1	62.8981	61.433	63.2497	53.6649	66.2103	53.319	59.3406	53.5906	68.748	61.043	61.8426	58.5874	48.6691	63.3323	55.2276	58.0729	44.1	74.728	64.9234	72.5302	68.692	68.0744	60.9588	66.7491	60.7361	66.1473	69.977	60.792	65.2171	63.3433	59.2309
	44.2	121.856	113.671	120.412	101.914	97.4303	84.521	82.9184	74.1179	69.7559	69.1588	69.9573	65.0087	65.7796	61.9497	69.1408	55.238	44.2	62.7352	61.1891	63.5979	53.7401	65.3739	52.6702	59.3607	53.4011	68.9668	60.2624	61.4599	58.457	48.7688	63.4324	55.147	58.1132	44.2	74.3048	64.5413	72.7928	69.3082	68.6613	61.2402	66.7962	60.8088	66.4842	70.021	60.8552	65.1443	63.0308	59.8853
	44.3	122.16	113.702	119.808	102.41	97.1027	84.381	82.871	74.3052	69.1368	68.354	69.3317	65.0184	65.367	62.0204	68.9504	55.4583	44.3	62.7312	61.5073	63.6221	53.6122	64.8074	52.053	59.2492	53.3169	69.1329	59.6337	61.0259	58.2299	49.3403	63.6888	54.9453	57.6642	44.3	74.3816	64.2019	73.478	69.7964	69.2154	61.1856	66.4308	60.5899	67.1968	70.2447	61.1816	65.0109	63.084	60.0537
	44.4	121.781	114.295	119.218	102.68	97.0193	83.6338	82.5249	74.1418	68.5676	68.0519	68.7793	64.7989	65.0032	62.8647	68.2809	55.3779	44.4	62.672	62.1363	63.4466	53.6774	64.6328	51.2801	59.7657	53.2996	69.1686	59.4147	61.1713	58.1027	49.6364	63.9098	54.7804	57.1797	44.4	74.4198	64.4694	74.2538	69.4972	69.8368	60.8481	65.762	60.267	67.9172	70.5438	61.318	65.168	63.3604	60.0154
	44.5	121.333	114.89	118.824	102.416	97.233	83.1802	82.4674	74.5076	68.236	68.0787	67.916	64.6526	64.8061	63.5593	67.6061	55.3964	44.5	62.8402	62.692	63.4183	53.5671	64.7257	51.2436	59.9709	53.8024	69.0632	59.5448	61.3938	58.4117	49.5856	63.8856	54.7387	56.783	44.5	74.5526	64.7962	74.6149	69.0242	69.3729	60.8151	65.1352	59.808	67.8644	70.7719	61.3337	65.0058	63.8358	59.8537
	44.6	120.795	115.093	119.03	101.956	97.5447	83.0033	82.1099	74.7372	68.4138	68.0874	67.5517	64.2663	64.9128	63.9697	66.8441	55.8241	44.6	62.6429	62.9702	63.3446	53.4332	64.7909	51.3861	60.5376	53.9703	69.0019	59.8752	61.6444	59.0329	48.9591	63.8939	54.6013	56.7703	44.6	73.9448	65.2828	73.9119	68.8101	68.7462	61.3261	64.6641	59.6594	67.3334	70.5024	61.0053	64.7181	64.489	59.5752
	44.7	120.911	114.904	119.529	101.727	98.0391	83.4957	81.8947	75.086	69.0066	67.9997	67.4523	64.123	64.8341	63.8918	66.5234	56.3689	44.7	62.3862	63.0536	63.2906	53.1002	64.744	51.9258	60.6381	53.8021	69.4388	60.1728	61.4549	59.4317	48.697	63.9808	54.3952	57.1021	44.7	73.5444	65.439	72.6174	68.6927	68.2478	61.9984	64.4233	59.8388	66.6592	70.0008	60.542	64.5837	64.6971	59.4599
	44.8	121.579	114.433	120.335	102.037	98.591	83.9416	81.6954	74.5927	69.7304	67.8129	68.0528	64.1643	64.5456	63.6024	66.511	56.8236	44.8	62.3297	62.827	63.3932	52.912	64.6568	52.1078	60.4854	53.2003	69.918	60.1953	61.0358	59.2567	48.7029	64.1821	54.2161	57.2812	44.8	73.2952	65.7552	71.4421	68.7533	68.449	62.4031	64.7943	60.1674	66.4224	69.4461	60.0863	64.3397	64.6073	59.4776
	44.9	122.315	113.87	121.137	102.096	98.7372	84.5514	81.8092	73.8979	70.2983	67.4428	68.3174	64.3764	64.4799	62.8778	67.0724	56.6442	44.9	62.6674	62.244	63.4804	52.887	64.4646	52.1996	60.0188	52.8088	70.315	59.7507	60.5596	58.7364	49.0292	64.6281	54.7361	57.7393	44.9	73.145	65.9504	71.2861	68.7751	68.8093	62.3731	65.3698	60.5848	66.3277	69.3247	59.8127	64.1167	64.1624	59.8944
	45	122.24	113.357	121.543	102.089	98.5001	84.6244	82.2436	72.7619	70.3877	67.2642	68.2773	64.6031	64.7551	62.4454	67.3394	56.4748	45	63.2389	61.5582	63.7769	52.6119	64.2353	51.9979	59.8058	52.4507	69.8108	59.2733	60.3613	58.1761	49.3119	65.2518	55.4904	58.2393	45	72.9851	66.4729	71.8684	68.8771	69.2858	61.9409	66.1364	60.5274	66.3733	69.7029	59.8997	63.6827	63.897	60.0127
	45.1	121.197	113.062	121.523	101.933	98.3607	84.5868	82.8466	72.6121	70.0458	67.403	67.7247	64.5491	65.4546	62.478	67.4402	56.28	45.1	63.2429	61.2761	63.8571	52.3817	63.9596	51.926	60.0027	52.3654	69.2423	59.1497	60.7803	58.4061	49.7981	65.7161	55.9656	58.7503	45.1	73.0878	66.6817	72.6983	68.539	69.7136	61.3947	66.4399	60.4004	66.1443	70.366	60.1709	63.6432	63.7217	60.0322
	45.2	119.984	113.033	120.999	101.885	98.7884	84.6206	83.1476	73.0684	69.4008	68.0997	67.5961	64.4643	65.9028	63.0881	67.1357	56.5124	45.2	63.2583	61.1531	63.9303	52.2063	63.9313	52.2407	60.266	52.3194	68.975	59.5934	61.2433	58.7553	50.3807	65.3814	55.6828	58.7506	45.2	73.2753	66.6264	72.826	68.1144	69.5248	60.9672	66.4201	59.9626	65.8677	71.0268	60.4533	64.1241	63.8074	59.6164
	45.3	119.929	113.062	120.596	101.811	99.4002	84.6481	82.6698	74.1016	68.8164	68.2457	67.8971	64.3383	66.3343	63.4723	66.9478	56.6421	45.3	63.0612	61.4847	63.5814	52.6224	64.2826	52.3011	60.2902	52.2711	69.3801	60.1824	61.5956	59.3827	50.9332	64.6229	55.1294	58.1783	45.3	73.2057	65.8327	72.357	67.6732	68.8331	60.8812	65.8566	59.6827	65.6437	71.0354	60.5292	64.7716	63.8536	59.5614
	45.4	120.898	113.133	120.149	101.959	99.3606	84.5612	81.8881	74.9154	68.4631	67.808	68.578	64.2846	66.5128	63.7199	66.737	56.5517	45.4	63.3741	61.4048	63.1787	52.8122	64.9333	52.3492	60.169	51.9031	69.7079	60.6236	61.531	59.3437	50.8661	63.4774	54.9847	57.6899	45.4	72.643	64.7477	71.5654	67.887	67.7029	61.1221	65.4684	59.4056	65.7068	70.6908	60.5604	65.0278	63.7506	59.0552
	45.5	122.245	113.114	119.752	102.356	98.5	83.6629	81.3891	75.5216	68.5814	66.9971	69.1946	64.2708	66.8372	63.7511	66.6212	56.528	45.5	63.4536	61.5373	63.0158	52.7424	65.527	52.1788	60.236	51.5581	69.2351	60.6441	61.3183	59.0534	50.3717	62.9996	55.0667	57.5046	45.5	72.5603	63.6164	71.2696	68.1032	67.2626	61.2896	65.1753	58.9426	65.9469	70.2907	60.5157	64.7411	63.4504	58.7463
	45.6	122.683	113.295	119.597	102.79	97.6301	82.8674	81.6344	75.7811	68.9572	66.8891	69.5187	64.2978	66.8706	63.7382	66.8961	56.5367	45.6	63.6256	61.3248	63.072	52.4898	65.6077	52.6033	60.4922	51.6372	68.472	60.401	61.1947	58.4489	49.5682	62.9504	55.1936	57.929	45.6	72.9218	63.1811	71.2427	68.382	67.3676	61.6137	65.4664	58.8298	66.3097	70.4574	60.3298	64.0611	63.2077	58.3007
	45.7	122.094	113.569	119.968	102.631	97.5169	82.582	82.2516	75.3514	69.3272	67.4492	69.541	64.4196	66.6926	63.4594	67.5809	56.9092	45.7	63.3917	61.3708	63.2778	52.6873	65.0561	53.2129	60.6682	52.0459	68.0647	60.189	60.9502	58.2652	49.1842	63.6543	54.8837	58.501	45.7	73.6963	63.3797	71.2236	68.1533	67.8314	61.6661	65.4986	58.9226	66.681	70.6983	60.0761	63.9206	63.3932	58.9449
	45.8	121.18	113.631	120.365	102.103	97.9473	83.1906	82.6047	74.784	69.1946	67.995	69.4161	64.4511	66.2584	63.0334	68.4281	56.904	45.8	62.9677	61.4103	63.5769	53.3266	64.5487	53.6154	60.5764	52.43	68.4751	60.3124	61.0342	58.5412	49.2477	63.9866	54.4478	59.1362	45.8	74.0153	64.2108	71.2458	67.8116	67.8346	61.7904	66.1426	59.7254	67.12	70.7644	59.9599	63.9968	63.5483	59.9708
	45.9	120.663	113.23	120.414	101.759	98.3449	84.0711	82.7966	74.2924	68.6491	68.1163	69.5396	64.3453	65.8327	62.7942	68.6841	56.7957	45.9	62.77	61.352	64.0561	53.7399	64.1381	53.6249	60.4711	52.5872	69.0582	60.7298	61.1564	59.326	49.7162	64.1793	54.1119	58.8402	45.9	73.9543	64.758	71.3737	67.511	67.5741	61.3313	66.4696	60.2223	67.3788	70.6266	59.9724	64.7629	63.8151	61.0419
	46	120.853	112.795	119.97	102.013	98.1496	84.5319	82.7453	74.3341	68.3852	68.14	69.8531	64.3181	65.3722	62.6509	68.3352	56.437	46	62.8137	61.6084	64.2401	53.6902	64.3008	53.2008	60.5038	52.8184	69.0783	61.0654	61.512	59.9273	50.2863	64.1263	53.92	58.0959	46	73.4296	65.1737	71.6834	67.3617	67.3947	61.232	66.9053	60.4977	67.767	70.7772	60.1008	65.1137	63.7217	61.1441
	46.1	120.893	112.86	119.511	102.705	97.7937	84.164	83.0928	74.3218	68.6892	68.2253	70.0824	64.4908	64.7414	62.8887	67.8421	56.2318	46.1	63.2379	61.9594	64.1092	53.0403	64.3847	52.7504	60.7599	52.9771	68.7046	60.8363	61.7173	60.1549	50.4047	64.3371	53.9912	56.7837	46.1	72.8101	65.055	71.7709	67.1737	67.9724	61.0597	66.6906	60.3909	67.7579	71.3624	60.1896	65.2342	63.7577	60.6983
	46.2	120.396	113.192	119.239	103.165	97.686	83.6071	83.1897	74.6826	69.3884	68.4944	69.6859	64.7343	64.2893	62.7731	68.0231	56.0656	46.2	63.4024	62.3697	63.4901	52.4582	64.7013	52.3927	61.0786	53.1414	68.177	60.2524	61.6806	59.656	50.3697	64.4356	53.9056	56.2828	46.2	72.2576	65.0623	71.6179	67.0339	68.6879	61.5751	66.6079	60.3174	67.4059	71.9873	60.5721	64.442	63.8478	59.9764
	46.3	119.874	113.277	118.985	103.388	97.9478	83.1459	83.2234	74.9298	69.5864	68.4061	69.3429	64.7546	64.2732	62.607	68.632	55.6477	46.3	63.4996	62.2408	62.9314	52.1537	64.6691	52.3836	61.046	53.2493	67.9353	59.7806	61.7009	59.0354	49.9559	64.5019	54.0339	56.2432	46.3	72.1951	64.6849	71.5081	67.1422	69.5846	61.9503	66.7016	60.1343	66.579	72.163	60.5248	63.7248	64.3888	59.5906
	46.4	119.701	113.313	119.144	103.074	98.4844	83.0649	82.8757	75.2378	69.1598	68.1513	69.1213	64.4769	64.8409	61.9843	69.2267	55.2534	46.4	63.4593	62.0988	62.518	52.3478	64.4326	52.4794	60.818	53.3649	67.8059	59.8822	61.5902	58.3978	49.981	64.2927	54.204	56.5537	46.4	72.3638	64.4878	71.4203	67.4998	69.6966	62.501	66.9799	59.8691	66.0199	71.751	60.2509	63.4142	64.8297	59.5061
	46.5	119.753	113.753	119.058	102.378	98.5428	82.8768	82.6702	75.0269	68.4559	67.5627	69.2433	64.3107	65.5773	61.8039	69.062	55.0759	46.5	63.515	62.2078	62.6064	52.7933	64.0256	52.7004	60.4656	53.1824	68.1523	59.9789	61.5464	58.3727	49.5792	64.1947	54.4924	56.4748	46.5	72.6363	64.2432	71.7422	67.8832	69.3882	62.4244	67.2124	59.6693	66.0623	71.1102	59.5514	63.5784	65.0374	59.7148
	46.6	119.297	114.69	119.156	101.508	98.3641	82.7806	82.4988	74.9894	68.0953	67.3689	68.8412	64.3192	66.1982	61.7571	68.573	55.341	46.6	63.3783	62.4568	63.0524	52.7776	63.5486	52.6844	60.5711	52.6134	68.735	59.8209	61.4126	58.4572	49.5901	64.0343	54.7261	56.2216	46.6	72.6758	64.3709	72.0338	68.107	68.5134	61.8023	67.3856	59.8779	66.3819	70.6712	59.5182	63.6572	64.7486	59.9439
	46.7	118.845	115.041	118.986	101.138	97.816	83.3461	81.986	75.0522	68.1638	67.4544	68.0698	64.2596	66.4387	61.7722	67.8259	55.5791	46.7	63.3817	62.1377	63.403	52.5481	63.2878	52.5022	60.8697	52.1499	69.2864	59.3947	61.3781	58.4497	49.2557	64.2816	54.3544	56.0073	46.7	72.8489	64.7826	72.4829	68.2013	68.0828	60.8008	67.4371	60.1408	66.6842	70.4713	59.72	63.4879	64.4821	60.3342
	46.8	118.777	114.827	118.716	101.371	97.7633	83.8327	81.3782	75.2821	68.5676	67.8876	67.343	63.7701	66.3746	61.5261	67.3359	55.5817	46.8	63.1339	61.58	63.477	52.1216	63.3487	51.9857	61.1881	52.0276	69.0431	59.3373	61.1372	57.8801	49.4798	64.3937	54.2993	56.3363	46.8	73.0056	64.9099	72.4547	68.1082	68.1157	60.077	67.3531	60.4449	66.7816	70.5011	60.2513	63.6366	64.4359	60.6156
	46.9	119.211	114.07	118.423	101.693	98.2019	84.1334	80.8559	75.0548	68.5396	68.0022	67.2806	63.286	66.1951	61.3828	66.9528	55.1717	46.9	63.0923	60.966	63.1931	52.4778	63.6737	51.5068	61.0577	52.3836	68.6452	59.3074	60.494	57.2749	49.3533	64.7988	53.9426	56.8024	46.9	72.9946	64.5599	72.5118	67.8834	68.4104	59.7924	67.2701	60.4287	66.6892	70.58	60.2391	64.1499	64.3143	60.7407
	47	119.335	113.867	118.167	101.678	98.9468	83.3233	81.0166	74.6698	68.5728	68.012	67.5583	63.339	66.2483	61.8014	66.8752	54.9439	47	62.7917	60.9391	62.8343	52.9103	63.7949	51.2567	60.7226	52.7376	68.6167	59.2728	59.8989	56.9976	49.483	65.2333	54.2003	57.6643	47	73.0956	63.9232	72.301	67.411	68.3474	59.9004	67.0069	60.5027	66.6752	70.7439	60.1457	64.8799	64.1519	60.4359
	47.1	119.372	113.769	118.575	101.608	99.3683	82.8809	81.11	74.2537	68.4938	68.1881	67.8536	64.0328	66.3259	62.2616	67.0551	54.9266	47.1	62.5628	61.2338	62.5294	53.2714	63.3493	51.418	60.2237	52.9266	69.4822	59.0811	59.9467	57.3446	49.559	65.8627	54.0681	58.099	47.1	73.2032	63.9514	72.0967	66.9736	68.0143	60.138	66.6647	60.5724	66.5529	70.7519	60.048	65.312	63.7867	60.0134
	47.2	119.533	113.794	119.098	101.537	99.0346	82.6142	81.0108	74.2477	68.9271	68.5482	67.9547	64.535	66.4926	62.432	67.2746	55.3728	47.2	62.4266	61.9941	62.5863	52.9319	62.7392	51.7047	59.9622	52.8619	70.336	59.3671	60.4494	57.7962	49.9136	66.0126	54.3757	58.1674	47.2	73.6316	64.5252	71.3986	66.6702	67.6	60.3391	65.9344	60.9578	66.7201	70.4649	60.2597	65.2746	63.8578	59.339
	47.3	120.081	113.411	119.388	101.615	98.4431	83.2394	81.0664	74.4522	69.1726	68.8859	68.1948	64.7364	66.4412	62.1251	67.7069	55.7524	47.3	62.4661	62.5939	62.7496	52.4892	62.5646	52.3284	59.422	52.9879	70.814	60.0457	60.9331	58.3581	49.88	65.6708	54.8142	57.8827	47.3	73.2421	65.0431	70.7557	67.1272	67.2223	60.3644	65.558	60.9403	66.5947	69.9992	60.3498	64.947	64.1704	58.7144
	47.4	120.582	113.059	119.372	101.585	97.6706	83.3926	81.5967	74.6637	69.1822	68.7968	68.557	64.4408	66.595	61.858	67.9089	56.0607	47.4	62.7661	62.9181	63.1614	52.279	62.9526	52.6282	59.0913	53.4033	70.4793	60.7023	60.9328	58.5059	49.7154	65.0869	55.2021	57.6662	47.4	72.8313	65.015	70.6367	67.866	66.7398	60.6729	65.3989	60.5031	66.4633	69.5709	60.5296	64.7394	64.5483	58.2038
	47.5	120.615	112.714	119.182	101.347	97.1542	83.2407	82.7193	74.7271	69.0796	68.3997	68.6871	64.2944	66.7097	62.004	68.1184	56.3408	47.5	62.8938	62.8757	63.3287	52.4729	64.0113	52.8737	58.8549	53.7331	70.0376	60.6324	60.9821	58.5606	49.4846	64.8592	55.349	57.8712	47.5	72.468	64.8359	71.0561	68.3808	66.4373	61.2814	65.8061	59.4677	66.2352	69.7036	60.657	65.0464	64.478	58.2522
	47.6	120.432	112.227	119.116	100.753	96.6622	82.5864	83.3941	74.6494	68.9819	68.0942	68.8008	63.8221	67.1416	62.3177	67.7258	56.5477	47.6	63.0722	63.0938	63.8202	52.8254	64.8583	52.5246	59.1889	53.5201	69.3933	59.6164	61.1226	58.1673	49.7226	64.9041	54.9917	58.1391	47.6	72.8481	64.6834	71.7477	68.4843	66.5368	62.1379	66.1854	59.0371	66.3486	70.1189	61.1753	65.2871	64.0573	58.5709
	47.7	119.893	111.502	118.688	99.767	96.5588	82.3647	83.6548	74.712	68.7151	67.9957	68.6707	63.2548	67.3544	62.6003	67.3161	56.7066	47.7	63.2192	63.0942	63.8449	52.7823	65.4002	52.4163	59.4603	52.687	69.328	58.7067	61.6701	57.7893	50.0643	64.877	55.0268	58.6098	47.7	73.1192	64.5404	71.6273	68.2172	67.1416	62.3609	66.7386	59.042	66.7337	70.5071	61.207	65.3792	63.6932	58.9354
	47.8	119.384	111.129	118.375	99.4438	96.5862	82.5958	83.0849	74.9711	67.9896	68.1261	68.802	62.5211	67.1948	62.4602	66.8224	56.69	47.8	63.2418	62.9177	63.6559	52.6481	65.0301	52.3097	59.9979	52.1619	69.3713	58.4976	62.0738	57.4626	50.0959	64.375	55.388	58.9392	47.8	73.1828	64.4354	71.2299	68.1626	67.7657	62.2246	67.0559	59.6687	67.1364	70.6102	61.2961	64.9309	63.7497	59.0551
	47.9	118.82	111.727	118.181	99.8653	96.7361	82.9301	82.4438	75.1381	67.2226	68.0989	68.5541	62.3582	66.5602	61.9563	66.7649	56.9766	47.9	62.8979	62.0939	62.7904	52.4049	64.6273	52.3102	60.5071	51.9726	69.8508	59.3318	62.1833	57.3722	49.8021	63.9676	55.9997	59.116	47.9	73.0392	64.284	70.9106	67.8478	67.9598	61.6831	66.9901	59.728	67.2852	70.7837	61.1273	64.8837	63.8672	58.8321
	48	118.776	112.946	118.062	100.768	96.7121	83.1494	81.7288	74.8956	66.8756	68.1028	68.3211	62.6861	65.5574	61.4822	66.9459	57.1069	48	62.3598	61.4936	61.9657	52.3974	64.5679	52.3084	61.2266	52.3306	70.0636	60.0423	61.7447	57.5346	49.282	63.932	56.1917	58.7011	48	73.077	64.336	71.5272	67.5652	67.5689	61.2966	66.3074	59.6906	67.4333	71.2118	61.065	64.7652	63.7936	58.4947
	48.1	119	113.637	117.708	101.013	96.6304	83.1634	81.3913	73.9867	67.2783	68.1974	68.1	63.2194	64.9772	61.4074	67.2462	57.3731	48.1	61.9257	61.0678	61.7294	52.5479	64.8504	52.3524	61.3279	52.3068	70.1674	60.2679	61.1793	57.6468	49.053	64.0824	55.7658	58.008	48.1	73.0304	64.3957	72.2946	67.1192	66.8518	60.939	65.1659	59.2239	67.2663	71.4904	60.799	64.9538	63.7002	58.3332
	48.2	119.59	113.603	117.393	100.796	96.8271	83.1346	81.1267	73.2756	67.8326	68.09	68.3209	63.3154	64.6694	61.8528	67.3091	57.0794	48.2	62.146	61.0254	62.0889	52.7926	65.3123	52.6626	61.3192	52.3276	70.1923	60.0824	60.8313	57.8807	49.0062	64.0384	55.3057	57.101	48.2	72.9723	64.5554	72.2449	66.9728	66.7354	60.617	64.4097	59.177	67.319	71.2118	60.1496	64.7443	63.8916	58.4392
	48.3	119.983	113.103	117.755	100.614	97.0343	82.6609	81.0836	72.9782	68.56	67.8132	68.656	63.1268	64.8671	62.467	67.0662	57.0006	48.3	62.4253	61.0114	62.8148	53.1809	65.2059	52.9277	61.0076	52.3071	70.1632	59.9596	60.7706	58.0536	49.0311	63.79	55.0816	56.8834	48.3	72.7402	64.6123	71.4258	67.0988	67.2149	60.5378	64.5254	59.2212	67.1542	70.799	59.5544	64.5641	64.5619	58.673
	48.4	120.158	112.89	118.274	100.846	97.6604	82.2344	80.9399	73.3378	68.9426	67.6168	68.6211	62.9011	64.9206	62.5653	66.6984	56.7026	48.4	63.0522	60.9309	63.1752	53.3286	65.0398	53.3103	60.906	52.5397	70.3306	59.9858	61.0861	58.5352	49.03	64.0011	55.1559	56.9319	48.4	72.8894	64.4727	70.339	67.2844	67.9402	60.6464	65.5576	59.5312	67.2921	70.373	59.3402	64.1449	65.0196	58.5961
	48.5	120.188	112.661	118.571	100.916	97.8046	82.2254	81.3119	73.3134	69.2311	67.7314	68.2484	62.783	65.258	62.3704	66.5971	56.6026	48.5	63.0202	60.8194	63.3714	53.3931	64.4627	53.4988	60.5083	52.8146	70.4449	60.0692	61.5384	59.1053	49.13	64.0667	55.128	57.3526	48.5	73.1501	64.4216	69.9251	67.2877	68.1261	61.067	66.5718	59.5393	67.2827	70.3117	59.8628	63.9278	65.3069	58.3332
	48.6	120.283	112.754	118.374	100.64	97.9778	83.1319	81.5949	73.3104	69.2598	67.9972	68.1191	62.6556	65.7544	62.0654	66.5762	56.264	48.6	62.8862	60.782	63.379	53.2778	63.8721	53.42	60.1577	53.0757	70.3862	60.1543	61.9032	59.3734	49.519	63.8724	54.9849	57.4558	48.6	73.501	64.4938	70.0511	67.1282	68.0996	61.1632	66.8303	59.3647	67.2599	70.0686	60.622	63.9247	64.9692	58.0566
	48.7	120.561	112.843	118.407	100.284	97.1344	84.2164	82.2308	73.3624	69.3308	67.9087	68.2898	62.5667	66.3279	62.0401	66.5792	55.7043	48.7	62.2572	60.9924	63.3069	53.1774	63.4261	53.0968	59.6887	53.4938	70.2147	60.3581	61.7624	59.1146	50.0761	63.2337	54.834	57.4516	48.7	73.4056	64.5084	70.7347	67.5539	68.1249	60.9478	66.4369	59.0749	67.2507	70.1613	60.8016	64.2276	64.6996	58.1752
	48.8	120.407	113.096	118.742	100.006	96.1886	84.6393	82.0379	73.8222	69.4627	67.7962	68.5896	62.8446	66.4989	62.0281	66.3071	55.1823	48.8	61.9912	61.5466	62.904	52.9682	63.0892	53.0534	59.6481	53.8689	69.7596	60.5018	61.1948	58.4449	50.4732	63.0072	54.9874	57.1628	48.8	73.0846	64.141	71.4162	68.3162	68.389	60.5189	65.9806	59.0063	67.2541	70.489	60.8223	64.507	64.5174	59.0114
	48.9	119.688	113.156	118.984	99.8923	95.315	84.3653	81.9256	74.121	69.5418	67.7051	68.4418	63.2324	66.4618	61.7857	66.1912	55.1253	48.9	61.9432	61.7362	62.8111	52.8611	63.4069	53.2627	59.855	54.1691	69.7897	60.7038	60.7107	58.1146	50.5853	63.2603	55.307	56.6199	48.9	73.0012	63.8017	72.1899	69.0481	68.2489	60.2642	66.047	59.3897	67.2781	70.9121	60.9422	64.4383	64.797	60.0843
	49	119.011	113.326	118.83	99.6486	95.4353	83.7958	81.4819	74.38	69.0801	67.8898	68.1756	63.2489	66.3893	61.6011	66.332	55.7128	49	62.2119	61.7989	62.7439	52.9478	63.8727	53.5619	60.2586	53.8711	69.7796	60.7402	60.6913	57.878	50.4393	63.4638	55.8833	56.2112	49	73.0078	63.8857	72.5609	69.1708	67.7834	60.114	66.2888	59.946	67.3087	70.8529	61.5347	64.2702	65.0759	61.0866
	49.1	118.867	113.948	118.636	99.8228	96.0033	83.6833	81.5099	74.6036	68.4502	67.9211	68.1752	62.9666	66.3147	61.3118	66.7781	56.3744	49.1	62.4983	61.3742	63.0993	53.1838	64.6918	53.4193	60.3137	53.2879	69.7759	60.9148	61.1128	57.7928	50.1683	63.2892	56.2659	56.123	49.1	72.9929	64.4004	73.0027	68.7128	67.0701	60.2021	66.157	60.6971	67.2454	70.4469	61.7546	64.049	65.2446	61.0986
	49.2	119.44	114.051	118.808	100.145	96.5686	83.7686	81.2202	74.7789	67.7851	67.99	68.6571	62.6172	66.1747	60.9994	67.0206	56.6934	49.2	62.616	61.421	63.0023	53.2977	65.404	53.5353	60.2447	52.4364	69.2364	61.1032	61.7936	57.7037	50.2268	63.0668	56.4702	56.3206	49.2	72.4456	64.7222	72.8334	68.2543	66.7971	60.4734	65.7886	60.8907	66.8863	70.2478	61.4683	64.3493	64.7634	60.5606
	49.3	119.977	113.699	119.158	100.54	96.9968	83.6197	80.7322	74.4862	67.7177	68.002	69.4932	62.8047	66.2199	60.759	67.1672	56.4803	49.3	62.6226	61.3189	62.9521	53.0588	65.986	53.6579	60.0229	52.1417	68.195	61.163	61.9677	58.0521	50.3813	63.3201	56.3299	56.3374	49.3	71.8994	64.6512	72.5063	67.8232	67.2667	60.8751	65.6792	60.7777	66.573	70.5556	60.8704	64.4323	64.1914	59.6846
	49.4	120.117	112.096	119.069	100.223	97.2276	83.0948	80.2361	73.9142	67.5469	68.3864	69.9902	62.6659	66.5259	60.7559	67.3314	55.963	49.4	62.5073	61.3217	62.6979	52.6411	66.2679	54.1096	59.9997	52.1469	67.5293	60.8721	61.8372	58.647	50.6876	63.8288	56.3398	56.3416	49.4	71.5709	64.2808	71.7967	67.9067	68.0204	61.0834	66.0456	60.2618	66.2673	70.7427	60.5043	64.6647	63.5923	59.4238
	49.5	119.666	111.264	118.71	99.5892	97.3219	82.3566	80.2516	73.1673	67.3179	68.4073	69.6814	62.5764	66.6817	61.1796	67.826	55.2791	49.5	62.6097	61.0878	62.5544	52.5081	65.9494	53.9959	59.6921	52.6768	67.367	59.9856	61.193	58.9013	50.6047	64.1366	56.4986	56.3477	49.5	71.6681	64.1831	71.3209	67.9497	68.6851	60.981	66.2589	59.9456	66.5966	70.6258	60.4682	64.5281	63.6842	59.5442
	49.6	119.12	111.127	118.205	98.9549	96.7951	82.0317	80.6012	72.9116	67.233	68.2563	68.9621	62.1996	66.367	61.4663	68.4206	54.9512	49.6	62.9168	60.774	62.5063	52.8618	65.2808	53.6779	59.9236	53.0316	68.1941	59.406	61.1091	58.717	50.4103	64.2336	56.6618	56.7703	49.6	71.7548	64.2251	71.2917	67.8027	68.5809	60.9978	65.816	60.1812	66.5233	70.2074	60.5066	64.9582	63.9788	59.6224
	49.7	119.006	111.825	117.949	99.0912	96.2156	82.1841	80.9356	72.9061	67.7022	67.556	68.3822	62.3928	65.6228	61.5238	68.8976	54.8086	49.7	63.3229	60.5066	62.3693	53.7004	64.6698	53.1518	60.1601	53.2258	69.0808	59.2113	61.3031	58.2194	50.3841	64.3781	56.175	57.2121	49.7	71.8709	64.6812	71.7354	67.3391	68.1934	61.1686	65.0451	60.6301	66.5666	70.1278	60.2882	65.3058	64.5454	59.3643
	49.8	119.455	112.086	117.723	99.5553	95.7951	82.567	80.9194	73.4781	68.5604	67.2566	68.2773	62.7593	65.0287	61.2309	68.7283	54.9748	49.8	63.5271	60.4067	62.0617	54.0973	64.5369	52.6998	61.0183	52.8787	69.9149	59.7972	61.9593	58.0586	50.5567	64.457	55.4264	57.8902	49.8	71.8664	64.6312	72.2801	66.855	67.8011	61.3601	64.3998	61.1524	66.285	70.2613	59.9643	65.5797	65.0306	58.9952
	49.9	119.899	111.592	117.913	99.838	95.9006	82.9619	81.0844	73.8491	69.0479	67.164	68.4817	63.2917	64.8363	61.1918	68.0249	54.8457	49.9	63.378	61.1694	61.5986	53.8724	64.5521	52.454	61.2192	52.72	70.3219	60.1964	62.2349	57.9158	50.6323	64.3213	54.8213	58.0724	49.9	72.1416	64.41	72.5461	66.5913	67.5327	61.4501	64.4658	61.0624	66.5601	70.7332	59.9261	65.2342	65.2343	59.127
	50	119.893	111.021	118.166	99.3758	96.2566	83.1047	81.2144	74.3708	69.122	67.3944	68.6844	63.4044	65.1392	61.4663	66.809	55.2156	50	62.991	61.9887	61.4319	53.1041	64.5761	52.17	61.2486	52.4993	70.2987	60.4387	62.2366	57.9768	50.3894	64.1697	54.8628	58.0641	50	72.2973	63.7657	72.2747	66.4144	67.4643	61.2777	64.8909	61.0519	66.9398	71.4363	60.3231	64.8149	65.0991	59.4676
	50.1	119.493	110.942	117.951	98.9927	96.6934	83.3992	81.5258	74.4866	68.8821	67.3719	68.8096	63.0646	65.4984	62.1254	66.1942	55.7532	50.1	62.6471	62.6652	61.7999	52.8056	64.4837	52.1086	60.2369	52.3723	69.849	60.2227	61.6293	58.0679	49.9342	64.1293	54.9671	57.9264	50.1	72.2793	63.6562	71.9747	66.3263	67.5872	61.3379	65.3511	60.7299	67.3534	72.0117	60.9452	64.5557	65.0569	59.8916
	50.2	118.758	111.668	117.289	98.6268	97.1782	83.0569	81.5176	74.6662	68.5687	67.358	68.5364	62.5962	65.5772	62.4367	65.8118	56.4559	50.2	62.5334	62.2423	62.3248	52.8073	64.5822	51.8544	59.081	52.0822	69.0466	60.031	61.1616	58.5971	49.7309	64.1547	55.0793	58.2747	50.2	71.9019	63.7184	71.5551	66.4013	68.3157	61.3342	65.409	60.8201	67.4614	72.1	61.1999	64.5164	65.3462	60.0199
	50.3	118.147	112.278	116.83	98.9433	97.3922	82.5826	81.6829	74.4553	68.2334	67.6329	67.9173	62.6142	65.3322	62.6006	66.0172	56.4522	50.3	62.553	61.7167	62.6106	53.0512	64.7984	51.8701	57.9261	52.0642	68.2306	59.6003	60.8273	59.2031	49.5441	63.9333	54.9294	58.6921	50.3	71.3374	63.6472	71.2202	66.5818	68.9234	61.348	65.6307	60.5707	67.5727	71.5643	61.2097	64.521	65.5973	59.7761
	50.4	117.811	112.293	117.013	98.9458	96.9569	81.9123	81.8421	74.3632	67.938	68.2576	67.7241	63.269	65.1791	62.2449	66.1906	55.9756	50.4	62.3924	60.9352	62.4233	53.1149	65.1254	52.0572	57.8772	52.4278	67.9618	59.2501	60.8691	59.702	49.5138	63.6641	54.8252	58.7252	50.4	71.2198	63.4522	70.809	66.8807	69.0046	60.9203	65.8768	60.6746	67.4462	70.9294	60.9574	64.7327	65.2832	59.3029
	50.5	117.999	111.669	117.351	99.5794	96.313	82.0784	82.4588	74.1156	67.807	68.8886	67.7761	64.2088	65.415	61.9608	66.7424	55.4619	50.5	62.2276	60.6603	61.8951	53.4092	65.2868	52.9122	58.5701	52.6801	67.946	59.0411	60.9698	59.8398	49.2969	63.3881	54.5128	58.331	50.5	71.289	63.315	70.6538	67.1642	68.4459	60.2439	66.2757	60.1749	67.2198	70.6824	60.9168	65.3494	64.5639	58.9447
	50.6	118.319	111.618	117.164	99.6794	95.6969	82.3959	82.3364	74.2052	67.8971	68.9084	68.3332	64.7889	65.525	61.8839	67.3756	55.3802	50.6	62.1711	60.4321	61.6647	53.6992	65.0174	53.594	59.3744	52.9434	68.4078	58.9124	61.0911	59.743	49.3651	63.2704	54.6542	57.6578	50.6	71.7709	63.6992	70.6883	67.3528	67.7907	59.7364	66.2254	60.1682	66.6637	70.7291	60.733	65.9868	63.9084	59.0018
	50.7	118.503	111.961	117.087	99.7929	95.8422	82.4951	82.0568	74.1564	67.8043	68.4879	68.6027	64.8834	65.5552	62.3682	67.8256	55.6413	50.7	62.4687	60.6807	61.9056	53.7791	64.2233	54.0943	59.6351	52.9733	68.5019	58.9661	61.4666	59.4108	49.5047	63.501	55.0983	57.3842	50.7	71.7344	63.9684	70.7836	67.2407	67.6273	59.629	66.087	60.2093	66.4313	71.024	60.6114	66.1128	63.7703	59.3954
	50.8	118.563	112.601	117.349	99.4666	95.8984	82.2227	81.3246	74.2931	67.5408	67.7373	69.0009	64.6772	65.3663	62.9488	68.0658	55.7416	50.8	62.699	61.1002	62.8783	53.8139	63.5757	53.7884	59.6659	53.0902	68.6683	58.8427	61.7956	59.0656	49.984	64.0527	55.7496	57.1516	50.8	71.7961	64.4333	70.6467	67.0224	67.6133	59.8433	66.013	60.9331	66.5937	71.2329	60.3789	65.4131	63.8342	59.4922
	50.9	118.582	112.797	117.935	99.4377	95.8631	82.0496	81.1482	74.0927	67.2137	67.3177	69.0893	64.4072	65.538	62.9782	68.0591	55.6089	50.9	62.9653	61.6186	63.7781	53.8959	63.1462	53.4578	59.8478	52.9702	68.6736	59.0283	61.9467	58.5523	50.4194	64.8636	55.9196	57.363	50.9	71.8017	64.4747	70.6429	66.8787	67.8996	60.2651	66.058	61.1507	66.8698	71.2804	60.2796	64.471	64.1903	59.4298
	51	118.76	112.692	118.207	99.7312	95.7216	82.3411	80.9486	74.2068	67.0801	67.0397	68.7761	64.1346	65.9109	62.4283	67.9766	55.3112	51	63.247	61.8041	64.3767	53.9221	63.1847	52.8532	60.2459	52.8477	68.659	59.2733	61.5794	58.1836	50.6783	65.3829	55.8847	57.3002	51	72.0586	64.311	70.9274	67.0338	67.7577	60.652	66.2487	61.0083	67.1198	71.0767	59.932	63.6979	64.362	59.173
	51.1	118.69	112.312	117.933	99.8921	95.8639	82.9019	80.721	74.4421	67.4354	67.1078	68.179	63.7087	66.0773	61.7914	67.5612	55.3814	51.1	63.2543	61.6066	64.4481	53.3548	63.1117	52.3664	60.3982	52.7688	68.9257	59.7803	61.2059	57.902	50.5326	65.6189	55.8784	57.3722	51.1	72.0999	63.765	71.4306	67.1427	67.594	61.042	66.289	60.2652	66.8858	70.4621	59.6666	63.4207	64.6922	59.1847
	51.2	118.627	111.712	117.669	100.316	96.0593	83.1352	80.5767	74.9149	67.7663	66.9947	67.4982	63.4199	66.2379	61.4091	67.3969	55.6691	51.2	62.9299	61.1128	63.9983	52.3308	63.2922	51.8459	60.4778	52.7038	68.9643	60.1732	61.1887	57.8244	49.9273	65.2208	55.5131	57.3696	51.2	72.0006	63.3946	71.6698	67.304	67.3423	61.0049	66.3246	59.7239	66.7999	70.129	59.4556	63.629	64.5073	59.3287
	51.3	118.569	111.636	117.262	100.52	95.9061	82.9926	80.5787	74.9763	68.149	67.0977	67.4582	63.3314	65.8968	61.3269	67.429	55.9842	51.3	62.099	60.7207	63.31	51.6579	63.667	51.7756	60.223	52.667	69.2146	59.9877	61.4103	57.9496	49.3252	64.6178	54.8394	57.5907	51.3	72.013	63.3704	71.297	67.3742	67.4254	61.1692	66.4406	59.663	67.0282	69.9769	59.8319	64.3249	64.3206	59.461
	51.4	118.82	111.774	116.784	100.786	95.5547	82.5011	80.6139	74.8099	68.2342	67.1091	67.6259	63.3793	65.9408	61.4219	67.878	56.1646	51.4	61.6552	60.1447	62.8806	51.7384	64.0694	52.0007	60.0761	52.6147	68.9399	59.4064	61.5347	58.3952	49.0069	63.7586	54.0054	57.6102	51.4	72.1897	63.3742	70.6017	67.5617	67.4006	61.3178	66.4236	60.2612	67.7232	70.3539	60.1289	65.1517	64.2258	59.7157
	51.5	118.821	111.91	116.294	100.486	95.5558	82.4431	80.5119	74.4028	68.1866	67.3652	68.2502	63.139	65.7609	61.5991	68.0442	56.0208	51.5	61.6699	59.9731	62.9849	52.5283	64.4776	52.3896	59.8447	52.5092	68.9324	58.5818	61.3737	59.2712	49.3609	63.3386	53.8056	57.496	51.5	72.2353	63.1737	70.0537	67.6116	67.4032	61.6431	66.491	60.9796	68.4668	70.4903	60.5191	65.544	64.7882	59.9338
	51.6	118.516	111.389	115.594	100.094	95.5138	82.4923	80.4391	74.1122	68.0783	67.4952	68.6716	62.6851	65.9074	61.7111	68.0977	55.9497	51.6	62.2543	60.0311	63.4512	53.1841	64.8411	52.6159	60.0762	52.1899	68.8858	58.3053	61.7281	60.1253	49.7942	63.47	53.9498	57.3547	51.6	72.2213	62.6808	69.786	67.4403	67.1872	61.6562	66.09	61.0623	68.3411	70.6513	60.4243	65.4373	65.2986	60.2496
	51.7	117.961	110.813	115.368	99.5424	95.6101	82.5952	80.1419	73.4974	68.0649	67.719	68.9076	62.4261	65.7666	61.5892	67.7919	56.1136	51.7	62.9006	60.5124	63.446	53.3884	65.2046	52.9407	60.2261	51.7092	69.0878	58.4641	62.0571	60.1658	50.1488	64.2432	54.1214	57.196	51.7	72.2221	62.3863	70.08	66.9591	67.3382	61.3424	65.8326	60.3984	67.5928	70.5389	60.2238	64.8971	65.2986	60.0021
	51.8	117.805	110.451	114.987	99.2572	95.3897	82.4084	79.7203	73.1976	68.4716	67.7513	68.7522	62.649	65.7079	61.6279	67.4577	56.523	51.8	63.3174	60.909	63.2497	53.1791	64.9626	53.362	60.5851	51.5009	69.07	58.8146	62.5416	59.4711	50.0278	64.9573	54.1478	56.9967	51.8	72.2382	62.5497	70.4757	66.542	67.1156	61.0799	65.4878	59.3113	66.3782	70.3752	59.7099	64.7266	64.923	59.3456
	51.9	117.625	110.539	115.237	98.634	95.5709	82.5149	79.3148	73.1159	68.8659	67.6298	68.6482	63.2869	65.564	61.9333	67.3154	56.6849	51.9	63.5272	61.0991	62.9284	53.0658	64.0543	53.6137	60.6543	51.6774	68.7152	58.9829	62.1707	58.4058	49.9736	65.0322	54.1566	56.7698	51.9	72.215	62.9147	70.8788	66.5577	67.0972	60.8459	65.3351	58.5704	65.5111	70.0857	59.3003	64.5846	64.5569	58.6344
	52	117.519	110.91	115.355	98.4111	95.7433	82.7526	79.4776	73.3019	68.9578	67.1739	68.6759	63.6846	65.5422	62.3146	67.6258	56.064	52	63.5341	61.3028	62.9134	53.0676	62.9731	53.5667	60.7691	52.105	68.339	58.8124	62.0856	58.0198	49.873	64.6409	54.3724	56.9827	52	72.3188	62.9469	70.9601	67.1421	66.7746	61.375	65.3276	58.3937	65.3726	69.7096	59.3772	64.8427	64.5439	58.5299
	52.1	116.933	111.421	115.99	98.2189	96.1173	83.1164	79.934	73.4393	68.4448	67.1272	68.5691	64.0432	65.6544	62.5824	67.8124	55.3192	52.1	63.1309	60.9358	62.9958	52.9374	62.7594	53.0836	60.6496	52.4057	67.9661	58.5938	61.7357	58.0834	49.7137	64.1003	54.8166	57.1369	52.1	72.6994	62.7718	70.9949	67.6241	67.0592	61.5994	65.3401	58.73	65.948	69.713	59.8488	64.7626	64.322	58.8809
	52.2	116.912	111.846	116.403	98.5991	96.0421	83.3582	79.903	73.3861	68.0492	67.1989	68.0016	64.0809	65.8756	62.2703	67.7231	54.7023	52.2	62.4614	60.368	62.9554	52.6007	63.2474	52.9671	60.5677	52.7266	68.026	58.4833	61.8243	58.7676	49.4518	64.0724	55.2958	57.3086	52.2	72.8	62.8353	71.2468	67.8614	67.2926	61.7906	65.8232	59.1436	67.088	70.0464	60.3637	64.6053	64.1982	59.1277
	52.3	117.037	111.968	117.019	98.4324	95.5636	83.3752	79.8044	73.5134	67.5862	67.7508	67.3686	64.3009	66.0217	61.8632	67.5361	54.417	52.3	61.7328	59.7441	62.7589	52.3361	64.0576	53.1817	60.745	52.9949	68.2413	58.5954	61.544	59.2127	49.1496	64.242	55.5551	57.4146	52.3	72.2902	63.2139	71.2387	67.6553	67.6409	61.0017	65.9014	59.3917	67.7419	70.9699	60.2269	64.1253	63.9406	59.0614
	52.4	117.715	112.096	117.202	98.0941	94.9057	83.1643	79.7272	73.4392	67.4512	67.8007	67.3979	64.2879	65.9473	61.2598	67.683	54.25	52.4	61.5152	60.0112	62.3206	52.4477	64.4958	53.6363	60.8901	53.4704	68.7898	58.9284	61.4629	59.3931	48.9811	64.631	55.4058	57.741	52.4	71.6874	63.6936	71.0037	67.5618	67.537	60.3396	65.7534	59.3899	68.1404	71.593	59.6262	63.713	63.7721	58.9827
	52.5	117.61	112.196	117.645	97.9158	94.9604	82.4763	80.4092	73.6646	67.3327	68.0527	67.8841	64.1868	65.8931	61.1143	67.9091	54.3208	52.5	61.2734	60.5887	61.8423	52.6072	64.7851	53.4936	61.0401	53.595	69.1818	59.3111	61.1116	58.5984	48.8644	64.6014	54.9998	57.7967	52.5	71.539	63.9254	70.7146	67.5662	67.4389	59.8068	65.0102	59.357	67.9724	71.9626	59.0574	63.8704	63.2144	58.9193
	52.6	117.511	112.391	117.556	98.3106	95.3541	81.9978	80.5838	74.0382	67.5449	67.934	68.2182	64.0477	65.9963	61.2234	67.772	55.0528	52.6	60.9991	61.0762	61.6404	52.782	65.1376	52.6456	60.7833	53.7121	69.6202	59.7229	60.7857	57.6202	48.9413	64.2324	54.703	57.3482	52.6	71.5778	64.1706	70.7356	67.5796	67.5381	60.0217	64.9201	59.5893	68.0142	71.6863	58.9383	64.4973	62.7393	59.1653
	52.7	117.21	112.129	117.487	98.8851	95.3914	81.9688	80.4594	74.6797	67.6346	68.1316	67.806	64.0281	66.4259	61.732	67.5276	55.6872	52.7	60.7352	61.0746	61.7963	52.772	65.3913	51.7564	60.6634	53.5622	69.8108	60.0327	60.3497	57.0036	49.3331	63.5468	54.5224	56.8736	52.7	71.3049	64.2242	70.7873	67.3339	67.806	60.7047	65.1599	59.7539	67.891	71.3392	59.3257	65.1834	62.7193	59.3176
	52.8	117.433	111.638	116.765	98.9029	94.6259	82.3698	79.909	74.8441	67.4248	67.8519	67.3324	64.2344	66.6299	62.1847	67.3243	55.9149	52.8	61.0141	61.0076	62.1983	52.8536	65.5872	51.3414	60.5739	53.4776	69.9818	60.2562	60.4607	57.3969	49.6662	63.1994	54.5857	56.809	52.8	70.795	63.925	70.5959	66.79	67.9651	61.2882	65.6607	59.803	67.8084	71.1164	59.8201	65.1018	63.231	59.4553
	52.9	117.415	111.13	116.148	98.7604	93.9614	82.9206	79.8789	74.5897	67.505	67.7981	67.2431	64.1638	66.5007	62.2569	67.5048	55.3087	52.9	61.6666	61.0041	62.54	52.8734	65.5884	51.6468	60.5898	53.5408	69.4896	60.3651	61.1442	58.4893	49.7146	63.2768	54.6712	57.1954	52.9	70.7053	63.2088	70.3084	66.2483	67.9271	61.4201	65.6949	59.3918	67.5462	71.0659	60.2741	64.2744	63.9853	58.9822
	53	117.207	111.061	115.765	98.6223	94.1261	83.1147	80.063	74.0427	67.8391	67.6531	67.7386	63.8982	65.8119	61.8538	67.803	54.776	53	62.2046	60.9117	62.862	52.9691	65.5388	52.4031	60.5366	53.7191	69.0104	60.3646	61.8944	59.2023	49.576	64.0038	54.9414	57.732	53	70.9517	62.3171	70.2781	65.9513	67.8916	60.9177	65.9407	59.5628	67.2919	71.0613	60.3783	63.588	64.5512	58.5657
	53.1	116.588	111.265	115.93	99.0196	94.8741	83.3121	80.322	73.8459	68.4208	67.89	68.1022	63.2382	65.4256	61.3197	68.1742	54.5439	53.1	62.5014	60.6216	63.1583	53.2151	64.9479	53.1173	60.2787	53.9152	68.6122	60.3204	61.9806	59.3413	49.6799	64.4681	54.939	58.1952	53.1	71.2068	61.8968	70.6451	65.9066	67.7446	60.4807	66.541	60.109	67.1827	70.5197	60.3916	63.5961	65.0816	58.3628
	53.2	115.948	111.347	116.391	99.2374	95.5819	83.228	80.2093	73.8568	68.1127	67.8842	68.473	62.7114	65.7161	61.2773	68.2712	54.7062	53.2	62.5213	60.3249	63.6124	53.4561	64.2833	53.3624	60.3679	53.682	68.977	60.1684	61.5488	58.8534	49.9243	64.6448	54.7026	58.4929	53.2	71.3178	62.1297	71.4484	66.146	67.0288	60.3253	67.156	61.1836	67.3544	70.1002	60.4762	64.4304	65.0884	58.7708
	53.3	115.417	111.367	116.228	99.376	95.5876	83.2514	80.0798	73.7948	67.5258	67.6898	68.69	62.1912	66.5008	61.1606	68.1549	55.0348	53.3	62.5513	60.5444	63.8942	53.6232	63.8677	52.8559	60.3872	53.2341	69.3342	60.0812	61.5437	58.6107	49.9222	64.067	54.3383	58.4256	53.3	71.4533	62.904	72.0913	66.6587	66.1774	60.428	67.2879	61.7036	67.4002	69.9754	60.9034	65.0599	64.7813	59.2334
	53.4	115.589	111.443	115.582	99.2976	95.5782	82.7969	80.12	73.4282	66.9673	67.238	68.9281	62.1744	66.9476	61.1256	67.6807	55.5324	53.4	62.5068	61.1093	64.185	53.1217	64.306	52.3458	60.8149	52.975	69.674	60.0156	62.128	58.7116	49.6123	63.659	54.2604	58.1614	53.4	71.3902	63.4593	72.1972	67.2336	65.7752	60.4797	66.8618	61.754	67.3953	70.7323	61.025	65.2152	64.2817	59.5234
	53.5	115.742	111.643	114.948	99.5953	95.3489	82.331	80.2671	73.2533	67.3386	66.9316	69.0637	62.4909	66.5424	61.0687	67.3457	56.0642	53.5	62.3294	61.5718	63.8319	52.6343	64.9051	52.3098	60.9087	52.7619	69.661	59.9841	62.7384	58.8844	49.274	63.6274	54.503	58.0004	53.5	71.3224	63.7744	71.7363	67.7644	66.3444	60.3149	66.5588	61.1192	67.0571	71.5028	60.7356	64.8406	63.9484	59.5029
	53.6	116.135	111.442	114.979	99.7851	95.3681	82.0504	80.2596	73.7127	67.842	66.7488	69.0164	63.0526	65.7616	61.4657	67.1616	56.2968	53.6	62.0187	61.3931	63.1486	52.1237	65.4328	52.7306	61.1114	52.6458	69.667	59.8356	62.6488	59.0651	49.2268	64.175	54.7304	58.0206	53.6	71.1316	63.6336	71.3892	67.7341	67.0466	60.4521	66.391	60.3874	67.0001	71.9539	60.0014	64.6404	63.744	59.2856
	53.7	116.436	110.777	115.444	99.5753	95.0574	82.2189	80.0608	74.424	68.3769	66.6947	68.7444	63.4613	65.1259	61.8781	67.473	56.1798	53.7	61.7677	60.7048	62.4154	52.3682	65.5567	53.3018	61.1101	52.4208	69.6659	59.6711	62.2632	58.878	49.624	64.6508	55.015	57.9898	53.7	71.4587	63.8751	71.3562	67.3044	67.4217	60.7948	66.3429	59.8346	66.6688	71.5538	59.6781	64.6691	63.4843	59.297
	53.8	117.724	110.142	115.757	98.8094	94.8804	82.5124	80.0182	74.4593	68.515	66.658	68.1707	63.7169	65.1299	61.8883	67.6534	55.856	53.8	61.8543	60.1897	62.2301	52.799	65.7514	53.7492	61.2286	52.7991	69.5264	59.6004	62.0881	58.797	50.1664	64.7336	55.2447	57.5854	53.8	71.9252	63.7272	71.376	66.473	67.4757	61.5208	66.1687	59.7739	66.4248	70.9573	59.744	64.7484	63.5167	59.6242
	53.9	118.882	110.259	115.817	98.0589	94.833	82.3874	80.2603	73.7998	68.6298	66.6114	67.658	63.7793	65.2928	61.7534	67.8171	55.6089	53.9	62.1061	60.0093	62.6129	53.2594	65.5109	54.207	61.0729	53.3076	69.1706	59.7846	62.266	58.8457	50.5247	64.4954	55.4582	57.1853	53.9	72.5091	63.655	71.1533	65.8218	67.4024	62.2062	65.9013	60.1409	66.0644	70.3542	60.172	64.9969	63.9591	59.9079
	54	119.159	111.035	115.836	97.8429	94.8458	82.4622	80.5351	72.7729	68.6217	66.6596	67.5762	63.6899	65.3336	61.7612	67.6722	55.8133	54	62.2223	60.298	63.1653	53.2392	65.1778	54.2163	60.6888	53.9242	68.8337	59.8961	62.3433	59.2103	50.2072	64.4151	55.3341	57.0194	54	72.7777	63.159	70.7114	65.6734	67.4206	62.8867	65.5104	60.4957	65.9046	70.2928	60.48	65.1684	64.6148	59.8332
	54.1	117.934	111.779	116.146	98.1769	94.9142	82.4916	80.91	72.2931	68.3092	66.7126	67.6402	63.5766	65.1844	62.0631	67.6178	56.3048	54.1	62.069	60.3392	63.7189	52.6236	64.376	54.0209	60.2893	53.7927	69.1463	59.9078	62.4548	59.8941	49.5264	64.6554	54.826	57.099	54.1	72.4712	62.988	70.214	65.9363	67.1513	63.572	65.417	60.5201	65.9799	70.3084	60.7402	65.4424	65.0983	59.3127
	54.2	116.443	111.651	116.316	98.7964	95.0542	82.7333	80.9689	72.0807	67.9414	66.9402	67.8411	63.6381	65.1291	62.3694	67.3753	56.8201	54.2	61.9754	60.3369	64.0063	52.0159	64.046	53.5852	60.043	53.5014	69.9476	59.5349	62.7027	60.0749	48.6133	65.1224	54.2446	56.968	54.2	71.6501	62.8674	70.0919	66.3434	67.1649	63.8219	65.6382	60.1419	66.272	70.605	60.7948	65.0736	65.1683	59.1089
	54.3	115.73	111.239	116.625	98.9581	95.367	82.3714	80.793	72.2266	67.5861	67.1301	68.1227	63.6734	65.105	62.1927	67.2688	56.713	54.3	61.8812	60.6449	64.0062	51.8042	63.8401	53.4764	60.0206	52.9644	70.541	59.4978	63.1581	60.0484	48.0336	65.3421	53.782	56.6064	54.3	70.655	62.805	70.3127	66.2469	67.1974	63.3986	66.1461	59.6926	66.9672	70.6274	60.9217	64.8506	65.1366	59.238
	54.4	116.103	110.715	116.721	98.5403	95.719	82.1399	80.3457	71.9968	67.5827	67.292	68.6756	63.7019	64.8078	61.6093	67.1698	56.2724	54.4	61.8502	61.2588	63.613	52.2112	63.9398	53.1899	59.9693	52.6718	70.2793	59.6469	63.0159	59.3977	47.9187	65.1949	53.9206	56.3969	54.4	70.1699	62.6427	70.8819	65.8363	67.6431	62.3678	66.3573	59.8526	67.1397	70.7021	60.7767	64.6881	65.0628	59.386
	54.5	116.604	110.811	117.217	97.8097	95.5417	81.7592	80.1274	71.9789	67.6713	66.9622	68.9937	63.6922	64.7168	61.1079	67.1812	55.9372	54.5	61.7209	61.9611	63.101	52.7198	63.5904	52.9839	60.1202	52.4648	69.6228	59.8507	62.3614	59.0759	48.4424	64.7479	54.2239	56.376	54.5	70.4189	62.469	71.0021	65.5107	67.9048	61.4159	66.4484	60.1583	66.9574	70.5502	60.6507	64.9584	64.9177	59.2766
	54.6	116.663	110.679	117.117	97.6133	95.0733	81.7674	80.1461	71.8571	67.624	66.6164	69.1633	64.1749	64.7951	61.3143	67.1753	55.8758	54.6	61.7587	61.6174	62.5807	52.8833	63.3224	52.8813	60.195	52.5208	69.1622	59.6192	61.7001	58.8652	49.1487	64.3033	54.812	56.5662	54.6	70.8344	62.2432	71.0471	65.7054	68.0029	60.9992	66.6371	60.7426	66.2338	70.556	60.2598	64.9006	64.8954	59.066
	54.7	116.174	110.057	116.552	97.9767	94.1798	81.6327	80.3187	72.1153	67.539	65.8617	69.1116	64.4287	65.2756	61.9739	67.2014	55.8931	54.7	61.6677	60.7978	62.6002	52.812	62.7716	53.436	60.3467	52.9943	69.2329	59.307	61.6389	58.7418	49.7598	64.0536	54.9346	56.6302	54.7	71.2384	62.1379	70.8482	66.1546	67.6643	60.9968	67.072	60.7949	66.0238	70.5583	60.037	64.9442	64.9544	59.4086
	54.8	115.986	109.165	115.677	98.5863	93.7042	81.5029	80.2299	71.8578	67.3598	65.6721	69.1757	64.4311	65.5454	62.3608	67.2549	55.7127	54.8	61.3547	59.6538	62.9729	52.4916	62.9321	54.0111	60.5891	53.3453	69.1928	59.2393	61.9163	58.4043	50.1884	63.8982	55.0503	56.8063	54.8	71.1406	61.9921	70.7434	66.3191	67.5296	60.951	67.3972	60.7931	66.1258	70.6263	59.7939	65.002	65.2922	59.6573
	54.9	116.015	108.633	115.322	99.1067	93.4089	81.557	80.1418	71.8687	67.368	65.5383	68.8742	63.6644	65.7032	62.0252	67.0534	55.666	54.9	60.9868	59.4341	63.4831	52.3734	63.1003	54.1323	60.8547	53.5086	69.1437	59.3362	61.9318	57.9257	50.393	63.9773	54.9073	56.841	54.9	70.9476	61.926	70.3623	66.0542	67.5693	60.6647	67.2798	60.5111	66.5732	70.6443	60.1856	65.1892	65.0761	59.8468
	55	116.238	109.208	115.79	99.1543	93.6322	81.9168	80.0443	72.0959	67.3273	66.1437	68.4428	62.8873	65.63	61.4611	66.7157	55.6346	55	60.8757	60.028	63.4138	52.3673	63.9088	53.6752	60.709	53.3609	69.1678	59.3212	62.0577	57.8579	50.4697	64.1176	54.6847	57.044	55	70.4353	61.9229	70.2237	65.5376	67.9036	60.0869	66.5901	60.4857	67.1169	70.6693	60.7979	65.1168	64.745	59.624
	55.1	116.068	109.874	116.2	99.2973	93.8992	82.77	80.1766	72.8991	67.3268	66.4561	67.9397	62.4251	65.3543	60.8736	66.3322	55.5628	55.1	61.2574	61.2253	62.7437	52.534	64.2694	53.3197	60.3118	53.5402	69.8713	59.4162	61.9739	58.0487	50.1039	64.0844	54.3884	57.1946	55.1	69.9612	61.9956	70.4471	65.3928	67.7573	59.8011	65.7738	60.3437	67.5278	70.8546	61.7557	64.9524	64.29	59.6336
	55.2	115.959	110.199	116.345	99.1366	94.1664	83.56	80.2917	73.3118	67.1372	66.785	67.9407	62.5826	65.0994	60.7139	66.3	55.1672	55.2	61.747	61.9481	61.8114	52.8271	64.8811	53.1023	60.2122	53.6431	70.5421	59.7279	62.0343	58.3599	49.7334	63.9293	54.0698	57.5573	55.2	70.01	62.1383	71.2048	65.6577	67.4392	59.9737	65.2247	60.3418	67.6828	70.7861	61.9501	64.7488	64.3041	59.7497
	55.3	115.757	110.015	115.846	99.4041	94.3584	83.4356	80.2247	73.1433	67.0889	66.8423	68.0963	63.1036	64.8766	60.9518	66.4162	54.7482	55.3	62.1391	62.0154	61.2971	53.0206	65.4234	52.7874	60.7616	53.5028	70.8401	60.0014	61.4657	58.4903	49.2576	63.6426	54.3476	57.7207	55.3	70.4739	62.0939	71.7094	66.2907	66.6936	60.4526	65.2838	60.103	67.2698	70.5529	61.796	64.5032	64.2468	60.0422
	55.4	115.972	110.053	115.768	99.1988	94.4127	82.5034	80.3583	72.4569	67.0768	66.9542	68.3387	63.4513	65.1456	61.9241	66.6237	54.6331	55.4	62.2217	61.4757	61.4664	53.2233	66.0316	52.4884	61.2426	53.1133	70.2404	60.2094	61.1189	58.5339	49.12	63.8089	54.662	57.9433	55.4	71.17	62.0619	72.0143	66.6897	66.1943	60.6943	65.689	60.207	66.6233	69.8213	61.1136	64.3563	63.8618	60.1319
	55.5	116.38	110.426	115.931	99.0296	94.3146	80.8729	80.3274	72.0292	67.3471	66.8939	68.4199	63.5771	65.8051	62.9213	66.8988	54.6771	55.5	62.1639	61.1933	61.9713	52.8371	65.9819	52.3352	61.171	52.7372	69.6907	60.2543	60.849	58.769	48.9552	64.1922	55.0521	58.0632	55.5	70.987	61.9829	71.5992	66.8958	65.8807	60.3807	65.9909	59.9094	66.0373	69.4393	60.7172	64.1987	63.3824	60.1823
	55.6	117.205	110.831	116.623	98.8443	93.9582	80.2128	80.2971	72.1549	67.7499	66.6413	68.5007	63.7183	66.5263	63.2464	67.474	54.8558	55.6	62.2592	61.3042	62.1521	52.2384	65.2043	52.754	60.8668	52.8061	69.1347	60.374	60.8944	58.601	48.8128	64.9082	54.8473	58.3502	55.6	70.235	61.9454	71.1206	66.8229	66.0981	59.912	66.043	59.5977	65.8367	69.3764	60.4477	64.2904	63.1866	59.8442
	55.7	117.432	110.963	116.911	98.9657	93.7603	80.2361	79.9854	72.4941	68.2744	66.4227	68.6059	64.1017	66.6996	62.6828	67.9074	54.7591	55.7	62.2304	61.585	61.8344	51.6999	64.2648	53.1528	60.5757	52.9766	68.9564	60.0313	61.2474	58.1741	48.5616	65.1807	54.5497	58.0738	55.7	69.5283	61.8242	70.6204	66.4684	66.2058	59.6213	66.0251	59.3347	65.9336	69.8656	60.2727	64.221	63.3807	59.8693
	55.8	117.514	110.944	117.193	99.1123	93.9239	80.8987	79.9032	72.7867	68.7973	66.0022	68.469	64.4064	66.2243	61.8194	67.9946	54.7251	55.8	62.1608	61.7007	61.5668	52.0242	63.6003	53.6563	60.5781	53.5012	68.4637	59.6629	61.5727	57.3766	48.9774	65.0898	54.3334	57.7563	55.8	69.5962	61.7623	70.592	66.1284	65.9754	60.0207	66.2036	59.6783	66.505	70.2304	60.0676	64.5032	63.9822	59.7474
	55.9	117.44	110.906	117.031	98.9697	94.1619	81.2129	79.6741	72.8853	68.9482	65.9534	68.1707	64.5386	65.4763	61.3174	67.6649	54.7136	55.9	61.6122	61.2881	61.5026	52.6403	63.4403	53.4729	60.3302	53.7216	68.295	59.4471	61.8918	57.3657	49.6421	64.6119	54.4394	57.2644	55.9	70.3021	61.7242	70.7207	66.0402	65.6692	60.6449	66.555	60.2306	67.2641	70.2084	59.8566	64.6237	64.4628	59.9978
	56	118.202	110.649	117.062	98.6747	94.1279	81.2452	78.9113	73.4593	68.8952	66.1426	67.7446	64.2934	64.7963	61.1104	67.6202	54.9196	56	61.2528	60.8629	62.0644	52.9396	63.4354	53.1413	60.2851	53.7027	68.2663	59.7569	61.7373	57.6977	50.4106	64.653	54.7083	57.2974	56	70.6201	61.7954	70.4212	66.3347	65.7611	61.1681	66.6231	60.3953	67.9808	69.7446	60.015	64.8803	65.0791	59.882
	56.1	118.906	110.201	116.845	98.396	93.6691	80.9807	78.1941	74.0851	68.7034	66.9794	67.4912	64.1748	64.5786	61.3996	67.719	55.0987	56.1	60.9551	60.2551	62.424	52.6152	63.6997	52.5572	60.1136	53.4852	68.7317	59.8726	61.6883	58.1349	50.1384	64.6016	54.8488	57.2807	56.1	70.5457	61.9856	70.0679	66.6252	66.4554	61.2253	66.5004	60.3222	67.9654	69.7367	60.2807	64.9853	65.1568	59.6842
	56.2	118.826	109.563	116.842	98.1703	93.243	80.5014	78.1338	74.3926	68.5724	67.5378	67.7862	64.0401	65.032	61.6588	67.8058	55.0788	56.2	61.3159	60.1722	62.7773	52.486	64.0452	52.6011	59.975	53.1967	68.9054	59.712	61.7836	57.9688	49.6917	64.5358	54.8042	57.1123	56.2	70.2994	62.188	69.768	66.4056	67.1749	61.0803	66.0847	60.1213	67.6797	70.0746	60.4021	65.5063	65.0411	59.3101
	56.3	117.733	109.476	116.547	98.229	92.7856	79.9791	78.9977	74.0548	68.4434	67.576	68.0854	63.9053	65.8051	61.8151	68.0136	54.789	56.3	61.6557	60.2683	62.5694	52.5789	64.5951	52.3419	59.9977	53.0016	68.9937	59.0059	62.0093	58.0932	49.3643	63.8044	54.5761	57.1518	56.3	70.2814	62.1123	70.1197	66.2556	67.506	60.7472	65.7063	59.858	67.4974	70.6093	60.2008	65.999	64.2606	59.0063
	56.4	116.33	109.948	116.339	98.0838	92.7468	79.7908	79.8887	73.4577	67.896	67.1876	68.3968	63.4124	66.0689	61.671	68.2618	54.8362	56.4	62.0451	60.7853	62.346	53.1098	65.0202	51.9501	60.2946	52.4812	68.8031	58.4963	61.8597	58.3542	49.539	63.3791	54.5204	57.0286	56.4	70.3617	61.7149	70.4878	65.9219	67.634	60.4359	65.3997	59.4754	67.6508	70.2272	59.6913	66.2316	63.3632	58.8167
	56.5	115.515	110.749	115.857	97.8732	92.9177	80.0382	80.1574	73.0083	67.2892	66.8163	67.937	62.8334	65.6802	61.5633	68.4286	55.0404	56.5	62.1647	60.8469	62.2952	53.416	64.9592	51.2634	60.4427	52.2746	68.8061	58.3346	61.3214	58.9254	49.5929	63.0971	54.8059	57.1431	56.5	70.526	61.4506	70.909	66.0909	67.4854	60.2332	65.3582	59.1108	67.8646	69.4711	59.416	65.7631	62.7539	58.7703
	56.6	115.07	111.349	115.626	97.7068	93.4434	80.4043	79.7746	72.9406	66.8382	66.8572	67.609	62.5551	64.9336	61.6003	68.101	55.3883	56.6	62.3654	60.6312	62.574	53.6733	64.8121	51.277	59.9158	52.0376	69.0469	58.8099	60.5794	59.0298	49.4562	63.5886	55.2903	56.785	56.6	70.9443	61.5602	71.0768	66.0132	67.4608	60.4254	65.7126	59.1768	68.0026	68.8162	59.3759	65.1098	62.9253	58.7818
	56.7	114.976	111.214	115.302	98.0356	93.6658	80.4708	79.1664	73.0294	66.9494	66.776	67.2129	62.6251	64.6458	61.1698	67.7736	55.0009	56.7	62.5126	60.2268	63.1511	53.2741	64.445	52.0737	58.8947	52.23	69.2868	59.4114	60.151	59.1347	49.2528	64.317	55.1883	56.9026	56.7	71.4253	62.0158	71.2091	66.1513	67.263	60.6957	66.032	59.3527	67.9887	69.029	59.7277	64.5932	63.5483	58.8581
	56.8	115.512	111.008	115.184	98.4529	93.653	80.4244	78.9493	73.1176	67.4346	66.8197	67.3391	62.6567	64.4969	60.9027	67.7158	54.449	56.8	62.4089	60.0864	63.348	52.6514	64.8604	52.9777	58.2314	52.2557	69.5363	59.8276	60.187	58.9193	49.3906	65.1177	54.7791	57.3171	56.8	71.5468	62.3667	71.0379	66.0771	67.1366	60.9276	66.4799	59.2759	67.6862	69.3684	59.9273	64.3863	63.9742	58.9429
	56.9	116.475	110.913	115.241	98.302	93.4307	80.5644	79.1581	72.9337	67.6088	66.747	67.4799	62.4299	64.6214	60.8336	67.6758	53.8668	56.9	61.9856	60.1023	63.374	52.2537	65.0511	53.5906	58.0873	52.959	69.5224	60.163	60.5609	58.607	49.8031	65.1512	54.4256	57.9104	56.9	71.2682	62.6896	70.713	66.171	66.9207	61.0799	66.55	59.0487	66.8581	69.6723	59.8704	64.5892	64.1842	59.4271
	57	117.173	111.242	115.922	97.4234	93.5538	81.0627	79.3609	72.7322	67.722	66.7692	67.5653	62.2651	64.6526	61.6763	67.2168	53.8898	57	61.5349	59.9769	63.131	52.3457	65.3397	53.3129	58.6791	53.5449	69.6913	60.2313	60.9311	58.0333	50.5666	64.68	54.9684	58.0517	57	70.7286	62.9142	70.0914	66.1814	66.5981	61.2148	66.6209	58.8369	66.0001	69.3591	59.7093	65.0322	64.1251	60.0716
	57.1	116.703	111.269	116.736	96.3632	93.949	81.4327	79.3019	72.5213	67.5931	66.449	67.2362	62.505	64.8781	62.408	66.4537	54.3722	57.1	61.2214	59.6383	63.2813	52.8316	64.9971	53.02	59.3534	54.1814	70.0851	60.1624	61.0229	57.6162	51.1606	63.9599	55.7196	57.8604	57.1	70.2712	62.9646	69.9317	66.2341	66.5734	61.2923	66.1011	59.1202	65.3792	69.552	59.7848	65.6313	64.3061	60.2037
	57.2	115.826	110.958	117.058	95.5148	94.5033	81.3364	79.1827	72.3541	67.7886	66.0096	66.9013	62.9389	65.0531	63.0271	65.6526	55.2477	57.2	61.4821	59.6168	62.9238	52.9491	64.6416	52.778	59.821	53.8552	70.3516	59.6769	61.0813	57.6254	51.2329	63.3544	56.3703	57.8987	57.2	70.0053	62.6207	70.046	66.3311	66.9549	61.4102	65.6572	59.4441	65.4081	69.9858	60.1087	65.7209	64.4698	59.4906
	57.3	115.277	110.53	116.517	95.5133	94.8914	80.6748	79.1361	72.2293	67.9118	65.7994	66.8266	63.1514	65.1647	62.8793	65.3632	55.795	57.3	62.2403	59.8172	62.2481	52.7139	64.5157	53.207	59.9331	53.4166	70.3968	59.5047	61.0741	57.9404	50.7963	62.844	56.3249	58.27	57.3	70.2708	61.9836	70.404	66.7763	67.3941	61.6913	65.301	59.5379	65.8773	70.6879	60.3143	65.3242	65.0349	58.4974
	57.4	115.145	110.299	115.705	96.0482	95.1287	79.7351	79.076	72.2678	67.8404	65.9183	67.2753	62.8681	65.3629	62.2776	65.4413	55.8936	57.4	63.2356	60.2334	61.5223	52.2509	64.6961	53.8203	60.0176	52.9693	70.0288	59.7046	61.3389	58.2439	50.3092	62.5417	55.9938	58.7621	57.4	70.644	61.5109	70.2864	67.4923	67.5314	62.0077	65.4724	59.4791	66.4104	71.0254	60.4088	64.8644	65.2846	58.3562
	57.5	115.102	110.095	115.066	97.1021	94.9723	79.0726	78.8058	72.102	67.7111	66.2843	67.7406	62.6598	65.5599	61.5012	65.7706	55.646	57.5	63.7638	60.017	61.9147	52.0849	65.0388	54.0879	60.277	52.9957	69.9046	60.2728	61.587	58.2678	50.0414	62.6599	55.331	58.8659	57.5	71.0347	61.4991	69.9993	68.1323	67.3098	61.9734	65.7348	59.5573	66.6273	70.7937	60.3433	64.9691	65.3046	59.1246
	57.6	114.707	110.127	115.035	97.6989	94.2179	79.0919	78.7378	71.782	67.7474	66.6372	67.9288	62.792	66.0019	61.0544	66.0049	55.7462	57.6	63.574	59.6386	63.0739	52.6161	65.1468	53.821	60.4529	53.1293	70.0676	60.4503	61.9678	58.0328	49.9468	62.8899	54.9046	58.7947	57.6	71.2806	61.5974	69.5508	68.2876	67.2668	61.4359	65.9299	59.9484	66.3356	70.6567	60.2667	65.5357	65.067	60.2434
	57.7	114.569	110.062	115.219	97.5837	93.2762	79.5888	78.9739	71.53	68.0057	67.2122	67.7397	63.2957	65.9956	60.968	66.1241	56.0793	57.7	63.0431	59.0978	63.9792	52.7	65.1906	53.0576	60.573	53.3021	70.1011	60.219	62.3088	58.0102	49.8054	63.1451	54.6299	58.5881	57.7	71.5902	61.6971	69.3766	68.0067	67.2214	60.7666	65.8471	60.4007	65.8744	70.2483	60.2131	65.8539	64.6506	60.7166
	57.8	114.72	110.128	115.76	96.8264	92.726	80.1826	79.4696	71.8928	68.1849	67.4939	67.6386	63.5358	65.8829	61.0779	66.2159	56.1567	57.8	62.5098	59.0621	64.1844	52.7721	65.2486	52.6917	60.6612	53.4091	70.0034	59.95	62.4149	58.0146	49.5601	63.3084	54.791	58.4651	57.8	71.8903	61.565	69.2726	67.1622	67.2698	60.4788	65.4596	60.2856	65.7838	70.1871	60.0672	65.7654	64.4553	60.264
	57.9	115.391	109.653	115.989	96.1388	92.7964	80.2142	79.7509	72.5701	67.7406	67.6492	67.9993	63.4672	65.4534	61.272	66.4729	55.8688	57.9	61.9189	59.1512	63.6131	52.4213	65.1237	52.8537	60.7606	53.5228	69.5186	59.9187	62.4704	58.203	49.1333	63.4539	55.0093	58.1711	57.9	71.7376	61.4108	69.587	66.2278	67.49	60.7017	65.0897	60.0599	66.2111	70.0658	60.2753	65.3674	63.9509	59.5473
	58	115.744	109.284	116.116	95.8418	93.1464	79.9863	79.7531	73.0043	67.0911	67.3721	68.5916	63.1466	65.2092	61.7781	66.7203	55.063	58	61.43	59.7334	63.2004	52.8899	64.6271	53.2791	60.731	53.4862	69.3583	59.9388	62.2797	58.0684	48.7429	63.3978	55.3427	57.5767	58	71.4713	61.166	69.868	65.6432	67.7642	60.9646	64.8162	59.445	66.8958	70.5032	60.5411	64.9258	64.1931	59.1679
	58.1	115.826	108.676	115.997	95.8219	93.4114	79.8763	79.6693	72.916	66.6167	67.3336	68.8477	63.0216	64.9941	62.1706	67.0043	54.5098	58.1	60.9778	60.1739	62.802	53.3708	64.1623	53.4241	60.5233	53.2898	69.3339	59.5862	62.2349	58.0399	48.8473	63.4583	55.2922	57.1297	58.1	71.018	61.0384	70.1657	65.9629	67.6874	60.7546	65.295	59.1242	67.2732	71.0177	61.0176	64.521	64.3393	59.3207
	58.2	115.521	108.433	115.826	95.9008	93.9432	80.0657	79.5892	72.567	66.9527	66.975	68.7164	62.8481	64.9018	62.7524	66.844	54.3119	58.2	60.883	60.7143	63.0663	54.0558	64.009	52.8417	60.2218	53.3186	69.6344	59.1583	61.9841	58.0752	49.3734	63.5242	55.3036	56.959	58.2	70.8559	61.3442	70.3654	66.6283	67.2472	60.232	65.8886	58.8287	67.3896	71.4092	61.1592	64.1731	64.9809	59.5289
	58.3	115.204	108.307	115.799	96.3327	94.4516	80.5527	79.8061	72.2373	67.779	66.3792	68.3974	62.4851	64.9557	63.0952	66.6757	54.8033	58.3	61.0591	60.9717	63.0748	54.4624	64.4173	52.1983	60.0139	53.5789	69.7777	59.0467	61.9967	58.4054	50.0516	63.746	54.974	57.2691	58.3	70.6232	61.8871	70.3409	66.7947	66.9018	59.9502	66.4981	58.9253	67.3046	71.2614	61.0418	63.9624	65.1758	59.5449
	58.4	114.705	108.907	115.615	96.9064	94.8037	80.4183	79.8351	71.9927	68.2084	65.5371	68.1144	62.1692	65.0749	63.4231	66.567	55.4244	58.4	61.5578	61.2403	62.9039	54.7443	64.6514	51.9188	59.9981	54.2163	70.1107	59.1313	62.1743	58.7251	50.0687	63.5713	54.9292	57.4918	58.4	70.6642	62.39	70.2113	66.3933	67.1137	60.1957	66.2434	59.3547	67.3274	70.7631	60.721	63.506	65.0909	59.4586
	58.5	114.182	109.591	115.493	97.3747	94.4419	80.509	79.9877	71.8931	68.1134	65.3461	67.8456	62.1838	65.0776	63.2824	67.1709	55.696	58.5	62.22	61.1841	62.0706	54.6158	64.9009	52.2496	60.2337	54.2197	70.1082	59.1817	62.5411	58.8216	49.7712	63.4684	54.5786	57.9031	58.5	70.5121	62.6036	69.8502	65.6653	67.5674	60.6456	65.7036	59.7242	67.1717	70.3597	60.3421	63.0568	64.3321	59.0947
	58.6	114.285	110.26	115.061	97.5618	93.7157	80.2252	79.907	71.9646	67.23	65.5992	67.7818	62.9502	64.9806	63.0358	67.5832	55.8313	58.6	62.4389	60.9763	61.4024	54.0498	64.6694	52.824	60.7773	53.7942	70.1799	58.8226	62.6731	58.7458	49.4806	63.2141	54.691	58.3876	58.6	70.4786	62.5003	69.4776	65.257	68.1131	60.8427	65.0818	59.8204	67.1849	70.1708	59.8677	63.0196	63.5846	58.8567
	58.7	114.391	110.215	114.611	97.6767	93.1684	80.4563	80.023	72.0672	66.7128	66.2102	67.9236	63.5692	64.9381	62.5917	67.6874	55.8409	58.7	62.26	60.6712	61.1291	53.2742	64.4741	53.1457	61.3728	53.036	69.676	58.451	62.5018	58.5362	49.5871	63.071	54.7304	58.9487	58.7	70.162	62.2668	69.1934	64.9897	68.4244	60.6436	64.8766	59.528	67.1548	70.4301	59.8819	63.6167	63.432	58.6764
	58.8	114.655	110.16	114.01	97.8299	93.1447	80.2459	80.2934	71.9576	66.2613	66.4979	68.0573	63.7941	64.9947	62.2578	67.3096	56.2036	58.8	61.729	60.8163	61.2118	52.3311	64.0354	53.2034	61.6513	52.7219	69.6467	58.3909	62.2002	58.6053	49.6469	63.0978	54.8722	59.1909	58.8	69.8528	62.0744	68.9192	65.3293	68.4037	60.2543	64.942	59.3002	67.1564	70.7303	60.2101	64.5437	64.1189	58.8329
	58.9	114.185	109.956	113.895	97.8982	93.2438	80.5346	80.529	71.6579	66.5308	66.9062	67.8503	63.2158	64.8858	61.6011	67.0099	56.5848	58.9	61.6373	61.0621	61.3801	51.9616	64.0183	52.9168	60.9761	52.726	69.7438	58.908	61.9093	58.9517	49.1571	63.4738	54.4017	58.9241	58.9	69.3582	62.2163	69.0518	65.3422	68.2802	59.9281	65.5057	59.4051	66.8836	71.0708	61.1243	65.2103	64.778	58.9232
	59	113.93	110.133	114.432	97.8922	93.3742	80.7628	80.7459	71.5623	66.5621	66.8198	67.8062	62.531	64.6479	61.3122	67.0169	57.0293	59	61.548	61.4748	61.2901	51.8846	64.0601	52.6827	59.9513	52.7181	70.193	59.741	61.7457	59.2649	48.627	63.8898	53.8198	58.6398	59	68.9189	62.6668	69.4266	65.2908	68.1454	59.7136	66.0147	59.8117	66.3906	70.8852	61.6057	65.5961	65.0743	59.066
	59.1	113.531	110.287	115.399	98.1064	93.2136	80.9107	80.1747	71.6788	66.8133	66.7078	67.9092	62.3786	64.5571	61.305	66.9189	56.9428	59.1	61.6477	61.5012	61.2498	52.5328	64.4311	52.5101	59.0534	52.6511	70.0038	60.2337	61.7306	59.4759	48.4952	63.814	53.4738	58.4681	59.1	68.7681	62.9698	70.1034	65.0052	68.2596	59.6374	66.1424	60.0034	66.0349	70.3999	61.9911	65.4773	65.0187	59.0492
	59.2	113.66	110.406	115.816	98.3284	93.0553	80.4409	79.5497	71.851	66.8224	66.3768	68.4748	63.0488	64.8444	62.0244	67.0864	56.3708	59.2	61.4724	61.1958	61.3288	52.9772	64.7637	52.5863	58.6751	52.6304	69.5404	60.1734	61.6534	59.1201	49.2223	63.5547	53.8229	58.7376	59.2	68.8239	62.9678	70.6013	65.4199	68.1587	59.569	65.547	59.8466	65.8867	69.9743	61.6007	65.2912	65.2246	59.1707
	59.3	113.74	110.083	115.165	98.4992	92.9897	79.9478	78.665	71.9782	67.1748	66.4341	68.7444	64.0076	65.1683	62.5229	67.1149	55.621	59.3	61.7029	60.8323	61.7513	53.4163	64.975	52.6101	58.74	52.7344	68.9989	59.8436	61.4772	58.8423	49.9997	63.6967	54.5351	58.6507	59.3	69.0724	62.7241	70.3282	66.2079	67.8104	59.7334	64.9192	59.424	66.1112	70.0327	61.2431	65.1642	65.5679	59.2672
	59.4	114.37	109.517	114.249	98.2601	93.093	79.8224	78.4622	72.1682	67.3572	66.458	68.8802	64.427	65.1284	62.5724	67.1861	55.3379	59.4	62.0172	60.5269	62.1849	53.2054	64.9256	52.6911	58.9471	52.7639	69.0642	59.8182	61.0488	58.3028	50.244	64.4101	55.0446	58.2167	59.4	69.3319	62.3493	69.676	66.7018	67.3549	59.8768	64.8826	59.0364	66.4298	70.6622	60.46	65.2879	65.8533	59.3893
	59.5	115.067	109.048	113.613	98.1336	93.4942	80.023	78.4558	72.5168	67.4884	66.6331	68.6254	64.161	64.764	62.058	67.0202	55.4222	59.5	62.5493	60.624	62.4087	52.8692	64.8468	52.7526	59.4883	52.4274	69.3234	60.1406	60.8203	58.1306	49.9448	65.1708	55.0518	57.3806	59.5	69.6321	62.3634	68.9782	66.6839	67.1629	60.2377	64.9169	59.2347	66.7248	70.995	60.4454	65.3157	65.6268	59.3903
	59.6	116.13	109.027	114.048	97.9189	93.4834	80.2422	79.019	72.6487	67.1861	67.0191	68.5362	63.7424	64.4744	61.5066	66.9611	55.6831	59.6	62.7536	60.6877	62.3439	52.6468	65.0388	52.8454	60.0803	52.206	69.4606	60.5042	60.7099	57.8642	49.7407	65.5896	54.6101	57.2838	59.6	69.937	62.3831	69.2911	66.3371	67.3713	60.244	65.0381	59.6861	66.9818	70.8966	60.3157	65.1372	65.1683	59.2431
	59.7	116.512	109.078	114.476	97.753	93.7311	80.573	79.44	72.3176	67.1381	67.5466	68.2853	63.624	64.2481	61.1074	66.8407	55.5151	59.7	62.624	60.9781	62.321	52.9624	65.2442	52.8283	60.8041	52.4828	69.3072	60.5471	60.9924	57.9201	50.09	65.6571	54.3217	57.7523	59.7	70.2179	62.9522	69.8584	66.3609	67.3247	59.9787	64.8154	60.5886	67.2218	70.1266	60.7157	64.8674	64.662	59.154
	59.8	116.383	109.017	115.238	97.2222	93.5983	80.8331	79.6164	71.751	67.4156	67.8051	68.3297	63.537	64.3152	61.0846	66.8326	55.4483	59.8	62.0668	61.3644	62.6484	53.4609	65.1838	52.51	61.2481	53.3343	69.255	60.1079	61.3186	58.0409	50.4223	65.5507	54.357	58.654	59.8	70.5861	63.0714	70.5327	66.5916	66.9332	59.4222	64.9977	61.0216	67.6161	69.3914	60.6944	64.5822	64.5296	59.1144
	59.9	115.867	108.821	115.294	96.5541	93.4869	81.0193	79.1644	71.3233	68.1081	67.6749	68.2821	63.405	64.4296	61.6713	66.6729	55.2168	59.9	61.5382	61.4442	63.1867	53.54	65.0414	52.4918	61.1547	54.0218	69.3806	59.6042	61.7502	58.4823	50.3407	65.4038	54.4091	58.9569	59.9	70.7094	63.1751	70.5178	66.9049	66.4058	59.1277	65.1137	61.1079	67.947	69.2366	60.8434	64.2207	64.5944	59.1758
	60	115.624	108.944	115.637	96.0763	92.7076	80.9244	78.475	71.2578	68.4007	67.2732	68.6463	62.7898	64.9249	62.3617	66.5579	55.3987	60	61.4654	61.2191	63.8404	52.9516	65.0834	52.7664	60.8	53.8772	69.4187	59.2552	62.12	58.8094	50.0009	65.385	54.4586	58.7733	60	70.623	62.679	70.0736	66.5778	66.5174	59.5809	65.1909	60.699	68.1197	69.6198	60.7272	64.0867	64.8834	59.0399
	60.1	115.789	109.42	115.57	95.6477	92.2499	81.1059	77.9559	71.3193	68.2612	67.3261	68.8981	62.3548	65.2026	62.7666	66.2902	55.4473	60.1	61.712	60.8591	64.1348	52.0458	65.3873	53.495	60.5919	53.3322	69.1274	59.2703	62.3564	59.0521	49.9704	65.4294	54.0864	58.3253	60.1	70.3303	62.2361	69.3576	66.1669	67.0611	60.2528	65.2619	60.0168	68.0771	70.3711	60.3384	64.0686	65.2842	58.6547
	60.2	115.905	109.843	115.733	95.7519	91.9794	81.2303	77.8157	71.4689	67.7296	67.5269	69.0228	61.7857	65.3708	62.3768	66.0821	55.4404	60.2	62.2856	60.7258	64.0956	51.372	65.6193	53.661	60.6501	52.6114	68.698	59.2398	62.491	59.1334	50.2998	65.2693	54.3477	58.1041	60.2	70.3611	61.8118	68.9518	65.8294	67.4689	60.8349	65.4243	59.5603	67.8979	70.7581	59.6768	64.5646	65.6579	58.1904
	60.3	115.753	110.18	115.652	95.7324	91.9157	81.5474	78.2953	71.8569	67.0127	67.8722	68.8411	61.7867	65.6172	62.1719	66.3277	55.2636	60.3	62.7612	60.6464	63.3002	51.4104	65.8692	53.457	60.6574	52.2948	68.4093	58.9844	62.2758	58.8357	50.3947	64.8757	54.6368	58.2428	60.3	70.4576	61.5038	69.0353	66.0856	67.398	60.6318	65.7731	59.4102	67.6737	70.5544	59.1178	64.9098	65.5161	58.1711
	60.4	115.346	110.28	115.696	96.0493	91.8154	81.3091	78.8932	72.3991	66.5392	67.4603	68.3143	61.9006	65.9374	62.3196	66.939	55.1814	60.4	63.1323	60.3177	62.1648	51.7318	65.953	52.9992	60.2307	51.944	68.4703	58.72	61.9724	58.3828	50.2564	64.5572	55.6387	58.5444	60.4	70.5651	61.3239	69.2921	66.4584	67.294	60.2114	65.8964	59.5449	67.3163	70.1414	59.0176	65.319	64.8837	58.4097
	60.5	115.077	110.395	115.608	95.9381	91.9262	81.189	79.477	72.7669	66.6118	66.9167	67.8007	62.3359	66.1722	62.8383	67.637	55.5491	60.5	63.0714	60.0926	61.1138	52.1269	65.8941	52.7159	60.0979	51.9254	68.6447	58.7917	61.7883	57.62	49.9208	64.5388	56.2472	58.7509	60.5	70.2587	60.9687	69.3549	66.6299	67.5779	60.0027	65.9242	59.3757	66.9077	69.679	59.3896	65.3743	64.0826	58.7891
	60.6	115.091	110.15	115.263	95.7421	92.4254	80.937	79.7606	73.079	67.4057	66.662	67.4554	62.6796	66.0171	62.9668	68.0394	55.9963	60.6	62.4942	60.1383	60.9242	52.2272	65.5333	52.6906	60.1713	52.0262	68.9443	59.2071	61.8649	57.2197	49.8343	64.5867	56.666	58.7363	60.6	69.788	61.1086	69.3097	66.6344	67.9013	60.0128	65.7006	59.098	66.6023	69.8976	59.6578	65.5346	63.795	58.9842
	60.7	115.383	109.707	114.209	95.2429	92.7429	80.975	80.045	73.0063	68.1399	67.1366	67.5838	62.6051	66.0224	62.5202	68.1443	55.8951	60.7	62.1988	60.6301	61.2401	52.5543	65.0538	52.7471	60.7302	52.5201	69.0046	59.7323	62.0117	56.9594	49.943	64.6713	56.4426	58.5027	60.7	69.3162	61.4267	69.3493	66.1116	67.9838	60.1296	65.7112	59.0423	66.4936	70.3374	59.7929	65.8246	64.0696	59.2023
	60.8	115.7	109.194	113.258	94.9779	92.5949	80.9504	80.2588	72.8022	68.3633	67.5499	68.0121	62.195	66.2002	61.9429	68.1581	55.5241	60.8	62.0672	61.1391	61.7951	52.8476	64.7113	52.9718	60.7634	52.8838	69.2464	59.915	61.9974	56.9416	50.4423	64.7752	55.9937	58.3244	60.8	69.271	62.2071	69.7722	65.5233	67.8773	59.9892	65.8546	59.6351	66.5189	70.9182	59.6003	66.0484	64.612	59.5121
	60.9	115.991	108.855	112.691	94.8816	92.1331	80.5511	79.9493	72.0041	68.2217	67.4093	68.4469	61.8333	66.2271	61.8393	67.8574	55.1904	60.9	62.3389	61.3612	61.757	52.7493	64.4438	53.2052	60.5407	52.9212	69.0926	59.8988	62.0214	57.1009	51.038	65.1072	55.3288	58.2379	60.9	69.4661	62.533	70.2878	64.9481	68.1993	59.9984	66.294	60.4308	66.4797	71.268	59.6297	65.9506	64.6488	59.7129
	61	115.568	108.732	112.802	95.0318	91.8064	80.2529	79.3046	71.4742	67.7729	66.7167	68.6618	62.0528	65.7917	62.0702	67.2918	55.5389	61	62.1817	61.19	61.5063	52.4498	64.1194	53.5752	60.1627	52.8304	68.9957	59.7521	62.0322	57.3778	51.4326	64.9486	54.719	58.3396	61	69.5861	62.4737	70.7414	65.201	68.394	60.105	66.3863	60.9803	66.5039	71.2476	59.9368	65.6174	63.971	59.859
	61.1	114.895	108.765	113.201	95.0147	92.1442	79.8487	78.5101	71.4416	67.4376	66.0741	68.6816	62.9191	65.1143	62.0636	66.7594	55.9216	61.1	61.8384	61.0922	61.0072	52.2063	63.6108	53.752	60.3818	52.9794	68.5601	59.7037	61.9193	57.761	51.3637	64.3091	54.2061	58.2448	61.1	69.271	61.9217	70.4908	65.6453	68.2927	60.2779	66.4284	60.857	66.5304	71.2613	60.4171	65.3329	63.0798	59.8552
	61.2	114.221	109.28	113.649	94.9523	92.688	79.769	78.3641	72.0427	67.1018	65.8854	68.4629	63.8444	64.4777	61.5198	66.6017	56.1013	61.2	61.5201	61.0863	60.8557	52.4824	63.1403	53.4639	60.8021	53.4142	68.6142	59.9911	61.7478	58.1067	51.0472	63.0904	54.4001	58.0018	61.2	68.95	61.4407	69.9852	66.0041	67.6442	60.7187	66.2108	60.1968	66.7683	71.2071	60.5356	65.345	62.7517	60.026
	61.3	114.172	109.825	114.246	94.8792	93.0123	79.585	78.5837	72.8462	67.0538	65.9406	68.2499	64.4098	64.0747	60.9853	66.9799	56.0194	61.3	61.5981	60.9993	60.9419	52.6562	63.1808	52.6516	61.415	53.3892	68.7836	60.1112	61.7456	58.3582	50.8047	62.2679	54.8092	57.7049	61.3	68.751	61.3339	69.4001	65.8789	67.3021	61.1841	66.3233	59.6593	67.0714	71.2521	60.3087	65.277	63.1459	60.1486
	61.4	114.198	110.404	114.239	95.2027	92.7231	79.6992	79.0158	73.1887	67.1383	66.1237	68.0162	64.0719	64.0894	61.0173	67.1019	55.7028	61.4	62.1307	60.689	61.2559	52.4566	63.5626	52.0913	61.7114	53.0018	69.0996	60.1868	61.9232	58.6332	50.5201	61.9263	55.3373	57.6906	61.4	69.1809	61.5623	69.3917	65.8761	67.1457	61.4472	66.1504	59.4908	67.3386	70.7973	59.8798	64.9852	63.6093	60.1888
	61.5	114.316	110.173	113.628	95.7133	91.9789	79.7372	79.2984	73.1284	67.2751	65.9741	67.7562	63.3298	64.6194	61.2068	67.0129	55.44	61.5	62.5159	60.3413	61.6321	52.2823	64.09	51.9953	61.9703	52.4934	69.2369	59.8994	62.0544	58.8429	50.1266	62.3634	55.273	57.9332	61.5	69.6393	61.9089	69.4617	66.1044	67.1176	60.9567	65.9571	59.83	67.275	70.3832	59.655	64.592	63.9478	60.1138
	61.6	114.441	109.582	112.753	96.1803	91.345	79.8952	79.3313	72.5687	67.2983	65.9828	67.4534	62.6908	65.3117	61.3868	66.6797	55.0959	61.6	62.5057	60.4427	61.8784	52.376	64.1804	52.45	61.8052	52.3318	69.2087	59.9259	62.1481	59.0099	49.4054	63.1232	55.0809	58.1764	61.6	70.2332	61.9742	69.6766	66.5772	66.9081	60.193	65.4896	60.0963	66.9874	70.1266	59.1913	64.196	64.2141	60.1297
	61.7	114.839	108.795	112.28	96.2633	90.9286	79.7182	79.2968	72.0656	66.8542	65.9436	66.9817	62.999	65.6872	61.2936	66.7444	54.9988	61.7	62.1182	60.6941	61.9812	52.8861	64.1991	52.901	61.3834	52.2496	69.1657	60.0319	62.3048	58.9296	48.8997	63.9324	54.8658	58.3058	61.7	70.474	62.0329	69.5116	66.7401	66.6722	59.8943	65.2769	60.4517	66.5477	70.3709	59.011	64.5164	64.4638	60.4199
	61.8	114.602	108.538	112.498	96.3303	90.995	79.9381	78.9838	71.6374	66.3518	66.2498	66.705	63.6917	65.8518	61.2713	66.9896	55.2309	61.8	61.7702	60.9821	62.0502	53.2092	63.88	53.0497	60.8984	52.301	69.0059	60.1049	62.2491	58.5927	48.8966	64.0784	54.7781	58.2746	61.8	70.6644	61.8167	69.4138	66.4381	66.5848	60.4721	65.2831	60.5909	66.2824	70.1811	59.234	64.9037	64.5066	60.5127
	61.9	114.083	108.726	113.376	96.4012	91.7001	79.9773	78.9089	71.581	66.1737	66.4173	66.7301	64.173	65.8122	61.4006	67.0612	55.7488	61.9	61.5918	61.0419	62.3613	52.9211	63.4882	52.8761	60.7766	52.311	68.866	59.9731	62.0908	58.1009	49.3129	63.6377	54.75	58.3146	61.9	70.4617	62.004	69.2299	65.5652	66.6637	61.1936	65.5756	60.6862	65.9794	69.9329	60.26	65.5279	64.2257	60.3338
	62	113.415	109.083	114.392	96.5979	92.3118	80.3477	78.954	71.7244	66.3948	66.3582	67.1903	63.8496	65.7616	61.4361	67.0328	56.0833	62	61.4878	60.8373	62.7913	52.5378	62.7503	52.4482	60.9531	52.2862	68.6048	59.8522	62.0134	57.9602	49.9884	62.8236	54.78	58.3031	62	70.1424	62.0892	69.3014	64.7334	66.879	61.4462	66.0016	60.3984	66.2438	69.7913	60.9727	65.6153	64.3827	59.7944
	62.1	113.444	109.395	115.155	96.346	92.9418	80.264	79.5238	72.0858	66.5022	66.266	67.8043	63.0589	65.5237	61.6334	66.8847	55.9148	62.1	61.4636	60.7294	63.2351	52.1058	62.5187	52.3409	61.1811	52.2187	68.4347	59.8056	62.1996	58.1953	50.4886	62.4714	54.8763	58.1992	62.1	69.8058	62.489	69.2383	64.3691	66.9582	61.0188	66.3809	60.1202	66.6522	70.4239	60.9854	65.4747	64.8101	59.3031
	62.2	113.787	109.475	114.769	96.2568	92.8096	80.387	79.7312	72.1224	66.3799	66.3649	68.1736	62.5354	65.5118	61.5709	67.1351	55.2572	62.2	61.6148	60.5488	63.3138	52.0867	63.043	52.329	61.1736	52.2494	68.4651	59.8488	62.2317	58.7739	50.9219	62.8917	55.0194	57.7644	62.2	69.7969	62.3936	69.3533	64.9687	66.9008	60.7633	66.3377	59.9944	67.2857	71.0362	60.4374	65.0283	65.179	59.1941
	62.3	114.096	109.426	114.207	95.692	92.8649	80.3084	79.5316	71.948	66.4529	67.0978	68.02	62.4259	65.713	61.7326	67.3292	54.7834	62.3	61.7434	60.6817	63.3807	52.0854	64.1871	52.5263	60.9356	52.6062	68.7956	59.8684	62.0123	59.1616	50.7546	63.9586	55.0129	57.085	62.3	69.698	62.289	69.483	65.9421	66.6412	60.7381	66.1534	60.2202	67.5708	71.4186	60.1341	64.779	65.0117	59.1824
	62.4	114.391	108.939	113.538	95.52	92.5457	80.4547	78.7977	71.5338	66.6531	67.7307	67.6207	62.5897	65.9692	61.7994	67.4971	54.5554	62.4	61.8966	60.48	63.1482	52.3663	65.0329	52.8828	60.6191	52.8499	69.211	59.9211	61.7117	59.2072	49.9732	64.8718	54.9497	56.536	62.4	69.6974	61.9809	69.733	66.9901	66.4327	61.1487	66.0149	60.6081	67.6609	71.3046	60.299	64.6818	64.71	59.2782
	62.5	114.602	108.138	113.654	95.2672	92.317	80.2748	78.0271	71.5142	67.0141	68.2087	67.1987	63.0236	65.9497	62.0039	67.2281	54.9466	62.5	61.8146	60.2849	62.9641	52.6233	65.5086	53.2549	60.6976	53.067	69.4576	59.8671	61.7634	59.0898	49.1088	64.9466	54.8087	56.287	62.5	69.7942	61.7041	69.6463	67.0934	66.0947	61.5346	66.0057	60.8068	67.5778	70.9244	60.3111	64.9877	64.5443	59.2134
	62.6	114.842	107.221	113.781	95.56	91.9142	80.029	77.6596	71.4543	67.2024	68.0779	67.3567	63.4443	65.7319	62.0461	66.8293	55.5929	62.6	61.6788	59.9124	62.3782	52.6479	65.2469	53.5408	60.919	52.8143	69.5413	59.8132	61.8649	58.7753	48.3478	64.5568	54.8022	56.8722	62.6	70.2508	61.1188	69.5532	66.9254	65.8672	62.0289	65.7852	60.6893	67.4933	70.1491	59.9731	65.3486	64.3446	59.1262
	62.7	114.884	106.897	114.255	95.8909	91.8337	79.7333	77.5598	71.429	67.4508	67.9321	67.5112	63.79	65.6662	61.966	66.4412	56.1827	62.7	61.53	59.9159	62.147	52.3609	64.9889	53.414	61.4041	52.658	69.3337	59.9318	62.1157	58.6638	48.4513	64.3792	54.8493	57.5677	62.7	70.6304	60.4194	69.3119	66.251	65.8983	62.0702	65.5088	60.268	67.3118	69.2743	59.0971	65.9997	64.0403	59.0717
	62.8	114.577	107.323	114.577	95.9864	92.0449	79.7134	78.0078	71.1678	67.2644	67.53	67.5691	63.6347	65.7646	62.0269	66.3894	56.3754	62.8	61.5712	60.1192	62.1029	52.0139	64.4169	53.3202	61.5274	52.3411	69.0717	60.3121	62.3768	58.438	48.5649	64.4514	54.8977	57.9844	62.8	70.6787	60.1354	69.1869	66.2867	66.5146	61.7517	65.6314	59.9083	67.2722	68.8101	58.6926	66.4853	63.9188	59.0496
	62.9	114.24	107.997	114.509	96.2218	92.6526	79.7314	78.4336	71.2939	66.8596	67.5067	67.0593	63.4077	65.7223	62.0301	66.6963	55.8764	62.9	61.802	60.5922	62.6776	52.2682	64.3154	53.3162	61.7378	52.3722	68.5867	60.7558	62.7561	58.3641	49.2068	64.387	54.9411	57.6154	62.9	70.4742	60.4171	69.0253	66.2917	67.1781	61.1124	66.1364	59.8711	66.9934	69.1929	58.9583	66.432	63.9908	59.4362
	63	113.918	108.484	113.946	96.0802	92.8703	79.3507	79.0462	71.7723	66.4842	67.5728	66.743	63.5329	65.2987	61.9343	67.2819	55.49	63	61.8796	60.9989	63.0523	52.7067	64.2487	53.2217	61.6061	52.2954	68.2938	60.7449	63.0164	58.1711	49.5953	63.9854	55.0054	57.0111	63	70.0357	61.0246	69.1466	66.5786	67.5852	60.8553	66.3886	60.0359	67.0059	69.6023	59.9517	65.9052	64.2227	59.7876
	63.1	114.22	108.768	113.437	95.9506	92.772	78.7746	79.1762	72.558	66.2366	67.7069	66.8314	63.7914	65.0178	61.5556	67.5752	54.8058	63.1	61.5751	61.0853	63.2862	53.3697	64.2102	53.112	61.1791	52.5868	68.2019	60.4416	63.0161	58.0799	50.1978	63.7934	55.0666	56.8214	63.1	69.8052	61.01	69.2959	66.2397	67.2097	60.8739	66.4789	60.2068	66.8299	69.7878	60.6397	64.9023	64.3792	60.1001
	63.2	114.836	109.239	113.316	95.5342	92.055	78.4292	78.9971	72.8971	66.1046	67.2419	67.4064	63.7322	64.977	61.2071	67.3503	54.5509	63.2	61.1804	60.9206	63.2147	53.6358	64.177	52.7048	60.6786	52.4234	68.5444	59.9031	62.7143	57.975	50.5886	63.7883	54.6059	57.1286	63.2	69.5356	60.591	69.1413	65.9823	66.5846	61.0959	66.2013	60.0726	66.9977	69.7622	60.8003	64.157	64.7421	59.9193
	63.3	115.188	109.558	113.193	95.3372	91.6887	78.5789	78.2408	72.6913	65.86	66.4446	67.9414	63.1961	65.1468	61.1934	66.8986	54.1932	63.3	60.936	60.4828	63.0894	53.6559	64.2196	52.5439	60.4509	52.3318	68.9353	59.7342	62.3781	57.9766	50.6344	64.0147	54.0854	57.5267	63.3	69.4261	60.0137	69.0377	65.7126	65.902	61.0731	66.1119	59.9146	67.0697	70.1538	60.5802	63.6119	64.8729	59.8892
	63.4	114.888	109.37	112.689	95.1616	91.5252	78.8019	77.5563	71.8887	65.9317	65.8786	68.102	62.678	65.1034	61.178	67.0686	54.479	63.4	61.1837	60.0779	63.0954	53.5196	64.6122	52.2759	60.5687	51.7169	69.1594	59.6348	61.8194	58.0087	50.2964	64.0484	53.7347	58.08	63.4	69.1234	59.9909	68.9102	65.7182	65.8196	60.7759	65.7652	59.8343	67.2324	70.5767	60.373	63.6584	64.9463	59.6051
	63.5	113.938	108.57	112.567	95.1311	91.7123	78.7027	77.1109	71.4134	66.2342	65.7676	68.1013	62.7537	65.2477	61.0226	67.5416	54.5726	63.5	61.6859	59.4348	62.9923	53.2067	64.9599	52.2867	60.5993	51.5573	69.1652	59.6679	61.41	58.1012	49.7689	63.9691	54.2239	58.1693	63.5	68.8466	60.3058	69.3388	65.9041	66.1859	60.2662	65.8093	59.7477	67.2643	70.4724	60.2237	64.1749	64.4207	59.4457
	63.6	113.564	107.879	112.895	95.2469	91.9612	78.5	77.0884	71.0686	66.4256	65.7568	68.2013	63.0507	65.6318	60.8228	67.7568	54.7547	63.6	62.2291	59.1538	62.7926	53.2332	65.1062	52.3423	60.3397	51.3898	69.2462	59.6271	60.808	58.1327	49.5518	63.895	54.9096	58.2653	63.6	68.7363	60.693	69.3584	66.1153	66.7683	59.7941	66.0184	59.5331	67.36	70.1037	60.0679	64.5338	64.0957	59.235
	63.7	113.484	107.596	113.105	95.7167	92.138	78.7312	77.24	70.7933	66.4158	65.7196	68.2482	63.1806	65.8217	60.7971	67.1529	54.9587	63.7	62.2818	59.3338	62.194	53.1819	64.6657	52.5982	60.2192	51.603	69.6642	59.5373	60.4408	58.1604	49.8628	64.277	55.7516	57.7578	63.7	68.9204	61.0733	69.6722	66.3959	66.9341	59.5759	66.5271	59.3379	67.4763	69.8956	59.9764	64.7821	63.5054	59.2704
	63.8	113.718	107.635	112.93	95.9389	92.5047	78.8842	77.4721	70.355	66.3027	65.86	68.1908	62.97	65.3928	61.2911	66.5249	55.4189	63.8	61.9202	59.9266	61.8623	53.2966	63.9551	52.7508	60.1707	51.9548	70.1216	59.5416	60.3002	58.3261	50.229	64.9549	56.4117	57.6032	63.8	69.3274	61.1786	69.7482	66.1689	66.6926	59.6582	66.6466	59.5723	67.4808	70.0398	60.0107	64.4922	63.3323	59.4134
	63.9	113.319	107.391	112.845	96.0059	92.7617	79.1931	77.7562	70.2448	66.339	66.2018	67.8623	62.7863	64.5312	61.6507	66.3113	55.9669	63.9	61.2424	60.2308	62.1184	53.0734	63.2248	52.9171	60.3186	52.437	70.2841	59.6523	60.4819	58.7277	50.3963	65.4308	56.8676	57.5339	63.9	69.4737	61.3892	70.0482	66.0217	66.2734	59.7198	66.1252	60.1116	67.2828	70.2041	59.9677	64.2872	63.1102	59.305
	64	112.954	106.76	113.555	95.4596	92.924	79.2371	78.1337	70.9287	66.3548	66.4499	67.9476	62.8633	63.9836	62.2006	66.4333	55.96	64	61.063	60.013	62.9354	53.0197	63.105	53.1286	60.2316	52.747	69.9314	59.9381	61.0262	59.036	49.8643	65.3118	56.7431	57.4441	64	69.5343	61.3681	69.5404	65.6316	66.445	59.9521	65.1193	60.6233	67.2172	70.2054	59.811	64.0401	63.3583	59.387
	64.1	112.892	106.32	113.936	95.1523	92.8629	79.6911	78.2271	71.946	66.1004	66.4527	67.8996	63.0358	64.1067	62.2872	66.7228	55.927	64.1	60.8669	59.6093	63.519	52.9781	63.5573	53.6562	59.9744	52.7211	69.5271	60.2708	61.6163	59.0617	49.3933	65.0134	56.225	57.0853	64.1	69.2824	61.5427	68.5671	65.6173	67.1293	60.1707	64.1644	60.8404	67.1918	70.1768	59.7776	63.899	63.6279	59.2531
	64.2	113.404	106.281	113.961	94.9503	92.7599	79.8262	78.276	72.7731	65.7736	66.4556	67.6476	63.1431	64.7624	62.2299	66.994	55.8187	64.2	61.1551	59.4633	63.3719	53.2021	64.6792	53.8656	59.3881	52.6716	68.9662	60.5102	62.2424	58.5823	49.3974	64.5481	55.739	56.7544	64.2	69.369	61.2776	67.5308	65.1167	67.7851	60.645	64.0769	60.754	67.2499	70.2786	60.0822	64.2744	63.8619	59.3852
	64.3	113.714	106.951	113.686	95.4136	92.95	79.3886	78.4038	72.6702	65.3816	66.3512	66.8509	62.9809	65.461	61.7044	67.5142	56.1206	64.3	61.1659	59.6444	62.9494	53.3494	65.6077	53.8154	58.68	52.9077	68.5121	60.6027	62.7127	58.3693	50.0249	64.2608	55.4949	57.0997	64.3	69.3247	60.8479	67.507	65.0169	67.695	60.8401	64.6086	60.594	67.0027	70.3622	60.5937	64.8467	63.8031	59.319
	64.4	113.685	107.361	113.477	95.9302	93.1056	78.5416	78.7659	72.0753	65.2153	65.9591	66.255	62.7699	65.9636	61.3964	68.0936	56.1249	64.4	61.5242	60.1382	62.7421	53.4482	66.1381	53.2786	58.4417	53.4497	67.9094	60.341	62.8743	58.1443	50.548	63.9146	55.4447	57.7541	64.4	69.5966	60.1183	68.1874	64.8846	66.8326	60.919	65.5732	60.5672	66.9504	70.3943	60.7207	65.4507	63.8593	59.6124
	64.5	113.163	107.613	113.459	96.2302	92.994	77.897	78.8898	71.4953	65.4174	65.2056	66.1392	62.7143	65.7928	61.5044	68.3444	55.5384	64.5	61.6844	60.8466	62.9323	53.5178	65.9034	52.8436	58.8993	53.9376	68.0234	60.0252	62.6933	58.3033	50.5977	63.9419	55.2798	58.3019	64.5	69.4406	59.606	68.8034	65.3642	66.1088	60.9208	66.144	60.4958	66.8059	70.3086	60.5429	65.4101	64.0806	59.8693
	64.6	113.2	107.576	113.33	96.2174	92.2938	78.1483	78.7087	71.3729	66.108	64.5739	66.5354	63.0557	65.2648	62.0953	68.0128	54.7143	64.6	61.9994	61.3026	63.0037	53.3923	65.555	52.3939	59.842	54.0362	68.2768	59.7582	62.1844	58.024	50.2198	63.8526	55.0169	58.2687	64.6	69.4798	59.2948	68.6854	65.5687	66.0733	60.8923	66.0936	60.4892	67.0887	69.8939	60.5082	65.0697	64.6127	59.8414
	64.7	113.164	107.76	113.392	95.664	91.4134	78.8089	78.5653	71.4768	67.0198	64.5112	67.0768	63.5596	64.4817	62.5888	67.3181	54.365	64.7	61.8963	61.2708	62.9492	53.2342	64.9454	52.1921	60.5057	53.7184	68.6266	59.8538	61.519	58.0718	49.8446	63.6104	54.8726	58.0349	64.7	69.0969	59.2386	68.0462	65.5517	66.5264	60.8629	65.3459	60.4946	67.2567	69.3801	60.823	65.0701	65.1233	59.605
	64.8	113.724	107.897	112.865	95.1301	91.0641	79.3958	78.9313	71.4222	67.4958	64.8821	67.635	64.0906	64.2142	62.7863	66.744	54.9336	64.8	61.6202	60.5153	62.9699	52.7151	64.5622	52.1054	60.7977	53.0582	68.5586	59.7553	61.3736	58.0429	49.4387	63.2963	54.9228	57.5887	64.8	68.8799	59.4701	67.893	65.4938	66.9657	60.7934	64.6267	60.9509	67.7901	68.9431	61.2563	65.231	65.4668	59.1496
	64.9	113.629	107.557	112.137	94.5483	91.3298	79.4132	79.1638	71.4572	67.4857	65.3137	67.9178	64.2387	64.2758	62.6279	66.7066	55.6873	64.9	61.3281	59.976	63.3324	52.4152	64.3588	52.3576	60.8237	52.394	68.6618	59.3018	61.385	58.2023	49.2164	63.4891	55.3051	57.336	64.9	68.4247	60.0312	68.3246	65.6802	66.7966	61.0701	64.7123	61.3564	67.9267	69.3171	61.2579	65.3728	65.5041	58.9684
	65	113.835	107.1	111.72	94.5501	91.9097	79.1716	79.1337	71.5982	67.3083	65.413	68.1398	63.9721	64.5768	62.4662	66.7042	56.0439	65	61.5076	59.7496	63.6181	52.2783	65.1017	52.4156	60.7958	51.7636	68.9416	58.517	61.8703	58.1136	49.0289	64.1396	55.4101	57.1314	65	68.663	60.5398	69.2964	66.263	66.6482	61.3987	65.5328	61.5828	67.9241	69.82	60.996	65.135	65.1653	58.6732
	65.1	113.373	107.195	112.091	94.735	92.2268	78.6158	78.703	71.7988	67.3863	65.4166	67.9756	63.1917	64.475	62.0979	66.7439	56.148	65.1	61.6773	59.824	63.5974	52.6632	65.8599	52.5497	60.6487	51.6869	69.1983	58.1628	61.8972	58.1367	48.9831	64.8292	55.2603	57.4039	65.1	69.3511	60.8824	69.5367	66.6057	66.429	61.747	66.4269	61.4696	67.3818	70.0682	60.6631	64.7728	64.8494	58.5462
	65.2	113.335	108.034	112.895	95.0747	92.3447	77.9302	78.4567	71.856	67.4998	65.6213	67.8058	62.7694	64.2112	62.1007	66.3759	56.1647	65.2	61.8806	59.7821	63.197	52.921	66.2843	52.4138	60.4766	51.7102	69.236	58.5723	62.0376	58.2792	48.856	64.9357	54.8964	57.6489	65.2	70.0641	60.8659	69.3651	66.804	66.295	61.7429	66.6303	61.3429	67.0014	69.9707	60.5771	64.5346	64.4287	58.4709
	65.3	113.202	108.685	113.332	95.206	92.4278	77.3957	78.2839	71.5049	67.2279	66.2526	67.3863	62.8094	63.9127	62.5164	66.1661	56.2301	65.3	61.9171	59.5611	62.689	52.8941	65.7167	52.33	60.4101	51.8892	69.2778	59.4188	61.9271	58.5164	48.9897	64.6471	54.7661	57.673	65.3	70.1876	61.1724	68.7617	66.7591	66.1572	61.8073	66.3773	61.2559	66.7073	69.9807	60.4822	64.4309	64.2572	58.4613
	65.4	113.512	108.292	113.214	95.3158	92.5007	77.3323	77.737	71.2686	66.6423	66.8863	67.1194	63.4937	64.2082	63.2617	66.0951	56.0172	65.4	62.3098	59.4796	62.3499	52.6332	65.0861	52.3191	60.4359	51.6239	69.795	60.1561	61.825	58.8931	49.3838	64.2601	54.7479	57.4144	65.4	69.6481	61.5247	68.7042	66.7386	66.2886	61.9307	65.8738	61.1113	66.7193	70.1221	60.2674	64.8207	64.3343	58.8329
	65.5	113.717	107.144	112.537	95.1742	92.5698	77.5156	77.0349	71.1502	66.1576	67.3683	67.0897	63.9472	64.5821	63.5688	66.4621	55.8066	65.5	62.4797	59.5501	61.9961	52.4254	64.571	52.2973	60.5779	51.5769	70.38	60.6488	61.7523	59.4137	50.115	64.1831	54.7472	57.2699	65.5	69.1891	61.6229	68.9762	66.6669	66.7152	61.95	65.4837	60.8244	66.7151	70.0809	59.9303	65.38	64.8216	59.3202
	65.6	113.835	106.38	111.781	95.3609	92.5477	77.6992	77.0192	71.3733	66.068	67.4327	67.3492	63.9701	64.6869	63.2097	66.9404	55.7543	65.6	62.4586	59.8979	61.9299	52.4093	64.3091	52.7458	60.7257	51.5071	70.9407	60.9979	61.7324	59.8099	50.5478	64.4566	54.9383	57.2939	65.6	69.0119	61.1624	69.6913	66.5121	67.1749	61.702	65.3142	60.1219	66.7823	69.9677	59.7636	65.7176	65.0743	59.7968
	65.7	113.933	106.234	111.327	95.7943	92.7563	77.9284	77.6497	71.5926	66.2818	67.4664	67.8534	63.4476	64.2922	63.0431	67.283	55.8989	65.7	62.0418	60.1388	61.8049	52.323	63.9629	53.1178	60.7754	51.5751	70.6662	61.1274	62.0532	59.647	50.3932	64.6087	55.5251	57.4241	65.7	69.419	60.425	70.095	66.1428	66.9969	61.0027	65.6102	59.5171	66.8648	70.0396	59.7574	65.5639	64.7418	59.3633
	65.8	113.878	106.423	111.49	96.2969	93.0511	78.5261	78.6511	71.5606	66.5731	67.0684	68.194	62.7826	63.9796	62.8964	67.2339	55.8392	65.8	61.6344	60.024	62.0406	52.4681	63.8388	53.4124	60.6317	51.8086	70.1933	60.5902	62.0517	58.8379	50.0068	64.3947	56.1697	57.5708	65.8	69.8158	60.1198	69.9709	65.5953	66.7506	60.419	66.1518	59.0766	66.7998	70.0961	60.0696	65.0612	63.8272	58.7231
	65.9	113.868	106.039	112.054	95.9587	93.1248	79.0291	78.6411	71.5173	66.9016	66.6101	68.2371	62.3828	64.2618	62.9607	66.6144	55.4958	65.9	61.4428	59.7772	62.1492	52.5471	63.9266	53.2094	60.2224	52.3016	69.5574	59.6427	62.0659	57.9949	49.6493	63.9346	56.0973	57.9176	65.9	70.1281	59.712	69.4074	65.1241	66.3899	60.0991	66.8069	59.1881	66.7733	70.0468	60.4233	64.7629	63.1846	58.119
	66	113.132	105.954	112.731	94.8171	92.7216	79.4804	78.255	71.3247	67.1781	66.3342	68.0341	62.08	64.7803	62.6352	65.6771	55.2341	66	61.3014	59.8303	62.2998	52.5523	64.2464	52.929	59.8896	52.8737	69.4886	58.843	61.872	57.5977	49.6163	63.8276	55.4109	57.8921	66	69.8993	59.4264	69.051	64.985	66.826	60.1861	66.898	59.129	66.7924	69.8724	60.6781	64.7221	63.1186	58.2309
	66.1	112.689	106.198	113.096	93.8779	91.8053	79.4747	77.6739	71.2242	67.4752	66.8971	67.8731	62.0072	65.4862	62.3821	64.898	55.2793	66.1	61.27	60.3379	62.2341	52.1436	64.4231	53.0581	59.8077	52.8448	69.4866	58.9757	61.786	57.825	49.4184	64.3654	54.7119	57.4331	66.1	69.6206	59.1058	69.0298	65.1133	67.4678	60.3038	66.7387	59.1612	67.07	69.7638	60.4772	64.9139	63.861	58.5277
	66.2	111.942	106.993	113.034	93.3127	91.0687	79.5973	77.714	71.0552	67.7207	67.5152	67.9322	61.852	65.7394	62.0877	64.8572	55.6808	66.2	61.0669	60.7868	62.1217	51.9454	64.4868	53.2421	59.9682	52.3951	69.6989	59.7497	61.758	58.4088	49.5487	64.8578	54.8	56.8504	66.2	69.2116	59.2649	69.1008	65.0717	68.1708	60.2073	65.8584	59.3603	67.1893	69.8744	60.0173	65.1987	64.8184	59.0114
	66.3	112.269	107.256	112.747	93.2812	90.4938	79.3829	77.9802	71.0172	67.6011	67.7113	68.0003	61.9619	66.1111	61.8943	65.3113	55.9953	66.3	61.1568	60.9299	62.1413	52.1878	64.453	53.396	60.0403	52.0284	69.7014	60.4077	61.6901	58.6769	49.8794	65.024	55.2676	56.6073	66.3	69.2607	59.6559	69.1673	64.9688	68.2151	60.2194	65.3759	59.7116	67.2078	69.8351	59.6383	65.1502	65.4264	59.2981
	66.4	112.16	107.156	112.228	93.2427	90.5632	79.2207	78.2697	70.82	66.969	67.0739	67.9779	61.853	66.0111	61.7119	66.0172	56.2201	66.4	61.2253	60.6707	62.1491	52.6419	64.3704	53.3144	59.6862	52.0908	69.8016	60.3582	61.6809	58.8407	50.0504	64.6983	55.6413	56.9122	66.4	69.3948	60.04	69.2946	64.7443	67.9117	60.5973	65.002	59.957	67.2269	69.9804	59.6408	64.8823	65.041	59.5243
	66.5	112.47	106.906	112.281	93.6764	90.7314	78.7447	78.1977	70.5753	66.1627	66.5497	67.9518	61.9388	65.6734	61.7422	66.1383	56.2648	66.5	61.3439	60.2091	61.9842	52.9968	64.3453	53.2721	59.5216	52.3688	69.5998	59.854	61.7216	58.7918	49.679	64.6237	55.6938	57.0374	66.5	69.5879	60.6103	69.6204	64.9529	67.3683	61.3264	65.4874	59.6408	67.3509	69.9362	59.9769	64.2349	64.2709	59.5416
	66.6	112.227	106.799	112.544	94.224	91.1698	78.6156	78.178	70.4141	65.8294	66.2466	68.0054	62.1829	64.9681	61.6072	66.1669	56.0707	66.6	61.0579	59.6207	61.647	52.9327	64.6141	53.2138	59.7964	52.6316	69.4254	59.5157	62.0524	58.8681	48.9077	64.7213	55.8627	57.0776	66.6	69.4327	61.0074	70.0327	64.9402	67.0014	61.8851	65.8028	59.2609	67.4272	70.2816	60.3799	64.137	63.5646	59.5282
	66.7	112.565	106.512	113.371	94.628	91.5362	78.5192	77.9504	70.3218	66.2947	66	67.7851	62.6716	64.4123	61.6747	65.961	56.0459	66.7	60.6387	59.4834	61.5013	52.9168	65.2819	52.9122	60.5831	52.7186	69.3238	59.6061	62.5334	58.861	48.5258	65.0171	56.0208	56.769	66.7	69.0943	61.577	70.3352	65.0086	66.8009	62.3062	66.1633	59.0498	67.4527	70.7871	60.7569	64.3216	63.6563	59.6143
	66.8	113.038	106.237	113.611	94.7933	91.9446	78.7063	77.8073	70.2506	66.6961	65.3472	67.51	62.7019	64.5499	61.514	66.3229	56.0959	66.8	60.3073	59.7533	61.8904	52.6297	65.6857	52.6683	60.7669	53.0331	69.4251	59.6074	62.6509	58.6307	48.461	65.2533	56.0123	56.6268	66.8	68.9909	61.7883	70.3032	64.7389	66.7737	62.3028	66.0006	59.3539	67.5794	71.2631	60.8754	64.8514	63.5777	59.7766
	66.9	113.678	106.147	113.544	94.7942	92.0243	78.6647	77.434	70.2508	66.799	64.6084	66.9108	62.2516	64.9002	61.5743	66.958	56.1663	66.9	60.3274	60.5724	62.2803	52.1397	65.5187	52.4373	60.562	53.3526	69.4936	59.2104	62.5137	58.4889	49.1406	65.5533	55.5411	56.4804	66.9	68.9543	62.1587	69.9678	64.9592	67.2042	62.1457	65.9268	60.0203	67.855	71.3527	61.031	64.7218	63.6768	59.823
	67	113.686	106.686	113.008	94.4698	92.0012	78.6784	77.4293	70.5041	66.2356	64.7363	66.9476	61.7614	65.2331	61.6128	67.762	55.8416	67	60.5166	60.9323	62.3468	51.3001	64.6783	52.5298	60.0814	53.9057	69.3719	58.5944	62.3438	58.3494	49.8299	65.7117	55.1249	56.7652	67	69.228	62.1314	69.6088	65.1712	67.4059	61.4531	65.787	60.2658	67.716	71.1598	60.7168	64.2314	63.6844	59.3019
	67.1	113.274	107.217	112.396	93.9096	91.6917	78.8029	77.5936	70.778	65.9722	65.7486	66.845	61.7294	64.8501	62.0058	68.2118	55.2342	67.1	60.516	61.0972	62.3097	50.713	64.1383	52.7823	60.2512	53.8602	68.9523	58.4574	62.4197	58.4479	50.324	65.422	54.9071	57.4362	67.1	69.3891	61.8821	69.6331	65.6462	67.763	60.8293	65.8148	60.0751	67.2934	71.0446	60.6533	63.7877	64.088	58.819
	67.2	112.497	107.604	111.603	93.5364	91.4552	79.0677	78.0349	70.9042	66.2443	66.8809	67.0431	61.9796	64.532	62.3744	67.9134	54.8981	67.2	60.3271	60.8557	62.1914	50.8057	63.9718	53.2713	60.4199	53.2019	68.6042	59.2063	62.5852	58.4784	49.8918	64.9581	54.9382	58.1863	67.2	69.7189	61.2588	69.7639	65.9484	67.6658	60.2371	65.7042	59.4861	66.8774	71.1179	60.2961	63.8701	64.1033	58.6683
	67.3	112.047	107.553	111.041	93.5897	90.5832	78.9487	78.3521	71.2529	67.0293	67.3077	66.9027	62.3844	64.5308	62.6067	67.2923	54.7701	67.3	60.1478	60.9999	62.1602	51.5127	64.5818	53.4349	60.6614	52.066	68.5462	60.2331	62.5977	58.66	49.3422	64.6704	54.9437	58.1696	67.3	69.8093	60.9258	69.7578	66.4629	67.8009	60.0236	65.7234	59.3639	66.8967	71.0421	60.0248	64.2721	63.6417	58.9097
	67.4	111.886	107.486	110.882	93.4836	90.0447	78.4068	78.4621	71.7429	67.3474	67.014	66.7597	62.7271	65.1563	62.6858	66.6423	55.1433	67.4	60.3158	60.998	61.8743	52.4209	65.083	53.2866	60.6218	51.2609	68.8647	60.9909	62.551	58.9094	49.0554	64.6992	54.6544	57.2689	67.4	69.7978	61.0372	69.181	66.7014	67.7146	60.1924	65.8998	59.6124	67.0162	71.0831	59.4366	64.3132	62.8766	59.0204
	67.5	112.146	107.283	111.222	93.1333	89.7887	77.8583	78.2211	72.0637	66.8911	66.7394	66.7419	63.0638	65.6276	62.7922	66.5633	55.6259	67.5	60.5883	60.7078	61.9921	53.0126	65.2674	52.9056	60.63	51.4136	69.3071	60.7614	61.9393	59.3288	49.289	64.4519	54.2862	56.314	67.5	69.5157	61.2831	68.4824	66.6106	67.5387	60.2363	66.3733	59.9688	67.076	70.8734	59.3447	64.1299	62.5561	59.0794
	67.6	112.43	107.258	111.362	92.8493	90.5006	77.5642	77.8122	72.0598	66.0932	66.733	66.6744	63.1059	65.8471	62.8419	66.8232	56.1203	67.6	61.1012	60.0971	62.4966	53.4033	64.6212	52.9414	60.4722	52.0817	69.5579	60.0779	61.2721	59.3278	49.643	63.9832	53.7869	56.2498	67.6	69.3481	60.9927	68.2448	66.1622	67.545	60.5653	66.502	59.8286	67.3572	70.3822	59.6662	63.9871	62.7557	59.5249
	67.7	112.367	107.312	111.36	93.3249	91.1019	77.2878	77.4149	71.9616	65.6223	66.8752	67.1407	62.9582	65.8391	62.6186	67.1158	56.4303	67.7	61.3402	59.6408	62.9401	53.3854	64.0809	53.051	60.1919	53.0842	69.752	59.3677	60.5503	58.9733	49.6916	63.5046	53.8618	57.0246	67.7	69.0712	60.3653	68.6321	65.9944	67.7012	60.7302	66.2954	59.2679	67.9226	69.5579	60.2387	64.1863	63.3289	59.8826
	67.8	112.202	107.306	111.222	93.9067	91.4716	76.7653	77.3088	71.7883	65.3967	67.2084	67.4773	62.8478	65.5273	62.3229	67.3636	56.4949	67.8	61.6836	59.6232	63.003	53.1297	63.9561	53.0038	60.1096	53.5994	69.6086	59.3692	60.5639	58.3437	49.6811	63.6336	54.0897	58.1524	67.8	69.1323	59.8651	69.2027	66.1162	67.8746	61.4191	65.6944	58.7509	68.2527	68.7867	60.2767	64.4912	63.6518	59.7519
	67.9	112.002	107.201	111.324	94.2406	91.3699	76.3036	77.2937	71.3242	65.3247	66.9687	67.612	62.7336	65.1	62.1286	67.5702	56.5232	67.9	61.6234	59.6557	62.9213	52.6322	64.5297	52.8608	60.2258	53.9786	69.4343	59.5296	61.055	58.1387	49.5891	63.8194	54.6312	58.6599	67.9	69.047	60.0967	69.2632	66.3806	67.5208	61.7607	65.2859	58.8232	67.8492	68.6168	60.1022	64.4894	63.7546	58.7714
	68	112.183	106.761	111.776	93.9539	91.0994	76.0256	77.1522	70.7829	65.5689	66.5481	67.1161	62.7661	64.7152	62.31	67.798	56.2024	68	61.6686	59.6247	62.8907	52.441	64.9118	52.8803	60.3201	53.9573	69.0417	59.7122	61.6369	58.4402	50.0306	64.1537	54.6993	58.5243	68	69.1692	60.4791	68.822	66.3442	67.2787	61.7377	64.7372	59.1573	67.0271	68.7387	59.8908	64.4246	63.9851	58.0944
	68.1	112.357	106.813	112.484	93.6183	90.6363	75.8844	76.7121	70.5721	66.2484	65.3412	66.759	62.8404	65.1192	62.6309	67.6521	55.8191	68.1	61.5694	59.5124	62.7581	52.5912	65.2222	53.355	60.3494	53.8014	68.6524	59.4423	62.0213	58.8952	50.3631	64.2846	54.6228	57.8562	68.1	69.1181	60.9928	68.3173	66.2477	67.3439	61.4273	64.4912	59.6677	66.3956	69.3356	60.0866	64.4059	64.5852	57.877
	68.2	112.389	106.854	113.11	93.7131	90.1089	76.2437	76.1981	70.7399	66.8591	64.5628	67.0771	63.1108	65.5918	63.0969	67.2253	55.6264	68.2	61.6271	59.506	62.1384	52.9053	65.1666	53.7786	60.5233	53.4091	68.1072	59.2554	62.058	59.1619	50.4796	64.5974	54.3753	57.3181	68.2	69.1822	61.1249	68.1031	66.1597	67.8556	61.0634	64.5628	60.0414	66.167	69.7466	60.3302	64.5383	65.2417	58.506
	68.3	112.241	107.119	113.273	94.2677	89.7579	77.0037	76.1377	71.189	67.091	64.3332	67.7489	63.0927	65.8012	63.2413	66.8439	55.7181	68.3	61.5658	59.731	61.5327	52.9942	65.1432	54.0077	60.8236	53.3456	67.7288	59.0679	62.0311	59.0534	50.2208	64.6872	54.3978	57.0212	68.3	68.9069	61.2723	68.1086	66.0113	67.7424	60.8218	65.22	60.7557	66.0527	70.2239	60.6691	64.3896	65.4301	58.7788
	68.4	112.377	106.977	112.798	94.8884	89.5181	77.7879	76.3544	71.6658	66.7941	65.1507	68.0624	62.8592	65.4354	63.2203	66.9173	55.7879	68.4	61.2044	59.999	61.2251	52.8261	64.9328	53.658	60.6702	53.633	67.6203	58.8657	61.7861	58.9232	49.9991	64.4599	54.456	56.7843	68.4	68.308	61.0796	68.2069	65.8409	67.2611	60.5801	65.6746	61.2278	65.7851	70.3209	60.8272	63.8949	65.4086	58.8122
	68.5	112.733	106.734	111.931	94.9583	89.2784	77.8117	76.6192	72.1067	66.3044	66.1384	67.8484	62.1373	65.1673	62.5511	66.9582	55.3239	68.5	60.6659	60.4389	61.2882	52.7848	64.8684	53.0764	60.2999	53.9059	67.8034	58.8878	61.1871	58.6268	50.1483	63.964	54.5326	56.6882	68.5	67.6209	60.7673	68.2469	65.602	66.4371	60.2164	65.8079	61.1642	65.5642	70.3761	61.1958	63.4548	65.4323	58.2001
	68.6	112.819	106.591	110.991	94.4113	89.0021	77.3533	76.5128	72.3647	65.9187	66.7008	67.4337	61.817	64.8364	61.936	66.8179	54.775	68.6	60.1632	60.7837	61.5262	53.0302	65.0286	52.5803	60.0641	53.6308	68.1054	59.0944	60.7644	58.398	50.3481	63.7599	54.5923	56.7038	68.6	67.5026	60.4631	68.5712	65.8716	66.0776	60.0863	65.7467	60.4943	65.4372	70.3319	61.218	63.4088	65.4599	57.972
	68.7	112.307	106.591	110.376	93.6453	88.8039	77.2199	76.3671	72.3983	65.7507	66.5144	67.1423	61.6567	64.4878	61.2976	66.2138	54.2113	68.7	60.1914	61.147	61.666	53.4346	64.994	52.3982	60.2311	52.672	68.3288	59.9433	60.9307	58.2266	50.5618	63.7777	54.8082	57.114	68.7	67.8813	60.4696	68.7994	66.1249	66.072	60.0129	65.7989	59.7931	65.738	70.3587	61.2333	63.6966	65.1453	58.1094
	68.8	111.682	106.731	110.205	93.1547	88.9213	77.5034	76.3873	72.1848	66.0004	66.3882	66.9223	62.3129	63.982	61.1726	65.8913	54.1174	68.8	60.5787	61.1281	62.0133	53.4391	64.4673	52.1594	60.2481	51.6573	68.771	60.6481	61.6851	58.7026	50.4468	63.8549	54.9953	57.4953	68.8	68.3516	60.576	68.8343	66.3858	65.9978	60.5494	65.9789	59.7176	66.1783	70.7093	61.023	64.0049	64.5272	58.789
	68.9	111.535	106.647	110.601	93	88.9341	77.9191	76.7573	71.4761	66.1833	66.678	66.5557	62.9933	63.9353	61.0053	65.8017	53.9876	68.9	61.0834	60.8618	62.126	53.2444	63.7193	51.9673	60.3048	50.8677	69.331	61.0937	62.3614	59.2342	50.1544	63.6277	54.9202	57.7724	68.9	68.2979	60.7927	68.7422	66.1076	66.0394	61.2072	65.9007	59.8871	66.7351	70.8381	61.0501	63.9828	63.9417	59.1736
	69	111.553	106.334	111.245	93.3447	89.2587	78.097	77.1556	70.6306	66.3568	67.2394	66.262	63.5632	64.1284	61.0719	66.101	54.0286	69	61.5014	60.4806	62.22	53.2762	63.5868	51.8873	60.4054	51.0417	70.0068	60.939	62.5063	59.5518	49.6604	63.5492	54.7282	57.5603	69	68.1638	60.5884	68.9037	65.5374	66.0522	61.6312	65.7262	60.0009	66.9136	71.0322	61.2232	64.0739	63.5597	59.2829
	69.1	111.242	105.934	111.79	93.828	89.5158	78.2501	77.4362	70.1503	66.1696	67.3407	66.2669	63.457	64.424	61.2652	66.4237	54.0379	69.1	61.5191	60.2298	62.0047	53.5708	64.2656	52.3736	60.677	51.7332	69.8357	60.4854	62.5393	59.1451	49.3606	63.4934	54.5709	57.3216	69.1	68.07	60.7904	69.7673	65.1016	66.5552	61.5091	65.4858	59.8587	66.8872	70.9371	61.4587	64.1944	63.5859	58.9206
	69.2	110.566	105.782	111.912	94.5491	89.9403	78.4727	77.427	70.1508	66.0228	67.1301	66.9792	63.277	64.682	61.9321	66.8517	54.3384	69.2	61.8203	60.148	61.9124	53.7601	65.0613	53.0526	60.6676	52.8167	69.1872	60.1772	62.774	59.0754	49.1887	63.6251	54.3176	57.4022	69.2	68.4049	60.863	70.474	64.8702	66.757	60.8453	65.7201	59.5959	66.7972	70.9502	61.5067	64.7077	63.9158	58.7901
	69.3	110.103	105.766	111.629	95.0071	89.9141	78.4806	77.6802	70.4327	66.0827	66.7989	68.0801	63.0494	64.9632	62.3959	67.1513	54.7327	69.3	61.9288	59.9747	62.0067	53.4134	65.4966	53.5458	60.3654	53.6513	68.4387	59.9208	63.0982	59.1898	49.4362	63.7081	54.0662	58.0286	69.3	68.5784	61.3634	70.6556	65.1158	66.6378	60.1633	65.9599	59.4154	67.014	70.6306	61.102	64.9477	64.6206	58.6572
	69.4	109.997	105.88	111.692	95.3247	89.5013	78.3449	78.0192	70.4334	66.0508	66.6756	68.6988	62.906	65.3783	62.4183	67.1551	54.9811	69.4	62.3824	60.0976	62.0672	52.9052	65.5021	53.5224	60.1486	54.4286	68.7816	59.9619	63.1988	59.57	49.7206	63.8924	53.9234	58.4118	69.4	68.7358	61.4612	70.0804	65.1363	66.2404	59.6209	66.0986	59.1021	67.4099	69.9881	60.3423	65.0414	64.9601	58.8688
	69.5	110.171	106.09	111.579	95.3747	89.1899	78.1331	78.5698	70.5942	65.81	66.5437	68.3363	62.538	65.4237	61.8666	66.8937	55.0262	69.5	62.0821	60.2502	62.3282	52.3858	65.4176	52.87	60.011	54.6509	69.467	60.0307	62.7933	59.2967	50.0598	64.206	54.2476	58.119	69.5	68.446	61.5661	69.2329	65.3357	66.2332	59.4603	65.6708	58.9587	67.6951	69.3694	59.6354	64.7237	65.0981	58.8778
	69.6	110.518	106.552	111.623	95.0993	89.3938	78.1219	78.4756	70.8642	65.3507	66.2951	67.2607	62.1086	65.0626	61.2054	66.4648	55.1336	69.6	61.7528	60.5733	62.2469	52.1457	65.291	52.3406	59.9229	54.4224	70.489	60.4397	62.0362	58.775	50.066	64.5358	54.423	57.2202	69.6	68.0463	61.6342	68.7122	65.265	66.7158	59.5929	65.3751	58.9711	67.7749	69.0288	59.1102	64.5949	65.0803	59.0042
	69.7	110.831	107.16	111.055	94.4796	89.9913	78.323	78.411	71.0298	65.3782	66.0338	66.3342	62.2216	64.6728	61.1962	66.1514	55.1506	69.7	61.3184	60.4541	62.3504	52.2043	65.0437	52.1798	59.8664	53.839	70.5999	60.6606	61.0449	57.9673	50.2156	65.1426	54.5054	56.5548	69.7	67.6586	61.3762	68.432	65.2137	67.3258	59.7468	65.408	59.2169	67.509	69.1529	58.816	64.617	65.5297	58.8676
	69.8	111.099	107.494	110.869	93.6034	90.201	78.3676	78.3747	71.1064	65.6291	65.7549	66.3677	62.3239	64.406	61.4506	65.773	54.9162	69.8	61.3414	60.2544	62.1568	52.3138	64.7451	52.5483	59.9707	53.3248	70.3758	60.9134	60.2156	57.6637	50.676	65.2666	54.4264	56.6487	69.8	67.8106	61.022	68.6907	64.6824	67.4609	59.8716	65.9357	59.7203	67.1337	69.5184	58.5653	64.869	65.776	58.9998
	69.9	110.791	107.642	110.791	93.0447	90.1628	78.3874	78.6237	71.0916	65.91	66.0128	67.0316	62.6096	64.6546	62.0107	65.9076	54.4643	69.9	61.6538	59.6081	62.1503	52.4321	64.5037	53.077	60.0889	52.9883	69.5826	60.8169	59.8591	57.8054	51.3019	65.1037	54.5559	57.2649	69.9	68.4517	60.5053	68.9767	64.4521	67.1327	60.1061	66.5493	60.1046	66.8081	69.9307	58.5106	64.4002	65.1372	59.2998
	70	110.75	107.601	111.038	92.672	90.7992	78.1269	78.6181	71.4928	65.8036	66.3162	68.0558	62.6606	64.6877	62.083	66.2771	54.3519	70	61.8441	59.097	61.9956	52.1259	64.691	53.4381	59.6924	52.705	69.2148	60.9843	60.1382	58.5378	51.3679	64.5394	54.6722	57.8411	70	69.1503	60.5628	69.4037	64.5391	66.6692	60.6369	66.5846	60.5968	66.8768	70.334	58.6988	63.8744	63.8574	59.4876
	70.1	110.916	107.533	110.719	92.6368	91.9979	77.8947	78.1977	71.6166	65.7736	66.2561	68.6413	62.8108	64.9533	61.9471	67.1424	54.6617	70.1	62.1266	58.6496	61.9228	51.9171	65.1623	53.7233	59.0084	52.6707	69.086	61.0321	60.6314	58.8757	50.6453	64.2454	54.8818	57.8861	70.1	69.4171	60.6036	69.6298	65.0499	66.6286	61.3563	66.2002	60.5462	67.2011	70.5362	59.1202	63.2512	62.8736	59.3381
	70.2	111.551	107.469	110.191	92.7264	92.8714	77.63	77.655	71.3714	65.8039	65.6892	68.8431	63.0208	64.9061	61.6608	67.6843	54.8882	70.2	62.1444	58.8143	61.8963	51.5488	65.5143	53.8203	58.705	52.707	69.0188	61.3054	61.2739	59.0607	50.0338	64.1156	55.0369	57.6819	70.2	69.303	60.5818	70.1743	65.1652	66.5531	61.6553	65.5363	60.1618	67.4732	70.391	59.7008	63.7518	62.9879	58.7538
	70.3	112.147	107.053	109.821	93.0013	92.2469	77.5109	76.8083	70.9797	66.1191	65.1628	68.5593	62.9218	65.0048	61.5296	67.9982	55.0777	70.3	62.1023	59.386	61.9967	51.8749	65.2664	53.7559	58.9026	52.2943	68.9641	61.334	61.582	58.9063	49.8811	63.8702	55.3591	57.7292	70.3	68.9294	60.4228	70.3291	65.1169	66.5296	61.3819	65.2631	59.2353	67.5293	69.9112	59.7669	64.2053	63.5128	58.8091
	70.4	112.105	106.662	110.477	92.873	91.1683	77.7382	76.2688	70.9601	66.5592	65.2521	68.1353	63.0207	64.7908	61.7111	67.6822	55.1266	70.4	61.8257	59.9367	62.0973	52.1701	64.5457	53.5989	59.5446	51.7701	69.1454	61.0943	61.494	58.8163	50.2104	63.7242	55.569	57.9756	70.4	68.7859	60.2317	70.1752	64.9997	66.603	60.7977	65.1729	58.5311	67.4491	69.3464	59.9146	64.7644	64.3393	59.1608
	70.5	111.82	106.316	111.21	92.1021	90.1221	77.8056	75.8927	71.2938	67.0097	65.8872	67.617	62.9067	64.7181	61.8937	67.0589	55.2562	70.5	61.3732	60.4341	62.2246	52.7682	63.9182	53.4371	59.9781	51.3236	69.6344	60.4514	60.8798	58.4802	50.2314	63.5614	55.8333	58.3587	70.5	68.7562	60.2112	69.2422	65.3368	67.1214	60.7998	65.0061	58.4551	67.3683	69.3479	60.1638	64.562	64.8876	59.925
	70.6	111.067	106.1	111.814	91.2532	89.776	77.8861	76.4923	71.1051	67.3826	66.2822	67.1902	63.0793	64.3206	62.1262	66.405	55.0681	70.6	61.0404	60.5613	62.0887	52.58	63.4973	53.0452	60.3729	51.5693	69.7978	59.9071	60.1176	58.3326	49.9481	63.6316	55.837	58.7449	70.6	68.9482	60.1064	68.4103	65.634	67.452	61.24	64.8001	58.8697	67.4056	69.5429	60.9763	64.2907	65.4927	60.1767
	70.7	111.06	106.016	111.448	91.1926	89.545	77.5549	76.8721	70.3918	67.2141	66.3363	66.5924	63.0738	63.9522	62.6333	66.0098	55.0406	70.7	60.8749	60.688	61.7517	52.7041	63.4244	52.516	60.431	51.9538	69.5767	59.844	59.9962	58.5519	49.6872	63.8541	55.6023	58.8682	70.7	68.7529	60.496	67.8313	65.7711	66.9618	61.8014	64.5678	59.1437	67.5633	69.7749	61.4289	63.9307	65.3417	60.324
	70.8	111.061	106.065	111.215	91.9594	89.8697	77.4724	77.1446	69.6418	66.7497	65.7607	66.1036	63.2297	63.4058	63.1816	66.0851	55.3498	70.8	61.0252	60.5224	61.1293	52.7111	63.2222	51.735	60.6278	52.2837	69.1672	60.1461	60.4161	59.1793	49.6766	64.511	55.3763	58.7788	70.8	68.4156	60.7233	67.8323	65.398	66.2667	61.8058	64.7916	59.0354	67.5011	69.7276	61.3442	64.0249	65.0208	59.6888
	70.9	111.22	106.551	110.524	92.6177	90.145	77.3947	76.6534	69.7344	66.0521	65.4892	66.0559	63.0466	63.357	63.5352	66.1653	56.0106	70.9	61.2638	60.3341	60.9583	53.1736	63.3781	51.863	61.0338	52.7992	69.1486	60.4774	61.2382	59.4753	49.9202	65.1691	55.159	58.1477	70.9	68.1737	60.8648	68.2129	64.7507	65.9921	61.6947	65.1099	58.9311	67.2457	69.5567	61.1088	64.2999	64.344	58.964
	71	110.362	106.873	110.303	92.7407	90.3301	77.7706	76.6342	70.2796	65.8544	65.578	66.4642	62.9826	63.5238	62.9464	66.3948	56.2859	71	61.1791	60.0017	61.1136	53.2042	63.7621	52.433	61.657	53.2644	69.2986	60.4416	61.7374	59.3808	49.9618	65.343	55.1304	57.7319	71	68.5239	60.2732	68.4317	64.1602	66.4808	61.5047	65.8293	59.3444	66.9959	69.4592	60.579	64.7804	63.8702	57.9907
	71.1	109.659	106.872	110	92.1237	90.1487	78.2511	76.7669	70.9304	65.9503	66.1693	66.911	62.9846	64.1324	62.1243	66.5608	55.8432	71.1	60.7966	59.9038	61.422	53.4239	64.5427	53.4053	62.0059	53.6161	69.5534	60.2007	61.9032	58.8348	49.6641	64.8287	55.0603	57.3348	71.1	68.9779	59.7911	68.4521	63.8769	66.9501	61.4462	66.1786	60.0807	67.046	69.1303	59.9929	64.752	63.2568	57.7529
	71.2	109.299	106.433	110.036	91.609	90.1308	78.3853	77.1573	71.0233	66.2971	66.7371	66.8377	63.119	64.4557	61.5186	66.9691	54.9911	71.2	60.4044	59.7522	61.3624	53.6942	64.8033	53.9506	61.8169	53.4009	69.6572	59.938	61.7458	58.607	49.1724	64.285	55.0507	57.1358	71.2	69.1956	59.5649	68.0084	64.176	67.3032	61.3294	66.1147	60.5322	67.3536	69.1046	59.2274	64.6317	62.8644	57.9847
	71.3	110.145	106.005	110.09	91.4362	89.9719	77.9619	76.9287	70.9431	66.5223	66.9711	66.5376	62.9797	64.6727	61.6014	67.2514	54.357	71.3	60.7859	60.06	61.2243	53.8753	64.361	54.2782	60.9871	53.038	69.7657	59.7988	61.6558	58.5876	48.9858	64.047	55.2117	57.1706	71.3	69.0741	59.9316	67.778	64.7444	67.3773	61.2331	65.6809	60.4771	67.817	69.3353	59.2093	64.2851	62.9863	58.5481
	71.4	110.818	105.638	110.194	92.2098	89.5264	77.1256	76.9108	70.4844	66.6029	66.6042	66.302	62.7098	64.5851	61.8879	67.2516	54.1458	71.4	61.4273	60.4047	61.4633	53.364	63.5287	54.4179	59.9337	52.7991	69.759	59.8446	61.793	58.648	49.1839	64.1313	55.2327	57.5849	71.4	69.016	60.4812	67.5349	65.4121	67.1187	60.9422	65.5031	60.2068	68.23	69.998	59.7409	64.6472	63.5806	58.9152
	71.5	111.145	105.948	110.432	93.3488	88.5264	76.7153	77.0428	70.0482	66.3543	65.8662	66.5892	62.9371	64.5137	61.9256	67.2329	54.2449	71.5	61.8543	60.9036	62.0298	52.4576	63.2664	54.175	59.3432	52.7087	69.8496	59.7656	62.1867	58.4263	49.6129	64.3654	55.2384	58.2097	71.5	68.7212	60.9918	67.6692	65.5923	66.5463	60.3431	65.848	60.0711	68.2443	70.4661	60.4807	65.1508	64.4253	58.85
	71.6	110.916	106.345	110.392	94.1942	88.3122	77.0044	77.6758	69.582	65.6257	65.3138	67.1716	63.3048	64.3163	61.9343	67.0116	54.4227	71.6	61.6033	61.0287	62.7912	51.9368	63.7394	53.6942	59.7811	52.8172	69.896	59.7133	62.3529	57.9897	49.9322	64.5509	55.1529	58.57	71.6	68.154	61.1303	67.9118	65.502	66.1443	59.8029	65.946	59.787	67.6538	70.5481	60.8834	65.7946	64.9501	58.7782
	71.7	110.884	106.733	110.148	94.2042	88.6606	77.7813	78.1492	69.4369	64.701	65.2741	67.8691	63.8124	63.9544	61.8144	66.7799	54.8427	71.7	61.6439	60.9894	63.1611	52.0914	64.5554	53.2649	60.7834	52.8766	70.0727	59.4673	62.3616	57.7957	50.1011	64.59	55.252	58.3758	71.7	67.4516	61.0451	68.3413	64.9101	66.5376	59.8156	65.8209	59.2607	67.3244	70.3244	61.0364	65.8411	65.0401	58.9972
	71.8	110.915	106.27	109.733	93.8382	89.7708	78.5041	78.4126	69.4539	64.239	65.7567	68.3952	63.6737	63.7187	61.7966	65.9884	55.2572	71.8	62.0379	60.7911	63.1988	52.7824	65.0838	53.2514	61.3467	52.8907	70.2457	59.6149	62.1757	57.8132	50.0158	64.1399	55.3428	58.0126	71.8	67.2804	60.7448	68.7919	64.3771	67.2684	60.4876	65.5933	58.6861	67.2181	70.1829	60.8123	65.4757	64.8389	59.4123
	71.9	110.908	105.926	109.583	93.1953	89.9516	78.5242	78.5811	69.7593	64.5228	66.2958	68.9909	63.4022	63.8256	61.1392	65.3772	55.5579	71.9	62.2896	60.5654	62.8516	53.2006	65.4509	53.694	61.136	52.5556	70.5173	59.6943	62.1163	58.4292	49.9227	63.617	55.3033	57.4151	71.9	67.9233	60.6968	69.1424	63.9363	67.9077	61.0883	65.8351	58.7128	67.6193	69.99	60.5712	64.7477	64.2752	59.7291
	72	110.764	105.692	109.533	92.8713	89.7801	78.3051	78.35	70.0417	65.361	66.4419	69.4524	62.6534	64.3218	60.6529	65.1047	55.5382	72	61.9562	60.3447	62.5848	53.3701	65.5491	54.0738	60.613	52.0614	70.4959	59.7868	62.1888	58.9812	50.0993	63.2492	55.2274	56.9837	72	68.6649	60.58	69.1666	64.2031	67.8476	61.1986	66.2857	59.2144	67.4627	69.8544	60.41	64.115	63.6619	59.8121
	72.1	110.944	105.753	109.871	92.5798	89.623	77.7751	78.1251	70.4079	65.9483	66.2659	69.3849	61.9127	65.0108	60.368	65.6908	55.5033	72.1	61.339	60.067	62.5278	53.0177	65.5082	53.9996	60.4086	51.6963	70.2374	59.1869	62.4176	59.5449	50.5303	63.2351	55.2972	56.7807	72.1	69.3179	60.7712	68.9263	64.756	67.5167	60.9658	66.3991	59.7418	67.3332	69.8807	60.58	63.8616	62.8491	59.8214
	72.2	111.172	105.814	110.211	92.6779	89.9378	77.4049	77.9013	70.5344	66.1694	65.6058	68.5982	61.2651	65.5841	60.9122	66.4136	55.4147	72.2	61.1892	60.0153	62.3992	52.7728	65.0758	53.4633	60.3056	51.8372	69.5792	58.8816	62.6358	59.4956	50.7876	63.2582	55.4362	56.9742	72.2	69.3539	60.896	68.7473	65.5584	67.1978	60.8793	66.0088	60.0414	66.7506	70.2687	60.8951	63.8961	62.7309	59.624
	72.3	111.655	105.888	110.737	92.529	90.1949	77.0759	78.1624	70.6252	65.8809	65.3719	67.8954	61.0552	65.6933	61.58	66.9396	55.2454	72.3	61.3834	60.0729	61.9493	52.6367	64.6032	53.148	60.12	52.4524	69.1251	58.887	62.5196	59.443	50.4324	63.5161	55.3826	57.329	72.3	69.4424	60.7872	69.0513	66.1097	66.9279	61.0217	65.4506	59.9428	66.6088	70.8597	60.9837	64.2009	63.0184	59.5441
	72.4	111.723	106.319	110.759	92.4086	89.9594	77.1494	78.2442	70.4379	65.6297	65.2541	67.7093	61.3698	65.2152	61.8479	66.6723	54.9877	72.4	61.7631	60.5348	61.4701	52.9489	64.217	53.426	59.9107	53.0012	68.7968	59.4179	62.1999	59.2479	50.0108	64.2006	55.2828	57.4581	72.4	69.3358	60.0544	69.2294	66.2853	66.7124	60.9714	65.3808	59.9648	66.6183	71.2639	61.1448	64.3589	63.881	59.786
	72.5	111.506	106.199	110.461	92.5783	89.7326	77.6178	77.9304	70.1939	65.4119	65.5512	67.5857	61.8141	64.4837	61.8362	66.2122	55.0058	72.5	61.636	60.9934	61.472	53.2587	63.8977	54.0061	59.9007	53.2209	68.7326	59.4658	62.0998	58.9398	49.6987	64.9377	55.0394	57.4801	72.5	69.0684	59.1936	69.2489	66.0763	66.392	60.5924	65.6236	59.8729	67.2014	71.5172	60.8778	64.5371	64.1212	60.2792
	72.6	110.761	105.977	109.857	93.3407	89.9192	77.82	77.2881	69.9577	65.5809	65.672	67.1229	62.2206	64.286	61.6294	65.7956	55.4127	72.6	61.1993	61.2362	62.0311	53.4216	63.7082	54.2507	59.8063	53.0324	68.7861	59.1698	62.2767	58.3973	49.8298	65.2222	54.7513	57.3792	72.6	68.4416	58.8777	68.8584	65.5021	66.4923	59.9537	65.7679	59.8408	67.4478	71.5333	60.7212	64.5737	64.3819	60.4602
	72.7	110.035	105.189	109.707	93.7907	90.2318	77.8061	77.1179	70.0467	65.5642	65.7372	66.4932	62.4192	64.7657	61.7178	65.9743	55.9301	72.7	60.5124	61.1134	62.2867	53.1024	63.8249	54.2384	59.621	53.0618	69.1101	58.8623	62.4453	57.8182	49.7773	64.8878	53.957	57.239	72.7	67.9254	59.1736	68.8414	65.2576	66.658	59.6536	65.4417	59.6402	67.6054	71.2812	60.3524	64.7014	64.3306	59.8659
	72.8	109.61	105.021	109.845	93.3981	90.3583	77.3998	77.2883	70.3519	65.5951	65.9513	66.5438	62.6149	65.5654	61.9436	66.1807	56.0826	72.8	60.31	60.6487	62.0153	52.8332	64.4988	53.7837	59.3531	53.023	69.5223	59.0946	62.1492	57.5416	49.5832	64.5088	53.1611	57.0322	72.8	67.6536	59.5364	68.6513	65.001	66.8867	60.071	65.0398	59.382	67.4631	70.8763	60.4393	65.0499	64.7077	59.0654
	72.9	109.658	105.127	110.395	92.6857	89.9933	77.4361	77.2742	70.4838	65.3771	66.0459	66.951	62.7873	65.7797	62.2002	66.5188	55.6821	72.9	60.4683	60.2424	61.1664	52.6087	65.3569	53.4347	59.6697	53.079	69.8798	59.7428	61.4729	57.5429	49.1868	64.2599	52.8473	56.8393	72.9	67.7448	59.7052	68.6143	64.93	66.7426	61.1948	64.7881	59.3483	67.4601	70.4773	60.5727	65.2783	64.7013	58.393
	73	109.887	105.594	110.486	92.3079	89.6743	77.6487	76.8639	70.3507	65.3309	66.4798	67.4259	62.7006	65.2233	62.555	66.6281	55.1973	73	60.6541	60.2714	60.7337	52.5338	65.9652	52.9572	59.6251	52.6844	69.7179	60.2847	61.0126	57.7362	49.2157	64.0977	53.3203	56.9464	73	67.7462	59.8412	68.5906	65.1442	66.8799	62.1614	64.9491	59.4766	67.1217	70.4553	60.788	65.3112	64.4111	58.6122
	73.1	110.545	105.853	110.403	92.7237	89.399	78.1001	76.4767	69.9709	65.001	66.3918	67.521	62.7958	64.3464	62.5098	66.9741	54.9837	73.1	60.6557	60.6602	60.9283	52.4896	65.784	53.048	59.669	52.6182	69.4996	60.6991	61.09	58.109	49.7329	64.0714	54.354	57.2243	73.1	68.0446	60.3218	68.89	65.6646	67.1699	62.3188	65.1132	59.7238	66.9499	70.3402	60.5802	65.1392	63.633	59.3778
	73.2	111.388	105.665	109.777	92.8422	89.2669	78.277	76.846	69.9344	64.9196	66.59	67.4287	62.9769	63.7583	62.2696	66.9336	55.1142	73.2	60.5309	60.9161	61.4441	52.5851	65.5677	53.1263	59.3851	52.577	69.0262	60.6373	61.534	58.2727	50.4128	64.3221	55.0573	57.7463	73.2	68.1498	60.9431	68.9199	66.232	68.0058	61.4072	65.2618	59.9099	66.9807	70.1461	60.3196	65.0076	63.0981	60.3327
	73.3	112.153	105.486	109.389	92.786	89.1044	78.4063	77.2708	70.2051	65.1944	66.4044	66.8798	63.1709	63.9487	61.9489	66.8872	55.2489	73.3	60.6652	60.5753	61.6108	53.0149	65.4496	53.0744	59.9258	52.8036	69.0283	60.7918	61.5851	57.9984	50.5282	64.8036	55.538	58.1113	73.3	68.2961	61.2091	68.5332	66.059	68.4128	60.4843	65.0708	59.8591	67.3242	69.8977	59.9756	64.8784	62.7941	60.6873
	73.4	112.119	105.526	109.081	92.3539	89.034	78.2689	77.9938	70.5687	66.0741	66.7271	66.3236	62.9249	64.1953	62.0717	66.6798	55.0141	73.4	60.5132	59.9287	61.3197	52.977	65.7869	52.501	60.2673	52.7858	69.1428	60.5663	61.1374	57.532	50.0131	65.0338	55.5976	58.5898	73.4	68.1702	60.9083	67.9302	65.6237	68.459	60.0721	65.3594	60.0567	67.3561	70.1956	60.1134	64.5489	62.848	60.6614
	73.5	111.499	105.765	109.456	91.7347	89.3398	77.8849	78.0787	70.6861	66.8121	67.0426	65.7689	62.381	64.4928	62.4988	66.9284	55.1683	73.5	60.3451	59.8756	61.5684	52.6728	65.465	52.2179	60.6091	52.7674	69.4672	60.6536	60.5673	57.3483	49.338	64.6074	55.7392	58.9629	73.5	68.1184	60.3248	67.411	65.3339	68.0791	60.3233	65.9492	60.1306	67.082	70.883	60.3131	64.2347	62.9952	60.4274
	73.6	111.313	105.817	109.825	91.0921	89.8176	77.049	78.2261	70.5938	67.3281	67.3333	66.006	62.1242	64.2444	62.6206	67.2288	55.249	73.6	60.011	60.4046	61.9902	52.0807	64.6668	52.6501	60.3984	52.993	69.385	60.4029	60.3938	57.8187	49.0813	63.9229	55.7419	59.266	73.6	67.9919	59.9904	67.1591	65.3957	67.6653	60.6462	66.8407	60.4912	66.553	71.2183	60.8221	64.2449	63.4288	60.4046
	73.7	111.456	105.634	110.059	90.6369	90.1012	76.1271	77.6841	70.6822	67.4036	67.4331	66.4438	61.9503	64.3844	62.3466	67.5597	55.785	73.7	60.2876	60.9622	62.4308	51.799	63.9572	53.6913	60.3429	53.4662	69.2984	60.3657	60.445	58.2458	49.4534	63.4617	55.5481	58.9201	73.7	67.8262	59.895	67.1531	65.5927	67.5282	60.5658	67.1928	60.4849	66.0429	70.9181	61.1758	64.4967	64.0262	60.0886
	73.8	111.844	105.561	109.717	90.7978	89.8399	75.6063	77.3257	70.9626	66.9847	67.3074	66.9973	62.2068	64.5807	61.7451	67.6401	55.6207	73.8	60.4874	60.8599	62.1522	51.5458	63.8556	54.3974	60.106	53.8801	69.3473	60.0491	60.6732	58.4553	50.1047	63.8154	55.2134	58.0966	73.8	67.8116	60.1153	67.2309	65.6431	67.0304	60.5826	66.8796	60.5333	65.9331	70.113	61.3108	64.9672	64.1878	59.9064
	73.9	111.746	105.208	109.195	91.2628	89.4759	75.962	76.9921	71.2703	66.063	67.4061	67.092	62.4548	65.2026	61.3771	67.447	55.3721	73.9	60.6802	60.0663	62.2817	51.3694	64.2312	54.3121	60.1562	53.9376	69.5961	59.7046	60.6603	58.4122	50.653	64.3161	54.7544	57.3939	73.9	67.8924	60.3333	67.2647	65.6433	66.626	60.7313	66.3966	60.5988	66.3688	69.5654	61.0236	65.363	63.9282	59.3506
	74	111.858	104.717	109.268	91.5233	89.4669	76.8282	76.9381	71.4477	65.0687	67.4087	67.2296	62.932	65.4006	61.2189	67.0618	54.829	74	60.7978	59.5229	62.5751	51.4018	64.1181	53.7778	60.5031	53.5478	69.8011	59.2779	60.7147	58.4121	50.6244	64.6644	54.5638	57.3969	74	67.9344	60.5246	67.1171	65.4413	66.0723	61.3272	66.0099	60.6443	66.9846	69.1949	60.5919	65.5851	63.3828	58.9124
	74.1	111.661	104.051	109.351	92.0721	89.8649	77.8142	76.6851	71.3146	64.7291	67.3507	67.2831	63.0356	65.3789	61.3367	66.6712	54.5378	74.1	61.1892	59.4319	63.1554	51.692	63.7852	53.326	61.0222	53.3174	69.8068	59.1072	60.8707	58.6297	50.3769	64.5536	54.4298	57.8959	74.1	67.8833	60.4298	67.0409	65.3898	66.1338	61.572	66.3124	60.7173	67.2421	69.153	60.39	65.5221	63.1859	57.9142
	74.2	111.5	103.834	109.979	92.9731	89.9771	77.8538	76.4533	71.1274	65.0001	66.9674	67.4403	62.8791	65.0332	61.4263	66.4291	54.6367	74.2	61.7919	59.9513	63.1691	51.9713	63.4879	53.3081	61.1851	53.3258	69.8533	59.1329	61.3881	58.8142	49.9766	64.213	54.6377	58.3457	74.2	67.9571	60.3529	66.8808	65.5406	66.2852	61.2924	66.5148	60.4103	66.9872	69.5121	60.4994	65.3057	63.2074	57.6356
	74.3	110.827	103.734	109.842	93.7901	90.033	77.5733	76.1817	71.086	65.5116	66.474	67.2532	62.5518	64.9599	61.4017	66.4693	54.9931	74.3	61.8943	60.1752	62.9131	52.2548	63.8059	53.3143	60.8377	53.652	69.7049	59.5651	61.9233	59.0947	49.8708	63.8408	54.9334	58.4638	74.3	68.1561	60.449	66.6801	66.0256	66.5901	60.6392	66.7372	60.2644	66.9917	70.3869	60.5959	65.3814	63.274	57.5021
	74.4	110.388	103.84	110.158	93.6927	89.8756	77.0358	76.2962	71.3762	65.8367	65.9789	67.1893	62.4091	65.2007	61.1952	66.7043	55.3196	74.4	61.546	59.901	62.3927	52.4958	64.2227	53.273	60.4951	53.7893	69.5904	59.9786	62.1054	59.2956	49.9072	63.4979	55.6513	58.3754	74.4	68.3867	60.7953	66.7092	66.3747	66.542	60.2577	66.4551	59.9517	67.0704	71.5134	60.9026	65.4882	63.4921	57.9559
	74.5	109.651	103.872	109.961	92.8781	90.2297	77.2047	76.5436	71.784	66.0416	65.8421	66.909	62.5984	65.5457	60.8671	67.1622	55.1793	74.5	60.8016	59.435	61.9061	52.771	64.6647	53.1211	60.2361	53.6431	69.6449	60.2064	62.1391	59.4448	50.1071	63.3943	56.1957	57.9207	74.5	68.2629	61.116	67.2199	66.3399	66.741	60.5593	66.2569	59.8587	67.3104	72.0523	61.1468	65.3767	63.771	57.9949
	74.6	109.387	104.011	110.398	92.5763	90.2262	77.4089	76.8568	71.6738	66.3792	66.0351	66.9627	62.9012	65.7574	60.5454	67.4988	54.7322	74.6	60.5406	59.3826	61.3363	53.1107	64.728	53.121	60.1661	53.3361	69.8446	59.882	62.2708	59.2298	50.127	63.5617	56.4098	57.3817	74.6	67.9754	61.077	67.9351	66.1366	67.1143	61.0758	65.8502	59.7332	67.2761	71.7273	61.4368	65.0639	64.1724	58.0439
	74.7	109.138	104.205	110.792	92.775	90.1008	77.5359	76.9967	71.4029	66.5882	66.3124	66.9542	63.1826	65.7148	60.5143	67.5128	54.4219	74.7	60.7157	59.6204	60.9254	53.5072	64.803	53.0346	59.9879	53.1967	69.9589	59.2631	62.618	58.5756	49.7866	63.8711	55.9387	57.0462	74.7	67.7068	60.682	68.3803	66.0309	67.4002	61.6008	65.399	59.772	67.2369	70.7574	61.0196	64.7976	64.1509	58.3847
	74.8	109.283	104.5	111.158	93.1577	89.5647	77.0297	77.0743	70.8368	66.4547	65.9737	67.4038	63.2253	65.4243	60.8393	67.2633	54.5307	74.8	61.0943	59.7548	60.8626	53.9972	64.4774	52.7636	59.9862	53.177	69.7124	58.8203	62.7008	57.9441	49.5338	64.2339	55.2757	57.1666	74.8	67.8493	60.2001	68.3491	66.14	67.4063	61.6927	65.1662	59.8622	67.3339	69.9852	60.5224	64.9341	64.0733	58.7204
	74.9	109.109	104.623	111.161	92.9667	89.3	76.5371	77.428	70.6809	65.742	65.4612	67.4163	63.0478	64.8911	61.1682	66.8692	54.8863	74.9	60.7791	59.6486	61.5522	54.1951	64.0097	52.532	59.7373	53.3317	69.3261	58.6386	62.3273	57.9472	49.6368	64.3656	54.8621	57.2446	74.9	68.4652	59.7186	68.1611	66.2443	67.0449	61.6739	65.1509	60.0302	67.1928	70.1294	60.1942	64.9738	64.0838	59.1669
	75	109.429	104.201	110.603	92.4137	89.2334	76.2714	77.7613	70.5443	65.4468	65.0584	67.3313	62.8642	64.4802	61.3533	66.7866	55.2212	75	60.2039	59.5891	62.4324	53.7929	63.4839	52.6546	59.5191	53.311	69.1132	59.1152	61.6672	58.6104	49.9879	64.1334	54.7804	56.9771	75	69.0286	59.2693	68.1064	66.1832	66.9499	61.4304	65.4462	60.1907	67.1119	70.6128	60.6656	64.9847	64.5674	58.924
	75.1	109.632	103.669	110.243	91.4762	89.1012	76.3632	77.5196	70.9182	65.3608	65.1619	66.7641	62.3789	64.419	61.2392	66.7854	55.2886	75.1	59.7684	59.5462	62.8957	53.1806	62.9708	52.8038	59.4468	53.3578	69.2143	59.6154	60.9858	59.2287	50.0167	63.787	54.9599	56.7989	75.1	69.0327	58.8691	68.1956	66.4142	66.8159	61.0034	65.032	60.2428	66.9107	71.1037	60.9827	64.9002	65.0573	58.7819
	75.2	110.166	103.526	109.706	90.6194	88.6137	76.453	76.9543	71.5273	65.739	65.2211	66.6842	61.9797	64.6671	61.4216	66.7132	55.2041	75.2	60.0071	59.2753	62.6427	52.5569	63.029	52.7003	59.9234	53.0562	69.7254	60.0597	60.4813	59.1367	49.6928	63.3224	55.1349	57.1529	75.2	68.4229	59.062	68.3429	66.4179	66.7596	60.5362	64.6604	60.0911	66.8913	71.1096	61.0471	64.7322	65.2729	58.5816
	75.3	110.071	103.908	109.639	90.369	88.1682	76.6448	76.4352	72.0374	65.6509	65.0027	66.8293	61.6657	64.6179	61.537	66.5177	54.9683	75.3	60.2864	59.0646	62.0796	52.5161	63.2916	52.2059	60.5506	52.8618	70.2391	59.8366	60.4628	58.6576	49.5723	63.3317	55.1274	58.0021	75.3	67.5519	59.5583	68.2573	66.5116	66.9187	60.2131	64.5023	60.0031	66.6212	71.2411	60.4454	64.5552	65.0429	58.7691
	75.4	110.354	104.4	109.548	90.8256	88.077	77.2013	76.6706	71.8691	65.6834	64.7283	66.9847	62.0372	64.5428	61.8014	66.5008	55.008	75.4	60.5132	58.9173	61.8036	52.3987	63.7811	51.9071	60.8046	52.5338	70.3212	59.2781	60.8684	58.2913	49.8153	63.1731	54.7674	58.4857	75.4	67.3004	59.951	67.9968	65.9557	67.1848	60.2527	65.1802	59.6763	66.3764	71.2127	60.0133	64.5126	64.5967	58.955
	75.5	110.373	104.57	109.492	91.5867	88.5289	77.8983	77.1273	70.7729	65.867	64.5374	66.8701	62.7102	64.4739	61.8561	66.9352	55.2316	75.5	60.7708	59.198	61.9789	52.367	63.757	51.9277	60.7833	52.7173	69.955	58.7902	61.4857	58.4899	50.4306	63.3668	54.0994	58.7358	75.5	67.1428	59.883	67.619	65.8112	67.5083	60.3653	65.9377	59.3653	65.9537	71.2886	59.5426	64.7319	64.1343	58.9487
	75.6	110.755	104.687	108.873	92.0886	89.2581	78.1788	77.4162	69.609	66.3799	64.8661	66.3856	63.2352	64.7126	62.0292	67.1919	55.4467	75.6	60.9639	59.4567	62.4342	52.182	63.666	52.1603	60.5676	52.9351	69.4459	58.782	61.8621	58.7773	50.8823	63.1234	53.4427	58.6602	75.6	67.0929	59.7102	67.2634	65.6233	67.3408	60.6357	66.2374	58.9478	66.0612	70.9586	59.3786	64.9617	63.705	58.7733
	75.7	110.624	104.777	108.218	92.2602	90.0876	78.1926	77.007	68.9711	66.6813	65.2889	66.3828	63.5187	64.6119	61.888	66.9226	55.2016	75.7	61.1034	59.9012	62.6159	52.3153	63.8296	52.7236	60.5837	53.2654	69.1637	59.1809	62.074	59.0392	50.9253	63.0944	53.4076	58.8109	75.7	66.8234	59.9231	67.0756	65.9056	66.8171	60.8261	66.2897	59.2002	66.0754	70.6188	59.37	64.9452	63.5306	58.5926
	75.8	110.558	104.875	108.348	92.2899	90.7702	77.7922	76.2704	69.5392	66.443	65.7013	66.4464	63.3418	64.1438	61.5674	66.2072	54.6104	75.8	61.4967	60.0462	62.5333	52.4884	64.1779	52.8563	60.5846	53.205	69.1869	59.5822	62.2429	58.9036	50.6032	62.7091	53.8593	58.624	75.8	67.2197	60.2572	66.9744	65.8294	66.277	60.848	66.1004	59.6981	66.6278	69.898	59.7159	64.6079	63.63	58.8967
	75.9	110.529	104.867	109.046	92.0648	90.8359	77.4054	75.7364	70.4032	66.0343	65.6388	66.8349	63.0852	63.6568	60.936	65.4359	54.0637	75.9	62.2338	60.1001	62.2149	52.5556	64.4192	53.2442	60.6784	52.8292	69.2298	59.2687	62.3658	58.783	50.121	62.726	54.61	58.7096	75.9	67.9899	60.3494	67.2278	65.5541	65.984	60.376	66.0454	60.35	66.733	69.4728	59.9861	64.4043	64.0928	59.5602
	76	110.615	104.873	109.665	91.7434	90.3287	76.653	75.7186	70.9926	65.815	65.5638	67.0779	62.3891	63.3966	60.7007	65.2022	53.9058	76	62.9972	60.1037	62.1808	52.381	64.3829	53.2488	60.7536	52.2499	69.3	58.8818	62.2978	58.513	49.8903	62.811	54.7662	58.5719	76	68.628	59.7293	67.2192	65.0953	66.3854	59.9468	65.8159	60.6679	66.7929	69.2674	60.135	64.3123	64.4859	60.2381
	76.1	110.767	105.052	109.076	91.1663	89.5888	76.0942	75.623	70.6619	65.9506	65.687	67.3224	61.8562	63.7492	60.9374	65.2559	54.107	76.1	63.0468	60.475	62.1931	52.3168	64.5424	53.6756	60.5444	51.7457	69.1464	58.6674	62.1434	58.6314	49.9219	63.0218	54.6171	58.6959	76.1	68.6357	58.8542	67.3476	64.7956	66.942	59.6827	65.9032	60.6339	66.7902	69.4272	60.1878	64.6687	64.7392	60.408
	76.2	110.62	105.237	108.267	90.8759	89.0547	75.8712	75.2873	70.0809	66.0014	66.1414	67.4762	61.5379	64.1073	61.73	65.7531	54.5978	76.2	62.621	60.8788	62.1244	52.4828	64.8583	53.8834	60.3032	51.454	69.1917	58.856	62.0739	58.6366	50.2099	63.0481	54.3899	58.3936	76.2	68.4899	58.3477	67.1201	64.8367	67.5158	59.758	65.9836	60.268	67.1627	69.715	60.5367	64.8523	64.647	60.1642
	76.3	110.515	104.718	107.38	90.6463	88.6841	75.9533	75.0344	69.6343	65.9797	66.404	67.3778	61.7744	64.7851	62.2781	66.1972	55.0049	76.3	62.0317	60.7676	62.031	52.6938	65.3488	53.8021	59.7013	51.6343	69.5596	59.1802	62.2813	58.5874	50.4178	63.1501	54.2826	58.3752	76.3	68.3904	58.5218	67.488	64.9906	67.61	59.9947	66.0184	59.6387	67.7569	69.9918	60.6187	64.9094	64.3256	59.7783
	76.4	110.348	103.805	107.258	91.0224	88.3201	76.3147	75.2624	69.579	66.1013	66.3561	67.0407	62.209	65.0103	62.1311	66.4534	55.18	76.4	61.5472	60.2341	61.8656	52.7794	65.452	53.6268	59.4752	52.1527	70.0198	59.2612	62.4964	58.015	50.1169	63.7357	54.2406	58.3146	76.4	68.3669	59.2666	67.7854	65.1207	67.3772	60.614	65.8484	59.4732	67.9686	69.9977	60.4166	64.5509	64.0417	59.4197
	76.5	110.399	102.925	107.229	91.422	88.1248	76.4681	76.2658	69.4884	66.4708	65.7631	66.8473	62.4479	65.0158	61.4943	66.4567	55.0279	76.5	61.4806	59.8671	61.7757	53.0504	65.1386	53.0966	59.6527	52.9239	70.0973	59.7748	62.3152	57.2011	49.4891	64.4049	54.3123	58.4666	76.5	68.3294	59.973	68.1628	65.2434	67.0759	61.3292	65.865	59.7733	67.6268	69.6611	60.1199	64.2156	64.091	59.2939
	76.6	110.632	103.002	107.7	92.1114	88.3026	76.7419	77.0194	69.431	66.4619	65.2621	66.795	62.7003	64.7052	61.1789	66.1383	54.9868	76.6	61.5288	60.2391	61.3133	53.4697	64.6702	53.0342	60.1857	53.2111	69.2182	59.8954	61.6946	56.6412	49.0149	64.7467	54.9739	58.4433	76.6	68.351	60.4603	68.074	65.3874	66.9664	61.8693	66.2816	60.4387	67.076	69.5272	60.2227	63.5259	64.4228	59.4378
	76.7	110.696	103.191	108.067	92.2934	88.7752	76.8928	77.407	69.4291	65.979	64.5321	67.0387	62.8034	64.6841	61.3826	66.1683	55.1207	76.7	61.9069	60.6073	60.8633	54.0797	64.5801	52.7168	60.4697	53.0782	68.2403	60.1367	60.9479	56.6682	49.0536	64.5502	55.7362	58.2457	76.7	68.3446	60.3928	68.1537	65.8191	67.2212	61.7673	66.5382	60.5209	66.7382	69.9548	60.3993	63.1611	64.8241	59.9357
	76.8	110.098	102.805	108.893	92.2602	89.6093	77.1257	76.6389	69.7382	65.3692	64.397	66.9977	63.0867	65.0746	61.5604	66.2202	55.4323	76.8	62.0896	60.5473	60.6726	54.2856	64.4908	52.6771	59.9779	52.796	67.4504	60.0706	61.0214	57.4443	49.3016	64.3092	56.149	58.1039	76.8	68.1698	59.7577	68.3332	66.1504	67.5069	61.5847	66.7806	59.9939	67.0494	70.6309	60.5203	62.9388	64.6444	60.0907
	76.9	109.464	101.976	109.322	92.0038	90.2447	77.0734	76.0351	70.2124	65.557	64.3344	67.0554	62.941	65.5269	61.4002	66.5577	55.6154	76.9	62.523	59.8913	61.0592	54.18	64.1132	52.523	59.6581	52.8056	67.6488	60.282	61.6781	58.1886	49.5088	64.3633	55.8282	58.0152	76.9	67.9947	59.0843	68.7184	66.3831	67.7477	61.2757	66.8033	59.2002	67.7263	70.8106	60.6426	63.518	64.4617	59.9542
	77	109.004	101.351	109.718	92.0301	90.5913	76.9412	75.646	70.4349	66.0097	65.2039	67.1482	63.0367	65.3779	61.1552	66.415	55.7634	77	62.6819	59.536	61.7248	53.3799	63.7466	52.7943	59.6782	52.9116	68.0612	60.2784	62.6547	58.6991	49.5558	64.3994	55.3558	57.9113	77	67.9841	58.4663	68.6819	66.3248	67.6554	61.2727	67.1326	59.0302	68.2409	70.5303	60.8017	64.0643	63.9646	59.5224
	77.1	109.149	101.796	109.428	92.1517	90.2144	76.8881	75.8531	70.4313	66.5396	66.0592	67.2509	63.0254	64.6388	61.3257	66.3434	55.7104	77.1	62.7906	59.2186	62.0849	52.6234	64.055	53.1084	60.1787	52.8199	68.6938	60.0013	62.837	58.7463	49.7262	64.4687	55.0572	57.5994	77.1	68.1391	58.8843	68.4996	66.3236	67.5333	61.1292	67.1186	59.4026	68.2364	70.3264	60.6127	64.4973	64.1548	59.5368
	77.2	108.938	102.773	109.333	92.1203	89.6842	76.8417	75.7516	70.0219	66.5394	67.0244	67.2894	63.1583	63.8348	61.636	66.0662	55.3898	77.2	62.5063	59.0069	62.3732	52.2394	64.7839	53.2219	60.5954	52.4161	69.2377	59.7438	62.4898	58.7622	49.8871	64.4727	55.2594	57.1211	77.2	68.6146	59.4894	67.8937	66.5417	67.339	60.9447	66.6386	59.9213	67.5806	70.3976	60.0414	64.6823	63.9771	59.939
	77.3	108.952	103.878	109.152	91.4679	89.1031	76.5603	75.7324	69.8698	66.5952	67.2681	67.1633	63.0151	63.911	61.8493	65.964	54.9826	77.3	62.0763	58.5409	62.4299	52.6879	64.8657	52.8306	60.8497	52.0266	69.7692	59.6408	61.8123	58.7551	50.3792	64.7011	55.276	56.9291	77.3	69.0764	60.3423	67.3576	66.7576	67.3042	60.7327	65.827	59.7851	66.8629	70.8876	59.8423	64.5623	63.9081	60.3858
	77.4	109.568	104.302	109.227	90.9043	88.6729	75.9264	75.4219	69.8732	66.4336	67.3448	67.2191	62.7144	64.4539	62.0113	65.8339	54.7826	77.4	61.3709	58.4126	62.7657	53.2984	64.5446	52.4157	60.9778	51.9253	70.2611	59.9513	61.5038	58.714	50.4681	64.74	55.2407	56.8984	77.4	69.3179	60.5373	66.9509	66.8677	67.2156	60.7519	65.1636	59.2272	66.5067	71.4701	60.05	64.595	63.2612	60.39
	77.5	110.692	103.984	109.337	90.2882	88.6601	75.8586	75.208	70.2796	66.127	67.1946	67.2657	62.5526	64.9673	62.2733	66.1776	55.1118	77.5	60.5936	58.6039	62.8647	53.435	63.8919	52.0263	60.8374	52.3106	70.4232	59.8613	61.8137	58.6694	50.3992	64.7092	54.5269	56.9338	77.5	68.9537	60.4109	67.0868	66.4501	67.0118	61.1881	65.1479	58.8537	66.8396	72.3043	60.3472	64.453	63.2426	59.9751
	77.6	111.334	103.471	109.946	90.2553	89.0762	76.2392	74.8073	70.5202	65.8493	67.2496	67.5592	62.1983	65.0203	62.4278	66.6662	55.5952	77.6	60.0821	58.8656	63.1788	53.0593	63.6756	52.1226	60.5768	53.0141	70.326	59.7934	62.2882	58.4639	49.7636	64.4778	54.1293	56.6421	77.6	68.3584	60.4003	67.4149	66.0319	66.9116	61.7124	65.3288	59.0423	67.5874	72.4212	60.337	64.7036	63.4942	59.9284
	77.7	110.846	103.109	110.305	90.3468	89.549	76.7291	75.1104	70.6209	65.9381	67.0206	67.8539	61.97	65.0784	62.1629	67.1373	56.0728	77.7	60.156	59.2011	63.4742	52.4563	63.3067	52.2897	60.437	53.5522	69.9916	59.5378	62.6227	58.506	49.6236	64.5073	53.7837	56.6554	77.7	67.9326	60.1789	67.4687	65.6877	66.8331	61.9386	65.94	59.5154	68.1669	71.8349	60.2032	64.6913	64.3117	60.3593
	77.8	109.795	102.887	110.282	90.8683	89.7864	76.0452	75.7368	70.4242	66.6524	66.9227	68.2513	61.5357	65.2879	61.6474	67.214	56.1281	77.8	60.2521	59.4191	63.727	52.4536	63.1872	52.4553	60.4679	53.7167	69.7427	59.7919	62.5344	58.4887	49.4344	64.3926	54.0798	57.2229	77.8	67.9348	60.126	67.3074	65.7194	67.1009	61.5649	66.3758	59.5619	68.15	70.7207	60.2694	64.7962	64.7811	60.8989
	77.9	109.268	102.568	109.641	91.516	89.5794	75.0167	76.5051	70.3742	67.2377	66.4167	68.3171	61.5248	65.3448	61.2326	67.3501	55.8857	77.9	60.2738	59.8534	63.4229	52.5616	63.1537	52.1746	60.7587	53.4231	69.4961	59.862	62.4564	58.6947	49.5052	64.4018	54.4407	58.1808	77.9	68.2569	59.8373	67.0824	65.4378	67.0559	61.0556	66.7834	59.3847	67.5007	69.9448	60.1461	64.5871	64.9298	60.7659
	78	109.024	102.218	109.308	91.7753	89.2093	74.532	76.7443	70.256	67.5714	66.0598	68.2718	61.6682	65.2162	60.9862	67.584	55.2879	78	60.1271	60.0949	62.822	52.8681	63.4919	51.9094	61.0922	53.0574	69.2087	59.9167	62.4846	58.8479	49.3641	64.2957	54.8832	58.6178	78	68.7348	60.0209	67.5036	64.822	66.9947	60.5897	66.3748	59.2626	66.633	69.5706	60.0674	64.5863	64.5227	60.3118
	78.1	109.287	101.696	109.128	91.5327	88.1367	75.3134	76.6936	70.2777	67.3546	65.4236	67.9511	62.0467	64.9338	60.9669	67.879	54.9409	78.1	60.5391	60.1871	62.1549	52.7634	63.8629	52.0047	61.0632	52.8331	69.1011	59.7788	62.1374	59.2073	49.7208	64.5397	55.3562	58.2883	78.1	68.9671	60.2433	67.8596	64.4066	66.3523	60.6221	65.9948	59.6243	66.3614	69.4433	60.0612	64.719	64.0837	59.6819
	78.2	109.469	101.326	109.062	91.0079	87.3509	76.3742	76.4503	70.0357	67.1243	65.3549	67.866	62.3016	64.8676	61.0996	67.8982	54.966	78.2	61.0476	60.0607	61.7878	52.6761	64.084	52.4854	60.6544	52.6748	69.4107	59.8068	61.6168	59.356	50.3766	64.9011	55.5797	57.8538	78.2	69.0683	60.5794	68.2179	64.5632	66.0871	60.637	65.4619	60.1847	66.7392	69.4316	60.204	65.0132	63.9952	59.406
	78.3	109.69	101.32	108.933	91.0059	86.9231	76.8309	76.4192	70.0753	66.6918	65.2848	67.7726	62.4629	64.6559	61.3831	67.6568	55.4857	78.3	61.3368	59.7506	61.5233	52.4431	63.9447	52.8056	60.0647	52.6963	70.2576	59.5903	60.8552	59.1467	51.051	65.0999	55.79	57.6251	78.3	68.724	60.8548	67.9257	65.1801	65.9753	60.8822	65.5174	60.6314	67.2152	69.291	60.0797	65.2204	64.2209	58.9832
	78.4	109.268	102.255	108.707	91.3564	87.4989	76.3828	76.7242	69.8048	66.1448	65.4298	67.49	62.657	64.2886	61.3357	67.3957	55.5717	78.4	61.0361	59.4712	61.6821	52.3798	63.7531	52.799	60.0489	52.7897	70.4326	59.194	60.5403	58.9252	51.1678	65.0049	55.4357	57.7707	78.4	68.3596	61.1014	67.5367	65.6109	66.5772	61.1371	65.3481	60.7349	67.3657	68.9931	59.6376	64.959	64.4943	58.9
	78.5	108.403	103.387	108.569	91.508	87.819	75.7039	77.1809	69.6918	65.3099	65.2793	66.983	62.7259	63.9126	61.2754	67.0968	55.0894	78.5	60.359	59.2158	62.0111	52.4448	63.8648	52.8151	60.4431	53.1282	70.1542	58.5114	60.5151	58.8004	50.5827	64.7192	55.1162	57.8494	78.5	67.9042	60.9254	67.1681	65.9412	67.1152	61.6259	65.4287	60.563	67.2096	68.9672	59.1794	64.8061	64.2828	58.9717
	78.6	108.212	104.203	107.975	90.6958	88.0768	75.2912	77.2481	69.5537	64.4339	65.4291	66.5363	62.8786	63.862	61.1604	66.9529	54.3149	78.6	59.6324	59.406	62.4269	52.6454	64.3684	52.8704	60.6741	53.2241	69.2951	58.2514	61.0947	58.9043	49.8106	64.3174	54.5626	57.9012	78.6	67.5237	60.2686	67.3046	66.1984	67.7071	62.0931	65.3713	60.4091	67.4958	69.6697	58.8561	64.8027	63.9902	59.6257
	78.7	108.87	104.369	107.388	89.8434	88.0717	75.3093	76.7453	69.9693	63.7608	65.6018	66.616	63.067	64.1811	61.3477	66.6862	53.9021	78.7	59.206	59.8261	62.1966	52.6312	65.0137	53.1977	60.3278	53.3217	69.3234	58.2232	61.8922	58.583	49.3167	63.9214	54.5293	58.1236	78.7	67.3953	59.4653	67.6598	66.2129	67.6853	62.3051	65.4397	60.3196	67.6891	70.8011	58.6813	65.1149	63.5009	60.2766
	78.8	110.104	104.179	106.764	89.6006	88.5989	75.4962	76.0939	70.6783	63.6147	65.6346	66.9019	63.6394	64.4611	61.3762	66.5788	54.0964	78.8	59.5042	60.4412	61.657	52.4698	65.3781	53.1169	59.7253	53.384	69.3174	58.7858	62.5843	58.4018	49.5351	63.2543	54.5143	58.3986	78.8	67.5907	59.2572	67.9702	65.8429	67.471	62.2316	65.4743	60.2192	67.7011	71.5431	58.7344	65.413	63.424	60.7801
	78.9	110.627	103.727	107.02	90.2379	89.3189	75.6026	75.7837	71.1897	63.7923	65.5741	67.3536	64.0318	64.7619	61.4537	66.308	54.2343	78.9	60.5496	60.7501	60.8407	52.2656	65.3532	53.1762	59.6836	53.7486	69.3671	59.4968	62.5912	58.1173	49.8046	62.9966	54.6656	58.804	78.9	68.3022	59.5019	67.7768	65.3224	67.0797	62.0138	65.5296	59.9994	67.2036	71.5141	59.1186	65.5818	63.3388	60.6713
	79	110.381	103.227	107.697	91.1212	89.8329	75.9247	75.7611	71.5451	64.1413	65.4523	67.4853	64.0094	65.0268	61.4237	66.2	54.546	79	61.7034	60.5851	60.5621	52.3289	65.0471	52.9358	60.2644	53.7734	68.9017	60.3253	62.1618	58.2826	49.899	62.8299	54.8022	58.7434	79	68.5692	60.1943	67.623	65.0629	67.2977	61.6389	65.7538	59.7373	66.608	70.9512	59.6856	65.6692	63.4926	60.35
	79.1	109.507	102.921	108.448	91.6453	89.6418	76.0761	75.4736	71.6449	64.4609	65.7504	67.1557	63.2446	65.6268	61.4892	66.3242	54.5863	79.1	62.43	60.1096	60.6291	52.5893	64.5072	53.1317	60.7833	53.5716	68.7377	60.9037	61.6714	58.4066	49.3812	63.319	55.1309	58.5563	79.1	68.2253	60.4308	67.2688	65.2072	67.471	61.1917	65.9807	59.6819	66.2137	70.2971	60.2254	65.6956	63.2126	59.968
	79.2	108.504	103.076	108.782	92.0169	88.97	76.2147	75.0093	71.5114	64.8741	66.0529	66.5876	62.6951	66.0032	61.3704	66.6518	54.9359	79.2	62.2031	59.5493	61.1491	52.9299	63.9974	53.1456	60.5266	52.9936	68.5913	60.7759	61.7036	58.5598	49.0987	64.0351	55.5063	58.0022	79.2	67.4221	60.7754	66.9852	65.4046	67.4819	60.733	66.1418	59.4994	65.8826	69.8259	60.4221	65.6616	63.007	60.1107
	79.3	108.069	103.366	109.004	91.9603	88.6467	75.9848	74.4797	71.1364	65.4328	66.621	66.3894	62.4131	65.7783	61.3329	66.8963	55.1304	79.3	61.6824	59.598	61.3858	53.2013	63.4688	52.9322	60.0843	52.6089	68.4313	60.4339	61.9298	58.1516	48.9627	64.6934	55.5573	57.4476	79.3	67.2778	60.478	66.7174	65.3554	66.6252	60.5211	66.0528	59.4077	65.9121	69.7683	60.508	65.72	62.875	60.1658
	79.4	107.814	103.515	109.331	91.6257	88.9131	75.9192	74.4	70.6521	66.0453	66.9634	67.003	62.5143	64.8033	61.3101	66.853	55.3062	79.4	61.0897	59.8041	61.4971	53.0292	63.7564	52.5484	59.9286	52.59	68.5594	60.0472	62.033	57.6516	49.2471	64.9373	55.6271	57.0714	79.4	67.5946	60.3103	66.9252	65.3437	65.7622	60.697	65.6828	59.3884	66.0506	69.9216	60.5384	65.3647	63.1654	60.0973
	79.5	107.848	103.502	109.224	91.1659	89.2001	75.7229	74.3418	70.569	66.5278	67.0767	67.6511	62.1309	63.6928	61.483	66.868	55.0209	79.5	61.0052	60.2781	61.5311	52.5334	64.1762	52.0562	60.1592	53.0823	69.0427	60.3688	61.6254	57.5971	49.5757	64.8117	55.6281	57.1152	79.5	67.9914	59.9579	67.3393	65.3892	65.0999	60.6268	65.2903	59.8507	66.4322	69.9798	60.7728	64.7803	63.1536	59.576
	79.6	107.542	103.478	108.757	90.8862	89.1507	75.428	74.449	70.4609	67.017	66.7748	67.9279	61.3906	63.2527	61.8271	67.0424	54.5777	79.6	61.0849	60.2978	61.8422	52.0479	64.815	52.0824	60.0387	53.6166	69.9223	60.5933	61.3757	58.0518	49.962	65.0782	55.8199	57.6766	79.6	67.7223	60.0866	67.5489	65.8954	65.1069	60.5378	65.1181	60.2306	66.5607	70.0692	60.9937	64.2177	63.1278	59.5073
	79.7	107.515	103.499	107.901	91.2079	88.5881	75.039	74.564	70.2781	66.9601	66.5917	67.5679	61.0043	63.4251	62.0396	67.1249	54.2739	79.7	61.5752	60.3037	61.914	52.1358	64.7632	51.8662	59.7958	53.7352	70.4311	60.6387	61.3243	58.6269	50.0343	65.5827	55.5506	58.1962	79.7	67.2904	60.4713	67.4042	66.2532	65.3642	60.0268	64.9433	60.1237	66.5831	70.1219	60.7376	64.1992	62.9026	59.6997
	79.8	107.575	103.347	107.652	91.6457	88.4883	74.8967	74.7228	69.9458	66.8631	66.6603	67.1361	61.46	64.1387	62.1059	66.8057	54.436	79.8	62.0904	59.9472	61.5176	52.382	64.7588	52.0812	59.9674	53.1423	70.8829	60.3199	61.5782	58.8614	49.8367	66.0088	55.373	58.8352	79.8	66.9758	60.6526	67.3317	66.5493	65.5147	59.8982	64.9059	59.6744	66.4138	70.0954	60.2256	64.547	62.9399	59.8798
	79.9	107.554	102.949	107.722	92.0556	88.414	75.2464	74.7339	69.6493	66.3219	67.1943	66.5878	62.535	64.8728	61.8703	65.9983	54.7977	79.9	62.4148	59.8182	60.7998	52.3311	64.4723	52.1984	60.4949	52.4079	70.9514	60.182	61.5721	59.0501	49.6211	65.6519	55.1024	59.1674	79.9	67.0357	60.5379	67.6319	66.2778	65.8289	59.6492	64.725	59.5349	66.2511	69.5598	59.4546	64.6177	62.7004	59.6738
	80	107.542	102.343	107.731	92.134	88.4586	75.7603	74.7126	69.3663	66.2181	67.6387	66.2189	63.021	65.3741	61.8061	65.4496	55.2677	80	62.0893	59.7346	60.4658	51.9717	63.9052	52.6414	60.8787	51.6852	70.7489	60.2352	61.4773	58.8631	49.8016	64.7424	55.0739	59.2499	80	67.1308	60.0499	68.3446	65.601	66.0931	59.5499	65.1777	59.9009	66.0008	69.0054	59.3984	64.5299	62.7833	59.2731
	80.1	107.784	101.738	107.555	91.8841	87.823	76.4747	74.8133	69.0268	65.917	67.6318	65.8832	63.0766	65.1426	61.8302	65.5049	55.4394	80.1	61.2322	59.8717	60.7471	51.9673	63.0427	52.9489	60.885	51.4896	70.2472	60.0481	61.354	58.4719	49.9433	63.9492	54.8317	58.7574	80.1	67.1667	59.7602	69.1282	64.9898	66.4191	59.331	65.6019	60.3791	65.8677	69.0336	59.6258	64.3832	63.1496	59.1909
	80.2	108.329	101.188	107.18	91.5228	87.0887	76.8574	75.2564	68.8549	65.8434	66.9321	65.8197	62.9476	64.6446	62.0819	66.0464	55.4351	80.2	60.5638	59.7738	61.3613	52.5396	62.4972	53.1138	60.8707	51.6932	69.9296	59.8376	61.3332	57.8511	49.7406	63.6704	54.7792	58.0384	80.2	67.2336	59.5536	69.4898	64.9119	66.1103	59.3439	65.9407	60.4661	66.0911	69.3606	60.1933	64.3037	63.4798	58.8914
	80.3	108.438	101.032	107.326	90.6031	86.3458	76.9697	75.6038	69.0698	65.7708	66.2731	65.6924	63.2311	64.4276	62.2516	66.2391	55.1414	80.3	60.2699	59.5874	61.826	53.2014	62.6566	53.2009	61.1316	52.2707	69.9794	59.6792	61.4622	57.7668	49.4781	64.0242	54.9267	57.4066	80.3	67.0937	59.6509	69.2339	65.2847	66.0079	59.4448	65.7471	60.1316	66.3872	69.5602	60.4372	64.2223	63.3367	58.6797
	80.4	108.235	100.875	107.144	89.6929	86.1229	76.6738	75.6892	69.3566	66.0846	66.1208	65.783	63.2109	64.9736	62.1658	66.1119	55.1783	80.4	60.3901	59.5213	61.8832	53.4894	63.2308	53.026	61.6038	52.9133	70.1067	59.8127	61.6328	57.9387	49.3092	63.9498	55.0991	56.9907	80.4	66.7377	59.7562	68.5546	65.5399	66.0426	59.7129	65.3449	59.5486	66.5958	69.4004	60.6571	64.2528	62.8567	58.5547
	80.5	108.444	100.988	107.331	88.832	86.3599	76.0341	75.0698	69.4858	66.5342	66.5939	66.17	63.0632	65.9142	61.6401	66.1038	55.3393	80.5	60.4879	59.6726	61.4477	53.4603	63.7632	53.0812	61.8068	52.9919	70.1992	59.6466	61.8756	58.4463	49.4517	63.7337	54.8236	56.9396	80.5	66.3184	59.9946	67.9358	65.5156	66.7153	59.9853	65.2973	58.8486	66.4126	69.4067	60.8213	64.6058	62.8587	58.9729
	80.6	108.889	100.98	107.378	88.8009	87.1796	75.551	74.391	69.3624	66.5641	66.9442	67.1739	62.8398	66.438	61.074	66.5047	55.5357	80.6	60.6041	59.8379	60.9862	53.2867	64.1117	53.0076	61.5378	52.7797	70.0362	58.9889	62.2113	58.6612	49.144	63.2059	54.4636	57.0062	80.6	66.3782	60.1018	67.8146	65.3774	67.0436	60.5296	65.5867	58.5822	66.3624	69.6461	60.7014	64.7987	63.2247	59.5124
	80.7	108.974	101.165	107.513	89.2863	88.0636	75.1226	74.2269	69.1697	66.22	66.9587	67.9761	63.0131	66.2703	60.8088	66.9691	55.4789	80.7	60.6348	59.7407	60.857	53.0721	64.4637	52.8918	60.8891	52.5917	69.7914	58.1332	62.4138	58.6531	48.9299	63.3206	54.3951	57.1862	80.7	66.7136	60.3172	68.0416	65.2822	67.6124	61.024	66.0818	58.9717	66.4932	69.9541	60.3861	64.6866	63.6973	59.6294
	80.8	108.258	101.373	106.854	89.9392	88.5739	75.3593	74.7593	69.4421	65.5638	66.6536	68.2474	63.3909	65.3754	61.0678	67.1374	55.5582	80.8	60.5893	59.68	61.2262	52.6573	64.6591	52.5934	60.4734	52.7927	69.2312	57.6107	62.1842	58.2389	48.8008	63.7973	54.8672	57.4376	80.8	66.9527	60.1747	68.3224	65.053	67.7312	61.5071	65.8901	59.9553	66.8827	70.033	60.0194	64.3741	64.2559	59.5958
	80.9	107.947	101.526	106.075	90.5722	88.4	75.5224	75.2347	69.8888	65.2689	66.5839	67.7028	63.5309	64.5413	61.2003	67.173	56.019	80.9	60.6604	59.6194	61.6424	52.4018	64.787	52.4811	60.2658	53.036	68.9708	57.8394	61.3412	57.5908	49.1357	64.6417	55.252	57.9482	80.9	67.1314	59.7286	68.3727	65.1339	67.5681	61.5503	65.0553	60.9879	67.0442	69.7989	60.0827	64.316	64.7806	59.6009
	81	108.202	102.104	106.046	90.9434	88.1957	75.8036	75.1724	70.5171	65.2998	66.7409	67.2562	63.4146	64.3048	61.2374	67.1699	56.492	81	61.0374	59.9029	61.7336	52.2418	64.6287	52.7756	60.0942	53.0579	68.708	58.5657	60.7246	57.4348	49.4972	65.3889	55.3764	58.6172	81	67.5782	58.9473	68.1583	65.3297	66.6464	61.4207	64.4587	61.6647	67.0643	69.3344	60.1073	64.4438	65.2992	59.5868
	81.1	108.691	102.658	107.015	91.1731	88.3134	76.0032	74.7278	70.3936	65.5308	67.1239	66.759	62.7068	64.6023	60.9177	67.1344	56.423	81.1	61.4393	59.8747	61.6264	52.0783	64.6303	52.9509	59.7464	52.9588	68.7171	59.2471	60.6936	57.7577	49.6446	65.6936	55.4217	58.8068	81.1	68.2389	58.5644	67.795	65.9084	65.838	60.9767	64.8176	62.0254	66.8869	69.3882	59.9026	64.7918	65.2064	59.3591
	81.2	108.758	103.11	108.189	91.3631	88.5092	76.2831	74.6067	69.76	65.7163	66.8962	66.6593	61.9533	64.8864	60.773	67.2577	55.6267	81.2	61.2878	59.7252	61.3651	51.7018	64.5101	53.0579	59.6437	52.8881	68.3543	59.7823	61.3098	58.525	49.598	65.4702	55.1811	58.3153	81.2	68.7954	58.6182	67.4798	65.9828	65.5257	60.6898	65.9039	61.8604	66.9882	70.0344	59.6107	64.8804	64.978	58.7073
	81.3	108.491	102.736	108.499	91.74	88.3556	76.4653	74.9103	68.9806	65.4718	66.4878	66.3668	61.0366	64.7871	60.8202	67.1908	55.0101	81.3	60.6599	59.3476	61.2491	51.5488	64.4454	52.7422	59.9837	52.8141	68.438	59.8531	61.8282	58.7972	49.2839	64.751	55.0814	57.5939	81.3	68.8569	58.7441	67.1981	66.0018	65.6486	60.7049	66.4522	61.535	67.0452	71.1926	59.5639	65.109	64.6796	58.4754
	81.4	108.151	102.048	108.028	92.1407	88.0606	76.1446	75.4343	68.7767	65.1869	65.9629	66.5232	60.5513	64.4628	61.0752	67.2911	54.8726	81.4	60.2761	59.4443	61.1044	51.6313	64.058	52.6313	60.651	52.6492	68.8826	60.0871	61.8242	58.6523	49.139	64.1757	54.565	57.163	81.4	68.7619	58.8866	67.248	65.9563	65.9238	60.94	66.0777	60.9879	67.2513	71.8889	59.9734	64.9741	64.987	58.6186
	81.5	107.781	101.323	107.322	92.1427	88.2158	75.7254	75.6707	69.2143	64.9909	66.2481	66.4508	60.6289	64.2348	61.7333	66.8724	55.2226	81.5	60.4573	59.736	61.1129	51.7854	63.829	52.4364	61.133	52.4304	69.9876	59.9162	61.4032	58.2857	49.0851	63.7936	54.8039	57.2736	81.5	68.4189	59.0527	67.2222	66.5046	66.0613	61.069	65.5386	60.5324	67.3064	72.1876	60.2582	64.9943	65.2597	58.8483
	81.6	107.67	100.87	106.883	91.648	88.6378	75.174	75.5134	69.6928	65.3251	66.5887	66.7823	61.0941	64.1223	62.2509	66.7061	55.2893	81.6	61.0852	59.9706	61.1877	51.7912	63.6618	52.598	61.0921	52.0584	70.5806	59.8366	61.0319	57.9243	49.2459	63.8261	55.0753	57.3888	81.6	68.2418	59.6817	67.2294	66.9199	66.3969	60.7141	65.3031	59.9162	67.4171	72.0212	60.4616	64.8472	65.5249	59.0179
	81.7	108.028	100.8	106.819	91.236	88.6761	75.0508	75.2802	69.6393	65.7541	66.7521	66.8612	61.6311	64.3301	62.4939	66.545	55.3593	81.7	61.6076	59.7781	61.2683	51.8266	63.6833	52.5438	60.4274	52.0969	70.4332	59.4098	61.2306	57.7697	49.3072	63.9074	55.6633	57.4862	81.7	68.1244	60.2447	67.0451	66.9374	66.8341	60.1957	65.7321	59.3838	67.273	71.6943	60.2883	64.9988	65.2584	58.7659
	81.8	108.397	101.132	106.833	90.82	88.2592	75.0634	74.9293	68.9933	66.1252	66.251	67.2171	61.8083	64.599	62.0944	66.7337	55.5301	81.8	62.0458	59.5722	61.3674	52.0646	63.8032	52.5636	59.8619	52.4983	69.6874	59.025	61.9013	57.77	49.3864	64.2571	55.7421	57.5161	81.8	68.3824	60.5513	66.9327	66.2336	67.568	59.9688	65.7184	59.1232	66.9692	71.0741	60.4388	65.1579	64.8758	58.8938
	81.9	108.771	101.901	107.145	90.6177	87.7403	75.3339	74.6871	68.2926	66.0442	65.9379	67.225	61.9551	64.772	61.515	66.453	55.8007	81.9	62.119	59.222	61.4992	52.1521	63.9466	52.3904	59.5144	53.1497	69.0852	58.9558	62.4017	58.0732	49.4997	64.5494	55.6106	57.835	81.9	68.7598	60.1146	67.1191	65.6479	68.2256	60.1502	65.7076	59.0019	66.6112	70.2957	60.4244	65.1666	64.6796	58.9318
	82	108.663	102.562	107.734	90.092	87.4294	75.5193	74.186	67.9973	65.692	65.6172	67.2891	62.0884	64.3818	60.9991	65.912	55.9283	82	61.6971	59.0562	61.8566	52.0048	64.4991	52.5183	59.6799	53.3029	69.049	59.1422	62.8001	58.6242	49.3223	64.5387	55.4068	58.2284	82	68.6981	59.2957	67.6419	65.3587	68.394	60.7071	65.3801	58.9759	66.4002	69.9978	60.6267	64.8908	64.4173	59.2563
	82.1	108.785	103.24	108.177	89.8459	87.2732	75.5541	74.1254	67.9921	65.211	65.4107	67.0428	62.1699	63.9306	60.4436	65.2512	55.8978	82.1	60.836	58.9613	61.7922	51.8036	64.8619	52.4503	59.7061	52.8326	69.2992	59.4957	62.812	58.9429	48.7456	64.1701	55.4704	58.596	82.1	68.1439	58.6626	68.273	65.7829	67.9369	60.6979	65.4866	58.8879	66.3612	70.2572	60.3347	64.6046	64.903	59.5102
	82.2	108.884	103.517	108.215	89.7391	87.0776	75.6008	74.1583	67.971	65.3401	64.8827	66.9074	62.1372	63.7461	60.064	65.4216	56.0697	82.2	60.099	59.2494	61.2754	51.6831	65.0004	52.5492	59.8068	52.4691	69.6203	59.3694	62.5878	59.1247	48.288	63.7933	55.6022	58.5144	82.2	67.39	58.6559	68.5347	66.2772	67.2401	60.3157	65.5388	59.0011	66.2561	70.5701	60.2399	64.7302	65.136	59.8409
	82.3	109.148	103.858	107.376	89.9022	86.9206	75.5196	74.6676	67.9369	65.5934	64.7284	66.9727	62.054	64.0637	60.094	66.0596	56.1471	82.3	59.7002	59.412	60.4642	51.9116	64.501	52.683	59.9631	52.2874	69.84	59.2528	61.9012	58.8517	48.5604	63.6126	55.9091	58.566	82.3	67.4871	59.1629	68.3806	66.7018	66.9831	59.584	65.6309	59.2297	66.291	70.0929	60.1958	65.1748	65.7126	60.2067
	82.4	109.081	103.821	106.579	90.0861	86.6866	75.528	74.7424	68.0511	65.7878	65.0711	66.9699	62.1251	64.8331	60.6221	66.83	55.9427	82.4	59.998	59.3946	60.3156	52.0879	64.1279	53.2544	60.298	52.6192	69.9528	59.4608	60.9651	58.908	49.3224	63.622	55.5308	58.5623	82.4	67.8884	59.5672	68.0473	66.3078	67.1163	59.4869	65.518	59.4201	66.3478	69.0853	60.5536	65.5136	65.2667	60.3372
	82.5	108.686	104.186	105.819	90.0282	86.5478	75.1452	74.7108	68.3487	65.4397	65.7253	66.6123	62.2509	65.2576	61.2279	67.0301	55.3117	82.5	60.5198	59.6511	60.7834	52.3926	64.2784	53.8962	60.3859	52.579	70.0032	59.9347	60.4763	59.1668	49.7784	63.6944	55.3557	58.6254	82.5	67.9856	59.9059	67.9836	65.7528	67.4554	60.0037	65.4536	59.9482	66.6037	68.7336	60.9106	65.4723	64.7826	60.1676
	82.6	108.381	104.501	105.817	89.7926	86.523	74.9036	74.4124	68.7282	65.1438	66.1151	65.8723	62.3901	65.2397	61.4672	66.7092	54.8269	82.6	61.3959	60.1083	61.3957	52.5709	65.065	54.3618	60.5371	52.5857	69.8621	60.1583	60.1759	59.6041	49.6704	63.9578	54.8738	58.3263	82.6	67.4219	59.936	68.0911	65.1571	67.4764	60.8442	65.5694	60.5246	66.8526	69.0804	61.1814	65.0031	63.9774	59.7556
	82.7	108.526	104.806	106.04	89.5258	86.7712	74.6298	74.5407	69.2247	65.2883	65.7084	65.6717	62.5207	64.5209	61.6896	66.3888	54.7552	82.7	61.7186	60.7951	61.9187	52.5804	65.6081	54.2598	60.5366	52.2127	69.4086	59.9237	60.3482	59.7066	49.4122	63.9703	54.8749	57.9462	82.7	67.1087	59.8337	68.4322	65.2026	67.5531	61.3532	65.816	61.0072	66.9012	69.8227	61.2273	64.6062	63.6292	59.522
	82.8	108.925	104.202	106.731	89.7306	87.0822	75.1728	74.5661	69.8073	65.5709	65.1998	66.0563	62.7412	63.9488	61.8097	66.3992	54.8946	82.8	61.7453	60.6772	62.0264	52.3153	65.7756	53.7944	60.9084	52.0186	68.9101	59.6446	60.4454	59.4071	49.2399	64.0704	54.4658	57.8348	82.8	67.657	59.4672	68.7937	64.9591	67.5476	61.4072	65.9884	60.6776	66.8526	69.9063	60.9043	64.231	63.5564	59.705
	82.9	109.067	103.333	107.171	90.575	87.1586	75.6689	74.6984	70.2589	65.9787	64.9049	66.5207	62.6802	63.9202	61.8907	66.7494	54.9591	82.9	61.1399	60.2558	61.9664	51.862	65.4113	53.2443	61.0098	51.8898	68.512	59.4101	60.8259	59.0914	49.3762	64.1742	54.3146	57.8601	82.9	68.5053	59.2401	69.0128	64.8689	67.527	61.221	65.7232	59.9448	66.6137	69.792	60.141	64.0802	63.8089	60.1806
	83	108.821	102.849	107.555	91.3299	86.8834	76.2726	74.4858	70.2101	66.2286	65.4498	66.7649	62.4797	64.5476	61.7066	66.7908	54.821	83	60.7929	59.4519	61.425	51.6104	65.2687	53.379	61.1063	51.9499	68.7927	59.0999	61.0456	58.9924	49.6359	64.6347	54.1538	58.0008	83	68.5906	59.1919	69.1036	64.6188	67.2053	61.2118	65.4209	59.4284	66.6498	69.595	59.3818	63.7216	64.1343	60.5303
	83.1	108.528	103.14	107.318	91.6292	86.5508	76.0897	74.3506	69.7781	66.5394	65.7363	66.7559	62.0961	65.6328	61.6089	66.3421	54.9207	83.1	60.493	59.2571	61.0531	51.6454	64.9193	53.465	60.9888	52.0584	69.1943	59.015	61.3084	59.077	50.0211	64.5674	54.3423	57.7568	83.1	68.1642	59.2172	68.8721	65.0459	66.5651	61.1583	65.0246	59.3904	66.7547	69.6751	58.9269	63.7199	64.2572	60.4003
	83.2	108.721	103.53	106.652	91.0123	86.5499	75.8106	74.1557	69.3981	66.7978	65.7366	67.0784	62.1183	66.2964	61.6264	65.8931	55.191	83.2	60.679	59.234	60.8722	51.7491	64.6867	53.388	60.6112	52.154	69.4549	59.1533	61.3743	58.9861	50.2148	64.0083	54.3088	57.5406	83.2	67.3986	59.2947	68.6384	65.376	66.1812	61.3423	64.8776	59.6717	66.9471	69.701	58.9602	63.7762	64.2794	59.9811
	83.3	109.023	103.332	105.864	90.2879	86.9176	75.4859	74.3753	69.1903	66.6987	65.5704	67.1758	62.2244	66.1597	61.5987	65.9921	55.5456	83.3	60.7294	59.3329	61.1603	51.818	64.4393	52.9161	60.062	52.4603	69.1334	59.5431	61.5837	58.7364	50.0671	62.8956	54.5689	57.2384	83.3	67.2469	59.5859	68.2601	65.8328	66.1339	61.6021	64.5627	59.8658	66.8131	69.5774	59.0417	64.3879	64.2244	59.5816
	83.4	109.263	102.738	105.481	89.4682	87.0864	75.5631	75.1133	69.389	66.4631	65.6552	67.1566	62.3214	65.1774	61.2731	66.5111	55.4471	83.4	60.7357	58.9392	61.3146	51.7642	64.5264	52.5809	59.757	52.8338	68.7732	59.491	61.5447	58.4203	49.8434	62.293	54.9676	57.3154	83.4	66.7843	59.9174	68.0668	66.0328	66.5179	62.1378	64.4338	60.0271	66.5679	69.2461	59.3563	64.5352	64.2898	59.576
	83.5	109.021	102.247	106.079	89.1719	86.9886	75.6488	75.8261	69.6299	66.0987	66.1536	66.9246	62.184	64.2968	61.0832	66.8256	55.4934	83.5	60.6548	58.6797	61.4741	51.7672	64.6207	52.3266	59.8776	53.0536	68.6714	59.4511	61.518	58.3697	49.7927	62.4891	55.4482	57.4136	83.5	66.7074	60.192	68.1012	66.3109	67.0384	62.184	64.5278	60.3374	66.4996	68.9816	59.89	64.629	64.2798	59.7544
	83.6	109.17	101.892	106.612	89.0689	86.5441	75.6271	76.1627	70.1228	65.8804	66.2524	66.9216	62.1604	64.3968	60.8189	66.8364	55.6374	83.6	60.8453	58.8103	61.4187	51.7534	64.6653	51.9838	60.3549	52.8736	68.7389	59.4566	61.2959	58.426	50.2252	63.6399	55.6779	57.4033	83.6	66.5713	60.0073	68.2173	66.433	67.1808	61.8461	65.1451	60.6808	66.7864	69.0494	60.5867	64.6286	64.1592	59.858
	83.7	109.335	101.785	106.966	89.2536	86.2923	75.402	76.0861	70.2516	66.0267	66.216	67.1716	62.3629	64.8214	60.6913	66.9377	55.9788	83.7	61.2716	59.1936	61.5632	51.7282	64.4812	51.8453	60.4693	52.5364	69.0583	59.884	61.472	58.7504	50.4711	64.7708	55.524	57.1467	83.7	67.208	59.7111	68.247	66.2582	67.0042	61.4277	65.9444	60.7151	67.2696	69.3711	61.2374	65.1111	63.7164	59.6592
	83.8	109.422	101.964	106.582	89.4332	86.2074	75.3442	75.7747	69.8688	66.2573	65.5553	67.3926	62.4443	65.1229	60.4444	67.2669	55.7812	83.8	61.6523	59.511	61.807	51.5987	64.3972	52.0892	60.5706	52.2902	69.3537	60.0293	61.7736	58.882	50.4191	65.3997	55.576	56.8524	83.8	67.6363	59.3146	68.0568	65.65	66.604	61.5781	66.8338	60.3866	67.4364	69.7658	61.5667	65.7186	63.4202	59.3978
	83.9	108.849	102.984	106.454	89.3017	86.1502	75.2766	75.5726	69.2763	66.5804	64.9291	67.1807	62.2501	64.3287	60.7371	67.6452	55.4557	83.9	61.6004	59.3601	61.9411	51.5344	64.1822	52.5233	60.6422	52.2631	69.7242	59.9253	62.3101	58.6843	49.9607	65.1553	55.5233	56.6841	83.9	68.1106	59.1784	67.8437	64.8481	66.4452	62.018	67.1883	59.7216	67.3293	69.9323	61.8883	65.8516	63.1883	59.4804
	84	108.051	103.958	106.268	89.2844	86.05	75.1853	75.3983	68.8531	66.1957	64.5509	66.6918	62.071	63.5358	61.21	67.5251	55.2672	84	61.467	59.1857	61.9481	51.5493	64.0249	52.9227	60.5716	52.334	69.5127	59.5391	62.4114	58.2289	49.9417	64.658	55.6101	56.875	84	68.0303	59.303	67.9151	64.5169	66.6301	62.3764	67.0428	59.5071	67.0428	69.9487	61.7	65.5263	63.4468	59.9623
	84.1	107.556	104.518	106.518	89.2472	85.9794	75.233	75.5591	69.3121	65.7751	64.74	65.9997	62.3412	63.1404	61.6828	66.9797	55.5858	84.1	61.2461	58.9927	61.2406	52.0309	63.7604	53.0851	60.361	52.3936	69.0961	59.4552	62.3777	58.1612	50.0803	63.9084	55.4016	57.3061	84.1	67.923	59.4876	67.9016	64.642	66.7764	62.4578	66.459	59.5207	67.1303	69.7422	61.2197	64.8199	63.7384	60.2844
	84.2	107.364	103.77	106.72	89.7358	86.1908	75.486	75.5847	69.6656	65.3244	65.3329	65.6141	62.9289	63.4302	61.7196	66.3312	55.7722	84.2	61.6134	59.0538	60.4663	52.4832	63.606	53.0567	59.9972	52.4649	68.7962	59.612	62.0613	58.4986	50.3192	63.1918	55.2072	58.2103	84.2	67.8143	59.7942	67.9071	65.1133	66.935	62.4018	66.0546	60.1693	67.4684	69.3929	60.0432	64.2792	64.4722	60.2454
	84.3	107.872	102.749	106.921	90.131	86.3109	75.7662	75.3792	70.0129	65.0796	65.848	65.4368	63.0994	63.9528	61.6302	65.8933	55.85	84.3	61.8077	59.3871	59.7181	52.8036	63.543	52.854	60.1834	52.5122	69.3137	59.9068	61.9511	58.7087	50.0978	62.7163	54.8064	58.8223	84.3	67.8784	59.8932	67.5431	65.4671	66.876	62.0376	65.7418	60.3426	67.711	69.3606	59.5053	64.0247	65.037	59.9114
	84.4	108.241	101.611	106.714	90.5399	86.1203	75.498	75.0806	69.5264	64.6533	65.9586	65.5937	62.7991	64.292	61.5916	65.4208	55.4388	84.4	62.0433	59.6891	59.8621	52.5732	63.488	52.8111	60.3163	52.6474	69.9622	59.97	61.6728	58.2651	49.9922	62.9381	54.5256	59.1978	84.4	68.1199	59.7403	67.3279	65.7721	66.8101	61.4569	65.4298	60.1653	67.3987	69.466	59.5488	64.3131	65.4019	59.6287
	84.5	108.408	101.044	106.615	90.6281	85.526	74.972	74.755	69.2421	64.3062	65.5018	66.1373	62.188	64.3717	61.5497	64.933	55.3	84.5	61.7791	59.8451	60.3318	52.1239	63.7752	52.8403	60.2929	52.5387	70.1359	60.0174	61.6741	57.6494	49.924	63.6676	54.4479	58.8416	84.5	67.8819	59.3684	66.996	65.8339	66.697	60.6836	65.0773	59.3992	66.6632	70.1227	60.2106	64.7998	65.2539	59.3352
	84.6	107.925	100.826	106.595	90.7804	85.2796	74.7589	74.7983	68.7468	64.374	64.8903	66.6196	61.8564	64.1511	61.5224	64.4761	55.2156	84.6	61.7168	59.4419	60.834	51.7997	64.472	53.1656	59.8352	52.4254	69.2091	59.7936	61.8742	57.2428	50.1014	64.1317	54.8216	58.4341	84.6	67.531	59.1497	66.8032	65.6647	66.5463	60.3343	65.0743	59.1142	66.0949	70.6	60.1662	64.9028	64.9234	58.9544
	84.7	107.642	100.887	106.822	90.6211	85.6236	75.0616	74.8858	68.8792	64.3503	64.6547	66.8634	61.7624	63.6093	61.3947	65.0948	55.4168	84.7	61.4702	59.0821	60.9964	51.8888	65.4621	53.1106	59.4326	52.0292	68.2701	59.3501	62.4429	57.284	49.8914	64.0881	55.2064	57.7972	84.7	67.4337	59.5294	66.7386	65.3163	66.3952	59.9457	65.419	59.1578	65.9051	70.9927	59.6999	64.6517	64.7371	58.8314
	84.8	107.641	101.425	106.541	90.4808	86.0516	75.5897	75.5862	68.796	64.0809	65.0186	66.4024	61.7887	63.0408	61.1791	65.8341	55.3817	84.8	61.2994	58.8471	61.0318	52.2257	66.043	52.9669	59.159	52.1839	67.975	58.57	62.5148	57.6886	49.5737	63.7126	55.4541	57.7393	84.8	67.9731	59.9664	67.121	65.3113	66.1659	59.7603	65.683	59.3138	66.106	70.7258	59.3929	64.3172	64.6253	58.9979
	84.9	107.561	101.758	106.553	90.0911	86.0968	75.7267	75.8404	69.0513	63.9158	65.6411	66.1083	62.0117	62.8193	61.0388	66.6671	55.303	84.9	61.0183	59.2942	61.051	52.5047	66.0554	52.5561	59.1546	52.2717	68.7257	58.1643	62.2156	58.2431	49.2547	63.4758	55.4798	57.9757	84.9	68.5076	60.0814	67.6986	65.1536	66.143	59.4459	65.6652	59.0816	66.3928	70.4438	59.5633	64.6443	64.4731	59.1002
	85	107.057	102.206	106.488	90.224	85.5868	75.5689	75.7882	69.0697	64.3668	66.2428	66.0838	62.3744	63.1047	60.791	66.5779	55.1186	85	61.0444	59.8219	60.9602	52.343	65.507	52.2243	59.1676	52.5652	69.7368	58.5009	61.7759	58.8008	49.3904	63.3979	55.7567	58.47	85	68.5233	59.7659	67.8361	65.1611	66.2539	59.4022	65.3442	59.1007	66.7551	70.4807	60.1158	65.0963	64.1194	58.838
	85.1	106.512	102.467	106.966	90.3644	85.1559	75.2598	74.9863	69.5616	65.1443	66.5287	66.6361	62.5612	63.7647	60.8504	66.4283	54.9703	85.1	60.8718	60.1951	60.8846	52.2124	64.7708	52.2933	59.2978	52.4096	70.1809	59.3221	61.7544	58.8021	49.5748	63.4391	55.9943	58.4543	85.1	68.4073	59.4377	67.5332	64.6122	66.7082	59.6224	65.2383	59.3673	67.1572	70.6601	60.9406	65.2509	63.5927	58.4132
	85.2	106.548	103.124	106.918	90.47	84.7632	75.0576	74.404	70.1723	65.3623	66.4143	67.0827	62.2432	64.3963	60.7043	66.3213	54.9818	85.2	60.6981	60.0883	61.0378	51.9858	64.0442	52.4308	59.4282	52.462	70.0609	60.1798	61.8183	58.7682	49.6072	63.502	56.1901	58.1031	85.2	68.4381	59.432	66.8373	64.4042	67.0424	60.0959	65.1661	59.8018	67.3691	70.5238	61.679	64.7131	63.5488	58.5421
	85.3	107.086	103.38	106.879	90.0088	84.7807	75.104	74.1222	70.6536	65.3449	65.6264	67.0889	61.5559	64.8156	61.0509	66.4576	55.0902	85.3	60.3221	59.9146	61.549	52.006	63.8854	52.8748	59.5022	52.5868	69.6539	60.4757	61.5888	58.7532	49.2623	63.4794	55.8807	57.7308	85.3	68.5576	59.3219	66.7062	64.1799	67.0238	61.0358	65.1644	59.8302	67.5549	70.0067	61.799	64.145	64.0992	59.0099
	85.4	107.77	103.281	106.641	89.4554	85.3054	75.1672	73.8901	70.7003	65.4106	64.9954	66.9434	61.3198	65.0714	61.4284	66.5808	55.3604	85.4	60.3697	59.9679	61.8767	51.858	64.1131	53.0316	59.7017	52.7418	69.5217	60.6487	61.5893	59.0036	49.1314	63.7519	55.4077	57.6604	85.4	68.3981	59.1824	66.7798	64.443	66.595	61.7309	65.2798	59.6082	67.4803	69.7377	60.7167	63.9437	65.1693	59.6798
	85.5	107.981	102.757	106.819	89.089	86.3623	75.4529	73.7342	70.25	65.9048	64.5957	66.6929	61.562	65.1007	61.9234	66.5164	55.3527	85.5	60.4917	60.1262	61.7507	52.0587	64.4428	53.2051	59.6573	52.5964	69.4133	60.4808	61.9446	58.866	49.2052	63.9181	54.9143	57.6756	85.5	68.093	59.0359	67.3061	64.8154	66.0237	62.1993	65.6337	59.4402	67.1397	69.9501	59.6881	64.3543	65.9492	59.8721
	85.6	107.595	102.58	106.968	88.968	87.1001	75.329	73.8447	69.6692	66.1958	64.8094	66.9731	62.1197	64.981	61.7772	66.1546	55.4187	85.6	60.9284	60.1591	61.2931	52.4163	64.4044	53.1762	59.7799	52.3652	69.3991	60.2601	62.4743	58.442	49.5248	64.1617	54.8546	57.7394	85.6	67.8326	59.4681	67.3574	65.3528	65.7799	62.0281	65.8788	59.2159	66.1982	70.4734	59.365	64.6999	66.0833	59.8874
	85.7	106.921	102.311	106.79	89.0999	87.2807	75.2058	74.3814	69.0219	65.9589	64.777	67.0909	62.4623	64.9434	61.2213	66.0453	55.1384	85.7	61.3606	60.0134	61.3548	53.0963	63.8604	53.1074	59.4766	52.3584	69.4897	59.7247	62.443	57.933	49.8972	63.9361	55.1949	57.7226	85.7	67.6688	60.181	67.1476	65.784	65.6519	61.5922	65.7062	59.2019	65.2237	70.7152	60.0014	64.9356	65.6869	59.3878
	85.8	106.64	101.862	106.237	89.1733	86.8073	74.6382	74.9094	68.5851	65.5796	64.9491	67.2068	62.465	64.7413	60.7018	66.1408	55.0031	85.8	61.6059	59.6186	61.7711	53.8009	63.3872	52.8443	59.3089	52.5671	69.6191	59.1429	61.7467	57.6746	50.2892	64.091	55.7074	57.8441	85.8	67.7503	61.0716	66.7544	66.0247	65.8503	60.7983	65.4289	59.3526	64.7062	70.574	60.6647	64.6894	64.7107	58.7081
	85.9	106.95	101.33	105.554	89.2326	86.6087	74.4078	74.8782	68.3903	65.2052	65.2351	67.07	62.5893	64.7921	60.527	66.872	54.7484	85.9	61.5419	59.2448	62.4493	54.2857	62.9094	52.5909	59.0374	52.8209	69.3889	58.7917	61.0466	57.5288	50.8239	64.0704	55.752	57.7862	85.9	67.8364	61.4866	67.0239	65.9792	66.1503	59.9826	65.651	59.9179	64.9879	70.1189	60.9383	64.6463	63.6677	58.1366
	86	107.582	100.88	105.2	89.1119	86.5743	74.3962	74.5253	68.4731	65.3951	65.6304	67.0836	62.4187	64.5644	60.3649	67.3173	54.8954	86	61.3797	58.9091	62.7451	54.196	63.1409	52.3506	59.263	53.0414	69.1467	58.73	60.6606	57.6076	50.9434	64.0732	55.5136	57.824	86	67.8564	61.2729	67.8968	65.6432	66.6891	59.4561	66.3157	60.0308	65.6597	70.1182	60.9237	64.5404	62.7596	57.8783
	86.1	107.716	100.909	105.316	89.0196	86.8332	74.6194	74.1963	68.3387	65.358	65.7387	67.242	62.3984	64.7153	60.1306	67.6549	54.9681	86.1	61.4167	58.7054	62.72	53.5421	63.1561	52.2648	59.4083	53.2047	69.2204	59.0381	60.8167	57.7436	50.7637	63.7836	55.0777	57.5686	86.1	67.3512	60.7528	68.6529	65.3133	67.1221	59.5193	66.8279	59.8749	66.2451	70.0061	60.6778	64.7593	62.8747	58.1972
	86.2	107.446	101.023	105.553	88.8164	86.7479	74.8141	74.3291	68.473	65.7203	65.4218	67.351	61.7419	64.552	59.9634	67.07	54.9271	86.2	61.5896	58.5952	62.0268	52.9201	63.3831	52.3529	59.7148	53.4716	69.7839	59.2616	60.9432	58.1514	50.293	63.8019	55.1183	57.7532	86.2	66.899	60.1386	68.9191	65.225	67.5489	59.7318	66.7597	59.1697	66.35	70.4184	60.3497	64.7587	63.4443	58.3688
	86.3	106.395	101.776	105.679	88.5906	86.4048	74.7433	74.8664	68.4573	65.8736	65.1521	67.2726	61.3779	64.4772	60.3168	66.5756	54.6426	86.3	61.4601	58.6873	61.0719	53.0054	63.5887	52.6398	59.8586	53.4258	69.9964	59.3504	60.8828	58.5471	49.9907	64.0252	55.0351	57.8822	86.3	66.5966	60.148	68.5533	65.233	68.1567	60.0549	66.0813	59.3272	66.0073	70.5943	60.1756	65.0569	64.1532	58.7504
	86.4	106.106	102.443	105.689	88.2184	85.8181	74.9071	75.1723	68.9644	66.3892	64.9797	66.8843	61.2426	64.2876	61.1506	66.0008	54.4912	86.4	61.2116	59.2863	60.3476	53.4758	64.3384	52.9377	60.1376	53.3288	69.9224	59.1974	60.6012	58.9278	49.9212	64.3467	54.8686	58.4784	86.4	66.7377	59.8256	68.1171	65.2182	68.869	60.0658	65.4346	59.5316	65.6771	71.0609	60.0498	65.2786	64.5321	59.0217
	86.5	106.485	102.8	105.858	88.174	85.3624	74.9358	74.9731	69.076	66.5388	65.1839	66.6821	61.8867	64.1319	61.8917	66.0907	54.629	86.5	60.9126	59.667	60.3304	53.8024	65.1864	53.0132	59.9179	53.0482	69.6701	59.0623	60.4713	59.1471	49.9698	64.6109	54.3314	58.7166	86.5	66.882	59.7028	67.7619	65.0552	69.1664	60.3134	65.1626	60.1896	65.7628	70.8051	59.9382	65.5224	64.9191	59.4658
	86.6	107.772	102.246	106.079	88.192	85.1826	75.0953	74.2782	69.4526	66.4752	65.407	66.7514	62.9169	63.6602	62.1903	66.1384	55.0741	86.6	60.892	59.9129	60.8727	53.492	65.5233	52.909	59.5267	53.0939	69.6711	59.0767	60.5207	59.2874	50.0489	64.7688	54.1439	58.8991	86.6	66.9199	59.3897	67.6276	65.156	68.5199	60.5744	65.6033	60.206	66.2922	70.2349	59.5601	65.2157	65.4189	59.6049
	86.7	108.357	101.458	105.987	88.5212	85.1964	75.0048	73.8538	69.6457	66.2839	65.7383	67.0608	63.498	63.1799	61.9111	66.2942	55.4563	86.7	61.0408	60.1174	61.3892	53.141	65.3148	53.0246	59.343	53.1319	69.4288	59.3196	60.6571	59.3861	49.8103	64.7012	54.2686	58.7798	86.7	66.895	59.5556	67.7252	65.2621	67.4858	60.7997	66.1853	60.0749	66.7722	69.7829	59.3782	64.6263	65.3357	59.1921
	86.8	108.139	100.587	105.723	88.8712	85.0544	75.1148	73.9557	69.8167	66.1257	65.9881	66.9326	63.3034	62.9596	61.4806	66.4533	55.8469	86.8	61.2783	60.6318	61.6306	53.0058	64.9008	53.2689	60.1116	53.0203	68.7532	59.4346	61.224	59.3639	49.7481	64.3773	54.6847	58.4498	86.8	66.7243	59.5057	67.6987	65.2908	66.7748	60.7601	66.6123	59.8189	67.0201	69.8349	59.7087	64.2478	64.7229	58.584
	86.9	107.645	100.302	105.474	89.2667	84.8029	74.7898	74.4802	69.557	66.2539	66.5501	66.5513	62.3242	63.5348	61.29	66.7524	55.9071	86.9	61.5434	61.0872	61.5769	53.2679	64.6232	53.1763	60.9354	52.7261	68.0922	59.1147	61.8406	58.8709	49.7332	63.971	54.9133	58.0722	86.9	66.5554	59.1627	67.8292	65.3381	66.5406	60.3243	66.6284	59.573	66.9408	70.1962	60.081	64.3563	63.8699	57.9859
	87	107.187	100.071	105.227	89.5616	84.5528	74.196	75.1509	68.8434	66.5014	67.1159	66.2017	61.7592	64.0343	61.0678	67.0083	56.1204	87	61.6502	61.0552	61.3958	53.4196	64.533	52.743	61.431	52.582	68.0032	58.3632	62.3243	58.1154	50.3044	63.4947	54.8643	57.8558	87	66.2637	58.8039	68.0662	65.5722	66.3413	59.9566	66.5557	59.7958	66.8619	70.2033	60.1334	64.6738	63.3954	57.9699
	87.1	106.776	100.383	105.033	89.3663	84.5293	73.5074	75.605	68.3719	66.6502	67.4819	66.3119	61.824	64.2262	61.0266	66.9591	55.7966	87.1	61.6171	60.9314	61.6747	53.5408	64.2878	52.3338	60.9269	52.7487	68.8259	58.1237	61.9831	57.3079	50.4317	62.9179	54.6868	57.9027	87.1	65.9698	58.9759	68.5252	65.7509	65.9563	59.4332	66.4741	59.9108	66.8131	70.0431	59.6059	64.4538	63.1853	58.1696
	87.2	105.866	100.262	105.087	89.0629	84.6174	73.5061	75.9699	68.1801	66.6341	67.03	66.3593	62.1482	63.7389	60.9781	66.4367	55.698	87.2	61.4082	60.6913	61.9911	53.4282	64.2942	52.6008	60.5628	53.2376	69.9134	58.5019	61.6336	57.0896	50.4374	62.3347	54.7183	57.8729	87.2	66.0846	59.5191	68.9692	65.7538	65.8264	59.447	66.3272	60.4612	66.8022	69.736	59.3449	63.7853	63.197	58.6867
	87.3	105.464	99.9076	105.498	88.848	85.089	73.977	76.1858	68.5368	66.1646	66.1257	66.3194	61.9821	63.0484	61.0292	65.7884	55.3624	87.3	60.9369	60.3651	62.6282	53.0819	64.4399	52.8168	60.1146	53.626	70.4631	59.2788	61.5077	57.3747	49.7607	62.2784	54.9324	57.6232	87.3	66.3408	59.8231	69.2002	65.2939	65.934	59.8681	66.2246	60.4203	66.9066	69.5966	59.5911	63.4426	63.6329	59.1691
	87.4	105.726	99.4164	105.879	89.0791	85.6848	74.4247	76.5328	68.9781	65.8484	65.5382	66.0604	61.7714	62.8449	61.1491	65.3784	55.5226	87.4	60.1371	60.0759	62.5124	52.5611	64.7417	52.9002	60.1273	53.8442	70.2383	59.6609	61.7332	57.8896	49.3499	62.841	55.2442	57.503	87.4	66.865	59.7761	69.2967	64.686	66.3647	60.9187	65.9094	60.3269	66.7844	69.3348	60.0369	64.0832	64.3472	59.239
	87.5	106.704	99.6426	105.717	89.1768	86.0218	74.6358	76.3613	69.4871	65.2523	65.8163	66.0648	61.7839	63.1939	61.3203	65.5889	55.3699	87.5	59.3112	59.871	62.5223	52.211	64.6872	52.8608	60.1299	53.3276	69.3686	59.8782	61.7956	58.5187	49.0887	63.8237	55.3737	57.7762	87.5	66.851	59.2751	69.1018	63.9058	66.6774	61.6126	65.6956	60.0427	66.9509	69.1723	60.284	65.5561	64.6356	58.9491
	87.6	107.056	100.555	105.129	88.9102	85.5114	74.9866	75.7824	69.9714	64.9094	66.5168	66.1867	62.334	64.1988	61.7987	66.1857	55.1026	87.6	59.005	59.9103	62.3173	52.217	64.5137	53.0097	60.4834	52.7277	69.0672	59.9438	61.8897	58.8147	49.4289	64.3049	55.6926	58.3443	87.6	67.0708	58.8792	68.9234	63.472	67.0316	61.8801	65.3582	60.0838	66.8733	69.3053	60.2268	66.3724	64.2784	58.7386
	87.7	106.852	101.074	104.171	88.7493	84.9417	75.3164	74.9214	69.8412	64.2096	66.7196	66.4298	62.6949	64.6873	62.1747	66.6751	54.8833	87.7	59.0873	59.9031	62.4774	52.2664	64.3034	53.1608	61.0139	52.1119	69.2916	60.0081	62.0167	58.8651	49.8469	64.2333	55.8791	58.7743	87.7	67.419	58.4403	68.5643	63.59	66.9848	61.6929	65.5392	60.32	67.0256	69.9001	60.3346	66.0822	63.8841	59.1341
	87.8	105.998	100.983	103.608	89.0036	84.8476	75.4191	74.5436	69.5183	63.7587	66.2273	66.7308	63.2011	64.5673	62.3292	66.7436	55.0219	87.8	59.46	59.747	62.4864	52.2056	64.4873	52.5693	61.3881	52.0419	69.9156	59.9919	62.1512	58.781	50.0811	63.7308	55.9663	58.8917	87.8	67.9202	58.588	68.3598	64.2192	66.9858	61.6686	65.6942	60.2621	66.8859	70.6229	60.4348	64.9471	64.0696	59.7722
	87.9	105.534	100.287	103.216	89.2071	85.4112	75.1173	74.5732	68.9753	63.2737	65.4514	67.1551	63.625	64.1258	62.1404	66.4002	55.5033	87.9	59.6973	59.4078	62.3816	52.2131	64.3241	52.0406	61.316	51.9853	70.1889	60.2204	61.8202	59.0546	49.9377	63.4201	55.6696	58.4912	87.9	68.0691	58.6001	67.9167	64.9192	67.0906	61.3449	66.0292	60.1558	66.8996	71.046	60.3644	64.2912	64.6834	59.798
	88	105.13	99.9622	103.684	88.6158	85.7269	74.95	74.6337	69.1843	63.5274	65.165	67.7631	64.2048	64.1959	62.0049	66.1764	55.6037	88	60.122	59.0809	62.3692	52.3756	64.1942	51.6724	60.6764	52.1721	70.1421	60.3247	61.5366	59.6039	49.5163	63.1277	55.3366	57.9951	88	67.7222	58.6747	67.7971	65.3479	67.415	60.7861	66.1693	59.7721	66.7614	70.8859	60.1718	64.5058	64.7909	59.5329
	88.1	104.869	99.906	104.326	87.7036	85.8061	74.983	74.6863	69.5463	64.2884	65.2157	67.9593	64.3326	64.8186	61.9764	66.215	55.1357	88.1	60.3136	58.9686	62.0622	52.5572	63.8383	52.3762	59.855	52.2391	70.2063	60.2823	61.343	59.5189	49.2329	62.7728	55.0872	57.4414	88.1	67.4688	58.6252	67.5053	65.0164	67.4612	59.9031	66.4339	59.4049	66.307	70.4896	59.975	64.9196	64.4292	59.2237
	88.2	104.546	100.274	105.415	87.4028	85.6971	74.9737	74.5886	69.9631	65.4804	65.7113	67.4266	64.211	65.2196	61.9203	66.427	54.2214	88.2	60.4534	59.0019	61.8771	52.3288	64.0412	53.1613	59.7168	52.4786	70.1156	59.864	61.6771	58.7881	49.491	62.3373	54.7327	57.3293	88.2	67.0038	58.9893	67.6038	64.3416	67.2179	59.6887	66.3601	59.1178	65.7396	70.2347	59.9541	64.9334	63.8547	59.4186
	88.3	104.601	100.439	106.161	87.7884	85.7199	74.5556	74.5347	69.9433	66.0324	65.9631	66.5932	63.5957	65.303	61.6982	66.6449	53.2937	88.3	60.5046	58.7253	61.4491	51.7783	64.4388	53.7497	60.2221	52.335	70.0806	59.7892	61.8433	57.7494	49.9962	62.2649	54.39	57.2971	88.3	66.6946	59.3899	67.8294	63.6396	66.8964	60.1126	66.006	59.3037	65.5742	70.4086	59.8911	64.428	63.403	59.6606
	88.4	105.122	100.202	106.635	88.1977	85.4989	73.9846	74.3668	69.6873	65.73	66.1779	66.2384	63.1268	64.8196	61.4103	66.7186	52.7831	88.4	60.9057	58.6828	61.4421	51.2087	64.6788	53.3657	60.8552	52.2274	69.7669	60.0511	62.0636	57.1383	50.4796	62.6847	54.1599	57.4431	88.4	66.3504	59.6282	68.3651	63.6814	66.6782	61.003	65.6783	59.5922	66.1073	70.7527	60.0608	63.8878	63.0676	59.9159
	88.5	105.711	99.8778	106.708	88.174	85.3122	73.4207	74.1369	69.3224	65.0049	66.0114	66.8022	62.632	64.3989	61.446	66.6627	52.6253	88.5	61.1236	58.8013	61.1308	51.2352	64.595	52.7071	60.6253	51.9431	69.5406	60.3601	62.1028	57.1873	50.3148	63.3262	54.4663	57.533	88.5	66.3681	59.6601	68.8768	64.2909	66.3787	61.178	65.7003	59.9309	66.7633	70.8658	60.4941	63.9768	62.8296	60.0059
	88.6	106.178	99.7544	106.5	88.2576	85.0022	73.1982	73.9419	68.9818	64.586	65.9223	67.3117	62.3333	63.8777	61.4066	66.5437	53.0042	88.6	61.261	59.5188	61.0797	51.7224	64.2454	52.0073	59.8964	51.8319	69.18	60.212	62.2432	57.5794	50.4162	64.0276	55.064	57.7819	88.6	66.715	59.7328	68.8702	65.0784	66.5203	60.4516	65.872	60.0976	66.8101	70.6491	60.82	64.345	63.0494	59.7912
	88.7	106.818	99.9769	106.165	88.7878	84.9068	73.3413	73.6366	68.7677	64.7649	65.9652	67.6308	62.138	63.8716	61.3804	66.6468	53.5133	88.7	61.1361	59.89	61.0069	52.0546	64.1748	52.063	59.5526	51.8713	68.8403	59.6257	62.1108	58.168	50.5622	64.3776	55.3662	58.0313	88.7	67.1489	59.7403	68.735	65.6949	67.1066	59.4073	65.6341	60.3723	66.2413	70.3001	60.6501	64.9952	63.4898	59.3096
	88.8	107.563	100.029	105.586	89.4347	84.4369	73.8789	73.5751	68.5719	65.153	66.2448	67.5119	61.9883	63.767	61.4171	66.9844	54.1439	88.8	61.0847	60.1321	61.2696	51.8369	64.2237	52.3252	59.6671	52.3412	68.7367	59.1908	61.5452	58.4681	50.9944	64.7218	55.2703	58.0269	88.8	67.6192	59.3762	68.3261	66.1527	68.0862	59.2314	65.2338	60.3088	65.6587	69.8854	60.1607	65.0387	64.0713	59.0351
	88.9	108.002	100.239	104.851	89.9112	84.3901	74.536	73.608	68.308	65.4332	66.4582	67.5731	62.0643	63.8688	61.8647	67.0989	54.2989	88.9	60.7922	59.9501	61.3624	51.4498	64.4624	52.9746	59.9036	53.0061	68.8922	58.9618	61.0424	58.791	50.6064	64.6673	54.9864	57.8673	88.9	67.7204	58.7512	68.2973	66.3418	68.3597	60.0748	64.9953	59.9906	65.5494	69.533	59.7627	64.8536	64.3892	59.0564
	89	107.754	100.814	104.415	90.0338	84.8074	74.9458	74.1583	67.8053	65.6093	66.2908	67.7729	61.9161	63.7748	62.4161	67.0156	54.544	89	60.3954	59.9576	61.3382	51.3811	64.6598	53.1384	59.673	53.1918	69.1833	59.0239	60.8194	59.0227	50.1196	64.7264	55.2931	57.6769	89	67.6462	58.3282	68.1713	66.0574	68.0583	60.9622	65.3444	59.7862	65.6883	69.167	59.477	64.4298	64.6794	59.4747
	89.1	106.896	101.386	104.641	90.3168	86.0654	75.0963	74.7506	67.2277	65.1074	65.9449	67.7491	61.9412	64.0099	62.4047	66.656	54.7114	89.1	60.168	60.093	61.5604	51.7908	64.8419	53.1311	59.4583	52.8356	69.2407	59.3251	61.1773	58.9432	49.385	64.496	55.5224	57.9127	89.1	67.6607	58.737	68.1463	64.9924	67.2633	61.2597	65.8893	59.9608	65.5258	69.1694	59.2654	64.4609	64.9997	59.6111
	89.2	105.989	101.42	105.823	90.4567	87.0444	75.0523	75.3023	66.9758	64.641	65.5931	67.567	61.995	64.2784	61.9541	66.3824	55.3284	89.2	60.3914	60.0741	61.9543	52.1598	65.1021	52.767	59.2236	52.2148	69.1913	59.9248	61.2676	58.3987	49.1953	64.6851	55.3882	58.2176	89.2	67.6488	59.2854	67.9623	64.1876	66.8157	61.0233	66.2413	60.4261	64.924	69.5241	59.1917	64.7724	65.6702	59.9088
	89.3	105.4	100.796	106.775	90.7609	87.2771	75.1382	75.1701	67.1437	64.1919	65.6208	66.9621	62.3072	64.6464	61.3863	65.7954	55.7169	89.3	60.9524	59.862	62.3693	52.655	65.3521	52.6617	59.3919	52.138	68.9634	60.3692	61.4097	57.8178	49.0661	64.8701	54.8119	58.6806	89.3	67.8179	59.639	67.7262	63.9341	66.5799	60.9597	66.189	60.4141	64.7582	70.0683	59.5251	65.3378	65.9978	60.055
	89.4	105.597	100.342	107.118	90.6391	86.912	75.17	74.6483	67.8016	64.4562	65.8294	66.6011	62.6244	65.1243	61.1143	65.5417	55.8768	89.4	61.5726	59.3309	62.3234	53.1217	65.5273	52.6216	59.5756	52.3357	68.8979	60.2939	61.4446	57.8267	49.2767	65.1477	54.4162	58.9413	89.4	67.6631	59.1854	67.7918	64.6003	66.724	61.0089	65.9012	59.8981	65.2614	70.3948	59.9387	65.6514	65.9829	60.2679
	89.5	106.13	100.077	106.286	90.303	86.4819	75.1892	73.9901	68.4042	64.7106	65.7902	66.2468	62.8872	65.455	61.1851	65.521	55.7021	89.5	61.9323	59.4537	61.7828	53.8913	65.1131	52.4487	59.896	52.6768	68.9478	59.8541	61.6724	58.0367	49.565	64.7509	54.6431	59.1669	89.5	67.828	58.8971	68.0768	65.1938	66.7269	60.908	65.8769	59.1851	66.2309	70.3748	60.1486	65.7209	65.2152	59.9787
	89.6	106.508	100.3	105.545	89.134	86.2524	74.8068	73.6791	69.0104	64.9056	65.8854	66.0686	63.1729	65.6776	61.0702	65.933	55.6626	89.6	61.7377	59.7956	61.2649	54.2566	64.7077	52.3948	59.9974	52.8132	69.2804	59.5716	61.5766	58.0493	49.8103	64.0962	54.9029	58.9033	89.6	67.8304	58.854	68.6511	65.487	66.6261	60.4527	65.9878	59.0484	66.6887	70.3301	60.1896	65.6103	64.599	59.5249
	89.7	106.195	100.399	105.35	88.139	86.1964	74.6371	73.74	68.9179	64.8788	66.1736	65.934	63.2983	65.5094	60.9343	66.0826	55.6978	89.7	61.2831	60.5732	60.9072	54.226	64.4644	52.4398	60.208	52.6709	69.8021	59.3911	61.6817	58.0608	49.8463	63.8142	55.3262	58.0639	89.7	67.9094	59.3536	68.7526	65.4689	66.2881	59.9621	65.9308	59.4758	66.8058	70.2634	60.1111	65.4613	63.9241	59.1577
	89.8	105.653	100.416	105.781	87.3202	86.381	74.756	74.1864	68.441	64.7051	67.2363	65.9168	63.3909	65.3687	60.5243	66.4122	55.7121	89.8	61.0053	60.5762	61.091	53.556	64.7764	52.9648	60.3702	52.5318	70.0593	59.2812	61.8447	58.6169	49.6899	64.1802	55.3937	57.2282	89.8	67.9124	59.6237	68.4386	65.1123	66.0956	59.8493	65.614	60.0971	67.0648	70.1441	60.0503	65.3006	63.7399	59.4899
	89.9	105.111	100.141	106.119	87.3214	86.9032	75.0569	74.7732	67.5051	64.8163	67.7799	65.8861	63.3496	65.0539	60.4966	66.6624	55.1569	89.9	61.3722	60.3633	61.1098	52.8647	64.8467	53.0219	60.6524	52.3838	70.099	59.0071	62.168	59.5102	49.6608	64.7596	55.2922	56.9839	89.9	67.97	59.6328	68.0237	64.6309	66.0046	60.0689	65.1268	60.3377	67.7956	69.9059	59.993	64.9573	63.6497	60.0394
	90	105.181	100.043	105.855	87.2153	87.2203	74.6851	75.305	67.2856	65.2076	67.5819	66.2213	63.1943	64.841	60.549	66.8676	54.6964	90	62.1844	59.5553	61.3229	52.2214	64.6517	52.9317	60.9557	52.5801	69.4519	58.8704	62.1264	59.6823	50.0529	64.6782	55.0327	57.6874	90	67.8564	59.4039	67.7421	64.2556	66.0717	60.2117	65.129	60.2321	68.5653	70.0044	60.038	64.5692	63.802	60.4082
	90.1	105.516	100.123	105.82	87.7187	87.2332	73.523	75.3576	67.4961	65.8787	66.5458	66.9477	62.7454	64.6099	60.8978	66.4364	54.1907	90.1	62.8466	59.1483	61.4657	52.0828	64.1609	52.5279	61.5312	52.8932	69.0726	58.7377	62.2122	59.0429	50.8251	64.0964	54.702	58.3161	90.1	67.4602	59.4716	67.6811	64.5411	66.028	60.1851	65.0581	59.8741	68.9009	70.1984	60.4462	64.2623	63.9068	60.266
	90.2	106.259	100.058	105.806	88.1697	86.8293	72.5258	74.7331	67.8856	65.8044	65.5468	68.0483	61.9498	64.5194	61.0184	65.8321	54.3304	90.2	63.0452	58.7454	61.8562	52.3712	63.6703	52.4971	61.8769	53.5609	69.0526	58.4814	62.5777	58.1493	51.4682	63.6409	54.6189	58.2072	90.2	66.9038	59.6518	67.4953	65.3347	66.2246	60.055	65.3474	59.6656	68.555	70.5622	60.8823	64.1397	63.7988	59.9119
	90.3	106.836	99.6176	106.062	88.8954	86.2426	72.3283	73.7169	67.7307	65.2767	64.8843	68.2983	61.4304	64.1714	61.0281	65.4837	54.259	90.3	62.6607	59.026	61.9234	52.9122	63.5022	52.6109	61.9583	54.1441	69.6798	58.3257	63.0464	57.9332	51.5387	63.6991	54.391	57.4358	90.3	66.6859	59.7744	67.2948	65.652	66.314	60.262	65.6511	59.5558	67.9236	70.4539	61.2006	64.3868	63.7462	59.5711
	90.4	107.151	99.406	105.922	88.8218	85.8091	72.8756	72.7342	67.7074	64.7287	64.676	67.7234	61.475	63.9538	60.7989	65.3981	54.6324	90.4	62.1638	59.5333	61.8161	53.1549	63.7638	52.8211	61.3568	54.3102	69.9621	58.262	63.1531	58.0171	51.0376	64.2003	54.5083	56.7723	90.4	66.5498	59.7514	67.2474	65.559	66.6104	60.602	66.2011	59.5088	67.1884	70.7936	61.1523	64.3924	63.5513	59.1787
	90.5	106.918	99.4403	106.145	88.8429	85.4894	73.4876	72.7604	68.3116	64.6962	64.8637	66.7578	62.2094	63.8221	60.5456	65.4797	54.789	90.5	61.6857	59.9949	61.4841	52.9902	64.3917	52.9311	61.0051	53.7222	69.498	58.8186	62.7951	58.3399	50.4751	64.5373	54.7919	56.8482	90.5	66.9933	59.6747	67.6163	65.131	66.3617	61.3031	66.5706	59.3599	66.601	70.8668	60.9171	64.6602	63.4761	58.8927
	90.6	106.251	99.7366	106.636	88.8309	85.7096	73.8433	73.5293	69.4567	65.161	65.4203	66.6842	62.8	64.1173	60.5633	65.3567	54.9477	90.6	61.1939	60.0831	61.3594	52.6609	64.6133	53.0002	60.7934	53.1421	68.6986	59.3392	61.9549	58.3421	49.9557	64.2972	55.1454	57.425	90.6	67.5041	59.7374	68.2546	65.188	66.2458	61.8351	66.7383	59.4052	66.1718	71.1992	60.4678	64.8876	63.2111	58.8656
	90.7	105.874	99.7169	107.208	89.0332	85.817	74.3391	74.6229	69.9543	65.5487	65.9039	66.9298	62.8338	63.906	60.5116	65.6056	54.5273	90.7	60.7116	59.772	61.3293	52.5824	64.3527	53.3801	61.1969	53.0566	68.3613	60.0461	60.9886	58.3462	49.8018	63.5891	55.272	57.6576	90.7	68.0824	59.601	68.6981	65.2118	65.986	62.2757	66.9581	59.7566	66.1654	71.1631	59.6983	65.5536	63.4457	59.1012
	90.8	105.675	99.4666	107.012	88.8566	86.0036	74.5072	75.1964	69.7418	65.679	66.2587	67.2037	62.2617	63.5419	60.742	66.1249	53.9853	90.8	60.3473	59.6831	61.336	52.4304	63.7406	53.7287	61.5478	53.5138	68.5486	60.0751	60.1266	58.0548	49.7634	62.9871	54.9427	57.5196	90.8	68.0881	59.5552	68.7139	65.104	66.4556	62.1558	67.1606	60.0641	66.6866	71.0453	59.1023	65.6484	63.8028	59.1564
	90.9	105.834	99.0201	106.622	88.5677	85.9172	74.5743	75.144	69.0272	65.1452	66.3916	66.9116	61.6523	63.0388	60.8213	66.9472	53.9188	90.9	60.28	59.5118	61.4139	52.0406	63.4932	53.7346	61.5141	53.6588	68.7923	59.9352	60.1661	57.618	50.0262	63.0557	54.7871	57.0981	90.9	67.7459	59.4664	68.4491	64.9158	66.8824	61.7712	66.8939	60.1394	67.4909	70.5074	59.0069	65.3117	64.1676	59.1884
	91	105.375	98.3719	106.014	88.4307	86.1173	74.0036	74.8846	68.5966	64.4856	66.5584	66.903	61.369	63.3577	61.1646	67.3818	53.991	91	60.1256	59.5412	61.5088	51.3994	63.4318	53.1769	61.2896	53.4343	68.6474	59.523	60.9159	57.2699	49.9932	63.5589	54.5284	57.3089	91	67.8636	59.7163	68.0649	64.9552	67.2534	61.2378	66.0364	59.8514	67.7974	69.8982	59.4367	64.8739	64.1584	58.9383
	91.1	104.658	97.9483	106.007	88.244	86.0183	73.6571	74.4677	68.2369	64.2992	66.5302	66.798	61.4909	63.8503	61.333	67.4069	54.2447	91.1	59.8599	59.7346	61.9563	51.2403	63.83	52.721	60.9922	53.0781	68.3411	59.5926	61.8646	57.2553	49.9832	64.0531	54.6032	57.6299	91.1	68.0842	60.0021	67.4623	65.4544	66.8277	61.0471	64.8962	59.8048	67.4717	69.482	59.5838	65.1529	64.2349	59.0768
	91.2	103.929	98.0013	105.61	88.2067	85.9739	73.3059	74.1344	68.0851	64.7329	66.2372	66.5136	61.6948	64.3313	61.52	67.0487	54.2369	91.2	59.4718	60.1427	62.3418	51.8016	64.2694	52.7197	61.3578	53.2244	68.006	59.6444	62.2618	57.8274	49.7743	64.2989	54.6502	58.0781	91.2	68.5511	60.1319	66.7793	65.7314	66.4124	61.0802	64.153	59.7128	66.6911	69.7399	59.4088	65.5974	64.5211	59.0127
	91.3	104.044	98.4423	105.425	88.0346	85.5967	73.1836	73.9184	68.2	65.1254	65.7284	65.8614	62.0919	64.3819	61.6706	66.7293	54.4078	91.3	59.2948	60.4599	62.728	52.5799	64.9282	53.045	61.4857	53.6756	68.0076	59.666	62.0113	58.6041	49.7569	64.4547	54.9278	58.3027	91.3	68.5339	59.7871	66.3556	65.6839	66.1242	61.2837	64.0263	59.791	66.3847	69.8041	59.117	65.7573	64.8514	59.2222
	91.4	104.605	98.8993	104.921	88.1131	85.6589	73.0166	73.928	68.7439	64.8816	65.3873	65.718	62.5388	64.3232	61.8669	66.7146	54.5648	91.4	59.2306	60.5311	62.7284	52.7901	65.0731	53.159	61.5311	54.1648	68.1887	59.5247	61.8464	59.1092	49.6624	64.3169	55.2592	58.4607	91.4	68.7343	59.3774	66.4398	65.4477	66.3903	61.1628	64.3197	59.7804	66.104	70.1958	59.2022	65.1939	65.0898	58.9514
	91.5	104.807	99.0157	104.652	87.9049	85.4824	73.0312	74.0671	69.399	64.5261	65.2203	66.0214	62.936	64.3707	61.9177	66.9899	54.6264	91.5	59.3403	60.2698	62.3601	52.5691	64.8766	53.1447	60.8233	53.9904	68.5121	59.7346	61.8454	59.1514	49.7563	64.1403	55.608	58.4797	91.5	68.6611	59.1354	66.8841	65.6082	66.9007	61.2488	64.8123	59.9206	65.7211	70.3966	59.4437	64.6207	65.0084	58.9668
	91.6	104.272	99.082	104.492	87.3397	84.9758	73.4758	74.0022	69.9571	64.3741	65.2533	66.7224	62.8744	64.3733	61.8153	67.3166	54.8881	91.6	59.2998	60.0354	61.9018	52.3167	64.5503	52.9148	60.4301	53.4862	68.2951	60.0192	62.2259	58.8374	49.6018	64.0699	55.5722	58.1077	91.6	68.3868	59.1771	67.3066	65.6868	67.5198	61.1016	65.0343	59.7722	64.9338	70.9806	59.6429	64.2719	64.3956	58.8313
	91.7	103.38	99.4052	104.538	86.7158	84.3006	74.0791	73.9294	70.0321	64.5932	65.3657	67.0228	62.44	64.5724	61.6114	67.113	54.9028	91.7	59.3367	59.5036	61.4231	52.5642	64.6256	52.782	60.2278	52.6383	68.0687	60.3237	62.4076	58.5852	49.3209	64.3494	55.0761	57.9547	91.7	67.7292	59.1067	67.5613	65.3766	67.7813	61.0737	64.8037	59.3719	64.7029	71.2741	59.8166	64.4263	63.5048	58.9587
	91.8	103.27	99.5233	104.639	86.2709	84.0774	74.6158	73.7846	69.7078	64.8403	65.6148	67.2609	62.1453	64.4582	61.2923	66.5407	54.8533	91.8	59.4651	59.393	61.1302	52.8702	65.0151	52.6688	60.8302	52.2902	67.9453	60.4951	62.5222	58.4106	49.0132	64.9018	54.3209	57.6459	91.8	67.1702	59.031	67.7093	64.8856	67.555	60.7761	64.4296	58.8171	65.0738	71.1317	59.8678	64.5904	62.9227	58.7428
	91.9	103.592	99.7191	104.617	86.6496	84.6422	74.5628	73.9554	69.2693	65.3642	65.7731	67.151	62.1094	64.2212	61.2164	65.8272	54.4237	91.9	59.7819	59.2034	61.0403	53.4417	65.0788	52.5234	61.3029	51.794	68.3301	60.6089	62.3741	58.3127	49.18	65.0716	54.0697	57.7962	91.9	66.7381	59.2571	67.8216	65.003	67.0483	60.7187	64.4689	58.4261	65.9916	70.5843	60.0142	64.7737	63.2162	58.6568
	92	104.41	99.0684	104.739	87.13	84.95	74.1898	74.223	69.1561	66.0013	66.1658	66.9879	62.2973	63.7987	61.2816	65.5957	54.267	92	60.1574	59.4007	61.018	53.7577	64.9098	52.4927	61.3514	51.7702	68.8031	60.418	62.0821	58.1747	49.8109	65.0976	54.2761	57.8592	92	66.4464	59.7607	67.7109	65.4901	66.575	60.7592	65.5951	58.3547	66.787	69.8603	60.0997	64.9059	63.6894	58.8519
	92.1	104.583	98.7533	105.103	87.7891	84.6476	73.7299	74.6837	69.3831	66.2693	66.6451	66.7703	62.4332	63.958	61.7038	65.5869	54.1597	92.1	60.3637	59.3593	61.3888	53.6952	64.3304	52.5172	60.6789	51.6473	69.2831	59.6188	61.8661	57.9627	50.2956	64.5517	54.7452	58.1627	92.1	66.2282	60.3142	67.4382	65.7891	66.2333	60.8571	66.9952	58.2332	67.2323	69.65	60.3574	65.2919	64.0527	59.2559
	92.2	104.318	98.2718	105.509	87.9567	84.0301	73.499	75.0177	69.6253	65.9509	67.1384	66.9142	62.4032	64.5498	61.8451	65.7304	54.0171	92.2	60.6843	59.4813	61.5583	52.6621	63.861	52.8399	60.315	52.0267	69.6977	58.5616	61.6811	57.8071	50.4244	64.3418	55.0424	58.1012	92.2	66.4387	60.3869	66.6777	65.6229	66.1517	61.0264	67.905	58.2684	67.046	69.8036	60.5932	65.5361	63.9987	59.7292
	92.3	103.708	98.3133	105.386	87.8808	83.6957	73.1859	75.0243	69.3144	65.3341	67.0388	67.1656	62.1214	65.0039	61.9777	66.0591	54.0626	92.3	60.7281	59.4599	62.1396	51.895	63.3038	53.0267	60.2784	52.1022	69.7313	57.8657	61.6721	57.8584	50.1112	64.4089	55.3791	58.0091	92.3	66.9131	60.0493	66.1237	65.2724	66.5502	61.0668	67.6757	58.3708	66.4193	70.1937	60.7298	65.5239	64.2376	59.801
	92.4	103.111	98.1338	104.794	87.5553	84.3269	72.9419	74.7556	68.9239	64.9661	66.466	67.0806	61.7066	64.8013	62.1791	66.635	54.2234	92.4	60.7191	59.5508	62.1581	51.4431	62.9386	52.8183	60.5699	52.1636	69.3293	58.0354	61.5061	58.0881	49.7401	65.0997	55.6234	58.2779	92.4	67.437	59.8712	65.9121	65.0224	66.9328	61.1523	66.9529	58.9917	65.8442	70.4177	60.7402	65.2242	64.4601	59.8451
	92.5	103.215	97.9386	103.808	87.4408	84.9614	72.5879	74.046	68.856	64.8937	65.9579	66.6632	61.3901	64.0844	62.6901	67.2722	54.5027	92.5	60.4853	59.4444	62.0303	51.9726	63.0971	52.1817	60.4527	52.1763	68.8326	58.7276	61.5228	58.4861	49.5728	65.615	55.7717	58.5322	92.5	67.6276	59.866	66.5643	64.7422	67.0106	60.8546	66.3234	59.4302	65.4848	70.5847	60.7246	65.07	64.6529	59.4582
	92.6	103.461	97.995	103.312	87.8591	85.4633	72.6732	73.3347	69.5461	65.1448	65.6471	66.3063	61.494	63.4004	62.844	67.3277	54.3059	92.6	60.5119	59.3758	61.5203	52.4141	63.6663	51.9387	60.3367	52.2829	68.7969	59.2001	61.7533	58.582	49.5127	65.6207	55.4999	58.4201	92.6	67.5828	60.178	67.3098	64.5227	66.6582	60.8019	66.0649	59.6314	65.6102	70.7097	60.3888	64.7698	64.3819	59.269
	92.7	104.022	98.3681	103.238	88.5149	84.9468	72.6552	72.9081	70.2468	65.445	65.5021	66.2892	61.4863	63.1106	62.4367	67.229	54.2289	92.7	60.8187	59.2279	61.186	53.0517	64.8383	52.0826	60.4648	52.2232	69.2701	59.4091	62.3248	58.6957	49.5888	65.1876	54.8322	57.4987	92.7	67.5748	60.0138	67.6244	64.2344	66.4807	60.733	65.7697	59.5438	65.7421	70.8711	59.6168	64.5713	63.8476	59.3421
	92.8	104.05	99.0824	103.735	89.2322	84.4618	72.9612	73.1623	70.3743	65.7181	65.1151	66.1934	61.4863	63.277	61.529	66.982	54.3263	92.8	61.1606	59.171	60.9709	53.2757	65.3658	52.8007	60.6467	51.6182	69.9507	59.678	62.9096	58.3448	49.4801	64.721	54.1912	57.1044	92.8	67.2956	59.7187	67.7768	64.1242	66.4888	61.0257	65.6322	59.6163	66.0912	71.0733	58.7592	64.3552	63.3367	59.8118
	92.9	104.034	99.9151	104.325	89.4283	84.3762	73.1512	73.7089	69.9713	65.7366	64.6398	66.1389	61.4609	63.8087	60.9056	66.8257	54.7458	92.9	61.4478	58.9804	60.7529	53.4373	65.3626	53.183	60.5618	51.1984	70.2268	60.0463	63.29	58.2386	49.4504	64.4428	53.8638	57.0261	92.9	67.0176	59.2808	67.8534	64.2912	66.5694	61.1822	65.4442	59.8978	66.3834	70.9909	58.5462	64.5754	63.0521	60.2004
	93	103.85	100.783	104.908	89.0284	84.8056	73.4392	74.0261	69.4148	65.616	64.3868	66.5158	61.8237	63.9581	60.6356	66.1962	54.8334	93	61.2476	58.7566	61.0699	53.3976	64.4711	53.4113	59.6886	51.1644	69.9274	60.0643	63.2853	58.0307	49.3049	64.1944	54.1259	57.607	93	66.5393	59.0366	67.9502	65.0412	66.5351	61.1527	65.538	60.0207	66.7426	70.7234	59.1639	64.7848	62.996	59.8864
	93.1	103.744	101.077	105.098	88.105	85.1076	73.5156	74.1004	69.0393	65.1538	64.7148	67.3041	62.2993	63.8729	60.8259	65.6819	54.6177	93.1	61.1291	58.8559	61.4454	53.4594	63.8601	53.3784	58.8308	51.7707	69.0221	59.7871	63.0922	58.2059	49.3646	63.9958	54.3868	57.9413	93.1	66.6744	59.0422	67.6361	65.7548	66.2374	60.9061	65.5357	60.1058	67.3536	70.1793	60.2696	65.0458	62.6886	59.3664
	93.2	103.395	100.768	105.003	87.2007	84.947	73.5894	74.5182	68.8066	64.665	65.46	68.0578	62.5384	63.5124	60.999	65.4342	54.2222	93.2	60.8488	59.5902	61.7769	53.1309	63.3631	52.9443	58.5272	52.2497	68.1338	59.5764	62.9056	58.5016	49.0873	63.8648	54.4112	58.5998	93.2	66.8828	59.2037	67.0394	65.9843	65.921	60.6517	65.5894	60.1857	67.8281	70.0462	61.1271	65.0561	62.2137	58.9997
	93.3	103.151	99.9434	104.963	86.8572	84.7691	73.726	75.3426	68.7131	64.2217	66.0721	68.0502	62.7719	63.7102	61.07	65.7299	54.2024	93.3	60.8078	60.4188	61.319	52.6878	63.2141	52.698	59.0218	52.4492	67.8521	59.9437	63.0822	58.7533	49.104	63.8792	54.2313	59.0244	93.3	67.4861	59.4479	66.9347	65.1559	65.7162	60.7523	65.4539	60.5023	68.0961	70.0492	61.3098	65.0184	62.0279	59.1778
	93.4	103.193	99.5948	105.385	86.939	84.6336	73.6201	76.2497	68.7437	64.6449	66.182	67.5126	62.9344	64.0364	60.8548	66.0284	54.4137	93.4	60.5543	61.0052	61.0617	52.1932	63.2823	52.5907	59.6862	52.5648	68.4126	60.2309	63.3006	58.8526	49.0274	63.9272	54.0997	59.0579	93.4	67.5306	59.6196	67.3539	64.4166	65.8363	60.8128	65.1793	60.775	67.7574	70.2579	60.418	64.6616	62.4938	59.3774
	93.5	103.687	99.5176	105.516	87.2403	84.6819	73.4367	76.2672	68.983	65.3564	65.8167	66.6464	63.2373	64.5052	60.8552	66.2797	54.9551	93.5	60.5126	60.9911	61.0073	52.0973	63.7329	53.046	60.2281	52.801	69.1673	60.4896	63.2551	58.6822	49.3059	63.7202	54.5681	58.402	93.5	67.7262	59.6343	68.3599	64.0654	65.7824	60.7912	64.8712	60.4879	66.9396	70.315	59.4082	64.504	63.461	59.4324
	93.6	103.827	99.6863	105.031	87.5881	84.6579	73.1568	75.416	69.2984	66.0599	65.5691	66.0918	63.2277	64.6524	61.1922	66.4373	55.1383	93.6	60.7961	61.0228	61.6932	52.24	64.323	53.4653	60.8192	53.2863	69.6686	60.4192	62.6213	58.8743	49.4568	63.3116	55.0961	57.6783	93.6	67.5384	59.3402	68.9186	64.7284	65.6058	60.3734	64.7593	60.0599	66.1442	70.4267	58.7432	64.4989	64.2347	59.369
	93.7	103.792	99.4643	104.198	87.5533	84.8726	73.0858	74.1661	69.3974	66.0669	65.1129	65.9918	62.9807	64.5283	61.7974	66.3981	55.4137	93.7	61.1259	60.8231	62.225	52.4424	64.5737	53.6843	61.2461	53.645	69.7756	60.2828	61.8912	59.0482	49.7707	62.7794	55.531	57.403	93.7	67.6599	58.8621	68.8734	65.1309	65.2397	60.2809	65.0696	59.7317	65.2671	70.7802	59.1073	64.8296	64.293	59.5368
	93.8	103.587	99.1202	103.975	86.9486	85.0882	72.8776	73.3292	69.1304	65.8459	65.08	66.1718	62.6377	64.3654	62.0583	66.2099	55.2291	93.8	61.0368	60.5954	62.4866	52.4321	64.6704	53.7816	61.3678	53.8237	70.1487	59.9184	61.7172	59.101	50.2156	62.6273	55.4068	57.6558	93.8	67.0224	58.2423	68.3564	65.1241	65.4098	60.2614	65.3264	59.957	64.9627	71.0939	59.5979	64.8223	63.7007	59.5714
	93.9	103.908	98.6061	104.097	86.285	85.2143	72.6596	73.2906	68.6	65.7697	65.1648	66.291	62.394	64.6204	61.9817	65.8663	55.1869	93.9	60.1958	60.2178	61.9959	52.2546	64.4968	53.7916	60.9409	53.9252	70.5027	59.355	62.3759	58.6696	50.5577	62.7626	55.1908	58.0026	93.9	66.1418	58.0262	67.9408	64.4398	65.7277	60.4474	65.6664	59.8919	64.8914	71.0401	60.0907	64.8216	62.9852	59.5602
	94	104.118	98.1244	104.339	85.9859	84.8963	72.5966	73.6196	68.2656	65.6274	65.9127	66.0788	62.4137	65.375	61.5946	65.7448	54.8101	94	59.5968	59.9892	61.2223	52.2599	64.4919	53.6246	60.6451	53.8286	70.6826	58.816	63.2383	58.5632	50.6329	63.2683	55.0268	58.301	94	65.2354	57.9842	67.3869	64.0348	66.3321	60.5937	65.5307	59.7089	65.2309	70.4766	60.0841	64.7502	62.8139	59.4513
	94.1	104.108	97.6638	104.333	86.3349	84.261	72.5042	73.9472	68.2748	65.487	66.3632	65.7409	62.123	66.2432	61.2718	65.7592	54.6628	94.1	59.256	59.8058	60.5694	52.6903	64.4552	53.5146	60.3421	53.5452	70.2912	58.5292	63.4314	58.8493	50.4571	63.7424	54.9068	58.3612	94.1	65.1824	58.5218	66.7369	64.2089	66.7097	60.8684	65.6247	59.604	65.5736	69.9597	60.0624	64.9824	63.2679	59.4991
	94.2	104.145	97.7066	104.533	86.2758	83.7028	72.2336	73.7717	68.7099	65.1622	66.3288	65.498	61.5899	66.2899	61.1059	65.8648	54.6819	94.2	59.4243	59.8883	60.4691	53.2699	64.5172	53.4876	60.3986	53.1151	69.8352	58.3524	62.7616	59.4274	50.3889	64.1414	54.8171	58.3408	94.2	65.5604	58.782	65.9501	64.6892	66.9127	61.048	65.7366	59.7637	65.8868	69.9726	59.9241	64.9962	63.8947	59.3832
	94.3	104.287	98.2304	104.613	86.5237	83.358	71.414	73.469	69.1894	65.2753	66.0558	65.4158	60.9694	65.9263	61.074	65.7308	54.9396	94.3	59.5981	60.1229	60.8818	53.6047	64.2648	53.5266	60.3734	52.6771	69.377	58.3213	61.8056	59.4712	50.457	64.2492	54.7598	58.0986	94.3	65.8628	59.0974	66.053	64.7108	66.9251	61.0492	66.4044	60.0699	66.093	70.3319	59.8552	64.8196	64.2814	59.1003
	94.4	104.858	98.9411	104.385	86.9332	83.5692	71.0443	73.3432	69.621	65.5801	65.7586	65.7464	60.8127	65.2782	61.1607	65.6986	55.1287	94.4	60.0582	60.432	61.4487	53.6841	64.1526	53.4221	60.6663	52.6517	69.1846	58.0982	61.4314	59.2143	50.7279	64.1964	54.6377	57.8293	94.4	65.9263	58.8628	66.5101	64.2311	66.6634	60.9872	67.0132	59.9623	66.2643	70.54	59.5999	64.4874	64.2134	59.1138
	94.5	104.719	99.2828	103.64	87.7903	83.979	71.325	73.8594	69.6758	65.8674	65.9874	65.8782	61.061	65.2546	61.064	65.7913	54.9319	94.5	60.6997	60.3403	61.8806	53.6963	64.2756	53.0309	60.8217	52.71	69.2879	58.2718	61.6847	58.8193	50.7032	64.344	54.549	57.6792	94.5	65.942	58.955	67.336	63.6908	66.3947	61.2262	67.1439	60.075	66.5863	70.4269	59.4207	64.304	64.1269	59.6451
	94.6	104.443	99.3791	102.897	87.734	84.4026	72.5691	74.5076	69.4922	65.7782	66.0248	66.3069	61.1459	65.2411	61.4372	66.1037	54.5804	94.6	61.0438	60.0997	62.0926	53.4571	64.6832	52.7056	60.9382	53.2656	69.6948	58.9009	62.4068	58.7493	50.2982	64.4409	54.4637	57.9082	94.6	65.7357	59.1782	67.4551	63.8563	66.3128	61.4506	66.6248	60.165	67.1791	69.9898	59.4369	64.18	64.1628	60.1413
	94.7	103.718	99.3656	102.529	87.3003	84.4073	73.666	75.0348	69.0598	65.3097	66.1366	66.3393	60.9053	64.8726	61.8689	66.1001	54.2628	94.7	61.0832	59.8238	62.1808	53.0859	64.5513	52.3854	60.6242	53.7152	70.1446	59.9221	62.6893	58.7823	49.6288	64.8332	54.5482	58.3673	94.7	65.6211	59.4884	67.4116	64.5834	66.1759	61.4207	65.817	60.5737	67.4517	69.7402	59.5197	64.1296	64.3511	60.2514
	94.8	103.571	99.2334	102.951	86.6418	83.8132	74.3766	74.9719	68.6911	65.0531	65.9511	66.7299	60.4791	64.0303	62.4098	66.0132	54.2891	94.8	60.5686	59.7313	61.962	52.4706	64.1009	52.3453	60.34	54.1287	70.1387	60.6041	62.5096	58.7851	49.2458	64.714	54.5341	58.7108	94.8	65.497	59.4062	67.1549	65.4652	66.1806	61.3861	65.4624	60.518	67.3003	69.543	59.5221	63.9458	64.252	59.9631
	94.9	103.367	98.6812	103.776	86.7561	83.608	74.7716	74.649	68.4172	64.7834	65.9034	66.5781	60.6333	63.2642	61.8618	66.099	54.4384	94.9	60.4398	59.7958	61.5346	52.4279	63.7123	52.6657	59.9793	54.0563	69.6213	60.4768	61.8944	58.7318	49.5217	64.5296	54.6073	58.7354	94.9	65.646	59.0877	67.0449	66.1031	65.7759	61.3626	65.5134	60.1172	66.6732	69.9764	59.0271	63.9166	64.1087	59.8253
	95	103.488	98.0324	104.504	86.9787	83.9668	74.8987	74.6176	68.4354	64.7572	65.9904	66.3314	61.1897	63.3684	60.8397	66.4712	54.6629	95	60.3674	59.8868	61.2038	52.489	63.872	53.1598	60.0208	53.6609	68.9464	60.1661	61.4057	58.7693	49.9449	63.8574	54.5752	58.5822	95	65.6203	58.7802	67.0259	66.0922	65.9331	61.6262	65.7947	59.5787	66.1148	70.4269	58.7523	64.0697	63.7961	59.2894
	95.1	103.71	97.5642	104.885	87.3371	85.0862	74.8654	74.8657	68.5289	64.8798	66.0902	65.887	61.8146	63.8644	59.6287	66.6977	54.6067	95.1	60.3638	60.0714	61.4037	52.8913	64.2596	53.9852	60.0312	53.2538	68.6073	59.7593	61.2304	58.7614	50.3084	63.5027	54.7332	58.5408	95.1	65.7106	58.7836	66.9736	65.7926	66.0646	61.594	65.987	59.3748	65.5558	70.7368	58.778	64.4002	63.9459	58.7213
	95.2	104.343	97.5733	104.998	87.3823	85.7506	74.3779	74.9678	68.7387	65.3083	66.097	65.9644	61.8236	64.54	59.2522	66.475	54.543	95.2	59.7393	60.0648	62.0572	52.8286	64.587	54.5248	60.3093	53.015	68.5342	59.6992	61.2591	58.454	50.2778	63.4488	54.6041	58.5224	95.2	66.0411	58.7889	67.1379	64.9734	66.3078	61.7391	66.1174	59.2778	65.2408	70.3268	59.4334	64.7507	64.2839	58.2693
	95.3	104.654	97.51	105.565	87.4349	85.4776	74.1822	74.0051	68.7283	65.7559	65.9481	66.5532	61.6328	64.5993	59.6506	66.3421	54.3028	95.3	59.0973	59.9757	62.7616	52.6609	64.6847	54.901	60.3246	52.9661	68.4482	59.3341	61.5539	57.9278	50.0233	63.6627	54.8502	58.3658	95.3	66.212	59.0733	67.3482	64.4567	66.1639	61.7298	66.2826	58.9458	65.3327	69.652	60.1511	64.8583	64.9317	58.499
	95.4	104.559	97.618	106.055	87.3626	84.7452	73.8637	72.6256	68.7178	65.7476	65.8698	67.4453	61.3348	64.7174	60.792	66.3839	54.3413	95.4	59.3073	59.4979	63.2532	52.4012	64.707	54.5681	60.463	52.6844	68.1573	59.0058	61.6894	57.4347	49.7968	63.6349	55.0073	58.0379	95.4	66.5038	59.1983	67.5944	63.8994	66.0556	61.8217	66.0958	58.5198	65.7974	69.3568	60.5778	64.9643	65.1642	58.8498
	95.5	104.378	97.4742	105.991	87.2616	84.2094	73.709	71.8388	68.6301	65.5593	65.9171	67.9869	61.1034	64.5668	61.9532	66.7542	54.3907	95.5	60.0833	59.0782	63.1901	52.2668	64.549	54.207	60.4071	52.111	68.0962	58.8492	61.611	57.378	49.4807	63.5117	55.1796	57.9503	95.5	66.6971	59.011	67.7343	63.6509	66.2111	61.5434	65.7449	58.4912	66.2939	69.3203	60.6436	64.8989	64.9379	58.8273
	95.6	104.439	97.4971	105.267	87.0801	84.5904	73.3673	72.175	68.482	65.5017	65.8041	68.1704	60.8037	64.7737	62.7137	66.9688	54.8279	95.6	60.9627	59.0363	62.6652	52.3322	64.2202	53.7909	60.4667	51.6018	67.9691	59.1016	60.9452	57.5534	49.6801	63.6226	54.874	58.29	95.6	67.3814	58.6541	67.8444	63.4578	66.5262	60.982	65.4137	58.8802	66.7123	69.833	60.3861	64.662	64.3593	58.5568
	95.7	104.781	97.1863	104.206	86.8393	85.2406	73.1982	73.0072	68.269	65.495	65.665	67.5857	60.7818	64.8644	62.8469	67.0139	55.1136	95.7	60.9839	59.641	61.8711	52.1741	63.7408	53.5652	60.2908	51.5328	67.8772	59.6221	60.4283	57.8448	50.0399	64.1627	54.5633	58.5978	95.7	67.7693	58.4068	68.0742	63.9839	66.7992	60.3147	65.5247	59.3152	67.0622	70.1007	59.9786	64.0556	63.9802	58.1199
	95.8	104.655	97.0052	103.587	86.9672	85.5662	72.8527	73.4721	68.129	65.3391	65.4274	66.9201	61.0421	65.0522	62.7901	66.8377	55.2031	95.8	60.846	60.009	61.3957	51.9933	63.5146	53.0408	60.0633	51.8549	67.7902	60.1778	60.3253	57.8522	50.6	64.5098	54.5449	58.3277	95.8	67.7803	58.8328	68.2052	64.8849	66.9871	59.8868	65.5564	59.5177	67.0892	70.6807	59.3897	63.5487	63.7979	58.0634
	95.9	104.491	96.8239	102.682	87.0279	85.253	72.2334	73.5556	68.2736	64.7762	65.3702	66.1711	61.5118	65.2197	62.6916	66.4567	55.0401	95.9	60.7684	60.0509	61.3261	51.7631	63.6039	52.3163	59.5782	52.1326	67.865	60.3536	60.7598	57.648	50.4921	64.4374	54.6096	57.943	95.9	67.3127	59.0862	67.9236	65.7642	66.9046	60.094	65.2741	59.7677	66.9503	70.5179	58.7408	63.457	63.8051	57.9826
	96	104.287	96.8567	102.376	87.3548	84.6609	71.7214	73.1937	68.615	64.4916	65.38	65.9876	61.6937	65.134	62.4269	66.2343	54.7939	96	61.0459	59.7924	61.6138	51.7967	63.8837	51.651	59.2273	52.2872	67.8863	60.1848	60.9687	57.6612	50.1341	64.0312	54.5478	57.9762	96	66.6294	59.3631	67.1337	66.0043	66.7526	60.4357	64.9324	60.0072	66.6758	70.3513	58.3304	63.6707	63.5796	58.4192
	96.1	104.608	96.8524	102.365	87.2879	84.235	72.007	72.851	69.0056	64.7396	65.4599	65.9408	61.7972	64.9288	62.083	66.0432	54.8001	96.1	61.1939	59.9382	61.765	52.1117	64.0326	51.3798	59.2166	52.4278	67.6596	59.4151	60.8716	58.0732	49.8193	63.9123	54.2934	58.5282	96.1	66.3603	59.3639	66.2074	66.0249	66.5656	60.7357	64.8346	60.2258	66.9904	69.7988	58.422	63.8098	63.41	58.7591
	96.2	104.731	97.0471	103.27	87.4859	84.2162	73.123	72.6378	69.2048	65.4104	65.7298	65.8913	61.6933	64.2144	61.8367	65.7089	54.591	96.2	60.9741	59.909	61.7992	52.2517	64.0044	51.7119	59.8982	52.7536	67.7249	58.9229	60.7121	58.7508	49.9227	63.838	54.1596	58.7054	96.2	66.3168	59.4348	65.8386	66.0823	66.7284	60.8149	64.9582	60.0101	67.285	69.6637	58.5932	63.771	63.2147	59.2423
	96.3	104.264	97.3857	103.701	87.4957	84.3478	74.3096	73.3587	69.2802	65.7768	65.8826	65.5786	61.8616	63.8363	61.8897	65.3734	54.716	96.3	60.7401	59.7547	61.4833	52.3757	64.1097	52.2138	60.3882	52.9647	67.8814	58.5831	60.9666	59.135	49.8887	63.929	54.2949	58.3968	96.3	66.5354	59.3128	65.8361	66.0486	66.8563	60.8622	64.7978	59.5463	67.5151	69.666	58.8954	64.0451	63.3407	59.0286
	96.4	103.571	97.7449	103.79	87.5477	84.5332	74.5223	74.2137	69.0831	65.7417	66.1421	65.3098	62.0681	63.7453	61.8996	65.2843	54.9009	96.4	60.7169	59.4827	61.3319	52.2377	64.4064	52.7742	60.4868	53.1497	68.1901	58.6302	61.4497	59.2123	49.718	63.9946	54.6856	57.7833	96.4	66.4649	59.1291	66.1564	65.879	66.6678	60.9784	64.7063	58.9928	67.1162	69.6867	59.231	64.5884	63.5233	58.8788
	96.5	103.24	98.1029	103.022	87.409	84.586	73.9898	74.898	68.8102	65.5454	66.2563	65.6959	62.2242	64.0993	61.6564	65.8193	55.2954	96.5	60.9548	59.5548	61.1957	52.6919	65.0493	52.8542	59.8964	53.1331	68.1798	58.5969	62.0421	59.061	49.6737	64.1307	54.9413	57.2207	96.5	66.5669	59.2843	66.4482	65.7506	66.2148	60.989	64.789	58.6406	66.4136	69.8779	60.0013	65.0536	63.8657	58.6537
	96.6	103.318	98.1049	102.208	87.5089	84.5774	73.26	74.5473	68.3291	65.7534	66.3123	66.462	62.0026	64.3696	61.3992	66.3582	55.1369	96.6	60.5737	59.5389	61.2512	52.9909	65.2282	52.558	59.4564	53.1484	68.562	58.8833	62.3946	58.7847	50.0724	64.1742	54.6782	57.0021	96.6	66.8174	59.7364	67.0068	65.9476	65.8808	60.9751	65.3844	58.9754	65.8753	70.3243	60.5949	64.841	64.1424	58.8991
	96.7	103.374	98.228	101.388	87.9674	84.5602	73.0872	74.0172	68.0557	66.0291	66.1553	67.3364	61.4209	64.35	61.4261	66.9403	54.6966	96.7	60.0163	59.2151	61.2009	53.4662	65.1522	52.1784	58.8941	53.1383	68.9774	59.4243	62.5571	58.5998	50.667	63.9517	54.1457	57.1852	96.7	67.2371	60.1847	67.3348	66.2788	66.1197	61.0904	66.0264	59.5536	65.6503	71.1648	60.6617	64.2733	64.1967	59.2243
	96.8	103.282	97.7291	101.51	88.0158	84.0821	72.8199	73.3639	68.1308	66.026	65.9666	67.4449	60.9912	64.2483	61.8796	67.1652	54.0621	96.8	59.3384	58.608	61.1386	53.4301	64.7568	52.1954	58.6804	53.1152	69.5548	60.0224	62.5644	58.2146	50.8901	63.8348	53.7601	57.7087	96.8	67.4407	60.2533	67.3903	66.2399	66.4157	61.1558	66.6116	60.4092	65.9878	71.7961	60.161	63.8894	64.2066	59.8707
	96.9	103.558	97.2662	102.197	87.5433	83.5989	72.5993	73.0059	68.6023	65.3303	65.955	67.2643	61.0108	64.1733	62.3187	67.286	53.9179	96.9	59.765	58.1701	61.3996	53.7013	64.9121	52.3891	58.8339	53.1689	69.652	60.1891	62.3106	58.1344	50.8717	63.6963	53.845	57.9966	96.9	67.3996	60.4736	67.2367	66.1101	66.7126	61.1959	66.8293	60.9119	66.1444	71.7131	59.6017	64.0877	64.0786	60.3876
	97	103.859	96.7567	103.055	86.5177	83.0352	72.4388	72.913	69.4153	64.5783	65.8658	66.9611	61.6072	64.2109	62.3808	66.956	54.062	97	60.374	58.3556	61.7414	53.9026	64.7596	52.3959	59.5997	53.1766	69.7093	60.2058	62.1159	57.9993	50.5316	63.6534	54.1492	57.9754	97	67.0167	60.5176	67.4888	65.8357	66.6334	60.9192	66.7323	61.1648	66.4266	71.1537	59.3544	64.4007	63.9514	60.4531
	97.1	104.258	96.7887	103.306	86.091	82.9228	72.6869	73.107	69.6877	64.4241	65.692	66.9886	62.0638	64.5889	61.9994	66.6198	54.5213	97.1	61.2669	58.9702	62.208	53.8591	64.4733	52.1206	60.2219	53.1839	69.5621	60.1316	61.6588	58.188	50.3029	63.7472	54.4933	58.0234	97.1	66.5069	60.7174	67.5438	65.9031	66.5053	60.6367	66.571	61.0979	66.4274	70.3678	59.4222	64.6907	63.9369	60.1229
	97.2	104.497	97.2023	103.561	86.0697	82.8247	72.8603	73.5796	69.5541	64.9767	65.2688	67.141	62.1339	64.7953	61.3797	66.2297	54.6948	97.2	61.2997	59.6788	62.2144	53.1964	63.744	52.464	60.316	52.918	69.5177	60.1739	61.6713	58.2127	49.8157	64.1888	54.6709	58.1732	97.2	65.9472	60.3234	67.3397	65.6803	66.0568	60.4796	66.3953	60.6068	66.7771	69.8736	59.5419	64.7582	64.0047	59.858
	97.3	104.974	97.3623	104.06	86.2754	82.9243	72.6966	73.5968	68.673	65.8078	64.9421	67.2326	62.0489	65.2282	60.9697	65.9386	54.5126	97.3	61.181	59.9851	62.1572	52.3301	63.6107	52.8511	60.1491	52.6613	69.0863	59.9728	61.6826	58.1551	49.5212	64.6021	54.6327	58.437	97.3	65.8854	59.9987	66.8291	65.5561	65.5831	60.7204	66.4944	60.2123	67.1618	69.7067	59.3649	64.7177	64.6287	59.962
	97.4	105.299	97.4572	104.709	86.2314	83.5441	72.7393	73.236	68.2092	66.2967	64.9181	67.1176	62.1134	65.2427	60.7124	65.5778	54.3136	97.4	60.7673	59.9096	61.9926	51.6798	63.469	53.257	60.1274	52.5809	68.7207	59.7037	62.1161	58.0816	49.251	64.6408	54.6517	58.4166	97.4	66.169	59.351	66.8304	65.3316	65.6643	61.3224	66.1677	59.979	67.7958	69.8756	59.1499	64.5596	64.7166	59.9654
	97.5	105.53	97.483	104.814	86.1869	84.5876	73.1187	72.6309	67.8622	66.4929	65.458	66.6549	62.4509	65.6038	60.8477	65.0436	54.5314	97.5	60.8134	59.7636	62.1648	51.7179	63.6688	53.1182	60.4411	52.6914	68.5102	59.3037	62.5079	57.8776	49.2813	63.7219	54.8588	58.2543	97.5	66.5829	58.9327	67.4752	65.7037	66.2623	61.8032	65.8904	60.1474	67.9213	70.167	59.0258	64.2941	64.725	59.82
	97.6	105.443	97.7474	104.041	86.1708	85.5093	73.4519	72.728	67.835	65.9769	66.2307	66.2906	62.4031	65.6053	61.0828	64.7859	54.6941	97.6	60.9137	59.4413	62.2169	51.888	63.7532	53.4036	60.476	52.6083	69.1316	58.9221	62.7384	57.8403	49.4183	63.1516	55.1368	57.8599	97.6	66.6309	58.9657	67.8397	65.9982	67.0727	61.9528	65.5154	60.2776	67.9443	70.4517	59.671	64.5441	64.0897	59.545
	97.7	105.12	97.7194	103.097	86.2172	85.6778	73.1321	73.4297	67.87	65.3454	66.9319	66.0594	62.4421	65.9136	61.4657	64.7864	54.5834	97.7	61.0988	59.3243	62.1913	52.2101	64.1466	53.7778	60.3608	52.235	69.8738	58.6949	62.738	57.8957	49.801	62.9051	55.2514	57.3703	97.7	66.2401	59.4094	67.9999	66.1354	66.743	61.7602	65.6609	60.2264	67.7257	70.7727	60.1408	64.7708	63.7788	59.3789
	97.8	104.626	97.1461	102.618	85.7169	85.183	72.4732	74.2283	68.4011	64.8844	67.0958	66.3608	62.4003	65.7496	61.5136	65.3539	54.1553	97.8	61.0648	59.317	61.8806	52.1717	64.1984	53.9996	60.1486	51.8391	70.3796	58.7299	62.3443	58.3436	50.3228	63.6728	54.9662	57.1698	97.8	66.09	59.9489	67.5596	65.521	66.0463	61.7609	66.1029	60.0531	67.9021	71.1206	60.4728	64.8727	63.8322	59.3228
	97.9	104.141	96.571	102.836	85.4674	84.5531	72.0997	74.5737	69.1619	65.1361	67.1048	66.6462	62.7076	66.053	61.464	65.7738	53.988	97.9	61.1137	59.8942	61.8761	52.2578	64.1702	53.9972	60.0709	51.7381	70.2067	58.7871	62.1242	58.758	50.6322	64.2811	54.6023	57.3993	97.9	66.3197	60.2327	67.5362	64.9286	65.5926	61.7186	66.5489	60.0101	67.7364	71.2011	60.0543	64.4041	64.1454	59.1529
	98	103.856	96.2213	103.011	85.5947	84.034	72.4448	74.7053	69.7354	65.4619	66.7751	67.0751	62.8251	65.9179	61.2592	65.8364	53.9542	98	61.2248	60.3767	61.9628	52.351	64.0271	54.0729	60.1207	52.0031	70.0836	58.7187	61.8604	58.7712	50.6257	64.7986	54.2776	57.8921	98	66.8442	60.2303	67.2631	64.5739	66.0182	61.435	66.9566	59.804	67.596	71.2017	60.2324	63.8604	64.4106	58.989
	98.1	103.459	96.3016	102.972	86.1794	83.7411	72.7299	74.5904	69.451	65.5008	66.5727	67.5899	62.8542	65.9951	61.0658	65.5969	53.9229	98.1	61.3214	60.6271	62.0633	52.7307	63.9637	54.2702	60.2409	52.6728	70.0701	58.8298	61.8148	58.4808	50.3367	64.9164	54.4687	58.1993	98.1	67.2258	59.9782	66.9411	64.9479	66.7234	60.8629	66.8728	59.6051	67.0843	71.0741	60.335	63.8238	64.0883	58.5241
	98.2	103.049	96.5087	102.921	86.3566	83.6794	72.8544	74.193	68.9068	65.1374	66.3604	68.1111	62.8049	65.463	60.773	65.4398	54.1471	98.2	61.2216	60.3339	61.6543	53.0491	64.0383	54.2497	60.6397	53.3864	70.387	59.2878	61.6456	58.3959	50.3154	64.6024	54.7739	58.0474	98.2	67.2834	59.6332	66.359	65.5589	66.7756	60.2434	66.3591	59.1418	66.7981	71.059	60.5172	64.092	63.7194	58.1952
	98.3	102.846	97.2632	103.002	86.0519	83.7707	72.5006	73.3524	68.44	64.7626	66.2611	68.3487	62.7903	65.0301	60.3027	65.6811	54.1471	98.3	61.0046	59.9142	61.1018	53.2839	64.1589	54.1764	60.7012	53.9419	70.695	59.9192	61.6786	59.1249	50.2972	64.0551	55.0401	57.6032	98.3	67.2537	59.6624	66.4328	66.2357	66.358	60.0139	65.4353	59.0113	66.5151	70.8959	59.831	64.7621	63.4966	57.9206
	98.4	103.254	98.0232	102.973	85.991	83.6232	72.3491	72.7812	68.5393	64.5912	66.1207	67.7023	62.8081	64.4373	60.2032	65.8023	53.7634	98.4	60.7207	59.6594	60.4418	53.1258	64.5551	54.0769	60.5148	53.7543	71.0478	59.958	61.7874	59.9426	50.3173	63.8154	55.0752	57.0414	98.4	67.0772	59.9308	66.9809	66.4597	65.7524	59.8457	64.7213	58.9054	66.4994	70.6924	59.4649	65.0562	63.6884	58.1966
	98.5	103.694	98.4421	102.809	86.2144	83.4163	72.1437	72.9241	68.7276	64.6138	65.7169	66.7829	62.7753	64.1452	60.1659	65.6831	53.1838	98.5	60.5672	59.5052	60.3023	52.7867	64.771	53.9824	60.0643	53.2591	71.1612	59.7221	62.0703	60.4751	49.8212	64.0503	55.1649	57.0881	98.5	67.3014	60.045	68.0591	66.1402	65.4801	60.0949	64.7777	59.1389	66.8176	70.4886	59.4114	65.2504	64.0272	58.5422
	98.6	103.608	97.8834	102.622	86.398	83.3656	71.9106	73.3212	68.7437	64.7436	65.3071	65.6253	62.6834	63.9501	60.3821	65.5272	53.0241	98.6	60.3252	59.6342	60.165	52.3066	64.965	53.6949	60.2251	52.5701	70.6228	59.3483	62.0387	60.0922	49.5377	64.7641	55.4234	57.4696	98.6	67.5899	60.0447	68.4154	65.3853	66.0167	60.539	65.1538	59.4491	67.0038	70.3201	60.0793	64.9124	64.1431	58.7304
	98.7	102.677	97.2538	102.466	86.5516	84.118	71.9231	73.4359	68.6937	64.6847	65.0384	65.0463	62.3474	64.0713	60.4338	65.8097	53.6734	98.7	60.1676	59.8023	60.088	52.0668	64.8176	53.5591	60.863	52.2477	70.0342	59.238	61.7739	59.4788	49.3313	64.9368	55.6423	58.2359	98.7	67.909	59.7997	68.6637	64.7354	66.6407	61.0616	65.5711	59.5117	67.2352	70.0657	60.5361	64.6777	64.0392	58.5536
	98.8	101.931	96.6686	102.176	86.8943	84.9026	72.2416	73.0156	68.6519	64.7203	65.1083	65.0389	61.9232	64.0932	60.7344	66.4923	54.1219	98.8	59.7513	60.0751	59.8251	52.2369	64.5006	53.5802	61.6732	51.8998	69.5422	58.9587	61.3054	58.7677	49.4659	64.9669	55.4666	58.4051	98.8	67.5969	59.8034	68.2507	64.5339	67.0167	61.0707	65.6139	59.4577	66.9004	69.767	60.92	64.5696	63.717	58.3774
	98.9	101.605	96.3489	102.255	87.3256	85.1853	72.7363	72.8211	68.7308	64.7613	65.4479	65.4861	61.5361	64.0787	61.1958	66.8001	54.735	98.9	59.5841	60.2276	60.11	52.6033	64.2624	53.5874	61.7191	51.7664	69.6418	58.8316	61.2604	58.4504	49.5744	64.4448	54.8887	58.3441	98.9	67.222	59.3189	68.0598	64.6491	66.3671	60.6637	65.6233	59.0732	66.901	69.4947	60.9453	64.8904	63.5406	58.6678
	99	101.92	95.8939	102.522	87.4279	84.8252	72.7526	73.1547	68.6256	65.1151	65.7926	66.0841	61.4187	63.9231	61.4032	66.6617	55.1193	99	59.4001	60.0572	60.6894	52.9466	64.1841	53.5789	61.1183	51.9312	69.5506	58.6128	61.4968	58.6487	49.8338	64.1267	54.4629	57.8819	99	66.7408	59.0943	67.3557	64.7144	65.4874	60.3113	65.6346	59.074	66.9851	69.6672	61.1506	65.2531	63.4307	59.1952
	99.1	102.161	95.4458	103.231	87.0211	84.563	72.8602	73.6454	68.5027	65.3387	66.2384	66.3001	61.5084	63.6806	61.3304	66.351	55.7688	99.1	59.3517	59.9242	61.4027	53.0893	64.2338	53.3978	60.5463	52.3124	69.24	58.7433	61.7733	58.924	50.3896	63.8297	54.5354	57.6284	99.1	66.7118	58.6766	66.8909	64.6652	65.1129	60.3034	65.1828	59.2993	67.3343	69.9487	61.1464	65.2756	63.4881	59.5848
	99.2	102.365	95.3649	103.564	86.6313	84.8083	72.9719	74.1782	68.3029	65.4758	66.5367	66.744	61.8586	63.5762	61.1667	66.1947	55.7526	99.2	59.3528	59.7392	61.5936	53.3977	63.9624	53.2974	60.7576	52.7289	68.9912	58.5984	61.4787	59.3671	50.7722	63.717	55.0911	57.3174	99.2	66.7144	58.909	66.5664	64.7827	65.3863	60.6216	65.021	59.9693	67.3286	70.2802	61.0571	65.114	63.7848	59.4267
	99.3	102.77	95.4342	103.803	86.4622	84.8998	73.5316	74.1372	68.25	65.1994	66.5479	67.0738	62.285	63.4662	61.2767	66.1616	55.2716	99.3	59.5693	59.989	61.4703	53.6162	63.7936	52.9917	61.3183	52.813	68.9262	58.7597	60.8359	59.5321	50.7447	63.7703	55.329	57.1257	99.3	66.7826	59.1104	66.9758	65.0449	66.0074	61.0029	64.6713	60.8838	66.9344	70.2209	60.6752	64.9103	64.2608	58.9348
	99.4	102.902	95.6734	103.55	86.5804	84.6961	73.5451	73.9293	68.3671	64.8967	66.2249	67.34	62.6072	63.7477	61.3458	66.1182	54.7037	99.4	60.227	60.1294	61.0842	53.267	63.8122	52.8444	61.3682	52.8939	69.2319	58.7298	60.448	59.7818	49.9598	63.6777	55.6172	56.9853	99.4	66.7301	59.5777	67.2607	65.3931	66.5344	61.3342	64.949	61.0126	66.6627	69.9973	60.1909	64.6856	64.3642	58.6181
	99.5	102.983	95.9084	103.467	86.8353	83.982	73.2951	72.9851	68.5497	64.7002	65.947	66.9983	62.8604	63.9564	61.2409	66.2803	54.6404	99.5	60.7193	60.243	61.0618	52.7817	64.0447	52.9924	60.9239	52.8883	69.3797	59.1068	60.3857	59.7002	48.9148	63.6741	55.6194	57.1909	99.5	66.9149	59.7299	67.3947	65.4564	67.1594	61.2484	64.9167	60.5654	66.5786	69.6406	59.7463	64.2222	63.975	58.62
	99.6	102.492	96.3716	103.176	86.7493	83.8689	72.453	72.2602	68.5806	64.9112	65.9194	66.5664	62.9389	63.9454	60.9376	66.249	54.798	99.6	60.988	60.1518	61.3732	52.3361	64.2261	53.2519	60.3797	52.8561	69.6846	59.1958	60.5683	59.3624	48.224	63.3437	55.5878	57.548	99.6	67.1612	59.6726	67.1977	65.381	67.5543	60.8387	65.3113	59.4231	66.7593	69.4357	59.3077	63.4761	63.2592	58.8808
	99.7	102.342	96.7989	102.973	86.2813	83.96	72.0953	71.6718	68.1122	65.1048	65.8424	65.9951	62.9729	63.4004	60.6083	65.8803	54.7581	99.7	60.8223	59.8626	61.6733	52.7722	64.1949	53.4232	60.4874	52.9524	69.82	59.4034	60.6408	58.9173	48.1034	63.3942	55.0048	57.8991	99.7	67.3563	59.4407	67.0324	65.377	67.4688	60.2657	65.7327	59.0766	66.8058	69.4956	59.4334	63.0049	62.9786	58.9267
	99.8	102.202	97.2231	102.447	85.6927	84.533	72.2344	71.9269	67.8564	64.9719	65.5334	65.912	62.4408	62.878	60.3466	65.3883	54.5494	99.8	60.7418	59.7387	61.7273	53.0299	64.0126	53.0671	60.729	52.7868	70.1182	59.1742	60.95	58.7228	48.6427	63.4016	54.3497	57.9206	99.8	67.2797	59.21	67.0772	65.4408	67.0332	60.0323	66.084	59.2407	66.853	69.5453	59.8166	62.8203	63.1654	58.7087
	99.9	102.187	97.3931	102.194	85.3667	84.7668	73.0653	72.4171	67.9558	64.59	65.2571	66.0621	61.8982	62.9158	60.5254	65.137	54.4496	99.9	60.8369	59.6261	61.7428	53.4689	63.715	52.6103	61.0528	52.6852	70.2656	59.3242	61.2361	58.7389	48.8651	63.8842	54.2571	57.8948	99.9	67.4174	59.4991	67.1204	65.5013	66.6407	59.9191	65.9426	59.7808	66.9733	69.4306	60.4483	63.0677	63.4133	58.3653
	100	102.17	97.6946	102.301	85.3441	84.7306	73.7374	72.8564	68.6457	64.3123	65.3988	66.6372	61.1936	63.7047	61.0442	65.3226	54.5767	100	61.1787	60.1052	62.0496	53.3633	63.8453	52.2737	60.7622	52.3727	70.4541	59.5781	61.1883	59.029	49.0612	64.0239	54.6219	57.8283	100	67.4264	59.6251	67.2678	65.0926	66.5394	60.0697	65.4498	59.81	66.9842	69.1332	60.8298	63.225	63.6169	58.5619
	100.1	102.158	97.8474	102.386	85.4206	84.5552	74.2243	72.8443	68.9503	64.6438	65.7458	66.849	61.0236	64.516	61.7006	65.7014	54.822	100.1	61.2646	60.4714	62.1127	53.2862	64.3422	52.2459	60.2311	52.3828	70.5473	59.9873	61.0618	58.9007	48.7857	64.2989	55.2872	58.1712	100.1	67.0689	59.9564	67.1567	64.7707	66.3736	59.9138	65.0834	59.6851	66.6958	68.9769	61.0378	63.6807	63.4568	59.4492
	100.2	102.39	97.9952	102.179	85.4932	84.2067	74.2161	72.8676	68.7986	65.1051	65.9436	66.7656	61.1129	64.685	61.7603	66.0837	55.3059	100.2	60.95	60.644	61.9731	52.9209	64.9189	52.5998	59.7638	52.354	70.7357	59.8409	61.0316	58.692	48.8197	64.2634	55.5567	58.4234	100.2	66.3149	59.7667	66.9576	64.9752	66.429	59.958	64.8313	59.8949	66.0599	69.0859	60.9603	64.2102	63.6466	60.3679
	100.3	102.254	97.9589	101.758	85.5098	84.216	73.7794	73.2296	68.1767	65.6231	65.8484	66.7162	61.7159	64.2873	61.7704	66.2973	55.7324	100.3	60.1588	60.097	61.7139	52.8271	64.8284	52.9794	59.8973	52.1256	70.8336	59.4152	61.3797	58.2953	48.9158	64.3123	55.5769	58.6117	100.3	65.6241	59.8023	67.0607	65.5494	66.3112	59.879	64.8184	60.6382	65.4779	69.4957	60.725	65.0001	63.8274	60.4064
	100.4	102.494	97.8648	101.79	85.4041	84.2674	73.0101	73.9667	67.5148	65.7149	65.7797	67.0309	62.1698	64.0289	61.8726	66.23	55.6443	100.4	59.7011	59.4243	61.7021	53.0126	64.4186	53.1223	60.4464	52.1539	70.668	59.246	61.3262	58.3794	49.6509	64.3801	55.469	58.377	100.4	65.819	59.596	67.408	66.1602	66.2246	60.0404	64.7063	61.043	65.3899	69.958	60.5024	65.2093	64.2564	59.7166
	100.5	102.336	97.6406	102.17	85.4233	84.5729	72.3572	74.2691	67.0144	65.8343	65.9503	67.0238	62.4314	64.3262	62.3264	66.5264	55.0452	100.5	59.7219	59.0706	61.7714	53.2558	64.0847	52.7061	60.8654	52.4487	70.1871	59.3801	61.2823	58.6767	50.4013	64.4607	55.3051	57.9181	100.5	66.5902	59.6659	67.689	65.898	65.8411	60.2223	64.7001	60.6602	65.653	70.1918	60.7076	65.0469	64.1897	58.8884
	100.6	102.263	97.2186	102.394	85.9377	84.7491	72.1919	74.3649	66.7879	65.9322	66.1556	66.4388	62.269	64.6497	62.3644	66.9321	54.5094	100.6	60.3597	59.3899	61.7789	53.1959	64.2486	52.3074	60.8908	53.1417	69.7704	59.7412	61.3312	58.9549	51.0122	64.6798	55.3133	57.3951	100.6	67.5982	60.1714	67.6031	65.5142	65.7147	60.3002	64.8214	59.5318	66.0626	69.9491	60.7052	64.659	64.0252	58.5826
	100.7	101.546	96.5186	102.521	86.658	84.5523	72.4312	74.0643	67.0143	66.0834	66.0838	65.3678	62.0131	64.6877	61.7468	67.0963	54.5239	100.7	60.8862	60.0742	61.8234	52.7969	64.4702	52.2574	60.6294	53.259	69.4277	59.7468	61.8103	59.0121	50.8084	64.4976	55.2047	56.8757	100.7	67.9281	60.6662	67.6384	64.8358	65.8246	60.1214	65.2542	58.8547	66.1687	69.5523	60.6338	64.5341	63.384	58.7158
	100.8	101.22	96.0539	102.389	87.2114	84.0971	72.7178	73.7508	67.5044	66.1556	65.6831	64.8716	61.7798	64.6794	61.1252	66.65	54.7074	100.8	61.3601	60.8293	61.761	52.5871	64.5039	52.6093	60.2948	52.9527	69.151	59.826	62.2328	58.8683	50.299	64.412	55.2014	56.8392	100.8	67.7833	61.0382	67.8088	64.7402	66.1857	59.9118	65.6768	58.6728	66.3552	69.3112	60.3537	64.5801	63.1192	59.2557
	100.9	101.319	96.0134	102.218	87.118	83.3559	72.8672	72.9984	67.9443	66.0553	65.463	64.9941	61.7934	64.727	60.8446	66.2418	54.7722	100.9	61.3361	61.2216	61.7263	52.6012	64.2801	52.3643	60.1024	52.3896	68.9196	59.7228	62.4631	58.6961	49.6971	64.0031	55.0498	57.1177	100.9	67.6132	60.4678	68.1312	64.8024	66.8236	60.097	65.7992	59.294	66.516	69.535	60.474	64.5844	62.767	59.4928
	101	101.804	96.4189	101.775	87.0578	82.9036	72.7707	72.1362	68.3819	65.9124	65.6942	65.6121	62.2899	64.8222	60.9698	66.5799	54.9344	101	61.0971	61.1723	61.6422	52.7036	64.1258	52.0244	60.1122	52.0872	69.1138	59.8246	62.6104	58.6531	49.4826	64.1182	54.8442	57.8951	101	67.4854	60.0462	68.0606	64.8472	67.2667	60.9666	65.475	59.693	66.8194	70.1814	60.4467	64.5043	63.1396	59.2913
	101.1	102.213	96.595	101.679	87.0724	82.7106	72.8466	71.5592	68.6131	65.6579	66.0572	65.911	62.7367	64.795	61.1666	67.1687	55.3344	101.1	60.4703	60.6831	61.5337	52.571	63.8429	51.7174	60.397	52.1284	69.5719	59.8566	62.6497	58.8858	49.6252	64.1428	54.5824	58.4281	101.1	67.3654	59.699	68.004	64.4303	67.558	61.6793	65.3576	60.0016	66.9666	70.8462	60.3929	64.4586	63.3977	58.8152
	101.2	102.297	96.4556	102.017	87.4731	82.9206	73.062	71.3554	68.5564	65.3692	66.0524	65.5012	62.8009	65.1211	61.4564	67.5171	55.6888	101.2	60.1572	60.2211	61.3666	52.2853	63.5642	52.1022	60.5282	52.5294	69.7694	59.7022	62.624	59.1552	50.1142	64.391	54.568	58.6439	101.2	66.9247	59.8156	67.7348	64.0658	67.3959	61.8369	65.2363	60.1812	67.0887	71.1882	60.1602	64.8387	63.7566	58.7701
	101.3	102.126	96.338	102.705	87.3854	83.3034	73.2466	71.5794	67.9499	65.0167	65.8298	64.6936	62.4686	65.618	61.8904	67.3287	55.443	101.3	60.1926	59.8508	61.0194	51.9854	63.2758	52.4488	60.6259	52.9868	69.6924	59.5126	62.5	59.1762	50.6536	64.3559	54.7888	58.4553	101.3	66.6141	59.5336	67.7301	64.2667	67.4376	61.3043	65.3956	60.4923	67.021	71.2267	60.2099	65.4277	63.8356	58.9946
	101.4	101.946	96.4959	103.058	87.1713	83.4863	73.0261	72.0061	67.6583	64.6913	65.8214	64.2342	62.3552	65.7982	62.0847	67.1004	54.8837	101.4	60.6541	59.7902	60.7834	51.7601	63.3198	52.6079	60.7651	53.3383	69.426	59.2934	62.2124	58.8368	51.0381	64.2943	55.2442	58.4599	101.4	66.2653	58.8237	67.8471	64.9602	67.4111	60.646	65.1306	60.8016	66.7257	71.0961	60.2162	65.6481	64.1212	59.4554
	101.5	101.867	96.8484	103.19	86.7214	83.4588	72.6717	72.5213	67.9547	64.3134	66.1782	64.845	62.7582	65.5634	61.972	66.9503	54.3882	101.5	60.8981	59.8259	60.795	52.0832	63.422	52.603	61.0268	53.3992	69.461	59.5322	62.0458	58.7383	50.6487	64.1479	55.3252	58.7164	101.5	66.3477	57.8644	68.0193	65.4341	67.3197	60.2364	64.8941	60.4996	66.1161	70.9436	60.3663	65.0256	64.5131	59.6871
	101.6	101.812	96.6199	102.745	86.6192	83.0721	72.5668	72.8536	68.658	64.0577	66.167	65.879	63.0271	65.1629	62.1238	66.8823	54.4386	101.6	61.0304	60.0967	61.1939	52.7193	63.494	52.5168	61.0504	53.5007	69.2342	59.7563	61.7	58.9046	49.8916	63.9243	55.3048	58.8691	101.6	66.4669	57.4981	67.8007	65.3389	66.8001	60.0191	64.7866	60.0256	65.7196	70.5913	60.6322	64.1961	64.6638	59.8252
	101.7	101.626	96.1671	102.207	86.5797	82.9493	72.8108	72.7196	68.5192	63.7098	65.6587	66.7859	62.9104	65.1312	62.3107	67.0868	54.493	101.7	60.9521	60.1738	61.6039	53.4381	63.5689	52.5849	60.8542	53.4086	69.0553	60.2281	61.6301	59.2392	49.2406	64.0194	54.8471	58.7018	101.7	66.804	57.6904	67.1126	65.0229	66.1742	60.0574	64.9549	59.4953	65.5284	70.4243	60.8168	63.8591	64.5259	59.6722
	101.8	101.529	95.6302	101.691	86.6254	82.7492	73.3178	72.6763	68.014	63.7847	64.944	66.8254	62.4874	65.3176	62.5162	67.5436	54.447	101.8	61.044	60.0432	61.6727	53.5819	63.8239	52.9128	60.8579	53.1873	68.8489	60.5382	61.4583	59.1723	49.5334	64.1169	54.5688	58.2827	101.8	66.7599	58.2242	66.5453	64.7136	65.8899	60.3401	65.1853	59.5873	65.8562	70.2809	60.8253	64.0936	64.1689	59.8931
	101.9	101.58	95.8938	102.132	86.807	82.7096	73.7623	72.8993	67.2849	63.9777	64.9387	66.5538	62.0361	65.6849	61.9913	67.833	54.2001	101.9	61.0027	59.6294	61.5229	53.3367	64.2756	53.5738	61.0501	52.8718	68.855	60.5973	61.7651	58.9422	50.3047	64.4578	54.379	58.0126	101.9	66.6106	58.5341	66.3824	64.7906	66.1393	60.7302	65.1057	59.8723	66.0502	70.3083	60.6251	64.6164	64.022	60.1347
	102	101.717	96.4267	102.845	87.0866	82.4738	73.8377	73.6001	67.2992	64.5503	65.5329	66.2913	61.7442	65.7197	61.2544	67.3759	54.2118	102	60.7997	59.1986	61.4166	53.1403	64.836	54.1061	61.2246	52.9607	68.8832	60.2504	61.7857	59.0082	50.763	64.5856	54.72	57.8998	102	66.2763	58.6969	66.5363	64.9274	66.6946	61.0579	65.204	60.1862	66.2282	70.2026	60.3977	64.9917	64.1627	60.4963
	102.1	101.914	97.0591	102.921	87.2918	82.3108	73.2998	73.9451	67.351	64.8468	66.1684	66.617	61.2702	65.5058	60.458	66.3449	54.5068	102.1	60.5881	59.0049	61.3888	52.9831	65.3959	54.0154	61.1943	53.464	68.7877	59.9037	61.768	59.1881	50.4881	64.8401	55.0854	58.1697	102.1	66.105	58.983	66.5894	65.4364	67.1518	61.071	65.5933	60.2886	66.1201	70.1109	60.0177	65.3482	64.3248	60.2226
	102.2	102.25	96.9547	102.103	87.3487	82.3126	72.8493	73.9354	67.3901	65.0679	66.2868	66.9972	61.2259	65.1191	59.9948	65.4944	54.7718	102.2	60.3119	59.1844	61.3437	52.9822	65.4739	53.2432	61.3422	53.6784	68.9186	59.9794	61.3603	59.7061	49.9881	64.7224	55.3744	58.4402	102.2	66.076	59.2793	66.4279	65.7509	67.2771	60.8658	66.0622	60.2722	66.2818	70.0062	59.543	65.3384	64.2349	59.8953
	102.3	102.455	96.5572	101.228	87.2648	82.2818	72.7168	73.2844	67.2309	65.1037	66.0272	67.282	61.2274	64.7814	59.8481	65.2303	55.0928	102.3	60.1121	59.6168	61.3034	52.7616	64.9343	52.5622	61.4019	53.5122	69.1011	60.3818	61.5229	59.6518	49.859	64.4742	55.1848	58.5947	102.3	66.0977	59.6049	66.3687	66.1229	67.3082	60.8648	66.1678	60.229	66.6484	69.9903	59.2403	65.3251	63.688	59.2686
	102.4	102.066	96.0512	101.137	87.2511	82.4334	73.158	72.8146	67.1547	65.3746	65.642	66.9773	61.701	64.5976	60.1767	65.5156	55.1661	102.4	59.6764	60.0812	61.5516	52.6689	64.4261	52.4917	61.5199	53.1064	69.1701	60.7529	61.573	59.6223	50.1443	64.2167	55.0416	58.13	102.4	66.1478	59.3766	66.4711	65.9741	67.2614	61.1082	65.7109	60.2513	67.0631	70.0403	59.1299	65.3331	63.2813	58.8256
	102.5	101.444	96.301	101.327	87.1089	82.2323	73.1137	72.3352	67.4163	65.4982	65.4202	66.7207	61.8839	64.2544	60.9972	65.9816	55.142	102.5	59.4319	60.556	62.1329	52.4109	64.6443	53.2373	61.3984	53.0854	68.9659	60.7344	61.5962	58.8963	50.1576	64.4642	54.6229	57.6549	102.5	66.2938	58.9586	66.899	65.7456	67.4358	61.5328	65.3462	60.4673	67.0513	70.1696	58.9883	65.5107	63.2582	58.3569
	102.6	101.195	96.6517	101.412	86.863	82.3997	73.0176	72.1041	67.7269	65.4192	65.2417	66.4753	62.16	64.3512	61.8071	66.476	54.9684	102.6	59.6518	61.1336	62.6601	52.4061	65.2942	53.7501	61.3907	52.854	68.6113	60.4121	61.2706	58.2244	49.8374	64.806	54.4394	57.4818	102.6	66.7072	58.304	67.2907	65.2979	67.4281	61.3986	65.264	60.9713	66.7127	70.1891	58.8951	65.5601	63.5821	58.2361
	102.7	101.508	97.0383	101.241	86.6771	82.3673	72.5691	71.892	67.9858	64.8232	65.2521	66.4451	61.9066	64.2976	62.0527	66.6949	55.0651	102.7	60.2267	61.4548	62.897	52.3806	65.6191	53.8477	61.0469	52.6024	68.4751	60.1371	61.4111	57.437	49.4064	64.9291	54.2369	58.0359	102.7	67.3176	58.3789	67.8204	65.1563	66.9332	60.8939	65.8153	61.4204	66.6198	70.1946	59.0118	65.2384	63.9437	58.2281
	102.8	101.856	96.841	101.16	86.4291	82.5758	72.8046	71.7439	68.301	64.4162	65.216	66.4498	61.4553	64.3986	61.4554	66.7497	55.348	102.8	60.8246	61.4289	62.615	52.6919	64.9826	53.4371	60.5109	52.3809	68.205	60.245	61.8473	57.5231	49.6004	64.6296	54.3749	58.6809	102.8	67.922	58.6429	68.1204	65.0954	66.2936	60.3809	66.4494	61.6591	66.7242	70.0623	59.5839	64.663	64.1827	58.3976
	102.9	102.223	96.6232	101.413	86.1023	82.547	73.1589	71.6204	68.5408	64.4946	64.9897	66.5243	60.7402	64.256	60.5502	66.4686	55.542	102.9	61.1576	61.1617	62.3998	52.6736	64.4419	53.2586	60.0294	52.6746	68.3487	60.4482	62.0992	57.917	50.1798	64.251	54.576	58.8922	102.9	67.9683	58.924	68.2911	65.2046	65.989	60.1174	66.9488	61.5978	67.011	70.098	60.1662	63.964	64.2853	58.4547
	103	102.519	96.2379	101.717	85.3003	83.04	73.5676	71.4653	68.7711	65.1132	64.6631	66.6716	60.4521	64.419	60.0533	66.4617	55.5288	103	61.1938	61.0573	62.2589	52.7726	64.1012	53.0198	59.749	52.7664	68.4771	60.3587	61.895	58.5674	50.7416	64.2657	54.748	58.3519	103	67.5494	58.6832	67.9487	65.2561	66.552	60.1193	66.9321	61.1152	67.084	70.085	60.8024	63.4277	64.36	58.6742
	103.1	103.089	95.9773	101.813	84.6563	83.598	73.4836	71.6044	68.7512	65.3972	64.3653	66.6584	60.6403	64.8916	60.1123	66.1568	55.6112	103.1	61.4086	61.2888	62.331	52.5766	64.498	52.7983	59.8416	52.5799	68.7164	59.8162	61.2532	58.5427	50.9543	64.7414	54.9921	57.5521	103.1	66.8063	58.2182	67.4327	65.5612	67.3698	60.3191	66.6314	60.6494	66.9431	70.1293	60.9757	63.0623	64.2186	58.6963
	103.2	103.075	95.5072	101.848	84.2429	83.9756	73.0572	72.0631	68.578	65.2401	64.2099	66.5961	61.2688	65.2459	60.8081	66.0626	55.6647	103.2	61.2957	61.478	62.1392	52.667	64.5037	52.3441	59.931	52.3527	68.3618	59.3038	60.8084	58.635	50.8372	65.2769	55.0203	56.9768	103.2	66.639	58.2112	67.0654	65.9798	67.7518	60.9153	66.0112	59.9939	66.7008	70.0199	60.7668	63.0928	64.2914	58.3527
	103.3	103.008	95.1391	101.72	84.2432	83.6472	72.6612	72.7774	68.3916	64.7406	63.9049	66.9046	61.6893	65.5788	61.31	65.7972	55.6143	103.3	61.1403	61.8779	61.9328	52.6463	64.3552	52.2793	60.3262	52.4102	67.9034	59.2838	60.5058	58.7591	50.8608	65.28	55.0703	57.1218	103.3	66.7951	58.4473	67.2862	66.4021	67.6141	61.3009	65.3832	59.6663	66.2794	70.4054	60.2742	63.3798	64.025	57.8463
	103.4	102.631	94.7753	101.633	84.4148	83.035	72.4064	73.534	68.0919	64.6852	63.3949	67.4914	61.7629	65.6019	61.6238	66.1998	55.4636	103.4	60.5006	61.8119	61.4729	52.7714	64.0501	52.3431	60.5717	52.4909	67.7244	59.6606	60.5772	59.1756	50.8834	64.6599	54.8093	57.5854	103.4	67.3007	59.0958	67.7256	66.5504	67.0119	61.4381	64.7536	59.0513	66.3379	70.8616	60.163	63.8728	63.817	57.7459
	103.5	102.544	95.209	100.913	85.1667	82.2463	72.2237	74.2846	67.8539	64.4963	63.3794	68.1103	61.3772	65.7068	61.8018	66.6902	55.451	103.5	60.1764	61.5147	61.1492	52.6709	64.1077	52.8449	60.7113	52.4399	67.9953	59.8918	60.7889	59.2483	51.0577	63.7374	54.5649	58.24	103.5	67.3282	59.334	68.1213	66.6784	66.852	60.9562	64.5752	58.7933	66.4547	71.3357	60.6176	64.1837	63.302	58.6012
	103.6	102.284	95.76	100.659	86.1664	81.4757	72.2133	74.5297	67.4667	64.1036	63.9398	67.8926	61.1049	65.7298	62.074	67.0838	55.5147	103.6	60.0627	60.6113	61.034	52.4444	64.102	52.9616	60.708	52.4657	68.7196	59.6447	61.1498	59.1019	50.9506	63.1972	54.2044	58.0509	103.6	67.1706	59.5192	67.9066	66.6298	66.989	60.6081	64.665	58.7966	66.8403	70.9738	61.2387	64.4444	63.2096	59.4551
	103.7	101.507	96.6637	100.897	86.9636	81.0156	72.1632	74.0354	66.9887	63.47	64.7759	67.3697	61.2401	65.9281	62.443	66.9971	55.3838	103.7	60.2157	59.8634	61.2697	52.1771	63.8099	53.18	60.4626	53.0009	69.3838	59.2851	61.5267	58.8416	50.7807	63.1386	54.139	57.3704	103.7	66.5346	59.4766	67.7054	66.5447	67.3091	60.009	64.9276	59.3327	66.8294	70.5428	61.4271	64.6979	63.3062	59.7114
	103.8	100.732	96.7281	101.895	86.8611	81.132	72.2813	73.1272	66.9117	63.3271	65.2209	66.9426	61.6634	66.1111	62.1337	66.878	55.255	103.8	60.5396	59.4097	61.545	52.1234	63.578	53.0539	60.2686	53.6116	69.4843	59.1813	61.909	58.8909	50.3771	63.7694	54.3591	56.5271	103.8	66.2481	59.6154	67.5244	66.0168	67.3636	59.9532	64.9486	59.8238	66.8001	70.0281	61.1627	65.1199	63.4066	59.1331
	103.9	99.9921	96.8969	102.605	86.0236	81.77	72.1809	72.6477	67.1361	63.7307	65.0851	66.949	61.9598	65.9351	61.8212	66.8484	55.4907	103.9	61.1509	59.2508	61.4287	52.3002	63.6619	53.3971	60.034	53.7024	68.7879	59.2512	62.0117	59.1719	50.1732	64.2487	54.6608	56.432	103.9	65.865	59.6176	67.64	65.6717	67.084	59.9542	64.9572	59.9246	66.8324	69.893	60.6082	65.2144	63.2627	58.3471
	104	100.32	96.4932	102.805	84.9377	82.233	72.1678	72.9659	67.8216	64.3579	65.0837	67.0289	61.8539	65.2677	61.2911	67.1939	55.8769	104	61.8049	59.173	61.599	52.6864	64.015	53.5584	60.2609	53.0991	67.7433	59.1989	61.9544	59.3582	50.083	64.512	54.8631	56.9802	104	65.7093	59.7976	67.7796	65.2456	66.731	60.4519	65.2573	60.0413	67.0662	69.6568	60.3607	65.2238	63.0211	58.2611
	104.1	100.716	96.4636	102.758	84.0162	82.2842	72.2334	73.5789	68.2244	64.6663	64.9953	66.9393	61.7398	64.5752	61.2179	67.5052	56.0817	104.1	62.0307	59.3594	61.7231	53.2743	63.908	53.746	60.4786	52.4184	67.4243	59.244	61.72	59.0014	50.241	64.3022	54.9702	57.3398	104.1	65.2341	59.8789	67.9693	65.4646	66.4871	60.9533	65.6611	60.0512	67.05	69.521	60.2103	65.0384	62.8818	58.6134
	104.2	101.399	96.0858	102.703	83.7862	82.0949	72.5134	73.9899	68.3938	64.6136	65.1962	66.981	61.6788	64.2173	61.1287	67.4927	55.5854	104.2	61.6247	59.9742	61.8668	53.5242	63.577	53.4866	60.4261	52.2962	67.8576	59.2604	61.6932	58.2089	50.4047	64.3462	54.9939	57.2508	104.2	65.3767	60.0966	68.2452	65.9604	66.3954	61.4448	66.066	60.5374	66.565	69.5271	60.5777	65.3169	62.7507	59.3466
	104.3	101.836	95.9912	102.662	83.9762	82.0539	72.7767	73.7977	68.2342	64.2174	65.0228	67.175	61.8099	64.384	61.1103	66.9797	54.9433	104.3	61.0312	60.4391	61.4739	53.2836	63.3472	53.0994	60.0459	52.4551	68.5947	59.5271	61.7508	57.8231	50.4516	64.3904	54.7779	56.8003	104.3	65.8082	60.1234	68.0292	66.9079	66.5311	61.5851	66.126	60.6083	66.3284	69.4618	61.0716	65.524	62.7117	59.3378
	104.4	102.191	95.2961	102.256	84.6241	82.3206	72.9132	73.4437	67.8773	63.6726	64.8902	67.4583	61.9962	64.4974	61.3456	66.4096	54.4124	104.4	60.4646	60.4887	61.487	52.5842	63.6867	52.837	59.7773	52.4968	68.7614	59.4823	61.8494	58.1398	50.2614	64.7081	54.3008	56.6424	104.4	66.6504	60.1907	67.3332	67.1034	66.7183	61.4273	66.4696	60.7189	66.6132	69.2749	61.5489	65.5371	62.9457	58.8413
[truncated: 2,956 more rows]
[truncated: 2 more columns]

## Sheet: Exp2
	Raw fluorescence values
	BiP (2039)																		Hsp70 (2532)																		Hsc70 (2533)
[truncated: 4,004 more rows]
[truncated: 5 more columns]

## Sheet: Exp3
	Raw fluorescence values
	BiP (2039)																		Hsp70 (2532)																		Hsc70 (2533)
[truncated: 4,004 more rows]
[truncated: 5 more columns]

## Sheet: Rates
		MABA-ADP release rates (s-1)
			BiP (2039)			Hsp70 (2532)			Hsc70 (2533)
[truncated: 18 more rows]

## Sheet: IC50s
Sorce data: Figure 6C
	NBD source data
		BiP (2039)			Hsp70 (2532)			Hsc70 (2533)
[truncated: 6 more rows]
