# Supplementary material for: Calcium depletion challenges endoplasmic reticulum proteostasis by destabilising BiP-substrate complexes
Source: eLife. 2020 Dec 9;9:e62601. doi: 10.7554/eLife.62601 (PMC7758071; doi:10.7554/eLife.62601)
Supplement: Figure 6—source data 2. [file elife-62601-fig6-data2.xlsx]

## Sheet: Exp1
Experiment 1			Sorce data: Figure 6D
RFU																Derivative
Temperature	1_Mg	2_Ca	3_BiP_Mg	4_BiP_Mg_ADP	5_BiP_Ca	6_BiP_Ca_ADP	7_Hsp70_Mg	8_Hsp70_Mg_ADP	9_Hsp70_Ca	10_Hsp70_Ca_ADP	11_Hsc70_Mg	12_Hsc70_Mg_ADP	13_Hsc70_Ca	14_Hsc70_Ca_ADP		Temperature	1_Mg	2_Ca	3_BiP_Mg	4_BiP_Mg_ADP	5_BiP_Ca	6_BiP_Ca_ADP	7_Hsp70_Mg	8_Hsp70_Mg_ADP	9_Hsp70_Ca	10_Hsp70_Ca_ADP	11_Hsc70_Mg	12_Hsc70_Mg_ADP	13_Hsc70_Ca	14_Hsc70_Ca_ADP			1_Mg	2_Ca	3_BiP_Mg	4_BiP_Mg_ADP	5_BiP_Ca	6_BiP_Ca_ADP	7_Hsp70_Mg	8_Hsp70_Mg_ADP	9_Hsp70_Ca	10_Hsp70_Ca_ADP	11_Hsc70_Mg	12_Hsc70_Mg_ADP	13_Hsc70_Ca	14_Hsc70_Ca_ADP
20	2723.08	2736.82	2843.84	2778.01	2861.86	2829.2	2905.45	2878.48	2868.59	2857.79	2858.85	2789.03	2864.75	2766.44		20	8.66942	7.28692	9.24271	8.51074	8.62412	9.41584	10.04	8.73159	8.26068	8.10226	8.46584	9.01639	8.853	7.89775		Min	20	-2.31392	-2.17223	-34.4907	-29.7037	-31.3859	-21.9443	-56.8719	-36.1638	-61.8878	-33.9323	-38.0015	-35.8177	-32.3827
20.5	2714.41	2729.53	2834.6	2769.5	2853.24	2819.79	2895.41	2869.75	2860.33	2849.69	2850.38	2780.02	2855.89	2758.54		20.5	18.7837	15.7883	20.0259	18.4399	18.6856	20.401	21.7533	18.9185	17.8981	17.5549	18.3426	19.5355	19.1815	17.1118		Tm	40	36.5	47.5	56	48	59	44	56.5	43.5	57.5	45.5	57.5	45.5	59
21	2705.74	2722.25	2825.35	2760.99	2844.62	2810.37	2885.37	2861.02	2852.07	2841.58	2841.92	2771	2847.04	2750.64		21	17.3388	14.5738	18.4854	17.0215	17.2482	18.8317	20.08	17.4632	16.5214	16.2045	16.9317	18.0328	17.706	15.7955
21.5	2697.07	2714.96	2816.11	2752.48	2835.99	2800.96	2875.33	2852.28	2843.81	2833.48	2833.45	2761.98	2838.19	2742.74		21.5	17.3388	14.5738	18.4854	17.0215	17.2482	18.8317	20.08	17.4632	16.5214	16.2045	16.9317	18.0328	17.706	15.7955
22	2688.41	2707.67	2806.87	2743.97	2827.37	2791.54	2865.29	2843.55	2835.55	2825.38	2824.98	2752.97	2829.33	2734.85		22	17.3388	14.5738	18.4854	17.0215	17.2482	18.8317	20.08	17.4632	16.5214	16.2045	16.9317	18.0328	17.706	15.7955
22.5	2679.74	2700.38	2797.63	2735.46	2818.74	2782.12	2855.25	2834.82	2827.28	2817.28	2816.52	2743.95	2820.48	2726.95		22.5	17.3869	14.534	18.6104	17.076	17.3047	18.9125	20.2687	17.4775	16.5382	16.3007	17.0656	18.1497	17.7425	15.9209
23	2671.07	2693.1	2788.38	2726.95	2810.12	2772.71	2845.21	2826.09	2819.02	2809.18	2808.05	2734.94	2811.63	2719.05		23	17.087	14.8171	17.8068	16.7545	16.9039	18.4644	18.9992	17.497	16.4431	15.6285	16.1555	17.4489	17.4952	15.0991
23.5	2662.69	2685.57	2779.89	2718.77	2801.83	2763.78	2836.3	2817.44	2810.86	2801.65	2800.39	2726.62	2802.99	2711.9		23.5	16.5157	15.0572	16.4921	16.0484	16.6312	17.1765	17.424	16.6125	16.1329	15.0713	15.0825	15.9455	17.2476	13.8967
24	2654.52	2678.07	2771.82	2710.94	2793.52	2755.55	2827.7	2809.52	2802.84	2794.13	2792.89	2719.01	2794.41	2705.09		24	16.2639	14.9896	15.817	15.0957	16.2176	15.8224	16.5719	15.4994	16.2271	14.3237	14.5811	14.3011	16.9002	13.1922
24.5	2646.48	2670.53	2764.1	2703.71	2785.7	2747.95	2819.73	2801.91	2794.62	2787.36	2785.72	2712.22	2786.21	2698.69		24.5	15.5044	15.3903	14.7967	13.8196	15.1267	14.4626	15.6133	14.726	16.4618	13.1498	14.7459	13.4122	15.6699	12.6105
25	2639.04	2662.67	2756.99	2697.05	2778.36	2741.05	2812.11	2794.81	2786.46	2780.79	2778.21	2705.53	2778.75	2692.45		25	14.6409	15.9047	13.9411	13.2024	14.3269	13.4153	14.4831	13.8085	16.0662	13.5374	14.3731	13.0291	14.4229	12.2436
25.5	2631.81	2654.73	2750.03	2690.51	2771.37	2734.54	2805.22	2788.13	2778.55	2773.78	2771.42	2699.25	2771.73	2686.43		25.5	14.1288	15.6244	14.1376	12.5426	13.5876	12.2929	13.5289	12.5895	15.792	14.1775	13.5107	12.066	13.6905	11.887
26	2624.97	2647.12	2742.85	2684.57	2764.82	2728.74	2798.53	2782.13	2770.67	2766.7	2764.69	2693.44	2765.12	2680.54		26	13.1783	14.9373	14.3212	11.274	12.4129	11.2685	12.8942	12.0203	15.6291	14.0476	12.7616	11.2617	12.407	11.7338
26.5	2618.72	2639.82	2735.81	2679.16	2758.87	2723.19	2792.3	2776.06	2763.08	2759.73	2758.65	2687.91	2759.33	2674.72		26.5	11.5438	14.2122	13.6409	10.6063	11.8956	10.8517	12.3669	11.7969	14.2219	14.0479	11.9926	11.1346	11.0027	11.4592
27	2613.37	2633.01	2729.16	2673.93	2752.83	2717.86	2786.11	2770.4	2756.44	2752.69	2752.64	2682.37	2753.96	2669.11		27	10.365	12.7003	13.4425	10.1512	12.0188	10.4636	12.191	10.9499	12.911	13.8053	11.6985	10.5017	10.8394	10.9885
27.5	2608.27	2627.11	2722.35	2669.03	2746.81	2712.66	2780.05	2765.03	2750.07	2746.01	2746.92	2677.46	2748.46	2663.76		27.5	9.66257	11.1022	13.2939	9.37362	12.2719	10.3794	12.3178	10.6909	12.3214	12.7481	11.5107	9.27964	10.6905	10.1923
28	2603.58	2621.67	2715.87	2664.38	2740.44	2707.3	2773.63	2759.56	2744.06	2739.8	2741.04	2672.84	2743.19	2658.8		28	9.62724	11.1389	12.9185	9.79265	13.2094	11.5686	13.5888	11.4311	11.8704	12.6875	11.7919	9.82952	10.845	10.1573
28.5	2598.4	2615.78	2709.21	2659.01	2733.43	2700.96	2766.37	2753.46	2737.94	2733.1	2734.97	2667.4	2737.34	2653.36		28.5	11.2326	12.3877	14.0659	11.7005	15.2779	13.5667	15.2602	12.9576	13.1667	14.1418	13.0546	11.9108	12.8539	11.7651
29	2592.15	2609.17	2701.57	2652.55	2725.07	2693.66	2758.25	2746.45	2730.65	2725.48	2727.8	2660.86	2730.09	2646.88		29	14.048	14.1487	16.7296	14.3115	17.8661	15.8761	17.701	15.2885	16.0989	16.6621	15.6508	14.1765	16.5167	14.2825
29.5	2584.18	2601.4	2692.37	2644.57	2715.52	2684.92	2748.56	2737.9	2721.79	2716.3	2719.26	2653.07	2720.77	2639.01		29.5	18.0058	17.4863	20.0361	17.7435	20.703	19.3398	21.0119	19.5776	19.1462	20.0997	18.5264	17.4911	20.4229	17.1558
30	2574.17	2591.58	2681.52	2634.75	2704.34	2674.24	2737.28	2726.83	2711.43	2705.37	2709.25	2643.28	2709.71	2629.66		30	21.7836	21.6734	23.5432	21.7083	23.914	23.4522	23.9967	24.1515	22.8292	23.6933	21.6203	21.6181	24.1171	20.6245
30.5	2562.63	2579.97	2669.01	2623.09	2691.77	2661.66	2724.73	2713.99	2699.06	2692.77	2697.78	2631.68	2696.83	2618.51		30.5	24.0618	24.0699	25.9362	24.0798	25.9718	26.1688	25.8706	27.016	26.0018	26.1732	23.8576	24.179	26.6805	23.3712
31	2550.38	2567.76	2655.9	2610.96	2678.6	2648.32	2711.6	2700.04	2685.8	2679.46	2685.64	2619.44	2683.33	2606.63		31	24.7124	24.8625	26.2408	24.5798	26.5145	27.3117	26.6083	28.5708	26.5132	26.9821	24.5215	24.4724	27.3577	23.7384
31.5	2538.22	2555.29	2643.02	2598.7	2665.48	2634.56	2698.34	2685.69	2672.77	2666.06	2673.49	2607.43	2669.82	2594.99		31.5	23.5423	24.801	25.0543	24.1475	25.7112	27.3942	26.034	28.6319	25.8254	26.0901	23.7347	23.5416	25.9171	22.7925
32	2527.17	2543.29	2631.1	2587.07	2653.11	2621.25	2685.83	2671.82	2660.15	2653.56	2662.13	2596.09	2657.73	2583.99		32	20.0919	22.5696	22.1909	22.1286	23.6194	25.3593	23.6973	25.8557	24.2651	24.0019	21.4926	21.4515	22.4626	21.0364
32.5	2518.22	2533	2620.97	2576.85	2642.07	2609.51	2674.77	2660.02	2648.79	2642.17	2652.15	2586.15	2647.52	2574.15		32.5	16.1911	18.4891	18.4685	18.1638	20.1799	21.2308	20.7062	21.9906	20.7278	21.3034	18.2674	18.2022	18.0916	18.0084
33	2510.98	2524.85	2612.58	2568.92	2633.03	2600.06	2665.25	2649.83	2639.56	2632.33	2643.87	2577.95	2639.72	2566.12		33	12.4172	14.2363	15.3304	14.2945	16.2262	17.1098	16.8688	18.4649	16.3218	18.155	15.2018	14.5838	13.2579	14.0824
33.5	2505.86	2518.73	2605.69	2562.53	2625.91	2592.4	2657.94	2641.68	2632.4	2624.04	2636.98	2571.49	2634.29	2560.11		33.5	8.13624	10.2799	11.8371	10.6758	11.797	13.0075	12.8741	13.8969	12.5486	14.9066	12	11.6355	8.20203	9.97739
34	2502.74	2514.58	2600.84	2558.34	2621.2	2587.09	2652.41	2635.89	2626.99	2617.44	2631.93	2566.29	2631.45	2556.18		34	4.6149	6.11254	7.5254	6.18667	7.5486	8.49482	8.66617	9.60427	8.88125	11.5486	8.27434	8.78675	3.51984	5.56774
34.5	2501.09	2512.51	2598.04	2556.23	2618.24	2583.76	2649.29	2631.89	2623.55	2612.45	2628.62	2562.72	2630.56	2554.48		34.5	2.14138	2.65899	4.13435	2.46365	4.16496	5.07559	4.32491	6.69209	4.85858	8.41816	5.14476	5.69044	0.273924	1.51145
35	2500.53	2511.74	2596.57	2555.65	2616.92	2581.85	2647.99	2629.13	2622.07	2608.96	2626.66	2560.52	2630.96	2554.48		35	-0.0490578	0.361945	1.70083	0.368206	1.42088	2.70981	0.573978	4.02152	1.20538	5.65633	2.84071	3.18331	-1.63	-1.2909
35.5	2501	2511.96	2596.35	2555.77	2616.68	2581	2648.55	2627.76	2622.23	2606.75	2625.74	2559.43	2632.05	2555.59		35.5	-1.42657	-0.673693	-1.07958	-1.33883	-0.522942	0.379774	-2.02642	1.90663	-1.5755	3.14584	0.67462	1.44955	-2.68504	-2.90627
36	2501.78	2512.37	2597.54	2556.87	2617.27	2581.33	2649.99	2627.01	2623.59	2605.71	2625.91	2559.05	2633.58	2557.26		36	-1.62038	-1.59896	-3.15492	-2.35964	-1.30591	-1.00075	-4.63069	1.36079	-4.01171	1.27276	-1.02933	-0.401157	-3.40603	-3.82062
36.5	2502.54	2513.5	2599.27	2557.95	2617.9	2581.82	2653.12	2626.36	2626.26	2605.31	2626.63	2559.71	2635.42	2559.26		36.5	-1.34696	-2.17223	-3.53843	-1.99043	-1.50958	-1.10681	-6.9103	0.896469	-6.81486	0.563949	-1.77117	-1.4776	-3.92262	-3.75393
37	2503.07	2514.44	2601.01	2558.86	2618.82	2582.4	2656.77	2626.08	2630.32	2605.1	2627.61	2560.41	2637.54	2560.98		37	-0.6852	-1.9555	-3.55351	-1.86145	-2.03307	-1.12307	-8.15852	0.534396	-8.91187	0.0360773	-2.04577	-1.72041	-4.67485	-3.45412
37.5	2503.26	2515.44	2602.9	2559.79	2619.98	2582.93	2661.33	2625.75	2635.13	2605.24	2628.7	2561.45	2640.14	2562.81		37.5	-0.332076	-1.70107	-4.32154	-1.57901	-2.89431	-1.09725	-9.90836	0.738238	-10.6378	-0.321822	-2.51987	-2.29067	-5.83114	-3.95105
38	2503.46	2516.15	2605.26	2560.42	2621.71	2583.48	2666.71	2625.37	2641.03	2605.36	2630.25	2562.64	2643.31	2564.92		38	-0.386146	-1.59158	-4.55736	-1.0673	-3.74018	-0.938199	-11.8716	0.711793	-12.9272	-0.199234	-3.95556	-2.46654	-6.57554	-4.35922
38.5	2503.69	2517.02	2607.37	2560.91	2623.67	2583.87	2673.13	2625.06	2648.11	2605.45	2632.66	2563.79	2646.65	2567.11		38.5	-0.62245	-1.39418	-4.03397	-1.05561	-4.22792	-0.703001	-13.175	0.474755	-15.5632	-0.290275	-5.24304	-1.62263	-6.8545	-4.28866
39	2504.16	2517.52	2609.36	2561.49	2625.92	2584.25	2679.92	2624.82	2656.57	2605.63	2635.48	2564.34	2650.13	2569.21		39	-1.40065	-0.999061	-4.08321	-1.23536	-4.63151	-0.94982	-14.7064	0.86688	-17.9846	-0.310958	-6.33181	-1.4085	-6.88356	-4.32316
39.5	2505.09	2518.05	2611.51	2562.07	2628.27	2584.88	2687.98	2624.21	2666.13	2605.68	2639.05	2565.27	2653.53	2571.42		39.5	-2.24887	-0.871397	-4.57328	-0.707063	-4.88825	-1.66335	-17.3449	1.11523	-20.6426	0.333296	-7.87271	-1.74653	-6.89799	-4.29479
40	2506.3	2518.41	2613.93	2562.27	2630.7	2585.86	2697.28	2623.74	2677.31	2605.3	2643.38	2565.98	2657.07	2573.44		40	-2.31392	-0.766153	-4.90164	-0.796188	-4.32442	-1.98503	-19.8687	1.07116	-23.9094	0.933128	-9.75576	-1.15099	-7.18102	-3.72702
40.5	2507.37	2518.88	2616.47	2562.9	2632.59	2586.78	2707.96	2623.1	2690.12	2604.81	2648.67	2566.47	2660.82	2575.16		40.5	-2.16893	-1.18774	-5.55776	-1.14504	-3.71034	-1.6641	-22.9923	1.43179	-27.5722	0.996457	-10.5499	-0.957662	-8.16495	-3.33843
41	2508.47	2519.56	2619.59	2563.37	2634.57	2587.55	2720.53	2622.35	2705.05	2604.28	2653.9	2567.04	2665.31	2576.81		41	-2.08069	-1.31691	-6.95772	-1.00571	-4.26622	-1.66482	-27.921	1.48256	-32.2903	1.39059	-11.081	-1.64355	-9.49967	-3.18688
41.5	2509.37	2520.14	2623.44	2563.94	2636.97	2588.44	2736.02	2621.69	2722.61	2603.52	2659.91	2568	2670.4	2578.33		41.5	-1.34329	-1.05825	-8.38969	-1.13422	-5.4977	-1.65592	-33.6708	0.960748	-38.2326	1.11247	-12.843	-1.40895	-11.3737	-2.81417
42	2509.84	2520.61	2627.97	2564.54	2640.08	2589.12	2754.27	2621.4	2743.48	2603.28	2666.85	2568.39	2676.74	2579.62		42	-0.8724	-0.694337	-9.76105	-1.61457	-6.6957	-0.924737	-39.7056	0.43166	-45.557	-0.00948365	-15.2009	-0.761613	-13.6503	-2.47981
42.5	2510.31	2520.9	2633.15	2565.51	2643.74	2589.39	2775.83	2621.25	2768.18	2603.48	2675.16	2568.85	2684.08	2580.79		42.5	-0.981478	-0.920916	-10.7197	-1.76022	-8.45009	-0.405053	-46.6431	0.0261914	-53.0519	-0.691731	-17.7412	-0.851031	-16.0465	-2.05142
43	2510.78	2521.47	2638.72	2566.25	2648.58	2589.62	2800.78	2621.4	2796.26	2603.91	2684.69	2569.23	2692.85	2581.65		43	-0.704495	-0.664369	-11.9593	-1.50732	-10.6034	-0.626255	-52.8565	-0.684472	-58.851	-0.901178	-20.8951	-0.758664	-18.8549	-1.44376
43.5	2510.98	2521.5	2645.16	2567.04	2654.26	2589.97	2828.27	2621.88	2826.58	2604.39	2696.22	2569.59	2703	2582.26		43.5	-0.0917509	0.217366	-13.4815	-1.44682	-12.1337	-0.462657	-56.2863	-1.03554	-61.8878	-1.35906	-25.2714	-0.449484	-22.1331	-1.03303
44	2510.95	2521.44	2652.25	2567.67	2660.66	2590.04	2856.59	2622.35	2857.59	2605.15	2709.99	2569.75	2714.97	2582.73		44	-0.0959792	-0.389664	-15.2677	-1.16951	-13.2048	0.101527	-56.8719	-0.768748	-61.611	-0.896749	-29.7821	-0.745809	-25.218	-0.982597
44.5	2511.1	2521.96	2660.52	2568.21	2667.54	2589.97	2884.58	2622.6	2887.49	2605.25	2725.94	2570.33	2728.19	2583.23		44.5	-0.216705	-1.51307	-17.6571	-0.946102	-14.8442	-0.168627	-54.0223	-0.173469	-56.8574	-0.143057	-33.9346	-0.971427	-28.1231	-0.693371
45	2511.15	2522.76	2670	2568.61	2675.56	2590.2	2910.07	2622.55	2913.89	2605.41	2743.72	2570.73	2743.06	2583.48		45	-0.155266	-0.97809	-20.5784	-0.575922	-16.8719	-0.394382	-47.6759	0.133436	-48.4531	-0.424041	-36.8002	-1.22733	-31.0875	-0.803022
45.5	2511.33	2522.99	2681.15	2568.86	2684.44	2590.3	2931.96	2622.5	2935.79	2605.61	2762.46	2571.58	2759.03	2584.07		45.5	-0.678346	-0.97087	-23.7717	-0.741317	-18.8845	-0.0720044	-39.6016	0.235275	-39.3697	-0.190894	-38.0015	-1.68741	-32.3827	-1.30396
46	2511.85	2523.83	2693.83	2569.4	2694.59	2590.34	2949.55	2622.3	2953.26	2605.54	2781.38	2572.34	2775.18	2584.69		46	-1.38056	-1.97426	-27.4731	-1.19657	-21.9365	-0.264642	-30.834	0.572579	-30.4277	0.595327	-37.0925	-1.55485	-31.9814	-1.01307
46.5	2512.64	2524.7	2708.57	2570.08	2706.46	2590.61	2962.82	2621.99	2966.22	2605.16	2799.19	2573.12	2790.8	2585.07		46.5	-1.60654	-0.843988	-30.9019	-1.81413	-25.6457	-0.875738	-22.1693	0.416985	-21.2368	0.18443	-33.9271	-1.35445	-30.4848	-0.599984
47	2513.38	2524.63	2724.55	2571.25	2720.13	2591.12	2971.92	2621.93	2974.74	2605.38	2815.02	2573.73	2805.37	2585.34		47	-1.3204	0.535903	-33.0863	-2.67458	-28.5516	-0.670485	-14.8531	-0.13772	-13.671	-0.384709	-28.9307	-1.49329	-27.1485	-0.681407
47.5	2513.91	2524.35	2741.5	2572.78	2734.85	2591.28	2977.95	2622.06	2980.24	2605.37	2828.05	2574.56	2817.64	2585.73		47.5	-0.717515	0.394411	-34.4907	-3.80711	-30.5082	-0.488033	-9.29855	-0.162688	-8.54742	0.556838	-23.5572	-1.18176	-21.6621	-0.564198
48	2514.08	2524.21	2758.71	2574.96	2750.43	2591.67	2981.49	2622.07	2983.44	2604.89	2838.64	2574.91	2826.99	2585.91		48	-0.0301381	0.626924	-33.8238	-4.24668	-31.3859	-0.827409	-5.29735	0.0904098	-4.19782	0.923416	-18.679	-0.733124	-16.1576	-0.360591
48.5	2513.96	2523.72	2774.88	2576.94	2765.85	2592.1	2983.52	2622.08	2984.53	2604.59	2846.74	2575.41	2833.84	2586.19		48.5	0.468915	1.01762	-30.1742	-3.99999	-29.6835	-1.05947	-3.12105	-0.484185	-0.134025	0.157854	-13.7441	-1.26942	-10.9308	-0.964484
49	2513.62	2523.33	2788.67	2578.98	2779.79	2592.71	2984.74	2622.6	2983.87	2604.66	2852.44	2576.16	2837.98	2586.84		49	0.976361	0.297905	-25.3437	-3.99866	-25.9085	-1.09371	-1.69345	-1.3069	1.91448	0.0884965	-9.15843	-1.63106	-5.83717	-1.28262
49.5	2513.04	2523.41	2800.13	2580.97	2791.64	2593.28	2985.28	2623.38	2982.88	2604.51	2856.02	2576.98	2839.92	2587.42		49.5	1.15037	-0.286788	-20.0548	-4.18606	-21.5887	-1.68475	-0.563946	-2.01205	2.20393	-0.0122508	-5.41816	-1.39103	-2.384	-1.23674
50	2512.54	2523.58	2808.65	2583.2	2801.29	2594.5	2985.36	2624.68	2981.66	2604.84	2857.97	2577.63	2840.64	2588.1		50	0.803225	-0.596948	-14.1276	-4.53953	-16.5994	-2.97456	0.182615	-3.24758	2.8843	-1.42964	-2.38112	-1.81553	-0.802882	-1.40347
50.5	2512.23	2523.99	2814.41	2585.56	2808.24	2596.24	2985.09	2626.7	2980.07	2605.94	2858.46	2578.82	2840.87	2588.8		50.5	0.577912	-0.848532	-9.3591	-5.22915	-11.5877	-4.11085	1.01095	-4.96418	3.07245	-2.66196	0.523746	-2.42781	-0.0115412	-1.32622
51	2511.96	2524.35	2818.18	2588.54	2813.04	2598.6	2984.33	2629.63	2978.72	2607.46	2857.63	2580.03	2840.74	2589.44		51	0.40905	-0.496075	-5.69786	-6.6613	-7.75634	-5.17154	2.06427	-6.47017	2.20939	-3.47615	2.14854	-2.62524	0.278455	-1.32247
51.5	2511.83	2524.45	2820.18	2592.26	2816.14	2601.47	2983.11	2633.16	2977.78	2609.48	2856.47	2581.57	2840.65	2590.23		51.5	0.161595	0.0994938	-2.25319	-8.28061	-4.76216	-6.75024	2.50051	-7.83097	1.9807	-4.94306	2.82646	-3.80247	0.178793	-2.15203
52	2511.79	2524.3	2820.63	2596.81	2817.9	2605.3	2981.93	2637.54	2976.63	2612.36	2854.94	2583.88	2840.54	2591.62		52	0.0249102	0.221766	-0.13739	-9.74239	-2.28606	-7.97383	2.26743	-9.79827	2.61309	-5.99763	2.69812	-5.3581	0.276927	-3.11131
52.5	2511.8	2524.19	2820.49	2602.06	2818.57	2609.31	2980.84	2643.02	2975.28	2615.49	2853.87	2586.86	2840.32	2593.31		52.5	-0.178567	0.743591	0.862574	-11.4784	-0.791009	-8.20741	2.16808	-12.1794	2.32004	-7.04565	1.88547	-6.245	0.770666	-3.73506
53	2511.92	2523.57	2819.77	2608.45	2818.76	2613.47	2979.75	2649.72	2974.34	2619.55	2853.05	2590.22	2839.75	2595.39		53	-0.11953	1.28417	2.14015	-14.408	0.342671	-8.28906	2.12603	-14.3955	1.88179	-9.23918	1.15585	-7.79729	1.33636	-4.72899
53.5	2511.86	2523.05	2818.51	2616.55	2818.26	2617.59	2978.74	2657.53	2973.34	2624.76	2852.64	2594.79	2838.99	2598		53.5	0.450187	0.712637	2.28723	-17.8553	1.33129	-8.35647	1.87501	-17.3938	1.96362	-11.4613	0.948701	-10.2702	1.93529	-5.42959
54	2511.53	2522.88	2817.66	2626.3	2817.53	2621.77	2977.88	2667.24	2972.43	2631.06	2852.05	2600.51	2837.91	2600.78		54	0.54627	-0.00483936	1.06903	-21.1458	1.5824	-7.93845	1.57346	-21.3168	1.53654	-13.9007	0.923297	-12.6491	1.85859	-5.75777
54.5	2511.35	2522.95	2817.36	2637.71	2816.71	2625.56	2977.14	2678.83	2971.81	2638.81	2851.62	2607.61	2837.15	2603.87		54.5	0.342168	0.137493	0.630174	-24.616	1.72031	-7.76462	1.49311	-24.98	0.970702	-17.4984	1.55812	-16.188	1.66099	-6.88712
55	2511.13	2522.78	2816.98	2650.86	2815.83	2629.63	2976.43	2692.25	2971.36	2648.58	2850.4	2616.9	2836.23	2607.77		55	0.657274	-0.130112	0.598293	-27.8014	1.75666	-8.27524	1.04262	-28.8681	1.22698	-21.1437	2.96009	-21.165	1.64948	-8.65047
55.5	2510.74	2523.1	2816.79	2665.29	2814.96	2633.9	2976.08	2707.71	2970.55	2659.91	2848.8	2628.76	2835.53	2612.55		55.5	0.608954	-0.664711	0.221958	-29.5196	1.72833	-9.09944	0.664704	-33.0449	1.72919	-24.3461	3.25285	-25.9471	1.3753	-10.4936
56	2510.6	2523.31	2816.66	2680.13	2814.09	2638.82	2975.64	2725.06	2969.7	2672.95	2847.25	2642.72	2834.86	2618.32		56	-0.0856711	-0.055712	0.507135	-29.7037	1.7711	-10.4306	1.26243	-35.6275	1.68384	-27.8491	2.94037	-29.8232	0.961173	-12.6369
56.5	2510.75	2523.18	2816.19	2694.78	2813.21	2644.46	2974.79	2743.02	2968.91	2687.7	2845.87	2658.46	2834.48	2625.29		56.5	-0.139587	0.301963	1.47375	-28.6785	1.67368	-12.5977	1.9383	-36.1638	1.34065	-31.0596	2.67519	-33.0166	1.30992	-15.5948
57	2510.68	2523.07	2815.25	2708.57	2812.41	2651.52	2973.7	2761	2968.31	2703.83	2844.62	2675.56	2833.54	2633.9		57	0.232589	0.146155	1.86537	-26.1038	1.61418	-15.468	2.54219	-35.5257	1.39767	-33.0517	2.05074	-35.123	1.6794	-18.362
57.5	2510.55	2523.02	2814.36	2720.7	2811.53	2659.91	2972.2	2778.23	2967.54	2720.57	2843.87	2693.36	2832.84	2643.62		57.5	0.307843	0.124975	2.03091	-22.4222	2.07662	-18.1568	3.69052	-32.7928	1.20733	-33.9323	0.954973	-35.8177	1.63276	-20.851
58	2510.38	2522.89	2813.21	2730.88	2810.38	2669.59	2970.12	2793.53	2967.11	2737.59	2843.55	2711.16	2831.86	2654.75		58	0.365497	0.573369	2.37953	-18.0919	2.13905	-20.2926	4.00914	-28.4553	0.980068	-33.9261	0.732525	-35.2412	2.0902	-23.4954
58.5	2510.19	2522.49	2812.05	2738.77	2809.45	2680.09	2968.28	2806.55	2966.5	2754.24	2843.04	2728.37	2830.76	2667.02		58.5	0.402656	0.58587	2.20634	-13.5918	1.69847	-21.9081	3.58775	-23.3376	1.11284	-32.3088	1.18773	-33.2974	2.4177	-25.6929
59	2510	2522.3	2811.02	2744.57	2808.58	2691.25	2966.47	2816.85	2965.92	2769.61	2842.34	2744.19	2829.47	2680.15		59	0.251849	0.645449	1.94044	-9.77236	2.12266	-21.9443	3.8122	-18.1286	1.83065	-28.7577	1.6973	-29.6794	2.50716	-25.885
59.5	2509.95	2521.84	2810.06	2748.66	2807.34	2701.75	2964.48	2824.72	2964.7	2782.87	2841.31	2757.85	2828.23	2692.68		59.5	0.0454815	0.707202	2.05568	-6.68645	2.46786	-20.0426	3.85471	-13.1252	2.34928	-24.5726	2.37809	-24.8563	2.83678	-24.7072
60	2509.95	2521.58	2808.99	2751.34	2806.2	2711.18	2962.59	2830.11	2963.64	2794.14	2839.95	2768.9	2826.62	2704.67		60	-0.11524	0.938915	1.97561	-4.03124	2.11855	-17.5815	3.87817	-9.04994	2.31946	-20.2601	3.13701	-19.0649	3.21165	-22.4676
60.5	2510.01	2520.92	2808.13	2752.84	2805.19	2719.26	2960.44	2833.91	2962.36	2803.02	2838.17	2776.9	2825.01	2714.9		60.5	0.0545065	1.0786	1.48986	-2.37364	1.94214	-14.7819	5.16516	-5.81331	2.42056	-14.9574	3.94964	-13.1531	3.58582	-18.5365
61	2509.83	2520.52	2807.41	2753.83	2804.15	2725.83	2957.41	2836.11	2961.11	2809.18	2836.02	2782.22	2822.97	2723.12		61	0.766352	1.03997	1.70115	-1.51522	2.60881	-10.9811	6.48611	-3.74685	3.25505	-10.2422	4.66534	-8.31921	4.45534	-14.0828
61.5	2509.32	2519.89	2806.35	2754.34	2802.6	2730.31	2954.03	2837.81	2959.03	2813.42	2833.56	2785.5	2820.55	2729.06		61.5	0.914603	0.931268	2.44934	-0.397097	3.09689	-7.69077	7.1429	-2.60384	4.5253	-6.72241	4.97263	-5.32486	5.29524	-10.3077
62	2508.97	2519.6	2804.98	2754.28	2801.08	2733.68	2950.21	2838.82	2956.58	2815.95	2831.07	2787.77	2817.69	2733.45		62	0.645092	0.772903	2.90846	0.438542	3.32418	-5.54914	8.36416	-2.14045	5.67903	-3.35937	5.08507	-3.72467	6.0331	-6.61664
62.5	2508.66	2519.11	2803.4	2754.01	2799.19	2735.88	2945.69	2839.97	2953.23	2816.89	2828.42	2789.34	2814.53	2735.74		62.5	0.515792	0.727538	3.71147	0.51598	4.17029	-3.34832	9.46845	-1.8057	7.8087	-0.671031	5.6229	-2.77236	6.79843	-3.23342
63	2508.48	2518.93	2801.24	2753.78	2796.86	2737.11	2940.83	2840.55	2948.76	2816.79	2825.43	2790.57	2810.98	2736.88		63	0.230181	0.18652	4.73115	0.497725	5.42206	-1.63535	9.9614	-0.887798	10.0539	0.861499	6.26449	-1.9027	6.85135	-1.25959
63.5	2508.47	2518.92	2798.72	2753.49	2793.85	2737.66	2935.8	2840.82	2943.34	2816.06	2822.19	2791.3	2807.7	2737.09		63.5	-0.381211	-0.311152	5.37992	0.766429	6.04068	-1.00063	9.93751	0.247516	11.0893	2.36812	6.6334	-1.57899	6.6992	0.216646
64	2508.77	2519.16	2795.94	2753.08	2790.9	2738.15	2930.88	2840.29	2937.79	2814.48	2818.76	2792.1	2804.2	2736.7		64	-0.33365	-0.208441	5.45662	0.515531	6.0287	-0.601005	10.039	1.36267	11.3585	3.56253	7.2703	-0.942422	7.2105	1.57454
64.5	2508.72	2519.09	2793.27	2753	2787.78	2738.18	2925.71	2839.37	2931.97	2812.63	2814.87	2792.1	2800.49	2735.6		64.5	0.243929	0.155358	5.57715	-0.022702	6.49133	0.524296	10.5553	3.18096	11.8629	3.79826	8.26953	0.889585	7.6731	2.35067
65	2508.54	2519.04	2790.35	2753.01	2784.46	2737.67	2920.32	2837.12	2925.99	2810.7	2810.56	2791.3	2796.52	2734.42		65	0.674967	0.171136	5.83371	0.118605	6.57365	1.20691	11.0463	5.0133	11.8837	4.02153	8.82749	1.99219	8.11209	2.63065
65.5	2508.06	2518.87	2787.42	2752.8	2781.26	2737.01	2914.68	2834.54	2920.11	2808.62	2806.14	2790.23	2792.27	2732.94		65.5	1.01546	0.595063	6.22091	0.849567	6.24057	1.60345	11.2467	5.43727	11.712	4.19076	8.72412	2.07718	9.40954	3.238
66	2507.55	2518.46	2784.14	2752.16	2778.18	2736.01	2908.96	2831.72	2914.18	2806.51	2801.84	2789.11	2787.13	2731.18		66	1.21945	0.920555	6.44075	1.50184	6.20485	2.49988	12.3686	5.69314	12.2997	4.33624	8.59426	3.21415	10.6214	3.82801
66.5	2506.88	2517.98	2780.97	2751.26	2774.98	2734.51	2902.31	2828.82	2907.8	2804.23	2797.51	2786.99	2781.8	2729.13		66.5	1.19214	1.05155	6.69345	2.33682	6.70924	3.43828	13.6262	6.24926	12.9016	4.80487	8.74804	4.63641	10.5734	4.33132
67	2506.36	2517.41	2777.39	2749.74	2771.45	2732.68	2895.54	2825.54	2901.29	2801.6	2793.11	2784.65	2776.54	2726.89		67	1.18484	1.13776	7.38497	3.77851	7.25218	3.49889	13.3347	6.25694	13.4043	6.01891	8.72159	4.54793	10.8125	4.54225
67.5	2505.68	2516.84	2773.57	2747.49	2767.72	2731.01	2889.02	2822.57	2894.37	2798.17	2788.75	2782.4	2770.97	2724.61		67.5	1.27709	1.29246	8.11585	5.15563	7.90468	3.62788	12.7718	6.14627	14.1109	7.52913	8.97592	4.89733	11.3183	4.60399
68	2505.12	2516.16	2769.29	2744.67	2763.58	2728.99	2882.69	2819.22	2887.17	2794.15	2784.11	2779.69	2765.35	2722.26		68	0.98437	1.12101	8.74533	5.89088	8.3742	4.31026	12.8746	7.34238	14.8893	8.3944	9.33638	5.79665	10.8171	4.93578
68.5	2504.66	2515.69	2764.86	2741.64	2759.4	2726.75	2876.19	2815.19	2879.53	2789.84	2779.39	2776.69	2760.2	2719.69		68.5	1.05329	1.18121	9.15598	6.42388	8.39125	4.52521	12.6058	8.71491	15.1922	8.83371	9.868	5.91182	9.97888	5.09424
69	2504.07	2514.98	2760.15	2738.25	2755.2	2724.48	2870.09	2810.58	2871.96	2785.35	2774.25	2773.75	2755.25	2717.17		69	1.17446	1.25735	9.57021	7.08682	8.35047	4.62081	12.1516	9.50657	15.7503	9.13853	10.3484	6.16694	10.1298	5.14272
69.5	2503.57	2514.49	2755.35	2734.65	2751.07	2722.09	2863.86	2805.73	2863.82	2780.75	2769.09	2770.39	2750.09	2714.44		69.5	0.588882	0.922008	9.60409	7.00885	8.21196	5.07384	13.0969	9.99272	16.098	9.11614	10.4441	7.58197	10.0363	5.96703
70	2503.44	2514.06	2750.65	2731.29	2746.99	2719.41	2856.96	2800.55	2855.96	2776.25	2763.79	2766.26	2745.26	2711.12		70	0.272243	0.553731	8.86209	6.5463	8.06429	5.49437	14.2577	10.8995	15.728	8.90141	10.7318	8.21733	9.51368	7.36119
70.5	2503.2	2513.85	2746.52	2728.04	2742.95	2716.63	2849.7	2794.93	2848.14	2771.73	2758.33	2762.21	2740.45	2707.12		70.5	0.761021	0.787338	7.87727	6.61879	8.30933	5.64797	14.5721	11.0441	15.045	9.58888	11.319	8.52168	9.96908	8.3768
71	2502.7	2513.25	2742.67	2724.67	2738.62	2713.75	2842.42	2789.58	2840.85	2766.59	2752.53	2757.64	2735.24	2702.75		71	0.966853	1.1446	7.70331	6.67842	8.93371	5.92198	14.7405	10.7017	14.8842	10.7166	11.4402	9.72736	10.7638	9.37408
71.5	2502.23	2512.75	2738.75	2721.39	2734.04	2710.69	2834.93	2784.17	2833.23	2761.04	2746.94	2752.59	2729.78	2697.75		71.5	1.14523	1.13452	7.96873	6.46673	9.38762	6.32181	15.2816	10.8773	14.8929	11.6141	11.1444	10.1057	10.833	10.4258
72	2501.5	2512.05	2734.74	2718.14	2729.29	2707.44	2827.24	2778.66	2826	2755.05	2741.3	2747.65	2724.45	2692.41		72	1.83999	1.65382	7.74995	6.7733	9.45516	6.58417	14.9781	11.2936	14.4295	11.9408	11.6375	9.51056	10.5831	10.9115
72.5	2500.48	2511.1	2730.93	2714.58	2724.61	2704.1	2819.98	2772.88	2818.7	2749.11	2735.4	2742.93	2719.15	2686.96		72.5	1.84054	2.13957	8.02563	7.35769	9.30775	6.9132	14.4951	11.5551	14.7677	12.3444	11.2304	10.1738	10.7888	10.5245
73	2499.73	2510	2726.61	2710.84	2719.96	2700.53	2812.67	2767.07	2811.18	2742.78	2730.08	2737.39	2713.71	2681.93		73	1.40817	2.00049	9.20813	7.46354	9.36717	7.27003	14.6311	12.1833	15.4909	12.3152	10.8055	11.5761	10.5544	9.84829
73.5	2499.05	2509.15	2721.81	2707.12	2715.25	2696.85	2805.38	2760.73	2803.24	2736.92	2724.51	2731.54	2708.61	2677.04		73.5	1.15468	1.48503	9.73095	7.61561	9.44185	7.45676	14.504	12.5127	15.919	11.307	11.1293	11.4185	10.243	9.77002
74	2498.57	2508.5	2717	2703.21	2710.57	2693.08	2798.22	2754.55	2795.31	2731.38	2718.96	2725.99	2703.41	2672.18		74	0.901422	1.13872	9.26434	7.91897	9.04804	7.60295	13.9012	12.8154	15.9136	11.0524	11.3067	11.1948	10.4258	9.54583
74.5	2498.15	2508.03	2712.46	2699.22	2706.15	2689.24	2791.38	2747.87	2787.29	2725.74	2713.25	2720.27	2698.15	2667.53		74.5	0.629582	0.677733	9.56513	8.0308	9.06232	7.8836	14.0656	13.62	16.3495	11.7785	11.045	11.6076	10.8679	8.99753
75	2497.91	2507.8	2707.4	2695.2	2701.47	2685.22	2784.1	2741.05	2779.03	2719.67	2707.87	2714.46	2692.61	2663.08		75	0.609147	0.342869	10.1194	7.8856	9.443	7.97241	14.5833	13.5048	16.2746	11.7797	11.2334	11.5086	10.6833	9.17409
75.5	2497.54	2507.62	2702.44	2691.27	2696.81	2681.27	2776.84	2734.39	2771.07	2713.94	2702.02	2708.88	2687.47	2658.29		75.5	0.609047	0.443622	9.83275	8.30826	8.96268	7.99947	14.7338	13.2086	15.8047	11.9052	11.3297	10.4602	10.5105	9.86419
76	2497.32	2507.28	2697.53	2686.88	2692.52	2677.17	2769.36	2727.74	2763.23	2707.65	2696.56	2703.89	2682.07	2653.32		76	0.419967	1.0914	9.88216	8.83087	8.41506	8.44882	15.0115	13.7478	15.3475	13.177	11.2335	10.2608	10.6677	9.69475
76.5	2497.08	2506.52	2692.48	2682.48	2688.32	2672.86	2761.83	2720.67	2755.72	2700.97	2690.77	2698.5	2676.85	2648.59		76.5	0.490475	1.7473	10.5696	8.94834	8.46593	8.57622	15.3459	14.0117	14.9042	12.7894	11.3592	10.9796	10.3831	9.55749
77	2496.78	2505.59	2687.01	2677.91	2684.03	2668.61	2754.1	2713.83	2748.29	2695	2685.24	2692.95	2671.68	2643.68		77	0.87044	1.95337	10.8279	9.26797	8.59817	8.55247	15.085	13.4349	14.6652	11.35	11.0423	11.3751	10.1631	10.1235
77.5	2496.19	2504.59	2681.71	2673.18	2679.7	2664.26	2746.83	2707.18	2740.99	2689.46	2679.65	2687.22	2666.63	2638.5		77.5	1.35129	2.08706	10.68	9.93799	8.84142	8.87409	14.1984	13.4377	14.9527	11.2842	11.4071	11.0343	10.3973	10.4305
78	2495.4	2503.58	2676.36	2668.05	2675.17	2659.74	2739.87	2700.42	2733.34	2683.7	2673.81	2681.9	2661.31	2633.29		78	2.00667	1.73757	10.3834	9.94514	9.25909	9.15997	13.5755	13.2808	15.2306	11.2439	11.9647	10.8444	10.4025	10.3883
78.5	2494.17	2502.93	2671.36	2663.3	2670.46	2655.11	2733.18	2693.99	2725.86	2678.3	2667.74	2676.33	2656.29	2628.09		78.5	2.82335	0.841019	9.82749	9.44053	9.47292	9.39042	13.4846	12.4234	14.6509	10.3257	11.9905	11.031	9.91522	10.5922
79	2492.65	2502.7	2666.5	2658.58	2665.68	2650.32	2726.39	2687.96	2718.66	2673.18	2661.78	2670.94	2651.33	2622.74		79	3.14267	0.252687	9.5651	9.25979	9.99913	9.90841	13.3092	11.8015	14.3769	11.0022	12.4054	10.5799	9.9975	10.5403
79.5	2491.11	2502.59	2661.75	2654.03	2660.58	2645.25	2719.89	2682.08	2711.45	2667.23	2655.32	2665.73	2646.3	2617.63		79.5	2.87599	0.280766	9.58676	9.19793	9.62002	10.0212	12.961	12.0395	14.4625	12.1616	12.9986	10.2703	10.001	9.84537
80	2489.79	2502.37	2656.89	2649.4	2656.11	2640.35	2713.36	2675.92	2704.31	2661.15	2648.9	2660.57	2641.36	2612.88		80	2.56041	0.517291	9.69544	8.99601	8.84353	9.81997	13.1665	12.1669	13.589	12.1533	12.665	10.6964	9.75462	9.27026
80.5	2488.57	2502.01	2652.04	2645.04	2651.62	2635.46	2706.69	2669.92	2697.85	2655.09	2642.73	2655.01	2636.49	2608.32		80.5	2.14079	1.14659	9.89489	8.68755	9.02499	9.51779	13.56	12.1809	12.7461	12.132	11.8992	11.316	9.85249	9.09831
81	2487.66	2501.21	2647	2640.63	2647.08	2630.88	2699.82	2663.7	2691.39	2648.97	2637	2649.32	2631.44	2603.83		81	1.61084	1.89004	10.0935	8.98444	9.09629	8.78859	13.7538	12.6229	13.3123	12.59	11.2353	11.4383	10.4906	8.44661
81.5	2486.92	2500.18	2641.98	2636.02	2642.56	2626.65	2692.97	2657.35	2684.56	2642.59	2631.54	2643.58	2626.06	2599.83		81.5	1.36884	2.18716	10.0914	9.54	8.80243	8.19006	13.666	12.6742	13.5742	12.3145	10.1922	11.5613	10.697	8.08059
82	2486.29	2499.06	2636.92	2631.14	2638.15	2622.62	2686.12	2651.08	2677.9	2636.68	2626.79	2637.79	2620.81	2595.66		82	1.1235	2.32431	10.027	9.68403	9.6002	8.11578	13.8604	12.254	13.1273	11.9311	9.27668	11.4785	10.3486	8.45753
82.5	2485.81	2497.89	2631.96	2626.36	2632.99	2618.47	2679.11	2645.05	2671.37	2630.61	2622.19	2632.14	2615.68	2591.45		82.5	0.773284	2.24257	9.84223	9.6028	10.1071	8.47374	14.1595	12.1879	13.2746	11.9856	8.84142	11.1327	10.3075	8.1994
83	2485.51	2496.84	2627.04	2621.51	2628.14	2614.16	2672.09	2638.88	2664.61	2624.71	2617.89	2626.66	2610.5	2587.51		83	0.537207	1.94597	9.93795	9.7886	9.86132	8.64937	13.5348	12.2119	13.5743	11.8924	8.76365	10.7997	10.4307	7.52422
83.5	2485.25	2495.92	2622.01	2616.6	2623.08	2609.85	2665.65	2632.84	2657.89	2618.76	2613.36	2621.37	2605.39	2583.81		83.5	0.394556	1.84501	10.1416	9.72687	10.1308	8.63128	12.3026	12.2209	13.0805	11.4879	9.11251	10.1553	9.45884	7.82837
84	2485.07	2494.96	2616.97	2611.77	2618.07	2605.51	2659.67	2626.68	2651.55	2613.2	2608.73	2616.47	2601.08	2579.68		84	0.453655	2.02839	9.8055	9.83344	9.89273	8.78702	12.0454	12.1264	12.5655	11.2801	9.70018	9.82555	8.16206	8.08773
84.5	2484.73	2493.92	2612.22	2606.78	2613.27	2601.05	2653.57	2620.78	2645.31	2607.44	2603.62	2611.5	2597.1	2575.77		84.5	1.00456	1.959	9.42704	9.86273	9.01064	9.09226	12.0007	11.5948	12.1737	11.426	10.5858	9.85708	7.97295	7.84757
85	2484.03	2492.99	2607.53	2601.93	2608.97	2596.48	2647.74	2615.14	2639.33	2601.84	2598.19	2606.6	2593.13	2571.77		85	1.87225	1.9403	9.17184	9.68152	8.97233	8.85199	11.2996	10.6396	12.073	10.9478	11.0914	9.8573	7.49676	8.20955
85.5	2482.89	2491.92	2603.04	2597.05	2604.3	2592.17	2642.19	2610.09	2633.24	2596.48	2592.56	2601.62	2589.65	2567.57		85.5	2.43599	2.37497	8.87023	9.90747	8.81851	8.85234	11.2962	10.0354	11.933	10.5865	11.4699	9.9477	6.4611	8.44663
86	2481.64	2490.64	2598.6	2592.03	2600.18	2587.6	2636.38	2605.02	2627.43	2591.21	2586.81	2596.6	2586.5	2563.36		86	2.74212	2.62571	9.04377	10.1078	8.29605	9.14525	11.8167	10.0632	11.5057	10.6613	11.2718	10.4554	6.72972	8.35335
86.5	2480.23	2489.33	2593.98	2587.06	2595.87	2583.07	2630.46	2600.01	2621.69	2585.9	2581.35	2591.18	2582.83	2559.19		86.5	2.49408	2.59177	9.41416	9.31423	8.93061	9.06356	11.636	10.1049	11.4579	10.0928	10.7544	10.8155	7.65773	8.58274
87	2479.18	2488.03	2589.26	2582.69	2591.26	2578.61	2624.78	2594.88	2615.95	2581.17	2576.11	2585.81	2578.95	2554.8		87	2.03664	2.68153	9.03569	8.77907	9.44767	8.39579	11.1221	10.3305	11.6201	9.06655	9.81945	11.018	7.66544	8.57309
87.5	2478.19	2486.61	2584.87	2578.21	2586.54	2574.67	2619.24	2589.62	2610.12	2576.69	2571.51	2580.17	2575.15	2550.63		87.5	1.64576	3.12756	9.23379	8.90327	8.98024	7.80893	11.3673	11.085	11.3145	9.22807	9.00456	11.2257	7.8647	8.42554
88	2477.5	2484.93	2579.98	2573.85	2582.24	2570.72	2613.42	2583.87	2604.64	2571.94	2567.03	2574.61	2571.07	2546.33		88	1.40436	3.3075	9.90941	8.4624	8.886	7.85376	11.5022	11.3438	10.8947	9.33073	8.72004	11.2563	8.27665	8.73882
88.5	2476.71	2483.31	2575.1	2569.72	2577.6	2566.82	2607.76	2578.44	2599.12	2567.41	2562.72	2568.96	2567	2541.92		88.5	1.62856	3.41739	9.37272	8.21961	9.28744	7.76446	11.4856	10.2997	11.3656	8.89998	8.93076	11.0713	7.64002	8.80302
89	2475.81	2481.49	2570.54	2565.55	2573.1	2562.97	2601.9	2573.47	2593.28	2562.92	2558.13	2563.65	2563.4	2537.56		89	2.30157	3.67262	9.32397	8.61539	8.4319	7.49439	11.7589	10.1645	11.8255	9.42931	8.76992	10.1129	7.25277	8.62323
89.5	2474.41	2479.61	2565.63	2561.15	2569.13	2559.25	2596.02	2568.21	2587.38	2557.98	2553.9	2558.87	2559.66	2533.29		89.5	2.93652	4.25554	10.5273	8.60326	7.92444	7.81785	11.972	10.4893	11.6048	10.0106	9.0902	8.97159	7.63738	8.58752
90	2472.92	2477.34	2560.17	2557	2565.05	2555.14	2590.05	2563.07	2581.68	2553.05	2549.02	2554.62	2555.81	2529.01		90	3.18405	4.05149	10.5163	8.13086	8.42703	8.29911	11.2543	10.0165	11.3882	9.45664	9.60439	8.28656	7.53272	8.24383
90.5	2471.24	2475.62	2555.29	2552.96	2560.72	2551.05	2584.78	2558.16	2575.96	2548.54	2544.42	2550.56	2552.11	2525.08		90.5	3.42881	3.36656	9.17735	8.19266	8.74855	8.00184	10.5312	9.87331	11.5158	8.86342	9.07299	7.66657	7.55504	7.62407
91	2469.51	2473.93	2550.9	2548.82	2556.41	2547.12	2579.51	2553.14	2570.26	2544.14	2539.92	2546.91	2548.22	2521.36		91	3.55528	3.12704	8.79337	8.13046	8.16135	7.84747	9.90934	10.2365	10.8639	8.7116	8.81123	7.22421	8.03668	7.2659
91.5	2467.68	2472.5	2546.52	2544.84	2552.52	2543.13	2574.89	2548.04	2565.16	2539.85	2535.51	2543.21	2544.2	2517.83		91.5	3.71934	2.83162	8.18798	7.94898	8.0084	8.28563	9.05571	9.63477	9.69096	8.28864	9.37258	7.78118	7.49659	6.75575
92	2465.82	2471.13	2542.76	2540.84	2548.39	2538.87	2570.39	2543.51	2560.49	2535.83	2530.67	2539.13	2540.77	2514.57		92	3.65471	2.17853	7.09732	8.00051	7.94999	8.46509	8.58605	9.05905	9.29444	7.95699	8.92899	8.27101	6.60392	6.40528
92.5	2463.99	2470.22	2539.33	2536.84	2544.61	2534.73	2566.18	2538.9	2555.89	2531.8	2526.66	2534.98	2537.48	2511.32		92.5	3.8668	2.30032	6.71045	8.09552	7.51821	8.08434	8.97983	9.14656	8.74447	8.33724	7.96763	8.43656	6.65965	6.78675
93	2461.94	2468.72	2535.94	2532.79	2540.87	2530.7	2561.34	2534.37	2551.8	2527.47	2522.66	2530.69	2534.1	2507.76		93	4.14232	3.17235	7.23481	7.79199	6.98514	8.42406	9.84462	9.05718	7.74228	8.74176	7.56427	8.50802	6.61403	7.28651
93.5	2459.84	2467.06	2532.19	2529	2537.42	2526.32	2556.34	2529.85	2548.18	2522.98	2519.2	2526.36	2530.83	2504.06		93.5	4.51152	3.81369	6.88409	7.89036	8.09606	8.67444	10.5877	8.85353	6.45182	9.79523	6.22213	9.49966	6.80695	7.51279
94	2457.44	2464.9	2529.07	2524.9	2532.76	2522.11	2550.73	2525.48	2545.29	2517.71	2516.41	2521.25	2527.22	2500.22		94	4.70856	4.53559	6.65555	7.89117	8.8462	8.26479	11.519	9.05348	5.85805	10.3205	5.24169	9.74491	7.48638	8.04383
94.5	2455.07	2462.5	2525.66	2521.02	2528.37	2518.06	2544.86	2520.87	2542.47	2512.49	2513.99	2516.41	2523.3	2496.06		94.5	5.9546	5.95087	5.77132	9.37961	12.292	8.48982	13.2121	9.38609	4.18668	13.3359	4.16673	12.7857	9.20469	8.91773
95	2451.99	2459.49	2523.68	2516.27	2521.56	2514.23	2538.61	2516.81	2541.29	2505.53	2512.44	2509.56	2518.82	2492.03		95	3.19455	3.11964	1.75083	4.89266	7.21672	3.78574	6.31105	3.96588	0.912009	7.25835	1.41611	7.18977	4.58224	4.01667

## Sheet: Exp 2
Experiment 2
RFU																Derivative
Temperature	1_Mg	2_Ca	3_BiP_Mg	4_BiP_Mg_ADP	5_BiP_Ca	6_BiP_Ca_ADP	7_Hsp70_Mg	8_Hsp70_Mg_ADP	9_Hsp70_Ca	10_Hsp70_Ca_ADP	11_Hsc70_Mg	12_Hsc70_Mg_ADP	13_Hsc70_Ca	14_Hsc70_Ca_ADP		Temperature	1_Mg	2_Ca	3_BiP_Mg	4_BiP_Mg_ADP	5_BiP_Ca	6_BiP_Ca_ADP	7_Hsp70_Mg	8_Hsp70_Mg_ADP	9_Hsp70_Ca	10_Hsp70_Ca_ADP	11_Hsc70_Mg	12_Hsc70_Mg_ADP	13_Hsc70_Ca	14_Hsc70_Ca_ADP			1_Mg	2_Ca	3_BiP_Mg	4_BiP_Mg_ADP	5_BiP_Ca	6_BiP_Ca_ADP	7_Hsp70_Mg	8_Hsp70_Mg_ADP	9_Hsp70_Ca	10_Hsp70_Ca_ADP	11_Hsc70_Mg	12_Hsc70_Mg_ADP	13_Hsc70_Ca	14_Hsc70_Ca_ADP
20	2629.27	2618.52	2674.62	2653.69	2684.56	2652.14	2702.05	2705.63	2733.02	2710.3	2708.45	2693.16	2666.7	2645.96		20	6.43068	6.24272	7.00735	6.42276	6.96901	6.09974	7.28318	6.28466	6.54828	7.06118	6.51509	5.77009	7.08516	5.90467		Min	-3.9859	-3.31399	-48.2976	-39.5675	-48.956	-34.4103	-84.6044	-60.9086	-86.9793	-67.4396	-60.5032	-47.4574	-60.4551	-41.8266
20.5	2622.84	2612.28	2667.62	2647.26	2677.59	2646.04	2694.77	2699.34	2726.47	2703.24	2701.93	2687.39	2659.61	2640.06		20.5	13.9331	13.5259	15.1826	13.916	15.0995	13.2161	15.7802	13.6168	14.1879	15.2992	14.116	12.5019	15.3512	12.7935		Tm	36.5	36	47.5	56	48	59	44	56.5	43.5	58	46	57.5	45.5	59
21	2616.41	2606.04	2660.61	2640.84	2670.62	2639.94	2687.49	2693.06	2719.92	2696.18	2695.42	2681.62	2652.53	2634.16		21	12.8614	12.4854	14.0147	12.8455	13.938	12.1995	14.5664	12.5693	13.0966	14.1224	13.0302	11.5402	14.1703	11.8093
21.5	2609.98	2599.79	2653.6	2634.42	2663.65	2633.84	2680.2	2686.77	2713.37	2689.12	2688.9	2675.85	2645.44	2628.25		21.5	12.8614	12.4854	14.0147	12.8455	13.938	12.1995	14.5664	12.5693	13.0966	14.1224	13.0302	11.5402	14.1703	11.8093
22	2603.55	2593.55	2646.59	2628	2656.68	2627.74	2672.92	2680.49	2706.82	2682.06	2682.39	2670.08	2638.36	2622.35		22	12.8614	12.4854	14.0147	12.8455	13.938	12.1995	14.5664	12.5693	13.0966	14.1224	13.0302	11.5402	14.1703	11.8093
22.5	2597.12	2587.31	2639.59	2621.57	2649.71	2621.64	2665.64	2674.21	2700.27	2675	2675.87	2664.31	2631.27	2616.44		22.5	12.8787	12.5264	14.1405	12.9168	14.0076	12.2037	14.6813	12.6012	13.0912	14.1375	13.0453	11.5496	14.2698	11.8277
23	2590.69	2581.07	2632.58	2615.15	2642.74	2615.54	2658.35	2667.92	2693.73	2667.94	2669.36	2658.54	2624.19	2610.54		23	12.8476	12.3367	13.2291	12.3746	13.4801	12.1994	14.0069	12.3878	13.1834	14.0658	12.95	11.498	13.6402	11.7365
23.5	2584.36	2575.07	2626.33	2609.15	2636.19	2609.47	2651.76	2661.83	2687.15	2660.97	2662.93	2652.82	2617.7	2604.74		23.5	12.1294	11.4722	12.6151	12.3018	13.3407	12.0211	12.3542	12.0987	12.8466	13.8237	12.8932	11.3308	12.5518	11.4877
24	2578.58	2569.65	2619.89	2602.9	2629.39	2603.54	2645.95	2655.79	2680.89	2654.2	2656.57	2647.19	2611.61	2599.17		24	11.3585	10.1521	12.6934	11.9274	13.3377	11.7346	11.1383	12.0525	12.4857	12.9958	12.0444	11.2522	11.703	10.3088
24.5	2573.01	2564.84	2613.77	2597.39	2622.97	2597.78	2640.52	2649.79	2674.7	2648.07	2650.93	2641.55	2605.95	2594.44		24.5	10.6042	9.44675	11.6544	10.3198	12.4278	11.1533	10.6591	11.8835	11.8828	11.4574	10.8771	11.4472	11.1829	9.16574
25	2568.03	2560.18	2608.29	2592.57	2617	2592.48	2635.27	2643.91	2669.07	2642.75	2645.63	2635.85	2600.46	2589.95		25	9.40579	8.91614	10.2525	8.8426	11.4068	9.92251	10.1836	11.7643	10.8292	9.98276	10.2334	10.9588	10.3219	8.45828
25.5	2563.59	2555.96	2603.44	2588.46	2611.62	2587.86	2630.28	2638.07	2663.81	2638.06	2640.72	2630.75	2595.65	2586		25.5	8.36777	8.12127	9.55982	8.03737	10.0397	8.73092	10.1002	11.3951	10.2995	8.70057	9.37454	9.2815	9.3016	7.52458
26	2559.66	2552.08	2598.74	2584.55	2607.03	2583.71	2625.11	2632.63	2658.78	2634.04	2636.23	2626.57	2591.13	2582.38		26	7.35878	7.14532	8.77118	7.053	8.11672	7.87515	10.5199	10.1999	9.70963	7.42647	8.68468	7.76903	8.5835	6.90316
26.5	2556.26	2548.81	2594.75	2581.39	2603.44	2580.01	2619.87	2627.86	2654.23	2630.58	2631.97	2623.03	2587.11	2579.03		26.5	6.06715	6.24196	7.2868	6.05754	6.67607	6.75334	10.1137	9.10277	8.1065	6.53585	8.48599	5.85023	7.46756	6.76013
27	2553.5	2545.82	2591.44	2578.36	2600.23	2576.89	2615.09	2623.47	2650.68	2627.41	2627.76	2620.71	2583.62	2575.66		27	5.40228	5.54167	5.83869	5.99034	6.0663	6.05792	9.05047	8.39137	6.40583	6.1766	8.13619	3.93332	6.59182	6.28153
27.5	2550.71	2543.26	2588.76	2575.35	2597.28	2573.8	2610.8	2619.48	2647.62	2624.28	2623.83	2618.93	2580.36	2572.75		27.5	5.62128	4.67508	5.33003	6.11704	5.83306	6.3747	8.12156	7.44338	6.25064	6.53381	7.64024	3.11514	6.75293	5.67868
28	2547.73	2540.95	2585.84	2572.16	2594.2	2570.43	2606.88	2615.88	2644.33	2620.73	2619.96	2617.34	2576.7	2569.81		28	6.72686	5.02903	6.71336	6.75373	6.92848	7.10854	7.744	7.44157	6.5694	7.8337	8.27751	3.86291	7.91233	6.30078
28.5	2543.81	2537.93	2581.91	2568.45	2590.17	2566.6	2602.9	2611.81	2640.95	2616.3	2615.42	2614.79	2572.27	2566.31		28.5	8.96206	7.37378	8.85925	8.3983	9.26785	8.34151	8.35007	8.99718	7.28332	9.98132	9.67683	6.31599	10.2146	7.75765
29	2538.63	2533.4	2576.9	2563.65	2584.88	2561.94	2598.32	2606.75	2636.74	2610.6	2610.16	2610.81	2566.37	2561.92		29	11.9926	10.7958	11.4019	10.6379	11.713	10.5552	10.2873	11.3465	10.1461	13.1045	11.734	10.0798	13.2432	9.95123
29.5	2531.76	2527.07	2570.38	2557.7	2578.35	2555.93	2592.39	2600.37	2630.62	2603.16	2603.52	2604.61	2559.04	2556.19		29.5	15.4143	14.5485	14.9137	13.6094	14.8837	13.5407	13.6949	14.2071	14.2677	16.4312	15.0108	14.4561	16.0762	13.3274
30	2523.26	2518.83	2562.01	2550.01	2569.97	2548.34	2584.56	2592.46	2622.55	2594.23	2595.1	2596.36	2550.29	2548.59		30	18.7265	18.6712	18.4092	16.9827	18.3622	16.9854	17.5031	17.7843	17.8359	19.4484	18.7725	18.8953	19.1385	16.7343
30.5	2513.28	2508.67	2552.29	2540.93	2560.17	2539.05	2575.04	2582.72	2613	2583.9	2585	2585.91	2540.06	2539.64		30.5	20.3353	20.951	19.6338	18.912	20.6154	19.7397	20.3052	20.4623	19.9451	21.2032	20.7025	22.206	21.2625	18.9059
31	2503.19	2498.23	2542.63	2531.36	2549.6	2528.82	2564.53	2572.25	2602.79	2573.2	2574.66	2574.54	2529.36	2529.91		31	20.2204	20.895	19.2135	19.1036	21.2402	21.0726	21.3613	21.4353	21.0245	21.8982	20.9137	22.8342	21.0841	19.6971
31.5	2493.19	2487.98	2533.19	2521.97	2539.13	2518.19	2553.97	2561.49	2592.25	2562.21	2564.22	2563.31	2519.14	2520.19		31.5	19.5572	19.7926	18.2614	18.6157	20.7668	21.1763	20.6371	21.2356	20.4012	21.3678	20.5257	22.1158	19.9628	18.9676
32	2483.87	2478.67	2524.5	2512.94	2529.08	2507.92	2544.14	2551.23	2582.67	2552.04	2554.33	2552.61	2509.47	2511.17		32	17.2742	17.1886	16.4893	16.8109	18.8107	19.5182	18.3477	19.6515	17.984	19.5083	18.886	20.3929	18.6772	16.824
32.5	2476.09	2470.95	2516.81	2505.32	2520.54	2498.91	2535.76	2541.96	2574.4	2542.79	2545.53	2543.13	2500.75	2503.48		32.5	13.84	13.5009	14.0171	13.872	15.4447	16.243	15.2806	17.3116	14.7578	17.101	15.798	17.2068	15.3592	14.0206
33	2470	2465.09	2510.55	2499.04	2513.71	2491.72	2528.93	2533.93	2567.94	2534.93	2538.5	2535.47	2494.27	2497.21		33	10.7892	10.5113	11.2083	11.3273	11.6492	12.8914	11.8373	15.0423	11.4559	14.9607	13.1196	13.61	10.956	10.9101
33.5	2465.27	2460.4	2505.63	2493.98	2508.86	2486.02	2523.95	2526.99	2562.95	2527.9	2532.32	2529.43	2489.7	2492.64		33.5	7.99203	7.80511	8.22878	8.91862	8.03115	9.58566	8.19695	12.2849	8.13563	12.2718	11.2805	10.8623	7.464	7.27904
34	2462.07	2457.37	2502.34	2490.19	2505.59	2482.15	2520.75	2521.72	2559.82	2522.69	2527.32	2524.66	2486.81	2489.87		34	4.61797	4.30179	5.14266	5.94657	5.05426	6.02175	4.52841	8.91839	4.67806	9.2629	8.65023	7.61628	3.87935	4.03051
34.5	2460.58	2456.01	2500.49	2488.02	2503.76	2479.9	2519.46	2517.99	2558.25	2518.56	2523.78	2521.81	2485.85	2488.49		34.5	1.75047	1.50401	2.04489	3.05661	2.28483	3.19598	0.526453	6.23158	1.40015	6.97441	5.14572	4.33014	-0.176759	1.64319
35	2460.21	2455.73	2500.29	2487.05	2503.22	2478.86	2520.2	2515.48	2558.41	2515.74	2522.07	2520.19	2486.78	2488.19		35	-0.421542	-0.278183	-1.17865	0.766158	0.00319476	0.982733	-3.3007	3.58189	-1.9133	4.40096	2.45398	2.06833	-2.74616	-0.586797
35.5	2460.94	2456.24	2501.51	2487.22	2503.62	2478.91	2522.72	2514.41	2560.07	2514.15	2521.23	2519.67	2488.39	2488.99		35.5	-2.25115	-1.95059	-3.31339	-1.37942	-1.32901	-1.33897	-6.86629	0.732268	-4.5693	1.78215	0.453639	0.129876	-3.80714	-2.42777
36	2462.36	2457.61	2503.4	2488.34	2504.51	2480.1	2526.95	2514.55	2562.91	2513.87	2521.71	2519.98	2490.6	2490.42		36	-3.4091	-3.31399	-4.02193	-2.98049	-2.38221	-3.07723	-9.68199	-0.775227	-6.83839	-0.219647	-2.46536	-1.34688	-5.22173	-2.87249
36.5	2464.25	2459.36	2505.5	2490.03	2506.08	2481.78	2532.27	2515	2566.86	2514.28	2523.61	2520.87	2493.55	2491.8		36.5	-3.9859	-3.21342	-4.67798	-3.46214	-4.13769	-3.38785	-11.6516	-0.983786	-8.76579	-1.6576	-4.79681	-1.79432	-6.26762	-2.89523
37	2466.24	2460.77	2508.06	2491.7	2508.55	2483.4	2538.53	2515.52	2571.65	2515.45	2526.29	2521.67	2496.78	2493.37		37	-3.86071	-2.84904	-5.37951	-3.34354	-5.16571	-3.18856	-13.1043	-1.23143	-10.5188	-2.69004	-5.46383	-1.56236	-6.66747	-3.50143
37.5	2468.06	2462.26	2510.77	2493.31	2511.13	2484.95	2545.43	2516.21	2577.38	2516.8	2529.1	2522.45	2500.27	2495.23		37.5	-3.45387	-2.97477	-5.14839	-2.80872	-5.39161	-2.95329	-15.0806	-1.4168	-12.2433	-2.52028	-6.44636	-1.63871	-7.5218	-3.56315
38	2469.72	2463.72	2513.24	2494.48	2513.98	2486.27	2553.66	2516.91	2583.99	2517.92	2532.81	2523.29	2504.35	2496.91		38	-3.27171	-2.84077	-5.17174	-2.16017	-6.11899	-2.0597	-17.3256	-1.38657	-14.5942	-2.16482	-8.13096	-1.51976	-8.73102	-3.38548
38.5	2471.37	2465.09	2516.04	2495.48	2517.21	2487.04	2562.84	2517.65	2592.13	2518.94	2537.1	2523.98	2508.95	2498.69		38.5	-3.41843	-2.59451	-6.03954	-1.60613	-6.53973	-1.34851	-19.9898	-1.77004	-17.924	-1.61491	-8.67379	-1.50239	-9.45685	-3.859
39	2473.11	2466.38	2519.22	2496.15	2520.4	2487.79	2573.78	2518.68	2602.04	2519.51	2541.51	2524.81	2513.81	2500.71		39	-3.30211	-2.92509	-6.34286	-1.45475	-5.96131	-1.89414	-23.5968	-2.18085	-22.057	-0.932822	-9.39013	-1.59397	-10.1894	-3.88868
39.5	2474.68	2468.02	2522.36	2497.01	2523.23	2488.98	2586.51	2519.77	2614.29	2519.87	2546.63	2525.61	2519.18	2502.48		39.5	-3.22644	-3.26768	-6.45992	-1.85222	-5.90627	-2.65703	-27.636	-2.12294	-26.7697	-0.259201	-11.2458	-1.96739	-11.1915	-3.18115
40	2476.36	2469.57	2525.79	2498	2526.39	2490.4	2601.5	2520.78	2628.92	2519.83	2552.77	2526.73	2525.03	2503.89		40	-3.40845	-2.96101	-7.42109	-2.15795	-6.47009	-3.00825	-32.1324	-1.94818	-32.0857	-0.00322364	-13.0097	-1.92241	-12.3763	-2.63418
40.5	2478.04	2470.98	2529.83	2499.13	2529.69	2491.99	2618.77	2521.67	2646.52	2519.91	2559.68	2527.51	2531.6	2505.1		40.5	-3.2183	-2.7889	-8.60649	-2.07657	-6.85349	-3.53884	-37.3128	-1.47162	-38.3133	0.0616612	-14.9438	-1.70597	-13.8734	-2.02199
41	2479.51	2472.34	2534.4	2500.1	2533.26	2493.81	2639.01	2522.19	2667.43	2519.77	2567.82	2528.46	2538.96	2505.88		41	-2.53205	-2.51818	-9.66722	-2.26576	-7.3155	-3.20699	-43.6568	-0.514261	-45.6596	0.121467	-17.7302	-1.74811	-15.6183	-1.06151
41.5	2480.57	2473.47	2539.59	2501.37	2537.08	2495.09	2662.66	2522.28	2692.47	2519.79	2577.41	2529.22	2547.36	2506.25		41.5	-1.86818	-2.00295	-11.4361	-2.29525	-8.29139	-2.09364	-51.4971	-0.302716	-54.9823	0.174456	-20.3536	-1.46323	-18.2578	-0.76328
42	2481.41	2474.36	2545.85	2502.32	2541.63	2495.97	2690.72	2522.56	2722.57	2519.63	2588.21	2529.91	2557.36	2506.74		42	-1.42582	-1.59667	-13.2903	-1.66477	-9.74965	-1.58681	-60.8079	-0.547682	-65.3337	-0.00974669	-23.1095	-1.10878	-21.8047	-1.17254
42.5	2481.98	2475.13	2552.83	2503.1	2546.86	2496.68	2723.51	2522.81	2757.72	2519.81	2600.64	2530.38	2569.25	2507.4		42.5	-0.853836	-1.66546	-14.7643	-1.68505	-11.3394	-1.05937	-70.4082	-0.580836	-75.1228	-0.185457	-26.7181	-1.19897	-25.7668	-1.24364
43	2482.25	2476.03	2560.65	2504.01	2553.05	2497.04	2760.93	2523.16	2797.37	2519.82	2615.06	2531.09	2583.29	2507.99		43	-0.190416	-1.69839	-16.5263	-1.77202	-13.4457	-0.468835	-78.9246	-0.67356	-83.1468	-0.379413	-31.0469	-1.0661	-30.7607	-1.36178
43.5	2482.2	2476.81	2569.41	2504.81	2560.41	2497.26	2801.91	2523.52	2840.18	2520.22	2631.88	2531.41	2600.25	2508.8		43.5	0.265858	-1.586	-18.5548	-1.26877	-16.2665	-0.692556	-84.1984	-1.11687	-86.9793	-0.884517	-36.5344	-0.609911	-37.3952	-1.86294
44	2482.07	2477.64	2579.31	2505.31	2569.34	2497.77	2844.35	2524.23	2883.4	2520.64	2651.81	2531.77	2620.75	2509.79		44	0.14175	-1.71024	-21.1904	-1.05566	-19.179	-1.24171	-84.6044	-1.26764	-84.6726	-0.796945	-43.515	-0.83548	-44.3498	-1.85767
44.5	2482.11	2478.45	2590.75	2505.91	2579.61	2498.4	2885.68	2524.74	2924.06	2521.02	2675.43	2532.2	2644.55	2510.58		44.5	-0.320808	-1.2704	-24.7624	-1.23033	-22.1497	-0.971078	-79.9093	-1.02466	-77.5179	-0.781606	-50.7963	-0.723684	-51.0318	-1.21253
45	2482.36	2478.88	2604.19	2506.51	2591.58	2498.76	2923.5	2525.27	2960.33	2521.47	2702.4	2532.42	2671.64	2511.07		45	-0.502399	-0.604089	-29.0463	-1.03367	-25.7541	-0.891207	-70.5199	-0.910606	-66.8645	-1.26109	-56.8268	-0.0811024	-56.9806	-1.21508
45.5	2482.62	2479.13	2619.91	2506.99	2605.43	2499.32	2955.66	2525.64	2990.53	2522.2	2731.86	2532.28	2701.13	2511.8		45.5	-0.758721	-0.592671	-34.0719	-1.2389	-29.6177	-1.06832	-57.6959	-0.743549	-53.7386	-1.07848	-60.4316	0.551914	-60.4551	-1.25053
46	2483.15	2479.48	2638.31	2507.73	2621.33	2499.78	2981.08	2525.99	3014.03	2522.48	2762.26	2531.91	2731.47	2512.29		46	-1.27644	-0.56191	-39.5457	-1.23771	-34.4339	-0.843193	-44.3013	-0.387687	-40.4879	-0.293308	-60.5032	0.907666	-59.9636	-0.989292
46.5	2483.82	2479.69	2659.29	2508.22	2639.93	2500.16	3000.09	2526.03	3031.22	2522.62	2791.7	2531.39	2760.5	2512.86		46.5	-1.2117	-0.386049	-43.8823	-1.18408	-39.8134	-0.526278	-31.7733	-0.0298156	-28.609	-0.602881	-56.3421	1.20753	-55.8335	-1.31833
47	2484.3	2479.95	2681.96	2508.95	2661.01	2500.38	3013.1	2526.1	3042.93	2523.08	2818.09	2530.77	2786.81	2513.61		47	-0.741286	-0.951377	-46.7918	-1.4606	-44.2207	-0.813682	-20.7341	-0.308563	-18.4793	-0.848137	-48.9862	1.0554	-48.6885	-1.62688
47.5	2484.6	2480.6	2705.82	2509.71	2683.97	2500.98	3021.22	2526.38	3050.07	2523.39	2840.43	2530.39	2808.85	2514.43		47.5	-0.629642	-1.19948	-48.2976	-1.86561	-47.613	-1.08364	-12.2381	-0.693547	-10.6469	-0.426949	-40.2368	0.611847	-39.4161	-1.52138
48	2484.94	2481.04	2729.8	2510.84	2708.27	2501.44	3025.76	2526.86	3053.92	2523.61	2858.2	2530.23	2826.17	2515.1		48	-0.599517	-0.569315	-46.7941	-2.29929	-48.956	-1.09266	-6.42405	-1.59388	-4.92486	-0.821414	-30.6995	-0.425406	-29.8895	-1.24537
48.5	2485.19	2481.2	2752.2	2512.11	2732.32	2502.11	3027.95	2527.98	3055.31	2524.27	2871.21	2530.81	2838.87	2515.61		48.5	-0.444952	-0.296496	-42.7268	-3.53108	-46.2611	-1.48825	-2.35269	-2.5547	-1.0499	-1.67538	-21.6137	-1.39962	-21.2224	-0.435256
49	2485.39	2481.32	2772.23	2514.4	2754.09	2502.91	3028.37	2529.39	3055.28	2525.16	2880.15	2531.57	2847.65	2515.56		49	-0.361778	0.082935	-36.9531	-4.94696	-40.8815	-1.73997	0.266062	-3.19831	0.85809	-1.48901	-14.8828	-1.86068	-14.1399	0.162301
49.5	2485.51	2481.09	2788.89	2517.01	2772.97	2503.8	3027.92	2531.24	3054.59	2525.74	2886.36	2532.68	2853.32	2515.56		49.5	0.0817857	0.711445	-29.4611	-5.87853	-34.3667	-1.59601	1.29839	-4.26584	2.03347	-1.15075	-9.73852	-2.36746	-8.97575	-0.110832
50	2485.3	2480.69	2801.59	2520.32	2788.21	2504.51	3027.16	2533.7	3053.32	2526.41	2890.09	2533.99	2856.88	2515.67		50	0.598487	0.715319	-21.3616	-7.14649	-26.0862	-1.54333	1.91537	-5.69315	2.85283	-1.62422	-5.62059	-3.24591	-5.37455	-0.17062
50.5	2484.98	2480.42	2810.34	2524.21	2799.06	2505.37	3026.05	2536.91	3051.82	2527.38	2892.28	2535.94	2858.86	2515.8		50.5	0.547963	0.463302	-13.9433	-8.80645	-17.8608	-1.71011	2.30377	-6.82797	3.06506	-2.12119	-3.49502	-4.19737	-2.65695	-0.704901
51	2484.75	2480.21	2815.69	2529.16	2806.31	2506.24	3024.89	2540.66	3050.28	2528.58	2893.76	2538.2	2859.73	2516.49		51	0.655489	0.427933	-7.43543	-10.6524	-11.3874	-1.92154	2.43203	-8.77563	3.07471	-2.803	-2.51802	-5.22615	-1.22803	-2.14822
51.5	2484.34	2480.01	2818.03	2534.89	2810.64	2507.33	3023.61	2545.88	3048.71	2530.37	2894.77	2541.19	2860.17	2517.86		51.5	0.745488	0.178632	-2.46571	-12.5556	-5.98109	-2.36941	2.65329	-12.0874	3.48273	-4.77617	-1.10455	-6.46797	-0.328173	-2.76778
52	2484.13	2480.03	2818.49	2541.82	2812.49	2508.64	3022.22	2552.81	3046.87	2533.46	2894.94	2544.67	2860.04	2519.22		52	-0.163657	-0.131621	0.310431	-15.1769	-1.731	-2.93267	3.03607	-15.5818	3.40195	-7.35824	-0.193705	-7.65026	0.888238	-3.12394
52.5	2484.5	2480.1	2817.92	2550.14	2812.62	2510.36	3020.63	2561.59	3045.38	2537.78	2895.04	2548.9	2859.37	2521.08		52.5	-1.05969	-0.104453	1.97601	-18.2104	0.877744	-4.21256	3.03591	-19.7476	2.73099	-10.1734	0.190179	-9.20527	1.52645	-4.3051
53	2485.05	2480.09	2816.69	2560.08	2811.78	2512.91	3019.22	2572.79	3044.06	2543.72	2894.71	2553.96	2858.63	2523.48		53	-0.905905	0.264176	2.51575	-21.5615	2.60467	-5.94931	2.8185	-25.5093	2.68723	-13.5215	0.96361	-11.2579	1.28948	-4.9587
53.5	2485.36	2479.84	2815.53	2571.75	2810.18	2516.27	3017.81	2587.25	3042.68	2551.41	2894.12	2560.28	2858.05	2526.06		53.5	-0.512535	0.556316	2.25659	-25.178	3.39005	-7.2599	2.67464	-32.2131	2.7175	-17.4502	1.48295	-13.9925	1.4779	-5.73462
54	2485.58	2479.54	2814.47	2585.34	2808.56	2520.2	3016.57	2605.04	3041.4	2561.36	2893.36	2568.16	2857.2	2529.37		54	-0.323186	0.760093	1.8816	-29.4197	2.9855	-8.78208	2.22924	-39.0799	2.27281	-22.5501	1.01115	-18.0608	1.39091	-7.7641
54.5	2485.63	2479.05	2813.64	2601.14	2807.23	2525.11	3015.53	2626.33	3040.34	2574.16	2893.11	2578.57	2856.8	2533.86		54.5	0.254664	1.22099	1.56826	-33.4573	2.45423	-10.7671	2.15979	-45.9943	2.35273	-29.0183	0.608313	-23.6483	0.181114	-9.82188
55	2485.3	2478.38	2812.89	2618.69	2806.15	2530.9	3014.39	2650.95	3038.98	2590.47	2892.71	2591.88	2856.96	2539.23		55	1.08619	1.31385	1.23939	-36.8027	1.66975	-12.0832	2.25802	-52.429	3.00182	-35.9289	0.546385	-29.5992	-0.62937	-11.892
55.5	2484.66	2477.83	2812.33	2637.76	2805.58	2537.24	3013.26	2678.54	3037.46	2610.19	2892.57	2608.15	2857.29	2545.98		55.5	1.09323	0.719934	1.47058	-39.1604	0.70556	-13.6484	2.48153	-57.5612	2.65593	-43.4208	0.307001	-35.423	-0.374774	-15.6672
56	2484.29	2477.64	2811.4	2657.53	2805.34	2544.74	3011.93	2708.16	3036.34	2634	2892.34	2627.22	2857.37	2555.03		56	0.501283	0.271541	1.8518	-39.5675	0.5264	-16.599	2.49893	-60.565	2.25193	-51.9213	0.521187	-40.7678	-0.49033	-20.2433
56.5	2484.12	2477.51	2810.53	2676.95	2804.99	2553.94	3010.8	2738.68	3035.17	2661.9	2892.02	2648.72	2857.82	2566.22		56.5	0.236859	0.240444	1.80913	-37.5028	0.736963	-20.1345	2.29874	-60.9086	2.24298	-58.9848	0.957596	-44.9285	-1.00817	-24.5735
57	2484.03	2477.43	2809.59	2694.76	2804.63	2564.95	3009.69	2768.69	3034.16	2692.66	2891.39	2671.85	2858.27	2579.68		57	0.135167	-0.0838745	1.88391	-33.8223	0.588941	-24.1647	1.68681	-58.9962	1.73712	-63.9629	1.34577	-47.222	-0.561002	-29.4367
57.5	2484.01	2477.54	2808.68	2710.56	2804.36	2578.15	3009.12	2797.31	3033.48	2725.55	2890.71	2695.61	2858.39	2595.73		57.5	-0.249548	-0.0399671	1.7507	-28.8861	0.841385	-28.578	1.02801	-54.8876	0.880883	-67.2723	1.47694	-47.4574	-0.190518	-35.0567
58	2484.22	2477.44	2807.88	2723.5	2803.79	2593.39	3008.69	2823.18	3033.24	2759.41	2889.95	2718.99	2858.59	2614.52		58	-0.134467	0.221633	1.28186	-22.9307	1.12945	-32.0769	0.188331	-48.2163	0.382032	-67.4396	1.42482	-45.8366	-0.863681	-39.2377
58.5	2484.12	2477.35	2807.41	2733.56	2803.34	2609.99	3008.92	2845.27	3033.1	2792.3	2889.32	2741.14	2859.21	2634.63		58.5	0.196587	0.285818	0.698963	-17.5616	0.501192	-34.0888	-0.578031	-39.9672	-0.155273	-63.0683	1.07197	-42.352	-1.23158	-41.1403
59	2484.05	2477.17	2807.16	2741.18	2803.26	2627.2	3009.17	2863.14	3033.42	2822.02	2888.81	2761.03	2859.65	2655.42		59	0.240024	0.235882	0.237834	-12.9066	0.110607	-34.4103	-0.675826	-31.9143	-0.939729	-55.9305	1.28583	-36.8405	-0.270943	-41.8266
59.5	2483.85	2477.11	2807.12	2746.62	2803.13	2644.08	3009.53	2877.2	3033.95	2847.97	2888.05	2777.83	2859.53	2676.1		59.5	0.566844	0.202281	0.152241	-9.15504	0.511348	-32.7168	-0.395907	-23.8555	-1.15218	-47.3615	1.26802	-30.4985	0.146901	-40.3892
60	2483.51	2476.98	2806.94	2750.49	2802.75	2659.65	3009.52	2887.11	3034.44	2869.17	2887.53	2791.51	2859.52	2695.33		60	0.668258	-0.000268207	0.597889	-6.40973	0.858661	-29.4437	0.167528	-16.3274	-0.541772	-37.3092	1.32705	-24.062	0.32712	-35.7207
60.5	2483.2	2477.08	2806.55	2753.15	2802.27	2673.3	3009.31	2893.86	3034.41	2885.35	2886.67	2801.92	2859.08	2711.6		60.5	0.663825	0.0858992	0.696681	-4.36798	1.11017	-24.7287	1.04111	-10.9656	0.53158	-27.7454	1.82052	-17.7076	1.55307	-29.7696
61	2482.85	2476.88	2806.24	2754.98	2801.55	2684.32	3008.45	2898.44	3033.84	2897.23	2885.71	2809.42	2857.96	2725.09		61	0.670963	0.328881	0.776865	-2.94518	2.0502	-19.7336	2.04839	-8.05874	1.98883	-20.2726	2.24322	-12.7005	2.87518	-23.9293
61.5	2482.56	2476.78	2805.65	2756.25	2800.2	2693.09	3007.25	2902.11	3032.33	2905.94	2884.43	2814.86	2856.31	2735.51		61.5	0.42225	0.23256	1.83644	-2.63411	3.09758	-15.163	3.1207	-6.14774	4.12993	-14.8118	2.52602	-9.29567	3.22309	-17.7699
62	2482.43	2476.61	2804.41	2757.65	2798.5	2699.55	3005.31	2904.73	3029.74	2912.24	2883.1	2818.82	2854.66	2743		62	0.129288	0.460903	2.71233	-2.5428	3.74933	-10.8472	4.39627	-5.00468	6.01728	-10.4551	3.49384	-6.3448	4.18898	-12.5361
62.5	2482.4	2476.31	2802.98	2758.77	2796.49	2704.1	3002.88	2907.27	3026.4	2916.59	2880.92	2821.35	2852.05	2748.32		62.5	0.119115	0.794327	3.20244	-2.17168	4.09828	-7.61708	5.46194	-4.98628	7.30051	-7.2696	4.52788	-4.29294	5.78216	-9.20045
63	2482.34	2475.86	2801.14	2759.87	2794.35	2707.38	2999.86	2909.72	3022.45	2919.66	2878.61	2823.24	2848.98	2752.35		63	-0.0886629	0.817159	4.2625	-2.23862	4.8615	-5.95386	6.32939	-4.91253	8.63718	-4.98464	5.23456	-3.16325	6.51797	-6.62083
63.5	2482.5	2475.53	2798.71	2760.97	2791.61	2710.09	2996.47	2912.09	3017.78	2921.66	2875.66	2824.46	2845.57	2755.05		63.5	-0.441123	0.577482	5.39831	-2.06788	5.7712	-4.26834	7.84187	-4.1025	9.8636	-3.26974	6.14416	-1.49279	6.99248	-4.63219
64	2482.71	2475.26	2795.81	2761.85	2788.64	2711.68	2992.01	2913.79	3012.65	2922.9	2872.44	2824.76	2841.92	2757.12		64	-0.264904	0.499205	5.97314	-1.27903	6.22173	-2.68525	9.43457	-3.14142	10.5651	-1.23767	7.23167	0.0016123	8.10433	-3.63447
64.5	2482.77	2475.05	2792.73	2762.17	2785.41	2712.89	2987.09	2915.23	3007.21	2922.9	2868.48	2824.57	2837.52	2758.71		64.5	-0.217295	0.265831	6.70485	0.0846707	6.54939	-2.02322	10.4909	-2.23808	11.3602	0.863972	7.98123	0.656506	8.76004	-2.7452
65	2482.95	2475.01	2789.14	2761.8	2782.06	2713.69	2981.45	2916	3001.25	2922.2	2864.5	2824.07	2833.24	2759.85		65	-0.32283	-0.0358457	7.22625	1.11113	7.1906	-1.08217	12.1156	-1.10407	12.5418	1.72174	8.36691	1.70982	8.69975	-1.66662
65.5	2483.08	2475.07	2785.55	2761.07	2778.29	2713.98	2974.94	2916.33	2994.7	2921.24	2860.05	2822.88	2828.69	2760.44		65.5	-0.298952	-0.243624	7.33637	2.05885	7.26968	-0.179609	14.1176	0.0528151	13.4632	2.18915	9.2811	2.64047	9.70271	-1.01667
66	2483.2	2475.21	2781.75	2759.7	2774.85	2713.95	2967.45	2915.96	2987.81	2919.94	2855.21	2821.56	2823.49	2760.92		66	0.0385202	-0.226081	7.9805	3.35432	6.91146	0.062162	15.1978	1.07528	14.1884	3.2983	10.3013	2.45919	11.0183	-0.805941
66.5	2483.02	2475.24	2777.61	2757.73	2771.29	2713.92	2959.85	2915.24	2980.45	2917.98	2849.82	2820.33	2817.76	2761.17		66.5	0.488081	0.155253	8.34369	4.61955	7.30916	0.378935	15.5205	2.21377	15.4147	4.06301	10.7495	3.08705	11.556	-0.0284614
67	2482.74	2475.06	2773.5	2755.2	2767.51	2713.55	2951.93	2913.73	2972.42	2915.9	2844.48	2818.36	2811.91	2760.88		67	0.700944	0.511718	7.92717	4.92199	7.86722	0.907141	16.109	3.37764	16.4315	4.55374	11.0242	4.58691	12.3698	1.26552
67.5	2482.31	2474.72	2769.65	2752.82	2763.45	2713.02	2943.83	2911.81	2964.12	2913.31	2838.72	2815.82	2805.36	2759.93		67.5	1.01811	0.928582	7.82507	5.20002	8.0942	1.34565	16.0222	4.801	16.6826	5.92724	11.9429	5.30677	13.6083	2.26162
68	2481.72	2474.12	2765.6	2749.94	2759.35	2712.16	2935.95	2908.84	2955.71	2909.9	2832.54	2813.01	2798.48	2758.61		68	1.3522	1.40534	8.33618	6.09977	8.82352	2.05077	15.4888	6.87344	17.2669	7.85592	12.782	6.3302	13.4211	3.2715
68.5	2480.95	2473.34	2761.37	2746.8	2754.6	2710.93	2928.22	2904.92	2946.86	2905.52	2825.97	2809.37	2792	2756.56		68.5	1.80405	1.72812	8.34507	6.27149	9.82182	3.07014	15.9274	9.0581	17.8349	9.23386	13.3396	8.41989	12.8461	5.08768
69	2479.98	2472.43	2757.25	2743.67	2749.65	2709.13	2919.96	2899.84	2937.99	2900.73	2819.22	2804.74	2785.55	2753.56		69	1.74541	1.80809	8.36702	6.44318	9.88894	3.71003	16.8119	10.8685	17.4965	10.2411	13.8042	9.29302	13.1016	6.61566
69.5	2479.23	2471.56	2752.89	2740.29	2744.73	2707.21	2911.44	2894.1	2929.32	2895.33	2812.16	2800.17	2778.97	2750.1		69.5	1.51433	1.72921	9.25115	7.20645	9.91255	4.44538	17.315	12.3908	17.5019	10.9569	14.4412	9.51906	12.7534	6.94154
70	2478.42	2470.74	2747.97	2736.47	2739.73	2704.67	2902.61	2887.46	2920.36	2889.79	2804.85	2795.18	2772.84	2746.57		70	1.68865	1.38167	10.3137	7.82138	10.0567	5.28008	18.105	13.9137	18.5121	11.5818	14.5843	10.2192	11.9881	7.69692
70.5	2477.55	2470.16	2742.68	2732.5	2734.71	2701.91	2893.34	2880.25	2910.88	2883.77	2797.68	2790	2766.85	2742.3		70.5	1.84054	1.19564	10.5804	8.15029	9.90739	6.22279	19.0028	14.9208	18.8316	12.0366	13.9076	10.5326	12.289	9.27278
71	2476.65	2469.52	2737.45	2728.3	2729.83	2698.45	2883.76	2872.56	2901.54	2877.73	2790.92	2784.69	2760.55	2737.39		71	1.42947	1.16265	10.4261	8.71765	9.68754	7.19489	18.7711	15.7948	19.0103	12.5929	13.4956	10.5044	12.5711	10.1108
71.5	2476.11	2469.04	2732.22	2723.83	2725	2694.76	2874.61	2864.46	2891.76	2871.08	2784.12	2779.45	2754.34	2732.25		71.5	1.14172	0.781255	10.6179	8.87128	9.66736	7.86291	18.3112	16.7878	20.1432	13.8251	13.5997	10.8383	12.2874	10.5249
72	2475.46	2468.74	2726.87	2719.43	2720.18	2690.62	2865.43	2855.85	2881.45	2863.86	2777.33	2773.85	2748.17	2726.79		72	1.27827	0.402571	10.5733	9.07866	9.48176	8.42379	18.0546	17.3288	20.8838	15.3531	13.4796	11.108	12.7826	11.5919
72.5	2474.91	2468.55	2721.7	2714.72	2715.5	2686.43	2856.59	2847.24	2871.03	2855.79	2770.59	2768.36	2741.57	2720.68		72.5	0.763772	0.678507	10.0447	9.65016	9.45417	8.39905	17.4657	17.0493	20.4703	16.471	13.7201	11.2774	13.1838	12.4812
73	2474.73	2468.04	2716.78	2709.86	2710.74	2682.35	2847.89	2838.82	2860.98	2847.49	2763.57	2762.55	2735.06	2714.45		73	0.0325862	1.05893	9.81885	9.5158	9.30101	7.42824	17.4322	16.6911	20.1791	16.8767	14.369	11.6962	12.9713	12.317
73.5	2474.79	2467.53	2711.76	2705.22	2706.19	2678.99	2839.09	2830.53	2850.8	2838.94	2756.31	2756.71	2728.57	2708.4		73.5	-0.0861312	1.10781	10.6583	9.27443	9.13586	6.46223	17.8719	16.5396	20.3992	17.2122	14.2716	11.6953	13.0779	12.0176
74	2474.76	2466.91	2706.18	2700.51	2701.52	2675.71	2830.03	2822.3	2840.69	2830.38	2749.31	2750.82	2722	2702.39		74	0.127451	1.35607	10.9203	9.68196	9.57233	6.91417	18.1149	16.1762	19.7638	16.8753	14.1089	12.0596	13.0732	12.1251
74.5	2474.66	2466.15	2700.91	2695.57	2696.59	2672.1	2820.93	2814.3	2831.1	2822.18	2742.15	2744.66	2715.56	2696.27		74.5	0.319283	1.89769	10.6005	9.78978	10.2077	6.99794	18.7172	16.1255	18.6494	15.6857	14.4799	12.3138	12.4879	12.2005
75	2474.37	2465.1	2695.53	2690.75	2691.3	2668.65	2811.3	2806.06	2821.96	2814.63	2734.9	2738.55	2709.43	2690.22		75	1.01591	1.76093	10.7928	9.59161	10.9796	7.38916	19.4964	16.9573	18.1547	15.0144	14.2654	12.2571	12.5713	11.9752
75.5	2473.63	2464.43	2690.13	2685.89	2685.65	2664.53	2801.58	2797.39	2812.88	2807.02	2727.92	2732.41	2702.95	2684.28		75.5	1.82349	1.28348	10.9238	10.0727	11.5188	9.21546	19.1473	17.3591	18.1379	15.4235	13.6789	12.1457	12.9256	11.8456
76	2472.64	2463.74	2684.7	2680.64	2679.88	2659.53	2792.2	2788.72	2803.84	2799.22	2721.11	2726.34	2696.55	2678.31		76	1.95287	1.43616	10.2483	10.8658	11.336	10.3694	18.5747	17.6109	17.9287	15.5542	14.0205	12.5595	12.8907	12.2177
76.5	2471.71	2463.02	2679.81	2675.11	2674.34	2654.36	2782.97	2779.73	2794.91	2791.46	2713.92	2719.88	2690.01	2672.07		76.5	1.87518	1.27826	10.1571	10.9772	10.99	9.93875	18.3794	18.2937	17.9271	15.6784	14.2019	12.7108	13.285	12.5375
77	2470.76	2462.48	2674.47	2669.69	2668.9	2649.53	2773.89	2770.5	2785.84	2783.41	2706.97	2713.66	2683.24	2665.84		77	1.93028	1.01981	10.667	10.9438	10.6413	10.1932	17.5618	18.4497	18.3869	16.8966	13.8908	12.6056	13.8769	12.3718
77.5	2469.83	2461.97	2669.22	2664.17	2663.75	2644.18	2765.39	2761.36	2776.5	2774.6	2699.99	2707.22	2676.23	2659.74		77.5	1.52911	1.08737	10.4104	10.9647	9.80276	10.4118	16.8224	18.048	19.1006	17.7461	13.8909	12.9224	13.6478	11.93
78	2469.18	2461.41	2664.01	2658.77	2659	2639.25	2756.97	2752.41	2766.85	2765.78	2693.02	2700.72	2669.63	2653.89		78	1.5281	0.963361	10.6014	10.6991	9.63245	9.47941	16.8007	18.0548	19.0436	17.6835	14.3279	13.3775	13.1467	11.7182
78.5	2468.25	2460.99	2658.6	2653.48	2654	2634.64	2748.56	2743.37	2757.58	2756.87	2685.68	2693.93	2663.01	2648.04		78.5	1.93781	0.908167	10.9532	10.3412	10.3397	9.12781	16.933	17.5425	18.0333	18.1332	14.5836	13.157	13.3649	11.3813
79	2467.27	2460.43	2653.12	2648.41	2648.7	2630.04	2740	2734.97	2748.78	2747.69	2678.49	2687.59	2656.31	2642.52		79	2.07278	1.43993	10.7583	10.0839	10.6965	9.44261	17.2823	16.236	17.4067	18.355	14.5255	12.7019	13.2178	10.8844
79.5	2466.21	2459.59	2647.84	2643.38	2643.35	2625.22	2731.24	2727.02	2740.12	2738.7	2671.23	2681.1	2649.83	2637.08		79.5	1.96085	1.58784	10.5819	9.9465	10.762	9.46629	17.9948	15.8809	17.2719	17.2235	13.9425	13.3279	12.694	10.8804
80	2465.32	2458.83	2642.44	2638.45	2637.94	2620.57	2722.12	2719.02	2731.59	2730.49	2664.53	2674.31	2643.53	2631.57		80	1.84588	1.8548	11.28	9.91553	10.8717	9.51013	17.8462	15.911	16.354	15.9713	13.5185	13.5436	12.8762	11.4171
80.5	2464.41	2457.74	2636.65	2633.47	2632.51	2615.69	2713.46	2711.13	2723.7	2722.62	2657.68	2667.64	2636.94	2625.72		80.5	1.37425	2.14582	11.1803	9.87467	10.767	9.75709	17.2676	15.7307	15.9002	15.5944	13.3462	13.1367	13.231	11.5336
81	2463.91	2456.79	2631.26	2628.6	2627.19	2610.81	2704.83	2703.27	2715.53	2714.92	2651.25	2661.2	2630.42	2620.1		81	1.16992	1.58642	11.0936	9.6064	10.5101	9.9353	16.9821	15.6779	16.7165	14.8428	12.5103	12.5953	12.6231	11.1958
81.5	2463.16	2456.16	2625.5	2623.81	2622	2605.73	2696.56	2695.4	2707.03	2707.7	2645.11	2655.03	2624.35	2614.49		81.5	1.55947	1.02304	11.5126	9.73893	10.2384	10.326	16.0046	16.0335	17.0364	14.577	12.1943	12.2786	11.8208	11.1421
82	2462.37	2455.67	2619.82	2618.84	2616.93	2600.56	2688.86	2687.28	2698.55	2700.19	2639	2648.96	2618.57	2608.96		82	1.68327	1.29445	11.3994	9.98981	10.1495	10.0788	14.7347	16.1556	16.9182	15.4431	12.3443	11.6037	11.241	11.0479
82.5	2461.46	2454.87	2614.13	2613.86	2611.79	2595.64	2681.65	2679.35	2690.09	2692.27	2632.83	2643.4	2613.09	2603.47		82.5	1.999	1.34892	10.9999	9.82472	10.5297	9.92371	14.8315	15.5005	17.0861	16.2055	11.9147	11.0964	10.7367	10.7244
83	2460.4	2454.28	2608.74	2608.97	2606.4	2590.56	2673.97	2671.79	2681.5	2684.12	2627.08	2637.79	2607.79	2598.19		83	2.14933	1.68957	11.2096	10.062	10.8788	10.4681	15.2512	14.792	16.9714	15.9211	11.5358	11.0754	10.5997	10.7695
83.5	2459.37	2453.14	2602.93	2603.77	2600.95	2585.24	2666.48	2664.51	2673.18	2676.37	2621.23	2632.25	2602.47	2592.66		83.5	1.93284	2.35905	11.3857	10.6159	10.9182	10.468	14.9375	14.4941	16.4153	15.6158	11.6789	11.5772	10.4965	11.1686
84	2458.54	2451.98	2597.43	2598.44	2595.48	2580.17	2659	2657.28	2665.1	2668.49	2615.42	2626.21	2597.22	2587.08		84	1.20335	2.60952	10.985	10.5029	11.0067	9.82014	14.9198	14.2654	15.94	15.5091	11.5379	12.0342	10.8772	11.0572
84.5	2458.15	2450.61	2591.9	2593.32	2589.94	2575.35	2651.52	2650.27	2657.31	2660.92	2609.63	2620.27	2591.54	2581.64		84.5	0.582945	2.29338	11.0738	9.94889	11.1627	9.86428	15.2724	13.7205	14.8789	14.8512	11.9452	12.0335	11.7108	10.6855
85	2457.89	2449.7	2586.41	2588.41	2584.39	2570.32	2643.8	2643.49	2650.16	2653.61	2603.47	2614.19	2585.62	2576.35		85	0.385588	1.94556	10.7596	10.1491	10.7747	9.84424	15.0133	13.8171	14.2384	14.4262	12.4067	12.0438	11.7028	10.7259
85.5	2457.7	2448.67	2581.21	2583.19	2579.19	2565.57	2636.51	2636.44	2642.99	2646.44	2597.3	2608.23	2579.93	2570.93		85.5	0.620348	1.52765	9.92613	10.2054	10.2436	9.1974	14.7471	13.9066	14.2283	14.4605	12.1757	12.0698	11.0768	10.6136
86	2457.26	2448.11	2576.47	2578.26	2574.11	2561.03	2628.99	2629.59	2635.96	2639.21	2591.26	2602.1	2574.51	2565.77		86	0.856283	1.52872	9.16409	9.70025	10.0176	9.2651	14.9995	13.9528	13.8546	14.0668	12.3745	12.2569	10.8361	10.2225
86.5	2456.82	2447.06	2571.93	2573.4	2569.18	2556.28	2621.53	2622.51	2629.09	2632.43	2585	2596	2569.11	2560.68		86.5	1.24494	2.16159	9.26814	9.85722	9.62515	9.50523	15.1245	13.8972	13.7667	13.181	12.0501	12.1908	10.4238	10.0945
87	2455.99	2445.99	2567.21	2568.31	2564.47	2551.57	2613.91	2615.71	2622.13	2625.93	2579.28	2589.92	2564.11	2555.69		87	1.91736	2.37247	9.12054	10.7898	9.31748	9.46613	14.93	13.6572	14.2421	13.1172	11.1296	12.1038	9.77001	9.8725
87.5	2454.99	2444.7	2562.78	2562.7	2559.83	2546.85	2606.61	2608.81	2614.9	2619.31	2573.73	2583.95	2559.26	2550.83		87.5	1.93642	2.51088	9.14131	10.9782	9.30682	9.12716	14.7033	13.8003	14.3541	12.9212	11.3342	11.631	9.77172	9.46157
88	2454.09	2443.45	2557.93	2557.4	2555.15	2542.44	2599.23	2601.91	2607.84	2612.97	2567.91	2578.32	2554.28	2546.19		88	1.65628	2.93514	10.2826	10.6134	9.32632	8.8419	14.3465	13.9474	13.9986	12.8792	11.7709	10.9652	10.0796	9.32907
88.5	2453.31	2441.82	2552.54	2551.99	2550.51	2538.02	2592.29	2594.92	2600.91	2606.31	2562.09	2572.95	2549.14	2541.46		88.5	1.57449	2.94735	11.0374	11.1224	9.28843	8.46918	13.7654	13.6103	13.6203	13.811	11.0486	10.542	10.6426	9.39386
89	2452.5	2440.6	2547.04	2546.34	2545.86	2533.97	2585.41	2588.27	2594.26	2599.19	2556.81	2567.74	2543.64	2536.76		89	1.57321	2.19442	10.6755	11.1736	9.38098	8.09162	13.6254	13.5106	12.8922	14.5202	10.9135	10.3294	11.2499	9.6405
89.5	2451.71	2439.55	2541.86	2540.94	2541.18	2529.89	2578.67	2581.38	2587.97	2591.94	2551.15	2562.61	2537.97	2531.78		89.5	1.78861	2.12549	10.5361	10.2829	9.03513	7.98914	13.4063	13.7391	12.5997	14.0813	11.0161	10.1105	11.2654	10.2907
90	2450.68	2438.45	2536.5	2536	2536.81	2525.93	2572.05	2574.65	2581.61	2585.13	2545.89	2557.54	2532.42	2526.55		90	2.26616	2.16158	10.4982	9.89645	8.82454	8.25497	12.8105	12.9704	12.6411	13.7326	10.2628	10.6041	10.9964	10.317
90.5	2449.44	2437.41	2531.49	2531.02	2532.38	2521.65	2565.84	2568.41	2575.36	2578.27	2540.9	2552.01	2526.97	2521.53		90.5	2.73741	2.001	9.39108	9.75731	8.4215	8.42237	12.4271	12.2769	12.349	13.0115	9.51815	11.0973	10.8147	9.89278
91	2447.97	2436.4	2527.06	2526.35	2528.41	2517.54	2559.63	2562.36	2569.27	2572.17	2536.31	2546.54	2521.68	2516.65		91	3.03559	2.26298	8.70163	8.72043	7.79842	8.24697	12.0383	11.7739	12.0541	11.8039	9.2531	10.8633	10.0702	9.65979
91.5	2446.44	2435.12	2522.68	2522.24	2524.5	2513.37	2553.86	2556.67	2563.29	2566.36	2531.57	2541.13	2516.93	2511.89		91.5	3.11133	2.69199	8.83251	8.1498	7.7934	8.3609	11.1794	10.9228	12.0119	11.3989	9.54668	10.7736	9.12313	9.22398
92	2444.9	2433.75	2518.22	2518.09	2520.59	2509.2	2548.42	2551.41	2557.34	2560.7	2526.79	2535.73	2512.48	2507.46		92	2.85023	2.71824	8.92169	8.38961	8.01882	8.36503	10.6046	10.2191	11.3269	11.4295	9.58921	11.0044	8.77079	8.48485
92.5	2443.59	2432.35	2513.73	2513.89	2516.53	2505.02	2543.21	2546.38	2552.02	2554.93	2522.04	2530.21	2508.11	2503.36		92.5	2.65863	3.23685	9.18163	8.16305	7.77458	8.2548	10.3035	10.054	10.1285	11.3988	9.11082	10.5946	8.70139	8.14599
93	2442.23	2430.55	2509	2509.89	2512.79	2500.93	2538.13	2541.32	2547.09	2549.29	2517.66	2525.2	2503.75	2499.25		93	2.59556	3.35877	9.65322	8.27089	7.74738	8.25592	9.84273	10.0693	9.79277	11.444	8.89946	9.83853	8.73043	8.28639
93.5	2441.01	2428.98	2504.06	2505.57	2508.76	2496.76	2533.35	2536.24	2542.08	2543.47	2513.19	2520.43	2499.32	2495.14		93.5	2.30634	3.60277	10.2611	8.79325	7.98179	8.25505	9.56754	10.6247	10.5467	11.6498	8.35528	8.6985	9.21365	7.80799
94	2439.88	2426.9	2498.77	2501.16	2504.89	2492.68	2528.52	2530.7	2536.61	2537.69	2509.37	2516.48	2494.53	2491.43		94	2.39854	4.13016	10.5859	8.76782	7.53488	8.22834	9.53007	11.0096	10.4651	11.4084	7.42774	7.94092	9.6762	7.56742
94.5	2438.66	2424.76	2493.45	2496.82	2501.2	2488.57	2523.81	2525.16	2531.41	2532.03	2505.84	2512.64	2489.62	2487.64		94.5	2.20615	5.83919	12.1241	9.38372	7.96954	8.52615	10.248	13.0297	13.2107	12.4068	6.35634	6.26332	11.2504	7.28585
95	2437.83	2421.6	2487.63	2492.49	2497.5	2484.79	2519.05	2518.74	2524.5	2526.23	2503.37	2510.54	2484.2	2484.66		95	0.766693	3.33168	5.90078	4.32682	3.6985	3.73048	4.77021	6.56744	7.19274	5.81638	2.2844	1.8051	5.50293	2.84308

## Sheet: Exp 3
Experiment 3
RFU																Derivative
Temperature	1_Mg	2_Ca	3_BiP_Mg	4_BiP_Mg_ADP	5_BiP_Ca	6_BiP_Ca_ADP	7_Hsp70_Mg	8_Hsp70_Mg_ADP	9_Hsp70_Ca	10_Hsp70_Ca_ADP	11_Hsc70_Mg	12_Hsc70_Mg_ADP	13_Hsc70_Ca	14_Hsc70_Ca_ADP		Temperature	1_Mg	2_Ca	3_BiP_Mg	4_BiP_Mg_ADP	5_BiP_Ca	6_BiP_Ca_ADP	7_Hsp70_Mg	8_Hsp70_Mg_ADP	9_Hsp70_Ca	10_Hsp70_Ca_ADP	11_Hsc70_Mg	12_Hsc70_Mg_ADP	13_Hsc70_Ca	14_Hsc70_Ca_ADP			1_Mg	2_Ca	3_BiP_Mg	4_BiP_Mg_ADP	5_BiP_Ca	6_BiP_Ca_ADP	7_Hsp70_Mg	8_Hsp70_Mg_ADP	9_Hsp70_Ca	10_Hsp70_Ca_ADP	11_Hsc70_Mg	12_Hsc70_Mg_ADP	13_Hsc70_Ca	14_Hsc70_Ca_ADP
20	2712.9	2684.6	2752.53	2712.14	2739.55	2720.21	2827.39	2747.88	2766.97	2737.94	2743.75	2702.63	2728.3	2808.15		20	7.87191	7.45986	7.81515	7.74771	7.38792	7.3332	8.51207	7.58324	9.2299	6.6678	7.34483	7.36427	7.49368	8.11364		Min	-2.24508	-3.04021	-53.2878	-44.8443	-61.5751	-35.2242	-111.981	-71.4857	-95.6985	-65.1448	-68.3156	-58.4366	-63.7135	-38.9618
20.5	2705.03	2677.14	2744.71	2704.39	2732.17	2712.87	2818.88	2740.29	2757.74	2731.27	2736.41	2695.27	2720.81	2800.04		20.5	17.0558	16.163	16.9328	16.7867	16.0072	15.8886	18.4428	16.4303	19.9981	14.4469	15.9138	15.9559	16.2363	17.5796		Tm (oC)	35.5	37.5	47.5	55.5	47.5	58.5	43.5	56	43.5	58	45.5	57.5	45.5	58.5
21	2697.15	2669.68	2736.9	2696.64	2724.78	2705.54	2810.37	2732.71	2748.51	2724.6	2729.06	2687.9	2713.31	2791.92		21	15.7438	14.9197	15.6303	15.4954	14.7758	14.6664	17.0241	15.1665	18.4598	13.3356	14.6897	14.7285	14.9874	16.2273
21.5	2689.28	2662.22	2729.08	2688.89	2717.39	2698.21	2801.86	2725.13	2739.28	2717.94	2721.72	2680.54	2705.82	2783.81		21.5	15.7438	14.9197	15.6303	15.4954	14.7758	14.6664	17.0241	15.1665	18.4598	13.3356	14.6897	14.7285	14.9874	16.2273
22	2681.41	2654.76	2721.26	2681.15	2710	2690.87	2793.34	2717.55	2730.05	2711.27	2714.37	2673.18	2698.33	2775.69		22	15.7438	14.9197	15.6303	15.4954	14.7758	14.6664	17.0241	15.1665	18.4598	13.3356	14.6897	14.7285	14.9874	16.2273
22.5	2673.54	2647.3	2713.45	2673.4	2702.61	2683.54	2784.83	2709.96	2720.82	2704.6	2707.03	2665.81	2690.83	2767.58		22.5	15.759	14.9673	15.6933	15.6106	14.8419	14.6658	17.0983	15.2538	18.6674	13.3637	14.6042	14.7384	15.0969	16.2965
23	2665.67	2639.84	2705.63	2665.65	2695.23	2676.21	2776.32	2702.38	2711.59	2697.93	2699.68	2658.45	2683.34	2759.47		23	15.6895	14.7376	15.3645	14.8382	14.3412	14.7392	16.6793	14.6264	17.3536	13.1765	15.1762	14.6644	14.3729	15.8585
23.5	2657.88	2632.67	2698.2	2658.59	2688.23	2668.87	2768.25	2695.32	2703.61	2691.43	2691.83	2651.14	2676.5	2751.77		23.5	15.3645	13.8219	14.1836	13.9399	14.1845	14.3379	15.4545	14.2011	14.9892	12.9953	16.0219	14.7165	13.3271	15.1543
24	2650.32	2626.11	2691.44	2651.74	2681.01	2661.95	2760.78	2688.16	2696.46	2684.99	2683.81	2643.81	2669.93	2744.35		24	14.9175	12.2657	13.1623	12.8576	14.2984	13.3784	14.9401	13.8988	13.8111	12.492	15.7093	14.1851	13.0317	14.2467
24.5	2642.99	2620.39	2684.96	2645.77	2674.03	2655.5	2753.27	2681.45	2689.71	2679.02	2676.17	2637.01	2663.49	2737.55		24.5	14.418	10.8317	12.7443	11.4367	13.5276	12.5282	14.7335	13.2879	13.1825	11.3212	15.1328	13.2168	12.4422	13.0447
25	2636.01	2615.21	2678.68	2640.18	2667.41	2649.48	2746.1	2674.82	2683.28	2673.6	2668.68	2630.51	2657.41	2731.22		25	13.1376	9.93769	12.3797	11.0059	13.3939	11.3078	14.0857	13.1421	12.2974	10.7452	14.6651	13.1058	12.3489	12.5165
25.5	2629.88	2610.43	2672.61	2634.74	2660.59	2644.26	2739.22	2668.33	2677.27	2668.28	2661.6	2624.03	2651.06	2725.01		25.5	11.7159	9.01577	11.7888	10.6371	13.6999	9.51476	13.2353	12.8797	12.4948	10.1086	13.3917	12.0757	12.9626	12.1141
26	2624.26	2606.11	2666.91	2629.59	2653.84	2639.92	2732.87	2662.05	2670.74	2663.51	2655.29	2618.57	2644.56	2719.13		26	10.5853	8.69804	11.1402	9.79098	12.9684	8.03311	12.4168	11.7396	13.0972	9.36555	12.1083	9.92172	12.7057	11.476
26.5	2619.3	2601.67	2661.51	2624.87	2647.62	2636.1	2726.85	2656.55	2664.36	2658.88	2649.39	2613.97	2638.43	2713.54		26.5	9.35706	8.83549	10.2155	9.6718	12.3605	7.51318	11.229	10.9405	12.2015	8.86727	11.8179	8.87166	11.8646	10.7776
27	2614.87	2597.32	2656.73	2619.89	2641.45	2632.35	2721.66	2650.99	2658.57	2654.64	2643.58	2609.6	2632.67	2708.3		27	8.26678	8.506	8.90036	9.77356	12.0298	7.20872	9.82356	11.1113	11.2258	8.30826	10.6061	8.44277	11.3254	10.4649
27.5	2610.88	2593.14	2652.48	2615.18	2635.62	2628.83	2716.88	2645.48	2653.07	2650.54	2638.79	2605.48	2627.11	2703.05		27.5	8.18553	8.35697	8.50147	8.99552	11.3032	7.15385	9.47484	10.7025	10.7178	7.89828	9.14315	8.06661	10.6157	10.2087
28	2606.52	2588.84	2648.06	2610.78	2630.04	2625.02	2712.03	2640.22	2647.78	2646.59	2634.18	2601.28	2621.96	2697.99		28	9.12408	9.03784	9.1549	9.04741	11.2487	8.38182	10.1102	10.6913	10.5055	8.49641	9.57804	9.47923	10.4658	10.5801
28.5	2601.65	2583.99	2643.16	2605.93	2624.19	2620.33	2706.65	2634.57	2642.35	2641.93	2629.07	2595.81	2616.43	2692.25		28.5	10.5978	10.3745	10.7608	10.5416	12.4351	10.3049	11.4004	12.2426	11.7001	9.66803	10.8264	12.1446	11.7874	12.4681
29	2595.76	2578.36	2637.1	2600.18	2617.5	2614.65	2700.48	2627.82	2635.85	2636.73	2623.3	2589.1	2610.01	2685.4		29	13.1754	12.276	13.6958	12.1385	14.1654	12.5064	13.5376	14.8061	14.3967	12.0395	12.0497	14.8792	14.0974	15.0523
29.5	2588.35	2571.54	2629.37	2593.66	2609.9	2607.7	2692.92	2619.78	2627.84	2629.66	2616.73	2580.89	2602.24	2677.14		29.5	16.5688	15.4312	17.217	14.6194	16.7577	15.5944	17.0381	16.9759	17.822	16.0547	15.443	17.9395	16.9997	17.9942
30	2579.21	2562.93	2619.97	2585.42	2600.66	2599.01	2683.48	2610.74	2618.03	2620.69	2607.75	2571.25	2593.04	2667.38		30	19.8824	18.6054	20.1326	18.2818	20.0048	19.1105	20.3042	20.1061	21.2682	19.9173	19.6921	20.454	19.8025	21.312
30.5	2568.66	2553.12	2609.39	2575.55	2590.06	2588.81	2672.84	2599.75	2606.76	2609.88	2597.33	2560.67	2582.65	2656.05		30.5	21.8831	20.5487	22.1745	20.7152	21.9979	21.0975	21.9673	22.8697	23.4771	22.9113	21.7835	21.3899	21.2216	23.1575
31	2557.55	2542.61	2598.01	2565.03	2578.86	2578.18	2661.67	2588.19	2594.84	2597.97	2586.23	2550.03	2572.09	2644.59		31	22.5784	21.0096	22.8558	20.948	22.8178	21.3409	22.8179	23.3904	23.8457	24.8454	22.3041	21.3919	20.9155	22.4094
31.5	2546.36	2532.3	2586.82	2554.81	2567.48	2567.67	2650.23	2576.63	2583.16	2585.39	2575.22	2539.46	2562.02	2633.82		31.5	21.5724	20.4825	21.6817	20.1042	22.2656	20.4957	22.6119	22.2452	22.801	24.5053	21.8085	20.2862	18.8532	20.8473
32	2536.28	2522.42	2576.54	2545.13	2556.91	2558	2639.5	2566.16	2572.3	2573.85	2564.73	2529.93	2553.49	2623.94		32	18.5965	18.044	19.3025	18.0298	19.6541	17.5463	19.2428	19.8468	20.1115	21.5664	19.2646	17.8701	15.1422	18.1146
32.5	2527.95	2514.47	2567.68	2536.98	2548.03	2550.3	2631.17	2556.96	2563.25	2563.99	2556.2	2521.64	2546.96	2615.95		32.5	14.5241	14.1666	15.8753	14.5589	15.7766	13.4897	14.8365	16.2947	16.1202	17.8047	15.0933	15.307	11.0258	13.6426
33	2521.8	2508.26	2560.77	2530.62	2541.19	2544.43	2624.6	2549.93	2556.26	2556.16	2549.64	2514.67	2542.46	2610.32		33	10.2831	10.3979	11.8033	10.8518	11.6931	10.1648	11.2219	12.3977	11.7023	13.3218	11.0957	12.5587	6.99001	9.16071
33.5	2517.67	2504.05	2555.9	2526.07	2536.39	2540.09	2620.04	2544.54	2551.59	2550.69	2545.08	2509.18	2539.96	2606.68		33.5	5.92906	6.82604	7.65613	7.62365	7.17171	7.09551	6.8232	8.68838	7.05251	8.61461	7.24348	9.05863	2.92067	5.42864
34	2515.77	2501.4	2553.05	2522.95	2533.94	2537.34	2617.84	2541.16	2549.2	2547.36	2542.34	2505.63	2539.39	2604.79		34	2.14229	3.30327	3.89336	4.65352	3.20396	3.82052	1.79632	5.4118	2.45422	5.16174	3.72054	5.43241	-0.191826	2.23428
34.5	2515.3	2500.58	2551.87	2521.35	2533.03	2536.13	2618.03	2538.96	2549.03	2545.3	2541.24	2503.64	2539.93	2604.31		34.5	-0.0656188	0.949259	0.955181	2.03073	0.252313	1.55564	-1.52108	3.35975	-1.47353	3.24695	0.984204	2.58798	-1.7657	-0.140294
35	2515.69	2500.31	2551.91	2520.79	2533.53	2535.67	2619.3	2537.74	2550.52	2544.01	2541.2	2502.97	2541.08	2604.75		35	-1.43635	-0.441405	-0.718371	0.239725	-1.84653	0.0740307	-4.48463	1.51913	-4.39543	1.8733	-0.69161	0.0648915	-3.03486	-1.38758
35.5	2516.63	2500.96	2552.49	2521.01	2534.68	2536.06	2622.63	2537.35	2553.36	2543.35	2541.89	2503.44	2542.89	2605.51		35.5	-2.24508	-1.61894	-1.86187	-0.920006	-2.65096	-1.66439	-8.46112	0.227571	-6.94927	0.915393	-2.23973	-1.62245	-3.93092	-1.41409
36	2517.76	2501.82	2553.71	2521.62	2536.09	2537.21	2627.69	2537.39	2557.44	2543.02	2543.41	2504.36	2544.9	2606.04		36	-1.80502	-2.05353	-2.75456	-1.58251	-2.9405	-2.58544	-11.8197	-0.255234	-9.3893	0.469154	-3.59166	-1.72339	-4.00522	-0.626391
36.5	2518.37	2502.97	2555.15	2522.49	2537.57	2538.49	2634.35	2537.55	2562.67	2542.84	2545.46	2505.06	2546.9	2606.16		36.5	-0.962331	-2.21189	-2.94221	-1.60216	-2.95751	-2.47528	-14.3971	-0.429153	-11.2474	0.261352	-4.79362	-1.21511	-4.09549	-0.142639
37	2518.79	2504.07	2556.64	2523.18	2538.98	2539.66	2642.14	2537.8	2568.7	2542.77	2548.2	2505.58	2549.07	2606.21		37	-0.710965	-2.77344	-3.0802	-1.32819	-2.41736	-2.24116	-17.5262	-0.555983	-13.2168	-0.124589	-5.97979	-0.82574	-4.74235	0.242928
37.5	2519.11	2505.7	2558.26	2523.81	2540.04	2540.75	2651.89	2538.05	2575.97	2542.92	2551.45	2505.87	2551.67	2605.96		37.5	-0.681738	-3.04021	-3.53764	-1.03076	-2.22637	-2.21846	-20.7157	-0.323398	-15.8817	-0.185817	-7.3	-0.318947	-5.51729	0.371433
38	2519.44	2507	2560.16	2524.19	2541.35	2541.84	2662.86	2538.1	2584.55	2542.88	2555.49	2505.96	2554.65	2605.92		38	-0.305737	-2.50052	-3.81704	-0.623775	-3.1241	-1.92999	-23.7416	0.0877972	-18.1362	0.281143	-8.59102	-0.229424	-6.70974	-0.13588
38.5	2519.5	2508.19	2562.06	2524.46	2543.17	2542.68	2675.76	2537.98	2594.13	2542.64	2559.98	2506.21	2558.45	2606.1		38.5	-0.550406	-1.99062	-3.85844	-0.435743	-3.8698	-1.61412	-27.672	0.373112	-20.4681	0.696685	-9.38467	-0.925651	-8.32026	-0.644575
39	2520.04	2508.99	2564.09	2524.67	2545.24	2543.5	2690.63	2537.79	2605.19	2542.26	2564.87	2506.87	2563.01	2606.52		39	-1.17038	-1.45201	-4.4692	-0.467728	-4.74389	-1.62453	-32.1821	0.210342	-24.0864	0.536884	-10.0656	-1.49489	-10.1245	-0.801776
39.5	2520.58	2509.61	2566.57	2524.97	2547.97	2544.34	2708.08	2537.8	2618.35	2542.11	2570.19	2507.63	2568.6	2606.89		39.5	-1.11097	-0.707839	-5.25384	-0.694876	-6.09717	-1.87334	-37.4442	-0.103235	-28.3496	0.3999	-11.7988	-1.52357	-12.0707	-1.01778
40	2521.1	2509.69	2569.42	2525.41	2551.31	2545.34	2728.32	2537.87	2633.73	2541.88	2576.76	2508.35	2575.11	2607.45		40	-0.723202	0.122154	-6.5498	-1.31167	-7.24806	-1.8436	-44.325	-0.176971	-33.6211	0.201525	-14.1049	-1.2765	-14.2278	-0.55438
40.5	2521.31	2509.61	2573.19	2526.23	2555.15	2546.14	2752.61	2538.03	2652.33	2541.96	2584.33	2508.88	2582.83	2607.41		40.5	-0.428471	0.0971139	-8.39805	-1.59712	-7.861	-1.47071	-52.358	-0.782684	-41.2807	-0.40983	-16.3989	-0.935746	-16.4055	0.249046
41	2521.5	2509.66	2577.8	2526.92	2559.2	2546.85	2780.93	2538.56	2675.31	2542.24	2593.37	2509.25	2591.52	2607.31		41	0.12321	-0.406006	-9.98298	-1.21549	-8.73924	-1.44355	-61.7978	-0.66082	-50.6963	-0.682104	-20.2747	-0.367536	-18.5402	0.107013
41.5	2521.19	2509.94	2583.19	2527.46	2563.95	2547.58	2814.81	2538.62	2703.29	2542.54	2604.68	2509.23	2601.45	2607.29		41.5	0.657574	-0.307009	-11.6363	-1.0135	-9.99194	-1.42343	-74.1249	0.0364884	-61.757	-0.230647	-24.6392	0.460984	-21.155	0.16508
42	2520.92	2509.95	2589.48	2527.9	2569.28	2548.19	2855.18	2538.62	2737.22	2542.45	2617.89	2508.88	2612.79	2607.12		42	0.562886	-0.0540371	-13.7291	-0.627526	-11.704	-0.777173	-87.3007	-0.0594821	-73.99	0.29964	-27.8398	0.667907	-24.5339	0.493821
42.5	2520.62	2510.09	2596.86	2528.05	2575.77	2548.37	2901.86	2538.72	2777.06	2542.27	2632.61	2508.69	2626.09	2606.85		42.5	0.639823	-0.561036	-15.2647	0.119503	-14.1101	-0.2182	-98.7191	-0.454117	-84.8507	0.578987	-31.7344	-0.122348	-28.4369	0.3346
43	2520.32	2510.5	2604.78	2527.87	2583.53	2548.5	2953.47	2539.04	2821.55	2541.88	2649.81	2508.96	2641.44	2606.8		43	0.406061	-0.925556	-16.9308	0.255842	-17.3908	-0.40633	-107.706	-0.517122	-92.5358	0.827724	-36.9381	-0.508774	-33.6342	0.0464992
43.5	2520.29	2510.92	2613.96	2527.86	2593.28	2548.75	3008.76	2539.26	2868.84	2541.49	2669.62	2509.12	2659.98	2606.72		43.5	-0.415582	-0.545527	-19.8356	-0.115599	-21.5077	-0.312196	-111.981	-0.807532	-95.6985	0.803573	-42.2922	-0.300969	-40.6051	0.544755
44	2520.65	2511.1	2624.7	2527.98	2605.05	2548.79	3064.22	2539.81	2916.24	2541.13	2692.35	2509.32	2682.14	2606.32		44	-0.504317	-0.660934	-23.179	-0.396973	-25.5886	0.0494322	-108.245	-0.883772	-92.5601	0.503663	-49.3891	-0.644906	-48.1646	0.47738
44.5	2520.7	2511.61	2637.2	2528.28	2618.9	2548.78	3115.99	2540.06	2960.42	2541.06	2719.18	2509.79	2708.09	2606.3		44.5	0.0867922	-1.06339	-26.7876	-0.803193	-29.7693	-0.315167	-98.1971	-0.317916	-83.2222	-0.350786	-57.8195	-1.28349	-55.4178	-0.0384146
45	2520.61	2512.05	2651.66	2528.79	2634.93	2549.1	3161.77	2540.14	2998.87	2541.46	2749.92	2510.44	2737.32	2606.35		45	0.123954	-0.585513	-31.6234	-1.26503	-34.6846	-0.656143	-84.5312	0.0747077	-70.38	-1.11088	-64.6168	-0.586943	-61.3503	-0.468032
45.5	2520.55	2512.19	2668.93	2529.52	2653.69	2549.35	3199.98	2539.97	3030.51	2542.08	2783.29	2510.38	2768.88	2606.77		45.5	0.325359	-0.0760395	-37.1225	-1.60969	-40.307	-0.184052	-67.3967	0.714114	-55.8341	-1.20671	-68.3156	0.121325	-63.7135	-0.901046
46	2520.23	2512.21	2688.77	2530.38	2675.26	2549.34	3228.98	2539.53	3054.65	2542.64	2817.52	2510.49	2800.34	2607.21		46	1.05156	-0.213163	-42.5239	-1.79581	-45.9939	-0.241442	-48.9735	0.605988	-40.897	-1.12046	-67.5862	-0.560459	-61.6896	-1.02771
46.5	2519.58	2512.4	2711.37	2531.31	2699.76	2549.61	3249.29	2539.46	3071.65	2543.22	2850.09	2510.89	2829.98	2607.77		46.5	1.14212	-0.299808	-47.4761	-1.90579	-52.3589	-0.572084	-32.9935	-0.230841	-27.4907	-1.32899	-61.9563	-0.772085	-56.1021	-1.08
47	2519.16	2512.48	2736.08	2532.31	2727.52	2549.79	3262.39	2539.71	3082.65	2543.83	2878.87	2511.15	2855.96	2608.2		47	0.728284	-0.120886	-51.5371	-2.20861	-58.2616	0.16114	-19.6419	-0.617205	-17.4679	-0.443386	-52.5341	-0.0515761	-47.5106	-0.4741
47.5	2518.82	2512.53	2762.53	2533.54	2757.61	2549.48	3269.31	2540.06	3089.57	2543.63	2902.32	2511.04	2877.21	2608.22		47.5	0.689064	-0.0905909	-53.2878	-2.6528	-61.5751	0.680094	-8.37139	-0.797553	-10.2862	0.676887	-41.288	-0.198555	-37.189	0.283825
48	2518.47	2512.52	2788.81	2534.97	2788.51	2549.22	3271.31	2540.59	3093.16	2543.28	2920.15	2511.43	2893.18	2607.95		48	0.592943	0.311378	-51.4155	-3.11231	-61.2665	0.284966	-0.566011	-1.61635	-4.12406	0.773717	-29.9937	-0.92328	-27.218	0.853874
48.5	2518.22	2512.2	2813.43	2536.68	2818.23	2549.15	3270.4	2541.7	3094	2542.87	2932.61	2511.9	2904.62	2607.43		48.5	0.541953	0.87202	-46.3788	-3.73393	-56.9795	0.34412	3.87253	-2.56307	0.132657	0.857762	-20.724	-0.915028	-18.5242	0.946401
49	2517.9	2511.66	2834.8	2538.72	2844.9	2548.89	3267.73	2543.14	3093.32	2542.44	2941.18	2512.42	2911.91	2607.02		49	0.706959	1.31426	-39.0488	-4.41033	-48.967	0.37892	6.69081	-3.32915	2.43793	0.991779	-13.3148	-1.5455	-11.018	1.03854
49.5	2517.51	2510.92	2852.21	2541.14	2866.83	2548.92	3263.91	2545.07	3091.68	2542.04	2946.24	2513.5	2915.94	2606.46		49.5	0.820464	1.55779	-29.9831	-5.43795	-38.6865	-0.760331	8.42009	-4.32979	4.12269	-0.11239	-7.84839	-2.56649	-5.40625	0.653194
50	2517.09	2510.18	2864.76	2544.2	2883.5	2549.66	3259.5	2547.58	3089.24	2542.59	2949.3	2514.96	2917.6	2606.41		50	0.86311	1.26057	-20.7664	-6.70677	-27.9559	-1.86912	8.93719	-6.06895	5.75696	-1.47402	-4.09251	-3.26605	-1.49194	-0.076741
50.5	2516.64	2509.69	2873.21	2547.91	2894.89	2550.71	3255.06	2551.23	3086.1	2543.44	2950.48	2516.79	2917.66	2606.51		50.5	0.977321	0.802367	-13.1938	-8.26133	-17.7969	-2.33796	8.88894	-8.4473	6.10396	-2.07	-1.10372	-4.19117	1.04288	-0.596991
51	2516.07	2509.39	2878.17	2552.62	2901.6	2551.96	3250.6	2556.05	3083.22	2544.76	2950.53	2519.17	2916.71	2607.02		51	1.47021	0.29995	-6.87316	-10.9277	-9.64323	-2.59943	9.01203	-10.7247	5.94399	-3.49836	1.07376	-5.3484	2.64759	-1.20968
51.5	2515.2	2509.37	2880.33	2558.93	2904.84	2553.29	3246.09	2562.1	3080.15	2546.99	2949.51	2522.09	2915.13	2607.73		51.5	1.68163	-0.129652	-1.9849	-14.2426	-3.37201	-2.79321	8.86845	-13.8881	5.91456	-5.25094	2.62869	-5.9606	3.55277	-1.90226
52	2514.43	2509.44	2880.45	2566.84	2905.24	2554.74	3241.79	2570.21	3077.34	2550.01	2947.98	2525.28	2913.24	2608.92		52	1.57816	-0.0490359	0.925361	-17.1884	1.30091	-2.91078	8.34406	-18.9878	5.67677	-6.77735	3.77754	-7.627	4.07608	-2.54472
52.5	2513.63	2509.36	2879.59	2576.22	2903.82	2556.22	3237.77	2581.24	3074.5	2553.93	2945.83	2529.85	2911.16	2610.25		52.5	1.48574	0.501233	2.71547	-20.8215	4.19096	-3.13055	7.6686	-24.8443	5.24086	-9.40165	4.38718	-10.1364	3.83685	-2.8645
53	2512.95	2508.99	2877.82	2587.81	2901.28	2557.93	3234.09	2595.18	3072.1	2559.61	2943.77	2535.5	2909.41	2611.86		53	1.41068	0.620663	4.18329	-25.5294	5.60943	-3.65841	7.29086	-31.3008	4.80041	-13.3379	3.71286	-12.9816	3.63221	-3.89436
53.5	2512.32	2508.74	2875.57	2601.76	2898.32	2560.02	3230.52	2612.76	3069.69	2567.34	2942.13	2543.04	2907.53	2614.14		53.5	0.502287	0.766063	4.5711	-30.1384	6.59723	-5.18209	6.55199	-39.2669	4.52428	-17.4681	3.05489	-17.1838	3.47438	-4.8411
54	2512.42	2508.23	2873.37	2617.97	2894.84	2563.18	3227.53	2634.57	3067.6	2577.28	2940.71	2552.87	2906	2616.7		54	-0.142594	0.909159	4.16756	-34.8981	6.54161	-7.17899	5.9113	-48.1406	3.94846	-22.9725	2.47255	-22.6611	2.81212	-5.58926
54.5	2512.35	2507.89	2871.41	2636.63	2891.89	2567.15	3224.56	2660.78	3065.69	2590.52	2939.7	2565.72	2904.69	2619.92		54.5	0.0470912	0.64346	3.81874	-39.6128	5.62392	-8.59257	5.64865	-56.1784	3.74576	-29.8895	1.54817	-27.9843	2.35831	-7.70521
55	2512.37	2507.6	2869.57	2657.4	2889.15	2571.86	3221.89	2690.53	3063.85	2607.19	2939.11	2580.97	2903.58	2624.57		55	0.135237	0.209409	3.37968	-43.2526	5.43597	-10.5274	5.26203	-62.8419	3.62784	-36.6819	0.973298	-34.1587	2.38394	-10.9013
55.5	2512.23	2507.61	2868.06	2679.56	2886.47	2577.85	3219.31	2723.4	3062.12	2627.24	2938.6	2599.93	2902.32	2630.82		55.5	0.0760697	0.273473	2.70777	-44.8443	5.15005	-13.7667	4.70188	-68.2862	3.13064	-43.7523	1.31758	-40.7746	2.26058	-13.7591
56	2512.25	2507.28	2866.84	2701.84	2884.11	2585.65	3217.09	2758.44	3060.75	2650.97	2937.81	2621.61	2901.34	2638.51		56	0.402357	0.651238	2.18003	-43.8811	3.96485	-16.9829	4.95072	-71.4857	2.37305	-51.2496	1.49881	-46.338	1.94623	-17.8601
56.5	2511.82	2506.96	2865.84	2723.08	2882.49	2594.91	3214.41	2794.34	3059.67	2678.3	2937.17	2646.2	2900.34	2648.87		56.5	0.83949	0.977109	1.86089	-40.691	2.9386	-20.5833	4.85524	-71.1922	2.28489	-57.4456	1.15531	-51.6505	1.96565	-23.3484
57	2511.47	2506.31	2864.94	2742.29	2881.05	2606.45	3212.37	2829.16	3058.49	2708.16	2936.64	2673.11	2899.41	2661.75		57	0.730373	1.30086	1.84577	-36.1313	2.87668	-25.8559	3.65265	-67.9691	1.9764	-61.9916	1.00548	-56.209	1.59735	-27.9012
57.5	2511.05	2505.71	2864.01	2759.04	2879.68	2620.71	3210.66	2861.95	3057.75	2740.02	2936.18	2702.04	2898.73	2676.7		57.5	0.907298	1.35891	1.731	-30.5164	2.15136	-30.7247	3.34817	-62.7565	1.13154	-65.0994	0.752267	-58.4366	1.28216	-32.0489
58	2510.53	2505.03	2863.25	2772.7	2878.9	2636.89	3209.05	2891.49	3057.27	2772.77	2935.89	2731.05	2898.07	2693.79		58	1.369	0.868037	1.30567	-24.1431	1.36089	-33.6493	2.82835	-54.832	1.01997	-65.1448	0.462314	-57.5377	1.43566	-36.4562
58.5	2509.71	2504.84	2862.68	2783.26	2878.18	2654.12	3207.93	2916.44	3056.69	2804.6	2935.69	2759.11	2897.3	2712.87		58.5	1.61115	0.363205	1.08571	-18.3668	1.63609	-35.2242	1.44056	-44.7076	1.15785	-61.6636	0.300533	-53.925	1.56982	-38.9618
59	2508.97	2504.63	2862.11	2791.22	2877.19	2671.82	3207.49	2936.08	3056.14	2833.94	2935.52	2784.51	2896.54	2732.36		59	1.46166	0.196309	1.2298	-13.5831	2.47974	-35.076	0.988063	-33.884	0.941793	-55.1927	0.575265	-47.3698	1.31703	-38.8841
59.5	2508.23	2504.66	2861.44	2796.99	2875.77	2688.76	3206.83	2950.48	3055.66	2859.37	2935.04	2806.13	2895.93	2751.47		59.5	1.56646	-0.198985	1.30906	-9.70156	2.63455	-32.0434	1.34278	-24.24	1.36262	-46.0531	1.41869	-38.5885	1.52473	-37.1527
60	2507.43	2504.76	2860.76	2801.03	2874.55	2703.6	3206.2	2960.57	3054.7	2879.8	2934.1	2822.99	2895.02	2769.26		60	1.40701	-0.137222	1.7078	-6.34462	2.80196	-27.511	1.08639	-16.0905	2.35413	-35.6978	2.21883	-29.1409	1.75151	-33.9267
60.5	2506.87	2504.76	2859.7	2803.52	2872.88	2716.17	3205.66	2966.91	3053.37	2895.23	2932.86	2835.45	2894.25	2785.15		60.5	0.932766	0.22809	2.36185	-4.20877	3.7473	-22.4723	1.51296	-9.95735	2.75346	-26.5817	2.56167	-20.9373	1.29617	-29.0442
61	2506.48	2504.61	2858.42	2805.41	2870.87	2726.05	3204.59	2970.94	3051.9	2906.62	2931.44	2844.2	2893.67	2798.22		61	0.610572	0.0255613	2.83371	-3.18221	4.17633	-17.1975	2.62639	-6.41917	3.51615	-18.8574	3.67938	-14.4338	1.23218	-23.7583
61.5	2506.21	2504.77	2856.87	2806.76	2868.82	2733.45	3203.04	2973.71	3049.8	2914.42	2929.13	2850.18	2892.92	2808.95		61.5	0.605304	-0.409237	3.29024	-2.38538	3.73334	-12.3832	3.48351	-5.37869	4.69307	-13.0866	5.22429	-9.70249	1.86689	-18.9112
62	2505.87	2504.96	2855.14	2807.85	2867.1	2738.62	3201.03	2976.46	3047.28	2920.16	2926.32	2854.22	2891.78	2817.17		62	0.639007	-0.372377	3.66598	-1.89769	3.61026	-8.87913	4.90794	-5.0922	5.20197	-10.3919	5.86895	-7.05625	2.60653	-14.2249
62.5	2505.59	2505.15	2853.21	2808.73	2865.12	2742.49	3198.04	2978.77	3044.54	2925	2923.24	2857.4	2890.3	2823.25		62.5	0.462285	-0.509575	3.99325	-1.98791	4.18248	-6.35291	6.93171	-4.38697	6.13013	-8.8112	6.69933	-5.40043	3.36392	-9.91958
63	2505.38	2505.41	2851.07	2809.83	2862.94	2745.1	3194.05	2980.84	3041.02	2928.91	2919.52	2859.64	2888.31	2827.27		63	0.470217	-0.168307	4.82143	-1.9754	4.46105	-4.46685	9.19705	-3.65092	8.02859	-6.46939	8.45656	-3.72033	4.91463	-6.78204
63.5	2505.1	2505.26	2848.32	2810.66	2860.63	2747.14	3188.83	2982.42	3036.51	2931.56	2914.89	2861.13	2885.37	2830.21		63.5	0.683659	0.628251	6.08982	-1.61919	4.84228	-3.84328	11.5422	-2.99639	9.88724	-4.87086	9.32499	-2.02753	6.52002	-4.79442
64	2504.72	2504.81	2845.01	2811.4	2857.94	2749	3182.56	2983.77	3031.17	2933.85	2910.28	2861.68	2881.83	2832.15		64	0.692541	1.1556	7.08714	-0.985844	6.38035	-3.63735	13.5124	-1.84472	11.3899	-3.86517	9.54655	-0.433845	7.84514	-3.17279
64.5	2504.41	2504.16	2841.23	2811.58	2854.19	2750.69	3175.33	2984.25	3025.09	2935.28	2905.29	2861.56	2877.57	2833.52		64.5	0.639335	1.24003	8.21071	0.101061	8.29981	-2.66523	15.5065	-0.480525	13.1655	-1.54325	10.2739	1.2222	8.80474	-2.43619
65	2504.03	2503.59	2836.84	2811.26	2849.75	2751.67	3167.1	2984.39	3018.04	2935.43	2900	2860.52	2873.02	2834.67		65	1.04273	1.25599	9.09349	1.45265	9.34403	-1.68126	17.2448	-0.204583	14.7843	0.48454	11.0917	2.47607	9.86746	-2.31498
65.5	2503.37	2502.96	2832.22	2810.13	2844.91	2752.45	3158.22	2984.46	3010.44	2934.95	2894.29	2859.19	2867.74	2835.74		65.5	1.40702	0.927395	9.39051	2.68043	10.0285	-1.4185	18.0398	0.0341358	15.483	1.30461	11.1597	2.97982	10.7715	-1.55612
66	2502.67	2502.69	2827.47	2808.57	2839.73	2752.99	3149.12	2984.23	3002.63	2934.11	2888.8	2857.57	2862.32	2836.09		66	1.34202	0.404651	9.52936	4.03488	10.8024	-0.270292	18.4943	1.27886	15.6836	2.25983	11.5319	3.34359	11.2007	0.219688
66.5	2502	2502.52	2822.67	2806.14	2834.22	2752.73	3139.71	2983.16	2994.71	2932.61	2882.67	2855.82	2856.56	2835.54		66.5	1.59387	0.0695639	9.8413	5.0869	10.7856	0.827616	19.1876	2.48992	16.2471	3.86399	12.5126	3.98545	11.4945	1.76429
67	2501.08	2502.56	2817.63	2803.54	2829.04	2752.31	3130.02	2981.72	2986.34	2930.28	2876.26	2853.6	2850.79	2834.38		67	1.85037	0.191708	10.1823	5.68691	10.0963	0.694784	19.1698	3.66528	17.1579	5.16789	13.6341	4.45771	12.0909	2.79181
67.5	2500.2	2502.3	2812.49	2800.46	2824.06	2752.02	3120.53	2979.32	2977.6	2927.45	2869.05	2851.32	2844.5	2832.69		67.5	1.70921	0.515268	10.485	6.30405	9.96872	0.721635	19.2481	6.19396	17.5722	6.40286	14.6436	5.12646	12.4311	4.42136
68	2499.41	2502.06	2807.18	2797.23	2819.02	2751.49	3110.66	2975.51	2968.73	2923.82	2861.63	2848.38	2838.4	2829.98		68	1.29933	0.669943	10.587	6.95486	10.1315	1.55577	20.1969	8.77629	18.4049	8.07333	15.6746	6.49959	12.3858	5.97689
68.5	2498.87	2501.61	2801.96	2793.47	2813.91	2750.46	3100.38	2970.7	2959.22	2919.37	2853.44	2844.84	2832.05	2826.86		68.5	1.22765	1.01475	10.2897	7.87128	10.3148	2.24096	20.6277	10.1062	19.1122	9.82695	16.2686	7.71513	12.886	6.41111
69	2498.21	2501.06	2796.9	2789.36	2808.68	2749.19	3090.05	2965.41	2949.73	2914.08	2845.48	2840.72	2825.51	2823.59		69	0.897427	1.21779	9.93767	8.75964	10.6737	3.37623	20.9177	11.5855	19.0136	11.0132	15.9923	8.4244	13.3928	6.69172
69.5	2497.98	2500.43	2792.06	2784.75	2803.2	2747.06	3079.4	2959.09	2940.29	2908.45	2837.52	2836.34	2818.69	2820.05		69.5	0.451272	1.09856	9.24577	9.39695	11.381	4.76289	21.8323	13.4477	18.3566	11.4885	15.376	9.75643	13.623	7.95285
70	2497.68	2499.94	2787.58	2780.02	2797.36	2744.49	3068.27	2952.16	2931.37	2902.58	2830.16	2830.95	2811.88	2815.69		70	0.545537	1.22506	9.15416	9.66314	11.6393	5.63018	22.3102	13.7064	17.7751	12.1218	14.3737	11.2639	14.0145	8.78588
70.5	2497.38	2499.2	2782.82	2775.09	2791.62	2741.48	3057.13	2945.41	2922.48	2896.36	2823.14	2825.19	2804.68	2811.36		70.5	0.965914	1.4128	9.5625	10.004	11.5016	6.19131	22.4267	13.859	17.4547	12.5158	13.3821	11.8747	14.4175	8.85946
71	2496.7	2498.58	2777.94	2770.09	2785.88	2738.36	3045.76	2938.16	2913.83	2890.06	2816.69	2819.08	2797.55	2806.76		71	1.45332	1.12489	10.4873	9.79403	11.2347	6.39513	23.2402	15.1862	17.685	13.0173	12.9659	12.4895	14.0936	9.52377
71.5	2495.92	2498.05	2772.33	2765.33	2780.39	2735.12	3033.9	2930.25	2904.7	2883.35	2810.05	2812.67	2790.57	2801.77		71.5	2.04747	1.11071	11.4835	9.34801	10.9566	6.33091	23.9341	16.2346	18.5127	13.3725	13.4191	13.4284	14.0432	10.6997
72	2494.7	2497.46	2766.52	2760.65	2774.91	2731.98	3021.91	2922.01	2895.31	2876.65	2803.26	2805.71	2783.5	2796.14		72	2.32507	1.24799	11.9875	9.58681	10.7323	6.59611	24.006	16.5124	19.2692	14.0463	13.8431	13.8896	14.0183	11.2053
72.5	2493.69	2496.88	2760.38	2755.71	2769.61	2728.48	3009.91	2913.66	2885.42	2869.33	2796.18	2798.82	2776.57	2790.62		72.5	1.86832	0.726971	12.2486	10.0061	10.8838	7.20951	24.1182	17.5728	20.1763	14.5588	14.4685	14.0685	13.7484	11.2732
73	2492.82	2496.7	2754.3	2750.7	2764.01	2724.83	2997.84	2904.48	2875.2	2862.13	2788.78	2791.63	2769.73	2784.81		73	1.63781	0.435518	12.4361	10.0016	11.0983	7.34754	23.8737	18.3116	20.6229	14.8149	15.2497	14.4798	13.6064	11.8513
73.5	2492.07	2496.33	2748.04	2745.69	2758.48	2721.16	2986.03	2895.45	2864.85	2854.55	2781.04	2784.43	2762.92	2778.77		73.5	1.28137	0.995642	11.9158	10.1633	11.4842	7.3462	23.73	18.2518	20.7542	14.7609	15.2574	14.2723	13.9127	12.4315
74	2491.55	2495.72	2742.39	2740.5	2752.51	2717.48	2974.1	2886.22	2854.49	2847.31	2773.63	2777.44	2755.88	2772.45		74	0.807191	1.3853	11.3484	10.6262	11.97	7.44988	23.6558	18.3966	20.5697	15.2292	14.4739	13.4605	13.6847	12.4337
74.5	2491.17	2494.99	2736.59	2735.12	2746.56	2713.73	2962.37	2877.04	2844.25	2839.28	2766.51	2770.95	2749.26	2766.34		74.5	1.02408	1.42679	11.6302	10.6696	12.0479	7.4198	23.529	18.6778	20.7217	15.9947	14.2687	12.8635	13.2828	12.4112
75	2490.46	2494.27	2730.82	2729.84	2740.46	2710.07	2950.56	2867.59	2833.79	2831.35	2759.37	2764.58	2742.55	2759.94		75	1.70348	1.69342	11.291	10.6367	12.2322	7.18769	23.4742	18.5697	20.6559	16.4163	13.9601	12.2646	13.3154	13.2756
75.5	2489.52	2493.3	2725.3	2724.47	2734.3	2706.46	2938.88	2858.48	2823.65	2822.86	2752.55	2758.67	2735.93	2753.1		75.5	1.81655	2.01541	11.0033	10.7263	12.6954	7.58238	23.5769	18.4169	20.1764	16.9073	13.4689	11.6433	13.3404	13.8871
76	2488.63	2492.35	2719.78	2719.15	2727.78	2702.44	2927.03	2849.16	2813.6	2814.46	2745.75	2752.79	2729.2	2746.18		76	2.0492	1.54063	11.0469	10.5752	12.9882	8.30574	23.314	18.4387	19.9161	17.2893	14.142	12.065	13.3434	13.4722
76.5	2487.47	2491.74	2714.28	2713.91	2721.35	2698.18	2915.59	2840.11	2803.72	2805.63	2738.39	2746.52	2722.54	2739.61		76.5	2.37359	1.27429	10.7569	10.3298	12.9711	8.75527	22.8855	17.846	19.7918	17.262	14.9816	13.1006	13.7259	13.2558
77	2486.29	2490.99	2708.97	2708.82	2714.83	2693.68	2904.1	2831.27	2793.87	2797.26	2730.91	2739.74	2715.46	2732.86		77	2.42888	1.65725	10.8912	10.046	12.8867	9.34612	22.8152	17.5802	19.1022	16.8147	14.6308	13.6497	14.3169	13.5715
77.5	2485.03	2490.09	2703.32	2703.83	2708.48	2688.87	2892.79	2822.45	2784.62	2788.79	2723.75	2732.86	2708.31	2726.1		77.5	2.60296	1.93174	11.539	10.0042	12.7573	9.67272	22.5834	17.9156	18.4551	16.6581	14.4895	14.3011	14.2531	13.3763
78	2483.67	2489.12	2697.47	2698.76	2702.12	2684.06	2881.53	2813.35	2775.38	2780.6	2716.44	2725.44	2701.26	2719.5		78	2.93311	1.64809	11.7359	10.3705	12.2488	9.61447	22.297	18.256	18.1888	16.459	14.3185	14.995	13.8157	13.016
78.5	2482.14	2488.4	2691.56	2693.43	2696.27	2679.23	2870.51	2804.25	2766.49	2772.33	2709.56	2717.96	2694.49	2712.99		78.5	2.86064	1.75203	12.159	10.89	11.4295	9.80134	21.9509	18.1085	17.346	16.2944	13.0908	14.9732	13.4524	13.3794
79	2480.84	2487.35	2685.29	2687.87	2690.63	2674.26	2859.59	2795.16	2758.02	2764.31	2703.29	2710.52	2687.79	2706.13		79	2.67398	2.0631	12.8315	11.3462	11.1156	9.96921	21.5618	18.6605	16.5222	16.051	12.3241	14.7026	13.2775	13.7138
79.5	2479.54	2486.37	2678.84	2682.08	2685.13	2669.32	2848.97	2785.58	2749.85	2756.26	2697.09	2703.31	2681.25	2699.37		79.5	2.04515	2.02097	12.6563	11.9045	10.9235	9.6118	20.9181	19.2488	16.6381	15.9556	12.6503	14.0384	12.7629	13.3205
80	2478.85	2485.32	2672.7	2676.03	2679.73	2664.55	2838.63	2776.03	2741.39	2748.37	2690.65	2696.48	2674.98	2692.83		80	0.953136	2.04292	12.0417	11.997	10.4372	10.0728	20.6419	18.9295	16.6074	15.7353	12.7961	13.3873	12.5745	12.7865
80.5	2478.51	2484.3	2666.77	2670.15	2674.59	2659.21	2828.33	2766.67	2733.23	2740.53	2684.28	2689.87	2668.6	2686.56		80.5	0.434809	2.35107	11.7292	11.5996	10.7497	10.8172	20.3056	18.5353	16.5823	15.4023	12.9935	13.1906	12.964	12.5033
81	2478.37	2482.99	2661	2664.43	2668.94	2653.86	2818.31	2757.44	2724.7	2732.93	2677.57	2683.32	2662.06	2680.32		81	0.231089	2.51435	11.1907	11.2579	11.3708	10.5152	20.0345	18.6543	17.4574	15.329	13.8614	12.6225	13.0257	12.282
81.5	2478.23	2481.86	2655.58	2658.89	2663.29	2648.69	2808.27	2748.1	2715.87	2725.13	2670.48	2677.18	2655.64	2674.26		81.5	0.300649	2.09167	10.6582	10.9895	11.4071	10.3775	19.9996	18.1221	17.5996	15.8685	14.2683	12.5242	12.5638	12.1514
82	2477.96	2480.89	2650.31	2653.45	2657.49	2643.44	2798.32	2739.36	2707.22	2717.12	2663.41	2670.66	2649.45	2668.14		82	1.08881	1.74936	10.3222	10.6548	11.8015	10.6384	19.875	17.3163	16.8113	15.8753	13.8593	13.5535	12.4713	12.2409
82.5	2477.1	2480.08	2645.2	2648.2	2651.49	2638.11	2788.41	2730.74	2698.99	2709.28	2656.62	2663.74	2643.13	2662.04		82.5	2.18971	1.62024	10.3855	10.5037	12.2207	10.3676	19.6087	16.8852	16.6742	15.6764	13.5419	13.6458	12.6937	12.1091
83	2475.86	2479.27	2639.91	2642.89	2645.37	2633.1	2778.7	2722.49	2690.56	2701.4	2649.81	2657.11	2636.8	2655.99		83	2.62036	1.48815	10.5026	10.7254	11.9066	9.84191	19.532	16.2481	16.4719	15.8884	13.7918	12.9634	12.559	12.281
83.5	2474.52	2478.6	2634.71	2637.47	2639.61	2628.23	2768.94	2714.45	2682.61	2693.42	2642.86	2650.67	2630.57	2649.75		83.5	2.85841	1.28655	10.5039	10.9532	11.3975	9.68857	18.9722	15.9248	15.4079	15.928	13.7109	13.2939	12.4576	12.5169
84	2473.05	2477.93	2629.37	2631.96	2633.93	2623.42	2759.74	2706.51	2675	2685.57	2636.12	2643.91	2624.33	2643.55		84	2.79549	1.52238	10.7953	11.0029	11.2605	9.46306	18.3063	16.0811	15.5901	15.2278	13.4325	12.8732	12.5048	12.1259
84.5	2471.78	2477.1	2623.88	2626.48	2628.34	2618.73	2750.57	2698.44	2666.96	2678.17	2629.39	2637.87	2618.12	2637.62		84.5	2.28923	1.56531	11.3551	11.0216	11.1771	9.54229	18.2241	15.5327	16.2202	14.7305	13.5686	11.8206	12.1198	11.8173
85	2470.77	2476.4	2618.07	2620.96	2622.76	2613.9	2741.56	2690.92	2658.92	2670.77	2622.62	2631.97	2612.28	2631.68		85	1.72257	1.33391	11.4444	10.9611	10.9579	9.35136	17.7066	15.4292	15.6676	14.7746	13.2037	11.7857	11.1795	12.0522
85.5	2470.02	2475.74	2612.5	2615.56	2617.35	2609.35	2732.89	2682.91	2651.31	2663.43	2616.3	2626.04	2606.92	2625.63		85.5	1.43773	1.26156	11.0692	10.6256	10.9464	9.31892	16.9126	16.1291	15.1161	14.5692	11.9564	12.0577	10.4141	11.7452
86	2469.29	2475.06	2606.98	2610.37	2611.77	2604.47	2724.54	2674.87	2643.77	2656.23	2610.62	2619.95	2601.8	2619.98		86	1.46654	1.80913	10.9815	10.0347	11.3686	10.2055	17.0309	16.1276	14.941	14.0635	11.1087	11.9395	10.1155	11.0036
86.5	2468.54	2473.95	2601.54	2605.5	2606.04	2599.18	2715.82	2666.82	2636.47	2649.31	2605.12	2614.07	2596.78	2614.54		86.5	1.57666	2.15813	10.7089	9.62003	11.3473	10.812	17.4218	15.9073	13.8921	13.9647	10.7071	12.1643	9.94352	11.0248
87	2467.7	2472.94	2596.3	2600.69	2600.49	2593.75	2707.2	2658.9	2629.87	2642.23	2599.86	2607.81	2591.82	2608.93		87	1.70321	2.23004	10.1752	9.57282	10.7902	10.6176	17.0628	16.2366	12.8339	14.1528	10.5591	12.1359	10.0457	11.21
87.5	2466.79	2471.69	2591.29	2595.88	2595.2	2588.51	2698.72	2650.61	2623.47	2635.21	2594.43	2601.93	2586.68	2603.37		87.5	2.16235	2.55836	10.1907	9.84201	10.6979	10.9257	17.0629	16.3402	13.0602	13.8994	11.4022	12.0802	10.5063	10.9897
88	2465.51	2470.39	2586.01	2590.82	2589.81	2582.87	2690.13	2642.63	2616.75	2628.32	2588.43	2595.66	2581.3	2597.92		88	2.79879	2.85208	10.8883	10.2756	10.4517	10.9375	17.1739	15.8833	13.6728	13.8291	12.4351	12.6238	11.065	10.9222
88.5	2464.03	2468.9	2580.42	2585.59	2584.81	2577.68	2681.63	2634.73	2609.83	2621.36	2582.12	2589.39	2575.67	2592.38		88.5	3.13077	2.6854	11.4283	10.7978	9.70656	10.131	16.5933	15.4412	13.9802	13.9514	12.4402	12.4762	11.2213	11.4606
89	2462.41	2467.72	2574.68	2580.05	2580.04	2572.69	2673.57	2627.19	2602.77	2614.44	2576.01	2583.22	2570.14	2586.53		89	3.29758	2.36445	11.3539	11.1777	9.49031	9.81633	15.8107	14.9704	14.3323	13.4631	12.4677	12.0895	10.9578	11.4171
89.5	2460.76	2466.46	2569.15	2574.5	2575.32	2567.82	2665.81	2619.76	2595.54	2607.93	2569.69	2577.25	2564.75	2581.01		89.5	3.39534	2.63698	10.7575	10.9644	9.29589	9.78788	15.1923	14.6041	14.4463	12.76	12.3069	12.1661	10.5516	11.0233
90	2459.1	2465.08	2563.93	2569.14	2570.81	2562.92	2658.41	2612.63	2588.47	2601.66	2563.82	2571.15	2559.61	2575.48		90	2.88068	2.87706	10.1451	10.4345	8.57681	9.53566	14.2841	13.9403	13.5266	12.3135	11.2072	11.5683	9.98199	10.8665
90.5	2457.93	2463.64	2559.01	2564.1	2566.7	2558.27	2651.47	2605.81	2582.09	2595.63	2558.47	2565.77	2554.78	2570.15		90.5	1.99442	2.73271	9.54419	9.657	8.18939	9.43343	13.8419	13.3463	12.1324	11.7292	10.2762	10.3578	9.28271	10.7362
91	2457.06	2462.37	2554.41	2559.49	2562.58	2553.52	2644.54	2599.28	2576.27	2589.9	2553.45	2560.72	2550.33	2564.78		91	1.49196	2.48938	8.64241	8.79032	8.14994	9.01525	13.5938	12.7438	11.2587	11.2874	10.1326	9.79088	8.53085	10.2895
91.5	2456.35	2461.15	2550.28	2555.26	2558.6	2549.25	2637.9	2593.03	2570.77	2584.3	2548.4	2555.99	2546.16	2559.83		91.5	1.51824	2.24339	8.27869	8.27235	7.64923	8.66309	13.0485	12.3656	10.7612	11.137	9.40465	8.97271	8.37091	10.0581
92	2455.48	2460.13	2546.01	2551.17	2554.89	2544.81	2631.42	2586.85	2565.5	2578.71	2544.04	2551.69	2541.85	2554.71		92	1.86051	1.87216	8.8359	8.13759	7.43129	8.79027	13.0146	12.4521	10.2193	11.4135	8.6968	8.49446	8.9624	9.92706
92.5	2454.42	2459.21	2541.47	2547.12	2551.12	2540.51	2624.85	2580.59	2560.44	2572.87	2539.62	2547.4	2537.2	2549.96		92.5	2.67623	2.03737	9.14679	7.93185	7.60752	8.37956	13.2468	12.4079	10.5185	11.7647	8.64242	8.75735	9.50983	9.42613
93	2452.77	2458.05	2536.9	2543.18	2547.33	2536.38	2618.2	2574.45	2554.95	2567.01	2535.43	2542.93	2532.39	2545.33		93	3.69145	2.39108	9.11841	8.1351	7.29939	8.37644	13.271	12.3524	10.9176	11.5717	8.34953	8.95179	9.69258	8.69713
93.5	2450.75	2456.71	2532.29	2538.98	2543.75	2532.14	2611.6	2568.31	2549.5	2561.33	2531.32	2538.4	2527.53	2541.29		93.5	4.5431	3.49878	9.64907	8.37454	7.56094	8.3215	13.1159	11.7403	11.4612	11.1506	7.62778	9.46557	9.75863	7.68191
94	2448.27	2454.54	2527.27	2534.86	2539.75	2528.1	2605.05	2562.71	2543.48	2555.82	2527.74	2533.44	2522.65	2537.59		94	5.08404	4.47492	9.95066	8.25466	7.77541	8.07171	13.3047	11.4208	11.9684	11.1931	7.49592	10.1055	9.87026	7.18196
94.5	2445.68	2452.13	2522.34	2530.76	2535.86	2524.2	2598.37	2557.1	2537.44	2550.22	2523.9	2528.27	2517.79	2534.17		94.5	6.08126	7.0441	11.1589	8.56978	9.75113	7.29136	13.8559	10.056	14.3611	11.3604	7.23747	11.8761	9.62608	6.59151
95	2442.71	2448.19	2516.99	2526.92	2530.82	2521.28	2592.24	2553.29	2530.31	2545.29	2521.03	2522.55	2513.7	2531.41		95	3.04015	4.18315	5.40875	3.78979	5.22569	2.76261	6.04343	3.50424	7.31582	4.81977	2.71109	5.81912	3.96548	2.64203

## Sheet: Exp 4
Experiment 4		2039 BiP NBD
		2532 Hsp70 NBD
RFU		2532 Hsc70 NBD														Derivative
Temperature	Mg	Ca	2039_Mg	2039_MgADP	2039_Ca	2039_CaADP	2532_Mg	2532_MgADP	2532_Ca	2532_CaADP	2533_Mg	2533_MgADP	2533_Ca	2533_CaADP		Temperature	Mg	Ca	2039_Mg	2039_MgADP	2039_Ca	2039_CaADP	2532_Mg	2532_MgADP	2532_Ca	2532_CaADP	2533_Mg	2533_MgADP	2533_Ca	2533_CaADP			2039_Mg	2039_MgADP	2039_Ca	2039_CaADP	2532_Mg	2532_MgADP	2532_Ca	2532_CaADP	2533_Mg	2533_MgADP	2533_Ca	2533_CaADP
20	2719.19	2721.44	2739.58	2732.55	2745.49	2774.2	2760.59	2745.48	2749.12	2752.03	2742.32	2741.03	2731.61	2711.25		20	7.83031	8.25702	7.15439	7.92296	6.64577	8.02937	7.95564	7.63208	8.44642	8.79896	7.79249	7.09444	7.5631	7.21801		Min	-144.446	-105.288	-142.86	-99.3067	-222.042	-171.884	-233.815	-155.409	-176.006	-121.828	-140.82	-136.043
20.5	2711.36	2713.18	2732.43	2724.62	2738.84	2766.17	2752.63	2737.85	2740.67	2743.23	2734.53	2733.94	2724.05	2704.03		20.5	16.9657	17.8902	15.5012	17.1664	14.3992	17.397	17.2372	16.5362	18.3006	19.0644	16.8837	15.3713	16.3867	15.639		Tm	47.5	55.5	47.5	58.5	43.5	56.5	43.5	57.5	45.5	57.5	45.5	58.5
21	2703.53	2704.92	2725.27	2716.7	2732.2	2758.14	2744.68	2730.21	2732.22	2734.43	2726.73	2726.84	2716.48	2696.81		21	15.6606	16.514	14.3088	15.8459	13.2915	16.0587	15.9113	15.2642	16.8928	17.5979	15.585	14.1889	15.1262	14.436
21.5	2695.7	2696.67	2718.12	2708.78	2725.55	2750.11	2736.72	2722.58	2723.78	2725.63	2718.94	2719.75	2708.92	2689.59		21.5	15.6606	16.514	14.3088	15.8459	13.2915	16.0587	15.9113	15.2642	16.8928	17.5979	15.585	14.1889	15.1262	14.436
22	2687.87	2688.41	2710.96	2700.85	2718.91	2742.08	2728.77	2714.95	2715.33	2716.83	2711.15	2712.66	2701.36	2682.38		22	15.6606	16.514	14.3088	15.8459	13.2915	16.0587	15.9113	15.2642	16.8928	17.5979	15.585	14.1889	15.1262	14.436
22.5	2680.04	2680.15	2703.81	2692.93	2712.26	2734.05	2720.81	2707.32	2706.88	2708.03	2703.36	2705.56	2693.79	2675.16		22.5	15.7255	16.5577	14.2536	15.7574	13.14	16.126	15.9618	15.2807	16.8737	17.636	15.7019	14.3269	15.0817	14.3818
23	2672.21	2671.89	2696.66	2685.01	2705.61	2726.02	2712.85	2699.69	2698.44	2699.23	2695.56	2698.47	2686.23	2667.94		23	15.2562	16.378	14.5715	16.3737	14.1198	15.7222	15.6181	15.0791	17.0807	17.4484	14.8706	13.3577	15.4048	14.7654
23.5	2664.77	2663.9	2689.17	2676.55	2698.06	2718.39	2705.2	2692.15	2689.87	2690.66	2688.47	2692.2	2678.4	2660.4		23.5	14.9016	15.2634	15.4822	17.046	15.7242	14.8407	15.1888	15.627	16.8521	16.712	14.1796	12.3793	15.6524	15.0914
24	2657.23	2656.66	2681.27	2668.08	2690.02	2711.17	2697.61	2684.11	2681.75	2682.56	2681.3	2685.91	2670.64	2652.88		24	15.1193	13.9236	15.6518	16.8914	16.3659	14.0564	15.3001	15.91	15.4141	15.7013	14.2093	12.7402	15.4411	15.2014
24.5	2649.67	2649.86	2673.66	2659.8	2681.85	2704.3	2689.97	2676.45	2674.5	2674.96	2674.34	2679.42	2662.97	2645.22		24.5	15.1972	13.5601	14.8249	15.7937	15.9268	13.5815	14.933	14.6687	13.7714	14.752	13.4879	13.2945	15.2732	15.2154
25	2642.14	2643.09	2666.48	2652.32	2674.16	2697.58	2682.83	2669.49	2667.91	2667.81	2667.79	2672.69	2655.4	2637.77		25	14.4911	13.2223	13.9077	14.5905	15.1246	13.1331	13.3825	13.1537	12.7274	13.799	13.0254	13.2223	14.8157	14.4912
25.5	2635.21	2636.7	2659.76	2645.24	2666.74	2691.12	2676.57	2663.23	2661.81	2661.1	2661.27	2666.21	2648.16	2630.78		25.5	13.617	12.2659	12.9606	13.2536	14.3549	12.9551	12.0774	12.1242	11.2112	13.3014	13.0476	13.2173	14.2129	13.3987
26	2628.56	2630.73	2653.51	2639.12	2659.83	2684.59	2670.66	2657.3	2656.64	2654.52	2654.86	2659.51	2641.05	2624.31		26	12.5492	12.1263	12.0174	11.4604	13.3226	13.0092	11.4725	11.5674	10.0626	12.6116	12.0049	13.0498	14.68	12.7968
26.5	2622.69	2624.55	2647.64	2633.71	2653.36	2678.14	2665.09	2651.65	2651.56	2648.46	2649.26	2653.24	2633.42	2617.92		26.5	11.3307	12.1096	11.7842	10.075	12.6482	12.8715	10.8137	10.9608	10.3625	12.0239	11.0277	12.2051	15.5829	12.6609
27	2617.21	2618.69	2641.62	2628.9	2647.08	2671.78	2659.8	2646.26	2646.26	2642.36	2643.74	2647.27	2625.62	2611.66		27	10.2125	11.4547	12.2272	9.70578	12.6508	12.3066	10.3704	10.8658	10.5732	12.5108	10.8319	11.6034	15.2354	12.294
27.5	2612.4	2613.06	2635.41	2623.93	2640.65	2665.84	2654.56	2640.7	2640.93	2635.96	2638.43	2641.53	2618.24	2605.58		27.5	9.38958	10.9787	12.5115	9.75527	13.0235	11.7157	11.0384	11.2881	11.0224	12.8461	10.3602	11.7213	14.5455	12.1493
28	2607.57	2607.54	2629.04	2619.06	2634.03	2659.97	2648.67	2634.88	2635.05	2629.53	2633.24	2635.43	2610.97	2599.33		28	10.2659	11.6441	13.2431	10.1494	13.4138	11.6659	12.2552	12.3259	12.7871	12.8758	10.7437	12.5312	14.6555	13.2145
28.5	2601.93	2601.25	2622.01	2613.51	2627.08	2654.01	2642.26	2628.31	2628.08	2622.9	2627.45	2628.87	2603.5	2592.21		28.5	12.4552	13.3581	15.0929	12.444	14.9071	12.6016	13.6229	13.6245	14.9212	14.1781	12.736	14.0561	15.2055	15.2837
29	2595.01	2594.07	2613.87	2606.43	2619	2647.17	2634.91	2621.12	2620.19	2615.19	2620.37	2621.19	2595.65	2583.97		29	15.1142	15.7431	17.2956	15.8902	17.1869	14.7928	15.9179	15.699	16.4573	16.5581	15.4987	16.8186	16.347	17.827
29.5	2586.68	2585.4	2604.64	2597.58	2609.84	2639.04	2626.25	2612.41	2611.54	2606.33	2611.9	2611.95	2586.89	2574.34		29.5	18.7455	18.8095	19.8634	19.4392	19.6752	18.0872	18.8239	19.2138	18.6766	18.7374	18.5475	20.2281	19.3972	20.6136
30	2576.23	2575.19	2593.9	2586.99	2599.3	2628.99	2616.11	2601.82	2601.48	2596.33	2601.81	2600.98	2576.18	2563.34		30	22.7839	22.4938	23.3706	23.1142	22.4022	22.0475	21.5833	23.3547	21.2416	21.8602	21.8511	23.5654	22.9941	23.5932
30.5	2564.13	2563.06	2581.43	2574.6	2587.51	2617.1	2604.8	2589.2	2590.49	2584.44	2590.2	2588.52	2564.13	2550.89		30.5	25.1984	25.2449	25.905	26.027	24.7331	25.3417	23.5491	26.4676	22.4904	25.3906	24.1838	26.0698	24.9261	25.7462
31	2551.34	2550.28	2568.35	2561.29	2574.78	2603.91	2592.8	2575.63	2579.2	2571.2	2577.84	2575.11	2551.51	2537.9		31	25.6459	25.6083	25.979	26.6892	25.6739	26.9589	24.0216	27.7931	22.3541	27.0997	25.1238	27.3378	25.3026	25.816
31.5	2538.73	2537.64	2555.7	2548.17	2562.1	2590.45	2581.07	2561.66	2568.26	2557.68	2565.29	2561.43	2539.09	2525.3		31.5	24.7138	25.004	24.6054	25.8507	24.9846	26.6576	22.6093	27.7818	21.6914	26.6415	24.7627	27.0146	24.1505	24.4887
32	2526.88	2525.5	2543.96	2535.67	2550.02	2577.51	2570.42	2548.21	2557.73	2544.8	2553.31	2548.29	2527.69	2513.57		32	22.1428	23.0941	22.0011	23.7384	22.9095	24.8574	19.8423	25.359	19.7053	24.8518	22.9839	25.5982	20.8574	22.3767
32.5	2516.77	2514.85	2533.93	2524.69	2539.35	2565.81	2561.42	2536.57	2548.85	2533.05	2542.55	2536.02	2518.46	2503.14		32.5	18.411	19.0867	17.8267	19.8773	19.8786	21.6736	15.9453	21.2325	15.6607	21.587	19.6714	22.9841	16.0914	18.9158
33	2508.58	2506.53	2526.19	2515.86	2530.22	2555.99	2554.67	2527.05	2542.21	2523.35	2533.79	2525.46	2511.62	2494.83		33	14.015	14.4724	13.3609	15.6688	16.5596	17.5148	10.7981	16.8141	10.9012	17.4172	15.5308	19.3283	11.4416	14.1752
33.5	2502.75	2500.34	2520.48	2508.98	2522.92	2548.31	2550.74	2519.73	2538.07	2515.58	2527.16	2516.72	2507.04	2488.92		33.5	9.73309	10.2947	9.61115	11.8187	12.2504	13.3179	4.99103	12.5864	5.48279	13.8542	10.4692	15.6509	6.64423	9.82286
34	2498.76	2496.24	2516.53	2504.04	2517.96	2542.58	2549.75	2514.45	2536.88	2509.49	2523.38	2509.88	2504.97	2484.92		34	5.99378	5.86787	6.09191	7.79915	7.97448	9.72539	-1.15694	8.26802	-1.01354	10.2535	5.03373	11.5236	1.73031	6.0843
34.5	2496.67	2494.34	2514.29	2501.08	2514.83	2538.51	2551.98	2511.29	2539.13	2505.29	2522.06	2505.25	2505.17	2482.77		34.5	2.73101	2.27905	3.21121	4.43036	4.59128	6.55104	-7.85115	5.19684	-7.77469	6.75152	0.0955478	6.93658	-2.33217	2.60197
35	2495.89	2493.73	2513.25	2499.43	2513.32	2535.93	2557.63	2509.09	2544.6	2502.56	2523.19	2502.78	2507.09	2482.12		35	0.392769	0.303176	0.716964	2.28707	1.51022	4.00058	-14.8248	3.16038	-14.0725	4.56625	-4.24793	3.45311	-4.85083	0.360116
35.5	2496.14	2493.9	2513.55	2498.69	2513.34	2534.36	2566.68	2508.03	2553.16	2500.66	2526.2	2501.59	2509.96	2482.18		35.5	-1.12007	-0.962653	-1.74017	0.683493	-1.97547	2.41865	-20.8945	1.59202	-20.1219	2.7003	-7.97273	1.28673	-7.04942	-0.274296
36	2496.93	2494.59	2514.93	2498.64	2515.11	2533.43	2578.41	2507.34	2564.71	2499.89	2531.01	2501.39	2514.12	2482.31		36	-2.22784	-1.6219	-3.74856	-0.285011	-4.07914	1.32012	-26.1417	1.10182	-26.1577	0.338824	-10.6483	-0.342043	-9.34539	-0.45438
36.5	2498.26	2495.44	2517.24	2498.85	2517.26	2533.02	2592.83	2506.88	2579.27	2500.12	2536.76	2501.8	2519.18	2482.64		36.5	-2.63976	-1.74385	-5.33702	-0.368933	-5.1466	0.333921	-31.509	0.914379	-31.7624	-0.545939	-12.7979	-1.14095	-10.7144	-0.781782
37	2499.48	2496.31	2520.29	2499.02	2520.26	2533.07	2609.97	2506.5	2596.53	2500.25	2543.85	2502.41	2524.81	2483.07		37	-2.47378	-1.76148	-7.21221	-0.662906	-6.45329	-0.562173	-37.14	0.0747026	-37.6058	-0.0102068	-15.3203	-1.1561	-11.8446	-0.856655
37.5	2500.74	2497.2	2524.41	2499.5	2523.65	2533.51	2630.14	2506.81	2617.1	2500.26	2552.11	2502.93	2531.14	2483.52		37.5	-2.50459	-1.76909	-8.73712	-0.885491	-7.31677	-0.963449	-43.8431	-0.768617	-44.9149	-0.68604	-17.9127	-0.988122	-13.8459	-1.08954
38	2501.92	2498.05	2528.95	2499.88	2527.5	2534	2654.1	2507.23	2641.71	2500.95	2561.87	2503.43	2538.71	2484.22		38	-2.01749	-1.55775	-9.58237	-0.917552	-7.607	-1.20403	-52.3676	-1.26153	-53.923	-1.55803	-21.2031	-1.11751	-16.2515	-1.83924
38.5	2502.73	2498.75	2534.08	2500.4	2531.35	2534.68	2682.8	2508.05	2671.24	2501.64	2573.51	2504.06	2547.37	2485.32		38.5	-1.28949	-1.31776	-11.1802	-0.842844	-8.55429	-1.22191	-62.7384	-1.778	-64.0764	-0.965323	-25.7684	-1.40381	-18.2718	-2.36173
39	2503.29	2499.35	2540.21	2500.73	2536.16	2535.18	2717.05	2508.89	2706.07	2501.95	2587.84	2504.74	2557.12	2486.48		39	-1.1479	-0.956832	-13.2996	-0.850935	-10.1659	-0.990132	-74.3602	-1.44211	-76.0477	-0.722293	-31.5683	-0.900223	-21.2003	-2.13679
39.5	2503.93	2499.73	2547.42	2501.25	2541.57	2535.64	2757.34	2509.43	2747.57	2502.5	2605.2	2504.95	2568.76	2487.46		39.5	-1.39814	-0.769466	-15.5005	-0.761145	-12.0276	-0.502823	-87.0406	-0.677226	-89.8528	-1.63426	-37.9791	-0.279996	-25.4329	-2.03145
40	2504.61	2500.19	2555.85	2501.5	2548.31	2535.73	2804.25	2509.58	2796.07	2503.46	2625.97	2505.14	2582.68	2488.51		40	-1.03736	-1.10694	-18.6371	-0.713298	-14.7694	-0.40075	-100.55	-0.0538912	-104.279	-1.43463	-45.3292	-0.733053	-30.379	-1.96762
40.5	2504.97	2500.82	2566.22	2501.99	2556.39	2536.04	2858.1	2509.55	2852.1	2503.85	2650.7	2505.63	2599.26	2489.38		40.5	-0.808457	-1.29497	-22.8645	-0.867183	-17.7096	-0.271839	-115.295	0.143762	-120.142	-0.590066	-53.7714	-0.719689	-36.008	-1.47658
41	2505.43	2501.44	2578.78	2502.43	2566.1	2535.99	2919.86	2509.51	2916.65	2504.17	2679.87	2505.84	2618.87	2490.03		41	-0.627109	-1.16001	-27.2966	-1.51382	-21.0562	-0.0352319	-131.869	-0.0784682	-138.677	-0.816186	-62.9231	-0.421922	-42.7397	-1.29417
41.5	2505.56	2502.01	2593.65	2503.51	2577.59	2536.13	2990.44	2509.67	2991.33	2504.66	2713.78	2506.18	2642.2	2490.75		41.5	-0.160405	-1.32324	-32.5426	-2.21993	-25.3057	-0.227461	-151.491	-0.623298	-160.937	-0.878263	-72.9411	-1.18019	-50.6697	-1.72832
42	2505.58	2502.75	2611.51	2504.55	2591.54	2536.24	3071.71	2510.1	3077.88	2505.01	2753.03	2506.96	2669.7	2491.7		42	0.441549	-1.36	-38.9807	-2.12892	-30.2804	-0.506483	-173.658	-0.902409	-185.186	-0.606595	-84.3191	-1.47622	-59.4945	-1.63698
42.5	2505.22	2503.3	2632.8	2505.63	2608.08	2536.6	3163.98	2510.56	3176.31	2505.34	2798.37	2507.52	2701.93	2492.38		42.5	0.292895	-0.748347	-46.3656	-2.09905	-36.5605	-0.47408	-195.24	-1.16499	-208.343	-0.961425	-97.3887	-0.635246	-69.7151	-1.53074
43	2505.32	2503.55	2658.06	2506.63	2628.35	2536.74	3266.25	2511.2	3285.32	2505.96	2850.71	2507.7	2739.74	2493.24		43	-0.09544	-0.615407	-54.9265	-1.88545	-44.5779	-0.672782	-212.736	-0.924628	-226.254	-1.18277	-112.209	-0.766425	-81.8688	-1.53835
43.5	2505.3	2503.98	2687.92	2507.49	2652.74	2537.3	3375.34	2511.47	3400.85	2506.49	2910.87	2508.29	2784.16	2493.87		43.5	-0.291777	-1.07103	-64.7402	-1.49889	-52.9322	-1.18346	-222.042	-0.570735	-233.815	-1.09267	-128.993	-0.918837	-96.5374	-1.12187
44	2505.64	2504.56	2722.95	2508.15	2681.4	2537.8	3486.17	2511.86	3516.67	2507.12	2979.75	2508.56	2836.39	2494.4		44	-0.786731	-0.899637	-75.395	-1.27003	-61.9602	-0.756004	-218.04	-0.971081	-225.721	-1.61474	-146.128	-0.479793	-112.04	-1.01456
44.5	2506.03	2504.9	2763.41	2508.87	2714.86	2538.03	3591.07	2512.44	3624.18	2508	3056.72	2508.9	2895.95	2494.92		44.5	-0.881829	-0.868134	-86.5805	-1.8046	-72.0686	-0.172372	-199.505	-1.20131	-202.811	-1.35077	-161.709	-1.12053	-125.98	-1.20809
45	2506.48	2505.48	2809.6	2509.98	2753.5	2538.04	3683.81	2513.06	3717.71	2508.4	3140.72	2509.7	2961.8	2495.56		45	-0.622484	-1.26784	-98.1442	-2.41924	-82.024	-0.122447	-169.608	-1.37776	-169.192	-0.59923	-172.997	-1.8461	-136.669	-0.950752
45.5	2506.67	2506.15	2861.69	2511.28	2797.16	2538.16	3759.47	2513.88	3792.29	2508.66	3228.37	2510.63	3031.54	2495.91		45.5	-0.474037	-1.49925	-110.73	-2.98657	-93.723	-0.102495	-132.31	-2.11423	-128.735	-0.347058	-176.006	-1.66784	-140.82	-0.970397
46	2506.97	2506.92	2920.35	2512.94	2847.65	2538.1	3815.75	2515.13	3846.36	2508.76	3315.01	2511.36	3101.11	2496.57		46	-0.461747	-1.29872	-123.6	-3.32142	-108.591	0.35948	-92.693	-2.45006	-87.9496	-0.156766	-168.245	-1.53378	-135.332	-1.31915
46.5	2507.1	2507.43	2984.99	2514.6	2905.68	2537.91	3852.69	2516.26	3881	2508.81	3395.01	2512.18	3165.51	2497.15		46.5	-0.151709	-1.11435	-134.57	-3.65037	-122.934	-0.0840738	-56.5431	-2.18474	-52.1638	0.149341	-150.624	-1.52698	-121.395	-1.06083
47	2507.17	2507.99	3054.36	2516.59	2970.16	2538.23	3873.39	2517.44	3899.68	2508.69	3464.35	2512.84	3221.55	2497.64		47	-0.278887	-0.641727	-142.325	-3.95156	-134.623	-0.874475	-27.4618	-3.0559	-23.6186	-0.130705	-125.099	-1.09205	-101.787	-0.923384
47.5	2507.37	2508.03	3126.36	2518.57	3039.65	2538.7	3881.39	2519.3	3905.86	2508.99	3519.33	2513.35	3266.7	2498.11		47.5	-0.321226	0.189336	-144.446	-4.33343	-142.86	-0.948727	-5.97527	-3.68448	-2.61253	-0.708673	-94.6579	-1.25933	-78.3781	-1.06559
48	2507.48	2507.81	3197.39	2521.05	3111.63	2539.13	3880.56	2521.1	3903.53	2509.42	3559.02	2514.2	3299.94	2498.71		48	-0.308358	1.01288	-137.658	-5.6224	-142.365	-0.652152	8.27111	-3.90731	10.7191	-1.3888	-64.4129	-2.10983	-55.1079	-1.18769
48.5	2507.7	2507.09	3262.57	2524.29	3180.27	2539.42	3874.14	2523.44	3896.12	2510.36	3584.4	2515.49	3322.33	2499.31		48.5	-0.501622	1.30844	-121.73	-7.45081	-130.493	-0.916501	16.2045	-5.86374	18.1455	-1.92527	-38.3749	-3.08598	-35.354	-1.34322
49	2507.95	2506.57	3318.06	2528.57	3240.92	2540.07	3865.05	2527.1	3886.1	2511.3	3598.36	2517.3	3335.95	2500.08		49	-0.409092	1.15222	-99.3725	-9.59894	-111.607	-1.33816	19.9991	-8.60064	21.2278	-2.05998	-18.4777	-4.09143	-19.5899	-1.64442
49.5	2508.1	2505.96	3361.31	2534.03	3291.07	2540.69	3854.54	2532.06	3875.33	2512.52	3603.87	2519.66	3342.65	2501.01		49.5	-0.228879	0.913639	-73.0588	-12.6253	-87.8431	-1.17115	21.5668	-11.0568	21.829	-2.88118	-4.67282	-5.6282	-8.32403	-2.31514
50	2508.22	2505.7	3391.09	2541.36	3328.41	2541.29	3843.75	2538.45	3864.54	2514.34	3603.92	2522.98	3344.92	2502.47		50	-0.429694	0.355716	-46.646	-16.7299	-61.7488	-1.37454	21.5318	-15.5977	20.8603	-4.81278	3.7017	-7.51236	-1.10013	-3.57044
50.5	2508.49	2505.6	3408.49	2550.84	3353.09	2542.18	3833.16	2547.95	3854.57	2517.4	3600.8	2527.16	3344.22	2504.58		50.5	-0.32644	-0.17787	-23.6995	-21.1808	-37.5289	-2.44662	20.6092	-22.1163	19.2698	-7.08368	8.30384	-9.14968	3.37959	-4.7174
51	2508.49	2505.82	3415.6	2562.73	3366.61	2543.74	3823.18	2560.63	3845.17	2521.49	3596	2532.24	3341.9	2507.18		51	0.276487	-0.292835	-5.80495	-26.8077	-17.5804	-3.38965	19.5646	-28.6078	18.5235	-9.56599	10.6238	-11.461	5.72572	-5.7522
51.5	2508.3	2505.87	3415.21	2577.9	3371.47	2545.56	3813.63	2576.75	3836.04	2527.21	3590.36	2538.79	3338.76	2510.39		51.5	0.154476	-0.286952	6.34111	-34.0676	-2.5397	-4.08435	18.3022	-36.3322	17.7449	-13.7193	11.9326	-14.9559	6.42479	-7.21453
52	2508.33	2506.13	3410.06	2596.97	3369.98	2548.03	3804.91	2597.21	3827.47	2535.42	3584.18	2547.28	3335.57	2514.44		52	0.0850301	-0.525402	13.5806	-42.2899	7.19967	-6.2847	16.7599	-45.7594	16.5892	-19.1901	12.654	-18.8389	6.70566	-8.89887
52.5	2508.16	2506.4	3402.18	2620.36	3364.88	2552.02	3796.85	2622.66	3819.43	2546.52	3577.84	2557.78	3332.08	2519.35		52.5	0.437747	-0.802046	17.6282	-51.412	13.4137	-9.61478	15.4114	-55.8567	15.6904	-25.0984	12.5754	-23.4636	6.87787	-10.8287
53	2507.93	2506.87	3392.83	2648.63	3357.08	2557.65	3789.49	2653.36	3811.79	2560.78	3571.73	2571.07	3328.75	2525.43		53	0.507589	-0.587201	19.3619	-62.2336	16.6646	-12.7061	14.1004	-67.6314	14.8277	-32.5707	11.6831	-30.2648	6.60973	-13.7285
53.5	2507.69	2506.94	3383.14	2682.74	3348.7	2564.84	3782.7	2690.74	3804.72	2579.51	3566.16	2588.33	3325.5	2533.34		53.5	0.251397	-0.0440308	18.9725	-74.0881	16.6739	-16.4803	13.1654	-82.4106	12.9692	-42.8662	10.8423	-38.7289	6.18303	-18.3899
54	2507.61	2506.94	3373.95	2722.63	3340.52	2574.35	3776.31	2736.12	3798.78	2603.95	3560.89	2610.14	3322.56	2544.01		54	0.558544	0.232647	18.2002	-85.3442	16.24	-21.8001	12.2391	-99.2264	11.4804	-54.8093	9.98813	-49.2055	5.88717	-24.0786
54.5	2507.12	2506.69	3364.99	2767.85	3332.49	2586.72	3770.43	2790.27	3793.14	2634.65	3556.22	2637.94	3319.64	2557.64		54.5	0.945775	0.660082	17.2216	-95.2572	15.8043	-27.4822	11.477	-117.925	10.7352	-68.7184	8.69885	-62.2882	5.40841	-30.9834
55	2506.71	2506.26	3356.81	2817.46	3324.84	2601.95	3764.82	2854.22	3788.02	2673	3552.13	2672.67	3317.22	2575.41		55	0.985693	1.31006	15.6161	-102.763	14.4142	-33.7128	10.6917	-138.147	9.99	-84.7928	7.80346	-76.9668	4.35499	-40.5458
55.5	2506.13	2505.45	3349.32	2869.82	3318.02	2620.74	3759.62	2928.01	3783.06	2719.63	3548.27	2714.88	3315.21	2598.61		55.5	1.06732	1.46893	14.4167	-105.288	13.4328	-41.9861	10.7431	-155.941	9.75959	-102.058	8.01633	-91.411	3.92915	-52.7543
56	2505.63	2504.9	3342.26	2921.81	3311.27	2644.22	3753.99	3009.16	3778.08	2775.1	3544.1	2763.92	3313.2	2628.45		56	1.21581	0.793001	14.2063	-101.972	13.5258	-52.0714	11.3872	-167.276	10.887	-119.702	8.19307	-105.092	4.06518	-66.5167
56.5	2504.93	2504.64	3335.14	2970.95	3304.59	2672.94	3748.25	3094.14	3772.16	2839.11	3540.06	2819.49	3311.12	2665.49		56.5	1.31291	0.348095	13.729	-93.5399	12.7936	-62.7585	11.8213	-171.884	11.9466	-136.127	8.35559	-115.851	4.25	-82.7129
57	2504.37	2504.49	3328.59	3014.64	3298.48	2707.11	3742.17	3179.59	3766.17	2910.59	3535.63	2878.99	3308.91	2711.38		57	0.966297	0.368744	12.7236	-80.7586	12.0467	-74.5529	12.1958	-167.83	12.6214	-148.544	9.41911	-121.718	4.74583	-100.588
57.5	2503.93	2504.28	3322.3	3051.21	3292.42	2747.38	3736	3260.19	3759.47	2986.73	3530.66	2940.27	3306.33	2765.78		57.5	0.908052	0.24283	12.7132	-64.8553	12.3428	-85.715	13.1858	-152.247	13.8573	-155.409	10.407	-121.828	5.63144	-116.39
58	2503.45	2504.28	3315.91	3079.35	3286.22	2792.42	3729.1	3330.57	3752.3	3064.81	3525.38	2999.83	3303.34	2827.19		58	0.976471	-0.232603	12.3989	-48.1685	11.8786	-94.312	13.3108	-128.838	15.1317	-155.165	10.185	-115.966	6.03109	-128.63
58.5	2502.98	2504.39	3310.02	3099.51	3280.61	2841.09	3722.8	3388.46	3744.4	3140.45	3520.46	3055.27	3300.34	2893.57		58.5	0.864088	0.249359	11.0521	-32.3365	10.7876	-99.3067	12.4402	-102.431	15.8007	-145.911	10.1011	-104.14	6.166	-136.043
59	2502.59	2503.99	3304.75	3112.08	3275.28	2890.88	3716.46	3432.71	3736.39	3209.36	3515.14	3103.19	3297.18	2961.98		59	0.750195	1.03252	10.5424	-18.9511	10.9107	-99.1606	13.1544	-74.0605	17.3687	-128.183	11.0963	-87.5056	6.26229	-135.678
59.5	2502.22	2503.45	3299.27	3118.96	3269.61	2939.22	3709.5	3462.77	3726.93	3267.69	3509.42	3142.35	3294.05	3027.88		59.5	0.718204	1.08905	11.6295	-8.66482	11.6143	-92.449	14.7956	-47.03	19.6939	-104.69	11.4749	-68.2741	6.49735	-126.646
60	2501.9	2502.9	3293.18	3121.21	3263.7	2982.5	3701.68	3480.7	3716.73	3313.61	3503.61	3171.46	3290.58	3087.56		60	0.414834	1.19583	11.9459	-1.14334	11.9238	-80.7539	16.0568	-26.3867	21.5803	-78.4801	12.1805	-49.0968	7.43165	-111.265
60.5	2501.79	2502.23	3287.28	3120.6	3257.61	3019.39	3693.36	3490.16	3705.34	3346.26	3497.01	3191.76	3286.56	3138.29		60.5	0.224864	1.56197	12.49	3.26914	12.7974	-65.5808	17.9099	-12.0326	23.5664	-52.8767	14.5598	-31.872	8.68509	-90.5807
61	2501.64	2501.42	3280.49	3118.31	3250.84	3047.73	3683.65	3493.52	3693.13	3367.09	3489.01	3203.9	3281.87	3177.72		61	0.345664	1.25745	14.6391	5.38468	14.105	-48.0442	20.7612	-2.29917	25.8552	-31.184	16.9975	-18.1611	9.98895	-67.2468
61.5	2501.47	2501.01	3272.7	3115.37	3243.52	3067.54	3672.73	3493.12	3679.51	3378.31	3480.03	3210.61	3276.47	3205.73		61.5	0.235251	0.747281	16.2532	6.69801	15.3039	-31.2702	22.5661	3.43765	27.8854	-14.8932	19.1641	-8.79726	12.0375	-45.2552
62	2501.36	2500.65	3264.38	3111.71	3235.58	3079.47	3661.18	3490.59	3665.25	3382.89	3469.76	3213.25	3269.84	3223.56		62	0.423974	0.445323	16.7565	7.51522	16.0871	-17.5656	23.7583	6.02202	29.8477	-4.25651	22.1252	-2.83799	13.9972	-26.986
62.5	2501.02	2500.57	3255.87	3107.98	3227.43	3085.69	3648.94	3487.36	3649.62	3383.28	3457.97	3213.82	3262.57	3233.47		62.5	0.788239	-0.0397838	17.9843	7.44698	16.9133	-7.45337	25.2744	7.04176	32.2298	2.09504	24.6843	0.96112	15.232	-13.3945
63	2500.59	2500.61	3246.39	3104.24	3218.61	3087.51	3635.89	3483.58	3633.11	3381.31	3445.22	3212.53	3254.63	3237.74		63	1.04012	0.0737593	19.2333	7.62216	18.2571	-0.977196	26.9379	8.12194	34.0258	5.30759	26.1855	3.34238	16.4279	-4.67963
63.5	2500.03	2500.44	3236.74	3100.35	3209.19	3087.16	3622.09	3479.26	3615.72	3378.28	3431.84	3210.63	3246.12	3238.78		63.5	0.935828	0.549631	19.5854	7.83613	19.4877	2.40119	27.8991	9.12277	35.0164	6.78181	27.5222	4.72841	17.8948	0.243277
64	2499.67	2500.08	3226.73	3096.45	3199.19	3085.4	3608.02	3474.5	3598.2	3374.73	3417.82	3207.81	3236.79	3237.92		64	0.746078	0.775591	20.5509	7.68738	20.0975	4.12376	28.6664	9.63322	35.3152	6.96192	27.9864	6.21742	18.8097	2.61916
64.5	2499.27	2499.63	3216.09	3092.62	3189.02	3083.16	3593.34	3469.52	3580.48	3371.32	3403.9	3204.41	3227.29	3236.35		64.5	0.618352	1.34157	22.2549	7.77983	21.2858	5.16285	30.1664	10.8453	35.1625	7.26373	28.1157	7.73782	19.8592	3.82986
65	2499.04	2498.74	3204.49	3088.55	3177.85	3080.24	3577.91	3463.46	3563.06	3367.36	3389.64	3200.12	3216.87	3234.08		65	0.608482	1.95325	23.7898	8.75024	22.9277	6.21203	31.1843	13.5323	34.7897	8.26293	28.8119	8.99591	21.3804	5.26161
65.5	2498.65	2497.77	3192.32	3083.81	3166.21	3076.93	3562.2	3455.99	3545.56	3362.92	3375.07	3195.48	3205.9	3231.09		65.5	0.656856	1.84604	25.2333	10.1188	23.5996	7.5197	31.8262	16.0442	35.3593	10.2245	29.6168	9.71909	23.0234	6.72884
66	2498.36	2496.92	3179.3	3078.42	3154.28	3072.81	3545.98	3447.41	3527.64	3357.1	3360.04	3190.3	3193.92	3227.36		66	0.825244	1.61534	26.3934	11.4299	24.156	8.21406	33.2777	18.6297	36.3156	12.3186	30.2508	11.2232	24.1733	8.08847
66.5	2497.8	2496.14	3166.02	3072.37	3142.02	3068.78	3528.88	3437.39	3509.26	3350.58	3344.82	3184.23	3181.8	3222.93		66.5	1.1294	1.60223	26.9291	12.8675	25.0923	8.41013	35.1142	21.1002	37.1146	14.4854	30.9084	12.9233	24.797	9.9458
67	2497.22	2495.37	3152.47	3065.59	3129.28	3064.34	3511.03	3426.46	3490.55	3342.57	3329.14	3177.44	3169.16	3217.39		67	1.56305	1.13739	26.8639	14.0412	25.32	9.08194	35.5304	22.4634	37.7665	17.1383	31.5538	14.1629	25.2771	11.9719
67.5	2496.27	2494.97	3139.22	3058.35	3116.78	3059.69	3493.32	3414.96	3471.53	3333.54	3313.31	3170.09	3156.6	3210.98		67.5	1.79528	0.919359	26.3673	15.0928	24.9903	9.71271	36.332	23.7124	38.3363	19.0485	31.8389	15.1954	25.2425	13.8551
68	2495.49	2494.44	3126.11	3050.52	3104.28	3054.59	3474.69	3402.74	3452.36	3323.65	3297.35	3162.21	3143.96	3203.53		68	1.46497	0.815959	25.7853	16.0306	24.8359	10.5246	37.3318	25.0269	37.7497	19.9386	31.7569	16.4438	24.8975	15.8207
68.5	2494.76	2494.18	3113.38	3042.32	3091.98	3049.03	3456.16	3389.97	3433.81	3313.54	3281.54	3153.61	3131.66	3195.21		68.5	1.58081	0.517856	25.636	16.9155	24.3987	12.3401	37.0213	25.9584	37.0027	21.356	31.8666	17.9982	24.9215	17.4477
69	2493.9	2493.92	3100.45	3033.55	3079.91	3042.2	3437.68	3376.7	3415.31	3302.2	3265.5	3144.24	3119	3186.15		69	1.78994	0.187386	25.6645	18.182	23.7894	14.4784	36.6868	27.5274	36.6632	23.581	31.9136	19.3461	25.2852	18.5123
69.5	2493.05	2493.98	3087.69	3024.13	3068.16	3034.64	3419.34	3362.39	3397.1	3290.09	3249.71	3134.29	3106.42	3176.67		69.5	1.37434	-0.0736304	25.8464	19.5593	23.4394	15.9659	37.3969	29.5511	36.5842	24.71	31.2844	20.471	25.1919	19.8535
70	2492.52	2493.96	3074.58	3014.06	3056.43	3026.29	3400.31	3347.31	3378.68	3277.48	3234.19	3123.76	3093.77	3166.34		70	0.980785	-0.138678	26.2282	20.4201	23.2643	17.1739	37.8332	30.3563	36.7943	26.0142	30.9338	21.7428	25.4166	20.9498
70.5	2491.99	2494.04	3061.52	3003.73	3044.82	3017.55	3381.58	3332.1	3360.26	3264.03	3218.74	3112.59	3081	3155.79		70.5	1.25326	0.335531	26.2102	21.1938	23.6423	17.789	37.6711	30.8452	37.3912	27.7481	30.8843	22.8761	25.6999	21.4489
71	2491.31	2493.61	3048.43	2992.9	3032.76	3008.56	3362.56	3316.51	3341.29	3249.86	3203.34	3101.06	3068.16	3144.81		71	1.13871	0.864736	25.7205	21.8467	24.2482	18.0246	38.2217	31.1308	37.8771	28.4887	30.4446	22.6807	25.2687	22.5757
71.5	2490.87	2493.19	3035.78	2981.99	3020.61	2999.5	3343.37	3301.06	3322.38	3235.64	3188.25	3089.94	3055.73	3133.14		71.5	0.858309	1.26358	25.4935	21.6852	24.5226	18.6008	38.7632	30.6972	38.4288	28.5627	30.4357	22.3796	24.8439	24.3364
72	2490.39	2492.35	3022.97	2971.27	3008.29	2990.02	3323.97	3285.76	3302.96	3221.27	3172.9	3078.63	3043.23	3120.59		72	1.04531	1.76889	25.1025	21.2676	24.5008	18.6854	38.0089	30.6587	38.3929	29.0931	30.5759	22.5209	25.171	25.1137
72.5	2489.81	2491.49	3010.75	2960.79	2996.19	2980.84	3305.41	3270.32	3284.15	3206.63	3157.79	3067.44	3030.65	3108.08		72.5	1.34788	1.84214	24.0826	20.4488	23.9819	18.5349	36.9258	31.2334	37.211	29.006	29.7784	22.3639	24.7643	25.5929
73	2489.11	2490.58	2998.83	2950.86	2984.4	2971.41	3286.93	3254.58	3265.75	3192.33	3143.11	3056.22	3018.5	3094.95		73	1.1524	1.32683	23.5098	19.2552	22.7301	19.0381	36.7915	31.3044	36.0458	28.359	29.0796	22.5033	24.0311	26.6313
73.5	2488.69	2490.14	2987.17	2941.42	2973.42	2961.86	3268.63	3239	3248	3178.19	3128.64	3044.88	3006.47	3081.52		73.5	0.672019	1.02548	23.452	18.9353	21.835	19.1057	36.4533	31.5223	35.704	28.3528	28.8847	23.0652	24.4929	27.0845
74	2488.38	2489.48	2975.42	2931.88	2962.49	2952.4	3250.53	3223.03	3230.08	3163.93	3114.2	3033.15	2994.02	3067.95		74	0.632203	1.29169	22.958	18.765	21.4394	18.4023	35.5719	32.053	34.9461	28.6647	28.8162	23.6728	24.828	26.8089
74.5	2488.03	2488.86	2964.2	2922.62	2951.91	2943.36	3232.92	3207.05	3213.03	3149.54	3099.77	3021.23	2981.76	3054.64		74.5	0.839167	1.34992	22.5112	18.7741	21.4498	18.5744	35.7983	31.8492	34.2493	28.7955	29.1149	24.1327	24.1684	27.2236
75	2487.59	2488.14	2952.79	2912.99	2940.96	2933.81	3214.66	3191.26	3195.66	3135.09	3085.05	3009.05	2969.77	3040.74		75	0.599127	1.32835	22.9833	19.7047	21.9973	18.8493	36.5965	31.0118	34.9806	29.2545	29.6822	24.374	24.2799	27.5527
75.5	2487.39	2487.5	2941.2	2902.94	2929.88	2924.57	3196.46	3175.96	3178.08	3120.26	3070.13	2996.9	2957.45	3027.17		75.5	0.640013	1.59428	23.5308	20.3822	22.7263	18.5275	36.2123	30.8054	35.4149	29.9317	29.9229	24.2605	24.6826	27.2096
76	2486.86	2486.58	2929.32	2892.72	2918.26	2915.21	3178.44	3160.37	3160.35	3105.23	3055.18	2984.74	2945.22	3013.51		76	1.42777	1.62221	23.6111	20.2061	23.3229	18.8021	35.972	31.263	34.9727	30.1442	29.8281	24.6858	23.9077	27.1067
76.5	2485.99	2485.94	2917.59	2882.7	2906.63	2905.73	3160.44	3144.75	3143.07	3090.2	3040.39	2972.29	2933.51	3000.07		76.5	1.95125	1.18472	23.7108	20.4399	23.4355	19.3226	36.1841	31.2008	34.9476	29.7698	29.0929	24.449	23.4281	26.9858
77	2485	2485.37	2905.58	2872.3	2894.89	2895.93	3142.32	3129.18	3125.42	3075.47	3026.09	2960.33	2921.7	2986.58		77	1.69979	0.963459	24.1367	20.5069	23.0987	19.4	35.9285	31.0977	34.9471	29.3734	28.3588	23.8701	23.7701	26.369
77.5	2484.25	2484.94	2893.55	2862.27	2883.59	2886.28	3124.58	3113.62	3108.28	3060.84	3011.93	2948.31	2909.8	2973.66		77.5	1.86127	0.955628	23.8168	19.919	22.4169	19.9216	35.0779	31.3183	33.6235	28.8597	28.4076	24.2228	23.5416	26.1354
78	2483.11	2484.39	2881.81	2852.28	2872.51	2875.99	3107.14	3097.9	3091.72	3046.62	2997.69	2936.12	2898.19	2960.43		78	2.32444	1.14895	23.177	20.2394	21.5571	20.6012	35.0726	31.3035	32.967	28.2449	28.2913	24.4445	23.0681	26.1003
78.5	2482.01	2483.78	2870.33	2842	2862.05	2865.76	3089.53	3082.41	3075.24	3032.58	2983.64	2923.97	2886.68	2947.63		78.5	2.10462	1.46056	22.9268	20.7782	20.492	20.6393	34.9141	30.4872	32.8141	27.7731	28.1444	23.8119	23.1081	25.4644
79	2481.04	2482.95	2858.89	2831.58	2851.95	2855.33	3072.31	3067.36	3058.93	3018.82	2969.47	2912.25	2875.1	2934.94		79	1.63161	1.54765	22.6036	20.674	19.9407	20.9574	34.1608	30.117	32.334	27.53	28.6371	23.6929	22.9127	25.0204
79.5	2480.33	2482.25	2847.77	2821.33	2842.08	2844.83	3055.36	3052.25	3042.84	3005.02	2955.09	2900.24	2863.79	2922.58		79.5	1.64768	1.52036	21.8784	20.5152	19.4998	21.0952	33.4833	30.0499	32.3398	27.4877	28.4342	23.915	22.49	24.8311
80	2479.42	2481.42	2836.93	2811.02	2832.37	2834.32	3038.75	3037.31	3026.5	2991.34	2941.16	2888.46	2852.59	2910.13		80	1.42854	1.689	21.7954	20.7608	19.5712	20.6371	33.4705	29.8848	33.0692	27.3097	27.291	23.1845	22.3068	24.4933
80.5	2478.92	2480.62	2825.95	2800.67	2822.42	2824.19	3021.97	3022.34	3009.86	2977.69	2927.75	2877.08	2841.5	2898.09		80.5	0.978473	1.38461	21.8044	20.2908	20.3485	20.2332	32.8207	29.9782	33.1853	27.2419	26.6558	22.3472	21.983	24.0162
81	2478.37	2480.06	2815.15	2790.81	2812.05	2814.07	3006	3007.34	2993.46	2964.05	2914.51	2866.04	2830.6	2886.05		81	1.06773	0.904829	21.5966	19.2397	20.8648	20.0372	31.577	30.0441	32.2738	27.517	26.0795	22.0765	21.7147	24.0526
81.5	2477.84	2479.67	2804.34	2781.35	2801.61	2804.25	2990.33	2992.36	2977.61	2950.14	2901.77	2855.01	2819.77	2874.04		81.5	1.21169	0.791613	21.5498	18.8182	20.9087	19.0258	30.873	29.6479	31.2948	28.0638	24.6823	21.6419	21.6311	24.0822
82	2477.15	2479.24	2793.62	2771.96	2791.16	2795.03	2975.1	2977.73	2962.19	2936.04	2889.73	2844.4	2809.03	2862.02		82	1.33971	0.833386	21.4212	18.6221	21.0027	18.1769	30.4146	29.0586	30.1695	28.1736	23.9774	21.1536	21.0908	23.6711
82.5	2476.44	2478.83	2782.99	2762.77	2780.73	2786.02	2959.99	2963.31	2947.48	2922	2877.65	2833.78	2798.72	2850.37		82.5	1.91914	0.819507	20.8135	18.1163	20.3	17.8113	29.2796	28.3973	28.7839	28.1596	24.2923	21.2501	20.2504	23.236
83	2475.24	2478.39	2772.85	2753.85	2770.96	2777.24	2945.78	2949.34	2933.4	2907.94	2865.48	2823.13	2788.72	2838.72		83	2.47915	1.04094	19.9169	17.5318	18.8465	17.1773	28.4181	27.6951	27.383	27.7624	24.1828	21.4593	19.9269	23.341
83.5	2474.03	2477.76	2763.08	2745.19	2761.82	2768.82	2931.43	2935.62	2919.98	2894.32	2853.49	2812.4	2778.79	2827.06		83.5	2.50586	1.48336	18.9627	17.3412	17.9402	16.6657	28.7208	26.9636	26.7776	26.8028	23.9102	21.0683	19.6331	23.1495
84	2472.72	2476.91	2753.86	2736.52	2752.96	2760.52	2917.1	2922.35	2906.52	2881.19	2841.52	2802.09	2769.18	2815.6		84	2.69404	1.85517	18.2411	17.037	17.4481	16.6347	28.5942	26.3754	26.8435	25.4906	24.0959	20.5478	18.5757	22.7477
84.5	2471.36	2475.92	2744.85	2728.17	2744.36	2752.23	2902.92	2909.19	2893.12	2868.81	2829.49	2791.85	2760.18	2804.28		84.5	2.7354	2.15097	17.3936	16.6275	16.9002	16.2255	27.8457	26.2042	26.9317	24.3297	23.643	20.0651	17.7709	22.658
85	2470.01	2474.79	2736.45	2719.93	2735.99	2744.31	2889.26	2896.13	2879.6	2856.79	2818.03	2782.05	2751.31	2792.97		85	2.59111	2.28448	16.6067	15.8405	16.8239	15.693	27.1174	26.115	26.9503	23.6745	22.0945	19.3887	17.7278	22.4256
85.5	2468.77	2473.68	2728.15	2712.27	2727.51	2736.48	2875.78	2883.1	2866.17	2845.06	2807.36	2772.42	2742.48	2781.97		85.5	2.40975	2.15779	16.5234	15.5413	16.9289	15.5989	26.6084	25.7143	26.9748	23.5378	20.8887	18.9996	17.419	21.2847
86	2467.62	2472.66	2719.91	2704.34	2719.1	2728.72	2862.69	2870.38	2852.63	2833.22	2797.07	2762.98	2733.94	2771.67		86	2.15304	1.81371	16.538	15.639	16.8145	15.26	25.7561	25.6266	27.0387	23.5982	20.1724	19.0478	16.6536	20.3191
86.5	2466.62	2471.83	2711.67	2696.68	2710.74	2721.17	2849.96	2857.49	2839.22	2821.51	2787.13	2753.35	2725.74	2761.59		86.5	1.89134	1.74485	16.0397	15.2585	16.4233	15.302	25.2972	25.4324	26.4938	23.1887	19.7212	19.2588	16.5893	19.8868
87	2465.71	2470.89	2703.83	2689.05	2702.7	2713.31	2837.27	2844.98	2826.19	2810.04	2777.25	2743.72	2717.32	2751.79		87	1.79795	1.82263	15.9037	15.0684	15.8677	16.2442	25.6628	24.9801	25.5197	22.7824	19.8759	19.4981	16.7121	19.3264
87.5	2464.86	2470.03	2695.74	2681.52	2694.87	2704.99	2824.22	2832.46	2813.65	2798.71	2767.19	2733.87	2709.09	2742.23		87.5	1.41625	1.63262	16.0362	15.6344	15.3034	16.5918	26.5911	24.955	24.889	22.4853	20.4737	19.6104	16.3154	18.9307
88	2464.31	2469.21	2687.86	2673.44	2687.35	2696.79	2810.78	2820.04	2801.21	2787.53	2756.77	2724.18	2700.96	2732.77		88	0.843922	1.79671	15.6278	16.0503	15.0741	16.4537	26.7334	24.7669	24.947	22.3542	21.1435	19.2366	16.3296	19.1677
88.5	2463.91	2468.19	2680.12	2665.55	2679.78	2688.54	2797.59	2807.72	2788.74	2776.35	2746.12	2714.66	2692.75	2723.07		88.5	1.06451	2.36127	15.1933	15.8114	14.9047	16.4778	26.2356	24.3563	24.7357	22.297	21.3029	18.7115	16.3614	19.3264
89	2463.21	2466.92	2672.64	2657.63	2672.44	2680.44	2784.58	2795.66	2776.55	2765.21	2735.53	2705.43	2684.63	2713.52		89	1.43339	2.35948	14.9221	15.6421	14.7858	15.5992	25.7141	24.2327	23.9445	22.3797	21.0361	18.5534	16.1992	18.9218
89.5	2462.51	2465.84	2665.18	2649.96	2665.01	2673.03	2772.03	2783.53	2764.76	2753.95	2725.11	2696.18	2676.56	2704.15		89.5	1.49728	2.23687	14.7806	15.1147	14.5879	14.0318	24.0621	23.8442	23.5251	22.6213	20.6151	17.7839	16.0227	18.5961
90	2461.69	2464.63	2657.91	2642.59	2657.89	2666.34	2760.62	2771.88	2753.08	2742.64	2714.93	2687.67	2668.63	2694.92		90	1.87814	2.55904	14.2608	14.1634	14.1129	13.0695	21.6394	22.9147	22.7715	22.5976	20.1886	16.7679	15.7525	18.2664
90.5	2460.67	2463.3	2650.93	2635.87	2650.9	2659.95	2750.26	2760.58	2742.14	2731.51	2704.98	2679.3	2660.92	2685.87		90.5	2.04451	2.73652	13.7427	12.61	13.7052	12.1714	20.3401	22.2652	20.8523	21.4065	19.302	16.6941	14.5802	18.0391
91	2459.73	2461.96	2644.17	2629.9	2644.23	2654.16	2740.23	2749.61	2732.21	2721.27	2695.65	2671	2653.99	2676.93		91	1.5866	2.39237	13.1448	11.6868	12.931	11.2383	19.2987	21.6944	19.0739	19.9539	18.3472	16.438	13.92	17.4418
91.5	2459.09	2460.9	2637.77	2624.13	2637.97	2648.63	2730.95	2738.92	2722.93	2711.46	2686.67	2662.93	2646.95	2668.43		91.5	1.06801	2.16543	12.737	11.1624	12.019	10.9024	18.1563	20.903	18.3916	19.3173	17.1655	15.5883	13.5828	16.9358
92	2458.6	2459.72	2631.48	2618.75	2632.1	2643.21	2721.94	2728.71	2713.8	2701.97	2678.48	2655.36	2640.44	2660.04		92	0.958302	2.54508	11.9305	10.3434	11.9769	10.8432	18.0183	20.1003	17.6886	18.4906	15.9863	15.2312	12.9542	16.1664
92.5	2458.09	2458.37	2625.83	2613.68	2625.98	2637.76	2712.87	2718.8	2705.21	2693.02	2670.62	2647.7	2633.95	2652.34		92.5	1.03425	2.66427	11.1411	10.3174	12.0383	10.92	18.2326	19.4206	17.0098	17.2179	15.2964	14.9515	12.7002	14.7881
93	2457.47	2457.04	2620.28	2608.34	2620.14	2632.25	2703.74	2709.31	2696.64	2684.66	2663.17	2640.51	2627.68	2645.23		93	1.73101	2.90167	10.9084	10.7974	11.5108	11.2275	18.1223	18.6014	17.5219	16.7697	14.5023	13.7997	12.8488	13.4498
93.5	2456.26	2455.48	2614.97	2602.74	2614.5	2626.46	2694.74	2700.23	2687.7	2676.27	2655.97	2633.85	2621.12	2638.73		93.5	3.16807	3.11039	10.1814	12.3008	10.7391	12.0427	18.1089	17.5586	17.8527	16.0439	14.7906	13.1336	12.8608	13.3827
94	2454.37	2453.94	2610.07	2596.08	2609.36	2620.23	2685.62	2691.7	2678.85	2668.65	2648.33	2627.33	2614.85	2631.85		94	3.89905	3.36552	9.82424	13.0904	10.5169	12.4946	18.2388	16.9811	17.7567	15.1662	15.1658	12.7216	12.598	12.9148
94.5	2452.26	2452.23	2605.23	2589.35	2604.17	2613.89	2676.56	2683.27	2669.98	2661.19	2640.65	2621.08	2608.48	2625.6		94.5	6.13709	2.83933	9.39785	17.9358	9.40153	14.8286	19.4016	17.4321	18.8474	14.6418	18.2208	13.5927	13.7384	15.4232
95	2448.84	2451.29	2601.31	2579.75	2600.56	2606.63	2667.68	2675.54	2661.43	2655.01	2631.62	2614.75	2602.18	2617.65		95	3.64125	0.810952	3.7699	10.0826	3.34203	7.41291	8.84217	7.61831	8.50039	5.97026	9.25748	6.35287	6.28707	8.2339

## Sheet: Exp 5
Experiment 5		2039 BiP NBD
		2532 Hsp70 NBD
RFU		2532 Hsc70 NBD														Derivative
Temperature	A1	A2	A3	A4	A5	A6	A7	A8	A9	A10	A11	A12	B1	B2			A1	A2	A3	A4	A5	A6	A7	A8	A9	A10	A11	A12	B1	B2
	Mg	Ca	2039_Mg	2039_MgADP	2039_Ca	2039_CaADP	2532_Mg	2532_MgADP	2532_Ca	2532_CaADP	2533_Mg	2533_MgADP	2533_Ca	2533_CaADP		Temperature	Mg	Ca	2039_Mg	2039_MgADP	2039_Ca	2039_CaADP	2532_Mg	2532_MgADP	2532_Ca	2532_CaADP	2533_Mg	2533_MgADP	2533_Ca	2533_CaADP			2039_Mg	2039_MgADP	2039_Ca	2039_CaADP	2532_Mg	2532_MgADP	2532_Ca	2532_CaADP	2533_Mg	2533_MgADP	2533_Ca	2533_CaADP
20	2705.15	2702.91	2743.43	2738.1	2756.71	2776.67	2773.26	2763.87	2805.43	2744.11	2759.13	2740.94	2734.17	2715.41		20	8.62577	8.05442	8.58846	9.19342	8.3639	9.23306	7.96728	9.01199	10.3006	8.46171	9.20256	8.18599	7.62044	7.94346		Min	-118.728	-92.4261	-128.388	-73.8911	-201.059	-142.423	-212.956	-140.154	-153.918	-121.321	-153.893	-124.834
20.5	2696.52	2694.85	2734.84	2728.91	2748.34	2767.44	2765.29	2754.85	2795.13	2735.65	2749.93	2732.75	2726.55	2707.47		20.5	18.6892	17.4512	18.6083	19.9191	18.1218	20.005	17.2624	19.526	22.318	18.3337	19.9389	17.7363	16.511	17.2108		Temp	47.5	55.5	47.5	59	44	56.5	43.5	58	45.5	57.5	45.5	58.5
21	2687.89	2686.8	2726.26	2719.72	2739.98	2758.2	2757.32	2745.84	2784.83	2727.19	2740.72	2724.57	2718.92	2699.52		21	17.2515	16.1088	17.1769	18.3868	16.7278	18.4661	15.9346	18.024	20.6012	16.9234	18.4051	16.372	15.2409	15.8869
21.5	2679.27	2678.74	2717.67	2710.52	2731.61	2748.97	2749.35	2736.83	2774.53	2718.73	2731.52	2716.38	2711.3	2691.58		21.5	17.2515	16.1088	17.1769	18.3868	16.7278	18.4661	15.9346	18.024	20.6012	16.9234	18.4051	16.372	15.2409	15.8869
22	2670.64	2670.69	2709.08	2701.33	2723.25	2739.74	2741.39	2727.82	2764.23	2710.27	2722.32	2708.2	2703.68	2683.64		22	17.2515	16.1088	17.1769	18.3868	16.7278	18.4661	15.9346	18.024	20.6012	16.9234	18.4051	16.372	15.2409	15.8869
22.5	2662.02	2662.63	2700.49	2692.14	2714.89	2730.5	2733.42	2718.81	2753.93	2701.81	2713.12	2700.01	2696.06	2675.69		22.5	17.3923	16.1537	17.1842	18.4924	16.8179	18.5836	15.916	18.0711	20.6885	17.0287	18.6183	16.3737	15.3308	15.9795
23	2653.39	2654.58	2691.9	2682.94	2706.52	2721.27	2725.45	2709.79	2743.62	2693.34	2703.91	2691.82	2688.44	2667.75		23	16.4125	15.9653	17.2275	17.8876	16.2745	17.8338	16.0464	17.8415	20.3018	16.2883	17.1968	16.364	14.7388	15.4554
23.5	2645.61	2646.79	2683.36	2674.38	2698.7	2712.74	2717.37	2701.06	2733.85	2685.51	2695.99	2683.65	2681.36	2660.36		23.5	15.5629	14.8484	16.5904	16.3281	15.1154	16.6712	16.2759	16.9436	18.2402	15.6499	15.298	16.4255	13.9277	13.9844
24	2637.86	2639.76	2675.38	2666.63	2691.4	2704.65	2709.3	2692.93	2725.41	2677.66	2688.49	2675.48	2674.51	2653.72		24	14.5506	13.5548	15.5738	14.7083	13.9972	15.2715	15.6478	15.4776	16.1273	15.2716	14.4379	15.8742	13.2072	12.964
24.5	2631.15	2633.2	2667.84	2659.59	2684.61	2697.56	2701.84	2685.6	2717.69	2670.27	2681.52	2667.84	2668.15	2647.35		24.5	12.7021	12.5639	14.2834	13.7565	13.6436	13.009	14.2724	13.9849	14.3003	14.6362	13.7255	14.8174	12.4275	12.3574
25	2625.01	2627.18	2661.17	2652.8	2677.79	2691.48	2695.04	2678.92	2711.1	2663	2674.74	2660.64	2661.98	2641.43		25	12.1002	11.7317	12.3646	13.2633	13.0288	12.0112	12.8635	12.6839	12.4811	14.3074	13.1716	14.1167	12.4426	11.0593
25.5	2619.02	2621.52	2655.4	2646.31	2671.67	2685.47	2688.96	2672.86	2705.11	2655.99	2668.35	2653.79	2655.71	2636.21		25.5	11.6734	10.4642	10.9894	12.7667	11.648	11.5807	11.5284	11.698	11.2684	13.7705	12.5614	12.9599	12.4215	10.3946
26	2613.44	2616.69	2650.05	2640.04	2666.07	2679.94	2683.49	2667.18	2699.69	2649.28	2662.21	2647.76	2649.61	2630.99		26	10.4061	9.43856	10.5917	12.2466	10.8909	10.6867	10.2599	11.0255	10.9761	12.8281	11.6994	11.153	11.9109	10.1632
26.5	2608.6	2612.05	2644.85	2634.08	2660.77	2674.67	2678.62	2661.87	2694.07	2643.16	2656.62	2642.55	2643.76	2626.15		26.5	9.27492	8.6044	9.72088	11.6846	10.2516	10.6769	9.54039	10.0099	11.0326	11.9683	11.0486	10.0568	11.7622	9.04902
27	2604.05	2608.07	2640.32	2628.39	2655.88	2669.24	2673.88	2657.11	2688.63	2637.34	2651.12	2637.63	2637.86	2621.91		27	9.04559	7.82098	8.86347	10.8983	9.06542	10.8571	9.26107	9.32576	11.2972	10.8052	10.7631	9.41091	11.5989	8.04743
27.5	2599.62	2604.16	2635.84	2623.24	2651.63	2663.93	2669.3	2652.38	2682.8	2632.31	2645.91	2633.08	2632.22	2617.92		27.5	8.07258	7.46626	9.10812	9.50813	8.28899	9.97313	9.31957	9.82662	11.2779	9.87613	9.99322	9.00618	10.8612	8.38709
28	2595.89	2600.46	2631.18	2618.73	2647.4	2659.12	2664.44	2647.25	2677.33	2627.31	2641.04	2628.47	2626.89	2613.43		28	7.5511	7.93757	9.46697	9.17195	8.81363	10.1601	10.1067	10.3925	11.3828	10.0227	9.68571	9.55058	10.7927	9.18282
28.5	2591.71	2596.03	2626.35	2613.83	2642.65	2653.56	2659.05	2641.88	2671.3	2622.1	2635.99	2623.33	2621.21	2608.57		28.5	9.59529	9.64165	9.71628	10.4549	10.2536	11.8277	11.7167	11.5304	12.2932	11.3092	10.9962	11.3775	12.2062	10.9141
29	2586.12	2590.66	2621.24	2608.13	2636.94	2647.26	2652.54	2635.43	2664.92	2615.84	2629.9	2616.94	2614.58	2602.23		29	12.7124	12.363	11.5054	12.5706	13.0042	13.2458	14.5473	14.6519	13.8562	13.4817	13.2075	14.0912	14.1294	14.6011
29.5	2579	2583.56	2614.64	2601.16	2629.47	2640.06	2644.35	2627.08	2657.28	2608.43	2622.73	2609.14	2606.93	2593.86		29.5	15.5416	15.7016	14.6727	15.2394	16.9157	16.392	18.384	18.7155	16.5131	16.9736	15.5251	17.4056	16.9939	18.9481
30	2570.46	2574.9	2606.5	2592.79	2619.96	2630.6	2634.17	2616.78	2648.28	2598.77	2614.23	2599.5	2597.38	2583.29		30	19.3988	19.4011	18.1759	18.7006	21.2627	21.6235	22.106	22.2435	20.0653	21.2025	18.9575	21.049	21.4114	23.2311
30.5	2559.68	2564.17	2596.48	2582.59	2608.31	2618.61	2622.38	2604.91	2637.27	2587.4	2603.76	2588.19	2585.61	2570.72		30.5	22.8777	23.1409	21.6862	21.2665	24.9755	25.522	24.9755	25.4375	23.2651	24.2155	22.7224	24.1695	25.2101	27.031
31	2547.98	2551.95	2585	2571.77	2595.24	2605.41	2609.41	2591.49	2625.23	2574.81	2591.84	2575.64	2572.52	2556.53		31	23.4706	25.6427	24.0557	22.1263	27.0693	27.1245	26.5759	27.8497	25.0334	25.6079	24.1245	25.2677	26.5375	29.0791
31.5	2536.42	2538.81	2572.73	2560.59	2581.55	2591.64	2596.19	2577.43	2612.51	2562.03	2580	2563.26	2559.32	2542		31.5	22.9676	26.3485	24.3861	22.3562	27.266	28.1888	25.715	27.7986	25.1989	25.5553	23.0881	24.0544	26.5179	28.7698
32	2525.17	2525.89	2560.87	2549.58	2568.26	2577.57	2584.06	2564.03	2600.41	2549.49	2568.91	2551.67	2546.29	2528.04		32	21.6813	25.2729	23.2592	21.618	25.6804	27.0028	22.5195	25.5257	22.8927	24.1244	21.4016	22.6064	24.9539	26.9327
32.5	2515.03	2513.81	2549.77	2539.18	2556.1	2565.09	2573.84	2552.02	2589.9	2538.15	2558.83	2540.79	2534.82	2515.37		32.5	18.396	22.6222	20.3698	19.4959	22.7323	22.6146	18.463	22.6667	18.8763	21.087	18.2721	20.3837	20.2843	23.245
33	2506.91	2503.54	2540.82	2530.19	2545.76	2555.04	2565.79	2541.44	2581.74	2528.51	2550.87	2531.5	2526.23	2505.05		33	14.2842	18.1762	15.2175	16.7701	18.2776	17.9796	13.2283	19.5499	13.6771	17.4006	13.525	16.5789	14.1743	17.8271
33.5	2500.75	2495.74	2534.54	2522.46	2537.94	2547.01	2560.79	2532.67	2576.36	2520.76	2545.32	2524.2	2520.59	2497.54		33.5	10.1783	13.0357	10.3652	13.8691	13.0234	14.2292	6.77403	14.9066	7.71667	13.7052	8.79157	12.9751	8.7333	12.5068
34	2496.7	2490.43	2530.34	2516.44	2532.65	2540.83	2558.95	2526.47	2574.11	2514.79	2541.99	2518.41	2517.47	2492.4		34	6.16334	8.42879	6.38196	10.0555	8.43551	10.1581	0.930807	10.789	1.15384	10.1174	4.83145	10.3869	3.42902	8.22419
34.5	2494.38	2487.15	2528.16	2512.38	2529.38	2536.79	2559.8	2521.71	2575.2	2510.63	2540.52	2513.92	2517.11	2489.25		34.5	3.61439	4.9852	2.08097	6.42537	4.74238	6.35647	-4.49911	7.92769	-5.3422	6.51807	0.412503	6.85909	-1.70988	4.19414
35	2492.92	2485.37	2528.08	2509.88	2527.87	2534.24	2563.51	2518.55	2579.42	2508.18	2541.5	2511.55	2518.96	2488.06		35	2.02215	1.84777	-1.09129	3.79501	1.07547	4.14857	-10.476	4.78321	-11.5785	3.54326	-3.60672	3.2413	-5.36605	0.996597
35.5	2492.21	2485.15	2528.95	2508.51	2528.13	2532.49	2570.22	2516.85	2586.74	2506.94	2543.91	2510.47	2522.3	2487.99		35.5	1.29187	-0.40763	-2.0858	1.50893	-1.48781	2.91445	-16.0646	2.06902	-17.5724	1.58682	-6.03745	1.10107	-7.82295	-0.362052
36	2491.47	2485.55	2530.16	2508.27	2529.12	2531.3	2579.46	2516.25	2596.95	2506.48	2547.43	2510.26	2526.81	2488.24		36	1.74224	-0.988035	-3.23784	-0.246688	-2.34688	1.74511	-20.7416	1.04574	-23.3233	0.242513	-7.86263	0.128173	-10.5981	-0.511776
36.5	2490.52	2486.11	2532.22	2508.57	2530.47	2530.73	2591.04	2515.74	2610.04	2506.62	2551.75	2510.27	2532.91	2488.51		36.5	1.78346	-1.50134	-4.68743	-0.670779	-3.36567	0.538381	-26.0556	0.235993	-28.8442	-0.728295	-9.64546	-0.505407	-13.5441	-0.978872
37	2489.86	2487.07	2534.77	2508.87	2532.51	2530.62	2605.64	2515.98	2625.9	2507.1	2557.04	2510.71	2540.3	2489.17		37	0.423193	-2.32859	-5.49398	-0.726885	-4.63623	0.424629	-32.2243	-0.502648	-35.0107	-0.930331	-11.0376	-0.775101	-16.0372	-1.10359
37.5	2490.06	2488.31	2537.77	2509.32	2535.03	2530.26	2623.3	2516.15	2645.25	2507.45	2562.9	2510.96	2548.97	2489.54		37.5	-0.477994	-2.14806	-6.74306	-1.03805	-5.21442	0.612937	-38.4107	-0.416081	-42.405	-0.439361	-13.237	-0.510429	-18.6881	-0.610884
38	2490.33	2489.18	2541.61	2509.86	2537.73	2530.11	2644.17	2516.44	2668.51	2507.59	2570.47	2511.17	2559.06	2489.84		38	-1.28967	-1.69847	-8.72626	-0.980629	-5.77541	-0.100125	-45.263	-0.751476	-51.1068	-0.499943	-16.7772	0.177928	-21.8858	-0.643487
38.5	2491.4	2490.13	2546.45	2510.26	2540.94	2530.32	2668.82	2516.93	2696.56	2507.94	2579.7	2510.88	2570.88	2490.25		38.5	-2.64064	-2.32893	-10.237	-0.601151	-7.38097	-0.491165	-53.7783	-1.36554	-61.0361	-0.489036	-20.1191	0.0514453	-25.0691	-1.19543
39	2492.81	2491.43	2551.83	2510.51	2545.15	2530.5	2698.17	2517.74	2729.74	2507.99	2590.74	2511.17	2584.21	2491.02		39	-2.83993	-2.30452	-11.6009	-0.630203	-9.15175	-0.115798	-63.7837	-1.40604	-72.1216	0.349793	-24.4778	-0.532434	-28.673	-1.57142
39.5	2494.09	2492.36	2558.14	2510.92	2550.13	2530.49	2732.69	2518.3	2768.83	2507.71	2604.37	2511.28	2599.74	2491.81		39.5	-1.95568	-1.72791	-13.6725	-0.878434	-11.0929	-0.186756	-74.0765	-1.20329	-84.1145	0.259458	-30.1468	0.111961	-33.5616	-1.8751
40	2494.84	2493.22	2565.57	2511.36	2556.32	2530.73	2772.47	2518.96	2813.99	2507.82	2620.98	2511.12	2617.97	2492.86		40	-1.81644	-1.74274	-16.0719	-0.843437	-13.5762	-0.585517	-85.688	-1.28116	-96.8512	-0.609036	-36.2216	0.219227	-39.6502	-1.95297
40.5	2495.91	2494.05	2574.29	2511.77	2563.74	2531.05	2818.69	2519.52	2865.91	2508.17	2640.76	2511.18	2639.58	2493.71		40.5	-1.67363	-1.3383	-18.8916	-0.86102	-16.2727	-0.695512	-99.3346	-0.881794	-110.801	-0.21206	-43.247	-0.73119	-46.8065	-1.61431
41	2496.42	2494.51	2584.57	2512.25	2572.63	2531.44	2872.04	2519.8	2925.21	2508.06	2664.52	2511.71	2664.95	2494.53		41	-0.645841	-0.492871	-22.4186	-1.12724	-19.1338	-0.908048	-114.28	-0.185822	-127.371	-0.0341045	-52.3178	-0.44339	-55.1012	-1.74676
41.5	2496.65	2494.64	2596.84	2512.87	2582.98	2531.95	2933.31	2519.74	2993.76	2508.3	2693.22	2511.6	2694.8	2495.42		41.5	-0.462128	-0.417505	-26.7401	-1.20736	-22.6909	-1.16618	-131.292	0.31245	-147.18	-0.732734	-62.1931	0.0797907	-64.104	-1.57507
42	2496.92	2494.97	2611.42	2513.42	2595.44	2532.54	3003.77	2519.6	3072.61	2508.66	2726.71	2511.83	2729.13	2496.05		42	-0.571688	-0.644798	-31.64	-1.00834	-26.8876	-0.93704	-151.366	-0.0590193	-168.375	-0.298334	-71.773	-1.1942	-73.4415	-0.961366
42.5	2497.15	2495.23	2628.66	2513.9	2610.05	2532.86	3084.73	2519.8	3162.02	2508.59	2765.11	2512.64	2768.37	2496.47		42.5	-0.0526513	-0.363722	-37.7193	-0.984272	-32.1758	-0.512043	-171.931	-0.42213	-189.084	0.17156	-82.046	-1.23703	-83.4915	-1.09634
43	2497.01	2495.35	2649.3	2514.42	2627.84	2533.06	3175.16	2519.97	3261	2508.59	2809.02	2512.88	2812.91	2497.17		43	0.190621	-0.255555	-44.7493	-1.01184	-38.9681	-0.154437	-189.17	-0.340307	-205.935	-0.271753	-94.123	0.268378	-95.3562	-1.45109
43.5	2497.03	2495.49	2673.53	2514.93	2649.16	2533.04	3272.86	2520.15	3366.36	2508.8	2859.45	2512.56	2864.04	2497.81		43.5	-0.104823	-0.220783	-52.4941	-1.14274	-46.5217	0.00211148	-200.397	-0.376492	-212.956	-0.12216	-107.535	0.160851	-109.262	-0.899073
44	2497.09	2495.55	2701.94	2515.58	2674.49	2533.07	3373.84	2520.34	3471.79	2508.7	2916.71	2512.76	2922.35	2498.06		44	-0.167742	0.0028893	-61.2465	-1.42093	-54.8231	0.148236	-201.059	-0.371666	-206.383	0.189824	-121.85	-0.25424	-124.46	-0.23012
44.5	2497.19	2495.48	2734.84	2516.32	2704.13	2532.98	3471.81	2520.45	3570.64	2508.69	2981.35	2512.63	2988.39	2498.15		44.5	-0.146019	0.272502	-70.3482	-1.52073	-64.0415	-0.31812	-188.43	0.174629	-186.911	-0.149244	-136.942	0.975236	-139.224	-0.448453
45	2497.25	2495.31	2772.28	2517.08	2738.66	2533.43	3560.39	2520.18	3656.91	2508.82	3053.14	2511.96	3060.97	2498.5		45	-0.278923	0.319946	-79.158	-1.46296	-73.8598	-1.11017	-164.143	0.651524	-156.296	-0.235645	-149.135	0.758617	-150.444	-0.539302
45.5	2497.44	2495.22	2814.15	2517.81	2778.23	2534.02	3634.67	2519.91	3725.79	2508.89	3129.31	2512.06	3137.59	2498.69		45.5	-0.204148	-0.0444242	-89.072	-1.60282	-85.2937	-1.3371	-132.058	0.34822	-118.525	0.00281932	-153.918	-0.827685	-153.893	-0.586832
46	2497.44	2495.35	2861.45	2518.7	2824.19	2534.75	3691.82	2519.88	3775.25	2508.89	3205.57	2512.69	3213.26	2499.15		46	-0.0470081	-0.333805	-99.8752	-1.83657	-98.4168	-1.52297	-96.1094	-0.180551	-79.8298	-0.365609	-149.499	-1.4958	-147.394	-1.11282
46.5	2497.47	2495.52	2913.78	2519.65	2876.58	2535.5	3730.89	2520.15	3806.23	2509.29	3277.21	2513.49	3283.42	2499.83		46.5	0.286576	-0.343646	-108.998	-1.98757	-111.065	-1.45245	-60.7713	-1.12544	-45.0616	-1.01376	-135.109	-1.67061	-131.184	-1.8882
47	2497.21	2495.7	2970.05	2520.81	2934.91	2536.19	3753.48	2521.02	3821.39	2509.82	3339.36	2514.47	3343.2	2500.97		47	0.167394	-0.49778	-115.843	-3.01295	-121.777	-1.28682	-31.2485	-2.13399	-17.0928	-0.961046	-112.587	-2.80844	-107.149	-2.1523
47.5	2497.31	2496.02	3028.92	2522.75	2997.65	2536.78	3763.31	2522.31	3824.57	2510.27	3389.05	2516.26	3389.97	2501.91		47.5	0.028775	-0.768339	-118.728	-4.61629	-128.388	-1.09875	-9.13996	-3.34246	3.15206	-1.06463	-85.4133	-3.61937	-79.4813	-1.94414
48	2497.15	2496.4	3087.57	2525.41	3062.09	2537.26	3763.71	2524.38	3819.43	2510.97	3424.72	2518.01	3422.77	2502.9		48	0.188319	-0.407988	-113.929	-5.97361	-127.377	-0.683444	6.42946	-4.70914	16.0615	-1.79411	-57.9342	-3.80101	-52.574	-1.58806
48.5	2497.17	2496.44	3141.6	2528.76	3123.69	2537.47	3757.94	2527.01	3809.49	2512.04	3447.57	2520.07	3443.1	2503.54		48.5	0.0145116	-0.154265	-101.219	-7.51811	-118.002	-0.167837	15.4695	-5.83628	23.0161	-2.29302	-34.3076	-4.0399	-29.24	-1.50498
49	2497.2	2496.6	3187.92	2533.02	3179	2537.58	3749.13	2530.32	3797.11	2513.24	3459.92	2522.08	3452.85	2504.47		49	-0.693108	-0.338259	-83.3704	-9.74344	-101.981	-0.929689	18.9449	-7.61721	25.8271	-2.537	-16.4429	-4.53281	-11.0657	-1.91643
49.5	2497.8	2496.72	3224.42	2538.53	3224.86	2538.39	3739.42	2534.76	3784.05	2514.7	3464.79	2524.65	3455.14	2505.45		49.5	-0.912291	-0.0150731	-62.0827	-12.0735	-80.8972	-1.52934	20.1582	-10.396	26.3812	-3.73168	-3.13222	-5.32618	0.965078	-2.11268
50	2498.06	2496.62	3249.9	2545.14	3259.56	2539.07	3729.2	2540.74	3770.89	2517.02	3463.85	2527.5	3452.65	2506.66		50	-0.750304	0.315968	-40.0174	-14.6006	-57.8404	-1.68488	20.1353	-13.0705	26.0239	-5.17846	5.23236	-6.56245	8.39254	-2.85305
50.5	2498.58	2496.5	3264.88	2553.3	3282.8	2540.2	3719.48	2547.98	3758.06	2519.88	3460.27	2531.41	3447.29	2508.41		50.5	-0.915456	-0.15185	-20.8738	-18.2436	-35.3962	-2.87691	18.6516	-16.5976	25.5477	-6.39641	9.03449	-9.13808	12.5898	-4.34432
51	2498.94	2496.72	3271.48	2563.57	3295.47	2541.93	3710.45	2557.67	3745.35	2523.56	3455.11	2536.74	3440.45	2511.01		51	-0.776338	-0.210332	-6.27901	-23.0026	-16.2392	-3.88948	18.0525	-22.5206	25.0875	-8.55675	11.394	-12.2696	14.4744	-5.79977
51.5	2499.3	2496.66	3271.85	2576.48	3299.77	2544.02	3701.31	2570.64	3732.96	2528.63	3449.08	2543.79	3433.06	2514.18		51.5	-0.226178	0.244323	4.1172	-28.8353	-1.71803	-4.25341	18.3532	-29.0605	24.743	-12.0444	12.7053	-16.1156	14.8571	-6.95358
52	2499.18	2496.6	3267.98	2592.57	3297.91	2546.28	3692.14	2586.84	3720.59	2535.74	3442.71	2552.97	3425.68	2518.06		52	0.145047	-0.412143	10.8027	-35.5821	8.35464	-5.2944	18.2662	-35.9459	24.5827	-16.3081	11.867	-20.671	14.8222	-8.85464
52.5	2499.2	2497.03	3261.56	2612.29	3292.06	2549.42	3683.1	2606.94	3708.5	2545.1	3437.3	2564.54	3418.3	2523.11		52.5	0.196512	-0.679938	14.347	-43.7647	14.6118	-7.03235	17.7659	-45.335	23.4692	-21.3506	10.4782	-25.662	14.4601	-11.1631
53	2498.97	2497.19	3254.02	2636.55	3283.88	2553.37	3674.34	2632.43	3697.15	2557.43	3432.11	2578.74	3411.28	2529.27		53	0.410931	-0.144015	15.466	-53.3798	17.188	-8.98407	17.6016	-56.3462	22.2801	-28.631	10.2088	-31.1169	13.7088	-13.5862
53.5	2498.82	2497.24	3246.3	2665.75	3275.19	2558.59	3665.58	2663.41	3686.2	2573.98	3427.15	2595.94	3404.64	2536.84		53.5	0.310113	-0.259456	15.4837	-63.4135	17.9001	-12.2661	16.9146	-67.7384	21.3437	-37.4503	9.35226	-38.3298	12.6924	-16.9482
54	2498.61	2497.45	3238.64	2699.94	3266.12	2565.71	3657.57	2700.54	3675.87	2595.05	3422.76	2617.44	3398.6	2546.43		54	0.682516	-0.453673	15.0013	-73.3188	17.9665	-15.8452	15.1507	-81.6094	19.8453	-47.034	8.45577	-47.9891	11.6028	-21.6408
54.5	2498.12	2497.57	3231.4	2738.93	3257.34	2574.51	3650.41	2745.37	3666.36	2621.39	3418.57	2644.23	3393.03	2558.75		54.5	1.25501	0.420168	13.8053	-82.5009	17.2825	-19.8539	13.5151	-97.9327	18.1783	-59.0324	8.60267	-59.3831	10.5432	-27.9504
55	2497.45	2497.09	3224.86	2782.07	3248.88	2585.72	3643.88	2798.4	3657.56	2654.47	3414.17	2677.07	3388.05	2574.72		55	1.07977	0.805517	12.4008	-89.5703	16.3832	-24.9124	13.1522	-113.665	17.578	-73.6543	8.58595	-72.2657	9.44368	-36.3474
55.5	2497.08	2496.87	3218.9	2827.83	3240.98	2599.53	3637.13	2858.73	3648.74	2695.15	3410.07	2716.68	3383.52	2595.47		55.5	0.556894	0.341591	11.7976	-92.4261	15.2988	-30.5368	13.5936	-127.583	17.2248	-88.5716	7.85678	-86.4736	8.8364	-46.9883
56	2496.81	2496.7	3213.03	2873.76	3233.54	2616.39	3630.31	2925.42	3640.34	2743.16	3406.27	2763.48	3379.15	2622.08		56	0.806353	0.33394	11.3783	-90.7363	14.5446	-36.9393	13.7246	-138.372	16.6464	-104.403	7.51173	-100.387	8.68386	-59.8169
56.5	2496.37	2496.51	3207.51	2917.83	3226.42	2636.72	3623.37	2996.03	3631.97	2799.52	3402.52	2816.62	3374.81	2655.64		56.5	0.253754	0.52142	10.8965	-84.6361	13.8582	-45.0974	14.1487	-142.423	16.9776	-120.469	7.37688	-111.438	8.6585	-75.0099
57	2496.59	2496.21	3202.05	2957.64	3219.67	2661.57	3616.12	3066.57	3623.27	2863.02	3398.86	2874.31	3370.48	2697.18		57	-0.649507	0.443583	11.0286	-73.7902	13.2104	-53.6916	14.9347	-138.521	17.9535	-132.518	7.38537	-118.925	8.65976	-90.7563
57.5	2496.85	2496.05	3196.48	2991.11	3213.18	2690.35	3608.51	3133.37	3614.1	2931.19	3395.06	2934.7	3366.15	2746.2		57.5	-0.215041	0.444241	11.1667	-59.7228	12.7924	-61.8978	15.2031	-127.515	18.2294	-139.534	8.00187	-121.321	8.64815	-105.272
58	2496.78	2495.7	3190.93	3017.27	3206.82	2723.31	3601.03	3193.01	3605.11	3001.47	3390.87	2994.51	3361.85	2802.04		58	0.367294	0.973198	10.9446	-45.3116	12.9107	-69.3431	14.5997	-109.76	17.9879	-140.154	8.42349	-116.708	8.56878	-117.51
58.5	2496.59	2495.13	3185.54	3036.51	3200.33	2759.21	3593.87	3242.45	3596.05	3069.9	3386.62	3050.28	3357.65	2862.89		58.5	0.0820297	1.13891	10.7378	-31.4068	12.4652	-73.779	14.2196	-87.8209	18.3301	-131.493	8.92665	-105.1	7.9453	-124.834
59	2496.66	2494.65	3180.2	3048.92	3194.38	2796.4	3586.65	3280.67	3586.82	3131.73	3381.89	3098.75	3353.88	2925.65		59	0.165829	0.667924	10.4892	-18.8216	11.8306	-73.8911	15.0101	-65.0596	18.3394	-115.214	9.90055	-88.3417	7.4834	-124.463
59.5	2496.37	2494.47	3175.04	3055.88	3188.45	2832.41	3578.8	3307.7	3577.77	3184.34	3376.77	3138.06	3350.03	2986.09		59.5	0.716253	0.162716	10.2661	-9.97026	11.611	-69.8146	16.2244	-43.4341	17.8407	-94.505	10.4238	-67.9971	7.93698	-116.28
60	2496.05	2494.46	3169.85	3059.36	3182.78	2865.55	3570.5	3324.67	3568.84	3225.73	3371.48	3166.71	3345.84	3040.87		60	0.390527	-0.141311	10.58	-4.00973	11.2643	-61.6627	16.7119	-25.302	18.423	-70.3051	10.7989	-47.4193	9.11034	-101.719
60.5	2495.99	2494.58	3164.39	3060.15	3177.2	2893.56	3562.05	3333.87	3559.22	3254.84	3365.89	3185.92	3340.95	3087.02		60.5	-0.0183968	-0.276312	11.3285	0.663209	10.7902	-50.2798	17.4796	-12.835	19.9141	-47.4816	11.8264	-29.6745	9.9413	-82.1985
61	2496	2494.68	3158.46	3059.01	3171.9	2915.6	3552.9	3338.24	3548.99	3273.91	3359.62	3197.07	3335.84	3122.72		61	0.132992	-0.0370886	12.5323	3.23346	10.931	-37.5576	19.268	-4.822	20.7052	-29.3987	13.0752	-16.2593	11.1408	-60.441
61.5	2495.89	2494.58	3151.83	3057.14	3166.17	2931.16	3542.86	3339.25	3538.47	3284.88	3352.85	3202.91	3329.72	3147.67		61.5	0.074448	0.43875	13.952	4.41512	11.7646	-25.1163	20.3961	-0.0212542	21.8036	-15.0202	13.9526	-7.37377	13.0245	-40.0859
62	2495.98	2494.25	3144.56	3054.65	3160.13	2941.03	3532.61	3338.78	3527.11	3289.66	3345.64	3205.1	3322.87	3163.48		62	-0.455875	0.845864	14.9277	5.52496	12.5154	-14.7212	20.5478	1.40789	23.5477	-5.10047	15.053	-2.65356	14.4268	-24.2089
62.5	2496.3	2493.76	3136.92	3051.7	3153.62	2946.28	3522.13	3338.07	3514.98	3290.75	3337.75	3205.97	3315.3	3172.59		62.5	-0.629542	1.10461	15.7924	6.07217	13.5045	-6.74391	22.2123	1.49471	24.8835	-0.284259	16.4785	-0.381973	15.6685	-12.7234
63	2496.53	2493.22	3128.78	3048.66	3146.59	2948.19	3510.36	3337.24	3502.33	3290.29	3329.11	3205.62	3307.04	3176.83		63	-0.251165	0.854062	16.5841	6.04862	14.7007	-1.27511	24.1903	2.14521	25.3809	2.75584	18.2831	1.30584	18.0861	-4.94273
63.5	2496.51	2492.95	3120.4	3045.65	3138.9	2947.97	3498.09	3335.89	3489.57	3288.16	3319.45	3204.75	3297.12	3178.11		63.5	0.312914	0.294733	16.8661	6.0874	16.0584	1.58641	24.8954	2.99111	26.1631	5.08589	20.1255	2.39567	21.2592	-0.759045
64	2496.23	2492.88	3111.86	3042.51	3130.58	2946.9	3485.42	3334.21	3476.13	3285.44	3309.01	3203.2	3285.93	3177.93		64	0.751759	0.0879811	17.5895	6.48802	16.9881	2.62372	25.9681	4.01855	27.2667	5.63156	21.7989	3.61792	23.2606	1.35098
64.5	2495.76	2492.81	3102.72	3039.09	3121.92	2945.47	3472.03	3331.75	3462.32	3282.52	3297.69	3201	3273.93	3176.84		64.5	1.23284	0.25515	19.0114	7.28259	17.881	3.04942	27.8598	5.98583	28.2351	6.30744	23.2776	5.87593	24.9049	3.13053
65	2495.02	2492.62	3092.89	3035.14	3112.69	2943.95	3457.67	3328.18	3447.94	3278.97	3285.77	3197.3	3261.1	3174.82		65	1.68958	0.364057	20.1069	8.71622	18.883	2.75973	28.8345	8.24791	28.8161	8.31477	24.5177	8.3352	26.2427	4.85321
65.5	2494.19	2492.44	3082.69	3030.34	3103.05	2942.69	3443.23	3323.58	3433.5	3274.22	3273.23	3192.78	3247.9	3171.98		65.5	1.26195	0.528763	20.5888	10.3281	19.8605	2.63896	29.575	9.84553	29.5067	10.1733	25.366	9.78783	26.0512	6.63068
66	2493.83	2492.05	3072.28	3024.81	3092.91	2941.24	3428.06	3318.35	3418.4	3268.88	3260.49	3187.48	3235.14	3168.16		66	0.310124	1.03076	21.3813	11.9408	20.1761	3.05381	30.6711	11.3805	30.5424	11.2676	25.6225	11.5422	25.2104	8.66715
66.5	2493.81	2491.43	3061.36	3018.44	3082.84	2939.58	3412.57	3312.18	3403.03	3262.83	3247.63	3181.2	3222.57	3163.36		66.5	0.0224456	1.4068	21.7957	13.2475	20.7539	3.84318	31.7301	13.1288	30.988	13.3332	25.7976	13.775	25.3741	10.3222
67	2493.77	2490.75	3050.59	3011.56	3072.12	2937.4	3396.4	3305.27	3387.46	3255.52	3234.64	3173.87	3209.75	3157.85		67	-0.124747	0.965779	21.3789	14.6476	21.6846	4.50624	32.2769	14.4568	31.0713	15.5744	26.397	14.7369	25.5345	11.9671
67.5	2493.91	2490.49	3039.95	3003.84	3061.2	2935.03	3380.33	3297.69	3371.89	3247.37	3221.24	3166.5	3197.03	3151.42		67.5	-0.226029	0.341096	21.2631	15.7492	22.27	5.5074	32.5573	15.9392	31.7208	16.9849	26.868	15.3794	25.6469	13.4727
68	2493.89	2490.32	3029.25	2995.88	3049.89	2931.89	3363.8	3289.21	3355.71	3238.6	3207.8	3158.33	3183.98	3144.47		68	0.538321	0.521024	21.7446	16.3832	22.5283	6.58092	33.2389	18.3706	32.6331	17.9198	27.1519	17.3437	26.7704	14.2258
68.5	2493.36	2489.99	3018.27	2987.43	3038.69	2928.53	3347.13	3279.35	3339.33	3229.41	3194.1	3149.16	3170.28	3137.22		68.5	1.27004	0.442364	21.7246	17.3558	22.8393	7.01214	33.7515	20.627	32.9487	19.3468	27.4074	19.2367	27.6932	14.8654
69	2492.66	2489.92	3007.6	2978.61	3027.16	2924.89	3330.21	3268.71	3322.78	3219.34	3180.42	3139.19	3156.43	3129.57		69	1.65511	-0.123735	21.1073	17.7115	22.4093	7.34562	32.9869	21.8654	33.23	20.1969	27.4369	20.3298	27.488	15.7759
69.5	2491.72	2490	2997.09	2969.85	3016.35	2921.12	3314.15	3257.47	3306.14	3209.3	3166.67	3128.8	3142.79	3121.41		69.5	2.05607	0.244748	21.1541	17.0626	21.456	8.20146	32.2877	23.3752	33.2797	20.3844	27.4173	21.7183	27.4724	16.8852
70	2490.68	2489.59	2986.47	2961.54	3005.66	2916.67	3297.85	3245.41	3289.59	3198.91	3152.98	3117.47	3128.93	3112.66		70	1.99473	1.31297	21.0289	16.5641	20.8917	9.14307	32.2303	24.4475	32.6278	20.9232	27.7088	23.272	27.7196	18.1307
70.5	2489.8	2488.79	2976.14	2953.27	2995.42	2912.01	3281.99	3233.2	3273.48	3188.3	3139.03	3105.7	3115.15	3103.25		70.5	1.35448	1.44979	20.3032	16.248	20.503	9.77117	31.447	24.1037	32.2297	21.9879	27.4348	23.5621	27.295	19.5865
71	2489.29	2488.13	2966.14	2945.36	2985.08	2906.82	3266.34	3221.24	3257.26	3176.88	3125.54	3093.98	3101.63	3093.08		71	1.01301	1.7294	19.7885	15.312	20.6025	11.0699	31.0975	24.4104	32.5612	23.3293	27.1887	23.3792	26.9994	21.0173
71.5	2488.78	2487.02	2956.27	2937.83	2974.75	2900.96	3250.75	3208.69	3240.9	3164.98	3111.79	3082.31	3088.11	3082.26		71.5	0.698387	2.39519	19.8772	15.3391	21.1962	12.1683	31.7797	25.471	32.9372	24.5723	27.3819	23.3821	26.9897	22.3296
72	2488.58	2485.83	2946.29	2929.89	2963.91	2894.7	3234.55	3195.82	3224.3	3152.34	3098.23	3070.64	3074.66	3070.84		72	0.440757	2.27938	19.6878	16.3448	21.5777	13.0038	32.5331	26.0141	33.5329	25.6383	27.0663	23.0636	26.7686	23.0238
72.5	2488.29	2484.78	2936.6	2921.57	2953.21	2888	3218.34	3182.7	3207.41	3139.44	3084.8	3059.26	3061.35	3059.32		72.5	0.579796	1.94507	19.3457	16.5364	21.6914	13.6035	32.3415	26.3485	33.8652	25.9463	26.217	22.6054	26.5083	23.1813
73	2488	2483.86	2926.87	2913.32	2942.2	2881.15	3202.21	3169.34	3190.56	3126.41	3071.97	3047.97	3048.14	3047.66		73	0.705574	1.88726	19.6488	17.0224	22.0849	13.7769	32.3101	27.875	33.3074	26.3186	25.7067	22.6413	26.3694	23.4509
73.5	2487.59	2482.9	2916.96	2904.48	2931.23	2874.22	3186.05	3154.93	3174.19	3113.17	3059.05	3036.57	3034.98	3035.9		73.5	0.808948	1.64992	19.8521	18.1475	21.6267	13.9505	32.0876	28.5136	32.2008	26.3848	25.4747	23.0489	26.2045	23.4015
74	2487.24	2482.18	2907.04	2895.31	2920.61	2867.18	3170.14	3140.94	3158.38	3100.07	3046.5	3024.93	3021.9	3024.25		74	0.509494	1.62366	19.8799	18.1416	20.9174	14.3358	31.7506	28.3049	30.9908	26.0633	25.1547	23.3032	26.3279	23.4348
74.5	2487.06	2481.25	2897.08	2886.43	2910.26	2859.93	3154.29	3126.61	3143.15	3087.08	3033.89	3013.23	3008.66	3012.43		74.5	0.441396	1.85583	19.8953	17.4638	20.7301	14.347	31.466	28.3243	30.0191	25.9851	24.9112	23.8246	26.3738	23.7713
75	2486.77	2480.4	2887.17	2877.75	2899.89	2852.81	3138.58	3112.62	3128.22	3074.04	3021.59	3001.09	2995.58	3000.49		75	0.542821	1.48092	19.7447	17.7208	20.4106	14.5131	31.8783	28.3906	30.0413	26.3029	24.5451	24.4191	25.9633	24.0329
75.5	2486.49	2479.78	2877.39	2868.77	2889.88	2845.32	3122.42	3098.28	3113.05	3060.87	3009.25	2988.83	2982.71	2988.46		75.5	0.783937	1.08077	19.167	17.4406	19.8097	15.4754	32.1332	27.9872	30.4744	25.8833	24.8989	24.8971	25.5651	23.7949
76	2485.98	2479.29	2867.96	2860.33	2880.04	2837.39	3106.49	3084.66	3097.75	3048.2	2996.66	2976.23	2970.02	2976.68		76	0.987839	0.940573	18.9738	16.9629	19.5467	15.925	32.1463	27.4239	30.8004	25.1489	25.5151	25.1354	25.1215	23.7154
76.5	2485.47	2478.85	2858.41	2851.68	2870.3	2829.43	3090.31	3070.84	3082.28	3035.64	2983.79	2963.73	2957.58	2964.76		76.5	1.53659	0.713658	18.8328	17.5267	19.421	16.1056	31.9925	27.0744	30.9539	24.9996	25.6372	25.1309	24.6924	23.5013
77	2484.48	2478.59	2849.14	2842.83	2860.59	2821.26	3074.58	3057.59	3066.9	3023.16	2971.01	2951.09	2945.3	2953.2		77	1.83194	0.328322	18.5578	17.7474	19.4463	16.5509	31.1933	26.6223	30.4439	25.1462	25.849	25.3033	24.4535	23.1033
77.5	2483.68	2478.46	2839.79	2833.96	2850.82	2812.95	3059.16	3044.21	3051.91	3010.49	2957.93	2938.45	2933.08	2941.62		77.5	1.73775	0.433743	18.761	17.6829	19.7737	16.5569	30.1278	26.1973	29.4001	25.2614	26.3322	25.2729	24.5515	22.9584
78	2482.73	2478.11	2830.37	2825.1	2840.88	2804.82	3044.41	3031.39	3037.48	2997.89	2944.83	2925.85	2920.78	2930.18		78	1.76123	0.898239	19.0212	18.1641	19.5968	15.6859	29.4933	25.7279	28.5111	25.348	25.6417	25.0255	24.406	23.2915
78.5	2481.93	2477.6	2820.82	2815.89	2831.24	2797.24	3029.68	3018.41	3023.37	2985.11	2932.36	2913.49	2908.74	2918.34		78.5	1.73316	1.01598	18.9081	17.9115	19.313	15.0622	28.6537	25.8501	27.8105	25.7606	24.4291	24.2445	23.7965	23.5551
79	2480.99	2477.11	2811.53	2807.25	2821.52	2789.73	3015.76	3005.52	3009.64	2972.13	2920.37	2901.55	2896.98	2906.65		79	1.79894	0.979265	18.2595	17.1109	19.4841	14.6936	27.7074	25.9787	27.3054	26.1759	23.6046	24.014	23.3627	23.6626
79.5	2480.15	2476.57	2802.55	2798.69	2811.83	2782.58	3001.89	2992.4	2996.05	2958.98	2908.76	2889.49	2885.4	2894.71		79.5	1.63291	1.3492	17.8065	17.1058	19.1042	14.0293	27.514	26.341	26.8827	26.1547	22.6476	23.7252	22.7585	23.5459
80	2479.32	2475.79	2793.72	2790.13	2802.47	2775.67	2988.28	2979.17	2982.69	2945.97	2897.65	2877.92	2874.27	2883.11		80	1.73937	1.44174	17.3987	17.1733	18.2893	13.551	26.998	26.8705	26.9495	26.2315	22.1845	22.6436	21.6477	23.4039
80.5	2478.39	2475.18	2785.14	2781.56	2793.42	2768.96	2974.94	2965.61	2969.06	2932.71	2886.48	2866.82	2863.67	2871.32		80.5	2.03605	1.14047	17.0089	16.8548	18.396	13.6601	26.03	26.7941	27.2781	26.6981	22.4368	21.7113	21.1573	23.175
81	2477.3	2474.61	2776.68	2773.21	2784.01	2762.04	2962.15	2952.44	2955.47	2919.35	2875.25	2856.08	2853.02	2860		81	2.26415	1.22084	16.7932	17.0901	19.055	13.4948	25.8599	26.2092	27.1163	26.5997	22.3014	21.8777	21.4259	22.4771
81.5	2476.17	2473.96	2768.29	2764.45	2774.51	2755.48	2949.02	2939.35	2941.97	2906.2	2864.18	2845.01	2842.29	2848.88		81.5	2.16981	1.28925	16.9971	17.453	18.4697	13.0847	26.138	26.1503	26.6965	25.8823	22.1715	21.4193	21.2351	21.5569
82	2475.15	2473.32	2759.69	2755.81	2765.53	2748.86	2936.07	2926.38	2928.68	2893.51	2853.05	2834.69	2831.8	2838.41		82	1.93307	1.30916	17.0899	17.4662	18.0384	13.4256	25.8314	25.4175	27.1493	24.9762	22.2769	20.654	20.8599	20.9273
82.5	2474.25	2472.59	2751.24	2747.03	2756.42	2742.04	2923.13	2913.99	2914.87	2881.27	2841.95	2824.2	2821.37	2827.91		82.5	1.57735	1.78799	16.9784	17.1425	18.1017	13.8451	26.0382	24.2471	27.27	23.7279	22.0156	21.1257	21.0221	20.5641
83	2473.59	2471.53	2742.78	2738.67	2747.52	2735.03	2910.01	2902.05	2901.53	2869.72	2831.04	2813.57	2810.81	2817.88		83	1.1461	2.26212	16.4015	16.7563	17.4033	14.0894	26.469	23.7144	26.4031	22.9164	21.7015	21.4786	21.0029	19.851
83.5	2473.11	2470.38	2734.84	2730.24	2739.05	2727.91	2896.77	2890.23	2888.42	2858.28	2820.22	2802.81	2800.48	2807.98		83.5	0.638267	2.33659	15.7532	16.648	16.4659	14.6974	26.0428	23.5314	26.0086	22.6198	21.6355	21.122	20.1415	19.7685
84	2472.9	2469.24	2726.96	2722.06	2730.95	2720.39	2884.02	2878.55	2875.48	2847.08	2809.39	2792.43	2790.66	2798.03		84	0.448864	2.13082	15.6892	16.2598	16.4193	14.9569	25.2721	22.9924	25.957	22.3569	21.7453	20.9476	19.3503	20.2525
84.5	2472.57	2468.3	2719.18	2714	2722.64	2713.09	2871.47	2867.16	2862.54	2835.84	2798.49	2781.82	2781.03	2787.74		84.5	0.947014	1.60963	15.4333	15.757	16.182	14.2008	24.776	23.0553	25.2912	22.7237	21.7544	21.1509	19.3641	20.6533
85	2471.94	2467.67	2711.58	2706.27	2714.76	2706.19	2859.26	2855.44	2850.25	2824.37	2787.75	2771.33	2771.36	2777.48		85	1.49348	0.851082	14.6251	15.511	15.9068	13.5262	24.1273	23.5399	24.1511	23.0701	20.7884	20.9347	18.7969	20.2447
85.5	2471.16	2467.41	2704.44	2698.52	2706.69	2699.56	2847.33	2843.68	2838.33	2812.93	2777.7	2760.92	2762.26	2767.51		85.5	1.33948	0.355403	14.7523	15.0447	16.1106	12.9201	23.5824	23.5342	23.5265	22.1386	19.9106	20.5548	18.0153	19.8634
86	2470.55	2467.24	2696.8	2691.28	2698.75	2693.32	2835.66	2831.95	2826.71	2802.24	2767.75	2750.81	2753.21	2757.64		86	1.64352	0.367043	15.1462	14.0876	15.471	11.8429	23.1648	23.2321	22.9718	21.1483	19.8931	19.9579	18.3967	19.277
86.5	2469.47	2466.99	2689.42	2684.34	2691.21	2687.62	2824.17	2820.46	2815.34	2791.69	2757.92	2740.98	2743.89	2748.25		86.5	2.30901	0.696872	14.4589	13.8493	14.9097	11.4638	22.6409	22.8208	22.5446	20.969	18.845	19.2365	18.4365	18.5568
87	2468.31	2466.47	2682.32	2677.35	2683.77	2681.72	2813	2809.13	2804.16	2781.34	2748.87	2731.58	2734.83	2739.07		87	2.39461	1.46257	13.9591	14.2199	15.0331	12.1098	22.286	22.3855	22.082	20.1659	17.9919	18.4381	17.9134	17.872
87.5	2467.08	2465.5	2675.35	2670.15	2676.29	2675.53	2801.88	2798.06	2793.21	2771.5	2739.73	2722.51	2725.86	2730.29		87.5	2.45418	2.41684	14.388	14.2494	14.2666	12.501	21.9903	22.0802	21.8966	19.4759	18.7152	17.814	18.4428	17.8348
88	2465.78	2464.11	2668	2663.06	2669.59	2669.26	2791.01	2787.01	2782.21	2761.73	2730.18	2713.69	2716.42	2721.18		88	3.18519	2.99309	14.2505	14.5932	12.7781	12.4966	21.6037	22.0963	22.081	19.8256	19.1308	17.6829	18.73	18.2463
88.5	2463.92	2462.56	2661.2	2655.52	2663.33	2662.98	2780.22	2775.95	2771.14	2751.67	2720.67	2704.72	2707.27	2712.07		88.5	3.70642	3.19065	13.3087	15.3571	12.7862	13.0371	21.6788	22.1453	22.224	20.1975	18.9723	18.3525	17.8265	18.4823
89	2462.17	2460.95	2654.61	2647.87	2656.77	2656.31	2769.34	2764.86	2760.08	2741.58	2711.15	2695.35	2698.54	2702.78		89	3.44234	3.24969	13.1003	14.8501	12.9649	12.971	21.6475	22.2491	21.7075	20.1543	19.367	18.8867	17.4956	18.1111
89.5	2460.46	2459.37	2648.1	2640.79	2650.5	2650.1	2758.6	2753.77	2749.49	2731.53	2701.38	2685.91	2689.8	2693.99		89.5	3.40749	2.8714	12.8984	13.4984	11.9301	12.2198	21.3902	21.8912	20.8378	20.0143	19.1598	18.8697	17.0438	17.5592
90	2458.75	2458.08	2641.79	2634.34	2644.77	2644.04	2747.95	2743.06	2739.24	2721.55	2692.09	2676.52	2681.59	2685.21		90	3.52196	2.48445	12.0871	12.5475	11.4752	11.9631	21.2234	20.9095	20.0787	20.0306	18.3375	18.6457	15.8578	17.1491
90.5	2456.98	2456.82	2636	2628.24	2638.92	2638.14	2737.43	2732.85	2729.48	2711.48	2683.09	2667.35	2673.9	2676.88		90.5	3.32718	2.59564	11.3629	11.5954	11.8971	11.667	20.7293	20.0752	18.8103	20.2826	17.3262	17.8193	15.0083	16.3905
91	2455.44	2455.46	2630.32	2622.73	2632.98	2632.38	2727.31	2722.94	2720.43	2701.36	2674.84	2658.76	2666.53	2668.81		91	2.91451	2.77365	11.4578	10.5638	11.4689	11.2407	19.5231	19.5433	17.5302	19.8518	15.6159	16.5755	14.4889	15.6283
91.5	2454.01	2453.98	2624.54	2617.52	2627.52	2626.82	2717.85	2713.31	2711.85	2691.7	2667.39	2650.72	2659.36	2661.16		91.5	3.00327	3.44454	11.4835	10.6534	10.4684	11.4438	18.7675	18.9291	16.9743	18.8008	14.5584	15.8353	14.2853	15.5065
92	2452.49	2452	2618.83	2612.03	2622.37	2620.96	2708.5	2703.99	2703.37	2682.47	2660.18	2642.9	2652.19	2653.26		92	2.70513	4.25367	11.5259	11.0489	10.5527	11.406	18.3238	18.5403	16.9988	18.4864	14.2318	15.2088	14.49	15.7665
92.5	2451.33	2449.83	2613.01	2606.52	2616.9	2615.47	2699.57	2694.76	2694.84	2673.21	2653.16	2635.51	2644.89	2645.47		92.5	2.21631	4.23329	11.6201	11.0811	11.1366	10.8836	17.4163	18.2685	16.9545	18.2286	13.7235	14.5377	14.4444	15.3666
93	2450.22	2447.78	2607.26	2600.98	2611.29	2610.02	2690.96	2685.79	2686.41	2664.33	2646.4	2628.35	2637.7	2637.87		93	2.09255	4.24481	11.4746	10.9162	11.2008	10.8841	17.4653	17.4889	16.9247	17.122	13.5114	13.952	14.7794	15.1921
93.5	2449.19	2445.64	2601.66	2595.65	2605.63	2604.57	2682.03	2677.36	2677.9	2655.95	2639.46	2621.52	2630.13	2630.28		93.5	2.29924	3.90762	10.3213	10.3816	11.781	10.9906	18.0146	15.9615	17.0788	17.172	14.7677	13.6878	15.0247	14.9869
94	2447.93	2443.94	2596.91	2590.6	2599.48	2599.06	2673.01	2669.77	2669.37	2647.09	2631.7	2614.65	2622.75	2622.91		94	2.2922	3.18054	9.65317	9.93315	12.4607	10.7025	17.9865	15.1282	16.9186	17.5645	15.1517	13.3632	14.7602	14.6431
94.5	2446.81	2442.52	2592.17	2585.77	2593.14	2593.77	2664.05	2662.35	2660.96	2638.32	2624.2	2608.07	2615.44	2615.7		94.5	3.2808	2.14659	8.19328	9.76554	14.5598	12.1533	19.5272	14.2936	18.356	20.0007	18.0105	14.8466	15.0878	14.9099
95	2444.94	2441.85	2589.21	2581.51	2586.12	2587.86	2654.99	2656.43	2652.41	2628.68	2615.16	2600.95	2608.76	2609.08		95	1.99484	0.535646	2.65926	4.15925	7.1334	6.02367	9.07393	5.66427	8.57117	9.77618	9.29251	7.20973	6.57157	6.52839

## Sheet: Summary
Sorce data: Figure 6D
		NBD Tm (°C)
			MgCl2					CaCl2					MgCl2 + ADP					CaCl2 + ADP
			Exp. 1	Exp. 2	Exp. 3	Exp.4	Exp. 5	Exp. 1	Exp. 2	Exp. 3	Exp.4	Exp. 5	Exp. 1	Exp. 2	Exp. 3	Exp.4	Exp. 5	Exp. 1	Exp. 2	Exp. 3	Exp.4	Exp. 5
		BiP NBD	47.5	47.5	47.5	47.5	47.5	48	48	47.5	47.5	47.5	56	56	55.5	55.5	55.5	59	59	58.5	58.5	59
		Hsp70 NBD	44	44	43.5	43.5	44	43.5	43.5	43.5	43.5	43.5	56.5	56.5	56	56.5	56.5	57.5	58	58	57.5	58
		Hsc70 NBD	45.5	46	45.5	45.5	45.5	45.5	45.5	45.5	45.5	45.5	57.5	57.5	57.5	57.5	57.5	59	59	58.5	58.5	58.5
			Mean	SD	N
	MgCl2	BiP NBD	47.5	0	5
		Hsp70 NBD	43.8	0.273861	5
		Hsc70 NBD	45.6	0.223607	5
	CaCl2	BiP NBD	47.7	0.273861	5
		Hsp70 NBD	43.5	0	5
		Hsc70 NBD	45.5	0	5
	MgCl2 + ADP	BiP NBD	55.7	0.273861	5
		Hsp70 NBD	56.4	0.223607	5
		Hsc70 NBD	57.5	0	5
	CaCl2 + ADP	BiP NBD	58.8	0.273861	5
		Hsp70 NBD	57.8	0.273861	5
		Hsc70 NBD	58.7	0.273861	5
