# Supplementary material for: Calcium depletion challenges endoplasmic reticulum proteostasis by destabilising BiP-substrate complexes
Source: eLife. 2020 Dec 9;9:e62601. doi: 10.7554/eLife.62601 (PMC7758071; doi:10.7554/eLife.62601)
Supplement: Figure 7—source data 1. [file elife-62601-fig7-data1.xlsx]

## Sheet: Sheet1
Source data: Figure 7C
1_BiP		3_BiP+SubA		6_Marker
Time (min)	A230	Time (min)	A230	Time (min)	A230
0.00625	0.493549	0.00125	0.759415	0.00458333	-0.325456
0.0129167	0.518836	0.00791667	0.870794	0.01125	-0.110611
0.0195833	0.54463	0.0145833	0.995927	0.0179167	0.111014
0.02625	0.563256	0.02125	1.11542	0.0245833	0.311933
0.0329167	0.568181	0.0279167	1.20816	0.03125	0.462294
0.0395833	0.559203	0.0345833	1.25583	0.0379167	0.540361
0.04625	0.541046	0.04125	1.25305	0.0445833	0.548929
0.0529167	0.519425	0.0479167	1.21311	0.05125	0.513002
0.0595833	0.497162	0.0545833	1.15586	0.0579167	0.457875
0.06625	0.475168	0.06125	1.09372	0.0645833	0.395849
0.0729167	0.451975	0.0679167	1.03142	0.07125	0.330783
0.0795833	0.425451	0.0745833	0.968926	0.0779167	0.263199
0.08625	0.395797	0.08125	0.906013	0.0845833	0.193201
0.0929167	0.365451	0.0879167	0.842117	0.09125	0.120297
0.0995833	0.336863	0.0945833	0.777334	0.0979167	0.0455752
0.10625	0.310428	0.10125	0.712708	0.104583	-0.0285879
0.112917	0.287279	0.107917	0.649862	0.11125	-0.100628
0.119583	0.269018	0.114583	0.590347	0.117917	-0.169776
0.12625	0.256784	0.12125	0.534669	0.124583	-0.236414
0.132917	0.250474	0.127917	0.483058	0.13125	-0.299118
0.139583	0.248723	0.134583	0.435203	0.137917	-0.357002
0.14625	0.251733	0.14125	0.392482	0.144583	-0.40967
0.152917	0.259109	0.147917	0.355683	0.15125	-0.457302
0.159583	0.269763	0.154583	0.325486	0.157917	-0.499509
0.16625	0.281289	0.16125	0.300907	0.164583	-0.535443
0.172917	0.29178	0.167917	0.281684	0.17125	-0.565939
0.179583	0.301041	0.174583	0.267901	0.177917	-0.592209
0.18625	0.309438	0.18125	0.258155	0.184583	-0.614926
0.192917	0.31732	0.187917	0.25057	0.19125	-0.634894
0.199583	0.324741	0.194583	0.242375	0.197917	-0.653915
0.20625	0.332259	0.20125	0.231884	0.204583	-0.67392
0.212917	0.340387	0.207917	0.217348	0.21125	-0.695936
0.219583	0.35008	0.214583	0.198565	0.217917	-0.720456
0.22625	0.360392	0.22125	0.175908	0.224583	-0.748038
0.232917	0.371151	0.227917	0.150092	0.23125	-0.77787
0.239583	0.382066	0.234583	0.122741	0.237917	-0.808477
0.24625	0.393972	0.24125	0.0957698	0.244583	-0.838868
0.252917	0.406623	0.247917	0.0717565	0.25125	-0.869356
0.259583	0.418991	0.254583	0.051938	0.257917	-0.899404
0.26625	0.431128	0.26125	0.0363812	0.264583	-0.927687
0.272917	0.442974	0.267917	0.0247508	0.27125	-0.953473
0.279583	0.454761	0.274583	0.0166297	0.277917	-0.976741
0.28625	0.466533	0.28125	0.012286	0.284583	-0.998698
0.292917	0.478923	0.287917	0.00953674	0.29125	-1.01887
0.299583	0.492305	0.294583	0.00551343	0.297917	-1.03757
0.30625	0.506125	0.30125	-0.00108033	0.304583	-1.05549
0.312917	0.520431	0.307917	-0.0102967	0.31125	-1.07326
0.319583	0.53522	0.314583	-0.0221133	0.317917	-1.09075
0.32625	0.550151	0.32125	-0.0370517	0.324583	-1.10656
0.332917	0.564896	0.327917	-0.0541434	0.33125	-1.12014
0.339583	0.579134	0.334583	-0.0711679	0.337917	-1.13131
0.34625	0.593558	0.34125	-0.088118	0.344583	-1.14084
0.352917	0.606976	0.347917	-0.1055	0.35125	-1.15015
0.359583	0.618614	0.354583	-0.123248	0.357917	-1.16039
0.36625	0.628091	0.36125	-0.14051	0.364583	-1.1712
0.372917	0.636265	0.367917	-0.157021	0.37125	-1.18176
0.379583	0.643954	0.374583	-0.173561	0.377917	-1.1919
0.38625	0.650503	0.38125	-0.189476	0.384583	-1.20072
0.392917	0.655554	0.387917	-0.203982	0.39125	-1.20728
0.399583	0.659183	0.394583	-0.21755	0.397917	-1.21082
0.40625	0.661626	0.40125	-0.230931	0.404583	-1.21092
0.412917	0.662826	0.407917	-0.243969	0.41125	-1.20747
0.419583	0.662759	0.414583	-0.255652	0.417917	-1.19998
0.42625	0.661477	0.42125	-0.264429	0.424583	-1.18954
0.432917	0.659555	0.427917	-0.269838	0.43125	-1.17686
0.439583	0.656627	0.434583	-0.271305	0.437917	-1.16224
0.44625	0.651881	0.44125	-0.268653	0.444583	-1.14642
0.452917	0.644036	0.447917	-0.260539	0.45125	-1.13045
0.459583	0.633121	0.454583	-0.245333	0.457917	-1.11434
0.46625	0.620797	0.46125	-0.2231	0.464583	-1.09649
0.472917	0.609145	0.467917	-0.193954	0.47125	-1.07477
0.479583	0.599355	0.474583	-0.158556	0.477917	-1.04856
0.48625	0.592463	0.48125	-0.117958	0.484583	-1.01852
0.492917	0.588953	0.487917	-0.0744089	0.49125	-0.98452
0.499583	0.589155	0.494583	-0.0307411	0.497917	-0.947125
0.50625	0.593275	0.50125	0.0119433	0.504583	-0.907153
0.512917	0.600912	0.507917	0.0536218	0.51125	-0.866562
0.519583	0.611909	0.514583	0.0943989	0.517917	-0.826813
0.52625	0.625908	0.52125	0.134543	0.524583	-0.788912
0.532917	0.642441	0.527917	0.173464	0.53125	-0.755087
0.539583	0.660226	0.534583	0.211686	0.537917	-0.727117
0.54625	0.67728	0.54125	0.249565	0.544583	-0.704579
0.552917	0.691757	0.547917	0.286929	0.55125	-0.686325
0.559583	0.702254	0.554583	0.32372	0.557917	-0.670776
0.56625	0.707835	0.56125	0.358738	0.564583	-0.657544
0.572917	0.70902	0.567917	0.392146	0.57125	-0.645675
0.579583	0.706539	0.574583	0.423096	0.577917	-0.634097
0.58625	0.701301	0.58125	0.450745	0.584583	-0.62345
0.592917	0.693247	0.587917	0.474192	0.59125	-0.614792
0.599583	0.683568	0.594583	0.493258	0.597917	-0.609383
0.60625	0.674725	0.60125	0.508592	0.604583	-0.606835
0.612917	0.667848	0.607917	0.519782	0.61125	-0.605926
0.619583	0.663295	0.614583	0.52727	0.617917	-0.606686
0.62625	0.66033	0.62125	0.531919	0.624583	-0.609316
0.632917	0.660591	0.627917	0.534855	0.63125	-0.613332
0.639583	0.664175	0.634583	0.535429	0.637917	-0.616737
0.64625	0.669345	0.64125	0.533082	0.644583	-0.617802
0.652917	0.674613	0.647917	0.528455	0.65125	-0.616387
0.659583	0.679493	0.654583	0.522271	0.657917	-0.611633
0.66625	0.685185	0.66125	0.514284	0.664583	-0.602856
0.672917	0.691615	0.667917	0.503421	0.67125	-0.589095
0.679583	0.699654	0.674583	0.48963	0.677917	-0.571154
0.68625	0.710547	0.68125	0.473447	0.684583	-0.550173
0.692917	0.725001	0.687917	0.454731	0.69125	-0.526994
0.699583	0.742607	0.694583	0.433519	0.697917	-0.502504
0.70625	0.762284	0.70125	0.409529	0.704583	-0.477642
0.712917	0.783198	0.707917	0.382684	0.71125	-0.452615
0.719583	0.804573	0.714583	0.353724	0.717917	-0.427984
0.72625	0.825331	0.72125	0.323661	0.724583	-0.404298
0.732917	0.845067	0.727917	0.293709	0.73125	-0.382401
0.739583	0.864066	0.734583	0.263833	0.737917	-0.36256
0.74625	0.882454	0.74125	0.234224	0.744583	-0.344396
0.752917	0.899993	0.747917	0.206307	0.75125	-0.329137
0.759583	0.915863	0.754583	0.180945	0.757917	-0.316642
0.76625	0.929393	0.76125	0.158072	0.764583	-0.307471
0.772917	0.94033	0.767917	0.137612	0.77125	-0.30145
0.779583	0.949219	0.774583	0.119604	0.777917	-0.299647
0.78625	0.957295	0.78125	0.105105	0.784583	-0.302419
0.792917	0.965334	0.787917	0.0943169	0.79125	-0.309251
0.799583	0.974104	0.794583	0.0869334	0.797917	-0.318952
0.80625	0.984527	0.80125	0.082776	0.804583	-0.330031
0.812917	0.997178	0.807917	0.0813454	0.81125	-0.342011
0.819583	1.01208	0.814583	0.0825077	0.817917	-0.353992
0.82625	1.02861	0.82125	0.0846088	0.824583	-0.366151
0.832917	1.04632	0.827917	0.0859946	0.83125	-0.378266
0.839583	1.06457	0.834583	0.0866055	0.837917	-0.391588
0.84625	1.08287	0.84125	0.0864714	0.844583	-0.406735
0.852917	1.10088	0.847917	0.0842661	0.85125	-0.423476
0.859583	1.11747	0.854583	0.0786036	0.857917	-0.441678
0.86625	1.13264	0.86125	0.0701547	0.864583	-0.461616
0.872917	1.14696	0.867917	0.0604689	0.87125	-0.484206
0.879583	1.16196	0.874583	0.0499785	0.877917	-0.509299
0.88625	1.17844	0.88125	0.037685	0.884583	-0.537649
0.892917	1.19694	0.887917	0.0227168	0.89125	-0.570208
0.899583	1.21828	0.894583	0.00474602	0.897917	-0.607558
0.90625	1.2428	0.90125	-0.0161529	0.904583	-0.649013
0.912917	1.27005	0.907917	-0.0400022	0.91125	-0.693157
0.919583	1.29903	0.914583	-0.0668615	0.917917	-0.739731
0.92625	1.32886	0.92125	-0.0954494	0.924583	-0.788525
0.932917	1.3586	0.927917	-0.122808	0.93125	-0.839658
0.939583	1.38802	0.934583	-0.147253	0.937917	-0.893019
0.94625	1.41646	0.94125	-0.168629	0.944583	-0.94787
0.952917	1.44406	0.947917	-0.187486	0.95125	-1.00522
0.959583	1.47076	0.954583	-0.203177	0.957917	-1.06549
0.96625	1.49679	0.96125	-0.215024	0.964583	-1.12835
0.972917	1.52266	0.967917	-0.223942	0.97125	-1.19162
0.979583	1.54778	0.974583	-0.230603	0.977917	-1.25355
0.98625	1.57157	0.98125	-0.236511	0.984583	-1.31427
0.992917	1.5939	0.987917	-0.241667	0.99125	-1.37272
0.999583	1.61515	0.994583	-0.247277	0.997917	-1.42812
1.00625	1.63645	1.00125	-0.254385	1.00458	-1.47969
1.01292	1.65853	1.00792	-0.263356	1.01125	-1.52809
1.01958	1.68291	1.01458	-0.273526	1.01792	-1.57325
1.02625	1.71047	1.02125	-0.282757	1.02458	-1.61464
1.03292	1.74125	1.02792	-0.2902	1.03125	-1.65142
1.03958	1.77518	1.03458	-0.294842	1.03792	-1.68263
1.04625	1.8118	1.04125	-0.295796	1.04458	-1.70712
1.05292	1.85131	1.04792	-0.291854	1.05125	-1.72488
1.05958	1.89316	1.05458	-0.282295	1.05792	-1.73701
1.06625	1.93728	1.06125	-0.266515	1.06458	-1.74417
1.07292	1.98308	1.06792	-0.245027	1.07125	-1.74671
1.07958	2.03006	1.07458	-0.218004	1.07792	-1.74523
1.08625	2.07776	1.08125	-0.185363	1.08458	-1.74132
1.09292	2.12549	1.08792	-0.146836	1.09125	-1.73583
1.09958	2.17298	1.09458	-0.1029	1.09792	-1.72912
1.10625	2.21992	1.10125	-0.0552684	1.10458	-1.7216
1.11292	2.26647	1.10792	-0.00459701	1.11125	-1.71441
1.11958	2.31172	1.11458	0.0483915	1.11792	-1.70903
1.12625	2.35379	1.12125	0.102744	1.12458	-1.70638
1.13292	2.39138	1.12792	0.15676	1.13125	-1.7075
1.13958	2.42379	1.13458	0.209376	1.13792	-1.71214
1.14625	2.44974	1.14125	0.260033	1.14458	-1.71984
1.15292	2.46779	1.14792	0.30864	1.15125	-1.72977
1.15958	2.47824	1.15458	0.354961	1.15792	-1.74101
1.16625	2.48307	1.16125	0.399128	1.16458	-1.75194
1.17292	2.48328	1.16792	0.441313	1.17125	-1.76003
1.17958	2.47868	1.17458	0.482149	1.17792	-1.76457
1.18625	2.46988	1.18125	0.522934	1.18458	-1.76529
1.19292	2.45795	1.18792	0.563748	1.19125	-1.76378
1.19958	2.44386	1.19458	0.603966	1.19792	-1.76026
1.20625	2.42705	1.20125	0.642732	1.20458	-1.75542
1.21292	2.40721	1.20792	0.680365	1.21125	-1.74944
1.21958	2.38427	1.21458	0.716902	1.21792	-1.74263
1.22625	2.35862	1.22125	0.751175	1.22458	-1.73645
1.23292	2.33035	1.22792	0.783034	1.23125	-1.73105
1.23958	2.29887	1.23458	0.812963	1.23792	-1.7269
1.24625	2.26489	1.24125	0.841327	1.24458	-1.72461
1.25292	2.22908	1.24792	0.867374	1.25125	-1.72457
1.25958	2.1921	1.25458	0.889793	1.25792	-1.72717
1.26625	2.15381	1.26125	0.908367	1.26458	-1.73172
1.27292	2.11541	1.26792	0.923038	1.27125	-1.73797
1.27958	2.07777	1.27458	0.934228	1.27792	-1.74541
1.28625	2.04199	1.28125	0.942394	1.28458	-1.75256
1.29292	2.00823	1.28792	0.948153	1.29125	-1.75933
1.29958	1.97703	1.29458	0.953227	1.29792	-1.76585
1.30625	1.94952	1.30125	0.95924	1.30458	-1.7724
1.31292	1.92595	1.30792	0.968181	1.31125	-1.77901
1.31958	1.90573	1.31458	0.980295	1.31792	-1.78512
1.32625	1.88664	1.32125	0.995234	1.32458	-1.79109
1.33292	1.86814	1.32792	1.0129	1.33125	-1.79596
1.33958	1.85104	1.33458	1.03245	1.33792	-1.7988
1.34625	1.83594	1.34125	1.05277	1.34458	-1.79787
1.35292	1.82226	1.34792	1.07134	1.35125	-1.79148
1.35958	1.81002	1.35458	1.08662	1.35792	-1.77931
1.36625	1.80007	1.36125	1.09734	1.36458	-1.76208
1.37292	1.79323	1.36792	1.1023	1.37125	-1.74122
1.37958	1.78858	1.37458	1.10141	1.37792	-1.7168
1.38625	1.78589	1.38125	1.09544	1.38458	-1.68962
1.39292	1.78558	1.38792	1.08515	1.39125	-1.66019
1.39958	1.78859	1.39458	1.07142	1.39792	-1.62963
1.40625	1.79496	1.40125	1.055	1.40458	-1.59737
1.41292	1.80382	1.40792	1.03759	1.41125	-1.56258
1.41958	1.81548	1.41458	1.02083	1.41792	-1.52446
1.42625	1.82819	1.42125	1.00548	1.42458	-1.48299
1.43292	1.84048	1.42792	0.99194	1.43125	-1.43886
1.43958	1.85058	1.43458	0.979759	1.43792	-1.3923
1.44625	1.8581	1.44125	0.969112	1.44458	-1.34486
1.45292	1.86253	1.44792	0.959769	1.45125	-1.29819
1.45958	1.8626	1.45458	0.950195	1.45792	-1.25486
1.46625	1.85921	1.46125	0.939824	1.46458	-1.21488
1.47292	1.85235	1.46792	0.929423	1.47125	-1.17812
1.47958	1.84241	1.47458	0.920705	1.47792	-1.14431
1.48625	1.82953	1.48125	0.913732	1.48458	-1.11245
1.49292	1.81468	1.48792	0.908121	1.49125	-1.08209
1.49958	1.79886	1.49458	0.904858	1.49792	-1.05291
1.50625	1.7819	1.50125	0.904836	1.50458	-1.02675
1.51292	1.76463	1.50792	0.907138	1.51125	-1.00482
1.51958	1.74784	1.51458	0.910223	1.51792	-0.987612
1.52625	1.73166	1.52125	0.914641	1.52458	-0.976361
1.53292	1.71551	1.52792	0.921205	1.53125	-0.971153
1.53958	1.69905	1.53458	0.929751	1.53792	-0.971474
1.54625	1.68265	1.54125	0.938885	1.54458	-0.975564
1.55292	1.66651	1.54792	0.948645	1.55125	-0.982367
1.55958	1.65063	1.55458	0.959642	1.55792	-0.991598
1.56625	1.63568	1.56125	0.971474	1.56458	-1.00258
1.57292	1.62259	1.56792	0.983134	1.57125	-1.01461
1.57958	1.61119	1.57458	0.994131	1.57792	-1.02627
1.58625	1.6005	1.58125	1.00394	1.58458	-1.038
1.59292	1.59053	1.58792	1.01183	1.59125	-1.04917
1.59958	1.58125	1.59458	1.01629	1.59792	-1.05958
1.60625	1.57242	1.60125	1.01735	1.60458	-1.06893
1.61292	1.5629	1.60792	1.01534	1.61125	-1.07813
1.61958	1.55241	1.61458	1.01114	1.61792	-1.08876
1.62625	1.54188	1.62125	1.00596	1.62458	-1.10017
1.63292	1.53093	1.62792	1.00116	1.63125	-1.11423
1.63958	1.51911	1.63458	0.998266	1.63792	-1.1316
1.64625	1.50607	1.64125	0.996992	1.64458	-1.15151
1.65292	1.49335	1.64792	0.997983	1.65125	-1.17232
1.65958	1.48225	1.65458	1.00026	1.65792	-1.19238
1.66625	1.47259	1.66125	1.00334	1.66458	-1.21175
1.67292	1.46462	1.66792	1.00574	1.67125	-1.22843
1.67958	1.4589	1.67458	1.00768	1.67792	-1.24098
1.68625	1.45578	1.68125	1.00899	1.68458	-1.24928
1.69292	1.4544	1.68792	1.00925	1.69125	-1.25331
1.69958	1.4549	1.69458	1.00844	1.69792	-1.25325
1.70625	1.45891	1.70125	1.00686	1.70458	-1.24951
1.71292	1.46703	1.70792	1.00493	1.71125	-1.24253
1.71958	1.47922	1.71458	1.00203	1.71792	-1.23313
1.72625	1.49478	1.72125	0.998676	1.72458	-1.22328
1.73292	1.51393	1.72792	0.994697	1.73125	-1.21531
1.73958	1.53585	1.73458	0.989914	1.73792	-1.21134
1.74625	1.55874	1.74125	0.983045	1.74458	-1.21079
1.75292	1.58154	1.74792	0.973694	1.75125	-1.21355
1.75958	1.60406	1.75458	0.961654	1.75792	-1.21924
1.76625	1.62666	1.76125	0.947304	1.76458	-1.22685
1.77292	1.64884	1.76792	0.931583	1.77125	-1.23537
1.77958	1.66977	1.77458	0.914313	1.77792	-1.24302
1.78625	1.68844	1.78125	0.894323	1.78458	-1.24851
1.79292	1.70401	1.78792	0.871129	1.79125	-1.25061
1.79958	1.71547	1.79458	0.84506	1.79792	-1.24929
1.80625	1.72228	1.80125	0.816062	1.80458	-1.24593
1.81292	1.72447	1.80792	0.783272	1.81125	-1.24018
1.81958	1.72193	1.81458	0.747606	1.81792	-1.23155
1.82625	1.71503	1.82125	0.710763	1.82458	-1.2208
1.83292	1.70362	1.82792	0.673361	1.83125	-1.21035
1.83958	1.68803	1.83458	0.635155	1.83792	-1.20143
1.84625	1.6694	1.84125	0.597343	1.84458	-1.1924
1.85292	1.64912	1.84792	0.560738	1.85125	-1.1816
1.85958	1.62844	1.85458	0.524893	1.85792	-1.16906
1.86625	1.60714	1.86125	0.489771	1.86458	-1.15488
1.87292	1.58614	1.86792	0.456721	1.87125	-1.13733
1.87958	1.56631	1.87458	0.427842	1.87792	-1.11531
1.88625	1.54804	1.88125	0.402041	1.88458	-1.0892
1.89292	1.52997	1.88792	0.378527	1.89125	-1.06089
1.89958	1.51192	1.89458	0.357434	1.89792	-1.03141
1.90625	1.49496	1.90125	0.339217	1.90458	-1.0018
1.91292	1.47995	1.90792	0.322245	1.91125	-0.97426
1.91958	1.46636	1.91458	0.304252	1.91792	-0.949077
1.92625	1.45321	1.92125	0.284925	1.92458	-0.926338
1.93292	1.44075	1.92792	0.264376	1.93125	-0.905477
1.93958	1.42893	1.93458	0.24274	1.93792	-0.887156
1.94625	1.41735	1.94125	0.220247	1.94458	-0.871725
1.95292	1.4054	1.94792	0.197254	1.95125	-0.858717
1.95958	1.39327	1.95458	0.173986	1.95792	-0.84883
1.96625	1.38117	1.96125	0.150122	1.96458	-0.842035
1.97292	1.36825	1.96792	0.125527	1.97125	-0.839494
1.97958	1.35354	1.97458	0.100158	1.97792	-0.84129
1.98625	1.33695	1.98125	0.0732616	1.98458	-0.847809
1.99292	1.31893	1.98792	0.0458956	1.99125	-0.858955
1.99958	1.29957	1.99458	0.0190362	1.99792	-0.874415
2.00625	1.27798	2.00125	-0.00604242	2.00458	-0.894204
2.01292	1.25505	2.00792	-0.0281408	2.01125	-0.917614
2.01958	1.23101	2.01458	-0.0471249	2.01792	-0.944406
2.02625	1.20628	2.02125	-0.0626668	2.02458	-0.97394
2.03292	1.18013	2.02792	-0.0752211	2.03125	-1.0051
2.03958	1.15294	2.03458	-0.0847653	2.03792	-1.03701
2.04625	1.1255	2.04125	-0.0918061	2.04458	-1.06911
2.05292	1.09781	2.04792	-0.0982583	2.05125	-1.0998
2.05958	1.0704	2.05458	-0.104651	2.05792	-1.12719
2.06625	1.0445	2.06125	-0.110537	2.06458	-1.15002
2.07292	1.02118	2.06792	-0.115305	2.07125	-1.16868
2.07958	1.00134	2.07458	-0.119194	2.07792	-1.18317
2.08625	0.985242	2.08125	-0.122495	2.08458	-1.19273
2.09292	0.972986	2.08792	-0.123665	2.09125	-1.19869
2.09958	0.965655	2.09458	-0.121556	2.09792	-1.20191
2.10625	0.96333	2.10125	-0.115849	2.10458	-1.20385
2.11292	0.966378	2.10792	-0.10705	2.11125	-1.20375
2.11958	0.972763	2.11458	-0.0950396	2.11792	-1.20109
2.12625	0.981301	2.12125	-0.0781119	2.12458	-1.19674
2.13292	0.991069	2.12792	-0.0552014	2.13125	-1.19064
2.13958	1.00103	2.13458	-0.0252873	2.13792	-1.18355
2.14625	1.00934	2.14125	0.0112876	2.14458	-1.17467
2.15292	1.01462	2.14792	0.0550672	2.15125	-1.16542
2.15958	1.01784	2.15458	0.106193	2.15792	-1.15849
2.16625	1.0204	2.16125	0.163019	2.16458	-1.15474
2.17292	1.02296	2.16792	0.223324	2.17125	-1.15419
2.17958	1.02507	2.17458	0.283986	2.17792	-1.15521
2.18625	1.02699	2.18125	0.343889	2.18458	-1.15856
2.19292	1.02923	2.18792	0.401065	2.19125	-1.1644
2.19958	1.0307	2.19458	0.454828	2.19792	-1.17187
2.20625	1.03	2.20125	0.504866	2.20458	-1.18018
2.21292	1.02787	2.20792	0.551067	2.21125	-1.1892
2.21958	1.02494	2.21458	0.594221	2.21792	-1.19961
2.22625	1.02142	2.22125	0.634119	2.22458	-1.21099
2.23292	1.01692	2.22792	0.670679	2.23125	-1.22271
2.23958	1.01246	2.23458	0.702612	2.23792	-1.23424
2.24625	1.00899	2.24125	0.728756	2.24458	-1.24482
2.25292	1.00544	2.24792	0.748478	2.25125	-1.25353
2.25958	1.00157	2.25458	0.760727	2.25792	-1.2606
2.26625	0.997692	2.26125	0.766076	2.26458	-1.26585
2.27292	0.993975	2.26792	0.765637	2.27125	-1.2683
2.27958	0.990905	2.27458	0.760682	2.27792	-1.26655
2.28625	0.988856	2.28125	0.752255	2.28458	-1.26168
2.29292	0.988424	2.28792	0.742041	2.29125	-1.25626
2.29958	0.989735	2.29458	0.731915	2.29792	-1.2512
2.30625	0.992946	2.30125	0.722475	2.30458	-1.24659
2.31292	0.998959	2.30792	0.714071	2.31125	-1.24317
2.31958	1.00701	2.31458	0.707135	2.31792	-1.24139
2.32625	1.01578	2.32125	0.702128	2.32458	-1.24021
2.33292	1.02507	2.32792	0.69882	2.33125	-1.23789
2.33958	1.03541	2.33458	0.697397	2.33792	-1.23521
2.34625	1.0474	2.34125	0.698321	2.34458	-1.23287
2.35292	1.06055	2.34792	0.701286	2.35125	-1.231
2.35958	1.0754	2.35458	0.704907	2.35792	-1.22984
2.36625	1.09253	2.36125	0.707828	2.36458	-1.23015
2.37292	1.11149	2.36792	0.708871	2.37125	-1.23236
2.37958	1.13146	2.37458	0.707455	2.37792	-1.23514
2.38625	1.15093	2.38125	0.702508	2.38458	-1.23807
2.39292	1.16994	2.38792	0.692524	2.39125	-1.24139
2.39958	1.18821	2.39458	0.677295	2.39792	-1.24662
2.40625	1.20603	2.40125	0.657424	2.40458	-1.25398
2.41292	1.22337	2.40792	0.63365	2.41125	-1.26269
2.41958	1.23973	2.41458	0.605658	2.41792	-1.27109
2.42625	1.25508	2.42125	0.574082	2.42458	-1.27856
2.43292	1.26753	2.42792	0.542186	2.43125	-1.28447
2.43958	1.27677	2.43458	0.512414	2.43792	-1.28733
2.44625	1.28271	2.44125	0.486135	2.44458	-1.28541
2.45292	1.28573	2.44792	0.464328	2.45125	-1.27877
2.45958	1.28661	2.45458	0.448234	2.45792	-1.26921
2.46625	1.28521	2.46125	0.439286	2.46458	-1.25765
2.47292	1.2825	2.46792	0.43603	2.47125	-1.24427
2.47958	1.27791	2.47458	0.436299	2.47792	-1.22855
2.48625	1.27169	2.48125	0.439115	2.48458	-1.21193
2.49292	1.26389	2.48792	0.444628	2.49125	-1.19576
2.49958	1.25383	2.49458	0.452697	2.49792	-1.18001
2.50625	1.24166	2.50125	0.461288	2.50458	-1.16306
2.51292	1.22882	2.50792	0.469372	2.51125	-1.14428
2.51958	1.21728	2.51458	0.47861	2.51792	-1.12441
2.52625	1.20698	2.52125	0.489421	2.52458	-1.10494
2.53292	1.19775	2.52792	0.500016	2.53125	-1.0856
2.53958	1.19024	2.53458	0.508502	2.53792	-1.06733
2.54625	1.18604	2.54125	0.513688	2.54458	-1.05204
2.55292	1.18527	2.54792	0.514925	2.55125	-1.041
2.55958	1.18675	2.55458	0.510618	2.55792	-1.03418
2.56625	1.19024	2.56125	0.500731	2.56458	-1.02995
2.57292	1.19544	2.56792	0.486389	2.57125	-1.02882
2.57958	1.20252	2.57458	0.469051	2.57792	-1.03033
2.58625	1.2098	2.58125	0.451319	2.58458	-1.03361
2.59292	1.21672	2.58792	0.435732	2.59125	-1.03826
2.59958	1.22393	2.59458	0.423662	2.59792	-1.04501
2.60625	1.23218	2.60125	0.415511	2.60458	-1.05534
2.61292	1.24219	2.60792	0.412188	2.61125	-1.06867
2.61958	1.25445	2.61458	0.414632	2.61792	-1.08433
2.62625	1.2708	2.62125	0.422269	2.62458	-1.10137
2.63292	1.29224	2.62792	0.434294	2.63125	-1.11915
2.63958	1.31923	2.63458	0.451483	2.63792	-1.13789
2.64625	1.35203	2.64125	0.473686	2.64458	-1.15675
2.65292	1.39139	2.64792	0.501543	2.65125	-1.17597
2.65958	1.43769	2.65458	0.534855	2.65792	-1.19596
2.66625	1.49083	2.66125	0.573158	2.66458	-1.21815
2.67292	1.54979	2.66792	0.614733	2.67125	-1.24315
2.67958	1.61409	2.67458	0.657879	2.67792	-1.26925
2.68625	1.68293	2.68125	0.702173	2.68458	-1.29578
2.69292	1.75559	2.68792	0.745252	2.69125	-1.32291
2.69958	1.8306	2.69458	0.78515	2.69792	-1.35036
2.70625	1.9059	2.70125	0.821486	2.70458	-1.37684
2.71292	1.97988	2.70792	0.855125	2.71125	-1.4012
2.71958	2.05091	2.71458	0.884771	2.71792	-1.4239
2.72625	2.11825	2.72125	0.908762	2.72458	-1.44546
2.73292	2.18007	2.72792	0.925742	2.73125	-1.46528
2.73958	2.23541	2.73458	0.93548	2.73792	-1.48313
2.74625	2.28377	2.74125	0.937417	2.74458	-1.49934
2.75292	2.32578	2.74792	0.932425	2.75125	-1.51436
2.75958	2.36163	2.75458	0.921607	2.75792	-1.52849
2.76625	2.39147	2.76125	0.905439	2.76458	-1.54077
2.77292	2.41642	2.76792	0.885934	2.77125	-1.55034
2.77958	2.43755	2.77458	0.865988	2.77792	-1.55677
2.78625	2.45582	2.78125	0.848383	2.78458	-1.55973
2.79292	2.47184	2.78792	0.833943	2.79125	-1.55902
2.79958	2.48638	2.79458	0.824466	2.79792	-1.55319
2.80625	2.4988	2.80125	0.82273	2.80458	-1.54202
2.81292	2.50864	2.80792	0.82989	2.81125	-1.52558
2.81958	2.51563	2.81458	0.844426	2.81792	-1.50438
2.82625	2.51969	2.82125	0.864886	2.82458	-1.48014
2.83292	2.52024	2.82792	0.891037	2.83125	-1.45467
2.83958	2.51711	2.83458	0.922494	2.83792	-1.4298
2.84625	2.51126	2.84125	0.957601	2.84458	-1.40617
2.85292	2.50284	2.84792	0.994094	2.85125	-1.38405
2.85958	2.49075	2.85458	1.03147	2.85792	-1.36358
2.86625	2.47477	2.86125	1.06909	2.86458	-1.34408
2.87292	2.45563	2.86792	1.10564	2.87125	-1.325
2.87958	2.43492	2.87458	1.13896	2.87792	-1.30601
2.88625	2.41447	2.88125	1.16783	2.88458	-1.28691
2.89292	2.39486	2.88792	1.19247	2.89125	-1.26793
2.89958	2.37816	2.89458	1.21323	2.89792	-1.24889
2.90625	2.36513	2.90125	1.2296	2.90458	-1.22994
2.91292	2.35657	2.90792	1.24202	2.91125	-1.2116
2.91958	2.35143	2.91458	1.2514	2.91792	-1.19584
2.92625	2.34832	2.92125	1.25819	2.92458	-1.18476
2.93292	2.34737	2.92792	1.26283	2.93125	-1.17937
2.93958	2.34853	2.93458	1.26565	2.93792	-1.17991
2.94625	2.35188	2.94125	1.26854	2.94458	-1.18595
2.95292	2.35696	2.94792	1.27239	2.95125	-1.19689
2.95958	2.36353	2.95458	1.27862	2.95792	-1.21115
2.96625	2.37098	2.96125	1.28871	2.96458	-1.22678
2.97292	2.37866	2.96792	1.30352	2.97125	-1.24235
2.97958	2.38688	2.97458	1.32252	2.97792	-1.25768
2.98625	2.39599	2.98125	1.34491	2.98458	-1.27284
2.99292	2.40511	2.98792	1.37031	2.99125	-1.28734
2.99958	2.41388	2.99458	1.39813	2.99792	-1.30022
3.00625	2.42277	3.00125	1.42855	3.00458	-1.31217
3.01292	2.43293	3.00792	1.46118	3.01125	-1.32348
3.01958	2.44346	3.01458	1.49643	3.01792	-1.33383
3.02625	2.45377	3.02125	1.5332	3.02458	-1.34312
3.03292	2.46427	3.02792	1.56976	3.03125	-1.35208
3.03958	2.47588	3.03458	1.60553	3.03792	-1.36075
3.04625	2.48875	3.04125	1.63937	3.04458	-1.36821
3.05292	2.50222	3.04792	1.671	3.05125	-1.37492
3.05958	2.51637	3.05458	1.69954	3.05792	-1.38213
3.06625	2.53119	3.06125	1.72486	3.06458	-1.39031
3.07292	2.5471	3.06792	1.74824	3.07125	-1.39826
3.07958	2.5631	3.07458	1.76928	3.07792	-1.4063
3.08625	2.57812	3.08125	1.78768	3.08458	-1.41454
3.09292	2.59183	3.08792	1.80233	3.09125	-1.42238
3.09958	2.60482	3.09458	1.81291	3.09792	-1.42867
3.10625	2.61814	3.10125	1.81948	3.10458	-1.43278
3.11292	2.63157	3.10792	1.82153	3.11125	-1.43568
3.11958	2.64546	3.11458	1.82042	3.11792	-1.43758
3.12625	2.66035	3.12125	1.81655	3.12458	-1.43912
3.13292	2.67693	3.12792	1.81077	3.13125	-1.44117
3.13958	2.6949	3.13458	1.80294	3.13792	-1.44389
3.14625	2.71328	3.14125	1.79335	3.14458	-1.44775
3.15292	2.73088	3.14792	1.78134	3.15125	-1.45309
3.15958	2.74778	3.15458	1.76547	3.15792	-1.46108
3.16625	2.76394	3.16125	1.74593	3.16458	-1.47165
3.17292	2.7797	3.16792	1.72348	3.17125	-1.4842
3.17958	2.795	3.17458	1.69902	3.17792	-1.498
3.18625	2.81002	3.18125	1.67333	3.18458	-1.51154
3.19292	2.82572	3.18792	1.64741	3.19125	-1.52347
3.19958	2.84284	3.19458	1.62205	3.19792	-1.5334
3.20625	2.86216	3.20125	1.59708	3.20458	-1.54296
3.21292	2.8829	3.20792	1.57239	3.21125	-1.55285
3.21958	2.90385	3.21458	1.54811	3.21792	-1.56361
3.22625	2.92332	3.22125	1.5239	3.22458	-1.5763
3.23292	2.94068	3.22792	1.49956	3.23125	-1.59241
3.23958	2.95518	3.23458	1.47508	3.23792	-1.6112
3.24625	2.96584	3.24125	1.45034	3.24458	-1.63022
3.25292	2.97181	3.24792	1.42479	3.25125	-1.64808
3.25958	2.97311	3.25458	1.39765	3.25792	-1.6648
3.26625	2.97163	3.26125	1.3688	3.26458	-1.68072
3.27292	2.96783	3.26792	1.33911	3.27125	-1.6951
3.27958	2.96195	3.27458	1.30919	3.27792	-1.70767
3.28625	2.95391	3.28125	1.28046	3.28458	-1.71968
3.29292	2.94434	3.28792	1.25403	3.29125	-1.73344
3.29958	2.93455	3.29458	1.23065	3.29792	-1.75066
3.30625	2.92516	3.30125	1.20968	3.30458	-1.77178
3.31292	2.9176	3.30792	1.19056	3.31125	-1.79609
3.31958	2.912	3.31458	1.17288	3.31792	-1.82358
3.32625	2.90789	3.32125	1.15527	3.32458	-1.85396
3.33292	2.90424	3.32792	1.13541	3.33125	-1.88615
3.33958	2.90085	3.33458	1.11192	3.33792	-1.91898
3.34625	2.89766	3.34125	1.08504	3.34458	-1.95168
3.35292	2.89356	3.34792	1.0542	3.35125	-1.98531
3.35958	2.88801	3.35458	1.01969	3.35792	-2.02021
3.36625	2.88165	3.36125	0.981428	3.36458	-2.05619
3.37292	2.877	3.36792	0.940509	3.37125	-2.09234
3.37958	2.87454	3.37458	0.898175	3.37792	-2.12816
3.38625	2.87408	3.38125	0.855304	3.38458	-2.16392
3.39292	2.87642	3.38792	0.813022	3.39125	-2.19876
3.39958	2.88256	3.39458	0.76995	3.39792	-2.23191
3.40625	2.89242	3.40125	0.726707	3.40458	-2.26221
3.41292	2.90405	3.40792	0.685073	3.41125	-2.28899
3.41958	2.91698	3.41458	0.646666	3.41792	-2.3111
3.42625	2.92997	3.42125	0.612132	3.42458	-2.3271
3.43292	2.94132	3.42792	0.58163	3.43125	-2.33649
3.43958	2.9503	3.43458	0.556625	3.43792	-2.33997
3.44625	2.95752	3.44125	0.536844	3.44458	-2.33855
3.45292	2.96298	3.44792	0.521146	3.45125	-2.33264
3.45958	2.9658	3.45458	0.508942	3.45792	-2.32227
3.46625	2.96584	3.46125	0.499919	3.46458	-2.3077
3.47292	2.9641	3.46792	0.493623	3.47125	-2.28891
3.47958	2.96093	3.47458	0.490107	3.47792	-2.26532
3.48625	2.95606	3.48125	0.49033	3.48458	-2.23678
3.49292	2.95015	3.48792	0.494197	3.49125	-2.20461
3.49958	2.94353	3.49458	0.500254	3.49792	-2.17073
3.50625	2.93779	3.50125	0.50842	3.50458	-2.13619
3.51292	2.93384	3.50792	0.519462	3.51125	-2.10153
3.51958	2.9315	3.51458	0.53332	3.51792	-2.06678
3.52625	2.92925	3.52125	0.548057	3.52458	-2.03242
3.53292	2.92563	3.52792	0.562154	3.53125	-2.00014
3.53958	2.92139	3.53458	0.576109	3.53792	-1.9703
3.54625	2.91663	3.54125	0.588968	3.54458	-1.94321
3.55292	2.91015	3.54792	0.599831	3.55125	-1.91861
3.55958	2.9024	3.55458	0.607349	3.55792	-1.89779
3.56625	2.89542	3.56125	0.612013	3.56458	-1.88163
3.57292	2.89078	3.56792	0.614524	3.57125	-1.86761
3.57958	2.88775	3.57458	0.614554	3.57792	-1.85371
3.58625	2.88544	3.58125	0.61246	3.58458	-1.839
3.59292	2.88361	3.58792	0.608549	3.59125	-1.82541
3.59958	2.88108	3.59458	0.603683	3.59792	-1.81334
3.60625	2.87656	3.60125	0.599548	3.60458	-1.80176
3.61292	2.87065	3.60792	0.598028	3.61125	-1.7902
3.61958	2.86429	3.61458	0.600643	3.61792	-1.78002
3.62625	2.8579	3.62125	0.607565	3.62458	-1.77313
3.63292	2.85139	3.62792	0.618935	3.63125	-1.76894
3.63958	2.84646	3.63458	0.6359	3.63792	-1.76606
3.64625	2.84558	3.64125	0.657961	3.64458	-1.76375
3.65292	2.84903	3.64792	0.683539	3.65125	-1.76216
3.65958	2.85614	3.65458	0.711456	3.65792	-1.76053
3.66625	2.86535	3.66125	0.74181	3.66458	-1.7581
3.67292	2.87722	3.66792	0.774235	3.67125	-1.75437
3.67958	2.8908	3.67458	0.807025	3.67792	-1.74955
3.68625	2.90377	3.68125	0.838123	3.68458	-1.74338
3.69292	2.91461	3.68792	0.867352	3.69125	-1.73592
3.69958	2.92265	3.69458	0.894263	3.69792	-1.72833
3.70625	2.92882	3.70125	0.918381	3.70458	-1.72056
3.71292	2.9324	3.70792	0.939548	3.71125	-1.71328
3.71958	2.93191	3.71458	0.958748	3.71792	-1.70672
3.72625	2.92677	3.72125	0.977769	3.72458	-1.70199
3.73292	2.91796	3.72792	0.997297	3.73125	-1.69934
3.73958	2.90739	3.73458	1.01772	3.73792	-1.69814
3.74625	2.896	3.74125	1.04029	3.74458	-1.69861
3.75292	2.8842	3.74792	1.06549	3.75125	-1.69987
3.75958	2.87342	3.75458	1.09231	3.75792	-1.7011
3.76625	2.86507	3.76125	1.11888	3.76458	-1.70092
3.77292	2.85928	3.76792	1.14488	3.77125	-1.6995
3.77958	2.85611	3.77458	1.17081	3.77792	-1.69643
3.78625	2.85524	3.78125	1.19554	3.78458	-1.69066
3.79292	2.85561	3.78792	1.21766	3.79125	-1.68141
3.79958	2.85596	3.79458	1.23623	3.79792	-1.66906
3.80625	2.85517	3.80125	1.25203	3.80458	-1.65433
3.81292	2.8526	3.80792	1.26393	3.81125	-1.63595
3.81958	2.84703	3.81458	1.27096	3.81792	-1.61314
3.82625	2.83834	3.82125	1.274	3.82458	-1.58551
3.83292	2.82789	3.82792	1.27497	3.83125	-1.55383
3.83958	2.81695	3.83458	1.27599	3.83792	-1.5178
3.84625	2.80618	3.84125	1.277	3.84458	-1.47779
3.85292	2.79598	3.84792	1.27899	3.85125	-1.43589
3.85958	2.7867	3.85458	1.28306	3.85792	-1.39388
3.86625	2.77832	3.86125	1.2887	3.86458	-1.35317
3.87292	2.77047	3.86792	1.29476	3.87125	-1.31465
3.87958	2.76253	3.87458	1.29998	3.87792	-1.28133
3.88625	2.75402	3.88125	1.30486	3.88458	-1.25503
3.89292	2.74398	3.88792	1.30995	3.89125	-1.23601
3.89958	2.73225	3.89458	1.31413	3.89792	-1.22432
3.90625	2.7182	3.90125	1.31572	3.90458	-1.21997
3.91292	2.70177	3.90792	1.31319	3.91125	-1.22257
3.91958	2.68373	3.91458	1.30652	3.91792	-1.22943
3.92625	2.66497	3.92125	1.29725	3.92458	-1.2392
3.93292	2.6467	3.92792	1.28598	3.93125	-1.25089
3.93958	2.62935	3.93458	1.27328	3.93792	-1.26274
3.94625	2.61433	3.94125	1.25983	3.94458	-1.27348
3.95292	2.60273	3.94792	1.24764	3.95125	-1.28265
3.95958	2.59467	3.95458	1.2379	3.95792	-1.29093
3.96625	2.59074	3.96125	1.22927	3.96458	-1.29702
3.97292	2.5911	3.96792	1.22118	3.97125	-1.30111
3.97958	2.59574	3.97458	1.21442	3.97792	-1.30554
3.98625	2.60297	3.98125	1.21033	3.98458	-1.3129
3.99292	2.61121	3.98792	1.20829	3.99125	-1.32374
3.99958	2.62086	3.99458	1.20751	3.99792	-1.33774
4.00625	2.63144	4.00125	1.20901	4.00458	-1.35588
4.01292	2.64204	4.00792	1.21329	4.01125	-1.37822
4.01958	2.65239	4.01458	1.21951	4.01792	-1.40415
4.02625	2.66409	4.02125	1.22685	4.02458	-1.43296
4.03292	2.67825	4.02792	1.2352	4.03125	-1.46456
4.03958	2.69324	4.03458	1.24447	4.03792	-1.49856
4.04625	2.70777	4.04125	1.25316	4.04458	-1.53372
4.05292	2.72271	4.04792	1.26133	4.05125	-1.56904
4.05958	2.73822	4.05458	1.27073	4.05792	-1.60333
4.06625	2.75371	4.06125	1.2824	4.06458	-1.63575
4.07292	2.76928	4.06792	1.29661	4.07125	-1.66681
4.07958	2.78589	4.07458	1.31305	4.07792	-1.69697
4.08625	2.80352	4.08125	1.33214	4.08458	-1.72678
4.09292	2.82051	4.08792	1.35159	4.09125	-1.75672
4.09958	2.83637	4.09458	1.36865	4.09792	-1.78854
4.10625	2.85181	4.10125	1.38243	4.10458	-1.82246
4.11292	2.86628	4.10792	1.39346	4.11125	-1.85717
4.11958	2.87925	4.11458	1.40127	4.11792	-1.89228
4.12625	2.89093	4.12125	1.40467	4.12458	-1.92806
4.13292	2.9019	4.12792	1.40432	4.13125	-1.96382
4.13958	2.9131	4.13458	1.40063	4.13792	-1.99685
4.14625	2.9238	4.14125	1.39264	4.14458	-2.02622
4.15292	2.93428	4.14792	1.37929	4.15125	-2.05269
4.15958	2.94396	4.15458	1.36174	4.15792	-2.07651
4.16625	2.95258	4.16125	1.34175	4.16458	-2.09727
4.17292	2.96033	4.16792	1.32013	4.17125	-2.11535
4.17958	2.96719	4.17458	1.29678	4.17792	-2.1322
4.18625	2.97266	4.18125	1.27213	4.18458	-2.14755
4.19292	2.9761	4.18792	1.24758	4.19125	-2.1605
4.19958	2.97777	4.19458	1.22364	4.19792	-2.17104
4.20625	2.97911	4.20125	1.19925	4.20458	-2.18051
4.21292	2.98112	4.20792	1.17307	4.21125	-2.1897
4.21958	2.98353	4.21458	1.14565	4.21792	-2.19819
4.22625	2.98647	4.22125	1.11815	4.22458	-2.20652
4.23292	2.98995	4.22792	1.09109	4.23125	-2.21443
4.23958	2.99554	4.23458	1.06502	4.23792	-2.22111
4.24625	3.00272	4.24125	1.04178	4.24458	-2.22432
4.25292	3.0109	4.24792	1.02362	4.25125	-2.22324
4.25958	3.01977	4.25458	1.01084	4.25792	-2.21764
4.26625	3.02909	4.26125	1.00347	4.26458	-2.20636
4.27292	3.0392	4.26792	1.00128	4.27125	-2.18884
4.27958	3.04822	4.27458	1.0047	4.27792	-2.16595
4.28625	3.05589	4.28125	1.01311	4.28458	-2.13929
4.29292	3.06185	4.28792	1.02554	4.29125	-2.10853
4.29958	3.06599	4.29458	1.04237	4.29792	-2.07343
4.30625	3.06819	4.30125	1.06313	4.30458	-2.03522
4.31292	3.06863	4.30792	1.0867	4.31125	-1.99492
4.31958	3.06899	4.31458	1.11123	4.31792	-1.95261
4.32625	3.07027	4.32125	1.13525	4.32458	-1.90903
4.33292	3.07275	4.32792	1.1583	4.33125	-1.86601
4.33958	3.07493	4.33458	1.17941	4.33792	-1.82517
4.34625	3.07629	4.34125	1.19834	4.34458	-1.78761
4.35292	3.07692	4.34792	1.21559	4.35125	-1.75405
4.35958	3.07732	4.35458	1.23169	4.35792	-1.72403
4.36625	3.07737	4.36125	1.24732	4.36458	-1.69658
4.37292	3.07663	4.36792	1.26199	4.37125	-1.67145
4.37958	3.07678	4.37458	1.27526	4.37792	-1.64837
4.38625	3.07883	4.38125	1.28716	4.38458	-1.62489
4.39292	3.08211	4.38792	1.29655	4.39125	-1.60004
4.39958	3.08558	4.39458	1.30254	4.39792	-1.57399
4.40625	3.08955	4.40125	1.30448	4.40458	-1.54805
4.41292	3.09561	4.40792	1.3036	4.41125	-1.5215
4.41958	3.10353	4.41458	1.30066	4.41792	-1.49322
4.42625	3.11273	4.42125	1.2961	4.42458	-1.46409
4.43292	3.12366	4.42792	1.29113	4.43125	-1.43466
4.43958	3.13676	4.43458	1.28756	4.43792	-1.40564
4.44625	3.15126	4.44125	1.2865	4.44458	-1.37587
4.45292	3.1659	4.44792	1.28803	4.45125	-1.34566
4.45958	3.18053	4.45458	1.29202	4.45792	-1.31598
4.46625	3.19576	4.46125	1.29726	4.46458	-1.28782
4.47292	3.21213	4.46792	1.30241	4.47125	-1.2615
4.47958	3.2296	4.47458	1.30618	4.47792	-1.23637
4.48625	3.24795	4.48125	1.30838	4.48458	-1.21241
4.49292	3.26752	4.48792	1.30859	4.49125	-1.18937
4.49958	3.28804	4.49458	1.3063	4.49792	-1.16742
4.50625	3.30918	4.50125	1.3006	4.50458	-1.14691
4.51292	3.3298	4.50792	1.29161	4.51125	-1.12797
4.51958	3.34967	4.51458	1.27979	4.51792	-1.1124
4.52625	3.36958	4.52125	1.26658	4.52458	-1.10172
4.53292	3.38975	4.52792	1.25255	4.53125	-1.09556
4.53958	3.41018	4.53458	1.23813	4.53792	-1.0931
4.54625	3.43086	4.54125	1.22532	4.54458	-1.09413
4.55292	3.4515	4.54792	1.21498	4.55125	-1.0991
4.55958	3.47176	4.55458	1.20714	4.55792	-1.10628
4.56625	3.48987	4.56125	1.19979	4.56458	-1.11388
4.57292	3.50498	4.56792	1.1923	4.57125	-1.12272
4.57958	3.51696	4.57458	1.18575	4.57792	-1.13406
4.58625	3.52525	4.58125	1.18084	4.58458	-1.14757
4.59292	3.53086	4.58792	1.17812	4.59125	-1.16222
4.59958	3.53421	4.59458	1.17758	4.59792	-1.17844
4.60625	3.53672	4.60125	1.18023	4.60458	-1.19761
4.61292	3.53841	4.60792	1.18689	4.61125	-1.2196
4.61958	3.5394	4.61458	1.19727	4.61792	-1.24422
4.62625	3.54125	4.62125	1.21076	4.62458	-1.27085
4.63292	3.54425	4.62792	1.22765	4.63125	-1.30032
4.63958	3.54784	4.63458	1.24776	4.63792	-1.33281
4.64625	3.55094	4.64125	1.27021	4.64458	-1.3673
4.65292	3.55417	4.64792	1.2942	4.65125	-1.40359
4.65958	3.5584	4.65458	1.31983	4.65792	-1.44091
4.66625	3.56297	4.66125	1.34692	4.66458	-1.47928
4.67292	3.56662	4.66792	1.37344	4.67125	-1.51761
4.67958	3.56808	4.67458	1.39857	4.67792	-1.55428
4.68625	3.56784	4.68125	1.4224	4.68458	-1.58967
4.69292	3.56588	4.68792	1.44447	4.69125	-1.62257
4.69958	3.56248	4.69458	1.4635	4.69792	-1.65211
4.70625	3.55698	4.70125	1.47875	4.70458	-1.67795
4.71292	3.5497	4.70792	1.49079	4.71125	-1.69993
4.71958	3.54149	4.71458	1.49959	4.71792	-1.71816
4.72625	3.5323	4.72125	1.5048	4.72458	-1.73197
4.73292	3.52182	4.72792	1.50742	4.73125	-1.74231
4.73958	3.50952	4.73458	1.50825	4.73792	-1.75001
4.74625	3.49661	4.74125	1.50774	4.74458	-1.75516
4.75292	3.48394	4.74792	1.50573	4.75125	-1.75866
4.75958	3.47245	4.75458	1.50307	4.75792	-1.76226
4.76625	3.46208	4.76125	1.49986	4.76458	-1.76668
4.77292	3.45315	4.76792	1.49529	4.77125	-1.77262
4.77958	3.44571	4.77458	1.48872	4.77792	-1.78003
4.78625	3.43925	4.78125	1.48021	4.78458	-1.78959
4.79292	3.43345	4.78792	1.46951	4.79125	-1.79984
4.79958	3.42819	4.79458	1.45475	4.79792	-1.80994
4.80625	3.42397	4.80125	1.43468	4.80458	-1.81983
4.81292	3.42046	4.80792	1.40832	4.81125	-1.82849
4.81958	3.41741	4.81458	1.37562	4.81792	-1.83485
4.82625	3.41444	4.82125	1.33599	4.82458	-1.8377
4.83292	3.41122	4.82792	1.29002	4.83125	-1.83742
4.83958	3.40732	4.83458	1.23932	4.83792	-1.83374
4.84625	3.4031	4.84125	1.1851	4.84458	-1.82538
4.85292	3.39854	4.84792	1.12835	4.85125	-1.81289
4.85958	3.39352	4.85458	1.07142	4.85792	-1.79745
4.86625	3.388	4.86125	1.01708	4.86458	-1.77976
4.87292	3.38291	4.86792	0.967771	4.87125	-1.75978
4.87958	3.37918	4.87458	0.924639	4.87792	-1.73797
4.88625	3.37684	4.88125	0.889421	4.88458	-1.71544
4.89292	3.37568	4.88792	0.864163	4.89125	-1.69177
4.89958	3.3761	4.89458	0.848249	4.89792	-1.66687
4.90625	3.37958	4.90125	0.839919	4.90458	-1.64183
4.91292	3.38688	4.90792	0.837296	4.91125	-1.6172
4.91958	3.39778	4.91458	0.839412	4.91792	-1.59241
4.92625	3.41158	4.92125	0.845194	4.92458	-1.56619
4.93292	3.42864	4.92792	0.853457	4.93125	-1.53806
4.93958	3.44791	4.93458	0.863038	4.93792	-1.50806
4.94625	3.4672	4.94125	0.87335	4.94458	-1.4763
4.95292	3.48433	4.94792	0.883013	4.95125	-1.44362
4.95958	3.49833	4.95458	0.891283	4.95792	-1.41148
4.96625	3.50945	4.96125	0.897177	4.96458	-1.38122
4.97292	3.51785	4.96792	0.899516	4.97125	-1.35374
4.97958	3.52431	4.97458	0.897288	4.97792	-1.32917
4.98625	3.52965	4.98125	0.890806	4.98458	-1.30772
4.99292	3.53336	4.98792	0.882037	4.99125	-1.29056
4.99958	3.53507	4.99458	0.871643	4.99792	-1.27929
5.00625	3.53465	5.00125	0.859544	5.00458	-1.27543
5.01292	3.53181	5.00792	0.845768	5.01125	-1.28043
5.01958	3.52684	5.01458	0.83115	5.01792	-1.29557
5.02625	3.52025	5.02125	0.815772	5.02458	-1.32085
5.03292	3.51362	5.02792	0.798292	5.03125	-1.35458
5.03958	3.50758	5.03458	0.779562	5.03792	-1.3943
5.04625	3.5013	5.04125	0.7613	5.04458	-1.43871
5.05292	3.49536	5.04792	0.744805	5.05125	-1.48577
5.05958	3.4902	5.05458	0.730298	5.05792	-1.53299
5.06625	3.48622	5.06125	0.717543	5.06458	-1.57858
5.07292	3.48375	5.06792	0.707351	5.07125	-1.62226
5.07958	3.48344	5.07458	0.699326	5.07792	-1.66445
5.08625	3.48713	5.08125	0.692926	5.08458	-1.70488
5.09292	3.49475	5.08792	0.687532	5.09125	-1.7448
5.09958	3.50528	5.09458	0.682995	5.09792	-1.78535
5.10625	3.51722	5.10125	0.679865	5.10458	-1.8274
5.11292	3.52985	5.10792	0.678003	5.11125	-1.87015
5.11958	3.5428	5.11458	0.67766	5.11792	-1.91256
5.12625	3.55552	5.12125	0.678845	5.12458	-1.95464
5.13292	3.56704	5.12792	0.682287	5.13125	-1.99601
5.13958	3.57755	5.13458	0.687771	5.13792	-2.03647
5.14625	3.58883	5.14125	0.694789	5.14458	-2.07552
5.15292	3.6023	5.14792	0.702776	5.15125	-2.11336
5.15958	3.61826	5.15458	0.711828	5.15792	-2.15005
5.16625	3.63526	5.16125	0.722282	5.16458	-2.18417
5.17292	3.65309	5.16792	0.733577	5.17125	-2.21509
5.17958	3.67174	5.17458	0.746451	5.17792	-2.24277
5.18625	3.69083	5.18125	0.761069	5.18458	-2.2676
5.19292	3.70853	5.18792	0.778072	5.19125	-2.28977
5.19958	3.72373	5.19458	0.795551	5.19792	-2.30957
5.20625	3.73706	5.20125	0.811584	5.20458	-2.32753
5.21292	3.74947	5.20792	0.825599	5.21125	-2.343
5.21958	3.76104	5.21458	0.837237	5.21792	-2.35645
5.22625	3.7714	5.22125	0.846691	5.22458	-2.36877
5.23292	3.78156	5.22792	0.853732	5.23125	-2.37977
5.23958	3.79356	5.23458	0.858799	5.23792	-2.38921
5.24625	3.80734	5.24125	0.86306	5.24458	-2.39771
5.25292	3.82212	5.24792	0.868067	5.25125	-2.40726
5.25958	3.83738	5.25458	0.875644	5.25792	-2.41791
5.26625	3.85284	5.26125	0.886418	5.26458	-2.42945
5.27292	3.86804	5.26792	0.900581	5.27125	-2.44354
5.27958	3.88156	5.27458	0.919707	5.27792	-2.46113
5.28625	3.89444	5.28125	0.945076	5.28458	-2.48122
5.29292	3.90784	5.28792	0.976406	5.29125	-2.50226
5.29958	3.92172	5.29458	1.01198	5.29792	-2.52404
5.30625	3.93563	5.30125	1.05055	5.30458	-2.54598
5.31292	3.94967	5.30792	1.09064	5.31125	-2.56602
5.31958	3.96415	5.31458	1.13101	5.31792	-2.58227
5.32625	3.97907	5.32125	1.17092	5.32458	-2.59607
5.33292	3.99411	5.32792	1.20901	5.33125	-2.60881
5.33958	4.00978	5.33458	1.24336	5.33792	-2.62059
5.34625	4.02641	5.34125	1.27242	5.34458	-2.63063
5.35292	4.04338	5.34792	1.29651	5.35125	-2.63924
5.35958	4.06023	5.35458	1.3148	5.35792	-2.64802
5.36625	4.07575	5.36125	1.32572	5.36458	-2.65759
5.37292	4.08842	5.36792	1.3285	5.37125	-2.66699
5.37958	4.09741	5.37458	1.32447	5.37792	-2.67509
5.38625	4.10273	5.38125	1.31489	5.38458	-2.68118
5.39292	4.10499	5.38792	1.30054	5.39125	-2.68582
5.39958	4.10487	5.39458	1.28286	5.39792	-2.68964
5.40625	4.10243	5.40125	1.26302	5.40458	-2.69244
5.41292	4.0981	5.40792	1.24199	5.41125	-2.69452
5.41958	4.09225	5.41458	1.21949	5.41792	-2.69713
5.42625	4.08488	5.42125	1.19577	5.42458	-2.70144
5.43292	4.07621	5.42792	1.17036	5.43125	-2.70667
5.43958	4.06589	5.43458	1.14217	5.43792	-2.71133
5.44625	4.05392	5.44125	1.11055	5.44458	-2.71561
5.45292	4.04081	5.44792	1.07659	5.45125	-2.71975
5.45958	4.02657	5.45458	1.0417	5.45792	-2.72312
5.46625	4.01098	5.46125	1.00667	5.46458	-2.72563
5.47292	3.9931	5.46792	0.971757	5.47125	-2.72892
5.47958	3.972	5.47458	0.938751	5.47792	-2.73412
5.48625	3.94791	5.48125	0.909403	5.48458	-2.74037
5.49292	3.92193	5.48792	0.882961	5.49125	-2.74688
5.49958	3.89452	5.49458	0.85742	5.49792	-2.75336
5.50625	3.86545	5.50125	0.831909	5.50458	-2.76022
5.51292	3.83496	5.50792	0.80692	5.51125	-2.76637
5.51958	3.80396	5.51458	0.782475	5.51792	-2.77125
5.52625	3.77345	5.52125	0.757776	5.52458	-2.77457
5.53292	3.74275	5.52792	0.733517	5.53125	-2.77647
5.53958	3.71194	5.53458	0.71156	5.53792	-2.77732
5.54625	3.68213	5.54125	0.692725	5.54458	-2.77559
5.55292	3.65331	5.54792	0.676095	5.55125	-2.77016
5.55958	3.6253	5.55458	0.661418	5.55792	-2.76146
5.56625	3.59735	5.56125	0.648506	5.56458	-2.75036
5.57292	3.56965	5.56792	0.63657	5.57125	-2.73717
5.57958	3.54343	5.57458	0.625052	5.57792	-2.7209
5.58625	3.51908	5.58125	0.61357	5.58458	-2.70198
5.59292	3.49755	5.58792	0.603333	5.59125	-2.68246
5.59958	3.47927	5.59458	0.593878	5.59792	-2.6619
5.60625	3.46478	5.60125	0.586234	5.60458	-2.63946
5.61292	3.45515	5.60792	0.581957	5.61125	-2.61507
5.61958	3.44934	5.61458	0.581086	5.61792	-2.59031
5.62625	3.44711	5.62125	0.583939	5.62458	-2.56654
5.63292	3.44843	5.62792	0.590049	5.63125	-2.54274
5.63958	3.4534	5.63458	0.599757	5.63792	-2.5184
5.64625	3.46135	5.64125	0.611216	5.64458	-2.49364
5.65292	3.4709	5.64792	0.622764	5.65125	-2.46792
5.65958	3.48186	5.65458	0.634007	5.65792	-2.44084
5.66625	3.49373	5.66125	0.64496	5.66458	-2.41212
5.67292	3.50527	5.66792	0.656247	5.67125	-2.38255
5.67958	3.51629	5.67458	0.668086	5.67792	-2.35222
5.68625	3.52754	5.68125	0.681862	5.68458	-2.32074
5.69292	3.53922	5.68792	0.698283	5.69125	-2.28807
5.69958	3.55046	5.69458	0.717901	5.69792	-2.25525
5.70625	3.5613	5.70125	0.740759	5.70458	-2.22278
5.71292	3.57246	5.70792	0.766702	5.71125	-2.19038
5.71958	3.58438	5.71458	0.794806	5.71792	-2.15781
5.72625	3.59666	5.72125	0.824258	5.72458	-2.12488
5.73292	3.60919	5.72792	0.854254	5.73125	-2.0927
5.73958	3.62263	5.73458	0.884846	5.73792	-2.06041
5.74625	3.63602	5.74125	0.916868	5.74458	-2.02686
5.75292	3.64903	5.74792	0.949882	5.75125	-1.99095
5.75958	3.66097	5.75458	0.983752	5.75792	-1.95457
5.76625	3.67139	5.76125	1.0175	5.76458	-1.91849
5.77292	3.67993	5.76792	1.05183	5.77125	-1.88176
5.77958	3.68575	5.77458	1.08796	5.77792	-1.84421
5.78625	3.68894	5.78125	1.12587	5.78458	-1.80729
5.79292	3.68879	5.78792	1.16559	5.79125	-1.77237
5.79958	3.68444	5.79458	1.20735	5.79792	-1.73776
5.80625	3.67554	5.80125	1.25197	5.80458	-1.70372
5.81292	3.66225	5.80792	1.2988	5.81125	-1.67127
5.81958	3.6449	5.81458	1.34598	5.81792	-1.64129
5.82625	3.62372	5.82125	1.39205	5.82458	-1.61339
5.83292	3.6002	5.82792	1.43717	5.83125	-1.58708
5.83958	3.57609	5.83458	1.48206	5.83792	-1.56366
5.84625	3.55225	5.84125	1.5269	5.84458	-1.54277
5.85292	3.52821	5.84792	1.57163	5.85125	-1.52422
5.85958	3.50455	5.85458	1.61637	5.85792	-1.5072
5.86625	3.4829	5.86125	1.66237	5.86458	-1.49177
5.87292	3.46305	5.86792	1.70904	5.87125	-1.47882
5.87958	3.4443	5.87458	1.75524	5.87792	-1.46756
5.88625	3.42649	5.88125	1.80046	5.88458	-1.45692
5.89292	3.41055	5.88792	1.84491	5.89125	-1.4443
5.89958	3.39664	5.89458	1.88931	5.89792	-1.4286
5.90625	3.3834	5.90125	1.93328	5.90458	-1.40937
5.91292	3.37117	5.90792	1.97717	5.91125	-1.38518
5.91958	3.36009	5.91458	2.01981	5.91792	-1.35466
5.92625	3.35062	5.92125	2.06042	5.92458	-1.31764
5.93292	3.34313	5.92792	2.09854	5.93125	-1.27581
5.93958	3.33846	5.93458	2.1338	5.93792	-1.23023
5.94625	3.33704	5.94125	2.16544	5.94458	-1.18024
5.95292	3.3386	5.94792	2.19386	5.95125	-1.12667
5.95958	3.34311	5.95458	2.22101	5.95792	-1.07252
5.96625	3.35144	5.96125	2.24826	5.96458	-1.02036
5.97292	3.36391	5.96792	2.27588	5.97125	-0.971578
5.97958	3.3801	5.97458	2.30432	5.97792	-0.927016
5.98625	3.40006	5.98125	2.33489	5.98458	-0.887953
5.99292	3.42338	5.98792	2.36824	5.99125	-0.854999
5.99958	3.44983	5.99458	2.40353	5.99792	-0.827581
6.00625	3.47754	6.00125	2.43991	6.00458	-0.805005
6.01292	3.50565	6.00792	2.47682	6.01125	-0.786819
6.01958	3.53379	6.01458	2.51348	6.01792	-0.772074
6.02625	3.5622	6.02125	2.54925	6.02458	-0.759989
6.03292	3.59145	6.02792	2.58215	6.03125	-0.749588
6.03958	3.62208	6.03458	2.61211	6.03792	-0.73906
6.04625	3.65476	6.04125	2.6394	6.04458	-0.726178
6.05292	3.68898	6.04792	2.66497	6.05125	-0.708133
6.05958	3.72415	6.05458	2.68865	6.05792	-0.684135
6.06625	3.75969	6.06125	2.71014	6.06458	-0.652805
6.07292	3.7953	6.06792	2.73074	6.07125	-0.612386
6.07958	3.83122	6.07458	2.75177	6.07792	-0.561818
6.08625	3.868	6.08125	2.77376	6.08458	-0.500172
6.09292	3.90545	6.08792	2.79646	6.09125	-0.426151
6.09958	3.94361	6.09458	2.8211	6.09792	-0.335917
6.10625	3.98183	6.10125	2.84752	6.10458	-0.227414
6.11292	4.0198	6.10792	2.87496	6.11125	-0.099726
6.11958	4.05608	6.11458	2.9013	6.11792	0.0493154
6.12625	4.08965	6.12125	2.92651	6.12458	0.222526
6.13292	4.12095	6.12792	2.95133	6.13125	0.420786
6.13958	4.15038	6.13458	2.97468	6.13792	0.641346
6.14625	4.17892	6.14125	2.9962	6.14458	0.882141
6.15292	4.20684	6.14792	3.01553	6.15125	1.143
6.15958	4.2345	6.15458	3.03462	6.15792	1.42132
6.16625	4.26167	6.16125	3.05402	6.16458	1.71264
6.17292	4.28863	6.16792	3.07337	6.17125	2.0128
6.17958	4.31613	6.17458	3.09262	6.17792	2.32085
6.18625	4.34457	6.18125	3.11281	6.18458	2.63668
6.19292	4.37392	6.18792	3.1349	6.19125	2.95832
6.19958	4.40437	6.19458	3.1583	6.19792	3.28566
6.20625	4.43636	6.20125	3.1812	6.20458	3.61948
6.21292	4.47024	6.20792	3.20213	6.21125	3.96121
6.21958	4.5054	6.21458	3.2201	6.21792	4.31176
6.22625	4.54078	6.22125	3.23422	6.22458	4.67131
6.23292	4.57595	6.22792	3.24388	6.23125	5.04018
6.23958	4.61075	6.23458	3.24964	6.23792	5.41826
6.24625	4.64525	6.24125	3.25326	6.24458	5.80467
6.25292	4.6782	6.24792	3.25615	6.25125	6.19876
6.25958	4.7088	6.25458	3.2594	6.25792	6.60008
6.26625	4.73673	6.26125	3.26282	6.26458	7.00934
6.27292	4.76241	6.26792	3.26633	6.27125	7.42733
6.27958	4.78583	6.27458	3.26844	6.27792	7.85349
6.28625	4.80656	6.28125	3.26837	6.28458	8.2886
6.29292	4.82488	6.28792	3.26681	6.29125	8.73268
6.29958	4.84072	6.29458	3.26464	6.29792	9.18557
6.30625	4.85446	6.30125	3.26268	6.30458	9.64602
6.31292	4.86545	6.30792	3.26099	6.31125	10.1136
6.31958	4.87444	6.31458	3.26061	6.31792	10.5879
6.32625	4.88243	6.32125	3.26226	6.32458	11.0679
6.33292	4.88935	6.32792	3.26562	6.33125	11.5535
6.33958	4.89535	6.33458	3.26986	6.33792	12.0449
6.34625	4.90059	6.34125	3.27445	6.34458	12.5423
6.35292	4.90598	6.34792	3.28001	6.35125	13.0443
6.35958	4.91084	6.35458	3.28751	6.35792	13.5508
6.36625	4.91433	6.36125	3.29731	6.36458	14.0615
6.37292	4.91672	6.36792	3.30895	6.37125	14.5757
6.37958	4.91872	6.37458	3.32262	6.37792	15.0914
6.38625	4.92049	6.38125	3.33845	6.38458	15.6072
6.39292	4.92247	6.38792	3.35634	6.39125	16.1232
6.39958	4.92482	6.39458	3.37453	6.39792	16.6377
6.40625	4.92819	6.40125	3.39168	6.40458	17.1493
6.41292	4.93325	6.40792	3.40738	6.41125	17.6564
6.41958	4.94027	6.41458	3.42215	6.41792	18.1578
6.42625	4.94938	6.42125	3.43619	6.42458	18.6513
6.43292	4.95967	6.42792	3.44963	6.43125	19.135
6.43958	4.97136	6.43458	3.46326	6.43792	19.6091
6.44625	4.98386	6.44125	3.47735	6.44458	20.0738
6.45292	4.99664	6.44792	3.49139	6.45125	20.53
6.45958	5.00944	6.45458	3.50507	6.45792	20.978
6.46625	5.02229	6.46125	3.51933	6.46458	21.4187
6.47292	5.03572	6.46792	3.53415	6.47125	21.8528
6.47958	5.04962	6.47458	3.5487	6.47792	22.2814
6.48625	5.06383	6.48125	3.56214	6.48458	22.7045
6.49292	5.07822	6.48792	3.57529	6.49125	23.1206
6.49958	5.09357	6.49458	3.5876	6.49792	23.5289
6.50625	5.11155	6.50125	3.59829	6.50458	23.9301
6.51292	5.133	6.50792	3.60698	6.51125	24.3241
6.51958	5.15771	6.51458	3.61452	6.51792	24.7085
6.52625	5.18573	6.52125	3.62264	6.52458	25.082
6.53292	5.21721	6.52792	3.63203	6.53125	25.4448
6.53958	5.25189	6.53458	3.64348	6.53792	25.7974
6.54625	5.28809	6.54125	3.65698	6.54458	26.139
6.55292	5.32458	6.54792	3.67226	6.55125	26.4695
6.55958	5.36136	6.55458	3.68916	6.55792	26.7898
6.56625	5.39865	6.56125	3.70661	6.56458	27.1005
6.57292	5.43601	6.56792	3.72484	6.57125	27.4016
6.57958	5.47207	6.57458	3.74494	6.57792	27.693
6.58625	5.50611	6.58125	3.76727	6.58458	27.9746
6.59292	5.5384	6.58792	3.79194	6.59125	28.2458
6.59958	5.56892	6.59458	3.81938	6.59792	28.5062
6.60625	5.59736	6.60125	3.85071	6.60458	28.7544
6.61292	5.62302	6.60792	3.88616	6.61125	28.9897
6.61958	5.6468	6.61458	3.92359	6.61792	29.2101
6.62625	5.66972	6.62125	3.96162	6.62458	29.4157
6.63292	5.69187	6.62792	3.99933	6.63125	29.6066
6.63958	5.71314	6.63458	4.03555	6.63792	29.7824
6.64625	5.73397	6.64125	4.06986	6.64458	29.9428
6.65292	5.75607	6.64792	4.10146	6.65125	30.0872
6.65958	5.77942	6.65458	4.13042	6.65792	30.2179
6.66625	5.80393	6.66125	4.15654	6.66458	30.3358
6.67292	5.83011	6.66792	4.18042	6.67125	30.4415
6.67958	5.85937	6.67458	4.2031	6.67792	30.5357
6.68625	5.89346	6.68125	4.22445	6.68458	30.6215
6.69292	5.93309	6.68792	4.24413	6.69125	30.7023
6.69958	5.97823	6.69458	4.26222	6.69792	30.7787
6.70625	6.02812	6.70125	4.27908	6.70458	30.851
6.71292	6.08247	6.70792	4.29466	6.71125	30.9193
6.71958	6.1416	6.71458	4.30897	6.71792	30.9846
6.72625	6.2043	6.72125	4.32239	6.72458	31.0475
6.73292	6.26916	6.72792	4.33467	6.73125	31.109
6.73958	6.33562	6.73458	4.34607	6.73792	31.17
6.74625	6.40403	6.74125	4.35806	6.74458	31.2319
6.75292	6.47344	6.74792	4.37222	6.75125	31.2972
6.75958	6.54264	6.75458	4.3891	6.75792	31.3673
6.76625	6.61199	6.76125	4.40807	6.76458	31.4435
6.77292	6.6824	6.76792	4.43	6.77125	31.5254
6.77958	6.75479	6.77458	4.45505	6.77792	31.6139
6.78625	6.83009	6.78125	4.48222	6.78458	31.7083
6.79292	6.90999	6.78792	4.50982	6.79125	31.8076
6.79958	6.9952	6.79458	4.5363	6.79792	31.9109
6.80625	7.08546	6.80125	4.56141	6.80458	32.0181
6.81292	7.18077	6.80792	4.58468	6.81125	32.1294
6.81958	7.28071	6.81458	4.60509	6.81792	32.246
6.82625	7.38433	6.82125	4.62143	6.82458	32.3702
6.83292	7.49129	6.82792	4.63382	6.83125	32.5047
6.83958	7.6025	6.83458	4.64372	6.83792	32.6527
6.84625	7.71903	6.84125	4.65211	6.84458	32.8151
6.85292	7.84087	6.84792	4.65921	6.85125	32.9932
6.85958	7.96809	6.85458	4.66612	6.85792	33.1873
6.86625	8.10157	6.86125	4.67441	6.86458	33.399
6.87292	8.24118	6.86792	4.68551	6.87125	33.6307
6.87958	8.38586	6.87458	4.6986	6.87792	33.8838
6.88625	8.5354	6.88125	4.71368	6.88458	34.1622
6.89292	8.69065	6.88792	4.73172	6.89125	34.4706
6.89958	8.85203	6.89458	4.75397	6.89792	34.8118
6.90625	9.01867	6.90125	4.78128	6.90458	35.1864
6.91292	9.19031	6.90792	4.81333	6.91125	35.5952
6.91958	9.36707	6.91458	4.85151	6.91792	36.041
6.92625	9.5486	6.92125	4.89592	6.92458	36.5253
6.93292	9.73401	6.92792	4.94522	6.93125	37.0489
6.93958	9.9231	6.93458	4.99795	6.93792	37.6137
6.94625	10.1154	6.94125	5.05412	6.94458	38.2241
6.95292	10.3101	6.94792	5.11409	6.95125	38.8843
6.95958	10.507	6.95458	5.17629	6.95792	39.5978
6.96625	10.7063	6.96125	5.24041	6.96458	40.3689
6.97292	10.908	6.96792	5.30761	6.97125	41.2019
6.97958	11.1123	6.97458	5.37935	6.97792	42.1009
6.98625	11.3202	6.98125	5.45539	6.98458	43.0682
6.99292	11.5316	6.98792	5.53575	6.99125	44.1064
6.99958	11.746	6.99458	5.62081	6.99792	45.2177
7.00625	11.9606	7.00125	5.70994	7.00458	46.4046
7.01292	12.1743	7.00792	5.80209	7.01125	47.67
7.01958	12.3866	7.01458	5.8957	7.01792	49.0168
7.02625	12.5991	7.02125	5.98858	7.02458	50.4484
7.03292	12.8128	7.02792	6.07766	7.03125	51.9662
7.03958	13.0274	7.03458	6.16224	7.03792	53.5718
7.04625	13.2437	7.04125	6.24277	7.04458	55.2668
7.05292	13.4624	7.04792	6.31999	7.05125	57.0526
7.05958	13.6852	7.05458	6.39316	7.05792	58.9292
7.06625	13.9118	7.06125	6.4633	7.06458	60.8957
7.07292	14.1427	7.06792	6.53242	7.07125	62.9517
7.07958	14.3789	7.07458	6.60207	7.07792	65.0969
7.08625	14.621	7.08125	6.67173	7.08458	67.3289
7.09292	14.87	7.08792	6.74053	7.09125	69.6449
7.09958	15.1257	7.09458	6.81008	7.09792	72.042
7.10625	15.3877	7.10125	6.88151	7.10458	74.5181
7.11292	15.6553	7.10792	6.95497	7.11125	77.0703
7.11958	15.9289	7.11458	7.02897	7.11792	79.6927
7.12625	16.2108	7.12125	7.10412	7.12458	82.3802
7.13292	16.5018	7.12792	7.18081	7.13125	85.1274
7.13958	16.8015	7.13458	7.25804	7.13792	87.9294
7.14625	17.1091	7.14125	7.33465	7.14458	90.7796
7.15292	17.424	7.14792	7.41116	7.15125	93.6706
7.15958	17.7441	7.15458	7.4892	7.15792	96.5965
7.16625	18.0663	7.16125	7.56855	7.16458	99.5505
7.17292	18.3879	7.16792	7.64888	7.17125	102.524
7.17958	18.7081	7.17458	7.73013	7.17792	105.509
7.18625	19.0258	7.18125	7.81412	7.18458	108.498
7.19292	19.3398	7.18792	7.90262	7.19125	111.483
7.19958	19.6498	7.19458	7.99619	7.19792	114.454
7.20625	19.9565	7.20125	8.09415	7.20458	117.399
7.21292	20.2601	7.20792	8.196	7.21125	120.308
7.21958	20.5598	7.21458	8.30294	7.21792	123.168
7.22625	20.8564	7.22125	8.41488	7.22458	125.968
7.23292	21.151	7.22792	8.53015	7.23125	128.696
7.23958	21.4442	7.23458	8.64691	7.23792	131.341
7.24625	21.7363	7.24125	8.76585	7.24458	133.897
7.25292	22.0281	7.24792	8.88783	7.25125	136.357
7.25958	22.3211	7.25458	9.01261	7.25792	138.716
7.26625	22.616	7.26125	9.13897	7.26458	140.965
7.27292	22.9139	7.26792	9.26659	7.27125	143.1
7.27958	23.2169	7.27458	9.39685	7.27792	145.115
7.28625	23.5266	7.28125	9.53094	7.28458	147.006
7.29292	23.8441	7.28792	9.66922	7.29125	148.766
7.29958	24.1704	7.29458	9.81044	7.29792	150.393
7.30625	24.5051	7.30125	9.95449	7.30458	151.884
7.31292	24.848	7.30792	10.1015	7.31125	153.239
7.31958	25.1982	7.31458	10.2511	7.31792	154.456
7.32625	25.5551	7.32125	10.403	7.32458	155.531
7.33292	25.918	7.32792	10.5559	7.33125	156.465
7.33958	26.2855	7.33458	10.7098	7.33792	157.259
7.34625	26.6572	7.34125	10.8643	7.34458	157.914
7.35292	27.0328	7.34792	11.02	7.35125	158.431
7.35958	27.4124	7.35458	11.1763	7.35792	158.812
7.36625	27.795	7.36125	11.3326	7.36458	159.06
7.37292	28.1815	7.36792	11.4906	7.37125	159.176
7.37958	28.573	7.37458	11.6505	7.37792	159.168
7.38625	28.97	7.38125	11.8125	7.38458	159.036
7.39292	29.3718	7.38792	11.9752	7.39125	158.785
7.39958	29.7775	7.39458	12.1395	7.39792	158.417
7.40625	30.1887	7.40125	12.3057	7.40458	157.938
7.41292	30.6066	7.40792	12.4724	7.41125	157.352
7.41958	31.0314	7.41458	12.6398	7.41792	156.658
7.42625	31.4631	7.42125	12.8089	7.42458	155.861
7.43292	31.9021	7.42792	12.9802	7.43125	154.965
7.43958	32.3501	7.43458	13.1526	7.43792	153.978
7.44625	32.8065	7.44125	13.3245	7.44458	152.904
7.45292	33.2693	7.44792	13.4959	7.45125	151.749
7.45958	33.7368	7.45458	13.6669	7.45792	150.518
7.46625	34.2075	7.46125	13.8356	7.46458	149.22
7.47292	34.6812	7.46792	14.0007	7.47125	147.857
7.47958	35.1567	7.47458	14.1607	7.47792	146.435
7.48625	35.6331	7.48125	14.3167	7.48458	144.955
7.49292	36.1108	7.48792	14.4693	7.49125	143.423
7.49958	36.5916	7.49458	14.6187	7.49792	141.845
7.50625	37.0771	7.50125	14.7656	7.50458	140.225
7.51292	37.5675	7.50792	14.9108	7.51125	138.566
7.51958	38.063	7.51458	15.0563	7.51792	136.873
7.52625	38.5636	7.52125	15.2032	7.52458	135.151
7.53292	39.0691	7.52792	15.3524	7.53125	133.408
7.53958	39.579	7.53458	15.5055	7.53792	131.647
7.54625	40.0923	7.54125	15.6652	7.54458	129.87
7.55292	40.6084	7.54792	15.8334	7.55125	128.083
7.55958	41.1268	7.55458	16.0096	7.55792	126.287
7.56625	41.6475	7.56125	16.194	7.56458	124.488
7.57292	42.1697	7.56792	16.3863	7.57125	122.687
7.57958	42.6908	7.57458	16.5863	7.57792	120.888
7.58625	43.2104	7.58125	16.7931	7.58458	119.093
7.59292	43.7287	7.58792	17.0064	7.59125	117.305
7.59958	44.2462	7.59458	17.2264	7.59792	115.527
7.60625	44.7622	7.60125	17.4522	7.60458	113.761
7.61292	45.2764	7.60792	17.6829	7.61125	112.009
7.61958	45.7903	7.61458	17.9185	7.61792	110.273
7.62625	46.3044	7.62125	18.1593	7.62458	108.555
7.63292	46.8207	7.62792	18.4046	7.63125	106.856
7.63958	47.3397	7.63458	18.6536	7.63792	105.18
7.64625	47.8619	7.64125	18.9058	7.64458	103.525
7.65292	48.3887	7.64792	19.1618	7.65125	101.89
7.65958	48.9211	7.65458	19.422	7.65792	100.278
7.66625	49.4613	7.66125	19.6866	7.66458	98.6914
7.67292	50.0091	7.66792	19.9559	7.67125	97.1293
7.67958	50.5647	7.67458	20.2307	7.67792	95.5914
7.68625	51.128	7.68125	20.5121	7.68458	94.0812
7.69292	51.6983	7.68792	20.7999	7.69125	92.6026
7.69958	52.2752	7.69458	21.0929	7.69792	91.1573
7.70625	52.8585	7.70125	21.3893	7.70458	89.7463
7.71292	53.4485	7.70792	21.6883	7.71125	88.3733
7.71958	54.0441	7.71458	21.9909	7.71792	87.0411
7.72625	54.6452	7.72125	22.2973	7.72458	85.7497
7.73292	55.2528	7.72792	22.6069	7.73125	84.4975
7.73958	55.8667	7.73458	22.9179	7.73792	83.2842
7.74625	56.4846	7.74125	23.2302	7.74458	82.1092
7.75292	57.1042	7.74792	23.544	7.75125	80.9705
7.75958	57.7259	7.75458	23.8578	7.75792	79.8668
7.76625	58.349	7.76125	24.1705	7.76458	78.7982
7.77292	58.9724	7.76792	24.482	7.77125	77.764
7.77958	59.5953	7.77458	24.7944	7.77792	76.764
7.78625	60.2187	7.78125	25.1081	7.78458	75.7987
7.79292	60.8434	7.78792	25.4233	7.79125	74.8688
7.79958	61.4686	7.79458	25.7399	7.79792	73.9737
7.80625	62.093	7.80125	26.0582	7.80458	73.1127
7.81292	62.7156	7.80792	26.3778	7.81125	72.2859
7.81958	63.3359	7.81458	26.6988	7.81792	71.4931
7.82625	63.9521	7.82125	27.0208	7.82458	70.7342
7.83292	64.5632	7.82792	27.3432	7.83125	70.0092
7.83958	65.1692	7.83458	27.6657	7.83792	69.3178
7.84625	65.7713	7.84125	27.9878	7.84458	68.6599
7.85292	66.3697	7.84792	28.3098	7.85125	68.0352
7.85958	66.963	7.85458	28.6304	7.85792	67.4428
7.86625	67.551	7.86125	28.9478	7.86458	66.8816
7.87292	68.1339	7.86792	29.2623	7.87125	66.3503
7.87958	68.7123	7.87458	29.5741	7.87792	65.8497
7.88625	69.2868	7.88125	29.8837	7.88458	65.3789
7.89292	69.858	7.88792	30.1891	7.89125	64.9363
7.89958	70.4263	7.89458	30.4893	7.89792	64.5211
7.90625	70.9912	7.90125	30.7854	7.90458	64.1334
7.91292	71.5537	7.90792	31.0787	7.91125	63.7738
7.91958	72.1141	7.91458	31.3705	7.91792	63.4415
7.92625	72.6719	7.92125	31.6615	7.92458	63.1367
7.93292	73.2248	7.92792	31.9527	7.93125	62.8582
7.93958	73.7719	7.93458	32.2466	7.93792	62.6041
7.94625	74.3134	7.94125	32.5441	7.94458	62.3727
7.95292	74.8498	7.94792	32.8449	7.95125	62.1619
7.95958	75.3809	7.95458	33.1478	7.95792	61.969
7.96625	75.9073	7.96125	33.4521	7.96458	61.7911
7.97292	76.431	7.96792	33.7594	7.97125	61.6283
7.97958	76.954	7.97458	34.0705	7.97792	61.4798
7.98625	77.478	7.98125	34.3853	7.98458	61.3435
7.99292	78.0041	7.98792	34.7039	7.99125	61.2165
7.99958	78.5323	7.99458	35.0267	7.99792	61.0985
8.00625	79.0626	8.00125	35.3546	8.00458	60.9889
8.01292	79.596	8.00792	35.6875	8.01125	60.8857
8.01958	80.1329	8.01458	36.0246	8.01792	60.7867
8.02625	80.6737	8.02125	36.3653	8.02458	60.6909
8.03292	81.2165	8.02792	36.7103	8.03125	60.597
8.03958	81.7612	8.03458	37.0604	8.03792	60.5022
8.04625	82.308	8.04125	37.4162	8.04458	60.4051
8.05292	82.8574	8.04792	37.7775	8.05125	60.306
8.05958	83.4098	8.05458	38.1446	8.05792	60.2045
8.06625	83.9652	8.06125	38.5173	8.06458	60.099
8.07292	84.5241	8.06792	38.8936	8.07125	59.9891
8.07958	85.0867	8.07458	39.2723	8.07792	59.8761
8.08625	85.6537	8.08125	39.6532	8.08458	59.7607
8.09292	86.2259	8.08792	40.0377	8.09125	59.6414
8.09958	86.8043	8.09458	40.4266	8.09792	59.5177
8.10625	87.3898	8.10125	40.8212	8.10458	59.3897
8.11292	87.9838	8.10792	41.2227	8.11125	59.2568
8.11958	88.5881	8.11458	41.6318	8.11792	59.118
8.12625	89.2029	8.12125	42.0484	8.12458	58.9726
8.13292	89.8281	8.12792	42.4702	8.13125	58.8204
8.13958	90.4634	8.13458	42.8953	8.13792	58.6618
8.14625	91.1092	8.14125	43.3228	8.14458	58.498
8.15292	91.7652	8.14792	43.7525	8.15125	58.33
8.15958	92.4301	8.15458	44.184	8.15792	58.1576
8.16625	93.1042	8.16125	44.6173	8.16458	57.9786
8.17292	93.7882	8.16792	45.0527	8.17125	57.7921
8.17958	94.4838	8.17458	45.4903	8.17792	57.5974
8.18625	95.1918	8.18125	45.9301	8.18458	57.3928
8.19292	95.9121	8.18792	46.373	8.19125	57.1768
8.19958	96.6453	8.19458	46.8191	8.19792	56.9486
8.20625	97.3904	8.20125	47.2667	8.20458	56.7077
8.21292	98.1469	8.20792	47.7149	8.21125	56.4525
8.21958	98.9145	8.21458	48.1631	8.21792	56.1819
8.22625	99.6919	8.22125	48.611	8.22458	55.8972
8.23292	100.478	8.22792	49.0563	8.23125	55.5996
8.23958	101.272	8.23458	49.4974	8.23792	55.2896
8.24625	102.073	8.24125	49.9349	8.24458	54.9673
8.25292	102.878	8.24792	50.3694	8.25125	54.6329
8.25958	103.684	8.25458	50.8006	8.25792	54.2866
8.26625	104.488	8.26125	51.227	8.26458	53.9275
8.27292	105.286	8.26792	51.6476	8.27125	53.5555
8.27958	106.077	8.27458	52.0623	8.27792	53.171
8.28625	106.859	8.28125	52.4705	8.28458	52.7759
8.29292	107.628	8.28792	52.8716	8.29125	52.371
8.29958	108.384	8.29458	53.2657	8.29792	51.9566
8.30625	109.125	8.30125	53.6545	8.30458	51.5334
8.31292	109.848	8.30792	54.0391	8.31125	51.1016
8.31958	110.55	8.31458	54.418	8.31792	50.6608
8.32625	111.228	8.32125	54.7901	8.32458	50.2102
8.33292	111.88	8.32792	55.1557	8.33125	49.7504
8.33958	112.503	8.33458	55.5148	8.33792	49.2813
8.34625	113.094	8.34125	55.8663	8.34458	48.8034
8.35292	113.652	8.34792	56.2089	8.35125	48.3188
8.35958	114.174	8.35458	56.5431	8.35792	47.8306
8.36625	114.662	8.36125	56.8702	8.36458	47.3408
8.37292	115.114	8.36792	57.1899	8.37125	46.8506
8.37958	115.53	8.37458	57.5035	8.37792	46.362
8.38625	115.91	8.38125	57.8122	8.38458	45.8764
8.39292	116.251	8.38792	58.1186	8.39125	45.3942
8.39958	116.553	8.39458	58.4255	8.39792	44.9153
8.40625	116.818	8.40125	58.7366	8.40458	44.4413
8.41292	117.044	8.40792	59.0549	8.41125	43.973
8.41958	117.232	8.41458	59.3812	8.41792	43.5115
8.42625	117.382	8.42125	59.7169	8.42458	43.0571
8.43292	117.498	8.42792	60.0641	8.43125	42.6097
8.43958	117.579	8.43458	60.4234	8.43792	42.1681
8.44625	117.626	8.44125	60.7945	8.44458	41.7316
8.45292	117.639	8.44792	61.1761	8.45125	41.3014
8.45958	117.621	8.45458	61.5692	8.45792	40.8774
8.46625	117.573	8.46125	61.9757	8.46458	40.4593
8.47292	117.496	8.46792	62.396	8.47125	40.0461
8.47958	117.393	8.47458	62.8301	8.47792	39.6364
8.48625	117.264	8.48125	63.2772	8.48458	39.2303
8.49292	117.113	8.48792	63.7378	8.49125	38.827
8.49958	116.941	8.49458	64.2105	8.49792	38.4264
8.50625	116.751	8.50125	64.6933	8.50458	38.0292
8.51292	116.545	8.50792	65.1839	8.51125	37.638
8.51958	116.325	8.51458	65.6812	8.51792	37.2559
8.52625	116.096	8.52125	66.1844	8.52458	36.8836
8.53292	115.862	8.52792	66.6919	8.53125	36.5217
8.53958	115.626	8.53458	67.2026	8.53792	36.1701
8.54625	115.391	8.54125	67.7155	8.54458	35.8292
8.55292	115.162	8.54792	68.2316	8.55125	35.4974
8.55958	114.943	8.55458	68.7515	8.55792	35.1734
8.56625	114.734	8.56125	69.2743	8.56458	34.8576
8.57292	114.537	8.56792	69.7999	8.57125	34.5508
8.57958	114.356	8.57458	70.3287	8.57792	34.2539
8.58625	114.195	8.58125	70.8619	8.58458	33.966
8.59292	114.059	8.58792	71.3974	8.59125	33.6872
8.59958	113.952	8.59458	71.9341	8.59792	33.4179
8.60625	113.878	8.60125	72.4719	8.60458	33.1574
8.61292	113.84	8.60792	73.0098	8.61125	32.9044
8.61958	113.842	8.61458	73.5461	8.61792	32.6569
8.62625	113.887	8.62125	74.0777	8.62458	32.4147
8.63292	113.977	8.62792	74.6022	8.63125	32.1768
8.63958	114.117	8.63458	75.1171	8.63792	31.942
8.64625	114.31	8.64125	75.6203	8.64458	31.7091
8.65292	114.56	8.64792	76.109	8.65125	31.4782
8.65958	114.871	8.65458	76.5802	8.65792	31.2496
8.66625	115.246	8.66125	77.0323	8.66458	31.0239
8.67292	115.684	8.66792	77.4647	8.67125	30.8024
8.67958	116.186	8.67458	77.8758	8.67792	30.5861
8.68625	116.752	8.68125	78.2633	8.68458	30.3764
8.69292	117.384	8.68792	78.6263	8.69125	30.1744
8.69958	118.083	8.69458	78.9651	8.69792	29.9805
8.70625	118.848	8.70125	79.2791	8.70458	29.7946
8.71292	119.681	8.70792	79.567	8.71125	29.6172
8.71958	120.581	8.71458	79.8296	8.71792	29.4489
8.72625	121.549	8.72125	80.0677	8.72458	29.2903
8.73292	122.583	8.72792	80.2808	8.73125	29.1405
8.73958	123.677	8.73458	80.468	8.73792	29.0002
8.74625	124.828	8.74125	80.6289	8.74458	28.8707
8.75292	126.031	8.74792	80.7636	8.75125	28.7532
8.75958	127.282	8.75458	80.8709	8.75792	28.6483
8.76625	128.578	8.76125	80.9512	8.76458	28.5558
8.77292	129.912	8.76792	81.0063	8.77125	28.4771
8.77958	131.28	8.77458	81.037	8.77792	28.4119
8.78625	132.677	8.78125	81.0452	8.78458	28.3601
8.79292	134.097	8.78792	81.0326	8.79125	28.321
8.79958	135.536	8.79458	81.0012	8.79792	28.2945
8.80625	136.988	8.80125	80.9515	8.80458	28.2815
8.81292	138.446	8.80792	80.8832	8.81125	28.2829
8.81958	139.902	8.81458	80.7976	8.81792	28.3006
8.82625	141.349	8.82125	80.6954	8.82458	28.3361
8.83292	142.781	8.82792	80.577	8.83125	28.3913
8.83958	144.192	8.83458	80.4435	8.83792	28.4675
8.84625	145.572	8.84125	80.2968	8.84458	28.5656
8.85292	146.915	8.84792	80.1384	8.85125	28.6871
8.85958	148.216	8.85458	79.9687	8.85792	28.8325
8.86625	149.47	8.86125	79.7887	8.86458	29.003
8.87292	150.672	8.86792	79.5994	8.87125	29.1984
8.87958	151.818	8.87458	79.4014	8.87792	29.4204
8.88625	152.904	8.88125	79.1953	8.88458	29.6712
8.89292	153.925	8.88792	78.9829	8.89125	29.953
8.89958	154.879	8.89458	78.7657	8.89792	30.2672
8.90625	155.76	8.90125	78.5447	8.90458	30.6143
8.91292	156.569	8.90792	78.3211	8.91125	30.9962
8.91958	157.302	8.91458	78.0965	8.91792	31.4142
8.92625	157.958	8.92125	77.8713	8.92458	31.8695
8.93292	158.534	8.92792	77.6442	8.93125	32.3631
8.93958	159.031	8.93458	77.4148	8.93792	32.8969
8.94625	159.446	8.94125	77.1844	8.94458	33.4746
8.95292	159.78	8.94792	76.9545	8.95125	34.0984
8.95958	160.03	8.95458	76.7263	8.95792	34.7701
8.96625	160.197	8.96125	76.5008	8.96458	35.4902
8.97292	160.28	8.96792	76.279	8.97125	36.2597
8.97958	160.282	8.97458	76.0607	8.97792	37.0789
8.98625	160.203	8.98125	75.8455	8.98458	37.9469
8.99292	160.044	8.98792	75.6331	8.99125	38.8639
8.99958	159.806	8.99458	75.4232	8.99792	39.8298
9.00625	159.488	9.00125	75.2165	9.00458	40.8452
9.01292	159.094	9.00792	75.0145	9.01125	41.9108
9.01958	158.627	9.01458	74.8203	9.01792	43.0272
9.02625	158.089	9.02125	74.6358	9.02458	44.1971
9.03292	157.483	9.02792	74.4613	9.03125	45.4227
9.03958	156.811	9.03458	74.2979	9.03792	46.7069
9.04625	156.078	9.04125	74.1471	9.04458	48.0509
9.05292	155.287	9.04792	74.0101	9.05125	49.4552
9.05958	154.438	9.05458	73.8872	9.05792	50.9204
9.06625	153.537	9.06125	73.7805	9.06458	52.4455
9.07292	152.585	9.06792	73.6919	9.07125	54.0296
9.07958	151.587	9.07458	73.6222	9.07792	55.6715
9.08625	150.546	9.08125	73.5722	9.08458	57.3702
9.09292	149.466	9.08792	73.544	9.09125	59.1249
9.09958	148.352	9.09458	73.5406	9.09792	60.9344
9.10625	147.204	9.10125	73.5631	9.10458	62.7983
9.11292	146.024	9.10792	73.6144	9.11125	64.7161
9.11958	144.816	9.11458	73.6983	9.11792	66.6863
9.12625	143.58	9.12125	73.8167	9.12458	68.706
9.13292	142.32	9.12792	73.9711	9.13125	70.7739
9.13958	141.036	9.13458	74.1627	9.13792	72.8892
9.14625	139.73	9.14125	74.3945	9.14458	75.0498
9.15292	138.403	9.14792	74.6671	9.15125	77.2527
9.15958	137.057	9.15458	74.9817	9.15792	79.4952
9.16625	135.695	9.16125	75.3388	9.16458	81.7762
9.17292	134.318	9.16792	75.7389	9.17125	84.0933
9.17958	132.928	9.17458	76.1823	9.17792	86.4451
9.18625	131.529	9.18125	76.6697	9.18458	88.8281
9.19292	130.123	9.18792	77.2008	9.19125	91.2374
9.19958	128.712	9.19458	77.775	9.19792	93.6699
9.20625	127.296	9.20125	78.3912	9.20458	96.1245
9.21292	125.876	9.20792	79.0495	9.21125	98.5987
9.21958	124.453	9.21458	79.7482	9.21792	101.086
9.22625	123.03	9.22125	80.4832	9.22458	103.582
9.23292	121.606	9.22792	81.2516	9.23125	106.083
9.23958	120.185	9.23458	82.051	9.23792	108.587
9.24625	118.769	9.24125	82.8819	9.24458	111.088
9.25292	117.361	9.24792	83.7417	9.25125	113.581
9.25958	115.962	9.25458	84.6278	9.25792	116.061
9.26625	114.573	9.26125	85.5372	9.26458	118.524
9.27292	113.193	9.26792	86.4673	9.27125	120.966
9.27958	111.823	9.27458	87.4161	9.27792	123.382
9.28625	110.462	9.28125	88.3785	9.28458	125.766
9.29292	109.112	9.28792	89.3495	9.29125	128.112
9.29958	107.775	9.29458	90.3243	9.29792	130.415
9.30625	106.453	9.30125	91.2983	9.30458	132.671
9.31292	105.147	9.30792	92.2653	9.31125	134.877
9.31958	103.856	9.31458	93.2174	9.31792	137.027
9.32625	102.58	9.32125	94.1478	9.32458	139.118
9.33292	101.32	9.32792	95.0509	9.33125	141.147
9.33958	100.075	9.33458	95.9222	9.33792	143.115
9.34625	98.8437	9.34125	96.7567	9.34458	145.016
9.35292	97.6273	9.34792	97.5512	9.35125	146.851
9.35958	96.4274	9.35458	98.304	9.35792	148.616
9.36625	95.2455	9.36125	99.0132	9.36458	150.311
9.37292	94.0822	9.36792	99.6775	9.37125	151.933
9.37958	92.9383	9.37458	100.294	9.37792	153.484
9.38625	91.8149	9.38125	100.861	9.38458	154.964
9.39292	90.7131	9.38792	101.378	9.39125	156.371
9.39958	89.6333	9.39458	101.842	9.39792	157.704
9.40625	88.5748	9.40125	102.255	9.40458	158.962
9.41292	87.5379	9.40792	102.616	9.41125	160.145
9.41958	86.5223	9.41458	102.925	9.41792	161.253
9.42625	85.5278	9.42125	103.183	9.42458	162.284
9.43292	84.5545	9.42792	103.387	9.43125	163.238
9.43958	83.604	9.43458	103.535	9.43792	164.117
9.44625	82.6773	9.44125	103.623	9.44458	164.923
9.45292	81.7737	9.44792	103.649	9.45125	165.653
9.45958	80.8941	9.45458	103.611	9.45792	166.309
9.46625	80.0392	9.46125	103.511	9.46458	166.889
9.47292	79.2097	9.46792	103.348	9.47125	167.393
9.47958	78.405	9.47458	103.128	9.47792	167.82
9.48625	77.6264	9.48125	102.853	9.48458	168.173
9.49292	76.8753	9.48792	102.53	9.49125	168.455
9.49958	76.1511	9.49458	102.162	9.49792	168.668
9.50625	75.453	9.50125	101.754	9.50458	168.814
9.51292	74.781	9.50792	101.311	9.51125	168.897
9.51958	74.1354	9.51458	100.833	9.51792	168.921
9.52625	73.5156	9.52125	100.324	9.52458	168.888
9.53292	72.9216	9.52792	99.7861	9.53125	168.799
9.53958	72.3542	9.53458	99.2199	9.53792	168.659
9.54625	71.814	9.54125	98.626	9.54458	168.47
9.55292	71.3012	9.54792	98.006	9.55125	168.235
9.55958	70.8159	9.55458	97.3606	9.55792	167.953
9.56625	70.3587	9.56125	96.6899	9.56458	167.628
9.57292	69.9295	9.56792	95.9949	9.57125	167.261
9.57958	69.5284	9.57458	95.2787	9.57792	166.851
9.58625	69.1561	9.58125	94.5445	9.58458	166.401
9.59292	68.8129	9.58792	93.7956	9.59125	165.914
9.59958	68.4987	9.59458	93.0345	9.59792	165.392
9.60625	68.2132	9.60125	92.2638	9.60458	164.838
9.61292	67.9562	9.60792	91.4863	9.61125	164.251
9.61958	67.7293	9.61458	90.7034	9.61792	163.632
9.62625	67.5336	9.62125	89.9155	9.62458	162.987
9.63292	67.3688	9.62792	89.122	9.63125	162.314
9.63958	67.2359	9.63458	88.3238	9.63792	161.615
9.64625	67.1365	9.64125	87.5226	9.64458	160.889
9.65292	67.0727	9.64792	86.7189	9.65125	160.137
9.65958	67.0436	9.65458	85.9127	9.65792	159.36
9.66625	67.0491	9.66125	85.1048	9.66458	158.556
9.67292	67.0907	9.66792	84.2981	9.67125	157.728
9.67958	67.1692	9.67458	83.4938	9.67792	156.876
9.68625	67.2844	9.68125	82.6922	9.68458	156.004
9.69292	67.4366	9.68792	81.8935	9.69125	155.115
9.69958	67.6278	9.69458	81.0981	9.69792	154.21
9.70625	67.8588	9.70125	80.3065	9.70458	153.289
9.71292	68.1285	9.70792	79.5196	9.71125	152.352
9.71958	68.4355	9.71458	78.7392	9.71792	151.397
9.72625	68.7782	9.72125	77.9661	9.72458	150.423
9.73292	69.1543	9.72792	77.2014	9.73125	149.431
9.73958	69.5619	9.73458	76.4454	9.73792	148.421
9.74625	69.9993	9.74125	75.6984	9.74458	147.395
9.75292	70.4648	9.74792	74.959	9.75125	146.355
9.75958	70.9572	9.75458	74.2254	9.75792	145.302
9.76625	71.4754	9.76125	73.4958	9.76458	144.237
9.77292	72.0183	9.76792	72.7691	9.77125	143.165
9.77958	72.5833	9.77458	72.0446	9.77792	142.085
9.78625	73.1679	9.78125	71.3215	9.78458	140.999
9.79292	73.7705	9.78792	70.6003	9.79125	139.906
9.79958	74.3885	9.79458	69.8806	9.79792	138.809
9.80625	75.0191	9.80125	69.1641	9.80458	137.709
9.81292	75.6589	9.80792	68.4511	9.81125	136.604
9.81958	76.3036	9.81458	67.7417	9.81792	135.493
9.82625	76.9489	9.82125	67.0368	9.82458	134.376
9.83292	77.5906	9.82792	66.337	9.83125	133.255
9.83958	78.2263	9.83458	65.6438	9.83792	132.127
9.84625	78.8528	9.84125	64.9568	9.84458	130.991
9.85292	79.4667	9.84792	64.2774	9.85125	129.846
9.85958	80.0655	9.85458	63.6069	9.85792	128.694
9.86625	80.6461	9.86125	62.9464	9.86458	127.535
9.87292	81.2056	9.86792	62.2956	9.87125	126.37
9.87958	81.7401	9.87458	61.6531	9.87792	125.199
9.88625	82.2464	9.88125	61.0183	9.88458	124.024
9.89292	82.722	9.88792	60.3913	9.89125	122.846
9.89958	83.1649	9.89458	59.7715	9.89792	121.666
9.90625	83.5727	9.90125	59.1572	9.90458	120.483
9.91292	83.943	9.90792	58.5474	9.91125	119.295
9.91958	84.2752	9.91458	57.9424	9.91792	118.106
9.92625	84.5697	9.92125	57.343	9.92458	116.915
9.93292	84.8247	9.92792	56.7479	9.93125	115.723
9.93958	85.039	9.93458	56.1553	9.93792	114.53
9.94625	85.2126	9.94125	55.5639	9.94458	113.339
9.95292	85.3461	9.94792	54.9734	9.95125	112.151
9.95958	85.4389	9.95458	54.3845	9.95792	110.967
9.96625	85.4891	9.96125	53.7974	9.96458	109.788
9.97292	85.4972	9.96792	53.2125	9.97125	108.615
9.97958	85.4649	9.97458	52.6307	9.97792	107.45
9.98625	85.3935	9.98125	52.0538	9.98458	106.294
9.99292	85.2838	9.98792	51.4825	9.99125	105.149
9.99958	85.1358	9.99458	50.9161	9.99792	104.015
10.0062	84.9511	10.0013	50.3535	10.0046	102.891
10.0129	84.7306	10.0079	49.7941	10.0113	101.776
10.0196	84.4763	10.0146	49.2382	10.0179	100.668
10.0262	84.1898	10.0213	48.6852	10.0246	99.5652
10.0329	83.8717	10.0279	48.1358	10.0312	98.4689
10.0396	83.5236	10.0346	47.5907	10.0379	97.3781
10.0463	83.1466	10.0412	47.0512	10.0446	96.293
10.0529	82.743	10.0479	46.5181	10.0512	95.2149
10.0596	82.3143	10.0546	45.9908	10.0579	94.1456
10.0663	81.8618	10.0612	45.4697	10.0646	93.0866
10.0729	81.3878	10.0679	44.9541	10.0712	92.037
10.0796	80.8947	10.0746	44.4443	10.0779	90.9974
10.0862	80.3856	10.0813	43.9393	10.0846	89.9692
10.0929	79.8619	10.0879	43.4399	10.0913	88.9554
10.0996	79.3238	10.0946	42.9481	10.0979	87.9585
10.1062	78.7714	10.1013	42.465	10.1046	86.9788
10.1129	78.2052	10.1079	41.9923	10.1113	86.0177
10.1196	77.6272	10.1146	41.531	10.1179	85.0772
10.1263	77.0386	10.1212	41.0828	10.1246	84.1582
10.1329	76.4406	10.1279	40.6484	10.1312	83.2594
10.1396	75.8341	10.1346	40.2271	10.1379	82.379
10.1463	75.221	10.1412	39.8173	10.1446	81.5172
10.1529	74.6028	10.1479	39.4172	10.1512	80.6733
10.1596	73.9797	10.1546	39.0254	10.1579	79.8465
10.1662	73.3515	10.1613	38.6408	10.1646	79.036
10.1729	72.7188	10.1679	38.2624	10.1713	78.2425
10.1796	72.0841	10.1746	37.8895	10.1779	77.4666
10.1862	71.4495	10.1813	37.5226	10.1846	76.7105
10.1929	70.8157	10.1879	37.1621	10.1913	75.976
10.1996	70.1833	10.1946	36.808	10.1979	75.2631
10.2063	69.5522	10.2012	36.4601	10.2046	74.5704
10.2129	68.922	10.2079	36.1193	10.2112	73.8981
10.2196	68.2921	10.2146	35.7856	10.2179	73.2476
10.2263	67.6628	10.2212	35.4593	10.2246	72.619
10.2329	67.0356	10.2279	35.1405	10.2312	72.0122
10.2396	66.4116	10.2346	34.8299	10.2379	71.4273
10.2462	65.7925	10.2413	34.5275	10.2446	70.8665
10.2529	65.1798	10.2479	34.2314	10.2513	70.3302
10.2596	64.5738	10.2546	33.9422	10.2579	69.8184
10.2662	63.9731	10.2613	33.661	10.2646	69.3309
10.2729	63.3769	10.2679	33.3879	10.2713	68.869
10.2796	62.7854	10.2746	33.1217	10.2779	68.4348
10.2863	62.1988	10.2812	32.862	10.2846	68.0291
10.2929	61.6174	10.2879	32.6094	10.2912	67.6534
10.2996	61.0408	10.2946	32.3637	10.2979	67.3077
10.3063	60.4685	10.3012	32.1237	10.3046	66.9919
10.3129	59.8991	10.3079	31.8876	10.3112	66.7053
10.3196	59.3331	10.3146	31.6554	10.3179	66.4491
10.3262	58.7705	10.3212	31.4279	10.3246	66.2256
10.3329	58.2102	10.3279	31.2066	10.3313	66.0364
10.3396	57.6513	10.3346	30.9911	10.3379	65.8834
10.3462	57.0948	10.3413	30.7807	10.3446	65.7686
10.3529	56.5429	10.3479	30.5768	10.3513	65.6962
10.3596	55.9962	10.3546	30.3813	10.3579	65.6696
10.3663	55.4545	10.3613	30.1958	10.3646	65.6898
10.3729	54.919	10.3679	30.0193	10.3712	65.7585
10.3796	54.3921	10.3746	29.8528	10.3779	65.8789
10.3863	53.8746	10.3812	29.6981	10.3846	66.0558
10.3929	53.3659	10.3879	29.5574	10.3912	66.2909
10.3996	52.8654	10.3946	29.4311	10.3979	66.5867
10.4062	52.373	10.4012	29.3182	10.4046	66.9467
10.4129	51.8886	10.4079	29.2191	10.4113	67.3765
10.4196	51.412	10.4146	29.1354	10.4179	67.8807
10.4262	50.9434	10.4213	29.0691	10.4246	68.4613
10.4329	50.4833	10.4279	29.02	10.4313	69.1215
10.4396	50.0323	10.4346	28.9879	10.4379	69.8659
10.4462	49.5905	10.4413	28.973	10.4446	70.7001
10.4529	49.1579	10.4479	28.9769	10.4512	71.6262
10.4596	48.7349	10.4546	29.0002	10.4579	72.6458
10.4663	48.3209	10.4612	29.0423	10.4646	73.7619
10.4729	47.9158	10.4679	29.1019	10.4712	74.9781
10.4796	47.519	10.4746	29.1782	10.4779	76.296
10.4863	47.1311	10.4812	29.2723	10.4846	77.7144
10.4929	46.7523	10.4879	29.3849	10.4913	79.234
10.4996	46.3822	10.4946	29.5162	10.4979	80.8548
10.5062	46.0208	10.5013	29.6668	10.5046	82.5763
10.5129	45.6687	10.5079	29.8388	10.5113	84.396
10.5196	45.3252	10.5146	30.0352	10.5179	86.3109
10.5262	44.9893	10.5213	30.2571	10.5246	88.3177
10.5329	44.6613	10.5279	30.5051	10.5312	90.4123
10.5396	44.3422	10.5346	30.7798	10.5379	92.5908
10.5463	44.0322	10.5412	31.0827	10.5446	94.8481
10.5529	43.7297	10.5479	31.4159	10.5512	97.1777
10.5596	43.4344	10.5546	31.7816	10.5579	99.5719
10.5663	43.1463	10.5612	32.1817	10.5646	102.024
10.5729	42.866	10.5679	32.6176	10.5712	104.525
10.5796	42.5925	10.5746	33.0915	10.5779	107.07
10.5862	42.3247	10.5813	33.6061	10.5846	109.648
10.5929	42.0634	10.5879	34.1632	10.5913	112.25
10.5996	41.8095	10.5946	34.7646	10.5979	114.864
10.6062	41.563	10.6013	35.4119	10.6046	117.48
10.6129	41.3214	10.6079	36.1083	10.6113	120.086
10.6196	41.0836	10.6146	36.8573	10.6179	122.669
10.6263	40.8497	10.6212	37.6615	10.6246	125.218
10.6329	40.6201	10.6279	38.5246	10.6312	127.722
10.6396	40.3943	10.6346	39.4497	10.6379	130.172
10.6463	40.1706	10.6412	40.4409	10.6446	132.56
10.6529	39.9487	10.6479	41.5021	10.6512	134.876
10.6596	39.7297	10.6546	42.6375	10.6579	137.112
10.6662	39.5148	10.6613	43.8524	10.6646	139.26
10.6729	39.3031	10.6679	45.1505	10.6713	141.314
10.6796	39.0928	10.6746	46.5353	10.6779	143.267
10.6862	38.8845	10.6813	48.0086	10.6846	145.112
10.6929	38.68	10.6879	49.573	10.6913	146.845
10.6996	38.4798	10.6946	51.2299	10.6979	148.461
10.7063	38.2825	10.7012	52.9796	10.7046	149.956
10.7129	38.088	10.7079	54.8229	10.7112	151.325
10.7196	37.8987	10.7146	56.7611	10.7179	152.563
10.7263	37.7168	10.7212	58.7955	10.7246	153.668
10.7329	37.5426	10.7279	60.9248	10.7312	154.64
10.7396	37.3761	10.7346	63.1478	10.7379	155.476
10.7462	37.2168	10.7413	65.4626	10.7446	156.173
10.7529	37.065	10.7479	67.8665	10.7513	156.734
10.7596	36.9207	10.7546	70.3553	10.7579	157.162
10.7662	36.7834	10.7613	72.9257	10.7646	157.458
10.7729	36.6519	10.7679	75.5742	10.7713	157.625
10.7796	36.5254	10.7746	78.2951	10.7779	157.665
10.7863	36.4039	10.7812	81.0823	10.7846	157.585
10.7929	36.288	10.7879	83.9298	10.7912	157.387
10.7996	36.1775	10.7946	86.8292	10.7979	157.075
10.8063	36.0712	10.8012	89.7713	10.8046	156.653
10.8129	35.9679	10.8079	92.7471	10.8112	156.126
10.8196	35.8665	10.8146	95.7481	10.8179	155.5
10.8262	35.7669	10.8212	98.7643	10.8246	154.78
10.8329	35.6687	10.8279	101.784	10.8313	153.973
10.8396	35.5704	10.8346	104.797	10.8379	153.084
10.8462	35.4707	10.8413	107.793	10.8446	152.118
10.8529	35.3693	10.8479	110.763	10.8513	151.083
10.8596	35.2663	10.8546	113.695	10.8579	149.987
10.8663	35.161	10.8613	116.582	10.8646	148.836
10.8729	35.0529	10.8679	119.416	10.8712	147.634
10.8796	34.9423	10.8746	122.191	10.8779	146.386
10.8863	34.8293	10.8812	124.898	10.8846	145.096
10.8929	34.7149	10.8879	127.528	10.8912	143.769
10.8996	34.6005	10.8946	130.075	10.8979	142.41
10.9062	34.4871	10.9012	132.529	10.9046	141.021
10.9129	34.3735	10.9079	134.882	10.9113	139.606
10.9196	34.2597	10.9146	137.127	10.9179	138.168
10.9262	34.1471	10.9213	139.255	10.9246	136.711
10.9329	34.0364	10.9279	141.26	10.9313	135.238
10.9396	33.9268	10.9346	143.138	10.9379	133.75
10.9462	33.817	10.9413	144.884	10.9446	132.25
10.9529	33.707	10.9479	146.497	10.9512	130.741
10.9596	33.5962	10.9546	147.976	10.9579	129.228
10.9663	33.483	10.9612	149.319	10.9646	127.712
10.9729	33.3665	10.9679	150.528	10.9712	126.194
10.9796	33.2465	10.9746	151.602	10.9779	124.674
10.9863	33.1236	10.9812	152.542	10.9846	123.154
10.9929	32.999	10.9879	153.349	10.9913	121.635
10.9996	32.8729	10.9946	154.027	10.9979	120.119
11.0062	32.7453	11.0013	154.579	11.0046	118.605
11.0129	32.6159	11.0079	155.008	11.0113	117.093
11.0196	32.4846	11.0146	155.317	11.0179	115.587
11.0262	32.3516	11.0213	155.511	11.0246	114.09
11.0329	32.2158	11.0279	155.591	11.0312	112.604
11.0396	32.0771	11.0346	155.561	11.0379	111.13
11.0463	31.9349	11.0412	155.422	11.0446	109.671
11.0529	31.7894	11.0479	155.181	11.0512	108.227
11.0596	31.641	11.0546	154.842	11.0579	106.798
11.0663	31.4893	11.0612	154.411	11.0646	105.381
11.0729	31.3345	11.0679	153.893	11.0712	103.976
11.0796	31.177	11.0746	153.292	11.0779	102.583
11.0862	31.0179	11.0813	152.612	11.0846	101.204
11.0929	30.8577	11.0879	151.858	11.0913	99.8386
11.0996	30.6969	11.0946	151.033	11.0979	98.4902
11.1062	30.5365	11.1013	150.142	11.1046	97.16
11.1129	30.3779	11.1079	149.189	11.1113	95.8476
11.1196	30.2213	11.1146	148.182	11.1179	94.5533
11.1263	30.0679	11.1212	147.125	11.1246	93.2776
11.1329	29.9178	11.1279	146.021	11.1312	92.0193
11.1396	29.7707	11.1346	144.875	11.1379	90.7763
11.1463	29.6261	11.1412	143.69	11.1446	89.5474
11.1529	29.4838	11.1479	142.468	11.1512	88.3339
11.1596	29.3435	11.1546	141.212	11.1579	87.1357
11.1662	29.2046	11.1613	139.925	11.1646	85.9515
11.1729	29.0674	11.1679	138.612	11.1713	84.7797
11.1796	28.9323	11.1746	137.273	11.1779	83.6202
11.1862	28.7995	11.1813	135.912	11.1846	82.475
11.1929	28.6683	11.1879	134.533	11.1913	81.345
11.1996	28.5393	11.1946	133.141	11.1979	80.231
11.2063	28.4125	11.2012	131.738	11.2046	79.1339
11.2129	28.2881	11.2079	130.326	11.2112	78.0561
11.2196	28.1662	11.2146	128.91	11.2179	76.9986
11.2263	28.046	11.2212	127.492	11.2246	75.9616
11.2329	27.9279	11.2279	126.074	11.2312	74.9443
11.2396	27.8119	11.2346	124.658	11.2379	73.9465
11.2462	27.6984	11.2413	123.244	11.2446	72.9681
11.2529	27.5865	11.2479	121.835	11.2513	72.0083
11.2596	27.4757	11.2546	120.43	11.2579	71.0675
11.2662	27.3663	11.2613	119.029	11.2646	70.1464
11.2729	27.2578	11.2679	117.632	11.2713	69.2449
11.2796	27.1495	11.2746	116.239	11.2779	68.3622
11.2863	27.0413	11.2812	114.847	11.2846	67.499
11.2929	26.9339	11.2879	113.456	11.2912	66.6567
11.2996	26.8267	11.2946	112.067	11.2979	65.837
11.3063	26.7191	11.3012	110.678	11.3046	65.0401
11.3129	26.6105	11.3079	109.291	11.3112	64.2677
11.3196	26.502	11.3146	107.906	11.3179	63.5223
11.3262	26.3933	11.3212	106.526	11.3246	62.8054
11.3329	26.2846	11.3279	105.149	11.3313	62.1178
11.3396	26.1767	11.3346	103.779	11.3379	61.4588
11.3462	26.0704	11.3413	102.417	11.3446	60.828
11.3529	25.9672	11.3479	101.066	11.3513	60.2264
11.3596	25.8673	11.3546	99.7262	11.3579	59.6548
11.3663	25.7702	11.3613	98.401	11.3646	59.1143
11.3729	25.6748	11.3679	97.0916	11.3712	58.6046
11.3796	25.5803	11.3746	95.7985	11.3779	58.1262
11.3863	25.4869	11.3812	94.5218	11.3846	57.6811
11.3929	25.3943	11.3879	93.261	11.3912	57.27
11.3996	25.3026	11.3946	92.0155	11.3979	56.8934
11.4062	25.2121	11.4012	90.7849	11.4046	56.5516
11.4129	25.124	11.4079	89.5698	11.4113	56.248
11.4196	25.0384	11.4146	88.3712	11.4179	55.9854
11.4262	24.9556	11.4213	87.1881	11.4246	55.7645
11.4329	24.8757	11.4279	86.0199	11.4313	55.5859
11.4396	24.7984	11.4346	84.867	11.4379	55.4513
11.4462	24.7233	11.4413	83.7301	11.4446	55.3629
11.4529	24.6494	11.4479	82.6104	11.4512	55.321
11.4596	24.5772	11.4546	81.5081	11.4579	55.3253
11.4663	24.5062	11.4612	80.4252	11.4646	55.3775
11.4729	24.4371	11.4679	79.3622	11.4712	55.4799
11.4796	24.3695	11.4746	78.3195	11.4779	55.6347
11.4863	24.3034	11.4812	77.2976	11.4846	55.8432
11.4929	24.2394	11.4879	76.2973	11.4913	56.1073
11.4996	24.1767	11.4946	75.3212	11.4979	56.4307
11.5062	24.1156	11.5013	74.369	11.5046	56.8153
11.5129	24.0547	11.5079	73.4414	11.5113	57.2628
11.5196	23.9937	11.5146	72.5376	11.5179	57.7747
11.5262	23.9325	11.5213	71.6568	11.5246	58.353
11.5329	23.8717	11.5279	70.7978	11.5312	58.9997
11.5396	23.8121	11.5346	69.9582	11.5379	59.7171
11.5463	23.7531	11.5412	69.1371	11.5446	60.5067
11.5529	23.6933	11.5479	68.3342	11.5512	61.3686
11.5596	23.6331	11.5546	67.5503	11.5579	62.3019
11.5663	23.5724	11.5612	66.7877	11.5646	63.3041
11.5729	23.5108	11.5679	66.0469	11.5712	64.3711
11.5796	23.4481	11.5746	65.328	11.5779	65.4982
11.5862	23.3841	11.5813	64.629	11.5846	66.6818
11.5929	23.3195	11.5879	63.9492	11.5913	67.9193
11.5996	23.253	11.5946	63.2881	11.5979	69.2055
11.6062	23.1848	11.6013	62.6431	11.6046	70.5348
11.6129	23.116	11.6079	62.0134	11.6113	71.9028
11.6196	23.0463	11.6146	61.3993	11.6179	73.3039
11.6263	22.9765	11.6212	60.8021	11.6246	74.7296
11.6329	22.907	11.6279	60.2223	11.6312	76.1695
11.6396	22.8387	11.6346	59.6583	11.6379	77.616
11.6463	22.7704	11.6412	59.1097	11.6446	79.0626
11.6529	22.7008	11.6479	58.5762	11.6512	80.5009
11.6596	22.6306	11.6546	58.0561	11.6579	81.9215
11.6662	22.5591	11.6613	57.5489	11.6646	83.3161
11.6729	22.4868	11.6679	57.0535	11.6713	84.6778
11.6796	22.4135	11.6746	56.5705	11.6779	85.9978
11.6862	22.3402	11.6813	56.0992	11.6846	87.2665
11.6929	22.2675	11.6879	55.6391	11.6913	88.4757
11.6996	22.1947	11.6946	55.1901	11.6979	89.6188
11.7063	22.1226	11.7012	54.7516	11.7046	90.6898
11.7129	22.0518	11.7079	54.3226	11.7112	91.6846
11.7196	21.9821	11.7146	53.9019	11.7179	92.5989
11.7263	21.9128	11.7212	53.4895	11.7246	93.429
11.7329	21.8419	11.7279	53.0852	11.7312	94.1726
11.7396	21.7696	11.7346	52.6874	11.7379	94.8299
11.7462	21.6961	11.7413	52.2947	11.7446	95.401
11.7529	21.6215	11.7479	51.9076	11.7513	95.8835
11.7596	21.546	11.7546	51.5251	11.7579	96.2769
11.7662	21.4708	11.7613	51.1459	11.7646	96.5826
11.7729	21.3984	11.7679	50.7683	11.7713	96.8019
11.7796	21.3294	11.7746	50.3917	11.7779	96.9336
11.7863	21.2639	11.7812	50.0143	11.7846	96.9774
11.7929	21.2029	11.7879	49.6346	11.7912	96.9366
11.7996	21.1477	11.7946	49.2513	11.7979	96.815
11.8063	21.0986	11.8012	48.8636	11.8046	96.6151
11.8129	21.0553	11.8079	48.4703	11.8112	96.3376
11.8196	21.017	11.8146	48.0719	11.8179	95.9857
11.8262	20.9818	11.8212	47.6693	11.8246	95.565
11.8329	20.949	11.8279	47.2627	11.8313	95.0815
11.8396	20.9184	11.8346	46.8524	11.8379	94.5405
11.8462	20.8902	11.8413	46.4383	11.8446	93.9463
11.8529	20.8636	11.8479	46.0223	11.8513	93.3049
11.8596	20.8388	11.8546	45.6054	11.8579	92.6214
11.8663	20.8167	11.8613	45.1879	11.8646	91.8993
11.8729	20.7971	11.8679	44.7704	11.8712	91.1399
11.8796	20.7792	11.8746	44.3539	11.8779	90.3463
11.8863	20.7623	11.8812	43.9389	11.8846	89.524
11.8929	20.7461	11.8879	43.5247	11.8912	88.6784
11.8996	20.7298	11.8946	43.1112	11.8979	87.811
11.9062	20.7132	11.9012	42.6993	11.9046	86.9231
11.9129	20.6964	11.9079	42.2891	11.9113	86.0173
11.9196	20.679	11.9146	41.8807	11.9179	85.096
11.9262	20.6609	11.9213	41.4736	11.9246	84.1618
11.9329	20.6421	11.9279	41.068	11.9313	83.2163
11.9396	20.6226	11.9346	40.6635	11.9379	82.2625
11.9462	20.6018	11.9413	40.2592	11.9446	81.3032
11.9529	20.5795	11.9479	39.8547	11.9512	80.3398
11.9596	20.5555	11.9546	39.4503	11.9579	79.374
11.9663	20.529	11.9612	39.0472	11.9646	78.4068
11.9729	20.5006	11.9679	38.6469	11.9712	77.4388
11.9796	20.47	11.9746	38.2499	11.9779	76.4719
11.9863	20.4372	11.9812	37.858	11.9846	75.5079
11.9929	20.4015	11.9879	37.4727	11.9913	74.5495
11.9996	20.3632	11.9946	37.0957	11.9979	73.5969
12.0062	20.3229	12.0013	36.7273	12.0046	72.6485
12.0129	20.2806	12.0079	36.3671	12.0113	71.7041
12.0196	20.2367	12.0146	36.0148	12.0179	70.764
12.0262	20.1925	12.0213	35.669	12.0246	69.8299
12.0329	20.1494	12.0279	35.3294	12.0312	68.902
12.0396	20.1081	12.0346	34.9953	12.0379	67.9814
12.0463	20.069	12.0412	34.666	12.0446	67.0699
12.0529	20.0329	12.0479	34.3407	12.0512	66.1689
12.0596	19.9996	12.0546	34.0193	12.0579	65.2794
12.0663	19.9688	12.0612	33.7032	12.0646	64.4004
12.0729	19.941	12.0679	33.393	12.0712	63.5316
12.0796	19.9158	12.0746	33.0888	12.0779	62.6733
12.0862	19.8931	12.0813	32.7892	12.0846	61.8268
12.0929	19.873	12.0879	32.4936	12.0913	60.9931
12.0996	19.8561	12.0946	32.2016	12.0979	60.1722
12.1062	19.842	12.1013	31.9123	12.1046	59.3649
12.1129	19.829	12.1079	31.6236	12.1113	58.5709
12.1196	19.8169	12.1146	31.3335	12.1179	57.7879
12.1263	19.8059	12.1212	31.0421	12.1246	57.013
12.1329	19.7941	12.1279	30.7506	12.1312	56.2456
12.1396	19.7805	12.1346	30.4593	12.1379	55.4862
12.1463	19.7653	12.1412	30.1672	12.1446	54.7339
12.1529	19.75	12.1479	29.876	12.1512	53.9886
12.1596	19.7346	12.1546	29.5881	12.1579	53.2518
12.1662	19.7183	12.1613	29.3061	12.1646	52.5263
12.1729	19.7022	12.1679	29.0305	12.1713	51.8123
12.1796	19.6875	12.1746	28.7611	12.1779	51.1071
12.1862	19.6747	12.1813	28.5	12.1846	50.4101
12.1929	19.6632	12.1879	28.2478	12.1913	49.7212
12.1996	19.6529	12.1946	28.0052	12.1979	49.0416
12.2063	19.6437	12.2012	27.772	12.2046	48.3707
12.2129	19.6348	12.2079	27.5486	12.2112	47.7079
12.2196	19.6254	12.2146	27.3355	12.2179	47.0545
12.2263	19.6149	12.2212	27.1319	12.2246	46.4119
12.2329	19.6028	12.2279	26.936	12.2312	45.7804
12.2396	19.5892	12.2346	26.7453	12.2379	45.1588
12.2462	19.5753	12.2413	26.5577	12.2446	44.5452
12.2529	19.5623	12.2479	26.3721	12.2513	43.94
12.2596	19.5505	12.2546	26.1876	12.2579	43.3435
12.2662	19.5408	12.2613	26.002	12.2646	42.7548
12.2729	19.5334	12.2679	25.8138	12.2713	42.1732
12.2796	19.528	12.2746	25.6226	12.2779	41.5978
12.2863	19.524	12.2812	25.4285	12.2846	41.0291
12.2929	19.5207	12.2879	25.2311	12.2912	40.4661
12.2996	19.5177	12.2946	25.0305	12.2979	39.9081
12.3063	19.5139	12.3012	24.8284	12.3046	39.3549
12.3129	19.5091	12.3079	24.6268	12.3112	38.8067
12.3196	19.5036	12.3146	24.4271	12.3179	38.265
12.3262	19.4978	12.3212	24.2301	12.3246	37.7307
12.3329	19.4926	12.3279	24.0353	12.3313	37.2051
12.3396	19.4881	12.3346	23.8424	12.3379	36.6884
12.3462	19.4839	12.3413	23.6502	12.3446	36.1804
12.3529	19.4802	12.3479	23.4587	12.3513	35.6808
12.3596	19.4774	12.3546	23.2684	12.3579	35.1895
12.3663	19.4761	12.3613	23.0792	12.3646	34.7082
12.3729	19.4747	12.3679	22.8915	12.3712	34.2368
12.3796	19.4732	12.3746	22.7052	12.3779	33.7755
12.3863	19.4723	12.3812	22.5229	12.3846	33.3252
12.3929	19.4719	12.3879	22.345	12.3912	32.8871
12.3996	19.4718	12.3946	22.1722	12.3979	32.4607
12.4062	19.4713	12.4012	22.0046	12.4046	32.0445
12.4129	19.47	12.4079	21.8424	12.4113	31.6389
12.4196	19.4684	12.4146	21.6857	12.4179	31.2455
12.4262	19.4671	12.4213	21.533	12.4246	30.8647
12.4329	19.4676	12.4279	21.383	12.4313	30.4954
12.4396	19.4687	12.4346	21.2338	12.4379	30.1368
12.4462	19.4698	12.4413	21.0846	12.4446	29.7878
12.4529	19.4718	12.4479	20.9355	12.4512	29.4467
12.4596	19.475	12.4546	20.7878	12.4579	29.1111
12.4663	19.4796	12.4612	20.6408	12.4646	28.7792
12.4729	19.4844	12.4679	20.4941	12.4712	28.4499
12.4796	19.4899	12.4746	20.3488	12.4779	28.1221
12.4863	19.4969	12.4812	20.2063	12.4846	27.7955
12.4929	19.5063	12.4879	20.0675	12.4913	27.47
12.4996	19.5184	12.4946	19.9313	12.4979	27.1465
12.5062	19.5329	12.5013	19.7989	12.5046	26.8256
12.5129	19.5494	12.5079	19.6719	12.5113	26.5088
12.5196	19.5677	12.5146	19.5505	12.5179	26.1971
12.5262	19.5874	12.5213	19.4344	12.5246	25.8911
12.5329	19.6079	12.5279	19.3229	12.5312	25.5911
12.5396	19.6273	12.5346	19.2169	12.5379	25.297
12.5463	19.6452	12.5412	19.1172	12.5446	25.0084
12.5529	19.6622	12.5479	19.0249	12.5512	24.7241
12.5596	19.6798	12.5546	18.9409	12.5579	24.4433
12.5663	19.6981	12.5612	18.8662	12.5646	24.1657
12.5729	19.7174	12.5679	18.8024	12.5712	23.8903
12.5796	19.7387	12.5746	18.7503	12.5779	23.6156
12.5862	19.7631	12.5813	18.7085	12.5846	23.3412
12.5929	19.7908	12.5879	18.675	12.5913	23.068
12.5996	19.8211	12.5946	18.6479	12.5979	22.7973
12.6062	19.8549	12.6013	18.6254	12.6046	22.5289
12.6129	19.8939	12.6079	18.6055	12.6113	22.2627
12.6196	19.939	12.6146	18.5872	12.6179	22
12.6263	19.9911	12.6212	18.571	12.6246	21.7418
12.6329	20.0505	12.6279	18.5572	12.6312	21.4884
12.6396	20.118	12.6346	18.546	12.6379	21.2394
12.6463	20.1935	12.6412	18.5388	12.6446	20.9948
12.6529	20.2752	12.6479	18.537	12.6512	20.7553
12.6596	20.3619	12.6546	18.5407	12.6579	20.5208
12.6662	20.4528	12.6613	18.5493	12.6646	20.2911
12.6729	20.548	12.6679	18.5635	12.6713	20.0668
12.6796	20.6476	12.6746	18.5848	12.6779	19.8486
12.6862	20.752	12.6813	18.613	12.6846	19.6367
12.6929	20.8626	12.6879	18.6479	12.6913	19.4319
12.6996	20.9806	12.6946	18.6906	12.6979	19.2348
12.7063	21.1064	12.7012	18.7436	12.7046	19.0451
12.7129	21.2398	12.7079	18.8078	12.7112	18.8614
12.7196	21.3813	12.7146	18.8823	12.7179	18.6819
12.7263	21.5327	12.7212	18.9662	12.7246	18.506
12.7329	21.6949	12.7279	19.0594	12.7312	18.3319
12.7396	21.8676	12.7346	19.1618	12.7379	18.1582
12.7462	22.0512	12.7413	19.2727	12.7446	17.9836
12.7529	22.2471	12.7479	19.3912	12.7513	17.8062
12.7596	22.4554	12.7546	19.5182	12.7579	17.6254
12.7662	22.6748	12.7613	19.6553	12.7646	17.4393
12.7729	22.9063	12.7679	19.8034	12.7713	17.2473
12.7796	23.1521	12.7746	19.9619	12.7779	17.048
12.7863	23.4136	12.7812	20.1319	12.7846	16.842
12.7929	23.6911	12.7879	20.3163	12.7912	16.6309
12.7996	23.9855	12.7946	20.5182	12.7979	16.416
12.8063	24.299	12.8012	20.7395	12.8046	16.1994
12.8129	24.6318	12.8079	20.9827	12.8112	15.9826
12.8196	24.9843	12.8146	21.2509	12.8179	15.7674
12.8262	25.3578	12.8212	21.5447	12.8246	15.5536
12.8329	25.7536	12.8279	21.8639	12.8313	15.341
12.8396	26.1729	12.8346	22.2079	12.8379	15.1287
12.8462	26.6169	12.8413	22.5769	12.8446	14.9153
12.8529	27.0864	12.8479	22.9708	12.8513	14.7012
12.8596	27.5812	12.8546	23.3887	12.8579	14.4866
12.8663	28.1008	12.8613	23.8309	12.8646	14.2726
12.8729	28.6462	12.8679	24.2979	12.8712	14.0596
12.8796	29.2186	12.8746	24.7898	12.8779	13.8488
12.8863	29.8182	12.8812	25.306	12.8846	13.6415
12.8929	30.445	12.8879	25.8462	12.8912	13.4388
12.8996	31.0993	12.8946	26.4109	12.8979	13.2421
12.9062	31.7818	12.9012	27.001	12.9046	13.0522
12.9129	32.4925	12.9079	27.6161	12.9113	12.8698
12.9196	33.2312	12.9146	28.2561	12.9179	12.6953
12.9262	33.999	12.9213	28.9224	12.9246	12.5277
12.9329	34.7975	12.9279	29.6173	12.9313	12.3651
12.9396	35.6286	12.9346	30.343	12.9379	12.2049
12.9462	36.4947	12.9413	31.1007	12.9446	12.0446
12.9529	37.3983	12.9479	31.8929	12.9512	11.8832
12.9596	38.3429	12.9546	32.7224	12.9579	11.7199
12.9663	39.3309	12.9612	33.5916	12.9646	11.5548
12.9729	40.3646	12.9679	34.5034	12.9712	11.3897
12.9796	41.4465	12.9746	35.4605	12.9779	11.226
12.9863	42.5787	12.9812	36.467	12.9846	11.0649
12.9929	43.7635	12.9879	37.5254	12.9913	10.9062
12.9996	45.0018	12.9946	38.638	12.9979	10.7505
13.0062	46.295	13.0013	39.807	13.0046	10.5991
13.0129	47.6448	13.0079	41.0344	13.0113	10.4519
13.0196	49.0533	13.0146	42.3225	13.0179	10.3078
13.0262	50.5225	13.0213	43.6726	13.0246	10.1659
13.0329	52.0527	13.0279	45.0872	13.0312	10.0266
13.0396	53.6449	13.0346	46.5681	13.0379	9.89122
13.0463	55.3	13.0412	48.1159	13.0446	9.75943
13.0529	57.0173	13.0479	49.7296	13.0512	9.63032
13.0596	58.7952	13.0546	51.4075	13.0579	9.50568
13.0663	60.6302	13.0612	53.1479	13.0646	9.38687
13.0729	62.5201	13.0679	54.9475	13.0712	9.27531
13.0796	64.4603	13.0746	56.8027	13.0779	9.17044
13.0862	66.4448	13.0813	58.7088	13.0846	9.0709
13.0929	68.4669	13.0879	60.6607	13.0913	8.97659
13.0996	70.5199	13.0946	62.6527	13.0979	8.88725
13.1062	72.5964	13.1013	64.6779	13.1046	8.80302
13.1129	74.6873	13.1079	66.7293	13.1113	8.72242
13.1196	76.7833	13.1146	68.7981	13.1179	8.64445
13.1263	78.8756	13.1212	70.8754	13.1246	8.57064
13.1329	80.9538	13.1279	72.9525	13.1312	8.50185
13.1396	83.0064	13.1346	75.0189	13.1379	8.43734
13.1463	85.0227	13.1412	77.0638	13.1446	8.37521
13.1529	86.9908	13.1479	79.0757	13.1512	8.31541
13.1596	88.8992	13.1546	81.0445	13.1579	8.25876
13.1662	90.7362	13.1613	82.9603	13.1646	8.20466
13.1729	92.4924	13.1679	84.8114	13.1713	8.1508
13.1796	94.1596	13.1746	86.5875	13.1779	8.09528
13.1862	95.7286	13.1813	88.2795	13.1846	8.0381
13.1929	97.1927	13.1879	89.8799	13.1913	7.9793
13.1996	98.547	13.1946	91.3811	13.1979	7.91879
13.2063	99.7879	13.2012	92.7747	13.2046	7.85594
13.2129	100.912	13.2079	94.054	13.2112	7.79214
13.2196	101.916	13.2146	95.2139	13.2179	7.72927
13.2263	102.802	13.2212	96.2516	13.2246	7.66823
13.2329	103.569	13.2279	97.1644	13.2312	7.60856
13.2396	104.218	13.2346	97.9506	13.2379	7.54961
13.2462	104.749	13.2413	98.61	13.2446	7.49158
13.2529	105.165	13.2479	99.1435	13.2513	7.43499
13.2596	105.469	13.2546	99.5538	13.2579	7.38038
13.2662	105.663	13.2613	99.8437	13.2646	7.32899
13.2729	105.749	13.2679	100.016	13.2713	7.28211
13.2796	105.733	13.2746	100.075	13.2779	7.24027
13.2863	105.619	13.2812	100.028	13.2846	7.20348
13.2929	105.413	13.2879	99.8805	13.2912	7.17192
13.2996	105.119	13.2946	99.6394	13.2979	7.14619
13.3063	104.745	13.3012	99.311	13.3046	7.12604
13.3129	104.299	13.3079	98.9038	13.3112	7.11042
[truncated: 1,753 more rows]
