# Supplementary material for: Calcium depletion challenges endoplasmic reticulum proteostasis by destabilising BiP-substrate complexes
Source: eLife. 2020 Dec 9;9:e62601. doi: 10.7554/eLife.62601 (PMC7758071; doi:10.7554/eLife.62601)
Supplement: Figure 7—source data 2. [file elife-62601-fig7-data2.xlsx]

## Sheet: Sheet1
Source data: Figure 7D
1_ctrl.				2_ATP -> 10' -> inject				3_SubA -> 30' -> inject				4_SubA -> 20' -> ATP -> 10' -> inject				5_ATP -> 10' -> SubA -> 20' -> inject
1_230		1_FAM		2_230		2_FAM		3_230		3_FAM		4_230		4_FAM		5_230		5_FAM
Time (min)	A230	Time (min)	FL	Time (min)	A230	Time (min)	FL	Time (min)	A230	Time (min)	FL	Time (min)	A230	Time (min)	FL	Time (min)	A230	Time (min)	FL
0.00645	1.98508	0	34.3238	0.00103333	-1.22255	0	34.0094	0.00625	1.53323	0	34.3633	0.00395	0.479318	0	34.4472	0.00228333	-0.441678	0	34.5106
0.0131167	2.20872	0.00720005	34.3222	0.0077	-1.01351	0.00720005	34.0011	0.0129167	1.7403	0.00720005	34.3644	0.0106167	0.736803	0.00720005	34.4269	0.00895	-0.228249	0.00720005	34.5064
0.0197833	2.43356	0.0144001	34.3237	0.0143667	-0.777282	0.0144001	33.9902	0.0195833	1.94477	0.0144001	34.3742	0.0172833	0.999764	0.0144001	34.4032	0.0156167	0.0038445	0.0144001	34.5049
0.02645	2.63041	0.0216001	34.3294	0.0210333	-0.547059	0.0216001	33.9763	0.02625	2.11535	0.0216001	34.3917	0.02395	1.23541	0.0216001	34.3786	0.0222833	0.222132	0.0216001	34.505
0.0331167	2.76791	0.0288002	34.3391	0.0277	-0.358552	0.0288002	33.9589	0.0329167	2.21962	0.0288002	34.4144	0.0306167	1.40584	0.0288002	34.3559	0.02895	0.389531	0.0288002	34.5057
0.0397833	2.8287	0.0360002	34.3511	0.0343667	-0.245795	0.0360002	33.9379	0.0395833	2.24163	0.0360002	34.4392	0.0372833	1.4846	0.0360002	34.3381	0.0356167	0.475243	0.0360002	34.5065
0.04645	2.82342	0.0432003	34.3631	0.0410333	-0.220731	0.0432003	33.9137	0.04625	2.19437	0.0432003	34.4626	0.04395	1.47571	0.0432003	34.3278	0.0422833	0.473246	0.0432003	34.5071
0.0531167	2.77986	0.0504003	34.3739	0.0477	-0.264362	0.0504003	33.8875	0.0529167	2.11012	0.0504003	34.4818	0.0506167	1.40861	0.0504003	34.327	0.04895	0.40783	0.0504003	34.5074
0.0597833	2.71966	0.0576004	34.3828	0.0543667	-0.34254	0.0576004	33.8608	0.0595833	2.01382	0.0576004	34.495	0.0572833	1.31433	0.0576004	34.3362	0.0556167	0.313587	0.0576004	34.5077
0.06645	2.65246	0.0648004	34.3888	0.0610333	-0.430703	0.0648004	33.8357	0.06625	1.91635	0.0648004	34.5013	0.06395	1.21197	0.0648004	34.3529	0.0622833	0.210926	0.0648004	34.5089
0.0731167	2.58151	0.0720005	34.3904	0.0677	-0.517927	0.0720005	33.8144	0.0729167	1.81996	0.0720005	34.5007	0.0706167	1.10926	0.0720005	34.3731	0.06895	0.107437	0.0720005	34.5124
0.0797833	2.50906	0.0792005	34.3869	0.0743667	-0.600748	0.0792005	33.7999	0.0795833	1.72465	0.0792005	34.4934	0.0772833	1.00862	0.0792005	34.3926	0.0756167	0.00335276	0.0792005	34.5195
0.08645	2.43585	0.0864006	34.3793	0.0810333	-0.677347	0.0864006	33.795	0.08625	1.63138	0.0864006	34.4802	0.08395	0.910498	0.0864006	34.4084	0.0822833	-0.102289	0.0864006	34.5304
0.0931167	2.36224	0.0936006	34.3699	0.0877	-0.746429	0.0936006	33.8022	0.0929167	1.54024	0.0936006	34.4625	0.0906167	0.816777	0.0936006	34.4193	0.08895	-0.208855	0.0936006	34.5447
0.0997833	2.28894	0.100801	34.3615	0.0943667	-0.806712	0.100801	33.8224	0.0995833	1.45391	0.100801	34.4417	0.0972833	0.730731	0.100801	34.4258	0.0956167	-0.315033	0.100801	34.5614
0.10645	2.21758	0.108001	34.3561	0.101033	-0.85637	0.108001	33.8549	0.10625	1.37444	0.108001	34.4194	0.10395	0.653997	0.108001	34.4286	0.102283	-0.417963	0.108001	34.5799
0.113117	2.14984	0.115201	34.3547	0.1077	-0.89471	0.115201	33.8968	0.112917	1.30411	0.115201	34.3978	0.110617	0.588067	0.115201	34.4285	0.10895	-0.516146	0.115201	34.5994
0.119783	2.08626	0.122401	34.3578	0.114367	-0.921629	0.122401	33.9435	0.119583	1.24354	0.122401	34.3794	0.117283	0.533074	0.122401	34.4265	0.115617	-0.608534	0.122401	34.6188
0.12645	2.02668	0.129601	34.3651	0.121033	-0.937015	0.129601	33.9889	0.12625	1.19243	0.129601	34.3672	0.12395	0.489987	0.129601	34.4237	0.122283	-0.695176	0.129601	34.6364
0.133117	1.9723	0.136801	34.3753	0.1277	-0.939362	0.136801	34.0269	0.132917	1.15089	0.136801	34.3631	0.130617	0.458792	0.136801	34.4212	0.12895	-0.77644	0.136801	34.6512
0.139783	1.92405	0.144001	34.3856	0.134367	-0.929125	0.144001	34.0527	0.139583	1.11682	0.144001	34.3677	0.137283	0.437565	0.144001	34.4193	0.135617	-0.854716	0.144001	34.6633
0.14645	1.88157	0.151201	34.3926	0.141033	-0.908382	0.151201	34.0637	0.14625	1.08881	0.151201	34.3788	0.14395	0.424102	0.151201	34.417	0.142283	-0.932418	0.151201	34.6733
0.153117	1.84372	0.158401	34.3933	0.1477	-0.879273	0.158401	34.0602	0.152917	1.06642	0.158401	34.3928	0.150617	0.417009	0.158401	34.4127	0.14895	-1.01047	0.158401	34.6813
0.159783	1.80947	0.165601	34.3858	0.154367	-0.843309	0.165601	34.0448	0.159583	1.05027	0.165601	34.4058	0.157283	0.415795	0.165601	34.406	0.155617	-1.08866	0.165601	34.6864
0.16645	1.77791	0.172801	34.3702	0.161033	-0.802912	0.172801	34.0225	0.16625	1.04095	0.172801	34.4142	0.16395	0.418887	0.172801	34.3971	0.162283	-1.16567	0.172801	34.6874
0.173117	1.74835	0.180001	34.3487	0.1677	-0.761949	0.180001	33.9993	0.172917	1.03819	0.180001	34.4158	0.170617	0.424668	0.180001	34.3873	0.16895	-1.24079	0.180001	34.6839
0.179783	1.72013	0.187201	34.325	0.174367	-0.723481	0.187201	33.9808	0.179583	1.04158	0.187201	34.4092	0.177283	0.433102	0.187201	34.3779	0.175617	-1.31123	0.187201	34.6761
0.18645	1.69329	0.194401	34.3042	0.181033	-0.688896	0.194401	33.9706	0.18625	1.04988	0.194401	34.3948	0.18395	0.444949	0.194401	34.3695	0.182283	-1.37532	0.194401	34.6651
0.193117	1.66831	0.201601	34.291	0.1877	-0.658378	0.201601	33.9701	0.192917	1.05977	0.201601	34.375	0.190617	0.459805	0.201601	34.363	0.18895	-1.43269	0.201601	34.6525
0.199783	1.64612	0.208801	34.2889	0.194367	-0.633284	0.208801	33.9781	0.199583	1.06926	0.208801	34.3547	0.197283	0.47753	0.208801	34.3588	0.195617	-1.4855	0.208801	34.6408
0.20645	1.62752	0.216001	34.2993	0.201033	-0.615515	0.216001	33.9921	0.20625	1.07675	0.216001	34.339	0.20395	0.497922	0.216001	34.3572	0.202283	-1.53536	0.216001	34.6328
0.213117	1.61163	0.223201	34.3218	0.2077	-0.606045	0.223201	34.0092	0.212917	1.08083	0.223201	34.3315	0.210617	0.521518	0.223201	34.3579	0.20895	-1.58357	0.223201	34.6311
0.219783	1.5989	0.230401	34.3538	0.214367	-0.603423	0.230401	34.0263	0.219583	1.07946	0.230401	34.3329	0.217283	0.548519	0.230401	34.3602	0.215617	-1.63157	0.230401	34.6367
0.22645	1.59023	0.237602	34.3911	0.221033	-0.605606	0.237602	34.041	0.22625	1.07172	0.237602	34.3416	0.22395	0.57888	0.237602	34.3628	0.222283	-1.67999	0.237602	34.6489
0.233117	1.58437	0.244802	34.4279	0.2277	-0.611372	0.244802	34.0517	0.232917	1.05972	0.244802	34.3551	0.230617	0.612549	0.244802	34.3642	0.22895	-1.72921	0.244802	34.6656
0.239783	1.5796	0.252002	34.4585	0.234367	-0.618495	0.252002	34.0575	0.239583	1.0438	0.252002	34.3707	0.237283	0.649065	0.252002	34.3631	0.235617	-1.77717	0.252002	34.6837
0.24645	1.57489	0.259202	34.4779	0.241033	-0.623673	0.259202	34.059	0.24625	1.0222	0.259202	34.3861	0.24395	0.688143	0.259202	34.3592	0.242283	-1.82286	0.259202	34.6999
0.253117	1.57126	0.266402	34.4834	0.2477	-0.623427	0.266402	34.0579	0.252917	0.993364	0.266402	34.3986	0.250617	0.729986	0.266402	34.353	0.24895	-1.86631	0.266402	34.7112
0.259783	1.56794	0.273602	34.4748	0.254367	-0.616066	0.273602	34.056	0.259583	0.958115	0.273602	34.4061	0.257283	0.774369	0.273602	34.3457	0.255617	-1.90768	0.273602	34.7161
0.26645	1.56391	0.280802	34.4541	0.261033	-0.601165	0.280802	34.0551	0.26625	0.91771	0.280802	34.4078	0.26395	0.819691	0.280802	34.3387	0.262283	-1.94772	0.280802	34.7148
0.273117	1.5602	0.288002	34.4254	0.2677	-0.578992	0.288002	34.056	0.272917	0.871181	0.288002	34.4042	0.270617	0.864714	0.288002	34.3336	0.26895	-1.98706	0.288002	34.7089
0.279783	1.55938	0.295202	34.3933	0.274367	-0.551634	0.295202	34.0591	0.279583	0.81715	0.295202	34.3966	0.277283	0.907853	0.295202	34.3321	0.275617	-2.02744	0.295202	34.701
0.28645	1.56245	0.302402	34.3626	0.281033	-0.521004	0.302402	34.0642	0.28625	0.755981	0.302402	34.3867	0.28395	0.949308	0.302402	34.3364	0.282283	-2.06856	0.302402	34.6933
0.293117	1.56945	0.309602	34.3373	0.2877	-0.488557	0.309602	34.0708	0.292917	0.688933	0.309602	34.3752	0.290617	0.987805	0.309602	34.3488	0.28895	-2.10778	0.309602	34.6874
0.299783	1.58089	0.316802	34.3198	0.294367	-0.454888	0.316802	34.0777	0.299583	0.616968	0.316802	34.3626	0.297283	1.02175	0.316802	34.3704	0.295617	-2.1434	0.316802	34.6836
0.30645	1.59632	0.324002	34.3107	0.301033	-0.421315	0.324002	34.0823	0.30625	0.5413	0.324002	34.3496	0.30395	1.0519	0.324002	34.4008	0.302283	-2.17476	0.324002	34.6805
0.313117	1.61464	0.331202	34.3085	0.3077	-0.389181	0.331202	34.0816	0.312917	0.462949	0.331202	34.337	0.310617	1.08013	0.331202	34.4385	0.30895	-2.20143	0.331202	34.6757
0.319783	1.63381	0.338402	34.3096	0.314367	-0.358	0.338402	34.0741	0.319583	0.384077	0.338402	34.3261	0.317283	1.10857	0.338402	34.4809	0.315617	-2.22151	0.338402	34.6671
0.32645	1.65331	0.345602	34.3093	0.321033	-0.328228	0.345602	34.0598	0.32625	0.306472	0.345602	34.3175	0.32395	1.13611	0.345602	34.5248	0.322283	-2.23377	0.345602	34.6533
0.333117	1.6735	0.352802	34.3034	0.3277	-0.301346	0.352802	34.0407	0.332917	0.232391	0.352802	34.3109	0.330617	1.16144	0.352802	34.5662	0.32895	-2.23894	0.352802	34.6346
0.339783	1.69294	0.360002	34.2901	0.334367	-0.278994	0.360002	34.0189	0.339583	0.163287	0.360002	34.3055	0.337283	1.18305	0.360002	34.6013	0.335617	-2.23776	0.360002	34.6118
0.34645	1.71202	0.367202	34.2703	0.341033	-0.261284	0.367202	33.9963	0.34625	0.0989139	0.367202	34.3002	0.34395	1.19871	0.367202	34.627	0.342283	-2.23026	0.367202	34.5872
0.353117	1.7309	0.374402	34.2468	0.3477	-0.246383	0.374402	33.9748	0.352917	0.0390559	0.374402	34.2946	0.350617	1.2056	0.374402	34.6413	0.34895	-2.21601	0.374402	34.5636
0.359783	1.75002	0.381602	34.2233	0.354367	-0.233658	0.381602	33.9573	0.359583	-0.0164211	0.381602	34.2881	0.357283	1.20158	0.381602	34.6441	0.355617	-2.19586	0.381602	34.5449
0.36645	1.76915	0.388802	34.2038	0.361033	-0.221588	0.388802	33.9467	0.36625	-0.0669882	0.388802	34.2798	0.36395	1.18636	0.388802	34.636	0.362283	-2.17266	0.388802	34.5338
0.373117	1.78623	0.396003	34.1923	0.3677	-0.209033	0.396003	33.9442	0.372917	-0.112332	0.396003	34.2688	0.370617	1.16046	0.396003	34.6189	0.36895	-2.1494	0.396003	34.5318
0.379783	1.80235	0.403203	34.1925	0.374367	-0.195436	0.403203	33.9486	0.379583	-0.152022	0.403203	34.2556	0.377283	1.12564	0.403203	34.5954	0.375617	-2.12891	0.403203	34.5376
0.38645	1.81697	0.410403	34.2058	0.381033	-0.180893	0.410403	33.9575	0.38625	-0.186458	0.410403	34.2424	0.38395	1.08503	0.410403	34.5684	0.382283	-2.11253	0.410403	34.5484
0.393117	1.83025	0.417603	34.2297	0.3877	-0.167467	0.417603	33.9686	0.392917	-0.21828	0.417603	34.2326	0.390617	1.04225	0.417603	34.5401	0.38895	-2.10153	0.417603	34.561
0.399783	1.84091	0.424803	34.2594	0.394367	-0.155888	0.424803	33.9812	0.399583	-0.250116	0.424803	34.2287	0.397283	1.00078	0.424803	34.5118	0.395617	-2.09661	0.424803	34.5725
0.40645	1.84789	0.432003	34.2891	0.401033	-0.146635	0.432003	33.995	0.40625	-0.28418	0.432003	34.2321	0.40395	0.962093	0.432003	34.4843	0.402283	-2.09665	0.432003	34.5814
0.413117	1.85144	0.439203	34.3142	0.4077	-0.139043	0.439203	34.0093	0.412917	-0.321448	0.439203	34.2422	0.410617	0.927009	0.439203	34.4586	0.40895	-2.0998	0.439203	34.5875
0.419783	1.85054	0.446403	34.3315	0.414367	-0.13274	0.446403	34.0227	0.419583	-0.363894	0.446403	34.2577	0.417283	0.896238	0.446403	34.4357	0.415617	-2.10442	0.446403	34.5911
0.42645	1.84622	0.453603	34.3389	0.421033	-0.127271	0.453603	34.0338	0.42625	-0.41274	0.453603	34.2765	0.42395	0.870317	0.453603	34.4173	0.422283	-2.10999	0.453603	34.5934
0.433117	1.83965	0.460803	34.3359	0.4277	-0.121012	0.460803	34.0425	0.432917	-0.465564	0.460803	34.2953	0.430617	0.848688	0.460803	34.4048	0.42895	-2.11544	0.460803	34.5964
0.439783	1.83264	0.468003	34.3242	0.434367	-0.11389	0.468003	34.0495	0.439583	-0.519335	0.468003	34.3101	0.437283	0.829615	0.468003	34.4002	0.435617	-2.12	0.468003	34.6029
0.44645	1.82539	0.475203	34.3075	0.441033	-0.105835	0.475203	34.0563	0.44625	-0.571139	0.475203	34.3172	0.44395	0.812255	0.475203	34.4054	0.442283	-2.12405	0.475203	34.6152
0.453117	1.8166	0.482403	34.2899	0.4477	-0.0969172	0.482403	34.0636	0.452917	-0.619859	0.482403	34.3148	0.450617	0.796683	0.482403	34.421	0.44895	-2.12897	0.482403	34.6344
0.459783	1.80551	0.489603	34.2748	0.454367	-0.0858605	0.489603	34.0709	0.459583	-0.6641	0.489603	34.3035	0.457283	0.782862	0.489603	34.4457	0.455617	-2.13333	0.489603	34.6596
0.46645	1.79163	0.496803	34.2643	0.461033	-0.0720918	0.496803	34.0779	0.46625	-0.701204	0.496803	34.2867	0.46395	0.769787	0.496803	34.476	0.462283	-2.13473	0.496803	34.6886
0.473117	1.77453	0.504003	34.2591	0.4677	-0.0566542	0.504003	34.0848	0.472917	-0.73	0.504003	34.2688	0.470617	0.756331	0.504003	34.5064	0.46895	-2.13107	0.504003	34.7195
0.479783	1.75382	0.511203	34.2595	0.474367	-0.0389889	0.511203	34.0924	0.479583	-0.749715	0.511203	34.2537	0.477283	0.743121	0.511203	34.5311	0.475617	-2.12178	0.511203	34.7505
0.48645	1.72941	0.518403	34.2648	0.481033	-0.0198185	0.518403	34.1013	0.48625	-0.760198	0.518403	34.2446	0.48395	0.730641	0.518403	34.5448	0.482283	-2.10566	0.518403	34.7798
0.493117	1.70181	0.525603	34.2733	0.4877	0.00109524	0.525603	34.1111	0.492917	-0.760689	0.525603	34.243	0.490617	0.718236	0.525603	34.5449	0.48895	-2.081	0.525603	34.8046
0.499783	1.67213	0.532803	34.2826	0.494367	0.0225827	0.532803	34.1201	0.499583	-0.750735	0.532803	34.2496	0.497283	0.704214	0.532803	34.5314	0.495617	-2.04694	0.532803	34.822
0.50645	1.64039	0.540003	34.2909	0.501033	0.0442937	0.540003	34.1272	0.50625	-0.730351	0.540003	34.2635	0.50395	0.687309	0.540003	34.5075	0.502283	-2.00374	0.540003	34.8295
0.513117	1.60671	0.547204	34.2974	0.5077	0.0662953	0.547204	34.1322	0.512917	-0.69993	0.547204	34.2824	0.510617	0.668198	0.547204	34.4781	0.50895	-1.95245	0.547204	34.8259
0.519783	1.57125	0.554404	34.3023	0.514367	0.0883788	0.554404	34.1365	0.519583	-0.660129	0.554404	34.3028	0.517283	0.647582	0.554404	34.4491	0.515617	-1.89459	0.554404	34.8118
0.52645	1.53566	0.561604	34.3056	0.521033	0.11187	0.561604	34.1415	0.52625	-0.612013	0.561604	34.3204	0.52395	0.626631	0.561604	34.4257	0.522283	-1.83164	0.561604	34.7889
0.533117	1.50188	0.568804	34.307	0.5277	0.137381	0.568804	34.1477	0.532917	-0.556856	0.568804	34.3326	0.530617	0.606999	0.568804	34.4119	0.52895	-1.76428	0.568804	34.7594
0.539783	1.47117	0.576004	34.3062	0.534367	0.16553	0.576004	34.1545	0.539583	-0.495575	0.576004	34.3388	0.537283	0.589564	0.576004	34.4087	0.535617	-1.69379	0.576004	34.7265
0.54645	1.44301	0.583204	34.3035	0.541033	0.196375	0.583204	34.1614	0.54625	-0.429094	0.583204	34.3407	0.54395	0.574589	0.583204	34.4139	0.542283	-1.6214	0.583204	34.6945
0.553117	1.41652	0.590404	34.2997	0.5477	0.228845	0.590404	34.1679	0.552917	-0.357747	0.590404	34.3402	0.550617	0.561014	0.590404	34.4232	0.54895	-1.54895	0.590404	34.6672
0.559783	1.39005	0.597604	34.296	0.554367	0.261895	0.597604	34.1734	0.559583	-0.28161	0.597604	34.3389	0.557283	0.547826	0.597604	34.4315	0.555617	-1.47758	0.597604	34.6475
0.56645	1.36265	0.604804	34.2924	0.561033	0.294156	0.604804	34.177	0.56625	-0.200793	0.604804	34.3373	0.56395	0.534549	0.604804	34.4351	0.562283	-1.40873	0.604804	34.6358
0.573117	1.33415	0.612004	34.2891	0.5677	0.324249	0.612004	34.1772	0.572917	-0.117034	0.612004	34.3356	0.570617	0.520341	0.612004	34.4322	0.56895	-1.3437	0.612004	34.6303
0.579783	1.30438	0.619204	34.2867	0.574367	0.350572	0.619204	34.1727	0.579583	-0.0314489	0.619204	34.3334	0.577283	0.506043	0.619204	34.4225	0.575617	-1.28388	0.619204	34.6285
0.58645	1.27371	0.626404	34.2869	0.581033	0.372253	0.626404	34.1638	0.58625	0.0547618	0.626404	34.3303	0.58395	0.492655	0.626404	34.4079	0.582283	-1.23063	0.626404	34.6281
0.593117	1.24117	0.633604	34.2914	0.5877	0.39041	0.633604	34.1517	0.592917	0.140734	0.633604	34.3252	0.590617	0.481516	0.633604	34.3919	0.58895	-1.18434	0.633604	34.6274
0.599783	1.20703	0.640804	34.3015	0.594367	0.405483	0.640804	34.1386	0.599583	0.225395	0.640804	34.3166	0.597283	0.473633	0.640804	34.3785	0.595617	-1.14405	0.640804	34.6252
0.60645	1.17145	0.648004	34.3177	0.601033	0.417173	0.648004	34.1268	0.60625	0.307485	0.648004	34.3042	0.60395	0.470094	0.648004	34.3711	0.602283	-1.10767	0.648004	34.6211
0.613117	1.13539	0.655204	34.3398	0.6077	0.426099	0.655204	34.1179	0.612917	0.387169	0.655204	34.2888	0.610617	0.472784	0.655204	34.3719	0.60895	-1.07408	0.655204	34.6156
0.619783	1.09942	0.662404	34.3674	0.614367	0.432938	0.662404	34.1133	0.619583	0.46394	0.662404	34.2724	0.617283	0.481457	0.662404	34.3812	0.615617	-1.04215	0.662404	34.6106
0.62645	1.06412	0.669604	34.4002	0.621033	0.43755	0.669604	34.1141	0.62625	0.537217	0.669604	34.2578	0.62395	0.494875	0.669604	34.3976	0.622283	-1.0112	0.669604	34.6082
0.633117	1.03083	0.676804	34.4365	0.6277	0.439085	0.676804	34.1209	0.632917	0.605717	0.676804	34.2475	0.630617	0.511453	0.676804	34.4179	0.62895	-0.980236	0.676804	34.6091
0.639783	1.0009	0.684004	34.4735	0.634367	0.438884	0.684004	34.1341	0.639583	0.666767	0.684004	34.2431	0.637283	0.529855	0.684004	34.438	0.635617	-0.94822	0.684004	34.6122
0.64645	0.975199	0.691204	34.5071	0.641033	0.438593	0.691204	34.1541	0.64625	0.719525	0.691204	34.2449	0.64395	0.549182	0.691204	34.4543	0.642283	-0.916533	0.691204	34.6155
0.653117	0.952736	0.698404	34.5331	0.6477	0.437073	0.698404	34.1803	0.652917	0.765286	0.698404	34.2524	0.650617	0.567608	0.698404	34.4649	0.64895	-0.885718	0.698404	34.6172
0.659783	0.932246	0.705605	34.5483	0.654367	0.431992	0.705605	34.2118	0.659583	0.806503	0.705605	34.2643	0.657283	0.585996	0.705605	34.4696	0.655617	-0.855602	0.705605	34.6164
0.66645	0.912383	0.712805	34.5512	0.661033	0.420623	0.712805	34.247	0.66625	0.844665	0.712805	34.2791	0.66395	0.605479	0.712805	34.4692	0.662283	-0.825696	0.712805	34.612
0.673117	0.892632	0.720005	34.5423	0.6677	0.400752	0.720005	34.2836	0.672917	0.880718	0.720005	34.2955	0.670617	0.626676	0.720005	34.4646	0.66895	-0.797562	0.720005	34.6027
0.679783	0.872716	0.727205	34.5234	0.674367	0.36943	0.727205	34.3185	0.679583	0.916168	0.727205	34.3118	0.677283	0.648357	0.727205	34.4573	0.675617	-0.774615	0.727205	34.5871
0.68645	0.852652	0.734405	34.4976	0.681033	0.324547	0.734405	34.3484	0.68625	0.951819	0.734405	34.3269	0.68395	0.668615	0.734405	34.4495	0.682283	-0.757746	0.734405	34.5642
0.693117	0.831537	0.741605	34.4686	0.6877	0.266291	0.741605	34.3698	0.692917	0.986986	0.741605	34.3396	0.690617	0.686638	0.741605	34.444	0.68895	-0.748314	0.741605	34.5347
0.699783	0.809945	0.748805	34.4413	0.694367	0.196159	0.748805	34.3801	0.699583	1.02118	0.748805	34.3491	0.697283	0.700071	0.748805	34.4426	0.695617	-0.748932	0.748805	34.5001
0.70645	0.789903	0.756005	34.4201	0.701033	0.116609	0.756005	34.3781	0.70625	1.05513	0.756005	34.3556	0.70395	0.707537	0.756005	34.4456	0.702283	-0.761569	0.756005	34.4623
0.713117	0.773013	0.763205	34.4082	0.7077	0.0300407	0.763205	34.3645	0.712917	1.09018	0.763205	34.3596	0.710617	0.708073	0.763205	34.4518	0.70895	-0.785626	0.763205	34.4238
0.719783	0.758618	0.770405	34.4062	0.714367	-0.0611246	0.770405	34.3417	0.719583	1.12785	0.770405	34.3616	0.717283	0.702538	0.770405	34.4598	0.715617	-0.818491	0.770405	34.3873
0.72645	0.744894	0.777605	34.4118	0.721033	-0.153907	0.777605	34.3135	0.72625	1.16902	0.777605	34.362	0.72395	0.692084	0.777605	34.4688	0.722283	-0.857294	0.777605	34.3563
0.733117	0.732452	0.784805	34.4217	0.7277	-0.247315	0.784805	34.2839	0.732917	1.21308	0.784805	34.361	0.730617	0.6769	0.784805	34.4777	0.72895	-0.899725	0.784805	34.3337
0.739783	0.72173	0.792005	34.4324	0.734367	-0.340775	0.792005	34.2563	0.739583	1.25849	0.792005	34.3592	0.737283	0.658847	0.792005	34.4852	0.735617	-0.942998	0.792005	34.3216
0.74645	0.711799	0.799205	34.4412	0.741033	-0.43492	0.799205	34.2332	0.74625	1.30215	0.799205	34.3577	0.74395	0.638314	0.799205	34.4894	0.742283	-0.985265	0.799205	34.3209
0.753117	0.701331	0.806405	34.4459	0.7477	-0.529416	0.806405	34.2156	0.752917	1.34121	0.806405	34.3579	0.750617	0.616126	0.806405	34.4886	0.74895	-1.02607	0.806405	34.3318
0.759783	0.690438	0.813605	34.4452	0.754367	-0.624366	0.813605	34.2032	0.759583	1.37351	0.813605	34.3596	0.757283	0.591613	0.813605	34.4818	0.755617	-1.06592	0.813605	34.3531
0.76645	0.680506	0.820805	34.4384	0.761033	-0.719801	0.820805	34.1954	0.76625	1.39763	0.820805	34.3616	0.76395	0.563703	0.820805	34.4696	0.762283	-1.10593	0.820805	34.3832
0.773117	0.671647	0.828005	34.4267	0.7677	-0.814207	0.828005	34.191	0.772917	1.41416	0.828005	34.362	0.770617	0.532344	0.828005	34.4534	0.76895	-1.14569	0.828005	34.4194
0.779783	0.663668	0.835205	34.4122	0.774367	-0.906356	0.835205	34.1887	0.779583	1.42422	0.835205	34.3599	0.777283	0.497229	0.835205	34.4356	0.775617	-1.18589	0.835205	34.459
0.78645	0.657216	0.842405	34.3973	0.781033	-0.994943	0.842405	34.1874	0.78625	1.43052	0.842405	34.3553	0.78395	0.459045	0.842405	34.4186	0.782283	-1.22687	0.842405	34.4998
0.793117	0.652939	0.849605	34.3842	0.7877	-1.07861	0.849605	34.1871	0.792917	1.43564	0.849605	34.3497	0.790617	0.417359	0.849605	34.4043	0.78895	-1.26767	0.849605	34.5407
0.799783	0.650719	0.856805	34.3741	0.794367	-1.15594	0.856805	34.1891	0.799583	1.44184	0.856805	34.344	0.797283	0.373095	0.856805	34.3943	0.795617	-1.30698	0.856805	34.5804
0.80645	0.650167	0.864006	34.3675	0.801033	-1.22645	0.864006	34.195	0.80625	1.45052	0.864006	34.3394	0.80395	0.32822	0.864006	34.39	0.802283	-1.34411	0.864006	34.6174
0.813117	0.651576	0.871206	34.3642	0.8077	-1.29051	0.871206	34.2059	0.812917	1.46155	0.871206	34.3374	0.810617	0.28415	0.871206	34.3922	0.80895	-1.37944	0.871206	34.6495
0.819783	0.654377	0.878406	34.3638	0.814367	-1.34712	0.878406	34.2216	0.819583	1.47293	0.878406	34.34	0.817283	0.241779	0.878406	34.4002	0.815617	-1.41162	0.878406	34.6748
0.82645	0.656389	0.885606	34.3659	0.821033	-1.39426	0.885606	34.2406	0.82625	1.48242	0.885606	34.3486	0.82395	0.202619	0.885606	34.4121	0.822283	-1.44	0.885606	34.6924
0.833117	0.655428	0.892806	34.37	0.8277	-1.43027	0.892806	34.2613	0.832917	1.48875	0.892806	34.3629	0.830617	0.169761	0.892806	34.4247	0.82895	-1.46493	0.892806	34.7024
0.839783	0.651889	0.900006	34.3759	0.834367	-1.45461	0.900006	34.2819	0.839583	1.49094	0.900006	34.381	0.837283	0.146404	0.900006	34.4351	0.835617	-1.48717	0.900006	34.7051
0.84645	0.646576	0.907206	34.3832	0.841033	-1.4683	0.907206	34.3005	0.84625	1.4888	0.907206	34.4003	0.84395	0.133373	0.907206	34.4404	0.842283	-1.50698	0.907206	34.7005
0.853117	0.639513	0.914406	34.3918	0.8477	-1.47293	0.914406	34.3147	0.852917	1.48232	0.914406	34.4181	0.850617	0.131674	0.914406	34.4389	0.84895	-1.5249	0.914406	34.6886
0.859783	0.629641	0.921606	34.4013	0.854367	-1.46984	0.921606	34.3221	0.859583	1.47133	0.921606	34.4328	0.857283	0.140794	0.921606	34.4297	0.855617	-1.54268	0.921606	34.6705
0.86645	0.617363	0.928806	34.411	0.861033	-1.46065	0.928806	34.3206	0.86625	1.45508	0.928806	34.4429	0.86395	0.160418	0.928806	34.4131	0.862283	-1.56107	0.928806	34.6481
0.873117	0.604324	0.936006	34.4196	0.8677	-1.44865	0.936006	34.3096	0.872917	1.4333	0.936006	34.4474	0.870617	0.188947	0.936006	34.3908	0.86895	-1.58028	0.936006	34.6238
0.879783	0.591382	0.943206	34.4256	0.874367	-1.4368	0.943206	34.2892	0.879583	1.407	0.943206	34.4452	0.877283	0.223704	0.943206	34.3648	0.875617	-1.59985	0.943206	34.5993
0.88645	0.579193	0.950406	34.4282	0.881033	-1.42587	0.950406	34.2609	0.88625	1.37643	0.950406	34.4358	0.88395	0.262879	0.950406	34.3378	0.882283	-1.61951	0.950406	34.5756
0.893117	0.568859	0.957606	34.427	0.8877	-1.41425	0.957606	34.2272	0.892917	1.34059	0.957606	34.4196	0.890617	0.303499	0.957606	34.3127	0.88895	-1.63864	0.957606	34.5538
0.899783	0.563167	0.964806	34.422	0.894367	-1.40149	0.964806	34.1907	0.899583	1.29991	0.964806	34.3977	0.897283	0.344753	0.964806	34.2928	0.895617	-1.65634	0.964806	34.5354
0.90645	0.56389	0.972006	34.4138	0.901033	-1.38841	0.972006	34.1546	0.90625	1.25543	0.972006	34.3719	0.90395	0.385672	0.972006	34.2804	0.902283	-1.67269	0.972006	34.5222
0.913117	0.572599	0.979206	34.403	0.9077	-1.3747	0.979206	34.1217	0.912917	1.20744	0.979206	34.344	0.910617	0.426389	0.979206	34.2763	0.90895	-1.68823	0.979206	34.5153
0.919783	0.588588	0.986406	34.3911	0.914367	-1.36057	0.986406	34.0943	0.919583	1.15583	0.986406	34.3158	0.917283	0.467047	0.986406	34.2794	0.915617	-1.70407	0.986406	34.5148
0.92645	0.6098	0.993606	34.3798	0.921033	-1.3459	0.993606	34.0745	0.92625	1.10161	0.993606	34.2893	0.92395	0.50769	0.993606	34.2878	0.922283	-1.72165	0.993606	34.5201
0.933117	0.633545	1.00081	34.3706	0.9277	-1.33325	1.00081	34.0637	0.932917	1.04729	1.00081	34.2667	0.930617	0.549778	1.00081	34.2999	0.92895	-1.74285	1.00081	34.5303
0.939783	0.658154	1.00801	34.3641	0.934367	-1.3238	1.00801	34.0622	0.939583	0.993222	1.00801	34.25	0.937283	0.594221	1.00801	34.3148	0.935617	-1.76845	1.00801	34.5438
0.94645	0.684574	1.01521	34.3609	0.941033	-1.31764	1.01521	34.0686	0.94625	0.939816	1.01521	34.2406	0.94395	0.640444	1.01521	34.3311	0.942283	-1.79791	1.01521	34.558
0.953117	0.71118	1.02241	34.3614	0.9477	-1.31442	1.02241	34.0809	0.952917	0.886485	1.02241	34.239	0.950617	0.68742	1.02241	34.3471	0.94895	-1.82985	1.02241	34.5692
0.959783	0.737108	1.02961	34.3661	0.954367	-1.31214	1.02961	34.0967	0.959583	0.832289	1.02961	34.245	0.957283	0.734217	1.02961	34.3615	0.955617	-1.86245	1.02961	34.5742
0.96645	0.762478	1.03681	34.3754	0.961033	-1.3107	1.03681	34.1143	0.96625	0.775099	1.03681	34.2572	0.96395	0.780955	1.03681	34.3739	0.962283	-1.89361	1.03681	34.5709
0.973117	0.789136	1.04401	34.3886	0.9677	-1.30934	1.04401	34.1322	0.972917	0.713021	1.04401	34.2741	0.970617	0.826992	1.04401	34.3851	0.96895	-1.92124	1.04401	34.5592
0.979783	0.818372	1.05121	34.404	0.974367	-1.30914	1.05121	34.1486	0.979583	0.647329	1.05121	34.2936	0.977283	0.871077	1.05121	34.3961	0.975617	-1.94404	1.05121	34.5402
0.98645	0.848353	1.05841	34.4192	0.981033	-1.30954	1.05841	34.1615	0.98625	0.578947	1.05841	34.3142	0.98395	0.913545	1.05841	34.4071	0.982283	-1.96309	1.05841	34.5163
0.993117	0.877991	1.06561	34.4316	0.9877	-1.30973	1.06561	34.1695	0.992917	0.509478	1.06561	34.3342	0.990617	0.953183	1.06561	34.4171	0.98895	-1.97998	1.06561	34.4904
0.999783	0.907741	1.07281	34.4381	0.994367	-1.30954	1.07281	34.1722	0.999583	0.439107	1.07281	34.3531	0.997283	0.988945	1.07281	34.425	0.995617	-1.99591	1.07281	34.4665
1.00645	0.939019	1.08001	34.4363	1.00103	-1.30887	1.08001	34.1709	1.00625	0.368237	1.08001	34.3702	1.00395	1.01896	1.08001	34.4308	1.00228	-2.00991	1.08001	34.4486
1.01312	0.971407	1.08721	34.4251	1.0077	-1.30747	1.08721	34.1671	1.01292	0.297613	1.08721	34.3851	1.01062	1.04257	1.08721	34.4353	1.00895	-2.02161	1.08721	34.4394
1.01978	1.00327	1.09441	34.4052	1.01437	-1.30396	1.09441	34.1623	1.01958	0.227392	1.09441	34.3973	1.01728	1.05992	1.09441	34.4394	1.01562	-2.03186	1.09441	34.4391
1.02645	1.03404	1.10161	34.3793	1.02103	-1.29785	1.10161	34.1571	1.02625	0.158861	1.10161	34.4068	1.02395	1.06934	1.10161	34.4433	1.02228	-2.03975	1.10161	34.4457
1.03312	1.06534	1.10881	34.3515	1.0277	-1.28975	1.10881	34.1516	1.03292	0.0926554	1.10881	34.4142	1.03062	1.07067	1.10881	34.4467	1.02895	-2.04328	1.10881	34.4562
1.03978	1.09651	1.11601	34.3262	1.03437	-1.28084	1.11601	34.1458	1.03958	0.0299737	1.11601	34.4208	1.03728	1.06446	1.11601	34.4496	1.03562	-2.04148	1.11601	34.4679
1.04645	1.12492	1.12321	34.3067	1.04103	-1.27171	1.12321	34.1398	1.04625	-0.0289455	1.12321	34.4272	1.04395	1.05252	1.12321	34.4527	1.04228	-2.03662	1.12321	34.4791
1.05312	1.14922	1.13041	34.2949	1.0477	-1.2616	1.13041	34.1337	1.05292	-0.0823885	1.13041	34.4337	1.05062	1.03598	1.13041	34.4571	1.04895	-2.02931	1.13041	34.4884
1.05978	1.17055	1.13761	34.2909	1.05437	-1.25019	1.13761	34.1264	1.05958	-0.129633	1.13761	34.4401	1.05728	1.01539	1.13761	34.4628	1.05562	-2.01817	1.13761	34.4954
1.06645	1.19015	1.14481	34.2927	1.06103	-1.2376	1.14481	34.1167	1.06625	-0.171483	1.14481	34.4463	1.06395	0.992313	1.14481	34.4688	1.06228	-2.00209	1.14481	34.5007
1.07312	1.20781	1.15201	34.2972	1.0677	-1.22354	1.15201	34.1033	1.07292	-0.208959	1.15201	34.4518	1.07062	0.968508	1.15201	34.4734	1.06895	-1.98233	1.15201	34.5059
1.07978	1.22361	1.15921	34.3004	1.07437	-1.20758	1.15921	34.0863	1.07958	-0.243448	1.15921	34.4554	1.07728	0.94448	1.15921	34.4757	1.07562	-1.9587	1.15921	34.513
1.08645	1.23889	1.16641	34.2984	1.08103	-1.18885	1.16641	34.0676	1.08625	-0.274189	1.16641	34.4548	1.08395	0.920415	1.16641	34.4758	1.08228	-1.92901	1.16641	34.523
1.09312	1.25377	1.17361	34.2888	1.0877	-1.16847	1.17361	34.0493	1.09292	-0.302002	1.17361	34.4477	1.09062	0.896238	1.17361	34.4741	1.08895	-1.89122	1.17361	34.5355
1.09978	1.268	1.18081	34.2713	1.09437	-1.14615	1.18081	34.0338	1.09958	-0.327609	1.18081	34.4331	1.09728	0.871763	1.18081	34.4711	1.09562	-1.84479	1.18081	34.5486
1.10645	1.28247	1.18801	34.248	1.10103	-1.12258	1.18801	34.0223	1.10625	-0.351258	1.18801	34.4112	1.10395	0.846915	1.18801	34.4668	1.10228	-1.78916	1.18801	34.5603
1.11312	1.29808	1.19521	34.2222	1.1077	-1.09852	1.19521	34.0158	1.11292	-0.374623	1.19521	34.3833	1.11062	0.821285	1.19521	34.4618	1.10895	-1.72312	1.19521	34.5692
1.11978	1.31526	1.20241	34.1975	1.11437	-1.07492	1.20241	34.0147	1.11958	-0.397883	1.20241	34.3517	1.11728	0.796705	1.20241	34.4575	1.11562	-1.64715	1.20241	34.5742
1.12645	1.33388	1.20961	34.1765	1.12103	-1.05217	1.20961	34.0191	1.12625	-0.422001	1.20961	34.319	1.12395	0.77267	1.20961	34.456	1.12228	-1.5621	1.20961	34.5751
1.13312	1.35588	1.21681	34.1614	1.1277	-1.02989	1.21681	34.028	1.13292	-0.447556	1.21681	34.2887	1.13062	0.748321	1.21681	34.4582	1.12895	-1.47001	1.21681	34.5721
1.13978	1.38168	1.22401	34.1543	1.13437	-1.00961	1.22401	34.0398	1.13958	-0.474535	1.22401	34.2644	1.13728	0.723556	1.22401	34.4635	1.13562	-1.37307	1.22401	34.5668
1.14645	1.40928	1.23121	34.1565	1.14103	-0.991754	1.23121	34.0527	1.14625	-0.503771	1.23121	34.2486	1.14395	0.699341	1.23121	34.4703	1.14228	-1.2745	1.23121	34.5621
1.15312	1.43529	1.23841	34.1682	1.1477	-0.976272	1.23841	34.0652	1.15292	-0.533633	1.23841	34.2422	1.15062	0.676297	1.23841	34.4763	1.14895	-1.17687	1.23841	34.5609
1.15978	1.45849	1.24561	34.1875	1.15437	-0.961952	1.24561	34.0763	1.15958	-0.563346	1.24561	34.2442	1.15728	0.651546	1.24561	34.4803	1.15562	-1.08153	1.24561	34.5651
1.16645	1.47879	1.25281	34.2113	1.16103	-0.948362	1.25281	34.0857	1.16625	-0.592731	1.25281	34.2527	1.16395	0.623859	1.25281	34.4818	1.16228	-0.990212	1.25281	34.5743
1.17312	1.49542	1.26001	34.2366	1.1677	-0.935338	1.26001	34.0934	1.17292	-0.622004	1.26001	34.2651	1.17062	0.593171	1.26001	34.4807	1.16895	-0.904575	1.26001	34.5863
1.17978	1.50681	1.26721	34.2613	1.17437	-0.922151	1.26721	34.1004	1.17958	-0.651717	1.26721	34.279	1.17728	0.560075	1.26721	34.4769	1.17562	-0.827067	1.26721	34.5985
1.18645	1.51254	1.27441	34.2833	1.18103	-0.907362	1.27441	34.1076	1.18625	-0.681892	1.27441	34.2921	1.18395	0.524782	1.27441	34.4705	1.18228	-0.759311	1.27441	34.6086
1.19312	1.51384	1.28161	34.3002	1.1877	-0.890352	1.28161	34.1155	1.19292	-0.712678	1.28161	34.3028	1.19062	0.486329	1.28161	34.4616	1.18895	-0.70221	1.28161	34.6148
1.19978	1.51135	1.28881	34.3099	1.19437	-0.872597	1.28881	34.1235	1.19958	-0.745207	1.28881	34.3108	1.19728	0.44556	1.28881	34.4503	1.19562	-0.655159	1.28881	34.6163
1.20645	1.50535	1.29601	34.3113	1.20103	-0.856221	1.29601	34.1305	1.20625	-0.779308	1.29601	34.3172	1.20395	0.403173	1.29601	34.4364	1.20228	-0.617839	1.29601	34.6132
1.21312	1.49512	1.30321	34.3056	1.2077	-0.842467	1.30321	34.1356	1.21292	-0.816256	1.30321	34.3243	1.21062	0.361815	1.30321	34.4196	1.20895	-0.589155	1.30321	34.6066
1.21978	1.48095	1.31041	34.2956	1.21437	-0.831023	1.31041	34.1381	1.21958	-0.856772	1.31041	34.3337	1.21728	0.323087	1.31041	34.3998	1.21562	-0.567123	1.31041	34.5992
1.22645	1.46304	1.31761	34.2844	1.22103	-0.822373	1.31761	34.1377	1.22625	-0.900783	1.31761	34.346	1.22395	0.286885	1.31761	34.3775	1.22228	-0.548057	1.31761	34.5937
1.23312	1.44182	1.32481	34.2744	1.2277	-0.816949	1.32481	34.134	1.23292	-0.948146	1.32481	34.3608	1.23062	0.253387	1.32481	34.3543	1.22895	-0.52876	1.32481	34.5925
1.23978	1.41745	1.33201	34.2673	1.23437	-0.814237	1.33201	34.1267	1.23958	-0.997603	1.33201	34.3769	1.23728	0.222668	1.33201	34.3323	1.23562	-0.508793	1.33201	34.5964
1.24645	1.39015	1.33921	34.2644	1.24103	-0.813022	1.33921	34.1171	1.24625	-1.04882	1.33921	34.3927	1.24395	0.195377	1.33921	34.3148	1.24228	-0.487506	1.33921	34.6045
1.25312	1.36043	1.34641	34.2662	1.2477	-0.812255	1.34641	34.1076	1.25292	-1.10032	1.34641	34.4068	1.25062	0.17006	1.34641	34.3048	1.24895	-0.465229	1.34641	34.6143
1.25978	1.32941	1.35361	34.2716	1.25437	-0.812076	1.35361	34.1006	1.25958	-1.1518	1.35361	34.4178	1.25728	0.145808	1.35361	34.3047	1.25562	-0.440374	1.35361	34.6228
1.26645	1.29767	1.36081	34.2778	1.26103	-0.812776	1.36081	34.0972	1.26625	-1.20323	1.36081	34.4252	1.26395	0.123203	1.36081	34.3149	1.26228	-0.412457	1.36081	34.6276
1.27312	1.2652	1.36801	34.2814	1.2677	-0.813887	1.36801	34.0965	1.27292	-1.25374	1.36801	34.4292	1.27062	0.103869	1.36801	34.3335	1.26895	-0.382349	1.36801	34.6274
1.27978	1.23177	1.37521	34.2801	1.27437	-0.81528	1.37521	34.0971	1.27958	-1.30232	1.37521	34.4312	1.27728	0.0897571	1.37521	34.3573	1.27562	-0.351362	1.37521	34.6222
1.28645	1.19714	1.38241	34.2732	1.28103	-0.816599	1.38241	34.0976	1.28625	-1.34747	1.38241	34.4323	1.28395	0.0816733	1.38241	34.3824	1.28228	-0.321254	1.38241	34.6132
1.29312	1.16148	1.38961	34.2613	1.2877	-0.81753	1.38961	34.0977	1.29292	-1.38891	1.38961	34.4338	1.29062	0.0785291	1.38961	34.4051	1.28895	-0.292875	1.38961	34.6018
1.29978	1.12373	1.39681	34.246	1.29437	-0.818059	1.39681	34.0972	1.29958	-1.42601	1.39681	34.4357	1.29728	0.0779405	1.39681	34.422	1.29562	-0.268534	1.39681	34.5894
1.30645	1.08384	1.40401	34.2294	1.30103	-0.818528	1.40401	34.0961	1.30625	-1.45832	1.40401	34.4371	1.30395	0.0779778	1.40401	34.4305	1.30228	-0.250757	1.40401	34.5771
1.31312	1.04181	1.41121	34.2143	1.3077	-0.820301	1.41121	34.095	1.31292	-1.48553	1.41121	34.4365	1.31062	0.0763312	1.41121	34.4297	1.30895	-0.240922	1.41121	34.566
1.31978	0.999115	1.41841	34.2038	1.31437	-0.822723	1.41841	34.095	1.31958	-1.50831	1.41841	34.4314	1.31728	0.0714511	1.41841	34.4203	1.31562	-0.238948	1.41841	34.5567
1.32645	0.95734	1.42561	34.2001	1.32103	-0.824921	1.42561	34.098	1.32625	-1.52779	1.42561	34.4194	1.32395	0.0623539	1.42561	34.4048	1.32228	-0.244647	1.42561	34.5491
1.33312	0.917524	1.43281	34.2032	1.3277	-0.827171	1.43281	34.1055	1.33292	-1.5455	1.43281	34.399	1.33062	0.0492856	1.43281	34.386	1.32895	-0.257649	1.43281	34.542
1.33978	0.879899	1.44001	34.2119	1.33437	-0.829794	1.44001	34.1177	1.33958	-1.56204	1.44001	34.3709	1.33728	0.0330135	1.44001	34.3658	1.33562	-0.277795	1.44001	34.5341
1.34645	0.844777	1.44721	34.2236	1.34103	-0.832789	1.44721	34.1337	1.34625	-1.57857	1.44721	34.3377	1.34395	0.0128448	1.44721	34.3457	1.34228	-0.303373	1.44721	34.5248
1.35312	0.813134	1.45441	34.236	1.3477	-0.836015	1.45441	34.1516	1.35292	-1.59752	1.45441	34.3034	1.35062	-0.00984222	1.45441	34.3264	1.34895	-0.331901	1.45441	34.5147
1.35978	0.784919	1.46161	34.247	1.35437	-0.840306	1.46161	34.1692	1.35958	-1.62052	1.46161	34.2727	1.35728	-0.0350699	1.46161	34.3087	1.35562	-0.359386	1.46161	34.5056
1.36645	0.759065	1.46881	34.2559	1.36103	-0.846446	1.46881	34.1851	1.36625	-1.64812	1.46881	34.2502	1.36395	-0.0622869	1.46881	34.2932	1.36228	-0.383072	1.46881	34.4989
1.37312	0.734344	1.47601	34.2629	1.3677	-0.8533	1.47601	34.1988	1.37292	-1.67829	1.47601	34.2396	1.37062	-0.0910237	1.47601	34.2803	1.36895	-0.401072	1.47601	34.4953
1.37978	0.710607	1.48321	34.269	1.37437	-0.860214	1.48321	34.2104	1.37958	-1.7091	1.48321	34.2436	1.37728	-0.120096	1.48321	34.2702	1.37562	-0.410996	1.48321	34.4947
1.38645	0.68704	1.49041	34.2755	1.38103	-0.865728	1.49041	34.2203	1.38625	-1.73842	1.49041	34.263	1.38395	-0.148647	1.49041	34.2636	1.38228	-0.410989	1.49041	34.4969
1.39312	0.661813	1.49761	34.2835	1.3877	-0.868298	1.49761	34.229	1.39292	-1.76423	1.49761	34.2955	1.39062	-0.177801	1.49761	34.2617	1.38895	-0.401221	1.49761	34.5008
1.39978	0.634551	1.50481	34.2937	1.39437	-0.865921	1.50481	34.2373	1.39958	-1.78431	1.50481	34.3367	1.39728	-0.208199	1.50481	34.265	1.39562	-0.384606	1.50481	34.5046
1.40645	0.606038	1.51201	34.3065	1.40103	-0.858292	1.51201	34.2456	1.40625	-1.7979	1.51201	34.3806	1.40395	-0.24125	1.51201	34.2732	1.40228	-0.363342	1.51201	34.5057
1.41312	0.576772	1.51921	34.3211	1.4077	-0.84728	1.51921	34.254	1.41292	-1.80488	1.51921	34.4206	1.41062	-0.277176	1.51921	34.2847	1.40895	-0.337459	1.51921	34.5018
1.41978	0.545554	1.52641	34.3362	1.41437	-0.83372	1.52641	34.2615	1.41958	-1.80634	1.52641	34.4512	1.41728	-0.316694	1.52641	34.2974	1.41562	-0.307932	1.52641	34.4919
1.42645	0.511348	1.53361	34.3498	1.42103	-0.819094	1.53361	34.2669	1.42625	-1.80366	1.53361	34.4684	1.42395	-0.360057	1.53361	34.3101	1.42228	-0.277169	1.53361	34.477
1.43312	0.474192	1.54081	34.3601	1.4277	-0.803396	1.54081	34.2694	1.43292	-1.798	1.54081	34.4712	1.43062	-0.406802	1.54081	34.3221	1.42895	-0.246733	1.54081	34.4598
1.43978	0.434093	1.54801	34.366	1.43437	-0.788324	1.54801	34.2692	1.43958	-1.79059	1.54801	34.4607	1.43728	-0.455104	1.54801	34.3326	1.43562	-0.216417	1.54801	34.4436
1.44645	0.390209	1.55521	34.3679	1.44103	-0.774704	1.55521	34.2671	1.44625	-1.78165	1.55521	34.4397	1.44395	-0.502139	1.55521	34.3412	1.44228	-0.186116	1.55521	34.4322
1.45312	0.342406	1.56241	34.3667	1.4477	-0.761114	1.56241	34.2644	1.45292	-1.77114	1.56241	34.4123	1.45062	-0.546381	1.56241	34.348	1.44895	-0.158206	1.56241	34.4289
1.45978	0.29242	1.56961	34.3633	1.45437	-0.745617	1.56961	34.2624	1.45958	-1.75866	1.56961	34.3826	1.45728	-0.588082	1.56961	34.3543	1.45562	-0.134036	1.56961	34.4359
1.46645	0.242464	1.57681	34.3581	1.46103	-0.724912	1.57681	34.2623	1.46625	-1.74342	1.57681	34.3542	1.46395	-0.626907	1.57681	34.362	1.46228	-0.113986	1.57681	34.4532
1.47312	0.194296	1.58401	34.3511	1.4677	-0.697851	1.58401	34.2651	1.47292	-1.72523	1.58401	34.3292	1.47062	-0.662543	1.58401	34.3721	1.46895	-0.0983253	1.58401	34.4789
1.47978	0.148475	1.59121	34.3424	1.47437	-0.664435	1.59121	34.2707	1.47958	-1.70295	1.59121	34.3078	1.47728	-0.694998	1.59121	34.3841	1.47562	-0.0879318	1.59121	34.5094
1.48645	0.105537	1.59841	34.333	1.48103	-0.624917	1.59841	34.2781	1.48625	-1.67581	1.59841	34.2888	1.48395	-0.724271	1.59841	34.3969	1.48228	-0.0818521	1.59841	34.5405
1.49312	0.0660196	1.60561	34.3239	1.4877	-0.580549	1.60561	34.2852	1.49292	-1.64326	1.60561	34.2708	1.49062	-0.750154	1.60561	34.4093	1.48895	-0.0781491	1.60561	34.5688
1.49978	0.0306368	1.61281	34.3161	1.49437	-0.532173	1.61281	34.29	1.49958	-1.60467	1.61281	34.2536	1.49728	-0.771694	1.61281	34.4212	1.49562	-0.0757277	1.61281	34.5922
1.50645	0.000417233	1.62001	34.3106	1.50103	-0.481986	1.62001	34.2911	1.50625	-1.55886	1.62001	34.2385	1.50395	-0.788435	1.62001	34.4319	1.50228	-0.0734106	1.62001	34.6093
1.51312	-0.0232607	1.62721	34.3088	1.5077	-0.43238	1.62721	34.2878	1.51292	-1.50403	1.62721	34.2282	1.51062	-0.799239	1.62721	34.4403	1.50895	-0.0694022	1.62721	34.6199
1.51978	-0.0412986	1.63441	34.3125	1.51437	-0.38521	1.63441	34.2806	1.51958	-1.44098	1.63441	34.2263	1.51728	-0.803612	1.63441	34.4451	1.51562	-0.0622943	1.63441	34.6243
1.52645	-0.0547394	1.64161	34.323	1.52103	-0.340983	1.64161	34.2705	1.52625	-1.37155	1.64161	34.236	1.52395	-0.80163	1.64161	34.4457	1.52228	-0.0523329	1.64161	34.6243
1.53312	-0.0642687	1.64881	34.3408	1.5277	-0.298962	1.64881	34.2587	1.53292	-1.29878	1.64881	34.2587	1.53062	-0.79371	1.64881	34.4425	1.52895	-0.0395775	1.64881	34.6222
1.53978	-0.0696778	1.65601	34.3644	1.53437	-0.258848	1.65601	34.2465	1.53958	-1.22465	1.65601	34.2931	1.53728	-0.779778	1.65601	34.4365	1.53562	-0.0231564	1.65601	34.6197
1.54645	-0.0714436	1.66321	34.391	1.54103	-0.221416	1.66321	34.2351	1.54625	-1.15135	1.66321	34.3346	1.54395	-0.75984	1.66321	34.4279	1.54228	-0.00341237	1.66321	34.6171
1.55312	-0.0714734	1.67041	34.4175	1.5477	-0.186644	1.67041	34.2251	1.55292	-1.08115	1.67041	34.3767	1.55062	-0.735566	1.67041	34.4166	1.54895	0.0175387	1.67041	34.6135
1.55978	-0.0701472	1.67761	34.4408	1.55437	-0.152357	1.67761	34.2167	1.55958	-1.01466	1.67761	34.4116	1.55728	-0.708215	1.67761	34.4025	1.55562	0.037916	1.67761	34.6079
1.56645	-0.0680164	1.68481	34.4581	1.56103	-0.116765	1.68481	34.2099	1.56625	-0.951521	1.68481	34.4318	1.56395	-0.678711	1.68481	34.3861	1.56228	0.0561178	1.68481	34.5998
1.57312	-0.0663772	1.69201	34.4676	1.5677	-0.0794828	1.69201	34.2044	1.57292	-0.890784	1.69201	34.4326	1.57062	-0.647619	1.69201	34.3685	1.56895	0.0705048	1.69201	34.5897
1.57978	-0.0664741	1.69921	34.4691	1.57437	-0.0412464	1.69921	34.1998	1.57958	-0.831723	1.69921	34.4128	1.57728	-0.615537	1.69921	34.3504	1.57562	0.0786483	1.69921	34.5781
1.58645	-0.068143	1.70641	34.4636	1.58103	-0.00200421	1.70641	34.1958	1.58625	-0.773668	1.70641	34.3762	1.58395	-0.583582	1.70641	34.333	1.58228	0.0790507	1.70641	34.565
1.59312	-0.070408	1.71361	34.4528	1.5877	0.038445	1.71361	34.1923	1.59292	-0.715137	1.71361	34.3302	1.59062	-0.552073	1.71361	34.3175	1.58895	0.0719056	1.71361	34.551
1.59978	-0.0729635	1.72081	34.4388	1.59437	0.0791922	1.72081	34.1895	1.59958	-0.655241	1.72081	34.2836	1.59728	-0.52166	1.72081	34.3058	1.59562	0.0584573	1.72081	34.5375
1.60645	-0.0758693	1.72801	34.4231	1.60103	0.11836	1.72801	34.1871	1.60625	-0.594027	1.72801	34.2451	1.60395	-0.493415	1.72801	34.3002	1.60228	0.0413507	1.72801	34.5267
1.61312	-0.0777468	1.73521	34.4076	1.6077	0.153974	1.73521	34.1839	1.61292	-0.532053	1.73521	34.2213	1.61062	-0.467487	1.73521	34.303	1.60895	0.0219569	1.73521	34.5207
1.61978	-0.0771433	1.74241	34.3941	1.61437	0.184976	1.74241	34.1784	1.61958	-0.471026	1.74241	34.2161	1.61728	-0.443414	1.74241	34.3154	1.61562	0.000536442	1.74241	34.5205
1.62645	-0.074029	1.74961	34.3836	1.62103	0.210762	1.74961	34.1701	1.62625	-0.412785	1.74961	34.2297	1.62395	-0.419609	1.74961	34.3375	1.62228	-0.0226572	1.74961	34.526
1.63312	-0.0689328	1.75681	34.376	1.6277	0.230633	1.75681	34.1603	1.63292	-0.359021	1.75681	34.258	1.63062	-0.39503	1.75681	34.3676	1.62895	-0.0470355	1.75681	34.5359
1.63978	-0.0604317	1.76401	34.3707	1.63437	0.243403	1.76401	34.1516	1.63958	-0.310577	1.76401	34.294	1.63728	-0.369124	1.76401	34.4021	1.63562	-0.0724494	1.76401	34.5496
1.64645	-0.0461042	1.77121	34.3671	1.64103	0.248507	1.77121	34.1464	1.64625	-0.267819	1.77121	34.3304	1.64395	-0.342272	1.77121	34.4362	1.64228	-0.0997335	1.77121	34.5667
1.65312	-0.0252277	1.77841	34.3654	1.6477	0.244156	1.77841	34.1461	1.65292	-0.231445	1.77841	34.3617	1.65062	-0.314891	1.77841	34.465	1.64895	-0.129491	1.77841	34.587
1.65978	0.00164658	1.78561	34.366	1.65437	0.230476	1.78561	34.1511	1.65958	-0.202082	1.78561	34.3844	1.65728	-0.288233	1.78561	34.4853	1.65562	-0.161052	1.78561	34.6102
1.66645	0.0338778	1.79281	34.3692	1.66103	0.208266	1.79281	34.1617	1.66625	-0.178687	1.79281	34.3964	1.66395	-0.263728	1.79281	34.4959	1.66228	-0.192843	1.79281	34.6357
1.67312	0.0715405	1.80001	34.3749	1.6677	0.179172	1.80001	34.1772	1.67292	-0.16091	1.80001	34.3966	1.67062	-0.242375	1.80001	34.4976	1.66895	-0.223286	1.80001	34.6631
1.67978	0.113539	1.80721	34.383	1.67437	0.145204	1.80721	34.196	1.67958	-0.148378	1.80721	34.3845	1.67728	-0.225358	1.80721	34.4919	1.67562	-0.251815	1.80721	34.6926
1.68645	0.159092	1.81441	34.3935	1.68103	0.108041	1.81441	34.2149	1.68625	-0.141174	1.81441	34.3612	1.68395	-0.213377	1.81441	34.4813	1.68228	-0.279054	1.81441	34.7239
1.69312	0.207931	1.82161	34.4066	1.6877	0.0728741	1.82161	34.2307	1.69292	-0.138104	1.82161	34.3286	1.69062	-0.209518	1.82161	34.4683	1.68895	-0.30449	1.82161	34.7557
1.69978	0.25931	1.82881	34.4222	1.69437	0.0415668	1.82881	34.2414	1.69958	-0.138044	1.82881	34.289	1.69728	-0.215501	1.82881	34.4552	1.69562	-0.328213	1.82881	34.7852
1.70645	0.31212	1.83601	34.4399	1.70103	0.01508	1.83601	34.2462	1.70625	-0.140928	1.83601	34.2443	1.70395	-0.23149	1.83601	34.4431	1.70228	-0.351429	1.83601	34.8087
1.71312	0.36598	1.84321	34.4583	1.7077	-0.0070408	1.84321	34.245	1.71292	-0.146389	1.84321	34.1969	1.71062	-0.255927	1.84321	34.4313	1.70895	-0.376329	1.84321	34.823
1.71978	0.419922	1.85041	34.4757	1.71437	-0.0252202	1.85041	34.2382	1.71958	-0.153668	1.85041	34.1506	1.71728	-0.28675	1.85041	34.4181	1.71562	-0.404887	1.85041	34.8263
1.72645	0.472307	1.85761	34.4901	1.72103	-0.0392497	1.85761	34.2264	1.72625	-0.161886	1.85761	34.1108	1.72395	-0.322156	1.85761	34.402	1.72228	-0.437193	1.85761	34.8189
1.73312	0.521161	1.86481	34.5001	1.7277	-0.0510439	1.86481	34.2111	1.73292	-0.170857	1.86481	34.0833	1.73062	-0.358641	1.86481	34.3827	1.72895	-0.472791	1.86481	34.8028
1.73978	0.565723	1.87201	34.5049	1.73437	-0.0602081	1.87201	34.1942	1.73958	-0.179291	1.87201	34.073	1.73728	-0.393391	1.87201	34.3618	1.73562	-0.510469	1.87201	34.7817
1.74645	0.606753	1.87921	34.5037	1.74103	-0.0668317	1.87921	34.1777	1.74625	-0.186756	1.87921	34.0817	1.74395	-0.426039	1.87921	34.3414	1.74228	-0.550054	1.87921	34.7601
1.75312	0.644438	1.88641	34.4959	1.7477	-0.0710487	1.88641	34.1634	1.75292	-0.193164	1.88641	34.1085	1.75062	-0.458367	1.88641	34.3244	1.74895	-0.592351	1.88641	34.7425
1.75978	0.679016	1.89361	34.4821	1.75437	-0.0728667	1.89361	34.1533	1.75958	-0.199325	1.89361	34.1496	1.75728	-0.493169	1.89361	34.3127	1.75562	-0.637189	1.89361	34.7326
1.76645	0.710309	1.90081	34.4636	1.76103	-0.071995	1.90081	34.1495	1.76625	-0.205919	1.90081	34.1996	1.76395	-0.531808	1.90081	34.3072	1.76228	-0.684492	1.90081	34.7324
1.77312	0.737987	1.90801	34.4431	1.7677	-0.0680909	1.90801	34.1524	1.77292	-0.212759	1.90801	34.2523	1.77062	-0.574358	1.90801	34.3076	1.76895	-0.735149	1.90801	34.7415
1.77978	0.762686	1.91521	34.4231	1.77437	-0.0612363	1.91521	34.1609	1.77958	-0.220537	1.91521	34.3012	1.77728	-0.62038	1.91521	34.3132	1.77562	-0.78959	1.91521	34.7575
1.78645	0.784576	1.92241	34.4052	1.78103	-0.0509992	1.92241	34.172	1.78625	-0.229798	1.92241	34.3407	1.78395	-0.668377	1.92241	34.3223	1.78228	-0.846408	1.92241	34.7763
1.79312	0.803828	1.92961	34.3896	1.7877	-0.0361279	1.92961	34.1826	1.79292	-0.240922	1.92961	34.3671	1.79062	-0.715554	1.92961	34.3326	1.78895	-0.901856	1.92961	34.793
1.79978	0.821084	1.93681	34.3767	1.79437	-0.0159517	1.93681	34.1901	1.79958	-0.254221	1.93681	34.3795	1.79728	-0.757709	1.93681	34.3419	1.79562	-0.953913	1.93681	34.8033
1.80645	0.837646	1.94401	34.3664	1.80103	0.00999123	1.94401	34.1933	1.80625	-0.269786	1.94401	34.3795	1.80395	-0.791438	1.94401	34.3482	1.80228	-1.00114	1.94401	34.8049
1.81312	0.855736	1.95121	34.3587	1.8077	0.0422522	1.95121	34.1914	1.81292	-0.287347	1.95121	34.37	1.81062	-0.815727	1.95121	34.3511	1.80895	-1.04258	1.95121	34.7974
1.81978	0.87557	1.95841	34.3522	1.81437	0.0807717	1.95841	34.1845	1.81958	-0.308111	1.95841	34.354	1.81728	-0.830956	1.95841	34.3507	1.81562	-1.0777	1.95841	34.7824
1.82645	0.897147	1.96561	34.3445	1.82103	0.124551	1.96561	34.1731	1.82625	-0.332803	1.96561	34.3341	1.82395	-0.836752	1.96561	34.3473	1.82228	-1.10707	1.96561	34.7622
1.83312	0.919983	1.97281	34.3337	1.8277	0.173055	1.97281	34.1591	1.83292	-0.361621	1.97281	34.3131	1.83062	-0.833951	1.97281	34.341	1.82895	-1.13214	1.97281	34.7393
1.83978	0.944026	1.98001	34.3192	1.83437	0.226475	1.98001	34.1445	1.83958	-0.39316	1.98001	34.2939	1.83728	-0.824593	1.98001	34.3321	1.83562	-1.1523	1.98001	34.7165
1.84645	0.968203	1.98721	34.3021	1.84103	0.283293	1.98721	34.1306	1.84625	-0.425525	1.98721	34.2789	1.84395	-0.810347	1.98721	34.3211	1.84228	-1.16646	1.98721	34.6964
1.85312	0.990249	1.99441	34.2842	1.8477	0.342496	1.99441	34.1173	1.85292	-0.458732	1.99441	34.2699	1.85062	-0.791609	1.99441	34.3091	1.84895	-1.17282	1.99441	34.681
1.85978	1.00906	2.00161	34.2666	1.85437	0.401556	2.00161	34.1033	1.85958	-0.491224	2.00161	34.2676	1.85728	-0.767313	2.00161	34.2972	1.85562	-1.17011	2.00161	34.6712
1.86645	1.02425	2.00881	34.2502	1.86103	0.459537	2.00881	34.0873	1.86625	-0.522032	2.00881	34.2726	1.86395	-0.738762	2.00881	34.2868	1.86228	-1.15652	2.00881	34.6662
1.87312	1.03636	2.01601	34.2362	1.8677	0.514895	2.01601	34.0694	1.87292	-0.55024	2.01601	34.2848	1.87062	-0.707082	2.01601	34.2794	1.86895	-1.13186	2.01601	34.665
1.87978	1.04637	2.02321	34.2266	1.87437	0.566252	2.02321	34.0511	1.87958	-0.576437	2.02321	34.3031	1.87728	-0.673302	2.02321	34.2768	1.87562	-1.09708	2.02321	34.6668
1.88645	1.05521	2.03041	34.2228	1.88103	0.614218	2.03041	34.0342	1.88625	-0.601642	2.03041	34.3244	1.88395	-0.638023	2.03041	34.2804	1.88228	-1.05301	2.03041	34.6714
1.89312	1.06455	2.03761	34.2248	1.8877	0.658639	2.03761	34.0203	1.89292	-0.626452	2.03761	34.3448	1.89062	-0.601433	2.03761	34.2904	1.88895	-1.00123	2.03761	34.6783
1.89978	1.07545	2.04481	34.2309	1.89437	0.701375	2.04481	34.0103	1.89958	-0.650533	2.04481	34.3607	1.89728	-0.564799	2.04481	34.3059	1.89562	-0.943609	2.04481	34.6866
1.90645	1.08895	2.05201	34.239	1.90103	0.743687	2.05201	34.0049	1.90625	-0.67246	2.05201	34.3697	1.90395	-0.528224	2.05201	34.3256	1.90228	-0.883132	2.05201	34.6955
1.91312	1.10556	2.05921	34.2472	1.9077	0.786573	2.05921	34.0049	1.91292	-0.690863	2.05921	34.3704	1.91062	-0.492647	2.05921	34.3477	1.90895	-0.821516	2.05921	34.704
1.91978	1.12385	2.06641	34.2549	1.91437	0.830702	2.06641	34.0105	1.91958	-0.705257	2.06641	34.3626	1.91728	-0.457644	2.06641	34.371	1.91562	-0.760883	2.06641	34.7115
1.92645	1.14334	2.07361	34.2618	1.92103	0.875562	2.07361	34.0212	1.92625	-0.714228	2.07361	34.3472	1.92395	-0.425734	2.07361	34.3942	1.92228	-0.704534	2.07361	34.7169
1.93312	1.16308	2.08081	34.2679	1.9277	0.920251	2.08081	34.0353	1.93292	-0.715666	2.08081	34.3266	1.93062	-0.399783	2.08081	34.4165	1.92895	-0.65504	2.08081	34.7191
1.93978	1.18291	2.08801	34.2736	1.93437	0.96301	2.08801	34.0507	1.93958	-0.708163	2.08801	34.3043	1.93728	-0.382282	2.08801	34.4375	1.93562	-0.613183	2.08801	34.717
1.94645	1.20165	2.09521	34.2803	1.94103	1.0025	2.09521	34.0652	1.94625	-0.692233	2.09521	34.2837	1.94395	-0.374019	2.09521	34.4578	1.94228	-0.578828	2.09521	34.7106
1.95312	1.21871	2.10241	34.2897	1.9477	1.03857	2.10241	34.0777	1.95292	-0.668623	2.10241	34.2669	1.95062	-0.373565	2.10241	34.4784	1.94895	-0.551857	2.10241	34.7007
1.95978	1.23401	2.10961	34.3039	1.95437	1.07089	2.10961	34.0877	1.95958	-0.638075	2.10961	34.2546	1.95728	-0.381351	2.10961	34.5003	1.95562	-0.532568	2.10961	34.6886
1.96645	1.24719	2.11681	34.3246	1.96103	1.09948	2.11681	34.0945	1.96625	-0.602566	2.11681	34.2472	1.96395	-0.394911	2.11681	34.5237	1.96228	-0.519991	2.11681	34.6758
1.97312	1.25837	2.12401	34.3515	1.9677	1.1251	2.12401	34.0979	1.97292	-0.564627	2.12401	34.2449	1.97062	-0.411831	2.12401	34.547	1.96895	-0.513077	2.12401	34.6638
1.97978	1.26719	2.13121	34.3828	1.97437	1.14927	2.13121	34.098	1.97958	-0.526689	2.13121	34.2474	1.97728	-0.429407	2.13121	34.5673	1.97562	-0.510573	2.13121	34.6541
1.98645	1.27289	2.13841	34.4155	1.98103	1.17256	2.13841	34.0964	1.98625	-0.490606	2.13841	34.2533	1.98395	-0.446588	2.13841	34.5814	1.98228	-0.511736	2.13841	34.6476
1.99312	1.27325	2.14561	34.4462	1.9877	1.19434	2.14561	34.0963	1.99292	-0.459217	2.14561	34.2605	1.99062	-0.463434	2.14561	34.587	1.98895	-0.515275	2.14561	34.6436
1.99978	1.26727	2.15281	34.472	1.99437	1.21458	2.15281	34.1005	1.99958	-0.433721	2.15281	34.2674	1.99728	-0.479035	2.15281	34.5833	1.99562	-0.518881	2.15281	34.6409
2.00645	1.25501	2.16001	34.4908	2.00103	1.23327	2.16001	34.1104	2.00625	-0.413939	2.16001	34.2734	2.00395	-0.49372	2.16001	34.5707	2.00228	-0.520833	2.16001	34.6383
2.01312	1.23622	2.16721	34.5011	2.0077	1.25001	2.16721	34.1255	2.01292	-0.398599	2.16721	34.2786	2.01062	-0.508077	2.16721	34.551	2.00895	-0.519998	2.16721	34.6359
2.01978	1.21143	2.17441	34.5026	2.01437	1.26429	2.17441	34.1441	2.01958	-0.387102	2.17441	34.2834	2.01728	-0.522986	2.17441	34.5274	2.01562	-0.516593	2.17441	34.6341
2.02645	1.18181	2.18161	34.4968	2.02103	1.27561	2.18161	34.164	2.02625	-0.379041	2.18161	34.2878	2.02395	-0.538714	2.18161	34.5038	2.02228	-0.510521	2.18161	34.6335
2.03312	1.14978	2.18881	34.4872	2.0277	1.28502	2.18881	34.1824	2.03292	-0.373729	2.18881	34.2925	2.03062	-0.556074	2.18881	34.4844	2.02895	-0.502996	2.18881	34.6345
2.03978	1.1172	2.19601	34.4776	2.03437	1.29276	2.19601	34.1958	2.03958	-0.37124	2.19601	34.2989	2.03728	-0.57555	2.19601	34.4722	2.03562	-0.496127	2.19601	34.6379
2.04645	1.08624	2.20321	34.4704	2.04103	1.2994	2.20321	34.2007	2.04625	-0.371672	2.20321	34.3094	2.04395	-0.596955	2.20321	34.4682	2.04228	-0.491679	2.20321	34.6448
2.05312	1.05935	2.21041	34.4662	2.0477	1.3053	2.21041	34.1954	2.05292	-0.375524	2.21041	34.3265	2.05062	-0.620425	2.21041	34.4711	2.04895	-0.491083	2.21041	34.6556
2.05978	1.03785	2.21761	34.4637	2.05437	1.30939	2.21761	34.1808	2.05958	-0.382945	2.21761	34.3511	2.05728	-0.646226	2.21761	34.4779	2.05562	-0.494525	2.21761	34.6688
2.06645	1.02254	2.22481	34.4618	2.06103	1.31147	2.22481	34.1593	2.06625	-0.394352	2.22481	34.3828	2.06395	-0.674859	2.22481	34.485	2.06228	-0.503257	2.22481	34.6809
2.07312	1.01323	2.23201	34.4591	2.0677	1.31153	2.23201	34.1339	2.07292	-0.409	2.23201	34.4195	2.07062	-0.705175	2.23201	34.4892	2.06895	-0.517055	2.23201	34.6882
2.07978	1.01002	2.23921	34.4543	2.07437	1.31086	2.23921	34.1077	2.07958	-0.426441	2.23921	34.458	2.07728	-0.735283	2.23921	34.4885	2.07562	-0.534974	2.23921	34.688
2.08645	1.01222	2.24641	34.4455	2.08103	1.31063	2.24641	34.0843	2.08625	-0.447005	2.24641	34.4949	2.08395	-0.762485	2.24641	34.482	2.08228	-0.554956	2.24641	34.6797
2.09312	1.01987	2.25361	34.4318	2.0877	1.31084	2.25361	34.0667	2.09292	-0.470579	2.25361	34.5262	2.09062	-0.784166	2.25361	34.47	2.08895	-0.575647	2.25361	34.6639
2.09978	1.03294	2.26081	34.4137	2.09437	1.31249	2.26081	34.0569	2.09958	-0.495799	2.26081	34.5485	2.09728	-0.798382	2.26081	34.4534	2.09562	-0.596754	2.26081	34.6422
2.10645	1.05181	2.26801	34.3936	2.10103	1.31661	2.26801	34.0546	2.10625	-0.520609	2.26801	34.5587	2.10395	-0.803359	2.26801	34.4337	2.10228	-0.617027	2.26801	34.6177
2.11312	1.07714	2.27521	34.3744	2.1077	1.32263	2.27521	34.0578	2.11292	-0.544913	2.27521	34.5556	2.11062	-0.798993	2.27521	34.4129	2.10895	-0.635654	2.27521	34.5942
2.11978	1.10817	2.28241	34.3583	2.11437	1.33004	2.28241	34.064	2.11958	-0.568092	2.28241	34.5398	2.11728	-0.786513	2.28241	34.3925	2.11562	-0.653103	2.28241	34.5753
2.12645	1.14428	2.28961	34.3464	2.12103	1.33764	2.28961	34.0713	2.12625	-0.58955	2.28961	34.5144	2.12395	-0.769064	2.28961	34.3735	2.12228	-0.671446	2.28961	34.5638
2.13312	1.18379	2.29681	34.3399	2.1277	1.34479	2.29681	34.0783	2.13292	-0.608318	2.29681	34.484	2.13062	-0.748448	2.29681	34.3566	2.12895	-0.691719	2.29681	34.5605
2.13978	1.22493	2.30401	34.3401	2.13437	1.35095	2.30401	34.0838	2.13958	-0.625469	2.30401	34.4535	2.13728	-0.725903	2.30401	34.3427	2.13562	-0.713892	2.30401	34.5646
2.14645	1.26558	2.31121	34.3477	2.14103	1.35591	2.31121	34.0871	2.14625	-0.642292	2.31121	34.4262	2.14395	-0.703007	2.31121	34.3328	2.14228	-0.738561	2.31121	34.5744
2.15312	1.30342	2.31841	34.3623	2.1477	1.36016	2.31841	34.0877	2.15292	-0.65995	2.31841	34.404	2.15062	-0.681706	2.31841	34.3279	2.14895	-0.766262	2.31841	34.5871
2.15978	1.33733	2.32561	34.3818	2.15437	1.36291	2.32561	34.086	2.15958	-0.679642	2.32561	34.3875	2.15728	-0.66451	2.32561	34.3292	2.15562	-0.797205	2.32561	34.6003
2.16645	1.36507	2.33281	34.4036	2.16103	1.36459	2.33281	34.0827	2.16625	-0.702791	2.33281	34.3762	2.16395	-0.652298	2.33281	34.3368	2.16228	-0.830539	2.33281	34.6123
2.17312	1.38529	2.34001	34.4257	2.1677	1.36649	2.34001	34.0785	2.17292	-0.731893	2.34001	34.3689	2.17062	-0.645354	2.34001	34.35	2.16895	-0.866614	2.34001	34.6224
2.17978	1.3976	2.34722	34.4462	2.17437	1.36828	2.34722	34.0742	2.17958	-0.768118	2.34722	34.3634	2.17728	-0.643276	2.34722	34.3669	2.17562	-0.90602	2.34722	34.6304
2.18645	1.40292	2.35442	34.4635	2.18103	1.36835	2.35442	34.0704	2.18625	-0.812337	2.35442	34.357	2.18395	-0.647299	2.35442	34.385	2.18228	-0.948124	2.35442	34.6357
2.19312	1.40225	2.36162	34.4765	2.1877	1.36489	2.36162	34.0679	2.19292	-0.863671	2.36162	34.348	2.19062	-0.658706	2.36162	34.4016	2.18895	-0.991829	2.36162	34.6378
2.19978	1.39745	2.36882	34.4845	2.19437	1.35793	2.36882	34.0674	2.19958	-0.92157	2.36882	34.336	2.19728	-0.676237	2.36882	34.4147	2.19562	-1.03484	2.36882	34.636
2.20645	1.39154	2.37602	34.4877	2.20103	1.34672	2.37602	34.0701	2.20625	-0.984788	2.37602	34.3224	2.20395	-0.699013	2.37602	34.4236	2.20228	-1.07761	2.37602	34.6301
2.21312	1.38794	2.38322	34.4871	2.2077	1.3311	2.38322	34.0779	2.21292	-1.0516	2.38322	34.309	2.21062	-0.72778	2.38322	34.4288	2.20895	-1.11999	2.38322	34.6206
2.21978	1.3884	2.39042	34.4841	2.21437	1.3119	2.39042	34.092	2.21958	-1.12152	2.39042	34.2977	2.21728	-0.76396	2.39042	34.432	2.21562	-1.16169	2.39042	34.608
2.22645	1.39238	2.39762	34.4798	2.22103	1.28969	2.39762	34.112	2.22625	-1.19492	2.39762	34.2889	2.22395	-0.805572	2.39762	34.4356	2.22228	-1.20261	2.39762	34.5928
2.23312	1.39911	2.40482	34.4752	2.2277	1.26521	2.40482	34.1349	2.23292	-1.27157	2.40482	34.2819	2.23062	-0.849232	2.40482	34.4418	2.22895	-1.24336	2.40482	34.5764
2.23978	1.40662	2.41202	34.4712	2.23437	1.23797	2.41202	34.1564	2.23958	-1.35106	2.41202	34.2753	2.23728	-0.89395	2.41202	34.4517	2.23562	-1.28479	2.41202	34.5603
2.24645	1.41324	2.41922	34.4681	2.24103	1.20877	2.41922	34.1715	2.24625	-1.4325	2.41922	34.2675	2.24395	-0.939295	2.41922	34.4646	2.24228	-1.32503	2.41922	34.5469
2.25312	1.4164	2.42642	34.4661	2.2477	1.17819	2.42642	34.1755	2.25292	-1.51565	2.42642	34.2574	2.25062	-0.984035	2.42642	34.4783	2.24895	-1.36264	2.42642	34.5377
2.25978	1.41456	2.43362	34.4644	2.25437	1.1467	2.43362	34.1652	2.25958	-1.59964	2.43362	34.2448	2.25728	-1.02593	2.43362	34.4898	2.25562	-1.39757	2.43362	34.5335
2.26645	1.40738	2.44082	34.4623	2.26103	1.11517	2.44082	34.1386	2.26625	-1.68269	2.44082	34.2302	2.26395	-1.06466	2.44082	34.4965	2.26228	-1.42942	2.44082	34.5344
2.27312	1.39453	2.44802	34.459	2.2677	1.08361	2.44802	34.0963	2.27292	-1.76351	2.44802	34.2148	2.27062	-1.10067	2.44802	34.4973	2.26895	-1.45741	2.44802	34.5401
2.27978	1.37723	2.45522	34.4533	2.27437	1.05228	2.45522	34.0414	2.27958	-1.84091	2.45522	34.2012	2.27728	-1.13371	2.45522	34.4929	2.27562	-1.48152	2.45522	34.5494
2.28645	1.35685	2.46242	34.4441	2.28103	1.02004	2.46242	33.9795	2.28625	-1.91583	2.46242	34.1929	2.28395	-1.16461	2.46242	34.4852	2.28228	-1.50292	2.46242	34.5608
2.29312	1.33491	2.46962	34.4304	2.2877	0.985853	2.46962	33.9179	2.29292	-1.9889	2.46962	34.1935	2.29062	-1.19352	2.46962	34.4773	2.28895	-1.52203	2.46962	34.5722
2.29978	1.31162	2.47682	34.4119	2.29437	0.949621	2.47682	33.8638	2.29958	-2.05994	2.47682	34.2044	2.29728	-1.22247	2.47682	34.4726	2.29562	-1.53848	2.47682	34.5817
2.30645	1.2873	2.48402	34.3898	2.30103	0.913054	2.48402	33.8227	2.30625	-2.12846	2.48402	34.2249	2.30395	-1.25285	2.48402	34.4739	2.30228	-1.55214	2.48402	34.5878
2.31312	1.2643	2.49122	34.3661	2.3077	0.877701	2.49122	33.7981	2.31292	-2.19426	2.49122	34.2525	2.31062	-1.28688	2.49122	34.482	2.30895	-1.56315	2.49122	34.5891
2.31978	1.24535	2.49842	34.3433	2.31437	0.844598	2.49842	33.7919	2.31958	-2.25758	2.49842	34.2843	2.31728	-1.32551	2.49842	34.4952	2.31562	-1.5709	2.49842	34.5844
2.32645	1.23239	2.50562	34.3229	2.32103	0.814475	2.50562	33.8045	2.32625	-2.31636	2.50562	34.3179	2.32395	-1.36715	2.50562	34.5099	2.32228	-1.5747	2.50562	34.5732
2.33312	1.22591	2.51282	34.3061	2.3277	0.788368	2.51282	33.8352	2.33292	-2.36874	2.51282	34.3507	2.33062	-1.41106	2.51282	34.5217	2.32895	-1.57415	2.51282	34.5562
2.33978	1.22703	2.52002	34.2931	2.33437	0.767156	2.52002	33.8817	2.33958	-2.41173	2.52002	34.3804	2.33728	-1.45578	2.52002	34.5271	2.33562	-1.56949	2.52002	34.5356
2.34645	1.23605	2.52722	34.2842	2.34103	0.749864	2.52722	33.9399	2.34625	-2.44345	2.52722	34.4053	2.34395	-1.50069	2.52722	34.524	2.34228	-1.56116	2.52722	34.5147
2.35312	1.25073	2.53442	34.2795	2.3477	0.73494	2.53442	34.0047	2.35292	-2.46342	2.53442	34.4252	2.35062	-1.5431	2.53442	34.5121	2.34895	-1.54899	2.53442	34.497
2.35978	1.26825	2.54162	34.2786	2.35437	0.721484	2.54162	34.0701	2.35958	-2.47165	2.54162	34.4403	2.35728	-1.58144	2.54162	34.4927	2.35562	-1.53315	2.54162	34.4858
2.36645	1.28597	2.54882	34.281	2.36103	0.710078	2.54882	34.1302	2.36625	-2.46844	2.54882	34.4503	2.36395	-1.61438	2.54882	34.4689	2.36228	-1.51392	2.54882	34.4835
2.37312	1.30301	2.55602	34.2868	2.3677	0.701569	2.55602	34.1794	2.37292	-2.45354	2.55602	34.4544	2.37062	-1.64158	2.55602	34.4451	2.36895	-1.492	2.55602	34.4922
2.37978	1.31846	2.56322	34.2962	2.37437	0.696793	2.56322	34.2132	2.37958	-2.42848	2.56322	34.4516	2.37728	-1.66278	2.56322	34.4257	2.37562	-1.46659	2.56322	34.5122
2.38645	1.33206	2.57042	34.3095	2.38103	0.697449	2.57042	34.2296	2.38625	-2.395	2.57042	34.4416	2.38395	-1.67848	2.57042	34.4143	2.38228	-1.43676	2.57042	34.5423
2.39312	1.34469	2.57762	34.3265	2.3877	0.705428	2.57762	34.2292	2.39292	-2.35519	2.57762	34.4251	2.39062	-1.68981	2.57762	34.4123	2.38895	-1.40376	2.57762	34.5797
2.39978	1.35679	2.58482	34.3455	2.39437	0.721395	2.58482	34.2154	2.39958	-2.31013	2.58482	34.4035	2.39728	-1.69759	2.58482	34.4195	2.39562	-1.36861	2.58482	34.6209
2.40645	1.3683	2.59202	34.3641	2.40103	0.743449	2.59202	34.1925	2.40625	-2.26197	2.59202	34.3786	2.40395	-1.70309	2.59202	34.4336	2.40228	-1.3323	2.59202	34.662
2.41312	1.37883	2.59922	34.379	2.4077	0.769526	2.59922	34.1651	2.41292	-2.2138	2.59922	34.3533	2.41062	-1.70722	2.59922	34.4514	2.40895	-1.29435	2.59922	34.6996
2.41978	1.38819	2.60642	34.387	2.41437	0.797167	2.60642	34.1376	2.41958	-2.16887	2.60642	34.3306	2.41728	-1.71185	2.60642	34.4689	2.41562	-1.25549	2.60642	34.7311
2.42645	1.39742	2.61362	34.3856	2.42103	0.824206	2.61362	34.1141	2.42625	-2.12859	2.61362	34.3131	2.42395	-1.71749	2.61362	34.4825	2.42228	-1.21732	2.61362	34.7542
2.43312	1.40736	2.62082	34.3738	2.4277	0.849202	2.62082	34.0971	2.43292	-2.09241	2.62082	34.3023	2.43062	-1.72365	2.62082	34.4898	2.42895	-1.18042	2.62082	34.7678
2.43978	1.41738	2.62802	34.3528	2.43437	0.870831	2.62802	34.0867	2.43958	-2.06071	2.62802	34.2985	2.43728	-1.72981	2.62802	34.4897	2.43562	-1.14515	2.62802	34.7719
2.44645	1.42633	2.63522	34.3255	2.44103	0.889882	2.63522	34.081	2.44625	-2.0355	2.63522	34.3009	2.44395	-1.73704	2.63522	34.4824	2.44228	-1.11144	2.63522	34.7677
2.45312	1.43241	2.64242	34.2958	2.4477	0.906534	2.64242	34.0778	2.45292	-2.01711	2.64242	34.308	2.45062	-1.74673	2.64242	34.4694	2.44895	-1.08004	2.64242	34.757
2.45978	1.43458	2.64962	34.2682	2.45437	0.920519	2.64962	34.0765	2.45958	-2.0042	2.64962	34.3182	2.45728	-1.75802	2.64962	34.453	2.45562	-1.05117	2.64962	34.7417
2.46645	1.43212	2.65682	34.2466	2.46103	0.929743	2.65682	34.0778	2.46625	-1.99621	2.65682	34.3297	2.46395	-1.77066	2.65682	34.4362	2.46228	-1.02396	2.65682	34.723
2.47312	1.42578	2.66402	34.2345	2.4677	0.932768	2.66402	34.0828	2.47292	-1.99348	2.66402	34.3406	2.47062	-1.78602	2.66402	34.4217	2.46895	-0.996239	2.66402	34.7026
2.47978	1.4175	2.67122	34.2337	2.47437	0.929788	2.67122	34.091	2.47958	-1.99581	2.67122	34.3491	2.47728	-1.8063	2.67122	34.4119	2.47562	-0.966936	2.67122	34.6822
2.48645	1.40897	2.67842	34.2442	2.48103	0.921682	2.67842	34.1008	2.48625	-1.99958	2.67842	34.3539	2.48395	-1.83093	2.67842	34.4084	2.48228	-0.935875	2.67842	34.6631
2.49312	1.40221	2.68562	34.2646	2.4877	0.908032	2.68562	34.1099	2.49292	-2.00216	2.68562	34.3535	2.49062	-1.85893	2.68562	34.4123	2.48895	-0.902936	2.68562	34.6458
2.49978	1.39967	2.69282	34.2921	2.49437	0.88945	2.69282	34.1168	2.49958	-2.00247	2.69282	34.3472	2.49728	-1.8895	2.69282	34.4243	2.49562	-0.8687	2.69282	34.6298
2.50645	1.40249	2.70002	34.3236	2.50103	0.867307	2.70002	34.1199	2.50625	-1.99855	2.70002	34.3351	2.50395	-1.92094	2.70002	34.4445	2.50228	-0.834182	2.70002	34.6146
2.51312	1.41063	2.70722	34.3559	2.5077	0.842787	2.70722	34.1167	2.51292	-1.98772	2.70722	34.3187	2.51062	-1.95061	2.70722	34.4716	2.50895	-0.800885	2.70722	34.6
2.51978	1.42278	2.71442	34.3859	2.51437	0.815555	2.71442	34.1045	2.51958	-1.96733	2.71442	34.3002	2.51728	-1.97563	2.71442	34.503	2.51562	-0.769369	2.71442	34.5863
2.52645	1.43823	2.72162	34.411	2.52103	0.784896	2.72162	34.0814	2.52625	-1.9384	2.72162	34.2829	2.52395	-1.99558	2.72162	34.5345	2.52228	-0.739135	2.72162	34.5734
2.53312	1.45546	2.72882	34.4291	2.5277	0.750527	2.72882	34.0482	2.53292	-1.9017	2.72882	34.2701	2.53062	-2.01028	2.72882	34.5619	2.52895	-0.710465	2.72882	34.5613
2.53978	1.4722	2.73602	34.4388	2.53437	0.711001	2.73602	34.0088	2.53958	-1.8578	2.73602	34.2657	2.53728	-2.02081	2.73602	34.5815	2.53562	-0.683255	2.73602	34.55
2.54645	1.48628	2.74322	34.4391	2.54103	0.664897	2.74322	33.9682	2.54625	-1.80788	2.74322	34.2728	2.54395	-2.02885	2.74322	34.5903	2.54228	-0.65773	2.74322	34.5401
2.55312	1.49634	2.75042	34.4299	2.5477	0.611484	2.75042	33.9314	2.55292	-1.75489	2.75042	34.2924	2.55062	-2.03614	2.75042	34.5866	2.54895	-0.633813	2.75042	34.5326
2.55978	1.50239	2.75762	34.4117	2.55437	0.551842	2.75762	33.9017	2.55958	-1.70133	2.75762	34.3227	2.55728	-2.04445	2.75762	34.57	2.55562	-0.610799	2.75762	34.5284
2.56645	1.50622	2.76482	34.3859	2.56103	0.486933	2.76482	33.8819	2.56625	-1.64753	2.76482	34.3594	2.56395	-2.05433	2.76482	34.5425	2.56228	-0.587791	2.76482	34.528
2.57312	1.51008	2.77202	34.355	2.5677	0.418723	2.77202	33.8742	2.57292	-1.59469	2.77202	34.3975	2.57062	-2.06589	2.77202	34.5083	2.56895	-0.563435	2.77202	34.5316
2.57978	1.5167	2.77922	34.3213	2.57437	0.349022	2.77922	33.8801	2.57958	-1.54451	2.77922	34.4324	2.57728	-2.07873	2.77922	34.4729	2.57562	-0.536405	2.77922	34.539
2.58645	1.52739	2.78642	34.2868	2.58103	0.280105	2.78642	33.8993	2.58625	-1.49922	2.78642	34.4605	2.58395	-2.09113	2.78642	34.4417	2.58228	-0.504345	2.78642	34.5489
2.59312	1.54167	2.79362	34.2539	2.5877	0.213213	2.79362	33.9292	2.59292	-1.45938	2.79362	34.4787	2.59062	-2.10112	2.79362	34.4188	2.58895	-0.46619	2.79362	34.5594
2.59978	1.55796	2.80082	34.2252	2.59437	0.147857	2.80082	33.9655	2.59958	-1.42547	2.80082	34.4848	2.59728	-2.10727	2.80082	34.4068	2.59562	-0.423245	2.80082	34.5678
2.60645	1.5732	2.80802	34.2026	2.60103	0.0825226	2.80802	34.0039	2.60625	-1.39852	2.80802	34.4789	2.60395	-2.10907	2.80802	34.4065	2.60228	-0.377364	2.80802	34.5722
2.61312	1.58508	2.81522	34.1873	2.6077	0.0161901	2.81522	34.0409	2.61292	-1.37942	2.81522	34.4632	2.61062	-2.107	2.81522	34.4164	2.60895	-0.33085	2.81522	34.5712
2.61978	1.59089	2.82242	34.1789	2.61437	-0.0503585	2.82242	34.0746	2.61958	-1.36863	2.82242	34.442	2.61728	-2.10062	2.82242	34.434	2.61562	-0.283867	2.82242	34.564
2.62645	1.58943	2.82962	34.1763	2.62103	-0.116818	2.82962	34.1036	2.62625	-1.36688	2.82962	34.4189	2.62395	-2.09074	2.82962	34.4556	2.62228	-0.238307	2.82962	34.5509
2.63312	1.58086	2.83682	34.1788	2.6277	-0.183754	2.83682	34.1267	2.63292	-1.37495	2.83682	34.3967	2.63062	-2.07894	2.83682	34.4777	2.62895	-0.195652	2.83682	34.5333
2.63978	1.56604	2.84402	34.1861	2.63437	-0.250958	2.84402	34.1428	2.63958	-1.39263	2.84402	34.377	2.63728	-2.06694	2.84402	34.4971	2.63562	-0.156187	2.84402	34.5146
2.64645	1.5462	2.85122	34.1974	2.64103	-0.317842	2.85122	34.1516	2.64625	-1.41838	2.85122	34.3611	2.64395	-2.05598	2.85122	34.5116	2.64228	-0.119887	2.85122	34.4987
2.65312	1.52162	2.85842	34.2117	2.6477	-0.384428	2.85842	34.1538	2.65292	-1.45001	2.85842	34.3495	2.65062	-2.04679	2.85842	34.5199	2.64895	-0.0861213	2.85842	34.4896
2.65978	1.49335	2.86562	34.2273	2.65437	-0.451587	2.86562	34.1508	2.65958	-1.48499	2.86562	34.342	2.65728	-2.04058	2.86562	34.5225	2.65562	-0.0573471	2.86562	34.4898
2.66645	1.4619	2.87282	34.2432	2.66103	-0.518672	2.87282	34.1443	2.66625	-1.52043	2.87282	34.3376	2.66395	-2.03808	2.87282	34.5212	2.66228	-0.0360385	2.87282	34.5002
2.67312	1.42686	2.88002	34.2589	2.6677	-0.58423	2.88002	34.1354	2.67292	-1.55375	2.88002	34.335	2.67062	-2.03817	2.88002	34.5188	2.66895	-0.0237152	2.88002	34.5199
2.67978	1.38817	2.88722	34.2736	2.67437	-0.647418	2.88722	34.1256	2.67958	-1.58489	2.88722	34.3335	2.67728	-2.03963	2.88722	34.5176	2.67562	-0.0196621	2.88722	34.5463
2.68645	1.34711	2.89442	34.2864	2.68103	-0.707842	2.89442	34.1166	2.68625	-1.61514	2.89442	34.3331	2.68395	-2.04237	2.89442	34.5192	2.68228	-0.0228882	2.89442	34.5755
2.69312	1.30669	2.90162	34.2956	2.6877	-0.765204	2.90162	34.1109	2.69292	-1.64526	2.90162	34.3338	2.69062	-2.04581	2.90162	34.5243	2.68895	-0.0323802	2.90162	34.6037
2.69978	1.26874	2.90882	34.3008	2.69437	-0.818834	2.90882	34.1106	2.69958	-1.67459	2.90882	34.336	2.69728	-2.04879	2.90882	34.5331	2.69562	-0.0473484	2.90882	34.628
2.70645	1.23555	2.91602	34.3022	2.70103	-0.868388	2.91602	34.1167	2.70625	-1.70212	2.91602	34.3397	2.70395	-2.05052	2.91602	34.5445	2.70228	-0.0645593	2.91602	34.6466
2.71312	1.21032	2.92322	34.3008	2.7077	-0.912845	2.92322	34.1285	2.71292	-1.72789	2.92322	34.3449	2.71062	-2.05234	2.92322	34.5563	2.70895	-0.0817552	2.92322	34.6589
2.71978	1.19677	2.93042	34.2974	2.71437	-0.950187	2.93042	34.1439	2.71958	-1.75043	2.93042	34.3516	2.71728	-2.05425	2.93042	34.5659	2.71562	-0.0994653	2.93042	34.6652
2.72645	1.19619	2.93762	34.2919	2.72103	-0.977628	2.93762	34.1597	2.72625	-1.76899	2.93762	34.3586	2.72395	-2.05517	2.93762	34.5713	2.72228	-0.119984	2.93762	34.6671
2.73312	1.20755	2.94482	34.284	2.7277	-0.993609	2.94482	34.1723	2.73292	-1.78242	2.94482	34.3648	2.73062	-2.05323	2.94482	34.572	2.72895	-0.144869	2.94482	34.6666
2.73978	1.22922	2.95202	34.2737	2.73437	-0.998035	2.95202	34.1784	2.73958	-1.79225	2.95202	34.3689	2.73728	-2.04822	2.95202	34.5689	2.73562	-0.174053	2.95202	34.6653
2.74645	1.25922	2.95922	34.2614	2.74103	-0.9927	2.95922	34.1759	2.74625	-1.79957	2.95922	34.3708	2.74395	-2.03884	2.95922	34.5633	2.74228	-0.209212	2.95922	34.6633
2.75312	1.29481	2.96642	34.2478	2.7477	-0.98031	2.96642	34.1648	2.75292	-1.80548	2.96642	34.3709	2.75062	-2.02389	2.96642	34.5556	2.74895	-0.251718	2.96642	34.6591
2.75978	1.3319	2.97362	34.2335	2.75437	-0.96447	2.97362	34.1464	2.75958	-1.81156	2.97362	34.37	2.75728	-2.00283	2.97362	34.5461	2.75562	-0.300243	2.97362	34.6505
2.76645	1.36743	2.98082	34.2188	2.76103	-0.948615	2.98082	34.1233	2.76625	-1.81799	2.98082	34.3685	2.76395	-1.97604	2.98082	34.5352	2.76228	-0.35207	2.98082	34.6362
2.77312	1.3996	2.98802	34.2039	2.7677	-0.934586	2.98802	34.099	2.77292	-1.82551	2.98802	34.3667	2.77062	-1.94487	2.98802	34.5229	2.76895	-0.406735	2.98802	34.6163
2.77978	1.42743	2.99522	34.189	2.77437	-0.923291	2.99522	34.077	2.77958	-1.83294	2.99522	34.3655	2.77728	-1.91068	2.99522	34.5085	2.77562	-0.464335	2.99522	34.5921
2.78645	1.44959	3.00242	34.1749	2.78103	-0.914454	3.00242	34.0599	2.78625	-1.84019	3.00242	34.3658	2.78395	-1.87637	3.00242	34.4906	2.78228	-0.523694	3.00242	34.5658
2.79312	1.4657	3.00962	34.1624	2.7877	-0.906758	3.00962	34.0484	2.79292	-1.84653	3.00962	34.3688	2.79062	-1.84464	3.00962	34.4679	2.78895	-0.582904	3.00962	34.5402
2.79978	1.47757	3.01682	34.1526	2.79437	-0.898845	3.01682	34.0411	2.79958	-1.85197	3.01682	34.3752	2.79728	-1.81703	3.01682	34.4408	2.79562	-0.641532	3.01682	34.5181
2.80645	1.48711	3.02402	34.1459	2.80103	-0.889823	3.02402	34.0358	2.80625	-1.85587	3.02402	34.3848	2.80395	-1.79368	3.02402	34.4113	2.80228	-0.698529	3.02402	34.5025
2.81312	1.4967	3.03122	34.1427	2.8077	-0.878721	3.03122	34.0308	2.81292	-1.85831	3.03122	34.3969	2.81062	-1.77335	3.03122	34.3823	2.80895	-0.751048	3.03122	34.4945
2.81978	1.50841	3.03842	34.1434	2.81437	-0.863463	3.03842	34.0246	2.81958	-1.86001	3.03842	34.4106	2.81728	-1.75395	3.03842	34.3561	2.81562	-0.796422	3.03842	34.494
2.82645	1.52515	3.04562	34.1491	2.82103	-0.843421	3.04562	34.0164	2.82625	-1.86083	3.04562	34.425	2.82395	-1.73295	3.04562	34.3338	2.82228	-0.833802	3.04562	34.4992
2.83312	1.54912	3.05282	34.1607	2.8277	-0.819497	3.05282	34.0058	2.83292	-1.86006	3.05282	34.4387	2.83062	-1.70788	3.05282	34.3164	2.82895	-0.862777	3.05282	34.5083
2.83978	1.57999	3.06002	34.1786	2.83437	-0.792757	3.06002	33.9939	2.83958	-1.85599	3.06002	34.4498	2.83728	-1.67821	3.06002	34.3041	2.83562	-0.883691	3.06002	34.52
2.84645	1.61747	3.06722	34.2014	2.84103	-0.763305	3.06722	33.983	2.84625	-1.84986	3.06722	34.4561	2.84395	-1.64357	3.06722	34.2968	2.84228	-0.89898	3.06722	34.5337
2.85312	1.66081	3.07442	34.2273	2.8477	-0.731073	3.07442	33.9757	2.85292	-1.84289	3.07442	34.4562	2.85062	-1.60576	3.07442	34.2936	2.84895	-0.910945	3.07442	34.5488
2.85978	1.70853	3.08162	34.2543	2.85437	-0.6973	3.08162	33.9736	2.85958	-1.83713	3.08162	34.45	2.85728	-1.5678	3.08162	34.2932	2.85562	-0.921533	3.08162	34.5653
2.86645	1.75861	3.08882	34.2817	2.86103	-0.66302	3.08882	33.9767	2.86625	-1.8356	3.08882	34.4392	2.86395	-1.53199	3.08882	34.2948	2.86228	-0.931017	3.08882	34.5834
2.87312	1.80793	3.09602	34.3086	2.8677	-0.629224	3.09602	33.984	2.87292	-1.84039	3.09602	34.4264	2.87062	-1.49914	3.09602	34.2981	2.86895	-0.941068	3.09602	34.6037
2.87978	1.85482	3.10322	34.3334	2.87437	-0.595696	3.10322	33.9942	2.87958	-1.85336	3.10322	34.4146	2.87728	-1.46927	3.10322	34.3033	2.87562	-0.952281	3.10322	34.6253
2.88645	1.89829	3.11042	34.3542	2.88103	-0.5619	3.11042	34.0058	2.88625	-1.87353	3.11042	34.4059	2.88395	-1.44316	3.11042	34.3103	2.88228	-0.964805	3.11042	34.6455
2.89312	1.93793	3.11762	34.3697	2.8877	-0.527948	3.11762	34.0172	2.89292	-1.8994	3.11762	34.4017	2.89062	-1.4207	3.11762	34.3192	2.88895	-0.979125	3.11762	34.6611
2.89978	1.97323	3.12482	34.3799	2.89437	-0.494398	3.12482	34.027	2.89958	-1.92886	3.12482	34.4026	2.89728	-1.39987	3.12482	34.3301	2.89562	-0.994481	3.12482	34.6699
2.90645	2.00354	3.13202	34.3859	2.90103	-0.461295	3.13202	34.0345	2.90625	-1.95839	3.13202	34.408	2.90395	-1.37962	3.13202	34.3427	2.90228	-1.01161	3.13202	34.6716
2.91312	2.03031	3.13922	34.3885	2.9077	-0.427432	3.13922	34.04	2.91292	-1.986	3.13922	34.4162	2.91062	-1.35998	3.13922	34.3568	2.90895	-1.03001	3.13922	34.6679
2.91978	2.05525	3.14642	34.3879	2.91437	-0.391901	3.14642	34.0447	2.91958	-2.00979	3.14642	34.4243	2.91728	-1.34052	3.14642	34.3714	2.91562	-1.04963	3.14642	34.6607
2.92645	2.07986	3.15362	34.3845	2.92103	-0.354789	3.15362	34.0499	2.92625	-2.02908	3.15362	34.429	2.92395	-1.31905	3.15362	34.3864	2.92228	-1.06896	3.15362	34.6514
2.93312	2.10441	3.16082	34.3797	2.9277	-0.316419	3.16082	34.0563	2.93292	-2.04451	3.16082	34.4282	2.93062	-1.2937	3.16082	34.4018	2.92895	-1.08745	3.16082	34.642
2.93978	2.13069	3.16802	34.3748	2.93437	-0.276975	3.16802	34.0639	2.93958	-2.05584	3.16802	34.4215	2.93728	-1.26431	3.16802	34.4178	2.93562	-1.10681	3.16802	34.6346
2.94645	2.15938	3.17522	34.3709	2.94103	-0.234872	3.17522	34.0714	2.94625	-2.06313	3.17522	34.4095	2.94395	-1.22994	3.17522	34.434	2.94228	-1.12702	3.17522	34.6309
2.95312	2.19052	3.18242	34.3674	2.9477	-0.190027	3.18242	34.0769	2.95292	-2.06666	3.18242	34.3937	2.95062	-1.18922	3.18242	34.4496	2.94895	-1.14825	3.18242	34.6312
2.95978	2.22259	3.18962	34.3628	2.95437	-0.143737	3.18962	34.0782	2.95958	-2.0681	3.18962	34.3761	2.95728	-1.14138	3.18962	34.4638	2.95562	-1.17105	3.18962	34.6335
2.96645	2.25383	3.19682	34.3551	2.96103	-0.0985339	3.19682	34.0735	2.96625	-2.06804	3.19682	34.3589	2.96395	-1.0877	3.19682	34.4764	2.96228	-1.19663	3.19682	34.6345
2.97312	2.28257	3.20402	34.343	2.9677	-0.0567213	3.20402	34.0618	2.97292	-2.06479	3.20402	34.3445	2.97062	-1.02846	3.20402	34.4871	2.96895	-1.22459	3.20402	34.6318
2.97978	2.3073	3.21122	34.326	2.97437	-0.0195727	3.21122	34.044	2.97958	-2.05782	3.21122	34.3354	2.97728	-0.96409	3.21122	34.4952	2.97562	-1.25394	3.21122	34.6241
2.98645	2.32724	3.21842	34.3048	2.98103	0.0106171	3.21842	34.022	2.98625	-2.04755	3.21842	34.3332	2.98395	-0.896156	3.21842	34.5002	2.98228	-1.28605	3.21842	34.6118
2.99312	2.34117	3.22562	34.281	2.9877	0.0328943	3.22562	33.9996	2.99292	-2.0339	3.22562	34.3384	2.99062	-0.826515	3.22562	34.5027	2.98895	-1.3222	3.22562	34.5954
2.99978	2.34883	3.23282	34.2574	2.99437	0.0467822	3.23282	33.9814	2.99958	-2.0148	3.23282	34.3509	2.99728	-0.757381	3.23282	34.5033	2.99562	-1.36172	3.23282	34.5757
3.00645	2.35011	3.24002	34.2371	3.00103	0.053145	3.24002	33.9719	3.00625	-1.98992	3.24002	34.3697	3.00395	-0.690609	3.24002	34.5026	3.00228	-1.40314	3.24002	34.5546
3.01312	2.3463	3.24722	34.2234	3.0077	0.0531003	3.24722	33.9741	3.01292	-1.96003	3.24722	34.3929	3.01062	-0.629231	3.24722	34.5002	3.00895	-1.44564	3.24722	34.5357
3.01978	2.33793	3.25442	34.2185	3.01437	0.0477955	3.25442	33.9887	3.01958	-1.92603	3.25442	34.4178	3.01728	-0.575215	3.25442	34.4956	3.01562	-1.48817	3.25442	34.5229
3.02645	2.32586	3.26162	34.2227	3.02103	0.0383332	3.26162	34.0137	3.02625	-1.8892	3.26162	34.4418	3.02395	-0.52885	3.26162	34.4885	3.02228	-1.52824	3.26162	34.5194
3.03312	2.31061	3.26882	34.2348	3.0277	0.0266135	3.26882	34.0455	3.03292	-1.85099	3.26882	34.4622	3.03062	-0.48963	3.26882	34.4795	3.02895	-1.5638	3.26882	34.527
3.03978	2.29347	3.27602	34.252	3.03437	0.0152662	3.27602	34.0797	3.03958	-1.81337	3.27602	34.4774	3.03728	-0.457227	3.27602	34.4688	3.03562	-1.59492	3.27602	34.5454
3.04645	2.27588	3.28322	34.2717	3.04103	0.00624359	3.28322	34.1117	3.04625	-1.77605	3.28322	34.4864	3.04395	-0.431828	3.28322	34.4561	3.04228	-1.62239	3.28322	34.5734
3.05312	2.25817	3.29042	34.2911	3.0477	3.72529e-05	3.29042	34.1376	3.05292	-1.73885	3.29042	34.4893	3.05062	-0.412136	3.29042	34.4412	3.04895	-1.64695	3.29042	34.608
3.05978	2.2397	3.29762	34.3079	3.05437	-0.00372529	3.29762	34.1545	3.05958	-1.70207	3.29762	34.4874	3.05728	-0.396393	3.29762	34.4246	3.05562	-1.66935	3.29762	34.6446
3.06645	2.221	3.30482	34.3197	3.06103	-0.00476837	3.30482	34.1618	3.06625	-1.6659	3.30482	34.4831	3.06395	-0.383809	3.30482	34.4074	3.06228	-1.69075	3.30482	34.6777
3.07312	2.2032	3.31202	34.3247	3.0677	-0.00297278	3.31202	34.1614	3.07292	-1.63069	3.31202	34.4793	3.07062	-0.376076	3.31202	34.3913	3.06895	-1.71255	3.31202	34.7016
3.07978	2.18616	3.31922	34.3222	3.07437	0.00101328	3.31922	34.1566	3.07958	-1.59681	3.31922	34.4784	3.07728	-0.374079	3.31922	34.378	3.07562	-1.73604	3.31922	34.7123
3.08645	2.16816	3.32642	34.3125	3.08103	0.00626594	3.32642	34.151	3.08625	-1.56487	3.32642	34.4813	3.08395	-0.376672	3.32642	34.369	3.08228	-1.76126	3.32642	34.7082
3.09312	2.14847	3.33362	34.2961	3.0877	0.0126213	3.33362	34.1475	3.09292	-1.53478	3.33362	34.4879	3.09062	-0.383295	3.33362	34.3653	3.08895	-1.78792	3.33362	34.6904
3.09978	2.12859	3.34082	34.2736	3.09437	0.0215545	3.34082	34.1476	3.09958	-1.50574	3.34082	34.497	3.09728	-0.39278	3.34082	34.3676	3.09562	-1.81498	3.34082	34.6614
3.10645	2.10895	3.34802	34.246	3.10103	0.0329763	3.34802	34.1521	3.10625	-1.47636	3.34802	34.5071	3.10395	-0.40514	3.34802	34.3758	3.10228	-1.84191	3.34802	34.6251
3.11312	2.0896	3.35522	34.2156	3.1077	0.0442564	3.35522	34.1607	3.11292	-1.44551	3.35522	34.5163	3.11062	-0.419393	3.35522	34.3892	3.10895	-1.8677	3.35522	34.5857
3.11978	2.07012	3.36242	34.1855	3.11437	0.0530258	3.36242	34.1717	3.11958	-1.41299	3.36242	34.523	3.11728	-0.435024	3.36242	34.4056	3.11562	-1.8906	3.36242	34.5466
3.12645	2.05146	3.36962	34.1589	3.12103	0.0593513	3.36962	34.1823	3.12625	-1.37983	3.36962	34.5263	3.12395	-0.451975	3.36962	34.4222	3.12228	-1.91056	3.36962	34.5109
3.13312	2.03358	3.37682	34.1385	3.1277	0.0644177	3.37682	34.1893	3.13292	-1.34794	3.37682	34.5254	3.13062	-0.468671	3.37682	34.4358	3.12895	-1.92819	3.37682	34.4804
3.13978	2.01525	3.38402	34.1262	3.13437	0.0671595	3.38402	34.1905	3.13958	-1.31679	3.38402	34.5202	3.13728	-0.485443	3.38402	34.4436	3.13562	-1.94421	3.38402	34.4566
3.14645	1.99538	3.39122	34.1231	3.14103	0.0665858	3.39122	34.1853	3.14625	-1.28523	3.39122	34.5108	3.14395	-0.502586	3.39122	34.4444	3.14228	-1.95784	3.39122	34.44
3.15312	1.97221	3.39842	34.1291	3.1477	0.0639334	3.39842	34.1751	3.15292	-1.25241	3.39842	34.4975	3.15062	-0.520118	3.39842	34.4386	3.14895	-1.96733	3.39842	34.4306
3.15978	1.94543	3.40562	34.1428	3.15437	0.0607744	3.40562	34.1622	3.15958	-1.21824	3.40562	34.4806	3.15728	-0.53706	3.40562	34.4284	3.15562	-1.97292	3.40562	34.4285
3.16645	1.91484	3.41282	34.1614	3.16103	0.0568777	3.41282	34.1495	3.16625	-1.18285	3.41282	34.4606	3.16395	-0.551902	3.41282	34.417	3.16228	-1.97496	3.41282	34.4338
3.17312	1.88033	3.42002	34.1818	3.1677	0.050813	3.42002	34.1388	3.17292	-1.1454	3.42002	34.4378	3.17062	-0.565425	3.42002	34.4076	3.16895	-1.97229	3.42002	34.4469
3.17978	1.84077	3.42722	34.2013	3.17437	0.0430495	3.42722	34.1316	3.17958	-1.10722	3.42722	34.4128	3.17728	-0.579208	3.42722	34.4039	3.17562	-1.964	3.42722	34.4677
3.18645	1.79533	3.43442	34.2182	3.18103	0.0342652	3.43442	34.1288	3.18625	-1.07148	3.43442	34.3867	3.18395	-0.593573	3.43442	34.4088	3.18228	-1.94968	3.43442	34.4956
3.19312	1.7449	3.44162	34.2318	3.1877	0.0250489	3.44162	34.1303	3.19292	-1.04094	3.44162	34.3613	3.19062	-0.608802	3.44162	34.424	3.18895	-1.93088	3.44162	34.5294
3.19978	1.69	3.44882	34.2423	3.19437	0.0157952	3.44882	34.1352	3.19958	-1.01705	3.44882	34.3389	3.19728	-0.624657	3.44882	34.4492	3.19562	-1.90711	3.44882	34.5673
3.20645	1.63057	3.45602	34.2513	3.20103	0.00778586	3.45602	34.1408	3.20625	-1.00035	3.45602	34.3214	3.20395	-0.642456	3.45602	34.4819	3.20228	-1.87826	3.45602	34.6077
3.21312	1.56718	3.46322	34.2604	3.2077	0.00243634	3.46322	34.1433	3.21292	-0.992104	3.46322	34.3091	3.21062	-0.662498	3.46322	34.5184	3.20895	-1.84525	3.46322	34.6486
3.21978	1.50236	3.47042	34.2715	3.21437	-8.9407e-05	3.47042	34.1402	3.21958	-0.994526	3.47042	34.3009	3.21728	-0.684015	3.47042	34.556	3.21562	-1.8096	3.47042	34.6876
3.22645	1.43819	3.47762	34.2851	3.22103	0.000678003	3.47762	34.1306	3.22625	-1.00725	3.47762	34.2954	3.22395	-0.706546	3.47762	34.5921	3.22228	-1.77289	3.47762	34.722
3.23312	1.37543	3.48482	34.3007	3.2277	0.00441074	3.48482	34.1158	3.23292	-1.02884	3.48482	34.2916	3.23062	-0.72857	3.48482	34.6247	3.22895	-1.73582	3.48482	34.7493
3.23978	1.31443	3.49202	34.3169	3.23437	0.0112951	3.49202	34.0978	3.23958	-1.05732	3.49202	34.2895	3.23728	-0.750087	3.49202	34.6514	3.23562	-1.69892	3.49202	34.7673
3.24645	1.25434	3.49922	34.3316	3.24103	0.0208393	3.49922	34.0786	3.24625	-1.09122	3.49922	34.2899	3.24395	-0.770234	3.49922	34.6704	3.24228	-1.66345	3.49922	34.7746
3.25312	1.1944	3.50642	34.3426	3.2477	0.0326782	3.50642	34.0603	3.25292	-1.12806	3.50642	34.293	3.25062	-0.789188	3.50642	34.6815	3.24895	-1.63159	3.50642	34.7712
3.25978	1.13358	3.51362	34.3489	3.25437	0.0466779	3.51362	34.0462	3.25958	-1.1645	3.51362	34.2994	3.25728	-0.80701	3.51362	34.6853	3.25562	-1.60523	3.51362	34.7575
3.26645	1.07196	3.52082	34.3507	3.26103	0.0619441	3.52082	34.0398	3.26625	-1.19894	3.52082	34.3106	3.26395	-0.823811	3.52082	34.6822	3.26228	-1.58494	3.52082	34.735
3.27312	1.01089	3.52802	34.3494	3.2677	0.0787005	3.52802	34.0435	3.27292	-1.23111	3.52802	34.3285	3.27062	-0.83936	3.52802	34.6719	3.26895	-1.57056	3.52802	34.7057
3.27978	0.951663	3.53522	34.3472	3.27437	0.0967234	3.53522	34.0571	3.27958	-1.2599	3.53522	34.354	3.27728	-0.853159	3.53522	34.6541	3.27562	-1.56288	3.53522	34.6723
3.28645	0.896387	3.54242	34.3465	3.28103	0.116453	3.54242	34.0776	3.28625	-1.28388	3.54242	34.3849	3.28395	-0.866562	3.54242	34.6289	3.28228	-1.5611	3.54242	34.6376
3.29312	0.846572	3.54962	34.3496	3.2877	0.137299	3.54962	34.1008	3.29292	-1.30396	3.54962	34.4168	3.29062	-0.879295	3.54962	34.5979	3.28895	-1.56471	3.54962	34.6043
3.29978	0.80318	3.55682	34.3582	3.29437	0.159368	3.55682	34.1229	3.29958	-1.32189	3.55682	34.4448	3.29728	-0.889979	3.55682	34.5629	3.29562	-1.57314	3.55682	34.5743
3.30645	0.767708	3.56402	34.3734	3.30103	0.183299	3.56402	34.1405	3.30625	-1.33812	3.56402	34.4662	3.30395	-0.896648	3.56402	34.526	3.30228	-1.58759	3.56402	34.5488
3.31312	0.740029	3.57122	34.3941	3.3077	0.209346	3.57122	34.1505	3.31292	-1.35124	3.57122	34.4801	3.31062	-0.899576	3.57122	34.4894	3.30895	-1.60906	3.57122	34.5287
3.31978	0.720583	3.57842	34.4174	3.31437	0.238642	3.57842	34.1504	3.31958	-1.36085	3.57842	34.4864	3.31728	-0.898696	3.57842	34.4556	3.31562	-1.63721	3.57842	34.5143
3.32645	0.709713	3.58562	34.4397	3.32103	0.271209	3.58562	34.1395	3.32625	-1.36779	3.58562	34.4846	3.32395	-0.892349	3.58562	34.4271	3.32228	-1.67207	3.58562	34.5053
3.33312	0.706479	3.59282	34.4572	3.3277	0.307798	3.59282	34.1199	3.33292	-1.37188	3.59282	34.4753	3.33062	-0.880003	3.59282	34.4052	3.32895	-1.71193	3.59282	34.5008
3.33978	0.709563	3.60002	34.4671	3.33437	0.346981	3.60002	34.0955	3.33958	-1.37236	3.60002	34.4605	3.33728	-0.862613	3.60002	34.3904	3.33562	-1.75571	3.60002	34.4995
3.34645	0.717685	3.60722	34.4671	3.34103	0.387244	3.60722	34.0712	3.34625	-1.36842	3.60722	34.4436	3.34395	-0.841349	3.60722	34.3821	3.34228	-1.80173	3.60722	34.5003
3.35312	0.731796	3.61442	34.4554	3.3477	0.427447	3.61442	34.0511	3.35292	-1.36131	3.61442	34.4273	3.35062	-0.816666	3.61442	34.3793	3.34895	-1.84897	3.61442	34.5017
3.35978	0.751078	3.62162	34.4315	3.35437	0.465125	3.62162	34.038	3.35958	-1.35271	3.62162	34.4122	3.35728	-0.789605	3.62162	34.3804	3.35562	-1.89783	3.62162	34.5024
3.36645	0.773489	3.62882	34.3965	3.36103	0.49863	3.62882	34.0337	3.36625	-1.34255	3.62882	34.3972	3.36395	-0.760563	3.62882	34.3829	3.36228	-1.94754	3.62882	34.5013
3.37312	0.798374	3.63602	34.3538	3.3677	0.526108	3.63602	34.0386	3.37292	-1.33032	3.63602	34.3813	3.37062	-0.72965	3.63602	34.3847	3.36895	-1.99816	3.63602	34.4983
3.37978	0.826925	3.64322	34.308	3.37437	0.548415	3.64322	34.0522	3.37958	-1.31493	3.64322	34.3642	3.37728	-0.696681	3.64322	34.385	3.37562	-2.04886	3.64322	34.4938
3.38645	0.858866	3.65042	34.2642	3.38103	0.5669	3.65042	34.073	3.38625	-1.29679	3.65042	34.3473	3.38395	-0.66369	3.65042	34.3847	3.38228	-2.09884	3.65042	34.4889
3.39312	0.891879	3.65762	34.2266	3.3877	0.582039	3.65762	34.0988	3.39292	-1.27513	3.65762	34.3324	3.39062	-0.632741	3.65762	34.3848	3.38895	-2.14592	3.65762	34.4845
3.39978	0.923753	3.66482	34.1985	3.39437	0.593938	3.66482	34.1277	3.39958	-1.24975	3.66482	34.3204	3.39728	-0.605337	3.66482	34.3856	3.39562	-2.18784	3.66482	34.482
3.40645	0.954837	3.67202	34.1819	3.40103	0.602454	3.67202	34.1579	3.40625	-1.22154	3.67202	34.3117	3.40395	-0.58382	3.67202	34.3867	3.40228	-2.22415	3.67202	34.4827
3.41312	0.986427	3.67922	34.177	3.4077	0.607431	3.67922	34.1879	3.41292	-1.19036	3.67922	34.3064	3.41062	-0.570104	3.67922	34.3881	3.40895	-2.25485	3.67922	34.4882
3.41978	1.0182	3.68642	34.182	3.41437	0.607997	3.68642	34.2159	3.41958	-1.15623	3.68642	34.3045	3.41728	-0.566028	3.68642	34.3906	3.41562	-2.28004	3.68642	34.499
3.42645	1.04899	3.69362	34.1934	3.42103	0.604086	3.69362	34.24	3.42625	-1.11889	3.69362	34.3063	3.42395	-0.570722	3.69362	34.3946	3.42228	-2.30031	3.69362	34.5146
3.43312	1.07846	3.70082	34.2068	3.4277	0.596121	3.70082	34.2582	3.43292	-1.0796	3.70082	34.3109	3.43062	-0.582471	3.70082	34.3993	3.42895	-2.31821	3.70082	34.5342
3.43978	1.10785	3.70802	34.2185	3.43437	0.58566	3.70802	34.2689	3.43958	-1.0387	3.70802	34.3163	3.43728	-0.59972	3.70802	34.4026	3.43562	-2.33563	3.70802	34.5572
3.44645	1.13802	3.71522	34.2256	3.44103	0.573225	3.71522	34.2712	3.44625	-0.995904	3.71522	34.3196	3.44395	-0.621036	3.71522	34.4034	3.44228	-2.35213	3.71522	34.5832
3.45312	1.16906	3.72242	34.2269	3.4477	0.559993	3.72242	34.265	3.45292	-0.951812	3.72242	34.3193	3.45062	-0.646226	3.72242	34.4023	3.44895	-2.36601	3.72242	34.6113
3.45978	1.20146	3.72962	34.2224	3.45437	0.54656	3.72962	34.2512	3.45958	-0.907749	3.72962	34.3153	3.45728	-0.674658	3.72962	34.4014	3.45562	-2.37504	3.72962	34.6391
3.46645	1.23505	3.73682	34.2129	3.46103	0.532649	3.73682	34.2314	3.46625	-0.864707	3.73682	34.3092	3.46395	-0.706509	3.73682	34.4022	3.46228	-2.37779	3.73682	34.6642
3.47312	1.26833	3.74402	34.2001	3.4677	0.518233	3.74402	34.2075	3.47292	-0.822917	3.74402	34.3029	3.47062	-0.742324	3.74402	34.4048	3.46895	-2.37275	3.74402	34.6845
3.47978	1.30074	3.75122	34.1865	3.47437	0.502765	3.75122	34.1824	3.47958	-0.78211	3.75122	34.2985	3.47728	-0.783034	3.75122	34.4086	3.47562	-2.35918	3.75122	34.6993
3.48645	1.33204	3.75842	34.1748	3.48103	0.485577	3.75842	34.1594	3.48625	-0.741862	3.75842	34.298	3.48395	-0.829808	3.75842	34.4134	3.48228	-2.33865	3.75842	34.7082
3.49312	1.36143	3.76562	34.1672	3.4877	0.465199	3.76562	34.1412	3.49292	-0.702158	3.76562	34.3032	3.49062	-0.883147	3.76562	34.4189	3.48895	-2.31367	3.76562	34.711
3.49978	1.38695	3.77282	34.1644	3.49437	0.440821	3.77282	34.1296	3.49958	-0.662938	3.77282	34.315	3.49728	-0.943422	3.77282	34.4241	3.49562	-2.28722	3.77282	34.7074
3.50645	1.40936	3.78002	34.1666	3.50103	0.412419	3.78002	34.1254	3.50625	-0.623971	3.78002	34.3328	3.50395	-1.00882	3.78002	34.4263	3.50228	-2.25987	3.78002	34.6983
3.51312	1.43055	3.78722	34.1735	3.5077	0.379272	3.78722	34.1284	3.51292	-0.582404	3.78722	34.3544	3.51062	-1.07723	3.78722	34.4225	3.50895	-2.23089	3.78722	34.6859
3.51978	1.45035	3.79442	34.1852	3.51437	0.341065	3.79442	34.1384	3.51958	-0.537075	3.79442	34.3772	3.51728	-1.14692	3.79442	34.4111	3.51562	-2.20027	3.79442	34.6727
3.52645	1.46753	3.80162	34.2016	3.52103	0.298075	3.80162	34.1543	3.52625	-0.488527	3.80162	34.3988	3.52395	-1.21626	3.80162	34.3933	3.52228	-2.16851	3.80162	34.6609
3.53312	1.48218	3.80882	34.2222	3.5277	0.251941	3.80882	34.1747	3.53292	-0.438161	3.80882	34.418	3.53062	-1.28365	3.80882	34.3716	3.52895	-2.13607	3.80882	34.6518
3.53978	1.49511	3.81602	34.245	3.53437	0.203669	3.81602	34.1975	3.53958	-0.386156	3.81602	34.4345	3.53728	-1.34769	3.81602	34.349	3.53562	-2.10343	3.81602	34.6461
3.54645	1.50558	3.82322	34.268	3.54103	0.15454	3.82322	34.2209	3.54625	-0.33243	3.82322	34.4482	3.54395	-1.40948	3.82322	34.3279	3.54228	-2.07073	3.82322	34.6448
3.55312	1.51302	3.83042	34.2893	3.5477	0.106111	3.83042	34.2432	3.55292	-0.279889	3.83042	34.4597	3.55062	-1.46986	3.83042	34.3102	3.54895	-2.03894	3.83042	34.6482
3.55978	1.51802	3.83762	34.3079	3.55437	0.0602752	3.83762	34.2627	3.55958	-0.230715	3.83762	34.4696	3.55728	-1.52837	3.83762	34.2973	3.55562	-2.00706	3.83762	34.6556
3.56645	1.52125	3.84482	34.3226	3.56103	0.0187755	3.84482	34.278	3.56625	-0.185698	3.84482	34.4787	3.56395	-1.58489	3.84482	34.2895	3.56228	-1.97289	3.84482	34.665
3.57312	1.52206	3.85202	34.3316	3.5677	-0.0175685	3.85202	34.2889	3.57292	-0.144787	3.85202	34.4868	3.57062	-1.63843	3.85202	34.2859	3.56895	-1.93433	3.85202	34.6734
3.57978	1.52045	3.85922	34.3326	3.57437	-0.0472441	3.85922	34.2959	3.57958	-0.10927	3.85922	34.4928	3.57728	-1.6873	3.85922	34.2856	3.57562	-1.88936	3.85922	34.678
3.58645	1.518	3.86642	34.3245	3.58103	-0.0703558	3.86642	34.3001	3.58625	-0.0799969	3.86642	34.4952	3.58395	-1.72946	3.86642	34.2876	3.58228	-1.83691	3.86642	34.6765
3.59312	1.51573	3.87362	34.308	3.5877	-0.0873953	3.87362	34.3027	3.59292	-0.0557601	3.87362	34.493	3.59062	-1.76437	3.87362	34.2914	3.58895	-1.77576	3.87362	34.6674
3.59978	1.51335	3.88082	34.2852	3.59437	-0.0999793	3.88082	34.3045	3.59958	-0.0344887	3.88082	34.4866	3.59728	-1.79289	3.88082	34.297	3.59562	-1.70717	3.88082	34.6504
3.60645	1.50999	3.88802	34.2589	3.60103	-0.10851	3.88802	34.3058	3.60625	-0.0154972	3.88802	34.4765	3.60395	-1.81442	3.88802	34.3055	3.60228	-1.63299	3.88802	34.6265
3.61312	1.50639	3.89522	34.2313	3.6077	-0.112839	3.89522	34.3069	3.61292	0.00186265	3.89522	34.4629	3.61062	-1.82862	3.89522	34.3182	3.60895	-1.55427	3.89522	34.5982
3.61978	1.50244	3.90242	34.2042	3.61437	-0.113726	3.90242	34.307	3.61958	0.0177249	3.90242	34.446	3.61728	-1.83689	3.90242	34.3364	3.61562	-1.47155	3.90242	34.569
3.62645	1.4966	3.90963	34.1788	3.62103	-0.111423	3.90963	34.3048	3.62625	0.0316128	3.90963	34.4259	3.62395	-1.8418	3.90963	34.3598	3.62228	-1.38716	3.90963	34.5424
3.63312	1.4879	3.91683	34.1566	3.6277	-0.106059	3.91683	34.2984	3.63292	0.0431165	3.91683	34.4034	3.63062	-1.84466	3.91683	34.3866	3.62895	-1.30377	3.91683	34.5219
3.63978	1.47714	3.92403	34.1383	3.63437	-0.0989959	3.92403	34.2861	3.63958	0.0526309	3.92403	34.3791	3.63728	-1.8456	3.92403	34.4141	3.63562	-1.22173	3.92403	34.5102
3.64645	1.46534	3.93123	34.124	3.64103	-0.0922903	3.93123	34.2676	3.64625	0.0615567	3.93123	34.3534	3.64395	-1.84523	3.93123	34.4399	3.64228	-1.1398	3.93123	34.5087
3.65312	1.45231	3.93843	34.1131	3.6477	-0.0876188	3.93843	34.2443	3.65292	0.0703856	3.93843	34.3273	3.65062	-1.84564	3.93843	34.4623	3.64895	-1.05722	3.93843	34.5167
3.65978	1.43836	3.94563	34.1053	3.65437	-0.0851378	3.94563	34.2193	3.65958	0.080727	3.94563	34.3025	3.65728	-1.84906	3.94563	34.4797	3.65562	-0.974253	3.94563	34.5319
3.66645	1.42425	3.95283	34.1011	3.66103	-0.085637	3.95283	34.196	3.66625	0.0958964	3.95283	34.2824	3.66395	-1.85566	3.95283	34.4908	3.66228	-0.891373	3.95283	34.5505
3.67312	1.41122	3.96003	34.1019	3.6677	-0.089407	3.96003	34.1776	3.67292	0.117488	3.96003	34.2699	3.67062	-1.86515	3.96003	34.4957	3.66895	-0.809863	3.96003	34.5696
3.67978	1.39917	3.96723	34.1096	3.67437	-0.0946894	3.96723	34.1663	3.67958	0.14431	3.96723	34.2669	3.67728	-1.87767	3.96723	34.4955	3.67562	-0.732273	3.96723	34.5868
3.68645	1.38834	3.97443	34.1257	3.68103	-0.0996217	3.97443	34.1631	3.68625	0.175104	3.97443	34.2733	3.68395	-1.89342	3.97443	34.4926	3.68228	-0.66147	3.97443	34.6009
3.69312	1.37962	3.98163	34.1508	3.6877	-0.1036	3.98163	34.1682	3.69292	0.209115	3.98163	34.2879	3.69062	-1.91106	3.98163	34.4893	3.68895	-0.599235	3.98163	34.6109
3.69978	1.37304	3.98883	34.1838	3.69437	-0.106283	3.98883	34.1795	3.69958	0.246182	3.98883	34.3083	3.69728	-1.92857	3.98883	34.487	3.69562	-0.54691	3.98883	34.6165
3.70645	1.36972	3.99603	34.2221	3.70103	-0.106238	3.99603	34.1933	3.70625	0.284977	3.99603	34.3315	3.70395	-1.94507	3.99603	34.487	3.70228	-0.505291	3.99603	34.6186
3.71312	1.36885	4.00323	34.2617	3.7077	-0.101857	4.00323	34.2047	3.71292	0.324428	4.00323	34.3535	3.71062	-1.95983	4.00323	34.49	3.70895	-0.474907	4.00323	34.6196
3.71978	1.371	4.01043	34.2986	3.71437	-0.0923127	4.01043	34.2099	3.71958	0.364795	4.01043	34.3708	3.71728	-1.97213	4.01043	34.4961	3.71562	-0.455305	4.01043	34.6217
3.72645	1.37649	4.01763	34.3294	3.72103	-0.0783801	4.01763	34.2072	3.72625	0.40593	4.01763	34.3809	3.72395	-1.98147	4.01763	34.5039	3.72228	-0.445247	4.01763	34.6263
3.73312	1.38528	4.02483	34.3518	3.7277	-0.0601932	4.02483	34.1973	3.73292	0.448219	4.02483	34.3836	3.73062	-1.98905	4.02483	34.5113	3.72895	-0.444077	4.02483	34.6327
3.73978	1.3967	4.03203	34.3648	3.73437	-0.0381395	4.03203	34.1825	3.73958	0.491261	4.03203	34.3803	3.73728	-1.99475	4.03203	34.516	3.73562	-0.451073	4.03203	34.6389
3.74645	1.40896	4.03923	34.3686	3.74103	-0.0123084	4.03923	34.1655	3.74625	0.534274	4.03923	34.3732	3.74395	-1.99743	4.03923	34.5165	3.74228	-0.4647	4.03923	34.6429
3.75312	1.42296	4.04643	34.3645	3.7477	0.0153854	4.04643	34.1495	3.75292	0.577532	4.04643	34.3641	3.75062	-1.99688	4.04643	34.512	3.74895	-0.483327	4.04643	34.6433
3.75978	1.43868	4.05363	34.3556	3.75437	0.042744	4.05363	34.1379	3.75958	0.621051	4.05363	34.3543	3.75728	-1.99431	4.05363	34.5021	3.75562	-0.506908	4.05363	34.6391
3.76645	1.45575	4.06083	34.3461	3.76103	0.0688508	4.06083	34.1332	3.76625	0.664353	4.06083	34.3444	3.76395	-1.99094	4.06083	34.487	3.76228	-0.536233	4.06083	34.6291
3.77312	1.47333	4.06803	34.3392	3.7677	0.0925362	4.06803	34.1358	3.77292	0.707597	4.06803	34.3347	3.77062	-1.98606	4.06803	34.4681	3.76895	-0.571556	4.06803	34.6125
3.77978	1.49199	4.07523	34.3366	3.77437	0.112817	4.07523	34.1432	3.77958	0.75084	4.07523	34.3259	3.77728	-1.9793	4.07523	34.4487	3.77562	-0.611655	4.07523	34.5895
3.78645	1.51189	4.08243	34.3372	3.78103	0.127725	4.08243	34.1513	3.78625	0.793822	4.08243	34.3183	3.78395	-1.97249	4.08243	34.4327	3.78228	-0.655457	4.08243	34.5621
3.79312	1.5315	4.08963	34.3393	3.7877	0.137456	4.08963	34.1565	3.79292	0.834607	4.08963	34.311	3.79062	-1.96779	4.08963	34.4231	3.78895	-0.701815	4.08963	34.5344
3.79978	1.54971	4.09683	34.3415	3.79437	0.142619	4.09683	34.1569	3.79958	0.872418	4.09683	34.3022	3.79728	-1.96534	4.09683	34.421	3.79562	-0.748888	4.09683	34.5109
3.80645	1.5661	4.10403	34.3425	3.80103	0.145115	4.10403	34.1527	3.80625	0.907674	4.10403	34.2906	3.80395	-1.96466	4.10403	34.4259	3.80228	-0.794977	4.10403	34.4948
3.81312	1.58113	4.11123	34.3409	3.8077	0.145905	4.11123	34.1444	3.81292	0.940084	4.11123	34.2762	3.81062	-1.9661	4.11123	34.4371	3.80895	-0.839807	4.11123	34.488
3.81978	1.59565	4.11843	34.3346	3.81437	0.145003	4.11843	34.1335	3.81958	0.968881	4.11843	34.2605	3.81728	-1.97074	4.11843	34.4542	3.81562	-0.883222	4.11843	34.4911
3.82645	1.61166	4.12563	34.3224	3.82103	0.143327	4.12563	34.1227	3.82625	0.994049	4.12563	34.2459	3.82395	-1.97765	4.12563	34.4761	3.82228	-0.924334	4.12563	34.5039
3.83312	1.62949	4.13283	34.3044	3.8277	0.141583	4.13283	34.1165	3.83292	1.01718	4.13283	34.234	3.83062	-1.98437	4.13283	34.5008	3.82895	-0.960976	4.13283	34.525
3.83978	1.64898	4.14003	34.283	3.83437	0.140548	4.14003	34.1193	3.83958	1.03901	4.14003	34.2258	3.83728	-1.98961	4.14003	34.5255	3.83562	-0.99127	4.14003	34.5516
3.84645	1.66932	4.14723	34.2607	3.84103	0.139236	4.14723	34.133	3.84625	1.05938	4.14723	34.2224	3.84395	-1.99271	4.14723	34.5475	3.84228	-1.01471	4.14723	34.5789
3.85312	1.68968	4.15443	34.2394	3.8477	0.137143	4.15443	34.1561	3.85292	1.0785	4.15443	34.2258	3.85062	-1.99383	4.15443	34.5654	3.84895	-1.03149	4.15443	34.6013
3.85978	1.70797	4.16163	34.2197	3.85437	0.133321	4.16163	34.185	3.85958	1.09851	4.16163	34.2379	3.85728	-1.99319	4.16163	34.5779	3.85562	-1.04316	4.16163	34.6142
3.86645	1.72099	4.16883	34.2016	3.86103	0.126608	4.16883	34.2156	3.86625	1.12186	4.16883	34.2589	3.86395	-1.99168	4.16883	34.5836	3.86228	-1.05189	4.16883	34.6156
3.87312	1.72784	4.17603	34.185	3.8677	0.116706	4.17603	34.2441	3.87292	1.14909	4.17603	34.2862	3.87062	-1.99049	4.17603	34.5808	3.86895	-1.059	4.17603	34.6061
3.87978	1.72809	4.18323	34.1699	3.87437	0.105135	4.18323	34.2673	3.87958	1.17915	4.18323	34.3154	3.87728	-1.9903	4.18323	34.5689	3.87562	-1.06605	4.18323	34.5887
3.88645	1.7235	4.19043	34.1558	3.88103	0.0923946	4.19043	34.2814	3.88625	1.21181	4.19043	34.3425	3.88395	-1.99153	4.19043	34.5487	3.88228	-1.07436	4.19043	34.5676
3.89312	1.71521	4.19763	34.1419	3.8877	0.0777915	4.19763	34.2832	3.89292	1.24656	4.19763	34.3656	3.89062	-1.99385	4.19763	34.5227	3.88895	-1.08402	4.19763	34.5476
3.89978	1.70463	4.20483	34.1274	3.89437	0.0616759	4.20483	34.272	3.89958	1.28071	4.20483	34.3837	3.89728	-1.99573	4.20483	34.4941	3.89562	-1.0942	4.20483	34.5333
3.90645	1.69282	4.21203	34.1124	3.90103	0.0459105	4.21203	34.2495	3.90625	1.31017	4.21203	34.3956	3.90395	-1.99609	4.21203	34.4667	3.90228	-1.10339	4.21203	34.5279
3.91312	1.68111	4.21923	34.0982	3.9077	0.0307709	4.21923	34.2197	3.91292	1.33323	4.21923	34.3993	3.91062	-1.99529	4.21923	34.4439	3.90895	-1.11091	4.21923	34.5329
3.91978	1.67086	4.22643	34.0873	3.91437	0.0153854	4.22643	34.1869	3.91958	1.35098	4.22643	34.3933	3.91728	-1.99468	4.22643	34.4282	3.91562	-1.11503	4.22643	34.5472
3.92645	1.66165	4.23363	34.0821	3.92103	5.21541e-05	4.23363	34.1553	3.92625	1.36444	4.23363	34.3787	3.92395	-1.99461	4.23363	34.4208	3.92228	-1.1127	4.23363	34.5672
3.93312	1.65281	4.24083	34.0846	3.9277	-0.011839	4.24083	34.1281	3.93292	1.37419	4.24083	34.3584	3.93062	-1.995	4.24083	34.4208	3.92895	-1.1021	4.24083	34.5877
3.93978	1.6441	4.24803	34.0955	3.93437	-0.0183433	4.24803	34.108	3.93958	1.38132	4.24803	34.3358	3.93728	-1.99785	4.24803	34.427	3.93562	-1.08247	4.24803	34.6037
3.94645	1.63709	4.25523	34.115	3.94103	-0.0197142	4.25523	34.0962	3.94625	1.38719	4.25523	34.3125	3.94395	-2.00426	4.25523	34.4374	3.94228	-1.05411	4.25523	34.6112
3.95312	1.63179	4.26243	34.1424	3.9477	-0.0157356	4.26243	34.092	3.95292	1.39192	4.26243	34.2888	3.95062	-2.01302	4.26243	34.4498	3.94895	-1.01875	4.26243	34.6085
3.95978	1.62714	4.26963	34.176	3.95437	-0.00645965	4.26963	34.093	3.95958	1.3954	4.26963	34.2658	3.95728	-2.02116	4.26963	34.4618	3.95562	-0.978537	4.26963	34.5964
3.96645	1.62204	4.27683	34.2125	3.96103	0.00827014	4.27683	34.095	3.96625	1.3981	4.27683	34.2461	3.96395	-2.02788	4.27683	34.4716	3.96228	-0.936024	4.27683	34.5775
3.97312	1.61697	4.28403	34.2479	3.9677	0.026688	4.28403	34.0934	3.97292	1.40058	4.28403	34.2332	3.97062	-2.03413	4.28403	34.4787	3.96895	-0.892252	4.28403	34.556
3.97978	1.61362	4.29123	34.2781	3.97437	0.0483021	4.29123	34.0846	3.97958	1.40443	4.29123	34.2294	3.97728	-2.03877	4.29123	34.4842	3.97562	-0.849016	4.29123	34.536
3.98645	1.61169	4.29843	34.3003	3.98103	0.0741929	4.29843	34.0674	3.98625	1.41115	4.29843	34.2348	3.98395	-2.04162	4.29843	34.4897	3.98228	-0.808418	4.29843	34.521
3.99312	1.61256	4.30563	34.3132	3.9877	0.105098	4.30563	34.0431	3.99292	1.4219	4.30563	34.2479	3.99062	-2.04334	4.30563	34.4964	3.98895	-0.772394	4.30563	34.514
3.99978	1.61842	4.31283	34.3167	3.99437	0.142552	4.31283	34.0155	3.99958	1.4367	4.31283	34.2671	3.99728	-2.04579	4.31283	34.5046	3.99562	-0.74207	4.31283	34.5166
4.00645	1.6311	4.32003	34.3115	4.00103	0.187077	4.32003	33.9894	4.00625	1.45462	4.32003	34.2902	4.00395	-2.04936	4.32003	34.5136	4.00228	-0.718392	4.32003	34.529
4.01312	1.65013	4.32723	34.2997	4.0077	0.239655	4.32723	33.9696	4.01292	1.476	4.32723	34.3145	4.01062	-2.05354	4.32723	34.5221	4.00895	-0.702634	4.32723	34.549
4.01978	1.67379	4.33443	34.2843	4.01437	0.301249	4.33443	33.9608	4.01958	1.499	4.33443	34.337	4.01728	-2.05853	4.33443	34.528	4.01562	-0.694998	4.33443	34.573
4.02645	1.70187	4.34163	34.2681	4.02103	0.371791	4.34163	33.9662	4.02625	1.523	4.34163	34.3542	4.02395	-2.06442	4.34163	34.5288	4.02228	-0.69467	4.34163	34.5967
4.03312	1.73312	4.34883	34.253	4.0277	0.451252	4.34883	33.9866	4.03292	1.54654	4.34883	34.3632	4.03062	-2.07082	4.34883	34.5221	4.02895	-0.699572	4.34883	34.6163
4.03978	1.76495	4.35603	34.2392	4.03437	0.537135	4.35603	34.0198	4.03958	1.56859	4.35603	34.3624	4.03728	-2.07705	4.35603	34.5069	4.03562	-0.708528	4.35603	34.6291
4.04645	1.79554	4.36323	34.2258	4.04103	0.627562	4.36323	34.0607	4.04625	1.58881	4.36323	34.3517	4.04395	-2.083	4.36323	34.4835	4.04228	-0.721559	4.36323	34.6334
4.05312	1.82466	4.37043	34.2122	4.0477	0.720017	4.37043	34.1028	4.05292	1.60696	4.37043	34.3325	4.05062	-2.08876	4.37043	34.4536	4.04895	-0.739522	4.37043	34.6288
4.05978	1.85145	4.37763	34.1984	4.05437	0.812471	4.37763	34.1396	4.05958	1.62456	4.37763	34.3079	4.05728	-2.0941	4.37763	34.4194	4.05562	-0.762038	4.37763	34.6163
4.06645	1.87565	4.38483	34.185	4.06103	0.90225	4.38483	34.1662	4.06625	1.64132	4.38483	34.2811	4.06395	-2.09718	4.38483	34.3844	4.06228	-0.787944	4.38483	34.5974
4.07312	1.89724	4.39203	34.173	4.0677	0.986695	4.39203	34.1802	4.07292	1.65769	4.39203	34.2552	4.07062	-2.09738	4.39203	34.3524	4.06895	-0.817001	4.39203	34.5742
4.07978	1.91791	4.39923	34.1642	4.07437	1.0644	4.39923	34.181	4.07958	1.67376	4.39923	34.2327	4.07728	-2.09473	4.39923	34.3278	4.07562	-0.849515	4.39923	34.549
4.08645	1.93843	4.40643	34.1605	4.08103	1.13592	4.40643	34.1697	4.08625	1.68882	4.40643	34.2162	4.08395	-2.08876	4.40643	34.3131	4.08228	-0.884026	4.40643	34.5247
4.09312	1.95815	4.41363	34.1642	4.0877	1.20217	4.41363	34.1483	4.09292	1.70179	4.41363	34.2084	4.09062	-2.0788	4.41363	34.3087	4.08895	-0.917725	4.41363	34.504
4.09978	1.9769	4.42083	34.1766	4.09437	1.26219	4.42083	34.1194	4.09958	1.71187	4.42083	34.2114	4.09728	-2.06361	4.42083	34.313	4.09562	-0.949651	4.42083	34.4886
4.10645	1.99318	4.42803	34.1978	4.10103	1.31535	4.42803	34.0869	4.10625	1.71989	4.42803	34.2255	4.10395	-2.04278	4.42803	34.3233	4.10228	-0.97999	4.42803	34.4782
4.11312	2.00647	4.43523	34.2259	4.1077	1.36074	4.43523	34.0545	4.11292	1.72715	4.43523	34.2491	4.11062	-2.01519	4.43523	34.3376	4.10895	-1.00853	4.43523	34.4716
4.11978	2.01619	4.44243	34.2578	4.11437	1.3987	4.44243	34.0245	4.11958	1.73496	4.44243	34.2791	4.11728	-1.97958	4.44243	34.3533	4.11562	-1.03377	4.44243	34.468
4.12645	2.02253	4.44963	34.2904	4.12103	1.42866	4.44963	33.9977	4.12625	1.7442	4.44963	34.3122	4.12395	-1.93582	4.44963	34.3679	4.12228	-1.05494	4.44963	34.4676
4.13312	2.02689	4.45683	34.3211	4.1277	1.4499	4.45683	33.9737	4.13292	1.75554	4.45683	34.3455	4.13062	-1.88442	4.45683	34.3785	4.12895	-1.07321	4.45683	34.4706
4.13978	2.03139	4.46403	34.3474	4.13437	1.46328	4.46403	33.9529	4.13958	1.76883	4.46403	34.3761	4.13728	-1.82782	4.46403	34.3841	4.13562	-1.08872	4.46403	34.4764
4.14645	2.03814	4.47123	34.3679	4.14103	1.46876	4.47123	33.9363	4.14625	1.78416	4.47123	34.4013	4.14395	-1.76934	4.47123	34.3862	4.14228	-1.10247	4.47123	34.4839
4.15312	2.04714	4.47843	34.3819	4.1477	1.46787	4.47843	33.9248	4.15292	1.80008	4.47843	34.419	4.15062	-1.71124	4.47843	34.3879	4.14895	-1.11544	4.47843	34.4923
4.15978	2.05755	4.48563	34.3894	4.15437	1.46076	4.48563	33.9178	4.15958	1.81581	4.48563	34.4285	4.15728	-1.65492	4.48563	34.3921	4.15562	-1.12903	4.48563	34.5017
4.16645	2.06848	4.49283	34.3914	4.16103	1.44757	4.49283	33.9142	4.16625	1.83181	4.49283	34.4316	4.16395	-1.60186	4.49283	34.3998	4.16228	-1.14474	4.49283	34.5125
4.17312	2.07818	4.50003	34.3894	4.1677	1.4298	4.50003	33.9132	4.17292	1.84805	4.50003	34.4312	4.17062	-1.55387	4.50003	34.4104	4.16895	-1.16149	4.50003	34.5238
4.17978	2.08361	4.50723	34.3852	4.17437	1.40878	4.50723	33.9149	4.17958	1.86399	4.50723	34.4298	4.17728	-1.51164	4.50723	34.4231	4.17562	-1.17895	4.50723	34.5336
4.18645	2.08271	4.51443	34.3807	4.18103	1.38553	4.51443	33.9197	4.18625	1.87737	4.51443	34.4288	4.18395	-1.47416	4.51443	34.4365	4.18228	-1.1953	4.51443	34.5396
4.19312	2.07569	4.52163	34.3778	4.1877	1.35934	4.52163	33.9272	4.19292	1.88864	4.52163	34.4281	4.19062	-1.44245	4.52163	34.4485	4.18895	-1.21021	4.52163	34.5402
4.19978	2.06341	4.52883	34.3778	4.19437	1.33031	4.52883	33.9364	4.19958	1.89867	4.52883	34.4275	4.19728	-1.41931	4.52883	34.4558	4.19562	-1.22311	4.52883	34.5353
4.20645	2.04682	4.53603	34.3821	4.20103	1.2996	4.53603	33.9457	4.20625	1.90806	4.53603	34.4266	4.20395	-1.40627	4.53603	34.4555	4.20228	-1.23292	4.53603	34.5253
4.21312	2.02706	4.54323	34.3914	4.2077	1.26804	4.54323	33.9543	4.21292	1.91665	4.54323	34.4253	4.21062	-1.40256	4.54323	34.4464	4.20895	-1.23937	4.54323	34.5111
4.21978	2.00602	4.55043	34.4056	4.21437	1.23511	4.55043	33.9626	4.21958	1.92267	4.55043	34.4223	4.21728	-1.4073	4.55043	34.4301	4.21562	-1.24231	4.55043	34.4935
4.22645	1.9844	4.55763	34.4236	4.22103	1.20191	4.55763	33.9711	4.22625	1.92517	4.55763	34.4157	4.22395	-1.42177	4.55763	34.41	4.22228	-1.24209	4.55763	34.4742
4.23312	1.96254	4.56483	34.4434	4.2277	1.16879	4.56483	33.9804	4.23292	1.92243	4.56483	34.4045	4.23062	-1.44653	4.56483	34.3898	4.22895	-1.23754	4.56483	34.4553
4.23978	1.94029	4.57203	34.4624	4.23437	1.13732	4.57203	33.9903	4.23958	1.91412	4.57203	34.3891	4.23728	-1.48036	4.57203	34.3725	4.23562	-1.22709	4.57203	34.4386
4.24645	1.91731	4.57923	34.4789	4.24103	1.10807	4.57923	34	4.24625	1.89958	4.57923	34.3714	4.24395	-1.52143	4.57923	34.3605	4.24228	-1.21001	4.57923	34.4248
4.25312	1.89336	4.58643	34.4921	4.2477	1.0804	4.58643	34.0089	4.25292	1.87807	4.58643	34.3536	4.25062	-1.56868	4.58643	34.3553	4.24895	-1.18623	4.58643	34.4137
4.25978	1.86795	4.59363	34.5019	4.25437	1.05465	4.59363	34.0165	4.25958	1.85111	4.59363	34.3375	4.25728	-1.62209	4.59363	34.3575	4.25562	-1.15524	4.59363	34.4049
4.26645	1.84068	4.60083	34.5084	4.26103	1.03106	4.60083	34.0226	4.26625	1.82083	4.60083	34.324	4.26395	-1.68011	4.60083	34.3662	4.26228	-1.11648	4.60083	34.3983
4.27312	1.81152	4.60803	34.5115	4.2677	1.01145	4.60803	34.026	4.27292	1.78991	4.60803	34.3136	4.27062	-1.74033	4.60803	34.3793	4.26895	-1.06927	4.60803	34.3942
4.27978	1.7809	4.61523	34.5113	4.27437	0.996433	4.61523	34.0252	4.27958	1.75864	4.61523	34.3069	4.27728	-1.80011	4.61523	34.3944	4.27562	-1.01345	4.61523	34.3935
4.28645	1.74979	4.62243	34.508	4.28103	0.985555	4.62243	34.0193	4.28625	1.72732	4.62243	34.3038	4.28395	-1.85793	4.62243	34.4104	4.28228	-0.948831	4.62243	34.3973
4.29312	1.71878	4.62963	34.501	4.2877	0.978105	4.62963	34.0089	4.29292	1.69569	4.62963	34.3037	4.29062	-1.91332	4.62963	34.4272	4.28895	-0.876546	4.62963	34.4068
4.29978	1.68864	4.63683	34.4891	4.29437	0.972807	4.63683	33.9968	4.29958	1.66388	4.63683	34.3048	4.29728	-1.96461	4.63683	34.4452	4.29562	-0.798292	4.63683	34.423
4.30645	1.66035	4.64403	34.4708	4.30103	0.968441	4.64403	33.9869	4.30625	1.63195	4.64403	34.305	4.30395	-2.01018	4.64403	34.4642	4.30228	-0.716157	4.64403	34.4461
4.31312	1.63495	4.65123	34.4457	4.3077	0.964098	4.65123	33.9825	4.31292	1.59909	4.65123	34.3027	4.31062	-2.04907	4.65123	34.4831	4.30895	-0.631496	4.65123	34.4749
4.31978	1.6131	4.65843	34.4153	4.31437	0.958204	4.65843	33.9855	4.31958	1.56405	4.65843	34.2973	4.31728	-2.08047	4.65843	34.4999	4.31562	-0.54647	4.65843	34.5074
4.32645	1.59531	4.66563	34.382	4.32103	0.949092	4.66563	33.9969	4.32625	1.52729	4.66563	34.2891	4.32395	-2.10439	4.66563	34.5129	4.32228	-0.462987	4.66563	34.541
4.33312	1.58173	4.67283	34.3486	4.3277	0.935532	4.67283	34.0165	4.33292	1.49084	4.67283	34.2791	4.33062	-2.12066	4.67283	34.5204	4.32895	-0.381507	4.67283	34.5726
4.33978	1.5723	4.68003	34.3172	4.33437	0.918433	4.68003	34.043	4.33958	1.4568	4.68003	34.2684	4.33728	-2.12963	4.68003	34.5207	4.33562	-0.302471	4.68003	34.5987
4.34645	1.56819	4.68723	34.2899	4.34103	0.899687	4.68723	34.0731	4.34625	1.4258	4.68723	34.258	4.34395	-2.1315	4.68723	34.5124	4.34228	-0.227101	4.68723	34.6166
4.35312	1.57019	4.69443	34.2682	4.3477	0.880785	4.69443	34.102	4.35292	1.39873	4.69443	34.2491	4.35062	-2.12704	4.69443	34.4957	4.34895	-0.158034	4.69443	34.6247
4.35978	1.57793	4.70163	34.2524	4.35437	0.862963	4.70163	34.1249	4.35958	1.37648	4.70163	34.2428	4.35728	-2.11975	4.70163	34.4727	4.35562	-0.0955611	4.70163	34.6233
4.36645	1.58969	4.70883	34.2415	4.36103	0.847422	4.70883	34.1386	4.36625	1.35849	4.70883	34.2404	4.36395	-2.1124	4.70883	34.4468	4.36228	-0.0395253	4.70883	34.6141
4.37312	1.60486	4.71603	34.2336	4.3677	0.835195	4.71603	34.1428	4.37292	1.3443	4.71603	34.2427	4.37062	-2.1068	4.71603	34.422	4.36895	0.01055	4.71603	34.5999
4.37978	1.62365	4.72323	34.2272	4.37437	0.824794	4.72323	34.1396	4.37958	1.33225	4.72323	34.2507	4.37728	-2.10372	4.72323	34.401	4.37562	0.0539422	4.72323	34.584
4.38645	1.64477	4.73043	34.2221	4.38103	0.813611	4.73043	34.1323	4.38625	1.32125	4.73043	34.2645	4.38395	-2.10413	4.73043	34.3858	4.38228	0.0921711	4.73043	34.5699
4.39312	1.66584	4.73763	34.2186	4.3877	0.798754	4.73763	34.124	4.39292	1.31019	4.73763	34.2843	4.39062	-2.10783	4.73763	34.3777	4.38895	0.127785	4.73763	34.5615
4.39978	1.68595	4.74483	34.2167	4.39437	0.778809	4.74483	34.1177	4.39958	1.29829	4.74483	34.309	4.39728	-2.11222	4.74483	34.377	4.39562	0.161693	4.74483	34.5616
4.40645	1.70548	4.75203	34.2161	4.40103	0.753567	4.75203	34.1157	4.40625	1.28566	4.75203	34.3372	4.40395	-2.11509	4.75203	34.3827	4.40228	0.194184	4.75203	34.5714
4.41312	1.72421	4.75923	34.2165	4.4077	0.722222	4.75923	34.1191	4.41292	1.27205	4.75923	34.3668	4.41062	-2.11454	4.75923	34.3926	4.40895	0.225127	4.75923	34.5897
4.41978	1.74136	4.76643	34.2182	4.41437	0.685148	4.76643	34.1275	4.41958	1.25828	4.76643	34.3952	4.41728	-2.10904	4.76643	34.4037	4.41562	0.256836	4.76643	34.6133
4.42645	1.75659	4.77363	34.221	4.42103	0.643112	4.77363	34.1391	4.42625	1.244	4.77363	34.4197	4.42395	-2.09662	4.77363	34.4142	4.42228	0.289381	4.77363	34.6382
4.43312	1.76951	4.78083	34.2242	4.4277	0.597686	4.78083	34.1512	4.43292	1.22842	4.78083	34.4368	4.43062	-2.07762	4.78083	34.4233	4.42895	0.321656	4.78083	34.6604
4.43978	1.77991	4.78803	34.2262	4.43437	0.549257	4.78803	34.1615	4.43958	1.21178	4.78803	34.443	4.43728	-2.0538	4.78803	34.4314	4.43562	0.351757	4.78803	34.6773
4.44645	1.78716	4.79523	34.226	4.44103	0.499003	4.79523	34.1695	4.44625	1.1941	4.79523	34.4362	4.44395	-2.02725	4.79523	34.439	4.44228	0.378191	4.79523	34.6872
4.45312	1.79198	4.80243	34.2238	4.4477	0.449382	4.80243	34.1755	4.45292	1.17393	4.80243	34.4165	4.45062	-1.99907	4.80243	34.4468	4.44895	0.399642	4.80243	34.6894
4.45978	1.79413	4.80963	34.2211	4.45437	0.402801	4.80963	34.1807	4.45958	1.14871	4.80963	34.3871	4.45728	-1.96993	4.80963	34.4561	4.45562	0.413649	4.80963	34.6841
4.46645	1.79296	4.81683	34.2187	4.46103	0.359349	4.81683	34.1862	4.46625	1.11858	4.81683	34.3522	4.46395	-1.94251	4.81683	34.4688	4.46228	0.419028	4.81683	34.6726
4.47312	1.78792	4.82403	34.2165	4.4677	0.317909	4.82403	34.1928	4.47292	1.08505	4.82403	34.3162	4.47062	-1.91807	4.82403	34.4868	4.46895	0.416346	4.82403	34.6568
4.47978	1.77927	4.83123	34.2133	4.47437	0.27778	4.83123	34.2003	4.47958	1.04897	4.83123	34.283	4.47728	-1.89634	4.83123	34.5099	4.47562	0.407271	4.83123	34.6392
4.48645	1.76816	4.83843	34.2082	4.48103	0.238486	4.83843	34.2078	4.48625	1.0096	4.83843	34.2561	4.48395	-1.87545	4.83843	34.5369	4.48228	0.393733	4.83843	34.6209
4.49312	1.75478	4.84563	34.2013	4.4877	0.201106	4.84563	34.213	4.49292	0.967763	4.84563	34.2387	4.49062	-1.85429	4.84563	34.5652	4.48895	0.377268	4.84563	34.6019
4.49978	1.73831	4.85283	34.1926	4.49437	0.166006	4.85283	34.2133	4.49958	0.925422	4.85283	34.2329	4.49728	-1.83401	4.85283	34.5925	4.49562	0.360578	4.85283	34.5818
4.50645	1.71917	4.86003	34.1823	4.50103	0.13411	4.86003	34.2063	4.50625	0.884295	4.86003	34.2388	4.50395	-1.81496	4.86003	34.6168	4.50228	0.346184	4.86003	34.5608
4.51312	1.69972	4.86723	34.1707	4.5077	0.106022	4.86723	34.1909	4.51292	0.844404	4.86723	34.2541	4.51062	-1.79765	4.86723	34.636	4.50895	0.335097	4.86723	34.5403
4.51978	1.68206	4.87443	34.1591	4.51437	0.0827312	4.87443	34.1679	4.51958	0.805065	4.87443	34.2757	4.51728	-1.78117	4.87443	34.6478	4.51562	0.327408	4.87443	34.5221
4.52645	1.6662	4.88163	34.1499	4.52103	0.0640824	4.88163	34.1399	4.52625	0.766225	4.88163	34.3002	4.52395	-1.76463	4.88163	34.6509	4.52228	0.322737	4.88163	34.5076
4.53312	1.65074	4.88883	34.1457	4.5277	0.0485182	4.88883	34.1114	4.53292	0.728264	4.88883	34.3249	4.53062	-1.74753	4.88883	34.6458	4.52895	0.321344	4.88883	34.498
4.53978	1.63691	4.89603	34.1475	4.53437	0.0350028	4.89603	34.0868	4.53958	0.69201	4.89603	34.3471	4.53728	-1.7287	4.89603	34.6344	4.53562	0.321828	4.89603	34.4944
4.54645	1.62545	4.90323	34.1549	4.54103	0.0236779	4.90323	34.0702	4.54625	0.657268	4.90323	34.3643	4.54395	-1.70647	4.90323	34.6196	4.54228	0.323102	4.90323	34.4984
4.55312	1.61572	4.91043	34.1664	4.5477	0.0145733	4.91043	34.064	4.55292	0.624478	4.91043	34.3745	4.55062	-1.67913	4.91043	34.6034	4.54895	0.323728	4.91043	34.5109
4.55978	1.60617	4.91763	34.1798	4.55437	0.00752509	4.91763	34.0692	4.55958	0.594966	4.91763	34.3762	4.55728	-1.64881	4.91763	34.5874	4.55562	0.32308	4.91763	34.5312
4.56645	1.59665	4.92483	34.1933	4.56103	0.00258535	4.92483	34.0849	4.56625	0.569783	4.92483	34.3686	4.56395	-1.61867	4.92483	34.5727	4.56228	0.319682	4.92483	34.557
4.57312	1.58802	4.93203	34.2049	4.5677	0.000186265	4.93203	34.1087	4.57292	0.549436	4.93203	34.3518	4.57062	-1.5912	4.93203	34.5598	4.56895	0.311993	4.93203	34.5848
4.57978	1.57979	4.93923	34.2132	4.57437	0.00187755	4.93923	34.1367	4.57958	0.533223	4.93923	34.327	4.57728	-1.5668	4.93923	34.5481	4.57562	0.300117	4.93923	34.6113
4.58645	1.57119	4.94643	34.2175	4.58103	0.00872463	4.94643	34.1642	4.58625	0.520766	4.94643	34.2968	4.58395	-1.54545	4.94643	34.5361	4.58228	0.283197	4.94643	34.6339
4.59312	1.56171	4.95363	34.2179	4.5877	0.020884	4.95363	34.1875	4.59292	0.510931	4.95363	34.2649	4.59062	-1.52819	4.95363	34.5218	4.58895	0.261374	4.95363	34.6507
4.59978	1.55147	4.96083	34.2149	4.59437	0.0377074	4.96083	34.2038	4.59958	0.503004	4.96083	34.2351	4.59728	-1.51391	4.96083	34.5035	4.59562	0.234321	4.96083	34.6609
4.60645	1.53997	4.96803	34.2092	4.60103	0.0588298	4.96803	34.2125	4.60625	0.497624	4.96803	34.2106	4.60395	-1.5014	4.96803	34.4814	4.60228	0.203311	4.96803	34.6642
4.61312	1.52619	4.97523	34.2022	4.6077	0.0842735	4.97523	34.2139	4.61292	0.495732	4.97523	34.1939	4.61062	-1.48898	4.97523	34.4567	4.60895	0.169635	4.97523	34.6615
4.61978	1.50967	4.98243	34.1951	4.61437	0.112295	4.98243	34.2091	4.61958	0.497743	4.98243	34.1868	4.61728	-1.4776	4.98243	34.4312	4.61562	0.133783	4.98243	34.6541
4.62645	1.49047	4.98963	34.1889	4.62103	0.141397	4.98963	34.1997	4.62625	0.503264	4.98963	34.1899	4.62395	-1.46838	4.98963	34.4066	4.62228	0.0971407	4.98963	34.645
4.63312	1.46935	4.99683	34.1839	4.6277	0.172734	4.99683	34.1875	4.63292	0.51219	4.99683	34.2025	4.63062	-1.45954	4.99683	34.3838	4.62895	0.0606552	4.99683	34.6371
4.63978	1.44517	5.00403	34.1807	4.63437	0.207961	5.00403	34.1743	4.63958	0.523023	5.00403	34.2229	4.63728	-1.44965	5.00403	34.3638	4.63562	0.0254512	5.00403	34.632
4.64645	1.41744	5.01123	34.1805	4.64103	0.248305	5.01123	34.1624	4.64625	0.532776	5.01123	34.2494	4.64395	-1.4381	5.01123	34.3473	4.64228	-0.00815094	5.01123	34.6293
4.65312	1.38717	5.01843	34.1847	4.6477	0.292547	5.01843	34.1534	4.65292	0.539109	5.01843	34.2805	4.65062	-1.42578	5.01843	34.3341	4.64895	-0.0397563	5.01843	34.627
4.65978	1.35633	5.02563	34.1943	4.65437	0.341088	5.02563	34.1489	4.65958	0.54165	5.02563	34.3149	4.65728	-1.41159	5.02563	34.3228	4.65562	-0.0684261	5.02563	34.6226
4.66645	1.32611	5.03283	34.209	4.66103	0.394903	5.03283	34.1491	4.66625	0.541195	5.03283	34.3512	4.66395	-1.39382	5.03283	34.3117	4.66228	-0.0939444	5.03283	34.615
4.67312	1.29664	5.04003	34.2276	4.6677	0.452995	5.04003	34.1535	4.67292	0.538781	5.04003	34.3877	4.67062	-1.37332	5.04003	34.3002	4.66895	-0.117064	5.04003	34.6039
4.67978	1.26924	5.04723	34.2488	4.67437	0.512302	5.04723	34.1611	4.67958	0.535421	5.04723	34.4228	4.67728	-1.35078	5.04723	34.2895	4.67562	-0.138931	5.04723	34.59
4.68645	1.24508	5.05443	34.2712	4.68103	0.568606	5.05443	34.1711	4.68625	0.532582	5.05443	34.4546	4.68395	-1.32562	5.05443	34.2818	4.68228	-0.159763	5.05443	34.5757
4.69312	1.22431	5.06163	34.293	4.6877	0.620842	5.06163	34.182	4.69292	0.530168	5.06163	34.4809	4.69062	-1.29657	5.06163	34.279	4.68895	-0.17979	5.06163	34.5647
4.69978	1.20538	5.06883	34.3122	4.69437	0.667408	5.06883	34.1921	4.69958	0.526458	5.06883	34.4991	4.69728	-1.26335	5.06883	34.2823	4.69562	-0.200287	5.06883	34.562
4.70645	1.18766	5.07603	34.3276	4.70103	0.705607	5.07603	34.199	4.70625	0.520349	5.07603	34.5074	4.70395	-1.22683	5.07603	34.2922	4.70228	-0.222236	5.07603	34.5719
4.71312	1.1706	5.08323	34.339	4.7077	0.73263	5.08323	34.2008	4.71292	0.510022	5.08323	34.5052	4.71062	-1.18727	5.08323	34.3087	4.70895	-0.245407	5.08323	34.5964
4.71978	1.15354	5.09043	34.3473	4.71437	0.747882	5.09043	34.1969	4.71958	0.495605	5.09043	34.493	4.71728	-1.14468	5.09043	34.3319	4.71562	-0.268705	5.09043	34.634
4.72645	1.13656	5.09763	34.354	4.72103	0.752524	5.09763	34.1889	4.72625	0.476584	5.09763	34.4718	4.72395	-1.09909	5.09763	34.3607	4.72228	-0.292696	5.09763	34.6797
4.73312	1.12042	5.10483	34.3603	4.7277	0.746682	5.10483	34.1789	4.73292	0.453986	5.10483	34.4434	4.73062	-1.05079	5.10483	34.3928	4.72895	-0.318535	5.10483	34.7257
4.73978	1.107	5.11203	34.3672	4.73437	0.731766	5.11203	34.1686	4.73958	0.428893	5.11203	34.4098	4.73728	-1.00116	5.11203	34.4259	4.73562	-0.346467	5.11203	34.7632
4.74645	1.09743	5.11923	34.3759	4.74103	0.710674	5.11923	34.159	4.74625	0.401527	5.11923	34.3737	4.74395	-0.951201	5.11923	34.4583	4.74228	-0.37656	5.11923	34.7846
4.75312	1.09199	5.12643	34.3863	4.7477	0.686817	5.12643	34.1504	4.75292	0.373036	5.12643	34.338	4.75062	-0.900909	5.12643	34.4893	4.74895	-0.408493	5.12643	34.7853
4.75978	1.09155	5.13363	34.3968	4.75437	0.662558	5.13363	34.1435	4.75958	0.343941	5.13363	34.3048	4.75728	-0.851028	5.13363	34.5183	4.75562	-0.442103	5.13363	34.7646
4.76645	1.09596	5.14083	34.4042	4.76103	0.639394	5.14083	34.1384	4.76625	0.314519	5.14083	34.2758	4.76395	-0.803567	5.14083	34.5447	4.76228	-0.475436	5.14083	34.7255
4.77312	1.10488	5.14803	34.4052	4.7677	0.618853	5.14803	34.1348	4.77292	0.283599	5.14803	34.2519	4.77062	-0.760809	5.14803	34.5673	4.76895	-0.506751	5.14803	34.6735
4.77978	1.11733	5.15523	34.3978	4.77437	0.601068	5.15523	34.1311	4.77958	0.250861	5.15523	34.234	4.77728	-0.722542	5.15523	34.5854	4.77562	-0.534639	5.15523	34.6163
4.78645	1.13142	5.16243	34.3814	4.78103	0.584356	5.16243	34.1261	4.78625	0.217505	5.16243	34.2224	4.78395	-0.687294	5.16243	34.5992	4.78228	-0.557795	5.16243	34.5628
4.79312	1.14626	5.16963	34.3566	4.7877	0.567816	5.16963	34.1198	4.79292	0.185899	5.16963	34.2168	4.79062	-0.655472	5.16963	34.6098	4.78895	-0.575677	5.16963	34.5209
4.79978	1.16093	5.17683	34.3248	4.79437	0.551961	5.17683	34.1128	4.79958	0.156902	5.17683	34.2168	4.79728	-0.627577	5.17683	34.6178	4.79562	-0.588991	5.17683	34.4948
4.80645	1.17452	5.18403	34.2885	4.80103	0.537515	5.18403	34.1063	4.80625	0.132136	5.18403	34.2216	4.80395	-0.603154	5.18403	34.6233	4.80228	-0.599109	5.18403	34.4847
4.81312	1.18552	5.19123	34.2516	4.8077	0.52432	5.19123	34.1006	4.81292	0.112757	5.19123	34.2305	4.81062	-0.581086	5.19123	34.6254	4.80895	-0.606745	5.19123	34.4878
4.81978	1.19323	5.19843	34.2186	4.81437	0.512108	5.19843	34.096	4.81958	0.0996813	5.19843	34.243	4.81728	-0.561439	5.19843	34.6231	4.81562	-0.613131	5.19843	34.5
4.82645	1.19793	5.20563	34.1935	4.82103	0.502884	5.20563	34.0929	4.82625	0.0922978	5.20563	34.259	4.82395	-0.547089	5.20563	34.6149	4.82228	-0.619203	5.20563	34.5176
4.83312	1.19989	5.21283	34.178	4.8277	0.497267	5.21283	34.0921	4.83292	0.0877231	5.21283	34.2782	4.83062	-0.538632	5.21283	34.5996	4.82895	-0.624791	5.21283	34.5371
4.83978	1.19897	5.22003	34.1722	4.83437	0.494942	5.22003	34.094	4.83958	0.0842363	5.22003	34.2998	4.83728	-0.536777	5.22003	34.5758	4.83562	-0.628255	5.22003	34.5555
4.84645	1.19638	5.22723	34.1749	4.84103	0.495844	5.22723	34.0986	4.84625	0.0803545	5.22723	34.3224	4.84395	-0.541173	5.22723	34.543	4.84228	-0.62874	5.22723	34.5706
4.85312	1.19334	5.23443	34.1846	4.8477	0.500254	5.23443	34.1061	4.85292	0.0760481	5.23443	34.3443	4.85062	-0.550307	5.23443	34.5024	4.84895	-0.626929	5.23443	34.5824
4.85978	1.19029	5.24163	34.1996	4.85437	0.507146	5.24163	34.1162	4.85958	0.0709444	5.24163	34.3638	4.85728	-0.561446	5.24163	34.457	4.85562	-0.62263	5.24163	34.5922
4.86645	1.18678	5.24883	34.2175	4.86103	0.514112	5.24883	34.1287	4.86625	0.0639334	5.24883	34.379	4.86395	-0.571609	5.24883	34.4115	4.86228	-0.615984	5.24883	34.6018
4.87312	1.18244	5.25603	34.2358	4.8677	0.521079	5.25603	34.1438	4.87292	0.0546202	5.25603	34.3883	4.87062	-0.5804	5.25603	34.3706	4.86895	-0.607632	5.25603	34.6124
4.87978	1.17683	5.26323	34.2521	4.87437	0.528596	5.26323	34.1612	4.87958	0.0420362	5.26323	34.3902	4.87728	-0.587232	5.26323	34.3382	4.87562	-0.599422	5.26323	34.6239
4.88645	1.16809	5.27043	34.2652	4.88103	0.535928	5.27043	34.1805	4.88625	0.0253394	5.27043	34.3845	4.88395	-0.591226	5.27043	34.3164	4.88228	-0.593103	5.27043	34.6356
4.89312	1.15516	5.27763	34.2743	4.8877	0.541553	5.27763	34.201	4.89292	0.00412762	5.27763	34.3721	4.89062	-0.59209	5.27763	34.3053	4.88895	-0.589974	5.27763	34.6461
4.89978	1.13727	5.28483	34.279	4.89437	0.546388	5.28483	34.222	4.89958	-0.0210479	5.28483	34.3554	4.89728	-0.591256	5.28483	34.3034	4.89562	-0.591278	5.28483	34.6535
4.90645	1.11549	5.29203	34.2796	4.90103	0.55252	5.29203	34.243	4.90625	-0.0487417	5.29203	34.3368	4.90395	-0.588849	5.29203	34.308	4.90228	-0.598587	5.29203	34.6556
4.91312	1.09015	5.29923	34.277	4.9077	0.560552	5.29923	34.2642	4.91292	-0.0780821	5.29923	34.319	4.91062	-0.583649	5.29923	34.3161	4.90895	-0.613712	5.29923	34.6504
4.91978	1.06125	5.30643	34.2726	4.91437	0.569247	5.30643	34.2855	4.91958	-0.10813	5.30643	34.3042	4.91728	-0.573583	5.30643	34.3244	4.91562	-0.637263	5.30643	34.6369
4.92645	1.02857	5.31363	34.2681	4.92103	0.578284	5.31363	34.3055	4.92625	-0.138029	5.31363	34.2941	4.92395	-0.558227	5.31363	34.3307	4.92228	-0.668012	5.31363	34.6155
4.93312	0.991628	5.32083	34.2648	4.9277	0.587761	5.32083	34.322	4.93292	-0.165932	5.32083	34.2893	4.93062	-0.538401	5.32083	34.334	4.92895	-0.704333	5.32083	34.5881
4.93978	0.950456	5.32803	34.2634	4.93437	0.596516	5.32803	34.3319	4.93958	-0.190526	5.32803	34.2897	4.93728	-0.515439	5.32803	34.3349	4.93562	-0.745848	5.32803	34.5588
4.94645	0.904731	5.33523	34.2642	4.94103	0.601068	5.33523	34.333	4.94625	-0.211857	5.33523	34.2943	4.94395	-0.490859	5.33523	34.3348	4.94228	-0.792339	5.33523	34.5324
4.95312	0.855483	5.34243	34.2664	4.9477	0.598893	5.34243	34.3239	4.95292	-0.229515	5.34243	34.3023	4.95062	-0.466235	5.34243	34.3355	4.94895	-0.842921	5.34243	34.514
4.95978	0.804842	5.34963	34.2693	4.95437	0.590235	5.34963	34.3048	4.95958	-0.24277	5.34963	34.3129	4.95728	-0.442199	5.34963	34.3378	4.95562	-0.896655	5.34963	34.5074
4.96645	0.755094	5.35683	34.2718	4.96103	0.577107	5.35683	34.2765	4.96625	-0.25022	5.35683	34.3258	4.96395	-0.418589	5.35683	34.3418	4.96228	-0.953116	5.35683	34.5146
4.97312	0.708736	5.36403	34.2739	4.9677	0.56161	5.36403	34.2416	4.97292	-0.25335	5.36403	34.3403	4.97062	-0.394747	5.36403	34.347	4.96895	-1.01187	5.36403	34.5353
4.97978	0.667989	5.37123	34.2757	4.97437	0.545241	5.37123	34.2038	4.97958	-0.255175	5.37123	34.3557	4.97728	-0.369534	5.37123	34.3522	4.97562	-1.07252	5.37123	34.567
4.98645	0.636026	5.37843	34.2782	4.98103	0.530541	5.37843	34.168	4.98625	-0.257768	5.37843	34.3716	4.98395	-0.342555	5.37843	34.3561	4.98228	-1.13402	5.37843	34.6043
4.99312	0.614583	5.38563	34.2824	4.9877	0.518903	5.38563	34.1387	4.99292	-0.262201	5.38563	34.3878	4.99062	-0.313483	5.38563	34.3572	4.98895	-1.19494	5.38563	34.6406
4.99978	0.60343	5.39283	34.2891	4.99437	0.510909	5.39283	34.1188	4.99958	-0.268191	5.39283	34.4034	4.99728	-0.284329	5.39283	34.3555	4.99562	-1.25486	5.39283	34.6696
5.00645	0.602692	5.40003	34.2988	5.00103	0.505581	5.40003	34.1092	5.00625	-0.276007	5.40003	34.4171	5.00395	-0.25665	5.40003	34.3518	5.00228	-1.31426	5.40003	34.6876
5.01312	0.611894	5.40723	34.311	5.0077	0.502571	5.40723	34.1085	5.01292	-0.286199	5.40723	34.4269	5.01062	-0.231802	5.40723	34.3477	5.00895	-1.37246	5.40723	34.694
5.01978	0.631504	5.41443	34.3237	5.01437	0.502266	5.41443	34.1147	5.01958	-0.298627	5.41443	34.4308	5.01728	-0.210717	5.41443	34.3449	5.01562	-1.42751	5.41443	34.6901
5.02645	0.659071	5.42163	34.3339	5.02103	0.504263	5.42163	34.1255	5.02625	-0.312939	5.42163	34.4282	5.02395	-0.193954	5.42163	34.3447	5.02228	-1.47841	5.42163	34.6786
5.03312	0.692032	5.42883	34.339	5.0277	0.508636	5.42883	34.1389	5.03292	-0.328563	5.42883	34.4192	5.03062	-0.181168	5.42883	34.3485	5.02895	-1.52618	5.42883	34.6633
5.03978	0.727899	5.43603	34.3375	5.03437	0.515036	5.43603	34.1533	5.03958	-0.345796	5.43603	34.4051	5.03728	-0.170276	5.43603	34.3571	5.03562	-1.57028	5.43603	34.6488
5.04645	0.764497	5.44323	34.3295	5.04103	0.523433	5.44323	34.1673	5.04625	-0.364713	5.44323	34.3874	5.04395	-0.160277	5.44323	34.3699	5.04228	-1.60981	5.44323	34.6396
5.05312	0.800699	5.45043	34.3166	5.0477	0.533007	5.45043	34.1796	5.05292	-0.384152	5.45043	34.3681	5.05062	-0.14966	5.45043	34.3842	5.04895	-1.64438	5.45043	34.6382
5.05978	0.834011	5.45763	34.3006	5.05437	0.54273	5.45763	34.1898	5.05958	-0.402518	5.45763	34.3489	5.05728	-0.137687	5.45763	34.3955	5.05562	-1.67428	5.45763	34.6442
5.06645	0.86315	5.46483	34.2842	5.06103	0.552937	5.46483	34.1978	5.06625	-0.418991	5.46483	34.3313	5.06395	-0.123724	5.46483	34.4003	5.06228	-1.69925	5.46483	34.6549
5.07312	0.88685	5.47204	34.2702	5.0677	0.564627	5.47204	34.2037	5.07292	-0.433981	5.47204	34.3165	5.07062	-0.108086	5.47204	34.397	5.06895	-1.71836	5.47204	34.6673
5.07978	0.905335	5.47924	34.2606	5.07437	0.578761	5.47924	34.2074	5.07958	-0.447884	5.47924	34.305	5.07728	-0.0913292	5.47924	34.3857	5.07562	-1.73259	5.47924	34.6791
5.08645	0.918664	5.48644	34.2561	5.08103	0.596762	5.48644	34.2089	5.08625	-0.461757	5.48644	34.2961	5.08395	-0.0733584	5.48644	34.3672	5.08228	-1.74292	5.48644	34.6887
5.09312	0.926174	5.49364	34.2554	5.0877	0.619382	5.49364	34.209	5.09292	-0.475615	5.49364	34.2887	5.09062	-0.0562817	5.49364	34.3427	5.08895	-1.75053	5.49364	34.6947
5.09978	0.928514	5.50084	34.2558	5.09437	0.647299	5.50084	34.2093	5.09958	-0.48881	5.50084	34.2818	5.09728	-0.0414029	5.50084	34.3149	5.09562	-1.75566	5.50084	34.6961
5.10645	0.92718	5.50804	34.2542	5.10103	0.681095	5.50804	34.2118	5.10625	-0.501081	5.50804	34.2752	5.10395	-0.0299662	5.50804	34.288	5.10228	-1.7594	5.50804	34.6923
5.11312	0.924021	5.51524	34.248	5.1077	0.721551	5.51524	34.2176	5.11292	-0.512429	5.51524	34.269	5.11062	-0.0217333	5.51524	34.2666	5.10895	-1.76294	5.51524	34.6843
5.11978	0.920564	5.52244	34.2365	5.11437	0.768855	5.52244	34.2266	5.11958	-0.523508	5.52244	34.264	5.11728	-0.0166595	5.52244	34.2542	5.11562	-1.76629	5.52244	34.6743
5.12645	0.916846	5.52964	34.2203	5.12103	0.821538	5.52964	34.2376	5.12625	-0.533141	5.52964	34.2602	5.12395	-0.0158548	5.52964	34.2516	5.12228	-1.76936	5.52964	34.664
5.13312	0.912532	5.53684	34.2013	5.1277	0.877902	5.53684	34.2487	5.13292	-0.541322	5.53684	34.2584	5.13062	-0.0192448	5.53684	34.2578	5.12895	-1.77255	5.53684	34.6546
5.13978	0.906169	5.54404	34.1821	5.13437	0.936769	5.54404	34.2573	5.13958	-0.549652	5.54404	34.2595	5.13728	-0.0264868	5.54404	34.2714	5.13562	-1.77736	5.54404	34.6462
5.14645	0.896506	5.55124	34.1655	5.14103	0.996299	5.55124	34.2603	5.14625	-0.559017	5.55124	34.2647	5.14395	-0.0354424	5.55124	34.291	5.14228	-1.78368	5.55124	34.6387
5.15312	0.883654	5.55844	34.154	5.1477	1.05353	5.55844	34.2549	5.15292	-0.568718	5.55844	34.2748	5.15062	-0.0456348	5.55844	34.315	5.14895	-1.79088	5.55844	34.6322
5.15978	0.866994	5.56564	34.1492	5.15437	1.10602	5.56564	34.24	5.15958	-0.577763	5.56564	34.2897	5.15728	-0.057295	5.56564	34.3407	5.15562	-1.7994	5.56564	34.6266
5.16645	0.846878	5.57284	34.151	5.16103	1.15143	5.57284	34.2166	5.16625	-0.58718	5.57284	34.3084	5.16395	-0.0693053	5.57284	34.3648	5.16228	-1.8113	5.57284	34.6212
5.17312	0.824019	5.58004	34.1572	5.1677	1.18868	5.58004	34.1883	5.17292	-0.59855	5.58004	34.3293	5.17062	-0.080362	5.58004	34.3843	5.16895	-1.82883	5.58004	34.6152
5.17978	0.800326	5.58724	34.1644	5.17437	1.21646	5.58724	34.1591	5.17958	-0.612773	5.58724	34.3509	5.17728	-0.0901818	5.58724	34.3975	5.17562	-1.85446	5.58724	34.6081
5.18645	0.778154	5.59444	34.1698	5.18103	1.23549	5.59444	34.1325	5.18625	-0.63061	5.59444	34.3719	5.18395	-0.100814	5.59444	34.4042	5.18228	-1.88956	5.59444	34.6005
5.19312	0.758342	5.60164	34.1717	5.1877	1.2475	5.60164	34.1114	5.19292	-0.652961	5.60164	34.3908	5.19062	-0.112921	5.60164	34.4051	5.18895	-1.9348	5.60164	34.5942
5.19978	0.74023	5.60884	34.1703	5.19437	1.25453	5.60884	34.0979	5.19958	-0.680164	5.60884	34.4062	5.19728	-0.126705	5.60884	34.4016	5.19562	-1.98825	5.60884	34.5911
5.20645	0.723161	5.61604	34.1669	5.20103	1.25834	5.61604	34.0927	5.20625	-0.712067	5.61604	34.4164	5.20395	-0.141859	5.61604	34.3954	5.20228	-2.04741	5.61604	34.5923
5.21312	0.707418	5.62324	34.1637	5.2077	1.26085	5.62324	34.0946	5.21292	-0.748836	5.62324	34.421	5.21062	-0.157788	5.62324	34.3887	5.20895	-2.11019	5.62324	34.5973
5.21978	0.693046	5.63044	34.1635	5.21437	1.2636	5.63044	34.101	5.21958	-0.789925	5.63044	34.421	5.21728	-0.173256	5.63044	34.3844	5.21562	-2.17382	5.63044	34.6047
5.22645	0.678442	5.63764	34.1691	5.22103	1.26798	5.63764	34.1088	5.22625	-0.834003	5.63764	34.4182	5.22395	-0.187345	5.63764	34.3852	5.22228	-2.23681	5.63764	34.6126
5.23312	0.661835	5.64484	34.1823	5.2277	1.27361	5.64484	34.1159	5.23292	-0.879958	5.64484	34.414	5.23062	-0.200868	5.64484	34.3925	5.22895	-2.29856	5.64484	34.6184
5.23978	0.644162	5.65204	34.2031	5.23437	1.27974	5.65204	34.1215	5.23958	-0.926867	5.65204	34.4087	5.23728	-0.213899	5.65204	34.4064	5.23562	-2.36019	5.65204	34.6191
5.24645	0.628136	5.65924	34.2295	5.24103	1.2854	5.65924	34.1256	5.24625	-0.974871	5.65924	34.402	5.24395	-0.226282	5.65924	34.4256	5.24228	-2.4218	5.65924	34.612
5.25312	0.615463	5.66644	34.2586	5.2477	1.28949	5.66644	34.1286	5.25292	-1.02278	5.66644	34.3945	5.25062	-0.238158	5.66644	34.4474	5.24895	-2.48157	5.66644	34.5953
5.25978	0.606477	5.67364	34.2868	5.25437	1.29217	5.67364	34.131	5.25958	-1.06975	5.67364	34.3871	5.25728	-0.248753	5.67364	34.4687	5.25562	-2.53931	5.67364	34.5694
5.26645	0.601351	5.68084	34.3105	5.26103	1.29249	5.68084	34.1341	5.26625	-1.11417	5.68084	34.3806	5.26395	-0.25744	5.68084	34.4856	5.26228	-2.59478	5.68084	34.5372
5.27312	0.601791	5.68804	34.327	5.2677	1.29069	5.68804	34.1388	5.27292	-1.15444	5.68804	34.3742	5.27062	-0.262067	5.68804	34.495	5.26895	-2.64733	5.68804	34.5027
5.27978	0.608645	5.69524	34.335	5.27437	1.28739	5.69524	34.1456	5.27958	-1.18978	5.69524	34.3666	5.27728	-0.261933	5.69524	34.4947	5.27562	-2.69572	5.69524	34.4703
5.28645	0.621013	5.70244	34.3353	5.28103	1.28515	5.70244	34.154	5.28625	-1.2183	5.70244	34.357	5.28395	-0.257224	5.70244	34.4845	5.28228	-2.73886	5.70244	34.4436
5.29312	0.637941	5.70964	34.3296	5.2877	1.28613	5.70964	34.1629	5.29292	-1.23898	5.70964	34.3458	5.29062	-0.24876	5.70964	34.4662	5.28895	-2.77682	5.70964	34.425
5.29978	0.659749	5.71684	34.3206	5.29437	1.29079	5.71684	34.171	5.29958	-1.25084	5.71684	34.3341	5.29728	-0.237934	5.71684	34.4435	5.29562	-2.80765	5.71684	34.4151
5.30645	0.686228	5.72404	34.3103	5.30103	1.29874	5.72404	34.1772	5.30625	-1.25448	5.72404	34.3222	5.30395	-0.225618	5.72404	34.421	5.30228	-2.83104	5.72404	34.4135
5.31312	0.715554	5.73124	34.3006	5.3077	1.3093	5.73124	34.1807	5.31292	-1.25118	5.73124	34.31	5.31062	-0.212766	5.73124	34.4031	5.30895	-2.84687	5.73124	34.418
5.31978	0.746563	5.73844	34.2929	5.31437	1.32243	5.73844	34.181	5.31958	-1.24279	5.73844	34.2976	5.31728	-0.200421	5.73844	34.393	5.31562	-2.8559	5.73844	34.4261
5.32645	0.779562	5.74564	34.2879	5.32103	1.33752	5.74564	34.1783	5.32625	-1.23235	5.74564	34.2866	5.32395	-0.190377	5.74564	34.392	5.32228	-2.85865	5.74564	34.435
5.33312	0.81449	5.75284	34.2843	5.3277	1.35448	5.75284	34.1733	5.33292	-1.2218	5.75284	34.2796	5.33062	-0.183918	5.75284	34.3998	5.32895	-2.85555	5.75284	34.4425
5.33978	0.849284	5.76004	34.2795	5.33437	1.37242	5.76004	34.1665	5.33958	-1.21154	5.76004	34.2781	5.33728	-0.182696	5.76004	34.4145	5.33562	-2.84844	5.76004	34.4468
5.34645	0.882789	5.76724	34.2706	5.34103	1.39069	5.76724	34.1581	5.34625	-1.20087	5.76724	34.2822	5.34395	-0.186712	5.76724	34.4334	5.34228	-2.83834	5.76724	34.4478
5.35312	0.915967	5.77444	34.2566	5.3477	1.40946	5.77444	34.1481	5.35292	-1.18954	5.77444	34.2902	5.35062	-0.19601	5.77444	34.4531	5.34895	-2.82534	5.77444	34.447
5.35978	0.949986	5.78164	34.2382	5.35437	1.42792	5.78164	34.1369	5.35958	-1.17695	5.78164	34.3	5.35728	-0.207849	5.78164	34.4704	5.35562	-2.80819	5.78164	34.4478
5.36645	0.985503	5.78884	34.2167	5.36103	1.44565	5.78884	34.1255	5.36625	-1.16152	5.78884	34.31	5.36395	-0.219569	5.78884	34.4835	5.36228	-2.78629	5.78884	34.4538
5.37312	1.02342	5.79604	34.1936	5.3677	1.46099	5.79604	34.1151	5.37292	-1.14111	5.79604	34.3184	5.37062	-0.228614	5.79604	34.4924	5.36895	-2.75972	5.79604	34.4676
5.37978	1.06534	5.80324	34.1703	5.37437	1.47381	5.80324	34.1062	5.37958	-1.11559	5.80324	34.3227	5.37728	-0.233844	5.80324	34.4981	5.37562	-2.72947	5.80324	34.4901
5.38645	1.11125	5.81044	34.149	5.38103	1.48394	5.81044	34.0991	5.38625	-1.08764	5.81044	34.3209	5.38395	-0.233799	5.81044	34.5017	5.38228	-2.69657	5.81044	34.5209
5.39312	1.15913	5.81764	34.1321	5.3877	1.49065	5.81764	34.0945	5.39292	-1.06005	5.81764	34.3123	5.39062	-0.228107	5.81764	34.5037	5.38895	-2.66469	5.81764	34.5583
5.39978	1.20748	5.82484	34.1209	5.39437	1.49445	5.82484	34.0934	5.39958	-1.03441	5.82484	34.2983	5.39728	-0.219434	5.82484	34.504	5.39562	-2.63807	5.82484	34.5996
5.40645	1.25414	5.83204	34.1145	5.40103	1.49547	5.83204	34.0966	5.40625	-1.01081	5.83204	34.2821	5.40395	-0.210091	5.83204	34.5026	5.40228	-2.62001	5.83204	34.64
5.41312	1.29716	5.83924	34.1111	5.4077	1.49447	5.83924	34.1032	5.41292	-0.991128	5.83924	34.2662	5.41062	-0.201762	5.83924	34.4998	5.40895	-2.61057	5.83924	34.6743
5.41978	1.33584	5.84644	34.1088	5.41437	1.49129	5.84644	34.1108	5.41958	-0.977196	5.84644	34.2524	5.41728	-0.193551	5.84644	34.4956	5.41562	-2.60714	5.84644	34.6976
5.42645	1.3703	5.85364	34.1074	5.42103	1.48582	5.85364	34.1164	5.42625	-0.968784	5.85364	34.2418	5.42395	-0.186183	5.85364	34.4905	5.42228	-2.60691	5.85364	34.7074
5.43312	1.40058	5.86084	34.1074	5.4277	1.47767	5.86084	34.1177	5.43292	-0.964053	5.86084	34.2359	5.43062	-0.180051	5.86084	34.4856	5.42895	-2.60624	5.86084	34.7039
5.43978	1.4262	5.86804	34.1091	5.43437	1.46689	5.86804	34.1138	5.43958	-0.960916	5.86804	34.2363	5.43728	-0.174381	5.86804	34.4825	5.43562	-2.60255	5.86804	34.6891
5.44645	1.44918	5.87524	34.113	5.44103	1.4533	5.87524	34.1048	5.44625	-0.958547	5.87524	34.2434	5.44395	-0.167646	5.87524	34.4837	5.44228	-2.59359	5.87524	34.666
5.45312	1.47167	5.88244	34.1198	5.4477	1.43745	5.88244	34.0911	5.45292	-0.955187	5.88244	34.2558	5.45062	-0.158004	5.88244	34.4911	5.44895	-2.57884	5.88244	34.6385
5.45978	1.49382	5.88964	34.1308	5.45437	1.41988	5.88964	34.0742	5.45958	-0.948429	5.88964	34.2716	5.45728	-0.144847	5.88964	34.5051	5.45562	-2.55811	5.88964	34.61
5.46645	1.51398	5.89684	34.1469	5.46103	1.4011	5.89684	34.0567	5.46625	-0.936471	5.89684	34.2889	5.46395	-0.127941	5.89684	34.5248	5.46228	-2.53116	5.89684	34.5837
5.47312	1.53199	5.90404	34.1684	5.4677	1.38226	5.90404	34.0419	5.47292	-0.91777	5.90404	34.3073	5.47062	-0.107415	5.90404	34.5475	5.46895	-2.49858	5.90404	34.5616
5.47978	1.54719	5.91124	34.1943	5.47437	1.36266	5.91124	34.032	5.47958	-0.891678	5.91124	34.326	5.47728	-0.0842884	5.91124	34.5697	5.47562	-2.46018	5.91124	34.5447
5.48645	1.55798	5.91844	34.223	5.48103	1.34212	5.91844	34.0275	5.48625	-0.859275	5.91844	34.3441	5.48395	-0.058651	5.91844	34.5873	5.48228	-2.41576	5.91844	34.5329
5.49312	1.56225	5.92564	34.2517	5.4877	1.31965	5.92564	34.0273	5.49292	-0.823334	5.92564	34.3607	5.49062	-0.0310019	5.92564	34.5958	5.48895	-2.36531	5.92564	34.526
5.49978	1.55909	5.93284	34.2776	5.49437	1.29531	5.93284	34.0298	5.49958	-0.786416	5.93284	34.3765	5.49728	-0.00239164	5.93284	34.592	5.49562	-2.31024	5.93284	34.5232
5.50645	1.55145	5.94004	34.2983	5.50103	1.26981	5.94004	34.0337	5.50625	-0.749491	5.94004	34.3937	5.50395	0.0262484	5.94004	34.5748	5.50228	-2.25228	5.94004	34.5243
5.51312	1.54125	5.94724	34.3119	5.5077	1.24354	5.94724	34.0379	5.51292	-0.7146	5.94724	34.4143	5.51062	0.0549555	5.94724	34.5453	5.50895	-2.19135	5.94724	34.5292
5.51978	1.53024	5.95444	34.3173	5.51437	1.21667	5.95444	34.0417	5.51958	-0.685126	5.95444	34.4396	5.51728	0.084646	5.95444	34.507	5.51562	-2.12714	5.95444	34.5375
5.52645	1.51848	5.96164	34.3134	5.52103	1.18893	5.96164	34.0459	5.52625	-0.663444	5.96164	34.4687	5.52395	0.114545	5.96164	34.4646	5.52228	-2.05947	5.96164	34.5484
5.53312	1.50727	5.96884	34.2994	5.5277	1.16067	5.96884	34.0524	5.53292	-0.648625	5.96884	34.4998	5.53062	0.142194	5.96884	34.4233	5.52895	-1.98863	5.96884	34.5605
5.53978	1.49899	5.97604	34.2753	5.53437	1.13238	5.97604	34.0641	5.53958	-0.638746	5.97604	34.5305	5.53728	0.167087	5.97604	34.3884	5.53562	-1.91361	5.97604	34.5719
5.54645	1.49424	5.98324	34.2421	5.54103	1.10421	5.98324	34.0827	5.54625	-0.633627	5.98324	34.558	5.54395	0.189357	5.98324	34.3646	5.54228	-1.83295	5.98324	34.5808
5.55312	1.49307	5.99044	34.2022	5.5477	1.07596	5.99044	34.1081	5.55292	-0.633106	5.99044	34.5794	5.55062	0.209324	5.99044	34.3544	5.54895	-1.74545	5.99044	34.5864
5.55978	1.49421	5.99764	34.1584	5.55437	1.04804	5.99764	34.1381	5.55958	-0.636123	5.99764	34.5923	5.55728	0.226744	5.99764	34.3571	5.55562	-1.65145	5.99764	34.5886
5.56645	1.49755	6.00484	34.1138	5.56103	1.02104	6.00484	34.1696	5.56625	-0.63958	6.00484	34.5954	5.56395	0.241235	6.00484	34.3695	5.56228	-1.55216	6.00484	34.5884
5.57312	1.50286	6.01204	34.0711	5.5677	0.995204	6.01204	34.1995	5.57292	-0.642225	6.01204	34.5897	5.57062	0.252828	6.01204	34.3869	5.56895	-1.44792	6.01204	34.5877
5.57978	1.5085	6.01924	34.0331	5.57437	0.971176	6.01924	34.2241	5.57958	-0.642829	6.01924	34.5779	5.57728	0.260517	6.01924	34.4046	5.57562	-1.3398	6.01924	34.5885
5.58645	1.51198	6.02644	34.0026	5.58103	0.949174	6.02644	34.2396	5.58625	-0.639863	6.02644	34.5638	5.58395	0.263982	6.02644	34.4186	5.58228	-1.22959	6.02644	34.5925
5.59312	1.51158	6.03364	33.9826	5.5877	0.929639	6.03364	34.2436	5.59292	-0.631317	6.03364	34.5505	5.59062	0.263073	6.03364	34.4255	5.58895	-1.12034	6.03364	34.6009
5.59978	1.50854	6.04084	33.975	5.59437	0.913389	6.04084	34.2356	5.59958	-0.6155	6.04084	34.5396	5.59728	0.258178	6.04084	34.4231	5.59562	-1.01379	6.04084	34.6139
5.60645	1.50405	6.04804	33.9805	5.60103	0.90082	6.04804	34.2178	5.60625	-0.592493	6.04804	34.5309	5.60395	0.250213	6.04804	34.4105	5.60228	-0.909932	6.04804	34.6304
5.61312	1.49959	6.05524	33.9982	5.6077	0.891432	6.05524	34.1942	5.61292	-0.562206	6.05524	34.5226	5.61062	0.240907	6.05524	34.3893	5.60895	-0.808999	6.05524	34.6478
5.61978	1.49667	6.06244	34.0263	5.61437	0.884183	6.06244	34.1689	5.61958	-0.525661	6.06244	34.5121	5.61728	0.232115	6.06244	34.3626	5.61562	-0.711143	6.06244	34.6632
5.62645	1.49725	6.06964	34.0626	5.62103	0.879116	6.06964	34.1455	5.62625	-0.483789	6.06964	34.4971	5.62395	0.224829	6.06964	34.3346	5.62228	-0.616625	6.06964	34.6745
5.63312	1.50236	6.07684	34.1047	5.6277	0.875778	6.07684	34.1273	5.63292	-0.437312	6.07684	34.4759	5.63062	0.219494	6.07684	34.3091	5.62895	-0.523679	6.07684	34.681
5.63978	1.51116	6.08404	34.1494	5.63437	0.873834	6.08404	34.1165	5.63958	-0.386573	6.08404	34.4488	5.63728	0.215277	6.08404	34.2893	5.63562	-0.430934	6.08404	34.6832
5.64645	1.52234	6.09124	34.1929	5.64103	0.874043	6.09124	34.1137	5.64625	-0.331841	6.09124	34.4182	5.64395	0.210837	6.09124	34.2776	5.64228	-0.33877	6.09124	34.6816
5.65312	1.53369	6.09844	34.2316	5.6477	0.878349	6.09844	34.1174	5.65292	-0.273697	6.09844	34.3881	5.65062	0.205383	6.09844	34.2757	5.64895	-0.249192	6.09844	34.677
5.65978	1.54287	6.10564	34.2631	5.65437	0.88685	6.10564	34.1245	5.65958	-0.213712	6.10564	34.3632	5.65728	0.198878	6.10564	34.2841	5.65562	-0.163816	6.10564	34.6699
5.66645	1.54738	6.11284	34.2863	5.66103	0.898719	6.11284	34.1317	5.66625	-0.1534	6.11284	34.3471	5.66395	0.19116	6.11284	34.3023	5.66228	-0.0825003	6.11284	34.6614
5.67312	1.54648	6.12004	34.3014	5.6677	0.914574	6.12004	34.1361	5.67292	-0.0936612	6.12004	34.342	5.67062	0.181682	6.12004	34.3283	5.66895	-0.00698119	6.12004	34.6522
5.67978	1.54146	6.12724	34.3091	5.67437	0.93586	6.12724	34.1357	5.67958	-0.0339374	6.12724	34.3477	5.67728	0.170015	6.12724	34.3591	5.67562	0.0612438	6.12724	34.6419
5.68645	1.53387	6.13444	34.3108	5.68103	0.962295	6.13444	34.1298	5.68625	0.0259355	6.13444	34.3617	5.68395	0.156626	6.13444	34.3912	5.68228	0.120208	6.13444	34.6298
5.69312	1.52463	6.14164	34.3087	5.6877	0.99279	6.14164	34.1187	5.69292	0.085257	6.14164	34.3795	5.69062	0.142455	6.14164	34.4217	5.68895	0.170164	6.14164	34.6148
5.69978	1.5136	6.14884	34.3058	5.69437	1.02795	6.14884	34.1047	5.69958	0.143066	6.14884	34.3959	5.69728	0.127181	6.14884	34.4492	5.69562	0.210337	6.14884	34.5973
5.70645	1.50177	6.15604	34.3047	5.70103	1.06865	6.15604	34.0906	5.70625	0.199959	6.15604	34.4066	5.70395	0.11047	6.15604	34.4737	5.70228	0.237875	6.15604	34.578
5.71312	1.48857	6.16324	34.307	5.7077	1.11544	6.16324	34.0797	5.71292	0.256829	6.16324	34.4095	5.71062	0.091821	6.16324	34.4953	5.70895	0.251241	6.16324	34.5585
5.71978	1.47242	6.17044	34.3132	5.71437	1.16695	6.17044	34.0742	5.71958	0.31288	6.17044	34.4056	5.71728	0.0718683	6.17044	34.5146	5.71562	0.250213	6.17044	34.5406
5.72645	1.45281	6.17764	34.3226	5.72103	1.22226	6.17764	34.0755	5.72625	0.366896	6.17764	34.3975	5.72395	0.0504926	6.17764	34.5318	5.72228	0.23701	6.17764	34.5266
5.73312	1.43064	6.18484	34.3331	5.7277	1.28081	6.18484	34.084	5.73292	0.419118	6.18484	34.3885	5.73062	0.0269264	6.18484	34.548	5.72895	0.212729	6.18484	34.5186
5.73978	1.40745	6.19204	34.3418	5.73437	1.34251	6.19204	34.0989	5.73958	0.471763	6.19204	34.3813	5.73728	0.00120699	6.19204	34.5638	5.73562	0.179008	6.19204	34.5177
5.74645	1.38368	6.19924	34.3455	5.74103	1.40703	6.19924	34.1185	5.74625	0.524826	6.19924	34.378	5.74395	-0.0263155	6.19924	34.5787	5.74228	0.138454	6.19924	34.5237
5.75312	1.36048	6.20644	34.3417	5.7477	1.47257	6.20644	34.1403	5.75292	0.576176	6.20644	34.379	5.75062	-0.0556111	6.20644	34.5909	5.74895	0.094153	6.20644	34.5357
5.75978	1.33928	6.21364	34.3296	5.75437	1.53724	6.21364	34.1618	5.75958	0.624619	6.21364	34.3834	5.75728	-0.0863969	6.21364	34.5979	5.75562	0.048846	6.21364	34.5525
5.76645	1.31971	6.22084	34.31	5.76103	1.60027	6.22084	34.1807	5.76625	0.671335	6.22084	34.3888	5.76395	-0.117198	6.22084	34.598	5.76228	0.0044629	6.22084	34.5728
5.77312	1.30138	6.22804	34.2857	5.7677	1.66077	6.22804	34.195	5.77292	0.717089	6.22804	34.3922	5.77062	-0.145443	6.22804	34.5907	5.76895	-0.0376329	6.22804	34.5945
5.77978	1.28429	6.23524	34.2607	5.77437	1.71737	6.23524	34.2031	5.77958	0.761516	6.23524	34.3915	5.77728	-0.169389	6.23524	34.5764	5.77562	-0.0760779	6.23524	34.6148
5.78645	1.26985	6.24244	34.2401	5.78103	1.77078	6.24244	34.2035	5.78625	0.804074	6.24244	34.3862	5.78395	-0.188135	6.24244	34.5564	5.78228	-0.107765	6.24244	34.6312
5.79312	1.25811	6.24964	34.2286	5.7877	1.82199	6.24964	34.1959	5.79292	0.844695	6.24964	34.3782	5.79062	-0.200771	6.24964	34.5327	5.78895	-0.130773	6.24964	34.6431
5.79978	1.24852	6.25684	34.2298	5.79437	1.8722	6.25684	34.181	5.79958	0.883251	6.25684	34.3701	5.79728	-0.205904	6.25684	34.5078	5.79562	-0.145987	6.25684	34.6513
5.80645	1.24062	6.26404	34.2446	5.80103	1.92046	6.26404	34.1611	5.80625	0.919349	6.26404	34.3645	5.80395	-0.201672	6.26404	34.4846	5.80228	-0.156142	6.26404	34.6565
5.81312	1.23334	6.27124	34.2712	5.8077	1.9665	6.27124	34.1388	5.81292	0.952609	6.27124	34.363	5.81062	-0.18847	6.27124	34.465	5.80895	-0.162706	6.27124	34.6583
5.81978	1.22612	6.27844	34.3067	5.81437	2.01131	6.27844	34.1168	5.81958	0.982709	6.27844	34.366	5.81728	-0.167713	6.27844	34.4503	5.81562	-0.166036	6.27844	34.6556
5.82645	1.21718	6.28564	34.3473	5.82103	2.05445	6.28564	34.0973	5.82625	1.00895	6.28564	34.3729	5.82395	-0.140406	6.28564	34.4414	5.82228	-0.168346	6.28564	34.6485
5.83312	1.20559	6.29284	34.3886	5.8277	2.09492	6.29284	34.0825	5.83292	1.0317	6.29284	34.3822	5.83062	-0.106119	6.29284	34.4388	5.82895	-0.170991	6.29284	34.6386
5.83978	1.19088	6.30004	34.426	5.83437	2.13111	6.30004	34.074	5.83958	1.05166	6.30004	34.3923	5.83728	-0.0645369	6.30004	34.4423	5.83562	-0.173256	6.30004	34.6277
5.84645	1.17364	6.30724	34.4555	5.84103	2.16264	6.30724	34.0723	5.84625	1.06857	6.30724	34.4017	5.84395	-0.0173226	6.30724	34.4504	5.84228	-0.17336	6.30724	34.617
5.85312	1.1553	6.31444	34.4749	5.8477	2.18968	6.31444	34.0765	5.85292	1.082	6.31444	34.4095	5.85062	0.0347793	6.31444	34.4611	5.84895	-0.170037	6.31444	34.6076
5.85978	1.13719	6.32164	34.4849	5.85437	2.21225	6.32164	34.0848	5.85958	1.09015	6.32164	34.4157	5.85728	0.0917837	6.32164	34.4727	5.85562	-0.162281	6.32164	34.601
5.86645	1.12081	6.32884	34.4872	5.86103	2.22962	6.32884	34.0953	5.86625	1.09368	6.32884	34.421	5.86395	0.153914	6.32884	34.4838	5.86228	-0.148632	6.32884	34.5998
5.87312	1.1078	6.33604	34.4835	5.8677	2.2419	6.33604	34.1065	5.87292	1.09255	6.33604	34.426	5.87062	0.221021	6.33604	34.4925	5.86895	-0.129148	6.33604	34.606
5.87978	1.09877	6.34324	34.4747	5.87437	2.25005	6.34324	34.1176	5.87958	1.087	6.34324	34.4306	5.87728	0.291474	6.34324	34.4967	5.87562	-0.105366	6.34324	34.6197
5.88645	1.09338	6.35044	34.4618	5.88103	2.25591	6.35044	34.1279	5.88625	1.07644	6.35044	34.4339	5.88395	0.363886	6.35044	34.4942	5.88228	-0.0779033	6.35044	34.6392
5.89312	1.09093	6.35764	34.4461	5.8877	2.25969	6.35764	34.1368	5.89292	1.06134	6.35764	34.4348	5.89062	0.436768	6.35764	34.4845	5.88895	-0.0469536	6.35764	34.6614
5.89978	1.08983	6.36484	34.4289	5.89437	2.2606	6.36484	34.1437	5.89958	1.04412	6.36484	34.4318	5.89728	0.509068	6.36484	34.4689	5.89562	-0.0132695	6.36484	34.6834
5.90645	1.08895	6.37204	34.4112	5.90103	2.25791	6.37204	34.148	5.90625	1.02557	6.37204	34.4245	5.90395	0.580639	6.37204	34.45	5.90228	0.0217706	6.37204	34.7024
5.91312	1.08818	6.37924	34.3933	5.9077	2.25183	6.37924	34.1494	5.91292	1.00615	6.37924	34.413	5.91062	0.650182	6.37924	34.4313	5.90895	0.0583455	6.37924	34.7161
5.91978	1.08802	6.38644	34.3761	5.91437	2.24159	6.38644	34.1479	5.91958	0.9856	6.38644	34.399	5.91728	0.718296	6.38644	34.4165	5.91562	0.0976771	6.38644	34.7224
5.92645	1.08927	6.39364	34.361	5.92103	2.22554	6.39364	34.1437	5.92625	0.964075	6.39364	34.3851	5.92395	0.784516	6.39364	34.4092	5.92228	0.138536	6.39364	34.7209
5.93312	1.09156	6.40084	34.3499	5.9277	2.20284	6.40084	34.1369	5.93292	0.94115	6.40084	34.3746	5.93062	0.848554	6.40084	34.4126	5.92895	0.17868	6.40084	34.7124
5.93978	1.0953	6.40804	34.3436	5.93437	2.17365	6.40804	34.1279	5.93958	0.916265	6.40804	34.3703	5.93728	0.909716	6.40804	34.4282	5.93562	0.21717	6.40804	34.6995
5.94645	1.10028	6.41524	34.3416	5.94103	2.13839	6.41524	34.1172	5.94625	0.889294	6.41524	34.3734	5.94395	0.967473	6.41524	34.4547	5.94228	0.25405	6.41524	34.6845
5.95312	1.10609	6.42244	34.342	5.9477	2.09686	6.42244	34.106	5.95292	0.860579	6.42244	34.3835	5.95062	1.02216	6.42244	34.4891	5.94895	0.288896	6.42244	34.6692
5.95978	1.11261	6.42964	34.3427	5.95437	2.05067	6.42964	34.0955	5.95958	0.829197	6.42964	34.3979	5.95728	1.07382	6.42964	34.5269	5.95562	0.32074	6.42964	34.6548
5.96645	1.11991	6.43684	34.3414	5.96103	2.00146	6.43684	34.0866	5.96625	0.795111	6.43684	34.4129	5.96395	1.12181	6.43684	34.5641	5.96228	0.350825	6.43684	34.6418
5.97312	1.12827	6.44404	34.3356	5.9677	1.95067	6.44404	34.079	5.97292	0.758879	6.44404	34.4244	5.97062	1.16517	6.44404	34.5969	5.96895	0.381254	6.44404	34.6309
5.97978	1.13756	6.45124	34.3229	5.97437	1.89912	6.45124	34.0722	5.97958	0.721373	6.45124	34.4286	5.97728	1.20268	6.45124	34.6222	5.97562	0.412829	6.45124	34.6218
5.98645	1.14845	6.45844	34.3018	5.98103	1.84817	6.45844	34.0658	5.98625	0.682816	6.45844	34.4234	5.98395	1.2319	6.45844	34.6383	5.98228	0.445671	6.45844	34.6139
5.99312	1.16126	6.46564	34.2724	5.9877	1.79903	6.46564	34.0602	5.99292	0.642575	6.46564	34.4083	5.99062	1.2509	6.46564	34.645	5.98895	0.480413	6.46564	34.6071
5.99978	1.17483	6.47284	34.2369	5.99437	1.75196	6.47284	34.0563	5.99958	0.601269	6.47284	34.3853	5.99728	1.25775	6.47284	34.6435	5.99562	0.517227	6.47284	34.6023
6.00645	1.18677	6.48004	34.1991	6.00103	1.70857	6.48004	34.0552	6.00625	0.560679	6.48004	34.3574	6.00395	1.2542	6.48004	34.6354	6.00228	0.554278	6.48004	34.6011
6.01312	1.19556	6.48724	34.1635	6.0077	1.67093	6.48724	34.0579	6.01292	0.522338	6.48724	34.3283	6.01062	1.24141	6.48724	34.6213	6.00895	0.589259	6.48724	34.6048
6.01978	1.20116	6.49444	34.134	6.01437	1.64129	6.49444	34.066	6.01958	0.486597	6.49444	34.3016	6.01728	1.21962	6.49444	34.6014	6.01562	0.62111	6.49444	34.6134
6.02645	1.20372	6.50164	34.1142	6.02103	1.62148	6.50164	34.0812	6.02625	0.453018	6.50164	34.2799	6.02395	1.19057	6.50164	34.5754	6.02228	0.649877	6.50164	34.6262
6.03312	1.20173	6.50884	34.1067	6.0277	1.61219	6.50884	34.1047	6.03292	0.422023	6.50884	34.265	6.03062	1.15459	6.50884	34.5439	6.02895	0.674576	6.50884	34.6422
6.03978	1.19493	6.51604	34.113	6.03437	1.61406	6.51604	34.1361	6.03958	0.39465	6.51604	34.2574	6.03728	1.11195	6.51604	34.5079	6.03562	0.695243	6.51604	34.6604
6.04645	1.18438	6.52324	34.1328	6.04103	1.62532	6.52324	34.1729	6.04625	0.370376	6.52324	34.2564	6.04395	1.05994	6.52324	34.4694	6.04228	0.712886	6.52324	34.6794
6.05312	1.17134	6.53044	34.1637	6.0477	1.64425	6.53044	34.2109	6.05292	0.348158	6.53044	34.2603	6.05062	0.997305	6.53044	34.4311	6.04895	0.729367	6.53044	34.697
6.05978	1.15573	6.53764	34.2016	6.05437	1.66824	6.53764	34.2454	6.05958	0.327349	6.53764	34.2679	6.05728	0.925429	6.53764	34.3963	6.05562	0.744537	6.53764	34.7108
6.06645	1.13734	6.54484	34.2409	6.06103	1.69369	6.54484	34.272	6.06625	0.309013	6.54484	34.2779	6.06395	0.846267	6.54484	34.3691	6.06228	0.757374	6.54484	34.72
6.07312	1.11817	6.55204	34.2763	6.0677	1.71681	6.55204	34.2871	6.07292	0.294007	6.55204	34.2899	6.07062	0.762179	6.55204	34.353	6.06895	0.766896	6.55204	34.7255
6.07978	1.09951	6.55924	34.3027	6.07437	1.73546	6.55924	34.2877	6.07958	0.282928	6.55924	34.3029	6.07728	0.673957	6.55924	34.3502	6.07562	0.772722	6.55924	34.7291
6.08645	1.08162	6.56644	34.3169	6.08103	1.75038	6.56644	34.2727	6.08625	0.276014	6.56644	34.3162	6.08395	0.582993	6.56644	34.3604	6.08228	0.776157	6.56644	34.7321
6.09312	1.06423	6.57364	34.3177	6.0877	1.76281	6.57364	34.2427	6.09292	0.273094	6.57364	34.3296	6.09062	0.49115	6.57364	34.3814	6.08895	0.776596	6.57364	34.734
6.09978	1.04816	6.58084	34.3057	6.09437	1.77336	6.58084	34.2002	6.09958	0.274092	6.58084	34.3431	6.09728	0.399768	6.58084	34.4093	6.09562	0.775181	6.58084	34.7335
6.10645	1.03465	6.58804	34.2831	6.10103	1.78307	6.58804	34.1496	6.10625	0.279255	6.58804	34.3572	6.10395	0.308305	6.58804	34.4392	6.10228	0.77226	6.58804	34.729
6.11312	1.02296	6.59524	34.2526	6.1077	1.79417	6.59524	34.096	6.11292	0.288449	6.59524	34.3715	6.11062	0.215985	6.59524	34.4661	6.10895	0.768743	6.59524	34.719
6.11978	1.01275	6.60244	34.2181	6.11437	1.80746	6.60244	34.0443	6.11958	0.300415	6.60244	34.3845	6.11728	0.123128	6.60244	34.4861	6.11562	0.76434	6.60244	34.7024
6.12645	1.00368	6.60964	34.184	6.12103	1.82126	6.60964	33.999	6.12625	0.313953	6.60964	34.3948	6.12395	0.0311285	6.60964	34.496	6.12228	0.758059	6.60964	34.678
6.13312	0.996202	6.61684	34.1543	6.1277	1.83227	6.61684	33.9636	6.13292	0.327982	6.61684	34.4017	6.13062	-0.0585243	6.61684	34.4946	6.12895	0.750817	6.61684	34.6459
6.13978	0.990652	6.62404	34.1312	6.13437	1.83904	6.62404	33.94	6.13958	0.341952	6.62404	34.4056	6.13728	-0.144489	6.62404	34.4828	6.13562	0.742339	6.62404	34.6081
6.14645	0.986822	6.63124	34.1147	6.14103	1.84199	6.63124	33.9295	6.14625	0.355169	6.63124	34.4073	6.14395	-0.225663	6.63124	34.4638	6.14228	0.732608	6.63124	34.5688
6.15312	0.98557	6.63844	34.1034	6.1477	1.8419	6.63844	33.9318	6.15292	0.36753	6.63844	34.4072	6.15062	-0.30043	6.63844	34.4417	6.14895	0.721708	6.63844	34.533
6.15978	0.986733	6.64564	34.0962	6.15437	1.83839	6.64564	33.9455	6.15958	0.378504	6.64564	34.4059	6.15728	-0.367261	6.64564	34.4203	6.15562	0.710689	6.64564	34.5048
6.16645	0.992179	6.65284	34.0931	6.16103	1.831	6.65284	33.9678	6.16625	0.386581	6.65284	34.4049	6.16395	-0.424407	6.65284	34.4021	6.16228	0.700489	6.65284	34.4857
6.17312	1.00241	6.66004	34.0939	6.1677	1.82047	6.66004	33.9954	6.17292	0.391096	6.66004	34.4065	6.17062	-0.472456	6.66004	34.3883	6.16895	0.691362	6.66004	34.4752
6.17978	1.01706	6.66724	34.0969	6.17437	1.80736	6.66724	34.0255	6.17958	0.392132	6.66724	34.413	6.17728	-0.512876	6.66724	34.3796	6.17562	0.68251	6.66724	34.4713
6.18645	1.03423	6.67444	34.0998	6.18103	1.79126	6.67444	34.056	6.18625	0.390008	6.67444	34.4251	6.18395	-0.545964	6.67444	34.3764	6.18228	0.672974	6.67444	34.4718
6.19312	1.05309	6.68164	34.1008	6.1877	1.77106	6.68164	34.0855	6.19292	0.384532	6.68164	34.4416	6.19062	-0.571355	6.68164	34.3787	6.18895	0.661641	6.68164	34.4747
6.19978	1.07459	6.68884	34.0997	6.19437	1.74754	6.68884	34.112	6.19958	0.37618	6.68884	34.4596	6.19728	-0.588484	6.68884	34.385	6.19562	0.648476	6.68884	34.4781
6.20645	1.09716	6.69604	34.0971	6.20103	1.72372	6.69604	34.1341	6.20625	0.366576	6.69604	34.4757	6.20395	-0.598669	6.69604	34.3934	6.20228	0.633195	6.69604	34.4802
6.21312	1.11914	6.70324	34.0929	6.2077	1.70159	6.70324	34.1511	6.21292	0.357486	6.70324	34.4868	6.21062	-0.602491	6.70324	34.4028	6.20895	0.61506	6.70324	34.4805
6.21978	1.13934	6.71044	34.0869	6.21437	1.68152	6.71044	34.1637	6.21958	0.348791	6.71044	34.4906	6.21728	-0.600711	6.71044	34.4133	6.21562	0.594579	6.71044	34.4797
6.22645	1.15958	6.71764	34.0792	6.22103	1.66343	6.71764	34.1717	6.22625	0.339881	6.71764	34.4855	6.22395	-0.594422	6.71764	34.4266	6.22228	0.572897	6.71764	34.4788
6.23312	1.18009	6.72484	34.0715	6.2277	1.64795	6.72484	34.1737	6.23292	0.330567	6.72484	34.4715	6.23062	-0.585414	6.72484	34.4438	6.22895	0.552475	6.72484	34.4783
6.23978	1.19985	6.73204	34.0663	6.23437	1.63595	6.73204	34.1679	6.23958	0.321157	6.73204	34.4505	6.23728	-0.575989	6.73204	34.4645	6.23562	0.534765	6.73204	34.4777
6.24645	1.21798	6.73924	34.0655	6.24103	1.62641	6.73924	34.1533	6.24625	0.311531	6.73924	34.4263	6.24395	-0.567228	6.73924	34.4868	6.24228	0.519536	6.73924	34.4754
6.25312	1.23484	6.74644	34.0701	6.2477	1.61877	6.74644	34.1313	6.25292	0.301652	6.74644	34.4043	6.25062	-0.559598	6.74644	34.5087	6.24895	0.506341	6.74644	34.4701
6.25978	1.2503	6.75364	34.0802	6.25437	1.61292	6.75364	34.1045	6.25958	0.291295	6.75364	34.3895	6.25728	-0.551634	6.75364	34.5284	6.25562	0.495501	6.75364	34.4615
6.26645	1.26214	6.76084	34.0956	6.26103	1.60884	6.76084	34.0755	6.26625	0.280112	6.76084	34.3854	6.26395	-0.541814	6.76084	34.5446	6.26228	0.487737	6.76084	34.4503
6.27312	1.2688	6.76804	34.1158	6.2677	1.60631	6.76804	34.047	6.27292	0.267036	6.76804	34.3921	6.27062	-0.528954	6.76804	34.5555	6.26895	0.48127	6.76804	34.4387
6.27978	1.26923	6.77524	34.1399	6.27437	1.60533	6.77524	34.0227	6.27958	0.252031	6.77524	34.4073	6.27728	-0.511967	6.77524	34.5595	6.27562	0.473142	6.77524	34.4295
6.28645	1.26403	6.78244	34.1667	6.28103	1.60604	6.78244	34.0066	6.28625	0.236087	6.78244	34.4267	6.28395	-0.489563	6.78244	34.5559	6.28228	0.461936	6.78244	34.4258
6.29312	1.254	6.78964	34.195	6.2877	1.60785	6.78964	34.002	6.29292	0.219196	6.78964	34.4458	6.29062	-0.459976	6.78964	34.5464	6.28895	0.447817	6.78964	34.4296
6.29978	1.23928	6.79684	34.2239	6.29437	1.61048	6.79684	34.0091	6.29958	0.202239	6.79684	34.4606	6.29728	-0.422999	6.79684	34.5345	6.29562	0.431232	6.79684	34.4424
6.30645	1.22167	6.80404	34.2524	6.30103	1.61345	6.80404	34.0253	6.30625	0.185765	6.80404	34.4679	6.30395	-0.378884	6.80404	34.5247	6.30228	0.412673	6.80404	34.4645
6.31312	1.20326	6.81124	34.2796	6.3077	1.61733	6.81124	34.0472	6.31292	0.171982	6.81124	34.466	6.31062	-0.327893	6.81124	34.5202	6.30895	0.392728	6.81124	34.4946
6.31978	1.18704	6.81844	34.3046	6.31437	1.62169	6.81844	34.0716	6.31958	0.162058	6.81844	34.4552	6.31728	-0.270002	6.81844	34.5222	6.31562	0.371642	6.81844	34.5301
6.32645	1.17381	6.82564	34.3264	6.32103	1.62632	6.82564	34.0958	6.32625	0.156619	6.82564	34.4383	6.32395	-0.205174	6.82564	34.5296	6.32228	0.350535	6.82564	34.5669
6.33312	1.16119	6.83284	34.3442	6.3277	1.63135	6.83284	34.1174	6.33292	0.155367	6.83284	34.4195	6.33062	-0.134431	6.83284	34.5399	6.32895	0.329755	6.83284	34.6006
6.33978	1.14843	6.84004	34.3567	6.33437	1.63635	6.84004	34.1344	6.33958	0.157364	6.84004	34.4027	6.33728	-0.059858	6.84004	34.55	6.33562	0.307769	6.84004	34.6288
6.34645	1.13391	6.84724	34.3625	6.34103	1.64182	6.84724	34.1462	6.34625	0.162549	6.84724	34.3902	6.34395	0.0167042	6.84724	34.5563	6.34228	0.282429	6.84724	34.6504
6.35312	1.1183	6.85444	34.3607	6.3477	1.64726	6.85444	34.1536	6.35292	0.169635	6.85444	34.3822	6.35062	0.0942498	6.85444	34.5551	6.34895	0.253886	6.85444	34.6657
6.35978	1.1014	6.86164	34.3511	6.35437	1.65308	6.86164	34.1581	6.35958	0.177033	6.86164	34.3777	6.35728	0.173569	6.86164	34.5432	6.35562	0.225469	6.86164	34.6753
6.36645	1.08373	6.86884	34.3348	6.36103	1.66006	6.86884	34.1601	6.36625	0.181727	6.86884	34.375	6.36395	0.25329	6.86884	34.5192	6.36228	0.198945	6.86884	34.6797
6.37312	1.06764	6.87604	34.3137	6.3677	1.66952	6.87604	34.1593	6.37292	0.182867	6.87604	34.3722	6.37062	0.331268	6.87604	34.4844	6.36895	0.174306	6.87604	34.6798
6.37978	1.05554	6.88324	34.2895	6.37437	1.6833	6.88324	34.1547	6.37958	0.180058	6.88324	34.3677	6.37728	0.406742	6.88324	34.443	6.37562	0.15042	6.88324	34.6766
6.38645	1.05096	6.89044	34.2638	6.38103	1.70191	6.89044	34.1455	6.38625	0.173353	6.89044	34.3603	6.38395	0.480033	6.89044	34.4006	6.38228	0.127405	6.89044	34.6704
6.39312	1.05438	6.89764	34.2385	6.3877	1.7247	6.89764	34.1315	6.39292	0.162959	6.89764	34.35	6.39062	0.550926	6.89764	34.3628	6.38895	0.104949	6.89764	34.6603
6.39978	1.06501	6.90484	34.2156	6.39437	1.74997	6.90484	34.1131	6.39958	0.150174	6.90484	34.3378	6.39728	0.616409	6.90484	34.3336	6.39562	0.0818744	6.90484	34.6448
6.40645	1.08237	6.91204	34.1974	6.40103	1.77505	6.91204	34.0912	6.40625	0.136197	6.91204	34.3257	6.40395	0.675224	6.91204	34.3151	6.40228	0.057362	6.91204	34.623
6.41312	1.10652	6.91924	34.1847	6.4077	1.79729	6.91924	34.0673	6.41292	0.121132	6.91924	34.3155	6.41062	0.729047	6.91924	34.3077	6.40895	0.0328422	6.91924	34.5954
6.41978	1.13709	6.92644	34.1767	6.41437	1.81493	6.92644	34.0434	6.41958	0.10626	6.92644	34.3084	6.41728	0.780739	6.92644	34.3099	6.41562	0.010699	6.92644	34.5639
6.42645	1.1728	6.93364	34.1715	6.42103	1.82727	6.93364	34.0216	6.42625	0.0930056	6.93364	34.3041	6.42395	0.832073	6.93364	34.3196	6.42228	-0.00838935	6.93364	34.5318
6.43312	1.2137	6.94084	34.1673	6.4277	1.83418	6.94084	34.0036	6.43292	0.0821427	6.94084	34.3022	6.43062	0.883251	6.94084	34.3334	6.42895	-0.0243559	6.94084	34.503
6.43978	1.2616	6.94804	34.1633	6.43437	1.83497	6.94804	33.9905	6.43958	0.0715256	6.94804	34.3018	6.43728	0.934049	6.94804	34.3478	6.43562	-0.0372455	6.94804	34.4816
6.44645	1.31828	6.95524	34.159	6.44103	1.83079	6.95524	33.9819	6.44625	0.0602752	6.95524	34.3021	6.44395	0.984229	6.95524	34.3603	6.44228	-0.0466928	6.95524	34.4705
6.45312	1.38564	6.96244	34.1539	6.4477	1.82308	6.96244	33.9765	6.45292	0.0494793	6.96244	34.3023	6.45062	1.03341	6.96244	34.37	6.44895	-0.0540838	6.96244	34.4709
6.45978	1.46291	6.96964	34.1475	6.45437	1.81316	6.96964	33.9724	6.45958	0.0390038	6.96964	34.3015	6.45728	1.08078	6.96964	34.3782	6.45562	-0.0591576	6.96964	34.4816
6.46645	1.5484	6.97684	34.1399	6.46103	1.80151	6.97684	33.9681	6.46625	0.0264198	6.97684	34.2988	6.46395	1.12413	6.97684	34.3875	6.46228	-0.0607818	6.97684	34.4996
6.47312	1.63975	6.98404	34.1319	6.4677	1.7897	6.98404	33.9628	6.47292	0.00865012	6.98404	34.2936	6.47062	1.16166	6.98404	34.4002	6.46895	-0.0571683	6.98404	34.5209
6.47978	1.735	6.99124	34.1253	6.47437	1.78012	6.99124	33.9567	6.47958	-0.0143126	6.99124	34.2863	6.47728	1.19408	6.99124	34.4164	6.47562	-0.0470802	6.99124	34.5415
6.48645	1.83232	6.99844	34.1211	6.48103	1.77442	6.99844	33.9497	6.48625	-0.0412166	6.99844	34.2775	6.48395	1.22367	6.99844	34.4349	6.48228	-0.0291914	6.99844	34.5586
6.49312	1.92961	7.00564	34.12	6.4877	1.77217	7.00564	33.9416	6.49292	-0.0719428	7.00564	34.2677	6.49062	1.25003	7.00564	34.4536	6.48895	-0.00337511	7.00564	34.5707
6.49978	2.02689	7.01284	34.1216	6.49437	1.77093	7.01284	33.9324	6.49958	-0.10661	7.01284	34.2577	6.49728	1.27073	7.01284	34.4706	6.49562	0.0289455	7.01284	34.5779
6.50645	2.1239	7.02004	34.1251	6.50103	1.76856	7.02004	33.9228	6.50625	-0.144064	7.02004	34.2483	6.50395	1.28564	7.02004	34.4835	6.50228	0.0653267	7.02004	34.582
6.51312	2.21902	7.02724	34.1291	6.5077	1.76246	7.02724	33.9142	6.51292	-0.181749	7.02724	34.2408	6.51062	1.29691	7.02724	34.4895	6.50895	0.102937	7.02724	34.5855
6.51978	2.3095	7.03445	34.1327	6.51437	1.75077	7.03445	33.9077	6.51958	-0.218302	7.03445	34.2364	6.51728	1.30614	7.03445	34.4863	6.51562	0.140041	7.03445	34.5906
6.52645	2.39235	7.04165	34.136	6.52103	1.73224	7.04165	33.9032	6.52625	-0.253528	7.04165	34.2356	6.52395	1.31258	7.04165	34.4732	6.52228	0.174694	7.04165	34.5983
6.53312	2.46481	7.04885	34.1396	6.5277	1.70736	7.04885	33.9	6.53292	-0.287965	7.04885	34.2376	6.53062	1.31568	7.04885	34.4526	6.52895	0.206694	7.04885	34.6081
6.53978	2.52444	7.05605	34.1444	6.53437	1.67777	7.05605	33.8978	6.53958	-0.320882	7.05605	34.2411	6.53728	1.31621	7.05605	34.4278	6.53562	0.23552	7.05605	34.6184
6.54645	2.57018	7.06325	34.1507	6.54103	1.64447	7.06325	33.8974	6.54625	-0.352189	7.06325	34.2449	6.54395	1.3143	7.06325	34.4023	6.54228	0.262186	7.06325	34.6272
6.55312	2.6032	7.07045	34.1584	6.5477	1.60873	7.07045	33.8999	6.55292	-0.381015	7.07045	34.2482	6.55062	1.30965	7.07045	34.3779	6.54895	0.287913	7.07045	34.6332
6.55978	2.62445	7.07765	34.1679	6.55437	1.57191	7.07765	33.9053	6.55958	-0.405639	7.07765	34.2505	6.55728	1.29983	7.07765	34.3555	6.55562	0.311576	7.07765	34.6359
6.56645	2.6357	7.08485	34.1799	6.56103	1.535	7.08485	33.9127	6.56625	-0.423044	7.08485	34.2516	6.56395	1.28221	7.08485	34.3356	6.56228	0.332259	7.08485	34.6358
6.57312	2.6384	7.09205	34.1948	6.5677	1.49839	7.09205	33.9206	6.57292	-0.43191	7.09205	34.2521	6.57062	1.25463	7.09205	34.3192	6.56895	0.350304	7.09205	34.6338
6.57978	2.63482	7.09925	34.212	6.57437	1.4618	7.09925	33.9284	6.57958	-0.433229	7.09925	34.254	6.57728	1.21627	7.09925	34.3069	6.57562	0.366755	7.09925	34.6314
6.58645	2.62561	7.10645	34.2299	6.58103	1.42514	7.10645	33.9358	6.58625	-0.428773	7.10645	34.2598	6.58395	1.16695	7.10645	34.2992	6.58228	0.381581	7.10645	34.6302
6.59312	2.60986	7.11365	34.2473	6.5877	1.38807	7.11365	33.9422	6.59292	-0.420295	7.11365	34.2716	6.59062	1.10617	7.11365	34.2962	6.58895	0.393569	7.11365	34.6311
6.59978	2.58665	7.12085	34.2642	6.59437	1.34934	7.12085	33.9463	6.59958	-0.409894	7.12085	34.2904	6.59728	1.03497	7.12085	34.2984	6.59562	0.403151	7.12085	34.6343
6.60645	2.55549	7.12805	34.2815	6.60103	1.30811	7.12805	33.9475	6.60625	-0.401109	7.12805	34.3156	6.60395	0.956491	7.12805	34.3065	6.60228	0.409737	7.12805	34.64
6.61312	2.51726	7.13525	34.2997	6.6077	1.26449	7.13525	33.9469	6.61292	-0.395365	7.13525	34.3466	6.61062	0.874199	7.13525	34.3207	6.60895	0.412494	7.13525	34.6483
6.61978	2.47294	7.14245	34.3188	6.61437	1.22011	7.14245	33.9477	6.61958	-0.391357	7.14245	34.3825	6.61728	0.791788	7.14245	34.3406	6.61562	0.411749	7.14245	34.6594
6.62645	2.42477	7.14965	34.338	6.62103	1.17734	7.14965	33.9538	6.62625	-0.38638	7.14965	34.4222	6.62395	0.711963	7.14965	34.3646	6.62228	0.408113	7.14965	34.6727
6.63312	2.3753	7.15685	34.3564	6.6277	1.13774	7.15685	33.968	6.63292	-0.378065	7.15685	34.4642	6.63062	0.636488	7.15685	34.3899	6.62895	0.402145	7.15685	34.6869
6.63978	2.32721	7.16405	34.3732	6.63437	1.10228	7.16405	33.9913	6.63958	-0.364669	7.16405	34.5067	6.63728	0.566781	7.16405	34.4137	6.63562	0.393346	7.16405	34.7006
6.64645	2.28184	7.17125	34.3875	6.64103	1.07095	7.17125	34.023	6.64625	-0.344023	7.17125	34.5482	6.64395	0.503987	7.17125	34.4341	6.64228	0.382774	7.17125	34.7127
6.65312	2.23918	7.17845	34.3986	6.6477	1.04283	7.17845	34.0616	6.65292	-0.315376	7.17845	34.587	6.65062	0.449181	7.17845	34.4501	6.64895	0.371158	7.17845	34.7218
6.65978	2.19913	7.18565	34.4055	6.65437	1.0168	7.18565	34.1044	6.65958	-0.279553	7.18565	34.6211	6.65728	0.400506	7.18565	34.4618	6.65562	0.358619	7.18565	34.7257
6.66645	2.16103	7.19285	34.4081	6.66103	0.991069	7.19285	34.147	6.66625	-0.238597	7.19285	34.6476	6.66395	0.355199	7.19285	34.4694	6.66228	0.345565	7.19285	34.7219
6.67312	2.12374	7.20005	34.4063	6.6677	0.965215	7.20005	34.1837	6.67292	-0.196137	7.20005	34.6637	6.67062	0.31101	7.20005	34.473	6.66895	0.332877	7.20005	34.7092
6.67978	2.08554	7.20725	34.4007	6.67437	0.939429	7.20725	34.2091	6.67958	-0.155546	7.20725	34.6674	6.67728	0.267886	7.20725	34.472	6.67562	0.321142	7.20725	34.689
6.68645	2.046	7.21445	34.3923	6.68103	0.913903	7.21445	34.2206	6.68625	-0.118971	7.21445	34.6585	6.68395	0.225939	7.21445	34.4661	6.68228	0.309892	7.21445	34.6654
6.69312	2.00659	7.22165	34.3818	6.6877	0.888996	7.22165	34.218	6.69292	-0.0878498	7.22165	34.6379	6.69062	0.185229	7.22165	34.4548	6.68895	0.298359	7.22165	34.6439
6.69978	1.96759	7.22885	34.3705	6.69437	0.864506	7.22885	34.2032	6.69958	-0.0627339	7.22885	34.6081	6.69728	0.146262	7.22885	34.4381	6.69562	0.286423	7.22885	34.6303
6.70645	1.93051	7.23605	34.3591	6.70103	0.84082	7.23605	34.1782	6.70625	-0.0424236	7.23605	34.5727	6.70395	0.110798	7.23605	34.4168	6.70228	0.273935	7.23605	34.629
6.71312	1.89757	7.24325	34.3489	6.7077	0.816695	7.24325	34.1455	6.71292	-0.0248402	7.24325	34.5366	6.71062	0.0810325	7.24325	34.3926	6.70895	0.260495	7.24325	34.6423
6.71978	1.87147	7.25045	34.3407	6.71437	0.791341	7.25045	34.1082	6.71958	-0.00780821	7.25045	34.5047	6.71728	0.0562519	7.25045	34.3684	6.71562	0.246651	7.25045	34.6696
6.72645	1.85367	7.25765	34.3355	6.72103	0.766046	7.25765	34.0706	6.72625	0.00909716	7.25765	34.4807	6.72395	0.0340268	7.25765	34.3482	6.72228	0.233121	7.25765	34.7075
6.73312	1.84289	7.26485	34.3334	6.7277	0.742503	7.26485	34.0368	6.73292	0.0281408	7.26485	34.4658	6.73062	0.0117645	7.26485	34.3367	6.72895	0.220068	7.26485	34.7497
6.73978	1.83931	7.27205	34.3337	6.73437	0.720948	7.27205	34.0096	6.73958	0.0503585	7.27205	34.4592	6.73728	-0.0120625	7.27205	34.3381	6.73562	0.207834	7.27205	34.7885
6.74645	1.8413	7.27925	34.3351	6.74103	0.701882	7.27925	33.9906	6.74625	0.0751391	7.27925	34.4587	6.74395	-0.0395253	7.27925	34.3548	6.74228	0.19639	7.27925	34.8161
6.75312	1.84794	7.28645	34.3359	6.7477	0.687346	7.28645	33.9807	6.75292	0.102818	7.28645	34.4614	6.75062	-0.0726432	7.28645	34.3855	6.74895	0.186466	7.28645	34.826
6.75978	1.85807	7.29365	34.3342	6.75437	0.679202	7.29365	33.9803	6.75958	0.134416	7.29365	34.4642	6.75728	-0.111356	7.29365	34.4257	6.75562	0.178017	7.29365	34.8151
6.76645	1.87084	7.30085	34.3287	6.76103	0.675946	7.30085	33.989	6.76625	0.170432	7.30085	34.4641	6.76395	-0.153571	7.30085	34.4689	6.76228	0.17032	7.30085	34.7854
6.77312	1.88685	7.30805	34.3186	6.7677	0.67611	7.30805	34.005	6.77292	0.209741	7.30805	34.4588	6.77062	-0.197224	7.30805	34.5082	6.76895	0.163689	7.30805	34.7429
6.77978	1.90514	7.31525	34.3045	6.77437	0.679702	7.31525	34.0254	6.77958	0.25256	7.31525	34.447	6.77728	-0.24087	7.31525	34.5378	6.77562	0.157483	7.31525	34.6963
6.78645	1.92603	7.32245	34.2885	6.78103	0.686072	7.32245	34.0468	6.78625	0.300467	7.32245	34.4292	6.78395	-0.283115	7.32245	34.5534	6.78228	0.152007	7.32245	34.6532
6.79312	1.94944	7.32965	34.2738	6.7877	0.693381	7.32965	34.0663	6.79292	0.353619	7.32965	34.4068	6.79062	-0.322983	7.32965	34.5527	6.78895	0.146903	7.32965	34.6189
6.79978	1.97601	7.33685	34.2638	6.79437	0.700504	7.33685	34.0817	6.79958	0.410274	7.33685	34.3822	6.79728	-0.359692	7.33685	34.5361	6.79562	0.142187	7.33685	34.5962
6.80645	2.00618	7.34405	34.261	6.80103	0.707924	7.34405	34.0917	6.80625	0.470884	7.34405	34.358	6.80395	-0.393085	7.34405	34.5068	6.80228	0.139736	7.34405	34.5857
6.81312	2.0399	7.35125	34.2666	6.8077	0.715628	7.35125	34.0959	6.81292	0.53484	7.35125	34.336	6.81062	-0.421174	7.35125	34.4701	6.80895	0.140771	7.35125	34.5857
6.81978	2.07659	7.35845	34.28	6.81437	0.723101	7.35845	34.0956	6.81958	0.600226	7.35845	34.3174	6.81728	-0.44173	7.35845	34.4315	6.81562	0.146367	7.35845	34.5919
6.82645	2.11613	7.36565	34.2993	6.82103	0.730745	7.36565	34.0932	6.82625	0.664644	7.36565	34.3031	6.82395	-0.452429	7.36565	34.3952	6.82228	0.156619	7.36565	34.5979
6.83312	2.15892	7.37285	34.3225	6.8277	0.738956	7.37285	34.0918	6.83292	0.7267	7.37285	34.294	6.83062	-0.452787	7.37285	34.3637	6.82895	0.1719	7.37285	34.5971
6.83978	2.20624	7.38005	34.3465	6.83437	0.747129	7.38005	34.0935	6.83958	0.786185	7.38005	34.2901	6.83728	-0.443012	7.38005	34.339	6.83562	0.192262	7.38005	34.5859
6.84645	2.25882	7.38725	34.3683	6.84103	0.755057	7.38725	34.0996	6.84625	0.840828	7.38725	34.2912	6.84395	-0.423662	7.38725	34.3228	6.84228	0.216544	7.38725	34.5648
6.85312	2.31636	7.39445	34.3853	6.8477	0.763766	7.39445	34.1104	6.85292	0.89062	7.39445	34.2962	6.85062	-0.395969	7.39445	34.3165	6.84895	0.243679	7.39445	34.5377
6.85978	2.38005	7.40165	34.3965	6.85437	0.774406	7.40165	34.1256	6.85958	0.937462	7.40165	34.3044	6.85728	-0.361115	7.40165	34.321	6.85562	0.272915	7.40165	34.5099
6.86645	2.44973	7.40885	34.4028	6.86103	0.787213	7.40885	34.1439	6.86625	0.982881	7.40885	34.3153	6.86395	-0.321522	7.40885	34.3364	6.86228	0.302799	7.40885	34.4865
6.87312	2.52439	7.41605	34.4059	6.8677	0.802055	7.41605	34.1627	6.87292	1.02822	7.41605	34.328	6.87062	-0.277586	7.41605	34.3627	6.86895	0.331797	7.41605	34.471
6.87978	2.60143	7.42325	34.4077	6.87437	0.819676	7.42325	34.1789	6.87958	1.07448	7.42325	34.3411	6.87728	-0.228554	7.42325	34.4001	6.87562	0.358097	7.42325	34.4657
6.88645	2.67943	7.43045	34.4095	6.88103	0.840731	7.43045	34.1896	6.88625	1.12393	7.43045	34.3524	6.88395	-0.173375	7.43045	34.4474	6.88228	0.379756	7.43045	34.4709
6.89312	2.75848	7.43765	34.4132	6.8877	0.864364	7.43765	34.194	6.89292	1.17707	7.43765	34.3597	6.89062	-0.112928	7.43765	34.5019	6.88895	0.396743	7.43765	34.4842
6.89978	2.83799	7.44485	34.4206	6.89437	0.890411	7.44485	34.193	6.89958	1.2328	7.44485	34.3619	6.89728	-0.0491515	7.44485	34.5594	6.89562	0.409693	7.44485	34.5007
6.90645	2.91722	7.45205	34.4331	6.90103	0.918411	7.45205	34.1883	6.90625	1.29063	7.45205	34.3584	6.90395	0.0175089	7.45205	34.6153	6.90228	0.420496	7.45205	34.5149
6.91312	2.99551	7.45925	34.4506	6.9077	0.94869	7.45925	34.1817	6.91292	1.34898	7.45925	34.3495	6.91062	0.0864565	7.45925	34.6659	6.90895	0.43004	7.45925	34.5221
6.91978	3.07366	7.46645	34.4719	6.91437	0.981003	7.46645	34.1748	6.91958	1.40736	7.46645	34.3362	6.91728	0.15717	7.46645	34.7085	6.91562	0.440508	7.46645	34.5209
6.92645	3.15367	7.47365	34.4948	6.92103	1.01425	7.47365	34.1686	6.92625	1.46427	7.47365	34.3213	6.92395	0.228405	7.47365	34.7412	6.92228	0.455618	7.47365	34.5132
6.93312	3.23686	7.48085	34.5175	6.9277	1.04869	7.48085	34.1638	6.93292	1.52081	7.48085	34.3082	6.93062	0.300303	7.48085	34.7635	6.92895	0.476494	7.48085	34.5034
6.93978	3.32409	7.48805	34.538	6.93437	1.08369	7.48805	34.1607	6.93958	1.57823	7.48805	34.3003	6.93728	0.373274	7.48805	34.7763	6.93562	0.502683	7.48805	34.4974
6.94645	3.41628	7.49525	34.5536	6.94103	1.11935	7.49525	34.1588	6.94625	1.63687	7.49525	34.2993	6.94395	0.448689	7.49525	34.7826	6.94228	0.532195	7.49525	34.501
6.95312	3.51416	7.50245	34.5618	6.9477	1.15643	7.50245	34.1571	6.95292	1.69814	7.50245	34.3051	6.95062	0.5273	7.50245	34.7859	6.94895	0.563607	7.50245	34.5183
6.95978	3.61719	7.50965	34.5615	6.95437	1.1961	7.50965	34.1544	6.95958	1.76176	7.50965	34.3162	6.95728	0.60904	7.50965	34.7893	6.95562	0.596054	7.50965	34.5505
6.96645	3.72336	7.51685	34.5536	6.96103	1.23937	7.51685	34.1499	6.96625	1.82736	7.51685	34.3306	6.96395	0.695013	7.51685	34.7943	6.96228	0.627927	7.51685	34.5953
6.97312	3.83125	7.52405	34.5411	6.9677	1.28536	7.52405	34.1441	6.97292	1.89258	7.52405	34.3453	6.97062	0.785828	7.52405	34.8012	6.96895	0.657953	7.52405	34.6482
6.97978	3.94024	7.53125	34.5277	6.97437	1.33416	7.53125	34.1382	6.97958	1.95718	7.53125	34.3575	6.97728	0.88156	7.53125	34.8094	6.97562	0.685535	7.53125	34.7029
6.98645	4.04992	7.53845	34.5175	6.98103	1.38627	7.53845	34.1338	6.98625	2.02174	7.53845	34.3648	6.98395	0.980362	7.53845	34.8174	6.98228	0.710748	7.53845	34.753
6.99312	4.15993	7.54565	34.5141	6.9877	1.44079	7.54565	34.1319	6.99292	2.0863	7.54565	34.3668	6.99062	1.08064	7.54565	34.8231	6.98895	0.734925	7.54565	34.7922
6.99978	4.27159	7.55285	34.5205	6.99437	1.49538	7.55285	34.1323	6.99958	2.15105	7.55285	34.3652	6.99728	1.18046	7.55285	34.8236	6.99562	0.757627	7.55285	34.8156
7.00645	4.38627	7.56005	34.5384	7.00103	1.54965	7.56005	34.1341	7.00625	2.21743	7.56005	34.363	7.00395	1.27672	7.56005	34.8162	7.00228	0.777632	7.56005	34.8213
7.01312	4.50533	7.56725	34.5678	7.0077	1.60484	7.56725	34.1366	7.01292	2.28699	7.56725	34.3628	7.01062	1.36691	7.56725	34.8	7.00895	0.79371	7.56725	34.8102
7.01978	4.62922	7.57445	34.6061	7.01437	1.66123	7.57445	34.1387	7.01958	2.35883	7.57445	34.3664	7.01728	1.45023	7.57445	34.7757	7.01562	0.804774	7.57445	34.7857
7.02645	4.75936	7.58165	34.6492	7.02103	1.7184	7.58165	34.1391	7.02625	2.43168	7.58165	34.3745	7.02395	1.52714	7.58165	34.7459	7.02228	0.811264	7.58165	34.7522
7.03312	4.89707	7.58885	34.6928	7.0277	1.77655	7.58885	34.1367	7.03292	2.50427	7.58885	34.3869	7.03062	1.59852	7.58885	34.7135	7.02895	0.813507	7.58885	34.714
7.03978	5.0423	7.59605	34.7331	7.03437	1.83618	7.59605	34.1302	7.03958	2.5765	7.59605	34.4021	7.03728	1.66524	7.59605	34.6813	7.03562	0.812426	7.59605	34.6748
7.04645	5.19389	7.60325	34.7682	7.04103	1.89678	7.60325	34.1194	7.04625	2.64828	7.60325	34.4174	7.04395	1.72842	7.60325	34.6514	7.04228	0.809602	7.60325	34.6385
7.05312	5.35009	7.61045	34.7974	7.0477	1.95696	7.61045	34.1052	7.05292	2.72015	7.61045	34.4289	7.05062	1.78937	7.61045	34.6251	7.04895	0.807285	7.61045	34.6085
7.05978	5.50971	7.61765	34.8211	7.05437	2.01694	7.61765	34.0893	7.05958	2.79281	7.61765	34.4337	7.05728	1.84936	7.61765	34.6025	7.05562	0.807248	7.61765	34.5876
7.06645	5.67096	7.62485	34.8402	7.06103	2.07647	7.62485	34.0741	7.06625	2.86642	7.62485	34.4307	7.06395	1.90939	7.62485	34.5822	7.06228	0.810646	7.62485	34.5774
7.07312	5.83306	7.63205	34.8566	7.0677	2.13597	7.63205	34.0616	7.07292	2.94017	7.63205	34.4207	7.07062	1.96868	7.63205	34.5619	7.06895	0.818208	7.63205	34.5776
7.07978	5.99516	7.63925	34.8725	7.07437	2.19554	7.63925	34.0535	7.07958	3.01257	7.63925	34.406	7.07728	2.02658	7.63925	34.5398	7.07562	0.831045	7.63925	34.5859
7.08645	6.15682	7.64645	34.8898	7.08103	2.25428	7.64645	34.0513	7.08625	3.0812	7.64645	34.3894	7.08395	2.08323	7.64645	34.5163	7.08228	0.848569	7.64645	34.599
7.09312	6.31753	7.65365	34.9092	7.0877	2.31196	7.65365	34.0563	7.09292	3.14347	7.65365	34.3736	7.09062	2.13937	7.65365	34.4932	7.08895	0.870183	7.65365	34.6137
7.09978	6.47727	7.66085	34.9299	7.09437	2.36795	7.66085	34.0682	7.09958	3.19736	7.66085	34.3611	7.09728	2.19592	7.66085	34.474	7.09562	0.897013	7.66085	34.6272
7.10645	6.63702	7.66805	34.95	7.10103	2.42232	7.66805	34.0853	7.10625	3.24225	7.66805	34.3533	7.10395	2.25278	7.66805	34.4624	7.10228	0.929907	7.66805	34.6379
7.11312	6.79701	7.67525	34.9675	7.1077	2.47378	7.67525	34.1046	7.11292	3.2794	7.67525	34.3509	7.11062	2.31006	7.67525	34.4616	7.10895	0.969097	7.67525	34.6438
7.11978	6.95686	7.68245	34.9814	7.11437	2.52151	7.68245	34.1233	7.11958	3.31091	7.68245	34.3531	7.11728	2.36766	7.68245	34.4735	7.11562	1.01318	7.68245	34.6438
7.12645	7.11694	7.68965	34.9915	7.12103	2.56517	7.68965	34.1396	7.12625	3.3395	7.68965	34.3589	7.12395	2.42538	7.68965	34.4976	7.12228	1.0622	7.68965	34.6388
7.13312	7.27847	7.69685	34.9977	7.1277	2.60481	7.69685	34.1529	7.13292	3.36741	7.69685	34.3678	7.13062	2.48357	7.69685	34.5314	7.12895	1.11747	7.69685	34.6315
7.13978	7.44356	7.70405	34.9999	7.13437	2.63931	7.70405	34.1627	7.13958	3.39718	7.70405	34.3799	7.13728	2.54197	7.70405	34.5703	7.13562	1.17823	7.70405	34.6262
7.14645	7.613	7.71125	34.9978	7.14103	2.66737	7.71125	34.1686	7.14625	3.42909	7.71125	34.3956	7.14395	2.6007	7.71125	34.6098	7.14228	1.24432	7.71125	34.6267
7.15312	7.78772	7.71845	34.9916	7.1477	2.68809	7.71845	34.1713	7.15292	3.4629	7.71845	34.4156	7.15062	2.6609	7.71845	34.6461	7.14895	1.31445	7.71845	34.6346
7.15978	7.96922	7.72565	34.9812	7.15437	2.70098	7.72565	34.1729	7.15958	3.49757	7.72565	34.4405	7.15728	2.72337	7.72565	34.6767	7.15562	1.38876	7.72565	34.6505
7.16645	8.15839	7.73285	34.9664	7.16103	2.70599	7.73285	34.1759	7.16625	3.53196	7.73285	34.4706	7.16395	2.78766	7.73285	34.701	7.16228	1.46689	7.73285	34.6743
7.17312	8.35489	7.74005	34.9469	7.1677	2.7018	7.74005	34.1814	7.17292	3.56422	7.74005	34.505	7.17062	2.85194	7.74005	34.7198	7.16895	1.54737	7.74005	34.7052
7.17978	8.55719	7.74725	34.9224	7.17437	2.68897	7.74725	34.1891	7.17958	3.59178	7.74725	34.5411	7.17728	2.91443	7.74725	34.7353	7.17562	1.62992	7.74725	34.7411
7.18645	8.76562	7.75445	34.8937	7.18103	2.66936	7.75445	34.1983	7.18625	3.61531	7.75445	34.5752	7.18395	2.97391	7.75445	34.75	7.18228	1.71371	7.75445	34.7778
7.19312	8.98027	7.76165	34.8631	7.1877	2.64486	7.76165	34.2084	7.19292	3.63658	7.76165	34.6028	7.19062	3.02881	7.76165	34.7659	7.18895	1.79927	7.76165	34.8105
7.19978	9.20147	7.76885	34.8345	7.19437	2.61731	7.76885	34.2193	7.19958	3.65838	7.76885	34.6209	7.19728	3.07836	7.76885	34.7831	7.19562	1.88706	7.76885	34.835
7.20645	9.43011	7.77605	34.8131	7.20103	2.58788	7.77605	34.2299	7.20625	3.6825	7.77605	34.6272	7.20395	3.12386	7.77605	34.8001	7.20228	1.977	7.77605	34.8485
7.21312	9.66769	7.78325	34.8041	7.2077	2.55877	7.78325	34.2382	7.21292	3.71157	7.78325	34.621	7.21062	3.16568	7.78325	34.8147	7.20895	2.0679	7.78325	34.8502
7.21978	9.91519	7.79045	34.811	7.21437	2.53002	7.79045	34.2419	7.21958	3.74785	7.79045	34.6027	7.21728	3.2049	7.79045	34.8246	7.21562	2.15878	7.79045	34.8407
7.22645	10.1701	7.79765	34.8348	7.22103	2.50085	7.79765	34.2395	7.22625	3.79277	7.79765	34.5738	7.22395	3.24308	7.79765	34.8288	7.22228	2.24797	7.79765	34.8212
7.23312	10.4311	7.80485	34.8736	7.2277	2.47084	7.80485	34.2308	7.23292	3.84688	7.80485	34.5369	7.23062	3.28232	7.80485	34.8272	7.22895	2.33465	7.80485	34.7938
7.23978	10.6963	7.81205	34.9238	7.23437	2.43999	7.81205	34.2167	7.23958	3.90969	7.81205	34.4959	7.23728	3.32417	7.81205	34.8205	7.23562	2.41838	7.81205	34.7615
7.24645	10.9653	7.81925	34.9804	7.24103	2.4094	7.81925	34.1992	7.24625	3.98085	7.81925	34.4553	7.24395	3.36865	7.81925	34.8105	7.24228	2.49951	7.81925	34.7281
7.25312	11.2366	7.82645	35.0379	7.2477	2.37924	7.82645	34.1812	7.25292	4.05989	7.82645	34.4189	7.25062	3.41703	7.82645	34.7995	7.24895	2.57778	7.82645	34.6974
7.25978	11.5086	7.83365	35.0902	7.25437	2.35091	7.83365	34.1669	7.25958	4.14779	7.83365	34.3905	7.25728	3.46991	7.83365	34.7898	7.25562	2.65171	7.83365	34.6723
7.26645	11.7814	7.84085	35.1327	7.26103	2.32554	7.84085	34.16	7.26625	4.24328	7.84085	34.3731	7.26395	3.52696	7.84085	34.7838	7.26228	2.72179	7.84085	34.6548
7.27312	12.0551	7.84805	35.1634	7.2677	2.305	7.84805	34.1633	7.27292	4.34359	7.84805	34.3687	7.27062	3.58748	7.84805	34.7831	7.26895	2.78804	7.84805	34.6462
7.27978	12.3295	7.85525	35.1832	7.27437	2.2903	7.85525	34.1783	7.27958	4.44615	7.85525	34.3784	7.27728	3.65056	7.85525	34.7884	7.27562	2.85026	7.85525	34.6478
7.28645	12.6022	7.86245	35.1951	7.28103	2.28086	7.86245	34.2053	7.28625	4.55075	7.86245	34.4017	7.28395	3.71527	7.86245	34.7992	7.28228	2.90869	7.86245	34.6599
7.29312	12.8707	7.86965	35.2026	7.2877	2.27646	7.86965	34.2436	7.29292	4.65778	7.86965	34.4364	7.29062	3.78198	7.86965	34.8138	7.28895	2.96462	7.86965	34.6811
7.29978	13.1356	7.87685	35.2084	7.29437	2.27689	7.87685	34.291	7.29958	4.76561	7.87685	34.4784	7.29728	3.8505	7.87685	34.8297	7.29562	3.02036	7.87685	34.7086
7.30645	13.3994	7.88405	35.2145	7.30103	2.28237	7.88405	34.3432	7.30625	4.87404	7.88405	34.5228	7.30395	3.92024	7.88405	34.8443	7.30228	3.07721	7.88405	34.7385
7.31312	13.6632	7.89125	35.2223	7.3077	2.29211	7.89125	34.3957	7.31292	4.98391	7.89125	34.5652	7.31062	3.99071	7.89125	34.8553	7.30895	3.13714	7.89125	34.7669
7.31978	13.9275	7.89845	35.2332	7.31437	2.30528	7.89845	34.4443	7.31958	5.09569	7.89845	34.6022	7.31728	4.06268	7.89845	34.8613	7.31562	3.20082	7.89845	34.7902
7.32645	14.1941	7.90565	35.2482	7.32103	2.32218	7.90565	34.4868	7.32625	5.20909	7.90565	34.6317	7.32395	4.13745	7.90565	34.8612	7.32228	3.26746	7.90565	34.8055
7.33312	14.4657	7.91285	35.2681	7.3277	2.34335	7.91285	34.5213	7.33292	5.32357	7.91285	34.6529	7.33062	4.21219	7.91285	34.8549	7.32895	3.33718	7.91285	34.8111
7.33978	14.7439	7.92005	35.2935	7.33437	2.3681	7.92005	34.5465	7.33958	5.43975	7.92005	34.6658	7.33728	4.28533	7.92005	34.8428	7.33562	3.40966	7.92005	34.8065
7.34645	15.0274	7.92725	35.3245	7.34103	2.39594	7.92725	34.5616	7.34625	5.55847	7.92725	34.6711	7.34395	4.35638	7.92725	34.8273	7.34228	3.48416	7.92725	34.7929
7.35312	15.3151	7.93445	35.3607	7.3477	2.42626	7.93445	34.5674	7.35292	5.6821	7.93445	34.6714	7.35062	4.42585	7.93445	34.8118	7.34895	3.55776	7.93445	34.7733
7.35978	15.6067	7.94165	35.4015	7.35437	2.45889	7.94165	34.5661	7.35958	5.81393	7.94165	34.6694	7.35728	4.49333	7.94165	34.8003	7.35562	3.62848	7.94165	34.7516
7.36645	15.9024	7.94885	35.4453	7.36103	2.49341	7.94885	34.5605	7.36625	5.95485	7.94885	34.6676	7.36395	4.55856	7.94885	34.7959	7.36228	3.69623	7.94885	34.7317
7.37312	16.2025	7.95605	35.4904	7.3677	2.53019	7.95605	34.553	7.37292	6.10383	7.95605	34.6675	7.37062	4.62393	7.95605	34.7999	7.36895	3.76088	7.95605	34.7172
7.37978	16.5051	7.96325	35.5347	7.37437	2.57117	7.96325	34.5449	7.37958	6.26007	7.96325	34.6701	7.37728	4.69134	7.96325	34.812	7.37562	3.82334	7.96325	34.7105
7.38645	16.8101	7.97045	35.5771	7.38103	2.61778	7.97045	34.5368	7.38625	6.42259	7.97045	34.6764	7.38395	4.76249	7.97045	34.8314	7.38228	3.88326	7.97045	34.7124
7.39312	17.116	7.97765	35.6171	7.3877	2.67052	7.97765	34.5291	7.39292	6.58979	7.97765	34.6875	7.39062	4.83912	7.97765	34.8567	7.38895	3.9416	7.97765	34.7228
7.39978	17.422	7.98485	35.6554	7.39437	2.73038	7.98485	34.5217	7.39958	6.75908	7.98485	34.7038	7.39728	4.92228	7.98485	34.8857	7.39562	3.99947	7.98485	34.7405
7.40645	17.7262	7.99205	35.6935	7.40103	2.79852	7.99205	34.5139	7.40625	6.92952	7.99205	34.7235	7.40395	5.01136	7.99205	34.9151	7.40228	4.05847	7.99205	34.7639
7.41312	18.0275	7.99925	35.7327	7.4077	2.8753	7.99925	34.5042	7.41292	7.10146	7.99925	34.744	7.41062	5.10477	7.99925	34.9415	7.40895	4.11887	7.99925	34.7908
7.41978	18.3269	8.00645	35.7738	7.41437	2.95962	8.00645	34.4917	7.41958	7.27487	8.00645	34.7625	7.41728	5.20147	8.00645	34.9622	7.41562	4.18056	8.00645	34.8183
7.42645	18.626	8.01365	35.8165	7.42103	3.04928	8.01365	34.4772	7.42625	7.44914	8.01365	34.7775	7.42395	5.30247	8.01365	34.9769	7.42228	4.24436	8.01365	34.843
7.43312	18.9278	8.02085	35.8592	7.4277	3.14457	8.02085	34.4629	7.43292	7.6232	8.02085	34.7882	7.43062	5.40787	8.02085	34.9866	7.42895	4.31269	8.02085	34.8623
7.43978	19.2346	8.02805	35.899	7.43437	3.24608	8.02805	34.4517	7.43958	7.79653	8.02805	34.7939	7.43728	5.51784	8.02805	34.9929	7.43562	4.38726	8.02805	34.8746
7.44645	19.5484	8.03525	35.9333	7.44103	3.35465	8.03525	34.4457	7.44625	7.96945	8.03525	34.7944	7.44395	5.63285	8.03525	34.9973	7.44228	4.46872	8.03525	34.8797
7.45312	19.8703	8.04245	35.96	7.4477	3.46825	8.04245	34.4464	7.45292	8.14226	8.04245	34.7912	7.45062	5.75497	8.04245	35.0008	7.44895	4.55756	8.04245	34.8786
7.45978	20.1992	8.04965	35.9785	7.45437	3.58493	8.04965	34.4552	7.45958	8.31508	8.04965	34.7874	7.45728	5.88572	8.04965	35.0049	7.45562	4.65392	8.04965	34.8732
7.46645	20.5342	8.05685	35.9902	7.46103	3.70404	8.05685	34.4733	7.46625	8.48781	8.05685	34.7872	7.46395	6.02362	8.05685	35.0113	7.46228	4.75778	8.05685	34.8662
7.47312	20.8728	8.06405	35.9981	7.4677	3.82441	8.06405	34.5008	7.47292	8.66096	8.06405	34.7941	7.47062	6.16731	8.06405	35.021	7.46895	4.86659	8.06405	34.861
7.47978	21.2137	8.07125	36.0064	7.47437	3.94334	8.07125	34.5361	7.47958	8.83571	8.07125	34.8098	7.47728	6.31649	8.07125	35.0338	7.47562	4.97825	8.07125	34.861
7.48645	21.5569	8.07845	36.02	7.48103	4.05753	8.07845	34.5758	7.48625	9.01202	8.07845	34.8347	7.48395	6.47298	8.07845	35.0489	7.48228	5.09133	8.07845	34.8685
7.49312	21.9036	8.08565	36.0437	7.4877	4.16647	8.08565	34.6173	7.49292	9.18932	8.08565	34.8689	7.49062	6.63705	8.08565	35.0659	7.48895	5.20629	8.08565	34.8836
7.49978	22.2539	8.09285	36.0807	7.49437	4.27043	8.09285	34.6588	7.49958	9.36735	8.09285	34.9117	7.49728	6.80741	8.09285	35.0852	7.49562	5.32243	8.09285	34.9048
7.50645	22.6078	8.10005	36.1325	7.50103	4.36934	8.10005	34.6995	7.50625	9.54694	8.10005	34.9614	7.50395	6.98269	8.10005	35.1073	7.50228	5.43915	8.10005	34.9296
7.51312	22.9653	8.10725	36.1988	7.5077	4.46253	8.10725	34.7382	7.51292	9.72917	8.10725	35.0148	7.51062	7.16233	8.10725	35.1323	7.50895	5.55693	8.10725	34.9551
7.51978	23.3271	8.11445	36.2776	7.51437	4.55073	8.11445	34.7729	7.51958	9.91387	8.11445	35.0679	7.51728	7.34596	8.11445	35.1596	7.51562	5.67722	8.11445	34.978
7.52645	23.6925	8.12165	36.3657	7.52103	4.63481	8.12165	34.8009	7.52625	10.1001	8.12165	35.1171	7.52395	7.53131	8.12165	35.189	7.52228	5.80003	8.12165	34.9957
7.53312	24.0603	8.12885	36.4591	7.5277	4.71494	8.12885	34.8204	7.53292	10.2867	8.12885	35.1595	7.53062	7.71593	8.12885	35.2205	7.52895	5.92396	8.12885	35.0067
7.53978	24.4292	8.13605	36.5533	7.53437	4.79049	8.13605	34.8306	7.53958	10.4729	8.13605	35.1934	7.53728	7.89935	8.13605	35.254	7.53562	6.04704	8.13605	35.0117
7.54645	24.7983	8.14325	36.6445	7.54103	4.86208	8.14325	34.8309	7.54625	10.658	8.14325	35.2176	7.54395	8.08228	8.14325	35.2894	7.54228	6.16807	8.14325	35.0128
7.55312	25.1677	8.15045	36.7304	7.5477	4.93207	8.15045	34.8209	7.55292	10.8405	8.15045	35.2326	7.55062	8.26454	8.15045	35.3258	7.54895	6.28646	8.15045	35.0129
7.55978	25.5357	8.15765	36.8101	7.55437	5.00269	8.15765	34.8004	7.55958	11.0193	8.15765	35.2404	7.55728	8.44486	8.15765	35.3629	7.55562	6.40162	8.15765	35.0144
7.56645	25.9015	8.16485	36.8844	7.56103	5.07483	8.16485	34.7713	7.56625	11.1947	8.16485	35.2445	7.56395	8.62288	8.16485	35.4007	7.56228	6.51334	8.16485	35.0194
7.57312	26.266	8.17205	36.9557	7.5677	5.14971	8.17205	34.7378	7.57292	11.3674	8.17205	35.2494	7.57062	8.7999	8.17205	35.4389	7.56895	6.62131	8.17205	35.0301
7.57978	26.6307	8.17925	37.028	7.57437	5.22928	8.17925	34.7055	7.57958	11.5381	8.17925	35.2587	7.57728	8.97686	8.17925	35.4763	7.57562	6.72848	8.17925	35.0476
7.58645	26.998	8.18645	37.1055	7.58103	5.31548	8.18645	34.6791	7.58625	11.7081	8.18645	35.2752	7.58395	9.15488	8.18645	35.5115	7.58228	6.83753	8.18645	35.0715
7.59312	27.3678	8.19365	37.1917	7.5877	5.40801	8.19365	34.6623	7.59292	11.8787	8.19365	35.3002	7.59062	9.33479	8.19365	35.543	7.58895	6.94987	8.19365	35.0993
7.59978	27.7421	8.20085	37.2884	7.59437	5.50492	8.20085	34.6578	7.59958	12.0508	8.20085	35.3334	7.59728	9.51781	8.20085	35.5696	7.59562	7.06526	8.20085	35.1276
7.60645	28.1212	8.20805	37.395	7.60103	5.6045	8.20805	34.6671	7.60625	12.2238	8.20805	35.3724	7.60395	9.70498	8.20805	35.5904	7.60228	7.18429	8.20805	35.1529
7.61312	28.5056	8.21525	37.5097	7.6077	5.70531	8.21525	34.6904	7.61292	12.3979	8.21525	35.4132	7.61062	9.89486	8.21525	35.6052	7.60895	7.30905	8.21525	35.1725
7.61978	28.8962	8.22245	37.6292	7.61437	5.80698	8.22245	34.7257	7.61958	12.5734	8.22245	35.4511	7.61728	10.0856	8.22245	35.6146	7.61562	7.43877	8.22245	35.1842
7.62645	29.293	8.22965	37.7495	7.62103	5.90965	8.22965	34.7694	7.62625	12.7504	8.22965	35.4819	7.62395	10.2761	8.22965	35.6206	7.62228	7.57162	8.22965	35.1865
7.63312	29.6968	8.23685	37.8666	7.6277	6.0129	8.23685	34.8174	7.63292	12.9282	8.23685	35.5033	7.63062	10.4669	8.23685	35.6261	7.62895	7.70561	8.23685	35.1793
7.63978	30.1065	8.24405	37.9772	7.63437	6.11767	8.24405	34.8673	7.63958	13.1057	8.24405	35.5141	7.63728	10.6577	8.24405	35.6335	7.63562	7.84	8.24405	35.1636
7.64645	30.5235	8.25125	38.0803	7.64103	6.22578	8.25125	34.9176	7.64625	13.2817	8.25125	35.5149	7.64395	10.8462	8.25125	35.6443	7.64228	7.97539	8.25125	35.1425
7.65312	30.9475	8.25845	38.1768	7.6477	6.34063	8.25845	34.9674	7.65292	13.4556	8.25845	35.5082	7.65062	11.0321	8.25845	35.6585	7.64895	8.11157	8.25845	35.1203
7.65978	31.3772	8.26565	38.2687	7.65437	6.46466	8.26565	35.0157	7.65958	13.6273	8.26565	35.4984	7.65728	11.2159	8.26565	35.675	7.65562	8.24889	8.26565	35.1018
7.66645	31.8102	8.27285	38.3577	7.66103	6.59779	8.27285	35.0614	7.66625	13.7962	8.27285	35.491	7.66395	11.3985	8.27285	35.6921	7.66228	8.38751	8.27285	35.0913
7.67312	32.2459	8.28005	38.4457	7.6677	6.74067	8.28005	35.1043	7.67292	13.9618	8.28005	35.4911	7.67062	11.5777	8.28005	35.7078	7.66895	8.52787	8.28005	35.0918
7.67978	32.6843	8.28725	38.5343	7.67437	6.89287	8.28725	35.1451	7.67958	14.1244	8.28725	35.5024	7.67728	11.7531	8.28725	35.7201	7.67562	8.67014	8.28725	35.1043
7.68645	33.1258	8.29445	38.6243	7.68103	7.05443	8.29445	35.1841	7.68625	14.2849	8.29445	35.5268	7.68395	11.9256	8.29445	35.7282	7.68228	8.81349	8.29445	35.1285
7.69312	33.5704	8.30165	38.7148	7.6877	7.22289	8.30165	35.2206	7.69292	14.4452	8.30165	35.5647	7.69062	12.0961	8.30165	35.7326	7.68895	8.95772	8.30165	35.1622
7.69978	34.0182	8.30885	38.8036	7.69437	7.39653	8.30885	35.2532	7.69958	14.6056	8.30885	35.6147	7.69728	12.2651	8.30885	35.7362	7.69562	9.10334	8.30885	35.2019
7.70645	34.4693	8.31605	38.8882	7.70103	7.57461	8.31605	35.2805	7.70625	14.767	8.31605	35.6739	7.70395	12.4328	8.31605	35.743	7.70228	9.25178	8.31605	35.2427
7.71312	34.9238	8.32325	38.9674	7.7077	7.75618	8.32325	35.3023	7.71292	14.9293	8.32325	35.7387	7.71062	12.6011	8.32325	35.7578	7.70895	9.40466	8.32325	35.2794
7.71978	35.3817	8.33045	39.0412	7.71437	7.9411	8.33045	35.3194	7.71958	15.0934	8.33045	35.8055	7.71728	12.7716	8.33045	35.7842	7.71562	9.56399	8.33045	35.3077
7.72645	35.8433	8.33765	39.1102	7.72103	8.12876	8.33765	35.3322	7.72625	15.2611	8.33765	35.871	7.72395	12.945	8.33765	35.8242	7.72228	9.73062	8.33765	35.3253
7.73312	36.307	8.34485	39.175	7.7277	8.32022	8.34485	35.3406	7.73292	15.4343	8.34485	35.9329	7.73062	13.12	8.34485	35.878	7.72895	9.90354	8.34485	35.3323
7.73978	36.7725	8.35205	39.2368	7.73437	8.51534	8.35205	35.3441	7.73958	15.6157	8.35205	35.989	7.73728	13.2969	8.35205	35.9437	7.73562	10.0801	8.35205	35.331
7.74645	37.2394	8.35925	39.2977	7.74103	8.71496	8.35925	35.3434	7.74625	15.8058	8.35925	36.0379	7.74395	13.4755	8.35925	36.0172	7.74228	10.2585	8.35925	35.3253
7.75312	37.7062	8.36645	39.3598	7.7477	8.91916	8.36645	35.3404	7.75292	16.0052	8.36645	36.0793	7.75062	13.6554	8.36645	36.0927	7.74895	10.4383	8.36645	35.32
7.75978	38.1705	8.37365	39.4236	7.75437	9.12721	8.37365	35.3372	7.75958	16.2139	8.37365	36.1142	7.75728	13.8355	8.37365	36.164	7.75562	10.6179	8.37365	35.3199
7.76645	38.6303	8.38085	39.4878	7.76103	9.3394	8.38085	35.3359	7.76625	16.4322	8.38085	36.1449	7.76395	14.015	8.38085	36.2263	7.76228	10.7946	8.38085	35.3297
7.77312	39.087	8.38805	39.5505	7.7677	9.55653	8.38805	35.3381	7.77292	16.6601	8.38805	36.1742	7.77062	14.1943	8.38805	36.2779	7.76895	10.9666	8.38805	35.3528
7.77978	39.542	8.39525	39.6107	7.77437	9.77964	8.39525	35.346	7.77958	16.8957	8.39525	36.2046	7.77728	14.3738	8.39525	36.3194	7.77562	11.1337	8.39525	35.391
7.78645	39.9953	8.40245	39.6688	7.78103	10.0067	8.40245	35.3618	7.78625	17.1376	8.40245	36.2384	7.78395	14.5538	8.40245	36.3541	7.78228	11.2958	8.40245	35.4438
7.79312	40.4487	8.40965	39.7253	7.7877	10.2351	8.40965	35.387	7.79292	17.3855	8.40965	36.2776	7.79062	14.7344	8.40965	36.3862	7.78895	11.4517	8.40965	35.5083
7.79978	40.9031	8.41685	39.7806	7.79437	10.4633	8.41685	35.4212	7.79958	17.6381	8.41685	36.3234	7.79728	14.9154	8.41685	36.4211	7.79562	11.5994	8.41685	35.5803
7.80645	41.3574	8.42405	39.835	7.80103	10.6902	8.42405	35.4626	7.80625	17.8934	8.42405	36.376	7.80395	15.0976	8.42405	36.4636	7.80228	11.7395	8.42405	35.6546
7.81312	41.809	8.43125	39.8893	7.8077	10.9134	8.43125	35.5079	7.81292	18.1481	8.43125	36.4344	7.81062	15.2815	8.43125	36.5174	7.80895	11.8739	8.43125	35.726
7.81978	42.2548	8.43845	39.9442	7.81437	11.1291	8.43845	35.5538	7.81958	18.4008	8.43845	36.497	7.81728	15.4675	8.43845	36.5838	7.81562	12.0058	8.43845	35.7897
7.82645	42.6951	8.44565	39.9996	7.82103	11.3363	8.44565	35.5965	7.82625	18.6516	8.44565	36.5617	7.82395	15.6568	8.44565	36.6612	7.82228	12.1363	8.44565	35.8418
7.83312	43.1291	8.45285	40.0534	7.8277	11.5361	8.45285	35.6326	7.83292	18.9015	8.45285	36.6268	7.83062	15.8501	8.45285	36.7466	7.82895	12.2653	8.45285	35.8797
7.83978	43.5585	8.46005	40.1024	7.83437	11.7289	8.46005	35.6599	7.83958	19.1516	8.46005	36.6914	7.83728	16.0485	8.46005	36.837	7.83562	12.3938	8.46005	35.9031
7.84645	43.9854	8.46725	40.1446	7.84103	11.9154	8.46725	35.6782	7.84625	19.4023	8.46725	36.7559	7.84395	16.2526	8.46725	36.9301	7.84228	12.5232	8.46725	35.914
7.85312	44.4128	8.47445	40.1791	7.8477	12.0964	8.47445	35.6889	7.85292	19.6547	8.47445	36.8214	7.85062	16.4646	8.47445	37.0249	7.84895	12.6547	8.47445	35.9161
7.85978	44.8424	8.48165	40.2069	7.85437	12.2732	8.48165	35.6945	7.85958	19.9091	8.48165	36.8891	7.85728	16.6866	8.48165	37.1212	7.85562	12.7877	8.48165	35.914
7.86645	45.2752	8.48885	40.2302	7.86103	12.4466	8.48885	35.6969	7.86625	20.1648	8.48885	36.9601	7.86395	16.9188	8.48885	37.22	7.86228	12.9231	8.48885	35.9121
7.87312	45.7131	8.49605	40.252	7.8677	12.6183	8.49605	35.6975	7.87292	20.4209	8.49605	37.0348	7.87062	17.1614	8.49605	37.3225	7.86895	13.0636	8.49605	35.9143
7.87978	46.1578	8.50325	40.2764	7.87437	12.791	8.50325	35.6968	7.87958	20.6747	8.50325	37.1133	7.87728	17.4144	8.50325	37.4304	7.87562	13.2116	8.50325	35.9233
7.88645	46.6099	8.51045	40.3074	7.88103	12.9653	8.51045	35.6943	7.88625	20.9257	8.51045	37.1962	7.88395	17.6777	8.51045	37.5443	7.88228	13.3672	8.51045	35.9407
7.89312	47.0685	8.51765	40.3485	7.8877	13.1416	8.51765	35.6887	7.89292	21.1743	8.51765	37.2844	7.89062	17.9503	8.51765	37.664	7.88895	13.5292	8.51765	35.9661
7.89978	47.532	8.52485	40.4014	7.89437	13.3197	8.52485	35.6785	7.89958	21.4205	8.52485	37.378	7.89728	18.2295	8.52485	37.7882	7.89562	13.6966	8.52485	35.9971
7.90645	47.9986	8.53205	40.4661	7.90103	13.5004	8.53205	35.6628	7.90625	21.6642	8.53205	37.4761	7.90395	18.5133	8.53205	37.9144	7.90228	13.8698	8.53205	36.0307
7.91312	48.4661	8.53925	40.5422	7.9077	13.6826	8.53925	35.6427	7.91292	21.9055	8.53925	37.5772	7.91062	18.8004	8.53925	38.0397	7.90895	14.0504	8.53925	36.0636
7.91978	48.9321	8.54645	40.6291	7.91437	13.8648	8.54645	35.6206	7.91958	22.1468	8.54645	37.6804	7.91728	19.0896	8.54645	38.1602	7.91562	14.239	8.54645	36.0935
7.92645	49.395	8.55365	40.7264	7.92103	14.0468	8.55365	35.6005	7.92625	22.3899	8.55365	37.7848	7.92395	19.381	8.55365	38.2727	7.92228	14.4353	8.55365	36.1186
7.93312	49.8538	8.56085	40.8344	7.9277	14.2282	8.56085	35.5867	7.93292	22.6348	8.56085	37.889	7.93062	19.6742	8.56085	38.3747	7.92895	14.6388	8.56085	36.1375
7.93978	50.3101	8.56805	40.9542	7.93437	14.4086	8.56805	35.5831	7.93958	22.8814	8.56805	37.9901	7.93728	19.9681	8.56805	38.4653	7.93562	14.8501	8.56805	36.149
7.94645	50.765	8.57525	41.0878	7.94103	14.5875	8.57525	35.5928	7.94625	23.1309	8.57525	38.0846	7.94395	20.2603	8.57525	38.5447	7.94228	15.0672	8.57525	36.1537
7.95312	51.2204	8.58245	41.2374	7.9477	14.7659	8.58245	35.6172	7.95292	23.3843	8.58245	38.1698	7.95062	20.5496	8.58245	38.6131	7.94895	15.2859	8.58245	36.1536
7.95978	51.6778	8.58965	41.4051	7.95437	14.9445	8.58965	35.6557	7.95958	23.6406	8.58965	38.2452	7.95728	20.8361	8.58965	38.6715	7.95562	15.5036	8.58965	36.1526
7.96645	52.1372	8.59686	41.592	7.96103	15.1222	8.59686	35.7058	7.96625	23.8981	8.59686	38.3119	7.96395	21.1216	8.59686	38.721	7.96228	15.7199	8.59686	36.1538
7.97312	52.5983	8.60406	41.7982	7.9677	15.2977	8.60406	35.7648	7.97292	24.1578	8.60406	38.3717	7.97062	21.407	8.60406	38.7641	7.96895	15.9361	8.60406	36.16
7.97978	53.06	8.61126	42.0226	7.97437	15.4704	8.61126	35.8303	7.97958	24.4209	8.61126	38.4267	7.97728	21.6931	8.61126	38.8034	7.97562	16.1516	8.61126	36.1732
7.98645	53.5209	8.61846	42.2636	7.98103	15.6395	8.61846	35.9003	7.98625	24.6885	8.61846	38.4796	7.98395	21.9814	8.61846	38.8409	7.98228	16.3655	8.61846	36.1961
7.99312	53.9801	8.62566	42.5191	7.9877	15.804	8.62566	35.9732	7.99292	24.9611	8.62566	38.5332	7.99062	22.2736	8.62566	38.8778	7.98895	16.5784	8.62566	36.2302
7.99978	54.4369	8.63286	42.788	7.99437	15.9624	8.63286	36.0467	7.99958	25.2405	8.63286	38.5903	7.99728	22.5699	8.63286	38.9147	7.99562	16.7915	8.63286	36.275
8.00645	54.892	8.64006	43.0708	8.00103	16.1161	8.64006	36.1192	8.00625	25.5275	8.64006	38.6524	8.00395	22.8675	8.64006	38.9524	8.00228	17.0053	8.64006	36.327
8.01312	55.3469	8.64726	43.3693	8.0077	16.2671	8.64726	36.1895	8.01292	25.8219	8.64726	38.7193	8.01062	23.1657	8.64726	38.9921	8.00895	17.2191	8.64726	36.3807
8.01978	55.803	8.65446	43.6866	8.01437	16.4172	8.65446	36.2573	8.01958	26.1231	8.65446	38.7887	8.01728	23.4653	8.65446	39.0346	8.01562	17.4329	8.65446	36.4313
8.02645	56.262	8.66166	44.0268	8.02103	16.5673	8.66166	36.3226	8.02625	26.4299	8.66166	38.8579	8.02395	23.7681	8.66166	39.0802	8.02228	17.6474	8.66166	36.4756
8.03312	56.7247	8.66886	44.3944	8.0277	16.7192	8.66886	36.3856	8.03292	26.7423	8.66886	38.9241	8.03062	24.0739	8.66886	39.1286	8.02895	17.863	8.66886	36.5117
8.03978	57.1923	8.67606	44.7935	8.03437	16.8743	8.67606	36.4475	8.03958	27.0594	8.67606	38.9844	8.03728	24.3823	8.67606	39.1796	8.03562	18.0794	8.67606	36.5387
8.04645	57.6644	8.68326	45.2269	8.04103	17.0327	8.68326	36.5107	8.04625	27.3816	8.68326	39.0361	8.04395	24.6942	8.68326	39.2332	8.04228	18.2965	8.68326	36.557
8.05312	58.1414	8.69046	45.6953	8.0477	17.194	8.69046	36.5787	8.05292	27.7093	8.69046	39.0776	8.05062	25.0097	8.69046	39.2889	8.04895	18.515	8.69046	36.5679
8.05978	58.6241	8.69766	46.1966	8.05437	17.3594	8.69766	36.655	8.05958	28.0422	8.69766	39.1081	8.05728	25.3293	8.69766	39.3456	8.05562	18.7375	8.69766	36.5745
8.06645	59.1152	8.70486	46.7272	8.06103	17.5311	8.70486	36.7413	8.06625	28.3798	8.70486	39.1289	8.06395	25.6535	8.70486	39.4012	8.06228	18.9659	8.70486	36.5798
8.07312	59.6155	8.71206	47.2827	8.0677	17.7092	8.71206	36.8374	8.07292	28.7207	8.71206	39.1418	8.07062	25.9827	8.71206	39.4534	8.06895	19.2021	8.71206	36.5854
8.07978	60.1258	8.71926	47.8592	8.07437	17.8923	8.71926	36.9417	8.07958	29.0642	8.71926	39.149	8.07728	26.3175	8.71926	39.5004	8.07562	19.4466	8.71926	36.5912
8.08645	60.6462	8.72646	48.4535	8.08103	18.0804	8.72646	37.0521	8.08625	29.4104	8.72646	39.1527	8.08395	26.6576	8.72646	39.5412	8.08228	19.6994	8.72646	36.5959
8.09312	61.1775	8.73366	49.0637	8.0877	18.2741	8.73366	37.1669	8.09292	29.7596	8.73366	39.1558	8.09062	27.0039	8.73366	39.5747	8.08895	19.959	8.73366	36.5982
8.09978	61.721	8.74086	49.6892	8.09437	18.473	8.74086	37.2844	8.09958	30.1126	8.74086	39.1619	8.09728	27.3563	8.74086	39.6	8.09562	20.2224	8.74086	36.5971
8.10645	62.2759	8.74806	50.3304	8.10103	18.6753	8.74806	37.4027	8.10625	30.4692	8.74806	39.1736	8.10395	27.7142	8.74806	39.6167	8.10228	20.4878	8.74806	36.5922
8.11312	62.8426	8.75526	50.9881	8.1077	18.8809	8.75526	37.5201	8.11292	30.8313	8.75526	39.1925	8.11062	28.078	8.75526	39.6254	8.10895	20.755	8.75526	36.5838
8.11978	63.4194	8.76246	51.6619	8.11437	19.0914	8.76246	37.636	8.11958	31.2	8.76246	39.2183	8.11728	28.4468	8.76246	39.628	8.11562	21.0243	8.76246	36.5732
8.12645	64.0059	8.76966	52.3501	8.12103	19.308	8.76966	37.7511	8.12625	31.5746	8.76966	39.2497	8.12395	28.8199	8.76966	39.627	8.12228	21.2962	8.76966	36.5632
8.13312	64.6024	8.77686	53.049	8.1277	19.5302	8.77686	37.8667	8.13292	31.9533	8.77686	39.2847	8.13062	29.1957	8.77686	39.6251	8.12895	21.5719	8.77686	36.5566
8.13978	65.2081	8.78406	53.7525	8.13437	19.7581	8.78406	37.9835	8.13958	32.3356	8.78406	39.3207	8.13728	29.5721	8.78406	39.6246	8.13562	21.8509	8.78406	36.5561
8.14645	65.8218	8.79126	54.4534	8.14103	19.9922	8.79126	38.1011	8.14625	32.7224	8.79126	39.3545	8.14395	29.9474	8.79126	39.6267	8.14228	22.1319	8.79126	36.5629
8.15312	66.4426	8.79846	55.1431	8.1477	20.2319	8.79846	38.2182	8.15292	33.113	8.79846	39.3829	8.15062	30.3193	8.79846	39.6323	8.14895	22.4128	8.79846	36.5775
8.15978	67.0726	8.80566	55.8142	8.15437	20.4768	8.80566	38.3337	8.15958	33.506	8.80566	39.4037	8.15728	30.6881	8.80566	39.6406	8.15562	22.6924	8.80566	36.5998
8.16645	67.7138	8.81286	56.461	8.16103	20.7258	8.81286	38.4469	8.16625	33.9011	8.81286	39.4157	8.16395	31.0538	8.81286	39.6502	8.16228	22.9695	8.81286	36.6289
8.17312	68.3645	8.82006	57.0804	8.1677	20.9791	8.82006	38.558	8.17292	34.2976	8.82006	39.4195	8.17062	31.4151	8.82006	39.659	8.16895	23.2426	8.82006	36.663
8.17978	69.0233	8.82726	57.6722	8.17437	21.2363	8.82726	38.6666	8.17958	34.6934	8.82726	39.4165	8.17728	31.7726	8.82726	39.6641	8.17562	23.5121	8.82726	36.7
8.18645	69.6895	8.83446	58.2375	8.18103	21.4985	8.83446	38.772	8.18625	35.0866	8.83446	39.4093	8.18395	32.1281	8.83446	39.6634	8.18228	23.7789	8.83446	36.7386
8.19312	70.363	8.84166	58.7779	8.1877	21.7671	8.84166	38.8732	8.19292	35.4769	8.84166	39.401	8.19062	32.4832	8.84166	39.6554	8.18895	24.0431	8.84166	36.7782
8.19978	71.0429	8.84886	59.2954	8.19437	22.0425	8.84886	38.9698	8.19958	35.8651	8.84886	39.3943	8.19728	32.8368	8.84886	39.6406	8.19562	24.3027	8.84886	36.8187
8.20645	71.727	8.85606	59.7916	8.20103	22.3242	8.85606	39.0624	8.20625	36.2509	8.85606	39.3918	8.20395	33.1878	8.85606	39.6214	8.20228	24.5567	8.85606	36.8601
8.21312	72.415	8.86326	60.2673	8.2077	22.6129	8.86326	39.1523	8.21292	36.6352	8.86326	39.3955	8.21062	33.5381	8.86326	39.601	8.20895	24.8065	8.86326	36.9023
8.21978	73.1073	8.87046	60.7215	8.21437	22.9086	8.87046	39.2405	8.21958	37.0175	8.87046	39.4071	8.21728	33.8889	8.87046	39.5824	8.21562	25.0547	8.87046	36.9457
8.22645	73.8043	8.87766	61.1507	8.22103	23.2106	8.87766	39.3263	8.22625	37.3974	8.87766	39.4275	8.22395	34.2387	8.87766	39.569	8.22228	25.303	8.87766	36.9911
8.23312	74.505	8.88486	61.5492	8.2277	23.516	8.88486	39.4084	8.23292	37.7743	8.88486	39.4567	8.23062	34.5859	8.88486	39.5637	8.22895	25.5522	8.88486	37.0392
8.23978	75.2071	8.89206	61.911	8.23437	23.8238	8.89206	39.4853	8.23958	38.1478	8.89206	39.4928	8.23728	34.9318	8.89206	39.5699	8.23562	25.8043	8.89206	37.0891
8.24645	75.9088	8.89926	62.2315	8.24103	24.1337	8.89926	39.5568	8.24625	38.5174	8.89926	39.5338	8.24395	35.2778	8.89926	39.5904	8.24228	26.0608	8.89926	37.1391
8.25312	76.6094	8.90646	62.5073	8.2477	24.4439	8.90646	39.6228	8.25292	38.8825	8.90646	39.578	8.25062	35.6226	8.90646	39.6273	8.24895	26.3219	8.90646	37.187
8.25978	77.3075	8.91366	62.7368	8.25437	24.7522	8.91366	39.6831	8.25958	39.2434	8.91366	39.6248	8.25728	35.9645	8.91366	39.6812	8.25562	26.5857	8.91366	37.2313
8.26645	78.002	8.92086	62.9194	8.26103	25.0577	8.92086	39.7366	8.26625	39.5996	8.92086	39.6743	8.26395	36.3024	8.92086	39.7513	8.26228	26.8509	8.92086	37.2705
8.27312	78.6921	8.92806	63.0564	8.2677	25.3615	8.92806	39.7827	8.27292	39.9501	8.92806	39.7266	8.27062	36.636	8.92806	39.8353	8.26895	27.1164	8.92806	37.3025
8.27978	79.3763	8.93526	63.151	8.27437	25.6646	8.93526	39.8216	8.27958	40.295	8.93526	39.7821	8.27728	36.9628	8.93526	39.9297	8.27562	27.3811	8.93526	37.3252
8.28645	80.0532	8.94246	63.2077	8.28103	25.968	8.94246	39.8541	8.28625	40.6351	8.94246	39.8414	8.28395	37.2818	8.94246	40.0298	8.28228	27.6428	8.94246	37.3378
8.29312	80.7209	8.94966	63.2308	8.2877	26.2724	8.94966	39.8809	8.29292	40.9699	8.94966	39.9061	8.29062	37.5933	8.94966	40.1305	8.28895	27.8983	8.94966	37.3422
8.29978	81.377	8.95686	63.2232	8.29437	26.5785	8.95686	39.9009	8.29958	41.2993	8.95686	39.9774	8.29728	37.8982	8.95686	40.2272	8.29562	28.1452	8.95686	37.3427
8.30645	82.0176	8.96406	63.1865	8.30103	26.8848	8.96406	39.9118	8.30625	41.6235	8.96406	40.0558	8.30395	38.1965	8.96406	40.3173	8.30228	28.3815	8.96406	37.3442
8.31312	82.6392	8.97126	63.1215	8.3077	27.1887	8.97126	39.9111	8.31292	41.943	8.97126	40.1408	8.31062	38.488	8.97126	40.4002	8.30895	28.607	8.97126	37.3512
8.31978	83.2406	8.97846	63.0289	8.31437	27.488	8.97846	39.8978	8.31958	42.2577	8.97846	40.2318	8.31728	38.7753	8.97846	40.4783	8.31562	28.8225	8.97846	37.3678
8.32645	83.8205	8.98566	62.9096	8.32103	27.7812	8.98566	39.8728	8.32625	42.567	8.98566	40.3284	8.32395	39.0593	8.98566	40.5566	8.32228	29.0301	8.98566	37.3976
8.33312	84.377	8.99286	62.7642	8.3277	28.0674	8.99286	39.8384	8.33292	42.8724	8.99286	40.4309	8.33062	39.3405	8.99286	40.6414	8.32895	29.2327	8.99286	37.4435
8.33978	84.9091	9.00006	62.5943	8.33437	28.3466	9.00006	39.7977	8.33958	43.1743	9.00006	40.5397	8.33728	39.6195	9.00006	40.7397	8.33562	29.4327	9.00006	37.5063
8.34645	85.4162	9.00726	62.4021	8.34103	28.6192	9.00726	39.7542	8.34625	43.4739	9.00726	40.6559	8.34395	39.8981	9.00726	40.8578	8.34228	29.6319	9.00726	37.5839
8.35312	85.8983	9.01446	62.1909	8.3477	28.8862	9.01446	39.7113	8.35292	43.7715	9.01446	40.7812	8.35062	40.1769	9.01446	41.001	8.34895	29.8309	9.01446	37.6713
8.35978	86.3535	9.02166	61.9638	8.35437	29.1478	9.02166	39.6723	8.35958	44.0677	9.02166	40.9183	8.35728	40.4555	9.02166	41.1728	8.35562	30.029	9.02166	37.7631
8.36645	86.7807	9.02886	61.7233	8.36103	29.4039	9.02886	39.6392	8.36625	44.3637	9.02886	41.0705	8.36395	40.7347	9.02886	41.3751	8.36228	30.2256	9.02886	37.8547
8.37312	87.179	9.03606	61.4711	8.3677	29.6544	9.03606	39.6124	8.37292	44.6605	9.03606	41.241	8.37062	41.016	9.03606	41.6083	8.36895	30.4189	9.03606	37.9434
8.37978	87.548	9.04326	61.2084	8.37437	29.8974	9.04326	39.5905	8.37958	44.958	9.04326	41.4337	8.37728	41.2998	9.04326	41.872	8.37562	30.6086	9.04326	38.0279
8.38645	87.8866	9.05046	60.9363	8.38103	30.132	9.05046	39.5708	8.38625	45.2565	9.05046	41.6526	8.38395	41.5865	9.05046	42.1658	8.38228	30.7937	9.05046	38.108
8.39312	88.1937	9.05766	60.6551	8.3877	30.3571	9.05766	39.5502	8.39292	45.5571	9.05766	41.9026	8.39062	41.8777	9.05766	42.4896	8.38895	30.9755	9.05766	38.1852
8.39978	88.4695	9.06486	60.3652	8.39437	30.5721	9.06486	39.5264	8.39958	45.8618	9.06486	42.1873	8.39728	42.1757	9.06486	42.8433	8.39562	31.1555	9.06486	38.2626
8.40645	88.7147	9.07206	60.0667	8.40103	30.7752	9.07206	39.498	8.40625	46.1718	9.07206	42.5092	8.40395	42.4825	9.07206	43.2271	8.40228	31.3353	9.07206	38.3447
8.41312	88.9305	9.07926	59.7606	8.4077	30.9655	9.07926	39.4642	8.41292	46.4877	9.07926	42.8686	8.41062	42.799	9.07926	43.6402	8.40895	31.5166	9.07926	38.4352
8.41978	89.1162	9.08646	59.4476	8.41437	31.143	9.08646	39.4244	8.41958	46.8138	9.08646	43.2643	8.41728	43.127	9.08646	44.0814	8.41562	31.7002	9.08646	38.5359
8.42645	89.272	9.09366	59.1291	8.42103	31.308	9.09366	39.3778	8.42625	47.1535	9.09366	43.6938	8.42395	43.4677	9.09366	44.5485	8.42228	31.8866	9.09366	38.6464
8.43312	89.3997	9.10086	58.8059	8.4277	31.4614	9.10086	39.3244	8.43292	47.5083	9.10086	44.1533	8.43062	43.8232	9.10086	45.0384	8.42895	32.075	9.10086	38.7657
8.43978	89.5007	9.10806	58.4789	8.43437	31.6034	9.10806	39.2649	8.43958	47.8776	9.10806	44.6382	8.43728	44.194	9.10806	45.5481	8.43562	32.2664	9.10806	38.8934
8.44645	89.5754	9.11526	58.1487	8.44103	31.7363	9.11526	39.201	8.44625	48.261	9.11526	45.1448	8.44395	44.5781	9.11526	46.0741	8.44228	32.4627	9.11526	39.0297
8.45312	89.6232	9.12246	57.816	8.4477	31.8612	9.12246	39.1344	8.45292	48.658	9.12246	45.671	8.45062	44.9734	9.12246	46.614	8.44895	32.6653	9.12246	39.175
8.45978	89.6472	9.12966	57.4812	8.45437	31.9787	9.12966	39.0662	8.45958	49.0653	9.12966	46.2168	8.45728	45.379	9.12966	47.1662	8.45562	32.8742	9.12966	39.33
8.46645	89.6489	9.13686	57.1453	8.46103	32.0902	9.13686	38.9976	8.46625	49.4803	9.13686	46.783	8.46395	45.7949	9.13686	47.7309	8.46228	33.0902	9.13686	39.4956
8.47312	89.6289	9.14406	56.8094	8.4677	32.1963	9.14406	38.9299	8.47292	49.9012	9.14406	47.3708	8.47062	46.2203	9.14406	48.3098	8.46895	33.3144	9.14406	39.6732
8.47978	89.5879	9.15126	56.4743	8.47437	32.2983	9.15126	38.8647	8.47958	50.3269	9.15126	47.9805	8.47728	46.6544	9.15126	48.906	8.47562	33.5468	9.15126	39.8644
8.48645	89.5291	9.15846	56.1408	8.48103	32.3951	9.15846	38.8023	8.48625	50.7571	9.15846	48.6119	8.48395	47.098	9.15846	49.5226	8.48228	33.7852	9.15846	40.0699
8.49312	89.4559	9.16566	55.8095	8.4877	32.4867	9.16566	38.7417	8.49292	51.1912	9.16566	49.2628	8.49062	47.5523	9.16566	50.162	8.48895	34.0288	9.16566	40.2887
8.49978	89.37	9.17286	55.4807	8.49437	32.5744	9.17286	38.6808	8.49958	51.63	9.17286	49.9287	8.49728	48.0175	9.17286	50.8248	8.49562	34.2785	9.17286	40.5181
8.50645	89.2745	9.18006	55.1551	8.50103	32.6595	9.18006	38.6181	8.50625	52.0738	9.18006	50.6032	8.50395	48.4931	9.18006	51.5105	8.50228	34.5345	9.18006	40.7546
8.51312	89.1727	9.18726	54.8335	8.5077	32.7429	9.18726	38.553	8.51292	52.5226	9.18726	51.2798	8.51062	48.9785	9.18726	52.217	8.50895	34.7959	9.18726	40.9945
8.51978	89.0683	9.19446	54.5167	8.51437	32.8246	9.19446	38.4855	8.51958	52.9759	9.19446	51.9538	8.51728	49.4737	9.19446	52.9407	8.51562	35.0614	9.19446	41.235
8.52645	88.9636	9.20166	54.2056	8.52103	32.9064	9.20166	38.416	8.52625	53.4332	9.20166	52.6225	8.52395	49.98	9.20166	53.6761	8.52228	35.3309	9.20166	41.4743
8.53312	88.8616	9.20886	53.9006	8.5277	32.9909	9.20886	38.3453	8.53292	53.8942	9.20886	53.2844	8.53062	50.4974	9.20886	54.4157	8.52895	35.6043	9.20886	41.7105
8.53978	88.7652	9.21606	53.6017	8.53437	33.0801	9.21606	38.2746	8.53958	54.3564	9.21606	53.9386	8.53728	51.0238	9.21606	55.1516	8.53562	35.8809	9.21606	41.9417
8.54645	88.6776	9.22326	53.3083	8.54103	33.176	9.22326	38.2057	8.54625	54.8171	9.22326	54.5841	8.54395	51.556	9.22326	55.8769	8.54228	36.1602	9.22326	42.1663
8.55312	88.604	9.23046	53.0201	8.5477	33.2808	9.23046	38.1402	8.55292	55.2749	9.23046	55.2205	8.55062	52.0928	9.23046	56.5856	8.54895	36.4415	9.23046	42.3841
8.55978	88.5482	9.23766	52.7367	8.55437	33.3975	9.23766	38.0786	8.55958	55.7292	9.23766	55.8475	8.55728	52.6337	9.23766	57.2721	8.55562	36.725	9.23766	42.5959
8.56645	88.514	9.24486	52.4584	8.56103	33.5296	9.24486	38.0209	8.56625	56.1793	9.24486	56.4642	8.56395	53.1757	9.24486	57.9313	8.56228	37.0101	9.24486	42.8029
8.57312	88.5043	9.25206	52.186	8.5677	33.6794	9.25206	37.9665	8.57292	56.6231	9.25206	57.0679	8.57062	53.7146	9.25206	58.5594	8.56895	37.2955	9.25206	43.0052
8.57978	88.5221	9.25926	51.921	8.57437	33.8477	9.25926	37.915	8.57958	57.0612	9.25926	57.655	8.57728	54.2481	9.25926	59.1545	8.57562	37.5803	9.25926	43.2015
8.58645	88.5706	9.26646	51.6653	8.58103	34.0349	9.26646	37.8665	8.58625	57.4936	9.26646	58.2211	8.58395	54.7755	9.26646	59.7169	8.58228	37.8648	9.26646	43.3901
8.59312	88.6521	9.27366	51.4214	8.5877	34.2419	9.27366	37.8222	8.59292	57.9193	9.27366	58.7629	8.59062	55.2944	9.27366	60.2479	8.58895	38.1486	9.27366	43.5696
8.59978	88.7709	9.28086	51.191	8.59437	34.4697	9.28086	37.7832	8.59958	58.3352	9.28086	59.2781	8.59728	55.8012	9.28086	60.7485	8.59562	38.43	9.28086	43.7384
8.60645	88.9322	9.28806	50.9748	8.60103	34.7185	9.28806	37.751	8.60625	58.7375	9.28806	59.7656	8.60395	56.2939	9.28806	61.2191	8.60228	38.7067	9.28806	43.8945
8.61312	89.1411	9.29526	50.772	8.6077	34.988	9.29526	37.7266	8.61292	59.125	9.29526	60.2234	8.61062	56.7722	9.29526	61.6603	8.60895	38.9788	9.29526	44.0349
8.61978	89.402	9.30246	50.5807	8.61437	35.279	9.30246	37.7108	8.61958	59.495	9.30246	60.6489	8.61728	57.2352	9.30246	62.0719	8.61562	39.2466	9.30246	44.1574
8.62645	89.7169	9.30966	50.3983	8.62103	35.5913	9.30966	37.7039	8.62625	59.8457	9.30966	61.0388	8.62395	57.6803	9.30966	62.4527	8.62228	39.5097	9.30966	44.2617
8.63312	90.0882	9.31686	50.2223	8.6277	35.9247	9.31686	37.7054	8.63292	60.1759	9.31686	61.3903	8.63062	58.1052	9.31686	62.8	8.62895	39.767	9.31686	44.3499
8.63978	90.5195	9.32406	50.0508	8.63437	36.2786	9.32406	37.7137	8.63958	60.4866	9.32406	61.7017	8.63728	58.5108	9.32406	63.1108	8.63562	40.0173	9.32406	44.4258
8.64645	91.0138	9.33126	49.8826	8.64103	36.652	9.33126	37.7262	8.64625	60.7778	9.33126	61.9721	8.64395	58.8979	9.33126	63.3824	8.64228	40.2606	9.33126	44.4927
8.65312	91.5735	9.33846	49.7179	8.6477	37.0456	9.33846	37.7399	8.65292	61.0481	9.33846	62.2007	8.65062	59.2669	9.33846	63.6142	8.64895	40.496	9.33846	44.5532
8.65978	92.2014	9.34566	49.5583	8.65437	37.4598	9.34566	37.7521	8.65958	61.298	9.34566	62.3864	8.65728	59.6176	9.34566	63.8063	8.65562	40.7223	9.34566	44.6084
8.66645	92.9018	9.35286	49.4071	8.66103	37.8964	9.35286	37.7607	8.66625	61.5291	9.35286	62.5294	8.66395	59.9515	9.35286	63.9594	8.66228	40.9364	9.35286	44.6584
8.67312	93.6789	9.36006	49.2681	8.6677	38.3578	9.36006	37.7645	8.67292	61.7421	9.36006	62.6313	8.67062	60.2694	9.36006	64.0743	8.66895	41.1363	9.36006	44.7025
8.67978	94.5342	9.36726	49.1445	8.67437	38.8455	9.36726	37.7631	8.67958	61.9362	9.36726	62.6949	8.67728	60.5709	9.36726	64.1518	8.67562	41.3224	9.36726	44.7383
8.68645	95.4692	9.37446	49.0381	8.68103	39.3622	9.37446	37.7575	8.68625	62.1124	9.37446	62.7233	8.68395	60.8549	9.37446	64.1933	8.68228	41.4955	9.37446	44.7625
8.69312	96.4836	9.38166	48.9492	8.6877	39.9093	9.38166	37.749	8.69292	62.2733	9.38166	62.7189	8.69062	61.1216	9.38166	64.2002	8.68895	41.6544	9.38166	44.7712
8.69978	97.5775	9.38886	48.8767	8.69437	40.4883	9.38886	37.7397	8.69958	62.4201	9.38886	62.6835	8.69728	61.3727	9.38886	64.1742	8.69562	41.7973	9.38886	44.762
8.70645	98.7513	9.39606	48.8185	8.70103	41.1014	9.39606	37.7316	8.70625	62.5543	9.39606	62.6193	8.70395	61.6093	9.39606	64.1163	8.70228	41.9247	9.39606	44.7343
8.71312	100.005	9.40326	48.7714	8.7077	41.75	9.40326	37.7269	8.71292	62.6759	9.40326	62.5288	8.71062	61.8321	9.40326	64.0273	8.70895	42.0373	9.40326	44.6899
8.71978	101.335	9.41046	48.7322	8.71437	42.4357	9.41046	37.7278	8.71958	62.7862	9.41046	62.4148	8.71728	62.0399	9.41046	63.9082	8.71562	42.1354	9.41046	44.6319
8.72645	102.737	9.41766	48.6992	8.72103	43.159	9.41766	37.7359	8.72625	62.8851	9.41766	62.2795	8.72395	62.2325	9.41766	63.7601	8.72228	42.2186	9.41766	44.5637
8.73312	104.208	9.42486	48.6729	8.7277	43.9202	9.42486	37.7523	8.73292	62.9725	9.42486	62.124	8.73062	62.4104	9.42486	63.5842	8.72895	42.2883	9.42486	44.4883
8.73978	105.745	9.43206	48.6561	8.73437	44.7198	9.43206	37.7778	8.73958	63.0465	9.43206	61.9487	8.73728	62.5734	9.43206	63.3815	8.73562	42.3462	9.43206	44.4085
8.74645	107.34	9.43926	48.6521	8.74103	45.5565	9.43926	37.8133	8.74625	63.1041	9.43926	61.7535	8.74395	62.7201	9.43926	63.1522	8.74228	42.3947	9.43926	44.327
8.75312	108.988	9.44646	48.6651	8.7477	46.4288	9.44646	37.86	8.75292	63.1451	9.44646	61.5386	8.75062	62.8511	9.44646	62.8968	8.74895	42.4368	9.44646	44.2456
8.75978	110.682	9.45366	48.6995	8.75437	47.3334	9.45366	37.9189	8.75958	63.1706	9.45366	61.3043	8.75728	62.9682	9.45366	62.6163	8.75562	42.4764	9.45366	44.1649
8.76645	112.417	9.46086	48.7603	8.76103	48.2676	9.46086	37.9904	8.76625	63.1827	9.46086	61.0514	8.76395	63.0722	9.46086	62.3126	8.76228	42.5158	9.46086	44.084
8.77312	114.189	9.46806	48.8521	8.7677	49.2298	9.46806	38.0741	8.77292	63.1822	9.46806	60.7807	8.77062	63.1615	9.46806	61.9887	8.76895	42.5561	9.46806	44.0004
8.77978	115.99	9.47526	48.978	8.77437	50.2167	9.47526	38.1686	8.77958	63.1727	9.47526	60.4931	8.77728	63.2367	9.47526	61.6481	8.77562	42.5995	9.47526	43.9117
8.78645	117.817	9.48246	49.139	8.78103	51.2249	9.48246	38.2727	8.78625	63.1573	9.48246	60.1901	8.78395	63.3011	9.48246	61.295	8.78228	42.6474	9.48246	43.8161
8.79312	119.664	9.48966	49.336	8.7877	52.2526	9.48966	38.3854	8.79292	63.1391	9.48966	59.8735	8.79062	63.3568	9.48966	60.934	8.78895	42.7007	9.48966	43.7129
8.79978	121.522	9.49686	49.5706	8.79437	53.2984	9.49686	38.5062	8.79958	63.1177	9.49686	59.5462	8.79728	63.4036	9.49686	60.57	8.79562	42.7583	9.49686	43.6024
8.80645	123.384	9.50406	49.8456	8.80103	54.3581	9.50406	38.6352	8.80625	63.0928	9.50406	59.2107	8.80395	63.4413	9.50406	60.2071	8.80228	42.8179	9.50406	43.4851
8.81312	125.241	9.51126	50.1638	8.8077	55.4258	9.51126	38.7731	8.81292	63.0641	9.51126	58.8694	8.81062	63.4718	9.51126	59.8489	8.80895	42.8794	9.51126	43.3609
8.81978	127.085	9.51846	50.5273	8.81437	56.4968	9.51846	38.9222	8.81958	63.0292	9.51846	58.5241	8.81728	63.4955	9.51846	59.498	8.81562	42.9422	9.51846	43.2304
8.82645	128.907	9.52566	50.9372	8.82103	57.5657	9.52566	39.0861	8.82625	62.9877	9.52566	58.1768	8.82395	63.5095	9.52566	59.1559	8.82228	43.0057	9.52566	43.0942
8.83312	130.699	9.53286	51.3949	8.8277	58.6236	9.53286	39.2693	8.83292	62.9384	9.53286	57.8304	8.83062	63.5119	9.53286	58.8224	8.82895	43.0674	9.53286	42.9539
8.83978	132.452	9.54006	51.9027	8.83437	59.6617	9.54006	39.4759	8.83958	62.8841	9.54006	57.4879	8.83728	63.502	9.54006	58.4961	8.83562	43.1252	9.54006	42.8114
8.84645	134.16	9.54726	52.4629	8.84103	60.6741	9.54726	39.7084	8.84625	62.8257	9.54726	57.1516	8.84395	63.4787	9.54726	58.1744	8.84228	43.1784	9.54726	42.6685
8.85312	135.814	9.55446	53.0773	8.8477	61.657	9.55446	39.9677	8.85292	62.7654	9.55446	56.823	8.85062	63.4404	9.55446	57.8545	8.84895	43.2264	9.55446	42.5268
8.85978	137.409	9.56166	53.7461	8.85437	62.6055	9.56166	40.2534	8.85958	62.7061	9.56166	56.5023	8.85728	63.3878	9.56166	57.5344	8.85562	43.27	9.56166	42.3885
8.86645	138.939	9.56886	54.4696	8.86103	63.5164	9.56886	40.5647	8.86625	62.651	9.56886	56.1892	8.86395	63.3232	9.56886	57.2127	8.86228	43.3095	9.56886	42.2566
8.87312	140.398	9.57606	55.2481	8.8677	64.3891	9.57606	40.8995	8.87292	62.6019	9.57606	55.8825	8.87062	63.2479	9.57606	56.8884	8.86895	43.3462	9.57606	42.1346
8.87978	141.78	9.58326	56.0818	8.87437	65.2239	9.58326	41.2553	8.87958	62.558	9.58326	55.5799	8.87728	63.1641	9.58326	56.561	8.87562	43.3815	9.58326	42.0248
8.88645	143.084	9.59046	56.9696	8.88103	66.0195	9.59046	41.6291	8.88625	62.5186	9.59046	55.2782	8.88395	63.075	9.59046	56.2309	8.88228	43.4155	9.59046	41.9274
8.89312	144.305	9.59766	57.9085	8.8877	66.7747	9.59766	42.0188	8.89292	62.4845	9.59766	54.9741	8.89062	62.9834	9.59766	55.8996	8.88895	43.4486	9.59766	41.8405
8.89978	145.438	9.60486	58.8934	8.89437	67.4899	9.60486	42.4233	8.89958	62.4569	9.60486	54.6659	8.89728	62.8894	9.60486	55.5692	8.89562	43.4797	9.60486	41.7609
8.90645	146.477	9.61206	59.9187	8.90103	68.1635	9.61206	42.8428	8.90625	62.4363	9.61206	54.3538	8.90395	62.7927	9.61206	55.2412	8.90228	43.5083	9.61206	41.6848
8.91312	147.419	9.61926	60.9798	8.9077	68.7929	9.61926	43.2771	8.91292	62.4214	9.61926	54.0396	8.91062	62.6938	9.61926	54.9164	8.90895	43.5336	9.61926	41.6087
8.91978	148.261	9.62646	62.0731	8.91437	69.376	9.62646	43.7262	8.91958	62.4118	9.62646	53.7258	8.91728	62.5929	9.62646	54.5952	8.91562	43.5571	9.62646	41.5301
8.92645	149	9.63366	63.1965	8.92103	69.9125	9.63366	44.1894	8.92625	62.4084	9.63366	53.4139	8.92395	62.4895	9.63366	54.2784	8.92228	43.5812	9.63366	41.4478
8.93312	149.635	9.64086	64.3485	8.9277	70.4021	9.64086	44.6665	8.93292	62.4111	9.64086	53.1048	8.93062	62.3815	9.64086	53.9674	8.92895	43.6071	9.64086	41.3627
8.93978	150.167	9.64806	65.5282	8.93437	70.8434	9.64806	45.157	8.93958	62.4178	9.64806	52.7986	8.93728	62.2701	9.64806	53.663	8.93562	43.635	9.64806	41.2772
8.94645	150.597	9.65526	66.7342	8.94103	71.238	9.65526	45.6604	8.94625	62.4252	9.65526	52.4946	8.94395	62.1574	9.65526	53.3659	8.94228	43.6662	9.65526	41.1941
8.95312	150.926	9.66246	67.9647	8.9477	71.5875	9.66246	46.1751	8.95292	62.434	9.66246	52.1918	8.95062	62.0457	9.66246	53.0757	8.94895	43.7025	9.66246	41.1163
8.95978	151.152	9.66966	69.2158	8.95437	71.8932	9.66966	46.6986	8.95958	62.4461	9.66966	51.8893	8.95728	61.9361	9.66966	52.7918	8.95562	43.7454	9.66966	41.0457
8.96645	151.275	9.67686	70.482	8.96103	72.1548	9.67686	47.2282	8.96625	62.4625	9.67686	51.5867	8.96395	61.8289	9.67686	52.5127	8.96228	43.796	9.67686	40.9834
8.97312	151.294	9.68406	71.7558	8.9677	72.3731	9.68406	47.7612	8.97292	62.481	9.68406	51.2861	8.97062	61.7282	9.68406	52.2359	8.96895	43.8556	9.68406	40.9283
8.97978	151.213	9.69126	73.0289	8.97437	72.5488	9.69126	48.2948	8.97958	62.5007	9.69126	50.9915	8.97728	61.6381	9.69126	51.9588	8.97562	43.9247	9.69126	40.8774
8.98645	151.038	9.69846	74.2928	8.98103	72.6826	9.69846	48.8259	8.98625	62.5225	9.69846	50.7083	8.98395	61.5619	9.69846	51.6801	8.98228	44.0032	9.69846	40.8267
8.99312	150.774	9.70566	75.5398	8.9877	72.7769	9.70566	49.3504	8.99292	62.5471	9.70566	50.4413	8.99062	61.501	9.70566	51.4	8.98895	44.0913	9.70566	40.7728
8.99978	150.423	9.71286	76.7642	8.99437	72.8343	9.71286	49.8639	8.99958	62.5749	9.71286	50.1935	8.99728	61.4563	9.71286	51.1198	8.99562	44.1904	9.71286	40.7145
9.00645	149.991	9.72006	77.9632	9.00103	72.8574	9.72006	50.3621	9.00625	62.6058	9.72006	49.9646	9.00395	61.4295	9.72006	50.8422	9.00228	44.3006	9.72006	40.6522
9.01312	149.482	9.72726	79.1358	9.0077	72.8472	9.72726	50.8414	9.01292	62.6419	9.72726	49.7518	9.01062	61.421	9.72726	50.5708	9.00895	44.421	9.72726	40.5868
9.01978	148.897	9.73446	80.2809	9.01437	72.804	9.73446	51.2984	9.01958	62.686	9.73446	49.5506	9.01728	61.43	9.73446	50.3103	9.01562	44.551	9.73446	40.5194
9.02645	148.237	9.74166	81.3961	9.02103	72.728	9.74166	51.7294	9.02625	62.74	9.74166	49.3556	9.02395	61.4561	9.74166	50.0651	9.02228	44.6916	9.74166	40.4517
9.03312	147.504	9.74886	82.4772	9.0277	72.6198	9.74886	52.1319	9.03292	62.8051	9.74886	49.1615	9.03062	61.5001	9.74886	49.8371	9.02895	44.8424	9.74886	40.3861
9.03978	146.702	9.75606	83.5189	9.03437	72.4797	9.75606	52.5052	9.03958	62.8814	9.75606	48.9642	9.03728	61.5627	9.75606	49.6241	9.03562	45.0015	9.75606	40.3251
9.04645	145.836	9.76326	84.5145	9.04103	72.3078	9.76326	52.8502	9.04625	62.9712	9.76326	48.7615	9.04395	61.6454	9.76326	49.4217	9.04228	45.1671	9.76326	40.2693
9.05312	144.912	9.77046	85.4554	9.0477	72.1055	9.77046	53.1687	9.05292	63.0773	9.77046	48.5534	9.05062	61.7495	9.77046	49.224	9.04895	45.3406	9.77046	40.2173
9.05978	143.932	9.77766	86.3313	9.05437	71.8754	9.77766	53.4615	9.05958	63.2003	9.77766	48.3417	9.05728	61.8773	9.77766	49.0258	9.05562	45.5239	9.77766	40.1663
9.06645	142.901	9.78486	87.1328	9.06103	71.6198	9.78486	53.7287	9.06625	63.3405	9.78486	48.1288	9.06395	62.0304	9.78486	48.8226	9.06228	45.7185	9.78486	40.1145
9.07312	141.823	9.79206	87.8533	9.0677	71.34	9.79206	53.9707	9.07292	63.499	9.79206	47.9168	9.07062	62.2095	9.79206	48.611	9.06895	45.9254	9.79206	40.0615
9.07978	140.703	9.79926	88.49	9.07437	71.0371	9.79926	54.1883	9.07958	63.6773	9.79926	47.707	9.07728	62.4168	9.79926	48.39	9.07562	46.1466	9.79926	40.0076
9.08645	139.546	9.80646	89.0431	9.08103	70.7125	9.80646	54.3815	9.08625	63.8768	9.80646	47.4999	9.08395	62.6543	9.80646	48.1609	9.08228	46.3842	9.80646	39.9532
9.09312	138.356	9.81366	89.515	9.0877	70.3667	9.81366	54.5484	9.09292	64.1	9.81366	47.2954	9.09062	62.9242	9.81366	47.9278	9.08895	46.6378	9.81366	39.8986
9.09978	137.139	9.82086	89.9102	9.09437	70.0009	9.82086	54.6853	9.09958	64.3526	9.82086	47.0931	9.09728	63.2279	9.82086	47.6954	9.09562	46.9068	9.82086	39.8454
9.10645	135.9	9.82806	90.2344	9.10103	69.6172	9.82806	54.7889	9.10625	64.6403	9.82806	46.8926	9.10395	63.566	9.82806	47.4679	9.10228	47.1908	9.82806	39.7966
9.11312	134.644	9.83526	90.4934	9.1077	69.2165	9.83526	54.8579	9.11292	64.9675	9.83526	46.6943	9.11062	63.9402	9.83526	47.247	9.10895	47.4899	9.83526	39.7551
9.11978	133.371	9.84246	90.6915	9.11437	68.7995	9.84246	54.8929	9.11958	65.3374	9.84246	46.4994	9.11728	64.353	9.84246	47.0326	9.11562	47.8029	9.84246	39.7222
9.12645	132.085	9.84966	90.8303	9.12103	68.3682	9.84966	54.8952	9.12625	65.7533	9.84966	46.3092	9.12395	64.8085	9.84966	46.8229	9.12228	48.1296	9.84966	39.6971
9.13312	130.786	9.85686	90.9096	9.1277	67.9268	9.85686	54.8659	9.13292	66.217	9.85686	46.1246	9.13062	65.3091	9.85686	46.6164	9.12895	48.4703	9.85686	39.6781
9.13978	129.475	9.86406	90.929	9.13437	67.4768	9.86406	54.8069	9.13958	66.7282	9.86406	45.9455	9.13728	65.8561	9.86406	46.4124	9.13562	48.8259	9.86406	39.6637
9.14645	128.154	9.87126	90.8875	9.14103	67.0186	9.87126	54.7222	9.14625	67.287	9.87126	45.7715	9.14395	66.4511	9.87126	46.2117	9.14228	49.1963	9.87126	39.6519
9.15312	126.825	9.87846	90.7844	9.1477	66.555	9.87846	54.617	9.15292	67.8946	9.87846	45.6024	9.15062	67.0967	9.87846	46.0161	9.14895	49.5823	9.87846	39.6401
9.15978	125.492	9.88566	90.6199	9.15437	66.0895	9.88566	54.4962	9.15958	68.5516	9.88566	45.4382	9.15728	67.7955	9.88566	45.8281	9.15562	49.9857	9.88566	39.6249
9.16645	124.157	9.89286	90.3964	9.16103	65.6239	9.89286	54.3629	9.16625	69.2571	9.89286	45.2785	9.16395	68.5462	9.89286	45.6503	9.16228	50.4071	9.89286	39.6038
9.17312	122.824	9.90006	90.1189	9.1677	65.1564	9.90006	54.2188	9.17292	70.0113	9.90006	45.1221	9.17062	69.3462	9.90006	45.4849	9.16895	50.8464	9.90006	39.5755
9.17978	121.491	9.90726	89.7937	9.17437	64.688	9.90726	54.0651	9.17958	70.8157	9.90726	44.9674	9.17728	70.1943	9.90726	45.3325	9.17562	51.3023	9.90726	39.54
9.18645	120.163	9.91446	89.4268	9.18103	64.2213	9.91446	53.9033	9.18625	71.6713	9.91446	44.8133	9.18395	71.0907	9.91446	45.1906	9.18228	51.7751	9.91446	39.4982
9.19312	118.839	9.92166	89.0234	9.1877	63.7566	9.92166	53.7347	9.19292	72.5769	9.92166	44.6599	9.19062	72.034	9.92166	45.0544	9.18895	52.265	9.92166	39.451
9.19978	117.522	9.92886	88.5877	9.19437	63.2921	9.92886	53.5593	9.19958	73.532	9.92886	44.5076	9.19728	73.0219	9.92886	44.9185	9.19562	52.7724	9.92886	39.4004
9.20645	116.21	9.93606	88.123	9.20103	62.8256	9.93606	53.3769	9.20625	74.5357	9.93606	44.3563	9.20395	74.0538	9.93606	44.7782	9.20228	53.298	9.93606	39.3491
9.21312	114.907	9.94326	87.6316	9.2077	62.3579	9.94326	53.187	9.21292	75.584	9.94326	44.2054	9.21062	75.1308	9.94326	44.6309	9.20895	53.8437	9.94326	39.2997
9.21978	113.615	9.95046	87.1146	9.21437	61.8884	9.95046	52.9895	9.21958	76.6708	9.95046	44.0543	9.21728	76.2517	9.95046	44.4757	9.21562	54.4099	9.95046	39.2542
9.22645	112.333	9.95766	86.5731	9.22103	61.4147	9.95766	52.7842	9.22625	77.7889	9.95766	43.9029	9.22395	77.4126	9.95766	44.3137	9.22228	54.9955	9.95766	39.214
9.23312	111.064	9.96486	86.0085	9.2277	60.9359	9.96486	52.5706	9.23292	78.9344	9.96486	43.7514	9.23062	78.6085	9.96486	44.1474	9.22895	55.5978	9.96486	39.1802
9.23978	109.807	9.97206	85.4226	9.23437	60.452	9.97206	52.3482	9.23958	80.1037	9.97206	43.5995	9.23728	79.8343	9.97206	43.9808	9.23562	56.2142	9.97206	39.1536
9.24645	108.564	9.97926	84.8174	9.24103	59.9648	9.97926	52.1164	9.24625	81.2924	9.97926	43.4469	9.24395	81.0839	9.97926	43.8178	9.24228	56.8408	9.97926	39.1336
9.25312	107.331	9.98646	84.1958	9.2477	59.4757	9.98646	51.8745	9.25292	82.4969	9.98646	43.2929	9.25062	82.3501	9.98646	43.6608	9.24895	57.4747	9.98646	39.1181
9.25978	106.11	9.99366	83.5618	9.25437	58.9862	9.99366	51.6217	9.25958	83.7131	9.99366	43.1378	9.25728	83.6257	9.99366	43.5101	9.25562	58.1147	9.99366	39.1036
9.26645	104.901	10.0009	82.9204	9.26103	58.4973	10.0009	51.3574	9.26625	84.937	10.0009	42.9818	9.26395	84.9052	10.0009	43.3647	9.26228	58.7598	10.0009	39.0863
9.27312	103.704	10.0081	82.2767	9.2677	58.0104	10.0081	51.0815	9.27292	86.1622	10.0081	42.8255	9.27062	86.184	10.0081	43.2233	9.26895	59.4091	10.0081	39.0633
9.27978	102.519	10.0153	81.634	9.27437	57.5271	10.0153	50.7946	9.27958	87.3817	10.0153	42.6696	9.27728	87.4567	10.0153	43.0844	9.27562	60.0605	10.0153	39.0321
9.28645	101.347	10.0225	80.994	9.28103	57.0494	10.0225	50.4978	9.28625	88.5903	10.0225	42.5153	9.28395	88.7185	10.0225	42.9467	9.28228	60.7122	10.0225	38.9909
9.29312	100.193	10.0297	80.3574	9.2877	56.5782	10.0297	50.193	9.29292	89.7831	10.0297	42.3637	9.29062	89.9651	10.0297	42.809	9.28895	61.3617	10.0297	38.9385
9.29978	99.0583	10.0369	79.7238	9.29437	56.1157	10.0369	49.8832	9.29958	90.9564	10.0369	42.2161	9.29728	91.1933	10.0369	42.6714	9.29562	62.0057	10.0369	38.8755
9.30645	97.9457	10.0441	79.0923	9.30103	55.662	10.0441	49.5723	9.30625	92.1064	10.0441	42.0732	9.30395	92.3979	10.0441	42.5353	9.30228	62.6402	10.0441	38.8047
9.31312	96.855	10.0513	78.4602	9.3077	55.2163	10.0513	49.2645	9.31292	93.2282	10.0513	41.9357	9.31062	93.5728	10.0513	42.4024	9.30895	63.2598	10.0513	38.7308
9.31978	95.7856	10.0585	77.8243	9.31437	54.7797	10.0585	48.9637	9.31958	94.3164	10.0585	41.8042	9.31728	94.713	10.0585	42.2746	9.31562	63.8595	10.0585	38.6589
9.32645	94.7371	10.0657	77.1822	9.32103	54.3526	10.0657	48.6735	9.32625	95.3642	10.0657	41.6795	9.32395	95.8129	10.0657	42.1534	9.32228	64.4349	10.0657	38.593
9.33312	93.7102	10.0729	76.5347	9.3277	53.9347	10.0729	48.3966	9.33292	96.3657	10.0729	41.5618	9.33062	96.8666	10.0729	42.0396	9.32895	64.9814	10.0729	38.5349
9.33978	92.7033	10.0801	75.8849	9.33437	53.5236	10.0801	48.1343	9.33958	97.3158	10.0801	41.4509	9.33728	97.866	10.0801	41.934	9.33562	65.4941	10.0801	38.4851
9.34645	91.7168	10.0873	75.238	9.34103	53.1213	10.0873	47.886	9.34625	98.2097	10.0873	41.3461	9.34395	98.8051	10.0873	41.8365	9.34228	65.9684	10.0873	38.443
9.35312	90.7524	10.0945	74.5994	9.3477	52.7308	10.0945	47.6489	9.35292	99.0411	10.0945	41.2469	9.35062	99.6786	10.0945	41.746	9.34895	66.4011	10.0945	38.4076
9.35978	89.8114	10.1017	73.9746	9.35437	52.3534	10.1017	47.4198	9.35958	99.8045	10.1017	41.1526	9.35728	100.482	10.1017	41.6607	9.35562	66.7915	10.1017	38.3772
9.36645	88.8931	10.1089	73.3687	9.36103	51.9883	10.1089	47.1958	9.36625	100.497	10.1089	41.0629	9.36395	101.211	10.1089	41.5787	9.36228	67.1394	10.1089	38.3497
9.37312	87.9947	10.1161	72.7852	9.3677	51.6369	10.1161	46.9748	9.37292	101.116	10.1161	40.9776	9.37062	101.861	10.1161	41.4985	9.36895	67.4445	10.1161	38.323
9.37978	87.1146	10.1233	72.2255	9.37437	51.3039	10.1233	46.7554	9.37958	101.66	10.1233	40.8968	9.37728	102.433	10.1233	41.4191	9.37562	67.7072	10.1233	38.2961
9.38645	86.2524	10.1305	71.6877	9.38103	50.9926	10.1305	46.5369	9.38625	102.126	10.1305	40.8208	9.38395	102.926	10.1305	41.3395	9.38228	67.9285	10.1305	38.2701
9.39312	85.407	10.1377	71.1677	9.3877	50.7039	10.1377	46.3199	9.39292	102.516	10.1377	40.7503	9.39062	103.339	10.1377	41.2586	9.38895	68.1116	10.1377	38.2479
9.39978	84.5788	10.1449	70.6606	9.39437	50.4381	10.1449	46.1064	9.39958	102.83	10.1449	40.6854	9.39728	103.673	10.1449	41.1757	9.39562	68.2587	10.1449	38.2328
9.40645	83.7693	10.1521	70.1621	9.40103	50.1971	10.1521	45.8985	9.40625	103.069	10.1521	40.6257	9.40395	103.929	10.1521	41.0905	9.40228	68.3708	10.1521	38.2272
9.41312	82.9791	10.1593	69.6684	9.4077	49.9824	10.1593	45.6972	9.41292	103.233	10.1593	40.57	9.41062	104.109	10.1593	41.0039	9.40895	68.4491	10.1593	38.2322
9.41978	82.2082	10.1665	69.1765	9.41437	49.7934	10.1665	45.5019	9.41958	103.324	10.1665	40.5165	9.41728	104.213	10.1665	40.9175	9.41562	68.4951	10.1665	38.2487
9.42645	81.4561	10.1737	68.6834	9.42103	49.629	10.1737	45.3107	9.42625	103.343	10.1737	40.4642	9.42395	104.246	10.1737	40.8333	9.42228	68.509	10.1737	38.2773
9.43312	80.7234	10.1809	68.1871	9.4277	49.4897	10.1809	45.1223	9.43292	103.29	10.1809	40.4125	9.43062	104.206	10.1809	40.7534	9.42895	68.4897	10.1809	38.3185
9.43978	80.0101	10.1881	67.6866	9.43437	49.3761	10.1881	44.9358	9.43958	103.169	10.1881	40.3615	9.43728	104.095	10.1881	40.68	9.43562	68.4353	10.1881	38.3717
9.44645	79.3151	10.1953	67.1822	9.44103	49.2891	10.1953	44.7503	9.44625	102.986	10.1953	40.312	9.44395	103.914	10.1953	40.6159	9.44228	68.3459	10.1953	38.435
9.45312	78.6375	10.2025	66.6757	9.4477	49.2289	10.2025	44.5649	9.45292	102.744	10.2025	40.2656	9.45062	103.667	10.2025	40.5639	9.44895	68.2222	10.2025	38.5064
9.45978	77.9775	10.2097	66.1695	9.45437	49.1947	10.2097	44.3786	9.45958	102.447	10.2097	40.225	9.45728	103.359	10.2097	40.5258	9.45562	68.0649	10.2097	38.5848
9.46645	77.3361	10.2169	65.6673	9.46103	49.1845	10.2169	44.1914	9.46625	102.099	10.2169	40.1932	9.46395	102.991	10.2169	40.5022	9.46228	67.8764	10.2169	38.6701
9.47312	76.7146	10.2241	65.1734	9.4677	49.198	10.2241	44.0039	9.47292	101.707	10.2241	40.1719	9.47062	102.565	10.2241	40.4921	9.46895	67.6593	10.2241	38.7621
9.47978	76.1146	10.2313	64.6923	9.47437	49.236	10.2313	43.8174	9.47958	101.274	10.2313	40.1607	9.47728	102.088	10.2313	40.4937	9.47562	67.4175	10.2313	38.8599
9.48645	75.5371	10.2385	64.2275	9.48103	49.2981	10.2385	43.632	9.48625	100.804	10.2385	40.1576	9.48395	101.564	10.2385	40.5048	9.48228	67.1536	10.2385	38.9617
9.49312	74.9853	10.2457	63.7808	9.4877	49.3853	10.2457	43.4472	9.49292	100.298	10.2457	40.1606	9.49062	100.994	10.2457	40.5229	9.48895	66.8705	10.2457	39.0659
9.49978	74.4613	10.2529	63.352	9.49437	49.4992	10.2529	43.2627	9.49958	99.7603	10.2529	40.168	9.49728	100.379	10.2529	40.545	9.49562	66.5713	10.2529	39.1711
9.50645	73.9664	10.2601	62.9382	9.50103	49.6413	10.2601	43.0795	9.50625	99.1929	10.2601	40.1788	9.50395	99.723	10.2601	40.568	9.50228	66.2583	10.2601	39.2766
9.51312	73.5009	10.2673	62.5353	9.5077	49.8118	10.2673	42.8997	9.51292	98.5975	10.2673	40.192	9.51062	99.029	10.2673	40.5898	9.50895	65.9342	10.2673	39.3819
9.51978	73.0652	10.2745	62.1379	9.51437	50.0094	10.2745	42.7259	9.51958	97.9757	10.2745	40.2075	9.51728	98.3005	10.2745	40.6097	9.51562	65.6013	10.2745	39.4869
9.52645	72.6613	10.2817	61.7412	9.52103	50.2358	10.2817	42.5596	9.52625	97.3298	10.2817	40.2267	9.52395	97.5418	10.2817	40.6279	9.52228	65.2625	10.2817	39.5929
9.53312	72.2894	10.2889	61.3414	9.5277	50.491	10.2889	42.4008	9.53292	96.6604	10.2889	40.2526	9.53062	96.7584	10.2889	40.6459	9.52895	64.92	10.2889	39.7021
9.53978	71.9483	10.2961	60.9367	9.53437	50.7759	10.2961	42.249	9.53958	95.9689	10.2961	40.2883	9.53728	95.9566	10.2961	40.6657	9.53562	64.5763	10.2961	39.8171
9.54645	71.6381	10.3033	60.5261	9.54103	51.0919	10.3033	42.1035	9.54625	95.258	10.3033	40.3361	9.54395	95.1415	10.3033	40.6906	9.54228	64.2333	10.3033	39.9414
9.55312	71.3596	10.3105	60.1099	9.5477	51.4411	10.3105	41.963	9.55292	94.5305	10.3105	40.397	9.55062	94.3187	10.3105	40.7258	9.54895	63.8934	10.3105	40.0781
9.55978	71.114	10.3177	59.69	9.55437	51.8269	10.3177	41.8259	9.55958	93.7899	10.3177	40.4724	9.55728	93.4921	10.3177	40.7766	9.55562	63.5584	10.3177	40.2302
9.56645	70.9018	10.3249	59.2698	9.56103	52.2511	10.3249	41.6897	9.56625	93.0398	10.3249	40.5633	9.56395	92.6633	10.3249	40.8472	9.56228	63.2287	10.3249	40.4002
9.57312	70.724	10.3321	58.8534	9.5677	52.716	10.3321	41.5524	9.57292	92.2847	10.3321	40.6707	9.57062	91.8344	10.3321	40.9398	9.56895	62.9043	10.3321	40.5897
9.57978	70.5818	10.3393	58.4436	9.57437	53.2238	10.3393	41.4135	9.57958	91.5281	10.3393	40.7941	9.57728	91.0069	10.3393	41.0548	9.57562	62.5853	10.3393	40.7999
9.58645	70.4767	10.3465	58.0422	9.58103	53.7774	10.3465	41.2738	9.58625	90.7712	10.3465	40.9323	9.58395	90.1816	10.3465	41.1916	9.58228	62.2735	10.3465	41.0318
9.59312	70.411	10.3537	57.6504	9.5877	54.3806	10.3537	41.1342	9.59292	90.016	10.3537	41.0845	9.59062	89.3579	10.3537	41.3488	9.58895	61.9697	10.3537	41.2866
9.59978	70.3866	10.3609	57.2706	9.59437	55.0364	10.3609	40.9947	9.59958	89.2641	10.3609	41.2501	9.59728	88.5347	10.3609	41.5241	9.59562	61.6742	10.3609	41.5654
9.60645	70.4051	10.3681	56.9045	9.60103	55.7498	10.3681	40.8542	9.60625	88.5166	10.3681	41.4285	9.60395	87.7125	10.3681	41.7149	9.60228	61.3889	10.3681	41.8691
9.61312	70.4695	10.3753	56.5527	9.6077	56.5259	10.3753	40.7118	9.61292	87.7728	10.3753	41.6176	9.61062	86.8917	10.3753	41.9191	9.60895	61.1158	10.3753	42.1985
9.61978	70.5841	10.3825	56.2139	9.61437	57.3709	10.3825	40.5675	9.61958	87.0331	10.3825	41.8154	9.61728	86.0728	10.3825	42.1371	9.61562	60.8571	10.3825	42.5547
9.62645	70.751	10.3897	55.8866	9.62103	58.2893	10.3897	40.4221	9.62625	86.2986	10.3897	42.0207	9.62395	85.2573	10.3897	42.3719	9.62228	60.6143	10.3897	42.9384
9.63312	70.9708	10.3969	55.5704	9.6277	59.2849	10.3969	40.277	9.63292	85.5702	10.3969	42.2342	9.63062	84.4474	10.3969	42.6278	9.62895	60.3877	10.3969	43.3506
9.63978	71.2441	10.4041	55.2653	9.63437	60.3619	10.4041	40.1342	9.63958	84.8476	10.4041	42.4582	9.63728	83.6459	10.4041	42.909	9.63562	60.1768	10.4041	43.7926
9.64645	71.574	10.4113	54.9705	9.64103	61.5239	10.4113	39.9967	9.64625	84.1291	10.4113	42.6959	9.64395	82.8542	10.4113	43.2182	9.64228	59.98	10.4113	44.2662
9.65312	71.9624	10.4185	54.6835	9.6477	62.7742	10.4185	39.8683	9.65292	83.4152	10.4185	42.9512	9.65062	82.0732	10.4185	43.5569	9.64895	59.7975	10.4185	44.7745
9.65978	72.4092	10.4257	54.4007	9.65437	64.1159	10.4257	39.7524	9.65958	82.7055	10.4257	43.2293	9.65728	81.3037	10.4257	43.9253	9.65562	59.6278	10.4257	45.3218
9.66645	72.9151	10.4329	54.1188	9.66103	65.5548	10.4329	39.6504	9.66625	82.0007	10.4329	43.5364	9.66395	80.5479	10.4329	44.3229	9.66228	59.4681	10.4329	45.9119
9.67312	73.4834	10.4401	53.8352	9.6677	67.0971	10.4401	39.5613	9.67292	81.2996	10.4401	43.8794	9.67062	79.8064	10.4401	44.7483	9.66895	59.3171	10.4401	46.548
9.67978	74.1168	10.4473	53.5483	9.67437	68.7482	10.4473	39.4827	9.67958	80.6012	10.4473	44.2643	9.67728	79.0807	10.4473	45.2004	9.67562	59.1746	10.4473	47.2329
9.68645	74.8174	10.4545	53.2561	9.68103	70.5141	10.4545	39.4109	9.68625	79.9064	10.4545	44.6956	9.68395	78.3718	10.4545	45.6791	9.68228	59.0413	10.4545	47.9704
9.69312	75.5863	10.4617	52.9568	9.6877	72.4021	10.4617	39.342	9.69292	79.2167	10.4617	45.1768	9.69062	77.6813	10.4617	46.1861	9.68895	58.9172	10.4617	48.7662
9.69978	76.4235	10.4689	52.6491	9.69437	74.4187	10.4689	39.2712	9.69958	78.5332	10.4689	45.7107	9.69728	77.011	10.4689	46.7255	9.69562	58.803	10.4689	49.6255
9.70645	77.3293	10.4761	52.3332	9.70103	76.5697	10.4761	39.1939	9.70625	77.8552	10.4761	46.2994	9.70395	76.361	10.4761	47.3023	9.70228	58.6998	10.4761	50.5528
9.71312	78.3028	10.4833	52.0116	9.7077	78.8607	10.4833	39.1071	9.71292	77.183	10.4833	46.9442	9.71062	75.7324	10.4833	47.9224	9.70895	58.6096	10.4833	51.5512
9.71978	79.3442	10.4905	51.6877	9.71437	81.2984	10.4905	39.01	9.71958	76.5189	10.4905	47.6462	9.71728	75.1235	10.4905	48.5921	9.71562	58.5338	10.4905	52.6253
9.72645	80.4521	10.4977	51.3651	9.72103	83.8897	10.4977	38.9041	9.72625	75.8648	10.4977	48.4054	9.72395	74.5322	10.4977	49.3174	9.72228	58.4725	10.4977	53.7815
9.73312	81.6263	10.5049	51.0467	9.7277	86.6395	10.5049	38.7917	9.73292	75.2203	10.5049	49.221	9.73062	73.9568	10.5049	50.104	9.72895	58.4234	10.5049	55.027
9.73978	82.8679	10.5121	50.7354	9.73437	89.5517	10.5121	38.6763	9.73958	74.5848	10.5121	50.0911	9.73728	73.3953	10.5121	50.9559	9.73562	58.3851	10.5121	56.3666
9.74645	84.1776	10.5193	50.4348	9.74103	92.63	10.5193	38.5622	9.74625	73.9594	10.5193	51.0135	9.74395	72.8449	10.5193	51.8758	9.74228	58.3559	10.5193	57.8023
9.75312	85.5547	10.5265	50.1494	9.7477	95.8771	10.5265	38.4544	9.75292	73.3448	10.5265	51.9867	9.75062	72.3024	10.5265	52.8652	9.74895	58.3331	10.5265	59.335
9.75978	86.9967	10.5337	49.8833	9.75437	99.2945	10.5337	38.3579	9.75958	72.7394	10.5337	53.0109	9.75728	71.7668	10.5337	53.9249	9.75562	58.3144	10.5337	60.966
9.76645	88.4985	10.5409	49.6386	9.76103	102.882	10.5409	38.2763	9.76625	72.1412	10.5409	54.0868	9.76395	71.238	10.5409	55.0547	9.76228	58.2965	10.5409	62.6976
9.77312	90.0545	10.5481	49.4155	9.7677	106.637	10.5481	38.2112	9.77292	71.5495	10.5481	55.2154	9.77062	70.7138	10.5481	56.2526	9.76895	58.2782	10.5481	64.53
9.77978	91.6587	10.5553	49.2122	9.77437	110.558	10.5553	38.162	9.77958	70.9637	10.5553	56.398	9.77728	70.1913	10.5553	57.5144	9.77562	58.2568	10.5553	66.4607
9.78645	93.3069	10.5625	49.0258	9.78103	114.641	10.5625	38.126	9.78625	70.3828	10.5625	57.6372	9.78395	69.6701	10.5625	58.8344	9.78228	58.2311	10.5625	68.4846
9.79312	94.995	10.5697	48.8514	9.7877	118.881	10.5697	38.0987	9.79292	69.8066	10.5697	58.9365	9.79062	69.1496	10.5697	60.2068	9.78895	58.1985	10.5697	70.5966
9.79978	96.7179	10.5769	48.6826	9.79437	123.272	10.5769	38.0738	9.79958	69.2355	10.5769	60.2985	9.79728	68.628	10.5769	61.626	9.79562	58.1566	10.5769	72.7922
9.80645	98.4703	10.5841	48.5123	9.80103	127.806	10.5841	38.045	9.80625	68.6692	10.5841	61.7231	9.80395	68.1048	10.5841	63.0865	9.80228	58.1035	10.5841	75.066
9.81312	100.246	10.5913	48.3342	9.8077	132.474	10.5913	38.0073	9.81292	68.1079	10.5913	63.207	9.81062	67.5808	10.5913	64.5825	9.80895	58.0384	10.5913	77.4107
9.81978	102.038	10.5985	48.1443	9.81437	137.263	10.5985	37.9575	9.81958	67.5507	10.5985	64.7448	9.81728	67.0558	10.5985	66.109	9.81562	57.9619	10.5985	79.8164
9.82645	103.84	10.6057	47.9415	9.82103	142.16	10.6057	37.8946	9.82625	66.9961	10.6057	66.3302	9.82395	66.5271	10.6057	67.6618	9.82228	57.8742	10.6057	82.2722
9.83312	105.645	10.6129	47.728	9.8277	147.152	10.6129	37.8198	9.83292	66.4406	10.6129	67.9561	9.83062	65.995	10.6129	69.2374	9.82895	57.7764	10.6129	84.7671
9.83978	107.445	10.6201	47.5082	9.83437	152.222	10.6201	37.7361	9.83958	65.8829	10.6201	69.6138	9.83728	65.4606	10.6201	70.8321	9.83562	57.6701	10.6201	87.2899
9.84645	109.233	10.6273	47.2887	9.84103	157.353	10.6273	37.6478	9.84625	65.3216	10.6273	71.2938	9.84395	64.9242	10.6273	72.4413	9.84228	57.5569	10.6273	89.8285
9.85312	111.002	10.6345	47.0763	9.8477	162.532	10.6345	37.5591	9.85292	64.7568	10.6345	72.9864	9.85062	64.3852	10.6345	74.0598	9.84895	57.4373	10.6345	92.3705
9.85978	112.746	10.6417	46.8771	9.85437	167.741	10.6417	37.4729	9.85958	64.1883	10.6417	74.6829	9.85728	63.8446	10.6417	75.6826	9.85562	57.3127	10.6417	94.9041
9.86645	114.455	10.6489	46.6947	9.86103	172.959	10.6489	37.3906	9.86625	63.6175	10.6489	76.3754	9.86395	63.3058	10.6489	77.3053	9.86228	57.1826	10.6489	97.4181
9.87312	116.12	10.6561	46.5296	9.8677	178.164	10.6561	37.3121	9.87292	63.0465	10.6561	78.0554	9.87062	62.7704	10.6561	78.9234	9.86895	57.0466	10.6561	99.9008
9.87978	117.732	10.6633	46.3794	9.87437	183.334	10.6633	37.2365	9.87958	62.4756	10.6633	79.7136	9.87728	62.2385	10.6633	80.5309	9.87562	56.9039	10.6633	102.34
9.88645	119.285	10.6705	46.2394	9.88103	188.448	10.6705	37.1623	9.88625	61.9048	10.6705	81.3396	9.88395	61.7091	10.6705	82.1196	9.88228	56.7535	10.6705	104.725
9.89312	120.775	10.6777	46.1041	9.8877	193.482	10.6777	37.0881	9.89292	61.3343	10.6777	82.9227	9.89062	61.1818	10.6777	83.6792	9.88895	56.5948	10.6777	107.044
9.89978	122.193	10.6849	45.9678	9.89437	198.413	10.6849	37.0133	9.89958	60.7653	10.6849	84.4533	9.89728	60.6558	10.6849	85.1978	9.89562	56.4264	10.6849	109.289
9.90645	123.533	10.6921	45.8255	9.90103	203.223	10.6921	36.939	9.90625	60.1989	10.6921	85.9231	9.90395	60.13	10.6921	86.6629	9.90228	56.2477	10.6921	111.449
9.91312	124.789	10.6993	45.6733	9.9077	207.892	10.6993	36.8671	9.91292	59.6355	10.6993	87.3257	9.91062	59.6026	10.6993	88.061	9.90895	56.0587	10.6993	113.51
9.91978	125.956	10.7065	45.5093	9.91437	212.401	10.7065	36.8001	9.91958	59.0757	10.7065	88.6561	9.91728	59.0721	10.7065	89.3782	9.91562	55.8581	10.7065	115.459
9.92645	127.029	10.7137	45.334	9.92103	216.73	10.7137	36.7402	9.92625	58.5212	10.7137	89.9093	9.92395	58.5381	10.7137	90.6023	9.92228	55.6454	10.7137	117.286
9.93312	128.004	10.7209	45.1503	9.9277	220.861	10.7209	36.6887	9.93292	57.9722	10.7209	91.08	9.93062	58.0012	10.7209	91.7249	9.92895	55.42	10.7209	118.983
9.93978	128.878	10.7281	44.962	9.93437	224.775	10.7281	36.6459	9.93958	57.427	10.7281	92.1637	9.93728	57.462	10.7281	92.743	9.93562	55.1816	10.7281	120.543
9.94645	129.649	10.7353	44.7724	9.94103	228.459	10.7353	36.6104	9.94625	56.8825	10.7353	93.1573	9.94395	56.9201	10.7353	93.6585	9.94228	54.9306	10.7353	121.96
9.95312	130.317	10.7425	44.5843	9.9477	231.903	10.7425	36.579	9.95292	56.3372	10.7425	94.0587	9.95062	56.3741	10.7425	94.4754	9.94895	54.6682	10.7425	123.228
9.95978	130.879	10.7497	44.4001	9.95437	235.098	10.7497	36.5478	9.95958	55.7906	10.7497	94.8667	9.95728	55.8232	10.7497	95.1983	9.95562	54.3969	10.7497	124.344
9.96645	131.337	10.7569	44.2228	9.96103	238.033	10.7569	36.5133	9.96625	55.2414	10.7569	95.5806	9.96395	55.267	10.7569	95.8312	9.96228	54.1172	10.7569	125.309
9.97312	131.691	10.7641	44.0552	9.9677	240.703	10.7641	36.4731	9.97292	54.6882	10.7641	96.2012	9.97062	54.7062	10.7641	96.3777	9.96895	53.8312	10.7641	126.127
9.97978	131.942	10.7713	43.8987	9.97437	243.102	10.7713	36.4267	9.97958	54.1306	10.7713	96.7317	9.97728	54.1422	10.7713	96.8411	9.97562	53.5402	10.7713	126.798
9.98645	132.093	10.7785	43.753	9.98103	245.227	10.7785	36.3752	9.98625	53.57	10.7785	97.1777	9.98395	53.5754	10.7785	97.2221	9.98228	53.2454	10.7785	127.324
9.99312	132.146	10.7857	43.6168	9.9877	247.078	10.7857	36.3217	9.99292	53.0073	10.7857	97.5451	9.99062	53.0072	10.7857	97.5195	9.98895	52.945	10.7857	127.709
9.99978	132.104	10.7929	43.4887	9.99437	248.652	10.7929	36.2709	9.99958	52.4438	10.7929	97.8384	9.99728	52.4396	10.7929	97.7314	9.99562	52.6381	10.7929	127.959
10.0064	131.966	10.8001	43.3677	10.001	249.954	10.8001	36.2277	10.0062	51.8794	10.8001	98.0589	10.0039	51.8747	10.8001	97.8586	10.0023	52.3253	10.8001	128.087
10.0131	131.733	10.8073	43.2522	10.0077	250.99	10.8073	36.1962	10.0129	51.3144	10.8073	98.2054	10.0106	51.3133	10.8073	97.9048	10.009	52.0068	10.8073	128.101
10.0198	131.408	10.8145	43.1396	10.0144	251.765	10.8145	36.1786	10.0196	50.747	10.8145	98.276	10.0173	50.7543	10.8145	97.8755	10.0156	51.6819	10.8145	128.007
10.0265	130.997	10.8217	43.027	10.021	252.284	10.8217	36.1744	10.0262	50.1767	10.8217	98.2684	10.0239	50.1987	10.8217	97.776	10.0223	51.3495	10.8217	127.81
10.0331	130.5	10.8289	42.9125	10.0277	252.552	10.8289	36.1808	10.0329	49.6031	10.8289	98.181	10.0306	49.6489	10.8289	97.611	10.029	51.0098	10.8289	127.516
10.0398	129.922	10.8361	42.7956	10.0344	252.577	10.8361	36.1926	10.0396	49.0263	10.8361	98.013	10.0373	49.1055	10.8361	97.3841	10.0356	50.6638	10.8361	127.13
10.0465	129.271	10.8433	42.6767	10.041	252.366	10.8433	36.2036	10.0463	48.4473	10.8433	97.7656	10.044	48.5683	10.8433	97.0984	10.0423	50.3129	10.8433	126.659
10.0531	128.555	10.8505	42.556	10.0477	251.93	10.8505	36.2076	10.0529	47.868	10.8505	97.4432	10.0506	48.035	10.8505	96.7555	10.0489	49.9581	10.8505	126.105
10.0598	127.779	10.8577	42.4336	10.0544	251.28	10.8577	36.2001	10.0596	47.2918	10.8577	97.054	10.0573	47.505	10.8577	96.3555	10.0556	49.6008	10.8577	125.469
10.0664	126.945	10.8649	42.3095	10.061	250.431	10.8649	36.1792	10.0663	46.7205	10.8649	96.6083	10.064	46.977	10.8649	95.8987	10.0623	49.2423	10.8649	124.755
10.0731	126.059	10.8721	42.1844	10.0677	249.393	10.8721	36.1452	10.0729	46.1557	10.8721	96.1167	10.0706	46.4501	10.8721	95.3871	10.0689	48.885	10.8721	123.971
10.0798	125.124	10.8793	42.0599	10.0744	248.181	10.8793	36.1014	10.0796	45.5967	10.8793	95.5876	10.0773	45.9244	10.8793	94.8257	10.0756	48.5304	10.8793	123.125
10.0864	124.142	10.8865	41.9373	10.081	246.805	10.8865	36.0524	10.0862	45.0427	10.8865	95.0265	10.0839	45.3999	10.8865	94.2219	10.0823	48.1793	10.8865	122.23
10.0931	123.118	10.8937	41.8175	10.0877	245.278	10.8937	36.0037	10.0929	44.4935	10.8937	94.4368	10.0906	44.8784	10.8937	93.5839	10.089	47.8311	10.8937	121.292
10.0998	122.053	10.9009	41.7008	10.0944	243.611	10.9009	35.96	10.0996	43.947	10.9009	93.8207	10.0973	44.359	10.9009	92.9197	10.0956	47.4837	10.9009	120.319
10.1065	120.952	10.9081	41.5881	10.101	241.816	10.9081	35.9241	10.1062	43.4017	10.9081	93.1798	10.1039	43.8422	10.9081	92.2364	10.1023	47.1355	10.9081	119.32
10.1131	119.82	10.9153	41.4803	10.1077	239.904	10.9153	35.8967	10.1129	42.8556	10.9153	92.5157	10.1106	43.328	10.9153	91.5392	10.109	46.7853	10.9153	118.301
10.1198	118.663	10.9225	41.3783	10.1144	237.885	10.9225	35.876	10.1196	42.3101	10.9225	91.8306	10.1173	42.8165	10.9225	90.8318	10.1156	46.4307	10.9225	117.264
10.1265	117.483	10.9297	41.2823	10.121	235.771	10.9297	35.8592	10.1263	41.7677	10.9297	91.1271	10.124	42.3075	10.9297	90.116	10.1223	46.0683	10.9297	116.209
10.1331	116.282	10.9369	41.1915	10.1277	233.573	10.9369	35.8429	10.1329	41.2309	10.9369	90.4095	10.1306	41.801	10.9369	89.3923	10.1289	45.6983	10.9369	115.131
10.1398	115.066	10.9441	41.1047	10.1344	231.301	10.9441	35.8244	10.1396	40.7036	10.9441	89.6831	10.1373	41.3005	10.9441	88.6602	10.1356	45.324	10.9441	114.028
10.1464	113.841	10.9513	41.0213	10.141	228.965	10.9513	35.8023	10.1463	40.1897	10.9513	88.9527	10.144	40.8075	10.9513	87.919	10.1423	44.9489	10.9513	112.9
10.1531	112.611	10.9585	40.9414	10.1477	226.574	10.9585	35.7765	10.1529	39.6914	10.9585	88.2221	10.1506	40.3218	10.9585	87.1684	10.1489	44.5749	10.9585	111.752
10.1598	111.381	10.9657	40.8653	10.1544	224.14	10.9657	35.7482	10.1596	39.2074	10.9657	87.4934	10.1573	39.8437	10.9657	86.4095	10.1556	44.2054	10.9657	110.589
10.1664	110.155	10.9729	40.793	10.161	221.672	10.9729	35.7198	10.1662	38.7348	10.9729	86.7672	10.1639	39.3739	10.9729	85.6441	10.1623	43.8427	10.9729	109.422
10.1731	108.937	10.9801	40.7239	10.1677	219.179	10.9801	35.6941	10.1729	38.2733	10.9801	86.0434	10.1706	38.9139	10.9801	84.875	10.169	43.4868	10.9801	108.262
10.1798	107.726	10.9873	40.6579	10.1744	216.667	10.9873	35.6735	10.1796	37.8217	10.9873	85.3208	10.1773	38.4638	10.9873	84.1043	10.1756	43.1365	10.9873	107.124
10.1865	106.521	10.9945	40.595	10.181	214.144	10.9945	35.6592	10.1862	37.3778	10.9945	84.5985	10.1839	38.0237	10.9945	83.3348	10.1823	42.7909	10.9945	106.019
10.1931	105.322	11.0017	40.5356	10.1877	211.615	11.0017	35.6508	10.1929	36.9407	11.0017	83.876	10.1906	37.595	11.0017	82.5701	10.189	42.4494	11.0017	104.952
10.1998	104.128	11.0089	40.4793	10.1944	209.088	11.0089	35.6465	10.1996	36.5127	11.0089	83.1548	10.1973	37.1788	11.0089	81.8158	10.1956	42.1101	11.0089	103.924
10.2065	102.942	11.0161	40.424	10.201	206.567	11.0161	35.6446	10.2063	36.0958	11.0161	82.4387	10.204	36.7759	11.0161	81.0787	10.2023	41.7733	11.0161	102.93
10.2131	101.765	11.0233	40.367	10.2077	204.059	11.0233	35.6435	10.2129	35.6897	11.0233	81.7324	10.2106	36.3857	11.0233	80.3648	10.2089	41.4398	11.0233	101.959
10.2198	100.601	11.0305	40.306	10.2144	201.565	11.0305	35.6421	10.2196	35.2946	11.0305	81.0407	10.2173	36.0075	11.0305	79.678	10.2156	41.1105	11.0305	101.004
10.2264	99.4521	11.0377	40.2399	10.221	199.091	11.0377	35.6394	10.2263	34.9124	11.0377	80.3675	10.224	35.6407	11.0377	79.0193	10.2223	40.7854	11.0377	100.053
10.2331	98.3152	11.0449	40.1682	10.2277	196.641	11.0449	35.6346	10.2329	34.544	11.0449	79.7148	10.2306	35.2852	11.0449	78.3875	10.2289	40.466	11.0449	99.0979
10.2398	97.1902	11.0521	40.0906	10.2344	194.219	11.0521	35.6272	10.2396	34.1887	11.0521	79.0827	10.2373	34.9406	11.0521	77.779	10.2356	40.1543	11.0521	98.1367
10.2464	96.0756	11.0593	40.0071	10.241	191.828	11.0593	35.6169	10.2462	33.8463	11.0593	78.4683	10.2439	34.6056	11.0593	77.1889	10.2423	39.8515	11.0593	97.1723
10.2531	94.9694	11.0665	39.9197	10.2477	189.469	11.0665	35.6037	10.2529	33.5186	11.0665	77.8665	10.2506	34.2796	11.0665	76.6104	10.249	39.5586	11.0665	96.2124
10.2598	93.8703	11.0737	39.8321	10.2544	187.144	11.0737	35.5866	10.2596	33.2063	11.0737	77.2708	10.2573	33.9624	11.0737	76.0372	10.2556	39.2766	11.0737	95.2667
10.2665	92.7799	11.0809	39.7488	10.261	184.852	11.0809	35.5645	10.2662	32.9086	11.0809	76.6754	10.2639	33.655	11.0809	75.4641	10.2623	39.0051	11.0809	94.3444
10.2731	91.7017	11.0881	39.6735	10.2677	182.593	11.0881	35.5362	10.2729	32.6249	11.0881	76.0758	10.2706	33.358	11.0881	74.8887	10.269	38.741	11.0881	93.452
10.2798	90.6378	11.0953	39.6084	10.2744	180.368	11.0953	35.5012	10.2796	32.356	11.0953	75.4694	10.2773	33.0709	11.0953	74.3111	10.2756	38.4827	11.0953	92.5934
10.2865	89.5901	11.1025	39.5541	10.281	178.177	11.1025	35.4602	10.2863	32.1021	11.1025	74.8562	10.284	32.7947	11.1025	73.7337	10.2823	38.2288	11.1025	91.7694
10.2931	88.5587	11.1097	39.5097	10.2877	176.018	11.1097	35.4145	10.2929	31.8606	11.1097	74.2383	10.2906	32.5297	11.1097	73.1599	10.2889	37.9776	11.1097	90.9779
10.2998	87.5434	11.1169	39.4733	10.2944	173.895	11.1169	35.3654	10.2996	31.6299	11.1169	73.6201	10.2973	32.2761	11.1169	72.5934	10.2956	37.726	11.1169	90.2134
10.3064	86.5438	11.1241	39.4417	10.301	171.806	11.1241	35.3147	10.3063	31.4106	11.1241	73.0072	10.304	32.0333	11.1241	72.0372	10.3023	37.4735	11.1241	89.4686
10.3131	85.5603	11.1313	39.4111	10.3077	169.755	11.1313	35.2647	10.3129	31.2042	11.1313	72.4049	10.3106	31.8	11.1313	71.4937	10.3089	37.2207	11.1313	88.7357
10.3198	84.5927	11.1385	39.3782	10.3144	167.737	11.1385	35.218	10.3196	31.0116	11.1385	71.8181	10.3173	31.5762	11.1385	70.9644	10.3156	36.9665	11.1385	88.0086
10.3264	83.6412	11.1457	39.3411	10.321	165.753	11.1457	35.1772	10.3262	30.8319	11.1457	71.2508	10.3239	31.3626	11.1457	70.45	10.3223	36.7098	11.1457	87.2843
10.3331	82.707	11.1529	39.3001	10.3277	163.8	11.1529	35.1437	10.3329	30.6659	11.1529	70.7058	10.3306	31.1605	11.1529	69.95	10.329	36.451	11.1529	86.5614
10.3398	81.7917	11.1601	39.2573	10.3344	161.876	11.1601	35.1177	10.3396	30.5139	11.1601	70.1847	10.3373	30.97	11.1601	69.4625	10.3356	36.1934	11.1601	85.8401
10.3465	80.8958	11.1673	39.2151	10.341	159.981	11.1673	35.0986	10.3462	30.3752	11.1673	69.6874	10.3439	30.7895	11.1673	68.9846	10.3423	35.9392	11.1673	85.1218
10.3531	80.0175	11.1745	39.1759	10.3477	158.111	11.1745	35.0857	10.3529	30.2479	11.1745	69.212	10.3506	30.6191	11.1745	68.513	10.349	35.6897	11.1745	84.4082
10.3598	79.1539	11.1817	39.1408	10.3544	156.265	11.1817	35.0783	10.3596	30.1315	11.1817	68.7551	10.3573	30.4596	11.1817	68.0455	10.3556	35.4469	11.1817	83.7014
10.3665	78.3033	11.1889	39.1096	10.361	154.441	11.1889	35.0759	10.3663	30.0267	11.1889	68.3116	10.364	30.3088	11.1889	67.5811	10.3623	35.2137	11.1889	83.0027
10.3731	77.4634	11.1961	39.0802	10.3677	152.638	11.1961	35.0772	10.3729	29.9334	11.1961	67.8756	10.3706	30.1627	11.1961	67.1201	10.3689	34.9918	11.1961	82.3127
10.3798	76.6313	11.2033	39.0502	10.3744	150.855	11.2033	35.0806	10.3796	29.8521	11.2033	67.4407	10.3773	30.0174	11.2033	66.6632	10.3756	34.7812	11.2033	81.6308
10.3864	75.8038	11.2105	39.0161	10.381	149.09	11.2105	35.0846	10.3863	29.7833	11.2105	67.0013	10.384	29.872	11.2105	66.2113	10.3823	34.5821	11.2105	80.9568
10.3931	74.9791	11.2177	38.9753	10.3877	147.343	11.2177	35.0885	10.3929	29.7273	11.2177	66.5541	10.3906	29.7249	11.2177	65.766	10.3889	34.3955	11.2177	80.2902
10.3998	74.1571	11.2249	38.9263	10.3944	145.612	11.2249	35.0917	10.3996	29.6827	11.2249	66.0982	10.3973	29.5743	11.2249	65.3289	10.3956	34.222	11.2249	79.6305
10.4064	73.3381	11.2321	38.8697	10.401	143.898	11.2321	35.0935	10.4062	29.6478	11.2321	65.6353	10.404	29.42	11.2321	64.9018	10.4023	34.0607	11.2321	78.9772
10.4131	72.5231	11.2393	38.8079	10.4077	142.202	11.2393	35.0928	10.4129	29.6219	11.2393	65.1693	10.4106	29.2654	11.2393	64.4844	10.409	33.9115	11.2393	78.3302
10.4198	71.7135	11.2465	38.7447	10.4144	140.523	11.2465	35.0888	10.4196	29.6026	11.2465	64.7056	10.4173	29.1156	11.2465	64.0746	10.4156	33.7737	11.2465	77.6894
10.4265	70.9114	11.2537	38.6834	10.421	138.86	11.2537	35.0817	10.4262	29.5877	11.2537	64.2504	10.4239	28.9742	11.2537	63.6685	10.4223	33.6468	11.2537	77.0552
10.4331	70.118	11.2609	38.6262	10.4277	137.214	11.2609	35.0728	10.4329	29.5757	11.2609	63.809	10.4306	28.8441	11.2609	63.2626	10.429	33.5308	11.2609	76.4283
10.4398	69.3348	11.2681	38.5742	10.4344	135.584	11.2681	35.0636	10.4396	29.5673	11.2681	63.3844	10.4373	28.7258	11.2681	62.8553	10.4356	33.427	11.2681	75.8098
10.4465	68.5612	11.2753	38.5269	10.441	133.971	11.2753	35.0554	10.4462	29.5635	11.2753	62.9766	10.4439	28.62	11.2753	62.4466	10.4423	33.3371	11.2753	75.2009
10.4531	67.7979	11.2825	38.4834	10.4477	132.373	11.2825	35.0489	10.4529	29.5645	11.2825	62.5833	10.4506	28.5263	11.2825	62.0369	10.4489	33.262	11.2825	74.6038
10.4598	67.0455	11.2897	38.4418	10.4544	130.791	11.2897	35.0447	10.4596	29.5709	11.2897	62.2016	10.4573	28.4461	11.2897	61.6265	10.4556	33.2017	11.2897	74.0206
10.4665	66.3045	11.2969	38.4003	10.461	129.227	11.2969	35.0432	10.4663	29.5839	11.2969	61.8284	10.464	28.3791	11.2969	61.2165	10.4623	33.1567	11.2969	73.4527
10.4731	65.5752	11.3041	38.3581	10.4677	127.683	11.3041	35.0433	10.4729	29.6049	11.3041	61.4605	10.4706	28.3237	11.3041	60.8096	10.4689	33.1265	11.3041	72.9009
10.4798	64.8569	11.3113	38.3154	10.4744	126.157	11.3113	35.0433	10.4796	29.6342	11.3113	61.0941	10.4773	28.2781	11.3113	60.409	10.4756	33.1104	11.3113	72.3641
10.4864	64.1511	11.3185	38.2733	10.481	124.651	11.3185	35.0411	10.4863	29.672	11.3185	60.7262	10.484	28.2418	11.3185	60.0164	10.4823	33.1078	11.3185	71.8401
10.4931	63.4584	11.3257	38.2329	10.4877	123.164	11.3257	35.0352	10.4929	29.7195	11.3257	60.3553	10.4906	28.2162	11.3257	59.632	10.489	33.1188	11.3257	71.3256
10.4998	62.7781	11.3329	38.1946	10.4944	121.697	11.3329	35.0246	10.4996	29.7789	11.3329	59.9819	10.4973	28.1998	11.3329	59.2554	10.4956	33.1455	11.3329	70.8169
10.5064	62.1089	11.3401	38.1578	10.501	120.247	11.3401	35.0096	10.5062	29.853	11.3401	59.6077	10.5039	28.193	11.3401	58.8878	10.5023	33.1894	11.3401	70.3103
10.5131	61.4511	11.3473	38.1212	10.5077	118.814	11.3473	34.9908	10.5129	29.9448	11.3473	59.2346	10.5106	28.1997	11.3473	58.5307	10.509	33.2525	11.3473	69.8036
10.5198	60.8058	11.3545	38.083	10.5144	117.4	11.3545	34.9699	10.5196	30.0573	11.3545	58.8648	10.5173	28.2263	11.3545	58.1847	10.5156	33.3377	11.3545	69.2957
10.5265	60.1728	11.3617	38.0414	10.521	116.003	11.3617	34.949	10.5262	30.1936	11.3617	58.5005	10.5239	28.2784	11.3617	57.8479	10.5223	33.4482	11.3617	68.788
10.5331	59.5516	11.3689	37.9953	10.5277	114.624	11.3689	34.9303	10.5329	30.3568	11.3689	58.1441	10.5306	28.3576	11.3689	57.5177	10.529	33.586	11.3689	68.2833
10.5398	58.9423	11.3761	37.9456	10.5344	113.265	11.3761	34.9153	10.5396	30.5494	11.3761	57.7968	10.5373	28.4655	11.3761	57.1923	10.5356	33.751	11.3761	67.7847
10.5465	58.3451	11.3833	37.8948	10.541	111.93	11.3833	34.9048	10.5463	30.7712	11.3833	57.4577	10.544	28.6034	11.3833	56.8706	10.5423	33.9437	11.3833	67.2948
10.5531	57.7599	11.3905	37.8469	10.5477	110.62	11.3905	34.8991	10.5529	31.0208	11.3905	57.1246	10.5506	28.7706	11.3905	56.5511	10.5489	34.1646	11.3905	66.8149
10.5598	57.1847	11.3977	37.8055	10.5544	109.337	11.3977	34.8979	10.5596	31.2976	11.3977	56.7949	10.5573	28.9658	11.3977	56.2318	10.5556	34.4145	11.3977	66.3455
10.5664	56.6182	11.4049	37.7731	10.561	108.079	11.4049	34.9002	10.5663	31.6017	11.4049	56.4667	10.564	29.187	11.4049	55.9114	10.5623	34.6933	11.4049	65.8855
10.5731	56.0597	11.4121	37.7505	10.5677	106.85	11.4121	34.905	10.5729	31.9314	11.4121	56.1397	10.5706	29.4338	11.4121	55.5916	10.5689	35.0023	11.4121	65.4325
10.5798	55.5095	11.4193	37.7367	10.5744	105.648	11.4193	34.9115	10.5796	32.2855	11.4193	55.8144	10.5773	29.7068	11.4193	55.2764	10.5756	35.3449	11.4193	64.9826
10.5864	54.9688	11.4265	37.7294	10.581	104.473	11.4265	34.9195	10.5862	32.6645	11.4265	55.4933	10.5839	30.0053	11.4265	54.9706	10.5823	35.7235	11.4265	64.5326
10.5931	54.4371	11.4337	37.7249	10.5877	103.321	11.4337	34.9291	10.5929	33.0706	11.4337	55.1799	10.5906	30.3303	11.4337	54.6772	10.589	36.1403	11.4337	64.081
10.5998	53.9151	11.4409	37.7199	10.5944	102.191	11.4409	34.9397	10.5996	33.5049	11.4409	54.8782	10.5973	30.6844	11.4409	54.3982	10.5956	36.5966	11.4409	63.6286
10.6065	53.403	11.4481	37.7123	10.601	101.082	11.4481	34.9505	10.6062	33.9674	11.4481	54.5907	10.6039	31.0708	11.4481	54.1345	10.6023	37.0943	11.4481	63.1779
10.6131	52.9023	11.4553	37.7021	10.6077	99.9925	11.4553	34.9603	10.6129	34.4597	11.4553	54.3177	10.6106	31.4929	11.4553	53.8866	10.609	37.6345	11.4553	62.7317
10.6198	52.4123	11.4625	37.691	10.6144	98.9203	11.4625	34.9685	10.6196	34.9842	11.4625	54.057	10.6173	31.9553	11.4625	53.6539	10.6156	38.2175	11.4625	62.2931
10.6265	51.9321	11.4697	37.6815	10.621	97.8653	11.4697	34.9749	10.6263	35.5447	11.4697	53.8047	10.624	32.4625	11.4697	53.4335	10.6223	38.8453	11.4697	61.8654
10.6331	51.4607	11.4769	37.6762	10.6277	96.827	11.4769	34.9795	10.6329	36.1429	11.4769	53.5564	10.6306	33.0174	11.4769	53.2208	10.6289	39.5204	11.4769	61.4521
10.6398	50.9978	11.4841	37.6763	10.6344	95.806	11.4841	34.982	10.6396	36.7816	11.4841	53.3075	10.6373	33.6198	11.4841	53.0107	10.6356	40.244	11.4841	61.0555
10.6464	50.543	11.4913	37.6814	10.641	94.803	11.4913	34.9824	10.6463	37.4644	11.4913	53.0548	10.644	34.2715	11.4913	52.7988	10.6423	41.0169	11.4913	60.6761
10.6531	50.0935	11.4985	37.6896	10.6477	93.8188	11.4985	34.9807	10.6529	38.1955	11.4985	52.7969	10.6506	34.9737	11.4985	52.5814	10.6489	41.8401	11.4985	60.3125
10.6598	49.6479	11.5057	37.6971	10.6544	92.8535	11.5057	34.9775	10.6596	38.9783	11.5057	52.5349	10.6573	35.7268	11.5057	52.3547	10.6556	42.7175	11.5057	59.9618
10.6664	49.2055	11.5129	37.6999	10.661	91.9063	11.5129	34.9738	10.6662	39.8141	11.5129	52.272	10.6639	36.5313	11.5129	52.1158	10.6623	43.6523	11.5129	59.6212
10.6731	48.7679	11.5201	37.6942	10.6677	90.9771	11.5201	34.9707	10.6729	40.7059	11.5201	52.0113	10.6706	37.3889	11.5201	51.8628	10.669	44.6468	11.5201	59.2883
10.6798	48.3361	11.5273	37.6787	10.6744	90.0648	11.5273	34.9681	10.6796	41.6567	11.5273	51.7551	10.6773	38.3019	11.5273	51.5963	10.6756	45.7055	11.5273	58.9608
10.6865	47.9103	11.5345	37.6539	10.681	89.1677	11.5345	34.9649	10.6862	42.6702	11.5345	51.5046	10.6839	39.272	11.5345	51.3192	10.6823	46.834	11.5345	58.6358
10.6931	47.4909	11.5417	37.6219	10.6877	88.2839	11.5417	34.9594	10.6929	43.7487	11.5417	51.2599	10.6906	40.3006	11.5417	51.0359	10.689	48.0374	11.5417	58.3103
10.6998	47.0794	11.5489	37.5857	10.6944	87.4119	11.5489	34.951	10.6996	44.8951	11.5489	51.0202	10.6973	41.3905	11.5489	50.7521	10.6956	49.3184	11.5489	57.9823
10.7065	46.6765	11.5561	37.5494	10.701	86.5505	11.5561	34.9395	10.7063	46.114	11.5561	50.7836	10.704	42.5458	11.5561	50.4736	10.7023	50.6803	11.5561	57.6514
10.7131	46.2806	11.5633	37.5168	10.7077	85.6988	11.5633	34.9254	10.7129	47.4098	11.5633	50.5484	10.7106	43.77	11.5633	50.2062	10.7089	52.1287	11.5633	57.319
10.7198	45.8894	11.5705	37.4907	10.7144	84.8558	11.5705	34.9088	10.7196	48.7853	11.5705	50.3134	10.7173	45.067	11.5705	49.9539	10.7156	53.6694	11.5705	56.9868
10.7264	45.5027	11.5777	37.4717	10.721	84.0214	11.5777	34.8894	10.7263	50.2428	11.5777	50.0788	10.724	46.4415	11.5777	49.7183	10.7223	55.3081	11.5777	56.6559
10.7331	45.1209	11.5849	37.4575	10.7277	83.1951	11.5849	34.8673	10.7329	51.7846	11.5849	49.8453	10.7306	47.8974	11.5849	49.4981	10.7289	57.0506	11.5849	56.3271
10.7398	44.7439	11.5921	37.4451	10.7344	82.3758	11.5921	34.8431	10.7396	53.4131	11.5921	49.6138	10.7373	49.438	11.5921	49.2901	10.7356	58.9039	11.5921	56.0025
10.7464	44.3713	11.5993	37.4322	10.741	81.563	11.5993	34.8181	10.7462	55.1302	11.5993	49.3847	10.7439	51.0649	11.5993	49.0899	10.7423	60.8735	11.5993	55.6849
10.7531	44.0045	11.6065	37.4176	10.7477	80.7569	11.6065	34.7934	10.7529	56.9369	11.6065	49.1581	10.7506	52.7813	11.6065	48.8931	10.749	62.9629	11.6065	55.3759
10.7598	43.6457	11.6137	37.4009	10.7544	79.9591	11.6137	34.7696	10.7596	58.8358	11.6137	48.9346	10.7573	54.5894	11.6137	48.6965	10.7556	65.1748	11.6137	55.0746
10.7665	43.2948	11.6209	37.3818	10.761	79.1702	11.6209	34.747	10.7662	60.8302	11.6209	48.7149	10.7639	56.491	11.6209	48.4985	10.7623	67.5131	11.6209	54.7782
10.7731	42.9506	11.6281	37.3607	10.7677	78.3902	11.6281	34.7258	10.7729	62.9237	11.6281	48.4997	10.7706	58.4891	11.6281	48.2994	10.769	69.9804	11.6281	54.4836
10.7798	42.6113	11.6353	37.3395	10.7744	77.6197	11.6353	34.707	10.7796	65.1188	11.6353	48.2895	10.7773	60.5865	11.6353	48.1014	10.7756	72.5786	11.6353	54.1901
10.7865	42.276	11.6425	37.321	10.781	76.8597	11.6425	34.6921	10.7863	67.4174	11.6425	48.085	10.784	62.7869	11.6425	47.9075	10.7823	75.31	11.6425	53.8979
10.7931	41.9449	11.6497	37.3074	10.7877	76.1093	11.6497	34.6822	10.7929	69.8211	11.6497	47.8868	10.7906	65.0914	11.6497	47.7209	10.7889	78.1764	11.6497	53.6076
10.7998	41.6182	11.6569	37.2988	10.7944	75.3659	11.6569	34.6771	10.7996	72.3293	11.6569	47.6949	10.7973	67.5009	11.6569	47.5442	10.7956	81.1777	11.6569	53.3189
10.8064	41.2963	11.6641	37.2939	10.801	74.6271	11.6641	34.6756	10.8063	74.9391	11.6641	47.5089	10.804	70.0146	11.6641	47.3777	10.8023	84.3101	11.6641	53.0325
10.8131	40.9806	11.6713	37.2912	10.8077	73.8928	11.6713	34.6759	10.8129	77.647	11.6713	47.3276	10.8106	72.6292	11.6713	47.2196	10.8089	87.5715	11.6713	52.7512
10.8198	40.673	11.6785	37.2895	10.8144	73.1627	11.6785	34.677	10.8196	80.4486	11.6785	47.1497	10.8173	75.3396	11.6785	47.0659	10.8156	90.9592	11.6785	52.4794
10.8264	40.3739	11.6857	37.2883	10.821	72.4351	11.6857	34.6789	10.8262	83.3398	11.6857	46.9737	10.8239	78.1402	11.6857	46.9127	10.8223	94.468	11.6857	52.2198
10.8331	40.0827	11.6929	37.2868	10.8277	71.7097	11.6929	34.6821	10.8329	86.3149	11.6929	46.7982	10.8306	81.0257	11.6929	46.7562	10.829	98.0895	11.6929	51.9725
10.8398	39.7969	11.7001	37.2846	10.8344	70.9861	11.7001	34.6863	10.8396	89.3682	11.7001	46.6221	10.8373	83.9893	11.7001	46.5947	10.8356	101.816	11.7001	51.7347
10.8465	39.516	11.7073	37.281	10.841	70.2644	11.7073	34.6911	10.8462	92.4935	11.7073	46.4451	10.8439	87.0226	11.7073	46.4276	10.8423	105.642	11.7073	51.5029
10.8531	39.2382	11.7145	37.2759	10.8477	69.5441	11.7145	34.6961	10.8529	95.6839	11.7145	46.2683	10.8506	90.1185	11.7145	46.256	10.849	109.557	11.7145	51.2749
10.8598	38.9607	11.7217	37.2687	10.8544	68.8256	11.7217	34.7016	10.8596	98.9307	11.7217	46.0935	10.8573	93.2699	11.7217	46.0822	10.8556	113.549	11.7217	51.0487
10.8665	38.681	11.7289	37.2589	10.861	68.1125	11.7289	34.708	10.8663	102.224	11.7289	45.923	10.864	96.4676	11.7289	45.9096	10.8623	117.602	11.7289	50.8226
10.8731	38.3992	11.7361	37.246	10.8677	67.4075	11.7361	34.7149	10.8729	105.556	11.7361	45.7582	10.8706	99.7	11.7361	45.7418	10.8689	121.705	11.7361	50.595
10.8798	38.1162	11.7433	37.23	10.8744	66.7128	11.7433	34.7204	10.8796	108.913	11.7433	45.6005	10.8773	102.958	11.7433	45.5819	10.8756	125.847	11.7433	50.366
10.8864	37.8306	11.7505	37.2111	10.881	66.0286	11.7505	34.7227	10.8863	112.286	11.7505	45.4502	10.884	106.233	11.7505	45.4318	10.8823	130.016	11.7505	50.1374
10.8931	37.5401	11.7577	37.1898	10.8877	65.3552	11.7577	34.7212	10.8929	115.663	11.7577	45.3073	10.8906	109.517	11.7577	45.2923	10.8889	134.198	11.7577	49.912
10.8998	37.2442	11.7649	37.1671	10.8944	64.6932	11.7649	34.7166	10.8996	119.034	11.7649	45.1697	10.8973	112.8	11.7649	45.1633	10.8956	138.381	11.7649	49.6925
10.9064	36.9431	11.7721	37.1449	10.901	64.0416	11.7721	34.711	10.9062	122.386	11.7721	45.0345	10.904	116.071	11.7721	45.0444	10.9023	142.553	11.7721	49.4799
10.9131	36.636	11.7793	37.1249	10.9077	63.3985	11.7793	34.7058	10.9129	125.707	11.7793	44.8982	10.9106	119.317	11.7793	44.935	10.909	146.701	11.7793	49.2741
10.9198	36.322	11.7865	37.1082	10.9144	62.7632	11.7865	34.7018	10.9196	128.985	11.7865	44.7587	10.9173	122.528	11.7865	44.8343	10.9156	150.81	11.7865	49.0742
10.9265	36.0028	11.7937	37.0949	10.921	62.137	11.7937	34.6993	10.9262	132.212	11.7937	44.6158	10.9239	125.69	11.7937	44.7406	10.9223	154.862	11.7937	48.8792
10.9331	35.6825	11.8009	37.0845	10.9277	61.5208	11.8009	34.6983	10.9329	135.375	11.8009	44.4711	10.9306	128.787	11.8009	44.651	10.929	158.845	11.8009	48.6888
10.9398	35.3644	11.8081	37.0769	10.9344	60.9138	11.8081	34.698	10.9396	138.461	11.8081	44.3271	10.9373	131.81	11.8081	44.562	10.9356	162.743	11.8081	48.5023
10.9465	35.0503	11.8153	37.0725	10.941	60.3149	11.8153	34.6967	10.9462	141.461	11.8153	44.1872	10.9439	134.747	11.8153	44.4703	10.9423	166.541	11.8153	48.3198
10.9531	34.7406	11.8225	37.0707	10.9477	59.724	11.8225	34.692	10.9529	144.364	11.8225	44.0553	10.9506	137.586	11.8225	44.3729	10.9489	170.23	11.8225	48.1416
10.9598	34.4349	11.8297	37.0707	10.9544	59.1425	11.8297	34.6824	10.9596	147.162	11.8297	43.9353	10.9573	140.32	11.8297	44.2669	10.9556	173.796	11.8297	47.9686
10.9665	34.1338	11.8369	37.071	10.961	58.5698	11.8369	34.6682	10.9663	149.846	11.8369	43.83	10.964	142.941	11.8369	44.1503	10.9623	177.229	11.8369	47.8018
10.9731	33.8362	11.8441	37.07	10.9677	58.0061	11.8441	34.6514	10.9729	152.407	11.8441	43.7395	10.9706	145.442	11.8441	44.0225	10.9689	180.515	11.8441	47.6415
10.9798	33.5407	11.8513	37.0665	10.9744	57.4507	11.8513	34.6351	10.9796	154.836	11.8513	43.661	10.9773	147.817	11.8513	43.8849	10.9756	183.643	11.8513	47.4869
10.9864	33.246	11.8585	37.0588	10.981	56.905	11.8585	34.6224	10.9863	157.128	11.8585	43.5889	10.984	150.059	11.8585	43.7409	10.9823	186.603	11.8585	47.3366
10.9931	32.9539	11.8657	37.0457	10.9877	56.3703	11.8657	34.6159	10.9929	159.277	11.8657	43.5172	10.9906	152.167	11.8657	43.5943	10.989	189.385	11.8657	47.1897
10.9998	32.6669	11.8729	37.027	10.9944	55.8458	11.8729	34.6173	10.9996	161.278	11.8729	43.4408	10.9973	154.137	11.8729	43.4484	10.9956	191.976	11.8729	47.0459
11.0064	32.3847	11.8801	37.0043	11.001	55.3304	11.8801	34.6265	11.0062	163.124	11.8801	43.3562	11.0039	155.962	11.8801	43.3055	11.0023	194.372	11.8801	46.9054
11.0131	32.1071	11.8873	36.9799	11.0077	54.8228	11.8873	34.6422	11.0129	164.813	11.8873	43.2621	11.0106	157.637	11.8873	43.1671	11.009	196.567	11.8873	46.7676
11.0198	31.835	11.8945	36.9564	11.0144	54.3237	11.8945	34.6613	11.0196	166.344	11.8945	43.1585	11.0173	159.16	11.8945	43.0342	11.0156	198.559	11.8945	46.6306
11.0265	31.5701	11.9017	36.9354	11.021	53.8306	11.9017	34.6802	11.0262	167.718	11.9017	43.0472	11.0239	160.531	11.9017	42.9078	11.0223	200.348	11.9017	46.493
11.0331	31.3128	11.9089	36.9184	11.0277	53.3419	11.9089	34.6959	11.0329	168.932	11.9089	42.9321	11.0306	161.747	11.9089	42.7885	11.029	201.934	11.9089	46.3543
11.0398	31.0623	11.9161	36.9061	11.0344	52.8571	11.9161	34.7067	11.0396	169.988	11.9161	42.8184	11.0373	162.807	11.9161	42.6764	11.0356	203.316	11.9161	46.2146
11.0465	30.8173	11.9233	36.8986	11.041	52.3766	11.9233	34.7119	11.0463	170.886	11.9233	42.7112	11.044	163.713	11.9233	42.5708	11.0423	204.495	11.9233	46.0737
11.0531	30.5768	11.9305	36.8942	11.0477	51.9002	11.9305	34.7121	11.0529	171.629	11.9305	42.6129	11.0506	164.467	11.9305	42.471	11.0489	205.471	11.9305	45.9304
11.0598	30.3398	11.9377	36.8907	11.0544	51.4276	11.9377	34.7088	11.0596	172.219	11.9377	42.5233	11.0573	165.072	11.9377	42.3766	11.0556	206.248	11.9377	45.7843
11.0664	30.1064	11.9449	36.886	11.061	50.9599	11.9449	34.7037	11.0663	172.658	11.9449	42.4399	11.064	165.531	11.9449	42.2876	11.0623	206.831	11.9449	45.6366
11.0731	29.8753	11.9521	36.8792	11.0677	50.497	11.9521	34.6987	11.0729	172.95	11.9521	42.3598	11.0706	165.845	11.9521	42.2032	11.0689	207.224	11.9521	45.4905
11.0798	29.6459	11.9593	36.8708	11.0744	50.0383	11.9593	34.6947	11.0796	173.101	11.9593	42.2796	11.0773	166.017	11.9593	42.1219	11.0756	207.436	11.9593	45.3491
11.0864	29.4194	11.9665	36.8616	11.081	49.5831	11.9665	34.692	11.0862	173.113	11.9665	42.1962	11.0839	166.052	11.9665	42.0415	11.0823	207.477	11.9665	45.2138
11.0931	29.1966	11.9737	36.8518	11.0877	49.1308	11.9737	34.6901	11.0929	172.993	11.9737	42.1061	11.0906	165.957	11.9737	41.9605	11.089	207.358	11.9737	45.0835
11.0998	28.9783	11.9809	36.841	11.0944	48.6802	11.9809	34.6883	11.0996	172.744	11.9809	42.0074	11.0973	165.736	11.9809	41.8798	11.0956	207.087	11.9809	44.9567
11.1065	28.7637	11.9881	36.8283	11.101	48.2299	11.9881	34.6858	11.1062	172.373	11.9881	41.9007	11.1039	165.393	11.9881	41.8013	11.1023	206.67	11.9881	44.8321
11.1131	28.5543	11.9953	36.8134	11.1077	47.7797	11.9953	34.6815	11.1129	171.886	11.9953	41.7898	11.1106	164.934	11.9953	41.7263	11.109	206.114	11.9953	44.7082
11.1198	28.3498	12.0025	36.7958	11.1144	47.3293	12.0025	34.6743	11.1196	171.29	12.0025	41.6802	11.1173	164.367	12.0025	41.6552	11.1156	205.425	12.0025	44.5834
11.1265	28.1497	12.0097	36.775	11.121	46.8787	12.0097	34.664	11.1263	170.591	12.0097	41.577	11.124	163.696	12.0097	41.5869	11.1223	204.609	12.0097	44.4566
11.1331	27.9525	12.0169	36.7509	11.1277	46.429	12.0169	34.6511	11.1329	169.797	12.0169	41.4834	11.1306	162.924	12.0169	41.5207	11.1289	203.672	12.0169	44.3279
11.1398	27.7586	12.0241	36.7247	11.1344	45.9822	12.0241	34.6368	11.1396	168.915	12.0241	41.4003	11.1373	162.057	12.0241	41.4564	11.1356	202.622	12.0241	44.2
11.1464	27.5674	12.0313	36.6989	11.141	45.5386	12.0313	34.6225	11.1463	167.95	12.0313	41.3268	11.144	161.1	12.0313	41.3936	11.1423	201.465	12.0313	44.0767
11.1531	27.377	12.0385	36.6769	11.1477	45.0973	12.0385	34.6097	11.1529	166.908	12.0385	41.2609	11.1506	160.061	12.0385	41.3311	11.1489	200.213	12.0385	43.9617
11.1598	27.1874	12.0457	36.6618	11.1544	44.6585	12.0457	34.6005	11.1596	165.795	12.0457	41.2002	11.1573	158.946	12.0457	41.268	11.1556	198.874	12.0457	43.8574
11.1664	26.9992	12.0529	36.6553	11.161	44.2226	12.0529	34.5972	11.1662	164.619	12.0529	41.1421	11.1639	157.763	12.0529	41.2041	11.1623	197.456	12.0529	43.7648
11.1731	26.8133	12.0601	36.6574	11.1677	43.7896	12.0601	34.6019	11.1729	163.384	12.0601	41.0836	11.1706	156.518	12.0601	41.141	11.169	195.966	12.0601	43.6831
11.1798	26.6279	12.0673	36.6671	11.1744	43.3592	12.0673	34.6147	11.1796	162.097	12.0673	41.0227	11.1773	155.22	12.0673	41.0811	11.1756	194.409	12.0673	43.6099
11.1865	26.4418	12.0745	36.6822	11.181	42.9313	12.0745	34.6338	11.1862	160.761	12.0745	40.9589	11.1839	153.874	12.0745	41.0259	11.1823	192.792	12.0745	43.5407
11.1931	26.255	12.0817	36.6998	11.1877	42.5068	12.0817	34.6561	11.1929	159.38	12.0817	40.8933	11.1906	152.487	12.0817	40.9756	11.189	191.123	12.0817	43.4694
11.1998	26.0673	12.0889	36.7164	11.1944	42.0864	12.0889	34.6781	11.1996	157.962	12.0889	40.8278	11.1973	151.067	12.0889	40.9292	11.1956	189.407	12.0889	43.3903
11.2065	25.8777	12.0961	36.7286	11.201	41.6717	12.0961	34.6962	11.2063	156.511	12.0961	40.7632	11.204	149.62	12.0961	40.8851	11.2023	187.65	12.0961	43.299
11.2131	25.6856	12.1033	36.7343	11.2077	41.2643	12.1033	34.7073	11.2129	155.031	12.1033	40.6993	11.2106	148.154	12.1033	40.8414	11.2089	185.86	12.1033	43.1936
11.2198	25.4919	12.1105	36.7335	11.2144	40.8646	12.1105	34.7087	11.2196	153.528	12.1105	40.6355	11.2173	146.675	12.1105	40.7962	11.2156	184.041	12.1105	43.0745
11.2264	25.2987	12.1177	36.728	11.221	40.4737	12.1177	34.6996	11.2263	152.007	12.1177	40.5725	11.224	145.187	12.1177	40.7475	11.2223	182.199	12.1177	42.9445
11.2331	25.1079	12.1249	36.7204	11.2277	40.0923	12.1249	34.6814	11.2329	150.475	12.1249	40.5115	11.2306	143.693	12.1249	40.6941	11.2289	180.338	12.1249	42.8085
11.2398	24.9203	12.1321	36.713	11.2344	39.7222	12.1321	34.6576	11.2396	148.935	12.1321	40.4542	11.2373	142.197	12.1321	40.6357	11.2356	178.465	12.1321	42.6731
11.2464	24.7361	12.1393	36.7071	11.241	39.364	12.1393	34.6325	11.2462	147.389	12.1393	40.4017	11.2439	140.702	12.1393	40.5729	11.2423	176.583	12.1393	42.5455
11.2531	24.5568	12.1465	36.7039	11.2477	39.0166	12.1465	34.61	11.2529	145.837	12.1465	40.3548	11.2506	139.208	12.1465	40.5067	11.249	174.698	12.1465	42.4316
11.2598	24.3828	12.1537	36.7037	11.2544	38.6791	12.1537	34.5929	11.2596	144.281	12.1537	40.3143	11.2573	137.721	12.1537	40.4388	11.2556	172.813	12.1537	42.335
11.2665	24.2122	12.1609	36.7057	11.261	38.3497	12.1609	34.5824	11.2662	142.726	12.1609	40.2805	11.2639	136.243	12.1609	40.3713	11.2623	170.936	12.1609	42.2563
11.2731	24.043	12.1681	36.7078	11.2677	38.0265	12.1681	34.5779	11.2729	141.171	12.1681	40.2523	11.2706	134.778	12.1681	40.3066	11.269	169.069	12.1681	42.1929
11.2798	23.875	12.1753	36.7067	11.2744	37.7075	12.1753	34.577	11.2796	139.62	12.1753	40.227	11.2773	133.329	12.1753	40.2474	11.2756	167.217	12.1753	42.1403
11.2865	23.7098	12.1825	36.6998	11.281	37.3908	12.1825	34.5763	11.2863	138.075	12.1825	40.2012	11.284	131.895	12.1825	40.1963	11.2823	165.38	12.1825	42.0926
11.2931	23.5479	12.1897	36.6868	11.2877	37.0756	12.1897	34.5727	11.2929	136.538	12.1897	40.1718	11.2906	130.473	12.1897	40.1551	11.2889	163.561	12.1897	42.0442
11.2998	23.3887	12.1969	36.6696	11.2944	36.7621	12.1969	34.5645	11.2996	135.01	12.1969	40.1375	11.2973	129.064	12.1969	40.1241	11.2956	161.758	12.1969	41.9908
11.3064	23.2322	12.2041	36.6514	11.301	36.4511	12.2041	34.5518	11.3063	133.49	12.2041	40.0975	11.304	127.665	12.2041	40.1021	11.3023	159.976	12.2041	41.93
11.3131	23.0799	12.2113	36.635	11.3077	36.1433	12.2113	34.5363	11.3129	131.983	12.2113	40.052	11.3106	126.276	12.2113	40.0862	11.3089	158.214	12.2113	41.8617
11.3198	22.9325	12.2185	36.6224	11.3144	35.8377	12.2185	34.5208	11.3196	130.489	12.2185	40.0026	11.3173	124.896	12.2185	40.0717	11.3156	156.474	12.2185	41.7885
11.3264	22.7901	12.2257	36.6152	11.321	35.5346	12.2257	34.5089	11.3262	129.01	12.2257	39.9516	11.3239	123.527	12.2257	40.0539	11.3223	154.756	12.2257	41.7143
11.3331	22.6516	12.2329	36.614	11.3277	35.235	12.2329	34.5051	11.3329	127.546	12.2329	39.9013	11.3306	122.172	12.2329	40.0281	11.329	153.058	12.2329	41.6438
11.3398	22.5178	12.2401	36.618	11.3344	34.9393	12.2401	34.5127	11.3396	126.103	12.2401	39.8526	11.3373	120.834	12.2401	39.9918	11.3356	151.382	12.2401	41.5805
11.3465	22.3893	12.2473	36.624	11.341	34.6466	12.2473	34.5329	11.3462	124.68	12.2473	39.8045	11.3439	119.514	12.2473	39.9445	11.3423	149.722	12.2473	41.5254
11.3531	22.2655	12.2545	36.6267	11.3477	34.3554	12.2545	34.564	11.3529	123.279	12.2545	39.7555	11.3506	118.214	12.2545	39.8886	11.349	148.078	12.2545	41.4775
11.3598	22.1465	12.2617	36.621	11.3544	34.0658	12.2617	34.6028	11.3596	121.898	12.2617	39.7038	11.3573	116.935	12.2617	39.8282	11.3556	146.444	12.2617	41.4338
11.3665	22.031	12.2689	36.6038	11.361	33.7773	12.2689	34.6451	11.3663	120.54	12.2689	39.6485	11.364	115.68	12.2689	39.7678	11.3623	144.821	12.2689	41.3911
11.3731	21.9188	12.2761	36.5753	11.3677	33.4886	12.2761	34.6872	11.3729	119.204	12.2761	39.5884	11.3706	114.447	12.2761	39.7113	11.3689	143.208	12.2761	41.3462
11.3798	21.8085	12.2833	36.5381	11.3744	33.1985	12.2833	34.7248	11.3796	117.89	12.2833	39.5229	11.3773	113.236	12.2833	39.6608	11.3756	141.604	12.2833	41.297
11.3864	21.6993	12.2905	36.4964	11.381	32.9065	12.2905	34.7541	11.3863	116.597	12.2905	39.4523	11.384	112.046	12.2905	39.617	11.3823	140.012	12.2905	41.2435
11.3931	21.591	12.2977	36.4555	11.3877	32.6122	12.2977	34.7722	11.3929	115.322	12.2977	39.3793	11.3906	110.874	12.2977	39.5788	11.3889	138.432	12.2977	41.1872
11.3998	21.4815	12.3049	36.4208	11.3944	32.3151	12.3049	34.7785	11.3996	114.066	12.3049	39.308	11.3973	109.72	12.3049	39.5435	11.3956	136.866	12.3049	41.1311
11.4064	21.3701	12.3121	36.3972	11.401	32.0151	12.3121	34.7748	11.4062	112.825	12.3121	39.243	11.404	108.579	12.3121	39.5081	11.4023	135.316	12.3121	41.0787
11.4131	21.2563	12.3193	36.3879	11.4077	31.7116	12.3193	34.764	11.4129	111.599	12.3193	39.1878	11.4106	107.452	12.3193	39.4702	11.409	133.784	12.3193	41.0322
11.4198	21.141	12.3265	36.3934	11.4144	31.4043	12.3265	34.7489	11.4196	110.387	12.3265	39.1447	11.4173	106.338	12.3265	39.4292	11.4156	132.271	12.3265	40.9929
11.4265	21.0248	12.3337	36.4115	11.421	31.0939	12.3337	34.7322	11.4262	109.188	12.3337	39.1145	11.4239	105.238	12.3337	39.3856	11.4223	130.777	12.3337	40.9604
11.4331	20.9072	12.3409	36.4382	11.4277	30.7834	12.3409	34.7163	11.4329	108	12.3409	39.0964	11.4306	104.152	12.3409	39.3407	11.429	129.302	12.3409	40.933
11.4398	20.7893	12.3481	36.4685	11.4344	30.474	12.3481	34.7036	11.4396	106.825	12.3481	39.0876	11.4373	103.078	12.3481	39.2957	11.4356	127.846	12.3481	40.9082
11.4465	20.6704	12.3553	36.4984	11.441	30.1656	12.3553	34.6956	11.4462	105.663	12.3553	39.0839	11.4439	102.015	12.3553	39.2517	11.4423	126.408	12.3553	40.8831
11.4531	20.55	12.3625	36.5248	11.4477	29.8587	12.3625	34.6929	11.4529	104.513	12.3625	39.0803	11.4506	100.96	12.3625	39.2094	11.4489	124.986	12.3625	40.8553
11.4598	20.427	12.3697	36.5459	11.4544	29.5542	12.3697	34.6952	11.4596	103.374	12.3697	39.0726	11.4573	99.9116	12.3697	39.1694	11.4556	123.581	12.3697	40.8239
11.4665	20.3003	12.3769	36.5609	11.461	29.2532	12.3769	34.7012	11.4663	102.247	12.3769	39.0587	11.464	98.8684	12.3769	39.1321	11.4623	122.19	12.3769	40.7893
11.4731	20.1694	12.3841	36.5697	11.4677	28.9551	12.3841	34.7094	11.4729	101.132	12.3841	39.0384	11.4706	97.832	12.3841	39.0978	11.4689	120.812	12.3841	40.7527
11.4798	20.0333	12.3913	36.5733	11.4744	28.6608	12.3913	34.7169	11.4796	100.028	12.3913	39.0126	11.4773	96.8054	12.3913	39.0673	11.4756	119.445	12.3913	40.7148
11.4864	19.8936	12.3985	36.5731	11.481	28.3711	12.3985	34.7205	11.4863	98.9325	12.3985	38.9823	11.484	95.7904	12.3985	39.0415	11.4823	118.088	12.3985	40.6751
11.4931	19.7515	12.4057	36.5706	11.4877	28.0851	12.4057	34.7176	11.4929	97.8457	12.4057	38.9484	11.4906	94.7885	12.4057	39.022	11.489	116.744	12.4057	40.6329
11.4998	19.6087	12.4129	36.5667	11.4944	27.8029	12.4129	34.7068	11.4996	96.7691	12.4129	38.9113	11.4973	93.8009	12.4129	39.0101	11.4956	115.412	12.4129	40.5874
11.5064	19.4657	12.4201	36.5612	11.501	27.5247	12.4201	34.6882	11.5062	95.7019	12.4201	38.8713	11.5039	92.8276	12.4201	39.0068	11.5023	114.095	12.4201	40.5382
11.5131	19.3226	12.4273	36.5536	11.5077	27.2514	12.4273	34.6628	11.5129	94.6436	12.4273	38.8283	11.5106	91.8677	12.4273	39.0118	11.509	112.794	12.4273	40.4853
11.5198	19.1792	12.4345	36.544	11.5144	26.9814	12.4345	34.6327	11.5196	93.5932	12.4345	38.7813	11.5173	90.9182	12.4345	39.0233	11.5156	111.512	12.4345	40.4286
11.5265	19.0341	12.4417	36.5328	11.521	26.7153	12.4417	34.6013	11.5262	92.5511	12.4417	38.7303	11.5239	89.9767	12.4417	39.0378	11.5223	110.251	12.4417	40.3688
11.5331	18.8857	12.4489	36.521	11.5277	26.4539	12.4489	34.5725	11.5329	91.5158	12.4489	38.6764	11.5306	89.0424	12.4489	39.0516	11.529	109.012	12.4489	40.3079
11.5398	18.7316	12.4561	36.5097	11.5344	26.1973	12.4561	34.5505	11.5396	90.4858	12.4561	38.6233	11.5373	88.114	12.4561	39.061	11.5356	107.796	12.4561	40.2493
11.5465	18.571	12.4633	36.5	11.541	25.9445	12.4633	34.5377	11.5463	89.462	12.4633	38.5762	11.544	87.1892	12.4633	39.0627	11.5423	106.604	12.4633	40.1961
11.5531	18.4031	12.4705	36.493	11.5477	25.6942	12.4705	34.5347	11.5529	88.445	12.4705	38.5398	11.5506	86.2649	12.4705	39.054	11.5489	105.436	12.4705	40.1502
11.5598	18.2289	12.4777	36.4896	11.5544	25.4461	12.4777	34.5398	11.5596	87.4363	12.4777	38.5169	11.5573	85.3402	12.4777	39.0333	11.5556	104.292	12.4777	40.1118
11.5664	18.0505	12.4849	36.4901	11.561	25.1992	12.4849	34.5503	11.5663	86.4359	12.4849	38.508	11.564	84.4156	12.4849	39.0001	11.5623	103.173	12.4849	40.0798
11.5731	17.8713	12.4921	36.494	11.5677	24.9535	12.4921	34.5631	11.5729	85.4455	12.4921	38.5107	11.5706	83.4916	12.4921	38.956	11.5689	102.072	12.4921	40.0528
11.5798	17.6939	12.4993	36.5	11.5744	24.709	12.4993	34.5757	11.5796	84.4659	12.4993	38.5212	11.5773	82.5689	12.4993	38.9038	11.5756	100.989	12.4993	40.0292
11.5864	17.5206	12.5065	36.5063	11.581	24.4661	12.5065	34.5857	11.5862	83.4961	12.5065	38.5336	11.5839	81.6497	12.5065	38.8465	11.5823	99.9199	12.5065	40.0069
11.5931	17.3535	12.5137	36.5112	11.5877	24.2248	12.5137	34.5916	11.5929	82.5355	12.5137	38.542	11.5906	80.7368	12.5137	38.7872	11.589	98.8661	12.5137	39.9835
11.5998	17.1934	12.5209	36.5138	11.5944	23.9869	12.5209	34.5927	11.5996	81.5854	12.5209	38.5413	11.5973	79.8339	12.5209	38.7283	11.5956	97.8247	12.5209	39.9572
11.6065	17.04	12.5281	36.5139	11.601	23.7536	12.5281	34.5896	11.6062	80.6465	12.5281	38.5293	11.6039	78.9427	12.5281	38.6724	11.6023	96.7941	12.5281	39.9271
11.6131	16.8935	12.5353	36.5126	11.6077	23.5249	12.5353	34.5833	11.6129	79.7182	12.5353	38.5068	11.6106	78.0655	12.5353	38.6217	11.609	95.7752	12.5353	39.8936
11.6198	16.7547	12.5425	36.5111	11.6144	23.3002	12.5425	34.5754	11.6196	78.7986	12.5425	38.4773	11.6173	77.2038	12.5425	38.5782	11.6156	94.7682	12.5425	39.8578
11.6265	16.6242	12.5497	36.511	11.621	23.0799	12.5497	34.5672	11.6263	77.8878	12.5497	38.4449	11.624	76.3584	12.5497	38.5433	11.6223	93.7734	12.5497	39.8213
11.6331	16.5028	12.5569	36.5135	11.6277	22.8653	12.5569	34.5588	11.6329	76.988	12.5569	38.4132	11.6306	75.5299	12.5569	38.5175	11.6289	92.7893	12.5569	39.7863
11.6398	16.3907	12.5641	36.5196	11.6344	22.6562	12.5641	34.5499	11.6396	76.0991	12.5641	38.3844	11.6373	74.7175	12.5641	38.5007	11.6356	91.8156	12.5641	39.7548
11.6464	16.2869	12.5713	36.5291	11.641	22.4513	12.5713	34.5403	11.6463	75.222	12.5713	38.3592	11.644	73.9218	12.5713	38.4923	11.6423	90.8522	12.5713	39.7287
11.6531	16.1896	12.5785	36.5416	11.6477	22.2497	12.5785	34.531	11.6529	74.3586	12.5785	38.3364	11.6506	73.1425	12.5785	38.4913	11.6489	89.9003	12.5785	39.7091
11.6598	16.098	12.5857	36.5554	11.6544	22.0518	12.5857	34.5239	11.6596	73.5127	12.5857	38.3139	11.6573	72.3794	12.5857	38.4953	11.6556	88.961	12.5857	39.6958
11.6664	16.0116	12.5929	36.5686	11.661	21.8568	12.5929	34.5216	11.6662	72.687	12.5929	38.2892	11.6639	71.6324	12.5929	38.5008	11.6623	88.032	12.5929	39.6875
11.6731	15.9309	12.6001	36.5786	11.6677	21.6638	12.6001	34.5263	11.6729	71.8807	12.6001	38.2608	11.6706	70.9012	12.6001	38.5035	11.669	87.1127	12.6001	39.6815
11.6798	15.8556	12.6073	36.5833	11.6744	21.4715	12.6073	34.5392	11.6796	71.0943	12.6073	38.2287	11.6773	70.1858	12.6073	38.4993	11.6756	86.2034	12.6073	39.6743
11.6865	15.7855	12.6145	36.5812	11.681	21.2813	12.6145	34.5606	11.6862	70.3289	12.6145	38.1947	11.6839	69.4844	12.6145	38.4859	11.6823	85.3059	12.6145	39.6616
11.6931	15.7206	12.6217	36.5723	11.6877	21.0953	12.6217	34.5901	11.6929	69.585	12.6217	38.1611	11.6906	68.7951	12.6217	38.4627	11.689	84.4186	12.6217	39.6397
11.6998	15.6617	12.6289	36.5578	11.6944	20.9159	12.6289	34.6265	11.6996	68.8627	12.6289	38.1302	11.6973	68.1164	12.6289	38.4308	11.6956	83.5398	12.6289	39.607
11.7065	15.6094	12.6361	36.5401	11.701	20.7434	12.6361	34.6676	11.7063	68.1606	12.6361	38.1037	11.704	67.4473	12.6361	38.3922	11.7023	82.6692	12.6361	39.5635
11.7131	15.5621	12.6433	36.5217	11.7077	20.5777	12.6433	34.7094	11.7129	67.4781	12.6433	38.0819	11.7106	66.7874	12.6433	38.35	11.7089	81.8064	12.6433	39.5114
11.7198	15.5175	12.6505	36.5051	11.7144	20.4193	12.6505	34.7476	11.7196	66.8134	12.6505	38.0644	11.7173	66.1354	12.6505	38.3083	11.7156	80.9506	12.6505	39.4544
11.7264	15.4752	12.6577	36.4922	11.721	20.2685	12.6577	34.778	11.7263	66.1656	12.6577	38.0494	11.724	65.4909	12.6577	38.2711	11.7223	80.1	12.6577	39.397
11.7331	15.4349	12.6649	36.4843	11.7277	20.1237	12.6649	34.7984	11.7329	65.5335	12.6649	38.035	11.7306	64.8541	12.6649	38.2402	11.7289	79.2546	12.6649	39.344
11.7398	15.3946	12.6721	36.4814	11.7344	19.9834	12.6721	34.8083	11.7396	64.9145	12.6721	38.0193	11.7373	64.2256	12.6721	38.2153	11.7356	78.4144	12.6721	39.2994
11.7464	15.3517	12.6793	36.4825	11.741	19.848	12.6793	34.8089	11.7462	64.3063	12.6793	38.0018	11.7439	63.606	12.6793	38.1946	11.7423	77.5797	12.6793	39.2657
11.7531	15.305	12.6865	36.4854	11.7477	19.7172	12.6865	34.8016	11.7529	63.7086	12.6865	37.9833	11.7506	62.996	12.6865	38.1763	11.749	76.7522	12.6865	39.2424
11.7598	15.2563	12.6937	36.4876	11.7544	19.5896	12.6937	34.7883	11.7596	63.1218	12.6937	37.9654	11.7573	62.3977	12.6937	38.1596	11.7556	75.9331	12.6937	39.2277
11.7665	15.2076	12.7009	36.4861	11.761	19.4628	12.7009	34.7716	11.7662	62.5458	12.7009	37.9496	11.7639	61.8127	12.7009	38.144	11.7623	75.1232	12.7009	39.2184
11.7731	15.161	12.7081	36.4792	11.7677	19.3358	12.7081	34.7546	11.7729	61.979	12.7081	37.9373	11.7706	61.242	12.7081	38.1294	11.769	74.3226	12.7081	39.2114
11.7798	15.1172	12.7153	36.4666	11.7744	19.2073	12.7153	34.7397	11.7796	61.4214	12.7153	37.9293	11.7773	60.6859	12.7153	38.1154	11.7756	73.5345	12.7153	39.2041
11.7865	15.0761	12.7225	36.4499	11.781	19.0757	12.7225	34.7278	11.7863	60.8741	12.7225	37.9257	11.784	60.143	12.7225	38.1027	11.7823	72.7606	12.7225	39.1947
11.7931	15.0381	12.7297	36.4313	11.7877	18.9398	12.7297	34.7182	11.7929	60.3365	12.7297	37.9257	11.7906	59.6118	12.7297	38.0917	11.7889	72.0008	12.7297	39.1822
11.7998	15.0023	12.7369	36.4127	11.7944	18.7999	12.7369	34.7091	11.7996	59.8059	12.7369	37.9273	11.7973	59.0892	12.7369	38.0824	11.7956	71.2539	12.7369	39.1667
11.8064	14.9673	12.7441	36.3953	11.801	18.6572	12.7441	34.6982	11.8063	59.2792	12.7441	37.9282	11.804	58.5722	12.7441	38.0732	11.8023	70.5202	12.7441	39.1488
11.8131	14.9311	12.7513	36.3802	11.8077	18.512	12.7513	34.6833	11.8129	58.7546	12.7513	37.9268	11.8106	58.0585	12.7513	38.0615	11.8089	69.8008	12.7513	39.1295
11.8198	14.8924	12.7585	36.3689	11.8144	18.3654	12.7585	34.6626	11.8196	58.2313	12.7585	37.9226	11.8173	57.5468	12.7585	38.0456	11.8156	69.094	12.7585	39.1088
11.8264	14.8519	12.7657	36.363	11.821	18.2187	12.7657	34.6355	11.8262	57.7092	12.7657	37.9155	11.8239	57.0367	12.7657	38.0256	11.8223	68.3971	12.7657	39.0865
11.8331	14.8096	12.7729	36.3636	11.8277	18.0754	12.7729	34.6024	11.8329	57.1873	12.7729	37.9061	11.8306	56.528	12.7729	38.0032	11.829	67.707	12.7729	39.0624
11.8398	14.7656	12.7801	36.3701	11.8344	17.9377	12.7801	34.5653	11.8396	56.6643	12.7801	37.8953	11.8373	56.021	12.7801	37.9814	11.8356	67.0227	12.7801	39.0368
11.8465	14.7194	12.7873	36.3811	11.841	17.8067	12.7873	34.5271	11.8462	56.1397	12.7873	37.8842	11.8439	55.5159	12.7873	37.9639	11.8423	66.3445	12.7873	39.0109
11.8531	14.6707	12.7945	36.3953	11.8477	17.6836	12.7945	34.4917	11.8529	55.6145	12.7945	37.8741	11.8506	55.0134	12.7945	37.954	11.849	65.6725	12.7945	38.9864
11.8598	14.62	12.8017	36.4118	11.8544	17.5679	12.8017	34.463	11.8596	55.0891	12.8017	37.8666	11.8573	54.5138	12.8017	37.9549	11.8556	65.0075	12.8017	38.9661
11.8665	14.5677	12.8089	36.4301	11.861	17.4579	12.8089	34.4439	11.8663	54.5633	12.8089	37.8625	11.864	54.0171	12.8089	37.9684	11.8623	64.3495	12.8089	38.9532
11.8731	14.5129	12.8161	36.4486	11.8677	17.3507	12.8161	34.436	11.8729	54.0366	12.8161	37.8621	11.8706	53.5235	12.8161	37.9942	11.8689	63.6992	12.8161	38.951
11.8798	14.4548	12.8233	36.4652	11.8744	17.245	12.8233	34.4394	11.8796	53.5097	12.8233	37.865	11.8773	53.0326	12.8233	38.0297	11.8756	63.0562	12.8233	38.9615
11.8864	14.3936	12.8305	36.4779	11.881	17.1406	12.8305	34.4533	11.8863	52.9836	12.8305	37.8703	11.884	52.5449	12.8305	38.0705	11.8823	62.4189	12.8305	38.9843
11.8931	14.3304	12.8377	36.486	11.8877	17.0353	12.8377	34.4763	11.8929	52.4589	12.8377	37.8764	11.8906	52.0602	12.8377	38.1118	11.8889	61.7855	12.8377	39.0168
11.8998	14.2651	12.8449	36.4901	11.8944	16.9271	12.8449	34.5065	11.8996	51.936	12.8449	37.882	11.8973	51.5782	12.8449	38.1495	11.8956	61.1532	12.8449	39.0548
11.9064	14.1975	12.8521	36.4918	11.901	16.8149	12.8521	34.5419	11.9062	51.415	12.8521	37.8853	11.904	51.0991	12.8521	38.1808	11.9023	60.5209	12.8521	39.0931
11.9131	14.1292	12.8593	36.4917	11.9077	16.6988	12.8593	34.5803	11.9129	50.8971	12.8593	37.885	11.9106	50.6227	12.8593	38.204	11.909	59.8886	12.8593	39.1254
11.9198	14.0611	12.8665	36.4897	11.9144	16.5772	12.8665	34.6199	11.9196	50.3841	12.8665	37.8794	11.9173	50.1489	12.8665	38.2181	11.9156	59.2571	12.8665	39.1461
11.9265	13.9918	12.8737	36.4853	11.921	16.4469	12.8737	34.659	11.9262	49.8777	12.8737	37.868	11.9239	49.6783	12.8737	38.2222	11.9223	58.6283	12.8737	39.1512
11.9331	13.9187	12.8809	36.4776	11.9277	16.3072	12.8809	34.6958	11.9329	49.3776	12.8809	37.8511	11.9306	49.2126	12.8809	38.216	11.929	58.0019	12.8809	39.1397
11.9398	13.8406	12.8881	36.4663	11.9344	16.1598	12.8881	34.7286	11.9396	48.8829	12.8881	37.8306	11.9373	48.7534	12.8881	38.1998	11.9356	57.3785	12.8881	39.1134
11.9465	13.7571	12.8953	36.4508	11.941	16.0078	12.8953	34.7565	11.9462	48.393	12.8953	37.8089	11.9439	48.3018	12.8953	38.1735	11.9423	56.7599	12.8953	39.0756
11.9531	13.6681	12.9025	36.4311	11.9477	15.8535	12.9025	34.7792	11.9529	47.9084	12.9025	37.7884	11.9506	47.8595	12.9025	38.1369	11.9489	56.1489	12.9025	39.03
11.9598	13.5733	12.9097	36.4074	11.9544	15.6981	12.9097	34.7973	11.9596	47.4297	12.9097	37.7712	11.9573	47.4276	12.9097	38.0901	11.9556	55.5471	12.9097	38.9808
11.9665	13.4737	12.9169	36.3815	11.961	15.545	12.9169	34.8115	11.9663	46.9562	12.9169	37.7585	11.964	47.0064	12.9169	38.0349	11.9623	54.9539	12.9169	38.9326
11.9731	13.3704	12.9241	36.3556	11.9677	15.3976	12.9241	34.8231	11.9729	46.4873	12.9241	37.7511	11.9706	46.5949	12.9241	37.9756	11.9689	54.3695	12.9241	38.8894
11.9798	13.265	12.9313	36.3318	11.9744	15.2572	12.9313	34.8329	11.9796	46.0221	12.9313	37.7491	11.9773	46.1907	12.9313	37.9176	11.9756	53.7933	12.9313	38.8535
11.9864	13.1596	12.9385	36.3118	11.981	15.1245	12.9385	34.842	11.9863	45.5615	12.9385	37.7519	11.984	45.7911	12.9385	37.8665	11.9823	53.2249	12.9385	38.8248
11.9931	13.0547	12.9457	36.2964	11.9877	14.9994	12.9457	34.8503	11.9929	45.1048	12.9457	37.7575	11.9906	45.3935	12.9457	37.8271	11.989	52.6641	12.9457	38.8019
11.9998	12.9503	12.9529	36.2859	11.9944	14.8834	12.9529	34.857	11.9996	44.6502	12.9529	37.7628	11.9973	44.9978	12.9529	37.8026	11.9956	52.1093	12.9529	38.7829
12.0064	12.8465	12.9601	36.2799	12.001	14.7775	12.9601	34.8611	12.0062	44.1972	12.9601	37.7647	12.0039	44.6043	12.9601	37.7938	12.0023	51.5583	12.9601	38.7666
12.0131	12.7454	12.9673	36.2773	12.0077	14.6808	12.9673	34.8615	12.0129	43.7465	12.9673	37.761	12.0106	44.2124	12.9673	37.799	12.009	51.0092	12.9673	38.7524
12.0198	12.648	12.9745	36.2767	12.0144	14.5933	12.9745	34.8578	12.0196	43.2974	12.9745	37.7502	12.0173	43.8217	12.9745	37.8132	12.0156	50.463	12.9745	38.739
12.0265	12.5547	12.9817	36.2774	12.021	14.5144	12.9817	34.8503	12.0262	42.8475	12.9817	37.7318	12.0239	43.4323	12.9817	37.8298	12.0223	49.9202	12.9817	38.7255
12.0331	12.4662	12.9889	36.2795	12.0277	14.4442	12.9889	34.8391	12.0329	42.3963	12.9889	37.7059	12.0306	43.0449	12.9889	37.8417	12.029	49.378	12.9889	38.712
12.0398	12.3845	12.9961	36.2839	12.0344	14.3814	12.9961	34.8245	12.0396	41.9445	12.9961	37.6739	12.0373	42.6589	12.9961	37.8438	12.0356	48.8338	12.9961	38.6998
12.0465	12.3108	13.0033	36.2911	12.041	14.3247	13.0033	34.807	12.0463	41.4908	13.0033	37.6393	12.044	42.2743	13.0033	37.8329	12.0423	48.2875	13.0033	38.6911
12.0531	12.2444	13.0105	36.3015	12.0477	14.2735	13.0105	34.7867	12.0529	41.0339	13.0105	37.6067	12.0506	41.8914	13.0105	37.8092	12.0489	47.7426	13.0105	38.6876
12.0598	12.1843	13.0177	36.3147	12.0544	14.2271	13.0177	34.7637	12.0596	40.5753	13.0177	37.5802	12.0573	41.5107	13.0177	37.7755	12.0556	47.2001	13.0177	38.6894
12.0664	12.1299	13.0249	36.3301	12.061	14.1839	13.0249	34.7375	12.0663	40.1173	13.0249	37.5628	12.064	41.1319	13.0249	37.7368	12.0623	46.6612	13.0249	38.6949
12.0731	12.0803	13.0321	36.3463	12.0677	14.1428	13.0321	34.7082	12.0729	39.6618	13.0321	37.5558	12.0706	40.7544	13.0321	37.6984	12.0689	46.127	13.0321	38.7021
12.0798	12.0348	13.0393	36.3617	12.0744	14.1036	13.0393	34.6768	12.0796	39.2087	13.0393	37.559	12.0773	40.3781	13.0393	37.6646	12.0756	45.5996	13.0393	38.7087
12.0864	11.9933	13.0465	36.375	12.081	14.0675	13.0465	34.646	12.0862	38.7597	13.0465	37.5712	12.0839	40.0024	13.0465	37.6376	12.0823	45.081	13.0465	38.7123
12.0931	11.9559	13.0537	36.3852	12.0877	14.0362	13.0537	34.6195	12.0929	38.3174	13.0537	37.5897	12.0906	39.627	13.0537	37.6183	12.089	44.5713	13.0537	38.7104
12.0998	11.9237	13.0609	36.3918	12.0944	14.0116	13.0609	34.6004	12.0996	37.8829	13.0609	37.6106	12.0973	39.2536	13.0609	37.606	12.0956	44.0706	13.0609	38.7008
12.1065	11.8952	13.0681	36.3946	12.101	13.9961	13.0681	34.5908	12.1062	37.4556	13.0681	37.6293	12.1039	38.8851	13.0681	37.5988	12.1023	43.5783	13.0681	38.6826
12.1131	11.8699	13.0753	36.394	12.1077	13.9909	13.0753	34.5912	12.1129	37.0331	13.0753	37.642	12.1106	38.5234	13.0753	37.594	12.109	43.0949	13.0753	38.6577
12.1198	11.8475	13.0825	36.3909	12.1144	13.9952	13.0825	34.6007	12.1196	36.6141	13.0825	37.6465	12.1173	38.1684	13.0825	37.5892	12.1156	42.6209	13.0825	38.6297
12.1265	11.8277	13.0897	36.3864	12.121	14.0067	13.0897	34.6166	12.1263	36.1988	13.0897	37.6425	12.124	37.8202	13.0897	37.5837	12.1223	42.1559	13.0897	38.6035
12.1331	11.81	13.0969	36.3815	12.1277	14.0226	13.0969	34.6348	12.1329	35.7873	13.0969	37.6315	12.1306	37.4798	13.0969	37.5784	12.1289	41.6978	13.0969	38.583
12.1398	11.7917	13.1041	36.3768	12.1344	14.0403	13.1041	34.6503	12.1396	35.3798	13.1041	37.6159	12.1373	37.1476	13.1041	37.5748	12.1356	41.246	13.1041	38.571
12.1464	11.7721	13.1113	36.3725	12.141	14.057	13.1113	34.6594	12.1463	34.9769	13.1113	37.5994	12.144	36.822	13.1113	37.5739	12.1423	40.8003	13.1113	38.5688
12.1531	11.7518	13.1185	36.3686	12.1477	14.0701	13.1185	34.6606	12.1529	34.5803	13.1185	37.5858	12.1506	36.5019	13.1185	37.5759	12.1489	40.3598	13.1185	38.5762
12.1598	11.7315	13.1257	36.3655	12.1544	14.0813	13.1257	34.6549	12.1596	34.1911	13.1257	37.5787	12.1573	36.1872	13.1257	37.5811	12.1556	39.9226	13.1257	38.5916
12.1664	11.7114	13.1329	36.3629	12.161	14.0916	13.1329	34.6453	12.1662	33.809	13.1329	37.5799	12.1639	35.8774	13.1329	37.5895	12.1623	39.4879	13.1329	38.6117
12.1731	11.6915	13.1401	36.3599	12.1677	14.1015	13.1401	34.6356	12.1729	33.4339	13.1401	37.5893	12.1706	35.5693	13.1401	37.6007	12.169	39.0557	13.1401	38.6324
12.1798	11.6742	13.1473	36.3555	12.1744	14.1093	13.1473	34.6298	12.1796	33.0662	13.1473	37.6043	12.1773	35.2592	13.1473	37.6135	12.1756	38.6252	13.1473	38.6491
12.1865	11.6614	13.1545	36.349	12.181	14.1145	13.1545	34.6316	12.1862	32.706	13.1545	37.6205	12.1839	34.9456	13.1545	37.6268	12.1823	38.1954	13.1545	38.6581
12.1931	11.653	13.1617	36.3407	12.1877	14.1177	13.1617	34.6431	12.1929	32.3537	13.1617	37.6328	12.1906	34.6281	13.1617	37.6397	12.189	37.7676	13.1617	38.6577
12.1998	11.6493	13.1689	36.3315	12.1944	14.118	13.1689	34.6648	12.1996	32.0099	13.1689	37.6363	12.1973	34.3058	13.1689	37.6525	12.1956	37.3445	13.1689	38.6483
12.2065	11.6511	13.1761	36.3222	12.201	14.1137	13.1761	34.6948	12.2063	31.6758	13.1761	37.6275	12.204	33.9771	13.1761	37.6654	12.2023	36.9277	13.1761	38.6314
12.2131	11.6586	13.1833	36.314	12.2077	14.1044	13.1833	34.7293	12.2129	31.3511	13.1833	37.6054	12.2106	33.6438	13.1833	37.6783	12.2089	36.518	13.1833	38.6094
12.2198	11.6714	13.1905	36.3086	12.2144	14.091	13.1905	34.7644	12.2196	31.0337	13.1905	37.572	12.2173	33.3096	13.1905	37.6907	12.2156	36.117	13.1905	38.5844
12.2264	11.6886	13.1977	36.3075	12.221	14.074	13.1977	34.7963	12.2263	30.7223	13.1977	37.5318	12.224	32.9762	13.1977	37.7026	12.2223	35.7271	13.1977	38.5591
12.2331	11.7095	13.2049	36.3119	12.2277	14.0527	13.2049	34.8224	12.2329	30.4162	13.2049	37.4904	12.2306	32.6437	13.2049	37.7137	12.2289	35.3493	13.2049	38.5368
12.2398	11.7319	13.2121	36.3217	12.2344	14.0259	13.2121	34.8407	12.2396	30.1148	13.2121	37.4533	12.2373	32.3111	13.2121	37.7235	12.2356	34.9826	13.2121	38.5202
12.2464	11.7554	13.2193	36.3357	12.241	13.9948	13.2193	34.8503	12.2462	29.8164	13.2193	37.4245	12.2439	31.9801	13.2193	37.7311	12.2423	34.6268	13.2193	38.5103
12.2531	11.7805	13.2265	36.3522	12.2477	13.9603	13.2265	34.8516	12.2529	29.5216	13.2265	37.4062	12.2506	31.652	13.2265	37.7352	12.249	34.2813	13.2265	38.5065
12.2598	11.8072	13.2337	36.3696	12.2544	13.925	13.2337	34.8458	12.2596	29.2316	13.2337	37.3979	12.2573	31.3264	13.2337	37.7349	12.2556	33.9449	13.2337	38.507
12.2665	11.8346	13.2409	36.3865	12.261	13.8916	13.2409	34.8352	12.2662	28.9456	13.2409	37.397	12.2639	31.0024	13.2409	37.7299	12.2623	33.6164	13.2409	38.5105
12.2731	11.8618	13.2481	36.4025	12.2677	13.8616	13.2481	34.8217	12.2729	28.662	13.2481	37.3988	12.2706	30.6792	13.2481	37.7198	12.269	33.2946	13.2481	38.516
12.2798	11.8873	13.2553	36.4172	12.2744	13.8364	13.2553	34.8068	12.2796	28.3797	13.2553	37.3989	12.2773	30.3581	13.2553	37.704	12.2756	32.9779	13.2553	38.5223
12.2865	11.9086	13.2625	36.4309	12.281	13.8155	13.2625	34.7913	12.2863	28.0996	13.2625	37.3947	12.284	30.0399	13.2625	37.6821	12.2823	32.6642	13.2625	38.5267
12.2931	11.9234	13.2697	36.4445	12.2877	13.8	13.2697	34.7765	12.2929	27.8209	13.2697	37.3862	12.2906	29.7254	13.2697	37.6548	12.2889	32.3532	13.2697	38.5265
12.2998	11.9315	13.2769	36.4587	12.2944	13.7899	13.2769	34.764	12.2996	27.5437	13.2769	37.3754	12.2973	29.4152	13.2769	37.6241	12.2956	32.0452	13.2769	38.5204
12.3064	11.9326	13.2841	36.4739	12.301	13.7855	13.2841	34.7553	12.3063	27.2689	13.2841	37.3655	12.304	29.1095	13.2841	37.5932	12.3023	31.7396	13.2841	38.509
12.3131	11.9266	13.2913	36.4895	12.3077	13.7869	13.2913	34.7518	12.3129	26.9963	13.2913	37.3601	12.3106	28.8102	13.2913	37.5656	12.3089	31.4356	13.2913	38.4935
12.3198	11.9147	13.2985	36.5037	12.3144	13.7938	13.2985	34.7533	12.3196	26.7248	13.2985	37.3626	12.3173	28.5175	13.2985	37.5444	12.3156	31.1346	13.2985	38.4746
12.3264	11.8984	13.3057	36.5142	12.321	13.8058	13.3057	34.7592	12.3262	26.4511	13.3057	37.3749	12.3239	28.2325	13.3057	37.532	12.3223	30.8373	13.3057	38.4522
12.3331	11.8797	13.3129	36.5191	12.3277	13.8215	13.3129	34.7687	12.3329	26.1738	13.3129	37.397	12.3306	27.955	13.3129	37.53	12.329	30.5425	13.3129	38.4265
12.3398	11.8592	13.3201	36.5164	12.3344	13.8395	13.3201	34.7806	12.3396	25.8924	13.3201	37.4261	12.3373	27.6861	13.3201	37.5387	12.3356	30.2486	13.3201	38.3986
12.3465	11.8371	13.3273	36.505	12.341	13.8583	13.3273	34.7938	12.3462	25.6082	13.3273	37.4573	12.3439	27.4267	13.3273	37.5566	12.3423	29.9551	13.3273	38.3704
12.3531	11.8144	13.3345	36.4852	12.3477	13.8773	13.3345	34.8064	12.3529	25.323	13.3345	37.4847	12.3506	27.1766	13.3345	37.5805	12.349	29.6624	13.3345	38.3425
12.3598	11.7921	13.3417	36.4588	12.3544	13.8965	13.3417	34.8162	12.3596	25.04	13.3417	37.5028	12.3573	26.9361	13.3417	37.6057	12.3556	29.3713	13.3417	38.3151
12.3665	11.7704	13.3489	36.4291	12.361	13.9154	13.3489	34.8219	12.3663	24.7624	13.3489	37.5076	12.364	26.7033	13.3489	37.6276	12.3623	29.0831	13.3489	38.289
12.3731	11.7473	13.3561	36.3999	12.3677	13.9346	13.3561	34.8238	12.3729	24.4928	13.3561	37.4973	12.3706	26.4766	13.3561	37.643	12.3689	28.7992	13.3561	38.2662
12.3798	11.7212	13.3633	36.3745	12.3744	13.9538	13.3633	34.8234	12.3796	24.2318	13.3633	37.4724	12.3773	26.2545	13.3633	37.6506	12.3756	28.5207	13.3633	38.2496
12.3864	11.6913	13.3705	36.3558	12.381	13.9737	13.3705	34.8236	12.3863	23.9788	13.3705	37.4353	12.384	26.0374	13.3705	37.6508	12.3823	28.2481	13.3705	38.2418
12.3931	11.6585	13.3777	36.346	12.3877	13.9947	13.3777	34.8267	12.3929	23.7337	13.3777	37.3902	12.3906	25.8268	13.3777	37.6457	12.3889	27.9836	13.3777	38.2437
12.3998	11.6234	13.3849	36.3456	12.3944	14.0185	13.3849	34.8346	12.3996	23.496	13.3849	37.3428	12.3973	25.6253	13.3849	37.638	12.3956	27.7283	13.3849	38.2547
12.4064	11.5857	13.3921	36.3533	12.401	14.0485	13.3921	34.8475	12.4062	23.2661	13.3921	37.2985	12.404	25.4361	13.3921	37.6307	12.4023	27.4822	13.3921	38.2739
12.4131	11.5457	13.3993	36.3653	12.4077	14.0862	13.3993	34.865	12.4129	23.044	13.3993	37.2623	12.4106	25.2617	13.3993	37.6268	12.409	27.2472	13.3993	38.2997
12.4198	11.5043	13.4065	36.3775	12.4144	14.1333	13.4065	34.8862	12.4196	22.8295	13.4065	37.2374	12.4173	25.1034	13.4065	37.6278	12.4156	27.0265	13.4065	38.3305
12.4265	11.4632	13.4137	36.3873	12.421	14.1909	13.4137	34.9095	12.4262	22.6223	13.4137	37.2257	12.4239	24.9629	13.4137	37.6339	12.4223	26.8247	13.4137	38.3642
12.4331	11.4229	13.4209	36.3939	12.4277	14.261	13.4209	34.9325	12.4329	22.4224	13.4209	37.2279	12.4306	24.8423	13.4209	37.6441	12.429	26.6436	13.4209	38.3983
12.4398	11.382	13.4281	36.3979	12.4344	14.3451	13.4281	34.9522	12.4396	22.2298	13.4281	37.2439	12.4373	24.7434	13.4281	37.6571	12.4356	26.4851	13.4281	38.4307
12.4465	11.3409	13.4353	36.4007	12.441	14.4432	13.4353	34.9663	12.4462	22.0431	13.4353	37.2728	12.4439	24.6664	13.4353	37.6719	12.4423	26.3502	13.4353	38.4597
12.4531	11.3003	13.4425	36.4045	12.4477	14.5563	13.4425	34.9746	12.4529	21.8599	13.4425	37.3124	12.4506	24.6119	13.4425	37.6876	12.4489	26.2399	13.4425	38.4842
12.4598	11.2608	13.4497	36.4124	12.4544	14.6861	13.4497	34.9795	12.4596	21.6791	13.4497	37.3598	12.4573	24.5808	13.4497	37.704	12.4556	26.1543	13.4497	38.503
12.4665	11.2235	13.4569	36.4273	12.461	14.835	13.4569	34.9842	12.4663	21.5015	13.4569	37.412	12.464	24.5734	13.4569	37.7212	12.4623	26.094	13.4569	38.5152
12.4731	11.1896	13.4641	36.4509	12.4677	15.0054	13.4641	34.9914	12.4729	21.3288	13.4641	37.4659	12.4706	24.5893	13.4641	37.7393	12.4689	26.0602	13.4641	38.5205
12.4798	11.1607	13.4713	36.4828	12.4744	15.1989	13.4713	35.0023	12.4796	21.162	13.4713	37.5189	12.4773	24.6283	13.4713	37.7584	12.4756	26.0534	13.4713	38.5191
12.4864	11.1371	13.4785	36.5211	12.481	15.4179	13.4785	35.0174	12.4863	21.0013	13.4785	37.5684	12.484	24.692	13.4785	37.778	12.4823	26.0746	13.4785	38.5119
12.4931	11.1192	13.4857	36.563	12.4877	15.6647	13.4857	35.0373	12.4929	20.8462	13.4857	37.6118	12.4906	24.7823	13.4857	37.7968	12.489	26.1262	13.4857	38.5002
12.4998	11.1074	13.4929	36.605	12.4944	15.9407	13.4929	35.0631	12.4996	20.6967	13.4929	37.6473	12.4973	24.9017	13.4929	37.8135	12.4956	26.2107	13.4929	38.4856
12.5064	11.101	13.5001	36.644	12.501	16.2469	13.5001	35.0947	12.5062	20.5507	13.5001	37.6749	12.5039	25.0514	13.5001	37.8269	12.5023	26.3283	13.5001	38.4699
12.5131	11.099	13.5073	36.6773	12.5077	16.5849	13.5073	35.1307	12.5129	20.4051	13.5073	37.6957	12.5106	25.2331	13.5073	37.8364	12.509	26.479	13.5073	38.4547
12.5198	11.1021	13.5145	36.7042	12.5144	16.9563	13.5145	35.1693	12.5196	20.2583	13.5145	37.7108	12.5173	25.4494	13.5145	37.8422	12.5156	26.6646	13.5145	38.4407
12.5265	11.1122	13.5217	36.7246	12.521	17.3623	13.5217	35.2099	12.5262	20.11	13.5217	37.721	12.5239	25.7036	13.5217	37.8447	12.5223	26.8889	13.5217	38.4274
12.5331	11.1306	13.5289	36.7389	12.5277	17.8034	13.5289	35.2535	12.5329	19.9607	13.5289	37.7271	12.5306	25.9979	13.5289	37.845	12.529	27.1528	13.5289	38.4138
12.5398	11.1576	13.5361	36.7476	12.5344	18.2811	13.5361	35.3022	12.5396	19.8102	13.5361	37.7308	12.5373	26.335	13.5361	37.8447	12.5356	27.4564	13.5361	38.3989
12.5465	11.1918	13.5433	36.7516	12.541	18.7969	13.5433	35.357	12.5463	19.6593	13.5433	37.7335	12.544	26.7182	13.5433	37.8449	12.5423	27.8007	13.5433	38.3829
12.5531	11.2323	13.5505	36.7533	12.5477	19.3511	13.5505	35.4177	12.5529	19.5076	13.5505	37.736	12.5506	27.1501	13.5505	37.8457	12.5489	28.1875	13.5505	38.3677
12.5598	11.2791	13.5577	36.7557	12.5544	19.945	13.5577	35.4827	12.5596	19.3544	13.5577	37.7378	12.5573	27.6318	13.5577	37.8468	12.5556	28.6191	13.5577	38.3563
12.5664	11.3318	13.5649	36.7617	12.561	20.5814	13.5649	35.5496	12.5663	19.2001	13.5649	37.7378	12.564	28.1628	13.5649	37.8476	12.5623	29.0971	13.5649	38.352
12.5731	11.3887	13.5721	36.7732	12.5677	21.2637	13.5721	35.6159	12.5729	19.0471	13.5721	37.7357	12.5706	28.7447	13.5721	37.8485	12.5689	29.624	13.5721	38.3575
12.5798	11.4486	13.5793	36.7919	12.5744	21.9947	13.5793	35.6792	12.5796	18.8966	13.5793	37.7324	12.5773	29.3787	13.5793	37.8501	12.5756	30.2022	13.5793	38.3747
12.5864	11.5139	13.5865	36.8192	12.581	22.7756	13.5865	35.7371	12.5862	18.7481	13.5865	37.7285	12.5839	30.0675	13.5865	37.8532	12.5823	30.8337	13.5865	38.4039
12.5931	11.5865	13.5937	36.8563	12.5877	23.6088	13.5937	35.7875	12.5929	18.6021	13.5937	37.7243	12.5906	30.8141	13.5937	37.8583	12.589	31.521	13.5937	38.443
12.5998	11.6665	13.6009	36.9033	12.5944	24.4962	13.6009	35.829	12.5996	18.4598	13.6009	37.7205	12.5973	31.6207	13.6009	37.8661	12.5956	32.2662	13.6009	38.487
12.6065	11.7529	13.6081	36.9586	12.601	25.4399	13.6081	35.8619	12.6062	18.3225	13.6081	37.7189	12.6039	32.489	13.6081	37.8776	12.6023	33.0703	13.6081	38.5295
12.6131	11.8464	13.6153	37.0192	12.6077	26.44	13.6153	35.8883	12.6129	18.1895	13.6153	37.7228	12.6106	33.4204	13.6153	37.8929	12.609	33.9333	13.6153	38.564
12.6198	11.9488	13.6225	37.0815	12.6144	27.4973	13.6225	35.9119	12.6196	18.0614	13.6225	37.7354	12.6173	34.4154	13.6225	37.9109	12.6156	34.8566	13.6225	38.5861
12.6265	12.0594	13.6297	37.1421	12.621	28.6132	13.6297	35.9367	12.6263	17.9395	13.6297	37.7585	12.624	35.4743	13.6297	37.9297	12.6223	35.8439	13.6297	38.5941
12.6331	12.1775	13.6369	37.1975	12.6277	29.7888	13.6369	35.9657	12.6329	17.8271	13.6369	37.7917	12.6306	36.5982	13.6369	37.9473	12.6289	36.8993	13.6369	38.5896
12.6398	12.3027	13.6441	37.2445	12.6344	31.0253	13.6441	36.0004	12.6396	17.7257	13.6441	37.8338	12.6373	37.7898	13.6441	37.962	12.6356	38.0253	13.6441	38.5759
12.6464	12.4349	13.6513	37.2803	12.641	32.325	13.6513	36.0407	12.6463	17.6367	13.6513	37.8826	12.644	39.053	13.6513	37.9735	12.6423	39.2246	13.6513	38.5579
12.6531	12.5737	13.6585	37.3025	12.6477	33.6912	13.6585	36.0856	12.6529	17.5626	13.6585	37.9349	12.6506	40.392	13.6585	37.982	12.6489	40.501	13.6585	38.5406
12.6598	12.718	13.6657	37.3099	12.6544	35.1278	13.6657	36.1332	12.6596	17.506	13.6657	37.9861	12.6573	41.8112	13.6657	37.9885	12.6556	41.8581	13.6657	38.5286
12.6664	12.8688	13.6729	37.303	12.661	36.6397	13.6729	36.1806	12.6662	17.47	13.6729	38.031	12.6639	43.3153	13.6729	37.9942	12.6623	43.2971	13.6729	38.5249
12.6731	13.0262	13.6801	37.2844	12.6677	38.2317	13.6801	36.224	12.6729	17.4545	13.6801	38.0655	12.6706	44.908	13.6801	38.0002	12.669	44.8194	13.6801	38.5309
12.6798	13.1901	13.6873	37.2582	12.6744	39.9074	13.6873	36.2598	12.6796	17.4599	13.6873	38.0875	12.6773	46.5943	13.6873	38.0076	12.6756	46.4268	13.6873	38.5458
12.6865	13.3612	13.6945	37.2298	12.681	41.669	13.6945	36.2868	12.6862	17.4851	13.6945	38.0977	12.6839	48.3778	13.6945	38.0181	12.6823	48.1223	13.6945	38.5673
12.6931	13.5397	13.7017	37.2051	12.6877	43.5188	13.7017	36.3063	12.6929	17.5293	13.7017	38.0985	12.6906	50.2616	13.7017	38.0329	12.689	49.9083	13.7017	38.5922
12.6998	13.7241	13.7089	37.1895	12.6944	45.4599	13.7089	36.3221	12.6996	17.5905	13.7089	38.0937	12.6973	52.2495	13.7089	38.0529	12.6956	51.7874	13.7089	38.6177
12.7065	13.9123	13.7161	37.1872	12.701	47.4956	13.7161	36.3382	12.7063	17.6669	13.7161	38.0871	12.704	54.3454	13.7161	38.0781	12.7023	53.7634	13.7161	38.6426
12.7131	14.1033	13.7233	37.2003	12.7077	49.6297	13.7233	36.3579	12.7129	17.7566	13.7233	38.0823	12.7106	56.5545	13.7233	38.1079	12.7089	55.8409	13.7233	38.6667
12.7198	14.2965	13.7305	37.2284	12.7144	51.8657	13.7305	36.3837	12.7196	17.8587	13.7305	38.0813	12.7173	58.8793	13.7305	38.1418	12.7156	58.0255	13.7305	38.6903
12.7264	14.4909	13.7377	37.2683	12.721	54.2062	13.7377	36.4173	12.7263	17.9727	13.7377	38.0849	12.724	61.3243	13.7377	38.1792	12.7223	60.3225	13.7377	38.7133
12.7331	14.6876	13.7449	37.3144	12.7277	56.6554	13.7449	36.4591	12.7329	18.0966	13.7449	38.092	12.7306	63.8952	13.7449	38.2186	12.7289	62.7393	13.7449	38.7354
12.7398	14.8896	13.7521	37.3607	12.7344	59.2191	13.7521	36.5082	12.7396	18.2289	13.7521	38.1004	12.7373	66.5978	13.7521	38.2565	12.7356	65.2833	13.7521	38.7559
12.7464	15.0994	13.7593	37.4011	12.741	61.9027	13.7593	36.5621	12.7462	18.3686	13.7593	38.1068	12.7439	69.4365	13.7593	38.2883	12.7423	67.9614	13.7593	38.7742
12.7531	15.3188	13.7665	37.4314	12.7477	64.712	13.7665	36.6176	12.7529	18.5166	13.7665	38.108	12.7506	72.4152	13.7665	38.3096	12.749	70.7786	13.7665	38.7888
12.7598	15.5496	13.7737	37.4491	12.7544	67.655	13.7737	36.6717	12.7596	18.6734	13.7737	38.1019	12.7573	75.541	13.7737	38.3175	12.7556	73.7404	13.7737	38.7976
12.7665	15.7938	13.7809	37.4539	12.761	70.742	13.7809	36.7225	12.7662	18.8393	13.7809	38.0879	12.7639	78.8227	13.7809	38.3114	12.7623	76.8548	13.7809	38.7993
12.7731	16.0509	13.7881	37.4475	12.7677	73.9824	13.7881	36.7693	12.7729	19.016	13.7881	38.067	12.7706	82.269	13.7881	38.2921	12.769	80.1304	13.7881	38.7933
12.7798	16.3192	13.7953	37.4333	12.7744	77.3845	13.7953	36.8118	12.7796	19.2054	13.7953	38.0416	12.7773	85.888	13.7953	38.2621	12.7756	83.575	13.7953	38.7802
12.7865	16.5983	13.8025	37.4156	12.781	80.9582	13.8025	36.8499	12.7863	19.4083	13.8025	38.0145	12.784	89.6896	13.8025	38.2258	12.7823	87.199	13.8025	38.7615
12.7931	16.8881	13.8097	37.3989	12.7877	84.7146	13.8097	36.884	12.7929	19.6255	13.8097	37.9891	12.7906	93.6872	13.8097	38.1893	12.7889	91.0166	13.8097	38.7387
12.7998	17.1888	13.8169	37.3868	12.7944	88.666	13.8169	36.9142	12.7996	19.8571	13.8169	37.9685	12.7973	97.8948	13.8169	38.1591	12.7956	95.042	13.8169	38.7136
12.8064	17.5	13.8241	37.3818	12.801	92.8265	13.8241	36.941	12.8063	20.1038	13.8241	37.9555	12.804	102.325	13.8241	38.1399	12.8023	99.2886	13.8241	38.6884
12.8131	17.8231	13.8313	37.3847	12.8077	97.2115	13.8313	36.9645	12.8129	20.3646	13.8313	37.9518	12.8106	106.99	13.8313	38.1337	12.8089	103.77	13.8313	38.6647
12.8198	18.1604	13.8385	37.395	12.8144	101.837	13.8385	36.9851	12.8196	20.6398	13.8385	37.9574	12.8173	111.907	13.8385	38.14	12.8156	108.503	13.8385	38.6433
12.8264	18.5139	13.8457	37.4114	12.821	106.72	13.8457	37.0027	12.8262	20.9302	13.8457	37.9702	12.8239	117.096	13.8457	38.1566	12.8223	113.504	13.8457	38.6244
12.8331	18.887	13.8529	37.4317	12.8277	111.88	13.8529	37.0165	12.8329	21.2355	13.8529	37.987	12.8306	122.577	13.8529	38.1803	12.829	118.79	13.8529	38.608
12.8398	19.2824	13.8601	37.453	12.8344	117.336	13.8601	37.0256	12.8396	21.5554	13.8601	38.0038	12.8373	128.375	13.8601	38.207	12.8356	124.381	13.8601	38.5948
12.8465	19.701	13.8673	37.4718	12.841	123.108	13.8673	37.029	12.8462	21.8899	13.8673	38.017	12.8439	134.512	13.8673	38.2333	12.8423	130.302	13.8673	38.5858
12.8531	20.1427	13.8745	37.4851	12.8477	129.219	13.8745	37.0265	12.8529	22.2396	13.8745	38.0241	12.8506	141.016	13.8745	38.2562	12.849	136.577	13.8745	38.5814
12.8598	20.6075	13.8817	37.4914	12.8544	135.691	13.8817	37.0183	12.8596	22.6049	13.8817	38.0241	12.8573	147.914	13.8817	38.2745	12.8556	143.229	13.8817	38.5817
12.8665	21.0967	13.8889	37.4911	12.861	142.549	13.8889	37.0045	12.8663	22.9875	13.8889	38.0171	12.864	155.232	13.8889	38.288	12.8623	150.282	13.8889	38.587
12.8731	21.6107	13.8961	37.4856	12.8677	149.813	13.8961	36.9853	12.8729	23.3913	13.8961	38.005	12.8706	162.994	13.8961	38.2978	12.8689	157.76	13.8961	38.5977
12.8798	22.1483	13.9033	37.4765	12.8744	157.507	13.9033	36.9615	12.8796	23.8205	13.9033	37.9908	12.8773	171.219	13.9033	38.3051	12.8756	165.687	13.9033	38.6143
12.8864	22.7093	13.9105	37.4649	12.881	165.65	13.9105	36.9351	12.8863	24.278	13.9105	37.978	12.884	179.933	13.9105	38.3115	12.8823	174.084	13.9105	38.6357
12.8931	23.2949	13.9177	37.4521	12.8877	174.263	13.9177	36.909	12.8929	24.766	13.9177	37.9701	12.8906	189.156	13.9177	38.3176	12.8889	182.972	13.9177	38.66
12.8998	23.9078	13.9249	37.4395	12.8944	183.365	13.9249	36.8863	12.8996	25.2874	13.9249	37.9689	12.8973	198.906	13.9249	38.3231	12.8956	192.371	13.9249	38.6844
12.9064	24.5482	13.9321	37.4282	12.901	192.972	13.9321	36.8697	12.9062	25.8435	13.9321	37.9747	12.904	209.195	13.9321	38.3269	12.9023	202.301	13.9321	38.7065
12.9131	25.2151	13.9393	37.4185	12.9077	203.099	13.9393	36.861	12.9129	26.4333	13.9393	37.9865	12.9106	220.035	13.9393	38.3277	12.909	212.771	13.9393	38.7235
12.9198	25.9095	13.9465	37.4094	12.9144	213.756	13.9465	36.861	12.9196	27.0559	13.9465	38.0019	12.9173	231.432	13.9465	38.3248	12.9156	223.79	13.9465	38.7331
12.9265	26.6348	13.9537	37.4002	12.921	224.947	13.9537	36.8696	12.9262	27.7112	13.9537	38.0185	12.9239	243.382	13.9537	38.318	12.9223	235.36	13.9537	38.7334
12.9331	27.3945	13.9609	37.3909	12.9277	236.672	13.9609	36.8854	12.9329	28.4001	13.9609	38.0342	12.9306	255.873	13.9609	38.3078	12.929	247.476	13.9609	38.7238
12.9398	28.1904	13.9681	37.3833	12.9344	248.922	13.9681	36.9052	12.9396	29.1246	13.9681	38.0473	12.9373	268.887	13.9681	38.2947	12.9356	260.123	13.9681	38.7053
12.9465	29.0246	13.9753	37.3793	12.941	261.686	13.9753	36.925	12.9462	29.8874	13.9753	38.057	12.9439	282.397	13.9753	38.2802	12.9423	273.284	13.9753	38.6802
12.9531	29.9001	13.9825	37.3803	12.9477	274.94	13.9825	36.9406	12.9529	30.6923	13.9825	38.0628	12.9506	296.372	13.9825	38.2666	12.9489	286.93	13.9825	38.6519
12.9598	30.8209	13.9897	37.3862	12.9544	288.654	13.9897	36.9486	12.9596	31.5432	13.9897	38.0645	12.9573	310.77	13.9897	38.2564	12.9556	301.027	13.9897	38.6241
12.9665	31.7894	13.9969	37.3961	12.961	302.794	13.9969	36.9478	12.9663	32.4453	13.9969	38.0621	12.964	325.544	13.9969	38.251	12.9623	315.533	13.9969	38.6009
12.9731	32.8075	14.0041	37.4086	12.9677	317.314	14.0041	36.939	12.9729	33.405	14.0041	38.056	12.9706	340.636	14.0041	38.2507	12.9689	330.397	14.0041	38.5855
12.9798	33.8781	14.0113	37.4218	12.9744	332.16	14.0113	36.9244	12.9796	34.4276	14.0113	38.0474	12.9773	355.982	14.0113	38.2537	12.9756	345.565	14.0113	38.5802
12.9864	35.0056	14.0185	37.4333	12.981	347.271	14.0185	36.9066	12.9863	35.5155	14.0185	38.0378	12.984	371.515	14.0185	38.2577	12.9823	360.969	14.0185	38.5851
12.9931	36.1939	14.0257	37.4403	12.9877	362.58	14.0257	36.8881	12.9929	36.6712	14.0257	38.0293	12.9906	387.161	14.0257	38.2599	12.989	376.537	14.0257	38.598
12.9998	37.4464	14.0329	37.4411	12.9944	378.018	14.0329	36.8708	12.9996	37.898	14.0329	38.0237	12.9973	402.838	14.0329	38.2579	12.9956	392.192	14.0329	38.6154
13.0064	38.7664	14.0401	37.4352	13.001	393.502	14.0401	36.8559	13.0062	39.1978	14.0401	38.022	13.0039	418.461	14.0401	38.2493	13.0023	407.854	14.0401	38.6334
13.0131	40.158	14.0473	37.424	13.0077	408.952	14.0473	36.8434	13.0129	40.57	14.0473	38.0244	13.0106	433.942	14.0473	38.233	13.009	423.433	14.0473	38.6488
13.0198	41.6245	14.0545	37.4102	13.0144	424.283	14.0545	36.8323	13.0196	42.0121	14.0545	38.03	13.0173	449.197	14.0545	38.2096	13.0156	438.84	14.0545	38.6599
13.0265	43.1676	14.0617	37.3968	13.021	439.413	14.0617	36.8213	13.0262	43.5236	14.0617	38.037	13.0239	464.141	14.0617	38.1822	13.0223	453.99	14.0617	38.6659
13.0331	44.7899	14.0689	37.3867	13.0277	454.254	14.0689	36.8103	13.0329	45.1046	14.0689	38.0422	13.0306	478.69	14.0689	38.1553	13.029	468.799	14.0689	38.667
13.0398	46.494	14.0761	37.3814	13.0344	468.723	14.0761	36.8006	13.0396	46.7554	14.0761	38.0421	13.0373	492.76	14.0761	38.1337	13.0356	483.18	14.0761	38.665
13.0465	48.2809	14.0833	37.3821	13.041	482.74	14.0833	36.7943	13.0463	48.4761	14.0833	38.0338	13.044	506.272	14.0833	38.1212	13.0423	497.053	14.0833	38.6626
13.0531	50.1502	14.0905	37.3887	13.0477	496.231	14.0905	36.7927	13.0529	50.2666	14.0905	38.016	13.0506	519.161	14.0905	38.1196	13.0489	510.342	14.0905	38.663
13.0598	52.1007	14.0977	37.4009	13.0544	509.126	14.0977	36.7963	13.0596	52.126	14.0977	37.9906	13.0573	531.359	14.0977	38.1289	13.0556	522.98	14.0977	38.6688
13.0664	54.1311	14.1049	37.418	13.061	521.36	14.1049	36.8044	13.0663	54.0518	14.1049	37.9616	13.064	542.804	14.1049	38.1474	13.0623	534.907	14.1049	38.6808
13.0731	56.2361	14.1121	37.4388	13.0677	532.876	14.1121	36.8161	13.0729	56.0397	14.1121	37.9341	13.0706	553.44	14.1121	38.1719	13.0689	546.064	14.1121	38.6984
13.0798	58.4085	14.1193	37.4624	13.0744	543.621	14.1193	36.8307	13.0796	58.0834	14.1193	37.9126	13.0773	563.225	14.1193	38.1984	13.0756	556.406	14.1193	38.7206
13.0864	60.6404	14.1265	37.4877	13.081	553.551	14.1265	36.8472	13.0862	60.176	14.1265	37.9002	13.0839	572.125	14.1265	38.223	13.0823	565.892	14.1265	38.746
13.0931	62.9234	14.1337	37.5141	13.0877	562.627	14.1337	36.8642	13.0929	62.3115	14.1337	37.8992	13.0906	580.107	14.1337	38.2429	13.089	574.489	14.1337	38.7729
13.0998	65.2485	14.1409	37.5412	13.0944	570.822	14.1409	36.8812	13.0996	64.4828	14.1409	37.9107	13.0973	587.15	14.1409	38.257	13.0956	582.175	14.1409	38.7992
13.1065	67.605	14.1481	37.5686	13.101	578.114	14.1481	36.8991	13.1062	66.6814	14.1481	37.9341	13.1039	593.244	14.1481	38.2664	13.1023	588.935	14.1481	38.8222
13.1131	69.9811	14.1553	37.5963	13.1077	584.486	14.1553	36.9193	13.1129	68.8976	14.1553	37.9668	13.1106	598.387	14.1553	38.274	13.109	594.765	14.1553	38.8403
13.1198	72.3644	14.1625	37.6242	13.1144	589.927	14.1625	36.9429	13.1196	71.121	14.1625	38.0048	13.1173	602.579	14.1625	38.2833	13.1156	599.664	14.1625	38.8528
13.1265	74.7433	14.1697	37.6529	13.121	594.437	14.1697	36.9691	13.1263	73.3393	14.1697	38.044	13.124	605.834	14.1697	38.2975	13.1223	603.637	14.1697	38.8601
13.1331	77.1052	14.1769	37.6831	13.1277	598.025	14.1769	36.9956	13.1329	75.5387	14.1769	38.0813	13.1306	608.172	14.1769	38.319	13.1289	606.699	14.1769	38.8631
13.1398	79.4363	14.1841	37.7155	13.1344	600.702	14.1841	37.0198	13.1396	77.7059	14.1841	38.1149	13.1373	609.612	14.1841	38.349	13.1356	608.872	14.1841	38.8629
13.1464	81.7209	14.1913	37.7504	13.141	602.482	14.1913	37.0396	13.1463	79.8288	14.1913	38.1437	13.144	610.176	14.1913	38.3876	13.1423	610.177	14.1913	38.8609
13.1531	83.9449	14.1985	37.7872	13.1477	603.386	14.1985	37.0536	13.1529	81.8957	14.1985	38.1671	13.1506	609.891	14.1985	38.4332	13.1489	610.636	14.1985	38.8589
13.1598	86.0948	14.2057	37.8246	13.1544	603.447	14.2057	37.0618	13.1596	83.8942	14.2057	38.1845	13.1573	608.796	14.2057	38.4828	13.1556	610.281	14.2057	38.8586
13.1664	88.1581	14.2129	37.8605	13.161	602.697	14.2129	37.0652	13.1662	85.8115	14.2129	38.1957	13.1639	606.93	14.2129	38.5329	13.1623	609.148	14.2129	38.8609
13.1731	90.1224	14.2201	37.892	13.1677	601.175	14.2201	37.0662	13.1729	87.635	14.2201	38.2008	13.1706	604.332	14.2201	38.5797	13.169	607.272	14.2201	38.8649
13.1798	91.9763	14.2273	37.916	13.1744	598.919	14.2273	37.0683	13.1796	89.352	14.2273	38.2002	13.1773	601.045	14.2273	38.6196	13.1756	604.69	14.2273	38.8697
13.1865	93.7105	14.2345	37.9301	13.181	595.974	14.2345	37.0749	13.1862	90.9524	14.2345	38.195	13.1839	597.116	14.2345	38.6496	13.1823	601.444	14.2345	38.8745
13.1931	95.3169	14.2417	37.9334	13.1877	592.386	14.2417	37.0883	13.1929	92.4257	14.2417	38.1868	13.1906	592.592	14.2417	38.6676	13.189	597.58	14.2417	38.8796
13.1998	96.7899	14.2489	37.9268	13.1944	588.202	14.2489	37.1094	13.1996	93.7639	14.2489	38.1769	13.1973	587.522	14.2489	38.6723	13.1956	593.144	14.2489	38.8856
13.2065	98.124	14.2561	37.9132	13.201	583.469	14.2561	37.1372	13.2063	94.9605	14.2561	38.1665	13.204	581.953	14.2561	38.6638	13.2023	588.18	14.2561	38.8928
13.2131	99.3133	14.2633	37.8965	13.2077	578.232	14.2633	37.1693	13.2129	96.0111	14.2633	38.1565	13.2106	575.934	14.2633	38.6433	13.2089	582.738	14.2633	38.9015
13.2198	100.354	14.2705	37.8812	13.2144	572.54	14.2705	37.2029	13.2196	96.9123	14.2705	38.1483	13.2173	569.513	14.2705	38.6128	13.2156	576.86	14.2705	38.913
13.2264	101.244	14.2777	37.8705	13.221	566.436	14.2777	37.235	13.2263	97.6621	14.2777	38.1432	13.224	562.739	14.2777	38.5752	13.2223	570.592	14.2777	38.9289
13.2331	101.984	14.2849	37.8665	13.2277	559.967	14.2849	37.2637	13.2329	98.2608	14.2849	38.1413	13.2306	555.66	14.2849	38.5336	13.2289	563.975	14.2849	38.9513
13.2398	102.575	14.2921	37.8699	13.2344	553.181	14.2921	37.2881	13.2396	98.7097	14.2921	38.1418	13.2373	548.318	14.2921	38.492	13.2356	557.055	14.2921	38.9805
13.2464	103.014	14.2993	37.8805	13.241	546.122	14.2993	37.3083	13.2462	99.0108	14.2993	38.1439	13.2439	540.752	14.2993	38.4547	13.2423	549.872	14.2993	39.0155
13.2531	103.305	14.3065	37.8969	13.2477	538.834	14.3065	37.3255	13.2529	99.167	14.3065	38.1477	13.2506	533.002	14.3065	38.4255	13.249	542.468	14.3065	39.0541
13.2598	103.451	14.3137	37.9168	13.2544	531.358	14.3137	37.3416	13.2596	99.1825	14.3137	38.1539	13.2573	525.11	14.3137	38.4079	13.2556	534.879	14.3137	39.0943
13.2665	103.453	14.3209	37.9373	13.261	523.738	14.3209	37.3588	13.2662	99.0621	14.3209	38.1628	13.2639	517.114	14.3209	38.4039	13.2623	527.142	14.3209	39.1341
13.2731	103.315	14.3281	37.9558	13.2677	516.014	14.3281	37.3789	13.2729	98.8116	14.3281	38.1743	13.2706	509.045	14.3281	38.4147	13.269	519.297	14.3281	39.1713
13.2798	103.04	14.3353	37.9713	13.2744	508.224	14.3353	37.4027	13.2796	98.4373	14.3353	38.1883	13.2773	500.937	14.3353	38.4403	13.2756	511.378	14.3353	39.2038
13.2865	102.634	14.3425	37.9839	13.281	500.401	14.3425	37.43	13.2863	97.9467	14.3425	38.2057	13.284	492.824	14.3425	38.4795	13.2823	503.416	14.3425	39.2291
13.2931	102.104	14.3497	37.9941	13.2877	492.578	14.3497	37.4606	13.2929	97.3481	14.3497	38.2273	13.2906	484.736	14.3497	38.5294	13.2889	495.44	14.3497	39.2451
13.2998	101.457	14.3569	38.0027	13.2944	484.783	14.3569	37.4937	13.2996	96.6512	14.3569	38.2531	13.2973	476.697	14.3569	38.5858	13.2956	487.482	14.3569	39.2513
13.3064	100.704	14.3641	38.0099	13.301	477.041	14.3641	37.5288	13.3063	95.8657	14.3641	38.282	13.304	468.729	14.3641	38.6431	13.3023	479.567	14.3641	39.2491
[truncated: 1,754 more rows]
