# Supplementary material for: Calcium depletion challenges endoplasmic reticulum proteostasis by destabilising BiP-substrate complexes
Source: eLife. 2020 Dec 9;9:e62601. doi: 10.7554/eLife.62601 (PMC7758071; doi:10.7554/eLife.62601)
Supplement: Figure 7—source data 3. [file elife-62601-fig7-data3.xlsx]

## Sheet: Exp. 1
Source data: Figure 7E
		Sample ID	1_buffer	1a	2a_rep	2b	3a	4a	4b
		Time (s)	BiP+Mg_buffer	BiP+Mg	BiP+Ca	BiP+Ca+Grp170	Oligos+Mg	Oligos+Ca	Oligos+Ca+Grp170
		0	171.433	148.44	216.469	159.621	137.817	157.684	182.323
		0.1	170.123	148.743	216.81	158.837	137.64	158.179	182.044
		0.2	169.238	148.874	217.15	157.982	137.403	158.484	181.645
		0.3	168.566	148.762	217.275	156.799	137.104	158.683	181.201
		0.4	167.724	148.618	217.153	155.382	136.802	158.758	180.754
		0.5	166.651	148.149	216.965	153.782	136.473	158.579	180.165
		0.6	166.016	147.32	216.899	152.32	136.024	157.953	179.562
		0.7	165.402	146.407	216.631	151.006	135.577	157.42	179.11
		0.8	164.669	145.717	216.475	149.7	134.969	157.06	178.694
		0.9	164.167	145.077	216.512	148.475	134.328	156.777	178.13
		1	163.945	144.758	216.714	147.264	133.632	156.742	177.831
		1.1	163.688	144.634	216.562	145.945	133.115	156.795	177.831
		1.2	163.426	144.599	216.452	144.338	132.722	156.637	177.803
		1.3	163.331	144.482	216.144	142.917	132.561	156.093	177.818
		1.4	163.196	144.429	215.605	141.572	132.511	155.532	178.044
		1.5	163.119	144.158	214.915	140.226	132.474	154.838	178.023
		1.6	163.252	143.92	214.45	139.038	132.35	154.303	177.596
		1.7	163.641	143.738	214.088	138.246	132.105	153.88	177.019
		1.8	164.086	143.604	213.975	137.459	131.735	153.744	176.305
		1.9	164.573	143.497	214.169	136.737	131.301	153.595	175.516
		2	165.103	143.493	214.509	136.115	130.899	153.482	174.689
		2.1	165.313	143.419	214.675	135.339	130.556	153.38	174.121
		2.2	165.138	143.335	214.627	134.39	130.392	153.235	173.756
		2.3	164.851	143.195	214.393	133.591	130.213	153.12	173.527
		2.4	164.523	142.879	213.829	132.808	130.091	153	173.395
		2.5	164.04	142.534	213.113	131.92	130.01	152.841	173.546
		2.6	163.792	142.014	212.484	131.167	129.869	152.652	173.547
		2.7	163.791	141.353	212.004	130.547	129.481	152.758	173.294
		2.8	163.94	140.744	211.736	129.69	129.165	152.771	172.964
		2.9	164.116	140.286	211.777	128.696	128.791	152.943	172.614
		3	164.353	139.904	211.792	127.791	128.384	153.26	171.973
		3.1	164.475	139.639	211.647	126.941	128.04	153.544	171.39
		3.2	164.495	139.51	211.402	126.032	127.924	153.427	170.966
		3.3	164.222	139.209	210.858	125.294	127.857	153.415	170.486
		3.4	163.97	138.738	210.045	124.644	127.78	153.248	169.736
		3.5	163.612	138.091	209.46	124.133	127.648	152.978	169.21
		3.6	163.29	137.524	209.225	123.574	127.447	152.679	168.646
		3.7	163.144	136.916	209.217	122.87	127.106	152.663	168.056
		3.8	163.13	136.354	209.426	122.234	126.617	152.542	167.727
		3.9	163.03	135.931	209.871	121.634	126.144	152.415	167.633
		4	163.019	135.717	210.259	120.87	125.638	152.342	167.35
		4.1	163.027	135.475	210.383	120.211	125.226	152.228	167.294
		4.2	162.868	135.189	210.358	119.794	124.827	151.964	167.455
		4.3	162.873	135.126	210.348	119.165	124.598	151.669	167.533
		4.4	162.773	135.049	210.189	118.541	124.401	151.463	167.616
		4.5	162.574	134.821	209.917	118.033	124.474	151.267	167.766
		4.6	162.399	134.665	209.715	117.456	124.606	151.261	167.587
		4.7	162.209	134.637	209.44	116.85	124.794	151.201	167.209
		4.8	161.793	134.481	209.078	116.357	124.933	151.227	166.736
		4.9	161.751	134.274	208.755	115.989	125.009	151.248	166.201
		5	162.003	134.102	208.375	115.572	124.691	151.262	165.833
		5.1	162.238	133.868	208.081	115.167	124.103	151.112	165.66
		5.2	162.481	133.439	207.834	114.772	123.571	151.172	165.458
		5.3	162.736	133.044	207.624	114.442	123.03	151.243	165.16
		5.4	162.661	132.66	207.363	113.95	122.525	151.048	164.936
		5.5	162.276	132.375	207.098	113.526	122.504	150.638	164.537
		5.6	161.809	132.056	206.732	113.112	122.761	150.302	164.122
		5.7	161.222	131.816	206.334	112.65	122.783	149.891	163.704
		5.8	160.809	131.426	205.744	112.13	122.697	149.412	163.449
		5.9	160.693	131.03	205.215	111.633	122.601	149.36	163.095
		6	160.773	130.431	204.755	111.056	122.21	149.452	162.809
		6.1	160.949	129.793	204.267	110.509	121.601	149.356	162.796
		6.2	161.527	129.474	204.096	109.927	121.141	149.145	163.015
		6.3	161.967	129.288	204.365	109.522	120.84	149.059	163.294
		6.4	162.026	129.14	204.599	109.309	120.575	148.745	163.694
		6.5	161.84	129.189	204.961	109.148	120.156	148.514	164.06
		6.6	161.651	129.499	205.357	108.928	119.963	148.455	163.864
		6.7	160.979	129.455	205.46	108.853	119.766	148.516	163.434
		6.8	160.35	129.382	205.078	108.573	119.486	148.408	162.945
		6.9	159.872	129.363	204.874	108.11	119.31	148.275	162.49
		7	159.617	129.137	204.64	107.732	119.475	148.176	162.061
		7.1	159.306	128.668	204.624	107.501	119.42	148.218	161.866
		7.2	159.352	128.244	204.639	107.171	119.504	148.182	161.657
		7.3	159.482	127.732	204.935	106.864	119.565	148.214	161.446
		7.4	159.725	127.121	205.049	106.549	119.394	148.41	161.153
		7.5	159.889	126.742	205.02	106.193	118.907	148.543	160.856
		7.6	160.026	126.318	204.564	105.802	118.682	148.493	160.727
		7.7	159.987	125.927	204.211	105.587	118.328	148.534	160.73
		7.8	159.782	125.826	203.905	105.581	118.124	148.598	160.511
		7.9	159.526	125.82	203.631	105.722	118.122	148.408	160.168
		8	159.301	125.728	203.353	105.853	118.474	148.236	159.861
		8.1	159.115	125.789	203.227	105.827	118.612	148.097	159.433
		8.2	159.04	125.877	202.931	105.665	118.661	147.799	159.114
		8.3	159.212	125.686	202.499	105.395	118.422	147.489	159.142
		8.4	159.439	125.421	202.128	105.083	118.022	147.362	159.264
		8.5	159.64	125.28	201.958	104.774	117.296	147.152	159.468
		8.6	159.915	125.188	202.114	104.669	116.654	146.894	159.728
		8.7	160.179	124.943	202.405	104.552	116.15	146.961	159.682
		8.8	160.232	124.783	202.811	104.355	115.897	147.119	159.403
		8.9	159.993	124.675	203.085	104.175	115.696	147.241	159.179
		9	159.83	124.324	203.072	103.962	115.572	147.39	158.791
		9.1	159.633	123.871	202.811	103.559	115.445	147.696	158.241
		9.2	159.421	123.735	202.49	103.12	115.242	147.669	157.754
		9.3	159.362	123.633	202.114	102.851	115.091	147.456	157.439
		9.4	159.757	123.409	201.863	102.547	115.022	147.252	157.128
		9.5	160.114	123.257	201.857	102.311	115.061	147.19	156.828
		9.6	160.531	123.151	201.825	102.293	115.049	146.974	156.709
		9.7	160.778	122.873	201.681	102.407	115.122	146.917	156.677
		9.8	160.835	122.579	201.552	102.371	115.017	146.992	156.391
		9.9	160.599	122.347	201.416	102.424	114.863	147.075	156.03
		10	160.256	122.201	201.161	102.441	114.718	147.033	155.814
		10.1	159.743	121.996	201.043	102.466	114.564	147.114	155.761
		10.2	159.536	121.662	201.285	102.487	114.17	147.125	155.745
		10.3	159.559	121.319	201.44	102.574	113.892	147.218	155.979
		10.4	159.599	121.181	201.537	102.498	113.677	147.33	156.321
		10.5	159.787	121.095	201.626	102.446	113.441	147.376	156.429
		10.6	160.06	121.037	201.551	102.257	113.332	147.179	156.026
		10.7	160.104	121.169	201.186	102.054	113.589	146.968	155.568
		10.8	159.992	121.267	200.791	101.815	113.829	146.453	154.943
		10.9	159.976	121.159	200.418	101.707	113.938	145.918	154.206
		11	159.821	120.825	200.278	101.618	113.953	145.484	153.626
		11.1	159.668	120.519	200.161	101.516	113.823	145.422	153.307
		11.2	159.66	120.158	200.093	101.251	113.463	145.475	153.025
		11.3	159.672	119.802	200.088	100.951	113.057	145.704	152.883
		11.4	159.636	119.467	200.087	100.546	112.772	145.868	152.785
		11.5	159.717	119.284	199.91	100.112	112.529	145.914	152.74
		11.6	159.778	119.019	199.801	99.7226	112.531	145.633	152.756
		11.7	159.568	118.7	199.681	99.5268	112.592	145.213	152.792
		11.8	159.411	118.428	199.681	99.477	112.808	144.901	152.781
		11.9	159.294	118.157	199.714	99.4504	112.945	144.568	152.726
		12	159.261	118.01	199.708	99.3566	113.063	144.422	152.445
		12.1	159.297	118.112	199.732	99.2731	112.931	144.294	152.008
		12.2	159.548	118.418	199.905	99.0574	112.741	144.235	151.352
		12.3	159.636	118.751	199.923	98.7728	112.392	143.977	150.622
		12.4	159.664	119.179	200.015	98.511	112.063	143.808	149.941
		12.5	159.384	119.449	199.993	98.3165	111.88	143.472	149.392
		12.6	159.054	119.429	199.723	98.1478	111.806	143.327	149.028
		12.7	158.611	119.04	199.192	98.0673	111.886	143.167	148.99
		12.8	158.214	118.582	198.811	97.8028	111.886	143.128	149.172
		12.9	157.873	118.043	198.353	97.522	111.778	143.057	149.487
		13	157.838	117.488	198.191	97.298	111.546	143.133	149.84
		13.1	157.853	117.015	198.239	96.9189	111.248	143.194	150.157
		13.2	158.222	116.793	198.488	96.5972	110.868	143.313	150.326
		13.3	158.728	116.675	198.668	96.6727	110.598	143.474	150.303
		13.4	159.171	116.554	198.647	96.8636	110.55	143.681	150.063
		13.5	159.523	116.534	198.53	96.9981	110.537	143.739	149.861
		13.6	159.887	116.502	198.437	97.3639	110.546	143.742	149.76
		13.7	159.784	116.507	198.223	97.6694	110.522	143.677	149.511
		13.8	159.581	116.457	197.902	97.6748	110.517	143.619	149.068
		13.9	159.478	116.496	197.828	97.6938	110.489	143.466	148.637
		14	159.29	116.428	197.545	97.763	110.578	143.409	148.185
		14.1	159.039	116.443	197.102	97.775	110.748	143.394	147.563
		14.2	159.118	116.27	196.656	97.8126	110.914	143.394	147.337
		14.3	159.273	115.999	196.451	98.0354	111.078	143.399	147.545
		14.4	159.262	115.59	195.959	98.1634	111.078	143.502	147.79
		14.5	159.302	115.292	195.508	98.2703	110.779	143.626	147.782
		14.6	159.498	114.998	195.158	98.1665	110.407	143.568	147.675
		14.7	159.677	114.941	194.866	97.9612	110.106	143.518	147.092
		14.8	159.762	115.093	194.349	97.5484	109.771	143.331	146.312
		14.9	159.839	115.473	194.318	97.1256	109.541	143.219	145.703
		15	159.917	115.824	194.744	96.6927	109.582	143.055	145.482
		15.1	159.766	116.205	195.351	96.5528	109.653	143.053	145.451
		15.2	159.315	116.46	195.973	96.501	109.599	143.062	145.797
		15.3	158.977	116.581	196.588	96.6362	109.534	143.075	146.125
		15.4	158.824	116.514	196.754	96.725	109.387	142.847	146.147
		15.5	158.477	116.36	196.41	96.7398	108.961	142.586	145.882
		15.6	158.127	116.078	195.708	96.6205	108.391	142.185	145.41
		15.7	158.084	115.889	195.097	96.4478	108.015	141.735	144.729
		15.8	158.034	115.644	194.71	96.0829	107.676	141.499	144.058
		15.9	157.895	115.376	194.53	95.9991	107.438	141.534	143.603
		16	158.179	115.14	194.456	96.0112	107.541	141.718	143.35
		16.1	158.598	114.927	194.801	96.0175	107.878	142.09	143.34
		16.2	158.86	114.642	194.975	96.0696	108.017	142.602	143.499
		16.3	158.994	114.505	195.068	96.1838	108.108	142.942	143.696
		16.4	159.046	114.439	195.177	95.8342	108.14	143.118	144.034
		16.5	158.922	114.505	195.274	95.5416	108.009	143.055	144.433
		16.6	158.772	114.667	194.984	95.3984	107.703	142.806	144.822
		16.7	158.869	114.754	194.821	95.2782	107.534	142.218	145.035
		16.8	159.13	114.897	194.358	95.3583	107.486	141.473	145.241
		16.9	159.574	115.073	193.764	95.7543	107.587	140.742	145.132
		17	159.937	115.098	193.421	96.1933	107.744	140.227	144.765
		17.1	160.304	114.966	193.359	96.5041	108.098	140.02	144.305
		17.2	160.146	114.95	193.143	96.8309	108.385	140.239	143.907
		17.3	159.88	114.641	193.144	96.9148	108.489	140.837	143.296
		17.4	159.483	114.245	193.245	96.8978	108.435	141.551	142.854
		17.5	159.252	113.928	192.994	96.5822	108.293	142.182	142.693
		17.6	158.88	113.88	192.517	96.1049	108.173	142.509	142.54
		17.7	158.815	113.748	192.159	95.5926	108.227	142.522	142.593
		17.8	158.55	113.814	191.738	95.2406	108.55	142.285	142.855
		17.9	158.431	114.002	191.228	95.151	108.779	141.825	142.902
		18	158.102	114.123	190.969	95.2436	108.957	141.216	142.7
		18.1	157.956	113.989	190.903	95.5446	108.653	140.735	142.556
		18.2	157.931	113.821	190.81	95.8146	108.155	140.468	141.989
		18.3	158.303	113.619	190.825	95.9721	107.489	140.206	141.659
		18.4	158.38	113.311	191.035	95.6309	107.003	140.095	141.754
		18.5	158.497	112.961	191.342	95.2544	106.661	140.28	141.885
		18.6	158.645	112.698	191.486	94.8479	106.733	140.515	141.903
		18.7	158.711	112.6	191.667	94.4632	106.779	140.607	142.234
		18.8	158.673	112.566	191.834	94.3188	106.841	140.776	142.045
		18.9	159.027	112.525	191.789	94.5458	106.95	140.954	141.468
		19	159.422	112.637	191.341	94.7737	107.114	140.955	140.87
		19.1	159.658	112.604	190.967	94.9625	107.262	140.751	140.385
		19.2	159.824	112.52	190.578	95.2744	107.431	140.562	139.882
		19.3	159.888	112.379	190.329	95.306	107.521	140.217	139.733
		19.4	159.537	112.372	190.274	95.3018	107.362	139.634	139.757
		19.5	159.063	112.324	190.586	95.253	107.077	138.985	139.842
		19.6	158.579	112.544	190.913	95.1384	106.609	138.493	139.803
		19.7	158.12	112.667	191.398	94.8968	106.199	138.082	139.639
		19.8	157.673	112.714	191.717	94.739	105.835	137.8	139.43
		19.9	157.439	112.543	191.905	94.5462	105.757	137.712	139.169
		20	157.331	112.409	191.973	94.5379	105.723	137.785	138.978
		20.1	157.198	112.158	191.925	94.751	105.972	138.014	138.99
		20.2	157.179	111.915	191.507	94.7597	106.27	138.218	139.093
		20.3	157.282	111.714	191.096	94.7366	106.678	138.439	139.198
		20.4	157.514	111.745	190.64	94.7676	106.874	138.733	139.436
		20.5	157.868	111.674	190.185	94.812	107.026	138.965	139.624
		20.6	158.357	111.595	189.977	94.7532	106.977	138.887	139.529
		20.7	158.695	111.599	190.04	94.9904	106.809	138.848	139.484
		20.8	158.861	111.573	190.359	95.3855	106.552	138.738	139.39
		20.9	158.757	111.287	190.689	95.6582	106.339	138.632	139.097
		21	158.283	110.971	190.912	95.7356	106.12	138.595	138.7
		21.1	157.762	110.659	191.044	95.7366	105.878	138.69	138.562
		21.2	157.264	110.35	191.208	95.6954	105.677	138.754	138.293
		21.3	156.834	110.207	190.819	95.447	105.469	138.95	137.992
		21.4	156.771	110.25	190.792	95.213	105.265	139.083	137.864
		21.5	157.164	110.437	190.969	95.0532	105.083	139.071	137.972
		21.6	157.673	110.644	191.114	94.9325	105.065	139.093	138.022
		21.7	158.336	110.845	190.939	94.7095	105.06	139.074	138.089
		21.8	159.026	110.966	191.164	94.5523	104.965	139.11	138.122
		21.9	159.268	111.145	190.859	94.4861	104.924	139.026	137.995
		22	159.289	111.285	190.432	94.3896	105.019	138.926	137.713
		22.1	159.099	111.331	189.78	94.248	105.035	138.791	137.446
		22.2	158.734	111.292	189.478	94.1008	105.063	138.715	137.303
		22.3	158.281	111.189	189.066	93.9485	105.142	138.34	137.315
		22.4	158.091	110.975	188.975	93.592	105.265	138.226	137.392
		22.5	157.92	110.69	188.855	93.2722	105.153	138.369	137.511
		22.6	157.748	110.469	188.923	93.1374	104.96	138.466	137.539
		22.7	157.562	110.248	188.947	93.2116	104.784	138.357	137.482
		22.8	157.467	109.989	189.035	93.3061	104.721	138.506	137.337
		22.9	157.355	109.76	189.091	93.5841	104.586	138.425	137.291
		23	157.304	109.498	189.143	93.941	104.521	138.098	137.084
		23.1	157.59	109.35	189.314	94.0858	104.515	137.816	136.865
		23.2	158.127	109.273	189.26	93.9631	104.589	137.796	136.665
		23.3	158.712	109.374	189.113	93.9753	104.797	137.624	136.575
		23.4	159.349	109.599	188.934	93.9902	105.05	137.532	136.493
		23.5	159.84	109.961	188.835	93.7559	105.398	137.523	136.688
		23.6	160.114	110.185	188.791	93.656	105.689	137.553	137.098
		23.7	160.206	110.402	188.982	93.6862	105.791	137.447	137.406
		23.8	160.007	110.442	189.237	93.4422	105.587	137.531	137.607
		23.9	159.527	110.137	189.304	93.155	105.24	137.707	137.618
		24	159.048	109.815	189.228	93.205	104.828	137.841	137.366
		24.1	158.497	109.536	188.86	93.262	104.52	137.907	136.717
		24.2	157.873	109.266	188.349	93.3899	104.207	137.925	136.196
		24.3	157.516	109.095	187.868	93.6528	104.029	137.64	135.643
		24.4	157.446	109.135	187.653	93.9553	104.143	137.136	135.117
		24.5	157.518	109.166	187.725	94.1322	104.285	136.747	134.832
		24.6	157.645	109.105	188.009	94.2898	104.425	136.471	134.887
		24.7	157.899	108.981	188.394	94.4425	104.734	136.445	134.808
		24.8	158.176	108.756	188.692	94.7366	104.963	136.63	134.728
		24.9	158.486	108.405	188.891	94.8912	104.854	137.04	134.861
		25	158.677	108.019	188.878	95.0534	104.77	137.467	135.009
		25.1	158.895	107.782	188.694	95.2859	104.635	137.814	134.994
		25.2	159.102	107.635	188.258	95.4786	104.456	137.862	135.335
		25.3	159.166	107.722	187.772	95.4414	104.282	138.045	135.811
		25.4	159.004	108.121	187.295	95.6402	104.282	138.119	136.058
		25.5	158.997	108.36	186.902	95.5818	104.174	137.959	135.936
		25.6	158.94	108.623	186.631	95.1209	104.183	137.687	135.879
		25.7	158.836	108.941	186.746	94.5839	104.061	137.643	135.402
		25.8	158.899	109.189	187.096	94.2642	104.06	137.209	134.776
		25.9	158.941	109.368	187.433	93.7474	104.028	136.893	134.143
		26	158.81	109.845	187.634	93.4809	104.059	136.642	133.65
		26.1	158.696	110.192	187.916	93.6323	103.92	136.478	133.076
		26.2	158.47	110.474	187.926	93.8567	103.968	136.046	132.461
		26.3	158.107	110.595	187.568	94.0072	103.888	135.934	131.822
		26.4	157.924	110.498	187.337	94.29	103.727	135.612	131.269
		26.5	157.816	110.118	187.26	94.523	103.575	135.531	130.958
		26.6	157.564	109.843	186.902	94.7121	103.377	135.725	130.831
		26.7	157.486	109.478	186.496	94.8381	103.025	136.313	131.106
		26.8	157.471	109.187	186.407	94.8102	102.713	136.84	131.651
		26.9	157.506	109.076	186.036	94.6248	102.529	137.497	132.23
		27	157.625	109.256	185.357	94.4928	102.333	137.977	132.654
		27.1	157.961	109.242	184.875	94.2581	102.237	137.947	132.983
		27.2	158.134	109.253	184.787	93.9956	102.246	137.545	133.146
		27.3	158.203	109.22	184.646	93.8832	102.37	137.051	133.093
		27.4	158.036	108.969	184.556	93.923	102.583	136.428	133.095
		27.5	157.751	108.517	184.812	93.873	102.842	135.677	133.075
		27.6	157.324	108.225	185.084	93.7426	103.149	135.167	132.982
		27.7	157.119	107.933	184.975	93.7444	103.354	134.948	132.863
		27.8	156.899	107.604	184.817	93.7529	103.476	134.777	132.809
		27.9	156.916	107.56	184.777	93.6698	103.397	134.832	132.674
		28	156.89	107.615	184.74	93.5528	103.311	135.048	132.693
		28.1	156.945	107.615	184.665	93.6116	103.192	135.366	132.989
		28.2	156.844	107.699	184.727	93.5441	103.273	135.499	133.221
		28.3	156.913	107.95	184.805	93.3744	103.338	135.634	133.179
		28.4	156.898	107.945	184.761	93.3038	103.412	135.611	133.075
		28.5	156.964	107.934	184.343	93.4264	103.422	135.663	132.869
		28.6	157.086	107.958	183.98	93.5177	103.449	135.54	132.329
		28.7	157.322	107.92	183.553	93.6776	103.274	135.361	131.889
		28.8	157.541	107.821	183.073	93.9182	103.004	135.108	131.841
		28.9	157.683	107.914	182.862	94.032	102.813	134.829	131.864
		29	157.788	107.968	183.101	93.8643	102.767	134.337	131.837
		29.1	157.692	107.98	183.338	93.5072	102.686	133.869	131.985
		29.2	157.453	107.939	183.617	93.0829	102.684	133.573	132.052
		29.3	157.15	107.934	183.845	92.7036	102.836	133.41	131.911
		29.4	156.849	107.904	183.864	92.3494	103.04	133.429	131.72
		29.5	156.624	107.827	183.642	92.234	102.998	133.686	131.358
		29.6	156.601	107.815	183.284	92.288	103.046	134.109	130.648
		29.7	156.701	107.906	182.901	92.5148	103.177	134.554	129.923
		29.8	156.853	107.97	182.671	92.6552	103.325	135.066	129.382
		29.9	157.155	107.953	182.474	92.8884	103.49	135.38	128.95
		30	157.407	107.87	182.273	92.9759	103.77	135.542	128.865
		30.1	157.566	107.625	182.082	93.0823	103.949	135.656	129.272
		30.2	157.706	107.32	181.858	92.9266	103.904	135.636	129.758
		30.3	157.752	106.87	181.572	92.7346	103.694	135.345	129.986
		30.4	157.613	106.391	181.28	92.4346	103.295	135.024	130.092
		30.5	157.456	106.114	181.13	92.3485	102.802	134.656	130.158
		30.6	157.385	106.121	180.956	92.2112	102.203	134.129	130.102
		30.7	157.263	106.185	180.99	92.281	101.871	133.768	130.115
		30.8	157.169	106.444	181.202	92.5176	101.757	133.695	130.265
		30.9	157.236	106.909	181.413	92.9486	101.817	133.763	130.396
		31	157.3	107.298	181.514	93.3557	102.237	134.027	130.243
		31.1	157.417	107.5	181.955	93.8398	102.86	134.437	129.942
		31.2	157.619	107.746	182.363	94.3133	103.311	134.622	129.545
		31.3	157.965	107.941	182.576	94.6661	103.669	134.601	129.208
		31.4	158.344	107.908	183.004	94.7798	103.935	134.601	129.052
		31.5	158.811	107.934	183.481	94.6066	103.935	134.444	129.102
		31.6	159.035	108.066	183.56	94.3188	103.867	134.259	129.355
		31.7	159.173	108.019	183.353	93.9774	103.828	134.31	129.46
		31.8	159.066	107.783	183.031	93.5656	103.724	134.521	129.368
		31.9	158.801	107.572	182.503	93.1872	103.628	134.72	129.048
		32	158.459	107.194	182.047	93.0645	103.541	135.043	128.667
		32.1	158.302	106.729	181.754	93.1092	103.499	135.265	127.95
		32.2	158.234	106.455	181.681	93.1522	103.475	135.105	127.556
		32.3	158.353	106.505	181.814	93.2606	103.495	134.535	127.392
		32.4	158.531	106.625	181.942	93.513	103.471	133.878	127.394
		32.5	158.696	106.949	181.95	93.5778	103.462	132.99	127.626
		32.6	158.718	107.355	181.882	93.3956	103.35	132.239	128.102
		32.7	158.548	107.666	181.709	93.362	103.153	131.761	128.313
		32.8	158.298	107.692	181.486	93.2786	102.977	131.807	128.471
		32.9	158.004	107.618	181.21	93.13	102.947	131.874	128.646
		33	157.831	107.381	180.877	93.0818	102.878	132.073	128.638
		33.1	157.826	107.08	180.793	93.2751	102.741	132.135	128.829
		33.2	158.078	106.736	180.815	93.1416	102.578	132.03	129.234
		33.3	158.325	106.586	180.72	93.1247	102.339	131.758	129.639
		33.4	158.605	106.72	180.682	92.965	101.924	131.645	130.02
		33.5	158.721	106.938	180.688	92.8548	101.47	131.626	130.314
		33.6	158.652	107.114	180.391	92.6191	101.204	131.799	130.36
		33.7	158.279	107.339	179.954	92.6418	101.069	132.315	130.207
		33.8	157.903	107.307	179.679	92.6871	100.964	132.744	129.968
		33.9	157.477	106.867	179.485	92.8422	100.962	132.994	129.756
		34	157.052	106.28	179.527	92.7472	100.979	133.153	129.708
		34.1	156.805	105.565	179.758	92.4753	100.849	133.141	129.476
		34.2	156.861	104.822	180.144	91.9639	100.751	132.951	129.332
		34.3	156.862	104.43	180.475	91.2398	100.586	132.797	129.222
		34.4	156.94	104.495	180.549	90.5932	100.526	132.671	128.937
		34.5	157.161	104.772	180.293	90.2928	100.667	132.647	128.341
		34.6	157.298	105.275	179.85	90.3336	100.928	132.862	127.91
		34.7	157.338	105.689	179.377	90.7184	101.084	132.926	127.456
		34.8	157.42	105.88	178.945	91.3435	101.45	132.971	126.963
		34.9	157.613	105.722	178.802	91.8946	101.761	133.055	126.496
		35	157.811	105.504	178.751	92.2718	101.894	133.059	126.418
		35.1	158.094	105.371	178.705	92.4611	102.099	132.812	126.4
		35.2	158.233	105.54	178.529	92.4552	102.552	132.799	126.453
		35.3	158.532	105.73	178.206	92.366	102.959	132.918	126.618
		35.4	158.581	106.038	177.745	92.2971	103.149	132.979	126.961
		35.5	158.452	106.261	177.38	92.3761	103.183	133.058	127.113
		35.6	158.325	106.262	177.386	92.5501	102.974	133.235	127.183
		35.7	158.275	106.059	177.542	92.7019	102.332	133.251	127.126
		35.8	158.084	105.935	177.846	92.6648	101.612	133.204	127.105
		35.9	157.995	105.805	178.331	92.6232	101.068	133.179	127.093
		36	158.096	105.798	178.893	92.3944	100.805	132.976	127.062
		36.1	157.963	105.992	179.072	92.0503	100.651	132.858	127.197
		36.2	157.883	106.268	179.142	91.7153	100.766	132.655	127.276
		36.3	157.797	106.598	179.256	91.6925	100.752	132.248	127.108
		36.4	157.6	107	179.194	91.6338	100.77	131.913	126.689
		36.5	157.143	107.227	178.93	91.6202	100.833	131.731	126.315
		36.6	156.978	107.129	178.792	91.7653	100.951	131.335	125.852
		36.7	156.936	106.954	178.721	91.9573	100.982	131.186	125.62
		36.8	156.986	106.719	178.533	92.0126	101.103	131.153	125.53
		36.9	157.243	106.375	178.386	92.0828	101.078	130.958	125.609
		37	157.654	106.252	178.193	92.2033	100.718	130.747	125.687
		37.1	157.944	106.434	177.935	92.0932	100.275	130.574	125.663
		37.2	157.947	106.592	177.626	91.8262	99.9854	130.379	125.542
		37.3	157.802	106.736	177.276	91.4892	99.8806	130.433	125.59
		37.4	157.748	107.044	176.856	91.1147	99.875	130.556	125.744
		37.5	157.849	107.155	176.586	90.6772	100.203	130.741	126.004
		37.6	157.906	107.183	176.422	90.3838	100.653	131.031	126.274
		37.7	158.23	107.23	176.439	90.3354	101.114	131.079	126.574
		37.8	158.613	107.14	176.523	90.3993	101.365	130.91	126.595
		37.9	158.627	106.821	176.727	90.585	101.587	130.832	126.487
		38	158.511	106.477	176.91	90.7503	101.593	130.65	126.275
		38.1	158.522	106.052	177.12	90.919	101.533	130.404	126.184
		38.2	158.381	105.75	177.06	90.9186	101.225	130.524	126.015
		38.3	158.409	105.538	176.945	90.8638	101.037	130.683	125.952
		38.4	158.702	105.388	176.665	90.8228	100.932	130.79	125.817
		38.5	158.937	105.385	176.268	90.8119	101.028	130.977	125.538
		38.6	158.877	105.374	175.767	90.735	101.238	131.297	125.244
		38.7	158.822	105.144	175.456	90.832	101.578	131.189	125.114
		38.8	158.56	105.05	175.254	91.0452	101.77	130.94	125.032
		38.9	158.347	105.014	175.224	91.1466	101.903	130.923	125.063
		39	158.242	105.051	175.409	91.4328	101.981	131.007	125.335
		39.1	158.353	105.324	175.622	91.7774	101.877	130.87	125.499
		39.2	158.417	105.758	175.684	91.994	101.686	130.913	125.49
		39.3	158.539	106.001	175.672	92.0895	101.725	131.185	125.352
		39.4	158.335	106.341	175.584	92.2473	101.867	130.957	125.05
		39.5	158.081	106.516	175.303	92.1799	101.81	130.353	124.61
		39.6	157.888	106.423	175.053	92.2204	101.695	129.827	124.221
		39.7	157.742	106.272	174.898	92.4457	101.757	129.467	123.756
		39.8	157.331	106.251	174.66	92.5567	101.736	128.985	123.392
		39.9	157.216	106.063	174.436	92.6347	101.54	128.799	123.229
		40	157.195	105.994	174.254	92.7106	101.564	129.048	123.262
		40.1	157.157	106.208	174.127	92.5603	101.889	129.527	123.388
		40.2	157.275	106.439	174.011	92.0918	102.031	130.011	123.63
		40.3	157.912	106.593	174.098	91.8157	102.033	130.449	123.89
		40.4	158.563	106.802	174.177	91.4554	102.198	130.904	124.09
		40.5	159.069	106.84	174.382	91.1713	102.237	131.201	124.074
		40.6	159.38	106.459	174.308	91.0103	102.014	131.292	124.027
		40.7	159.53	106.072	174.222	91.0364	102.048	131.199	124.123
		40.8	159.444	105.611	174.091	90.9874	102.025	131.309	124.11
		40.9	159.124	105.201	173.919	91.0223	101.696	131.364	124.034
		41	158.82	104.959	173.634	91.0626	101.436	131.447	123.922
		41.1	158.775	105.169	173.603	91.1943	101.396	131.58	123.638
		41.2	158.804	105.427	173.467	91.1786	101.202	131.67	123.236
		41.3	158.82	105.872	173.177	91.1722	101.255	131.528	123.043
		41.4	158.965	106.154	173.054	91.3074	101.658	131.529	123.074
		41.5	159.22	106.279	173.089	91.5537	102.108	131.382	123.333
		41.6	159.367	106.14	173.165	91.6056	102.239	131.086	123.804
		41.7	159.44	105.95	173.559	91.7695	102.292	130.876	124.264
		41.8	159.547	105.731	174.171	91.9099	102.44	130.741	124.545
		41.9	159.682	105.598	174.755	91.8696	102.547	130.311	124.561
		42	159.51	105.567	175.113	91.6615	102.528	130.044	124.376
		42.1	159.181	105.573	175.269	91.6121	102.758	129.934	124.106
		42.2	158.879	105.531	175.133	91.5772	103.007	129.702	123.794
		42.3	158.565	105.417	174.878	91.6222	102.802	129.381	123.616
		42.4	158.302	105.344	174.461	91.6592	102.297	129.2	123.526
		42.5	158.317	105.254	174.12	91.7492	101.695	128.841	123.626
		42.6	158.608	105.174	174.007	91.7335	100.915	128.391	123.746
		42.7	158.875	105.153	173.882	91.7895	100.182	128.06	124.004
		42.8	159.079	105.131	173.71	91.7852	99.722	127.757	124.116
		42.9	159.068	105.136	173.562	91.8371	99.5661	127.434	124.319
		43	159.1	105.219	173.38	91.7719	99.5114	127.221	124.34
		43.1	158.877	105.305	173.007	91.7319	99.5904	127.173	124.345
		43.2	158.815	105.475	172.926	91.5356	99.7308	127.207	124.061
		43.3	158.756	105.6	172.928	91.4124	100.05	127.466	123.769
		43.4	158.829	105.593	173.017	91.3653	100.272	127.774	123.343
		43.5	158.663	105.616	173.123	91.4683	100.687	127.966	122.981
		43.6	158.694	105.767	173.234	91.579	101.073	127.806	122.587
		43.7	158.587	105.889	172.866	91.8404	101.266	127.51	122.408
		43.8	158.522	106.268	172.428	91.9084	101.112	127.069	122.472
		43.9	158.607	106.795	171.986	91.9077	101.009	126.784	122.669
		44	159.005	107.056	171.644	91.7708	100.624	126.78	122.802
		44.1	159.286	106.97	171.394	91.6678	100.195	127.166	122.959
		44.2	159.322	106.798	171.63	91.428	99.9706	127.642	123.209
		44.3	159.278	106.342	171.843	91.4536	100.006	128.063	123.239
		44.4	158.98	105.967	171.85	91.4302	99.9393	128.15	123.088
		44.5	158.49	105.681	172.062	91.5257	100.058	128.041	123.111
		44.6	158.06	105.558	172.332	91.4887	100.269	127.763	123.213
		44.7	158.001	105.365	172.329	91.4437	100.543	127.487	123.185
		44.8	158.168	105.17	172.525	91.13	100.577	127.358	123.064
		44.9	158.378	104.696	173.01	90.7114	100.591	127.347	122.983
		45	158.721	104.43	172.877	90.2739	100.691	127.311	122.748
		45.1	159.086	104.438	172.692	90.1054	100.733	127.391	122.435
		45.2	159.332	104.677	172.693	90.1855	100.474	127.478	122.206
		45.3	159.404	105.082	172.427	90.4522	100.384	127.426	122.192
		45.4	159.686	105.692	172.144	90.9576	100.432	127.636	122.321
		45.5	159.76	106.041	172.45	91.477	100.308	127.933	122.469
		45.6	159.779	106.04	172.659	91.881	100.24	128.079	122.641
		45.7	159.927	105.759	172.768	92.0812	100.489	128.032	122.731
		45.8	159.958	105.404	173.116	92.3843	100.766	128.016	122.85
		45.9	159.772	104.99	173.199	92.6641	100.892	127.768	122.875
		46	159.667	104.926	172.953	92.8866	101.05	127.481	122.873
		46.1	159.538	105.048	172.734	92.8225	101.247	127.26	122.644
		46.2	159.214	105.348	172.368	92.7405	101.3	127.27	122.415
		46.3	159.073	105.653	171.667	92.2686	101.218	127.267	121.897
		46.4	159.022	105.847	171.126	91.5092	101.282	127.152	121.361
		46.5	159.018	105.7	170.642	90.8672	101.332	127.061	120.987
		46.6	159.08	105.574	170.168	90.6883	101.321	126.89	120.962
		46.7	159.115	105.499	169.88	90.4256	101.319	126.656	121.029
		46.8	159.031	105.294	170.031	90.4176	101.446	126.485	121.485
		46.9	158.988	105.217	170.249	90.792	101.475	126.459	122.092
		47	158.944	105.198	170.592	91.0561	101.619	126.35	122.552
		47.1	158.867	105.038	171.013	90.8556	101.625	126.306	122.992
		47.2	159.042	104.853	171.254	90.7021	101.606	126.124	123.219
		47.3	159.362	104.867	171.146	90.6109	101.632	125.841	123.092
		47.4	159.6	104.858	171.075	90.3062	101.704	125.754	122.745
		47.5	159.823	105.019	171.005	89.9906	101.61	125.908	122.486
		47.6	160.01	105.225	170.909	90.0407	101.532	126.034	121.972
		47.7	159.96	105.146	171.125	90.276	101.412	126.466	121.65
		47.8	159.894	104.971	171.53	90.4529	101.01	127.105	121.59
		47.9	159.858	104.693	171.488	90.6496	100.607	127.294	121.664
		48	159.67	104.182	171.167	90.9294	100.22	127.176	121.552
		48.1	159.544	103.96	170.815	90.9716	100.166	127.079	121.536
		48.2	159.497	104.175	170.05	90.9567	100.236	126.743	121.382
		48.3	159.245	104.48	169.14	90.8492	100.667	126.117	121.075
		48.4	158.929	104.92	168.876	90.708	101.135	125.854	120.779
		48.5	158.918	105.528	168.867	90.6027	101.713	125.579	120.768
		48.6	158.851	105.658	168.827	90.7287	101.983	125.376	120.789
		48.7	158.772	105.553	169.077	90.7965	102.164	125.305	120.94
		48.8	158.902	105.233	169.503	90.9168	102.053	125.397	121.168
		48.9	159.158	104.933	169.498	91.1599	101.889	125.202	121.287
		49	159.159	104.609	169.379	91.2912	101.593	125.173	121.215
		49.1	159.274	104.534	169.506	91.1675	101.287	125.063	121.077
		49.2	159.37	104.474	169.696	90.9425	100.963	124.868	121.047
		49.3	159.309	104.673	169.767	90.7404	100.798	124.786	121.082
		49.4	159.047	104.816	169.951	90.4285	100.799	125.005	121.083
		49.5	158.847	104.995	170.111	90.1228	100.912	125.28	121.061
		49.6	158.709	105.11	169.917	90.0739	101.149	125.659	121.143
		49.7	158.583	105.265	169.433	90.3442	101.315	126.054	120.961
		49.8	158.7	105.248	168.925	90.7203	101.368	126.135	120.534
		49.9	159.117	105.204	168.56	91.1936	101.166	126.027	120.303
		50	159.547	104.95	168.375	91.5272	100.898	125.86	120.156
		50.1	159.733	104.755	168.272	91.6213	100.495	125.552	119.953
		50.2	160.005	104.604	168.462	91.3253	100.325	125.22	119.93
		50.3	160.076	104.473	168.736	90.7632	100.223	125.141	120.072
		50.4	159.886	104.415	168.816	90.1451	100.182	125.14	120.029
		50.5	159.629	104.626	168.664	89.9125	100.36	125.133	119.96
		50.6	159.385	104.807	168.531	89.8884	100.694	125.16	120.005
		50.7	158.911	104.834	168.286	90.1407	100.827	125.164	119.777
		50.8	158.521	104.994	168.171	90.4823	100.942	125.009	119.516
		50.9	158.262	105.244	168.161	90.7817	101.061	124.829	119.391
		51	158.003	105.356	168.321	90.7265	100.814	124.602	119.313
		51.1	157.661	105.429	168.559	90.6901	100.522	124.559	119.214
		51.2	157.697	105.549	168.68	90.5402	100.274	124.557	119.386
		51.3	157.722	105.438	168.435	90.6162	100.11	124.699	119.646
		51.4	157.691	105.116	168.013	90.8646	100.022	124.803	119.765
		51.5	157.879	104.938	167.63	91.4028	100.12	124.824	119.809
		51.6	158.452	104.766	167.397	91.7803	100.175	124.481	119.688
		51.7	158.618	104.637	167.345	92.0794	100.321	124.194	119.489
		51.8	158.712	104.677	167.687	91.9535	100.362	123.816	119.106
		51.9	158.643	104.737	168.378	91.6051	100.377	123.556	118.989
		52	158.33	104.637	169.01	91.0758	100.522	123.503	118.835
		52.1	157.669	104.596	169.297	90.6809	100.86	123.668	118.792
		52.2	157.359	104.58	169.374	90.372	101.066	123.696	118.875
		52.3	157.133	104.553	169.067	90.5082	101.308	124.016	119.21
		52.4	157.198	104.585	168.515	90.7617	101.548	124.234	119.343
		52.5	157.574	104.667	167.846	90.9546	101.596	124.471	119.633
		52.6	158.203	104.792	167.316	90.9536	101.473	124.723	119.922
		52.7	158.566	104.911	166.795	90.9539	101.514	125.068	120.058
		52.8	158.827	105.013	166.404	90.716	101.583	125.058	120.07
		52.9	158.931	105.221	166.021	90.4292	101.668	125.048	120.183
		53	158.795	105.34	165.857	90.2102	101.742	124.942	120.169
		53.1	158.641	105.28	165.694	90.0348	101.706	124.919	120.113
		53.2	158.59	105.12	165.795	89.9262	101.476	124.788	120.061
		53.3	158.711	104.953	166.168	89.8988	101.173	124.718	119.878
		53.4	158.926	104.603	166.57	89.8956	100.858	124.691	119.522
		53.5	159.158	104.44	166.772	89.838	100.696	124.544	119.372
		53.6	159.309	104.447	167.102	89.8337	100.724	124.306	119.279
		53.7	159.541	104.615	167.346	89.7985	100.939	124.37	119.323
		53.8	159.497	104.77	167.404	89.814	101.213	124.507	119.447
		53.9	159.355	104.937	167.582	89.8854	101.463	124.799	119.647
		54	159.206	104.905	167.805	90.1254	101.625	125.211	119.508
		54.1	158.908	104.692	168.113	90.3812	101.727	125.438	119.323
		54.2	158.451	104.329	168.337	90.5822	101.66	125.27	118.968
		54.3	158.333	103.956	168.402	90.6175	101.616	125.002	118.775
		54.4	158.283	103.712	168.223	90.6323	101.614	124.434	118.616
		54.5	158.147	103.503	168.11	90.6462	101.518	123.914	118.783
		54.6	158.096	103.52	167.649	90.7086	101.411	123.669	118.927
		54.7	158.185	103.555	167.139	90.8357	101.495	123.735	119.111
		54.8	158.037	103.665	166.831	91.126	101.542	123.943	119.103
		54.9	158.071	103.59	166.621	91.3543	101.462	124.198	119.064
		55	158.379	103.561	166.427	91.473	101.458	124.293	118.72
		55.1	158.795	103.521	166.361	91.5552	101.317	124.228	118.381
		55.2	159.145	103.558	166.247	91.4679	101.07	124.006	118.001
		55.3	159.62	103.515	166.064	91.2575	100.662	123.73	117.8
		55.4	159.834	103.681	165.89	90.9889	100.401	123.631	117.685
		55.5	159.748	103.871	165.658	90.7078	100.161	123.608	117.783
		55.6	159.565	103.904	165.375	90.3799	100.117	123.649	118
		55.7	159.345	104.006	165.373	90.1986	100.159	123.88	118.272
		55.8	159.021	104.192	165.489	89.9509	100.551	124.006	118.311
		55.9	158.671	104.233	165.671	89.8738	100.844	123.929	118.169
		56	158.458	104.264	165.708	89.6554	101.122	123.892	117.942
		56.1	158.307	104.333	165.855	89.3932	101.278	123.936	117.633
		56.2	158.098	104.394	165.797	89.137	101.274	123.699	117.389
		56.3	157.826	104.477	165.477	89.079	100.916	123.444	117.472
		56.4	157.846	104.667	164.941	88.9016	100.547	123.297	117.701
		56.5	157.984	104.997	164.654	88.9831	100.222	123.133	117.869
		56.6	158.199	105.249	164.4	89.181	99.9394	122.711	118
		56.7	158.448	105.374	164.242	89.2793	99.7148	122.425	118.13
		56.8	158.853	105.263	164.248	89.3274	99.6966	122.346	118.009
		56.9	158.893	105.037	164.687	89.3843	99.8003	122.399	117.873
		57	158.737	104.634	164.985	89.3547	99.9219	122.506	117.781
		57.1	158.231	104.332	165.194	89.4082	100.168	122.763	117.675
		57.2	157.837	103.886	165.32	89.745	100.462	122.899	117.554
		57.3	157.484	103.616	165.3	90.0839	100.721	122.897	117.349
		57.4	157.342	103.563	164.928	90.4256	100.807	122.643	117.072
		57.5	157.247	103.576	164.65	90.843	100.786	122.388	116.906
		57.6	157.596	103.759	164.505	91.0108	100.605	122.29	116.79
		57.7	158.024	104.278	164.387	90.8666	100.303	122.381	116.549
		57.8	158.44	104.888	164.567	90.6252	100.097	122.492	116.597
		57.9	158.703	105.335	164.868	90.5407	100.046	122.849	116.746
		58	158.952	105.745	165.071	90.3975	100.08	123.08	116.893
		58.1	158.903	105.996	165.054	90.391	100.15	123.181	117.083
		58.2	158.763	106.063	164.901	90.4335	100.367	123.284	117.358
		58.3	158.45	105.889	164.631	90.5544	100.396	123.481	117.466
		58.4	158.464	105.64	164.255	90.521	100.382	123.498	117.514
		58.5	158.667	105.325	163.971	90.3534	100.395	123.538	117.532
		58.6	159.021	104.951	163.744	90.2297	100.461	123.48	117.546
		58.7	159.342	104.599	163.78	90.1694	100.446	123.253	117.56
		58.8	159.793	104.505	163.902	89.9548	100.605	122.847	117.448
		58.9	159.724	104.466	164.186	89.5498	100.776	122.451	117.277
		59	159.314	104.639	164.367	89.329	100.909	122.279	117.023
		59.1	158.84	104.909	164.68	89.0811	100.975	122.334	116.607
		59.2	158.349	105.129	164.97	88.8847	101.002	122.522	116.177
		59.3	157.832	105.115	164.875	88.9725	100.892	122.79	115.953
		59.4	157.692	105.034	164.519	89.3727	100.827	123.127	115.992
		59.5	157.874	104.685	164.248	89.6098	100.858	123.126	116.233
		59.6	158.126	104.162	163.958	89.6812	100.999	122.899	116.681
		59.7	158.432	103.659	163.419	89.6508	101.244	122.599	117.184
		59.8	158.667	103.291	163.084	89.4579	101.455	122.307	117.538
		59.9	158.916	103.219	163.052	89.3113	101.493	122.051	117.626
		60	158.994	103.297	162.897	89.3154	101.102	122.15	117.631
		60.1	158.891	103.515	162.622	89.5072	100.483	122.29	117.621
		60.2	158.651	103.891	162.372	89.8544	99.7683	122.362	117.574
		60.3	158.418	104.297	162.233	90.1776	99.2264	122.506	117.72
		60.4	157.855	104.399	161.788	90.341	98.939	122.463	117.918
		60.5	157.155	104.459	161.43	90.4683	99.1056	121.987	117.999
		60.6	156.593	104.494	161.15	90.5505	99.4794	121.552	117.982
		60.7	156.308	104.373	161.027	90.4322	99.8998	121.33	118.031
		60.8	156.255	104.158	160.854	90.3242	100.192	121.026	117.851
		60.9	156.63	104.031	160.964	90.1883	100.262	120.879	117.782
		61	157.379	103.895	161.105	89.9987	100.196	121.048	117.667
		61.1	158.267	103.732	161.243	89.7991	100.033	121.251	117.546
		61.2	158.995	103.608	161.388	89.688	99.905	121.385	117.322
		61.3	159.646	103.498	161.602	89.6812	99.9419	121.557	117.232
		61.4	160.168	103.458	161.742	89.7212	100.119	121.734	116.968
		61.5	160.504	103.54	161.943	89.7356	100.36	121.862	116.824
		61.6	160.595	103.797	162.192	89.8128	100.735	121.944	116.701
		61.7	160.512	104.104	162.413	89.9609	101.124	121.969	116.572
		61.8	160.101	104.442	162.546	89.9612	101.269	121.919	116.573
		61.9	159.525	104.789	162.733	89.9337	101.23	121.844	116.687
		62	158.924	105.133	162.828	90.009	101.174	121.816	116.805
		62.1	158.393	105.326	162.825	90.0205	100.927	121.841	116.948
		62.2	157.971	105.455	162.825	89.9777	100.592	121.883	117.081
		62.3	157.905	105.574	162.903	90.1572	100.383	122.025	116.923
		62.4	157.924	105.59	162.752	90.4911	100.323	122.131	116.644
		62.5	157.987	105.415	162.643	90.8773	100.078	122.088	116.233
		62.6	158.098	105.257	162.438	91.2587	99.8793	122.013	115.816
		62.7	158.372	105.075	162.334	91.6048	99.679	122.033	115.493
		62.8	158.479	104.875	162.09	91.7476	99.3817	122.165	115.465
		62.9	158.662	104.756	161.902	91.5921	98.9561	122.298	115.671
		63	158.878	104.785	161.655	91.1923	98.7762	122.484	116.139
		63.1	159.038	104.773	161.624	90.8032	98.733	122.684	116.575
		63.2	159.058	104.761	161.265	90.3757	98.8409	122.609	117.032
		63.3	159.062	104.852	160.927	89.91	99.1131	122.237	117.233
		63.4	158.988	104.979	160.794	89.6385	99.5088	121.813	117.266
		63.5	158.8	105.113	160.595	89.6552	99.7439	121.357	117.075
		63.6	158.563	105.318	160.42	89.6857	99.8404	120.68	116.859
		63.7	158.358	105.584	160.609	89.6922	99.8701	120.274	116.485
		63.8	158.421	105.806	160.92	89.7734	99.89	120.012	116.272
		63.9	158.575	105.822	161.064	89.8808	99.948	119.99	116.006
		64	158.764	105.765	161.388	89.7408	100.091	119.897	115.845
		64.1	159.059	105.748	161.636	89.5688	100.441	120.097	115.784
		64.2	159.527	105.803	161.638	89.5535	100.822	120.128	115.817
		64.3	159.674	105.66	161.468	89.677	101.32	120.072	115.74
		64.4	159.778	105.555	161.393	89.7106	101.776	119.736	115.651
		64.5	159.913	105.326	161.242	89.946	102.271	119.701	115.611
		64.6	160.031	104.873	160.987	90.2299	102.577	119.56	115.525
		64.7	159.956	104.183	160.998	90.4116	102.625	119.571	115.398
		64.8	160.062	103.657	161.143	90.3621	102.345	119.804	115.371
		64.9	160.062	103.358	160.983	90.3109	101.979	120.322	115.552
		65	159.983	103.279	160.774	90.062	101.388	120.708	115.496
		65.1	159.917	103.378	160.554	89.7963	100.713	121.274	115.356
		65.2	159.65	103.862	159.98	89.5852	100.32	121.585	115.184
		65.3	159.199	104.433	159.271	89.5992	100.115	121.655	114.923
		65.4	158.981	104.843	158.884	89.6481	100.031	121.381	114.574
		65.5	158.979	105.128	158.435	89.7338	100.149	121.02	114.418
		65.6	158.981	105.419	158.157	89.7434	100.347	120.436	114.48
		65.7	159.35	105.234	158.117	89.7082	100.421	120.175	114.757
		65.8	159.719	104.842	158.361	89.5402	100.386	120.037	115.027
		65.9	160.06	104.532	158.673	89.3496	100.232	120.099	115.205
		66	160.107	104.257	159.279	89.2855	99.9333	120.173	115.316
		66.1	160.127	103.968	159.873	89.2603	99.6248	120.221	115.224
		66.2	159.946	104.059	160.262	89.283	99.3216	119.965	115.085
		66.3	160.062	104.39	160.369	89.3064	99.0877	119.774	115.078
		66.4	159.806	104.688	160.367	89.4977	98.9528	119.627	115.188
		66.5	159.73	105.005	160.085	89.7947	99.1246	119.573	115.328
		66.6	159.633	105.245	159.768	90.1955	99.3841	119.629	115.586
		66.7	159.597	105.175	159.746	90.634	99.6623	119.969	115.726
		66.8	159.406	105.002	159.849	91.076	99.9866	120.268	115.847
		66.9	159.634	104.812	159.911	91.163	100.299	120.569	115.801
		67	159.675	104.737	160.027	90.9435	100.338	120.821	115.713
		67.1	159.61	104.73	159.975	90.5874	100.292	121.008	115.48
		67.2	159.455	105.025	159.667	90.1208	100.272	120.979	115.148
		67.3	159.167	105.339	159.231	89.6937	100.092	120.596	114.774
		67.4	158.535	105.577	158.839	89.6447	99.9674	119.981	114.539
		67.5	157.965	105.627	158.533	89.82	99.8785	119.294	114.464
		67.6	157.617	105.751	158.555	90.0317	99.8784	118.74	114.573
		67.7	157.563	105.689	158.807	90.2189	99.8537	118.32	114.779
		67.8	157.608	105.453	159.239	90.3654	100.086	118.391	114.831
		67.9	157.902	105.256	159.584	90.3168	100.216	118.682	114.994
		68	158.493	105.126	159.85	90.1958	100.327	119.093	114.978
		68.1	159.124	104.871	159.659	90.1121	100.406	119.382	114.814
		68.2	159.492	104.608	159.141	90.1782	100.519	119.625	114.629
		68.3	159.799	104.467	158.7	90.2688	100.501	119.712	114.607
		68.4	159.864	104.425	158.315	90.2823	100.378	119.879	114.281
		68.5	159.749	104.278	157.89	90.176	100.234	119.984	113.997
		68.6	159.412	104.027	157.772	90.0806	100.144	120.117	113.826
		68.7	158.892	103.88	158.028	89.8756	100.035	120.223	113.89
		68.8	158.487	103.864	157.992	89.6141	99.8406	120.369	114.119
		68.9	158.379	103.779	157.919	89.4591	99.8666	120.202	114.551
		69	158.292	103.896	157.845	89.432	100.157	120.077	114.957
		69.1	158.288	104.332	157.81	89.3527	100.391	119.97	115.18
		69.2	158.56	104.681	157.654	89.2598	100.607	119.975	115.144
		69.3	158.689	104.87	157.637	89.2268	100.938	119.9	114.701
		69.4	158.692	105.159	157.627	89.1819	101.135	119.949	114.284
		69.5	158.619	105.351	157.657	89.1315	101.085	119.824	114.066
		69.6	158.782	105.343	157.558	89.1263	100.991	119.708	114.063
		69.7	158.973	105.467	157.381	89.1622	100.944	119.447	114.146
		69.8	159.36	105.664	157.265	89.208	100.829	119.169	114.589
		69.9	159.741	105.637	157.321	89.4176	100.741	119.04	114.874
		70	160.067	105.493	157.489	89.609	100.792	119.127	114.865
		70.1	159.84	105.449	157.593	89.7734	100.855	119.052	114.879
		70.2	159.404	105.269	157.711	90.0452	100.76	119.028	114.829
		70.3	158.944	104.953	157.789	90.2205	100.715	118.976	114.539
		70.4	158.661	104.731	157.646	90.2612	100.678	118.836	114.464
		70.5	158.54	104.585	157.467	90.2348	100.382	118.613	114.698
		70.6	158.788	104.26	157.632	90.2686	100.128	118.572	114.753
		70.7	159.396	103.876	157.684	90.084	100.112	118.633	114.841
		70.8	159.899	103.656	157.707	90.028	100.109	118.822	115.08
		70.9	160.024	103.505	157.894	89.9716	100.091	119.152	115.086
		71	159.989	103.373	157.972	90.1013	100.271	119.603	114.757
		71.1	159.895	103.339	157.676	90.1358	100.499	120.105	114.442
		71.2	159.421	103.347	157.487	90.2161	100.547	120.475	114.174
		71.3	158.913	103.361	157.208	90.2013	100.543	120.778	113.812
		71.4	158.688	103.437	156.835	90.0388	100.614	120.823	113.665
		71.5	158.513	103.56	156.614	89.6984	100.671	120.72	113.662
		71.6	158.392	103.686	156.647	89.4146	100.633	120.526	113.692
		71.7	158.45	103.953	156.765	89.404	100.751	120.341	113.579
		71.8	158.606	104.087	156.927	89.4713	100.914	120.049	113.546
		71.9	158.763	104.034	157.074	89.6838	100.994	119.798	113.367
		72	158.847	104.044	157.069	89.9922	101.159	119.321	113.21
		72.1	158.796	104.04	156.801	90.2432	101.331	118.775	113.182
		72.2	158.797	103.942	156.364	90.0273	101.297	118.341	113.373
		72.3	158.755	103.85	155.948	89.606	101.387	118.036	113.59
		72.4	158.498	103.866	155.452	89.0907	101.597	117.829	113.835
		72.5	158.55	103.746	155.008	88.6224	101.663	117.938	114.16
		72.6	158.76	103.594	154.772	88.1956	101.821	118.011	114.338
		72.7	158.872	103.495	154.695	88.1861	102.129	117.958	114.41
		72.8	159.044	103.626	154.73	88.4852	102.116	117.888	114.36
		72.9	159.399	103.706	154.954	88.9982	101.879	117.745	114.303
		73	159.509	103.883	155.112	89.3458	101.575	117.627	114.111
		73.1	159.626	104.131	155.282	89.7292	101.034	117.719	114.004
		73.2	159.882	104.33	155.409	89.885	100.283	117.87	113.785
		73.3	160.05	104.132	155.458	89.8854	99.6236	118.093	113.534
		73.4	160.089	104.029	155.462	89.6858	98.9937	118.39	113.237
		73.5	160.184	103.757	155.575	89.5276	98.4426	118.486	112.971
		73.6	160.089	103.415	155.511	89.2414	98.1438	118.371	112.473
		73.7	159.614	102.996	155.456	88.9965	98.1902	118.126	112.034
		73.8	159.012	102.869	155.313	88.6656	98.498	117.644	111.815
		73.9	158.544	102.623	155.111	88.3168	99.0801	117.064	111.759
		74	157.97	102.49	154.923	88.0521	99.861	116.651	111.678
		74.1	157.51	102.414	154.89	87.991	100.609	116.374	111.89
		74.2	157.526	102.347	154.863	88.0415	101.174	116.254	112.319
		74.3	157.746	102.239	154.983	88.3753	101.527	116.33	112.582
		74.4	157.793	102.29	155.039	89.0262	101.653	116.586	112.749
		74.5	158.003	102.342	154.99	89.7067	101.452	116.692	112.951
		74.6	158.242	102.564	154.988	90.2426	101.054	116.748	112.987
		74.7	158.146	103.069	155.017	90.5632	100.696	116.904	112.819
		74.8	158.084	103.565	155.092	90.5304	100.418	117.165	112.67
		74.9	158.386	103.941	155.378	90.1557	100.304	117.178	112.579
		75	158.675	104.42	155.709	89.7076	100.441	117.415	112.6
		75.1	159.023	104.632	155.859	89.2202	100.906	117.685	112.752
		75.2	159.559	104.497	155.91	88.8109	101.292	117.712	112.841
		75.3	159.878	104.446	155.695	88.6922	101.565	117.493	112.949
		75.4	159.736	104.388	155.363	88.7784	101.664	117.48	112.952
		75.5	159.379	104.188	155.051	88.7774	101.695	117.264	112.75
		75.6	158.785	104.044	154.778	88.8966	101.534	117.12	112.555
		75.7	158.094	104.132	154.527	89.2871	101.413	117.173	112.558
		75.8	157.694	104.119	154.623	89.5516	101.336	117.357	112.669
		75.9	157.658	104.15	154.771	89.6516	101.252	117.499	112.834
		76	157.746	104.151	155.056	89.7768	101.166	117.725	113.191
		76.1	158.089	104.25	155.507	89.8493	101.095	117.76	113.432
		76.2	158.555	104.361	156.05	89.6008	101.108	117.508	113.553
		76.3	158.77	104.473	156.389	89.3182	101.16	117.124	113.466
		76.4	158.631	104.553	156.663	88.9968	101.343	116.532	113.323
		76.5	158.482	104.815	156.669	88.7496	101.499	115.932	113.113
		76.6	158.195	104.949	156.406	88.4714	101.585	115.486	112.973
		76.7	157.839	104.845	155.996	88.3967	101.475	115.272	112.86
		76.8	157.606	104.736	155.474	88.4602	101.321	115.254	112.837
		76.9	157.613	104.646	154.754	88.8378	101.061	115.643	112.943
		77	157.782	104.391	154.063	89.2267	100.637	116.178	113.038
		77.1	157.942	104.3	153.541	89.6981	100.233	116.632	112.968
		77.2	158.1	104.303	152.994	90.0138	99.952	117.022	112.988
		77.3	158.273	104.204	152.647	90.0626	99.8008	117.307	113.026
		77.4	158.503	104.092	152.673	89.7943	99.7529	117.308	112.913
		77.5	158.491	104.034	152.873	89.6174	99.999	117.079	112.713
		77.6	158.591	103.781	153.077	89.4407	100.251	116.845	112.832
		77.7	158.66	103.606	153.42	89.3012	100.35	116.715	112.764
		77.8	158.692	103.64	153.665	89.4449	100.216	116.46	112.744
		77.9	158.721	103.729	153.686	89.6576	100.03	116.17	112.903
		78	158.787	103.883	153.511	89.6723	99.7623	115.951	113.031
		78.1	158.688	104.178	153.253	89.5888	99.5944	115.812	112.771
		78.2	158.465	104.523	153.057	89.4793	99.6593	115.608	112.617
		78.3	158.285	104.766	152.913	89.2082	99.879	115.59	112.36
		78.4	157.905	104.966	152.782	88.9665	100.021	115.826	111.963
		78.5	157.713	104.982	152.919	88.7785	100.081	116.162	111.886
		78.6	157.619	104.989	153.296	88.6292	100.111	116.451	112.045
		78.7	157.673	104.87	153.502	88.5101	100.057	116.723	112.212
		78.8	157.705	104.673	153.616	88.6096	99.9113	116.989	112.499
		78.9	157.957	104.495	153.896	88.8081	99.8407	116.971	112.816
		79	158.216	104.629	154.043	89.0992	99.8448	116.783	112.845
		79.1	158.577	104.65	153.899	89.4326	99.7485	116.482	112.909
		79.2	159.013	104.594	153.797	89.9349	99.7474	116.189	112.811
		79.3	159.348	104.596	153.768	90.2619	99.9098	115.927	112.58
		79.4	159.478	104.429	153.572	90.5298	100.192	115.868	112.234
		79.5	159.382	103.952	153.395	90.717	100.4	115.918	111.855
		79.6	159.106	103.575	153.385	90.8704	100.647	116.102	111.374
		79.7	158.752	103.288	153.374	90.671	100.684	116.276	111.163
		79.8	158.436	103.094	153.366	90.3074	100.547	116.388	111.098
		79.9	158.338	103.272	153.443	89.868	100.255	116.419	111.28
		80	158.355	103.538	153.298	89.5146	99.9599	116.39	111.641
		80.1	158.526	103.806	152.968	89.2203	99.7115	116.403	111.985
		80.2	158.577	104.225	152.805	89.2249	99.5614	116.536	112.166
		80.3	158.829	104.629	152.666	89.3888	99.4937	116.71	112.169
		80.4	158.964	104.786	152.368	89.5476	99.4443	116.774	112.007
		80.5	159.142	105.067	152.205	89.5708	99.5649	116.865	111.813
		80.6	159.195	105.293	152.207	89.5122	99.6987	116.888	111.709
		80.7	159.494	105.403	151.943	89.3136	99.8417	116.62	111.605
		80.8	159.395	105.481	151.466	89.1735	100.073	116.216	111.58
		80.9	159.077	105.408	151.082	89.063	100.266	115.907	111.549
		81	158.684	105.175	150.786	89.0637	100.28	115.646	111.379
		81.1	158.256	105.056	150.561	89.1483	100.21	115.38	111.132
		81.2	157.772	104.899	150.506	89.2834	100.184	115.489	110.939
		81.3	157.662	104.663	150.688	89.3248	99.9523	115.787	110.808
		81.4	157.881	104.591	150.996	89.3309	99.8643	116.154	110.913
		81.5	158.15	104.577	151.135	89.2982	99.8916	116.42	111.242
		81.6	158.607	104.322	151.064	89.1334	100.104	116.551	111.694
		81.7	158.744	103.961	150.832	89.0052	100.281	116.297	112.163
		81.8	158.747	103.665	150.545	88.939	100.567	115.711	112.579
		81.9	158.731	103.518	150.126	89.1306	100.771	115.05	112.755
		82	158.656	103.47	149.983	89.2429	100.725	114.467	112.796
		82.1	158.449	103.805	150.045	89.3384	100.418	114.214	112.741
		82.2	158.571	104.33	150.315	89.2671	100.102	114.137	112.61
		82.3	158.706	104.885	150.646	89.0684	99.8471	114.305	112.424
		82.4	158.695	105.343	151.049	88.4756	99.5506	114.52	112.226
		82.5	158.716	105.712	151.451	88.0304	99.524	114.697	111.999
		82.6	158.764	105.696	151.806	87.8211	99.6892	114.651	111.801
		82.7	158.773	105.712	152.163	87.7596	99.8242	114.618	111.609
		82.8	158.751	105.692	152.438	87.9479	99.9247	114.605	111.503
		82.9	158.831	105.436	152.67	88.4196	100.185	114.646	111.559
		83	158.916	105.171	152.76	88.8852	100.527	114.653	111.66
		83.1	159.159	104.975	152.811	89.1806	100.919	114.593	111.719
		83.2	159.174	104.568	152.689	89.4886	101.33	114.656	111.879
		83.3	159.203	104.02	152.595	89.4981	101.713	114.676	111.979
		83.4	159.162	103.755	152.523	89.3478	101.888	114.623	111.926
		83.5	159.036	103.35	152.195	88.9558	101.746	114.722	111.819
		83.6	158.727	103.217	151.745	88.5087	101.349	114.941	111.689
		83.7	158.746	103.139	151.464	87.9033	101.002	115.028	111.425
		83.8	158.703	103.206	151.252	87.4789	100.698	115.247	111.212
		83.9	158.464	103.223	151.002	87.2613	100.398	115.381	110.901
		84	158.263	103.472	151.168	87.3945	100.234	115.357	110.739
		84.1	157.952	103.443	151.4	87.5526	100.185	115.28	110.72
		84.2	157.589	103.706	151.406	87.8772	100.109	115.173	110.86
		84.3	157.327	103.993	151.15	88.222	100.065	114.826	110.933
		84.4	157.461	104.106	150.805	88.3627	100.204	114.615	111.368
		84.5	157.762	104.143	150.255	88.2129	100.464	114.492	111.653
		84.6	158.463	104.289	149.799	88.2614	100.746	114.52	111.801
		84.7	158.975	104.214	149.471	88.301	100.979	114.567	111.749
		84.8	159.577	104.234	149.463	88.2981	100.951	114.742	111.851
		84.9	159.993	104.56	149.75	88.3591	100.783	114.786	111.628
		85	160.233	104.89	150.112	88.598	100.555	114.902	111.436
		85.1	160.022	105.248	150.364	88.6188	100.378	114.91	111.21
		85.2	159.908	105.416	150.621	88.6486	100.28	114.981	111.056
		85.3	159.6	105.357	150.717	88.7596	100.481	114.994	110.715
		85.4	159.3	105.014	150.644	88.9756	100.772	115.209	110.662
		85.5	159.096	104.719	150.416	89.0265	100.969	115.268	110.69
		85.6	159.027	104.426	150.398	89.1917	101.168	115.385	110.897
		85.7	158.946	104.367	150.58	89.237	101.393	115.388	111.075
		85.8	158.961	104.472	150.88	89.094	101.522	115.446	111.33
		85.9	159.022	104.662	151.174	88.7525	101.446	115.298	111.162
		86	159.06	104.702	151.701	88.4965	101.349	115.193	110.834
		86.1	159.184	104.658	151.969	88.168	101.09	114.922	110.404
		86.2	159.416	104.564	151.894	87.899	100.593	114.783	110.174
		86.3	159.483	104.27	151.684	87.7921	100.015	114.768	109.968
		86.4	159.405	103.919	151.367	87.8406	99.8313	114.851	110.163
		86.5	159.171	103.683	150.814	87.996	99.7	114.97	110.595
		86.6	158.802	103.47	150.354	88.3036	99.8384	115.147	110.998
		86.7	158.193	103.267	150.105	88.677	100.425	115.275	111.206
		86.8	157.797	103.375	149.835	89.0116	101.133	115.348	111.39
		86.9	157.547	103.651	149.751	89.133	101.423	115.265	111.384
		87	157.5	103.952	149.905	89.163	101.706	114.999	111.24
		87.1	157.521	104.247	150.04	89.0394	101.671	114.757	111.168
		87.2	157.774	104.677	150.138	88.8912	101.184	114.353	111.408
		87.3	157.93	104.826	150.3	88.6797	100.579	113.526	111.716
		87.4	157.961	104.915	150.219	88.7338	100.046	112.866	112.082
		87.5	157.989	104.97	149.937	88.9209	99.6642	112.448	112.233
		87.6	158.373	105.063	149.739	89.1346	99.5589	112.028	112.225
		87.7	158.692	104.942	149.559	89.1202	99.6351	111.813	111.892
		87.8	159.143	104.987	149.484	89.1867	99.7956	112.083	111.472
		87.9	159.774	105.055	149.588	89.1565	100.133	112.489	110.993
		88	160.338	104.973	149.82	88.841	100.278	112.989	110.841
		88.1	160.492	104.981	150.085	88.5441	100.28	113.74	110.897
		88.2	160.614	105.093	150.214	88.6064	100.225	114.459	110.86
		88.3	160.312	105.188	150.294	88.7272	100.125	115.058	110.892
		88.4	159.82	105.152	150.437	88.8138	99.9356	115.41	110.974
		88.5	159.396	105.26	150.485	89.1455	99.8098	115.572	110.926
		88.6	159.018	105.142	150.388	89.4299	99.6677	115.279	110.8
		88.7	158.536	104.936	150.344	89.4949	99.6521	114.914	110.987
		88.8	158.611	104.629	150.146	89.4153	99.7234	114.54	111.19
		88.9	158.841	104.536	149.918	89.3688	99.9272	114.275	111.382
		89	159.073	104.52	149.948	89.1797	100.183	113.837	111.628
		89.1	159.463	104.673	149.941	89.1546	100.543	113.728	111.794
		89.2	160.005	104.848	149.948	89.2104	100.878	113.756	111.741
		89.3	160.19	105.029	149.886	89.2666	101.086	113.692	111.62
		89.4	160.315	104.953	149.589	89.3878	101.085	113.567	111.53
		89.5	160.203	104.769	148.933	89.6786	100.922	113.733	111.364
		89.6	159.819	104.528	148.359	89.6788	100.724	113.798	111.343
		89.7	159.45	104.382	147.917	89.6956	100.418	113.707	111.437
		89.8	159.304	104.363	147.702	89.7349	100.249	113.701	111.36
		89.9	159.251	104.498	147.721	89.6944	100.239	113.647	111.19
		90	159.338	104.704	147.769	89.4089	100.426	113.429	111.064
		90.1	159.557	104.854	147.958	89.3463	100.49	113.127	110.82
		90.2	159.695	104.939	148.03	89.1749	100.535	112.879	110.498
		90.3	159.687	105.025	148.077	89.178	100.451	112.653	110.506
		90.4	159.503	105.117	148.128	89.0922	100.273	112.46	110.605
		90.5	159.439	105.141	148.486	89.1881	99.98	112.332	110.739
		90.6	159.51	105.273	148.668	89.3378	99.7883	112.386	110.916
		90.7	159.444	105.432	148.821	89.5851	99.734	112.57	111.175
		90.8	159.448	105.493	148.943	89.4598	99.8034	112.797	111.296
		90.9	159.574	105.677	148.908	89.4983	99.8806	113.216	111.504
		91	159.687	106.03	148.502	89.4016	100.061	113.645	111.567
		91.1	159.553	106.298	148.016	88.8062	100.226	113.927	111.614
		91.2	159.75	106.531	147.535	88.2281	100.208	114.066	111.657
		91.3	159.903	106.735	147.113	88.0799	100.086	114.088	111.475
		91.4	159.882	106.605	146.766	87.7757	99.9978	113.899	111.073
		91.5	159.485	106.174	146.711	87.6142	99.7948	113.704	110.945
		91.6	159.309	105.893	146.898	88.0364	99.6508	113.521	110.846
		91.7	158.935	105.648	147.148	88.272	99.8242	113.405	110.692
		91.8	158.509	105.395	147.275	88.1866	99.9768	113.269	110.834
		91.9	158.259	105.335	147.449	88.2375	100.022	113.246	111.151
		92	158.472	105.44	147.482	88.1439	100.095	113.187	111.285
		92.1	158.529	105.374	147.434	87.8238	100.159	112.97	111.401
		92.2	158.638	105.261	147.244	87.635	100.049	112.503	111.415
		92.3	158.932	105.215	147.161	87.5801	100.094	112.098	111.349
		92.4	159.186	105.022	147.198	87.3796	100.244	111.746	111.141
		92.5	159.272	104.742	147.272	87.287	100.377	111.524	110.866
		92.6	159.515	104.469	147.238	87.34	100.462	111.753	110.611
		92.7	159.595	104.163	147.412	87.4466	100.418	112.244	110.596
		92.8	159.492	103.745	147.409	87.5604	100.249	112.88	110.693
		92.9	159.346	103.561	147.07	87.7849	100.089	113.401	110.847
		93	159.126	103.502	146.656	87.9798	99.9949	113.827	111.151
		93.1	158.815	103.495	146.243	88.0412	99.9669	113.98	111.46
		93.2	158.605	103.555	145.736	88.0941	100.025	114.251	111.668
		93.3	158.467	103.785	145.502	88.0757	100.175	114.384	111.569
		93.4	158.411	103.955	145.59	87.9215	100.35	114.419	111.421
		93.5	158.586	104.063	145.888	87.8711	100.562	114.337	111.211
		93.6	158.739	104.13	146.466	87.7996	100.653	114.198	110.895
		93.7	158.971	104.146	147.099	87.7128	100.821	113.804	110.473
		93.8	159.06	104.157	147.576	87.761	100.875	113.428	110.414
		93.9	159.091	104.038	147.842	88.1671	100.91	113.193	110.623
		94	158.87	103.887	148.039	88.4772	100.81	113.163	110.76
		94.1	158.612	103.718	147.938	88.873	100.764	113.323	110.971
		94.2	158.35	103.646	147.777	89.2642	100.646	113.587	111.108
		94.3	158.354	103.442	147.692	89.5639	100.516	113.719	110.839
		94.4	158.314	103.362	147.629	89.5131	100.286	113.87	110.254
		94.5	158.316	103.426	147.4	89.4314	100.094	113.892	109.719
		94.6	158.559	103.646	147.228	89.2522	99.94	113.585	109.233
		94.7	158.819	103.846	146.88	89.0289	99.8188	113.19	109.058
		94.8	158.851	104.138	146.41	88.7302	99.7908	112.846	109.328
		94.9	158.932	104.339	145.942	88.5574	100.044	112.4	109.784
		95	159.096	104.352	145.577	88.3678	100.321	112.059	110.268
		95.1	158.923	104.241	145.226	88.323	100.575	112.053	110.668
		95.2	158.742	104.041	145.153	88.3134	100.762	112.102	110.956
		95.3	158.788	103.8	145.06	88.3849	100.984	112.284	110.951
		95.4	158.86	103.687	145.055	88.3648	100.82	112.547	110.955
		95.5	158.987	103.78	145.053	88.3662	100.674	112.589	111.149
		95.6	159.368	103.804	145.067	88.3051	100.513	112.425	111.435
		95.7	159.672	103.933	144.939	88.1289	100.39	112.37	111.648
		95.8	159.74	104.209	144.884	87.9023	100.191	112.108	111.882
		95.9	159.863	104.402	144.835	87.8298	100.177	111.733	111.916
		96	159.837	104.362	144.889	87.7852	100.003	111.648	111.659
		96.1	159.715	104.465	144.944	87.5923	99.8779	111.766	111.439
		96.2	159.54	104.509	145.089	87.6781	99.7347	111.891	111.243
		96.3	159.39	104.306	145.307	87.9339	99.5247	112.234	111.078
		96.4	159.02	103.986	145.497	88.0702	99.2516	112.767	111.077
		96.5	158.686	103.75	145.407	88.2122	99.1715	113.142	111.082
		96.6	158.352	103.517	145.254	88.4877	99.0219	113.239	110.837
		96.7	157.989	103.258	144.995	88.4014	98.9437	113.172	110.479
		96.8	157.77	103.232	144.794	88.1566	98.9359	112.96	110.193
		96.9	157.747	103.535	144.715	87.9878	99.0685	112.559	109.902
		97	157.837	103.921	145.041	87.8752	99.1906	112.034	109.744
		97.1	157.877	104.335	145.58	87.7734	99.3111	111.711	109.851
		97.2	158.151	104.838	146.206	87.8984	99.4832	111.385	110.133
		97.3	158.275	105.224	146.616	87.9474	99.7285	111.062	110.339
		97.4	158.276	105.227	146.833	88.0555	99.8152	110.723	110.376
		97.5	158.122	105.189	146.758	87.9873	99.9908	110.66	110.312
		97.6	158.077	104.942	146.462	87.8062	100.314	110.557	110.13
		97.7	157.98	104.604	146.23	87.608	100.555	110.474	109.948
		97.8	158.112	104.215	146.139	87.7106	100.808	110.482	109.906
		97.9	158.43	104.054	146.005	87.7306	101.136	110.747	110.136
		98	158.81	103.914	145.887	87.8918	101.283	110.848	110.407
		98.1	159.045	104.074	145.952	88.2518	101.228	111.011	110.645
		98.2	159.089	104.323	145.941	88.6375	101.102	111.414	110.683
		98.3	158.86	104.648	145.8	88.6633	100.928	111.859	110.57
		98.4	158.44	104.993	145.803	88.672	100.87	112.102	110.153
		98.5	158.025	105.213	145.838	88.6912	100.841	112.396	109.676
		98.6	157.671	105.184	145.681	88.586	101.016	112.579	109.113
		98.7	157.462	105.091	145.466	88.3772	101.401	112.393	108.788
		98.8	157.521	104.927	145.395	88.4228	101.863	112.192	108.6
		98.9	157.712	104.772	145.387	88.4898	102.279	112	108.7
		99	157.906	104.84	145.426	88.6275	102.673	111.744	108.812
		99.1	158.044	104.917	145.581	88.7574	102.979	111.539	109.129
		99.2	158.132	105.064	145.855	88.8932	102.919	111.554	109.441
		99.3	157.976	105.389	146.159	88.9009	102.484	111.469	109.598
		99.4	157.717	105.583	146.352	88.8512	101.654	111.55	109.427
		99.5	157.612	105.773	146.446	88.6393	100.926	111.662	109.409
		99.6	157.867	106.237	146.463	88.5552	100.019	111.664	109.321
		99.7	158.256	106.672	146.399	88.5797	99.3293	111.493	109.049
		99.8	158.885	106.731	146.181	88.5636	98.9948	111.19	108.886
		99.9	159.674	106.726	145.961	88.4398	99.1575	110.639	109.089
		100	160.145	106.371	145.945	88.3558	99.2499	110.159	109.219
		100.1	160.314	105.559	146.167	88.0632	99.6006	109.9	109.347
		100.2	160.306	104.518	146.33	87.7066	100.004	109.939	109.622
		100.3	160.113	103.799	146.351	87.6052	100.282	110.397	109.685
		100.4	159.684	103.231	146.119	87.8902	100.36	110.978	109.444
		100.5	159.414	102.94	145.548	88.0717	100.542	111.555	109.25
		100.6	159.038	102.948	144.579	88.2894	100.628	111.929	109.217
		100.7	158.618	103.184	143.681	88.5785	100.619	112.125	109.244
		100.8	158.246	103.438	142.97	88.7271	100.596	111.923	109.549
		100.9	158.107	103.77	142.662	88.5216	100.701	111.819	110.12
		101	157.936	104.066	142.66	88.5173	100.514	111.555	110.6
		101.1	157.826	104.435	142.812	88.5666	100.095	111.339	110.793
		101.2	157.904	104.901	142.906	88.6176	99.7365	111.119	110.837
		101.3	157.96	105.212	143.12	88.528	99.5806	110.948	110.695
		101.4	157.914	105.35	143.296	88.5175	99.4014	110.663	110.376
		101.5	158.125	105.596	143.36	88.3636	99.4996	110.528	110.149
		101.6	158.41	105.75	143.535	88.284	100.062	110.462	110.146
		101.7	158.491	105.683	143.792	88.067	100.59	110.373	110.167
		101.8	158.578	105.568	144.029	88.0208	100.901	110.531	110.368
		101.9	158.698	105.44	144.1	87.9384	101.13	110.656	110.605
		102	158.404	105.064	144.191	87.7959	101.365	110.767	110.654
		102.1	158.138	104.643	144.22	87.6948	101.326	110.786	110.584
		102.2	158.05	104.366	144.193	87.7119	101.346	110.8	110.472
		102.3	157.96	104.252	144.101	87.6969	101.508	110.587	110.239
		102.4	157.783	104.23	144.151	87.8725	101.549	110.489	109.981
		102.5	157.907	104.293	144.192	88.3238	101.426	110.451	109.822
		102.6	158.051	104.301	144.274	88.5171	101.306	110.436	109.684
		102.7	158.084	104.164	144.464	88.5969	101.099	110.54	109.624
		102.8	157.998	103.967	144.611	88.6549	100.664	110.711	109.597
		102.9	157.818	103.733	144.607	88.6704	100.291	110.818	109.783
		103	157.47	103.583	144.639	88.5304	100.041	110.743	110.092
		103.1	157.126	103.722	144.554	88.4912	99.798	110.917	110.359
		103.2	157.106	103.992	144.22	88.477	99.5853	110.977	110.451
		103.3	157.389	104.267	143.853	88.4828	99.6051	111.15	110.404
		103.4	157.861	104.583	143.612	88.3606	99.7694	111.24	109.941
		103.5	158.393	104.838	143.197	88.1299	99.99	111.368	109.232
		103.6	158.824	104.726	142.842	88.0082	100.262	111.155	108.545
		103.7	158.684	104.669	142.737	87.9651	100.502	111.002	108.068
		103.8	158.459	104.622	142.605	87.7615	100.674	110.611	107.777
		103.9	158.237	104.597	142.25	87.5391	100.731	110.29	107.907
		104	158.014	104.573	142.203	87.4584	100.526	110.144	108.257
		104.1	157.791	104.729	142.301	87.3033	100.239	110.129	108.623
		104.2	157.845	104.8	142.341	87.1141	99.9738	110.139	109.033
		104.3	157.685	104.908	142.4	87.1466	99.6616	110.337	109.24
		104.4	157.393	104.945	142.72	87.4573	99.358	110.67	109.255
		104.5	157.143	104.987	142.78	87.7935	99.2927	110.949	109.269
		104.6	157.016	104.932	142.701	88.2509	99.2947	111.219	109.294
		104.7	157.083	104.772	142.71	88.7305	99.518	111.434	109.168
		104.8	157.382	104.456	142.887	89.112	99.682	111.566	109.272
		104.9	157.817	104.029	143.032	89.2069	99.851	111.367	109.328
		105	158.254	103.65	143.224	89.1863	99.96	110.939	109.218
		105.1	158.651	103.4	143.331	88.9232	100.004	110.487	109.16
		105.2	158.844	103.301	143.212	88.5862	99.7188	110.1	109.259
		105.3	158.817	103.455	142.965	88.3213	99.6875	109.716	109.29
		105.4	158.734	103.967	142.624	88.0737	99.7402	109.532	109.376
		105.5	158.591	104.483	142.368	87.9758	99.8047	109.555	109.584
		105.6	158.414	104.825	142.236	88.1085	100.064	109.566	109.749
		105.7	158.183	105.026	142.24	88.311	100.453	109.487	109.803
		105.8	158.163	104.984	142.251	88.4533	100.585	109.403	109.787
		105.9	158.106	104.674	142.338	88.5989	100.521	109.433	109.805
		106	158.151	104.339	142.441	88.5624	100.33	109.426	109.643
		106.1	158.124	104.235	142.456	88.3668	99.9288	109.483	109.374
		106.2	158.316	104.356	142.399	88.1442	99.4866	109.514	109.01
		106.3	158.568	104.575	142.374	87.9051	99.2288	109.641	108.706
		106.4	158.929	104.826	142.305	87.7933	99.2123	109.666	108.4
		106.5	158.975	104.906	142.166	87.7938	99.3998	109.797	108.265
		106.6	159.092	104.888	142.224	87.955	99.6862	109.897	108.247
		106.7	159.075	104.756	142.455	88.1596	100.07	110.016	108.408
		106.8	158.892	104.731	142.673	88.4231	100.317	110.018	108.684
		106.9	158.596	104.675	142.938	88.6714	100.51	110.064	108.994
		107	158.567	104.837	143.299	88.8618	100.593	110.01	109.511
		107.1	158.569	104.936	143.511	88.9252	100.479	109.911	109.944
		107.2	158.487	104.956	143.594	88.8782	100.37	109.938	110.221
		107.3	158.283	104.848	143.618	88.6467	100.356	110.109	110.198
		107.4	158.127	104.845	143.472	88.2642	100.306	110.147	109.972
		107.5	158.022	104.843	143.117	88.0432	100.299	110.074	109.486
		107.6	157.796	104.827	142.624	87.8444	100.573	110.166	109.107
		107.7	157.602	105.039	142.022	87.7682	100.755	110.126	108.696
		107.8	157.582	105.359	141.501	87.8326	100.929	109.998	108.555
		107.9	157.515	105.661	141.134	88.0436	100.885	110.051	108.714
		108	157.298	105.869	140.913	87.9451	100.796	110.204	108.967
		108.1	157.353	106.174	140.854	87.7989	100.774	110.092	109.273
		108.2	157.511	106.15	140.921	87.6438	100.819	109.969	109.898
		108.3	157.646	105.895	141.017	87.5978	100.825	109.56	110.361
		108.4	157.935	105.48	141.097	87.4843	101.084	108.852	110.422
		108.5	158.353	105.016	141.208	87.656	101.276	108.08	110.41
		108.6	158.576	104.548	141.375	87.852	101.046	107.441	110.272
		108.7	158.847	104.37	141.518	87.9794	100.756	106.918	109.813
		108.8	159.102	104.338	141.564	87.9558	100.373	106.885	109.41
		108.9	159.202	104.51	141.602	87.8932	99.8902	107.191	109.424
		109	159.261	104.765	141.567	87.7144	99.6143	107.687	109.366
		109.1	159.231	104.985	141.478	87.5841	99.602	108.36	109.414
		109.2	159.08	105.028	141.419	87.4725	99.5799	108.877	109.685
		109.3	158.95	105.129	141.48	87.3866	99.7264	109.155	110.069
		109.4	158.769	105.1	141.455	87.4642	99.9318	109.278	110.244
		109.5	158.589	105.147	141.379	87.5439	99.9756	109.231	110.464
		109.6	158.577	105.118	141.278	87.7136	99.9791	108.909	110.525
		109.7	158.547	105.074	141.097	87.921	100.046	108.781	110.327
		109.8	158.526	104.936	140.733	88.1931	100.038	108.637	109.89
		109.9	158.69	104.854	140.55	88.4751	100.01	108.566	109.469
		110	158.788	104.703	140.507	88.7487	99.9564	108.603	109.091
		110.1	158.661	104.526	140.38	88.893	99.9189	108.7	108.773
		110.2	158.558	104.406	140.433	89.088	99.6991	108.649	108.701
		110.3	158.472	104.274	140.741	89.188	99.3558	108.697	108.87
		110.4	158.309	104.197	140.997	88.949	99.0518	108.689	109.088
		110.5	158.127	104.104	141.262	88.7167	98.8252	108.556	109.379
		110.6	158.332	104.127	141.629	88.2932	98.6661	108.473	109.767
		110.7	158.592	104.143	141.86	87.6706	98.8	108.574	109.999
		110.8	158.725	104.338	141.804	87.0402	99.1223	108.495	110.152
		110.9	158.956	104.436	141.628	86.7295	99.3669	108.232	110.261
		111	159.215	104.6	141.251	86.5337	99.598	107.904	110.243
		111.1	159.295	104.885	140.944	86.8263	99.8284	107.66	110.028
		111.2	159.405	105.153	140.576	87.2902	99.8412	107.348	109.811
		111.3	159.529	105.138	140.475	87.8546	99.8066	107.239	109.49
		111.4	159.312	105.095	140.453	88.3045	99.8433	107.558	109.188
		111.5	159.22	104.856	140.49	88.5562	99.8298	108.077	108.937
		111.6	158.91	104.379	140.277	88.4852	99.6518	108.375	108.872
		111.7	158.397	103.953	140.161	88.3456	99.6881	108.475	108.757
		111.8	157.991	103.878	139.751	88.1006	99.6938	108.542	108.587
		111.9	157.942	103.951	139.425	87.8305	99.6147	108.374	108.249
		112	157.734	104.242	139.276	87.566	99.5774	108.078	107.816
		112.1	157.798	104.61	139.398	87.3985	99.625	107.996	107.252
		112.2	158.024	104.925	139.629	87.2078	99.4765	107.981	106.949
		112.3	158.355	105.029	140.1	87.1731	99.4125	107.871	106.995
		112.4	158.539	105.019	140.42	87.3009	99.5169	107.737	107.305
		112.5	158.732	104.961	140.603	87.7074	99.6042	107.587	107.753
		112.6	158.739	104.841	140.727	88.0497	99.6207	107.281	108.299
		112.7	158.667	104.695	140.736	88.5539	99.6579	107.113	108.698
		112.8	158.345	104.516	140.631	88.9544	99.6349	107.005	108.87
		112.9	158.037	104.323	140.429	89.1999	99.4437	106.911	108.95
		113	157.758	104.16	140.162	89.1172	99.3406	107.053	108.953
		113.1	157.513	104.136	139.886	89.0492	99.3414	107.323	108.929
		113.2	157.256	104.221	139.557	88.9158	99.379	107.562	108.944
		113.3	157.195	104.219	139.257	88.8433	99.505	107.812	108.998
		113.4	157.102	104.19	139.177	88.8599	99.7186	108.008	109.049
		113.5	157.103	104.098	139.189	89.007	99.8319	107.997	109.124
		113.6	157.342	104.035	139.126	89.0358	100.013	108.028	109.092
		113.7	157.774	104.066	138.998	88.8478	100.192	108.125	108.888
		113.8	158.187	104.409	138.923	88.4923	100.079	108.257	108.621
		113.9	158.639	104.838	138.891	88.0764	99.9815	108.473	108.41
		114	158.93	105.158	138.902	87.7437	100.128	108.65	108.32
		114.1	158.977	105.307	138.939	87.5769	100.189	108.788	108.379
		114.2	158.972	105.285	139.082	87.6038	100.266	108.747	108.611
		114.3	158.869	105.004	139.159	87.8296	100.61	108.618	108.795
		114.4	158.898	104.774	139.15	88.0494	100.868	108.449	108.816
		114.5	159.16	104.713	139.299	88.1993	100.784	108.436	108.536
		114.6	159.518	104.674	139.565	88.4185	100.676	108.297	108.289
		114.7	159.699	104.47	139.906	88.527	100.587	108.278	108.008
		114.8	159.734	104.424	140.373	88.4593	100.462	108.226	107.886
		114.9	159.471	104.226	140.567	88.4082	100.352	108.135	107.95
		115	159.085	103.922	140.398	88.3764	100.344	108.098	108.344
		115.1	158.606	103.861	140.014	88.1273	100.232	108.178	108.685
		115.2	158.143	104.052	139.496	87.9446	100.074	108.217	109.019
		115.3	157.969	104.069	138.893	87.9384	99.9464	108.441	109.312
		115.4	157.868	104.229	138.791	87.8998	99.8349	108.831	109.5
		115.5	157.548	104.46	138.915	87.7427	99.8349	109.06	109.525
		115.6	157.285	104.393	139.148	87.8068	100.148	109.32	109.401
		115.7	157.182	104.315	139.4	88.0047	100.318	109.492	109.306
		115.8	156.93	104.319	139.563	88.072	100.382	109.384	109.142
		115.9	156.813	104.281	139.31	88.1948	100.556	109.106	108.856
		116	156.969	104.161	139.051	88.3934	100.642	108.782	108.534
		116.1	157.295	104.144	138.795	88.3894	100.503	108.208	108.446
		116.2	157.714	104.126	138.589	88.3039	100.622	107.632	108.354
		116.3	158.247	104.18	138.461	88.3367	100.641	107.211	108.48
		116.4	158.847	104.204	138.525	88.2679	100.436	106.867	108.701
		116.5	159.358	104.279	138.424	88.2123	100.31	106.663	109.071
		116.6	159.563	104.444	138.403	88.249	100.269	106.779	109.279
		116.7	159.546	104.49	138.51	88.2041	100.163	107.124	109.388
		116.8	159.573	104.315	138.615	88.0749	100.287	107.583	109.103
		116.9	159.557	104.126	138.677	88.0545	100.611	108.105	108.948
		117	159.745	104.126	138.973	88.1274	100.835	108.537	108.546
		117.1	160.206	103.995	139.062	88.0632	100.904	108.702	108.153
		117.2	160.559	103.993	139.046	87.997	100.947	108.764	107.786
		117.3	160.7	104.261	139.065	87.8788	100.931	108.682	107.667
		117.4	160.786	104.51	139.303	87.7572	100.85	108.445	107.51
		117.5	160.46	104.425	139.499	87.5033	100.693	108.233	107.608
		117.6	159.963	104.429	139.977	87.4842	100.703	108.107	107.821
		117.7	159.626	104.381	140.32	87.5823	100.783	107.817	108.124
		117.8	159.355	104.241	140.591	87.7532	100.814	107.604	108.316
		117.9	158.96	104.136	140.463	87.8673	100.578	107.461	108.369
		118	158.845	104.317	140.035	87.9948	100.454	107.361	108.338
		118.1	158.706	104.519	139.418	87.9212	100.264	107.305	108.182
		118.2	158.595	104.748	138.911	87.6477	99.9167	107.489	107.823
		118.3	158.415	104.908	138.446	87.4827	99.5195	107.488	107.624
		118.4	158.374	105.089	138.292	87.5377	99.5372	107.647	107.46
		118.5	158.261	105.147	138.227	87.7107	99.4806	107.744	107.201
		118.6	158.204	105.073	138.162	88.084	99.4519	107.844	107
		118.7	158.111	104.809	138.017	88.6109	99.4826	107.719	107.109
		118.8	158.104	104.548	137.726	88.9891	99.7159	107.781	107.235
		118.9	158.167	104.353	137.249	89.0136	99.7469	107.535	107.483
		119	158.343	104.081	137.014	88.8258	99.9669	107.249	107.968
		119.1	158.534	103.773	136.762	88.5218	100.185	106.927	108.51
		119.2	158.723	103.609	136.78	88.2367	100.391	106.852	108.821
		119.3	158.971	103.534	136.984	87.9031	100.481	106.825	108.974
		119.4	158.997	103.253	137.245	87.6856	100.509	106.996	109.094
		119.5	158.759	103.077	137.5	87.7212	100.361	107.187	109.094
		119.6	158.478	103.112	137.786	87.8976	100.181	107.422	109.016
		119.7	158.052	103.328	137.638	88.0066	100.173	107.521	108.969
		119.8	157.452	103.566	137.413	88.2291	100.251	107.475	108.935
		119.9	157.165	103.926	137.224	88.6205	100.661	107.344	108.861
		120	157.23	104.189	136.806	88.8732	101.076	107.276	108.603
		120.1	157.324	104.368	136.388	88.8397	101.469	107.228	108.267
		120.2	157.722	104.304	136.232	88.8249	101.574	107.157	108.122
		120.3	158.347	104.25	136.184	88.7571	101.42	107.1	108.182
		120.4	158.662	104.259	136.162	88.5289	101.041	107.228	108.231
		120.5	158.58	104.506	136.324	88.2151	100.802	107.418	108.427
		120.6	158.529	104.819	136.601	88.12	100.678	107.439	108.784
		120.7	158.453	105.147	137.006	87.9872	100.859	107.297	108.859
		120.8	158.3	105.277	137.31	87.9063	101.255	107.219	108.759
		120.9	158.163	105.306	137.486	87.8772	101.589	106.871	108.736
		121	158.301	105.026	137.525	88.0643	101.91	106.347	108.651
		121.1	158.415	104.606	137.389	88.1778	102.094	106.142	108.424
		121.2	158.385	104.29	137.039	88.3646	101.964	106.394	108.538
		121.3	158.302	104.118	136.764	88.4882	101.741	106.665	108.562
		121.4	158.391	104.027	136.674	88.6594	101.558	106.986	108.558
		121.5	158.409	104.133	136.756	88.65	101.266	107.482	108.702
		121.6	158.342	104.404	137.048	88.6588	101.065	107.797	108.989
		121.7	158.373	104.7	137.337	88.6123	101.061	107.705	108.831
		121.8	158.61	105.017	137.458	88.4915	101.059	107.468	108.804
		121.9	158.803	105.321	137.393	88.2092	101.029	107.315	108.708
		122	158.984	105.559	137.164	87.9993	101.154	107.115	108.517
		122.1	159.307	105.512	136.644	87.7816	101.257	106.914	108.229
		122.2	159.522	105.381	136.142	87.6622	101.344	106.846	108.225
		122.3	159.445	105.03	135.63	87.7091	101.579	106.842	108.305
		122.4	159.3	104.591	135.119	87.8263	101.859	106.868	108.395
		122.5	159.307	104.13	134.754	87.8902	101.834	106.794	108.419
		122.6	159.328	103.91	134.703	87.9659	101.67	106.653	108.456
		122.7	159.448	103.803	134.851	87.9454	101.378	106.471	108.496
		122.8	159.566	104.067	135.381	87.8984	100.888	106.299	108.239
		122.9	159.761	104.511	136.087	87.9217	100.517	105.938	108.128
		123	159.779	105.015	136.687	87.9819	100.337	105.699	108.215
		123.1	159.634	105.377	137.008	88.0359	100.326	105.528	108.371
		123.2	159.413	105.551	137.195	88.0819	100.562	105.486	108.404
		123.3	159.39	105.481	137.018	88.0914	100.801	105.442	108.745
		123.4	159.351	105.082	136.603	88.0856	100.654	105.606	108.882
		123.5	159.374	104.528	136.19	88.0368	100.466	105.714	108.828
		123.6	159.483	104.093	135.978	88.0028	100.292	105.861	108.779
		123.7	159.593	103.657	135.808	87.9632	99.9723	106.11	108.906
		123.8	159.669	103.292	135.744	87.9711	99.7156	106.477	108.971
		123.9	159.774	103.397	135.999	87.8389	99.7726	106.849	109.017
		124	159.878	103.72	136.344	87.7051	99.7578	107.179	109.039
		124.1	160.137	103.998	136.503	87.4878	99.7022	107.36	108.92
		124.2	160.327	104.4	136.44	87.2562	99.5652	107.106	108.695
		124.3	160.272	104.707	136.366	86.8541	99.5115	106.717	108.338
		124.4	160.019	104.665	135.985	86.7192	99.4872	106.143	108.093
		124.5	159.641	104.54	135.597	86.6852	99.8114	105.57	108.114
		124.6	158.882	104.52	135.555	86.7165	100.028	105.156	108.248
		124.7	158.128	104.621	135.764	86.9437	100.278	105.009	108.354
		124.8	157.734	104.827	135.926	87.4361	100.55	104.852	108.467
		124.9	157.639	105.096	136.22	87.7124	100.859	104.948	108.719
		125	157.649	105.392	136.404	88.0395	100.796	105.268	108.738
		125.1	158.039	105.543	136.246	88.5018	100.831	105.566	108.751
		125.2	158.698	105.462	135.914	88.6698	101.018	105.787	108.805
		125.3	159.221	105.461	135.671	88.5256	101.115	106.027	108.939
		125.4	159.601	105.58	135.534	88.388	101.092	106.168	108.869
		125.5	159.932	105.591	135.329	88.1378	101.245	106.036	108.78
		125.6	160.096	105.607	135.165	87.5975	101.501	105.918	108.62
		125.7	159.886	105.617	135.215	87.3019	101.61	106.016	108.443
		125.8	159.492	105.338	135.436	87.2648	101.661	106.235	108.246
		125.9	159.165	104.897	135.749	87.4682	101.687	106.309	108.24
		126	159.013	104.552	136.312	87.6014	101.568	106.302	108.424
		126.1	158.806	104.265	136.84	87.8836	101.294	106.138	108.574
		126.2	158.926	104.186	137.107	88.1127	101.142	105.747	108.684
		126.3	159.377	104.334	137.081	88.4605	101.021	105.236	108.863
		126.4	159.821	104.53	136.676	88.3931	100.937	104.903	108.828
		126.5	160.249	104.722	136.191	88.4212	101.001	104.844	108.621
		126.6	160.769	104.9	135.923	88.6351	101.146	104.821	108.514
		126.7	161.05	104.944	135.698	88.8763	101.206	104.873	108.37
		126.8	161.099	105.002	135.395	88.757	101.321	104.962	108.184
		126.9	161.027	105.127	135.136	89.025	101.414	105.006	108.038
		127	160.643	105.192	134.791	89.275	101.395	105.047	107.95
		127.1	160.182	105.255	134.528	89.2457	101.319	105.334	107.841
		127.2	159.89	105.287	134.547	89.0502	101.088	105.646	107.811
		127.3	159.86	105.234	134.924	88.9008	100.873	106.034	107.657
		127.4	159.866	105.062	135.496	88.4678	100.64	106.267	107.429
		127.5	160.072	104.991	136.012	88.0622	100.477	106.257	107.087
		127.6	160.459	104.952	136.176	87.6227	100.222	106.018	106.794
		127.7	160.692	105.081	135.961	87.1603	100.263	105.814	106.525
		127.8	160.383	105.267	135.454	86.8484	100.22	105.539	106.432
		127.9	160.048	105.477	134.964	86.8312	100.219	105.505	106.539
		128	159.884	105.426	134.684	86.8084	100.219	105.617	106.916
		128.1	159.458	105.29	134.642	86.9468	100.357	105.828	107.309
		128.2	159.109	104.992	134.859	87.1695	100.399	105.984	107.775
		128.3	159.184	104.595	135.112	87.3191	100.432	106.037	108.093
		128.4	159.339	104.354	135.169	87.3065	100.36	105.957	108.338
		128.5	159.232	104.481	135.016	87.2697	100.345	105.939	108.499
		128.6	159.349	104.61	134.785	87.2884	100.329	105.657	108.605
		128.7	159.314	104.654	134.497	87.4372	100.236	105.189	108.55
		128.8	159.179	104.825	134.301	87.7088	100.206	104.82	108.645
		128.9	159.163	104.832	134.227	87.9475	100.358	104.495	108.748
		129	159.12	104.682	134.404	88.1053	100.404	104.03	108.764
		129.1	158.822	104.669	134.587	88.0842	100.456	103.947	108.567
		129.2	158.659	104.805	134.623	87.9909	100.605	104.112	108.474
		129.3	158.482	104.734	134.804	87.7691	100.752	104.311	108.23
		129.4	157.944	104.621	134.903	87.4686	100.819	104.601	107.81
		129.5	157.547	104.413	134.629	87.2476	100.909	104.984	107.283
		129.6	157.409	104.065	134.209	87.1519	100.879	105.251	107.187
		129.7	157.392	103.628	134.045	86.9454	100.71	105.562	107.017
		129.8	157.545	103.372	133.639	86.7343	100.54	105.829	107.026
		129.9	158.049	103.286	133.396	86.6637	100.343	105.929	107.314
		130	158.58	103.297	133.507	86.6933	100.2	106.082	107.706
		130.1	158.955	103.341	133.879	86.6973	100.087	106.21	107.706
		130.2	159.396	103.555	134.232	86.7874	100.085	106.293	107.773
		130.3	159.638	103.802	134.705	86.9702	100.014	106.249	107.871
		130.4	159.659	103.983	135.033	87.1655	99.8816	106.104	107.802
		130.5	159.583	104.104	135.196	87.1617	99.6224	105.823	107.763
		130.6	159.707	104.163	135.105	87.1672	99.5736	105.531	107.937
		130.7	159.595	104.058	134.705	87.2848	99.4437	105.215	108.006
		130.8	159.493	103.851	134.265	87.423	99.4225	105.088	107.849
		130.9	159.541	103.682	133.979	87.4375	99.6008	105.281	107.798
		131	159.77	103.58	133.744	87.6248	100.01	105.623	107.781
		131.1	159.887	103.645	133.626	87.8381	100.177	105.859	107.586
		131.2	159.968	103.789	133.774	87.7981	100.504	105.999	107.418
		131.3	160.141	103.923	133.819	87.65	100.783	106.075	107.22
		131.4	160.136	104.034	133.774	87.6594	100.91	105.923	106.906
		131.5	159.75	104.214	133.592	87.5958	100.941	105.692	106.558
		131.6	159.309	104.352	133.467	87.4059	101.065	105.516	106.427
		131.7	158.927	104.483	133.335	87.4315	100.993	105.228	106.545
		131.8	158.429	104.674	133.21	87.4979	100.993	105.012	106.902
		131.9	158.028	104.813	132.956	87.4812	101.081	104.842	107.305
		132	158.016	104.834	132.989	87.4345	100.977	104.631	107.789
		132.1	158.051	104.78	132.956	87.514	100.858	104.544	108.263
		132.2	158.226	104.621	132.781	87.5702	100.689	104.748	108.547
		132.3	158.428	104.435	132.881	87.6749	100.367	104.855	108.688
		132.4	158.673	104.285	133.272	87.7695	99.9638	104.995	108.917
		132.5	158.911	104.09	133.577	87.9779	99.6938	105.074	108.961
		132.6	159.017	103.875	133.963	88.1928	99.4702	104.958	108.931
		132.7	158.96	103.769	134.518	88.345	99.4928	104.745	108.8
		132.8	158.955	103.783	134.713	88.4868	99.6328	104.552	108.811
		132.9	158.812	103.825	134.628	88.7074	99.8491	104.354	108.749
		133	158.484	103.837	134.328	88.8719	100.101	104.346	108.768
		133.1	158.442	103.904	133.963	88.9896	100.294	104.48	108.803
		133.2	158.537	104.099	133.413	89.0892	100.419	104.548	108.908
		133.3	158.482	103.981	133.259	88.994	100.488	104.623	108.849
		133.4	158.591	103.764	133.236	88.7782	100.491	104.801	108.588
		133.5	158.666	103.805	133.353	88.5081	100.465	104.855	108.275
		133.6	158.383	103.861	133.551	88.1283	100.534	105.063	108.016
		133.7	157.915	103.822	133.892	87.7067	100.517	105.372	107.826
		133.8	157.73	104.088	133.971	87.5494	100.459	105.721	107.702
		133.9	157.54	104.458	134.141	87.5377	100.278	105.863	107.863
		134	157.594	104.619	134.344	87.4511	100.204	106.037	108.136
		134.1	157.924	104.86	134.381	87.433	100.103	105.924	108.209
		134.2	158.326	105.026	134.388	87.4468	100.099	105.616	108.176
		134.3	158.487	105.006	134.405	87.2944	100.223	105.215	108.194
		134.4	158.543	105.082	134.096	86.9652	100.599	104.88	108.24
		134.5	158.223	105.199	133.634	86.8101	100.807	104.559	108.233
		134.6	157.771	105.117	133.28	86.6974	100.898	104.441	108.362
		134.7	157.388	105.035	132.838	86.7079	100.842	104.6	108.685
		134.8	157.166	105.123	132.416	86.7322	100.68	104.894	108.821
		134.9	157.141	104.984	132.377	86.8008	100.354	105.163	108.707
		135	157.522	104.819	132.442	86.7487	100.086	105.413	108.763
		135.1	158.04	104.708	132.561	86.8249	99.9711	105.384	108.79
		135.2	158.483	104.537	132.872	86.7513	100.026	105.077	108.532
		135.3	158.809	104.334	133.204	86.7013	100.144	104.604	108.297
		135.4	158.827	104.142	133.275	86.7271	100.319	104.335	108.311
		135.5	158.576	104.013	133.307	86.7855	100.388	104.085	107.957
		135.6	158.211	103.859	133.11	86.5712	100.446	104.044	107.59
		135.7	157.963	103.895	132.659	86.5242	100.535	104.23	107.424
		135.8	157.972	103.835	132.133	86.6156	100.601	104.596	107.434
		135.9	158.284	103.858	131.712	86.6522	100.688	104.818	107.34
		136	158.74	103.781	131.472	86.7637	100.946	105.006	107.375
		136.1	159.239	103.861	131.522	87.17	100.979	105.129	107.447
		136.2	159.698	103.767	131.659	87.4474	100.779	105.011	107.484
		136.3	159.795	103.726	131.998	87.461	100.505	104.606	107.413
		136.4	159.643	103.74	132.248	87.4871	100.143	103.958	107.209
		136.5	159.409	103.886	132.292	87.4614	99.7096	103.408	107.19
		136.6	159.203	103.91	132.302	87.2164	99.4981	102.878	107.147
		136.7	158.835	104.061	132.554	87.0426	99.4432	102.54	107.039
		136.8	158.71	104.028	132.529	87.0154	99.5104	102.528	107.013
		136.9	158.911	103.851	132.612	86.9777	99.6661	102.888	107.109
		137	159.152	103.728	132.815	86.8488	99.7601	103.219	107.123
		137.1	159.19	103.641	132.817	86.8404	99.8549	103.593	107.17
		137.2	159.434	103.435	132.598	86.7604	99.9594	103.994	107.227
		137.3	159.572	103.543	132.743	86.7352	100.088	104.238	107.352
		137.4	159.478	103.911	132.925	86.8835	100.242	104.39	107.584
		137.5	159.344	104.071	133.021	87.2987	100.683	104.347	107.966
		137.6	159.433	104.108	133.281	87.5718	101.114	104.296	108.325
		137.7	159.563	104.214	133.569	87.7859	101.42	104.195	108.893
		137.8	159.686	104.164	133.467	87.8714	101.498	104.101	109.345
		137.9	159.702	103.917	133.265	87.7636	101.414	104.003	109.73
		138	159.668	103.832	133.07	87.4447	101.022	104.114	109.761
		138.1	159.526	103.961	132.675	87.3484	100.534	104.204	109.889
		138.2	159.275	104.232	132.212	87.4153	100.238	104.226	109.705
		138.3	159.164	104.417	131.89	87.5537	100.23	104.197	109.433
		138.4	159.209	104.595	131.591	87.7298	100.335	103.962	109.09
		138.5	159.494	104.711	131.285	87.8623	100.4	103.644	108.918
		138.6	159.909	104.787	131.216	87.747	100.489	103.34	108.625
		138.7	160.087	104.702	131.293	87.5254	100.458	103.132	108.543
		138.8	160.042	104.716	131.468	87.4146	100.295	103.067	108.561
		138.9	159.865	104.68	131.732	87.2781	100.269	103.259	108.641
		139	159.368	104.569	132.097	87.1816	100.462	103.586	108.758
		139.1	158.694	104.392	132.358	87.2311	100.652	103.926	108.954
		139.2	158.345	104.099	132.469	87.3758	100.796	104.206	108.977
		139.3	158.222	103.787	132.403	87.4481	100.936	104.395	108.974
		139.4	158.397	103.628	132.093	87.5553	100.935	104.467	108.891
		139.5	158.967	103.4	131.72	87.7675	100.831	104.376	108.745
		139.6	159.696	103.081	131.333	87.9622	100.707	104.259	108.477
		139.7	160.394	102.946	131.074	87.9983	100.585	104.227	108.308
		139.8	160.858	103.016	130.943	87.9959	100.288	104.138	108.059
		139.9	160.971	103.094	131.027	87.9895	100.015	104.176	107.812
		140	160.626	103.399	131.149	87.9866	99.8606	104.184	107.515
		140.1	160.113	103.853	131.32	88.0817	99.85	104.021	107.381
		140.2	159.42	104.117	131.449	88.3622	99.9869	103.645	107.328
		140.3	158.925	104.048	131.75	88.5343	100.468	103.593	107.429
		140.4	158.654	103.809	131.909	88.5992	100.82	103.465	107.589
		140.5	158.559	103.662	131.902	88.5522	101.024	103.469	107.823
		140.6	158.602	103.466	131.748	88.3696	101.02	103.76	108
		140.7	158.74	103.472	131.638	88.1248	100.983	104.282	108.068
		140.8	158.824	103.597	131.37	87.9468	100.714	104.375	108.064
		140.9	158.759	103.787	131.339	87.9228	100.555	104.372	108.052
		141	158.74	103.671	131.595	87.8836	100.436	104.249	108.141
		141.1	158.682	103.544	131.994	87.835	100.494	103.996	108.143
		141.2	158.654	103.421	132.181	87.7391	100.358	103.648	108.164
		141.3	158.589	103.397	132.268	87.7643	100.321	103.493	108.267
		141.4	158.681	103.437	132.315	87.8184	100.311	103.324	108.399
		141.5	158.663	103.676	132.223	88.0347	100.233	103.143	108.366
		141.6	158.554	103.883	132.1	88.223	100.137	103.02	108.329
		141.7	158.538	104.11	132.125	88.3068	100.355	102.962	108.322
		141.8	158.523	104.268	131.999	88.225	100.528	102.858	108.121
		141.9	158.429	104.436	131.641	87.9582	100.663	102.949	107.747
		142	158.618	104.439	131.185	87.4608	100.935	103.23	107.338
		142.1	158.894	104.519	130.717	87.1128	101.141	103.493	107.007
		142.2	158.995	104.409	130.269	86.8505	101.144	103.765	106.633
		142.3	158.978	104.438	130.204	86.6595	101.14	104.166	106.501
		142.4	158.804	104.417	130.324	86.547	101.079	104.542	106.624
		142.5	158.482	104.477	130.569	86.5531	100.89	104.797	106.924
		142.6	158.288	104.591	131.022	86.3216	100.749	105.094	107.248
		142.7	158.096	104.846	131.59	86.3034	100.571	105.21	107.6
		142.8	158.132	104.818	132.045	86.4018	100.314	105.116	107.797
		142.9	158.455	104.735	132.362	86.5728	100.156	104.74	107.885
		143	158.708	104.809	132.463	86.7364	100.112	104.314	107.851
		143.1	158.74	104.683	132.182	87.2008	99.9834	103.724	107.696
		143.2	158.946	104.451	131.699	87.4652	99.9444	103.146	107.48
		143.3	159.162	104.306	131.242	87.6496	100.047	102.701	107.349
		143.4	159.231	104.329	130.848	87.7098	100.131	102.668	107.189
		143.5	159.344	104.068	130.679	87.8174	100.132	102.698	107.194
		143.6	159.653	103.829	130.741	87.748	100.095	102.801	107.254
		143.7	159.751	103.624	130.839	87.5382	99.9508	103.148	107.387
		143.8	159.626	103.475	130.722	87.2458	99.8664	103.452	107.453
		143.9	159.524	103.257	130.569	87.146	99.8493	103.475	107.602
		144	159.323	103.366	130.406	86.9661	99.8654	103.544	107.513
		144.1	158.884	103.72	130.195	86.7452	100.042	103.652	107.33
		144.2	158.669	104.197	130.048	86.7958	100.37	103.408	107.038
		144.3	158.637	104.591	130.1	86.9357	100.439	103.053	106.711
		144.4	158.594	104.831	130.289	86.9469	100.398	102.768	106.321
		144.5	158.642	104.742	130.42	87.0402	100.453	102.51	106.207
		144.6	158.804	104.403	130.596	87.258	100.362	102.246	106.44
		144.7	158.71	103.918	130.719	87.3316	100.143	102.396	106.935
		144.8	158.373	103.626	130.682	87.3413	100.149	102.689	107.469
		144.9	158.014	103.539	130.567	87.3674	100.217	102.962	107.917
		145	157.683	103.692	130.513	87.419	100.134	103.103	108.111
		145.1	157.533	103.948	130.418	87.3693	100.231	103.272	108.094
		145.2	157.584	104.422	130.326	87.4924	100.301	103.301	107.845
		145.3	157.998	104.776	130.324	87.747	100.318	103.414	107.718
		145.4	158.558	104.951	130.345	88.0524	100.258	103.663	107.779
		145.5	159.136	104.927	130.227	88.2801	100.159	103.966	108.039
		145.6	159.525	104.949	130.067	88.5015	99.882	104.234	108.341
		145.7	159.907	104.787	129.978	88.5438	99.8854	104.401	108.702
		145.8	160.097	104.737	129.922	88.4913	99.838	104.493	108.889
		145.9	160.138	104.836	129.766	88.3465	99.883	104.369	108.921
		146	160.014	105.103	129.868	88.1895	100.04	104.202	108.839
		146.1	159.916	105.199	130.076	88.1163	100.379	104.057	108.613
		146.2	159.748	105.121	130.224	88.0861	100.488	103.939	108.388
		146.3	159.528	104.766	130.272	88.0141	100.629	103.705	108.108
		146.4	159.424	104.351	130.382	88.0136	100.743	103.614	107.88
		146.5	159.564	103.889	130.162	88.0429	100.975	103.629	107.54
		146.6	159.641	103.655	129.869	88.0068	101.048	103.463	107.276
		146.7	159.801	103.702	129.525	87.9138	101.197	103.265	106.998
		146.8	160.032	103.968	129.286	87.8753	101.371	103.245	107.012
		146.9	160.077	104.162	129.089	87.7919	101.48	103.102	107.099
		147	160.041	104.169	129.107	87.7561	101.38	102.95	107.28
		147.1	160.179	104.038	129.103	87.7366	101.243	103.064	107.483
		147.2	160.048	103.815	129.231	87.6702	100.948	103.224	107.643
		147.3	159.913	103.566	129.47	87.5594	100.575	103.356	107.539
		147.4	159.818	103.33	129.75	87.4982	100.099	103.561	107.241
		147.5	159.751	103.356	129.951	87.3955	99.6766	103.558	107.023
		147.6	159.458	103.419	130.11	87.4205	99.5332	103.431	106.829
		147.7	159.597	103.636	130.273	87.7074	99.615	103.334	106.708
		147.8	159.686	103.833	130.26	87.9898	99.8075	103.095	106.748
		147.9	159.828	104.158	130.183	88.1157	100.269	102.881	106.926
		148	159.835	104.344	130.164	88.0886	100.819	102.975	107.03
		148.1	160.036	104.538	130.365	87.8797	101.039	102.97	107.04
		148.2	159.912	104.569	130.514	87.44	101.077	102.837	107.202
		148.3	159.776	104.594	130.729	87.0401	101.005	102.791	107.262
		148.4	159.803	104.572	130.88	86.8925	100.83	102.664	107.343
		148.5	159.901	104.708	130.988	87.0358	100.502	102.281	107.382
		148.6	159.833	104.715	131.049	87.2656	100.384	102.109	107.461
		148.7	159.877	104.665	130.984	87.634	100.363	102.057	107.318
		148.8	159.965	104.738	130.712	88.0376	100.414	101.994	107.231
		148.9	159.854	104.72	130.488	88.2843	100.38	102.033	107.156
		149	159.744	104.551	130.342	88.3645	100.399	102.221	107.166
		149.1	159.712	104.63	129.988	88.4698	100.279	102.263	107.213
		149.2	159.483	104.73	129.748	88.5552	100.18	102.398	107.25
		149.3	159.324	104.576	129.811	88.621	100.022	102.625	107.18
		149.4	159.149	104.641	129.896	88.7103	99.9866	102.82	107.003
		149.5	158.901	104.891	129.757	88.8713	99.9825	102.808	106.979
		149.6	158.744	104.97	129.729	88.8587	100.031	102.814	106.913
		149.7	158.841	105.272	129.813	88.6733	100.081	102.674	107.01
		149.8	159.013	105.762	129.783	88.3648	100.246	102.323	107.39
		149.9	159.33	105.973	129.641	88.0051	100.382	102.048	107.966
		150	159.635	105.866	129.642	87.4788	100.654	102.192	108.239
		150.1	159.764	105.804	129.549	87.144	101.076	102.448	108.502
		150.2	159.878	105.586	129.283	86.9756	101.396	102.658	108.557
		150.3	159.729	105.265	129.009	86.9034	101.503	103.067	108.336
		150.4	159.448	105.056	128.9	86.8029	101.55	103.309	107.938
		150.5	159.381	105.106	128.92	86.8014	101.383	103.209	107.636
		150.6	159.422	105.278	129.103	86.7352	101.033	103.076	107.332
		150.7	159.286	105.309	129.399	86.55	100.808	103.038	107.125
		150.8	159.21	105.406	129.698	86.5378	100.76	102.781	107.031
		150.9	159.109	105.572	129.839	86.7246	100.665	102.564	107.051
		151	158.791	105.492	129.757	87.0217	100.76	102.302	107.066
		151.1	158.434	105.075	129.572	87.3446	100.9	101.948	107.215
		151.2	158.193	104.776	129.318	87.8768	100.829	101.617	107.533
		151.3	158.025	104.686	128.953	88.0951	100.756	101.518	107.638
		151.4	157.849	104.591	128.677	88.147	100.878	101.465	107.543
		151.5	157.761	104.728	128.557	88.0718	100.837	101.598	107.575
		151.6	157.698	105.058	128.378	87.9993	100.709	101.731	107.566
		151.7	157.736	105.43	128.033	87.6837	100.646	101.805	107.392
		151.8	157.802	105.439	127.788	87.5031	100.626	101.764	107.577
		151.9	158.022	105.383	127.589	87.3549	100.466	101.622	107.947
		152	158.291	105.314	127.397	87.1648	100.313	101.386	108.102
		152.1	158.599	105.331	127.445	86.8687	100.398	101.178	108.078
		152.2	158.763	105.207	127.722	86.7298	100.685	100.978	107.867
		152.3	158.867	105.231	127.996	86.6336	100.688	100.875	107.436
		152.4	158.94	105.281	128.295	86.6817	100.767	100.945	106.981
		152.5	159.019	105.252	128.493	86.948	100.922	101.14	106.701
		152.6	159.01	105.086	128.536	87.4012	100.879	101.433	106.61
		152.7	159.023	105.067	128.688	87.9694	100.723	101.736	106.889
		152.8	159.106	104.921	128.971	88.6154	100.98	101.935	107.191
		152.9	158.991	104.639	129.282	89.1354	101.103	102.05	107.395
		153	158.804	104.363	129.623	89.4242	101.018	102.073	107.478
		153.1	158.841	104.242	129.93	89.5634	101.035	101.936	107.439
		153.2	158.916	104.077	129.881	89.401	101.014	101.8	107.091
		153.3	158.867	104.161	129.689	89.0828	100.641	101.718	106.786
		153.4	159.029	104.502	129.254	88.7475	100.321	101.742	106.572
		153.5	159.166	104.858	128.982	88.4539	100.264	101.817	106.547
		153.6	158.998	105.033	128.793	88.2328	100.08	101.907	106.684
		153.7	158.902	105.194	128.99	88.2221	99.9457	101.933	107.119
		153.8	158.932	105.17	129.237	88.2584	100.005	101.943	107.6
		153.9	159.049	104.947	129.548	88.2274	100.002	101.821	108.059
		154	159.3	104.68	129.449	88.2768	99.8627	101.548	108.376
		154.1	159.798	104.573	129.377	88.2428	99.8245	101.376	108.563
		154.2	160.129	104.539	129.091	88.0797	99.7473	101.314	108.383
		154.3	160.405	104.603	128.772	87.8943	99.5216	101.26	107.969
		154.4	160.498	104.794	128.714	87.8158	99.4865	101.271	107.542
		154.5	160.328	105.136	129.11	87.6991	99.543	101.492	107.079
		154.6	159.783	105.2	129.358	87.5536	99.539	101.771	106.713
		154.7	159.286	105.166	129.544	87.4846	99.6017	101.958	106.667
		154.8	158.698	104.991	129.563	87.451	99.8131	102.121	106.779
		154.9	158.132	104.826	129.287	87.4504	99.9976	102.223	106.769
		155	157.635	104.588	128.854	87.4551	100.221	102.138	106.783
		155.1	157.374	104.683	128.447	87.6127	100.542	101.909	106.605
		155.2	157.167	104.913	128.253	87.6479	100.861	101.684	106.314
		155.3	157.279	105.253	128.295	87.5259	101.001	101.443	106.111
		155.4	157.536	105.336	128.407	87.153	100.941	101.306	106.099
		155.5	157.955	105.308	128.297	86.8761	100.736	101.321	106.127
		155.6	158.539	105.171	128.265	86.5869	100.52	101.393	106.353
		155.7	159.014	104.742	128.11	86.4068	100.273	101.508	106.599
		155.8	159.137	104.374	127.977	86.4376	100.356	101.64	106.793
		155.9	159.026	104.24	128.062	86.7246	100.657	101.611	106.904
		156	158.929	104.198	128.34	86.8232	100.974	101.472	107.059
		156.1	158.76	104.022	128.475	86.8133	101.084	101.422	107.229
		156.2	158.686	104.119	128.508	86.8739	101.014	101.475	107.432
		156.3	158.741	104.042	128.45	86.8839	100.556	101.644	107.584
		156.4	158.783	103.89	128.062	86.8851	99.8826	101.929	107.952
		156.5	158.633	103.754	127.729	86.9003	99.3508	102.363	108.272
		156.6	158.402	103.93	127.589	86.8755	99.0811	102.658	108.321
		156.7	158.238	104.009	127.574	86.7466	99.0621	102.764	108.213
		156.8	158.08	104.244	127.48	86.6232	99.2534	102.716	108.289
		156.9	158.229	104.441	127.686	86.5284	99.6352	102.635	108.027
		157	158.551	104.472	127.838	86.5898	99.8398	102.302	107.684
		157.1	158.838	104.193	127.975	86.9632	99.8977	101.99	107.531
		157.2	159.006	104.012	128.179	87.4511	99.7566	101.888	107.481
		157.3	159.053	103.85	128.603	87.9212	99.5756	101.795	107.102
		157.4	158.925	103.834	128.706	88.322	99.2843	101.694	106.886
		157.5	158.871	104.073	128.828	88.6206	99.1778	101.851	106.818
		157.6	158.915	104.388	128.805	88.5087	99.2762	102.022	106.788
		157.7	159.035	104.638	128.502	88.2683	99.5524	101.883	106.755
		157.8	159.431	104.726	127.861	88.0238	99.9222	101.792	106.979
		157.9	159.73	104.683	127.394	87.6752	100.398	101.698	107.247
		158	159.754	104.462	126.895	87.3009	100.695	101.436	107.381
		158.1	159.734	104.335	126.349	87.1207	100.672	101.121	107.425
		158.2	159.623	104.164	126.016	86.9128	100.639	101.114	107.456
		158.3	159.204	104.086	126.054	86.7036	100.593	101.232	107.219
		158.4	158.906	104.148	126.24	86.5994	100.488	101.365	106.867
		158.5	158.776	104.359	126.499	86.5941	100.596	101.421	106.545
		158.6	158.546	104.463	126.965	86.7233	100.958	101.622	106.389
		158.7	158.523	104.506	127.408	86.9607	101.308	101.684	106.325
		158.8	158.792	104.599	127.515	87.2234	101.605	101.443	106.493
		158.9	158.943	104.505	127.324	87.5203	101.909	101.246	106.746
		159	159.064	104.256	126.971	87.7554	102.018	101.312	107.154
		159.1	159.375	104.078	126.564	87.7854	101.963	101.226	107.368
		159.2	159.56	104.077	126.245	87.7863	101.768	101.12	107.372
		159.3	159.68	104.107	126.211	87.7668	101.597	101.231	107.251
		159.4	159.901	104.243	126.448	87.588	101.488	101.25	107.257
		159.5	160.163	104.49	126.844	87.4172	101.474	101.068	107.151
		159.6	160.256	104.749	127.257	87.2647	101.609	100.936	107.086
		159.7	160.138	104.974	127.518	87.0741	101.84	100.814	107.222
		159.8	159.859	105.099	127.489	86.8104	101.909	100.661	107.634
		159.9	159.469	105.116	127.355	86.6424	101.836	100.645	107.778
		160	158.969	105.004	127.202	86.503	101.592	100.693	107.794
		160.1	158.593	104.802	127.04	86.5329	101.255	100.836	107.807
		160.2	158.481	104.388	127.055	86.6294	100.911	100.972	107.875
		160.3	158.529	103.922	127.445	86.8544	100.616	101.104	107.613
		160.4	158.851	103.639	127.799	87.1042	100.371	101.101	107.438
		160.5	159.37	103.629	128.109	87.3882	100.352	101.232	107.421
		160.6	159.818	103.708	128.343	87.49	100.18	101.143	107.489
		160.7	160.313	104.094	128.489	87.6234	100.031	101.176	107.329
		160.8	160.546	104.644	128.322	87.7071	100.117	101.096	107.286
		160.9	160.411	105.085	128.06	87.7601	100.201	100.953	107.42
		161	160.044	105.097	127.712	87.6486	100.303	100.591	107.537
		161.1	159.628	105.097	127.451	87.5877	100.833	100.441	107.544
		161.2	159.068	104.933	126.956	87.3896	101.36	100.17	107.595
		161.3	158.79	104.546	126.468	87.1243	101.572	100.094	107.719
		161.4	158.93	104.21	126.299	87.0282	101.678	100.202	107.659
		161.5	159.276	104.291	126.335	87.1019	101.551	100.383	107.652
		161.6	159.759	104.398	126.251	87.218	100.988	100.583	107.731
		161.7	160.143	104.557	126.445	87.4036	100.361	100.772	107.865
		161.8	160.344	104.871	126.921	87.634	99.9174	100.921	107.954
		161.9	160.144	105.134	127.103	87.4721	99.7436	101.121	108.008
		162	159.839	105.171	127.017	87.1731	99.7518	101.474	107.865
		162.1	159.425	105.062	127.107	86.8328	99.89	101.753	107.748
		162.2	159.154	104.782	127.224	86.6194	100.169	102.16	107.586
		162.3	159.093	104.468	127.073	86.324	100.465	102.502	107.343
		162.4	159.16	104.271	126.938	86.3792	100.501	102.566	107.186
		162.5	159.191	104.019	127.134	86.5543	100.282	102.361	107.191
		162.6	159.279	103.788	127.121	86.6462	100.161	102.004	107.117
		162.7	159.229	103.8	126.974	86.528	99.8199	101.471	107.034
		162.8	158.93	103.822	126.974	86.5854	99.3484	100.921	107.077
		162.9	158.668	103.661	127.21	86.5512	98.908	100.661	107.056
		163	158.402	103.607	127.15	86.4964	98.7448	100.671	106.876
		163.1	157.919	103.723	127.195	86.6662	98.4586	100.811	106.596
		163.2	157.559	103.744	127.238	86.8752	98.4482	101.029	106.448
		163.3	157.307	103.838	127.178	86.9286	98.6627	101.177	106.181
		163.4	157.124	104.026	126.699	86.8596	99.1368	101.101	105.918
		163.5	157.069	104.283	126.339	86.731	99.6182	100.754	105.778
		163.6	157.346	104.213	126.012	86.3648	100.056	100.516	105.813
		163.7	157.705	104.113	125.641	86.0696	100.163	100.407	105.8
		163.8	158.225	104.004	125.269	86.0465	100.003	100.46	105.912
		163.9	158.62	103.76	125.294	86.2464	99.5498	100.565	106.096
		164	159.002	103.37	125.412	86.5436	98.9809	100.783	106.338
		164.1	159.374	103.448	125.507	86.9752	98.6906	100.869	106.456
		164.2	159.658	103.519	125.829	87.3458	98.5472	100.713	106.438
		164.3	159.624	103.363	126.188	87.4385	98.4837	100.491	106.189
		164.4	159.83	103.374	126.386	87.4735	98.7083	100.313	105.91
		164.5	159.94	103.583	126.383	87.4721	99.049	100.249	105.452
		164.6	159.772	103.574	126.432	87.4518	99.2837	100.218	105.039
		164.7	159.426	103.632	126.373	87.5321	99.6644	100.3	104.831
		164.8	159.352	104.082	126.343	87.7405	100.153	100.397	104.935
		164.9	158.99	104.481	126.354	87.8858	100.328	100.462	105.095
		165	158.418	104.686	126.536	87.939	100.478	100.294	105.525
		165.1	157.944	104.905	126.612	87.8757	100.53	100.062	106.146
		165.2	157.739	105.037	126.554	87.6281	100.487	99.9603	106.759
		165.3	157.319	104.68	126.503	87.2459	100.519	99.891	107.262
		165.4	157.109	104.41	126.411	86.8478	100.761	99.9451	107.63
		165.5	157.352	104.205	126.161	86.5234	100.734	100.244	107.805
		165.6	157.771	103.825	125.884	86.4229	100.828	100.588	107.764
		165.7	158.171	103.53	125.73	86.6091	100.906	100.657	107.534
		165.8	158.938	103.658	125.611	86.9074	100.773	100.582	107.122
		165.9	159.501	103.737	125.532	87.2067	100.513	100.296	106.851
		166	159.657	103.788	125.676	87.4457	100.517	99.8604	106.715
		166.1	159.56	104.048	125.982	87.5928	100.29	99.4591	106.682
		166.2	159.23	104.217	126.315	87.5518	100.022	99.3225	106.794
		166.3	158.514	104.204	126.609	87.5277	99.7315	99.4705	107.119
		166.4	158.043	104.05	126.865	87.4976	99.6379	99.8242	107.393
		166.5	158.037	104.045	126.871	87.559	99.4592	100.205	107.444
		166.6	158.315	104.014	126.766	87.5759	99.4676	100.616	107.43
		166.7	158.735	104.087	126.528	87.5289	99.5334	101.005	107.244
		166.8	159.264	104.192	126.112	87.3914	99.8534	101.042	107.035
		166.9	159.539	104.484	125.793	87.408	99.9906	100.881	106.761
		167	159.4	104.52	125.715	87.4362	100.27	100.825	106.677
		167.1	159.158	104.517	125.663	87.5394	100.573	100.748	106.534
		167.2	159.089	104.313	125.725	87.7783	100.927	100.481	106.683
		167.3	159.146	104.001	125.956	88.1441	101.065	100.349	106.685
		167.4	159.214	103.566	126.103	88.1722	101.192	100.372	106.844
		167.5	159.383	103.36	126.022	88.1653	101.164	100.305	107.041
		167.6	159.371	103.209	125.938	88.0044	100.996	100.225	107.389
		167.7	159.074	103.316	125.849	87.8503	100.758	100.294	107.515
		167.8	158.671	103.584	125.637	87.6232	100.659	100.542	107.733
		167.9	158.544	103.927	125.385	87.6776	100.711	100.802	107.788
		168	158.529	104.077	125.288	87.6063	100.86	101.088	107.679
		168.1	158.793	104.256	125.131	87.5909	101.074	101.311	107.459
		168.2	159.427	104.368	124.89	87.4824	101.243	101.564	107.328
		168.3	160.032	104.316	124.956	87.3109	101.209	101.564	107.205
		168.4	160.243	104.253	125.134	87.0937	100.922	101.483	107.199
		168.5	160.367	104.31	125.139	87.0158	100.468	101.401	107.198
		168.6	160.341	104.112	125.359	86.9804	100.049	101.325	107.272
		168.7	159.96	103.882	125.739	86.8743	99.6676	101.06	107.344
		168.8	159.521	103.938	125.971	86.8764	99.3912	100.917	107.433
		168.9	159.399	104.035	125.953	86.9017	99.3551	100.703	107.465
		169	159.306	104.11	126.021	87.017	99.5834	100.282	107.59
		169.1	159.174	104.316	125.846	87.2074	99.8712	99.9625	107.642
		169.2	159.114	104.431	125.469	87.5187	100.263	99.6644	107.66
		169.3	159.161	104.328	125.048	87.7833	100.877	99.2952	107.725
		169.4	159.044	104.126	124.979	87.9852	101.39	99.0401	107.738
		169.5	158.858	104.025	125.064	87.9389	101.662	99.1214	107.698
		169.6	158.715	104.044	125.213	87.8777	101.812	99.1558	107.562
		169.7	158.652	104.305	125.492	87.8433	101.831	99.4329	107.387
		169.8	158.661	104.514	125.795	87.8285	101.571	99.8362	107.158
		169.9	158.772	104.799	125.889	87.7996	101.347	100.261	106.926
		170	158.983	104.905	125.96	87.8778	101.278	100.604	106.72
		170.1	159.342	104.889	126.053	87.8537	101.316	100.997	106.712
		170.2	159.611	104.63	126.001	87.7726	101.461	101.161	106.668
		170.3	159.892	104.552	125.888	87.6234	101.716	101.142	106.492
		170.4	160.329	104.363	125.947	87.5713	101.883	101.035	106.476
		170.5	160.655	104.314	125.806	87.5683	101.964	100.815	106.595
		170.6	160.75	104.286	125.695	87.5882	101.861	100.461	106.679
		170.7	160.787	104.267	125.744	87.5489	101.451	100.192	106.97
		170.8	160.599	104.089	125.777	87.5378	100.955	100.134	107.406
		170.9	160.005	104.006	125.507	87.3581	100.6	100.181	107.629
		171	159.527	103.746	125.352	87.1766	100.187	100.215	107.579
		171.1	159.013	103.49	125.138	87.0018	99.8156	100.304	107.475
		171.2	158.575	103.375	124.923	87.0196	99.6902	100.523	107.168
		171.3	158.314	103.368	124.642	87.0188	99.5607	100.82	106.803
		171.4	158.27	103.333	124.68	87.2149	99.2664	101.044	106.674
		171.5	158.147	103.487	124.737	87.3192	99.1484	101.397	106.627
		171.6	158.105	103.578	124.877	87.3652	99.0285	101.743	106.631
		171.7	158.116	103.611	124.913	87.2158	99.08	101.991	106.683
		171.8	158.138	103.604	125.168	87.0538	99.2854	101.925	106.719
		171.9	158.13	103.584	125.214	86.6919	99.6604	101.933	106.597
		172	158.206	103.515	125.094	86.4653	99.9344	101.887	106.622
		172.1	158.499	103.791	124.832	86.3728	100.349	101.913	106.578
		172.2	158.778	104.04	124.606	86.3454	100.542	101.885	106.647
		172.3	159.032	104.166	124.258	86.3236	100.631	102.002	106.924
		172.4	159.399	104.269	123.99	86.3595	100.525	101.968	107.214
		172.5	159.767	104.315	123.961	86.1713	100.425	101.845	107.328
		172.6	159.801	103.961	124.161	85.8764	100.288	101.565	107.426
		172.7	159.748	103.605	124.384	85.6216	100.141	101.139	107.344
		172.8	159.528	103.384	124.511	85.5046	99.9928	100.746	106.966
		172.9	159.158	103.193	124.525	85.531	100.019	100.474	106.532
		173	158.632	103.131	124.429	85.8328	99.9668	100.299	106.17
		173.1	158.292	103.277	124.082	86.1934	99.9053	100.333	105.791
		173.2	158.154	103.491	123.717	86.4384	99.9643	100.632	105.519
		173.3	158.059	103.825	123.432	86.6107	100.025	100.724	105.555
		173.4	157.898	104.246	123.244	86.6679	99.9443	100.69	105.752
		173.5	157.92	104.557	123.047	86.6608	100.044	100.6	106.094
		173.6	157.917	104.792	123.079	86.6777	100.218	100.488	106.529
		173.7	157.67	104.877	123.229	86.8536	100.319	100.32	106.966
		173.8	157.636	104.704	123.595	87.0059	100.429	100.393	107.142
		173.9	157.957	104.545	124.128	87.2106	100.762	100.534	107.236
		174	158.189	104.382	124.615	87.3199	101.053	100.72	107.095
		174.1	158.29	104.284	124.911	87.3661	101.136	100.694	106.875
		174.2	158.533	104.301	125.022	87.3756	101.259	100.542	106.752
		174.3	158.637	104.568	124.901	87.3542	101.467	100.271	106.83
		174.4	158.382	104.822	124.429	87.3087	101.447	100.065	106.919
		174.5	158.182	105.193	124.148	87.3526	101.295	99.8253	106.998
		174.6	158.336	105.561	123.894	87.4206	101.221	99.6576	107.162
		174.7	158.558	105.96	123.707	87.394	100.997	99.449	107.111
		174.8	158.752	106.061	123.441	87.503	100.583	99.2937	106.853
		174.9	159.036	105.898	123.447	87.6179	100.306	99.0614	106.532
		175	159.181	105.584	123.302	87.7348	100.184	98.8408	106.412
		175.1	158.922	105.018	123.222	87.9475	100.069	98.677	106.268
		175.2	158.42	104.454	123.168	88.3408	100.097	98.6979	106.301
		175.3	157.94	104.244	123.25	88.4891	100.291	98.6879	106.415
		175.4	157.436	104.319	123.193	88.5155	100.549	98.7512	106.519
		175.5	157.106	104.479	123.176	88.3363	100.769	98.7341	106.562
		175.6	156.997	104.783	123.251	87.9412	101.161	98.7013	106.655
		175.7	157.089	104.941	123.48	87.3398	101.517	98.6638	106.733
		175.8	157.304	104.86	123.758	87.051	101.794	98.5765	106.823
		175.9	157.834	104.71	124.204	86.9154	101.778	98.5144	107.019
		176	158.191	104.58	124.665	86.9393	101.613	98.6091	107.087
		176.1	158.485	104.586	125.029	87.1194	101.254	98.7669	107.068
		176.2	158.994	104.661	125.131	87.3356	100.913	98.8474	106.961
		176.3	159.516	104.797	125.243	87.3421	100.529	99.0914	106.772
		176.4	159.822	104.912	125.145	87.2662	100.421	99.3203	106.513
		176.5	160.431	105.02	124.864	87.29	100.376	99.572	106.445
		176.6	160.93	105.016	124.457	87.369	100.362	99.714	106.43
		176.7	160.893	105.047	124.15	87.6132	100.4	99.7858	106.365
		176.8	160.587	105.037	123.786	87.8657	100.57	99.8005	106.422
		176.9	159.999	104.912	123.644	88.2653	100.647	99.7474	106.46
		177	159.098	104.635	123.772	88.4888	100.93	99.5118	106.388
		177.1	158.58	104.398	124.119	88.4386	101.26	99.4745	106.173
		177.2	158.446	104.212	124.516	88.2145	101.488	99.6802	106.014
		177.3	158.539	104.156	124.823	87.9964	101.685	99.8986	105.912
		177.4	158.848	104.232	124.753	87.5212	101.763	100.067	105.808
		177.5	159.324	104.418	124.538	87.093	101.544	100.257	105.74
		177.6	159.412	104.627	124.129	86.9919	101.295	100.252	105.864
		177.7	159.401	104.788	123.548	86.8127	101.106	100.074	106.285
		177.8	159.331	104.742	123.095	86.6146	100.802	99.681	106.586
		177.9	159.529	104.737	123.087	86.5381	100.717	99.2807	107.008
		178	159.54	104.636	123.107	86.4939	100.72	98.9346	107.379
		178.1	159.624	104.551	123.16	86.2526	100.782	98.7183	107.543
		178.2	159.631	104.439	123.302	86.3124	100.915	98.4796	107.219
		178.3	159.628	104.49	123.302	86.4334	101.141	98.4151	106.791
		178.4	159.278	104.335	123.049	86.7512	101.348	98.5313	106.278
		178.5	159.07	104.315	122.738	87.0654	101.72	98.7642	105.916
		178.6	158.932	104.223	122.68	87.453	101.858	98.8794	105.922
		178.7	158.784	104.137	122.716	87.583	101.777	98.998	106.281
		178.8	158.555	104.112	122.89	87.666	101.642	99.0396	106.935
		178.9	158.434	104.362	123.051	87.4273	101.34	98.81	107.629
		179	158.296	104.732	123.28	87.31	100.876	98.4067	108.025
		179.1	158.417	104.93	123.191	87.1188	100.736	98.044	108.036
		179.2	158.803	105.073	123.008	87.1478	100.667	97.804	107.906
		179.3	159.321	104.996	122.856	87.3524	100.687	97.7986	107.637
		179.4	159.891	104.792	122.841	87.8598	100.738	98.1135	107.374
		179.5	160.493	104.386	122.861	88.1163	100.83	98.6037	107.406
		179.6	160.483	104.314	123.024	88.4061	100.695	99.2982	107.599
		179.7	160.1	104.317	123.179	88.4839	100.676	99.7944	107.84
		179.8	159.654	104.403	123.105	88.4079	100.575	100.06	107.866
		179.9	159.111	104.409	122.877	88.0866	100.573	100.166	107.861
		180	158.632	104.426	122.555	87.9266	100.595	100.078	107.741
		180.1	158.653	104.438	122.206	87.8454	100.564	99.6748	107.585
		180.2	158.904	104.468	121.864	87.8232	100.573	99.4369	107.276
		180.3	159.135	104.55	121.775	87.6647	100.57	99.3134	107.204
		180.4	159.368	104.626	121.835	87.69	100.529	99.183	107.064
		180.5	159.307	104.633	121.912	87.6699	100.468	99.1642	106.914
		180.6	159.108	104.326	122.083	87.6534	100.722	99.2499	106.841
		180.7	158.904	103.945	122.298	87.7108	100.749	99.3005	106.851
		180.8	158.676	103.48	122.352	87.8613	100.837	99.1588	106.796
		180.9	158.655	103.158	122.322	87.7408	100.917	98.9788	106.792
		181	158.944	103.072	122.406	87.5852	100.981	98.7808	106.885
		181.1	159.162	103.35	122.246	87.2573	100.793	98.6709	106.826
		181.2	159.229	103.889	122.109	86.8704	100.777	98.508	106.849
		181.3	159.251	104.664	122.01	86.609	100.833	98.5455	106.944
		181.4	159.015	105.491	121.953	86.6084	100.902	98.8119	107.202
		181.5	158.566	106.105	121.746	86.7599	100.971	99.1536	107.267
		181.6	158.283	106.459	121.802	87.0113	101.056	99.348	107.488
		181.7	158.226	106.554	121.803	87.2514	101.163	99.555	107.705
		181.8	158.315	106.38	121.949	87.5128	101.074	99.7012	107.887
		181.9	158.55	105.998	122.133	87.7337	100.913	99.5529	107.882
		182	158.924	105.672	122.573	87.7411	100.821	99.1928	108.082
		182.1	159.111	105.301	122.973	87.7158	100.844	98.8738	108.235
		182.2	159.257	104.866	123.426	87.6752	100.744	98.6465	108.329
		182.3	159.4	104.458	123.781	87.4404	100.703	98.5367	108.393
		182.4	159.443	104.215	124.04	87.1851	100.677	98.5363	108.47
		182.5	159.461	103.979	124.042	87.0609	100.675	98.6492	108.467
		182.6	159.539	103.934	123.875	87.026	100.672	98.7932	108.381
		182.7	159.455	103.97	123.685	87.146	100.753	98.9548	108.237
		182.8	159.274	104.048	123.5	87.4146	101.015	98.9163	108.129
		182.9	159.124	103.986	123.28	87.58	101.366	98.8754	107.947
		183	158.885	103.921	123.111	87.7169	101.516	98.8992	107.586
		183.1	158.468	103.767	123.091	87.804	101.41	99.0304	107.329
		183.2	158.022	103.601	123.018	87.6775	101.169	99.0326	107.162
		183.3	157.746	103.57	122.855	87.4274	100.656	99.0522	106.941
		183.4	157.601	103.717	122.857	87.2545	99.9714	99.1922	106.801
		183.5	157.465	103.959	122.878	87.0304	99.4903	99.3239	106.978
		183.6	157.652	104.252	122.853	86.8034	99.2344	99.3614	107.065
		183.7	158.019	104.684	122.945	86.8694	99.2036	99.4532	107.157
		183.8	158.184	104.912	123.112	87.033	99.4549	99.6817	107.239
		183.9	158.179	104.892	123.212	87.1139	99.8784	99.6494	107.43
		184	158.292	104.668	123.274	87.2705	100.153	99.481	107.276
		184.1	158.37	104.364	123.259	87.4691	100.568	99.1958	107.189
		184.2	158.536	103.949	123.028	87.383	100.859	98.8671	106.956
		184.3	158.786	103.641	122.776	87.2764	100.822	98.514	106.735
		184.4	159.022	103.613	122.519	87.1813	100.728	98.4873	106.389
		184.5	159.247	103.84	122.31	87.0597	100.719	98.6781	106.245
		184.6	159.35	104.097	122.346	86.9386	100.373	98.9985	106.129
		184.7	159.129	104.212	122.536	86.8742	99.9112	99.3566	106.221
		184.8	158.997	104.169	122.786	86.987	99.8265	99.7552	106.397
		184.9	158.972	103.914	122.797	87.4218	99.9048	99.9952	106.495
		185	158.843	103.529	122.718	87.8104	99.9838	100.037	106.648
		185.1	158.649	103.204	122.332	88.1182	100.424	100.093	106.815
		185.2	158.601	103.099	121.837	88.4555	101.044	100.105	106.891
		185.3	158.315	103.323	121.224	88.4109	101.421	100.059	106.9
		185.4	157.934	103.526	120.973	87.937	101.596	99.9412	106.999
		185.5	157.749	103.687	120.887	87.6036	101.806	99.7752	106.976
		185.6	157.829	103.792	121.093	87.3087	101.765	99.5301	106.834
		185.7	158.061	103.912	121.486	87.0063	101.693	99.1973	106.651
		185.8	158.527	103.858	121.895	87.0045	101.627	98.6166	106.454
		185.9	159.197	104.043	122.172	87.2204	101.668	98.0292	106.371
		186	159.598	104.247	122.294	87.2877	101.757	97.6726	106.369
		186.1	159.735	104.517	122.144	87.3613	101.828	97.3622	106.484
		186.2	159.545	104.648	121.895	87.5528	101.884	97.3102	106.614
		186.3	159.282	104.656	121.786	87.5192	102.051	97.5997	106.751
		186.4	158.704	104.526	121.658	87.5677	102.087	97.94	106.621
		186.5	158.179	104.408	121.688	87.7382	101.912	98.1903	106.501
		186.6	157.745	104.061	121.944	87.8527	101.88	98.5351	106.312
		186.7	157.63	103.87	122.147	87.7932	101.787	98.7023	106.091
		186.8	157.328	103.93	122.291	88.0007	101.608	98.6963	105.984
		186.9	157.313	103.837	122.505	87.9573	101.524	98.7911	106.253
		187	157.504	103.777	122.48	87.7734	101.537	98.9316	106.6
		187.1	157.825	104.026	122.205	87.5755	101.491	98.9984	106.922
		187.2	158.073	104.137	121.946	87.3777	101.475	99.1898	107.395
		187.3	158.632	104.032	121.597	86.9645	101.395	99.4371	107.621
		187.4	159.133	104.14	121.154	86.6928	101.252	99.5875	107.535
		187.5	159.539	104.245	120.955	86.5929	101.139	99.5912	107.178
		187.6	159.674	104.116	120.931	86.5646	100.921	99.408	106.802
		187.7	159.758	103.99	120.949	86.4924	100.832	99.1494	106.418
		187.8	159.753	103.926	121.084	86.443	100.83	98.9712	106.365
		187.9	159.658	103.837	121.202	86.4011	100.856	98.7795	106.495
		188	159.48	103.766	121.192	86.1822	100.806	98.7188	106.828
		188.1	159.517	103.895	121.147	86.0863	100.78	98.8828	107.245
		188.2	159.619	104.061	121.17	86.2181	100.522	98.9983	107.4
		188.3	159.672	104.344	121.188	86.5016	100.151	98.9508	107.229
		188.4	159.784	104.58	121.29	86.7762	99.8124	98.9555	106.833
		188.5	159.92	104.666	121.426	87.1733	99.6595	98.9102	106.232
		188.6	159.822	104.625	121.595	87.4041	99.6329	98.7618	105.764
		188.7	159.65	104.587	121.741	87.4497	99.8918	98.613	105.734
		188.8	159.43	104.309	121.864	87.2853	100.357	98.5835	105.864
		188.9	159.263	104.014	121.922	87.1251	100.692	98.4925	106.271
		189	159.302	104.009	121.996	86.9343	100.905	98.432	106.969
		189.1	159.551	104.151	122.016	86.7506	101.152	98.5334	107.309
		189.2	159.748	104.207	121.861	86.6636	101.237	98.7445	107.343
		189.3	159.876	104.367	121.534	86.8136	101.27	98.8562	107.354
		189.4	159.86	104.554	121.226	86.9845	101.507	99.0809	107.175
		189.5	159.497	104.447	120.919	87.2339	101.625	99.2555	106.795
		189.6	159.224	104.127	120.736	87.5981	101.472	99.272	106.7
		189.7	158.95	103.945	120.688	87.9897	101.235	99.1702	106.539
		189.8	158.754	103.88	120.858	88.1845	100.924	99.1184	106.364
		189.9	158.584	103.719	121.021	88.2922	100.545	98.978	106.132
		190	158.669	103.586	121.155	88.1254	100.301	98.7744	105.994
		190.1	158.514	103.552	121.175	87.7744	100.378	98.5626	105.766
		190.2	158.617	103.551	121.325	87.2594	100.508	98.4046	105.723
		190.3	158.978	103.52	121.4	86.7904	100.725	98.3375	105.642
		190.4	159.489	103.611	121.521	86.3894	100.947	98.2376	105.8
		190.5	159.792	103.93	121.688	86.2511	101.117	98.3103	105.912
		190.6	160.304	104.206	121.948	86.2767	101.138	98.3942	106.071
		190.7	160.466	104.375	122.071	86.4075	101.188	98.4036	106.143
		190.8	160.153	104.318	122.167	86.593	101.199	98.3002	106.364
		190.9	159.762	104.207	122.208	86.7756	101.203	98.3308	106.38
		191	159.486	103.846	122.174	87.0254	101.217	98.313	106.493
		191.1	158.952	103.434	122.047	87.1909	101.24	98.3176	106.538
		191.2	158.554	102.999	121.976	87.4595	101.415	98.5104	106.565
		191.3	158.531	102.94	122.04	87.7264	101.516	98.7409	106.438
		191.4	158.309	103.034	122.189	87.8784	101.518	98.8166	106.426
		191.5	158.239	103.274	122.475	87.7681	101.483	98.6872	106.267
		191.6	158.485	103.729	122.772	87.7323	101.374	98.6375	106.144
		191.7	158.834	104.265	122.908	87.5354	101.001	98.4193	106.044
		191.8	159.179	104.531	122.903	87.2984	100.743	98.2584	106.012
		191.9	159.86	104.567	122.823	87.2613	100.542	98.1758	105.959
		192	160.347	104.622	122.638	87.3367	100.534	98.338	106.09
		192.1	160.643	104.55	122.362	87.3772	100.639	98.4744	106.189
		192.2	160.834	104.387	122.168	87.5768	100.807	98.7253	106.383
		192.3	160.825	104.275	121.941	87.763	100.793	98.8526	106.616
		192.4	160.603	104.225	121.666	87.7362	100.768	98.8668	106.844
		192.5	160.492	104.142	121.389	87.7037	100.525	98.7947	106.804
		192.6	160.485	103.995	121.251	87.5848	100.266	98.6406	106.763
		192.7	160.44	103.844	121.091	87.2781	100.142	98.3828	106.479
		192.8	160.331	103.637	121.128	86.915	100.304	98.1754	106.093
		192.9	160.214	103.503	121.31	86.7694	100.51	98.0784	105.632
		193	159.903	103.331	121.48	86.6152	100.753	98.1103	105.508
		193.1	159.342	103.309	121.562	86.5273	100.949	98.1718	105.509
		193.2	158.884	103.391	121.818	86.4086	100.932	98.2887	105.804
		193.3	158.57	103.59	121.815	86.515	100.583	98.4397	106.237
		193.4	158.336	103.707	121.7	86.5146	100.308	98.5539	106.84
		193.5	158.27	103.891	121.473	86.5964	100.242	98.4723	107.211
		193.6	158.455	104.036	121.278	86.5994	100.24	98.4533	107.444
		193.7	158.654	104.061	120.867	86.7753	100.338	98.5898	107.278
		193.8	158.751	104.009	120.509	86.786	100.655	98.5841	107.068
		193.9	158.887	104.137	120.165	86.8473	100.842	98.5544	106.709
		194	159.017	104.145	120.04	86.8606	100.876	98.6099	106.381
		194.1	158.953	104.117	119.893	86.9904	100.928	98.7176	106.161
		194.2	158.847	104.26	119.955	87.1661	101.203	98.5658	106.397
		194.3	159.084	104.378	120.216	87.3638	101.469	98.6447	106.592
		194.4	159.309	104.229	120.418	87.5336	101.788	98.8334	106.939
		194.5	159.475	103.998	120.463	87.646	102.057	99.0301	107.42
		194.6	159.805	103.647	120.566	87.8715	102.135	98.9885	107.711
		194.7	160.103	103.263	120.397	87.944	101.82	98.935	107.684
		194.8	160.018	102.92	120.044	87.9373	101.412	98.7332	107.757
		194.9	159.759	102.665	119.941	87.7878	100.879	98.4393	107.734
		195	159.534	102.706	120.126	87.6801	100.339	98.0448	107.585
		195.1	159.276	102.87	120.348	87.3711	100.01	97.7141	107.584
		195.2	159.028	102.897	120.654	87.1722	99.9672	97.5263	107.905
		195.3	159.016	103.113	120.909	86.983	99.9112	97.452	108.067
		195.4	159.262	103.552	120.915	86.9339	99.9695	97.5985	108.21
		195.5	159.575	103.874	120.484	86.8475	100.098	97.8772	108.243
		195.6	159.755	104.144	120.01	86.8259	100.145	98.2287	108.192
		195.7	159.907	104.394	119.696	86.7416	100.099	98.5103	107.748
		195.8	159.877	104.374	119.6	86.7822	100.182	98.4914	107.229
		195.9	159.625	104.067	119.597	86.7704	100.328	98.0546	106.694
		196	159.239	103.776	120.038	86.7841	100.429	97.5577	106.287
		196.1	159.316	103.517	120.429	86.7104	100.467	97.0858	106.054
		196.2	159.438	103.435	120.664	86.6777	100.479	96.7434	106.047
		196.3	159.629	103.543	120.839	86.6394	100.461	96.7702	106.255
		196.4	159.876	103.773	120.943	86.6506	100.556	97.1304	106.365
		196.5	160.241	103.942	120.769	86.7206	100.603	97.5657	106.529
		196.6	160.017	104.271	120.617	86.9203	100.812	98.1146	106.495
		196.7	159.81	104.53	120.555	87.0448	101.195	98.5143	106.568
		196.8	159.615	104.665	120.381	87.063	101.593	98.6989	106.611
		196.9	159.577	104.745	120.255	87.093	101.667	98.7803	106.817
		197	159.487	104.874	120.121	87.0066	101.814	98.7379	106.881
		197.1	159.462	104.828	119.947	86.7288	101.792	98.4592	107.036
		197.2	159.231	104.632	119.813	86.4217	101.505	98.1902	106.985
		197.3	159.007	104.462	119.911	86.2813	101.091	98.0144	106.982
		197.4	158.562	104.423	120.126	86.2235	100.665	97.7134	106.948
		197.5	157.925	104.327	120.456	86.3402	100.225	97.514	106.932
		197.6	157.517	104.324	120.904	86.6637	99.8982	97.3768	106.851
		197.7	157.493	104.672	121.364	87.0935	99.6304	97.3723	107.005
		197.8	157.563	105.02	121.517	87.2713	99.5164	97.4748	106.99
		197.9	157.778	105.105	121.566	87.2226	99.5936	97.9014	106.995
		198	158.364	105.159	121.645	87.0089	99.6939	98.2154	107.057
		198.1	159.046	105.092	121.701	86.7008	99.658	98.6094	107.167
		198.2	159.538	104.687	121.585	86.294	99.6128	98.9051	106.944
		198.3	159.939	104.266	121.6	86.0388	99.4401	98.9921	106.671
		198.4	160.243	104.021	121.582	85.9716	99.397	98.6648	106.369
		198.5	160.266	103.83	121.508	85.9668	99.359	98.4079	106.123
		198.6	160.041	103.642	121.451	86.0591	99.4392	98.0745	105.919
		198.7	159.769	103.638	121.475	86.2886	99.7324	97.6949	105.86
		198.8	159.468	103.711	121.481	86.5931	100.034	97.4045	106.133
		198.9	159.214	103.862	121.447	86.708	99.996	97.3317	106.465
		199	159.131	104.016	121.184	86.8422	99.9218	97.2791	106.704
		199.1	159.107	104.239	120.797	86.8628	99.8068	97.309	107.095
		199.2	159.127	104.308	120.455	86.8192	99.5064	97.348	107.441
		199.3	159.219	104.328	120.19	86.7395	99.2824	97.3482	107.487
		199.4	159.214	104.339	120.02	86.9564	99.2574	97.3664	107.395
		199.5	159.024	104.349	120.115	87.1551	99.1892	97.3779	107.299
		199.6	158.967	104.347	120.305	87.53	99.1922	97.3184	106.919
[truncated: 2,004 more rows]

## Sheet: Exp. 2
		Sample ID	1_buffer	1a	2a	2b	3a	4a	4b
		Time (s)	BiP+Mg_buffer	BiP+Mg	BiP+Ca	BiP+Ca+Grp170	Oligos+Mg	Oligos+Ca	Oligos+Ca+Grp170
		0	133.872	153.333	191.827	182.883	115.756	163.438	152.679
		0.1	133.873	153.003	192.089	182.438	115.661	163.714	152.159
		0.2	133.769	152.812	192.11	181.601	115.727	163.885	151.743
		0.3	133.973	152.442	191.884	180.701	115.665	163.88	151.376
		0.4	134.161	152.001	191.893	179.575	115.346	163.786	151.027
		0.5	134.278	151.625	191.904	178.276	114.978	163.756	150.704
		0.6	134.322	151.161	191.742	176.735	114.644	163.514	150.537
		0.7	134.459	150.636	191.914	175.178	114.273	163.271	150.473
		0.8	134.314	150.333	192.108	173.537	113.922	163.078	150.301
		0.9	134.079	150.215	192.055	171.86	113.764	162.882	149.815
		1	133.836	149.941	191.982	170.151	113.704	162.433	149.246
		1.1	133.674	149.875	191.97	168.741	113.523	162.09	148.735
		1.2	133.486	149.75	191.669	167.472	113.178	161.713	148.15
		1.3	133.454	149.432	191.475	166.381	112.768	161.332	147.655
		1.4	133.549	149.006	191.495	165.412	112.287	161.1	147.441
		1.5	133.669	148.76	191.469	164.494	111.692	161.133	147.186
		1.6	133.717	148.326	191.248	163.375	111.14	161.257	146.738
		1.7	133.735	148.022	190.846	162.368	110.829	161.383	146.292
		1.8	133.752	147.681	190.378	161.243	110.68	161.601	145.801
		1.9	133.706	147.302	189.694	160.101	110.57	161.681	145.284
		2	133.675	146.705	189.144	159.018	110.505	161.524	144.802
		2.1	133.751	146.124	188.916	158.157	110.565	161.263	144.467
		2.2	133.88	145.412	189.105	157.074	110.364	160.999	144.21
		2.3	133.924	144.907	189.36	156.024	110.076	160.644	144.097
		2.4	133.947	144.475	189.727	155.067	109.848	160.319	144.103
		2.5	133.944	144.183	189.887	154.113	109.663	160.129	144.375
		2.6	133.809	143.993	189.729	153.038	109.428	159.997	144.764
		2.7	133.678	143.848	189.347	152.209	109.273	160.007	145.081
		2.8	133.501	143.514	188.792	151.546	109.09	159.998	145.338
		2.9	133.235	143.09	188.104	150.761	108.785	159.994	145.348
		3	132.95	142.719	187.577	149.924	108.541	159.972	144.939
		3.1	132.612	142.17	187.377	149.128	108.363	159.918	144.372
		3.2	132.171	141.638	187.128	148.099	108.332	159.711	143.831
		3.3	131.834	141.221	186.981	146.887	108.422	159.679	143.273
		3.4	131.553	140.951	187.053	145.868	108.65	159.709	142.908
		3.5	131.349	140.641	187.158	144.779	108.754	159.797	142.909
		3.6	131.449	140.571	186.987	143.658	108.686	159.847	143.009
		3.7	131.656	140.629	187.062	142.869	108.512	159.914	143.102
		3.8	131.903	140.724	187.311	142.25	108.177	159.804	143.179
		3.9	132.291	140.596	187.488	141.536	107.714	159.477	143.123
		4	132.579	140.429	187.527	141.16	107.261	159.136	142.859
		4.1	132.732	140.145	187.654	140.975	106.891	158.77	142.53
		4.2	132.92	139.717	187.525	140.718	106.606	158.418	142.199
		4.3	132.811	139.181	187.2	140.396	106.37	158.101	141.758
		4.4	132.525	138.81	186.733	140.134	106.219	157.98	141.346
		4.5	132.262	138.343	186.291	139.759	106.204	157.837	140.907
		4.6	131.773	137.812	185.826	139.458	106.334	157.631	140.465
		4.7	131.114	137.304	185.589	139.209	106.428	157.395	139.939
		4.8	130.798	136.844	185.417	139.057	106.65	157.122	139.596
		4.9	130.727	136.495	185.429	138.9	106.816	156.818	139.292
		5	130.759	136.333	185.469	138.554	106.751	156.475	139.047
		5.1	130.975	136.286	185.5	137.772	106.488	156.344	138.623
		5.2	131.259	136.284	185.38	136.655	106.025	156.319	138.384
		5.3	131.385	136.235	185.157	135.475	105.369	156.366	138.08
		5.4	131.168	136.025	184.85	134.255	104.746	156.551	137.887
		5.5	130.809	135.671	184.467	133.297	104.291	156.738	137.78
		5.6	130.601	135.334	184.141	132.788	103.941	156.804	137.951
		5.7	130.515	134.763	183.819	132.587	103.749	156.687	137.846
		5.8	130.48	134.132	183.65	132.339	103.651	156.465	137.627
		5.9	130.555	133.42	183.512	132.159	103.607	155.992	137.177
		6	130.563	132.858	183.527	131.901	103.531	155.523	136.613
		6.1	130.274	132.222	183.594	131.34	103.414	155.005	136.035
		6.2	129.868	131.801	183.536	130.702	103.456	154.606	135.875
		6.3	129.501	131.622	183.328	130.202	103.612	154.325	135.873
		6.4	129.298	131.601	183.129	129.635	103.638	154.178	135.948
		6.5	129.253	131.537	182.944	128.897	103.681	154.043	135.994
		6.6	129.32	131.448	182.757	128.447	103.821	153.851	135.897
		6.7	129.412	131.25	182.902	128.018	103.696	153.52	135.547
		6.8	129.544	130.886	183.31	127.569	103.392	153.1	135.152
		6.9	129.741	130.506	183.697	127.202	103.185	152.698	134.865
		7	129.952	130.027	183.995	127.16	102.874	152.4	134.786
		7.1	130.238	129.546	184.287	126.922	102.458	152.499	134.721
		7.2	130.54	129.381	184.491	126.763	102.238	152.998	134.647
		7.3	130.749	129.19	184.315	126.578	102.159	153.714	134.706
		7.4	130.69	128.962	184.262	126.392	102.051	154.447	134.662
		7.5	130.619	128.889	184.188	126.017	102.106	155.165	134.579
		7.6	130.566	128.972	183.99	125.692	102.188	155.446	134.744
		7.7	130.515	128.635	183.756	125.321	102.124	155.316	134.945
		7.8	130.483	128.477	183.826	125.093	101.946	154.893	135.007
		7.9	130.515	128.368	183.541	124.891	101.697	154.279	135.076
		8	130.581	128.21	183.198	124.635	101.303	153.514	135.006
		8.1	130.544	128.001	182.86	124.456	100.803	153.049	134.641
		8.2	130.485	128.018	182.223	124.302	100.365	152.764	134.338
		8.3	130.282	127.923	181.385	123.881	99.985	152.573	133.988
		8.4	130.167	127.623	180.823	123.447	99.722	152.557	133.668
		8.5	130.084	127.164	180.549	123.169	99.5678	152.684	133.361
		8.6	130.107	126.701	180.349	122.816	99.4669	152.522	133.179
		8.7	130.137	126.382	180.51	122.482	99.3654	152.416	132.881
		8.8	130.438	126.043	180.711	122.294	99.1871	152.473	132.696
		8.9	130.789	126.035	180.727	122.194	99.0126	152.598	132.474
		9	130.989	126.287	180.458	122.043	98.7236	152.487	132.206
		9.1	131.003	126.398	180.236	122.027	98.616	152.527	131.979
		9.2	131.127	126.38	179.898	121.816	98.6171	152.425	131.816
		9.3	131.136	126.487	179.789	121.496	98.66	151.941	131.508
		9.4	131.1	126.429	180.032	120.981	98.6896	151.291	131.317
		9.5	131.172	126.228	180.286	120.588	98.8888	150.921	131.317
		9.6	131.434	126.147	180.266	119.967	98.9711	150.645	131.263
		9.7	131.529	125.896	180.172	119.581	98.9265	150.433	131.184
		9.8	131.489	125.436	179.918	119.376	98.8968	150.679	131.127
		9.9	131.264	125.016	179.292	119.325	98.7112	151.054	130.984
		10	130.861	124.611	178.605	119.07	98.3909	151.252	130.747
		10.1	130.262	124.233	178.26	119.035	97.9748	151.473	130.419
		10.2	129.672	124.049	178.079	118.962	97.6179	151.717	130.058
		10.3	129.33	124.12	177.805	118.865	97.3621	151.805	129.815
		10.4	129.282	124.187	177.793	118.792	97.4047	151.763	129.564
		10.5	129.415	124.284	177.978	118.811	97.5005	151.883	129.36
		10.6	129.741	124.288	177.952	118.926	97.8078	151.86	129.4
		10.7	130.193	124.28	177.781	119.092	98.0288	151.79	129.577
		10.8	130.401	124.048	177.876	119.072	98.0206	151.619	129.605
		10.9	130.333	123.767	177.889	118.969	97.8423	151.652	129.718
		11	130.174	123.469	177.969	118.955	97.6288	151.697	129.731
		11.1	129.931	123.237	178.459	118.596	97.2492	151.834	129.602
		11.2	129.511	122.945	179.067	118.111	96.9849	151.922	129.386
		11.3	129.228	122.699	179.324	118.023	97.0037	152.045	129.338
		11.4	129.083	122.497	179.465	117.914	97.0408	151.833	129.174
		11.5	129.124	122.231	179.434	117.68	97.0401	151.411	129
		11.6	129.275	121.9	178.985	117.668	97.012	150.988	128.766
		11.7	129.586	121.602	178.368	117.816	96.9422	150.776	128.5
		11.8	129.973	121.354	177.8	117.833	96.7088	150.582	128.261
		11.9	130.337	121.02	177.345	117.902	96.3146	150.63	128.189
		12	130.423	120.713	176.863	117.993	95.9432	150.75	128.054
		12.1	130.339	120.59	176.526	118.062	95.5536	150.686	127.913
		12.2	130.174	120.48	176.566	117.909	95.2477	150.449	127.665
		12.3	129.8	120.377	176.84	117.576	94.9458	150.306	127.274
		12.4	129.485	120.524	177.059	117.27	94.783	150.195	126.802
		12.5	129.312	120.684	177.414	117.026	94.7803	150.092	126.516
		12.6	129.281	120.796	177.629	116.804	95.1616	150.035	126.302
		12.7	129.291	120.788	177.281	116.669	95.5082	149.975	126.424
		12.8	129.469	120.66	176.745	116.592	95.9192	149.845	126.541
		12.9	129.638	120.374	176.234	116.535	96.3968	149.665	126.498
		13	129.864	120.161	175.799	116.471	96.7597	149.497	126.485
		13.1	130.029	119.796	175.389	116.384	96.5823	149.543	126.476
		13.2	130.269	119.621	175.258	116.4	96.2363	149.652	126.091
		13.3	130.438	119.605	175.244	116.342	95.8256	149.695	125.846
		13.4	130.645	119.434	175.316	116.166	95.4928	149.618	125.84
		13.5	130.953	119.141	175.195	115.952	95.179	149.55	125.703
		13.6	131.282	118.923	175.365	115.63	95.1548	149.232	125.518
		13.7	131.366	118.654	175.634	115.228	95.1074	148.862	125.708
		13.8	131.484	118.341	175.909	114.94	95.0993	148.42	125.839
		13.9	131.449	118.31	176.138	114.797	94.8693	148.087	125.936
		14	131.185	118.346	176.389	114.673	94.5894	147.687	126.149
		14.1	130.95	118.318	176.296	114.667	94.2388	147.48	126.439
		14.2	130.869	118.281	176.099	114.742	94.1747	147.329	126.527
		14.3	130.672	118.295	175.89	114.797	94.1199	147.452	126.596
		14.4	130.617	118.107	175.583	114.734	94.154	147.482	126.409
		14.5	130.634	117.965	175.385	114.634	94.2187	147.721	126.078
		14.6	130.426	118.01	175.197	114.523	94.3994	147.864	125.687
		14.7	130.308	118.09	174.985	114.316	94.4483	147.891	125.327
		14.8	130.282	118.269	174.749	114.16	94.44	147.698	124.901
		14.9	130.161	118.46	174.654	114.017	94.5022	147.688	124.74
		15	129.936	118.604	174.45	113.976	94.567	147.604	124.778
		15.1	129.936	118.581	174.666	113.926	94.6344	147.501	124.966
		15.2	129.786	118.444	175.134	113.772	94.6886	147.531	125.048
		15.3	129.792	118.001	175.573	113.563	94.8359	147.682	125.232
		15.4	129.802	117.689	176.068	113.321	94.9036	147.722	125.283
		15.5	129.842	117.41	176.551	113.02	94.9646	147.739	125.074
		15.6	129.914	117.186	176.574	112.782	94.891	147.831	124.668
		15.7	130.012	117.006	176.278	112.93	94.8086	147.828	124.402
		15.8	129.894	117.044	175.927	113.045	94.6444	147.649	124.158
		15.9	129.761	116.997	175.449	113.373	94.589	147.407	124.106
		16	129.648	116.973	175.009	113.702	94.6182	147.14	124.143
		16.1	129.498	116.948	174.723	113.987	94.7472	146.914	124.225
		16.2	129.365	117.029	174.582	113.918	94.9124	146.764	124.259
		16.3	129.226	117.062	174.634	114.026	95.1355	146.761	124.076
		16.4	129.102	117.069	174.582	113.932	95.1629	146.782	123.707
		16.5	129.01	117.022	174.454	113.836	94.9778	146.82	123.474
		16.6	128.794	117.051	174.257	113.796	94.7389	146.831	123.177
		16.7	128.622	116.935	174.016	113.996	94.4666	146.96	122.848
		16.8	128.566	116.748	173.529	114.146	94.0917	147.246	122.876
		16.9	128.52	116.618	173.029	114.409	93.832	147.709	122.954
		17	128.563	116.425	172.632	114.788	93.7097	148.051	122.809
		17.1	128.786	116.066	172.396	115.119	93.4534	148.18	122.775
		17.2	129.059	115.755	172.176	115.113	93.0837	148.084	122.781
		17.3	129.293	115.478	172.149	114.952	92.6845	147.542	122.357
		17.4	129.629	115.243	172.363	114.827	92.1916	146.858	121.89
		17.5	129.904	115.142	172.679	114.442	91.8014	146.255	121.484
		17.6	130.008	115.205	172.927	113.978	91.5796	145.94	121.026
		17.7	129.952	115.282	173.127	113.896	91.6076	145.552	120.513
		17.8	129.892	115.437	173.292	113.88	91.9407	145.536	120.393
		17.9	129.785	115.542	173.358	113.773	92.5345	145.424	120.246
		18	129.678	115.551	173.255	113.926	93.0459	145.334	120.201
		18.1	129.671	115.397	173.185	114.209	93.579	145.118	120.193
		18.2	129.79	115.163	173.162	114.182	93.9741	145.282	120.343
		18.3	129.838	114.915	173.059	114.178	94.0414	145.342	120.158
		18.4	129.778	114.74	172.867	114.049	93.8547	145.56	120.012
		18.5	129.747	114.605	172.783	113.676	93.6212	145.781	119.845
		18.6	129.621	114.584	172.619	113.063	93.2517	146.05	119.594
		18.7	129.48	114.679	172.512	112.64	92.8784	145.984	118.981
		18.8	129.542	114.641	172.455	112.226	92.6805	145.971	118.584
		18.9	129.667	114.374	172.59	112.076	92.513	146.078	118.184
		19	129.623	114.026	172.638	112.135	92.3564	146.227	117.702
		19.1	129.661	113.769	172.583	112.362	92.376	146.284	117.205
		19.2	129.637	113.436	172.361	112.532	92.3364	146.36	116.916
		19.3	129.34	113.243	172.07	112.713	92.2455	146.371	116.533
		19.4	129.138	113.334	171.518	112.674	92.2482	146.091	116.223
		19.5	129.126	113.638	170.937	112.594	92.2288	145.723	115.921
		19.6	129.102	113.73	170.523	112.65	92.0892	145.396	115.853
		19.7	129.153	113.939	170.238	112.64	92.0759	145.233	115.909
		19.8	129.468	114.121	170.168	112.487	92.0786	144.978	115.773
		19.9	129.637	113.984	170.474	112.326	92.0051	144.793	115.574
		20	129.721	113.654	170.758	111.915	91.9721	144.41	115.617
		20.1	129.763	113.456	171.023	111.31	91.936	143.858	115.422
		20.2	129.71	113.118	171.297	110.808	91.8802	143.18	115.179
		20.3	129.469	112.724	171.348	110.523	91.7385	142.534	115.459
		20.4	129.35	112.509	171.099	110.385	91.5255	141.896	115.764
		20.5	129.277	112.36	170.954	110.567	91.2948	141.633	115.695
		20.6	129.296	112.253	170.751	110.948	91.0817	141.52	115.732
		20.7	129.304	112.176	170.509	111.299	90.7654	141.603	115.79
		20.8	129.279	112.154	170.4	111.447	90.5459	141.848	115.488
		20.9	129.186	112.138	170.262	111.626	90.5962	142.141	115.223
		21	128.927	112.152	170.091	111.741	90.6913	142.315	115.21
		21.1	128.554	111.958	169.954	111.621	90.8249	142.652	115.088
		21.2	128.253	111.854	169.879	111.519	91.0736	142.908	114.892
		21.3	128.124	111.848	169.839	111.479	91.2624	143.23	114.802
		21.4	127.993	112.007	169.924	111.296	91.1398	143.621	114.483
		21.5	128.132	112.225	170.001	111.001	90.9754	143.975	114.108
		21.6	128.413	112.792	170.029	110.885	90.8378	144.178	113.85
		21.7	128.782	113.234	170.027	110.886	90.8149	144.25	113.616
		21.8	128.988	113.466	169.789	111.018	90.8589	144.133	113.333
		21.9	129.173	113.434	169.479	111.344	91.0979	143.941	113.42
		22	129.233	113.131	169.389	111.728	91.331	143.837	113.43
		22.1	129.114	112.504	169.504	111.999	91.407	143.835	113.501
		22.2	128.797	112.02	169.52	111.991	91.2312	143.817	113.629
		22.3	128.668	111.664	169.68	111.921	90.9652	143.781	113.924
		22.4	128.438	111.476	169.936	111.561	90.6236	143.745	114.203
		22.5	128.204	111.612	169.969	111.289	90.2597	143.591	114.585
		22.6	128.233	111.913	169.86	111.127	90.1236	143.317	114.859
		22.7	128.453	112.178	169.886	111.334	90.0649	143.083	114.889
		22.8	128.475	112.356	169.955	111.517	90.158	142.982	114.689
		22.9	128.807	112.379	169.945	111.915	90.3132	142.947	114.168
		23	129.158	112.139	169.929	112.292	90.6249	143.013	113.593
		23.1	129.251	111.902	170.011	112.514	90.93	143.124	113.007
		23.2	129.063	111.687	170.18	112.428	91.1568	143.379	112.755
		23.3	129.163	111.587	170.372	112.386	91.2089	143.527	112.546
		23.4	129.102	111.649	170.667	112.248	91.3138	143.534	112.532
		23.5	129.072	111.944	170.934	111.949	91.2315	143.327	112.556
		23.6	129.183	112.061	170.905	111.72	90.8599	143.219	112.567
		23.7	129.657	112.021	170.629	111.395	90.6573	143.074	112.338
		23.8	129.797	111.952	170.206	110.933	90.6025	142.892	112.139
		23.9	129.748	111.785	169.623	110.511	90.4579	142.789	111.787
		24	129.424	111.441	168.957	110.224	90.4435	143.007	111.57
		24.1	128.991	111.211	168.498	109.88	90.651	143.026	111.412
		24.2	128.309	111.038	168.264	109.841	90.7626	142.831	111.292
		24.3	127.815	110.698	168.075	109.99	90.8094	142.569	111.177
		24.4	127.6	110.327	167.994	110.199	90.8106	142.103	111.311
		24.5	127.739	109.912	168.099	110.466	90.7008	141.365	111.254
		24.6	127.93	109.581	168.132	110.987	90.6016	140.762	111.316
		24.7	128.279	109.338	167.93	111.325	90.6338	140.333	111.591
		24.8	128.564	109.388	167.81	111.372	90.6709	140.179	111.881
		24.9	128.736	109.609	167.574	111.35	90.7783	140.444	112.054
		25	128.843	110.042	167.282	111.226	90.8912	140.769	112.281
		25.1	129.095	110.487	167.063	110.795	90.9453	141.001	112.332
		25.2	129.303	110.884	167.027	110.446	90.7748	141.081	112.205
		25.3	129.602	111.236	166.945	110.405	90.5614	140.98	112.062
		25.4	130.002	111.39	166.993	110.274	90.2856	140.562	111.761
		25.5	130.361	111.381	167.175	110.243	90.0627	140.181	111.327
		25.6	130.45	111.228	167.504	110.439	89.7108	139.798	110.848
		25.7	130.357	111.118	167.883	110.603	89.5344	139.677	110.297
		25.8	130.145	110.849	168.452	110.797	89.3853	139.661	109.806
		25.9	129.741	110.587	169.183	111.338	89.2062	139.821	109.547
		26	129.263	110.477	169.696	111.698	89.0571	140.103	109.464
		26.1	128.985	110.445	170.026	112.041	89.1672	140.55	109.674
		26.2	128.873	110.287	170.275	112.471	89.1524	140.809	110.114
		26.3	128.892	110.093	170.213	112.591	89.1268	140.967	110.532
		26.4	129.023	110.088	169.831	112.386	89.1457	141.17	110.781
		26.5	129.11	109.915	169.558	112.346	89.148	141.254	110.861
		26.6	129.171	109.617	169.207	112.136	88.9801	141.294	110.606
		26.7	129.353	109.431	168.717	111.846	89.0323	141.448	110.175
		26.8	129.547	109.353	168.401	111.782	89.3025	141.605	109.673
		26.9	129.802	109.18	168.236	111.582	89.6972	141.589	109.24
		27	130.362	109.146	168.125	111.228	90.0668	141.695	108.968
		27.1	130.829	109.222	168.03	110.902	90.461	141.617	108.798
		27.2	131.163	109.223	167.962	110.447	90.6235	141.413	108.63
		27.3	131.261	109.271	167.882	109.898	90.5557	141.32	108.585
		27.4	131.323	109.133	167.738	109.708	90.3504	141.18	108.738
		27.5	131.144	108.98	167.613	109.734	90.1146	140.773	109.087
		27.6	131.149	108.936	167.712	109.798	89.9332	140.531	109.553
		27.7	131.082	109.022	167.668	110.049	89.764	140.38	110.02
		27.8	131.211	109.127	167.39	110.381	89.4684	140.086	110.33
		27.9	131.32	109.59	167.179	110.608	89.1753	140.002	110.419
		28	131.369	109.912	166.811	110.787	88.9452	140.087	110.168
		28.1	131.1	110.102	166.225	110.881	88.7342	140.089	109.829
		28.2	130.853	110.199	166.09	110.823	88.8067	140.104	109.451
		28.3	130.518	110.157	166.107	110.696	89.1033	140.1	109.176
		28.4	130.057	109.857	166.054	110.462	89.5162	140.016	108.941
		28.5	129.788	109.647	166.018	110.068	89.8099	139.917	108.817
		28.6	129.857	109.402	166.033	109.992	90.0081	139.821	108.687
		28.7	130.039	109.112	165.645	110.007	89.9108	139.641	108.884
		28.8	130.194	108.869	165.467	110.078	89.7436	139.577	109.113
		28.9	130.416	108.639	165.32	110.164	89.5022	139.38	109.255
		29	130.423	108.519	165.206	110.256	89.4554	139.119	109.398
		29.1	130.124	108.573	165.02	109.988	89.4011	138.965	109.623
		29.2	129.674	108.708	165.188	109.661	89.428	138.986	109.533
		29.3	129.251	108.885	165.116	109.139	89.396	139.013	109.359
		29.4	128.923	109.086	164.962	108.698	89.2522	139.246	109.45
		29.5	128.701	109.193	164.875	108.413	88.971	139.725	109.523
		29.6	128.758	109.127	165.01	108.348	88.6957	140.094	109.506
		29.7	128.955	109.078	164.928	108.52	88.2863	140.156	109.573
		29.8	129.256	109.057	165.051	109.05	88.0609	140.146	109.6
		29.9	129.531	109.183	165.298	109.772	88.0196	139.872	109.32
		30	129.807	109.205	165.445	110.427	88.1916	139.304	108.958
		30.1	129.987	109.341	165.502	110.948	88.555	138.848	108.514
		30.2	130.044	109.463	165.532	111.207	89.1217	138.549	108.037
		30.3	129.968	109.528	165.312	111.186	89.6379	138.312	107.753
		30.4	129.822	109.484	165.227	110.678	89.9946	138.421	107.799
		30.5	129.8	109.46	165.149	110.025	90.03	138.6	107.917
		30.6	129.868	109.34	164.873	109.457	89.8682	138.647	108.202
		30.7	130.004	109.145	164.68	108.932	89.6044	138.776	108.498
		30.8	130.245	108.823	164.654	108.484	89.0974	138.915	108.593
		30.9	130.58	108.449	164.365	108.397	88.783	138.791	108.321
		31	130.883	108.385	164.066	108.539	88.6156	138.758	108.14
		31.1	130.944	108.276	163.995	108.618	88.4448	138.703	107.903
		31.2	131.088	108.237	163.913	108.848	88.282	138.501	107.831
		31.3	131.329	108.366	163.738	109.036	88.3435	138.19	107.905
		31.4	131.381	108.472	163.562	109.004	88.2359	138.065	108.124
		31.5	131.242	108.2	163.354	108.811	88.1584	137.981	108.121
		31.6	131.26	108.084	163.103	108.744	88.17	138.165	108.075
		31.7	131.153	107.873	162.845	108.55	88.168	138.566	107.704
		31.8	130.756	107.628	162.556	108.454	88.0853	138.999	107.213
		31.9	130.441	107.513	162.35	108.493	88.0618	139.171	106.712
		32	130.137	107.545	162.362	108.585	87.9743	139.054	106.552
		32.1	129.696	107.42	162.356	108.539	87.8896	138.516	106.555
		32.2	129.264	107.366	162.385	108.566	87.9654	137.807	106.837
		32.3	128.968	107.418	162.624	108.554	88.0976	137.184	107.29
		32.4	128.981	107.407	163.017	108.683	88.2778	136.816	107.819
		32.5	129.181	107.404	163.386	108.893	88.4898	136.86	108.009
		32.6	129.605	107.57	163.692	109.232	88.6356	137.225	107.903
		32.7	130.002	107.774	164.078	109.457	88.6478	137.588	107.575
		32.8	130.44	107.811	164.285	109.747	88.6451	137.851	107.052
		32.9	130.5	107.95	164.37	109.884	88.5596	137.934	106.464
		33	130.405	108.105	164.186	109.873	88.5012	137.673	106.055
		33.1	130.179	108.272	164.152	109.689	88.4718	137.325	105.748
		33.2	130.02	108.433	163.933	109.638	88.3994	137.11	105.488
		33.3	129.898	108.658	163.856	109.432	88.3336	137.068	105.236
		33.4	129.815	108.833	163.653	109.227	88.2754	137.164	105.121
		33.5	129.864	108.959	163.693	109.153	88.1005	137.48	105.145
		33.6	129.98	108.861	163.564	109.364	87.8771	137.892	105.259
		33.7	130.029	108.726	163.381	109.566	87.6136	138.228	105.621
		33.8	129.86	108.624	163.042	109.885	87.3771	138.47	106.161
		33.9	129.824	108.343	162.957	110.15	87.2198	138.6	106.552
		34	129.644	108.264	162.853	110.304	87.1393	138.553	106.66
		34.1	129.322	108.482	162.875	110.159	87.1884	138.332	106.766
		34.2	129.072	108.761	162.985	109.781	87.5062	138.06	106.697
		34.3	129.024	108.981	163.049	109.232	87.7627	137.747	106.544
		34.4	128.936	109.338	162.742	108.785	87.8982	137.558	106.605
		34.5	128.909	109.388	162.211	108.49	88.0839	137.524	106.773
		34.6	128.935	109.202	161.651	108.245	88.0776	137.604	106.994
		34.7	128.948	108.948	161.272	108.196	87.9058	137.726	107.248
		34.8	129.005	108.704	161.075	108.429	87.7719	137.768	107.436
		34.9	129.093	108.495	161.281	108.608	87.669	137.669	107.284
		35	129.262	108.443	161.756	108.686	87.5758	137.39	107.149
		35.1	129.567	108.601	162.111	108.953	87.669	136.929	106.993
		35.2	129.864	108.828	162.299	109.303	87.6761	136.438	106.752
		35.3	129.992	109.031	162.37	109.506	87.6362	135.99	106.451
		35.4	129.944	109.122	162.185	109.697	87.6186	135.673	106.313
		35.5	129.782	109.128	161.927	109.914	87.5256	135.607	106.256
		35.6	129.581	108.88	161.846	109.874	87.3382	135.732	105.981
		35.7	129.324	108.546	161.701	109.801	87.3478	135.859	105.811
		35.8	129.113	108.321	161.634	109.779	87.4648	135.931	105.726
		35.9	129.218	108.193	161.537	109.772	87.7582	135.851	105.578
		36	129.545	108.159	161.337	109.736	88.132	135.574	105.223
		36.1	129.813	108.205	161.074	109.786	88.5345	135.27	105.01
		36.2	130.296	108.304	161.017	109.584	88.6814	134.917	104.607
		36.3	130.893	108.358	160.994	109.298	88.6436	134.876	104.174
		36.4	131.185	108.478	161.147	109.053	88.3669	134.9	103.892
		36.5	131.136	108.406	161.409	108.78	88.0928	134.961	103.753
		36.6	131.13	108.33	161.62	108.577	87.847	135.065	103.657
		36.7	130.893	108.188	161.769	108.605	87.6943	135.131	103.707
		36.8	130.579	107.989	161.871	108.668	87.6514	134.865	103.907
		36.9	130.422	107.619	161.989	108.74	87.7893	134.854	104.049
		37	130.508	107.594	162.01	108.862	87.8388	134.88	104.302
		37.1	130.53	107.666	162.029	109.105	87.8126	134.808	104.718
		37.2	130.63	107.733	161.917	109.345	87.9169	134.92	105.201
		37.3	130.617	107.783	161.646	109.563	88.0638	135.16	105.517
		37.4	130.552	107.87	161.176	109.692	88.1278	135.096	105.819
		37.5	130.29	107.68	160.797	109.811	88.2186	135.01	105.894
		37.6	129.852	107.269	160.585	109.751	88.3856	134.842	105.564
		37.7	129.335	106.889	160.291	109.626	88.392	134.66	105.007
		37.8	129.045	106.549	160.122	109.627	88.3067	134.638	104.492
		37.9	128.825	106.362	160.12	109.728	88.094	134.646	103.91
		38	128.842	106.277	160.095	109.907	87.9046	134.612	103.385
		38.1	129.292	106.433	159.889	110.017	87.6594	134.768	103.213
		38.2	129.905	106.665	159.995	110.13	87.5041	134.963	103.391
		38.3	130.406	107.098	160.143	109.959	87.4789	134.971	103.631
		38.4	130.737	107.409	160.308	109.546	87.5304	135.046	103.954
		38.5	130.954	107.617	160.442	109.119	87.4499	135.31	104.376
		38.6	130.782	107.767	160.508	108.852	87.3784	135.539	104.638
		38.7	130.457	107.763	160.328	108.517	87.3746	135.562	104.592
		38.8	130.023	107.432	160.023	108.413	87.2728	135.482	104.513
		38.9	129.676	106.987	159.595	108.618	87.2155	135.36	104.469
		39	129.292	106.695	159.256	108.653	87.4242	134.996	104.261
		39.1	129.073	106.512	159.175	108.647	87.6574	134.588	103.981
		39.2	128.995	106.502	159.206	108.823	87.7335	134.31	103.87
		39.3	128.906	106.651	159.387	108.914	87.7304	134.156	103.744
		39.4	128.961	106.96	159.67	108.894	87.709	133.958	103.471
		39.5	129.132	107.08	159.736	108.978	87.5263	133.883	103.228
		39.6	129.458	106.924	159.639	108.989	87.3832	133.836	103.191
		39.7	129.632	106.648	159.629	108.737	87.389	133.762	103.022
		39.8	130.02	106.34	159.649	108.469	87.5211	133.721	102.735
		39.9	130.27	105.99	159.579	108.246	87.7233	133.806	102.58
		40	130.461	105.932	159.671	108.125	87.9878	133.83	102.671
		40.1	130.399	106.089	159.818	108.077	88.1281	133.882	102.776
		40.2	130.536	106.258	159.732	108.103	88.1504	133.88	102.972
		40.3	130.637	106.38	159.502	108.283	88.1952	133.758	103.463
		40.4	130.745	106.578	159.335	108.342	88.1962	133.519	103.84
		40.5	130.746	106.553	159.268	108.314	88.0708	133.38	103.959
		40.6	130.934	106.422	158.985	108.305	88.0822	133.163	103.852
		40.7	130.96	106.424	158.795	108.438	88.167	132.971	103.688
		40.8	130.967	106.456	158.588	108.379	88.1239	132.865	103.31
		40.9	130.943	106.276	158.262	108.335	88.0382	132.862	102.986
		41	130.988	106.067	157.774	108.206	88.0387	132.809	102.793
		41.1	130.833	105.914	157.606	107.912	87.9561	132.796	102.727
		41.2	130.564	105.744	157.562	107.614	87.7705	132.794	102.775
		41.3	130.148	105.633	157.633	107.487	87.733	132.897	102.879
		41.4	129.842	105.721	157.942	107.492	87.7196	132.93	102.977
		41.5	129.495	106.075	158.322	107.573	87.6628	132.908	102.975
		41.6	129.118	106.534	158.444	107.756	87.5355	132.742	102.887
		41.7	128.976	106.859	158.546	107.932	87.6349	132.685	102.712
		41.8	129.104	107.28	158.688	108.057	87.5849	132.575	102.534
		41.9	129.301	107.798	158.686	108.079	87.4268	132.502	102.378
		42	129.614	108.099	158.735	108.197	87.2817	132.579	102.383
		42.1	130.161	108.207	159.022	108.453	87.2938	132.957	102.523
		42.2	130.51	108.311	159.007	108.676	87.0702	133.228	102.698
		42.3	130.474	108.153	158.829	108.939	86.957	133.313	102.825
		42.4	130.18	107.785	158.526	109.272	87.0708	133.37	102.987
		42.5	129.948	107.4	158.044	109.49	87.3813	133.234	102.98
		42.6	129.679	107.036	157.389	109.51	87.713	132.792	102.88
		42.7	129.662	106.666	157.055	109.434	88.2452	132.421	102.735
		42.8	129.909	106.532	156.915	109.156	88.6868	132.254	102.69
		42.9	130.298	106.373	156.987	108.83	88.9489	132.15	102.716
		43	130.555	106.293	157.149	108.522	89.0298	132.052	102.824
		43.1	130.77	106.322	157.403	108.184	88.9268	132.159	102.938
		43.2	130.867	106.479	157.656	107.846	88.6441	132.103	103.016
		43.3	131.048	106.438	157.681	107.661	88.547	131.953	102.925
		43.4	131.239	106.597	157.499	107.457	88.5371	131.695	102.55
		43.5	131.259	106.686	157.41	107.216	88.3536	131.583	102.031
		43.6	130.981	106.68	157.296	107.223	88.2145	131.348	101.582
		43.7	130.625	106.634	157.03	107.314	88.1079	131.282	101.196
		43.8	130.024	106.571	156.853	107.428	87.7167	131.181	100.95
		43.9	129.367	106.278	156.91	107.56	87.2466	131.245	101.004
		44	128.955	106.118	156.686	107.797	86.9775	131.295	101.362
		44.1	129.044	105.972	156.379	107.975	86.7722	131.552	101.717
		44.2	129.25	105.757	156.139	108.239	86.5726	131.733	102.168
		44.3	129.649	105.7	155.977	108.403	86.7084	132.074	102.563
		44.4	130.044	105.907	155.546	108.514	86.997	132.202	102.716
		44.5	130.273	106.072	155.439	108.504	87.3331	132.274	102.536
		44.6	130.09	106.226	155.418	108.4	87.6575	132.119	102.251
		44.7	129.763	106.443	155.351	108.234	87.9554	131.954	101.907
		44.8	129.378	106.662	155.269	108.15	88.0314	131.698	101.77
		44.9	129.172	106.727	155.361	108.216	87.9536	131.576	101.862
		45	129.25	106.615	155.271	108.46	87.8431	131.32	102.275
		45.1	129.519	106.567	155.187	108.698	87.6567	131.026	102.684
		45.2	129.899	106.588	155.049	108.934	87.5189	130.885	102.825
		45.3	130.188	106.566	154.821	109.147	87.4065	130.728	102.67
		45.4	130.235	106.565	154.6	109.076	87.2855	130.622	102.362
		45.5	129.946	106.78	154.623	108.839	87.0184	130.749	101.83
		45.6	129.816	107.006	154.708	108.628	86.862	131.038	101.433
		45.7	129.569	107.064	155.06	108.379	86.7778	131.09	101.407
		45.8	129.432	107.098	155.518	108.083	86.5463	131.053	101.448
		45.9	129.438	107.048	155.982	108.032	86.3754	130.787	101.506
		46	129.667	106.945	156.203	107.869	86.4747	130.402	101.573
		46.1	129.635	106.699	156.234	107.727	86.5265	130.07	101.629
		46.2	129.77	106.502	155.999	107.513	86.5538	129.944	101.514
		46.3	129.923	106.302	155.682	107.495	86.8121	130.095	101.465
		46.4	130.111	106.184	155.364	107.526	87.125	130.596	101.458
		46.5	130.221	106.015	155.046	107.855	87.2931	131.186	101.515
		46.6	130.539	106.005	154.897	108.131	87.546	131.635	101.424
		46.7	130.805	105.984	154.904	108.589	87.7932	132.002	101.31
		46.8	130.926	106.053	154.913	108.838	88.0788	132.123	101.124
		46.9	130.852	106.007	154.929	108.975	88.2582	131.936	100.977
		47	130.769	105.935	155.15	109.028	88.3102	131.657	100.77
		47.1	130.615	105.675	155.28	109.176	88.3258	131.461	100.597
		47.2	130.452	105.596	155.261	109.217	88.1996	131.113	100.615
		47.3	130.437	105.347	155.375	109.263	88.0031	130.77	100.897
		47.4	130.609	105.242	155.364	109.182	87.9205	130.547	101.117
		47.5	130.786	105.216	155.031	108.911	87.9876	130.342	101.465
		47.6	130.753	105.313	154.739	108.484	87.8934	130.131	101.975
		47.7	130.572	105.209	154.703	108.119	87.88	130.138	102.216
		47.8	130.24	105.291	154.555	107.75	87.6697	130.183	101.993
		47.9	129.709	105.415	154.554	107.625	87.3599	130.181	101.781
		48	129.31	105.4	154.825	107.66	87.0251	130.297	101.424
		48.1	129.298	105.446	155.007	107.636	87.0172	130.267	100.894
		48.2	129.531	105.674	154.82	107.548	87.0871	130.205	100.465
		48.3	129.984	105.877	154.529	107.563	87.3866	130.203	100.299
		48.4	130.635	105.879	154.256	107.395	87.7304	130.298	100.051
		48.5	131.085	106.126	153.965	107.21	87.9593	130.253	99.8237
		48.6	131.247	106.361	153.82	107.309	87.9235	130.204	99.7265
		48.7	131.223	106.299	153.91	107.369	87.7847	129.953	99.6828
		48.8	130.859	106.042	154.095	107.529	87.562	129.521	99.7711
		48.9	130.263	105.904	154.14	107.856	87.3311	128.953	100.015
		49	129.673	105.516	154.039	108.264	87.2159	128.369	100.405
		49.1	129.118	105.121	153.807	108.552	87.2057	127.957	100.665
		49.2	128.674	104.99	153.647	108.91	87.247	127.762	100.89
		49.3	128.527	105.067	153.61	109.081	87.2144	128.003	100.904
		49.4	128.735	105.186	153.575	109.011	87.1589	128.371	100.801
		49.5	129.258	105.359	153.554	108.89	87.2429	128.803	100.536
		49.6	130.034	105.5	153.689	108.8	87.2581	129.444	100.267
		49.7	130.691	105.622	153.759	108.646	87.3548	130.092	99.9636
		49.8	131.294	105.699	153.683	108.462	87.6766	130.331	99.6373
		49.9	131.534	105.637	153.589	108.594	88.1242	130.48	99.2752
		50	131.339	105.792	153.587	108.511	88.3554	130.634	98.983
		50.1	130.67	105.841	153.454	108.243	88.5159	130.231	98.968
		50.2	130.182	105.757	153.241	108.055	88.5446	129.7	99.1452
		50.3	129.67	105.6	153.161	107.892	88.4209	129.197	99.4581
		50.4	129.289	105.584	153.381	107.453	88.1466	128.752	99.9782
		50.5	129.163	105.302	153.577	107.376	87.7236	128.293	100.467
		50.6	129.139	105.099	153.889	107.511	87.3872	128.277	100.557
		50.7	128.898	104.944	154.185	107.549	87.044	128.287	100.377
		50.8	128.509	104.787	154.191	107.734	86.6303	128.512	100.142
		50.9	128.186	104.599	153.917	108.046	86.2309	128.807	99.6498
		51	127.817	104.498	153.499	108.076	86.1852	128.999	99.1912
		51.1	127.809	104.557	152.765	107.987	86.1278	128.997	98.9705
		51.2	128.018	104.711	152.068	108.059	86.2074	129.096	98.7977
		51.3	128.477	104.961	151.656	108.043	86.4656	129.068	98.613
		51.4	129.142	105.137	151.234	107.954	86.8458	128.911	98.6554
		51.5	129.774	105.346	150.952	107.948	87.2772	128.978	98.6107
		51.6	130.218	105.343	151.1	108.077	87.8121	129.137	98.5193
		51.7	130.594	105.254	151.27	107.977	88.2772	129.193	98.547
		51.8	130.965	105.008	151.374	107.728	88.6394	129.136	98.6252
		51.9	130.993	104.787	151.527	107.463	88.8875	128.928	98.5937
		52	131.097	104.566	151.81	107.339	88.836	128.416	98.7393
		52.1	131.189	104.41	151.946	107.098	88.671	127.94	98.9787
		52.2	131.1	104.172	152.169	106.994	88.4498	127.501	99.1747
		52.3	130.741	104.145	152.27	107.11	88.2218	127.209	99.4346
		52.4	130.4	104.305	152.487	107.321	87.976	127.221	99.6202
		52.5	130.001	104.564	152.598	107.254	87.7942	127.589	99.737
		52.6	129.574	104.713	152.564	107.262	87.6096	127.815	99.7188
		52.7	129.381	105.025	152.332	107.318	87.4109	128.107	99.631
		52.8	129.422	105.216	152.15	107.281	87.2427	128.365	99.4212
		52.9	129.549	105.139	151.661	107.368	87.1787	128.659	99.344
		53	129.705	104.914	150.937	107.676	87.143	128.755	99.16
		53.1	130.003	104.887	150.348	107.865	87.2729	128.936	98.9598
		53.2	130.066	104.717	149.871	108.043	87.4339	129.024	98.8335
		53.3	130.041	104.468	149.791	108.294	87.5992	129.248	98.6512
		53.4	129.97	104.27	150.015	108.354	87.5942	129.339	98.3382
		53.5	129.767	104.033	150.512	108.308	87.5097	129.476	98.0734
		53.6	129.247	103.87	150.806	108.379	87.2162	129.564	98.0248
		53.7	129.048	104.011	151.05	108.394	86.972	129.638	98.106
		53.8	128.976	104.385	150.755	108.259	86.657	129.436	98.3173
		53.9	129.049	104.976	150.461	108.139	86.4745	129.131	98.714
		54	129.311	105.691	150.126	108.185	86.5206	128.62	99.1536
		54.1	129.941	106.145	150.054	108.184	86.6531	127.94	99.3241
		54.2	130.439	106.227	150.134	108.115	86.8255	127.226	99.2404
		54.3	130.742	106.107	150.458	108.163	87.0446	126.72	99.1174
		54.4	130.831	105.748	150.66	108.178	87.3014	126.369	98.8135
		54.5	130.795	105.357	150.907	108.038	87.449	126.432	98.3707
		54.6	130.627	105.129	151.07	107.792	87.4639	126.845	98.1218
		54.7	130.187	105.151	151.106	107.601	87.3322	127.482	98.0726
		54.8	129.818	105.234	151.03	107.369	87.2752	127.91	98.0479
		54.9	129.597	105.43	150.968	107.257	87.1397	128.161	98.0811
		55	129.44	105.624	150.761	107.127	86.9498	128.077	98.3317
		55.1	129.204	105.719	150.599	107.157	86.9744	127.94	98.4614
		55.2	129.352	105.689	150.455	107.253	87.109	127.706	98.4039
		55.3	129.511	105.78	150.324	107.377	87.1442	127.681	98.3011
		55.4	129.722	105.773	150.185	107.326	87.1444	127.753	98.2723
		55.5	130.011	105.772	150.057	107.193	87.0547	128.034	98.0186
		55.6	130.459	105.829	149.858	107.025	86.8326	128.111	97.7646
		55.7	130.836	105.885	149.798	106.786	86.5288	128.071	97.6717
		55.8	131.224	105.676	149.895	106.526	86.1932	128.059	97.6631
		55.9	131.569	105.456	150.149	106.472	85.939	128.086	97.6464
		56	131.76	105.112	150.611	106.644	85.8874	127.998	97.9145
		56.1	131.492	104.647	150.972	106.844	85.8483	127.928	98.2743
		56.2	130.943	104.073	150.997	107.056	85.9503	127.798	98.7112
		56.3	130.391	103.771	150.798	107.281	86.1744	127.584	99.0772
		56.4	129.618	103.822	150.317	107.36	86.4606	127.405	99.2814
		56.5	128.833	104.015	149.648	107.257	86.8028	127.193	99.2239
		56.6	128.593	104.347	149.258	107.101	87.2863	127.093	98.9569
		56.7	128.638	104.964	149.209	107.058	87.6018	127.234	98.4186
		56.8	128.589	105.482	149.216	107.058	87.8055	127.214	97.8768
		56.9	128.815	105.665	149.489	107.151	87.876	126.878	97.4785
		57	129.123	105.741	149.774	107.409	87.6189	126.576	97.2138
		57.1	129.229	105.752	149.715	107.692	87.1689	126.511	97.0673
		57.2	129.271	105.546	149.444	107.735	86.9147	126.343	97.0099
		57.3	129.459	105.242	149.336	107.705	86.724	126.455	96.9265
		57.4	129.552	104.967	149.149	107.595	86.57	126.992	96.7551
		57.5	129.718	104.866	148.979	107.324	86.7076	127.477	96.4882
		57.6	129.932	104.779	149.022	106.9	86.9615	127.468	96.3265
		57.7	130.21	104.767	149.101	106.728	87.1125	127.358	96.2644
		57.8	130.537	104.836	149.161	106.51	87.2674	127.178	96.1552
		57.9	130.799	104.932	149.148	106.25	87.413	126.88	96.173
		58	130.986	105.048	149.25	106.264	87.4827	126.806	96.3688
		58.1	131.169	105.219	149.501	106.532	87.5216	126.963	96.5563
		58.2	131.159	105.298	149.827	106.552	87.4833	127.239	96.6277
		58.3	130.942	105.33	150.072	106.717	87.411	127.311	96.8588
		58.4	130.939	105.386	150.309	107.084	87.371	127.205	97.001
		58.5	130.915	105.274	150.237	107.074	87.1968	126.928	97.0418
		58.6	130.877	105.242	149.708	106.99	86.9973	126.637	97.0886
		58.7	131.046	105.312	149.156	107.145	86.9051	126.299	97.2356
		58.8	131.297	105.474	148.624	107.21	87.0386	126.19	97.249
		58.9	131.293	105.431	148.091	107.181	87.1725	126.301	97.3172
		59	131.297	105.428	147.801	107.405	87.5498	126.431	97.2897
		59.1	131.071	105.065	147.92	107.545	87.9396	126.605	97.1938
		59.2	130.558	104.761	147.905	107.62	88.2935	126.7	97.0312
		59.3	130.108	104.395	147.699	107.738	88.3383	126.703	96.976
		59.4	129.784	104.365	147.756	107.785	88.4578	126.573	96.9768
		59.5	129.379	104.307	147.928	107.74	88.4758	126.323	97.1564
		59.6	129.222	104.703	147.843	107.683	88.5388	125.893	97.3196
		59.7	129.308	105.015	147.883	107.425	88.5414	125.774	97.5752
		59.8	129.341	105.298	148.126	107.068	88.672	125.68	97.8338
		59.9	129.307	105.37	147.98	106.701	88.5929	125.679	97.8898
		60	129.352	105.608	147.513	106.233	88.3337	125.944	97.8671
		60.1	129.274	105.567	147.386	105.881	87.9474	126.401	97.7385
		60.2	129.168	105.448	147.416	105.763	87.5358	126.583	97.5636
		60.3	129.088	105.371	147.362	105.669	86.9516	126.757	97.346
		60.4	129.093	105.42	147.469	105.614	86.5864	126.8	97.2762
		60.5	129.119	105.25	147.832	105.864	86.477	126.582	97.081
		60.6	129.352	105.151	147.813	106.111	86.4776	126.343	97.1849
		60.7	129.53	105.173	147.572	106.372	86.4964	126.149	97.1772
		60.8	129.671	105.16	147.43	106.682	86.6728	125.818	97.1195
		60.9	129.829	104.915	147.173	107.074	86.683	125.626	96.9683
		61	130.075	104.736	146.765	107.135	86.6173	125.505	96.9247
		61.1	130.144	104.388	146.532	107.046	86.4832	125.337	96.7024
		61.2	130.263	104.018	146.333	106.793	86.5978	125.192	96.6476
		61.3	130.331	103.726	146.061	106.621	86.7802	125.227	96.5926
		61.4	130.231	103.689	145.891	106.491	87.1112	125.138	96.7046
		61.5	129.917	103.685	145.839	106.612	87.2825	125.087	96.9612
		61.6	129.636	103.907	145.848	106.877	87.5958	125.03	97.2345
		61.7	129.358	104.073	145.929	107.252	87.7844	124.936	97.3657
		61.8	129.194	104.259	146.057	107.571	87.8966	124.804	97.534
		61.9	129.247	104.407	146.4	107.7	87.7698	124.731	97.5695
		62	129.606	104.557	146.72	107.718	87.873	124.666	97.428
		62.1	129.927	104.847	147.048	107.584	87.9429	124.577	97.2068
		62.2	130.154	105.205	147.32	107.45	87.7603	124.429	97.1106
		62.3	130.531	105.54	147.668	107.302	87.5004	124.355	97.0737
		62.4	130.81	105.678	147.608	107.322	87.3686	124.292	97.0043
		62.5	130.675	105.695	147.672	107.381	87.055	124.302	96.9278
		62.6	130.496	105.428	147.603	107.567	86.5438	124.358	96.9339
		62.7	130.262	105.151	147.518	107.601	86.2585	124.68	97.0245
		62.8	129.593	104.789	147.264	107.621	86.0945	124.947	97.1332
		62.9	128.781	104.696	147.431	107.463	86.0977	125.265	97.2627
		63	128.172	104.693	147.379	107.254	86.1594	125.497	97.4049
		63.1	127.745	104.729	147.498	107.043	86.3914	125.662	97.5595
		63.2	127.64	104.729	147.646	106.975	86.6708	125.405	97.4736
		63.3	127.87	104.84	147.752	106.891	87.0556	125.167	97.3536
		63.4	128.291	104.886	147.573	106.839	87.229	124.822	97.3576
		63.5	128.872	105.014	147.425	106.716	87.4133	124.385	97.495
		63.6	129.443	105.193	147.053	106.53	87.6416	124.13	97.5916
		63.7	129.76	105.389	146.524	106.391	87.6622	124.242	97.7377
		63.8	130.008	105.531	146.215	106.17	87.4385	124.299	97.6639
		63.9	130.396	105.545	146.044	106.07	87.3211	124.427	97.3644
		64	130.587	105.611	145.741	106.136	87.2373	124.75	96.8659
		64.1	130.518	105.635	145.503	106.33	86.9699	124.944	96.3663
		64.2	130.494	105.611	145.531	106.411	86.8719	125.021	95.8502
		64.3	130.373	105.432	145.336	106.623	86.7565	124.965	95.4474
		64.4	129.88	105.306	145.045	106.76	86.6032	124.835	95.1341
		64.5	129.49	104.919	145.032	106.858	86.4679	124.569	94.8873
		64.6	129.403	104.645	145.237	106.856	86.5518	124.387	94.557
		64.7	129.445	104.455	145.361	106.988	86.6021	124.233	94.4267
		64.8	129.599	104.516	145.637	107.073	86.9961	124.347	94.5677
		64.9	130.121	104.55	145.898	107.111	87.365	124.595	94.9038
		65	130.51	104.701	146.022	107.141	87.7289	125.007	95.346
		65.1	130.69	104.656	145.858	107.11	88.031	125.417	96.0558
		65.2	130.608	104.51	145.675	106.882	88.3648	125.794	96.5455
		65.3	130.553	104.182	145.544	106.693	88.3142	125.812	96.6672
		65.4	130.271	103.937	145.348	106.672	88.2746	125.692	96.4605
		65.5	130.094	103.793	144.995	106.564	88.1072	125.258	96.1671
		65.6	130.098	103.816	144.754	106.536	87.7994	124.574	95.7176
		65.7	130.287	103.869	144.444	106.662	87.3934	123.906	95.4245
		65.8	130.375	104.07	143.9	106.914	87.0685	123.626	95.343
		65.9	130.46	104.326	143.559	106.97	86.7251	123.389	95.5078
		66	130.532	104.574	143.495	106.969	86.4278	123.462	95.671
		66.1	130.506	104.751	143.499	107.005	86.1679	123.763	95.7636
		66.2	130.649	104.987	143.611	107.006	86.0787	123.945	95.7542
		66.3	130.89	105.083	144.011	106.682	86.1306	123.92	95.7301
		66.4	131.075	105.043	144.364	106.603	86.2086	123.834	95.686
		66.5	131.154	104.856	144.696	106.679	86.3984	123.557	95.6027
		66.6	131.196	104.693	144.846	106.654	86.7045	123.259	95.4388
		66.7	130.767	104.559	144.845	106.653	86.8197	123.12	95.1936
		66.8	130.264	104.484	144.789	106.88	86.7279	123.053	94.8656
		66.9	129.858	104.401	144.766	106.967	86.7213	123.185	94.5528
		67	129.549	104.388	144.705	107.076	86.6261	123.575	94.3256
		67.1	129.283	104.455	144.763	107.284	86.475	124.066	94.4147
		67.2	129.319	104.583	144.798	107.314	86.3096	124.618	94.7057
		67.3	129.317	104.724	144.698	107.172	86.3809	125.157	95.0842
		67.4	129.363	104.961	144.458	106.923	86.2713	125.449	95.4148
		67.5	129.577	105.14	144.16	106.6	86.2412	125.368	95.8027
		67.6	129.833	105.117	143.764	106.348	86.2071	124.886	96.0613
		67.7	129.994	104.808	143.626	106.429	86.3548	124.18	96.2634
		67.8	130.223	104.508	143.495	106.754	86.3215	123.484	96.474
		67.9	130.371	104.079	143.524	107.159	86.4386	122.916	96.5916
		68	130.246	103.832	143.497	107.526	86.408	122.529	96.512
		68.1	130.031	103.79	143.724	107.719	86.3159	122.391	96.207
		68.2	129.989	103.92	143.872	107.56	86.0051	122.403	95.8494
		68.3	129.972	103.965	143.991	107.286	85.9097	122.415	95.4683
		68.4	129.918	104.109	143.87	106.971	85.8614	122.472	95.2685
		68.5	129.983	104.09	143.861	106.694	86.0334	122.569	95.248
		68.6	130.061	104.015	143.669	106.522	86.3428	122.894	95.5187
		68.7	130.071	104.021	143.378	106.662	86.928	123.111	95.7804
		68.8	129.934	104.18	143.225	106.701	87.412	123.169	95.9615
		68.9	129.958	104.32	143.233	106.83	87.8284	123.22	96.0056
		69	130.036	104.435	143.24	106.981	88.0549	123.234	96.0445
		69.1	130.191	104.386	143.295	106.964	88.1402	123.012	95.9999
		69.2	130.256	104.152	143.37	106.838	88.0461	122.9	95.937
		69.3	130.508	103.717	143.485	106.994	87.8515	122.972	95.8798
		69.4	130.72	103.286	143.681	107.096	87.6806	123.045	95.7349
		69.5	130.884	103.096	143.769	107.259	87.6172	123.047	95.4517
		69.6	130.996	103.036	143.737	107.632	87.6193	123.157	95.1431
		69.7	131.119	103.096	143.694	107.933	87.629	123.181	95.0562
		69.8	131.23	103.382	143.413	107.89	87.737	123.272	95.0672
		69.9	131.216	103.764	142.919	107.87	87.6999	123.284	95.2353
		70	131.17	103.88	142.592	107.665	87.513	123.461	95.3626
		70.1	131.051	104.059	142.488	107.286	87.4051	123.487	95.4266
		70.2	130.815	104.31	142.426	106.818	87.377	123.56	95.2869
		70.3	130.411	104.437	142.595	106.478	87.3339	123.506	95.1599
		70.4	130.136	104.397	143.023	106.102	87.2803	123.499	95.0688
		70.5	129.773	104.627	143.309	105.833	87.4218	123.474	95.1808
		70.6	129.702	104.785	143.445	105.687	87.5671	123.488	95.3589
		70.7	129.87	104.781	143.544	105.889	87.5821	123.546	95.5587
		70.8	130.058	104.68	143.589	106.183	87.5733	123.542	95.5824
		70.9	130.105	104.642	143.506	106.602	87.7788	123.282	95.5889
		71	130.31	104.273	143.604	107.089	87.7628	122.736	95.536
		71.1	130.303	103.921	143.803	107.574	87.4398	122.264	95.4963
		71.2	130.288	103.627	143.992	107.659	87.0992	121.848	95.4652
		71.3	130.516	103.562	144.083	107.578	86.6924	121.619	95.5578
		71.4	130.787	103.399	144.128	107.389	86.1953	121.74	95.6114
		71.5	131.005	103.403	143.909	107.174	85.9072	122.073	95.6227
		71.6	131.184	103.486	143.585	106.751	85.951	122.309	95.5103
		71.7	131.191	103.654	143.443	106.532	86.219	122.379	95.2778
		71.8	131.052	103.788	143.474	106.58	86.6068	122.242	95.0516
		71.9	131.134	104.106	143.445	106.631	87.0309	122.003	94.7257
		72	131.324	104.458	143.667	106.669	87.3776	121.848	94.2923
		72.1	131.555	104.755	143.893	107.061	87.6009	121.809	93.9978
		72.2	131.818	104.825	143.934	107.364	87.6768	121.724	93.8618
		72.3	131.992	104.796	143.558	107.392	87.6924	121.804	93.7911
		72.4	131.81	104.764	143.349	107.483	87.5886	121.976	93.7733
		72.5	131.419	104.673	143.032	107.461	87.4769	122.078	93.9172
		72.6	130.949	104.586	142.601	107.136	87.2931	122.021	93.9591
		72.7	130.584	104.871	142.088	106.872	87.1174	122.186	94.0227
		72.8	130.212	105.198	141.949	106.641	86.9322	122.305	94.127
		72.9	129.979	105.499	141.812	106.273	86.925	122.191	94.3549
		73	129.928	105.844	141.612	105.934	86.9468	121.979	94.5391
		73.1	129.877	106.226	141.464	105.62	87.1181	121.962	94.9455
		73.2	129.715	106.368	141.418	105.301	87.2524	121.759	95.2337
		73.3	129.611	106.496	141.177	105.091	87.3905	121.605	95.1373
		73.4	129.591	106.508	140.694	104.991	87.3308	121.586	94.9436
		73.5	129.323	106.392	140.117	104.941	87.2793	121.724	94.8222
		73.6	129.28	105.969	139.812	105.014	87.2174	121.709	94.5434
		73.7	129.379	105.399	139.574	105.121	87.2659	121.803	94.4019
		73.8	129.502	104.704	139.658	105.198	87.2718	121.81	94.6192
		73.9	129.591	104.005	139.92	105.176	87.2914	121.837	94.8775
		74	129.928	103.427	140.421	105.206	87.2348	121.744	95.1391
		74.1	130.045	103.113	140.703	105.36	87.0027	121.726	95.4389
		74.2	130.091	103.055	141.002	105.603	86.6026	121.62	95.6067
		74.3	130.168	103.029	140.976	105.881	86.3834	121.523	95.761
		74.4	130.128	103.046	140.942	106.224	86.3944	121.395	95.788
		74.5	129.976	103.13	140.852	106.447	86.4765	121.27	95.6278
		74.6	129.859	103.212	140.761	106.478	86.8335	121.322	95.1999
		74.7	129.797	103.247	140.599	106.2	87.4274	121.501	94.784
		74.8	129.584	103.496	140.656	105.812	87.9071	121.7	94.167
		74.9	129.536	103.927	140.833	105.576	88.1406	122.038	93.5151
		75	129.497	104.328	140.857	105.483	88.2733	122.48	92.9515
		75.1	129.423	104.698	140.912	105.35	88.0645	122.519	92.6484
		75.2	129.118	105.031	140.996	105.472	87.677	122.463	92.4166
		75.3	129.151	105.187	141.046	105.622	87.2176	122.185	92.4668
		75.4	129.191	105.055	141.049	105.646	86.8776	121.669	92.7009
		75.5	129.373	104.719	141.14	105.729	86.5634	121.128	92.8358
		75.6	129.744	104.382	141.295	105.859	86.4173	120.924	93.0516
		75.7	130.353	104.056	141.234	105.848	86.2709	120.85	93.3184
		75.8	130.592	103.722	140.971	105.861	86.3158	121.294	93.3612
		75.9	130.619	103.514	140.448	105.828	86.3294	121.943	93.4095
		76	130.371	103.485	139.989	105.531	86.4466	122.563	93.6532
		76.1	129.923	103.607	139.479	105.353	86.7653	123.021	93.7377
		76.2	129.467	103.826	139.224	105.329	87.2121	123.246	93.7457
		76.3	129.322	104.169	138.975	105.294	87.4935	122.958	93.7424
		76.4	129.491	104.58	139.01	105.223	87.8329	122.522	93.7312
		76.5	129.954	105.09	139.133	105.33	88.1656	122.034	93.791
		76.6	130.491	105.326	139.396	105.283	88.1958	121.559	93.9922
		76.7	130.873	105.365	139.716	105.256	88.0216	121.207	94.1694
		76.8	130.97	105.252	140.444	105.3	87.9321	121.152	94.4609
		76.9	130.791	105.018	141.017	105.504	87.6694	121.194	94.636
		77	130.444	104.629	141.406	105.578	87.2701	121.244	94.5729
		77.1	130.131	104.313	141.58	105.753	87.0118	121.345	94.3302
		77.2	129.844	104.02	141.597	105.618	86.8291	121.472	94.0664
		77.3	129.67	103.955	141.309	105.437	86.474	121.557	93.812
		77.4	129.557	104.015	141.146	105.181	86.2967	121.533	93.6361
		77.5	129.509	103.973	141.079	105.059	86.2376	121.62	93.4903
		77.6	129.465	104.084	141.1	104.856	86.0821	121.764	93.439
		77.7	129.551	104.31	141.09	104.946	86.1052	121.878	93.4134
		77.8	129.647	104.285	141.004	104.988	86.3171	121.762	93.1826
		77.9	129.853	104.21	140.861	104.96	86.4574	121.684	92.9042
		78	129.917	104.422	140.527	104.817	86.5576	121.501	92.7509
		78.1	129.848	104.564	140.09	104.872	86.8159	121.264	92.55
		78.2	129.746	104.747	139.784	104.839	86.8587	120.959	92.3172
		78.3	129.711	105.058	139.672	104.86	86.8174	120.956	92.3658
		78.4	129.49	105.263	139.496	105.056	86.7654	120.995	92.5543
		78.5	129.405	105.247	139.623	105.38	86.7266	121.133	92.7034
		78.6	129.459	105.135	139.76	105.425	86.6453	121.148	93.0056
		78.7	129.312	104.79	139.77	105.604	86.7312	121.214	93.5205
		78.8	129.023	104.475	139.667	105.834	86.8835	121.098	93.8828
		78.9	129.097	104.322	139.497	105.849	87.1676	120.908	94.0833
		79	129.235	104.185	139.001	105.735	87.473	120.383	94.1974
		79.1	129.281	104.072	138.823	105.733	87.6888	119.798	94.254
		79.2	129.538	104.07	138.671	105.573	87.7333	119.288	94.0574
		79.3	129.947	103.94	138.433	105.342	87.8724	118.88	93.8644
		79.4	129.95	103.809	138.286	105.255	87.7915	118.576	93.5875
		79.5	129.601	103.796	138.343	105.333	87.6626	118.775	93.398
		79.6	129.36	103.924	138.065	105.386	87.5792	119.254	93.0076
		79.7	129.282	104.176	138.036	105.474	87.6294	119.6	92.7079
		79.8	129.029	104.468	138.159	105.554	87.5042	120.067	92.3597
		79.9	128.997	104.684	138.447	105.444	87.5327	120.616	92.3004
		80	129.441	104.831	138.736	105.109	87.5788	120.859	92.2484
		80.1	129.831	104.871	139.018	104.768	87.6883	121.069	92.398
		80.2	129.895	104.892	138.907	104.316	87.7656	121.438	92.5535
		80.3	130.017	105.007	138.743	103.836	87.8706	121.476	92.9484
		80.4	130.081	104.979	138.344	103.512	87.8368	121.211	93.2694
		80.5	129.958	104.992	137.864	103.478	87.7588	121.025	93.5404
		80.6	129.892	104.989	137.519	103.588	87.4973	120.677	93.7678
		80.7	130.152	104.862	137.534	103.797	87.1866	120.264	94.001
		80.8	130.534	104.555	137.57	104.049	86.7618	120.025	94.0937
		80.9	130.903	104.362	137.67	104.39	86.3886	120.036	93.9849
		81	131.153	104.115	137.922	104.516	86.0482	119.953	93.9263
		81.1	131.218	103.872	138.211	104.587	85.8618	119.869	93.8143
		81.2	130.922	103.656	138.186	104.819	85.6765	119.737	93.6648
		81.3	130.57	103.62	138.253	105.177	85.6658	119.608	93.4172
		81.4	130.204	103.722	138.444	105.435	85.743	119.363	93.2925
		81.5	129.973	103.739	138.474	105.688	85.9732	119.208	93.0365
		81.6	129.87	103.862	138.39	105.873	86.3769	119.073	92.8156
		81.7	129.82	104.056	138.254	105.975	86.7634	118.987	92.6011
		81.8	129.724	104.228	137.959	105.857	87.0271	118.9	92.4188
		81.9	129.772	104.199	137.609	105.669	87.382	118.884	92.2974
		82	129.86	104.238	137.318	105.553	87.4962	118.905	92.3386
		82.1	130.07	104.014	137.065	105.441	87.2645	119.135	92.4177
		82.2	130.581	103.661	137.198	105.118	87.196	119.251	92.553
		82.3	131.115	103.206	137.34	104.849	87.3047	119.365	92.7232
		82.4	131.472	102.942	137.353	104.673	87.1603	119.501	92.8315
		82.5	131.784	102.95	137.388	104.54	87.132	119.614	92.9176
		82.6	131.919	103.261	137.423	104.57	87.2245	119.467	92.98
		82.7	131.744	103.676	137.267	104.627	87.0605	119.585	92.9588
		82.8	131.588	104.185	137.084	104.741	86.7216	119.812	92.9874
		82.9	131.45	104.589	136.951	104.76	86.6155	120.003	92.903
		83	131.101	104.575	136.772	104.75	86.5713	120.124	92.6968
		83.1	130.804	104.436	136.722	104.487	86.5398	120.334	92.4064
		83.2	130.683	104.257	136.679	104.564	86.7475	120.194	92.2146
		83.3	130.53	104.137	136.804	104.751	87.019	119.792	91.9962
		83.4	130.486	104.144	137.141	105.008	87.2398	119.345	92.0348
		83.5	130.71	104.387	137.614	105.243	87.3932	118.978	92.2241
		83.6	130.828	104.672	137.791	105.554	87.5046	118.733	92.5485
		83.7	130.865	104.94	137.806	105.586	87.5099	118.738	92.8004
		83.8	130.823	105.079	137.659	105.466	87.541	118.824	92.9814
		83.9	130.677	104.959	137.248	105.386	87.3578	118.781	93.0676
		84	130.412	104.794	136.602	105.212	87.047	118.707	93.1159
		84.1	130.361	104.566	136.285	105.032	86.8268	118.496	93.1828
		84.2	130.298	104.374	136.211	104.89	86.6203	118.261	93.3755
		84.3	130.386	104.226	136.229	104.725	86.2954	118.175	93.609
		84.4	130.4	104.246	136.285	104.52	86.1315	118.355	93.7508
		84.5	130.361	104.117	136.448	104.703	86.1354	118.605	93.873
		84.6	130.161	103.968	136.301	104.995	86.0892	118.983	93.9158
		84.7	130.064	103.985	135.957	105.293	86.0319	119.343	93.7357
		84.8	129.972	104.049	135.632	105.668	86.1766	119.702	93.5782
		84.9	130.017	104.177	135.326	106.094	86.3362	120.052	93.4395
		85	130.127	104.485	135.086	106.082	86.4573	120.162	93.2906
		85.1	130.27	104.848	135.083	105.971	86.5969	119.933	93.159
		85.2	130.245	104.851	135.293	105.913	86.779	119.638	93.2181
		85.3	130.042	104.756	135.636	105.879	87.0013	119.274	93.2514
		85.4	129.793	104.423	136.067	105.771	87.1876	118.785	93.1662
		85.5	129.601	104	136.346	105.621	87.391	118.686	92.99
		85.6	129.454	103.632	136.565	105.452	87.5756	118.897	92.6084
		85.7	129.397	103.584	136.7	105.309	87.7344	119.14	92.1807
		85.8	129.624	103.617	136.638	105.055	87.6343	119.278	91.7648
		85.9	129.913	103.871	136.667	104.778	87.4874	119.274	91.5605
		86	130.26	104.294	136.931	104.798	87.2068	118.987	91.4712
		86.1	130.529	104.645	137.251	104.924	86.9949	118.6	91.63
		86.2	130.834	104.784	137.597	104.909	86.7143	118.255	91.6894
		86.3	130.781	104.854	137.792	105	86.5414	117.995	91.78
		86.4	130.656	104.687	137.749	105.196	86.388	118.092	91.9058
		86.5	130.341	104.196	137.391	105.38	86.4988	118.338	91.9272
		86.6	130.086	103.718	136.738	105.533	86.5391	118.71	91.8999
		86.7	129.862	103.442	135.933	105.791	86.6021	119.029	91.9192
		86.8	130.012	103.284	135.299	105.949	86.6553	119.372	91.817
		86.9	130.254	103.431	134.868	105.974	86.8363	119.302	91.5807
		87	130.605	104.032	134.774	105.836	86.7925	119.039	91.4875
		87.1	131.071	104.685	135.039	105.716	86.6725	118.673	91.5608
		87.2	131.429	105.136	135.389	105.555	86.5926	118.311	91.8388
		87.3	131.494	105.468	135.702	105.558	86.5964	117.936	92.2819
		87.4	131.434	105.664	135.782	105.674	86.537	117.92	92.747
		87.5	131.28	105.495	135.541	105.788	86.7255	117.879	93.2312
		87.6	130.925	105.177	135.201	105.83	87.0678	117.855	93.429
		87.7	130.59	104.883	134.806	105.878	87.4467	117.918	93.2894
		87.8	130.403	104.591	134.41	105.784	87.7807	118.043	93.1661
		87.9	130.24	104.265	134.318	105.703	88.0518	117.981	93.0792
		88	130.057	104.045	134.636	105.744	87.9626	118.041	92.802
		88.1	130.018	103.929	135.056	105.766	87.8745	117.999	92.6717
		88.2	130.052	103.95	135.633	105.697	87.7676	117.882	92.8363
		88.3	129.876	103.983	136.411	105.622	87.5995	117.528	92.8273
		88.4	129.773	104.056	136.878	105.561	87.4556	117.093	92.5541
		88.5	129.961	104.128	136.969	105.507	87.5598	116.734	92.447
		88.6	129.99	104.223	136.781	105.625	87.5705	116.608	92.2912
		88.7	129.913	104.209	136.467	105.836	87.5667	116.432	91.8248
		88.8	130.108	104.202	135.937	106.088	87.6139	116.61	91.4626
		88.9	130.319	104.18	135.646	106.095	87.7175	117.106	91.5665
		89	130.246	104.113	135.452	105.966	87.6692	117.598	91.6497
		89.1	130.253	103.967	135.431	105.576	87.6125	117.954	91.7334
		89.2	130.334	103.854	135.615	105.144	87.4804	118.257	92.0757
		89.3	130.338	103.856	135.896	104.643	87.3318	118.319	92.4135
		89.4	130.379	103.832	136.033	104.307	87.1566	118.168	92.5212
		89.5	130.528	103.995	136.312	103.965	87.0358	117.885	92.5604
		89.6	130.742	104.209	136.515	103.711	86.888	117.477	92.5768
		89.7	130.948	104.496	136.314	103.637	86.8351	117.297	92.4605
		89.8	130.977	104.681	136.123	103.922	86.7877	117.298	92.2428
		89.9	130.79	105.076	135.96	104.266	86.6767	117.45	91.9725
		90	130.647	105.293	135.476	104.723	86.6476	117.849	91.7444
		90.1	130.367	105.529	134.933	105.271	86.675	118.409	91.5532
		90.2	130.118	105.66	134.68	105.636	86.6795	118.92	91.4436
		90.3	130.045	105.777	134.247	105.561	86.6455	119.32	91.4768
		90.4	130.012	105.607	133.814	105.428	86.6437	119.588	91.5555
		90.5	129.837	105.431	133.76	105.177	86.5992	119.522	91.6598
		90.6	129.836	105.263	133.94	104.882	86.6365	119.345	91.7964
		90.7	129.791	105.123	134.058	104.576	86.6561	118.94	91.7729
		90.8	129.751	104.97	134.312	104.372	86.7668	118.527	91.7148
		90.9	129.967	104.938	134.53	104.175	86.8477	118.035	91.6335
		91	130.339	104.924	134.409	104.14	86.8998	117.808	91.4864
		91.1	130.696	104.819	134.089	104.134	86.8471	117.815	91.2868
		91.2	131.186	104.766	133.821	104.237	86.7752	117.937	91.3528
		91.3	131.63	104.759	133.629	104.382	86.6072	117.92	91.4706
		91.4	131.819	104.712	133.626	104.475	86.5169	117.933	91.7326
		91.5	131.834	104.767	133.86	104.524	86.5542	117.792	92.1068
		91.6	131.699	104.881	134.173	104.536	86.5608	117.428	92.4912
		91.7	131.292	104.805	134.529	104.499	86.7156	117.101	92.6073
		91.8	130.871	104.617	134.858	104.58	86.966	117.109	92.5958
		91.9	130.553	104.492	134.943	104.827	87.1991	117.213	92.4405
		92	130.242	104.246	135.072	105.078	87.3503	117.375	92.0256
		92.1	130.091	103.945	135.221	105.354	87.6749	117.624	91.4393
		92.2	130.098	103.797	135.095	105.598	87.7868	118.006	91.082
		92.3	130.177	103.779	134.914	105.731	87.8525	118.091	90.6867
		92.4	130.364	103.637	134.781	105.676	87.7885	118.054	90.1978
		92.5	130.702	103.545	134.452	105.574	87.4795	118.059	90.0522
		92.6	130.739	103.448	134.177	105.366	86.9401	117.918	90.3705
		92.7	130.814	103.329	134.161	105.273	86.5692	117.566	90.6211
		92.8	130.887	103.156	134.06	105.164	86.1668	117.292	91.0954
		92.9	130.717	103.054	134.213	105.099	85.9138	117.185	91.9506
		93	130.516	102.899	134.5	105.074	85.9719	116.928	92.6618
		93.1	130.6	102.96	134.495	105.238	86.2563	116.927	93.074
		93.2	130.702	103.123	134.379	105.27	86.3961	117.077	93.4575
		93.3	130.655	103.302	134.394	105.237	86.4576	117.267	93.6703
		93.4	130.639	103.619	134.136	105.349	86.5688	117.368	93.4768
		93.5	130.52	104.125	133.712	105.313	86.5775	117.526	93.0976
		93.6	130.289	104.421	133.466	105.268	86.3446	117.481	92.5954
		93.7	129.895	104.526	133.3	105.312	86.2584	117.339	92.1058
		93.8	129.729	104.705	133.067	105.464	86.4206	117.194	91.706
		93.9	129.613	104.676	132.81	105.341	86.5011	117.014	91.443
		94	129.503	104.385	132.665	105.343	86.6013	116.992	91.4952
		94.1	129.459	104.126	132.641	105.224	86.8749	116.938	91.7706
		94.2	129.432	104.179	132.612	105.068	87.154	116.727	91.9283
		94.3	129.188	104.265	132.602	104.778	87.2858	116.405	91.9993
		94.4	129.142	104.573	132.676	104.671	87.3664	116.122	92.1044
		94.5	129.238	104.935	132.799	104.576	87.421	115.605	91.937
		94.6	129.372	105.191	132.798	104.47	87.442	115.108	91.7046
		94.7	129.6	105.077	132.785	104.321	87.3736	114.917	91.6615
		94.8	129.889	104.697	132.726	104.344	87.2682	114.884	91.6004
		94.9	130.051	104.016	132.823	104.322	87.2328	114.877	91.4302
		95	130.104	103.528	132.808	104.154	87.2978	114.972	91.3736
		95.1	130.035	103.267	132.69	104.001	87.4867	115.225	91.2626
		95.2	129.956	103.194	132.474	103.861	87.5604	115.418	91.0509
		95.3	129.802	103.394	132.394	103.755	87.7202	115.601	91.012
		95.4	129.472	103.804	132.153	103.738	87.841	115.748	91.1934
		95.5	129.31	104.029	132.055	103.97	87.855	116.056	91.4544
		95.6	129.296	104.135	132.193	104.328	87.5418	116.329	91.7707
		95.7	129.235	104.217	132.394	104.866	87.3757	116.403	92.0494
		95.8	129.38	104.262	132.458	105.126	87.2474	116.511	92.2847
		95.9	129.709	104.38	132.445	105.476	87.1001	116.635	92.4669
		96	129.856	104.524	132.47	105.772	86.8656	116.517	92.6244
		96.1	129.961	104.755	132.379	105.939	87.0137	116.325	92.6955
		96.2	130.177	105.045	132.414	105.79	87.1316	116.303	92.8804
		96.3	130.29	105.204	132.47	105.881	87.1086	116.11	92.8285
		96.4	130.376	105.072	132.667	105.678	87.2374	115.896	92.5277
		96.5	130.433	104.975	132.626	105.296	87.4905	115.82	92.1478
		96.6	130.415	104.862	132.655	104.878	87.4918	115.841	91.8742
		96.7	130.191	104.722	132.641	104.643	87.5608	115.865	91.5775
		96.8	130.028	104.521	132.722	104.316	87.6451	116.003	91.433
		96.9	129.966	104.494	132.682	104.237	87.4484	116.184	91.5086
		97	129.928	104.486	132.738	104.373	87.2746	116.393	91.562
		97.1	129.818	104.414	132.793	104.586	87.0802	116.536	91.5146
		97.2	130.106	104.267	132.662	104.794	86.787	116.608	91.2332
		97.3	130.378	104.298	132.446	105.082	86.6257	116.688	90.8825
		97.4	130.522	104.413	132.355	105.092	86.8228	116.792	90.4514
		97.5	130.725	104.476	132.347	104.894	87.1016	116.787	90.0646
		97.6	131.119	104.566	132.203	104.648	87.5792	116.737	89.7168
		97.7	131.05	104.644	132.055	104.455	88.1294	116.647	89.5439
		97.8	130.881	104.645	131.921	104.296	88.5935	116.45	89.4452
		97.9	130.736	104.487	131.755	104.456	88.778	116.154	89.3716
		98	130.55	104.295	131.534	104.748	88.8044	115.971	89.3495
		98.1	130.185	103.911	131.414	105.073	88.6079	115.87	89.4105
		98.2	130.064	103.532	131.472	105.256	88.3706	115.907	89.6531
		98.3	130.065	103.222	131.636	105.389	88.0065	116.03	90.2168
		98.4	129.934	103.096	131.805	105.232	87.6768	116.177	90.9522
		98.5	129.764	103.198	131.982	105.118	87.3686	116.107	91.7027
		98.6	129.767	103.575	132.098	105.054	87.2189	115.9	92.5107
		98.7	129.76	104.074	132.171	105.034	87.0561	115.682	93.193
		98.8	129.553	104.381	132.112	104.782	87.0528	115.474	93.3942
		98.9	129.621	104.489	132.111	104.623	87.0348	115.197	93.3105
		99	129.853	104.371	132.194	104.32	86.9818	115.18	93.0944
		99.1	129.97	104.144	132.378	104.002	86.7844	115.331	92.6877
		99.2	130.116	103.825	132.463	103.769	86.6609	115.368	92.2066
		99.3	130.515	103.718	132.524	103.861	86.5329	115.368	91.9776
		99.4	130.594	103.736	132.337	104.128	86.5382	115.579	91.9495
		99.5	130.624	103.777	131.924	104.446	86.6447	115.539	91.9931
		99.6	130.708	103.82	131.34	104.638	86.9381	115.352	92.0264
		99.7	130.737	103.874	130.999	104.649	87.0697	115.216	92.131
		99.8	130.683	103.872	130.705	104.519	87.0476	115.175	91.9416
		99.9	130.882	103.783	130.67	104.248	86.937	114.923	91.5581
		100	130.926	103.797	130.772	104.002	86.8144	114.847	91.2626
		100.1	130.867	103.875	131.119	103.915	86.7175	114.997	90.9374
		100.2	130.673	103.895	131.135	104.017	86.7831	115.107	90.4953
		100.3	130.437	103.937	131.253	104.188	87.0457	115.095	90.334
		100.4	130.144	104.122	131.35	104.374	87.4757	115.116	90.2426
		100.5	130.059	104.274	131.441	104.576	87.8179	115.085	89.942
		100.6	130.187	104.303	131.349	104.662	87.9878	114.814	89.8396
		100.7	130.452	104.411	131.47	104.707	88.1346	114.642	89.7883
		100.8	130.682	104.476	131.341	104.617	88.2251	114.505	89.6927
		100.9	130.74	104.45	131.109	104.451	88.0558	114.472	89.7282
		101	130.547	104.508	130.906	104.306	87.9462	114.342	90.0339
		101.1	130.152	104.691	130.718	104.242	87.9643	114.406	90.3918
		101.2	129.743	104.887	130.537	104	87.9159	114.452	90.91
		101.3	129.337	105.076	130.67	103.838	87.887	114.447	91.3522
		101.4	129.118	105.27	130.594	103.81	88.0558	114.347	91.7988
		101.5	129.12	105.33	130.448	103.637	88.2015	114.564	91.9683
		101.6	129.151	105.415	130.304	103.554	88.1853	114.541	91.8733
		101.7	129.224	105.506	130.13	103.714	88.2314	114.379	91.4956
		101.8	129.387	105.68	129.722	103.981	88.1916	114.391	91.2168
		101.9	129.518	105.911	129.735	104.205	87.9727	114.622	90.8228
		102	129.692	105.898	129.77	104.497	87.7659	114.583	90.5279
		102.1	129.907	105.728	129.907	104.594	87.6592	114.726	90.3992
		102.2	129.943	105.512	129.998	104.793	87.5496	115.045	90.4713
		102.3	129.876	105.14	130.197	104.956	87.5431	115.155	90.4732
		102.4	129.742	104.538	130.1	105.091	87.6953	115.034	90.4242
		102.5	129.539	104.369	130.092	105.397	87.792	114.975	90.4556
		102.6	129.513	104.258	129.987	105.704	87.941	114.977	90.4648
		102.7	129.845	104.093	129.869	105.741	88.0505	114.868	90.5112
		102.8	130.332	103.954	129.77	105.581	88.0359	114.819	90.5313
		102.9	130.936	104.107	129.883	105.318	87.9532	114.805	90.6498
		103	131.343	104.091	129.938	104.78	87.9608	114.797	90.7288
		103.1	131.429	104.147	129.995	104.317	87.7155	114.641	90.7007
		103.2	131.228	104.32	130.02	103.843	87.5035	114.507	90.5809
		103.3	130.906	104.625	129.821	103.567	87.3626	114.499	90.6127
		103.4	130.569	104.706	129.383	103.488	87.2122	114.642	90.6435
		103.5	130.348	104.773	129.013	103.7	86.9987	114.793	90.6563
		103.6	130.175	104.675	128.722	104.021	87.0375	114.935	90.8402
		103.7	129.967	104.394	128.542	104.456	86.9386	115.14	90.9379
		103.8	129.766	103.963	128.663	104.78	86.8454	115.255	90.8692
		103.9	129.402	103.698	129.023	105.072	86.7686	115.266	90.6874
		104	129.058	103.451	129.36	105.15	86.7604	115.402	90.5032
		104.1	128.835	103.342	129.7	105.054	86.7628	115.657	90.1955
		104.2	128.736	103.441	130.16	105.017	86.8682	115.874	89.9991
		104.3	128.666	103.681	130.528	105.141	86.9741	116.057	90.0297
		104.4	128.708	103.818	130.779	105.218	86.9976	116.149	90.2807
		104.5	128.913	103.852	130.915	105.485	87.0548	115.909	90.5919
		104.6	129.236	103.877	130.906	105.848	87.0413	115.541	90.9114
		104.7	129.738	103.757	130.581	106.088	87.0495	115.248	91.2228
		104.8	130.282	103.583	130.244	106.116	87.089	115.107	91.2442
		104.9	130.956	103.419	129.897	106.047	87.2968	115.07	91.1765
		105	131.44	103.529	129.657	105.809	87.415	115.144	91.0284
		105.1	131.676	103.549	129.461	105.56	87.4139	115.25	91.0846
		105.2	131.489	103.692	129.336	105.377	87.3927	115.223	91.2573
		105.3	131.24	103.843	129.093	105.346	87.3263	114.983	91.546
		105.4	130.884	104.148	129.052	105.477	87.2145	114.561	91.6842
		105.5	130.561	104.184	128.861	105.547	87.1699	114.359	91.8171
		105.6	130.333	104.334	128.641	105.608	87.3454	114.24	91.7769
		105.7	130.498	104.464	128.572	105.529	87.5739	114.059	91.6195
		105.8	130.638	104.586	128.687	105.385	87.8458	113.945	91.4656
		105.9	130.636	104.459	128.506	105.226	88.0136	114.091	91.382
		106	130.714	104.6	128.487	105.162	88.0566	114.048	91.4022
		106.1	130.801	104.867	128.688	105.02	87.9386	113.81	91.2568
		106.2	130.553	105.078	128.888	105.069	87.8891	113.748	91.0148
		106.3	130.32	105.322	129.019	105.111	87.7869	113.607	90.7956
		106.4	130.228	105.664	129.256	104.929	87.6963	113.246	90.615
		106.5	130.024	105.701	129.438	104.839	87.62	112.985	90.318
		106.6	129.882	105.43	129.32	104.853	87.592	113.031	90.3234
		106.7	130.004	105.286	128.962	104.833	87.3737	113.032	90.4815
		106.8	130.058	105.104	128.617	104.987	87.111	113.229	90.6132
		106.9	130.223	104.98	128.381	105.397	86.9055	113.544	90.8468
		107	130.467	104.974	128.087	105.713	86.8845	113.738	91.1957
		107.1	130.654	105.081	128.01	106.173	86.9144	113.719	91.3856
		107.2	130.804	105.025	128.247	106.675	87.0359	113.584	91.3351
		107.3	130.995	104.865	128.518	106.849	87.168	113.292	91.2948
		107.4	130.831	104.691	128.519	106.767	87.2782	113.1	91.2088
		107.5	130.544	104.486	128.74	106.541	87.1281	112.999	91.0989
		107.6	130.22	104.416	128.893	106.062	86.8792	112.936	91.0245
		107.7	129.843	104.379	128.814	105.36	86.6226	112.97	91.2691
		107.8	129.558	104.442	128.484	104.906	86.4779	113.07	91.4826
		107.9	129.517	104.532	128.434	104.667	86.3634	113.045	91.5261
		108	129.61	104.733	128.127	104.714	86.5273	113.013	91.4053
		108.1	129.666	104.71	127.938	104.942	86.8513	112.983	91.1838
		108.2	129.632	104.661	127.849	105.377	87.2152	112.979	90.7702
		108.3	129.63	104.625	127.937	105.764	87.5736	112.97	90.3416
		108.4	129.662	104.541	128.03	106.224	87.9846	112.955	90.0634
		108.5	129.575	104.398	128.296	106.543	88.1368	112.984	89.9574
		108.6	129.639	104.255	128.369	106.471	88.1522	113.217	89.954
		108.7	129.826	104.152	128.453	106.194	88.1388	113.53	90.0312
		108.8	129.766	104.127	128.627	105.76	88.0016	113.823	90.1112
		108.9	129.678	104.148	128.556	105.134	87.7082	114.181	90.0638
		109	129.693	104.223	128.37	104.519	87.6691	114.418	90.0372
		109.1	129.495	104.511	128.298	104.324	87.6116	114.283	90.0764
		109.2	129.121	104.909	128.328	104.353	87.4828	113.919	90.096
		109.3	129.02	105.173	128.311	104.628	87.4906	113.581	90.1987
		109.4	128.931	105.237	128.477	105.032	87.639	113.215	90.4536
		109.5	128.821	105.253	128.645	105.388	87.6038	112.787	90.6322
		109.6	128.938	105.209	128.875	105.521	87.6307	112.577	90.6684
		109.7	129.365	104.914	128.849	105.571	87.7279	112.553	90.6808
		109.8	129.792	104.569	128.778	105.527	87.736	112.654	90.677
		109.9	130.147	104.424	128.541	105.444	87.5898	112.84	90.638
		110	130.568	104.181	128.3	105.33	87.5003	113.25	90.5778
		110.1	130.976	103.914	127.757	105.346	87.4204	113.563	90.6361
		110.2	131.056	103.703	127.392	105.355	87.348	113.791	90.6901
		110.3	130.901	103.616	127.083	105.295	87.373	113.746	90.6754
		110.4	130.919	103.465	127.089	105.188	87.5951	113.444	90.7222
		110.5	130.782	103.425	127.247	105.105	87.8136	113.012	90.7465
		110.6	130.41	103.313	127.718	104.87	88.0765	112.696	90.6928
		110.7	130.281	103.469	128.219	104.463	88.2758	112.433	90.6178
		110.8	130.242	103.57	128.777	103.971	88.3561	112.383	90.6654
		110.9	129.938	103.704	129.135	103.552	88.315	112.513	90.4724
		111	129.795	103.697	129.372	103.245	88.1779	112.69	90.3016
		111.1	129.988	103.796	129.589	103.19	87.8451	112.692	90.057
		111.2	130.106	103.68	129.752	103.543	87.5706	112.644	89.8265
		111.3	130.236	103.591	129.568	104.183	87.2944	112.62	89.4684
		111.4	130.464	103.659	129.249	104.721	87.0249	112.604	89.2502
		111.5	130.569	103.804	128.847	105.299	86.8306	112.517	89.0649
		111.6	130.239	103.888	128.241	105.948	86.778	112.643	89.1049
		111.7	129.956	103.998	127.473	106.14	86.7613	112.859	89.3116
		111.8	129.814	104.129	127.012	106.001	86.8552	113.016	89.5277
		111.9	129.687	103.906	126.728	105.915	86.9458	113.288	89.7437
		112	129.57	103.815	126.532	105.873	87.1048	113.764	89.978
		112.1	129.786	103.818	126.404	105.559	87.2912	114.148	90.0648
		112.2	129.797	103.785	126.622	105.493	87.3925	114.432	89.8828
		112.3	129.585	103.785	126.772	105.552	87.3938	114.558	89.9071
		112.4	129.453	104.085	126.925	105.56	87.4179	114.371	90.0587
		112.5	129.403	104.348	127.25	105.201	87.3222	113.983	90.2718
		112.6	129.274	104.509	127.624	104.799	87.1058	113.535	90.5846
		112.7	129.381	104.885	127.665	104.405	86.96	113.06	91.0116
		112.8	129.608	105.12	127.766	104.067	86.8207	112.76	91.0916
		112.9	129.74	105.193	127.763	103.859	86.7134	112.661	90.962
		113	129.796	105.186	127.457	103.99	86.8302	112.608	90.6831
		113.1	129.889	105.03	127.183	104.214	87.036	112.653	90.3145
		113.2	129.943	104.563	127.152	104.395	87.2154	112.871	90.0918
		113.3	130.002	104.186	127.108	104.633	87.395	112.988	90.0899
		113.4	130.025	103.875	127.191	104.776	87.551	113.114	90.2676
		113.5	130.059	103.652	127.447	104.706	87.4698	113.359	90.4038
		113.6	130.088	103.763	127.601	104.604	87.4664	113.654	90.426
		113.7	130.202	104.036	127.446	104.44	87.4764	113.758	90.1614
		113.8	130.264	104.248	127.365	104.124	87.5476	113.772	89.8499
		113.9	130.44	104.394	127.216	103.883	87.4798	113.677	89.3867
		114	130.699	104.425	127.014	103.672	87.4741	113.269	89.1186
		114.1	130.891	104.245	127.119	103.499	87.4277	112.617	88.9624
		114.2	130.76	103.982	127.458	103.528	87.4236	111.984	89.0395
		114.3	130.647	103.764	127.466	103.777	87.3258	111.635	89.2423
		114.4	130.56	103.665	127.518	104.028	87.441	111.404	89.5897
		114.5	130.457	103.699	127.615	104.341	87.522	111.338	89.8552
		114.6	130.38	103.728	127.157	104.676	87.5702	111.426	90.1036
		114.7	130.569	103.933	126.642	104.795	87.4279	111.661	90.3005
		114.8	130.931	104.122	126.335	104.679	87.2957	111.791	90.4176
		114.9	131.207	104.068	126.008	104.342	87.0536	111.86	90.481
		115	131.287	103.824	125.629	103.948	86.879	112.002	90.604
		115.1	131.445	103.688	125.68	103.495	86.5753	112.094	90.8634
		115.2	131.478	103.343	125.712	103.191	86.4686	112.004	91.0133
		115.3	131.15	103.133	125.892	103.091	86.6048	111.872	90.939
		115.4	130.79	103.131	126.065	103.332	86.8451	111.689	90.8043
		115.5	130.521	103.182	126.282	103.775	87.0985	111.439	90.5018
		115.6	130.061	103.18	126.268	104.34	87.4887	111.317	89.9713
		115.7	129.705	103.408	126.319	104.882	87.814	111.302	89.5426
		115.8	129.701	103.558	126.121	105.335	87.8414	111.34	89.3497
		115.9	129.79	103.835	125.793	105.499	87.8577	111.448	89.1789
		116	129.947	104.216	125.44	105.356	87.8692	111.601	89.178
		116.1	130.272	104.469	125.346	105.156	87.9188	111.675	89.4492
		116.2	130.44	104.493	125.311	104.908	87.9686	111.851	89.7173
		116.3	130.489	104.386	125.488	104.549	88.0648	112.003	89.9712
		116.4	130.498	104.031	125.92	104.403	88.107	112.17	90.2235
		116.5	130.507	103.657	126.295	104.586	88.2411	112.375	90.3952
		116.6	130.445	103.529	126.582	104.852	88.39	112.615	90.3802
		116.7	130.439	103.529	126.921	105.026	88.5567	112.638	90.3946
		116.8	130.276	103.637	127.104	105.25	88.8545	112.561	90.3505
		116.9	130.054	103.761	126.959	105.163	89.0162	112.454	90.2608
		117	129.959	103.884	126.747	104.929	88.994	112.319	90.1076
		117.1	129.903	103.877	126.357	104.589	88.894	112.186	89.972
		117.2	130.041	103.816	125.596	104.456	88.7204	112.222	89.8003
		117.3	130.243	103.743	124.923	104.494	88.3577	112.364	89.5619
		117.4	130.508	103.727	124.704	104.845	88.0659	112.557	89.3992
		117.5	130.49	103.58	124.787	105.041	87.8578	112.587	89.384
		117.6	130.523	103.46	124.948	105.181	87.6101	112.565	89.4032
		117.7	130.322	103.417	125.379	105.129	87.4057	112.414	89.4203
		117.8	130.393	103.365	125.651	104.963	87.3668	112.17	89.6296
		117.9	130.413	103.286	125.524	104.866	87.482	111.873	89.8951
		118	130.648	103.431	125.326	105.042	87.5789	111.793	90.0742
		118.1	130.822	103.544	125.228	105.134	87.6635	111.638	90.3608
		118.2	131.057	103.596	125.143	105.35	87.8251	111.463	90.6809
		118.3	130.825	103.582	125.413	105.416	88.0415	111.32	90.9299
		118.4	130.666	103.642	125.914	105.13	88.0754	111.081	91.0942
		118.5	130.359	103.572	126.239	104.666	87.9864	110.675	91.411
		118.6	129.952	103.474	126.521	104.389	87.8812	110.4	91.4413
		118.7	129.698	103.374	126.83	103.923	87.6695	110.19	91.4109
		118.8	129.79	103.403	126.681	103.556	87.2607	109.985	91.408
		118.9	129.81	103.344	126.343	103.471	87.0247	109.856	91.477
		119	129.844	103.238	126.12	103.435	87.0165	109.802	91.2975
		119.1	130.022	103.153	125.835	103.387	87.2493	109.687	91.2898
		119.2	130.024	103.104	125.335	103.608	87.5123	109.634	91.2696
		119.3	129.927	103.039	125.198	104.049	87.8822	109.679	90.9482
		119.4	129.82	103.151	125.027	104.41	88.0118	109.881	90.4906
		119.5	129.8	103.431	124.667	104.796	87.9182	110.134	90.0486
		119.6	129.585	103.829	124.388	105.337	87.6378	110.445	89.5956
		119.7	129.322	104.186	124.415	105.912	87.3623	110.698	89.2206
		119.8	129.032	104.445	124.238	106.193	87.1555	110.927	89.2088
		119.9	128.934	104.587	124.391	106.443	87.1142	111.102	89.2434
		120	128.797	104.622	124.814	106.592	87.2836	111.348	89.4036
		120.1	128.879	104.456	125.218	106.421	87.477	111.651	89.4717
		120.2	129.179	104.383	125.496	105.974	87.6767	112.06	89.2958
		120.3	129.523	104.364	125.89	105.773	87.6363	112.466	88.9601
		120.4	129.698	104.302	126.029	105.53	87.694	112.605	88.7975
		120.5	129.921	104.039	126.02	105.368	87.7172	112.448	88.6646
		120.6	130.053	103.915	126.111	105.357	87.7171	112.089	88.7712
		120.7	130.173	103.732	126.097	105.47	87.6011	111.528	89.219
		120.8	130.425	103.584	126.114	105.339	87.6195	110.785	89.6991
		120.9	130.691	103.5	126.279	105.272	87.5153	110.305	89.8214
		121	130.968	103.674	126.413	105.078	87.358	110.08	89.8727
		121.1	131.255	103.835	126.299	104.809	87.1576	110.013	89.6818
		121.2	131.321	103.863	126.227	104.524	87.1194	109.942	89.3856
		121.3	131.169	103.763	125.924	104.338	87.1232	109.962	89.1396
		121.4	131.059	103.566	125.472	104.232	87.0426	109.843	89.2883
		121.5	130.841	103.267	125.03	104.438	86.9804	109.766	89.4754
		121.6	130.675	102.83	124.831	104.733	87.0468	109.587	89.6868
		121.7	130.512	102.553	124.499	105.067	87.0753	109.655	89.6796
		121.8	130.405	102.419	124.276	105.409	87.1118	109.867	89.5624
		121.9	130.302	102.418	124.033	105.627	87.2805	110.297	89.2712
		122	130.095	102.528	123.882	105.594	87.2703	110.678	88.8552
		122.1	129.679	102.862	123.639	105.452	87.1418	111.209	88.6063
		122.2	129.602	103.275	123.771	105.187	86.8973	111.553	88.6786
		122.3	129.611	103.767	124.032	104.982	86.6086	111.777	88.8397
		122.4	129.482	104.329	124.358	104.812	86.362	111.643	89.0144
		122.5	129.799	104.771	124.629	104.666	86.4586	111.141	89.336
		122.6	130.339	105.149	124.73	104.699	86.6536	110.43	89.5041
		122.7	130.545	105.279	124.54	104.808	87.0493	109.73	89.5347
		122.8	130.551	105.159	124.457	104.739	87.4626	109.023	89.5316
		122.9	130.69	104.678	124.511	104.732	87.723	108.697	89.4232
		123	130.454	104.268	124.58	104.733	87.6771	108.824	89.2276
		123.1	130.21	103.915	124.825	104.647	87.5456	109.01	89.1405
		123.2	130.104	103.646	125.085	104.708	87.3766	109.217	89.0832
		123.3	130.143	103.553	124.903	104.996	87.2108	109.498	89.0695
		123.4	130.148	103.74	124.562	105.11	87.1515	109.561	89.1382
		123.5	130.127	103.883	124.284	105.264	87.2864	109.505	89.2183
		123.6	129.98	103.732	124.13	105.301	87.4857	109.659	89.167
		123.7	129.723	103.693	124.073	105.196	87.5519	109.865	89.0536
		123.8	129.435	103.593	124.175	104.96	87.5898	110.084	88.7978
		123.9	129.16	103.403	124.211	104.87	87.6061	110.337	88.5416
		124	129.001	103.348	124.128	104.769	87.5053	110.534	88.437
		124.1	129.049	103.636	123.741	104.842	87.2942	110.444	88.5063
		124.2	129.315	103.956	123.305	104.919	87.1946	110.277	88.4597
		124.3	129.645	104.405	123.009	104.973	87.2373	110.046	88.6142
		124.4	129.908	105.092	122.904	105.178	87.2116	109.898	88.8087
		124.5	130.313	105.616	122.784	105.417	87.2373	109.783	88.8742
		124.6	130.577	105.886	122.851	105.593	87.4166	109.828	88.8433
		124.7	130.756	105.875	122.916	105.727	87.6183	109.937	89.054
		124.8	130.819	105.657	123.148	105.916	87.6419	109.958	89.1526
		124.9	130.818	105.041	123.354	105.662	87.6708	109.827	89.312
		125	130.687	104.536	123.683	105.203	87.7221	109.667	89.3472
		125.1	130.622	104.153	124.034	104.585	87.7845	109.37	89.3159
		125.2	130.3	104.058	124.42	104.033	87.7339	109.04	89.1965
		125.3	130.07	103.987	124.397	103.456	87.7058	108.816	89.0959
		125.4	130.047	104.201	124.289	103.236	87.7451	108.732	88.8933
		125.5	129.907	104.28	124.034	103.247	87.7075	108.727	88.9769
		125.6	129.529	104.349	123.702	103.586	87.4458	109.031	89.1298
		125.7	129.423	104.351	123.407	103.934	87.2497	109.387	89.2721
		125.8	129.348	104.465	123.38	104.263	87.146	109.657	89.3935
		125.9	129.293	104.537	123.248	104.438	87.1154	109.83	89.5732
		126	129.439	104.597	123.269	104.479	87.1204	110.004	89.5474
		126.1	129.803	104.599	123.39	104.292	87.4454	109.965	89.6395
		126.2	130.163	104.475	123.445	104.104	87.6757	109.936	89.7926
		126.3	130.447	104.275	123.337	103.975	87.7925	110.193	90.0007
		126.4	130.623	103.986	123.394	104.055	87.7636	110.481	90.0405
		126.5	130.784	103.741	123.5	104.377	87.7597	110.606	90.0578
		126.6	130.936	103.561	123.501	104.742	87.5289	110.788	89.8674
		126.7	131.087	103.468	123.355	105.045	87.4946	110.866	89.5483
		126.8	131.275	103.371	123.284	105.307	87.3944	110.664	89.2052
		126.9	131.353	103.28	123.169	105.335	87.3901	110.447	89.0398
		127	131.326	103.307	122.807	105.162	87.3417	110.27	88.8614
		127.1	131.166	103.3	122.468	105.03	87.2654	109.914	88.6686
		127.2	130.873	103.296	122.461	104.891	87.0393	109.598	88.4826
		127.3	130.607	103.393	122.577	104.863	87.0101	109.458	88.2979
		127.4	130.506	103.485	122.685	104.868	86.832	109.426	88.0922
		127.5	130.307	103.495	122.93	104.735	86.7054	109.556	88.048
		127.6	130.348	103.528	123.21	104.535	86.6129	109.886	88.1641
		127.7	130.44	103.535	123.288	104.469	86.5092	110.258	88.4183
		127.8	130.364	103.442	123.329	104.152	86.4002	110.387	88.674
		127.9	130.261	103.427	123.397	103.852	86.4686	110.411	88.7693
		128	130.301	103.376	123.595	103.756	86.5709	110.31	88.7615
		128.1	130.059	103.353	123.744	103.723	86.7004	110.025	88.577
		128.2	129.775	103.37	123.806	103.532	86.8586	109.65	88.28
		128.3	129.757	103.384	123.703	103.617	86.9832	109.472	87.9676
		128.4	129.758	103.512	123.625	103.82	87.0606	109.209	87.8445
		128.5	129.807	103.83	123.247	103.976	87.032	109.012	87.7474
		128.6	130.157	104.213	122.813	104.094	87.0263	108.957	87.8881
		128.7	130.634	104.615	122.448	104.277	87.1685	108.927	88.0677
		128.8	130.864	105.055	122.076	104.317	87.1652	108.851	88.2568
		128.9	130.948	105.223	121.54	104.16	86.9648	109.028	88.351
		129	130.973	105.128	121.333	103.99	86.8036	109.081	88.4819
		129.1	130.643	104.784	121.298	103.917	86.7489	109.14	88.5428
		129.2	130.238	104.295	121.381	103.959	86.5864	109.257	88.6587
		129.3	130.093	103.737	121.593	103.999	86.6684	109.328	88.6795
		129.4	130.098	103.42	122.025	104.197	86.9661	109.073	88.7356
		129.5	130.132	103.361	122.187	104.378	87.2746	108.826	88.8138
		129.6	130.529	103.557	122.286	104.328	87.2978	108.484	88.948
		129.7	130.938	103.98	122.256	104.143	87.1859	108.068	89.0154
		129.8	131.092	104.534	122.14	103.945	86.8489	107.743	89.207
		129.9	131.121	104.84	121.902	103.823	86.5124	107.79	89.4494
		130	130.993	104.823	121.825	103.837	86.2916	108.113	89.5852
		130.1	130.553	104.616	121.726	103.982	86.3072	108.478	89.5156
		130.2	130.241	104.27	121.746	104.156	86.4146	108.936	89.4602
		130.3	129.982	103.889	121.975	104.339	86.6539	109.19	89.3655
		130.4	129.97	103.674	122.358	104.362	86.8501	109.117	89.131
		130.5	130.22	103.572	122.671	104.37	86.7764	108.703	89.035
		130.6	130.75	103.58	122.923	104.398	86.7071	108.39	89.1741
		130.7	131.001	103.737	123.181	104.45	86.6728	108.203	89.2928
		130.8	131.356	103.856	123.258	104.623	86.6285	108.376	89.4516
		130.9	131.518	103.847	123.046	104.746	86.689	108.74	89.7673
		131	131.504	103.945	122.817	104.571	87.0418	109.295	89.844
		131.1	131.295	104.118	122.656	104.38	87.4172	109.727	89.5328
		131.2	131.283	104.001	122.404	104.184	87.7148	109.949	89.2169
		131.3	131.188	103.778	122.3	103.906	87.9748	109.87	88.7315
		131.4	130.909	103.62	122.483	103.896	88.1032	109.689	88.1186
		131.5	130.555	103.482	122.754	104.156	87.9333	109.536	87.7364
		131.6	130.081	103.16	123.031	104.44	87.6135	109.442	87.6856
		131.7	129.566	102.975	123.261	104.738	87.4737	109.376	87.6502
		131.8	129.184	102.899	123.208	105.035	87.3331	109.356	87.6972
		131.9	129.071	102.932	123.081	105.135	87.1794	109.474	87.7712
		132	129.228	102.924	122.777	105.335	87.3455	109.569	87.6974
		132.1	129.712	102.968	122.462	105.544	87.5661	109.647	87.5262
		132.2	130.158	103.096	122.159	105.681	87.6913	109.694	87.4259
		132.3	130.464	103.301	122.057	105.83	87.9033	109.789	87.4611
		132.4	130.656	103.476	121.79	106.002	88.204	109.613	87.4707
		132.5	130.512	103.581	121.793	105.82	88.2782	109.302	87.5921
		132.6	130.247	103.737	121.919	105.655	88.2803	109.003	87.8202
		132.7	130.002	103.88	122.125	105.556	88.0796	108.735	87.9334
		132.8	129.731	103.975	122.198	105.353	87.6576	108.503	88.0062
		132.9	129.52	104.021	122.45	105.023	87.1262	108.53	88.2779
		133	129.674	104.032	122.453	104.94	86.7199	108.653	88.4204
		133.1	129.797	104.09	122.187	104.727	86.4948	108.705	88.4975
		133.2	130.025	103.948	121.791	104.485	86.5504	108.799	88.7266
		133.3	130.358	103.806	121.547	104.302	86.8051	108.778	89.0292
		133.4	130.731	103.675	121.256	104.199	87.0246	108.706	89.155
		133.5	130.905	103.793	121.061	104.01	87.1445	108.73	89.4286
		133.6	131.042	103.798	121.076	104.016	87.2064	108.85	89.6974
		133.7	131.09	104.079	121.355	104.166	87.2177	108.873	89.6539
		133.8	131.078	104.332	121.626	104.471	87.1436	108.957	89.3584
		133.9	130.976	104.544	121.902	104.863	87.3015	108.975	89.0293
		134	130.939	104.65	122.144	105.262	87.4952	108.794	88.5559
		134.1	130.882	104.844	122.248	105.526	87.7314	108.617	88.0329
		134.2	130.754	104.968	122.129	105.566	87.9352	108.438	87.8356
		134.3	130.612	104.921	121.919	105.471	88.1946	108.192	87.8147
		134.4	130.439	104.889	121.693	105.361	88.2103	108.152	87.9009
		134.5	130.172	104.668	121.487	105.203	88.1296	108.172	88.155
		134.6	129.855	104.368	121.338	105.017	87.8348	107.999	88.3898
		134.7	129.551	103.802	121.221	104.831	87.4197	108.022	88.5348
		134.8	129.302	103.53	121.087	104.624	86.9247	108.252	88.6236
		134.9	129.227	103.3	120.954	104.37	86.6741	108.209	88.6409
		135	129.197	103.309	120.956	104.252	86.7171	108.097	88.5317
		135.1	129.386	103.421	121.017	104.273	86.8574	108.267	88.5096
		135.2	129.583	103.85	121.181	104.512	87.1252	108.443	88.4378
		135.3	129.627	104.148	121.429	104.808	87.5827	108.428	88.4718
		135.4	129.535	104.273	121.647	105.099	87.835	108.528	88.5673
		135.5	129.478	104.066	121.652	105.403	87.791	108.902	88.6862
		135.6	129.431	103.657	121.598	105.638	87.8872	109.155	88.8002
		135.7	129.511	103.169	121.495	105.78	88.0901	109.107	88.9387
		135.8	129.928	102.781	121.413	105.816	88.2075	109.153	88.787
		135.9	130.486	102.872	121.337	105.896	88.3867	109.085	88.5576
		136	130.994	103.412	121.365	105.839	88.749	108.779	88.3348
		136.1	131.268	104.28	121.497	105.71	88.927	108.502	88.0969
		136.2	131.47	105.265	121.761	105.501	88.7914	108.551	87.9016
		136.3	131.521	106.032	122.066	105.485	88.5059	108.402	88.0082
		136.4	131.381	106.172	122.307	105.464	88.236	108.399	88.2063
		136.5	131.176	105.916	122.559	105.54	87.8472	108.316	88.461
		136.6	131.091	105.383	122.706	105.647	87.5085	107.986	88.775
		136.7	130.94	104.578	122.479	105.764	87.4016	107.394	89.002
		136.8	130.593	103.887	121.953	105.716	87.3516	107.108	89.1778
		136.9	130.353	103.642	121.527	105.601	87.2304	106.789	89.3126
		137	130.101	103.67	121.036	105.412	87.0988	106.746	89.3211
		137.1	129.737	103.809	120.523	105.164	87.0396	107.074	89.1606
		137.2	129.548	104.07	120.286	104.803	87.0573	107.505	89.1317
		137.3	129.511	104.401	120.284	104.362	87.1348	107.751	89.038
		137.4	129.259	104.571	120.253	104.021	87.4061	108.014	88.9517
		137.5	129.14	104.56	120.344	103.855	87.7868	108.123	89.0574
		137.6	129.2	104.574	120.361	103.974	88.1012	108.115	89.2836
		137.7	129.1	104.613	120.297	104.393	88.2917	108.258	89.2292
		137.8	128.998	104.522	120.241	104.991	88.5826	108.548	89.1628
		137.9	129.186	104.329	120.358	105.604	88.6369	108.905	89.0497
		138	129.472	104.139	120.379	106.036	88.5985	109.252	88.6569
		138.1	129.839	103.803	120.546	106.248	88.5572	109.476	88.2113
		138.2	130.166	103.371	120.705	106.29	88.5274	109.424	88.0715
		138.3	130.526	102.965	120.719	106.29	88.3328	109.161	88.0428
		138.4	130.885	102.674	120.49	106.067	88.2549	108.752	88.1656
		138.5	131.094	102.474	120.224	105.872	88.3214	108.335	88.4708
		138.6	131.077	102.391	120.037	105.785	88.2743	108.018	88.7083
		138.7	131.337	102.528	119.844	105.751	88.0591	107.88	88.813
		138.8	131.512	102.773	119.829	105.757	87.8173	107.914	88.759
		138.9	131.421	103.152	119.918	105.95	87.6638	107.93	88.5316
		139	131.25	103.637	120.161	106.062	87.344	108.025	88.4041
		139.1	131.121	104.155	120.327	106.004	87.2083	108.067	88.5438
		139.2	130.791	104.516	120.616	105.852	87.2518	107.96	88.6898
		139.3	130.623	104.862	120.865	105.573	87.4044	107.802	88.8548
		139.4	130.71	104.994	121.202	105.303	87.3763	107.702	89.0181
		139.5	131.048	104.987	121.394	105.161	87.3632	107.45	89.0582
		139.6	131.454	104.954	121.45	105.01	87.4359	107.184	88.7106
		139.7	131.852	104.836	121.368	104.849	87.614	107.006	88.3856
		139.8	131.951	104.634	121.23	104.863	87.7785	106.839	88.0644
		139.9	132	104.443	120.895	104.818	88.0573	106.734	87.7801
		140	131.809	104.219	120.575	104.76	88.4341	106.773	87.5576
		140.1	131.441	103.885	120.441	104.838	88.6698	106.891	87.7293
		140.2	131.031	103.754	120.337	105.053	88.7745	107.178	87.8621
		140.3	130.872	103.725	120.193	105.105	88.7512	107.371	88.0523
		140.4	130.669	103.866	120.049	105.095	88.6419	107.51	88.2505
		140.5	130.59	104.01	119.815	105.085	88.4511	107.673	88.2408
		140.6	130.785	104.244	119.377	105	88.2205	107.882	88.0526
		140.7	131.129	104.256	119.051	104.84	87.8681	107.787	87.8504
		140.8	131.476	104.204	118.828	104.732	87.5533	107.798	87.6892
		140.9	131.774	104.052	118.848	104.785	87.2624	107.819	87.5631
		141	132.054	104.158	119.208	104.836	86.9797	107.802	87.6032
		141.1	132.114	104.37	119.756	105.034	86.7032	107.616	87.6589
		141.2	131.931	104.84	120.165	105.19	86.543	107.587	87.8784
		141.3	131.594	105.288	120.555	105.414	86.5964	107.603	88.0002
		141.4	131.199	105.821	120.784	105.599	86.7145	107.602	88.1397
		141.5	130.539	106.037	120.707	105.753	86.8159	107.657	88.3562
		141.6	129.989	106.102	120.59	105.783	86.9486	107.74	88.52
		141.7	129.667	105.934	120.544	105.772	87.1232	107.717	88.5042
		141.8	129.381	105.748	120.52	105.592	87.1282	107.468	88.5866
		141.9	129.299	105.367	120.524	105.372	87.1196	107.17	88.5849
		142	129.592	105.092	120.753	105.206	87.2563	106.751	88.496
		142.1	129.814	104.934	120.954	105.081	87.4545	106.531	88.3742
		142.2	129.838	104.898	121.034	105.142	87.6412	106.522	88.3034
		142.3	129.969	104.912	120.98	105.355	87.8067	106.778	88.2168
		142.4	130.091	105.032	120.854	105.573	87.9326	107.106	88.1973
		142.5	130.144	105.103	120.497	105.717	87.9543	107.441	88.0217
		142.6	130.314	104.951	119.957	105.778	87.9238	107.646	87.9079
		142.7	130.754	104.884	119.53	105.818	87.8921	107.737	87.732
		142.8	131.198	104.857	119.287	105.764	88.0154	107.528	87.5072
		142.9	131.379	104.733	119.049	105.59	88.0802	107.242	87.244
		143	131.463	104.701	118.867	105.475	87.8936	107.151	87.1394
		143.1	131.395	104.767	119.031	105.41	87.6742	107.045	87.0725
		143.2	131.149	104.585	119.274	105.313	87.4252	106.893	87.1544
		143.3	130.854	104.37	119.379	105.348	86.8144	107.03	87.223
		143.4	130.802	104.368	119.595	105.575	86.3748	107.295	87.3882
		143.5	130.838	104.231	119.92	105.815	86.2794	107.189	87.5654
		143.6	131.014	104.258	120.073	106	86.1844	106.963	87.8083
		143.7	131.154	104.438	119.974	106.002	86.0642	106.876	87.9865
		143.8	131.229	104.56	119.876	105.988	86.2975	106.64	88.204
		143.9	131.312	104.513	119.561	105.854	86.3143	106.401	88.3032
		144	131.311	104.622	119.101	105.559	86.1474	106.454	88.4365
		144.1	131.325	104.628	118.665	105.347	86.0864	106.709	88.422
		144.2	131.459	104.648	118.672	105.329	86.0764	106.905	88.3541
		144.3	131.572	104.652	118.798	105.192	86.0316	107.165	88.2323
		144.4	131.639	104.689	119.227	105.051	86.2438	107.404	88.0406
		144.5	131.663	104.608	119.765	104.97	86.7956	107.5	87.7012
		144.6	131.569	104.404	120.232	104.842	87.2594	107.478	87.4982
		144.7	131.317	104.076	120.32	104.74	87.6226	107.224	87.4643
		144.8	131.176	103.773	120.363	104.577	87.9239	106.888	87.5304
		144.9	130.984	103.576	120.214	104.443	88.036	106.437	87.8327
		145	130.827	103.407	120.023	104.55	87.7222	106.046	88.3455
		145.1	130.521	103.36	119.881	104.58	87.2849	105.626	88.6697
		145.2	130.33	103.416	119.841	104.485	87.0689	105.47	88.843
		145.3	130.052	103.623	119.685	104.642	86.8349	105.457	88.9922
		145.4	129.771	103.645	119.691	104.948	86.7387	105.562	88.9925
		145.5	129.503	103.747	119.719	104.971	86.8924	105.574	88.9136
		145.6	129.436	103.884	119.879	105.236	87.2364	105.639	88.9924
		145.7	129.281	104.031	120.052	105.423	87.4381	105.781	89.1105
		145.8	129.306	104.002	120.34	105.432	87.6625	105.824	89.159
		145.9	129.391	104.106	120.472	105.213	87.7162	105.761	89.1938
		146	129.546	104.206	120.472	105.221	87.7372	106.023	89.1735
		146.1	129.886	104.333	120.082	104.989	87.7333	106.451	89.2646
		146.2	130.341	104.456	119.61	104.83	87.7198	106.711	89.242
		146.3	130.599	104.555	119.222	104.663	87.7325	107.01	89.1676
		146.4	130.686	104.601	118.823	104.532	87.9102	107.409	89.122
		146.5	130.772	104.476	118.585	104.23	88.0776	107.554	89.1794
		146.6	130.658	104.14	118.792	104.027	88.2086	107.526	88.9
		146.7	130.697	103.791	119.055	104.007	88.3765	107.413	88.5976
		146.8	130.777	103.526	118.98	104.119	88.4023	107.161	88.4517
		146.9	130.965	103.232	118.934	104.405	88.3315	106.891	88.4377
		147	131.167	103.15	118.812	104.744	88.21	106.557	88.2056
		147.1	131.28	103.249	118.458	105.125	88.1218	106.235	88.1214
		147.2	131.097	103.368	118.113	105.31	88.0366	105.977	88.2697
		147.3	131.039	103.633	118.065	105.479	88.1202	105.929	88.348
		147.4	131.083	104.041	118.055	105.683	88.1007	105.795	88.1992
		147.5	130.927	104.288	118.141	105.892	88.0045	105.794	88.1919
		147.6	130.97	104.473	118.159	106.119	87.7868	105.87	88.2687
		147.7	131.036	104.515	118.282	106.474	87.4614	106.118	88.2842
		147.8	130.847	104.422	118.472	106.661	87.0769	106.357	88.3811
		147.9	130.643	104.232	118.597	106.598	86.7978	106.684	88.5738
		148	130.773	104.205	118.627	106.448	86.553	106.886	88.8346
		148.1	130.647	104.281	118.824	106.156	86.4095	106.867	89.0755
		148.2	130.59	104.544	118.854	105.817	86.3526	106.639	89.2844
		148.3	130.804	104.676	118.687	105.578	86.2908	106.279	89.3828
		148.4	131.015	104.677	118.68	105.473	86.2477	106.049	89.5361
		148.5	130.97	104.484	118.817	105.525	86.3098	106.065	89.5214
		148.6	131.206	104.127	118.988	105.655	86.473	106.384	89.4024
		148.7	131.452	103.64	119.221	105.66	86.5166	106.871	89.2495
		148.8	131.499	103.214	119.368	105.615	86.5982	107.394	89.1833
		148.9	131.45	103.039	119.186	105.371	86.8008	107.761	89.0526
		149	131.357	103.047	118.934	104.995	86.915	107.804	88.9849
		149.1	131.015	103.191	118.479	104.586	86.9711	107.608	88.9597
		149.2	130.672	103.415	117.959	104.267	87.2224	107.279	88.9378
		149.3	130.422	103.807	117.642	104.049	87.453	107.033	88.7158
		149.4	130.104	104.098	117.622	104.074	87.5682	106.801	88.5004
		149.5	129.947	104.197	117.424	104.142	87.8035	106.955	88.4186
		149.6	129.944	104.128	117.284	104.184	87.9469	107.4	88.4134
		149.7	129.928	103.946	117.165	104.384	87.9898	107.795	88.4648
		149.8	129.819	103.619	116.991	104.616	87.9618	108.004	88.6489
		149.9	129.931	103.319	116.806	104.808	87.9295	108.069	88.8526
		150	129.94	103.15	116.89	104.979	87.7656	107.72	88.9027
		150.1	129.965	103.105	117.288	105.204	87.6977	106.931	88.861
		150.2	130.083	103.282	117.704	105.277	87.7359	106.207	88.6515
		150.3	130.35	103.576	118.155	105.231	87.8867	105.63	88.397
		150.4	130.54	103.761	118.582	105.152	88.0006	105.25	88.0514
		150.5	130.861	104.013	118.82	105.231	88.2006	105.071	87.7688
		150.6	131.034	104.313	118.712	105.364	88.2394	105.248	87.5657
		150.7	131.133	104.508	118.669	105.385	88.0776	105.552	87.5922
		150.8	131.252	104.593	118.57	105.366	87.7753	105.867	87.7665
		150.9	131.168	104.738	118.402	105.206	87.5293	106.029	88.0374
		151	130.868	104.758	118.31	104.831	87.361	106.267	88.2844
		151.1	130.701	104.761	118.196	104.452	87.4492	106.334	88.4963
		151.2	130.457	104.775	118.087	104.266	87.7753	106.14	88.5417
		151.3	130.075	104.75	117.968	104.178	88.2194	105.861	88.5326
		151.4	129.885	104.659	117.916	104.429	88.5446	105.678	88.4741
		151.5	129.876	104.593	117.835	104.778	88.6234	105.31	88.3896
		151.6	129.806	104.492	117.866	104.971	88.3488	104.939	88.2986
		151.7	129.766	104.323	117.71	105.154	87.9053	104.884	88.2036
		151.8	129.75	104.247	117.6	105.427	87.45	104.904	88.0005
		151.9	129.729	104.229	117.352	105.32	87.1372	105.019	87.8139
		152	129.639	104.285	117.102	105.151	87.0344	105.198	87.7787
		152.1	129.708	104.34	117.052	105.215	87.289	105.493	87.7432
		152.2	129.911	104.341	117.224	105.086	87.6704	105.645	87.874
		152.3	130.073	104.295	117.35	104.703	87.9604	105.707	88.0754
		152.4	130.206	104.298	117.488	104.639	88.189	105.662	88.2467
		152.5	130.387	104.19	117.56	104.721	88.303	105.692	88.1273
		152.6	130.366	103.993	117.387	104.699	88.2156	105.697	87.962
		152.7	130.221	103.869	117.236	104.79	88.0404	105.82	87.6124
		152.8	130.258	103.758	117.224	105.03	88.0822	106.059	87.3308
		152.9	130.391	103.555	117.292	105.112	88.2806	106.209	87.2323
		153	130.492	103.309	117.55	105.063	88.577	106.336	87.3055
		153.1	130.496	103.203	117.786	104.994	88.8637	106.467	87.5266
		153.2	130.441	103.277	117.884	104.916	89.0943	106.269	87.8037
		153.3	130.137	103.47	117.83	104.864	89.0572	105.966	87.9858
		153.4	129.599	103.77	117.883	104.804	88.7954	105.843	88.0655
		153.5	129.106	104.303	117.827	104.771	88.4866	105.781	88.1633
		153.6	128.986	104.854	117.825	104.766	88.378	105.65	88.0658
		153.7	128.944	105.241	117.863	104.923	88.3146	105.793	88.0246
		153.8	129.079	105.401	117.966	105.133	88.3286	106.069	88.0944
		153.9	129.429	105.496	117.927	105.406	88.4037	106.154	87.9889
		154	129.649	105.462	117.799	105.68	88.3579	106.127	87.8418
		154.1	129.637	105.236	117.631	105.836	88.0489	106.212	87.6832
		154.2	129.779	104.957	117.465	105.774	87.7125	106.27	87.5441
		154.3	130.03	104.791	117.27	105.433	87.3506	106.195	87.172
		154.4	130.258	104.584	117.012	105.022	87.0352	106.347	87.0465
		154.5	130.591	104.278	116.743	104.536	86.8867	106.545	86.9704
		154.6	130.884	104.211	116.632	104.108	86.8198	106.504	87.1441
		154.7	130.923	104.157	116.612	103.849	86.901	106.374	87.302
		154.8	130.694	104.131	116.627	103.936	87.1351	106.158	87.6675
		154.9	130.515	104.203	116.82	104.079	87.2059	105.6	87.8115
		155	130.414	104.323	117.243	104.383	87.2379	104.901	87.9061
		155.1	130.359	104.225	117.542	104.81	87.2956	104.47	87.8616
		155.2	130.441	104.059	117.651	105.111	87.184	104.05	87.7923
		155.3	130.608	103.795	117.697	105.138	87.061	103.796	87.6447
		155.4	130.424	103.438	117.668	105.038	87.0803	103.916	87.7171
		155.5	130.134	103.24	117.468	104.823	87.054	104.346	87.9146
		155.6	130.073	103.196	117.289	104.469	87.0832	104.662	88.064
		155.7	130.123	103.302	117.103	104.14	87.1619	105.038	88.1402
		155.8	130.139	103.571	117.013	104.028	87.1971	105.433	88.2402
		155.9	130.425	103.857	116.801	104.091	87.2966	105.656	88.136
		156	130.686	103.925	116.518	104.376	87.4513	105.493	87.8457
		156.1	130.664	103.857	116.316	104.66	87.5492	105.256	87.6095
		156.2	130.477	103.783	116.366	104.938	87.642	104.954	87.4502
		156.3	130.447	103.654	116.184	105.135	87.7676	104.554	87.3653
		156.4	130.413	103.598	116.198	105.241	87.9434	104.298	87.4236
		156.5	130.32	103.654	116.42	105.035	87.9507	104.318	87.6065
		156.6	130.186	103.874	116.507	104.943	88.0099	104.454	87.8366
		156.7	129.902	104.029	116.414	104.958	88.0674	104.553	88.0981
		156.8	129.392	104.073	116.658	104.913	87.8531	104.766	88.1278
		156.9	128.988	104.142	116.935	104.997	87.3728	104.8	88.1505
		157	128.827	104.24	117.091	105.202	87.0897	104.766	88.1177
		157.1	128.956	104.259	117.271	105.469	86.7711	104.662	87.9868
		157.2	129.322	104.304	117.422	105.7	86.6315	104.655	87.8262
		157.3	129.789	104.44	117.311	106.078	86.7231	104.489	87.9119
		157.4	130.131	104.467	117.013	106.346	86.9909	104.348	87.9602
		157.5	130.304	104.382	116.785	106.624	87.1508	104.321	88.1014
		157.6	130.291	104.19	116.581	106.632	87.2282	104.426	88.3798
		157.7	130.303	104.046	116.448	106.523	87.0176	104.576	88.5813
		157.8	130.451	103.87	116.366	106.203	86.8648	104.813	88.67
		157.9	130.45	103.681	116.524	105.716	86.7107	105.05	88.6518
		158	130.428	103.577	116.611	105.146	86.7331	105.097	88.4734
		158.1	130.388	103.681	116.629	104.623	86.9488	104.915	88.1107
		158.2	130.234	103.708	116.602	104.154	87.4152	104.701	87.666
		158.3	130.049	103.853	116.681	103.8	87.774	104.554	87.1621
		158.4	130.121	104.085	116.398	103.693	88.057	104.454	86.8489
		158.5	130.245	104.312	116.027	103.686	88.1203	104.403	86.7073
		158.6	130.406	104.456	115.715	103.789	88.0285	104.622	86.6513
		158.7	130.495	104.733	115.485	103.937	87.7656	104.693	86.8952
		158.8	130.48	104.731	115.165	104.03	87.5728	104.619	87.3915
		158.9	130.31	104.754	115.132	103.949	87.4367	104.586	87.7676
		159	130.356	104.818	115.263	103.876	87.4827	104.606	87.9502
		159.1	130.56	104.769	115.434	103.976	87.6644	104.503	88.063
		159.2	131.001	104.576	115.515	104.043	87.875	104.683	87.9805
		159.3	131.584	104.607	115.665	104.073	87.9435	105.09	87.7597
		159.4	132.308	104.488	115.711	104.191	88.0936	105.31	87.6488
		159.5	132.677	104.246	115.8	104.422	88.2282	105.292	87.736
		159.6	132.727	104.007	115.872	104.345	88.2921	105.148	88.0497
		159.7	132.589	103.688	115.988	104.243	88.4158	104.725	88.429
		159.8	132.177	103.353	116.059	104.365	88.6296	104.098	88.6169
		159.9	131.584	103.176	116.061	104.532	88.633	103.628	88.6849
		160	130.978	103.054	115.859	104.487	88.4763	103.466	88.5649
		160.1	130.537	103.217	115.603	104.613	88.213	103.475	88.1826
		160.2	130.182	103.565	115.309	104.811	87.8594	103.661	87.6996
		160.3	130.146	103.906	114.991	104.889	87.5611	103.926	87.387
		160.4	130.263	104.125	114.805	105.011	87.4096	104.279	87.2632
		160.5	130.61	104.304	114.884	105.24	87.3386	104.609	87.367
		160.6	130.937	104.192	115.1	105.403	87.3	104.873	87.5659
		160.7	131.254	103.956	115.385	105.503	87.3635	105.019	87.9611
		160.8	131.434	103.593	115.694	105.502	87.4932	105.206	88.3822
		160.9	131.568	103.263	115.889	105.436	87.5608	105.211	88.5622
		161	131.649	103.069	115.927	105.244	87.5183	104.961	88.6478
		161.1	131.664	102.993	116.033	104.89	87.5137	104.754	88.9366
		161.2	131.591	102.999	116.201	104.395	87.3898	104.537	88.885
		161.3	131.414	103.131	116.434	103.98	87.1313	104.2	88.7647
		161.4	131.329	103.382	116.782	103.531	87.0206	103.867	88.7782
		161.5	131.173	103.557	117.057	103.273	87.1804	103.746	88.6723
		161.6	131.043	103.615	117.035	103.317	87.3605	103.626	88.1939
		161.7	130.95	103.637	116.846	103.523	87.649	103.666	88.1578
		161.8	130.952	103.578	116.559	103.895	87.8458	103.732	88.1375
		161.9	130.829	103.401	116.168	104.251	87.97	103.972	88.1589
		162	130.699	103.255	115.787	104.426	87.8358	104.213	88.336
		162.1	130.718	103.272	115.587	104.528	87.7926	104.315	88.8081
		162.2	130.647	103.382	115.582	104.701	87.7273	104.264	88.8928
		162.3	130.595	103.647	115.69	104.598	87.9349	104.312	88.973
		162.4	130.543	103.844	115.971	104.526	87.9256	104.273	88.7927
		162.5	130.59	103.934	116.376	104.611	88.0752	104.281	88.4233
		162.6	130.457	103.917	116.612	104.571	88.2323	104.487	87.731
		162.7	130.644	103.678	116.622	104.439	88.4145	104.821	87.318
		162.8	130.803	103.323	116.475	104.495	88.263	105.012	87.0218
		162.9	130.912	103.273	116.168	104.613	88.3194	105.094	87.0158
		163	131	103.377	115.762	104.635	88.2589	105.058	87.1632
		163.1	131.231	103.593	115.67	104.81	87.9811	104.842	87.6545
		163.2	131.071	104.13	115.716	105.029	87.7482	104.382	88.0594
		163.3	130.761	104.77	115.858	105.13	87.7731	104.155	88.3479
		163.4	130.539	105.041	116.088	105.042	87.7734	104.129	88.4928
		163.5	130.257	105.118	116.392	104.851	87.8605	104.12	88.5868
		163.6	129.842	105.178	116.428	104.604	87.8653	104.201	88.4856
		163.7	129.699	105.031	116.369	104.339	87.6003	104.45	88.2758
		163.8	129.747	104.607	116.208	104.172	87.33	104.406	87.9812
		163.9	129.756	104.255	115.95	104.168	87.0575	104.062	87.708
		164	129.77	104.135	115.694	104.331	86.7623	103.904	87.4771
		164.1	129.97	103.831	115.516	104.428	86.7972	103.818	87.2986
		164.2	130.105	103.599	115.447	104.455	87.0766	103.886	87.2241
		164.3	130.166	103.756	115.608	104.557	87.2182	104.149	87.2266
		164.4	130.225	104.054	115.846	104.68	87.3698	104.683	87.1893
		164.5	130.33	104.102	115.976	104.875	87.4993	104.952	87.1227
		164.6	130.204	104.365	116.078	105.077	87.4808	105.043	87.1539
		164.7	129.992	104.541	115.968	105.367	87.4082	104.913	87.1118
		164.8	129.814	104.455	115.641	105.227	87.4833	104.642	87.1585
		164.9	129.601	104.354	115.232	104.823	87.5464	104.255	87.3438
		165	129.294	104.499	114.804	104.295	87.6096	103.956	87.4395
		165.1	129.161	104.561	114.343	103.845	87.7098	103.89	87.3776
		165.2	129.229	104.633	114.084	103.397	87.7521	103.939	87.4513
		165.3	129.361	104.857	113.834	103.425	87.571	104.049	87.4916
		165.4	129.674	105.059	113.619	103.806	87.403	104.207	87.4162
		165.5	130.184	105.135	113.617	104.235	87.293	104.333	87.5166
		165.6	130.61	105.21	113.756	104.639	87.1663	104.297	87.7621
		165.7	130.846	105.369	113.852	105.056	87.1606	104.202	87.798
		165.8	130.865	105.455	114.144	105.273	87.3147	104.131	87.7163
		165.9	130.661	105.472	114.496	105.457	87.5081	103.917	87.6545
		166	130.333	105.483	114.594	105.565	87.6574	103.67	87.6031
		166.1	130.049	105.428	114.48	105.714	87.9172	103.33	87.4502
		166.2	129.744	105.299	114.475	105.762	88.1285	102.953	87.348
		166.3	129.869	105.054	114.429	105.86	88.2973	102.635	87.3611
		166.4	130.264	104.885	114.358	105.692	88.3653	102.507	87.4123
		166.5	130.579	104.774	114.477	105.618	88.5253	102.545	87.322
		166.6	130.819	104.622	114.827	105.442	88.3539	102.945	87.3217
		166.7	131.122	104.416	114.965	105.314	88.046	103.496	87.5418
		166.8	130.963	104.223	114.898	105.098	87.7256	103.955	87.7834
		166.9	130.49	103.898	114.663	105.157	87.5646	104.372	88.0108
		167	130.039	103.408	114.478	105.128	87.2668	104.679	88.2338
		167.1	129.695	103.097	114.323	105.181	87.3078	104.588	88.3317
		167.2	129.376	103.114	114.315	105.15	87.4241	104.35	88.3348
		167.3	129.201	103.459	114.471	105.147	87.6723	104.082	88.2826
		167.4	129.122	104.004	114.909	104.866	87.5865	103.77	88.1533
		167.5	129.158	104.679	115.224	104.572	87.4958	103.575	88.1062
		167.6	129.187	105.369	115.271	103.984	87.2542	103.667	88.1264
		167.7	129.156	105.652	115.289	103.525	87.1698	103.74	87.9212
		167.8	129.19	105.555	115.261	103.183	86.8619	103.967	87.7274
		167.9	129.369	105.231	115.107	103.093	86.7908	104.289	87.6524
		168	129.563	104.882	114.87	103.079	86.8103	104.469	87.4548
		168.1	129.633	104.291	114.865	103.439	86.8518	104.481	87.2755
		168.2	129.74	103.797	114.941	103.873	86.8832	104.645	87.3554
		168.3	129.773	103.385	115.028	104.333	87.0766	104.714	87.4533
		168.4	129.73	103.335	115.152	104.608	87.303	104.588	87.4889
		168.5	129.522	103.366	115.412	104.824	87.5206	104.52	87.7019
		168.6	129.426	103.505	115.567	104.94	87.7452	104.487	87.8643
		168.7	129.445	103.621	115.479	104.848	87.8026	104.293	87.9044
		168.8	129.579	103.69	115.364	104.538	87.8016	104.066	87.8728
		168.9	129.611	103.406	115.2	104.342	87.7608	104.071	87.8652
		169	129.853	103.063	115.011	104.223	87.7628	104.143	87.8
		169.1	130.022	102.737	114.901	104.186	87.8026	104.134	87.7418
		169.2	130.011	102.632	115.052	104.326	87.9268	104.216	87.8352
		169.3	129.964	102.767	115.131	104.576	88.0194	104.348	88.0769
		169.4	130.162	102.982	115.11	104.795	88.0647	104.302	88.4324
		169.5	130.138	103.087	115.151	104.896	87.8654	103.984	88.6936
		169.6	130.263	103.248	115.071	104.857	87.6004	103.815	88.8918
		169.7	130.608	103.269	114.881	104.709	87.2041	103.57	88.8444
		169.8	130.954	103.126	114.718	104.569	86.9606	103.329	88.6065
		169.9	131.016	103.046	114.674	104.501	86.8448	103.246	88.0542
		170	131.159	103.233	114.505	104.55	87.0849	103.451	87.508
		170.1	131.183	103.354	114.431	104.492	87.3733	103.687	87.1758
		170.2	130.915	103.369	114.275	104.509	87.7118	104.038	87.0901
		170.3	130.507	103.348	114.239	104.514	87.9299	104.347	87.1545
		170.4	130.327	103.228	114.262	104.357	88.0082	104.451	87.449
		170.5	130.341	102.953	114.38	104.132	87.8585	104.349	87.7592
		170.6	130.379	102.839	114.434	104.204	87.5763	104.02	87.9188
		170.7	130.634	102.976	114.574	104.169	87.4409	103.541	88.0127
		170.8	131.04	103.295	114.596	104.161	87.2788	103.181	87.9474
		170.9	131.225	103.754	114.541	104.314	87.2264	103.019	87.8667
		171	131.019	104.19	114.366	104.597	87.242	103.01	87.9658
		171.1	130.741	104.479	114.25	104.728	87.4275	103.29	88.044
		171.2	130.344	104.637	114.26	105.012	87.4561	103.721	88.0577
		171.3	129.959	104.664	114.527	105.304	87.5573	103.963	88.3022
		171.4	129.814	104.641	114.852	105.582	87.3186	104.068	88.4686
		171.5	130	104.467	115.251	105.688	87.002	103.978	88.4838
		171.6	130.219	104.168	115.531	105.788	86.764	103.622	88.5938
		171.7	130.504	103.767	115.57	105.698	86.7254	103.426	88.6244
		171.8	130.649	103.308	115.148	105.567	86.6224	103.424	88.5547
		171.9	130.618	102.828	114.542	105.286	86.9677	103.57	88.6105
		172	130.463	102.578	114.04	105.077	87.412	104.032	88.6861
		172.1	130.316	102.534	113.706	104.884	87.5869	104.537	88.595
		172.2	130.312	102.699	113.556	104.787	87.5102	104.525	88.5244
		172.3	130.452	102.98	113.848	104.66	87.495	104.284	88.2994
		172.4	130.598	103.29	114.274	104.672	87.3919	103.864	87.9195
		172.5	130.721	103.548	114.595	104.674	87.2658	103.062	87.4216
		172.6	130.807	103.817	114.748	104.52	87.3359	102.414	87.0503
		172.7	130.365	103.933	114.72	104.354	87.5919	102.178	86.8941
		172.8	129.646	103.95	114.316	104.168	87.8493	102.119	86.9468
		172.9	128.974	103.959	113.98	103.995	88.0714	102.166	87.0977
		173	128.294	103.994	113.565	103.891	88.176	102.675	87.3971
		173.1	127.793	103.846	113.133	104.055	88.1545	103.227	87.7018
		173.2	127.838	103.579	112.781	104.356	88.0871	103.728	87.809
		173.3	128.241	103.446	112.816	104.705	88.0754	104.241	87.6894
		173.4	128.575	103.294	112.864	104.995	87.9268	104.69	87.5467
		173.5	129.102	103.12	113.111	105.227	87.8867	104.771	87.3412
		173.6	129.374	103.084	113.644	105.264	87.9938	104.602	87.1503
		173.7	129.567	103.266	114.222	105.095	88.0477	104.204	86.9831
		173.8	129.589	103.302	114.493	104.913	87.8686	103.737	87.0376
		173.9	129.774	103.457	114.511	104.594	87.7998	103.338	87.0695
		174	129.74	103.624	114.225	104.17	87.7551	103.027	87.2145
		174.1	129.904	103.76	113.73	103.876	87.561	102.799	87.3052
		174.2	129.954	103.886	113.373	103.653	87.3756	102.774	87.4553
		174.3	130.256	104.066	113.233	103.465	87.3732	102.746	87.5689
		174.4	130.571	104.02	113.349	103.488	87.3794	102.609	87.7419
		174.5	131.041	103.768	113.706	103.644	87.3504	102.415	87.8524
		174.6	131.471	103.549	114.025	103.777	87.3611	102.211	87.9728
		174.7	131.845	103.24	114.036	104.005	87.315	102.049	87.9869
		174.8	131.93	103.087	113.92	104.335	87.2078	101.987	87.9366
		174.9	131.726	103.03	113.709	104.592	87.0299	102.199	87.9791
		175	131.311	103.104	113.487	104.776	86.8683	102.599	87.9573
		175.1	130.794	103.101	113.354	104.927	86.7207	103.083	88.0005
		175.2	130.341	103.097	113.528	105.071	86.7673	103.484	88.162
		175.3	129.785	102.883	113.613	105.067	86.9155	103.684	88.3628
		175.4	129.413	102.771	113.666	105.048	87.0236	103.54	88.3987
		175.5	129.267	102.9	113.794	105.077	87.0704	103.209	88.5083
		175.6	129.439	103.139	113.831	105.058	87.0834	102.873	88.5388
		175.7	129.78	103.471	113.531	104.833	86.9617	102.549	88.6208
		175.8	130.366	103.902	113.402	104.644	86.6987	102.283	88.6378
		175.9	130.847	104.218	113.441	104.453	86.6536	102.337	88.6298
		176	131.173	104.433	113.173	104.24	86.7462	102.603	88.6201
		176.1	131.122	104.567	112.934	104.059	86.9663	102.887	88.7174
		176.2	130.839	104.523	112.964	103.957	87.1224	103.178	88.742
		176.3	130.389	104.261	112.951	103.867	87.2835	103.565	88.7982
		176.4	130.152	103.868	112.776	103.876	87.1318	103.632	88.9328
		176.5	130.034	103.314	112.799	103.949	86.7233	103.565	88.9347
		176.6	130.115	102.808	112.916	104.191	86.1945	103.47	88.8238
		176.7	130.283	102.534	112.996	104.613	85.7747	103.362	88.713
		176.8	130.629	102.515	113.058	105.158	85.5294	103.204	88.799
		176.9	130.893	102.76	113.068	105.609	85.628	103.278	88.8847
		177	131.057	103.054	113.125	106.057	86.0265	103.194	89.1178
		177.1	130.919	103.428	113.172	106.267	86.5032	103.036	89.4239
		177.2	130.686	103.628	113.12	106.34	87.019	102.907	89.5899
		177.3	130.371	103.784	113.121	106.178	87.4129	102.805	89.4202
		177.4	130.041	103.918	113.319	106.034	87.6511	102.628	89.1175
		177.5	129.675	103.962	113.448	105.714	87.718	102.701	88.7129
		177.6	129.582	103.698	113.596	105.474	87.7878	102.899	88.153
		177.7	129.57	103.552	113.809	105.204	87.7832	103.122	87.6996
		177.8	129.558	103.439	114.025	105.023	87.9411	103.216	87.4721
		177.9	129.581	103.17	114.166	104.837	88.0278	103.173	87.524
		178	129.76	103.067	114.283	104.836	88.152	103.08	87.6726
		178.1	129.956	103.317	114.203	104.825	88.0857	102.954	87.9887
		178.2	130.233	103.596	114.174	104.825	87.9796	102.791	88.3415
		178.3	130.524	103.739	113.984	104.791	87.5964	102.938	88.5286
		178.4	130.615	103.989	113.779	104.696	87.3801	103.414	88.4544
		178.5	130.594	104.184	113.664	104.511	87.2078	103.859	88.2979
		178.6	130.5	104.192	113.624	104.323	87.3314	104.111	88.0205
		178.7	130.372	104.009	113.549	104.106	87.6326	104.161	87.6307
		178.8	130.244	103.964	113.513	103.887	88.114	103.896	87.4333
		178.9	130.325	103.888	113.438	103.832	88.4518	103.471	87.4426
		179	130.462	103.746	113.252	103.846	88.6596	103.094	87.5312
		179.1	130.533	103.529	113.148	103.846	88.6221	103.116	87.6852
		179.2	130.419	103.4	113.019	103.973	88.3747	103.332	87.9952
		179.3	130.235	103.089	113.094	104.112	87.976	103.649	88.0865
		179.4	130.172	102.692	113.138	104.139	87.6432	103.813	87.9794
		179.5	129.995	102.434	113.242	104.119	87.5263	103.836	87.7597
		179.6	129.884	102.294	113.302	104.078	87.6006	103.389	87.5711
		179.7	129.903	102.217	113.156	103.898	87.7752	102.857	87.3445
		179.8	129.953	102.443	112.852	103.727	88.1141	102.226	87.3074
		179.9	129.701	102.835	112.589	103.558	88.3298	101.712	87.4399
		180	129.539	103.21	112.359	103.396	88.3514	101.428	87.6958
		180.1	129.523	103.714	112.245	103.414	88.1497	101.452	87.9128
		180.2	129.638	104.286	112.493	103.672	87.8768	101.71	88.0215
		180.3	129.781	104.729	112.713	104.083	87.5664	102.276	88.0142
		180.4	130.083	105.089	112.953	104.504	87.4518	102.882	87.8758
		180.5	130.39	105.301	113.204	104.968	87.3998	103.243	87.6459
		180.6	130.573	105.284	113.369	105.301	87.5572	103.479	87.3885
		180.7	130.547	105.157	113.239	105.419	87.8602	103.501	87.2624
		180.8	130.403	104.883	113.242	105.339	88.0439	103.195	87.2025
		180.9	130.159	104.49	113.202	105.225	88.0772	102.873	87.2127
		181	129.912	104.091	112.964	105.028	88.1672	102.592	87.3794
		181.1	129.744	103.799	112.695	104.728	88.1078	102.384	87.5155
		181.2	129.789	103.4	112.639	104.417	87.8916	102.103	87.505
		181.3	130.014	103.029	112.551	104.159	87.7709	102.049	87.4345
		181.4	130.368	102.88	112.692	104.087	87.6273	101.951	87.2999
		181.5	130.688	103.07	113.15	104.007	87.4286	101.897	86.9731
		181.6	130.836	103.305	113.668	104.048	87.3266	101.832	86.696
		181.7	130.752	103.589	114.003	104.153	87.3962	102.078	86.6164
		181.8	130.704	103.994	114.138	104.216	87.4668	102.273	86.5887
		181.9	130.578	104.275	113.711	104.064	87.7642	102.559	86.6286
		182	130.519	104.263	112.889	104.004	88.005	102.83	86.7277
		182.1	130.628	104.136	112.024	103.945	88.1884	103.058	86.94
		182.2	130.837	104.07	111.334	103.959	88.2157	102.816	86.9985
		182.3	130.864	103.892	110.835	104.088	88.302	102.321	87.0731
		182.4	130.967	103.771	110.966	104.172	88.1307	101.688	87.1296
		182.5	131.004	103.674	111.468	104.241	87.883	101.12	87.1834
		182.6	130.837	103.479	111.969	104.343	87.6697	100.529	87.2374
		182.7	130.682	103.086	112.396	104.375	87.452	100.423	87.3572
		182.8	130.658	102.727	112.884	104.4	87.0678	100.69	87.4199
		182.9	130.637	102.254	113.041	104.64	86.7772	101.018	87.4584
		183	130.748	101.686	113.021	104.986	86.765	101.384	87.5432
		183.1	131.094	101.303	112.997	105.255	86.6834	101.911	87.4371
		183.2	131.387	101.209	112.922	105.509	86.687	102.328	87.3349
		183.3	131.532	101.357	112.584	105.63	86.8188	102.613	87.216
		183.4	131.539	101.727	112.248	105.532	86.9555	103.002	87.0834
		183.5	131.353	102.319	111.95	105.093	86.8897	103.248	86.984
		183.6	131.085	102.944	111.645	104.731	86.9632	103.31	86.8596
		183.7	130.841	103.705	111.338	104.337	87.0598	103.163	86.6632
		183.8	130.663	104.233	111.268	104.012	87.1989	102.87	86.4832
		183.9	130.431	104.473	111.341	103.835	87.2848	102.5	86.4536
		184	130.182	104.634	111.394	103.896	87.407	102.163	86.3912
		184.1	129.657	104.776	111.43	103.781	87.4505	101.949	86.595
		184.2	129.042	104.532	111.571	103.705	87.3833	101.923	86.8107
		184.3	128.406	104.268	111.717	103.656	87.2545	102.086	87.088
		184.4	127.925	104.128	111.736	103.612	87.3364	102.156	87.1641
		184.5	127.593	103.977	111.736	103.545	87.5591	102.248	87.1387
		184.6	127.593	103.652	111.858	103.61	87.7963	102.148	86.8584
		184.7	127.922	103.615	112.007	103.608	88.1544	101.914	86.716
		184.8	128.364	103.662	112.052	103.618	88.5365	101.536	86.6332
		184.9	128.759	103.791	112.179	103.536	88.7023	101.195	86.671
		185	129.095	103.932	112.231	103.427	88.6376	100.985	86.7744
		185.1	129.281	104.256	112.145	103.373	88.5812	101.179	87.0379
		185.2	129.148	104.298	111.905	103.491	88.4312	101.542	87.2366
		185.3	129	104.272	111.596	103.634	88.1748	101.936	87.2909
		185.4	128.873	104.194	111.344	103.891	87.9256	102.328	87.291
		185.5	128.727	104.069	111.321	104.306	87.7886	102.573	87.3106
		185.6	128.704	103.98	111.346	104.673	87.5643	102.462	87.2834
		185.7	128.815	104.039	111.399	104.878	87.3885	102.239	87.177
		185.8	128.746	103.993	111.524	105.082	87.2782	102.194	87.0703
		185.9	128.71	103.897	111.534	105.219	87.3329	102.321	87.0198
		186	128.797	103.714	111.426	105.128	87.444	102.518	87.0133
		186.1	128.979	103.35	111.465	104.95	87.5833	102.717	87.0472
		186.2	129.203	102.971	111.663	104.795	87.6607	102.836	87.2032
		186.3	129.746	102.78	111.848	104.537	87.7488	102.668	87.5725
		186.4	130.362	102.731	112.073	104.283	87.7551	102.259	87.9348
		186.5	130.953	102.85	112.283	104.064	87.799	101.91	88.1622
		186.6	131.345	103.093	112.314	103.915	87.9438	101.768	88.2455
		186.7	131.593	103.37	112.246	103.884	88.0951	101.749	88.221
		186.8	131.595	103.553	112.399	103.854	88.1628	101.944	87.8864
		186.9	131.418	103.608	112.623	103.723	88.0164	102.208	87.548
		187	131.071	103.727	112.842	103.753	87.6556	102.168	87.4047
		187.1	130.749	103.894	113.078	103.87	87.2518	102.016	87.3778
		187.2	130.585	104.172	113.207	103.858	86.9319	101.846	87.368
		187.3	130.381	104.48	112.963	103.81	86.6815	101.619	87.5407
		187.4	130.257	104.764	112.626	103.968	86.6674	101.521	87.6683
		187.5	130.162	104.908	112.196	104.019	86.7495	101.716	87.6838
		187.6	130.094	104.968	111.722	103.997	86.7291	101.84	87.7627
		187.7	129.999	104.757	111.462	104.035	86.7338	101.901	87.7722
		187.8	130.065	104.462	111.386	104.224	86.7988	101.945	87.7287
		187.9	130.212	104.26	111.064	104.173	86.8816	101.865	87.5813
		188	130.431	104.016	110.938	104.178	86.9664	101.728	87.4189
		188.1	130.541	103.778	110.793	104.102	87.1701	101.68	87.1914
		188.2	130.368	103.804	110.358	104.022	87.221	101.831	87.0106
		188.3	130.074	103.968	109.982	103.84	87.283	101.931	86.821
		188.4	129.697	104.095	110.047	103.867	87.243	102.059	86.9312
		188.5	129.38	104.396	110.017	103.812	87.3017	102.119	87.0258
		188.6	129.224	104.665	110.082	103.966	87.3183	102.157	87.0561
		188.7	129.334	104.806	110.451	104.253	87.4757	101.879	87.2001
		188.8	129.44	104.962	110.769	104.624	87.587	101.657	87.3442
		188.9	129.408	105.039	110.881	104.93	87.7485	101.334	87.23
		189	129.374	104.931	111.023	105.26	87.7846	100.964	87.1657
		189.1	129.283	104.809	111.224	105.397	87.8188	100.617	87.0824
		189.2	129.309	104.65	111.335	105.271	87.6927	100.547	86.855
		189.3	129.411	104.426	111.368	105.103	87.5684	100.641	86.6994
		189.4	129.605	104.394	111.444	104.949	87.4916	100.968	86.6379
		189.5	129.707	104.485	111.477	104.795	87.3486	101.514	86.5891
		189.6	129.827	104.605	111.34	104.676	87.2955	101.903	86.828
		189.7	129.658	104.657	111.034	104.653	87.3664	102.058	87.1997
		189.8	129.515	104.646	110.775	104.681	87.3781	101.933	87.6784
		189.9	129.538	104.309	110.593	104.745	87.2658	101.613	88.2748
		190	129.56	103.947	110.535	104.821	87.4298	101.179	88.8272
		190.1	129.663	103.567	110.719	104.929	87.4437	100.96	88.9986
		190.2	129.899	103.29	111.053	105.021	87.4608	101.022	89.0377
		190.3	130.019	103.016	111.458	105.012	87.4296	101.127	88.8374
		190.4	129.949	102.997	111.613	104.866	87.4066	101.298	88.3661
		190.5	129.921	102.946	111.466	104.641	87.2042	101.348	87.9142
		190.6	129.722	103.016	111.172	104.351	87.1029	101.429	87.6198
		190.7	129.444	103.187	110.978	104.194	86.7959	101.318	87.4491
		190.8	129.343	103.424	110.8	104.08	86.6301	101.31	87.2933
		190.9	129.327	103.636	110.828	104.015	86.436	101.353	87.1979
		191	129.3	103.799	111.199	103.962	86.2245	101.516	86.9785
		191.1	129.313	103.798	111.615	103.965	85.905	101.481	86.834
		191.2	129.37	103.607	111.979	103.82	85.7689	101.35	86.6883
		191.3	129.269	103.408	112.299	103.639	85.4926	101.271	86.6522
		191.4	129.113	103.247	112.651	103.4	85.2953	101.104	86.7854
		191.5	128.964	103.064	112.704	103.268	85.1638	100.88	87.0453
		191.6	128.919	103.005	112.548	103.047	85.1986	100.708	87.1583
		191.7	128.947	103.085	112.166	102.956	85.3563	100.791	87.2659
		191.8	129.08	103.182	111.742	102.935	85.7439	100.803	87.31
		191.9	129.425	103.186	111.24	103.053	86.243	100.866	87.1624
		192	129.809	103.314	110.96	103.081	86.7338	100.978	86.9849
		192.1	130.067	103.307	110.897	103.246	87.0981	101.126	86.974
		192.2	130.343	103.266	111.054	103.303	87.3226	101.153	86.8247
		192.3	130.721	103.272	111.158	103.273	87.3308	101.334	86.7571
		192.4	130.8	103.308	111.176	103.288	87.3962	101.578	86.8422
		192.5	130.764	103.319	111.146	103.481	87.4653	101.853	86.969
		192.6	130.818	103.314	111.138	103.642	87.5671	102.19	86.9616
		192.7	130.934	103.237	111.046	103.877	87.7662	102.383	87.0591
		192.8	130.883	103.031	111.007	104.283	88.0708	102.267	87.1676
		192.9	131.05	102.763	111.098	104.632	88.079	102.038	87.3128
		193	131.38	102.464	111.029	104.832	88.0259	101.816	87.4972
		193.1	131.658	102.335	110.834	105.079	88.0095	101.667	87.735
		193.2	131.714	102.355	110.638	105.294	87.8674	101.716	87.9468
		193.3	131.715	102.494	110.477	105.357	87.7812	101.837	88.0499
		193.4	131.547	102.636	110.236	105.256	87.8255	101.974	88.0207
		193.5	131.154	102.778	110.214	105.115	87.9785	102.013	87.9103
		193.6	130.811	102.888	110.312	104.915	88.1048	101.841	87.7039
		193.7	130.703	102.908	110.461	104.553	88.2166	101.675	87.4184
		193.8	130.743	102.846	110.606	104.221	88.103	101.658	87.094
		193.9	130.926	102.968	110.738	104.037	87.901	101.591	86.8282
		194	131.384	103.25	110.81	103.999	87.436	101.667	86.4466
		194.1	131.789	103.47	110.775	103.934	86.8693	101.745	86.1861
		194.2	132.054	103.679	110.608	104.081	86.4394	101.71	86.0844
		194.3	132.15	104.036	110.387	104.168	86.2063	101.53	85.993
		194.4	132.129	104.274	110.315	104.235	86.1764	101.535	85.8994
		194.5	131.942	104.312	110.265	104.128	86.4984	101.401	86.1266
		194.6	131.674	104.469	110.252	104.104	86.9169	101.32	86.4656
		194.7	131.22	104.64	110.361	104.016	87.2188	101.281	86.7208
		194.8	130.855	104.741	110.652	104.096	87.4078	101.331	87.2539
		194.9	130.59	104.761	110.85	104.202	87.5315	101.186	87.7484
		195	130.405	104.842	110.841	104.446	87.4369	101.036	87.9172
		195.1	130.375	104.701	110.776	104.524	87.4247	101.002	87.8558
		195.2	130.501	104.403	110.804	104.61	87.3904	100.916	87.9116
		195.3	130.542	103.818	110.564	104.515	87.4254	100.782	87.6954
		195.4	130.376	103.224	110.191	104.221	87.2666	100.888	87.5295
		195.5	130.049	102.57	110.04	103.801	87.1879	101.086	87.5905
		195.6	129.629	102.15	110.144	103.392	87.043	101.069	87.6444
		195.7	129.303	102.12	110.077	102.86	86.9512	101.214	87.5821
		195.8	129.026	102.493	110.218	102.545	86.7878	101.461	87.5339
		195.9	128.996	103.088	110.514	102.545	86.7496	101.488	87.434
		196	129.113	103.739	110.648	102.689	86.5072	101.419	87.1919
		196.1	129.219	104.205	110.417	103.05	86.2206	101.529	87.0121
		196.2	129.126	104.252	110.192	103.744	86.0348	101.569	86.8186
		196.3	129.091	104.168	109.8	104.172	86.0905	101.464	86.6878
		196.4	129.024	103.812	109.426	104.33	86.2521	101.337	86.5369
		196.5	129.013	103.393	109.212	104.383	86.828	101.243	86.4602
		196.6	129.223	103.046	109.296	104.435	87.4881	101.155	86.5075
		196.7	129.669	103.046	109.554	104.146	87.9494	100.931	86.577
		196.8	130.258	103.047	109.951	103.909	88.0938	100.865	86.7503
		196.9	130.925	103.278	110.295	103.921	88.2016	100.979	87.1352
		197	131.447	103.618	110.617	104.11	88.0174	101.17	87.5494
		197.1	131.826	104.087	110.741	104.088	87.7953	101.346	87.9443
		197.2	132.129	104.352	110.659	104.172	87.7826	101.653	88.3522
		197.3	132.115	104.569	110.436	104.34	88.0212	101.811	88.5639
		197.4	131.614	104.682	110.322	104.336	88.099	101.801	88.5278
		197.5	131.083	104.746	110.207	103.931	88.1701	101.643	88.451
		197.6	130.502	104.536	110.148	103.564	88.0992	101.231	88.1705
		197.7	129.967	104.237	110.096	103.426	87.9319	100.8	87.7257
		197.8	129.668	103.829	110.124	103.316	87.5875	100.47	87.3396
		197.9	129.829	103.336	109.835	103.219	87.4419	100.275	86.9798
		198	130.043	102.943	109.483	103.555	87.4759	100.288	86.5265
		198.1	130.108	102.771	109.166	104.042	87.6854	100.573	86.2452
		198.2	130.128	102.801	108.915	104.13	87.8194	100.811	86.2122
		198.3	130.134	102.958	108.801	104.325	88.0559	100.913	86.3749
		198.4	130.091	103.303	108.891	104.659	88.2187	100.929	86.7503
		198.5	130.247	103.513	108.936	104.751	88.225	100.877	87.3134
		198.6	130.681	103.59	108.977	104.658	88.097	100.653	87.7255
		198.7	130.977	103.641	109.066	104.76	88.0783	100.415	88.085
		198.8	131.136	103.747	108.998	104.732	87.9951	100.232	88.0899
		198.9	131.204	103.754	109.103	104.495	87.8229	99.9887	87.8551
		199	130.89	103.831	109.309	104.364	87.6452	99.559	87.4631
		199.1	130.46	103.975	109.484	104.314	87.5135	99.2436	87.2598
		199.2	130.247	104.036	109.618	104.32	87.3164	99.0805	86.9595
		199.3	130.024	104.163	109.703	104.107	87.0995	99.0585	86.7346
		199.4	129.878	104.319	109.524	103.981	86.9462	99.2781	86.4992
		199.5	130.091	104.392	109.494	103.757	86.9304	99.639	86.3068
		199.6	130.419	104.396	109.623	103.603	87.1061	100.084	86.0326
		199.7	130.5	104.431	109.834	103.368	87.2854	100.57	86.0095
[truncated: 2,003 more rows]

## Sheet: Exp. 3
		Sample ID	2_buffer	1_buffer	1a	2a	2b	3a	4a	4b
		Time (s)	BiP+Ca_buffer	BiP+Mg_buffer	BiP+Mg	BiP+Ca	BiP+Ca+Grp170	Oligos+Mg	Oligos+Ca	Oligos+Ca+Grp170
		0	163.256	129.816	128.56	163.544	169.089	108.38	143.883	141.206
		0.1	163.424	129.742	128.578	163.58	168.732	108.208	143.958	141.08
		0.2	163.549	129.65	128.44	163.615	168.223	108.01	143.949	140.869
		0.3	163.626	129.594	128.105	163.606	167.357	107.836	143.905	140.919
		0.4	163.848	129.676	127.55	163.394	166.338	107.558	143.958	141.063
		0.5	164.217	129.747	126.755	163.232	165.121	107.355	144.042	141.07
		0.6	164.374	129.904	125.966	163.027	163.871	107.13	143.885	141.143
		0.7	164.456	130.043	125.277	162.804	162.53	106.829	143.763	141.383
		0.8	164.53	130.113	124.773	162.446	161.383	106.456	143.723	141.444
		0.9	164.485	129.817	124.471	162.162	160.26	106.253	143.585	141.383
		1	164.212	129.502	124.232	161.868	159.171	106.043	143.495	141.474
		1.1	164.039	129.135	123.939	161.728	158.067	105.884	143.687	141.546
		1.2	163.89	128.821	123.722	161.551	157.052	105.658	143.72	141.413
		1.3	163.763	128.575	123.567	161.419	156.132	105.433	143.562	141.231
		1.4	163.517	128.686	123.06	161.41	155.289	105.152	143.568	140.985
		1.5	163.492	128.812	122.467	161.352	154.458	104.709	143.548	140.476
		1.6	163.415	128.852	121.983	161.213	153.685	104.18	143.329	139.771
		1.7	163.349	128.868	121.506	161.116	153.04	103.885	143.41	139.173
		1.8	163.199	128.876	120.804	161.125	152.154	103.686	143.672	138.535
		1.9	163.245	128.729	120.443	161.143	151.117	103.548	143.728	137.927
		2	163.187	128.581	120.256	161.317	150.016	103.583	143.764	137.691
		2.1	163.215	128.529	120.08	161.488	149.02	103.788	143.905	137.687
		2.2	163.288	128.506	119.782	161.725	147.97	103.824	143.675	137.577
		2.3	163.335	128.313	119.765	161.985	147.223	103.808	143.352	137.507
		2.4	163.264	128.053	119.801	162.085	146.636	103.6	143.121	137.549
		2.5	163.173	127.892	119.826	162.006	146.115	103.356	142.747	137.262
		2.6	162.89	127.832	119.815	161.863	145.404	103.047	142.336	136.896
		2.7	162.507	127.706	119.876	161.621	144.593	102.862	142.207	136.639
		2.8	162.252	127.752	119.74	161.307	143.458	102.7	142.084	136.494
		2.9	162.041	128.07	119.459	161.167	142.302	102.655	141.915	136.254
		3	161.88	128.255	118.976	161.049	141.189	102.553	141.887	136.159
		3.1	161.806	128.237	118.389	161.057	140.026	102.347	141.847	136.117
		3.2	161.654	128.274	117.808	161.14	138.85	102.134	141.713	136.037
		3.3	161.512	128.236	117.3	161.276	138.005	101.868	141.63	135.839
		3.4	161.243	127.936	116.786	161.152	137.111	101.619	141.545	135.779
		3.5	160.948	127.712	116.564	161.01	136.198	101.556	141.486	135.594
		3.6	160.901	127.68	116.463	160.607	135.613	101.614	141.422	135.253
		3.7	160.996	127.594	116.371	160.025	135.305	101.469	141.417	134.954
		3.8	161.125	127.62	116.184	159.285	134.785	101.296	141.506	134.722
		3.9	161.547	127.783	116.108	158.579	134.375	101.062	141.606	134.405
		4	161.967	127.912	115.936	157.792	133.969	100.542	141.571	134.32
		4.1	162.116	127.903	115.855	157.306	133.27	99.9311	141.57	134.399
		4.2	162.292	127.967	115.706	157.067	132.302	99.5323	141.504	134.434
		4.3	162.24	127.934	115.693	156.929	131.609	99.2884	141.209	134.426
		4.4	161.897	127.846	115.564	157.087	130.787	99.153	140.954	134.342
		4.5	161.466	127.807	115.458	157.504	130.037	99.2238	140.848	134.046
		4.6	161.071	127.87	115.086	157.824	129.585	99.4084	140.759	133.554
		4.7	160.549	127.99	114.702	158.013	129.442	99.3722	140.698	133.05
		4.8	160.132	128.171	114.291	158.197	129.15	99.2052	140.822	132.465
		4.9	159.797	128.22	114.009	158.151	129.084	98.9314	140.943	131.927
		5	159.462	128.125	113.622	157.867	128.954	98.6825	140.984	131.528
		5.1	159.182	127.958	113.426	157.622	128.655	98.2999	140.895	131.244
		5.2	159.1	127.639	113.352	157.382	128.125	98.1967	140.711	131.021
		5.3	159.26	127.336	113.207	157.198	127.586	98.245	140.388	130.954
		5.4	159.571	127.276	112.734	157.107	126.973	98.3575	140.024	130.775
		5.5	160.139	127.326	112.271	157.17	126.608	98.2631	139.664	130.489
		5.6	160.653	127.341	111.678	157.025	126.222	98.3239	139.327	130.219
		5.7	161.004	127.463	110.96	156.791	125.796	98.2643	139.128	129.942
		5.8	161.077	127.528	110.284	156.398	125.207	98.0314	138.998	129.645
		5.9	161.07	127.403	109.905	155.807	124.518	97.7712	138.931	129.61
		6	160.854	127.314	109.494	155.101	123.525	97.6743	138.927	129.665
		6.1	160.838	127.148	109.183	154.445	122.83	97.4028	139.088	129.841
		6.2	160.87	126.827	108.942	154.007	122.397	97.0114	139.107	129.997
		6.3	160.891	126.416	108.709	153.839	122.275	96.6028	139.101	130.067
		6.4	160.693	126.061	108.479	154.078	122.32	96.2389	139.034	130.035
		6.5	160.451	125.623	108.382	154.471	122.489	95.7663	138.99	129.995
		6.6	159.932	125.491	108.308	155.05	122.288	95.342	138.848	129.957
		6.7	159.463	125.588	108.194	155.44	121.901	95.1614	138.934	129.886
		6.8	159.029	125.903	108.016	155.536	121.319	95.1728	139.039	129.84
		6.9	158.782	126.274	107.87	155.345	120.656	95.1522	139.253	129.606
		7	158.674	126.742	107.76	154.972	120.033	95.2872	139.316	129.324
		7.1	158.806	127.114	107.674	154.509	119.6	95.4101	139.319	128.863
		7.2	158.863	127.312	107.712	154.069	119.184	95.3192	139.12	128.406
		7.3	159.052	127.319	107.867	153.836	118.793	95.132	138.913	128.012
		7.4	159.305	127.318	107.914	153.626	118.256	94.9808	138.664	127.796
		7.5	159.468	127.199	107.879	153.582	117.673	94.9155	138.611	127.615
		7.6	159.341	126.939	107.874	153.553	117.122	94.9754	138.635	127.387
		7.7	159.109	126.837	107.77	153.601	116.697	95.2146	138.606	127.179
		7.8	158.739	126.84	107.622	153.726	116.454	95.4101	138.533	127.013
		7.9	158.278	126.738	107.535	153.694	116.414	95.4041	138.33	126.879
		8	157.864	126.635	107.372	153.641	116.41	95.046	137.922	126.563
		8.1	157.679	126.537	107.043	153.624	116.3	94.6838	137.589	126.417
		8.2	157.721	126.254	106.663	153.577	116.097	94.2352	137.278	126.249
		8.3	157.921	125.866	106.296	153.265	115.713	93.8264	136.955	125.973
		8.4	158.213	125.608	105.872	153.271	115.34	93.6497	136.763	125.669
		8.5	158.642	125.541	105.65	153.168	114.933	93.7191	136.779	125.695
		8.6	159.087	125.507	105.539	153.052	114.473	93.6882	136.569	125.742
		8.7	159.472	125.616	105.581	153.158	114.021	93.6974	136.649	125.791
		8.8	159.626	125.896	105.615	153.529	113.806	93.793	136.831	125.846
		8.9	159.674	126.145	105.631	153.746	113.705	93.8383	136.778	125.861
		9	159.304	126.33	105.512	154.092	113.721	93.9192	136.558	125.669
		9.1	158.832	126.547	105.437	154.406	113.972	94.009	136.541	125.354
		9.2	158.36	126.632	105.217	154.378	114.325	94.0582	136.196	125.193
		9.3	158.159	126.619	105.032	154.065	114.409	93.9043	135.843	124.971
		9.4	158.077	126.521	104.875	153.736	114.232	93.7262	135.704	124.755
		9.5	158.385	126.316	104.711	153.209	113.924	93.3412	135.617	124.6
		9.6	158.712	126.234	104.432	152.715	113.517	93.0467	135.316	124.349
		9.7	158.967	126.361	104.222	152.356	112.996	92.7528	135.241	123.844
		9.8	158.955	126.6	103.853	152.16	112.549	92.6182	135.3	123.428
		9.9	158.689	127.159	103.648	152.05	112.205	92.5217	135.436	123.044
		10	158.204	127.761	103.535	152.181	111.951	92.5585	135.471	122.769
		10.1	157.635	128.179	103.472	152.043	111.722	92.4786	135.821	122.638
		10.2	157.167	128.362	103.513	151.746	111.584	92.3536	136.031	122.702
		10.3	157.022	128.214	103.83	151.466	111.628	92.2245	135.963	122.884
		10.4	157.123	127.593	103.86	151.115	111.704	92.1946	135.857	122.962
		10.5	157.421	126.836	103.728	150.613	111.67	92.2144	135.754	122.8
		10.6	157.831	126.032	103.609	150.475	111.581	92.2836	135.377	122.752
		10.7	158.014	125.426	103.305	150.529	111.454	92.5114	135.149	122.699
		10.8	157.814	125.18	102.663	150.454	111.171	92.7236	135.007	122.639
		10.9	157.634	125.319	102.192	150.342	110.943	92.6693	134.664	122.669
		11	157.302	125.718	101.916	150.309	110.781	92.4517	134.638	122.867
		11.1	156.998	126.187	101.64	150.19	110.522	92.2559	134.831	122.902
		11.2	156.942	126.536	101.419	150.021	110.289	91.9345	134.862	122.925
		11.3	157.216	126.776	101.429	150.084	110.084	91.6001	134.882	122.779
		11.4	157.431	126.692	101.459	150.209	109.802	91.4697	135.067	122.549
		11.5	157.852	126.438	101.292	150.11	109.546	91.4508	134.952	122.223
		11.6	158.117	126.361	101.07	149.798	109.537	91.365	134.76	121.948
		11.7	158.12	126.365	100.871	149.55	109.547	91.2487	134.585	121.531
		11.8	157.786	126.329	100.68	149.257	109.547	91.1663	134.588	121.132
		11.9	157.345	126.523	100.524	149.139	109.44	91.0042	134.679	120.971
		12	156.592	126.755	100.605	149.355	109.267	90.8575	134.949	120.97
		12.1	156.092	126.626	100.932	149.823	108.909	90.7404	135.224	120.993
		12.2	155.971	126.448	101.29	150.293	108.369	90.7536	135.581	121.058
		12.3	156.191	126.343	101.679	150.537	107.79	90.6994	135.798	121.136
		12.4	156.574	126.105	102.062	150.469	107.489	90.6508	135.723	120.978
		12.5	157.335	125.866	102.239	150.26	107.379	90.5121	135.489	120.679
		12.6	158.005	126.018	102.11	149.991	107.373	90.4213	135.075	120.341
		12.7	158.452	126.182	102.055	149.627	107.605	90.2058	134.562	120.169
		12.8	158.632	126.18	101.844	149.508	107.993	90.022	134.006	120.017
		12.9	158.572	126.219	101.451	149.613	108.163	89.7864	133.767	119.826
		13	158.125	126.448	101.289	149.719	108.159	89.6595	133.712	119.633
		13.1	157.398	126.467	101.137	149.856	108.065	89.5602	133.914	119.43
		13.2	156.703	126.416	100.707	150.001	107.803	89.5212	133.996	119.003
		13.3	156.126	126.547	100.233	149.974	107.344	89.4629	134.083	118.615
		13.4	155.661	126.787	99.8496	149.829	106.892	89.576	133.949	118.435
		13.5	155.34	126.668	99.0707	149.655	106.475	89.5813	133.544	118.382
		13.6	155.124	126.497	98.3998	149.304	106.187	89.4312	132.956	118.311
		13.7	154.797	126.284	97.9788	148.981	105.962	89.3252	132.75	118.441
		13.8	154.478	125.996	97.624	148.653	105.821	89.2357	132.571	118.479
		13.9	154.389	125.651	97.292	148.313	105.853	88.9945	132.527	118.525
		14	154.408	125.45	97.1916	147.922	105.865	88.859	132.742	118.471
		14.1	154.716	125.488	97.1862	147.863	105.813	88.8236	133.047	118.48
		14.2	155.242	125.746	97.1423	147.88	105.82	88.6044	133.157	118.466
		14.3	155.895	125.792	97.182	148.013	105.822	88.3623	133.392	118.689
		14.4	156.499	125.637	97.3026	148.183	105.67	88.2187	133.489	118.729
		14.5	157.055	125.552	97.557	148.475	105.6	88.1318	133.434	118.78
		14.6	157.385	125.279	97.7113	148.397	105.563	88.0417	133.343	118.759
		14.7	157.54	124.819	97.8251	148.223	105.433	88.0798	133.285	118.563
		14.8	157.492	124.624	97.9909	148.032	105.371	88.215	133.149	118.201
		14.9	157.074	124.627	98.1582	147.785	105.387	88.3912	133.197	117.905
		15	156.677	124.567	98.116	147.363	105.469	88.5059	133.268	117.553
		15.1	156.36	124.512	98.002	146.973	105.467	88.752	133.267	117.286
		15.2	156.098	124.602	97.9548	146.568	105.585	89.0352	133.066	117.223
		15.3	156.06	124.776	97.8775	146.091	105.665	89.0868	132.832	116.987
		15.4	156.411	125.017	97.6164	145.706	105.636	88.9378	132.344	116.828
		15.5	156.768	125.32	97.4648	145.687	105.308	88.6982	131.93	116.777
		15.6	157.076	125.624	97.4876	146.051	105.005	88.3253	131.744	116.743
		15.7	157.424	125.713	97.3886	146.454	104.623	87.8058	131.837	116.535
		15.8	157.413	125.736	97.2298	146.993	104.293	87.5488	131.948	116.658
		15.9	157.196	125.625	97.2424	147.621	104.134	87.3978	132.314	116.792
		16	156.715	125.438	97.225	147.898	104.308	87.2732	132.593	116.809
		16.1	156.34	125.256	97.0613	147.817	104.521	87.1028	132.787	116.829
		16.2	155.893	125.268	97.0328	147.593	104.843	87.154	132.772	117.032
		16.3	155.858	125.112	96.9562	147.183	105.1	87.2065	132.674	117.08
		16.4	155.964	125.153	96.7359	146.488	105.341	87.355	132.608	116.944
		16.5	156.368	125.288	96.4468	145.764	105.345	87.4383	132.802	117.074
		16.6	156.64	125.581	96.1498	145.125	105.298	87.6144	132.799	117.096
		16.7	157.116	125.832	95.6286	144.734	105.058	87.7073	132.891	116.951
		16.8	157.252	126.17	95.236	144.369	104.86	87.7083	133.081	116.824
		16.9	157.025	126.202	95.0942	144.314	104.547	87.7143	132.932	116.751
		17	156.584	126.304	95.1082	144.566	104.47	87.8558	132.344	116.355
		17.1	156.206	126.222	95.2348	144.89	104.527	87.9082	132.07	116.019
		17.2	155.449	126.016	95.7178	145.214	104.77	87.8434	131.768	115.752
		17.3	154.929	125.8	96.1934	145.745	104.941	87.6541	131.455	115.48
		17.4	154.889	125.706	96.4563	146.037	105.123	87.1092	131.386	115.393
		17.5	155.034	125.407	96.7226	146.199	105.106	86.4877	131.584	115.467
		17.6	155.274	125.019	97.01	146.161	105.036	86.0058	131.405	115.646
		17.7	155.798	124.717	96.9899	145.91	104.932	85.6512	131.193	115.899
		17.8	156.285	124.491	96.7822	145.396	104.837	85.4599	130.951	116.122
		17.9	156.498	124.283	96.6392	144.91	104.78	85.6006	130.641	116.205
		18	156.712	124.205	96.3878	144.314	104.721	85.939	130.276	116.209
		18.1	156.767	124.37	96.1212	143.891	104.465	86.2717	130.15	116.09
		18.2	156.789	124.724	96.0521	143.685	104.06	86.6546	130.114	115.95
		18.3	156.636	124.97	96.1235	143.718	103.686	87.0068	130.081	115.819
		18.4	156.732	125.223	96.1647	143.801	103.126	87.3752	130.067	115.693
		18.5	156.759	125.456	96.169	143.862	102.664	87.4778	130.07	115.579
		18.6	156.895	125.643	96.0026	143.925	102.401	87.4122	130.133	115.415
		18.7	156.869	125.583	95.7153	143.67	102.233	87.2299	130.25	115.024
		18.8	156.904	125.591	95.4277	143.167	102.09	87.026	130.351	114.472
		18.9	156.539	125.669	95.0972	142.705	102.347	86.6798	130.478	113.816
		19	156.12	125.632	94.8508	142.414	102.643	86.5194	130.602	113.229
		19.1	155.594	125.477	94.7808	142.058	102.905	86.4555	130.546	112.743
		19.2	155.415	125.479	94.7092	142.014	103.156	86.3163	130.27	112.417
		19.3	155.357	125.528	94.5504	142.123	103.309	86.1598	130.026	112.386
		19.4	155.569	125.531	94.4467	142.264	103.193	86.0883	129.796	112.561
		19.5	155.889	125.713	94.276	142.394	102.917	85.8575	129.56	112.797
		19.6	156.447	125.895	94.0831	142.64	102.59	85.5944	129.523	113.019
		19.7	156.68	126.006	93.9151	142.806	102.326	85.4742	129.629	113.282
		19.8	156.869	126.241	93.8823	143.188	102.168	85.488	129.725	113.364
		19.9	157.04	126.503	93.9744	143.624	102.149	85.5915	129.821	113.324
		20	157.166	126.675	94.2026	143.94	102.209	85.8272	129.909	113.182
		20.1	156.86	126.962	94.4537	144.237	102.399	86.0819	129.864	112.937
		20.2	156.579	127.161	94.7691	144.522	102.456	86.2797	129.87	112.817
		20.3	156.257	127.008	95.033	144.417	102.41	86.3628	129.953	112.876
		20.4	155.951	126.587	95.0308	144.135	102.164	86.2821	130.073	112.919
		20.5	155.765	126	94.9813	144.036	101.995	86.1615	130.13	112.885
		20.6	155.966	125.357	94.8078	143.875	101.686	86.0604	130.167	112.988
		20.7	156.349	124.707	94.6	143.713	101.489	86.0321	130.118	112.868
		20.8	156.797	124.127	94.391	143.731	101.413	85.8635	129.951	112.418
		20.9	157.238	123.893	94.3397	143.81	101.43	85.6916	129.598	112.118
		21	157.482	124.061	94.1233	143.685	101.347	85.4679	129.26	111.874
		21.1	157.634	124.188	93.8231	143.369	101.331	85.3161	128.931	111.519
		21.2	157.698	124.526	93.5741	142.9	101.364	85.1312	128.634	111.202
		21.3	157.539	124.973	93.3501	142.377	101.362	85.0686	128.306	111.321
		21.4	157.339	125.18	93.2438	141.903	101.384	85.0432	128.078	111.347
		21.5	157.347	125.05	93.413	141.489	101.36	85.1042	128.025	111.433
		21.6	157.263	124.923	93.782	141.482	101.302	85.0387	128.08	111.704
		21.7	157.18	124.605	93.925	141.664	101.041	84.9272	128.155	112.058
		21.8	157.49	124.37	93.9839	141.799	100.812	85.0088	128.412	112.01
		21.9	157.704	124.451	93.8222	141.793	100.576	85.2421	128.766	111.911
		22	157.607	124.778	93.4472	141.761	100.43	85.498	129.062	111.734
		22.1	157.481	125.185	92.9206	141.633	100.265	85.808	129.264	111.264
		22.2	157.225	125.709	92.669	141.501	100.257	86.2126	129.311	110.878
		22.3	156.641	126.085	92.4852	141.511	100.075	86.3612	129.331	110.86
		22.4	156.246	126.148	92.3879	141.565	99.9808	86.3527	129.362	110.893
		22.5	156.196	126.036	92.2746	141.667	99.9969	86.2608	129.297	111.025
		22.6	156.354	125.859	92.4797	141.463	100.084	86.1517	129.243	111.455
		22.7	156.586	125.638	92.631	141.263	100.202	85.9616	129.23	111.7
		22.8	157.017	125.5	92.8482	141.003	100.725	85.8578	129.07	111.695
		22.9	157.45	125.469	93.1527	140.785	101.211	85.7725	128.715	111.678
		23	157.639	125.451	93.5759	140.524	101.58	85.6166	128.305	111.604
		23.1	157.615	125.478	93.6186	140.459	102.002	85.4839	127.868	111.385
		23.2	157.731	125.496	93.5078	140.279	102.253	85.3782	127.651	111.188
		23.3	157.748	125.564	93.2379	140.162	102.103	85.2332	127.543	110.953
		23.4	157.547	125.698	92.7695	140.169	101.822	85.0558	127.682	110.747
		23.5	157.491	125.865	92.1734	140.201	101.486	84.939	128.074	110.625
		23.6	157.533	126.035	91.8593	140.316	101.061	84.7848	128.573	110.513
		23.7	157.476	126.197	91.7253	140.646	100.835	84.7215	128.957	110.405
		23.8	157.298	126.097	91.6594	140.738	100.7	84.8796	129.198	110.442
		23.9	157.106	125.878	91.7542	140.683	100.62	85.1112	129.204	110.315
		24	156.744	125.682	91.9943	140.781	100.608	85.4328	129.134	110.111
		24.1	156.207	125.473	92.0514	140.75	100.623	85.8548	129.089	109.829
		24.2	155.533	125.31	91.9362	140.496	100.631	86.1086	129.167	109.567
		24.3	155.048	125.437	91.7872	140.454	100.714	86.0617	129.462	109.336
		24.4	154.701	125.778	91.6597	140.233	100.913	85.9676	129.874	109.422
		24.5	154.357	126.091	91.4934	139.672	101.013	85.7763	129.925	109.561
		24.6	154.286	126.48	91.4448	139.105	100.963	85.4949	129.789	109.892
		24.7	154.522	126.892	91.5566	138.632	100.767	85.2627	129.352	110.313
		24.8	154.78	127.166	91.7625	138.202	100.479	85.2583	128.714	110.59
		24.9	155.159	127.235	91.8392	138.228	100.157	85.1818	128.003	110.623
		25	155.774	127.162	91.9522	138.715	99.9192	85.1449	127.68	110.473
		25.1	156.391	126.844	91.985	139.291	99.7501	85.0628	127.466	110.184
		25.2	156.613	126.447	91.8654	139.844	99.7635	84.8622	127.299	109.794
		25.3	156.606	126.207	91.738	140.271	99.9814	84.5261	127.336	109.489
		25.4	156.406	125.872	91.7898	140.428	100.123	84.3908	127.545	109.295
		25.5	155.934	125.616	91.8216	140.233	100.351	84.3422	127.735	109.321
		25.6	155.33	125.442	91.8948	140.031	100.715	84.4026	127.74	109.397
		25.7	155.069	125.257	91.9904	139.905	100.805	84.8066	127.847	109.411
		25.8	155.007	124.804	91.9638	139.811	100.61	85.2577	127.728	109.388
		25.9	155.053	124.483	91.7948	139.647	100.422	85.5611	127.395	109.433
		26	155.45	124.302	91.5538	139.564	100.379	85.7172	126.882	109.438
		26.1	155.894	124.248	91.2311	139.525	100.391	85.8985	126.643	109.355
		26.2	156.34	124.291	91.0994	139.413	100.851	85.8798	126.495	109.326
		26.3	156.681	124.595	91.0348	139.292	101.498	85.8564	126.417	109.337
		26.4	157.072	125.074	90.8666	139.363	102.212	85.7932	126.443	109.049
		26.5	157.151	125.416	90.7198	139.354	102.457	85.7424	126.555	108.588
		26.6	157.143	125.711	90.652	139.048	102.554	85.5684	126.471	108.233
		26.7	157	125.844	90.4153	138.589	102.084	85.3429	126.19	108.007
		26.8	156.954	125.828	90.2399	138.152	101.581	85.0759	125.929	107.797
		26.9	156.753	125.637	90.348	137.646	101.021	84.8579	125.588	107.819
		27	156.648	125.563	90.5346	137.46	100.766	84.7303	125.26	107.979
		27.1	156.375	125.542	90.7964	137.725	100.52	84.6477	125.083	108.199
		27.2	156.017	125.739	91.1613	138.239	100.684	84.556	125.032	108.328
		27.3	155.708	125.977	91.4688	138.831	100.794	84.4226	125.088	108.46
		27.4	155.474	126.153	91.5352	139.36	100.869	84.4452	125.157	108.575
		27.5	155.225	126.313	91.4328	139.6	100.815	84.4244	125.21	108.636
		27.6	155.507	126.443	91.1917	139.542	100.717	84.3762	125.242	108.439
		27.7	155.883	126.289	90.8939	139.474	100.398	84.515	125.28	108.152
		27.8	156.013	126.058	90.5846	139.286	100.077	84.8318	125.334	107.795
		27.9	156.246	125.95	90.4463	139.277	99.9268	84.9906	125.6	107.536
		28	156.609	125.769	90.6189	139.303	100.02	85.1888	125.866	107.481
		28.1	156.622	125.59	90.9195	139.323	100.127	85.4162	126.158	107.781
		28.2	156.69	125.727	91.1263	139.031	100.335	85.3466	126.368	108.241
		28.3	157.089	126.021	91.32	138.771	100.619	85.0744	126.433	108.687
		28.4	157.328	126.213	91.414	138.268	100.873	84.8258	126.302	108.691
		28.5	157.498	126.351	91.2964	137.808	100.86	84.411	126.193	108.445
		28.6	157.649	126.359	91.0378	137.587	100.983	84.0208	125.973	107.934
		28.7	157.645	126.11	90.9242	137.851	101.062	83.8976	125.963	107.422
		28.8	157.53	125.694	90.9721	138.076	101.08	84.0198	126.04	107.012
		28.9	157.383	125.361	90.972	138.346	100.881	84.1126	126.18	107.129
		29	157.095	125.133	90.8365	138.528	100.676	84.3633	126.298	107.411
		29.1	156.641	125.117	90.763	138.4	100.331	84.6189	126.533	107.722
		29.2	156.377	125.182	90.6624	137.882	100.161	84.6965	126.441	107.879
		29.3	155.849	125.254	90.4118	137.34	100.073	84.4446	126.194	107.965
		29.4	155.404	125.351	90.2685	136.909	100.139	84.1008	126.006	107.868
		29.5	155.12	125.464	90.3103	136.491	100.253	83.7366	125.749	107.643
		29.6	155.277	125.33	90.3371	136.173	100.425	83.29	125.373	107.41
		29.7	155.249	125.126	90.2973	136.03	100.316	82.9182	125.349	107.138
		29.8	155.622	125.048	90.2015	136.075	100.067	82.855	125.513	106.816
		29.9	156.174	124.945	90.1065	136.065	99.649	83.0564	125.444	106.436
		30	156.635	124.855	89.9165	136.19	99.4112	83.283	125.437	106.148
		30.1	156.852	125.005	89.6884	136.496	99.2762	83.5986	125.346	105.999
		30.2	157.351	125.34	89.4054	136.786	99.3603	83.8839	124.936	106.072
		30.3	157.617	125.568	89.3052	136.874	99.7038	83.9445	124.382	106.223
		30.4	157.617	125.75	89.2064	136.957	100.289	83.8029	123.938	106.287
		30.5	157.665	125.893	89.2402	136.9	100.629	83.5958	123.624	106.268
		30.6	157.851	125.958	89.4418	136.61	100.763	83.2878	123.603	106.117
		30.7	157.586	126.1	89.8576	136.295	100.816	83.1315	123.841	105.892
		30.8	157.232	126.316	90.0806	136.013	100.456	83.142	124.26	105.725
		30.9	156.972	126.679	90.3226	135.666	99.9524	83.2224	124.962	105.682
		31	156.55	127.066	90.5598	135.414	99.6874	83.3214	125.529	105.708
		31.1	155.963	127.412	90.5829	135.249	99.4838	83.5567	125.873	105.842
		31.2	155.801	127.558	90.3137	135.011	99.2526	83.61	125.988	105.758
		31.3	155.875	127.725	90.1794	134.865	99.4555	83.5044	125.856	105.388
		31.4	155.966	127.566	89.8974	134.978	99.8022	83.3768	125.204	105.075
		31.5	156.161	127.235	89.5423	135.09	99.99	83.3397	124.465	104.741
		31.6	156.351	126.938	89.3996	135.202	100.259	83.2945	123.747	104.236
		31.7	156.527	126.616	89.5666	135.406	100.576	83.3524	123.265	104.214
		31.8	156.605	126.235	89.6888	135.62	100.548	83.5291	123.093	104.616
		31.9	156.62	126.243	89.8971	135.456	100.349	83.6939	123.319	104.971
		32	156.799	126.517	90.103	135.277	100.112	83.7544	123.645	105.265
		32.1	157.125	126.755	90.2909	135.052	99.8464	83.6546	124.056	105.701
		32.2	157.16	127.043	90.3166	134.817	99.5196	83.4788	124.422	105.735
		32.3	157.155	127.273	90.3788	134.528	99.3712	83.2586	124.59	105.612
		32.4	157.224	127.269	90.4257	134.414	99.2541	83.1224	124.743	105.424
		32.5	157.215	127.23	90.4617	134.173	99.2011	83.0346	124.975	105.296
		32.6	157.044	127.133	90.2694	134	99.1199	83.1021	125.148	105.255
		32.7	156.96	126.911	90.0802	133.806	99.1235	83.2194	125.203	105.373
		32.8	156.835	126.76	89.7776	133.492	99.1653	83.411	125.337	105.249
		32.9	156.593	126.664	89.586	133.214	99.3565	83.4795	125.409	105.221
		33	156.347	126.218	89.3819	133.262	99.5393	83.4846	125.413	105.215
		33.1	156.199	125.858	89.3569	133.297	99.6528	83.3922	125.588	105.038
		33.2	156.156	125.734	89.3136	133.396	99.5906	83.2404	125.902	104.722
		33.3	156.169	125.616	89.3842	133.737	99.4473	82.9389	126.206	104.494
		33.4	156.262	125.375	89.32	134.117	99.1772	82.8193	126.382	104.217
		33.5	156.3	125.461	89.2953	134.182	99.1	82.7271	126.43	103.992
		33.6	156.488	125.469	89.2022	134.323	99.1176	82.7284	126.171	103.794
		33.7	156.573	125.332	89.171	134.361	99.4147	82.7511	125.731	103.803
		33.8	156.733	125.313	89.1416	134.157	99.7173	82.8274	125.13	104.088
		33.9	156.861	125.532	89.1767	133.879	100.103	82.762	124.602	104.341
		34	157.014	125.741	89.1804	133.764	100.178	82.7229	124.236	104.362
		34.1	156.975	126.153	89.2296	133.664	100.295	82.5789	124.085	104.451
		34.2	157.034	126.777	89.3497	133.598	100.319	82.6163	124.032	104.368
		34.3	156.973	127.214	89.4437	133.575	100.32	82.8634	124.19	104.008
		34.4	156.988	127.495	89.4336	133.478	100.17	83.0914	124.365	103.723
		34.5	156.907	127.717	89.5292	133.227	100.098	83.2498	124.567	103.7
		34.6	156.656	127.811	89.6388	132.843	99.9103	83.5424	124.699	103.523
		34.7	156.39	127.624	89.6242	132.471	99.6769	83.5158	124.774	103.314
		34.8	156.214	127.453	89.5732	132.235	99.5625	83.2702	124.566	103.284
		34.9	156.084	127.273	89.6942	132.268	99.6067	83.0572	124.304	103.216
		35	155.925	127.061	89.7733	132.438	99.8013	82.976	123.951	103.134
		35.1	156.249	126.833	89.8118	132.584	100.034	82.6925	123.607	103.35
		35.2	156.53	126.603	89.867	132.825	100.116	82.6708	123.305	103.751
		35.3	156.819	126.325	90.0801	133.149	99.8616	82.7592	123.296	104.105
		35.4	156.962	126.094	90.2269	133.114	99.3879	82.8993	123.355	104.366
		35.5	157.349	125.823	90.2784	132.983	98.7999	82.9308	123.324	104.342
		35.6	157.333	125.447	90.1824	133.007	98.2118	83.1667	123.147	104.109
		35.7	157.331	125.272	89.9899	132.934	97.9053	83.263	122.865	103.804
		35.8	157.214	125.441	89.5547	132.764	98.009	83.1517	122.495	103.443
		35.9	157.08	125.556	89.1253	132.777	98.3105	83.0258	122.2	103.258
		36	156.817	125.741	88.6863	132.835	98.5986	83.0312	122.11	103.294
		36.1	156.703	126.057	88.5582	132.79	98.8782	82.9532	122.373	103.297
		36.2	156.539	126.106	88.5774	132.777	98.9567	82.9658	122.84	103.185
		36.3	156.452	125.729	88.6497	132.724	98.8567	83.126	123.352	103.094
		36.4	156.541	125.437	88.5913	132.732	98.6572	83.1264	123.726	102.97
		36.5	156.63	125.028	88.7124	132.819	98.6324	82.9381	123.994	102.85
		36.6	156.602	124.766	88.7762	132.904	98.8265	82.7238	124.014	102.923
		36.7	156.692	124.898	88.9855	133.002	99.0948	82.3921	123.981	103.203
		36.8	156.89	125.181	89.3306	133.036	99.4408	82.1012	123.77	103.538
		36.9	157.011	125.394	89.8788	133.026	99.9904	82.1006	123.65	103.797
		37	157.017	125.882	90.2972	133.047	100.239	82.2584	123.497	103.883
		37.1	157.158	126.066	90.5678	132.982	100.209	82.5403	123.411	103.664
		37.2	157.172	125.956	90.4553	132.91	100.158	82.9413	123.232	103.297
		37.3	157.097	126.004	90.2988	132.844	99.9203	83.4107	123.239	102.869
		37.4	157.027	126.144	89.9167	132.6	99.3754	83.646	123.144	102.483
		37.5	157.194	126.1	89.425	132.099	99.1033	83.717	123.162	102.325
		37.6	157.254	126.241	89.0454	131.712	98.9025	83.5534	123.118	102.34
		37.7	157.29	126.45	88.9524	131.19	98.6782	83.3707	123.132	102.283
		37.8	157.324	126.501	88.8438	130.739	98.5624	82.9792	123	102.194
		37.9	157.202	126.494	89.0307	130.505	98.6233	82.7173	122.873	102.132
		38	157	126.529	89.4127	130.387	98.5729	82.7514	122.548	102.063
		38.1	156.964	126.544	89.6444	130.362	98.5904	82.9792	122.305	102.025
		38.2	157.126	126.605	89.7126	130.539	98.638	83.1398	122.105	102.062
		38.3	157.261	126.684	89.7708	130.649	98.714	83.44	121.982	102.199
		38.4	157.506	126.681	89.6428	130.607	98.8044	83.6849	122.056	102.189
		38.5	157.635	126.595	89.406	130.608	98.7678	83.4809	122.374	102.033
		38.6	157.705	126.466	89.2617	130.428	98.713	83.2965	122.633	101.954
		38.7	157.643	126.35	89.3532	130.151	98.7251	83.2052	122.639	101.99
		38.8	157.527	126.356	89.425	129.992	98.8506	83.0336	122.608	101.95
		38.9	157.506	126.433	89.439	130.058	98.8188	82.776	122.405	102.112
		39	157.426	126.565	89.647	130.157	98.955	82.739	121.898	102.386
		39.1	157.166	126.562	89.8959	130.347	98.9759	82.5269	121.437	102.434
		39.2	156.905	126.354	89.8853	130.472	98.8512	82.166	121.219	102.326
		39.3	156.575	125.918	89.8562	130.488	98.531	81.811	121.041	102.124
		39.4	155.95	125.514	90.0227	130.376	98.5466	81.7039	120.919	101.74
		39.5	155.532	125.097	90.0027	130.189	98.5092	81.7056	121.126	101.308
		39.6	155.291	125.048	90.0426	129.927	98.437	81.811	121.126	100.962
		39.7	154.946	125.284	90.1947	129.76	98.3719	82.0784	121.158	100.642
		39.8	154.933	125.588	90.3978	129.611	98.3379	82.4823	121.361	100.603
		39.9	155.294	125.855	90.3716	129.357	98.0509	82.6374	121.574	100.76
		40	155.421	126.187	90.1513	129.144	97.8134	82.7136	121.67	100.907
		40.1	155.339	126.205	89.781	129.081	97.8116	82.7851	122.038	101.21
		40.2	155.554	126.084	89.5773	129.017	98.056	82.7194	122.259	101.689
		40.3	155.484	126.14	89.2691	129.097	98.3616	82.3701	122.269	102.011
		40.4	155.331	126.185	89.0642	129.555	98.606	82.1068	122.276	102.133
		40.5	155.616	126.049	89.2046	130.013	98.7527	81.8721	122.419	102.281
		40.6	156.228	125.913	89.2922	130.469	98.8433	81.7299	122.558	102.312
		40.7	156.521	125.732	89.0113	131.007	98.6984	81.5676	122.751	102.183
		40.8	156.839	125.358	88.9482	131.375	98.5858	81.6987	122.923	101.99
		40.9	157.123	125.065	88.9106	131.378	98.5652	81.9318	123.042	101.921
		41	157.086	125.097	88.7507	131.557	98.5534	82.1646	122.941	101.908
		41.1	156.772	125.389	88.701	131.648	98.4573	82.2274	122.724	101.916
		41.2	156.573	125.747	88.8623	131.585	98.4979	82.412	122.54	102.087
		41.3	156.336	126.192	88.7968	131.599	98.4047	82.5162	122.358	102.286
		41.4	155.998	126.553	88.6786	131.631	98.3698	82.4184	122.144	102.422
		41.5	155.705	126.675	88.6054	131.4	98.5116	82.1533	121.838	102.411
		41.6	155.622	126.602	88.522	131.107	98.6486	82.0436	121.444	102.46
		41.7	155.807	126.483	88.3684	130.896	98.6091	81.8891	121.194	102.209
		41.8	156.265	126.35	88.3218	130.523	98.7098	81.6485	121.033	101.972
		41.9	156.7	126.19	88.2771	130.285	98.7513	81.5094	120.898	101.795
		42	157.086	126.138	88.2089	130.18	98.6192	81.5982	120.989	101.689
		42.1	157.348	126.188	88.057	130.234	98.5786	81.518	121.151	101.268
		42.2	157.178	126.298	88.0106	130.216	98.7118	81.6123	120.972	100.889
		42.3	156.744	126.387	88.016	130.489	98.7906	81.8735	120.686	100.485
		42.4	156.487	126.663	88.1104	130.617	98.8613	82.1651	120.477	99.9573
		42.5	156.295	126.95	88.1294	130.628	99.0455	82.34	120.168	99.5695
		42.6	156.298	127.103	88.378	130.399	99.1081	82.6958	119.996	99.5036
		42.7	156.56	127.202	88.5594	130.2	99.0997	82.8412	120.102	99.6581
		42.8	156.959	127.375	88.5994	129.69	99.1067	82.7001	120.362	99.7803
		42.9	157.232	127.353	88.556	129.283	99.1532	82.5231	120.58	100.08
		43	157.351	127.177	88.5894	128.967	99.0249	82.37	120.708	100.165
		43.1	157.062	127.074	88.4254	128.821	98.9394	82.0564	120.671	100.116
		43.2	156.9	127.062	88.2267	128.74	98.8461	81.6799	120.454	100.089
		43.3	156.68	127.028	88.0771	128.886	98.6674	81.528	120.151	100.272
		43.4	156.6	126.979	87.9242	128.875	98.4958	81.3782	119.883	100.34
		43.5	156.84	126.926	87.7764	128.66	98.4032	81.2125	119.913	100.39
		43.6	157.469	126.744	87.7507	128.414	98.2312	81.165	120.064	100.435
		43.7	157.79	126.366	87.8909	128.259	98.1157	81.353	120.35	100.381
		43.8	158	125.805	88.1193	128.071	98.1733	81.5147	120.636	100.238
		43.9	157.899	125.374	88.3816	128.14	98.1702	81.6777	120.848	100.12
		44	157.362	125.139	88.661	128.524	98.2345	81.8881	120.798	100.225
		44.1	156.554	125.137	88.8108	128.921	98.4743	82.0617	120.809	100.514
		44.2	155.823	125.346	88.8441	129.097	98.5912	82.0455	120.733	100.774
		44.3	155.229	125.748	88.9457	129.208	98.4219	82.0213	120.775	100.955
		44.4	155.059	126.188	89.1438	129.363	98.3509	82.1111	120.738	101.194
		44.5	155.352	126.573	89.1862	129.44	98.3683	82.2059	120.837	101.32
		44.6	155.811	126.84	89.2645	129.524	98.2358	82.3218	120.806	101.254
		44.7	156.254	127.036	89.2745	129.664	98.2363	82.5504	120.83	101.141
		44.8	156.669	127.196	89.1202	129.874	98.5959	82.7516	120.667	100.971
		44.9	156.82	127.276	88.8823	129.805	98.8665	82.7637	120.786	100.726
		45	156.871	127.198	88.775	129.547	98.8985	82.7991	120.714	100.34
		45.1	157.003	127.1	88.7549	129.201	99.0958	82.7454	120.52	99.9165
		45.2	157.371	126.869	88.8321	128.845	99.204	82.6318	120.324	99.5825
		45.3	157.801	126.546	88.8168	128.384	99.0418	82.5274	120.255	99.4381
		45.4	158.298	126.086	88.7031	127.883	98.8226	82.6011	119.932	99.2997
		45.5	158.495	125.739	88.6013	127.545	98.7068	82.5025	119.86	99.4052
		45.6	158.478	125.505	88.4804	127.387	98.4835	82.4172	120.113	99.5585
		45.7	158.024	125.567	88.3878	127.275	98.3015	82.3228	120.518	99.591
		45.8	157.571	125.863	88.5238	127.198	98.1485	82.3063	120.832	99.3975
		45.9	156.875	126.341	88.8059	127.408	98.0252	82.0364	121.224	99.165
		46	156.321	126.769	89.0659	127.725	97.937	81.929	121.388	98.7
		46.1	155.975	127.089	89.2481	127.934	97.8296	81.9876	121.213	98.3374
		46.2	155.916	127.037	89.3258	128.149	97.7534	82.024	120.831	98.0445
		46.3	155.637	126.78	89.2223	128.539	97.7257	81.9324	120.444	97.9073
		46.4	155.664	126.44	88.982	128.793	97.6432	82.0012	120.035	97.8524
		46.5	155.773	126.244	88.8556	128.794	97.4542	81.9365	119.716	97.9943
		46.6	155.593	126.111	88.7394	128.793	97.2794	81.6919	119.613	98.0746
		46.7	155.444	126.258	88.5946	128.849	96.9896	81.5229	119.454	98.3012
		46.8	155.509	126.389	88.4761	128.699	96.8431	81.3995	119.269	98.5022
		46.9	155.479	126.465	88.4502	128.494	96.9272	81.2972	119.173	98.6533
		47	155.406	126.537	88.2344	128.489	97.1143	81.3572	119.194	98.7266
		47.1	155.685	126.578	88.0337	128.559	97.3144	81.4357	119.194	98.797
		47.2	155.888	126.556	87.8534	128.539	97.6774	81.452	119.306	98.6757
		47.3	156.108	126.66	87.9004	128.47	97.879	81.5097	119.621	98.5947
		47.4	156.421	126.868	88.0307	128.425	97.9423	81.6451	119.816	98.6116
		47.5	156.707	126.887	88.1408	128.217	98.0572	81.7111	119.853	98.7139
		47.6	156.538	126.879	88.2838	127.78	98.1466	81.7721	119.776	98.9014
		47.7	156.293	126.761	88.4461	127.312	98.0592	81.7823	119.599	99.1909
		47.8	155.933	126.498	88.2001	126.858	98.0287	81.6237	119.277	99.479
		47.9	155.454	126.185	87.8251	126.453	98.1422	81.205	119.091	99.7188
		48	155.047	125.927	87.6225	126.171	98.2576	80.7573	118.97	99.8418
		48.1	155.025	125.627	87.4156	126.203	98.3683	80.491	119.011	99.8091
		48.2	155.12	125.55	87.3898	126.22	98.613	80.3575	119.269	99.6858
		48.3	155.178	125.593	87.7928	126.496	98.8244	80.4076	119.392	99.3393
		48.4	155.194	125.728	88.1939	126.814	98.901	80.679	119.361	98.7894
		48.5	155.26	125.928	88.3857	127.148	98.8161	80.9832	119.299	98.209
		48.6	155.275	126.158	88.5068	127.375	98.808	81.0671	119.184	97.825
		48.7	155.44	126.165	88.4054	127.796	98.7682	81.1452	119.018	97.5984
		48.8	155.841	126.14	87.99	128.022	98.6253	81.2299	119.169	97.6192
		48.9	156.504	126.058	87.4948	127.99	98.3946	81.274	119.394	97.8979
		49	156.99	125.85	87.3101	127.754	98.1908	81.2652	119.724	98.2755
		49.1	157.394	125.628	87.2022	127.314	97.9917	81.321	119.885	98.4012
		49.2	157.439	125.399	87.1159	126.689	97.7533	81.2186	119.82	98.3491
		49.3	157.317	125.225	87.2112	126.085	97.6423	80.9125	119.476	98.3176
		49.4	157.052	125.138	87.5154	125.74	97.605	80.4922	119.175	98.2735
		49.5	156.887	125.22	87.6701	125.647	97.6808	80.1276	118.751	98.1026
		49.6	156.731	125.398	87.7854	125.788	97.7567	79.804	118.51	98.1337
		49.7	156.783	125.775	88.024	125.939	97.8978	79.7482	118.346	98.2742
		49.8	156.797	126.002	88.2032	126.141	98.1032	79.9807	118.359	98.3297
		49.9	156.61	125.947	88.2527	126.397	98.3131	80.4497	118.468	98.3394
		50	156.482	125.914	88.1916	126.537	98.472	81.0316	118.686	98.4662
		50.1	156.285	125.917	88.2705	126.631	98.543	81.6838	118.757	98.4737
		50.2	156.096	125.805	88.2851	126.666	98.4714	82.1023	118.886	98.3594
		50.3	155.972	125.914	88.2568	126.627	98.1276	82.4126	119.028	98.1831
		50.4	156.056	126.305	88.247	126.544	97.7388	82.5703	118.876	97.9336
		50.5	155.958	126.505	88.2869	126.438	97.2715	82.5066	118.618	97.7986
		50.6	156.021	126.587	88.105	126.367	96.7905	82.3508	118.575	97.7318
		50.7	156.08	126.734	88.0637	126.499	96.5155	82.3028	118.494	97.7771
		50.8	156.155	126.778	88.1476	126.577	96.4608	82.1577	118.065	97.7376
		50.9	156.28	126.694	88.2659	126.428	96.5572	81.921	117.713	97.7116
		51	156.505	126.683	88.5119	126.361	96.6834	81.7705	117.358	97.428
		51.1	156.674	126.738	88.8964	126.222	96.8274	81.5545	116.799	97.3408
		51.2	156.911	126.772	89.0613	125.954	96.8107	81.2856	116.354	97.2849
		51.3	157.011	126.743	89.1382	125.886	96.9083	81.0809	116.305	97.4461
		51.4	156.857	126.847	89.2284	126.04	96.9959	80.9651	116.556	97.6961
		51.5	156.787	126.965	89.1521	126.119	97.2657	80.8046	116.973	97.9512
		51.6	156.749	127.049	89.038	126.222	97.5548	80.6433	117.564	97.6987
		51.7	156.513	127.129	88.9842	126.361	98.0132	80.4645	118.122	97.1984
		51.8	156.393	127.285	88.9082	126.425	98.1868	80.236	118.523	96.5149
		51.9	156.612	127.221	88.8067	126.455	98.1313	80.1559	118.619	95.8977
		52	156.628	127.275	88.6851	126.509	97.9206	80.3192	118.595	95.7193
		52.1	156.362	127.309	88.5402	126.501	97.7448	80.7169	118.475	96.0053
		52.2	156.032	127.256	88.3939	126.51	97.4208	81.1623	118.192	96.7356
		52.3	155.768	127.089	88.257	126.249	97.2301	81.6906	117.932	97.7669
		52.4	155.233	127.009	88.009	126.092	97.1822	82.0803	117.808	98.594
		52.5	154.934	126.663	87.8646	126.041	97.0085	82.211	117.562	98.8741
		52.6	154.935	126.353	87.6958	125.988	96.8307	82.1488	117.428	98.8938
		52.7	155.276	126.135	87.5035	125.956	96.7997	82.0979	117.675	98.5315
		52.8	155.494	126.117	87.2525	126.357	96.8432	82.0932	117.996	97.9102
		52.9	155.748	126.025	87.0321	126.477	97.0326	81.972	118.306	97.4006
		53	155.953	126.168	86.8682	126.377	97.4866	81.906	118.812	97.2471
		53.1	156.147	126.358	86.675	126.364	97.9451	82.0044	119.089	97.1958
		53.2	156.195	126.488	86.5587	126.263	98.1737	82.1352	119.022	97.294
		53.3	156.407	126.441	86.733	125.873	98.273	82.125	118.749	97.5034
		53.4	156.744	126.61	87.1226	125.636	98.1394	82.2128	118.321	97.712
		53.5	156.897	126.793	87.4949	125.582	97.8061	82.3316	117.717	97.7829
		53.6	156.95	126.766	88.0183	125.398	97.3804	82.171	117.142	97.7968
		53.7	156.877	126.755	88.5721	125.175	97.098	81.8691	116.458	97.7595
		53.8	156.617	126.93	88.8269	124.994	97.0212	81.5978	115.866	97.576
		53.9	156.154	127.049	88.8954	124.702	97.0773	81.3878	115.389	97.1956
		54	155.879	126.937	88.8496	124.259	97.244	81.1417	115.259	96.7222
		54.1	155.7	127.069	88.7458	124.028	97.4553	80.958	115.35	96.3189
		54.2	155.668	127.152	88.6064	123.963	97.6649	80.9035	115.834	96.0472
		54.3	155.834	126.879	88.5887	123.986	97.588	80.8165	116.41	95.9868
		54.4	156.157	126.441	88.6096	124.191	97.4531	80.6897	117.097	96.2287
		54.5	156.412	126.177	88.626	124.568	97.2641	80.6254	117.359	96.5743
		54.6	156.676	125.899	88.6219	124.792	97.2548	80.6408	117.534	96.8981
		54.7	156.756	125.734	88.4336	124.865	97.1479	80.5988	117.681	97.1721
		54.8	156.689	125.911	88.2012	124.974	97.2442	80.7872	117.864	97.3209
		54.9	156.633	126.319	87.944	125.004	97.2775	81.0001	117.888	97.2714
		55	156.71	126.91	87.6934	124.924	97.3654	81.1227	118.09	97.2095
		55.1	156.585	127.439	87.4318	124.826	97.196	81.296	118.068	97.0931
		55.2	156.683	127.883	87.3942	124.873	97.2192	81.4818	117.757	96.7478
		55.3	156.805	128.255	87.471	124.866	97.182	81.3902	117.318	96.2388
		55.4	156.91	128.424	87.635	124.975	97.2952	81.2188	116.855	95.8415
		55.5	156.753	128.21	87.894	125.025	97.4082	81.1387	116.419	95.4096
		55.6	156.717	127.787	88.1982	125.189	97.6801	81.0559	116.253	94.9963
		55.7	156.458	127.437	88.4836	125.201	97.6963	81.0326	116.133	94.7686
		55.8	156.208	126.947	88.6159	125.123	97.7933	81.1121	116.028	94.7797
		55.9	156.004	126.484	88.6822	124.836	97.7754	81.3684	116.123	94.7486
		56	156.054	126.129	88.8185	124.701	97.6116	81.5389	116.246	94.8312
		56.1	156.152	125.998	88.8501	124.493	97.2295	81.6671	116.331	95.0532
		56.2	156.435	125.849	88.7883	124.413	97.0236	81.8444	116.609	95.2181
		56.3	156.74	125.82	88.6995	124.322	96.7097	82.1402	116.891	95.372
		56.4	156.937	126.056	88.5358	124.213	96.4907	82.2316	116.94	95.5532
		56.5	156.835	126.349	88.2145	123.929	96.514	82.3548	116.929	95.623
		56.6	156.674	126.538	88.0321	123.619	96.8841	82.4806	116.843	95.4143
		56.7	156.598	126.592	87.773	123.292	97.3398	82.3786	116.523	95.3894
		56.8	156.371	126.528	87.5559	123.07	97.8136	82.1174	116.261	95.2704
		56.9	156.097	126.178	87.4759	123.078	98.3015	81.9097	116.024	95.185
		57	156.059	125.954	87.5107	123.264	98.5726	81.6584	115.642	95.2298
		57.1	156.056	125.87	87.4276	123.624	98.6022	81.2746	115.283	95.5499
		57.2	155.826	125.849	87.583	123.936	98.4692	80.9489	115.066	95.7191
		57.3	155.665	126.051	87.7708	124.327	98.3669	80.6637	114.808	95.9215
		57.4	155.573	126.23	88.0226	124.555	98.1866	80.4383	114.689	95.9282
		57.5	155.472	126.203	87.9675	124.628	98.1134	80.2957	114.82	95.8649
		57.6	155.476	126.084	87.8773	124.47	98.1018	80.4179	114.921	95.77
		57.7	155.594	126.151	87.6131	124.291	98.0968	80.6394	114.978	95.7054
		57.8	155.798	126.032	87.3469	123.984	98.0239	80.8715	115.051	95.7674
		57.9	155.921	126.071	86.8632	123.8	97.9444	81.132	115.085	95.9883
		58	156.001	126.284	86.7722	123.749	97.8257	81.3824	115.031	96.131
		58.1	155.857	126.563	86.9336	123.765	97.6326	81.4057	115.153	96.1973
		58.2	155.781	126.692	87.2825	123.817	97.4626	81.4547	115.425	96.1794
		58.3	155.796	126.873	87.682	123.871	97.3039	81.6004	115.645	96.0105
		58.4	156.144	126.944	88.2532	123.781	97.0725	81.7082	115.985	95.8469
		58.5	156.49	126.924	88.6316	123.657	96.9592	81.7876	116.376	95.7802
		58.6	156.969	126.819	88.9025	123.757	96.9242	82.0842	116.465	95.6922
		58.7	157.305	126.722	88.9404	123.855	96.8434	82.3284	116.37	95.7727
		58.8	157.477	126.656	88.8791	123.915	96.6914	82.3668	116.501	95.8067
		58.9	157.377	126.767	88.5867	123.954	96.5862	82.3004	116.453	95.7884
		59	157.208	126.83	88.3743	123.963	96.3024	82.301	116.36	95.7268
		59.1	156.994	127.045	88.0187	123.654	96.1036	82.1498	116.426	95.6974
		59.2	156.778	127.305	87.8102	123.197	96.1442	82.0752	116.531	95.544
		59.3	156.616	127.53	87.6852	122.753	96.4018	82.2146	116.268	95.5386
		59.4	156.336	127.545	87.7576	122.449	96.7978	82.4942	116.02	95.6312
		59.5	156.196	127.691	87.7663	122.149	97.2715	82.7214	115.761	95.6493
		59.6	155.996	127.676	87.8436	121.815	97.618	83.0226	115.569	95.5967
		59.7	155.869	127.565	87.7331	121.758	97.7197	83.2404	115.39	95.5735
		59.8	155.661	127.601	87.4454	121.792	97.7644	83.2024	115.421	95.4252
		59.9	155.814	127.633	87.089	121.876	97.6789	83.1698	115.507	95.2222
		60	155.866	127.588	86.8282	121.893	97.5973	83.0962	115.523	95.2204
		60.1	155.977	127.58	86.5957	122.163	97.5379	82.9583	115.488	95.2824
		60.2	156.124	127.623	86.6598	122.316	97.5132	82.7764	115.418	95.3354
		60.3	156.424	127.47	87.1293	122.525	97.3622	82.8138	115.329	95.5068
		60.4	156.36	127.503	87.7069	122.574	97.2589	82.6755	115.063	95.5787
		60.5	156.308	127.415	88.1649	122.751	97.2588	82.5837	114.921	95.4698
		60.6	156.379	127.279	88.6058	122.809	97.3025	82.3496	114.719	95.4316
		60.7	156.309	127.131	88.8626	122.866	97.4782	82.0609	114.613	95.4159
		60.8	156.079	126.875	88.7412	122.753	97.8062	81.6315	114.526	95.2121
		60.9	156.099	126.489	88.4829	122.693	98.1076	81.3087	114.731	95.1882
		61	156.184	126.317	88.3224	122.588	98.1255	80.9692	114.902	95.2608
		61.1	156.075	126.168	88.175	122.571	98.1644	80.8035	115.204	95.1962
		61.2	156.134	125.977	88.0232	122.465	98.0178	80.7909	115.323	95.1203
		61.3	156.316	126.122	87.9597	122.436	97.6481	80.971	115.361	95.3216
		61.4	156.279	126.32	87.9976	122.507	97.3782	81.0865	115.131	95.294
		61.5	156.229	126.317	87.9626	122.592	97.3206	81.1801	114.774	95.0711
		61.6	156.284	126.445	87.859	122.582	97.1068	81.3464	114.262	94.8849
		61.7	156.251	126.679	87.7292	122.727	96.8846	81.4239	114.078	94.7275
		61.8	156.104	126.668	87.7878	122.856	96.6968	81.3431	113.996	94.3915
		61.9	156.039	126.593	87.8873	122.707	96.2794	81.3946	114.194	94.2946
		62	155.842	126.508	88.0242	122.608	95.9253	81.5772	114.478	94.3776
		62.1	155.789	126.183	88.3107	122.515	95.7544	81.5829	114.87	94.4495
		62.2	155.707	125.675	88.7013	122.225	95.7413	81.5887	114.975	94.4681
		62.3	155.704	125.196	88.818	121.839	95.9722	81.5646	115.006	94.572
		62.4	155.906	124.796	88.7643	121.691	96.438	81.518	114.768	94.4376
		62.5	156.278	124.6	88.6129	121.378	96.8644	81.2598	114.561	94.2683
		62.6	156.451	124.615	88.3238	121.047	97.1934	81.1002	114.219	94.2103
		62.7	156.69	124.899	87.9636	120.94	97.5022	80.9661	114.052	94.1342
		62.8	157.137	125.347	87.7217	121.054	97.778	80.8784	113.947	93.8874
		62.9	157.395	125.768	87.5544	121.021	98.0648	80.6357	113.989	93.924
		63	157.598	126.003	87.5872	121.122	98.2416	80.4776	113.905	94.0815
		63.1	157.801	126.138	87.5984	121.226	98.5126	80.2297	113.962	94.1728
		63.2	157.95	126.154	87.6609	121.199	98.5912	80.024	114.101	94.2929
		63.3	157.668	125.988	87.7864	120.979	98.4936	79.9178	114.224	94.53
		63.4	157.445	125.793	88.0766	121.022	98.0894	80.0665	114.276	94.6086
		63.5	157.114	125.83	88.243	120.828	97.5013	80.3003	114.634	94.5398
		63.6	156.765	125.912	88.5	120.692	96.6511	80.6285	114.921	94.4186
		63.7	156.412	125.934	88.62	120.591	96.0646	80.8802	114.811	94.3897
		63.8	156.364	126.019	88.5605	120.676	95.5636	80.9128	114.694	94.3583
		63.9	156.262	126.036	88.213	120.533	95.3252	80.6971	114.625	94.3224
		64	156.338	125.934	87.8949	120.751	95.5663	80.4659	114.43	94.2545
		64.1	156.585	125.944	87.5533	121.035	96.0782	80.3824	114.397	94.3828
		64.2	156.803	125.962	87.407	121.346	96.4142	80.4579	114.675	94.5214
		64.3	156.953	126.021	87.305	121.488	96.7066	80.7544	114.896	94.7069
		64.4	156.984	126.138	87.2602	121.736	96.9129	81.1438	115.074	94.7884
		64.5	156.944	126.214	87.1527	121.911	96.8509	81.5144	115.102	95.0497
		64.6	156.691	126.102	87.1321	121.948	96.7844	81.6288	114.975	95.0826
		64.7	156.38	126.075	87.0448	121.965	96.8077	81.7117	114.653	94.8378
		64.8	156.062	126.05	87.1425	121.951	96.9982	81.829	114.268	94.4891
		64.9	156.002	126.203	87.413	121.724	97.2838	81.9856	113.903	94.381
		65	155.89	126.403	87.678	121.25	97.608	81.927	113.682	94.2014
		65.1	155.982	126.575	87.8032	120.813	97.8304	81.9598	113.436	94.0428
		65.2	156.163	126.616	88.0071	120.266	98.0034	81.8286	113.237	94.2551
		65.3	156.29	126.659	88.1059	119.818	97.9501	81.3852	113.132	94.618
		65.4	156.258	126.563	88.0801	119.642	97.8158	80.9604	113.014	94.729
		65.5	156.282	126.434	88.1468	119.665	97.6646	80.7771	112.734	94.6598
		65.6	155.982	126.445	88.2377	119.758	97.3536	80.5433	112.541	94.7309
		65.7	155.863	126.586	88.0702	120.009	97.0377	80.3157	112.532	94.5221
		65.8	155.75	126.563	87.803	120.35	96.8164	80.337	112.707	94.1553
		65.9	155.738	126.427	87.5266	120.475	96.5178	80.2316	113.062	94.0031
		66	155.845	126.379	87.2253	120.549	96.1913	80.1102	113.643	94.0264
		66.1	156.45	126.28	86.931	120.518	96.1692	80.1136	114.177	93.9535
		66.2	156.933	126.09	86.8174	120.347	96.1388	80.2108	114.644	94.0115
		66.3	157.414	126.025	86.8536	120.062	95.966	80.2584	114.889	94.1735
		66.4	157.843	126.218	86.9077	119.936	95.9288	80.55	114.91	94.1723
		66.5	157.964	126.287	86.8614	119.805	95.9443	80.92	114.678	94.0931
		66.6	157.537	126.442	86.9045	119.667	95.8425	81.2409	114.39	94.0009
		66.7	156.936	126.709	86.9609	119.649	95.8824	81.5306	113.884	93.7652
		66.8	156.394	126.993	86.9788	119.661	96.238	81.815	113.387	93.4235
		66.9	155.906	127.056	87.032	119.618	96.5698	81.8902	112.856	93.1833
		67	155.625	127.139	87.285	119.681	96.7711	81.7012	112.516	93.0441
		67.1	155.762	127.152	87.6041	119.793	97.0499	81.3844	112.288	92.8574
		67.2	156.11	127.004	88.0593	119.786	97.1687	81.0852	112.353	92.8524
		67.3	156.464	126.752	88.5507	119.728	96.9831	80.826	112.437	93.0395
		67.4	156.75	126.585	89.0832	119.624	96.6998	80.5598	112.878	93.1847
		67.5	157.092	126.46	89.3639	119.37	96.478	80.4611	113.379	93.2175
		67.6	157.378	126.452	89.401	119.221	96.0569	80.5516	113.802	93.216
		67.7	157.511	126.714	89.076	119.252	95.6974	80.6434	114.046	93.1154
		67.8	157.598	127.114	88.5744	119.319	95.625	80.7187	114.308	92.8263
		67.9	157.602	127.443	88.0039	119.45	95.7765	80.8408	114.029	92.4991
		68	157.372	127.605	87.6258	119.648	96.1169	80.9508	113.4	92.3368
		68.1	156.868	127.554	87.3178	119.802	96.6169	80.9762	112.847	92.5117
		68.2	156.529	127.132	87.1904	119.993	97.2172	81.013	112.288	92.6692
		68.3	156.218	126.694	87.2757	120.273	97.6121	80.9248	111.797	92.8932
		68.4	156.015	126.21	87.3216	120.636	97.8782	80.9165	111.733	93.3016
		68.5	155.975	125.951	87.3241	120.957	98.0104	81.0064	111.908	93.6449
		68.6	156.237	125.782	87.5464	121.161	98.1158	80.9949	111.962	93.6967
		68.7	156.303	125.953	87.8266	121.154	98.0289	80.9302	112.069	93.8816
		68.8	156.454	126.024	87.8728	120.807	97.8659	81.0532	112.139	94.0099
		68.9	156.518	126.29	88.0508	120.198	97.6199	81.0344	112.057	93.8946
		69	156.476	126.442	88.175	119.616	97.3927	80.7106	111.984	93.6924
		69.1	156.225	126.489	87.9507	119.169	97.1093	80.5698	111.998	93.6154
		69.2	156.176	126.335	87.6883	118.64	96.839	80.4794	112.107	93.3652
		69.3	155.833	126.27	87.6404	118.563	96.8015	80.3876	112.172	93.2942
		69.4	155.432	126.158	87.4849	118.707	96.797	80.5315	112.194	93.3784
		69.5	155.202	126.15	87.388	118.864	96.6755	81.1322	112.29	93.4822
		69.6	155.202	126.268	87.6264	118.765	96.5097	81.6696	112.389	93.4223
		69.7	155.105	126.386	87.9011	118.709	96.5036	82.2315	112.391	93.5048
		69.8	155.203	126.402	88.0844	118.427	96.4228	82.6592	112.401	93.4427
		69.9	155.596	126.324	88.2562	118.072	96.4277	82.8088	112.594	93.3943
		70	155.894	126.199	88.5004	117.58	96.6746	82.621	112.608	93.3675
		70.1	155.957	126.095	88.505	117.382	97.1606	82.2967	112.564	93.4626
		70.2	155.91	126.158	88.395	117.52	97.6147	82.0486	112.542	93.4083
		70.3	155.917	126.311	88.3691	117.757	97.9069	81.907	112.58	93.3814
		70.4	155.799	126.349	88.4786	118.039	98.155	81.9864	112.374	93.2132
		70.5	155.708	126.357	88.4178	118.519	98.1231	82.143	112.338	92.914
		70.6	155.722	126.444	88.5607	119.02	97.9046	82.4711	112.421	92.6194
		70.7	156.095	126.309	88.7848	119.323	97.4731	82.5191	112.432	92.5322
		70.8	156.414	126.163	88.7894	119.433	97.1074	82.4018	112.423	92.341
		70.9	156.738	126.267	88.5286	119.499	96.5864	81.9993	112.594	92.3852
		71	157.019	126.374	88.3619	119.566	96.0814	81.5317	112.619	92.6479
		71.1	157.207	126.26	87.8648	119.31	95.6376	80.978	112.632	92.9284
		71.2	156.843	126.409	87.4295	119.027	95.3663	80.5395	112.727	93.0072
		71.3	156.388	126.697	87.1825	118.916	95.185	80.2293	112.765	93.1515
		71.4	155.759	126.891	87.1011	118.811	95.1616	80.1087	112.7	93.0446
		71.5	155.131	126.989	86.9017	118.669	95.2829	80.042	112.818	92.9661
		71.6	154.696	127.176	86.9374	118.82	95.2183	80.0869	112.837	92.8027
		71.7	154.713	127.061	86.8558	118.941	95.0475	80.094	112.859	92.7813
		71.8	154.975	126.679	86.9418	118.946	94.9284	80.0358	112.858	92.9322
		71.9	155.38	126.338	87.061	118.966	94.8856	80.0358	113.008	93.1897
		72	155.817	126.062	87.3828	118.909	94.8514	80.1029	112.903	93.1818
		72.1	156.203	125.769	87.7069	118.691	95.0221	80.0385	112.791	93.2755
		72.2	156.45	125.583	87.9068	118.417	95.3927	80.2161	112.621	93.2533
		72.3	156.51	125.506	87.7145	118.295	95.5935	80.4498	112.52	92.9485
		72.4	156.633	125.267	87.5872	118.176	95.6335	80.604	112.218	92.5889
		72.5	156.742	125.142	87.3697	118.108	95.6671	80.8579	112.147	92.3798
		72.6	156.633	125.082	87.1226	117.994	95.5732	81.1872	112.033	92.0379
		72.7	156.462	125.233	87.158	117.959	95.3196	81.3751	111.941	91.8078
		72.8	156.357	125.394	87.4567	117.712	95.1618	81.5977	111.761	91.7637
		72.9	156.134	125.695	87.6398	117.347	95.1029	81.7499	111.562	91.8384
		73	155.969	125.93	87.7416	116.891	95.0044	81.5909	111.125	91.9258
		73.1	156.054	126.061	87.8194	116.678	95.0245	81.4438	110.869	92.0986
		73.2	156.344	125.867	87.8822	116.484	95.1116	81.1345	110.694	92.169
		73.3	156.617	125.764	87.7861	116.474	95.1381	80.6854	110.705	92.22
		73.4	156.921	125.686	87.7661	116.662	95.0775	80.3789	110.95	92.1808
		73.5	157.09	125.607	87.7248	117.132	94.9542	80.2854	111.471	92.1964
		73.6	157.083	125.628	87.6336	117.501	94.8494	80.1443	111.939	92.1431
		73.7	156.932	125.843	87.3326	117.684	94.6593	80.283	112.251	92.1631
		73.8	156.692	126.004	87.2168	117.857	94.4932	80.5854	112.446	92.2543
		73.9	156.344	126.101	86.9447	117.851	94.31	80.7985	112.424	92.352
		74	156.094	126.156	86.7629	117.537	94.192	80.9016	112.213	92.4364
		74.1	155.96	126.171	86.6274	117.199	94.0518	81.0242	111.927	92.7072
		74.2	155.773	126.111	86.5374	117.216	94.1143	81.1356	111.749	92.9842
		74.3	155.752	125.839	86.259	117.168	94.3776	81.1671	111.508	93.1293
		74.4	155.916	125.727	86.1399	117.244	94.9271	81.2282	111.418	93.357
		74.5	156.194	125.696	86.0187	117.274	95.6014	81.3671	111.3	93.4923
		74.6	156.441	125.767	86.0557	117.119	96.234	81.4577	111.178	93.429
		74.7	156.692	125.898	86.3528	116.683	96.7433	81.2434	111.059	93.1945
		74.8	156.775	126.302	86.7555	116.236	97.0018	81.0674	110.927	92.9329
		74.9	156.83	126.445	87.0552	115.733	96.989	81.0175	110.804	92.5281
		75	156.789	126.413	87.5267	115.373	96.7539	80.9959	110.829	92.1368
		75.1	156.908	126.155	87.9206	115.242	96.4933	80.9907	110.854	91.9129
		75.2	157.207	125.815	88.1608	115.231	96.1028	81.185	110.776	91.8967
		75.3	157.6	125.522	88.3669	115.215	95.8139	81.2338	110.826	91.8196
		75.4	157.933	125.412	88.6683	115.277	95.6532	81.0885	110.683	91.8843
		75.5	158.067	125.606	88.6268	115.502	95.664	80.8473	110.41	92.0309
		75.6	157.948	126.071	88.2692	115.709	95.6038	80.6232	110.134	91.8826
		75.7	157.705	126.597	87.737	115.921	95.5322	80.2445	110.021	91.5924
		75.8	157.318	126.89	87.2414	116.191	95.404	79.928	109.989	91.53
		75.9	156.963	127.12	86.6736	116.349	95.0586	79.686	110.134	91.4144
		76	157.019	127.006	86.4131	116.268	94.6886	79.4875	110.419	91.3714
		76.1	157.13	126.807	86.55	116.173	94.5936	79.3606	110.73	91.807
		76.2	157.1	126.734	86.8811	116.25	94.832	79.5682	110.915	92.4614
		76.3	157.223	126.809	87.1359	116.326	95.112	80.0776	110.96	92.9725
		76.4	157.225	126.885	87.4086	116.344	95.655	80.6265	110.986	93.3619
		76.5	156.808	127.305	87.4586	116.548	96.1464	81.1955	110.872	93.374
		76.6	156.424	127.552	87.2324	116.73	96.3844	81.6537	110.808	92.8748
		76.7	155.969	127.581	86.8348	116.493	96.3837	81.9523	110.823	92.1695
		76.8	155.443	127.525	86.5452	116.152	96.3748	81.9583	110.829	91.6496
		76.9	155.057	127.507	86.3074	116.15	96.2333	81.7679	110.758	91.2925
		77	155.048	127.179	86.2429	115.895	95.9568	81.5373	110.673	91.1617
		77.1	155.014	127.047	86.3883	115.733	95.8486	81.3926	110.6	91.353
		77.2	155.314	127.046	86.7642	115.81	95.7513	81.1409	110.44	91.5626
		77.3	155.779	127.057	87.0435	116.042	95.7068	80.9037	110.241	91.518
		77.4	156.211	126.937	87.2171	115.884	95.7029	80.9613	110.223	91.4125
		77.5	156.314	126.98	87.3383	115.913	95.9208	81.0807	110.446	91.411
		77.6	156.547	126.894	87.523	115.812	95.9682	81.2212	110.626	91.2283
		77.7	156.643	126.582	87.5757	115.708	96.0087	81.4028	110.847	91.1353
		77.8	156.635	126.241	87.809	115.54	96.0336	81.5473	111.174	91.1406
		77.9	156.557	126.051	88.1533	115.57	96.1185	81.5571	111.115	91.0902
		78	156.562	125.823	88.3551	115.648	96.0205	81.5343	110.955	90.8627
		78.1	156.291	125.664	88.2615	115.823	95.8561	81.3693	110.85	90.7422
		78.2	155.968	125.849	88.1037	116.052	95.7278	81.3018	110.739	90.5472
		78.3	155.613	126.167	87.714	116.181	95.4148	81.353	110.597	90.3138
		78.4	155.44	126.522	87.2631	116.235	94.9416	81.2957	110.805	90.192
		78.5	155.468	126.907	87.0008	116.086	94.6697	81.1192	110.8	90.285
		78.6	155.824	127.208	86.9577	115.849	94.6104	80.9219	110.659	90.5752
		78.7	156.362	127.243	86.9664	115.499	94.6586	80.6052	110.468	90.9293
		78.8	156.837	127.093	87.0322	115.421	94.8632	80.2842	110.287	91.466
		78.9	157.201	126.673	87.072	115.426	95.1309	80.094	110.05	91.9626
		79	157.332	126.216	86.9447	115.665	95.3023	80.1975	109.945	92.3164
		79.1	157.402	125.913	86.8777	115.82	95.4419	80.5705	109.925	92.3204
		79.2	157.401	125.781	86.806	116.147	95.2136	81.1024	110.046	92.3659
		79.3	157.582	125.833	86.774	116.177	94.9155	81.4819	110.045	92.0567
		79.4	157.627	126.107	86.7414	116.175	94.6714	81.8053	109.997	91.688
		79.5	157.63	126.389	86.792	116.03	94.3769	81.7513	109.973	91.3998
		79.6	157.345	126.691	86.5804	115.984	93.9344	81.4933	109.976	91.1775
		79.7	157.002	127.078	86.4969	115.745	93.8161	81.0694	109.867	90.8764
		79.8	156.589	127.46	86.5632	115.607	93.8185	80.7691	110.05	90.9756
		79.9	156.455	127.853	86.6928	115.521	93.7674	80.5192	110.24	91.21
		80	156.571	128.098	86.8382	115.507	93.7142	80.7278	110.41	91.2859
		80.1	157.06	128.057	87.1715	115.628	93.7854	81.0644	110.517	91.5291
		80.2	157.455	127.604	87.4904	115.689	93.7988	81.4936	110.526	91.6304
		80.3	157.767	127.074	87.4901	115.751	93.8416	81.9838	110.12	91.4512
		80.4	157.937	126.488	87.4954	115.644	93.9409	82.4438	109.698	91.1562
		80.5	157.907	126.271	87.6348	115.421	94.1351	82.4456	109.372	91.0464
		80.6	157.603	126.428	87.7408	114.97	94.515	82.2128	109.118	90.6608
		80.7	157.442	126.95	87.6882	114.704	94.9642	81.9777	109.154	90.3621
		80.8	157.318	127.411	87.8695	114.44	95.2242	81.7392	109.581	90.2024
		80.9	157.088	127.814	87.9564	114.073	95.441	81.5195	110.026	90.089
		81	156.86	127.9	87.7875	113.686	95.5937	81.5532	110.428	89.8611
		81.1	156.662	127.6	87.5666	113.417	95.4363	81.7954	110.837	90.0076
		81.2	156.372	127.217	87.3358	113.064	95.2001	82.0851	111.184	90.3833
		81.3	156.155	127.016	87.0356	112.818	95.0254	82.1959	111.319	90.6952
		81.4	156.11	126.883	86.855	112.999	94.8351	82.2489	111.502	90.9053
		81.5	156.281	126.811	86.9014	113.39	94.6893	82.293	111.627	91.1456
		81.6	156.443	126.866	87.0832	113.807	94.6338	82.2442	111.582	91.2215
		81.7	156.657	126.804	87.5391	114.407	94.461	81.8832	111.243	91.14
		81.8	156.675	126.508	88.0918	114.802	94.2357	81.5726	110.871	91.13
		81.9	156.441	126.205	88.4628	115.063	93.9194	81.2906	110.321	91.2442
		82	156.088	125.954	88.7769	115.183	93.5608	80.8563	109.717	91.3904
		82.1	156.022	125.766	89.0277	115.317	93.3114	80.3765	109.344	91.349
		82.2	155.993	125.547	88.9941	115.197	93.2278	80.2564	109.222	91.2695
		82.3	156.044	125.326	88.7846	115.092	93.4422	80.2856	109.212	91.1402
		82.4	156.4	125.048	88.7594	114.782	93.9564	80.3102	109.454	90.9995
		82.5	156.542	124.739	88.5527	114.46	94.622	80.3598	109.771	90.8955
		82.6	156.3	124.534	88.1772	114.049	95.1662	80.5541	109.896	91.171
		82.7	155.963	124.581	87.8215	113.707	95.5781	80.5904	109.909	91.5534
		82.8	155.77	124.778	87.5972	113.555	95.7477	80.5008	109.739	91.9496
		82.9	155.611	125.037	87.3225	113.638	95.7139	80.3724	109.291	92.4308
		83	155.787	125.352	87.2688	113.794	95.3874	80.443	108.828	92.9079
		83.1	156.269	125.523	87.4757	114.037	95.0854	80.3648	108.512	93.097
		83.2	156.912	125.588	87.8895	114.405	94.8216	80.1974	108.306	93.0766
		83.3	157.527	125.721	88.2543	114.71	94.6031	80.1315	108.254	93.0131
		83.4	157.863	125.901	88.5308	114.749	94.247	80.2248	108.436	92.6808
		83.5	158.075	126.203	88.7018	114.683	93.9997	80.2365	108.715	92.168
		83.6	158.105	126.543	88.6997	114.488	93.7139	80.3414	108.832	91.7531
		83.7	157.942	126.79	88.5168	114.041	93.5269	80.6483	108.895	91.6531
		83.8	157.843	126.733	88.3973	113.475	93.2933	80.8366	108.956	91.595
		83.9	157.819	126.708	88.4814	113.074	93.1467	80.9091	108.932	91.7323
		84	157.63	126.487	88.4835	112.844	93.0744	80.8079	108.673	92.0222
		84.1	157.491	126.319	88.4638	112.723	93.185	80.6893	108.48	92.1948
		84.2	157.508	126.294	88.3963	112.79	93.3168	80.5587	108.195	91.9558
		84.3	157.299	126.684	88.1798	113.069	93.5035	80.5493	108.036	91.6731
		84.4	157.196	126.947	87.7482	113.37	93.836	80.6028	107.863	91.3136
		84.5	157.369	127.097	87.3588	113.506	94.161	80.9359	107.884	90.8584
		84.6	157.63	127.255	87.0889	113.608	94.2944	81.3528	108.039	90.5126
		84.7	157.767	127.325	86.9465	113.784	94.3113	81.6409	108.443	90.3376
		84.8	157.989	126.971	86.8222	113.682	94.3437	81.8338	108.74	90.2555
		84.9	157.988	126.614	86.8351	113.628	94.3116	82.0174	109.101	90.3034
		85	157.698	126.482	86.8836	113.625	94.2913	82.0051	109.41	90.606
		85.1	157.275	126.258	86.7284	113.606	94.2878	81.9085	109.6	90.8991
		85.2	156.833	126.046	86.5633	113.422	94.3086	81.8295	109.614	91.4418
		85.3	156.298	126.23	86.5148	113.442	94.3311	81.7195	109.556	91.8292
		85.4	155.879	126.499	86.467	113.234	94.4473	81.5793	109.344	91.9113
		85.5	155.588	126.735	86.5745	113.078	94.5896	81.4628	109.209	91.5933
		85.6	155.372	126.991	87.0662	112.947	94.8066	81.264	109.116	91.1747
		85.7	155.448	127.257	87.5254	112.879	94.9739	81.1694	108.974	90.3604
		85.8	155.715	127.317	87.9434	112.73	94.9952	81.1573	108.901	89.6067
		85.9	156.073	127.312	88.2127	112.831	94.8349	81.0656	108.903	89.256
		86	156.411	127.215	88.2886	112.838	94.5877	81.0866	108.775	89.165
		86.1	156.633	127.16	88.0715	112.827	94.342	81.1663	108.499	89.2442
		86.2	156.517	127.127	87.9572	112.823	94.2522	81.1633	108.255	89.64
		86.3	156.298	127.159	87.9527	113.047	94.2823	81.1929	107.987	90.1352
		86.4	156.05	127.157	88.1539	113.168	94.3247	81.2238	107.809	90.4681
		86.5	156.034	127.091	88.3667	113.199	94.3812	81.139	107.757	90.7837
		86.6	156.054	127.036	88.6625	113.203	94.4461	81.122	107.941	90.9808
		86.7	156.155	126.968	88.766	113.152	94.3886	81.2232	108.184	90.9764
		86.8	156.253	126.81	88.6037	112.787	94.2931	81.1955	108.339	91.0475
		86.9	156.446	126.756	88.2559	112.449	94.234	81.2458	108.396	91.0245
		87	156.346	126.861	87.8554	112.417	94.2958	81.2756	108.388	90.9897
		87.1	156.427	126.909	87.3066	112.431	94.2454	81.1865	108.186	91.007
		87.2	156.467	126.834	86.9339	112.423	94.3371	80.879	108.017	91.178
		87.3	156.576	126.733	86.7849	112.444	94.5053	80.5301	107.964	91.2075
		87.4	156.472	126.547	86.7265	112.433	94.5652	80.2245	107.9	91.2135
		87.5	156.444	126.32	86.8338	112.332	94.4466	80.0214	107.798	91.0422
		87.6	156.216	126.052	87.1782	112.22	94.481	79.9829	107.794	90.7616
		87.7	156.21	125.956	87.5115	112.35	94.3262	80.062	107.637	90.3654
		87.8	156.052	125.965	87.7331	112.689	94.1526	80.3173	107.404	89.8841
		87.9	155.994	126.007	88.0916	112.948	94.3236	80.5011	107.249	89.5722
		88	156.051	126.197	88.4082	113.022	94.6083	80.67	107.143	89.4129
		88.1	156.095	126.461	88.6185	113.118	94.7898	80.6981	106.924	89.3236
		88.2	155.828	126.691	88.596	113.002	94.9276	80.7769	106.844	89.3586
		88.3	155.772	126.819	88.5668	112.804	94.9779	80.8281	106.87	89.4338
		88.4	155.972	126.98	88.2541	112.779	94.7476	80.8939	106.842	89.3772
		88.5	156.056	126.838	87.8638	112.859	94.426	80.9857	106.781	89.406
		88.6	156.394	126.648	87.4485	112.941	94.1541	81.1995	106.839	89.5091
		88.7	157.049	126.296	87.2081	112.997	94.1707	81.3685	106.811	89.5598
		88.8	157.558	126.264	86.974	112.904	94.176	81.4908	106.698	89.6247
		88.9	157.709	126.268	86.8309	112.553	94.2184	81.6637	106.591	89.7647
		89	157.953	126.454	86.8106	112.194	94.3653	81.7904	106.577	89.8558
		89.1	157.954	126.611	86.8443	111.85	94.5255	81.8803	106.513	89.9519
		89.2	157.856	126.85	86.9466	111.503	94.4582	81.8882	106.524	89.9862
		89.3	157.962	126.575	87.1267	111.321	94.562	81.8553	106.478	90.1422
		89.4	158.201	126.14	87.5124	111.354	94.7729	81.7765	106.423	90.3614
		89.5	158.406	125.453	87.8022	111.525	94.9364	81.563	106.249	90.4996
		89.6	158.75	124.814	88.0698	111.714	94.9815	81.3235	106.175	90.4889
		89.7	158.976	124.29	88.2202	112.04	95.107	81.1823	106.172	90.4936
		89.8	158.911	124.086	88.3439	112.245	95.1757	81.1246	106.411	90.4073
		89.9	158.671	124.045	88.1338	112.393	95.1343	81.0666	106.722	90.2061
		90	158.481	124.536	87.957	112.425	94.9728	81.2128	107.091	90.0119
		90.1	158.211	125.15	87.7458	112.307	94.8753	81.3648	107.272	89.9727
		90.2	157.943	125.868	87.6041	112.028	94.7868	81.4924	107.306	89.9092
		90.3	157.863	126.511	87.4092	111.772	94.5744	81.5367	107.121	89.8009
		90.4	157.994	127.043	87.4639	111.518	94.2806	81.5629	106.844	89.7562
		90.5	158.006	127.187	87.3824	111.14	94.1416	81.4166	106.619	89.8651
		90.6	157.871	127.193	87.2231	110.847	93.9849	81.2568	106.487	89.9314
		90.7	157.847	126.882	87.1251	110.728	93.759	81.1016	106.374	90.0747
		90.8	157.649	126.573	87.1743	110.622	93.4725	80.9538	106.356	90.4112
		90.9	157.389	126.304	87.2314	110.59	93.4378	80.7325	106.507	90.6002
		91	157.296	126.029	87.4645	110.763	93.3631	80.6394	106.641	90.5647
		91.1	157.437	125.805	87.9076	111.061	93.3064	80.4618	106.988	90.4805
		91.2	157.626	125.725	88.1528	111.311	93.14	80.313	107.471	90.2792
		91.3	158.058	125.756	88.2157	111.688	93.2621	80.1824	107.941	89.768
		91.4	158.558	125.843	88.017	111.996	93.3707	80.2082	108.205	89.4814
		91.5	158.925	126.068	87.7449	112.158	93.5792	80.233	108.374	89.2926
		91.6	159.142	126.31	87.312	112.063	93.7486	80.4131	108.318	89.034
		91.7	159.031	126.614	86.9904	111.818	94.0646	80.571	108.115	88.9382
		91.8	158.738	126.809	86.7532	111.422	94.1807	80.8753	107.942	89.0468
		91.9	158.272	127.006	86.7812	111.085	94.0792	81.1843	107.903	88.9824
		92	157.694	127.195	86.8301	110.758	93.7882	81.3601	107.872	88.946
		92.1	157.259	127.212	86.9206	110.599	93.6494	81.4008	107.742	89.1197
		92.2	157.234	127.092	87.099	110.485	93.6611	81.3378	107.545	89.179
		92.3	157.299	126.868	87.201	110.44	93.7738	81.1858	107.229	89.3546
		92.4	157.438	126.51	87.1399	110.348	93.9616	80.861	106.814	89.6289
		92.5	157.689	126.201	87.1806	110.395	94.2371	80.5624	106.41	89.9
		92.6	157.742	126.094	87.268	110.521	94.3613	80.4321	106.121	90.0214
		92.7	157.475	126.183	87.3077	110.772	94.3606	80.4998	105.972	90.2194
		92.8	157.071	126.52	87.5172	111.011	94.3941	80.4966	105.984	90.1048
		92.9	156.742	127.143	87.7912	111.21	94.3152	80.6915	106.135	89.9431
		93	156.327	127.51	87.8836	111.277	94.2448	81.0137	106.361	89.8352
		93.1	156.196	127.713	87.8607	111.278	94.1864	81.0951	106.611	89.7341
		93.2	156.288	127.721	87.6579	111.219	94.1021	81.0948	106.87	89.5928
		93.3	156.558	127.445	87.245	111.182	93.8944	81.1032	106.984	89.727
		93.4	156.811	126.745	86.9444	111.099	93.9736	80.9556	106.976	89.86
		93.5	157.235	126.235	86.7644	111.18	94.1139	80.7326	106.838	89.96
		93.6	157.447	125.885	86.8004	111.093	94.4022	80.5978	106.628	90.1967
		93.7	157.598	125.634	86.9865	111.037	94.7907	80.3878	106.304	90.4819
		93.8	157.585	125.541	87.3283	110.958	95.2809	80.1885	105.918	90.4653
		93.9	157.382	125.758	87.4604	110.946	95.6234	80.099	105.541	90.4648
		94	157.114	125.97	87.5445	110.654	95.8097	80.0867	105.369	90.2605
		94.1	157.014	126.228	87.4295	110.6	95.8394	80.2109	105.317	89.7608
		94.2	156.747	126.522	87.4428	110.428	95.5819	80.3872	105.421	89.1368
		94.3	156.632	126.888	87.4086	110.073	95.1336	80.685	105.646	88.6739
		94.4	156.755	127.039	87.6292	109.795	94.5438	80.9055	105.859	88.2944
		94.5	156.959	127.137	87.8564	109.789	93.97	81.0391	105.806	88.1742
		94.6	156.913	127.104	88.1114	109.699	93.4684	81.0963	105.792	88.3085
		94.7	157.112	126.91	88.1426	109.828	93.2136	81.3104	105.618	88.4736
		94.8	157.323	126.689	88.0796	110.383	93.1349	81.26	105.607	88.7144
		94.9	157.398	126.596	87.7084	110.828	93.4356	81.1813	105.664	88.8369
		95	157.225	126.436	87.2499	111.161	93.9929	81.0974	106.048	88.8487
		95.1	157.179	126.152	86.8394	111.516	94.4598	81.0519	106.277	88.7785
		95.2	156.888	126.073	86.5724	111.717	94.8908	80.9029	106.446	88.755
		95.3	156.497	126.004	86.3814	111.451	95.2824	80.9742	106.28	88.7625
		95.4	156.07	126.165	86.3166	111.245	95.2359	81.0353	106.011	88.8076
		95.5	155.82	126.516	86.3759	110.927	94.9378	81.1566	105.504	88.9214
		95.6	155.613	126.987	86.5604	110.454	94.7055	81.2143	104.986	89.1197
		95.7	155.72	127.42	86.6482	110.005	94.2631	81.0699	104.678	89.4354
		95.8	155.928	127.646	86.8854	109.883	93.7937	80.9024	104.585	89.6362
		95.9	156.417	127.34	87.2593	109.695	93.4774	80.8588	104.627	89.7722
		96	156.994	126.905	87.512	109.553	93.3096	80.8024	104.79	89.8688
		96.1	157.494	126.676	87.5553	109.588	93.2661	80.7652	105.176	90.0018
		96.2	157.693	126.316	87.6668	109.613	93.5774	80.9242	105.629	90.0176
		96.3	157.583	126.224	87.7072	109.461	93.8692	80.9504	106.086	89.9835
		96.4	157.273	126.577	87.6671	109.398	94.3078	80.9158	106.536	89.9305
		96.5	156.817	126.973	87.8514	109.51	94.7162	80.8458	106.869	89.7954
		96.6	156.394	127.146	88.0493	109.48	94.8674	80.726	107.038	89.3772
		96.7	156.312	127.38	88.1347	109.487	94.7682	80.5309	106.979	88.9729
		96.8	156.553	127.502	88.0354	109.56	94.6946	80.5183	106.816	88.7844
		96.9	156.596	127.527	87.9716	109.606	94.456	80.5956	106.596	88.7108
		97	156.604	127.549	87.7696	109.497	94.1091	80.6467	106.503	88.7132
		97.1	156.68	127.512	87.6605	109.55	93.951	80.6865	106.356	88.8814
		97.2	156.383	127.455	87.6004	109.625	93.9294	80.7059	106.3	88.9608
		97.3	156.104	127.27	87.715	109.79	93.9186	80.697	106.316	88.7988
		97.4	156.069	126.974	87.7436	109.927	94.0095	80.6248	106.139	88.5697
		97.5	156.153	126.565	87.7786	110.224	94.2306	80.6422	105.713	88.335
		97.6	156.233	126.295	87.8642	110.427	94.417	80.8193	105.203	88.141
		97.7	156.59	126.079	88.0309	110.396	94.5283	81.1048	104.625	87.9986
		97.8	156.759	125.933	88.0978	110.182	94.7105	81.2739	104.012	88.0404
		97.9	156.838	125.742	88.1116	109.919	94.8488	81.3422	103.642	88.1496
		98	156.856	125.736	87.9854	109.566	94.8343	81.2622	103.647	88.4083
		98.1	156.742	125.652	87.6453	109.27	94.8784	81.0697	103.847	88.6284
		98.2	156.504	125.539	87.3284	109.185	94.9355	80.8284	104.158	88.8416
		98.3	156.383	125.468	87.127	109.084	94.9797	80.7135	104.557	88.9665
		98.4	156.598	125.651	86.9376	109.095	94.8536	80.6921	105.004	89.0294
		98.5	156.915	125.654	86.9735	108.953	94.6359	80.9078	105.163	88.8278
		98.6	157.467	125.619	87.0499	108.677	94.2123	81.0051	105.345	88.6865
		98.7	158.151	125.697	86.9288	108.408	93.8639	81.0359	105.534	88.6398
		98.8	158.807	125.807	86.7292	108.348	93.4241	80.8946	105.663	88.6304
		98.9	158.951	125.736	86.7613	108.229	93.3028	80.6892	105.588	88.8267
		99	158.844	125.856	86.6209	108.22	93.4026	80.2836	105.617	89.1309
		99.1	158.534	126.158	86.7099	108.291	93.6622	80.1097	105.669	89.3984
		99.2	157.946	126.259	87.0813	108.241	93.8327	80.0306	105.654	89.6141
		99.3	157.447	126.437	87.56	108.039	94.0482	80.1	105.658	89.7918
		99.4	157.206	126.689	87.8221	107.897	94.0998	80.3165	105.763	89.6867
		99.5	157.272	126.926	88.2312	107.678	94.1966	80.694	105.857	89.4953
		99.6	157.325	127.056	88.531	107.37	94.2059	80.9297	105.837	89.2548
		99.7	157.472	127.398	88.6733	107.131	94.2758	81.0463	105.812	88.9368
		99.8	157.406	127.639	88.628	106.974	94.2483	81.0844	105.798	88.4957
		99.9	157.292	127.939	88.6508	106.776	94.1824	81.0177	105.944	88.0111
		100	156.876	128.157	88.5047	106.751	94.0322	80.9182	106.052	87.7654
		100.1	156.413	128.295	88.2615	107.023	94.0722	81.0578	106.186	87.6053
		100.2	156.029	128.186	87.8898	107.508	94.0445	81.4026	106.269	87.5414
		100.3	155.856	128.033	87.5197	108.014	94.0723	81.8305	106.188	87.6697
		100.4	155.771	127.723	87.0179	108.638	94.1551	82.2108	105.842	88.0266
		100.5	155.931	127.387	86.65	109.272	94.0964	82.4257	105.592	88.2824
		100.6	156.293	127.172	86.3677	109.652	93.7281	82.298	105.372	88.4959
		100.7	156.622	127.039	86.2648	109.777	93.4412	82.1094	105.275	88.7073
		100.8	156.695	126.856	86.4068	109.976	93.2929	81.8868	105.281	88.8579
		100.9	156.697	126.609	86.8253	109.904	93.0881	81.5333	105.346	88.884
		101	156.738	126.349	87.2308	109.603	93.1169	81.1832	105.408	88.6792
		101.1	156.807	126.04	87.5802	109.391	93.428	81.0297	105.371	88.3885
		101.2	156.931	125.87	87.7662	109.139	93.7069	80.7542	105.271	88.0543
		101.3	157.273	125.93	87.7117	108.575	93.8122	80.3898	105.309	87.8271
		101.4	157.417	126.198	87.5002	108.074	94.054	80.3065	105.429	87.7207
		101.5	157.329	126.523	87.3165	107.761	94.1457	80.3496	105.474	87.8269
		101.6	157.004	126.921	87.2005	107.379	94.2139	80.3074	105.704	88.0398
		101.7	156.747	127.16	87.3118	107.106	94.1874	80.334	105.994	88.2527
		101.8	156.527	127.201	87.5456	106.986	94.1482	80.527	106.054	88.3113
		101.9	156.605	127.138	87.735	107.013	93.995	80.6338	106.114	88.2721
		102	156.761	127.137	87.8805	106.935	93.847	80.7446	106.193	88.3104
		102.1	157.102	127.074	88.0338	106.952	93.4882	80.8626	106.015	88.3292
		102.2	157.29	127.034	88.0592	106.904	93.1794	80.9121	105.619	88.3526
		102.3	157.276	127.058	87.9942	106.936	92.9964	80.7216	105.356	88.4136
		102.4	157.181	127.072	87.8929	107.036	92.8603	80.5746	104.932	88.4642
		102.5	157.123	126.852	87.8048	107.28	92.8315	80.4289	104.348	88.4421
		102.6	156.862	126.537	87.5778	107.494	92.7868	80.3184	103.827	88.4954
		102.7	156.525	126.308	87.2621	107.895	92.7166	80.2849	103.581	88.613
		102.8	156.323	126.059	87.0648	108.398	92.6274	80.4459	103.344	88.9046
		102.9	156.203	125.82	87.0648	108.712	92.4726	80.5799	103.351	89.3783
		103	156.158	125.758	87.0822	108.794	92.2477	80.661	103.611	89.8818
		103.1	156.256	125.811	87.3152	108.867	92.3859	80.6319	103.994	90.2472
		103.2	156.475	125.862	87.8416	108.727	92.7099	80.6465	104.166	90.5192
		103.3	156.666	125.933	88.2466	108.222	93.1137	80.7034	104.162	90.4447
		103.4	156.849	125.918	88.5035	107.788	93.6392	80.7661	103.909	90.0738
		103.5	156.899	126.047	88.6312	107.682	94.2012	80.8528	103.55	89.5669
		103.6	157.023	126.237	88.5136	107.505	94.5095	81.1379	103.15	89.0978
		103.7	157.2	126.441	88.1268	107.481	94.5462	81.3482	102.925	88.6651
		103.8	157.348	126.749	87.7964	107.694	94.4724	81.3596	102.976	88.513
		103.9	157.278	127.296	87.4659	107.941	94.3791	81.3518	103.259	88.4785
		104	157.212	127.547	87.3172	107.965	94.2373	81.4238	103.431	88.5071
		104.1	157.035	127.53	87.4687	108.111	94.0989	81.337	103.579	88.5843
		104.2	156.78	127.366	87.7678	108.167	94.0671	81.1436	103.594	88.6624
		104.3	156.54	127.004	88.0118	108.333	93.888	81.0417	103.49	88.5534
		104.4	156.395	126.517	88.3194	108.536	93.572	80.8823	103.231	88.516
		104.5	156.293	126.168	88.4751	108.746	93.2259	80.6174	103.299	88.5484
		104.6	156.159	126.13	88.269	108.872	92.7914	80.4235	103.557	88.5472
		104.7	156.168	126.081	87.8841	109.009	92.4842	80.4136	103.943	88.5493
		104.8	156.226	126.032	87.4845	108.82	92.4661	80.4613	104.292	88.7081
		104.9	156.209	125.943	87.042	108.373	92.4821	80.5625	104.688	88.7834
		105	156.268	125.885	86.5769	107.876	92.5655	80.7471	104.755	88.618
		105.1	156.447	125.777	86.3914	107.279	92.863	80.914	104.661	88.3888
		105.2	156.351	125.792	86.3533	106.519	93.0479	81.0706	104.491	88.158
		105.3	156.212	125.91	86.6364	105.979	93.0155	81.1821	104.387	87.9311
		105.4	156.246	125.923	86.9445	105.763	93.111	81.2703	104.347	87.8608
		105.5	156.133	125.948	87.4058	105.607	93.3367	81.1326	104.369	88.1599
		105.6	156.038	125.831	87.8166	105.569	93.4483	80.9828	104.27	88.4984
		105.7	156.119	125.829	88.1872	105.932	93.5737	80.77	104.106	88.785
		105.8	156.193	125.834	88.1412	106.289	93.7814	80.605	103.858	88.9173
		105.9	156.259	126.057	87.9775	106.558	93.7706	80.5369	103.438	88.7795
		106	156.517	126.282	87.7594	106.897	93.4076	80.685	103.234	88.4535
		106.1	156.638	126.627	87.6072	107.203	93.0479	80.9228	103.254	88.3503
		106.2	156.872	126.778	87.4418	107.192	92.7786	81.242	103.462	88.2965
		106.3	157.071	126.897	87.6089	107.28	92.4925	81.5172	103.809	88.3623
		106.4	157.111	126.863	88.0035	107.274	92.4965	81.6248	104.305	88.6966
		106.5	157.078	126.561	88.4064	107.174	92.8598	81.7958	104.599	89.075
		106.6	157.062	126.111	88.5453	107.17	93.282	81.9727	104.528	89.2008
		106.7	156.727	125.832	88.719	107.39	93.4666	82.0506	104.239	89.2866
		106.8	156.433	125.625	88.5116	107.485	93.6462	82.0878	103.869	89.1594
		106.9	156.264	125.496	88.0749	107.535	93.5727	82.1414	103.517	88.848
		107	156.051	125.566	87.5834	107.633	93.296	82.0262	103.269	88.4365
		107.1	155.898	125.706	87.2336	107.723	93.0454	81.7052	103.363	88.0317
		107.2	156.06	125.678	86.7404	107.481	93.1343	81.4318	103.664	87.68
		107.3	156.289	125.645	86.4651	107.169	93.3199	81.2452	103.928	87.666
		107.4	156.519	125.685	86.2482	106.919	93.725	81.191	104.255	87.6533
		107.5	156.474	125.897	86.0333	106.519	94.1316	81.1332	104.595	87.6792
		107.6	156.198	126.112	85.8934	106.063	94.4858	81.1874	104.934	87.7632
		107.7	155.777	126.368	86.0117	105.89	94.6254	81.2692	105.049	87.9095
		107.8	155.465	126.427	86.3774	105.782	94.748	81.2841	105.138	87.8857
		107.9	155.137	126.491	86.9008	105.653	94.7493	81.2124	105.022	88.0468
		108	155.362	126.419	87.503	105.769	94.7964	81.2242	104.619	88.1859
		108.1	156.026	126.437	88.0543	105.907	94.6598	81.2352	104.098	88.2742
		108.2	156.669	126.479	88.4555	105.996	94.4304	80.9826	103.705	88.2442
		108.3	157.165	126.749	88.3417	106.139	93.9572	80.646	103.324	88.1572
		108.4	157.652	126.849	87.9774	106.414	93.3961	80.2804	103.001	87.9545
		108.5	157.844	126.828	87.5511	106.497	92.7998	79.9558	103.061	87.8786
		108.6	157.661	126.716	87.0574	106.517	92.4358	79.7987	103.294	87.9151
		108.7	157.505	126.651	86.5746	106.478	92.1521	79.9478	103.456	88.0558
		108.8	157.278	126.474	86.4286	106.349	92.214	80.2378	103.684	88.3501
		108.9	157.208	126.412	86.401	106.076	92.5045	80.5922	103.873	88.484
		109	157.08	126.535	86.2866	105.972	92.9616	80.829	103.83	88.4914
		109.1	157.183	126.801	86.264	105.766	93.2488	80.9394	103.477	88.3355
		109.2	157.347	127.048	86.3203	105.506	93.5484	81.0971	103.145	88.0426
		109.3	157.414	127.439	86.409	105.421	93.5187	81.3133	102.839	87.56
		109.4	157.051	127.81	86.6288	105.39	93.1726	81.4284	102.672	87.4019
		109.5	156.761	128.059	87.0014	105.224	92.6285	81.6093	102.602	87.357
		109.6	156.331	128.096	87.2552	105.362	92.2797	81.6814	102.705	87.4792
		109.7	155.833	128.16	87.3825	105.552	92.0578	81.5458	102.942	87.7992
		109.8	155.68	128.072	87.2619	105.5	92.1102	81.3464	103.073	88.3204
		109.9	155.95	127.909	86.9955	105.5	92.4436	81.3827	103.02	88.7159
		110	156.348	127.807	86.6986	105.64	92.8643	81.3322	102.96	89.0423
		110.1	156.881	127.843	86.6404	105.597	93.1062	81.284	102.904	89.2072
		110.2	157.473	127.687	86.6561	105.568	93.1947	81.2686	102.704	89.0954
		110.3	157.809	127.501	86.7954	105.725	93.2036	81.1686	102.564	88.8563
		110.4	157.789	127.363	86.9229	105.819	93.1074	80.8982	102.531	88.5027
		110.5	157.554	127.158	87.103	105.894	93.0148	80.763	102.439	88.1098
		110.6	157.248	126.872	87.111	106.129	93.0523	80.701	102.368	87.8612
		110.7	156.902	126.705	87.0212	106.471	93.2085	80.6842	102.498	87.7712
		110.8	156.445	126.563	87.1068	106.729	93.3846	80.6569	102.733	87.7946
		110.9	156.272	126.499	87.3143	106.879	93.5691	80.6018	103.017	87.9177
		111	156.219	126.528	87.4075	106.739	93.7128	80.372	103.376	88.0555
		111.1	155.962	126.427	87.5201	106.487	93.9415	80.2708	103.683	88.1331
		111.2	155.528	126.277	87.7294	106.16	94.0342	80.1768	103.689	88.217
		111.3	155.405	126.167	87.6575	105.791	93.9683	80.2328	103.475	88.0522
		111.4	155.197	126.036	87.4529	105.743	93.874	80.4424	103.165	87.8895
		111.5	154.84	125.892	87.297	105.968	93.8254	80.8662	102.88	87.7643
		111.6	154.977	126.06	87.1231	106.062	93.5198	81.1383	102.558	87.5735
		111.7	155.479	126.421	86.9466	105.956	93.3339	81.382	102.376	87.4126
		111.8	155.946	126.775	86.9381	105.87	93.3595	81.4288	102.411	87.4762
		111.9	156.517	126.904	87.0834	105.472	93.531	81.2814	102.596	87.4802
		112	157.356	126.932	87.2638	104.99	93.5716	81.0331	102.671	87.5972
		112.1	157.675	126.86	87.4986	104.559	93.7294	80.8993	102.903	87.9273
		112.2	157.83	126.618	87.7016	104.394	93.7662	80.7228	103.148	88.2563
		112.3	157.799	126.35	87.8349	104.365	93.7342	80.652	103.171	88.5958
		112.4	157.598	126.323	87.8907	104.505	93.5495	80.7465	103.165	88.9008
		112.5	157.181	126.401	87.9121	104.756	93.5274	80.8034	103.253	89.0263
		112.6	157.045	126.31	87.8258	105.014	93.4892	80.7158	103.252	88.9476
		112.7	156.854	126.186	87.7116	105.134	93.5302	80.7641	103.317	88.7793
		112.8	156.746	126.128	87.7448	105.161	93.4768	81.0297	103.644	88.4527
		112.9	156.705	126.052	87.5664	105.228	93.4132	81.2637	103.796	88.2618
		113	156.834	125.882	87.2531	105.153	93.293	81.49	103.83	88.007
		113.1	156.909	125.819	87.0965	105.261	93.2998	81.7988	103.797	87.7663
		113.2	156.967	125.834	87.0021	105.29	93.2899	81.9816	103.774	87.6347
		113.3	156.983	125.84	86.6548	105.275	93.2246	81.7887	103.699	87.6716
		113.4	156.879	125.95	86.723	105.121	93.3322	81.4714	103.72	87.5016
		113.5	156.614	126.227	87.0878	105.095	93.4832	81.3486	103.945	87.381
		113.6	156.356	126.66	87.3613	104.978	93.4795	81.1674	104.219	87.3107
		113.7	156.141	127.139	87.6583	105.142	93.5523	81.0667	104.28	87.1022
		113.8	156.002	127.648	88.1229	105.302	93.8204	81.176	104.157	86.7904
		113.9	156.101	127.93	88.2948	105.393	93.9236	81.3784	103.975	86.8142
		114	156.275	128.041	88.2622	105.286	93.8881	81.2801	103.552	87.1538
		114.1	156.479	127.876	88.1731	105.023	93.78	81.1111	103.058	87.4635
		114.2	156.707	127.747	88.102	104.508	93.5926	80.9109	102.78	87.9303
		114.3	157.004	127.66	87.855	104.002	93.3476	80.6736	102.497	88.3591
		114.4	157.222	127.671	87.6789	103.64	93.1377	80.4171	102.197	88.4286
		114.5	157.379	127.677	87.434	103.518	93.0684	80.4162	101.916	88.1926
		114.6	157.374	127.785	87.364	103.651	93.2834	80.5654	101.729	88.0771
		114.7	157.205	127.725	87.115	103.883	93.4708	80.7555	101.392	87.9117
		114.8	156.867	127.475	87.1883	104.118	93.6842	80.9366	101.232	88.0061
		114.9	156.461	127.087	87.3378	104.399	93.913	81.1884	101.272	88.3737
		115	156.002	126.816	87.6446	104.588	94.0842	81.2994	101.581	88.8107
		115.1	155.708	126.68	87.6838	104.538	94.185	81.4594	102.019	89.112
		115.2	155.725	126.459	87.8638	104.486	94.4286	81.485	102.585	89.2366
		115.3	155.88	126.258	87.7686	104.396	94.5359	81.451	103.116	89.0374
		115.4	156.026	126.287	87.5253	104.207	94.549	81.3142	103.567	88.7263
		115.5	156.267	126.219	87.2069	103.834	94.575	81.2253	103.897	88.3258
		115.6	156.39	125.96	87.0824	103.524	94.4517	81.0607	103.922	87.9264
		115.7	156.258	125.997	87.0464	103.358	94.0758	81.0323	103.797	87.7876
		115.8	155.941	126.221	87.1626	103.402	93.7478	81.0761	103.503	87.7536
		115.9	155.699	126.273	87.255	103.386	93.4699	81.1897	103.152	87.6646
		116	155.629	126.331	87.3418	103.773	93.1946	81.3169	102.73	87.7932
		116.1	155.639	126.358	87.3892	104.21	92.9338	81.4108	102.527	87.9741
		116.2	155.83	126.104	87.3174	104.39	92.9137	81.5016	102.439	88.1129
		116.3	156.063	125.61	87.2514	104.427	92.974	81.6506	102.47	88.2431
		116.4	156.262	125.246	87.396	104.698	93.1178	81.634	102.519	88.4479
		116.5	156.099	125.013	87.561	104.685	93.158	81.5068	102.517	88.4415
		116.6	156.068	124.943	87.7588	104.629	93.2795	81.2912	102.388	88.4575
		116.7	155.936	125.097	87.847	104.726	93.2131	80.9	102.24	88.3794
		116.8	155.834	125.366	87.8488	104.712	93.0579	80.4936	102.116	88.3334
		116.9	155.851	125.589	87.7019	104.484	92.7101	80.4271	102.003	88.1487
		117	156.167	125.709	87.5788	104.323	92.4934	80.4494	101.929	87.9896
		117.1	156.112	125.743	87.4676	104.169	92.2063	80.5968	101.866	87.8532
		117.2	156.021	125.741	87.4602	103.998	92.1018	80.8774	101.719	87.7032
		117.3	156.117	125.815	87.4132	103.96	92.1295	80.9911	101.574	87.5175
		117.4	156.141	125.89	87.3662	104.117	92.3978	80.8182	101.484	87.4392
		117.5	156.176	125.876	87.3921	104.228	92.5424	80.6772	101.507	87.3553
		117.6	156.567	126.033	87.3569	104.385	92.6371	80.6363	101.638	87.1731
		117.7	157.187	126.164	87.3472	104.536	92.6236	80.7482	101.841	87.1028
		117.8	157.698	126.201	87.4722	104.795	92.6494	81.0636	102.104	87.1698
		117.9	157.959	126.23	87.7084	104.701	92.6128	81.4639	102.193	87.3452
		118	158.005	126.418	87.7268	104.577	92.7672	81.8487	102.176	87.7209
		118.1	158.087	126.353	87.7322	104.506	93.0768	81.964	102.206	88.2225
		118.2	157.89	126.255	87.8344	104.338	93.4598	81.9108	102.37	88.5766
		118.3	157.625	126.21	87.8604	103.868	93.5905	81.5684	102.445	88.7416
		118.4	157.689	126.125	87.7994	103.77	93.6721	81.1928	102.645	88.6941
		118.5	157.766	126.034	87.9922	103.681	93.6319	80.788	102.926	88.3523
		118.6	157.619	126.149	88.1639	103.599	93.545	80.6679	103.059	87.667
		118.7	157.59	126.384	88.104	103.561	93.2839	80.36	103.081	86.9567
		118.8	157.614	126.56	87.8683	103.74	93.0978	80.3913	103.112	86.2762
		118.9	157.496	126.759	87.569	103.674	92.8527	80.4579	103.171	85.7301
		119	157.587	126.895	87.1602	103.66	92.5698	80.4696	103.154	85.4432
		119.1	157.589	127.051	86.878	103.473	92.187	80.3962	103.137	85.6073
		119.2	157.555	127.02	86.7749	103.332	92.0964	80.6258	103.119	86.0122
		119.3	157.459	127.109	87.0088	103.152	92.2235	80.6236	103.034	86.6054
		119.4	157.348	127.311	87.2987	103.031	92.5414	80.6855	102.835	87.3052
		119.5	157.014	127.591	87.5066	102.924	92.9052	80.8322	102.648	87.8506
		119.6	157.027	127.597	87.6294	102.936	93.3908	80.8048	102.41	88.2257
		119.7	157.085	127.62	87.6752	102.955	93.6032	80.7171	102.081	88.5514
		119.8	157.1	127.588	87.5115	102.996	93.5643	80.6647	101.811	88.7103
		119.9	157.226	127.375	87.3536	103.152	93.2886	80.522	101.688	88.6622
		120	157.553	126.978	87.2176	103.31	93.1016	80.3992	101.563	88.686
		120.1	157.476	126.769	86.9764	103.409	92.7553	80.4838	101.687	88.5754
		120.2	157.253	126.788	86.789	103.523	92.5642	80.4822	101.877	88.3382
		120.3	157.167	126.641	86.753	103.639	92.5695	80.6592	102.1	88.1134
		120.4	156.961	126.569	86.7457	103.669	92.7834	80.7622	102.254	87.9508
		120.5	156.703	126.672	86.7148	103.689	92.8682	80.789	102.359	87.7356
		120.6	156.707	126.714	86.8988	103.719	93.2269	80.7225	102.234	87.674
		120.7	156.812	126.604	87.0376	103.719	93.4791	80.7368	102.103	87.6496
		120.8	156.895	126.784	87.0366	103.606	93.4874	80.6355	102.023	87.7137
		120.9	157.046	126.948	87.0028	103.389	93.3256	80.7702	102.03	87.8711
		121	156.981	127.137	87.0754	103.235	93.2766	80.9717	102.187	88.0155
		121.1	157.004	127.472	87.0212	103.083	93.1154	81.1201	102.308	88.1221
		121.2	157.103	127.748	86.9106	102.926	93.0035	81.2816	102.475	88.1003
		121.3	157.144	127.835	86.704	102.85	93.028	81.4016	102.473	87.8934
		121.4	157.039	127.979	86.4882	103.033	93.0114	81.3162	102.166	87.6875
		121.5	157.163	127.886	86.2822	103.061	92.9798	81.0997	101.662	87.6486
		121.6	157.029	127.676	86.106	103.025	92.838	80.9794	101.392	87.6129
		121.7	156.79	127.415	86.1519	102.994	92.6865	80.7396	101.033	87.7881
		121.8	156.56	127.129	86.3889	103.004	92.6157	80.4769	100.84	88.1871
		121.9	156.563	126.761	86.6966	102.805	92.8446	80.1875	100.986	88.421
		122	156.565	126.524	86.9606	102.734	92.9922	79.9762	101.259	88.4238
		122.1	156.739	126.335	87.2705	102.928	93.2624	79.6438	101.341	88.3535
		122.2	157.067	126.327	87.292	103.111	93.5959	79.4322	101.433	88.1361
		122.3	157.417	126.307	87.3546	103.099	93.8388	79.3204	101.372	87.8003
		122.4	157.609	126.318	87.4362	103.124	93.8321	79.3377	101.025	87.6337
		122.5	157.677	126.382	87.449	103.079	93.9562	79.4489	100.579	87.631
		122.6	157.691	126.467	87.3832	102.734	93.96	79.788	100.231	87.8635
		122.7	157.562	126.444	87.5425	102.301	93.9457	80.1836	99.9664	88.1901
		122.8	157.541	126.51	87.6248	102.199	93.9325	80.5324	99.8679	88.4474
		122.9	157.609	126.652	87.5908	102.24	94.0597	80.8167	100.042	88.5192
		123	157.739	126.675	87.6846	102.18	94.0393	81.0124	100.358	88.5095
		123.1	157.775	126.551	87.7884	102.18	94.0199	80.9636	100.654	88.2731
		123.2	157.712	126.549	87.8224	102.382	93.9114	80.6904	100.892	87.9948
		123.3	157.441	126.542	87.8147	102.402	93.7169	80.5053	101.056	87.8502
		123.4	157.072	126.399	87.8582	102.135	93.4389	80.4268	101.074	87.8661
		123.5	156.664	126.447	87.8036	102.011	93.2705	80.4462	101.073	87.862
		123.6	156.22	126.482	87.7573	102.093	93.2696	80.6151	101.076	87.8023
		123.7	156.042	126.298	87.6655	102.033	93.4168	80.9741	101.081	87.8154
		123.8	156.081	126.22	87.5347	102.009	93.7546	81.1782	101.055	87.9168
		123.9	156.137	126.303	87.4428	102.274	94.1174	81.3088	101.044	87.9061
		124	156.204	126.347	87.3752	102.631	94.383	81.3246	100.975	87.9557
		124.1	156.522	126.513	87.3817	102.842	94.485	81.2118	100.883	88.1949
		124.2	156.524	126.737	87.3956	103.043	94.2927	80.9503	100.871	88.3782
		124.3	156.295	126.739	87.4533	103.21	93.9369	80.7908	100.839	88.2451
		124.4	156.106	126.691	87.403	103.337	93.4339	80.6751	100.84	88.1708
		124.5	156.008	126.537	87.3482	103.283	92.8825	80.6007	100.876	87.9526
		124.6	155.669	126.404	87.2045	103.143	92.32	80.6575	100.947	87.5543
		124.7	155.699	126.377	87.0641	102.966	92.0694	80.8191	101.015	87.1416
		124.8	155.806	126.515	86.9692	102.76	92.0235	80.975	101.036	87.0006
		124.9	155.86	126.553	87.1082	102.403	92.2666	80.9988	101.082	86.8788
		125	155.876	126.599	87.2768	102.134	92.7304	81.0349	101.022	86.9964
		125.1	156.054	126.568	87.557	102.032	93.3508	81.0208	100.9	87.3377
		125.2	155.955	126.611	87.94	102.294	93.9146	80.958	100.636	87.6334
		125.3	155.931	126.481	88.187	102.581	94.3162	80.7876	100.586	87.7837
		125.4	156.091	126.351	88.0806	102.905	94.4442	80.61	100.438	87.9139
		125.5	156.111	126.348	88.0403	103.268	94.3307	80.3171	100.464	87.9885
		125.6	156.062	126.453	87.9282	103.547	94.2073	80.0463	100.546	87.9669
		125.7	156.173	126.372	87.6518	103.332	94.0562	79.8037	100.715	88.0239
		125.8	156.33	126.357	87.4598	103.084	93.9567	79.6323	100.704	88.127
		125.9	156.301	126.32	87.5083	102.928	93.9996	79.6622	100.671	88.1318
		126	156.55	126.065	87.456	102.727	94.1824	79.8958	100.447	87.9536
		126.1	156.866	125.731	87.2834	102.685	94.182	80.1179	100.206	87.6411
		126.2	157.167	125.525	87.1614	102.922	94.1145	80.3321	99.855	87.2132
		126.3	157.199	125.474	87.1186	103.084	93.8528	80.6114	99.4982	86.8287
		126.4	157.257	125.631	87.0045	103.056	93.4888	80.7388	99.2362	86.6772
		126.5	157.074	125.915	86.8792	102.838	93.0104	80.7094	99.0178	86.7062
		126.6	156.888	126.216	86.9422	102.354	92.613	80.6793	98.8583	86.9317
		126.7	156.713	126.497	87.0958	101.795	92.1053	80.656	98.9046	87.3312
		126.8	156.732	126.704	87.3379	101.698	91.7562	80.5999	99.0637	87.5869
		126.9	156.684	126.738	87.7242	101.819	91.5053	80.6275	99.231	87.5253
		127	156.606	126.782	88.1025	102.21	91.3702	80.6546	99.6034	87.3688
		127.1	156.409	126.863	88.2993	102.597	91.1851	80.7074	99.7868	87.0724
		127.2	155.955	126.757	88.2888	103.019	91.2877	80.8073	99.8026	86.5741
		127.3	155.417	126.611	88.0147	102.938	91.4554	80.7766	99.7259	86.2136
		127.4	155.093	126.537	87.4798	102.704	91.7245	80.6177	99.6244	86.1043
		127.5	154.933	126.539	87.0024	102.481	91.9291	80.5294	99.3786	85.9655
		127.6	154.778	126.392	86.717	102.521	92.3306	80.4169	99.375	85.92
		127.7	154.916	126.436	86.7389	102.581	92.6222	80.2951	99.4874	86.1385
		127.8	155.316	126.45	86.9891	102.76	92.8864	80.4559	99.7459	86.3006
		127.9	155.561	126.351	87.5303	103.075	92.9729	80.6932	100.018	86.3682
		128	155.805	126.025	88.0506	103.153	93.067	80.9816	100.228	86.6404
		128.1	156.284	125.903	88.4236	102.953	92.8837	81.2094	100.24	86.8539
		128.2	156.744	125.821	88.6339	102.606	92.7622	81.2716	100.176	86.8744
		128.3	156.929	125.77	88.5999	102.274	92.7011	81.0879	99.9984	86.9455
		128.4	157.176	125.829	88.2284	101.717	92.7253	81.015	99.7951	87.1243
		128.5	157.124	126.07	87.8728	101.24	92.9206	80.808	99.7738	87.0228
		128.6	156.814	126.194	87.6326	100.816	93.4384	80.6782	99.9823	86.9186
		128.7	156.331	126.241	87.3443	100.416	93.7838	80.7852	100.272	86.8434
		128.8	155.913	126.362	87.2761	100.084	93.9689	80.9188	100.57	86.8176
		128.9	155.473	126.514	87.3764	100.023	94.1013	81.0032	100.864	86.7386
		129	155.519	126.665	87.4238	99.9454	94.0897	81.1064	100.945	86.8285
		129.1	155.762	126.76	87.4105	99.9836	93.8689	81.195	100.712	86.9153
		129.2	156.044	126.629	87.3461	100.169	93.7411	81.0836	100.412	87.0659
		129.3	156.412	126.4	87.1288	100.338	93.6381	81.0395	100.138	87.1337
		129.4	156.645	126.093	86.9613	100.463	93.5533	80.8351	99.9498	87.2258
		129.5	156.602	125.736	86.7996	100.841	93.4538	80.6605	99.7896	87.278
		129.6	156.348	125.448	86.5544	101.336	93.2998	80.4553	99.9222	87.3613
		129.7	156.144	125.523	86.5029	101.734	93.1492	80.4296	100.184	87.3646
		129.8	155.771	125.722	86.4996	102.154	93.0299	80.4748	100.382	87.3319
		129.9	155.69	125.997	86.4842	102.456	92.8016	80.635	100.388	87.1918
		130	155.658	126.249	86.548	102.459	92.4954	80.8068	100.463	87.248
		130.1	155.789	126.519	86.7904	102.232	92.3272	81.0147	100.434	87.4192
		130.2	155.923	126.76	86.9788	101.972	92.1023	81.0251	100.226	87.6348
		130.3	156.13	126.845	87.3877	101.544	91.9169	80.9016	100.024	87.8597
		130.4	156.17	126.881	87.8554	101.191	92.0285	80.8029	99.9962	88.0681
		130.5	156.064	127.147	88.3512	101.055	92.2063	80.8137	100.037	87.9109
		130.6	155.87	127.474	88.7433	101.002	92.4654	80.8463	100.109	87.5218
		130.7	155.782	127.623	89.0274	101.15	92.7692	81.0352	100.227	87.1592
		130.8	155.751	127.797	88.9	101.501	93.115	81.1332	100.362	86.9312
		130.9	155.603	128.051	88.6063	101.826	93.1563	81.1972	100.539	86.733
		131	155.828	128.015	88.1612	101.932	93.356	81.1844	100.52	86.7929
		131.1	156.217	127.797	87.7155	102.027	93.2625	81.1472	100.193	87.011
		131.2	156.503	127.644	87.3089	101.87	93.1353	81.0929	99.7978	87.1834
		131.3	156.716	127.506	87.273	101.566	92.8614	81.171	99.413	87.2323
		131.4	157.074	127.263	87.4114	101.329	92.7706	81.2306	98.928	87.446
		131.5	157.049	127.105	87.6312	101.288	92.4529	81.1506	98.6414	87.6228
		131.6	156.72	127.061	87.859	101.191	92.4254	81.0842	98.7626	87.784
		131.7	156.381	127.128	88.1021	101.228	92.4494	80.9604	98.89	87.9736
		131.8	156.057	127.259	88.0852	101.151	92.6216	80.7987	99.0232	88.1605
		131.9	155.788	127.373	87.8268	100.922	92.6789	80.6887	99.0803	88.266
		132	155.616	127.424	87.635	100.553	92.8733	80.7836	99.0586	88.2358
		132.1	155.72	127.394	87.3932	100.249	93.0358	80.8834	98.809	88.1249
		132.2	155.867	127.03	87.1398	99.9641	93.165	80.9645	98.7496	87.9863
		132.3	156.003	126.719	87.0608	100.017	93.1908	81.2014	98.6211	87.7638
		132.4	156.017	126.42	87.1739	100.122	93.255	81.3978	98.487	87.3225
		132.5	156.113	126.348	87.226	100.297	93.3024	81.4496	98.3318	87.1026
		132.6	156.152	126.452	87.4615	100.479	93.2613	81.4459	98.4317	86.9884
		132.7	156.145	126.838	87.7624	100.686	93.3558	81.5223	98.3915	86.9079
		132.8	156.185	127.073	87.8035	100.831	93.5885	81.553	98.5789	86.9848
		132.9	156.262	127.273	87.8314	101.164	93.9586	81.6205	98.9326	87.3147
		133	156.389	127.324	87.7979	101.506	94.2479	81.6281	99.3658	87.5053
		133.1	156.361	127.29	87.5854	101.91	94.4912	81.6367	99.5173	87.6364
		133.2	156.35	127.376	87.3084	102.113	94.5008	81.6094	99.6932	87.6283
		133.3	156.408	127.516	87.3289	102.103	94.2728	81.3719	99.5482	87.555
		133.4	156.558	127.723	87.2308	101.867	93.905	81.1128	99.3122	87.3124
		133.5	156.632	127.809	87.093	101.523	93.5142	81.1005	98.9457	86.9621
		133.6	156.816	127.726	86.8646	101.077	93.1743	81.0527	98.608	86.5228
		133.7	157.037	127.183	86.6982	100.853	93.1127	80.9871	98.341	86.1924
		133.8	157.174	126.57	86.3671	100.653	93.2682	81.1793	98.4874	86.016
		133.9	157.256	125.972	86.2173	100.332	93.3522	81.33	98.6209	86.0222
		134	157.189	125.436	86.2159	100.082	93.6236	81.2166	98.8913	86.2148
		134.1	157.053	125.166	86.4356	99.8158	93.821	81.2309	99.3736	86.5639
		134.2	156.838	125.251	86.6128	99.4711	93.7153	81.2198	99.7576	87.0039
		134.3	156.696	125.404	86.8002	99.4403	93.4999	80.9987	99.7391	87.2738
		134.4	156.618	125.564	86.8418	99.825	93.3752	80.8381	99.8622	87.4152
		134.5	156.824	125.844	86.8842	100.184	93.1442	80.8023	99.9449	87.5101
		134.6	157.29	126.064	86.923	100.561	92.9845	80.5561	99.7415	87.5166
		134.7	157.83	126.246	86.9552	100.941	93.1342	80.4081	99.5474	87.3382
		134.8	158.253	126.503	87.0581	100.921	93.4518	80.4078	99.5328	87.1507
		134.9	158.395	126.666	87.2914	100.701	93.847	80.3149	99.3387	87.0156
		135	158.245	126.599	87.4656	100.737	94.0718	80.2525	99.1095	86.8045
		135.1	157.692	126.293	87.5024	100.909	94.2081	80.3826	99.1212	86.6726
		135.2	157.024	125.974	87.583	101.078	94.1265	80.4553	99.1299	86.7518
		135.3	156.493	125.618	87.7486	101.509	93.9146	80.4041	99.0946	86.8942
		135.4	156.198	125.463	87.8036	101.76	93.454	80.4183	99.1362	87.0413
		135.5	156.165	125.586	87.7542	101.588	93.1587	80.4318	99.1053	87.3439
		135.6	156.524	126.031	87.7555	101.19	93.0406	80.444	98.931	87.5191
		135.7	156.956	126.53	87.7795	100.701	92.936	80.4654	98.825	87.4993
		135.8	157.223	126.898	87.5994	99.9762	92.7028	80.6247	98.7222	87.3158
		135.9	157.47	127.118	87.4758	99.5097	92.8374	80.7208	98.4918	86.9933
		136	157.668	127.338	87.4618	99.329	93.1079	80.8138	98.3885	86.4512
		136.1	157.677	127.474	87.4652	99.2684	93.2621	80.9098	98.3798	86.0562
		136.2	157.731	127.585	87.2716	99.3606	93.5297	80.9998	98.285	85.87
		136.3	157.861	127.88	87.1317	99.5654	93.9656	80.9893	98.2403	86.0288
		136.4	157.857	128.089	86.947	99.7245	94.223	81.073	98.4729	86.3959
		136.5	157.624	128.025	86.8168	99.9183	94.3772	81.0943	98.6589	86.9029
		136.6	157.287	127.722	86.7675	100.177	94.5163	81.0404	98.757	87.1827
		136.7	156.935	127.168	86.8602	100.327	94.4507	80.956	98.8445	87.2169
		136.8	156.57	126.461	87.0235	100.717	94.1938	80.8393	98.8591	86.9745
		136.9	156.218	125.892	87.2084	101.052	93.7522	80.6825	98.6289	86.6426
		137	156.002	125.527	87.3082	101.318	93.2802	80.567	98.399	86.3772
		137.1	155.917	125.388	87.2982	101.629	92.9723	80.4739	98.3059	86.4259
		137.2	155.843	125.536	87.2996	102.022	92.8184	80.4754	98.2387	86.6099
		137.3	155.848	125.793	87.2842	102.051	92.8775	80.6037	98.1471	86.8317
		137.4	156.054	126.11	87.32	102.056	93.1418	80.835	98.1843	87.0911
		137.5	156.426	126.347	87.4281	101.979	93.38	81.038	98.3248	87.1434
		137.6	156.883	126.479	87.571	101.597	93.4162	81.1649	98.4106	86.8848
		137.7	157.144	126.392	87.7947	101.191	93.4333	81.1209	98.5871	86.6253
		137.8	157.288	126.225	87.978	100.971	93.3552	80.9709	98.8052	86.4323
		137.9	157.234	125.893	88.0166	100.693	93.2579	80.7624	98.9166	86.2171
		138	156.888	125.538	88.0419	100.381	93.0979	80.5811	98.8394	86.2116
		138.1	156.44	125.214	88.0494	100.335	93.002	80.5038	98.6018	86.388
		138.2	156.28	125.181	87.8113	100.262	92.8727	80.5832	98.2437	86.542
		138.3	156.227	125.161	87.6158	100.181	92.787	80.7211	97.991	86.6791
		138.4	156.41	125.105	87.5119	100.128	92.5623	80.6835	97.8767	86.8298
		138.5	156.892	125.284	87.3098	100.107	92.4785	80.6625	97.9173	86.8542
		138.6	157.272	125.639	87.02	99.9022	92.4326	80.6683	98.1115	86.9248
		138.7	157.461	125.915	87.0061	99.7404	92.388	80.6031	98.449	87.0437
		138.8	157.639	126.284	86.9621	99.5186	92.4146	80.4538	98.7621	87.1853
		138.9	157.638	126.79	86.8489	99.4718	92.5692	80.4931	98.8596	87.264
		139	157.589	126.924	86.7403	99.4908	92.674	80.479	98.8663	87.2182
		139.1	157.488	126.861	86.787	99.7048	92.7736	80.3928	98.8707	87.0067
		139.2	157.368	126.7	86.6027	99.8402	92.9772	80.2944	98.7353	86.6672
		139.3	157.256	126.344	86.4923	100.041	92.945	80.256	98.4691	86.2414
		139.4	157.207	126.011	86.6026	100.058	92.8923	80.2052	98.2822	85.819
		139.5	156.919	126.028	86.7956	100.079	92.7972	80.1911	98.0904	85.712
		139.6	157.051	126.098	86.8548	99.8364	92.7143	80.2528	97.9227	85.8762
		139.7	157.403	126.15	87.0552	99.6167	92.6058	80.3636	97.8734	86.0931
		139.8	157.625	126.466	87.2008	99.2931	92.7335	80.4636	97.906	86.2654
		139.9	157.778	126.8	87.1578	99.0303	92.9794	80.4199	98.2088	86.4452
		140	158.11	126.922	87.1413	98.6508	93.3042	80.4154	98.5939	86.5414
		140.1	157.923	127.146	87.1869	98.5122	93.521	80.3428	98.9389	86.4102
		140.2	157.553	127.484	87.1633	98.4572	93.552	80.3167	99.1953	86.3281
		140.3	157.184	127.701	87.0824	98.4518	93.4333	80.4104	99.4532	86.4186
		140.4	156.855	127.853	87.0593	98.3902	93.239	80.6853	99.3727	86.5949
		140.5	156.384	127.923	86.9561	98.518	93.1181	80.8706	99.1564	86.653
		140.6	156.256	127.717	86.9028	98.6778	93.1496	81.043	98.7745	86.7002
		140.7	156.206	127.222	86.8323	98.7741	93.331	81.0841	98.4357	86.804
		140.8	156.282	126.707	86.8462	99.0098	93.6821	81.0729	98.0927	86.9882
		140.9	156.278	126.136	86.7552	99.4152	93.9722	81.1926	97.9728	87.1246
		141	156.416	125.749	86.7403	99.6131	94.0284	81.4177	98.0036	87.2013
		141.1	156.429	125.649	86.7651	99.6273	93.975	81.6573	98.2692	87.3999
		141.2	156.404	125.777	87.0636	99.6453	93.8622	81.9187	98.5148	87.5603
		141.3	156.341	125.876	87.357	99.5865	93.5798	82.0935	98.7368	87.391
		141.4	156.294	126.124	87.7924	99.4816	93.3998	81.9412	98.8328	87.1045
		141.5	156.209	126.323	88.2059	99.5207	93.5052	81.6084	98.9286	86.9884
		141.6	156.247	126.403	88.5639	99.6738	93.8112	81.1886	98.8958	86.7008
		141.7	156.236	126.507	88.5096	99.8688	94.272	80.8638	98.7581	86.3062
		141.8	156.194	126.585	88.2776	100.018	94.7872	80.5805	98.5752	86.1377
		141.9	156.404	126.453	87.9799	100.015	95.1344	80.4322	98.3246	86.2308
		142	156.687	126.443	87.6273	99.994	95.1376	80.5064	97.9922	86.3878
		142.1	156.795	126.323	87.1214	99.9322	94.8176	80.6754	97.8028	86.6716
		142.2	157.026	126.181	86.8992	99.773	94.2786	80.8588	97.868	86.9937
		142.3	157.276	126.078	86.9644	99.5406	93.865	80.9799	98.0398	87.2579
		142.4	157.186	126.179	87.0432	99.4928	93.5299	81.0588	98.3547	87.2766
		142.5	157.003	126.157	87.1178	99.5166	93.396	81.0224	98.4424	87.1542
		142.6	156.952	126.374	87.3355	99.5117	93.3724	81.0077	98.3419	87.0395
		142.7	156.773	126.54	87.4426	99.561	93.5115	81.0248	98.0157	87.0036
		142.8	156.519	126.701	87.3016	99.7186	93.4745	81.1064	97.6716	87.0475
		142.9	156.417	126.716	87.2194	99.6033	93.3965	81.138	97.3146	87.2308
		143	156.357	126.679	87.2841	99.319	93.2996	81.2092	97.3714	87.3798
		143.1	156.51	126.442	87.198	99.137	93.2408	81.2568	97.7016	87.4928
		143.2	156.899	126.273	87.0699	98.9729	93.0327	81.1315	98.1633	87.5587
		143.3	157.49	126.129	87.1893	98.7361	92.6891	80.9792	98.4827	87.4704
		143.4	158.26	125.958	87.1793	98.8846	92.432	80.8343	98.7649	87.1962
		143.5	158.938	125.799	86.9039	99.1118	92.2051	80.6426	98.9191	86.9643
		143.6	159.11	125.74	86.8597	99.1701	91.958	80.4254	98.8447	86.6224
		143.7	159.052	125.7	86.9483	99.2304	91.8182	80.1327	98.8346	86.3562
		143.8	158.847	125.677	86.7328	99.3672	91.996	79.8446	99.018	86.2017
		143.9	158.35	125.767	86.6282	99.1026	92.1807	79.8219	99.2273	86.2825
		144	158.062	125.924	86.7094	98.7724	92.2855	79.8453	99.2786	86.3596
		144.1	158.076	126.137	86.7055	98.5432	92.5044	79.9276	99.2376	86.6294
		144.2	158.07	126.276	86.6266	98.2824	92.7906	80.1704	98.9327	86.8699
		144.3	158.06	126.348	86.8585	98.0068	93.03	80.4436	98.5437	87.0691
		144.4	158.329	126.485	87.0418	98.0003	93.2254	80.5026	98.0965	87.1184
		144.5	158.273	126.616	87.2492	98.1109	93.4451	80.5351	97.7903	87.211
		144.6	158.055	126.607	87.6116	98.2636	93.4852	80.5504	97.675	87.255
		144.7	157.832	126.554	87.9439	98.3141	93.463	80.698	97.7767	87.134
		144.8	157.688	126.547	88.055	98.2691	93.3	80.7801	97.9095	86.9006
		144.9	157.299	126.373	88.172	98.107	93.1788	80.8834	98.0603	86.7376
		145	157.08	126.129	88.2722	97.8082	93.1074	80.891	98.2695	86.5785
		145.1	156.982	125.885	88.0823	97.4164	93.2214	80.8231	98.4642	86.3589
		145.2	157.03	125.784	87.7642	97.214	93.2939	80.592	98.5727	86.361
		145.3	157.078	125.803	87.4264	97.1081	93.3006	80.4697	98.6217	86.5651
		145.4	157.157	125.91	86.9932	96.9513	93.0828	80.268	98.6491	86.6883
		145.5	157.424	126.084	86.4236	96.9786	92.7434	80.1363	98.4837	86.676
		145.6	157.742	126.411	85.9278	97.0371	92.3572	80.2344	98.2468	86.6514
		145.7	158.109	126.647	85.7162	96.9768	91.9918	80.3711	98.0644	86.4018
		145.8	158.531	126.701	85.795	96.992	91.8928	80.5332	97.9791	85.9894
		145.9	159.077	126.637	86.0412	97.2908	92.1524	80.8222	98.0134	85.656
		146	159.283	126.556	86.4451	97.5018	92.5544	81.2352	98.1073	85.3899
		146.1	159.408	126.336	86.9272	97.8133	92.8166	81.3946	98.3095	85.2046
		146.2	159.312	126.2	87.2819	98.2797	93.0824	81.4603	98.4553	85.1473
		146.3	158.86	126.19	87.382	98.6626	93.2369	81.361	98.4808	85.2263
		146.4	158.207	126.306	87.4906	98.8224	93.1964	81.3042	98.3621	85.293
		146.5	157.794	126.532	87.5652	98.9107	93.1	81.1602	98.301	85.4353
		146.6	157.475	126.844	87.5194	98.9106	93.0742	81.1163	98.0584	85.6282
		146.7	157.411	127.002	87.3602	98.7194	92.9765	81.2633	97.7858	85.9112
		146.8	157.671	127.188	87.3289	98.3805	92.8079	81.4959	97.606	86.1241
		146.9	158.15	127.491	87.2227	97.9785	92.6346	81.6232	97.5508	86.4604
		147	158.497	127.543	87.0364	97.6843	92.5924	81.853	97.6814	86.8267
		147.1	158.712	127.524	87.0527	97.4346	92.6462	82.1548	98.0241	87.0582
		147.2	158.626	127.507	87.3396	97.2681	92.8574	82.2101	98.4314	87.1035
		147.3	158.408	127.079	87.4959	97.2778	93.17	82.2501	98.8091	87.2406
		147.4	157.953	126.277	87.5858	97.4989	93.5183	82.1931	99.171	87.1686
		147.5	157.661	125.697	87.7242	97.6576	93.6612	81.9511	99.1619	86.8945
		147.6	157.284	125.224	87.7352	97.8839	93.6618	81.5176	99.0462	86.6553
		147.7	157.06	124.967	87.6416	98.1279	93.434	81.2358	98.8087	86.5965
		147.8	156.795	125.196	87.5048	98.3002	93.0123	80.9788	98.4686	86.2748
		147.9	156.659	125.763	87.3808	98.3257	92.6112	80.9406	98.0068	86.0941
		148	156.573	126.256	87.4185	98.339	92.4046	80.9056	97.7479	86.1552
		148.1	156.776	126.715	87.5258	98.2038	92.334	81.014	97.4396	86.2867
		148.2	156.874	126.945	87.6257	98.0364	92.452	81.1847	97.3058	86.3331
		148.3	157.171	127.058	87.865	97.9816	92.862	81.3431	97.2299	86.5693
		148.4	157.572	127.016	88.0601	97.936	93.2751	81.2346	97.2484	86.6088
		148.5	157.575	127.006	87.9151	97.8666	93.456	81.1248	97.1684	86.5102
		148.6	157.362	126.991	87.7028	97.8204	93.5159	80.9631	97.2778	86.3047
		148.7	157.216	127.096	87.3366	97.7994	93.5065	80.7024	97.2901	86.0945
		148.8	156.975	127.043	87.059	97.6727	93.2125	80.4058	97.411	86.0326
		148.9	156.592	126.996	86.9337	97.4244	92.7406	80.2976	97.5134	86.1417
		149	156.485	126.814	87.0349	97.3453	92.3606	80.3336	97.7484	86.2246
		149.1	156.432	126.366	87.0964	97.2507	92.1009	80.3472	97.7251	86.2734
		149.2	156.667	125.811	87.3125	97.0727	91.9318	80.3574	97.6045	86.2466
		149.3	156.923	125.481	87.2962	96.9924	91.9413	80.4314	97.3192	85.9314
		149.4	157.1	125.187	87.2743	97.1828	92.1058	80.5791	97.0216	85.5469
		149.5	157.065	125.104	87.256	97.1738	92.3312	80.6972	96.717	85.3144
		149.6	157.119	125.395	87.5152	97.11	92.5158	80.9594	96.5773	85.2316
		149.7	156.856	125.902	87.7284	97.1909	92.6645	81.1454	96.7156	85.2249
		149.8	156.519	126.279	88.1239	97.247	92.854	81.2377	97.0992	85.4509
		149.9	156.343	126.701	88.6152	97.1748	93.0867	81.1532	97.5146	85.7734
		150	156.547	126.963	89.0593	97.2401	93.3034	80.958	97.8638	85.9648
		150.1	156.546	127.071	89.0976	97.5463	93.3278	80.5588	98.131	86.0907
		150.2	156.61	127.032	89.0547	97.83	93.1942	80.347	98.2351	86.2985
		150.3	156.804	126.99	88.8197	97.9748	92.8548	80.1845	98.0648	86.4059
		150.4	157.048	126.827	88.2267	98.0514	92.5923	80.0532	97.7397	86.3464
		150.5	157.101	126.686	87.6189	97.9368	92.3609	80.0051	97.4162	86.289
		150.6	157.297	126.65	87.1899	97.7079	92.2696	80.0766	97.0698	86.2393
		150.7	157.353	126.654	86.9149	97.5023	92.3598	80.0522	96.6925	86.0698
		150.8	157.224	126.765	86.7015	97.4944	92.6498	80.1028	96.4962	85.8152
		150.9	157.009	127.017	86.6634	97.58	92.805	80.277	96.595	85.6945
		151	156.723	127.196	86.617	97.8578	92.7505	80.3421	96.7701	85.5818
		151.1	156.443	127.205	86.5924	98.0726	92.9164	80.3697	97.0446	85.4402
		151.2	156.391	127.267	86.5851	98.0489	93.1048	80.3087	97.3994	85.4217
		151.3	156.482	127.234	86.8446	97.7445	93.1234	80.1467	97.6827	85.5664
		151.4	156.522	127.198	87.1672	97.4059	93.0708	79.9553	97.7088	85.6563
		151.5	156.62	127.424	87.4494	97.2236	93.341	79.9059	97.6059	85.8106
		151.6	156.685	127.735	87.6596	97.0287	93.2834	79.8255	97.4182	86.074
		151.7	156.57	127.866	87.7129	97.0585	93.1189	79.8318	97.2131	86.2445
		151.8	156.41	128.013	87.4626	97.3518	93.1624	79.7953	97.012	86.3344
		151.9	156.399	127.995	87.175	97.6695	93.4244	79.7072	96.9461	86.5742
		152	156.426	127.723	87.0417	97.6029	93.5626	79.721	96.8649	86.7629
		152.1	156.402	127.437	86.9294	97.6206	93.8715	79.8506	96.9785	86.8076
		152.2	156.541	127.223	86.9185	97.501	94.1518	80.0768	97.122	86.7476
		152.3	156.703	126.899	87.0419	97.2537	94.1134	80.4702	97.3931	86.6996
		152.4	156.708	126.785	87.2886	96.9887	93.9222	80.862	97.5312	86.5312
		152.5	156.552	126.787	87.4265	96.8886	93.5235	80.9881	97.8541	86.4084
		152.6	156.368	126.701	87.6009	96.7685	93.0743	81.028	98.0637	86.3223
		152.7	156.018	126.724	87.6888	96.8658	92.7352	81.0893	98.2144	86.4918
		152.8	155.604	126.958	87.7542	96.95	92.7402	81.041	98.123	86.7842
		152.9	155.266	127.097	87.5871	96.9794	92.6697	81.0126	98.2439	87.004
		153	155.177	127.176	87.3396	96.9856	92.7406	81.0318	98.1591	87.1627
		153.1	155.388	127.272	87.2605	96.864	92.8482	81.058	97.9441	87.3827
		153.2	155.769	127.095	87.3863	96.5474	92.9014	80.897	97.5886	87.4165
		153.3	156.343	126.57	87.5018	96.4015	92.8342	80.7967	97.4023	87.2679
		153.4	157.08	125.979	87.8458	96.4715	92.8471	80.5948	97.0941	87.1728
		153.5	157.709	125.398	88.4614	96.725	92.9882	80.59	96.9163	87.0866
		153.6	158.141	124.967	88.8555	97.1681	93.0412	80.6227	96.7708	86.8329
		153.7	158.6	124.779	89.0054	97.5615	92.9596	80.7254	96.8094	86.5936
		153.8	158.684	124.927	89.0806	97.8126	92.7731	80.8207	96.7223	86.3316
		153.9	158.341	125.164	88.9495	97.9026	92.5528	81.1089	96.5348	86.1226
		154	158.014	125.472	88.5026	97.6697	92.2442	81.1977	96.214	85.9709
		154.1	157.632	125.767	88.0312	97.2258	92.0189	81.1956	95.9487	86.1294
		154.2	157.077	126.127	87.4408	96.9547	92.0233	81.2465	95.6322	86.3504
		154.3	156.978	126.38	86.8208	96.7068	92.1283	81.1355	95.447	86.7357
		154.4	157.208	126.442	86.1964	96.4698	92.3671	80.8389	95.451	87.0238
		154.5	157.407	126.463	85.8116	96.5368	92.5321	80.4679	95.7382	87.2757
		154.6	157.631	126.354	85.5206	96.8081	92.8361	80.2144	96.0346	87.3104
		154.7	157.918	125.967	85.5476	97.0905	93.0729	79.819	96.4052	87.3318
		154.8	157.878	125.67	85.8852	97.2399	93.2762	79.6916	96.6267	87.164
		154.9	157.65	125.732	86.6028	97.2526	93.3655	79.6116	96.6736	87.0867
		155	157.378	125.839	87.2299	97.0386	93.4881	79.8618	96.4823	87.0033
		155.1	157.069	126.147	87.8168	96.7856	93.3196	80.1545	96.2574	86.8357
		155.2	156.652	126.747	88.3552	96.3948	92.9676	80.6308	95.8544	86.5797
		155.3	156.303	127.306	88.6729	96.1562	92.553	80.9447	95.537	86.454
		155.4	156.192	127.608	88.642	96.1192	92.1672	81.4065	95.3397	86.2694
		155.5	156.061	127.729	88.5478	96.1896	91.7704	81.6922	95.0652	86.0872
		155.6	156.099	127.711	88.5388	96.2503	91.5198	81.78	94.9052	86.1538
		155.7	156.372	127.496	88.558	96.3212	91.6119	81.8961	95.0453	86.1901
		155.8	156.559	127.14	88.4748	96.4108	91.9904	82.1077	95.2494	86.1714
		155.9	156.545	126.871	88.3852	96.4536	92.3593	82.1834	95.5404	86.2018
		156	156.738	126.879	88.2778	96.5002	92.9093	82.3174	96.0377	86.1037
		156.1	156.675	126.848	87.9807	96.4091	93.513	82.6219	96.5448	85.7723
		156.2	156.391	126.886	87.4476	96.3425	93.9012	82.6861	96.7658	85.6226
		156.3	156.461	127.035	87.0109	96.3554	93.9414	82.6098	96.9195	85.5516
		156.4	156.538	127.069	86.5293	96.36	93.9102	82.4964	96.9485	85.4484
		156.5	156.504	126.919	86.2566	96.312	93.715	82.1314	96.8661	85.5097
		156.6	156.679	126.718	86.2343	96.4307	93.4076	81.5148	96.6456	85.7196
		156.7	157.048	126.478	86.4064	96.6675	93.0193	80.9771	96.4376	85.9461
		156.8	157.072	126.286	86.6734	96.7618	92.8112	80.4669	96.1546	86.0054
		156.9	157.273	126.157	87.1704	96.7077	92.7168	80.0888	95.8035	86.1098
		157	157.381	126.042	87.4277	96.7373	92.606	79.9486	95.6537	86.208
		157.1	157.439	126.132	87.5103	96.7449	92.6752	80.0878	95.4246	86.23
		157.2	157.29	126.206	87.4124	96.5552	93.0214	80.2765	95.407	86.036
		157.3	157.199	126.145	86.9914	96.3201	93.2152	80.5788	95.6609	85.9686
		157.4	156.901	126.079	86.4039	96.2658	93.3384	80.8331	96.0408	85.8914
		157.5	156.621	126.036	85.9868	96.058	93.5551	81.0306	96.2242	85.8806
		157.6	156.357	125.811	85.632	95.7835	93.4921	81.0498	96.5208	85.9214
		157.7	156.296	125.669	85.602	95.6565	93.1757	81.0332	96.6338	86.1537
		157.8	156.271	125.594	86.0266	95.622	93.0464	80.8775	96.4549	86.3837
		157.9	156.295	125.617	86.5564	95.6499	92.945	80.5264	96.1418	86.4829
		158	156.379	125.595	87.0906	95.877	92.7348	80.0583	95.8098	86.3536
		158.1	156.426	125.719	87.6046	96.1272	92.7638	79.745	95.6388	86.1713
		158.2	156.477	125.752	87.9591	96.3162	92.8226	79.5402	95.5467	85.984
		158.3	156.736	125.876	88.0412	96.5148	92.7164	79.395	95.603	85.8219
		158.4	157.052	125.945	88.0885	96.5652	92.7018	79.5178	95.7879	85.8622
		158.5	157.495	126.001	87.8535	96.3524	92.7653	79.9645	96.002	86.1328
		158.6	157.84	125.919	87.6626	96.1738	92.7529	80.4101	95.9427	86.5574
		158.7	157.93	125.955	87.3376	96.0294	92.9393	80.7954	95.8826	86.9542
		158.8	157.674	125.767	87.1073	95.7733	93.3463	81.3082	95.7794	87.3613
		158.9	157.505	125.546	86.9278	95.5845	93.7374	81.7448	95.6204	87.5819
		159	157.192	125.421	87.158	95.708	94.1072	81.9485	95.428	87.5714
		159.1	156.983	125.454	87.3534	95.878	94.4132	82.0102	95.4479	87.3829
		159.2	156.899	125.373	87.8002	96.0036	94.5026	81.9186	95.5408	87.0777
		159.3	157.037	125.466	88.2309	96.2892	94.2978	81.6216	95.6888	86.6537
		159.4	156.963	125.515	88.506	96.4855	93.8774	81.3391	95.916	86.3164
		159.5	156.781	125.642	88.5317	96.6368	93.441	81.0355	96.344	86.1423
		159.6	156.648	125.545	88.5243	96.7809	93.0339	80.851	96.6736	85.9297
		159.7	156.693	125.515	88.2836	97.0924	92.689	80.899	96.8328	85.7499
		159.8	156.606	125.54	87.9501	97.3523	92.4696	80.975	96.8652	85.7419
		159.9	156.749	125.769	87.7538	97.7077	92.4326	80.8653	96.7252	85.7192
		160	157.027	125.852	87.6081	97.8296	92.3746	80.7048	96.3534	85.6063
		160.1	157.115	126.11	87.5028	97.782	92.4463	80.5004	95.802	85.6239
		160.2	156.972	126.491	87.5298	97.4646	92.5055	80.2084	95.2907	85.6232
		160.3	156.965	126.835	87.6803	97.1418	92.6789	80.0144	94.7782	85.3803
		160.4	156.808	126.977	87.6822	96.778	92.834	80.0484	94.4355	85.1832
		160.5	156.523	127.204	87.7408	96.599	93.1334	80.2958	94.1745	85.1104
		160.6	156.426	127.438	87.7275	96.5111	93.3076	80.4714	94.289	84.9473
		160.7	156.232	127.557	87.6257	96.579	93.6047	80.6145	94.3918	84.891
		160.8	155.885	127.62	87.487	96.537	93.8232	80.7678	94.6083	85.0755
		160.9	155.545	127.851	87.5219	96.456	94.0307	80.8914	94.9106	85.2892
		161	155.359	127.916	87.4423	96.2814	93.9862	80.9199	95.2429	85.3872
		161.1	155.043	127.941	87.5294	96.0516	93.8692	81.0316	95.4044	85.6088
		161.2	155.135	127.871	87.6887	95.7317	93.5058	81.1702	95.7726	85.8428
		161.3	155.5	127.785	87.8781	95.4642	93.0892	81.2184	96.1732	85.9826
		161.4	156.007	127.395	87.8474	95.278	92.6161	81.1068	96.221	85.9474
		161.5	156.619	127.233	87.867	95.1347	92.3604	80.9416	96.217	85.9958
		161.6	157.562	127.144	87.8388	95.2222	92.2094	80.8249	96.1838	85.8929
		161.7	158.177	127.2	87.7151	95.3652	92.3166	80.6205	95.8824	85.6984
		161.8	158.304	127.279	87.5166	95.6444	92.5245	80.2842	95.4789	85.5428
		161.9	158.215	127.545	87.5345	95.8091	92.7514	80.0234	95.4385	85.4971
		162	158.008	127.634	87.6028	95.9372	92.8773	79.7109	95.5096	85.4631
		162.1	157.478	127.522	87.513	95.8727	92.9468	79.3114	95.5186	85.5668
		162.2	157.091	127.153	87.4255	95.8602	92.9424	79.0422	95.708	85.6997
		162.3	157.178	126.662	87.3771	95.6364	92.8714	79.096	95.9336	85.8296
		162.4	157.4	126.242	87.3444	95.5085	92.8608	79.2736	95.8113	85.967
		162.5	157.396	125.868	87.4083	95.5271	92.8534	79.6141	95.5588	85.9847
		162.6	157.346	125.697	87.5718	95.5952	92.9061	79.9314	95.4426	86.0128
		162.7	157.262	125.956	87.8356	95.6135	92.8726	80.2072	95.382	86.021
		162.8	156.997	126.354	88.0805	95.7832	92.8431	80.2398	95.314	85.8725
		162.9	156.733	126.717	88.1492	95.9488	92.712	80.1309	95.4135	85.7962
		163	156.778	127.061	87.9444	95.9343	92.648	79.8605	95.5764	85.7718
		163.1	157.142	127.234	87.6293	95.912	92.6533	79.5637	95.7152	85.506
		163.2	157.515	127.076	87.2682	95.9126	92.7102	79.2664	95.5886	85.2845
		163.3	157.729	126.887	86.9345	95.9755	92.7768	79.228	95.4686	85.2274
		163.4	157.778	126.571	86.8293	96.0365	93.0822	79.3471	95.5164	85.164
		163.5	157.703	126.217	86.84	96.1745	93.3596	79.5878	95.5137	85.2601
		163.6	157.314	125.985	87.049	96.3199	93.3952	79.9355	95.408	85.602
		163.7	156.973	125.853	87.3782	96.4284	93.3227	80.3166	95.338	85.9324
		163.8	156.952	125.892	87.6932	96.3666	93.2848	80.5508	95.2522	86.1862
		163.9	157.125	126.065	87.6651	96.2887	92.9166	80.676	95.0451	86.2304
		164	157.245	126.384	87.6775	96.0753	92.5078	80.7672	94.9152	86.0789
		164.1	157.53	126.636	87.6616	95.6247	92.2681	80.8331	94.9646	85.836
		164.2	157.671	126.925	87.5581	95.1788	92.1624	80.7633	95.306	85.5466
		164.3	157.642	127.101	87.3218	94.7799	92.0398	80.5974	95.7101	85.3196
		164.4	157.481	127.257	87.4131	94.3459	92.1256	80.4104	96.1114	85.3058
		164.5	157.384	127.421	87.5308	94.1886	92.289	80.1987	96.4047	85.3264
		164.6	157.154	127.694	87.5172	94.4084	92.571	79.8928	96.4886	85.4622
		164.7	156.895	127.777	87.3951	94.7926	92.9223	79.691	96.4283	85.8102
		164.8	156.762	127.646	87.4458	95.1601	93.2648	79.5958	96.3786	86.0953
		164.9	157.022	127.509	87.2958	95.6082	93.5676	79.39	96.2743	86.3096
		165	157.348	127.09	87.0327	95.8349	93.8349	79.2548	96.3025	86.5776
		165.1	157.759	126.594	86.8923	96.001	93.8797	79.3588	96.4789	86.5426
		165.2	158.336	126.309	86.7806	95.9511	93.7869	79.623	96.5416	86.1421
		165.3	158.721	126.246	86.583	95.9389	93.6034	79.9268	96.5257	85.7873
		165.4	158.555	126.16	86.4689	95.7692	93.417	80.5618	96.5515	85.3474
		165.5	158.303	126.39	86.4485	95.7325	93.1376	81.1089	96.5428	84.8856
		165.6	158.125	126.516	86.4156	95.4671	92.9395	81.4074	96.4749	84.817
		165.7	157.922	126.6	86.4288	95.2394	92.7523	81.4875	96.4084	85.0313
		165.8	157.593	126.513	86.5344	95.0417	92.7147	81.4796	96.2625	85.1909
		165.9	157.513	126.338	86.8092	95.1268	92.6306	81.2538	96.0053	85.5076
		166	157.4	125.974	87.0362	95.196	92.6096	81.1079	95.5801	85.7186
		166.1	157.137	125.753	87.2444	95.382	92.5782	81.0334	95.0769	85.6442
		166.2	156.732	125.387	87.6614	95.5289	92.6915	81.0432	94.5941	85.4694
		166.3	156.633	125.155	88.0328	95.541	92.8021	81.1938	94.2348	85.3949
		166.4	156.516	125.138	88.0924	95.2994	93.0087	81.404	94.07	85.2868
		166.5	156.382	125.252	88.0836	94.8868	93.2572	81.4268	94.206	85.3348
		166.6	156.284	125.38	87.903	94.443	93.5501	81.5188	94.5024	85.618
		166.7	156.399	125.819	87.5331	94.1281	93.686	81.5746	94.8099	85.9982
		166.8	156.461	126.359	87.1806	93.9055	93.7382	81.4141	95.1194	86.2336
		166.9	156.571	126.927	86.8943	93.7974	93.7265	81.1962	95.3174	86.3708
		167	156.884	127.415	86.7866	93.7928	93.6798	81.3022	95.208	86.5121
		167.1	157.257	127.862	86.9471	93.9574	93.619	81.4344	95.0432	86.419
		167.2	157.552	128.133	86.9435	94.1316	93.6393	81.6095	95.1085	86.0814
		167.3	157.801	128.159	86.9118	94.4267	93.6286	81.8904	95.1538	85.8718
		167.4	157.94	127.936	87.0518	94.5957	93.6086	82.0731	95.2046	85.7054
		167.5	157.824	127.784	87.0366	94.8301	93.5982	82.0125	95.4562	85.4017
		167.6	157.723	127.477	86.8649	94.88	93.5988	81.7974	95.7463	85.3338
		167.7	157.389	126.995	86.8833	94.8142	93.3752	81.5138	95.7632	85.4797
		167.8	156.969	126.786	86.9057	94.6278	93.1931	81.0941	95.808	85.6926
		167.9	156.629	126.693	86.8181	94.5932	93.0007	80.7814	95.8423	86.0161
		168	156.495	126.543	86.7668	94.5678	92.6971	80.5788	95.77	86.4732
		168.1	156.236	126.668	86.6918	94.6446	92.2959	80.437	95.6405	86.7326
		168.2	156.416	126.936	86.5256	94.7794	92.1754	80.3455	95.4866	87.0182
		168.3	156.731	127.028	86.3707	94.9735	92.1247	80.4288	95.2593	87.0421
		168.4	156.952	127.074	86.1415	95.0723	92.1694	80.6422	95.0872	86.9114
		168.5	156.976	127.089	85.9326	95.1399	92.3424	80.8358	95.142	86.647
		168.6	157.05	126.924	85.8929	95.1098	92.6682	81.0789	95.1224	86.3891
		168.7	156.997	126.857	85.967	95.0536	92.9329	81.2199	95.3269	85.9299
		168.8	156.899	126.84	86.0193	94.9708	93.1777	81.3047	95.664	85.6147
		168.9	156.873	126.788	86.3094	95.0432	93.3301	81.1135	95.8157	85.4497
		169	156.972	126.758	86.904	95.0617	93.5052	80.7748	95.7038	85.4216
		169.1	157.259	126.768	87.4324	95.2055	93.5141	80.4503	95.8139	85.537
		169.2	157.334	126.62	87.8282	95.3356	93.4254	80.3722	95.7932	85.9169
		169.3	157.334	126.442	88.2069	95.4038	93.1919	80.3865	95.6243	86.349
		169.4	157.466	126.411	88.3401	95.2731	93.0374	80.7562	95.8108	86.71
		169.5	157.676	126.416	88.0308	95.1535	92.8892	81.3346	96.0282	86.9999
		169.6	157.465	126.49	87.6421	94.8838	92.9816	81.7694	95.9569	87.15
		169.7	157.4	126.685	87.443	94.6572	93.2113	81.8688	96.0302	87.0384
		169.8	157.279	126.781	87.2565	94.4802	93.6206	81.7456	96.2377	86.8495
		169.9	157.051	126.812	87.063	94.3978	93.9408	81.3849	96.1967	86.5963
		170	156.673	126.904	86.9594	94.3844	94.169	80.8875	96.1108	86.314
		170.1	156.73	126.896	86.9698	94.5492	94.1965	80.5605	96.0687	86.0153
		170.2	156.684	126.844	86.8916	94.6915	94.0786	80.4038	95.78	85.8705
		170.3	156.788	127.006	86.815	94.7588	93.7975	80.4175	95.2899	85.749
		170.4	156.77	127.018	86.8104	94.7859	93.6139	80.3822	94.8675	85.5739
		170.5	156.829	126.917	86.792	94.7849	93.6071	80.4111	94.6516	85.4468
		170.6	156.791	126.854	86.5712	94.6493	93.4974	80.3544	94.6284	85.449
		170.7	156.873	126.904	86.219	94.5363	93.3067	80.3911	94.7825	85.4502
		170.8	157.172	126.72	85.997	94.5998	93.1766	80.3852	94.9816	85.4997
		170.9	157.725	126.703	85.9265	94.7319	92.8533	80.3855	95.0526	85.7134
		171	158.249	126.582	86.0167	94.8323	92.299	80.3016	94.9271	85.914
		171.1	158.688	126.501	86.2024	94.8882	92.0395	80.2122	94.5653	86.0816
		171.2	158.988	126.171	86.538	94.9203	92.193	80.0417	94.0739	86.1982
		171.3	158.726	125.93	86.7482	94.809	92.471	79.96	93.7245	86.2516
		171.4	158.099	125.809	86.783	94.7689	92.8994	80.0737	93.6245	86.1743
		171.5	157.568	126.091	86.713	94.6956	93.3909	80.3451	93.7668	86.1115
		171.6	157.027	126.327	86.7166	94.8486	93.8044	80.7199	94.2226	85.9289
		171.7	156.545	126.783	86.7796	94.9752	93.953	81.0097	94.7603	85.7282
		171.8	156.515	127.391	86.8462	95.209	93.9717	81.142	95.1568	85.5612
		171.9	156.786	127.833	87.0388	95.3566	94.1082	81.1602	95.3192	85.4978
		172	156.944	127.668	87.2392	95.6715	94.3556	81.1599	95.2372	85.3475
		172.1	157.155	127.458	87.4185	95.903	94.4168	80.9871	94.9717	85.2693
		172.2	157.443	127.031	87.4013	96.2349	94.4196	80.8281	94.7688	85.2436
		172.3	157.659	126.491	87.3576	96.3626	94.4895	80.8196	94.7494	85.1936
		172.4	157.709	125.957	87.288	96.416	94.4298	80.7495	94.8712	85.1211
		172.5	157.757	125.884	87.2977	96.2868	94.2151	80.5013	95.2008	85.246
		172.6	157.841	125.855	87.2425	95.929	94.0354	80.2622	95.5192	85.4515
		172.7	158.058	125.944	87.1976	95.5368	93.7797	80.151	95.6538	85.6044
		172.8	158.262	125.975	87.0786	95.3457	93.4995	79.906	95.5999	85.8326
		172.9	158.646	125.979	86.7808	95.0916	93.1622	79.7225	95.399	85.9558
		173	159.03	125.908	86.3678	94.8046	92.792	79.6368	94.9481	85.878
		173.1	159.325	125.943	85.9905	94.6851	92.6725	79.7658	94.4319	85.783
		173.2	159.106	126.112	85.7775	94.4189	92.7194	79.8175	94.0343	85.7399
		173.3	158.685	126.343	85.7521	94.1324	92.6302	79.9084	93.8662	85.5498
		173.4	158.098	126.619	85.94	93.9794	92.5118	80.0639	93.829	85.4979
		173.5	157.587	126.8	86.2767	94.0816	92.5522	80.269	93.9902	85.4642
		173.6	157.032	126.874	86.6632	94.1668	92.2588	80.2283	94.3338	85.3714
		173.7	156.817	126.752	86.9971	94.4253	91.9649	80.2328	94.6752	85.3487
		173.8	156.835	126.627	87.2337	94.5515	91.8194	80.373	94.7104	85.5777
		173.9	156.912	126.464	87.4182	94.5984	91.7198	80.4575	94.7885	85.7129
		174	156.94	126.433	87.4176	94.3896	91.5884	80.5379	94.7272	85.8754
		174.1	157.08	126.315	87.4606	94.1535	91.6434	80.7948	94.5712	86.0056
		174.2	157.216	126.347	87.5556	93.8247	91.6156	80.9598	94.5462	85.9488
		174.3	157.156	126.377	87.5996	93.5912	91.6338	80.8307	94.7031	85.6075
		174.4	157.055	126.415	87.5261	93.4237	91.773	80.6287	94.6566	85.4666
		174.5	156.88	126.33	87.4701	93.2615	91.9354	80.3502	94.6649	85.5068
		174.6	156.632	126.394	87.3057	93.2784	92.1433	80.1121	94.6617	85.5671
		174.7	156.562	126.326	86.9356	93.2802	92.528	79.957	94.331	85.7206
		174.8	156.628	126.31	86.8204	93.2065	92.9034	80.1189	94.026	85.9049
		174.9	156.808	126.33	86.9355	93.201	93.2119	80.2974	93.9258	85.8303
		175	157.108	126.39	87.2219	93.309	93.4054	80.4645	93.8368	85.638
		175.1	157.269	126.344	87.4941	93.2247	93.3646	80.4525	93.7346	85.5834
		175.2	157.209	126.388	87.8955	93.2575	93.11	80.4454	93.9437	85.7203
		175.3	157.294	126.446	88.1967	93.4063	92.7083	80.2998	94.0235	86.0796
		175.4	157.436	126.454	88.197	93.4394	92.2252	80.292	94.0436	86.6276
		175.5	157.534	126.422	88.0295	93.4649	91.7984	80.5009	94.147	87.0498
		175.6	157.843	126.543	87.947	93.5568	91.676	80.8028	94.4018	87.2922
		175.7	158.016	126.632	87.8406	93.5782	91.6922	81.067	94.5096	87.2214
		175.8	157.752	126.649	87.4546	93.5913	91.7915	81.3274	94.7004	87.0407
		175.9	157.294	126.671	87.1852	93.6736	91.983	81.4692	94.796	86.7862
		176	156.817	126.67	86.9406	93.8059	92.1554	81.3122	94.7985	86.6031
		176.1	156.415	126.499	86.5916	94.0062	92.1196	81.003	94.5958	86.4486
		176.2	156.235	126.321	86.2912	94.1622	91.9478	80.7118	94.3523	86.4835
		176.3	156.412	126.032	86.2311	94.1958	91.7614	80.4454	94.2463	86.5052
		176.4	156.602	125.871	86.2938	94.1842	91.6043	80.2434	94.2923	86.4815
		176.5	156.738	125.724	86.5302	94.1132	91.6205	80.1464	94.4931	86.5203
		176.6	156.656	125.621	86.8115	93.8856	91.8216	80.3218	94.8016	86.7339
		176.7	156.6	125.53	87.0821	93.6556	92.2258	80.5803	95.2161	86.7664
		176.8	156.501	125.569	87.2875	93.4625	92.6755	80.8077	95.3676	86.6476
		176.9	156.367	125.511	87.3573	93.2683	92.9143	80.8708	95.3259	86.6001
		177	156.387	125.709	87.1327	92.9329	93.0646	80.9965	94.8966	86.5508
		177.1	156.566	126.002	86.9816	92.7287	93.0432	80.9097	94.3562	86.2382
		177.2	156.816	126.445	86.8871	92.6479	92.8494	80.6237	93.7511	86.0376
		177.3	157.046	126.852	86.8867	92.7001	92.5492	80.4261	93.2257	85.9852
		177.4	157.439	127.238	86.9707	92.9411	92.4067	80.4147	92.8297	85.8093
		177.5	157.674	127.428	87.3128	93.358	92.085	80.2795	92.7873	85.5786
		177.6	157.778	127.541	87.64	93.6596	91.9068	80.2007	92.9005	85.4121
		177.7	157.58	127.276	87.848	93.9203	91.8998	80.2528	93.0682	85.3282
		177.8	157.26	126.999	87.9394	94.1168	92.1182	80.1924	93.3684	85.2715
		177.9	156.702	126.719	88.0378	94.0652	92.4834	80.2128	93.7304	85.3118
		178	156.269	126.339	87.9742	93.9118	92.9878	80.4586	93.9596	85.3027
		178.1	155.922	125.895	87.8803	93.9104	93.3748	80.734	94.1278	85.426
		178.2	155.711	125.72	87.7358	93.8218	93.5605	80.8924	94.2723	85.4174
		178.3	155.502	125.71	87.5817	93.697	93.4572	81.0715	94.2996	85.2529
		178.4	155.582	125.74	87.4082	93.6645	93.0694	81.0201	94.255	85.1048
		178.5	155.751	125.897	87.283	93.7045	92.6572	80.8807	94.3288	85.0411
		178.6	156.026	126.146	86.9758	93.5971	92.2652	80.7852	94.327	84.914
		178.7	156.391	126.316	86.7133	93.6009	91.993	80.8201	94.2049	84.8533
		178.8	157.059	126.236	86.6304	93.6122	91.9708	80.8774	94.0311	85.0328
		178.9	157.706	126.043	86.4127	93.5261	92.0997	81.1136	93.7573	85.1368
		179	158.154	125.838	86.1494	93.4973	92.1922	81.3148	93.3443	85.3061
		179.1	158.352	125.773	86.1374	93.5129	92.1673	81.48	92.9867	85.5711
		179.2	158.481	125.893	86.3211	93.4276	92.0832	81.6328	92.9655	85.7964
		179.3	158.237	126.273	86.2868	93.2766	91.8821	81.7023	93.1389	85.8754
		179.4	157.837	126.874	86.4194	93.1812	91.6557	81.6493	93.5544	86.0295
		179.5	157.635	127.477	86.6976	92.8959	91.4892	81.5661	94.0771	86.0134
		179.6	157.615	127.828	87.0239	92.536	91.451	81.3946	94.6457	85.8146
		179.7	157.54	127.961	87.267	92.1439	91.3619	81.1897	94.8664	85.6497
		179.8	157.63	127.792	87.5772	91.8732	91.3518	81.064	94.9372	85.6194
		179.9	157.775	127.413	87.7679	91.7729	91.3959	80.9593	94.8095	85.5711
		180	157.593	126.862	87.8266	91.8666	91.6044	80.8276	94.53	85.6757
		180.1	157.4	126.375	87.7021	92.2374	91.8908	80.7531	94.232	85.8501
		180.2	157.295	125.97	87.439	92.8294	92.3121	80.7048	94.0629	86.0694
		180.3	157.272	125.87	87.164	93.3744	92.5873	80.7261	93.819	86.1228
		180.4	157.159	125.856	86.9593	93.6753	92.724	80.7521	93.7172	86.1706
		180.5	157.165	125.944	86.7978	93.8889	92.5399	80.8374	93.6606	86.2347
		180.6	157.136	126.097	86.6192	93.9576	92.2602	80.9948	93.596	86.3735
		180.7	156.986	126.243	86.5007	93.8751	91.8715	81.0902	93.5666	86.5615
		180.8	156.796	126.238	86.4338	93.6787	91.5777	81.0884	93.6998	86.7772
		180.9	156.749	126.332	86.4362	93.6182	91.3925	81.1192	93.6993	86.9884
		181	156.852	126.714	86.5238	93.7118	91.4238	81.0125	93.9127	87.075
		181.1	157.002	127.085	86.6861	93.6099	91.5278	80.864	94.072	87.0254
		181.2	157.374	127.493	86.8608	93.4464	91.8428	80.7668	94.1414	86.7847
		181.3	157.743	127.875	87.0465	93.5478	92.2846	80.6154	94.1858	86.5643
		181.4	158.02	128.085	87.1763	93.4932	92.8864	80.3701	94.2894	86.319
		181.5	158.131	127.963	87.2367	93.3123	93.4184	80.3153	94.1838	86.0009
		181.6	157.99	127.791	87.2757	93.4266	93.9053	80.2552	94.1188	85.8783
		181.7	157.634	127.572	87.2392	93.6319	94.0971	80.2019	94.0894	85.861
		181.8	157.225	127.433	87.2125	93.5	94.0984	80.3642	94.0153	85.8402
		181.9	156.843	127.304	87.0949	93.4182	93.7503	80.6192	93.9084	85.9476
		182	156.664	127.087	86.877	93.2085	93.342	80.833	93.841	86.2407
		182.1	156.65	126.798	86.7679	92.7103	92.8902	80.9862	93.8082	86.3435
		182.2	156.642	126.513	86.8437	92.1882	92.5519	81.0962	93.9134	86.4718
		182.3	156.545	126.179	86.7696	91.8416	92.2869	81.0574	94.1769	86.6504
		182.4	156.318	126.024	86.7665	91.6375	92.2759	80.9271	94.4986	86.5868
		182.5	155.808	126.204	86.7308	91.5616	92.4027	80.7638	94.7503	86.3538
		182.6	155.366	126.483	86.3982	91.7586	92.591	80.5991	94.9312	86.0965
		182.7	155.135	126.646	85.9484	91.9987	92.9588	80.5181	94.9688	85.6933
		182.8	155.004	126.71	85.7209	92.292	93.2205	80.285	94.814	85.2849
		182.9	155.185	126.689	85.4724	92.4988	93.3427	80.1807	94.5198	85.1196
		183	155.65	126.531	85.4145	92.7627	93.4446	80.1786	94.3591	85.1808
		183.1	156.304	126.461	85.7701	92.9166	93.4598	80.271	94.2842	85.4494
		183.2	156.923	126.554	86.1845	92.9735	93.234	80.2981	94.2144	85.8455
		183.3	157.561	126.809	86.4636	93.039	93.0261	80.6885	94.1309	86.1938
		183.4	158.13	126.971	86.8567	93.1536	92.8484	81.0502	94.1269	86.4346
		183.5	158.563	127.161	87.2737	93.1794	92.5384	81.3244	94.0497	86.5088
		183.6	158.709	127.252	87.3665	93.2238	92.2985	81.4621	93.8176	86.3956
		183.7	158.705	127.222	87.359	93.3229	92.1171	81.6306	93.6448	86.2476
		183.8	158.681	127.136	87.4737	93.3202	92.0221	81.5711	93.5012	86.0586
		183.9	158.487	126.958	87.4904	93.3726	91.9081	81.5064	93.4152	85.7373
		184	158.394	126.425	87.4282	93.39	91.886	81.4268	93.3621	85.33
		184.1	158.193	125.881	87.5432	93.3614	91.8652	81.5946	93.5203	84.9623
		184.2	157.984	125.477	87.6727	93.2956	91.8734	81.7676	93.4825	84.4568
		184.3	157.763	125.09	87.5631	93.3852	91.9083	81.982	93.5916	83.9892
		184.4	157.624	125.091	87.4861	93.4101	92.0558	82.1894	93.6616	83.7694
		184.5	157.42	125.585	87.3534	93.4994	92.1896	82.3746	93.6249	83.7775
		184.6	157.593	126.112	87.1912	93.549	92.3521	82.3194	93.3608	83.8596
		184.7	157.744	126.544	87.1242	93.645	92.6008	82.1787	93.2648	84.2902
		184.8	157.844	126.884	87.2128	93.601	92.9221	82.007	92.9105	84.7607
		184.9	157.807	126.926	87.2167	93.495	93.2179	81.8328	92.5393	85.0358
		185	157.633	126.891	87.1784	93.4015	93.5594	81.6654	92.3906	85.1983
		185.1	157.169	126.968	87.0834	93.2206	93.8828	81.5216	92.5394	85.31
		185.2	156.886	127.09	86.9676	93.0493	94.074	81.4587	92.7014	85.3068
		185.3	156.706	127.346	86.8747	92.8312	93.9656	81.4053	92.8903	85.3777
		185.4	156.82	127.603	86.8609	92.5212	93.7896	81.3204	93.174	85.68
		185.5	157.033	127.653	86.9917	92.1832	93.5125	81.2404	93.2177	86.0495
		185.6	157.252	127.434	87.1876	92.1165	93.1167	81.3059	93.1607	86.4588
		185.7	157.282	127.173	87.3085	92.0058	92.7593	81.3488	93.128	86.7756
		185.8	157.296	126.937	87.403	91.9468	92.7058	81.3663	93.331	86.908
		185.9	157.093	126.787	87.3945	92.1468	92.6216	81.2622	93.405	86.7945
		186	157.013	126.791	87.3801	92.2661	92.6101	81.1413	93.5938	86.4554
		186.1	157.018	126.887	87.3248	92.1458	92.8071	80.8107	93.5342	86.0363
		186.2	157.103	126.948	87.4355	92.0154	92.9513	80.4547	93.3707	85.5005
		186.3	157.234	126.873	87.4646	91.8626	92.9074	80.1769	93.1092	85.0569
		186.4	157.366	126.807	87.7111	91.5775	92.8702	80.105	92.9373	84.7729
		186.5	157.186	126.665	87.9259	91.4528	92.8046	80.134	92.7455	84.8597
		186.6	156.974	126.576	88.0392	91.5529	92.6095	80.3791	92.7518	85.0592
		186.7	156.819	126.536	87.857	91.7671	92.5302	80.509	92.9304	85.4617
		186.8	156.485	126.628	87.7865	92.1649	92.4983	80.6054	93.0976	85.8815
		186.9	156.261	126.622	87.5026	92.5885	92.6197	80.6802	93.2688	86.191
		187	156.431	126.582	87.0944	92.9292	92.6223	80.6723	93.482	86.1924
		187.1	156.785	126.588	86.7462	93.0386	92.6027	80.5113	93.6838	86.1342
		187.2	157.176	126.683	86.6037	93.0793	92.5488	80.5662	93.6419	85.953
		187.3	157.685	126.582	86.4306	92.8999	92.5875	80.5668	93.493	85.7189
		187.4	158.02	126.592	86.4665	92.538	92.5569	80.3878	93.2624	85.4975
		187.5	158.155	126.82	86.6302	92.1436	92.6716	80.2032	93.1969	85.5207
		187.6	158.133	127.021	86.8608	91.9862	92.6055	80.0476	93.1971	85.5544
		187.7	158.037	127.084	87.053	91.8402	92.445	79.853	93.2607	85.7142
		187.8	158.005	127.173	87.2771	92.0028	92.0172	79.7741	93.5119	85.9449
		187.9	158.142	127.221	87.3715	92.494	91.5053	79.8598	93.6923	86.2581
		188	158.415	127.023	87.4702	93.0583	90.9751	80.0363	93.4769	86.3286
		188.1	158.601	126.835	87.6605	93.43	90.8868	80.2962	93.06	86.3786
		188.2	158.659	126.628	87.9387	93.7158	90.9524	80.4589	92.7502	86.3294
		188.3	158.666	126.64	88.1671	93.6039	91.2608	80.465	92.313	86.1534
		188.4	158.656	126.519	88.3771	93.2025	91.6398	80.4096	92.1364	86.0524
		188.5	158.387	126.395	88.4313	92.6876	92.1727	80.2002	92.1863	86.1528
		188.6	158.152	126.191	88.3056	92.1827	92.4732	79.9952	92.5238	86.2907
		188.7	158.002	126.136	88.0703	91.9132	92.6606	79.9881	92.8724	86.4775
		188.8	157.83	125.977	87.7871	91.7268	92.7934	80.0062	93.3322	86.7154
		188.9	157.608	125.991	87.478	91.6188	92.98	80.16	93.6747	86.8055
		189	157.562	126.166	87.3325	91.616	93.0554	80.353	93.9719	86.7501
		189.1	157.745	126.238	87.2439	91.7362	93.2417	80.3249	93.9684	86.5564
		189.2	157.984	126.197	87.1387	91.6087	93.584	80.0794	94.0712	86.2923
		189.3	158.046	126.021	87.1013	91.7099	93.9692	79.9192	94.1723	86.0678
		189.4	158.095	125.763	87.1398	91.9245	94.2563	79.6299	94.2263	85.8054
		189.5	157.985	125.358	87.1681	92.2056	94.3685	79.4399	94.3425	85.5435
		189.6	157.458	125.328	87.2892	92.4408	94.295	79.5953	94.6286	85.493
		189.7	156.902	125.331	87.4329	92.5815	93.9518	79.8652	94.4408	85.5537
		189.8	156.565	125.484	87.6348	92.4262	93.5967	80.2026	94.1354	85.7706
		189.9	156.145	125.806	87.8334	92.2039	93.2014	80.6131	93.8314	85.9712
		190	155.944	126.332	88.0319	91.8958	92.9016	81.0248	93.5556	86.2913
		190.1	156.065	126.564	88.122	91.6408	92.6712	81.1632	93.1804	86.4446
		190.2	156.224	126.852	88.278	91.6097	92.5584	81.1546	93.2825	86.5038
		190.3	156.418	127.155	88.3532	91.6819	92.3572	80.969	93.3335	86.3471
		190.4	156.796	127.281	88.3905	91.7504	92.2949	80.6622	93.355	86.335
		190.5	157.108	127.291	88.3631	91.6888	92.2699	80.2846	93.186	86.307
		190.6	157.341	127.284	88.3285	91.4855	92.2361	80.0211	93.1935	86.3183
		190.7	157.547	127.205	88.1664	91.229	92.2276	80.017	93.0154	86.3298
		190.8	157.552	127.012	87.9698	91.062	92.352	80.1442	93.0341	86.3477
		190.9	157.412	126.748	87.6242	90.8511	92.4466	80.3218	93.1264	86.27
		191	157.236	126.396	87.3478	90.8278	92.6036	80.4632	93.4148	86.0082
		191.1	157.11	126.171	87.0733	90.8187	92.8012	80.6739	93.588	85.7519
		191.2	157.008	126.029	86.8739	90.8172	93.0898	80.6726	93.6434	85.5541
		191.3	157.256	126.004	86.7348	90.8748	93.2021	80.6633	93.5304	85.3604
		191.4	157.617	126.171	86.8215	91.0888	93.1946	80.7653	93.3834	85.2537
		191.5	157.862	126.42	86.8629	91.3158	93.1462	80.8976	93.2165	85.372
		191.6	158.02	126.469	86.9326	91.5703	93.0918	80.9088	93.0914	85.617
		191.7	157.999	126.384	87.1167	91.7975	92.9346	81.0264	93.2238	85.8782
		191.8	157.514	126.29	87.3295	91.9585	93.0116	81.0723	93.4108	86.2396
		191.9	156.835	126.059	87.5178	91.9784	93.1636	80.9293	93.5046	86.5368
		192	156.244	125.871	87.6634	91.804	93.3714	80.772	93.3624	86.7332
		192.1	155.747	125.868	87.7512	91.8545	93.5692	80.4778	92.9615	86.7344
		192.2	155.591	125.998	87.6956	92.0475	93.78	80.0364	92.377	86.5548
		192.3	155.753	126.052	87.6596	92.0818	93.8066	79.591	91.7284	86.3323
		192.4	156.095	126.227	87.6692	92.0848	93.7336	79.2659	91.1355	86.0706
		192.5	156.63	126.311	87.7634	92.2582	93.4148	79.0682	90.6476	85.739
		192.6	156.997	126.348	87.9476	92.1208	92.9663	79.1046	90.6603	85.5132
		192.7	156.981	126.356	88.1612	91.7546	92.4532	79.3639	90.8557	85.4816
		192.8	156.833	126.321	88.1719	91.5352	91.9022	79.6105	91.3059	85.5136
		192.9	156.7	126.121	87.9028	91.4338	91.5547	79.9538	91.8726	85.7295
		193	156.383	126.01	87.5398	91.3303	91.4046	80.2683	92.4822	85.9987
		193.1	156.121	126.143	87.179	91.3637	91.5024	80.4801	92.5958	86.2683
		193.2	156.228	126.167	86.7708	91.598	91.7019	80.5751	92.3621	86.4176
		193.3	156.404	126.323	86.5114	91.7554	91.9484	80.8042	91.9335	86.4696
		193.4	156.594	126.772	86.4499	91.8273	92.0258	80.9212	91.4671	86.2998
		193.5	156.645	127.228	86.3283	91.863	92.131	80.9546	91.1679	86.0944
		193.6	156.842	127.418	86.1334	91.9254	92.1955	81.1277	91.0717	85.7755
		193.7	156.685	127.639	86.0349	91.8427	92.2372	81.318	91.2986	85.4599
		193.8	156.532	127.724	85.978	92.0205	92.4266	81.4396	91.4318	85.0986
		193.9	156.291	127.466	85.9392	92.1953	92.7048	81.4436	91.4647	84.837
		194	156.331	126.996	86.1517	92.1308	92.9411	81.4963	91.3284	84.7672
		194.1	156.318	126.462	86.3311	91.9111	93.0533	81.3841	91.3278	84.8554
		194.2	156.578	126.093	86.3944	91.6871	93.0174	81.1745	91.1858	85.1684
		194.3	156.783	125.924	86.3766	91.1702	92.76	80.963	91.1863	85.6608
		194.4	156.98	126.013	86.3961	90.7698	92.4849	80.9115	91.4119	86.1944
		194.5	156.978	126.353	86.391	90.8852	92.123	80.8047	91.7569	86.5554
		194.6	156.913	126.798	86.654	91.1634	91.722	80.7768	92.0626	86.8028
		194.7	156.855	127.029	86.9969	91.4566	91.559	80.867	92.4988	86.8302
		194.8	156.783	127.063	87.4609	91.8601	91.573	80.9295	92.9527	86.7058
		194.9	156.752	127.089	87.827	92.0726	91.6426	80.9389	93.0451	86.4436
		195	156.821	127.078	87.9866	91.9875	91.8548	80.9492	92.9963	86.2024
		195.1	156.799	127.023	87.8652	91.9354	92.3003	80.8833	92.6807	86.0938
		195.2	156.534	127.096	87.7609	92.0147	92.6521	80.7653	92.2224	85.9928
		195.3	156.344	127.19	87.3434	92.031	92.9493	80.6535	91.6584	86.0411
		195.4	156.157	126.986	86.9433	92.1059	93.0014	80.551	91.4402	86.1189
		195.5	156.173	126.642	86.6574	92.1148	92.8886	80.5266	91.2522	86.1598
		195.6	156.374	126.528	86.5103	91.9788	92.5693	80.6575	91.269	86.052
		195.7	156.684	126.448	86.3454	91.8704	92.1774	80.8245	91.4155	85.9738
		195.8	156.976	126.517	86.5519	91.8672	91.8769	81.0092	91.6644	85.661
		195.9	157.245	126.743	86.8344	91.9704	91.927	81.1987	91.8092	85.5221
		196	157.138	127.076	87.0378	92.1325	92.1486	81.3552	92.024	85.5062
		196.1	156.919	127.088	87.0826	92.3767	92.4303	81.3392	92.2992	85.5708
		196.2	156.867	126.978	87.0511	92.4442	92.7696	81.3448	92.4514	85.684
		196.3	156.971	126.74	86.7788	92.4883	92.9694	81.3996	92.5836	85.8368
		196.4	157.195	126.557	86.3623	92.4755	93.0068	81.3578	92.5525	85.8318
		196.5	157.463	126.404	86.0027	92.3747	92.9242	81.3663	92.4275	85.811
		196.6	157.807	126.414	85.8027	92.1751	92.9193	81.4764	92.1765	85.9015
		196.7	157.939	126.554	85.7439	92.0219	92.9592	81.3973	91.9706	85.9425
		196.8	157.758	126.692	85.8918	91.6735	92.9646	81.1874	91.6826	86.1615
		196.9	157.482	126.808	86.3417	91.292	92.9366	81.0094	91.5822	86.4542
		197	157.37	126.82	86.832	91.1681	92.9376	80.5963	91.5611	86.6676
		197.1	157.225	126.79	87.2265	91.0786	92.6654	80.2159	91.5838	86.7415
		197.2	157.079	126.69	87.6023	91.0268	92.3837	80.0218	91.6588	86.7766
		197.3	157.079	126.715	87.7618	91.1812	92.2106	79.8314	91.8139	86.6955
		197.4	156.895	126.821	87.4802	91.3326	91.9084	79.8097	91.9215	86.591
		197.5	156.601	127.054	87.1577	91.2385	91.5585	80.1266	92.0486	86.4414
		197.6	156.309	127.261	86.8796	91.2544	91.4256	80.4831	92.2318	86.1301
		197.7	156.212	127.453	86.4714	91.1254	91.2799	80.8109	92.2799	86.0355
		197.8	156.101	127.385	86.2853	90.9722	91.1134	81.2582	92.1769	85.995
		197.9	156.261	127.206	86.38	90.9152	91.3581	81.5615	92.1452	85.8106
		198	156.588	126.886	86.5651	90.9181	91.8399	81.5834	92.02	85.7648
		198.1	156.857	126.652	86.8519	90.7423	92.4379	81.2492	91.7867	85.9946
		198.2	156.957	126.358	87.2376	90.7914	93.0344	80.965	91.7662	85.9397
		198.3	157.141	126.298	87.5051	90.9692	93.6083	80.6626	92.0307	85.9364
		198.4	157.217	126.273	87.8326	91.2267	93.8572	80.4864	92.2384	86.2287
		198.5	157.21	126.351	87.9823	91.6006	93.943	80.3594	92.4231	86.3655
		198.6	157.27	126.437	87.799	92.1598	93.7696	80.6045	92.7669	86.3642
		198.7	157.396	126.717	87.5745	92.4806	93.5387	80.7358	93.0016	86.5153
		198.8	157.314	126.968	87.2862	92.5454	93.3308	80.8745	93.0224	86.5242
		198.9	157.114	127.204	86.8164	92.3741	93.0529	80.828	92.8655	86.2706
		199	156.828	127.234	86.4927	92.0439	92.64	80.8518	92.8248	86.0245
		199.1	156.633	127.092	86.4942	91.665	92.4107	80.7177	92.5541	85.7824
		199.2	156.392	126.671	86.5133	91.5443	92.2664	80.7294	92.1142	85.5732
		199.3	156.426	126.158	86.6879	91.5179	92.1226	80.696	91.7749	85.5572
		199.4	156.712	125.666	86.9089	91.554	92.2107	80.8668	91.593	85.6832
		199.5	157.02	125.429	87.0412	91.7004	92.4402	81.228	91.4089	86.0222
		199.6	157.176	125.37	87.0793	91.8991	92.5784	81.7128	91.4176	86.5284
		199.7	157.404	125.674	87.0826	91.9349	92.6456	82.0427	91.6586	86.9234
[truncated: 2,003 more rows]

## Sheet: Rates
Source data: Figure 7E
		BiP+Mg			BiP+Ca			BiP+Ca+Grp170			Oligos+Mg			Oligos+Ca			Oligos+Ca+Grp170
		Exp. 1	Exp. 2	Exp. 3	Exp. 1	Exp. 2	Exp. 3	Exp. 1	Exp. 2	Exp. 3	Exp. 1	Exp. 2	Exp. 3	Exp. 1	Exp. 2	Exp. 3	Exp. 1	Exp. 2	Exp. 3
	Rate (s-1)	0.09086	0.08177	0.08595	0.01008	0.009783	0.01067	0.1282	0.138	0.109	0.09292	0.09428	0.07789	0.01163	0.01077	0.009614	0.03384	0.03113	0.02701
	R2	0.9906	0.9896	0.9798	0.9987	0.9989	0.9978	0.9126	0.9394	0.9326	0.9852	0.9798	0.9644	0.9974	0.9965	0.9968	0.9937	0.9895	0.9861
		Mean (s-1)	SD	N
	BiP+Mg	0.0861933	0.00454988	3
	BiP+Ca	0.0101777	0.000451493	3
	BiP+Ca+Grp170	0.125067	0.0147517	3
	Oligos+Mg	0.0883633	0.00909563	3
	Oligos+Ca	0.0106713	0.00101162	3
	Oligos+Ca+Grp170	0.03066	0.00343917	3
