# Supplementary material for: Calcium depletion challenges endoplasmic reticulum proteostasis by destabilising BiP-substrate complexes
Source: eLife. 2020 Dec 9;9:e62601. doi: 10.7554/eLife.62601 (PMC7758071; doi:10.7554/eLife.62601)
Supplement: Supplementary file 1. [file elife-62601-supp1.xlsx]

## Sheet: Median_TCRa-wt(24)
Summary		TCRa-wt (Clone 24)	Median		Normalised		FLAG-M1/Turquoise	Normalised	Average	SD	Average	SD	Average	SD
	all cells		FLAG-M1	Turquoise	FLAG-M1	Turquoise			FLAG-M1		Turquoise		Ratio
	Cell line	Tg (min)
Experiment 1	CHO-K1 TCRa (UK2469) Clone 24	0	190	560	1	1	0.339286	1	1.14211	0.202272	1.0625	0.119242	1.07023	0.0724631
		10	204	597	1.07368	1.06607	0.341709	1.00714	1.11053	0.0345128	1.08393	0.0264262	1.02482	0.0357513
		30	593	552	3.12105	0.985714	1.07428	3.16629	3.52105	0.545239	1.06429	0.0855094	3.29631	0.250537
		60	537	493	2.82632	0.880357	1.08925	3.21042	3.32456	0.563977	0.934524	0.0535813	3.54273	0.399987
		120	302	339	1.58947	0.605357	0.890855	2.62568	2.28596	0.654969	0.647619	0.0469861	3.4951	0.781295
		180	746	292	3.92632	0.521429	2.55479	7.52992	3.82456	1.06156	0.539286	0.0389187	7.03443	1.54824
		240	746	261	3.92632	0.466071	2.85824	8.42428	4.52807	0.524638	0.486905	0.0214534	9.283	0.751048
Experiment 2		0	200	553	1.05263	0.9875	0.361664	1.06596
		10	217	600	1.14211	1.07143	0.361667	1.06596
		30	627	589	3.3	1.05179	1.06452	3.13752
		60	610	524	3.21053	0.935714	1.16412	3.4311
		120	452	358	2.37895	0.639286	1.26257	3.72126
		180	516	287	2.71579	0.5125	1.79791	5.2991
		240	906	272	4.76842	0.485714	3.33088	9.81734
Experiment 3		0	261	672	1.37368	1.2	0.388393	1.14474
		10	212	624	1.11579	1.11429	0.339744	1.00135
		30	787	647	4.14211	1.15536	1.21638	3.58513
		60	748	553	3.93684	0.9875	1.35262	3.98668
		120	549	391	2.88947	0.698214	1.40409	4.13838
		180	918	327	4.83158	0.583929	2.80734	8.27426
		240	929	285	4.88947	0.508929	3.25965	9.60739

## Sheet: Median_TCRa-N Q(12)
Source data: Figure 1-figure supplement 2
Summary		TCRa-N/Q (Clone 12)	Median		Normalised		FLAG-M1/Turquoise	Normalised	Average	SD	Average	SD	Average	SD
	all cells		FLAG-M1	Turquoise	FLAG-M1	Turquoise			FLAG-M1		Turquoise		Ratio
	Cell line	Tg (min)
Experiment 1	CHO-K1 TCRa-N/Q (UK2520) Clone 12	0	158	494	1	1	0.319838	1	1.02954	0.0511576	1.01754	0.0172164	1.0115	0.0365261
		10	153	500	0.968354	1.01215	0.306	0.956734	0.974684	0.0167453	1.00877	0.00584363	0.966293	0.0221929
		30	214	482	1.35443	0.975709	0.443983	1.38815	1.49156	0.146302	0.992578	0.018368	1.50125	0.119251
		60	249	457	1.57595	0.925101	0.544858	1.70354	1.59705	0.134161	0.930499	0.0149213	1.71512	0.116726
		120	289	400	1.82911	0.809717	0.7225	2.25896	1.92616	0.213445	0.820513	0.00956643	2.34655	0.243802
		180	447	366	2.82911	0.740891	1.22131	3.81853	3.0865	0.242276	0.762483	0.0203774	4.0442	0.210889
		240	544	343	3.44304	0.694332	1.58601	4.95878	3.48734	0.574068	0.688934	0.0046749	5.06235	0.839483
Experiment 2		0	158	503	1	1.01822	0.314115	0.982107
		10	152	500	0.962025	1.01215	0.304	0.950481
		30	233	489	1.47468	0.989879	0.476483	1.48976
		60	233	454	1.47468	0.919028	0.513216	1.60461
		120	281	407	1.77848	0.823887	0.690418	2.15865
		180	493	378	3.12025	0.765182	1.30423	4.07779
		240	464	339	2.93671	0.686235	1.36873	4.27945
Experiment 3		0	172	511	1.08861	1.03441	0.336595	1.05239
		10	157	495	0.993671	1.00202	0.317172	0.991663
		30	260	500	1.64557	1.01215	0.52	1.62582
		60	275	468	1.74051	0.947368	0.587607	1.8372
		120	343	409	2.17089	0.827935	0.838631	2.62205
		180	523	386	3.31013	0.781377	1.35492	4.23628
		240	645	339	4.08228	0.686235	1.90265	5.94881
