# Supplementary material for: Calcium depletion challenges endoplasmic reticulum proteostasis by destabilising BiP-substrate complexes
Source: eLife. 2020 Dec 9;9:e62601. doi: 10.7554/eLife.62601 (PMC7758071; doi:10.7554/eLife.62601)
Supplement: Supplementary file 2. [file elife-62601-supp2.xlsx]

## Sheet: All data
Source data: Figure 3-figure supplement 1
						Final concentrations (dissociation): 1.3 µM MABA-ADP, 1.3 µM BiP, 3 mM MgCl2, 100 mM KCl, 50 mM HEPES-KOH pH 7.4, 3 mM CaCl2, 1.3 µM Grp170, 1.5 mM ATP
		Nucleotide-free BiP (UK173)
		Fitting method: Prism --> One phase decay (no constraints). Data were fitted over the entire data range. Data for the sample "ad" BiP with Mg + Grp170 (fast kinetics) were fitted only over the 35 seconds.
			ac_BiP_Mg			bc_BiP_Ca			ad_BiP_Mg_Grp170			bd_BiP_Ca_Grp170
			Experiment 1	Experiment 2	Experiment 3	Experiment 1	Experiment 2	Experiment 3	Experiment 1	Experiment 2	Experiment 3	Experiment 1	Experiment 2	Experiment 3
		k (sec-1)	0.08334	0.08242	0.08116	0.01042	0.009012	0.009949	0.3998	0.4162	0.3432	0.1339	0.1469	0.151
		R2	0.9932	0.9952	0.9925	0.9979	0.998	0.9975	0.9209	0.8909	0.9284	0.9953	0.9884	0.9606
			ac_BiP_Mg			bc_BiP_Ca			ad_BiP_Mg_Grp170			bd_BiP_Ca_Grp170
	FL data	Time (s)	Experiment 1	Experiment 2	Experiment 3	Experiment 1	Experiment 2	Experiment 3	Experiment 1	Experiment 2	Experiment 3	Experiment 1	Experiment 2	Experiment 3
		0	117.348	116.853	97.5771	148.512	161.956	146.318	83.3876	87.0614	88.8625	130.997	135.485	112.971
		0.1	117.184	116.36	97.4319	148.149	161.772	145.65	82.8929	86.6429	88.4882	130.545	135.242	112.766
		0.2	116.826	115.839	97.3245	147.516	161.615	145.231	82.2901	86.0797	87.8348	130.159	134.459	112.438
		0.3	116.477	115.504	97.1459	147.114	161.395	144.806	81.7549	85.3508	87.1221	129.974	133.664	111.993
		0.4	116.117	115.191	96.9475	146.69	161.318	144.496	81.2657	84.6625	86.4545	129.692	132.7	111.308
		0.5	115.864	114.693	96.8176	146.371	161.121	144.137	80.6611	84.0078	85.6795	129.273	131.561	110.388
		0.6	115.802	114.24	96.5631	146.185	161.031	143.861	80.0236	83.3726	84.9647	129.026	130.364	109.491
		0.7	115.865	113.711	96.1564	146.365	160.746	143.499	79.5187	82.9452	84.4501	128.585	129.525	108.59
		0.8	115.782	112.98	95.7549	146.252	160.5	143.163	79.0962	82.7034	83.9544	127.665	128.721	107.732
		0.9	115.648	112.161	95.4812	146.12	160.159	142.806	78.7206	82.4148	83.4268	126.65	128.064	107.12
		1	115.423	111.468	95.2024	145.802	159.957	142.527	78.4633	81.9823	82.9174	125.582	127.445	106.719
		1.1	114.977	110.838	95.0898	145.616	159.581	142.387	78.1856	81.5909	82.3898	124.367	126.963	106.211
		1.2	114.454	110.51	95.1275	145.319	159.28	142.351	77.7796	81.031	81.958	123.354	126.293	105.743
		1.3	114.134	110.304	95.0872	145.295	158.923	142.393	77.3576	80.3152	81.6647	122.721	125.517	105.231
		1.4	113.969	110.223	94.8598	145.281	158.607	142.548	76.8617	79.6801	81.5674	122.204	124.634	104.554
		1.5	113.744	110.162	94.5653	145.378	158.149	142.744	76.296	79.1572	81.6597	121.845	123.718	103.745
		1.6	113.532	110.206	94.0911	145.484	157.859	142.906	75.8488	78.7281	81.8206	121.535	122.681	102.898
		1.7	113.286	110.104	93.5468	145.512	157.739	142.933	75.5242	78.5155	81.8586	121.008	121.784	102.113
		1.8	112.866	109.978	93.2226	145.446	157.767	142.97	75.2032	78.4885	81.9048	120.419	120.968	101.346
		1.9	112.235	109.707	93.0795	145.478	157.692	142.699	75.0276	78.5293	81.8218	119.755	120.165	100.691
		2	111.721	109.518	92.8494	145.413	157.691	142.179	74.9912	78.547	81.5914	119.032	119.328	100.133
		2.1	111.232	109.185	92.6937	145.068	157.675	141.641	74.9956	78.4884	81.3377	118.33	118.384	99.7656
		2.2	110.8	108.86	92.533	144.784	157.52	141.261	75.1507	78.2351	81.1973	117.876	117.391	99.3447
		2.3	110.526	108.594	92.2164	144.41	157.226	140.815	75.3391	77.9283	81.0303	117.35	116.61	99.0195
		2.4	110.346	108.427	91.8455	143.997	157.005	140.696	75.5127	77.5426	80.7859	117.012	115.957	98.5839
		2.5	110.058	108.096	91.7196	143.797	156.769	140.854	75.5732	77.2724	80.51	116.713	115.413	98.0547
		2.6	109.76	107.884	91.7029	143.736	156.516	141.098	75.6632	77.0702	80.2361	116.389	115.121	97.4048
		2.7	109.489	107.745	91.7016	143.561	156.329	141.383	75.5525	77.0917	79.8936	115.828	114.862	96.8426
		2.8	109.202	107.583	91.6586	143.445	156.246	141.734	75.4034	77.1184	79.5999	115.175	114.424	96.2295
		2.9	108.952	107.415	91.5597	143.2	156.332	141.9	75.1112	77.1428	79.5308	114.28	113.867	95.6952
		3	108.778	107.347	91.2932	142.799	156.448	142.041	74.8584	77.1093	79.6286	113.357	113.348	95.2214
		3.1	108.601	107.091	90.8529	142.575	156.592	142.147	74.4608	76.9951	79.7366	112.431	112.697	94.7596
		3.2	108.36	106.795	90.4297	142.467	156.818	142.047	74.192	76.8276	79.9228	111.664	112.025	94.1111
		3.3	107.885	106.412	90.1909	142.287	157.02	141.868	74.0486	76.6982	79.9959	111.125	111.249	93.4842
		3.4	107.371	106.049	89.8916	142.133	157.016	141.81	73.9602	76.6423	79.898	110.744	110.539	92.8885
		3.5	106.931	105.68	89.5976	142.011	157.144	141.603	73.8105	76.6411	79.6135	110.293	109.774	92.3529
		3.6	106.579	105.496	89.3669	141.818	157.255	141.219	73.7738	76.7441	79.4313	109.928	109.062	92.0387
		3.7	106.29	105.181	89.1338	141.793	157.261	141.03	73.7234	76.8422	79.1015	109.56	108.349	91.9049
		3.8	106.241	104.978	88.7444	142.038	157.117	140.861	73.524	76.9513	78.7501	109.092	107.815	91.7625
		3.9	106.227	104.868	88.6126	142.52	157.019	140.548	73.4858	77.063	78.3727	108.499	107.293	91.5705
		4	106.121	104.737	88.5213	143.001	156.637	140.321	73.5811	77.1353	78.1446	107.976	106.779	91.2701
		4.1	106.024	104.436	88.4891	143.247	156.321	140.138	73.6586	77.2609	77.7626	107.435	106.212	90.7702
		4.2	105.964	104.296	88.4538	143.196	156.048	139.713	73.5718	77.3142	77.5853	106.907	105.601	90.3044
		4.3	105.826	104.062	88.3845	142.913	155.94	139.274	73.6447	77.3353	77.551	106.459	104.898	89.8009
		4.4	105.647	103.701	88.0104	142.414	155.931	138.883	73.5548	77.3185	77.6187	106.119	104.237	89.341
		4.5	105.427	103.289	87.66	141.981	156.059	138.475	73.3904	77.2948	77.7066	105.824	103.625	88.9262
		4.6	105.322	103.093	87.3474	141.73	156.055	138.274	73.257	77.2733	77.9233	105.401	103.102	88.5451
		4.7	105.312	102.846	87.0688	141.613	155.954	138.294	73.2918	77.2758	78.0686	104.828	102.752	88.1007
		4.8	105.379	102.643	86.921	141.674	155.843	138.352	73.1752	77.4171	78.3216	104.196	102.507	87.7851
		4.9	105.536	102.436	87.0077	141.856	155.612	138.481	73.1524	77.6041	78.5396	103.496	102.219	87.5409
		5	105.812	102.341	87.1993	141.861	155.345	138.655	73.1026	77.7374	78.58	102.757	101.844	87.4266
		5.1	105.812	102.058	87.3145	141.891	155.109	138.683	73.0246	77.6512	78.573	102.239	101.509	87.4144
		5.2	105.498	101.731	87.4795	141.992	155.056	138.56	72.8746	77.6314	78.5454	102.007	101.1	87.3926
		5.3	105.205	101.351	87.5852	141.889	154.976	138.34	72.6927	77.3484	78.3072	101.848	100.761	87.3411
		5.4	104.859	101.051	87.4696	141.692	154.892	138.07	72.508	76.945	78.1986	101.912	100.435	87.3011
		5.5	104.448	100.707	87.0415	141.767	154.876	137.703	72.4217	76.5936	78.3032	102.046	100.169	87.262
		5.6	104.066	100.547	86.6476	141.679	154.877	137.327	72.343	76.3406	78.3244	102.228	99.8024	87.1806
		5.7	103.892	100.51	86.1238	141.358	154.579	137.076	72.3601	76.0722	78.2959	102.348	99.3937	87.1832
		5.8	103.596	100.601	85.549	141.112	154.28	137.031	72.467	75.974	78.3102	102.352	98.9035	87.1122
		5.9	103.372	100.568	85.1996	140.92	153.902	137.07	72.4076	75.9773	78.186	102.178	98.4774	86.9341
		6	103.229	100.485	85.1604	140.559	153.481	137.211	72.2825	75.9264	77.9236	101.885	98.146	86.5672
		6.1	103.262	100.189	85.0864	140.329	153.276	137.35	72.0556	75.9385	77.8349	101.286	97.8986	86.1403
		6.2	103.285	99.7386	85.0546	140.234	153.419	137.508	71.7516	75.8347	77.7843	100.483	97.733	85.5572
		6.3	103.297	99.1692	85.1922	140.146	153.589	137.522	71.5074	75.632	77.6737	99.7081	97.547	85.109
		6.4	103.202	98.6801	85.243	139.931	153.98	137.408	71.4416	75.2929	77.6356	98.9417	97.3893	84.6718
		6.5	102.879	98.3888	85.0904	139.652	154.45	137.218	71.4819	75.0167	77.6162	98.2739	97.1541	84.2796
		6.6	102.358	98.3152	84.9033	139.354	154.604	137.209	71.7703	74.6987	77.4592	97.8452	96.9326	83.8651
		6.7	101.771	98.3334	84.754	139.078	154.548	137.187	72.0213	74.4577	77.3751	97.5778	96.8362	83.6769
		6.8	101.293	98.5204	84.5585	138.738	154.35	137.193	72.139	74.3638	77.3708	97.4415	96.7776	83.4303
		6.9	100.823	98.8358	84.334	138.461	154.044	137.236	72.1499	74.5717	77.2142	97.3476	96.5885	83.1932
		7	100.561	98.9953	84.2842	138.291	153.617	137.369	71.9555	74.8476	77.1111	97.1499	96.5071	83.1099
		7.1	100.42	98.964	84.3583	138.095	153.178	137.158	71.5602	75.2886	77.0398	96.7985	96.3514	83.1381
		7.2	100.292	98.9198	84.4583	137.941	152.774	136.776	71.3914	75.8553	76.89	96.3459	95.9303	83.036
		7.3	100.044	98.7127	84.4681	137.904	152.668	136.395	71.3692	76.27	76.8719	95.788	95.4424	82.8231
		7.4	99.7829	98.3575	84.45	137.942	152.588	136.129	71.4539	76.4033	77.039	95.2189	95.0558	82.7422
		7.5	99.4059	97.9329	84.2722	137.979	152.469	135.745	71.8001	76.4442	77.1609	94.8012	94.4965	82.6594
		7.6	99.0475	97.6174	84.0626	138.134	152.5	135.585	72.2011	76.2452	77.3891	94.6016	94.0415	82.6221
		7.7	98.8126	97.3838	83.8411	138.239	152.458	135.616	72.2746	75.8774	77.6373	94.6287	93.7365	82.5912
		7.8	98.793	97.233	83.7432	138.287	152.226	135.571	72.1777	75.5642	77.5825	94.6653	93.5403	82.701
		7.9	98.938	97.0472	83.7469	138.248	152.003	135.361	71.9936	75.3144	77.4328	94.7181	93.2948	82.6388
		8	99.1354	97.0349	83.8105	137.952	151.956	135.256	71.5034	74.9268	77.2449	94.6693	93.2404	82.3808
		8.1	99.3743	97.0446	83.805	137.639	151.876	135.318	70.9225	74.583	76.8842	94.3397	93.1698	81.8963
		8.2	99.5099	96.9687	83.665	137.31	151.819	135.275	70.5898	74.2828	76.6103	93.8023	93.0998	81.3822
		8.3	99.4422	96.8632	83.3636	137.056	151.647	135.313	70.4022	74.145	76.6036	93.3226	92.8234	80.8586
		8.4	99.1598	96.7592	82.9405	136.951	151.435	135.454	70.3495	74.1573	76.5494	92.9498	92.5214	80.3069
		8.5	98.9723	96.5147	82.5099	137.214	151.255	135.654	70.5255	74.4368	76.677	92.6105	91.9747	79.9648
		8.6	98.635	96.2972	82.0975	137.32	151.121	135.673	70.8656	74.7586	76.8946	92.5192	91.2876	79.7821
		8.7	98.2762	96.0871	81.8241	137.442	151.099	135.679	71.0752	75.1755	76.937	92.5496	90.4369	79.7126
		8.8	98.0008	95.8627	81.5826	137.385	151.161	135.65	71.2777	75.2846	76.8071	92.5715	89.7565	79.5793
		8.9	97.7373	95.7052	81.4948	137.139	151.19	135.485	71.4584	75.2039	76.8176	92.3673	89.121	79.7421
		9	97.3474	95.6286	81.481	136.654	150.855	135.064	71.5225	75.0962	76.6111	92.146	88.6722	79.8537
		9.1	97.0539	95.4726	81.436	136.134	150.317	134.609	71.5405	75.0136	76.4298	91.8418	88.376	80.0684
		9.2	96.8555	95.2634	81.307	135.626	149.683	134.359	71.6489	74.8639	76.4459	91.4068	88.3634	80.1726
		9.3	96.5653	94.9712	81.2878	135.24	149.078	134.257	71.7536	75.0418	76.489	90.8994	88.5465	80.3845
		9.4	96.3428	94.5611	81.1809	134.965	148.415	134.27	71.6794	75.3931	76.4316	90.5981	88.7983	80.4677
		9.5	96.1564	94.1473	80.9996	134.963	148.129	134.473	71.7161	75.5672	76.4307	90.3407	89.0854	80.4178
		9.6	96.0452	93.7394	80.8094	135.155	148.069	134.593	71.7367	75.7024	76.353	90.1104	89.324	80.2265
		9.7	95.9548	93.3829	80.6752	135.381	147.986	134.481	71.6626	75.7708	76.0875	90.0285	89.3684	80.1533
		9.8	96.0088	93.2156	80.4154	135.706	147.933	134.179	71.482	75.6574	75.9103	90.0929	89.0978	79.9039
		9.9	96.1644	93.3214	80.1498	135.929	148.071	133.875	71.4481	75.4258	75.7588	90.1124	88.8578	79.4038
		10	96.3686	93.3395	79.8692	135.932	147.926	133.506	71.3878	75.4448	75.6815	90.2186	88.5826	79.0929
		10.1	96.5098	93.3633	79.7282	135.812	147.672	133.37	71.2754	75.5386	75.63	90.3018	88.4014	78.8262
		10.2	96.5392	93.4572	79.6286	135.475	147.606	133.249	71.174	75.6353	75.6235	90.3446	88.4064	78.546
		10.3	96.4898	93.4993	79.5802	135.078	147.567	133.276	71.136	75.6754	75.5971	90.3338	88.5903	78.5976
		10.4	96.337	93.3213	79.5485	134.84	147.433	133.39	71.01	75.8585	75.6313	90.2614	88.71	79.0082
		10.5	96.0974	93.1986	79.5352	134.582	147.465	133.525	70.8644	75.7926	75.6168	90.1066	88.9499	79.3504
		10.6	95.772	93.0886	79.4618	134.398	147.645	133.474	70.7945	75.6564	75.6266	89.9472	89.2173	79.6428
		10.7	95.4705	92.9142	79.2768	134.527	147.725	133.635	70.8032	75.5874	75.7965	89.7544	89.4235	79.7355
		10.8	95.2554	92.6154	79.1096	134.625	147.819	133.597	70.9106	75.5866	76.0711	89.457	89.6148	79.4413
		10.9	95.1199	92.2869	78.936	134.668	147.912	133.398	71.2566	75.2402	76.2438	89.0372	89.7447	79.0063
		11	94.9984	91.9544	78.7652	134.907	148.035	133.126	71.6123	75.0158	76.3648	88.5587	89.5773	78.6004
		11.1	94.9014	91.533	78.4794	135.218	148.021	132.863	71.9353	74.8233	76.4996	88.1442	89.1754	78.2682
		11.2	94.7382	91.022	78.303	135.378	147.998	132.404	72.2336	74.5663	76.434	87.6914	88.6003	78.1072
		11.3	94.5658	90.5828	78.162	135.525	147.963	132.149	72.4022	74.3505	76.1024	87.2735	88.045	78.2245
		11.4	94.3216	90.2924	78.0128	135.695	147.885	131.994	72.2062	74.4295	75.8916	87.1196	87.6894	78.3912
		11.5	94.028	90.0405	77.9512	135.585	147.744	131.99	71.8913	74.4332	75.8644	87.162	87.5992	78.5361
		11.6	93.7772	89.8475	78.0526	135.373	147.601	132.06	71.6295	74.4144	75.752	87.1122	87.5471	78.6352
		11.7	93.6302	89.8976	78.0938	135.138	147.38	132.105	71.4436	74.5427	75.7091	87.1595	87.5424	78.8287
		11.8	93.3907	90.0993	78.1061	134.875	147.084	131.956	71.312	74.5994	75.838	87.2732	87.2522	78.9492
		11.9	93.1742	90.2156	78.2294	134.462	146.883	131.842	71.4426	74.5595	75.8145	87.1763	86.5787	79.0083
		12	93.2512	90.2586	78.2294	134.339	146.86	131.661	71.6632	74.5223	75.6231	86.8458	85.5941	78.9795
		12.1	93.2804	90.4942	78.1111	134.221	146.995	131.459	71.778	74.3897	75.5025	86.5526	84.852	78.9181
		12.2	93.352	90.6062	78.0726	134.239	147.202	131.379	71.6519	74.1299	75.3138	86.1545	84.3234	78.7005
		12.3	93.5638	90.5568	77.9683	134.267	147.401	131.415	71.4552	73.8735	75.1375	85.7596	84.2314	78.3909
		12.4	93.7531	90.4501	77.6629	134.415	147.576	131.322	71.088	73.6243	75.097	85.5756	84.544	77.9489
		12.5	93.6476	90.4916	77.4166	134.335	147.562	131.31	70.7092	73.4537	75.1911	85.3904	85.1135	77.5011
		12.6	93.7247	90.3213	77.1834	134.118	147.436	131.306	70.3399	73.4672	75.3462	85.3603	85.5151	77.1421
		12.7	93.7391	89.9916	76.8299	133.741	147.211	131.251	70.2024	73.4199	75.6583	85.533	85.7916	76.8061
		12.8	93.4704	89.7378	76.5592	133.419	147.05	131.265	70.2046	73.4209	75.9464	85.6096	85.8239	76.5925
		12.9	93.2277	89.7378	76.5073	133.075	146.773	131.343	70.3497	73.5195	76.1709	85.554	85.6194	76.6172
		13	93.0938	89.6308	76.527	132.98	146.469	131.371	70.5776	73.5563	76.1846	85.7187	85.3237	76.9366
		13.1	92.6934	89.5164	76.6147	133.114	146.096	131.614	70.973	73.5044	76.0557	85.5606	85.0986	77.2408
		13.2	92.1876	89.5592	76.759	133.294	145.876	131.817	71.3652	73.6212	75.907	85.142	84.7431	77.6318
		13.3	91.9384	89.502	76.8873	133.359	145.592	131.863	71.7036	73.8234	75.6743	84.8265	84.3707	77.9094
		13.4	91.6142	89.268	76.831	133.506	145.424	131.83	71.9878	74.0192	75.4064	84.5221	84.0312	78.0506
		13.5	91.249	89.0522	76.6388	133.344	145.368	131.603	72.2059	74.3828	75.3132	84.0162	83.8851	77.8979
		13.6	91.0277	88.862	76.4892	133.077	145.4	130.993	72.1977	74.6964	75.4134	83.835	83.7242	77.8194
		13.7	90.9512	88.582	76.3794	132.829	145.371	130.401	72.0189	74.9223	75.486	83.8414	83.7682	77.7561
		13.8	90.7956	88.2424	76.2966	132.708	145.386	130.098	71.8792	75.0325	75.7009	83.7694	83.8603	77.8897
		13.9	90.727	87.8679	76.3347	132.434	145.45	130.124	71.7188	75.0029	75.9939	83.6315	83.9767	78.1524
		14	90.668	87.4671	76.4392	132.318	145.52	130.412	71.4792	74.7325	76.2612	83.5769	83.7857	78.4813
		14.1	90.6073	87.1992	76.3802	132.364	145.532	130.785	71.3222	74.6169	76.3951	83.3077	83.4366	78.6631
		14.2	90.5717	87.1326	76.2797	132.426	145.591	131.223	71.2378	74.4894	76.4668	83.0046	82.9959	78.6889
		14.3	90.5432	87.3147	76.065	132.293	145.591	131.276	70.9498	74.3654	76.4209	82.7617	82.7192	78.469
		14.4	90.5291	87.5498	75.7618	132.147	145.447	130.906	70.7442	74.251	76.4444	82.7098	82.5247	78.1205
		14.5	90.5756	87.7972	75.512	131.965	145.147	130.469	70.7077	74.1308	76.5248	82.6353	82.5702	77.8677
		14.6	90.635	87.8288	75.4065	131.522	144.909	130.164	70.7187	73.873	76.5248	82.5848	82.8631	77.6379
		14.7	90.6512	87.7266	75.3044	130.976	144.607	129.879	70.7409	73.7904	76.6025	82.4171	83.119	77.4402
		14.8	90.5674	87.4337	75.2137	130.662	144.394	129.857	70.919	73.7226	76.6908	82.1832	83.1407	77.3561
		14.9	90.5315	87.1604	75.2247	130.553	144.236	130.153	70.891	73.7556	76.5589	81.9454	83.0534	77.2748
		15	90.4926	86.945	75.1724	130.552	144.175	130.417	70.7051	73.9109	76.2284	81.9012	82.8529	77.229
		15.1	90.4222	86.9324	75.1027	130.592	144.197	130.719	70.5668	74.0436	76.1429	81.9689	82.5142	77.2856
		15.2	90.1715	86.8297	75.0399	130.769	144.173	130.965	70.456	74.0098	75.9642	82.1766	82.2946	77.4028
		15.3	90.098	86.8205	75.1408	130.84	144.054	131.128	70.4164	74.063	75.8976	82.5042	82.2083	77.4952
		15.4	89.9248	86.9283	75.2237	130.694	144.059	131.173	70.6362	74.0914	76.0303	82.6004	82.305	77.592
		15.5	89.7504	87.0011	75.3037	130.495	143.997	131.149	70.8823	74.2334	76.2933	82.305	82.5296	77.401
		15.6	89.5605	87.0273	75.2972	130.342	143.655	130.842	70.9407	74.6314	76.3244	81.8819	82.7394	77.0728
		15.7	89.6381	87.3326	75.257	130.051	143.311	130.424	70.9872	74.9443	76.3123	81.5276	82.847	76.754
		15.8	89.733	87.7538	75.1355	129.969	143.084	129.968	70.8674	75.0117	76.1552	81.1601	82.8762	76.5033
		15.9	89.7851	87.8701	74.9206	130.193	142.64	129.45	70.4699	75.0773	75.8722	81.0117	82.6443	76.3544
		16	89.6566	87.9525	74.8307	130.35	142.222	129.018	70.0684	74.9581	75.6767	81.2049	82.322	76.3643
		16.1	89.5151	88.0672	74.9204	130.617	141.963	128.928	69.7436	74.5508	75.6759	81.4882	82.2209	76.3986
		16.2	89.2212	87.8707	75.1222	131.161	141.913	129.041	69.4179	74.2092	75.8499	81.5592	82.1251	76.5258
		16.3	88.7134	87.342	75.4046	131.533	141.813	129.086	69.1028	74.0752	76.1237	81.4747	82.0008	76.611
		16.4	88.2331	87.0009	75.7206	131.677	141.866	129.044	69.0514	73.9052	76.3987	81.268	82.1272	76.5829
		16.5	88.004	86.7566	75.8263	131.851	142.12	128.938	69.1673	73.8936	76.4911	80.906	82.2173	76.659
		16.6	87.8831	86.3025	75.6761	132.067	142.302	128.683	69.3812	73.9157	76.388	80.5651	81.9231	76.9192
		16.7	87.8946	85.9758	75.3728	132.038	142.282	128.378	69.4824	73.9482	76.2548	80.32	81.628	77.0021
		16.8	88.0678	85.8968	74.8189	131.885	142.33	128.25	69.6946	73.8242	76.1286	80.2253	81.4178	77.0972
		16.9	88.4254	85.7162	74.302	131.749	142.408	128.334	69.9313	73.7403	76.0707	80.2003	81.0305	77.2067
		17	88.59	85.4588	73.8346	131.542	142.174	128.568	70.1404	73.4774	76.0094	80.3945	80.8062	77.1226
		17.1	88.745	85.3535	73.5422	130.995	142.2	128.829	70.3575	73.413	75.8923	80.5826	80.9178	76.8195
		17.2	88.8576	85.2968	73.5018	130.314	142.315	129.018	70.8962	73.5222	75.6109	80.7463	81.1455	76.5368
		17.3	88.8346	85.1908	73.7713	129.776	142.279	129.172	71.3822	73.8676	75.2228	80.8951	81.4664	76.1191
		17.4	88.6464	85.166	73.9556	129.24	142.064	129.089	71.7014	74.2586	74.7182	80.9706	81.924	75.7967
		17.5	88.5832	84.974	74.1384	128.855	142.156	128.762	71.9085	74.7763	74.2873	80.6727	82.214	75.7118
		17.6	88.4054	84.7153	74.248	128.83	142.006	128.273	72.0311	75.0934	74.0802	80.3095	82.262	75.7502
		17.7	88.1848	84.363	74.0106	129.131	141.821	127.814	71.8083	75.2564	74.0436	80.1336	82.2	75.8888
		17.8	88.1746	84.0621	73.5129	129.386	141.747	127.261	71.5853	75.2094	74.1577	80.0298	81.911	76.2246
		17.9	88.1793	83.8494	73.1715	129.653	141.934	126.892	71.2938	74.9588	74.3608	79.9772	81.5054	76.5254
		18	88.1108	83.8922	72.943	129.811	141.985	126.641	71.0364	74.6072	74.5497	80.1906	81.0998	76.6196
		18.1	88.1324	84.0637	72.7273	129.794	142.197	126.55	70.8512	74.3676	74.7278	80.4212	80.862	76.6744
		18.2	88.1916	84.3098	72.6788	129.581	142.508	126.399	70.8628	74.0767	74.926	80.3747	80.6534	76.677
		18.3	88.1281	84.4133	72.7528	129.393	142.831	126.392	70.9628	73.9796	75.0283	80.1488	80.699	76.6457
		18.4	88.0468	84.3565	72.7712	129.293	142.861	126.495	71.2567	74.1795	75.1875	79.9406	80.8467	76.4994
		18.5	88.0541	84.2331	72.7524	129.27	142.877	126.699	71.5734	74.5844	75.443	79.5646	80.9993	76.4904
		18.6	88.0536	84.0359	72.8382	129.354	142.711	126.869	71.767	74.859	75.633	79.2494	81.1118	76.5286
		18.7	88.0449	83.7852	72.9904	129.661	142.29	127.111	71.7413	75.1654	75.7191	79.119	81.2326	76.5732
		18.8	88.0885	83.5317	73.1944	129.959	141.783	127.145	71.5489	75.335	75.8026	79.1318	81.1339	76.5593
		18.9	88.0933	83.369	73.2955	130.042	141.49	127.023	71.2273	75.2938	75.8024	79.03	80.951	76.7195
		19	88.0088	83.2452	73.3852	130.186	141.104	126.818	70.7844	74.9705	75.7394	79.0494	80.8855	76.864
		19.1	87.847	83.1128	73.4118	130.229	140.759	126.642	70.4834	74.737	75.6696	79.0201	80.8389	76.949
		19.2	87.6317	83.0686	73.381	129.983	140.659	126.536	70.5302	74.5377	75.5786	79.0078	80.7607	77.0084
		19.3	87.3169	83.2612	73.3321	129.79	140.628	126.626	70.669	74.3987	75.513	78.9318	80.8555	77.0611
		19.4	87.1349	83.495	73.4278	129.648	140.407	126.689	70.8558	74.2904	75.5478	79.093	80.9092	77.0851
		19.5	86.981	83.6399	73.5697	129.284	140.388	126.821	71.0831	74.2958	75.6789	79.2999	80.7561	77.0668
		19.6	86.8828	83.8144	73.5898	128.895	140.51	126.944	71.1313	74.2326	75.8086	79.5675	80.569	77.0416
		19.7	86.8516	83.8531	73.5593	128.641	140.482	126.967	70.9711	74.11	75.9749	79.6716	80.4218	77.0196
		19.8	86.9181	83.578	73.3343	128.438	140.302	127.029	70.8281	73.881	76.0896	79.7207	80.0956	77.0493
		19.9	86.8747	83.2066	73.0063	128.379	140.441	127.149	70.7343	73.6696	76.0206	79.616	79.8739	76.9738
		20	86.8171	82.7507	72.5809	128.36	140.452	127.197	70.7436	73.5918	75.7969	79.4338	79.9471	76.8005
		20.1	86.8612	82.3202	72.3806	128.391	140.371	127.284	70.9158	73.6795	75.5436	79.1115	79.94	76.6811
		20.2	86.8384	82.0494	72.3002	128.299	140.396	127.357	71.0738	73.8585	75.2482	78.9198	79.9526	76.5612
		20.3	86.8549	82.0684	72.4752	127.907	140.743	127.267	71.2713	74.0835	74.8898	78.9323	80.0717	76.3352
		20.4	87.0086	82.1752	72.6426	127.392	140.819	127.218	71.3838	74.3278	74.6678	78.9366	80.2046	76.0822
		20.5	87.2843	82.483	72.8285	127.121	140.942	127.07	71.4364	74.3689	74.4597	78.8796	80.1122	75.947
		20.6	87.4487	82.8333	72.8916	126.977	141.172	126.762	71.3391	74.2096	74.3335	79.0254	80.2955	75.6749
		20.7	87.6626	83.1399	72.7658	127.048	141.51	126.442	71.2229	73.9952	74.3366	79.0644	80.5112	75.3439
		20.8	87.6593	83.246	72.4129	127.395	141.538	126.079	71.0474	73.7944	74.5584	78.9762	80.6883	75.0988
		20.9	87.545	83.183	72.167	127.764	141.648	125.731	70.8264	73.5264	74.848	78.8318	80.766	75.02
		21	87.2689	83.0663	71.855	128.035	141.727	125.59	70.5159	73.329	75.2251	78.7974	80.9392	75.0151
		21.1	86.9262	82.7112	71.403	128.143	141.661	125.745	70.4376	73.3949	75.5764	78.5967	80.7485	75.2127
		21.2	86.5118	82.3186	71.157	127.962	141.387	126.099	70.461	73.5363	75.9011	78.6483	80.3176	75.5503
		21.3	86.3435	82.0435	71.1028	127.738	141.268	126.675	70.5365	73.6259	76.1716	78.5616	79.8598	75.8997
		21.4	86.2743	81.858	71.0161	127.628	141.081	127.084	70.8223	73.7491	76.2555	78.5998	79.3689	76.139
		21.5	86.3318	81.5912	71.0654	127.398	140.736	127.48	71.3556	73.8463	76.2592	78.7084	78.7232	76.2432
		21.6	86.4836	81.4553	71.2786	127.148	140.288	127.583	71.661	73.7164	76.2752	78.8056	78.3654	76.1579
		21.7	86.7224	81.4052	71.3719	127.284	139.805	127.405	71.7995	73.4838	76.2128	78.524	78.3417	76.0627
		21.8	86.8629	81.3913	71.3488	127.436	139.339	127.048	71.7761	73.4962	75.9905	78.2906	78.4466	75.8893
		21.9	86.8499	81.5138	71.3371	127.643	138.952	126.762	71.5735	73.5573	75.9133	78.0086	78.7483	75.6999
		22	86.6187	81.6625	71.32	127.944	138.88	126.276	71.1316	73.7494	75.9429	77.5866	79.2763	75.4866
		22.1	86.3802	81.8314	71.2886	128.309	138.946	125.935	70.7464	74.008	75.8305	77.3112	79.7435	75.3775
		22.2	86.1344	81.8728	71.2307	128.428	139.175	125.791	70.4707	74.3644	75.7464	77.208	80.0233	75.2573
		22.3	85.6999	81.8031	71.3485	128.403	139.403	125.701	70.3208	74.5406	75.8337	77.2734	80.176	75.3092
		22.4	85.2696	81.5866	71.3825	128.059	139.62	125.852	70.1442	74.7105	75.8617	77.3811	80.2308	75.4466
		22.5	85.0733	81.6254	71.3229	127.705	139.712	126.138	69.9493	74.8294	75.7685	77.4731	80.1929	75.7015
		22.6	84.8972	81.7641	71.2495	127.405	139.927	126.379	69.7909	74.8758	75.8288	77.4771	80.1242	75.9831
		22.7	84.6627	81.8754	71.3179	127.155	140.112	126.463	69.7402	74.7781	75.7555	77.6404	79.9739	76.1574
		22.8	84.6621	82.0611	71.2413	126.957	140.154	126.593	69.6968	74.6802	75.5614	77.702	79.9192	76.2314
		22.9	84.8029	82.3791	71.1933	126.923	140.293	126.393	69.8896	74.6694	75.3546	77.7124	79.7024	76.1862
		23	84.9375	82.3692	71.2044	126.839	140.31	126.128	70.3618	74.6821	75.2182	77.7507	79.3769	76.0346
		23.1	85.0824	82.242	71.3317	126.723	140.135	125.89	70.9527	74.7914	75.0236	77.7737	78.9704	75.6914
		23.2	85.1809	82.1644	71.3764	126.605	139.935	125.814	71.4738	74.96	75.092	77.6162	78.702	75.474
		23.3	85.3279	81.9505	71.4296	126.602	139.778	125.546	71.999	75.0821	75.286	77.4802	78.4771	75.2282
		23.4	85.309	81.5256	71.5341	126.676	139.497	125.401	72.2436	75.0524	75.5234	77.3633	78.5097	74.9452
		23.5	85.1773	81.1415	71.6976	126.776	139.292	125.341	72.1611	74.8846	75.6982	77.3228	78.7248	74.7411
		23.6	84.9381	80.7853	71.6314	126.748	139.093	125.254	71.8685	74.7513	75.9156	77.2791	79.0854	74.657
		23.7	84.9639	80.4936	71.5428	126.697	138.823	125.071	71.5636	74.7504	75.8907	77.1864	79.5419	74.3605
		23.8	84.8567	80.3513	71.384	126.449	138.675	125.169	71.2342	74.7342	75.7645	77.0566	79.8797	74.1045
		23.9	84.9744	80.3544	71.1224	126.09	138.501	125.124	71.0565	74.742	75.6141	76.8558	80.157	74.0564
		24	85.2251	80.5163	70.8193	125.7	138.477	124.973	71.0735	74.8671	75.5222	76.5997	80.3172	73.9405
		24.1	85.5488	80.6073	70.6892	125.505	138.655	124.782	71.1705	74.8432	75.5033	76.4581	80.3293	73.9845
		24.2	85.6679	80.6506	70.469	125.317	138.906	124.648	71.1733	74.6616	75.7517	76.4927	80.2158	74.2979
		24.3	85.888	80.6177	70.3338	125.381	138.995	124.314	71.1374	74.5999	76.0958	76.6236	80.2145	74.6899
		24.4	85.9474	80.5088	70.2891	125.555	139.013	124.25	71.074	74.5687	76.4393	76.905	80.1011	75.0382
		24.5	85.8532	80.24	70.072	125.747	138.904	124.353	71.009	74.3518	76.6444	77.1897	80.0451	75.434
		24.6	85.9728	80.0984	69.7441	125.81	138.525	124.649	70.9858	74.2516	76.6564	77.4158	80.0187	75.6954
		24.7	86.1343	80.0713	69.6337	125.807	138.029	124.864	71.0735	74.1675	76.4733	77.6028	79.8499	75.8303
		24.8	86.1657	80.0729	69.4983	125.715	137.746	125.112	71.2544	74.0115	76.1091	77.6918	79.3711	75.7434
		24.9	86.2236	80.2491	69.3507	125.776	137.684	125.088	71.5452	73.9099	75.8301	77.6025	79.0117	75.5959
		25	86.3515	80.5384	69.5289	125.924	137.534	124.799	71.8107	74.0137	75.8085	77.5407	78.5945	75.5015
		25.1	86.0139	80.7783	69.7739	126.045	137.69	124.294	71.9787	74.0772	75.8983	77.3916	78.2034	75.4188
		25.2	85.6062	80.78	69.975	126.302	137.887	123.812	72.065	74.2517	76.0915	77.19	78.0543	75.3344
		25.3	85.2438	80.7974	70.3188	126.409	137.723	123.454	72.0104	74.4743	76.47	77.1305	78.2468	75.3464
		25.4	84.8126	80.7071	70.7248	126.143	137.465	123.399	71.761	74.553	76.7236	77.2627	78.306	75.2398
		25.5	84.3075	80.5564	70.8648	125.755	137.283	123.623	71.3899	74.5402	76.7732	77.315	78.4082	75.0086
		25.6	84.1234	80.4576	71.0855	125.599	136.928	123.862	71.145	74.5208	76.786	77.4341	78.5736	74.7041
		25.7	83.9646	80.504	71.2302	125.452	136.855	124.178	71.0026	74.3618	76.6608	77.5263	78.6478	74.371
		25.8	83.8003	80.5069	71.2633	125.365	137.195	124.309	70.991	74.1427	76.4086	77.4507	78.6097	74.0404
		25.9	83.6419	80.5213	71.1156	125.376	137.637	124.245	70.9906	73.9248	76.102	77.2429	78.7115	73.9787
		26	83.7055	80.6895	70.9929	125.518	138.172	124.088	71.166	73.778	75.8813	77.2617	78.8364	74.1129
		26.1	83.7969	80.8756	70.6766	125.384	138.738	123.967	71.2334	73.6426	75.7139	77.2885	78.8418	74.3778
		26.2	83.9254	81.1875	70.4125	125.177	138.955	123.776	71.2518	73.6602	75.6894	77.4805	78.8164	74.712
		26.3	83.9843	81.5281	70.1334	125.281	138.915	123.656	71.1488	73.727	75.6948	77.6861	78.8382	75.0686
		26.4	84.165	81.805	70.0022	125.525	138.511	123.52	71.1274	73.9858	75.8068	78.0083	78.7023	75.172
		26.5	84.2113	81.7828	69.9014	125.608	137.964	123.392	70.9905	74.1805	75.9056	78.0002	78.5813	75.0612
		26.6	84.1193	81.5969	69.945	125.961	137.327	123.431	70.9645	74.4278	75.9475	78.056	78.6468	74.97
		26.7	84.0658	81.2393	69.8648	126.458	136.934	123.469	71.017	74.5099	75.8054	77.9628	78.6979	74.8323
		26.8	84.1796	80.8986	69.6972	126.654	136.617	123.558	71.2529	74.5857	75.6216	78.0408	78.6743	74.726
		26.9	84.3566	80.5538	69.5173	126.852	136.635	123.677	71.5372	74.6144	75.5168	78.049	78.8611	74.8256
		27	84.443	80.4011	69.4164	127.125	136.651	123.692	71.8653	74.7422	75.4555	78.2958	78.9836	75.0527
		27.1	84.5333	80.2355	69.2258	126.886	136.69	123.489	72.0986	74.8766	75.3841	78.516	78.9751	75.1546
		27.2	84.5136	80.0244	69.0966	126.476	136.679	123.242	72.1233	75.0352	75.5035	78.8026	79.1149	75.2574
		27.3	84.4214	79.8705	69.1897	126.113	136.703	122.895	71.9627	75.2193	75.7886	78.8574	79.2116	75.321
		27.4	83.9963	79.7856	69.1698	125.54	136.792	122.624	71.6609	75.2182	75.994	78.7997	79.0929	75.1829
		27.5	83.5974	79.7301	69.1581	124.907	137.095	122.341	71.3392	75.0797	76.1116	78.5902	78.997	74.9391
		27.6	83.3021	79.8594	69.2604	124.809	137.479	122.007	70.9522	74.8642	76.2565	78.264	78.8818	74.6609
		27.7	83.0228	80.1675	69.4124	124.65	137.73	121.723	70.6383	74.881	76.2587	77.8457	78.5526	74.3896
		27.8	82.7858	80.4106	69.2048	124.424	137.908	121.588	70.5084	74.7635	76.0702	77.6789	78.4105	74.1148
		27.9	83.019	80.657	69.1133	124.266	137.838	121.27	70.5116	74.757	75.8621	77.5944	78.4626	73.9866
		28	83.2154	80.8588	69.008	124.296	137.7	121.185	70.6041	74.8516	75.8001	77.5436	78.4661	74.0373
		28.1	83.2646	80.9832	68.8282	124.092	137.62	121.415	70.8318	74.986	75.7153	77.6039	78.4193	74.2478
		28.2	83.4603	80.9193	68.6112	123.928	137.631	121.706	71.0585	74.7836	75.6898	77.8015	78.5706	74.4903
		28.3	83.6721	80.7007	68.8	123.626	137.72	121.781	71.0518	74.815	75.8464	77.6753	78.5833	74.7517
		28.4	83.5263	80.3505	68.9348	123.486	137.977	122.147	71.0152	74.9615	76.0904	77.7148	78.388	74.95
		28.5	83.6322	79.8522	69.0429	123.132	137.973	122.334	70.8575	75.1866	76.0903	77.8228	78.2116	74.975
		28.6	83.9301	79.2888	69.1874	122.819	137.695	122.34	70.6525	75.3693	76.0207	77.7884	78.1321	74.9046
		28.7	84.1227	78.892	69.4584	122.605	137.377	122.347	70.5753	75.8125	76	77.551	77.8905	74.8205
		28.8	84.1783	78.7619	69.5575	122.772	137.017	122.603	70.6049	76.0236	75.933	77.4806	77.697	74.7677
		28.9	84.2996	78.861	69.6863	122.928	136.541	122.559	70.5681	76.008	75.7356	77.2388	77.6851	74.7818
		29	84.1849	79.1602	69.6369	123.296	136.286	122.502	70.625	75.7984	75.5992	77.052	77.6898	74.8661
		29.1	83.7796	79.549	69.5351	123.657	136.386	122.374	70.6849	75.5966	75.6661	76.9493	77.6668	74.9824
		29.2	83.3448	79.9159	69.3038	124.092	136.627	122.238	70.812	75.3264	75.7441	76.947	77.7334	75.0419
		29.3	83.0406	80.067	69.1592	124.245	136.958	122.051	71.1175	75.1749	75.783	77.0309	77.8404	74.9564
		29.4	82.8385	80.0722	69.1502	124.18	137.34	122.047	71.5284	75.1816	75.8816	77.068	77.7954	74.768
		29.5	82.7348	79.9849	69.503	123.906	137.74	122.217	71.7631	75.1828	76.1432	76.984	77.7639	74.527
		29.6	82.955	79.7857	69.8691	123.728	137.778	122.374	72.0416	75.201	76.2648	76.9338	77.7321	74.2234
		29.7	83.2868	79.5333	70.2782	123.358	137.376	122.429	72.033	75.195	76.3034	76.9142	77.6763	74.0731
		29.8	83.4947	79.4553	70.4818	123.186	136.765	122.369	71.7119	75.0848	76.2734	76.9149	77.4818	74.1749
		29.9	83.6848	79.3668	70.5534	123.284	136.212	122.251	71.2421	74.943	76.289	77.0613	77.4466	74.3211
		30	83.7894	79.3737	70.4269	123.539	135.54	121.911	70.9587	74.8378	76.2152	77.1627	77.4911	74.6052
		30.1	83.6389	79.6006	70.4685	123.674	135.048	121.67	70.6103	74.7075	76.2541	77.2628	77.6523	74.9145
		30.2	83.3216	79.746	70.4052	123.8	135.087	121.474	70.4813	74.5212	76.3749	77.2306	77.8832	75.0212
		30.3	83.1224	79.7231	70.5254	123.737	135.267	121.495	70.4878	74.4364	76.6054	76.9889	78.0986	74.826
		30.4	82.7796	79.6776	70.5911	123.461	135.269	121.555	70.5572	74.3131	76.6968	76.5894	78.2339	74.6314
		30.5	82.5409	79.5322	70.5983	123.007	135.187	121.609	70.6216	74.3263	76.8009	76.2308	78.2953	74.2001
		30.6	82.5038	79.1501	70.3753	122.493	135.159	121.731	70.7543	74.377	76.7706	75.7949	78.1121	73.6949
		30.7	82.4766	78.9481	70.2175	122.028	134.852	121.84	70.7403	74.5487	76.6019	75.5646	77.8656	73.2564
		30.8	82.3725	78.9553	69.9565	121.635	134.53	121.584	70.7563	74.7233	76.2974	75.4608	77.7425	73.0459
		30.9	82.3515	79.0269	69.7649	121.278	134.245	121.376	70.8922	74.8788	76.028	75.4628	77.6933	72.9048
		31	82.2308	79.14	69.6374	121.107	134.156	121.403	71.0087	74.9322	75.6334	75.6613	77.6048	73.0286
		31.1	81.9252	79.3791	69.4969	121.271	133.993	121.343	71.0854	74.89	75.2274	75.993	77.7129	73.4176
		31.2	81.7769	79.4132	69.416	121.518	133.812	121.36	71.2541	74.6712	74.9972	76.221	77.8045	73.9277
		31.3	81.7258	79.3486	69.401	121.843	133.642	121.666	71.4934	74.3394	74.9031	76.4153	77.952	74.2714
		31.4	81.7903	79.4732	69.3708	122.386	133.738	121.825	71.6202	74.0929	74.9353	76.5274	77.9966	74.5414
		31.5	81.9551	79.6	69.3013	122.739	133.864	121.782	71.7097	73.9234	75.2008	76.4298	78.103	74.7351
		31.6	82.3338	79.7879	69.2581	122.672	134.065	121.61	71.6668	73.9166	75.6575	76.2273	78.177	74.7036
		31.7	82.7661	80.0249	69.198	122.524	134.56	121.305	71.6275	74.0204	76.0877	76.11	78.1417	74.5104
		31.8	83.081	80.1384	69.1406	122.289	135.016	120.841	71.351	74.3096	76.4386	76.0815	77.9132	74.4392
		31.9	83.282	79.9228	69.1076	121.636	135.097	120.479	71.0295	74.5319	76.7373	76.2171	77.6989	74.3158
		32	83.5133	79.5896	69.123	121.142	135.073	120.2	70.6216	74.6249	76.9916	76.4287	77.3963	74.0101
		32.1	83.63	79.03	69.2812	120.855	134.938	120.055	70.4234	74.6962	77.0743	76.727	77.1446	73.6175
		32.2	83.612	78.5742	69.4555	120.591	134.454	119.981	70.1172	74.6938	76.9821	76.8934	77.116	73.2498
		32.3	83.7121	78.1745	69.4993	120.526	133.902	120.032	69.9763	74.4972	76.9574	76.8844	77.1406	72.8962
		32.4	83.9127	77.905	69.4469	120.814	133.617	119.94	69.8741	74.3097	76.8314	76.7659	77.1399	72.712
		32.5	84.0155	77.8945	69.5301	121.152	133.349	119.775	69.9091	74.1766	76.4661	76.5693	77.2326	72.8608
		32.6	84.0874	78.0233	69.5671	121.546	133.064	119.77	69.8536	73.9846	76.1048	76.154	77.1176	73.2512
		32.7	84.1474	78.1383	69.5214	122.061	132.891	119.871	69.8665	73.8402	75.8454	75.7115	76.8077	73.7603
		32.8	84.0511	78.4214	69.5616	122.325	132.856	119.983	70.0264	73.7931	75.4976	75.4046	76.5876	74.2274
		32.9	83.7408	78.6434	69.7351	122.559	132.717	120.315	70.2475	73.8577	75.2963	75.0475	76.4191	74.6608
		33	83.3917	78.5314	69.7762	122.601	132.491	120.825	70.479	73.8755	75.3339	74.7721	76.2477	74.7523
		33.1	83.0958	78.3976	69.6729	122.542	132.352	121.085	70.775	73.7628	75.4378	74.7875	76.3146	74.7665
		33.2	82.7671	78.1244	69.5429	122.374	132.257	121.211	71.0513	73.6534	75.4543	75.0934	76.5346	74.6288
		33.3	82.6058	77.5975	69.5228	122.244	132.106	121.182	71.0708	73.5024	75.5027	75.5164	76.7754	74.4178
		33.4	82.5948	77.1152	69.394	121.892	131.955	121.027	71.1193	73.2413	75.3356	76.0056	77.058	74.02
		33.5	82.5934	77.0528	69.0944	121.66	132.038	120.615	71.1404	73.1162	74.9978	76.4034	77.2152	73.6871
		33.6	82.5563	77.0958	69.0053	121.312	132.223	120.242	71.0593	73.2929	74.753	76.5262	77.3528	73.2564
		33.7	82.6273	77.3507	69.0185	121.018	132.442	119.843	71.0429	73.5698	74.7848	76.2918	77.4163	72.8625
		33.8	82.6059	77.8814	68.9124	120.814	132.844	119.491	71.1817	73.9834	74.8856	75.8418	77.3548	72.5266
		33.9	82.5599	78.443	68.8432	120.812	133.295	119.124	71.1242	74.4551	75.1977	75.5186	77.1874	72.1002
		34	82.5025	78.6716	68.9931	120.81	133.509	118.879	70.9432	74.8229	75.656	75.3532	77.2118	71.8836
		34.1	82.479	78.813	69.0733	121.035	133.625	118.799	70.8096	75.0552	75.8883	75.5134	77.0262	71.8387
		34.2	82.3817	78.9344	69.1696	121.075	133.694	118.855	70.7561	75.1723	75.8801	75.8501	76.837	72.0016
		34.3	82.2709	78.8856	69.3354	121.031	133.447	119.021	70.6653	75.1756	75.8736	76.2615	76.7286	72.2307
		34.4	82.2352	78.7406	69.4795	120.975	133.129	119.253	70.7791	75.0415	75.9694	76.4552	76.7052	72.8849
		34.5	82.3567	78.6102	69.5986	120.856	133.018	119.558	70.9706	74.9369	76.0219	76.5268	76.5733	73.3568
		34.6	82.4178	78.5027	69.6545	120.73	132.786	119.634	71.1534	74.6791	76.2542	76.2916	76.5771	73.67
		34.7	82.4606	78.208	69.5996	120.849	132.491	119.672	71.1687	74.3984	76.646	76.0849	76.7167	73.7882
		34.8	82.5359	77.9045	69.1996	121.047	132.323	119.672	71.0712	74.1338	76.9401	75.7972	76.9229	73.8318
		34.9	82.5135	77.8587	68.7764	121.137	132.213	119.676	70.8539	74.0989	76.9875	75.6284	77.3009	73.7009
		35	82.4404	77.9352	68.2676	121.342	131.951	119.594	70.6984	74.0684	77.0412	75.5447	77.6936	73.6472
		35.1	82.3521	77.9405	67.886	121.505	131.784	119.623	70.6384	74.1897	76.9028	75.6974	78.1434	73.6872
		35.2	82.2624	78.086	67.5886	121.466	131.68	119.596	70.6562	74.3225	76.6786	75.9128	78.4582	73.7164
		35.3	82.108	78.2861	67.7697	121.358	131.613	119.625	70.8374	74.465	76.5228	76.3473	78.666	73.7391
		35.4	82.0047	78.3411	68.0133	121.308	131.55	119.616	71.13	74.3007	76.4781	76.6605	78.5224	73.6033
		35.5	81.8283	78.4502	68.2303	121.192	131.577	119.676	71.4144	74.0716	76.3975	76.9269	78.3135	73.4866
		35.6	81.8336	78.6214	68.2042	121.001	131.748	119.751	71.4558	73.6802	76.4326	77.0736	78.0364	73.3892
		35.7	81.9323	78.6346	68.2411	120.956	131.939	119.914	71.3948	73.4494	76.4103	76.9296	77.7434	73.3374
		35.8	82.1712	78.5632	68.0654	120.897	132.111	119.918	71.2738	73.2311	76.3531	76.4123	77.5458	73.2601
		35.9	82.3601	78.4614	67.929	120.88	132.237	119.962	71.0166	73.2686	76.1218	75.9185	77.5289	73.3955
		36	82.5552	78.2495	67.8784	120.806	132.219	119.885	70.7266	73.3724	76.0007	75.3185	77.6336	73.4726
		36.1	82.6938	78.0312	67.9924	120.627	131.963	119.818	70.7142	73.7606	75.9674	74.6388	77.8277	73.473
		36.2	82.7049	77.9717	67.9996	120.473	131.671	119.654	70.9026	74.0902	75.943	74.2135	78.1493	73.4745
		36.3	82.6317	78.1043	68.0808	120.504	131.295	119.642	71.0332	74.2822	75.9559	74.2097	78.3931	73.7008
		36.4	82.5026	78.231	68.042	120.473	131.011	119.55	71.1966	74.4874	76.2262	74.3362	78.6163	73.8802
		36.5	82.4124	78.3052	67.9468	120.579	130.834	119.726	71.3641	74.7019	76.2767	74.658	78.6739	74.0482
		36.6	82.127	78.3776	67.7854	120.865	130.718	119.742	71.3265	74.6372	76.1129	75.0674	78.5543	74.184
		36.7	81.905	78.4915	67.4968	121.003	130.658	119.784	71.0242	74.4224	76.075	75.3495	78.266	74.431
		36.8	81.6023	78.3575	67.2237	120.944	130.759	119.728	70.8566	74.323	75.9761	75.343	77.9539	74.4358
		36.9	81.3015	78.1494	67.0228	120.869	130.792	119.734	70.8376	73.9894	75.6695	75.1966	77.6434	74.2546
		37	80.9674	78.0189	66.9996	120.63	130.746	119.394	70.8618	73.648	75.5015	74.8924	77.5616	74.0456
		37.1	80.8367	77.8721	67.1889	120.461	130.839	119.341	71.0036	73.4394	75.6451	74.7336	77.5805	73.7819
		37.2	80.6906	77.7324	67.5648	120.226	130.964	119.359	71.3829	73.2195	75.6289	74.6773	77.632	73.3708
		37.3	80.5466	77.8788	67.8035	119.863	131.022	119.28	71.5922	72.8706	75.5377	74.7867	77.7061	73.0528
		37.4	80.527	78.2109	68.0759	119.368	131.139	119.119	71.522	72.7425	75.6104	75.1184	77.7954	72.9175
		37.5	80.5982	78.5786	68.1264	118.958	131.501	119.075	71.314	72.5608	75.7058	75.5457	77.6879	72.908
		37.6	80.6527	78.992	67.9708	118.299	131.631	118.826	71.063	72.5468	75.4939	75.7093	77.5548	73.1526
		37.7	80.8259	79.2749	67.7988	117.91	131.526	118.373	70.7276	72.7586	75.3732	75.8098	77.5373	73.2202
		37.8	81.3514	79.2843	67.9085	117.825	131.441	118.041	70.4182	73.2239	75.4586	75.8519	77.4468	73.2577
		37.9	81.93	79.0862	68.0264	118.047	131.306	117.866	70.3178	73.6191	75.5574	75.7716	77.2866	73.2062
		38	82.3506	78.796	68.2571	118.28	130.887	117.741	70.3454	74.1988	75.6883	75.7758	77.2334	73.0172
		38.1	82.5978	78.4047	68.5411	118.65	130.583	117.701	70.4136	74.556	75.9992	76.0647	77.184	72.6
		38.2	82.6803	78.0188	68.7889	118.769	130.432	117.952	70.46	74.7926	76.2645	76.434	77.0661	72.5679
		38.3	82.3635	77.6624	68.608	118.793	130.327	118.155	70.6074	74.9283	76.4757	76.7822	76.9739	72.5081
		38.4	81.8505	77.4034	68.2568	118.6	130.143	118.277	70.8476	75.1979	76.5445	77.0395	76.7525	72.4924
		38.5	81.4006	77.1527	67.8471	118.349	130.11	118.471	70.9916	75.2927	76.4902	76.9996	76.4656	72.5956
		38.6	81.1887	76.956	67.3457	118.246	130.196	118.654	71.1724	75.3551	76.2978	76.6677	76.0471	72.9003
		38.7	81.1736	76.759	66.8379	118.389	130.428	118.634	71.3633	75.3768	76.1374	76.27	75.5379	72.9139
		38.8	81.3176	76.6665	66.7137	118.537	130.549	118.726	71.5184	75.3882	75.9562	75.9212	75.1469	72.8926
		38.9	81.6354	76.6458	66.8232	118.837	130.785	118.704	71.4322	75.0564	75.8574	75.6667	75.1467	72.7582
		39	82.0924	76.7638	66.9602	119.165	131.037	118.505	71.5173	74.6205	75.8247	75.6921	75.2292	72.371
		39.1	82.3065	76.9007	67.1352	119.243	131.237	118.13	71.4902	74.2132	75.9962	75.8513	75.6209	71.7251
		39.2	82.3766	77.0568	67.4087	119.129	131.206	117.839	71.4928	73.8687	76.1242	75.9307	76.2174	71.2506
		39.3	82.443	77.2276	67.3958	119.035	131.304	117.548	71.5016	73.524	76.1386	75.9455	76.8752	70.995
		39.4	82.472	77.2672	67.2406	118.873	131.351	117.417	71.5436	73.4582	76.0265	75.8781	77.2488	70.9945
		39.5	82.3549	77.1425	67.1433	118.618	131.25	117.472	71.4498	73.616	75.8257	75.6723	77.5227	71.2122
		39.6	82.3397	77.0224	67.2869	118.475	131.014	117.806	71.4	73.852	75.3932	75.5047	77.7026	71.6246
		39.7	82.3194	76.9692	67.2606	118.421	130.849	118.091	71.212	74.0462	75.049	75.5082	77.681	71.9666
		39.8	82.2909	76.9044	67.4571	118.218	130.416	118.299	71.0091	74.2189	74.9179	75.6466	77.4884	72.0489
		39.9	82.1732	76.9541	67.6671	118.056	130.028	118.462	70.9897	74.3042	75.0278	75.8516	77.405	72.1007
		40	82.0635	77.056	67.9106	118.137	129.723	118.569	71.0007	74.317	75.3027	76.0514	77.347	72.3003
		40.1	82.004	77.1692	67.9208	118.297	129.438	118.557	70.8417	74.3153	75.7312	76.1258	77.076	72.4
		40.2	81.9888	77.3078	68.015	118.366	129.23	118.563	70.8384	74.303	75.998	76.0827	76.9177	72.5346
		40.3	81.9708	77.4114	68.0319	118.559	129.137	118.608	70.9304	74.2878	76.141	75.762	76.8484	72.8755
		40.4	82.1148	77.3669	68.0606	118.672	128.888	118.631	71.0318	74.2239	76.129	75.4119	76.8619	72.9602
		40.5	82.1745	77.3832	67.9429	118.722	128.682	118.613	71.0785	74.0703	75.9933	75.0072	77.0201	72.8818
		40.6	82.1192	77.3922	67.72	118.548	128.839	118.642	71.3464	73.9046	75.7802	74.7098	77.4314	72.9077
		40.7	82.0298	77.2879	67.5141	118.575	128.778	118.73	71.7046	73.7994	75.7429	74.371	77.8736	72.8699
		40.8	81.9287	77.1486	67.3074	118.618	128.785	118.771	71.9389	73.8028	75.578	74.3051	78.2708	72.743
		40.9	81.7414	77.2373	67.1246	118.609	128.973	118.903	71.8905	73.9345	75.4052	74.2693	78.483	72.9632
		41	81.601	77.1917	66.933	118.461	129.068	118.962	71.8875	74.189	75.315	74.5088	78.4898	73.2195
		41.1	81.5567	77.1094	67.0403	118.515	128.729	118.822	71.8132	74.3296	75.2392	74.778	78.3626	73.3998
		41.2	81.5232	77.0295	67.1815	118.426	128.694	118.542	71.3848	74.4458	75.1278	75.2651	78.0958	73.7093
		41.3	81.528	77.0776	67.2774	118.313	128.672	118.325	70.9603	74.5593	75.1788	75.552	77.738	74.0557
		41.4	81.4571	76.9353	67.2586	118.424	128.527	117.92	70.7348	74.6341	75.2059	75.8234	77.497	74.0619
		41.5	81.4718	76.845	67.3602	118.564	128.412	117.537	70.476	74.5708	75.1646	75.8861	77.3106	73.9456
		41.6	81.4135	76.8022	67.1598	118.707	128.408	117.294	70.3561	74.6611	75.1944	75.9477	77.1316	73.917
		41.7	81.2993	76.8208	66.9283	118.825	128.354	117.142	70.473	74.6994	75.2664	75.7588	77.131	73.7278
		41.8	81.2036	76.7161	66.6916	118.874	128.414	116.841	70.6206	74.436	75.3543	75.8424	77.292	73.3596
		41.9	81.2	76.735	66.6031	118.808	128.753	116.679	70.6746	74.0431	75.4872	75.9522	77.3211	73.0627
		42	81.265	76.8142	66.5117	118.782	129.243	116.632	70.6982	73.8097	75.6777	76.1289	77.3961	72.8905
		42.1	81.5218	76.8296	66.6468	118.645	129.828	116.565	70.5168	73.7091	75.8542	76.1778	77.4592	72.5446
		42.2	82.0225	76.8184	66.8232	118.48	130.275	116.378	70.3411	73.7018	75.9062	76.2928	77.4913	72.1804
		42.3	82.4164	76.8672	67.1123	118.216	130.471	116.281	70.1206	73.9579	75.8888	76.1031	77.4031	71.9736
		42.4	82.7642	76.7648	67.4296	117.766	130.293	116.135	70.0162	74.3973	75.9948	75.8154	77.3721	71.8509
		42.5	82.9615	76.6695	67.5969	117.404	129.945	116.02	70.0516	74.8569	76.1543	75.4057	77.2475	71.7424
		42.6	83.0598	76.6625	67.6826	116.995	129.484	116.051	70.1946	75.1127	76.2577	75.0659	77.1073	71.8139
		42.7	82.7715	76.696	67.7338	116.618	129.171	116.232	70.3664	75.2357	76.3554	74.7677	76.7594	72.0664
		42.8	82.5466	76.6421	67.6983	116.532	129.123	116.548	70.5719	75.3035	76.607	74.6421	76.51	72.2175
		42.9	82.2363	76.6475	67.6187	116.59	129.198	117.027	70.6503	75.2786	76.755	74.5724	76.3589	72.4393
		43	82.0396	76.5526	67.7356	116.332	129.288	117.356	70.688	75.097	76.7532	74.6206	76.4427	72.6038
		43.1	81.8259	76.374	67.7964	116.201	129.466	117.518	70.7154	74.8572	76.7356	74.7015	76.7286	72.7013
		43.2	81.912	76.1424	67.7806	116.107	129.508	117.756	70.7286	74.7213	76.8114	74.8241	77.3115	72.7058
		43.3	81.9285	75.9894	67.7496	115.999	129.368	117.799	70.8403	74.5582	76.5779	74.9011	77.8821	72.8768
		43.4	82.0566	75.9564	67.725	116.007	129.214	117.584	71.122	74.3642	76.243	75.073	78.3148	72.8637
		43.5	82.056	76.1282	67.5128	116.412	129.12	117.421	71.3524	74.283	75.9639	75.2008	78.6803	72.8317
		43.6	81.9946	76.3857	67.3279	116.832	128.888	117.321	71.6204	74.3251	75.7486	75.3184	78.8905	72.7356
		43.7	81.7523	76.6988	67.2182	117.169	128.559	117.159	71.8529	74.2308	75.4814	75.3165	78.8757	72.6918
		43.8	81.472	77.0702	67.276	117.284	128.286	117.044	71.9606	74.1475	75.4347	75.351	78.6711	72.5596
		43.9	81.165	77.3744	67.3113	117.18	128.108	116.869	71.9058	74.1937	75.4424	75.3023	78.4484	72.623
		44	80.9558	77.5032	67.6959	116.779	127.89	116.667	71.9267	74.1197	75.3406	75.3322	78.0324	72.6473
		44.1	80.7912	77.5728	68.1666	116.39	127.891	116.467	71.8968	74.0394	75.1666	75.3658	77.5488	72.6943
		44.2	80.7223	77.5237	68.5944	116.159	127.877	116.234	71.8676	74.193	75.0693	75.5168	77.029	72.602
		44.3	80.7454	77.4073	68.7377	115.948	127.71	116.08	71.7506	74.307	74.9508	75.686	76.6818	72.5309
		44.4	80.7486	77.2958	68.7299	115.997	127.533	116.324	71.7036	74.2168	74.8436	75.7819	76.3746	72.3188
		44.5	80.7656	77.3554	68.3231	116.225	127.292	116.696	71.6394	74.3314	74.9157	75.7346	76.0434	72.1757
		44.6	80.7159	77.4533	67.9116	116.283	126.796	116.975	71.5472	74.4204	75.0553	75.7489	75.736	72.089
		44.7	80.694	77.7327	67.3862	116.23	126.605	117.041	71.3482	74.4894	75.0868	75.7954	75.6944	72.122
		44.8	80.7943	77.944	66.9168	116.309	126.623	116.934	71.364	74.7138	75.0598	75.7097	75.7427	72.235
		44.9	80.9952	78.0788	66.5598	116.193	126.679	116.475	71.3599	75.0771	75.0364	75.7816	75.9391	72.3883
		45	81.0867	77.9109	66.3134	116.038	126.934	115.865	71.2972	75.2791	74.9576	75.9508	76.3578	72.5579
		45.1	81.2935	77.6336	66.0421	115.929	127.453	115.193	71.2913	75.4119	74.8215	75.9043	76.8198	72.6666
		45.2	81.3816	77.2098	66.0423	115.886	127.825	114.877	71.4444	75.285	74.7435	75.7565	77.095	72.6915
		45.3	81.3094	76.8647	66.1992	115.648	128.167	114.8	71.4252	75.0855	74.7978	75.7637	77.1864	72.5575
		45.4	81.127	76.5817	66.471	115.441	128.456	114.944	71.4082	74.8656	74.9052	75.6563	77.2115	72.4657
		45.5	81.0283	76.4749	66.813	115.248	128.536	115.037	71.2901	74.5278	75.0429	75.5176	77.0549	72.3154
		45.6	80.7768	76.5915	67.0602	115.129	128.485	115.483	71.1153	74.2822	75.4185	75.5862	76.9267	72.2641
		45.7	80.6688	76.6647	67.1806	115.062	128.362	115.721	70.8768	74.2239	75.7874	75.6778	76.8553	72.3847
		45.8	80.6261	76.7589	67.2996	115.341	128.106	115.818	70.8094	74.1811	75.9707	75.6949	76.9321	72.4596
		45.9	80.5529	76.8518	67.2831	115.624	127.829	115.788	70.8052	74.2022	76.0949	75.7971	76.9668	72.3817
		46	80.4416	77.0242	67.2761	115.941	127.776	115.973	70.9166	74.4992	76.1224	75.9808	77.1582	72.3397
		46.1	80.5415	76.9874	67.3649	116.335	127.719	115.86	71.1042	74.9094	75.7984	76.102	77.3196	72.3156
		46.2	80.5842	77.0814	67.4078	116.574	127.728	115.814	71.2983	75.3535	75.5403	76.2181	77.357	72.0338
		46.3	80.4406	77.0649	67.3551	116.421	127.96	115.881	71.3889	75.6432	75.3871	76.3517	77.3246	71.8852
		46.4	80.4057	77.0752	67.4374	116.346	128.051	115.886	71.4756	75.7711	75.3152	76.4717	77.2492	71.9151
		46.5	80.4302	76.8888	67.3814	116.141	127.978	115.623	71.646	75.7044	75.4047	76.5003	77.0627	71.9678
		46.6	80.24	76.6225	67.2647	115.788	127.869	115.368	71.7551	75.3878	75.6912	76.3716	76.7532	71.8402
		46.7	80.081	76.233	67.3452	115.397	127.837	115.162	71.9483	75.0141	75.8261	76.1192	76.5264	71.9094
		46.8	80.3557	75.8893	67.543	115.395	127.679	114.775	72.1431	74.8331	75.9346	75.7285	76.2661	72.016
		46.9	80.5556	75.4939	67.558	115.401	127.701	114.547	72.2566	74.7357	75.9994	75.2386	76.0158	71.9974
		47	80.6781	75.2298	67.7062	115.353	127.687	114.644	72.2711	74.743	75.9717	74.8507	75.781	71.92
		47.1	81.0157	75.2517	67.8563	115.354	127.676	114.932	72.158	74.8431	75.9205	74.6423	75.7659	71.9019
		47.2	81.2879	75.5844	67.7664	115.498	127.489	115.021	71.7686	74.8397	75.9519	74.5522	75.8283	71.8331
		47.3	81.1239	76.009	67.4827	115.368	127.166	115.275	71.295	74.7777	75.9047	74.7337	76.005	71.7698
		47.4	81.0423	76.4112	67.3484	115.062	126.764	115.469	70.8386	74.846	75.8532	74.9726	76.2822	71.766
		47.5	81.0684	76.8328	67.282	114.967	126.37	115.55	70.3088	74.8734	75.69	75.0522	76.6791	71.7485
		47.6	80.9695	77.1705	67.3251	114.834	126.034	115.374	70.0396	74.8932	75.4329	75.0988	77.0224	71.8705
		47.7	80.8491	77.24	67.368	114.781	125.712	115.394	70.1169	75.0594	75.2832	75.25	77.2937	71.961
		47.8	80.8985	77.1659	67.6175	114.869	125.371	115.235	70.277	75.0396	75.3174	75.1949	77.4191	71.8141
		47.9	80.9121	77.0581	67.7749	115.19	125.053	115.073	70.4146	74.7221	75.3305	75.1276	77.363	71.7026
		48	80.792	76.9186	67.7884	115.298	124.892	114.814	70.7115	74.332	75.5377	75.1359	77.1269	71.5942
		48.1	80.6108	76.6552	67.7462	115.402	124.757	114.711	70.779	74.0134	75.8558	75.2388	76.868	71.2929
		48.2	80.533	76.3728	67.7894	115.312	124.701	114.575	70.6472	73.6679	75.9687	75.248	76.5545	71.1434
		48.3	80.5091	76.2469	67.5892	115.137	124.981	114.619	70.6244	73.5474	75.9984	75.2598	76.3023	71.2407
		48.4	80.4439	76.2779	67.3837	114.794	125.46	114.642	70.6334	73.7316	76.0407	75.2664	76.3204	71.3135
		48.5	80.4777	76.1728	67.1934	114.627	125.669	114.666	70.6858	74.0189	76.0135	75.2092	76.5652	71.5937
		48.6	80.5814	76.1018	66.9655	114.601	125.838	114.658	70.9311	74.1973	75.9601	75.0541	76.7221	72.0448
		48.7	80.6201	76.1576	66.7918	114.568	126.214	114.569	71.2524	74.4228	76.0176	74.8601	76.8927	72.3167
		48.8	80.5996	76.0667	66.7839	114.464	126.4	114.376	71.517	74.5497	76.0652	74.7818	77.057	72.4935
		48.9	80.5704	75.8918	66.755	114.185	126.21	114.192	71.7852	74.5493	76.1955	74.8169	76.984	72.7189
		49	80.4988	76.0544	66.6749	113.751	126.26	113.978	71.791	74.6128	76.2073	75.0213	76.6918	72.7582
		49.1	80.443	76.3376	66.6131	113.144	126.26	113.907	71.7141	74.7524	76.1387	75.2158	76.5009	72.7218
		49.2	80.429	76.6405	66.5019	112.645	125.914	113.94	71.632	74.7708	76.1015	75.5484	76.436	72.7035
		49.3	80.4027	77.1259	66.3952	112.292	125.572	113.922	71.5412	74.7628	76.0699	75.896	76.4872	72.7652
		49.4	80.4903	77.5857	66.4638	112.2	125.48	113.931	71.4981	74.7115	75.8647	76.0004	76.6174	72.7563
		49.5	80.6631	77.7262	66.6356	112.314	125.288	114.16	71.6936	74.4781	75.8046	75.9724	76.803	72.7599
		49.6	80.9379	77.7354	66.8515	112.592	125.182	114.162	71.8782	74.1416	75.8378	75.9156	76.9085	72.7901
		49.7	81.1452	77.4707	67.1126	112.797	125.107	113.999	71.997	73.8347	75.8344	75.7938	76.9774	72.7974
		49.8	81.397	77.0335	67.249	112.908	124.927	114.069	71.9158	73.6949	75.8771	75.5755	76.7336	72.634
		49.9	81.5362	76.5991	67.1961	113.192	124.671	114.137	71.6727	73.6716	75.9984	75.5465	76.4599	72.4037
		50	81.494	76.2783	67.026	113.478	124.458	114.091	71.3015	73.6766	76.0264	75.4102	76.297	72.1666
		50.1	81.1897	76.0239	66.8178	113.726	124.264	114.145	71.0324	73.8678	76.0605	75.3496	76.2011	71.9131
		50.2	80.8808	76.0096	66.5584	114.168	124.251	114.377	70.9024	74.1508	76.0151	75.1971	76.0746	71.9388
		50.3	80.4956	76.0064	66.5007	114.864	124.456	114.32	71.0451	74.3214	75.7979	75.091	76.3165	72.1638
		50.4	80.1581	76.158	66.5601	115.378	124.766	114.159	71.3548	74.4558	75.6595	75.0324	76.4921	72.4441
		50.5	80.0296	76.3922	66.7661	115.753	125.243	113.933	71.6792	74.7057	75.6928	75.2623	76.4099	72.7526
		50.6	80.0984	76.5729	66.8228	116.051	125.628	113.752	71.7719	74.8855	75.6551	75.4466	76.3285	72.9529
		50.7	80.2441	76.7206	66.8038	116.158	126.139	113.51	71.6442	74.926	75.7312	75.615	76.1949	72.7865
		50.8	80.4657	76.9906	66.6512	115.825	126.481	113.524	71.3156	74.946	75.9644	75.7273	75.8508	72.4551
		50.9	80.6652	76.9719	66.4604	115.197	126.671	113.707	70.9688	74.8971	76.0212	75.7389	75.6526	72.1461
		51	80.6393	76.8056	66.2737	114.55	126.526	113.979	70.7353	74.9	75.7946	75.6289	75.7698	71.8296
		51.1	80.5598	76.7973	66.2976	113.903	126.346	114.168	70.7649	74.7678	75.604	75.6068	75.7562	71.6593
		51.2	80.3919	76.6921	66.4398	113.174	125.853	114.366	70.9212	74.7054	75.3872	75.6951	75.7668	71.6612
		51.3	80.0585	76.5583	66.6257	112.663	125.385	114.474	71.1791	74.6954	75.1322	75.7068	75.7887	71.8478
		51.4	79.8031	76.7192	66.7718	112.428	124.972	114.457	71.4652	74.7164	74.968	75.7274	75.8856	72.0653
		51.5	79.8556	76.9474	66.7604	112.222	124.681	114.431	71.5651	74.5713	75.1136	75.6594	75.8397	72.2647
		51.6	80.0338	77.0104	66.6877	111.984	124.511	114.43	71.5237	74.7144	75.3552	75.451	75.9178	72.4378
		51.7	80.2132	77.1774	66.5634	111.871	124.425	114.343	71.5198	74.8766	75.559	75.1928	76.0568	72.5207
		51.8	80.6107	77.1892	66.375	111.901	124.452	114.087	71.5871	74.9953	75.9398	75.1028	76.3009	72.4547
		51.9	80.7156	76.969	66.3312	112.045	124.545	113.788	71.4813	75.0875	76.4449	75.0086	76.4113	72.3633
		52	80.537	76.8484	66.5604	112.249	124.708	113.254	71.4538	75.3338	76.7329	74.9383	76.4532	72.2572
		52.1	80.1494	76.7765	66.7784	112.635	124.816	112.795	71.3929	75.2612	76.8035	74.9269	76.5742	72.1634
		52.2	79.9676	76.7326	66.8536	113.098	124.868	112.502	71.2257	75.1416	76.8227	75.0038	76.6771	72.2547
		52.3	79.767	76.8692	66.9349	113.32	124.686	112.493	70.9973	75.1355	76.5113	75.1307	76.7619	72.4578
		52.4	79.925	77.1481	66.8813	113.338	124.423	112.749	70.9097	75.1933	76.1296	75.3668	76.7978	72.6097
		52.5	80.146	77.1209	66.6222	113.324	124.069	113.254	70.8791	75.0236	75.9256	75.7289	76.864	72.8276
		52.6	80.5935	76.965	66.3082	113.24	123.654	113.615	70.9108	74.9452	75.9336	76.1904	76.8545	72.8685
		52.7	80.9848	76.7165	66.2903	113.071	123.387	113.732	71.145	74.9103	76.114	76.5548	76.7542	72.676
		52.8	81.261	76.3592	66.4528	113.088	123.377	113.559	71.3104	74.7293	76.5172	76.6916	76.5448	72.2715
		52.9	81.4802	75.865	66.5275	113.28	123.432	113.129	71.4342	74.4477	76.8298	76.6493	76.3787	71.9041
		53	81.7656	75.5916	66.6239	113.473	123.486	112.539	71.4781	74.3521	76.9798	76.4077	76.2344	71.5131
		53.1	81.8524	75.4513	66.8992	113.595	123.607	112.098	71.5269	74.3692	77.0293	76.0836	76.042	71.3212
		53.2	81.6463	75.3764	67.0523	113.765	123.496	111.892	71.3162	74.3886	77.0039	75.7608	75.8976	71.3304
		53.3	81.467	75.4181	66.9851	113.779	123.265	111.939	71.2098	74.4196	76.8144	75.4962	75.7808	71.5476
		53.4	81.2326	75.5378	67.0073	113.639	122.989	112.079	71.1299	74.5	76.6755	75.2713	75.6946	71.8647
		53.5	80.9758	75.7142	67.0186	113.376	122.795	112.318	71.1415	74.5249	76.6074	75.2121	75.5945	72.2249
		53.6	80.7022	75.9542	66.8151	113.04	122.686	112.316	71.0495	74.5501	76.4992	75.0725	75.5259	72.5813
		53.7	80.5698	76.2834	66.4794	112.72	122.908	112.067	71.0465	74.4838	76.4445	74.8705	75.4836	72.7759
		53.8	80.5435	76.5001	66.1942	112.502	123.04	111.715	70.9055	74.3756	76.6105	74.7638	75.5554	72.93
		53.9	80.5306	76.7943	65.9977	112.341	123.155	111.436	70.8008	74.1888	76.6306	74.7377	75.7035	72.8354
		54	80.4724	77.044	65.8623	112.356	123.282	111.242	70.6381	73.9343	76.5836	74.6373	75.9504	72.5586
		54.1	80.4448	77.1972	65.9149	112.601	123.348	111.374	70.6012	73.5534	76.5884	74.6108	76.2044	72.0965
		54.2	80.5115	77.1354	66.0668	112.695	123.172	111.877	70.6659	73.4549	76.3769	74.7985	76.4258	71.6049
		54.3	80.3791	77.1309	66.3513	112.828	123.273	112.411	70.809	73.5204	75.9849	75.0043	76.3863	70.9522
		54.4	80.1244	77.116	66.6726	113.029	123.358	112.826	70.7578	73.7473	75.9266	75.1832	76.0773	70.5397
		54.5	79.8837	77.0769	66.9875	113.21	123.397	113.133	70.7163	74.1445	75.8906	75.3246	75.651	70.352
		54.6	79.7519	77.0632	67.2554	113.207	123.276	113.257	70.6441	74.5601	75.8212	75.4803	75.0938	70.3512
		54.7	79.5824	77.1081	67.6616	113.365	123.204	113.104	70.49	74.6508	75.9016	75.4268	74.5992	70.5955
		54.8	79.6096	77.0854	67.9339	113.452	122.922	112.945	70.3541	74.6088	75.9653	75.3812	74.3883	71.0298
		54.9	79.7469	76.9003	67.9149	113.395	122.781	112.826	70.3967	74.5121	75.8086	75.345	74.5081	71.4561
		55	79.8854	76.6753	67.7884	113.102	122.747	112.666	70.3647	74.3144	75.7356	75.3719	74.7621	71.8155
		55.1	80.0611	76.4206	67.5145	112.763	123.114	112.535	70.2961	74.2857	75.7753	75.2004	75.2452	72.1842
		55.2	80.2558	76.2658	67.0335	112.336	123.64	112.439	70.2085	74.4481	75.8879	75.0418	75.7087	72.3438
		55.3	80.3196	76.203	66.5401	111.929	124.252	112.09	70.1512	74.7636	76.0543	74.785	76.1681	72.5288
		55.4	80.3502	76.2918	66.3802	111.722	124.771	111.64	70.1176	75.0704	76.1987	74.5805	76.4565	72.6746
		55.5	80.5047	76.3422	66.3185	111.924	125.198	111.375	70.2192	75.3675	76.2213	74.4903	76.6393	72.7675
		55.6	80.5172	76.4073	66.4516	112.224	125.167	111.143	70.4438	75.4376	76.0436	74.8057	76.7802	72.9037
		55.7	80.4578	76.3956	66.7054	112.588	124.916	111.03	70.7101	75.2678	75.7885	75.3398	76.9739	73.1798
		55.8	80.5011	76.447	66.9704	112.961	124.538	111.235	70.9812	75.0377	75.5842	75.9085	77.0498	73.2927
		55.9	80.6452	76.4092	67.0014	113.171	124.07	111.603	71.124	74.8246	75.453	76.3301	77.1528	73.3699
		56	80.6846	76.5328	66.9232	113.056	123.49	111.728	71.1348	74.5714	75.4318	76.4493	77.3301	73.4574
		56.1	80.7524	76.6861	66.7512	112.942	123.107	111.808	71.0398	74.4789	75.584	76.2562	77.3467	73.3307
		56.2	80.941	76.8219	66.5392	112.728	122.875	111.642	70.9298	74.5974	75.6372	75.8907	77.2151	73.0728
		56.3	81.1104	76.8132	66.4862	112.301	122.823	111.437	70.6315	74.5273	75.6307	75.5362	77.0628	72.8487
		56.4	81.1704	76.9887	66.5996	111.826	122.839	111.144	70.3954	74.413	75.702	75.239	76.8846	72.5158
		56.5	81.2471	77.0383	66.8256	111.427	122.878	110.973	70.2746	74.3999	75.7274	75.2725	76.5768	72.0476
		56.6	81.3326	76.982	66.9781	110.995	122.868	110.916	70.175	74.2607	75.6356	75.2998	76.4052	71.6426
		56.7	81.2836	76.9621	67.133	110.622	122.79	111.113	69.9984	74.0551	75.582	75.2305	76.4178	71.3214
		56.8	81.1275	76.9148	67.092	110.547	122.386	111.376	70.0564	74.1201	75.584	75.0592	76.4715	71.1557
		56.9	80.8646	76.578	67.0676	110.725	121.844	111.719	70.1298	74.214	75.4625	74.9489	76.5664	71.1376
		57	80.4961	76.239	66.9941	111.07	121.404	112.09	70.3347	74.2419	75.2842	74.727	76.7405	71.3574
		57.1	80.0783	75.9673	67.062	111.634	121.08	112.331	70.6173	74.3756	75.285	74.7074	76.7808	71.7044
		57.2	79.6936	75.6133	67.1561	112.235	120.623	112.481	71.0816	74.4689	75.4538	74.9148	76.598	72.101
		57.3	79.4571	75.2959	67.2911	112.672	120.51	112.316	71.4649	74.2737	75.5733	75.2918	76.4568	72.385
		57.4	79.4078	75.2454	67.1812	112.887	120.687	111.93	71.8661	74.068	75.7706	75.5022	76.2509	72.5902
		57.5	79.4763	75.3018	67.1322	112.901	120.953	111.615	71.9873	73.9234	76.0826	75.6362	75.9892	72.7717
		57.6	79.5858	75.4587	67.0039	112.638	121.206	111.278	71.8926	73.8482	76.2654	75.6877	75.9877	72.932
		57.7	79.7816	75.813	66.873	112.249	121.658	110.849	71.8277	74.0711	76.3748	75.6665	76.2042	73.0339
		57.8	79.9172	76.1252	66.8454	111.971	122.115	110.538	71.7379	74.6619	76.641	75.6385	76.251	73.0928
		57.9	80.0498	76.3182	67.0563	111.72	122.422	110.535	71.7779	75.2578	76.7395	75.876	76.4787	73.2414
		58	80.1082	76.3391	67.2198	111.356	122.527	110.491	71.9558	75.7939	76.6692	76.1459	76.818	73.2986
		58.1	80.2752	76.3297	67.3441	111.025	122.522	110.645	72.3654	76.0491	76.6241	76.3077	76.9285	73.255
		58.2	80.375	76.2	67.3266	110.911	122.494	110.982	72.4982	75.9104	76.5055	76.3307	76.8944	73.1218
		58.3	80.4305	76.2546	67.1449	110.741	122.25	111.593	72.6443	75.4363	76.1833	76.179	77.1019	73.034
		58.4	80.3675	76.2305	66.7764	110.574	122.042	112.197	72.4639	74.9732	75.9866	75.8281	77.0225	72.7933
		58.5	80.4369	76.3334	66.4347	110.843	121.902	112.786	72.2761	74.5142	75.9341	75.493	76.9271	72.488
		58.6	80.3981	76.2836	66.1438	111.347	121.792	113.096	71.8809	74.4074	75.8714	75.2222	76.8733	72.1692
		58.7	80.5075	76.1635	66.0281	111.517	121.609	113.229	71.5856	74.559	75.8924	75.0924	76.7948	71.9214
		58.8	80.7328	75.9098	66.236	111.656	121.519	113.045	71.2964	74.8191	76.028	75.177	76.6534	71.5815
		58.9	81.0589	75.6937	66.6891	111.733	121.384	112.48	71.1382	74.9871	76.2487	75.2912	76.7727	71.3928
		59	81.2505	75.527	67.078	111.447	121.345	111.674	70.8708	75.0995	76.5096	75.343	76.9033	71.3621
		59.1	81.5068	75.5305	67.4281	110.758	121.378	111.027	70.7833	75.0595	76.7656	75.4484	77.1106	71.3442
		59.2	81.5066	75.5974	67.7659	110.356	121.492	110.48	70.7935	74.8856	76.9054	75.3852	77.4047	71.3162
		59.3	81.252	75.706	67.834	110.005	121.6	110.085	70.7376	74.6847	76.8437	75.11	77.5097	71.4779
		59.4	80.9765	75.8889	67.6975	109.952	121.682	110.028	70.7524	74.6952	76.601	74.8875	77.4052	71.6308
		59.5	80.868	76.0578	67.6821	109.971	121.686	110.27	70.8958	74.8096	76.3357	74.696	77.0764	71.7091
		59.6	80.7314	76.0973	67.7236	110.255	121.662	110.575	70.9591	74.7724	76.0508	74.4646	76.5867	71.776
		59.7	80.7616	76.1286	67.7524	110.45	121.573	111.074	71.0157	74.6661	75.8038	74.4939	76.0912	71.7929
		59.8	80.9632	76.1307	67.7135	110.539	121.493	111.575	71.0547	74.6044	75.7564	74.6406	75.8189	71.6512
		59.9	80.9748	76.1037	67.6088	110.304	121.61	111.98	71.048	74.1801	75.7451	74.7352	75.5946	71.4633
		60	80.7383	75.9297	67.3448	110.163	121.759	112.164	70.9099	73.733	75.5903	74.8512	75.5322	71.3165
		60.1	80.4406	75.825	67.0333	109.907	121.89	112.023	70.735	73.3417	75.4503	74.8833	75.5647	71.3162
		60.2	79.9912	75.8062	66.6371	109.646	121.946	111.436	70.5919	73.1165	75.5263	74.7631	75.5889	71.4742
		60.3	79.5823	75.675	66.3246	109.465	122.008	110.728	70.682	72.9776	75.5806	74.7042	75.4714	71.6902
		60.4	79.4088	75.5063	66.2996	109.329	121.821	109.97	70.7825	73.2862	75.7823	74.6696	75.3901	71.8915
		60.5	79.4187	75.4576	66.4123	109.119	121.561	109.451	71.0556	73.5573	75.9803	74.7519	75.3396	72.1026
		60.6	79.5501	75.4022	66.5828	109.038	121.166	109.298	71.3314	74.0098	76.2302	75.0091	75.4116	72.2131
		60.7	79.8634	75.3062	66.715	108.965	120.898	109.43	71.359	74.4192	76.122	75.2112	75.4748	72.1654
		60.8	80.1933	75.4494	66.9402	109.059	120.686	109.717	71.1835	74.8173	76.078	75.262	75.5655	72.1425
		60.9	80.6043	75.5348	66.931	109.3	120.632	110.14	71.1107	74.9427	75.9043	75.3354	75.6335	72.2562
		61	81.0168	75.4812	66.8137	109.596	120.597	110.381	70.9766	75.0044	75.9361	75.1796	75.6882	72.273
		61.1	81.2988	75.5546	66.8086	109.893	120.781	110.4	70.9552	74.8456	75.9444	74.9722	75.5407	72.2957
		61.2	81.477	75.5724	66.9068	110.233	120.984	110.351	71.2136	74.6149	76.078	74.9091	75.4306	72.3344
		61.3	81.5841	75.4466	66.8948	110.26	121.11	110.235	71.607	74.2428	76.0669	74.8552	75.4174	72.3876
		61.4	81.5296	75.4517	66.8984	110.208	121.163	109.986	71.9006	73.9648	76.1796	74.8383	75.6537	72.2294
		61.5	81.3759	75.6168	66.8674	110.138	121.084	109.79	72.045	73.925	76.0841	74.9739	75.9031	72.0797
		61.6	81.2765	75.6002	66.5518	109.808	120.889	109.648	72.0563	74.0438	75.8805	75.0384	76.2433	71.8905
		61.7	81.278	75.6223	66.2818	109.415	120.653	109.515	71.945	74.2483	75.8674	75.0116	76.5554	71.8047
		61.8	81.2932	75.6285	65.9251	109.288	120.471	109.281	71.6888	74.4315	75.945	75.1307	76.8124	71.6752
		61.9	81.253	75.6468	65.6504	109.142	120.287	109.138	71.2976	74.5564	75.9634	75.1592	76.7581	71.6612
		62	81.3004	75.5457	65.5622	108.877	120.457	109.07	71.1278	74.5142	76.2183	75.0878	76.6117	71.7127
		62.1	81.4187	75.4599	65.6085	108.842	120.727	109.029	71.0421	74.4088	76.5903	75.1851	76.4707	71.9054
		62.2	81.3856	75.3461	65.5908	108.859	120.882	108.975	70.9669	74.2183	76.7579	75.3392	76.24	72.1468
		62.3	81.2095	75.3605	65.8968	108.613	120.848	109.072	70.8967	74.2594	76.8621	75.3723	75.9794	72.5014
		62.4	81.1218	75.3207	66.1585	108.364	120.928	109.082	71.0154	74.3496	76.9184	75.37	75.7939	72.7978
		62.5	80.9893	75.4428	66.3264	108.137	120.821	109.139	70.9731	74.5392	76.7406	75.483	75.7234	73.0458
		62.6	80.6626	75.6292	66.5362	108.009	120.559	109.343	70.9365	74.7684	76.5116	75.4422	75.6642	73.1311
		62.7	80.3954	75.8735	66.7014	107.84	120.355	109.602	70.8746	75.0602	76.2599	75.3871	75.7102	72.9248
		62.8	80.3793	75.9586	66.563	107.995	120.487	109.737	70.9173	75.1029	75.9459	75.4354	75.777	72.4187
		62.9	80.2982	76.0912	66.417	108.151	120.434	109.966	70.9443	74.893	75.6296	75.6179	75.9531	71.9324
		63	80.2114	76.116	66.2871	108.4	120.268	110.017	71.0964	74.453	75.451	75.6978	76.1172	71.4868
		63.1	80.2226	76.1212	66.0539	108.499	120.177	109.954	71.168	74.0333	75.2796	75.7443	76.3176	71.1163
		63.2	80.3031	76.1273	65.8594	108.656	120.274	109.843	71.2121	73.5663	75.1648	75.6496	76.4429	71.083
		63.3	80.298	76.0859	65.7914	108.586	120.161	109.813	71.1909	73.318	75.1745	75.498	76.5005	71.3428
		63.4	80.2405	75.9575	65.7557	108.681	120.07	109.671	71.1718	73.4493	75.1198	75.264	76.3599	71.6839
		63.5	80.0899	75.8535	65.739	108.818	120.242	109.492	71.0314	73.6999	75.0168	75.2334	76.0332	72.0529
		63.6	79.9773	75.8231	65.9679	108.986	120.582	109.156	70.8726	73.8767	74.9982	75.308	75.5841	72.3845
		63.7	79.8119	75.7282	66.273	109.081	120.689	108.695	70.7672	74.0464	75.0998	75.6128	75.2504	72.4057
		63.8	79.5656	75.8153	66.608	109.273	120.701	108.269	70.6154	74.0749	75.2618	75.8899	75.0441	72.3279
		63.9	79.5029	75.9268	67.0133	109.212	120.892	107.908	70.3686	73.984	75.634	76.105	74.966	72.244
		64	79.6391	76.101	67.4092	109.059	120.886	107.745	70.2958	74.0187	76.0236	76.0851	75.1388	72.0174
		64.1	79.7885	76.1251	67.5898	108.869	120.73	107.84	70.4049	74.2065	76.244	75.9842	75.3342	71.6929
		64.2	79.9995	76.233	67.696	108.642	120.769	108.143	70.6685	74.5788	76.3944	75.7777	75.4378	71.5087
		64.3	80.3639	76.4397	67.6133	108.262	121.083	108.369	71.0996	75.0202	76.3816	75.6088	75.3826	71.2624
		64.4	80.7023	76.8543	67.4004	108.043	121.2	108.646	71.5734	75.4104	76.2056	75.6709	75.3964	70.8056
		64.5	80.869	77.1848	67.0417	107.897	121.227	108.722	71.8666	75.7562	76.0916	75.8662	75.3149	70.398
		64.6	80.9896	77.5606	66.6924	107.822	121.076	108.528	72.0025	75.842	76.1192	76.0627	75.2907	70.2458
		64.7	80.9354	77.83	66.2969	107.907	120.808	108.306	71.8662	75.7308	76.013	76.2555	75.2021	70.279
		64.8	80.7937	77.842	66.2373	108.086	120.341	108.208	71.5644	75.5173	76.0352	76.3574	75.1666	70.358
		64.9	80.5259	77.4782	66.3391	108.276	119.968	108.006	71.3169	75.2534	76.1894	76.2569	75.0238	70.5953
		65	80.3304	77.0304	66.6416	108.427	119.886	108.056	71.0946	74.7714	76.1564	75.9999	74.9463	70.909
		65.1	80.1172	76.6212	67.0028	108.623	120.09	108.355	70.9103	74.5303	76.1455	75.7624	74.8968	71.157
		65.2	79.9976	76.2312	67.4122	108.683	120.28	108.6	70.9916	74.4036	76.3929	75.453	75.1051	71.1272
		65.3	79.781	75.8673	67.5762	108.73	120.411	108.639	71.2142	74.3579	76.5813	75.2202	75.4194	71.2123
		65.4	79.632	75.7111	67.5582	108.709	120.462	108.713	71.4362	74.5032	76.5257	75.0434	75.7494	71.3498
		65.5	79.552	75.6472	67.432	108.678	120.222	108.556	71.7996	74.845	76.5971	74.9643	75.9659	71.5968
		65.6	79.5146	75.5227	67.2393	108.466	119.799	108.332	72.2184	74.8866	76.4998	74.9485	76.132	71.6474
		65.7	79.5605	75.4448	67.056	108.342	119.363	108.137	72.3944	74.802	76.1733	75.0844	76.0782	71.8564
		65.8	79.7013	75.4787	66.8447	108.3	119.11	108.123	72.426	74.7299	75.7639	75.197	75.8994	71.9477
		65.9	79.8855	75.5292	66.7671	108.235	119.011	108.272	72.4097	74.4427	75.4689	75.2824	75.6497	72.0776
		66	80.0249	75.5866	66.5974	108.157	119.13	108.639	72.2039	74.1513	75.1748	75.3932	75.4162	72.0103
		66.1	80.247	75.7524	66.4915	108.079	119.333	108.971	71.9307	74.1142	75.0498	75.4432	75.2013	72.1106
		66.2	80.4487	75.8616	66.4136	107.965	119.478	109.214	71.7142	74.1625	75.0025	75.3965	75.0112	72.2257
		66.3	80.6244	75.9352	66.4163	107.765	119.62	109.478	71.4763	74.2359	75.028	75.4164	74.9554	72.3618
		66.4	80.7724	76.0286	66.3004	107.536	119.683	109.577	71.189	74.389	75.0958	75.3538	74.9669	72.291
		66.5	80.8576	76.0908	66.4337	107.419	119.612	109.398	71.1003	74.4274	75.1704	75.2136	74.9789	72.2238
		66.6	80.7714	75.9476	66.4916	107.488	119.505	109.093	71.1366	74.4391	75.2208	75.0188	75.0174	72.1153
		66.7	80.5829	75.8001	66.5659	107.284	119.409	108.883	71.2108	74.3934	75.2732	74.8477	75.1332	71.8636
		66.8	80.4337	75.6091	66.6353	107.162	119.029	108.488	71.4008	74.2087	75.3966	74.6622	75.1872	71.5424
		66.9	80.1729	75.3037	66.7974	107.174	118.561	108.081	71.6156	74.0917	75.6005	74.6662	75.2738	71.218
		67	79.9232	75.1855	66.7412	107.1	118.095	107.882	71.5825	74.1736	75.7864	74.7422	75.4207	70.9636
		67.1	79.7559	75.4459	66.6977	106.904	117.597	107.942	71.3027	74.2298	75.8706	74.9117	75.4167	70.8048
		67.2	79.5953	75.8026	66.5518	107.224	117.459	107.981	71.0827	74.3721	75.9949	75.086	75.3226	70.771
		67.3	79.4176	76.2364	66.5482	107.389	117.663	108.086	70.8105	74.6406	76.0992	75.2198	75.2255	70.8337
		67.4	79.379	76.6042	66.4648	107.382	118.024	108.099	70.6428	74.9225	76.1731	75.1718	75.12	71.0872
		67.5	79.39	76.7134	66.4985	107.36	118.403	108.025	70.7537	75.048	76.164	75.1299	74.9743	71.3467
		67.6	79.4457	76.5107	66.6131	107.432	118.938	107.716	71.0328	75.0688	76.1872	75.1076	75.0578	71.3706
		67.7	79.7501	76.3189	66.8092	107.224	119.067	107.38	71.2636	75.0457	76.1213	74.9936	75.2614	71.359
		67.8	80.1479	76.1822	66.7267	107.354	119	107.094	71.5611	74.8982	75.9321	74.9336	75.486	71.4018
		67.9	80.6621	76.2568	66.7004	107.707	118.741	107.021	71.8349	74.5724	75.5076	75.0558	75.716	71.3166
		68	81.2226	76.319	66.5412	108.114	118.439	106.976	71.8207	74.3549	75.1944	75.1386	75.9514	71.1538
		68.1	81.7521	76.4692	66.3714	108.527	117.976	107.1	71.767	74.306	75.015	74.974	76.1044	71.1535
		68.2	81.994	76.5722	66.1783	108.915	117.646	107.354	71.7172	74.2449	74.9375	74.9091	76.1634	71.116
		68.3	82.1088	76.54	66.1752	108.919	117.441	107.604	71.6448	74.336	75.0617	74.774	76.1991	70.9479
		68.4	81.9706	76.4676	66.2227	108.737	117.354	107.818	71.4801	74.4838	75.5435	74.5712	76.2136	70.9236
		68.5	81.7221	76.5987	66.4294	108.341	117.498	108.118	71.6203	74.3808	76.014	74.4332	76.1502	71.0427
		68.6	81.3834	76.6304	66.5876	107.671	117.799	108.357	71.7782	74.1407	76.3543	74.6478	75.9496	71.1658
		68.7	80.9755	76.5524	66.6661	107.057	118.061	108.509	71.8504	73.8988	76.5879	74.823	75.7535	71.2159
		68.8	80.4254	76.5186	66.5499	106.523	118.171	108.649	71.8756	73.5826	76.7204	74.9453	75.5344	71.2703
		68.9	79.9605	76.4728	66.2898	105.907	118.279	108.648	71.9455	73.3477	76.5889	74.8907	75.3008	71.2492
		69	79.5291	76.3042	65.9602	105.537	118.151	108.421	71.8056	73.622	76.3908	74.6656	75.1482	71.1542
		69.1	79.2097	76.2186	65.5855	105.44	117.727	108.158	71.6242	73.9956	76.1159	74.2832	75.1294	71.0269
		69.2	79.2057	76.0771	65.4081	105.352	117.378	107.783	71.474	74.2531	75.9245	74.0353	75.2182	71.079
		69.3	79.5478	75.8534	65.5397	105.448	117.106	107.332	71.396	74.4122	75.6278	74.0366	75.3182	71.1271
		69.4	79.9985	75.6547	65.8223	105.914	116.87	107.028	71.2697	74.5251	75.4687	74.3592	75.4379	71.1561
		69.5	80.3294	75.5764	66.1831	106.378	116.733	106.978	71.0972	74.1238	75.4176	74.8461	75.673	71.1357
		69.6	80.64	75.583	66.7391	106.732	116.837	106.912	70.9675	73.6031	75.5062	75.3303	75.9609	71.1236
		69.7	80.7717	75.9627	67.1808	107.072	116.915	106.928	70.9106	73.2483	75.6068	75.5734	76.1184	71.0355
		69.8	80.6352	76.4055	67.3578	107.184	117.024	107.096	70.7428	73.069	75.7615	75.5786	76.2554	71.173
		69.9	80.3337	76.6634	67.4078	106.915	117.19	107.15	70.6999	72.8773	75.8977	75.4656	76.4274	71.3192
		70	80.3362	76.7195	67.3484	106.539	117.365	107.019	70.8472	72.8019	75.9801	75.4028	76.5047	71.4915
		70.1	80.3302	76.6514	67.0299	106.275	117.552	106.894	71.0494	72.9448	76.0665	75.3248	76.4825	71.7188
		70.2	80.2987	76.3162	66.6172	105.985	117.649	106.807	71.2393	73.161	75.9648	75.3837	76.3335	71.909
		70.3	80.3456	76.0114	66.3492	105.832	117.793	106.602	71.5412	73.3393	75.9762	75.5421	76.254	71.8168
		70.4	80.3653	75.849	66.2556	105.775	117.85	106.523	71.7262	73.5983	76.0321	75.5647	76.1936	71.7022
		70.5	80.1258	75.8905	66.1864	105.732	117.82	106.582	71.7041	74.0181	76.1782	75.4376	76.075	71.6411
		70.6	79.8299	75.9394	66.2938	105.63	117.796	106.711	71.636	74.3174	76.3855	75.3365	75.8594	71.4296
		70.7	79.6828	75.9484	66.4622	105.562	117.815	106.789	71.657	74.4005	76.8114	75.2112	75.9004	71.3127
		70.8	79.6614	75.9924	66.5948	105.453	117.615	106.909	71.5578	74.3412	77.0909	74.9549	75.8873	71.2929
		70.9	79.7747	76.0058	66.505	105.374	117.416	106.792	71.4666	74.2151	77.215	74.8072	75.7366	71.2466
		71	79.9717	75.9706	66.3281	105.482	117.384	106.612	71.5208	74.0786	77.1303	74.8011	75.6222	71.2876
		71.1	80.1747	75.981	66.0648	105.644	117.121	106.465	71.5806	73.9149	76.9132	74.7166	75.7536	71.5505
		71.2	80.2175	76.0836	65.8599	105.881	116.82	106.289	71.5521	73.9414	76.6925	74.702	75.7886	71.6676
		71.3	80.1353	76.1078	65.6222	106.276	116.687	106.271	71.6889	74.0193	76.5966	74.7982	75.8026	71.7197
		71.4	80.0792	76.059	65.4954	106.803	116.448	106.637	71.9783	74.2666	76.5314	74.9445	75.9419	71.8358
		71.5	80.1897	75.8568	65.5338	107.087	116.022	106.996	72.3286	74.4336	76.502	75.052	76.093	71.7194
		71.6	80.4936	75.7412	65.5647	107.115	115.858	107.245	72.6141	74.5697	76.4196	75.4454	75.8666	71.4192
		71.7	80.772	75.6047	65.5408	106.965	115.873	107.653	72.8231	74.6576	76.1742	75.7629	75.6761	71.2064
		71.8	81.1222	75.4907	65.559	106.598	115.985	107.921	72.8762	74.9488	75.8005	76.1022	75.5207	71.1395
		71.9	81.3135	75.4424	65.5807	106.116	116.393	107.846	72.6532	74.9848	75.484	76.3376	75.3117	71.0538
		72	81.1797	75.5202	65.5416	105.704	116.991	107.738	72.2636	75.0775	75.3736	76.3717	75.068	71.0021
		72.1	80.8307	75.462	65.5363	105.69	117.604	107.815	71.8841	75.1997	75.4638	76.0153	75.3707	71.0366
		72.2	80.6203	75.4404	65.489	105.814	118.191	107.731	71.6255	75.3296	75.6017	75.6648	75.6193	71.171
		72.3	80.3438	75.4131	65.2756	106.022	118.723	107.485	71.4908	75.3895	75.8448	75.2045	75.8462	71.2708
		72.4	80.174	75.5541	65.1028	106.256	118.886	107.269	71.5808	75.4876	76.0135	74.7844	76.0038	71.3892
		72.5	80.2103	75.7434	65.0466	106.512	118.846	107.169	71.7924	75.4481	75.9682	74.6795	76.1499	71.6176
		72.6	80.2405	75.9262	65.1481	106.536	118.784	106.779	72.0541	75.4303	75.6341	74.8131	75.9101	71.6996
		72.7	80.3232	75.985	65.458	106.551	118.673	106.415	72.1906	75.2344	75.4818	74.9512	75.6583	71.6454
		72.8	80.444	75.9994	65.9888	106.505	118.412	106.248	72.2158	74.8637	75.3457	75.2078	75.4845	71.5924
		72.9	80.5484	75.7988	66.3818	106.427	118.315	106.312	72.2033	74.6244	75.4252	75.4047	75.4392	71.4794
		73	80.4808	75.5022	66.626	106.356	118.29	106.177	72.0869	74.4038	75.5824	75.3446	75.3701	71.2491
		73.1	80.529	75.3343	66.5947	106.239	118.131	106.212	71.9644	74.1666	75.9958	75.245	75.2662	71.1668
		73.2	80.4166	75.4937	66.3474	106.128	117.731	106.266	71.8514	74.0502	76.1809	75.2549	75.1335	71.118
		73.3	80.2616	75.7328	66.0307	106.029	117.398	105.987	71.7252	74.0259	76.2914	75.2368	74.8981	70.8866
		73.4	80.1844	75.9665	65.916	105.943	117.201	105.46	71.4382	73.8948	76.1412	75.2636	74.6384	70.7925
		73.5	80.2849	76.1754	65.8544	105.756	117.052	105.028	71.2921	73.9678	76.0239	75.413	74.4897	70.9385
		73.6	80.3644	76.2702	65.9992	105.701	116.789	104.667	71.1264	74.0766	75.7815	75.3813	74.5593	71.0543
		73.7	80.5022	75.939	66.2906	105.53	116.742	104.408	71.0377	74.272	75.674	75.0678	74.774	71.2208
		73.8	80.6106	75.647	66.6589	105.453	116.662	104.677	71.0076	74.5884	75.5764	74.743	75.0435	71.6327
		73.9	80.6832	75.5538	66.8883	105.234	116.375	105.141	71.1408	75.0946	75.5949	74.4746	75.2443	71.89
		74	80.6615	75.4627	67.0063	105.007	115.861	105.685	71.0203	75.3577	75.5602	74.0464	75.3914	71.9649
		74.1	80.5379	75.2696	67.0973	104.367	115.492	106.083	70.9416	75.5702	75.6084	73.9235	75.5621	72.0968
		74.2	80.389	75.4004	66.9407	103.867	115.199	106.399	70.9435	75.6265	75.6266	74.1886	75.7752	72.0967
		74.3	80.2176	75.3887	66.6107	103.345	115.035	106.421	71.0116	75.4926	75.5837	74.4735	76.0036	71.9162
		74.4	79.8708	75.2756	66.289	103.162	114.913	106.336	71.1487	75.0122	75.5208	74.7511	76.2279	71.8376
		74.5	79.6627	75.3191	66.1045	103.23	115.08	106.166	71.6078	74.5456	75.514	75.3166	76.4277	71.7082
		74.6	79.5813	75.6086	65.7135	103.987	115.423	106.166	71.9867	74.1528	75.3858	75.5802	76.3465	71.5056
		74.7	79.4752	75.7483	65.5988	104.715	115.742	106.098	72.1323	73.9656	75.2625	75.5106	75.9912	71.3553
		74.8	79.4469	76.0119	65.4923	105.255	116.096	106.152	72.1151	73.9552	75.3178	75.3668	75.5363	71.3656
		74.9	79.5229	76.1385	65.375	105.484	116.591	106.217	72.0125	74.2978	75.2659	75.0702	75.2173	71.2556
		75	79.5317	76.0638	65.2747	105.522	117.079	106.436	71.7686	74.7962	75.1185	74.425	74.9849	71.2094
		75.1	79.6178	75.8475	65.4246	105.16	117.321	106.442	71.5354	75.2234	75.0415	73.985	74.929	71.2656
		75.2	79.8602	75.7341	65.4542	104.837	117.441	106.465	71.5396	75.3893	74.9975	73.6439	75.0629	71.4433
		75.3	80.0643	75.4961	65.7083	104.668	117.455	106.369	71.6956	75.3618	74.8308	73.4052	75.2803	71.488
		75.4	80.3802	75.303	66.0696	104.615	117.271	106.178	71.6058	75.0822	74.9496	73.3884	75.318	71.5624
		75.5	80.6227	75.1884	66.4143	104.55	116.813	105.768	71.3907	74.7916	75.2192	73.648	75.2676	71.732
		75.6	80.6224	75.0414	66.7551	104.509	116.495	105.355	71.1741	74.4654	75.546	73.9187	75.2966	71.7522
		75.7	80.4612	74.7565	67.1815	104.329	116.276	105.089	70.8133	74.3347	75.752	74.3	75.3626	71.5659
		75.8	80.4495	74.64	67.3893	104.216	115.919	104.935	70.3768	74.328	75.9356	74.645	75.5224	71.3744
		75.9	80.3872	74.5847	67.4525	104.04	115.686	104.963	70.2864	74.3695	76	74.8485	75.7475	71.3142
		76	80.432	74.5616	67.3234	103.921	115.748	105.05	70.4866	74.2822	75.8885	75.0224	76.0446	71.0955
		76.1	80.5326	74.6393	66.9572	103.882	115.686	105.194	70.7808	74.2429	75.6604	75.0943	76.145	70.9808
		76.2	80.5996	74.7598	66.3999	103.807	115.46	105.113	71.0824	74.1022	75.4808	75.0488	76.1489	71.1234
		76.3	80.4116	74.7695	66.0316	103.521	115.365	105.008	71.313	73.8608	75.3583	75.0136	75.9746	71.5021
		76.4	80.1238	74.9231	65.6817	103.332	115.285	104.889	71.3274	73.695	75.2347	75.0653	75.8595	71.7961
		76.5	79.7285	75.1305	65.5079	103.203	115	104.951	70.9744	73.721	75.2626	75.0483	75.6532	72.1734
		76.6	79.4186	75.4298	65.562	102.993	114.707	105.141	70.6005	73.822	75.3674	75.0898	75.4944	72.5013
		76.7	79.3062	75.6433	65.8486	103.03	114.557	105.578	70.2847	74.0328	75.4966	75.1752	75.2973	72.5964
		76.8	79.3929	75.8827	65.899	103.278	114.484	105.955	70.1878	74.3015	75.614	75.2142	75.1657	72.4159
		76.9	79.5244	75.9908	65.9931	103.497	114.388	106.279	70.3038	74.4842	75.6293	75.0536	74.962	72.24
		77	79.674	76.0817	66.0592	103.604	114.53	106.441	70.7472	74.488	75.6416	74.9635	74.8611	72.0157
		77.1	79.868	76.0198	66.0746	103.719	114.862	106.492	71.1984	74.3744	75.7218	74.8596	74.9661	71.7694
		77.2	80.0825	76.1185	65.9688	103.594	115.273	106.262	71.6019	74.0555	75.767	74.7823	75.1778	71.6435
		77.3	80.2976	76.2016	66.1691	103.415	115.626	105.997	71.9349	73.6234	75.8191	74.7644	75.4386	71.5325
		77.4	80.5698	76.1612	66.5536	103.198	115.923	105.753	72.1462	73.2463	75.8461	74.9773	75.8525	71.3645
		77.5	80.9128	76.0141	66.9412	103.08	115.919	105.54	72.1338	72.9824	75.7426	75.1362	76.1624	71.2422
		77.6	81.1172	75.8026	67.184	103.109	115.824	105.377	72.042	72.8422	75.5043	75.1708	76.3768	71.0566
		77.7	81.1168	75.61	67.4246	103.215	115.704	105.37	71.865	72.9232	75.3388	75.058	76.5294	70.8492
		77.8	81.0205	75.5298	67.4314	103.457	115.587	105.383	71.5813	73.2132	75.1658	74.8933	76.6256	70.6708
		77.9	80.8614	75.6657	67.087	103.942	115.537	105.161	71.1914	73.5701	75.16	74.688	76.4853	70.4916
		78	80.6434	75.8174	66.7309	104.338	115.796	104.779	70.8178	73.9134	75.1896	74.4055	76.3226	70.3826
		78.1	80.4306	76.1282	66.5218	104.505	116.055	104.32	70.4461	74.1517	75.3606	74.3538	75.9361	70.4048
		78.2	80.1784	76.2661	66.4314	104.796	116.134	103.95	70.2506	74.3332	75.5007	74.4975	75.5656	70.3346
		78.3	79.9006	76.2682	66.4124	104.926	116.252	103.593	70.0896	74.5292	75.676	74.6135	75.1445	70.4564
		78.4	79.7928	76.158	66.5769	104.688	116.296	103.44	70.1351	74.6232	75.7571	74.6273	74.8499	70.7662
		78.5	79.6393	76.2094	66.6449	104.46	116.089	103.451	70.3558	74.5565	75.8863	74.7821	74.7898	71.0504
		78.6	79.6679	76.153	66.6165	104.286	115.76	103.602	70.582	74.5476	75.8473	74.8883	74.9458	71.292
		78.7	79.7766	76.2357	66.4303	103.844	115.535	103.674	70.6686	74.4681	75.857	75.017	74.9846	71.7205
		78.8	79.9464	76.2436	66.2635	103.348	115.327	103.768	70.7895	74.2565	75.8634	75.1828	75.1542	71.8394
		78.9	79.8555	76.182	66.2439	102.929	115.158	103.94	70.7655	74.0268	75.8868	75.3945	75.3534	71.7708
		79	79.8895	75.9393	66.375	102.54	115.062	104.064	70.6439	73.9176	75.9584	75.4928	75.2306	71.6496
		79.1	79.7687	75.7071	66.6156	102.379	115.091	104.033	70.6081	73.754	76.1532	75.4572	75.0356	71.5566
		79.2	79.6977	75.4239	66.9348	102.62	115.199	103.938	70.679	73.6384	76.2139	75.2062	75.0882	71.2848
		79.3	79.7023	75.291	67.1843	102.967	115.191	103.932	70.6517	73.5274	76.2204	74.8868	75.0965	71.3152
		79.4	79.9118	75.3739	67.1778	103.44	115.242	103.865	70.6762	73.4969	76.2015	74.5548	75.0926	71.4193
		79.5	80.0376	75.5078	67.1803	103.754	115.449	103.948	70.7212	73.4477	76.0498	74.2778	75.2216	71.468
		79.6	80.1734	75.7178	67.1619	103.815	115.68	104.062	70.6262	73.4579	75.8974	74.0406	75.3581	71.5111
		79.7	80.3412	75.9586	67.1086	103.536	115.827	104.295	70.3884	73.5717	75.8913	73.8588	75.3045	71.7308
		79.8	80.4105	76.2661	66.9366	103.209	115.901	104.393	70.2357	73.6765	75.9348	73.7922	75.1921	71.8058
		79.9	80.293	76.3303	66.7986	102.847	115.897	104.459	70.1528	73.7016	76.1196	73.8906	74.9382	71.8751
		80	80.221	76.4454	66.4817	102.726	115.672	104.424	70.0118	73.7801	76.3552	74.0216	74.7805	72.0061
		80.1	80.2935	76.4815	66.1099	102.626	115.462	104.567	70.0554	73.7198	76.5041	74.2448	74.7216	72.1372
		80.2	80.2181	76.4893	65.748	102.614	115.121	104.576	70.3324	73.4606	76.5069	74.5049	74.7064	72.0236
		80.3	80.0556	76.3053	65.6836	102.568	114.989	104.489	70.6214	73.2944	76.4974	74.784	74.7036	71.9083
		80.4	79.9908	76.2594	65.7823	102.658	114.964	104.455	70.875	73.3247	76.2652	74.8037	74.8394	71.7468
		80.5	79.9427	76.1231	66.1602	102.733	115.124	104.263	71.1757	73.336	76.13	74.783	74.9284	71.4293
		80.6	79.6599	76.1382	66.6156	103.057	115.063	103.806	71.286	73.6112	76.0971	74.7469	74.9002	71.041
		80.7	79.5753	76.1912	66.9886	103.31	115.201	103.524	71.2682	74.0387	76.1448	74.7781	74.8902	70.9515
		80.8	79.6124	76.3236	67.1595	103.583	115.177	103.523	71.2424	74.355	76.025	74.7046	74.8238	71.0052
		80.9	79.6968	76.4878	67.2372	103.631	114.952	103.514	71.0893	74.462	76.013	74.7527	74.8689	71.1653
		81	79.6646	76.7787	67.1599	103.684	114.538	103.759	70.919	74.5752	75.9103	74.8595	74.8765	71.5161
		81.1	79.7758	76.8431	67.0357	103.439	114.272	104.12	70.8628	74.4059	75.6876	74.7904	74.9304	71.8341
		81.2	79.7834	76.8328	67.0507	103.45	113.929	104.24	70.7998	74.0395	75.5037	74.696	74.8928	71.8883
		81.3	79.9037	76.8407	67.104	103.635	113.638	104.149	70.8079	73.7754	75.6413	74.6389	75.1286	71.6412
		81.4	80.0286	76.7441	67.0525	103.953	113.475	104.037	70.9696	73.6625	75.7706	74.5047	75.242	71.1885
		81.5	80.2577	76.4676	66.8824	104.156	113.269	103.864	71.1563	73.527	75.9908	74.2154	75.324	70.8109
		81.6	80.4994	76.289	66.7172	104.327	113.08	103.743	71.289	73.4797	76.3151	74.0982	75.3878	70.6068
		81.7	80.7505	76.178	66.5444	104.237	112.831	103.713	71.3938	73.6038	76.5818	73.9216	75.4993	70.6048
		81.8	80.8264	76.093	66.5028	103.946	112.505	103.819	71.3118	73.6537	76.534	73.7479	75.266	70.8669
		81.9	80.9336	76.0374	66.7014	103.43	112.103	103.823	71.1028	73.5284	76.5461	73.8028	74.9022	71.2855
		82	81.0705	76.1772	67.1716	102.892	111.938	103.574	70.8522	73.4172	76.4598	74.1333	74.6121	71.4863
		82.1	81.1469	76.4044	67.653	102.503	111.971	103.216	70.6688	73.4089	76.3514	74.5945	74.3269	71.4964
		82.2	81.2586	76.6317	67.9451	102.301	112.122	103.01	70.5848	73.4232	76.2428	75.1929	74.1774	71.2917
		82.3	81.4176	76.8048	68.0713	101.991	112.503	102.762	70.5695	73.5398	76.235	75.8173	74.2058	70.8866
		82.4	81.4534	77.0515	67.9726	101.888	113.025	102.643	70.6571	73.7948	75.9821	76.3239	74.3661	70.4857
		82.5	81.3743	77.1306	67.517	101.865	113.538	102.804	70.8481	74.0231	75.6404	76.5139	74.463	70.2556
		82.6	81.2649	77.0056	67.0322	101.933	113.825	103.054	71.0411	74.204	75.2612	76.3882	74.6073	70.2363
		82.7	80.9152	76.8642	66.7434	101.868	114.205	103.224	71.1922	74.2759	74.937	76.0534	74.7252	70.3391
		82.8	80.5058	76.6424	66.4891	102.091	114.462	103.332	71.3324	74.2822	74.791	75.5625	74.8554	70.6115
		82.9	80.0196	76.276	66.344	102.356	114.698	103.436	71.3344	74.1557	74.8594	74.8433	74.9598	70.8339
		83	79.4182	75.9551	66.5588	102.524	114.745	103.531	71.1633	73.9395	75.1094	74.2622	75.1564	70.9707
		83.1	78.7972	75.706	66.7372	102.495	114.717	103.694	71.0065	73.7316	75.4084	73.7596	75.1415	70.948
		83.2	78.5142	75.309	66.8999	102.473	114.357	103.755	70.735	73.5619	75.645	73.3432	74.9283	70.7935
		83.3	78.2006	74.9418	67.1001	102.208	113.969	103.876	70.5492	73.3816	75.671	73.1508	74.7025	70.4297
		83.4	77.9937	74.6643	67.2754	101.81	113.437	103.928	70.6112	73.3726	75.766	73.2884	74.6149	70.0572
		83.5	78.094	74.5458	67.3122	101.606	113.057	103.98	70.8413	73.6514	75.7135	73.39	74.4309	69.6998
		83.6	78.3327	74.4746	67.4498	101.632	112.85	103.889	70.9728	73.9225	75.5507	73.6382	74.5272	69.3835
		83.7	78.3871	74.6467	67.5265	101.746	112.847	103.769	71.1771	74.2602	75.462	73.998	74.752	69.4256
		83.8	78.5622	75.0184	67.4995	102.088	112.859	103.648	71.3244	74.5304	75.5206	74.3117	74.9443	69.7166
		83.9	78.7935	75.3752	67.4658	102.573	112.912	103.54	71.366	74.7274	75.5246	74.4316	75.0169	70.0883
		84	78.8714	75.5333	67.2988	102.871	112.774	103.3	71.2401	74.6899	75.6327	74.6264	75.1307	70.4365
		84.1	78.8754	75.6913	67.0358	102.999	112.642	103.075	71.1188	74.5342	75.8356	74.5369	75.1429	70.8537
		84.2	78.9753	75.6657	66.8393	102.965	112.501	102.975	70.9892	74.302	75.9313	74.3526	75.1079	71.0564
		84.3	79.1809	75.3928	66.6868	102.699	112.289	102.814	70.9068	74.2345	75.9772	74.1878	74.9446	71.2538
		84.4	79.3185	75.1179	66.4642	102.305	112.073	102.653	70.7026	74.0964	76.0514	74.0542	74.7272	71.3791
		84.5	79.5342	74.8862	66.3035	101.988	112.037	102.554	70.5872	74.015	76.0706	73.8824	74.538	71.6292
		84.6	79.888	74.7133	66.1568	101.693	111.844	102.522	70.5289	74.2226	76.1788	74.2039	74.3596	71.8143
		84.7	80.1826	74.76	65.905	101.565	111.665	102.532	70.5639	74.519	76.4768	74.4718	74.3208	71.9322
		84.8	80.2804	75.171	65.7388	101.636	111.619	102.555	70.6698	74.6825	76.6846	74.6142	74.5594	71.8049
		84.9	80.4578	75.6772	65.7486	101.591	111.694	102.672	70.8582	74.9388	76.7259	74.8718	74.909	71.6551
		85	80.5613	76.2604	65.839	101.629	111.783	102.788	71.0788	75.16	76.8428	75.1376	75.1828	71.3102
		85.1	80.3512	76.8331	65.9606	101.681	111.982	102.841	71.3044	75.0279	76.8064	74.9836	75.4813	71.0236
		85.2	80.0772	77.1563	66.218	101.653	112.219	102.823	71.4901	74.7952	76.5209	74.8638	75.6815	70.7931
		85.3	79.9732	77.0367	66.4607	101.536	112.301	102.779	71.4532	74.5581	76.2774	74.7557	75.796	70.7948
		85.4	79.7762	76.7192	66.5151	101.6	112.291	102.603	71.4039	74.2038	76.1488	74.428	75.7776	70.9149
		85.5	79.4733	76.31	66.5259	101.502	112.217	102.415	71.3107	73.9129	75.951	74.0347	75.8212	71.0822
		85.6	79.4597	75.9057	66.4532	101.346	112.164	102.297	71.0863	73.8895	75.8401	73.7836	75.6284	70.9811
		85.7	79.6305	75.6675	66.2729	101.197	112.129	102.21	70.7401	73.8786	75.8849	73.642	75.4338	70.8852
		85.8	79.5797	75.6177	66.125	101	112.363	102.29	70.639	73.9681	75.9779	73.616	75.1455	70.8205
		85.9	79.6791	75.7279	66.168	100.934	112.687	102.481	70.5222	74.1879	76.0491	73.7912	74.918	70.6813
		86	79.8916	75.9151	66.3517	101.064	112.947	102.774	70.4531	74.3069	76.2717	74.0354	74.6152	70.6547
		86.1	79.939	75.9474	66.7713	101.228	113.052	102.984	70.6639	74.2925	76.4378	74.2047	74.6041	71.0134
		86.2	79.866	75.7348	67.2059	101.451	112.985	103.104	71.137	74.2691	76.5646	74.1903	74.6412	71.3551
		86.3	79.9686	75.463	67.4544	101.797	112.648	103.129	71.4514	74.1871	76.6018	74.1574	74.8066	71.4911
		86.4	79.8786	75.1725	67.5173	101.992	112.281	103.066	71.8699	74.0288	76.5709	74.0697	75.0306	71.5119
		86.5	79.8226	74.814	67.409	101.95	112.134	102.91	72.2055	73.9853	76.3118	73.9962	75.4029	71.4581
		86.6	79.9308	74.5901	67.1405	101.891	112.078	102.788	72.2655	73.8364	76.0482	73.9437	75.6578	71.275
		86.7	80.0355	74.6642	66.939	101.74	112.201	102.536	72.0404	73.755	75.8233	73.9976	75.8584	71.0552
		86.8	79.9557	74.8412	66.9132	101.517	112.494	102.162	71.8877	73.68	75.7648	74.0084	75.7478	70.9411
		86.9	79.8194	74.9341	67.0209	101.099	112.723	101.886	71.594	73.691	75.7948	73.9896	75.5678	71.0447
		87	79.6527	74.9732	67.0648	100.769	112.723	101.569	71.3216	73.6851	75.9519	73.9894	75.2682	71.175
		87.1	79.2739	74.9464	67.0342	100.562	112.615	101.353	71.1872	73.9825	76.1974	74.1986	75.0119	71.254
		87.2	78.8154	74.9236	66.8385	100.434	112.257	101.442	71.1645	74.2099	76.411	74.3836	74.8029	71.4835
		87.3	78.5409	74.7874	66.6	100.396	111.753	101.71	71.1034	74.386	76.4716	74.4419	74.9306	71.6895
		87.4	78.5441	74.6393	66.2388	100.731	111.356	101.927	71.2908	74.3833	76.572	74.5181	75.046	71.797
		87.5	78.6254	74.6754	66.1594	101.174	111.006	102.245	71.5431	74.3604	76.6952	74.4938	75.1866	71.8629
		87.6	78.9052	74.9218	66.1722	101.509	110.819	102.414	71.7727	74.1813	76.6811	74.245	75.3542	71.8648
		87.7	79.3472	74.9642	66.3296	101.773	110.84	102.446	72.0221	74.118	76.509	74.1026	75.4649	71.7338
		87.8	79.664	75.1521	66.4322	101.812	110.888	102.312	72.2421	74.1231	76.4292	74.14	75.3991	71.6291
		87.9	79.9022	75.6245	66.6302	101.606	110.686	102.173	72.026	74.2968	76.2194	74.1642	75.458	71.5863
		88	80.0636	76.0436	66.6298	101.329	110.545	101.912	71.688	74.4307	75.9158	74.2048	75.4754	71.6462
		88.1	80.0602	76.1878	66.5634	101.132	110.584	101.698	71.2914	74.5574	75.7739	74.1939	75.4702	71.8723
		88.2	79.9168	76.456	66.4914	100.904	110.676	101.687	70.8663	74.5658	75.8665	74.0692	75.6003	72.1405
		88.3	79.8084	76.7474	66.5356	100.764	110.949	101.916	70.4976	74.5164	75.972	73.8854	75.9084	72.3777
		88.4	79.5781	76.6368	66.4886	100.539	111.406	102.014	70.477	74.5206	76.2166	73.6378	76.1131	72.5092
		88.5	79.2872	76.3884	66.4921	100.18	111.76	102.042	70.6405	74.5039	76.493	73.559	76.2937	72.499
		88.6	79.1231	76.34	66.6376	99.7737	111.792	102.077	70.7828	74.3613	76.5248	73.7482	76.3182	72.2027
		88.7	79.2034	76.2843	66.8082	99.5556	111.787	101.881	70.8838	74.1723	76.4523	73.9664	76.0803	71.8395
		88.8	79.3692	75.9891	66.8953	99.5304	111.595	101.5	71.0256	74.0554	76.158	74.3203	75.74	71.4216
		88.9	79.5316	75.8914	67.0784	99.8342	111.394	101.237	71.0986	73.6593	75.7286	74.8181	75.3753	71.0258
		89	79.7266	75.9133	67.1531	100.348	111.352	101.167	71.1257	73.3681	75.3363	75.1772	75.1992	70.6821
		89.1	79.8026	75.6745	67.0959	100.839	111.407	101.116	71.4352	73.3084	75.1249	75.3268	75.2521	70.6573
		89.2	79.6048	75.3557	66.9134	101.138	111.397	101.014	71.8612	73.427	74.9776	75.34	75.4981	70.7129
		89.3	79.436	75.2381	66.6833	101.217	111.489	100.968	72.1458	73.4771	75.0989	74.9815	75.6935	70.8802
		89.4	79.4444	75.2256	66.4412	101.062	111.605	101.031	72.3428	73.7722	75.424	74.5397	75.8666	71.0107
		89.5	79.5668	75.1888	66.2861	100.827	111.625	101.137	72.4059	73.9843	75.7282	74.049	75.803	71.0839
		89.6	79.7771	75.3361	66.1371	100.572	111.684	101.236	72.1015	74.0199	76.1024	73.61	75.4792	70.9945
		89.7	80.0613	75.5781	66.158	100.351	111.828	101.496	71.7545	73.8887	76.3839	73.367	74.9612	70.8826
		89.8	80.1018	75.7753	66.2864	100.274	111.91	101.656	71.5214	73.7513	76.5238	73.538	74.4602	70.6603
		89.9	79.9623	75.801	66.531	100.198	111.923	101.759	71.3501	73.5866	76.3935	73.7159	74.047	70.4992
		90	79.695	75.773	66.6658	100.121	111.972	101.731	71.3172	73.5383	76.221	73.9838	73.788	70.4702
		90.1	79.389	75.7443	66.8501	100.217	111.97	101.709	71.519	73.5436	75.8969	74.1606	73.7355	70.517
		90.2	79.113	75.6552	66.7509	100.497	111.759	101.616	71.7526	73.544	75.6044	74.149	73.9726	70.6186
		90.3	78.948	75.5622	66.5639	100.604	111.505	101.69	71.8925	73.6059	75.4221	73.9195	74.2288	70.8722
		90.4	78.8363	75.4605	66.0934	100.689	111.296	101.516	72.0578	73.6408	75.4149	73.7714	74.4876	71.0811
		90.5	78.6998	75.533	65.8118	100.749	111.165	101.314	72.0769	73.5851	75.4282	73.602	74.7157	71.1835
		90.6	78.5041	75.7473	65.5416	100.715	110.944	101.055	71.9154	73.6283	75.6026	73.6176	75.0819	71.3458
		90.7	78.2443	76.0984	65.5582	100.467	110.892	100.805	71.7049	73.9431	75.8222	73.8658	75.3397	71.4231
		90.8	78.0341	76.5662	65.6277	100.372	110.834	100.355	71.5679	74.2188	75.9297	74.1661	75.5424	71.3734
		90.9	77.9236	77.114	65.9136	100.451	110.777	100.209	71.342	74.4555	76.0319	74.3574	75.603	71.2832
		91	77.9299	77.3594	66.1355	100.613	110.351	100.068	71.2342	74.6489	76.1536	74.5555	75.6396	71.2642
		91.1	78.1857	77.2274	66.3002	100.601	109.995	100.035	71.144	74.6786	76.0171	74.5703	75.3172	71.0259
		91.2	78.5733	76.8218	66.3773	100.621	109.678	100.012	71.038	74.4917	75.8862	74.4563	74.8798	70.8977
		91.3	78.9958	76.1963	66.4257	100.472	109.576	100.162	70.8234	74.3456	75.8866	74.3872	74.5157	70.7989
		91.4	79.3054	75.6044	66.4352	100.107	109.382	100.256	70.6698	74.3935	75.7491	74.3581	74.3197	70.8818
		91.5	79.6078	75.118	66.4575	99.569	109.555	100.544	70.5086	74.6218	75.6215	74.3871	74.2476	70.8882
		91.6	79.7224	74.925	66.4928	99.0854	109.873	100.806	70.4643	74.9574	75.7853	74.5434	74.4705	71.0279
		91.7	79.7501	74.9531	66.4751	98.6062	110.008	101.16	70.3394	75.2759	75.8664	74.703	74.9142	71.0412
		91.8	79.8195	74.9997	66.4213	98.4398	109.94	101.475	70.4008	75.4956	75.8093	74.7894	75.3586	71.1504
		91.9	79.8738	74.9703	66.3842	98.4907	110.116	101.798	70.5007	75.3349	75.8557	74.9438	75.7346	71.0718
		92	79.9303	75.2971	66.3024	98.6732	110.212	102.031	70.5711	74.8716	75.8432	74.9431	75.8909	71.0879
		92.1	79.9693	75.5066	66.3653	98.9659	110.251	102.13	70.6874	74.4172	75.5894	74.821	75.7525	71.0839
		92.2	80.1174	75.6521	66.5743	99.2763	110.527	102.184	70.8863	73.979	75.3387	74.7677	75.3054	71.0766
		92.3	80.1317	75.9021	66.9126	99.4394	110.713	102.225	70.9096	73.6152	75.0404	74.7369	74.8724	70.9414
		92.4	80.1779	76.198	67.1186	99.3755	110.648	102.164	70.8383	73.5114	74.7884	74.5919	74.5464	70.933
		92.5	80.0414	76.1525	67.3642	99.2291	110.621	102.017	70.6418	73.6314	74.635	74.4688	74.3338	70.9125
		92.6	79.9449	76.142	67.514	98.9564	110.454	102.004	70.3154	73.715	74.67	74.5343	74.427	70.9168
		92.7	79.695	76.0343	67.532	98.6518	109.991	101.781	70.0421	73.8418	74.8446	74.5503	74.8393	70.8948
		92.8	79.5451	75.868	67.4103	98.2388	109.791	101.491	70.0063	74.0082	75.1998	74.553	75.1497	70.8406
		92.9	79.4276	75.6112	67.414	98.1438	109.749	101.258	70.1376	73.9954	75.3959	74.6656	75.3344	70.7813
		93	79.5606	75.4226	67.3935	98.3868	109.637	101.014	70.5326	73.9225	75.5643	75.0092	75.6166	70.7732
		93.1	79.6501	75.2224	67.1963	98.9882	109.644	100.694	71.0481	73.8885	75.6503	75.2137	75.769	70.7148
		93.2	79.9021	75.2828	66.903	99.7991	110.001	100.518	71.5227	73.9631	75.577	75.4139	75.7415	70.8012
		93.3	80.2234	75.4447	66.6962	100.663	110.287	100.474	71.7444	74.044	75.3398	75.6351	75.8864	70.963
		93.4	80.6693	75.73	66.4482	101.176	110.522	100.422	71.8026	74.4152	75.2839	75.6977	75.9884	71.0688
		93.5	80.9612	75.9071	66.0906	101.297	110.779	100.483	71.7572	74.8296	75.1481	75.42	75.8582	71.0333
		93.6	81.2566	76.1678	65.9149	101.023	110.871	100.517	71.798	75.129	75.0439	75.1896	75.6491	71.1013
		93.7	81.3496	76.1926	65.9189	100.579	110.719	100.568	71.9449	75.1188	74.9887	74.9862	75.5295	71.0435
		93.8	81.1649	76.1456	65.882	100.174	110.415	100.591	72.203	74.9786	75.0705	74.5801	75.2925	71.1197
		93.9	80.7536	76.0112	65.8392	99.9232	110.027	100.701	72.4257	74.6144	75.1844	74.1379	75.1202	71.3035
		94	80.4194	75.97	65.8827	99.7953	109.555	100.723	72.5186	74.1678	75.3262	73.8316	75.2314	71.4619
		94.1	80.1584	75.8862	65.9597	99.7208	109.339	100.835	72.2132	73.7824	75.3725	73.4692	75.3689	71.4809
		94.2	80.0424	75.8226	65.982	99.572	109.139	100.901	71.6776	73.6129	75.4348	73.0837	75.3982	71.6833
		94.3	80.1533	75.8453	66.0974	99.3446	109.047	100.875	71.0347	73.5194	75.3892	73.049	75.3863	71.6747
		94.4	80.3427	75.941	66.2189	99.1172	109.043	100.692	70.4848	73.5382	75.28	73.2804	75.3917	71.3805
		94.5	80.5349	76.0395	66.446	98.8175	109.122	100.442	70.0227	73.6319	75.3088	73.6726	75.2055	71.1793
		94.6	80.688	76.0851	66.5694	98.6169	109.078	100.141	69.8342	73.7278	75.4672	74.1307	74.9918	70.9821
		94.7	80.8371	76.1732	66.7092	98.4732	109.201	99.9724	69.83	73.8131	75.6488	74.5013	74.7178	70.5146
		94.8	80.8356	76.1534	66.7966	98.3378	109.402	99.808	70.0565	73.8627	76.0184	74.7412	74.547	70.065
		94.9	80.7665	76.1562	66.9109	98.3632	109.608	99.7123	70.3448	73.8581	76.2463	74.7434	74.424	69.9692
		95	80.5514	76.1879	66.8709	98.5823	109.757	99.7491	70.6754	73.8603	76.2296	74.5996	74.2968	69.9103
		95.1	80.3906	76.2839	66.8927	98.7846	109.736	99.8294	71.0044	73.964	76.0596	74.3992	74.2999	70.1376
		95.2	80.094	76.3215	66.7805	99.0473	109.479	99.8036	71.2348	74.0139	75.8708	74.3202	74.4865	70.6525
		95.3	79.919	76.318	66.5866	99.3407	109.055	99.7562	71.2264	74.1479	75.5295	74.1931	74.6806	71.301
		95.4	79.8585	76.1982	66.2559	99.405	108.622	99.6451	71.085	74.2594	75.3266	74.2388	74.9139	71.7624
		95.5	79.9474	76.112	65.9298	99.2141	108.371	99.5906	70.8892	74.2866	75.3514	74.3202	75.2179	72.1203
		95.6	79.9289	75.9468	65.4614	99.0209	108.501	99.6874	70.6591	74.1249	75.4969	74.4783	75.533	72.1339
		95.7	80.0333	75.9006	65.179	98.7569	108.843	99.7392	70.4324	73.9786	75.6502	74.6509	75.7083	71.8806
		95.8	80.0478	75.9536	64.8758	98.5838	109.388	99.8701	70.3826	73.8209	75.7793	74.8116	75.7468	71.5517
		95.9	80.0153	76.1241	64.7198	98.3709	109.942	100.064	70.5981	73.7925	75.807	74.7788	75.693	71.2096
		96	79.9457	76.1041	64.5965	98.3684	110.358	100.09	70.8603	73.9141	75.7115	74.7073	75.5644	70.9869
		96.1	79.8423	76.053	64.5816	98.4572	110.487	99.8206	71.0979	74.1911	75.6479	74.6588	75.2463	70.9764
		96.2	79.607	75.9873	64.588	98.6358	110.49	99.6908	71.3437	74.4923	75.6242	74.3993	75.0333	71.0597
		96.3	79.4398	75.8258	64.6739	98.8198	110.26	99.632	71.5338	74.8129	75.7342	74.1642	74.8376	70.9828
		96.4	79.2393	75.556	64.7425	99.0627	109.943	99.6006	71.3944	74.9426	75.977	74.1384	74.5284	70.9199
		96.5	79.0376	75.5898	64.9894	99.1003	109.675	99.6162	71.2734	74.9018	76.291	73.9765	74.3477	70.7617
		96.6	78.9334	75.8176	65.3466	98.9901	109.493	99.8293	71.2293	74.8219	76.4844	73.7391	74.4212	70.4396
		96.7	78.9696	75.9874	65.6066	98.744	109.324	100.11	71.3298	74.7526	76.5986	73.8149	74.4919	70.2054
		96.8	78.9714	76.2417	65.8966	98.2786	109.263	100.274	71.3052	74.5301	76.5246	73.8026	74.7032	70.1664
		96.9	79.0106	76.6436	66.175	97.8684	109.215	100.492	71.3622	74.4301	76.3282	73.6472	75.0322	70.1701
		97	79.0294	76.7817	66.2594	97.6809	109.076	100.7	71.306	74.3176	76.167	73.8101	75.3663	70.1624
		97.1	79.1695	76.7909	66.1792	97.4601	108.969	100.73	71.2155	74.1268	76.0394	73.9886	75.5508	70.3068
		97.2	79.285	76.8074	66.0448	97.2824	108.844	100.414	70.8059	73.8813	75.8973	73.879	75.6534	70.3898
		97.3	79.4072	76.7601	65.7798	97.3071	108.774	100.191	70.5696	73.8015	75.8937	73.953	75.747	70.5402
		97.4	79.5366	76.441	65.6003	97.419	108.87	99.9143	70.4463	73.7023	75.9743	74.115	75.9036	70.6892
		97.5	79.6236	76.1594	65.4502	97.5873	109.037	99.8636	70.352	73.8269	75.9032	74.1264	75.9056	70.9728
		97.6	79.5238	75.8145	65.3913	97.9117	109.004	99.942	70.2382	74.0679	75.8088	74.0558	75.898	71.218
		97.7	79.4071	75.5315	65.436	98.3521	109.046	100.304	70.3877	74.3965	75.7306	74.2056	76.0479	71.4569
		97.8	79.3678	75.311	65.7445	98.7566	109.051	100.525	70.4506	74.7891	75.539	74.3388	76.1002	71.6011
		97.9	79.3622	75.3376	65.8449	98.9785	108.897	100.591	70.4445	75.188	75.3263	74.4082	76.0402	71.6584
		98	79.5567	75.55	66.0526	98.9065	108.631	100.272	70.6568	75.4234	75.1287	74.4375	76.0064	71.6008
		98.1	79.7863	75.8332	66.2109	98.7255	108.661	99.8896	70.8416	75.6289	74.953	74.587	76.0055	71.4696
		98.2	80.0463	75.9034	66.2543	98.3556	108.718	99.4188	71.0185	75.8727	74.9388	74.6703	75.8118	71.3495
		98.3	80.234	75.868	66.0808	97.8586	108.776	99.1123	71.297	75.8881	75.0802	74.6586	75.5964	71.1874
		98.4	80.2731	75.7412	66.0903	97.5358	108.749	98.914	71.5158	75.7449	75.1988	74.6078	75.4766	71.1581
		98.5	80.1131	75.435	66.0166	97.4206	108.755	98.9352	71.527	75.5623	75.4751	74.6581	75.332	71.0826
		98.6	79.9458	75.1546	66.0514	97.5348	108.464	98.9742	71.5883	75.3454	75.9058	74.6942	75.2024	71.0388
		98.7	79.7028	75.1715	66.2057	98.0361	107.968	98.8973	71.6395	74.9574	76.0535	74.6122	75.2262	71.0272
		98.8	79.331	75.3915	66.3726	98.8141	107.297	98.7196	71.5783	74.7234	75.9452	74.5932	75.4227	71.1681
		98.9	79.0891	75.6377	66.4817	99.3734	106.85	98.5975	71.6788	74.731	75.8826	74.7131	75.3776	71.2853
		99	78.8958	75.8965	66.6094	99.7896	106.597	98.4596	71.7474	74.7282	75.6555	74.5983	75.4831	71.4487
		99.1	78.6327	76.1089	66.599	99.8148	106.556	98.4523	71.813	74.7154	75.221	74.4107	75.5297	71.528
		99.2	78.418	76.0935	66.5351	99.4959	106.606	98.625	71.7441	74.7314	75.0564	74.3086	75.3614	71.4573
		99.3	78.5671	75.8696	66.5646	98.9857	106.922	98.8285	71.5606	74.6799	75.1809	74.0554	74.9896	71.1699
		99.4	78.7933	75.6499	66.5707	98.6836	107.219	99.1831	71.2353	74.5676	75.3002	73.7741	74.87	70.8208
		99.5	79.0032	75.3871	66.4251	98.4926	107.328	99.6053	71.0081	74.7162	75.5429	73.807	74.6347	70.5301
		99.6	79.4368	75.0948	66.2893	98.532	107.48	99.8742	70.7268	74.9373	75.9237	73.8362	74.4722	70.3784
		99.7	79.8309	74.9556	66.0628	98.4804	107.896	100.097	70.5753	75.2277	76.1735	74.0186	74.4822	70.4572
		99.8	79.8769	74.975	65.7659	98.3422	108.213	100.239	70.6231	75.3554	76.275	74.3002	74.5572	70.5909
		99.9	79.8131	74.8842	65.5698	98.0462	108.357	100.039	70.7518	75.5498	76.32	74.5236	74.506	70.6893
		100	79.9215	74.9237	65.6958	97.7186	108.417	99.6864	70.8656	75.4953	76.209	74.5485	74.4144	70.7907
		100.1	79.9512	75.0456	65.921	97.4737	108.249	99.346	71.0023	75.3646	75.913	74.6124	74.3214	70.7289
		100.2	80.0466	75.09	66.2855	97.4995	107.704	99.0444	71.0662	75.206	75.5703	74.4599	74.2514	70.4477
		100.3	80.2644	74.9984	66.6684	97.5252	107.136	98.8068	71.087	75.3344	75.2972	74.4434	74.2189	70.2991
		100.4	80.421	75.0772	66.8287	97.6864	106.752	98.7993	70.9802	75.2035	75.0522	74.3989	74.3612	70.101
		100.5	80.2139	75.1066	66.5813	97.8344	106.689	98.7102	70.7862	75.0616	74.9576	74.3825	74.6804	69.7821
		100.6	79.8738	75.0752	66.2947	97.7652	106.816	98.6663	70.676	74.8714	75.1427	74.4226	74.9524	69.5677
		100.7	79.6161	75.0707	66.0878	97.5672	107.236	98.4874	70.6721	74.6766	75.433	74.5472	75.2313	69.4308
		100.8	79.4354	75.2073	65.8718	97.5253	107.701	98.3896	70.7721	74.2251	75.667	74.4686	75.4238	69.1763
		100.9	79.2826	75.3629	65.785	97.4623	108.029	98.205	71.1565	73.9271	75.9191	74.3694	75.4885	69.1448
		101	79.4329	75.5462	65.9421	97.4507	108.186	98.3369	71.6073	73.7294	76.1246	74.2907	75.4432	69.2511
		101.1	79.67	75.7978	66.0692	97.5065	108.345	98.4761	71.8478	73.6144	76.0567	74.1324	75.2966	69.4487
		101.2	79.733	76.0311	65.9807	97.4263	108.262	98.8668	71.9897	73.6105	75.8638	73.9822	75.0262	69.7651
		101.3	79.6574	76.0922	65.8931	97.3622	108.103	99.2197	71.9273	73.872	75.695	73.9152	74.9592	70.1569
		101.4	79.7406	75.9123	65.8464	97.4051	107.989	99.4973	71.5385	74.1594	75.4701	74.0165	74.9871	70.423
		101.5	79.7576	75.7378	65.8286	97.3766	107.944	99.5441	71.1978	74.4095	75.2656	74.1395	75.0317	70.6108
		101.6	79.846	75.4761	65.9039	97.5917	107.849	99.4607	71.0968	74.6758	75.2262	74.2646	75.178	70.7768
		101.7	80.0445	75.3416	66.1052	98.2216	107.962	99.0554	71.0481	74.824	75.3218	74.3876	75.4073	70.839
		101.8	80.2816	75.3668	66.3715	98.7722	108.12	98.5631	71.1139	74.7399	75.5208	74.524	75.3971	70.87
		101.9	80.251	75.5767	66.6591	99.0252	108.093	98.2244	71.2144	74.6112	75.8308	74.5788	75.278	71.0066
		102	80.237	75.7494	66.9978	99.1588	107.745	97.9906	71.2671	74.4689	76.109	74.6441	75.1318	71.2212
		102.1	80.095	75.9803	67.229	98.8675	107.364	97.9878	71.1867	74.2614	76.3591	74.7553	75.1141	71.3928
		102.2	79.8772	75.9368	67.3224	98.26	106.882	98.1135	71.0449	74.039	76.4912	74.7473	75.0968	71.5366
		102.3	79.6651	75.798	67.2555	97.6823	106.472	98.2578	70.9166	74.1714	76.4113	74.5988	75.2233	71.48
		102.4	79.7296	75.6054	66.9921	97.2539	106.515	98.241	70.9298	74.3898	76.2072	74.4491	75.4106	71.1286
		102.5	79.7436	75.3273	66.4526	97.068	106.902	98.1792	70.9275	74.5625	75.9934	74.265	75.6659	70.5522
		102.6	79.8064	75.001	65.8035	97.1337	107.335	97.9755	70.9929	74.6734	75.8076	74.0621	75.7769	69.843
		102.7	79.9318	74.8432	65.3597	97.1662	107.652	97.7946	71.0652	74.8718	75.7148	73.9157	75.802	69.1824
		102.8	80.1605	74.6972	65.0708	97.166	107.842	97.7518	71.1116	74.7866	75.6662	73.9489	75.7661	68.8434
		102.9	80.1552	74.5864	65.1182	97.1926	107.654	97.9043	71.1428	74.5351	75.7174	73.935	75.6169	68.89
		103	80.151	74.6172	65.4037	97.1632	107.25	98.145	71.1845	74.368	75.8116	73.8746	75.3708	69.34
		103.1	80.1019	74.7676	65.8658	97.0189	106.742	98.4414	71.222	74.4645	75.727	73.7957	75.1379	70.03
		103.2	79.9506	74.9164	66.1596	96.926	106.468	98.8442	71.3874	74.3783	75.6702	73.8608	74.9579	70.6703
		103.3	79.6758	75.096	66.267	96.758	106.313	99.0799	71.5021	74.244	75.706	73.9306	74.8155	71.0422
		103.4	79.6763	75.1802	66.0744	96.5966	106.246	99.0946	71.4872	74.2881	75.7028	73.9817	74.795	71.1602
		103.5	79.6797	75.2133	65.8474	96.3415	106.385	98.9663	71.4049	74.4024	75.6519	74.1625	74.8041	70.9264
		103.6	79.763	75.0893	65.6021	96.2026	106.758	98.7907	71.2527	74.2907	75.7698	74.4815	74.8199	70.5729
		103.7	79.8632	74.955	65.4982	96.099	106.983	98.4989	70.9238	74.3392	75.8098	74.757	75.011	70.3434
		103.8	79.9579	74.9267	65.6539	96.1297	107.015	98.2163	70.5882	74.4587	75.8735	74.997	75.2502	70.3104
		103.9	79.8228	75.0868	65.9364	96.0449	107.147	98.0914	70.5109	74.4556	75.9092	75.265	75.4431	70.4054
		104	79.7128	75.2372	66.1034	96.0137	107.235	97.9581	70.6866	74.3714	75.9102	75.3848	75.7182	70.6088
		104.1	79.606	75.4961	66.1936	96.0099	107.137	97.7458	71.0218	74.4084	75.9333	75.3833	75.9944	70.7414
		104.2	79.6092	75.7827	66.1453	95.9905	107.167	97.5198	71.3725	74.4951	75.9656	75.3009	75.971	70.7566
		104.3	79.6401	75.8669	65.9136	96.0054	107.431	97.3635	71.7903	74.7037	75.9149	75.0362	75.7577	70.836
		104.4	79.5244	75.7938	65.7326	96.2035	107.634	97.1599	71.9282	75.0158	75.9213	74.796	75.5449	70.9344
		104.5	79.2376	75.701	65.6611	96.4625	107.885	97.1635	71.7678	75.2816	76.0234	74.5772	75.2628	71.1193
		104.6	78.9557	75.6302	65.7056	96.5958	108.18	97.2458	71.366	75.3847	76.0405	74.1734	75.025	71.4996
		104.7	78.7259	75.5272	65.9454	96.7738	108.3	97.4768	71.1202	75.2768	76.1598	73.7885	74.9746	71.8374
		104.8	78.4367	75.6162	66.353	96.7634	108.41	97.6799	70.8936	75.03	76.3946	73.602	75.0002	72.0552
		104.9	78.5045	75.7878	66.6055	96.7114	108.465	97.8745	70.8513	74.6158	76.5901	73.268	74.9448	72.0883
		105	78.8172	76.0446	66.8132	96.5148	108.338	97.7694	70.9539	74.3244	76.7696	72.9718	74.9706	71.8667
		105.1	78.9759	76.1898	66.9894	96.4262	108.157	97.7994	71.2273	74.2234	76.9544	72.9212	75.0894	71.3106
		105.2	78.9317	76.3654	67.0304	96.283	108.054	97.5395	71.3701	74.2814	76.9782	72.8617	75.235	70.8223
		105.3	79.0532	76.2644	66.9441	96.2561	107.878	97.3003	71.4642	74.3798	76.8572	72.814	75.541	70.2025
		105.4	79.0905	76.1262	67.0286	96.0565	107.836	97.1359	71.549	74.5052	76.7874	72.9759	75.938	69.6426
		105.5	78.9866	75.9243	67.1367	95.9991	107.785	97.2352	71.622	74.55	76.609	73.077	76.1868	69.4364
		105.6	78.9984	75.8102	67.1452	95.8116	107.729	97.2099	71.6628	74.5012	76.4574	73.155	76.162	69.559
		105.7	79.1607	75.6446	67.0612	95.6614	107.596	97.4118	71.7258	74.5119	76.348	73.2594	75.9411	69.7776
		105.8	79.1001	75.6089	67.037	95.4358	107.395	97.616	71.7796	74.4594	76.3428	73.3308	75.504	70.2044
		105.9	78.7803	75.5231	66.9329	95.3758	106.962	97.8163	71.7263	74.5598	76.3172	73.358	75.0828	70.7483
		106	78.6206	75.4424	66.7922	95.1199	106.437	97.9118	71.6877	74.6023	76.5261	73.4753	74.6848	71.0541
		106.1	78.4947	75.4503	66.7451	95.0448	105.9	97.954	71.5816	74.5627	76.636	73.4476	74.3718	71.1174
		106.2	78.3076	75.5228	66.7777	94.9908	105.59	97.9086	71.542	74.3098	76.7074	73.4705	74.2413	71.1298
		106.3	78.3487	75.6945	66.6088	95.1139	105.238	97.8112	71.3545	74.1476	76.6093	73.4876	74.3674	71.1236
		106.4	78.6946	75.9963	66.4125	95.2007	105.097	97.6656	71.208	73.9086	76.3241	73.428	74.4947	71.0641
		106.5	78.8236	76.1832	66.3336	95.5451	105.372	97.6072	70.8993	73.7115	75.8185	73.421	74.6628	71.1011
		106.6	78.8236	76.091	66.2493	95.8462	105.752	97.6374	70.7135	73.7267	75.4856	73.6722	74.8817	71.3819
		106.7	78.8056	75.943	66.1428	96.1118	105.904	97.6678	70.4372	73.9398	75.2767	73.7323	74.9874	71.6271
		106.8	78.6478	75.8505	66.2516	96.2586	106.074	97.7311	70.4817	74.1587	75.1441	73.7571	74.9422	71.6592
		106.9	78.3507	75.5672	66.3147	96.2873	106.092	97.7851	70.5527	74.5008	75.2522	73.9485	74.9229	71.6927
		107	78.2032	75.429	66.2371	96.2136	105.693	97.5999	70.7873	74.8627	75.4414	74.0706	74.8921	71.6737
		107.1	78.2939	75.494	66.0704	96.0177	105.253	97.3206	70.8259	75.0273	75.594	73.9631	74.9299	71.6042
		107.2	78.382	75.5485	65.9603	95.7264	104.903	97.0092	70.8844	75.191	75.5931	74.1273	75.0756	71.4777
		107.3	78.5499	75.5133	65.8369	95.4152	104.711	96.6711	70.7298	75.2303	75.7348	74.258	75.0729	71.506
		107.4	78.8468	75.7002	65.8893	95.3842	104.487	96.4179	70.6352	75.0429	75.8959	74.2059	75.0018	71.472
		107.5	79.1341	75.8807	66.0014	95.4351	104.592	96.3959	70.5741	74.8472	76.026	74.1711	74.9224	71.376
		107.6	79.2974	76.0141	66.2489	95.5664	104.75	96.4593	70.79	74.845	76.0216	74.2051	74.7408	70.9696
		107.7	79.4721	76.201	66.5524	95.7753	104.894	96.668	71.0892	74.7185	76.1699	74.12	74.4072	70.6538
		107.8	79.6076	76.2975	66.7436	95.9284	105.026	96.9969	71.449	74.6918	76.2944	74.1934	74.2776	70.3432
		107.9	79.589	76.1238	66.7667	95.7658	105.485	97.1506	71.6456	74.8614	76.1734	74.333	74.1902	70.0569
		108	79.5273	75.9086	66.778	95.37	105.768	97.2152	71.8368	75.0335	76.0649	74.3999	74.1576	69.8666
		108.1	79.3393	75.7909	66.7278	94.8724	105.879	97.2129	71.8874	75.0092	76.0795	74.536	74.2202	69.985
		108.2	79.2694	75.7715	66.5394	94.5089	105.902	97.0707	71.9015	75.0122	76.104	74.6192	74.4018	70.047
		108.3	79.2659	75.7332	66.4144	94.3776	105.756	96.8567	71.7756	75.0519	75.9778	74.5812	74.5578	70.1108
		108.4	79.3503	75.9197	66.3646	94.4104	105.312	96.7901	71.8304	74.8409	76.0436	74.5556	74.8138	70.1637
		108.5	79.5897	76.0919	66.3044	94.7166	105.028	96.7654	71.8405	74.6431	76.1944	74.6644	75.122	70.2334
		108.6	80.0274	76.1037	66.193	95.2461	105.062	96.851	71.8401	74.5496	76.4033	74.6971	75.2861	70.2406
		108.7	80.3736	75.9046	66.25	95.6653	105.252	97.0401	71.7811	74.6074	76.426	74.689	75.4128	70.2152
		108.8	80.6182	75.8025	66.2872	95.9318	105.638	97.1906	71.9559	74.686	76.4206	74.6556	75.4518	70.147
		108.9	80.8656	75.5733	66.2086	96.1049	106.078	97.2734	72.0144	75.0481	76.3304	74.6624	75.2862	70.2592
		109	80.8809	75.3905	66.158	96.0398	106.255	97.3139	72.0198	75.3645	76.1285	74.5959	75.0185	70.3946
		109.1	80.7317	75.2128	66.237	95.8081	106.121	97.2761	72.0328	75.5634	75.7232	74.6407	74.9261	70.5187
		109.2	80.6164	75.0412	66.2187	95.5131	105.883	97.0579	72.0538	75.5196	75.3503	74.7768	74.9034	70.7996
		109.3	80.612	74.8126	66.3046	95.1466	105.425	96.7986	71.9533	75.4201	75.1195	74.8902	74.8974	71.1919
		109.4	80.6173	74.64	66.5735	94.9393	105.057	96.4732	71.8641	75.1592	74.9328	75.0102	74.892	71.3382
		109.5	80.733	74.4413	66.8502	94.9155	104.848	96.1998	71.7659	74.9717	74.7371	75.0377	74.9254	71.4364
		109.6	80.8798	74.3354	66.9766	95.0364	104.671	95.984	71.5794	74.8793	74.6092	74.7756	74.8602	71.4237
		109.7	80.7372	74.2776	67.0029	95.2647	104.563	95.9108	71.4234	74.8753	74.6641	74.5668	74.7377	71.1928
		109.8	80.5005	74.25	66.8571	95.5741	104.632	95.8996	71.3923	74.7451	74.6295	74.5599	74.7376	70.8434
		109.9	80.2232	74.3003	66.708	95.7596	104.667	96.1374	71.303	74.6339	74.5772	74.3544	74.7843	70.6944
		110	80.022	74.5204	66.5138	95.8306	104.622	96.3845	71.3923	74.4285	74.5734	74.2602	74.7319	70.5092
		110.1	79.812	74.622	66.5954	95.7876	104.793	96.4835	71.4961	74.2371	74.7323	74.416	74.6446	70.661
		110.2	80.0932	74.7576	66.8266	95.6462	104.891	96.5747	71.5076	74.0986	74.8387	74.4545	74.5825	70.9823
		110.3	80.4249	75.0109	67.2536	95.6224	104.853	96.6228	71.4216	74.105	75.1906	74.2234	74.3966	71.3892
		110.4	80.574	75.1693	67.5023	95.6805	104.715	96.4466	71.5466	74.1826	75.6737	74.1546	74.2551	71.6849
		110.5	80.4824	74.9982	67.6809	95.697	104.693	96.1856	71.468	74.4689	76.1147	74.0548	74.3261	71.9824
		110.6	80.6363	74.9642	67.3781	95.6614	104.526	96.072	71.5056	74.715	76.3069	73.9744	74.5331	71.9509
		110.7	80.5011	75.0195	67.0167	95.8207	104.429	96.0676	71.5732	74.9274	76.3368	73.8783	74.7255	71.9396
		110.8	80.2078	75.0195	66.4741	95.7172	104.471	96.2146	71.6334	75.1294	76.0004	74.0098	75.0565	71.847
		110.9	80.174	75.023	66.065	95.538	104.578	96.335	71.5136	75.1659	75.5472	74.202	75.393	71.6906
		111	80.4004	75.2709	65.7328	95.6208	104.65	96.5382	71.4444	74.9897	75.207	74.4581	75.4512	71.5766
		111.1	80.3274	75.4865	65.7985	95.7184	104.706	96.69	71.3149	74.9085	74.953	74.554	75.3396	71.6289
		111.2	80.3128	75.5299	65.8414	95.533	104.74	96.7098	71.3452	74.8704	74.9492	74.6734	75.1795	71.5759
		111.3	80.6404	75.4478	65.9758	95.4808	104.71	96.5956	71.4906	74.726	75.2307	74.746	74.8316	71.4526
		111.4	80.9287	75.4204	65.9622	95.5902	104.69	96.6625	71.5349	74.6384	75.4591	74.7038	74.3785	71.4304
		111.5	80.8998	75.3483	66.0117	95.5086	104.65	96.7046	71.5717	74.4213	75.5233	74.549	74.1773	71.453
		111.6	80.9532	75.2462	65.8719	95.3374	104.549	96.7573	71.6259	74.0683	75.8086	74.5934	74.1136	71.3047
		111.7	81.0535	75.2375	65.7191	95.3516	104.449	96.7412	71.4959	73.7445	75.9382	74.7405	74.092	71.1151
		111.8	80.7677	75.2962	65.649	95.4192	104.505	96.81	71.1635	73.4568	75.981	74.7995	74.2209	71.0113
		111.9	80.4036	75.3128	65.7786	95.2342	104.651	96.7562	71.0268	73.3525	76.0959	74.8601	74.5063	70.8108
		112	80.425	75.2644	65.7884	94.9163	104.736	96.5622	70.9402	73.5741	76.3773	74.8724	74.6821	70.4282
		112.1	80.4997	75.2544	65.8644	94.8282	104.896	96.4023	70.869	73.8246	76.4247	74.7606	74.815	70.2148
		112.2	80.3085	75.2708	65.9271	94.5941	105.157	96.5098	70.9852	73.8689	76.4082	74.5635	74.9938	70.0738
		112.3	80.3392	75.3601	65.8465	94.2655	105.189	96.4567	71.1552	74.0026	76.2654	74.4617	75.0708	69.9704
		112.4	80.3862	75.349	65.6314	94.0994	104.933	96.3226	71.2758	73.9618	76.0445	74.3656	75.1072	69.939
		112.5	80.1494	75.3407	65.4643	94.0492	104.71	96.3004	71.4598	73.6963	75.6994	74.3644	75.1881	70.0528
		112.6	79.8267	75.1768	65.2172	93.8761	104.593	96.2186	71.5817	73.5662	75.3388	74.2892	75.2983	70.1878
		112.7	79.7702	74.9551	65.0698	93.8067	104.367	95.7873	71.5081	73.6314	75.152	74.1734	75.28	70.36
		112.8	79.6304	74.6978	64.8982	93.8493	104.19	95.4446	71.5028	73.68	75.1487	73.9606	75.3509	70.5562
		112.9	79.5394	74.8299	64.8581	93.8506	104.377	95.3013	71.6811	73.8653	75.1999	73.8184	75.4149	70.7301
		113	79.5101	75.0881	64.9951	93.8457	104.672	95.239	71.8197	74.1766	75.2505	73.7055	75.3944	70.9337
		113.1	79.4952	75.5927	65.3312	93.8287	104.836	95.2149	72.1135	74.229	75.2831	73.701	75.332	71.0507
		113.2	79.3657	76.2171	65.5644	93.8489	104.868	95.5099	72.6338	74.2631	75.2433	73.8663	75.3926	71.1366
		113.3	79.1612	76.6254	65.9529	93.7296	104.967	95.8731	73.175	74.2474	75.0462	73.951	75.3508	71.2068
		113.4	78.905	76.5382	66.2307	93.6524	104.859	96.1714	73.3776	73.9371	74.911	73.9418	75.3106	71.3584
		113.5	78.704	76.2594	66.2016	93.7664	104.648	96.4043	73.3673	73.5272	74.9082	73.8786	75.2943	71.395
		113.6	78.6456	75.8598	65.9724	94.0592	104.488	96.5376	73.1344	73.3601	75.1406	73.786	75.1682	71.3319
		113.7	78.7271	75.3337	65.8467	94.386	104.512	96.4604	72.7128	73.0915	75.2451	73.4349	75.0005	71.2846
		113.8	79.0099	75.1574	65.6113	94.9623	104.462	96.3	72.2185	72.8645	75.3403	73.2731	74.8449	71.1211
		113.9	79.4259	75.2271	65.3966	95.5365	104.537	96.1234	71.9338	73.0081	75.452	73.201	74.5885	70.7567
		114	79.7956	75.4024	65.3389	95.778	104.568	95.9762	71.8839	73.3576	75.4969	73.2144	74.3789	70.4106
		114.1	80.0042	75.6292	65.3588	95.9241	104.564	96.0215	71.9188	73.5563	75.4331	73.2231	74.3394	70.2048
		114.2	80.0753	75.9036	65.4291	95.9855	104.415	96.066	71.9688	73.865	75.5935	73.4029	74.2688	69.9121
		114.3	80.0073	75.9082	65.5449	95.8241	104.358	96.1117	72.0364	74.1522	75.9773	73.4325	74.2422	69.7681
		114.4	79.657	75.8143	65.6817	95.5958	104.221	96.0764	71.9545	74.2721	76.2431	73.3438	74.3246	69.812
		114.5	79.3378	75.768	66.0027	95.6119	104.228	96.008	71.8118	74.2115	76.48	73.1768	74.3403	69.9402
		114.6	79.0353	75.5578	66.3447	95.4534	104.287	95.8394	71.8166	74.2413	76.6853	72.9389	74.2497	70.0458
		114.7	78.7355	75.2897	66.4774	95.2114	104.533	95.7204	71.841	74.2547	76.7989	72.7635	74.2101	70.2882
		114.8	78.3363	75.2146	66.5238	94.9878	104.629	95.8068	71.7361	74.1933	76.7697	72.7593	74.3097	70.5509
		114.9	78.1638	75.2391	66.513	94.7056	104.68	96.0225	71.7575	74.0388	76.8548	72.8237	74.4582	70.7816
		115	77.9542	75.192	66.2563	94.3209	104.577	96.1113	71.7375	73.8886	76.8965	72.959	74.6496	71.0302
		115.1	77.8311	75.4418	66.0495	94.0494	104.393	96.3027	71.474	73.751	76.9662	73.3242	74.9038	71.1686
		115.2	77.8839	75.6776	65.9829	93.9707	104.152	96.5088	71.2094	73.6236	76.9445	73.6173	75.147	71.2416
		115.3	78.2729	75.8078	66.0286	93.8894	104.084	96.3819	71.117	73.6617	76.8271	73.8852	75.1952	71.2934
		115.4	78.6265	75.8077	66.13	93.8054	104.051	96.2741	71.0722	73.7724	76.4281	74.288	75.087	71.3241
		115.5	79.0682	75.7817	66.2501	93.7486	104.167	96.3942	71.1165	73.9246	76.1065	74.602	74.9473	71.2886
		115.6	79.4962	75.5581	66.2272	93.7614	104.331	96.255	71.3643	74.0808	75.6592	74.7804	74.7783	71.4064
		115.7	79.6722	75.4233	66.2201	93.6304	104.337	96.102	71.57	74.178	75.2027	74.907	74.5616	71.4516
		115.8	79.5966	75.332	66.239	93.5065	104.313	96.2296	71.6718	74.2823	74.7996	74.8469	74.3928	71.3483
		115.9	79.4601	75.4712	66.2925	93.6724	104.136	96.2435	71.6066	74.4793	74.7027	74.4952	74.4032	71.3104
		116	79.3384	75.6259	66.2761	93.9043	103.826	96.1884	71.4736	74.6465	74.6407	74.2222	74.5478	71.1977
		116.1	79.1821	75.6743	66.322	94.0235	103.499	96.33	71.2481	74.6942	74.6792	73.9537	74.7922	71.0654
		116.2	79.1977	75.6344	66.2466	94.2184	103.349	96.6178	71.155	74.687	74.7811	73.7397	75.1084	70.9787
		116.3	79.2153	75.5789	65.9963	94.5274	103.085	96.7683	71.1473	74.4001	74.9627	73.7133	75.4332	70.9435
		116.4	79.3131	75.3475	65.6336	94.6206	103.071	96.869	71.1988	74.0022	74.879	73.8718	75.6355	70.8395
		116.5	79.3637	75.077	65.4832	94.638	103.096	96.9152	71.2036	73.5458	74.7148	74.0336	75.7934	70.8692
		116.6	79.3408	74.8558	65.4273	94.7082	103.203	96.8208	71.1702	73.2126	74.4588	74.16	75.8494	70.8728
		116.7	79.1528	74.7032	65.5573	94.5914	103.202	96.4862	71.0407	73.0449	74.2525	74.2997	75.8062	71.0086
		116.8	79.0181	74.519	65.8318	94.3366	103.331	96.0667	71.0221	73.2042	74.026	74.4815	75.7444	71.2414
		116.9	78.865	74.468	66.2213	94.0264	103.457	95.7542	71.144	73.5292	74.0991	74.6594	75.6897	71.4642
		117	78.6567	74.5817	66.4927	93.8464	103.653	95.4493	71.4844	74.0813	74.1976	74.6498	75.4732	71.6018
		117.1	78.503	74.7548	66.6921	93.7619	103.703	95.206	71.941	74.6058	74.4691	74.5512	75.2538	71.7248
		117.2	78.6195	74.8812	66.7197	93.9625	103.861	95.144	72.4219	74.9824	74.7172	74.3247	75.1248	71.6217
		117.3	78.8037	74.99	66.701	94.1516	103.829	95.3265	72.7029	75.2439	74.8973	73.9212	75.032	71.3578
		117.4	78.9208	74.9359	66.5706	94.5386	103.753	95.5036	72.8557	75.3643	74.9139	73.5166	74.8733	71.0942
		117.5	79.0573	74.8264	66.4746	94.6818	103.625	95.6522	72.7551	75.2506	74.8211	73.4643	74.7572	70.777
		117.6	79.3102	74.8653	66.3192	94.6263	103.659	95.8278	72.5479	75.1553	74.5674	73.6441	74.5983	70.4913
		117.7	79.3902	75.0217	66.2497	94.396	103.613	95.8731	72.308	75.1187	74.328	73.9997	74.4275	70.3451
		117.8	79.4737	75.353	66.1234	94.249	103.757	95.6746	72.1138	74.9244	74.1862	74.4574	74.2806	70.3951
		117.9	79.6857	75.7799	66.0597	93.878	103.671	95.3772	71.8701	74.689	74.1122	74.9499	74.1512	70.4944
		118	79.9335	76.1042	65.9366	93.7201	103.48	95.0614	71.6988	74.5624	74.1837	75.1158	74.1581	70.7632
		118.1	80.0738	76.2722	65.9548	93.7722	103.215	94.7961	71.5224	74.383	74.3194	75.1329	74.2758	70.8062
		118.2	80.186	76.332	65.8829	93.9196	103.018	94.6636	71.4194	74.2671	74.3976	75.1797	74.4062	70.8222
		118.3	80.1536	76.1251	65.8584	94.0196	102.844	94.7196	71.3037	74.2896	74.4577	75.1049	74.376	70.7523
		118.4	80.0066	75.8609	65.8669	94.2099	102.791	95.019	71.286	74.4111	74.4882	74.9893	74.4127	70.5821
		118.5	79.8973	75.723	65.8983	94.1757	102.932	95.4387	71.3356	74.4172	74.5842	75.0164	74.3432	70.295
		118.6	79.7749	75.5741	65.8085	93.8715	103.08	95.8315	71.4826	74.3715	74.7703	75.0815	74.0701	70.391
		118.7	79.723	75.325	65.8268	93.5056	103.164	96.0699	71.5756	74.2263	75.0374	75.0043	73.6712	70.5251
		118.8	79.695	75.242	65.9934	93.2827	103.032	96.127	71.7641	74.128	75.2812	75.0838	73.3904	70.5987
		118.9	79.6488	75.059	66.1918	93.1058	102.992	96.0502	71.8784	73.9446	75.615	75.0874	73.2706	70.7195
		119	79.4458	74.6563	66.436	93.0608	102.779	96.0248	71.9026	73.9888	75.7832	74.9631	73.2225	70.847
		119.1	79.2094	74.2013	66.727	93.2775	102.718	96.002	71.7691	74.1336	75.8532	74.7562	73.4619	70.8372
		119.2	78.9506	73.8833	66.9789	93.3985	102.634	96.0184	71.58	74.3222	75.8287	74.539	73.8766	70.801
		119.3	78.8326	73.5135	67.0476	93.2668	102.654	96.1523	71.3005	74.4575	75.7221	74.1994	74.3972	70.7843
		119.4	78.784	73.3596	67.0131	93.0564	102.653	96.1392	71.035	74.6486	75.4058	73.9916	74.6946	70.7562
		119.5	78.7449	73.3839	66.8818	92.8594	102.842	95.8234	70.9031	74.5862	75.1461	74.0578	74.9741	70.7809
		119.6	78.7882	73.4958	66.7254	92.6226	102.578	95.4068	70.9148	74.4804	74.9192	74.2692	75.099	70.6899
		119.7	78.9118	73.6678	66.6146	92.6091	102.393	95.0478	71.0417	74.3293	74.6697	74.5258	75.145	70.6211
		119.8	78.9	73.991	66.502	92.7996	102.343	94.6468	71.2883	74.2171	74.6146	74.9065	75.035	70.5818
		119.9	78.9082	74.3798	66.4118	93.0525	102.266	94.3064	71.5828	74.0297	74.7248	75.1562	75.0081	70.6719
		120	79.0051	74.876	66.4092	93.3733	102.091	94.1952	71.7112	74.0143	74.9013	75.161	75.0064	70.8205
		120.1	79.03	75.4692	66.3298	93.5836	102.345	94.2425	71.7987	74.0393	75.1198	74.9992	74.9527	70.9658
		120.2	78.875	75.922	66.2022	93.7023	102.6	94.3247	71.8441	74.1079	75.5567	74.8232	74.8083	71.034
		120.3	78.8354	76.0362	66.1261	93.6911	102.71	94.5055	71.6837	74.141	75.8541	74.6475	74.7376	71.1161
		120.4	78.8605	75.8092	66.0349	93.5992	102.842	94.7238	71.495	74.3276	76.0763	74.5028	74.5574	71.045
		120.5	78.9905	75.4305	66.0208	93.4855	102.833	94.8312	71.3963	74.4454	76.1997	74.3874	74.3123	70.841
		120.6	79.3152	75.008	66.1322	93.416	102.642	94.8563	71.3857	74.4655	76.1737	74.4136	74.2868	70.7783
		120.7	79.7343	74.781	66.1959	93.2505	102.412	94.8911	71.3718	74.5196	75.8813	74.4266	74.5402	70.7154
		120.8	79.9565	74.8484	66.3336	93.1782	102.291	94.7292	71.5393	74.5053	75.6132	74.2094	74.7464	70.6009
		120.9	79.9373	75.0904	66.6232	93.1907	102.252	94.713	71.7646	74.3052	75.4379	73.997	75.188	70.5855
		121	79.8526	75.258	66.7704	92.9551	102.403	94.8751	72.0038	74.1421	75.3827	73.8099	75.5686	70.546
		121.1	79.5507	75.27	66.8476	92.6979	102.569	94.9508	72.0274	74.0501	75.4318	73.6248	75.737	70.3858
		121.2	79.3563	75.0916	66.9058	92.5309	102.67	94.8502	71.9066	73.8339	75.5822	73.5243	75.5952	70.2846
		121.3	79.4487	74.8773	66.794	92.3118	102.626	94.9878	71.7002	73.6974	75.6948	73.7309	75.4526	70.1797
		121.4	79.6782	74.8468	66.4037	92.0565	102.442	95.0593	71.3586	73.6213	75.6718	73.9676	75.052	70.1047
		121.5	79.7762	75.027	66.1023	92.1342	102.109	95.0783	70.9542	73.423	75.4225	74.2134	74.7747	70.2695
		121.6	79.9886	75.3269	65.8271	92.3309	101.783	95.2472	70.7667	73.1875	75.1539	74.3361	74.4988	70.518
		121.7	80.0312	75.5298	65.6747	92.4948	101.56	95.5459	70.8992	73.1374	75.0439	74.3021	74.4418	70.8141
		121.8	79.8014	75.6982	65.6447	92.8809	101.393	95.5304	70.9816	73.191	74.9344	74.0596	74.466	71.2826
		121.9	79.4696	75.6026	65.9462	93.3718	101.114	95.3286	71.0797	73.4893	74.8893	73.8132	74.62	71.5854
		122	79.297	75.3291	66.1389	93.6508	101.022	95.1234	71.1838	73.9387	75.0225	73.6595	74.72	71.6556
		122.1	79.0862	75.0532	66.2842	93.8466	101.033	94.7682	71.2154	74.5195	75.1911	73.5461	74.922	71.6666
		122.2	78.918	75.1013	66.4793	94.0793	100.984	94.3356	70.989	75.0451	75.1706	73.5575	74.9197	71.5758
		122.3	78.8107	75.0812	66.6807	93.9612	100.936	94.227	70.8286	75.4162	75.2334	73.6509	74.8343	71.3132
		122.4	78.9655	75.2449	66.5714	93.562	101.29	94.2836	70.9328	75.4907	75.3532	73.8648	74.6798	71.2263
		122.5	78.9958	75.5034	66.5416	93.2459	101.599	94.3102	71.1092	75.5565	75.5725	74.0558	74.5209	71.1718
		122.6	78.9955	75.8441	66.6565	92.852	101.86	94.524	71.2723	75.5247	75.7708	74.361	74.3236	71.0858
		122.7	79.0635	75.9814	66.6346	92.3142	102.154	94.702	71.5794	75.4336	75.9437	74.7381	74.2477	71.0017
		122.8	79.259	76.0966	66.4879	91.8579	102.409	94.6855	71.9358	75.2255	76.1338	75.0932	74.1921	71.0074
		122.9	79.2433	76.005	66.4582	91.6833	102.25	94.7165	71.9945	75.0883	76.4018	75.2722	74.1956	70.9219
		123	79.2199	75.822	66.4634	91.471	101.938	94.5984	71.9704	74.9486	76.4695	75.1668	74.2688	70.982
		123.1	79.1756	75.4353	66.3667	91.4175	101.619	94.3763	71.8662	74.8044	76.481	74.8793	74.3954	71.1894
		123.2	79.0996	75.066	66.3199	91.6271	101.275	94.3296	71.6062	74.7288	76.711	74.4145	74.6868	71.3972
		123.3	78.9916	74.8502	66.5176	91.9806	101.092	94.3158	71.2428	74.8576	76.8936	73.8914	75.0024	71.4373
		123.4	78.8976	74.7384	66.8026	92.2559	101.146	94.0188	71.0011	74.9894	76.8524	73.3687	75.3757	71.4052
		123.5	78.9198	74.7573	67.0175	92.6771	101.383	93.8298	70.8968	75.0054	76.8788	73.1958	75.6684	71.1078
		123.6	79.0524	74.843	67.1736	93.0103	101.516	93.6276	70.8514	74.9654	76.996	73.2675	75.7765	70.7754
		123.7	79.1128	74.9784	67.2241	93.1155	101.641	93.3376	70.9763	74.7664	76.8053	73.4656	75.5833	70.5585
		123.8	79.0836	75.0113	67.0475	93.1043	101.682	93.145	71.3561	74.5222	76.5552	73.7181	75.3901	70.4978
		123.9	79.1238	75.1282	66.8505	93.1702	101.726	93.2618	71.6876	74.3485	76.368	74.1328	74.9941	70.4658
		124	79.1833	75.1232	66.6351	93.0983	101.581	93.4991	71.9467	74.2388	76.1767	74.4382	74.5676	70.5766
		124.1	79.2438	75.1648	66.4556	92.962	101.499	93.7356	72.2909	74.1559	76.003	74.5165	74.3373	70.5782
		124.2	79.5448	75.1145	66.36	92.8032	101.524	93.9774	72.4932	74.0924	76.0916	74.5368	74.2154	70.5313
		124.3	79.8821	75.0149	66.2995	92.6642	101.482	94.1958	72.3196	74.0304	76.1497	74.6213	74.0435	70.5503
		124.4	80.2164	74.6959	66.0645	92.2931	101.352	94.3251	72.2654	73.9759	76.2286	74.5023	74.1049	70.6109
		124.5	80.4477	74.5014	65.9282	91.8583	101.355	94.188	72.2368	74.0077	76.2621	74.386	74.264	70.7752
		124.6	80.4885	74.3869	65.9251	91.5398	101.434	93.9388	72.0676	74.1507	76.1652	74.2719	74.4384	71.0734
		124.7	80.1881	74.4066	65.949	91.4704	101.418	93.5942	71.8853	74.4822	75.9204	74.2026	74.6276	71.3184
		124.8	79.946	74.6068	66.025	91.4696	101.436	93.0535	71.8933	74.8449	75.7215	74.0431	74.8342	71.3848
		124.9	79.7185	74.972	66.347	91.7318	101.536	92.4634	71.7424	75.0529	75.5304	73.9605	74.9867	71.4607
		125	79.5272	75.1341	66.5367	92.1548	101.794	92.0482	71.5137	75.121	75.4035	73.9009	75.0985	71.3915
		125.1	79.4334	75.0915	66.5561	92.5535	101.946	91.8052	71.3753	74.9978	75.4068	73.9594	75.0888	71.186
		125.2	79.4434	74.9519	66.6076	92.8125	102.159	91.9182	71.4344	74.7772	75.5018	73.9484	75.1818	70.9603
		125.3	79.3918	74.597	66.7261	92.9886	102.341	92.3341	71.5002	74.5828	75.7794	73.9429	75.3298	70.8167
		125.4	79.2271	74.285	66.704	92.922	102.331	92.85	71.585	74.5424	76.0571	74.0365	75.4156	70.7696
		125.5	79.0734	74.1069	66.7308	92.7632	102.011	93.4646	71.6168	74.5233	76.269	74.0316	75.4278	70.7638
		125.6	79.0279	73.9986	66.9026	92.6016	101.761	94.0194	71.5855	74.6362	76.3422	74.0404	75.4383	70.718
		125.7	79.0902	73.8787	66.9744	92.4042	101.504	94.1938	71.3048	74.65	76.3855	74.1151	75.2365	70.8008
		125.8	79.2454	73.9527	66.8918	92.3434	101.284	94.1261	71.1022	74.4661	76.0977	74.2852	74.9721	70.9281
		125.9	79.4043	74.0775	66.7552	92.4974	101.172	93.9406	71.1299	74.0613	75.7482	74.4029	74.7407	70.9187
		126	79.5509	74.2104	66.6394	92.6471	101.154	93.6352	71.2886	73.8364	75.4942	74.5266	74.6138	70.9996
		126.1	79.5678	74.5132	66.3048	92.6874	101.063	93.4046	71.5648	73.7074	75.3867	74.6394	74.4766	71.2124
		126.2	79.5005	74.9048	66.0574	92.8098	100.793	93.2644	71.9675	73.6804	75.2932	74.7295	74.4151	71.2075
		126.3	79.2956	75.1577	65.965	92.7223	100.6	93.2456	72.0717	73.8366	75.5189	74.7353	74.3302	71.0557
		126.4	79.2929	75.3117	65.9974	92.4149	100.597	93.2663	71.7148	74.1874	75.9018	74.7082	74.1447	70.862
		126.5	79.2822	75.4475	66.0292	92.1312	100.774	93.2269	71.1117	74.2524	76.2522	74.757	74.0371	70.5498
		126.6	79.3545	75.4258	66.2701	91.9798	100.967	93.1721	70.3662	74.2239	76.4171	74.695	74.1415	70.224
		126.7	79.5367	75.3704	66.3927	91.8618	101.401	93.2402	69.6455	74.2297	76.4869	74.616	74.3339	69.9724
		126.8	79.7565	75.4719	66.4472	91.8217	101.784	93.303	69.2266	74.1288	76.4264	74.5273	74.6497	69.8352
		126.9	79.7663	75.4656	66.3742	91.9387	101.889	93.3513	69.1158	74.0577	76.2708	74.3101	75.0099	69.8878
		127	79.7358	75.52	66.3944	91.9448	101.769	93.5488	69.3457	74.053	76.0297	74.0031	75.2168	70.0025
		127.1	79.6172	75.6986	66.311	91.9046	101.718	93.7213	69.7289	73.9642	76.0383	73.7807	75.1768	70.0094
		127.2	79.4221	75.751	66.3235	91.757	101.466	93.7344	70.163	73.9405	76.1286	73.5031	75.0456	70.1795
		127.3	79.1701	75.6012	66.2773	91.7449	101.128	93.5899	70.4901	74.1548	76.2285	73.279	74.8163	70.3367
		127.4	79.0612	75.4982	66.4348	91.733	100.865	93.6068	70.7952	74.2017	76.327	73.3172	74.6907	70.3257
		127.5	79.1565	75.386	66.3994	92.0346	100.574	93.5845	70.915	74.4946	76.567	73.4676	74.5659	70.3541
		127.6	79.4327	75.0232	66.3866	92.4782	100.18	93.4686	70.9857	74.9174	76.6876	73.5594	74.5417	70.6114
		127.7	79.7242	74.7952	66.3286	92.8447	99.7714	93.3649	71.0269	75.1014	76.8261	73.7124	74.688	70.8019
		127.8	80.1563	74.7573	66.191	93.0661	99.3701	93.5295	71.1172	74.8592	76.8495	73.8163	74.8258	70.9942
		127.9	80.3899	74.8337	65.8941	93.1333	98.9377	93.487	71.2628	74.7011	76.7613	73.7752	74.8486	71.2456
		128	80.3187	74.8239	65.7867	92.844	98.6144	93.395	71.4742	74.3409	76.521	73.6826	75.023	71.3192
		128.1	80.0133	75.0832	65.7637	92.345	98.3293	93.3981	71.6428	73.8605	76.1528	73.7525	75.2768	71.1958
		128.2	79.6712	75.3416	65.7756	91.9777	98.2214	93.4584	71.6696	73.538	75.6815	73.9342	75.3864	71.0436
		128.3	79.3562	75.4151	65.9768	91.6488	98.2423	93.251	71.6458	73.5384	75.3022	74.1286	75.5648	71.0475
		128.4	79.2022	75.5048	66.195	91.6974	98.4293	93.1635	71.62	73.6054	75.1804	74.3067	75.8661	71.1423
		128.5	79.095	75.4952	66.3424	91.933	98.6787	93.0545	71.5817	73.6209	75.2461	74.4999	75.858	71.4054
		128.6	79.1781	75.4283	66.4288	92.1482	99.0642	92.9371	71.4625	73.5754	75.5345	74.3744	75.7672	71.7938
		128.7	79.2344	75.3406	66.4662	92.2963	99.5195	92.8654	71.4602	73.5471	75.9326	74.0691	75.5896	72.1662
		128.8	79.0422	75.5152	66.503	92.5088	100.066	92.8902	71.48	73.445	76.4352	73.7339	75.3155	72.1874
		128.9	78.8108	75.6635	66.5776	92.3167	100.63	92.8058	71.4114	73.2536	76.7496	73.4542	74.9241	72.0192
		129	78.7811	76.0548	66.6196	92.1116	101.221	92.8103	71.3647	73.1772	76.9761	73.2516	74.8131	71.7313
		129.1	78.6096	76.3016	66.573	92.1444	101.802	92.8074	71.3679	73.4018	77.0464	73.4213	74.5675	71.3117
		129.2	78.3938	76.6022	66.6564	92.4102	102.257	92.7922	71.2738	73.5507	77.0344	73.7124	74.5158	70.8601
		129.3	78.4013	76.5348	66.6907	92.4865	102.452	92.9925	71.2315	73.647	76.7442	74.1258	74.5414	70.559
		129.4	78.4749	76.3209	66.6604	92.7208	102.389	93.2334	71.3196	73.8888	76.4833	74.5653	74.6204	70.3648
		129.5	78.3591	75.9577	66.5881	92.86	102.2	93.3091	71.3392	74.1519	76.229	74.8955	74.702	70.2094
		129.6	78.2835	75.6382	66.6184	92.6718	101.824	93.4254	71.3759	74.1448	76.0494	75.0191	74.9562	69.991
		129.7	78.3723	75.221	66.4906	92.2132	101.34	93.5713	71.468	74.1311	75.8891	75.0185	74.9614	69.8002
		129.8	78.3916	75.0812	66.2657	92.0496	100.825	93.5239	71.3564	74.2221	75.9822	74.8851	74.892	69.648
		129.9	78.3616	75.1062	66.0806	91.891	100.448	93.5176	71.0578	74.136	76.0683	74.5076	74.7538	69.5082
		130	78.5455	75.2389	65.9818	91.794	100.11	93.6696	70.9117	73.9207	76.0283	74.2379	74.4396	69.3875
		130.1	78.64	75.5094	65.8234	92.0244	99.7748	93.7785	70.902	73.8407	75.9161	74.0675	74.085	69.4372
		130.2	78.6019	75.8056	65.8504	92.189	99.5126	93.7828	70.975	73.8112	75.8574	74.0496	73.9252	69.5308
		130.3	78.5764	76.0424	66.0895	92.0572	99.4128	93.6612	71.2723	73.7333	75.703	74.1176	73.8515	69.6852
		130.4	78.5554	76.2515	66.272	91.8729	99.3878	93.5316	71.5877	73.6994	75.5911	74.4588	73.8796	69.8457
		130.5	78.4991	76.44	66.4032	91.7195	99.4265	93.3509	71.6097	73.7165	75.6644	74.4724	74.0156	70.0343
		130.6	78.6491	76.5222	66.6235	91.3544	99.7321	93.1142	71.3668	73.6604	75.6624	74.3164	74.0785	70.257
		130.7	78.963	76.594	66.6835	91.1964	100.255	92.9154	71.0878	73.7028	75.6169	74.0666	74.1523	70.4694
		130.8	79.411	76.7545	66.5413	91.2179	100.756	92.8132	70.7435	73.7185	75.6428	73.7864	74.2832	70.629
		130.9	79.8794	76.7314	66.5343	91.2948	101.079	92.593	70.5023	73.7613	75.6042	73.4351	74.4194	70.725
		131	80.2265	76.5856	66.596	91.2795	101.183	92.3955	70.5667	73.9739	75.3537	73.4094	74.4823	70.8229
		131.1	80.4878	76.3579	66.6034	91.3616	101.075	92.3834	70.9064	74.1421	75.3151	73.5128	74.6346	70.7741
		131.2	80.649	76.1268	66.5188	91.3863	100.656	92.399	71.2677	74.0822	75.3346	73.6002	74.8152	70.6748
		131.3	80.5154	75.6169	66.4561	91.3288	100.27	92.5366	71.5554	74.1418	75.2169	73.6285	74.8516	70.5229
		131.4	80.364	75.2365	66.3268	91.2189	99.9598	92.8815	71.7462	74.1985	75.1004	73.6292	74.7429	70.3494
		131.5	80.2164	74.9888	66.2214	91.3226	99.8446	93.1778	71.7672	74.0466	75.1422	73.5368	74.8012	70.1055
		131.6	80.1146	74.9586	66.1996	91.4044	99.6418	93.2762	71.6388	74.0209	75.2143	73.4164	74.9432	69.9426
		131.7	80.0287	74.9502	66.4166	91.4938	99.5386	93.2885	71.3558	74.125	75.286	73.3396	74.9486	69.8018
		131.8	80.1808	75.0704	66.7716	91.6383	99.4276	93.2556	71.0962	73.9863	75.4377	73.3352	75.0184	69.7771
		131.9	80.2852	75.2303	67.098	91.8765	99.4539	93.0474	70.9375	73.8988	75.7962	73.4404	75.3241	69.97
		132	80.3655	75.3439	67.294	91.8452	99.3782	92.8831	70.7506	73.8023	76.1845	73.5926	75.4854	70.3184
		132.1	80.2931	75.3551	67.2963	91.7655	99.3289	92.742	70.6512	73.5852	76.376	73.8031	75.4965	70.7247
		132.2	80.1795	75.3412	67.0465	91.6018	99.3341	92.6204	70.681	73.3348	76.3484	73.9937	75.645	71.1909
		132.3	79.9705	75.3486	66.6138	91.3372	99.3688	92.3334	70.7393	73.3446	76.3655	74.181	75.7924	71.5678
		132.4	79.7645	75.3081	66.1588	90.9562	99.2913	92.1533	70.7425	73.3917	76.116	74.2078	75.7764	71.7574
		132.5	79.6634	75.236	65.695	90.8088	99.3125	92.0578	70.9692	73.6552	75.729	74.2778	75.7693	71.776
		132.6	79.6907	75.071	65.3752	90.72	99.6122	92.0534	71.0659	74.0682	75.4316	74.3375	75.7422	71.6818
		132.7	79.6875	75.0303	65.2608	90.6932	99.8398	92.0939	71.1691	74.576	75.371	74.3576	75.5944	71.5734
		132.8	79.6453	75.0134	65.319	90.7924	99.9152	92.3969	71.3096	74.9079	75.3085	74.3068	75.3605	71.5354
		132.9	79.7169	74.9478	65.5232	90.922	99.9946	92.7436	71.489	75.0983	75.4432	74.3603	75.0952	71.352
		133	79.7182	74.9529	65.8615	90.8337	100.028	92.9671	71.4613	75.088	75.7935	74.3236	74.8228	71.1866
		133.1	79.7118	75.0409	66.1525	90.7366	99.8549	93.1102	71.5433	74.9241	76.1331	74.111	74.4783	70.9428
		133.2	79.7087	74.9386	66.5078	90.6474	99.7032	93.2835	71.5774	74.7079	76.4591	73.9632	74.0894	70.5671
		133.3	79.765	74.8593	66.7459	90.4822	99.554	93.2545	71.5424	74.5544	76.651	73.9346	73.8636	70.078
		133.4	79.5991	74.9143	66.8062	90.3442	99.4454	93.1422	71.449	74.4562	76.6444	73.8513	73.7178	69.9152
		133.5	79.3331	74.8651	66.8269	90.3334	99.4276	92.9896	71.3428	74.55	76.4682	73.6422	73.5732	69.8391
		133.6	79.0598	74.8853	66.8966	90.3392	99.486	92.9112	71.2127	74.7346	76.2359	73.5066	73.7639	69.9838
		133.7	79.0514	75.1571	66.8108	90.3944	99.6324	92.783	71.0666	74.8516	75.9704	73.3349	74.1597	70.2112
		133.8	79.0839	75.5588	66.7009	90.4489	99.8145	92.6618	70.9598	74.9419	75.873	73.0034	74.3566	70.4619
		133.9	79.2736	75.9383	66.7205	90.5078	99.8989	92.4583	71.0014	75.0027	75.9235	72.6584	74.4807	70.4718
		134	79.681	76.3918	66.7037	90.6574	99.8423	92.327	71.1407	74.888	75.9194	72.4285	74.6975	70.4095
		134.1	80.0082	76.653	66.5206	90.7646	99.6409	92.1642	71.2208	74.6288	76.0751	72.3404	74.7116	70.2552
		134.2	80.0076	76.609	66.2918	90.7797	99.3396	92.049	71.2997	74.3975	76.2045	72.2647	74.5342	70.1034
		134.3	79.9732	76.2563	66.271	90.8778	99.2586	92.0977	71.3384	74.1704	76.2618	72.3388	74.5628	69.9514
		134.4	79.9055	75.9405	66.1458	90.9417	99.2442	92.2006	71.1633	73.8032	76.1801	72.5409	74.6753	69.9198
		134.5	79.632	75.5122	66.0151	91.0049	99.2925	92.3054	71.0092	73.4398	76.1324	72.7983	74.762	70.0274
		134.6	79.3322	75.2983	66.1326	91.15	99.5289	92.4126	70.831	73.2186	75.8821	73.025	74.8579	70.1
		134.7	78.9803	75.2056	66.3971	91.4443	99.8234	92.5773	70.6804	73.0439	75.6761	73.365	75.0532	70.1825
		134.8	78.6147	75.2551	66.398	91.7219	99.9104	92.5998	70.5652	72.8834	75.4584	73.6357	75.0727	70.389
		134.9	78.2948	75.1347	66.3724	92.0216	100.039	92.5272	70.5328	72.933	75.3605	73.9138	74.9399	70.5499
		135	78.1438	75.2361	66.3674	92.1158	100.174	92.3186	70.3728	72.9737	75.4152	74.2606	74.7107	70.6325
		135.1	78.1211	75.201	66.1275	92.0691	100.119	91.9302	70.3155	73.0624	75.5944	74.5458	74.4308	70.7972
		135.2	78.3258	75.3118	65.6599	91.7974	100.096	91.2872	70.2864	73.0866	75.703	74.6997	74.1488	70.9662
		135.3	78.5724	75.4879	65.304	91.4168	100.061	90.7151	70.3783	73.084	75.866	74.8525	73.9697	70.8635
		135.4	78.8159	75.6999	65.0992	91.2985	99.8661	90.3032	70.5559	73.1128	76.1208	74.8733	73.9899	70.701
		135.5	79.0292	75.703	64.8829	91.1636	99.5824	90.2214	70.8309	73.3158	76.2768	74.7475	74.1231	70.4564
		135.6	79.2379	75.793	64.8889	91.0118	99.4809	90.5467	71.0652	73.4652	76.37	74.6999	74.2588	70.1106
		135.7	79.3324	75.7007	65.1662	91.0272	99.3134	91.2615	71.1886	73.6503	76.5438	74.7329	74.2877	69.7001
		135.8	79.2008	75.5179	65.4725	91.1048	99.2375	92.0538	71.0442	73.9929	76.5894	74.7484	74.302	69.6205
		135.9	78.9728	75.3583	65.6836	90.6946	99.3162	93.0058	70.7679	74.2936	76.4411	74.7405	74.2769	69.6515
		136	78.6886	75.3578	65.9636	90.4171	99.4816	93.6772	70.4343	74.3078	76.2455	74.8171	74.1385	69.7082
		136.1	78.4711	75.2589	66.1594	90.4046	99.4476	93.9784	70.1584	74.2533	76.11	74.726	74.0609	69.841
		136.2	78.405	75.2392	66.2636	90.4349	99.395	93.9089	70.076	74.24	75.8691	74.5403	74.0058	70.1705
		136.3	78.5316	75.3404	66.3816	90.5558	99.3836	93.668	70.1863	74.1184	75.7033	74.3561	73.9977	70.4124
		136.4	78.8692	75.4807	66.5538	90.9526	99.3943	93.1363	70.3678	73.9742	75.5542	74.1379	73.9581	70.6006
		136.5	79.1941	75.5228	66.5258	91.351	99.4699	92.6565	70.6718	74.0488	75.5367	73.8591	74.0696	70.8041
		136.6	79.3006	75.5774	66.3498	91.5204	99.6624	92.34	70.8526	74.1005	75.4465	73.7924	74.0864	70.9614
		136.7	79.2779	75.6714	66.1872	91.4833	99.835	92.257	70.9664	74.0915	75.372	73.8455	74.1738	70.797
		136.8	79.2952	75.5396	66.024	91.321	99.881	92.2115	71.0026	73.9586	75.381	74.0397	74.1256	70.5087
		136.9	79.135	75.4453	65.8961	91.1078	99.8052	92.265	70.9832	73.7302	75.6618	74.5085	74.1422	70.3224
		137	79.0346	75.3992	66.0288	90.884	99.7663	92.3281	70.8056	73.3931	75.9211	75.0012	74.0414	70.1284
		137.1	79.0248	75.479	66.328	90.6685	99.8232	92.4667	70.7262	73.2737	76.2631	75.2803	74.0033	69.9718
		137.2	79.0978	75.3944	66.5245	90.5109	100.002	92.4282	70.5616	73.1507	76.6058	75.3245	74.0027	70.1036
		137.3	79.1722	75.5724	66.6174	90.3989	100.183	92.3754	70.4392	73.12	76.7432	75.3306	74.1587	70.3067
		137.4	79.3193	75.5544	66.5458	90.2845	100.476	92.2464	70.4202	73.2566	76.5788	75.0716	74.1851	70.3089
		137.5	79.5292	75.4084	66.3974	90.0852	100.59	92.2816	70.5384	73.5367	76.2228	74.8559	74.2392	70.4711
		137.6	79.823	75.1856	66.2944	89.9024	100.507	92.1944	70.6659	73.7483	75.7892	74.6868	74.4403	70.6379
		137.7	80.0888	75.0096	66.3443	89.9224	100.239	92.1687	70.9161	74.0406	75.4845	74.8313	74.61	70.656
		137.8	80.2431	74.6105	66.5168	90.0858	99.9736	92.1641	71.2254	74.4032	75.3824	74.8611	74.6442	70.7412
		137.9	80.2833	74.649	66.8161	90.2936	99.5721	92.3077	71.5859	74.7094	75.2332	75.0067	74.7129	71.0175
		138	80.1153	74.8185	66.9999	90.6954	99.1553	92.1721	71.9571	74.8838	75.2623	74.9374	74.7416	71.0446
		138.1	79.9274	74.878	66.971	91.1768	98.7776	91.9788	72.1926	74.8413	75.3118	74.8875	74.5611	70.9678
		138.2	79.7817	74.9824	66.7463	91.3484	98.5502	91.8052	72.3401	74.7179	75.2836	74.5435	74.29	71.074
		138.3	79.7356	75.1657	66.4212	91.167	98.3371	91.5616	72.3498	74.5265	75.162	74.1308	74.0954	71.176
		138.4	79.7699	74.9437	66.0341	90.9928	98.1688	91.2376	72.0915	74.3116	75.3179	73.5963	73.8738	71.3032
		138.5	79.9814	74.6472	65.6656	90.7032	98.2021	91.0449	71.6737	74.1055	75.5191	73.308	73.691	71.4961
		138.6	80.0509	74.4966	65.4915	90.3651	98.3936	90.8522	71.4388	74.0505	75.8028	73.0531	73.6345	71.781
		138.7	79.9836	74.4978	65.5414	90.2638	98.4956	90.64	71.2442	73.9338	75.9785	73.0071	73.7571	71.8581
		138.8	79.8854	74.539	65.7236	90.3124	98.6661	90.6572	71.1748	73.7432	76.2282	73.1508	73.8966	71.6844
		138.9	79.7132	74.6022	65.8915	90.2548	98.8726	90.6949	71.3201	73.4785	76.3388	73.5356	74.1339	71.3209
		139	79.4241	74.7908	66.0956	90.1678	98.7992	90.567	71.4913	73.3254	76.1548	73.791	74.3298	70.9825
		139.1	79.2722	74.9518	66.2604	90.135	98.5577	90.5256	71.5679	73.157	75.9258	74.0924	74.3776	70.5817
		139.2	79.0975	75.0193	66.258	90.0785	98.4319	90.5351	71.5984	73.1614	75.9602	74.2961	74.2331	70.2235
		139.3	78.8535	75.1335	66.1292	90.1846	98.3341	90.4623	71.6171	73.3466	75.9993	74.4962	74.0269	70.026
		139.4	78.6236	75.4059	66.0404	90.2938	98.334	90.3354	71.6412	73.6299	76.0234	74.4726	73.689	69.8896
		139.5	78.4512	75.6194	66.078	90.3982	98.6562	90.5361	71.8022	73.8027	76.3203	74.4814	73.4139	69.8804
		139.6	78.1823	75.7475	66.0274	90.3801	99.0518	90.7088	72.0226	74.0194	76.5598	74.4989	73.2441	69.983
		139.7	78.0724	75.7586	66.0402	90.416	99.3342	90.905	72.303	74.1071	76.5694	74.5114	73.2641	69.9962
		139.8	78.0878	75.6624	66.1526	90.3517	99.4319	90.9159	72.49	74.0754	76.4778	74.3095	73.32	70.0509
		139.9	78.2485	75.4964	66.3166	90.4604	99.3767	90.9767	72.515	74.0012	76.5178	74.0563	73.5325	70.1904
		140	78.5145	75.2908	66.3884	90.5654	99.1438	90.9275	72.3902	73.7851	76.5161	73.923	73.7306	70.1377
		140.1	78.8375	75.1258	66.5891	90.6793	98.9543	91.0548	72.1367	73.4096	76.6116	73.7365	74.0482	70.012
		140.2	79.093	74.9615	66.799	90.4553	98.7848	91.2014	71.7822	73.0525	76.6347	73.6452	74.3281	70.2036
		140.3	79.3922	74.8219	66.926	90.0976	98.7796	91.463	71.4354	72.7017	76.5881	73.7465	74.6833	70.3537
		140.4	79.7328	74.6398	66.9753	89.5442	98.8255	91.7626	71.2274	72.3239	76.3765	74.0157	75.0001	70.4568
		140.5	80.0078	74.4722	66.9206	89.1988	98.8512	91.9057	71.0868	72.2636	76.1228	74.1083	75.308	70.5982
		140.6	80.474	74.4552	66.7402	88.9704	98.8721	91.832	70.9833	72.417	75.8154	74.1543	75.4136	70.6843
		140.7	80.9528	74.6058	66.5191	89.0794	98.884	91.6705	70.9461	72.7024	75.7246	74.1074	75.2995	70.4936
		140.8	81.2552	74.8228	66.3012	89.3268	98.7136	91.6922	70.9584	72.9704	75.7744	74.0484	75.0536	70.3699
		140.9	81.2258	75.0894	66.1817	89.7396	98.612	91.6961	71.0443	73.278	75.7985	73.9876	74.6933	70.1682
		141	80.943	75.3848	66.1346	89.8652	98.5632	91.9022	71.269	73.4645	75.9154	74.1069	74.3552	70.0745
		141.1	80.3247	75.4518	66.1801	89.9319	98.4569	92.0433	71.6478	73.5414	76.008	74.2594	74.1251	70.1871
		141.2	79.674	75.4298	66.2402	89.7832	98.4658	92.0376	72.0477	73.4535	76.0492	74.446	74.0353	70.4018
		141.3	78.9313	75.3463	66.4077	89.6619	98.7204	91.6542	72.4621	73.4128	76.092	74.714	74.0187	70.6481
		141.4	78.4862	75.26	66.531	89.2247	98.8258	91.1401	72.727	73.39	76.1742	74.949	74.1061	71.0128
		141.5	78.381	75.1332	66.7152	88.7928	98.8872	90.5444	72.8813	73.3853	76.113	74.9183	74.1644	71.3018
		141.6	78.4543	75.1665	66.9283	88.3895	98.8005	90.193	72.927	73.375	76.1434	74.9213	74.1156	71.4275
		141.7	78.505	75.2407	67.1185	88.2247	98.5656	90.1668	72.8215	73.3444	76.2374	74.8925	74.1027	71.5544
		141.8	78.8104	75.346	67.119	88.0145	98.2366	90.4188	72.5644	73.2686	76.2984	74.5382	74.0105	71.4808
		141.9	78.9285	75.5549	67.0139	88.0838	98.0532	90.8507	72.1215	73.1303	76.4484	74.1015	74.0267	71.4208
		142	79.0205	75.8226	66.852	88.2682	97.7803	91.2688	71.4594	72.9119	76.7338	73.8208	74.1098	71.3682
		142.1	79.1061	75.9639	66.4817	88.3127	97.8571	91.5214	70.6216	72.8162	76.9502	73.5091	74.3055	71.3512
		142.2	79.2635	76.0186	66.2012	88.1711	98.0362	91.6546	69.8327	72.8568	77.0067	73.1878	74.4629	71.2894
		142.3	79.2902	76.0132	66.0416	88.1622	98.1486	91.7739	69.1995	72.9194	77.0789	73.1173	74.7555	71.4372
		142.4	79.372	75.8769	66.0142	88.1605	98.1455	91.74	68.8541	73.0968	77.116	73.0948	74.7816	71.4697
		142.5	79.3289	75.8263	66.0559	88.2022	98.3566	91.6945	68.7392	73.2894	76.9551	73.0828	74.756	71.4935
		142.6	79.3057	75.9518	66.4191	88.429	98.2234	91.6526	68.8138	73.3708	76.6284	73.1376	74.7039	71.3155
		142.7	79.2759	76.0911	66.6992	88.6448	98.0564	91.5105	69.1072	73.4873	76.4413	73.3009	74.6196	71.1618
		142.8	79.2714	76.2558	66.9276	88.5636	97.9126	91.3565	69.3783	73.6202	76.3036	73.3019	74.298	70.9796
		142.9	79.3715	76.4334	67.036	88.5005	97.8711	91.4004	69.6994	73.7417	76.0557	73.399	74.1453	70.8272
		143	79.4414	76.3136	67.0979	88.383	97.7405	91.3937	70.0002	73.9374	75.9238	73.5551	74.0112	70.7137
		143.1	79.3959	75.9235	66.9703	88.0528	97.8385	91.4178	70.4392	74.0971	75.9671	73.6205	73.8879	70.827
		143.2	79.3882	75.4124	66.9697	87.7179	97.9004	91.362	70.7296	74.1538	75.8154	73.5256	73.8993	70.8724
		143.3	79.5682	74.8898	67.0781	87.5309	97.9423	91.0964	71.0402	74.3718	75.5269	73.6844	74.2029	70.69
		143.4	79.7303	74.3691	67.3192	87.228	97.7164	90.679	71.2695	74.6022	75.3714	73.644	74.4911	70.453
		143.5	79.93	74.0234	67.6053	87.0797	97.4418	90.3322	71.5853	74.7682	75.1722	73.4387	74.7466	70.3054
		143.6	80.1847	73.9238	67.845	87.2858	97.1029	89.9911	71.7201	75.0121	74.9878	73.111	74.9919	70.1646
		143.7	80.2011	74.0933	67.9487	87.7391	96.8761	89.9101	71.9072	75.1595	75.0315	72.8766	75.0822	70.0406
		143.8	79.908	74.2937	67.9688	88.3922	96.7863	90.1007	72.2004	75.0199	75.2246	72.4904	74.9371	70.184
		143.9	79.602	74.4672	67.8036	89.1151	97.1098	90.2858	72.4238	74.7332	75.3888	72.4072	74.7638	70.4982
		144	79.3442	74.7062	67.396	89.5466	97.4062	90.4804	72.4592	74.5356	75.6229	72.5926	74.524	70.5588
		144.1	79.128	74.9629	66.9685	89.6418	97.5898	90.6778	72.43	74.2506	75.875	73.0903	74.3082	70.6033
		144.2	79.2388	75.1275	66.437	89.6174	97.6093	90.8104	72.2742	74.15	75.9732	73.663	74.2142	70.7454
		144.3	79.5187	75.3805	65.8991	89.3656	97.5482	90.7135	71.821	74.0798	75.8957	74.3284	74.3019	70.7722
		144.4	79.7015	75.7242	65.5817	89.0836	97.3373	90.6671	71.2412	74.0196	75.7242	74.8033	74.2977	70.7081
		144.5	79.7981	75.8788	65.4714	88.8633	97.3062	90.5752	70.7796	73.7873	75.5588	75.0216	74.3768	70.7724
		144.6	79.8674	75.7892	65.448	88.781	97.5021	90.4922	70.4602	73.6173	75.3692	75.1229	74.4512	70.7378
		144.7	79.8655	75.5899	65.5857	88.6294	97.7858	90.3932	70.2435	73.2885	75.3036	75.1106	74.6044	70.6558
		144.8	79.8166	75.2321	65.7353	88.4246	98.114	90.4838	70.2052	73.0791	75.4033	74.9203	74.7357	70.4807
		144.9	79.7586	74.8043	65.7821	88.1663	98.3252	90.4275	70.5362	73.0189	75.6544	74.6778	74.9968	70.234
		145	79.7504	74.5532	65.8645	88.1081	98.3778	90.3618	70.8324	73.0775	76.0029	74.4413	75.2008	70.1064
		145.1	79.7686	74.4037	65.9695	88.1201	98.2411	90.3132	71.1587	73.181	76.2822	73.999	75.163	70.0901
		145.2	79.5535	74.3176	66.1178	88.0858	98.0384	90.1478	71.3356	73.4489	76.4175	73.6618	74.788	70.0221
		145.3	79.2551	74.3326	66.2611	88.1029	97.5836	89.9184	71.5657	73.7772	76.4396	73.575	74.196	70.0571
		145.4	79.0529	74.3798	66.438	88.2452	97.2009	89.9095	71.4299	74.0757	76.3883	73.6184	73.5288	70.1287
		145.5	78.8653	74.2934	66.5618	88.2287	96.919	89.9648	71.1975	74.3082	76.1566	73.8104	72.8981	70.0552
		145.6	78.7074	74.327	66.6143	88.097	96.7138	90.0473	70.7872	74.4691	75.9856	74.3651	72.5284	69.8956
		145.7	78.8597	74.4815	66.5206	87.9349	96.6189	90.2197	70.6226	74.5068	76.022	74.8201	72.4292	69.7002
		145.8	79.2216	74.5999	66.4969	87.9337	96.8571	90.462	70.476	74.3911	76.135	74.9962	72.6734	69.6327
		145.9	79.4704	74.682	66.3336	87.8173	97.1008	90.5907	70.5757	74.2086	76.1824	75.0656	73.0438	69.6968
		146	79.6494	74.8504	66.0358	87.7572	97.2216	90.6827	70.8455	74.1486	76.182	75.0371	73.4876	69.753
		146.1	79.6441	74.9168	65.8484	87.7097	97.2741	90.6241	71.2466	74.1008	76.2146	74.7725	73.8871	69.9192
		146.2	79.4164	74.8938	65.8534	87.7546	97.1871	90.5534	71.5575	74.1095	75.9963	74.4149	74.2357	70.2426
		146.3	78.9654	74.9114	65.7355	87.6719	96.9507	90.4188	71.6739	74.2859	75.8098	74.1788	74.3822	70.4762
		146.4	78.6245	74.9877	65.7483	87.7665	96.7566	90.343	71.7229	74.4913	75.9089	73.9675	74.437	70.6067
		146.5	78.3811	75.1361	66.0662	87.9356	96.7069	90.3037	71.6144	74.5738	76.1992	73.8424	74.4479	70.8503
		146.6	78.3914	75.3357	66.2897	88.0572	96.8159	90.4348	71.3904	74.7275	76.4807	73.6181	74.5652	71.092
		146.7	78.4528	75.4786	66.3118	88.3774	97.0661	90.6304	71.1254	74.8406	76.8708	73.5699	74.7189	71.3356
		146.8	78.6963	75.5382	66.3376	88.818	97.1545	90.7516	71.052	74.8801	77.079	73.6638	74.8317	71.4587
		146.9	78.8694	75.6493	66.3333	89.0548	97.0397	90.8087	70.9464	74.9802	76.7589	73.8225	74.9339	71.4355
		147	79.0724	75.632	66.1014	89.1568	96.7963	90.8318	71.0237	75.173	76.2974	73.9454	74.9568	71.1976
		147.1	79.0513	75.4719	65.8864	89.4939	96.3512	90.7376	71.1578	75.2563	75.7928	74.3668	74.8237	70.7817
		147.2	78.9318	75.4024	65.8212	89.6048	95.8992	90.5609	71.1977	75.3092	75.3332	74.7369	74.58	70.2207
		147.3	78.7504	75.3946	65.7741	89.4918	95.7192	90.3746	71.0325	75.238	75.1522	74.8318	74.3918	69.765
		147.4	78.7752	75.2263	65.724	89.3097	95.7667	90.2908	70.7891	75.0006	75.6098	74.9578	74.2295	69.5925
		147.5	78.7437	75.0778	65.6959	89.055	95.8635	90.1045	70.405	74.6706	76.2719	74.9756	74.202	69.6684
		147.6	78.8704	75.1372	65.6657	88.6043	96.1047	89.8864	70.012	74.3768	76.9046	74.6633	74.2162	69.9008
		147.7	79.1902	75.1286	65.5844	88.1897	96.3373	89.719	69.7965	74.1936	77.558	74.3194	74.3668	70.1569
		147.8	79.4229	75.1242	65.6204	88.0322	96.5255	89.6796	69.731	74.0458	78.0522	74.1343	74.6211	70.3484
		147.9	79.3904	75.22	65.6498	88.0623	96.5503	89.5802	69.8402	73.9771	78.055	73.7783	74.865	70.3621
		148	79.2067	75.4208	65.7245	88.3719	96.6489	89.6777	70.042	73.9254	77.809	73.5871	75.0651	70.1652
		148.1	78.9768	75.5471	65.8561	88.7546	96.6158	89.9956	70.2768	73.9258	77.6032	73.637	75.2483	69.9012
		148.2	78.7131	75.6505	65.9314	89.1162	96.4722	90.2772	70.4202	73.8957	77.2806	73.7507	75.3741	69.6952
		148.3	78.5315	75.692	65.9019	89.2594	96.2923	90.6082	70.5504	73.9775	76.7873	73.8693	75.3504	69.5707
		148.4	78.4611	75.6268	65.9874	89.5119	96.2401	90.8827	70.5633	74.0885	76.4851	74.0235	75.2982	69.4344
		148.5	78.584	75.3759	66.0753	89.5547	95.9803	91.2291	70.434	74.2288	76.2415	74.094	75.2988	69.4948
		148.6	78.751	75.2018	66.0772	89.3973	95.8842	91.3623	70.3518	74.3365	75.9038	74.087	75.3737	69.5665
		148.7	78.8151	75.0967	66.133	89.2405	95.8946	91.4548	70.272	74.3362	75.5551	73.9892	75.2286	69.6467
		148.8	78.924	75.0002	66.2524	89.236	95.7563	91.2783	70.2302	74.2633	75.4565	73.8478	74.966	69.6845
		148.9	79.0618	75.0884	66.1688	88.9499	95.6825	91.0871	70.1924	74.2288	75.378	73.8206	74.7938	69.8224
		149	79.1871	75.3827	66.0512	88.6607	95.8394	90.5415	70.277	74.1965	75.3478	73.7276	74.4162	70.0254
		149.1	79.1905	75.5382	66.027	88.5353	95.9153	90.12	70.3114	74.0191	75.5243	73.7218	73.8862	70.2313
		149.2	79.298	75.5865	65.9001	88.4205	95.9857	89.6975	70.5717	73.9554	75.805	73.7844	73.5147	70.3272
		149.3	79.3981	75.6633	65.706	88.1384	96.2386	89.4647	70.7455	73.9353	76.1181	73.8958	73.3057	70.4788
		149.4	79.4097	75.5009	65.7018	88.0101	96.3229	89.2621	71.0441	73.8251	76.4086	73.947	73.0836	70.7096
		149.5	79.429	75.1279	65.7877	87.9456	96.3373	89.2746	71.3548	73.7883	76.6564	74.1174	73.0584	70.6812
		149.6	79.5878	74.7229	65.7668	87.7747	96.4854	89.2344	71.6753	74.0112	76.7758	74.0893	73.0873	70.6289
		149.7	79.6245	74.495	65.881	87.5384	96.6956	89.3181	71.6418	74.2018	76.8456	73.9801	73.3564	70.8102
		149.8	79.5548	74.3668	66.0179	87.432	96.9277	89.4472	71.6795	74.3132	76.5637	73.8073	73.7932	70.8783
		149.9	79.5882	74.4901	66.0476	87.4014	97.2272	89.6005	71.6219	74.4036	76.2164	73.6285	74.0191	70.7357
		150	79.4742	74.7636	65.9825	87.2741	97.5109	89.7578	71.5615	74.3353	76.0314	73.3656	74.0134	70.685
		150.1	79.154	75.159	65.8933	87.2332	97.5077	89.9084	71.6095	74.0793	75.8834	73.3472	74.2284	70.7046
		150.2	79.0166	75.4463	65.7093	87.1286	97.3081	89.9205	71.8424	73.8583	75.8133	73.483	74.2038	70.6436
		150.3	78.9109	75.5937	65.6465	87.0356	97.0276	89.8808	72.0445	73.7789	76.0969	73.7305	73.9531	70.7644
		150.4	78.8285	75.6142	65.6132	86.7741	96.8444	90.0011	72.2061	73.7042	76.3976	74.1046	74.0656	70.887
		150.5	79.0012	75.7299	65.5442	86.6223	96.6388	90.0222	72.2834	73.673	76.4627	74.6827	74.4103	70.9328
		150.6	79.3282	75.8958	65.618	86.6083	96.6994	90.0164	72.064	73.7276	76.4594	75.0818	74.4078	70.899
		150.7	79.4134	76.0763	65.7486	86.9377	96.8319	90.0743	71.7449	73.66	76.3896	75.3232	74.4625	70.6782
		150.8	79.5014	76.194	65.7918	87.1282	96.9808	90.0668	71.4007	73.5042	76.2912	75.4255	74.6538	70.4011
		150.9	79.4452	76.1919	65.9064	87.3332	96.9023	89.8677	71.1862	73.5267	76.1385	75.3168	74.5501	70.2796
		151	79.1681	75.9104	66.0772	87.544	96.7675	89.6864	71.032	73.6485	76.1802	74.8736	74.3629	70.3481
		151.1	78.989	75.3683	66.2976	87.593	96.3927	89.5116	71.1669	73.8138	76.315	74.4424	74.454	70.5079
		151.2	79.1424	74.8394	66.727	87.3806	96.0904	89.3919	71.3887	74.1568	76.4478	74.0535	74.4643	70.8168
		151.3	79.3515	74.4801	67.1034	87.3896	95.7037	89.4003	71.5665	74.5001	76.4349	73.6818	74.5083	70.9775
		151.4	79.6512	74.2167	67.3773	87.5159	95.3944	89.4193	71.4249	74.7035	76.6222	73.417	74.6276	71.0465
		151.5	80.048	74.1163	67.621	87.6961	95.1872	89.4626	71.189	74.9191	76.5958	73.3608	74.7474	70.9349
		151.6	80.3106	74.2523	67.5922	87.9938	95.1079	89.4603	70.8418	75.1224	76.5678	73.3769	74.6812	70.7182
		151.7	80.3164	74.3034	67.1481	88.3667	95.0649	89.4528	70.4765	75.2652	76.601	73.5709	74.6773	70.3899
		151.8	80.3361	74.1932	66.5964	88.4979	95.1335	89.3169	70.3346	75.3501	76.7656	73.9267	74.3237	70.1341
		151.9	80.2398	74.1727	66.0542	88.5753	95.3366	89.1981	70.6381	75.3276	76.7266	74.2767	73.9153	69.9247
		152	80.0966	74.0718	65.54	88.421	95.489	89.2171	71.1894	75.0675	76.9566	74.6022	73.5701	69.8215
		152.1	79.9244	73.9248	65.2092	88.0927	95.7722	89.3758	71.7515	74.5367	77.0318	74.8255	73.393	69.855
		152.2	79.7103	73.9816	65.0832	87.7663	95.9841	89.5188	72.2215	73.8814	76.8908	74.7862	73.315	70.0059
		152.3	79.4179	74.2542	65.254	87.6089	96.1842	89.7556	72.2956	73.4132	76.6251	74.4837	73.6035	70.2205
		152.4	79.3562	74.6012	65.4719	87.435	96.4693	89.8596	72.1294	73.1494	76.4768	74.0703	74.1167	70.3782
		152.5	79.3458	75.083	65.7495	87.488	96.9056	89.8536	71.721	73.1058	76.2366	73.6594	74.577	70.54
		152.6	79.323	75.4022	66.0173	87.6823	97.2697	89.7816	71.1696	73.3981	76.1864	73.3499	74.8668	70.5584
		152.7	79.5178	75.5103	66.2957	87.7653	97.6065	89.5374	70.7088	73.8571	76.3585	73.2368	74.9724	70.519
		152.8	79.7405	75.3981	66.3269	87.8438	97.8606	89.1417	70.554	74.0767	76.5746	73.3938	74.9041	70.3526
		152.9	79.8196	75.0285	66.2874	88.0096	97.8047	89.0834	70.4484	74.2735	76.7376	73.7129	74.5908	70.2894
		153	79.8073	74.631	66.1006	88.2172	97.4342	89.0168	70.3527	74.4713	76.668	73.9434	74.2184	70.115
		153.1	79.8067	74.4848	65.8994	88.4248	96.7709	88.9426	70.4738	74.5282	76.4328	74.1279	73.8342	70.049
		153.2	79.6438	74.3694	65.7396	88.8251	96.2237	89.0887	70.5723	74.3839	76.0764	74.1428	73.4255	70.0416
		153.3	79.4266	74.3452	65.5789	89.1179	95.7816	89.3644	70.5586	74.3362	75.5814	74.0081	73.0688	70.1223
		153.4	79.0552	74.5216	65.467	89.1961	95.4612	89.2733	70.4866	74.277	75.0283	73.8253	72.9519	70.0718
		153.5	78.6731	74.6247	65.5754	89.0675	95.3162	89.1902	70.468	74.1153	74.7558	73.7906	73.006	70.2268
		153.6	78.3233	74.5466	65.8032	88.875	95.4674	89.102	70.3999	73.9998	74.5814	73.8637	73.3045	70.3824
		153.7	77.8518	74.4635	65.9115	88.5452	95.3456	88.8238	70.4218	73.9888	74.4566	73.9941	73.8918	70.4842
		153.8	77.4076	74.4483	66.2395	88.2837	95.1378	88.5653	70.5168	73.8877	74.6883	74.1023	74.4797	70.5538
		153.9	77.2107	74.2843	66.5507	88.1999	95.0232	88.638	70.6965	73.6653	75.1218	74.2014	74.8582	70.6481
		154	77.055	74.1796	66.731	88.145	94.9586	88.7902	70.8948	73.4524	75.4312	74.1437	75.1434	70.5444
		154.1	76.9815	74.2572	66.6473	88.0752	94.9141	89.0211	70.9515	73.2342	75.776	73.9608	75.2167	70.4297
		154.2	77.307	74.4411	66.6566	87.9938	95.0826	89.3797	70.9334	73.1339	76.1911	73.8976	75.0597	70.3619
		154.3	77.7374	74.6554	66.4984	87.8972	95.2423	89.6297	70.9306	73.15	76.3421	73.8417	74.9395	70.3955
		154.4	78.0958	75.0577	66.2874	87.8369	95.257	89.5979	70.8415	73.2284	76.2744	73.7064	74.9038	70.5024
		154.5	78.4818	75.4618	66.0235	87.7228	95.285	89.3954	70.8502	73.3844	76.1826	73.6868	74.7674	70.7777
		154.6	78.7967	75.7708	65.7939	87.412	95.1823	89.0742	71.1323	73.5048	75.9978	73.648	74.6181	70.9685
		154.7	78.8703	76.1508	65.5501	87.0786	95.0289	88.801	71.4611	73.5835	75.7516	73.4959	74.4925	71.0907
		154.8	78.8608	76.4321	65.3472	86.763	95.0475	88.6187	71.7234	73.792	75.5941	73.4546	74.3532	71.1177
		154.9	78.8164	76.567	65.3215	86.2149	95.1526	88.5337	71.984	73.954	75.5023	73.5473	74.1526	71.0958
		155	78.8031	76.5754	65.4498	85.9698	95.169	88.596	72.0557	74.0793	75.5341	73.6302	74.0501	70.8588
		155.1	78.7494	76.4987	65.8035	86.176	95.2995	88.6341	71.8058	74.1659	75.6893	73.7476	74.1312	70.6075
		155.2	78.5965	76.1728	66.1196	86.4581	95.5038	88.5152	71.4104	74.2451	75.9132	74.0195	74.2992	70.4094
		155.3	78.5338	75.7809	66.4222	86.6772	95.6063	88.3636	71.0211	74.1017	76.0767	74.3655	74.4098	70.1942
		155.4	78.4009	75.4565	66.5663	87.1124	95.6425	88.3692	70.6585	74.0271	76.3313	74.6884	74.5758	69.9199
		155.5	78.2395	75.3078	66.5357	87.2162	95.7871	88.3536	70.3826	73.9847	76.5463	74.9591	74.6237	69.7143
		155.6	78.2409	75.14	66.4308	86.9685	95.8593	88.4289	70.4316	74.0737	76.6514	75.2484	74.4409	69.5932
		155.7	78.4088	75.0729	66.459	86.808	95.8751	88.5872	70.6851	74.0319	76.6558	75.2608	74.1894	69.5506
		155.8	78.3776	75.1358	66.4059	86.6954	95.7285	88.8247	70.9395	74.0954	76.8138	74.9735	73.9581	69.617
		155.9	78.4946	75.0969	66.3641	86.4357	95.7186	88.7488	71.1019	74.0866	76.8956	74.5949	73.6284	69.788
		156	78.6414	74.9506	66.3427	86.3514	95.5841	88.6692	71.2458	73.969	76.8926	74.2743	73.4982	70.145
		156.1	78.568	74.9144	66.1512	86.45	95.4338	88.671	71.124	73.7186	76.8147	74.0336	73.5481	70.5698
		156.2	78.3744	75.0011	65.7562	86.366	95.249	88.6936	70.8783	73.5214	76.8088	74.0134	73.662	70.8348
		156.3	78.2911	74.8735	65.5639	86.3869	95.1744	88.6175	70.5882	73.3313	76.5645	74.1723	73.8713	71.0315
		156.4	78.2369	74.773	65.4795	86.715	95.0108	88.7428	70.603	73.3356	76.3015	74.4546	74.1446	71.19
		156.5	78.2064	74.7208	65.4905	87.0948	94.9498	88.8034	70.6067	73.5082	76.0653	74.6966	74.2392	71.21
		156.6	78.2429	74.586	65.7017	87.4033	94.9844	88.7416	70.7573	73.832	75.961	74.8458	74.3114	71.1152
		156.7	78.3884	74.2857	66.02	87.7376	95.1512	88.7936	71.0025	74.1486	75.8111	74.764	74.2166	71.0728
		156.8	78.5916	74.2591	66.1719	87.943	95.3622	88.8822	71.3932	74.302	75.8178	74.6586	74.0011	71.0371
		156.9	78.7756	74.321	66.1227	87.7604	95.4024	88.987	71.4638	74.281	75.947	74.429	73.9833	71.1119
		157	78.8175	74.3037	66.1114	87.4578	95.3176	89.2015	71.5999	74.0872	76.0953	74.0871	74.1603	71.0667
		157.1	78.857	74.4464	66.0945	87.1874	95.0943	89.465	71.6705	73.7148	76.1822	73.6208	74.3731	71.0537
		157.2	78.8554	74.7244	66.0814	87.0008	94.7783	89.4871	71.5062	73.4871	76.1491	73.2281	74.8324	71.124
		157.3	78.8614	74.9473	66.1509	86.683	94.389	89.4764	71.216	73.4924	75.9292	72.748	75.3368	71.2025
		157.4	78.7357	75.2209	66.4243	86.3973	94.2319	89.497	71.1088	73.6011	75.5439	72.3983	75.6217	71.1995
		157.5	78.7426	75.599	66.5151	86.0889	94.1478	89.3592	71.0551	73.8017	75.2626	72.2768	75.77	71.3904
		157.6	78.8705	75.8382	66.5144	85.8144	94.1094	89.1287	71.0258	74.0367	75.2274	72.4829	75.7148	71.5384
		157.7	78.9057	75.9459	66.4729	85.6041	93.91	88.9509	71.2209	74.1828	75.479	72.8824	75.4622	71.7703
		157.8	78.832	76.0147	66.3834	85.7792	93.8898	88.7216	71.4437	74.2463	76.0378	73.4266	75.1429	71.9321
		157.9	78.8666	75.9386	66.1174	86.2073	93.9607	88.3073	71.6119	74.2923	76.7151	73.8364	74.8112	71.9574
		158	78.8048	75.7644	65.9537	86.691	93.9895	87.9461	71.6274	74.305	77.1572	74.1353	74.557	71.893
		158.1	78.7221	75.619	65.7847	87.0398	94.0435	87.7052	71.5483	74.4954	77.2853	74.1612	74.4842	71.8588
		158.2	78.7969	75.4479	65.6262	87.1847	94.4982	87.6569	71.3576	74.6505	77.2862	74.1629	74.4226	71.4468
		158.3	79.0029	75.1512	65.497	86.9659	94.8147	87.7606	71.2404	74.8083	77.14	74.1069	74.359	71.0876
		158.4	79.1788	74.8804	65.594	86.7579	94.87	88.0788	71.0498	74.9263	76.9483	74.2004	74.3654	70.9306
		158.5	79.4418	74.6519	65.742	86.5006	94.9726	88.5221	70.8634	75.1012	76.9642	74.2521	74.2736	70.8544
		158.6	79.528	74.5422	65.9857	86.3496	95.1738	88.838	70.6985	75.1281	77.0196	74.3723	74.0661	70.7331
		158.7	79.5558	74.629	66.2598	86.3645	95.0022	88.8903	70.6278	75.0987	76.8922	74.3798	73.8882	70.7879
		158.8	79.5007	74.8208	66.5702	86.6481	94.8965	88.8082	70.4967	75.0058	76.6511	74.4956	73.8252	70.7868
		158.9	79.3772	75.0578	66.6475	86.7174	94.9657	88.5259	70.4516	74.837	76.3517	74.3548	73.8303	70.6728
		159	79.3008	75.3287	66.5998	86.7988	95.0871	88.1265	70.5362	74.5817	75.9123	74.2181	73.8531	70.4135
		159.1	79.4041	75.3448	66.3626	86.6708	94.981	87.8706	70.731	74.3622	75.5222	74.097	73.8918	70.1854
		159.2	79.4334	75.1776	66.1213	86.55	94.9802	87.8751	70.8637	74.3418	75.2128	74.033	73.9505	70.0864
		159.3	79.4354	75.0765	65.8168	86.1411	94.964	87.936	71.0169	74.3386	75.0423	73.7934	73.9506	70.0268
		159.4	79.4767	74.9525	65.6556	85.8967	94.8577	88.1956	71.2355	74.403	74.9464	73.8299	73.8195	69.8765
		159.5	79.2678	74.7954	65.5739	85.7901	94.7045	88.4096	71.4182	74.4917	74.9717	73.9393	73.6918	69.8772
		159.6	79.0329	74.9298	65.6958	86.0372	94.6777	88.4961	71.6411	74.5647	75.0468	73.9758	73.7555	70.022
		159.7	78.9778	75.27	65.8256	86.2596	94.6384	88.5406	71.8444	74.3746	75.3952	73.8521	73.8612	70.0477
		159.8	78.9754	75.5254	65.8759	86.8652	94.4368	88.7305	71.994	74.2128	75.7216	73.7591	73.9358	70.0796
		159.9	79.0324	75.7803	65.8246	87.3795	94.3156	88.893	72.0559	74.0698	76.0386	73.6075	74.0307	70.327
		160	79.3908	76.0641	65.9083	87.7883	94.1972	89.2617	71.9562	73.9235	76.2714	73.4848	74.0087	70.4646
		160.1	79.6089	76.1654	65.9297	88.0446	94.1991	89.6552	71.7798	73.7182	76.501	73.433	73.8386	70.4718
		160.2	79.7127	76.1232	65.9189	88.2558	94.3083	89.8306	71.6615	73.7342	76.4361	73.5445	73.7414	70.5464
		160.3	79.7976	76.1071	66.1188	88.0889	94.6469	89.7198	71.5446	73.7174	76.3221	73.6406	73.7854	70.608
		160.4	79.9365	76.0196	66.4459	87.8791	94.8978	89.4479	71.1752	73.6989	76.198	73.6029	73.9259	70.5758
		160.5	79.9357	75.8522	66.5206	87.6772	95.101	88.9491	70.9522	73.743	76.1146	73.4996	74.3365	70.6035
		160.6	79.9848	75.6425	66.5249	87.429	95.1182	88.5179	70.6639	73.8608	75.8746	73.486	74.6697	70.6009
		160.7	79.9928	75.4138	66.4998	87.1242	95.1133	88.1771	70.453	73.7498	75.6774	73.5548	74.7609	70.6944
		160.8	80.0196	75.1325	66.2358	87.0272	95.0128	87.9889	70.2805	73.6255	75.5607	73.8202	74.7036	70.935
		160.9	79.7809	75.0561	65.8766	86.8864	94.9712	87.8667	70.5201	73.579	75.4463	74.194	74.6189	71.1767
		161	79.567	75.1449	65.6042	86.7865	94.9257	87.698	70.7214	73.4512	75.2846	74.5088	74.4996	71.464
		161.1	79.5393	75.2188	65.3542	86.6625	94.8987	87.5201	71.0159	73.1518	75.287	74.6776	74.4675	71.738
		161.2	79.5671	75.1597	65.1868	86.6541	94.8033	87.322	71.0834	73.0397	75.3218	74.7786	74.671	71.825
		161.3	79.5628	75.3029	65.3133	86.6006	94.6679	87.0877	71.0862	72.9992	75.2143	74.6265	74.9291	71.7212
		161.4	79.8255	75.292	65.5405	86.6852	94.4692	86.8452	70.9348	72.8299	75.1837	74.3612	75.103	71.5096
		161.5	80.026	75.171	65.9291	86.6049	94.2656	86.8645	70.8364	72.7649	75.2932	74.1608	74.9696	71.1768
		161.6	80.0078	75.2238	66.4336	86.691	94.0993	86.9258	70.7453	73.0182	75.4105	74.0139	74.8473	70.923
		161.7	79.8939	75.4943	66.9194	86.6798	93.9478	87.0935	70.8144	73.2784	75.5292	73.6694	74.6484	70.7256
		161.8	79.7913	75.409	67.1302	86.63	93.8718	87.2714	70.9907	73.5056	75.7831	73.4253	74.3045	70.5737
		161.9	79.6047	75.2447	67.2468	86.5371	93.9255	87.4899	71.1475	73.6832	75.9453	73.3816	73.9519	70.6317
		162	79.4472	75.0002	67.1781	86.5261	94.2258	87.5342	71.2249	73.8744	76.062	73.3386	73.9363	70.766
		162.1	79.3871	74.6534	67.0321	86.4273	94.6006	87.4336	71.1213	73.9887	76.1342	73.318	73.9048	70.7502
		162.2	79.4191	74.2916	66.8035	86.3231	95.0287	87.3217	71.1114	74.158	76.2931	73.5193	73.7477	70.711
		162.3	79.4092	74.2206	66.7015	86.2048	95.4173	87.2511	71.0912	74.3896	76.397	73.7578	73.8217	70.7181
		162.4	79.3808	74.2841	66.558	86.0818	95.642	87.145	71.1712	74.7162	76.3848	73.8716	73.9657	70.5146
		162.5	79.3235	74.4125	66.4422	85.9529	95.4841	87.1868	71.4702	74.8817	76.2274	74.031	73.9971	70.2886
		162.6	79.295	74.5571	66.3436	85.6665	95.2745	87.2512	72.0314	74.8872	76.0878	74.1459	73.9901	70.232
		162.7	79.395	74.6934	66.3006	85.5457	94.9345	87.2716	72.2726	74.777	75.864	74.1568	74.1391	70.2713
		162.8	79.5746	74.753	66.2583	85.5583	94.426	87.2959	72.4324	74.6568	75.8723	74.1195	74.2344	70.2104
		162.9	79.7804	74.7783	66.2138	85.603	93.9174	87.4492	72.4095	74.536	76.1418	74.0978	74.4346	70.2534
		163	80.0512	74.8439	66.1458	85.7906	93.5404	87.513	72.0837	74.4876	76.5536	74.0243	74.6643	70.2577
		163.1	80.2034	74.918	66.0015	86.084	93.0122	87.5698	71.5578	74.5785	76.9282	73.9414	74.9629	70.2046
		163.2	80.0329	75.0022	65.9268	86.1423	92.6816	87.6302	71.3367	74.6819	77.3251	73.8043	75.1269	70.0071
		163.3	79.6618	75.0312	65.8122	86.0457	92.5745	87.689	71.2042	74.632	77.3152	73.6784	75.1857	69.9847
		163.4	79.1609	75.0603	65.9432	85.865	92.6291	87.714	71.2282	74.5509	77.0264	73.4662	75.0355	70.0092
		163.5	78.7	75.1586	66.2389	85.5623	92.8814	87.5261	71.4132	74.4621	76.6991	73.19	74.7459	70.0462
		163.6	78.3891	75.2776	66.5808	85.2365	93.4845	87.4573	71.619	74.199	76.3711	73.0398	74.4364	70.0574
		163.7	78.3394	75.3283	66.8376	85.0323	93.9539	87.2678	71.666	73.8547	75.9938	73.0268	74.246	70.1445
		163.8	78.4268	75.4316	67.1846	84.8504	94.4516	87.0874	71.6052	73.6514	75.8615	73.0604	74.235	70.0628
		163.9	78.6249	75.4969	67.2322	84.7497	94.8118	86.6983	71.4594	73.4962	76.1075	73.1962	74.3412	69.9358
		164	78.7104	75.4304	67.1103	84.6769	94.935	86.6873	71.1472	73.4272	76.3594	73.4443	74.5534	69.9484
		164.1	78.6781	75.3521	67.0049	84.7619	94.7759	86.6327	70.8544	73.4907	76.5948	73.5553	74.7441	70.1219
		164.2	78.5545	75.2549	66.9847	84.9462	94.6621	86.7417	70.6347	73.6021	76.8564	73.5176	74.8217	70.366
		164.3	78.6747	75.1849	66.9096	85.2161	94.4898	86.6865	70.5064	73.7115	77.0305	73.4961	74.6718	70.7814
		164.4	78.7957	75.1785	66.9714	85.3754	94.3356	86.8568	70.3459	73.894	76.8378	73.6334	74.4068	71.1837
		164.5	79.0015	75.1237	66.9948	85.5053	94.1864	86.793	70.43	74.0838	76.5362	73.8148	74.134	71.4238
		164.6	79.2256	75.0283	66.9314	85.5333	93.907	86.7795	70.7187	74.3861	76.405	74.1432	73.8178	71.5264
		164.7	79.476	75.0021	66.6891	85.3524	93.4777	86.7967	71.0146	74.8558	76.3498	74.6262	73.6672	71.5873
		164.8	79.473	74.946	66.3537	85.1726	92.9472	87.0279	71.2748	75.2312	76.3062	75.0807	73.6595	71.5259
		164.9	79.4566	74.9136	65.9023	85.1214	92.5386	87.0532	71.6038	75.3704	76.3778	75.2781	73.8558	71.3977
		165	79.4094	75.069	65.5526	85.1336	92.2958	87.1577	71.8081	75.3568	76.537	75.3273	74.2374	71.3651
		165.1	79.4033	75.3262	65.3078	85.1673	92.4273	87.155	71.7862	75.1188	76.478	75.2112	74.6822	71.3716
		165.2	79.405	75.5911	65.3066	85.393	92.7917	87.126	71.6508	74.7051	76.3236	75.1067	74.8974	71.1828
		165.3	79.4641	75.8433	65.3441	85.4901	93.2709	86.9303	71.4625	74.4248	76.2152	74.8987	75.0144	70.8903
		165.4	79.6126	75.9725	65.5754	85.6226	93.6929	86.9057	71.3528	74.3525	76.2074	74.7043	74.9417	70.748
		165.5	79.7224	75.8917	65.7983	85.713	94.0319	86.8722	71.3074	74.3858	76.2417	74.4896	74.5594	70.5794
		165.6	79.9277	75.5978	65.9611	85.7628	94.0547	86.9386	71.2952	74.4757	76.3631	74.2499	74.2375	70.3594
		165.7	80.1626	75.2245	65.7514	85.7342	93.8899	86.9273	71.3269	74.6417	76.45	73.9053	74.1162	70.3389
		165.8	80.2806	74.8089	65.573	85.8556	93.5884	87.0074	71.3701	74.7177	76.4382	73.6642	74.0477	70.4539
		165.9	80.2522	74.56	65.2139	85.9517	93.2554	87.0839	71.3031	74.6173	76.304	73.5647	73.9953	70.4533
		166	80.2688	74.5205	64.8723	86.0657	92.9332	87.1227	71.0761	74.5551	76.0455	73.6038	74.042	70.4064
		166.1	80.094	74.6775	64.6242	86.2088	92.9041	87.1439	70.8442	74.6152	75.6986	73.781	73.9455	70.4073
		166.2	79.8325	74.9672	64.8539	86.3086	93.0698	87.3347	70.619	74.6484	75.361	73.9826	73.7532	70.472
		166.3	79.8113	75.3685	65.0657	86.4038	93.4174	87.6159	70.525	74.6868	75.1644	74.1175	73.6208	70.5159
		166.4	79.8261	75.5121	65.3862	86.3412	93.68	87.7928	70.4976	74.907	74.9952	74.183	73.5694	70.4901
		166.5	79.802	75.4087	65.7132	86.3085	93.923	88.0573	70.6964	74.9553	74.9296	74.1086	73.4995	70.4406
		166.6	79.8101	75.2695	65.857	86.2182	94.0273	88.2303	70.9746	74.7683	74.9829	73.8925	73.5026	70.2786
		166.7	79.849	74.9549	65.6226	86.2312	93.9924	88.1341	71.2806	74.4749	75.2439	73.6606	73.5024	70.0319
		166.8	79.6491	74.557	65.4538	86.0439	93.8136	87.9562	71.5729	74.1902	75.394	73.4816	73.5502	69.9444
		166.9	79.4925	74.473	65.2162	86.0039	93.6747	87.8325	71.6932	73.845	75.571	73.1949	73.5808	70.0639
		167	79.36	74.6085	64.8945	85.8601	93.4366	87.6991	71.5426	73.6113	75.7109	73.0808	73.6245	70.2077
		167.1	79.2512	74.6897	64.8043	85.7756	93.135	87.7264	71.2477	73.6758	75.7898	73.1391	73.6216	70.5249
		167.2	79.0882	74.9584	65.0332	85.5768	92.8327	88.0328	70.8757	73.8841	75.6397	73.304	73.7652	70.7765
		167.3	78.9888	75.261	65.2391	85.5534	92.6364	88.2464	70.2543	74.1195	75.573	73.3762	73.7761	70.6655
		167.4	78.764	75.2899	65.6526	85.54	92.5394	88.5534	69.8354	74.3562	75.5258	73.4934	73.8881	70.4113
		167.5	78.4753	75.1442	66.0833	85.49	92.7425	88.7825	69.648	74.7156	75.4973	73.4679	74.1693	70.332
		167.6	78.2436	75.0489	66.2494	85.3106	93.0364	88.8173	69.5506	74.847	75.5632	73.3698	74.6108	70.2141
		167.7	78.1297	74.7838	66.0204	85.2045	93.353	88.5921	69.7471	74.8934	75.82	73.0709	74.9401	70.1667
		167.8	78.055	74.5023	65.7892	85.0298	93.4918	88.435	70.1632	74.7808	76.0009	72.8869	75.12	70.3643
		167.9	78.1954	74.4498	65.2468	84.7198	93.6033	88.0622	70.4416	74.6051	76.0423	72.9226	75.1369	70.5722
		168	78.5527	74.7353	64.736	84.5662	93.559	87.6087	70.5823	74.1533	76.141	73.0032	75.0105	70.5895
		168.1	78.8909	75.0608	64.4231	84.5821	93.5509	87.156	70.8453	73.7564	76.2416	73.1048	74.7242	70.4681
		168.2	79.1494	75.4614	64.4431	84.5769	93.6086	86.8156	70.7936	73.4028	76.131	73.4017	74.4158	70.2318
		168.3	79.3788	75.8384	64.499	84.6415	93.9309	86.5211	70.6984	73.2142	76.1053	73.7924	74.4924	69.949
		168.4	79.548	76.1536	64.8073	84.7859	94.2657	86.4489	70.721	73.0795	76.2491	73.9174	74.5612	69.6482
		168.5	79.5247	76.1746	65.2572	85.0028	94.4616	86.5228	70.8958	73.0484	76.2027	74.023	74.5654	69.345
		168.6	79.5158	76.1881	65.7562	85.27	94.3745	86.7367	70.7886	73.1514	75.9877	74.0586	74.536	69.1854
		168.7	79.4278	76.2414	66.1122	85.5805	94.1108	86.9452	70.7326	73.325	75.876	73.9433	74.4735	69.2032
		168.8	79.3917	76.373	66.3318	85.9862	93.7688	87.1291	70.7664	73.5393	75.6768	73.5415	74.1341	69.2416
		168.9	79.3276	76.3194	66.4668	86.4833	93.3139	87.2154	70.7471	73.78	75.4507	73.3491	73.8376	69.3786
		169	79.2122	76.2888	66.4937	86.7569	92.8986	87.3284	70.5642	74.1312	75.3839	73.317	73.6202	69.5803
		169.1	79.0495	76.0746	66.3125	86.8181	92.8172	87.4441	70.6527	74.2723	75.3309	73.3005	73.6458	69.6727
		169.2	79.0707	75.783	66.0938	86.7651	92.8655	87.6335	70.8748	74.2598	75.3645	73.437	73.7615	69.7552
		169.3	78.9952	75.5071	65.9638	86.345	92.697	87.7227	70.997	74.0628	75.4486	73.7428	74.0074	69.8618
		169.4	78.8535	75.4173	65.7336	85.7309	92.5808	87.864	71.1616	73.8716	75.475	73.9003	74.3772	69.9616
		169.5	78.7794	75.3243	65.4483	85.3446	92.5574	87.9892	71.4463	73.7121	75.5105	73.7891	74.6211	69.9689
		169.6	78.6162	75.4169	65.357	85.1434	92.2731	87.9593	71.6137	73.7503	75.6995	73.7659	74.589	70.0459
		169.7	78.384	75.4782	65.4507	84.9905	91.9962	87.9441	71.6527	73.9877	75.721	73.6098	74.5849	70.0294
		169.8	78.3201	75.3719	65.6038	85.0814	91.9005	88.0888	71.661	74.4191	75.7621	73.4088	74.5645	70.056
		169.9	78.3164	75.1866	66.0218	85.2118	91.8867	88.1986	71.6086	74.762	75.8378	73.2206	74.2556	70.1053
		170	78.407	75.0218	66.3642	84.9378	91.7717	88.2532	71.4531	74.9247	75.9022	73.3064	74.1488	70.3115
		170.1	78.585	74.7866	66.574	84.4521	91.9124	88.4496	71.3063	74.8652	75.9564	73.2674	74.1087	70.5126
		170.2	78.7909	74.6589	66.5348	83.9988	91.9588	88.5098	71.1252	74.6462	76.0458	73.2773	73.9425	70.7279
		170.3	78.8566	74.6782	66.3506	83.5329	92.1754	88.4019	70.9534	74.4016	75.9819	73.4387	73.6963	70.8225
		170.4	78.9477	74.7666	65.8186	83.288	92.3317	88.2311	70.6344	74.354	75.8995	73.6706	73.7377	70.7337
		170.5	79.0912	74.915	65.4161	83.3581	92.5636	88.036	70.4069	74.5297	75.7389	73.7252	73.6439	70.6314
		170.6	79.2931	75.0786	65.2302	83.6218	92.5807	87.8195	70.1705	74.8762	75.4286	73.8776	73.6507	70.5479
		170.7	79.3045	75.2071	65.1618	83.9481	92.699	87.56	70.0714	75.2993	75.1956	74.1625	73.663	70.5283
		170.8	79.1829	75.2229	65.1132	84.4608	92.4985	87.4627	70.0249	75.6552	75.1503	74.3823	73.7472	70.5272
		170.9	78.9899	75.2223	65.2957	84.7343	92.2835	87.4357	70.2814	75.777	75.153	74.5684	73.6836	70.7153
		171	78.7376	75.264	65.4684	84.9857	92.2051	87.4708	70.6096	75.7317	75.2489	74.8157	73.7353	70.7496
		171.1	78.5127	75.2903	65.2754	85.1368	92.3101	87.5607	70.981	75.6337	75.5583	75.0179	73.7946	70.7177
		171.2	78.5266	75.3256	65.1283	85.1052	92.3386	87.8573	71.3378	75.455	75.8128	74.9798	73.9918	70.5717
		171.3	78.9058	75.4306	65.1112	84.7788	92.5337	88.0522	71.722	75.2649	76.0367	74.809	74.1203	70.4882
		171.4	79.1934	75.5727	65.0048	84.5438	92.8276	88.0518	71.9818	75.1305	76.153	74.6617	74.3303	70.3092
		171.5	79.138	75.5622	64.9277	84.3351	92.9137	87.8974	71.9575	75.0611	76.1198	74.4535	74.4813	70.2195
		171.6	78.9297	75.5396	65.1039	84.3128	93.0228	87.5803	71.8934	74.957	75.8709	74.2539	74.5292	70.1841
		171.7	78.6546	75.493	65.4074	84.4419	93.3564	87.0882	71.7672	74.8904	75.6443	74.1767	74.4413	70.2925
		171.8	78.1998	75.3487	65.7021	84.6052	93.6934	86.617	71.5235	74.828	75.3334	74.1525	74.4204	70.3115
		171.9	77.9396	75.081	66.039	84.7071	93.8146	86.3581	71.207	74.8372	75.1781	74.0288	74.4425	70.3686
		172	78.113	74.8929	66.2888	84.7409	94.0338	86.2456	71.1554	74.6633	75.2361	74.0098	74.4283	70.4056
		172.1	78.4995	74.7861	66.4545	84.4519	93.9416	86.0737	71.0076	74.5446	75.5029	74.0628	74.5115	70.4404
		172.2	78.9342	74.7437	66.3566	84.1039	93.6508	85.9654	70.8894	74.2915	75.7626	74.1279	74.7314	70.2909
		172.3	79.3836	74.9242	66.1343	83.9691	93.2498	85.9712	70.8675	74.1095	76.1527	74.235	74.8997	70.2059
		172.4	79.8091	75.1642	65.931	84.0086	92.9978	86.0488	70.9172	73.9291	76.3912	74.4506	74.971	70.0897
		172.5	80.0929	75.4908	65.8313	83.9856	92.6238	86.2393	70.7973	74.0048	76.5464	74.5887	75.0184	70.0286
		172.6	80.1816	75.8608	65.798	84.1516	92.5345	86.7849	70.7307	74.0518	76.4848	74.5891	74.8774	70.0066
		172.7	80.1173	76.151	65.8924	84.3902	92.3114	87.3823	70.6191	74.3196	76.4426	74.502	74.5065	70.1019
		172.8	79.8408	76.1913	66.1042	84.4469	92.1256	87.7486	70.5225	74.4244	76.307	74.4022	74.1599	70.1565
		172.9	79.5478	76.2276	66.1617	84.3511	92.0138	87.9246	70.3787	74.4355	76.3728	74.2679	73.8006	70.2443
		173	79.2885	76.1323	66.0584	84.3894	92.0473	87.796	70.3912	74.2726	76.4613	74.0635	73.5131	70.2587
		173.1	79.106	75.7979	65.9457	84.5206	91.9828	87.4472	70.536	74.1138	76.6402	73.8572	73.42	70.1347
		173.2	78.8964	75.4482	65.8588	84.5748	92.1684	87.0249	70.7174	73.969	76.7956	73.7856	73.6779	70.0891
		173.3	78.9994	75.3388	65.6558	84.6284	92.4319	86.7077	70.763	73.9722	76.9665	73.745	73.9781	70.1663
		173.4	79.0268	75.3218	65.6525	84.7531	92.6792	86.5254	70.9917	74.0167	76.9158	73.7205	74.2575	70.2826
		173.5	78.8717	75.3117	65.792	84.845	92.8592	86.6047	71.1595	74.0833	76.7715	73.7818	74.4584	70.4264
		173.6	78.7325	75.4073	65.9011	84.7742	93.0586	86.7334	71.2454	74.1076	76.6264	73.9154	74.5785	70.6052
		173.7	78.7202	75.4385	65.8666	84.7048	93.1146	86.8754	71.2927	73.8888	76.5107	73.9808	74.3766	70.6567
		173.8	78.5062	75.31	65.9534	84.7414	92.9898	87.1082	71.5001	73.6432	76.3178	73.9088	74.1305	70.5889
		173.9	78.3909	75.15	65.9436	84.6218	92.591	87.2611	71.5078	73.3689	76.1393	73.7818	73.9899	70.4197
		174	78.501	75.0217	65.9605	84.5345	92.102	87.3232	71.4948	73.1725	75.9907	73.6496	74.051	70.3278
		174.1	78.5614	74.9912	66.0524	84.5226	91.546	87.313	71.4693	73.116	75.9574	73.5654	74.2064	70.316
		174.2	78.6149	75.2124	66.2416	84.5691	91.0852	87.3275	71.4862	73.289	75.8735	73.378	74.4821	70.4056
		174.3	78.8791	75.373	66.2984	84.5659	90.9888	87.2409	71.4242	73.4325	75.8628	73.2864	74.8666	70.5522
		174.4	79.235	75.4484	66.4292	84.8339	91.1632	87.173	71.1946	73.587	75.9624	73.2013	75.1911	70.7635
		174.5	79.5396	75.5672	66.4892	85.0001	91.6037	87.1314	70.9514	73.7361	76.0982	73.1914	75.2878	70.968
		174.6	79.9554	75.7503	66.3903	85.0265	92.0303	87.1337	70.8517	73.806	76.1739	73.137	75.337	71.2361
		174.7	80.4518	75.794	66.3168	85.1688	92.4311	87.177	70.7946	73.6971	76.3039	73.2717	75.3293	71.417
		174.8	80.775	75.9172	66.3407	85.4485	92.4354	87.2378	70.6244	73.6181	76.495	73.5532	75.111	71.423
		174.9	80.7694	75.9032	66.2628	85.4838	92.3512	87.3622	70.7633	73.6548	76.7213	73.8451	74.855	71.4049
		175	80.5182	75.7168	66.1157	85.5347	92.082	87.3814	70.8081	73.6676	76.995	74.0158	74.6478	71.2258
		175.1	80.0128	75.2112	66.0757	85.7432	92.0759	87.3888	70.6877	73.6799	77.1629	74.1542	74.2725	70.9486
		175.2	79.2473	74.6208	66.0568	85.6722	91.9759	87.3501	70.531	73.8072	77.3036	74.128	73.9983	70.6073
		175.3	78.397	74.1081	65.9765	85.2033	92.1038	87.3866	70.5584	73.9311	77.3164	73.8404	73.758	70.4675
		175.4	77.7884	73.773	65.7874	84.6982	92.2311	87.3439	70.5593	74.052	77.1815	73.5294	73.6303	70.3912
		175.5	77.4222	73.5181	65.7302	84.2266	92.4012	87.371	70.7624	74.0892	77.0022	73.2232	73.5861	70.4122
		175.6	77.251	73.4932	65.6445	83.7499	92.3368	87.2642	70.897	73.9924	76.8518	72.9544	73.8201	70.3857
		175.7	77.3384	73.6118	65.5456	83.4077	92.3846	86.975	70.9544	73.8707	76.7373	72.8209	74.0658	70.4467
		175.8	77.5846	73.5564	65.6169	83.3828	92.506	86.5622	71.0039	73.6032	76.7306	72.9428	74.3976	70.4468
		175.9	77.7184	73.6255	65.9982	83.5859	92.7164	86.2039	70.9359	73.0656	76.8679	73.1533	74.6724	70.2413
		176	77.9644	73.8321	66.2527	83.8523	92.8332	85.9146	70.8594	72.6524	76.877	73.4197	74.9184	69.9027
		176.1	78.2693	74.0907	66.5305	84.0775	92.8264	85.8706	71.0046	72.4483	76.8944	73.6796	74.9882	69.5626
		176.2	78.5626	74.2872	66.7227	84.1742	92.722	86.1779	71.1606	72.288	76.8702	73.7687	74.9937	69.2248
		176.3	78.8622	74.7803	66.6956	84.1616	92.3412	86.573	71.2196	72.3575	76.8216	73.5167	75.0181	68.9339
		176.4	79.2546	75.1196	66.4008	84.1652	91.8124	86.8806	71.3763	72.7584	76.6905	73.2694	74.9169	68.894
		176.5	79.4497	75.384	66.1998	84.0184	91.5175	87.0964	71.4189	73.1761	76.6958	73.0102	74.7957	69.0706
		176.6	79.5653	75.5592	65.9423	83.9425	91.5925	87.2148	71.2502	73.5106	76.7418	72.7591	74.6568	69.2321
		176.7	79.5941	75.7452	65.7242	84.0737	91.8917	87.0418	71.1504	73.7291	76.7083	72.7591	74.5829	69.3888
		176.8	79.6223	75.7097	65.5859	84.359	92.4197	86.8215	71.1303	73.9114	76.5756	73.023	74.4408	69.5093
		176.9	79.7135	75.7254	65.7165	84.5277	93.0296	86.5952	71.0246	73.9032	76.3438	73.136	74.5358	69.469
		177	79.8962	75.7773	65.9168	84.8184	93.4175	86.363	70.8488	73.7431	76.0818	73.1859	74.6934	69.445
		177.1	80.0462	75.8717	66.2546	84.9711	93.4903	86.0388	70.7244	73.642	75.8447	73.1505	75.0334	69.6879
		177.2	80.0783	75.8471	66.6669	85.0472	93.3655	85.8652	70.7872	73.6919	75.7707	72.9836	75.1584	69.9755
		177.3	79.9079	75.8807	67.1485	84.9514	93.048	85.7581	70.8575	73.7672	75.7538	72.8374	75.255	70.2892
		177.4	79.6241	75.8985	67.436	84.814	92.7489	85.7951	70.968	73.8306	75.9878	72.8821	75.174	70.7764
		177.5	79.2992	75.7095	67.5542	84.5507	92.3474	85.8368	71.2486	73.963	76.13	73.0146	74.9679	71.0976
		177.6	78.9543	75.3275	67.5025	84.3738	91.9971	85.9475	71.5678	73.9078	76.227	73.2767	74.5104	71.1143
		177.7	78.6469	75.1285	67.3753	84.2037	91.5678	86.0258	71.5976	73.8119	76.2738	73.4466	74.2334	70.9547
		177.8	78.5137	74.8279	67.1956	84.1121	91.18	86.0024	71.5823	73.5385	76.4673	73.4685	74.2078	70.7344
		177.9	78.334	74.4942	66.9153	83.9331	90.8567	85.8781	71.5696	73.3817	76.3984	73.3664	74.3271	70.3835
		178	78.0252	74.4563	66.588	83.8214	90.8657	85.9478	71.5299	73.2222	76.4863	73.1958	74.5988	70.2021
		178.1	77.8543	74.684	66.3058	83.7326	91.0568	86.0446	71.4281	73.3012	76.5322	72.948	74.9503	70.2043
		178.2	77.9738	74.7993	65.8508	83.6674	91.4768	86.1761	71.2962	73.4704	76.4908	72.804	75.2913	70.4312
		178.3	78.1481	75.0671	65.3655	83.6153	91.9937	86.3934	71.1626	73.7805	76.263	72.7833	75.3308	70.6238
		178.4	78.5253	75.4102	65.0425	83.833	92.2267	86.5919	70.995	74.0868	76.2033	72.7981	75.1691	70.814
		178.5	79.2326	75.5966	64.8502	84.0821	92.1653	86.5319	70.768	74.467	76.0131	72.9782	74.8201	70.8038
		178.6	79.7817	75.6241	64.7266	84.3566	92.0947	86.4658	70.6695	74.7596	75.8186	73.1572	74.5671	70.7727
		178.7	80.0617	75.6402	64.9314	84.4855	91.7685	86.387	70.7285	74.9262	75.6336	73.3631	74.3097	70.7902
		178.8	80.245	75.6956	65.2041	84.397	91.3878	86.2108	70.7332	74.9437	75.5353	73.5626	74.1483	70.9122
		178.9	80.1046	75.7532	65.488	84.0997	91.2174	86.0951	70.6794	74.7584	75.4788	73.7188	74.199	71.0558
		179	79.5954	75.8358	65.8069	83.8806	91.1215	86.098	70.6381	74.5436	75.5856	73.7179	74.4057	71.345
		179.1	79.2362	76.0392	66.0738	83.5577	90.7504	86.1469	70.5098	74.2812	75.7837	73.7868	74.5783	71.4872
		179.2	79.112	76.3664	66.1847	83.3236	90.4731	86.2288	70.2252	73.9303	76.1497	73.7834	74.6967	71.4288
		179.3	79.1157	76.365	66.0805	83.3731	90.2452	86.4771	70.0958	73.7224	76.5047	73.7822	74.8712	71.3044
		179.4	79.3902	76.0773	65.8853	83.5351	90.118	86.6534	70.1717	73.6512	76.7113	73.8294	74.8985	71.1693
		179.5	79.9229	75.7825	65.6497	83.5005	90.1229	86.7866	70.1844	73.5568	76.9037	73.9132	74.747	71.0559
		179.6	80.2568	75.4188	65.4152	83.4658	90.3012	86.7576	70.2936	73.5352	77.0644	73.8986	74.5581	71.0899
		179.7	80.3402	74.9706	65.1526	83.4857	90.6251	86.5206	70.6421	73.7131	77.0038	73.982	74.5164	71.1965
		179.8	80.3325	74.8487	65.1289	83.5291	90.9325	86.0957	70.8654	73.8611	76.9225	73.9663	74.3721	71.3444
		179.9	80.1808	75.0518	65.1726	83.5407	91.0767	85.8614	70.9774	74.0882	76.9433	74.0852	74.1653	71.4105
		180	79.9585	75.2473	65.1628	83.6974	91.0765	85.6377	71.1726	74.3239	76.7903	74.1318	74.202	71.2532
		180.1	79.8509	75.3029	65.1607	83.9095	91.1092	85.5781	71.1491	74.356	76.6925	74.266	74.3631	71.0213
		180.2	79.6271	75.387	65.234	84.1325	90.994	85.7221	70.8561	74.125	76.7136	74.2351	74.4018	70.7741
		180.3	79.2575	75.4261	65.3194	84.2173	90.8008	86.019	70.6058	73.9895	76.6684	74.2065	74.5188	70.4578
		180.4	78.9553	75.439	65.4213	84.2982	90.613	86.0162	70.2948	73.8958	76.5471	74.0373	74.8084	70.267
		180.5	78.6426	75.3473	65.6352	84.4862	90.5	86.118	69.9883	73.7638	76.509	73.9806	74.8862	70.3258
		180.6	78.4395	75.371	65.8727	84.591	90.4185	86.1215	69.8532	73.9342	76.2732	73.8653	74.7494	70.321
		180.7	78.5726	75.2859	66.0742	84.5348	90.3474	86.187	69.9319	74.3468	76.0837	73.9274	74.5592	70.1546
		180.8	78.8616	75.0825	66.1645	84.4538	90.3557	86.1924	69.9744	74.6158	76.1021	73.9967	74.3362	70.0671
		180.9	79.2042	74.8172	66.179	84.411	90.4442	86.368	70.1275	74.6702	76.079	73.9945	73.9799	69.9758
		181	79.5756	74.7272	66.1659	84.0161	90.5605	86.3538	70.3204	74.8454	76.003	73.9658	73.7386	69.7659
		181.1	79.7308	74.7612	66.2605	83.7354	90.5712	86.4248	70.5728	74.8487	76.0894	73.9306	73.6401	69.6833
		181.2	79.7286	74.8754	66.3093	83.735	90.6787	86.3068	70.7599	74.6976	76.1285	73.8113	73.697	69.8426
		181.3	79.7154	75.0386	66.3742	83.6799	90.7218	86.2226	71.0771	74.5502	76.071	73.8624	73.8166	69.9488
		181.4	79.6768	75.1264	66.645	83.5216	90.7139	86.1313	71.3677	74.597	76.1871	73.919	73.953	70.0402
		181.5	79.5378	75.1112	66.8393	83.5974	90.6514	86.2268	71.515	74.4997	76.5012	73.9063	74.026	70.2002
		181.6	79.3948	74.9638	66.8984	83.6712	90.4817	86.2589	71.5566	74.4239	76.712	73.901	74.0532	70.2684
		181.7	79.1975	74.7556	67.0947	83.4704	90.2893	86.4275	71.6815	74.5634	76.7734	73.8464	73.9305	70.2566
		181.8	78.958	74.5377	67.2724	83.4713	90.3333	86.5943	71.6868	74.6782	76.7546	73.5865	73.7481	70.5151
		181.9	78.4746	74.399	67.2188	83.5315	90.4576	86.8956	71.6648	74.5924	76.6448	73.4014	73.8102	70.774
		182	78.0372	74.3584	67.275	83.6919	90.6794	86.989	71.8106	74.554	76.2632	73.3457	74.0173	71.0368
		182.1	77.8712	74.2983	67.289	83.7419	91.155	87.0006	71.9727	74.4774	75.962	73.4266	74.1758	71.3373
		182.2	77.885	74.4438	67.0069	83.9054	91.4494	86.8777	71.9645	74.1311	75.8269	73.6131	74.4023	71.57
		182.3	77.8994	74.6919	66.706	83.868	91.5404	86.6886	71.8453	73.8048	75.6638	73.9094	74.687	71.3785
		182.4	78.2734	74.8934	66.4528	83.7708	91.4774	86.2271	71.7065	73.6078	75.4464	74.216	74.7515	71.1603
		182.5	78.7135	74.953	66.0353	83.5602	91.1849	85.9115	71.4762	73.3806	75.3832	74.3502	74.7348	70.7639
		182.6	78.977	75.0214	65.6368	83.4452	90.7705	85.7358	71.2996	73.1926	75.3357	74.3383	74.793	70.4492
		182.7	79.1449	74.8757	65.616	83.2762	90.613	85.6477	71.1608	73.1708	75.2242	74.3959	74.8427	70.2446
		182.8	79.4183	74.6424	65.7004	83.2845	90.3704	85.5148	71.0787	73.3104	75.1476	74.3839	74.7943	70.1138
		182.9	79.4396	74.547	65.7273	83.4248	90.214	85.5297	70.9343	73.5036	75.0756	74.2742	74.6352	69.865
		183	79.3367	74.5939	65.9046	83.6169	90.3519	85.4842	70.7194	73.8467	75.0272	74.3088	74.3856	69.8488
		183.1	79.2352	74.7446	66.2202	83.8188	90.5049	85.5071	70.4234	74.1966	75.0296	74.246	74.2248	69.7864
		183.2	79.0888	75.0588	66.393	84.1029	90.4806	85.4914	70.262	74.5102	75.1559	73.9331	74.1548	69.7586
		183.3	78.929	75.4381	66.542	84.155	90.6562	85.6235	70.3785	74.6584	75.4505	73.6852	74.1932	69.9429
		183.4	79.0026	75.7407	66.8512	84.0261	90.794	85.7359	70.5891	74.6869	75.7854	73.7358	74.4216	70.3587
		183.5	79.207	75.9802	67.1003	83.7761	90.7231	85.9527	70.8316	74.5596	76.0739	73.737	74.5174	70.6266
		183.6	79.3972	76.146	67.1005	83.5568	90.7289	85.8912	71.0799	74.4931	76.336	73.9564	74.3826	70.8519
		183.7	79.6345	76.2225	67.0609	83.4191	90.8996	85.8352	71.1075	74.5077	76.4506	74.224	74.104	70.8451
		183.8	79.7295	76.1616	66.8851	83.5773	90.9612	85.6934	70.7739	74.6	76.4342	74.4216	73.7744	70.6474
		183.9	79.613	75.9978	66.5846	83.8977	91.0196	85.5383	70.4622	74.7602	76.4457	74.3153	73.3853	70.3576
		184	79.5262	75.8924	66.276	84.1965	91.1684	85.3063	70.2042	74.909	76.4628	74.2259	73.3515	70.08
		184.1	79.5145	75.8389	66.1398	84.3294	91.1215	85.3829	69.924	74.8856	76.3197	73.9595	73.4568	69.8067
		184.2	79.4639	75.7074	65.9797	84.2501	90.9152	85.5179	69.9266	74.647	76.1998	73.759	73.6007	69.8083
		184.3	79.4805	75.499	66.0056	83.9798	90.6571	85.7108	70.125	74.2776	75.8489	73.6419	73.6328	69.8726
		184.4	79.5847	75.3262	66.0672	83.6411	90.5426	85.8942	70.3327	73.7456	75.4595	73.6246	73.5954	69.8654
		184.5	79.4516	74.9878	66.1295	83.3875	90.3744	85.9775	70.6044	73.2119	75.0567	73.6023	73.349	69.9024
		184.6	79.201	74.5696	66.217	83.1751	90.2829	85.9104	70.9828	72.7324	74.7666	73.6714	73.1309	69.9492
		184.7	78.9709	74.2833	66.2762	82.9791	90.3613	85.8278	71.1848	72.4437	74.5848	73.8491	73.0375	69.8823
		184.8	78.6863	74.227	66.2697	82.855	90.5409	85.5796	71.3003	72.3604	74.8206	74.0391	73.1684	69.8292
		184.9	78.3435	74.3194	66.2409	82.5974	90.6135	85.4128	71.2986	72.5538	75.1013	74.0514	73.4442	69.8763
		185	78.2518	74.5995	66.233	82.214	90.6176	85.4366	71.3116	72.9091	75.4406	74.0134	73.7257	69.9417
		185.1	78.2913	74.8558	66.0621	81.9266	90.652	85.4462	71.2435	73.4572	75.8925	74.035	73.9995	70.0664
		185.2	78.3937	74.9773	65.8846	81.7729	90.5875	85.4584	71.1659	73.8908	76.1532	73.8843	74.17	70.2355
		185.3	78.6236	75.0427	65.6754	81.5728	90.5384	85.6354	71.1728	74.1834	76.2358	73.5618	74.1853	70.4722
		185.4	78.8732	74.8749	65.588	81.7146	90.5449	85.6878	71.1923	74.2651	76.3726	73.4476	74.142	70.6384
		185.5	79.0232	74.6526	65.521	82.1334	90.6923	85.61	71.1072	74.2633	76.4489	73.3264	74.2668	70.7085
		185.6	79.1192	74.5351	65.7007	82.5754	90.9087	85.5264	71.0558	74.0823	76.3941	73.1064	74.3446	70.7682
		185.7	79.0734	74.4568	66.0218	82.9896	90.9744	85.3818	71.0466	73.8932	76.5457	73.0433	74.4006	70.7342
		185.8	78.9385	74.313	66.404	83.5259	91.0715	85.215	70.9731	73.8178	76.6472	73.0333	74.5512	70.5473
		185.9	78.8633	74.418	66.6311	83.9082	91.1324	85.1222	71.1337	73.9447	76.6201	73.0187	74.6604	70.4964
		186	78.7522	74.4923	66.8776	84.119	91.1161	85.1247	71.3084	74.0054	76.6296	73.1237	74.6416	70.5607
		186.1	78.665	74.5032	66.9593	84.2352	91.0113	85.2846	71.4921	74.1998	76.5655	73.233	74.6123	70.5024
		186.2	78.7684	74.5112	66.9792	84.3093	91.1237	85.4522	71.596	74.5206	76.5112	73.2632	74.6806	70.4884
		186.3	78.9294	74.503	66.912	84.3242	91.0162	85.5257	71.7335	74.6995	76.4536	73.4907	74.7448	70.6668
		186.4	79.0953	74.3653	66.924	84.1383	90.7572	85.6513	71.596	74.68	76.4162	73.5938	74.9588	70.7033
		186.5	79.3086	74.2553	66.8842	83.9021	90.4722	85.7226	71.388	74.6183	76.4461	73.5942	75.0781	70.7805
		186.6	79.3463	74.2594	66.7955	83.5959	90.2067	85.5512	71.0292	74.3865	76.6373	73.685	75.1876	70.969
		186.7	79.1988	74.4268	66.713	83.253	89.8806	85.4034	70.7593	74.0623	76.678	73.7578	75.2526	71.0752
		186.8	78.9801	74.7706	66.6238	82.7587	89.6723	85.4146	70.5146	73.8004	76.8451	73.7132	75.0928	71.1153
		186.9	78.6968	75.1816	66.4096	82.4469	89.7008	85.4465	70.347	73.705	76.9898	73.871	74.7378	71.0944
		187	78.3724	75.4831	66.0818	82.1721	89.8234	85.5644	70.2068	73.7658	76.922	74.0397	74.5742	70.7987
		187.1	78.3445	75.5979	65.8764	82.0984	90.0294	85.869	70.2636	73.8657	76.846	74.1313	74.4292	70.4726
		187.2	78.4274	75.6398	65.6678	82.1808	90.1724	86.258	70.3067	74.0193	76.7829	74.2366	74.1454	70.2026
		187.3	78.6172	75.5667	65.3869	82.4635	90.3368	86.6041	70.3516	74.1165	76.4156	74.2657	74.0912	69.9237
		187.4	78.8527	75.3778	65.2396	82.763	90.4287	86.7282	70.5495	74.0134	76.0544	74.1338	74.0257	69.9147
		187.5	78.993	75.2611	65.2015	83.2082	90.6483	86.5446	70.8778	73.8724	75.7723	74.0399	73.886	70.2447
		187.6	78.8097	75.2628	65.0962	83.62	90.7636	86.2815	71.0878	73.7164	75.2861	73.9404	73.8671	70.4437
		187.7	78.5762	75.1916	64.9605	83.8942	91.0238	85.7949	71.2074	73.585	74.8762	73.668	74.0546	70.7577
		187.8	78.2866	75.062	65.09	83.9883	91.2641	85.2089	71.1661	73.6376	74.8795	73.4925	74.1706	71.0049
		187.9	77.952	74.9506	65.1562	83.9484	91.4175	84.9151	70.8592	73.7462	74.9876	73.4115	74.5484	70.9802
		188	77.9733	74.8592	65.2193	83.7118	91.2963	85.0441	70.3705	73.7688	75.1404	73.3774	74.8737	70.8142
		188.1	78.3044	74.6132	65.3464	83.4707	91.2561	85.2162	69.9861	73.8676	75.4454	73.3583	75.0278	70.823
		188.2	78.6716	74.3539	65.482	83.2306	91.0116	85.5909	69.8476	73.9216	75.7284	73.7	75.0188	70.6657
		188.3	79.024	74.2458	65.3612	83.0683	90.7574	86.0759	69.9181	73.807	75.9253	74.0034	75.0798	70.5181
		188.4	79.4804	74.2278	65.3865	83.0696	90.5461	86.3718	70.2056	73.8595	76.0995	74.1259	74.8632	70.4811
		188.5	79.6044	74.1493	65.5264	83.1537	90.4882	86.4134	70.782	73.864	76.3002	74.1053	74.6525	70.3338
		188.6	79.5422	74.2709	65.6197	82.9887	90.2935	86.3736	71.3878	73.8843	76.4739	74.0362	74.6096	70.0748
		188.7	79.3822	74.4452	65.7985	82.8568	90.2585	86.2702	71.8066	73.87	76.5868	73.7395	74.6075	69.9566
		188.8	79.1345	74.4168	66.164	82.7608	90.343	86.043	72.0781	73.8697	76.4859	73.4571	74.5465	69.9084
		188.9	78.8136	74.3169	66.3807	82.5545	90.4483	85.8138	72.257	73.7186	76.2767	73.4351	74.6322	69.8203
		189	78.662	74.4124	66.415	82.449	90.5333	85.6066	72.1589	73.7636	76.0562	73.5057	74.6242	69.8598
		189.1	78.6542	74.5438	66.4344	82.6154	90.8143	85.3346	71.8527	73.8004	75.8786	73.738	74.4036	70.0281
		189.2	78.7991	74.7018	66.2538	82.716	91.098	85.0629	71.5346	73.8064	75.7443	73.9642	74.1249	70.2372
		189.3	79.182	75.0541	66.0627	82.7756	91.2841	84.8042	71.3713	73.926	75.6985	74.1504	73.9307	70.4634
		189.4	79.5531	75.408	65.9469	82.9057	91.3736	84.6868	71.1424	74.166	75.6501	74.0728	73.7445	70.84
		189.5	79.7848	75.5948	66.0008	82.8025	91.3117	84.6275	70.9597	74.405	75.5876	73.956	73.7866	71.2138
		189.6	79.7965	75.6226	65.9973	82.4841	90.9848	84.7646	70.9778	74.6336	75.5301	73.6752	74.0062	71.5695
		189.7	79.7214	75.5997	66.1589	82.2501	90.5017	85.0132	71.0928	74.895	75.5397	73.433	74.3741	71.8104
		189.8	79.4972	75.5582	66.2168	81.9911	90.1536	85.4927	71.1621	75.004	75.6496	73.1886	74.5192	71.8829
		189.9	79.2506	75.566	66.2707	81.7086	90.0578	85.7391	71.2755	75.0081	75.9678	73.167	74.5017	71.7661
		190	79.1134	75.5827	66.1685	81.6019	90.1764	85.913	71.4137	74.8841	76.2423	73.1604	74.4192	71.5914
		190.1	79.181	75.6573	66.0976	81.7672	90.438	86.0194	71.3994	74.5426	76.4934	73.192	74.2585	71.4293
		190.2	79.2054	75.7705	65.9582	81.9684	90.7974	86.0089	71.259	74.2532	76.6298	73.2624	74.109	71.2314
		190.3	79.2204	75.8196	65.9171	82.287	90.8825	85.7975	70.9539	74.0272	76.598	73.369	74.1938	71.131
		190.4	79.3214	75.8127	65.87	82.5413	90.724	85.7586	70.659	73.7806	76.3774	73.267	74.3943	70.96
		190.5	79.4242	75.8095	65.874	82.6383	90.4328	85.7814	70.336	73.5662	76.1849	73.1638	74.5626	70.7908
		190.6	79.3313	75.7493	66.1009	82.5892	90.1836	85.7814	70.0632	73.6918	76.0204	73.1092	74.7392	70.4056
		190.7	79.268	75.6329	66.3768	82.5155	89.8862	85.7219	69.9456	73.7291	75.9119	73.0177	74.744	70.0235
		190.8	79.1381	75.3862	66.5064	82.3152	89.6554	85.5835	69.9228	73.6411	75.9078	72.8586	74.7277	69.8135
		190.9	78.8706	75.1238	66.5755	82.3004	89.6014	85.3396	69.9781	73.6155	76.0232	72.9618	74.8147	69.8159
		191	78.5801	74.9259	66.7384	82.4789	89.6626	85.082	70.1533	73.6153	76.2202	73.1506	74.8641	69.7633
		191.1	78.5251	74.8235	66.6023	82.5318	89.6466	84.837	70.4079	73.5516	76.3327	73.2764	74.9047	69.9229
		191.2	78.4713	74.7184	66.4386	82.5726	89.67	84.5896	70.4988	73.6054	76.3346	73.4821	75.0956	70.2248
		191.3	78.4932	74.8316	66.2865	82.6815	89.7107	84.4814	70.5602	73.881	76.3168	73.9582	75.0544	70.2784
		191.4	78.651	75.0122	66.1266	82.7077	89.4944	84.5648	70.543	74.0739	76.2016	74.1528	74.8221	70.2122
		191.5	78.7908	75.1414	65.8855	82.7056	89.0869	84.696	70.5121	74.2678	75.9935	74.1098	74.5963	70.3798
		191.6	78.7169	75.2403	65.8	82.9773	88.8794	84.8348	70.3509	74.3554	75.8559	74.1141	74.4176	70.48
		191.7	78.7763	75.3982	65.7072	83.0651	88.7942	85.0603	70.2843	74.4291	75.7354	74.1192	74.1702	70.3839
		191.8	78.912	75.4781	65.7178	82.9856	88.8878	85.2746	70.3389	74.3963	75.5574	73.8807	74.1408	70.2364
		191.9	78.9568	75.5236	65.7506	82.7804	89.2352	85.2964	70.4718	74.4244	75.2977	73.7782	74.185	70.1981
		192	78.9622	75.4452	65.6648	82.4446	89.7292	85.2985	70.4638	74.3918	75.0334	73.8838	74.3303	69.9647
		192.1	79.1191	75.2664	65.4541	81.9214	89.9748	85.2374	70.558	74.361	74.8124	73.8969	74.342	69.7322
		192.2	79.1896	75.0505	65.1895	81.7281	90.0865	85.1091	70.6618	74.2363	74.819	73.703	74.3132	69.6342
		192.3	79.1862	74.8177	64.9176	81.8705	90.0984	85.0004	70.7141	74.0945	75.0312	73.4023	74.1947	69.8155
		192.4	79.1785	74.6661	64.709	82.0772	90.0756	84.965	70.7571	73.9778	75.4098	73.0696	74.0696	69.9392
		192.5	79.2163	74.6588	64.6591	82.4045	90.1374	84.7828	71.0564	73.847	75.8297	72.7074	73.7232	70.1746
		192.6	79.2511	74.7565	64.7798	82.885	90.2837	84.668	71.3494	73.6577	76.0594	72.5152	73.5094	70.4887
		192.7	79.2526	74.8175	65.0544	83.1505	90.4373	84.6502	71.6449	73.5255	76.2235	72.4983	73.3972	70.7594
		192.8	79.1949	74.8194	65.2732	83.123	90.4822	84.4557	71.889	73.5067	76.1391	72.6789	73.3823	70.9236
		192.9	79.1852	74.7268	65.3832	83.1935	90.3246	84.2405	72.0763	73.3998	75.9928	72.9808	73.4387	71.0826
		193	79.082	74.7273	65.5066	83.1594	90.0629	84.3144	72.027	73.4016	75.9587	73.2304	73.768	71.0857
		193.1	78.9068	74.7574	65.5822	82.8941	89.8612	84.4292	71.9485	73.4926	76.145	73.3844	74.0593	71.0407
		193.2	78.7854	74.904	65.6413	82.7674	89.668	84.5232	71.7536	73.709	76.1623	73.43	74.2971	71.0306
		193.3	78.7855	75.1173	65.8073	82.83	89.5719	84.8403	71.69	73.8763	76.3248	73.3672	74.3758	70.9051
		193.4	78.9488	75.348	66.0164	82.8201	89.6457	85.251	71.5763	74.1101	76.5504	73.2903	74.4202	70.8626
		193.5	79.3418	75.4667	66.1986	82.9346	89.6938	85.4862	71.5274	74.2826	76.6197	73.3864	74.3194	70.9874
		193.6	79.79	75.4205	66.3475	83.1529	89.6328	85.6983	71.4758	74.4739	76.5716	73.4024	74.319	71.0359
		193.7	80.2181	75.26	66.4048	83.0984	89.548	85.8346	71.5706	74.3363	76.6151	73.5598	74.3331	71.1371
		193.8	80.589	75.1001	66.489	82.912	89.5236	85.9208	71.4981	74.0284	76.599	73.936	74.5254	71.3844
		193.9	80.6519	74.9069	66.6626	82.604	89.5056	85.9371	71.5748	73.7967	76.5329	74.1638	74.6288	71.4427
		194	80.536	74.6378	66.6301	82.0563	89.4853	85.8091	71.5434	73.5748	76.407	74.1947	74.7723	71.4549
		194.1	80.2937	74.5518	66.5325	81.6526	89.5482	85.5059	71.471	73.2996	76.2459	74.3994	74.711	71.5076
		194.2	80.0326	74.5299	66.2731	81.5943	89.6284	85.3038	71.3188	73.2111	76.083	74.5515	74.579	71.3535
		194.3	79.6704	74.4797	65.8819	81.6905	89.6724	85.0366	71.1093	73.3318	75.8878	74.4117	74.329	71.0283
		194.4	79.4434	74.4636	65.4128	81.8979	89.6974	84.6794	70.7218	73.3044	75.6064	74.2704	74.2168	70.822
		194.5	79.3342	74.5323	65.2138	82.286	89.5996	84.542	70.5453	73.2177	75.3555	74.1356	73.9851	70.5192
		194.6	79.3505	74.5607	65.1346	82.4504	89.3981	84.6304	70.5389	73.1208	75.1524	73.8657	73.8883	70.255
		194.7	79.1442	74.587	65.27	82.2768	89.1512	84.6523	70.5206	73.1299	74.9797	73.4878	73.8918	70.137
		194.8	79.0831	74.7042	65.3226	81.9038	88.8504	84.7608	70.7418	73.0894	74.9859	73.1865	73.9221	70.2334
		194.9	78.9846	74.8465	65.3468	81.6005	88.5844	84.9652	71.1627	73.1372	75.159	72.9587	73.8734	70.288
		195	78.6479	75.0743	65.3008	81.4197	88.5256	84.9504	71.478	73.2457	75.4011	72.7429	74.0309	70.3592
		195.1	78.2259	75.2988	65.183	81.39	88.6249	84.8679	71.6103	73.4434	75.7153	72.5238	74.2042	70.3866
		195.2	78.1831	75.4522	65.1148	81.7038	88.8699	84.7399	71.8863	73.573	75.991	72.4108	74.3314	70.3803
		195.3	78.0398	75.5912	65.2238	82.1072	89.1356	84.5026	72.1302	73.5538	76.0833	72.3272	74.494	70.2983
		195.4	77.935	75.7071	65.5251	82.3703	89.3463	84.3217	72.1833	73.3698	76.008	72.3148	74.7076	70.2271
		195.5	78.0296	75.6393	65.7745	82.5117	89.4383	84.4378	72.1172	73.2731	76.1154	72.3119	74.755	70.152
		195.6	78.1916	75.4482	66.0989	82.5085	89.3865	84.5075	72.1057	73.1384	76.1228	72.3422	74.8112	70.0769
		195.7	78.2403	75.3222	66.313	82.2666	89.3396	84.7056	71.899	72.9334	76.1444	72.3091	74.9201	70.2212
		195.8	78.5238	75.1505	66.4275	82.0784	89.3146	84.9578	71.5814	72.9374	76.2853	72.3426	75.0718	70.431
		195.9	78.9214	75.0212	66.2959	82.0109	89.3218	84.952	71.2449	73.2343	76.5348	72.3119	75.1016	70.7701
		196	79.3881	74.9342	66.2875	82.0087	89.4429	84.7692	70.9636	73.3823	76.5132	72.3888	75.1544	71.213
		196.1	79.9771	74.9931	66.1505	82.2378	89.6593	84.4779	70.7417	73.5762	76.5697	72.5375	75.0723	71.701
		196.2	80.4121	75.0855	66.0394	82.5147	89.6913	84.1051	70.6783	73.87	76.649	72.8504	74.8911	71.8943
		196.3	80.4692	75.1353	66.0786	82.7374	89.6215	83.6738	70.557	73.9718	76.5107	73.06	74.5018	71.8837
		196.4	80.3897	75.1243	66.1527	82.8199	89.428	83.5062	70.6007	73.8272	76.253	73.2288	74.237	71.7214
		196.5	80.1769	75.186	66.0564	82.7676	89.2067	83.3898	70.8561	73.6763	76.104	73.3277	74.0312	71.561
		196.6	79.7548	75.2095	66.0857	82.568	89.0386	83.5567	70.9914	73.4254	76.0114	73.3613	73.806	71.4397
		196.7	79.4232	75.1428	66.1816	82.4194	88.8982	83.7127	70.9943	73.1208	75.8836	73.1879	73.6484	71.3339
		196.8	79.3378	75.0508	66.1053	82.2252	88.8208	83.9538	71.1394	73.0277	76.0331	73.1138	73.6983	71.2315
		196.9	79.194	75.0345	66.1384	82.1953	88.9094	84.1095	71.2461	73.0613	76.3048	73.0888	73.6772	71.119
		197	79.0665	74.9738	66.3014	82.201	88.8773	84.2319	71.1724	73.1122	76.4317	73.0987	73.6861	70.8896
		197.1	78.8998	74.9058	66.4646	82.0636	88.5899	84.1941	71.2239	73.1602	76.3058	73.0979	73.9674	70.6284
		197.2	78.7104	74.903	66.4936	81.9271	88.4003	84.3248	71.1393	73.166	76.1819	73.113	74.2888	70.4768
		197.3	78.5536	75.0103	66.5098	81.9127	88.2238	84.4648	70.9769	73.0953	75.844	73.0094	74.6046	70.5054
		197.4	78.5094	75.0024	66.4315	81.8177	88.0632	84.593	70.854	73.0179	75.5128	72.826	74.9302	70.5966
		197.5	78.4041	75.0943	66.2021	81.7718	88.1333	84.7244	70.7396	73.0888	75.3698	72.5467	75.0834	70.7477
		197.6	78.4531	75.1656	65.7474	81.9242	88.4147	84.7832	70.5762	73.3097	75.3897	72.3146	75.0385	70.7473
		197.7	78.6119	75.3221	65.4084	82.0589	88.6404	84.5812	70.6781	73.5868	75.4541	72.2726	74.9336	70.668
		197.8	78.6648	75.4982	65.2128	82.0757	88.8825	84.3442	70.8225	73.896	75.6397	72.4741	74.702	70.4482
		197.9	78.722	75.707	65.108	82.2269	88.976	84.1288	70.8556	74.2525	75.8011	72.7876	74.5589	70.2332
		198	78.8781	75.77	65.113	82.3133	88.9016	83.9336	70.8836	74.5333	75.9228	73.1747	74.6052	70.0573
		198.1	78.9984	75.8582	65.2484	82.3532	88.8375	83.8626	70.8777	74.7318	76.1094	73.496	74.6839	69.9805
		198.2	78.9221	75.7906	65.2717	82.2819	88.8562	83.937	70.8774	75.0278	76.2083	73.6138	74.7172	69.9064
		198.3	78.8132	75.5655	65.1225	82.2914	88.8012	83.908	70.9077	75.2815	76.1918	73.5124	74.8184	69.9923
		198.4	78.5936	75.4017	64.9594	82.0995	88.731	83.9956	70.9403	75.4622	76.0976	73.3846	74.7938	70.0494
		198.5	78.362	75.2523	64.869	81.8909	88.7222	84.0788	71.0386	75.6338	76.004	73.1926	74.5964	69.9966
		198.6	78.1058	74.9659	64.921	81.8066	88.6558	84.1525	71.1455	75.7576	75.8266	73.0606	74.4303	70.0423
		198.7	78.0467	74.5591	65.1126	81.869	88.4823	84.1028	71.2441	75.5776	75.7548	73.0079	74.4037	70.1523
		198.8	78.042	74.178	65.5346	81.7053	88.3307	84.1046	71.284	75.1766	75.921	73.0113	74.3737	70.1584
		198.9	78.2414	73.7431	66.0038	81.5574	88.2934	83.8019	71.5089	74.7599	76.1747	72.9827	74.3688	70.213
[truncated: 3,011 more rows]

## Sheet: Rates average
			Mean (s-1)	SD	N
		ac_BiP_Mg	0.0823067	0.00109441	3
		bc_BiP_Ca	0.00979367	0.000716738	3
		ad_BiP_Mg_Grp170	0.3864	0.0383004	3
		bd_BiP_Ca_Grp170	0.143933	0.00892767	3
