# Supplementary material for: Calcium depletion challenges endoplasmic reticulum proteostasis by destabilising BiP-substrate complexes
Source: eLife. 2020 Dec 9;9:e62601. doi: 10.7554/eLife.62601 (PMC7758071; doi:10.7554/eLife.62601)
Supplement: Supplementary file 3. [file elife-62601-supp3.xlsx]

## Sheet: Exp. 1
Sorce data: Figure 6-figure supplement 2A
	Experiment 1
	DnaK (2531)																	dBiP (2534)																	Kar2 (2606)
	Sample ID	2531_minus_1	2531_0	2531_1	2531_2	2531_3	2531_4	2531_5	2531_6	2531_7	2531_8	2531_9	2531_10	2531_11	2531_12	2531_13	2531_14	Sample ID	2534_minus_1	2534_0	2534_1	2534_2_	2534_3	2534_4	2534_5	2534_6	2534_7	2534_8	2534_9	2534_10	2534_11	2534_12	2534_13	2534_14	Sample ID	2606_minus_1	2606_0	2606_1	2606_2	2606_3_	2606_4	2606_5_	2606_6	2606_7	2606_8	2606_9	2606_10	2606_11	2606_12
	[Ca2+] (µM)	38400	19200	9600	4800	2400	1200	600	300	150	75	37.5	18.75	9.38	4.69	2.34	1.17	[Ca2+] (µM)	38400	19200	9600	4800	2400	1200	600	300	150	75	37.5	18.75	9.38	4.69	2.34	1.17	[Ca2+] (µM)	38400	19200	9600	4800	2400	1200	600	300	150	75	37.5	18.75	9.38	4.69
	Time (s)	FL	FL	FL	FL	FL	FL	FL	FL	FL	FL	FL	FL	FL	FL	FL	FL	Time (s)	FL	FL	FL	FL	FL	FL	FL	FL	FL	FL	FL	FL	FL	FL	FL	FL	Time (s)	FL	FL	FL	FL	FL	FL	FL	FL	FL	FL	FL	FL	FL	FL
	0	123.577	106.799	127.275	96.8653	125.419	100.165	119.318	102.914	93.9055	113.165	92.7034	119.292	91.9696	112.065	99.4354	93.1439	0	123.854	113.741	96.2185	130.687	115.422	116.991	77.9788	105.706	99.5252	89.2893	91.1069	79.7027	93.8143	67.9899	67.1679	82.7021	0	111.992	104.763	105.472	109.517	91.7387	103.386	92.6923	89.6035	85.7973	97.2493	89.9563	89.7511	91.9238	73.5452
	0.1	123.176	106.35	127.021	96.5444	124.351	99.3445	118.372	102.337	93.8443	112.619	92.1327	118.894	91.6549	111.784	98.7131	93.0787	0.1	123.75	114.081	95.9807	130.415	115.17	117.127	77.8271	105.657	99.4328	89.1601	91.1034	79.0535	93.5712	67.6973	67.0484	82.7136	0.1	111.615	105.061	105.451	109.166	91.569	102.846	92.5988	89.8786	85.2979	97.6386	90.1549	89.5695	92.0866	73.8461
	0.2	122.799	106.103	126.554	96.2257	123.505	98.5762	117.368	101.894	93.4579	112.283	91.665	118.275	91.1795	111.348	97.9794	92.7325	0.2	123.669	114.265	95.8957	130.347	114.897	117.313	77.6586	105.678	99.3378	88.9681	91.0619	78.5871	93.5137	67.4506	67.0508	82.6518	0.2	111.061	105.139	105.243	108.824	91.3805	102.636	92.4424	89.8927	84.8858	97.838	90.1295	89.2484	92.1106	73.9553
	0.3	122.317	105.805	126.027	95.87	122.734	97.9631	116.318	101.443	93.1146	111.966	91.0336	117.814	90.542	110.781	97.2235	92.1598	0.3	123.611	114.376	95.953	130.19	114.721	117.397	77.4704	105.646	99.112	88.8516	91.1221	78.1854	93.4099	67.1613	66.9743	82.6348	0.3	110.563	105.241	105.061	108.509	91.2073	102.629	92.3245	89.7503	84.5323	97.8589	89.9488	88.9138	92.1554	74.0006
	0.4	121.661	105.492	125.412	95.4881	121.946	97.3932	115.188	100.862	92.8646	111.607	90.4328	117.364	89.8008	110.157	96.2608	91.5124	0.4	123.549	114.534	95.8662	130.053	114.614	117.414	77.4298	105.484	98.9286	88.7721	91.1004	77.8591	93.2404	66.884	66.794	82.6175	0.4	110.154	105.288	104.911	108.458	91.0525	102.583	92.3461	89.2213	84.1087	97.5462	89.8224	88.6267	92.1558	73.943
	0.5	120.94	105.303	124.624	95.015	121.097	96.7533	114.25	100.261	92.4996	111.041	89.7094	116.767	89.0512	109.471	95.273	90.8435	0.5	123.574	114.839	95.6333	129.875	114.565	117.396	77.4424	105.245	98.6557	88.6556	91.0627	77.5518	93.0134	66.6888	66.6493	82.3757	0.5	109.837	105.37	104.832	108.536	90.8291	102.456	92.3445	88.6074	83.667	97.2732	89.6591	88.337	92.1102	73.692
	0.6	120.34	105.168	123.871	94.462	120.502	96.3193	113.492	99.8166	92.0431	110.557	89.1134	116.013	88.3189	108.779	94.5124	90.273	0.6	123.643	114.914	95.6181	129.873	114.608	117.406	77.3878	104.926	98.4148	88.4453	90.887	77.4685	92.8696	66.5624	66.4433	81.9585	0.6	109.573	105.298	104.72	108.524	90.5613	102.619	92.4058	88.0583	83.4684	96.8828	89.3548	88.111	91.8406	73.3479
	0.7	119.785	105.032	123.255	93.8228	119.944	95.8715	112.856	99.2651	91.5962	110.024	88.4716	115.433	87.6881	108.227	93.8226	89.8013	0.7	123.671	114.89	95.5385	129.873	114.52	117.202	77.4267	104.524	98.1536	88.1349	90.8178	77.4962	92.6359	66.432	66.0663	81.4836	0.7	109.571	105.128	104.765	108.579	90.3126	102.615	92.7206	87.5987	83.3863	96.4304	89.1111	87.9631	91.4492	73.0115
	0.8	119.234	104.823	122.617	93.1536	119.323	95.2373	112.175	98.768	90.9818	109.474	87.8146	114.797	87.2228	107.753	93.2466	89.5425	0.8	123.571	114.788	95.2632	129.987	114.315	116.923	77.436	104.255	97.9288	87.8557	90.6604	77.5373	92.4124	66.3307	65.8004	80.9749	0.8	109.552	104.916	104.843	108.631	90.1246	102.298	92.9954	87.2168	83.2079	95.9272	89.045	87.8861	91.1092	72.6156
	0.9	118.896	104.384	122.076	92.3438	118.772	94.6344	111.56	98.2635	90.193	108.931	87.0698	114.139	86.846	107.403	92.7858	89.2935	0.9	123.35	114.439	95.1915	130.161	114.108	116.68	77.2982	104.045	97.6989	87.6055	90.5106	77.5286	92.2978	66.1563	65.6864	80.473	0.9	109.346	104.664	104.811	108.461	90.0504	101.926	93.1096	87.2253	83.1592	95.6948	88.9254	87.8058	90.7345	72.2908
	1	118.597	103.696	121.699	91.6101	118.147	94.0047	110.748	97.5596	89.541	108.474	86.33	113.547	86.3878	106.992	92.2891	88.8666	1	122.941	113.966	95.2189	130.366	114.008	116.421	77.2068	103.827	97.5532	87.4764	90.1893	77.4258	92.2873	65.9717	65.5252	80.089	1	108.988	104.445	104.633	108.141	90.0535	101.61	93.1294	87.4281	83.1153	95.4266	88.7714	87.6399	90.2948	72.1753
	1.1	118.151	102.979	121.406	91.1234	117.407	93.2692	110.146	96.898	88.8418	108.075	85.5203	113.135	85.9575	106.536	91.7582	88.2512	1.1	122.636	113.547	95.2962	130.438	113.896	115.971	77.0839	103.548	97.4476	87.4459	89.8495	77.3972	92.1921	65.7478	65.4614	79.8076	1.1	108.631	104.245	104.473	108.057	90.2272	101.099	92.9738	87.3638	82.9399	95.1626	88.5656	87.4985	90.0619	72.0764
	1.2	117.652	102.154	121.187	90.6813	116.619	92.5821	109.732	96.3763	88.1927	107.586	84.703	112.65	85.4208	105.999	91.2862	87.6845	1.2	122.451	113.328	95.4051	130.322	114.137	115.644	76.8834	103.266	97.3814	87.5549	89.2953	77.2472	92.0237	65.5318	65.5193	79.6477	1.2	108.254	104.105	104.274	107.975	90.3618	100.62	92.4368	87.1857	82.598	95.0735	88.3378	87.4127	89.9114	71.9814
	1.3	117.336	101.501	120.945	90.2149	115.954	92.1032	109.505	95.7717	87.727	106.904	84.1608	112.021	84.6816	105.477	90.7755	86.9828	1.3	122.382	113.162	95.6789	130.024	114.371	115.376	76.7658	102.854	97.2695	87.6004	88.7526	76.9848	91.7818	65.3578	65.4894	79.4374	1.3	107.871	103.927	104.052	107.938	90.3735	100.406	91.9153	86.9896	82.2419	95.1054	88.0048	87.1522	89.6508	72.017
	1.4	116.99	101.181	120.585	89.9242	115.187	91.5338	109.159	95.1937	87.3777	106.175	83.716	111.364	83.8677	104.785	90.3632	86.305	1.4	122.538	113.315	95.766	129.655	114.421	115.176	76.7906	102.482	97.0733	87.5572	88.2222	76.6182	91.2982	65.2977	65.3692	79.2388	1.4	107.626	103.734	104.013	108.004	90.1843	100.308	91.4465	86.5544	81.7806	95.0737	87.663	86.916	89.4786	71.9936
	1.5	116.543	101.088	120.075	89.6239	114.533	90.9948	108.88	94.8197	86.8515	105.379	83.3902	110.654	83.103	104.165	90.1112	85.7452	1.5	122.757	113.618	95.688	129.198	114.319	114.978	76.7664	102.199	96.8231	87.3112	87.9441	76.2836	90.7542	65.1101	65.2977	78.9997	1.5	107.504	103.362	104.077	108.044	89.8112	100.257	91.0508	86.0615	81.3649	95.1286	87.3804	86.7981	89.5297	71.8461
	1.6	116.321	100.966	119.469	89.2252	114.166	90.7133	108.433	94.2325	86.2944	104.462	83.0549	109.882	82.3856	103.583	89.7794	85.2338	1.6	122.746	114.056	95.3738	128.867	114.131	114.996	76.8522	102.193	96.4633	87.0734	87.916	75.8199	90.3542	64.9106	65.2034	78.8212	1.6	107.368	103.019	104.084	107.935	89.3162	100.438	90.6583	85.8787	80.9736	95.1433	87.2462	86.6658	89.4202	71.6747
	1.7	116.13	100.863	118.805	88.9291	113.983	90.4365	107.665	93.5228	85.6619	103.547	82.8228	109.104	81.8818	102.909	89.3655	84.7043	1.7	122.621	114.3	95.044	128.672	113.573	115.108	76.8988	102.113	96.0314	86.7912	88.0453	75.4757	89.9878	64.726	65.054	78.6242	1.7	107.129	102.744	103.899	107.787	88.972	100.739	90.421	85.8446	80.6301	94.9877	87.1	86.4264	89.3058	71.5423
	1.8	115.846	100.589	118.264	88.6805	113.703	89.963	106.788	92.8036	85.0016	102.704	82.4536	108.413	81.5926	102.116	88.9284	84.2425	1.8	122.531	114.545	94.5897	128.603	112.965	115.261	76.8428	102.045	95.7061	86.5348	88.1541	75.331	89.7488	64.5145	64.9073	78.4813	1.8	106.843	102.669	103.646	107.648	88.6993	100.932	90.2011	85.8017	80.3381	94.8546	86.8362	86.388	89.1947	71.3497
	1.9	115.47	99.9898	117.871	88.3105	113.45	89.4952	106.138	91.9294	84.2746	101.806	82.0946	107.673	81.3389	101.397	88.4765	83.7994	1.9	122.2	114.513	94.3119	128.501	112.468	115.337	76.6446	101.936	95.4098	86.4321	88.3267	75.3134	89.7672	64.3552	64.7604	78.365	1.9	106.6	102.658	103.299	107.375	88.5358	101.022	90.034	85.9054	80.172	94.5768	86.4839	86.3271	88.9442	71.2711
	2	115.159	99.231	117.526	87.9227	113.092	89.0572	105.543	91.0634	83.6511	100.94	81.5978	106.994	81.0822	100.61	87.8786	83.3244	2	121.786	114.284	94.2589	128.425	111.998	115.338	76.3381	101.572	95.119	86.4311	88.4541	75.3252	89.779	64.2439	64.559	78.4333	2	106.44	102.87	102.893	107.157	88.5753	101.021	89.9111	85.8712	79.9681	94.1412	86.1292	86.1311	88.4365	71.2751
	2.1	114.604	98.4546	117.055	87.4185	112.501	88.3391	104.925	90.4638	83.1693	100.208	81.1059	106.392	80.6704	99.7894	87.4377	82.8316	2.1	121.523	113.895	94.3465	128.185	111.536	115.186	75.9074	100.958	94.957	86.3844	88.4004	75.4066	89.6763	64.2438	64.2769	78.4948	2.1	106.288	103.161	102.661	106.973	88.651	100.681	89.922	85.5871	79.9104	93.6953	85.6929	85.7723	88.0742	71.3289
	2.2	114.11	97.675	116.554	86.7953	111.703	87.5808	104.494	90.0825	82.8549	99.441	80.5161	105.82	80.0281	99.0978	87.0638	82.2748	2.2	121.38	113.667	94.4428	127.9	111.258	114.99	75.6036	100.51	94.8769	86.3511	88.2851	75.3898	89.588	64.3572	64.0313	78.4032	2.2	106.236	103.449	102.758	106.71	88.6101	100.183	89.9406	85.2681	79.9254	93.3414	85.3035	85.4418	87.7726	71.2993
	2.3	113.565	97.0586	115.868	86.1875	111.023	87.0781	104.132	89.8805	82.5314	98.8601	79.8284	105.311	79.3034	98.5738	86.7194	81.6595	2.3	121.192	113.458	94.5074	127.611	111.255	114.853	75.3657	100.041	94.6586	86.2627	88.1478	75.2446	89.4416	64.4982	63.7693	78.2484	2.3	106.331	103.507	102.876	106.348	88.4882	99.784	89.9553	85.0344	80.1295	92.9157	85.1498	85.0465	87.5227	71.2246
	2.4	113.001	96.6544	115.184	85.7058	110.399	86.734	103.501	89.9714	82.2828	98.3409	79.0086	104.867	78.6007	98.0801	86.2546	81.0798	2.4	121.142	113.381	94.3815	127.331	111.363	114.828	75.2502	99.6658	94.454	85.9808	87.8785	75.1352	89.0954	64.3326	63.4843	78.1236	2.4	106.428	103.514	103.004	105.956	88.2007	99.4529	89.8748	84.6452	80.2533	92.7305	85.1573	84.508	87.3282	71.0025
	2.5	112.418	96.2462	114.585	85.291	109.95	86.3902	102.734	90.1296	81.9388	97.7876	78.318	104.385	77.9761	97.6097	85.8304	80.6144	2.5	121.236	113.336	94.0954	127.189	111.364	114.944	75.2215	99.5924	94.2345	85.7386	87.4928	75.0016	88.6966	64.1971	63.296	77.8531	2.5	106.452	103.321	103.111	105.436	87.7785	99.062	89.6412	84.3316	80.3775	92.6801	85.1189	84.1008	87.2667	70.6553
	2.6	112.107	95.99	114.193	84.9843	109.651	86.1936	102.045	90.1629	81.47	97.2353	77.8126	103.713	77.5517	97.2047	85.3378	80.16	2.6	121.34	113.325	93.7901	127.176	111.457	115.12	75.3161	99.7027	93.9434	85.5746	87.0221	74.6921	88.4825	63.9918	63.1714	77.5171	2.6	106.574	102.942	102.966	104.862	87.2898	98.889	89.4322	84.2314	80.369	92.6622	85.2	83.9778	87.0581	70.2497
	2.7	111.804	95.7856	113.891	84.7715	109.421	86.03	101.326	89.8892	80.8343	96.9266	77.37	102.938	77.3496	96.8526	84.8198	79.7318	2.7	121.397	113.175	93.4436	127.262	111.552	115.176	75.318	99.8172	93.7179	85.51	86.5457	74.3418	88.3543	63.5941	63.0448	77.3381	2.7	106.667	102.586	102.593	104.511	86.6874	98.7566	89.244	84.086	80.2952	92.7209	85.2408	83.8607	86.89	69.9602
	2.8	111.666	95.4274	113.703	84.4245	109.025	85.666	100.632	89.4034	80.0634	96.6027	77.0385	102.125	77.2519	96.3412	84.2892	79.4749	2.8	121.472	113.043	93.2297	127.385	111.4	115.051	75.3236	100.078	93.5769	85.5146	86.1371	73.9842	88.2464	63.1754	63.0146	77.2503	2.8	106.633	102.314	102.319	104.279	86.1363	98.4544	89.027	83.8736	79.9108	92.8408	85.098	83.736	86.7932	69.7308
	2.9	111.695	95.064	113.347	84.0212	108.643	85.1183	100.177	88.7202	79.2044	96.3544	76.8794	101.329	77.1389	95.8234	83.7168	79.1492	2.9	121.537	112.888	93.1958	127.529	111.198	114.639	75.2434	100.305	93.4821	85.603	85.814	73.4804	88.2509	63.0138	63.0356	77.0029	2.9	106.587	102.096	102.06	104.308	85.9078	98.1447	88.7366	83.859	79.4277	92.8064	84.7946	83.9185	86.758	69.6131
	3	111.809	94.7762	112.846	83.5702	108.052	84.4482	99.7783	87.8427	78.4848	96.2286	76.684	100.592	76.9448	95.3885	83.0476	78.7355	3	121.564	112.773	93.4226	127.518	111.188	114.15	75.1189	100.338	93.4765	85.6159	85.5194	72.957	88.2877	62.8242	62.922	76.7477	3	106.47	102.085	101.931	104.585	85.7164	98.0817	88.5494	83.9621	78.9075	92.8364	84.4382	84.0858	86.6571	69.6187
	3.1	111.701	94.4956	112.229	83.0507	107.349	83.835	99.3167	87.0089	77.9416	96.1076	76.4324	100.093	76.744	95.0329	82.3484	78.3035	3.1	121.551	112.662	93.7669	127.483	111.145	113.559	74.9359	100.256	93.5718	85.5957	85.3808	72.7048	88.047	62.637	62.8426	76.5203	3.1	106.236	102.214	102.035	104.927	85.5644	97.9064	88.2452	83.8821	78.3993	92.9872	83.8446	84.0512	86.5864	69.6204
	3.2	111.496	94.2044	111.424	82.435	106.628	83.283	98.9286	86.3749	77.5293	95.8225	76.2683	99.8596	76.4985	94.5918	81.6138	77.9193	3.2	121.454	112.563	94.1805	127.379	111.162	112.94	74.7252	100.152	93.6312	85.4123	85.3022	72.5129	87.757	62.5432	62.7736	76.2305	3.2	105.988	102.258	102.214	105.029	85.5813	97.7054	88.0181	83.8032	77.8928	92.9398	83.2537	84.1297	86.4048	69.5617
	3.3	111.116	94.0068	110.664	81.9855	105.959	82.8102	98.5936	85.8189	77.2842	95.413	76.098	99.6883	76.1505	94.2892	80.8433	77.4092	3.3	121.346	112.306	94.4342	127.091	111.296	112.313	74.5329	99.9477	93.7935	85.2243	85.2297	72.3453	87.518	62.4315	62.6294	75.9748	3.3	105.922	102.244	102.242	104.944	85.5792	97.581	87.8256	83.7458	77.5947	92.8968	82.7276	84.1884	86.1245	69.509
	3.4	110.655	93.7653	110.044	81.5477	105.157	82.4636	98.2397	85.402	77.1301	95.0153	75.8615	99.5473	75.7588	93.998	80.3282	76.9228	3.4	121.221	112.035	94.4989	126.879	111.416	111.9	74.394	99.7016	93.878	85.0852	85.1274	72.2678	87.3588	62.2214	62.4789	75.8447	3.4	105.788	102.128	102.168	104.681	85.3338	97.2956	87.7765	83.5938	77.4689	92.8983	82.3405	84.0344	85.7294	69.3704
	3.5	110.1	93.4795	109.591	81.1033	104.538	82.289	97.9746	85.0488	76.9759	94.553	75.6408	99.2785	75.3692	93.5945	80.0612	76.463	3.5	121.158	111.749	94.3197	126.669	111.272	111.456	74.349	99.5752	93.8256	84.9409	85.0075	72.3705	87.2153	62.1328	62.4363	75.7539	3.5	105.723	101.837	101.935	104.215	85.1969	96.7356	87.7912	83.37	77.3778	92.6744	82.1233	83.858	85.4288	69.2021
	3.6	109.679	93.0693	109.254	80.8058	103.9	82.055	97.8453	84.7492	76.6918	93.962	75.406	98.781	74.8381	93.0712	79.8742	76.1487	3.6	121.04	111.507	93.9409	126.363	111.153	111.079	74.3059	99.3547	93.5994	84.642	84.8637	72.4434	87.1787	62.0703	62.3824	75.587	3.6	105.725	101.468	101.498	103.685	85.1304	96.3024	87.8696	83.2937	77.3219	92.2339	82.1392	83.7489	85.2044	69.0434
	3.7	109.402	92.5749	109.112	80.535	103.233	81.7879	97.7674	84.4245	76.4154	93.3571	75.1464	98.0719	74.2034	92.5271	79.8392	75.8326	3.7	120.898	111.351	93.4602	126.091	110.955	110.877	74.2952	99.0956	93.1777	84.3354	84.6832	72.6296	87.0072	61.9178	62.3238	75.4229	3.7	105.744	101.134	100.985	103.301	85.0661	96.0418	87.7984	83.3454	77.3858	91.8365	82.1982	83.3958	85.0017	68.935
	3.8	109.133	92.0489	108.883	80.2596	102.509	81.5368	97.5696	84.1197	76.1315	92.7927	74.8824	97.2814	73.6153	92.0187	79.9541	75.5413	3.8	120.75	111.45	93.1533	126.046	110.753	110.822	74.1454	98.8842	92.6776	83.9172	84.5188	72.7716	86.6859	61.7506	62.1524	75.1837	3.8	105.5	100.921	100.498	103.169	85.0406	95.8736	87.7297	83.383	77.3921	91.3508	82.3211	83.0878	84.781	68.7687
	3.9	108.81	91.5327	108.557	80.0294	101.963	81.2299	97.2558	83.7451	75.8615	92.1748	74.6365	96.4775	73.2462	91.5146	79.9065	75.2899	3.9	120.742	111.559	93.0079	125.975	110.535	110.742	73.9649	98.6162	92.2834	83.3913	84.4245	72.9391	86.2489	61.6654	61.9518	74.9718	3.9	105.293	100.903	100.025	103.005	85.0647	95.8908	87.725	83.4798	77.3201	90.9049	82.4334	82.7678	84.6872	68.7086
	4	108.617	91.0705	108.026	79.8454	101.309	80.8211	96.9839	83.3837	75.3964	91.5771	74.3252	95.8118	72.866	91.0436	79.6278	75.0418	4	120.695	111.734	92.881	125.938	110.625	110.738	73.6988	98.3747	92.0364	82.9398	84.4831	72.8355	85.8245	61.4484	61.6465	74.7765	4	105.075	101.019	99.579	102.941	84.9096	96.1148	87.6139	83.5658	77.3448	90.6674	82.4165	82.3496	84.6077	68.6556
	4.1	108.457	90.6937	107.409	79.573	100.727	80.3865	96.5939	82.8789	74.9568	91.182	73.9276	95.3191	72.6114	90.6633	79.3148	74.7123	4.1	120.684	111.75	92.7849	125.945	110.6	110.847	73.3482	98.3398	91.9162	82.6502	84.556	72.5759	85.4318	61.1652	61.2036	74.6784	4.1	104.843	101.076	99.327	103.072	84.7203	96.3764	87.435	83.5614	77.3426	90.643	82.2637	81.9321	84.5377	68.5764
	4.2	108.234	90.5628	106.758	79.4109	100.307	79.9577	95.9956	82.3182	74.429	90.8499	73.349	94.9372	72.5042	90.3501	78.9816	74.3776	4.2	120.707	111.71	92.9253	125.813	110.534	110.917	73.0814	98.2922	92.062	82.517	84.632	72.1636	85.2511	61.0529	60.7435	74.6914	4.2	104.596	101.122	99.1046	103.221	84.4484	96.626	87.3976	83.4474	77.1354	90.7455	82.1492	81.7704	84.4152	68.4305
	4.3	108.114	90.482	106.201	79.2628	100.111	79.4889	95.3664	81.7705	73.8722	90.4629	72.8068	94.6622	72.3928	89.9585	78.4568	74.0061	4.3	120.731	111.51	93.0489	125.566	110.436	111.009	72.922	98.1235	92.0904	82.4604	84.5566	71.863	85.146	60.9518	60.4084	74.7632	4.3	104.555	101.064	99.0059	103.15	84.2356	96.888	87.3348	83.3436	76.9176	90.9534	81.9859	81.4955	84.4127	68.3134
	4.4	107.99	90.5054	105.762	79.0293	99.8612	79.0224	94.8156	81.192	73.3185	90.0377	72.3468	94.4444	72.1102	89.6247	77.9245	73.6022	4.4	120.553	111.242	93.2011	125.134	110.394	111.095	72.7514	98.0408	92.0454	82.4779	84.4119	71.5095	84.9384	60.8243	60.0644	74.7293	4.4	104.522	100.918	99.0751	103.214	84.0996	97.1432	87.1079	83.1568	76.8176	90.9568	81.7973	81.231	84.4552	68.1041
	4.5	107.641	90.6083	105.585	78.8439	99.6806	78.7408	94.027	80.6634	72.9844	89.6331	71.9937	94.127	71.9631	89.3444	77.4798	73.2353	4.5	120.203	110.929	93.3522	124.818	110.249	111.276	72.6392	97.9137	91.8707	82.4165	84.1654	71.3719	84.7197	60.6815	59.8637	74.6547	4.5	104.468	100.707	99.207	103.251	84.1548	97.3762	86.8754	82.9305	76.5952	90.8198	81.6442	81.0988	84.4131	67.9366
	4.6	107.078	90.6494	105.381	78.5001	99.5429	78.5699	93.3026	80.2314	72.6852	89.0334	71.5912	93.7479	71.7308	88.8567	76.9582	72.8803	4.6	119.843	110.798	93.6046	124.755	110.238	111.366	72.7582	97.7672	91.584	82.4122	83.881	71.2614	84.5144	60.6521	59.9082	74.5464	4.6	104.381	100.575	99.1245	103.116	84.1909	97.4032	86.671	82.727	76.4758	90.4872	81.5557	80.9146	84.3006	67.8597
	4.7	106.403	90.409	105.209	78.0442	99.2768	78.4378	92.7278	79.833	72.6162	88.3603	71.3622	93.3095	71.3408	88.2965	76.2682	72.5459	4.7	119.501	110.791	93.6348	124.827	110.314	111.369	72.8432	97.6457	91.1343	82.3132	83.6228	71.2668	84.2004	60.557	60.0262	74.3067	4.7	104.225	100.4	99.102	102.839	84.2386	97.2428	86.2803	82.4869	76.5874	89.9738	81.3292	80.5524	84.3044	67.7202
	4.8	105.697	90.1572	104.983	77.4989	98.9907	78.4461	92.3982	79.36	72.517	87.8762	71.1372	92.8112	70.9609	87.7084	75.8253	72.2511	4.8	119.188	110.832	93.5974	124.934	110.313	111.255	72.97	97.6838	90.8249	82.2728	83.509	71.2131	83.933	60.5015	60.2272	73.9683	4.8	103.964	100.336	98.9627	102.604	84.329	96.921	85.8385	82.3102	76.786	89.423	81.1066	80.3307	84.175	67.5359
	4.9	105.048	89.691	104.668	77.0062	98.7112	78.5776	92.084	78.9522	72.3442	87.4752	70.7981	92.1078	70.6073	87.0417	75.5008	71.8635	4.9	118.989	110.935	93.346	125.325	109.977	111.243	73.18	97.7717	90.4786	82.1793	83.4337	71.2334	83.9537	60.4232	60.4542	73.6827	4.9	103.739	100.238	98.6453	102.244	84.387	96.4664	85.4618	82.1501	76.8097	89.177	80.8662	80.24	83.801	67.3257
	5	104.612	89.1003	104.145	76.3219	98.364	78.5352	91.9505	78.4662	72.1696	87.1123	70.3877	91.5418	70.1366	86.2942	75.1704	71.4509	5	118.963	111.019	93.1034	125.458	109.6	111.049	73.3945	97.7558	90.1974	82.1261	83.278	71.0965	83.9266	60.4069	60.5978	73.3966	5	103.568	100.075	98.3496	101.916	84.3584	95.8349	85.1459	82.0176	76.8783	89.0185	80.6302	80.0674	83.4104	66.8859
	5.1	104.623	88.6203	103.701	75.9002	97.9837	78.4705	91.8046	77.9746	71.8752	86.8881	70.1368	91.1254	69.7498	85.786	74.9896	70.9991	5.1	118.987	111.109	92.8129	125.231	109.179	110.924	73.443	97.6526	90.0995	81.8571	83.0733	71.0817	83.9516	60.269	60.503	73.117	5.1	103.442	99.9864	98.2284	101.636	84.334	95.4843	84.873	81.8381	76.8013	88.9792	80.4127	79.8879	83.0802	66.4086
	5.2	104.796	88.2413	103.127	75.5342	97.7104	78.3373	91.6512	77.5682	71.4084	86.7135	69.8224	90.646	69.5137	85.3921	74.948	70.5001	5.2	118.987	110.974	92.4042	125.055	108.685	110.986	73.3745	97.4991	90.0887	81.529	82.7974	70.9291	84.0101	60.0425	60.2396	72.9161	5.2	103.551	99.9926	98.0824	101.449	84.3858	95.1504	84.8512	81.7648	76.6134	89.0402	80.3204	79.7872	82.7206	66.079
	5.3	104.963	87.7884	102.633	75.287	97.3384	77.9658	91.2935	77.304	70.9766	86.3902	69.4872	90.1157	69.3348	84.9902	74.7548	70.0975	5.3	118.897	110.798	92.0185	124.966	108.234	111.131	73.2214	97.3217	90.1296	81.2097	82.5187	70.7372	84.05	59.75	59.8886	72.7982	5.3	103.814	99.8358	98.0814	101.283	84.1661	94.8939	85.0575	81.5872	76.3662	88.9256	80.2474	79.5896	82.3624	65.9391
	5.4	105.105	87.4712	102.317	75.0576	96.885	77.4879	90.8862	76.9422	70.5773	86.0501	69.1132	89.8233	69.1614	84.5228	74.4263	69.9692	5.4	118.749	110.654	91.787	124.717	108.214	111.098	72.989	97.0834	90.2088	81.0199	82.2693	70.4532	83.8477	59.4277	59.591	72.703	5.4	104.068	99.583	98.2384	101.247	83.9044	94.7548	85.3385	81.4458	76.2863	88.66	80.1718	79.1922	82.1701	65.8972
	5.5	105.116	87.2444	102.187	75.1367	96.4617	77.0707	90.4526	76.6384	70.131	85.5662	68.7862	89.4786	69.0745	84.1346	74.0572	69.8599	5.5	118.62	110.673	91.5831	124.698	108.099	111.024	72.7108	96.9612	90.2893	80.8137	82.1678	70.3097	83.8577	59.1264	59.2983	72.6172	5.5	104.382	99.531	98.3268	101.258	83.6402	94.8296	85.6137	81.369	76.234	88.3442	80.1109	78.9175	82.0828	66.1418
	5.6	104.586	86.9762	101.96	75.1342	96.1483	76.5736	89.8852	76.2979	69.8826	84.9576	68.4629	88.9919	68.9416	83.643	73.5554	69.7801	5.6	118.462	110.659	91.3337	124.928	107.913	110.762	72.4409	96.7719	90.173	80.6907	82.1721	70.0049	83.848	58.9384	59.2054	72.5458	5.6	104.823	99.4137	98.4111	101.243	83.3909	94.6874	85.8867	81.4216	76.2303	87.9954	80.0503	78.7504	81.954	66.419
	5.7	103.871	86.792	101.827	75.132	95.8286	76.0718	89.2821	75.9056	69.6121	84.4138	68.1554	88.6577	68.7152	83.1895	72.9435	69.7161	5.7	118.466	110.88	91.3212	125.036	107.793	110.3	72.255	96.5622	89.9782	80.7064	82.2205	69.7028	83.8362	58.878	59.3173	72.4236	5.7	104.992	99.2713	98.5416	101.132	83.1485	94.6282	85.9813	81.404	76.197	87.7328	79.9436	78.6389	81.898	66.5714
	5.8	103.083	86.7124	101.489	74.9106	95.5451	75.7236	88.6868	75.4834	69.4361	83.8926	67.8433	88.3989	68.3322	82.943	72.3376	69.5288	5.8	118.549	111.053	91.241	124.872	107.857	109.712	72.183	96.2106	89.5828	80.5774	82.2903	69.4474	83.7231	58.9865	59.412	72.1936	5.8	104.928	99.3036	98.579	101.125	83.2205	94.5911	85.7962	81.4308	76.1258	87.7537	79.8611	78.6986	82.0443	66.5374
	5.9	102.308	86.6896	100.88	74.6636	95.3512	75.4159	88.1344	75.2107	69.3086	83.3117	67.6588	88.0282	67.896	82.9197	71.76	69.1344	5.9	118.592	111.31	91.1292	124.793	107.831	109.135	72.1691	95.8692	89.1922	80.2852	82.2795	69.2649	83.7416	59.2159	59.5091	71.9521	5.9	104.667	99.4457	98.4594	101.012	83.2846	94.485	85.5288	81.3506	75.9434	87.8042	79.8521	79.0734	82.2958	66.5172
	6	101.588	86.498	100.103	74.2167	95.25	75.0269	87.5741	74.984	69.189	82.7917	67.4494	87.5997	67.3995	82.9235	71.2674	68.7552	6	118.521	111.338	91.1066	124.733	107.961	108.682	72.2287	95.5689	88.8373	80.0503	82.1753	68.967	83.4513	59.3681	59.5965	71.7136	6	104.235	99.3116	98.4936	100.735	83.3449	94.2887	85.2201	81.1233	75.7289	87.9203	79.8734	79.3558	82.5737	66.3998
	6.1	101.139	86.2175	99.5592	73.7897	94.984	74.608	87.1551	74.8921	68.9412	82.4732	67.1523	87.1383	66.9094	82.9347	70.8942	68.4642	6.1	118.359	111.221	91.177	124.49	108.18	108.402	72.3245	95.4258	88.6604	79.8012	81.9838	68.7739	83.0666	59.5142	59.5052	71.5372	6.1	103.571	99.1552	98.4416	100.474	83.3936	94.114	84.811	80.7014	75.433	88.025	79.838	79.6487	82.9112	66.2729
	6.2	100.861	85.8663	99.1261	73.3885	94.5866	74.2561	86.8705	74.8266	68.6642	82.1499	66.7854	86.5512	66.4664	82.7964	70.7401	68.2608	6.2	117.998	110.894	91.2766	124.208	108.318	108.247	72.4592	95.394	88.538	79.3919	81.7894	68.6476	82.6982	59.5125	59.2057	71.3153	6.2	103.096	99.0987	98.4093	100.379	83.414	93.9224	84.3874	80.2775	75.1705	88.1218	79.7739	79.9938	83.0586	66.2253
	6.3	100.826	85.4775	98.9507	73.3031	94.1196	73.9004	86.6289	74.7088	68.2362	81.8951	66.3494	85.8025	66.0823	82.5917	70.6492	68.089	6.3	117.57	110.732	91.4902	124.113	108.246	108.3	72.4877	95.4165	88.6366	79.143	81.5308	68.4936	82.457	59.3364	58.9223	71.2956	6.3	102.754	98.9483	98.3128	100.239	83.2877	93.632	84.1691	79.8732	74.8666	87.9937	79.6814	80.2027	82.9341	66.2005
	6.4	100.821	85.0014	98.9677	73.2525	93.7388	73.4246	86.3438	74.5405	67.8656	81.8168	65.8762	85.0311	65.8089	82.246	70.7829	67.922	6.4	117.177	110.351	91.6336	123.869	108.093	108.533	72.5179	95.3	88.7715	78.9651	81.3591	68.2795	82.1552	59.0042	58.5128	71.2851	6.4	102.741	98.6975	98.3214	100.148	83.3256	93.6004	83.9903	79.5955	74.6141	87.7604	79.5891	80.1743	82.6873	66.0857
	6.5	100.803	84.7195	99.1293	73.137	93.3138	73.0345	86.0918	74.3834	67.5168	81.791	65.4573	84.3671	65.527	81.8561	71.0002	67.6786	6.5	116.87	110.107	91.5875	123.427	107.926	108.816	72.4363	95.1326	88.8568	78.708	81.1551	68.1161	82.0848	58.7748	58.0422	71.2689	6.5	102.723	98.664	98.1399	100.232	83.3822	93.5348	83.8998	79.4418	74.3276	87.4934	79.5256	80.1948	82.2828	65.8297
	6.6	100.809	84.5066	99.1646	73.0161	92.9664	72.6324	85.9409	74.2536	67.2964	81.6668	65.1233	83.7921	65.2772	81.5995	71.186	67.3794	6.6	116.801	110.06	91.4068	123.093	107.724	109.085	72.25	94.9406	88.8689	78.6308	81.023	68.0099	82.068	58.4906	57.6964	71.1828	6.6	102.675	98.6444	97.9515	100.25	83.4497	93.6117	83.8517	79.4393	74.2522	87.2248	79.4991	80.058	81.7185	65.5045
	6.7	100.752	84.3889	99.0322	72.8506	92.6872	72.1376	85.6148	74.1162	67.202	81.5166	64.9499	83.4414	65.1072	81.4622	71.185	67.0644	6.7	116.833	110.114	91.0476	122.931	107.585	109.278	72.0452	94.704	88.8576	78.7585	80.8811	67.9264	82.0665	58.4414	57.5012	71.2086	6.7	102.484	98.4084	97.6201	100.213	83.459	93.6573	83.8113	79.4109	74.1654	86.7472	79.5072	79.6536	81.2944	65.2674
	6.8	100.364	84.2941	98.7209	72.4444	92.4937	71.6478	85.2504	73.9546	67.3269	81.3285	64.9451	83.5048	65.1276	81.202	71.1432	66.8012	6.8	116.984	109.985	90.6459	122.749	107.438	109.359	71.9874	94.694	88.5865	78.8337	80.6855	67.829	82.0156	58.4477	57.29	71.0849	6.8	102.262	98.1738	97.4683	100.178	83.4988	93.6741	83.6489	79.2442	74.1737	86.3984	79.3772	79.2531	81.081	65.036
	6.9	99.99	84.1889	98.345	72.0116	92.2179	71.3058	84.8877	73.6991	67.2549	80.9606	64.9192	83.7487	65.0467	80.9703	70.9068	66.5314	6.9	117.191	109.98	90.3906	122.606	107.264	109.285	71.9617	94.9535	88.2406	79.0053	80.3407	67.7214	81.9687	58.6106	57.147	70.9517	6.9	101.87	98.1204	97.2868	100.21	83.262	93.3774	83.4861	79.104	74.125	86.1773	79.1563	78.871	80.9218	64.8078
	7	99.5914	83.9626	97.921	71.6995	91.924	70.926	84.5007	73.2612	67.0814	80.5938	64.8652	83.9688	64.9126	80.8408	70.5529	66.2396	7	117.411	109.937	90.268	122.573	106.974	109.097	72.0086	95.2855	87.9338	79.2059	80.0948	67.63	81.859	58.7307	57.169	70.8622	7	101.556	97.9774	97.1571	100.24	82.9734	93.1397	83.2893	78.9508	74.1342	85.9176	78.7871	78.3988	80.8107	64.8404
	7.1	99.1708	83.7282	97.383	71.3964	91.5494	70.8114	83.9985	72.5442	66.7861	80.1836	64.8084	84.3316	64.7006	80.4423	70.1698	65.8634	7.1	117.379	109.796	90.3259	122.477	106.669	108.848	72.1752	95.5382	87.578	79.2737	79.7849	67.4194	81.6632	58.8132	57.272	70.774	7.1	101.489	97.8174	97.2155	100.433	82.6642	92.726	83.2904	78.7579	74.0481	85.6993	78.345	78.0562	80.8828	64.9296
	7.2	98.6966	83.3776	96.9338	71.079	91.195	70.826	83.6467	71.7542	66.4225	79.7624	64.6704	84.5749	64.385	79.9452	69.9134	65.472	7.2	117.251	109.7	90.475	122.281	106.346	108.656	72.3175	95.7756	87.3321	79.1694	79.5805	67.2583	81.319	58.7078	57.3427	70.6128	7.2	101.458	97.7135	97.4288	100.629	82.397	92.3817	83.3958	78.658	74.0156	85.7142	78.0119	77.9244	80.9026	64.8098
	7.3	98.3926	83.0169	96.577	70.8989	90.9104	70.7575	83.2983	71.0704	65.809	79.3706	64.451	84.5361	63.8921	79.4874	69.5966	64.9402	7.3	117.004	109.651	90.7172	122.06	106.222	108.532	72.2348	95.7342	87.3204	79.0885	79.5498	67.1842	81.0124	58.6424	57.4574	70.4527	7.3	101.441	97.6215	97.5439	100.788	82.0432	92.1985	83.4365	78.7522	73.9427	85.6657	77.8812	77.8144	80.7456	64.623
	7.4	98.1421	82.6946	96.3205	70.7062	90.5665	70.6199	83.0603	70.487	65.4162	79.1207	64.3483	84.3571	63.468	79.0525	69.2188	64.667	7.4	116.715	109.576	90.8722	121.911	106.23	108.455	72.0004	95.4603	87.297	78.8832	79.6924	67.0829	80.6943	58.4372	57.658	70.2838	7.4	101.405	97.4658	97.5876	100.795	81.861	92.1078	83.3738	78.6752	73.9033	85.5489	77.784	77.7926	80.4644	64.3972
	7.5	98.0721	82.451	96.0932	70.4698	90.1884	70.5137	82.8421	70.165	65.155	78.8437	64.1364	84.1215	63.2978	78.6077	68.837	64.5747	7.5	116.415	109.384	90.9773	121.71	106.327	108.464	71.7386	95.0539	87.2444	78.7833	79.9369	66.9624	80.3635	58.2509	57.857	70.0621	7.5	101.392	97.247	97.7062	100.695	81.6777	91.9613	83.2666	78.6261	73.8539	85.4991	77.7876	77.8574	80.1332	64.0184
	7.6	97.9185	82.2898	96.0825	70.2644	89.9292	70.1254	82.6532	70.1058	64.9623	78.6086	63.8394	83.7321	63.2564	78.4001	68.4581	64.6117	7.6	116.359	109.027	90.9857	121.589	106.45	108.557	71.5175	94.6653	87.3285	78.6459	80.2736	66.8734	80.2046	58.1317	57.9194	69.8738	7.6	101.182	97.1329	97.6651	100.445	81.5356	91.9624	82.8909	78.5592	73.6919	85.4149	77.8777	77.9145	79.6875	63.5971
	7.7	97.86	82.172	96.0003	70.2601	89.7271	69.6936	82.3008	70.1432	64.8932	78.3689	63.5692	83.2385	63.1956	78.3708	67.9536	64.558	7.7	116.474	108.515	91.0508	121.694	106.557	108.546	71.2954	94.2347	87.3262	78.5324	80.535	66.6926	80.107	58.13	57.9008	69.6811	7.7	101.007	97.0894	97.5816	100.201	81.3354	91.963	82.4841	78.4514	73.4583	85.154	77.8629	77.9238	79.2737	63.2886
	7.8	97.8564	82.0086	95.9944	70.1934	89.3812	69.4418	82.0828	70.0898	65.0014	78.1288	63.3219	82.6483	63.089	78.3826	67.586	64.711	7.8	116.794	108.119	90.8301	121.841	106.486	108.446	71.2921	93.9208	87.3291	78.2679	80.5519	66.5707	79.9616	58.0524	57.8676	69.4841	7.8	100.863	96.9392	97.4072	100.04	81.2083	92.0356	82.3375	78.2644	73.2917	84.9236	77.8474	77.9986	78.9974	63.2105
	7.9	97.7305	81.8825	95.9375	70.1243	89.1417	69.2041	81.8009	70.0633	64.8997	77.8158	62.8858	82.0202	62.9351	78.2782	67.345	64.6408	7.9	117.129	107.757	90.5343	121.937	106.43	108.439	71.2642	93.7601	87.4347	78.0242	80.3821	66.6836	79.9872	58.0374	57.7572	69.2629	7.9	100.71	96.7809	97.3525	99.9369	81.0907	92.206	82.3451	78.1248	73.0913	84.7405	77.8428	78.013	78.843	63.3323
	8	97.476	81.6922	95.8498	69.9977	89.0681	69.0006	81.644	69.8956	64.7317	77.6213	62.5601	81.4766	62.4553	77.9266	67.1284	64.4676	8	117.294	107.524	90.2537	122.089	106.449	108.441	71.1486	93.5874	87.519	77.6621	79.9614	66.9098	80.1075	57.9183	57.5708	69.1178	8	100.594	96.7158	97.2233	99.7812	81.0727	92.604	82.4125	77.904	72.9077	84.3893	77.8926	77.9941	78.9819	63.4864
	8.1	97.2778	81.36	95.5491	69.67	88.9223	68.9323	81.4826	69.62	64.4807	77.5378	62.3546	80.9323	61.8942	77.6058	66.9048	64.1573	8.1	117.239	107.508	90.007	122.21	106.524	108.439	70.9694	93.4527	87.4704	77.3769	79.4996	67.1135	80.0854	57.6921	57.3992	69.0084	8.1	100.618	96.4696	97.0461	99.6174	80.9768	92.9141	82.6542	77.6715	72.8802	83.9655	77.9879	77.9369	79.2267	63.7047
	8.2	97.067	81.0585	95.256	69.0508	88.6944	68.8175	81.53	69.3748	64.0522	77.6289	62.162	80.3942	61.4169	77.0979	66.7862	63.8509	8.2	117.101	107.72	89.68	121.827	106.694	108.662	70.7786	93.5084	87.3841	77.2246	79.0501	67.2996	80.1198	57.2665	57.3706	69.0678	8.2	100.7	96.1976	96.726	99.428	81.0338	93.1137	82.8929	77.4556	72.8493	83.66	77.9424	77.8834	79.4018	63.9657
	8.3	96.7664	80.8564	94.7794	68.4588	88.5055	68.5248	81.4478	69.2718	63.5179	77.651	61.8151	80.0004	61.1505	76.6044	66.5213	63.4021	8.3	116.646	107.85	89.5794	121.368	107.002	108.89	70.2852	93.6006	87.1833	77.2704	78.7876	67.3116	80.207	56.8668	57.4039	69.2439	8.3	100.736	96.1235	96.5296	99.0784	81.0008	93.2082	82.8184	77.3097	72.6534	83.4477	77.7489	77.6143	79.5799	64.0549
	8.4	96.4619	80.7068	94.2354	68.0206	88.2019	68.2254	81.4264	69.2589	63.149	77.6662	61.5343	79.7293	61.0114	76.3318	66.18	62.9508	8.4	116.122	107.954	89.646	121.019	107.128	108.891	69.9548	93.642	86.9159	77.3919	78.7365	67.1758	80.1101	56.5642	57.4334	69.5695	8.4	100.785	96.1186	96.3012	98.6749	80.8796	93.1973	82.6163	77.386	72.5032	83.2702	77.5239	77.227	79.6417	64.0196
	8.5	96.0474	80.6717	93.593	67.7183	87.6832	67.8304	81.1665	69.3384	62.8555	77.5524	61.2878	79.4694	61.0152	76.3919	65.8606	62.5136	8.5	115.712	108.079	89.8014	120.658	107.202	108.661	69.84	93.6849	86.7032	77.5873	78.8055	66.8066	79.8212	56.3864	57.4312	69.766	8.5	100.807	96.1127	96.0764	98.4228	80.6423	92.8064	82.2686	77.5021	72.2922	83.379	77.202	76.7525	79.3181	64.0049
	8.6	95.7058	80.7352	93.0292	67.6344	87.1958	67.4295	80.9342	69.4729	62.7296	77.2422	60.8898	79.1918	61.0467	76.4118	65.5639	62.2793	8.6	115.454	108.149	89.8907	120.23	107.188	108.255	69.6957	93.7143	86.649	77.8813	78.8864	66.5099	79.6382	56.4206	57.4218	69.8733	8.6	100.775	96.2346	95.9584	98.2847	80.5455	92.438	81.7801	77.6533	71.8881	83.6544	76.7304	76.2865	79.0028	63.935
	8.7	95.3334	80.7552	92.4788	67.6816	86.7212	67.0958	80.6407	69.4683	62.7529	76.5528	60.3519	79.0173	60.9768	76.5649	65.1995	62.1798	8.7	115.223	108.037	90.0574	120.171	107.144	107.566	69.716	93.6924	86.6702	78.0143	78.8397	66.3672	79.5278	56.6531	57.2396	69.811	8.7	100.654	96.4376	95.892	98.0157	80.3008	92.2651	81.2482	77.7214	71.5147	84.006	76.5324	75.7726	78.8695	63.7968
	8.8	94.9949	80.7302	92.0954	67.7257	86.1601	66.8712	80.3934	69.3165	62.8515	75.9495	60.0198	78.9408	60.6769	76.69	65.0855	62.1302	8.8	115.284	108.004	90.2437	120.184	107.088	106.776	70.0432	93.591	86.7273	78.0472	78.7091	66.3906	79.3763	56.9246	56.945	69.575	8.8	100.505	96.5971	95.7909	97.8262	80.2016	92.0279	80.912	77.7195	71.3642	84.3394	76.4322	75.4414	78.6741	63.7291
	8.9	94.6549	80.607	91.828	67.516	85.5702	66.7594	80.1331	69.0171	62.8551	75.3372	59.8157	78.7804	60.3025	76.7102	65.1274	62.0722	8.9	115.563	108.035	90.3491	119.969	107.104	106.056	70.3105	93.4698	86.9094	77.9524	78.5	66.3454	79.2482	57.0798	56.5901	69.0562	8.9	100.367	96.582	95.6982	97.6791	80.1637	91.8221	80.7128	77.4693	71.1877	84.614	76.3928	75.2927	78.6278	63.638
	9	94.4137	80.3839	91.7287	67.2358	84.9774	66.8738	80.0464	68.6669	62.7744	74.8227	59.6378	78.5352	60.0615	76.5996	65.2217	61.9552	9	116.035	107.884	90.3621	119.778	107.106	105.63	70.3703	93.4561	86.9834	77.7301	78.2758	66.4905	79.1964	57.183	56.2117	68.6355	9	100.198	96.5822	95.6432	97.3985	80.1602	91.8066	80.6866	77.2294	71.1053	84.6993	76.3954	75.2923	78.805	63.5026
	9.1	93.9894	80.1221	91.7375	66.8628	84.4604	66.9522	79.8902	68.3507	62.5925	74.4227	59.5779	78.407	59.7858	76.4021	65.3875	61.76	9.1	116.435	107.789	90.3706	119.662	107.182	105.264	70.4732	93.4954	86.7497	77.2774	77.9912	66.6266	79.121	57.1137	55.8062	68.2185	9.1	100.052	96.5823	95.5053	96.9617	80.058	91.766	80.7917	77.1348	71.26	84.7088	76.4666	75.3023	78.8528	63.4997
	9.2	93.6353	79.8442	91.8912	66.546	84.0968	66.9421	79.6251	68.1415	62.2488	74.326	59.8	78.3702	59.6066	76.0893	65.5242	61.5491	9.2	116.761	107.729	90.2704	119.518	107.088	105.061	70.296	93.3725	86.3769	76.977	77.8458	66.5482	78.9895	57.0916	55.5452	67.7563	9.2	100.006	96.5397	95.5062	96.7018	80.0713	91.5048	80.8818	77.1454	71.4815	84.522	76.3183	75.3166	78.7591	63.5814
	9.3	93.2972	79.4871	91.9358	66.3112	84.0505	66.9196	79.3602	67.9664	61.8573	74.1818	60.0157	78.2705	59.5599	75.6166	65.4432	61.4146	9.3	116.869	107.424	90.1204	119.282	106.727	105.114	69.9842	93.2485	85.9379	76.7593	77.7962	66.2727	78.8202	57.1191	55.3397	67.571	9.3	100.061	96.3729	95.5196	96.4284	80.0742	91.229	80.8895	77.1589	71.6178	84.1029	76.0828	75.2784	78.6878	63.5879
	9.4	92.9839	79.1399	91.8922	66.237	84.2033	66.8518	78.995	67.7604	61.574	73.9946	60.1426	78.3055	59.5343	75.0375	65.1726	61.3974	9.4	116.685	106.982	90.1557	119.182	106.305	105.331	69.6151	93.0522	85.3332	76.6198	77.6277	66.127	78.6854	57.1554	55.2656	67.7143	9.4	100.196	96.3183	95.3623	96.2879	80.1232	90.9813	80.7253	77.322	71.856	83.6233	75.8342	75.2128	78.5542	63.6194
	9.5	92.6581	78.7685	91.8484	66.155	84.4735	66.5147	78.6989	67.4988	61.3389	73.6558	60.1538	78.3663	59.3264	74.3942	64.6922	61.4026	9.5	116.303	106.762	90.1554	119.059	105.871	105.504	69.3159	92.7268	84.9178	76.6352	77.4834	65.9494	78.6376	57.2287	55.2447	67.8806	9.5	100.268	96.2502	95.151	96.2952	80.2258	90.7453	80.5238	77.5368	71.958	83.1954	75.5247	75.102	78.3718	63.6343
	9.6	92.5896	78.3637	91.737	66.1089	84.5767	66.1266	78.5539	67.1125	61.1044	73.3314	60.1418	78.2397	59.2118	73.819	64.0992	61.2694	9.6	115.96	106.463	90.1323	118.882	105.305	105.921	68.9468	92.314	84.7467	76.8042	77.392	65.7386	78.5654	57.4541	55.3518	68.0727	9.6	100.213	96.1597	95.0219	96.5155	80.2393	90.4913	80.3664	77.5519	71.8465	82.7434	75.2475	75.0668	78.1998	63.4829
	9.7	92.5106	78.03	91.4704	65.9727	84.5732	65.8606	78.4841	66.8224	61.0781	73.0282	59.893	77.9621	59.0892	73.3432	63.6551	61.103	9.7	115.566	106.284	90.0682	118.645	104.819	106.198	68.6728	91.9365	84.6758	76.7943	77.2387	65.6714	78.4861	57.4862	55.4378	68.3806	9.7	100.101	96.0872	94.8454	96.7423	80.2416	90.3126	80.3527	77.4696	71.5685	82.5053	75.1016	75.2022	78.045	63.2384
	9.8	92.4495	77.7877	91.2551	65.7064	84.3765	65.7038	78.4489	66.6838	61.1205	72.7609	59.492	77.6317	58.9249	73.1642	63.287	60.8298	9.8	115.147	106.405	89.9082	118.568	104.475	106.24	68.4197	91.5881	84.7685	76.6676	76.9122	65.7522	78.5281	57.3568	55.544	68.3919	9.8	100.033	96.1154	94.6331	97.1216	80.1865	90.1845	80.4488	77.3354	71.2439	82.5565	75.1253	75.4026	77.9144	63.0635
	9.9	92.528	77.5139	91.0503	65.4818	84.0418	65.4818	78.5321	66.6286	61.1194	72.6772	59.0676	77.1751	58.6812	73.1476	63.0661	60.5047	9.9	114.937	106.583	89.4646	118.599	104.281	106.088	68.3406	91.4164	84.9598	76.4945	76.7828	65.719	78.5352	57.2043	55.674	68.1596	9.9	99.9155	96.2263	94.5903	97.3838	79.986	89.942	80.6628	77.0866	70.783	82.8267	75.0368	75.4779	77.7103	62.8993
	10	92.7118	77.2404	90.6491	65.3843	83.6876	65.3479	78.444	66.669	61.1799	72.7429	58.7539	76.6666	58.6527	73.1743	63.131	60.2361	10	114.678	106.74	89.0052	118.606	104.156	105.994	68.3759	91.342	84.9517	76.137	76.6708	65.6015	78.456	56.979	55.8259	67.8325	10	99.9286	96.4079	94.5091	97.5395	79.7544	89.7464	80.895	76.7425	70.4898	83.114	74.9757	75.5821	77.5264	62.7756
	10.1	92.6052	77.0218	90.1949	65.332	83.3429	65.3138	78.2224	66.858	61.2482	72.8069	58.5136	76.3075	58.4496	73.1934	63.3072	60.0353	10.1	114.324	106.965	88.7154	118.706	104.175	105.711	68.4506	91.322	84.9651	75.6499	76.6406	65.5616	78.4304	56.6644	55.894	67.566	10.1	99.9678	96.6188	94.3687	97.5517	79.6416	89.6457	81.0338	76.4166	70.3733	83.3942	74.9604	75.6664	77.4197	62.6524
	10.2	92.3634	76.7905	89.8384	65.3719	82.9298	65.236	77.9958	66.8936	61.2601	72.7016	58.3185	76.0714	58.2438	73.1815	63.4044	59.804	10.2	114.028	107.011	88.6593	118.906	104.267	105.535	68.5961	91.32	85.0435	75.2905	76.8173	65.5318	78.4311	56.4274	56.0185	67.2868	10.2	99.8713	96.6687	94.1251	97.3987	79.3362	89.5768	81.0988	76.2412	70.4632	83.4675	74.9232	75.5632	77.2444	62.5154
	10.3	92.052	76.4247	89.4623	65.4439	82.4026	64.8036	77.7255	66.7191	61.2045	72.623	58.2318	75.7735	58.2345	73.0957	63.4157	59.6084	10.3	113.929	106.945	88.7377	119.112	104.481	105.381	68.8184	91.2807	84.9622	74.9999	77.2258	65.4654	78.4026	56.2779	56.1661	67.0435	10.3	99.5717	96.6938	93.9106	97.0479	79.0217	89.6054	81.0431	76.2262	70.6177	83.3586	74.7107	75.3261	76.9994	62.4077
	10.4	91.632	76.1754	89.0347	65.3808	82.0353	64.3907	77.2769	66.5126	61.0817	72.4042	58.154	75.4755	58.3472	73.0004	63.2842	59.346	10.4	113.688	106.939	88.8283	119.258	104.539	105.492	69.0016	91.1195	84.8754	74.7478	77.4862	65.3999	78.4679	56.1369	56.2356	66.9136	10.4	99.1916	96.5338	93.7868	96.6452	78.7714	89.7304	80.9427	76.2459	70.8386	83.0494	74.6387	75.2025	76.9744	62.349
	10.5	91.0403	76.083	88.7118	65.1852	81.793	64.0134	76.867	66.1978	60.7881	72.1166	58.0029	75.3736	58.2491	73.0077	63.0439	59.1375	10.5	113.563	106.718	89.075	119.557	104.574	105.296	69.1465	90.9305	84.8936	74.7247	77.6123	65.4272	78.5521	56.0693	56.3163	66.9687	10.5	98.7249	96.2474	93.8284	96.2961	78.4693	89.7375	80.7624	76.2313	70.9789	82.7532	74.631	75.024	76.9054	62.2126
	10.6	90.6376	75.9959	88.3115	64.9258	81.7274	63.5935	76.3632	65.7644	60.4494	71.8146	57.7583	75.2962	58.3525	73.0607	62.794	59.0214	10.6	113.61	106.33	89.1301	119.82	104.58	105.096	69.3127	90.7386	84.8026	74.7776	77.567	65.3609	78.539	55.8632	56.424	66.961	10.6	98.3938	95.8914	93.8602	96.0667	78.0858	89.7245	80.5451	76.2948	71.0531	82.5515	74.5083	74.761	76.7868	62.1522
	10.7	90.3679	75.7709	87.8257	64.6078	81.6357	63.2065	75.7782	65.3684	60.019	71.5918	57.6045	75.0102	58.4518	73.1551	62.4998	58.8865	10.7	113.752	106.006	89.0059	119.923	104.612	104.936	69.5178	90.6306	84.5529	74.8671	77.2908	65.2211	78.4448	55.6244	56.4252	66.9936	10.7	98.2582	95.7386	94.0565	96.0123	77.8455	89.7913	80.2576	76.2647	71.0115	82.5457	74.309	74.6319	76.7252	62.1289
	10.8	90.184	75.7265	87.4005	64.3318	81.6824	63.1811	75.2618	65.0792	59.5615	71.2575	57.5073	74.9012	58.2705	73.2225	62.3103	58.777	10.8	113.749	105.588	88.7739	119.956	104.584	104.946	69.5868	90.6267	84.4044	74.9918	76.899	65.0639	78.2654	55.3443	56.2933	67.2088	10.8	98.2675	95.6204	94.2166	96.0972	77.5706	89.813	79.9364	75.9858	70.818	82.6886	74.288	74.6454	76.7098	61.9104
	10.9	90.0225	75.5114	87.1703	64.1548	81.5551	63.1522	74.8404	64.8448	59.173	70.9768	57.4602	74.9549	57.9815	73.1494	62.3422	58.6718	10.9	113.767	105.072	88.6362	119.862	104.64	104.714	69.4643	90.6623	84.3026	75.2032	76.5514	65.0593	77.9876	55.1411	56.0808	67.3957	10.9	98.4094	95.641	94.3082	96.389	77.4586	89.7747	79.6436	75.7444	70.589	82.9067	74.2545	74.64	76.4937	61.5891
	11	90.0379	75.1354	86.9291	63.9683	81.2562	63.2461	74.4486	64.7206	58.9284	70.813	57.4399	74.8693	57.768	72.879	62.3454	58.3921	11	113.814	104.751	88.41	119.539	104.582	104.779	69.206	90.8108	84.3324	75.2794	76.3526	65.0584	77.7682	54.9255	55.7426	67.3332	11	98.618	95.745	94.2027	96.6151	77.46	89.7334	79.4201	75.6041	70.2393	83.0279	74.1134	74.6174	76.345	61.3585
	11.1	90.1232	74.7144	86.8134	63.7237	80.8477	63.5027	74.3365	64.728	58.8711	70.6988	57.3972	74.6614	57.4946	72.5321	62.345	58.0669	11.1	113.652	104.691	88.3334	119.056	104.506	104.746	68.9318	90.8429	84.517	75.4082	76.2576	64.9979	77.5943	54.9714	55.3271	67.112	11.1	98.7912	95.9676	94.0731	96.617	77.6469	89.5697	79.2854	75.375	69.8381	83.0122	74.0973	74.5957	76.2608	61.0519
	11.2	90.1442	74.4862	86.6584	63.4891	80.5187	63.6702	74.4505	64.827	58.7895	70.6236	57.3622	74.6332	57.1617	72.0971	62.5017	57.925	11.2	113.44	104.657	88.3072	118.569	104.399	104.802	68.5282	90.8186	84.8956	75.4296	76.2368	64.9571	77.482	55.0364	54.873	66.8089	11.2	98.8986	96.0036	93.8938	96.458	77.8726	89.3354	79.1642	75.0848	69.4243	82.8394	74.1686	74.4911	76.194	60.7875
	11.3	90.0094	74.2272	86.435	63.2634	80.2281	63.7449	74.4862	64.9378	58.7666	70.7142	57.2853	74.5132	56.8505	71.5402	62.6534	57.7729	11.3	113.282	104.76	88.3992	118.081	104.348	104.895	68.2272	90.7458	85.1946	75.3784	76.1244	65.0111	77.4248	55.1344	54.5282	66.4115	11.3	98.9282	95.9555	93.7227	96.2997	78.111	88.9405	79.2315	74.9976	69.1454	82.5153	74.0856	74.3421	76.152	60.7271
	11.4	89.7156	74.0415	86.008	63.0273	80.0332	63.8502	74.7298	65.1038	58.7799	70.8566	57.1766	74.1754	56.6208	71.0731	62.6028	57.7181	11.4	113.32	104.99	88.5223	117.9	104.291	105.026	68.0186	90.6215	85.2821	75.3018	76.0594	64.9548	77.3242	55.1962	54.3037	66.0376	11.4	98.8822	95.7754	93.4269	96.024	78.1482	88.6422	79.3262	74.86	68.9629	82.2408	74.0674	74.1926	76.067	60.803
	11.5	89.347	73.9247	85.6136	62.8766	79.9113	63.8484	75.0249	65.1992	58.734	70.9493	56.9799	73.8243	56.4302	70.806	62.55	57.9192	11.5	113.365	105.234	88.5998	117.896	104.308	105.001	67.9766	90.3991	85.0845	75.2458	76.026	64.7422	77.1053	55.2526	54.2224	65.8772	11.5	98.925	95.4592	93.3528	95.8794	78.0631	88.474	79.4322	74.5679	68.9643	81.9401	74.1781	74.1012	75.8912	60.9609
	11.6	88.8976	73.8783	85.2528	62.8906	79.8722	63.7298	75.1605	65.1222	58.427	71.0082	56.8398	73.682	56.2481	70.4971	62.3922	58.1518	11.6	113.551	105.335	88.6046	118.163	104.325	105.162	67.9258	90.2969	84.7302	75.2075	75.9018	64.5691	76.9155	55.1166	54.2598	66.0854	11.6	98.9644	94.9588	93.4681	95.9737	77.7737	88.3705	79.4082	74.362	69.1611	81.7376	74.1599	73.9876	75.6939	61.2281
	11.7	88.4742	73.7557	84.9536	62.9204	79.9782	63.7497	75.0703	64.8929	58.1739	71.0419	56.6064	73.558	56.2916	70.2668	62.0799	58.2059	11.7	113.745	105.457	88.5419	118.651	104.276	105.184	67.935	90.2106	84.3253	75.2072	75.7024	64.4192	76.6658	54.9607	54.4918	66.2903	11.7	98.9959	94.6022	93.5804	96.2986	77.418	88.1523	79.3525	74.3423	69.5368	81.5033	74.0744	73.8852	75.4728	61.4905
	11.8	88.2342	73.4943	84.663	62.8557	79.9358	63.8336	75.0588	64.5995	57.9722	71.0482	56.3429	73.4591	56.6106	70.1888	61.7223	58.3138	11.8	113.93	105.572	88.3808	119.075	104.174	104.947	67.84	90.0766	84.0213	75.2392	75.7173	64.1002	76.4502	54.8093	54.702	66.4792	11.8	99.0139	94.4465	93.7712	96.3726	77.1918	88.1832	79.2014	74.4024	69.9758	81.3052	74.0364	73.7685	75.2296	61.7755
	11.9	88.2306	73.333	84.5185	62.7741	79.7769	63.8788	74.8023	64.1579	57.8088	70.9868	56.088	73.4267	56.8601	70.1341	61.4559	58.3897	11.9	113.895	105.642	88.1975	119.111	104.066	104.804	67.8556	90.0324	83.9378	75.2025	75.7104	63.7345	76.3072	54.6626	54.8558	66.6443	11.9	99.0055	94.4911	94.0724	96.3403	77.0116	88.175	79.0559	74.5548	70.3063	80.9707	73.8351	73.714	75.1657	61.9298
	12	88.2095	73.2433	84.5518	62.6644	79.6165	63.8511	74.4162	63.7418	57.657	70.8249	56.017	73.3969	57.0371	69.9553	61.1146	58.2092	12	113.677	105.594	88.0152	119.086	103.913	104.731	67.762	89.936	84.1526	75.1668	75.5375	63.5932	76.352	54.523	54.9842	66.6874	12	98.7181	94.6758	94.2595	96.2133	76.8975	88.0244	78.8829	75.0482	70.5808	80.8976	73.4982	73.6393	75.225	61.9028
	12.1	88.1934	73.1725	84.5516	62.4619	79.4456	63.766	74.0124	63.3708	57.7002	70.6451	56.0094	73.2308	57.215	69.9252	60.9002	57.993	12.1	113.369	105.405	87.7861	118.913	103.73	104.662	67.7309	89.8629	84.3691	75.0396	75.4039	63.6087	76.4085	54.4521	55.0364	66.4198	12.1	98.4553	95.0166	94.2764	95.9561	76.9853	87.8737	78.7381	75.421	70.6153	80.8644	73.2115	73.6538	75.208	61.7414
	12.2	88.2026	73.0994	84.6484	62.2164	79.1088	63.4151	73.7739	63.0718	57.8846	70.463	55.9857	73.119	57.1731	69.8754	60.7977	57.8712	12.2	112.999	105.203	87.5962	118.564	103.697	104.594	67.7851	89.8005	84.437	74.8936	75.2715	63.5947	76.5535	54.5374	54.9778	66.2322	12.2	98.097	95.2244	94.0891	95.4679	77.1063	87.8963	78.741	75.6154	70.4812	81.0082	72.9862	73.628	75.2824	61.4825
	12.3	88.1108	73.314	84.8314	62.0534	78.8301	62.7714	73.4751	62.8313	58.111	70.1732	55.991	73.0026	56.9108	69.8018	60.7527	57.641	12.3	112.763	104.896	87.4088	118.232	103.595	104.716	67.9307	89.7098	84.3868	74.7828	74.9062	63.6906	76.6068	54.6958	54.9289	66.1444	12.3	97.8414	95.1957	93.6952	95.2313	77.1152	87.6803	78.7791	75.625	70.298	81.2307	72.7192	73.5577	75.3299	61.069
	12.4	87.9824	73.4277	84.8747	61.9748	78.6453	62.1967	73.2328	62.6327	58.2318	69.8976	55.9828	72.9307	56.7088	69.7185	60.6525	57.3771	12.4	112.555	104.681	87.2105	118.237	103.518	104.769	67.8991	89.6236	84.2006	74.6923	74.5603	63.867	76.6634	54.8894	54.8451	66.0558	12.4	97.6951	95.0396	93.2141	95.0374	77.1407	87.4215	78.7092	75.5782	70.1475	81.489	72.5362	73.3679	75.2481	60.682
	12.5	87.9127	73.412	84.6548	61.8786	78.425	61.6505	73.1127	62.4774	58.3894	69.6908	55.9725	72.9833	56.587	69.707	60.7395	57.289	12.5	112.347	104.585	87.1313	118.241	103.55	104.7	67.9245	89.6907	83.7397	74.6119	74.325	63.914	76.5102	55.0304	54.6666	66.0099	12.5	97.6905	94.8757	92.714	94.8452	77.1531	87.2675	78.484	75.2816	70.0032	81.5111	72.552	73.1484	75	60.3516
	12.6	87.8164	73.2774	84.5232	61.7925	78.2053	61.118	73.0457	62.4998	58.4377	69.5397	55.8915	73.0649	56.4448	69.6066	60.7173	57.1915	12.6	112.191	104.775	87.2365	118.201	103.541	104.543	67.9363	89.7272	83.2556	74.5965	74.1196	63.8964	76.2614	55.1516	54.4286	66.1901	12.6	97.4782	94.6879	92.1222	94.7238	76.9538	87.175	78.4022	75.1271	69.9258	81.4132	72.6212	72.8406	74.9382	60.2535
	12.7	87.7767	73.1581	84.2716	61.7194	78.0394	60.8068	72.849	62.584	58.3684	69.3745	55.908	73.0429	56.3428	69.453	60.5309	56.9576	12.7	112.09	104.992	87.3158	118.203	103.338	104.272	67.9186	89.7104	82.867	74.6398	74.0871	63.9357	75.921	55.09	54.0735	66.3035	12.7	97.3916	94.6522	91.8041	94.8466	76.7	86.999	78.2989	74.9735	69.8418	81.1479	72.6724	72.585	74.8659	60.2708
	12.8	87.8057	72.74	83.9782	61.683	77.971	60.7854	72.7846	62.7478	58.1389	69.1684	55.8759	72.9834	56.2903	69.3423	60.3135	56.7933	12.8	111.796	105.285	87.4211	118.291	103.158	103.876	67.924	89.8152	82.5924	74.5964	74.287	63.9561	75.5798	54.8966	53.6653	66.2122	12.8	97.2655	94.6725	91.7262	94.9562	76.5266	86.9834	78.2389	74.7743	69.6522	80.8792	72.8907	72.4677	74.8726	60.2984
	12.9	87.7284	72.3062	83.7316	61.4612	77.9382	60.7056	72.7654	62.9804	57.9274	68.878	55.9321	72.8795	56.1766	69.3329	60.1663	56.6658	12.9	111.654	105.354	87.5261	118.15	102.99	103.497	68.0529	89.859	82.3593	74.4642	74.4509	63.9608	75.2534	54.5428	53.3325	66.0975	12.9	96.9687	94.595	91.852	95.1373	76.3644	87.0555	78.3137	74.5742	69.4832	80.5829	73.1237	72.4669	74.943	60.2944
	13	87.474	71.9036	83.6618	61.1924	77.9021	60.6416	72.6697	63.1516	57.647	68.5576	55.8116	72.6266	56.015	69.2386	59.9652	56.3736	13	111.719	105.43	87.5312	117.972	102.673	103.271	68.2096	89.7247	82.1891	74.2676	74.6544	63.9338	75.1031	54.2252	53.0938	66.0204	13	96.6836	94.4291	91.9733	95.309	76.3156	87.1175	78.5586	74.2727	69.2368	80.2742	73.1306	72.5598	75.1869	60.3024
	13.1	87.1887	71.5556	83.5912	60.8468	77.839	60.6244	72.5019	63.0953	57.3667	68.171	55.644	72.2891	55.9423	69.1363	59.8529	56.0335	13.1	111.673	105.568	87.4104	117.935	102.518	102.971	68.3652	89.5924	82.076	73.9656	74.8888	63.7873	75.0957	53.9208	52.9893	65.7557	13.1	96.5477	94.171	92.3394	95.3791	76.4526	87.1608	78.7254	73.8613	68.9931	80.1061	72.9985	72.7416	75.219	59.9812
	13.2	86.7547	71.1871	83.5438	60.5439	77.6826	60.7345	72.456	62.9486	56.9711	67.8548	55.4819	71.815	55.8562	69.1958	59.8243	55.847	13.2	111.511	105.866	87.3866	117.968	102.418	102.912	68.3256	89.5251	82.0151	73.6708	75.0139	63.6961	75.1302	53.7358	53.0312	65.4299	13.2	96.464	93.7437	92.503	95.1733	76.7	87.2747	78.7338	73.5362	68.74	80.0047	72.7208	73.0114	75.235	59.5297
	13.3	86.2845	70.9277	83.4698	60.2376	77.4824	60.7828	72.2984	62.6334	56.5889	67.7926	55.4094	71.3715	55.7255	69.139	59.8426	55.652	13.3	111.512	106.169	87.371	117.938	102.427	102.969	68.2112	89.284	81.9101	73.5032	74.999	63.532	75.3088	53.7227	53.0968	65.2753	13.3	96.353	93.3104	92.5494	94.8775	76.7957	87.3438	78.5265	73.1836	68.6046	79.7455	72.2423	73.2593	75.2301	59.0757
	13.4	85.9526	70.829	83.5559	60.001	77.2237	60.9716	72.204	62.2936	56.2301	67.9589	55.2406	71.0674	55.6391	68.8573	59.882	55.4644	13.4	111.286	106.614	87.3675	117.944	102.471	103.005	68.0826	88.9536	81.8223	73.4318	74.9821	63.2945	75.5523	53.8437	53.1667	65.1531	13.4	96.4567	92.9706	92.3518	94.6269	76.9579	87.3307	78.2684	72.7589	68.4012	79.6369	71.6596	73.5167	75.1475	58.6411
	13.5	85.893	70.8216	83.4521	59.9324	76.9716	61.2011	72.1371	62.0592	55.9657	68.2386	55.2576	70.8222	55.5188	68.6365	59.8519	55.5144	13.5	110.934	106.988	87.3402	117.965	102.578	103.02	67.8472	88.6953	81.7933	73.5171	74.8254	63.1581	75.8072	53.9094	53.2615	65.065	13.5	96.6242	92.6717	92.0918	94.397	77.0022	87.2697	78.0816	72.5548	68.2584	79.627	71.2831	73.6058	74.9764	58.1688
	13.6	85.8947	70.8653	83.081	60.0132	76.6869	61.4383	72.2104	61.9679	55.7964	68.5866	55.441	70.7061	55.3195	68.4714	59.8019	55.6887	13.6	110.73	107.033	87.228	117.912	102.454	103.202	67.5398	88.3776	81.866	73.7171	74.5518	63.1005	75.9212	53.9927	53.4287	65.182	13.6	96.8982	92.4767	91.6715	94.3532	76.8818	87.2918	77.7874	72.3756	68.1618	79.4334	71.069	73.5647	74.8944	57.8943
	13.7	86.0328	70.9419	82.7653	60.1022	76.4003	61.5598	72.2169	61.8615	55.8261	68.9364	55.6382	70.8459	55.2174	68.1496	59.7008	55.7204	13.7	110.612	106.631	87.198	117.664	102.366	103.276	67.4598	87.95	81.8732	73.7023	74.189	62.8396	76.0848	53.9927	53.5396	65.5837	13.7	97.0643	92.4193	91.461	94.5631	76.6954	87.2669	77.5713	72.0407	68.0628	79.3046	71.1258	73.3299	74.6537	57.775
	13.8	86.1828	71.1494	82.4525	60.0327	76.116	61.642	72.127	61.8575	55.9339	69.1397	55.6735	70.9527	55.2627	67.9058	59.4958	55.7061	13.8	110.447	106.136	87.2587	117.431	102.218	103.304	67.4576	87.7718	81.8412	73.5044	73.8534	62.6429	76.1174	53.8151	53.7653	65.8982	13.8	97.2034	92.437	91.307	94.9008	76.6922	87.2225	77.554	71.9034	67.8984	79.3614	71.2428	72.9535	74.3124	57.7826
	13.9	86.1446	71.1622	81.9093	60.1205	75.8958	61.5643	71.934	61.8418	56.0076	69.1788	55.7087	70.934	55.3679	67.8098	59.177	55.6655	13.9	110.573	105.666	87.3902	117.21	102.001	103.366	67.5759	87.7962	81.87	73.2905	73.491	62.4155	75.9649	53.5959	53.9354	66.2037	13.9	97.18	92.5328	91.2045	95.1102	76.6262	87.2092	77.528	71.9041	67.7672	79.2913	71.3556	72.4302	74.1566	57.9161
	14	85.9344	71.1203	81.5599	60.1398	75.7823	61.5592	71.7322	61.6913	55.9501	69.0864	55.6082	71.0702	55.4963	67.7496	58.8552	55.4149	14	110.799	105.218	87.5788	117.011	101.844	103.283	67.7115	87.9589	81.8948	72.9508	73.203	62.0666	75.593	53.419	53.9822	66.2562	14	97.0963	92.6378	91.2712	95.3154	76.5662	87.2685	77.4418	71.7707	67.6687	79.1621	71.3597	72.055	73.9591	58.1834
	14.1	85.7146	71.0105	81.4339	60.0864	75.7461	61.5565	71.3866	61.4592	55.8429	68.8376	55.3858	71.0902	55.5282	67.6934	58.5447	55.1206	14.1	111.019	104.86	87.9064	116.753	101.913	103.069	67.9196	88.3687	81.8367	72.5265	73.2018	61.7675	75.2926	53.2237	53.7957	66.11	14.1	96.8418	92.751	91.5386	95.2855	76.4771	87.2222	77.5042	71.6449	67.5628	79.0815	71.3334	71.9067	73.7852	58.5835
	14.2	85.4064	70.9712	81.2109	59.9985	75.8262	61.3819	71.09	61.3352	55.6802	68.4676	54.9745	70.9944	55.4266	67.7665	58.44	54.985	14.2	111.268	104.794	87.933	116.564	102.042	102.825	68.0362	88.9358	81.8899	72.3702	73.3891	61.7073	75.048	53.0787	53.6769	65.6353	14.2	96.5652	92.8793	91.6169	95.1253	76.3325	87.2106	77.5121	71.7053	67.5739	78.8957	71.2152	71.8728	73.7596	58.9244
	14.3	85.047	70.8151	80.9716	60.058	75.9022	61.1488	70.8572	61.2061	55.5116	68.0522	54.7059	70.9982	55.126	67.8776	58.4086	54.8982	14.3	111.438	104.867	87.796	116.43	102.155	102.634	68.0901	89.2119	81.9442	72.4205	73.5042	61.7333	74.8562	52.9843	53.3857	65.3074	14.3	96.3276	93.0152	91.65	94.7213	75.9727	87.2422	77.3536	71.6811	67.6965	78.7223	71.2039	71.8709	73.9004	59.2616
	14.4	84.8345	70.7274	80.8618	59.9043	76.0164	60.9157	70.6322	61.0691	55.3483	67.5952	54.398	71.055	54.7868	68.028	58.441	54.867	14.4	111.341	104.819	87.5972	116.381	102.292	102.419	67.9636	89.303	82.0085	72.4492	73.6267	61.944	74.844	52.8686	53.1502	65.0104	14.4	96.0753	93.1374	91.7439	94.2888	75.5317	87.241	77.0969	71.5338	67.8988	78.593	71.3801	71.9081	73.9523	59.4438
	14.5	84.6675	70.6023	80.5892	59.638	76.0914	60.5155	70.4509	61.0374	55.4004	67.2324	54.1318	70.9065	54.526	68.1201	58.5817	54.9452	14.5	111.048	104.686	87.4863	116.368	102.52	102.411	67.8888	89.1482	82.1823	72.5267	73.8189	62.2306	75.022	52.9448	53.1044	64.9134	14.5	95.8506	93.2822	91.6945	93.8343	75.0448	87.1492	76.6932	71.4954	68.1068	78.5698	71.4922	71.8431	74.0688	59.6233
	14.6	84.4665	70.5294	80.3067	59.4749	76.0422	60.0212	70.2948	61.1796	55.4517	67.1196	53.85	70.8306	54.3961	68.1546	58.6545	55.1644	14.6	110.808	104.466	87.3337	116.424	102.625	102.462	67.6803	88.6315	82.3126	72.6947	73.7193	62.4617	75.1954	53.0339	53.1572	64.8588	14.6	95.713	93.3307	91.2946	93.5308	74.7527	87.0692	76.2532	71.5623	68.2883	78.7017	71.6291	71.5401	74.0933	59.5918
	14.7	84.238	70.2649	80.1388	59.3954	75.9338	59.5716	70.019	61.3317	55.432	67.0521	53.74	70.674	54.3103	68.112	58.575	55.257	14.7	110.693	104.108	87.3615	116.562	102.671	102.638	67.4522	88.0044	82.2651	72.8036	73.521	62.4473	75.2021	53.0718	53.166	64.9259	14.7	95.675	93.3731	90.9647	93.2288	74.6115	86.7957	75.9272	71.6352	68.3361	78.8411	71.7564	71.2235	74.0474	59.6045
	14.8	84.066	69.9644	79.9462	59.4075	75.7912	59.24	69.8863	61.4024	55.3915	66.9803	53.6732	70.5108	54.2907	67.9573	58.507	55.3348	14.8	110.562	103.702	87.5708	116.548	102.755	102.736	67.2314	87.7132	82.3497	72.765	73.4903	62.3121	75.2245	53.1892	53.2838	64.7945	14.8	95.6284	93.3638	90.6715	93.1683	74.6758	86.4914	75.7478	71.7576	68.2817	78.7484	71.844	70.8991	73.8067	59.5274
	14.9	83.8516	69.6655	79.6921	59.598	75.4621	58.9578	69.8454	61.4507	55.3871	67.0454	53.7508	70.4478	54.2601	67.7408	58.4488	55.3266	14.9	110.586	103.38	87.6246	116.449	102.836	102.859	67.0394	87.5282	82.3046	72.8127	73.6216	62.1195	75.1468	53.4739	53.3366	64.645	14.9	95.7898	93.2022	90.4294	93.2586	74.8676	86.2297	75.6682	71.9633	68.2266	78.6404	71.9584	70.6719	73.3396	59.5928
	15	83.6199	69.3087	79.6253	59.888	75.0378	58.7871	69.7738	61.4918	55.2274	67.0362	53.8641	70.5416	54.0915	67.6368	58.1698	55.2434	15	110.843	103.132	87.4666	116.243	102.784	102.847	66.7912	87.4548	82.1333	72.7924	73.7218	62.0633	74.9794	53.5232	53.2781	64.5449	15	95.9487	93.0274	90.2615	93.4009	75.1934	86.0725	75.6635	72.0331	68.1249	78.471	72.1602	70.6187	72.8543	59.5437
	15.1	83.5324	68.9932	79.5899	59.9366	74.7358	58.6628	69.7631	61.3727	55.0842	66.7826	54.0275	70.5966	53.7916	67.613	57.9252	54.8681	15.1	110.93	103.163	87.2868	115.999	102.757	102.844	66.5581	87.7316	81.9953	72.7719	73.9354	62.1184	74.8546	53.6528	53.2554	64.5268	15.1	96.1686	92.9665	90.3416	93.4889	75.4607	85.9584	75.6014	71.9062	68.0778	78.1455	72.1747	70.7491	72.5203	59.5283
	15.2	83.5773	68.8364	79.6038	59.8306	74.5733	58.6683	69.7424	61.1557	54.9765	66.6992	54.2426	70.7868	53.6103	67.4753	57.739	54.6024	15.2	110.689	103.31	87.0253	115.719	102.726	102.67	66.3014	88.0947	81.8981	72.7322	74.0952	62.4053	74.7574	53.8195	53.1708	64.5626	15.2	96.3997	92.8693	90.4248	93.5329	75.6308	86.1568	75.5422	71.6199	68.1387	78.0271	72.1774	70.7558	72.281	59.4035
	15.3	83.6212	68.6691	79.6969	59.5448	74.4116	58.5953	69.5229	61.0976	54.8906	66.7114	54.2876	70.933	53.5289	67.4222	57.4871	54.3683	15.3	110.5	103.257	86.481	115.585	102.661	102.437	66.0616	88.1597	81.6828	72.7926	74.128	62.8169	74.6391	53.9136	53.079	64.7486	15.3	96.741	92.7856	90.4023	93.54	75.6126	86.3856	75.4821	71.3235	68.1742	78.12	72.0245	70.8638	72.1047	59.2891
	15.4	83.7312	68.5458	79.8793	59.2072	74.4209	58.6044	69.2743	61.0912	54.8134	66.597	54.2485	70.8046	53.5108	67.3984	57.2336	54.3003	15.4	110.166	103.163	86.1317	115.428	102.453	102.209	65.8077	88.1482	81.6234	72.7246	74.0034	63.2279	74.529	53.768	53.0352	64.91	15.4	96.7499	92.9212	90.2772	93.4582	75.5116	86.6087	75.3746	71	68.0328	78.2166	71.6688	70.8597	72.1778	58.9853
	15.5	83.7609	68.5886	79.9128	58.8519	74.5209	58.5954	69.0896	60.9424	54.7235	66.5878	54.1217	70.5254	53.6819	67.2074	57.276	54.377	15.5	109.815	103.094	85.9044	115.385	102.161	102.101	65.7186	88.2303	81.5452	72.7318	73.8386	63.4988	74.4424	53.6447	53.0533	64.9893	15.5	96.6803	93.0528	90.2625	93.2683	75.2572	86.6996	75.3478	70.8184	67.8809	78.2146	71.3383	70.673	72.3049	58.658
	15.6	83.6088	68.6022	79.7995	58.6662	74.5923	58.601	69.0694	60.7413	54.5942	66.6703	54.0099	70.3562	54.0968	66.8384	57.4092	54.6713	15.6	109.689	103.005	85.6176	115.49	101.975	101.971	65.8762	88.0414	81.5104	72.7684	73.6539	63.6048	74.2125	53.4161	53.0476	65.0184	15.6	96.5292	93.0713	90.2464	93.056	74.9368	86.7102	75.3698	70.7901	67.6961	78.3031	71.2272	70.39	72.3504	58.3542
	15.7	83.339	68.5609	79.4735	58.6034	74.6095	58.6103	69.3579	60.5417	54.4685	66.52	53.693	70.2675	54.4547	66.569	57.4731	54.8712	15.7	109.819	102.96	85.4766	115.682	101.829	101.932	66.1562	87.6378	81.6124	72.7958	73.6538	63.5154	74.0125	53.1133	53.1927	64.9718	15.7	96.27	93.0246	90.2349	92.9573	74.6149	86.5086	75.3992	70.8612	67.3619	78.0744	71.0079	70.2528	72.4664	58.166
	15.8	83.1111	68.5892	79.1309	58.5432	74.6905	58.7181	69.9024	60.217	54.429	66.273	53.456	70.109	54.7416	66.1976	57.6766	55.0906	15.8	109.958	103.224	85.6066	115.809	101.668	101.945	66.386	87.3565	81.7117	72.671	73.6626	63.2846	73.8718	52.8167	53.2816	64.8115	15.8	95.7963	92.9746	90.346	92.7812	74.4994	86.2597	75.3264	70.9944	66.9792	77.829	70.8951	70.0404	72.7345	57.9816
	15.9	82.6659	68.6791	78.7511	58.3551	74.6931	58.7204	70.3884	59.8683	54.4011	66.016	53.1972	70.1662	54.913	65.7987	57.967	55.0867	15.9	110.327	103.578	85.6461	116.122	101.646	102.019	66.658	87.2187	81.5822	72.6245	73.6121	63.0462	73.785	52.7624	53.3492	64.6612	15.9	95.662	92.7065	90.5314	92.6734	74.3748	85.9368	75.4029	71.1672	66.772	77.5905	70.8203	69.8891	72.9072	58.0019
	16	82.2927	68.6904	78.4216	58.2336	74.7041	58.7534	70.7381	59.6891	54.3966	65.6414	53.0468	70.3419	54.9292	65.5232	58.0232	54.9645	16	110.571	103.941	85.6894	116.364	101.704	101.987	66.6403	86.9681	81.5122	72.4652	73.5798	62.8157	73.6351	52.7793	53.2559	64.5062	16	95.5391	92.3357	90.5096	92.7215	74.431	85.7821	75.4102	71.2352	66.6159	77.4465	70.7234	69.8318	73.0816	58.1952
	16.1	82.0184	68.5871	78.2069	58.1287	74.64	58.8313	70.7413	59.6776	54.3676	65.3745	52.8725	70.3615	54.7564	65.3938	58.0359	54.7915	16.1	110.61	104.031	85.8354	116.368	101.553	101.919	66.4215	86.7581	81.4183	72.1458	73.4997	62.5562	73.6105	52.7974	53.0542	64.2784	16.1	95.3107	91.8891	90.4428	92.8447	74.5999	85.5861	75.4522	71.247	66.3898	77.2486	70.5035	69.7862	73.2997	58.5014
	16.2	81.8654	68.4973	78.0171	57.9434	74.5002	58.8732	70.4268	59.7678	54.442	65.2394	52.8314	70.094	54.4954	65.3382	58.1658	54.6937	16.2	110.693	104.051	85.9953	116.143	101.362	101.874	66.1008	86.8292	81.1833	71.797	73.184	62.395	73.613	53.0068	52.7211	64.0375	16.2	95.1139	91.4775	90.4743	92.912	74.7939	85.3939	75.4552	71.2916	66.3348	77.2059	70.376	69.7932	73.3753	58.7234
	16.3	81.5312	68.4823	77.8254	57.9391	74.3251	58.8316	69.8718	59.9975	54.284	65.26	52.8807	69.9142	54.1663	65.4075	58.1751	54.5526	16.3	110.68	103.844	86.1114	116.022	101.171	101.975	65.8407	87.0252	81.0568	71.6472	72.9704	62.2872	73.3941	53.3271	52.4453	63.8701	16.3	95.0996	91.059	90.4556	93.0236	74.8778	85.1682	75.5366	71.2016	66.413	76.9695	70.3316	69.8403	73.301	59.01
	16.4	81.4294	68.3682	77.6422	58.0078	74.1113	58.7017	69.2741	60.219	54.0114	65.4294	52.9641	69.7014	53.8088	65.3581	57.9531	54.6294	16.4	110.439	103.516	86.1982	115.649	101.089	101.978	65.5066	87.1428	81.179	71.4703	72.8843	62.1516	73.1233	53.5119	52.1762	63.7639	16.4	94.833	90.8701	90.3466	93.0798	75.0169	85.0461	75.4966	71.0499	66.41	76.7111	70.379	69.8517	73.3262	59.3034
	16.5	81.3816	68.1705	77.5313	57.8925	73.8809	58.4247	68.8491	60.3731	53.8505	65.6259	52.901	69.4994	53.538	65.2791	57.9084	54.7162	16.5	110.256	103.155	86.2139	115.409	101.145	102.132	65.4405	87.3376	81.3877	71.5238	72.7805	61.971	73.0058	53.639	52.0384	63.6801	16.5	94.6684	90.9478	90.3227	93.1229	75.1363	84.7445	75.5362	70.8807	66.3487	76.5682	70.3925	69.8226	73.2269	59.5449
	16.6	81.1697	68.0458	77.4754	57.8209	73.808	58.1127	68.6073	60.418	53.7978	65.6668	52.6743	69.4126	53.1653	65.2817	57.8225	54.7123	16.6	110.112	102.912	86.19	115.232	101.397	102.512	65.4645	87.6576	81.57	71.7004	72.763	61.9393	72.959	53.6952	52.0615	63.7306	16.6	94.8086	91.2078	90.3598	93.1149	75.1759	84.6182	75.5942	70.8029	66.4514	76.5901	70.476	69.8212	73.0435	59.5781
	16.7	80.77	67.8838	77.5767	57.799	73.7153	57.6896	68.4474	60.3941	53.6611	65.6234	52.4824	69.6181	52.7321	65.2895	57.6242	54.627	16.7	109.756	102.626	86.0009	115.272	101.57	102.803	65.6018	87.844	81.7366	71.939	72.8948	61.8752	73.0268	53.6288	52.1246	63.8639	16.7	94.9741	91.5381	90.2607	93.0494	75.1824	84.6056	75.5945	70.7735	66.4671	76.7287	70.5678	69.7879	72.85	59.5767
	16.8	80.5884	67.5173	77.639	57.6118	73.5592	57.2935	68.336	60.1498	53.7397	65.458	52.2046	69.7377	52.3433	65.2759	57.4075	54.5273	16.8	109.49	102.412	85.68	115.142	101.723	102.977	65.8183	87.6722	81.7135	72.0528	72.8735	61.8111	73.3776	53.3613	52.201	63.994	16.8	95.0712	91.8438	90.0745	92.8284	75.1766	84.6319	75.5848	70.7966	66.4822	77.1337	70.5309	69.7748	72.7004	59.4784
	16.9	80.3238	67.1286	77.7492	57.5758	73.532	57.0505	68.3156	59.9528	54.0409	65.1917	51.9151	69.8556	52.1002	65.4324	57.363	54.2424	16.9	109.351	102.248	85.4253	115.185	101.635	103.067	66.0854	87.4358	81.5599	72.232	72.8596	61.6389	73.7806	53.0753	52.2981	64.0515	16.9	95.2806	91.9974	89.8944	92.6066	75.1521	84.6	75.5734	70.8488	66.5956	77.6296	70.3774	69.8348	72.4271	59.0982
	17	80.1148	66.9857	77.749	57.7215	73.3641	56.9177	68.1537	59.7489	54.1739	64.9972	51.752	69.763	51.8268	65.5783	57.0525	53.9428	17	109.137	102.065	85.219	115.087	101.29	102.9	66.2544	87.1329	81.2616	72.2138	72.7865	61.4533	74.0851	52.8011	52.3581	64.0826	17	95.2968	91.9293	89.7358	92.2286	74.9242	84.751	75.4699	70.9831	66.7935	77.9061	70.195	69.9378	72.2838	58.4816
	17.1	80.1668	66.9194	77.7102	57.7788	73.0315	56.7035	67.9404	59.6096	54.2629	64.8843	51.8858	69.609	51.8326	65.5492	56.6873	53.7791	17.1	108.936	101.95	85.0619	115.03	100.814	102.467	66.3082	86.675	80.9661	72.1498	72.6542	61.2861	74.2201	52.6869	52.3874	64.019	17.1	95.0308	91.8779	89.4217	91.8817	74.6085	84.8048	75.3488	70.945	66.8849	77.918	70.0464	70.0464	72.1898	57.9596
	17.2	80.4205	66.9375	77.6309	57.84	72.7308	56.613	67.6818	59.4657	54.3288	64.829	51.8605	69.0962	52.0687	65.4268	56.3374	53.7476	17.2	108.821	101.855	84.8984	114.826	100.459	102.119	66.2146	86.27	80.8329	72.0161	72.4395	61.2131	74.0948	52.4627	52.4763	63.9553	17.2	94.8184	91.7218	89.1256	91.6589	74.297	84.7462	75.2416	70.8112	66.9927	77.7724	69.966	70.0644	72.1416	57.5564
	17.3	80.5999	67.1173	77.6316	57.9659	72.5526	56.5538	67.4675	59.3829	54.2892	64.7979	51.8253	68.6842	52.4098	65.2804	56.077	53.6292	17.3	108.624	101.825	84.7505	114.728	100.14	101.704	66.0062	86.1838	80.7744	71.8878	72.2854	61.1956	73.8005	52.3605	52.5642	63.9228	17.3	94.5857	91.5864	89.0259	91.6363	74.0798	84.693	75.1015	70.6367	67.0681	77.5228	69.9296	70.0621	72.0831	57.223
	17.4	80.8107	67.3777	77.4649	57.9368	72.342	56.4466	67.2068	59.1749	54.0556	64.8194	51.8458	68.2732	52.6488	65.1732	55.8532	53.5989	17.4	108.406	101.767	84.6916	114.486	100.023	101.439	65.8198	86.2686	80.731	71.7529	72.0814	61.3723	73.4448	52.1898	52.6664	63.9481	17.4	94.3428	91.4566	89.0254	91.5472	73.8399	84.7358	74.9652	70.4496	66.917	77.2269	69.9167	70.0327	72.22	57.123
	17.5	80.9094	67.4424	77.3178	57.8786	72.3602	56.3383	67.0148	58.9245	53.9342	64.7495	51.9023	68.0297	52.9028	65.0701	55.9313	53.624	17.5	108.191	101.679	84.8037	114.137	100.048	101.375	65.605	86.3843	80.6628	71.6446	72.0216	61.7457	73.1965	51.9542	52.7582	63.9326	17.5	94.3184	91.3404	89.0096	91.5836	73.7503	84.6513	74.8631	70.343	66.6537	77.0806	69.9153	69.8967	72.3069	57.2548
	17.6	80.8742	67.5513	77.149	57.8007	72.5226	56.3968	66.8113	58.5822	53.7827	64.7312	51.6886	67.7411	53.0208	65.0986	56.0834	53.4529	17.6	108.025	101.595	84.8446	113.811	100.032	101.411	65.5233	86.6321	80.4162	71.4631	71.9293	62.0328	73.1375	51.6151	52.8878	63.8917	17.6	94.3407	91.0965	89.1939	91.6972	73.7396	84.5053	74.556	70.425	66.3853	77.1299	69.7944	69.6874	72.3837	57.4842
	17.7	80.8096	67.6179	76.9916	57.6342	72.8136	56.5014	66.7948	58.2645	53.6166	64.6993	51.6128	67.8538	52.9504	65.0672	56.2875	53.0796	17.7	107.971	101.539	85.0027	113.728	100.034	101.349	65.6355	86.7827	79.9563	71.374	71.8746	62.1574	73.3322	51.4132	52.9774	63.8384	17.7	94.303	91.0674	89.4809	91.7408	73.8094	84.3927	74.3733	70.4894	66.2183	77.2422	69.5569	69.5455	72.3988	57.6663
	17.8	80.6967	67.5613	76.8806	57.3956	73.0631	56.6449	66.7645	58.0808	53.5344	64.684	51.5872	67.9521	52.7094	64.9894	56.4763	52.9552	17.8	108.169	101.442	85.376	113.629	100.135	101.396	65.768	86.9321	79.5773	71.3269	71.864	62.2033	73.5075	51.2508	53.0517	63.7253	17.8	94.2918	91.1144	89.6671	91.7675	73.7154	84.3957	74.2668	70.6119	66.0844	77.3499	69.4158	69.3976	72.3968	57.8233
	17.9	80.4924	67.4249	76.8815	57.1776	73.2996	56.8448	66.7228	58.129	53.5486	64.6657	51.4857	67.9072	52.5174	64.8065	56.5705	52.8258	17.9	108.257	101.484	85.6658	113.694	100.056	101.433	65.8468	86.8632	79.2244	71.2418	71.8282	62.1062	73.7852	51.291	53.1563	63.5833	17.9	94.2326	91.0841	89.7595	91.9168	73.6024	84.3432	74.1745	70.7621	66.1578	77.3997	69.385	69.2796	72.277	57.9536
	18	80.3068	67.3167	76.9265	56.8035	73.4778	57.1086	66.7274	58.4012	53.4968	64.7494	51.2551	67.7438	52.23	64.6715	56.6267	52.6216	18	108.516	101.678	85.7364	113.956	100.076	101.461	65.9113	86.692	79.0836	71.2602	71.7253	61.6805	73.947	51.5673	53.2849	63.5191	18	94.0101	91.0962	89.7687	91.9029	73.3628	84.3473	74.1063	70.7336	66.2844	77.4464	69.4577	69.3036	72.1732	58.0626
	18.1	80.1336	67.0206	76.9308	56.3958	73.5521	57.3166	66.8732	58.7452	53.5366	64.7603	51.2674	67.7213	51.9217	64.4599	56.8113	52.6353	18.1	108.79	101.849	85.8457	114.299	100.336	101.398	65.9281	86.4892	79.2136	71.5039	71.7578	61.0869	73.9917	51.8721	53.2088	63.5536	18.1	93.7808	91.158	89.6588	91.718	73.0668	84.3762	74.2192	70.5033	66.4058	77.3209	69.5873	69.3318	72.156	58.0204
	18.2	79.9085	66.7375	76.8958	56.06	73.3928	57.4692	66.894	59.0979	53.576	64.7864	51.3773	67.5796	51.8345	64.4899	56.9642	52.9493	18.2	108.93	102.062	85.8802	114.389	100.5	101.398	65.6868	86.368	79.5004	71.6495	71.7621	60.5699	73.8694	52.1869	53.005	63.5198	18.2	93.4874	90.9536	89.463	91.5343	72.6362	84.4592	74.1646	70.262	66.332	77.1448	69.752	69.2566	72.1807	58.0181
	18.3	79.7212	66.6116	76.7237	55.7813	73.2859	57.4965	67.0329	59.3292	53.6222	64.8498	51.4741	67.4076	51.8198	64.598	57.1201	53.1291	18.3	108.783	102.343	85.6724	114.52	100.486	101.3	65.4214	86.1493	79.658	71.7961	71.7824	60.0275	73.842	52.3763	52.7123	63.4311	18.3	93.2568	90.7029	89.2823	91.31	72.4554	84.4245	74.0865	69.9341	66.1628	76.9658	69.7931	69.1107	72.1916	57.9644
	18.4	79.6602	66.4683	76.5896	55.5353	73.2059	57.5219	67.299	59.3422	53.6468	64.9198	51.6438	67.4125	51.7406	64.7558	57.303	53.2947	18.4	108.694	102.441	85.3351	114.47	100.585	101.082	65.3621	86.0842	79.7538	71.9567	71.8844	59.5796	73.6215	52.4908	52.3023	63.226	18.4	93.1166	90.5378	89.2296	91.1264	72.404	84.2607	74.0396	69.5514	65.928	76.8208	69.6932	68.9204	72.1127	57.7196
	18.5	79.6178	66.316	76.4362	55.4916	73.0698	57.375	67.5093	59.1769	53.7306	65.0231	51.9916	67.6217	51.7524	64.8108	57.3543	53.549	18.5	108.575	102.356	85.0875	114.418	100.502	100.616	65.3844	86.159	79.6529	72.0486	72.0108	59.3794	73.3322	52.3624	51.8796	62.9248	18.5	93.187	90.2766	89.2957	91.3212	72.5254	84.0158	73.9502	69.222	65.6724	76.5055	69.483	68.6615	71.9754	57.4251
	18.6	79.5174	66.2828	76.2606	55.5743	72.946	57.1433	67.5768	59.0426	53.6393	65.1697	52.2284	67.7564	51.807	64.9709	57.157	53.6839	18.6	108.344	102.204	84.785	114.253	100.115	100.127	65.3282	86.087	79.4806	71.9324	72.0978	59.4952	72.9312	52.2529	51.6978	62.538	18.6	93.4029	90.1217	89.3639	91.63	72.8288	83.8594	73.9591	69.0638	65.5204	76.2083	69.2001	68.5086	71.7282	57.1984
	18.7	79.4078	66.0948	76.0264	55.775	73.0054	56.8772	67.6587	58.8954	53.5364	65.3249	52.2588	67.8476	51.7378	64.9708	56.9774	53.5086	18.7	108.028	102.035	84.529	114.243	99.6849	99.7036	65.3715	86.0496	79.3772	71.9378	72.2733	59.7028	72.5927	52.1112	51.6516	62.1417	18.7	93.6744	90.055	89.3266	91.8972	73.1522	83.5956	74.0912	68.9794	65.4258	75.8467	68.959	68.5522	71.5165	56.9234
	18.8	79.3638	65.813	75.8183	56.029	73.0084	56.7962	67.5312	58.9436	53.3242	65.3537	52.2127	68.0142	51.8344	65.0068	56.7762	53.3241	18.8	107.798	101.882	84.4174	114.16	99.2908	99.3956	65.3773	86.1471	79.4513	71.8788	72.305	60.0482	72.1951	52.0006	51.7316	61.7974	18.8	93.9475	89.9633	89.1646	92.188	73.2129	83.2686	74.1215	68.9698	65.3898	75.3729	68.7598	68.7552	71.398	56.7964
	18.9	79.1796	65.5381	75.5224	56.298	72.9437	56.6155	67.3057	59.1324	53.0795	65.3583	52.1374	68.1166	52.029	64.9992	56.6053	53.2541	18.9	107.744	101.839	84.4968	114.19	98.9665	99.1783	65.1938	86.2126	79.6312	71.7727	72.2837	60.4014	71.9746	51.8715	51.8399	61.6616	18.9	94.2628	89.8877	88.9122	92.3626	73.222	83.141	74.1343	69.0146	65.413	74.845	68.6902	68.9132	71.2637	57.0857
	19	78.8731	65.2554	75.1915	56.5138	72.8229	56.5716	67.0272	59.3477	52.7466	65.2351	51.9048	68.0252	52.2932	65.1024	56.4788	53.1774	19	107.465	101.961	84.438	114.119	98.6782	99.1256	65.0387	86.1468	79.8758	71.5572	72.1458	60.793	71.9602	51.8797	51.9401	61.8304	19	94.456	90.0653	88.6139	92.0972	73.1579	83.1252	74.164	69.1218	65.4699	74.5669	68.6229	69.187	71.1292	57.4231
	19.1	78.5993	64.916	74.8766	56.619	72.7424	56.5411	66.8777	59.4602	52.571	65.1645	51.675	67.8994	52.5618	65.0298	56.4088	53.2272	19.1	107.223	102.211	84.3402	114.142	98.6578	99.2442	65.0284	86.1607	80.1654	71.4219	71.8917	61.0063	72.1144	51.8239	51.9412	62.1422	19.1	94.543	90.156	88.3525	91.7986	72.9529	83.028	74.0015	69.1534	65.3972	74.5276	68.6287	69.4636	71.0237	57.863
	19.2	78.2655	64.7731	74.7282	56.6116	72.6223	56.5294	66.7397	59.4754	52.5352	65.0949	51.5611	67.6746	52.7343	64.8807	56.3118	53.3784	19.2	107.183	102.29	84.1601	114.063	98.8634	99.2244	65.081	85.9711	80.3088	71.1448	71.4993	61.1036	72.2134	51.7614	51.9008	62.4783	19.2	94.8134	90.3024	88.2925	91.4592	72.8368	83.0878	73.8982	69.1202	65.4225	74.6521	68.5936	69.5482	70.8203	58.2787
	19.3	77.8451	64.6582	74.6906	56.5031	72.4214	56.2841	66.7695	59.2616	52.5159	65.0714	51.6306	67.3656	52.7614	64.4746	56.0612	53.5304	19.3	107.235	102.123	83.8825	113.985	99.237	99.2247	65.2387	85.5425	80.2965	70.9404	71.2123	61.059	72.4245	51.8672	51.7298	62.8905	19.3	94.9973	90.4912	88.4822	91.0008	72.9031	83.336	73.8941	69.2744	65.4626	74.9296	68.4822	69.4649	70.543	58.5171
	19.4	77.5618	64.7594	74.7524	56.3058	72.2132	56.0201	66.7931	58.9027	52.4718	64.9871	51.6216	67.1622	52.7453	64.0242	55.7283	53.4636	19.4	107.14	101.981	83.5028	113.882	99.5483	99.2104	65.4404	85.0982	80.1746	70.814	70.8498	60.9746	72.6346	51.976	51.6886	63.2848	19.4	95.0468	90.7246	88.736	90.5288	72.9285	83.5138	73.8748	69.4627	65.4224	75.3199	68.2774	69.41	70.4776	58.4054
	19.5	77.5876	64.9381	74.9494	56.0868	72.1147	55.6605	66.8882	58.4326	52.5082	64.8854	51.6749	67.125	52.5845	63.4606	55.385	53.313	19.5	107.228	101.746	83.2662	113.749	100.062	99.3508	65.6357	84.7565	80.0594	70.8789	70.6245	60.7744	72.677	52.0584	51.6788	63.3877	19.5	95.0777	90.6595	89.0568	90.3953	72.9272	83.5385	73.9337	69.6385	65.4047	75.529	68.1458	69.1798	70.5318	58.316
	19.6	77.663	65.141	75.2938	56.068	72.0269	55.3856	66.9111	58.0692	52.5715	64.6767	51.7579	67.1664	52.3494	63.0149	55.1894	53.1179	19.6	107.37	101.385	83.1862	113.497	100.614	99.5146	65.7667	84.6733	79.9171	70.9336	70.4413	60.6871	72.5803	52.3083	51.6452	63.4246	19.6	95.2323	90.4784	89.3876	90.1856	72.9827	83.5768	74.0536	69.929	65.4267	75.545	67.9702	68.8038	70.5555	58.1196
	19.7	77.8273	65.251	75.5417	56.0254	71.8159	55.2513	66.9386	57.8277	52.6046	64.4563	51.7702	67.3888	52.1842	62.7297	54.9307	53.0374	19.7	107.454	101.257	83.2476	113.219	100.898	99.8536	65.9724	84.8655	79.8445	71.1719	70.4406	60.6222	72.6171	52.5474	51.725	63.5336	19.7	95.1889	90.2001	89.632	90.214	73.0678	83.4962	73.9132	70.3946	65.3818	75.5221	67.8454	68.5219	70.7187	58.0001
	19.8	78.0474	65.2902	75.7251	56.1077	71.5818	55.3104	66.9222	57.5965	52.815	64.3779	51.544	67.6536	52.0195	62.7882	54.8414	52.9874	19.8	107.522	101.29	83.3424	113.008	100.943	99.9609	66.1354	85.2433	79.9283	71.409	70.5355	60.6912	72.6303	52.6297	51.9062	63.6119	19.8	95.1576	89.8334	89.6828	90.4314	73.1226	83.3034	73.6954	70.4565	65.2731	75.5179	67.9322	68.3554	70.9417	58.0335
	19.9	78.2422	65.0102	76.0406	56.291	71.394	55.4931	66.9826	57.4984	53.1346	64.3717	51.4385	67.7316	51.8735	63.0308	54.84	53.0813	19.9	107.56	101.205	83.4466	112.894	100.92	100.14	66.2874	85.685	79.9491	71.5924	70.7856	60.7304	72.6633	52.6426	51.8719	63.5726	19.9	95.2466	89.4124	89.5318	90.7819	73.0651	83.0355	73.5455	70.4367	65.2234	75.4586	68.1707	68.248	71.0566	58.1006
	20	78.2045	64.643	76.2349	56.4846	71.1163	55.8768	67.0656	57.4888	53.5061	64.3551	51.2983	67.7357	51.8315	63.3408	54.8523	53.2332	20	107.576	101.031	83.4241	112.981	100.606	100.184	66.2503	86.1248	79.8493	71.716	71.0667	60.8504	72.8267	52.5474	51.9204	63.6239	20	95.3744	89.241	89.2824	90.9408	72.9676	82.9437	73.3189	70.476	65.1561	75.3847	68.4633	68.2368	71.1166	57.9871
	20.1	78.1076	64.3524	76.3312	56.3955	70.8376	56.284	67.175	57.462	53.7585	64.2815	51.0438	67.7145	51.942	63.5986	54.8126	53.238	20.1	107.546	100.852	83.3844	113.178	99.8678	100.107	66.1657	86.1312	79.6453	71.8651	71.3974	60.8698	73.1545	52.3036	52.0281	63.6636	20.1	95.332	89.1997	88.9472	91.2935	72.7272	83.02	73.233	70.3887	65.0171	75.3662	68.855	68.3785	71.2536	57.7595
	20.2	77.9854	64.2349	76.4228	56.3976	70.7134	56.4461	67.3347	57.4846	53.901	64.1966	50.8797	67.6076	52.0848	63.786	54.8794	53.1352	20.2	107.399	100.561	83.285	113.507	99.2564	99.8163	65.8874	85.9294	79.4357	71.7717	71.6274	60.9373	73.3387	52.122	51.952	63.7495	20.2	95.2563	89.2798	88.5696	91.4418	72.4282	83.2119	73.3827	70.0186	64.915	75.2768	69.1546	68.5558	71.3274	57.4559
	20.3	77.7719	64.2744	76.4707	56.2848	70.7985	56.487	67.3974	57.576	53.8101	63.9054	50.917	67.4636	52.1435	63.7404	54.9421	52.9295	20.3	107.187	100.271	83.1534	113.824	98.7358	99.6952	65.5394	85.6022	79.092	71.6219	71.7819	60.9736	73.4782	51.9438	51.9699	63.8988	20.3	95.0638	89.3433	88.3193	91.421	71.9548	83.2657	73.6456	69.9282	64.9106	75.1344	69.3182	68.6712	71.3187	57.0139
	20.4	77.4281	64.5657	76.1826	56.2282	70.8777	56.4311	67.3061	57.6866	53.6768	63.6483	50.9363	67.4564	52.1526	63.4704	54.9871	52.6858	20.4	107.08	100.052	83.0587	114.017	98.1709	99.4619	65.1426	85.2037	78.9502	71.479	71.9022	60.9872	73.424	51.8726	52.128	64.1513	20.4	94.7938	89.4451	88.3306	91.2455	71.7164	83.3592	73.8346	69.9226	64.9397	75.0271	69.2955	68.7055	71.2382	56.66
	20.5	76.9922	64.9479	76.0298	56.0464	71.1448	56.1142	67.1618	57.8524	53.4506	63.5191	50.9606	67.4666	52.102	63.1523	55.1354	52.4976	20.5	106.886	99.9402	83.1686	114.001	97.7043	99.1863	64.8584	84.8771	78.9983	71.2929	71.8828	60.7784	73.2356	51.9188	52.0298	64.3864	20.5	94.4399	89.3784	88.4424	91.0721	71.5878	83.4167	74.0764	69.7495	65.0182	74.9814	69.2019	68.6838	71.137	56.45
	20.6	76.6556	65.1591	75.8252	56.0778	71.3293	55.7491	67.0542	57.9441	53.2388	63.5126	51.0998	67.4828	51.8932	62.9489	55.2936	52.3812	20.6	106.592	99.9499	83.1486	113.849	97.6356	98.8638	64.5818	84.9839	79.1357	71.0168	71.7706	60.632	73.0555	51.9046	51.8902	64.5104	20.6	94.0763	89.3366	88.6147	90.7774	71.5572	83.1921	74.1101	69.6167	65.1428	74.889	69.0654	68.6143	71.0204	56.455
	20.7	76.3616	65.2462	75.6232	55.9719	71.4215	55.4693	66.8052	57.9645	52.9686	63.4825	51.138	67.5171	51.6854	62.841	55.5255	52.2495	20.7	106.468	99.9452	83.1096	113.632	97.6157	98.6683	64.3761	85.1102	79.179	70.8716	71.5565	60.5015	72.9214	51.8432	51.8756	64.3943	20.7	93.7741	89.2316	88.8377	90.5015	71.4097	82.7786	74.0896	69.649	65.2233	74.88	68.9887	68.4647	70.9165	56.4427
	20.8	76.1138	65.2689	75.4027	55.9174	71.3101	55.2191	66.7318	58.1494	52.7213	63.573	51.1126	67.581	51.6766	62.8336	55.8101	52.2624	20.8	106.494	99.8155	83.2081	113.276	97.7278	98.3719	64.3227	85.3093	79.2341	70.7196	71.2153	60.2724	72.7974	51.7793	51.5695	64.0968	20.8	93.6168	89.2024	88.972	90.2661	71.4152	82.6485	74.1514	69.5365	65.2371	74.871	68.8686	68.2914	70.9106	56.4692
	20.9	76.0151	65.2486	75.3594	55.7401	71.1753	55.0858	66.8202	58.272	52.3768	63.6222	51.0442	67.543	51.695	62.9733	56.1051	52.3091	20.9	106.462	99.7508	83.2362	112.951	98.1293	98.0976	64.3085	85.4017	79.2032	70.5707	70.7602	60.134	72.8126	51.672	51.1299	63.6555	20.9	93.3689	89.1171	88.9616	90.0194	71.3418	82.7036	74.254	69.2496	65.2192	74.8368	68.8439	68.1995	71.0951	56.4873
	21	76.0744	65.2598	75.1247	55.8421	70.8826	55.1797	66.9066	58.3247	52.0316	63.6084	51.0062	67.5826	51.7199	63.2062	56.2624	52.2438	21	106.635	99.6509	83.1312	112.721	98.5712	97.9327	64.349	85.3176	79.1052	70.3975	70.4145	60.2936	72.9589	51.4676	50.9144	63.2489	21	93.1317	89.1217	88.8898	89.7678	71.2656	82.66	74.2481	68.9957	65.1275	74.8793	68.7008	68.1493	71.281	56.434
	21.1	76.0663	65.3978	74.9606	55.7613	70.7168	55.2855	66.8636	58.4003	51.7475	63.6394	50.9723	67.6246	51.7984	63.3131	56.3904	52.24	21.1	107.03	99.4856	83.1144	112.535	98.8494	97.818	64.415	84.8341	79.0864	70.2578	70.2107	60.324	72.9362	51.3589	50.6932	63.0032	21.1	92.9246	88.9418	88.7946	89.4027	71.3142	82.7712	74.3617	68.6989	65.1982	74.927	68.5324	68.0488	71.3505	56.2554
	21.2	76.0557	65.464	74.8248	55.7883	70.5065	55.4862	66.9916	58.4586	51.686	63.6992	51.049	67.5375	51.802	63.2694	56.4319	52.3328	21.2	107.245	99.4314	83.1942	112.181	99.1016	97.7442	64.4904	84.4398	79.2088	70.082	70.2176	60.2301	72.9767	51.24	50.4328	62.946	21.2	92.7285	88.8429	88.767	89.1988	71.598	83.0371	74.413	68.4172	65.2817	75.0063	68.3666	68.0829	71.2899	56.1618
	21.3	76.118	65.4344	74.7426	55.7137	70.3356	55.6644	66.9832	58.3362	51.7565	63.6403	51.1227	67.3918	51.6962	63.3263	56.4133	52.3311	21.3	107.196	99.583	83.1618	111.933	99.2567	97.8958	64.4675	84.0138	79.3474	70.0606	70.3834	60.2559	72.9416	51.1802	50.4908	63.0149	21.3	92.7132	88.7853	88.7757	89.1262	71.9273	83.107	74.1804	68.2726	65.4589	75.0466	68.2522	68.251	71.0493	56.2035
	21.4	76.2178	65.1816	74.5571	55.5869	70.1239	55.6738	66.8936	58.2471	51.8546	63.5221	51.2945	67.3886	51.6591	63.3948	56.3497	52.2837	21.4	107.088	99.4962	83.2681	111.649	99.0459	98.0466	64.413	83.7226	79.4349	70.0209	70.6084	60.32	72.9121	51.1339	50.8302	63.2656	21.4	92.8626	88.8317	88.7794	89.1934	72.2195	82.9195	73.7955	68.3021	65.653	75.103	68.0494	68.4255	70.5701	56.2538
	21.5	76.3667	64.8428	74.335	55.1669	69.8482	55.498	66.8518	58.235	52.049	63.4646	51.497	67.1926	51.7197	63.4354	56.3114	52.332	21.5	106.795	99.419	83.2498	111.347	98.8524	98.0616	64.2835	83.5398	79.4435	70.0008	70.7541	60.2516	72.7875	51.2082	51.2008	63.4676	21.5	93.1007	88.8517	88.6786	89.3232	72.4984	82.9538	73.5222	68.4452	65.8648	75.0933	68.0552	68.6114	70.0554	56.4929
	21.6	76.5458	64.6434	74.0809	54.7913	69.5212	55.317	66.8248	58.2078	52.2345	63.2858	51.6096	66.9224	51.777	63.5953	56.2024	52.3468	21.6	106.4	99.3842	83.2189	111.137	98.7222	98.1784	64.1594	83.6724	79.2514	70.0827	70.7864	60.379	72.7312	51.2854	51.6448	63.4851	21.6	93.3891	89.11	88.4619	89.7526	72.6536	82.9854	73.2011	68.6165	65.9089	75.0413	68.113	68.8408	69.685	56.8034
	21.7	76.6351	64.5978	73.7734	54.4372	69.3183	55.1525	66.5676	58.1392	52.3135	63.1912	51.5988	66.8507	51.958	63.8799	55.9559	52.3134	21.7	106.195	99.21	82.9902	111.1	98.5218	98.2194	64.0448	83.7956	78.9417	70.2789	70.6101	60.6718	72.6164	51.3524	52.0366	63.4247	21.7	93.6124	89.1799	87.9827	89.9702	72.6895	82.9518	72.9405	68.7439	65.9932	74.857	68.1693	68.8547	69.5279	56.9957
	21.8	76.7485	64.6196	73.4622	54.2648	69.2903	55.1285	66.3322	57.992	52.3409	63.2254	51.583	66.9102	52.1046	63.9735	55.7008	52.3455	21.8	106.035	99.0556	82.8101	111.076	98.2901	98.1177	63.8744	83.9059	78.6252	70.3021	70.3735	60.8532	72.5187	51.4014	52.2374	63.2278	21.8	93.6082	89.258	87.4884	90.041	72.6308	82.9162	72.82	68.8144	65.9368	74.728	68.1682	68.8459	69.6052	57.1267
	21.9	76.7621	64.9362	73.3463	54.2345	69.386	55.4123	66.004	57.7614	52.4819	63.2574	51.4305	66.823	52.1022	64.042	55.4321	52.4392	21.9	105.837	99.1994	82.4811	111.092	98.2862	98.1501	63.8257	84.0018	78.3949	70.335	70.1811	60.9607	72.4436	51.4364	52.2326	62.8839	21.9	93.5936	89.1248	87.0341	90.0774	72.4885	82.8481	72.8258	68.8733	65.7264	74.6454	68.2757	68.7747	69.8314	57.2702
	22	76.713	65.2567	73.4456	54.4047	69.6768	55.9014	65.641	57.5513	52.5096	63.2632	51.0898	66.8226	51.897	64.087	55.1322	52.5498	22	105.6	99.3323	82.4761	111.195	98.2087	98.3324	63.8467	84.053	78.1887	70.3783	70.0219	61.0743	72.4126	51.4664	52.0131	62.5278	22	93.5432	89.011	86.7733	90.1849	72.3115	82.3963	72.7052	68.8572	65.4493	74.6036	68.3065	68.6995	69.9205	57.239
	22.1	76.6584	65.255	73.5998	54.7092	69.9635	56.3435	65.3008	57.5196	52.4433	63.2742	50.9158	66.9117	51.6871	64.037	54.9278	52.6271	22.1	105.361	99.3457	82.506	111.219	98.0014	98.5007	63.8789	84.0778	78.0344	70.316	69.913	61.0061	72.4978	51.544	51.6894	62.2619	22.1	93.4435	88.8109	86.6859	89.9339	72.2028	81.9492	72.5792	68.9218	65.1214	74.6808	68.3437	68.5725	69.8567	56.9894
	22.2	76.7245	64.9602	73.8798	54.9676	70.3053	56.6136	65.1387	57.6136	52.3246	63.2547	50.8653	66.8686	51.3432	63.9266	54.8112	52.694	22.2	105.047	99.4195	82.6808	111.344	97.8957	98.752	64.0467	84.1021	77.885	70.207	69.9389	60.8086	72.6544	51.7452	51.5039	62.1142	22.2	93.4134	88.7358	86.8247	89.7453	72.0598	81.5259	72.4083	68.9693	64.6719	74.8406	68.3998	68.5914	69.6886	56.7511
	22.3	76.5148	64.6459	74.0946	55.1217	70.4922	56.6004	65.0228	57.82	52.2156	63.2489	50.7883	66.6907	50.9459	63.9054	54.722	52.6671	22.3	104.879	99.2981	82.7826	111.584	97.9006	99.0665	64.2899	84.2658	77.7816	70.2266	70.0089	60.6683	72.8469	51.8923	51.4332	62.1322	22.3	93.2693	88.5952	86.9589	89.673	71.9513	81.1873	72.2056	69.0128	64.2296	74.9926	68.515	68.4466	69.3618	56.4097
	22.4	76.2031	64.1973	74.1562	55.2114	70.6184	56.254	65.0939	58.0247	52.0282	63.3821	50.7494	66.5537	50.6714	63.8126	54.7481	52.4895	22.4	104.9	99.0272	83.0018	111.937	97.918	99.238	64.4437	84.4878	77.5599	70.3167	70.0766	60.456	72.9499	52.0038	51.3153	62.12	22.4	93.0204	88.7589	87.1753	89.6014	71.9962	81.042	71.9897	69.0053	63.9254	75.005	68.5038	68.3162	69.0029	55.9647
	22.5	75.7998	63.6983	74.1257	55.211	70.5385	55.7836	65.1285	58.1399	51.9462	63.4653	51.0145	66.399	50.6351	63.6714	54.9347	52.1226	22.5	105.068	98.851	82.9071	112.151	98.0558	99.3868	64.4276	84.8111	77.4186	70.4918	70.1793	60.2289	73.1586	52.0273	51.3056	62.0655	22.5	92.7448	88.9276	87.2673	89.4634	71.9852	81.0774	71.8712	69.0257	63.7019	74.9779	68.3593	68.1581	68.9941	55.5502
	22.6	75.3333	63.3627	73.9656	55.1701	70.3036	55.2192	65.2724	58.0453	52.0671	63.5833	51.1418	66.2393	50.5608	63.615	55.0525	51.854	22.6	105.299	98.7431	82.7775	112.448	98.3764	99.4229	64.4139	84.9831	77.4103	70.7454	70.4468	60.1194	73.2354	52.0183	51.3349	62.1166	22.6	92.5406	89.1828	87.3558	89.5908	71.7753	80.9873	71.8828	68.8403	63.577	74.9581	68.1212	68.041	69.1342	55.3892
	22.7	74.744	63.2447	73.593	54.9696	69.8662	54.7069	65.324	57.8372	52.3524	63.6463	51.147	66.141	50.6025	63.5157	55.1645	51.6694	22.7	105.525	98.6235	82.6569	112.553	98.6575	99.3126	64.1785	85.2311	77.538	70.8615	70.6927	59.9931	73.2039	51.8106	51.2585	62.0167	22.7	92.3176	89.5382	87.4184	89.7654	71.4732	80.8166	71.8592	68.5816	63.6024	74.9246	67.8623	67.9346	69.2248	55.2621
	22.8	74.4332	63.177	73.3642	54.7268	69.5165	54.4395	65.3147	57.7132	52.5987	63.7731	51.1908	66.0995	50.7484	63.5073	55.1786	51.6219	22.8	105.785	98.5682	82.5847	112.4	98.6572	99.1102	63.9999	85.3358	77.7382	70.7688	70.9437	59.9549	73.2338	51.6583	50.9275	61.815	22.8	92.2822	89.8696	87.4119	89.8263	71.1206	80.5298	71.9882	68.2681	63.6832	74.8782	67.4845	67.9276	69.3782	55.2394
	22.9	74.3157	63.0992	73.1806	54.4571	69.2428	54.3041	65.2258	57.7588	52.8894	63.8515	51.2467	66.1265	50.9571	63.4876	55.0367	51.7782	22.9	105.996	98.544	82.5103	112.159	98.4748	99.0004	63.765	85.391	78.0627	70.5499	71.1274	60.0074	73.3031	51.5766	50.7651	61.6679	22.9	92.2515	89.94	87.2364	89.8956	70.5968	80.1693	72.2083	67.8754	63.6708	74.9394	67.357	67.9484	69.5384	55.3978
	23	74.3193	62.9966	72.9346	54.1397	69.1049	54.1329	65.2504	57.8084	53.1063	63.8724	51.0932	66.1308	51.0052	63.6844	54.7592	52.0761	23	106.053	98.4472	82.6706	111.886	98.1826	98.743	63.7426	85.3989	78.3463	70.2416	71.3082	60.0894	73.0184	51.5968	50.7523	61.5637	23	92.1299	89.9031	87.1033	89.8472	70.2028	79.8565	72.4371	67.4549	63.6763	75.1046	67.3725	68.0567	69.5527	55.6317
	23.1	74.3457	62.9237	72.7317	53.7352	69.2062	54.2113	65.2078	57.8958	53.129	63.858	50.9248	66.089	51.1671	63.7789	54.533	52.3832	23.1	106.051	98.341	82.7846	111.406	97.7429	98.4476	63.7194	85.3783	78.6795	69.9107	71.2393	60.2643	72.7203	51.5404	50.8247	61.4346	23.1	91.9738	89.5681	86.8557	89.6011	70.0676	79.6955	72.4991	67.2285	63.73	75.1884	67.4664	68.1894	69.5946	55.7848
	23.2	74.461	62.8435	72.68	53.559	69.4707	54.4123	65.2332	58.0072	52.9284	63.7394	50.9501	66.0782	51.317	63.9465	54.4178	52.5676	23.2	106.053	98.2633	82.714	111.04	97.2459	98.1337	63.8611	85.1074	78.8716	69.6648	71.2431	60.578	72.4252	51.5732	50.8946	61.4188	23.2	91.684	89.0091	86.6574	89.2885	70.0652	79.7666	72.6919	67.3153	63.8029	75.1715	67.5181	68.2878	69.7423	56.0539
	23.3	74.5164	62.6977	72.4848	53.5426	69.631	54.61	65.3	57.955	52.7384	63.3628	50.9839	66.0271	51.4748	63.971	54.395	52.6642	23.3	105.875	98.3191	82.5983	110.741	97.1673	97.8595	63.8813	84.8239	78.8202	69.5062	71.1629	60.7365	72.0723	51.6505	51.2479	61.5138	23.3	91.3375	88.4957	86.4928	88.9746	70.1325	80.1916	72.6066	67.5377	63.8369	75.1429	67.7276	68.5518	69.8406	56.3278
	23.4	74.5375	62.4949	72.4068	53.5601	69.6208	54.8256	65.444	57.6995	52.4662	63.0106	51.023	65.9543	51.4253	64.0648	54.5038	52.6991	23.4	105.538	98.319	82.3255	110.339	97.3503	97.4234	63.9861	84.4533	78.673	69.4338	71.134	60.8547	71.7636	51.7144	51.5579	61.7154	23.4	91.0404	88.1263	86.5486	88.5211	70.3855	80.6248	72.4229	67.986	63.9448	74.9993	67.7074	68.7957	69.7302	56.537
	23.5	74.4827	62.4092	72.479	53.707	69.5746	55.1891	65.4534	57.3813	52.1394	62.9273	51.1775	65.9717	51.4452	63.9124	54.6045	52.7793	23.5	105.265	98.3458	81.8542	110.1	97.5104	97.0501	64.1004	83.9633	78.5452	69.5375	71.0214	60.9775	71.8232	51.6226	51.6565	62.0368	23.5	90.9313	87.9306	86.5639	88.2194	70.5656	81.1188	72.3156	68.4019	63.9484	74.6825	67.758	68.8837	69.6059	56.7043
	23.6	74.5205	62.364	72.6284	53.8946	69.461	55.3462	65.3779	57.0715	51.8336	62.9643	51.3606	65.9184	51.3628	63.7388	54.7025	52.75	23.6	104.862	98.5112	81.4763	110.019	97.7695	96.7617	64.204	83.5698	78.2703	69.5573	70.9328	60.8056	71.8999	51.6018	51.6068	62.2086	23.6	90.8059	87.9409	86.7385	88.1191	70.6777	81.5684	72.2264	68.7266	63.8856	74.4261	67.7121	68.9137	69.3602	56.9118
	23.7	74.6344	62.3779	72.7656	54.0352	69.3274	55.292	65.4412	56.8273	51.6734	63.2306	51.4046	65.8636	51.1853	63.4773	54.8268	52.7458	23.7	104.546	98.8806	81.4103	109.799	97.9887	96.6929	64.2732	83.4901	78.0786	69.5636	70.7472	60.4691	72.0723	51.638	51.5295	62.3199	23.7	90.9518	88.0746	86.8961	88.0754	70.8018	81.7617	72.0048	68.7172	63.6483	74.3973	67.6753	68.8789	69.0608	57.0782
	23.8	74.7483	62.5043	72.9374	53.9786	69.312	55.1897	65.5906	56.5987	51.5404	63.724	51.395	65.9357	51.0818	63.2008	55.0866	52.658	23.8	104.44	99.1782	81.5136	109.755	97.8718	96.5966	64.5888	83.3273	77.9496	69.6403	70.6417	60.1801	72.2002	51.5748	51.4466	62.4106	23.8	91.1109	88.1355	87.2094	88.1272	70.8726	81.5788	71.9322	68.6063	63.4834	74.3979	67.6449	68.5804	68.8382	57.1796
	23.9	74.7456	62.7522	72.9164	53.9506	69.4083	55.1512	65.6433	56.5156	51.4246	64.0506	51.4263	65.984	51.1763	62.9556	55.3613	52.5678	23.9	104.481	99.4376	81.7464	109.808	97.42	96.5079	64.8998	83.2843	77.8605	69.6692	70.5508	60.0146	72.3319	51.3878	51.2904	62.4479	23.9	91.2687	88.0314	87.2511	88.2329	70.8568	81.3411	71.8288	68.2582	63.3737	74.5201	67.7232	68.3442	69.0275	57.066
	24	74.8525	62.974	72.7888	53.9005	69.4927	54.8409	65.8262	56.6254	51.4145	64.1043	51.3294	65.9995	51.1846	62.8017	55.6797	52.3938	24	104.581	99.5624	82.1207	109.838	96.9686	96.4566	65.0782	83.3617	77.7492	69.3596	70.5207	59.7316	72.315	51.2712	51.2395	62.3692	24	91.4028	87.8568	87.4046	88.2755	70.7929	81.0921	71.5769	67.9806	63.3909	74.7244	67.5751	68.246	69.2171	56.8122
	24.1	74.8118	63.0318	72.6279	53.9383	69.419	54.7303	66.0756	56.763	51.5316	63.9768	51.2903	66.1275	51.1784	62.8954	55.9308	52.2141	24.1	104.912	99.5644	82.4117	109.946	96.4603	96.5104	65.2042	83.5315	77.5699	69.1818	70.6855	59.6363	72.3999	51.2181	51.2295	62.4196	24.1	91.5795	87.7084	87.5415	88.144	70.7364	80.8234	71.3585	67.7455	63.3716	74.8692	67.4916	68.1655	69.435	56.431
	24.2	74.6236	62.9245	72.4629	53.9852	69.3113	54.7707	66.0162	56.8829	51.6042	63.6941	51.2213	66.1671	51.1809	63.0662	55.9282	52.0587	24.2	105.04	99.2604	82.5388	110.166	96.0805	96.5068	65.174	83.4545	77.3756	69.0881	70.876	59.6916	72.398	51.1216	51.2609	62.572	24.2	91.6399	87.4586	87.4786	88.0252	70.6433	80.687	71.226	67.6443	63.442	74.8364	67.4841	68.1268	69.6837	55.9842
	24.3	74.4506	62.6271	72.4418	54.2034	69.1184	54.7048	65.8116	57.1072	51.631	63.3785	51.0819	66.0938	51.0527	63.2366	55.6416	52.1116	24.3	104.988	98.9278	82.4278	110.37	95.8463	96.6074	64.7941	83.5384	77.4949	69.0098	71.0132	59.767	72.3226	51.0334	51.0945	62.6454	24.3	91.58	87.3818	87.2734	87.9071	70.6464	80.5786	71.205	67.4728	63.5977	74.825	67.4341	68.1992	69.8169	55.473
	24.4	74.3406	62.2371	72.4246	54.4263	68.8456	54.5003	65.5355	57.2285	51.7258	63.254	50.8529	66.0142	50.7878	63.3715	55.1596	52.1602	24.4	104.876	98.8294	82.3498	110.74	95.9941	96.9812	64.3937	83.5282	77.7354	68.9438	71.1231	59.5701	72.1708	51.1861	50.9555	62.7438	24.4	91.5396	87.4336	87.2633	87.8329	70.6958	80.5442	71.2784	67.4432	63.6041	74.7236	67.279	68.1678	69.6804	55.1325
	24.5	74.0434	61.9218	72.4467	54.5247	68.6464	54.5602	65.084	57.2928	51.7883	63.187	50.6544	65.9242	50.6116	63.4871	54.6672	52.3114	24.5	104.745	98.8818	82.2252	111.094	96.2944	97.3464	64.0228	83.4962	78.0534	69.0809	71.274	59.5587	72.0613	51.4979	50.7458	62.8508	24.5	91.3441	87.3814	87.2036	87.8679	70.8348	80.4728	71.358	67.4369	63.4434	74.6035	67.2142	67.9976	69.4998	54.9195
	24.6	73.7883	61.7235	72.4177	54.5168	68.7368	54.4707	64.6572	57.4587	51.8176	63.341	50.4336	65.9418	50.5414	63.2815	54.285	52.5246	24.6	104.408	98.9019	82.2223	111.373	96.6684	97.579	63.6292	83.2628	78.4666	69.1382	71.2453	59.6795	71.8374	51.6346	50.628	62.9945	24.6	91.1231	87.3158	86.9612	87.9075	70.8377	80.4523	71.5368	67.3418	63.3592	74.5727	67.2209	67.8892	69.3599	54.8452
	24.7	73.5675	61.6938	72.2906	54.3844	68.841	54.4039	64.4624	57.4474	51.8598	63.475	50.24	66.0424	50.5083	63.0394	54.0888	52.7268	24.7	104.121	99.0148	82.1204	111.79	96.97	97.7105	63.3423	83.0599	78.788	69.1424	71.1202	59.6298	71.5553	51.738	50.6026	62.9431	24.7	90.9601	87.5491	87.0383	87.7148	70.914	80.3782	71.7575	67.1896	63.3177	74.4786	67.1586	67.8455	69.2059	54.8036
	24.8	73.2751	61.7264	72.0339	54.1428	68.9853	54.4447	64.276	57.2694	51.9614	63.3869	50.2367	66.1927	50.4608	62.9038	53.9495	52.6703	24.8	103.899	98.9963	82.1742	111.973	97.1906	97.6494	63.2946	82.8311	78.8221	69.2038	70.8874	59.6168	71.5719	51.8566	50.6654	62.8161	24.8	91.0786	87.5748	87.1576	87.3095	70.8659	80.5096	71.8921	67.0805	63.1278	74.2602	67.0743	67.7051	69.1233	54.9215
	24.9	73.1264	61.8627	71.9262	53.7754	69.3093	54.5194	64.2569	57.114	52.112	63.1609	50.3163	66.3961	50.4362	62.7357	54.0111	52.4669	24.9	103.615	98.7622	82.1595	111.7	97.1656	97.3855	63.314	82.5702	78.8405	69.2498	70.6617	59.8719	71.5915	51.6488	50.7436	62.5483	24.9	91.2038	87.5928	87.234	86.9599	70.7282	80.626	71.9468	66.8172	63.0888	74.1208	67.0096	67.5545	69.1138	55.0623
	25	73.1459	61.9352	71.8844	53.6303	69.5214	54.4503	64.4732	56.7879	52.2372	62.9811	50.5026	66.6552	50.3577	62.58	54.0768	52.0942	25	103.388	98.5358	82.0814	111.372	96.9821	97.1664	63.3695	82.2256	78.7793	69.2909	70.268	60	71.5358	51.2377	50.8112	62.2269	25	91.4521	87.7114	87.1611	86.3286	70.4511	80.6222	71.9912	66.4411	63.2938	74.0447	67.0848	67.5062	69.1563	55.2174
	25.1	73.3496	62.0882	72.0102	53.5856	69.4956	54.407	64.6684	56.2905	52.1857	62.6939	50.7069	66.6778	50.2349	62.5248	54.0985	51.7004	25.1	103.445	98.3979	81.9115	110.938	96.7735	97.0628	63.5137	81.9572	78.7186	69.2835	69.9396	59.8937	71.5031	50.9601	50.71	61.8421	25.1	91.7776	87.7839	87.2516	85.8941	70.2557	80.5285	71.8106	66.1923	63.5041	73.7798	67.0004	67.4713	69.1949	55.3327
	25.2	73.5504	62.215	72.3492	53.7322	69.3696	54.2912	64.8729	56.0202	52.0944	62.5594	50.9598	66.5649	50.0714	62.5316	54.0618	51.2679	25.2	103.678	98.2096	81.9583	110.293	96.6953	97.0041	63.6828	81.877	78.7495	69.2523	69.7417	59.9834	71.5682	50.7314	50.5493	61.5886	25.2	91.8628	87.6281	87.0047	85.8229	69.9564	80.489	71.4123	66.087	63.5776	73.7019	66.9041	67.3935	69.2762	55.4185
	25.3	73.857	62.6172	72.6982	54.049	69.151	54.0836	65.2298	55.9198	51.9449	62.6206	51.139	66.362	49.9167	62.4776	54.1564	51.0394	25.3	103.833	98.1666	82.031	109.907	96.7504	97.0843	63.72	81.8322	78.8674	69.0323	69.7465	59.9928	71.4827	50.546	50.4649	61.492	25.3	91.686	87.583	86.6327	85.9889	69.7158	80.3468	70.9938	66.1188	63.554	73.7186	66.8318	67.4257	69.4536	55.3755
	25.4	74.015	63.0444	72.9049	54.4546	68.7449	53.8553	65.4948	55.7944	51.7612	62.734	51.2412	66.0555	49.7491	62.4432	54.1019	50.9957	25.4	104.158	98.1566	82.1427	109.88	96.7532	97.1738	63.7295	81.9643	78.7135	68.8374	69.747	59.9121	71.5346	50.6719	50.3235	61.486	25.4	91.522	87.4666	86.1695	86.0907	69.5271	80.222	70.7354	66.4208	63.4756	73.7012	66.8742	67.548	69.5456	55.3418
	25.5	74.1142	63.3532	72.9499	54.6971	68.5039	53.6779	65.6945	55.7666	51.6083	62.7565	51.2193	65.7146	49.605	62.4287	54.0377	51.1194	25.5	104.346	98.0679	82.4226	109.818	96.8935	97.3021	63.7771	82.2003	78.3916	68.6357	70.0012	59.8949	71.6454	50.9325	50.2903	61.523	25.5	91.4311	87.3524	85.8098	86.4981	69.548	80.367	70.6391	66.8157	63.247	73.5886	66.8028	67.6157	69.4871	55.3723
	25.6	73.9645	63.3736	72.9703	54.8557	68.4367	53.433	65.9988	55.8677	51.693	62.7986	51.1516	65.5806	49.4474	62.4812	53.8982	51.2427	25.6	104.178	97.8442	82.5662	109.9	97.0188	97.3	63.8577	82.5023	77.9714	68.6241	70.2519	60.0397	71.8634	51.2206	50.4104	61.4337	25.6	91.2701	87.2374	85.3571	86.8162	69.644	80.647	70.8313	67.1729	63.0768	73.5828	66.9163	67.4836	69.3414	55.3433
	25.7	73.8455	63.2874	72.9064	54.918	68.5123	53.2452	66.1635	55.8862	51.8349	62.6567	50.9934	65.5813	49.477	62.4633	53.8036	51.4874	25.7	103.767	97.7014	82.426	110.018	97.0587	97.2772	63.924	82.5836	77.5481	68.6571	70.5141	60.0417	72.1401	51.5711	50.4963	61.3556	25.7	91.3239	87.0547	85.2066	87.0492	69.8882	80.857	71.1712	67.3231	63.0404	73.4766	67.0828	67.3017	69.046	55.2838
	25.8	73.618	62.8955	72.8822	54.8643	68.7282	53.1368	66.2228	55.8419	51.9521	62.5402	50.851	65.6724	49.5496	62.5324	53.659	51.7274	25.8	103.399	97.5615	82.0374	110.004	97.0144	97.1352	64.0505	82.5579	77.0592	68.8596	70.6681	60.0808	72.2878	51.8594	50.5316	61.2682	25.8	91.6774	86.9564	85.304	87.3258	70.2704	80.9057	71.5203	67.3739	63.1954	73.3732	67.238	67.0399	68.653	55.2757
	25.9	73.421	62.3444	72.9966	54.8427	68.9913	53.0766	66.3281	56.0455	51.9544	62.475	50.7902	65.9129	49.6648	62.5904	53.6	51.8579	25.9	102.83	97.4495	81.4521	109.785	97.0802	96.9696	64.0913	82.4974	76.8332	69.0298	70.8887	60.0628	72.2355	51.9909	50.6301	61.2827	25.9	91.9681	86.9888	85.4686	87.6726	70.6959	80.8698	71.5535	67.2383	63.3262	73.3946	67.2285	66.6818	68.3733	55.2012
	26	73.2569	61.9232	73.1533	54.7162	69.0086	53.0796	66.286	56.3716	51.9484	62.5316	50.8198	66.1523	49.7724	62.5179	53.5992	51.8298	26	102.35	97.3222	80.7103	109.65	97.0814	96.7008	64.1176	82.4612	76.845	69.1086	70.9438	59.9706	72.1781	52.015	50.6132	61.3574	26	92.1544	87.0931	85.5977	87.8376	71.0383	80.6123	71.4339	67.1051	63.4249	73.4952	67.0898	66.2704	68.2884	54.9545
	26.1	73.2947	61.7426	73.1619	54.539	68.9163	53.1837	66.1054	56.5776	51.8929	62.5032	50.8547	66.2619	49.926	62.3982	53.7323	51.8896	26.1	102.044	97.2307	80.2796	109.434	97.0984	96.5435	64.1409	82.3883	77.0218	68.9363	70.9979	59.705	71.9696	52.0341	50.5035	61.5948	26.1	92.3229	87.1869	85.8018	87.9561	71.2225	80.2792	71.032	66.9526	63.3717	73.6347	66.8335	66.0575	68.22	54.8327
	26.2	73.2984	61.6217	73.08	54.3214	68.7658	53.297	65.9562	56.7495	51.8382	62.481	50.9388	66.4454	49.892	62.3547	53.9319	51.8432	26.2	101.985	96.9592	80.2056	109.133	97.0433	96.5429	64.1376	82.4778	77.1863	68.7596	71.0257	59.4789	71.7422	52.0232	50.3828	61.7893	26.2	92.4287	87.331	85.8446	88.0406	71.1751	80.0395	70.7061	66.9377	63.2247	73.8155	66.5177	65.9131	68.1858	54.8575
	26.3	73.2753	61.4493	72.9062	54.0027	68.5016	53.5112	65.7218	57.0204	51.9079	62.2986	50.8678	66.5756	49.9723	62.1088	54.154	51.7455	26.3	101.989	96.5459	80.3654	108.797	97.0178	96.718	64.1087	82.7414	77.3045	68.5136	71.1012	59.2332	71.6856	52.0936	50.226	61.9656	26.3	92.2962	87.2262	85.7502	87.9213	70.7821	80.0002	70.2981	66.9282	62.9795	74.0123	66.1057	65.9032	68.1446	54.9255
	26.4	73.1492	61.3534	72.5664	53.6112	68.3338	53.7838	65.4096	56.9585	52.1367	61.957	50.702	66.5039	50.0644	61.9135	54.4471	51.6784	26.4	102.162	96.1621	80.758	108.779	97.0256	97.0106	64.1061	82.8732	77.3204	68.3403	71.0805	59.0786	71.654	52.1672	50.035	61.9835	26.4	92.1278	86.9925	85.676	87.7038	70.2664	80.1013	70.1192	66.9122	62.7404	74.087	65.8728	65.9156	67.9644	55.1188
	26.5	73.0664	61.1396	72.1192	53.423	68.3973	53.9647	65.1838	56.7225	52.3141	61.6486	50.4448	66.4001	50.2556	61.993	54.6634	51.7586	26.5	102.275	95.8469	81.1879	108.748	97.0084	97.2915	63.9813	83.0093	77.2606	68.2792	71.1538	58.9396	71.5459	52.259	49.9925	62.0126	26.5	91.8688	86.567	85.707	87.661	69.5861	80.1276	69.9645	66.8825	62.5659	74.135	65.8967	66.1257	67.7031	55.2985
	26.6	72.9523	60.8716	71.6905	53.2647	68.494	54.2695	64.9277	56.6103	52.2859	61.4146	50.2122	66.2585	50.4331	62.1318	54.8013	51.7434	26.6	102.487	95.686	81.3886	108.697	96.9565	97.2872	63.655	83.2298	77.0857	68.3619	71.0933	58.8382	71.4638	52.1965	50.0513	62.002	26.6	91.436	86.1892	85.6794	87.5744	68.9188	80.0811	70.0884	66.9405	62.3656	74.2315	65.8952	66.3482	67.5433	55.3997
	26.7	72.8849	60.6598	71.3014	53.1401	68.7534	54.4788	64.7323	56.7093	52.1571	61.3941	50.0268	65.8826	50.7208	62.1774	54.824	51.7795	26.7	102.484	95.8158	81.2294	108.859	97.0057	96.9502	63.3213	83.4521	76.902	68.4347	70.971	58.7816	71.2732	51.9915	50.1471	62.053	26.7	91.0759	85.9752	85.6628	87.3667	68.4313	79.959	70.1468	67.0072	62.2626	74.3886	65.9165	66.5469	67.5298	55.3646
	26.8	72.9328	60.6709	70.9878	53.0174	69.1158	54.6261	64.5362	56.6905	52.0212	61.596	50.0727	65.5528	50.8358	62.4441	54.8578	51.7695	26.8	102.418	96.0886	80.9693	109.175	96.9712	96.5312	63.1392	83.6286	76.7876	68.5426	70.8091	58.7253	70.9573	51.842	50.3073	62.086	26.8	90.7443	86.0862	85.5093	87.2679	68.2104	79.748	70.3722	67.1282	62.2542	74.4833	66.1053	66.6417	67.537	55.2613
	26.9	73.09	60.6654	70.8451	52.9019	69.317	54.6426	64.359	56.9222	51.7612	61.9888	50.1681	65.3674	50.9785	62.66	54.7933	51.8379	26.9	102.334	96.2617	80.6692	109.266	96.8416	96.0483	62.9404	83.8489	76.5888	68.6885	70.6095	58.6329	70.8612	51.7124	50.4968	61.9904	26.9	90.5132	86.3297	85.3446	87.2942	68.1795	79.4759	70.5202	67.3347	62.3208	74.5064	66.1686	66.8097	67.7876	55.0298
	27	73.0872	60.8158	71.0482	52.7506	69.2543	54.6724	64.1457	57.2734	51.75	62.2606	50.3788	65.1429	51.0694	62.6168	54.6397	51.7794	27	102.26	96.408	80.4186	109.333	96.7562	95.6024	62.7714	83.8246	76.4173	68.7808	70.3454	58.6733	70.9813	51.616	50.5452	61.7807	27	90.4851	86.6197	85.1454	87.2005	68.4514	79.4306	70.5766	67.5997	62.4391	74.5182	66.0207	66.8582	68.068	55.0474
	27.1	72.9145	60.8426	71.2336	52.7249	69.1434	54.5179	63.9768	57.5827	51.922	62.4082	50.5247	65.0321	51.1432	62.5056	54.4955	51.6455	27.1	102.038	96.3808	80.2291	109.459	96.6579	95.4711	62.8697	83.6017	76.3652	68.8368	70.3324	58.8975	71.2198	51.6453	50.5028	61.5746	27.1	90.8032	86.8893	85.023	87.226	68.9095	79.4826	70.3895	67.7797	62.6307	74.4589	65.893	66.7394	68.3226	55.0572
	27.2	72.6064	60.7612	71.4232	52.7038	68.7661	54.4687	63.6742	57.665	52.2712	62.4346	50.6739	65.0996	51.1763	62.4562	54.3856	51.2957	27.2	101.998	96.1071	80.1946	109.412	96.4014	95.5523	63.0043	83.2786	76.392	68.9433	70.3047	59.1485	71.5594	51.7157	50.4109	61.2957	27.2	91.0856	86.9292	84.8738	87.3389	69.2519	79.5224	70.2466	67.8784	62.7606	74.2974	65.9156	66.7049	68.41	55.103
	27.3	72.1863	60.604	71.5869	52.8407	68.3934	54.3162	63.5814	57.725	52.4993	62.4484	50.6649	65.2462	51.3005	62.3045	54.1792	51.0109	27.3	102.186	95.8375	80.2509	109.175	96.1662	95.6461	62.8937	82.8543	76.4736	68.923	70.3486	59.4644	72.0264	51.6198	50.3254	60.9582	27.3	91.3391	86.644	84.8864	87.4589	69.5895	79.665	70.0702	67.8845	62.8714	74.247	65.9982	66.7024	68.3944	55.1678
	27.4	71.8141	60.5622	71.6988	53.13	68.1811	54.3453	63.5188	57.6092	52.6595	62.4179	50.6699	65.4065	51.3936	62.181	53.9774	50.661	27.4	102.356	95.669	80.3508	108.897	95.9864	95.6214	62.8554	82.5348	76.7686	68.8086	70.5305	59.6816	72.3051	51.6686	50.3371	60.9815	27.4	91.5726	86.321	84.8905	87.4316	69.7338	79.7343	70.0302	67.8912	62.9166	74.342	66.1849	66.5983	68.1722	55.296
	27.5	71.4922	60.5027	71.5492	53.4438	68.2155	54.3307	63.4329	57.4298	52.5127	62.4561	50.5168	65.6104	51.4155	62.184	54.0052	50.4028	27.5	102.7	95.4511	80.4988	108.678	95.6638	95.6969	62.8321	82.4969	77.0086	68.7452	70.6985	59.7019	72.4164	51.7741	50.4918	61.0415	27.5	91.7578	86.1704	84.8746	87.3502	69.7091	79.6077	70.2919	67.7492	62.9259	74.4167	66.5049	66.4818	68.006	55.2595
	27.6	71.2025	60.7423	71.4522	53.7054	68.2306	54.1971	63.4718	57.15	52.3189	62.5968	50.3989	65.65	51.4422	62.2439	54.0432	50.2687	27.6	103.186	95.2665	80.7073	108.494	95.3056	95.7292	62.6358	82.5423	77.1421	68.6778	70.5849	59.594	72.471	51.8037	50.6726	61.1576	27.6	91.7863	86.0078	84.7559	87.163	69.5376	79.375	70.6484	67.5904	63.0932	74.4907	66.8836	66.465	67.7657	55.2502
	27.7	71.1439	61.118	71.3068	53.9024	68.2383	54.0052	63.6924	56.904	51.9875	62.7645	50.2006	65.6138	51.503	62.3732	54.0894	50.4409	27.7	103.57	95.2601	80.9844	108.464	95.0128	95.8206	62.468	82.6081	77.1081	68.508	70.5453	59.4099	72.4946	51.9373	50.8876	61.2405	27.7	91.7294	86.0054	84.6891	87.0015	69.4548	79.1826	71.017	67.4462	63.3532	74.4862	67.0123	66.3615	67.663	55.2078
	27.8	71.2664	61.4764	71.2039	53.9471	68.0828	53.8503	63.9359	56.7092	51.8174	62.7736	50.0361	65.4895	51.5096	62.6179	54.2725	50.5542	27.8	103.641	95.3392	81.3142	108.458	94.8019	95.8974	62.4744	82.7563	76.9798	68.4207	70.4233	59.16	72.4732	52.141	51.0432	61.4246	27.8	91.7379	86.2792	84.6453	86.8767	69.2639	78.9042	71.424	67.3315	63.5429	74.384	66.868	66.3132	67.7832	55.1886
	27.9	71.2429	61.7506	71.1132	53.9272	67.9495	53.49	64.3158	56.6677	51.8918	62.7914	49.9014	65.3671	51.4888	62.9533	54.4374	50.724	27.9	103.716	95.3856	81.583	108.559	94.5757	96.1377	62.4988	82.7764	76.676	68.3429	70.1554	59.0808	72.4877	52.0831	51.0291	61.4297	27.9	91.5838	86.457	84.666	86.9716	69.1647	78.703	71.8068	67.0569	63.6822	74.2169	66.5742	66.4797	67.9271	55.1216
	28	71.1177	61.8741	71.1499	53.768	67.8412	53.3322	64.8842	56.7322	52.138	62.6955	49.9949	65.3183	51.5222	63.2438	54.4198	50.8814	28	103.493	95.4817	81.6064	108.556	94.4531	96.1131	62.6872	82.6919	76.4998	68.267	69.8415	59.1425	72.5406	51.8584	50.7898	61.5878	28	91.3721	86.5679	84.7696	87.1599	69.086	78.6577	71.9793	66.8235	63.6574	74.1166	66.2606	66.758	67.9649	55.0657
	28.1	71.1591	61.7706	71.2766	53.5149	67.8458	53.42	65.3237	56.7901	52.4984	62.6273	50.1361	65.4876	51.5204	63.4677	54.355	51.0192	28.1	103.106	95.6939	81.4846	108.495	94.5224	96.0502	62.9498	82.6205	76.3603	68.2394	69.7628	59.1697	72.561	51.7326	50.565	61.6149	28.1	91.0752	86.7836	84.9291	87.2837	69.1474	78.7506	72.1685	66.5339	63.4538	74.0253	65.8352	67.1006	68.1654	54.9639
	28.2	71.1131	61.5403	71.4777	53.4042	68.0498	53.5551	65.6125	56.8246	52.8618	62.4333	50.352	65.6891	51.265	63.6125	54.3063	51.101	28.2	102.628	95.7811	81.289	108.295	94.7604	95.8488	63.1555	82.5099	76.3896	68.1809	69.7003	59.1462	72.5525	51.5047	50.3628	61.6849	28.2	90.9508	86.9547	85.1354	87.2124	69.1835	78.9521	72.2014	66.2086	63.1624	74.1051	65.5608	67.395	68.3227	54.9554
	28.3	70.987	61.3477	71.5888	53.4006	68.4245	53.7367	65.6522	56.8534	52.9968	62.3228	50.6471	65.7223	51.0192	63.6792	54.1734	51.3701	28.3	102.314	95.7501	81.047	108.238	95.0951	95.555	63.2635	82.2118	76.5113	68.1358	69.6318	59.0853	72.4384	51.2858	50.1485	61.656	28.3	90.7951	87.0241	85.2477	86.8403	69.342	79.25	71.9766	65.82	62.9001	74.1532	65.5064	67.6124	68.3256	54.938
	28.4	71.0173	61.1084	71.6214	53.2372	68.6261	54.1266	65.5182	56.7062	52.8687	62.0454	50.8154	65.4858	50.754	63.6234	54.1707	51.6406	28.4	102.066	95.7831	80.7383	108.118	95.503	95.1974	63.2461	81.9755	76.7034	68.1604	69.5488	58.9503	72.2488	51.1375	50.019	61.666	28.4	90.859	87.0926	85.3117	86.1412	69.4907	79.581	71.5614	65.4742	62.7377	74.2078	65.4514	67.6126	68.3737	54.9348
	28.5	71.4772	61.0879	71.4971	53.1612	68.6651	54.2955	65.2272	56.4254	52.5909	61.8808	50.7297	65.1248	50.4462	63.604	54.3018	51.9897	28.5	102	95.9612	80.6224	107.927	95.9202	95.0958	63.0958	81.8115	76.754	68.1925	69.5006	58.6903	71.9286	51.0879	50.1257	61.4339	28.5	90.8485	86.9867	85.2676	85.3514	69.5284	79.9447	71.1703	65.173	62.7526	74.1155	65.3444	67.4189	68.3428	54.9873
	28.6	71.8269	61.182	71.1749	53.1537	68.6891	54.3436	64.8887	56.2863	52.1304	61.717	50.6268	64.6112	50.182	63.6145	54.4414	52.3603	28.6	101.967	96.0562	80.5891	107.637	96.1224	95.0552	62.9593	81.6766	76.7102	68.2432	69.3939	58.4999	71.5516	50.9304	50.2856	61.2858	28.6	90.9394	86.7809	85.3566	84.7832	69.3547	80.2293	70.7601	65.0199	62.7873	73.9344	65.3816	67.0854	68.1038	55.1824
	28.7	72.0609	61.298	70.7927	53.0458	68.6924	54.3408	64.6617	56.288	51.7302	61.6771	50.4627	64.01	50.2341	63.579	54.5295	52.6385	28.7	102.137	96.2296	80.5815	107.341	96.0826	95.1215	62.8557	81.5896	76.5279	68.4203	69.2821	58.5166	71.1791	50.8124	50.4689	61.2608	28.7	90.8429	86.581	85.4155	84.4846	69.2366	80.3662	70.3725	65.0196	62.7822	73.5794	65.4549	66.6764	67.8362	55.386
	28.8	72.2355	61.433	70.5464	52.9335	68.6249	54.3452	64.481	56.3715	51.563	61.6395	50.1764	63.627	50.2462	63.465	54.5232	52.5952	28.8	102.352	96.3925	80.406	106.883	95.6494	95.3041	62.7386	81.7678	76.2666	68.6064	69.1914	58.6897	70.8581	50.6362	50.7716	61.2772	28.8	90.6727	86.3529	85.5696	84.6511	69.1356	80.3012	70.0938	65.2162	62.701	73.3854	65.4048	66.2626	67.5572	55.6054
	28.9	72.3346	61.5827	70.3769	52.891	68.6466	54.1577	64.2818	56.498	51.5204	61.82	49.9721	63.6332	50.2959	63.2759	54.4258	52.4284	28.9	102.488	96.4314	80.2466	106.371	94.9513	95.4946	62.7384	81.9987	76.0675	68.6728	69.2067	58.916	70.6056	50.5693	51.054	61.1867	28.9	90.2536	86.3259	85.6467	85.0343	69.0724	80.1482	70.0242	65.6646	62.5043	73.1801	65.4147	65.9305	67.2388	55.8318
	29	72.05	61.4931	70.381	52.8236	68.7804	54.074	64.0613	56.6398	51.4786	61.9318	49.9637	63.7408	50.4515	63.0056	54.2739	52.0968	29	102.722	96.29	80.0113	106.082	94.2187	95.5357	62.7148	82.0865	75.9118	68.6657	69.2925	59.2607	70.5534	50.5984	51.1231	61.172	29	89.8654	86.5104	85.7086	85.4581	69.1482	79.9216	70.0187	66.0669	62.3012	73.0815	65.4779	65.7591	67.11	55.9452
	29.1	71.6582	61.2103	70.5977	52.8002	68.8152	54.0231	64.0074	56.8376	51.4112	61.9169	49.8576	64.0228	50.659	62.7611	54.1282	51.7956	29.1	103.121	96.1531	79.7747	106.032	93.6081	95.4066	62.6436	82.1772	75.9586	68.5768	69.3678	59.6684	70.5252	50.6321	51.1211	61.1497	29.1	89.4028	86.6517	85.5281	85.8874	69.3287	79.7167	70.0594	66.3488	62.017	73.0195	65.4866	65.7448	67.1089	55.885
	29.2	71.2661	60.966	70.9217	52.7995	68.7082	54.0555	63.7981	56.8564	51.3196	61.9296	49.708	64.4059	50.8266	62.4774	53.9566	51.5794	29.2	103.309	95.9763	79.4482	106.138	93.246	95.2328	62.6005	82.2282	76.0762	68.4087	69.3108	59.8512	70.4818	50.7024	51.0522	60.9904	29.2	89.0205	86.7828	85.2802	86.2291	69.3506	79.5279	70.2618	66.5861	61.8764	73.1505	65.3956	65.9734	67.1754	55.7242
	29.3	70.9396	60.6797	71.139	52.6966	68.5634	54.0704	63.5429	56.7184	50.9856	61.8552	49.6726	64.7374	51.1192	62.1419	53.9336	51.5786	29.3	103.389	95.8705	79.2169	106.392	93.3383	95.1259	62.7342	82.0561	76.3536	68.3034	69.3312	59.9286	70.4496	50.8335	50.8517	60.9535	29.3	88.8261	86.857	84.9699	86.2577	69.2766	79.5709	70.708	66.7317	61.8968	73.0429	65.3208	66.2967	67.3417	55.5272
	29.4	70.669	60.4109	71.2976	52.6709	68.3951	54.1903	63.4217	56.5962	50.7161	61.7018	49.7524	64.8698	51.3219	61.9136	53.8326	51.5942	29.4	103.362	95.9731	79.0641	106.756	93.7949	95.0921	62.9029	81.6883	76.4909	68.3856	69.4101	59.9226	70.53	50.9816	50.6255	60.9911	29.4	88.9305	86.6034	84.7268	86.2566	69.2363	79.739	71.0146	66.6142	62.066	72.6952	65.4089	66.6117	67.7137	55.329
	29.5	70.5642	60.3373	71.3671	52.6697	68.1426	54.1924	63.4818	56.5207	50.6013	61.6205	49.8034	64.9449	51.2788	61.7841	53.7158	51.7678	29.5	103.21	96.1009	79.0787	107.117	94.3363	95.2106	63.0437	81.3479	76.5734	68.5529	69.3911	59.9294	70.4	51.011	50.5114	61.1551	29.5	89.0294	86.1145	84.4391	86.2241	69.2296	79.8541	71.1153	66.5448	62.18	72.3466	65.4943	66.8033	68.0346	55.1148
	29.6	70.6885	60.4708	71.3732	52.5912	67.9016	54.118	63.4228	56.2263	50.6225	61.6226	50.0072	64.7718	51.0438	61.6343	53.6465	51.7898	29.6	102.957	96.2724	79.073	107.323	94.7859	95.3603	63.169	80.9552	76.5314	68.7875	69.3305	59.7624	70.2989	51.1507	50.3669	61.3764	29.6	89.1603	85.689	84.3224	85.9872	69.251	80.0158	71.047	66.6075	62.4244	72.0985	65.5144	66.7404	68.3373	54.9327
	29.7	70.846	60.6191	71.3458	52.5808	67.816	53.8611	63.552	56.0364	50.5683	61.4766	50.2619	64.6384	50.6325	61.5922	53.6831	51.7628	29.7	102.895	96.5427	79.346	107.476	95.0386	95.464	63.3239	80.5386	76.4781	69.0361	69.3589	59.6309	70.1266	51.2782	50.2879	61.6548	29.7	89.1371	85.3005	84.2641	85.7504	69.4405	80.1463	70.8339	66.6173	62.5048	71.622	65.5414	66.48	68.615	54.7594
	29.8	70.9035	60.6983	71.3798	52.6815	67.7836	53.5805	63.844	55.9134	50.7409	61.3695	50.4155	64.4268	50.0597	61.6911	53.6891	51.6944	29.8	102.733	96.7184	79.6862	107.682	94.9796	95.501	63.3984	80.2267	76.1874	69.1241	69.2803	59.4761	69.9944	51.3806	50.2202	61.7002	29.8	88.8096	85.0829	84.123	85.4902	69.6219	80.0929	70.3567	66.5621	62.4576	71.2603	65.6437	66.0987	68.778	54.519
	29.9	70.9305	60.7998	71.4241	52.7175	67.7893	53.2523	63.9713	55.7952	50.8688	61.1883	50.4045	64.2145	49.5233	61.8405	53.8112	51.717	29.9	102.689	96.6596	79.9964	107.914	94.8144	95.4491	63.3216	80.092	76.0486	68.9659	69.19	59.3136	69.816	51.2844	50.18	61.7505	29.9	88.3945	85.1319	83.9144	85.1924	69.6463	79.877	69.952	66.5512	62.3445	71.3372	65.4514	65.7476	68.6215	54.2532
	30	70.9377	60.8213	71.422	52.7232	67.8268	53.0486	63.9262	55.6171	50.91	61.0563	50.2776	64.1239	49.2946	61.916	53.8846	51.6428	30	102.564	96.583	80.1479	107.934	94.56	95.2257	63.3032	80.0154	76.0491	68.7634	69.2871	59.0438	69.8299	51.1587	50.2075	61.7224	30	88.0589	85.4109	83.8785	85.0934	69.6336	79.6708	69.7761	66.5801	62.2842	71.474	65.2015	65.5066	68.3023	54.116
	30.1	70.8511	60.7886	71.387	52.746	67.9412	52.95	63.9054	55.6104	50.9806	61.0501	50.0227	64.2358	49.242	61.9951	53.9428	51.6263	30.1	102.29	96.3511	80.4471	107.833	94.3976	95.1092	63.2972	79.9218	76.0511	68.435	69.4485	58.885	69.9106	50.9404	50.4572	61.5333	30.1	87.8572	85.7147	83.78	85.064	69.6812	79.3844	69.7766	66.5324	62.2159	71.661	65.1152	65.4908	67.9692	53.9541
	30.2	70.8801	60.7506	71.2535	52.6456	68.0201	53.0354	63.8476	55.6067	51.2406	61.1414	49.7852	64.3886	49.2877	62.0363	53.8589	51.6017	30.2	101.864	96.0512	80.4574	107.577	94.3027	95.0454	63.1021	79.9566	76.0955	68.174	69.6166	58.9154	70.1912	50.6958	50.6688	61.2603	30.2	87.9124	85.8884	83.7202	85.0306	69.6147	79.045	69.881	66.4691	62.2441	72.1281	65.0649	65.4857	67.5686	53.7264
	30.3	70.8395	60.8051	71.0066	52.5604	68.093	53.1952	63.8063	55.6888	51.3204	61.357	49.6099	64.6881	49.4249	62.0019	53.6773	51.5631	30.3	101.652	95.8069	80.3135	107.128	94.2975	94.9066	62.6595	79.9912	76.377	68.0168	69.907	59.0091	70.525	50.4257	50.9549	61.1774	30.3	88.3302	85.8995	83.8984	85.2396	69.4904	78.7688	70.0832	66.4468	62.2578	72.6902	64.9959	65.4409	67.2347	53.6672
	30.4	70.7601	60.8998	70.7528	52.6063	68.0918	53.3893	63.8829	55.7684	51.2299	61.594	49.4479	65.0288	49.7778	61.8561	53.4835	51.4828	30.4	101.39	95.7406	80.1515	106.65	94.1797	94.7273	62.2873	79.9008	76.6485	67.9872	70.0073	59.1473	70.6699	50.2816	51.2059	61.1288	30.4	88.7497	85.8682	84.2172	85.5453	69.4561	78.501	70.2482	66.5019	62.2282	72.9445	65.2907	65.3232	67.1078	53.6848
	30.5	70.5782	60.9238	70.5448	52.7354	68.0586	53.5786	63.9214	55.8721	51.1532	61.6684	49.4217	65.2037	49.934	61.7085	53.389	51.3057	30.5	101.231	95.789	80.0115	106.45	94.1736	94.6293	61.9013	79.9677	76.8884	67.8772	69.9045	59.374	70.8088	50.148	51.3532	61.0375	30.5	89.176	85.7387	84.4485	85.6074	69.253	78.1422	70.2192	66.4368	62.1536	73.0718	65.6624	65.2136	67.3484	53.7122
	30.6	70.3956	60.9012	70.2717	52.8318	67.9566	53.917	63.9406	55.9318	51.0308	61.6543	49.485	65.3112	49.9544	61.5041	53.2967	51.1489	30.6	101.188	96.0604	79.6769	106.566	94.0482	94.4516	61.5686	80.2192	77.1446	67.8807	69.7087	59.4903	70.9826	50.1627	51.2052	61.0686	30.6	89.5571	85.552	84.6363	85.6116	68.8369	77.8152	70.1893	66.3279	62.0667	72.9343	65.9634	65.1035	67.6308	53.7913
	30.7	70.2796	60.8264	70.1442	52.935	67.745	54.125	63.8317	55.9168	50.805	61.627	49.6402	65.2663	49.9392	61.346	53.3993	51.0202	30.7	101.231	96.3251	79.3385	106.771	93.9475	94.28	61.4169	80.5022	77.3016	67.8435	69.6094	59.3436	71.0901	50.1636	51.0294	61.127	30.7	89.8501	85.55	84.6608	85.4805	68.5255	77.6327	70.089	66.316	61.9628	72.621	66.2302	65.1084	67.928	54.0022
	30.8	70.3912	60.7153	70.2486	53.0198	67.5593	54.2012	63.5542	55.7735	50.7664	61.4573	49.7908	65.1181	49.9782	61.268	53.689	50.8927	30.8	101.059	96.5844	79.151	107.005	93.909	94.0946	61.4916	80.9336	77.2798	67.7962	69.4352	59.1084	71.0728	50.1546	50.7792	61.0556	30.8	89.9591	85.62	84.4702	85.1476	68.2533	77.4064	69.9171	66.3466	62.039	72.2546	66.472	65.2715	68.2562	54.1367
	30.9	70.4916	60.4468	70.4281	52.9382	67.5121	54.2373	63.2575	55.6529	50.9062	61.3691	49.9829	64.9865	49.7471	61.3354	53.856	50.888	30.9	100.895	96.6432	79.1281	107.219	93.8931	93.9477	61.5732	81.6165	77.0764	67.8027	69.4348	58.8186	71.272	50.1956	50.6744	60.9152	30.9	89.8772	85.5087	84.124	84.7241	67.9098	77.2955	69.7062	66.32	62.184	72.1087	66.4066	65.5476	68.4911	54.2536
	31	70.6273	60.3251	70.7746	52.7742	67.5794	54.199	63.1561	55.6643	51.0847	61.3172	50.0778	65.0112	49.5608	61.4876	53.9445	51.0402	31	100.737	96.5798	79.1149	107.19	93.8091	93.8607	61.6533	82.0743	76.8113	67.9244	69.4657	58.537	71.381	50.2894	50.6253	60.8811	31	89.7309	85.5653	83.775	84.4701	67.7895	77.4426	69.6154	66.403	62.2854	72.1573	66.3573	65.8168	68.3502	54.2292
	31.1	70.7015	60.1671	71.1951	52.6615	67.7184	53.875	63.1064	55.6328	51.2912	61.2208	50.1035	65.0776	49.4586	61.7464	54.037	51.1656	31.1	100.654	96.3563	79.1533	106.941	93.8636	93.9574	61.653	82.2722	76.5476	68.1121	69.5615	58.4648	71.3231	50.2036	50.6668	60.8682	31.1	89.4635	85.7216	83.4258	84.3632	67.8614	77.5942	69.3586	66.4364	62.3631	72.4529	66.2691	66.1556	68.1138	54.2143
	31.2	70.5035	59.998	71.445	52.5856	67.9063	53.6766	63.1812	55.7351	51.4304	61.1561	49.9476	65.0998	49.4665	61.9246	54.0246	51.2602	31.2	100.597	96.0392	79.4052	106.814	93.8505	94.0454	61.5093	82.3278	76.4005	68.217	69.5418	58.6023	71.2878	50.1504	50.7596	60.9602	31.2	89.2022	85.6258	83.2594	84.5156	67.8246	77.8448	69.0823	66.271	62.4888	72.8588	66.1282	66.5442	67.9175	54.2012
	31.3	70.1765	59.8576	71.4443	52.4512	67.9948	53.5701	63.4319	56.0372	51.3879	61.1595	49.7873	65.1482	49.4288	62.0844	53.8748	51.3958	31.3	100.705	95.6956	79.7149	106.856	93.7072	94.2464	61.4808	82.135	76.2921	68.264	69.5006	58.8999	71.2723	50.1931	50.9059	61.1713	31.3	89.0258	85.4369	83.1972	84.8252	67.936	78.2213	68.8355	66.0285	62.4227	73.234	65.9788	66.8262	67.6318	54.0684
	31.4	69.9212	59.8253	71.4522	52.3781	68.0127	53.4764	63.7767	56.5221	51.3775	61.1112	49.6955	65.2301	49.68	62.1751	53.8346	51.3546	31.4	100.9	95.4232	79.866	106.86	93.6255	94.5174	61.4576	81.714	76.2689	68.2282	69.4796	59.2568	71.1796	50.1924	50.8038	61.285	31.4	89.0991	85.4703	83.3962	85.0997	68.201	78.5908	68.7146	65.8124	62.2923	73.4267	66.0206	66.9901	67.394	53.816
	31.5	69.6272	59.742	71.1449	52.3651	67.9308	53.5137	63.895	56.8356	51.3872	61.2726	49.6234	65.0924	50.0196	62.241	53.7884	51.3308	31.5	101.146	95.222	80.0887	106.989	93.5072	94.711	61.4328	81.3641	76.2002	68.0738	69.4752	59.543	71.0845	50.1941	50.6542	61.2633	31.5	89.1687	85.248	83.7037	85.2718	68.3218	78.7576	68.6727	65.5889	62.2649	73.3586	65.98	67.101	67.3719	53.6409
	31.6	69.396	59.7976	70.8644	52.3882	67.7888	53.6153	63.9611	57.1638	51.3096	61.5049	49.6662	64.895	50.3996	62.2061	53.7412	51.5251	31.6	101.409	95.0822	80.225	107.058	93.2693	94.7111	61.4842	81.1876	76.07	67.8832	69.5	59.5655	71.0311	50.244	50.5262	61.2235	31.6	89.2605	84.9462	84.0596	85.4775	68.3644	78.9027	68.818	65.485	62.2994	73.1978	65.9781	67.0026	67.3943	53.4754
	31.7	69.3524	59.9147	70.7398	52.4607	67.8134	53.6315	63.9578	57.3398	51.2887	61.6572	49.857	64.8349	50.6902	62.3688	53.7143	51.7982	31.7	101.595	95.0507	80.2338	106.888	93.05	94.793	61.6596	81.0392	75.8194	67.7998	69.505	59.4693	70.943	50.2873	50.3384	61.0774	31.7	89.2355	84.9559	84.3088	85.3896	68.501	78.7952	69.1316	65.489	62.257	72.9826	66.2175	66.753	67.413	53.355
	31.8	69.4479	59.9036	70.7703	52.4895	67.9461	53.6171	63.8113	57.2505	51.386	61.7762	50.0725	64.833	50.9538	62.5884	53.6634	51.9674	31.8	101.786	94.8874	80.1016	106.502	93.0157	94.7996	61.583	81.0608	75.6546	67.8276	69.4972	59.2524	70.9869	50.2824	50.1344	60.7657	31.8	89.0727	85.1287	84.5727	85.1649	68.5779	78.6789	69.4789	65.4654	62.323	72.7094	66.4499	66.5328	67.5475	53.4827
	31.9	69.484	59.8337	70.6746	52.5379	67.9828	53.6563	63.4128	56.7917	51.5019	62.0366	50.2239	64.7178	50.959	62.6986	53.6254	52.1944	31.9	101.898	94.751	80.0139	106.291	92.9367	94.6556	61.5098	81.2365	75.5612	67.8242	69.3336	59.0715	71.0612	50.2869	50.1044	60.6787	31.9	88.8601	85.2973	84.5472	84.938	68.4823	78.5307	69.7293	65.495	62.3806	72.5289	66.5474	66.3824	67.7038	53.6829
	32	69.6572	59.661	70.737	52.5316	67.9884	53.5464	63.3065	56.3411	51.4874	62.0188	50.2718	64.8891	50.8518	62.804	53.6388	52.2662	32	101.851	94.6122	79.8412	106.076	92.8458	94.506	61.442	81.3216	75.5506	67.8727	69.1768	58.9278	71.2943	50.3021	50.1375	60.6634	32	88.659	85.553	84.3304	84.7302	68.4368	78.4843	69.822	65.5859	62.3571	72.4391	66.6109	66.1479	67.7356	53.963
	32.1	69.7754	59.3484	70.7498	52.4083	68.0863	53.4002	63.3011	55.892	51.476	61.8287	50.2105	65.0255	50.6633	62.997	53.6365	52.0027	32.1	101.676	94.3748	79.9163	106.156	92.91	94.2867	61.3172	81.3175	75.6112	67.7827	68.9379	58.9863	71.6356	50.3654	50.2744	60.5621	32.1	88.4879	85.6382	84.257	84.2973	68.3712	78.4943	69.8623	65.6878	62.2022	72.1935	66.6205	65.9599	67.8404	54.3421
	32.2	69.8794	59.0653	70.6502	52.3175	67.9803	53.2509	63.4176	55.5722	51.4714	61.7275	50.1092	65.0118	50.5282	62.9952	53.5474	51.5907	32.2	101.505	94.1154	79.9325	106.481	93.0384	93.8728	61.1047	81.4024	75.8535	67.6926	68.762	59.0042	71.9065	50.4265	50.4691	60.5021	32.2	88.4748	85.438	84.2727	84.1773	68.2982	78.7371	69.5459	65.9013	62.0416	71.8366	66.4758	65.9165	67.9346	54.6294
	32.3	69.7073	58.9426	70.3864	52.3844	67.9756	53.0963	63.6616	55.2841	51.4056	61.661	49.9164	64.9269	50.3924	62.747	53.5777	51.342	32.3	101.194	94.1969	79.8876	106.884	93.0596	93.5392	61.0156	81.3593	75.9598	67.5036	68.6849	58.973	72.0599	50.4474	50.6218	60.6442	32.3	88.4648	85.1286	84.1703	84.0716	68.1793	78.9162	69.2404	66.3011	61.8836	71.5971	66.2999	65.8072	67.9444	54.718
	32.4	69.6041	58.9572	70.2755	52.3725	68.1665	52.8355	64.0966	55.239	51.2431	61.3731	49.7019	65.0036	50.1823	62.5543	53.5296	51.0296	32.4	100.853	94.3446	79.7275	106.981	93.0728	93.3866	60.8469	81.1265	76.0752	67.4289	68.7061	58.8915	72.0939	50.4849	50.755	60.7584	32.4	88.3215	84.7497	84.1525	83.9969	68.2765	79.0281	69.0152	66.5726	61.7755	71.4202	66.1191	65.591	67.7691	54.901
	32.5	69.4121	59.085	70.2322	52.4087	68.4086	52.6829	64.3474	55.3272	51.2515	61.3068	49.6774	64.8862	49.9518	62.2472	53.4462	50.9109	32.5	100.592	94.3903	79.5647	107.031	93.1066	93.2939	60.7762	80.9707	76.3366	67.3681	68.8563	58.7685	71.8407	50.5226	50.7733	60.8722	32.5	88.2417	84.3736	84.234	83.942	68.4298	79.0781	68.813	66.631	61.7934	71.3193	65.9121	65.5335	67.6787	54.9029
	32.6	69.3474	59.217	70.2316	52.6064	68.5452	52.817	64.5792	55.4857	51.3532	61.4348	49.6776	64.8383	49.7635	61.9591	53.3032	51.0115	32.6	100.417	94.5118	79.25	106.912	93.0603	93.3724	60.8882	80.9012	76.6419	67.3159	69.0454	58.4843	71.5503	50.4356	50.6315	61.0241	32.6	88.1642	84.3072	84.0402	83.9979	68.6521	79.1073	68.6446	66.6885	61.9591	71.4801	65.6266	65.5897	67.4568	54.7155
	32.7	69.3134	59.2066	70.2814	52.606	68.6693	53.0258	64.7346	55.5262	51.4447	61.5845	49.6579	65.0588	49.5618	61.7522	53.2788	51.2428	32.7	100.341	94.6783	78.9281	106.705	93.0061	93.5852	61.1501	80.7453	76.7582	67.2298	69.1203	58.3704	71.3736	50.2489	50.4756	61.0819	32.7	88.0938	84.3786	83.7	83.9282	68.9253	78.9352	68.8756	66.659	62.1175	71.7104	65.2454	65.6131	67.2475	54.4901
	32.8	69.6527	59.1385	70.5661	52.4394	68.4416	53.2611	64.8097	55.8066	51.62	61.6829	49.7548	65.3307	49.3778	61.7706	53.222	51.3783	32.8	100.346	94.533	78.8131	106.547	92.9664	93.7228	61.4492	80.6415	76.8589	67.0856	69.09	58.3709	71.0644	50.062	50.3323	61.0112	32.8	88.1791	84.431	83.5023	84.0132	69.1522	78.5974	69.1344	66.3635	62.2166	71.9469	64.9602	65.8397	67.024	54.325
	32.9	69.9109	58.9536	70.6619	52.3573	67.9329	53.6765	64.8687	56.0065	51.7364	61.9054	49.9032	65.3408	49.412	61.8793	53.263	51.6886	32.9	100.325	94.3619	78.8205	106.479	93.0275	93.7716	61.9397	80.6759	76.7504	66.7848	69.0874	58.3254	70.7532	49.8105	50.1715	60.7514	32.9	88.3655	84.5238	83.3822	84.1881	69.2195	78.2154	69.2152	66.1034	62.3412	72.0093	64.7208	66.155	67.0101	54.0712
	33	70.1184	58.7469	70.7826	52.1652	67.4976	54.0084	64.8013	56.1254	51.5706	61.9077	49.9549	65.2468	49.4978	62.2302	53.3398	51.8685	33	100.264	94.2937	78.7994	106.354	93.2191	93.7568	62.3416	80.8989	76.3398	66.6893	68.9534	58.373	70.6395	49.5257	50.0729	60.498	33	88.5736	84.6709	83.2349	84.4446	69.2834	77.7329	69.3423	65.8582	62.3288	72.0236	64.6399	66.3908	66.9756	54.0134
	33.1	70.2731	58.6432	70.9747	51.86	67.0615	54.1013	64.5758	56.0998	51.2424	61.9234	49.9176	65.1169	49.5941	62.5395	53.5234	51.9875	33.1	100.102	94.3038	78.808	106.118	93.3618	93.6508	62.4328	81.0767	75.7725	66.8196	68.8924	58.5292	70.423	49.4326	49.9945	60.3609	33.1	88.7726	84.6995	83.2704	84.8265	69.3004	77.2416	69.391	65.512	62.2025	71.9434	64.7261	66.5144	67.042	54.0127
	33.2	70.3916	58.6843	71.165	51.8208	66.7746	54.1847	64.2849	56.1972	50.8075	61.8865	49.8169	64.8017	49.5729	62.6836	53.6013	52.0129	33.2	99.9776	94.2517	78.965	105.772	93.4207	93.5293	62.3935	81.2696	75.3065	66.9823	68.9672	58.524	70.1038	49.5838	49.8509	60.4298	33.2	88.7958	84.8013	83.4463	85.1339	69.0115	76.8042	69.287	65.1032	62.207	71.9202	64.8213	66.5	67.2026	54.0658
	33.3	70.1915	58.7688	71.254	51.973	66.8303	54.3271	64.0444	56.119	50.3026	61.8544	49.685	64.4619	49.5921	62.6783	53.6727	52.0746	33.3	99.9058	94.4716	78.9857	105.467	93.4331	93.4222	62.2992	81.5222	74.9857	67.3277	69.2072	58.4221	69.9714	49.8848	49.801	60.5659	33.3	88.7458	85.065	83.545	85.256	68.8064	76.666	69.0561	64.8986	62.1845	71.8392	64.8352	66.2741	67.4535	54.1182
	33.4	70.1124	58.964	71.4124	52.1127	67.0969	54.3489	63.7506	56.1439	49.9102	61.8223	49.513	64.5023	49.7212	62.5631	53.8246	52.0521	33.4	99.9557	94.6256	78.9389	105.418	93.3695	93.3198	61.9904	81.6523	74.8175	67.8382	69.4034	58.3349	69.9487	50.165	49.7902	60.8369	33.4	88.7312	85.2058	83.5888	85.3406	68.6019	76.7295	69.0132	64.761	62.0811	71.8847	64.9028	65.9851	67.7271	54.162
	33.5	70.154	59.0982	71.3302	52.3703	67.2277	54.3789	63.62	56.1419	49.9216	61.9208	49.4322	64.742	49.8664	62.1682	54.0008	51.995	33.5	100.019	94.7741	79.0103	105.459	93.1923	93.1706	61.6113	81.4315	74.8631	68.0612	69.5617	58.2086	69.8703	50.4316	49.8939	61.0938	33.5	88.6494	85.2418	83.6498	85.3701	68.2318	77.1107	69.0229	64.7984	62.0301	72.0642	64.9017	65.7112	67.9536	54.1877
	33.6	70.167	59.153	70.9784	52.6287	67.5539	54.3262	63.5812	56.2592	50.2176	61.8184	49.5595	64.9966	50.0127	61.6764	54.0669	51.9678	33.6	100.156	94.8756	79.005	105.588	93.0185	93.0377	61.3774	81.1347	75.0274	68.0659	69.6571	58.1233	69.8893	50.5593	50.0791	61.1175	33.6	88.6578	85.1839	83.7034	85.2974	67.8598	77.3906	68.9652	64.8956	61.928	72.2433	64.7526	65.4942	68.0839	54.293
	33.7	70.1146	59.168	70.5971	52.7402	67.7293	54.1804	63.5928	56.264	50.7406	61.7216	49.7345	65.3297	50.3448	61.3412	54.2326	52.0494	33.7	100.019	94.9753	78.9184	105.824	92.8658	92.7698	61.1421	80.7173	75.084	67.9186	69.7786	58.064	69.9858	50.5515	50.345	60.8561	33.7	88.8548	84.9368	83.7796	85.3543	67.7364	77.7882	68.8979	65.0707	61.6202	72.4072	64.8553	65.4323	67.9375	54.3714
	33.8	70.163	59.203	70.0632	52.6954	67.6944	53.9372	63.5581	56.2146	51.3283	61.6917	49.8418	65.6358	50.6172	61.188	54.2691	52.009	33.8	99.9665	94.7439	78.7807	105.997	92.7562	92.5094	60.8703	80.1935	74.9496	67.706	69.6706	58.0231	70.0822	50.3751	50.5108	60.5754	33.8	89.1015	84.4403	83.673	85.568	67.4941	78.0214	68.9996	65.0776	61.3916	72.5602	65.0052	65.5158	67.7438	54.4669
	33.9	69.9236	59.054	69.647	52.6896	67.6164	53.759	63.518	55.9134	51.8441	61.5786	49.9352	65.5528	50.6224	61.1899	53.9819	51.8692	33.9	99.864	94.6	78.6444	106.016	92.6906	92.2262	60.6528	79.8534	74.8127	67.4082	69.5141	58.1339	70.2188	50.3611	50.6095	60.3329	33.9	89.3162	83.8716	83.558	85.8217	67.2673	78.0782	69.0732	65.0855	61.227	72.666	65.1008	65.7371	67.4798	54.6526
	34	69.5417	59.085	69.4488	52.7231	67.6259	53.7221	63.3911	55.5855	52.1224	61.4618	49.9014	65.5366	50.6404	61.4315	53.642	51.8379	34	99.723	94.404	78.4078	106.101	92.516	92.1086	60.6065	79.8184	74.5272	67.1538	69.4328	58.1652	70.4522	50.3837	50.5732	60.1598	34	89.4118	83.2907	83.4638	86.03	67.2821	77.8311	69.0598	65.0082	60.9827	72.5907	65.1782	65.948	67.2897	54.7248
	34.1	69.0968	59.2169	69.4471	52.7734	67.4016	53.8886	63.3076	55.2127	52.1738	61.5648	49.6763	65.6136	50.6393	61.8788	53.4315	51.7198	34.1	99.5249	94.1266	78.36	106.169	92.3066	92.0783	60.6118	79.9506	74.2982	67.051	69.2242	58.0903	70.7474	50.4498	50.5818	60.2468	34.1	89.3432	82.7804	83.1883	86.152	67.2843	77.6746	69.1302	64.9145	60.8283	72.4357	65.4015	66.0414	67.1919	54.7641
	34.2	68.7332	59.2756	69.4685	52.7895	67.3465	54.1396	63.2823	54.8598	52.0907	61.611	49.5458	65.622	50.4638	62.3725	53.1861	51.4364	34.2	99.4855	93.9016	78.3564	106.173	92.1204	92.3236	60.668	80.3364	74.2082	67.0998	68.836	58.1037	70.9927	50.4032	50.532	60.6277	34.2	89.0584	82.4212	82.7842	86.013	67.2725	77.3704	69.1721	64.8427	60.8831	72.252	65.38	65.9348	67.377	54.8043
	34.3	68.5163	59.1574	69.6608	52.8915	67.5074	54.4702	63.1523	54.5269	51.9316	61.5968	49.4676	65.6474	50.2752	62.7965	53.0349	51.1611	34.3	99.0932	93.9977	78.4854	106.14	91.9116	92.6493	60.9217	80.9055	74.3746	67.0142	68.4416	58.2054	71.1796	50.2844	50.4349	60.9759	34.3	88.6208	82.152	82.7517	85.7024	67.3154	77.2543	69.0298	64.8914	60.9644	71.9968	65.3242	65.7752	67.5666	54.8771
	34.4	68.6689	59.1814	69.729	52.9957	67.8434	54.7058	63.1173	54.5709	51.8134	61.6907	49.3473	65.9169	50.0767	62.9909	53.1695	50.8767	34.4	98.6292	94.044	78.5972	105.974	91.6397	93.0701	61.2197	81.2812	74.6568	66.9282	68.1769	58.1413	71.3376	50.002	50.276	61.2067	34.4	88.0665	82.2149	82.7119	85.3704	67.3629	77.3848	68.8119	64.923	60.8951	71.6476	65.125	65.4252	67.661	54.8516
	34.5	69.0661	58.917	69.8197	52.93	68.1448	54.7954	63.1609	54.6531	51.6449	61.8416	49.3516	65.9632	49.8201	63.0294	53.435	50.5979	34.5	98.3307	94.1548	78.8068	105.55	91.6176	93.3221	61.3591	81.4384	75.0179	66.9144	67.9158	58.1195	71.4522	49.8135	50.078	61.2882	34.5	87.6529	82.5032	82.6923	85.0032	67.1942	77.6808	68.6111	64.9459	60.8778	71.3854	65.0036	65.0002	67.6928	54.7565
	34.6	69.5169	58.5232	69.995	53.0283	68.5215	54.8422	63.1704	54.6966	51.5181	61.9014	49.4961	65.8107	49.5061	62.9444	53.7159	50.2428	34.6	98.0614	94.3059	78.7416	105.133	91.7722	93.4969	61.3985	81.4057	75.2275	66.8249	67.8635	58.1707	71.3426	49.6346	49.7658	61.2156	34.6	87.3096	82.7623	82.8726	84.7474	67.1599	77.9541	68.5296	64.9589	60.9192	71.3569	64.8597	64.7608	67.7522	54.518
	34.7	69.8322	58.2897	70.2589	53.2182	68.8456	54.8721	63.0973	54.8043	51.3108	62.105	49.6246	65.7096	49.3581	62.6712	53.953	49.992	34.7	97.7416	94.3343	78.6577	104.893	92	93.4287	61.3905	81.1195	75.4061	66.7326	67.9679	58.1276	71.1764	49.6308	49.5387	61.0119	34.7	87.1338	83.0236	83.1157	84.723	67.1468	78.1742	68.5208	64.8339	60.8304	71.3503	64.8129	64.656	67.6899	54.3408
	34.8	69.9384	58.3162	70.5516	53.2919	69.0237	54.7801	63.2666	55.1218	51.0851	62.4301	49.7315	65.6091	49.2442	62.2848	54.2483	49.8964	34.8	97.8365	94.1946	78.4864	104.685	92.2496	93.1185	61.2122	80.6123	75.4194	66.8267	68.3503	58.0529	70.9802	49.9576	49.4162	60.7652	34.8	86.9258	83.4269	83.18	84.7634	67.1718	78.1022	68.6553	64.708	60.6386	71.4957	64.7689	64.5353	67.4762	54.0801
	34.9	69.7575	58.4106	70.873	53.2404	68.8309	54.7634	63.424	55.2156	50.7821	62.6918	49.9888	65.3326	49.2752	62.0987	54.3796	49.9566	34.9	98.1764	94.049	78.4008	104.544	92.521	92.7554	61.1224	80.1893	75.3052	66.9461	68.6384	57.9248	70.695	50.3331	49.3561	60.625	34.9	86.9151	83.5624	83.2146	84.6772	67.2317	77.7362	68.7887	64.4929	60.7258	71.7941	64.9754	64.6072	67.3719	53.89
	35	69.3528	58.7995	71.0374	53.3614	68.6764	54.8571	63.6413	55.4372	50.5698	62.833	50.1796	65.2748	49.2855	61.9524	54.3041	49.926	35	98.5556	93.8156	78.2542	104.64	92.6724	92.5302	61.1298	79.8205	75.2362	67.0594	68.8823	57.8472	70.2406	50.541	49.3993	60.6857	35	87.0603	83.4898	83.1978	84.6154	67.4189	77.3242	69.0031	64.3833	60.9922	72.0172	65.0572	64.8026	67.3808	53.8488
	35.1	68.9886	59.34	70.9994	53.2479	68.5004	54.8212	63.9429	55.7899	50.3826	62.9818	50.2811	65.3986	49.4333	61.7223	54.2011	50.1913	35.1	99.1286	93.7085	78.2462	104.843	92.7434	92.3121	61.2265	79.6385	75.245	67.0988	68.9764	57.8181	69.9453	50.7751	49.4542	60.7076	35.1	87.2038	83.5026	83.1224	84.394	67.3906	77.0204	69.083	64.432	61.2831	71.9787	64.9502	64.9093	67.3245	54.0139
	35.2	68.744	59.8596	70.8334	53.1162	68.2067	54.7176	64.3331	56.2362	50.303	62.9554	50.2564	65.4206	49.4471	61.6604	54.2258	50.4178	35.2	99.8642	93.7475	78.1498	104.807	92.6931	92.222	61.3208	79.6226	75.1926	67.0973	69.083	57.9659	69.8508	50.9485	49.3186	60.7318	35.2	87.3243	83.4505	82.9921	84.0563	67.3703	76.9535	69.0644	64.6532	61.6764	71.9132	64.8276	65.0247	67.2322	54.1179
	35.3	68.5531	60.2293	70.6039	53.1584	67.9192	54.6775	64.6113	56.4936	50.2733	62.6519	50.2553	65.4997	49.4387	61.8289	54.1212	50.554	35.3	100.365	93.8314	78.2081	104.695	92.7136	92.3686	61.3551	79.6282	75.2168	67.0754	68.941	58.1442	69.9391	50.8671	49.1668	60.9512	35.3	87.6454	83.2792	82.7678	83.733	67.3002	77.132	69.0696	64.8744	62.1018	71.8089	64.852	65.1331	67.2786	54.235
	35.4	68.6681	60.4438	70.4092	53.3651	67.898	54.4901	64.7377	56.7704	50.4256	62.3032	50.1155	65.7375	49.4303	61.9147	54.1016	50.667	35.4	100.645	93.9206	78.242	104.767	92.7233	92.4696	61.2484	79.728	75.2612	67.1094	68.862	58.6055	70.091	50.7994	49.1205	61.1246	35.4	87.7645	83.1998	82.5738	83.5274	67.0961	77.4652	69.1403	65.0876	62.3233	71.6512	64.7847	65.1084	67.2359	54.2902
	35.5	68.8536	60.5384	70.24	53.5602	67.8772	54.1616	64.7736	56.8697	50.6663	62.0619	50.0572	65.8073	49.5326	62.09	54.253	50.8862	35.5	100.697	93.9501	78.2196	104.787	92.7144	92.4614	60.9961	79.8364	75.2199	67.1252	68.8645	59.0708	70.534	50.7442	49.1465	61.1114	35.5	87.6489	83.2361	82.3377	83.329	66.9083	77.7746	69.0024	65.1359	62.288	71.5493	64.7952	65.0594	66.9831	54.4108
	35.6	69.0803	60.5575	70.1783	53.7635	67.8865	53.9049	64.6643	56.8128	50.8587	61.7932	50.1062	65.6788	49.5121	62.3586	54.2866	50.8416	35.6	100.463	93.8151	78.224	104.732	92.6948	92.4488	60.676	79.8126	75.2172	67.1767	69.0731	59.3954	71.012	50.5742	49.1914	61.2079	35.6	87.6151	83.309	82.0546	83.2686	66.852	77.9899	68.7833	64.8855	62.1456	71.5382	65.0232	64.9757	66.7506	54.4475
	35.7	69.2465	60.4734	70.1572	53.7922	67.909	53.7059	64.477	56.4868	51.0964	61.5514	50.2381	65.5899	49.5498	62.5178	54.1266	50.9249	35.7	100.088	93.5985	78.2766	104.956	92.7658	92.3806	60.4283	79.7042	75.2529	67.2246	69.1732	59.5567	71.2012	50.3593	49.4689	61.2504	35.7	87.6605	83.3476	81.8097	83.2775	66.7034	78.0332	68.552	64.4981	61.8759	71.5272	65.1244	64.8809	66.6028	54.512
	35.8	69.4098	60.2783	70.1715	53.6864	67.9343	53.5067	64.2718	56.1867	51.3228	61.4727	50.3612	65.3514	49.654	62.3936	54.0592	51.0577	35.8	99.7956	93.3724	78.2191	105.438	92.766	92.2214	60.2994	79.7915	75.286	67.1073	69.3626	59.5726	71.2243	50.2388	49.7782	61.129	35.8	87.6713	83.3456	81.6059	83.4131	66.7186	77.8706	68.194	64.1636	61.6278	71.3743	65.1016	64.7464	66.4211	54.5469
	35.9	69.2517	60.197	70.2196	53.4277	67.9725	53.507	64.111	55.8294	51.3824	61.3837	50.6357	65.049	49.6616	62.2348	53.9314	51.1472	35.9	99.5325	93.0858	78.0867	105.516	92.7708	92.1024	60.2775	79.8444	75.2374	66.8884	69.4614	59.3034	71.2702	50.1096	49.9712	60.934	35.9	87.8385	83.3577	81.5035	83.4289	66.9514	77.6275	67.8308	63.9899	61.4639	71.2694	65.167	64.7644	66.2584	54.5816
	36	69.1242	60.0848	70.261	53.041	68.0893	53.588	63.9459	55.617	51.2916	61.1967	50.7168	64.8364	49.6642	61.9241	53.6536	51.056	36	99.3066	92.9327	77.9774	105.592	92.5896	92.1082	60.4382	80.0004	75.1683	66.8009	69.4788	58.9862	71.0862	50.0225	50.0182	60.7693	36	88.0346	83.2017	81.525	83.4401	67.0142	77.4234	67.6978	63.9436	61.4385	71.0565	65.2754	64.8711	66.2836	54.4619
	36.1	68.9169	59.8949	70.2754	52.8403	68.26	53.7216	63.8189	55.5002	51.3248	60.9717	50.636	64.892	49.7883	61.6068	53.3927	51.0616	36.1	99.2432	92.7366	77.8793	105.707	92.266	92.1588	60.7187	80.1426	74.9384	66.8333	69.2893	58.7442	70.7978	49.9574	50.0342	60.6791	36.1	88.1656	82.9809	81.6387	83.4534	66.9293	77.2088	67.7571	64.1624	61.3931	70.8075	65.3508	65.0499	66.3879	54.2737
	36.2	68.8019	59.7071	70.4054	52.9428	68.5929	53.9426	63.6368	55.519	51.3074	60.8246	50.5737	65.032	49.9223	61.3884	53.2708	50.923	36.2	99.2437	92.553	77.8758	105.508	91.9417	92.1968	60.8854	80.352	74.7417	66.8646	69.116	58.5084	70.7478	49.9002	49.9564	60.6759	36.2	88.208	82.954	81.8402	83.4698	66.9796	76.9476	67.9249	64.4605	61.4728	70.4367	65.6252	65.2235	66.4898	54.0636
	36.3	68.7512	59.7012	70.5783	53.0019	68.8353	54.1866	63.5002	55.5453	51.3321	60.8293	50.5258	65.3044	50.0998	61.4247	53.2599	50.7696	36.3	99.0854	92.3	77.7789	104.998	91.5187	92.236	60.9513	80.3624	74.4946	67.039	68.9292	58.5564	70.6524	49.776	49.8149	60.6551	36.3	88.1888	83.0086	82.1622	83.2238	66.8388	76.7569	68.041	64.6588	61.5416	70.1204	65.79	65.4376	66.7932	53.9464
	36.4	68.8269	59.5428	70.7476	53.1109	68.9763	54.2808	63.5615	55.6146	51.5396	60.9706	50.3023	65.5561	50.3993	61.5109	53.4455	50.5495	36.4	98.7737	92.1567	77.7925	104.871	91.0436	92.2523	60.8372	80.2062	74.355	67.2223	68.7387	58.7909	70.4516	49.6489	49.7577	60.758	36.4	88.1583	83.0483	82.4695	83.1214	66.5112	76.651	68.111	64.8686	61.564	69.838	65.7998	65.3943	67.2706	53.8209
	36.5	68.8487	59.3603	71.0256	53.2742	68.8968	54.266	63.5924	55.5294	51.8146	61.1556	50.23	65.7479	50.5528	61.6774	53.7039	50.511	36.5	98.4408	92.0062	77.8863	104.73	90.832	92.1067	60.6543	80.0138	74.3082	67.1178	68.5885	58.9455	70.3284	49.5392	49.7546	60.8477	36.5	88.2254	83.1695	82.598	83.0003	66.2524	76.5125	68.0406	65.1388	61.5174	69.8018	65.6887	65.1631	67.6399	53.7609
	36.6	68.8422	59.2895	71.2409	53.2754	68.7668	54.1754	63.6172	55.495	51.8874	61.3784	50.2253	65.7426	50.6495	61.8558	53.9594	50.427	36.6	98.0809	92.0791	77.9249	104.476	90.8074	91.7827	60.3446	79.9117	74.49	66.867	68.5464	59.0502	70.3152	49.6422	49.7791	60.7707	36.6	88.2416	83.152	82.6178	82.9844	66.2566	76.4583	67.9606	65.2031	61.5187	69.9316	65.5342	64.8824	67.7706	53.8006
	36.7	68.747	59.1071	71.2605	53.0872	68.4964	53.8532	63.7408	55.5636	51.904	61.5119	50.1449	65.5897	50.7568	62.057	54.1631	50.4588	36.7	97.7643	92.1903	77.8917	104.411	90.6912	91.5009	60.1701	79.7087	74.6442	66.6372	68.5521	59.1049	70.2898	49.8997	49.7098	60.7388	36.7	88.1896	82.8594	82.55	83.0583	66.1844	76.6226	67.9191	65.2212	61.4228	70.4362	65.3023	64.6294	67.793	53.8358
	36.8	68.5524	58.7844	71.03	52.9801	68.282	53.517	63.8119	55.6622	51.8562	61.4112	50.0058	65.3364	50.7878	62.1695	54.241	50.4601	36.8	97.8136	92.4571	77.9308	104.457	90.7455	91.3604	60.12	79.5267	74.8668	66.4138	68.5874	58.7629	70.3406	50.2743	49.5495	60.7852	36.8	88.1798	82.5461	82.3933	83.367	66.1593	76.8613	68.0476	65.2972	61.3752	71.0994	65.1274	64.4305	67.4628	53.8461
	36.9	68.3689	58.6059	70.6785	52.8571	68.0252	53.2588	63.7158	55.7001	51.5645	61.1648	49.9252	65.1378	50.7526	62.2876	54.1269	50.5799	36.9	98.2239	92.7567	77.8705	104.319	90.9146	91.1973	60.2339	79.5098	75.0998	66.3143	68.7936	58.241	70.5031	50.6815	49.2636	60.8358	36.9	88.0244	82.2251	82.084	83.5875	66.2583	76.92	68.2082	65.2638	61.4034	71.5844	65.0165	64.2575	66.9345	53.9902
	37	68.1064	58.5092	70.2222	52.6619	67.8776	53.2208	63.7746	55.7819	51.1919	60.9499	49.8006	65.0274	50.9154	62.4171	53.9146	50.4822	37	98.8142	93.0961	77.7519	104.157	91.1211	91.1066	60.2889	79.3832	75.271	66.4698	68.8922	57.8789	70.621	51.0863	48.9851	60.9585	37	87.7071	82.0208	81.8639	83.9239	66.4928	76.9724	68.4596	65.0648	61.4161	71.9384	64.9044	64.1088	66.3794	54.215
	37.1	67.9933	58.3175	69.9236	52.4403	67.6725	53.2384	63.943	55.7046	51.0066	60.7646	49.6849	65.0072	51.0418	62.5824	53.8011	50.511	37.1	99.2322	93.2608	77.7214	104.074	91.2552	91.2914	60.4033	79.2442	75.3495	66.789	68.9144	57.6665	70.6436	51.2249	48.709	61.0855	37.1	87.4688	82.0295	81.8058	83.9872	66.5611	76.9162	68.5009	65.0478	61.502	72.1156	64.7446	64.0357	65.9673	54.4186
	37.2	67.9105	58.2178	69.6907	52.107	67.4828	53.4554	64.1637	55.4396	51.0127	60.7683	49.5893	65.152	51.1873	62.602	53.7294	50.4679	37.2	99.5356	93.431	77.6017	103.889	91.5835	91.5816	60.4589	79.3252	75.4624	67.174	68.9882	57.6619	70.4473	51.0745	48.641	61.0891	37.2	87.2238	82.2911	81.7627	83.8622	66.5235	76.6274	68.3577	65.1043	61.6626	71.9872	64.4692	63.9421	65.6438	54.6555
	37.3	67.9134	58.1311	69.5402	51.7823	67.3996	53.5991	64.3552	55.195	51.1375	60.8704	49.5682	65.4088	51.1949	62.5995	53.652	50.4426	37.3	99.5047	93.4812	77.5362	103.671	91.9011	91.6888	60.4827	79.5096	75.4998	67.6655	69.1502	57.8607	70.2435	50.6649	48.8276	61.068	37.3	86.9429	82.5692	81.8198	83.5171	66.4817	76.2552	68.153	65.0433	61.7571	71.7819	64.2514	63.7763	65.509	54.8713
	37.4	67.8807	57.9925	69.4335	51.562	67.3392	53.7574	64.5442	55.0505	51.3962	61.0544	49.5684	65.6043	51.1321	62.6661	53.5119	50.3364	37.4	99.1278	93.3861	77.5571	103.483	92.0211	91.9027	60.481	79.6766	75.5427	68.0176	69.1346	58.1805	70.0573	50.1864	49.1323	60.9041	37.4	86.7651	82.9728	81.9626	83.1579	66.3476	76.1955	67.9118	64.9075	61.7304	71.7168	63.9594	63.8779	65.3398	54.9786
	37.5	67.8927	57.8046	69.3433	51.5264	67.2362	53.7279	64.6151	54.9582	51.7056	61.0972	49.5606	65.614	50.9081	62.7009	53.4957	50.5304	37.5	98.5818	93.2535	77.5417	103.325	91.9034	92.1332	60.5556	79.9837	75.5857	68.23	69.2924	58.4726	70.0345	49.7011	49.4106	60.737	37.5	86.7525	83.4209	82.1754	82.6866	66.1048	76.21	67.5708	64.8259	61.7958	71.561	63.7895	64.0622	65.2958	54.9374
	37.6	67.6074	57.7429	69.0975	51.519	67.1763	53.7044	64.6233	54.9888	51.8727	61.0799	49.6095	65.529	50.6769	62.5922	53.4539	50.7085	37.6	98.2898	93.1449	77.3361	103.143	91.8141	92.2106	60.6365	80.3114	75.5495	68.2947	69.461	58.5458	70.1	49.3274	49.7764	60.6159	37.6	86.6395	83.7932	82.3031	82.4944	65.8386	76.2559	67.4553	64.7502	61.8246	71.4386	63.6503	64.1796	65.3411	54.7798
	37.7	67.3277	57.834	68.856	51.7732	67.0972	53.628	64.5319	55.0743	51.7741	60.861	49.6718	65.3459	50.3791	62.6271	53.3978	50.9402	37.7	97.8625	92.9388	77.2077	103.116	91.5292	92.161	60.7038	80.4452	75.4688	68.2314	69.6186	58.4415	70.4761	49.2343	50.0132	60.5248	37.7	86.7008	84.0244	82.4361	82.4028	65.6849	76.4692	67.4286	64.6442	61.7725	71.3417	63.6674	64.3118	65.5094	54.4924
	37.8	67.144	58.1207	68.8402	52.0111	66.9226	53.6912	64.5623	55.1249	51.5436	60.6401	49.6866	65.236	50.1852	62.5977	53.2639	51.2534	37.8	97.498	92.6574	77.0207	103.167	91.0199	92.1906	60.6598	80.5386	75.4293	67.892	69.464	58.5062	70.9231	49.3259	50.173	60.3976	37.8	86.8128	84.3022	82.4393	82.375	65.6076	76.814	67.4435	64.7234	61.7004	71.1782	63.7951	64.5633	65.7796	54.1869
	37.9	67.1312	58.4111	68.8215	52.0857	66.8314	53.6934	64.6888	55.2366	51.3744	60.4044	49.7491	65.2505	50.1423	62.4264	53.3139	51.6665	37.9	97.3888	92.4362	76.8959	103.318	90.7448	92.1043	60.5916	80.5462	75.2665	67.5989	69.2937	58.6061	71.3382	49.4526	50.3754	60.3852	37.9	86.9198	84.352	82.5146	82.4528	65.7541	77.0013	67.5699	64.9448	61.601	70.9935	64.046	64.6842	66.2161	53.7497
	38	67.2363	58.7138	68.8742	52.0086	66.8377	53.7361	64.8135	55.4315	51.2496	60.391	49.8275	65.405	50.141	62.2711	53.3998	51.8866	38	97.3027	92.1533	76.7327	103.481	90.7141	91.9394	60.5332	80.4616	75.1506	67.3736	69.0795	58.5964	71.5821	49.5902	50.5179	60.3058	38	86.8908	84.1249	82.5276	82.6522	66.0692	77.097	67.7545	65.0636	61.4697	70.8728	64.27	64.8537	66.5718	53.3296
	38.1	67.5632	58.8286	69.0674	52.0715	66.8648	53.7532	64.9596	55.6036	51.1754	60.477	49.821	65.6881	50.1339	62.3171	53.4429	51.96	38.1	97.0591	91.8802	76.7689	103.523	90.78	91.6852	60.4249	80.257	75.0973	67.1089	68.9217	58.828	71.6492	49.7695	50.4885	60.2392	38.1	86.8163	83.8957	82.4153	82.713	66.5439	77.1384	67.8176	65.0603	61.2842	70.7369	64.5526	65.0248	66.8301	53.0634
	38.2	67.921	58.8071	69.3401	52.004	66.9426	53.7164	65.0857	55.8292	51.1967	60.6474	49.8415	66.0988	50.1296	62.2232	53.4159	51.9344	38.2	97.052	91.6386	76.9616	103.355	90.7956	91.3806	60.2831	80.1772	74.9735	66.8879	68.6806	59.0868	71.4924	49.7692	50.4513	60.2091	38.2	86.5496	83.6698	82.2762	82.7769	67.0088	76.9549	67.8494	64.9577	61.1146	70.6027	64.7901	65.1417	66.8846	52.9774
	38.3	68.0893	58.5721	69.4606	52.087	66.9893	53.5814	65.0154	56.0241	51.1786	60.882	49.9448	66.3456	50.0853	62.2633	53.5427	51.8855	38.3	96.9898	91.4749	77.283	103.286	91.0579	90.993	60.2736	80.1266	74.8076	66.8496	68.7196	59.0674	71.2499	49.7352	50.2558	60.2541	38.3	86.1962	83.3414	82.1616	82.9389	67.3994	76.5889	67.8654	64.7321	60.947	70.4911	64.8105	65.1708	66.748	52.9503
	38.4	68	58.2168	69.6887	52.3308	66.973	53.4878	64.8762	56.1068	50.9621	61.2256	50.0633	66.5465	49.9207	62.4091	53.634	51.6844	38.4	96.7682	91.349	77.4138	103.186	91.27	90.7312	60.2738	80.0731	74.7754	66.7889	68.9374	58.9484	70.9752	49.7397	49.8753	60.2988	38.4	85.7617	83.1022	82.0274	83.0174	67.5686	76.1078	67.7883	64.5188	60.8657	70.256	64.7376	65.2882	66.6029	53.1508
	38.5	67.807	57.9002	69.943	52.6321	66.8623	53.5095	64.721	56.0654	50.681	61.4931	50.2012	66.754	49.8172	62.5566	53.6937	51.5085	38.5	96.7228	91.233	77.7388	103.106	91.1874	90.602	60.1258	79.9604	74.7931	66.7789	69.0892	58.9287	70.7331	49.7027	49.5258	60.4928	38.5	85.3939	83.0613	81.94	82.8603	67.5109	75.6787	67.7908	64.6502	60.7581	70.0183	64.597	65.2957	66.516	53.3645
	38.6	67.6666	57.6998	70.1691	52.739	66.6974	53.4638	64.4563	56.076	50.5052	61.718	50.3337	66.7988	49.7964	62.5132	53.7906	51.4177	38.6	96.867	91.2119	78.0068	103.207	90.8242	90.6671	60.0024	79.93	74.9153	66.8776	69.1874	58.7314	70.611	49.584	49.2349	60.7413	38.6	85.2416	83.0376	81.9478	82.5891	67.2498	75.3919	67.9072	64.8434	60.7235	69.8216	64.4411	65.2314	66.4033	53.5729
	38.7	67.5146	57.5267	70.3522	52.8148	66.6806	53.5688	64.1602	56.1706	50.4605	61.9704	50.4028	66.6564	49.839	62.5992	54.0741	51.419	38.7	97.0794	91.4685	78.0378	103.477	90.5862	90.7804	59.9708	79.6878	75.138	66.9474	69.234	58.6034	70.4544	49.5372	49.0345	60.956	38.7	85.1766	83.0371	81.9866	82.3169	66.9891	75.365	68.1211	65.1731	60.7738	69.6919	64.185	65.2039	66.3163	53.8048
	38.8	67.4558	57.5352	70.4821	52.6255	66.8398	53.7726	63.9989	56.2635	50.5221	62.1101	50.3643	66.4516	50.0144	62.5934	54.283	51.2821	38.8	97.47	91.8154	77.8287	103.406	90.2967	91.0104	59.8477	79.3601	75.2812	66.8886	69.1998	58.6714	70.286	49.577	48.9833	61.0883	38.8	85.1965	83.0975	82.123	82.0258	66.6849	75.4408	68.2542	65.602	60.923	69.6098	63.9886	65.1489	66.3546	54.0608
	38.9	67.4936	57.7118	70.4206	52.3182	67.0362	53.9958	63.8284	56.4674	50.709	62.0426	50.1964	66.0903	50.2591	62.4945	54.3944	51.2111	38.9	97.9254	92.1322	77.5797	103.196	89.9195	91.1493	59.6977	79.1594	75.313	66.8228	68.9758	58.812	70.1298	49.5078	49.0442	61.1967	38.9	85.3824	83.1634	82.0814	81.809	66.31	75.6749	68.3846	65.9275	61.1447	69.7651	63.853	64.9409	66.3414	54.2183
	39	67.6297	57.7843	70.2268	51.9748	67.3463	54.0263	63.5688	56.7516	50.8561	61.8576	50.0346	65.6215	50.3919	62.4162	54.4491	51.227	39	98.1915	92.6354	77.1102	102.964	89.7755	91.2516	59.7117	79.1059	75.2884	66.6289	68.7662	58.9232	69.9202	49.459	49.1976	61.2678	39	85.611	83.172	81.9334	81.9047	66.0584	75.8681	68.4284	65.8553	61.3884	69.9368	63.7	64.7612	66.3862	54.3942
	39.1	67.4887	57.9381	69.9583	51.7335	67.7622	54.135	63.3292	56.9691	50.8874	61.6583	49.967	65.2587	50.4186	62.4474	54.4372	51.2475	39.1	98.1804	92.9921	76.5774	102.731	89.8387	91.341	59.7957	79.0574	75.1008	66.464	68.607	59.0689	69.7266	49.501	49.3778	61.2857	39.1	85.8459	83.0495	81.8075	82.2756	65.95	75.9326	68.333	65.7112	61.4665	70.0902	63.4176	64.6658	66.4607	54.502
	39.2	67.3413	58.1592	69.6018	51.5988	67.9683	54.1239	63.1923	57.0594	50.7632	61.3936	50.039	65.0159	50.3224	62.4819	54.1436	51.202	39.2	97.9415	92.8892	76.1126	102.412	89.8467	91.5786	59.7784	79.2115	74.8932	66.4042	68.4678	59.0953	69.7104	49.4967	49.4748	61.2695	39.2	86.1698	82.9946	81.7169	82.6132	65.9072	75.9155	68.2456	65.5687	61.4612	70.2733	63.3156	64.6043	66.6125	54.3567
	39.3	67.1762	58.225	69.2632	51.592	68.0166	53.9439	63.0548	57.1269	50.6342	61.1528	50.2453	64.8267	50.1977	62.5526	53.8746	51.1996	39.3	97.6408	92.6901	75.7448	102.433	89.8239	91.7418	59.8339	79.4042	74.8678	66.406	68.3168	58.9354	69.8571	49.3479	49.509	61.317	39.3	86.4599	82.9431	81.4763	82.9217	66.0464	75.8929	68.1962	65.2686	61.4246	70.4498	63.223	64.5406	66.6648	54.0413
	39.4	67.0583	58.2262	69.0789	51.5987	67.9724	53.662	62.9152	57.1047	50.5312	61.0842	50.5255	64.806	49.9344	62.7217	53.6726	51.2525	39.4	97.2269	92.4912	75.5947	102.684	89.8789	91.7772	60.0329	79.513	74.8915	66.4322	68.3317	58.7155	69.9458	49.3586	49.531	61.3242	39.4	86.5984	83.0352	81.4487	83.1502	66.2611	75.8045	68.1093	64.8979	61.3378	70.4926	63.0663	64.5043	66.5588	53.6771
	39.5	66.8278	58.3555	68.873	51.6738	67.8633	53.5033	63.0927	56.8938	50.5442	61.1264	50.727	64.8981	49.745	62.8378	53.5677	51.2296	39.5	96.933	92.0924	75.6751	102.869	89.9156	91.7611	60.1383	79.4196	74.8813	66.5041	68.4415	58.4852	70.1168	49.3375	49.579	61.2282	39.5	86.6323	83.266	81.5258	83.1468	66.2727	75.7721	68.0262	64.6252	61.1894	70.6507	63.005	64.3851	66.3351	53.2475
	39.6	66.9648	58.4	68.6468	51.7744	67.7096	53.2928	63.4342	56.577	50.6915	61.2262	50.7822	64.9902	49.6932	62.9238	53.6105	51.2454	39.6	96.8007	91.801	75.8314	102.955	89.8474	91.529	60.1554	79.4347	74.9103	66.4899	68.5559	58.3	70.279	49.1698	49.5844	61.1107	39.6	86.4897	83.6017	81.626	82.9167	66.0417	75.9049	67.979	64.4068	61.1206	70.8515	63.1796	64.2849	66.0989	52.824
	39.7	67.0664	58.2602	68.338	51.7693	67.5261	53.046	63.8456	56.2283	50.948	61.3368	50.6402	64.9062	49.7457	62.8392	53.8695	51.2557	39.7	96.8823	91.7336	75.9741	103.072	89.7114	91.0714	60.2841	79.3794	74.9393	66.3579	68.7841	58.2944	70.4002	49.0845	49.6476	61.1248	39.7	86.2942	83.8145	81.7513	82.7157	65.5692	76.0577	67.7679	64.0819	61.0759	70.9688	63.3154	64.078	65.7052	52.6252
	39.8	67.1315	58.1633	68.0537	51.9034	67.478	52.9316	64.2786	55.9468	51.1837	61.4916	50.3477	64.972	49.7348	62.731	54.1714	51.2664	39.8	97.0225	91.8527	76.2053	103.044	89.545	90.5855	60.3468	79.3714	74.8969	66.3015	69.0034	58.4776	70.2641	49.142	49.7895	61.1229	39.8	86.0587	83.9443	82.0237	82.5293	64.964	76.2036	67.5819	63.8819	61.0374	71.0295	63.5747	63.8566	65.3832	52.4869
	39.9	67.1183	58.1317	67.7474	52.1368	67.6324	52.8311	64.8293	55.5692	51.3637	61.6051	49.938	64.9323	49.9061	62.4995	54.4288	51.3083	39.9	97.4694	92.0298	76.3936	102.79	89.414	90.3703	60.2094	79.4038	74.8513	66.3865	69.1275	58.6646	70.1888	48.9845	50.0648	61.1022	39.9	85.9722	83.8466	82.2049	82.3316	64.5578	76.4154	67.5033	63.9174	61.0365	71.0432	64.0106	63.6717	65.3739	52.4448
	40	67.181	58.0928	67.6022	52.2945	67.7417	52.703	65.146	55.1983	51.5462	61.7377	49.568	64.7698	50.1207	62.3401	54.5665	51.3713	40	97.7149	92.1688	76.3456	102.561	89.2901	90.2725	60.1268	79.6762	74.6982	66.4914	69.0836	58.8743	70.1472	48.9144	50.2264	61.0772	40	85.9563	83.5453	82.4007	82.2782	64.4629	76.6253	67.4246	64.0712	61.1416	70.867	64.5062	63.7364	65.3573	52.6222
	40.1	66.9456	58.0384	67.5331	52.4524	67.7768	52.7019	65.3418	54.978	51.5738	61.8184	49.4049	64.6136	50.2701	62.1439	54.625	51.2794	40.1	97.9519	92.1822	76.2271	102.329	89.2602	90.3554	60.1057	79.6215	74.5652	66.7272	68.8929	59.0321	70.0944	49.0179	50.5156	61.0217	40.1	85.9119	83.2208	82.5836	82.2816	64.6741	76.6298	67.4461	64.1878	61.3312	70.6844	64.8617	63.8011	65.4885	52.7854
	40.2	66.694	58.2562	67.7844	52.632	67.8802	52.7076	65.3028	54.839	51.5102	61.9513	49.377	64.6581	50.426	62.0662	54.5738	51.2997	40.2	97.9833	92.1941	76.2782	102.208	89.4595	90.4679	60.0517	79.5182	74.4554	67.0826	68.6146	58.9544	69.9582	49.0372	50.6204	60.925	40.2	85.7501	82.8463	82.4826	82.2699	65.1914	76.6324	67.6246	64.3345	61.4197	70.524	65.2109	63.9695	65.8027	52.9469
	40.3	66.4467	58.4948	68.1455	52.5775	67.713	52.7472	65.0946	54.6614	51.4446	62.0214	49.3428	64.4869	50.6295	61.9763	54.408	51.4139	40.3	97.7145	91.8911	76.2709	101.981	89.7911	90.6005	60.0662	79.3886	74.4013	67.2983	68.3934	58.6486	70.0394	49.0378	50.5554	60.8146	40.3	85.5458	82.6492	82.207	82.2673	65.5707	76.739	67.9023	64.4346	61.4179	70.4774	65.4348	64.2749	66.1042	53.2743
	40.4	66.4114	58.7388	68.4588	52.466	67.42	52.945	64.6898	54.5682	51.432	61.9242	49.4576	64.3729	50.7046	61.9882	54.3271	51.3106	40.4	97.0585	91.427	76.1529	101.907	90.0417	90.4715	60.1656	79.0508	74.3954	67.2758	68.2088	58.2842	70.0554	49.3953	50.2125	60.8693	40.4	85.2649	82.5459	81.895	82.4092	65.6784	76.7458	68.1837	64.3557	61.3588	70.5681	65.3638	64.6978	66.1947	53.516
	40.5	66.4084	58.9119	68.7204	52.3569	67.2138	53.2142	64.2415	54.7126	51.2525	61.7613	49.58	64.3806	50.8284	61.8239	54.251	51.1003	40.5	96.5001	91.1702	76.1672	101.929	90.2364	90.2798	60.2413	78.5374	74.5295	67.232	68.106	57.8098	69.992	49.7416	49.8665	60.9766	40.5	85.0469	82.484	81.442	82.4003	65.6114	76.666	68.4344	64.1676	61.2706	70.811	65.1175	64.945	66.4034	53.5303
	40.6	66.5563	59.0478	68.9675	52.237	67.0684	53.3988	63.764	54.8125	50.9957	61.5311	49.5553	64.2709	50.947	61.7695	54.0884	51.0241	40.6	95.9482	91.0208	76.2134	102.055	90.4256	90.072	60.1778	78.3308	74.6614	66.9633	68.1392	57.3239	69.8314	49.9527	49.4035	61.1596	40.6	85.0035	82.4221	80.9274	82.4008	65.4964	76.7148	68.4933	64.0028	61.1212	71.0897	64.8553	65.1627	66.4083	53.6705
	40.7	66.784	59.0164	69.0275	52.1471	66.9917	53.7167	63.5599	54.9647	50.8061	61.2509	49.5461	64.097	51.0495	61.8109	53.9678	50.86	40.7	95.5148	90.8342	75.9788	102.054	90.56	89.9317	59.9628	78.2359	74.7252	66.5757	68.2226	57.0044	69.7107	50.3592	49.2443	61.1793	40.7	85.0813	82.5271	80.694	82.335	65.1977	76.7342	68.4837	63.7978	61.1189	71.3516	64.5798	65.4176	66.3351	53.7117
	40.8	67.0883	59.0284	68.9922	52.1345	67.1202	53.9248	63.588	55.1047	50.5665	61.0177	49.6532	64.0619	51.0042	61.8724	53.8206	50.6502	40.8	95.3543	90.798	75.7062	102.308	90.4884	89.8692	59.6534	78.1349	74.6688	66.3085	68.1997	56.8151	69.4465	50.7286	49.2372	61.2683	40.8	85.2846	82.3694	80.6312	82.245	65.1849	76.6115	68.2623	63.5129	61.1962	71.4693	64.4	65.5829	66.3239	53.6719
	40.9	67.1656	58.8749	68.9544	52.0279	67.1169	54.0115	63.706	55.3048	50.3266	61.0099	49.8188	64.1247	50.9933	61.9386	53.6302	50.6738	40.9	95.5412	90.8594	75.5784	102.373	90.3041	90.0029	59.269	78.3507	74.6188	66.0818	68.0968	56.8207	69.343	50.8769	49.4425	61.247	40.9	85.5277	82.2133	80.5466	81.8778	65.3194	76.5271	67.8881	63.2593	61.186	71.4428	64.3771	65.5143	66.4319	53.644
	41	67.193	58.6373	68.8923	51.9921	66.9828	54.0078	63.8565	55.4696	50.2312	60.9738	50.1002	64.2304	50.8768	62.2299	53.4628	50.8294	41	95.8636	90.7776	75.5262	102.256	90.1587	89.954	58.9365	78.5818	74.5854	65.8236	68.0155	57.1629	69.2389	51.0579	49.7561	61.1145	41	85.7642	82.0381	80.5714	81.5216	65.4522	76.5758	67.5686	63.0978	61.0724	71.323	64.5388	65.4298	66.4039	53.6926
	41.1	67.2942	58.4269	68.8438	51.9316	66.9112	54.0052	64.0268	55.7246	50.377	60.9709	50.453	64.4284	50.6577	62.4089	53.2666	50.9533	41.1	96.1358	90.6364	75.4716	102.067	90.0055	89.8783	58.729	78.6812	74.5057	65.7487	67.9208	57.5495	69.3368	51.398	50.1871	60.8107	41.1	85.8698	81.8929	80.5603	81.197	65.5864	76.6072	67.4238	62.9212	60.989	71.151	64.8024	65.3332	66.5356	53.534
	41.2	67.3148	58.235	68.7895	51.8796	66.8739	53.9022	63.9636	55.8823	50.438	61.053	50.7256	64.7536	50.4075	62.4195	53.1448	50.9704	41.2	96.3459	90.4579	75.6034	101.89	89.7432	89.8846	58.6349	78.7336	74.5149	65.7825	67.8746	57.927	69.4857	51.437	50.3269	60.603	41.2	85.8907	81.6531	80.392	80.9196	65.7394	76.5485	67.3094	62.8981	60.9172	70.9471	64.9636	65.021	66.741	53.4592
	41.3	67.2727	57.9596	68.7013	51.858	66.8144	53.7758	63.7291	56.1432	50.6329	61.1698	50.9408	65.1848	50.3911	62.3954	53.141	50.9128	41.3	96.5636	90.3478	75.7947	101.626	89.5828	89.8031	58.6372	78.7405	74.6221	65.7415	67.9861	58.4879	69.7251	51.4066	50.4017	60.152	41.3	85.8357	81.5658	80.1062	80.6302	65.594	76.4273	67.3189	63.1049	60.8806	70.8634	65.0269	64.665	66.7777	53.293
	41.4	67.3124	57.8309	68.6027	51.9344	66.8847	53.5957	63.394	56.4138	50.8424	61.2491	50.9433	65.4178	50.3687	62.2308	53.1168	50.8415	41.4	96.5918	90.2648	75.858	101.72	89.5856	89.5611	58.8244	78.5818	74.664	65.8137	68.2738	58.9695	69.9063	51.2838	50.4029	59.7958	41.4	85.6208	81.4943	79.8805	80.477	65.3545	76.3038	67.4584	63.3832	60.9126	70.8839	65.085	64.4204	66.6484	53.2546
	41.5	67.414	57.8302	68.3597	51.9613	67.0772	53.4264	63.1395	56.5084	51.0458	61.3625	50.797	65.6028	50.2017	61.908	53.1378	50.7695	41.5	96.4921	90.2197	75.7685	102.039	89.5338	89.6424	58.9951	78.4414	74.7004	66.0223	68.6479	59.0685	70.1783	51.0513	50.3571	59.7107	41.5	85.3296	81.4648	79.656	80.4096	65.176	76.052	67.6065	63.6916	61.0751	70.7639	64.8944	64.2251	66.5714	53.2823
	41.6	67.4039	57.8407	68.0486	52.0771	67.1772	53.3065	62.9231	56.3496	51.0992	61.5004	50.547	65.8618	50.089	61.6459	53.356	50.689	41.6	96.43	90.3567	75.7383	102.369	89.4122	89.7357	59.1118	78.3264	74.7668	66.2162	69.0267	59.0966	70.4201	50.7277	50.1549	59.9263	41.6	85.2382	81.4318	79.5818	80.3837	64.8793	75.7086	67.6629	64.1849	61.2196	70.5075	64.603	64.069	66.3494	53.5009
	41.7	67.3978	57.8394	67.7696	52.1596	67.0233	53.2134	62.8439	56.1862	51.2049	61.498	50.2636	65.9164	50.0161	61.515	53.4762	50.9074	41.7	96.4841	90.6816	75.7555	102.642	89.349	89.704	59.3013	78.1885	74.7037	66.3926	69.305	59.0669	70.5524	50.6398	50.101	60.16	41.7	85.1779	81.4695	79.6665	80.4417	64.6187	75.4953	67.7592	64.6393	61.3796	70.3207	64.439	64.1469	66.0754	53.7228
	41.8	67.3677	57.9147	67.5455	52.2571	66.9338	53.2156	62.925	55.9387	51.1952	61.394	50.017	65.7735	49.7883	61.4754	53.657	51.3453	41.8	96.3651	90.9436	75.7276	102.806	89.3844	89.7795	59.4633	78.0738	74.5685	66.672	69.5489	58.729	70.6258	50.6498	50.0826	60.6298	41.8	85.1751	81.4198	79.7186	80.579	64.6564	75.3815	67.9043	64.9282	61.4627	69.9952	64.278	64.2688	66.0169	54.0526
	41.9	67.3406	58.0098	67.4444	52.4368	66.9474	53.3382	63.2546	55.5884	51.0405	61.1998	49.9197	65.7371	49.6144	61.6187	53.833	51.5706	41.9	96.2596	91.0856	75.7068	102.657	89.5047	90.0796	59.4366	77.9467	74.4369	66.9312	69.5872	58.2558	70.5451	50.6972	50.0569	60.9053	41.9	85.3888	81.2952	79.8008	80.9262	64.8113	75.3016	68.07	65.1313	61.597	69.6014	64.2378	64.3119	66.0891	54.2316
	42	67.1359	58.1288	67.6063	52.6908	66.9522	53.4505	63.4876	55.384	50.8225	61.0809	49.8392	65.5979	49.6708	61.8926	53.9579	51.7466	42	96.1404	91.188	75.7205	102.356	89.6312	90.1834	59.3596	77.9846	74.3299	67.0413	69.4754	57.9098	70.4804	50.7402	49.8911	61.1127	42	85.4812	81.248	79.9161	81.4181	64.9646	75.2273	68.2499	65.329	61.7087	69.5031	64.371	64.2275	66.2232	54.226
	42.1	66.9456	58.2613	67.8983	52.7445	66.9497	53.4218	63.6847	55.3783	50.6944	60.9053	49.8852	65.2879	49.8374	62.2239	53.987	52.004	42.1	96.0736	91.2028	75.69	102.026	89.9293	90.328	59.3235	78.1166	74.2862	66.995	69.3733	57.7376	70.347	50.7568	49.8278	61.1473	42.1	85.402	81.2738	80.0004	81.9679	65.2098	75.2856	68.3762	65.29	61.8845	69.6345	64.4976	64.0799	66.3702	54.1038
	42.2	66.902	58.3773	68.2438	52.8258	67.2516	53.3387	63.813	55.3502	50.6658	60.8807	49.9836	64.9498	49.9409	62.4382	54.0052	51.9346	42.2	95.8892	91.0707	75.5594	101.786	90.2769	90.5082	59.2266	78.3452	74.362	66.7902	69.3162	57.545	70.2979	50.7143	49.728	61.2281	42.2	85.3878	81.3569	80.0534	82.4193	65.5131	75.2527	68.3703	65.2407	61.9513	69.9171	64.5384	63.8633	66.5374	53.9169
	42.3	67.0346	58.3949	68.5628	52.8039	67.4968	53.248	63.7692	55.332	50.6447	61.054	49.9495	64.5801	50.1624	62.6704	53.9052	51.5997	42.3	95.856	90.9163	75.444	101.657	90.4692	90.5181	59.1261	78.6352	74.4438	66.5056	69.0212	57.4923	70.1953	50.6057	49.5908	61.335	42.3	85.4289	81.5617	80.3114	82.8145	65.7104	75.2338	68.1428	65.2431	62.0835	70.4247	64.6462	63.7067	66.5322	53.6524
	42.4	67.1696	58.3042	68.7908	52.5776	67.593	53.1279	63.6065	55.3949	50.7053	61.3359	49.926	64.2194	50.4209	62.8305	53.8569	51.4103	42.4	95.7099	91.0009	75.3798	101.549	90.484	90.3289	59.1282	79.0126	74.5754	66.1832	68.739	57.5636	70.2293	50.6168	49.4473	61.5251	42.4	85.4643	81.8167	80.5101	83.0412	65.8571	75.2423	67.807	65.2769	62.1894	70.9479	64.6295	63.6772	66.5154	53.4092
	42.5	67.4709	58.1525	68.8484	52.2112	67.6012	52.9735	63.5536	55.4652	50.8519	61.5695	49.9031	63.8918	50.5896	62.8882	53.8584	51.1953	42.5	95.56	91.166	75.2726	101.562	90.531	90.1088	59.171	79.1886	74.6039	65.9552	68.4393	57.6405	70.0733	50.5863	49.3976	61.4458	42.5	85.7282	81.9011	80.5582	82.9359	65.9168	75.3325	67.3546	65.1044	62.146	71.2961	64.5711	63.8678	66.4351	53.3192
	42.6	67.648	58.0134	68.7578	51.9446	67.6574	52.9652	63.5269	55.583	50.8801	61.9986	49.7526	63.6501	50.6372	62.7453	53.8904	50.8774	42.6	95.2786	91.3061	75.152	101.739	90.4242	89.9131	59.2592	79.0885	74.5002	65.9572	68.0865	57.5479	69.8966	50.5012	49.2982	61.3324	42.6	85.9774	81.8995	80.4686	82.6662	65.9366	75.4204	67.021	64.9659	61.9578	71.4673	64.6468	64.1678	66.4406	53.2839
	42.7	67.688	57.9621	68.5636	51.7302	67.5827	53.1476	63.6201	55.7904	50.717	62.2908	49.7052	63.65	50.814	62.6069	53.9435	50.7092	42.7	95.0913	91.5242	75.1028	101.833	90.2026	89.7442	59.3014	78.7922	74.274	66.1255	67.6401	57.5098	69.7318	50.3807	49.2677	61.1366	42.7	86.1232	81.7754	80.248	82.5654	65.9825	75.5884	66.8328	64.6432	61.7809	71.3997	64.7425	64.3911	66.3378	53.2892
	42.8	67.4929	57.9818	68.4004	51.5536	67.4826	53.4112	63.8252	56.0204	50.5943	62.2948	49.8696	63.807	50.8391	62.2971	54.0224	50.7492	42.8	95.0047	91.6258	75.1273	101.85	89.9416	89.8288	59.3215	78.3684	74.1134	66.3726	67.473	57.4533	69.7756	50.3726	49.249	60.8564	42.8	86.1258	81.6925	79.7387	82.5016	65.9657	75.701	66.8964	64.2039	61.4997	71.1039	64.8498	64.5206	66.3378	53.3666
	42.9	67.2792	58.1099	68.216	51.5328	67.4468	53.5935	63.8686	56.1505	50.5642	62.1408	49.952	63.9632	50.7336	62.0181	54.046	50.8375	42.9	95.2034	91.4976	75.2172	102.028	89.6662	89.9904	59.3004	77.8808	73.8991	66.5939	67.4715	57.3951	69.7734	50.3107	49.3127	60.6214	42.9	85.9701	81.73	79.2215	82.3449	65.951	75.6258	67.0686	63.7474	61.1996	70.7378	65.0024	64.6235	66.323	53.5644
	43	66.918	58.3226	68.1789	51.5822	67.5348	53.8397	63.8609	56.1586	50.4841	61.8813	50.0934	64.3148	50.6228	61.8176	54.0536	51.0324	43	95.5346	91.2814	75.5424	102.103	89.3852	90.1764	59.2562	77.5076	73.7113	66.7234	67.585	57.5356	69.889	50.4432	49.4509	60.5702	43	85.7726	81.9573	78.7675	82.3561	66.0256	75.4923	67.3866	63.5754	61.0328	70.3802	65.1323	64.5751	66.359	53.7466
	43.1	66.7372	58.6622	68.2649	51.5966	67.6009	54.0009	63.8356	56.0014	50.4562	61.3519	50.3593	64.7638	50.6031	61.7566	54.0254	51.2679	43.1	96.0058	90.9662	75.8575	101.88	89.1609	90.1882	59.1177	77.4066	73.6974	66.6598	67.7202	57.8088	70.0299	50.61	49.5089	60.5017	43.1	85.6813	82.2474	78.4605	82.3394	66.0418	75.2899	67.7916	63.3873	60.9592	70.2032	65.0485	64.4151	66.4263	53.8976
	43.2	66.5829	58.8172	68.4338	51.4249	67.616	53.8972	63.6599	55.8148	50.541	60.866	50.4804	65.1402	50.3946	61.7657	54.0035	51.5154	43.2	96.5618	90.6407	76.0162	101.804	88.9908	90.0355	58.9783	77.464	73.7993	66.5112	68.0146	58.0596	70.1726	50.7372	49.4821	60.4743	43.2	85.6904	82.5627	78.2887	82.0958	65.8176	75.0979	68.1028	63.299	60.9023	70.1246	64.9564	64.314	66.6844	53.8277
	43.3	66.5444	58.916	68.6319	51.242	67.5977	53.6028	63.4118	55.5396	50.5456	60.5622	50.3624	65.4735	50.2542	61.8636	53.8657	51.5067	43.3	96.9173	90.607	76.0662	101.78	88.9058	89.5222	58.8319	77.6202	73.9115	66.2191	68.2112	58.4048	70.1207	50.7085	49.4158	60.4467	43.3	85.7408	82.7751	78.4096	81.8932	65.6215	75.0594	68.258	63.3417	60.8586	70.2009	64.7144	64.0496	66.9185	53.6619
	43.4	66.4748	58.9528	68.9226	51.0258	67.4135	53.5037	63.3614	55.4192	50.5519	60.3997	50.2624	65.6549	50.2361	61.8455	53.6678	51.4383	43.4	97.1307	90.7131	76.0119	101.543	88.9466	89.0313	58.6133	77.7613	74.0175	65.9945	68.133	58.7644	70.0978	50.6388	49.2417	60.44	43.4	85.827	82.873	78.6129	81.7415	65.4195	75.2704	68.2829	63.456	60.8062	70.4013	64.3689	63.693	67.1067	53.3413
	43.5	66.5943	58.8994	69.0578	50.9459	67.0574	53.3666	63.3742	55.4319	50.5976	60.3058	50.1454	65.6034	50.2083	61.803	53.4863	51.2792	43.5	97.2947	90.8842	75.7455	101.295	88.9905	88.5919	58.4687	77.8103	74.178	65.8822	67.9572	58.7763	70.138	50.4572	48.9653	60.382	43.5	85.7591	82.9034	79.0736	81.5838	65.1788	75.3821	68.1618	63.3472	60.7845	70.6794	64.0781	63.4282	67.1534	52.9629
	43.6	66.6085	58.5839	69.235	51.0067	66.6877	53.2202	63.4083	55.572	50.798	60.4224	49.9241	65.4503	50.1635	61.7586	53.2451	51.1279	43.6	97.3885	91.1139	75.4941	101.224	88.9712	88.4232	58.3365	77.8243	74.1644	65.8497	67.7872	58.6148	70.1466	50.3746	48.886	60.4767	43.6	85.4647	82.6965	79.5928	81.437	65.0356	75.3791	67.7866	63.478	60.7197	70.8984	63.9741	63.2162	67.0574	52.57
	43.7	66.5108	58.4323	69.3691	51.3169	66.2545	53.2173	63.4658	55.6908	51.0136	60.6237	49.7395	65.2444	50.2409	61.674	52.9712	50.9362	43.7	97.1754	91.2525	75.2872	101.109	88.9477	88.6518	58.3242	77.7674	74.0801	65.8962	67.4742	58.5462	70.1276	50.2695	48.891	60.5496	43.7	85.0225	82.3669	80.1596	81.3546	65.08	75.2904	67.432	63.7242	60.6333	71.0178	63.9706	62.922	66.8014	52.5038
	43.8	66.4256	58.3305	69.4856	51.8067	65.8314	53.35	63.6048	55.9541	51.3606	60.8684	49.671	65.0537	50.3733	61.5887	52.9179	50.9082	43.8	97.0028	91.1367	75.1344	100.989	88.9808	89.2833	58.3162	77.6429	73.8891	65.9652	67.2514	58.3589	70.1635	50.1738	48.9254	60.5214	43.8	84.6799	81.938	80.6692	81.176	65.0991	75.1207	67.1229	63.9726	60.7393	71.0686	64.1839	62.9818	66.4843	52.5412
	43.9	66.4246	58.1251	69.5563	52.309	65.7212	53.3172	63.6476	56.1017	51.5272	61.1129	49.5649	65.1304	50.5182	61.5524	53.0662	50.8049	43.9	96.7281	90.9741	75.0578	100.929	88.8431	89.9149	58.4785	77.5789	73.685	66.0676	67.4168	58.1199	70.2256	50.059	49.0519	60.3723	43.9	84.3547	81.4875	81.2249	81.178	65.0718	74.7575	66.856	64.1463	60.9256	71.0682	64.5396	63.2121	66.1913	52.6875
	44	66.39	57.9258	69.6979	52.6035	65.8618	53.329	63.5756	55.9895	51.6765	61.5194	49.3958	65.3211	50.7508	61.5388	53.1806	50.5902	44	96.3366	90.8139	75.0808	100.892	88.6515	90.5842	58.5469	77.5484	73.4681	66.0874	67.5918	57.9868	70.1882	49.9105	49.2889	60.3658	44	84.1818	81.0201	81.4488	81.1184	64.9928	74.6303	66.6854	64.4444	61.0935	71.001	64.9796	63.402	66.0471	52.9703
	44.1	66.4868	58.0499	69.5527	52.8604	66.0388	53.4494	63.4437	55.7585	51.578	61.925	49.2364	65.5525	50.89	61.5249	53.4756	50.3582	44.1	95.848	90.6488	75.139	100.946	88.5051	90.9881	58.6435	77.5342	73.4133	66.1503	67.832	58.0481	70.1721	49.6383	49.3786	60.2207	44.1	84.2696	80.9303	81.4564	81.1452	64.8129	74.7264	66.6975	64.451	61.2834	70.8364	65.225	63.5386	66.0017	53.324
	44.2	66.7954	58.2385	69.3782	52.9225	66.4258	53.5054	63.3315	55.509	51.4917	62.1719	49.1651	65.7076	51.0168	61.5594	53.8667	50.1954	44.2	95.4417	90.473	75.3247	100.884	88.3127	90.9156	58.619	77.5221	73.425	66.2221	68.2366	57.9733	70.1753	49.4819	49.4175	60.0939	44.2	84.6194	81.0836	81.1917	81.2508	64.5757	74.94	66.6762	64.356	61.4816	70.7361	65.3349	63.9151	66.0346	53.555
	44.3	66.9969	58.4672	69.1257	52.7835	66.8858	53.4911	63.1048	55.09	51.3772	62.2338	49.1227	65.8674	51.1032	61.7245	54.0558	50.0942	44.3	95.0863	90.425	75.5494	100.645	88.0692	90.644	58.5904	77.5875	73.528	66.4358	68.5045	57.9476	70.146	49.3532	49.4217	60.1342	44.3	84.8847	81.5638	80.9014	81.3308	64.362	75.0422	66.7028	64.1592	61.3941	70.6513	65.165	64.1232	66.0819	53.6139
	44.4	67.1194	58.83	68.8527	52.5863	67.268	53.516	62.9544	54.6942	51.4216	62.1358	49.1877	65.7979	51.0759	62	54.0236	50.1716	44.4	94.8492	90.4223	75.6818	100.443	88.0801	90.3636	58.4949	77.6522	73.7339	66.5123	68.5419	57.9965	70.0086	49.2938	49.3082	60.2142	44.4	85.1836	82.1188	80.5108	81.2704	64.1516	75.2622	66.8863	63.9787	61.2571	70.6315	64.8173	64.237	66.1581	53.7201
	44.5	67.153	59.1455	68.5581	52.4542	67.497	53.555	62.7829	54.5714	51.3925	61.8722	49.2762	65.6564	50.9109	62.1966	53.9877	50.5206	44.5	94.6688	90.3102	75.7162	100.218	88.1962	90.0737	58.3883	77.8895	73.9135	66.593	68.6845	58.1516	69.9044	49.2908	49.2259	60.1143	44.5	85.41	82.5514	80.2095	81.351	64.0661	75.417	66.9964	63.7974	61.0076	70.5556	64.2249	64.459	66.1204	53.8652
	44.6	67.1239	59.0865	68.5516	52.1372	67.7201	53.4898	62.6405	54.5709	51.4495	61.4654	49.3835	65.5765	50.8724	62.396	53.7629	50.8124	44.6	94.6772	90.1992	75.7942	99.8665	88.3874	89.8924	58.2648	78.0504	74.0589	66.6088	68.6927	58.2376	69.7712	49.3452	49.308	60.0775	44.6	85.4846	82.6844	79.9674	81.4029	64.0558	75.4427	67.1122	63.7666	60.7486	70.5398	63.763	64.7351	66.1796	54.0222
	44.7	67.0441	58.801	68.6084	51.883	67.7927	53.4402	62.525	54.651	51.4169	61.22	49.3458	65.579	50.8185	62.4059	53.4558	51.043	44.7	94.8351	90.1208	75.7964	99.6105	88.6422	89.975	58.197	78.2964	74.206	66.4758	68.4997	58.3728	69.5262	49.4593	49.4098	60.0592	44.7	85.2962	82.6486	79.943	81.3777	64.1751	75.276	67.2527	63.7082	60.5159	70.6147	63.3611	64.7946	66.2122	54.112
	44.8	67.1307	58.4232	68.6314	51.8222	67.7831	53.4678	62.5642	54.8549	51.322	61.1659	49.3567	65.5579	50.5976	62.2361	53.2836	51.2064	44.8	94.8947	90.1354	75.7095	99.5982	88.9584	90.0272	58.1236	78.6178	74.2052	66.1782	68.3976	58.4521	69.3307	49.7294	49.7104	60.0216	44.8	85.0524	82.1725	79.8155	81.3461	64.4547	75.1726	67.3245	63.7087	60.4118	70.6277	63.1846	64.878	66.2966	54.392
	44.9	67.2299	58.071	68.6657	51.8287	67.5653	53.4554	62.5526	55.016	51.1869	61.2955	49.2295	65.7368	50.3594	61.9338	53.2523	51.2439	44.9	94.9056	89.9897	75.7246	99.635	89.0519	90.011	58.0388	78.8745	74.1176	65.9203	68.345	58.3472	69.2151	50.0199	50.1906	60.0155	44.9	84.7727	81.5865	79.6084	81.2477	64.9149	75.0984	67.1546	63.7446	60.3491	70.5888	63.1456	64.8313	66.4153	54.5196
	45	67.3412	57.7873	68.6878	51.8024	67.2571	53.415	62.6626	55.1058	51.1544	61.4213	49.156	66.0451	50.2094	61.581	53.2502	51.136	45	94.9629	89.9114	75.7304	99.7257	89.1294	89.9297	58.0515	78.9043	74.0353	65.763	68.2499	58.1758	69.0576	50.3271	50.4692	60.0518	45	84.5206	81.1256	79.3954	81.1196	65.3672	74.9074	67.0681	63.6288	60.4338	70.752	63.1816	64.5832	66.6331	54.3349
	45.1	67.2889	57.7251	68.5279	52.046	66.9204	53.418	62.9622	55.1907	51.1107	61.671	49.24	66.1723	50.0013	61.1834	53.3486	51.1274	45.1	94.9072	89.8479	75.5601	99.8398	89.0993	89.8078	58.2421	78.9525	73.9062	65.6539	68.2278	57.8768	68.9196	50.6072	50.5603	60.0826	45.1	84.4223	80.6852	79.3052	81.048	65.8352	74.7068	66.8933	63.3166	60.5797	70.9435	63.2362	64.3671	66.6694	54.0393
	45.2	67.0589	57.8477	68.38	52.3627	66.6621	53.437	63.3594	55.1733	51.0065	61.8903	49.4248	66.2582	49.8044	61.1029	53.5231	51.1332	45.2	94.8316	89.8302	75.3987	99.877	89.0323	89.7619	58.4642	79.1033	73.7676	65.7559	68.4301	57.553	68.8609	50.6604	50.5356	60.1179	45.2	84.4734	80.3304	79.2198	81.1126	66.055	74.6237	66.8219	63.0964	60.7176	71.0957	63.2935	64.1775	66.7002	53.8495
	45.3	66.6597	58.0481	68.46	52.4812	66.4245	53.3585	63.6085	55.0789	50.9146	62.0318	49.5646	66.1722	49.9108	61.1851	53.6465	51.0952	45.3	94.8317	89.6622	75.2241	99.7215	88.8948	89.7729	58.8479	79.1749	73.8459	65.9861	68.5758	57.3239	68.8313	50.6392	50.2848	60.024	45.3	84.699	80.3172	79.0761	81.2242	66.0174	74.5664	66.8453	62.9614	60.801	71.279	63.2532	63.9698	66.7325	53.6073
	45.4	66.2924	58.1758	68.4341	52.5068	66.2337	53.3627	63.7297	55.1109	50.7233	62.146	49.9249	65.811	50.057	61.4074	53.8356	51.0083	45.4	94.872	89.6998	74.9219	99.6186	88.7968	89.8836	59.2558	79.3771	73.871	66.1998	68.5797	57.271	68.8608	50.6058	49.8319	59.9122	45.4	84.9029	80.3601	79.0321	81.3401	65.7082	74.4785	66.9196	62.7927	60.7049	71.3904	63.2015	63.9708	66.6674	53.3768
	45.5	65.9323	58.3435	68.404	52.6772	66.2556	53.417	63.8652	55.1829	50.399	62.3174	50.2251	65.3119	50.173	61.8576	54.0575	50.8773	45.5	94.9101	89.7434	74.6376	99.5353	88.5576	89.926	59.5606	79.5759	73.8768	66.3055	68.5102	57.2279	69.074	50.5819	49.5413	59.8895	45.5	85.04	80.4922	78.9973	81.3913	65.3446	74.5977	66.9043	62.7874	60.4969	71.3441	63.289	64.0644	66.5532	53.3214
	45.6	65.8116	58.5463	68.48	52.7225	66.2606	53.4397	63.6809	55.2341	50.1591	62.4325	50.3199	65.0323	50.1962	62.4082	54.1994	50.7007	45.6	95.0122	89.6732	74.4918	99.5691	88.4335	89.9899	59.6872	79.6662	73.893	66.3351	68.3558	57.3586	69.3023	50.757	49.3454	59.7834	45.6	85.0634	80.7273	78.8398	81.2828	64.9519	74.9445	66.8886	63.0256	60.3608	71.4045	63.2092	64.0485	66.4785	53.2673
	45.7	65.8162	58.6515	68.4788	52.6001	66.2404	53.4492	63.3061	55.3568	50.1103	62.513	50.3998	64.7934	50.1528	62.7706	54.2438	50.5087	45.7	95.037	89.5859	74.3395	99.7019	88.3695	89.7849	59.8464	79.3566	73.7903	66.1931	68.035	57.5861	69.5395	51.1423	49.3902	59.6931	45.7	85.0667	80.9198	78.6655	80.9029	64.7733	75.4487	66.689	63.304	60.2831	71.3625	63.1985	64.133	66.4374	53.1606
	45.8	65.936	58.6777	68.2924	52.4586	66.3665	53.4879	62.9971	55.6046	50.1073	62.5932	50.4059	64.8479	49.8458	62.975	54.3047	50.3528	45.8	95.1094	89.6033	74.2716	100.1	88.3367	89.5202	59.8081	78.867	73.557	66.0492	67.7137	57.815	69.7523	51.394	49.597	59.7808	45.8	84.9172	81.014	78.5771	80.608	64.7312	75.9616	66.3772	63.5198	60.3106	71.3725	63.3426	64.199	66.302	52.9648
	45.9	65.969	58.7538	68.3556	52.4091	66.6534	53.4672	63.0032	55.727	50.2575	62.595	50.2471	65.1021	49.4588	63.0879	54.1327	50.3386	45.9	95.1373	89.5606	74.3004	100.46	88.3371	89.0812	59.6847	78.1922	73.6001	65.9669	67.6689	58.0385	69.8822	51.5712	49.9136	60.0053	45.9	84.803	81.0794	78.4554	80.4451	64.8506	76.3144	66.2225	63.8761	60.4396	71.4962	63.4499	64.1385	66.2073	52.7989
	46	65.935	58.6941	68.5786	52.2178	66.7336	53.3295	62.846	55.7284	50.52	62.6271	50.0917	65.3712	49.1185	62.9464	53.8809	50.3513	46	95.1011	89.4988	74.4566	100.813	88.4228	88.8882	59.6761	77.6529	73.7904	66.0034	67.7688	58.3222	69.7907	51.6839	50.1737	60.1186	46	84.8596	80.968	78.3884	80.2224	64.8344	76.4506	66.1102	64.1775	60.666	71.6282	63.472	64.1105	66.1531	52.6358
	46.1	65.8355	58.3714	68.7979	52.0329	66.8482	53.251	62.7551	55.597	50.7706	62.6276	49.9515	65.4042	48.9137	62.6104	53.7325	50.3232	46.1	95.0863	89.6938	74.626	100.955	88.3578	88.7668	59.6253	77.3174	73.8816	66.1409	68.0563	58.498	69.7582	51.4096	50.3681	60.3445	46.1	84.8809	80.9099	78.4519	80.1472	64.7923	76.3634	66.0717	64.482	60.6794	71.4536	63.8216	64.1335	66.1787	52.6156
	46.2	65.841	58.0444	69.0798	52.0475	67.0533	53.292	62.7362	55.4071	50.9632	62.4773	49.7974	65.3391	48.849	62.3661	53.6948	50.3691	46.2	95.092	89.9036	74.798	101.105	88.1516	88.8952	59.5008	77.2862	74.2281	66.3623	68.4486	58.5742	69.7888	50.929	50.2837	60.5528	46.2	84.7461	80.9071	78.4597	80.3056	64.5559	75.9656	66.1804	64.5926	60.627	71.2931	64.0317	64.0374	66.2363	52.6835
	46.3	65.8261	57.8209	69.4363	52.2074	67.0144	53.3085	62.7302	55.0589	51.1017	62.2398	49.6754	65.059	48.9484	62.1039	53.714	50.4428	46.3	94.9642	89.8695	75.0006	101.082	87.9255	89.0636	59.4052	77.4579	74.61	66.5103	68.8454	58.549	69.7525	50.5516	50.0687	60.6506	46.3	84.5189	80.8682	78.6397	80.2491	64.2897	75.5147	66.3822	64.5076	60.5294	71.1625	63.9948	63.985	66.4972	52.9259
	46.4	65.9563	57.4976	69.6589	52.3174	66.8585	53.3486	62.5374	54.84	51.1873	61.9891	49.5274	64.7473	49.2936	61.7938	53.8939	50.4058	46.4	94.8607	89.6601	75.0946	100.995	87.7906	89.4212	59.4047	77.7985	74.7962	66.6902	69.0207	58.4766	69.6689	50.1054	49.9074	60.5303	46.4	84.2429	80.9226	78.9365	80.034	64.1126	75.2702	66.4869	64.2319	60.491	70.8669	63.9615	64.0196	66.83	53.2509
	46.5	66.193	57.3193	69.7338	52.4774	66.825	53.4287	62.5698	54.738	51.287	61.6434	49.4369	64.4471	49.6924	61.6268	54.0373	50.4598	46.5	94.835	89.5125	75.0784	100.972	87.6853	89.5824	59.2782	78.0886	74.8087	66.7016	69.1319	58.4218	69.7488	49.6305	49.7271	60.4461	46.5	83.7804	81.1387	79.2598	80.0306	64.1696	75.0852	66.7169	63.9347	60.3134	70.6116	63.9826	63.9159	67.0212	53.6022
	46.6	66.3892	57.367	69.7164	52.5229	66.8181	53.5148	62.8484	54.7703	51.2902	61.3327	49.3844	64.3252	50.0392	61.7538	54.0644	50.7176	46.6	94.569	89.1493	74.9373	100.997	87.6314	89.6018	59.2177	78.1871	74.9695	66.6211	69.0738	58.4112	69.7929	49.5101	49.583	60.2976	46.6	83.3717	81.3114	79.3815	80.094	64.2852	74.8808	66.9736	63.3988	60.1818	70.5874	63.8375	63.8421	67.1166	53.7896
	46.7	66.4675	57.5202	69.5449	52.4048	66.7053	53.5175	63.1704	54.925	51.1594	61.2018	49.3289	64.309	50.1961	61.7619	54.0357	50.8572	46.7	94.4033	88.7918	74.6821	100.931	87.7366	89.4633	59.196	78.1506	74.8371	66.5024	68.7573	58.4128	69.6938	49.5409	49.5696	60.0954	46.7	83.1978	81.4546	79.534	80.1565	64.631	74.8619	67.172	63.0624	60.0475	70.6213	63.7626	63.7831	67.0892	53.7884
	46.8	66.548	57.5921	69.3896	52.2444	66.759	53.6524	63.4995	55.3464	51.0544	61.1633	49.3607	64.4424	50.3038	61.8775	53.8593	50.9452	46.8	94.2848	88.6638	74.3265	100.831	87.7361	89.4373	59.2633	78.1058	74.6654	66.3668	68.3951	58.4109	69.648	49.4656	49.5768	59.9264	46.8	83.2966	81.6905	79.5775	80.432	64.9972	74.928	67.3082	63.0245	59.9999	70.478	63.8121	63.6331	66.9576	53.6616
	46.9	66.6079	57.7466	69.1029	52.1868	66.8558	53.7484	63.808	55.7014	50.9568	61.1205	49.4572	64.6229	50.2328	62.0484	53.5839	51.1064	46.9	94.1378	88.7827	74.1059	100.666	87.7202	89.4702	59.2431	77.9115	74.4137	66.2006	68.0086	58.3147	69.696	49.5449	49.4585	59.9209	46.9	83.5506	81.829	79.5236	80.8282	65.2331	74.8546	67.424	63.0111	59.9441	70.5832	63.8664	63.3491	66.765	53.47
	47	66.6715	57.8444	68.7999	52.1369	66.9081	53.9125	63.9498	56.0362	50.7643	61.0859	49.5853	64.9212	50.0649	62.1449	53.2944	51.1422	47	93.9702	88.8131	73.933	100.308	87.7538	89.513	59.2391	77.6363	74.2227	66.1598	67.411	58.096	69.5838	49.6344	49.3426	60.0009	47	83.9138	81.88	79.2602	81.032	65.3864	74.8955	67.4014	62.9398	60.0644	70.6492	63.8239	63.2009	66.7679	53.3032
	47.1	66.7055	57.8464	68.6922	52.1177	66.8915	53.9975	63.8374	56.3712	50.6742	61.0968	49.7955	65.0758	49.8804	61.9083	53.0661	50.9461	47.1	94.0911	88.8274	73.8773	99.9922	87.8288	89.6234	59.1737	77.5565	74.0095	66.2069	66.9398	57.8698	69.4201	49.5578	49.2641	60.1906	47.1	84.2936	81.8582	79.2164	81.1647	65.5376	75.0183	67.1925	62.9932	60.3237	70.5776	63.6886	63.109	66.8285	53.2464
	47.2	66.813	57.7326	68.8106	52.1533	66.7723	53.9805	63.6444	56.549	50.7619	61.162	49.9918	65.3148	49.9145	61.7103	52.7308	50.8269	47.2	94.0172	88.7903	74.0814	99.7031	87.8699	89.7089	58.964	77.589	74.0156	66.3395	66.7156	57.706	69.3378	49.4004	49.333	60.4259	47.2	84.5012	81.7868	79.2373	81.2176	65.6108	75.1084	66.8719	62.9632	60.6168	70.4418	63.4589	63.169	66.799	53.3204
	47.3	66.9186	57.695	68.8516	52.1862	66.659	53.8521	63.528	56.3788	50.796	61.3254	50.0738	65.5367	49.9189	61.4248	52.4895	50.7423	47.3	94.0209	88.67	74.3441	99.5255	88.0185	89.5575	58.757	77.5686	74.0192	66.5136	66.5799	57.6095	69.2788	49.3724	49.4106	60.504	47.3	84.4616	81.5789	79.1956	81.0448	65.6732	75.1898	66.5533	62.7739	60.7949	70.4208	63.25	63.2611	66.6122	53.4106
	47.4	66.982	57.708	69.0574	52.1127	66.5254	53.7434	63.4643	56.1104	50.7863	61.6214	50.1605	65.6584	49.8895	61.1234	52.4082	50.6602	47.4	94.1511	88.3491	74.5453	99.4638	88.021	89.0251	58.6566	77.6684	74.0554	66.6572	66.6662	57.7273	69.1974	49.3871	49.5584	60.4912	47.4	84.2576	81.3582	79.1006	80.8361	65.6758	75.3889	66.3109	62.6363	60.986	70.1996	62.9846	63.4256	66.4498	53.4785
	47.5	67.0179	57.838	69.251	51.969	66.4822	53.6055	63.4478	55.7942	50.8852	61.935	50.1032	65.6113	49.851	60.9688	52.5412	50.622	47.5	94.2862	88.1005	74.651	99.5159	87.8916	88.5534	58.5535	77.9472	74.085	66.6846	67.0765	57.9344	69.2432	49.6028	49.7102	60.3728	47.5	84.0515	81.1128	79.1294	80.6102	65.5836	75.4136	66.1665	62.6561	61.1013	69.9568	62.796	63.5185	66.2196	53.4396
	47.6	67.0552	58.1487	69.255	51.9728	66.5534	53.4418	63.5512	55.433	50.9111	62.1537	49.9213	65.6875	49.9156	61.0558	52.7385	50.6202	47.6	94.2841	88.0491	74.6339	99.517	87.5595	88.118	58.5015	78.0758	74.0546	66.6538	67.4161	58.1648	69.2979	49.8788	49.8078	60.0744	47.6	83.8075	80.9145	79.0308	80.1323	65.4931	75.3894	66.3078	62.781	61.0297	69.8236	62.7384	63.4794	65.9572	53.3563
	47.7	66.9306	58.506	69.1593	51.9975	66.8038	53.3851	63.8033	55.108	50.8632	62.1592	49.7416	65.633	49.9138	61.1785	53.0656	50.6686	47.7	94.4241	88.026	74.3592	99.5422	87.075	87.9441	58.5828	78.2224	73.8778	66.5391	67.8599	58.432	69.4571	50.2267	49.6699	59.6874	47.7	83.6618	80.6096	78.8625	79.6136	65.3124	75.3507	66.8108	62.9876	60.9537	69.708	62.8608	63.2956	65.998	53.3117
	47.8	66.709	58.7407	69.1092	51.9419	67.0488	53.3068	63.9262	55.0498	50.9163	62.0284	49.5398	65.3777	49.9386	61.3742	53.4693	50.7281	47.8	94.4947	88.0823	74.082	99.5898	86.6253	87.8445	58.5904	78.3605	73.7058	66.4153	68.2866	58.7581	69.7562	50.6063	49.5288	59.4741	47.8	83.7652	80.307	78.7225	79.2677	65.0688	75.1829	67.4674	63.2307	60.8413	69.5866	62.9199	63.2391	66.2631	53.353
	47.9	66.3584	58.865	68.977	51.8967	67.3778	53.2576	64.0565	55.1437	51.0542	61.8048	49.3974	65.2684	49.9682	61.6356	53.7565	50.6975	47.9	94.3093	88.3144	73.8073	99.6398	86.249	88.155	58.571	78.3665	73.5122	66.3543	68.4967	58.9095	70.16	50.8121	49.4187	59.2715	47.9	83.8909	80.1659	78.6724	78.8685	64.9111	74.982	68.1105	63.483	60.664	69.4833	62.9918	63.2231	66.4817	53.5117
	48	65.9249	58.7788	68.9158	51.9998	67.5862	53.2641	64.1418	55.2666	51.1371	61.5778	49.3518	65.2909	49.942	61.7764	54.0005	50.7301	48	94.0087	88.5452	73.635	99.6354	85.9891	88.3159	58.744	78.1571	73.1614	66.364	68.5433	58.9456	70.4824	50.721	49.3222	59.1228	48	83.8652	80.2171	78.785	78.5965	64.8522	74.8697	68.5924	63.6994	60.4527	69.4635	63.052	63.3706	66.6304	53.7157
	48.1	65.5658	58.608	68.9882	51.9654	67.6768	53.3718	64.2986	55.4401	51.2062	61.43	49.3596	65.2327	49.8857	61.9073	54.2325	50.8343	48.1	93.7792	88.711	73.4305	99.8008	86.058	88.5133	58.8806	78.0086	72.7545	66.3889	68.4981	58.9509	70.851	50.5611	49.2635	59.1714	48.1	83.8797	80.2268	78.8902	78.6638	64.7222	74.8002	68.7948	63.9253	60.4181	69.3593	63.088	63.6232	66.7976	53.916
	48.2	65.3561	58.4108	69.0526	51.881	67.775	53.4608	64.2912	55.6793	51.3379	61.5227	49.4581	65.1648	49.6701	62.018	54.4795	50.8032	48.2	93.6139	88.868	73.3848	100.015	86.3416	88.5507	58.9074	77.6844	72.3412	66.4022	68.155	58.7426	71.0258	50.328	49.2939	59.4494	48.2	83.8446	80.3722	78.8988	78.8494	64.6371	74.8072	68.5298	64.0051	60.2926	69.3882	63.1592	63.8872	66.9013	54.0278
	48.3	65.2079	58.3517	69.0745	51.8388	67.7094	53.5889	64.3474	55.6982	51.423	61.6832	49.721	65.3887	49.429	62.1558	54.6196	50.6642	48.3	93.5376	88.9918	73.293	100.125	86.6025	88.6524	58.9254	77.4161	71.966	66.4868	67.7961	58.4127	70.9537	49.9619	49.4068	59.6656	48.3	83.5867	80.6296	78.8047	78.9924	64.5612	74.9277	68.0731	64.0181	60.2424	69.3865	63.3097	64.0954	66.8243	53.9469
	48.4	65.2722	58.3726	69.1558	51.7924	67.5595	53.6895	64.3832	55.5978	51.3796	61.8635	49.824	65.4014	49.357	62.2751	54.7801	50.5585	48.4	93.7731	89.1027	73.2164	100.213	86.8109	88.6059	58.7846	77.2341	71.7648	66.4366	67.5489	58.2275	70.6286	49.7048	49.4782	59.9374	48.4	83.3751	80.8214	78.648	79.2316	64.569	74.9124	67.5211	63.9458	60.2263	69.5222	63.5428	64.2331	66.786	53.7518
	48.5	65.45	58.4554	69.0851	51.6058	67.5138	53.7001	64.4972	55.5121	51.2752	62.0357	49.8446	65.3152	49.4152	62.4218	54.8194	50.351	48.5	94.137	89.2344	73.0682	100.434	86.8326	88.8101	58.3534	77.1953	71.8108	66.3556	67.2087	58.1045	70.4014	49.6018	49.5954	60.2658	48.5	83.3999	80.7257	78.3709	79.4021	64.6198	74.8304	67.0528	63.815	60.2743	69.6156	63.721	64.13	66.8502	53.5786
	48.6	65.53	58.4319	68.9714	51.455	67.4594	53.6325	64.471	55.3807	51.2846	62.087	49.7725	65.3145	49.3618	62.3754	54.726	50.055	48.6	94.4168	89.2673	73.1755	100.424	86.5332	88.8439	58.0028	77.0653	72.0828	66.2922	67.054	57.949	70.1001	49.5266	49.719	60.4637	48.6	83.392	80.6552	78.1331	79.4667	64.6356	74.7176	66.6452	63.613	60.2453	69.8173	63.7543	63.9701	66.9747	53.4237
	48.7	65.54	58.4286	68.8452	51.344	67.2906	53.4494	64.4781	55.2516	51.1904	61.9451	49.5583	65.3506	49.5527	62.2955	54.5626	49.913	48.7	94.4972	89.2692	73.2546	100.289	86.1763	88.7307	57.8402	77.0898	72.4909	66.3268	67.0629	57.8858	69.8798	49.4137	49.903	60.401	48.7	83.364	80.6348	78.0189	79.4408	64.5905	74.5188	66.3944	63.5008	60.2948	69.8429	63.4868	63.7837	67.0187	53.2553
	48.8	65.6091	58.3528	68.7664	51.2576	67.3018	53.2545	64.3542	55.3409	51.1391	61.7143	49.2403	65.214	49.9003	62.1001	54.3724	50.0357	48.8	94.3642	89.1675	73.403	100.191	85.8024	88.6393	57.6772	77.015	72.9432	66.3217	67.21	57.824	69.7991	49.3642	50.0459	60.5289	48.8	83.267	80.6102	78.1348	79.6252	64.6176	74.3192	66.1626	63.421	60.3514	69.9278	63.1188	63.5142	67.2251	53.1737
	48.9	65.5508	58.2142	68.7661	51.1869	67.2811	53.0648	64.304	55.5303	51.19	61.4662	49.1291	65.2608	50.1818	61.8166	54.1743	50.2458	48.9	93.9848	88.8248	73.5598	100.09	85.5386	88.4666	57.6699	76.8968	73.2587	66.3935	67.3461	57.5886	69.955	49.3046	50.1386	60.693	48.9	83.1646	80.4571	78.3159	79.8178	64.4126	74.2888	66.0542	63.4267	60.2914	69.8181	62.7512	63.3911	67.371	53.0458
	49	65.5544	58.095	68.953	51.1591	67.1847	52.9119	64.2769	55.6885	51.3872	61.2434	49.1838	65.3358	50.422	61.4424	53.9775	50.564	49	93.6252	88.3283	73.777	99.8837	85.4701	88.0232	57.8942	76.62	73.4483	66.5704	67.5925	57.4382	70.0428	49.2774	50.1112	60.7436	49	82.8946	80.4088	78.4158	80.1203	64.0088	74.2609	65.9438	63.5221	60.0588	69.6453	62.4158	63.3658	67.3797	52.8941
	49.1	65.6376	58.0086	68.9968	51.2326	67.192	52.8592	64.2696	55.8659	51.4468	61.1371	49.3567	65.3552	50.6935	61.2195	53.9216	50.9516	49.1	93.3352	87.9101	73.7829	99.8701	85.7159	87.8087	57.9897	76.3701	73.5144	66.8638	67.7846	57.265	70.2745	49.2379	50.1251	60.7954	49.1	82.6372	80.323	78.5198	80.423	63.666	74.2873	65.937	63.4926	59.7104	69.2838	62.1926	63.2911	67.2531	52.7058
	49.2	65.7119	58.046	68.9568	51.3708	67.2094	53.0769	64.2724	55.9192	51.5552	61.1077	49.6688	65.3892	50.6879	61.0712	54.0121	51.1929	49.2	93.1712	87.4946	73.7416	99.8662	85.9189	87.6952	57.8928	76.0194	73.5368	67.0126	67.989	57.252	70.5445	49.3505	50.0433	60.9772	49.2	82.395	80.1692	78.7467	80.7236	63.5339	74.3218	66.2247	63.4071	59.3983	69.1005	62.2486	63.297	66.9551	52.6175
	49.3	65.7785	58.0223	68.9217	51.6496	67.1514	53.3467	64.3862	55.7933	51.6082	61.1575	50.0038	65.5269	50.5623	61.1539	54.22	51.177	49.3	93.1884	87.184	73.6309	99.7274	86.1413	87.5929	57.7629	75.7855	73.4365	66.9989	67.9136	57.3582	70.6189	49.5154	49.8565	60.9336	49.3	82.3969	79.8972	78.8298	80.7148	63.3506	74.3832	66.6008	63.4899	59.1531	68.9492	62.4871	63.3285	66.5176	52.6703
	49.4	65.8903	58.0347	68.7362	51.8494	67.0527	53.6096	64.2635	55.5221	51.5393	61.1428	50.1835	65.6268	50.3497	61.3343	54.4889	51.0699	49.4	93.2846	87.1636	73.4787	99.5546	86.4084	87.6431	57.6182	75.7198	73.3748	67.0405	67.8267	57.5642	70.543	49.7276	49.7114	60.7603	49.4	82.434	79.6003	78.8179	80.6112	63.3001	74.4805	66.8148	63.5859	59.0965	68.8752	62.7548	63.2032	66.0835	52.9177
	49.5	65.845	58.0388	68.4843	52.1061	66.9719	53.8484	64.0384	55.2857	51.2945	61.2758	50.1952	65.7209	50.0862	61.6474	54.78	50.8454	49.5	93.4137	87.3186	73.2541	99.3655	86.7313	87.9572	57.312	75.8796	73.4033	67.0154	67.8012	57.6401	70.5156	49.8477	49.7984	60.6276	49.5	82.4829	79.3086	78.8304	80.3866	63.5287	74.673	67.0596	63.5832	59.2722	68.8615	63.0271	63.2302	65.7246	53.2486
	49.6	65.782	58.0684	68.4644	52.2808	66.8995	54.0085	63.7936	54.9875	51.0603	61.5246	50.2646	65.8626	49.8485	62.0876	54.9424	50.6397	49.6	93.588	87.4048	73.1044	99.0945	86.9378	88.1076	57.1173	76.2164	73.3126	66.739	67.6755	57.8376	70.3072	49.9983	49.7633	60.4383	49.6	82.4951	79.1046	78.8232	80.1858	63.8586	74.7288	67.2414	63.7134	59.6523	69.122	63.3499	63.4388	65.4442	53.7383
	49.7	65.9145	57.8814	68.7249	52.3492	66.8524	53.9248	63.6784	54.8226	50.752	61.8552	50.2441	66.0042	49.8735	62.5379	54.8914	50.4935	49.7	93.8604	87.6681	72.9875	98.8224	87.1583	88.3786	57.0193	76.6593	73.1559	66.5974	67.541	57.968	70.0617	50.1617	49.7771	60.1982	49.7	82.5713	79.0544	78.5587	79.9916	64.0903	74.848	67.139	63.8276	59.99	69.2851	63.5978	63.6218	65.3633	54.0712
	49.8	66.11	57.7154	68.9076	52.2084	66.7894	53.6877	63.5794	54.7791	50.4135	62.1385	50.3172	66.0142	49.8221	62.6372	54.6809	50.38	49.8	94.1798	87.9108	72.966	98.6587	87.3721	88.5415	56.9863	77.0006	73.1239	66.709	67.5468	58.0263	69.9861	50.1727	49.915	60.0258	49.8	82.5982	79.2002	78.3625	79.9009	64.4301	74.9182	66.8727	63.7957	60.1436	69.4136	63.7966	63.8056	65.4133	54.2959
	49.9	66.3802	57.4549	69.1156	52.2123	66.792	53.4998	63.6692	54.8631	50.1365	62.5795	50.3547	65.9528	49.8912	62.6809	54.3641	50.2625	49.9	94.471	88.0635	73.0593	98.565	87.539	88.6077	56.8593	77.1878	73.1159	66.7547	67.5029	58.0385	69.9438	50.0688	50.0963	59.837	49.9	82.5451	79.594	78.3051	79.843	64.85	74.7058	66.8269	63.6587	60.2742	69.6949	63.9222	64.0542	65.5086	54.2778
	50	66.781	57.2144	69.3817	52.1446	66.7933	53.3277	63.817	54.8864	50.0273	62.7882	50.5047	65.9422	50.0731	62.6802	54.1063	50.2661	50	94.6158	88.035	73.2164	98.4743	87.5014	88.5785	56.7836	77.2921	73.094	66.7812	67.4938	58.1065	69.827	50.0073	50.0391	59.6118	50	82.5698	80.0297	78.3268	79.8082	65.0266	74.4698	66.7196	63.6783	60.3644	70.0839	64.0825	64.0382	65.7476	54.1504
	50.1	67.2373	56.8974	69.4011	52.1295	66.6381	53.1024	64.0696	55.0694	50.0216	62.7138	50.5747	65.755	50.3209	62.4798	53.9861	50.1596	50.1	94.6802	88.0258	73.4035	98.3364	87.454	88.5799	56.6386	77.1879	73.0827	66.9132	67.6563	58.1532	69.8381	49.8918	49.9916	59.5745	50.1	82.668	80.5148	78.4237	79.6337	65.0976	74.378	66.6043	63.6863	60.398	70.3194	64.23	63.8681	65.9721	53.7426
	50.2	67.5094	56.6578	69.1129	52.2339	66.4672	53.0309	64.1452	55.2234	50.0505	62.4618	50.6152	65.4266	50.4386	62.2962	53.9397	50.0773	50.2	94.4136	87.8264	73.588	98.3086	87.3398	88.4572	56.5377	77.001	73.0626	66.9314	67.8765	58.0903	69.9457	49.651	49.8929	59.6139	50.2	82.8383	80.7056	78.6302	79.5045	65.0123	74.179	66.4328	63.7778	60.4651	70.5938	64.2348	63.6671	66.1374	53.5098
	50.3	67.5624	56.5538	68.8809	52.407	66.3411	53.18	64.1873	55.2514	50.0899	62.1871	50.4517	65.2104	50.6673	62.4197	53.9917	50.0322	50.3	93.9521	87.5142	73.648	98.338	87.1447	88.3629	56.4302	76.8142	73.0083	66.7723	68.1531	57.9365	70.1322	49.5217	49.73	59.6405	50.3	82.9899	80.7354	78.72	79.4445	64.7697	73.8584	66.3814	63.7864	60.7016	70.755	64.0858	63.6568	66.1919	53.2204
	50.4	67.5155	56.6411	68.6383	52.531	66.2907	53.2039	64.2497	55.299	50.3666	61.7401	50.4014	65.0231	50.6759	62.5144	54.0811	50.0229	50.4	93.6028	87.0143	73.5712	98.3754	86.771	88.2868	56.4154	76.5472	72.9068	66.624	68.525	57.8115	70.4281	49.4666	49.5552	59.8527	50.4	83.224	80.5941	78.615	79.3651	64.4022	73.7532	66.0996	63.8508	60.7968	70.7956	63.9237	63.8241	66.2606	53.2194
	50.5	67.3466	56.7204	68.4266	52.6788	66.2224	53.2149	64.3204	55.3437	50.5851	61.3941	50.2083	64.6932	50.6012	62.5108	54.0769	49.9674	50.5	93.2336	86.7112	73.4704	98.4681	86.479	88.2262	56.5131	76.2566	72.7008	66.4495	68.6576	57.7672	70.7292	49.4347	49.5116	60.1444	50.5	83.4278	80.3666	78.4106	79.1744	64.0419	73.6762	65.8905	63.6844	60.7214	70.6816	63.7768	64.2083	66.121	53.2996
	50.6	67.0164	56.915	68.5124	52.8179	66.3818	53.3362	64.2895	55.3149	50.727	61.2479	50.0124	64.5178	50.4071	62.477	53.9293	50.0759	50.6	92.7464	86.5079	73.4013	98.6584	86.1377	88.2077	56.769	76.1117	72.6397	66.3035	68.5276	57.6281	71.0395	49.5164	49.5424	60.3283	50.6	83.6335	79.9442	78.141	79.1216	63.7135	73.5953	65.7405	63.5275	60.5786	70.5005	63.5356	64.6433	65.9428	53.5928
	50.7	66.5844	57.1936	68.8207	52.8348	66.6975	53.3319	64.3764	55.2789	50.9394	61.275	49.9516	64.5741	50.1694	62.2864	53.82	50.1055	50.7	92.5069	86.3693	73.3848	98.7814	85.8469	88.2849	56.9633	76.0929	72.749	66.1704	68.2418	57.5471	71.2347	49.7198	49.6503	60.453	50.7	83.6795	79.8054	77.9437	79.0638	63.4801	73.5906	65.7688	63.419	60.3912	70.1479	63.5507	65.1022	65.8917	53.7878
	50.8	66.2079	57.3276	69.1622	52.8066	66.9785	53.1328	64.5281	55.3402	51.1756	61.2506	49.8816	64.5283	49.879	61.9335	53.7174	50.1524	50.8	92.4302	86.4384	73.3792	98.8358	85.7002	88.4944	57.2355	76.1785	72.8687	66.1121	67.9129	57.637	71.3002	49.972	49.7757	60.6004	50.8	83.6695	79.6755	77.9166	78.9068	63.2579	73.7185	65.862	63.4587	60.1472	69.8556	63.6406	65.2479	65.9597	54.0232
	50.9	65.7845	57.378	69.5305	52.7784	67.2291	53.0673	64.6011	55.3098	51.0879	61.3395	49.6532	64.5198	49.7895	61.6314	53.6548	50.2475	50.9	92.2912	86.7796	73.3628	98.7848	85.7574	88.7391	57.594	76.4843	72.9308	66.0339	67.5763	57.8067	71.1857	50.1331	49.7628	60.6135	50.9	83.6526	79.5502	78.1084	78.829	63.1602	73.7842	66.125	63.5252	60.1058	69.5663	63.7904	65.0092	65.9668	53.9919
	51	65.3282	57.4328	69.6792	52.7053	67.5199	53.0066	64.5234	55.3223	50.9184	61.3234	49.607	64.7378	49.6703	61.5249	53.5433	50.3692	51	92.2626	87.1162	73.3778	98.7649	85.8584	88.802	57.8358	76.8788	73.0296	65.9542	67.4837	57.8476	71.0934	50.2637	49.6789	60.5546	51	83.642	79.6195	78.4632	79.0442	63.2758	73.7844	66.4318	63.7079	60.262	69.2506	63.8559	64.7165	66.1137	53.8341
	51.1	65.0865	57.4633	69.5422	52.4364	67.6263	52.929	64.3849	55.2237	50.8908	61.1643	49.4714	64.9117	49.5559	61.5183	53.4252	50.4216	51.1	92.397	87.2767	73.3463	98.6457	85.9982	88.8512	57.9712	77.2735	73.045	65.8308	67.6292	57.8939	70.8078	50.2207	49.5462	60.5392	51.1	83.5344	79.8362	78.7718	79.3253	63.3464	73.7604	66.7119	63.9411	60.505	68.9812	63.9329	64.4023	66.3669	53.583
	51.2	65.022	57.3625	69.3351	52.1957	67.5498	52.8934	64.0956	55.1191	50.9105	60.876	49.1793	64.9884	49.4804	61.5958	53.2845	50.6052	51.2	92.5633	87.4906	73.2192	98.5439	86.1888	88.8096	58.0094	77.4589	72.9415	65.7942	67.905	57.9076	70.531	50.0236	49.3114	60.6135	51.2	83.5405	79.8333	78.9219	79.5566	63.4996	73.6986	66.9066	64.0266	60.7742	68.8582	63.8631	64.0782	66.4508	53.2991
	51.3	65.1895	57.2264	69.0408	52.04	67.5422	52.9922	63.7225	55.0659	50.9963	60.7194	49.0193	65.1176	49.4606	61.703	53.1529	50.8374	51.3	92.6754	87.5545	73.2193	98.377	86.2522	88.6105	57.8998	77.6319	72.7994	65.7764	68.1198	57.7618	70.3088	49.7201	49.1256	60.627	51.3	83.6107	79.8491	78.8242	79.7862	63.8294	73.5955	66.9821	64.0758	61.0661	68.8833	63.7916	63.9179	66.3838	52.9274
	51.4	65.5092	56.974	68.7581	51.8004	67.5712	53.0599	63.3195	55.1297	51.2734	60.5561	49.104	65.1647	49.2809	61.885	52.9423	51.0155	51.4	92.6824	87.458	73.3016	98.1648	86.1522	88.2809	57.6409	77.7298	72.847	65.9799	68.1296	57.4982	70.2742	49.5677	49.0962	60.6272	51.4	83.5846	79.9388	78.6883	79.9263	64.035	73.5874	66.9571	64.1184	61.1304	68.9385	63.6312	63.9795	66.411	52.5648
	51.5	65.9421	56.695	68.6238	51.6292	67.6716	53.1242	63.0805	55.1445	51.6422	60.51	49.1009	65.0536	49.1194	62.035	52.8064	51.1068	51.5	92.7835	87.247	73.3335	97.8297	85.9544	88.0008	57.3611	77.6212	73.0214	66.2433	68.0132	57.2422	70.2076	49.4127	49.132	60.6688	51.5	83.5644	79.8523	78.4695	79.8392	64.1225	73.564	66.85	64.1736	61.1017	69.2305	63.4134	63.9772	66.3717	52.2403
	51.6	66.1927	56.45	68.6576	51.6903	67.7521	53.139	63.0418	55.2503	51.8633	60.548	49.2244	65.0588	49.0914	62.1503	52.8111	51.1902	51.6	92.7956	87.1626	73.2768	97.4887	85.6087	87.583	57.1239	77.3615	73.2869	66.5412	67.8868	57.1766	70.2821	49.5141	49.2614	60.6317	51.6	83.6533	79.7644	78.2371	79.5286	64.2761	73.5149	66.6477	64.1253	60.9404	69.5285	63.2948	63.9864	66.255	51.9397
	51.7	66.4713	56.2754	68.6404	51.6833	67.8228	53.2312	63.1591	55.3318	51.9735	60.7542	49.4782	65.0251	49.1261	62.2394	52.8533	51.2479	51.7	92.627	86.941	73.1468	97.1776	85.2629	87.0708	57.1314	77.2846	73.5487	66.881	67.6137	57.173	70.3502	49.744	49.4746	60.4082	51.7	83.7047	79.7707	78.0884	79.2598	64.4312	73.4202	66.4568	64.0984	60.7648	69.8574	63.113	64.06	66.1861	51.715
	51.8	66.5421	56.2344	68.585	51.6344	67.875	53.3408	63.2501	55.3849	51.927	61.0791	49.7936	64.9892	49.0738	62.2708	52.8752	51.307	51.8	92.3575	86.9082	72.7956	97.0601	85.1532	86.5364	57.2858	77.0897	73.736	67.1325	67.4378	57.2323	70.3206	50.0398	49.5449	60.2613	51.8	83.6269	79.786	78.1007	79.0303	64.5303	73.4512	66.3157	64.0476	60.5418	70.0347	62.834	64.1148	66.1882	51.6587
	51.9	66.4785	56.317	68.3644	51.6327	67.7248	53.396	63.3627	55.3732	51.7334	61.3984	49.9187	65.0672	49.2426	62.1428	53.024	51.4228	51.9	92.179	87.0597	72.4538	97.2471	85.1396	86.0018	57.517	76.8117	73.6942	67.0164	67.4883	57.3092	70.2215	50.1934	49.6203	60.1779	51.9	83.4773	79.7957	78.0139	78.8944	64.6452	73.3612	66.2248	64.0561	60.43	70.1251	62.6766	64.1316	66.1305	51.7154
	52	66.358	56.5536	68.0468	51.5885	67.3897	53.4066	63.4602	55.4709	51.409	61.752	49.9668	65.1661	49.4153	61.8939	53.2824	51.559	52	91.6834	87.1589	72.2013	97.5937	85.1723	85.7007	57.8028	76.695	73.4712	66.9424	67.5974	57.4058	70.2856	50.3066	49.6605	60.0579	52	83.2784	79.871	77.8673	78.8928	64.6277	73.3392	66.0306	63.9461	60.357	69.9698	62.7199	64.1106	66.0409	51.9228
	52.1	66.2465	56.6907	67.673	51.487	67.1178	53.4719	63.3987	55.5898	50.9482	62.1142	49.9228	65.0834	49.5078	61.6576	53.5892	51.6832	52.1	91.1681	87.1754	72.0518	98.0373	85.3718	85.5502	57.923	76.6824	73.2522	66.877	67.6536	57.3052	70.4592	50.2225	49.7224	59.9466	52.1	83.01	79.8846	77.8414	79.0244	64.5227	73.2614	65.9036	63.8317	60.392	69.909	62.7358	63.9954	66.0058	52.1768
	52.2	65.9393	56.8285	67.2591	51.5756	66.8804	53.4032	63.2619	55.6965	50.4738	62.2437	49.7614	65.0306	49.6266	61.5739	53.9222	51.6058	52.2	90.8297	87.2252	72.1075	98.377	85.5681	85.5617	57.7942	76.5871	73.1125	66.6228	67.8454	57.2613	70.6703	50.1529	49.8208	60.0032	52.2	82.666	79.8577	77.9017	79.1488	64.317	73.3806	65.795	63.7897	60.4218	69.8755	62.8928	63.8132	66.0437	52.3792
	52.3	65.6911	56.9795	67.0222	51.7126	66.5842	53.1572	63.2711	55.6032	50.036	62.0708	49.5533	64.8566	49.7387	61.6991	54.2889	51.3982	52.3	90.6264	87.0415	72.4229	98.6534	85.5008	85.7986	57.5179	76.7242	73.197	66.3804	67.9634	57.3166	70.8905	50.0684	50.1223	60.0298	52.3	82.4458	79.7933	78.026	79.2967	64.0692	73.3665	65.7297	63.7334	60.471	69.8919	63.331	63.6272	65.982	52.517
	52.4	65.4758	57.1406	67.0722	51.906	66.4422	52.9826	63.3968	55.3989	49.6164	61.7654	49.3507	64.5739	49.6259	61.8936	54.5466	51.0646	52.4	90.5483	86.5602	72.7678	98.5818	85.4647	86.2286	57.1668	76.8395	73.483	66.2383	68.0174	57.3882	70.9707	50.1236	50.3772	60.0258	52.4	82.4278	79.6032	78.1692	79.3277	63.829	73.4126	65.6415	63.5695	60.5485	69.9893	63.6396	63.5125	65.9734	52.7092
	52.5	65.3178	56.9833	67.206	52.1168	66.4466	52.985	63.4191	55.1653	49.4146	61.333	49.263	64.1916	49.5536	62.1468	54.6852	50.8054	52.5	90.6738	86.1046	73.0256	98.3501	85.6082	86.443	56.8148	76.9124	73.9431	66.0448	67.939	57.554	70.8964	50.2487	50.5744	60.0072	52.5	82.4483	79.3439	78.3903	79.1361	63.8672	73.3857	65.7684	63.5582	60.6006	70.181	63.912	63.5567	66.0168	52.8846
	52.6	65.3039	56.9178	67.2776	52.2582	66.5413	52.9533	63.5061	54.9389	49.4765	60.9438	49.2105	63.8882	49.4814	62.3036	54.6856	50.6068	52.6	90.9364	85.8264	73.274	98.1966	85.7808	86.6355	56.5717	77.036	74.3312	65.8232	67.7562	57.811	70.6877	50.3239	50.6449	60.0638	52.6	82.3786	79.0995	78.61	78.8585	63.9985	73.4386	65.9779	63.5884	60.6264	70.2713	64.1579	63.8064	66.1341	53.1078
	52.7	65.4574	56.9393	67.4525	52.2683	66.7631	53.0842	63.6196	54.8374	49.5831	60.7605	49.182	63.642	49.383	62.2715	54.5272	50.6846	52.7	91.1582	85.721	73.4574	98.1642	85.8222	86.8043	56.5137	77.2039	74.5953	65.7853	67.5644	57.8893	70.4724	50.1844	50.7336	60.1266	52.7	82.2671	78.9799	78.7261	78.6224	64.1812	73.3983	66.1127	63.6796	60.6122	70.219	64.2793	64.1611	66.19	53.384
	52.8	65.6053	56.8916	67.4551	52.2473	67.0172	53.434	63.5721	54.9529	49.8778	60.8124	49.0285	63.5203	49.424	62.0961	54.2822	50.803	52.8	91.419	85.7798	73.5238	97.9785	86.0156	86.719	56.4945	77.0388	74.6528	65.8174	67.3766	57.841	70.3617	49.9732	50.7393	60.2424	52.8	82.0686	78.9802	78.6399	78.3781	64.232	73.4024	66.1102	63.7721	60.483	70.1891	64.1962	64.5161	66.4073	53.6852
	52.9	65.7325	56.8165	67.2682	52.1739	67.2824	53.597	63.4176	55.1885	50.3096	61.107	48.9767	63.5133	49.7022	61.9856	54.1227	51.0087	52.9	91.5131	86.0507	73.4232	97.9659	86.1029	86.4851	56.6005	76.9603	74.6181	65.9848	67.1913	57.8301	70.3875	49.6636	50.7686	60.4009	52.9	81.7857	79.0029	78.5885	78.2879	64.3016	73.5377	66.0846	63.8464	60.3162	70.1023	64.2274	64.754	66.5313	53.8379
	53	65.8026	57.1055	67.1932	52.142	67.3651	53.5605	63.4476	55.3221	50.6376	61.4514	48.9441	63.7569	50.0155	61.8653	54.05	51.1575	53	91.6854	86.5012	73.3948	98.0487	85.933	86.3031	56.7708	76.7723	74.3928	66.1904	67.1515	57.6752	70.297	49.4215	50.8806	60.6836	53	81.4902	78.9374	78.4741	78.4737	64.1347	73.7595	65.8161	63.8971	60.0966	70.0906	64.0907	64.8944	66.6146	53.8398
	53.1	65.7584	57.366	67.2917	52.1408	67.496	53.5578	63.4818	55.3108	50.8647	61.7942	49.0497	64.0792	50.31	61.9196	53.9836	51.2139	53.1	91.8443	86.831	73.3577	98.0052	85.7808	86.1971	57.0088	76.5154	74.0971	66.376	67.2498	57.4128	70.1548	49.3935	50.9522	60.9368	53.1	81.4572	78.8402	78.2377	78.7538	63.9132	74.0106	65.4991	63.9685	59.8212	70.1614	63.9324	64.9668	66.4342	53.7207
	53.2	65.6093	57.5828	67.3651	52.0972	67.5804	53.4054	63.4419	55.1521	51.0852	62.0206	49.2286	64.3337	50.4975	62.0211	54.0149	51.082	53.2	91.9914	86.9029	73.2465	97.8679	85.7662	86.1136	57.1651	76.3213	73.7286	66.4356	67.2245	57.2926	69.9471	49.4904	50.8343	61.0021	53.2	81.5966	78.6338	77.9519	78.9194	63.6547	74.09	65.2634	63.748	59.6709	70.339	63.8631	64.79	66.3588	53.657
	53.3	65.4448	57.9239	67.5539	51.9734	67.689	53.1612	63.5282	55.0424	51.1588	62.1007	49.538	64.6472	50.5547	62.1653	54.002	51.0037	53.3	92.0831	86.8584	73.1286	97.8866	85.6355	86.1672	57.4394	76.4648	73.3982	66.5314	67.3595	57.317	69.6699	49.7025	50.637	60.8918	53.3	81.9348	78.317	77.8708	79.0522	63.5086	74.0766	65.1617	63.5478	59.7168	70.4262	63.7383	64.6159	66.3023	53.4681
	53.4	65.3067	58.2777	67.932	51.9594	67.7679	53.1908	63.6356	54.9477	51.1266	61.965	49.8264	64.9507	50.4232	62.1918	53.9285	50.936	53.4	92.129	86.7671	73.1334	97.8362	85.7147	86.3178	57.6079	76.6604	73.0755	66.645	67.5541	57.2995	69.3154	49.9067	50.2768	60.8206	53.4	82.409	78.1733	77.7661	78.998	63.2718	73.825	65.1136	63.4765	59.8145	70.4578	63.5292	64.5006	66.2964	53.365
	53.5	65.1659	58.4713	68.2402	51.8222	68.082	53.3242	63.679	54.927	50.9828	61.8994	49.9974	65.0902	50.2896	62.1915	53.7671	50.8035	53.5	92.0856	86.6002	73.1262	97.7754	86.0092	86.469	57.5571	77.1338	72.8626	66.6049	67.7032	57.453	69.1504	49.9478	49.8511	60.658	53.5	82.9712	78.2922	77.6118	78.7605	63.194	73.5494	65.2454	63.2714	60.0154	70.3354	63.4015	64.365	66.3626	53.2791
	53.6	64.9679	58.647	68.4379	51.7734	68.2008	53.5209	63.7369	55.0229	50.8511	61.7615	50.0194	65.119	50.248	62.0079	53.6346	50.6077	53.6	92.0575	86.3662	72.9572	97.6846	86.209	86.4977	57.4078	77.5277	72.7136	66.5307	67.711	57.7948	69.05	49.8226	49.4655	60.5347	53.6	83.3986	78.4223	77.5782	78.5044	63.1014	73.195	65.355	63.005	60.2355	70.2167	63.2664	64.0544	66.6555	53.2766
	53.7	64.9614	58.7369	68.5901	51.9192	68.1094	53.8931	63.8456	55.2137	50.7041	61.7083	49.9707	65.2116	50.2674	61.9222	53.5554	50.5177	53.7	92.0248	86.2364	72.8586	97.744	86.2796	86.4972	57.2508	77.681	72.708	66.531	67.8394	58.1376	69.0446	49.7392	49.2374	60.6301	53.7	83.7954	78.5249	77.624	78.394	63.0066	73.0493	65.439	63.0722	60.262	70.0553	62.9846	63.9598	66.7672	53.1446
	53.8	65.0051	58.6241	68.7665	52.1938	67.8283	54.3146	63.7611	55.156	50.4672	61.7624	49.8549	65.2598	50.3621	61.7867	53.6157	50.4818	53.8	92.0083	86.2024	72.669	97.7626	86.3434	86.4519	56.973	77.6109	72.6986	66.4214	67.7576	58.2697	69.1208	49.516	49.0327	60.8877	53.8	83.98	78.6487	77.6604	78.3651	62.9432	73.1612	65.4158	63.097	60.2081	69.9936	62.8063	63.8183	66.7561	53.1167
	53.9	65.0826	58.4118	68.7877	52.3273	67.4555	54.6256	63.7185	55.092	50.2178	61.9917	49.7417	65.2162	50.566	61.6132	53.6078	50.4763	53.9	92.1699	86.1586	72.4388	97.8396	86.1795	86.4052	56.709	77.3852	72.6041	66.1851	67.628	58.421	69.2882	49.2224	49.021	60.9856	53.9	83.9888	78.7783	77.639	78.5107	63.1477	73.4161	65.3698	62.9413	60.1122	70.1238	62.6742	63.583	66.6514	53.0892
	54	65.2738	58.1339	68.7903	52.6052	67.0501	54.8684	63.5985	55.0704	50.1487	62.0924	49.6621	65.153	50.6624	61.3914	53.5479	50.593	54	92.3354	86.0892	72.0574	97.8435	85.7307	86.4618	56.7666	76.9834	72.4471	66.102	67.6318	58.5292	69.4682	48.9766	49.0772	61.1103	54	83.7918	78.8449	77.6825	78.5977	63.2088	73.672	65.3175	62.7924	59.9321	70.3551	62.5332	63.3944	66.4129	53.1153
	54.1	65.6367	57.9171	68.7711	52.8744	66.68	54.9666	63.4667	55.1095	50.1041	62.1608	49.7029	65.2141	50.5997	61.2418	53.4936	50.8575	54.1	92.4093	86.1795	71.8599	97.9317	85.2	86.5647	57.0206	76.7484	72.3347	66.1865	67.7884	58.5013	69.7206	48.8618	49.2261	61.0725	54.1	83.4848	79.0079	77.5332	78.7466	63.3386	73.9546	65.1696	62.694	59.939	70.4726	62.4605	63.2984	66.0755	53.0867
	54.2	65.7507	57.7577	68.7856	53.0546	66.5759	54.8554	63.5267	55.1334	50.0723	62.108	49.8675	65.1986	50.5804	60.9935	53.4303	51.1092	54.2	92.343	86.26	71.6762	97.8636	84.782	86.6284	57.4199	76.7542	72.2073	66.1989	67.9504	58.3641	69.8962	48.7312	49.3845	60.7958	54.2	83.0981	79.3054	77.4212	78.8492	63.4781	74.206	65.0586	62.5416	60.1488	70.4734	62.5587	63.1358	65.7667	53.2055
	54.3	65.7574	57.6502	68.6338	53.1915	66.8135	54.5687	63.7922	55.3966	50.2362	62.0092	50.0896	65.1197	50.5326	60.6054	53.3899	51.1939	54.3	92.1931	86.2844	71.7012	97.7836	84.4552	86.7052	57.928	76.8312	72.1199	66.3202	68.314	58.223	69.9553	48.8294	49.7129	60.4506	54.3	82.7901	79.6728	77.1342	78.865	63.6616	74.2398	65.1885	62.5354	60.3362	70.388	62.6758	63.0316	65.4307	53.3683
	54.4	65.6903	57.7576	68.4051	53.357	67.1823	54.2146	63.8409	55.5695	50.4727	61.851	50.265	65.025	50.5163	60.4021	53.5384	51.0877	54.4	91.9726	86.3337	71.7444	97.7158	84.2104	86.7033	58.4514	77.0827	72.1526	66.5596	68.5386	58.0239	70.0117	49.1489	50.0526	60.1017	54.4	82.418	79.8404	77.0232	78.8337	63.6071	74.2852	65.3815	62.8215	60.5534	70.1012	62.8368	63.1032	65.1685	53.4703
	54.5	65.5285	57.9432	68.0463	53.4312	67.3411	53.8747	63.8829	55.6637	50.6604	61.823	50.4122	65.0874	50.5574	60.4388	53.9095	50.8938	54.5	91.723	86.2489	71.8556	97.6933	84.1443	86.6382	58.8278	77.2202	72.2888	66.7144	68.4477	57.6598	69.9221	49.5582	50.2759	59.6573	54.5	82.1885	79.9069	77.0193	79.0212	63.5814	74.2495	65.5607	63.3364	60.8103	69.753	63.103	63.1134	64.9411	53.5597
	54.6	65.2794	57.9202	67.7402	53.346	67.5333	53.4588	63.8987	55.5948	50.8886	61.8701	50.3011	65.0476	50.7804	60.6346	54.2632	50.6464	54.6	91.3901	85.9862	71.9588	97.5161	84.2095	86.4854	58.9326	77.1993	72.404	66.6483	68.2388	57.303	69.6798	49.851	50.4682	59.3115	54.6	82.0154	79.923	77.1356	79.1228	63.5177	74.2334	65.8634	63.8536	60.8939	69.5	63.3358	63.1684	64.7155	53.477
	54.7	65.2005	57.8214	67.5184	52.9957	67.5866	53.0214	63.642	55.4933	51.1823	61.9728	50.017	64.9832	50.8949	60.8139	54.4877	50.3517	54.7	91.222	85.9296	71.9974	97.4258	84.3024	86.381	58.7688	77.0416	72.5644	66.6342	67.9001	57.0418	69.5116	50.2562	50.5386	59.1021	54.7	81.7882	79.8868	77.1492	79.1162	63.4618	74.0854	66.0651	64.3238	60.8154	69.4771	63.4815	63.1825	64.6056	53.1721
	54.8	65.1852	57.7414	67.497	52.5118	67.3271	52.7528	63.2524	55.2906	51.3474	61.9869	49.6169	64.9488	50.9054	61.2232	54.6719	50.2076	54.8	91.0799	86.0533	71.7922	97.303	84.3694	86.2344	58.4506	76.9058	72.745	66.5608	67.3498	57.0795	69.4556	50.5138	50.3388	58.9801	54.8	81.5031	79.7342	77.3122	79.1357	63.2688	73.9939	66.0052	64.7002	60.7107	69.4658	63.7228	63.35	64.513	52.7974
	54.9	65.1848	57.4032	67.6691	52.0526	66.9122	52.6566	63.1537	55.1812	51.4198	61.8778	49.287	65.1037	50.6794	61.5812	54.7018	50.2451	54.9	90.9408	86.2826	71.6225	97.0396	84.6245	86.0271	58.0499	76.6605	72.9055	66.3487	67.003	57.2526	69.4432	50.657	50.0202	59.0387	54.9	81.4297	79.5772	77.227	79.0616	63.1673	73.7998	65.912	64.8328	60.4093	69.6672	63.8565	63.5038	64.5202	52.5027
	55	65.1349	56.9938	67.976	51.6232	66.6089	52.6231	63.1364	55.1001	51.3826	61.6329	49.103	65.148	50.394	61.7454	54.4862	50.4203	55	90.7843	86.6837	71.4914	96.7047	84.9829	85.7489	57.4737	76.632	73.0318	66.1802	66.8987	57.6088	69.6478	50.7684	49.8195	59.1207	55	81.3859	79.4926	77.0436	78.8981	63.2146	73.6414	65.8868	64.8782	60.1115	69.8787	63.8512	63.6446	64.6833	52.217
	55.1	65.0827	56.9116	68.2066	51.2812	66.1206	52.812	63.0953	55.2275	51.2037	61.2852	49.1685	65.2033	49.9763	61.7472	54.205	50.6039	55.1	90.7322	87.2241	71.3246	96.5366	85.333	85.6832	57.0636	76.6519	73.1816	66.1948	66.9117	57.9177	70.0262	50.9454	49.6053	59.2949	55.1	81.3632	79.416	76.9719	78.7016	63.2175	73.4994	65.9022	64.844	59.8834	69.9926	63.7824	63.7341	64.9099	52.2248
	55.2	64.9457	56.9695	68.3117	51.3161	65.6074	53.254	63.163	55.4331	50.8496	60.8894	49.361	65.3388	49.7003	61.8434	53.9896	50.7624	55.2	90.5911	87.5375	71.1248	96.1986	85.6956	85.7169	56.7314	76.6632	73.2497	66.2281	66.9995	58.2119	70.4369	50.8921	49.5115	59.5782	55.2	81.4458	79.3263	77.054	78.6757	63.1979	73.4806	66.1659	64.5582	59.8588	69.9574	63.8135	63.8956	65.1354	52.371
	55.3	64.8	57.0804	68.3423	51.6364	65.2956	53.6081	63.3254	55.586	50.6122	60.5585	49.7274	65.6032	49.545	61.9618	53.6196	50.885	55.3	90.5375	87.5011	71.1248	96.0056	86.0906	85.8622	56.5193	76.5712	73.3209	66.2533	67.1437	58.339	70.6239	50.7472	49.629	59.8176	55.3	81.5912	79.326	77.1365	78.7549	63.2101	73.3864	66.6371	64.1098	60.0902	69.9262	63.5624	63.7575	65.4751	52.5223
	55.4	64.7566	57.3819	68.2973	51.9495	65.2744	53.766	63.4502	55.6838	50.5058	60.3887	49.8634	65.5643	49.5557	61.9911	53.2908	50.9893	55.4	90.4451	87.1498	71.1092	96	86.1741	86.1471	56.4717	76.4443	73.3686	66.3386	67.1994	58.3409	70.5973	50.5375	49.798	59.8803	55.4	81.5886	79.4382	77.4934	78.8595	63.1879	73.3099	67.0769	63.6552	60.6886	69.6246	63.3347	63.4414	65.6676	52.7115
	55.5	64.7629	57.7502	68.2059	52.2893	65.3406	53.9224	63.5003	55.7751	50.49	60.3395	49.8292	65.4942	49.6341	62.033	53.0986	50.9817	55.5	90.5073	86.7055	71.2115	96.1476	85.9602	86.4181	56.6209	76.0735	73.2853	66.4316	67.0895	58.278	70.318	50.2122	49.9006	60.0588	55.5	81.4634	79.379	77.8508	78.8741	62.9657	73.268	67.4248	63.1339	61.2631	69.3829	63.1512	63.2232	65.7409	52.9168
	55.6	64.7964	57.8645	68.197	52.6942	65.7186	54.0766	63.6414	55.7568	50.5232	60.4182	49.6477	65.4517	49.703	62.1519	53.0614	51.0503	55.6	90.7972	86.0754	71.3844	96.2451	85.8039	86.4096	56.6414	75.7084	73.1152	66.3385	66.9095	58.2801	70.0116	49.7433	49.9824	60.1428	55.6	81.3808	79.166	78.1347	79.0522	62.8401	73.2177	67.7099	62.7416	61.7767	69.3876	62.9621	63.1572	65.7732	52.9882
	55.7	64.914	57.7782	68.2241	52.8247	66.1942	54.0922	63.7809	55.6123	50.8188	60.5619	49.3708	65.3684	49.669	62.1127	53.0634	51.2332	55.7	91.2251	85.4196	71.753	96.6011	85.5507	86.129	56.8804	75.4428	72.9546	66.2167	66.8548	58.1651	69.6397	49.4613	50.0068	60.1554	55.7	81.2251	79.027	78.3163	79.1131	62.8125	73.2468	67.7388	62.73	62.1455	69.4489	62.7689	63.0784	65.739	53.0936
	55.8	65.108	57.6007	68.2199	52.7154	66.6494	54.1283	63.7872	55.5649	50.897	60.7433	49.0018	65.1355	49.6402	61.8745	53.1119	51.5108	55.8	91.4432	84.9817	72.1156	96.7821	85.2202	85.683	57.1618	75.305	72.7536	66.2214	66.8978	57.9932	69.5458	49.3083	50.0257	60.1121	55.8	81.1386	78.8122	78.4966	78.9854	62.8093	73.5022	67.5985	62.9034	62.1506	69.5551	62.7866	63.147	65.8007	53.2329
	55.9	65.2177	57.3837	68.1277	52.6172	66.9336	54.261	63.6875	55.5573	50.8323	60.826	48.9225	65.0977	49.6366	61.7774	53.208	51.7445	55.9	91.6562	84.7911	72.5004	96.7752	84.9861	85.2063	57.3719	75.207	72.6038	66.1958	66.8398	57.9072	69.6064	49.3396	50.0997	60.1292	55.9	81.2088	78.5055	78.527	78.8919	62.8572	73.8608	67.4678	63.0625	61.7678	69.9343	62.8076	63.3864	65.9694	53.2094
	56	65.3008	57.1789	68.1022	52.3404	67.175	54.289	63.6739	55.546	50.7928	60.8788	49.0214	65.1316	49.614	61.7595	53.2661	51.9422	56	91.7167	84.8301	72.7518	96.7004	85.019	84.8649	57.461	75.2257	72.739	66.0636	66.9871	57.7845	69.8329	49.4184	50.2343	60.0964	56	81.4232	78.4239	78.5094	78.8646	63.0307	74.2195	67.2284	63.2125	61.3818	70.2372	62.9604	63.5836	66.2018	53.1136
	56.1	65.257	57.0819	67.995	51.9319	67.3518	54.0836	63.5843	55.5527	50.7779	60.8957	49.2843	65.1219	49.6346	61.7404	53.2689	51.9832	56.1	91.2756	85.1091	72.8506	96.5887	84.9168	84.786	57.6303	75.2961	72.8266	66.1961	67.1596	57.6335	69.9604	49.6194	50.2946	60.0928	56.1	81.6198	78.4574	78.4406	78.7393	63.1555	74.5052	66.8931	63.2178	60.9763	70.2012	63.2928	63.6102	66.4809	52.998
	56.2	65.0872	57.1808	67.8599	51.69	67.4888	53.829	63.4248	55.6562	50.5459	60.9485	49.6403	65.0933	49.7369	61.8294	53.2458	51.8221	56.2	90.7623	85.4928	72.694	96.2502	84.8472	84.812	57.5321	75.3034	72.9262	66.2838	67.2099	57.6582	70.0524	49.7002	50.29	60.088	56.2	81.938	78.2132	78.4264	78.5561	63.2683	74.6254	66.6187	63.0827	60.4473	70.1198	63.5711	63.6133	66.7388	52.7456
	56.3	64.8021	57.3005	67.6458	51.4178	67.4965	53.6513	63.4494	55.6848	50.5283	61.0274	50.0042	65.1175	49.8038	62.0774	53.4891	51.3893	56.3	90.4626	85.8318	72.4664	96.0015	84.8698	85.0167	57.2782	75.3267	72.9062	66.1101	67.2006	57.7492	70.0744	49.7701	50.0402	60.0983	56.3	82.1118	78.0157	78.2796	78.4185	63.4754	74.4944	66.3405	63.0126	59.9901	70.0781	63.7373	63.591	66.7513	52.4844
	56.4	64.4353	57.294	67.4849	51.0192	67.5077	53.4267	63.4859	55.6222	50.6069	61.1568	50.2367	65.1202	49.822	62.1785	53.7121	50.9944	56.4	90.2057	86.1515	72.1164	95.9101	84.9989	85.2836	56.9536	75.494	72.6908	65.9515	67.4845	57.8191	70.0898	49.6261	49.6708	60.1525	56.4	82.1975	77.972	78.0603	78.3751	63.663	74.3207	66.0744	63.1902	59.8239	69.9564	63.993	63.468	66.691	52.3715
	56.5	64.1972	57.1592	67.2892	50.8437	67.438	53.1948	63.3966	55.501	50.6098	61.2471	50.4217	65.1063	49.868	62.0396	53.9955	50.6728	56.5	89.8588	86.1729	71.8408	95.7406	85.0818	85.4782	56.7428	75.8663	72.221	65.9555	67.646	57.8498	70.1189	49.5537	49.2254	60.1141	56.5	82.1889	77.9245	77.8451	78.4374	63.874	74.1518	65.9702	63.3285	59.6535	69.8595	64.0766	63.3631	66.5472	52.275
	56.6	64.2937	57.0294	67.3692	50.7408	67.3216	53.1022	63.3105	55.2583	50.5885	61.3909	50.4386	65.2064	49.979	61.7821	54.2126	50.501	56.6	89.9278	86.1005	71.7326	95.5416	85.1642	85.5799	56.4912	76.3349	72.0769	65.8352	67.7534	57.9058	70.1213	49.4455	48.9064	60.0051	56.6	82.1839	77.922	77.6722	78.483	64.0606	74.0264	66.0648	63.6265	59.5206	69.9512	63.9554	63.3333	66.23	52.1567
	56.7	64.5476	56.7068	67.5548	50.715	67.2632	53.0874	63.2859	54.8978	50.6694	61.4689	50.386	65.4184	50.0221	61.6479	54.4224	50.5604	56.7	89.9843	85.9548	71.8011	95.5435	85.2068	85.7377	56.3574	76.8864	71.8842	65.7736	67.9001	57.8622	70.1709	49.4186	48.7114	59.8987	56.7	82.1436	78.1615	77.3947	78.634	64.163	73.9342	66.1078	63.7562	59.6341	70.0213	63.727	63.2389	65.9225	52.1566
	56.8	64.9351	56.4802	68.0205	50.8708	67.2801	52.9315	63.179	54.6387	50.6686	61.5652	50.299	65.4909	50.166	61.4237	54.3466	50.8604	56.8	90.0255	85.7598	71.8868	95.6076	85.1204	85.819	56.3763	77.3026	71.917	65.8482	68.0127	57.7472	70.1873	49.3571	48.7634	59.917	56.8	82.2496	78.4985	77.3903	78.7806	64.1097	73.8533	66.2164	63.6652	59.9464	70.013	63.5769	63.1294	65.7242	52.0812
	56.9	65.5312	56.4668	68.6459	51.3053	67.1662	52.8197	63.02	54.5019	50.5646	61.6204	50.3366	65.5601	50.4198	61.3388	54.1814	51.1136	56.9	90.0181	85.4984	72.0878	95.5719	84.8871	85.7992	56.516	77.4492	72.1842	66.0199	67.8975	57.549	70.2002	49.4307	48.8861	59.9639	56.9	82.3294	78.7451	77.6057	78.8044	63.9918	73.7778	66.2791	63.2818	60.2435	69.8438	63.2707	63.0905	65.5343	51.9179
	57	66.0674	56.631	69.1759	51.7569	67.038	52.8508	62.933	54.5392	50.5187	61.7896	50.396	65.5971	50.7217	61.5494	53.9437	51.2932	57	90.256	85.3023	72.2906	95.61	84.5706	85.6444	56.6496	77.3169	72.5608	66.0765	67.9024	57.4942	70.0536	49.5277	49.1259	60.1362	57	82.4416	78.775	77.9171	78.5503	63.754	73.6754	66.3148	62.9522	60.6216	69.7784	62.9454	63.0949	65.3932	51.8106
	57.1	66.2433	56.6304	69.3728	52.238	66.9255	52.9097	62.7996	54.6324	50.5442	61.9344	50.536	65.4546	50.9028	61.9281	53.7367	51.3797	57.1	90.3596	85.1587	72.3691	95.8092	84.4697	85.3979	56.8818	76.9902	72.6172	66.1509	68.0225	57.4868	70.0178	49.7148	49.2787	60.367	57.1	82.5536	78.768	78.2214	78.2577	63.5294	73.6808	66.2875	62.4395	60.9796	69.6312	62.8076	63.0874	65.3611	51.885
	57.2	66.2946	56.8156	69.4842	52.478	66.7288	52.9409	62.6209	54.8095	50.5922	62.1314	50.7144	65.1069	51.0998	62.1599	53.5536	51.366	57.2	90.3227	85.0696	72.4081	95.7919	84.4336	85.0928	57.1298	76.578	72.8365	66.1756	68.0809	57.4977	70.0361	49.8852	49.3784	60.4876	57.2	82.5444	78.7402	78.6878	78.0241	63.3061	73.7142	66.4577	62.1094	61.2534	69.5474	62.8482	63.2151	65.2528	51.9957
	57.3	66.2159	56.9708	69.3852	52.6258	66.5507	53.0376	62.4631	54.8219	50.6372	62.13	50.8778	64.9669	51.1598	62.3829	53.4707	51.2306	57.3	90.1896	85.1112	72.4303	95.5171	84.4849	84.7612	57.1412	76.233	72.9841	66.3032	68.1855	57.5636	69.9734	50.0929	49.403	60.4552	57.3	82.4149	78.593	78.803	77.906	63.1862	73.8527	66.6449	61.9078	61.3462	69.5213	62.9211	63.3956	65.1288	52.1988
	57.4	65.9734	56.9854	69.0915	52.4902	66.644	53.1308	62.5056	54.7866	50.7548	62.2364	50.8411	64.8435	50.9808	62.4232	53.5373	51.1303	57.4	90.0785	85.1836	72.4125	95.3599	84.6375	84.5036	56.9872	76.0711	73.1158	66.4228	68.3222	57.7208	69.8621	50.2852	49.3938	60.2791	57.4	82.3521	78.4304	78.6484	77.9148	62.9933	73.9284	66.7925	61.7872	61.1996	69.7038	63.134	63.6477	64.9696	52.3766
	57.5	65.6026	56.8979	68.8572	52.225	67.036	53.161	62.7142	54.6271	50.7921	62.2259	50.5781	64.7714	50.6469	62.3068	53.6175	51.1032	57.5	89.8863	85.3919	72.3018	95.3506	84.8175	84.5217	56.7374	76.1065	73.2142	66.5467	68.2376	57.7795	69.8527	50.3196	49.3638	60.0542	57.5	82.4186	78.4143	78.3944	78.209	62.8763	74.0456	66.9214	61.7448	60.9495	69.6519	63.5027	63.7693	64.7018	52.5743
	57.6	65.398	57.0113	68.6848	51.9709	67.4031	53.075	63.1003	54.561	50.7387	62.1342	50.3556	64.7632	50.4598	62.0994	53.7804	51.0572	57.6	89.7077	85.4462	72.2388	95.2364	84.6974	84.6706	56.3901	76.0274	73.3512	66.5662	68.0487	57.803	69.7192	50.3093	49.4791	59.8493	57.6	82.579	78.4084	78.1501	78.6447	62.7736	73.9515	66.9719	61.8948	60.6729	69.6997	63.7228	63.8791	64.5056	52.6035
	57.7	65.2224	57.0831	68.5166	51.9077	67.8136	52.9061	63.5969	54.5403	50.5846	61.9703	50.1751	64.8664	50.2455	61.8653	53.9664	50.9616	57.7	89.7867	85.5922	72.0898	95.3351	84.5748	84.9733	55.959	76.0341	73.329	66.7029	67.9401	57.8873	69.3771	50.2141	49.5732	59.6317	57.7	82.8731	78.3099	77.7095	78.9478	62.7964	73.7348	66.8347	62.1425	60.2961	69.7573	63.7958	63.9389	64.4908	52.5552
	57.8	65.1594	57.1644	68.2483	51.8443	68.1956	52.7935	64.1098	54.6781	50.4898	61.9879	50.0234	64.887	49.9946	61.7101	54.1408	50.845	57.8	89.8938	85.6535	71.8991	95.6542	84.4209	85.2452	55.8082	76.0871	73.2268	66.704	67.7478	58.0221	69.2125	50.0264	49.7122	59.4968	57.8	83.207	78.0967	77.4398	79.0852	62.6948	73.4989	66.5862	62.4378	60.0081	69.8063	63.8167	63.9686	64.3062	52.5126
	57.9	65.1862	57.2389	68.0428	51.9174	68.2999	52.6098	64.4185	54.7786	50.3993	61.8842	50.0127	64.9348	49.9161	61.6958	54.2137	50.6907	57.9	90.0652	85.7446	71.7492	95.7722	84.1776	85.3182	55.839	76.0127	72.9617	66.5517	67.5521	58.135	69.1837	49.7314	49.8828	59.4832	57.9	83.4561	77.8946	77.291	79.0578	62.8267	73.3414	66.4008	62.8512	59.9235	69.8007	63.8406	63.7296	64.2479	52.6295
	58	65.4249	57.4116	67.856	51.9286	68.04	52.3856	64.4447	54.9043	50.4242	61.7532	50.2009	64.9513	49.9432	61.7948	54.2969	50.6061	58	90.2689	85.6915	71.5188	95.6702	83.7966	85.2081	55.9518	75.8682	72.595	66.4918	67.5951	58.2388	69.1838	49.6939	49.9412	59.4877	58	83.36	77.7856	77.237	78.811	63.0277	73.1137	66.0908	63.1439	59.8323	70.0403	63.798	63.6686	64.4203	52.7616
	58.1	65.5176	57.5007	67.7422	51.8812	67.691	52.2972	64.2526	54.9806	50.5301	61.5792	50.3461	65.0995	49.756	61.8896	54.2662	50.6242	58.1	90.4512	85.8292	71.2285	95.4614	83.4687	84.9584	56.0806	76.055	72.2777	66.4672	67.6738	58.2622	69.3596	49.6698	49.894	59.4833	58.1	83.0078	77.6845	77.1694	78.3104	63.1732	73.0238	65.7374	63.2194	59.7304	70.1999	63.9161	63.6506	64.6356	52.9593
	58.2	65.7302	57.4981	67.5849	51.6814	67.2096	52.3493	63.9483	54.9744	50.5552	61.4774	50.3472	65.3585	49.6672	62.0364	54.1564	50.7168	58.2	90.5264	85.7914	70.9629	95.1861	83.191	84.4589	56.3082	76.0372	72.0544	66.2296	67.8033	58.2664	69.8022	49.6679	49.962	59.7099	58.2	82.603	77.6988	77.1914	77.7942	63.1448	73.083	65.3992	63.0512	59.7239	70.411	64.0997	63.6472	64.7039	53.1657
	58.3	65.8817	57.3411	67.6365	51.5115	66.7534	52.3881	63.5221	54.9005	50.4563	61.3601	50.3228	65.6165	49.7408	62.2113	54.0951	50.9412	58.3	90.6248	85.7476	70.7888	95.0157	82.9324	83.9666	56.3962	75.9181	71.852	66.0221	68.0071	58.3249	70.1114	49.7512	49.9186	59.8421	58.3	82.1691	77.9678	77.2481	77.353	63.3332	73.1596	65.1556	62.767	59.7452	70.481	64.2719	63.659	65.0497	53.331
	58.4	65.9682	57.2073	67.6427	51.3153	66.4949	52.5665	63.1623	54.984	50.3825	61.2544	50.1394	65.6875	49.8793	62.3932	54.0418	51.1783	58.4	90.5595	85.6492	70.5204	95.1019	82.702	83.6786	56.4021	75.8922	71.7706	65.9238	68.1912	58.4675	70.3165	49.9189	49.9606	60.0478	58.4	81.7196	78.3538	77.3896	76.9624	63.4158	73.1722	64.9634	62.3985	59.8038	70.3822	64.3274	63.8632	65.444	53.3305
	58.5	65.9026	56.8767	67.6781	51.2418	66.3994	52.8267	62.881	55.0579	50.1837	61.1511	49.8831	65.575	50.1096	62.5299	53.9182	51.2437	58.5	90.3521	85.5526	70.3974	95.2591	82.7257	83.4555	56.3908	75.7785	71.9148	65.7745	68.2283	58.8638	70.516	49.9186	50.0948	60.2808	58.5	81.5808	78.575	77.449	76.7058	63.4275	73.2374	64.9048	62.1843	59.9389	70.1097	64.3176	63.8335	65.6068	53.2146
	58.6	66.0096	56.6011	67.7751	51.2538	66.3221	53.0529	62.8076	55.177	49.9259	61.1313	49.622	65.2747	50.5559	62.5708	53.837	51.2039	58.6	90.0908	85.3426	70.4377	95.559	82.9108	83.3736	56.4244	75.4778	72.1571	65.6616	68.2311	59.4225	70.641	49.8329	50.1858	60.4374	58.6	81.5798	78.8397	77.421	76.6147	63.5787	73.3046	64.99	62.1936	60.1476	69.825	64.1318	63.7737	65.5786	53.0494
	58.7	65.8538	56.465	68.036	51.3995	66.3514	53.181	62.8619	55.3576	49.8481	61.1331	49.4502	64.8016	50.9079	62.6712	53.9349	51.12	58.7	89.7766	85.2461	70.563	95.7888	82.9264	83.6183	56.419	75.3324	72.3826	65.5992	68.073	59.8747	70.5799	49.8588	50.1676	60.4789	58.7	81.5818	79.0495	77.4066	76.7426	63.852	73.3809	65.2637	62.3562	60.307	69.4061	63.927	63.7226	65.6944	52.9086
	58.8	65.6002	56.49	68.1684	51.5507	66.2958	53.2103	63.0676	55.5229	49.9164	61.0976	49.3352	64.2873	51.2122	62.6397	53.9823	50.9847	58.8	89.5309	85.14	70.6496	95.8443	83.0058	83.9383	56.4342	75.2952	72.7307	65.5402	67.8671	60.0563	70.4796	49.8347	50.2278	60.5914	58.8	81.6356	79.09	77.2675	76.9404	63.9989	73.3636	65.5366	62.6158	60.3271	69.2197	63.6705	63.6436	65.7113	52.7606
	58.9	65.3806	56.5198	68.3437	51.7115	66.1489	53.0941	63.2458	55.5446	50.0191	61.1101	49.3904	63.9877	51.3412	62.449	54.0042	50.9467	58.9	89.3755	85.0403	70.7694	95.817	83.2513	84.15	56.4626	75.2635	73.0766	65.5207	67.6297	60.1121	70.3028	49.8131	50.1496	60.5415	58.9	81.7684	78.884	77.0833	77.102	64.1506	73.3286	65.7959	62.9206	60.1224	69.2972	63.4463	63.6797	65.5066	52.6934
	59	65.0426	56.7268	68.463	51.9351	66.0277	52.9358	63.5504	55.5579	50.2729	61.287	49.5325	63.9118	51.3185	62.1663	54.0514	50.9498	59	89.3708	85.0029	70.8842	95.8286	83.351	84.3297	56.5231	75.2087	73.2234	65.5905	67.3838	59.8131	70.133	49.7822	49.9586	60.4957	59	81.7756	78.6806	76.9274	77.2772	64.1774	73.3316	66.0124	63.1001	59.7856	69.4844	63.2535	63.9056	65.4573	52.7066
	59.1	64.6309	56.8644	68.3769	52.0482	66.1597	52.7783	63.6905	55.57	50.5304	61.5814	49.6598	63.8656	51.2771	62.0479	54.1032	51.0462	59.1	89.5301	84.8583	70.8216	95.8669	83.4614	84.4457	56.5298	75.1572	73.1273	65.806	67.1454	59.4033	69.8382	49.8521	49.7148	60.5258	59.1	81.7956	78.3641	76.8814	77.4537	64.0565	73.3428	66.1982	63.2103	59.4658	69.6518	63.1047	64.0645	65.6034	52.9095
	59.2	64.4301	56.9163	68.1262	52.0754	66.3428	52.7075	63.6384	55.6163	50.718	61.6913	49.815	63.8986	51.2239	61.7514	53.9344	51.2439	59.2	89.7724	84.7028	70.7635	95.9621	83.5542	84.2528	56.5188	75.1762	72.9676	66.2526	66.92	59.034	69.6346	49.8277	49.3586	60.468	59.2	81.825	78.0443	76.7929	77.3987	63.8894	73.2861	66.1784	63.4142	59.1627	69.8468	63.0062	64.1508	65.6661	53.1478
	59.3	64.3523	56.9479	67.9713	52.0432	66.6819	52.7238	63.4982	55.6815	50.7886	61.7488	49.9551	63.965	51.0717	61.5159	53.7873	51.397	59.3	89.8714	84.6885	70.6308	95.9785	83.4882	84.0007	56.4636	75.0669	72.6922	66.6953	66.6745	58.8244	69.5767	49.9876	49.065	60.4016	59.3	81.8539	77.7696	76.8911	77.2414	63.67	73.3216	66.1902	63.7152	58.8998	69.8894	63.0866	64.2975	65.6132	53.3916
	59.4	64.2263	56.9547	67.9485	51.9709	67.0868	52.8527	63.328	55.6921	50.749	61.755	50.1176	64.069	51.0475	61.4728	53.7183	51.4371	59.4	89.9809	84.737	70.5299	95.87	83.159	83.8416	56.4751	75.0818	72.3505	66.9965	66.5761	58.5921	69.6407	50.1488	48.8134	60.4032	59.4	81.834	77.7307	76.9579	77.157	63.3354	73.3389	66.1048	64.0334	58.8112	69.7239	63.3104	64.1578	65.6511	53.6046
	59.5	64.469	56.8986	67.9779	51.746	67.4188	52.9833	62.9544	55.7276	50.7373	61.5641	50.1919	64.1682	50.9806	61.4573	53.6492	51.5328	59.5	89.8737	84.8369	70.4104	95.661	82.8836	83.7346	56.4505	75.3326	72.169	67.1131	66.5348	58.3578	69.6966	50.3183	48.6665	60.2651	59.5	81.84	77.7452	76.9628	77.0465	63.091	73.1885	66.1458	64.4529	58.9573	69.5615	63.5718	63.8692	65.6384	53.8264
	59.6	64.801	56.918	68.127	51.5594	67.51	53.1223	62.6748	55.5924	50.7907	61.1982	50.3566	64.3912	50.7792	61.3392	53.58	51.559	59.6	89.5102	85.1008	70.348	95.3408	82.4023	83.6634	56.5448	75.6295	72.251	66.9376	66.5406	58.0788	69.8723	50.422	48.668	60.0654	59.6	81.864	77.8095	76.8729	76.8943	62.9102	72.9559	66.1316	64.7417	59.0854	69.5617	63.7283	63.668	65.4784	53.7958
	59.7	64.9567	56.9479	68.3571	51.5155	67.5751	53.2222	62.5696	55.3564	50.8956	61.0414	50.5178	64.6323	50.641	61.3744	53.564	51.4288	59.7	89.104	85.2352	70.2398	94.9818	82.1985	83.6841	56.6846	75.8726	72.3866	66.5636	66.6596	57.8656	69.8861	50.6139	48.843	59.977	59.7	81.84	77.7847	76.8398	76.653	62.6616	72.8098	66.0892	64.7329	59.276	69.5531	63.8109	63.4964	65.318	53.5871
	59.8	65.1353	56.8938	68.5841	51.5669	67.5962	53.3976	62.508	55.1949	51.0888	60.9627	50.6988	64.9046	50.5595	61.417	53.5307	51.377	59.8	88.8369	85.2596	70.2338	94.7187	82.2007	83.7946	56.8354	76.2163	72.483	66.1873	66.9632	57.6951	69.7083	50.5587	48.8982	59.911	59.8	81.8258	77.7982	76.546	76.4462	62.5111	72.6156	65.9573	64.4855	59.4892	69.4056	63.7366	63.2926	65.4239	53.423
	59.9	65.4242	56.8622	68.5848	51.6999	67.5729	53.4305	62.637	55.1922	51.2452	60.9834	50.727	64.9798	50.2966	61.324	53.42	51.356	59.9	88.6889	85.32	70.2122	94.5339	82.4709	83.8677	56.8954	76.3136	72.6423	65.8913	67.1569	57.5664	69.473	50.4512	48.8793	59.8625	59.9	81.7809	77.63	76.1174	76.2771	62.5438	72.5194	65.9129	64.092	59.6886	69.339	63.5023	63.2946	65.6406	53.3136
	60	65.4496	56.8521	68.587	51.9283	67.5657	53.3629	63.1119	55.1485	51.1583	61.1116	50.7542	65.0592	50.0943	61.2529	53.4032	51.4073	60	88.7475	85.3057	70.2222	94.3386	82.8324	83.896	56.9781	76.195	72.7333	65.6964	67.3369	57.5788	69.1962	50.3089	48.9024	59.9628	60	81.6624	77.4892	75.7556	76.1227	62.7334	72.6121	65.7239	63.516	59.6341	69.1299	63.3103	63.4375	65.7713	53.2168
	60.1	65.2841	56.7994	68.6106	52.145	67.4908	53.2554	63.5501	55.3431	51.0841	61.2875	50.6608	64.9416	49.8277	61.3492	53.319	51.5434	60.1	89.0531	85.2301	70.3298	94.1873	83.4027	83.8699	56.9179	76.1636	72.7108	65.5563	67.5778	57.769	69.1221	50.1099	48.8922	60.1192	60.1	81.4863	77.3932	75.4856	76.0425	63.0246	72.7186	65.563	63.09	59.4082	68.7066	63.356	63.6022	65.9244	53.1991
	60.2	65.2499	56.7849	68.6006	52.208	67.3606	53.1164	63.8985	55.6177	51.0037	61.3674	50.5749	64.7578	49.5358	61.5462	53.3133	51.8371	60.2	89.4502	85.3211	70.5109	93.9582	83.7958	83.9888	56.8021	76.091	72.6458	65.4143	67.7431	57.928	69.2601	49.8388	48.8269	60.1032	60.2	81.4097	77.5104	75.1253	76.2445	63.4284	72.693	65.5678	62.7761	59.1419	68.4674	63.4802	63.8438	66.1332	53.3343
	60.3	65.0901	56.9585	68.4981	52.2003	67.1506	52.8135	64.0929	55.8261	50.9424	61.4916	50.534	64.5166	49.2436	61.7362	53.3372	52.071	60.3	89.7682	85.2855	70.6594	93.7212	83.9973	84.1876	56.7794	75.8862	72.7567	65.2656	67.7024	57.9776	69.5284	49.6474	48.8472	60.0617	60.3	81.1592	77.5688	75.0402	76.541	63.6909	72.7288	65.6174	62.4753	59.0394	68.5249	63.5954	64.0032	66.1281	53.3602
	60.4	64.7488	57.1427	68.4777	52.1897	66.9342	52.6736	64.0628	55.9131	50.9952	61.5088	50.6322	64.3012	49.1437	61.9859	53.3685	52.3029	60.4	89.9601	85.03	70.8522	93.4374	84.0194	84.4513	56.7125	75.7656	72.8592	65.0708	67.6801	58.0108	69.7968	49.5374	49.0054	59.8814	60.4	80.9219	77.7488	75.1723	76.767	63.7947	72.81	65.6043	62.2151	58.9147	68.6471	63.7509	64.0366	65.9264	53.2862
	60.5	64.3742	57.3167	68.407	52.22	66.7692	52.7513	63.6716	55.9917	51.2418	61.5566	50.7538	64.0349	49.0236	62.3472	53.3564	52.3677	60.5	90.1112	84.8519	71.0088	93.2734	83.954	84.7195	56.5538	75.7792	72.8408	64.908	67.6996	58.1224	70.1609	49.499	49.1019	59.6294	60.5	80.9035	77.8954	75.4048	76.8779	63.7226	72.8406	65.626	62.0067	59.0998	68.9039	63.739	64.0585	65.8602	53.0615
	60.6	64.2136	57.484	68.3446	52.2639	66.7446	52.8736	63.2153	55.928	51.2748	61.5836	50.8458	64.0683	49.1146	62.5076	53.4503	52.3798	60.6	90.2411	84.7581	70.9554	93.1594	83.7884	84.9996	56.428	75.663	72.8054	64.9635	67.6148	58.095	70.2664	49.592	49.2122	59.438	60.6	80.9273	77.9109	75.6553	77.0437	63.4213	72.936	65.599	61.7512	59.584	69.3787	63.5499	64.0325	65.9861	52.8553
	60.7	64.0848	57.6137	68.3097	52.3632	66.6526	52.9706	62.7793	55.758	51.1717	61.5996	50.9125	64.1974	49.2315	62.3686	53.4491	52.3237	60.7	90.2669	84.5041	70.7073	93.0688	83.6034	85.2033	56.3367	75.5303	72.8318	65.0855	67.4859	58.1607	70.4049	49.6868	49.3093	59.4373	60.7	80.8063	77.7609	76.1212	77.2257	63.0674	73.0978	65.4753	61.6992	60.0536	69.5926	63.2999	63.8487	66.0724	52.5801
	60.8	64.0778	57.5432	68.2495	52.519	66.5369	53.1478	62.6721	55.4708	50.858	61.5557	50.8133	64.3515	49.4122	62.2686	53.3383	52.2716	60.8	90.2898	84.3932	70.4798	93.0566	83.4703	85.1862	56.1634	75.6313	72.7018	65.25	67.4918	58.2761	70.7436	49.8118	49.323	59.4446	60.8	80.9018	77.6846	76.4074	77.403	62.8825	73.2412	65.4434	61.8512	60.3286	69.6915	63.0494	63.8266	66.2043	52.3964
	60.9	64.2587	57.5178	68.1194	52.6776	66.3811	53.2076	62.8165	55.239	50.5438	61.524	50.6013	64.6136	49.6183	62.2177	53.3091	52.2466	60.9	90.2704	84.4318	70.3317	93.2518	83.3914	85.0257	56.0067	75.7242	72.5078	65.5896	67.5156	58.4277	71.2087	49.8152	49.339	59.6121	60.9	81.172	77.5411	76.5574	77.6006	62.847	73.2388	65.5643	62.2037	60.5926	69.5782	62.885	63.9889	66.3688	52.2723
	61	64.6514	57.5156	67.9958	52.7494	66.1207	53.1384	63.0926	55.1898	50.0877	61.3462	50.5216	64.8505	50.0075	62.0071	53.307	52.3392	61	90.2391	84.3462	70.2073	93.4782	83.2991	84.8836	55.954	75.6374	72.4854	65.8469	67.4028	58.4552	71.4292	49.745	49.3188	59.7546	61	81.2373	77.4925	76.565	77.9202	62.9104	73.1754	65.76	62.7166	60.6821	69.4017	62.8976	64.0702	66.3835	52.293
	61.1	64.9694	57.5528	67.8769	52.9775	65.7487	53.1191	63.4503	55.1972	49.8612	61.1895	50.5789	64.8012	50.3806	61.8484	53.2177	52.3358	61.1	90.098	84.1502	70.3096	93.6805	83.2971	84.7288	55.938	75.509	72.4151	65.9304	67.3172	58.452	71.4555	49.5299	49.2662	59.7656	61.1	81.3312	77.6771	76.5063	78.0774	63.1015	73.0625	66.0839	63.2428	60.6007	69.214	62.9269	64.0958	65.9876	52.2308
	61.2	65.3395	57.5882	67.7015	53.2346	65.5322	53.208	63.7596	55.3033	49.824	61.0499	50.6009	64.67	50.6688	61.9691	53.1544	52.256	61.2	89.9514	84.1862	70.5987	94.2402	83.3393	84.524	55.8628	75.3892	72.2108	66.1177	67.3959	58.28	71.169	49.244	49.3366	59.7237	61.2	81.5888	77.8949	76.2105	78.0661	63.3133	72.9832	66.3258	63.5115	60.527	69.3675	62.9146	64.1598	65.5067	52.1978
	61.3	65.6739	57.7253	67.6707	53.4574	65.4444	53.2574	63.7508	55.5689	49.9738	60.8882	50.7367	64.5966	50.8825	62.0514	53.1527	52.1701	61.3	89.8074	84.1887	70.8712	94.7174	83.4408	84.485	55.7778	75.158	71.9823	66.3424	67.3885	58.0715	70.4924	48.9424	49.4796	59.7956	61.3	81.7516	77.9978	75.9919	77.8804	63.5051	72.8546	66.296	63.6851	60.5172	69.4848	63.0518	64.1467	65.0582	52.198
	61.4	66.0494	57.7363	67.7947	53.5908	65.3837	53.4572	63.5201	55.9248	50.1266	60.8042	50.9285	64.4859	51.0137	62.0224	53.0368	52.1411	61.4	89.7911	84.1758	70.9625	95.0029	83.4601	84.5839	55.7748	75.0621	71.7928	66.4769	67.3498	57.8444	69.6227	48.788	49.5665	59.9044	61.4	81.7371	78.1812	75.932	77.6783	63.5742	72.7539	66.1363	63.6633	60.4926	69.8303	63.0556	63.9557	64.831	52.2666
	61.5	66.2168	57.6678	67.9318	53.6919	65.3772	53.5456	63.3646	56.0873	50.5119	60.884	50.9114	64.4174	50.8507	62.0363	52.9455	52.035	61.5	89.7093	84.2546	71.0309	95.121	83.3498	84.667	55.7198	75.1526	71.577	66.668	67.4999	57.6561	69.0293	48.7956	49.7063	60.0453	61.5	81.7888	78.1089	75.9442	77.4757	63.5498	72.6357	65.9543	63.394	60.4391	70.2993	63.0998	63.7749	64.8948	52.28
	61.6	66.2512	57.5665	68.0634	53.44	65.5695	53.4268	63.2369	56.2361	50.8996	60.9786	50.7392	64.4684	50.4876	62.0166	52.9662	52.023	61.6	89.6794	84.368	71.0185	95.1973	83.091	84.8423	55.5956	75.235	71.4769	66.8411	67.5496	57.541	68.7578	48.9263	49.8358	60.196	61.6	81.7455	77.7747	75.958	77.4004	63.5702	72.4806	65.6256	63.1144	60.3615	70.5684	63.302	63.6188	65.399	52.3656
	61.7	66.0541	57.5435	68.28	53.0056	65.7201	53.2417	63.3328	56.3011	51.1626	61.1218	50.5732	64.5871	50.1505	61.8201	53.0869	52.1155	61.7	89.6285	84.2078	71.0031	94.8602	82.8133	85.0954	55.5925	75.3368	71.5271	66.8262	67.4358	57.4254	68.683	49.1886	49.7683	60.3196	61.7	81.5998	77.3982	76.0761	77.394	63.6315	72.2209	65.5106	62.9216	60.3062	70.4647	63.575	63.5866	66.0574	52.4844
	61.8	65.7034	57.4957	68.5015	52.466	65.8238	53.119	63.5289	56.362	51.3661	61.2876	50.3866	64.6098	49.7976	61.5982	53.3378	52.1374	61.8	89.6932	84.0511	70.911	94.5959	82.533	85.1258	55.6106	75.48	71.7061	66.7054	67.3506	57.4718	68.7918	49.4525	49.7407	60.1823	61.8	81.4274	77.1498	76.2162	77.4926	63.5993	72.0778	65.7549	62.6629	60.2584	70.4056	63.7344	63.4588	66.6741	52.4616
	61.9	65.0676	57.6541	68.6648	51.9916	65.9968	52.8747	63.7532	56.256	51.4956	61.3019	50.1953	64.5913	49.3695	61.4712	53.6273	51.8982	61.9	89.7186	83.8262	70.953	94.3482	82.4317	85.061	55.5885	75.4894	72.0336	66.3962	67.413	57.5308	69.0546	49.6864	49.6712	59.9232	61.9	81.3224	76.8126	76.2358	77.5473	63.5714	72.0936	65.9912	62.4242	60.3235	70.2218	63.9419	63.4859	67.0864	52.3324
	62	64.5106	57.9627	68.8427	51.5886	66.1876	52.7715	63.8922	56.1652	51.348	61.2646	50.0392	64.6069	49.1652	61.4914	53.7134	51.7647	62	89.8404	83.506	71.0233	94.1532	82.4946	84.9554	55.5997	75.3728	72.2936	65.9822	67.3085	57.6645	69.2224	49.6806	49.6187	59.7052	62	81.1618	76.8014	76.1725	77.5204	63.471	72.3202	66.0836	62.4422	60.3066	69.9515	63.8538	63.5701	67.174	52.1726
	62.1	64.0999	58.2007	68.951	51.5074	66.221	52.9192	64.0812	55.9767	50.9738	61.2331	49.958	64.7044	49.1566	61.5991	53.7317	51.5931	62.1	89.8498	83.2186	70.9603	94.0088	82.5516	84.7392	55.7332	75.3951	72.5487	65.6505	67.2882	57.7549	69.3816	49.6063	49.6589	59.5994	62.1	81.0837	76.9195	76.1816	77.3374	63.3892	72.6426	66.2534	62.4156	60.3496	69.8437	63.706	63.6893	66.9748	52.0714
	62.2	63.8982	58.2179	68.9853	51.6692	66.328	53.1246	63.9907	55.9108	50.7018	61.1726	49.7992	64.7898	49.2548	61.7059	53.7007	51.2659	62.2	89.9736	83.1561	70.8188	94.0104	82.6314	84.4118	55.7994	75.3968	72.7458	65.3896	67.3892	57.9469	69.6198	49.4505	49.8878	59.5199	62.2	80.9457	77.0985	76.0392	77.07	63.194	73.1512	66.3569	62.4945	60.3132	69.9096	63.6497	63.7692	66.6137	51.9803
	62.3	63.9058	58.2258	68.732	51.9229	66.4328	53.237	63.9553	55.7402	50.4714	61.1559	49.558	64.9392	49.3763	61.8415	53.5358	50.9963	62.3	89.917	83.198	70.9532	93.8718	82.6994	84.242	55.9607	75.224	72.9133	65.1856	67.5177	58.0516	69.7786	49.311	49.9679	59.6808	62.3	80.8364	77.1354	75.9024	76.8944	62.9894	73.5065	66.2676	62.612	60.2132	69.9228	63.5282	63.9698	66.3909	52.0355
	62.4	64.1114	57.9762	68.3447	52.1358	66.5183	53.2637	63.9712	55.5407	50.3632	61.3463	49.329	65.1803	49.5681	61.86	53.442	50.9364	62.4	89.7304	83.4862	70.8996	93.7315	82.4725	84.0584	56.2042	75.061	72.8735	65.204	67.4198	58.2461	69.7225	49.0456	50.0684	59.8771	62.4	80.5412	77.2637	75.7908	76.9127	62.8416	73.6136	66.1558	62.8097	59.9434	70.0323	63.3676	63.9773	66.1942	52.2499
	62.5	64.3337	57.5448	68.0076	52.4235	66.5163	53.207	64.0057	55.3442	50.4488	61.574	49.0268	65.2517	49.6878	61.6205	53.55	50.7237	62.5	89.4948	83.9548	70.7448	93.701	82.1606	83.8862	56.5177	75.1092	72.8576	65.4096	67.4607	58.3176	69.607	49.0137	50.131	59.9905	62.5	80.2916	77.1824	75.8085	77.0862	62.8099	73.5472	66.2017	62.9073	59.7852	70.0688	63.4775	64.015	66.1315	52.57
	62.6	64.4853	57.1206	67.6808	52.556	66.5817	52.9816	63.8551	55.2388	50.7507	61.8117	48.7588	65.1884	49.7015	61.3535	53.6317	50.4825	62.6	89.3916	84.4334	70.7394	93.5767	81.9616	83.7643	56.7289	75.1002	72.7397	65.7345	67.6016	58.4631	69.2446	49.0525	50.1185	60.002	62.6	80.0834	77.1564	75.8329	77.5075	62.5886	73.4838	66.2205	63.0691	59.6044	69.9767	63.4671	64.1271	66.1596	52.832
	62.7	64.4606	56.8845	67.4208	52.5693	66.5666	52.6223	63.8001	55.0166	50.9106	62.1171	48.5996	65.0919	49.5506	61.2534	53.5868	50.2774	62.7	89.1955	84.8518	70.6563	93.3463	81.7141	83.5873	56.9526	75.1215	72.6695	66.0376	67.5762	58.6235	68.7403	49.1551	49.9073	59.9821	62.7	80.0755	77.2504	76.1557	77.9906	62.4737	73.2487	66.1283	63.087	59.492	69.7806	63.2936	64.1004	66.27	53.0584
	62.8	64.421	56.7022	67.5296	52.631	66.5332	52.366	63.7303	54.8959	50.9927	62.2735	48.6692	65.0082	49.53	61.186	53.5581	50.0667	62.8	89.0521	85.0723	70.2469	93.2455	81.5	83.3709	57.0117	75.345	72.4017	66.3167	67.4393	58.6796	68.3434	49.2579	49.7978	59.8286	62.8	80.1825	77.4512	76.3724	78.3254	62.3958	73.0881	65.9962	63.2346	59.4336	69.6	63.2181	63.9585	66.1717	53.2734
	62.9	64.4456	56.6685	67.8216	52.715	66.4732	52.3997	63.6946	54.9878	50.9376	62.3068	48.7979	64.8025	49.616	61.3052	53.5075	49.7884	62.9	88.9936	85.0617	69.9265	93.3018	81.6345	83.2474	57.0147	75.6274	72.1813	66.4783	67.4557	58.6042	68.0961	49.5398	49.7754	59.7033	62.9	80.5494	77.4894	76.5608	78.5216	62.3228	73.0337	65.9646	63.3171	59.5468	69.311	63.2384	63.8579	66.2014	53.3224
	63	64.5204	56.7004	68.031	52.6669	66.5921	52.5539	63.5754	55.1569	50.794	62.1795	49.1498	64.786	49.6898	61.5854	53.458	49.6825	63	88.91	84.8622	69.6648	93.3099	81.8808	83.2287	56.855	75.7138	71.978	66.5595	67.432	58.5455	67.9128	49.6214	49.7515	59.6762	63	81.0012	77.642	76.6741	78.6136	62.441	72.9592	65.9473	63.3134	59.7141	69.1352	63.0658	63.5657	66.1954	53.3887
	63.1	64.6534	56.841	68.3282	52.6279	66.6461	52.745	63.497	55.36	50.5225	62.0116	49.4606	64.7508	49.8348	61.863	53.3956	49.7267	63.1	88.828	84.6997	69.4137	93.3561	82.1256	83.1214	56.7426	75.7963	71.8496	66.3586	67.3598	58.3388	68.03	49.6326	49.6885	59.7263	63.1	81.3814	77.7104	76.7286	78.5125	62.756	72.818	65.9068	63.3016	59.817	69.1615	62.8779	63.1598	66.2703	53.5118
	63.2	64.9265	56.8691	68.596	52.6266	66.5601	52.9136	63.3862	55.6705	50.2944	61.703	49.817	64.601	50.1546	62.0374	53.4071	50.0311	63.2	88.7235	84.5254	69.288	93.4622	82.4142	83.1432	56.5653	75.8251	71.6747	66.2006	67.481	57.9806	68.2812	49.5222	49.8111	59.7984	63.2	81.6215	77.6527	76.6195	78.3054	62.987	72.7256	65.9282	63.353	59.935	69.2964	62.7068	62.915	66.4848	53.5569
	63.3	65.1385	56.7304	68.6477	52.5962	66.4347	53.0012	63.2543	56.0282	50.2292	61.5293	49.9207	64.4178	50.2363	62.2218	53.4648	50.4566	63.3	88.6378	84.5744	69.216	93.5177	82.6218	83.217	56.4775	75.566	71.825	66.0615	67.7749	57.7323	68.5236	49.3436	49.9296	59.9982	63.3	81.6885	77.6791	76.6271	78.1045	63.2417	72.5782	65.9955	63.1346	60.0701	69.4927	62.5504	62.8794	66.761	53.4368
	63.4	65.2106	56.6134	68.622	52.5021	66.2966	52.7502	62.992	56.2369	50.1478	61.3313	49.7713	64.4857	50.1605	62.3647	53.4512	50.988	63.4	88.6785	84.5699	69.1947	93.3259	82.619	83.2562	56.2878	75.2558	71.9392	65.9744	68.0421	57.4882	68.8994	49.0656	49.9246	60.1269	63.4	81.6653	77.825	76.7117	77.803	63.4686	72.408	65.9739	62.829	60.1127	69.7314	62.3166	62.9793	66.8669	53.2934
	63.5	65.157	56.5437	68.6776	52.3125	66.0631	52.4795	62.8228	56.3642	50.0523	61.0812	49.5747	64.5498	50.1944	62.5531	53.2352	51.3915	63.5	88.7084	84.5695	69.1649	93.0585	82.6238	83.2412	56.2014	75.0022	72.0168	65.8087	68.265	57.2384	69.3656	48.9412	49.9258	60.18	63.5	81.4508	77.9039	76.7671	77.4442	63.2852	72.2454	65.7495	62.6096	60.1313	69.9044	62.2605	63.3535	67.1255	53.0268
	63.6	65.1107	56.3951	68.644	52.141	65.9587	52.2783	62.6984	56.3879	50.0036	60.8257	49.4178	64.751	50.2395	62.7476	53.125	51.6764	63.6	88.6374	84.3006	69.0522	93.0329	82.5019	83.4049	56.155	74.7964	72.1538	65.811	68.2603	57.1733	69.8026	48.7686	49.9	60.2509	63.6	81.2187	77.9938	76.7333	77.0942	62.936	72.0659	65.5598	62.2962	60.279	69.9332	62.29	63.7522	67.3016	52.6027
	63.7	65.2105	56.389	68.4909	51.9101	66.1396	52.3139	62.6588	56.3738	50.0772	60.7391	49.1596	65.1353	50.218	62.7891	53.0763	51.7378	63.7	88.5642	83.8285	68.9095	93.1111	82.3006	83.6129	56.1548	74.6852	72.2164	65.8381	68.152	57.2777	70.1825	48.674	49.8467	60.35	63.7	80.9089	78.0246	76.7077	76.9154	62.6345	71.8888	65.3716	61.8389	60.3233	69.9415	62.4142	63.9876	67.15	52.3323
	63.8	65.3221	56.5299	68.4026	51.5684	66.3554	52.4023	62.6274	56.2098	50.0715	60.6346	49.0345	65.5258	50.3156	62.6713	52.9933	51.5639	63.8	88.4384	83.0924	68.894	93.2188	82.1018	83.7789	56.1476	74.9966	72.0694	65.9644	67.9173	57.362	70.5638	48.7862	49.7489	60.2293	63.8	80.7204	77.8623	76.6236	76.8164	62.3016	71.9276	65.1792	61.6141	60.2946	69.9596	62.5968	63.9804	67.0347	52.2629
	63.9	65.45	56.6326	68.3695	51.3297	66.5961	52.6701	62.8032	56.0206	50.2515	60.5685	49.1377	65.5221	50.4324	62.4304	53.0254	51.2494	63.9	88.1959	82.5731	68.9491	93.487	82.0246	83.9464	56.2013	75.4138	71.9601	66.0061	67.6351	57.4384	70.7956	48.9651	49.7019	60.0886	63.9	80.5953	77.7788	76.5076	76.881	62.1068	72.0996	65.0604	61.5784	60.168	70.0493	62.8827	63.8388	66.9209	52.1669
	64	65.5833	56.7194	68.2696	51.3322	66.8648	52.9064	62.9766	55.8742	50.4724	60.7314	49.1882	65.3192	50.3454	62.0872	53.3154	50.8966	64	88.0788	82.2418	69.1667	93.8351	81.8474	84.0419	56.1754	75.8848	71.9342	66.2081	67.2634	57.5412	70.7113	49.0302	49.6075	59.9884	64	80.6979	77.6782	76.385	77.0092	62.2778	72.2861	65.135	61.5328	59.9122	70.1409	63.1982	63.5384	66.5536	52.0726
	64.1	65.6262	56.8898	68.2588	51.4306	67.1744	53.0464	63.2701	55.8166	50.7906	60.8699	49.2376	64.9934	50.2437	61.756	53.5424	50.5654	64.1	88.0268	82.2023	69.4306	93.9578	81.8722	83.9575	56.0151	76.332	71.7603	66.3966	67.1565	57.4541	70.4741	49.2758	49.65	59.8769	64.1	80.8227	77.6652	76.3095	77.096	62.5307	72.5194	65.2566	61.7134	59.6898	70.168	63.6824	63.1978	66.2066	52.2077
	64.2	65.1643	56.9206	68.4286	51.6372	67.3785	52.9989	63.5835	55.6024	51.0431	60.707	49.3291	64.6216	50.1308	61.6341	53.7808	50.3512	64.2	88.0053	82.342	69.6967	94.0983	82.0601	83.702	55.8064	76.7797	71.7019	66.4796	66.967	57.275	70.2233	49.734	49.585	59.6942	64.2	81.1313	77.6821	76.0587	77.1061	62.8312	72.7703	65.3319	62.2239	59.6174	70.232	64.0858	63.0901	66.0388	52.2768
	64.3	64.7086	56.994	68.4938	52.058	67.6932	52.8974	63.917	55.462	51.3049	60.5166	49.3274	64.1964	50.0581	61.6245	54.0366	50.4208	64.3	88.0374	82.7094	69.952	94.2176	82.214	83.4854	55.5488	76.9022	71.6927	66.3479	66.8144	57.0356	69.9419	50.0274	49.5207	59.6695	64.3	81.4211	77.7632	75.8529	77.0955	63.273	72.7924	65.4575	62.6524	59.6528	70.092	64.378	63.2074	65.8652	52.2435
	64.4	64.3241	57.0368	68.5006	52.4693	68.0744	52.794	63.989	55.4357	51.4523	60.2549	49.242	64.0249	49.9855	61.6499	54.1972	50.6108	64.4	88.0976	83.0201	70.1334	94.2367	82.3478	83.3052	55.2806	76.7741	71.6991	66.436	66.6757	56.948	69.6757	50.2081	49.4631	59.7245	64.4	81.5568	77.7027	75.6253	76.9768	63.5163	72.5917	65.6132	62.9454	59.8624	69.8102	64.5383	63.4218	65.8457	52.3718
	64.5	64.1102	57.0135	68.5267	52.6696	68.4561	52.6802	64.0201	55.3895	51.5945	60.0332	49.0823	64.0142	49.9764	61.6912	54.2068	50.9706	64.5	88.1429	83.1274	70.2092	94.2563	82.5252	83.1172	55.0208	76.402	71.5284	66.4179	66.7807	56.9068	69.6488	50.4826	49.4091	59.8123	64.5	81.5862	77.6373	75.4654	76.9077	63.4793	72.3853	65.7359	63.3042	60.2017	69.5758	64.5012	63.5476	66.0462	52.6356
	64.6	63.9525	56.8893	68.4058	52.7351	68.6357	52.6225	63.8446	55.3256	51.5257	60.0622	48.8668	64.2114	49.9747	61.6002	54.1601	51.2888	64.6	88.0889	83.1041	70.3638	94.1825	82.6764	82.9387	54.8196	76.0063	71.3997	66.4044	66.735	56.9782	69.5552	50.6842	49.297	59.8751	64.6	81.5993	77.4664	75.4039	76.9758	63.5129	72.237	65.8758	63.476	60.42	69.389	64.1653	63.835	66.0728	52.7202
	64.7	64.175	56.8433	68.184	52.6822	68.6812	52.6759	63.5466	55.5079	51.4847	60.361	48.6992	64.266	49.9296	61.4156	54.0996	51.3738	64.7	88.0652	83.1844	70.4968	93.9959	82.733	82.9048	54.763	75.5373	71.2468	66.4981	66.81	57.1187	69.4655	50.5764	49.2776	60.023	64.7	81.5068	77.2922	75.6661	77.0692	63.409	72.1679	66.1352	63.3818	60.5404	69.0876	64.0218	64.0501	66.1484	52.7812
	64.8	64.3626	56.7022	68.1921	52.3858	68.5942	52.8255	63.2517	55.6142	51.3796	60.6658	48.6696	64.2252	49.8369	61.2745	54.0767	51.1606	64.8	88.087	83.0063	70.5167	93.8011	82.8028	82.874	54.7568	75.2122	71.0979	66.6489	66.9915	57.3204	69.3466	50.4573	49.348	60.2409	64.8	81.3862	77.1732	75.8074	77.2258	63.0399	72.0981	66.2954	63.3294	60.5468	68.9804	63.846	64.141	66.2404	52.825
	64.9	64.483	56.6642	68.2052	52.0832	68.3372	52.9198	63.1835	55.6258	51.1594	61.1136	48.6622	64.1752	49.8586	61.1212	54.1763	50.9128	64.9	88.1081	82.6938	70.477	93.7373	82.6289	82.7067	54.853	75.0107	71.0617	66.5996	67.208	57.3914	69.2516	50.4347	49.4678	60.4607	64.9	81.383	77.1649	75.8046	77.513	62.6854	72.3214	66.3532	63.279	60.3431	69.009	63.7373	64.117	66.1877	52.7872
	65	64.5198	56.7943	68.1122	51.9388	67.9786	52.9752	63.1573	55.678	50.9202	61.4354	48.7506	64.2004	50.0401	60.962	54.279	50.5618	65	88.0518	82.4762	70.2677	93.6164	82.4061	82.5202	55.0433	74.9511	71.2232	66.4318	67.2276	57.4632	69.1475	50.4526	49.6513	60.6956	65	81.2845	77.1796	75.6386	77.7012	62.5328	72.69	66.3512	63.1404	60.0228	68.9927	63.7858	64.1464	66.0251	52.5928
	65.1	64.6388	57.0678	68.1613	51.846	67.6821	52.9536	63.3008	55.73	50.8634	61.48	48.9675	64.063	50.119	61.0142	54.4236	50.2811	65.1	88.2363	82.3978	69.9252	93.5866	82.0227	82.5208	55.2876	74.8692	71.4219	66.1164	67.3693	57.5352	69.2271	50.4732	49.7382	60.8086	65.1	81.2122	77.2769	75.44	77.6764	62.2924	72.989	66.2216	63.0504	59.7327	69.0003	63.9354	63.9395	66.1727	52.5671
	65.2	64.7852	57.3493	68.2626	51.7658	67.4864	52.9595	63.5073	55.5694	50.7152	61.496	49.1702	64.1301	50.3553	61.1674	54.4717	50.1566	65.2	88.389	82.3012	69.5789	93.4807	81.5033	82.5153	55.4633	74.6808	71.5651	65.6446	67.578	57.4802	69.4248	50.55	49.7968	60.7955	65.2	81.1486	77.4819	75.0836	77.5184	62.1888	73.1744	66.0519	63.0517	59.4218	69.1012	63.7905	63.5846	66.3591	52.582
	65.3	64.9704	57.6524	68.1802	51.9284	67.3457	52.9555	63.5903	55.48	50.5786	61.6303	49.3804	64.543	50.5288	61.2731	54.4142	50.2488	65.3	88.4652	82.5478	69.3344	93.396	81.043	82.412	55.6714	74.4644	71.7058	65.2609	67.6253	57.361	69.626	50.543	49.7621	60.6363	65.3	81.0173	77.6737	74.8214	77.1935	62.2903	73.5081	66.0455	62.9886	59.1489	69.181	63.6393	63.0629	66.3886	52.7308
	65.4	65.2166	57.8988	68.1254	51.9846	67.2296	53.0775	63.6022	55.4028	50.5742	61.8143	49.695	64.938	50.5535	61.4968	54.148	50.3064	65.4	88.4101	82.8184	69.1762	93.1595	80.8302	82.4501	55.7736	74.3366	71.7	64.9433	67.5874	57.1731	69.7227	50.4587	49.641	60.4657	65.4	80.7431	77.7432	74.6904	76.8575	62.3755	73.7524	66.0213	63.067	59.1249	69.1406	63.4645	62.6157	66.4578	52.9421
	65.5	65.3002	58.02	68.2868	51.9671	67.1746	53.297	63.609	55.2757	50.5855	62.0696	49.9493	65.2074	50.3832	61.6007	53.8836	50.3339	65.5	88.311	83.0792	69.1106	92.9285	80.6631	82.608	55.8429	74.29	71.6106	64.871	67.5523	56.9812	69.8507	50.119	49.4858	60.1929	65.5	80.6306	77.765	74.7994	76.4934	62.2799	73.8975	66.0661	63.0767	59.1434	69.0699	63.2291	62.2282	66.4498	53.2072
	65.6	65.1956	58.0581	68.4172	51.9191	67.0546	53.7381	63.597	55.1712	50.5399	62.44	50.0316	65.3692	50.352	61.537	53.7112	50.3554	65.6	87.9859	83.1246	68.8993	92.7086	80.4754	82.7296	55.8449	74.1972	71.5363	64.9298	67.4112	56.8796	69.9625	49.687	49.4311	60.1589	65.6	80.5474	77.6534	74.9098	76.4012	62.1466	73.9271	66.2606	63.0112	59.1623	68.9962	62.9603	61.9912	66.2199	53.2604
	65.7	64.9842	57.9594	68.4678	51.9516	66.9192	54.1199	63.6781	55.2536	50.5213	62.658	50.1064	65.4157	50.0356	61.3761	53.6384	50.4847	65.7	87.7306	83.0662	68.6754	92.7032	80.5836	82.905	55.7276	74.2276	71.5814	65.0523	67.147	56.9473	69.7781	49.3652	49.3289	60.2606	65.7	80.5766	77.4497	74.9676	76.4974	61.8692	73.9921	66.3764	63.0301	59.3214	68.8815	62.8225	61.9112	65.8929	53.2911
	65.8	64.7164	57.7907	68.544	51.7514	66.6763	54.3952	63.893	55.3885	50.4148	62.6763	50.1037	65.2122	49.9422	61.2056	53.6262	50.6055	65.8	87.5642	82.952	68.4606	92.6206	80.7741	83.1438	55.472	74.2392	71.6292	65.132	66.8805	57.1403	69.713	49.2512	49.2792	60.3651	65.8	80.6728	77.2459	75.0098	76.6918	61.5113	74.0222	66.2768	63.0864	59.5835	68.7955	62.79	62.1386	65.7685	53.176
	65.9	64.3322	57.54	68.5088	51.6742	66.503	54.6584	63.9831	55.5968	50.3952	62.5294	49.9817	64.9525	50.0242	60.9177	53.6684	50.7207	65.9	87.5808	83.0563	68.1912	92.7038	80.8694	83.2924	55.2146	74.2702	71.6689	65.2279	66.7131	57.5071	69.7776	49.2451	49.2804	60.5213	65.9	80.8672	77.2232	75.1215	76.6753	61.3318	73.8826	66.223	62.9875	59.7116	68.924	62.7953	62.3293	65.6745	53.008
	66	64.1504	57.289	68.2293	51.5974	66.3661	54.8189	64.0081	55.8149	50.5192	62.3271	49.8831	64.6472	50.322	60.9357	53.7635	50.8353	66	87.6528	83.0381	68.0972	92.8711	80.959	83.5728	54.9452	74.2552	71.6879	65.107	66.7892	57.8027	69.816	49.5165	49.3701	60.6291	66	80.9084	77.313	75.2394	76.7367	61.3336	73.6214	66.108	63.0602	59.9397	69.1278	62.809	62.5068	65.6602	52.914
	66.1	64.2482	57.0762	67.8733	51.5599	66.462	54.6737	63.9017	56.0097	50.653	62.0586	49.8534	64.38	50.4342	61.0975	53.7675	50.8264	66.1	87.8503	83.1344	68.399	93.0123	81.2315	83.6931	54.8082	74.3394	71.6697	65.1452	67.0378	57.9139	69.7917	49.9476	49.4562	60.3894	66.1	81.0016	77.426	75.3304	76.6815	61.5062	73.6318	65.7878	63.1462	60.2554	69.314	63.0018	62.6226	65.6782	52.9418
	66.2	64.4569	57.1253	67.6325	51.5206	66.6193	54.4016	63.557	56.0837	50.7646	61.9517	49.756	64.131	50.752	61.3413	53.8064	50.6583	66.2	88.0204	83.318	68.9477	93.0836	81.2538	83.7024	54.7653	74.5432	71.55	65.2874	67.3902	58.0066	69.9934	50.3286	49.635	60.0597	66.2	80.9868	77.6051	75.543	76.6208	61.8272	73.6916	65.445	62.997	60.3901	69.5027	63.2354	62.5866	65.6229	53.0101
	66.3	64.7561	57.3069	67.538	51.6432	66.965	54.1746	63.0869	56.0976	51.0352	61.9858	49.6106	63.798	50.782	61.6775	53.8116	50.4429	66.3	88.057	83.3299	69.4453	93.368	81.0865	83.7294	54.976	74.7331	71.3878	65.4408	67.8413	58.0743	70.047	50.541	49.8419	59.7812	66.3	80.969	77.7929	75.8325	76.6065	62.1527	73.6109	65.3066	62.7887	60.329	69.6614	63.4046	62.4193	65.459	53.2353
	66.4	65.1623	57.512	67.677	51.8385	67.2558	53.6488	62.8685	56.0429	51.1144	61.92	49.5378	63.4668	50.6364	61.9584	54.0374	50.2804	66.4	87.9153	83.1725	69.9037	93.5195	80.9411	83.883	55.2188	74.7102	71.2172	65.5247	68.2937	57.994	70.0257	50.6827	49.9907	59.5056	66.4	80.9421	77.8045	76.1315	76.7728	62.3946	73.442	65.3036	62.6532	60.2966	69.6146	63.5404	62.4154	65.2115	53.484
	66.5	65.3539	57.7757	67.9936	52.0868	67.6026	53.1686	62.7622	56.0139	50.9452	61.7901	49.5488	63.2822	50.2558	62.0085	54.2738	50.1773	66.5	87.8111	83.2546	70.2041	93.5826	80.752	83.7901	55.4552	74.6387	71.0882	65.737	68.475	57.9361	69.9586	50.8414	49.9995	59.4186	66.5	80.9507	77.7586	76.2672	76.9464	62.6188	73.4123	65.356	62.374	60.1704	69.5026	63.6951	62.4717	64.995	53.6443
	66.6	65.2904	57.9538	68.4268	52.391	67.8186	52.9023	62.749	56.0339	50.8284	61.6767	49.6442	63.3153	50.0535	61.9425	54.3758	50.2589	66.6	87.6912	83.3704	70.155	93.8174	80.4894	83.784	55.5913	74.5526	71.0662	65.7186	68.52	57.9472	69.8718	50.7307	49.978	59.6544	66.6	80.743	77.7567	76.4198	77.0527	62.6258	73.1747	65.6477	62.2274	59.8555	69.5188	63.7327	62.5794	64.9071	53.7702
	66.7	64.9972	58.0398	68.6994	52.5333	67.9468	52.7876	62.955	56.079	50.7243	61.5725	49.8395	63.3725	49.8236	61.7202	54.3775	50.3514	66.7	87.4633	83.3517	69.7302	93.9675	80.3949	83.7373	55.747	74.3172	71.0699	65.5554	68.4578	57.8409	69.6962	50.5801	49.8571	60.0412	66.7	80.5487	77.625	76.467	76.9821	62.5538	72.8133	66.1032	62.2787	59.622	69.6582	63.7357	62.8394	64.9721	53.7904
	66.8	64.6561	58.0482	68.7875	52.6282	67.904	52.6458	63.259	56.1304	50.5637	61.3384	50.0115	63.7696	49.7762	61.3834	54.4569	50.3867	66.8	87.3823	83.2539	69.3566	93.8369	80.497	83.7029	55.6627	74.1682	71.1927	65.3166	68.3772	57.5916	69.5778	50.5028	49.6717	60.4572	66.8	80.5335	77.3277	76.4822	76.8962	62.5822	72.578	66.3116	62.4258	59.5469	69.7502	63.8159	63.1298	65.1403	53.4821
	66.9	64.2788	58.1973	68.7143	52.551	67.9946	52.7774	63.4097	56.0942	50.4912	61.257	50.1226	64.2912	49.7436	61.1612	54.2929	50.4144	66.9	87.4684	83.1719	69.1416	93.7371	80.6021	83.4247	55.5936	74.2565	71.5338	65.0777	68.2152	57.4985	69.4448	50.2389	49.4881	60.7328	66.9	80.6327	77.1323	76.2866	76.6635	62.5773	72.5628	66.3684	62.6383	59.4516	69.8917	63.853	63.1869	65.4674	53.0372
	67	64.0852	58.1679	68.6165	52.4137	67.9264	52.8263	63.4528	56.008	50.4461	61.2158	50.1715	64.7966	49.8998	61.0827	54.0711	50.4804	67	87.4212	82.9174	68.9052	93.6208	80.7752	83.1258	55.4747	74.5363	71.9212	64.7445	68.1222	57.4892	69.3567	49.6708	49.3095	60.8353	67	80.7518	77.0212	76.1497	76.4235	62.469	72.4398	66.4637	62.902	59.4427	70.1977	63.8341	63.3001	65.876	52.6487
	67.1	63.9404	58.1572	68.4993	52.1076	67.7228	52.7623	63.4675	55.8149	50.2128	61.1716	50.0768	65.0781	49.9929	61.1584	54.0642	50.4279	67.1	87.3985	82.5508	68.8549	93.163	80.9618	82.8049	55.3076	74.8165	72.1199	64.536	68.0802	57.5104	69.3001	49.354	49.1374	60.8747	67.1	81.0429	77.0246	76.0087	76.2778	62.5032	72.318	66.294	63.0976	59.5171	70.3981	63.8159	63.4662	66.1056	52.2863
	67.2	63.9398	58.0589	68.5874	51.9709	67.4217	52.5405	63.42	55.6433	50.0096	60.9714	49.8388	65.3638	50.0596	61.4536	54.0377	50.3562	67.2	87.5447	82.1721	69.0051	92.827	81.0446	82.5344	55.1186	75.1894	72.3679	64.3837	68.0328	57.5112	69.3224	49.1822	49.0344	60.7342	67.2	81.2699	77.2244	75.8924	76.3142	62.4693	72.2897	65.9932	63.2811	59.5842	70.4949	63.7693	63.5199	66.2702	52.0135
	67.3	63.9066	58.0078	68.7234	51.8274	67.2266	52.44	63.4771	55.5355	49.8479	60.8014	49.7044	65.4685	50.0952	61.8296	53.9362	50.315	67.3	87.586	81.9966	69.0693	92.7278	80.9768	82.2947	54.9933	75.4992	72.5607	64.317	67.866	57.5978	69.3006	49.0013	48.9279	60.6068	67.3	81.1804	77.6162	75.6486	76.271	62.334	72.2588	65.947	63.3498	59.624	70.6251	63.5187	63.5357	66.4365	52.0364
	67.4	64.0175	57.7226	68.7912	51.6892	66.9706	52.3669	63.5308	55.5584	49.7792	60.6806	49.447	65.4264	50.199	62.2789	53.8732	50.2285	67.4	87.5407	81.8593	69.0179	92.6917	80.955	82.3292	54.831	75.6275	72.511	64.2843	67.771	57.5942	69.3224	49.0587	48.9462	60.5474	67.4	80.9651	77.882	75.6471	76.4472	62.1607	72.3188	65.8303	63.1959	59.619	70.765	63.3915	63.7404	66.4984	52.2414
	67.5	64.183	57.6166	68.7194	51.516	66.8282	52.5018	63.7096	55.506	49.9272	60.5968	49.1721	65.1875	50.0732	62.5962	53.7513	50.091	67.5	87.688	81.8165	69.031	92.7925	80.971	82.5178	54.8525	75.4562	72.3163	64.3672	67.6442	57.3974	69.2956	49.4203	49.1146	60.5611	67.5	80.8638	77.8656	75.662	76.6364	62.0056	72.5607	65.5326	63.0968	59.5633	70.6584	63.2871	63.7977	66.3328	52.3343
	67.6	64.4376	57.5223	68.5258	51.5264	66.8506	52.7037	63.8838	55.3761	50.0829	60.4292	49.0328	65.0805	49.8725	62.7373	53.5012	50.0588	67.6	87.712	81.929	69.0467	93.2236	80.926	82.7874	54.8975	75.2366	72.2264	64.2807	67.3294	57.1228	69.2011	49.7827	49.2389	60.3862	67.6	80.5975	77.6621	75.7541	76.7864	61.7732	72.9654	65.4292	63.0569	59.5242	70.5482	63.1422	63.7717	66.1489	52.4016
	67.7	64.8618	57.4114	68.2501	51.6004	66.9957	53.0887	64.0265	55.1936	50.2011	60.3814	49.0022	65.0012	49.6474	62.7752	53.3684	50.1895	67.7	87.6979	82.2377	69.0307	93.4284	80.9058	83.1562	54.9536	74.905	72.0617	64.3342	67.1105	57.0025	69.011	50.0244	49.2896	60.2632	67.7	80.3652	77.3071	75.9514	76.9303	61.7894	73.3089	65.3384	62.9224	59.5574	70.4017	63.0105	63.8714	65.8478	52.3954
	67.8	65.3261	57.2834	67.9476	51.695	66.9887	53.391	63.9624	54.7577	50.2439	60.3245	48.9425	64.755	49.3288	62.7498	53.2247	50.4313	67.8	87.7348	82.5653	69.1774	93.3648	80.9395	83.3451	55.1286	74.5275	71.8145	64.4653	66.995	56.9363	68.8346	50.2624	49.3153	60.0961	67.8	80.2191	76.9316	76.2638	77.0549	61.896	73.6215	65.2271	62.8215	59.6034	70.2774	63.032	63.9832	65.4381	52.4075
	67.9	65.5842	57.3735	67.7189	51.8427	66.9822	53.5904	63.8296	54.3889	50.1096	60.1546	49.182	64.5516	48.978	62.64	53.1266	50.6493	67.9	87.8348	82.7132	69.315	93.1432	80.915	83.3837	55.3944	74.2611	71.6485	64.5554	66.842	56.8919	68.6944	50.4888	49.2185	59.9195	67.9	80.0429	76.6078	76.4041	76.9768	62.1252	73.7219	65.2383	63.0144	59.7832	70.0889	62.9478	63.958	65.0983	52.4566
	68	65.7087	57.3493	67.6082	52.0639	66.9046	53.5928	63.5867	54.2718	49.8328	59.9854	49.4065	64.5514	48.901	62.4942	53.2404	50.7885	68	87.863	82.7634	69.4835	92.7548	80.7243	83.4178	55.403	74.157	71.6464	64.5043	66.8156	57.0519	68.5661	50.5508	49.0236	59.7626	68	79.704	76.4931	76.4349	76.8228	62.3698	73.573	65.3689	63.118	59.8637	70.0284	62.7919	63.8847	65.0124	52.6808
	68.1	65.6744	57.255	67.6023	52.2446	66.7633	53.5666	63.305	54.3089	49.8135	60.076	49.4765	64.4576	48.9609	62.3613	53.571	50.7886	68.1	87.9449	82.6787	69.5569	92.1932	80.5401	83.3725	55.3538	74.0611	71.6152	64.6205	67.0555	57.3889	68.5496	50.4194	48.9162	59.7869	68.1	79.5854	76.4832	76.3296	76.6978	62.7671	73.2356	65.3617	62.9851	59.9955	70.0502	62.6271	63.7839	65.196	52.878
	68.2	65.3144	57.2657	67.4909	52.2491	66.6322	53.4827	63.081	54.4688	49.8999	60.1752	49.4909	64.2821	49.1482	62.168	53.798	50.7392	68.2	87.8347	82.3457	69.6331	91.8485	80.4008	83.2302	55.3261	74.0419	71.5421	64.5657	67.2038	57.6396	68.6033	50.1937	48.8534	59.8586	68.2	79.503	76.4566	76.1058	76.4816	62.9767	72.9308	65.4796	62.8809	60.067	70.1575	62.4684	63.5022	65.6502	53.1628
	68.3	64.947	57.2838	67.4712	52.1994	66.6236	53.3803	62.9986	54.9526	50.0852	60.4158	49.5138	64.2735	49.4812	61.9979	54.0158	50.5198	68.3	87.5751	81.817	69.4977	91.7051	80.3294	83.2254	55.2332	74.179	71.4819	64.3775	67.3749	57.8965	68.8434	49.9614	48.8491	59.9262	68.3	79.4932	76.317	75.8986	76.4296	63.1106	72.5559	65.4062	62.8408	60.0434	70.2652	62.3512	63.1273	66.1186	53.2368
	68.4	64.52	57.1752	67.5234	52.1279	66.5719	53.2547	63.0599	55.3274	50.412	60.7434	49.3789	64.3294	49.8194	61.7895	54.2998	50.4524	68.4	87.0459	81.4282	69.3342	91.7262	80.3724	83.1304	55.057	74.3562	71.4602	64.3528	67.563	58.1853	69.1426	49.6605	48.8283	60.0799	68.4	79.5224	76.2883	75.824	76.423	63.1682	72.2009	65.2977	62.4918	59.8731	70.4268	62.2952	62.7484	66.4139	53.1142
	68.5	64.0956	57.1968	67.6178	52.0544	66.6151	53.2548	63.2052	55.5496	50.7088	61.0699	49.3504	64.4076	49.8873	61.754	54.3884	50.4895	68.5	86.522	81.2195	69.0163	91.8123	80.4614	82.8697	55.0247	74.6028	71.3609	64.5042	67.633	58.3881	69.4492	49.4075	48.8708	60.1915	68.5	79.6337	76.331	75.7864	76.4542	63.233	72.0752	65.1829	62.1582	59.7899	70.5847	62.4015	62.497	66.605	52.8937
	68.6	63.8858	57.3909	67.7013	51.8173	66.681	53.2692	63.454	55.8548	50.9259	61.2219	49.4617	64.5442	49.8881	61.8114	54.329	50.5705	68.6	86.0494	81.0177	68.726	91.947	80.7064	82.5994	55.202	74.829	71.2238	64.6469	67.5932	58.4676	69.773	49.363	49.0152	60.2882	68.6	79.5547	76.3958	75.8106	76.4371	63.1098	72.0461	65.2077	62.0436	59.6774	70.5797	62.6429	62.335	66.6532	52.8317
	68.7	63.8467	57.5002	67.9732	51.6009	66.8532	53.2496	63.7097	56.0237	51.0942	61.3604	49.6487	64.6758	49.8039	61.8574	54.3408	50.4889	68.7	85.7442	81.053	68.3402	91.8911	80.8962	82.2301	55.3279	75.0059	71.2537	64.8751	67.6038	58.5651	70.0631	49.4745	49.1768	60.3822	68.7	79.5041	76.4029	75.9213	76.3708	62.9869	72.1367	65.1236	61.9992	59.6177	70.4468	62.902	62.3539	66.4882	52.7624
	68.8	63.8656	57.436	68.2438	51.4487	67.092	53.3006	63.8249	55.9827	51.1328	61.4163	49.7787	64.7538	49.7368	61.8964	54.3894	50.5846	68.8	85.6884	81.2271	68.0479	91.7615	80.9194	81.7969	55.357	74.966	71.4802	65.1814	67.571	58.5602	70.086	49.6648	49.3186	60.4612	68.8	79.4979	76.4474	75.9981	76.149	62.7918	72.2737	65.1347	61.9449	59.6	70.1351	63.1777	62.4859	66.427	52.8786
	68.9	64.0814	57.3393	68.4377	51.392	67.3698	53.388	63.8858	55.8967	51.0675	61.6223	49.8382	64.7247	49.6837	62.0002	54.2762	50.5072	68.9	86.073	81.4626	67.8996	91.6739	80.8299	81.5482	55.406	74.7961	71.6088	65.3858	67.4062	58.3562	69.9756	49.8706	49.6082	60.4086	68.9	79.5968	76.3223	76.0685	76.1213	62.4675	72.5576	65.1698	62.104	59.7274	69.8363	63.4222	62.7818	66.5425	53.0932
	69	64.3274	57.1227	68.5811	51.3422	67.5427	53.252	63.8889	55.722	51.0488	61.8044	49.7718	64.5133	49.8828	62.0538	54.1858	50.4144	69	86.4055	81.4822	67.973	91.6257	80.8236	81.3562	55.487	74.5109	71.6704	65.5572	67.2854	58.0937	69.8484	50.0992	49.834	60.3554	69	79.7027	76.1098	76.2515	76.1908	62.1457	72.654	65.3432	62.3754	59.874	69.5148	63.5408	62.9027	66.5187	53.3312
	69.1	64.3894	56.7692	68.6062	51.498	67.6524	53.0716	63.8758	55.4144	50.9783	61.9212	49.6884	64.3353	50.1134	62.0389	54.0631	50.3763	69.1	86.6919	81.6461	68.1187	91.6673	80.6334	81.1016	55.487	74.3354	71.8334	65.6876	67.1315	57.7811	69.6656	50.164	49.8482	60.3997	69.1	79.9831	75.7788	76.4088	76.3505	61.9655	72.7315	65.5308	62.6265	60.1123	69.246	63.5854	62.9398	66.4756	53.4157
	69.2	64.4047	56.46	68.4344	51.6882	67.6429	52.8484	63.8222	55.2015	50.9533	61.996	49.5162	64.4292	50.2999	62.0273	53.8361	50.5746	69.2	87.0532	81.7754	68.4458	91.9251	80.5381	81.1115	55.6194	74.2064	71.8226	65.6921	66.9914	57.3506	69.5672	50.0883	49.8846	60.3831	69.2	80.1777	75.6366	76.4206	76.6058	61.829	72.559	65.693	62.7061	60.3036	69.0512	63.6817	62.7948	66.513	53.446
	69.3	64.3625	56.3706	68.148	51.8956	67.5834	52.4154	63.8894	54.9848	51.0526	62.0752	49.4725	64.6682	50.3252	62.0186	53.6735	50.6864	69.3	87.3834	81.884	68.75	92.2566	80.633	81.2347	55.8002	74.181	71.5302	65.5417	66.8831	56.9196	69.4864	49.9342	49.9072	60.2755	69.3	80.3056	75.6617	76.418	76.8484	61.74	72.4466	65.8981	62.7279	60.5619	69.0572	63.6717	62.6229	66.4996	53.4226
	69.4	64.3342	56.4028	67.9086	52.0483	67.4768	51.977	63.8352	54.8591	51.2981	61.8388	49.5362	64.9652	50.35	61.852	53.5696	50.971	69.4	87.4999	81.9032	68.9772	92.3539	80.7048	81.1883	55.9424	74.2437	71.291	65.3565	67.0042	56.6926	69.3488	49.8611	49.7328	60.2647	69.4	80.2917	75.7998	76.3728	76.9106	61.9416	72.2542	66.037	62.7282	60.6858	69.091	63.6642	62.3102	66.3873	53.4423
	69.5	64.3428	56.5766	67.6615	52.0573	67.4146	51.8619	63.7348	54.9419	51.5366	61.5202	49.6455	65.3864	50.1864	61.6133	53.5349	51.2046	69.5	87.7174	82.0516	69.1759	92.3363	80.728	81.2605	55.94	74.3276	71.1101	65.0786	67.1758	56.5954	69.2731	49.7992	49.5205	60.313	69.5	80.3178	75.8166	76.3398	76.9197	62.0983	72.2992	65.9017	62.5983	60.7123	69.1298	63.7993	62.2409	66.4014	53.3555
	69.6	64.5323	56.8247	67.6321	51.869	67.3492	51.7981	63.5534	55.0573	51.7947	61.2524	49.6481	65.7361	50.0335	61.4104	53.4252	51.4027	69.6	88.0106	82.1835	69.3273	92.1558	80.6923	81.4142	55.7801	74.3144	70.9017	64.8071	67.405	56.5957	69.1058	49.8769	49.3454	60.084	69.6	80.2473	75.941	76.3132	76.8541	62.1342	72.3598	65.6602	62.4044	60.4744	69.2167	63.9439	62.175	66.3054	53.2678
	69.7	64.8217	57.0418	67.7014	51.7755	67.2236	51.7935	63.2936	55.0693	51.9276	60.907	49.7656	65.7854	49.9859	61.2954	53.374	51.3933	69.7	88.1423	82.299	69.3751	91.9013	80.4792	81.3475	55.3943	74.2908	70.8279	64.8039	67.5806	56.703	68.7364	50.0555	49.0969	59.7614	69.7	80.1613	76.0106	76.3426	76.81	62.0942	72.5399	65.4122	62.403	60.1412	69.2375	64.0105	62.2804	66.0835	53.1453
	69.8	65.0261	57.1867	67.815	51.5321	67.0502	52.0281	63.0385	55.1572	51.9048	60.5673	49.7946	65.7555	50.0254	61.2684	53.215	51.2429	69.8	88.0094	82.3687	69.4032	91.6799	80.1249	81.3046	55.0951	74.3135	70.9178	65.076	67.7529	56.8946	68.4964	50.1986	48.909	59.5765	69.8	79.9866	75.9376	76.3483	76.9478	62.1091	72.635	65.1679	62.5214	59.6434	69.1694	64.0825	62.337	65.7987	52.9394
	69.9	65.1325	57.3693	67.8712	51.1876	66.9415	52.2872	62.9788	55.2265	51.7557	60.4146	49.7438	65.7967	50.1009	61.3878	53.1589	50.8024	69.9	87.8445	82.3217	69.2263	91.7003	79.8784	81.5191	54.8655	74.3804	71.0251	65.4203	67.7406	56.9783	68.3172	50.2895	48.9133	59.3987	69.9	79.8598	75.9254	76.246	77.1456	61.9044	72.6718	65.1367	62.5696	59.136	69.0647	64.101	62.379	65.6272	52.7107
	70	65.2582	57.4043	67.9902	51.0875	66.8115	52.4007	63.0903	55.1329	51.6591	60.5112	49.6213	65.9245	50.2281	61.445	53.1308	50.4482	70	87.5076	82.1987	68.7904	91.7618	79.682	81.6301	54.7419	74.4806	71.1951	65.7717	67.408	57.0309	67.9584	50.2052	48.9453	59.2386	70	79.6003	76.1578	75.8978	77.1876	61.8991	72.4714	65.3672	62.6996	58.6907	68.9777	63.8462	62.3258	65.5361	52.6295
	70.1	65.3255	57.3921	67.9768	51.1455	66.8737	52.5317	63.2036	55.0301	51.5254	60.7013	49.572	66.2173	50.2717	61.5396	53.3035	50.1503	70.1	87.0147	81.8537	68.3244	91.8926	79.6516	81.8089	54.7544	74.638	71.3651	66.0529	67.0117	57.1442	67.6912	49.9822	49.058	59.3741	70.1	79.4674	76.4801	75.4745	77.1738	62.0465	72.2125	65.6731	62.761	58.3421	68.8206	63.55	62.4099	65.5447	52.5605
	70.2	65.3236	57.4292	68.0439	51.0805	67.0589	52.6861	63.364	54.9868	51.4577	61.0163	49.4828	66.5412	50.1673	61.6586	53.6008	49.9086	70.2	86.523	81.3423	67.8728	91.8983	79.6747	82.0117	54.8757	74.7172	71.5256	66.146	66.7026	57.3393	67.6919	49.7595	49.3514	59.7956	70.2	79.4688	76.8138	75.0431	77.0977	62.3144	71.9199	66.0847	62.696	58.0846	68.7191	63.2589	62.4822	65.707	52.5468
	70.3	65.4856	57.4214	68.1966	51.1508	67.3099	52.7913	63.3364	55.0263	51.5632	61.3084	49.488	66.7092	50.0634	61.6132	54.0688	49.8144	70.3	86.3794	80.9059	67.5964	91.8154	79.8212	82.0249	54.8702	74.7488	71.7025	66.0034	66.4102	57.4873	67.7202	49.5976	49.5946	60.2554	70.3	79.6169	77.2529	74.6042	76.8814	62.6845	71.7352	66.3903	62.4113	58.0439	68.6448	63.0204	62.7232	65.8825	52.597
	70.4	65.5604	57.283	68.454	51.3278	67.4494	52.9179	63.1962	55.1452	51.681	61.5024	49.605	66.716	49.968	61.685	54.5521	49.9571	70.4	86.2155	80.8216	67.5822	91.4906	79.8748	81.9296	54.8132	74.6651	71.9058	65.7661	66.2972	57.6851	67.9174	49.3205	49.7038	60.6442	70.4	79.8328	77.5891	74.2668	76.6854	63.1414	71.7125	66.3745	62.2403	58.1351	68.5861	62.8509	62.9558	65.9228	52.4506
	70.5	65.5496	57.217	68.698	51.3201	67.5923	53.0106	62.8649	55.4265	51.6202	61.4111	49.765	66.4701	49.8978	62.0708	55.02	50.092	70.5	86.0003	80.7357	67.7809	91.3417	79.8528	81.9732	54.8701	74.5016	72.0168	65.6258	66.6628	57.8902	68.3984	49.3112	49.8889	60.915	70.5	80.161	77.774	74.1502	76.6455	63.3518	71.8415	66.0948	62.0482	58.3106	68.5132	62.9609	63.086	65.8851	52.1652
	70.6	65.4048	57.0722	68.8364	51.3236	67.5402	53.0125	62.6288	55.7145	51.5682	61.1905	49.9579	65.8824	49.8436	62.3819	55.3504	50.09	70.6	85.943	80.777	68.0927	91.1899	79.72	81.9908	54.9091	74.1754	72.1147	65.5067	67.0042	57.8755	68.8941	49.3678	50.0192	60.9008	70.6	80.2798	77.7409	74.18	76.7064	63.3691	72.0908	65.8428	62.1296	58.6521	68.511	63.0904	63.1468	65.9085	51.9843
	70.7	65.1845	56.8252	68.8796	51.376	67.4184	53.0539	62.3983	56.0247	51.5035	60.9136	50.0505	65.2776	49.8432	62.6963	55.4868	50.1488	70.7	86.0355	80.9346	68.4188	91.248	79.6051	82.093	54.9073	74.0111	72.0368	65.3206	67.1857	57.7018	69.1375	49.3972	49.8758	60.6184	70.7	80.3568	77.5988	74.3504	76.8357	63.3344	72.3692	65.5708	62.3451	59.0626	68.578	63.2686	63.1254	65.8571	51.8681
	70.8	64.932	56.6425	68.896	51.4192	67.1344	53.0203	62.3647	56.2622	51.3665	60.5919	49.9789	64.77	49.8206	63.1059	55.4674	50.2666	70.8	85.8265	81.0112	68.4992	91.307	79.2561	82.3408	54.8679	73.7728	71.9228	65.2137	67.3005	57.5958	69.3442	49.4852	49.7356	60.1981	70.8	80.452	77.1787	74.5617	77.0028	63.086	72.4422	65.4536	62.7205	59.3382	68.6437	63.4892	62.9246	65.8656	51.8078
	70.9	64.841	56.4644	68.888	51.4612	66.914	52.9215	62.37	56.2229	51.233	60.3507	49.7957	64.4321	49.763	63.319	55.3139	50.2679	70.9	85.6913	80.8104	68.5936	91.6258	78.9684	82.5035	54.8322	73.4945	71.83	65.1712	67.2928	57.4613	69.3862	49.7717	49.669	59.8526	70.9	80.4892	76.6713	74.7832	77.0958	62.7702	72.2765	65.4406	62.9492	59.5221	68.6228	63.7068	62.7982	65.8981	51.9104
	71	64.7587	56.3058	68.7446	51.6436	66.7296	52.8392	62.5406	55.9988	51.3584	60.2876	49.7399	64.1326	49.7335	63.1402	55.0294	50.0954	71	85.8083	80.6636	68.6586	91.7794	78.8149	82.507	54.5349	73.3938	71.7079	65.0898	67.0836	57.1475	69.201	49.8958	49.5172	59.6357	71	80.3994	76.1759	74.972	77.1715	62.5409	71.995	65.5645	63.1802	59.6651	68.6012	63.77	62.7574	65.9463	52.1865
	71.1	64.6784	56.3468	68.9231	51.7452	66.6477	52.9333	62.6152	55.8222	51.4616	60.2812	49.7455	64.0294	49.7915	62.9612	54.7074	50.0652	71.1	85.9011	80.5388	68.5786	91.9239	78.8347	82.5343	54.1604	73.4976	71.5639	65.0666	66.9854	56.9802	68.9368	50.0243	49.3775	59.503	71.1	80.411	75.7983	75.007	77.1318	62.4553	71.6089	65.5179	63.1634	59.664	68.5738	63.7521	62.6799	65.9712	52.3711
	71.2	64.7016	56.551	69.1099	51.7819	66.6935	53.0025	62.7392	55.6455	51.5423	60.3577	49.8159	63.8994	49.8712	62.6775	54.5261	50.0423	71.2	85.9798	80.4763	68.3636	91.8466	78.9966	82.5064	53.8505	73.5275	71.6753	65.1226	67.0776	56.9922	68.8758	50.1944	49.4256	59.4734	71.2	80.3774	75.562	74.7992	76.9578	62.2691	71.3227	65.3894	62.9323	59.5156	68.3909	63.707	62.5886	66.0833	52.4575
	71.3	64.614	56.7631	69.1843	51.7466	66.9754	53.2152	62.8233	55.4016	51.6574	60.531	49.9136	63.8853	50.0025	62.3689	54.3588	49.9812	71.3	86.3669	80.5519	68.2703	91.7097	79.4252	82.4081	53.7138	73.6544	71.8107	65.1884	67.288	56.9081	68.7998	50.1568	49.4359	59.5375	71.3	80.1536	75.5313	74.559	76.7243	62.1058	71.2713	65.2417	62.7251	59.4368	68.2716	63.5015	62.5327	66.1524	52.5389
	71.4	64.4934	57.0808	69.1099	51.7167	67.2174	53.4896	62.9354	55.3822	51.7895	60.5958	50.0364	63.8303	50.0644	62.0006	54.1699	50.0986	71.4	86.8444	80.7729	68.0934	91.3212	79.81	82.4222	53.6742	73.8762	71.8531	65.2159	67.5222	56.9094	68.7372	49.9711	49.4666	59.531	71.4	79.8577	75.7224	74.4349	76.5388	62.0106	71.4602	65.2301	62.5815	59.4458	68.2632	63.2961	62.4896	66.2882	52.6507
	71.5	64.4199	57.3325	69.1691	51.6086	67.349	53.8473	62.9112	55.4574	51.7664	60.6868	49.9422	63.9774	50.028	61.7576	54.0833	50.4065	71.5	87.1811	81.0712	67.9246	90.9502	80.1073	82.4703	53.8702	73.9368	72.0239	65.1442	67.5978	57.1513	68.8483	49.7634	49.5666	59.4871	71.5	79.6143	75.9604	74.3205	76.4178	62.0162	71.8439	65.2187	62.3872	59.5134	68.2716	63.1664	62.3863	66.2617	52.6232
	71.6	64.473	57.4188	69.015	51.6005	67.3443	54.0437	63.0421	55.4888	51.7184	60.867	49.7228	64.236	49.8928	61.3952	54.1199	50.6946	71.6	87.3876	81.4653	67.7635	90.5259	80.314	82.3754	54.2324	73.9288	72.1995	65.1094	67.6072	57.386	69.0434	49.5022	49.7193	59.6592	71.6	79.2936	76.1119	74.4312	76.4455	62.0512	72.2512	65.3749	62.3326	59.6081	68.3429	63.2084	62.1694	66.1381	52.5457
	71.7	64.5537	57.3901	68.8958	51.6674	67.1498	54.1369	63.2724	55.4968	51.6294	61.0162	49.5439	64.7412	49.7519	61.0399	54.0564	50.8822	71.7	87.6155	81.7976	67.6884	90.2144	80.3358	82.201	54.6242	73.8022	72.2243	65.0874	67.3911	57.5089	69.139	49.2288	49.828	59.804	71.7	78.9947	76.159	74.7116	76.4862	62.2667	72.5641	65.5674	62.5375	59.8454	68.6069	63.1344	62.0528	65.992	52.4736
	71.8	64.6522	57.3771	68.8302	51.838	66.7685	53.9939	63.5907	55.6154	51.3948	61.0832	49.3284	65.0624	49.412	60.6746	53.8738	50.9687	71.8	87.678	82.0963	67.5521	90.0169	80.3128	82.0962	54.9627	73.6236	72.1121	64.967	67.0198	57.7206	69.1502	49.2083	50.0391	59.9223	71.8	78.953	76.2332	74.9843	76.511	62.6165	72.8188	65.6763	62.6625	60.0004	68.8816	63.1336	62.0219	65.798	52.248
	71.9	64.6936	57.2943	68.7903	52.0392	66.5265	53.8294	63.95	55.7534	51.141	61.2404	49.0278	65.191	49.1605	60.4063	53.7439	50.999	71.9	87.5746	82.2496	67.361	89.9262	80.2709	81.8214	55.1674	73.5335	71.9185	64.9008	66.6	57.7803	69.1303	49.2838	50.1377	60.0133	71.9	79.0145	76.2409	75.0608	76.3396	62.9145	72.9	65.8156	62.7406	60.0451	69.1279	63.1566	61.9865	65.5863	52.1117
	72	64.7498	57.2219	68.6605	52.2156	66.3942	53.5251	64.4114	55.8694	50.8696	61.2612	48.9602	65.1779	49.0362	60.2492	53.587	51.0044	72	87.6343	82.2994	67.0669	89.9289	80.3112	81.6114	55.2925	73.5522	71.7306	64.955	66.3757	57.6684	69.0438	49.4956	50.0769	59.9806	72	79.0979	76.2342	75.1683	75.9844	63.1091	72.6416	66.0287	62.8674	59.8608	69.3914	63.2255	62.1323	65.55	52.0811
	72.1	64.8393	57.3047	68.4208	52.1648	66.3792	53.2094	64.7035	55.885	50.6634	61.1341	48.9477	65.0503	48.9507	60.4369	53.386	50.9384	72.1	87.8176	82.1798	66.827	90.1073	80.3472	81.5411	55.3652	73.5303	71.5826	64.8572	66.1526	57.4061	69.0158	49.8259	49.8362	59.7628	72.1	79.3076	76.3466	75.1122	75.5684	63.1195	72.208	66.0905	62.9298	59.6599	69.567	63.1459	62.4879	65.53	52.196
	72.2	64.7808	57.4254	67.9714	52.181	66.4023	52.9528	64.782	55.8546	50.5778	60.9644	48.9051	64.7881	48.9373	60.6805	53.2783	51.0132	72.2	87.7732	81.9504	66.7447	90.3632	80.5591	81.6847	55.3826	73.6895	71.3392	64.829	66.1297	57.0124	68.9587	50.1504	49.5827	59.6512	72.2	79.4793	76.5046	74.9606	75.3392	62.9551	71.704	66.0351	62.8714	59.3077	69.5734	63.2226	62.8409	65.4007	52.399
	72.3	64.7923	57.5133	67.6069	52.2364	66.513	52.8657	64.7353	55.7138	50.6623	60.9286	49.0193	64.5701	49.1302	60.9327	53.3636	51.2224	72.3	87.66	81.5711	66.796	90.5252	80.729	81.7222	55.3556	74.0194	71.1459	65.028	66.203	56.4297	69.109	50.365	49.3202	59.59	72.3	79.5316	76.6697	74.852	75.1989	62.6668	71.1619	66.0115	62.9039	59.0564	69.4784	63.4133	63.075	65.3594	52.7588
	72.4	64.9119	57.5962	67.4793	52.0815	66.4004	52.7412	64.5195	55.5277	50.6688	60.9913	49.3668	64.6362	49.2376	61.273	53.4353	51.2644	72.4	87.5007	81.3241	66.8629	90.7603	81.0083	81.8842	55.3457	74.2414	71.0873	65.176	66.4198	56.055	69.3445	50.5159	49.0954	59.6136	72.4	79.6494	76.8013	74.7844	75.2942	62.4376	70.6476	65.7676	63.0469	58.8653	69.4781	63.491	63.3375	65.2677	52.9475
	72.5	64.9206	57.7588	67.5689	51.9563	66.2722	52.7343	64.1374	55.3724	50.6518	61.116	49.5448	64.7706	49.285	61.6153	53.4656	51.3177	72.5	87.1537	81.0653	67.1578	90.8322	81.125	81.9576	55.249	74.3826	70.9438	65.2346	66.733	55.8684	69.4896	50.5446	49.0118	59.8566	72.5	79.896	76.9389	74.4955	75.5007	62.2223	70.4163	65.3543	63.0864	58.8869	69.5032	63.4782	63.6133	65.0939	53.1508
	72.6	64.8277	57.6538	67.8214	51.9884	66.1372	52.8186	63.6944	55.3148	50.6175	61.2954	49.6222	64.957	49.4074	61.6648	53.4408	51.4952	72.6	86.7676	80.917	67.5826	90.7141	81.1145	81.9262	55.084	74.6599	70.7751	65.4741	67.0951	55.914	69.522	50.4786	49.0341	60.0702	72.6	80.0118	76.9377	74.2606	75.7339	62.0939	70.6386	65.1033	63.0823	58.9592	69.6144	63.5981	63.7977	65.0428	53.3178
	72.7	64.8056	57.4612	68.2796	51.9055	66.0581	52.9544	63.2778	55.3839	50.6221	61.4876	49.7813	65.0846	49.4824	61.7318	53.354	51.6071	72.7	86.4871	80.8754	67.8977	90.563	80.832	81.6843	54.9034	74.826	70.844	65.6454	67.3397	56.2016	69.6329	50.382	48.9907	60.1796	72.7	80.1501	77.0223	74.1766	75.7999	62.0691	71.0358	65.0428	63.0162	59.1838	69.8128	63.6063	63.8268	65.1187	53.4291
	72.8	64.7789	57.3138	68.6566	51.5807	65.9516	53.126	62.854	55.5571	50.5979	61.56	49.9327	65.3943	49.5855	61.7992	53.2755	51.621	72.8	86.1956	80.9165	68.1584	90.6	80.3847	81.5198	54.76	74.836	70.9605	65.6381	67.4606	56.7282	69.5939	50.2703	48.7642	60.2027	72.8	80.155	77.0029	74.1045	75.8895	62.0705	71.5044	64.8776	62.8132	59.3324	69.9624	63.3782	64.0211	65.075	53.4732
	72.9	64.546	57.1382	68.6875	51.5073	66.0483	53.3735	62.4996	55.7536	50.6553	61.5116	49.9313	65.5148	49.8097	61.8377	53.381	51.8152	72.9	86.1049	80.7362	68.5742	90.5618	79.7427	81.3901	54.7143	74.9293	71.0884	65.7021	67.4354	57.1322	69.5194	50.1676	48.6566	60.2674	72.9	79.9838	76.8862	74.0829	75.9025	62.0158	72.1057	64.888	62.5846	59.4321	69.9716	63.2125	64.1063	65.0488	53.5844
	73	64.42	56.9024	68.4004	51.507	66.219	53.5756	62.3048	55.9392	50.8175	61.4996	50.0038	65.7052	50.039	61.8226	53.6483	51.9816	73	86.103	80.5732	68.7509	90.6705	79.1109	81.3081	54.7309	75.0394	71.0851	65.8953	67.1139	57.356	69.5033	50.075	48.6252	60.1024	73	79.7162	76.7027	74.2597	76.0359	61.8309	72.6724	65.0924	62.5096	59.4571	69.8604	62.9833	63.8846	65.1199	53.5613
	73.1	64.2969	56.9438	68.1085	51.6474	66.3891	53.7307	62.3251	56.1347	50.9189	61.5653	50.1673	65.8125	50.2036	61.9836	53.9618	52.0274	73.1	86.1211	80.469	68.7164	90.9638	78.6647	81.2843	54.662	75.0237	71.0036	65.9429	66.7399	57.481	69.5036	49.9909	48.6901	59.9498	73.1	79.6066	76.6782	74.3472	76.1198	61.7496	72.9216	65.3289	62.5484	59.4428	69.6854	62.6561	63.5698	65.0715	53.3222
	73.2	64.2364	57.1458	67.815	51.7644	66.5326	53.8067	62.3192	56.1723	50.8499	61.6337	50.1718	65.9455	50.3502	62.0703	54.2375	51.9174	73.2	86.176	80.4276	68.7045	91.1777	78.3974	81.4083	54.6997	74.9803	70.6056	65.8902	66.4156	57.521	69.4645	49.8604	48.8625	59.7596	73.2	79.5234	76.5541	74.3573	76.1952	61.7321	73.086	65.4555	62.7146	59.357	69.6416	62.4995	63.3871	64.8997	52.9775
	73.3	64.19	57.2171	67.4572	52.0968	66.752	53.8028	62.3189	56.0816	50.7138	61.6545	50.0511	65.8981	50.4616	62.1718	54.4846	51.6782	73.3	86.358	80.4152	68.6012	91.2884	78.3076	81.435	54.7546	74.835	70.3313	65.9331	66.2545	57.4174	69.2533	49.7423	49.2384	59.5408	73.3	79.5516	76.5457	74.417	76.27	61.6842	73.1519	65.7482	62.8951	59.4354	69.8669	62.5756	63.0293	64.7868	52.7262
	73.4	64.4352	57.403	67.3039	52.3395	66.9032	53.7542	62.3916	55.9124	50.6289	61.5604	49.902	65.813	50.4352	62.2816	54.5381	51.3863	73.4	86.4598	80.6674	68.2304	91.5876	78.4196	81.3465	54.6954	74.4561	70.0589	65.848	66.1008	57.2499	68.9596	49.6134	49.4832	59.2062	73.4	79.5992	76.5471	74.4558	76.4174	61.7164	73.0939	65.8326	63.0441	59.5649	70.1851	62.7976	62.8082	64.7675	52.4774
	73.5	64.6079	57.6353	67.4321	52.4442	66.9155	53.6748	62.4064	55.6014	50.5369	61.2926	49.7067	65.5402	50.3957	62.4028	54.33	50.9589	73.5	86.5866	81.0679	68.0263	91.8425	78.719	81.2311	54.5654	74.0659	69.9838	65.558	66.1861	57.1911	68.68	49.5143	49.5296	59.1092	73.5	79.5252	76.577	74.4594	76.3728	62.0233	72.9343	65.8719	63.0926	59.658	70.5624	63.1356	62.7595	64.7833	52.2355
	73.6	64.8089	57.8109	67.438	52.3808	66.9396	53.6004	62.4531	55.2838	50.625	60.9149	49.4731	65.2708	50.3653	62.3834	54.0249	50.5162	73.6	86.6604	81.217	67.874	91.9789	79.0078	81.1355	54.5898	73.7378	70.055	65.4162	66.3326	57.0591	68.4952	49.5404	49.5124	59.1307	73.6	79.342	76.5507	74.6222	76.332	62.23	72.841	65.6739	62.987	59.7431	70.8968	63.3112	62.8867	64.8894	52.2323
	73.7	65.001	57.799	67.369	52.4096	66.9898	53.6612	62.7618	55.0752	50.7535	60.6432	49.3205	65.0396	50.3494	62.4316	53.7464	50.2442	73.7	86.6361	81.3129	67.5851	92.1459	79.435	80.9714	54.4775	73.4628	70.4704	65.3233	66.5704	56.9298	68.4774	49.61	49.4613	59.3426	73.7	79.1305	76.4672	74.8316	76.3582	62.3051	72.7248	65.5516	62.698	59.8612	70.9978	63.3168	62.915	65.0663	52.463
	73.8	65.1725	57.7776	67.3904	52.3286	66.9084	53.7734	63.156	55.0328	50.8639	60.5437	49.263	64.807	50.2832	62.5298	53.3818	50.2544	73.8	86.5943	81.3786	67.4444	92.2626	79.8633	81.0124	54.3018	73.3127	70.6835	65.1469	66.6852	56.9754	68.879	49.5491	49.3428	59.6946	73.8	78.9349	76.1765	75.0071	76.3241	62.4736	72.5964	65.3082	62.6396	59.8162	70.7988	63.2784	63.095	65.2698	52.5941
	73.9	65.0604	57.5933	67.4312	52.207	66.7969	53.926	63.4564	55.1217	50.9166	60.6326	49.284	64.5907	50.3732	62.4927	53.0335	50.1594	73.9	86.5227	81.3048	67.5982	92.0466	80.2223	81.0661	54.1991	73.3228	70.8674	65.0207	66.8844	57.1822	69.429	49.3846	49.298	60.1576	73.9	78.8757	76.1177	75.2091	76.2421	62.4633	72.4926	65.2584	62.7008	59.8206	70.4709	63.1448	63.1225	65.2904	52.6976
	74	65.0112	57.295	67.2439	52.1024	66.755	54.0448	63.7698	55.4604	50.8906	60.9712	49.2706	64.3746	50.4555	62.4535	52.9963	50.1741	74	86.265	80.9892	67.5986	91.7931	80.4516	81.1189	54.273	73.2593	71.0415	65.0972	66.9728	57.3765	70.003	49.1616	49.3618	60.4305	74	78.9036	76.1401	75.4474	76.3454	62.2859	72.4134	65.03	62.8929	59.8418	70.0931	62.9699	63.1744	65.148	52.815
	74.1	64.903	57.0232	67.2579	51.9742	66.6036	54.2122	63.7902	55.8114	50.6865	61.3096	49.3218	64.1799	50.488	62.5381	53.1859	50.2507	74.1	86.0355	80.8693	67.608	91.6049	80.5112	81.0762	54.3153	73.1712	71.1394	64.9833	66.9262	57.6604	70.4818	48.7028	49.4471	60.682	74.1	78.9471	76.1197	75.5536	76.4728	62.1408	72.2042	64.9856	63.2204	59.8872	69.719	63.1077	63.1571	65.0505	52.8998
	74.2	64.7436	56.9217	67.415	51.8522	66.399	54.219	63.4844	56.175	50.577	61.522	49.4269	63.9003	50.5799	62.6072	53.4535	50.3104	74.2	85.8795	80.741	67.7114	91.4117	80.3654	80.9977	54.3973	73.1493	71.0424	65.0303	66.8141	57.9199	70.7086	48.2898	49.6521	60.812	74.2	79.0521	76.1245	75.5725	76.5279	61.9973	72.0135	64.9907	63.7272	59.9756	69.4619	63.291	63.2204	64.9788	52.6919
	74.3	64.4847	57.0273	67.5822	51.8197	66.2983	54.1638	63.0686	56.4058	50.51	61.6491	49.5156	63.7476	50.6381	62.6628	53.669	50.2212	74.3	85.6865	80.625	67.6891	91.2192	80.2266	80.7439	54.4756	73.1637	71.0574	65.0675	66.7855	57.9767	70.5858	48.1153	49.8926	60.7967	74.3	79.1698	76.315	75.4963	76.4851	61.8602	71.8757	65.0652	64.0279	59.9573	69.2828	63.3047	63.1486	64.9142	52.4658
	74.4	64.4053	57.2351	67.7426	51.7754	66.2683	54.0088	62.7295	56.5092	50.5391	61.688	49.6151	63.8799	50.5686	62.7825	53.8947	50.2728	74.4	85.4654	80.6	67.4356	91.2579	80.1765	80.5388	54.4357	73.2883	71.096	65.1927	66.6128	57.9911	70.3648	48.2396	50.1592	60.6116	74.4	79.1211	76.3196	75.2915	76.4056	61.8185	71.8041	65.0895	64.1218	59.8692	69.2284	63.1144	63.1175	64.9666	52.3022
	74.5	64.282	57.4535	67.9745	51.7836	66.2564	53.8926	62.3191	56.4737	50.5456	61.7136	49.8685	64.2004	50.4716	62.8071	54.0294	50.3678	74.5	85.4022	80.6194	67.2265	91.3443	80.2262	80.3872	54.3066	73.5713	71.1639	65.1461	66.4448	57.9877	70.1123	48.4468	50.431	60.4859	74.5	79.1861	76.2566	74.8788	76.0486	61.698	71.866	65.2858	64.066	59.8384	69.2666	62.8751	62.9873	65.1396	52.2552
	74.6	64.2564	57.5108	68.1083	51.976	66.3777	53.6934	62.2458	56.3699	50.5162	61.8234	50.0056	64.6289	50.471	62.7386	53.9888	50.5653	74.6	85.403	80.6044	67.1242	91.2386	80.3558	80.3232	54.229	73.7722	71.1429	65.1627	66.4423	57.955	69.8412	48.8123	50.6195	60.3154	74.6	79.2822	76.2726	74.4355	75.7185	61.4976	72.14	65.4216	63.8316	59.8691	69.327	62.4907	62.7879	65.1597	52.1108
	74.7	64.2044	57.4151	68.1764	52.1013	66.5062	53.5827	62.5233	56.0932	50.4046	61.8274	50.0217	65.2036	50.3895	62.5796	53.8432	50.804	74.7	85.5506	80.6696	67.1631	91.0853	80.4862	80.3149	54.2659	73.8776	71.2644	64.9209	66.3046	57.9122	69.671	49.1991	50.5578	60.2008	74.7	79.3728	76.378	74.0963	75.6134	61.4369	72.3715	65.4574	63.4723	59.7512	69.3848	62.0957	62.5952	65.1116	52.213
	74.8	64.2974	57.182	68.1868	52.1498	66.5999	53.4287	62.8635	55.8357	50.3526	61.789	50.0144	65.5408	50.3488	62.2814	53.8506	51.0292	74.8	85.6658	80.7882	67.1926	90.8798	80.4029	80.4018	54.435	74.0296	71.4556	64.6626	66.1321	58.0228	69.5523	49.4635	50.413	60.2481	74.8	79.4028	76.3836	73.7745	75.7012	61.2657	72.56	65.5951	63.1245	59.8295	69.5438	61.931	62.372	65.035	52.3644
	74.9	64.2828	56.9444	68.0905	52.2347	66.5669	53.3796	63.0772	55.56	50.0602	61.837	49.9816	65.6134	50.3404	61.9463	53.8937	51.2523	74.9	85.7646	80.8621	67.2966	90.5139	80.0855	80.6128	54.7825	73.9897	71.6695	64.2189	66.216	58.0834	69.4568	49.4412	50.0904	60.4594	74.9	79.5968	76.3377	73.6444	75.7896	61.1092	72.6304	65.742	62.8512	59.9325	69.5348	61.9926	62.1762	64.9787	52.4402
	75	64.3045	56.7387	67.9976	52.3093	66.4134	53.3127	63.408	55.2411	49.7966	61.6912	49.7883	65.4877	50.4395	61.6933	53.7884	51.3768	75	85.854	81.0243	67.548	90.0393	79.5384	80.8835	55.1421	73.8752	71.6938	63.8787	66.2602	58.102	69.3688	49.5368	49.8107	60.656	75	79.6765	76.2292	73.9611	76.0568	61.0852	72.6052	65.7966	62.5392	60.1045	69.5261	62.1247	62.0803	64.8963	52.407
	75.1	64.314	56.5176	67.8747	52.0876	66.2326	53.2915	63.5087	55.078	49.6298	61.471	49.696	65.2719	50.3032	61.4671	53.7857	51.2085	75.1	85.8952	81.1742	67.7618	89.8396	79.082	81.0682	55.3802	73.8214	71.9062	63.585	66.1209	58.1836	69.334	49.6222	49.4847	60.7565	75.1	79.6849	76.0261	74.4274	76.2955	61.1986	72.3838	65.8563	62.3326	60.2003	69.486	62.2032	61.9484	64.8134	52.4592
	75.2	64.4234	56.4124	67.7153	51.8404	66.1713	53.2472	63.3719	55.1928	49.4863	61.413	49.6955	64.9516	50.1942	61.3435	53.8026	50.9529	75.2	85.7436	81.2074	67.8106	89.7929	78.5987	81.2529	55.5058	73.8284	71.8972	63.5192	66.1234	58.3604	69.3952	49.6084	49.2745	60.6816	75.2	79.5784	75.8412	74.7944	76.3938	61.0925	72.1628	65.8206	62.2234	60.3523	69.3874	62.3021	61.7028	64.8423	52.3837
	75.3	64.4831	56.3624	67.6593	51.6082	66.0044	53.2763	63.3067	55.3746	49.2635	61.4142	49.6409	64.8899	50.0585	61.3703	53.7822	50.776	75.3	85.6434	81.179	67.9438	89.8143	78.4795	81.3584	55.4955	73.6258	71.6948	63.5866	66.0041	58.4699	69.541	49.6245	49.0928	60.4892	75.3	79.4812	75.6681	75.3292	76.2988	61.0426	71.9965	65.6795	62.1603	60.3542	69.1158	62.2885	61.6041	65.0285	52.3514
	75.4	64.5925	56.261	67.6449	51.404	66.0513	53.2086	63.5114	55.5792	49.3142	61.411	49.4046	64.913	49.9498	61.4798	53.7552	50.457	75.4	85.6695	81.0471	68.0933	89.9955	78.4833	81.2051	55.3819	73.5586	71.3344	63.8757	65.5509	58.5363	69.6775	49.8936	49.0543	60.3869	75.4	79.2362	75.5514	75.8078	76.1936	61.0659	71.8568	65.6035	62.1372	60.2387	68.8997	62.2418	61.5373	65.3638	52.3775
	75.5	64.7074	56.2882	67.6554	51.2784	66.3226	53.2774	63.6953	55.7958	49.4655	61.4398	49.2968	65.1118	49.7125	61.5732	53.7923	50.382	75.5	85.6024	80.8909	68.0501	90.2292	78.6016	80.8503	55.1771	73.4142	71.1147	64.0556	65.2531	58.5999	69.7791	49.8929	49.0123	60.303	75.5	78.9775	75.585	75.8877	76.0234	61.0844	71.6708	65.6895	62.2314	59.9777	68.6172	62.1795	61.5674	65.6541	52.5744
	75.6	64.7417	56.5272	67.6627	51.367	66.581	53.4368	63.9505	55.7994	49.6858	61.5268	49.2102	65.2694	49.7306	61.6148	53.8041	50.6244	75.6	85.4141	80.6844	67.9377	90.2545	78.6987	80.5097	55.0786	73.3973	70.7866	64.3332	65.1515	58.5828	69.8978	49.9143	49.2073	60.2897	75.6	78.8326	75.576	75.9093	75.7854	61.0883	71.6658	65.8244	62.3917	59.7949	68.4049	62.2352	61.8085	66.0336	52.7435
	75.7	64.6548	56.7284	67.5063	51.4291	66.7284	53.5633	64.1949	55.5733	49.8913	61.6129	49.1045	65.3442	49.6591	61.5505	53.9774	50.855	75.7	85.2077	80.4114	67.7616	90.1795	78.9668	80.1882	54.9505	73.3004	70.6126	64.5526	64.9806	58.4004	69.8631	50.0428	49.459	60.3738	75.7	78.8247	75.4022	75.9451	75.4748	61.3715	71.7629	66.0815	62.4286	59.6717	68.287	62.3223	62.1813	66.3252	52.9831
	75.8	64.6338	56.8368	67.2728	51.5366	67.0411	53.6108	64.3637	55.3175	50.1316	61.6175	49.1608	65.2594	49.6253	61.4105	54.2349	51.0296	75.8	84.9782	80.0341	67.5247	90.156	78.9896	79.8716	54.8443	73.4336	70.5568	64.6003	65.0873	58.1564	69.8261	50.0428	49.7803	60.4896	75.8	78.901	75.3448	75.7523	75.3618	61.6626	71.8388	66.2514	62.3479	59.7241	68.3487	62.4163	62.5142	66.4295	53.091
	75.9	64.6886	57.1313	67.1676	51.6058	67.2118	53.6868	64.3447	55.0949	50.2393	61.3392	49.4849	65.0828	49.6652	61.1721	54.4715	51.323	75.9	84.6784	79.7854	67.2113	90.1741	78.9833	79.744	54.7483	73.5004	70.6787	64.4909	65.4388	57.936	69.8308	49.8261	50.0262	60.3303	75.9	78.9983	75.3695	75.5612	75.3196	61.9166	72.0381	66.3038	62.1594	59.9627	68.5621	62.3959	62.7751	66.2433	53.2886
	76	64.7288	57.3378	67.1239	51.6045	67.171	53.5948	64.3805	54.9261	50.3099	61.041	49.6514	64.8401	49.8748	60.9048	54.7844	51.3196	76	84.5303	79.6248	66.9981	90.2885	78.9461	79.7375	54.7767	73.7254	70.8229	64.571	65.6405	57.6266	69.9139	49.8293	50.0972	60.1608	76	79.0872	75.252	75.5882	75.3642	62.1883	72.3224	66.1847	61.9495	60.285	68.8085	62.4398	62.9	66.1329	53.2804
	76.1	64.8339	57.4672	67.0864	51.5297	67.1537	53.3071	64.3942	54.8129	50.273	60.7181	49.716	64.6156	50.0807	60.6373	55.0518	51.1235	76.1	84.572	79.5614	66.7207	90.3248	78.7942	79.9394	54.7408	73.8154	70.9507	64.57	65.7514	57.3066	69.9433	49.7434	50.004	60.0674	76.1	79.1783	75.2658	75.624	75.3122	62.3366	72.4174	66.0555	61.6712	60.4321	69.0456	62.5195	62.9318	66.0914	53.2789
	76.2	64.9909	57.5679	67.3992	51.5429	67.14	52.9851	64.473	54.8212	50.2944	60.3109	49.6512	64.5681	50.3776	60.4318	55.112	50.9639	76.2	84.7516	79.5913	66.4951	90.2932	78.5829	80.1072	54.7744	74.0764	71.1134	64.565	66.0633	57.0076	70.04	49.5849	49.7958	59.9696	76.2	79.1077	75.4792	75.6414	75.2706	62.3517	72.4028	66.0401	61.4664	60.4331	69.1403	62.6132	63.0492	66.0771	53.2274
	76.3	64.9791	57.7163	67.6856	51.5945	67.0412	52.7076	64.4936	54.8918	50.3546	59.9571	49.4856	64.6304	50.7068	60.2398	55.0189	50.8676	76.3	84.9538	79.7157	66.3296	90.2796	78.3416	80.3695	54.8914	74.074	71.241	64.729	66.2508	56.7152	70.1722	49.5934	49.5019	59.8695	76.3	78.9454	75.685	75.8212	75.093	62.4585	72.3836	66.1637	61.4141	60.2647	69.1885	62.787	63.1423	66.1385	53.312
	76.4	64.8421	57.6464	67.8511	51.7001	67.0208	52.4471	64.4253	55.0662	50.4668	59.9154	49.2698	64.8308	50.8551	60.1503	54.945	50.7695	76.4	85.1652	79.7564	66.3709	90.1177	78.2272	80.5576	55.0734	73.9517	71.2081	65.0141	66.45	56.5096	70.2456	49.6477	49.285	59.9688	76.4	78.867	75.846	75.89	74.9171	62.4277	72.2258	66.2614	61.4779	59.9194	69.1602	63.203	63.3168	66.3178	53.1973
	76.5	64.7636	57.4794	67.8308	51.7439	67.1674	52.2849	64.1488	55.3676	50.5361	60.1108	49.2542	64.9699	50.8457	60.1571	54.8491	50.6977	76.5	85.2742	79.5766	66.545	89.7859	78.2774	80.7979	55.2214	73.7986	71.1465	65.2156	66.6615	56.5278	70.1589	49.582	49.2174	60.1266	76.5	78.7861	76.103	75.7464	74.7213	62.2528	71.8758	66.3118	61.6155	59.4802	69.147	63.5575	63.4344	66.4176	53.1474
	76.6	64.6305	57.1731	67.9391	51.8493	67.2636	52.1905	63.8639	55.8418	50.7175	60.3494	49.3074	65.096	50.7745	60.3633	54.6811	50.609	76.6	85.3484	79.2704	66.8156	89.6793	78.4638	80.7996	55.3852	73.6263	71.1768	65.3253	66.8985	56.5672	70.0182	49.5283	49.1295	60.2753	76.6	78.5946	76.2522	75.4975	74.795	62.1577	71.6417	66.2362	61.7949	59.2581	69.1034	63.7202	63.4454	66.3488	53.0998
	76.7	64.5948	56.9608	67.8697	52.0278	67.347	52.1604	63.4061	56.2356	50.8578	60.755	49.5802	65.0864	50.7288	60.6283	54.6148	50.5137	76.7	85.4739	79.0592	67.2897	89.6459	78.6139	80.797	55.4415	73.196	71.0892	65.2811	66.8961	56.7488	69.8261	49.4003	49.1632	60.5368	76.7	78.4736	76.2168	75.3286	74.8964	61.9581	71.4422	65.945	61.999	59.2086	69.2138	63.7522	63.2925	66.2536	53.0455
	76.8	64.7157	56.7415	67.7966	52.013	67.4219	52.289	63.0393	56.4435	50.9359	61.1585	49.7751	65.0225	50.7079	60.946	54.6077	50.3291	76.8	85.5024	78.8824	67.6923	89.5214	78.882	80.7097	55.3472	72.9534	71.0442	65.0942	66.915	57.0186	69.5495	49.1967	49.1326	60.7362	76.8	78.4696	76.0987	75.074	75.0268	61.6598	71.2171	65.4438	62.1939	59.2031	69.2675	63.5815	63.1998	66.1323	52.8611
	76.9	64.8783	56.5245	67.6453	51.9622	67.313	52.4945	62.8465	56.564	51.0194	61.5096	49.8528	64.8739	50.8585	61.3388	54.5828	50.0986	76.9	85.5332	78.7198	67.858	89.4056	79.0006	80.5607	55.1432	72.8872	71.0809	64.8931	66.7711	57.1874	69.3135	49.0763	49.0211	60.7748	76.9	78.5411	75.9558	74.8872	75.0112	61.6396	71.0991	64.9355	62.3725	59.2875	69.2772	63.1641	63.0692	65.9445	52.7603
	77	64.9324	56.4883	67.6632	51.9742	66.9682	52.7307	62.8031	56.5301	51.1244	61.6921	49.7888	64.852	51.0977	61.669	54.3929	49.9976	77	85.5327	78.7789	67.8101	89.5235	78.9963	80.3436	54.8404	72.6446	71.1198	64.7642	66.7825	57.2575	69.2968	48.9445	48.7697	60.6661	77	78.6696	75.7225	74.7622	74.9386	61.8196	71.3031	64.626	62.52	59.4192	69.2975	62.6712	63.0485	65.7338	52.5788
	77.1	65.0828	56.5996	67.472	51.8417	66.6181	53.0457	62.7764	56.2946	51.1989	61.8221	49.7231	64.8939	51.2558	61.7755	54.2252	50.0617	77.1	85.2671	78.975	67.718	89.6853	78.9366	80.2249	54.4275	72.4278	71.1523	64.7602	66.7951	57.4809	69.424	48.7644	48.5281	60.4204	77.1	78.841	75.58	74.6802	74.7118	61.9384	71.57	64.4152	62.6464	59.4394	69.3663	62.3532	63.0832	65.5796	52.4051
	77.2	64.9872	56.6224	67.2504	51.523	66.3756	53.4742	63.0738	56.122	51.2834	61.8342	49.5864	65.0819	51.3446	61.9056	54.007	50.1854	77.2	84.7774	78.9972	67.213	89.9309	78.948	80.1161	54.177	72.3358	71.1917	64.9398	66.998	57.6509	69.553	48.7494	48.1532	60.0384	77.2	79.0927	75.4615	74.523	74.5943	62.135	71.8709	64.3197	62.7637	59.4344	69.296	62.1234	63.0564	65.4349	52.3241
	77.3	64.733	56.6726	67.1375	51.3865	66.2257	53.6805	63.4534	56.1128	51.3201	61.8723	49.6373	65.3792	51.2816	61.9836	53.8567	50.3606	77.3	84.4988	79.0041	66.6773	90.2043	78.9955	80.037	54.0462	72.1568	71.0902	65.2487	67.184	57.772	69.7402	48.7988	47.9067	59.7924	77.3	79.1558	75.3193	74.383	74.5841	62.367	72.1602	64.4396	62.6626	59.4959	69.2904	62.068	62.8723	65.2691	52.3135
	77.4	64.6004	56.8093	67.2052	51.3232	66.2738	53.7464	63.7226	55.926	51.2756	61.8449	49.8098	65.6433	51.099	61.9231	53.7331	50.6143	77.4	84.2253	79.1336	66.2518	90.5119	79.2436	80.1058	53.9858	71.9793	71.0022	65.4032	67.5518	57.9153	70.0303	48.7903	47.6919	59.6676	77.4	78.9744	75.1699	74.1626	74.706	62.3082	72.1585	64.7462	62.5295	59.5688	69.3544	62.1021	62.6838	65.1442	52.2574
	77.5	64.4224	56.9076	67.2748	51.2798	66.5329	53.7555	63.9086	55.6138	51.1342	61.7041	49.9667	65.7893	50.7466	61.9464	53.7103	50.8275	77.5	84.0994	79.1193	65.8383	90.6887	79.5376	80.1438	54.0182	72.0052	70.8723	65.383	67.7858	57.9482	70.12	48.8543	47.7019	59.663	77.5	78.8375	75.1508	74.044	74.8098	62.0841	71.8234	64.9666	62.2998	59.6669	69.4047	62.2135	62.4435	64.9987	52.3725
	77.6	64.0221	57.0958	67.4734	51.3966	66.8186	53.7455	64.0228	55.5063	50.7343	61.6571	50.1249	65.8817	50.4254	62.0326	53.7749	50.9008	77.6	84.3988	79.0269	65.5446	90.7236	79.7584	80.1842	54.2874	71.9785	70.6036	65.2529	67.8409	57.7501	70.1351	49.035	47.7411	59.7728	77.6	78.7836	75.1739	73.9658	74.9924	62.0301	71.4469	65.1959	62.0878	59.7748	69.4246	62.192	62.2911	64.8691	52.4052
	77.7	63.8331	57.441	67.6295	51.6874	67.1162	53.5949	63.8582	55.3725	50.2473	61.6335	50.2795	65.8516	50.1009	62.022	53.8967	50.9265	77.7	84.8478	79.1444	65.6058	90.7013	79.8311	80.2491	54.4905	72.0114	70.3759	65.0779	67.7488	57.4398	70.1292	49.1644	47.8226	59.9097	77.7	78.7041	75.3415	73.8674	74.9786	62.0869	71.1044	65.2962	61.8904	59.777	69.4784	62.179	62.2615	64.7862	52.3022
	77.8	63.7637	57.844	67.7305	51.9029	67.345	53.6276	63.382	55.1967	49.9321	61.5052	50.3085	65.6234	49.7647	62.0806	53.8577	50.921	77.8	85.1476	79.3202	65.826	90.5767	79.7423	80.3142	54.5842	72.1749	70.2141	64.9123	67.6481	57.128	70.0492	49.3043	47.971	59.9487	77.8	78.7531	75.6639	73.7622	74.844	62.0504	70.8802	65.4345	61.8993	59.8098	69.4064	62.1111	62.414	64.7928	52.2302
	77.9	63.5264	58.2094	67.6053	51.853	67.514	53.7226	62.9901	55.3163	49.6899	61.4645	50.2751	65.419	49.4998	62.2003	53.6822	50.811	77.9	85.4457	79.4032	66.0335	90.494	79.4202	80.3462	54.6569	72.2609	70.1065	64.9923	67.3839	56.8216	69.7854	49.3488	48.2686	59.9318	77.9	78.9457	76.0416	73.821	74.7495	62.2541	70.9046	65.5027	61.9069	59.9092	69.2202	62.0766	62.6257	64.8783	52.1838
	78	63.4963	58.3598	67.3632	51.6665	67.7436	53.6772	62.675	55.6956	49.5518	61.6745	50.3599	65.1696	49.4882	62.1105	53.5724	50.7409	78	85.6323	79.5737	66.3468	90.2955	79.1315	80.4964	54.6792	72.2678	69.9552	65.1863	67.1088	56.6268	69.7002	49.2922	48.386	59.9334	78	79.0758	76.3447	73.8069	74.776	62.5214	71.1298	65.5546	61.8902	59.979	68.9798	62.1329	62.8476	65.0247	52.0142
	78.1	63.7987	58.2653	67.0622	51.3694	67.9575	53.5261	62.4609	55.917	49.7399	61.6814	50.3989	64.8808	49.4986	61.9998	53.4406	50.6815	78.1	85.5274	79.8113	66.477	90.1303	78.9072	80.6683	54.5334	72.469	69.9658	65.3688	67.1576	56.5091	69.5762	49.2954	48.4961	59.8939	78.1	79.0657	76.6545	73.7472	74.8071	62.6279	71.238	65.4733	61.9205	60.036	68.7004	62.3909	62.9789	65.137	51.9553
	78.2	64.0884	57.956	66.8502	51.0018	67.8889	53.2942	62.3424	56.2254	50.0853	61.5649	50.3273	64.584	49.588	61.9545	53.18	50.568	78.2	85.4511	79.9576	66.3737	89.9018	78.7114	80.7763	54.2694	72.6716	70.0562	65.4435	67.156	56.5278	69.5511	49.3208	48.7766	59.8918	78.2	78.9953	76.9221	73.8058	75.049	62.524	71.3505	65.4716	61.8894	60.239	68.4364	62.6642	63.1481	65.1165	52.0533
	78.3	64.4064	57.603	66.5868	50.7202	67.7608	53.0609	62.471	56.4934	50.194	61.6203	50.1834	64.2833	49.9111	61.8873	53.0382	50.3941	78.3	85.3409	80.0922	66.1201	89.7465	78.6662	80.7964	54.0642	72.78	70.3008	65.3281	67.0664	56.6097	69.5627	49.3264	48.9418	59.9109	78.3	78.9635	77.0101	73.8974	75.345	62.4195	71.4039	65.2819	61.9036	60.3898	68.4268	62.9917	63.255	64.8667	52.1426
	78.4	64.7191	57.2745	66.6131	50.7198	67.4753	52.921	62.5338	56.5048	50.2844	61.5693	49.9516	64.0411	50.0957	61.774	53.0411	50.2771	78.4	85.1528	80.2086	65.866	89.4008	78.767	80.7489	53.8881	73.0583	70.3788	64.9621	67.0528	56.7855	69.5583	49.5508	48.8803	59.8968	78.4	78.9466	76.9477	73.8818	75.5559	62.181	71.5318	65.0462	61.939	60.4174	68.62	63.181	63.2434	64.5018	52.2535
	78.5	64.8705	57.1701	66.8392	50.9473	66.9334	53.0668	62.5766	56.3116	50.445	61.337	49.6831	63.9142	50.1414	61.8755	52.921	50.1073	78.5	84.9462	80.1333	65.4792	89.1935	78.7615	80.5146	53.7563	73.3641	70.5019	64.6104	67.0673	57.09	69.3983	49.8381	48.9044	59.735	78.5	78.9453	76.7474	73.9352	75.715	61.9126	71.5708	64.8687	62.0531	60.48	68.7728	63.2466	63.2564	64.2704	52.4316
	78.6	64.8964	57.1408	67.0498	51.3022	66.3815	53.3163	62.5181	56.0232	50.4954	61.2026	49.4555	63.9937	50.3059	62.0764	52.8338	49.9334	78.6	84.8922	80.0187	65.1852	88.938	78.8369	80.1417	53.6638	73.5149	70.5159	64.3952	66.9003	57.4841	69.252	50.003	49.11	59.5973	78.6	79.0943	76.3052	74.0832	75.9102	61.6608	71.6744	64.9277	62.0438	60.5487	68.9458	63.0609	63.2812	64.2011	52.5482
	78.7	64.865	57.1607	67.3262	51.5142	66.1034	53.7306	62.5549	55.4373	50.487	61.258	49.2634	64.1866	50.3416	62.324	52.8286	49.7796	78.7	84.7814	79.8706	65.1153	88.6293	79.0029	79.8127	53.7206	73.5142	70.3623	64.3103	66.8723	57.8017	69.0884	50.0259	49.1698	59.4052	78.7	79.2378	75.7929	74.143	75.8943	61.5626	71.6472	65.0749	62.1071	60.4779	69.0848	62.9006	63.2774	64.323	52.5746
	78.8	64.7136	57.127	67.6994	51.5888	65.9022	53.9255	62.5809	54.7545	50.6764	61.1852	49.2151	64.5344	50.2047	62.3913	52.7508	49.767	78.8	84.6412	79.6232	65.0657	88.3781	78.9922	79.6121	53.8679	73.5468	70.0693	64.3007	66.903	58.0703	68.9706	49.8764	49.1863	59.2126	78.8	79.2794	75.2902	74.1954	75.762	61.6235	71.5904	65.23	62.0795	60.3339	68.9842	62.7198	63.1929	64.7939	52.6382
	78.9	64.7008	57.071	67.8846	51.5258	65.8829	54.0695	62.6583	54.2435	50.7978	61.2193	49.3646	64.8627	50.281	62.6309	52.7599	49.8314	78.9	84.5284	79.405	65.0502	88.3397	78.8202	79.4892	54.03	73.2316	69.9392	64.4249	66.9478	58.1709	69.0396	49.5929	49.3234	59.1432	78.9	79.3505	74.9243	74.3465	75.613	61.6053	71.4848	65.2947	62.0454	60.3164	68.7036	62.7371	63.1153	65.3656	52.6886
	79	64.7316	56.9945	67.8176	51.3428	66.0928	53.9666	62.841	53.926	50.7952	61.3643	49.4698	65.1636	50.3964	62.8134	53.0183	49.9754	79	84.4472	79.3317	65.1869	88.3908	78.683	79.538	54.2269	72.887	69.8974	64.5478	66.9436	58.0444	69.3063	49.3073	49.4312	59.3015	79	79.4117	74.831	74.4576	75.4028	61.691	71.4891	65.1561	62.0291	60.3001	68.5698	62.7892	62.95	65.8607	52.6561
	79.1	64.5875	57.0353	67.7918	51.1015	66.2948	53.8516	63.1649	53.888	50.8379	61.6178	49.5899	65.1818	50.3653	62.8569	53.305	50.233	79.1	84.3312	79.283	65.395	88.5162	78.4436	79.7567	54.4822	72.6494	69.902	64.5072	66.8549	57.774	69.7613	49.0903	49.3068	59.5062	79.1	79.289	74.9799	74.5022	75.0275	61.7778	71.5329	64.856	62.0315	60.2293	68.4893	62.9893	62.8296	66.1954	52.6604
	79.2	64.3939	57.1702	67.5187	51.153	66.3352	53.69	63.3502	54.2583	50.8158	61.7458	49.8056	65.1174	50.4576	62.6164	53.679	50.6207	79.2	84.186	79.151	65.6016	88.7874	78.1885	80.0144	54.7122	72.6876	70.0904	64.36	66.6573	57.5686	70.197	49.0705	49.2332	59.8635	79.2	79.3066	75.0276	74.5828	74.8462	61.8484	71.5982	64.5248	62.0629	60.1888	68.5019	63.1174	62.6614	66.3739	52.6204
	79.3	64.3009	57.3057	67.1325	51.3404	66.3275	53.6706	63.5689	54.8856	50.7126	61.8126	49.8368	64.9473	50.4882	62.5282	54.1087	50.8927	79.3	84.1985	78.983	66.004	89.034	78.1457	80.21	54.9482	72.7784	70.4128	64.3322	66.5045	57.3388	70.6414	49.1866	49.253	60.2871	79.3	79.3673	75.2492	74.6592	74.8688	61.75	71.734	64.3374	62.1312	60.2049	68.6124	63.1015	62.5572	66.3294	52.4808
	79.4	64.1802	57.518	66.944	51.6992	66.268	53.5024	63.7545	55.4003	50.666	61.7462	49.6568	64.789	50.2723	62.049	54.3206	50.9997	79.4	84.4483	78.7955	66.406	89.2424	78.3062	80.2663	55.13	73.2114	70.7506	64.3909	66.2507	57.2526	71.0216	49.2058	49.2852	60.6147	79.4	79.2262	75.5188	74.5809	75.0617	61.7998	71.7002	64.2462	62.2512	60.0562	68.7344	62.9832	62.5238	66.2246	52.3212
	79.5	64.0091	57.6863	67.0652	52.1191	66.0395	53.4868	63.7832	55.7058	50.5973	61.6202	49.52	64.6113	49.9641	61.408	54.3793	50.961	79.5	84.7868	78.8332	66.7318	89.3037	78.3944	80.2674	55.2532	73.5353	70.955	64.3678	65.9662	57.1985	71.1552	49.2597	49.3521	60.8774	79.5	78.9452	75.6474	74.4511	75.2822	61.7165	71.5869	64.3803	62.3956	59.9492	68.7906	62.8962	62.6136	65.952	52.254
	79.6	63.9831	57.719	67.3912	52.4178	65.7959	53.4374	63.7922	55.8093	50.389	61.3807	49.4225	64.6992	49.6586	60.8467	54.3046	50.7208	79.6	85.0001	78.7737	66.9079	89.2217	78.5144	80.1373	55.2473	73.6362	71.0469	64.4985	65.8246	57.2066	70.9276	49.2383	49.4862	61.1193	79.6	78.6822	75.7253	74.2389	75.4842	61.664	71.4708	64.5427	62.6477	59.9571	68.8383	62.8588	62.6616	65.6935	52.1644
	79.7	64.0616	57.6127	68.083	52.5425	65.6036	53.3175	63.919	55.6402	50.1846	61.1828	49.2644	64.854	49.2116	60.7149	54.1314	50.3233	79.7	85.2605	78.9099	66.992	89.0486	78.6174	79.8643	55.2413	73.5856	71.0826	64.8757	65.6828	57.0827	70.6434	49.0301	49.5428	61.2434	79.7	78.3221	75.9896	73.9858	75.5277	61.5838	71.5176	64.5845	62.8457	60.0616	68.9474	62.9841	62.7896	65.5252	52.1406
	79.8	64.1439	57.5861	68.8755	52.5916	65.5064	53.1685	63.9111	55.2848	50.0342	61.225	49.2748	65.0333	48.8931	60.7038	53.9766	50.0308	79.8	85.5264	79.135	66.8328	88.914	78.557	79.5756	55.1136	73.4192	70.9138	65.1712	65.5416	56.9321	70.2313	48.8891	49.5322	61.3294	79.8	78.0344	76.1351	73.6736	75.4496	61.6513	71.4789	64.5196	63.0568	60.1676	69.0506	63.2945	62.9537	65.5061	52.1691
	79.9	64.1066	57.5482	69.4692	52.4101	65.4307	53.0927	63.831	55.0304	49.9761	61.3606	49.4298	65.1305	48.879	61.0103	53.9666	49.8096	79.9	85.3974	79.3884	66.5853	88.7538	78.311	79.4502	54.9658	73.0813	70.6059	65.2333	65.5495	56.6341	69.646	49.0055	49.4673	61.4761	79.9	78.0139	76.2427	73.4548	75.1537	61.7179	71.6218	64.5016	63.2184	60.3952	69.283	63.6204	63.1541	65.5981	52.3015
	80	64.1478	57.5333	69.7992	52.0996	65.4331	52.9424	63.7837	54.8955	50.0792	61.5332	49.5038	65.169	48.9952	61.5258	53.8976	49.713	80	85.1768	79.3168	66.306	88.6246	78.2288	79.3546	54.8235	73.0572	70.4474	65.3092	65.8197	56.4466	69.1762	49.1441	49.436	61.4615	80	78.3012	76.371	73.3136	74.9318	61.9488	71.799	64.4356	63.2475	60.4885	69.511	63.8476	63.262	65.8862	52.4317
	80.1	64.1576	57.5854	69.8294	52.0014	65.5966	52.9021	63.6663	54.7466	50.3464	61.8106	49.4078	64.9944	49.058	62.0549	53.8363	49.8839	80.1	85.0715	79.3974	66.1305	88.6602	78.1274	79.3436	54.7387	73.3555	70.5332	65.3386	66.1514	56.3039	69.1006	49.41	49.3281	61.2766	80.1	78.7568	76.3977	73.3779	74.8673	62.1174	71.8905	64.5076	63.1925	60.5302	69.7022	63.9588	63.3446	66.09	52.5046
	80.2	64.092	57.7643	69.5719	51.9423	65.9021	53	63.4985	54.7701	50.6908	62.0148	49.4119	64.5875	49.2896	62.2158	53.7804	50.1116	80.2	84.7518	79.4134	66.0132	88.7031	78.0904	79.5579	54.6733	73.5132	70.54	65.1948	66.6636	56.3727	69.1935	49.7722	49.2337	60.9093	80.2	79.1353	76.35	73.4723	74.8722	62.2758	71.8088	64.7878	63.0778	60.5418	69.718	63.8282	63.2261	66.2285	52.5137
	80.3	63.9831	57.7936	69.2834	51.9674	66.1469	53.0414	63.3359	54.9183	51.0222	61.9972	49.4372	64.245	49.5214	62.127	53.7474	50.338	80.3	84.2264	79.4382	65.9488	88.724	78.2287	79.8833	54.6042	73.7104	70.7484	65.0864	67.1631	56.5162	69.434	50.0433	49.2116	60.5019	80.3	79.3187	76.2855	73.63	74.7631	62.4384	71.6912	65.0904	62.829	60.5676	69.6539	63.6195	63.0014	66.1976	52.4693
	80.4	63.909	57.6228	68.9396	52.1336	66.3744	53.0914	63.2509	55.0082	51.1842	61.9298	49.3846	64.0246	49.4938	61.9968	53.648	50.6103	80.4	83.9695	79.3257	65.9424	88.6699	78.5737	80.1064	54.6219	74.0922	71.0004	65.0528	67.6018	56.7162	69.7796	50.1088	49.2043	59.9971	80.4	79.4311	76.2128	73.7718	74.6757	62.5874	71.4414	65.4139	62.4648	60.5273	69.418	63.458	62.6159	66.1059	52.3334
	80.5	63.8276	57.3644	68.5871	52.3386	66.6326	53.1693	63.2634	55.1332	51.2235	61.8332	49.296	64.0982	49.3755	61.7563	53.6292	50.8761	80.5	83.7868	79.2854	66.0304	88.55	78.8147	80.2916	54.6169	74.1828	71.123	65.0284	67.7002	56.9207	70.1121	50.1394	49.0207	59.5469	80.5	79.3804	76.011	73.7576	74.513	62.6221	71.1313	65.6936	62.2748	60.5559	69.1936	63.3834	62.276	65.9676	52.1092
	80.6	63.8189	57.0734	68.2857	52.3695	66.6996	53.1042	63.337	55.3213	51.2281	61.562	49.3598	64.27	49.505	61.4293	53.6468	51.0236	80.6	83.6159	79.1064	66.067	88.3012	79.0118	80.5249	54.6842	73.9071	70.9428	64.8966	67.6149	57.2065	70.1383	50.0159	49.0168	59.3947	80.6	79.1692	75.8865	73.5517	74.4326	62.8189	70.9312	65.7938	62.1787	60.4568	68.9987	63.3067	62.0602	66.1466	52.0279
	80.7	63.885	56.8082	68.0919	52.3652	66.6264	52.9374	63.3961	55.3361	51.1393	61.4238	49.2678	64.6793	49.5962	61.258	53.6517	51.2427	80.7	83.729	78.8744	65.9074	87.9997	79.0504	80.629	54.6481	73.8494	70.7821	64.6958	67.3567	57.3407	69.9124	50.0354	49.1315	59.6	80.7	79.0276	75.7928	73.3147	74.4146	62.9431	70.7723	65.6927	62.1742	60.2555	68.8586	63.2988	62.1149	66.4008	51.9767
	80.8	63.92	56.715	67.9363	52.2332	66.4567	52.8992	63.4849	55.298	50.8901	61.3905	49.1654	65.0993	49.6763	61.1886	53.5036	51.3933	80.8	83.8892	78.7685	65.8232	87.6853	78.9422	80.6646	54.623	73.8309	70.3751	64.3764	67.0846	57.3496	69.5839	50.1855	49.1855	59.6943	80.8	78.9191	75.6756	73.0574	74.588	62.9147	70.8138	65.6718	62.3653	59.9643	68.7462	63.2544	62.2064	66.6536	52.0782
	80.9	64.0396	56.9394	67.873	52.0404	66.2605	53.0304	63.5354	55.3196	50.6921	61.4698	49.135	65.3668	49.8111	60.9968	53.3727	51.4531	80.9	83.9414	78.8771	65.6821	87.4725	78.7386	80.6468	54.5898	73.6741	70.1318	64.1582	66.884	57.4693	69.2545	50.3508	49.258	59.8252	80.9	78.7415	75.4918	72.7779	74.7308	62.8173	71.043	65.4659	62.7178	59.6432	68.6543	63.1999	62.4033	66.772	52.2166
	81	64.0906	57.2441	68.0036	51.9213	65.9501	53.0961	63.4157	55.208	50.4673	61.5122	49.236	65.4272	49.9874	60.8079	53.2174	51.4209	81	83.8136	79.1167	65.4258	87.322	78.5376	80.6086	54.5423	73.6647	70.0062	63.9674	67.0046	57.5417	68.9056	50.5269	49.574	59.9716	81	78.4388	75.4389	72.7266	74.8721	62.729	71.4774	65.3109	62.8963	59.2811	68.5151	63.1051	62.5794	66.8266	52.4287
	81.1	64.0133	57.54	68.2078	51.9508	65.6839	53.2374	63.2656	55.1186	50.0942	61.7188	49.3514	65.5418	49.9727	60.8225	53.1546	51.2833	81.1	83.6582	79.3634	65.2174	87.3034	78.3482	80.4802	54.402	73.9583	70.204	63.9184	67.2304	57.3464	68.5729	50.7706	49.6622	59.8711	81.1	78.186	75.4579	72.8358	74.7562	62.4008	71.9328	65.2237	62.9162	59.1322	68.2992	63.0632	62.5736	66.5812	52.4614
	81.2	63.9176	57.7075	68.2621	51.9846	65.427	53.3502	63.1633	55.1506	49.8015	61.8984	49.5562	65.5676	49.9016	60.853	53.1774	51.0908	81.2	83.4322	79.5729	65.195	87.4989	78.2588	80.3576	54.2774	74.0834	70.4884	63.8856	67.5225	57.1546	68.3492	50.8038	49.5274	59.5536	81.2	78.0138	75.5178	72.9213	74.5169	62.2296	72.3389	65.2112	62.8824	59.0596	68.1151	63.1665	62.4362	66.2014	52.5696
	81.3	63.8685	57.7345	68.2288	51.9859	65.3584	53.3894	63.149	55.1236	49.66	62.0449	49.6112	65.4695	49.8578	61.0424	53.325	50.8892	81.3	83.4607	79.4885	65.1847	87.5607	78.1901	80.1814	54.1152	74.1472	70.9045	63.8722	67.758	57.1026	68.1585	50.6738	49.4395	59.4444	81.3	78.0743	75.5863	73.0674	74.1779	62.0887	72.4669	65.0531	62.6814	59.1957	68.0354	63.3509	62.4165	65.9123	52.5668
	81.4	63.7284	57.5085	68.2144	51.9452	65.4138	53.3134	63.2348	55.1851	49.5866	61.9779	49.6694	65.4174	49.8651	61.2902	53.5008	50.7134	81.4	83.4696	79.2438	65.3501	87.6391	78.0887	80.1782	53.7596	74.1693	71.0801	63.86	67.8508	57.0114	68.156	50.6401	49.366	59.4654	81.4	78.0946	75.6691	73.2992	74.0604	61.8969	72.5089	65.145	62.523	59.4856	68.0298	63.407	62.6179	65.6244	52.5854
	81.5	63.6892	57.4161	68.0106	51.8403	65.661	53.3393	63.4932	55.3778	49.564	61.938	49.7954	65.2932	49.8214	61.679	53.6314	50.5722	81.5	83.5465	78.8484	65.649	87.7702	78.0147	80.2239	53.4778	74.0539	71.0909	63.854	67.7454	56.9642	68.3525	50.5261	49.1714	59.5279	81.5	78.2829	75.8161	73.446	74.0015	61.6246	72.3417	65.2692	62.5461	59.7087	68.0823	63.4486	62.9204	65.3105	52.6105
	81.6	63.8088	57.332	67.7522	51.6394	66.0289	53.2602	63.7409	55.5361	49.6246	61.73	49.8337	65.029	49.7839	61.9213	53.7313	50.4897	81.6	83.6214	78.5881	65.9371	87.8756	77.9938	80.186	53.3447	73.7278	70.8191	63.8464	67.5656	57.2898	68.7236	50.3456	49.2184	59.6541	81.6	78.48	75.8337	73.5074	74.0651	61.5205	71.9712	65.4245	62.6313	59.783	68.2156	63.3478	63.28	64.9985	52.7588
	81.7	63.9072	57.3827	67.7769	51.3703	66.4893	53.2363	63.9027	55.6381	49.5732	61.4438	49.847	64.8736	49.6807	62.1476	53.7648	50.3463	81.7	83.5691	78.3128	66.1627	87.8241	77.9526	80.1149	53.3562	73.4836	70.4801	63.9945	67.3371	57.7249	69.1752	50.2538	49.3633	59.7962	81.7	78.5002	75.7061	73.674	74.1471	61.2818	71.7998	65.5772	62.6764	59.8917	68.2855	63.0829	63.5456	64.774	52.8089
	81.8	64.0236	57.5369	67.8202	51.3383	66.8649	53.2785	63.9212	55.8084	49.524	61.1154	50.0138	64.8378	49.4044	62.1406	53.7907	50.3422	81.8	83.2319	78.2652	66.258	88.025	77.9925	80.0232	53.5258	73.221	70.1742	64.2931	67.0911	58.1845	69.6674	50.1488	49.4618	59.855	81.8	78.329	75.6083	73.7141	74.3309	61.1634	71.9112	65.8666	62.7722	59.7822	68.2998	62.8416	63.7823	64.4671	52.8336
	81.9	64.2155	57.8239	67.9583	51.5237	67.1295	53.204	63.8774	55.8263	49.4284	60.9702	50.0783	64.929	49.213	62.2254	53.8523	50.3936	81.9	83.007	78.3499	66.1581	88.0926	77.9589	79.8442	53.8851	72.9372	69.8679	64.3867	66.8386	58.6289	69.8048	50.0184	49.5602	59.7846	81.9	78.2321	75.5279	73.7519	74.3814	61.2159	71.9912	65.8888	62.6182	59.538	68.345	62.7321	63.7207	64.2951	52.8491
	82	64.3373	57.7641	68.2229	51.7226	67.2874	52.9938	63.7698	55.893	49.4462	60.9018	49.9964	65.0214	49.0767	62.1518	53.8912	50.4801	82	82.8633	78.4672	65.8572	88.1619	77.8788	79.5512	54.2335	72.7222	69.815	64.3934	66.5708	58.9388	69.5562	49.8787	49.6242	59.8578	82	78.0272	75.3794	73.7647	74.4046	61.3604	71.9888	65.7922	62.2694	59.5028	68.3463	62.609	63.4944	64.1959	52.8028
	82.1	64.3685	57.7313	68.5396	51.9632	67.3984	52.9272	63.6438	56.0284	49.6006	61.0127	49.9251	65.1575	49.0485	62.0818	53.8191	50.6406	82.1	82.6682	78.4068	65.5377	88.1442	77.91	79.353	54.3346	72.6455	70.0037	64.3339	66.3739	58.8224	69.1904	49.8064	49.4277	59.9582	82.1	77.8766	75.2817	73.7274	74.4063	61.3935	72.2168	65.59	61.9484	59.5738	68.3412	62.7113	63.3223	64.3161	52.7654
	82.2	64.4528	57.4428	68.6944	52.3871	67.4171	52.9144	63.5383	56.2257	49.9588	61.1501	49.8707	65.1557	49.2469	62.0002	53.749	50.843	82.2	82.583	78.4686	65.2113	88.128	78.0025	79.0696	54.2032	72.5306	70.172	64.0877	66.2806	58.3966	68.778	49.7078	49.3358	60.0353	82.2	77.9325	75.2806	73.6125	74.4077	61.4022	72.2734	65.3796	61.6771	59.5986	68.4545	62.9064	63.2802	64.3614	52.8037
	82.3	64.5794	57.068	68.8564	52.5665	67.464	52.8155	63.576	56.3917	50.277	61.4096	49.8108	65.035	49.6234	61.9496	53.6888	50.888	82.3	82.6046	78.4448	64.9916	87.9849	77.9737	78.9276	53.9431	72.3692	70.475	63.7963	66.3277	57.8334	68.3433	49.74	49.2088	60.052	82.3	78.0537	75.3725	73.6964	74.3373	61.325	72.1215	65.0972	61.4459	59.7346	68.5875	62.9153	63.1458	64.469	52.7812
	82.4	64.6635	56.5863	68.7975	52.52	67.5403	52.733	63.6583	56.5533	50.5526	61.6614	49.9351	64.8855	49.8964	61.8127	53.4242	50.8506	82.4	82.5487	78.4042	64.767	88.0286	78.0306	78.766	53.6204	72.1828	71.0324	63.743	66.5152	57.2108	68.246	49.6201	49.018	60.0646	82.4	78.1245	75.5082	73.7442	74.3532	61.083	71.9383	64.9418	61.4842	59.8849	68.6743	62.9767	63.087	64.6417	52.7212
	82.5	64.8369	56.2917	68.7246	52.45	67.5718	52.7676	63.6722	56.6059	50.64	61.7445	50.0962	64.8611	50.1628	61.8775	53.2768	50.7769	82.5	82.5045	78.3956	64.6784	88.0022	78.0877	78.703	53.195	72.1169	71.3652	63.8033	66.7526	56.7908	68.5496	49.6765	48.8699	59.8963	82.5	78.2252	75.6586	73.7999	74.4174	60.7995	71.8962	64.781	61.6001	60.0085	68.8599	63.1772	63.1494	64.8141	52.7173
	82.6	65.0446	56.0617	68.6369	52.2336	67.5444	52.6897	63.6838	56.5011	50.5855	61.7045	50.3286	64.8539	50.3288	61.9786	53.2843	50.5585	82.6	82.5016	78.4744	64.6312	88.1228	77.9349	78.7114	52.874	71.9976	71.4435	63.8518	66.9929	56.5948	68.9157	49.6785	48.9471	59.8196	82.6	78.3035	75.7854	73.9493	74.5167	60.7651	71.7847	64.7252	61.7401	60.0089	68.9042	63.313	63.2848	64.7781	52.6964
	82.7	65.0987	56.029	68.5106	51.7961	67.5093	52.4866	63.696	56.2487	50.4235	61.7623	50.482	64.9521	50.3726	62.0046	53.265	50.3143	82.7	82.6413	78.4161	64.6003	88.3471	77.7079	78.9037	52.7235	71.8323	71.5548	64.022	67.0688	56.7892	69.2076	49.6072	48.9301	59.8908	82.7	78.1732	75.8106	74.0753	74.6809	60.9264	71.5758	64.7735	61.9147	59.9717	68.8221	63.3573	63.3511	64.9146	52.6474
	82.8	65.0178	56.0379	68.4243	51.453	67.3728	52.2548	63.656	56.0498	50.2718	61.7216	50.4596	65.2376	50.416	62.1794	53.1308	50.136	82.8	82.8215	78.4512	64.5708	88.5311	77.5055	79.0242	52.5507	71.7857	71.3432	64.225	67.0547	57.0232	69.5496	49.4394	49.0574	60.1782	82.8	77.9974	75.6875	74.0528	74.8019	61.1104	71.4831	64.8016	62.0507	59.905	68.6315	63.64	63.4609	65.0171	52.7412
	82.9	64.9441	56.1522	68.5444	51.2356	67.2108	52.1666	63.4632	55.7937	50.1828	61.4806	50.1905	65.3908	50.5114	62.3116	53.0942	50.0291	82.9	83.0167	78.4389	64.8219	88.6106	77.3313	79.1309	52.3718	71.826	70.9385	64.3696	66.995	57.2284	69.7669	49.4933	49.2463	60.4788	82.9	77.8231	75.4685	74.0002	74.7546	61.3615	71.4108	64.9156	62.0546	59.8152	68.5339	63.7418	63.5328	64.9754	52.8033
	83	64.7754	56.4092	68.5707	51.0332	67.0488	52.0105	63.26	55.4252	50.1792	61.3396	49.8789	65.4827	50.7048	62.2275	52.9044	49.9674	83	83.1407	78.4191	65.2127	88.6312	77.1562	79.2096	52.3789	71.6946	70.6164	64.5089	66.9932	57.157	69.8028	49.3744	49.3288	60.7156	83	77.8016	75.1653	74.0101	74.558	61.6667	71.271	65.1816	62.2006	59.6402	68.4484	63.7034	63.5564	64.9307	52.8604
	83.1	64.4607	56.6056	68.5137	50.9763	66.7932	51.9781	63.1486	55.1219	50.2906	61.1559	49.4224	65.5942	50.9098	62.0871	52.6433	50.1348	83.1	83.3138	78.3631	65.5383	88.4689	77.0309	79.1276	52.475	71.6484	70.557	64.644	67.0064	57.0857	69.9238	49.3837	49.2183	60.6674	83.1	77.7586	74.8832	73.9861	74.2941	61.7976	71.0478	65.4274	62.3899	59.5619	68.6453	63.593	63.4142	65.0018	52.9673
	83.2	64.3191	56.8407	68.4523	51.0158	66.5267	52.1572	63.1251	54.9497	50.3474	60.8017	49.0021	65.6118	51.1651	62.0843	52.5348	50.312	83.2	83.2734	78.5618	65.803	88.1612	76.8921	79.0358	52.6531	71.8378	70.4651	64.7446	67.1182	56.8182	70.1546	49.4281	49.1259	60.4417	83.2	77.851	74.7631	74.1134	74.1022	61.8534	71.1023	65.5098	62.5328	59.4664	68.9791	63.461	63.338	64.9664	53.1623
	83.3	64.2844	57.1168	68.2884	51.0935	66.2741	52.5571	63.1028	54.6118	50.457	60.427	48.761	65.325	51.4082	61.9968	52.576	50.35	83.3	83.2259	78.527	66.0627	87.934	76.8592	78.9641	52.9929	72.1718	70.5956	64.7084	67.211	56.6341	70.2668	49.6281	48.9316	59.9221	83.3	77.9694	74.7195	74.3229	73.9752	61.9207	71.1038	65.652	62.6712	59.3933	69.3886	63.1524	63.2174	64.9898	53.3325
	83.4	64.3526	57.3206	67.9544	51.151	65.9164	52.8688	63.1885	54.3736	50.4975	60.2746	48.7878	65.0061	51.511	62.063	52.6978	50.4603	83.4	83.3242	78.4238	66.1416	87.8014	76.7648	78.9371	53.4602	72.6402	70.7831	64.6557	67.2283	56.5427	70.3493	49.6573	48.6742	59.4477	83.4	78.1448	74.8601	74.5271	74.049	62.0866	71.009	65.6968	62.8588	59.4218	69.6104	62.9303	63.2418	65.0166	53.4814
	83.5	64.4609	57.3648	67.7381	51.2334	65.5943	53.4035	63.4005	54.4395	50.4833	60.07	48.8744	64.5807	51.3651	62.1381	52.9409	50.6305	83.5	83.5246	78.4109	66.0194	87.8251	76.7814	78.8698	53.8499	73.1652	70.8786	64.5773	67.1485	56.6153	70.324	49.8499	48.6538	59.1171	83.5	78.1543	75.0247	74.5885	74.2388	62.2584	71.0844	65.624	62.9044	59.4207	69.6079	62.7804	63.1874	65.0501	53.584
	83.6	64.7414	57.3675	67.7169	51.306	65.4859	53.8762	63.5104	54.7213	50.3411	59.9784	49.0165	64.1666	51.1105	62.2829	53.123	50.6248	83.6	83.6409	78.5852	65.9587	87.9376	76.9793	78.8831	54.2035	73.5516	70.6479	64.6159	67.0153	56.6611	70.067	49.954	48.9084	59.0509	83.6	78.1995	75.2179	74.6807	74.5481	62.3885	71.2764	65.4889	62.74	59.3789	69.3341	62.725	63.2506	65.0884	53.5956
	83.7	64.9088	57.3737	67.788	51.4724	65.4748	54.1222	63.4817	54.9895	50.2732	60.0408	49.2472	63.8493	50.6787	62.3237	53.1706	50.6854	83.7	83.7954	78.4427	66.0217	88.119	77.2017	78.7996	54.2674	73.6514	70.4817	64.675	66.8307	56.7691	69.7997	50.1057	49.2197	59.1101	83.7	78.1933	75.3166	74.6629	74.7736	62.399	71.2804	65.448	62.5106	59.4269	68.9949	62.8639	63.2805	65.2996	53.4412
	83.8	64.9926	57.3803	68.0094	51.5161	65.5778	54.1489	63.25	55.4054	50.1786	60.2468	49.4755	63.8599	50.1914	62.3872	53.1788	50.9114	83.8	83.8922	78.6027	66.1112	88.2402	77.3017	78.6644	54.1932	73.4678	70.367	64.8822	66.7471	56.8485	69.5079	50.0654	49.5009	59.3298	83.8	78.1378	75.377	74.4305	74.9511	62.3362	71.121	65.3524	62.3344	59.4274	68.7126	63.1405	63.3916	65.5935	53.1843
	83.9	64.8572	57.4162	68.377	51.4948	65.8569	54.2506	62.9722	55.785	50.1787	60.4159	49.517	64.0933	49.741	62.3738	53.2808	50.9937	83.9	83.7243	78.9037	66.1144	88.0399	77.5247	78.5461	53.9096	73.0446	70.2646	65.0376	66.6924	56.9812	69.2719	50.1238	49.7821	59.4582	83.9	78.1406	75.2136	74.1945	74.9964	62.0876	71.1962	65.2072	62.1432	59.3977	68.6237	63.4335	63.3333	65.8792	52.9397
	84	64.6573	57.4705	68.6505	51.4533	66.2041	54.1126	62.5982	55.9087	50.2347	60.5352	49.5259	64.447	49.4998	62.42	53.3894	50.9425	84	83.428	79.101	66.1607	87.7258	77.6772	78.5332	53.5346	72.6792	70.2801	65.2022	66.595	57.2306	69.2842	49.9053	49.7868	59.5076	84	78.1283	75.1015	74.0822	74.9922	61.8151	71.2374	65.0189	61.9538	59.4256	68.6892	63.7114	63.3137	66.1027	52.7024
	84.1	64.4871	57.5244	68.6748	51.4093	66.3435	53.9834	62.3238	55.7556	50.2137	60.611	49.7022	64.7913	49.3901	62.3914	53.5996	50.921	84.1	83.2852	79.0881	66.1373	87.4754	77.6252	78.5209	53.1398	72.4143	70.5443	65.3159	66.469	57.6075	69.4506	49.6855	49.6504	59.5229	84.1	78.0328	74.9028	73.8569	74.8534	61.618	71.294	64.8248	61.9146	59.4146	68.9104	63.8652	63.2449	66.1762	52.454
	84.2	64.3872	57.4558	68.6543	51.2692	66.2976	53.8529	62.1787	55.6338	50.1462	60.8076	49.847	65.0358	49.3948	62.3765	53.9108	50.9358	84.2	83.15	79.13	66.0406	87.267	77.536	78.622	52.9756	72.357	70.6552	65.3222	66.5037	57.9824	69.6315	49.4641	49.4082	59.5581	84.2	78.0039	74.7633	73.5974	74.6218	61.5991	71.3825	64.6376	61.9791	59.3604	69.0902	63.7964	63.1254	65.9442	52.3064
	84.3	64.267	57.3995	68.5572	51.2497	66.2652	53.7466	62.3799	55.5383	50.0202	60.8385	49.8195	65.0402	49.4359	62.2912	54.2521	50.8706	84.3	82.991	78.9121	65.7251	87.0201	77.566	78.699	52.9267	72.3446	70.5824	65.1821	66.4514	58.2626	69.9047	49.2031	49.1979	59.5984	84.3	78.1942	74.7752	73.4679	74.4449	61.5648	71.7859	64.5118	62.0665	59.3708	69.2501	63.625	62.8401	65.5305	52.3967
	84.4	64.273	57.3659	68.4152	51.2931	66.2326	53.5723	62.6089	55.5851	49.8714	60.9673	49.875	64.9635	49.552	62.1006	54.3657	50.8864	84.4	82.8882	78.6538	65.3724	87.0566	77.4297	78.6911	53.0528	72.3664	70.416	65.2256	66.4117	58.3973	70.0586	48.8683	49.0875	59.8651	84.4	78.2852	74.9112	73.5162	74.2134	61.5388	72.0368	64.4396	62.1952	59.4027	69.3425	63.3821	62.4826	65.2366	52.6063
	84.5	64.3422	57.3515	68.2612	51.487	66.0918	53.4214	62.8457	55.634	49.6779	61.4356	50.0231	64.9065	49.646	61.9246	54.4231	50.9716	84.5	82.8545	78.2914	65.0174	87.0832	77.2701	78.6574	53.2537	72.3747	70.212	65.2444	66.5323	58.2679	70.0058	48.7149	49.0995	60.2855	84.5	78.479	74.9352	73.5727	74.0742	61.4136	72.1299	64.4809	62.3478	59.3387	69.5455	63.1728	62.1579	64.9998	52.7903
	84.6	64.2967	57.4088	68.271	51.7204	65.9722	53.1754	62.8679	55.8221	49.6243	61.9887	49.9462	64.8721	49.81	61.6356	54.4767	51.1888	84.6	82.753	77.8958	64.6916	86.9227	77.0245	78.6946	53.4945	72.318	69.88	65.2006	66.6911	57.8908	69.9104	48.6586	48.9524	60.6042	84.6	78.7942	75.0626	73.7178	74.005	61.2266	72.1537	64.5088	62.5071	59.4056	69.7371	63.1049	61.9153	64.9894	52.9756
	84.7	64.1672	57.4446	68.2947	51.9948	65.9801	53.113	62.8254	55.8824	49.6302	62.151	49.8306	65.0138	49.9237	61.3494	54.3158	51.293	84.7	82.7593	77.6777	64.3587	86.6955	76.7929	78.578	53.7046	72.1394	69.6556	65.2611	66.7032	57.3813	69.7216	48.5477	48.8958	60.7981	84.7	79.0508	75.1692	73.9073	74.0641	60.966	72.2555	64.4257	62.6448	59.4841	69.8966	63.1962	61.86	65.1738	53.0264
	84.8	64.1653	57.362	68.394	52.3653	65.7936	53.0947	62.6194	55.8421	49.7496	62.3366	49.947	65.3631	49.8773	61.1002	54.0247	51.4526	84.8	82.8676	77.7028	64.2517	86.6371	76.4155	78.5274	53.7583	72.1409	69.5226	65.4047	66.706	57.0411	69.5593	48.6019	48.9196	60.9525	84.8	78.9608	74.9998	74.1746	74.1165	60.8171	72.15	64.2614	62.7454	59.4774	70.0308	63.3242	62.0352	65.3992	52.7992
	84.9	64.223	57.2187	68.4261	52.7436	65.5119	53.1826	62.5233	55.5663	49.867	62.2184	49.9581	65.5649	49.9009	61.0018	53.848	51.7217	84.9	83.1655	77.5862	64.3074	86.5524	76.1504	78.5938	53.6988	72.2086	69.622	65.2378	66.6929	56.7752	69.5106	48.7952	48.8585	60.8351	84.9	78.948	74.7423	74.1654	74.2616	60.8714	71.9903	64.2187	62.7105	59.3322	70.1494	63.5289	62.4911	65.6222	52.5292
	85	64.256	56.9642	68.5187	52.8952	65.3853	53.3373	62.5115	55.4457	50.1063	61.7587	49.8227	65.7154	49.7938	60.9079	53.7179	51.8728	85	83.4475	77.7193	64.3189	86.5695	75.9036	78.6637	53.622	72.2003	69.7964	65.0257	66.5768	56.7718	69.546	49.1174	48.8494	60.4778	85	78.8579	74.725	74.0453	74.3533	61.0124	71.8893	64.1708	62.5897	59.2526	70.0626	63.6006	63.0492	65.9074	52.3772
	85.1	64.2557	56.6232	68.4666	52.8581	65.5042	53.5572	62.8068	55.1808	50.3752	61.3104	49.934	65.7479	49.5837	61.1668	53.486	51.8296	85.1	83.6394	78.0544	64.4184	86.8331	75.9411	78.7038	53.4283	72.2042	70.205	64.8759	66.3672	56.9025	69.5869	49.3182	49.107	60.2434	85.1	78.5778	74.66	73.9413	74.5212	61.1594	71.7404	64.3096	62.5318	58.9785	70.0074	63.5967	63.5061	66.0276	52.2326
	85.2	64.3765	56.4899	68.3408	52.8276	65.7327	53.6934	63.0695	55.034	50.5772	61.1403	50.089	65.5139	49.5128	61.5281	53.3789	51.7909	85.2	83.7977	78.2061	64.6362	87.1164	76.1749	78.8376	53.1791	72.2869	70.7646	64.7388	66.0647	57.241	69.6209	49.5709	49.4068	60.0836	85.2	78.1776	74.7116	73.7448	74.6108	61.2364	71.5277	64.5453	62.6073	58.7756	70.1026	63.5171	63.7149	66.1328	52.2101
	85.3	64.4588	56.5004	67.9746	52.5267	66.0822	53.7907	63.3504	54.9664	50.7417	61.0451	50.1261	64.9943	49.5875	61.8707	53.356	51.7902	85.3	83.779	78.1956	64.8115	87.2254	76.5076	78.9342	52.9743	72.2815	71.2744	64.5196	65.848	57.4452	69.5513	49.7663	49.6672	59.8578	85.3	77.9589	75.0505	73.499	74.6038	61.3101	71.3944	64.8364	62.6663	58.7144	70.1707	63.3632	63.7356	66.2395	52.3009
	85.4	64.422	56.6047	67.5957	52.1126	66.4803	53.6589	63.5284	55.047	50.9188	61.124	50.3099	64.527	49.5128	62.1424	53.3026	51.4355	85.4	83.6282	78.3625	64.905	87.3862	76.8992	79.058	52.8444	72.3683	71.3858	64.5145	65.6076	57.7793	69.3965	49.9032	49.9851	59.7322	85.4	77.5922	75.549	73.3841	74.5654	61.3392	71.2939	64.965	62.8283	58.8172	70.139	63.1542	63.672	66.1935	52.2834
	85.5	64.4456	56.8384	67.1729	51.776	66.7523	53.4576	63.6154	54.9294	50.9851	61.3028	50.5904	64.1178	49.578	62.3321	53.256	51.2429	85.5	83.5282	78.4556	65.0566	87.5815	77.309	79.2042	52.7995	72.5112	71.2229	64.5538	65.3557	57.912	69.2354	49.9008	50.2001	59.799	85.5	77.2266	75.8644	73.2976	74.439	61.4612	71.2123	65.0495	63.2021	59.0301	70.228	63.1133	63.5966	65.9533	52.2328
	85.6	64.491	57.138	66.9954	51.6249	66.8132	53.328	63.4908	54.9352	51.021	61.3552	50.5366	63.8649	49.6735	62.1842	53.3701	51.0092	85.6	83.5088	78.4243	65.0904	87.7527	77.5991	79.3334	52.8587	72.6726	70.807	64.5104	65.207	58.1679	69.1263	49.8763	50.1098	59.8283	85.6	76.9672	76.3484	73.1429	74.2424	61.6577	71.1267	64.9905	63.4284	59.5206	70.0729	62.9999	63.5458	65.6969	52.2556
	85.7	64.4122	57.1798	66.9694	51.4327	66.7632	53.1198	63.4002	54.882	51.0817	61.2256	50.3329	63.7548	49.6739	61.9776	53.4819	50.8212	85.7	83.3478	78.6522	64.8968	87.918	77.6829	79.4501	53.0657	72.8084	70.2276	64.5223	65.2388	58.3442	69.043	49.9404	49.824	59.7877	85.7	76.9779	76.5663	73.1112	74.0758	61.8478	71.0567	64.9916	63.3418	59.8706	69.8109	62.9322	63.6062	65.3865	52.1797
	85.8	64.342	57.0337	67.1394	51.4557	66.8699	52.9654	63.28	54.632	50.9872	61.0475	50.0168	63.9462	49.7842	61.7905	53.5769	50.5731	85.8	83.4145	78.7854	64.7081	88.2272	77.7778	79.6316	53.417	72.8525	69.7534	64.6834	65.3105	58.5094	69.0451	50.1185	49.4852	59.8902	85.8	77.0245	76.5118	73.1868	74.0166	62.0114	70.9745	65.0194	63.0702	59.9758	69.5362	62.9564	63.7043	65.1556	52.0212
	85.9	64.3864	56.8864	67.4192	51.5788	66.992	53.0262	63.1849	54.297	50.694	60.996	49.547	64.3647	50.0332	61.5672	53.8531	50.6222	85.9	83.4474	78.8128	64.67	88.4277	77.7577	79.5319	53.7828	72.7434	69.6301	64.8611	65.4922	58.504	69.1823	50.2342	49.0741	60.0414	85.9	77.1339	76.382	73.1462	74.0001	62.0692	71.1751	65.028	62.7422	59.9922	69.3697	63.0402	63.7067	65.0177	51.9547
	86	64.324	56.7317	67.8288	51.7373	67.1009	53.0688	63.2385	54.1831	50.3789	60.9957	48.9693	64.6754	50.2531	61.4934	54.124	50.6652	86	83.3108	78.5226	64.7263	88.4395	77.6827	79.3205	53.9995	72.5244	69.7371	65.0462	65.7492	58.5681	69.3652	50.3678	48.749	60.0464	86	77.3101	76.2964	73.1469	74.1389	62.0053	71.4108	64.9881	62.2133	59.8867	69.1737	62.8877	63.5168	65.0204	51.7651
	86.1	64.3022	56.5896	68.083	51.8074	67.2952	52.9986	63.3576	54.084	49.9544	60.9924	48.6549	64.8797	50.4731	61.5667	54.1826	50.8277	86.1	83.0573	78.2308	64.9046	88.102	77.5971	79.0946	54.2062	72.2616	69.9629	65.2104	66.1048	58.3859	69.4906	50.5796	48.6952	59.9909	86.1	77.5952	75.955	73.2223	74.3526	61.8746	71.689	65.0406	61.7538	59.5402	69.2692	62.8144	63.3257	65.1486	51.5104
	86.2	64.2965	56.692	68.091	51.911	67.4318	53.0134	63.5605	53.9908	49.4986	61.192	48.617	65.0452	50.7074	61.5875	54.2962	50.9012	86.2	82.9016	77.7624	65.3028	87.7697	77.5778	78.7793	54.2019	71.9577	70.2017	65.0744	66.4686	58.2326	69.6506	50.6218	48.8959	60.0278	86.2	77.7836	75.6627	73.306	74.6964	61.7973	71.884	64.985	61.581	59.2727	69.364	62.7453	63.1901	65.2327	51.4573
	86.3	64.1915	57.0617	68.0122	51.9502	67.2889	52.9611	63.7819	54.1811	49.2538	61.367	48.7569	65.1089	50.7458	61.6616	54.4471	51.0112	86.3	82.515	77.531	65.7214	87.2748	77.4921	78.3987	54.1093	71.8431	70.2229	64.836	66.556	58.2206	69.7749	50.4164	49.1119	59.9464	86.3	77.9938	75.5273	73.231	75.0892	61.686	72.1092	64.8691	61.7735	59.36	69.5636	62.6721	63.1269	65.2279	51.504
	86.4	64.0327	57.3478	67.9188	51.9873	67.0858	52.7673	63.9358	54.5734	49.3028	61.4027	48.9647	64.9453	50.6853	61.7739	54.3391	51.072	86.4	82.134	77.2576	65.9062	86.7556	77.2859	78.2518	53.9757	71.8734	70.0679	64.4475	66.5232	58.1293	69.8308	50.1907	49.4238	59.8728	86.4	78.2507	75.3428	73.2461	75.5091	61.6626	71.9926	64.8751	62.0495	59.5879	69.7158	62.6102	63.0947	65.1496	51.5626
	86.5	63.9342	57.718	67.6989	51.9961	66.7631	52.7041	63.8648	54.8486	49.3728	61.4133	49.2842	64.9446	50.508	61.7713	54.1373	51.0051	86.5	81.889	77.2576	65.8898	86.3517	77.1826	78.2311	53.9729	72.0728	70.0672	64.0506	66.4333	58.0958	69.6832	49.8477	49.7947	59.9329	86.5	78.4344	75.0564	73.3014	75.8374	61.7771	71.7652	64.9721	62.4579	59.8754	69.777	62.7779	63.1708	65.0937	51.7821
	86.6	63.863	58.0928	67.4765	52.124	66.3166	52.7974	63.7342	55.1092	49.5878	61.478	49.5288	65.1063	50.2272	61.8396	54.075	51.0198	86.6	81.8057	77.2822	65.7722	86.3636	77.0485	78.1618	53.9486	72.4465	70.1647	63.7985	66.1778	58.1766	69.4911	49.5055	49.9943	59.977	86.6	78.4837	74.8235	73.3308	75.9068	61.8761	71.5626	64.8772	62.8244	60.2454	69.592	62.9988	63.207	64.943	52.0197
	86.7	63.9466	58.3354	67.4416	52.1712	65.9492	52.9583	63.5359	55.3756	49.859	61.4083	49.5466	65.3062	49.9375	62.0279	53.9246	51.196	86.7	81.6593	77.2851	65.5408	86.3924	76.8324	78.2735	54.1292	72.9684	70.2983	63.8198	65.9171	58.1857	69.2482	49.2943	49.9682	59.9978	86.7	78.3353	74.6997	73.3234	75.6834	62.0117	71.4254	64.7404	63.0353	60.6498	69.3714	63.1811	63.2011	64.8606	52.0941
	86.8	64.1529	58.3483	67.4721	52.0986	65.6836	53.2727	63.2982	55.6179	50.0683	61.4094	49.4641	65.4507	49.8102	62.1466	53.736	51.3497	86.8	81.7598	77.1242	65.2561	86.5295	76.6366	78.359	54.2334	73.381	70.6432	63.8975	65.9064	58.0043	69.0825	49.2546	49.9014	60.1657	86.8	78.0034	74.5972	73.3625	75.3504	62.0961	71.223	64.641	62.9818	60.7258	69.0405	63.3297	63.1984	64.7659	52.2393
	86.9	64.2878	58.3316	67.49	51.9956	65.4361	53.6169	63.1758	55.6171	50.1368	61.2791	49.3487	65.648	49.6214	62.4043	53.6515	51.4939	86.9	81.9379	77.107	65.137	86.7566	76.6428	78.4507	54.3216	73.6687	71.0699	64.1547	66.0688	57.8939	68.8274	49.3303	49.6994	60.2104	86.9	77.6672	74.3971	73.5067	74.8643	62.0268	71.1886	64.5178	62.8232	60.5242	68.81	63.3897	63.2055	64.8937	52.3949
	87	64.3952	58.1412	67.4632	51.8402	65.4993	53.915	63.1943	55.6746	50.2226	61.1488	49.1788	65.6019	49.5854	62.7331	53.6879	51.6497	87	82.1752	77.1097	65.1391	87.0893	76.5417	78.408	54.2722	73.8289	71.2432	64.5347	66.3571	57.7232	68.7951	49.6118	49.3408	60.1025	87	77.3801	74.2844	73.5607	74.4611	61.6978	71.2171	64.3312	62.598	60.2452	68.6935	63.3859	63.2518	65.0239	52.4366
	87.1	64.4586	57.8809	67.4166	51.5304	65.6227	54.0215	63.3403	55.7486	50.3079	61.0757	48.922	65.2557	49.6244	62.9998	53.6438	51.7313	87.1	82.2904	77.0802	65.1522	87.2739	76.4233	78.4682	54.2012	73.7308	71.1442	64.9508	66.6842	57.6128	68.7903	49.8734	49.1092	60.0108	87.1	77.2637	74.2137	73.6001	74.3223	61.4228	71.1668	64.3296	62.4234	60.1366	68.761	63.1955	63.3745	65.1771	52.5015
	87.2	64.29	57.5466	67.4938	51.4046	65.6804	53.9813	63.3987	55.9158	50.4298	61.0646	48.6329	64.9087	49.6749	63.1437	53.536	51.6983	87.2	82.4332	77.0074	65.2298	87.5138	76.3582	78.3943	53.9725	73.304	70.9606	65.4613	66.9011	57.5032	68.8329	50.0023	48.967	59.9371	87.2	77.5062	74.22	73.6696	74.3946	61.1177	71.1015	64.4794	62.3592	59.9571	68.8744	62.9665	63.5798	65.3038	52.6449
	87.3	64.0342	57.2261	67.6699	51.3684	65.7545	53.832	63.5616	55.9839	50.5236	61.0516	48.4836	64.5652	49.5647	63.3793	53.496	51.4597	87.3	82.3598	76.9849	65.3079	87.6457	76.3392	78.4266	53.8198	72.731	70.7462	65.7565	67.0878	57.4665	68.9445	50.1032	48.9059	59.7302	87.3	77.945	74.1316	73.8228	74.5466	60.9724	71.0214	64.6162	62.333	59.8743	69.0011	62.7492	63.6208	65.4942	52.6707
	87.4	63.8888	57.0004	67.7346	51.2546	65.9116	53.8078	63.6861	56.2158	50.695	61.188	48.4106	64.2328	49.6531	63.3851	53.4044	51.1578	87.4	82.2525	76.8026	65.3077	87.7243	76.1945	78.453	53.6679	72.152	70.4992	65.8912	67.1027	57.4521	69.1736	50.0683	48.9892	59.6911	87.4	78.3168	74.3361	73.8425	74.8574	60.8454	70.8274	64.6373	62.4026	59.952	68.9943	62.5943	63.5877	65.4539	52.5807
	87.5	63.8137	56.8347	67.9041	51.2478	65.7656	53.755	63.7695	56.3533	51.0588	61.2488	48.4861	64.0792	49.6829	63.2416	53.2567	50.9146	87.5	82.1162	76.6523	65.2485	87.5411	76.1025	78.5644	53.6342	71.6923	70.1908	65.873	66.9606	57.4166	69.2336	49.954	49.2132	59.7844	87.5	78.6475	74.5096	73.963	74.9965	60.9846	70.7525	64.7294	62.4754	60.1292	69.0087	62.4177	63.4553	65.3859	52.4856
	87.6	63.885	56.7272	68.1502	51.3276	65.6713	53.9163	63.7265	56.3296	51.3545	61.1962	48.8415	64.0911	49.8418	62.9617	53.1008	50.5817	87.6	82.0399	76.5243	65.1527	87.3034	76.0798	78.6338	53.5656	71.4559	70.0924	65.5639	66.8399	57.2342	69.3448	49.8183	49.364	59.9874	87.6	78.7222	74.6617	74.0768	75.0622	61.1073	70.8048	64.8525	62.5885	60.114	69.0044	62.4112	63.2055	65.316	52.3783
	87.7	64.2786	56.6973	68.1267	51.1804	65.6941	54.095	63.7891	56.2486	51.5013	61.0404	49.4288	64.113	49.8686	62.6902	53.1214	50.3314	87.7	82.0424	76.5823	65.001	86.9259	76.1468	78.774	53.4598	71.5995	70.0246	64.9501	66.7951	57.0102	69.5324	49.7582	49.551	60.1263	87.7	78.5013	74.706	74.0806	75.1044	61.2694	70.9363	64.9198	62.6556	60.0951	69.0009	62.3845	62.6988	65.2794	52.1945
	87.8	64.6881	56.8211	67.9388	51.1092	65.7054	54.205	63.7156	56.1971	51.5358	60.8666	49.915	64.2025	50.0115	62.2512	53.1094	50.3634	87.8	82.1489	76.7556	64.8788	86.7388	76.2512	78.8589	53.2942	71.9389	69.8105	64.6482	66.6781	56.8592	69.5366	49.6684	49.792	60.3376	87.8	78.1378	74.7755	73.8744	75.1594	61.3302	71.1848	65.0508	62.9007	60.1217	69.0375	62.3165	62.4529	65.2301	52.0858
	87.9	64.9221	56.9241	67.8837	51.165	65.6406	54.0972	63.5602	56.062	51.3582	60.8865	50.3467	64.2674	50.0175	61.8244	53.185	50.3388	87.9	82.2197	77.1321	64.7916	86.7317	76.5382	78.7897	53.1744	72.3682	69.6215	64.4038	66.6398	56.7578	69.4631	49.5414	50.0283	60.3933	87.9	77.7553	74.6343	73.6759	75.0784	61.6023	71.3604	65.428	63.0157	60.1078	69.2199	62.2656	62.3507	65.195	52.1421
	88	65.103	57.115	67.9058	51.1224	65.8051	53.7928	63.4226	56.0297	50.9038	60.9363	50.5088	64.245	49.8776	61.5255	53.338	50.4004	88	82.1821	77.4174	64.8244	86.9642	76.8553	78.6651	52.9327	72.6004	69.6653	64.1548	66.608	56.7409	69.4565	49.2649	50.1378	60.4082	88	77.3267	74.5486	73.3165	75.056	61.7037	71.3996	65.7942	63.142	60.0291	69.2276	62.25	62.316	65.0752	52.2933
	88.1	65.0898	57.2868	68.0026	51.0121	65.8377	53.2004	63.2765	56.1792	50.4704	61.0595	50.2844	64.2817	49.5479	61.385	53.6327	50.6739	88.1	82.218	77.7159	64.9156	87.2828	77.0922	78.4972	52.8705	72.6888	69.554	64.2172	66.655	56.812	69.4368	48.9502	50.2644	60.3663	88.1	77.0377	74.4767	72.9287	74.877	61.7207	71.2534	65.9205	63.2012	59.9114	69.1661	62.2343	62.3986	65.053	52.4597
	88.2	64.8456	57.5386	68.262	51.0514	65.7922	52.586	63.0559	56.2809	50.1486	61.3304	49.9035	64.2731	49.4571	61.265	53.9222	50.7992	88.2	82.1734	77.8706	64.964	87.7202	77.1482	78.2263	52.954	72.4751	69.5537	64.4712	66.6495	56.927	69.1812	48.5872	50.3099	60.3483	88.2	76.7688	74.4387	72.5594	74.7315	61.715	71.0091	65.9557	63.1716	59.9191	69.2125	62.3397	62.7327	65.1297	52.6938
	88.3	64.6292	57.7008	68.5518	51.0713	65.8268	52.0255	62.9586	56.318	49.9595	61.6479	49.4936	64.1646	49.3146	61.3778	54.1945	50.7785	88.3	82.0176	77.8694	64.9234	87.8985	77.1067	77.8495	53.0213	72.1657	69.8266	64.5245	66.7563	57.0502	68.8215	48.201	50.1636	60.2484	88.3	76.4991	74.4723	72.4075	74.4619	61.7169	70.8128	65.9078	62.9514	59.9297	69.2663	62.5532	62.9279	65.1447	52.9188
	88.4	64.6436	57.8801	68.7483	51.1864	65.7949	51.635	62.9658	56.3269	49.9717	61.5927	49.1141	64.0082	49.1726	61.6869	54.413	51.0162	88.4	81.8185	77.723	64.8145	87.8311	76.8616	77.6484	52.9889	71.797	70.1345	64.5506	66.8574	57.1352	68.5482	48.061	49.8995	60.2441	88.4	76.3704	74.5224	72.3434	74.3071	61.5016	71.0114	65.6744	62.9154	60.1198	69.1318	62.7118	63.0137	65.1652	53.0424
	88.5	64.7188	57.7859	68.6739	51.4324	65.6278	51.5643	62.931	56.2256	50.0413	61.4709	48.9846	63.8927	49.2496	61.9597	54.5453	51.1802	88.5	81.723	77.6112	64.5678	87.646	76.5777	77.5148	53.1186	71.5932	70.322	64.589	67.0043	57.189	68.4593	48.019	49.7056	60.2634	88.5	76.2919	74.6221	72.3556	74.2077	61.3636	71.1841	65.3912	62.84	60.3355	69.11	62.8196	63.1764	65.2451	53.1465
	88.6	64.8113	57.6593	68.3543	51.8055	65.7324	51.6761	63.0283	55.9934	50.0238	61.358	49.1428	63.778	49.5011	62.1671	54.6079	51.146	88.6	81.4862	77.3758	64.2162	87.3651	76.4041	77.4537	53.0368	71.4116	70.5938	64.3874	67.0921	57.3545	68.3941	48.1408	49.555	60.2562	88.6	76.0873	74.7062	72.4703	74.3047	61.3372	71.5342	65.3073	62.7847	60.6375	69.1285	62.8973	63.3097	65.1218	53.2026
	88.7	64.8664	57.5486	67.9708	52.1271	65.8474	51.9018	63.3188	55.7402	49.9804	61.1294	49.2886	63.7818	49.6892	62.301	54.5935	51.2254	88.7	81.3296	77.1107	63.9556	86.8689	76.3906	77.5595	52.8489	71.3714	70.8266	64.1081	67.2319	57.5186	68.5102	48.4192	49.3647	60.2674	88.7	75.8819	74.7204	72.7452	74.2158	61.2502	71.9339	65.3074	62.7955	60.8076	68.9584	62.9817	63.3278	64.8022	53.2181
	88.8	64.8907	57.4419	67.5951	52.4393	65.821	52.1821	63.6404	55.433	49.9702	60.8196	49.4627	63.8596	49.8963	62.1515	54.5676	51.485	88.8	81.3328	76.8951	63.8172	86.6176	76.3723	77.7395	52.7685	71.4114	70.9507	63.9461	67.2074	57.5409	68.8752	48.8026	49.2675	60.2788	88.8	75.8294	74.725	72.8906	74.1901	61.1396	72.1499	65.2966	62.8136	60.9814	68.7813	62.9406	63.3637	64.694	53.1246
	88.9	64.7864	57.2231	67.3458	52.5466	65.855	52.4274	63.7793	55.1078	49.9994	60.7732	49.602	64.0302	50.0156	61.8832	54.5516	51.4014	88.9	81.5105	76.862	63.6956	86.5328	76.5823	77.9361	52.8271	71.5304	70.9649	63.8414	67.1966	57.6164	69.198	48.9749	49.1223	60.214	88.9	75.7166	74.7496	73.0113	74.0819	61.1168	71.9806	65.3069	62.6423	60.8575	68.7545	62.9674	63.3863	64.8061	53.0523
	89	64.6312	57.4045	67.3318	52.5118	65.9292	52.5748	63.9683	54.8387	50.021	60.9174	49.5582	64.217	50.0662	61.5897	54.5256	51.2111	89	81.6217	76.8101	63.6277	86.4598	76.8244	78.1724	52.7511	71.7799	71.0188	63.7955	67.2551	57.6763	69.2803	49.255	48.9314	60.0709	89	75.7117	74.7163	73.2449	74.003	61.0682	71.8605	65.2794	62.4926	60.6905	68.7343	63.1475	63.3102	65.0976	52.9146
	89.1	64.5299	57.5598	67.4569	52.4871	65.7844	52.8027	64.0422	54.6608	50.1568	61.091	49.3809	64.3085	49.9715	61.2443	54.4726	50.9485	89.1	81.756	77.0411	63.6834	86.2732	76.9974	78.4226	52.7089	72.094	71.1827	63.9757	67.1407	57.5168	69.2887	49.4258	48.6558	59.8959	89.1	75.9386	74.7018	73.475	73.9932	61.0591	71.7359	65.1631	62.368	60.4666	68.7751	63.4091	63.2499	65.4698	52.8014
	89.2	64.4577	57.6344	67.5756	52.4043	65.6442	53.0258	63.8639	54.4942	50.3277	61.4197	49.2522	64.2668	49.7557	61.0182	54.4269	50.5787	89.2	81.7668	77.4808	63.7313	86.2879	77.0499	78.6204	52.7842	72.5042	71.227	64.2508	66.958	57.3951	69.3664	49.3736	48.5097	59.7358	89.2	76.3417	74.7281	73.5726	74.1827	61.0301	71.5849	65.1245	62.334	60.2552	68.9474	63.5646	63.252	65.8832	52.6456
	89.3	64.4419	57.6295	67.7724	52.1731	65.5804	53.2189	63.518	54.5172	50.4714	61.7598	49.2169	64.2066	49.4632	61.0318	54.3134	50.0638	89.3	81.8848	77.8888	63.7636	86.2075	77.1064	78.8926	52.8408	72.9103	71.0795	64.4741	66.9566	57.2844	69.4032	49.2161	48.4778	59.6887	89.3	76.7691	74.7009	73.762	74.2541	61.0419	71.4315	65.1861	62.3686	60.0289	69.0623	63.788	63.2266	66.1644	52.5936
	89.4	64.4868	57.6681	67.8336	52.1351	65.5724	53.3549	63.4143	54.684	50.4588	62.0262	49.2867	64.1932	49.3812	61.1409	54.1305	49.8114	89.4	81.8659	78.0126	63.882	85.9597	76.9234	78.8935	52.6826	73.1062	70.9855	64.7025	66.7878	57.129	69.3993	49.1776	48.5858	59.7692	89.4	77.2338	74.646	73.9582	74.406	61.2044	71.3788	65.3444	62.5109	60.0837	69.0634	63.966	63.225	66.2856	52.512
	89.5	64.4806	57.3936	67.7869	52.2107	65.5928	53.4199	63.3666	54.8742	50.5547	62.2814	49.4791	64.2348	49.2212	61.3671	53.9652	49.7042	89.5	81.7858	78.1724	63.9911	85.7027	76.6783	78.8258	52.589	73.0464	70.7823	64.967	66.4642	56.945	69.5312	49.0594	48.6754	59.9547	89.5	77.5984	74.5461	74.014	74.4809	61.3981	71.3692	65.5792	62.6506	60.1895	69.1205	63.8943	63.2213	66.172	52.4518
	89.6	64.4742	57.2142	67.7656	52.1146	65.7242	53.3408	63.4336	55.0966	50.569	62.4026	49.7264	64.3684	49.0577	61.7231	53.6587	49.903	89.6	81.8106	78.0496	64.1697	85.773	76.4658	78.6487	52.6824	72.9714	70.4083	65.0727	66.3878	56.9379	69.6849	48.9248	48.7055	60.1981	89.6	77.8284	74.5425	73.91	74.3063	61.3909	71.2841	65.7924	62.731	60.2954	69.0567	63.6437	63.2017	66.1987	52.3949
	89.7	64.6554	57.0401	67.7622	52.1394	65.7543	53.1584	63.7142	55.3435	50.4926	62.3517	49.9588	64.5773	48.8989	62.105	53.4072	50.3458	89.7	81.8763	77.6348	64.3273	85.9258	76.4488	78.3232	52.6706	72.7532	69.993	65.1905	66.2655	57.0495	69.6994	49.0202	48.6709	60.4201	89.7	77.9597	74.6359	73.7788	74.065	61.4712	71.3313	65.9225	62.6871	60.3033	68.8412	63.3935	63.0575	66.2983	52.4931
	89.8	64.7945	56.9552	67.647	52.3644	65.83	52.9889	64.093	55.4598	50.4694	62.3764	49.9407	64.757	48.8595	62.3628	53.2918	50.8052	89.8	81.7159	77.124	64.3854	86.1863	76.529	77.9951	52.548	72.3908	69.7814	65.3468	65.8793	57.347	69.6807	49.1777	48.4874	60.5944	89.8	78.007	74.768	73.6625	73.9918	61.4796	71.484	65.9708	62.5955	60.3138	68.6298	63.1018	62.9276	66.2856	52.6329
	89.9	64.8696	56.9439	67.6492	52.4077	65.9133	52.9725	64.3478	55.4874	50.5571	62.3761	49.7957	64.8142	48.7683	62.4868	53.269	51.1874	89.9	81.6106	76.8202	64.3945	86.5191	76.6382	77.962	52.7404	72.2706	69.5812	65.4511	65.7692	57.6119	69.733	49.2115	48.3231	60.6284	89.9	78.1042	75.1032	73.4905	73.9086	61.2525	71.685	65.9352	62.52	60.212	68.4862	62.7915	62.8866	66.1811	52.7621
	90	64.9586	57.0454	67.7446	52.4825	66.0352	53.0102	64.4776	55.4182	50.5522	62.218	49.6294	64.8681	48.8966	62.5522	53.2145	51.4887	90	81.7375	76.4988	64.5281	86.8937	76.7691	77.8629	52.9728	72.2505	69.4998	65.506	65.8687	57.9138	69.7106	49.1958	48.3455	60.5982	90	78.2145	75.5279	73.3987	73.9392	60.9423	71.952	65.8655	62.4991	60.0248	68.2404	62.4712	62.8534	66.1109	52.9276
	90.1	65.1492	57.0875	67.8285	52.6947	66.0862	53.1029	64.4148	55.2712	50.7442	62.0422	49.3453	64.9312	49.1484	62.5331	53.4256	51.5858	90.1	81.7543	76.2712	64.5146	87.0877	76.8692	77.8718	53.0633	72.1144	69.4843	65.6295	65.8473	58.1015	69.7672	49.1098	48.5256	60.5195	90.1	78.2821	75.9179	73.3969	74.1558	60.8456	72.3256	65.8179	62.4235	59.792	68.1509	62.1747	62.8606	65.8017	53.0324
	90.2	65.0284	57.0763	67.9922	52.7491	66.3225	53.3266	64.0309	55.1901	51.0527	61.9062	49.0894	65.0012	49.5012	62.3501	53.4198	51.3897	90.2	81.8518	76.1803	64.4553	87.0625	76.7461	78.1427	53.1824	71.916	69.64	65.4257	66.0788	57.9966	69.7426	48.801	48.7953	60.3952	90.2	78.2807	76.1466	73.4482	74.3676	60.7563	72.4994	65.687	62.3062	59.692	68.2853	61.8595	62.9726	65.4862	53.0362
	90.3	64.9318	57.0943	68.282	52.6297	66.6208	53.4531	63.5498	55.2242	51.2362	61.6151	49.1058	65.1677	49.8271	62.2913	53.2196	51.2427	90.3	81.9365	76.3285	64.4106	86.9349	76.5839	78.4551	53.4717	71.8316	69.6478	65.0767	66.6263	57.7348	69.592	48.4115	49.1198	60.2481	90.3	78.1525	76.3519	73.3917	74.5776	60.8318	72.5472	65.5236	62.2529	59.6208	68.4845	61.5512	63.1201	65.2519	52.9381
	90.4	64.8414	57.2399	68.3944	52.4326	66.8856	53.4464	63.1098	55.3916	51.3966	61.3102	49.2027	65.3662	50.0172	62.2426	52.9812	51.1395	90.4	81.9471	76.3506	64.3799	86.8246	76.5863	78.602	53.4907	71.6975	69.7616	64.753	67.003	57.5408	69.3974	48.0898	49.4204	60.1638	90.4	77.7637	76.2407	73.409	74.764	60.9835	72.5463	65.3728	62.1607	59.4888	68.6412	61.226	63.1764	65.1198	52.9116
	90.5	64.7977	57.3965	68.4508	52.0221	67.0881	53.5051	62.7018	55.7475	51.6338	61.1228	49.2626	65.3904	49.9292	62.0744	52.721	51.0198	90.5	81.7667	76.3688	64.138	86.5879	76.6503	78.8439	53.4798	71.5483	69.8412	64.3087	67.1819	57.3468	69.275	47.8715	49.5438	60.085	90.5	77.4092	76.0549	73.4147	74.843	61.2662	72.5234	65.3558	61.9521	59.3745	68.8683	61.136	63.2205	65.012	52.8474
	90.6	64.4743	57.5417	68.556	51.4949	67.3236	53.5258	62.46	56.1232	51.7104	61.144	49.6317	65.1272	49.833	61.9958	52.2483	50.9521	90.6	81.5761	76.5237	63.8592	86.3865	76.7441	78.976	53.4834	71.6288	69.9835	63.8218	67.3748	57.3334	69.0886	47.7489	49.6068	60.1258	90.6	77.1774	75.7187	73.4824	74.882	61.4543	72.4491	65.4362	61.8526	59.4006	68.9774	61.1292	63.1694	65.0784	52.7559
	90.7	64.2102	57.7268	68.5309	51.1358	67.5224	53.4182	62.5066	56.348	51.6872	61.1546	50.0045	64.7082	49.7532	62.0536	52.0124	51.1008	90.7	81.2732	76.7975	63.6049	86.3209	76.9261	78.7866	53.4382	71.8454	70.1216	63.7448	67.309	57.5947	69.1462	47.7451	49.5829	60.2314	90.7	76.9994	75.4502	73.6784	74.891	61.5242	72.3992	65.7342	61.9067	59.5556	68.9952	61.3917	63.0793	65.02	52.5495
	90.8	63.86	57.9064	68.4175	50.9346	67.5413	53.4491	62.664	56.3853	51.6998	61.1944	50.2835	64.1888	49.6005	61.9863	51.9756	51.1614	90.8	81.133	76.9844	63.5019	86.17	76.9513	78.4337	53.3129	72.072	70.3423	63.7208	67.1015	57.8867	69.305	47.8608	49.612	60.2478	90.8	77.0018	75.0864	73.8357	74.7666	61.4511	72.5651	66.1412	61.9556	59.6103	69.0205	61.8256	62.8236	64.9211	52.2955
	90.9	63.6248	57.6905	68.4331	50.9315	67.6081	53.5268	62.8143	56.1437	51.6811	61.3353	50.5118	63.6344	49.5708	61.9606	51.8708	51.1726	90.9	81.1641	77.3323	63.3784	85.97	76.874	78.2172	53.4199	72.248	70.3278	63.6736	66.8588	58.2169	69.4092	48.0898	49.65	60.2216	90.9	77.2293	74.9505	73.873	74.6314	61.4576	72.7456	66.4656	62.1165	59.6886	69.1495	62.353	62.6298	64.7769	51.9454
	91	63.3301	57.4431	68.4621	51.1064	67.6213	53.4246	63.0776	55.6361	51.6853	61.3466	50.7524	63.2104	49.7932	62.0398	51.8995	51.2801	91	81.2275	77.5657	63.338	85.9525	76.6601	77.8902	53.5122	72.4301	70.2735	63.8335	66.6503	58.6145	69.4488	48.2674	49.7402	60.2612	91	77.435	74.8408	73.8743	74.5326	61.3757	72.691	66.5692	62.378	59.7805	69.2918	62.8039	62.548	64.5393	51.6367
	91.1	63.2642	57.1802	68.3812	51.3428	67.5243	53.3032	63.3077	55.1158	51.7425	61.2524	50.6364	63.1941	49.8816	61.9805	52.1164	51.3345	91.1	81.3921	77.5496	63.5047	85.8645	76.384	77.6131	53.5356	72.3594	70.1201	63.9404	66.4922	58.7753	69.487	48.5402	49.9121	60.163	91.1	77.5715	74.7998	73.7235	74.4436	61.2509	72.4932	66.5648	62.6119	59.8202	69.3079	63.2678	62.6096	64.361	51.5337
	91.2	63.5064	56.8463	68.3739	51.5565	67.2358	53.252	63.4304	54.815	51.855	61.277	50.4244	63.3851	49.877	61.8094	52.3074	51.2695	91.2	81.648	77.3311	63.6452	85.7154	76.1261	77.3918	53.666	72.4018	69.879	63.8465	66.4258	58.7144	69.3494	48.8904	50.1047	60.0508	91.2	77.6858	74.7358	73.1896	74.5034	61.3881	72.3736	66.3585	62.7141	59.6081	69.1886	63.3738	62.7456	64.4382	51.5981
	91.3	63.8386	56.4219	68.3282	51.7484	67.0401	53.1093	63.5611	54.7926	51.9504	61.4428	50.0985	63.6787	50.0038	61.6335	52.509	51.1519	91.3	81.8134	77.0552	63.7027	85.5956	76.1005	77.1665	53.6832	72.5098	69.6931	63.8391	66.3086	58.6178	69.2778	49.1794	50.1692	60.1082	91.3	77.6021	74.7671	72.8195	74.6904	61.7265	72.101	66.0513	62.8336	59.4592	68.9326	63.1946	63.088	64.4638	51.8215
	91.4	64.0744	56.3339	68.3145	51.8915	66.6878	52.9271	63.6258	54.9392	52.0234	61.4767	49.8809	64.1878	50.133	61.4345	52.921	50.9934	91.4	81.7541	76.5371	63.8026	85.5689	76.1332	76.8313	53.4443	72.6009	69.649	63.8758	66.2502	58.2923	69.2744	49.3162	50.0839	60.2014	91.4	77.4814	74.7536	72.5632	74.8612	62.0374	71.705	65.6741	62.7727	59.3456	68.6299	62.941	63.442	64.4511	52.1022
	91.5	64.436	56.2568	68.2608	51.9045	66.3767	52.905	63.5282	55.4094	51.9038	61.6034	49.6458	64.7642	50.0132	61.2742	53.2428	50.8476	91.5	81.7166	76.2062	63.9876	85.4337	76.2463	76.6448	53.2194	72.6105	69.6595	63.807	66.2573	57.7294	69.2386	49.3262	49.9413	60.108	91.5	77.3791	74.7247	72.3917	75.0187	62.3626	71.4456	65.331	62.6777	59.2972	68.2899	62.6373	63.7603	64.5602	52.3018
	91.6	64.7796	56.3226	68.2234	51.894	66.1782	53.0439	63.386	55.8824	51.6466	61.6266	49.5724	65.152	50.0336	61.271	53.4142	50.7352	91.6	81.6418	76.033	64.0407	85.2584	76.5397	76.492	53.0751	72.6959	69.8089	63.8433	66.2434	57.2045	69.3164	49.1382	49.6018	60.0413	91.6	77.1765	74.7002	72.3692	75.1003	62.7751	71.4195	65.0139	62.5876	59.1103	68.1479	62.3513	63.9142	64.5267	52.3617
	91.7	64.8376	56.5861	68.176	51.6931	66.2502	53.2084	63.2836	56.1923	51.3523	61.5247	49.6244	65.5244	50.0478	61.3883	53.4773	50.6208	91.7	81.6504	75.9536	64.2038	85.2072	76.7134	76.5788	52.838	72.4414	70.0622	63.9406	66.2941	56.7954	69.5311	48.7496	49.1544	59.8977	91.7	77.0585	74.6738	72.7447	75.0194	62.8491	71.411	64.7696	62.5809	59.039	68.2322	62.3044	63.9154	64.3523	52.3828
	91.8	64.9246	56.9203	68.217	51.4185	66.3338	53.4538	63.1724	56.1851	51.0303	61.4095	49.8516	65.7093	49.9621	61.5432	53.3426	50.6268	91.8	81.6026	75.981	64.3542	85.2604	76.763	76.8228	52.7344	72.0193	70.2346	64.0802	66.4154	56.4082	69.6589	48.3863	48.7175	59.678	91.8	77.1676	74.6369	73.0744	74.9523	62.6065	71.3512	64.6185	62.5027	58.9892	68.5331	62.4591	63.8227	64.407	52.3113
	91.9	65.039	57.1388	68.1797	51.1356	66.5383	53.7905	63.0477	56.2177	50.7334	61.444	49.8977	65.6398	49.8992	61.725	52.987	50.7196	91.9	81.7036	76.1878	64.5237	85.3152	76.713	77.1723	52.7044	71.6583	70.382	64.2854	66.645	56.3216	69.7082	48.0732	48.3643	59.4589	91.9	77.2162	74.4198	73.3992	74.8709	62.1925	71.4237	64.8484	62.5156	58.9136	68.8861	62.6805	63.7145	64.5278	52.3568
	92	65.0038	57.3002	68.1509	51.0108	66.8492	54.0844	62.9142	56.054	50.5477	61.407	49.9038	65.4393	50.0334	61.9477	52.7581	50.7519	92	81.7443	76.256	64.6686	85.4343	76.6746	77.5408	52.6365	71.5057	70.6066	64.4543	66.9004	56.3756	69.8146	48.0253	48.0851	59.4356	92	77.1831	74.1924	73.6665	74.8276	61.7752	71.5581	65.225	62.5804	58.8545	69.2615	62.8815	63.4923	64.6186	52.4692
	92.1	64.855	57.3995	68.1494	50.9782	67.1476	54.1769	62.7274	56.0246	50.492	61.4324	49.8653	65.2469	50.0669	62.1166	52.7734	50.7675	92.1	81.8006	76.4127	64.7866	85.7082	76.2711	77.911	52.5792	71.4236	70.6968	64.5722	67.1557	56.5289	69.6036	48.0917	47.9802	59.4689	92.1	77.3869	74.0375	73.952	74.6985	61.2698	71.5464	65.6642	62.6091	59.0172	69.6616	62.9803	63.4211	64.7172	52.5405
	92.2	64.6756	57.3373	68.1375	51.1876	67.2232	54.1485	62.5095	56.0336	50.452	61.5708	49.7419	64.8466	50.1327	62.2756	52.9453	50.8289	92.2	81.7631	76.6608	64.8448	85.7546	75.999	78.1986	52.5922	71.6435	70.5834	64.6647	67.3313	56.7694	69.2717	48.3055	48.0803	59.6107	92.2	77.6243	73.9144	74.1344	74.5676	60.9957	71.3536	66.0475	62.5228	59.1867	69.9467	62.9789	63.5805	64.7178	52.4978
	92.3	64.4188	57.2144	68.0324	51.4668	67.2398	53.9846	62.2381	56.221	50.4863	61.5754	49.4902	64.577	50.1714	62.4266	53.3099	50.939	92.3	81.8276	76.76	64.8388	85.785	75.6768	78.3302	52.5854	71.9556	70.4518	64.6625	67.5322	57.0859	68.9208	48.5032	48.1747	59.7274	92.3	77.7674	73.798	74.1672	74.3211	60.8455	71.2324	66.3157	62.3575	59.3697	70.0001	62.9878	63.8715	64.618	52.4945
	92.4	64.1108	57.0926	67.9383	51.721	67.2788	53.7085	62.013	56.3392	50.5186	61.4495	49.3618	64.396	49.9948	62.629	53.8617	51.026	92.4	81.8872	76.8775	64.6986	85.795	75.417	78.3078	52.6492	72.2707	70.3084	64.4766	67.5645	57.2522	68.6532	48.6883	48.2903	59.7782	92.4	77.9832	73.8145	74.0563	74.0644	60.9021	71.205	66.1712	62.1868	59.5561	69.8361	62.9464	64.1512	64.5992	52.4286
	92.5	63.9096	57.0928	67.8465	51.827	67.1585	53.4114	61.8727	56.4244	50.5983	61.454	49.3255	64.3766	49.7816	62.6148	54.2558	51.038	92.5	82.0116	77.0495	64.433	85.7829	75.2001	78.1384	52.7012	72.5768	69.9518	64.2977	67.5086	57.486	68.3646	48.6763	48.3668	59.724	92.5	78.2912	73.7525	73.869	73.7926	60.9825	71.1989	65.9394	61.8941	59.636	69.5206	63.0349	64.4452	64.6365	52.4583
	92.6	63.887	57.0114	67.7933	51.8204	67.0136	53.1778	61.875	56.3442	50.5648	61.4857	49.2413	64.2535	49.5755	62.3333	54.3925	51.0606	92.6	82.0068	77.0123	64.1323	85.7343	75.4122	77.9467	52.7301	72.8402	69.4875	64.1485	67.4218	57.6132	68.4438	48.6674	48.425	59.6896	92.6	78.281	73.5704	73.594	73.6622	61.1674	71.1757	65.7228	61.5644	59.5768	69.0565	63.1644	64.5524	64.7497	52.6563
	92.7	64.0995	56.998	67.5692	51.8056	66.9808	53.1014	61.9415	56.2494	50.4962	61.3627	49.1374	64.327	49.3844	62.0815	54.4422	51.1183	92.7	81.9439	76.7926	63.8294	85.8571	75.6263	77.7464	52.7298	72.8716	69.2561	64.1582	67.3024	57.5234	68.5705	48.5869	48.357	59.6407	92.7	78.0758	73.336	73.3088	73.503	61.2952	71.3304	65.5874	61.3704	59.5067	68.4118	63.2566	64.433	65.0485	53.0884
	92.8	64.3523	57.0464	67.3627	51.78	66.9817	53.2456	61.9845	56.0688	50.3628	61.2917	49.1232	64.3908	49.2557	61.9402	54.4654	51.0348	92.8	81.8397	76.6016	63.5579	85.9122	75.981	77.6859	52.6384	72.844	69.1198	64.1858	67.079	57.3965	68.7549	48.5035	48.4376	59.6118	92.8	77.7966	73.1878	73.2433	73.3963	61.5519	71.3972	65.4896	61.3242	59.3919	68.0232	63.2392	64.1421	65.3746	53.5408
	92.9	64.6245	57.1072	67.2089	51.7582	66.8829	53.5041	62.0716	55.8902	50.2192	61.2292	49.0139	64.4358	49.3725	61.6212	54.4357	50.8817	92.9	81.6998	76.2786	63.3467	85.8403	76.2841	77.7351	52.5205	72.7472	68.9701	64.3036	66.9379	57.1138	68.9472	48.5021	48.5708	59.7193	92.9	77.4436	73.1402	73.2634	73.437	61.7321	71.3288	65.5634	61.3071	59.1888	67.8247	63.2803	63.7446	65.6137	53.8324
	93	64.771	57.0932	67.0342	51.8239	66.8622	53.6723	62.2272	55.8262	50.0152	60.9802	48.8221	64.2184	49.4974	61.4544	54.4178	50.8444	93	81.5336	76.0492	63.2762	85.7465	76.4796	77.8635	52.4695	72.4147	68.9632	64.4719	66.7855	56.8185	69.1998	48.5891	48.7103	59.8476	93	77.0151	73.2715	73.3294	73.4112	61.9071	71.1463	65.5754	61.4029	59.1089	67.7883	63.1752	63.282	65.7384	53.9648
	93.1	64.708	57.1807	66.6902	51.9124	66.811	53.92	62.4656	55.8237	50.0219	60.7737	48.7686	64.2552	49.6263	61.5515	54.495	50.8581	93.1	81.4222	75.8977	63.4147	85.6315	76.384	78.0201	52.4123	72.1866	69.1606	64.5833	66.591	56.7392	69.1089	48.6206	48.7887	59.8746	93.1	76.8727	73.5036	73.3498	73.4569	62.0964	70.9392	65.3955	61.6442	59.2026	67.8087	63.0159	62.9916	65.7711	53.9936
	93.2	64.5032	57.2183	66.6002	51.7616	66.7226	54.0138	62.7099	55.7932	50.0664	60.7179	48.7857	64.2193	49.7942	61.4632	54.5133	50.898	93.2	81.2804	75.7856	63.5446	85.622	76.2573	78.0926	52.2516	72.1914	69.2608	64.3396	66.4794	56.8386	69.0476	48.7638	48.8887	59.8598	93.2	76.8826	73.8318	73.2328	73.655	62.2174	70.7548	64.9971	61.9393	59.3448	68.1295	62.9142	62.8411	65.6423	53.9332
	93.3	64.1776	57.1664	66.6418	51.4877	66.643	53.8972	63.0421	55.7718	50.1647	60.6647	48.7365	64.2278	49.9623	61.1055	54.4043	51.0618	93.3	81.1072	75.6569	63.7427	85.7221	76.0274	78.1351	52.169	72.2761	69.3425	64.0487	66.3476	56.8226	69.0515	48.8738	48.9596	59.8129	93.3	76.9331	74.0672	72.8992	73.9227	62.1865	70.8453	64.6416	62.2146	59.4359	68.275	62.766	62.7983	65.3834	53.8165
	93.4	63.8222	56.9948	66.6672	51.2734	66.6134	53.5342	63.3587	55.7856	50.2854	60.5241	48.7566	64.283	49.9626	60.9698	54.1605	51.2682	93.4	80.9138	75.6241	64.0026	86.0063	75.8781	78.1919	52.1459	72.3476	69.427	63.828	66.0973	56.9859	69.1013	48.8835	48.9307	59.7668	93.4	77.036	74.277	72.6151	74.006	62.1452	71.0547	64.2312	62.3749	59.7771	68.4248	62.417	62.898	65.0393	53.8593
	93.5	63.6298	56.7957	66.8127	51.0051	66.6074	53.3347	63.5723	55.6746	50.3517	60.5681	48.8118	64.5972	49.8632	60.8193	53.9782	51.4064	93.5	80.7608	75.5442	64.0911	86.2416	75.7467	78.2229	52.0272	72.4742	69.5537	63.5922	65.9044	57.0533	69.0677	48.8899	49.0168	59.8458	93.5	77.1316	74.3753	72.2858	74.047	62.0332	71.2997	63.8911	62.4974	60.0412	68.6131	62.1657	63.241	64.8066	53.9362
	93.6	63.6438	56.4591	67.1273	50.8128	66.7521	53.0104	63.5369	55.5792	50.1942	60.5556	48.7646	64.6811	49.8663	60.737	53.7563	51.3646	93.6	80.7842	75.5578	63.9225	86.4499	75.5626	78.2406	51.8644	72.3697	69.6744	63.4215	65.7327	56.8464	69.3239	49.013	49.2071	59.9504	93.6	77.1435	74.398	72.019	73.9418	61.7372	71.6342	63.7239	62.5594	60.1177	68.7818	62.0619	63.4641	64.6856	54.0401
	93.7	63.6882	56.1898	67.4072	50.8642	66.9205	52.8366	63.441	55.5832	50.096	60.3799	48.6696	64.7644	49.837	60.8604	53.5779	51.114	93.7	80.8896	75.7058	63.6496	86.2906	75.3905	78.3764	51.8344	72.1364	69.7929	63.5046	65.46	56.5123	69.576	49.0818	49.4736	60.0194	93.7	77.0735	74.3962	71.7716	73.8465	61.4596	71.9782	63.8787	62.4244	60.0894	68.7751	62.0018	63.6072	64.6894	54.138
	93.8	63.8772	56.145	67.5632	51.0354	66.9791	52.6718	63.3678	55.7565	50.0384	60.2792	48.596	64.8377	49.729	61.3022	53.4848	50.8143	93.8	81.1546	75.935	63.2959	85.9744	75.2756	78.4708	51.9586	71.8735	69.8227	63.6979	65.4466	56.3573	69.7327	49.2258	49.6396	60.2168	93.8	76.9934	74.3148	71.7293	73.6649	61.2586	72.0792	64.005	62.285	60.1983	68.7412	62.0256	63.6394	64.8332	54.1856
	93.9	64.143	56.3186	67.6961	51.121	67.0579	52.6653	63.2782	55.8651	50.0562	60.3792	48.5523	64.8724	49.7613	61.6047	53.4585	50.601	93.9	81.507	76.1423	62.8032	85.5471	75.0518	78.584	52.0821	71.6809	69.981	63.7754	65.6874	56.1552	69.6752	49.4512	49.917	60.3192	93.9	76.8931	74.0705	71.6347	73.702	61.1488	72.0696	64.2828	62.1977	60.026	68.6668	62.2837	63.5729	65.1602	54.2054
	94	64.4637	56.566	67.6872	51.2031	67.0535	52.5766	63.2492	56.0607	50.2156	60.4186	48.5979	64.7214	49.8347	61.8953	53.401	50.3893	94	81.8546	76.2381	62.5028	85.288	74.9827	78.7188	52.2885	71.5908	70.0389	63.8856	65.8582	56.0486	69.6374	49.6089	50.0703	60.1893	94	76.8523	73.952	71.6702	73.8501	61.1869	72.0321	64.6132	62.0296	59.712	68.4093	62.5309	63.253	65.484	54.1856
	94.1	64.6981	56.9153	67.7206	51.2039	66.7953	52.5957	63.3706	56.1148	50.492	60.4768	48.6613	64.5972	49.7624	62.1449	53.2478	50.3556	94.1	81.9915	76.2831	62.295	85.0836	75.1766	78.6777	52.535	71.6712	69.9275	63.9608	66.0576	56.1988	69.5424	49.5981	50.0925	60.0669	94.1	76.8537	73.7787	71.7256	74.1238	61.4366	71.9374	64.9655	61.7977	59.4479	68.2793	62.7096	63.0541	65.737	54.0565
	94.2	64.9543	57.1955	67.8356	51.0783	66.4712	52.4907	63.4877	56.1255	50.7233	60.7756	48.8138	64.379	49.623	62.2348	53.0611	50.5547	94.2	82.1217	76.2706	62.3178	85.1785	75.3503	78.5282	52.7365	71.7927	69.858	64.0311	66.3005	56.532	69.2811	49.581	50.0376	60.0674	94.2	77.0154	73.5518	72.0802	74.2627	61.6981	71.6991	65.1709	61.729	59.2197	68.1533	62.8049	62.9372	65.8586	53.7736
	94.3	65.248	57.2958	68.1223	50.9706	66.2652	52.541	63.493	55.9616	50.8843	61.0437	48.9863	64.1138	49.5726	62.1066	52.8936	50.7674	94.3	82.0801	76.177	62.395	85.3677	75.4341	78.3508	52.7551	71.9492	69.8992	64.0454	66.248	56.7718	69.0953	49.5221	50.0592	59.9642	94.3	77.2674	73.4112	72.272	74.5245	61.9583	71.5371	65.4478	61.631	58.815	68.1481	62.8409	62.8675	65.8298	53.493
	94.4	65.4866	57.2778	68.5825	50.9439	66.0054	52.706	63.5503	55.8256	50.8397	61.1921	49.1007	63.8274	49.4175	61.9852	52.8334	50.7615	94.4	81.8738	76.115	62.6055	85.5426	75.636	78.0681	52.6898	72.0383	69.8228	64.1414	65.923	57.0404	69.1339	49.4002	49.9094	59.8754	94.4	77.5382	73.3732	72.4968	74.6518	61.983	71.4896	65.6616	61.6779	58.614	68.1906	62.7651	62.8637	65.6352	53.1989
	94.5	65.4858	57.1778	69.1816	51.015	65.8056	52.9713	63.5443	55.7278	50.6537	61.3257	49.1581	63.714	49.2084	61.834	52.7602	50.7546	94.5	81.5896	76.1381	62.7051	85.5589	75.7246	77.759	52.6544	72.0669	69.7695	64.2439	65.653	57.2112	69.1644	49.345	49.6928	59.9756	94.5	77.7789	73.2662	72.6138	74.8346	61.7898	71.548	65.79	61.8606	58.6506	68.4611	62.6906	63.0292	65.3924	52.9863
	94.6	65.4045	57.0234	69.6346	51.1053	65.8956	53.1744	63.458	55.7608	50.4092	61.4384	49.3269	63.7586	49.1253	61.528	52.9194	50.7555	94.6	81.4843	76.0825	62.869	85.568	75.6842	77.6626	52.6328	72.1074	69.9109	64.3564	65.4761	57.2113	69.2244	49.4144	49.5537	60.1041	94.6	77.9126	73.404	72.7606	74.9032	61.4837	71.6658	65.8068	62.1435	58.7051	68.578	62.5092	63.0869	65.1932	52.9418
	94.7	65.3008	56.9623	69.7778	51.309	66.1232	53.3753	63.4373	55.7069	50.1564	61.4281	49.4324	64.0014	49.1604	61.242	53.174	50.5917	94.7	81.4147	75.9434	62.9484	85.4337	75.6854	77.5092	52.6607	71.992	69.8463	64.4295	65.4877	57.0354	69.51	49.3902	49.4062	60.1042	94.7	77.8233	73.4821	72.6804	74.925	61.2814	71.8318	65.7924	62.3227	58.8221	68.7985	62.3687	63.1447	65.1254	52.9862
	94.8	65.0704	56.8764	69.5759	51.5482	66.4357	53.3852	63.4336	55.7243	49.9551	61.3263	49.5978	64.154	49.1159	60.9182	53.39	50.3171	94.8	81.2848	75.9195	63.055	85.2182	75.7712	77.4366	52.6533	71.7933	69.7064	64.5268	65.6239	56.9202	69.7001	49.3534	49.2188	60.0754	94.8	77.6808	73.5934	72.6613	74.7726	61.0829	71.9509	65.6164	62.4742	59.0531	68.9576	62.3395	63.2317	65.2036	53.1382
	94.9	64.8216	56.8195	69.0299	51.7566	66.8302	53.2983	63.3295	55.7313	49.9955	61.2225	49.8164	64.2983	49.1349	60.677	53.4722	50.3175	94.9	81.224	75.8391	63.1212	84.9545	75.725	77.3788	52.6363	71.6462	69.5356	64.5876	65.9172	56.8942	69.8956	49.3061	49.1744	60.007	94.9	77.6072	73.7362	72.5821	74.5255	61.1852	71.7947	65.3553	62.4955	59.2855	68.939	62.2935	63.327	65.4561	53.2443
	95	64.7738	56.9509	68.2857	51.9858	67.2907	53.1542	63.2742	55.574	50.2064	61.1524	50.0018	64.3002	49.2977	60.5268	53.5327	50.3359	95	81.2038	75.7625	63.2778	84.6945	75.6636	77.223	52.5273	71.547	69.4176	64.5614	66.2328	56.9902	70.1754	49.2194	49.2849	59.8518	95	77.5797	73.749	72.6478	74.2832	61.4925	71.5081	65.2363	62.4452	59.3932	68.721	62.1434	63.3852	65.7922	53.3445
	95.1	64.8534	57.2673	67.6104	52.2481	67.604	53.0381	63.2056	55.3782	50.4846	61.1218	50.1184	64.2103	49.3687	60.5511	53.3346	50.2832	95.1	81.0554	75.6577	63.4751	84.3588	75.6653	76.9874	52.4096	71.4871	69.2801	64.5454	66.4996	57.1282	70.2524	49.0755	49.4734	59.5676	95.1	77.4709	73.5969	72.67	74.144	61.8757	71.2005	65.1849	62.3832	59.5327	68.6371	62.1247	63.5028	66.0696	53.3004
	95.2	64.8912	57.4529	67.2082	52.4199	67.7454	52.9639	63.0535	55.2587	50.8143	60.9538	50.2359	64.1054	49.3737	60.701	53.0686	50.3081	95.2	80.807	75.6985	63.6713	84.1597	75.6014	76.9521	52.2507	71.7325	69.4409	64.5804	66.512	57.3932	70.1581	49.0203	49.7002	59.3592	95.2	77.4862	73.6441	72.6857	74.2169	62.1066	70.979	65.1838	62.3373	59.674	68.5712	62.0644	63.5342	66.2462	53.2148
	95.3	64.9388	57.7037	67.1314	52.4802	67.638	52.9781	62.9616	55.0775	51.1363	60.8844	50.1968	64.2106	49.5542	61.0868	52.7826	50.4586	95.3	80.7292	75.7365	63.8165	84.1512	75.5686	76.8379	52.161	72.0754	69.5892	64.539	66.4154	57.5312	70.1009	49.0595	49.973	59.1234	95.3	77.4199	73.7855	72.7755	74.3694	62.1628	70.8549	65.3233	62.2718	59.8597	68.529	62.0481	63.5464	66.3627	53.0436
	95.4	64.9899	57.961	67.2649	52.53	67.3928	52.851	62.9704	54.9807	51.3038	60.8786	50.0613	64.3644	49.7569	61.3732	52.6308	50.4856	95.4	80.6264	75.7577	64.0425	84.4323	75.6678	76.612	52.1733	72.4604	69.7415	64.5086	66.2257	57.4754	69.9037	49.1589	50.2459	58.9744	95.4	77.2508	73.9092	73.0069	74.7082	62.0081	70.9387	65.4672	62.1871	59.9062	68.6174	62.1617	63.4201	66.3442	52.9303
	95.5	64.8526	58.036	67.6035	52.4158	67.0448	52.5699	62.8946	55.0289	51.3455	60.8202	49.8658	64.5187	49.8624	61.6311	52.6866	50.5396	95.5	80.5431	75.7624	64.2202	84.7148	75.8342	76.5888	52.259	72.8052	69.8432	64.5341	66.1307	57.3621	69.705	49.268	50.4019	58.8764	95.5	77.1287	74.1272	73.1006	74.8731	61.8056	71.0622	65.4695	62.1277	59.9799	68.8406	62.3599	63.3028	66.2056	52.83
	95.6	64.6504	57.9362	68.0522	52.308	66.675	52.2616	63.0055	55.1235	51.4124	60.746	49.535	64.6704	49.967	61.8202	52.9442	50.6437	95.6	80.503	75.9679	64.2936	85.0764	75.9718	76.6295	52.3463	72.9717	69.8375	64.649	65.9615	57.2072	69.6824	49.4354	50.2664	58.9302	95.6	77.2776	74.3724	73.1148	74.9947	61.4704	71.1948	65.4785	61.9375	60.0809	68.9948	62.4362	63.1172	66.1772	52.7618
	95.7	64.5131	57.8809	68.442	52.1222	66.3719	52.0477	63.1267	55.2739	51.3822	60.7714	49.2074	64.7987	50.0453	61.9444	53.2806	50.7493	95.7	80.5518	75.9721	64.2926	85.3434	76.0279	76.5713	52.3787	72.8823	69.7206	64.7108	65.974	56.9242	69.783	49.6167	50.1067	59.012	95.7	77.4532	74.4488	73.0862	74.9415	61.2026	71.3179	65.4849	61.78	60.1571	69.0841	62.5026	62.876	66.148	52.7996
	95.8	64.4748	57.7835	68.7264	51.9044	66.1919	51.9728	63.2753	55.4542	51.3246	60.7785	48.9982	64.8645	50.0241	61.9635	53.707	50.7944	95.8	80.4906	75.8925	64.2384	85.4048	75.8948	76.48	52.2965	72.7031	69.6977	64.8839	66.1904	56.7352	69.8902	49.7042	49.8786	59.2308	95.8	77.689	74.2878	73.0552	74.8091	61.1507	71.3229	65.4902	61.7311	60.129	69.0782	62.4705	62.6179	65.9874	52.8689
	95.9	64.561	57.6752	69.0664	51.6934	66.2447	52.1211	63.4505	55.5342	51.283	60.7353	48.8979	64.9944	49.964	62.0533	53.9494	50.7253	95.9	80.5273	75.9046	64.0918	85.3025	75.7631	76.504	52.1732	72.3654	69.7992	65.0992	66.5828	56.712	70.0683	49.6968	49.6707	59.3462	95.9	77.764	74.0513	72.9115	74.5512	61.1672	71.254	65.585	61.6852	60.1888	69.1078	62.2993	62.5084	65.7832	52.9299
	96	64.7104	57.5643	69.2965	51.6093	66.3354	52.4472	63.7375	55.5768	51.2469	60.7437	48.9096	65.1254	49.9282	62.1156	53.8976	50.6357	96	80.5442	75.9603	63.9525	85.2674	75.5173	76.377	51.9727	72.014	69.8268	65.253	66.7469	56.6797	70.152	49.6457	49.511	59.4504	96	77.7696	73.844	72.7692	74.3353	61.188	71.2742	65.7214	61.63	60.2802	69.0988	62.165	62.3103	65.6296	52.8612
	96.1	64.8718	57.4999	69.2874	51.4658	66.47	52.7487	63.7396	55.5789	51.1788	60.772	49.0825	65.314	49.9252	62.1289	53.8306	50.4674	96.1	80.4296	75.9479	63.805	85.1966	75.2122	76.2496	51.8162	71.8409	69.8922	65.213	66.9246	56.7405	70.1732	49.5238	49.5728	59.6591	96.1	77.6252	73.5876	72.8837	74.0933	61.2493	71.3297	65.7619	61.6434	60.2269	68.9999	62.2081	62.156	65.2748	52.7295
	96.2	64.9068	57.5142	69.1535	51.5591	66.5747	52.7374	63.8104	55.4956	51.1827	60.8445	49.1765	65.3872	49.9904	62.0785	53.6844	50.3436	96.2	80.1978	76.0393	63.5469	85.2416	75.1896	76.0585	51.7816	71.6663	69.8698	65.0902	66.9366	56.7978	70.1512	49.3368	49.5181	59.7856	96.2	77.3448	73.4404	73.0363	73.9207	61.3862	71.2097	65.7147	61.62	60.1678	68.7632	62.347	62.1042	64.9169	52.5944
	96.3	64.868	57.6167	68.9828	51.7725	66.5849	52.4635	63.775	55.4156	51.1335	60.8826	49.2689	65.3695	49.9529	62.0223	53.4732	50.2552	96.3	80.0407	76.1021	63.4107	85.4637	75.3818	76.0443	51.9754	71.5708	69.772	64.813	66.8471	56.8489	70.1164	49.1508	49.5141	59.9508	96.3	77.0842	73.3358	73.1104	73.8232	61.4429	71.1522	65.6015	61.5855	60.1714	68.6771	62.4284	62.1362	64.7025	52.5661
	96.4	64.6783	57.6763	68.6954	52.0063	66.2586	52.1021	63.6148	55.3417	51.1265	61.0195	49.3414	65.3109	49.9331	61.984	53.3537	50.266	96.4	79.9718	76.0633	63.2121	85.6241	75.4737	76.114	52.1383	71.6074	69.5155	64.4809	66.5644	56.8562	70.0147	49.0475	49.4131	60.2937	96.4	77.1102	73.2861	73.258	73.693	61.5026	71.2087	65.4469	61.6622	60.083	68.6196	62.6322	62.1663	64.6897	52.507
	96.5	64.5698	57.8787	68.466	52.1842	65.7729	51.7398	63.4481	55.2709	51.12	61.1509	49.421	65.4234	49.9428	61.9954	53.4534	50.3539	96.5	79.9883	75.9156	62.92	85.7626	75.5703	76.2856	52.3687	71.7938	69.3752	64.297	66.3875	56.8954	69.8688	49.0321	49.362	60.6025	96.5	77.0779	73.1294	73.414	73.6143	61.4704	71.087	65.1592	61.7698	59.944	68.5122	62.7685	62.2773	64.6149	52.5666
	96.6	64.396	58.0005	68.4492	52.3676	65.3016	51.5272	63.5086	55.234	51.0388	61.2729	49.4748	65.3393	50.0205	62.0433	53.6058	50.6195	96.6	80.1551	75.6011	62.7169	85.8529	75.6321	76.364	52.4962	71.9365	69.1913	64.2542	66.211	56.8773	69.7048	49.0956	49.3145	60.7914	96.6	76.9546	72.947	73.241	73.5744	61.4377	70.8471	65.0096	61.912	59.7953	68.5641	62.7549	62.4067	64.6667	52.7783
	96.7	64.2264	57.978	68.5518	52.3048	65.034	51.7088	63.4606	55.1934	50.8942	61.4843	49.735	65.2477	50.107	62.2476	53.7566	50.8072	96.7	80.523	75.4488	62.7592	85.8353	75.5404	76.4222	52.4588	72.2169	69.0868	64.2657	66.1573	57.0073	69.5259	49.2444	49.4612	60.9733	96.7	76.797	72.6172	73.1347	73.4523	61.3212	70.8212	65.064	62.0663	59.5673	68.7467	62.7242	62.5598	64.7956	52.9464
	96.8	64.0954	57.8436	68.6237	52.1539	65.0625	52.0895	63.5289	55.1766	50.7981	61.6976	49.9008	65.0912	50.39	62.4511	53.9525	51.045	96.8	80.7823	75.3782	62.6976	85.6132	75.4229	76.3234	52.2755	72.4528	68.9484	64.403	66.0328	57.1199	69.3331	49.4432	49.5184	60.9026	96.8	76.6298	72.3776	72.981	73.3897	61.1815	70.7785	65.045	62.149	59.3379	68.8571	62.7702	62.6634	65.0085	52.8822
	96.9	63.9153	57.7478	68.664	51.9612	65.3593	52.5254	63.6504	55.2382	50.707	61.7703	50.0232	64.7928	50.5064	62.5774	54.1959	51.3369	96.9	80.7404	75.3213	62.6625	85.3278	75.3608	76.254	52.0632	72.7407	69.0038	64.5408	65.9489	57.1595	69.1495	49.5527	49.6181	60.6778	96.9	76.3483	72.1082	72.7074	73.4105	60.9438	70.7456	64.9266	62.1201	59.2285	68.828	62.7029	62.7012	65.0072	52.8334
	97	63.685	57.4323	68.5126	51.769	65.9138	52.9086	63.746	55.3299	50.676	61.7637	50.1248	64.3436	50.5763	62.6084	54.2434	51.5514	97	80.589	75.3586	62.6419	85.0708	75.3874	76.2118	51.7955	72.8672	69.096	64.4999	65.9429	57.1026	69.0771	49.5968	49.5294	60.4664	97	76.0558	71.9739	72.4556	73.3338	60.7477	70.923	64.9319	62.1025	59.1953	68.8202	62.6679	62.7585	65.013	52.7651
	97.1	63.5303	57.0376	68.1655	51.5836	66.3679	53.1827	63.6953	55.434	50.6688	61.6713	50.2416	64.0126	50.4198	62.7335	54.1026	51.66	97.1	80.4417	75.6602	62.5791	84.8548	75.624	76.2918	51.6171	72.8878	69.2908	64.4524	66.0437	57.0044	69.1576	49.5537	49.3764	60.1292	97.1	75.9275	71.95	72.4069	73.1852	60.6161	71.1232	64.8349	62.1492	59.2892	68.7323	62.785	62.8518	64.9535	52.585
	97.2	63.5201	56.7685	67.7808	51.5315	66.6101	53.3261	63.7733	55.6634	50.7258	61.4135	50.203	63.8049	50.0731	62.6586	54.0082	51.7798	97.2	80.1954	75.7234	62.4331	84.5307	75.7234	76.5512	51.5524	72.9222	69.4472	64.575	66.1406	56.8407	69.1386	49.4649	49.1251	59.7975	97.2	75.9447	72.0073	72.3412	73.195	60.4821	71.2046	64.5316	62.2488	59.4147	68.7088	62.869	62.9016	64.9084	52.501
	97.3	63.382	56.5067	67.4549	51.4606	66.662	53.4427	63.7164	55.915	50.8338	61.1706	50.226	63.8264	49.5014	62.462	53.9795	51.8025	97.3	80.063	75.7112	62.3246	84.358	75.7372	76.8594	51.5398	72.8544	69.6216	64.6558	66.388	56.677	69.2511	49.2805	48.9658	59.5158	97.3	75.9674	72.1251	72.2916	73.1625	60.4026	71.287	64.4232	62.3328	59.5447	68.6699	62.9316	62.8716	64.836	52.5477
	97.4	63.365	56.2591	67.2707	51.3593	66.5253	53.5567	63.5513	56.0473	50.9016	61.0618	50.1687	64.0427	49.2105	62.2431	53.9215	51.7464	97.4	80.264	75.7402	62.3972	84.3242	75.6678	77.0594	51.5137	72.5597	69.6687	64.7584	66.719	56.6618	69.51	49.1727	48.7834	59.2503	97.4	76.1323	72.378	72.4187	73.1523	60.4287	71.2893	64.5326	62.3864	59.7077	68.7757	63.003	62.8523	64.9266	52.5956
	97.5	63.2847	56.253	67.3734	51.2507	66.2566	53.662	63.3153	56.1011	50.8989	61.0994	49.9597	64.2113	48.9441	62.0436	54.0392	51.6477	97.5	80.552	75.7367	62.5588	84.2746	75.5106	77.0502	51.4972	72.2076	69.6794	64.9383	66.9121	56.6938	69.6996	48.9858	48.8104	58.9438	97.5	76.4935	72.514	72.6448	73.3454	60.4651	71.2317	64.661	62.3099	59.8828	68.9966	63.0045	62.7544	65.0147	52.6998
	97.6	63.1814	56.4809	67.577	51.2508	66.1316	53.7231	63.2096	56.1146	50.8568	61.2648	49.6287	64.5004	48.9381	61.6416	54.211	51.3819	97.6	80.6702	75.438	62.6445	84.3385	75.0479	76.8744	51.4834	71.8246	69.6448	64.954	66.9514	56.7695	69.6638	48.872	48.833	58.65	97.6	76.7837	72.4899	72.7828	73.5912	60.487	71.339	64.6912	62.0769	60.0967	69.2134	62.8315	62.5942	65.2018	52.9304
	97.7	63.0409	56.7292	67.8176	51.282	66.1427	53.6973	63.0274	55.9612	50.7429	61.3972	49.2814	64.6132	49.0852	61.3312	54.3188	51.1626	97.7	80.666	75.1108	62.5488	84.6014	74.6058	76.5611	51.5252	71.2781	69.5472	64.668	66.8944	56.8432	69.7166	48.8111	48.9018	58.3997	97.7	77.0985	72.5236	72.8673	73.6274	60.6036	71.4972	64.7624	61.8563	60.371	69.3172	62.5757	62.5266	65.3066	53.0562
	97.8	63.1464	57.0071	68.1062	51.4275	66.2639	53.626	62.9507	55.7952	50.4983	61.5412	48.9648	64.5676	49.3348	61.2178	54.2495	51.0296	97.8	80.6837	74.9369	62.5621	84.7924	74.1142	76.2996	51.566	70.84	69.5441	64.3678	66.7971	57.0537	69.458	48.8082	48.9687	58.3443	97.8	77.4773	72.416	73.0546	73.6485	60.6857	71.6648	64.6484	61.793	60.608	69.3582	62.3488	62.5552	65.1362	53.2647
	97.9	63.3358	57.2058	68.2678	51.718	66.6886	53.505	63.1036	55.7541	50.3048	61.4888	48.7934	64.4267	49.5515	61.2495	54.1239	50.9532	97.9	80.4471	74.8542	62.3892	84.914	73.6917	76.043	51.7867	70.5514	69.5229	64.065	66.6543	57.061	69.113	48.7618	49.1166	58.3931	97.9	77.6249	72.1751	72.9328	73.619	60.823	71.6944	64.4504	61.8846	60.6414	69.1499	62.2081	62.6305	64.824	53.4641
	98	63.7374	57.2435	68.2448	52.0605	67.1129	53.2965	63.3789	55.8043	50.1518	61.2895	48.8154	64.3934	49.824	61.3229	53.8803	50.8556	98	80.1378	74.7653	62.3086	85.089	73.2702	76.0122	52.0692	70.4058	69.4046	63.7032	66.5326	57.08	68.8	48.9179	49.1674	58.5935	98	77.5048	72.1225	72.6701	73.506	61.1089	71.5996	64.289	62.1056	60.4755	68.837	62.1003	62.7969	64.6758	53.583
	98.1	64.1718	57.2625	68.3479	52.3024	67.4198	53.1071	63.5862	55.8903	50.1187	60.8835	48.9509	64.1313	49.9446	61.6488	53.691	50.8984	98.1	80.0916	74.8772	62.362	85.1118	72.9927	76.042	52.2866	70.4141	69.331	63.4508	66.4081	57.0708	68.5901	49.0551	49.2789	58.9363	98.1	77.3448	72.3272	72.5167	73.3921	61.3905	71.3639	64.3385	62.3925	60.1708	68.5416	62.0351	62.961	64.5602	53.5498
	98.2	64.6669	57.2633	68.4784	52.3336	67.5344	52.9992	63.738	56.0306	50.1818	60.6049	49.154	64.0697	50.1184	61.9728	53.5566	50.9126	98.2	80.1696	75.3585	62.7808	85.0633	72.9741	76.0558	52.4464	70.5077	69.3941	63.4541	66.2549	57.0143	68.4632	49.1035	49.4011	59.3314	98.2	77.2006	72.4888	72.3453	73.5054	61.529	70.9953	64.4962	62.5852	59.8044	68.3432	62.1012	63.0261	64.5013	53.5006
	98.3	64.9144	57.2844	68.523	52.2571	67.4407	52.9392	63.8114	56.108	50.4494	60.3218	49.2632	64.1004	50.308	62.1208	53.4142	50.8396	98.3	80.1143	75.6845	63.1075	85.0478	73.1179	76.0017	52.5247	70.6824	69.3758	63.578	66.0053	56.7318	68.7154	49.0733	49.5002	59.7478	98.3	76.9222	72.7766	72.2095	73.58	61.7329	70.6502	64.8159	62.6107	59.423	68.2989	62.0676	63.1324	64.735	53.2486
	98.4	65.0778	57.3124	68.6738	52.0527	67.0772	52.8052	63.5929	56.1763	50.6642	60.3111	49.3507	64.274	50.2696	62.1754	53.4019	50.7479	98.4	80.203	75.8922	63.4923	85.0711	73.3542	76.0453	52.3815	70.8492	69.347	63.7331	65.721	56.6045	68.8856	49.1055	49.5298	60.1634	98.4	76.6296	73.0544	72.4373	73.6595	61.8881	70.6655	65.0033	62.4724	59.1961	68.535	61.9272	63.1765	65.0953	52.9349
	98.5	65.0066	57.3222	68.9732	51.747	66.7072	52.8554	63.2702	56.1955	50.9203	60.3046	49.3316	64.4041	50.1584	62.1629	53.4514	50.7438	98.5	80.3837	76.0145	63.7542	84.9562	73.6926	76.0619	52.2325	70.9694	69.3766	64.0793	65.568	56.543	69.1391	49.0334	49.6313	60.3712	98.5	76.4018	73.2456	72.7171	73.7546	61.7709	70.8164	65.1502	62.3001	59.1349	68.649	61.8926	63.0921	65.3244	52.686
	98.6	64.9131	57.182	69.161	51.4013	66.4075	52.991	62.9408	56.1634	51.0658	60.519	49.3222	64.7244	50.0983	61.9192	53.5471	50.7532	98.6	80.4306	76.0324	63.9444	84.8606	74.0389	76.2439	52.1524	71.0809	69.2648	64.5264	65.5343	56.5859	69.5048	48.8644	49.7	60.5666	98.6	76.2106	73.2914	72.8748	73.9647	61.5797	70.9588	65.3109	62.1988	59.1494	68.7932	61.9466	63.0822	65.3256	52.497
	98.7	64.6974	56.938	69.1914	51.2463	66.2692	53.0932	62.7637	56.1143	51.0746	60.7184	49.2192	64.9951	49.9463	61.7229	53.6322	50.7178	98.7	80.4554	75.7045	63.8558	84.7605	74.2276	76.6124	52.0578	71.4338	69.1712	64.8048	65.5726	56.674	69.8199	48.7307	49.5965	60.745	98.7	75.9348	73.4412	73.1386	73.9582	61.4337	71.3506	65.5124	62.2242	59.242	68.8595	61.8643	63.1899	65.2194	52.3823
	98.8	64.6206	56.7352	69.2021	51.1977	66.2502	53.0948	62.6386	56.0992	50.9538	60.9242	49.1972	65.197	49.7965	61.5422	53.761	50.7051	98.8	80.6049	75.4972	63.6638	84.7212	74.3327	77.0424	52.1251	71.6617	69.1072	64.8849	65.6016	56.9199	69.8911	48.828	49.428	60.8148	98.8	75.7398	73.5722	73.2967	73.9552	61.1338	71.7414	65.6642	62.2404	59.3668	68.9469	61.8776	63.1465	65.0788	52.3828
	98.9	64.442	56.6761	69.0828	51.1607	66.2831	53.201	62.6984	56.0085	50.8696	60.947	49.113	65.1047	49.7972	61.2735	53.787	50.651	98.9	80.6623	75.3153	63.4003	84.6081	74.3465	77.3424	52.301	71.9847	69.1092	64.8098	65.6334	57.0664	70.1052	48.9337	49.2105	60.6951	98.9	75.818	73.8174	73.3159	73.97	60.7396	71.8358	65.9345	62.3381	59.4607	68.9912	61.9756	63.2248	64.9196	52.5597
	99	64.2315	56.7643	68.8399	51.2464	66.4954	53.1718	62.8099	55.889	50.6742	61.0696	49.0979	64.9977	49.75	61.1102	53.8294	50.5305	99	80.529	75.2374	63.0265	84.5598	74.3774	77.4741	52.3278	72.3515	69.071	64.5423	65.5994	57.0938	70.1625	49.0784	48.9636	60.6469	99	76.0545	73.9763	73.3555	73.9534	60.4693	71.94	66.1443	62.4452	59.5688	69.1834	62.0252	63.5018	64.8778	52.6079
	99.1	63.9797	56.8829	68.5134	51.4201	66.6407	53.1131	62.99	55.6988	50.5539	61.1528	49.0747	64.799	49.732	61.0712	53.7346	50.4403	99.1	80.2827	75.3034	62.6317	84.6012	74.3884	77.4984	52.3421	72.7046	69.1983	64.1375	65.5298	57.0398	69.895	49.3537	48.7675	60.4906	99.1	76.2667	74.1363	73.4803	73.8046	60.3117	71.9623	66.166	62.4662	59.7086	69.2546	62.0152	63.5676	65.0439	52.6923
	99.2	63.7314	57.0484	68.2457	51.6128	66.7463	53.0488	63.1075	55.5572	50.5501	61.2256	49.1932	64.5384	49.8496	61.0562	53.5802	50.3692	99.2	80.0796	75.4896	62.356	84.6117	74.289	77.3216	52.3438	72.6248	69.1862	63.7591	65.5028	56.9874	69.5397	49.6325	48.7658	60.2088	99.2	76.4493	74.129	73.6034	73.8784	60.1463	71.7832	65.8928	62.32	59.8067	69.326	62.2124	63.3467	65.2718	52.6852
	99.3	63.3816	57.1672	68.0808	51.7095	66.8985	53.0569	63.1988	55.3957	50.5442	61.2935	49.3638	64.1839	50.0564	61.1773	53.5857	50.316	99.3	79.7696	75.5594	62.1736	84.499	74.1443	77.0316	52.236	72.6192	69.2296	63.4946	65.6144	56.8683	69.2144	49.7767	48.9569	59.7634	99.3	76.6644	74.0196	73.6511	74.0065	60.2285	71.4747	65.4974	62.2566	59.9694	69.1446	62.5459	63.1491	65.3543	52.7718
	99.4	63.2205	57.1125	68.0052	51.8738	67.1828	52.9936	63.3013	55.2469	50.5555	61.4345	49.648	64.0339	50.2872	61.5764	53.6152	50.2487	99.4	79.4674	75.5995	62.1272	84.47	73.9666	76.8316	52.1363	72.4741	69.2915	63.3622	65.8489	56.836	68.7284	49.822	49.2989	59.3967	99.4	76.6784	73.865	73.6003	74.0616	60.4298	71.2161	65.0753	62.1349	60.1305	68.8216	62.9205	62.8409	65.3582	52.7009
	99.5	63.4134	56.8866	67.8793	52.0456	67.2821	53.0255	63.3338	55.1078	50.6499	61.5914	49.9298	64.0422	50.6246	61.973	53.6828	50.2665	99.5	79.4573	75.6421	62.1538	84.4461	73.5705	76.7639	52.3137	72.2262	69.5151	63.2604	66.0775	56.9055	68.2842	49.7898	49.6086	59.0324	99.5	76.5882	73.7326	73.5607	74.087	60.7199	70.8406	64.7303	61.9913	60.268	68.5498	63.1862	62.4074	65.1806	52.7228
	99.6	63.6467	56.6902	67.7887	52.1627	67.4768	53.0084	63.2182	55.1447	50.7638	61.6606	50.1068	64.1517	50.9072	62.2962	53.8719	50.2601	99.6	79.7324	75.5369	62.1169	84.3513	73.2483	76.6124	52.4734	71.8585	69.6524	63.2602	66.4371	57.0138	68.0703	49.6728	49.7564	58.8126	99.6	76.4672	73.6613	73.4626	74.0523	60.9994	70.5899	64.4836	61.8516	60.2979	68.3826	63.4894	62.2452	65.0114	52.6563
	99.7	63.954	56.5344	67.7648	52.173	67.7814	53.1001	62.9554	55.2452	50.8729	61.7239	50.2574	64.3357	51.0902	62.4735	54.1322	50.3136	99.7	80.0684	75.3136	61.97	84.353	73.1935	76.5655	52.6578	71.7572	69.9983	63.4369	66.7692	57.0126	67.9785	49.5698	49.819	58.6744	99.7	76.3486	73.6827	73.2375	73.8769	61.3155	70.3345	64.4269	61.8321	60.3732	68.3503	63.7144	62.4017	64.9	52.5839
	99.8	64.4084	56.3937	67.719	52.282	68.0976	53.1763	62.7377	55.3106	50.9907	61.7548	50.2976	64.7918	51.094	62.5602	54.2666	50.3651	99.8	80.4644	75.1278	61.8716	84.4594	73.2542	76.6718	52.7617	71.609	70.2927	63.5366	66.9768	56.9756	67.9587	49.3677	49.6858	58.8271	99.8	76.1804	73.687	73.1334	73.7144	61.4289	70.1649	64.4853	61.8963	60.261	68.4945	63.729	62.6349	64.8569	52.4694
	99.9	64.7546	56.3423	67.7036	52.2456	68.2218	53.3763	62.4733	55.4204	50.9584	61.6337	50.2206	65.246	50.9536	62.4335	54.3726	50.4924	99.9	81.0404	75.021	61.6982	84.5901	73.407	76.8064	52.8425	71.5345	70.5264	63.6325	66.9782	56.882	67.9842	49.2464	49.4417	59.0704	99.9	76.0092	73.6172	73.0323	73.6578	61.5198	70.0224	64.4758	62.0541	60.0348	68.7421	63.6534	62.8596	64.833	52.435
	100	64.8179	56.413	67.7391	52.0337	68.2268	53.6	62.3423	55.5608	50.8831	61.4353	50.0285	65.4954	50.6984	62.2302	54.3322	50.6984	100	81.3515	74.9378	61.7311	84.723	73.8627	76.9926	52.7425	71.5237	70.6595	63.8494	66.8558	56.816	68.0618	49.1826	49.1967	59.4189	100	75.8408	73.5172	72.8245	73.6198	61.4465	69.9438	64.3916	62.2429	59.7977	68.8988	63.6448	63.0375	64.9048	52.3707
	100.1	64.916	56.4551	67.8077	51.9431	68.0413	53.8884	62.3416	55.584	50.782	61.3244	49.9323	65.6524	50.4532	62.1147	54.2956	50.9372	100.1	81.5165	74.8946	61.9185	84.8287	74.2348	77.3889	52.6376	71.5483	70.7894	63.9939	66.4049	56.6918	68.2208	49.1836	49.1709	59.6264	100.1	75.891	73.2035	72.6976	73.716	61.3491	69.9377	64.3564	62.5916	59.5721	69.068	63.5664	63.0171	64.7747	52.3819
	100.2	64.9685	56.3118	67.9434	51.9392	67.6242	53.9399	62.5096	55.4271	50.6352	61.2142	49.7098	65.7978	50.0634	62.1714	54.3154	51.1365	100.2	81.4904	74.8983	62.255	84.8493	74.3307	77.8144	52.5889	71.4431	70.6825	63.9687	66.0295	56.6543	68.4304	49.1217	49.2312	59.8456	100.2	76.1424	72.6968	72.7408	73.8989	61.3135	70.1098	64.401	62.884	59.1978	69.0348	63.3945	62.8324	64.5774	52.4981
	100.3	64.9094	56.1382	68.094	51.8291	67.0085	53.9402	62.7158	55.3676	50.5435	61.175	49.5045	65.7299	49.7646	62.3126	54.3777	51.267	100.3	81.4444	74.9502	62.5396	84.8182	74.4111	78.1248	52.7244	71.3769	70.4552	63.9869	65.7982	56.7281	68.6193	49.1085	49.3578	59.8171	100.3	76.4441	72.2162	72.6833	74.0454	61.4271	70.3328	64.5176	63.0568	59.023	68.9551	63.2207	62.7082	64.4561	52.5226
	100.4	64.8027	56.032	68.1393	51.8275	66.5855	53.791	63.0412	55.2902	50.681	61.3171	49.4069	65.5655	49.5529	62.3831	54.4508	51.3538	100.4	81.1726	74.9123	62.7828	84.6149	74.366	78.3108	52.8738	71.1986	70.1654	63.9735	65.6676	56.8404	68.9628	49.1502	49.4794	59.7584	100.4	76.8266	71.7842	72.7324	74.2059	61.5002	70.4748	64.7552	63.2324	58.9785	68.8062	62.9979	62.6064	64.4038	52.523
	100.5	64.6949	55.9114	68.304	52.0024	66.4032	53.5466	63.1903	55.187	50.8977	61.4084	49.4456	65.4518	49.3841	62.4175	54.6622	51.1659	100.5	81.0586	74.7595	62.729	84.283	74.019	78.4967	53.0167	71.0172	69.8064	63.857	65.7553	56.8573	69.3543	49.1942	49.6198	59.6165	100.5	77.1905	71.5308	72.7798	74.3518	61.7465	70.6246	64.9617	63.4311	58.9517	68.6996	62.7943	62.6049	64.3269	52.5845
	100.6	64.4624	56.0264	68.5453	51.9472	66.3809	53.2025	63.2338	55.0798	51.092	61.4713	49.429	65.2876	49.2759	62.3595	54.7348	50.8848	100.6	80.816	74.623	62.6171	84.0769	73.7687	78.2992	53.1424	70.9549	69.5402	63.8375	66.0688	56.8362	69.6861	49.158	49.6173	59.6627	100.6	77.397	71.5972	72.6291	74.3107	62.0759	70.7891	65.1054	63.4274	58.99	68.5143	62.6834	62.7502	64.453	52.7078
	100.7	64.1561	56.381	68.5606	51.7683	66.4473	53.0467	63.3307	55.0162	51.2927	61.4925	49.4983	65.0954	49.4262	62.1748	54.5587	50.6625	100.7	80.6547	74.6676	62.3962	83.8355	73.7343	77.9417	53.1548	70.8625	69.3987	63.8242	66.2762	56.8028	69.8785	49.1627	49.5085	59.7619	100.7	77.4425	72.0208	72.3245	74.129	62.2415	70.8986	65.1898	63.35	59.1661	68.4866	62.6205	62.9611	64.6868	52.8702
	100.8	63.864	56.7111	68.4032	51.5835	66.6922	53.0897	63.3067	54.9355	51.3399	61.4632	49.5973	64.9758	49.6058	61.9402	54.2296	50.5454	100.8	80.5087	74.6669	62.1275	83.517	73.5968	77.64	52.9517	70.7044	69.3822	63.9668	66.3543	56.6651	69.9949	49.16	49.4839	60.0144	100.8	77.3248	72.5558	72.23	73.9299	62.1945	70.9193	65.2111	63.2354	59.2144	68.4533	62.6201	63.0999	64.9197	53.084
	100.9	63.7206	56.9388	68.2468	51.4822	66.7135	53.231	63.1128	54.7726	51.2125	61.3487	49.562	64.8922	49.8706	61.8245	53.9825	50.4559	100.9	80.4329	74.614	61.8952	83.4495	73.5692	77.4953	52.6348	70.76	69.4458	64.1724	66.5249	56.5466	69.9755	48.9137	49.4914	60.0709	100.9	77.091	73.0726	72.2017	73.6097	62.1451	71.1121	65.1053	63.0364	59.2742	68.4201	62.6372	63.3102	65.0262	53.2806
	101	63.5992	57.1089	67.9696	51.3276	66.6428	53.346	62.9847	54.638	50.9951	61.2637	49.4866	64.8818	50.27	61.7949	53.6548	50.5844	101	80.27	74.6908	61.8471	83.582	73.8523	77.162	52.3344	70.7993	69.4978	64.4024	66.5205	56.5214	69.9479	48.6434	49.4431	60.1204	101	76.9076	73.3814	72.4264	73.2907	61.953	71.2324	65.1218	62.7005	59.237	68.349	62.689	63.5209	65.1384	53.5123
	101.1	63.5229	56.919	67.6099	51.3528	66.6748	53.4839	62.9255	54.5679	50.6996	61.2131	49.5312	65.0184	50.6766	61.8254	53.358	50.7165	101.1	80.2391	74.8821	61.6742	83.5479	74.0708	77.233	52.0572	70.7714	69.4186	64.6194	66.4299	56.6834	69.9089	48.4272	49.4377	59.93	101.1	76.6055	73.4102	72.8422	73.1744	61.4516	71.1523	65.1182	62.359	59.2293	68.306	62.6473	63.6181	65.2235	53.5741
	101.2	63.6244	56.7042	67.4692	51.4989	66.7903	53.5418	62.728	54.5646	50.4096	61.1704	49.5688	65.1348	50.8935	61.7688	53.2858	50.7579	101.2	80.2325	74.7879	61.496	83.539	74.1126	77.3296	51.8071	70.955	69.2815	65.0014	66.3231	56.9402	69.8529	48.2182	49.4742	59.5467	101.2	76.1956	73.1932	73.3327	73.1254	61.0795	70.9822	65.1016	62.2144	59.0706	68.1886	62.6522	63.587	65.1596	53.4297
	101.3	63.7777	56.5662	67.3784	51.7328	66.799	53.4686	62.6056	54.5375	50.2817	61.0726	49.6551	65.1508	51.0015	61.6451	53.2888	50.7249	101.3	80.2378	74.7226	61.3148	83.5968	74.2661	77.3168	51.7482	71.2136	69.1568	65.1826	66.2554	57.355	69.9498	48.1244	49.2798	59.1768	101.3	76.0834	72.9532	73.6073	73.0698	60.7913	70.9834	65.075	62.1378	58.957	68.1232	62.7828	63.4284	64.9822	53.2512
	101.4	63.7398	56.4288	67.4199	51.7933	66.9914	53.3382	62.4539	54.5999	50.1744	61.0848	49.8804	65.145	50.9177	61.4347	53.1751	50.713	101.4	80.1298	74.9339	61.3129	83.4007	74.4569	77.0941	51.9261	71.2929	69.1254	65.2888	66.1648	57.6787	70.0683	48.3823	49.0318	59.0913	101.4	76.1482	72.7338	73.76	73.091	60.4392	70.8728	65.247	62.0522	58.8377	68.1436	63.0159	63.0791	64.9225	53.0875
	101.5	63.7199	56.351	67.4825	51.8487	67.2318	53.2404	62.4298	54.6445	50.0614	61.2508	50.1881	65.0903	50.7021	61.1689	53.0005	50.6568	101.5	79.9895	75.0934	61.2236	83.0764	74.4369	77.017	52.003	71.4221	69.1199	65.3747	66.2503	57.8556	70.0757	48.6666	48.7956	58.9834	101.5	76.2276	72.7299	73.6215	73.1586	60.1031	70.9489	65.3792	62.046	58.8378	68.1456	63.1329	62.5608	64.8644	52.7878
	101.6	63.7928	56.4403	67.5624	51.8447	67.262	53.2488	62.4288	54.7014	50.0759	61.3562	50.4017	64.9261	50.339	60.9999	52.8668	50.7081	101.6	79.8412	75.0255	61.2579	82.7116	74.5089	76.7361	52.04	71.475	69.0788	65.2754	66.427	57.9099	70.038	49.054	48.5333	59.0962	101.6	76.4954	72.8476	73.4348	73.1597	60.0264	71.0488	65.6256	62.0779	58.7888	68.1586	63.2164	62.1398	64.7116	52.625
	101.7	63.6676	56.4332	67.6536	51.8325	67.1531	53.3251	62.4702	54.8687	50.1935	61.5121	50.5998	64.8611	50.0483	61.0746	52.6804	50.8402	101.7	79.6828	75.203	61.259	82.4249	74.6788	76.6034	52.0345	71.4144	69.0856	64.9174	66.7076	57.9064	70.1652	49.437	48.2619	59.3952	101.7	76.9568	72.9791	73.1389	73.2747	59.8274	71.0892	65.8434	61.9975	58.9296	68.1406	63.1501	61.9079	64.518	52.6151
	101.8	63.4134	56.4065	67.9939	51.8092	67.0772	53.2686	62.485	55.1266	50.3106	61.6906	50.6765	64.964	49.7939	61.178	52.6542	51.1348	101.8	79.5439	75.248	61.4004	82.1788	74.8103	76.5911	51.8678	71.2691	69.0704	64.6252	66.9836	57.6709	70.1108	49.7248	48.2774	59.6418	101.8	77.1498	73.0246	72.9704	73.4876	59.6983	71.0005	65.9743	61.9926	59.1562	68.1281	62.7952	61.9004	64.3714	52.7337
	101.9	63.1827	56.4414	68.2925	51.917	66.8706	53.2668	62.6587	55.414	50.4963	61.659	50.5993	65.112	49.7395	61.3685	52.6231	51.4878	101.9	79.6594	75.0476	61.2883	82.0648	74.7933	76.6801	51.5603	71.1108	68.8728	64.4504	67.1696	57.4628	69.9621	49.8098	48.4102	59.7456	101.9	77.1334	72.9888	72.7411	73.6828	59.8002	71.0255	66.0063	61.961	59.3908	68.0387	62.4301	62.1021	64.2264	52.9282
	102	62.9147	56.4463	68.572	51.9567	66.4534	53.2777	62.6288	55.7572	50.7612	61.3726	50.3971	65.1625	49.667	61.6815	52.7122	51.7654	102	79.7977	74.8356	61.2355	82.1178	74.8715	76.6648	51.4386	70.898	68.8924	64.3176	67.1992	57.2946	69.8167	49.8746	48.6984	59.8906	102	77.0732	72.729	72.673	73.7912	59.9328	70.9086	66.0558	62.0359	59.5435	68.0089	62.1885	62.5484	64.1388	53.2828
	102.1	62.6958	56.4588	68.8518	51.868	66.0749	53.2	62.6406	56.0097	50.9781	61.067	50.1214	65.2418	49.7301	61.8283	52.9482	51.984	102.1	79.8319	74.7225	61.2784	82.5094	74.8394	76.6832	51.2926	70.7305	69.1071	64.2834	67.2676	57.0962	69.6654	49.7858	49.0793	59.8094	102.1	76.9994	72.5576	72.6079	73.8474	60.0805	71.0268	65.9898	62.1688	59.7017	68.0248	62.1286	62.9544	64.1772	53.5735
	102.2	62.6303	56.6118	68.9724	51.6754	65.8477	53.0264	62.7204	56.0772	51.07	60.6879	49.7759	65.1474	49.8086	61.8387	53.2864	52.162	102.2	79.9	74.4457	61.4526	82.893	74.8149	76.5407	51.2403	70.5255	69.3639	64.3239	67.2482	56.9632	69.3067	49.7851	49.4415	59.6311	102.2	76.8271	72.4257	72.6193	73.7002	60.4126	71.281	65.9032	62.2697	59.9105	68.1814	62.2446	63.2275	64.5224	53.8242
	102.3	62.7626	56.6908	68.8239	51.4705	65.6618	53.0137	62.8366	55.9534	51.0566	60.363	49.4037	64.8481	49.9086	61.9523	53.4349	52.088	102.3	79.9227	74.4002	61.5697	83.2748	74.768	76.3527	51.1974	70.4276	69.5596	64.3966	67.2383	57.0438	69.1147	49.8333	49.6444	59.4189	102.3	76.769	72.3054	72.5341	73.3872	60.7906	71.6117	65.903	62.2206	60.0285	68.3096	62.6006	63.3646	64.8456	53.9002
	102.4	63.1191	56.7019	68.5184	51.1941	65.5813	52.9329	62.9724	55.8377	51.0427	60.1951	49.2212	64.5584	49.8048	62.1504	53.7015	51.7796	102.4	79.8017	74.3694	61.8934	83.642	74.8278	76.1498	51.1132	70.4212	69.8724	64.3386	67.201	57.2128	69.0759	49.7962	49.8138	59.328	102.4	76.8898	72.3314	72.5565	73.1296	60.982	71.8688	65.7124	62.2346	60.1206	68.4486	62.8274	63.4239	65.0482	53.828
	102.5	63.6686	56.738	68.1879	51.0276	65.8062	52.981	63.4945	55.5769	50.9928	60.2716	49.0495	64.3718	49.7645	62.1389	53.9331	51.5481	102.5	79.8116	74.3745	62.1967	83.8976	74.7672	76.0041	50.9661	70.4324	69.9114	64.2045	67.1978	57.4764	69.2003	49.7253	49.7489	59.2938	102.5	76.918	72.3569	72.3844	72.9602	61.2755	71.9974	65.5044	62.1386	60.2561	68.5318	63.0436	63.436	65.0224	53.5533
	102.6	64.0859	56.8012	67.8181	51.0686	66.1287	52.9813	63.9523	55.3292	51.073	60.3336	48.999	64.0955	49.6584	62.1138	53.9214	51.2835	102.6	80.0271	74.4884	62.316	83.8715	74.6938	75.8978	51.0606	70.5904	69.7733	64.0666	66.9883	57.7087	69.1864	49.6988	49.4676	59.3737	102.6	76.8108	72.2614	72.1265	72.8375	61.4841	71.8982	65.2965	62.1058	60.3443	68.6051	63.1194	63.415	64.9073	53.3165
	102.7	64.4456	56.7354	67.4314	51.1737	66.3972	53.165	64.2411	55.1353	51.0999	60.4268	49.0196	63.9344	49.5451	62.0711	53.7059	50.9342	102.7	80.1865	74.6632	62.3164	83.7734	74.529	76.0014	51.2286	70.8016	69.5794	63.9644	66.8092	57.776	69.3143	49.5622	49.2511	59.4394	102.7	76.7115	72.2773	71.9932	72.8582	61.6208	71.796	65.1656	62.1276	60.2826	68.5389	63.1437	63.4927	64.6518	53.1163
	102.8	64.6465	56.7491	67.1216	51.1153	66.545	53.3246	64.4046	55.047	51.1632	60.5412	49.1552	64.0294	49.4715	61.956	53.679	50.7815	102.8	80.4477	74.6718	62.2566	83.6564	74.3016	76.0511	51.5281	70.8584	69.4486	63.8768	66.517	57.6711	69.3234	49.3826	48.9797	59.5432	102.8	76.5166	72.4003	71.9732	73.0816	61.6764	71.4389	65.1006	62.156	60.2619	68.4786	62.9803	63.5759	64.6238	52.9176
	102.9	64.6095	56.7656	66.9652	51.0736	66.6072	53.5451	64.3365	54.8002	51.1283	60.6028	49.0806	64.2506	49.5374	61.6962	53.5318	50.7758	102.9	80.741	74.7915	61.9632	83.5983	73.9078	76.055	51.7544	70.9064	69.2907	63.7174	66.3331	57.5182	69.2251	49.362	48.6489	59.5374	102.9	76.2405	72.4915	71.9192	73.2136	61.7278	71.0113	65.3197	62.2388	60.1894	68.4992	62.9785	63.6578	64.8549	52.7767
	103	64.249	56.7519	66.8867	51.0168	66.5315	53.5115	63.8486	54.8138	51.0656	60.5484	49.0504	64.4472	49.5395	61.6624	53.3758	50.6969	103	80.9339	74.9541	61.6413	83.5565	73.5783	76.1305	51.9236	70.9579	69.2591	63.6522	66.2043	57.2435	69.0367	49.4647	48.5242	59.4031	103	76.0998	72.8445	72.0299	73.3157	61.5459	70.8111	65.4572	62.3021	60.0848	68.5088	63.008	63.5972	65.4942	52.7912
	103.1	63.8807	56.6609	66.8558	51.0272	66.3556	53.6328	63.3306	55.0169	50.884	60.6503	49.0448	64.7448	49.5486	61.7008	53.3807	50.5791	103.1	80.91	74.9031	61.4798	83.5499	73.408	76.0888	51.758	70.8575	69.305	63.6563	66.3039	57.0819	69.1836	49.5942	48.6711	59.3244	103.1	76.0855	73.1167	72.2632	73.3752	61.3386	70.6668	65.6314	62.2824	60.0425	68.395	63.0204	63.6068	66.1794	52.8645
	103.2	63.5662	56.563	66.9893	51.0778	66.1152	53.5771	62.9083	55.2583	50.8946	60.788	49.1062	64.8867	49.5197	61.7785	53.5292	50.5334	103.2	80.7564	74.8418	61.48	83.5262	73.348	75.8225	51.383	70.8247	69.2241	63.7413	66.4558	56.9714	69.2442	49.8014	48.8656	59.4045	103.2	76.0704	73.3034	72.3264	73.3864	61.0192	70.4488	65.7676	62.3552	59.9973	68.3228	62.912	63.4968	66.7006	52.8456
	103.3	63.3573	56.4912	67.2574	51.4684	65.9592	53.4712	62.5879	55.4973	50.9704	60.8096	49.1628	64.7471	49.5088	61.8324	53.5254	50.398	103.3	80.4113	74.863	61.5221	83.52	73.2746	75.6826	51.0504	71.0029	69.1665	63.6119	66.7137	56.9403	69.3243	50.0438	49.2817	59.4672	103.3	76.1406	73.4516	72.2822	73.2412	60.6937	70.467	65.7398	62.5105	59.8167	68.3366	62.9658	63.4792	67.0503	52.9255
	103.4	63.2831	56.5868	67.4828	51.8254	65.8151	53.2757	62.6148	55.8952	51.1616	60.803	49.4313	64.414	49.5357	61.9052	53.5732	50.2826	103.4	80.0914	74.8151	61.7574	83.3409	73.4164	75.715	50.9677	71.2607	69.0602	63.6727	66.8259	56.9336	69.476	50.2808	49.6595	59.5167	103.4	76.2634	73.5839	72.2884	73.187	60.4356	70.5269	65.5452	62.6853	59.679	68.3954	62.9116	63.4428	67.1267	53.0465
	103.5	63.4932	56.695	67.7153	52.1362	65.6255	53.2339	62.8387	56.0363	51.4157	60.7784	49.6831	64.1706	49.6087	61.8854	53.5829	50.2865	103.5	79.6956	74.6038	62.093	83.0976	73.5881	75.7373	51.0002	71.4977	68.8584	63.6676	66.873	57.0471	69.476	50.3579	49.9459	59.6856	103.5	76.4902	73.5932	72.2504	73.2171	60.3607	70.4911	65.5184	62.8818	59.6436	68.4662	62.7143	63.4043	66.9261	53.1283
	103.6	63.8104	56.9117	67.9286	52.2676	65.5295	53.0321	63.0406	55.9707	51.577	60.7453	49.8264	63.9768	49.6548	61.7967	53.5146	50.4094	103.6	79.4091	74.5056	62.305	82.9181	73.544	75.9421	51.3208	71.6758	68.7002	63.6985	66.7906	57.1097	69.2524	50.3637	49.9893	59.863	103.6	76.6141	73.8002	72.0984	73.447	60.3987	70.4842	65.4887	63.0049	59.5986	68.72	62.5386	63.28	66.6875	53.0287
	103.7	64.1472	57.2338	68.0896	52.3933	65.5528	52.8971	63.2386	55.8745	51.5155	60.6491	49.9195	64.1174	49.7637	61.6809	53.432	50.541	103.7	79.408	74.4326	62.4396	82.78	73.4398	76.2814	51.8713	71.6918	68.6791	63.6494	66.6381	57.2147	69.1108	50.3012	49.8416	59.9148	103.7	76.7289	73.8479	72.0378	73.7681	60.5475	70.5268	65.3632	62.8675	59.6459	68.9649	62.542	63.1438	66.5874	52.9933
	103.8	64.4281	57.4799	68.0047	52.267	65.7136	52.8338	63.5066	55.7512	51.2844	60.7112	50.0244	64.4816	49.841	61.685	53.3538	50.6592	103.8	79.5039	74.2116	62.5801	82.6034	73.4915	76.577	52.3566	71.572	68.6541	63.7968	66.4922	57.1909	69.0561	50.1826	49.4674	59.8874	103.8	76.9087	73.7767	71.9713	74.0916	60.6357	70.5433	65.3215	62.679	59.8932	68.9439	62.4821	62.7874	66.3074	52.9645
	103.9	64.6529	57.5525	68.0326	52.1544	65.9808	52.941	63.5449	55.4769	50.9512	60.9466	50.013	64.9572	49.8977	61.6388	53.2856	50.7542	103.9	79.4605	73.8788	62.6508	82.5769	73.4446	76.7952	52.7764	71.3611	68.6446	63.8484	66.4392	57.0465	69.0297	49.9878	49.2486	59.8636	103.9	77.0227	73.6647	71.882	74.2781	60.5199	70.6001	65.3204	62.4414	60.133	68.6977	62.483	62.385	66.1131	52.8744
	104	64.7931	57.5942	68.0643	52.0052	66.2636	53.0546	63.4917	55.2957	50.4746	61.2225	49.9937	65.4037	49.9077	61.5069	53.1855	50.8003	104	79.5023	73.6304	62.7103	82.5416	73.3769	76.8888	53.0722	71.1621	68.6309	63.8319	66.4	56.8684	69.1642	49.8546	49.0351	59.7075	104	76.8662	73.4474	71.8368	74.3537	60.396	70.7465	65.1924	62.186	60.2142	68.4803	62.5194	62.0386	66.0286	52.6827
	104.1	64.8144	57.6201	68.1233	51.7942	66.4578	53.2681	63.4204	55.1899	50.1047	61.1943	49.9972	65.752	49.9402	61.6358	53.1108	50.8362	104.1	79.4716	73.4649	62.8066	82.3672	73.3118	76.7788	53.1935	71.0885	68.4907	63.7634	66.3664	56.6776	69.3148	49.7567	49.0438	59.4734	104.1	76.8082	73.1062	71.9554	74.2232	60.1496	70.9424	65.0348	62.0066	60.3392	68.0909	62.6682	61.6951	66.0052	52.6075
	104.2	64.675	57.4825	68.0774	51.3803	66.5674	53.4496	63.3648	55.0921	49.8093	61.1936	50.0716	65.9173	49.8735	61.8365	52.8976	50.9473	104.2	79.2913	73.3266	62.8728	82.2145	73.2589	76.6065	53.1345	71.1123	68.5031	63.6731	66.2977	56.4998	69.4899	49.6374	49.2135	59.3104	104.2	76.8539	72.8856	71.9827	74.1007	59.937	71.1218	64.9405	62.0325	60.3186	67.6423	62.7983	61.4311	65.9553	52.5703
	104.3	64.4478	57.3504	68.2742	50.9784	66.6426	53.575	63.2186	54.9805	49.6658	61.0195	50.1449	65.9385	49.7948	61.7755	52.7161	51.1954	104.3	79.1332	73.3972	62.9751	82.1223	73.1594	76.4182	52.9602	71.1797	68.467	63.5499	66.1846	56.5348	69.5788	49.6089	49.4334	59.305	104.3	76.7743	72.7668	72.0591	74.1284	59.8692	71.3157	64.7227	62.08	60.1914	67.4271	62.9682	61.3379	66.0352	52.3834
	104.4	64.1837	57.2337	68.3495	50.6259	66.6756	53.5326	62.9713	55.0561	49.6081	60.6447	50.1792	65.8461	49.6944	61.7841	52.6103	51.4159	104.4	79.0326	73.6015	62.984	82.0443	73.0569	76.2544	52.646	71.2678	68.6076	63.448	66.1682	56.6997	69.5208	49.5892	49.5188	59.2888	104.4	76.7509	72.6243	72.056	74.3644	60.1319	71.4661	64.4706	62.0484	60.1554	67.4482	63.1069	61.3568	66.0746	52.2462
	104.5	63.8542	57.2026	68.3606	50.407	66.7541	53.5324	62.6639	55.1814	49.7196	60.212	50.1973	65.628	49.671	61.8719	52.7409	51.5151	104.5	78.9861	73.7943	62.8704	82.0674	72.9604	76.1892	52.3626	71.4195	68.906	63.5968	66.1213	56.921	69.4507	49.5382	49.5688	59.3733	104.5	76.8832	72.5894	72.1312	74.5586	60.3013	71.5788	64.2334	62.0907	60.2012	67.6448	63.3002	61.5134	65.9267	52.2396
	104.6	63.587	57.0037	68.3058	50.3094	66.8796	53.4695	62.4672	55.2274	49.8208	60.1257	50.189	65.3959	49.6885	61.7909	52.9672	51.5022	104.6	79.0018	73.8273	62.7702	82.3208	72.9878	76.1756	51.9762	71.6592	69.417	63.6432	66.0633	57.1879	69.5303	49.595	49.4591	59.522	104.6	76.995	72.6122	72.1414	74.7637	60.5657	71.5056	63.9745	62.1912	60.1738	67.9898	63.4492	61.7996	65.7616	52.2634
[truncated: 2,954 more rows]
[truncated: 2 more columns]

## Sheet: Exp. 2
	Experiment 2
[truncated: 4,005 more rows]
[truncated: 5 more columns]

## Sheet: Exp. 3
	Experiment 3
[truncated: 4,005 more rows]
[truncated: 5 more columns]

## Sheet: Rates
	MABA-ADP release rates (s-1)
[truncated: 19 more rows]

## Sheet: IC50s
	NBD source data
[truncated: 7 more rows]
