# Supplementary material for: Calcium depletion challenges endoplasmic reticulum proteostasis by destabilising BiP-substrate complexes
Source: eLife. 2020 Dec 9;9:e62601. doi: 10.7554/eLife.62601 (PMC7758071; doi:10.7554/eLife.62601)
Supplement: Supplementary file 4. [file elife-62601-supp4.xlsx]

## Sheet: Exp 1
Experiment 1			Sorce data: Figure 6-figure supplement 2B
RFU																Derivative
	A1	A2	A3	A4	A5	A6	A7	A8	A9	A10	A11	A12	B1	B2		Temperature	1_Mg	2_Ca	3_DnaK_Mg	4_DnaK_Mg_ADP	5_DnaK_Ca	6_DnaK_Ca_ADP	7_dBiP_Mg	8_dBiP_Mg_ADP	9_dBiP_Ca	10_dBiP_Ca_ADP	11_Kar2_Mg	12_Kar2_Mg_ADP	13_Kar2_Ca	14_Kar2_Ca_ADP			1_Mg	2_Ca	3_DnaK_Mg	4_DnaK_Mg_ADP	5_DnaK_Ca	6_DnaK_Ca_ADP	7_dBiP_Mg	8_dBiP_Mg_ADP	9_dBiP_Ca	10_dBiP_Ca_ADP	11_Kar2_Mg	12_Kar2_Mg_ADP	13_Kar2_Ca	14_Kar2_Ca_ADP
Temperature	1_Mg	2_Ca	3_DnaK_Mg	4_DnaK_Mg_ADP	5_DnaK_Ca	6_DnaK_Ca_ADP	7_dBiP_Mg	8_dBiP_Mg_ADP	9_dBiP_Ca	10_dBiP_Ca_ADP	11_Kar2_Mg	12_Kar2_Mg_ADP	13_Kar2_Ca	14_Kar2_Ca_ADP		20	6.79954	6.79064	6.95563	6.67675	7.42706	6.99941	6.20269	7.91276	8.39004	8.19064	5.17044	9.58042	9.65698	9.89219		Min	-2.59541	-2.05342	-14.8509	-11.6781	-17.2718	-9.89248	-68.352	-55.5708	-74.5791	-51.3038	-34.7185	-23.9286	-57.8387	-30.322
20	2688.19	2680.97	2765.04	2756.72	2787.74	2796.28	2867.66	2831.99	2857.25	2842.02	3907.06	3866.74	3807.55	3659.01		20.5	14.7323	14.7131	15.0705	14.4663	16.092	15.1654	13.4392	17.1443	18.1784	17.7464	11.2026	20.7576	20.9235	21.4331		Tm (oC)	37	37.5	46.5	60	46	61	42	50	42.5	53.5	32.5	50	35.5	51.5
20.5	2681.39	2674.17	2758.09	2750.04	2780.31	2789.28	2861.46	2824.08	2848.86	2833.82	3901.89	3857.16	3797.89	3649.11		21	13.5991	13.5813	13.9113	13.3535	14.8541	13.9988	12.4054	15.8255	16.7801	16.3813	10.3409	19.1608	19.314	19.7844
21	2674.59	2667.38	2751.13	2743.37	2772.88	2782.28	2855.26	2816.17	2840.47	2825.63	3896.72	3847.58	3788.24	3639.22		21.5	13.5991	13.5813	13.9113	13.3535	14.8541	13.9988	12.4054	15.8255	16.7801	16.3813	10.3409	19.1608	19.314	19.7844
21.5	2667.79	2660.59	2744.18	2736.69	2765.46	2775.28	2849.05	2808.26	2832.08	2817.44	3891.55	3838	3778.58	3629.33		22	13.5991	13.5813	13.9113	13.3535	14.8541	13.9988	12.4054	15.8255	16.7801	16.3813	10.3409	19.1608	19.314	19.7844
22	2660.99	2653.8	2737.22	2730.01	2758.03	2768.28	2842.85	2800.34	2823.69	2809.25	3886.38	3828.42	3768.92	3619.44		22.5	13.628	13.6525	13.9953	13.4001	14.8808	14.0327	12.4555	15.894	16.8407	16.4284	10.4738	19.2341	19.5542	19.9302
22.5	2654.2	2647.01	2730.26	2723.34	2750.6	2761.28	2836.65	2792.43	2815.3	2801.06	3881.21	3818.84	3759.26	3609.55		23	13.4969	13.2133	13.5417	13.1269	14.7762	13.8689	12.059	15.4583	16.482	16.1592	9.71115	18.8035	18.08	19.0895
23	2647.4	2640.22	2723.31	2716.66	2743.18	2754.28	2830.45	2784.52	2806.91	2792.87	3876.04	3809.26	3749.61	3599.65		23.5	12.8168	12.3998	11.9707	12.4705	14.0871	13.1532	12.0406	14.6891	15.6511	15.4302	7.75473	17.6876	15.1387	16.9329
23.5	2640.77	2633.86	2716.86	2710.26	2735.91	2747.48	2824.54	2777.02	2798.89	2784.96	3871.67	3800.12	3741.39	3590.64		24	12.1941	11.3751	11.3316	11.8819	13.0844	12.4952	12.2588	14.3419	14.9347	14.9763	5.8089	17.3301	12.7071	14.9543
24	2634.57	2627.85	2711.22	2704.19	2729.13	2741.13	2818.37	2769.78	2791.25	2777.42	3868.3	3791.47	3734.42	3582.7		24.5	12.1067	10.6102	11.9683	11.3666	12.3656	11.9721	12.3422	14.2909	14.4224	14.3265	4.0066	17.8239	10.7631	14.2706
24.5	2628.51	2622.44	2705.35	2698.37	2722.79	2734.97	2812.29	2762.64	2783.93	2770.02	3865.83	3782.67	3728.62	3575.51		25	11.8227	10.5717	12.5008	10.9653	11.916	11.3934	13.0589	13.9252	13.6011	13.0668	2.7766	17.8297	8.94341	13.7645
25	2622.49	2617.15	2699.26	2692.8	2716.74	2729.16	2805.96	2755.53	2776.87	2763.17	3864.22	3773.7	3723.64	3568.39		25.5	10.7902	10.409	11.8443	10.593	10.6425	10.8694	13.1371	13.1877	12.6443	11.8353	1.3437	17.595	7.03557	13.0741
25.5	2616.79	2611.88	2693.01	2687.4	2710.97	2723.58	2799.32	2748.76	2770.35	2756.94	3863.08	3764.87	3719.68	3561.75		26	9.67055	9.66669	10.8661	10.2476	9.59845	9.75676	12.2979	12.4413	11.8739	11.7398	-0.293931	18.1524	5.30327	13.1963
26	2611.72	2606.81	2687.48	2682.2	2706.07	2718.36	2792.95	2742.35	2764.2	2751.19	3862.9	3756.01	3716.58	3555.21		26.5	9.16219	9.02781	9.78743	10.3746	9.18999	8.86702	11.2254	11.6996	11.2681	11.4881	-1.44525	18.6886	3.52829	13.2607
26.5	2607.05	2602.21	2682.17	2677.1	2701.3	2713.8	2787.06	2736.33	2758.45	2745.21	3863.33	3746.71	3714.37	3548.56		27	8.28328	8.34366	8.00861	9.90163	8.14015	8.49062	10.5598	10.4882	10.7154	10.6649	-3.49796	18.9879	2.18058	12.8713
27	2602.59	2597.8	2677.77	2671.9	2696.95	2709.42	2781.68	2730.7	2752.91	2739.76	3864.48	3737.34	3713	3541.99		27.5	7.76453	7.03518	6.51313	8.88735	7.28099	8.13719	9.8462	9.88961	10.6806	10.7975	-7.28019	19.8431	0.534804	13.1604
27.5	2598.69	2593.93	2674.11	2667.26	2693.11	2705.28	2776.48	2725.75	2747.65	2734.42	3867.06	3727.64	3712.21	3535.58		28	8.81115	6.78195	7.02222	8.95199	8.17456	8.63661	10.0165	10.4437	11.152	11.5123	-10.7686	21.607	-0.456034	14.6927
28	2594.6	2590.6	2670.98	2662.87	2689.43	2701.15	2771.69	2720.64	2742.15	2728.87	3871.75	3717.35	3712.34	3528.65		28.5	10.5876	8.2929	8.57942	9.59482	9.78377	10.7091	12.075	11.6221	12.1561	12.5427	-13.8142	24.1663	0.872555	16.9308
28.5	2589.76	2586.88	2666.9	2658.2	2684.81	2696.42	2766.19	2715.19	2736.4	2722.84	3877.77	3705.91	3712.34	3520.75		29	12.5903	11.0264	10.8263	10.7505	11.79	13.0109	15.18	13.7105	14.2303	14.5243	-17.3313	26.742	2.86647	20.8648
29	2583.95	2582.11	2662.27	2653.17	2679.55	2690.38	2759.45	2708.86	2729.82	2716.17	3885.6	3693.17	3711.35	3511.46		29.5	15.5014	14.353	14.4946	13.8472	15.3118	15.0674	17.8838	17.0318	17.6602	18.1098	-20.1544	29.313	4.45522	26.1253
29.5	2577.04	2575.75	2655.88	2647.18	2672.81	2683.41	2751.04	2701.29	2721.98	2708.08	3895.01	3679.16	3709.51	3499.69		30	18.9066	18.5128	18.1936	17.9261	19.0879	18.5315	20.7526	20.9835	21.0125	22.3281	-22.1466	32.8125	6.41671	30.8456
30	2568.39	2567.65	2647.76	2639.19	2664.19	2675.14	2741.55	2691.75	2712.17	2697.97	3905.65	3663.76	3706.89	3485.4		30.5	21.3023	21.9398	20.8005	20.622	22.2442	22.2071	23.5712	23.8893	22.9298	25.3463	-24.6073	35.1878	6.69585	34.6616
30.5	2558.27	2557.35	2637.83	2629.43	2653.81	2664.87	2730.33	2680.45	2701.17	2685.92	3917.22	3646.51	3703.37	3468.98		31	22.6692	23.4813	22.9342	22.3268	24.6219	23.7034	24.2258	25.6211	24.0704	26.8341	-28.0157	35.1793	3.06962	37.8637
31	2547.26	2545.99	2627.06	2618.74	2642.09	2653.22	2718.29	2668.05	2689.4	2672.86	3930.38	3628.89	3700.77	3450.88		31.5	23.0862	23.5749	24.0904	22.7679	25.3584	24.4846	23.3397	26.1444	23.2913	27.6155	-30.9671	35.3489	-2.85561	38.7369
31.5	2535.78	2534.1	2615.08	2607.32	2629.45	2641.29	2706.36	2655.04	2677.41	2659.24	3945.18	3611.35	3700.7	3431.47		32	21.7404	22.7045	22.8514	21.33	24.192	25.3511	21.6281	25.1875	20.0675	26.4272	-33.2575	35.7023	-10.523	37.263
32	2524.45	2522.6	2603.31	2596.25	2617.03	2628.79	2695.12	2642.15	2666.47	2645.54	3961.24	3593.56	3703.92	3412.5		32.5	18.6712	20.2756	20.8031	18.8084	22.0092	23.3247	18.217	22.3811	16.2866	23.4244	-34.7185	33.5568	-20.0853	34.7081
32.5	2514.29	2511.64	2592.38	2586.17	2605.45	2616.36	2684.99	2630.12	2657.45	2633.09	3978.28	3575.97	3711.5	3394.41		33	15.3492	16.6562	18.0981	15.9032	18.5916	18.6244	13.2508	19.086	12.7331	20.1807	-34.5158	31.0917	-29.5243	31.0954
33	2505.85	2502.51	2582.64	2577.53	2595.22	2605.85	2677.15	2619.86	2650.19	2622.2	3995.7	3560.07	3724.01	3377.97		33.5	11.3245	13.0135	13.7595	12.3958	14.0252	14.4006	7.42394	16.1344	8.08056	16.0969	-32.6621	30.0082	-38.1783	26.5501
33.5	2499.04	2495.01	2574.51	2570.35	2587.02	2597.72	2671.9	2611.01	2644.87	2613.03	4012.55	3544.73	3740.9	3363.45		34	7.09257	9.02572	9.09255	8.78808	9.80842	10.184	0.677853	12.8397	3.11097	11.5841	-30.5196	27.9913	-45.8655	22.4078
34	2494.54	2489.53	2568.93	2565.15	2581.15	2591.45	2669.86	2603.76	2642.17	2606.15	4028.27	3530.17	3762.02	3351.36		34.5	4.01592	5.21068	5.90754	5.61993	6.305	5.74618	-6.17491	9.6554	-2.17379	8.03331	-27.2702	25.1237	-51.8952	19.3649
34.5	2491.79	2485.95	2565.23	2561.5	2577.11	2587.54	2671.24	2598.15	2641.82	2601.32	4042.89	3516.85	3786.5	3340.88		35	1.90115	2.52414	3.07879	2.83238	3.20215	2.82069	-12.7463	7.36015	-8.45477	4.91583	-22.3971	23.1064	-55.9434	17.1588
35	2490.38	2484.16	2562.94	2559.46	2574.77	2585.49	2676	2593.98	2644.49	2598.03	4055.31	3504.94	3813.59	3331.86		35.5	-0.129154	0.7813	0.614835	0.292574	1.04892	1.12808	-19.0072	5.66514	-15.3828	2.77652	-17.6158	22.0444	-57.8387	15.855
35.5	2489.85	2483.28	2562.07	2558.61	2573.76	2584.53	2683.93	2590.69	2650.37	2596.24	4065.25	3493.61	3842.06	3323.58		36	-1.36007	-0.923932	-0.488135	-0.945088	-0.149392	-0.285334	-24.1651	3.89271	-21.8396	2.13507	-11.7527	20.7286	-55.8181	14.9944
36	2490.4	2483.34	2562.14	2558.98	2573.57	2584.29	2694.84	2588.3	2659.81	2595.04	4072.76	3482.91	3870.81	3315.92		36.5	-2.00739	-1.70955	-1.47053	-1.1225	-1.04072	-0.850197	-28.2091	2.7577	-27.6894	1.8793	-4.58438	19.1461	-50.0805	14.4914
36.5	2491.12	2484.08	2562.52	2559.39	2573.84	2584.7	2707.93	2586.71	2672.11	2594.03	4076.84	3472.9	3897.28	3308.52		37	-2.59541	-1.83207	-2.59855	-0.988337	-1.69641	-1.36883	-32.2991	1.97083	-32.6136	1.71456	1.62967	18.2054	-42.0735	14.311
37	2492.37	2484.95	2563.62	2560.04	2574.57	2585.12	2723.03	2585.49	2687.36	2593.12	4077.47	3463.68	3920.5	3301.37		37.5	-2.58237	-2.05342	-3.23606	-0.886289	-1.91209	-2.07681	-36.3642	1.06022	-37.08	2.25553	6.78993	18.0733	-32.0077	14.6715
37.5	2493.63	2485.9	2565.06	2560.37	2575.49	2586.07	2740.23	2584.75	2704.65	2592.23	4075.36	3454.6	3939.03	3294.14		38	-2.47044	-1.94521	-3.59723	-0.592463	-2.50376	-1.71126	-40.4823	0.352643	-41.6174	2.2107	11.7177	17.28	-21.0136	14.722
38	2494.93	2486.95	2566.81	2560.91	2576.52	2587.05	2759.42	2584.4	2724.44	2590.93	4070.74	3445.68	3952.37	3286.74		38.5	-1.97546	-1.46714	-3.67071	-0.401967	-2.98666	-0.825611	-45.5641	-0.0105114	-46.1064	2.07842	15.5497	16.1909	-11.2511	14.3629
38.5	2496.04	2487.8	2568.61	2560.98	2577.97	2587.71	2780.84	2584.35	2746.26	2590.03	4063.8	3437.35	3960.22	3279.47		39	-1.08664	-1.26654	-3.49999	-0.653508	-2.92958	-0.732458	-51.0094	-0.422838	-51.0242	2.55695	18.6209	16.1733	-3.44316	14.355
39	2496.85	2488.46	2570.44	2561.37	2579.45	2587.97	2805.03	2584.4	2770.61	2588.79	4055.31	3429.37	3963.91	3272.34		39.5	-0.673839	-1.4169	-3.56819	-1.22481	-3.41223	-0.598701	-55.6633	-0.300965	-56.2672	2.57493	21.5055	15.504	3.41494	14.2548
39.5	2497.19	2489.11	2572.14	2561.68	2580.97	2588.45	2831.74	2584.69	2797.33	2587.53	4045.23	3421.26	3963.85	3265.14		40	-0.830405	-1.56207	-3.82499	-1.60963	-4.42063	-0.202533	-59.8956	0.169718	-60.9233	2.13935	24.0771	13.8244	8.93712	13.3772
40	2497.6	2489.88	2574.04	2562.56	2582.93	2588.54	2860.62	2584.66	2826.8	2586.28	4033.85	3413.99	3960.71	3258.18		40.5	-0.613931	-1.92577	-4.21953	-1.14381	-5.07453	-0.366988	-63.8775	0.235437	-65.0044	1.77753	26.8247	12.7129	13.1922	12.8621
40.5	2497.98	2490.7	2575.99	2563.18	2585.36	2588.72	2891.57	2584.58	2858.17	2585.39	4021.14	3407.36	3955.1	3251.71		41	-0.428129	-1.73818	-5.18867	-1.03633	-6.08992	-0.650659	-66.2264	-0.00955965	-69.1587	1.22903	29.1133	12.4066	17.2579	13.3901
41	2498.22	2491.74	2578.33	2563.74	2588.05	2588.93	2924.26	2584.47	2891.78	2584.53	4007.09	3401.18	3947.57	3245.19		41.5	-0.552234	-1.37561	-5.70311	-1.09868	-7.63188	-0.643107	-67.5522	-0.471757	-72.4028	0.242018	30.9176	11.5204	21.2263	13.3022
41.5	2498.45	2492.41	2581.13	2564.24	2591.51	2589.33	2957.62	2584.64	2927.18	2584.22	3992.09	3395.02	3937.88	3238.39		42	-0.295928	-1.16964	-6.24397	-0.630836	-8.30948	-0.608224	-68.352	-2.04499	-74.4051	-0.250296	33.0364	10.5867	24.3306	12.3277
42	2498.73	2493.13	2584.05	2564.77	2595.58	2589.56	2991.68	2585.09	2963.97	2584.22	3976.15	3389.66	3926.46	3232		42.5	0.0453525	-0.952271	-7.64492	0.0776578	-8.87266	-0.497899	-66.8619	-3.85931	-74.5791	-0.329289	35.0351	10.4148	27.1698	11.953
42.5	2498.73	2493.57	2587.48	2564.84	2599.81	2589.92	3025.61	2586.72	3001.27	2584.4	3959.08	3384.34	3913.6	3226.01		43	0.01302	-0.599986	-8.7687	0.18473	-10.247	0.177428	-61.9875	-5.14452	-71.6668	-0.202848	36.4737	9.93702	29.6918	11.5309
43	2498.73	2494.07	2591.67	2564.77	2604.55	2589.99	3058.01	2588.89	3038.04	2584.52	3941.19	3379.3	3899.36	3220.05		43.5	-0.412839	-0.438149	-9.58874	0.344472	-11.4804	0.605954	-54.2002	-6.4909	-64.3913	-0.138934	37.8143	7.86866	30.7811	10.877
43.5	2498.78	2494.2	2596.23	2564.65	2610.05	2589.77	3087.11	2591.87	3072.25	2584.61	3922.63	3374.63	3884.11	3214.5		44	-0.835751	-0.323473	-11.3706	0.990802	-12.7379	0.871248	-43.7946	-7.76797	-53.1915	0.232812	38.8084	5.07342	31.0472	10.2555
44	2499.15	2494.51	2601.37	2564.37	2616.05	2589.41	3111.78	2595.37	3101.8	2584.63	3903.43	3371.54	3868.71	3209.17		44.5	-0.961981	-0.187405	-12.8392	1.16797	-14.7953	1.31653	-31.1392	-8.57206	-39.5139	0.185578	39.2068	2.81997	31.4705	9.7336
44.5	2499.57	2494.52	2607.55	2563.72	2622.89	2588.88	3130.56	2599.59	3125.03	2584.44	3883.91	3369.51	3853.07	3204.25		45	-1.03709	-0.0117072	-13.1734	0.764938	-16.7246	1.62129	-18.3335	-9.99561	-24.7258	-0.784212	39.2736	0.0140068	31.3484	8.52229
45	2500.09	2494.7	2614.06	2563.28	2630.82	2588.12	3142.88	2604.03	3141.13	2584.55	3864.27	3368.79	3837.31	3199.53		45.5	-0.888756	0.0795614	-13.8606	0.465706	-17.2452	1.13622	-6.46382	-12.6364	-10.1041	-0.97134	39.7017	-3.41136	31.1949	7.09152
45.5	2500.57	2494.54	2620.75	2562.95	2639.42	2587.36	3149.05	2609.76	3149.8	2585.14	3844.59	3369.56	3821.72	3195.78		46	-0.156634	-0.00289619	-14.8066	0.241617	-17.2718	0.792807	3.54016	-15.8615	2.06158	-1.06397	40.5496	-5.83747	32.1016	4.85619
46	2500.91	2494.64	2627.94	2562.81	2647.97	2586.97	3149.64	2616.78	3151.62	2585.53	3824.51	3372.07	3805.98	3192.55		46.5	0.504365	0.182334	-14.8509	-0.294537	-17.1819	0.637167	11.2558	-19.8215	10.5742	-2.62337	41.2016	-7.13773	33.2982	2.34651
46.5	2500.74	2494.51	2635.45	2562.74	2656.65	2586.55	3145.88	2625.74	3148.29	2586.38	3804.06	3375.25	3789.57	3190.97		47	0.388004	0.545511	-14.7191	-0.474662	-16.1166	0.248478	16.6478	-24.5053	16.8012	-3.92713	41.7402	-8.86064	34.1089	0.340792
47	2500.5	2494.43	2642.76	2563.05	2665.01	2586.36	3138.76	2636.72	3141.44	2588.14	3783.32	3379.25	3772.72	3190.16		47.5	0.106167	0.535834	-14.5487	-0.211831	-14.3716	0.178492	20.528	-29.9009	21.0521	-4.92284	42.7627	-11.0471	35.0361	-2.29059
47.5	2500.38	2494.01	2650.15	2563.15	2672.67	2586.25	3129.5	2650.36	3131.83	2590.3	3762.27	3384.18	3755.46	3190.71		48	-0.00199363	0.509552	-13.893	0.0922438	-13.0092	0.486366	22.2742	-35.7061	23.1025	-7.695	43.1119	-13.61	35.6506	-5.66439
48	2500.39	2493.9	2657.23	2563.25	2679.41	2586.12	3118.56	2666.69	3120.73	2593.29	3740.65	3390.36	3737.73	3192.55		48.5	-0.436814	0.639161	-12.4824	0.448282	-11.2432	0.865586	22.3582	-41.57	24.1802	-10.6285	42.4256	-16.6357	35.7086	-9.05002
48.5	2500.42	2493.5	2663.92	2563.06	2685.61	2585.75	3107.49	2686.08	3108.9	2598.02	3719.3	3397.86	3719.89	3196.4		49	-0.831794	-0.085791	-10.0545	0.598313	-8.42917	1.06972	22.2056	-47.3136	24.898	-12.3817	42.2668	-20.1504	35.646	-12.793
49	2500.81	2493.37	2669.56	2562.83	2690.52	2585.28	3096.27	2708.23	3096.63	2603.78	3698.18	3407.05	3702.05	3201.67		49.5	-0.585762	-0.742274	-7.58944	0.515758	-5.89422	1.55899	21.767	-52.6623	24.8147	-14.9398	42.0893	-23.0383	35.5039	-17.439
49.5	2501.17	2493.58	2673.95	2562.5	2694.07	2584.66	3085.34	2733.29	3084.13	2610.51	3677.05	3417.9	3684.26	3209.3		50	-0.304272	-0.793143	-5.3294	0.178973	-3.92711	1.74832	20.7716	-55.5708	23.5713	-18.5327	40.3818	-23.9286	35.0671	-21.4522
50	2501.39	2494.04	2677.17	2562.36	2696.49	2583.76	3074.58	2760.52	3071.98	2618.88	3656.29	3429.78	3666.58	3219.03		50.5	-0.222609	-0.96116	-2.78177	-0.294034	-1.74532	1.47971	20.1563	-55.4429	22.1328	-22.7011	38.6486	-22.2473	35.2053	-25.2994
50.5	2501.5	2494.38	2679.26	2562.34	2697.99	2582.98	3064.52	2788.38	3060.6	2629.16	3636.69	3441.43	3649.12	3230.71		51	-0.119345	-1.21021	-0.700159	-0.692317	-0.0988105	0.802219	20.0645	-52.6843	21.0754	-28.3993	37.3755	-18.7139	35.5343	-28.6863
51	2501.61	2495	2680.03	2562.64	2698.31	2582.34	3054.36	2815.5	3049.8	2641.81	3617.6	3451.72	3631.35	3244.24		51.5	-0.0513761	-0.690944	-0.0343398	-0.846128	0.969873	0.384709	19.1742	-46.4275	20.2245	-35.1272	35.2751	-13.9573	35.0925	-30.322
51.5	2501.62	2495.49	2680.15	2563	2698.17	2582.15	3044.55	2840.5	3039.5	2657.72	3599.41	3459.93	3613.68	3259.13		52	0.100855	-0.371377	0.412456	-1.19233	1.91782	-0.0482744	18.2581	-36.8986	19.1744	-41.8241	33.7099	-8.05796	34.6941	-30.1332
52	2501.65	2495.71	2680.12	2563.5	2697.37	2581.96	3035.2	2861.43	3029.59	2676.93	3582.25	3465.5	3596.25	3274.26		52.5	0.399524	-0.47157	0.806081	-1.27946	2.54769	-0.993622	17.4557	-26.6522	18.9208	-47.4931	33.3819	-2.05443	35.088	-28.0558
52.5	2501.51	2495.92	2679.76	2564.16	2696.3	2582.25	3026.28	2877.26	3020.22	2699.37	3565.54	3467.96	3578.91	3288.93		53	0.377868	-0.3147	0.867035	-1.00778	2.75491	-1.29126	16.2654	-16.6507	18.6811	-50.7354	32.6636	3.66686	34.1415	-22.8617
53	2501.29	2496.15	2679.36	2564.74	2694.88	2582.86	3017.79	2888.11	3010.68	2724.04	3548.9	3467.58	3561.34	3301.84		53.5	0.21874	-0.168097	1.07319	-0.913227	2.95541	-0.908925	15.3256	-7.42925	16.9309	-51.3038	31.7009	9.93304	32.2372	-15.9664
53.5	2501.15	2496.23	2678.87	2565.18	2693.57	2583.45	3009.98	2894.05	3001.73	2749.68	3532.9	3464.22	3544.88	3311.51		54	0.216238	-0.14264	1.55272	-1.07218	2.63646	-0.753007	15.0891	-0.577989	15.4624	-50.1462	31.0839	16.5976	32.0103	-8.55207
54	2501.06	2496.34	2678.24	2565.68	2692	2583.79	3002.37	2895.91	2993.71	2775.03	3517.17	3457.61	3528.9	3317.7		54.5	-0.000256817	-0.134233	2.31265	-0.835853	1.97377	-0.815606	14.5199	3.85134	15.2397	-46.4388	29.6138	21.9218	32.0059	-0.397212
54.5	2500.95	2496.37	2677.28	2566.21	2690.97	2584.22	2994.92	2895.02	2986.11	2799.42	3501.92	3447.8	3512.84	3319.97		55	-0.0483098	0.0805666	2.90889	-0.662433	1.87466	0.0435605	14.1596	6.47746	14.5772	-40.2832	28.1043	26.7142	30.5181	6.98679
55	2501.03	2496.45	2675.95	2566.53	2689.96	2584.51	2987.82	2892.35	2978.51	2821.08	3487.56	3435.79	3497.05	3318.21		55.5	0.35375	0.34294	3.15795	-1.50988	1.94996	0.247364	14.7535	8.07138	13.8239	-32.9496	27.395	31.0432	30.4397	12.7008
55.5	2500.94	2496.29	2674.42	2567.01	2689.07	2584.26	2980.64	2888.71	2971.52	2839.48	3473.71	3421.2	3482.14	3313.23		56	0.752252	0.0732206	3.48346	-2.63842	1.8176	-0.479519	14.9747	9.31854	14.9081	-24.5118	27.1875	32.7793	31.9614	17.391
56	2500.67	2496.17	2672.79	2568.09	2688.03	2584.39	2973.1	2884.35	2964.46	2853.86	3460.08	3405.12	3466.42	3305.7		56.5	1.13298	-0.0211643	3.87141	-3.45173	1.71754	-1.14443	14.7071	10.1574	15.7825	-15.4831	27.2358	32.7887	31.5638	20.5413
56.5	2500.2	2496.2	2670.93	2569.62	2687.25	2584.75	2965.72	2879.46	2956.63	2863.92	3446.48	3388.68	3450.41	3296.09		57	1.0544	0.483206	3.85793	-4.50366	1.87595	-1.97374	15.1419	10.6639	15.0843	-7.40675	27.1055	33.487	30.1292	21.6958
57	2499.6	2496.11	2668.97	2571.58	2686.29	2585.56	2958.32	2874.24	2948.87	2869.48	3432.87	3372.3	3435	3285.45		57.5	0.561673	0.71532	3.86167	-6.27737	1.62277	-3.32711	15.2823	11.6533	14.9352	-0.886989	27.0243	32.9925	29.9736	22.709
57.5	2499.21	2495.74	2667.08	2574.22	2685.42	2586.8	2950.62	2868.76	2941.49	2871.57	3419.37	3355.37	3420.15	3274.47		58	0.149901	0.45671	3.88285	-7.68599	1.26135	-4.82826	14.3477	11.7099	15.6502	4.02213	26.934	30.8881	29.1715	22.7291
58	2499.04	2495.45	2665.12	2577.82	2684.68	2588.91	2943.18	2862.72	2933.83	2870.64	3405.85	3339.52	3405.11	3262.89		58.5	-0.205992	1.08357	3.37918	-8.74813	1.33993	-5.96606	13.5477	10.6629	15.4155	6.82076	26.1675	29.4096	26.8725	21.8027
58.5	2499.05	2495.18	2663.27	2581.86	2684.11	2591.58	2936.26	2857.2	2925.96	2867.88	3392.53	3324.42	3391.16	3251.86		59	-0.742939	1.61247	2.69167	-10.1762	1.22537	-7.04435	13.6027	9.9852	14.7293	7.74799	25.3027	28.5008	25.8002	21.4768
59	2499.26	2494.39	2661.77	2586.6	2683.35	2594.86	2929.53	2852.03	2918.47	2864.11	3379.69	3310.04	3378.09	3241.02		59.5	-0.766136	0.960634	1.88742	-11.5313	1.14131	-8.06523	13.1343	9.11703	14.8098	7.83923	25.4458	26.9508	26.1109	21.8562
59.5	2499.72	2493.72	2660.59	2592.01	2682.88	2598.62	2922.71	2847.24	2911.15	2860.28	3367.1	3295.99	3365.17	3230.3		60	-0.299018	0.390669	1.22536	-11.6781	1.66942	-9.2126	12.654	7.79589	14.3067	8.04759	25.3556	25.5337	25.9761	21.4953
60	2499.96	2493.43	2659.86	2597.97	2682.14	2602.93	2916.39	2842.96	2903.74	2856.29	3354.27	3283.07	3352.01	3219.24		60.5	-0.0198114	0.249804	1.03598	-11.214	1.59552	-9.67242	12.9442	7.12626	12.9953	7.3728	24.8273	24.9984	25.3282	21.2572
60.5	2500.04	2493.29	2659.3	2603.59	2681.28	2607.74	2909.96	2839.36	2896.94	2852.35	3341.79	3270.33	3339.25	3208.79		61	0.122029	-0.332971	1.23513	-10.7226	1.17738	-9.89248	13.0497	7.11575	12.2168	6.62834	25.0301	25.1011	25.5371	21.7639
61	2499.99	2493.23	2658.77	2609.15	2680.59	2612.56	2903.46	2835.74	2890.68	2848.92	3329.35	3257.98	3326.59	3197.9		61.5	0.344032	-1.26089	1.34436	-9.46601	1.3754	-9.87045	12.611	7.13021	12.0893	7.05068	25.634	24.5372	25.3817	21.6006
61.5	2499.9	2493.65	2658.06	2614.2	2680.03	2617.59	2896.98	2832.22	2884.63	2845.57	3316.71	3245.32	3313.76	3187.11		62	0.79495	-0.931877	1.65476	-7.95631	1.60026	-9.24434	12.4232	7.65779	12.0107	7.29427	25.832	23.0508	24.4923	21.0101
62	2499.62	2494.33	2657.4	2618.58	2679.21	2622.34	2890.82	2828.55	2878.57	2841.9	3303.76	3233.56	3301.3	3176.36		62.5	1.01079	-0.147675	1.85943	-6.90953	1.22716	-8.07293	12.781	7.79672	12.3663	6.35381	25.8857	22.5014	24.1852	20.3965
62.5	2499.14	2494.51	2656.43	2622.21	2678.5	2626.75	2884.48	2824.6	2872.56	2838.42	3290.9	3222.16	3289.19	3166.1		63	0.850032	0.325219	1.61259	-5.80132	1.29002	-6.7485	13.109	8.19585	12.91	5.99756	25.7241	22.2247	24.7285	20.0818
63	2498.66	2494.51	2655.59	2625.48	2677.94	2630.38	2878.03	2820.72	2866.17	2835.48	3277.91	3211.03	3277.01	3155.94		63.5	1.08445	0.570585	1.72535	-4.369	1.3971	-5.28746	13.6851	9.02979	13.5185	6.1701	25.133	20.6759	24.6151	19.368
63.5	2498.25	2494.21	2654.77	2627.97	2677.2	2633.48	2871.34	2816.34	2859.64	2832.35	3265.24	3200.07	3264.53	3146.07		64	1.46773	1.02792	2.1333	-2.98474	1.50883	-3.98547	14.1629	9.78064	14.1319	6.45178	24.419	20.1178	24.6412	18.7816
64	2497.56	2493.92	2653.82	2629.86	2676.54	2635.69	2864.36	2811.69	2852.65	2829.28	3252.81	3190.23	3252.38	3136.55		64.5	1.03573	1.33092	2.43247	-1.84202	1.30118	-3.15508	14.5695	10.404	14.483	7.10926	23.5009	20.7583	24.8448	18.3694
64.5	2496.88	2493.21	2652.64	2630.99	2675.72	2637.53	2857.2	2806.58	2845.54	2825.84	3240.84	3179.81	3239.87	3127.26		65	0.402772	0.87002	3.0438	-0.825657	1.25592	-2.29625	14.4575	11.0836	14.7579	8.28601	22.9002	19.9515	24.484	17.9116
65	2496.56	2492.69	2651.35	2631.72	2675.21	2638.86	2849.86	2801.29	2838.18	2822.09	3229.25	3169.64	3227.61	3118.19		65.5	0.354119	0.64798	4.09859	0.239559	1.94368	-1.92902	14.0527	11.2752	15.3455	9.63099	23.2096	18.953	24.0405	17.2677
65.5	2496.41	2492.31	2649.55	2631.82	2674.37	2639.88	2842.79	2795.57	2830.76	2817.53	3217.82	3159.88	3215.4	3109.37		66	0.269688	1.16823	4.19354	0.972439	2.63171	-1.30694	13.4171	10.7178	15.0312	10.4477	23.8283	19.2921	23.9422	17.0564
66	2496.2	2491.94	2647.37	2631.53	2673.27	2640.75	2835.84	2790.12	2822.95	2812.53	3206	3150.53	3203.52	3100.86		66.5	-0.0755231	1.59108	4.00906	1.05229	2.84556	-0.192637	12.9881	10.0438	14.2113	10.7105	23.8087	18.921	24.0349	17.1922
66.5	2496.17	2491.16	2645.4	2630.93	2671.79	2641.13	2829.35	2784.88	2815.8	2807.16	3194.06	3140.66	3191.43	3092.26		67	0.04782	1.13668	4.23938	1.41915	3.53349	0.633331	12.7013	9.31959	13.9375	11.1065	23.9797	18.163	24.3992	16.989
67	2496.21	2490.46	2643.32	2630.45	2670.36	2640.98	2822.83	2780.07	2808.68	2801.82	3182.18	3131.63	3179.45	3083.7		67.5	0.641353	1.21854	3.90672	2.03473	4.75666	0.824934	12.5365	9.43649	13.4339	11.4621	23.99	19.5042	24.4363	17.174
67.5	2496.05	2489.97	2641.23	2629.49	2668.2	2640.57	2816.63	2775.45	2801.89	2796.06	3170.11	3122.24	3167.07	3075.23		68	1.18983	1.22174	3.25888	2.12662	4.94217	1.73101	12.6339	10.0286	12.7259	11.3622	23.5746	20.8435	23.9221	17.5362
68	2495.58	2489.25	2639.45	2628.48	2665.72	2640.08	2810.26	2770.56	2795.27	2790.41	3158.25	3112.11	3155.09	3066.51		68.5	1.28702	0.477133	3.29044	2.45689	5.20838	2.30882	12.5239	10.7344	12.4772	11.8273	22.9741	21.1872	23.6831	17.4769
68.5	2494.92	2488.84	2637.89	2627.33	2663.25	2638.88	2804.02	2765.4	2789.1	2784.65	3146.56	3101.52	3143.14	3057.75		69	1.47887	-0.0368727	3.69861	3.1987	6.04531	1.97674	12.0838	11.2602	12.8075	11.5358	22.5399	21.6813	22.7312	17.1525
69	2494.28	2488.75	2636.1	2625.97	2660.45	2637.89	2797.78	2759.85	2782.71	2778.68	3135.25	3090.91	3131.5	3049.06		69.5	1.8634	0.110766	4.08302	3.65323	6.33592	2.17656	11.8842	11.3749	12.9266	10.7446	22.1748	22.6664	21.3325	17.3279
69.5	2493.42	2488.79	2634.17	2624.17	2657.28	2636.85	2791.91	2754.2	2776.31	2773.18	3124.01	3079.8	3120.47	3040.53		70	1.75116	0.405064	5.08373	3.7939	5.68049	2.85648	11.7666	11.2411	12.923	10.6299	21.8168	21.9203	20.4018	17.6283
70	2492.48	2488.61	2631.95	2622.36	2654.24	2635.65	2785.88	2748.52	2769.81	2767.86	3113.08	3068.47	3110.11	3031.72		70.5	1.2778	0.683211	5.61095	4.21387	5.49039	3.00352	11.2343	11.0711	12.7564	10.555	21.4532	20.5647	20.0384	17.6847
70.5	2491.72	2488.37	2629.14	2620.35	2651.56	2634.06	2780.18	2742.97	2763.4	2762.54	3102.2	3057.97	3099.98	3022.93		71	0.986424	1.23297	5.89743	4.31366	5.32992	2.83407	11.66	10.5567	12.9573	9.67739	20.9662	20.0735	19.8171	17.6574
71	2491.19	2487.89	2626.37	2618.18	2648.75	2632.69	2774.53	2737.5	2757.02	2757.38	3091.64	3047.81	3090.03	3014.04		71.5	0.854061	1.84708	6.4827	4.24077	4.80595	3.08642	12.4147	9.95056	12.7299	9.90054	20.5671	19.834	19.9894	17.8816
71.5	2490.72	2487.14	2623.23	2616.06	2646.27	2631.17	2768.48	2732.42	2750.5	2752.73	3081.21	3037.86	3080.11	3005.24		72	0.582017	1.85518	6.33267	4.1678	4.55894	3.5986	12.1455	9.96852	12.0041	10.5635	20.535	19.1236	20.1122	18.1562
72	2490.35	2486.13	2619.99	2613.94	2643.9	2629.56	2762.24	2727.47	2744.34	2747.42	3071.02	3028.02	3070.04	2996.15		72.5	0.29859	1.31949	5.58777	4.2825	4.77925	4.1117	11.9463	9.90966	11.9227	10.2463	20.6143	18.6392	20.3411	18.0996
72.5	2490.13	2485.36	2616.97	2611.87	2641.64	2627.57	2756.33	2722.46	2738.42	2742.28	3060.67	3018.7	3059.99	2987.13		73	0.220463	1.19675	5.67431	4.36132	5.26916	4.29006	12.2818	9.49681	11.9975	10.3516	19.9546	18.9873	20.4358	18.2358
73	2490.02	2484.77	2614.3	2609.66	2639.08	2625.49	2750.24	2717.6	2732.4	2737.13	3050.49	3009.28	3049.72	2978.04		73.5	0.548038	0.899758	5.85216	4.47631	5.54517	4.50901	11.5533	9.46083	11.5611	10.9652	19.7898	18.9676	20.0323	18.3604
73.5	2489.86	2484.19	2611.28	2607.5	2636.39	2623.28	2744.18	2712.92	2726.5	2731.87	3040.66	2999.75	3039.61	2968.9		74	0.878653	-0.149665	5.28766	4.6828	6.05668	4.74713	10.4686	9.44999	10.6783	10.8555	20.1385	18.8919	19.8991	18.2403
74	2489.47	2483.95	2608.53	2605.17	2633.51	2620.99	2738.73	2708.13	2720.9	2726.26	3030.65	2990.31	3029.66	2959.72		74.5	0.793862	-0.166916	5.3241	5.13154	6.8508	4.2628	10.4221	9.331	10.1306	10.3968	19.2957	19.2915	20.0467	17.5909
74.5	2489.02	2484.21	2605.92	2602.79	2630.3	2618.63	2733.59	2703.49	2715.78	2721.06	3020.66	2980.79	3019.68	2950.73		75	1.13663	0.51759	5.61353	5.53453	7.20872	3.73891	10.1923	9.07831	9.49136	10.3371	18.4327	20.0365	19.9101	16.83
75	2488.62	2484.02	2603.18	2600.04	2626.71	2616.74	2728.32	2698.82	2710.78	2715.82	3011.35	2970.98	3009.65	2942.14		75.5	1.70911	0.668066	5.47873	5.77327	7.41146	3.9399	9.441	8.594	8.60588	9.63689	18.8374	20.4502	19.7528	16.2918
75.5	2487.86	2483.74	2600.36	2597.27	2623.12	2614.79	2723.46	2694.43	2706.32	2710.8	3002.08	2960.8	2999.78	2933.87		76	1.53213	0.919138	5.49332	6.19471	7.94152	4.41484	9.38789	8.38425	7.95459	9.1313	18.6039	20.6595	19.7137	16.038
76	2487.01	2483.33	2597.68	2594.25	2619.27	2612.75	2718.79	2690.19	2702.13	2706.16	2992.58	2950.56	2989.89	2925.81		76.5	1.12021	1.94731	5.86819	6.53404	7.93775	4.90529	9.8645	8.76692	8.26239	9.19261	18.0313	20.4382	19.2332	15.7583
76.5	2486.36	2482.74	2594.82	2591.09	2615.25	2610.37	2714	2685.98	2698.23	2701.6	2983.5	2940.2	2980.12	2917.82		77	1.24852	2.27139	5.81935	6.4734	7.5126	5.61202	9.86626	8.74307	9.09143	8.85687	19.0751	19.6751	18.8143	15.7717
77	2485.83	2481.48	2591.86	2587.77	2611.39	2607.82	2708.98	2681.47	2693.79	2697.01	2974.36	2930.2	2970.65	2910.02		77.5	1.30412	1.52685	5.6121	6.40836	7.28976	6.10774	9.82918	8.46265	9.52291	8.60866	19.5748	19.3055	18.7466	15.7981
77.5	2485.12	2480.61	2589.03	2584.62	2607.72	2604.79	2704.15	2677.26	2689.18	2692.72	2964.48	2920.49	2961.25	2902.05		78	1.28179	1.09976	5.63801	6.40782	6.64326	5.94059	9.73823	8.61561	9.79302	9.21788	19.4537	18.9259	18.7608	15.6241
78	2484.52	2479.92	2586.22	2581.36	2604.15	2601.8	2699.17	2672.95	2684.3	2688.3	2954.86	2910.88	2951.88	2894.24		78.5	1.74863	1.1132	5.59644	6.13697	5.92437	5.83032	9.37506	8.85872	10.1226	9.10897	20.1479	18.8605	18.9332	15.7856
78.5	2483.78	2479.45	2583.4	2578.25	2601.09	2598.86	2694.44	2668.63	2679.4	2683.59	2944.94	2901.51	2942.47	2886.39		79	2.17113	1.09041	5.19397	5.57741	5.44531	5.37406	9.12451	8.84643	9.81764	8.28761	20.185	19.5706	19.5076	15.7219
79	2482.78	2478.81	2580.67	2575.26	2598.2	2596.02	2689.78	2664.12	2674.27	2679.28	2934.8	2891.93	2932.9	2878.47		79.5	2.25023	0.965879	5.12883	5.3191	5.09868	4.64777	9.02826	8.97602	8.69455	8.47225	18.8863	19.5205	19.9234	15.6804
79.5	2481.65	2478.36	2578.16	2572.65	2595.61	2593.52	2685.3	2659.77	2669.68	2675.19	2924.92	2882.04	2922.98	2870.66		80	2.3212	1.56105	5.54122	4.95722	5.62558	4.1205	8.77678	9.31762	8.30874	8.75995	18.8355	18.2864	19.6346	16.2547
80	2480.54	2477.75	2575.48	2569.95	2592.98	2591.34	2680.76	2655.12	2665.48	2670.79	2915.77	2872.57	2913.07	2862.72		80.5	2.07673	2.05085	5.62965	4.42801	6.29525	3.96339	8.85699	9.74135	8.58333	8.55436	19.0079	17.2443	19.0121	16.4756
80.5	2479.37	2476.81	2572.66	2567.7	2589.96	2589.35	2676.48	2650.45	2661.28	2666.48	2906.05	2863.76	2903.4	2854.45		81	1.71392	2.06453	5.31621	4.44416	6.2684	3.86229	9.06396	9.4787	8.68274	8.9241	18.4194	16.0773	18.3982	15.7134
81	2478.48	2475.77	2569.9	2565.45	2586.77	2587.36	2671.89	2645.47	2656.9	2662.16	2896.85	2855.34	2894.07	2846.37		81.5	1.63734	1.50079	5.06992	4.63143	6.43715	4.11198	8.70628	8.48925	9.57069	9.50241	18.5257	14.713	17.5896	15.4737
81.5	2477.62	2474.82	2567.34	2563.23	2583.68	2585.43	2667.49	2641.07	2652.49	2657.53	2887.55	2847.68	2885.03	2838.68		82	1.86864	1.11503	5.07794	4.31666	6.74006	4.71155	7.96809	7.88222	10.6439	9.62437	18.6627	14.6731	16.806	15.6671
82	2476.81	2474.25	2564.81	2560.87	2580.33	2583.2	2663.23	2636.94	2647.31	2652.72	2878.32	2840.44	2876.46	2830.84		82.5	1.63602	1.18525	4.8163	4.39271	5.9652	5.18612	7.87225	7.51721	10.6844	9.17016	17.9491	15.9147	16.8378	15.2187
82.5	2475.81	2473.65	2562.29	2558.87	2577.08	2580.74	2659.44	2633.15	2641.98	2647.98	2869	2832.83	2868.11	2823.09		83	1.29381	1.10678	4.33728	4.86418	5.02201	5.35797	8.1938	7.04899	10.4974	8.81886	17.1588	16.9008	17.4378	14.9666
83	2475.19	2473.08	2560.01	2556.44	2574.39	2578.06	2655.31	2629.42	2636.67	2643.55	2860.4	2824.54	2859.55	2815.6		83.5	1.00198	1.07843	4.33839	4.27335	4.77074	5.18758	8.00708	7.34209	10.0514	8.56592	16.187	17.6848	17.4935	15.5637
83.5	2474.51	2472.53	2557.9	2554.13	2571.97	2575.43	2651.3	2626	2631.54	2639.15	2851.86	2815.96	2850.73	2808.01		84	0.541776	1.79652	4.53466	4.04296	4.6291	4.84718	7.78544	8.38496	8.94262	8.35525	15.6354	18.158	17.526	15.925
84	2474.2	2471.91	2555.65	2552.13	2569.6	2572.9	2647.3	2621.98	2626.7	2634.97	2844.14	2806.91	2842.07	2800.06		84.5	0.521937	2.28749	3.98371	4.58762	4.43294	4.43365	8.1648	8.58709	8.28479	8.23657	16.4966	18.1751	17.5602	15.412
84.5	2473.91	2470.76	2553.45	2549.99	2567.34	2570.6	2643.45	2617.71	2622.54	2630.78	2836.04	2797.88	2833.22	2792.2		85	0.720244	1.99399	3.43271	4.50742	4.13385	3.88887	8.14677	8.66774	8.09585	8.34556	16.9623	17.3923	16.9639	14.8358
85	2473.64	2469.72	2551.67	2547.61	2565.17	2568.48	2639.19	2613.43	2618.35	2626.71	2827.67	2788.84	2824.6	2784.67		85.5	1.04358	1.84308	3.6166	3.87215	4.55609	3.48334	7.51991	8.54569	7.80391	8.43374	17.2415	16.8447	15.8565	14.5592
85.5	2473.16	2468.76	2549.94	2545.55	2563.11	2566.69	2635.37	2609.08	2614.44	2622.43	2819.09	2780.46	2816.32	2777.33		86	1.81864	1.78192	3.17188	4.21973	5.45448	3.20761	8.07476	7.73591	8.16687	8.41137	18.7419	16.6468	15.274	14.1228
86	2472.54	2467.87	2548.12	2543.63	2560.56	2564.98	2631.52	2604.97	2610.47	2618.28	2810.29	2771.95	2808.67	2770.12		86.5	2.54269	1.44917	2.95016	4.40018	5.28428	3.16565	9.01851	7.12993	8.37609	8.73689	19.2482	16.2768	15.0963	13.6589
86.5	2471.36	2467	2546.73	2541.34	2557.79	2563.45	2627.24	2601.32	2606.28	2613.98	2800.48	2763.83	2800.98	2763.21		87	2.06931	1.48632	3.56192	4.13746	4.61467	3.36673	9.04327	7.40526	8.37569	8.66256	17.9666	16.0378	15.1168	13.7288
87	2470.15	2466.37	2545.07	2539.28	2555.33	2561.78	2622.61	2597.73	2602.12	2609.58	2791.28	2755.65	2793.54	2756.39		87.5	1.84356	1.80949	3.54672	4.29666	5.11941	3.59979	9.17024	7.50187	8.49236	9.0066	17.4633	16.0562	15.229	14.386
87.5	2469.27	2465.48	2543.24	2537.16	2553.05	2560.07	2618.19	2593.92	2597.9	2605.27	2782.45	2747.76	2785.85	2749.4		88	2.17258	2.06217	3.40542	4.65252	5.12055	4.03656	9.76579	7.38339	8.56014	9.38892	17.045	16.0514	15.3698	14.7733
88	2468.24	2464.56	2541.53	2534.96	2550.28	2558.15	2613.4	2590.25	2593.63	2600.57	2773.81	2739.6	2778.31	2742.04		88.5	2.00316	2.423	4.2045	4.67431	4.07527	4.30963	9.09717	7.68131	8.64799	9.48328	15.8083	15.5672	15.6723	14.6329
88.5	2467.16	2463.41	2539.72	2532.55	2548.04	2556.06	2608.58	2586.49	2589.33	2595.92	2765.49	2731.77	2770.47	2734.7		89	1.7011	2.46653	4.50652	4.47611	4.32494	4.22443	8.25422	7.68614	8.76151	9.42808	15.1889	15.0049	15.4631	14.2904
89	2466.25	2462.19	2537.38	2530.32	2546.04	2553.89	2604.33	2582.61	2584.99	2591.11	2757.92	2724.06	2762.7	2727.44		89.5	2.16092	2.24537	4.40559	4.03947	5.35701	4.02051	8.2934	7.3034	8.39865	9.68046	15.2861	14.2394	14.9016	13.8519
89.5	2465.36	2460.98	2535.26	2528.11	2543.62	2551.84	2600.22	2578.86	2580.63	2586.46	2750.21	2716.8	2755.05	2720.43		90	2.6149	2.05646	5.10056	3.62125	5.41956	4.47571	8.0973	7.06351	8.15399	9.4936	15.2239	13.3752	14.7237	12.9612
90	2464.09	2459.94	2532.9	2526.28	2540.8	2549.79	2596.06	2575.28	2576.58	2581.49	2742.64	2709.83	2747.76	2713.65		90.5	2.31311	1.8078	5.014	3.5026	5.13053	4.9336	7.48109	7.19523	7.75423	8.89311	15.3066	12.7028	14.7623	11.9359
90.5	2462.84	2458.94	2530.26	2524.45	2538.25	2547.36	2592.18	2571.75	2572.5	2577.03	2734.97	2703.38	2740.3	2707.48		91	2.06711	1.11908	4.50539	3.21956	5.40386	5.04882	7.22054	7.16864	6.92201	8.57315	14.7498	13.1298	14.1887	11.7392
91	2461.77	2458.18	2527.94	2522.78	2535.61	2544.89	2588.53	2568.1	2568.87	2572.57	2727.41	2696.98	2733.07	2701.6		91.5	2.19509	0.85475	4.49241	3.55178	5.44333	5.3661	7.37219	7.36101	7.02895	7.84478	14.1218	14.0572	13.5729	11.948
91.5	2460.73	2457.76	2525.7	2521.14	2532.87	2542.29	2584.89	2564.55	2565.46	2568.5	2720.23	2690.17	2726.12	2695.68		92	2.00474	1.05354	4.16616	4.37446	5.06686	6.0363	7.87962	7.76152	7.87951	7.1368	14.4535	14.7195	13.4177	11.7982
92	2459.61	2457.27	2523.48	2519.16	2530.22	2539.5	2581.11	2560.7	2561.74	2564.72	2713.18	2682.95	2719.44	2689.69		92.5	1.96738	1.14208	3.82374	4.7857	4.88405	5.82685	7.93305	8.28604	8.25015	6.91953	14.3892	15.0916	12.9039	12.0538
92.5	2458.7	2456.71	2521.53	2516.81	2527.78	2536.36	2577.06	2556.76	2557.62	2561.3	2705.81	2675.51	2712.75	2683.83		93	2.26569	1.41425	4.23861	5.2891	5.44556	5.45336	8.31298	9.22824	8.894	6.65044	14.0862	14.7804	12.3075	12.867
93	2457.58	2456.09	2519.56	2514.37	2525.24	2533.7	2573.16	2552.36	2553.47	2557.8	2698.81	2667.98	2706.55	2677.56		93.5	3.50297	2.2599	4.82324	5.73833	5.34699	5.56758	7.84656	10.4672	9.23973	6.13085	14.4626	12.4522	11.6949	13.6115
93.5	2456.32	2455.23	2517.26	2511.54	2522.41	2530.85	2568.86	2547.49	2548.77	2554.67	2691.65	2660.99	2700.44	2670.97		94	4.12564	2.66239	4.98391	5.65794	5.19936	5.32822	7.22552	11.1742	9.058	6.36087	14.5905	11.0786	11.3617	13.9632
94	2454.12	2453.88	2514.77	2508.71	2519.92	2528.17	2565.38	2541.95	2544.31	2551.59	2684.38	2655.47	2694.84	2663.98		94.5	7.0783	3.55437	6.43099	5.58101	4.67504	5.17732	4.81997	13.3743	8.45669	6.60021	15.0708	8.19741	10.9814	16.6367
94.5	2451.99	2452.55	2512.19	2505.94	2517.3	2525.57	2561.89	2536.28	2539.85	2548.36	2677.16	2650.14	2689.18	2656.89		95	4.61091	2.00614	3.40374	2.35949	1.58478	2.15039	0.747302	6.74089	3.24532	2.81421	6.64831	2.00503	4.36906	8.34785
95	2447.74	2450.64	2508.9	2503.52	2515.56	2523.35	2560.75	2529.69	2536.43	2545.49	2670.43	2647.66	2684.62	2648.72

## Sheet: Exp 2
Experiment 2
				2531 DnaK NBD
RFU				2534 bBiP NBD
				2606 Kar2 NBD
Temperature	2351_Mg	2351_MgADP	2351_Ca	2351_CaADP	2534_Mg	2534_MgADP	2534_Ca	2534_CaADP	2606_Mg	2606_MgADP	2606_Ca	2606_CaADP		Temperature	2351_Mg	2351_MgADP	2351_Ca	2351_CaADP	2534_Mg	2534_MgADP	2534_Ca	2534_CaADP	2606_Mg	2606_MgADP	2606_Ca	2606_CaADP			2351_Mg	2351_MgADP	2351_Ca	2351_CaADP	2534_Mg	2534_MgADP	2534_Ca	2534_CaADP	2606_Mg	2606_MgADP	2606_Ca	2606_CaADP
20	2747.68	2752.48	2757.11	2757.25	2879.52	2846.51	2864.13	2827.8	3984.14	3583.65	3749.04	3672.02		20	6.64728	6.97406	8.01451	7.60634	7.82559	7.52826	8.18858	8.16739	4.22062	6.80384	8.02693	9.10415		Min	-37.2503	-27.3723	-37.9206	-19.1901	-111.606	-78.063	-119.193	-74.4026	-91.3071	-62.7524	-116.165	-80.5296
20.5	2741.03	2745.5	2749.09	2749.64	2871.69	2838.98	2855.94	2819.63	3979.92	3576.85	3741.01	3662.92		20.5	14.4024	15.1105	17.3648	16.4804	16.9554	16.3112	17.7419	17.696	9.14467	14.7417	17.3917	19.7257		Tm	47	60	46	60.5	42	50	42	53.5	32.5	49.5	35	51.5
21	2734.38	2738.53	2741.08	2742.03	2863.87	2831.46	2847.75	2811.47	3975.7	3570.05	3732.99	3653.81		21	13.2946	13.9481	16.029	15.2127	15.6512	15.0565	16.3772	16.3348	8.44124	13.6077	16.0539	18.2083
21.5	2727.74	2731.56	2733.06	2734.43	2856.04	2823.93	2839.56	2803.3	3971.48	3563.24	3724.96	3644.71		21.5	13.2946	13.9481	16.029	15.2127	15.6512	15.0565	16.3772	16.3348	8.44124	13.6077	16.0539	18.2083
22	2721.09	2724.58	2725.05	2726.82	2848.22	2816.4	2831.37	2795.13	3967.26	3556.44	3716.93	3635.6		22	13.2946	13.9481	16.029	15.2127	15.6512	15.0565	16.3772	16.3348	8.44124	13.6077	16.0539	18.2083
22.5	2714.44	2717.61	2717.03	2719.22	2840.39	2808.87	2823.18	2786.96	3963.04	3549.64	3708.91	3626.5		22.5	13.2893	13.9818	16.0759	15.2514	15.6641	15.0283	16.4952	16.3164	8.69121	13.5539	16.2622	18.3092
23	2707.79	2710.63	2709.02	2711.61	2832.56	2801.34	2815	2778.8	3958.82	3542.83	3700.88	3617.4		23	13.3388	13.8108	15.7922	15.0813	15.5382	15.2507	15.6407	16.3704	7.24224	13.8499	15.0693	17.6921
23.5	2701.12	2703.86	2701.29	2704.23	2824.82	2793.65	2807.51	2770.52	3956.1	3535.71	3694.1	3608.9		23.5	13.2272	13.1888	15.2588	14.1522	15.7166	15.2835	14.9942	17.041	3.81927	14.7899	12.085	16.4121
24	2694.51	2697.48	2693.82	2697.47	2816.85	2786.1	2799.86	2761.79	3955.18	3528.1	3688.92	3600.93		24	13.5219	12.3147	14.3762	13.1418	15.9354	15.0565	15.4207	17.5404	-0.677384	15.3226	8.41876	15.5316
24.5	2687.55	2691.5	2687	2691.01	2809.01	2778.6	2792.1	2753.17	3956.86	3520.5	3685.72	3593.28		24.5	14.2175	11.7777	12.8597	12.8878	15.2311	14.8006	15.8031	16.5709	-5.6949	14.964	4.4376	15.2774
25	2680.44	2685.59	2680.99	2684.62	2801.72	2771.29	2784.18	2745.25	3960.88	3513.15	3684.37	3585.64		25	13.8008	12.0766	11.1369	12.2247	13.7645	14.5649	15.2219	15.5897	-10.4947	14.6257	1.32192	15.0502
25.5	2673.85	2679.43	2675.78	2678.79	2795.15	2764.03	2776.89	2737.58	3967.48	3505.91	3684.34	3578.24		25.5	12.7068	12.2202	10.0033	11.3582	13.1047	14.3536	14.6318	14.7113	-16.3593	14.1278	-1.41391	14.7142
26	2667.67	2673.43	2670.89	2673.11	2788.56	2756.95	2769.57	2730.63	3977.19	3499.11	3685.81	3570.9		26	12.1414	11.8881	9.54919	11.7037	12.9151	14.0652	14.0514	12.9608	-21.8628	12.939	-4.53828	14.6075
26.5	2661.64	2667.51	2666.21	2667.06	2782.3	2749.99	2762.94	2724.53	3989.24	3492.91	3688.76	3563.64		26.5	12.0382	11.8751	9.09473	12.2363	12.0577	13.6024	12.6183	11.9011	-26.4151	12.2279	-6.85405	14.4839
27	2655.59	2661.56	2661.7	2661.01	2776.45	2743.34	2756.85	2718.61	4003.73	3486.77	3692.49	3556.47		27	12.1444	11.7455	9.21971	11.5348	11.5644	13.2432	11.9081	11.7599	-31.9638	12.1988	-7.80069	13.9287
27.5	2649.4	2655.72	2656.82	2655.44	2770.64	2736.71	2750.88	2712.76	4021.31	3480.61	3696.69	3549.68		27.5	12.8213	11.8107	10.5226	11.4864	11.7881	13.1767	12.2648	11.4459	-38.386	12.6256	-9.86385	13.4836
28	2642.66	2649.59	2651.1	2649.34	2764.66	2730.18	2744.55	2707.05	4042.01	3473.9	3702.45	3542.8		28	14.2028	12.906	12.1418	12.7927	11.8276	12.7704	12.7273	11.7737	-43.853	14.6939	-12.6628	14.2627
28.5	2635.12	2642.65	2644.62	2642.6	2758.7	2723.77	2738.09	2700.77	4065.13	3465.67	3709.21	3535.18		28.5	15.9678	15.0493	13.9977	14.1078	12.4739	13.3932	13.4602	13.6554	-49.0944	18.3431	-14.0865	16.4626
29	2626.59	2634.44	2636.92	2635.07	2751.9	2716.46	2730.92	2693.29	4091.13	3455.42	3716.62	3526.11		29	18.4087	17.8087	17.1781	16.4591	15.1302	16.2454	15.2906	16.0759	-54.6786	22.6753	-16.0778	20.089
29.5	2616.64	2624.78	2627.37	2625.91	2743.45	2707.35	2722.67	2684.58	4119.74	3442.83	3725.52	3514.93		29.5	21.381	21.0518	20.8591	20.5474	18.4975	20.1407	18.0013	19.1887	-59.7315	28.143	-19.7977	24.7518
30	2605.23	2613.45	2616.18	2614.52	2733.43	2696.32	2712.92	2673.97	4150.85	3427.25	3736.49	3501.29		30	24.2209	23.8817	23.6737	24.6714	21.7139	23.9059	20.6876	23.2407	-64.6344	34.0233	-23.6904	30.0011
30.5	2592.54	2601.08	2603.84	2601.48	2721.88	2683.49	2702.1	2661.4	4184.51	3409.14	3749.42	3485.1		30.5	26.3074	25.559	25.5966	27.1001	24.2083	27.6497	22.6674	26.9	-70.4706	37.5751	-28.7586	34.1195
31	2579.13	2588.12	2590.76	2587.67	2709.6	2668.96	2690.46	2647.34	4221.45	3390.07	3765.71	3467.53		31	27.1136	25.8496	26.5524	28.0131	24.2493	29.5067	23.4901	28.741	-77.2426	38.4775	-36.9254	35.831
31.5	2565.73	2575.46	2577.59	2573.74	2698.1	2654.34	2678.93	2632.93	4261.73	3370.9	3786.71	3449.59		31.5	25.9688	24.6385	25.5599	27.3083	21.2272	29.0066	22.3388	28.9059	-83.937	38.2419	-47.2718	35.5826
32	2553.42	2563.62	2565.45	2560.7	2688.7	2640.22	2668.51	2618.66	4305.16	3352.11	3813.21	3432.14		32	23.2014	22.6678	23.0808	24.3405	16.3046	26.8848	18.7021	27.8496	-89.3084	36.2354	-58.9395	34.3036
32.5	2542.66	2552.92	2554.67	2549.57	2682.04	2627.64	2660.55	2605.38	4350.52	3334.91	3845.8	3415.52		32.5	19.7313	19.9219	19.6432	20.3479	9.97645	23.7505	13.0953	24.8387	-91.3071	32.5561	-71.6112	31.503
33	2533.81	2543.83	2545.91	2540.35	2678.96	2616.61	2655.6	2593.98	4395.94	3319.6	3884.83	3400.81		33	15.4666	16.3237	15.5887	16.5743	2.0859	19.7214	6.3724	20.8626	-90.0646	28.6658	-84.3573	27.5662
33.5	2527.25	2536.65	2539.12	2533.04	2680.04	2607.93	2654.28	2584.54	4440.16	3306.17	3930.03	3387.95		33.5	10.8178	12.4187	11.2861	12.4574	-6.21229	15.6298	-0.913688	16.8923	-86.4003	25.4251	-96.3553	23.8247
34	2522.94	2531.38	2534.61	2527.88	2685.16	2600.93	2656.59	2577.11	4481.85	3294.18	3980.88	3376.97		34	6.62118	8.75736	7.01213	8.35502	-14.3268	11.8835	-8.61624	12.7684	-79.6254	22.0658	-106.57	20.1918
34.5	2520.55	2527.85	2532.02	2524.53	2694.37	2596.01	2662.95	2571.76	4519.35	3284.11	4036.06	3367.7		34.5	2.94582	5.30415	3.30043	5.40586	-22.5072	8.35538	-16.7003	8.58456	-70.024	18.5747	-113.472	16.8084
35	2519.88	2525.95	2531.15	2522.39	2707.63	2592.48	2673.27	2568.37	4551.73	3275.51	4093.68	3360.01		35	-0.13667	2.61615	0.654195	2.9425	-30.5222	5.46563	-24.6048	5.52215	-59.946	15.7501	-116.165	14.4114
35.5	2520.49	2525.08	2531.22	2521.51	2724.78	2590.43	2687.5	2566.14	4579.11	3268.24	4151.56	3353.13		35.5	-1.90683	0.975306	-1.03011	0.788653	-37.7297	3.24553	-32.1286	2.99459	-48.7716	13.725	-114.956	13.1201
36	2521.68	2524.89	2532.11	2521.44	2745.31	2589.09	2705.38	2565.26	4600.27	3261.72	4207.85	3346.8		36	-3.03329	-0.195787	-2.36723	-0.260286	-44.6288	1.96416	-39.6353	1.16291	-35.8933	12.14	-108.99	12.2797
36.5	2523.46	2525.2	2533.53	2521.66	2769.36	2588.41	2727.07	2564.82	4615.03	3256.09	4259.7	3340.78		36.5	-3.82976	-0.919766	-3.39012	-0.608101	-51.2426	0.866201	-46.6656	0.383829	-23.3421	10.4756	-97.5836	11.9196
37	2525.42	2525.76	2535.45	2522	2796.53	2588.16	2751.99	2564.83	4623.76	3251.21	4304.89	3334.89		37	-4.00569	-1.33176	-4.1351	-0.682812	-57.6645	0.262365	-53.26	-0.238938	-11.6872	9.00032	-82.9108	11.4053
37.5	2527.44	2526.51	2537.65	2522.36	2827.14	2588.12	2780.36	2565.05	4626.93	3247.02	4342.4	3329.38		37.5	-4.02798	-1.63836	-4.73495	-0.935031	-64.8955	-0.24866	-60.0795	-0.849617	-1.18825	8.03611	-67.2172	10.7918
38	2529.48	2527.36	2540.24	2522.94	2861.56	2588.36	2812.15	2565.61	4625.3	3243.14	4371.97	3324.04		38	-4.42	-1.78761	-5.74118	-1.20318	-73.1441	-0.471179	-67.5211	-0.920093	6.96609	7.28831	-50.5538	10.5957
38.5	2531.84	2528.18	2543.41	2523.55	2900.2	2588.56	2847.93	2565.96	4620.23	3239.75	4392.98	3318.74		38.5	-4.62117	-1.09853	-6.95863	-1.35582	-80.7514	-0.46895	-75.3085	-1.03904	13.4646	6.41791	-33.851	10.6455
39	2534.1	2528.46	2547.15	2524.32	2942.19	2588.77	2887.47	2566.66	4612	3236.72	4406.23	3313.4		39	-4.70056	-0.432079	-7.70309	-1.68646	-87.4894	-0.0542428	-83.1455	-1.32634	19.0703	5.49469	-20.0802	10.5759
39.5	2536.61	2528.68	2551.12	2525.26	2987.64	2588.62	2931.02	2567.19	4601.34	3234.22	4413.44	3308.09		39.5	-5.27934	-0.262909	-8.43623	-2.26553	-94.0369	0.240263	-90.5194	-0.870865	23.5491	4.85902	-8.67287	11.1643
40	2539.46	2528.76	2555.68	2526.5	3036.07	2588.58	2977.94	2567.49	4588.55	3231.89	4415.11	3302.26		40	-6.368	-0.317671	-9.92287	-2.19875	-99.6352	0.239385	-97.5752	-0.126032	27.4083	4.01581	1.77337	11.6106
40.5	2543.04	2529	2561.04	2527.42	3087.09	2588.48	3028.57	2567.33	4573.92	3230.27	4411.96	3296.61		40.5	-7.82207	-0.272183	-11.3441	-1.87004	-104.05	-0.385862	-104.649	0.468905	31.4799	2.68707	10.3758	11.088
41	2547.29	2529.11	2566.97	2528.39	3140	2589.05	3082.48	2567.04	4557.09	3229.22	4405.07	3291.2		41	-9.25775	-0.807541	-12.3607	-1.83079	-107.791	-1.51189	-111.09	0.853336	35.4134	1.19238	16.6894	10.5236
41.5	2552.37	2529.85	2573.45	2529.22	3194.72	2590.03	3139.44	2566.46	4538.56	3228.96	4395.39	3286.12		41.5	-11.1782	-1.68617	-13.7071	-1.49817	-110.814	-2.84016	-116.289	1.45226	39.0746	0.67921	22.5276	9.7431
42	2558.56	2530.68	2580.75	2529.89	3250.42	2591.95	3198.36	2565.65	4518.13	3228.57	4382.65	3281.54		42	-13.7418	-1.6236	-15.5153	-1.12503	-111.606	-4.60311	-119.193	1.74668	41.8495	-0.0149009	27.8641	8.2907
42.5	2566.09	2531.46	2589.01	2530.36	3305.57	2594.63	3257.91	2564.86	4496.7	3229.17	4367.77	3277.84		42.5	-16.1099	-1.60097	-17.5022	-0.888461	-107.708	-6.33463	-117.724	0.988307	44.7953	-2.20277	31.4374	6.83565
43	2574.66	2532.28	2598.39	2530.8	3357.15	2598.22	3315.02	2564.7	4473.34	3230.78	4351.33	3274.69		43	-18.3056	-1.67841	-20.381	-0.888537	-97.6322	-7.51645	-109.502	-0.0216518	47.876	-4.20816	34.3482	5.55463
43.5	2584.54	2533.04	2609.55	2531.2	3402.33	2602.2	3366.4	2564.8	4448.95	3233.37	4333.45	3272.3		43.5	-21.5621	-1.0206	-24.3935	-0.500835	-82.2322	-9.01921	-95.0885	-0.291954	50.0522	-5.93156	37.2348	4.19087
44	2596.25	2533.26	2622.81	2531.3	3438.67	2607.41	3409.27	2565.01	4423.36	3236.97	4314.18	3270.49		44	-24.9464	-0.0588684	-28.498	-0.099511	-62.4899	-11.7778	-75.4686	-0.828311	51.7181	-9.54256	39.6101	2.9831
44.5	2609.42	2533.19	2638.03	2531.34	3464.35	2614.02	3441.34	2565.63	4397.19	3243.12	4293.97	3269.41		44.5	-27.8106	0.12875	-32.5227	0.0400738	-39.6686	-14.6517	-52.5565	-1.4513	53.8157	-14.5384	41.0902	1.04109
45	2624.08	2533.1	2655.23	2531.26	3478.42	2622.1	3461.77	2566.35	4369.58	3251.47	4273.1	3269.5		45	-30.9571	0.661302	-35.9578	0.211588	-17.3948	-17.6729	-29.3768	-1.1037	55.6553	-18.9869	42.6359	-1.2253
45.5	2640.35	2532.57	2673.73	2531.13	3482.28	2631.84	3471.06	2566.8	4341.63	3262.15	4251.38	3270.64		45.5	-34.0005	1.00435	-37.7079	0.355076	1.38452	-21.7151	-8.46277	-1.30051	56.7884	-23.7593	43.8453	-3.32343
46	2657.91	2532.24	2692.69	2530.95	3477.71	2643.89	3470.78	2567.78	4312.82	3275.37	4229.28	3272.95		46	-35.807	0.269457	-37.9206	0.123728	16.0049	-26.2269	9.12567	-2.41939	57.8708	-29.5656	44.9495	-6.27541
46.5	2676.03	2532.27	2711.46	2531	3466.99	2658.07	3462.65	2569.26	4283.82	3291.71	4206.43	3277.05		46.5	-36.8885	-0.160087	-37.0677	-0.00295913	26.2688	-30.6176	22.2562	-3.59123	58.5206	-35.2612	46.0714	-10.1365
47	2694.66	2532.35	2729.54	2530.95	3452.15	2674.65	3449.24	2571.53	4254.32	3310.5	4183.25	3283.19		47	-37.2503	-0.247442	-34.9023	-0.00156944	32.1441	-35.8994	30.9146	-5.8723	59.146	-39.9321	46.8745	-14.4356
47.5	2713.01	2532.53	2746.16	2531.1	3435.41	2694.18	3432.29	2575.27	4224.75	3331.69	4159.58	3291.7		47.5	-35.8475	-0.511624	-31.4746	-0.859122	34.5515	-42.4599	36.3709	-9.15194	59.2044	-45.0512	47.5077	-20.0776
48	2730.32	2532.84	2760.87	2531.74	3417.9	2717.33	3413.34	2580.63	4195.13	3355.65	4135.71	3303.52		48	-33.3869	-0.634929	-27.1908	-1.17818	35.2605	-50.4304	38.9944	-11.7481	59.1459	-50.9955	48.5348	-27.3874
48.5	2746.22	2533.09	2773.23	2532.2	3400.29	2744.73	3393.68	2587.12	4165.56	3382.6	4111.13	3319.28		48.5	-29.8953	-0.108844	-22.1219	-0.845014	35.233	-59.227	39.2341	-15.0151	59.4861	-56.351	48.9521	-35.7971
49	2759.95	2532.98	2782.96	2532.63	3382.73	2776.46	3374.35	2595.84	4135.72	3411.78	4086.83	3339.46		49	-24.5939	0.162987	-16.9339	-0.977448	34.8057	-67.4396	38.0319	-19.7261	59.3464	-60.3021	48.7759	-45.0959
49.5	2770.71	2532.98	2790.15	2533.12	3365.48	2811.91	3355.73	2606.86	4106.34	3442.63	4062.3	3364.4		49.5	-18.6229	-0.00282355	-11.5808	-0.79109	34.485	-74.2193	36.4726	-24.2245	58.2815	-62.7524	49.136	-54.5357
50	2778.7	2532.96	2794.62	2533.28	3348.25	2850.18	3337.93	2620.21	4077.41	3474.1	4037.71	3393.93		50	-13.7059	0.0223946	-6.70867	0.50988	34.2218	-78.063	34.5969	-29.5944	57.612	-62.4582	49.3349	-63.6153
50.5	2784.48	2532.98	2797.06	2532.66	3331.38	2889.16	3321.15	2636.76	4048.78	3504.64	4013	3427.86		50.5	-9.0515	-0.0806267	-3.19848	1.48166	33.0772	-76.6623	32.5344	-37.1321	56.6382	-59.4076	49.2222	-71.9217
51	2787.88	2533.11	2797.97	2531.96	3315.26	2926.05	3305.32	2657.43	4020.91	3533.07	3988.48	3465.49		51	-5.07147	-0.69342	-0.535718	1.20558	31.3526	-70.3371	31.0008	-45.043	54.5725	-53.7018	49.2858	-77.9877
51.5	2789.81	2533.66	2797.72	2531.47	3300.01	2958.87	3290.06	2681.79	3994.19	3557.95	3963.72	3505.29		51.5	-2.93347	-1.2031	1.43319	0.955304	29.8525	-60.3341	30.1207	-52.7251	52.7821	-45.5116	49.323	-80.5296
52	2790.9	2534.24	2796.68	2531.02	3285.43	2985.88	3275.19	2710.21	3968.13	3578.35	3939.21	3545.4		52	-1.25213	-1.07316	2.38968	0.674631	28.1848	-47.0476	29.1637	-61.0536	51.0321	-36.0957	48.9262	-79.5262
52.5	2791.04	2534.77	2795.39	2530.89	3271.81	3005.76	3260.87	2742.67	3943.24	3593.82	3914.79	3584.03		52.5	0.762473	-1.27589	3.04656	-0.292343	26.5219	-32.7706	28.3739	-68.3514	48.5692	-25.3689	48.6814	-73.6755
53	2790.2	2535.54	2793.63	2531.34	3258.79	3018.86	3246.75	2778.12	3919.51	3603.51	3890.6	3618.26		53	2.28638	-1.73357	3.88419	-1.51778	25.7338	-20.0707	28.1098	-72.8209	46.4535	-13.1222	47.852	-62.6618
53.5	2788.82	2536.44	2791.55	2532.26	3246.04	3026.15	3232.77	2815.01	3896.66	3606.96	3866.98	3646.06		53.5	3.35019	-1.62676	4.36635	-1.59308	25.1978	-9.34116	27.6919	-74.4026	45.2018	-1.06357	46.7828	-47.8281
54	2786.89	2537.21	2789.27	2532.89	3233.65	3028.58	3219.08	2852	3874.18	3604.73	3843.84	3665.7		54	4.29135	-1.80022	4.82658	-1.39669	24.1704	-0.831014	27.1193	-72.9387	44.8173	9.95909	45.7007	-30.6819
54.5	2784.62	2538.39	2786.74	2533.71	3221.88	3027.44	3205.67	2887.28	3851.75	3597.18	3821.36	3676.61		54.5	4.64739	-3.06962	5.21946	-1.68659	23.0162	4.69103	26.4557	-67.2538	44.9979	20.0308	44.0588	-12.6139
55	2782.31	2540.35	2784.14	2534.55	3210.56	3024.18	3192.68	2918.65	3829.21	3585.05	3799.79	3678.54		55	4.51238	-4.74084	4.95303	-1.71698	22.3748	8.50783	25.3951	-57.7137	44.9025	27.8005	42.2608	3.93818
55.5	2780.12	2543.11	2781.79	2535.43	3199.44	3019.08	3180.32	2944.65	3806.89	3569.74	3778.97	3673.09		55.5	4.30838	-6.06863	4.74288	-1.71228	22.1534	11.6097	24.0534	-46.1652	44.5582	33.3116	41.4111	17.9242
56	2777.99	2546.54	2779.38	2536.36	3188.35	3012.72	3168.64	2964.68	3784.71	3552.02	3758.32	3661.15		56	4.22341	-8.29527	4.65423	-2.35915	22.3112	13.7948	22.598	-33.9745	43.8297	37.2919	40.9139	28.7362
56.5	2775.85	2551.51	2777.15	2537.89	3177.07	3005.47	3157.68	2978.56	3763.15	3532.77	3738.05	3645.04		56.5	4.49763	-11.2264	4.40685	-3.70278	22.8589	14.6909	21.3628	-21.2355	42.431	39.2095	40.3285	35.092
57	2773.48	2557.73	2774.92	2540.09	3165.45	2998.12	3147.15	2986.14	3742.27	3513.01	3717.9	3626.59		57	4.79149	-13.7389	4.55144	-5.07887	23.7163	15.1893	21.0824	-9.85623	41.1352	39.9285	40.4886	38.1859
57.5	2771.07	2565.3	2772.55	2543.03	3153.41	2990.37	3136.58	2988.85	3721.89	3492.97	3697.59	3607.18		57.5	4.95064	-16.5683	5.11858	-6.8493	24.1293	15.2222	20.8912	-1.39239	40.803	40.0013	40.5122	39.548
58	2768.55	2574.41	2769.91	2547.02	3141.42	2983.04	3126.29	2987.87	3701.43	3473.21	3677.6	3587.34		58	5.02025	-20.3163	4.8359	-9.19708	23.874	14.2305	20.329	5.12599	40.6261	38.7133	38.9329	39.0559
58.5	2766.07	2585.55	2767.74	2552.29	3129.58	2976.2	3116.15	2984.06	3681.27	3454.34	3658.73	3568.32		58.5	5.03022	-23.6464	4.41405	-11.9755	23.3603	12.8306	20.5427	9.7476	40.3874	36.8704	36.9371	37.2201
59	2763.56	2597.88	2765.45	2558.94	3118.05	2970.13	3105.72	2978.53	3661.03	3436.25	3640.63	3550.06		59	4.74514	-25.7477	4.45692	-14.2557	22.9378	12.0703	20.9557	11.6232	40.2742	35.7485	35.3166	36.0343
59.5	2761.33	2611.17	2763.41	2566.49	3106.64	2964.07	3095.29	2972.65	3641.06	3418.57	3623.41	3532.22		59.5	4.42572	-27.2088	3.45061	-16.1948	22.4585	11.6979	20.54	12.2164	39.6762	34.6916	33.6022	35.3065
60	2759.11	2624.88	2762.03	2575.1	3095.54	2958.43	3085.11	2966.36	3621.41	3401.51	3606.94	3514.77		60	4.28008	-27.3723	2.14824	-18.0269	22.3544	11.1694	20.6677	12.7576	38.6454	34.0096	32.3833	34.2641
60.5	2757.03	2638.25	2761.07	2584.4	3084.26	2952.81	3074.51	2960.03	3602.37	3384.52	3590.81	3497.89		60.5	4.27385	-25.632	2.39429	-19.1901	22.4457	11.3225	21.672	12.3459	37.9517	33.6217	32.7935	33.7012
61	2754.84	2650.32	2759.62	2594.1	3073.07	2947.04	3063.53	2954.06	3583.4	3367.92	3574.08	3481.02		61	4.20204	-22.7376	2.72669	-19.1475	22.6317	11.9841	21.8761	11.6228	37.7297	32.9341	33.4872	33.5193
61.5	2752.81	2660.95	2758.44	2603.41	3061.57	2940.84	3052.65	2948.29	3564.66	3351.63	3557.33	3464.38		61.5	4.19273	-19.7818	2.11552	-18.2211	23.2444	12.4433	21.9438	11.7948	37.2631	31.9501	33.9955	33.2126
62	2750.59	2670.05	2757.37	2612.24	3049.82	2934.6	3041.47	2942.18	3546.11	3336.02	3540.08	3447.82		62	4.62796	-16.4181	2.56463	-16.9234	23.9459	12.8013	22.9778	12.5144	37.0878	30.6991	34.637	32.8819
62.5	2748.17	2677.34	2755.8	2620.16	3037.7	2928	3029.72	2935.78	3527.59	3320.95	3522.77	3431.59		62.5	5.13963	-12.7363	3.58371	-14.5154	24.0472	13.4937	23.6168	13.1031	36.8346	29.2671	34.818	31.8952
63	2745.46	2682.89	2753.89	2626.63	3025.79	2921.13	3017.95	2929.08	3509.35	3306.67	3505.38	3415.97		63	5.54466	-9.81017	3.72917	-11.1818	24.0858	13.9845	23.5302	13.6271	36.0293	28.3996	34.1498	30.6149
63.5	2742.62	2687.27	2752.06	2631.4	3013.61	2914.01	3006.12	2922.09	3491.63	3292.43	3488.64	3400.95		63.5	5.97872	-7.74167	3.94669	-8.2693	24.3213	14.5572	24.1097	14.6363	34.6761	28.371	33.4517	29.6437
64	2739.47	2690.64	2749.83	2635.02	3001.62	2906.6	2993.89	2914.47	3474.64	3278.27	3471.92	3386.35		64	6.53772	-5.57995	5.02779	-6.28881	23.3391	14.9156	24.3616	15.4911	33.6156	28.4338	32.8514	28.4466
64.5	2736.13	2692.86	2747.07	2637.7	2990.3	2899.13	2981.94	2906.7	3457.95	3264.03	3455.79	3372.5		64.5	6.75601	-3.4583	5.80415	-4.24835	22.186	15.0738	23.1918	15.5794	33.0549	28.2066	32.1377	27.1771
65	2732.71	2694.16	2744.08	2639.34	2979.33	2891.55	2970.66	2898.9	3441.57	3250.07	3439.73	3359.06		65	6.95441	-1.86988	6.23498	-2.6536	21.8923	15.0411	22.4755	15.5921	32.4637	27.9535	31.8091	26.7937
65.5	2729.14	2694.74	2740.87	2640.43	2968.36	2884.05	2959.4	2891.05	3425.44	3236.06	3423.93	3345.67		65.5	7.39156	-0.307732	6.45695	-1.60729	21.9016	15.3639	22.2549	16.1116	32.096	27.9709	31.891	26.5213
66	2725.3	2694.44	2737.63	2640.93	2957.48	2876.21	2948.46	2882.82	3409.37	3222.21	3407.85	3332.51		66	7.96871	1.60229	6.67552	-0.396366	21.3676	15.4952	21.5123	16.4074	32.5921	27.0944	31.7645	26.4032
66.5	2721.15	2693.2	2734.19	2640.82	2946.91	2868.57	2937.85	2874.7	3392.87	3208.98	3392.14	3319.2		66.5	8.71218	3.06016	6.89195	0.931774	21.5268	15.5328	21.0568	16.2652	32.9077	26.1135	31.7825	26.8248
67	2716.6	2691.47	2730.71	2640.03	2935.96	2860.66	2927.33	2866.55	3376.57	3195.96	3376.06	3305.7		67	9.33292	3.81291	7.32632	2.02731	21.6189	15.6979	21.1058	16.2131	32.2646	26.2871	31.9727	26.9941
67.5	2711.83	2689.36	2726.84	2638.84	2925.37	2852.84	2916.77	2858.49	3360.5	3182.71	3360.27	3292.19		67.5	9.83634	4.90796	7.84386	2.79679	21.1896	16.1848	20.9504	16.2188	32.5885	26.2206	31.421	27.3022
68	2706.76	2686.6	2722.81	2637.31	2914.82	2844.57	2906.4	2850.35	3343.95	3169.79	3344.66	3278.4		68	10.4546	5.74707	8.70237	3.0156	20.4175	16.0166	20.7198	16.0593	33.1175	25.6584	30.6853	27.6972
68.5	2701.41	2683.67	2718.09	2635.83	2904.95	2836.95	2896.07	2842.44	3327.49	3156.99	3329.51	3264.58		68.5	10.8632	6.1224	9.97294	3.23603	19.6681	14.9005	20.3287	15.7608	32.7057	25.7113	30.5786	27.4399
69	2695.93	2680.41	2712.93	2634.03	2895.13	2829.64	2886.09	2834.54	3311.21	3144.14	3314.12	3250.96		69	10.9263	7.06897	10.5227	3.84331	19.0947	14.1162	19.7348	15.8999	32.6792	25.3572	30.1409	27.1957
69.5	2690.42	2676.58	2707.62	2632.03	2885.84	2822.8	2876.28	2826.5	3294.77	3131.73	3299.44	3237.37		69.5	11.516	8.19727	10.732	4.01368	18.5421	13.6023	19.6106	16.3593	33.0951	24.2419	29.1006	27.0618
70	2684.41	2672.31	2702.16	2629.96	2876.54	2816.07	2866.48	2818.25	3278.27	3119.84	3284.92	3223.93		70	12.1597	8.51193	11.3064	4.6063	18.2275	12.6867	19.4846	16.2273	32.2954	23.6627	28.894	26.6499
70.5	2678.33	2668.07	2696.36	2627.33	2867.52	2810.02	2856.81	2810.35	3262.56	3108.07	3270.51	3210.71		70.5	12.2087	8.93203	11.5792	5.96491	18.5815	12.3674	19.2135	15.5246	31.0038	22.9661	28.9546	26.358
71	2672.19	2663.36	2690.67	2624.08	2857.93	2803.53	2847.24	2802.69	3247.25	3096.88	3256.04	3197.57		71	12.4552	9.57158	11.1176	6.56882	19.1623	13.3652	19.1915	15.2038	29.9551	22.0886	28.3438	26.1526
71.5	2665.9	2658.55	2685.14	2620.79	2848.43	2796.68	2837.64	2795.17	3232.65	3085.86	3242.14	3184.59		71.5	12.6216	9.80562	11.5196	6.98488	19.1095	14.0611	19.0381	14.7447	28.4926	22.1333	27.9447	25.7076
72	2659.68	2653.58	2679.15	2617.05	2838.8	2789.55	2828.29	2788.03	3218.73	3074.71	3228.02	3171.87		72	11.9061	9.81415	11.9141	7.94577	19.3975	14.1094	18.2343	13.6267	27.2494	22.4057	28.198	25.2511
72.5	2653.97	2648.73	2673.32	2613	2829.12	2782.58	2819.44	2781.47	3205.33	3063.51	3213.99	3159.38		72.5	11.4353	9.7916	11.4955	7.71727	19.1148	14.2105	17.2256	13.0164	26.4709	22.2195	28.0153	24.4452
73	2648.17	2643.72	2667.59	2609.42	2819.83	2775.4	2811.05	2774.86	3192.22	3052.48	3200.05	3147.42		73	11.5	10.3112	11.6103	6.85567	17.7095	14.0008	16.2733	13.5824	25.8232	22.1868	27.4564	23.6318
73.5	2642.48	2638.41	2661.67	2606.03	2811.39	2768.69	2803.1	2767.96	3179.38	3041.31	3186.49	3135.68		73.5	11.3385	10.9178	12.0147	6.94857	16.5522	12.9652	15.8023	13.4853	26.1314	22.2748	27.2922	23.3449
74	2636.81	2632.85	2655.59	2602.46	2803.22	2762.39	2795.17	2761.4	3166.03	3030.27	3172.78	3124.09		74	11.3089	11.0764	12.2504	7.04812	15.9048	12.2772	15.8388	13.1827	26.8454	21.8889	26.9783	22.8777
74.5	2631.1	2627.28	2649.37	2599	2795.52	2756.3	2787.25	2754.65	3152.64	3019.45	3159.56	3112.75		74.5	11.8496	11.6259	12.8801	6.87116	14.8699	12.3663	15.9272	13.9283	26.6435	21.3034	26.2861	22.8067
75	2624.95	2621.2	2642.7	2595.44	2788.24	2749.98	2779.28	2747.5	3139.39	3008.93	3146.48	3101.2		75	12.448	12.5334	13.5979	7.83481	14.6594	12.7125	15.7944	14.3926	26.4999	20.9759	25.7697	23.3366
75.5	2618.7	2614.9	2635.84	2591.16	2780.81	2743.66	2771.48	2740.38	3126.09	2998.41	3133.82	3089.45		75.5	12.612	12.3144	13.747	8.82891	14.724	12.442	15.5363	13.8796	26.8511	21.153	25.0469	23.544
76	2612.34	2608.94	2628.98	2586.72	2773.54	2737.51	2763.81	2733.6	3112.68	2987.79	3121.43	3077.71		76	12.8018	11.7241	13.8815	9.05591	14.4869	12.47	14.7962	13.7094	26.09	21.1374	24.3493	23.3201
76.5	2605.89	2603.16	2622.06	2582.16	2766.27	2731.16	2756.71	2726.69	3100.08	2977.27	3109.4	3066.11		76.5	13.1517	11.3332	13.2942	8.98381	14.7129	12.8462	13.8355	13.4839	24.7182	21.1206	24.1292	23.3671
77	2599.26	2597.65	2615.75	2577.77	2758.85	2724.8	2749.85	2720.24	3087.83	2966.62	3097.29	3054.4		77	13.0242	10.5851	12.222	8.74347	14.8191	12.1709	13.7745	12.2144	24.5085	21.5701	23.9211	23.0134
77.5	2592.95	2592.57	2609.77	2573.5	2751.57	2719.06	2742.83	2714.4	3075.56	2955.77	3085.49	3043.14		77.5	12.2261	9.83735	11.7667	7.79177	13.9474	10.8999	14.408	11.6327	24.3602	21.4605	23.541	22.2997
78	2586.97	2587.75	2603.97	2569.96	2744.84	2713.74	2735.45	2708.54	3063.52	2945.24	3073.66	3032.06		78	12.0572	9.57685	11.3199	7.01472	13.6617	10.8916	14.8739	11.5383	23.7179	20.7019	23.947	21.9247
78.5	2580.91	2582.95	2598.47	2566.4	2737.83	2708.11	2728	2702.89	3051.81	2934.98	3061.58	3021.18		78.5	11.713	9.58743	10.6193	6.97958	14.0717	11.3236	14.9852	11.0182	23.2704	20.8105	24.0457	21.7968
79	2575.32	2578.14	2593.25	2563.01	2730.87	2702.54	2720.47	2697.45	3040.16	2924.45	3049.68	3010.29		79	10.7986	9.78968	10.7274	6.5573	13.5796	10.6611	15.2485	10.9982	23.5582	20.7554	23.5471	21.4258
79.5	2570.05	2573.19	2587.71	2559.82	2724.28	2697.39	2712.86	2691.83	3028.31	2914.32	3037.96	2999.73		79.5	10.5048	9.7526	11.0984	6.26454	12.8082	10.5056	14.8212	11.5104	23.3073	19.7923	23.7187	21.2299
80	2564.81	2568.38	2582.24	2556.66	2717.94	2691.95	2705.75	2686.03	3016.91	2904.56	3025.94	2988.98		80	10.231	9.78303	10.7737	6.71925	13.0824	11.0964	13.6162	11.2849	22.6242	19.6738	24.1489	21.7134
80.5	2559.88	2563.39	2576.94	2553.15	2711.21	2686.38	2699.23	2680.55	3005.6	2894.61	3013.94	2978.08		80.5	9.36438	9.94934	10.4971	6.78375	13.2634	10.9778	12.5167	11.0383	22.6601	19.8987	23.4994	21.6215
81	2555.4	2558.5	2571.78	2549.96	2704.85	2681.06	2693.16	2674.9	2994.21	2884.78	3002.43	2967.41		81	8.86228	9.55755	10.0423	6.17713	12.0342	10.1112	12.0099	11.5968	22.9844	19.0959	22.9754	21.0835
81.5	2550.97	2553.87	2567.01	2546.9	2699.1	2676.16	2687.22	2669.01	2982.74	2875.5	2990.91	2956.91		81.5	8.77888	8.90406	8.7939	6.2116	11.4498	10.1486	11.4182	11.5758	22.312	18.4659	22.921	21.322
82	2546.65	2549.54	2563.01	2543.73	2693.25	2670.86	2681.75	2663.33	2971.89	2866.23	2979.6	2946.11		82	8.48255	8.80166	7.35455	6.33585	12.0404	10.5594	10.7406	11.5104	21.7901	18.5632	22.0666	21.4337
82.5	2542.48	2545.13	2559.55	2540.63	2687.15	2665.69	2676.4	2657.49	2960.85	2856.98	2968.82	2935.59		82.5	8.26557	8.23014	6.74414	5.86038	11.8753	10.2113	10.6362	11.6257	22.1044	18.2874	21.3457	20.5721
83	2538.43	2541.37	2556.21	2537.87	2681.43	2660.69	2671.03	2651.8	2949.89	2848.03	2958.1	2925.45		83	7.65556	7.19718	6.37753	5.47901	11.2346	9.65259	11.1093	11.0525	21.5268	17.2968	21.8565	20.4364
83.5	2534.87	2537.87	2553.13	2535.16	2675.81	2656.02	2665.34	2646.51	2939.38	2839.65	2946.98	2915.1		83.5	6.78724	6.75797	6.15697	5.05234	11.4908	9.2734	11.201	10.0078	20.5577	16.5968	22.1586	20.7835
84	2531.65	2534.62	2549.98	2532.8	2669.99	2651.38	2659.88	2641.73	2929.24	2831.36	2936.02	2904.79		84	5.97954	6.20254	6.4514	4.79429	11.266	9.12806	10.8856	9.53928	20.3754	16.4535	21.8455	20.0562
84.5	2528.91	2531.71	2546.65	2530.37	2664.6	2646.87	2654.41	2636.98	2919.02	2823.21	2925.12	2895.03		84.5	4.90459	5.21575	7.02417	4.44089	10.6862	9.06726	10.9777	8.84043	20.0369	16.1796	21.842	19.4864
85	2526.65	2529.35	2543.06	2528.35	2659.29	2642.26	2648.91	2632.86	2909.26	2815.19	2914.24	2885.22		85	4.40387	4.62676	6.84554	4.05529	10.2898	9.36629	11.0175	8.28535	19.2708	15.7017	21.4112	19.6317
85.5	2524.36	2526.98	2539.86	2526.24	2654.31	2637.45	2643.45	2628.55	2899.73	2807.39	2903.79	2875.44		85.5	5.03141	4.85412	6.25884	4.25745	9.8331	10.015	10.5747	8.85557	18.6422	16.188	20.2674	19.405
86	2521.64	2524.5	2536.73	2524.06	2649.41	2632.24	2638.32	2623.99	2890.57	2799.01	2893.88	2865.85		86	5.40452	4.96018	6.30619	4.714	9.73921	10.7763	10.322	9.41798	18.2767	16.586	19.8719	18.9085
86.5	2519.01	2522.04	2533.57	2521.6	2644.54	2626.82	2633.1	2619.2	2881.37	2790.89	2883.85	2856.48		86.5	5.31004	4.85491	6.19078	4.54231	9.86329	10.4749	10.2768	9.38134	18.5037	16.2509	19.974	18.8424
87	2516.29	2519.61	2530.56	2519.52	2639.61	2621.86	2628.06	2614.55	2872.01	2782.75	2873.91	2847.03		87	5.66114	5.0387	5.87529	4.46902	9.42898	9.53666	10.0701	9.90045	19.1217	16.0732	19.9067	18.5179
87.5	2513.42	2517.02	2527.69	2517.11	2635.08	2617.25	2623.01	2609.33	2862.29	2774.8	2863.91	2837.97		87.5	5.56211	5.15745	5.64199	4.64099	9.21655	8.97614	10.07	10.2339	19.2969	16.0397	20.0738	18.1246
88	2510.9	2514.54	2524.91	2514.96	2630.31	2612.89	2618.02	2604.43	2852.7	2766.73	2853.84	2828.87		88	4.12229	4.58612	5.48243	4.12519	9.70785	8.27392	9.80191	9.62669	19.651	15.7976	20.2916	18.0459
88.5	2509.22	2512.42	2522.22	2512.99	2625.43	2608.96	2613.22	2599.64	2842.66	2758.95	2843.7	2819.97		88.5	3.31442	4.03793	5.15278	3.60628	9.71773	7.58725	9.43499	9.57472	20.0215	16.0019	19.8649	17.6187
89	2507.44	2510.38	2519.74	2511.3	2620.62	2605.18	2608.53	2594.81	2832.83	2750.71	2834	2811.25		89	3.59921	4.52475	4.98034	3.48097	9.47912	7.83898	9.54137	9.99869	19.2617	16.3254	19.3103	17.2475
89.5	2505.66	2507.94	2517.27	2509.47	2615.9	2601.05	2603.7	2589.77	2823.49	2742.67	2824.41	2802.7		89.5	3.39438	4.55836	4.56497	3.57264	9.59649	8.61057	9.47722	9.35575	17.8309	16.2903	18.6644	17.1322
90	2504.05	2505.87	2515.15	2507.74	2611.01	2596.64	2599.14	2585.47	2814.92	2734.43	2815.36	2794.21		90	3.11585	4.1844	4.41141	3.54497	9.87455	8.72527	8.66893	8.60518	17.0408	16.2717	17.8244	16.2726
90.5	2502.43	2503.67	2512.82	2505.91	2606.08	2592.34	2594.98	2581.1	2806.37	2726.48	2806.53	2786.43		90.5	3.80427	4.58813	4.56737	3.6053	9.77448	8.77662	8.25411	8.49347	16.8174	15.6558	17.4552	15.3432
91	2500.27	2501.33	2510.66	2504.07	2601.25	2587.82	2590.82	2577.05	2798.13	2718.83	2797.92	2778.72		91	4.28845	4.57539	4.05326	4.15916	9.4926	9.25466	8.39233	7.79554	16.3126	14.7553	16.9065	15.615
91.5	2498.29	2499.21	2508.77	2501.75	2596.52	2583.15	2586.62	2573.35	2790	2711.75	2789.65	2770.86		91.5	3.61686	3.62408	3.51553	4.75988	9.73239	9.19496	8.23146	6.60882	16.2033	13.6614	16.1063	15.3868
92	2496.64	2497.59	2507.08	2499.37	2591.52	2578.7	2582.59	2570.27	2781.85	2705.18	2781.78	2763.33		92	3.11608	3.68429	3.49727	4.86618	9.95707	8.57798	8.04887	6.66713	16.6868	12.409	15.6303	15.1241
92.5	2495.1	2495.46	2505.26	2496.87	2586.64	2574.5	2578.52	2566.56	2773.38	2699.29	2774	2755.64		92.5	3.23797	4.27971	3.48572	5.13123	9.59584	8.58325	8.21516	7.66053	16.6495	11.5835	15.3169	15.6601
93	2493.43	2493.43	2503.58	2494.24	2581.9	2570.09	2574.34	2562.67	2765.27	2693.55	2766.5	2747.77		93	3.07651	3.86969	3.54802	5.47496	9.47767	8.69662	8.64181	7.99368	16.1691	11.1188	14.5417	15.4899
93.5	2491.96	2491.58	2501.67	2491.51	2577.14	2565.79	2569.96	2558.52	2757.23	2688.16	2759.36	2740.32		93.5	3.32061	3.52961	3.98941	4.84123	9.54659	8.84817	8.47532	8.72371	15.562	10.5889	14.6045	13.9987
94	2490.05	2489.83	2499.6	2489.39	2572.39	2561.22	2565.89	2553.92	2749.7	2682.88	2751.87	2733.67		94	3.87499	3.83562	4.31651	4.47835	9.30461	9.03428	8.18007	9.68298	15.0928	10.6671	14.7359	13.6448
94.5	2487.99	2487.9	2497.39	2487.12	2567.84	2556.63	2561.78	2548.86	2742.23	2677.47	2744.53	2726.82		94.5	5.71817	3.07635	4.74908	3.68913	9.76224	11.1572	8.50919	11.3232	14.9196	11.7458	16.8836	12.8938
95	2484.87	2486.95	2495.23	2485.92	2563.35	2551	2558.02	2543.56	2735.84	2672.06	2736.32	2721.67		95	3.29491	0.788516	2.14603	1.01509	4.47946	5.80214	3.70671	5.34696	6.21651	5.4202	8.35806	4.87235

## Sheet: Exp 3
Experiment 3
			2531 DnaK NBD
RFU			2534 bBiP NBD
			2606 Kar2 NBD
Temperature	B3	B4	B5	B6	B7	B8	B9	B10	B11	B12	C1	C2			B3	B4	B5	B6	B7	B8	B9	B10	B11	B12	C1	C2
	2351_Mg	2351_MgADP	2351_Ca	2351_CaADP	2534_Mg	2534_MgADP	2534_Ca	2534_CaADP	2606_Mg	2606_MgADP	2606_Ca	2606_CaADP		Temperature	2351_Mg	2351_MgADP	2351_Ca	2351_CaADP	2534_Mg	2534_MgADP	2534_Ca	2534_CaADP	2606_Mg	2606_MgADP	2606_Ca	2606_CaADP			2351_Mg	2351_MgADP	2351_Ca	2351_CaADP	2534_Mg	2534_MgADP	2534_Ca	2534_CaADP	2606_Mg	2606_MgADP	2606_Ca	2606_CaADP
20	2768.64	2750.09	2763.79	2752.9	2874.78	3016.14	2881.33	2855.6	3872.39	3622.18	3854.46	3693.15		20	8.05041	8.356	8.15198	6.77458	8.99672	7.57835	9.27927	7.79873	2.13326	6.32258	5.206	7.12408		Min	-20.72	-28.4396	-39.1427	-23.1033	-111.524	-108.326	-133.015	-80.9886	-67.4068	-59.7237	-146.817	-81.2727
20.5	2760.59	2741.73	2755.64	2746.12	2865.78	3008.56	2872.05	2847.8	3870.25	3615.86	3849.25	3686.03		20.5	17.4426	18.1047	17.6626	14.6783	19.4929	16.4198	20.1051	16.8973	4.62206	13.6989	11.2797	15.4355		Temp	47	60	46	60.5	41.5	50	42	53.5	32.5	50	35	51.5
21	2752.54	2733.37	2747.49	2739.35	2856.78	3000.98	2862.77	2840	3868.12	3609.53	3844.04	3678.9		21	16.1008	16.712	16.304	13.5492	17.9934	15.1567	18.5585	15.5975	4.26652	12.6452	10.412	14.2482
21.5	2744.49	2725.02	2739.34	2732.57	2847.78	2993.4	2853.49	2832.2	3865.99	3603.21	3838.84	3671.78		21.5	16.1008	16.712	16.304	13.5492	17.9934	15.1567	18.5585	15.5975	4.26652	12.6452	10.412	14.2482
22	2736.44	2716.66	2731.19	2725.8	2838.79	2985.82	2844.21	2824.41	3863.85	3596.89	3833.63	3664.65		22	16.1008	16.712	16.304	13.5492	17.9934	15.1567	18.5585	15.5975	4.26652	12.6452	10.412	14.2482
22.5	2728.39	2708.31	2723.03	2719.02	2829.79	2978.24	2834.93	2816.61	3861.72	3590.56	3828.43	3657.53		22.5	16.238	16.7928	16.2743	13.5439	18.0876	15.1439	18.5974	15.5721	4.56507	12.6683	10.6487	14.4085
23	2720.34	2699.95	2714.88	2712.25	2820.79	2970.67	2825.66	2808.81	3859.59	3584.24	3823.22	3650.41		23	15.4131	16.3123	16.5294	13.6666	17.4926	15.191	18.4376	15.7732	2.79142	12.5853	9.17871	13.3918
23.5	2713.11	2692.08	2706.55	2705.44	2812.36	2963.01	2816.61	2800.86	3859.24	3578.06	3819.43	3644.24		23.5	13.6485	15.3147	16.4862	13.1358	16.3881	15.5692	17.4155	15.8187	-1.33278	11.8764	6.50594	11.6291
24	2706.7	2684.72	2698.51	2699.15	2804.32	2955.1	2808.24	2793.05	3860.8	3572.35	3816.77	3638.72		24	11.9563	13.7298	15.5936	12.3316	16.0442	16.0214	16.4916	15.4319	-4.29255	11.2469	3.6439	10.4032
24.5	2701.13	2678.32	2690.96	2693.06	2796.29	2947.14	2800.07	2785.44	3863.43	3566.68	3815.87	3633.79		24.5	10.4994	12.3134	14.776	11.9066	15.9035	15.2473	16.005	15.0149	-6.50773	11.5817	0.205548	9.44321
25	2696.19	2672.3	2683.75	2687.18	2788.51	2939.83	2792.3	2778.09	3867.34	3560.66	3816.59	3629.23		25	8.98945	11.7104	13.957	11.8982	15.006	14.7765	14.8995	14.2513	-9.03998	12.6717	-3.35977	8.63653
25.5	2692.06	2666.61	2677.11	2681.12	2781.33	2932.36	2785.18	2771.27	3872.53	3554.06	3819.23	3625.02		25.5	8.00004	11.011	12.3717	12.1914	13.9247	14.4472	13.7912	12.9081	-11.8994	13.2234	-6.86734	8.87606
26	2688.07	2661.3	2671.38	2674.99	2774.6	2925.53	2778.49	2765.2	3879.33	3547.48	3823.46	3620.3		26	7.78964	10.2176	10.6879	12.504	12.7491	12.9184	12.9161	11.4313	-15.2986	13.3612	-10.4599	9.46331
26.5	2684.17	2656.41	2666.27	2668.68	2768.59	2919.42	2772.31	2759.79	3887.92	3540.57	3829.66	3615.64		26.5	8.21472	9.31257	10.1371	12.3512	11.4097	11.5507	11.6891	10.2951	-19.2384	14.7058	-13.8071	9.27539
27	2679.82	2651.94	2661.18	2662.71	2763.16	2913.84	2766.84	2754.8	3898.71	3532.92	3837.24	3611.01		27	8.7543	8.74448	9.97127	11.7095	10.3506	11.3632	10.1143	9.87915	-24.1115	14.8971	-16.8231	9.17319
27.5	2675.38	2647.58	2656.31	2657.02	2758.22	2908.08	2762.08	2749.82	3912.17	3525.77	3846.57	3606.31		27.5	9.38396	8.65084	9.51516	10.6755	9.30706	10.7598	9.421	9.99745	-29.865	14.2342	-20.6542	10.2079
28	2670.27	2643.17	2651.51	2652	2753.74	2902.98	2757.33	2744.7	3928.59	3518.46	3857.87	3600.7		28	11.2658	9.29126	10.0679	9.76819	8.94972	10.6605	9.11932	10.5997	-35.7523	15.3243	-24.332	11.7729
28.5	2664.05	2638.16	2646.05	2647.01	2749.06	2897.11	2752.81	2739.02	3947.79	3510.32	3870.81	3594.4		28.5	13.4344	10.6787	11.9639	10.5302	10.0965	12.7541	9.79639	12.5755	-40.6962	17.2668	-27.1958	14.0874
29	2656.82	2632.29	2639.5	2641.21	2743.54	2890.05	2747.38	2732.02	3969.22	3501.21	3885.16	3586.34		29	15.5387	13.4348	13.981	12.8958	11.8212	15.744	11.4455	15.2044	-45.3535	18.6346	-30.7203	18.2603
29.5	2648.38	2624.63	2632.01	2633.93	2737.2	2881.22	2741.27	2723.8	3993.04	3491.36	3901.68	3576		29.5	18.7323	16.7606	16.3198	16.309	13.6397	19.6031	13.5621	17.769	-49.3903	22.4107	-35.2892	23.3033
30	2638.08	2615.56	2623.07	2624.73	2729.79	2870.31	2733.73	2714.15	4018.45	3478.65	3920.49	3563.11		30	22.1847	19.7872	19.5117	20.9917	16.4202	24.5276	16.3469	21.0646	-52.1178	27.3225	-39.6724	27.7874
30.5	2626.49	2604.92	2612.54	2613.01	2720.89	2856.81	2724.93	2702.69	4045.24	3464.29	3941.73	3548.36		30.5	23.3303	22.4994	22.4668	25.2401	18.4897	28.7003	19.2148	24.8137	-55.5571	30.2405	-46.5201	31.3695
31	2614.87	2593.3	2600.83	2599.82	2711.61	2841.89	2714.75	2689.56	4074.08	3448.51	3967.53	3531.91		31	23.8648	23.6118	23.8999	27.296	18.3651	31.0566	20.3941	27.0191	-59.6261	32.7765	-56.8631	34.0658
31.5	2602.72	2581.54	2588.84	2586.04	2702.75	2826.03	2704.77	2675.92	4104.78	3431.74	3998.9	3514.59		31.5	24.1355	23.1749	24.1379	27.3445	16.9639	31.8575	20.1701	27.622	-63.0934	33.9475	-68.8725	34.7798
32	2591.05	2570.26	2576.87	2572.76	2694.84	2810.41	2694.82	2662.05	4137.06	3414.92	4036.63	3497.4		32	22.1953	22.1086	23.338	25.6949	14.4689	30.1806	18.7572	27.7501	-65.9245	32.7258	-82.2191	33.8209
32.5	2580.71	2559.63	2565.69	2560.63	2688.54	2796.12	2686.48	2648.41	4170.47	3399.27	4081.26	3480.97		32.5	19.0837	19.8828	21.4074	22.2404	10.3037	26.8333	14.1852	26.3815	-67.4068	29.9407	-96.6535	31.7897
33	2571.99	2550.61	2555.71	2550.67	2684.71	2783.72	2680.97	2636	4204.02	3385.1	4133.16	3465.82		33	16.0998	15.9657	17.7856	17.8434	5.16771	22.7213	7.62646	22.8	-65.883	26.6073	-110.159	28.4135
33.5	2564.77	2543.64	2548.04	2542.78	2683.53	2773.51	2679.09	2625.77	4236.06	3372.75	4191.26	3452.65		33.5	11.9132	12.4884	13.3767	13.5698	-0.842931	17.8417	-0.214085	18.1751	-62.7979	22.5941	-122.724	24.3972
34	2560.14	2538.13	2542.32	2536.99	2685.78	2765.86	2681.41	2617.78	4266.53	3362.45	4255.66	3441.37		34	7.20864	8.94645	9.24555	10.1	-8.38742	13.0102	-9.47638	14.0526	-58.0473	19.0653	-134.158	20.8176
34.5	2557.4	2534.74	2538.77	2532.59	2692.04	2760.31	2688.68	2611.69	4293.72	3353.64	4324.9	3431.76		34.5	3.67193	4.79104	5.1383	7.14455	-16.6275	9.57935	-19.4874	10.012	-50.6325	15.6669	-142.263	17.6348
35	2556.29	2533.15	2537.08	2529.76	2702.49	2756.19	2700.83	2607.64	4317	3346.63	4397.31	3423.55		35	1.23632	1.96075	1.61337	4.65508	-25.2769	6.67546	-28.8807	6.71039	-42.4594	13.2585	-146.817	15.6203
35.5	2556.01	2532.55	2536.99	2527.81	2717.4	2753.58	2717.56	2604.77	4336.07	3340.22	4470.91	3415.97		35.5	-0.250436	0.707397	-0.751013	2.97214	-34.5472	3.98484	-38.4213	4.81949	-33.6816	12.0297	-146.657	14.738
36	2556.41	2532.36	2537.73	2526.73	2737	2752.04	2739.19	2602.67	4350.52	3334.58	4542.82	3408.81		36	-0.928805	-0.13648	-2.54541	1.55158	-43.5898	2.42209	-47.5762	3.85532	-23.624	10.7555	-139.186	13.7423
36.5	2556.86	2532.6	2539.48	2526.19	2760.88	2751.05	2765.06	2600.81	4359.75	3329.41	4609	3402.2		36.5	-1.11343	-0.443505	-4.07924	0.577217	-51.8401	1.56325	-56.1566	3.55246	-13.9196	9.75952	-124.86	12.9116
37	2557.49	2532.71	2541.69	2526.05	2788.81	2750.51	2795.39	2599.12	4364.7	3324.73	4666.94	3395.83		37	-1.06373	-0.0345336	-4.73038	0.327226	-59.9022	0.308556	-65.1182	3.19268	-6.20948	9.43574	-106.149	12.6919
37.5	2557.98	2532.72	2544.17	2525.85	2820.77	2750.71	2830.18	2597.66	4366.04	3319.98	4714.69	3389.6		37.5	-1.43495	-0.360368	-5.20375	0.0312221	-67.893	-0.729395	-74.0175	2.4611	1.17941	9.0922	-84.6497	11.6724
38	2559.03	2533.15	2546.88	2526.03	2856.71	2751.13	2869.41	2596.63	4363.64	3315.7	4751.49	3384.15		38	-2.64284	-1.31097	-5.65133	-0.431111	-76.0159	-0.971144	-82.8963	1.95986	7.90576	8.3037	-62.5654	10.6711
38.5	2560.54	2533.99	2549.76	2526.19	2896.79	2751.66	2913.11	2595.64	4358.31	3311.7	4777.5	3378.8		38.5	-3.09007	-1.85676	-5.6293	-0.0491333	-84.2159	-1.2165	-92.1487	1.91748	13.5165	7.3285	-42.0095	10.7138
39	2562.07	2534.93	2552.55	2526.16	2940.82	2752.36	2961.48	2594.74	4350.24	3308.37	4793.98	3373.45		39	-3.16237	-1.80052	-5.9488	-0.327488	-91.6781	-1.5623	-100.933	1.4974	18.3831	6.411	-24.5776	10.5118
39.5	2563.76	2535.79	2555.8	2526.62	2988.36	2753.18	3013.89	2594.08	4339.99	3305.3	4802.57	3368.31		39.5	-3.82878	-1.91889	-6.80535	-1.4755	-98.5856	-1.55706	-108.58	1.62613	23.0034	5.46898	-10.2069	10.1089
40	2565.89	2536.79	2559.48	2527.54	3039.23	2753.92	3070.02	2593.09	4327.4	3302.97	4804.58	3363.31		40	-4.38037	-1.67693	-8.42579	-1.77931	-104.487	-1.69313	-116.258	1.96237	26.6376	3.934	1.86785	10.0545
40.5	2568.08	2537.38	2564.35	2528.34	3092.5	2754.87	3129.95	2592.17	4313.55	3301.32	4801.05	3358.32		40.5	-4.36727	-0.750235	-10.8673	-1.59457	-108.011	-1.70578	-122.663	1.77756	28.9226	2.84176	11.8777	9.53764
41	2570.33	2537.58	2570.4	2529.22	3147.01	2755.69	3192.42	2591.26	4298.55	3300.12	4793.07	3353.83		41	-4.9379	-0.0721806	-13.5571	-2.25749	-110.277	-2.0684	-127.307	2.04269	30.7675	1.80271	19.4588	8.56805
41.5	2573.12	2537.59	2577.92	2530.53	3202.56	2757.06	3257.1	2590.14	4282.77	3299.58	4781.76	3349.73		41.5	-6.23175	-0.402124	-16.2591	-2.44346	-111.524	-3.30581	-131.358	2.24873	32.7675	0.25469	26.2081	7.86451
42	2576.57	2538.01	2586.69	2531.53	3258.03	2759.06	3323.36	2589.13	4265.73	3299.85	4767.01	3346		42	-7.49609	-0.869361	-19.2175	-1.54164	-109.505	-4.90737	-133.015	1.48625	35.2191	-1.10651	32.183	6.84935
42.5	2580.61	2538.39	2597.12	2532.12	3311.5	2762.03	3389.3	2588.58	4247.55	3300.7	4749.79	3342.84		42.5	-8.66624	-0.797642	-22.1147	-1.10381	-104.039	-6.76427	-129.444	1.38658	37.5404	-2.42465	36.735	6.0972
43	2585.3	2538.82	2608.73	2532.68	3361.49	2766	3451.93	2587.66	4228.17	3302.45	4730.39	3339.82		43	-10.2414	-0.896579	-24.3675	-1.09666	-95.3836	-9.82836	-120.73	2.02605	40.0156	-5.16913	40.5668	5.97941
43.5	2590.92	2539.32	2621.54	2533.14	3405.99	2771.98	3508.99	2586.71	4207.58	3305.85	4709.28	3336.88		43.5	-12.3109	-1.36477	-27.0141	-0.45657	-80.9697	-13.6563	-105.715	1.35046	42.2435	-7.51254	44.1919	5.69011
44	2597.55	2540.08	2635.8	2533.13	3441.71	2779.65	3556.55	2586.33	4186.01	3310	4686.32	3334.2		44	-13.8353	-0.963342	-30.0906	0.286315	-61.7468	-17.2256	-83.645	0.592897	43.9549	-9.83954	47.029	4.94573
44.5	2604.74	2540.21	2651.63	2532.97	3467.45	2789.3	3592.01	2586.04	4163.74	3315.97	4662.35	3332.05		44.5	-15.2869	-0.00798095	-33.2439	0.138146	-41.0209	-21.3257	-57.7738	0.589692	44.8291	-14.3489	49.1722	3.48371
45	2612.9	2540.17	2668.96	2533.01	3482.66	2801.18	3614.21	2585.89	4141.19	3324.43	4637.11	3330.83		45	-17.421	0.235791	-35.8018	-0.0879753	-19.7842	-26.7817	-31.3346	-0.631605	45.7946	-19.3396	51.6691	1.31919
45.5	2622.07	2539.99	2687.36	2533	3487.5	2816.23	3623.58	2586.78	4117.93	3335.25	4610.6	3330.82		45.5	-18.8396	0.421867	-38.071	0.217679	-0.0506629	-33.2094	-6.25277	-2.57233	46.9234	-23.6117	54.8179	-1.34009
46	2631.63	2539.73	2706.83	2532.82	3483.37	2834.45	3621.13	2588.38	4094.3	3348.18	4582.35	3332.34		46	-19.3772	0.810058	-39.1427	0.298526	15.3766	-39.7392	14.5974	-3.71467	47.7227	-29.0212	57.4647	-5.16106
46.5	2641.49	2539.3	2726.12	2532.72	3472.84	2856.21	3609.88	2590.51	4070.19	3364.28	4553.24	3336.08		46.5	-20.4719	0.257641	-37.5962	0.239409	26.3731	-47.8916	29.8051	-5.03016	48.6221	-34.5633	59.2085	-9.5097
47	2651.98	2539.51	2744.14	2532.61	3457.66	2882.61	3592.17	2593.52	4045.65	3382.53	4523.05	3341.91		47	-20.72	-0.480846	-34.3674	-0.0605666	33.3291	-57.9183	39.9335	-7.14004	49.76	-38.3666	61.8334	-14.03
47.5	2662.04	2539.73	2760.33	2532.78	3440.05	2914.16	3570.69	2597.72	4020.47	3402.7	4491.42	3350.31		47.5	-19.8083	-0.700307	-30.3383	-0.347441	36.9334	-67.8785	45.6201	-9.56285	50.6891	-42.7323	64.5278	-19.8796
48	2671.71	2540.26	2774.31	2532.95	3421.04	2950.54	3547.17	2603.19	3995.03	3425.35	4458.8	3362.03		48	-18.6556	-1.40051	-25.1354	-0.492545	38.8215	-78.1359	47.49	-12.6336	51.2104	-47.8317	65.0713	-27.3038
48.5	2680.52	2541.1	2785.41	2533.32	3401.49	2992.37	3523.63	2610.5	3969.35	3450.42	4426.38	3377.73		48.5	-16.3263	-1.95223	-19.5526	-1.01585	39.1709	-89.1215	46.6874	-16.6009	51.1298	-52.0034	65.5484	-35.2342
49	2687.87	2542.08	2794	2533.95	3382.07	3039.44	3500.67	2619.96	3944.02	3477.29	4393.15	3397.41		49	-12.8056	-1.45498	-15.1223	-1.55832	38.2006	-98.7443	44.8984	-21.622	50.2234	-55.8865	67.0797	-44.1076
49.5	2693.35	2542.56	2800.57	2534.71	3363.26	3090.63	3478.79	2632.24	3919.15	3506.17	4359.54	3421.94		49.5	-9.6826	-1.10836	-10.7777	-0.774157	37.6893	-105.357	42.8309	-27.3077	49.2833	-59.2062	66.7693	-53.7388
50	2697.57	2543.22	2804.82	2534.7	3344.43	3144.16	3457.81	2647.35	3894.78	3536.06	4326.56	3451.08		50	-6.63737	-1.09963	-6.61765	0.11825	36.8753	-108.326	40.9041	-33.311	48.0227	-59.7237	65.201	-62.8723
50.5	2700	2543.61	2807.31	2534.73	3326.52	3198.03	3437.78	2665.77	3871.16	3565.35	4294.26	3484.68		50.5	-3.45234	-0.571084	-3.3507	-0.139992	34.9714	-105.486	39.6533	-40.81	46.4316	-56.7243	64.4886	-71.345
51	2701.2	2543.86	2808.22	2534.79	3309.4	3248.65	3418.05	2688.33	3848.2	3592.33	4262.09	3522.1		51	-1.62648	-0.557936	-0.285894	0.19211	33.5342	-96.4879	39.1695	-49.5273	45.9648	-51.0947	63.5868	-77.8667
51.5	2701.71	2544.22	2807.65	2534.59	3292.88	3293.63	3398.59	2715.26	3825.11	3615.99	4230.75	3562.03		51.5	-0.355998	-0.888723	2.55539	0.198197	32.8735	-82.1104	38.7266	-57.8055	46.1904	-42.7205	62.0054	-81.2727
52	2701.54	2544.76	2805.82	2534.75	3276.55	3330.03	3379.32	2746.15	3802.17	3634.65	4200	3602.69		52	1.23164	-1.23346	4.34295	-0.946497	31.9555	-63.0798	38.3584	-66.2795	45.0504	-31.8264	61.1923	-80.4475
52.5	2700.55	2545.48	2803.43	2535.53	3260.93	3356.41	3360.34	2781.47	3780.07	3647.56	4169.52	3641.73		52.5	2.40975	-1.77277	5.33668	-2.0147	30.966	-42.2361	37.2678	-74.7018	43.9317	-19.3787	60.6299	-75.1766
53	2699.27	2546.49	2800.5	2536.63	3245.54	3372.41	3342.13	2820.33	3758.19	3653.94	4139.39	3677.02		53	2.49894	-2.02883	6.44221	-2.08395	30.3393	-22.4497	35.645	-79.6073	43.3123	-6.46237	59.9261	-64.6084
53.5	2698.07	2547.44	2797.11	2537.6	3230.61	3379.25	3324.67	2860.51	3736.87	3654.05	4109.66	3705.61		53.5	2.60764	-1.74675	6.62865	-2.2381	29.6336	-5.12367	34.2495	-80.9886	41.7159	6.33081	58.7616	-49.437
54	2696.67	2548.32	2793.97	2538.79	3215.97	3378.1	3307.9	2900.84	3716.46	3647.76	4080.71	3726.06		54	2.82848	-2.19563	6.0845	-1.78471	28.5656	8.79721	32.6572	-79.8105	40.2351	18.1779	57.0938	-31.9525
54.5	2695.34	2549.68	2790.97	2539.36	3202.13	3371.19	3291.99	2939.59	3696.49	3636.15	4052.65	3737.49		54.5	2.22836	-2.82727	6.06762	-1.18186	26.8266	17.9578	31.1956	-74.016	40.0201	28.3269	54.8237	-14.135
55	2694.43	2551.18	2787.86	2540.07	3189.14	3360.72	3276.6	2974.1	3676.5	3619.85	4025.88	3740.32		55	1.71157	-3.48001	6.47281	-1.28938	25.0609	23.6339	30.5027	-63.319	39.1517	35.8808	52.6179	3.04212
55.5	2693.52	2553.32	2784.61	2540.71	3176.95	3347.97	3261.43	3002.51	3657.32	3600.71	3999.94	3734.83		55.5	2.03812	-5.36137	5.92965	-1.61663	24.176	27.0019	30.1481	-50.4121	38.3314	40.7109	51.0918	17.9291
56	2692.4	2556.62	2781.91	2541.79	3164.89	3334.08	3246.41	3024.29	3638.08	3579.47	3974.7	3723.05		56	2.20923	-7.65757	5.57638	-2.60057	23.686	28.1364	30.0725	-36.1686	38.3257	43.6501	50.163	28.4289
56.5	2691.33	2561.03	2778.99	2543.45	3153.23	3320.04	3231.34	3038.65	3619.12	3557.34	3949.79	3706.94		56.5	2.22388	-10.1418	5.68783	-4.62786	23.3083	27.9964	30.1272	-21.5435	37.2413	44.8585	49.0157	35.7403
57	2690.12	2566.9	2776.33	2546.45	3141.45	3306.13	3216.35	3046.18	3600.84	3534.86	3925.63	3687.77		57	2.69088	-13.603	4.94689	-6.79979	23.9126	27.7898	29.5367	-9.21669	36.1585	44.4975	48.3411	40.4173
57.5	2688.65	2574.71	2774.09	2550.24	3129.23	3292.38	3201.76	3048.35	3582.8	3512.98	3901.45	3667.02		57.5	2.98589	-17.5381	3.80691	-8.70907	25.1095	26.6486	29.3167	0.0870068	36.4494	43.4074	47.7385	41.9694
58	2687.17	2584.39	2772.44	2555.29	3116.42	3279.57	3187	3046.6	3564.45	3491.54	3878.09	3646.18		58	3.0144	-21.0344	3.33992	-11.6316	25.6453	24.8354	29.4637	6.2452	36.1645	41.81	45.534	41.1061
58.5	2685.66	2595.74	2770.7	2561.91	3103.68	3267.44	3172.43	3042.56	3546.74	3471.23	3855.91	3626.01		58.5	3.01021	-24.7774	3.24113	-14.7904	25.583	23.9308	28.5488	9.51605	34.9647	39.765	43.4322	39.8545
59	2684.24	2609.01	2769.22	2570.03	3090.9	3255.62	3158.45	3037.31	3529.34	3451.75	3834.5	3606.38		59	2.4342	-27.5173	2.80206	-17.5155	25.1748	23.1402	27.6401	11.4965	35.0592	37.9084	42.5728	38.2405
59.5	2683.22	2622.99	2767.79	2579.41	3078.54	3244.33	3144.68	3031.1	3511.68	3433.26	3813.34	3587.76		59.5	1.85032	-28.4137	3.15715	-20.255	24.5678	21.9642	27.6628	13.4429	35.2007	36.4748	41.4558	36.6356
60	2682.32	2637.26	2766	2590.19	3066.34	3233.49	3130.87	3023.94	3494.32	3415.21	3792.97	3569.58		60	1.84173	-28.4396	3.9879	-22.5204	23.912	22.0316	26.9869	14.879	33.8121	35.569	40.7578	36.2349
60.5	2681.38	2651.26	2763.88	2601.69	3054.66	3222.21	3117.73	3016.28	3477.81	3397.75	3772.4	3551.46		60.5	1.75217	-27.496	4.23673	-23.1033	22.9552	22.689	25.9962	15.9564	32.8833	34.189	41.5231	36.251
61	2680.54	2664.5	2761.84	2613.12	3043.35	3210.87	3104.73	3007.99	3461.29	3381.05	3751.53	3533.38		61	1.76519	-24.7914	3.89938	-22.647	22.1936	22.6464	26.1221	17.2117	33.2342	32.4786	41.5278	35.7658
61.5	2679.5	2675.95	2759.88	2624.19	3032.32	3199.54	3091.58	2999.21	3444.73	3365.17	3730.95	3515.68		61.5	2.68011	-21.5619	4.46649	-21.4304	22.5495	22.8382	26.3959	17.5166	32.3251	31.5837	41.0061	35.488
62	2677.83	2686.03	2757.42	2634.36	3020.8	3188.01	3078.4	2990.65	3429.07	3349.5	3710.54	3497.97		62	3.75845	-18.3166	4.61717	-18.8908	22.8434	23.3177	26.0886	16.4916	30.5374	30.3987	40.4897	34.7147
62.5	2675.85	2694.1	2755.37	2643.03	3009.55	3176.3	3065.43	2982.71	3414.01	3334.82	3690.57	3481.09		62.5	3.95777	-13.8255	3.85686	-16.0932	22.5023	23.1233	26.2946	15.6146	30.3394	28.7022	39.1684	33.0122
63	2673.93	2699.86	2753.49	2650.46	2998.24	3164.88	3052.13	2974.95	3398.75	3320.57	3671.4	3464.91		63	3.81483	-9.34361	3.73106	-13.4496	22.6651	22.9606	26.3329	15.3879	29.9843	28.7845	37.6903	31.8155
63.5	2672.01	2703.61	2751.55	2656.43	2986.87	3153.31	3039.2	2967.29	3384.2	3305.96	3652.79	3449.23		63.5	4.00087	-6.1109	4.32561	-10.3512	23.0156	23.1598	25.5409	15.3254	28.114	29.4349	36.9548	30.9945
64	2669.99	2706.03	2749.22	2660.86	2975.3	3141.78	3026.57	2959.57	3370.48	3291.33	3634.41	3433.98		64	3.72334	-3.11621	4.31816	-7.60207	22.8115	22.8369	25.0426	15.553	27.4788	28.4888	36.2673	29.4633
64.5	2668.32	2706.81	2747.21	2664.14	2964.13	3130.45	3014.14	2951.63	3356.57	3277.49	3616.42	3419.66		64.5	3.16258	-0.529369	4.45175	-5.65069	22.0666	22.7754	24.6752	16.556	28.0382	27.4776	36.2671	28.7401
65	2666.75	2706.78	2744.64	2666.54	2953.18	3119.03	3001.91	2943.02	3342.55	3263.8	3598.07	3405.14		65	3.19344	0.38008	5.63559	-3.78683	21.8613	22.5504	24.1523	17.5632	27.5834	27.0428	36.7968	28.7621
65.5	2665.05	2706.48	2741.59	2667.99	2942.26	3107.97	2989.97	2934.18	3328.96	3250.57	3579.65	3390.94		65.5	3.76092	1.08844	6.60639	-2.30737	21.6799	21.7223	23.751	17.7157	27.253	25.6038	37.0957	28.2641
66	2662.98	2705.65	2738.08	2668.88	2931.53	3097.26	2978.12	2925.34	3315.13	3238.2	3561.01	3376.81		66	4.33057	2.22164	7.1968	-1.04096	21.1933	21.292	23.6679	17.5896	28.3469	23.9755	37.1715	28.2608
66.5	2660.75	2704.3	2734.38	2668.99	2921.08	3086.6	2966.35	2916.53	3300.69	3226.34	3542.52	3362.57		66.5	4.66458	3.0402	7.96173	0.534102	20.5913	21.4293	23.2018	18.0505	28.75	24.2592	37.0152	29.1325
67	2658.33	2702.64	2730.16	2668.36	2910.87	3075.86	2954.95	2907.34	3286.49	3213.78	3524.06	3347.77		67	4.95573	3.61718	8.45441	1.96444	20.5445	21.1866	22.4796	18.1363	28.2348	25.5844	36.4332	29.2407
67.5	2655.82	2700.62	2725.98	2667.03	2900.5	3065.33	2943.86	2898.45	3272.39	3200.77	3506.11	3333.42		67.5	5.08743	4.71255	8.49964	3.41794	20.6566	21.5788	21.8705	17.6923	28.3564	26.6463	35.7302	28.7172
68	2653.28	2697.93	2721.6	2664.97	2890.23	3054.23	2933.02	2889.53	3258.17	3187.16	3488.34	3319.01		68	4.95807	5.82396	9.06568	4.79648	20.6032	22.4732	21.7772	18.2785	28.3076	27.5572	34.9492	28.608
68.5	2650.89	2694.86	2716.91	2662.36	2879.91	3043.02	2922.09	2880.22	3244.21	3173.25	3471.13	3304.85		68.5	4.5909	6.42441	9.63199	5.23735	20.537	22.1233	21.5662	18.4858	27.2621	28.4121	34.3566	28.1409
69	2648.61	2691.51	2712.02	2659.76	2869.74	3032.17	2911.47	2871.18	3230.9	3158.96	3453.96	3290.91		69	4.81834	6.98422	9.71153	5.50561	20.2258	21.4276	21.1776	17.602	26.3029	27.7757	33.9286	27.3691
69.5	2646.03	2687.8	2707.14	2656.79	2859.74	3021.6	2900.84	2862.54	3217.82	3145.64	3437.25	3277.45		69.5	5.27867	8.15092	10.2695	6.31544	19.5992	20.76	21.4585	17.391	26.047	25.9856	33.0768	26.9186
70	2643.34	2683.35	2701.72	2653.48	2850.24	3011.43	2890.08	2853.75	3204.85	3132.99	3420.84	3263.97		70	5.62452	9.3195	11.102	6.79486	18.1553	19.8995	21.2017	17.5068	25.7527	24.2033	32.5848	26.6081
70.5	2640.37	2678.54	2696.14	2650.03	2841.58	3001.69	2879.73	2845.14	3192.12	3121.42	3404.62	3250.86		70.5	6.27874	9.94828	11.1236	6.99513	16.8472	19.0453	20.2385	16.6619	25.0215	22.564	32.4854	26.0742
71	2637.04	2673.37	2690.61	2646.43	2833.36	2992.29	2869.78	2836.99	3179.77	3110.39	3388.4	3237.88		71	7.06618	10.9335	11.0929	7.65495	15.787	18.9272	19.7583	16.7192	24.7469	21.138	31.9681	25.7107
71.5	2633.36	2667.64	2685	2642.35	2825.77	2982.73	2859.89	2828.39	3167.31	3100.24	3372.62	3225.18		71.5	7.39809	11.7802	11.4797	8.5501	14.7998	18.9721	19.8599	17.0436	24.9662	19.9653	31.5748	25.1428
72	2629.7	2661.7	2679.17	2637.94	2818.48	2973.31	2849.96	2820.05	3154.87	3090.34	3356.69	3212.74		72	7.35988	11.7871	11.5307	8.97693	14.3781	19.1123	19.5293	16.4958	24.6645	19.4116	32.1901	24.5833
72.5	2626	2655.9	2673.51	2633.42	2811.29	2963.66	2840.37	2811.94	3142.69	3080.76	3340.46	3200.55		72.5	7.42484	11.5001	11.2717	8.99289	14.6185	18.8739	19.19	15.6889	23.9607	19.1167	32.5498	24.31
73	2622.31	2650.16	2667.84	2628.89	2803.84	2954.45	2830.74	2804.37	3130.82	3071.09	3324.21	3188.39		73	7.22567	11.6323	11.4826	9.51136	14.8889	18.5609	19.1267	14.9122	24.0447	19.772	32.3893	24.3056
73.5	2618.8	2644.29	2661.99	2623.92	2796.38	2945.1	2821.25	2797.03	3118.68	3060.93	3308.05	3176.24		73.5	6.78922	11.5497	11.906	10.0559	15.299	18.2763	19.0637	13.9905	23.8564	20.7739	32.4717	24.3167
74	2615.49	2638.64	2655.96	2618.98	2788.51	2936.18	2811.78	2790.28	3107.03	3050.32	3291.77	3164.06		74	6.60462	11.2258	12.1509	9.4609	16.0298	17.9098	18.2228	13.8089	23.1138	21.7765	32.3946	24.3914
74.5	2612.14	2633	2649.84	2614.47	2780.41	2927.18	2803.08	2783.15	3095.55	3039.23	3275.74	3151.84		74.5	6.91223	11.416	12.396	8.82182	16.2905	17.675	16.9175	14.0406	22.6047	22.2113	31.7175	24.5435
75	2608.62	2627.25	2643.5	2610.08	2772.27	2918.53	2794.77	2776.18	3084.45	3028.17	3260.09	3139.55		75	6.80692	11.4083	13.1891	8.84736	16.224	17.2683	16.4262	14.6048	21.8318	22.272	30.822	24.4827
75.5	2605.33	2621.65	2636.72	2605.66	2764.23	2909.92	2786.62	2768.51	3073.67	3017.06	3244.91	3127.41		75.5	6.69459	10.9095	13.4429	8.46743	15.9566	16.8112	16.1909	15.5461	21.3288	21.6973	29.9272	24.0726
76	2601.85	2616.27	2630.17	2601.59	2756.35	2901.69	2778.66	2760.74	3063.03	3006.55	3230.09	3115.52		76	7.19629	10.9168	12.8598	8.24875	15.412	16.5956	15.2056	15.646	21.5294	20.6165	29.5488	23.3573
76.5	2598.19	2610.69	2623.87	2597.3	2748.84	2893.34	2771.38	2752.95	3052.1	2996.41	3215.35	3104.04		76.5	7.24742	11.3538	12.3305	8.95516	14.7167	16.2608	14.4972	15.2214	22.0111	19.7725	29.2746	22.7505
77	2594.69	2605.02	2617.85	2592.69	2741.64	2885.47	2764.05	2745.57	3041.03	2986.66	3200.87	3092.72		77	6.56349	10.8713	11.8731	9.15098	14.0195	15.5382	14.706	14.5407	22.346	19.7709	28.4592	22.5364
77.5	2591.51	2599.77	2612.1	2588.19	2734.83	2877.7	2756.68	2738.43	3029.75	2976.61	3186.8	3081.5		77.5	6.90856	10.762	10.5068	9.03436	13.237	15.6332	14.7722	13.6219	22.8262	19.9877	28.3051	22.3068
78	2587.77	2594.18	2607.26	2583.62	2728.37	2869.82	2749.31	2731.89	3018.28	2966.75	3172.49	3070.43		78	7.32911	11.4244	9.76654	9.28182	12.64	15.7613	14.5328	13.1429	22.7937	19.4893	28.7995	21.829
78.5	2584.3	2588.5	2602.2	2578.96	2722.12	2861.98	2742.11	2725.25	3007.09	2957.07	3158.14	3059.59		78.5	6.70306	10.8904	10.042	9.17137	12.564	15.5265	14.6201	12.9589	21.8059	19.3914	28.1365	21.9493
79	2581	2583.37	2597.21	2574.51	2715.83	2854.28	2734.66	2718.96	2996.54	2947.31	3144.37	3048.43		79	6.6669	9.74587	10.2874	8.54574	12.2664	15.3618	14.9084	12.5062	20.3745	19.738	27.3429	22.5519
79.5	2577.57	2578.61	2591.95	2570.33	2709.83	2846.55	2727.23	2712.7	2986.62	2937.4	3130.67	3037.19		79.5	7.14034	9.75732	10.2341	8.57666	12.0884	15.7458	14.9751	12.4205	19.6363	19.5436	27.6837	21.8796
80	2573.97	2573.6	2586.99	2565.88	2703.65	2838.56	2719.73	2706.56	2976.81	2927.79	3116.79	3026.53		80	6.77552	9.85127	10.0835	9.01301	12.6363	15.9057	14.6756	12.2215	19.6255	19.1662	27.1893	21.4364
80.5	2570.83	2568.88	2581.9	2561.39	2697.21	2830.71	2712.55	2700.58	2967.07	2918.18	3103.56	3015.62		80.5	6.2081	8.85273	9.6997	8.85199	13.0608	15.627	14.4274	11.2161	18.9335	19.2417	26.0481	22.143
81	2567.73	2564.61	2577.34	2557.09	2690.69	2822.95	2705.29	2695.27	2957.85	2908.58	3090.65	3004.51		81	6.00982	8.94491	8.9213	8.25313	12.6549	15.3149	14.3242	10.7291	18.3752	19.0517	25.7731	21.7799
81.5	2564.9	2559.85	2572.94	2553.1	2684.55	2815.37	2698.25	2689.75	2948.55	2899.17	3077.81	2993.93		81.5	5.1077	9.67142	8.45789	7.9837	12.353	15.2912	14.02	10.9713	18.9826	18.5105	25.337	20.6873
82	2562.6	2555.04	2568.83	2549.07	2678.34	2807.74	2691.3	2684.31	2938.94	2890.05	3065.37	2983.66		82	4.41595	9.53225	8.34152	8.0951	12.0906	14.6534	13.5694	11.0093	18.922	18.0754	24.3502	21.052
82.5	2560.43	2550.37	2564.54	2545.12	2672.51	2800.77	2684.71	2678.69	2929.71	2881.01	3053.4	2972.91		82.5	4.11647	9.04303	8.67249	7.24347	11.4907	13.5076	12.9859	11.455	18.1263	18.2183	23.8581	21.0747
83	2558.43	2545.96	2560.18	2541.83	2666.85	2794.12	2678.36	2672.82	2920.66	2871.74	3041.47	2962.69		83	4.12819	9.05615	8.83043	6.36424	10.8428	13.2322	12.0156	12.2767	18.5763	19.0157	23.599	20.1833
83.5	2556.27	2541.42	2555.76	2538.64	2661.61	2787.47	2672.68	2666.53	2911.06	2862.01	3029.75	2952.6		83.5	4.32761	8.31544	8.65256	6.41143	10.6011	13.4707	11.1843	12.1879	19.6264	19.702	23.5826	20.4203
84	2554.05	2537.72	2551.59	2535.42	2656.22	2780.7	2667.11	2660.7	2901.17	2852.12	3017.82	2942.29		84	4.92687	7.005	8.02522	6.39366	10.6028	13.1644	10.841	11.6729	19.5559	19.7028	24.1096	20.4244
84.5	2551.35	2534.4	2547.75	2532.35	2651.02	2774.26	2661.84	2654.87	2891.54	2842.28	3005.67	2932.29		84.5	5.40774	5.77475	7.38191	5.51039	10.449	13.1741	10.311	11.1514	19.3357	20.1549	24.4137	19.5602
85	2548.7	2531.88	2544.19	2529.86	2645.78	2767.47	2656.74	2649.62	2881.83	2832.09	2993.47	2922.71		85	5.51204	5.01572	6.77857	5.0695	10.1893	13.7301	10.2139	10.0374	19.2545	19.7384	24.2795	18.9797
85.5	2545.9	2529.3	2540.89	2527.2	2640.81	2760.64	2651.53	2644.78	2872.35	2822.65	2981.41	2913.31		85.5	5.25766	4.81155	6.74346	5.29866	10.1252	13.4645	10.8625	9.25944	18.7027	18.4994	24.0927	18.4397
86	2543.45	2527.03	2537.41	2524.58	2635.64	2754.07	2645.88	2640.21	2863.15	2813.53	2969.45	2904.31		86	4.94097	4.73146	7.01297	5.267	10.1989	12.7216	11.4374	9.60539	18.0159	17.7873	23.356	17.4242
86.5	2540.94	2524.48	2533.92	2521.96	2630.64	2747.85	2640.17	2635.18	2854.31	2804.8	2958.12	2895.74		86.5	4.78299	5.26322	6.88665	4.9991	9.95384	12.5421	11.3945	9.71946	17.396	17.533	22.1717	17.5128
87	2538.7	2521.68	2530.54	2519.55	2625.66	2741.52	2634.51	2630.46	2845.65	2796.07	2947.23	2886.76		87	4.30516	6.48323	6.63362	5.00993	9.94036	12.3345	11.2696	10.0298	17.4993	16.6043	21.3547	17.8705
87.5	2536.62	2518.08	2527.27	2516.89	2620.72	2735.55	2628.91	2625.07	2836.75	2788.14	2936.7	2877.94		87.5	3.93655	7.05796	6.65519	5.49343	9.88154	11.8136	11.1485	11.1267	18.0273	16.1724	21.0292	17.6233
88	2534.73	2514.76	2523.96	2514.14	2615.84	2729.65	2623.38	2619.44	2827.65	2779.84	2926.2	2869.1		88	3.74119	6.5727	6.07283	5.31697	9.30354	11.7995	10.9307	11.3243	18.27	16.1248	20.631	17.6732
88.5	2532.8	2511.48	2521.2	2511.65	2611.4	2723.74	2618.02	2613.85	2818.51	2772.03	2916.04	2860.25		88.5	4.1345	6.48594	5.35709	4.66309	8.75489	11.823	10.3026	10.7445	18.3586	15.8311	20.4102	17.9072
89	2530.57	2508.3	2518.48	2509.46	2606.99	2717.82	2613.03	2608.67	2809.34	2763.91	2905.75	2851.29		89	4.68531	6.30927	5.60967	4.16019	9.01404	11.8581	10.0682	10.5218	18.1983	16.33	20.5271	17.3904
89.5	2528.13	2505.28	2515.58	2507.47	2602.39	2711.89	2607.9	2603.35	2800.37	2755.71	2895.54	2842.86		89.5	5.0887	5.2877	5.95432	3.79599	9.18359	11.8172	10.2567	10.2038	17.5896	16.6545	20.3904	16.8391
90	2525.48	2502.98	2512.64	2505.68	2597.83	2706.02	2602.82	2598.58	2791.73	2747.27	2885.42	2834.32		90	5.54476	4.48867	5.3534	3.28431	9.07629	11.664	10.0483	8.96242	17.2384	16.8403	19.8003	17.3249
90.5	2522.6	2500.67	2510.22	2504.15	2593.25	2700.19	2597.89	2594.36	2783.16	2738.85	2875.76	2825.56		90.5	5.98999	4.62243	4.88722	2.95903	9.55921	11.7915	9.59662	7.939	16.6593	17.2984	19.1582	17.5096
91	2519.59	2498.37	2507.69	2502.65	2588.29	2694.23	2593.19	2590.51	2775.12	2730.08	2866.27	2816.86		91	5.70401	4.54758	5.01634	3.13288	9.98396	11.9288	9.38912	7.89055	15.5687	17.0398	18.5545	17.3396
91.5	2516.94	2496.15	2505.27	2500.97	2583.39	2688.33	2588.5	2586.43	2767.45	2721.95	2857.24	2808.21		91.5	5.05022	4.18309	4.54015	3.68565	9.38718	11.5279	9.14858	8.0641	15.6256	15.683	17.697	17.3845
92	2514.48	2494.13	2503.14	2499	2578.89	2682.67	2584.04	2582.47	2759.47	2714.3	2848.59	2799.52		92	4.87781	4.35168	4.07062	3.88245	8.91804	11.4287	8.94556	7.90201	15.804	15.2431	16.6387	17.1936
92.5	2512.03	2491.8	2501.05	2497.08	2574.38	2676.87	2579.55	2578.42	2751.75	2706.7	2840.53	2791.12		92.5	4.95906	4.54563	4.73632	4.07486	9.19752	11.5756	8.72617	8.55131	15.0585	14.852	16.1351	16.1909
93	2509.51	2489.66	2498.38	2494.86	2569.73	2671.15	2575.31	2573.85	2744.27	2699.52	2832.41	2783.34		93	4.99009	4.15441	5.43392	4.69969	9.1131	11.2899	8.53247	9.80737	15.4494	13.7918	15.8443	15.1906
93.5	2506.97	2487.7	2495.65	2492.32	2565.34	2665.6	2571.03	2568.78	2736.22	2692.85	2824.64	2775.98		93.5	5.5078	3.37889	5.84512	5.8037	8.42593	10.8263	8.3116	9.63611	16.3989	13.1379	15.7899	13.7736
94	2504	2486.25	2492.5	2489.12	2561.21	2660.28	2567.02	2564.24	2727.99	2686.3	2816.58	2769.53		94	6.00152	3.01851	6.54035	6.2095	8.71752	10.8123	7.98628	9.5932	16.3183	13.1789	15.9902	12.821
94.5	2500.94	2484.78	2489.09	2485.96	2556.75	2654.86	2563.08	2559.31	2719.89	2679.78	2808.56	2763.26		94.5	7.3825	1.88246	7.99324	8.73646	8.50298	11.011	7.91495	9.33027	17.8755	13.2905	18.3252	11.8321
95	2497.24	2484.43	2485.2	2481.17	2553.33	2650.08	2559.66	2555.59	2711.49	2673.98	2799.72	2758.47		95	3.80012	0.167757	3.9714	5.05372	3.24442	4.67981	3.3329	3.51333	8.44125	5.67789	8.9867	4.54128

## Sheet: Summary
Sorce data: Figure 6-figure supplement 2B
	NBD Tm (°C)
		Mg2+			Ca2+			MgADP			CaADP
		Exp. 1	Exp. 2	Exp. 3	Exp. 1	Exp. 2	Exp. 3	Exp. 1	Exp. 2	Exp. 3	Exp. 1	Exp. 2	Exp. 3
	DnaK NBD	46.5	47	47	46	46	46	60	60	60	61	60.5	60.5
	dBiP NBD	42	42	41.5	42.5	42	42	50	50	50	53.5	53.5	53.5
	Kar2 NBD	32.5	32.5	32.5	35.5	35	35	50	49.5	50	51.5	51.5	51.5
			Mean	SD	N
	MgCl2	DnaK NBD	46.8333	0.288675	3
		dBiP NBD	41.8333	0.288675	3
		Kar2 NBD	32.5	0	3
	CaCl2	DnaK NBD	46	0	3
		dBiP NBD	42.1667	0.288675	3
		Kar2 NBD	35.1667	0.288675	3
	MgCl2 + ADP	DnaK NBD	60	0	3
		dBiP NBD	50	0	3
		Kar2 NBD	49.8333	0.288675	3
	CaCl2 + ADP	DnaK NBD	60.6667	0.288675	3
		dBiP NBD	53.5	0	3
		Kar2 NBD	51.5	0	3
