# Supplementary material for: Calcium depletion challenges endoplasmic reticulum proteostasis by destabilising BiP-substrate complexes
Source: eLife. 2020 Dec 9;9:e62601. doi: 10.7554/eLife.62601 (PMC7758071; doi:10.7554/eLife.62601)
Supplement: Supplementary file 5. [file elife-62601-supp5.xlsx]

## Sheet: All data
Source data: Figure 6-figure supplement 3B
			Final concentrations (dissociation): 1.3 µM MABA-ADP, 1.3 µM BiP, 3 mM MgCl2, 100 mM KCl, 50 mM HEPES-KOH pH 7.4, 1 mM CaCl2, 1.3 µM Grp170, 1.5 mM ATP
	Fitting method: Prism --> One phase decay (no constraints). Data for samples w/o Grp170 were fitted over the entire data range (300). Fast kinetics of samples containing Grp170 w/o CaCl2 were fitted only over the 50 seconds. Fast kinetics of samples containing Grp170 + CaCl2 were fitted only over the 100 seconds.
		BiP				BiP + Ca				D257A				D257A + Ca				D257N				D257N + Ca				BiP + Grp170				BiP + Ca + Grp170				D257A + Grp170				D257A + Ca + Grp170				D257N + Grp170				D257N + Ca + Grp170
		Experiment 1	Experiment 2	Experiment 3	Experiment 4	Experiment 1	Experiment 2	Experiment 3	Experiment 4	Experiment 1	Experiment 2	Experiment 3	Experiment 4	Experiment 1	Experiment 2	Experiment 3	Experiment 4	Experiment 1	Experiment 2	Experiment 3	Experiment 4	Experiment 1	Experiment 2	Experiment 3	Experiment 4	Experiment 1	Experiment 2	Experiment 3	Experiment 4	Experiment 1	Experiment 2	Experiment 3	Experiment 4	Experiment 1	Experiment 2	Experiment 3	Experiment 4	Experiment 1	Experiment 2	Experiment 3	Experiment 4	Experiment 1	Experiment 2	Experiment 3	Experiment 4	Experiment 1	Experiment 2	Experiment 3	Experiment 4
	k (sec-1)	0.0863	0.06082	0.07256	0.0764	0.01302	0.01261	0.01531	0.01306	0.1219	0.1024	0.1198	0.1266	0.01393	0.01252	0.01505	0.01282	0.06585	0.06035	0.06219	0.06694	0.008978	0.007766	0.009265	0.008697	0.3658	0.3457	0.2343	0.3296	0.2181	0.2263	0.2807	0.2359	0.2783	0.2359	0.2299	0.2664	0.0897	0.0778	0.08199	0.088	0.28	0.2932	0.27	0.2506	0.1157	0.1069	0.1221	0.1618
	R2	0.9889	0.9764	0.9778	0.9845	0.9942	0.9952	0.9957	0.9937	0.9629	0.9551	0.9695	0.9767	0.9955	0.9972	0.9975	0.9955	0.9914	0.9889	0.991	0.9876	0.994	0.9921	0.9918	0.9883	0.9632	0.958	0.9471	0.962	0.9832	0.9626	0.9421	0.967	0.9684	0.9677	0.977	0.9658	0.9857	0.9836	0.9869	0.982	0.9805	0.9836	0.9827	0.9839	0.9933	0.9813	0.9769	0.9901
FL data	Time (s)
	0	148.622	152.784	121.791	152.746	187.426	183.982	160.613	168.609	146.15	125.135	140.372	153.742	192.313	179.344	178.901	163.391	152.571	151.618	143.039	140.21	165.884	158.926	143.835	175.372	123.4	122.055	99.2719	102.096	156.007	137.75	144.644	126.054	127.205	124.544	107.34	104.038	157.646	158.917	171.921	167.728	122.553	137.071	108.769	109.469	177.51	157.132	149.761	136.59
	0.1	147.937	152.419	121.446	152.558	187.311	184.172	160.829	168.144	145.782	124.984	140.198	152.838	192.017	179.625	179.022	163.306	152.358	151.195	142.468	140.342	165.543	159.047	144.319	175.246	122.454	121.395	99.0267	101.396	155.662	137.131	144.119	125.443	127.423	124.464	106.493	103.648	156.624	158.729	171.69	166.667	121.79	136.209	108.099	109.561	176.958	157.554	149.063	135.88
	0.2	147.26	152.142	121.302	152.577	187.21	184.147	160.924	167.966	145.701	124.529	140.06	152.09	191.749	179.826	178.936	163.042	151.89	151.056	142.043	140.5	165.186	158.93	144.619	175.333	121.706	120.595	98.6854	100.496	154.846	136.318	143.331	124.743	127.283	123.915	105.772	103.054	155.662	158.554	171.253	165.669	120.956	135.065	107.258	109.337	176.207	157.667	148.68	135.389
	0.3	146.697	151.878	121.106	152.491	186.99	183.857	160.796	167.882	145.523	124.044	139.65	151.301	191.399	180.234	178.7	162.77	151.479	150.93	141.429	140.817	164.96	158.798	144.53	175.514	120.761	119.68	98.3286	99.5036	154.047	135.104	142.384	124.267	126.921	123.194	105.355	102.357	154.598	158.389	170.561	164.526	120.184	133.738	106.308	108.739	175.382	157.492	148.361	134.966
	0.4	146.26	151.799	120.806	152.454	186.564	183.534	160.501	167.771	145.262	123.54	139.114	150.688	190.813	180.637	178.363	162.745	151.034	150.541	140.843	141.018	164.763	158.529	144.257	175.609	119.83	118.709	97.9429	98.4101	153.23	133.886	141.107	123.595	126.388	122.463	104.864	101.609	153.489	158.127	169.645	163.207	119.415	132.558	105.282	107.989	174.542	157.084	148.088	134.369
	0.5	145.865	151.788	120.568	152.382	186.243	183.449	160.173	167.687	145.09	123.009	138.468	150.076	190.063	181.057	178.152	162.537	150.369	149.951	140.31	141.191	164.457	158.235	143.931	175.676	118.638	117.554	97.2969	97.3212	152.175	132.605	139.384	122.913	125.591	121.673	104.342	100.62	152.208	157.368	168.222	161.677	118.503	131.134	104.078	107.156	173.559	156.375	147.616	133.524
	0.6	145.742	151.79	120.424	152.119	186.012	183.31	159.8	167.823	144.779	122.55	137.773	149.695	189.418	181.425	178.058	162.154	149.678	149.743	139.939	141.442	164.436	157.817	143.408	175.875	117.684	116.417	96.5156	96.3686	150.702	131.436	137.588	122.222	124.627	120.736	104.001	99.5191	151.237	156.486	166.713	160.384	117.683	129.849	103.046	106.124	172.603	155.468	147.214	132.764
	0.7	145.826	151.659	120.174	151.773	185.77	183.255	159.351	167.924	144.203	122.342	137.011	149.415	188.987	181.803	178.19	161.901	149.154	149.631	139.5	141.566	164.776	157.578	143.19	175.912	116.704	115.297	95.7342	95.6962	149.361	130.3	135.898	121.362	123.798	120.18	103.614	98.5959	150.323	155.327	165.26	159.011	117.033	128.72	102.226	105.115	171.787	154.496	146.588	131.766
	0.8	145.718	151.362	119.898	151.462	185.697	183.36	158.946	167.858	143.559	122.324	136.307	149.19	188.571	181.941	178.437	161.794	148.862	149.641	139.233	141.66	165.039	157.469	143.032	175.787	115.817	114.287	95.0933	95.1954	147.916	129.415	134.315	120.203	123.234	119.704	103.12	97.8389	149.666	153.84	164.007	157.666	116.574	127.711	101.449	104.371	170.888	153.662	145.89	130.737
	0.9	145.484	150.738	119.563	151.015	185.847	183.598	158.864	167.782	143.073	122.446	135.678	148.652	188.418	181.866	178.533	161.522	148.805	149.94	138.941	141.674	165.264	157.433	142.893	175.621	114.873	113.201	94.5835	94.9419	146.307	128.468	133.04	119.06	122.921	119.305	102.725	97.0509	149.012	152.141	162.86	156.4	116.087	126.687	100.82	103.898	170.018	153.014	145.138	129.764
	1	145.055	150.015	119.043	150.415	185.906	183.687	158.743	167.727	142.56	122.693	135.233	147.963	188.448	181.62	178.369	161.339	148.839	150.34	138.65	141.609	165.668	157.384	142.807	175.405	113.938	112.142	94.2886	94.6384	144.724	127.284	132.049	117.907	122.689	118.846	102.31	96.4451	148.42	150.707	162.211	155.217	115.633	125.795	100.213	103.374	169.21	152.462	144.389	128.767
	1.1	144.641	149.362	118.467	150.077	185.864	183.751	158.541	167.682	142.242	122.779	134.965	147.341	188.414	181.151	177.941	161.246	148.995	150.476	138.354	141.418	165.912	157.565	142.919	174.983	112.885	111.182	94.1963	94.416	143.527	125.872	131.076	116.891	122.477	118.289	101.937	96.1823	147.7	149.339	161.554	154.128	115.238	124.967	99.6918	102.84	168.252	152.052	143.703	127.879
	1.2	144.215	148.814	117.874	149.648	185.81	183.685	158.618	167.521	142.023	122.648	134.616	146.575	188.052	180.688	177.172	161.181	149.257	150.337	138.148	141.251	165.788	157.707	142.637	174.75	111.881	110.315	94.0544	94.0793	142.351	124.683	130.265	116.072	122.202	117.471	101.543	95.8443	146.869	148.197	160.815	153.399	114.639	124.368	99.0872	102.442	167.136	151.812	143.132	127.019
	1.3	143.86	148.578	117.225	149.265	185.545	183.602	158.717	167.55	141.779	122.219	134.29	145.828	187.746	180.366	176.403	160.932	149.052	149.932	137.901	140.836	165.697	157.693	142.452	174.657	110.965	109.514	93.6875	93.815	141.236	123.465	129.443	115.434	121.628	116.6	101.183	95.3994	145.98	147.318	160.049	152.892	113.725	123.918	98.5599	101.962	165.994	151.536	142.46	126.077
	1.4	143.554	148.625	116.657	148.976	184.9	183.336	158.626	167.551	141.47	121.387	133.987	145.191	187.195	180.188	175.811	160.819	148.403	149.288	137.656	140.498	165.498	157.714	142.216	174.763	110.168	108.826	93.1939	93.415	140.276	122.313	128.421	114.904	120.924	115.728	100.765	95.1038	145.171	146.604	159.279	152.646	112.62	123.4	97.8323	101.151	164.712	151.177	141.728	125.164
	1.5	143.36	148.63	116.073	148.834	184.199	183.023	158.499	167.56	141.11	120.492	133.556	144.632	186.517	180.11	175.495	160.713	147.862	148.634	137.373	140.094	165.039	157.96	141.997	174.808	109.54	108.302	92.6912	92.9776	139.426	121.382	127.252	114.48	120.446	114.947	100.412	94.7644	144.334	146.02	158.212	152.499	111.48	122.66	97.109	100.364	163.362	150.84	141.04	124.386
	1.6	143.015	148.559	115.498	148.51	183.603	182.64	158.368	167.527	140.736	119.743	132.994	144.005	185.875	180.34	175.438	160.67	147.108	148.087	137.141	139.689	164.433	158.064	141.676	174.936	109.059	107.866	92.0034	92.4758	138.359	120.646	126.176	114.007	120.044	114.374	99.9933	94.2006	143.553	145.56	157.335	152.341	110.419	121.847	96.2798	99.7545	162.26	150.23	140.364	123.476
	1.7	142.597	148.444	114.871	148.292	183.085	182.328	157.971	167.643	140.337	119.152	132.7	143.372	185.513	180.375	175.738	160.412	146.254	147.569	136.921	139.267	163.942	158.028	141.553	174.747	108.669	107.546	91.5845	92.0921	137.296	119.72	124.94	113.68	119.69	113.924	99.6494	93.6265	143.008	145.106	156.596	151.936	109.633	120.842	95.4516	99.1721	161.354	149.424	139.71	122.65
	1.8	142.129	148.042	114.253	148.045	182.654	181.885	157.683	167.491	140.035	118.793	132.361	142.826	185.189	180.267	176.146	160.158	145.844	147.07	136.831	138.944	163.472	158.031	141.424	174.414	108.497	107.206	91.2855	91.5849	136.279	118.841	123.643	113.46	119.445	113.629	99.1614	93.1558	142.27	144.649	155.835	151.356	108.921	119.799	94.6131	98.7351	160.701	148.585	139.089	121.859
	1.9	141.728	147.406	113.696	147.851	182.493	181.399	157.433	167.211	139.581	118.816	131.901	142.451	185.153	180.01	176.597	159.715	145.794	146.776	136.889	138.748	163.256	157.861	141.534	173.691	108.326	107.071	90.9503	91.188	135.297	118.076	122.446	113.158	119.112	113.24	98.6132	92.5966	141.401	144.325	155.28	150.422	108.586	118.931	93.9473	98.6253	160.179	147.609	138.631	120.984
	2	141.227	146.933	113.41	147.595	182.416	180.76	157.194	166.862	139.091	118.927	131.348	142.163	185.139	179.634	176.995	159.318	145.597	146.481	137.067	138.691	163.227	157.278	141.678	173.064	107.993	106.942	90.5702	90.9893	134.234	117.293	121.294	112.76	118.476	112.782	97.938	92.0456	140.614	143.877	154.964	149.304	108.329	118.493	93.4837	98.5263	159.692	146.536	138.244	120.091
	2.1	140.738	146.572	113.225	147.407	182.123	180.219	157.059	166.487	138.453	118.978	130.727	141.806	185.193	179.145	177.133	158.712	145.611	146.072	137.174	138.627	163.444	156.625	141.843	172.429	107.778	106.754	90.3769	90.7308	133.319	116.476	120.151	112.349	117.595	112.43	97.3316	91.6229	139.826	143.443	154.675	148.089	108.07	118.27	93.0788	98.2886	159.064	145.584	137.783	119.306
	2.2	140.179	146.178	113.367	147.1	181.79	179.702	157.169	165.976	137.826	119.055	129.857	141.641	185.057	178.933	176.97	158.371	145.538	145.67	137.273	138.518	163.87	156.063	142.006	172.081	107.579	106.528	89.9933	90.3671	132.539	115.748	119.157	111.684	116.591	112.242	96.6864	91.3904	138.954	143.102	154.576	146.801	107.661	118.207	92.7922	98.0128	158.443	144.871	137.02	118.617
	2.3	139.764	145.858	113.805	146.769	181.47	179.417	157.142	165.721	136.912	118.965	129.04	141.452	184.86	178.768	176.588	158.209	145.285	145.478	137.119	138.558	164.166	155.574	142.145	171.731	107.153	106.316	89.7618	90.091	131.758	115.045	118.421	110.804	115.709	112.041	96.1994	91.0444	138.491	142.951	154.471	145.614	107.42	118.216	92.4796	97.6574	157.8	144.261	136.304	118.016
	2.4	139.133	145.739	114.1	146.296	181.104	179.297	157.014	165.727	136.079	118.703	128.282	141.175	184.572	178.712	176.05	158.138	144.837	145.093	136.739	138.451	164.222	155.292	142.137	171.753	106.687	105.95	89.7675	89.7663	130.861	114.293	117.856	109.954	114.988	112.013	95.8372	90.812	138.199	142.667	154.198	144.753	106.979	118.192	92.154	97.2712	157.159	143.849	135.377	117.512
	2.5	138.496	145.597	114.253	145.954	180.739	179.566	156.888	165.742	135.384	118.182	127.671	140.799	184.423	178.758	175.358	157.935	144.373	144.747	136.165	138.267	164.262	155.214	142.113	171.78	106.527	105.51	89.6936	89.3766	130.168	113.487	117.459	109.07	114.478	112.134	95.5584	90.6071	137.992	142.452	153.739	144.04	106.503	118.06	91.6792	96.9502	156.512	143.561	134.441	116.95
	2.6	137.877	145.155	114.335	145.551	180.613	179.8	156.695	165.602	134.883	117.722	127.178	140.641	184.145	178.757	174.832	157.949	143.906	144.582	135.495	138.125	164.19	155.246	141.95	171.777	106.16	105.133	89.6956	89.2279	129.565	112.903	117.167	108.191	114.283	112.066	95.1868	90.2488	137.928	142.128	153.1	143.327	105.995	117.76	91.1642	96.63	155.944	143.342	133.53	116.439
	2.7	137.326	144.843	114.092	145.202	180.481	179.964	156.255	165.452	134.468	117.142	126.832	140.525	184.036	178.52	174.647	157.756	143.652	144.541	134.746	138.026	163.757	155.386	141.804	171.592	105.678	104.818	89.7809	89.2071	128.782	112.501	116.881	107.468	114.202	111.904	94.8998	89.7373	137.865	141.632	152.052	142.881	105.573	117.254	90.6565	96.2879	155.303	142.872	132.918	115.829
	2.8	136.775	144.722	113.396	144.812	180.438	179.835	155.851	165.245	134.485	116.736	126.576	140.491	184.105	178.146	174.592	157.335	143.461	144.329	133.957	137.757	163.297	155.529	141.667	171.682	105.266	104.63	89.7665	89.0971	128.066	112.322	116.451	106.925	113.943	111.825	94.5903	89.3503	137.456	140.776	151.026	142.494	104.996	116.548	90.3118	95.9518	154.509	142.351	132.43	115.119
	2.9	136.471	144.591	112.821	144.407	180.563	179.703	155.533	164.905	134.587	116.314	126.516	140.433	184.173	177.689	174.534	156.918	143.471	144.078	133.234	137.395	162.899	155.54	141.488	171.639	104.974	104.448	89.7174	88.888	127.454	112.204	115.953	106.479	113.592	111.737	94.3004	88.9285	136.934	139.995	149.985	141.928	104.438	115.639	90.0595	95.4397	153.749	141.776	132.048	114.418
	3	136.305	144.415	112.149	143.948	180.67	179.178	155.337	164.567	134.576	115.894	126.47	140.424	184.073	177.155	174.483	156.666	143.437	143.761	132.57	137.072	162.383	155.436	141.153	171.628	104.476	104.334	89.7914	88.6054	126.663	112.253	115.618	106.122	113.163	111.651	94.154	88.6461	136.209	139.296	148.896	141.397	103.879	114.49	89.8378	94.9232	153.14	141.294	131.545	113.903
	3.1	136.158	144.648	111.43	143.721	180.746	178.657	155.198	164.458	134.486	115.362	126.276	140.27	184.14	176.504	174.086	156.305	143.258	143.276	132.197	136.859	161.862	155.109	140.786	171.766	104.102	104.246	89.7836	88.0226	125.853	112.137	115.245	105.905	112.643	111.697	94.103	88.5571	135.351	138.643	147.961	141.162	103.306	113.412	89.8133	94.4837	152.641	140.783	131.28	113.462
	3.2	136.048	144.804	110.732	143.611	180.757	178.203	155.186	164.538	134.284	114.799	126.025	139.926	184.129	175.878	173.28	156.081	142.922	142.809	131.957	136.758	161.321	154.537	140.052	172.095	103.788	104.119	89.8224	87.4074	125.244	111.812	114.852	105.707	112.302	111.657	93.9678	88.5104	134.403	138.196	147.402	140.776	102.725	112.612	89.8651	94.0648	152.13	140.57	131.136	113.082
	3.3	135.769	144.748	110.506	143.624	180.496	178.009	155.212	164.542	133.854	114.119	125.649	139.218	183.908	175.446	172.414	156.166	142.471	142.428	132.069	136.83	160.999	153.852	139.339	172.075	103.491	103.872	89.8094	86.9848	124.661	111.337	114.6	105.44	112.108	111.471	93.8134	88.4468	133.52	138.118	146.811	140.302	102.427	112.137	89.8904	93.5878	151.607	140.385	130.754	112.931
	3.4	135.258	144.485	110.307	143.795	179.95	177.724	155.329	164.556	133.27	113.558	125.03	138.511	183.661	175.29	171.629	156.261	141.943	142.279	132.235	136.96	160.82	153.294	138.732	171.93	103.182	103.629	89.6224	86.7179	124.198	110.873	114.401	105.085	111.957	111.199	93.5904	88.3454	132.679	138.05	146.341	139.848	102.301	111.951	89.8298	93.2688	151.11	140.363	130.456	112.754
	3.5	134.616	144.024	110.157	143.872	179.308	177.529	155.343	164.705	132.638	113.127	124.295	137.735	183.521	175.42	170.965	156.305	141.678	142.096	132.395	137.088	160.792	153.158	138.347	171.629	103.039	103.442	89.4332	86.5734	123.898	110.437	113.978	104.745	111.872	110.875	93.2865	88.0557	131.908	137.819	146.113	139.373	102.214	111.971	89.7193	93.0026	150.564	139.988	130.241	112.469
	3.6	134.02	143.284	110.192	143.707	178.515	177.099	155.213	164.875	131.811	112.724	123.637	137.032	183.167	175.753	170.774	156.266	141.473	141.938	132.25	137.039	160.749	153.371	138.207	171.217	103.004	103.193	89.2342	86.8756	123.661	110.038	113.572	104.215	111.724	110.419	93.0616	87.7945	131.183	137.695	145.695	138.758	102.143	112.021	89.3917	92.8118	149.87	139.536	129.677	111.913
	3.7	133.356	142.317	110.412	143.271	177.835	176.711	155.027	164.829	131.032	112.444	122.88	136.313	182.715	176.135	171.028	156.133	141.167	141.558	132.01	136.761	160.983	153.736	138.606	170.595	103.092	102.949	89.0084	87.206	123.455	109.715	113.185	103.562	111.329	109.867	93.0066	87.7336	130.749	137.445	145.11	138.358	102.061	111.889	88.8108	92.657	149.379	138.719	128.922	111.399
	3.8	132.905	141.351	110.405	142.556	177.585	176.084	154.811	164.805	130.336	112.275	122.251	135.944	182.37	176.533	171.093	155.809	140.879	141.165	131.644	136.121	161.06	154.164	139.01	170.18	103.18	102.708	88.8028	87.4259	123.159	109.336	112.815	102.996	110.942	109.453	93.0909	87.7431	130.555	136.823	144.722	138.308	101.742	111.541	88.1429	92.5718	149.054	137.716	128.414	110.69
	3.9	132.732	140.482	110.342	141.637	177.566	175.632	154.427	164.745	129.782	112.147	121.649	135.736	181.97	176.56	171.28	155.435	140.499	140.56	131.365	135.305	160.923	154.432	139.464	169.92	103.223	102.603	88.6919	87.5515	122.719	108.934	112.477	102.549	110.687	109.08	93.3623	87.8167	130.484	136.094	144.234	138.543	101.146	111.174	87.6187	92.3918	148.574	136.268	127.812	110.109
	4	132.809	139.827	110.321	140.753	177.683	175.4	154.071	164.57	129.369	112.198	121.162	135.726	181.489	176.203	171.482	155.045	139.749	139.982	131.131	134.463	160.735	154.275	139.678	169.693	102.915	102.384	88.586	87.6644	122.283	108.456	112.215	102.141	110.369	108.668	93.6007	88.0001	130.49	135.442	143.673	138.788	100.588	110.896	87.3353	92.0573	147.998	135.172	127.173	109.6
	4.1	132.912	139.22	110.12	140.077	177.99	175.546	153.828	164.217	129.277	112.292	120.856	135.574	181.187	175.808	171.405	154.915	139.068	139.501	131.111	133.47	160.512	153.95	139.626	169.496	102.434	102.245	88.5452	87.3698	121.863	108.017	111.957	101.857	110.001	108.341	93.7284	88.0228	130.505	134.636	143.327	138.908	100.154	110.627	87.0879	91.6412	147.425	134.148	126.693	109.412
	4.2	133.152	138.91	109.857	139.769	178.07	175.627	153.478	164.039	129.059	112.343	120.822	135.506	180.796	175.623	170.966	154.976	138.52	139.21	131.169	132.57	160.04	153.773	139.245	169.38	101.849	102.119	88.4564	86.9377	121.362	107.613	111.782	101.758	109.645	108.354	93.6918	87.7744	130.297	133.841	143.018	138.859	99.6678	110.475	87.0321	91.1932	146.605	133.511	126.169	109.187
	4.3	133.22	138.754	109.624	139.76	177.796	176.071	153.015	163.905	128.826	112.327	120.692	135.416	180.227	175.321	170.738	154.921	138.017	139.077	130.939	131.977	159.518	153.556	138.799	169.196	101.266	101.977	88.5056	86.5774	120.968	107.192	111.517	101.713	109.298	108.238	93.5648	87.3835	129.956	133.407	142.514	138.354	99.2736	110.432	86.9812	90.8584	145.774	133.162	125.5	109.044
	4.4	133.028	138.775	109.458	139.973	177.465	176.346	152.611	163.761	128.475	112.072	120.655	135.092	179.784	175.17	170.308	154.788	137.476	139.125	130.411	131.737	159.014	153.435	138.09	168.897	100.766	101.73	88.5615	86.4447	120.722	106.741	111.16	101.555	108.766	108.098	93.139	86.9729	129.534	133.224	142.035	137.389	99.1587	110.285	86.6953	90.6753	145.095	133.147	124.836	108.774
	4.5	132.629	138.836	109.392	140.237	177.161	176.514	152.25	163.498	128.005	111.558	120.49	134.535	179.285	175.151	169.665	154.622	137.322	139.318	129.854	131.481	158.413	153.435	137.459	168.758	100.739	101.562	88.6483	86.1158	120.442	106.255	110.797	101.293	108.396	107.974	92.6998	86.5293	129.212	133.061	141.545	136.438	99.1906	110.008	86.1502	90.75	144.4	133.015	124.258	108.503
	4.6	132.257	138.989	109.404	140.195	176.64	176.513	152.037	163.273	127.346	111.105	120.204	134.095	178.724	175.169	169.127	154.318	137.027	139.494	129.136	131.572	157.952	153.448	136.957	168.703	100.85	101.32	88.631	85.9794	119.905	105.853	110.534	101.104	108.207	107.867	92.3132	86.1949	128.969	132.95	141.057	135.668	99.1358	109.668	85.8376	90.9166	143.672	132.927	123.684	107.99
	4.7	131.814	139.092	109.377	139.76	176.452	176.592	152.068	163.079	126.91	110.703	119.682	133.527	178.606	174.842	168.855	153.812	136.788	139.592	128.357	131.672	157.713	153.323	136.584	168.533	101.043	101.046	88.6526	86.0624	119.318	105.642	110.284	100.937	108.329	107.616	91.9511	85.9076	128.793	132.769	140.674	135.041	99.2777	109.323	85.6578	91.1755	143.058	132.472	123.352	107.51
	4.8	131.473	139.128	109.272	139.314	176.503	176.5	152.221	162.854	126.469	110.169	119.296	132.723	178.631	174.57	168.762	153.605	136.526	139.416	128.003	131.686	157.689	153.26	136.217	168.3	101.261	100.827	88.5985	86.0771	118.722	105.57	110.044	100.638	108.387	107.415	91.553	85.7592	128.67	132.421	140.347	134.814	99.372	108.809	85.6966	91.2715	142.365	131.644	123.138	107.016
	4.9	131.289	139.033	109.167	138.751	176.413	176.436	152.461	162.672	126.15	109.69	118.944	131.902	178.463	174.386	168.793	153.744	136.384	139.22	128.02	131.629	157.943	153.197	136.189	168.182	101.38	100.601	88.6065	85.8744	117.966	105.645	109.924	100.518	108.57	107.285	91.3355	85.6789	128.489	131.959	140.162	134.925	99.3139	108.32	85.9737	91.3969	141.767	130.723	122.876	106.538
	5	131.097	138.876	109.011	138.13	176.184	176.352	152.589	162.536	125.93	109.24	118.676	131.167	178.586	174.204	169.026	153.888	136.149	138.84	128.057	131.626	158.335	153.165	136.21	167.972	101.183	100.353	88.6014	85.8824	117.112	105.913	109.828	100.665	108.655	107.195	91.105	85.5452	128.129	131.555	139.967	135.137	98.9538	107.826	86.5138	91.3826	141.324	129.869	122.42	106.036
	5.1	130.685	138.66	108.822	137.855	176.233	176.422	152.556	162.359	125.689	108.822	118.412	130.369	178.828	173.798	169.301	154.137	136.1	138.456	128.118	131.32	158.633	153.161	136.28	167.66	100.855	100.192	88.7319	85.8208	116.568	106.018	109.721	100.761	108.702	107.107	90.9776	85.4118	127.701	131.254	139.69	135.236	98.5174	107.382	86.8542	91.2493	141.043	128.893	122.023	105.779
	5.2	130.124	138.629	108.521	137.799	176.153	176.434	152.381	162.059	125.368	108.405	118.227	129.744	178.779	173.541	169.321	154.618	135.937	138.049	128.187	130.946	158.832	153.101	136.373	167.58	100.405	100.174	88.8024	85.6064	116.197	105.684	109.624	100.719	108.557	107.039	91.0293	85.4631	127.191	131.106	139.204	135.135	97.9073	106.893	86.8802	91.0712	140.682	128.132	121.374	105.565
	5.3	129.523	138.526	108.27	137.537	175.999	176.32	152.186	161.722	124.995	108.219	117.853	129.366	178.871	173.32	169.003	155.017	135.86	137.588	127.985	130.644	158.801	153.073	136.539	167.72	99.9633	100.199	88.8464	85.388	115.905	105.151	109.575	100.832	108.52	106.97	91.0655	85.6057	126.593	131.015	138.784	134.519	97.4552	106.697	86.695	91.0022	140.3	127.721	120.488	105.362
	5.4	128.822	138.464	107.805	137.322	176.086	176.127	151.832	161.443	124.615	108.22	117.42	129.111	179.204	173.12	168.687	155.142	135.674	136.952	127.497	130.348	158.545	153.118	136.412	167.741	99.6191	100.286	88.8023	85.1947	115.751	104.411	109.411	100.824	108.323	106.85	91.0478	85.7442	126.189	130.929	138.231	133.82	97.1571	106.586	86.3481	90.6351	139.696	127.438	119.678	105.18
	5.5	128.187	138.306	107.212	137.033	176.263	176.115	151.54	161.308	124.192	108.415	117.047	128.77	179.249	173.168	168.443	155.294	135.336	136.647	126.927	130.022	158.128	153.18	136.397	167.693	99.4356	100.436	88.6053	85.064	115.743	103.502	109.104	100.552	108.12	106.641	91.1363	86.1363	125.845	130.914	137.793	132.97	97.0936	106.64	85.6462	90.2145	139.037	127.109	119.175	105.049
	5.6	127.829	138.225	106.689	136.546	176.207	175.942	151.232	161.371	123.951	108.463	116.758	128.483	179	173.486	168.255	155.327	134.882	136.307	126.401	129.984	157.705	153.168	136.39	167.687	99.4439	100.516	88.1904	85.0262	115.534	102.726	108.708	100.329	107.928	106.368	91.0712	86.5155	125.427	130.953	137.46	132.16	97.1376	106.903	85.0081	89.8907	138.345	126.968	118.678	104.74
	5.7	127.718	137.717	106.42	136.188	176.187	175.644	150.923	161.188	123.664	108.447	116.538	128.265	178.697	173.705	168.327	154.993	134.531	136.198	126.003	130.129	157.285	153.15	136.318	167.454	99.6111	100.428	87.7883	84.9561	115.119	102.512	108.104	100.254	107.656	106.023	90.8003	86.7966	125.092	130.913	137.292	131.52	97.3801	107.194	84.6002	89.5035	137.752	126.882	118.219	104.337
	5.8	127.743	137.264	106.152	136.028	176.146	175.451	150.613	161.004	123.466	108.36	116.4	127.904	178.185	173.575	168.66	154.456	134.079	136.322	125.741	130.177	157.02	152.972	136.238	166.957	99.6883	100.301	87.2752	84.8927	114.642	102.544	107.553	100.122	107.376	105.775	90.6592	86.8936	124.756	130.863	137.122	131.305	97.5366	107.348	84.2398	88.9938	137.225	126.717	118.033	104.06
	5.9	128.038	136.678	106.106	135.887	176.029	175.357	150.396	160.782	123.218	108.263	116.163	127.564	177.496	173.237	168.906	153.926	133.838	136.559	125.624	130.123	156.649	152.683	136.408	166.612	99.7652	100.091	86.7049	84.928	114.216	102.837	107.185	100.006	107.373	105.551	90.6325	86.8866	124.337	130.865	137.053	131.155	97.553	107.46	83.9924	88.7522	136.774	126.396	117.854	103.85
	6	128.351	136.154	106.145	135.975	176.121	175.018	150.17	160.456	123.052	108.112	115.886	127.397	176.847	172.605	168.807	153.49	133.652	136.352	125.648	130.145	156.494	152.217	136.545	166.472	99.8672	99.8109	86.3182	84.8161	113.833	103.132	107.009	99.9865	107.455	105.647	90.5395	86.5963	123.964	130.607	136.812	131.024	97.3402	107.518	84.0669	88.6032	136.254	125.956	117.465	103.452
	6.1	128.564	135.411	105.975	136.138	176.417	174.635	149.839	159.895	122.806	108.063	115.395	127.233	176.4	171.849	168.468	153.044	133.425	136.079	125.726	130.1	156.331	151.764	136.598	166.274	99.8913	99.6756	86.0195	84.6238	113.664	103.463	106.838	99.7776	107.573	105.916	90.497	86.2469	123.735	130.078	136.545	130.939	97.1508	107.311	84.1726	88.4243	135.603	125.39	116.955	103.114
	6.2	128.587	134.909	105.575	136.053	176.516	174.239	149.403	159.557	122.624	108	114.86	126.871	176.137	171.381	167.9	152.816	133.257	135.62	125.633	130.079	156.299	151.338	136.75	166.368	99.8166	99.6226	85.8222	84.5204	113.722	103.374	106.921	99.4296	107.77	106.176	90.5599	85.853	123.649	129.613	136.377	130.742	96.7864	107.238	84.2497	88.1988	134.927	124.802	116.668	102.71
	6.3	128.468	134.524	105.251	135.934	176.341	173.793	149.26	159.14	122.317	107.911	114.265	126.66	175.866	171.476	167.175	152.612	133.109	135.138	125.347	130.164	156.299	151.08	136.881	166.681	99.8227	99.7062	85.7509	84.3988	113.817	103.293	106.868	98.9248	107.937	106.282	90.4925	85.4403	123.558	129.043	136.178	130.52	96.3953	107.193	84.2876	88.1288	134.326	124.347	116.367	102.027
	6.4	128.089	134.224	105.037	135.931	175.948	173.332	149.297	158.61	122.003	107.673	113.856	126.478	175.631	171.832	166.426	152.378	132.783	134.775	125.116	130.235	156.514	150.871	136.72	166.913	99.8224	99.961	85.8012	84.148	113.718	103.067	106.69	98.3773	107.862	106.348	90.367	84.9302	123.297	128.321	135.917	130.257	96.0694	107.139	84.3247	87.9428	133.656	124.054	116.103	101.24
	6.5	127.694	133.992	104.887	135.781	175.138	172.996	149.506	158.023	121.596	107.229	113.554	126.227	175.617	172.141	166.019	151.971	132.502	134.687	124.809	130.262	156.583	150.862	136.319	167.012	99.7029	100.311	85.7728	83.8371	113.467	102.938	106.636	97.757	107.817	105.999	90.159	84.5911	122.915	127.781	135.863	130.058	95.9364	106.957	84.2198	87.6737	133.161	123.932	115.965	100.653
	6.6	127.368	133.986	105.006	135.544	174.177	172.739	149.862	157.625	121.176	106.747	113.322	125.872	175.704	172.371	165.705	151.569	132.355	134.602	124.361	130.031	156.706	150.971	136.082	166.993	99.6529	100.564	85.8602	83.5518	113.075	102.728	106.711	97.4728	107.853	105.502	89.9196	84.363	122.453	127.459	135.665	129.711	95.8096	106.829	83.992	87.3882	132.989	123.934	115.851	100.073
	6.7	127.219	134.007	105.244	135.564	173.383	172.583	150.431	157.424	120.699	106.428	113.043	125.573	175.642	172.442	165.532	151.164	132.038	134.466	123.808	129.553	156.68	151.172	135.645	166.732	99.6015	100.8	85.8944	83.351	112.594	102.608	106.766	97.3386	107.987	105.2	89.6883	84.1941	121.77	127.114	135.243	129.412	95.8373	106.55	83.6848	87.4004	132.815	123.944	115.539	99.6135
	6.8	127.006	133.792	105.317	135.623	173.048	172.445	150.649	157.55	120.414	106.014	112.961	125.305	175.716	172.392	165.403	150.696	131.856	134.183	123.394	129.043	156.3	151.374	135.069	166.296	99.6102	100.798	85.925	83.2342	112.109	102.426	106.943	97.3264	107.967	104.998	89.4519	84.2619	121.106	126.853	134.81	129.009	95.9208	106.243	83.3818	87.3552	132.462	123.545	115.205	99.3685
	6.9	126.882	133.705	105.06	135.538	173.02	172.221	150.602	157.814	120.26	105.648	112.846	125.09	175.799	172.172	165.261	150.312	131.836	133.729	122.853	128.504	155.732	151.545	134.647	166.004	99.6518	100.541	85.9392	83.3028	111.962	102.262	107.095	97.41	108.005	104.895	89.1287	84.501	120.583	126.681	134.294	128.516	96.1582	106.04	82.8719	87.2628	132.301	123.136	115.014	99.3003
	7	126.896	133.671	104.674	135.544	173.226	171.759	150.334	158.232	120.164	105.554	112.652	124.895	175.611	172.215	164.941	149.833	131.899	133.002	122.324	127.9	155.219	151.632	134.448	165.625	99.7914	100.108	86.0171	83.6044	111.926	102.105	107.04	97.5582	107.781	105.063	89.0247	84.6649	120.229	126.558	133.666	127.891	96.5208	105.909	82.3492	87.2976	131.858	122.757	114.898	99.2354
	7.1	126.67	133.476	104.2	135.449	173.367	171.127	150.167	158.504	120.017	105.491	112.718	124.878	175.291	172.457	164.769	149.313	131.856	132.369	122.026	127.586	154.697	151.485	134.132	165.479	99.7482	99.5256	86.0371	83.9224	111.962	101.973	106.872	97.5037	107.333	105.166	89.0662	84.7598	119.952	126.451	133.278	127.383	96.8619	105.724	81.9424	87.465	131.085	122.365	114.939	99.2886
	7.2	126.332	133.246	103.7	134.946	173.456	170.762	149.879	158.584	119.894	105.192	112.89	124.851	175.147	172.659	164.382	148.692	131.932	131.829	122.003	127.344	154.183	151.129	134.005	165.519	99.7082	99.0205	86.0204	84.1895	112.058	101.973	106.665	97.4026	106.692	104.921	89.1233	84.767	119.879	126.296	132.957	126.814	96.9962	105.527	81.6606	87.4009	130.534	121.868	115.059	99.3724
	7.3	126.2	133.103	103.376	134.151	173.357	170.596	149.562	158.441	119.741	105.019	112.923	124.587	174.955	172.691	164.048	148.349	131.956	131.53	122.06	127.102	154.311	150.546	134.135	165.565	99.6094	98.7034	85.9324	84.5222	112.027	102.031	106.486	97.3874	106.251	104.522	89.3435	84.4917	119.905	126.325	132.73	126.215	97.104	105.24	81.5589	87.3799	130.192	121.739	115.048	99.4565
	7.4	125.894	132.697	103.341	133.241	173.1	170.701	149.423	158.228	119.567	104.957	112.946	124.186	174.903	172.659	163.803	147.975	131.888	131.353	122.163	127.013	154.759	150.065	134.346	165.27	99.2228	98.6651	85.8661	84.6763	111.706	102.089	106.363	97.3351	105.848	104.133	89.5894	84.2063	119.859	126.353	132.675	125.706	96.9295	104.801	81.6911	87.5286	129.653	121.555	114.818	99.4374
	7.5	125.231	132.184	103.383	132.186	172.766	171.115	149.208	157.918	119.501	104.67	112.9	123.812	174.971	172.44	163.609	147.78	131.605	131.526	122.252	127.074	155.314	149.65	134.689	164.998	98.809	98.8756	85.7557	84.5991	111.459	101.892	106.339	97.3241	105.61	103.739	89.744	83.889	119.67	126.193	132.7	125.447	96.483	104.422	81.8548	87.5755	129.32	121.255	114.399	99.3949
	7.6	124.657	131.944	103.358	131.398	172.624	172.019	148.857	157.708	119.604	104.235	112.561	123.425	175.057	172.003	163.302	147.631	131.491	131.765	122.153	127.187	155.942	149.398	135.043	164.613	98.5688	99.3294	85.5959	84.4995	111.258	101.677	106.406	97.2708	105.274	103.627	89.7006	83.6073	119.408	125.953	132.51	125.471	95.9719	104.184	81.9206	87.4829	129.145	120.837	113.825	99.049
	7.7	123.983	131.656	103.337	131.035	172.62	172.694	148.668	157.496	119.774	103.924	112.222	123.215	175.051	171.534	163.42	147.566	131.373	131.929	121.908	127.445	156.604	149.292	135.435	164.149	98.3882	99.6586	85.4056	84.3104	111.106	101.438	106.365	97.0626	105.025	103.993	89.5006	83.443	119.002	125.874	132.465	125.846	95.5862	104.046	81.8506	87.3599	128.815	120.426	113.277	98.6709
	7.8	123.183	131.272	103.154	130.91	172.602	173.09	148.611	157.301	119.81	103.588	111.937	123.196	175.036	170.902	163.453	147.437	131.14	131.97	121.56	127.565	156.661	149.543	135.672	163.828	98.2544	99.9982	85.2445	83.9123	111.188	100.897	106.268	96.7735	104.803	104.723	89.1427	83.4448	118.523	125.481	132.374	126.232	95.1643	104.179	81.5141	87.1879	128.475	120.024	112.943	98.2495
	7.9	122.804	131.182	102.811	130.871	172.679	173.258	148.231	157.218	119.695	103.094	111.674	123.181	174.801	170.353	163.549	147.359	130.92	131.859	121.112	127.699	156.407	149.618	135.939	163.737	98.5741	100.144	84.9632	83.6388	111.419	100.356	106.156	96.4759	104.563	105.36	88.8776	83.4826	118.309	125.108	132.246	126.522	94.8966	104.383	81.1668	86.912	128.572	119.642	112.721	97.8253
	8	122.662	131.145	102.384	130.772	172.85	173.362	147.993	157.192	119.348	102.682	111.414	123.288	174.559	169.923	163.63	147.305	130.797	131.504	120.752	127.563	155.893	149.69	135.786	163.907	98.998	100.046	84.7502	83.5582	111.646	100.156	105.991	96.1112	104.389	105.944	88.5616	83.5039	118.143	124.866	132.076	126.62	94.7816	104.476	80.9638	86.6274	128.672	119.348	112.763	97.3809
	8.1	122.564	130.922	101.813	130.469	172.968	173.025	147.773	157.296	118.885	102.424	111.346	123.42	174.435	169.697	163.724	147.343	130.469	131.01	120.453	127.035	155.21	149.661	135.586	164.112	99.2725	99.8421	84.6515	83.5153	111.84	99.8755	105.723	95.7542	104.565	106.307	88.385	83.3817	118.067	124.637	132.042	126.288	94.8977	104.5	80.9326	86.4088	128.772	119.178	113.058	97.1785
	8.2	122.547	130.779	101.266	129.923	172.888	172.567	147.374	157.491	118.301	102.194	111.243	123.417	174.38	169.463	163.433	147.462	129.958	130.718	120.18	126.403	154.499	149.655	135.229	164.184	99.4577	99.7131	84.6431	83.5632	111.792	99.4094	105.6	95.4997	104.817	106.211	88.2908	83.0886	117.931	124.319	131.732	125.589	95.1532	104.524	81.1151	86.2317	128.844	119.224	113.29	97.0091
	8.3	122.451	131.011	100.923	129.545	172.768	172.268	147.003	157.597	117.82	102.057	111.089	123.196	174.369	169.504	163.279	147.455	129.509	130.418	119.958	126.018	153.977	149.292	134.865	164.119	99.6744	99.3516	84.7711	83.6895	111.566	99.2481	105.49	95.2238	104.924	105.85	88.2915	82.6858	117.793	124.211	131.327	125.076	95.4915	104.256	81.5149	85.9644	128.753	119.169	113.334	96.9636
	8.4	121.872	131.084	100.617	129.249	172.437	172.004	146.962	157.658	117.481	102.09	110.916	122.918	174.74	169.603	163.127	147.424	128.957	130.32	120.034	125.316	153.615	149.083	134.25	164.071	99.6834	99.0012	85.0829	83.7181	111.264	99.0684	105.464	94.9869	105.088	105.507	88.2029	82.2126	117.406	124.264	130.853	124.855	95.7864	104.034	81.8989	85.8154	128.111	119.239	113.158	96.9463
	8.5	121.341	131.04	100.531	129.164	171.94	171.499	147.002	157.853	117.329	102.204	110.942	122.439	175.158	169.724	163.089	147.539	128.383	130.453	120.095	124.782	153.374	148.76	133.957	163.593	99.3906	98.7682	85.2575	83.5657	110.738	98.8882	105.422	94.7217	105.166	105.039	88.103	82.0001	117.038	124.337	130.205	124.777	96.0217	103.957	82.1529	85.7436	127.455	119.302	112.668	97.0788
	8.6	120.963	130.959	100.891	129.26	171.346	171.011	147.058	157.728	117.213	102.412	110.855	121.815	175.219	169.604	162.993	147.629	127.953	130.683	120.163	124.533	153.217	148.582	133.639	162.992	99.2204	98.4923	85.277	83.3913	110.171	98.8192	105.464	94.5373	105.081	104.528	87.9628	82.0963	116.478	124.422	129.595	124.843	95.9286	104.03	82.285	85.5078	126.713	119.229	111.866	97.2697
	8.7	120.762	130.938	101.174	129.634	170.874	170.634	147.136	157.496	117.249	102.685	110.772	121.314	174.833	169.733	163.094	147.74	127.651	130.64	120.217	124.397	153.107	148.35	133.365	162.522	99.2812	98.1449	85.2742	83.1456	109.872	98.8918	105.434	94.3856	104.802	104.266	87.9002	82.411	116.047	124.432	129.243	124.899	95.5719	104.009	82.2528	85.3123	125.861	118.952	111.087	97.5012
	8.8	120.818	130.595	101.166	129.802	170.475	170.05	146.999	157.358	117.231	102.912	110.757	121.066	174.414	169.705	163.042	147.892	127.336	130.514	120.303	124.084	153.118	148.362	133.121	162.274	99.2313	97.9468	85.1546	82.9726	109.608	98.887	105.36	94.282	104.575	104.08	87.8076	82.8608	115.674	124.478	128.962	124.797	95.2047	104.132	82.1542	85.403	125.196	118.688	110.354	97.569
	8.9	121.226	130.143	100.996	129.898	170.344	169.377	146.714	157.195	116.972	103.043	110.651	121.121	173.482	169.488	162.932	147.992	127.052	130.108	120.157	124.106	153.056	148.242	133.034	162.013	99.0919	97.8181	84.8462	82.9178	109.32	99.0047	105.213	94.1294	104.285	103.936	87.7209	83.3656	115.371	124.212	128.635	124.309	94.8414	104.164	81.9978	85.305	124.973	118.213	109.852	97.6544
	9	121.487	129.833	100.57	129.991	170.405	168.803	146.197	156.75	116.663	103.165	110.308	121.249	172.451	169.059	162.824	147.812	126.897	129.35	119.873	124.202	153.095	148.356	132.869	162.034	99.246	97.671	84.7374	83.0776	109.266	98.8692	105.123	94.1733	104.006	103.926	87.5452	83.5891	115.091	124.012	128.386	123.752	94.5656	104.03	81.914	85.2177	124.86	117.749	109.453	97.4791
	9.1	121.679	129.47	99.7969	129.946	170.587	168.277	145.508	156.52	116.407	103.046	110.006	121.535	171.746	168.844	162.801	147.542	126.66	128.427	119.559	124.287	153.24	148.415	132.73	162.392	99.3246	97.582	84.7912	83.2514	109.215	98.778	105.038	94.2504	103.715	104.076	87.3049	83.5625	115.089	123.884	128.029	123.32	94.5398	103.61	81.8353	85.3433	124.834	117.468	109.219	97.2077
	9.2	121.811	128.86	99.1214	129.706	170.674	167.918	144.885	156.437	116.216	102.74	109.646	121.729	171.475	168.366	162.616	147.148	126.51	127.573	119.303	124.229	153.399	148.478	132.513	162.751	99.0846	97.672	84.7926	83.5112	109.081	98.7469	104.999	94.289	103.753	104.234	87.1015	83.5014	115.15	123.766	127.621	123.183	94.6658	103.212	81.7074	85.4305	124.963	117.194	109.009	96.9106
	9.3	121.779	128.396	98.7323	129.324	170.692	167.81	144.537	156.446	116.173	102.362	109.306	121.948	171.207	168.061	162.465	146.985	126.389	126.878	118.973	124.155	153.596	148.443	132.231	162.8	98.7868	97.9927	84.8025	83.7989	108.994	98.766	105.052	94.3427	103.878	104.241	86.9662	83.451	115.258	123.483	127.129	123.06	94.6402	102.889	81.5182	85.2807	124.833	117.018	108.838	96.718
	9.4	121.613	128.153	98.6839	128.915	170.455	167.938	144.369	156.361	116.387	102.002	109.06	122.013	171.306	168.045	162.228	147.102	126.379	126.455	118.608	124.019	153.845	148.452	131.975	162.814	98.6507	98.2789	84.9878	83.9839	109.045	98.6912	105.18	94.3576	104.119	104.135	86.9347	83.4011	115.302	123.368	126.885	123.198	94.6798	102.612	81.3285	85.2492	124.378	117.013	108.629	96.5298
	9.5	121.617	127.807	98.7878	128.431	170.219	168.287	144.47	156.36	116.512	101.56	108.84	122.01	171.478	168.16	161.79	147.422	126.239	126.457	118.3	123.775	153.978	148.053	131.625	162.827	98.3561	98.5445	84.8611	84.0394	108.96	98.7506	105.275	94.1797	104.406	104.034	87.2006	83.4092	115.425	123.054	126.795	123.315	94.6503	102.552	81.0223	85.1524	123.803	116.815	108.423	96.5549
	9.6	121.45	127.627	98.9333	128.032	169.884	168.916	144.851	156.315	116.571	101.323	108.63	121.849	171.574	168.163	161.315	147.863	126.15	126.716	117.948	123.389	153.939	147.683	131.301	162.438	98.1004	98.7831	84.6377	84.0996	108.97	98.8214	105.258	93.9898	104.61	104.032	87.5312	83.6433	115.456	122.583	126.593	123.372	94.461	102.675	80.7275	85.0536	123.328	116.604	108.076	96.5552
	9.7	121.06	127.736	98.9728	127.477	169.481	169.325	145.222	156.182	116.434	101.225	108.522	121.603	171.61	168.16	161.058	148.298	125.87	127.116	117.558	122.951	153.938	147.433	131.025	161.993	98.0625	98.8048	84.5158	84.059	108.915	98.8487	105.126	93.9196	104.448	103.981	87.7148	83.6622	115.352	122.107	126.256	123.147	94.2281	102.723	80.6501	85.1178	122.881	116.555	107.789	96.4669
	9.8	120.664	127.737	98.9279	127.102	169.117	169.602	145.486	155.988	116.162	101.268	108.385	121.355	171.579	168.022	160.957	148.349	125.502	127.441	117.248	122.599	153.829	147.122	130.888	161.763	98.1076	98.466	84.4727	83.8941	108.807	98.9024	104.907	93.8639	104.094	104.053	87.6865	83.6047	115.146	121.779	126.073	123.021	94.1584	102.549	80.5788	85.2192	122.548	116.264	107.495	96.2794
	9.9	120.182	127.523	98.6629	126.749	169.06	169.826	145.589	155.831	115.951	101.308	108.173	120.903	171.352	167.704	160.998	147.988	125.102	127.726	117.101	122.081	153.675	146.815	130.719	161.454	97.9659	98.14	84.2928	83.7191	108.639	98.9524	104.546	93.9957	103.557	104.285	87.5793	83.4892	115.17	121.449	125.6	122.858	94.0298	102.374	80.6097	85.4242	122.438	115.943	107.37	96.0154
	10	119.546	127.411	98.2925	126.302	168.911	169.849	145.652	155.685	115.868	101.318	108.081	120.54	171.136	167.272	161.09	147.56	124.727	127.712	116.943	121.642	153.491	146.818	130.742	161.121	97.9693	97.8633	84.3946	83.4593	108.512	99.0345	104.153	94.2184	102.959	104.519	87.3136	83.3148	115.064	121.245	125.004	122.693	93.9211	102.031	80.7737	85.6904	122.487	115.935	107.451	95.5004
	10.1	119.044	127.392	98.1201	125.824	168.777	169.431	145.646	155.469	115.674	101.195	107.826	120.291	170.887	166.8	161.154	147.07	124.37	127.617	116.933	121.325	153.263	146.773	130.869	160.993	98.0545	97.632	84.4981	83.0796	108.165	99.0143	103.867	94.4127	102.629	104.339	87.1109	82.8648	114.852	121.162	124.578	122.312	93.9452	101.743	81.0174	85.7576	122.377	115.798	107.796	94.9879
	10.2	118.74	127.132	98.0161	125.441	168.915	169.026	145.583	155.138	115.486	101.124	107.413	120.2	170.647	166.423	161.13	146.702	124.198	127.485	116.996	121.204	152.947	146.59	131.042	160.868	98.0425	97.4993	84.5834	82.851	107.797	98.9766	103.701	94.6419	102.731	104.038	87.0646	82.6753	114.746	121.203	124.17	122.038	93.9441	101.814	80.9806	85.6408	122.293	115.522	108.114	94.543
	10.3	118.404	126.964	97.9133	125.096	169.177	168.777	145.543	154.667	115.272	100.92	106.954	119.871	170.55	166.102	160.95	146.644	124.123	127.497	116.985	121.02	152.581	146.479	131.324	160.712	98.0601	97.5455	84.5206	82.6458	107.514	98.8074	103.667	94.7862	103.106	103.733	87.3305	82.4939	114.713	121.161	123.574	121.621	93.851	102.019	81.0713	85.5236	122.409	115.524	108.402	94.0804
	10.4	118.171	127.027	97.8676	124.832	169.251	168.363	145.565	154.264	114.782	100.687	106.73	119.774	170.48	166.016	160.703	146.868	123.955	127.412	116.819	121.164	152.237	146.292	131.704	160.849	98.1972	97.6915	84.5477	82.524	107.131	98.5932	103.788	94.8432	103.753	103.288	87.5574	82.375	114.396	120.99	123.115	121.135	93.7271	102.251	81.0405	85.2398	122.456	115.468	108.441	93.6643
	10.5	118.099	126.959	97.9656	124.735	169.478	168.041	145.467	153.973	114.137	100.618	106.53	119.665	170.328	166.074	160.655	146.993	123.876	127.465	116.825	121.179	152.087	146.117	131.98	161.046	98.1298	97.8422	84.4641	82.5056	106.967	98.3398	103.858	94.981	104.535	102.719	87.6676	82.4051	114.172	120.742	122.719	120.664	93.611	102.531	80.8955	84.9074	122.238	115.349	108.308	93.4929
	10.6	118.06	126.568	97.8894	124.654	169.933	167.85	145.257	153.858	113.603	100.638	106.544	119.458	170.346	166.353	160.849	147.048	123.734	127.328	116.629	121.267	152.044	146.034	132.239	161.198	98.0224	97.9257	84.2742	82.6595	106.988	98.0679	103.899	95.138	105.109	102.373	87.6706	82.5348	114.109	120.424	122.418	120.503	93.3928	102.678	80.5219	84.8218	122.019	115.322	108.135	93.3985
	10.7	117.921	126.251	97.8099	124.751	170.113	167.792	145.011	153.853	113.289	100.406	106.655	119.05	170.639	166.645	160.912	146.942	123.58	127.129	116.337	121.347	152.002	146.044	132.658	161.37	97.9201	98.0554	83.9974	82.6619	107.185	97.7646	103.919	95.1673	105.318	102.168	87.5643	82.5997	114.064	120.051	122.254	120.268	93.1512	102.494	80.2549	84.8564	121.65	115.341	107.855	93.4562
	10.8	117.947	125.791	97.5508	124.829	170.074	167.59	144.747	153.953	113.117	100.093	106.666	118.785	170.782	167.055	160.951	146.656	123.546	126.753	115.997	121.55	151.944	146.125	132.839	161.511	97.8642	98.16	83.886	82.6826	107.401	97.5452	103.703	95.4024	105.336	102.085	87.1915	82.5784	113.854	119.699	122.368	120.093	93.0321	102.426	79.8564	84.8738	120.99	115.308	107.675	93.7102
	10.9	117.967	125.154	97.2842	124.949	169.842	167.327	144.482	154.059	113.232	99.8606	106.482	118.558	171.138	167.078	160.987	146.421	123.718	126.489	115.804	121.433	151.73	146.386	132.775	161.325	97.8432	98.1756	83.8048	82.6464	107.684	97.4328	103.441	95.5443	105.07	102.153	86.9125	82.5666	113.805	119.564	122.524	120.124	92.894	102.275	79.5576	84.9512	120.346	115.192	107.52	93.9549
	11	117.892	124.632	97.1181	125.109	169.341	167.114	144.224	153.897	113.511	99.5592	106.128	118.395	171.608	167.206	160.831	146.327	123.964	126.074	115.42	121.391	151.415	146.494	132.697	160.895	97.935	98.3055	83.8015	82.6556	107.65	97.2934	103.467	95.5893	104.646	102.395	86.8548	82.4928	113.669	119.631	122.761	120.145	92.7019	102.161	79.2191	85.031	119.812	114.812	107.361	94.2142
	11.1	117.829	124.389	97.0473	125.388	168.579	167.119	144.171	153.66	113.893	99.3523	105.767	118.416	171.871	167.232	160.286	146.461	124.141	125.708	115.22	121.253	151.216	146.443	132.46	160.456	97.9524	98.4409	84.0726	82.6397	107.612	97.2658	103.662	95.7218	104.268	102.73	86.821	82.476	113.279	119.82	122.942	119.93	92.5864	102.067	79.1337	84.9383	119.378	114.395	107.021	94.4598
	11.2	117.888	124.209	97.023	125.515	168.078	166.98	144.302	153.449	114.114	99.4992	105.541	118.604	171.657	167.251	159.991	146.84	124.258	125.255	115.063	120.954	150.843	146.545	131.986	160.021	98.1674	98.5201	84.4072	82.7219	107.361	97.3101	103.847	95.764	103.872	103.133	86.7098	82.2736	112.718	120.159	123.139	119.974	92.7124	102.117	79.1171	84.7164	119.129	113.978	106.697	94.4308
	11.3	117.837	124.208	97.3266	125.565	167.715	166.799	144.273	153.428	114.115	99.7943	105.528	118.822	171.655	167.099	159.808	147.411	124.235	124.739	115.031	120.631	150.576	146.696	131.46	159.476	98.2962	98.53	84.6144	82.8008	107.015	97.1421	104.108	95.5756	103.52	103.332	86.7291	82.117	112.221	120.441	123.246	120.264	92.6658	102.019	79.2222	84.6037	119.257	113.357	106.313	94.2982
	11.4	117.819	124.426	97.767	125.524	167.645	166.921	144.214	153.381	114.091	99.998	105.439	118.904	171.272	167.234	159.674	147.56	124.006	124.042	114.758	120.456	150.693	146.826	131.193	159.035	98.3296	98.5533	84.7614	82.8928	106.767	96.8623	104.273	95.4169	103.269	103.42	86.8313	81.9268	111.676	120.616	123.338	120.332	92.7437	102.107	79.1663	84.4597	119.38	112.809	106.03	94.2452
	11.5	117.779	124.62	97.9226	125.354	167.703	166.915	144.229	153.732	114.1	100.233	105.489	118.767	170.815	167.26	159.742	147.54	123.398	123.493	114.546	120.529	150.757	147.065	130.91	158.89	98.3766	98.3545	84.789	82.892	106.539	96.6316	104.266	95.1904	103.159	103.347	86.7949	81.7261	111.072	120.439	123.349	120.486	92.8528	102.212	79.148	84.4476	119.586	112.576	105.802	94.1189
	11.6	117.743	124.639	97.9313	125.026	167.708	166.801	144.037	154.031	113.864	100.207	105.469	118.448	170.389	167.297	160.187	147.274	122.824	123.246	114.415	120.649	150.759	147.617	130.676	158.975	98.344	98.2841	84.5898	82.8226	106.313	96.264	104.018	94.7361	103.076	103.18	86.9246	81.4993	110.678	120.106	123.194	120.805	92.9536	102.458	79.0849	84.5312	119.753	112.446	105.742	93.9096
	11.7	117.557	124.651	97.9303	124.749	167.498	166.832	143.699	154.371	113.531	99.946	105.282	118.067	170.151	167.234	160.519	146.687	122.261	123.178	114.402	120.785	151.09	147.685	130.517	159.064	97.9651	98.1513	84.3666	82.6316	106.327	95.8086	103.785	94.4332	103.145	102.795	87.3176	81.5727	110.367	119.404	122.896	120.85	92.8425	102.591	79.0524	84.7536	119.746	112.483	105.698	93.661
	11.8	117.321	124.413	97.6874	124.597	167.395	167.043	143.697	154.474	113.459	99.6422	105.106	117.602	169.662	167.274	160.901	145.905	121.614	123.266	114.308	120.853	151.447	147.538	130.465	159.236	97.6446	98.1107	84.1364	82.5829	106.289	95.7015	103.804	94.1678	103.083	102.471	87.6012	81.7439	110.149	118.801	122.616	120.317	92.9759	102.712	79.0373	84.8832	119.536	112.673	105.574	93.2987
	11.9	117.005	123.947	97.146	124.415	167.263	167.054	143.63	154.733	113.191	99.3875	105.146	117.09	169.474	167.361	161.256	145.464	121.114	123.469	114.504	120.903	151.399	147.201	130.307	159.44	97.3296	98.039	83.8418	82.6145	106.11	95.9161	103.9	94.0276	102.922	102.124	87.6374	81.8957	110.019	118.28	122.459	119.843	92.981	102.592	79.216	85.0753	119.24	112.995	105.471	92.8845
	12	116.777	123.591	96.6949	124.383	167.144	167.265	143.504	154.657	112.957	98.9629	105.21	116.825	169.396	167.371	161.318	145.117	120.91	123.742	114.809	120.535	151.266	146.82	130.301	159.578	97.0358	98.0267	83.707	82.7745	106.218	96.2699	103.863	93.936	102.521	101.885	87.5981	82.0927	110.174	118.118	122.46	119.387	93.1026	102.311	79.4978	85.1528	118.759	113.227	105.381	92.483
	12.1	116.42	123.428	96.3676	124.32	167.22	167.371	143.623	154.616	112.976	98.7036	105.303	116.683	169.312	167.216	161.078	144.96	120.73	123.775	114.936	120.036	150.857	145.926	130.383	159.332	96.9216	97.949	83.7148	83.0651	106.303	96.7558	103.813	93.9919	101.996	101.646	87.2832	82.2381	110.35	118.11	122.634	118.967	93.2363	101.827	79.6513	85.2569	118.212	113.27	105.143	92.1433
	12.2	116.042	123.393	96.0384	124.197	167.471	167.227	143.841	154.459	113.163	98.4781	105.369	116.584	169.139	167.176	160.601	145.156	120.636	123.677	114.74	119.685	150.282	145.331	130.441	158.994	97.0019	98.0546	83.7418	83.5008	106.212	97.308	103.822	93.9856	101.485	101.591	86.7112	82.1651	110.483	118.419	122.941	118.664	93.3538	101.407	79.7674	85.1473	117.699	113.016	104.96	92.1318
	12.3	115.701	123.626	95.8986	123.919	167.438	166.808	143.822	154.217	113.247	98.4461	105.254	116.579	169.024	166.913	159.82	145.578	120.804	123.541	114.534	119.231	149.572	144.825	130.647	158.718	96.9822	98.0728	83.9259	83.7478	106.354	97.777	103.563	94.1395	101.204	101.48	86.2617	82.0959	110.666	118.699	123.087	118.927	93.2999	101.034	79.7904	84.9753	117.052	112.865	104.917	92.2628
	12.4	115.417	124.019	96.0286	123.733	167.244	166.592	143.913	153.838	113.498	98.5313	104.967	116.761	168.792	166.334	159.055	146.004	120.963	123.393	114.203	118.762	148.981	144.425	130.783	158.344	97.068	98.0066	84.1707	83.7634	106.536	97.7666	103.371	94.2227	101.231	101.436	86.0544	82.1419	110.698	118.778	122.977	119.171	93.4177	100.797	79.7093	84.7582	116.483	112.655	104.552	92.3113
	12.5	115.064	124.151	96.2506	123.287	166.96	166.197	144.059	153.513	113.575	98.8847	104.697	116.782	168.306	165.624	158.475	146.487	121.217	123.025	113.689	118.449	148.652	144.048	130.666	157.667	97.215	97.9869	84.2455	83.6074	106.531	97.5095	103.216	94.2613	101.587	101.269	86.0255	82.1642	110.416	118.504	122.553	119.267	93.3985	100.856	79.6477	84.5555	116.195	112.554	104.065	92.2573
	12.6	114.764	124.096	96.4621	122.945	166.496	165.893	143.923	153.119	113.656	99.2796	104.45	116.737	167.874	164.997	157.988	146.702	121.779	122.576	113.135	118.344	148.752	144.111	130.548	157.092	97.2988	97.8119	84.1236	83.2638	106.551	97.3063	103.301	94.2354	102.16	101.271	86.1658	82.2654	110.016	118.012	122.099	119.212	93.3414	101.178	79.7978	84.1888	116.103	112.591	103.608	92.1978
	12.7	114.518	123.739	96.6241	122.78	165.87	165.79	143.68	152.74	113.65	99.7121	104.289	116.609	167.68	164.436	157.669	146.558	122.199	122.169	112.89	118.186	148.826	144.228	130.408	156.793	97.3447	97.4406	83.8364	82.8962	106.631	97.1591	103.262	94.1732	102.752	101.353	86.4942	82.3968	109.768	117.479	121.7	119.259	93.407	101.6	79.9248	84.1179	116.148	112.751	103.094	91.9819
	12.8	114.291	123.275	96.6396	122.728	165.384	165.97	143.495	152.541	113.6	99.8016	104.28	116.405	167.577	164.153	157.775	146.02	122.36	121.73	112.749	118.196	148.968	144.408	130.025	156.519	97.4937	97.2081	83.3564	82.6254	106.576	96.9048	103.138	93.863	103.202	101.553	86.798	82.4176	109.447	116.873	121.389	119.216	93.5556	102.115	79.9856	84.205	116.43	112.778	102.58	91.7491
	12.9	113.922	122.707	96.5947	122.486	165.006	165.852	143.193	151.964	113.326	99.7401	104.414	116.085	167.477	163.999	157.877	145.313	122.344	121.329	112.626	118.188	149.431	144.654	129.705	156.506	97.6203	97.1524	82.9539	82.601	106.483	96.9415	102.913	93.5374	103.436	101.792	86.8584	82.1846	109.234	116.645	121.156	119.342	93.6248	102.715	80.0825	84.283	116.899	112.672	102.56	91.6406
	13	113.488	122.194	96.4463	122.371	164.828	165.591	142.859	151.419	112.995	99.4719	104.46	115.793	167.626	164.06	157.937	144.458	122.052	121.086	112.628	118.269	149.757	144.861	129.479	156.913	97.6549	97.0678	82.6871	82.6596	106.323	97.2304	102.731	93.3982	103.485	102.184	86.8541	81.9024	109.195	116.782	121.006	119.565	93.7596	103.151	80.015	84.2945	117.245	112.197	102.714	91.5498
	13.1	113.096	121.732	96.2476	122.189	164.805	165.294	142.689	151.018	112.403	99.1118	104.487	115.44	167.871	164.275	158.007	143.94	121.445	120.976	112.671	118.217	149.738	144.768	129.122	157.596	97.7966	97.2412	82.5421	82.8176	106.094	97.352	102.424	93.3338	103.442	102.398	86.8296	81.6287	109.308	117.254	120.832	119.989	93.8042	103.317	79.6825	84.3715	117.294	111.68	102.955	91.4968
	13.2	112.958	121.646	96.1204	121.892	164.746	164.98	142.683	150.642	111.829	98.686	104.603	115.118	167.834	164.444	158.243	143.769	120.931	120.983	112.579	118.16	149.851	144.494	128.814	157.928	98.0651	97.5439	82.6328	82.8016	105.9	97.2344	102.395	93.4325	103.505	102.457	86.7583	81.3649	109.377	117.666	120.523	120.183	93.7122	103.25	79.2765	84.2117	117.141	111.183	103.522	91.3963
	13.3	112.815	121.547	95.9867	121.603	164.563	164.425	142.677	150.348	111.293	98.3728	104.576	114.806	167.646	164.339	158.214	143.843	120.559	121.125	112.38	117.877	149.872	144.171	128.665	158.13	98.4321	97.6991	82.8466	82.7093	105.738	97.0611	102.815	93.7371	103.915	102.543	86.6466	81.1088	109.424	118.274	120.317	120.114	93.4514	103.113	78.9152	83.9698	116.81	110.68	104.079	91.2211
	13.4	112.87	121.594	95.7506	121.542	164.345	163.952	142.883	150.643	111.182	98.1394	104.385	114.448	167.476	164.473	158.212	144.034	120.32	121.34	112.183	117.494	149.48	143.933	128.613	157.965	98.7354	97.7367	82.8692	82.4209	105.783	96.9261	103.217	94.0769	104.346	102.557	86.7354	81.041	109.499	118.505	120.106	119.844	92.9756	102.781	78.6056	83.7188	116.164	110.321	104.397	90.9906
	13.5	113.059	121.892	95.6191	121.627	163.957	163.739	143.157	150.989	111.311	97.9532	104.227	114.122	167.213	164.595	158.264	144.382	120.21	121.596	111.932	117.156	149.08	143.66	128.696	157.475	98.9788	97.8539	82.736	82.039	105.921	96.6505	103.751	94.2402	104.77	102.606	86.7225	80.9641	109.546	118.68	120.015	119.471	92.4731	102.344	78.4225	83.4345	115.423	110.246	104.474	90.8816
	13.6	113.264	122.204	95.5964	121.705	163.561	163.555	143.219	151.206	111.65	97.8906	103.997	113.948	166.908	164.459	158.319	144.535	120.056	121.867	111.699	116.863	149.001	143.713	128.824	156.778	99.0981	97.9016	82.7122	81.5543	106.213	96.5331	104.236	94.3706	105.148	102.667	86.5351	80.8014	109.435	118.65	120.029	118.799	92.2082	102.045	78.4931	83.2589	114.909	110.169	104.409	90.7657
	13.7	113.276	122.303	95.3943	121.647	163.413	163.493	143.028	151.466	112.108	97.9706	103.577	113.945	166.813	164.265	158.295	144.47	119.769	122.045	111.493	116.428	148.863	143.956	128.966	156.344	98.9822	97.9186	82.6099	81.2997	106.404	96.7869	104.363	94.3276	105.237	102.63	86.1396	80.7881	109.318	118.493	120.179	118.093	92.0538	101.811	78.7194	83.2338	114.438	110.025	103.908	90.7727
	13.8	113.231	122.405	95.3813	121.508	163.427	163.655	142.815	151.554	112.467	98.2369	103.242	113.987	166.976	164.34	158.221	144.348	119.358	122.041	111.36	116.311	148.892	144.177	129.133	156.069	98.5821	97.9164	82.4353	81.0399	106.518	97.1754	104.109	94.1282	104.821	102.389	85.7198	80.9544	109.195	118.15	120.279	117.459	92.1738	101.482	79.0176	83.1962	114.062	109.95	103.277	90.894
	13.9	113.255	122.307	95.488	121.313	163.513	163.992	142.514	151.432	112.408	98.3949	102.992	114.143	167.175	164.188	158.026	144.141	118.847	121.88	111.126	116.531	149.1	144.108	129.289	156.177	98.2225	97.8692	82.3704	80.985	106.396	97.4615	103.926	93.7449	104.462	102.216	85.2178	81.1731	109.084	117.948	120.484	116.732	92.6128	101.349	79.1672	83.2054	113.858	109.856	102.64	91.173
	14	113.309	122.01	95.4877	120.943	163.542	164.161	142.078	151.327	112.274	98.5897	102.67	114.274	167.362	164.203	157.726	143.89	118.213	121.6	110.856	116.558	149.113	144.269	129.373	156.43	97.9287	97.7852	82.3796	81.1207	106.242	97.6235	103.569	93.4474	104.206	101.987	84.8677	81.5551	109.033	117.539	120.685	116.084	92.9875	101.3	79.3606	83.4505	113.762	109.609	102.14	91.3289
	14.1	113.352	121.676	95.381	120.773	163.57	164.345	141.96	151.271	112.293	98.6109	102.591	114.268	167.395	164.57	157.388	143.674	117.542	121.468	110.658	116.538	148.931	144.15	129.629	156.655	97.6202	97.4672	82.3338	81.361	105.872	97.7993	103.206	93.2012	103.879	101.785	84.7339	81.9869	109.024	117.104	120.687	115.763	93.1496	101.262	79.5172	83.5509	113.702	109.278	101.807	91.3908
	14.2	113.345	121.321	95.5817	120.873	163.36	164.152	142.089	151.14	112.19	98.4436	102.694	114.153	167.211	164.919	156.979	143.51	117.132	121.328	110.531	116.866	148.919	143.838	129.906	156.759	97.4049	96.9935	82.4088	81.55	105.641	97.7805	103.04	93.1025	103.618	101.738	84.7997	82.1704	108.91	116.926	120.57	115.736	93.2918	101.295	79.5501	83.5264	113.819	108.972	101.625	91.3494
	14.3	113.443	121.16	95.544	121.007	163.137	163.725	142.254	150.944	112.303	98.0114	102.895	114.144	166.809	165.087	156.69	143.5	116.921	121.207	110.221	116.929	148.928	143.696	129.929	156.641	97.2952	96.6824	82.6141	81.8275	105.476	97.7686	103.024	93.1447	103.551	102.037	84.9082	82.0545	108.864	116.735	120.295	115.844	93.1774	101.463	79.5529	83.6011	113.912	108.601	101.579	91.2397
	14.4	113.391	121.164	95.354	121.09	162.898	163.085	142.367	150.616	112.639	97.553	103.209	114.136	166.406	165.225	156.411	143.605	116.992	121.067	109.978	116.682	148.917	143.899	129.828	156.422	97.1664	96.5674	82.8712	82.147	105.387	97.7118	103.003	93.4458	103.193	102.24	85.081	81.912	108.619	116.476	119.991	116.248	93.0028	101.55	79.6422	83.7189	114.011	108.223	101.558	90.8112
	14.5	113.197	121.201	95.2671	121.312	162.89	162.719	142.656	150.402	112.818	96.9222	103.569	114.212	165.9	165.007	156.291	143.732	117.391	120.881	109.942	116.572	149.197	143.919	129.746	156.29	96.9554	96.2652	83.2362	82.3405	105.243	97.909	103.105	93.669	102.683	102.306	85.2756	81.571	108.192	116.373	119.512	116.653	93.0166	101.795	79.514	83.6337	114.066	108.004	101.564	90.5126
	14.6	112.803	121.487	95.1966	121.346	162.8	162.452	142.681	150.143	112.722	96.2887	103.615	114.375	165.375	164.447	156.257	143.908	118.172	120.461	109.946	116.332	149.48	144.06	129.427	156.169	96.7406	96.188	83.5145	82.5916	105.273	97.8583	103.325	93.7884	102.276	102.312	85.4932	81.2278	107.834	116.179	119.156	116.617	93.0606	101.927	79.2005	83.728	114.084	107.9	101.395	90.359
	14.7	112.462	121.869	94.7705	121.268	162.963	162.443	142.574	150.116	112.518	95.8456	103.575	114.464	165.003	163.774	156.206	143.902	118.841	120.117	109.866	115.714	149.459	144.403	129.048	156.12	96.6676	96.2871	83.6883	82.8754	105.081	97.8455	103.399	93.7775	102.04	102.306	85.7234	81.0839	107.488	115.856	118.791	116.466	92.9964	102.115	78.9052	83.9174	114.125	107.972	101.293	90.287
	14.8	112.13	122.02	94.4017	121.257	163.293	162.68	142.395	150.308	112.096	95.7912	103.434	114.366	164.752	163.145	156.146	143.681	119.149	119.844	109.938	115.424	149.274	144.522	129.045	156.447	96.7356	96.3688	83.758	83.0989	104.847	97.7385	103.39	93.7781	101.872	101.895	86.0299	81.209	107.098	115.658	118.677	116.249	93.0726	102.186	78.6028	84.0241	114.256	108.046	101.143	90.2547
	14.9	111.668	122.072	94.2623	121.291	163.541	163.206	142.111	150.677	111.577	95.9243	103.258	114.12	164.488	162.585	156.079	143.35	119.182	119.87	110.118	115.342	149.16	144.501	129.003	156.586	96.8707	96.2447	83.8545	82.9531	104.779	97.5193	103.447	93.6078	102.013	101.434	86.3505	81.1802	106.948	115.6	118.428	115.851	93.0705	102.131	78.3746	84.0772	114.25	108.062	101.003	90.4127
	15	111.195	122.047	93.9542	121.168	163.61	163.47	141.576	150.746	111.159	96.3647	103.166	113.784	164.415	162.256	155.936	142.976	118.925	120.178	110.005	115.121	148.972	144.453	128.845	156.651	97.0905	96.3499	84.0107	82.8366	104.864	97.0558	103.506	93.4501	102.325	101.005	86.5669	81.2938	106.996	115.401	118.323	115.376	92.94	101.836	78.3569	84.1885	114.249	107.995	100.905	90.4901
	15.1	111.125	121.759	93.6072	121.029	163.594	163.455	141.074	151.056	110.762	97.0001	103.288	113.468	164.498	162.049	155.835	142.383	118.351	120.583	109.765	115.266	148.828	144.358	128.746	156.761	97.2144	96.584	84.1346	82.5282	104.743	96.6878	103.509	93.2777	102.695	100.689	86.6446	81.3833	107.046	115.344	118.115	115.336	92.9265	101.575	78.5578	84.1413	114.122	108.017	101.045	90.499
	15.2	111.035	121.282	93.5814	120.801	163.248	163.583	140.517	151.102	110.701	97.5025	103.272	113.204	164.561	162.139	155.858	142.056	117.656	120.788	109.566	115.582	148.753	144.244	128.562	156.749	97.1612	96.9503	84.1104	81.9272	104.766	96.1542	103.711	93.1984	102.88	100.348	86.6076	81.4354	107.14	115.164	117.913	115.212	92.9964	101.328	78.8431	84.0985	113.686	107.859	101.142	90.3805
	15.3	110.96	120.752	93.6078	120.551	162.506	163.603	139.998	151.016	110.805	97.7757	103.141	113.059	164.513	162.429	155.87	141.922	117.297	120.932	109.512	115.583	148.795	144.202	128.023	156.356	97.0161	97.1998	84.0257	81.3382	104.761	95.6036	104.04	92.9944	102.975	100.349	86.5965	81.4624	107.217	114.903	117.599	115.048	93.0932	101.175	79.1316	84.0539	113.111	107.808	101.242	90.1413
	15.4	111.021	120.215	93.3831	120.226	161.869	163.267	139.613	150.959	111.008	97.9544	102.832	113.081	164.407	162.705	156.076	141.884	117.012	120.714	109.446	115.322	148.681	144.079	127.594	156.115	96.8275	97.6801	83.7154	81.027	104.631	95.3048	104.112	92.8029	103.081	100.548	86.4969	81.5987	107.235	114.493	117.54	114.905	93.2478	101.18	79.3522	84.0543	112.628	107.887	101.289	89.8989
	15.5	111.252	119.885	93.2796	119.88	161.393	162.939	139.387	151.03	111.33	97.9238	102.501	113.103	164.241	162.912	156.211	141.954	116.693	120.178	109.612	115.254	148.45	144.013	127.184	155.891	96.695	98.071	83.0156	80.7858	104.326	95.1058	104.112	92.6724	103.027	100.833	86.4383	81.6297	107.256	114.112	117.534	114.969	93.3686	101.323	79.5488	84.0322	112.15	108.057	101.399	89.8044
	15.6	111.201	119.625	93.3632	119.574	161.133	162.839	139.21	150.561	111.675	97.8266	102.086	113.132	164.134	163.194	156.346	142.304	116.462	119.506	109.836	114.792	148.275	143.889	126.861	155.782	96.7393	98.2028	82.4462	80.8326	104.168	94.9814	104.111	92.6242	102.811	101.043	86.4944	81.7774	107.261	113.754	117.742	114.857	93.4639	101.453	79.6341	84.0064	111.709	108.295	101.554	89.6173
	15.7	111.073	119.51	93.2308	119.46	161.062	162.594	139.021	150.088	111.69	97.7538	101.916	113.177	164.092	163.288	156.355	142.548	116.371	119.17	109.994	114.345	148.103	143.672	126.649	155.971	96.9187	98.0737	82.1258	81.2907	104.011	94.8836	104.011	92.4838	102.672	101.334	86.6685	81.9734	107.368	113.579	118.04	114.719	93.5907	101.447	79.6684	83.9099	111.644	108.69	101.717	89.5665
	15.8	110.734	119.547	93.0573	119.261	161.268	162.421	138.782	149.54	111.6	97.4814	101.97	113.192	164.06	163.178	156.375	142.707	116.241	118.979	110.018	114.054	147.908	143.393	126.636	156.313	97.0196	97.9856	82.0056	81.8268	103.97	94.8243	103.824	92.5016	102.663	101.519	86.7281	82.0266	107.452	113.428	118.311	114.471	93.5592	101.374	79.6584	83.865	111.613	108.849	101.921	89.775
	15.9	110.49	119.623	92.9231	119.27	161.359	162.595	138.48	148.779	111.445	97.0163	102.121	113.169	164.107	163.053	156.304	142.757	116.135	118.954	110.015	113.977	147.869	143.086	126.557	156.531	96.9963	97.7112	82.1614	82.3039	103.844	94.5925	103.856	92.5903	102.716	101.48	86.7105	82.1532	107.385	113.371	118.276	114.32	93.4218	101.286	79.7306	83.7202	111.661	108.869	101.968	89.8508
	16	110.222	119.649	92.7884	119.564	161.382	162.775	138.157	148.084	111.119	96.5802	102.205	113.258	164.226	163.059	156.332	142.686	116.29	118.994	109.806	113.662	148.059	142.816	126.474	156.694	96.9413	97.4274	82.7212	82.6186	103.931	94.3904	103.902	92.5744	102.805	101.369	86.6476	82.3837	107.15	113.445	118.161	113.978	93.2332	101.172	79.6488	83.696	111.615	109.027	101.775	89.561
	16.1	110.032	119.624	92.3753	119.878	161.276	162.901	138.009	147.749	110.826	96.0629	102.292	113.343	164.323	163.117	156.217	142.371	116.339	119.072	109.495	113.627	148.042	142.698	126.348	156.567	96.8256	97.1196	83.2418	82.7195	103.865	94.317	103.831	92.4739	102.932	101.302	86.581	82.4309	106.89	113.437	117.817	113.701	92.8777	101.218	79.4659	83.889	111.641	108.971	101.304	89.3142
	16.2	110.058	119.522	92.1315	119.917	161.298	162.907	138	147.502	110.621	95.5308	102.174	113.62	164.383	163.253	156.142	141.914	116.33	118.738	109.261	113.514	148.144	142.691	126.218	156.074	96.6014	96.925	83.6166	82.5975	103.85	94.5977	103.546	92.4454	102.954	101.13	86.3757	82.2765	106.702	113.274	117.341	113.735	92.4868	101.356	79.1659	84.1227	111.338	108.601	100.879	88.9308
	16.3	110.325	119.416	91.9186	120.022	161.307	162.828	138.111	147.396	110.31	95.2084	101.864	113.966	164.576	163.357	156.034	141.388	116.32	118.32	108.974	113.491	148.293	142.895	126.094	155.614	96.5076	96.8882	83.8036	82.447	103.714	95.0313	103.019	92.1781	102.761	100.801	86.1576	82.1106	106.559	113.133	116.762	114.056	92.1806	101.66	78.8983	84.2853	111.038	108.463	100.423	88.319
	16.4	110.684	119.387	91.9064	119.95	161.483	162.517	138.584	147.656	109.83	95.2344	101.584	114.241	164.826	163.634	155.769	141.081	116.338	117.979	108.433	113.39	148.295	143.229	126.196	155.166	96.6895	96.8884	83.9446	82.3887	103.576	95.5901	102.477	91.9102	102.312	100.623	86.1591	81.7898	106.64	112.997	116.348	114.282	92.0144	101.901	78.5266	84.4869	110.657	108.393	100.261	87.9617
	16.5	110.974	119.261	91.8874	119.611	161.548	162.243	139.269	147.848	109.371	95.3179	101.426	114.484	165.091	163.639	155.348	140.769	116.1	117.791	108.053	113.488	148.158	143.356	126.687	154.817	96.8996	96.9886	83.9818	82.4308	103.246	96.1181	102.099	91.8398	102.052	100.514	86.2424	81.4201	106.78	112.753	116.007	114.627	91.9951	102.058	78.4326	84.5386	110.594	108.067	100.286	87.9465
	16.6	111.287	119.15	92.038	119.147	161.644	161.906	139.801	148.043	108.86	95.401	101.292	114.628	165.117	163.403	154.959	140.727	115.941	117.846	107.805	113.521	148.187	143.477	127.224	154.652	97.1817	97.2942	84.0271	82.578	103.224	96.4714	101.794	91.9709	102.019	100.35	86.173	81.1565	106.941	112.613	115.936	114.849	92.1015	102.134	78.4525	84.29	110.593	107.807	100.363	88.0905
	16.7	111.621	119.192	92.0746	118.799	161.661	161.762	140.315	148.254	108.576	95.5858	101.386	114.43	165.126	163.072	154.55	140.91	115.856	118.166	107.496	113.628	148.316	143.411	127.71	154.661	97.5886	97.5488	84.067	82.7712	103.247	96.4262	101.783	92.0768	102.246	100.004	86.275	81.0188	106.876	112.721	116.003	114.711	92.2018	102.224	78.6949	83.9977	110.788	107.758	100.381	88.4584
	16.8	111.954	119.278	92.1936	118.424	161.617	161.666	140.799	148.397	108.583	95.7419	101.678	114.083	164.949	162.835	154.2	141.202	115.651	118.454	107.191	113.521	148.411	143.079	128.077	154.583	97.9333	97.5709	84.2529	83.0178	103.338	96.2417	102.189	92.4085	102.619	99.7689	86.3254	80.9792	106.82	112.907	116.335	114.495	92.3706	102.066	79.0996	83.7057	111.023	107.613	100.418	88.9366
	16.9	111.84	119.263	92.1077	118.015	161.467	161.638	140.715	148.195	108.834	95.7278	101.988	113.882	164.645	162.334	153.994	141.354	115.497	118.496	107.319	113.43	148.645	142.645	128.18	154.597	98.0624	97.5624	84.3968	83.1712	103.5	96.0958	102.566	92.8737	103.064	99.5136	86.1698	80.999	106.574	113.013	116.719	114.246	92.4122	101.897	79.4618	83.4866	111.393	107.42	100.464	89.2103
	17	111.536	119.434	92.0885	117.71	161.443	161.7	140.194	148.21	109.263	95.7083	102.108	113.672	164.156	162.119	154.079	141.5	115.714	118.368	107.473	113.337	148.778	142.598	127.659	154.398	98.07	97.4733	84.4255	83.3839	103.862	96.0685	102.612	93.3041	103.252	99.2776	85.83	81.028	106.368	113.19	116.94	113.815	92.4066	101.755	79.4786	83.2516	111.447	107.177	100.44	89.3877
	17.1	111.038	119.771	92.0947	117.625	161.449	161.991	139.661	148.477	109.789	95.6501	102.193	113.542	163.786	162.13	154.343	141.311	115.958	117.867	107.574	113.359	148.952	142.534	127.069	154.212	97.99	97.2576	84.4003	83.4618	104.148	96.0078	102.815	93.5908	103.141	99.1578	85.5856	81.0793	106.055	113.49	116.905	113.485	92.4611	101.451	79.486	83.221	111.409	106.895	100.441	89.3266
	17.2	110.222	119.902	92.1582	117.579	161.275	162.199	139.195	148.918	109.972	95.4606	102.181	113.608	163.45	162.121	154.63	140.975	116.028	117.385	107.746	113.452	148.834	142.573	126.582	153.934	97.6478	97.1126	84.4817	83.4607	104.224	96.0177	102.943	93.9503	102.761	99.4527	85.2271	81.1558	105.742	113.615	116.641	113.204	92.4828	101.008	79.3006	83.1844	111.241	106.771	100.427	88.9077
	17.3	109.326	119.862	92.057	117.556	161.007	162.142	138.78	149.614	109.922	95.2265	102.013	113.728	163.216	162.079	154.919	140.633	116.248	116.839	107.953	113.69	148.601	142.698	126.2	153.698	97.1473	97.036	84.3698	83.3065	104.348	96.0941	102.851	94.1806	102.312	99.7801	85.0459	81.2126	105.475	113.515	116.057	112.896	92.2342	100.726	78.8981	83.0699	111.179	106.74	100.428	88.3594
	17.4	108.924	119.924	92.1269	117.569	160.706	162.161	138.69	150.451	109.764	94.9826	101.68	113.679	162.869	162.196	155.33	140.329	116.269	116.413	107.792	113.971	148.221	142.764	125.704	153.438	96.5628	97.074	84.0902	83.1035	104.645	96.1198	102.71	94.1213	101.885	100.193	84.9892	81.3457	105.237	113.549	115.395	112.714	91.9695	100.507	78.5922	82.9724	110.994	106.833	100.318	87.8516
	17.5	108.838	119.681	92.0963	117.543	160.257	162.255	139.025	151.088	109.369	94.6918	101.446	113.561	162.675	162.027	155.571	140.115	115.906	116.166	107.511	114.293	147.949	142.582	125.598	153.427	96.0356	97.0453	83.8041	82.759	104.813	95.9891	102.695	93.8085	101.648	100.663	85.149	81.4498	104.933	113.595	114.987	112.758	91.7077	100.412	78.5556	83.1108	110.847	107.176	100.132	87.3784
	17.6	109.104	119.197	91.9577	117.5	159.795	162.065	139.434	151.36	108.943	94.5376	101.232	113.42	162.556	161.631	155.563	140.222	115.588	116.19	107.246	114.343	147.5	142.274	125.549	153.344	95.7027	96.9962	83.4346	82.3754	104.731	95.9444	102.379	93.4452	101.506	101.184	85.3498	81.3988	104.707	113.384	114.648	112.735	91.269	100.516	78.5962	83.233	110.679	107.393	100.014	87.1309
	17.7	109.773	118.89	91.6116	117.459	159.561	161.786	139.828	151.297	108.751	94.5204	100.883	113.067	162.314	161.197	155.6	140.665	115.426	116.12	107.019	114.082	147.016	141.858	125.412	153.406	95.7378	96.889	82.9062	81.9555	104.783	96.0539	101.975	92.9421	101.567	101.533	85.5295	81.2364	104.582	113.108	114.516	112.831	90.9336	100.748	78.7318	83.5613	110.566	107.344	99.881	87.215
	17.8	110.312	118.706	91.3775	117.475	159.457	162.038	140.14	150.89	108.683	94.7702	100.51	112.684	162.147	160.681	155.551	141.004	115.153	116.228	106.875	113.557	146.724	141.591	125.164	153.612	96.1027	96.8096	82.5312	81.5369	104.769	96.114	101.653	92.5453	101.736	101.864	85.4574	81.058	104.382	113.011	114.694	112.835	90.9282	100.911	78.921	84.0121	110.196	107.279	99.8814	87.4806
	17.9	110.513	118.263	90.9827	117.537	159.394	162.153	140.344	150.332	108.531	95.1976	100.326	112.323	162.274	160.057	155.26	141.262	115.011	116.418	106.876	112.855	146.589	141.737	125.239	153.866	96.6527	96.5983	82.3071	81.2504	104.585	96.2842	101.436	92.4343	101.884	102.19	85.4614	80.7733	104.236	112.761	114.951	112.685	91.0466	101.024	78.9968	84.1722	109.668	107.214	99.9883	87.9312
	18	110.506	117.896	90.6058	117.55	159.596	161.965	140.314	149.692	108.399	95.6712	100.262	111.939	162.248	159.572	154.886	141.484	114.907	116.431	106.949	111.941	146.351	141.907	125.416	153.893	97.198	96.4959	82.1895	81.0635	104.324	96.6201	101.308	92.6392	101.885	102.29	85.3725	80.5627	104.194	112.484	115.035	112.413	91.117	100.994	78.8851	84.0067	109.305	107.042	100.235	88.3496
	18.1	110.168	117.609	90.178	117.438	159.71	161.853	140.21	149.102	108.143	96.1906	100.291	111.652	162.269	159.298	154.603	141.64	114.725	116.325	106.909	111.205	146.103	142.053	125.61	154.099	97.5604	96.4498	82.3838	81.0315	104.381	96.9781	101.38	92.8442	101.933	102.23	85.3114	80.586	104.18	112.396	115.072	112.307	91.4958	100.99	78.5599	83.7355	109.08	107.073	100.41	88.6538
	18.2	109.398	117.331	90.0374	117.337	159.64	161.852	139.958	148.635	107.735	96.776	100.494	111.487	162.293	159.204	154.19	141.454	114.453	116.259	106.837	110.745	146.123	142.3	125.916	154.254	97.6107	96.4074	82.7272	81.2372	104.515	97.2626	101.695	93.156	101.931	102.078	85.4009	80.775	104.155	112.58	115	112.192	91.8924	100.935	78.1522	83.2842	108.928	107.276	100.565	88.7005
	18.3	108.728	117.046	89.9051	117.187	159.658	161.394	139.763	148.202	107.403	96.9918	100.881	111.235	162.221	159.231	153.775	141.337	114.216	115.978	106.755	110.63	145.963	142.54	126.359	154.159	97.5099	96.4343	83.0474	81.5252	104.623	97.524	101.922	93.3892	101.941	101.86	85.6587	81.1015	104.095	112.755	114.812	112.157	92.2321	100.891	77.7783	82.938	108.933	107.35	100.431	88.5645
	18.4	108.246	117.059	89.9158	117.112	159.518	161.025	139.647	147.999	107.406	96.9489	101.168	111.066	161.879	159.35	153.514	141.22	114.007	115.743	106.674	110.725	145.761	142.12	126.724	154.09	97.2828	96.5351	83.4264	81.6541	104.633	97.4302	102.141	93.337	102.05	101.464	85.6525	81.5486	104.11	113.114	114.486	112.226	92.5718	100.879	77.5674	82.8886	109.234	107.343	100.114	88.3243
	18.5	107.949	117.146	90.0004	117.161	159.193	160.908	139.592	147.966	107.658	96.8739	101.105	110.89	161.599	159.593	153.341	140.959	114.046	115.626	106.531	111.002	145.805	141.701	126.621	154.291	96.96	96.6575	83.8446	81.7989	104.727	97.166	102.344	93.1249	102.195	101.332	85.5628	81.9693	104.027	113.656	114.129	112.255	92.9269	100.962	77.5566	83.1036	109.554	107.294	99.8321	88.2069
	18.6	107.918	117.308	90.3437	117.218	159.021	160.785	139.499	147.985	108.055	96.6616	100.848	110.616	161.154	159.745	153.08	140.513	114.155	115.694	106.496	111.231	146.101	141.347	126.346	154.277	96.4995	96.8773	84.0001	82.0084	104.623	96.7993	102.626	93.0454	102.487	101.245	85.3901	82.2277	103.943	113.949	113.924	112.147	92.9053	100.897	77.8508	83.2782	109.678	107.236	99.6037	88.0968
	18.7	108.177	117.282	90.6434	117.217	158.916	160.565	139.383	147.997	108.422	96.1912	100.575	110.446	160.847	160.067	152.977	140.03	114.255	115.822	106.305	111.514	146.395	141.131	125.987	154.168	96.2425	97.13	84.0792	82.0718	104.326	96.4466	102.797	92.833	102.85	101.207	85.1814	82.2546	103.713	113.919	113.836	112.155	92.7466	100.786	78.3425	83.4626	109.544	107.018	99.5375	88.2828
	18.8	108.342	117.309	90.8736	117.148	158.58	160.462	138.95	147.995	108.605	95.9068	100.197	110.459	160.583	160.523	152.971	139.611	114.267	116.212	105.991	111.609	146.772	140.719	125.496	154.024	95.9476	97.1534	84.1779	81.9982	104.073	96.0722	103.008	92.574	102.891	101.36	85.1254	82.0669	103.544	113.847	113.657	112.057	92.5351	100.775	78.6798	83.4337	109.415	106.871	99.5403	88.5577
	18.9	108.333	117.397	91.0257	116.881	158.404	160.261	138.305	147.746	108.444	95.7764	99.8989	110.611	160.574	161.062	152.876	139.14	114.082	116.527	105.65	111.681	147.11	140.916	124.98	153.693	95.7631	97.0962	84.1644	82.149	103.841	95.8632	103.139	92.5778	102.928	101.624	85.3494	81.695	103.308	113.674	113.517	112.053	92.2158	100.681	78.8556	83.2776	109.148	106.706	99.6792	88.75
	19	108.266	117.586	91.1262	116.483	158.216	160.125	137.463	147.341	107.969	95.5619	99.978	110.864	160.704	161.373	152.73	138.821	113.761	116.772	105.389	111.744	147.249	141.015	124.798	153.206	95.798	96.9482	84.046	82.361	103.607	95.6218	103.332	92.5205	103.112	101.698	85.7715	81.2433	103.272	113.029	113.554	112.246	91.98	100.533	78.8067	82.9654	108.694	106.478	99.7582	88.7132
	19.1	108.131	117.743	90.9465	116.168	157.918	160.277	136.545	146.905	107.54	95.3116	100.114	110.976	160.857	161.666	152.716	138.729	113.331	116.794	105.254	111.866	147.252	141.187	124.743	152.718	96.1062	96.596	84.0126	82.4585	103.324	95.4442	103.516	92.345	102.954	101.623	86.2226	80.8588	103.16	112.469	113.508	112.441	91.9647	100.482	78.371	82.8317	108.364	106.069	99.7914	88.6882
	19.2	107.854	118.019	90.5566	115.98	157.579	160.57	135.721	146.616	107.281	95.0737	100.144	111.062	161.031	161.583	152.593	138.733	112.978	116.673	105.157	111.748	146.975	141.188	124.561	152.34	96.3657	96.266	84.044	82.4713	103.116	95.2279	103.485	92.2229	102.666	101.562	86.5075	80.8051	103.153	112.042	113.475	112.442	92.0415	100.582	77.7733	82.7515	108.462	105.798	99.7162	88.508
	19.3	107.941	118.076	90.2862	115.909	157.46	160.84	135.373	146.456	107.134	94.7251	100.154	111.152	161.195	161.174	152.41	138.641	112.841	116.292	105.01	111.821	146.659	141.175	124.6	152.242	96.6363	96.2504	83.9565	82.6044	102.895	95.0099	103.498	92.2199	102.762	101.318	86.4995	80.8557	103.1	111.738	113.536	112.675	92.0856	100.583	77.3764	82.8951	108.605	105.541	99.7246	88.3336
	19.4	108.187	117.769	90.0482	115.864	157.456	161.239	135.256	146.364	107.226	94.3217	100.134	110.939	161.104	160.628	152.174	138.694	112.88	115.845	104.954	111.767	146.262	140.655	124.588	152.333	96.895	96.4526	83.8437	82.5328	102.752	94.8607	103.63	92.063	102.575	101.154	86.2657	81.0362	103.027	111.266	113.681	112.693	92.0764	100.809	77.104	83.1082	108.662	105.273	99.5838	88.0486
	19.5	108.387	117.284	89.8294	115.896	157.617	161.486	135.296	146.267	107.49	94.1564	99.8867	110.815	160.72	160.201	151.91	138.698	112.896	115.416	104.931	111.466	146.064	140.347	124.573	152.357	97.0864	96.6393	83.7393	82.2303	102.523	94.8436	103.602	91.9631	102.181	101.205	85.7694	81.1706	102.737	111.069	113.636	112.652	91.9889	101.077	77.1004	83.3344	108.68	105.187	99.28	87.6711
	19.6	108.42	116.767	89.8715	115.965	157.995	161.304	135.482	146.141	107.695	94.1477	99.7573	110.799	160.528	159.889	151.552	138.637	112.97	115.124	104.877	110.977	145.902	140.167	124.59	152.547	96.9954	96.976	83.5859	81.9128	102.443	94.8908	103.436	91.9322	101.959	101.415	85.2636	81.2683	102.562	111.144	113.573	112.642	91.8122	101.408	77.4995	83.4917	108.611	105.313	99.0899	87.2106
	19.7	108.467	116.368	90.156	115.892	158.337	161.071	135.652	145.829	107.844	94.3268	99.8038	110.591	160.438	159.56	151.219	138.626	113.024	114.964	104.971	110.551	145.94	139.999	124.799	152.752	96.8096	97.2925	83.3546	81.782	102.402	95.0942	103.492	92.2003	101.652	101.576	84.8984	81.0665	102.576	111.276	113.356	112.663	91.5246	101.601	78.0241	83.5221	108.27	105.477	98.9286	86.681
	19.8	108.128	116.125	90.2426	115.713	158.638	161.086	135.638	145.552	107.976	94.6205	99.9472	110.255	160.448	159.411	150.779	138.491	112.765	115.033	105.264	109.991	145.962	139.855	124.856	152.963	96.7186	97.5222	83.1312	81.8375	102.371	95.4571	103.551	92.4524	101.177	101.799	84.7552	80.6882	102.768	111.212	113.021	112.569	91.2453	101.623	78.5891	83.3678	107.721	105.768	98.769	86.274
	19.9	107.725	116.083	90.1993	115.764	158.869	161.095	135.57	145.454	107.986	94.9489	100.017	110.076	160.644	159.105	150.482	138.334	112.497	115.178	105.478	109.673	146.032	140.091	124.958	153.141	96.6191	97.5285	82.9983	81.8894	102.412	95.8661	103.467	92.7943	101.103	101.93	84.6818	80.2972	102.847	111.449	112.718	112.709	91.1244	101.465	79.0263	83.2588	107.379	105.906	98.8328	86.0512
	20	107.393	116.279	89.9982	115.949	158.842	160.966	135.636	145.464	108.09	95.0718	100.261	109.719	161.151	158.695	150.342	138.295	112.226	115.293	105.602	109.657	145.801	140.256	125.011	153.429	96.3804	97.5304	82.841	82.0918	102.735	96.2345	103.411	93.1883	101.2	101.789	84.7445	80.0239	102.952	111.82	112.592	112.783	90.992	101.418	79.2358	83.3247	107.152	105.724	99.0911	86.273
	20.1	107.085	116.506	89.6281	116.073	158.593	161.051	135.704	145.621	108.256	94.9648	100.448	109.5	161.512	158.249	150.352	138.204	111.823	115.276	105.453	109.87	145.591	140.297	124.932	153.606	96.4118	97.4572	82.6694	82.2119	103.031	96.4566	103.26	93.5385	101.367	101.605	84.8037	79.6995	102.962	111.914	112.58	112.732	90.9414	101.161	79.1826	83.3309	107.029	105.542	99.279	86.6808
	20.2	106.902	116.594	89.0642	116.301	158.387	161.042	135.798	145.828	108.342	94.7381	100.408	109.505	161.542	157.983	150.383	138.152	111.36	115.081	105.306	110.285	145.415	140.352	124.853	153.838	96.502	97.4148	82.4202	82.1656	103.236	96.407	103.022	93.4306	101.58	101.435	84.8834	79.4827	102.662	111.919	112.728	112.737	91.1346	101.075	78.9714	83.2917	106.996	105.222	99.4006	87.2768
	20.3	106.933	116.879	88.6435	116.64	158.144	160.634	135.761	146.141	108.266	94.4698	100.148	109.761	161.286	157.774	150.568	138.431	111.046	114.661	105.148	110.491	145.423	140.507	124.753	153.905	96.445	97.1585	82.3097	81.7565	103.536	96.2019	102.761	93.2834	101.914	101.239	84.925	79.6406	102.132	111.899	113.092	112.66	91.361	101.24	78.5898	83.2857	107.211	104.612	99.3849	87.707
	20.4	106.951	117.349	88.3636	116.691	157.77	160.089	135.765	146.423	108.099	94.1228	99.9213	110.009	161.031	158.004	150.739	138.647	110.698	114.176	105.082	110.454	145.564	140.477	124.556	153.931	96.3098	96.9502	82.1737	81.485	103.765	95.837	102.542	92.9904	102.031	100.945	85.0215	79.868	101.725	111.777	113.282	112.274	91.6078	101.423	78.3778	83.2423	107.242	104.232	99.2696	88.2263
	20.5	106.755	117.598	88.0976	116.541	157.563	159.642	135.57	146.855	107.853	93.7739	99.6824	110.272	160.735	158.453	150.762	138.691	110.326	113.808	104.955	110.424	145.812	140.251	124.162	153.991	96.2703	96.8791	82.09	81.2414	103.673	95.342	102.369	92.6568	102.037	100.875	85.2448	80.1653	101.396	111.47	113.337	111.72	91.7953	101.374	78.2695	82.9004	107.346	104.2	99.1773	88.3928
	20.6	106.627	117.819	87.8792	116.228	157.36	159.142	135.287	147.048	107.385	93.7097	99.5648	110.46	160.379	158.825	150.725	138.71	110.134	113.552	104.967	110.24	145.779	139.829	123.748	154.191	96.2122	96.7818	82.0767	81.2287	103.49	94.9231	102.24	92.4728	101.925	100.759	85.4258	80.6452	101.109	111.262	113.183	111.457	91.9028	101.437	78.2229	82.7537	107.587	104.203	98.9984	88.4648
	20.7	106.382	117.934	87.8987	115.827	157.325	158.712	135.104	147.2	107.132	93.6648	99.6203	110.656	160.198	159.377	150.658	138.549	110.09	113.411	104.864	109.927	145.682	139.441	123.23	154.255	96.1096	96.596	82.1257	81.2819	103.511	94.8013	102.097	92.5252	101.973	100.737	85.5831	81.1819	101.08	111.254	112.964	111.314	91.6408	101.25	78.2714	82.9149	107.834	104.247	98.903	88.381
	20.8	105.98	117.79	87.8689	115.25	157.202	158.662	135.206	146.905	107.041	93.5267	99.9841	110.653	160.287	159.993	150.621	138.238	110.249	113.453	104.591	109.936	145.354	139.219	122.653	154.232	96.0934	96.5274	82.1423	81.5851	103.277	94.8109	101.875	92.5317	101.922	100.769	85.6145	81.4306	101.07	111.445	112.611	111.29	91.3718	101.009	78.334	83.1784	107.918	104.702	99.0444	88.3069
	20.9	105.725	117.362	87.8673	114.796	157.329	158.687	135.341	146.401	106.939	93.5988	100.465	110.578	160.381	160.393	150.392	137.958	110.39	113.532	104.212	110.021	144.896	139.162	122.215	154.053	96.1121	96.5694	82.1702	81.8711	103.028	95.0427	101.634	92.6233	101.923	100.882	85.5911	81.46	101.209	111.459	112.523	111.746	90.9604	100.73	78.2664	83.3225	108.071	105.244	99.0072	88.0039
	21	105.725	116.986	88.0336	114.372	157.568	158.643	135.683	145.696	106.624	93.7998	100.751	110.694	160.312	160.728	150.261	137.809	110.575	113.669	104.103	109.927	144.661	139.298	122.105	153.723	96.2406	96.6953	82.1792	82.0686	102.914	95.4209	101.356	92.6602	101.815	100.653	85.5584	81.3977	101.314	111.591	112.502	112.468	90.7434	100.59	78.1594	83.6221	108.077	105.65	98.7	87.7651
	21.1	105.763	116.581	88.0968	114.222	157.899	158.596	136.206	145.295	106.474	93.7489	100.721	110.912	160.517	161.011	149.986	137.486	110.792	113.809	104.172	110.061	144.679	139.695	122.417	153.251	96.2383	96.909	82.1392	82.0393	102.841	95.8133	101.18	92.4694	101.755	100.553	85.638	81.2455	101.561	111.749	112.536	112.969	90.5476	100.469	78.1668	83.7307	107.802	105.731	98.5036	87.474
	21.2	105.967	116.284	88.026	114.264	158.117	158.593	136.647	144.998	106.204	93.864	100.577	111.15	160.667	161.028	149.792	137.341	110.797	113.977	104.322	110.203	144.679	140.146	122.842	152.78	96.2872	97.1287	82.2751	82.05	102.637	95.8496	101.013	92.3128	101.588	100.305	85.5773	80.9627	101.798	111.607	112.555	113.057	90.5757	100.572	78.0637	83.688	107.383	105.753	98.2496	87.1596
	21.3	106.375	115.967	87.9222	114.472	158.435	158.403	136.866	145.138	105.988	94.1509	100.055	111.496	160.774	160.749	149.554	137.064	110.558	114.051	104.497	110.215	144.817	140.359	123.529	152.425	96.3456	97.3832	82.3155	82.0957	102.57	95.6722	100.909	92.1881	101.482	99.9216	85.558	80.7983	102.273	111.395	112.543	112.835	90.5313	100.725	78.0546	83.4926	107.085	105.278	97.8926	86.9506
	21.4	106.547	115.72	87.7894	114.87	158.485	158.132	136.956	145.523	106.178	94.1496	99.5518	112.041	160.761	160.502	149.48	136.879	110.466	114	104.836	110.141	145.013	140.411	124.144	152.425	96.5222	97.4826	82.2708	82.1306	102.391	95.3076	100.818	92.07	101.47	99.5182	85.5945	80.8388	102.565	111.331	112.21	112.258	90.4739	101.079	78.1178	83.3818	106.858	104.605	97.8762	86.8648
	21.5	106.472	115.496	87.7153	115.437	158.291	158.179	136.922	145.842	106.686	94.0859	99.2683	112.427	160.661	160.223	149.285	136.69	110.361	113.671	104.985	110.15	145.054	140.342	124.558	152.699	96.4715	97.2703	82.2522	82.3024	102.208	94.997	100.877	92.1578	101.783	99.4158	85.4338	80.9012	102.776	111.101	111.735	111.548	90.2367	101.412	78.2342	83.2806	106.851	103.9	98.2999	86.8571
	21.6	106.452	115.462	87.793	115.91	158.113	158.312	136.641	146.079	107.303	94.2622	99.2202	112.587	160.199	160.126	149.278	136.833	110.273	113.291	104.989	110.021	145.233	140.047	124.607	153.093	96.4457	97.065	82.3656	82.6891	102.219	94.7202	100.905	92.2558	102.176	99.2342	85.2224	80.9174	102.829	110.797	111.539	110.775	90.1614	101.693	78.2659	83.0716	106.923	103.609	98.6929	86.8203
	21.7	106.227	115.673	87.8712	116.246	157.969	158.4	136.183	146.233	107.882	94.2589	99.2837	112.543	159.744	160.043	149.175	136.927	110.472	112.897	104.936	109.892	145.454	139.559	124.711	153.508	96.5332	96.7933	82.4536	83.0365	102.256	94.6756	101.04	92.2048	102.591	99.2272	85.2179	81.1275	102.682	110.82	111.407	110.365	90.247	101.823	78.4924	82.8119	107.16	103.526	99.0665	86.9073
	21.8	105.893	116.164	88.1463	116.565	157.799	158.477	135.772	146.234	108.415	94.2386	99.6292	112.38	159.157	159.941	149.006	137.176	110.935	112.59	105.169	109.851	145.65	139.118	124.636	153.887	96.5635	96.482	82.8058	83.0418	102.315	94.8877	101.182	92.2054	102.838	99.4112	85.3969	81.2544	102.349	110.709	111.294	110.347	90.5226	101.884	78.7608	82.6228	107.326	103.889	99.4128	86.7528
	21.9	105.832	116.735	88.4182	116.649	157.76	158.618	135.417	146.032	108.611	94.3321	99.8013	112.086	158.653	159.599	149.034	137.389	111.385	112.526	105.129	109.992	145.823	138.73	124.759	154.104	96.4412	96.2512	83.348	82.8567	102.502	95.1366	101.374	92.1826	103.016	99.711	85.5612	81.2962	101.992	110.537	111.183	110.383	91.0144	101.593	79.0369	82.4448	107.524	104.329	99.4249	86.6242
	22	106.047	117.279	88.6427	116.565	157.929	158.637	134.96	145.796	108.675	94.4888	99.9167	111.742	158.506	159.208	149.352	137.469	112.012	112.65	104.931	110.155	146.045	138.493	125.081	154.131	96.4547	96.2346	83.9186	82.6007	102.659	95.2998	101.398	91.9489	102.799	100.061	85.808	81.2774	101.821	110.405	111.213	110.362	91.5358	101.159	79.3304	82.3548	107.475	104.924	98.994	86.496
	22.1	106.163	117.531	88.8804	116.447	157.951	158.655	134.775	145.319	108.592	94.436	100.085	111.521	158.496	158.662	149.75	137.472	112.469	112.962	104.721	110.146	146.025	138.433	125.359	153.927	96.5398	96.2243	84.2988	82.1736	102.543	95.2973	101.506	91.913	102.313	100.476	86.0537	81.2858	101.715	110.109	110.926	110.502	91.872	100.862	79.5176	82.5048	107.39	105.273	98.6304	86.5307
	22.2	106.432	117.393	89.0528	116.173	157.838	158.741	134.839	145.036	108.59	94.4475	100.227	111.394	158.5	158.187	150.144	137.362	112.663	113.337	104.488	110.096	146.011	138.62	125.361	153.622	96.5433	96.4521	84.5417	81.8226	102.34	95.258	101.527	92.03	101.772	100.777	86.1072	81.1946	101.678	109.416	110.436	110.551	91.9791	100.608	79.5218	82.6069	107.346	105.454	98.2774	86.4134
	22.3	106.608	116.9	88.91	115.883	157.703	158.9	134.89	144.71	108.627	94.3713	100.403	111.212	158.699	157.921	150.699	137.223	112.541	113.584	103.998	109.867	145.8	138.819	125.397	153.44	96.6662	96.7982	84.5889	81.7351	102.132	95.1444	101.555	92.1002	101.502	101.051	85.877	81.1029	101.706	108.907	110.036	110.353	91.8383	100.262	79.348	82.7604	107.338	105.414	97.9982	86.5423
	22.4	106.45	116.293	88.5965	115.565	157.541	158.973	134.917	144.41	108.687	94.3577	100.725	110.947	158.868	157.767	151.072	137.034	112.178	113.816	103.702	109.484	145.465	138.969	125.16	153.106	96.9146	97.1617	84.4735	81.8561	101.808	95.1236	101.406	92.1937	101.141	101.304	85.6779	81.0816	101.894	108.564	110.077	110.162	91.5042	100.239	79.1172	82.9636	107.03	105.347	97.8878	86.5611
	22.5	106.146	115.673	88.251	115.254	157.144	158.917	135.147	144.449	108.806	94.2459	100.989	110.725	158.675	157.638	151.188	136.949	111.466	113.95	103.545	108.924	144.889	139.053	124.652	152.715	97.14	97.4412	84.3358	81.9175	101.536	95.0479	101.327	92.4244	101.077	101.497	85.5491	81.1332	101.976	108.375	110.218	110.179	91.1614	100.511	78.7696	83.0859	106.73	105.167	98.0793	86.5535
	22.6	105.871	115.317	87.8189	115.04	156.843	158.703	135.347	144.891	108.896	94.1463	101.11	110.443	158.516	157.572	151	136.89	110.833	113.781	103.394	108.504	144.346	139.132	124.304	152.504	97.1967	97.5798	84.3302	82.0332	101.404	95.1089	101.27	92.5736	101.331	101.661	85.4099	81.1583	101.954	108.468	110.5	110.179	90.8138	100.568	78.6544	83.1605	106.43	105.147	98.2206	86.4686
	22.7	105.511	115.133	87.4714	114.882	156.615	158.506	135.4	145.042	108.739	93.9627	101.134	110.081	158.311	157.453	150.835	136.95	110.345	113.698	103.298	108.146	143.871	138.992	124.106	152.488	97.1913	97.4841	84.2006	82.017	101.266	95.1269	101.222	92.6144	101.763	101.959	85.3571	81.1372	102.002	108.882	111.185	110.21	90.4414	100.648	78.6511	83.3759	105.946	105.077	98.3776	86.4702
	22.8	105.358	115.108	87.4602	114.663	156.531	158.191	135.411	145.293	108.307	93.6832	100.913	109.754	157.853	157.476	150.55	137.059	110.102	113.822	103.165	107.941	143.763	138.78	123.824	152.395	97.1226	97.2048	83.9122	81.9126	101.193	94.9484	101.114	92.791	102.088	101.971	85.5516	81.2113	102.029	109.234	111.837	110.385	90.1965	100.916	78.6688	83.5709	105.563	104.988	98.2968	86.4689
	22.9	105.595	115.005	87.8114	114.542	156.414	158.101	135.474	145.653	107.783	93.3536	100.461	109.379	157.403	157.834	150.002	137.18	110.048	113.791	102.947	107.891	143.918	138.628	123.644	152.32	97.0231	96.9286	83.5706	81.7136	101.437	94.6195	101.344	92.9547	102.508	101.823	85.7227	81.2254	101.911	109.52	112.041	110.525	90.0134	101.154	78.788	83.6609	105.561	104.851	98.2362	86.4898
	23	105.854	115.052	88.1812	114.367	156.408	157.972	135.467	145.722	107.179	92.9849	99.936	109.061	157.387	158.263	149.391	137.33	110.124	113.832	102.816	108.034	144.323	138.464	123.63	152.238	96.9609	96.5924	83.2091	81.4827	101.656	94.4973	101.577	92.9104	102.851	101.492	85.764	81.1168	101.721	109.696	111.987	110.533	89.9836	101.184	79.0677	83.7637	105.705	104.644	97.9825	86.501
	23.1	105.991	115.001	88.7469	113.91	156.463	157.901	135.243	145.429	106.539	92.7816	99.365	108.786	157.398	158.709	149.004	137.441	110.235	113.974	102.72	108.239	144.793	138.215	123.584	152.166	97.0977	96.3458	82.689	81.4142	101.862	94.4196	101.774	92.7926	103.147	101.2	85.7074	81.0005	101.617	109.805	111.832	110.42	90.0596	101.313	79.1857	83.9031	105.989	104.205	97.6501	86.5236
	23.2	106.026	114.897	89.3534	113.626	156.659	157.588	135.043	145.299	106.303	92.659	98.9401	108.625	157.497	159.146	148.627	137.597	110.264	113.649	102.566	108.376	145.041	138.002	123.549	151.991	97.3166	96.2218	82.4202	81.5571	102.274	94.3997	102.139	92.786	103.205	100.733	85.6623	80.7782	101.409	109.774	111.21	110.202	90.3151	101.427	79.265	83.9377	106.329	104.058	97.474	86.5312
	23.3	105.813	114.643	89.7719	113.353	156.658	157.482	134.936	145.103	106.402	92.6786	98.7126	108.648	157.72	159.39	148.307	137.484	110.002	113.184	102.492	108.55	145.127	137.92	123.376	151.874	97.4289	96.1376	82.2944	81.8729	102.664	94.534	102.585	92.5654	103.133	100.532	85.3874	80.5502	101.264	109.768	110.528	109.93	90.5822	101.521	79.4763	83.9167	106.274	103.937	97.6092	86.4454
	23.4	105.339	114.696	89.8989	113.236	156.701	157.059	134.763	144.908	106.887	92.6952	98.7869	109.046	157.807	159.299	148.388	137.117	109.619	112.754	102.425	108.659	145.051	137.894	123.125	152.006	97.4489	95.9001	82.3552	82.3558	102.856	94.7992	102.793	92.3411	102.967	100.4	85.0073	80.3718	101.126	109.585	110.004	109.702	90.8339	101.377	79.5724	83.9893	105.897	103.985	97.6731	86.554
	23.5	104.837	114.598	90.0033	113.348	156.811	156.717	134.561	144.945	107.423	92.835	99.032	109.529	157.519	158.932	148.677	136.709	109.4	112.251	102.265	108.749	144.738	138.061	122.935	152.281	97.4352	95.7725	82.4185	82.9416	103.01	94.894	102.969	92.3177	102.829	100.376	84.826	80.2718	101.016	109.461	109.589	109.437	90.9788	101.142	79.391	84.0025	105.623	104.096	97.8846	86.7489
	23.6	104.496	114.423	89.8284	113.653	156.745	156.364	134.48	145.052	108.126	92.9914	99.3781	110.062	157.284	158.53	148.936	136.17	109.065	111.834	102.159	108.682	144.34	138.48	122.768	152.434	97.3772	95.6214	82.6446	83.228	103.015	94.8915	102.877	92.3249	102.582	100.171	84.8714	80.2628	100.823	109.218	109.194	109.469	91.0811	100.911	79.1024	83.7954	105.399	104.329	98.2388	87.0331
	23.7	104.408	114.324	89.5158	113.946	156.529	156.077	134.465	145.119	108.535	93.2399	99.5438	110.612	157.033	158.272	149.339	135.537	108.763	111.773	102.091	108.594	144.161	139.157	122.696	152.575	97.2996	95.5117	82.8077	83.2527	102.775	94.9107	102.554	92.2302	102.466	100.004	84.931	80.4807	100.626	108.999	109.155	109.618	91.1082	100.626	78.7956	83.6323	105.251	104.277	98.3619	87.3793
	23.8	104.535	114.561	89.2302	114.296	156.485	155.511	134.331	145.272	108.779	93.5452	99.6232	111.107	156.786	157.958	149.736	135.357	108.76	111.557	102.063	108.356	143.787	139.849	123.037	152.336	97.3404	95.602	82.9466	83.1621	102.405	94.9206	102.273	92.291	102.298	99.8968	85.1322	80.5983	100.18	108.782	109.08	109.862	91.2856	100.227	78.4034	83.5874	105.554	104.229	98.351	87.7224
	23.9	104.733	114.594	89.1274	114.306	156.442	155.33	134.074	145.289	108.566	93.8084	99.5471	111.21	157.001	157.552	149.923	135.603	108.919	111.466	102.234	108.064	143.306	140.368	123.458	151.816	97.5012	95.8786	83.0309	82.8422	101.989	94.93	102.111	92.3345	102.177	99.8862	85.5284	80.7516	99.7811	108.703	109.127	110.025	91.5834	99.9731	77.9876	83.511	106.133	103.941	98.4386	87.8446
	24	105.038	114.744	88.9594	114.023	156.191	155.163	133.666	144.973	108.203	94.0368	99.298	111.085	157.501	157.38	149.869	135.726	108.919	111.539	102.463	107.713	143.168	140.721	123.704	151.173	97.6373	96.0972	83.0984	82.366	101.657	94.9379	101.863	92.3017	101.974	99.9756	85.7432	80.927	99.4477	108.591	109.272	110.184	91.87	99.8407	77.8927	83.5942	106.411	103.697	98.591	87.7794
	24.1	105.311	114.914	88.9094	113.694	156.062	155.198	133.203	144.673	107.75	94.0809	98.9837	110.769	157.94	157.069	149.81	136.021	109.138	111.675	102.543	107.466	143.136	140.795	123.899	150.548	97.7718	96.4166	83.1444	82.0217	101.497	94.9548	101.963	92.389	101.746	100.244	85.76	81.0596	99.1614	108.661	109.609	109.969	92.1209	99.8448	78.015	83.7932	106.394	103.407	98.5528	87.3998
	24.2	105.44	115.064	88.9952	113.197	156.004	155.401	132.694	144.396	107.352	93.8592	98.8414	110.404	158.411	156.487	149.553	136.411	109.552	111.772	102.724	107.31	142.943	140.6	123.89	149.985	97.789	96.6202	83.0671	81.8046	101.491	94.913	102.135	92.6074	101.522	100.595	85.7846	81.1829	99.178	108.756	109.958	109.763	92.3706	100.076	78.209	83.9587	106.288	103.181	98.6785	87.0998
	24.3	105.48	114.903	89.0261	112.774	155.63	155.88	132.291	143.909	107.078	93.594	98.8854	109.815	159.096	155.867	149.056	136.464	109.853	112.107	102.82	107.187	142.941	140.312	123.7	150.034	97.7165	96.6594	83.1575	81.6007	101.656	94.8855	102.22	92.5927	101.575	100.89	85.8318	81.3882	99.4728	108.832	110.475	109.347	92.3778	100.396	78.5187	83.8789	106.025	103.222	98.6602	86.8593
	24.4	105.441	114.852	88.7934	112.744	155.131	156.232	132.204	143.52	107.037	93.5056	98.8904	109.453	159.336	155.398	148.569	136.26	110.022	112.313	102.669	107.287	143.191	140.264	123.593	150.227	97.5677	96.6894	83.1994	81.5782	101.782	94.7624	102.25	92.6194	101.735	101.143	85.6708	81.4338	99.825	108.985	110.973	109.031	92.298	100.795	78.8136	83.7419	105.634	103.533	98.5285	86.6676
	24.5	105.215	114.628	88.5416	112.936	154.99	156.621	132.261	143.487	107.158	93.489	98.9584	109.112	159.108	154.937	148.326	136.266	110.203	112.298	102.484	107.475	143.1	140.18	123.675	150.375	97.4639	96.8276	83.2281	81.8202	101.801	94.6236	102.496	92.5927	101.916	101.28	85.554	81.6021	100.097	109.194	111.448	108.79	92.2556	101.341	78.8643	83.3966	105.376	103.785	98.126	86.6452
	24.6	105.001	114.472	88.2248	113.111	154.645	156.812	132.337	143.531	107.348	93.5202	99.1398	108.944	158.857	154.8	147.886	136.218	110.211	112.099	102.386	107.738	142.8	140.114	123.871	150.543	97.3259	96.8958	83.2308	82.0706	101.908	94.5686	102.683	92.397	102.184	101.375	85.602	81.6184	100.467	109.331	111.687	108.7	92.3998	101.724	78.7956	83.0678	105.405	104.26	97.8789	86.9215
	24.7	104.753	114.423	87.8052	113.287	154.121	156.931	132.495	143.426	107.712	93.6785	99.1504	108.877	158.601	154.955	147.458	136.038	109.974	112.048	102.121	107.894	142.519	140.089	124.106	150.689	97.3062	97.1142	83.3606	82.2896	101.924	94.5185	102.79	91.8774	102.462	101.329	85.6638	81.5757	100.477	109.405	111.52	108.552	92.507	101.772	78.6419	82.7278	105.495	104.704	97.5331	86.9272
	24.8	104.464	114.621	87.4231	113.279	154.026	156.87	132.634	143.467	107.965	93.8123	98.9457	109.17	158.05	155.333	147.313	135.871	109.739	111.906	101.858	108.105	142.375	140.078	124.103	150.489	97.3026	97.283	83.2461	82.5557	101.708	94.3444	102.872	91.6117	102.632	101.186	85.7415	81.433	100.391	109.404	111.206	108.682	92.6631	101.707	78.3385	82.6423	105.46	104.732	97.44	86.9098
	24.9	104.214	114.826	87.2139	113.023	154.223	156.611	132.546	143.643	108.124	93.7448	98.798	109.479	157.524	155.871	147.225	135.826	109.577	111.714	101.632	107.999	142.234	139.859	123.849	150.193	97.2692	97.3724	83.1446	82.7377	101.767	94.1172	102.805	91.3207	102.751	101.085	85.955	81.3754	100.158	109.246	110.562	108.833	92.7558	101.579	78.2085	82.67	105.336	104.596	97.4634	86.9448
	25	104.2	115.109	87.0924	112.616	154.331	156.176	132.546	143.53	108.158	93.531	98.8102	109.984	157.34	156.438	147.076	135.692	109.481	111.724	101.417	107.909	142.387	139.484	123.409	150.004	97.2903	97.3392	83.0572	82.7479	101.956	94.0083	102.68	91.16	102.918	100.94	86.1622	81.1732	100.161	108.991	109.706	109.072	92.8443	101.252	78.2189	82.791	105.221	104.439	97.6701	86.9168
	25.1	104.219	115.348	87.1071	112.461	154.843	155.703	132.655	143.301	108.108	93.3488	98.8841	110.746	157.111	156.839	147.153	135.421	109.371	111.707	101.254	107.665	142.827	139.172	122.598	150.021	97.211	97.4065	83.0179	82.7496	101.946	93.7942	102.496	91.1511	103.111	100.746	86.2023	81.2002	100.098	108.65	108.891	109.325	92.621	100.96	78.3174	83.0444	104.972	103.96	97.8653	86.7137
	25.2	104.234	115.321	87.2204	112.512	155.554	155.227	132.734	143.218	107.773	93.216	99.2468	111.465	156.955	157.029	147.413	135.169	109.21	111.465	101.233	107.444	143.398	138.966	121.851	150.039	97.0458	97.318	83.098	82.7194	102.069	93.642	102.414	91.3105	103.092	100.516	86.1032	81.0982	100.174	108.331	108.48	109.414	92.3524	100.907	78.5081	83.3516	104.772	103.491	97.9935	86.744
	25.3	104.325	115.091	87.4078	112.646	155.976	154.85	132.857	143.124	107.478	93.1152	99.5438	111.661	156.841	156.998	147.709	135.076	109.014	111.336	101.328	107.179	143.656	138.814	121.472	150.057	96.9133	97.3876	83.3151	82.5882	102.396	93.6008	102.357	91.3933	102.861	100.337	85.7774	81.0787	100.204	108.076	108.243	109.251	92.0993	100.976	78.7501	83.4578	104.766	103.177	97.9008	86.5719
	25.4	104.567	114.575	87.6495	112.67	156.007	154.715	133.113	142.688	107.257	93.165	99.6716	111.604	156.889	156.591	148.022	135.059	108.839	111.354	101.513	106.975	143.554	138.779	121.296	150.346	96.7735	97.4605	83.4693	82.4349	102.387	93.762	102.485	91.619	102.37	100.031	85.4225	80.9786	100.437	107.789	108.291	109.224	91.7537	100.993	78.7762	83.3419	104.991	102.821	97.7028	86.3429
	25.5	104.623	114.111	87.9102	112.895	155.858	154.905	133.331	142.436	107.165	93.3143	99.4892	111.364	157.075	155.87	148.282	135.012	108.72	111.303	101.773	106.447	143.264	138.967	121.075	150.678	96.376	97.5312	83.6142	82.3218	102.36	93.823	102.486	91.921	101.885	99.9711	85.068	80.8105	100.364	107.523	108.575	109.026	91.3198	101.216	78.7638	83.2014	105.219	102.497	97.3835	86.0597
	25.6	104.645	113.679	88.0214	112.873	155.475	155.406	133.465	142.344	107.097	93.5719	99.0518	110.682	157.27	155.14	148.499	135.087	108.659	111.487	101.84	106.127	142.861	139.132	121.143	150.683	96.1878	97.4837	83.6418	82.3368	102.353	93.9409	102.408	91.9494	101.431	99.8913	84.6328	80.5942	100.138	107.349	108.978	108.906	90.9863	101.475	78.7201	82.9491	105.369	102.326	96.8871	85.8713
	25.7	104.828	113.518	87.9993	112.823	154.871	155.964	133.489	142.31	107.181	93.9546	98.3285	109.865	157.333	154.598	148.464	135.093	108.649	111.77	101.808	106.014	142.437	139.154	121.199	150.449	96.0329	97.5449	83.4154	82.4612	102.263	94.0099	102.266	92.0279	101.342	99.9923	84.3182	80.4512	99.9534	107.287	109.31	109.012	90.6497	101.698	78.5388	82.7642	105.398	102.194	96.4793	85.5752
	25.8	104.938	113.433	87.7692	112.852	154.244	156.436	133.373	142.242	107.302	94.3513	97.8213	109.485	157.515	154.263	148.05	134.854	108.658	111.817	101.715	105.92	142.237	139.108	121.001	150.276	96.0802	97.4635	83.1935	82.635	102.198	94.0802	102.129	91.9596	101.544	100.082	84.2538	80.2976	99.8746	107.351	109.415	109.1	90.3262	101.857	78.327	82.7148	105.35	102.093	96.266	85.5563
	25.9	104.798	113.715	87.3388	113.132	153.941	156.735	133.096	142.497	107.438	94.7011	97.6618	109.278	157.594	154.274	147.548	134.416	108.417	111.804	101.574	105.92	142.458	138.892	120.8	149.897	96.3198	97.3984	83.0647	82.8202	102.338	94.0996	102.01	91.6825	102.038	100.189	84.1552	80.3344	99.6886	107.745	109.554	108.754	90.2135	101.958	78.3824	82.8479	105.081	102.094	96.2341	85.6075
	26	104.713	113.834	86.8584	113.194	153.848	156.709	132.875	142.493	107.488	95.0237	97.6506	109.15	157.36	154.677	146.925	134.025	108.056	111.767	101.37	106.197	142.821	138.569	120.854	149.436	96.8218	97.4768	82.8977	82.9459	102.415	94.199	101.982	91.1252	102.495	99.9979	84.1546	80.5294	99.7291	108.283	109.704	108.387	90.2898	101.748	78.4457	82.955	104.825	102.184	96.4988	85.7323
	26.1	104.594	113.771	86.3816	113.244	153.828	156.387	132.661	142.576	107.565	95.228	97.6968	109.068	157.205	155.165	146.089	133.802	107.625	111.507	101.374	106.242	143.133	138.077	121.061	149.077	97.2214	97.4562	82.7821	82.863	102.59	94.2202	102.06	90.8046	102.775	99.9845	84.5255	80.5526	100.046	108.719	109.797	107.964	90.5271	101.384	78.4459	83.0657	104.619	102.284	97.1402	85.8677
	26.2	104.376	113.505	86.048	113.053	154.031	156.017	132.553	142.818	107.591	95.1951	97.7882	108.939	156.902	155.522	145.395	134.014	107.46	111.14	101.506	106.139	143.327	137.511	121.208	149.138	97.7393	97.2944	82.6968	82.7556	102.656	94.2597	102.223	90.5168	102.812	100.079	84.9258	80.5541	100.351	108.919	109.628	107.557	90.8726	100.973	78.5347	83.0664	104.498	102.615	97.8141	85.9671
	26.3	104.273	113.109	85.9833	112.809	154.42	155.943	132.667	143.152	107.559	95.0774	97.7699	108.692	156.517	155.817	145.097	134.308	107.39	110.952	101.684	106.098	143.376	136.924	121.466	149.325	97.8404	97.0951	82.5588	82.6388	102.64	94.3374	102.383	90.4904	102.808	100.206	85.1841	80.6274	100.616	108.875	109.587	107.296	91.2298	100.614	78.7122	83.1007	104.396	103	98.3317	86.0962
	26.4	104.397	112.494	86.207	112.41	154.711	156.006	133.084	143.276	107.515	94.936	97.5258	108.351	156.053	156.097	144.795	134.554	107.744	110.758	101.847	106.034	143.27	136.542	121.801	149.643	97.758	96.7954	82.4985	82.6395	102.672	94.2883	102.382	90.5956	102.846	100.405	85.4797	80.6197	100.972	108.675	109.378	107.418	91.5529	100.422	78.6656	83.2778	104.467	103.353	98.5432	86.1068
	26.5	104.532	112.153	86.4838	112.079	154.722	156.226	133.371	143.672	107.599	94.8143	97.4994	108.079	155.72	156.306	144.794	134.831	108.074	110.576	101.936	105.924	142.988	136.28	121.962	150.103	97.5791	96.1909	82.6334	82.6746	102.815	94.1688	102.278	90.9294	102.973	100.784	85.715	80.5354	101.204	108.312	108.986	107.667	91.6626	100.417	78.6176	83.6214	104.594	103.659	98.4355	86.006
	26.6	104.596	112.215	86.8534	111.888	154.68	156.33	133.512	143.709	107.609	94.646	97.6638	108.034	155.253	156.513	145.275	134.794	108.652	110.492	101.814	105.952	142.752	136.296	121.93	150.835	97.3589	95.7022	82.7077	82.8364	102.872	94.2502	102.033	91.206	103.192	101.011	85.6477	80.6054	101.223	108.081	108.579	107.784	91.5666	100.521	78.5066	83.9652	104.802	104.082	97.989	85.9631
	26.7	104.632	112.514	87.095	112.03	154.522	156.359	133.576	143.324	107.682	94.5244	97.8425	108.217	155.053	156.585	145.698	134.186	108.897	110.46	101.52	105.982	142.539	136.675	122.091	151.353	96.997	95.3312	82.906	82.8951	103.221	94.2484	101.815	91.5357	103.385	101.083	85.4781	80.8127	101.157	108.17	108.475	107.749	91.4222	100.616	78.4318	84.413	104.891	104.029	97.5129	86.0553
	26.8	104.555	112.984	87.2614	112.187	154.188	156.042	133.443	142.883	107.576	94.3411	97.9018	108.34	154.81	156.544	146.004	133.828	109.033	110.398	101.081	105.895	142.398	137.161	122.221	151.381	96.9422	95.2303	83.1982	82.8083	103.603	94.2447	101.741	91.6426	103.432	101.08	85.4301	80.8829	101.048	108.327	108.255	107.823	91.2657	100.764	78.2666	84.787	104.805	103.857	97.2412	85.9662
	26.9	104.449	113.444	87.2076	112.315	153.869	155.645	133.059	142.659	107.352	94.1044	98.0447	108.638	154.827	156.385	146.382	133.712	108.937	110.332	100.764	105.868	142.062	137.499	122.052	151.106	97.0544	95.4328	83.3085	82.4369	103.859	94.344	101.821	91.6414	103.25	101.02	85.3256	80.8836	100.687	108.178	108.13	107.675	90.9866	100.823	78.2673	84.8243	104.474	103.748	97.0983	86.028
	27	104.314	113.698	87.1356	112.57	153.62	155.244	132.709	142.402	107.02	93.7506	97.9602	108.828	154.748	156.106	146.473	133.509	109.133	110.325	100.531	105.886	141.802	137.77	122.073	150.697	97.2124	95.9214	83.2749	82.0746	103.826	94.5101	102.069	91.4091	102.843	100.931	85.1712	80.8808	100.485	107.942	108.264	107.443	90.8133	100.916	78.2169	84.6208	104.06	103.544	96.9379	86.325
	27.1	104.236	113.681	87.0145	112.832	153.227	155.257	132.497	142.322	106.701	93.4136	97.8327	108.973	154.845	155.56	146.117	133.467	109.085	110.285	100.566	105.899	141.557	137.946	122.136	149.963	97.3366	96.282	83.3905	81.6183	103.909	94.4749	102.524	91.1278	102.494	100.827	85.0476	80.9746	100.448	107.645	108.364	107.379	90.8816	101.106	78.3691	84.3878	103.614	102.987	96.8053	86.5562
	27.2	104.098	113.44	86.9347	112.854	152.886	155.469	132.353	142.524	106.32	93.0989	97.8207	108.994	154.797	155.313	145.8	133.762	109.242	110.229	100.638	105.802	141.382	137.837	122.048	149.373	97.5494	96.5948	83.4669	81.1289	103.695	94.5952	102.865	90.7322	102.354	100.662	84.9625	81.0411	100.38	107.161	108.325	107.474	91.016	101.344	78.4258	83.9667	103.399	102.716	96.5952	86.7462
	27.3	103.887	113.316	86.7051	112.675	152.769	155.683	132.36	142.775	106.195	93.0041	98.0273	109.164	154.916	155.117	145.465	133.961	109.228	110.234	100.734	105.727	141.314	137.636	121.996	149.33	97.7002	96.6635	83.3997	80.9286	103.342	94.5858	102.896	90.4611	102.315	100.5	84.7475	81.1643	100.219	106.806	108.367	107.396	91.1059	101.357	78.5152	83.5387	103.44	102.511	96.1007	87.0265
	27.4	103.645	113.264	86.5816	112.62	152.455	155.849	132.41	142.812	106.162	93.1104	98.2301	109.317	154.899	154.959	144.98	133.886	109.171	110.196	100.656	105.469	141.455	137.522	122.11	149.425	97.6153	96.5166	83.3262	81.0284	102.82	94.6361	102.855	90.1587	102.34	100.376	84.658	81.3357	100.078	106.827	108.423	107.482	91.4465	101.35	78.4378	83.2671	103.773	102.257	95.7464	87.1687
	27.5	103.411	113.292	86.3665	112.482	152.148	155.992	132.313	142.849	106.119	93.3512	98.5157	109.372	155.129	154.88	144.705	133.784	108.67	110.075	100.51	105.22	141.682	137.353	122.011	149.556	97.5911	96.3146	83.2607	81.238	102.482	94.6172	102.755	90.1455	102.531	100.258	84.6383	81.3596	99.789	107.038	108.131	107.629	91.858	101.161	78.4082	83.1486	104.152	102.24	95.7065	87.0102
	27.6	103.294	113.452	86.2615	112.087	152.075	155.943	132.296	143.031	106.085	93.752	98.7065	109.221	155.242	154.966	144.56	133.697	108.2	110.111	100.159	104.911	141.918	137.2	121.898	149.813	97.5416	96.5178	83.0946	81.6127	101.927	94.6159	102.408	90.2518	102.628	100.207	84.7364	81.208	99.3718	107.269	107.852	107.768	92.0798	101.009	78.3219	83.0469	104.736	102.537	95.8232	86.6884
	27.7	103.323	113.642	86.2294	111.732	152.037	155.659	132.232	143.026	106.061	94.2977	98.9007	109.17	155.36	154.911	144.433	133.542	107.59	110.237	99.7846	104.82	142.067	136.962	121.745	149.687	97.2816	96.8521	82.9156	82.2049	101.445	94.5576	101.894	90.4625	102.641	100.321	84.9704	80.9474	99.1547	107.518	107.648	107.796	92.2137	100.882	78.2445	83.0736	105.034	102.88	96.0475	86.379
	27.8	103.535	113.554	86.4575	111.652	151.962	155.507	132.077	142.752	106.009	94.5823	99.2196	109.089	155.272	154.787	144.271	133.112	107.218	110.335	99.5898	104.789	142.082	136.789	121.453	149.28	96.9421	97.2217	82.774	82.5453	101.143	94.6468	101.672	90.7104	102.619	100.51	85.2922	80.6834	99.134	107.651	107.459	107.86	92.4042	100.907	78.1107	83.1372	105.266	103.162	96.5428	86.077
	27.9	103.77	113.389	86.5232	111.652	152.207	155.476	131.881	142.502	105.862	94.6196	99.5279	109.062	155.063	154.501	144.293	133.047	106.893	110.554	99.4942	104.92	142.078	136.575	121.155	148.932	96.6924	97.4174	82.8176	82.7044	101.222	94.5666	101.367	91.1392	102.656	100.679	85.5526	80.3998	99.5309	107.534	107.223	107.861	92.2541	101.062	77.9714	83.205	105.247	103.381	96.8876	85.9411
	28	104.12	113.151	86.6668	111.576	152.544	155.263	131.979	142.096	105.711	94.6229	99.7433	109.372	154.734	154.292	144.098	133.024	106.82	110.824	99.5995	105.106	141.953	136.514	120.679	148.561	96.3655	97.5169	82.841	82.6504	101.541	94.5667	100.934	91.3156	102.498	100.842	85.6786	80.3692	99.8886	107.298	107.233	107.785	91.9834	101.403	77.8718	83.2105	105.215	103.303	96.9132	86.019
	28.1	104.403	112.59	86.6289	111.686	152.723	154.822	132.028	141.401	105.45	94.4403	99.9089	109.916	154.443	154.298	143.959	132.959	106.882	110.922	99.7727	105.555	141.728	136.373	120.061	148.168	96.2668	97.1866	82.8112	82.334	102.133	94.5636	100.722	91.4606	102.228	100.906	85.6873	80.2841	100.203	107.056	107.312	107.638	91.7908	101.42	77.6834	83.0142	104.871	103.26	96.8378	86.3505
	28.2	104.645	112.145	86.5392	111.915	152.784	154.481	132.112	140.855	105.236	94.0238	100.137	110.454	154.197	154.291	143.86	132.963	107.013	110.964	100.121	105.884	141.562	136.338	119.548	148.148	96.5217	96.5881	82.6536	81.8416	102.818	94.4158	100.837	91.551	101.827	100.689	85.6314	80.1837	100.409	106.791	107.219	107.587	91.4978	101.222	77.5161	82.7232	104.599	103.163	96.6423	86.5312
	28.3	104.816	111.899	86.2047	112.086	152.734	153.946	132.144	140.534	105.014	93.8025	100.014	110.801	154.108	154.591	143.814	133.286	107.26	110.847	100.393	106.303	141.388	136.243	119.185	148.24	96.7674	96.0118	82.6519	81.549	103.345	94.1031	100.779	91.5832	101.356	100.376	85.5498	80.135	100.514	106.52	107.289	107.574	91.2097	101.027	77.4746	82.466	104.194	103.174	96.1802	86.4989
	28.4	104.685	111.875	86.1048	112.015	152.472	153.206	132.246	140.277	104.934	93.622	99.8539	110.88	154.17	155.147	143.792	133.308	107.555	110.656	100.612	106.807	141.236	136.123	119.083	148.38	97.0182	95.7887	82.463	81.3827	103.555	93.8463	100.874	91.4631	100.815	100.013	85.4373	80.117	100.195	106.401	107.472	107.595	91.1065	100.679	77.6261	82.2909	103.908	103.2	95.8523	86.2497
	28.5	104.271	111.954	86.0866	111.984	152.308	152.735	132.182	140.148	104.906	93.4178	99.7902	110.612	154.022	155.427	143.966	133.435	107.836	110.35	100.507	107.133	141.237	135.912	119.537	148.567	97.1604	95.8479	82.278	81.2459	103.314	93.5168	101.18	91.5586	100.649	99.6682	85.4589	79.9628	99.8991	106.433	107.716	107.8	90.9493	100.352	77.7168	82.2696	103.541	103.43	95.724	86.0324
	28.6	103.789	112.427	86.241	112.098	152.264	152.504	132.063	140.177	105.131	93.2981	99.7646	110.083	153.735	155.362	144.07	133.6	107.888	110.013	100.418	107.036	141.331	135.908	120.315	148.69	97.102	96.0786	82.1979	81.2832	102.8	93.3448	101.403	91.611	100.763	99.4829	85.5465	80.0012	99.8088	106.492	107.961	108.042	90.6644	100.262	77.8575	82.648	103.333	103.603	95.6185	85.5339
	28.7	103.329	112.726	86.3416	112.098	152.379	152.255	131.977	140.253	105.351	93.3356	99.2849	109.414	153.466	155.452	144.079	133.647	107.935	109.654	100.235	106.837	141.52	135.992	120.975	148.787	96.762	96.5057	82.4276	81.4732	102.242	93.2885	101.554	91.6965	100.919	99.5396	85.457	80.2574	99.7598	106.59	108.501	108.036	90.5086	100.294	78.0172	83.1318	103.255	103.748	95.7122	85.185
	28.8	102.958	112.983	86.653	112.043	152.516	152.355	131.937	140.379	105.628	93.297	99.0526	108.819	152.994	155.209	144.03	133.632	107.766	109.47	100.04	106.496	141.705	136.205	121.589	149.021	96.495	97.023	82.415	81.5627	101.93	93.4121	101.764	91.7824	101.278	99.8548	85.2162	80.5173	99.6749	106.757	108.856	108.069	90.4053	100.233	78.1321	83.4235	103.224	103.764	96.086	85.1803
	28.9	102.848	113.09	86.8836	112.035	152.7	152.882	131.906	140.382	106.016	93.3109	98.8678	108.158	152.547	154.883	143.884	133.738	107.601	109.364	99.8541	105.977	141.742	136.59	121.839	149.16	96.3776	97.3438	82.4858	81.6078	101.82	93.6774	101.948	92.0199	101.826	100.309	85.0076	80.6875	99.7191	106.912	109.166	108.095	90.4218	100.294	78.0334	83.6588	103.326	103.814	96.341	85.3859
	29	102.997	113.181	86.9283	112.08	152.727	153.257	131.995	140.458	106.505	93.244	98.75	107.572	152.362	154.82	143.7	133.653	107.329	109.367	99.9661	105.752	141.655	136.935	121.633	149.13	96.3386	97.2609	82.6417	81.8382	101.993	93.9019	102.001	92.1238	102.138	100.648	84.7363	80.8476	99.768	106.875	109.266	107.939	90.6625	100.229	77.9412	83.6669	103.605	103.675	96.5972	85.4169
	29.1	103.14	113.112	86.9471	111.766	152.733	153.744	132.124	140.726	107.028	93.1199	98.5734	107.198	152.574	154.932	143.692	133.529	107.235	109.454	100.154	105.832	141.644	137.145	121	149.324	96.3575	97.0387	82.8293	82.1388	102.314	94.0343	101.986	92.211	102.323	100.815	84.3848	80.9485	99.5771	106.688	109.282	107.638	90.9866	100.254	77.7792	83.5344	103.779	103.363	96.9239	85.7784
	29.2	103.077	113.172	87.0322	111.362	152.667	154.303	132.167	141.005	107.483	92.999	98.7319	106.911	152.742	154.917	143.708	133.485	107.03	109.528	100.322	106.273	141.592	137.385	120.639	149.37	96.4576	96.7005	82.8664	82.2899	102.65	94.2763	101.911	92.2429	102.564	100.862	84.0122	80.9197	99.1884	106.519	109.092	107.577	91.3729	100.414	77.5402	83.3456	103.923	103.061	97.2318	86.0166
	29.3	102.86	113.146	86.8321	110.867	152.58	154.501	132.199	141.298	107.792	92.9863	98.6978	106.75	153.098	155.201	143.811	133.388	106.968	109.435	100.382	106.648	141.756	137.44	120.361	149.218	96.5793	96.2139	83.0675	82.3652	102.667	94.4978	101.849	92.3092	102.747	100.574	83.9812	80.8353	98.853	106.422	108.9	107.402	91.5885	100.731	77.264	83.4004	104.117	102.827	97.3295	86.0102
	29.4	102.71	113.145	86.5632	110.526	152.509	154.27	132.109	141.868	107.822	93.0246	98.441	107.063	153.394	155.385	143.95	133.244	106.86	109.181	100.376	106.887	142.076	137.362	120.216	149.209	96.4063	95.8381	83.1671	82.3756	102.492	94.4578	101.862	92.2479	102.84	100.187	83.9026	80.8797	98.5881	106.317	108.587	107.218	91.6222	101.01	77.0968	83.4178	104.033	102.544	97.4178	85.9917
	29.5	102.471	113.001	86.4844	110.108	152.495	154.186	131.774	142.311	107.506	93.1564	97.9445	107.539	153.65	155.378	144.006	133.302	106.951	108.884	100.211	106.773	142.479	137.435	120.205	149.361	96.2579	95.7207	83.2253	82.2214	102.128	94.3992	101.821	92.2566	102.936	100.017	83.9174	80.9681	98.3565	106.34	108.411	107.018	91.5058	101.37	76.9266	83.4166	103.758	102.257	97.3793	86.0493
	29.6	102.213	112.907	86.2924	110.047	152.408	153.882	131.299	142.467	106.885	93.3072	97.6324	107.975	153.546	155.388	143.911	133.236	106.888	108.601	100.058	106.522	142.787	137.56	120.405	149.168	96.066	95.9148	83.3078	81.9486	101.758	94.4456	101.916	92.3076	103.029	99.9994	84.0231	80.9084	98.3085	106.542	108.337	106.981	91.4788	101.516	76.9494	83.1169	103.455	101.857	97.1089	85.8186
	29.7	102.102	112.826	86.0607	110.143	152.228	153.525	130.776	142.32	106.256	93.2358	97.3694	108.341	153.517	155.24	143.858	132.915	106.999	108.466	99.9349	105.888	143.048	137.547	120.192	149.039	95.9768	96.193	83.198	81.7925	101.475	94.3964	101.993	92.4085	103.203	100.132	84.3608	80.7719	98.3223	106.648	108.219	106.852	91.4832	101.519	77.2741	82.717	103.054	101.322	96.5401	85.7579
	29.8	102.003	112.791	85.9996	110.473	152.102	153.254	130.222	142.152	105.601	93.0105	97.174	108.61	153.476	154.763	143.773	132.512	107.062	108.442	99.8316	105.303	143.085	137.607	119.886	148.856	95.9277	96.4878	83.0503	81.7309	101.442	94.4037	102.095	92.3941	103.306	100.477	84.446	80.5253	98.3558	106.583	108.024	106.673	91.72	101.398	77.6462	82.0375	102.768	100.736	96.017	85.9487
	29.9	101.872	112.672	85.9531	110.68	151.974	153.08	129.839	141.859	105.089	92.7595	97.1901	108.641	153.395	154.356	143.622	132.024	107.229	108.511	99.902	104.951	143.069	137.693	119.484	148.62	96.1254	96.717	83.2162	81.7258	101.54	94.6745	101.938	92.4509	103.446	100.855	84.6771	80.2008	98.2518	106.512	107.775	106.445	91.9736	101.265	78.0273	81.3121	102.677	100.106	95.5354	85.9604
	30	101.779	112.863	85.7672	111.025	151.954	152.657	129.541	141.62	104.888	92.5629	97.3062	108.635	153.216	154.097	143.695	131.357	107.121	108.643	99.9885	104.769	142.897	137.559	119.178	148.46	96.3981	96.928	83.2665	81.9163	101.88	95.1383	101.803	92.4757	103.667	100.932	84.8464	79.9248	98.1812	106.395	107.597	106.471	92.2181	100.978	78.4731	80.8342	102.814	99.7839	95.0047	86.0582
	30.1	101.762	113.017	85.6117	111.313	151.949	152.215	129.388	141.444	104.884	92.4462	97.4316	108.648	153.13	153.66	143.775	130.9	107.208	108.616	100.063	104.608	142.53	137.303	119.053	148.733	96.8228	96.8923	83.0789	82.1324	102.225	95.388	101.594	92.5805	103.765	100.957	85.0622	79.7629	98.0501	106.353	107.333	106.458	92.3566	100.742	78.8112	80.7687	103.15	99.9727	94.7735	86.4206
	30.2	101.741	113.079	85.5353	111.52	151.964	151.854	129.4	141.503	104.922	92.6516	97.4528	108.897	153.031	153.427	143.754	130.714	107.351	108.524	100.098	104.616	141.991	137.13	119.447	148.955	97.0631	96.9028	83.0816	82.241	102.372	95.54	101.438	92.4091	103.686	100.778	85.1356	79.6745	98.0932	106.541	107.238	106.585	92.223	100.535	78.7902	80.9882	103.655	100.381	94.8236	86.7333
	30.3	101.669	113.136	85.5914	111.497	151.917	151.774	129.444	141.558	105	92.9001	97.5594	109.227	152.967	153.228	143.708	130.635	107.406	108.437	100.244	104.836	141.465	136.939	119.937	149.357	97.2344	96.9499	83.1296	82.3468	102.553	95.4479	101.129	92.2437	103.494	100.576	85.2891	79.7303	98.2093	106.858	107.26	106.924	91.8638	100.458	78.8476	81.4632	104.033	100.884	94.8922	86.8464
	30.4	101.434	113.306	85.6366	111.537	151.817	151.716	129.419	141.598	105.066	93.1236	97.6788	109.338	153.079	152.954	143.917	130.792	107.409	108.273	100.364	105.131	140.81	136.678	120.639	149.703	97.3491	96.9084	82.9411	82.4305	102.778	95.1881	100.975	91.933	103.105	100.49	85.1524	79.7629	98.4929	107.137	107.516	107.259	91.6054	100.353	78.9629	81.9909	104.424	101.596	94.9129	87.0388
	30.5	101.08	113.133	85.6803	111.299	151.386	151.887	129.51	141.548	105.109	93.3042	97.8781	109.345	153.148	152.757	143.943	131.106	107.792	107.984	100.532	105.367	140.213	136.594	121.317	149.817	97.3851	96.6435	82.76	82.4142	102.796	94.8486	100.864	91.5338	102.566	100.708	84.9704	79.7092	98.8234	107.426	107.663	107.291	91.4915	100.492	79.0092	82.3602	104.706	102.173	95.2057	87.0813
	30.6	100.746	112.761	85.7384	110.734	151.085	152.207	129.562	141.509	105.219	93.3991	97.8694	109.249	153.197	152.93	143.963	131.408	108.072	107.932	100.508	105.453	139.974	136.602	121.824	149.589	97.2929	96.2857	82.7034	82.4876	102.817	94.5702	100.677	91.0076	102.076	100.933	84.7253	79.7846	99.0569	107.385	107.791	107.362	91.3234	100.671	78.9548	82.5616	104.838	102.446	95.527	86.8521
	30.7	100.352	112.291	85.7637	110.2	150.9	152.502	129.523	141.343	105.442	93.3561	98.0178	108.855	153.117	153.122	144.074	131.66	108.113	107.844	100.505	105.477	140.004	136.473	121.876	149.463	97.3783	95.9247	82.637	82.5869	102.994	94.5064	100.477	90.9671	101.626	101.307	84.6058	79.8778	99.1729	106.964	107.748	107.195	91.456	100.951	79.1422	82.5744	104.889	102.502	96.0224	86.3574
	30.8	100.173	111.917	85.6294	109.842	150.859	152.631	129.519	140.959	105.806	93.3958	98.133	108.372	152.892	153.633	144.277	131.835	108.105	107.773	100.428	105.249	140.089	136.417	121.792	149.106	97.5067	95.7552	82.5019	82.6978	102.808	94.6427	100.36	91.0967	101.374	101.685	84.5104	79.9262	99.1078	106.393	107.701	106.819	91.617	101.069	79.1145	82.5033	104.876	102.471	96.6619	85.7285
	30.9	100.061	111.458	85.66	109.461	150.97	152.959	129.403	140.45	106.234	93.4762	98.305	108.109	152.363	154.446	144.03	131.784	107.829	107.787	100.232	104.981	140.387	136.405	121.533	148.522	97.5029	95.722	82.3438	82.705	102.477	94.772	100.343	91.3989	101.276	101.839	84.6694	80.0326	98.7597	105.932	107.63	106.417	91.7494	101.077	78.9524	82.4391	104.661	102.35	97.4476	85.0953
	31	100.092	111.254	85.7646	109.436	151.375	153.331	129.247	139.974	106.561	93.601	98.6455	108.009	151.914	155.014	143.702	131.704	107.283	107.909	100.128	104.717	140.788	136.312	121.26	148.136	97.4279	96.0366	82.4458	82.5581	102.226	94.7639	100.547	91.7146	101.206	101.735	85.0267	80.2385	98.3583	105.492	107.43	106.076	91.7988	100.858	78.8792	82.4317	104.29	102.065	97.9764	84.4686
	31.1	100.093	111.243	85.9824	109.795	151.693	153.659	129.221	139.619	106.723	93.7259	99.168	108.153	151.434	155.02	143.324	131.431	106.811	107.971	100.126	104.807	140.893	136.164	120.88	147.736	97.4162	96.6401	82.652	82.2107	101.96	94.6965	100.871	92.0763	101.309	101.65	85.4134	80.3364	98.0878	105.442	107.282	105.778	92.0883	100.694	78.8958	82.3417	103.942	101.716	98.1992	84.0224
	31.2	100.33	111.494	86.2115	110.224	152.054	153.838	129.187	139.491	106.749	93.7197	99.4503	108.536	151.001	154.721	142.853	131.096	106.45	108.015	100.138	104.879	140.755	136.292	120.738	147.247	97.2848	97.1103	82.7288	81.8947	101.553	94.3373	101.111	92.0262	101.5	101.579	85.7412	80.3828	97.8136	105.682	107.331	105.67	92.2926	100.496	78.6393	82.3326	103.51	101.407	97.9941	83.98
	31.3	100.483	111.538	86.4675	110.647	152.109	153.821	129.137	139.572	106.597	93.5752	99.6145	109.021	150.703	153.985	142.2	130.749	106.163	108.098	100.273	105.065	140.627	136.324	120.658	146.886	97.1028	97.3789	82.7186	81.5322	101.369	93.8323	101.522	91.8606	101.647	101.319	85.9759	80.4787	97.5714	106.065	107.328	105.597	92.7237	100.408	78.592	82.4056	103.264	101.156	97.6463	84.1739
	31.4	100.797	111.649	86.6313	111.259	151.899	153.464	129.173	139.864	106.207	93.2954	99.5902	109.588	150.639	152.93	141.846	130.657	106.179	108.246	100.501	105.217	140.517	136.347	120.667	146.913	97.0884	97.6252	82.759	81.3806	101.29	93.4895	101.796	91.697	101.73	101.125	86.1457	80.5591	97.6442	106.21	107.183	105.716	92.9992	100.568	78.727	82.5667	103.307	100.828	97.1915	84.3722
	31.5	101.079	111.603	86.8748	111.794	151.701	152.909	129.117	140.197	105.791	92.9096	99.2001	109.943	150.632	151.93	141.714	130.4	106.264	108.372	100.448	105.453	140.321	136.404	120.444	146.725	97.1816	97.5352	82.5098	81.3719	101.317	93.4073	101.683	91.6487	101.974	101.203	86.023	80.5533	97.565	106.376	107.163	105.998	93.1611	100.859	78.7404	82.6768	103.448	100.497	96.8276	84.6282
	31.6	101.468	111.427	86.8955	112.232	151.574	152.262	128.841	140.264	105.506	92.5613	98.6291	110.033	150.986	151.394	141.759	130.236	106.22	108.326	100.237	105.396	140.472	136.454	120.329	146.655	97.1802	97.2858	82.168	81.4322	101.293	93.5614	101.599	91.563	102.164	101.263	85.6886	80.4536	97.4873	106.329	107.138	106.251	93.0282	101.065	78.6531	82.9114	103.566	100.238	96.6166	84.8534
	31.7	101.755	111.019	86.7214	112.594	151.221	151.734	128.6	140.039	105.401	92.3604	98.2903	109.85	151.603	151.342	142.011	130.089	106.196	108.138	100.044	105.371	140.786	136.268	120.048	146.634	97.2018	97.1935	82.0538	81.3996	101.324	93.8919	101.509	91.7394	102.188	101.282	85.355	80.4225	97.31	106.256	106.961	106.426	92.7452	101.173	78.7537	83.0174	103.638	100.289	96.5955	84.88
	31.8	102.002	110.688	86.4296	112.771	151.258	151.434	128.322	139.856	105.421	92.2694	98.1764	109.602	152.127	151.581	142.512	129.995	106.238	107.952	99.732	105.402	140.971	136.256	119.722	146.789	97.0921	97.0014	82.0525	81.3855	101.457	94.3455	101.316	92.0965	102.067	101.44	85.1238	80.4264	97.2711	106.163	106.878	106.775	92.1894	101.152	78.6436	82.9576	103.563	100.462	96.5805	84.8644
	31.9	102.194	110.382	86.0292	112.451	151.729	151.428	128.039	139.528	105.784	92.3616	98.2652	109.158	152.623	151.808	142.999	129.632	106.219	107.65	99.3378	105.496	141.002	136.179	119.373	146.741	96.906	96.6405	81.9827	81.1812	101.637	94.603	101.167	92.3392	101.89	101.682	84.837	80.5464	97.1384	106.349	106.82	106.925	91.7601	100.985	78.306	82.7304	103.319	100.851	96.5306	85.0184
	32	102.479	110.159	85.4011	111.817	152.09	151.492	127.953	139.269	106.354	92.5534	98.4183	108.748	153.034	152.037	143.393	129.453	106.135	107.349	99.0437	105.675	141.024	136.095	119.345	146.807	96.5752	96.6095	82.0422	80.904	101.625	94.5837	101.263	92.591	101.608	101.651	84.6798	80.6915	97.1365	106.432	106.828	106.959	91.4431	100.817	77.9414	82.6328	103.079	101.394	96.4943	85.2861
	32.1	102.524	110.177	84.9999	111.101	152.369	151.62	128.032	139.347	106.56	92.7351	98.6304	108.518	152.848	152.198	143.646	129.526	106.169	107.244	99.0096	105.937	140.761	136.038	119.296	146.96	96.2528	96.4968	82.1402	80.8121	101.685	94.4679	101.26	92.8788	101.25	101.549	84.7629	80.8687	97.0329	106.484	106.853	106.893	91.2558	100.565	77.8671	82.503	102.883	101.875	96.4617	85.5834
	32.2	102.349	110.332	85.017	110.485	152.925	151.552	128.327	139.683	106.405	93.0165	98.8136	108.549	152.333	151.805	143.793	129.849	106.184	107.43	98.7995	106.143	140.521	135.998	119.368	147.199	95.9047	96.1601	82.0445	80.7926	101.7	94.5114	101.473	92.9788	101.177	101.516	84.777	81.0157	97.1904	106.46	106.934	106.862	91.1317	100.359	77.8532	82.5004	102.966	102.1	96.4289	85.9005
	32.3	102.14	110.698	85.2429	110.103	153.189	151.35	128.824	139.815	106.15	93.3152	98.9698	108.61	152.014	151.277	143.644	130.33	106.158	107.375	98.6527	106.145	140.39	135.801	119.41	147.286	95.6711	95.9989	81.9344	80.7969	101.55	94.5555	101.615	92.7714	101.155	101.575	84.685	81.1551	97.1738	106.387	106.978	106.703	91.0696	100.326	78.003	82.6521	103.073	102.035	96.4172	86.1032
	32.4	101.852	110.925	85.5675	110.225	153.026	150.99	129.382	139.996	105.716	93.4817	99.0535	108.677	151.678	150.95	143.491	130.922	106.129	107.4	98.5156	105.923	140.299	135.78	119.482	147.36	95.464	95.9456	82.0505	81.03	101.249	94.775	101.72	92.7268	101.362	101.609	84.5812	81.1316	97.2473	106.188	107.079	106.625	91.046	100.267	78.2556	82.9	103.088	101.721	96.4818	86.0111
	32.5	101.496	110.969	86.1102	110.653	152.752	150.727	129.785	140.004	104.976	93.6174	99.2932	108.823	151.512	150.828	143.352	131.479	106.073	107.398	98.5312	105.568	140.237	135.77	119.372	147.495	95.3048	95.6825	82.194	81.419	101.031	95.0827	101.745	92.5968	101.549	101.756	84.4406	81.1113	97.4876	106.055	107.034	106.607	90.9919	100.234	78.5686	82.8012	103.076	101.507	96.814	85.7981
	32.6	101.337	110.905	86.5296	110.975	152.432	150.45	130.159	139.889	104.548	93.7853	99.5187	108.832	151.648	150.753	143.334	131.864	105.929	107.282	98.3168	105.396	140.213	135.646	119.331	147.541	95.1288	95.5984	82.3226	81.577	100.876	95.2527	101.847	92.4637	101.836	102.011	84.2528	81.2072	97.9113	105.934	106.981	106.619	91.0298	100.376	78.5602	82.6125	103.13	101.485	97.024	85.5226
	32.7	101.497	110.951	86.6272	111.214	152.059	150.401	130.01	139.536	104.457	93.8796	99.4174	108.717	151.912	151.116	143.143	131.87	105.794	107.076	98.2195	105.444	140.292	135.434	119.365	147.556	95.0507	95.6968	82.6059	81.8584	100.869	95.1663	101.855	92.3921	101.887	102.055	84.0448	81.242	98.291	105.867	106.905	106.532	91.232	100.477	78.4934	82.442	102.994	101.584	97.1796	85.1976
	32.8	101.789	110.756	86.6509	111.233	151.817	150.593	129.529	139.298	104.428	93.9568	99.0048	108.478	151.808	151.553	143.069	131.738	105.726	107.147	98.0833	105.6	140.434	135.204	119.473	147.454	95.048	95.7246	82.9618	82.1167	101.057	94.9779	101.769	92.4587	102.036	102.08	83.9188	81.2207	98.9474	105.738	106.774	106.39	91.5398	100.436	78.316	82.217	102.919	102.049	97.1638	84.9907
	32.9	102.066	110.656	86.5315	111.045	151.699	150.757	129.007	138.898	104.24	94.081	98.4308	108.314	151.662	151.823	142.845	131.727	105.597	107.132	98.1316	105.861	140.498	134.807	119.313	147.488	95.1166	95.8928	83.1159	82.1427	101.386	94.8165	101.718	92.2313	101.979	102.109	83.9014	81.2182	99.4524	105.416	106.663	106.285	91.9037	100.377	78.0731	82.0628	103.041	102.62	97.0518	84.9855
	33	102.27	110.635	86.2148	110.724	151.786	150.782	128.413	138.596	104.335	94.0435	97.6873	108.186	151.383	152.021	142.42	131.747	105.639	107.264	97.9692	105.973	140.65	134.346	119.161	147.497	95.4078	96.1146	83.2085	81.8179	101.712	94.6479	101.621	92.0004	101.998	102.12	83.9324	81.1597	99.6671	105.107	106.723	106.171	92.24	100.221	77.9785	82.2505	103.273	102.893	96.56	84.9985
	33.1	102.453	110.589	85.8574	110.511	151.894	150.968	127.713	138.018	104.736	93.9407	97.1076	107.949	151.157	152.138	141.832	131.652	105.68	107.641	98.1778	105.748	140.889	134.122	118.862	147.471	95.9594	96.2876	83.2924	81.6498	101.947	94.5116	101.416	91.8596	101.916	101.973	83.9102	81.0478	99.7247	104.899	106.681	106.046	92.509	99.9907	78.1307	82.6367	103.327	103.017	96.2885	85.0524
	33.2	102.492	110.412	85.5872	110.132	151.74	151.348	127.438	137.658	104.998	93.6477	96.9954	107.702	150.751	152.197	141.356	131.718	105.766	107.975	98.4614	105.337	140.77	134.17	118.371	147.194	96.4981	96.4189	83.2745	81.3986	102.008	94.3735	101.115	91.8512	101.94	101.93	84.1269	80.9187	99.6709	104.68	106.615	106.131	92.6223	99.7985	78.2834	82.8963	103.465	103.009	95.9549	85.2338
	33.3	102.46	110.191	85.3053	109.86	151.624	151.576	127.422	137.266	105.262	93.1547	97.1137	107.517	150.53	152.504	140.93	131.702	105.767	108.122	98.806	104.998	140.527	134.423	117.93	147.143	96.9499	96.5642	83.2092	81.1908	101.887	94.2784	100.957	91.8114	102.043	101.655	84.3407	80.7722	99.3976	104.59	106.524	106.34	92.6908	99.8456	78.5368	83.0159	103.589	102.479	95.9786	85.3398
	33.4	102.436	109.925	85.1584	109.692	151.608	151.931	127.457	137.138	105.82	92.6861	97.3696	107.36	150.254	153.141	140.608	131.568	105.742	108.334	98.9483	104.657	140.56	134.811	117.776	147.111	97.2068	96.6409	83.2068	81.1381	101.682	93.8994	100.723	92.008	102.157	101.238	84.4964	80.5596	99.1336	104.738	106.383	106.409	92.5468	100.013	78.9433	82.9543	103.578	101.907	96.1504	85.2914
	33.5	102.387	109.867	85.1543	109.791	151.257	152.463	127.752	137.144	106.329	92.3198	97.7925	107.196	150.052	153.656	140.508	131.491	105.514	108.31	99.1982	104.455	140.428	135.27	117.615	146.967	97.3782	96.666	83.2904	81.4669	101.547	93.5177	100.52	92.205	102.162	100.972	84.675	80.4102	98.9175	104.77	106.149	106.461	92.5161	100.238	79.2082	82.8816	103.484	101.551	96.3393	85.2194
	33.6	102.387	109.877	85.2493	110.088	150.97	152.757	128.192	137.446	106.322	92.0641	98.1145	107.308	149.922	154.097	140.477	131.515	105.397	107.88	99.0241	104.384	140.078	135.566	117.729	146.845	97.3518	96.6207	83.3959	81.7113	101.424	93.1376	100.528	92.077	102.238	100.939	84.8902	80.1684	98.6229	104.574	106.072	106.698	92.3342	100.569	79.206	82.546	103.48	101.086	96.3998	85.1117
	33.7	102.324	109.761	85.3568	110.549	150.935	152.714	128.543	137.732	106.522	92.1051	98.1971	107.564	150.12	154.371	140.424	131.644	105.223	107.403	98.7436	104.289	139.979	135.812	117.969	147.042	97.192	96.7253	83.4616	81.8156	101.485	92.8446	100.616	91.7259	102.282	100.918	84.9446	79.9152	98.3397	104.324	105.922	106.879	92.2526	100.953	79.1438	82.3226	103.401	100.644	96.681	84.8714
	33.8	102.174	109.759	85.547	111.103	150.67	152.564	128.872	138.146	106.808	92.3932	98.2964	107.938	150.422	154.114	140.387	131.762	104.929	106.983	98.4094	104.163	139.796	135.793	118.13	147.173	97.0643	96.8324	83.4216	81.8613	101.444	92.5407	100.712	91.4653	102.281	101.213	84.9144	79.6635	97.9257	104.047	105.878	106.915	92.0978	101.091	78.9728	82.2594	103.196	100.708	96.632	84.6734
	33.9	102.025	109.793	85.774	111.571	150.283	152.378	129.079	138.57	106.966	92.7127	98.2849	108.292	150.707	153.349	140.503	131.673	104.73	106.521	98.1578	103.935	139.307	135.816	118.351	147.139	97.0827	96.9107	83.3382	81.9142	101.384	92.4392	100.796	91.1588	102.568	101.671	84.9765	79.6687	97.4038	103.622	105.856	107.043	92.022	101.268	78.6112	82.3447	103.163	100.837	96.5223	84.6429
	34	101.963	109.633	85.9783	111.632	150.309	151.97	129.155	138.835	106.955	93.1834	98.177	108.606	150.779	152.507	140.557	131.217	104.718	106.158	97.9425	103.77	138.773	135.916	118.74	147.442	96.8903	97.1036	83.1412	81.9037	101.287	92.5835	100.845	91.064	102.937	101.971	85.0749	79.7125	96.9161	103.427	105.835	107.057	91.6414	101.501	78.0737	82.3172	103.307	101.05	96.5344	84.6474
	34.1	101.852	109.385	86.2281	111.323	150.087	151.793	129.178	138.954	107.078	93.4738	98.0818	108.808	150.55	151.714	140.639	130.672	104.696	106.09	98.0154	103.782	138.504	136.047	118.932	147.821	96.6829	97.2857	82.9028	81.8212	101.143	93.026	100.659	91.3502	103.15	102.132	85.1986	79.8613	96.5908	103.516	105.679	106.877	91.4014	101.76	77.5703	82.6279	103.626	101.576	96.5052	84.5484
	34.2	101.805	109.398	86.4013	111.044	149.64	151.704	129.048	138.923	106.971	93.4964	97.8788	108.773	149.942	151.135	141.088	129.933	104.553	106.204	98.1995	103.942	138.275	136.038	118.992	148.063	96.5117	97.2809	82.6919	81.9349	100.754	93.6024	100.442	91.8106	103.272	102.281	85.3068	80.1343	96.1767	103.695	105.674	106.644	90.9918	101.992	77.0492	82.841	103.97	102.083	96.2781	84.5847
	34.3	101.767	109.535	86.3708	110.546	149.377	151.517	128.733	138.715	106.681	93.4666	97.5714	108.682	149.235	150.984	141.571	129.19	104.591	106.459	98.2521	104.148	138.432	136.138	119.16	148.131	96.3346	97.2507	82.5388	82.0683	100.73	94.2365	100.22	92.1239	103.18	102.039	85.4858	80.3002	96.0359	103.941	105.592	106.549	90.7266	102.27	76.7102	82.9938	104.449	102.257	96.1316	84.7455
	34.4	101.769	109.817	86.2752	109.951	149.106	151.171	128.504	138.266	106.333	93.3296	97.5442	108.626	148.726	151.04	141.957	128.81	104.723	106.858	98.2029	104.608	138.754	136.11	119.159	148.22	96.1268	97.0574	82.3652	82.0872	100.793	94.7722	100.205	92.3096	102.713	101.574	85.4683	80.1777	96.1783	104.464	105.406	106.408	90.5239	102.458	76.5896	83.1899	104.725	102.31	95.7982	84.7868
	34.5	101.759	110.279	86.1704	109.556	148.676	150.902	128.274	137.916	106.023	92.9998	97.511	108.516	148.393	151.139	142.355	128.816	104.77	107.285	98.1765	104.99	139.342	135.829	119.065	147.917	96.0542	96.709	82.2501	81.97	100.822	95.0396	100.426	92.1296	102.197	101.123	85.357	79.8683	96.4905	104.749	105.126	106.427	90.7458	102.445	76.7935	83.3974	104.685	102.191	95.263	84.8156
	34.6	101.52	110.848	85.855	109.513	148.677	150.608	128.077	137.744	105.777	92.8683	97.448	108.343	148.349	151.088	142.762	128.967	104.711	107.578	98.054	105.162	139.746	135.616	119.029	147.419	96.0748	96.397	82.2451	82.0411	100.816	94.8998	100.855	91.7358	101.866	100.612	85.2177	79.5111	96.8046	104.843	104.918	106.444	91.1944	102.095	77.1684	83.2915	104.308	101.77	94.7048	85.2093
	34.7	101.258	111.329	85.5593	109.472	148.968	150.38	128.05	137.605	105.496	92.8959	97.4862	108.175	148.775	150.985	142.598	129.252	104.929	107.629	97.913	105.085	139.972	135.448	119.097	146.796	96.3745	96.1208	82.3165	81.9976	101.084	94.4814	101.202	91.2479	101.755	100.088	85.0476	79.0804	97.2582	104.718	104.779	106.287	91.8836	101.632	77.6326	83.1277	103.901	101.315	94.2657	85.5043
	34.8	101.168	111.718	85.3006	109.68	149.152	150.569	128.21	137.697	105.415	92.9046	97.646	107.812	149.32	150.761	142.379	129.716	105.142	107.485	98.0402	104.814	139.878	135.364	119.06	146.286	96.7466	95.834	82.5427	81.938	101.083	94.0695	101.472	90.8692	101.817	99.8667	84.9385	78.8646	97.6814	104.404	104.889	105.946	92.3434	101.209	77.8959	82.9499	103.449	100.979	94.0179	85.5931
	34.9	101.03	111.941	85.0581	110.108	149.325	151.082	128.349	137.943	105.474	92.9438	97.6198	107.398	149.852	150.636	141.93	129.976	105.124	107.156	98.2114	104.335	139.694	135.256	119.058	145.919	97.154	95.7312	82.85	81.8721	100.968	93.8678	101.546	90.6072	101.936	99.9657	84.9398	78.8078	97.8984	103.85	105.228	105.463	92.6913	100.723	78.0096	82.5952	103.238	100.764	94.0728	85.7462
	35	100.911	111.949	84.7502	110.595	149.452	151.825	128.477	137.916	105.702	93.0688	97.6638	107.051	150.331	150.636	141.459	130.089	104.994	106.802	98.3395	103.833	139.259	135.28	118.885	145.782	97.6386	95.6619	83.1315	81.8652	100.867	93.8586	101.386	90.555	101.98	100.038	84.9536	79.0362	98.022	103.552	105.77	104.755	92.7014	100.524	78.0209	82.3214	103.32	100.462	94.4483	85.8894
	35.1	100.973	111.788	84.5217	110.827	149.301	152.399	128.499	137.743	105.883	92.898	97.7416	106.853	150.642	150.803	140.84	130.044	104.839	106.443	98.3544	103.512	138.889	135.262	118.61	145.866	97.996	95.6436	83.4034	81.686	100.814	94.1951	100.909	90.5658	101.901	100.234	84.9368	79.2822	98.1297	103.41	106.134	104.088	92.4055	100.556	78.0711	82.2482	103.766	100.337	94.9237	85.6787
	35.2	101.009	111.593	84.2206	110.993	149.037	152.798	128.457	137.678	106.036	92.5568	98.0346	106.996	150.531	150.936	140.458	130.006	104.468	106.211	98.1655	103.471	138.74	135.225	118.197	145.987	97.9806	95.6617	83.7319	81.5432	100.62	94.6113	100.601	90.5902	101.639	100.481	84.9835	79.6865	98.2825	103.55	106.33	103.674	91.8977	100.684	78.1186	82.2822	104.177	100.312	95.3518	85.4784
	35.3	100.968	111.472	84.2093	110.918	148.979	152.907	128.325	137.232	105.982	92.1714	98.2088	107.446	150.272	151.094	139.922	129.94	104.21	106.127	97.734	103.603	138.642	134.856	117.799	146.116	97.8817	95.7692	83.9664	81.5392	100.681	94.9008	100.472	90.7104	101.368	100.738	84.9258	80.1118	98.2786	103.879	106.304	103.498	91.54	100.802	78.251	82.4086	104.514	100.313	95.4489	85.4136
	35.4	100.929	111.43	84.2383	110.714	149.084	152.641	128.136	136.64	105.734	91.6986	98.4053	107.9	149.843	151.289	139.532	129.858	104.151	106.051	97.5101	103.784	138.679	134.51	117.465	146.033	97.6448	95.851	84.0979	81.6122	100.836	94.9807	100.445	90.8566	101.171	100.878	84.9912	80.5208	98.366	104.378	106.15	103.729	91.2785	100.944	78.381	82.4546	104.553	100.309	95.1881	85.3601
	35.5	100.83	111.444	84.3506	110.356	149.103	151.866	127.818	136.26	105.34	91.3238	98.535	108.408	149.379	151.465	139.232	129.793	104.2	105.997	97.2488	104.039	138.995	134.229	117.333	145.831	97.1534	96.0819	84.214	81.7394	100.936	94.7156	100.454	91.0336	101.108	101.082	85.1314	80.6435	98.4376	104.723	105.836	104.09	91.1459	100.698	78.36	82.329	104.412	100.483	94.8155	85.3531
	35.6	100.861	111.478	84.5738	110.18	149.131	150.998	127.491	135.931	105.003	91.2987	98.8027	108.782	148.917	151.565	139.119	129.806	104.283	106.021	97.0886	104.138	139.264	133.894	117.358	145.411	96.7861	96.2595	84.0091	81.9125	101.082	94.3543	100.727	91.2271	101.292	101.163	85.3424	80.7632	98.2448	105.039	105.842	104.389	90.9598	100.474	78.1675	82.0218	103.983	100.478	94.5788	85.4109
	35.7	100.897	111.391	85.0351	110.082	149.039	150.197	127.142	135.565	104.83	91.3536	98.7785	109.004	148.686	151.409	139.234	129.797	104.474	106.07	97.1903	104.093	139.281	133.644	117.701	145.28	96.5533	96.3306	83.6571	82.0191	101.364	94.2262	100.835	91.4059	101.579	101.355	85.5181	80.6819	97.8914	105.304	105.809	104.421	90.9404	100.339	77.8541	81.8516	103.655	100.484	94.4632	85.4948
	35.8	100.847	111.212	85.1703	110.087	148.765	149.342	126.728	135.597	104.701	91.4865	98.855	109.094	148.485	151.14	139.613	129.758	104.43	105.971	97.4497	104.046	139.292	133.837	117.884	145.171	96.3742	96.3564	83.1723	81.8625	101.362	94.2669	100.719	91.3808	101.9	101.429	85.6045	80.361	97.6992	105.559	105.552	104.404	91.1072	100.184	77.5582	81.7636	103.526	100.682	94.7798	85.5368
	35.9	100.76	110.922	85.2777	110.029	148.551	148.743	126.32	135.887	104.724	91.9758	98.8527	109.063	148.449	150.739	140.162	129.901	104.446	105.951	97.4203	104.019	139.106	133.986	117.864	145.084	96.356	96.3859	82.763	81.6445	101.354	94.4068	100.5	91.3992	102.319	101.455	85.4482	79.9926	97.3917	105.641	105.228	104.177	91.2294	100.158	77.349	81.9811	103.609	100.9	95.4811	85.6038
	36	100.657	110.7	85.3731	110.013	148.609	148.635	126.169	136.217	104.678	92.3154	98.7518	108.841	148.645	150.356	140.578	130.049	104.698	105.948	97.3032	104.052	138.693	133.983	117.85	145.158	96.593	96.1656	82.3438	81.2189	101.562	94.8616	100.291	91.3375	102.814	101.401	85.1403	79.8871	96.8589	105.66	105.003	104.177	91.3334	100.39	77.394	82.3312	103.778	101.132	96.0051	85.695
	36.1	100.489	110.704	85.4125	109.927	148.744	148.687	125.99	136.609	104.569	92.4716	98.3082	108.659	148.949	150.19	140.969	130.322	105.172	105.897	97.3045	104.116	138.395	133.987	117.75	145.483	96.5769	96.0718	82.2246	80.8809	101.87	95.0892	100.022	91.3037	102.951	101.296	84.6579	79.7968	96.6433	105.386	104.641	104.331	91.4948	100.674	77.5634	82.9172	104.002	101.594	96.3562	85.918
	36.2	100.361	110.836	85.2036	109.651	148.915	148.868	125.82	136.984	104.472	92.6289	97.8489	108.373	149.169	150.404	141.045	130.666	105.63	105.734	97.2593	104.253	138.196	133.815	117.364	145.292	96.6502	96.0965	82.2311	80.6309	102.036	95.0451	99.8048	91.4848	102.957	100.947	84.1238	79.5816	96.5287	104.868	104.376	104.758	91.5107	100.778	77.808	83.3739	104.217	101.971	96.5588	86.0181
	36.3	100.301	110.863	85.0952	109.349	149.297	149.193	125.909	137.29	104.475	92.7017	97.3858	108.084	149.587	150.641	141.012	130.904	106.05	105.759	97.1018	104.23	138.094	133.446	117.216	144.93	96.6604	96.2061	82.2962	80.6658	102.397	94.8025	99.7432	91.7356	102.915	100.812	83.8474	79.4953	96.2834	104.158	104.479	105.038	91.322	100.848	78.0547	83.5468	104.15	102.092	96.3702	86.0312
	36.4	100.428	111.072	84.9158	109.193	149.399	149.544	126.189	137.463	104.467	92.3358	96.8908	107.966	149.935	150.995	140.92	130.862	106.04	105.843	97.0594	104.231	138.107	133.166	117.24	144.821	96.661	96.3776	82.2895	80.8612	102.857	94.6229	99.8571	91.9062	102.826	100.548	83.6896	79.5597	96.1838	103.611	104.69	105.219	91.188	100.81	78.2326	83.5711	103.936	102.037	95.9976	85.9242
	36.5	100.472	111.247	84.7082	109.121	149.327	149.772	126.252	137.542	104.694	91.9934	96.5723	108.092	149.977	151.247	140.859	130.801	105.637	105.916	97.2602	104.096	138.175	133.056	117.223	144.583	96.5869	96.8062	82.3501	81.2832	103.097	94.5192	100.089	92.0515	102.724	100.404	83.7316	79.5089	96.3974	103.212	104.812	105.128	91.1893	100.978	78.2292	83.6349	103.543	101.912	95.8165	85.6832
	36.6	100.36	111.409	84.609	109.059	149.163	150.175	126.57	137.574	105.105	91.6306	96.3811	108.218	149.901	151.208	140.561	130.676	104.942	105.996	97.3408	103.912	138.225	133.094	117.284	144.101	96.767	97.2232	82.437	81.663	103.023	94.5568	100.242	92.0254	102.857	100.427	84.0302	79.4678	96.6066	103.277	104.955	104.961	91.2985	101	78.1742	83.4481	103.239	101.645	95.619	85.2962
	36.7	100.212	111.672	84.6644	109.17	148.984	150.427	126.937	137.724	105.462	91.2764	96.3521	108.364	149.689	150.851	140.356	130.311	104.198	106.216	97.3167	103.49	138.354	133.351	117.479	144.037	96.8303	97.5252	82.3872	81.9968	102.919	94.6953	100.589	91.6196	103.155	100.55	84.3774	79.7318	96.9044	103.647	105.169	104.768	91.3738	101.14	78.214	83.1233	102.872	101.542	95.4449	85.0564
	36.8	100.187	112.063	84.6851	109.329	148.632	150.649	127.008	137.755	105.816	90.9677	96.2244	108.407	149.127	150.472	140.105	129.957	103.574	106.3	97.4395	103.247	138.22	133.784	117.753	144.271	96.9868	97.6712	82.4324	81.9981	102.685	95.0944	100.933	91.1962	103.404	100.382	84.4176	80.0745	97.1233	104.046	105.048	104.564	91.2796	101.401	78.3322	83.043	102.732	101.417	95.4216	84.8354
	36.9	100.136	112.269	84.7508	109.29	148.409	150.621	127.017	137.715	106.089	90.9622	96.327	108.511	148.463	149.809	139.736	129.885	103.249	106.219	97.527	103.145	138.115	134.304	118.116	144.41	96.931	97.8057	82.748	81.7945	102.206	95.2677	101.112	90.7214	103.57	100.531	84.485	80.35	97.2522	104.21	104.777	104.394	91.1213	101.625	78.4377	83.0225	102.682	101.34	95.4625	84.7257
	37	100.296	112.496	84.7852	109.177	148.294	150.49	127.163	137.818	106.385	90.9981	96.4948	108.414	147.94	149.178	139.455	129.86	103.038	106.044	97.6031	103.17	138.13	134.842	118.509	144.468	96.8076	97.8022	82.946	81.5842	101.694	95.0602	101.212	90.335	103.55	100.604	84.363	80.5638	97.279	104.219	104.678	104.316	90.7258	101.441	78.5348	82.835	102.808	101.089	95.4258	84.6098
	37.1	100.666	112.429	84.6091	109.036	148.24	150.07	126.969	137.867	106.566	91.0677	96.7474	108.419	147.614	148.701	139.301	129.569	102.89	105.896	97.8103	103.403	138.009	135.229	118.712	144.742	96.5542	97.465	82.986	81.4432	101.49	94.8195	101.585	90.1741	103.346	100.68	84.0845	80.7698	97.2018	104.001	104.48	104.177	90.4231	101.29	78.713	82.6646	102.882	100.877	95.3999	84.5565
	37.2	101.093	112.236	84.389	108.903	148.204	149.728	126.714	137.755	106.818	91.2977	96.948	108.433	147.583	148.487	139.041	129.331	102.821	105.691	98.2151	103.93	137.847	135.509	118.81	145.012	96.335	97.1734	83.0563	81.2973	101.42	94.5892	101.689	90.265	103.066	100.891	83.8319	80.8405	96.8922	103.667	104.171	103.823	90.1204	101.049	78.8165	82.6231	102.983	100.43	95.3616	84.5275
	37.3	101.365	111.952	84.2258	108.759	148.062	149.372	126.785	137.556	106.967	91.6127	97.2192	108.481	147.748	148.347	138.847	129.222	102.886	105.534	98.5461	104.306	138.07	135.38	118.63	145.124	95.9238	96.9101	83.028	81.2998	101.392	94.2021	101.739	90.324	102.886	101.217	83.7404	80.7718	96.8451	103.509	104.249	103.498	90.0878	100.632	78.7172	82.4778	102.942	99.9771	95.405	84.6623
	37.4	101.316	111.51	83.9878	108.704	148.03	149.149	126.819	137.481	107.195	91.9005	97.3176	108.431	147.966	148.541	138.708	129.055	103.132	105.532	98.9722	104.264	138.132	135.059	118.241	145.16	95.742	96.524	82.7129	81.41	101.558	94.0118	101.912	90.5257	102.702	101.243	83.5535	80.5107	96.9488	103.586	104.471	103.223	90.0613	100.228	78.6998	82.238	102.765	99.5997	95.508	84.8408
	37.5	101.146	110.896	83.792	108.692	147.933	148.873	126.728	137.302	107.169	92.1488	97.3872	108.48	148.22	148.708	138.528	128.732	103.469	105.68	99.116	104.114	137.904	134.515	117.681	145.25	95.7136	96.23	82.5773	81.4093	101.965	94.0498	101.955	90.7244	102.676	101.201	83.505	80.2999	97.1444	103.742	104.58	103.063	90.1332	99.9168	78.7426	82.1226	102.514	99.5029	95.6655	85.2406
	37.6	100.781	110.381	83.6262	108.728	147.907	148.588	126.97	137.259	107.045	92.5368	97.5	108.434	148.231	148.853	138.624	128.683	103.983	105.886	99.031	103.818	137.819	133.88	117.112	145.298	95.759	96.2404	82.6363	81.2831	102.261	94.0932	101.695	90.7888	102.961	101.132	83.5554	80.0723	97.4348	103.907	104.763	103.18	89.8746	99.6897	78.6434	82.2873	102.171	99.4324	95.8998	85.6185
	37.7	100.387	109.68	83.5238	108.872	148.001	148.318	127.339	137.269	106.707	92.7334	97.6042	108.254	148.011	148.825	138.968	128.847	104.371	106.168	98.6358	103.381	137.605	133.207	116.639	145.249	95.7177	96.4787	82.7775	81.2435	102.234	94.2192	101.58	90.8609	103.249	100.822	83.6913	79.9917	97.858	103.989	104.906	103.548	89.844	99.549	78.4637	82.5601	101.743	99.55	96.238	85.8882
	37.8	99.978	109.143	83.431	109.115	148.197	148.21	127.405	137.445	106.391	92.8208	97.7524	108.179	147.899	148.73	139.32	128.911	104.492	106.458	98.2379	102.995	137.137	132.713	116.25	145.205	95.8998	96.6694	83.1209	81.3632	101.933	94.3349	101.42	91.1285	103.279	100.465	83.9561	80.0213	98.1279	104	104.825	104.033	89.8131	99.5927	78.4406	82.7132	101.495	99.9199	96.4911	85.9475
	37.9	99.8799	108.886	83.4132	109.426	148.066	148.139	127.291	137.484	105.971	92.7173	97.8394	108.02	147.901	148.35	139.457	128.95	104.457	106.547	97.755	102.878	136.974	132.402	116.093	145.17	96.0722	96.8243	83.5813	81.4548	101.463	94.4426	101.055	91.3375	103.449	100.245	84.3088	80.3331	98.1705	103.997	104.691	104.613	89.9301	99.7507	78.2972	82.799	101.36	100.485	96.5442	85.9232
	38	99.8522	108.832	83.4296	109.741	147.783	148.334	127.285	137.508	105.524	92.7288	97.7662	107.827	147.804	148.008	139.536	129.303	104.464	106.559	97.455	102.749	137.008	132.339	116.127	145.367	96.114	96.831	83.9273	81.6493	100.695	94.5139	100.808	91.534	103.543	100.195	84.734	80.7704	97.9629	103.989	104.463	104.949	90.1713	100.052	78.1984	82.9059	101.27	100.957	96.5584	85.7542
	38.1	99.8812	108.898	83.6947	110.033	147.274	148.838	127.011	137.186	105.144	92.5469	97.6504	107.666	147.829	147.731	139.276	129.729	104.307	106.418	97.1834	102.515	137.014	132.641	116.497	145.489	96.2089	96.6661	83.9371	81.904	99.9048	94.8145	100.585	91.7327	103.192	100.281	85.2056	81.1786	97.7256	103.941	104.471	104.747	90.6862	100.227	78.0782	82.7408	101.273	101.386	96.5653	85.6026
	38.2	99.9234	109.198	83.8752	110.061	146.679	149.408	126.436	136.86	104.924	92.4285	97.6208	107.938	147.993	147.679	138.89	130.02	104.205	106.124	97.1481	102.312	137.304	133.089	116.919	145.62	96.5001	96.1316	83.845	82.0054	99.4648	94.953	100.341	91.7861	102.683	100.421	85.5512	81.3715	97.483	104.111	104.678	104.513	91.09	100.435	77.9294	82.4297	101.421	101.769	96.5228	85.5142
	38.3	99.9296	109.332	84.0402	109.996	146.216	149.807	125.738	136.487	104.765	92.379	97.6542	108.262	147.966	147.869	138.278	130.393	104.085	105.817	97.0196	102.388	137.726	133.663	117.526	145.789	96.6323	95.733	83.5193	81.994	99.5141	95.069	100.216	91.7507	102.541	100.57	85.7709	81.4696	97.1708	104.36	104.905	104.423	91.3585	100.537	77.6532	82.3888	101.349	101.8	96.4038	85.5836
	38.4	99.8693	109.385	84.2845	109.895	146.188	150.228	125.093	136.173	104.562	92.3252	97.989	108.666	147.997	148.394	137.869	130.545	103.857	105.707	96.8431	102.503	137.896	134.059	118.018	145.878	96.786	95.4644	83.107	82.0681	99.7383	95.0107	100.351	91.6244	102.217	100.657	85.9549	81.3771	96.7816	104.543	105.192	104.281	91.4909	100.531	77.5976	82.5212	101.402	101.444	96.3088	85.6071
	38.5	99.7762	109.376	84.5599	109.874	146.427	150.316	124.385	135.981	104.477	92.1403	98.3818	109.085	148.122	149.065	137.363	130.436	103.549	105.65	96.6629	102.692	138.028	134.414	118.535	145.626	96.983	95.4194	82.7762	82.0477	100.159	94.921	100.461	91.3248	101.83	100.645	85.8967	81.0046	96.531	104.771	105.565	104.135	91.4792	100.504	77.524	82.5688	101.502	101.062	96.2054	85.5544
	38.6	99.8764	109.228	84.5641	109.801	147.024	150.108	123.758	136.21	104.353	92.1882	98.6998	109.371	148.24	149.561	137.028	130.088	103.235	105.855	96.7476	103.044	138.27	134.561	118.945	145.291	97.1384	95.5412	82.8412	82.089	100.716	94.4893	100.709	91.0253	101.79	100.337	85.6901	80.6749	96.1362	105.078	105.361	104.381	91.3883	100.601	77.5771	82.6874	101.718	100.741	95.9208	85.5444
	38.7	99.9935	109.018	84.6036	109.835	147.733	149.69	123.488	136.433	104.216	92.2659	98.8191	109.226	148.316	149.854	136.721	129.794	102.954	106.028	96.7786	103.455	138.391	134.486	119.251	144.907	97.134	95.9124	83.0228	82.186	101.316	94.2098	100.86	90.8638	101.9	100.098	85.4968	80.4645	95.7159	105.059	105.083	104.522	91.2225	100.536	77.7842	82.7913	101.877	100.284	95.4638	85.4959
	38.8	100.261	108.755	84.6213	109.815	148.257	149.06	123.607	136.583	103.94	92.1846	98.6609	109.021	148.454	149.813	136.59	129.397	103.029	106.137	96.8764	103.421	138.362	134.348	119.259	144.32	97.1544	96.273	83.3102	82.1414	101.607	93.9926	100.916	90.6142	101.691	99.8971	85.3209	80.3027	95.4839	104.976	104.89	104.288	90.9273	100.35	77.9832	82.7379	102.207	100.027	95.2209	85.427
	38.9	100.502	108.558	84.4969	109.779	148.478	148.339	123.83	136.865	103.874	92.3708	98.273	108.743	148.24	149.416	136.475	129.188	103.123	106.173	97.0224	103.254	138.346	134.325	119.085	143.789	97.0171	96.6468	83.6849	81.9877	101.704	93.9214	100.907	90.4514	101.503	99.8364	85.0982	80.1199	95.5174	104.8	104.624	103.834	90.5517	100.197	77.9457	82.6482	102.361	99.9324	95.1863	85.5336
	39	100.591	108.332	84.3192	109.615	148.5	147.832	124.125	137.002	103.898	92.6664	97.9222	108.48	148.01	148.802	136.692	128.953	103.126	106.16	97.1896	102.918	138.327	134.147	118.647	143.547	96.8486	96.7835	83.9549	81.9328	101.835	93.9841	100.85	90.4904	101.267	99.8394	84.9113	80.1295	95.5913	104.499	104.402	103.587	90.1602	99.9061	77.7758	82.6653	102.523	99.7836	95.0958	85.7639
	39.1	100.294	108.156	84.2178	109.533	148.201	147.478	124.588	136.79	104.044	92.7451	97.669	108.329	147.703	148.334	136.934	128.727	103.217	105.835	97.0942	102.449	137.872	133.793	118.086	143.321	96.5408	96.9622	83.9534	81.7055	101.754	94.2278	100.724	90.7384	100.892	99.8972	84.7233	80.2123	95.8055	103.991	104.617	103.365	89.9918	99.4802	77.5648	82.7143	102.594	99.6233	95.1638	85.9208
	39.2	99.9862	108.104	84.1118	109.434	147.625	147.161	124.921	136.49	104.153	92.6777	97.6584	108.303	147.394	147.904	137.095	128.397	103.365	105.813	97.0202	101.979	137.252	133.622	117.427	143.137	96.2788	96.949	83.7318	81.5814	101.415	94.315	100.666	91.0035	100.41	99.9994	84.5472	80.3601	96.047	103.718	104.752	103.207	89.883	99.16	77.3895	82.8482	102.586	99.7274	95.4368	86.1979
	39.3	99.6349	108.143	84.0092	109.316	147.155	147.255	125.101	136.164	104.462	92.7423	97.9772	108.176	147.05	147.541	137.226	128.226	103.298	105.85	97.0758	101.638	136.674	133.494	117.068	143.254	96.1694	96.8062	83.3764	81.6849	101.336	94.4426	100.529	91.3064	100.046	100.152	84.228	80.455	96.2207	103.436	104.899	103.297	90.1014	99.099	77.3757	82.9573	102.637	99.9862	95.4504	86.4586
	39.4	99.3604	108.139	84.0699	109.222	146.824	147.472	125.329	135.526	104.779	92.7121	98.35	108.162	146.903	147.494	137.319	128.082	103.284	105.854	97.213	101.409	136.123	133.143	116.887	143.394	96.1355	96.4561	83.0506	81.8532	101.527	94.443	100.239	91.6456	99.8207	100.248	84.1217	80.6845	96.452	103.288	105.075	103.739	90.4656	99.0509	77.3504	82.8897	102.71	100.322	95.311	86.4108
	39.5	99.4761	108.119	84.0053	109.095	146.705	147.616	125.553	134.874	104.961	92.6585	98.6996	108.233	146.73	147.347	137.137	128.099	103.413	105.807	97.3374	101.342	135.685	132.793	116.775	143.278	96.1187	96.2419	82.9569	81.8499	101.656	94.2465	100.042	91.8144	99.7898	100.291	84.1568	80.9556	96.6947	103.302	105.238	104.013	90.9183	99.0805	77.4154	82.714	102.642	100.733	95.3229	86.3082
	39.6	99.9642	108.166	83.9096	108.757	146.612	147.715	125.69	134.449	104.911	92.7092	99.0053	108.233	146.596	147.026	136.944	128.202	103.509	106.016	97.4168	101.357	135.67	132.639	116.552	143.359	96.3798	95.8904	82.8793	81.9293	101.913	93.9601	99.9873	91.6755	99.9545	100.499	84.2092	81.06	96.714	103.555	105.248	104.079	90.9836	99.1862	77.3967	82.5659	102.365	100.965	95.2891	86.3013
	39.7	100.322	108.109	83.8858	108.464	146.634	148.046	125.906	134.071	104.795	93.0137	99.1985	108.184	146.388	146.681	136.981	128.406	103.475	105.914	97.2804	101.208	135.778	132.442	116.568	143.586	96.6301	95.7065	82.9094	82.0396	102.149	93.7312	100.037	91.346	100.314	100.832	84.2821	80.893	96.5233	103.856	105.206	104.011	90.985	99.1964	77.3006	82.2714	102.345	100.905	95.1912	86.1722
	39.8	100.616	108.09	83.9238	108.332	146.579	148.255	126.175	133.892	104.555	93.3696	99.0869	108.282	146.291	146.552	137.326	128.441	103.551	105.802	96.8796	101.273	135.949	132.205	116.498	143.536	96.6912	95.6053	83.0946	82.0237	102.07	93.453	100.275	91.092	100.806	101.119	84.6406	80.8724	96.2344	104.072	104.822	103.958	90.8207	99.0328	77.1876	82.0019	102.133	100.567	95.2621	85.9788
	39.9	100.849	108.097	83.9416	108.19	146.228	148.233	126.349	133.997	104.234	93.5831	98.83	108.312	146.32	146.365	137.819	128.32	103.651	105.772	96.3852	101.385	136.257	132.235	116.384	143.432	96.6818	95.7455	83.081	81.9201	101.754	93.398	100.689	90.7836	101.305	101.267	84.8575	80.7734	95.8281	104.233	104.339	103.623	90.7324	98.8023	77.2604	81.9968	101.914	100.259	95.2582	85.9496
	40	100.673	108.295	84.1208	108.07	145.587	148.263	126.498	134.143	104.047	93.6536	98.5753	108.237	146.267	146.557	138.304	128.095	103.576	105.838	95.777	101.683	136.45	132.308	116.366	143.492	96.6101	95.797	82.8066	82.0568	101.341	93.4269	101.063	90.6569	101.792	101.335	85.0632	80.4575	95.3292	104.187	103.77	103.534	90.6365	98.8091	77.3806	82.054	101.71	99.9859	95.2089	85.9368
	40.1	100.268	108.474	84.4867	108.283	145.312	148.17	126.518	134.163	104.101	93.5857	98.1672	108.447	146.256	146.932	138.66	127.828	103.468	105.573	95.3044	102.042	136.49	132.406	116.497	143.455	96.3288	95.7992	82.7086	82.3442	100.893	93.5601	101.271	90.5959	101.974	101.234	85.2788	80.3136	95.1913	104.023	103.387	103.461	90.6317	98.8754	77.6335	81.9958	101.867	99.8822	95.4137	85.7572
	40.2	100.122	108.635	84.6147	108.427	145.113	147.786	126.282	134.247	104.364	93.4064	97.6856	108.764	146.445	147.402	138.787	127.451	103.444	105.408	95.0098	102.505	136.493	132.463	116.425	143.277	96.1235	95.7384	82.7474	82.5026	100.82	93.7411	101.378	90.6996	102.044	100.853	85.5268	80.58	95.4266	103.575	103.171	103.448	90.7426	99.2656	77.7864	82.0936	101.766	99.9717	95.6148	85.5094
	40.3	100.133	108.938	84.6886	108.403	144.938	147.251	125.787	134.277	104.67	93.103	97.3003	108.898	146.428	147.553	138.508	126.954	103.191	105.121	94.9564	102.96	136.45	132.508	116.306	143.372	95.9603	95.7131	82.5589	82.7705	100.947	93.7852	101.416	90.8102	102.048	100.544	85.6275	80.733	95.7082	103.191	103.349	103.378	90.8327	99.8652	77.8782	82.1898	101.704	100.099	95.79	85.3164
	40.4	100.131	109.238	84.6728	108.438	145.177	146.981	125.3	134.285	104.834	92.9019	97.0983	109.04	146.361	147.579	138.14	126.647	102.852	104.668	95.0293	103.369	136.202	132.509	116.384	143.752	95.9025	95.6371	82.3346	83.1104	101.222	93.6059	101.285	90.7621	101.982	100.336	85.6625	80.8941	95.8524	102.713	103.663	103.501	90.6724	100.716	77.8992	82.0906	101.773	100.035	96.166	85.1808
	40.5	100.461	109.391	84.6476	108.69	145.555	146.634	124.719	134.348	104.916	92.716	96.9581	109.068	146.539	147.47	137.97	126.341	102.775	104.217	95.318	103.426	135.952	132.713	116.51	144.081	95.963	95.6462	82.1078	83.2205	101.669	93.5403	101.045	90.6226	101.847	100.278	85.5372	81.362	96.0494	102.548	103.978	103.311	90.5486	101.363	77.7794	81.9362	101.873	99.948	96.3618	85.0079
	40.6	100.812	109.574	84.347	108.68	145.557	146.438	124.185	134.55	104.843	92.6035	97.0826	108.681	146.798	147.399	137.78	126.078	102.808	104.105	95.704	103.307	135.761	132.811	116.564	144.427	95.9905	95.6882	81.8195	83.1161	102.153	93.4477	100.719	90.5489	102.133	100.312	85.4248	81.6111	96.1338	102.587	104.216	103.221	90.6074	101.97	77.6184	81.9711	101.739	99.8715	96.1739	85.0341
	40.7	100.963	109.694	84.2577	108.817	145.751	146.456	123.853	134.895	104.689	92.3466	97.2528	108.222	146.758	147.124	137.545	125.772	102.965	104.13	96.0935	103.237	135.752	132.914	116.747	144.711	96.0922	95.7856	81.4639	83.0255	102.233	93.3106	100.236	90.4805	102.674	100.4	85.2772	81.4848	96.0176	102.879	104.335	103.127	90.6286	102.179	77.5702	82.1298	101.956	99.7418	96.0742	85.1274
	40.8	100.833	109.482	84.3069	109.04	146.041	146.485	123.858	135.299	104.632	92.1834	97.5335	107.936	146.679	147.104	137.478	125.668	103.352	104.536	96.3056	102.964	135.794	133.001	116.925	144.944	96.4473	95.7271	81.4865	82.8753	102.296	93.3331	99.7282	90.3206	103.177	100.271	85.1141	81.3462	95.8625	103.113	104.3	103.051	90.7512	102.057	77.6134	82.3669	102.184	99.8529	95.9087	85.3192
	40.9	100.743	109.172	84.2969	109.237	146.283	146.42	123.847	135.566	104.812	91.9857	97.6731	107.772	146.419	147.295	137.469	125.56	103.891	105.258	96.2905	102.608	135.889	133.132	116.852	144.821	96.8669	95.5632	81.7813	82.6355	102.344	93.5508	99.4356	90.4738	103.528	100.111	84.947	81.183	95.6005	103.435	104.231	102.861	90.9767	101.624	77.6802	82.7727	102.383	100.267	95.5075	85.4959
	41	100.396	108.838	84.276	109.145	146.499	146.607	123.865	135.77	105.122	91.9745	97.7005	107.708	145.924	147.36	137.299	125.51	104.334	105.817	95.9101	102.349	135.911	133.117	116.788	144.718	97.3661	95.3801	82.1638	82.4928	102.31	93.6668	99.3406	90.842	103.805	99.7168	84.8378	80.7875	95.3002	103.472	104.42	102.883	91.1176	101.086	78.0068	83.2533	102.744	100.615	95.2495	85.7253
	41.1	100.159	108.273	84.5757	109.185	146.837	146.852	123.921	135.89	105.579	91.9767	97.6639	108.009	145.254	147.275	137.197	125.533	104.466	106.269	95.253	102.156	135.808	133.186	116.734	144.476	98.0427	95.3114	82.3111	82.385	102.212	93.6756	99.4805	91.3836	103.706	99.3779	84.7506	80.596	94.8816	103.225	104.543	103.077	91.1668	100.562	78.3717	83.4929	103.152	100.847	95.0109	85.8398
	41.2	99.9872	107.939	84.9299	109.054	147.023	147.028	123.86	135.808	106.069	92.1534	97.552	108.314	144.789	147.236	137.108	125.715	104.21	106.612	94.5882	101.837	135.419	133.207	116.591	144.428	98.4354	95.2051	82.3984	82.3182	102.331	93.6781	99.9594	91.9365	103.238	98.9712	84.656	80.5599	94.6056	102.938	104.778	103.347	91.2126	100.107	78.7491	83.4608	102.996	100.965	94.699	86.1175
	41.3	99.992	107.999	84.9764	108.991	147.069	147.389	123.568	135.402	106.475	92.3847	97.3139	108.555	144.714	147.155	136.858	126.014	103.78	106.484	94.1996	101.436	135.107	133.306	116.374	144.242	98.3358	95.4412	82.1403	82.1278	102.328	93.7341	100.401	92.4758	102.815	98.686	84.626	80.591	94.5296	102.762	105.052	103.546	91.258	99.838	78.8331	83.3655	102.8	100.776	94.4762	86.2864
	41.4	99.9549	108.129	85.0974	108.931	146.889	147.596	123.381	135.176	106.796	92.7854	97.2625	108.758	144.78	146.679	136.35	126.284	103.237	106.028	94.058	101.19	134.945	133.427	116.35	144.145	98.042	95.8253	81.8318	82.0399	102.111	93.7222	100.585	92.8067	102.699	98.5357	84.8196	80.7395	94.8524	102.68	105.254	103.769	91.3628	99.642	78.7977	83.2335	102.415	100.335	94.5304	86.4161
	41.5	100.172	108.296	85.1255	108.907	146.804	147.462	123.294	135.087	106.799	92.9859	97.2308	109.127	144.847	146.117	135.769	126.616	102.586	105.784	94.3065	101.162	134.812	133.483	116.259	144.117	97.645	96.1082	81.4929	81.8742	101.808	93.7206	100.732	92.8876	102.747	98.7328	85.189	80.9698	95.3348	102.691	105.068	103.947	91.4465	99.4639	78.575	83.0858	101.827	99.9987	94.7256	86.4624
	41.6	100.532	108.809	84.891	108.833	146.605	147.073	123.209	135.152	106.641	93.2128	97.0194	109.07	145.034	145.568	135.178	126.907	102.3	105.367	94.8492	101.274	134.896	133.428	116.203	144.349	97.1402	96.2882	81.5536	81.6589	101.537	93.7423	100.722	92.7605	102.886	98.7933	85.4748	81.1071	95.9074	102.773	104.719	103.981	91.5274	99.2583	78.2892	83.0104	101.225	100.021	95.2542	86.538
	41.7	100.959	109.051	84.3447	108.791	146.362	146.597	123.198	135.192	106.215	93.3954	97.0863	109.082	145.233	145.264	134.856	127.139	102.335	104.826	95.4524	101.457	135.189	133.612	116.103	144.319	96.866	96.4858	81.7957	81.4	101.195	93.6506	100.378	92.4396	103.04	99.034	85.7293	81.1869	96.1792	102.803	104.075	104.016	91.5656	99.212	78.082	83.0454	100.92	100.372	95.779	86.3051
	41.8	101.435	108.962	83.9542	108.593	146.275	146.15	123.225	135.531	105.59	93.4052	97.2044	108.891	145.137	144.908	134.862	127.19	102.6	104.572	95.8558	101.738	135.294	133.729	115.893	144.245	96.9989	96.37	82.2094	81.411	100.796	93.3976	100.011	92.1285	103.146	99.437	85.9039	81.1333	96.1722	102.791	103.494	104.053	91.4878	99.2331	78.2749	83.0978	100.683	100.806	96.1866	85.9656
	41.9	101.843	108.847	83.6311	108.286	146.278	145.915	123.116	135.64	104.935	93.1662	97.0998	108.433	145.083	144.806	135.016	127.17	103.022	104.569	96.073	101.888	135.186	133.546	115.348	144.157	97.3355	96.161	82.5221	81.4098	100.654	93.0376	99.9174	91.8693	103.151	99.7595	85.8502	80.8828	95.9293	102.693	103.135	104.067	91.5652	99.2608	78.5911	83.0526	100.669	101.228	96.5063	85.5276
	42	102.026	108.765	83.4648	108.071	146.246	145.828	122.928	135.572	104.609	92.9983	97.024	107.778	145.159	144.991	135.336	126.91	103.49	104.494	96.0712	101.828	135.322	133.351	114.879	143.888	97.4751	96.223	82.9018	81.5737	100.675	92.5637	99.8108	91.5412	103.061	99.8459	85.6093	80.583	95.5126	102.659	102.991	104.115	91.7867	99.5039	79.0005	82.9131	100.824	101.584	96.663	85.23
	42.1	101.932	108.467	83.3316	107.837	146.606	145.931	122.787	135.274	104.454	92.925	97.072	107.501	145.197	145.327	135.588	126.471	103.731	104.509	95.8531	101.699	135.479	133.312	114.528	143.408	97.4928	96.381	83.093	81.8724	100.613	92.1967	99.7254	91.1441	103.03	100.066	85.4429	80.2486	95.0795	102.731	103.12	103.847	91.9872	99.7892	79.3243	83.0389	101.073	101.376	96.4651	84.8364
	42.2	101.631	108.43	83.4685	107.692	146.677	146.21	122.746	134.88	104.654	92.7873	96.9478	107.14	145.102	145.442	135.456	126.025	103.96	104.579	95.5122	101.629	135.486	133.067	114.443	143.002	97.3102	96.5856	83.073	82.0364	100.611	92.091	99.8209	90.9586	103.29	100.288	85.2115	79.8873	95.0255	102.817	103.604	103.569	92.2376	100.09	79.3629	83.1314	101.41	100.868	96.1748	84.6851
	42.3	101.187	108.648	83.6831	107.592	146.635	146.156	122.831	134.337	105.263	92.7162	96.907	107.053	145.137	145.514	134.883	125.657	104.047	104.624	95.1349	101.7	135.565	132.962	114.626	142.789	96.9497	97.0325	83.2654	81.822	100.964	92.0471	100.072	90.8153	103.644	100.361	84.916	79.7033	95.1538	102.923	103.974	103.138	92.6206	100.255	79.0434	83.2918	101.781	100.28	95.971	84.6957
	42.4	100.788	108.877	83.7112	107.584	146.62	146.154	123.061	133.898	105.969	92.6453	97.0701	107.129	145.161	145.533	134.192	125.391	103.901	104.547	94.8814	101.803	135.904	133.109	115.1	142.889	96.3248	97.4375	83.551	81.5224	101.292	92.1942	100.126	90.588	103.838	100.454	84.601	79.7215	95.4172	102.971	104.089	102.584	92.6408	100.521	78.6537	83.447	102.037	99.6529	95.6122	84.851
	42.5	100.38	109.126	83.7174	107.538	146.59	146.157	123.225	133.696	106.486	92.6386	97.2517	107.172	145.133	145.525	133.41	125.324	103.848	104.464	94.8686	101.934	136.017	133.295	115.525	142.995	95.8986	97.4156	83.6663	81.1555	101.481	92.5462	100.055	90.5088	104.06	100.659	84.4426	79.8282	95.6288	102.879	104.111	101.818	92.451	100.495	78.0991	83.6218	102.099	99.0627	95.2641	84.9385
	42.6	100.068	109.522	83.7916	107.716	146.182	146.171	123.353	133.648	106.867	92.3968	97.4046	106.945	145.056	145.433	132.739	125.5	103.942	104.621	95.0236	102.131	135.96	133.286	115.913	143.143	95.6034	97.303	83.6357	80.9237	101.858	92.9312	99.9634	90.6332	104.091	100.812	84.3517	80.0774	95.6907	102.729	103.974	101.465	92.2186	100.319	77.7699	83.3834	102.041	98.8688	95.1708	85.1056
	42.7	100.103	109.698	83.798	108.051	146.261	146.009	123.193	133.87	107.052	92.1674	97.4246	106.693	145.127	145.544	132.396	125.762	103.85	104.925	95.2826	102.425	135.942	133.362	116.036	143.274	95.4853	97.0172	83.6847	81.0154	102.157	93.2123	100.024	90.6534	103.862	101.021	84.4643	80.6433	95.4438	102.465	103.775	101.051	91.8272	99.9941	77.6816	83.1555	101.849	98.7605	95.0893	85.1594
	42.8	100.252	109.613	83.7353	108.467	146.39	146.081	122.98	134.218	106.969	91.8916	97.2457	106.491	145.05	145.821	132.428	125.877	103.731	105.072	95.5598	102.754	135.911	133.204	116.067	143.238	95.3475	96.3668	83.4597	81.5237	102.234	93.7191	99.9396	90.6416	103.559	101.144	84.774	81.2083	95.1907	102.1	103.411	101.011	91.3188	99.783	77.8268	82.6927	101.481	99.0537	94.8495	85.1696
	42.9	100.468	109.611	83.8758	108.929	146.479	145.96	122.783	134.501	106.586	91.7657	97.0111	106.359	144.705	146.263	132.767	125.881	103.884	105.115	95.7799	102.979	135.566	132.89	116.082	142.694	95.3719	95.7606	83.2207	82.08	102.165	94.058	99.8591	90.6784	103.406	101.086	85.2112	81.7372	94.7905	101.753	103.041	101.435	91.0001	99.5907	78.025	82.238	101.032	99.545	94.5854	85.1807
	43	100.787	109.499	83.8959	109.599	146.458	145.774	122.758	134.39	106.331	91.6728	96.7458	106.354	144.191	146.51	133.372	125.913	103.886	105.086	95.6884	103.151	135.173	132.574	116.128	142.455	95.4041	95.5632	83.249	82.622	102.148	94.31	99.8608	90.6353	103.135	100.966	85.4204	82.2233	94.4616	101.477	102.737	102.215	90.7859	99.5055	78.3076	81.7964	100.733	99.9016	94.2559	85.0205
	43.1	100.957	109.347	83.9137	110.004	146.39	145.469	122.619	134.151	106.091	91.7387	96.4176	106.736	143.704	146.681	134.175	125.871	103.743	104.912	95.5994	103.141	134.71	132.333	116.168	142.146	95.4764	95.4924	83.4556	82.7336	101.994	94.5092	99.9203	90.4098	103.05	100.927	85.4688	82.6329	94.2746	101.193	102.526	102.96	90.714	99.4968	78.4007	81.6114	100.615	100.041	93.8427	84.8663
	43.2	100.626	109.34	83.9568	110.022	145.976	145.125	122.806	133.865	105.834	91.903	96.2719	107.222	143.193	146.451	134.889	125.769	103.824	104.532	95.5338	102.899	134.294	131.971	116.222	141.963	95.5562	95.5848	83.6442	82.5001	101.721	94.6273	99.76	90.2944	103.109	100.808	85.4517	82.6686	94.355	101.211	102.298	103.855	90.9433	99.6849	78.4409	81.4362	100.463	100.287	93.6175	84.6743
	43.3	100.182	109.413	84.1352	109.935	145.465	144.766	122.938	133.553	105.484	92.2264	96.2624	107.48	142.797	145.979	135.442	125.828	103.811	104.304	95.4674	102.468	133.887	131.854	116.205	141.864	95.8319	95.9518	83.7674	81.96	101.387	94.3271	99.7785	90.1757	103.079	100.812	85.3254	82.5785	94.3967	101.256	102.432	104.638	91.1552	99.911	78.4361	81.4704	100.489	100.076	93.691	84.4972
	43.4	99.6919	109.309	84.1834	109.661	144.938	144.576	122.974	133.466	105.393	92.5688	95.9652	107.836	142.7	145.334	135.788	125.93	103.463	104.196	95.4041	102.189	133.745	132.099	116.053	142.099	96.0996	96.5069	83.7886	81.4507	101.061	93.8992	99.8537	90.1765	102.938	101.069	85.191	82.3689	94.517	101.443	102.755	105.068	91.3532	99.8309	78.4002	81.5757	100.653	99.7656	93.8556	84.2805
	43.5	99.1674	109.207	84.1777	108.979	144.579	144.588	122.895	133.616	105.139	92.8235	95.6574	108.087	142.841	144.725	135.714	125.97	103.148	104.181	95.503	102.089	133.848	132.501	115.773	142.084	96.407	96.8374	83.5882	80.9735	100.754	93.4861	99.971	90.3878	102.946	101.331	85.2372	82.0201	94.7944	101.657	103.054	105.228	91.6684	99.74	78.3952	81.7442	100.65	99.5577	94.0765	84.3625
	43.6	98.7974	108.928	84.0216	108.347	144.367	144.857	123.013	133.841	104.968	92.9557	95.5405	107.945	143.056	144.304	135.226	126.013	102.868	104.093	95.4283	102.114	133.97	132.96	115.172	142.316	96.6407	96.9933	83.3174	80.8214	100.544	93.0851	100.149	90.5724	103.026	101.366	85.3732	81.6118	95.1722	101.914	103.273	105.212	91.8482	99.7187	78.4997	81.9038	100.448	99.5035	94.2181	84.4494
	43.7	98.8317	108.48	83.9284	107.98	144.386	145.379	122.976	133.946	104.902	93.0564	95.4178	107.818	143.268	144.422	134.56	126.012	102.353	104.105	95.3386	102.251	134.083	133.422	114.486	142.537	96.6182	97.0961	83.0037	80.8862	100.509	92.8296	100.381	90.5073	103.073	101.27	85.3705	81.2498	95.2831	101.957	103.365	105.028	91.9057	99.5076	78.5991	82.1386	100.406	99.3378	94.2052	84.6732
	43.8	98.9755	108.043	83.6296	107.744	144.487	145.86	123.015	134.004	105.058	92.8998	95.3968	107.876	143.575	144.975	134.125	126.068	102.003	104.105	95.433	102.464	134.181	133.483	113.992	142.913	96.3578	97.2033	82.761	81.1443	100.566	92.9721	100.389	90.5143	103.174	101.207	85.348	80.8268	95.3438	102.159	103.365	104.742	92.0692	99.2229	78.7508	82.2568	100.572	99.4028	94.0782	84.8281
	43.9	99.1692	107.803	83.3642	107.667	144.74	146.123	122.948	133.854	105.245	92.608	95.8142	107.66	143.746	145.732	133.838	126.187	101.812	104.17	95.5265	102.69	134.088	133.161	113.767	143.413	96.1679	96.9958	82.6223	81.5201	100.722	93.458	100.446	90.5225	103.315	100.993	85.2592	80.4054	95.4096	102.231	103.388	104.436	92.2213	99.3328	78.9715	82.3676	100.781	99.4709	93.948	84.9979
	44	99.4286	107.819	83.2041	107.947	144.854	146.089	123.038	133.817	105.518	92.2505	96.309	107.472	143.912	146.499	133.906	126.256	101.799	104.233	95.5829	102.746	133.648	132.651	113.558	143.909	95.8535	96.8768	82.5554	81.8484	100.84	93.8074	100.417	90.374	103.444	100.695	85.0928	80.1126	95.3547	102.372	103.591	104.187	92.2712	99.5752	79.1968	82.567	101.217	99.6082	93.8645	84.9896
	44.1	99.6466	108.047	83.2208	108.334	145.058	145.811	122.972	133.758	105.621	92.0238	96.9684	107.447	144.129	147.009	134.395	126.266	101.907	104.239	95.6812	102.634	133.514	132.149	113.736	144.223	95.5416	96.8313	82.591	82.0893	100.875	94.0302	100.319	90.48	103.455	100.659	84.9168	79.8144	95.1032	102.53	103.861	103.954	92.2928	99.749	79.3947	82.7618	101.673	99.6538	93.835	85.0582
	44.2	99.7871	108.338	83.1137	108.579	145.188	145.433	122.825	133.837	105.72	91.7622	97.5836	107.414	144.272	147.252	135.027	126.361	102.263	104.307	95.7068	102.486	133.504	131.614	114.265	144.554	95.538	96.7439	82.6965	82.3699	101.018	94.1058	100.151	90.8208	103.601	100.661	84.789	79.6016	94.9878	102.827	104.241	103.706	92.2111	99.9544	79.5104	82.8983	101.975	99.6915	93.8848	84.9874
	44.3	99.8814	108.635	83.1186	108.756	145.33	145.118	122.746	133.932	105.593	91.6244	98.0132	107.384	144.216	147.077	135.334	126.245	102.606	104.388	95.4639	102.362	133.603	131.37	114.674	144.601	95.6064	96.6312	82.7952	82.6421	101.159	93.8046	100.077	91.1693	103.817	100.708	84.6348	79.485	95.0306	103.064	104.598	103.464	92.0981	99.9623	79.3374	83.1824	101.911	99.6799	93.8196	85.0557
	44.4	99.832	108.776	83.259	108.787	145.316	144.875	122.818	134.113	105.231	91.4642	98.169	107.562	144.412	146.614	135.582	126.035	102.944	104.391	95.0818	102.073	133.82	131.244	114.773	144.24	95.5146	96.7274	82.8997	82.7248	101.435	93.2869	99.9698	91.4871	104.111	100.928	84.469	79.5122	95.161	103.42	104.654	103.202	92.0097	99.7634	78.9009	83.4751	101.804	99.5538	93.912	85.1716
	44.5	99.6828	108.532	83.4802	108.711	145.494	144.771	122.673	134.094	104.932	91.5054	98.2196	107.988	144.632	146.319	135.639	125.878	102.998	104.279	94.6958	101.847	134.354	131.1	115.008	143.89	95.4454	96.7084	83.0464	82.7147	101.682	93.1268	100.025	91.8468	104.349	101.335	84.3402	79.5277	95.2278	103.639	104.428	102.958	91.8252	99.5102	78.4186	83.6104	101.602	99.3329	94.0301	85.3476
	44.6	99.6866	108.069	83.7422	108.551	145.482	144.788	122.555	134.067	104.785	91.5411	97.6623	108.497	144.591	146.288	135.488	125.679	103.051	104.271	94.4683	101.768	134.607	130.835	115.16	143.498	95.5344	96.6679	83.0444	82.6353	101.864	93.1227	100.053	92.0841	104.429	101.532	84.248	79.5682	95.3444	103.676	104.101	102.773	91.7673	99.321	77.9498	83.6512	101.465	99.0801	94.022	85.3484
	44.7	99.6656	107.694	84.0096	108.46	145.348	144.772	122.48	133.852	104.543	91.5828	96.9536	109.03	144.521	146.111	135.594	125.403	103.02	104.182	94.3311	101.621	134.814	130.816	115.104	142.943	95.5025	96.5768	82.9832	82.4064	101.923	93.1224	100.21	92.367	104.026	101.718	84.2512	79.5294	95.531	103.489	103.725	102.581	91.7276	99.2371	77.576	83.6648	101.412	98.7792	93.9036	85.5457
	44.8	99.5995	107.399	84.2006	108.247	145.163	144.73	122.131	133.666	104.421	91.723	96.3906	109.409	144.565	145.93	135.768	125.203	102.817	103.912	94.3953	101.367	135.035	130.715	115.201	142.472	95.5118	96.4733	83.0626	82.0588	102.012	93.25	100.429	92.5406	103.567	101.618	84.2604	79.523	95.6543	103.148	103.229	102.383	91.5588	99.3935	77.4769	83.5309	101.382	98.594	93.97	85.5916
	44.9	99.7347	107.2	84.1851	108.243	144.985	144.865	121.616	133.499	104.52	91.979	95.9445	109.577	144.313	145.814	135.742	125.001	102.549	103.61	94.7856	101.25	135.226	130.595	115.54	142.268	95.6655	96.2117	82.9221	81.7032	101.797	93.5719	100.619	92.521	103.055	101.267	84.2217	79.3241	95.7322	102.671	102.996	102.37	91.2801	99.4761	77.6269	83.3168	101.231	98.6017	93.86	85.37
	45	99.8768	107.199	84.2053	108.178	144.75	144.971	121.269	133.385	104.582	92.0092	95.7048	109.427	143.839	145.582	135.68	124.806	102.533	103.413	95.1968	101.036	135.319	130.639	115.987	142.164	95.8117	96.0716	82.6657	81.5133	101.656	93.5672	100.591	92.3897	102.598	100.797	84.1901	79.2269	95.8779	102.258	102.965	102.341	91.2203	99.5284	77.7992	83.2088	101.042	98.6576	93.6768	85.1822
	45.1	99.7048	107.312	84.113	108.156	144.596	145.031	120.914	133.269	104.731	91.9672	95.9551	109.171	143.606	145.153	135.6	124.695	102.308	103.311	95.4722	100.792	135.388	130.692	116.382	142.161	95.7722	95.8984	82.438	81.5234	101.643	93.3715	100.626	92.1343	102.336	100.417	84.121	79.2346	95.9705	102.04	102.975	102.316	91.0726	99.602	77.9151	83.2563	100.925	98.8917	93.831	85.1401
	45.2	99.4108	107.349	83.9249	108.087	144.677	145.159	120.828	133.305	104.936	91.9592	96.5129	108.788	143.542	144.927	135.169	124.603	101.865	103.35	95.5951	100.703	135.358	130.493	116.769	142.153	95.7868	95.8124	82.2967	81.6054	101.617	93.2267	100.62	91.581	102.508	100.241	83.999	79.4114	95.8296	101.862	102.806	102.551	90.898	99.6526	77.8957	83.3092	100.85	99.1898	94.1014	84.9859
	45.3	99.1757	107.286	83.7872	108.199	144.848	145.42	121.023	133.315	105.31	92.0247	97.0968	108.4	143.374	144.913	134.735	124.714	101.662	103.59	95.6048	100.738	135.107	130.391	116.949	142.203	95.813	95.7685	81.9631	81.6032	101.428	93.2806	100.661	91.0758	102.596	100.291	84.0495	79.6163	95.4983	101.806	102.483	102.716	90.939	99.6647	77.8204	83.4404	100.838	99.3536	94.1338	84.9778
	45.4	98.8336	107.181	83.704	108.13	145.135	145.388	121.445	133.336	105.573	92.1218	97.733	108.205	143.217	145.045	134.446	124.891	101.688	103.915	95.4912	100.682	134.8	130.224	116.93	142.272	95.687	95.8056	81.9992	81.6962	101.304	93.0706	100.892	90.6773	102.526	100.386	84.3666	79.9467	94.8524	101.772	102.003	102.786	91.2026	99.9515	77.7257	83.7028	100.937	99.5398	94.1365	85.2811
	45.5	98.6231	107.056	83.3906	108.067	145.3	145.475	121.748	133.514	105.705	92.3192	98.1988	108.027	143.29	145.155	134.267	124.976	101.605	104.296	95.523	100.732	134.377	129.85	116.592	142.168	95.529	95.8397	82.2117	81.6561	101.068	92.9283	101.233	90.3956	102.328	100.506	84.7442	80.0946	94.1303	101.723	101.253	102.951	91.2359	100.264	77.6518	83.8646	101.043	99.706	94.1945	85.4678
	45.6	98.9163	107.042	83.0616	107.876	145.537	145.604	122.094	133.759	105.571	92.3826	98.5312	107.698	143.284	145.162	134.01	125.183	101.661	104.511	95.6484	100.78	134.059	129.648	116.228	142.106	95.4822	95.9207	82.569	81.5248	100.751	92.9005	101.279	90.2931	102.136	100.666	85.1003	80.1939	93.544	101.769	100.505	103.229	91.1634	100.496	77.6473	83.8098	100.977	99.6936	93.9949	85.6661
	45.7	99.4208	107.091	82.9631	107.686	145.556	145.673	122.145	133.922	105.457	92.3106	98.6009	107.382	142.999	145.008	133.734	125.454	101.997	104.734	95.7686	100.766	133.652	129.631	115.981	142.298	95.3897	95.8658	82.74	81.3656	100.367	92.82	101.17	90.5225	101.887	100.688	85.4468	80.1661	93.1054	102.064	100.102	103.242	91.1376	100.562	77.8408	83.7638	100.917	99.7762	93.8682	85.9509
	45.8	100.046	107.139	82.9184	107.426	145.529	145.419	122.038	133.968	105.131	92.0309	98.375	107.108	142.692	144.811	133.583	125.541	102.208	104.883	95.7139	100.775	133.347	129.519	115.77	142.471	95.3125	95.5925	83.0312	81.3277	100.075	92.5467	101.002	90.7474	101.832	100.532	85.5198	80.0769	92.8357	102.383	100.192	103.374	91.0145	100.703	77.9448	83.6389	100.96	99.8877	93.9788	86.0242
	45.9	100.749	107.207	82.9166	107.422	145.409	145.325	121.857	133.896	104.819	91.6898	97.9353	106.738	142.545	144.46	133.324	125.606	102.147	104.979	95.5103	100.827	133.131	129.604	115.636	142.271	95.4706	95.4702	83.054	81.3538	99.998	92.5507	100.466	91.1349	101.989	100.561	85.33	80.0156	93.0653	102.756	100.38	103.327	90.7247	100.584	78.0114	83.3838	100.961	99.8524	94.1892	86.0286
	46	101.332	107.446	83.0352	107.406	145.498	145.185	121.84	133.628	104.666	91.3847	97.4174	106.566	142.215	143.952	133.005	125.78	102.099	104.888	95.1903	100.967	133.061	129.875	115.706	142.119	95.7453	95.2391	82.905	81.6224	100.059	92.5688	99.8284	91.4282	102.229	100.558	85.0492	80.0064	93.5676	103.146	100.855	103.146	90.5678	100.466	78.072	83.1339	100.988	99.876	94.4197	86.08
	46.1	101.492	107.62	83.1058	107.398	145.389	144.87	121.94	133.338	104.621	91.3995	96.8727	106.716	141.843	143.8	132.799	125.9	102.149	104.822	94.8041	101.126	133.049	130.138	115.827	141.762	95.821	95.0655	82.6456	81.8114	100.085	92.6571	99.5448	91.7049	102.496	100.41	84.8095	79.9833	94.3249	103.391	101.545	102.769	90.711	100.291	77.9934	82.9735	101.11	100.116	94.6996	85.9508
	46.2	101.419	107.671	83.114	107.472	145.203	144.41	121.925	133.1	104.519	91.4392	96.5192	107.039	141.849	143.949	132.895	126.037	102.159	104.55	94.5178	101.333	133.218	130.364	115.699	141.28	95.8107	95.2333	82.7026	82.0291	100.118	92.8615	99.4866	91.805	102.646	100.195	84.5818	80.0484	95.1228	103.454	102.173	102.534	90.9175	100.189	77.8572	82.8534	101.189	100.218	94.8777	85.6396
	46.3	101.134	107.844	82.9571	107.523	145.051	144.195	121.856	133.087	104.48	91.53	96.42	107.373	142.025	143.859	132.943	126.098	102.242	104.316	94.6027	101.488	133.32	130.769	115.542	140.889	95.7089	95.475	82.7763	82.2915	100.228	93.0763	99.2706	91.8656	102.691	100.24	84.6412	80.0484	96.023	103.405	102.486	102.318	91.0194	99.9434	77.8142	82.8631	101.186	100.174	94.9377	85.4615
	46.4	100.604	108.083	82.7992	107.29	144.958	143.958	121.71	133.166	104.553	91.5392	96.5564	107.909	142.165	143.869	133.214	126.125	102.582	104.047	94.7757	101.824	133.431	131.164	115.413	141.068	95.5323	95.6311	82.7977	82.392	100.161	92.8573	99.2123	91.8031	102.585	100.129	84.7866	79.993	96.5772	103.38	102.846	102.42	91.2689	99.7085	77.6803	82.8531	101.376	100.05	94.9239	85.1314
	46.5	99.9869	108.008	82.5442	107.201	144.588	143.607	121.261	133.193	104.633	91.5742	96.7798	108.356	142.333	144.161	133.503	126.184	102.894	103.803	94.8691	102.174	133.537	131.567	115.243	141.562	95.4214	96.0438	82.9034	82.299	100.145	92.6007	99.3834	91.9091	102.496	100.106	84.958	79.9831	96.8533	103.293	103.223	102.66	91.5787	99.4371	77.4595	82.7624	101.634	99.8051	94.7498	84.785
	46.6	99.4593	107.779	82.4665	107.429	144.315	143.345	120.649	133.214	104.707	91.5096	97.0704	108.588	142.524	144.287	133.833	126.091	103.056	103.49	94.9906	102.566	133.51	131.783	114.983	142.271	95.4974	96.5111	82.9054	82.2391	100.196	92.3839	99.5688	91.8854	102.279	100.396	85.1111	79.9169	96.5064	103.171	103.346	103.005	91.7484	99.2309	77.4002	82.7156	101.948	99.3614	94.6426	84.5599
	46.7	99.1655	107.591	82.3361	107.681	144.346	143.264	120.367	133.254	104.781	91.6727	97.27	108.545	142.504	144.04	133.852	125.725	103.113	103.288	95.1638	102.891	133.454	131.944	114.894	142.936	95.7138	96.72	82.6276	82.2568	100.447	92.1672	99.6398	91.9703	102.05	100.756	85.4015	79.8568	96.0716	102.939	103.314	103.256	91.73	99.1338	77.2414	82.5715	102.264	98.8967	94.4833	84.3825
	46.8	99.0708	107.418	82.4097	108.042	144.27	143.245	120.299	133.296	104.888	91.8809	97.3984	108.606	142.689	144.312	133.76	125.377	103.084	103	95.1823	103.085	133.58	132.027	114.846	143.483	96.0552	97.0389	82.2608	82.2607	100.617	92.1325	99.7896	92.1632	101.738	100.949	85.5621	79.9464	95.3007	102.781	103.285	103.531	91.8973	99.1842	77.1072	82.2143	102.608	98.778	94.2998	84.3044
	46.9	99.2227	107.143	82.508	108.655	144.111	143.394	120.293	133.323	104.895	92.2817	97.3248	108.486	142.812	144.628	133.508	124.883	102.948	102.894	95.1594	102.98	133.59	131.852	114.747	143.704	96.2011	97.1624	82.1802	82.3639	100.775	92.6218	99.9788	92.1744	101.53	101.336	85.7824	80.0301	94.6616	102.505	103.341	103.509	91.9278	99.5258	77.2083	81.9634	102.66	98.9816	94.3197	84.4966
	47	99.4318	106.803	82.7879	109.166	144.005	143.845	120.544	133.445	104.796	92.5632	97.3331	108.359	143.092	144.711	133.248	124.202	102.877	103.171	95.1635	102.52	133.49	131.624	114.471	143.562	96.1462	96.9538	82.1865	82.3978	100.675	93.1392	99.9886	91.9996	101.189	101.656	86.022	80.1799	93.9538	102.328	103.385	103.335	91.999	99.9794	77.498	81.7505	102.652	99.2992	94.5302	84.8086
	47.1	99.5125	106.706	82.964	109.337	143.98	144.378	120.916	133.497	104.873	92.6582	97.2942	108.291	143.583	144.675	132.927	123.535	102.91	103.752	95.0766	102.147	133.506	131.689	114.256	143.315	96.0838	96.6346	82.3157	82.5193	100.623	93.5112	99.9123	91.8713	100.938	101.604	86.2695	80.3196	93.6085	102.134	103.439	103.179	92.1194	100.59	77.5732	81.4864	102.429	99.656	94.5614	85.1511
	47.2	99.4626	106.84	83.1663	109.328	143.907	144.752	121.178	133.518	105.03	92.5482	97.3316	108.478	144.06	145	132.6	123.064	102.943	104.283	95.0512	101.705	133.495	131.73	114.108	143.066	95.9829	96.3439	82.4761	82.5273	100.489	93.713	99.8639	91.5486	100.872	101.575	86.2465	80.3154	93.4412	102.101	103.533	103.089	92.4986	101.214	77.7366	81.2346	102.123	100.066	94.5577	85.548
	47.3	99.3192	106.937	83.2641	109.201	143.905	144.811	121.19	133.347	105.093	92.3654	97.3898	108.724	144	144.87	132.378	122.603	102.947	105.028	95.0012	101.283	133.38	131.627	113.901	142.663	95.6274	96.1107	82.7329	82.4802	100.382	93.7058	99.9786	91.1065	100.964	101.667	86.1105	80.2441	93.548	102.063	103.661	102.928	92.7578	101.641	77.8258	81.187	101.874	100.257	94.639	85.6576
	47.4	99.0415	107.174	83.439	108.796	144.063	144.637	121.153	133.147	105.241	92.0795	97.6402	109.019	144.012	144.639	132.293	122.511	102.797	105.579	95.0898	100.844	133.315	131.842	113.632	142.143	95.4679	96.1113	82.6885	82.305	100.292	93.2834	100.114	90.8515	101.167	101.525	85.7424	80.2885	93.507	102.094	103.506	102.995	92.9566	101.721	77.7767	81.1495	101.707	100.171	94.4861	85.5246
	47.5	99.0117	108.022	83.4879	108.231	144.334	144.097	120.96	132.994	105.524	91.7569	97.8197	109.146	143.802	144.691	132.25	122.656	102.609	105.607	95.2236	100.711	133.224	131.988	113.505	141.679	95.441	96.3233	82.3799	82.2752	100.45	92.8951	100.234	90.7183	101.6	101.323	85.2838	80.225	93.7258	101.997	103.073	103.046	92.7454	101.617	77.6322	81.3168	101.487	99.9626	94.1433	85.3112
	47.6	99.0982	108.782	83.5462	107.662	144.6	143.761	120.559	132.983	105.672	91.6604	97.9939	109.25	143.214	144.871	132.03	122.914	102.216	105.34	95.4398	100.341	133.033	131.694	113.338	141.173	95.4631	96.4573	82.1083	82.2026	100.596	92.6068	100.285	90.6039	102.032	101.283	84.8199	80.3165	93.8461	102.026	102.754	102.913	92.41	101.401	77.7766	81.6898	101.414	99.847	93.9619	85.1587
	47.7	99.1643	109.284	83.5976	107.223	144.741	143.649	120.088	133.196	105.704	91.6788	97.9417	109.205	142.722	144.635	131.985	123.249	101.874	105.131	95.3932	100.006	132.9	131.504	113.23	140.743	95.4982	96.5938	82.0657	82.1384	100.744	92.5156	100.255	90.6217	102.298	101.243	84.4121	80.5078	93.7645	102.02	102.499	102.595	92.0467	100.992	78.0057	82.1432	101.308	99.8202	94.099	84.9497
	47.8	99.0412	109.735	83.6253	106.817	144.798	143.822	119.723	133.607	105.748	91.8054	97.8016	108.654	142.493	144.409	132.066	123.653	101.682	104.743	95.2794	99.8102	132.903	131.541	113.393	140.597	95.7796	96.6287	81.8829	82.1218	100.87	92.448	100.041	90.7166	102.412	101.065	84.0976	80.7262	93.7171	102.085	102.273	102.195	91.671	100.57	78.2941	82.5336	100.953	99.7442	94.2229	85.0354
	47.9	99.0455	110.129	83.3869	106.549	144.667	144.062	119.386	134.058	105.74	91.8379	97.4462	108.003	142.248	144.216	132.118	123.707	101.662	104.317	94.9824	99.9193	133.095	131.391	113.714	140.709	95.9842	96.5963	81.8871	82.3926	101.073	92.666	99.8408	90.9072	102.441	100.94	84.1638	80.8406	93.9962	102.228	102.247	101.63	91.398	100.298	78.5773	82.7548	100.572	99.7592	94.4674	85.2578
	48	98.7793	109.924	83.1506	106.564	144.469	144.513	119.185	134.603	105.69	91.9955	97.0228	107.598	142.278	143.817	132.113	123.683	101.612	104.225	94.5812	100.028	133.56	131.205	114.119	140.882	96.148	96.4066	82.198	82.5816	101.138	92.9869	99.6773	90.9806	102.283	100.908	84.3024	81.0009	94.0761	102.505	102.461	101.299	91.5794	100.091	78.8575	82.7882	100.266	99.7471	94.8887	85.2984
	48.1	98.6636	109.667	82.9475	106.904	144.102	144.595	119.24	135.098	105.636	91.8513	96.5557	107.21	142.62	143.305	132.308	123.645	101.837	104.167	94.152	100.173	133.941	131.357	114.625	141.139	96.1507	96.3522	82.4936	82.6846	101.094	93.1776	99.5389	91.1227	101.93	100.789	84.2642	80.9351	94.3552	102.585	102.563	101.119	91.7919	99.8417	78.85	82.5092	100.05	99.6157	95.2584	85.2162
	48.2	98.6907	109.594	82.7852	107.288	143.67	144.713	119.357	135.139	105.763	91.534	96.1923	106.768	142.741	143.258	132.409	123.583	102.166	104.045	94.0096	100.465	134.184	131.444	114.907	141.371	96.0838	96.4973	82.5634	82.8355	100.83	93.2108	99.6311	91.2268	101.672	100.598	84.3635	80.919	94.7601	102.631	102.671	101.092	91.7899	99.7977	78.4858	82.2506	100.079	99.3006	95.1753	85.2325
	48.3	98.8866	109.534	82.8083	107.742	143.388	144.879	119.58	134.929	105.967	91.1265	96.002	106.848	142.809	143.419	132.322	123.579	102.364	103.773	94.005	100.704	134.186	131.288	114.836	141.623	95.9946	96.8076	82.6952	82.952	100.753	93.2981	99.7164	91.3517	101.419	100.369	84.5416	80.9029	95.0292	102.532	102.713	101.308	91.8043	99.9224	78.0258	82.0519	100.298	98.9324	95.0146	85.0779
	48.4	99.0158	109.242	83.0848	108.199	143.089	145.08	119.87	134.678	105.957	90.8507	96.2335	107.048	142.824	143.471	132.194	123.777	102.428	103.569	93.9943	100.774	133.948	131.146	114.785	141.706	96.0298	97.1897	82.8498	82.6682	100.752	93.286	99.7235	91.2949	101.063	100.214	84.4274	80.8406	94.833	102.19	102.571	101.64	91.7463	100.044	77.4624	81.9995	100.698	98.559	94.8208	84.929
	48.5	99.2514	109.177	83.5154	108.425	142.697	145.142	120.109	134.225	105.829	90.6258	96.6284	107.261	142.617	143.524	132.124	123.748	102.509	103.159	94.089	100.778	133.419	131.177	114.763	141.725	96.0977	97.8018	82.868	82.4124	100.761	93.108	99.9348	91.294	100.947	100.006	84.2143	80.7826	94.7932	101.777	102.407	101.742	91.4186	100.159	76.7277	82.0974	101.077	98.5562	94.6378	85.0801
	48.6	99.3414	109.121	83.9349	108.397	142.557	145.358	120.062	133.604	105.593	90.8708	97.0393	107.352	142.179	143.735	132.129	123.603	102.372	102.868	94.1801	100.882	133.138	131.096	114.701	141.718	96.1818	98.2788	82.7414	82.2078	100.875	92.9054	100.347	91.2408	101.172	99.9543	84.3546	80.8167	94.5415	101.563	102.308	101.955	91.1867	100.196	76.2181	82.3765	101.314	98.587	94.5459	85.101
	48.7	99.135	108.824	84.2182	108.223	142.671	145.396	119.955	133.03	105.204	91.4325	97.6173	107.48	141.957	143.7	132.386	123.246	101.985	102.62	93.869	100.882	132.813	131.075	114.828	141.731	96.2714	98.428	82.6798	81.9574	101.146	92.7907	100.58	91.1817	101.371	99.8844	84.5885	80.6394	94.2197	101.531	102.072	102.303	91.1016	100.001	76.0908	82.627	101.366	98.8223	94.6806	85.1188
	48.8	98.9532	108.448	84.235	107.861	142.567	145.111	119.747	132.295	104.811	91.9322	98.117	107.525	141.917	143.486	132.692	122.776	101.703	102.633	93.4602	100.929	132.68	131.199	115.147	141.542	96.5257	98.1593	82.6809	81.7355	101.216	92.7202	100.936	91.0526	101.752	99.9902	84.6445	80.3972	93.9885	101.659	101.942	102.44	90.9983	99.7216	76.0729	82.886	101.503	99.2554	94.8931	85.1875
	48.9	98.7671	108.277	84.0941	107.53	142.43	144.753	119.586	131.47	104.812	92.2751	98.1084	107.49	142.058	143.359	132.817	122.177	101.562	102.666	93.2711	100.97	132.718	131.154	115.345	141.519	96.4978	97.5532	82.6142	81.7452	101.099	92.5996	101.495	90.9609	102.184	100.092	84.7144	80.3626	94.1789	102.039	102.14	102.583	90.9469	99.417	76.2436	83.1368	101.502	99.7494	95.1456	85.0148
	49	98.5454	108.037	83.7401	107.379	142.601	144.563	119.479	130.744	104.776	92.504	97.8737	107.321	142.369	143.155	132.742	121.891	101.478	102.832	93.0321	100.976	132.967	130.95	115.32	141.608	96.4135	96.7529	82.4816	81.7624	101.141	92.4449	101.86	90.8501	102.28	100.213	84.9669	80.2444	94.271	102.446	102.233	102.755	90.8862	99.2101	76.581	83.4198	101.43	99.7668	95.2324	84.64
	49.1	98.316	107.901	83.3734	107.246	142.601	144.303	119.684	130.227	104.858	92.3809	97.6589	107.249	142.707	142.821	132.507	121.632	101.598	102.905	92.7593	100.938	133.16	130.659	115.21	141.77	96.3911	96.1422	82.5231	81.7157	101.195	92.5198	101.86	90.5968	102.139	100.411	85.0056	80.2427	94.3677	102.673	102.46	102.724	90.7372	99.0242	76.8742	83.6214	101.46	99.8447	95.3197	84.5828
	49.2	98.3552	108.055	83.2626	107.233	142.289	143.94	119.939	129.984	105.071	91.9634	97.1235	107.169	143.164	142.369	131.828	121.701	102.015	102.86	92.9118	100.931	133.496	130.257	114.778	141.849	96.3719	95.6277	82.5819	81.708	101.453	92.7124	101.796	90.4448	101.81	100.8	84.7602	80.4509	94.453	102.574	102.872	102.516	90.6314	98.987	77.0996	83.6822	101.481	99.8763	95.3943	84.3584
	49.3	98.4522	108.407	83.2184	107.488	142.361	143.728	120.281	130.311	105.179	91.6983	96.4891	107.053	143.508	142.198	131.206	122.003	102.297	102.606	93.1264	100.744	133.743	129.78	114.252	142.126	95.9582	95.4948	82.6475	81.7314	101.77	92.9664	101.669	90.4434	101.27	101.128	84.7354	80.6099	94.38	102.22	103.027	102.292	90.7299	98.9658	77.3236	83.5285	101.366	99.8558	95.3516	84.1576
	49.4	98.5843	108.691	83.246	107.781	142.671	143.729	120.543	130.941	104.958	91.5831	96.0532	106.96	143.492	142.323	130.872	122.559	102.551	102.327	93.2154	100.507	133.813	129.557	113.746	142.403	95.8218	95.7776	82.8141	81.7627	102.12	93.23	101.138	90.5851	100.71	101.27	84.8287	80.4598	93.9876	101.961	102.664	102.075	90.8532	98.9562	77.462	83.2989	101.186	99.7178	95.1489	84.2524
	49.5	98.6235	109.069	83.4276	108.054	142.717	143.549	120.643	131.47	104.955	91.4862	95.7281	106.852	143.251	142.692	130.829	122.931	102.663	102.087	93.4065	100.433	133.656	129.339	113.284	142.821	95.7503	96.1996	83.1386	81.641	102.377	93.5811	100.563	90.7432	100.361	101.259	84.7969	80.3615	93.6216	101.637	102.359	101.948	91.2479	98.9359	77.7261	82.7525	100.997	99.8317	95.0166	84.4177
	49.6	98.8175	109.317	83.6406	108.322	142.66	143.401	120.487	131.953	104.902	91.5372	95.4514	106.878	143.105	143.157	130.778	123.38	102.526	101.931	93.711	100.39	133.259	129.369	112.916	143.059	95.7991	96.4081	83.5314	81.5892	102.587	93.9263	100.174	90.9828	100.219	101.019	84.7336	80.1599	93.264	101.371	101.686	101.946	91.6245	99.1028	77.9812	82.1057	100.773	99.7021	94.6539	84.3807
	49.7	99.0679	109.327	83.4799	108.546	142.71	143.473	120.24	132.508	104.549	91.67	95.4716	107.104	142.69	143.806	131.007	123.54	102.099	102.01	93.7596	100.248	132.833	129.556	112.682	143.183	95.8945	96.6827	83.8795	81.3992	102.409	94.1547	99.8272	91.1677	100.421	100.585	84.8422	79.8975	92.806	101.473	100.828	101.957	91.8225	99.2884	78.1526	81.6028	100.639	99.4652	94.3564	84.5742
	49.8	99.2633	108.974	83.4545	108.665	142.274	143.702	119.954	132.773	104.28	91.7285	95.6496	107.243	142.21	144.076	131.11	123.495	101.665	102.32	93.7358	100.4	132.365	129.851	112.442	143.175	96.1875	96.7512	84.1974	81.1675	102.069	94.1366	99.3755	91.1324	100.926	100.103	84.8524	79.7545	92.4755	101.926	100.37	102.22	91.8249	99.5298	78.3085	81.3361	100.488	99.2821	94.2182	84.8107
	49.9	99.4651	108.637	83.3796	108.687	141.625	143.719	119.577	132.776	104.053	91.7474	95.8172	107.395	142.025	143.739	131.075	123.417	101.134	102.727	93.6844	100.65	132.004	130.173	112.324	143.055	96.3855	96.407	84.3433	80.894	101.773	94.1339	99.2132	90.9842	101.426	99.9152	84.7283	79.7778	92.3252	102.048	100.537	102.503	91.8961	99.7812	78.4382	81.1578	100.307	99.1429	94.2261	84.8853
	50	99.8487	108.029	83.2504	108.559	141.152	143.725	119.407	132.911	103.732	91.8401	95.9984	107.581	142.063	143.202	130.935	123.52	100.707	102.942	93.5036	100.643	131.793	130.618	112.386	142.815	96.4274	95.923	84.3443	80.7208	101.46	94.0924	99.2283	90.9141	101.962	99.9589	84.6769	79.9317	92.1901	102.171	100.882	102.847	91.7046	99.9515	78.291	81.0844	100.321	98.9633	94.3494	84.9514
	50.1	99.9532	107.447	83.013	108.457	141.016	143.683	119.468	133.059	103.491	91.7824	96.0168	107.716	142.253	142.615	130.776	123.668	100.454	103.117	93.2258	100.679	131.939	130.883	112.433	142.711	96.364	95.7801	84.1063	80.5843	101.153	93.6348	99.2335	90.9986	102.272	99.9705	84.8122	80.1184	92.2872	102.334	101.563	103.126	91.5396	99.9537	77.9907	81.3688	100.246	99.1411	94.6459	85.0547
	50.2	99.734	107.018	83.041	108.393	141.051	143.538	119.714	133.064	103.626	91.5682	95.9314	107.822	142.388	141.887	130.627	123.971	100.498	103.224	93.0516	100.824	132.168	130.922	112.768	142.847	96.3693	95.6117	83.9152	80.6132	101.143	93.0257	99.2979	90.9991	102.395	100.048	84.8211	80.4048	92.4812	102.189	102.389	103.388	91.6392	99.838	77.6991	81.5367	100.025	99.3642	94.7444	85.109
	50.3	99.3227	106.993	83.064	108.171	141.415	143.234	119.841	133.108	103.873	91.3396	95.6596	107.999	142.509	141.411	130.712	124.11	100.773	103.183	93.0443	100.755	132.512	130.793	113.281	142.975	96.2322	95.4829	83.6082	80.5551	101.368	92.465	99.477	90.9822	102.265	100.145	84.7997	80.6931	92.6316	101.693	102.866	103.27	91.6356	99.5507	77.265	81.5064	99.8253	99.3587	94.6775	85.1134
	50.4	98.9183	106.983	83.19	108.06	141.899	142.806	119.977	133.235	104.232	91.1972	95.4066	108.241	142.375	141.349	130.887	123.921	101.168	103.001	93.2225	100.727	132.852	130.503	113.594	143.043	96.006	95.6546	83.2976	80.6274	101.567	92.0724	99.4741	90.9844	102.324	99.9669	84.9796	81.0761	92.7462	101.386	102.971	102.948	91.4432	99.273	76.9298	81.4626	99.781	99.3419	94.6911	85.1966
	50.5	98.4209	107.339	83.2844	108.277	142.274	142.479	119.893	133.211	104.529	91.0388	95.1771	108.501	142.201	141.466	130.962	123.577	101.755	102.949	93.5242	100.921	133.228	130.146	113.951	142.741	95.9712	95.9441	83.0742	80.8292	101.692	91.8654	99.2188	90.9277	102.146	99.7909	85.089	81.2835	92.7005	101.269	102.833	102.546	91.3452	98.8668	76.7997	81.6154	99.532	99.2595	94.5194	85.3882
	50.6	98.1187	107.686	83.5158	108.416	142.442	142.261	119.51	133.02	104.837	91.0105	95.2555	108.552	141.757	141.608	131.321	123.213	102.3	102.815	93.874	100.939	133.288	129.849	114.447	142.299	95.9355	95.8786	82.8501	81.0565	101.77	92.176	98.9743	90.7123	102.071	99.836	84.9421	81.6306	92.3696	101.236	102.61	102.13	91.2594	98.5057	76.855	81.4666	99.3482	98.8754	94.2375	85.6299
	50.7	98.1177	107.867	83.6737	108.513	142.45	142.033	119.077	132.711	104.874	91.3814	95.4448	108.429	141.516	141.981	131.658	122.844	102.651	102.619	94.2036	100.929	133.308	129.714	114.668	141.737	95.8361	95.8342	82.5372	81.3806	101.643	92.7378	98.7938	90.628	101.964	99.9904	84.9097	81.8268	92.1099	101.274	102.291	101.802	91.0095	98.373	77.0038	81.5691	99.2502	98.5557	94.1884	85.7347
	50.8	98.5723	107.889	83.6847	108.781	142.409	141.84	118.731	132.345	104.811	91.8103	95.7558	108.213	141.325	142.257	131.667	122.722	102.811	102.493	94.3192	100.847	133.336	129.673	114.716	141.2	96.0387	95.885	82.2851	81.7906	101.432	93.556	98.7041	90.8041	101.813	100.21	84.8833	81.9185	92.016	101.54	102.148	101.713	91.1138	98.5333	77.3557	81.8152	99.3852	98.5378	94.243	85.7241
	50.9	98.9164	107.92	83.5993	108.819	142.306	141.995	118.566	131.861	104.744	92.1929	96.0498	107.921	141.369	142.443	131.45	122.775	103.006	102.652	94.1925	100.575	133.452	129.798	114.805	140.778	96.3519	95.9226	82.2159	82.0373	101.244	94.2052	98.8079	90.9812	101.521	100.71	84.6799	81.781	92.0696	101.769	101.969	101.822	91.2738	98.6178	77.6708	81.9114	99.6956	98.3994	94.2211	85.7389
	51	99.2736	107.932	83.5612	108.436	142.237	142.345	118.569	131.498	104.761	92.4974	96.4052	107.758	141.181	142.611	131.223	122.817	102.907	102.972	94.0489	100.197	133.421	130.02	114.619	140.791	96.5496	95.8951	82.1149	82.2728	101.281	94.706	99.0962	91.1794	101.523	101.01	84.5294	81.7554	92.2557	101.811	101.847	101.921	91.4634	98.8968	77.9724	81.875	100.096	98.2082	94.2958	85.6675
	51.1	99.6026	107.962	83.3755	108.292	142.16	142.71	118.76	131.252	104.664	92.6804	96.6052	107.901	141.121	142.726	130.711	122.713	102.806	103.397	93.8304	99.9795	133.573	130.292	114.287	141.071	96.6696	96.0562	82.1943	82.3734	101.395	94.9183	99.3721	91.4192	101.423	101.169	84.4602	81.4036	92.5907	101.682	101.788	102.086	91.6816	99.1263	78.2779	81.8469	100.552	98.1991	94.6516	85.5458
	51.2	99.8234	107.981	83.2263	108.094	142.073	143.157	118.941	131.026	104.806	92.4383	96.8035	108.154	140.887	142.539	130.181	122.644	102.705	103.849	93.773	99.695	133.614	130.334	114.066	141.478	96.7351	96.2566	82.3286	82.2678	101.77	94.8529	99.625	91.4012	101.37	101.006	84.4326	80.9232	93.0329	101.64	102.024	102.272	91.7451	99.1649	78.455	81.628	101.173	98.1436	94.9158	85.4443
	51.3	99.5827	107.78	82.9169	107.752	141.804	143.569	119.138	130.78	104.912	92.1885	97.1368	108.474	140.794	142.401	129.951	122.495	102.561	104.25	93.8928	99.6116	133.509	130.448	113.933	141.562	96.6016	96.4698	82.5007	82.1766	102.116	94.5296	99.7757	91.1203	101.534	100.654	84.435	80.451	93.2936	101.611	102.436	102.532	91.4044	99.0232	78.4441	81.4782	101.398	97.7682	95.2106	85.4814
	51.4	99.4067	107.656	82.5959	107.58	141.617	143.737	119.084	130.734	105.018	91.9183	97.4735	108.773	140.627	142.258	129.865	122.37	102.274	104.269	94.094	99.7167	133.116	130.379	113.874	141.537	96.4498	96.6993	82.4481	82.1286	102.384	94.1314	100.006	90.7263	101.623	99.8649	84.5533	80.1031	93.3289	101.584	102.937	102.731	91.1429	98.8886	78.2567	81.5548	101.202	97.8193	95.4541	85.5007
	51.5	99.2688	107.277	82.3872	107.724	141.383	143.585	118.873	130.646	105.076	91.8755	97.7185	108.913	140.574	141.876	129.895	122.308	101.923	104	94.165	99.8186	132.682	130.162	113.882	141.287	96.2956	96.8323	82.4706	82.0042	102.242	93.6152	100.153	90.2806	101.564	99.2702	84.5726	79.7268	93.5502	101.685	103.458	102.919	90.8201	98.7448	77.8468	81.5915	100.912	98.0981	95.6633	85.5999
	51.6	99.2285	106.892	82.427	107.609	141.169	143.291	118.66	130.548	105.212	91.9262	97.8766	108.74	140.36	141.484	129.904	122.338	101.653	103.765	94.4326	99.8312	132.167	129.769	113.855	140.809	96.1084	96.8603	82.3927	82.0459	102.034	93.181	100.292	89.8301	101.644	98.7976	84.7059	79.6069	93.7724	101.831	103.789	102.976	90.5194	98.7604	77.2922	81.7464	100.587	98.4236	95.6194	85.6436
	51.7	99.2776	106.719	82.4964	107.67	141.077	142.745	118.407	130.614	105.201	92.2466	97.8318	108.427	140.355	141.341	129.814	122.331	101.319	103.513	94.4513	99.8886	131.654	129.74	113.759	140.062	95.9469	96.8877	82.3713	82.1724	101.574	93.0344	100.307	89.6804	101.768	98.6644	84.7302	79.7533	93.7378	101.916	103.75	102.929	90.4295	98.8558	76.7229	81.949	100.088	98.6201	95.5682	85.7521
	51.8	99.4743	106.993	82.9045	107.673	141.364	142.169	118.247	130.652	105.236	92.585	97.6262	108.132	140.007	141.308	129.657	122.31	101.093	103.34	94.2791	100.01	131.207	129.659	113.724	139.804	95.7983	96.8591	82.3709	82.2665	101.105	93.0964	100.251	89.6825	101.781	98.6198	84.6826	80.0048	93.7042	101.902	103.405	102.755	90.651	98.9563	76.3256	82.144	99.8851	99.0522	95.5273	85.8608
	51.9	99.6402	107.249	83.549	107.535	141.736	141.652	118.415	130.64	105.356	92.7452	97.5676	107.827	139.596	141.142	129.548	122.167	100.894	103.273	94.0913	99.9849	130.971	129.683	113.801	139.578	95.5679	96.8043	82.6345	82.3878	100.73	93.1983	99.9102	89.7828	101.924	98.9388	84.6379	80.2895	93.8571	101.809	103.073	102.542	90.8657	99.2644	76.1829	82.2991	99.8763	99.0948	95.3102	85.9349
	52	99.6424	107.584	83.8656	107.145	142.015	141.168	118.673	130.804	105.712	92.5628	97.5088	107.291	139.314	141.12	129.53	121.988	100.906	103.204	93.9077	99.9422	130.951	129.692	113.946	139.4	95.4738	96.9608	82.6411	82.637	100.701	93.3178	99.7059	90.0206	102.069	99.1395	84.7613	80.3783	93.9036	101.477	102.626	102.389	91.131	99.4764	76.3097	82.6432	100.035	99.1164	95.0488	85.7801
	52.1	99.3874	107.891	83.8852	106.805	142.259	140.729	118.881	131.058	106.13	92.4026	97.4937	106.885	139.16	141.121	129.909	121.932	100.782	102.881	93.4731	100.001	131.022	129.68	114.081	139.173	95.7136	97.2222	82.6018	82.7082	100.757	93.4657	99.587	90.3464	102.148	99.1526	84.9033	80.307	93.8492	101.362	102.207	102.471	91.2125	99.5304	76.5667	83.0022	100.167	99.0775	94.7567	85.5776
	52.2	98.9746	108.088	83.8218	106.293	142.333	140.673	119.183	131.219	106.42	92.2211	97.4632	106.661	138.905	140.957	130.463	121.836	100.797	102.478	93.241	100.067	131.166	129.437	114.153	139.203	96.016	97.425	82.5941	82.6366	100.929	93.4607	99.4935	90.5861	102.181	98.9432	85	80.1851	93.9852	101.302	101.828	102.593	91.3097	99.4693	76.8862	83.2517	100.318	99.159	94.3578	85.304
	52.3	98.5776	107.771	83.7252	106.228	142.066	140.58	119.349	131.605	106.536	92.0233	97.3674	106.544	138.958	140.538	130.709	121.882	100.801	101.994	93.2947	99.8829	131.418	129.171	113.947	139.136	96.3867	97.5175	82.6695	82.6357	101.242	93.3094	99.5661	90.7366	102.023	98.8414	85.1968	79.9305	94.2134	101.286	101.485	102.805	91.2458	99.2798	77.129	83.2329	100.242	99.1752	93.9351	84.9648
	52.4	98.1826	107.234	83.3257	106.363	141.651	140.556	119.176	131.898	106.476	92.1771	97.0282	106.522	139.173	140.405	130.914	122.028	100.843	101.71	93.3915	99.8433	131.704	128.978	113.563	139.123	96.9257	97.4814	82.51	82.6199	101.66	93.3703	99.9947	90.9862	101.802	98.796	85.2258	79.7155	94.2204	101.297	101.038	103.086	91.1591	98.8508	77.2281	83.1676	100.301	99.2473	93.8742	84.5406
	52.5	98.0443	106.756	83.2742	106.615	141.422	140.651	119.141	131.943	106.119	92.3682	96.6322	106.931	139.443	140.298	130.964	122.202	100.777	101.617	93.6622	99.97	132.119	128.921	113.334	139.312	97.1969	97.2791	82.5582	82.3928	101.897	93.6786	100.242	90.9754	101.573	98.8916	85.1066	79.8302	94.1194	101.681	100.806	103.189	91.1009	98.582	77.3038	82.9472	100.268	99.1422	93.8995	84.2942
	52.6	98.182	106.366	83.2559	106.969	141.307	140.803	119.308	131.803	105.555	92.4399	96.2743	107.495	139.743	140.238	130.564	122.062	100.834	101.714	94.1686	100.145	132.51	129.132	113.12	139.804	97.0163	96.7714	82.6473	82.2403	102.113	93.9581	100.356	90.8222	101.479	99.2266	84.9508	79.9926	94.2836	101.875	100.661	103.095	91.187	98.4061	77.3238	82.5962	100.286	98.971	94.0244	84.3198
	52.7	98.448	105.872	83.2871	107.378	141.289	140.846	119.195	131.678	105.209	92.4448	96.144	108.003	140.164	140.414	129.968	121.944	100.913	101.815	94.5106	100.373	132.892	129.441	113.004	140.439	96.768	96.2608	82.5463	82.296	102.329	94.2178	100.451	90.6513	101.492	99.7593	84.9102	80.079	94.2962	102.043	100.57	102.969	91.198	98.4355	77.4146	82.3353	100.177	98.8172	94.2187	84.4942
	52.8	98.8085	105.785	83.2146	107.369	141.359	141.102	119.038	131.276	105.029	92.3056	96.1269	108.276	140.411	140.822	129.648	121.612	100.877	101.945	94.633	100.774	133.052	129.711	113.082	141.069	96.3246	95.9204	82.2965	82.2656	102.355	94.4825	100.431	90.7004	101.929	100.178	84.8139	80.2955	94.2445	102.184	100.561	102.674	91.2483	98.713	77.5355	82.1898	100.308	98.5625	94.1409	84.7421
	52.9	99.3094	105.892	83.2762	107.363	141.363	141.318	119.093	131.002	104.959	91.8638	96.2436	108.458	140.579	141.12	129.262	121.317	100.737	101.988	94.7816	101.106	133.025	129.701	113.088	141.731	95.7796	95.6497	82.2127	82.1194	102.234	94.4338	100.138	90.6102	102.362	100.503	84.867	80.3799	94.4024	102.378	100.887	102.358	91.401	99.0877	77.7693	81.9673	100.257	98.3378	93.8489	85.1777
	53	99.5258	106.081	83.1484	107.36	141.379	141.396	119.034	130.889	104.972	91.6557	96.5103	108.578	140.542	141.469	128.835	120.986	100.691	101.973	94.8102	101.053	132.568	129.706	112.85	141.981	95.4817	95.4477	82.1436	82.0153	102.203	94.1324	99.8396	90.7994	102.814	100.597	84.9816	80.2409	94.5872	102.183	101.158	102.297	91.5363	99.3359	77.864	81.807	100.166	98.094	93.5955	85.6122
	53.1	99.5543	106.126	83.2028	107.247	141.291	141.512	118.793	131.058	105.239	91.5915	96.5904	108.505	140.521	141.859	128.459	120.928	100.647	102.088	94.6385	100.696	131.938	129.543	112.682	141.948	95.3154	95.5862	82.1377	81.987	102.193	93.5806	99.6208	91.2569	103.085	100.414	85.0569	80.1933	94.405	101.922	101.518	102.402	91.6541	99.5127	78.0348	81.792	100.151	97.9249	93.3652	85.8041
	53.2	99.4754	106.358	83.1703	107.227	141.292	141.452	118.762	131.246	105.439	91.4704	96.3562	108.434	140.292	142.041	128.108	120.717	100.482	102.325	94.5756	100.291	131.336	129.212	112.494	141.452	95.112	95.6352	82.1343	81.9604	102.075	92.9646	99.5322	91.6862	103.249	100.162	85.0292	80.2547	94.2576	101.656	101.852	102.55	91.7865	99.542	78.0184	81.7583	100.31	97.8204	93.286	85.9306
	53.3	99.2968	106.389	83.1407	107.275	141.401	141.415	118.772	131.638	105.779	91.3472	96.1204	108.556	140.277	141.911	127.717	120.659	100.407	102.711	94.503	99.8739	131.003	128.966	112.377	140.776	95.2477	95.6152	82.201	82.0048	102.056	92.3772	99.4732	91.8659	103.133	99.9649	85.0144	80.3498	94.182	101.261	102.206	102.822	92.0299	99.5101	77.9988	81.7726	100.21	97.8898	93.6367	85.8924
	53.4	98.9383	106.377	83.0189	107.172	141.507	141.313	118.749	131.854	106.008	91.2655	96.0193	108.829	140.122	141.618	127.461	120.601	100.454	103.074	94.364	99.5823	130.866	129.057	112.434	140.082	95.3507	95.7018	82.0072	82.2493	102.021	91.9676	99.3408	92.1392	102.995	99.636	84.9563	80.5147	94.1038	100.93	102.126	103.069	92.0515	99.5118	77.9628	81.8876	100.043	98.0275	94.0512	85.7631
	53.5	98.7573	106.349	82.9378	107.219	141.424	141.441	118.674	131.904	106.231	91.0837	95.8414	108.909	139.913	141.113	127.324	120.585	100.545	103.265	94.3332	99.7317	130.992	128.909	112.454	139.81	95.281	95.7377	81.6849	82.5438	101.973	91.8057	99.2619	92.1765	102.89	99.4527	84.8281	80.7629	93.8609	100.737	101.943	103.034	92.0339	99.4918	78.0964	81.8861	99.9464	98.189	94.3468	85.5663
	53.6	98.6047	106.574	82.7877	107.3	141.359	141.436	118.666	131.623	106.26	90.9292	95.9328	109.056	139.694	140.53	127.408	120.473	100.504	103.374	94.2449	100.12	131.322	128.764	112.374	139.841	95.4848	95.6283	81.3568	82.8034	101.827	92.0789	99.1104	91.8092	102.898	99.4124	84.6465	80.7916	93.7103	100.648	101.629	102.832	92.0706	99.4758	78.1107	81.7945	99.717	98.281	94.4983	85.391
	53.7	98.54	106.829	82.7643	107.25	141.167	141.609	118.633	131.234	106.129	91.0484	96.3641	109.129	139.574	139.997	127.805	120.502	100.403	103.677	94.0022	100.674	131.604	128.984	112.356	140.229	95.8134	95.6932	81.1656	82.836	101.717	92.7479	98.9125	91.4202	102.836	99.2953	84.6308	80.592	93.6071	100.5	101.499	102.626	92.1822	99.4502	78.2732	81.836	99.5705	98.3838	94.5211	85.1174
	53.8	98.6211	107.163	82.7137	107.37	140.708	141.498	118.688	130.594	105.681	91.5272	96.7734	108.856	139.107	139.763	128.319	120.342	100.392	103.727	93.9097	101.201	131.717	129.312	112.176	140.724	96.0074	95.8231	80.8578	82.8989	101.35	93.3176	98.7125	91.1566	102.746	99.1857	84.6588	80.1971	93.4249	100.616	101.279	102.375	92.1022	99.4115	78.3653	82.0077	99.6333	98.3788	94.288	85.0493
	53.9	98.945	107.494	82.6747	107.511	140.211	141.343	118.613	129.96	105.24	92.0344	96.901	108.34	138.87	139.666	128.79	120.221	100.482	103.632	93.8503	101.577	131.725	129.373	111.953	141.303	96.3386	95.777	80.7396	82.9045	100.925	93.872	98.6711	90.846	102.754	99.201	84.6752	79.7109	93.1599	100.668	101.17	102.094	92.1064	99.2111	78.1947	82.1026	99.7437	98.3216	94.0652	84.7603
	54	99.3771	107.582	82.6978	107.308	139.692	140.875	118.57	129.569	104.82	92.4641	96.9914	107.795	138.906	139.792	129.352	120.1	100.414	103.783	93.6035	101.596	131.645	129.703	112.054	141.675	96.8996	95.7176	80.7029	82.92	100.501	94.2666	98.7866	90.7267	102.736	99.3574	84.8983	79.1053	93.1764	100.882	101.191	102.047	92.0621	99.038	77.8165	82.3209	99.8148	98.4958	93.8591	84.4638
	54.1	99.8268	107.411	82.6478	107.107	139.236	140.378	118.606	129.521	104.538	92.8071	97.0234	107.218	138.8	139.949	129.819	119.941	100.397	103.8	93.6482	101.612	131.475	130.081	112.358	141.698	97.2986	95.8458	80.6517	82.9533	100.049	94.5057	99.0482	90.8132	102.627	99.564	85.0911	78.658	93.3444	100.947	101.304	101.997	91.9468	98.8748	77.5234	82.5796	99.9259	98.7076	93.8619	84.2438
	54.2	100.129	107.014	82.5622	106.908	138.763	139.682	118.747	129.512	104.587	92.764	97.0257	106.661	138.583	140.05	129.982	119.855	100.64	103.384	93.8414	101.465	131.183	130.051	112.656	141.51	97.608	95.897	80.6073	83.1418	99.6478	94.3128	99.2208	91.0907	102.642	99.799	85.1766	78.3401	93.5898	101.086	101.301	101.864	91.7522	98.7263	77.2528	82.748	99.7984	98.6738	93.9919	84.0465
	54.3	100.204	106.773	82.6453	106.447	138.597	139.225	118.823	129.674	104.71	92.3802	97.0559	106.529	138.65	140.191	130.01	119.966	100.826	103.013	93.9175	101.216	130.902	129.889	113.091	141.242	97.8404	95.8966	80.7387	83.1047	99.7203	94.259	99.3027	91.3492	102.739	100.004	85.084	78.2499	93.8534	101.115	101.403	101.68	91.6299	98.4547	77.0515	82.6935	99.6413	98.6515	94.2184	83.8527
	54.4	100.018	106.749	82.8897	105.946	138.685	139.006	119.006	130.08	104.828	92.1449	97.2917	106.525	138.586	140.475	129.889	119.981	100.85	102.826	93.8753	100.939	130.673	130.053	113.507	140.744	97.9341	95.9509	80.9906	82.8893	99.9862	94.0678	99.3304	91.6765	102.789	100.157	85.0519	78.2959	94.0069	101.161	101.662	101.61	91.5614	98.3208	77.0847	82.7308	99.7854	98.584	94.3538	83.9796
	54.5	99.6148	106.966	82.9322	105.717	139.116	139.074	119.221	130.234	104.969	91.9736	97.508	106.71	138.344	140.81	129.503	120.105	101.032	102.49	94.0351	101.036	130.448	130.005	113.6	140.464	97.8362	96.0843	81.3433	82.677	100.211	93.8018	99.3784	91.8107	102.942	100.014	84.8303	78.4746	94.0362	101.109	101.756	101.404	91.5641	98.232	77.1266	82.6494	100.069	98.4031	94.6784	84.2118
	54.6	99.5058	107.379	83.1957	105.52	139.463	139.159	119.113	130.14	104.964	91.6734	97.5632	106.867	138.193	141.179	129.06	120.497	101.28	102.227	94.0916	101.18	130.286	129.877	113.43	140.393	97.6532	96.0412	81.8428	82.4103	100.474	93.3385	99.4133	91.9754	103.218	99.8682	84.7661	78.7313	93.8462	101.238	101.673	101.355	91.5798	98.3199	77.0567	82.4448	100.233	98.2268	94.9463	84.6161
	54.7	99.5655	107.905	83.3735	105.433	139.825	139.495	118.71	130.279	104.714	91.5545	97.3379	107.132	138.184	141.738	128.709	120.87	101.384	102.304	94.0074	101.242	130.493	129.784	113.212	140.464	97.501	95.9925	82.3988	82.0564	100.782	92.992	99.5876	91.8798	103.496	99.7269	84.7629	79.177	93.5095	101.331	101.514	101.54	91.5892	98.5294	76.9485	82.1212	100.555	98.3187	95.0292	85.1775
	54.8	99.5663	108.155	83.3612	105.626	139.94	139.683	118.302	130.433	104.739	91.5194	96.9956	107.243	138.099	142.128	128.348	121.242	101.522	102.445	93.7908	101.482	130.75	129.463	112.87	140.609	97.2476	96.0568	82.8884	81.9236	100.752	92.5632	99.8865	91.8118	103.88	99.6519	84.8252	79.4143	93.2378	101.413	101.385	101.858	91.6282	98.882	76.9492	82.1051	100.892	98.5066	95.0086	85.5687
	54.9	99.6068	108.003	83.3394	106.021	139.874	139.672	117.924	130.375	105.093	91.2966	96.4721	107.336	138.065	142.296	128.175	121.56	101.732	102.465	93.7505	101.668	131.063	128.786	112.592	140.814	97.1114	96.2826	83.2974	82.0356	100.663	92.41	100.31	91.7579	104.29	99.529	84.8309	79.6021	93.1155	101.445	101.425	102.115	91.7529	99.3134	76.9859	82.1215	100.936	98.751	94.9525	85.7798
	55	99.7087	107.721	83.5704	106.393	139.512	139.596	117.536	130.527	105.417	91.0663	96.0695	107.323	138.153	142.224	128.175	121.548	101.823	102.727	93.7168	101.642	131.493	128.224	112.451	140.496	97.1764	96.5739	83.614	82.1528	100.691	92.3167	100.43	91.9216	104.555	99.625	84.89	79.8035	93.0507	101.388	101.597	102.507	91.913	99.7934	77.2863	82.2719	100.624	98.9814	94.6861	85.8939
	55.1	99.3434	107.45	83.4634	106.831	139.224	139.836	117.342	130.679	105.843	91.0745	95.8232	107.425	138.336	141.857	128.288	121.192	101.826	103.002	93.5328	101.485	131.88	127.734	112.48	139.865	97.2736	96.9029	83.6986	82.1383	100.787	92.3818	100.32	92.1109	104.672	99.6765	84.8621	79.9224	93.2887	101.416	101.777	102.816	92.13	99.9046	77.5763	82.7523	100.474	99.1888	94.3784	85.6672
	55.2	98.868	107.256	83.482	107.239	138.985	139.888	117.328	130.449	106.332	91.0454	95.8166	107.49	138.36	141.179	128.25	120.857	101.794	103.013	93.4449	101.46	131.927	127.509	112.392	139.054	97.3048	97.2476	83.7897	82.22	100.814	92.5818	100.196	92.426	104.679	99.8585	84.7304	79.875	93.5089	101.595	101.959	102.777	92.3346	99.7921	77.8262	83.4304	100.309	99.2379	94.0884	85.2205
	55.3	98.747	107.226	83.6202	107.478	138.828	140.025	117.333	130.262	106.665	91.1152	95.9499	107.537	138.411	140.359	128.328	120.479	101.609	103.149	93.663	101.359	131.823	127.468	112.354	138.565	97.4174	97.387	83.8392	82.233	100.975	92.913	100.121	92.5399	104.491	100.041	84.706	80.0774	93.6232	101.709	102.001	102.74	92.4742	99.6163	77.8188	83.8629	100.123	99.0944	93.9882	84.8395
	55.4	98.8558	107.402	83.5613	107.676	138.794	140.209	117.382	130.006	106.421	91.3233	96.222	107.691	138.397	139.604	128.444	120.259	101.329	103.301	93.7613	101.515	131.515	127.532	112.207	138.25	97.4183	97.251	83.784	82.0568	100.987	93.112	99.96	92.2281	104.284	100.355	84.6088	80.397	93.7358	101.952	101.768	102.671	92.4115	99.3075	77.7121	84.2333	100.083	98.973	94.0475	84.5443
	55.5	98.9893	107.68	83.3184	107.867	138.925	140.41	117.473	129.473	106.01	91.5449	96.3945	108.013	138.187	139.051	128.481	120.448	101.07	103.195	93.5941	101.671	130.928	127.781	111.996	138.269	97.1738	97.0194	83.5854	81.8272	100.891	93.3793	99.9093	91.7022	104.091	100.623	84.3394	80.6828	93.8637	102.269	101.428	102.434	92.2235	98.8803	77.4058	84.6062	100.415	98.815	93.994	84.2298
	55.6	99.2381	107.754	83.2854	108.134	139.04	140.462	117.624	129.052	105.652	91.7314	96.6436	108.267	137.854	138.862	128.447	120.941	100.728	102.988	93.6387	101.871	130.256	128.157	111.787	138.693	96.8714	96.8424	83.3616	81.79	100.806	93.536	100.047	91.0665	104.035	100.925	84.0313	80.9421	93.842	102.354	101.223	102.156	92.0116	98.8846	77.3859	84.647	100.633	98.6763	93.7782	84.043
	55.7	99.592	107.799	83.0478	108.4	139.202	140.553	117.915	128.674	105.337	91.9039	96.9772	108.309	137.742	138.851	128.802	121.295	100.392	102.864	93.6983	102.086	129.851	128.5	111.71	139.409	96.5652	96.746	83.0082	81.7497	100.772	93.5335	100.038	90.3929	104.025	101.026	83.7932	81.2268	93.969	102.148	101.139	102.245	91.8765	99.111	77.4468	84.5891	100.804	98.5304	93.613	84.0529
	55.8	99.6655	107.901	82.737	108.753	139.513	140.577	118.137	128.269	104.866	91.9293	97.191	108.377	137.78	139.116	129.043	121.651	100.233	102.403	93.568	102.28	129.597	129.064	111.663	139.607	96.4208	96.7923	82.6776	81.7821	100.639	93.3091	99.9476	90.0025	104.062	101.027	83.5548	81.2421	94.0705	101.876	101.196	102.224	91.7245	99.2817	77.6976	84.5029	100.911	98.5249	93.3094	84.04
	55.9	99.4977	108.087	82.6258	108.935	139.698	140.628	118.188	128.195	104.847	91.9566	97.3926	108.401	137.994	139.463	128.998	122.049	100.202	102.144	93.4935	102.208	129.517	129.793	111.518	139.481	96.2734	96.9538	82.3164	81.976	100.581	93.102	99.8888	90.1513	103.961	101.06	83.3743	80.9954	94.1441	101.497	101.263	102.126	91.635	99.4643	78.0129	84.3801	100.848	98.4609	92.981	84.0528
	56	99.4494	108.232	82.5115	109.109	139.696	140.632	118.056	128.418	105.041	91.936	97.691	108.279	138.329	139.565	129	122.173	100.19	101.913	93.4923	102.113	129.703	130.232	111.403	139.61	96.2079	97.0403	82.1417	82.1111	100.667	92.8632	100.013	90.4768	103.803	101.049	83.4325	80.735	94.1075	101.144	101.568	102.136	91.6209	99.698	78.2946	84.1295	100.71	98.2801	93.052	84.1512
	56.1	99.2941	108.431	82.4655	109.024	139.665	140.463	117.885	128.505	105.127	91.6934	97.6973	108.117	138.787	139.551	128.91	121.993	100.274	101.86	93.2729	102.176	129.909	130.401	111.194	139.558	96.2434	97.0022	82.105	82.1722	100.739	92.9564	100.085	90.8701	103.525	100.909	83.6416	80.6015	93.8683	100.741	101.903	102.336	91.4102	99.6494	78.2598	83.8552	100.674	98.0634	93.4297	84.3826
	56.2	98.9916	108.373	82.6275	108.829	139.617	140.377	117.671	128.948	105.066	91.5643	97.4263	108.071	139.255	139.583	128.463	121.898	100.465	101.844	93.1637	102.012	129.922	130.321	110.905	139.393	96.4399	96.8134	82.1122	82.2509	100.811	93.1532	100.277	91.2819	103.197	100.833	83.9915	80.4882	93.4596	100.537	102.29	102.093	91.045	99.5267	78.0334	83.4225	100.615	97.8625	93.8369	84.4505
	56.3	98.8137	107.963	82.754	108.476	139.447	140.44	117.644	129.323	105.083	91.5625	97.2437	108.002	139.553	139.596	128	121.681	100.522	102.094	93.0942	101.763	129.939	129.883	110.611	139.493	96.4367	96.4768	82.1143	82.1547	100.965	93.5773	100.453	91.466	102.809	100.852	84.2074	80.5227	93.0925	100.478	102.433	101.868	90.7468	99.4878	77.7533	83.1036	100.54	97.6018	94.2815	84.7098
	56.4	98.5523	107.214	82.7212	108.349	139.432	140.516	117.641	129.372	105.091	91.5332	96.96	107.892	139.564	139.687	127.835	121.246	100.338	102.157	93.0233	101.654	129.899	129.267	110.592	140.035	96.4346	96.2511	82.1502	81.9582	101.215	93.8806	100.401	91.4047	102.523	100.647	84.5555	80.6371	92.6479	100.317	102.506	101.824	90.5996	99.4911	77.5172	82.6184	100.536	97.4722	94.7249	84.964
	56.5	97.9895	106.327	82.877	108.132	139.574	140.51	117.941	129.222	104.952	91.689	96.5423	107.594	139.624	139.97	127.677	120.869	99.964	102.255	93.0584	101.574	129.84	128.616	110.736	140.376	96.4441	96.1318	82.2465	81.9433	101.291	94.1257	100.023	91.2474	102.356	100.404	84.9461	80.6833	92.3305	100.052	102.375	101.695	90.4834	99.5068	77.4025	82.2454	100.427	97.6016	94.99	85.2787
	56.6	97.7598	105.41	82.9014	107.945	139.772	140.575	118.414	129.256	104.655	92.0634	96.3189	107.448	139.582	140.251	127.833	120.587	99.5929	102.164	93.1002	101.111	129.93	128.023	110.791	140.863	96.4218	96.1214	82.3592	82.0365	101.235	93.9655	99.6974	91.0695	102.151	100.244	85.2678	80.5727	92.3013	100.148	102.207	101.225	90.6499	99.4673	77.364	82.0606	100.299	97.6748	95.176	85.4403
	56.7	97.7255	104.78	82.8517	107.765	139.935	140.535	118.648	128.995	104.447	92.2669	96.2356	107.375	139.418	140.428	127.965	120.266	99.075	102.134	92.8242	100.855	129.971	127.672	110.936	141.201	96.1492	96.136	82.3874	82.0377	101.103	93.7398	99.4753	90.9896	102.009	100.097	85.3069	80.388	92.55	100.173	101.883	101.193	90.9828	99.4083	77.5326	82.0933	100.287	97.75	95.2547	85.6625
	56.8	97.6113	104.511	82.877	107.792	140.165	140.267	118.64	128.761	104.352	92.1976	96.0625	107.343	139.01	140.432	128.169	120.078	98.5148	102.127	92.5296	100.77	129.998	127.473	111.067	141.509	95.8054	96.1717	82.3399	82.2013	100.979	93.3727	99.2062	90.966	101.909	99.9421	85.494	80.1666	92.8804	100.28	101.7	101.121	91.312	99.3997	77.654	82.0892	100.351	97.8574	95.1342	85.6518
	56.9	97.8106	104.689	82.9256	107.577	140.325	140.011	118.737	128.598	104.013	91.9361	96.0476	107.209	138.757	140.067	128.168	119.924	98.2602	102.062	92.2722	100.747	130.028	127.416	110.946	141.493	95.4743	96.1035	82.513	82.4847	100.845	93.1223	99.1582	90.9993	101.649	100.152	85.5929	80.1232	93.2115	100.539	101.697	100.987	91.5852	99.3637	77.5293	82.4661	100.442	97.7726	94.892	85.5299
	57	98.2667	105.207	82.8523	107.45	140.537	139.991	118.581	128.632	103.885	91.3224	96.2226	107.355	138.383	139.596	128.246	119.841	98.4156	102.131	91.9903	100.718	130.007	127.533	110.566	141.257	95.1667	96.0463	82.5202	82.6981	100.815	92.8778	99.4824	91.1436	101.347	100.474	85.4938	80.2231	93.3882	100.828	101.636	101.06	91.6781	99.2183	77.2823	82.8853	100.643	97.4398	94.5725	85.1929
	57.1	98.7484	105.906	82.6299	107.502	140.62	140.09	118.069	128.685	104.029	90.6489	96.4697	107.286	137.837	139.123	128.004	119.786	98.7122	102.572	91.9475	101.034	129.973	127.819	110.423	140.744	94.9434	95.9455	82.5261	82.834	100.887	92.9142	99.7504	91.2223	101.193	100.859	85.3541	80.4071	93.5441	100.719	101.685	101.347	91.6376	99.1472	77.1039	83.3154	100.815	97.3206	94.0758	84.8896
	57.2	99.1816	106.621	82.4256	107.606	140.634	140.259	117.825	129.004	104.176	90.198	96.6735	107.274	137.269	138.708	127.95	119.938	99.0794	102.96	92.1146	101.302	130.073	128.116	110.466	140.308	94.9605	95.7943	82.67	83.1012	100.9	92.8071	99.6981	91.1432	101.253	101.327	85.3436	80.5533	93.4008	100.677	101.734	101.479	91.4636	98.9927	76.9334	83.6936	100.832	97.2439	93.6764	84.7263
	57.3	99.6538	107.16	82.2143	107.497	140.565	140.535	117.773	129.403	104.234	90.1342	96.9493	107.281	136.965	138.449	127.907	120.139	99.7087	103.238	92.3338	101.56	130.229	128.564	110.591	139.884	95.209	95.8414	82.9963	83.3774	100.907	92.7344	99.8274	91.1921	101.307	101.69	85.1582	80.7296	93.1828	100.529	101.862	101.845	91.2649	98.5638	76.8576	84.0059	100.893	97.1349	93.5466	84.5905
	57.4	100.009	107.55	81.9536	107.34	140.249	140.632	117.615	130.016	104.297	90.2646	97.106	107.455	136.49	138.311	128.052	120.417	100.242	103.666	92.5118	101.575	130.271	128.825	111.008	139.639	95.4531	96.071	83.1789	83.5459	100.806	92.6817	99.9508	91.1891	101.465	101.482	84.9326	80.7131	93.1964	100.316	101.725	102.244	90.971	98.0682	77.0789	84.1165	100.847	97.1584	93.53	84.5439
	57.5	100.294	107.643	81.6599	107.172	139.722	140.34	117.559	130.384	104.263	90.6632	97.0526	107.593	136.142	138.308	128.012	120.667	100.557	103.979	92.7457	101.442	130.296	129.071	111.579	139.56	95.8093	96.3166	83.4134	83.582	100.693	92.7802	99.75	91.0415	101.614	101.225	84.8813	80.5958	93.3862	100.066	101.702	102.464	91.1167	97.6711	77.3838	84.0702	100.596	97.5264	93.5668	84.6394
	57.6	100.283	107.412	81.7419	106.749	139.429	139.898	117.713	130.572	104.216	90.9969	96.8841	107.91	136.108	138.37	128.074	121.001	100.757	103.903	92.8353	101.029	130.216	129.138	112.059	139.662	96.0268	96.5939	83.571	83.6168	100.786	92.7666	99.4968	91.0819	101.716	100.833	84.7974	80.4967	93.5165	99.9329	101.398	102.657	91.4339	97.4059	77.6689	83.8647	100.252	97.6293	93.7451	84.762
	57.7	100.092	106.987	81.9066	106.422	139.075	139.466	117.637	130.51	104.206	91.1521	96.7628	108.145	136.031	138.518	128.091	121.028	101.017	103.757	92.9453	100.67	130.023	129.019	112.175	139.886	96.0646	97.0218	83.5974	83.4549	101.028	92.96	99.5292	91.1451	101.453	100.342	84.6493	80.5395	93.8578	99.6924	101.144	102.819	91.8616	97.2208	77.891	83.684	99.9983	97.7238	93.8902	84.6418
	57.8	99.9336	106.536	82.0492	106.274	138.726	139.057	117.465	130.385	104.113	91.1093	96.6828	108.079	135.92	138.615	128.162	121.085	101.01	103.493	93.0191	100.273	129.607	128.673	112.059	139.813	96.043	97.2874	83.4424	83.0145	101.201	93.1254	99.3137	91.1264	101.48	99.8664	84.7096	80.628	94.2495	99.4876	100.729	102.737	92.3787	97.4255	78.1515	83.6573	99.6702	97.9324	93.9805	84.6156
	57.9	99.5015	105.914	82.2862	106.361	138.8	138.702	117.493	130.065	104.204	91.0095	96.5807	107.78	136.113	138.968	128.047	121.213	100.947	103.189	93.0722	100.255	129.334	128.306	111.729	139.556	96.2541	97.3716	83.2099	82.4904	101.449	93.1258	99.2081	91.1768	101.781	99.876	84.8034	80.8646	94.3965	99.288	100.465	102.522	92.8633	97.7855	78.1844	83.6296	99.4975	98.0928	94.0213	84.5716
	58	98.9173	105.395	82.54	106.361	139.016	138.694	117.494	129.881	104.221	90.8956	96.6071	107.48	136.23	139.233	127.901	121.406	100.909	102.805	93.1998	100.429	129.095	127.834	111.389	139.148	96.3067	97.3673	82.8959	82.1738	101.701	92.951	99.3014	91.3279	102.217	99.8077	84.8114	81.2212	94.3623	99.2183	100.283	102.243	92.9024	98.388	78.178	83.5796	99.5452	97.992	94.0082	84.5609
	58.1	98.4101	105.359	82.5774	106.458	139.024	138.793	117.373	129.693	104.293	90.9166	96.6358	107.133	136.287	139.208	127.706	121.522	100.875	102.494	93.2531	100.791	128.897	127.506	111.023	138.718	96.582	97.2553	82.4807	81.824	101.671	92.7364	99.4488	91.2718	102.619	99.8105	84.7977	81.481	94.3413	99.2943	100.253	101.988	92.7426	98.9497	78.1558	83.6188	99.6906	98.1419	93.9474	84.5298
	58.2	98.0912	105.551	82.4672	106.361	139.276	138.699	117.324	129.515	104.376	90.9984	96.6306	106.868	136.536	138.888	127.531	121.62	100.72	102.085	93.2894	100.974	128.879	127.205	110.875	138.216	97.0074	97.1056	82.1905	81.596	101.594	92.4522	99.3267	91.2273	103.251	99.7727	84.8062	81.6529	94.1689	99.5934	100.082	101.788	92.5745	99.5291	78.057	83.5815	99.7956	98.4344	93.9042	84.7016
	58.3	97.7266	105.941	82.3933	106.109	139.585	138.558	117.307	129.269	104.593	91.117	96.553	107.12	136.832	138.547	127.246	121.285	100.746	101.88	93.2909	100.863	129.018	127.154	110.954	138.146	97.3974	96.9373	81.9955	81.8083	101.514	92.2036	99.3642	91.1489	103.639	99.8011	84.7204	81.6592	93.9297	99.743	99.9482	101.67	92.2671	99.8888	77.7744	83.3661	99.9096	98.5553	93.7828	84.818
	58.4	97.7405	106.505	82.472	105.721	139.624	138.787	116.99	128.936	104.75	91.263	96.6563	107.749	136.983	138.085	127.13	120.787	100.812	101.607	93.1688	100.29	129.145	127.442	110.96	138.026	97.351	96.742	81.9115	82.1762	101.352	92.0379	99.0964	91.0096	103.828	99.6596	84.5847	81.5132	93.7617	99.9569	99.977	101.742	91.8934	100.282	77.7126	82.9833	99.9439	98.5951	93.6191	84.9274
	58.5	97.9808	107.013	82.5948	105.406	139.586	138.965	116.55	128.361	105.025	91.4584	96.7428	108.388	137.243	137.65	127.254	120.111	100.782	101.391	92.8285	99.8114	129.272	127.875	110.781	138.293	97.1252	96.576	82.0358	82.4478	100.958	91.8887	98.7329	90.655	103.748	99.6764	84.3838	81.3083	93.7236	100.227	99.9404	101.956	91.7138	100.363	77.6598	82.77	99.9006	98.4934	93.3483	84.8946
	58.6	98.2985	107.096	82.6624	105.211	139.416	139.001	116.177	127.924	105.075	91.5754	96.7936	108.978	137.472	137.512	127.483	119.38	100.69	101.312	92.6243	99.4051	129.402	128.256	110.56	138.601	96.6442	96.5709	82.4129	82.7569	100.632	91.8293	98.4604	90.413	103.653	99.895	84.242	81.2162	93.5123	100.412	99.8662	102.138	91.4546	100.416	77.608	82.5244	100.005	98.2751	93.161	84.8488
	58.7	98.5324	107.127	82.8267	105.254	138.96	139.246	115.887	127.646	105.096	91.6787	96.8837	109.369	137.506	137.739	127.554	118.888	100.717	101.536	92.3833	99.2244	129.391	128.774	110.385	138.804	96.0758	96.5256	82.7946	83.2181	100.346	91.8346	98.5811	90.3508	103.43	100.293	84.1727	81.0529	93.4202	100.527	99.9738	102.266	91.1589	100.673	77.6732	82.2988	100.116	97.7549	93.1282	84.6064
	58.8	98.7984	107.1	82.9034	105.411	138.449	139.575	115.597	127.413	105.135	91.8524	96.9582	109.4	137.368	138.136	127.579	118.76	100.649	101.731	92.1456	99.5583	129.461	129.203	110.257	138.86	95.7432	96.5586	83.2757	83.346	100.143	91.8514	98.8456	90.4976	103.12	100.736	84.1678	81.058	93.4291	100.875	100.238	102.324	91.0348	100.877	77.8985	82.0535	100.112	97.4211	93.1038	84.3991
	58.9	98.8498	107.026	82.6208	105.739	137.845	139.513	115.586	127.342	105.197	92.1045	96.7708	109.166	137.178	138.493	127.397	118.628	100.545	101.831	92.1991	100.346	129.591	129.396	110.357	139.079	95.8196	96.6224	83.7243	83.4111	99.961	92.0906	99.3602	90.7624	102.675	101.263	84.3412	81.2404	93.4344	101.167	100.303	102.237	91.0558	100.823	77.9655	82.1058	100.066	97.2128	93.2053	84.263
	59	98.8556	106.922	82.3593	105.97	137.342	139.384	115.784	127.587	105.128	92.2532	96.6019	108.721	136.683	138.912	127.061	118.584	100.489	101.956	92.3268	100.992	129.777	129.568	110.68	138.928	96.2164	96.5576	84.0283	83.3623	100.116	92.49	99.9735	91.3436	102.493	101.63	84.5496	81.2951	93.4436	101.248	100.243	102.02	91.052	100.802	78.11	82.0624	99.8885	97.1828	93.6065	84.3055
	59.1	98.8519	107.016	82.1689	106.121	137.053	139.414	115.918	127.894	105.004	92.4158	96.4676	108.26	136.183	139.335	126.512	118.654	100.586	102.082	92.2952	101.539	129.9	129.793	111.218	138.669	96.7776	96.2944	84.181	83.3375	100.252	92.8297	100.676	91.8281	102.346	101.663	84.8002	81.2576	93.6926	101.34	100.289	101.65	91.2246	100.807	78.303	82.108	99.4917	97.0644	93.8736	84.3896
	59.2	98.9731	107.02	81.8666	106.081	136.941	139.56	116.056	128.083	104.748	92.6155	96.2116	107.974	135.848	139.708	126.113	118.603	100.609	102.167	92.2626	101.96	130.015	129.835	111.497	138.411	97.4938	95.9639	84.2906	83.023	100.302	93.0748	101.097	92.0955	102.227	101.597	85.0057	81.2478	93.9574	101.273	100.243	101.115	91.3454	100.499	78.329	82.1812	99.2943	97.1346	93.8667	84.7758
	59.3	99.1642	106.944	81.7873	106.064	136.866	139.698	116.224	128.36	104.464	92.6205	95.9988	107.743	135.692	139.754	125.787	118.611	100.616	102.209	92.2693	102.01	129.901	129.63	111.488	138.073	97.8118	95.6812	84.3259	82.9602	100.35	93.344	101.23	92.017	102.166	101.487	85.0617	81.051	94.2618	101.062	100.181	100.63	91.4161	100.394	78.1722	82.4112	99.2812	97.0727	93.87	85.1325
	59.4	99.3859	106.929	82.0907	105.921	137.025	139.893	116.388	128.708	104.134	92.4573	95.9682	107.426	135.62	139.656	125.571	118.768	100.563	102.498	92.1695	101.763	129.715	129.398	111.422	137.891	97.8904	95.5776	84.2362	82.8898	100.53	93.3855	101.26	91.759	102.365	101.255	84.7424	80.66	94.613	100.784	100.357	100.148	91.6893	100.373	78.0184	82.5387	99.4332	97.0634	93.755	85.4912
	59.5	99.4696	107.143	82.4047	106.013	137.019	140.138	116.41	129.015	103.794	92.2833	95.7977	107.314	135.895	139.594	125.568	118.94	100.598	102.744	92.1515	101.579	129.327	128.985	111.335	137.872	97.977	95.7796	84.1734	82.9762	100.633	93.2585	101.119	91.3285	102.424	101.084	84.453	80.4576	94.9174	100.623	100.744	99.7917	92.0488	100.277	77.6924	82.7305	99.8191	97.1053	93.4156	85.6566
	59.6	99.5457	107.231	82.6888	106.234	137.1	140.232	116.596	128.915	103.782	92.0132	95.7484	107.316	136.115	139.484	125.805	118.967	100.553	103.027	92.3756	101.432	129.075	128.377	110.954	138.101	98.0489	96.1367	84.0862	82.871	100.78	93.1858	100.707	91.0284	102.438	101.149	84.1926	80.3571	95.0299	100.485	101.117	99.717	92.4754	100.043	77.3148	82.9002	100.329	97.2076	93.1678	85.7931
	59.7	99.4759	107.26	83.0454	106.518	137.333	139.988	116.796	128.775	104.019	91.6692	95.924	107.168	136.176	139.143	126.142	119.027	100.591	103.26	92.5922	101.226	128.879	127.959	110.762	138.521	97.9187	96.8056	83.9666	82.9328	101.022	93.1498	100.351	90.7983	102.49	101.254	84.0078	80.4105	94.8319	100.209	101.617	100.001	93.0294	99.8878	77.1443	83.1078	100.651	97.3532	92.9782	85.5861
	59.8	99.2111	107.235	83.1762	106.761	137.689	139.616	116.973	128.533	104.309	91.4206	96.1596	107.046	136.36	138.991	126.534	119.064	100.677	103.58	92.8696	101.079	129.009	127.836	110.818	138.986	97.9648	97.4182	83.6438	82.8203	101.16	93.1156	100.005	90.7881	102.601	101.239	84.0022	80.5723	94.3542	99.7849	101.925	100.396	93.4494	99.6542	77.1194	83.131	100.914	97.5297	92.9074	85.455
	59.9	99.0461	106.99	83.1585	107.04	137.991	139.238	116.872	128.177	104.594	91.3025	96.4756	107.067	136.643	139.018	127.118	119.019	101.033	103.833	92.9962	100.956	129.135	127.82	110.781	139.224	98.018	97.6278	83.4182	82.744	101.242	93.0252	99.6163	90.9039	102.399	101.287	84.3221	80.872	93.8384	99.369	101.895	100.701	93.5043	99.608	77.013	83.0523	101.045	97.6225	92.9803	85.1411
	60	99.0957	106.387	83.0074	107.145	138.397	138.566	116.828	127.893	104.99	91.2173	96.8756	107.023	136.897	138.827	127.478	118.841	101.344	104.091	92.9512	100.687	129.52	128.018	110.773	139.453	97.801	97.5208	83.1786	82.6481	101.255	93.0692	99.4436	91.0074	102.146	101.378	84.5711	81.054	93.2768	98.9069	101.569	101.074	93.3706	99.6625	77.0221	82.9268	101.054	97.5591	93.133	84.8314
	60.1	99.1204	105.9	83.0751	107.073	138.585	138.003	116.802	127.889	105.218	91.2122	97.2414	106.851	137.248	138.634	127.848	118.886	101.591	104.053	92.7178	100.273	129.729	128.317	110.949	139.369	97.4345	97.3584	82.9433	82.7828	101.293	92.994	99.364	91.0436	101.866	101.215	84.7356	80.9964	92.8507	98.2163	101.221	101.386	92.9982	99.8138	77.0706	82.7394	100.939	97.5861	93.1837	84.4081
	60.2	99.1138	105.539	83.205	106.999	138.437	137.661	116.606	127.855	105.351	91.355	97.6064	106.928	137.777	138.671	128.126	118.964	101.711	103.791	92.4857	99.979	129.946	128.385	111.125	139.138	97.1702	96.6658	82.6916	82.8092	101.157	92.9071	99.2765	91.0085	101.507	100.803	84.9002	80.7579	92.7579	97.8835	100.704	101.498	92.4764	99.843	76.8956	82.3182	100.679	97.4608	93.2636	84.1752
	60.3	99.2367	105.323	83.3416	106.97	138.086	137.317	116.315	127.721	105.345	91.5353	97.891	107.063	138.12	138.766	128.381	118.956	101.855	103.399	92.2066	99.7925	129.87	128.101	111.258	138.938	96.9265	95.7019	82.6041	82.7219	101.123	92.734	99.4909	90.9466	101.179	100.53	84.9686	80.6277	92.9444	97.863	100.423	101.493	91.9872	99.7084	76.6597	82.1318	100.415	97.2832	93.351	83.8468
	60.4	99.2215	105.238	83.3044	106.808	137.762	137.126	116.148	127.549	105.34	91.631	97.9357	107.274	138.19	139.029	128.405	119.011	101.747	103.024	92.2194	99.68	129.732	127.48	111.477	138.843	96.7786	94.9895	82.528	82.55	100.961	92.6608	99.741	90.8611	101.064	100.236	84.9381	80.5013	93.141	98.0063	100.326	101.748	91.6659	99.3143	76.6781	82.0166	100.117	96.9902	93.3434	83.7233
	60.5	99.0181	105.467	83.3305	106.732	137.431	137.325	116.097	127.181	105.257	91.6022	97.9055	107.408	138.115	139.391	128.357	119.386	101.568	102.692	92.4663	99.6948	129.274	126.655	111.549	138.748	96.8683	94.5316	82.3891	82.5174	100.784	92.4901	99.8181	90.6904	101	99.9155	84.9886	80.3121	93.3512	98.2139	100.458	101.933	91.409	98.9004	76.7733	81.7766	99.7342	96.8208	93.3231	83.7819
	60.6	98.725	105.693	83.1164	106.746	137.221	137.427	115.863	127.002	105.099	91.595	97.5901	107.452	138.043	139.585	128.148	119.586	101.407	102.645	92.8555	100.035	129.11	125.795	111.584	138.793	97.142	94.1038	82.3187	82.2869	100.35	92.5199	99.8697	90.5877	101.163	99.757	84.9815	80.3958	93.4425	98.7723	100.488	101.949	91.1842	98.5159	76.7544	81.6002	99.4149	96.5756	93.3984	84.0708
	60.7	98.4303	105.893	82.8109	106.743	137.31	137.485	115.805	126.91	104.896	91.4378	96.8824	107.221	137.833	139.481	127.722	119.808	101.303	102.956	93.2062	100.456	128.894	125.25	111.526	138.851	97.4181	94.2179	82.2598	82.1375	100.164	92.6598	99.8402	90.6169	101.312	99.9221	84.9052	80.6666	93.4242	99.2966	100.621	102.048	91.0682	98.2979	76.965	81.7106	99.3115	96.4215	93.5796	84.3024
	60.8	98.1846	105.937	82.6668	106.659	137.392	137.701	115.905	127.123	104.791	91.236	96.1141	106.869	137.518	139.257	127.225	120.006	101.051	103.286	93.3886	100.897	128.701	125.145	111.414	138.779	97.5943	94.6447	82.2666	82.2542	99.9834	92.8232	99.4337	90.5854	101.348	100.042	84.8581	80.6904	93.1716	99.7933	100.558	102.213	91.0876	98.3352	77.3289	81.6669	99.1699	96.3215	93.6101	84.5004
	60.9	97.9717	105.97	82.632	106.544	137.394	137.897	116.192	127.38	104.683	91.0633	95.5574	106.501	137.416	138.647	126.792	120.112	100.822	103.507	93.3455	101.344	128.593	125.582	111.24	138.409	97.6162	95.1442	82.2851	82.4934	99.8516	93.0726	99.1574	90.6272	101.46	100.308	84.8772	80.5844	92.9349	100.211	100.371	102.257	91.0942	98.5394	77.5143	81.6449	99.1884	96.2774	93.5904	84.604
	61	97.8263	105.907	82.6554	106.415	137.417	137.995	116.352	127.856	104.69	90.9403	95.0391	106.352	137.29	138.044	126.557	119.908	100.539	103.634	93.0591	101.561	128.928	126.137	111.138	138.061	97.654	95.4287	82.486	82.4433	99.6726	93.2884	99.001	91.0709	101.687	100.62	84.9639	80.6803	92.8444	100.536	100.077	102.106	91.2514	98.8119	77.6402	81.8564	99.3249	96.2836	93.5353	84.7182
	61.1	97.7861	105.862	82.7298	106.369	137.404	138.117	116.62	128.244	104.989	90.7943	94.8604	106.446	137.077	137.562	126.31	119.728	100.303	103.54	92.6239	101.31	128.89	126.935	110.925	137.69	97.5379	95.6516	82.627	82.6676	99.7302	93.3741	98.8614	91.3858	101.649	100.873	85.1061	80.7025	92.9527	100.593	99.8053	102.089	91.702	99.0801	77.9062	82.027	99.4127	96.3015	93.551	84.7992
	61.2	97.9632	105.723	82.9148	106.437	137.169	138.168	116.768	128.761	105.355	90.7897	95.0425	106.729	136.863	137.438	126.171	119.437	100.111	103.192	92.4116	100.856	128.876	127.5	110.841	137.511	97.2603	95.5596	82.7626	83.0006	99.6806	93.4622	98.8709	91.6645	101.88	100.853	85.1946	80.6848	93.1614	100.537	99.5291	101.879	92.1111	99.444	77.9053	82.0902	99.3968	96.3582	93.5306	85.0311
	61.3	97.8764	105.673	82.9789	106.533	137.034	138.141	116.75	129.035	105.562	90.905	95.2846	107.254	136.924	137.344	125.964	119.37	100.044	102.835	92.4822	100.202	129.162	127.764	110.761	137.571	97.0866	95.4909	82.8616	83.1534	99.6364	93.5655	99.1042	91.8845	102.141	100.873	85.1302	80.9449	93.4301	100.39	99.5192	101.539	92.3882	99.5877	77.6971	82.2578	99.3986	96.4952	93.4914	85.4612
	61.4	97.8703	105.704	83.0947	107.04	136.803	137.938	116.545	129.107	105.756	91.1197	95.4416	107.667	136.871	137.412	125.744	119.384	100.018	102.451	92.6062	99.5344	129.544	127.652	110.703	138.069	97.141	95.2679	82.9706	83.2171	99.7134	93.512	99.2484	91.9629	102.18	100.722	84.961	81.3867	93.6174	100.213	99.8154	101.346	92.6011	99.6009	77.6083	82.4596	99.2846	96.8688	93.5738	86.0334
	61.5	97.8983	105.742	83.0807	107.583	136.649	137.724	116.396	128.891	105.992	91.3701	95.8308	107.978	136.851	137.292	125.48	119.533	100.118	102.144	93.0123	99.205	129.494	127.475	110.588	138.467	97.0324	95.268	82.8486	83.4309	99.8963	93.5603	99.3909	91.5794	101.978	100.506	84.679	81.6482	93.6195	100.164	100.19	101.335	92.5521	99.5138	77.5096	82.4298	99.1523	97.0943	93.7395	86.6259
	61.6	97.9239	105.681	83.0186	108	136.615	137.737	116.158	128.381	105.833	91.6958	96.045	108.246	136.697	137.302	125.311	119.713	100.093	101.957	93.5032	99.1594	129.661	126.95	110.645	138.767	97.0105	95.3327	82.7317	83.347	100.211	93.6313	99.593	91.2143	101.797	100.418	84.3925	81.7912	93.3258	100.26	100.624	101.314	92.1692	99.3614	77.4543	82.3451	99.0536	97.3408	93.7442	87.1719
	61.7	97.7963	105.659	82.8402	108.384	136.696	137.932	115.895	127.647	105.639	91.9522	96.0718	108.369	136.52	137.103	125.399	119.899	99.9614	101.772	93.8658	99.2312	129.765	126.605	110.661	138.746	97.2344	95.5288	82.596	82.9708	100.53	93.4951	99.7643	90.8397	101.318	100.533	84.0828	81.6807	92.7528	100.409	100.881	101.42	91.6828	98.9837	77.6908	82.2897	98.9854	97.5199	93.6949	87.5331
	61.8	97.9788	105.679	82.7325	108.917	136.715	138.157	115.79	127.001	105.583	92.1508	96.1078	108.204	136.114	136.866	125.658	119.663	99.9458	101.638	94.071	99.4944	129.486	126.355	110.726	138.689	97.3554	95.6951	82.4206	82.6126	100.734	93.355	99.9011	90.6077	100.944	100.683	83.9424	81.2833	92.3102	100.327	100.825	101.596	91.138	98.7944	77.9912	82.2046	98.9592	97.6204	93.7856	87.7037
	61.9	98.2379	105.736	82.8095	109.152	137.039	138.531	115.698	126.719	105.555	92.1542	96.0906	107.981	135.741	136.619	125.966	119.415	99.9166	101.574	94.2128	99.6297	129.017	126.074	110.946	138.272	97.2464	96.0222	82.1888	82.2873	100.924	93.2289	100.018	90.3422	100.749	100.734	83.8969	80.7619	91.96	100.228	100.439	101.452	90.6955	98.8026	78.0714	82.0626	99.0094	97.4468	93.7587	87.6439
	62	98.3987	105.827	83.1574	109.18	137.192	138.717	115.419	126.499	105.236	92.1872	95.9111	107.633	135.488	136.777	126.134	119.145	99.8684	101.602	94.1629	99.6912	128.681	125.815	111.277	137.958	97.0012	96.1585	82.0384	81.8523	101.211	93.0284	100.144	90.3328	100.898	100.717	83.9022	80.2833	91.6301	99.972	100.054	101.304	90.4736	98.886	78.1396	82.1177	99.0555	97.3809	93.7258	87.249
	62.1	98.5386	106.103	83.5316	109.12	136.963	138.495	115.228	126.601	105.171	92.1539	95.7559	107.219	135.463	136.752	126.177	118.876	99.9686	101.69	94.0852	99.849	128.268	125.847	111.52	137.807	96.7887	96.3057	82.0285	81.6112	101.342	92.7686	100.195	90.4841	101.268	100.546	84.0002	79.982	91.5633	99.6115	99.7265	101.219	90.3064	99.0064	77.9994	82.2118	99.2188	97.3067	93.7694	86.7331
	62.2	98.5903	106.47	83.9612	108.863	136.867	138.075	115.32	126.86	105.057	92.054	95.859	106.881	135.42	136.657	125.861	118.755	100.125	101.904	93.9804	99.8423	127.983	125.519	111.704	137.787	96.4448	96.3536	82.1399	81.6045	101.453	92.7622	100.219	90.6038	101.924	100.389	84.2298	79.9635	91.7212	99.0155	99.7528	101.067	90.2695	99.3479	77.7574	82.2618	99.3916	97.2427	93.9192	86.188
	62.3	98.4429	106.71	84.292	108.279	136.883	137.734	115.357	126.965	105.01	91.8459	96.0908	106.758	135.359	136.678	125.422	118.957	100.12	102.2	93.9673	99.9146	127.989	125.218	111.873	137.514	96.2753	96.3015	82.129	81.6304	101.842	92.7101	100.199	90.5509	102.497	100.086	84.4212	80.2557	91.8568	98.7662	99.8708	100.972	90.5252	99.4662	77.5682	82.2698	99.5193	97.1583	93.9611	85.67
	62.4	98.0231	106.712	84.2254	107.609	136.714	137.248	115.422	126.939	105.043	91.755	96.3698	106.814	135.226	136.815	124.87	119.118	100.155	102.641	93.9978	100.292	127.959	125.362	111.672	137.536	96.3419	96.068	82.1582	81.6915	102.105	92.733	100.129	90.5989	102.931	100.078	84.5007	80.5745	91.8723	98.7022	100.205	100.948	90.8528	99.4839	77.5709	82.3351	99.503	97.1826	94.0149	85.1786
	62.5	97.7813	106.486	83.8512	106.988	136.731	136.975	115.727	126.999	105.305	91.6658	96.5475	107.136	134.909	136.674	124.434	119.283	100.172	102.981	93.9924	100.583	127.917	125.845	111.379	137.499	96.7318	95.9313	82.329	81.9182	102.044	92.8263	99.9118	90.527	102.963	100.217	84.5843	80.8516	92.0016	98.7871	100.536	100.923	90.9718	99.4348	77.4923	82.3306	99.5609	97.2626	94.0563	84.9635
	62.6	97.6324	106.036	83.5128	106.459	137.275	137.012	115.933	126.83	105.334	91.3791	96.8492	107.577	134.677	136.687	124.281	119.49	100.138	103.243	93.9153	100.707	128.066	126.277	111.18	137.328	96.9783	95.887	82.4032	82.0478	102.026	92.8958	99.7754	90.2431	102.885	100.534	84.6245	81.1368	92.0824	99.044	100.808	100.641	91.2579	99.3276	77.5298	82.3396	99.5479	97.3702	94.2548	84.8032
	62.7	97.7259	105.498	83.0295	106.111	137.49	137.132	115.82	126.542	105.289	91.1277	97.033	107.992	134.642	136.914	124.358	119.537	100.114	103.478	93.7967	101.079	128.206	127.122	111.035	137.255	97.2085	95.9614	82.4009	82.1217	102.024	92.6462	99.6203	89.967	102.649	100.77	84.6686	81.3748	92.2015	99.6273	100.882	100.552	91.5703	98.9727	77.5765	82.4412	99.5615	97.5206	94.1806	84.6846
	62.8	97.908	105.195	82.5557	105.96	137.487	136.962	115.584	126.496	105.067	90.9009	97.0859	108.324	134.7	137.163	124.571	119.522	100.044	103.559	93.5702	101.052	128.235	127.962	110.903	137.289	97.347	96.0332	82.5147	82.2877	101.68	92.6532	99.5814	89.9177	102.37	101.13	84.8081	81.3705	92.3417	100.091	101.093	100.502	91.5972	98.7519	77.586	82.6159	99.6144	97.6809	94.1468	84.4716
	62.9	98.3197	105.18	82.2405	106.134	137.471	136.928	115.316	126.315	104.645	90.7201	97.0536	108.528	134.988	137.379	124.867	119.519	99.9272	103.421	93.2193	100.611	128.409	128.442	111.221	137.258	97.3426	96.2608	82.6898	82.3976	101.436	92.7442	99.6668	89.9992	102.231	101.278	85.1775	81.2625	92.7078	100.386	101.262	100.686	91.4	98.5453	77.5462	82.7917	99.8472	97.8106	94.2796	84.2551
	63	98.7401	105.376	82.1124	106.576	137.393	136.754	114.938	126.16	104.18	90.5759	97.1455	108.468	135.514	137.69	125.108	119.406	99.8467	103.215	92.952	100.24	128.736	128.484	111.586	137.228	97.2494	96.4	82.7798	82.4231	101.468	92.6296	99.7828	90.2891	102.436	101.298	85.4089	81.2976	93.048	100.632	101.448	100.939	91.3329	98.538	77.562	82.9216	99.9457	97.6206	94.2953	83.9998
	63.1	99.0561	105.684	82.0835	107.032	137.039	136.512	114.597	126.161	103.945	90.7332	97.205	108.22	135.745	137.891	125.188	119.013	99.924	102.918	92.8106	99.8589	128.704	128.432	111.877	137.281	97.2931	96.2389	82.7381	82.6235	101.406	92.5807	99.8668	90.795	102.611	101.135	85.4294	81.0376	93.334	100.812	101.63	101.437	91.0956	98.6174	77.5797	83.0954	100.001	97.2954	93.9642	83.6722
	63.2	99.3025	106.112	82.2441	107.335	136.907	136.416	114.229	126.391	103.791	90.8935	97.2806	107.917	135.804	138.1	125.2	118.711	100.019	102.505	92.6587	99.3252	128.607	128.147	112.114	137.26	97.3005	95.8278	82.6933	82.8285	101.327	92.7642	100.06	91.4167	102.579	101.022	85.3089	80.6798	93.577	100.778	101.901	101.743	90.8608	98.7848	77.5842	83.2542	100.038	96.831	93.8656	83.5438
	63.3	99.7108	106.22	82.3927	107.682	137.049	136.676	113.858	126.616	103.851	90.9538	97.1618	107.548	135.993	138.099	125.232	118.316	100.252	102.237	92.4117	99.1733	128.447	127.68	112.333	137.25	97.2574	95.4248	82.7507	82.9138	101.35	92.6708	100.023	91.9803	102.621	100.78	84.9553	80.3956	93.6875	100.671	102.029	101.816	90.6764	98.893	77.6031	83.2817	99.9604	96.3735	93.7883	83.7252
	63.4	100.056	106.158	82.6914	107.762	137.185	136.931	113.428	126.962	104.174	90.9136	97.157	107.267	135.974	137.873	125.242	117.844	100.447	101.971	92.266	99.3259	128.279	127.319	112.19	137.204	97.2358	94.9279	82.6242	82.9001	101.326	92.4257	99.9006	92.4411	102.646	100.434	84.3033	80.3238	93.572	100.362	102.099	101.706	90.5408	98.9416	77.5823	83.2423	99.6739	95.9599	93.4264	84.0058
	63.5	100.049	106.175	82.9239	107.523	137.163	137.392	112.908	127.278	104.349	90.7531	97.133	107.086	135.759	137.647	125.442	117.442	100.605	101.867	91.9689	99.3362	128.057	127.005	112.036	137.269	97.0795	94.5917	82.4647	82.8618	101.301	92.5711	99.959	92.5304	102.575	100.112	83.8853	80.1456	93.409	99.954	101.979	101.397	90.4759	98.7854	77.6543	83.3195	99.4528	96.0138	93.1006	84.209
	63.6	100.153	106.139	83.0546	107.227	137.039	138.015	112.479	127.404	104.453	90.467	96.9404	106.982	135.685	137.425	125.524	117.305	100.545	101.899	91.584	99.5742	128.254	126.552	111.85	137.413	96.8492	94.5256	82.4513	82.7394	101.39	92.8898	100.092	92.3958	102.431	99.9648	83.7547	80.2576	93.2676	99.4851	101.786	100.952	90.5131	98.621	77.6899	83.3324	99.2637	96.231	93.0278	84.5624
	63.7	100.061	105.862	83.1881	107.137	136.784	138.327	112.413	127.234	104.716	90.0532	96.4098	107.109	135.654	136.971	125.662	117.049	100.437	101.999	91.3074	99.802	128.396	126.166	111.687	137.473	96.684	94.6202	82.3957	82.6948	101.396	93.2606	100.105	92.0595	102.603	99.7277	83.904	80.4159	92.9283	99.0365	101.454	100.513	90.5214	98.4723	77.634	83.2849	98.9772	96.5846	92.9466	84.7898
	63.8	99.6364	105.792	83.5174	106.946	136.363	138.395	112.628	126.736	104.888	89.986	96.153	107.304	135.418	136.719	125.494	116.722	100.189	101.832	91.3013	99.8446	128.606	126.031	111.385	137.671	96.5465	94.8718	82.1789	82.7466	101.457	93.7275	100.422	91.5831	102.764	99.6126	84.277	80.5236	92.6883	98.6098	101.15	100.323	90.5888	98.5271	77.6073	83.3418	98.8964	96.9928	92.8404	84.7524
	63.9	99.0689	105.778	83.755	106.689	135.971	138.559	112.971	126.275	104.991	89.9855	95.8214	107.446	135.274	136.661	125.276	116.457	100.081	101.924	91.4131	99.7862	128.768	125.689	111.248	137.908	96.2561	95.1322	82.1298	82.9373	101.69	94.2068	100.7	91.0416	102.867	99.8042	84.8138	80.4087	92.6806	98.586	100.778	100.062	90.7166	98.676	77.7073	83.38	99.0964	97.3587	92.9783	84.6246
	64	98.9048	105.6	83.9394	106.708	135.784	138.599	113.564	125.936	105.3	90.2244	95.3374	107.537	135.19	136.521	124.816	116.292	100.023	101.856	91.6962	99.7688	128.77	125.505	111.06	137.958	96.0145	95.2848	82.1364	83.1985	101.805	94.3377	100.829	90.7926	102.771	100.217	85.1783	80.3609	92.7958	98.7522	100.584	99.9136	90.732	98.8436	77.6831	83.3065	99.4082	97.4114	93.2932	84.6577
	64.1	98.6889	105.471	84.1125	106.819	135.948	138.428	114.209	125.859	105.514	90.5384	94.9103	107.567	135.066	136.389	124.4	116.075	100.042	101.762	92.135	99.4046	128.547	125.447	110.892	137.719	95.7299	95.3568	82.1983	83.2761	101.86	94.0996	100.829	90.6553	102.747	100.679	85.408	80.188	92.8835	98.9754	100.446	100.002	90.801	99.0258	77.7221	83.2273	99.8164	97.4094	93.5262	84.6852
	64.2	98.6809	105.532	84.2235	106.927	136.165	138.526	114.58	125.929	105.514	91.1718	94.9047	107.304	134.805	136.268	123.842	115.949	100.127	101.624	92.469	99.1326	128.567	125.429	110.688	137.678	95.5041	95.3962	82.3961	83.277	102.03	93.6613	100.979	90.4441	102.565	101.124	85.1538	80.0984	93.2152	99.4381	100.369	100.154	90.8303	99.3698	77.8487	83.0982	100.407	97.3892	93.683	84.6253
	64.3	98.914	105.683	84.1942	107.154	136.546	138.738	114.678	126.331	105.491	91.604	94.9559	107.054	134.532	136.151	123.617	116.007	100.317	101.852	92.6741	99.1196	128.558	125.266	110.502	137.638	95.2841	95.1819	82.8421	83.1487	102.088	93.141	101.039	90.1829	102.306	101.479	84.7532	80.147	93.6252	100.019	100.337	100.182	90.9772	99.5324	77.9306	82.8438	100.77	97.306	93.8742	84.6228
	64.4	99.3882	105.952	84.0268	107.61	136.821	138.591	114.768	126.686	105.318	92.0792	95.1454	106.958	134.326	136.105	123.618	116.103	100.465	101.845	92.9288	99.2304	128.637	125.333	110.287	137.445	95.3121	95.0043	83.2371	82.9659	101.649	92.669	101.202	89.7781	101.918	101.657	84.3752	80.2787	93.8174	100.36	100.467	100.373	91.1011	99.6589	77.9365	82.5468	100.966	97.2633	93.9996	84.8413
	64.5	99.5621	106.169	83.8975	107.748	136.843	138.297	114.709	126.857	105.185	92.3107	95.4998	107.065	134.125	136.137	123.785	116.054	100.536	101.908	93.1473	99.3697	128.86	125.469	110.125	137.311	95.458	94.9189	83.553	82.6109	101.087	92.331	101.35	89.3459	101.831	101.536	84.0651	80.3139	93.8532	100.528	100.614	100.632	91.1736	99.9013	77.9233	82.2176	100.896	97.1761	93.8482	84.9165
	64.6	99.6449	106.362	83.707	107.837	136.501	137.799	114.485	126.827	105.136	92.456	95.9655	107.318	134.04	136.106	124.048	116.149	100.463	101.983	93.156	99.6752	128.97	125.897	109.92	137.491	95.7598	94.8467	83.8382	82.5286	100.48	92.2347	101.489	88.9937	101.827	101.037	83.8614	80.3779	93.7828	100.671	100.785	100.581	91.2044	100.057	77.8156	82.023	100.529	97.0557	93.5601	84.966
	64.7	99.5945	106.543	83.4018	107.793	136.297	137.014	114.37	126.744	105.243	92.3523	96.2552	107.826	134.266	136.286	124.492	116.257	100.299	102.084	93.2095	100.07	128.658	126.275	109.774	137.546	96.0261	94.9042	84.0046	82.3073	99.9232	92.3418	101.41	89.0005	101.867	100.632	84.2159	80.3286	93.5672	100.544	100.82	100.571	91.2668	99.9703	77.6318	81.9718	100.028	96.8706	93.2553	84.9868
	64.8	99.3743	106.416	82.9008	107.626	135.884	136.093	114.41	126.549	105.269	92.0928	96.3906	108.347	134.571	136.296	124.703	116.352	100.126	101.991	93.2063	100.287	128.364	126.709	109.859	137.447	96.3184	95.1246	83.9059	82.056	99.5118	92.5648	101.097	89.2942	101.936	100.335	84.6972	80.1447	93.2075	100.451	100.709	100.63	91.2043	99.9287	77.4712	82.125	99.6372	96.7686	92.8438	84.9727
	64.9	99.1229	105.988	82.596	107.351	135.599	135.366	114.497	126.284	105.27	91.6695	96.4571	108.676	134.752	136.265	124.616	116.426	99.7861	101.989	92.9452	100.372	127.901	127.067	109.945	137.395	96.4472	95.3082	83.8395	81.9048	99.5518	92.7894	100.706	89.838	102.105	100.046	85.1465	79.9665	93.0563	100.478	100.438	100.768	91.1683	99.9752	77.3044	82.5231	99.126	96.5392	92.3756	84.8291
	65	98.9121	105.714	82.3499	107.326	135.597	134.947	114.6	126.041	105.244	91.2371	96.6677	108.815	134.812	136.301	124.377	116.723	99.5004	101.916	92.7344	100.467	127.469	127.171	110.029	137.511	96.6222	95.2774	83.7125	81.9901	99.8507	92.9898	100.439	90.2708	102.082	99.8452	85.5008	79.8222	92.9647	100.723	100.129	100.83	91.3259	100.049	77.3228	83.2562	98.8046	96.5555	92.108	84.8012
	65.1	98.6249	105.497	82.0891	107.44	135.696	134.754	114.752	125.917	105.253	90.7316	96.794	108.82	134.771	136.61	124.21	116.756	99.4674	101.78	92.5934	100.637	127.256	126.845	110.231	137.694	96.5487	95.1933	83.5155	81.8096	100.223	93.2839	100.259	90.6305	102.042	100.013	85.7553	79.5875	93.1477	100.943	99.765	101.074	91.394	100.177	77.3913	83.9223	98.6942	96.6301	92.1918	84.7722
	65.2	98.341	105.287	81.922	107.54	135.662	134.9	114.853	125.901	105.007	90.2774	97.0155	108.666	134.605	136.818	124.028	116.707	99.512	101.784	92.4701	100.611	127.311	126.625	110.615	137.872	96.3024	95.1862	83.356	81.7513	100.434	93.4857	100.166	90.726	102.057	100.227	85.6013	79.3179	93.4502	101.288	99.6112	101.319	91.4346	100.533	77.4263	84.2938	98.6434	96.7506	92.4524	84.8681
	65.3	98.2589	105.262	82.074	107.686	135.735	135.141	115.008	125.923	104.878	90.1846	97.2557	108.491	134.617	137.174	123.871	116.67	99.4654	101.644	92.5395	100.429	127.341	126.475	110.799	138.084	96.0556	95.2234	83.3056	81.8402	100.539	93.6178	100.366	90.6842	102.221	100.328	85.2176	79.0913	93.7756	101.45	99.7287	101.602	91.5582	100.81	77.4432	84.5209	98.6326	96.7344	92.8733	85.09
	65.4	98.0451	105.361	82.0446	107.678	135.851	135.517	115.065	126.156	104.854	90.2753	97.4518	108.346	134.532	137.279	123.71	116.594	99.5142	101.409	92.8136	100.247	127.513	126.346	110.829	138.334	95.9612	95.2864	83.2476	81.8257	100.623	93.7572	100.586	90.5661	102.43	100.447	84.7428	78.9657	93.8182	101.556	99.9334	101.624	91.8378	100.851	77.435	84.4645	98.8796	96.8248	93.4515	85.3088
	65.5	98.0418	105.582	81.9724	107.538	135.811	135.69	115.04	126.433	104.665	90.6226	97.4447	108.187	134.603	137.192	123.605	116.264	99.5685	101.319	93.1036	100.038	127.584	126.343	110.848	138.373	95.608	95.4968	83.3853	81.5902	100.66	94.0044	100.693	90.5059	102.716	100.712	84.4738	78.9247	93.6465	101.514	100.122	101.656	92.0019	100.612	77.3282	84.0219	99.102	96.8063	94.0193	85.4492
	65.6	98.2448	105.788	82.044	107.26	135.99	135.898	115.148	126.659	104.494	91.0915	97.484	108.153	134.583	136.916	123.354	116.2	99.5298	101.224	93.4594	99.7106	127.413	126.543	110.589	137.899	95.6014	95.7726	83.3781	81.597	100.558	94.0702	100.736	90.4683	102.912	100.847	84.2576	78.9824	93.3863	101.415	100.44	101.71	92.1816	100.35	77.3399	83.502	99.4882	96.8026	94.3317	85.5018
	65.7	98.6384	106.084	82.1554	107.062	136.178	135.954	115.246	126.673	104.657	91.5263	97.4086	108.2	134.393	136.719	123.115	116.334	99.502	100.828	93.7762	99.3478	127.271	126.669	109.964	137.424	95.8246	95.8739	83.3808	81.6811	100.515	94.074	100.792	90.5757	103.016	100.851	84.2608	79.0939	93.0542	101.308	100.757	101.682	92.4361	99.9817	77.6184	83.2719	100.005	96.8888	94.3979	85.5746
	65.8	98.7542	106.438	82.1292	106.775	136.28	136.199	115.185	126.632	104.747	91.5	97.2668	108.159	134.118	136.323	123.181	116.343	99.6216	100.626	93.8416	99.0986	127.213	126.665	109.246	136.945	96.0799	95.9923	83.3495	81.6839	100.597	93.981	100.546	90.705	102.955	101.007	84.6028	79.2269	92.6754	101.175	100.881	101.55	92.5337	99.665	77.7691	83.0794	100.524	97.0662	94.1852	85.417
	65.9	98.8016	106.799	82.2741	106.694	136.138	136.256	115.138	126.33	104.818	91.3604	97.0804	108.172	134.058	136.298	123.448	116.409	99.892	100.6	93.8732	98.8059	127.12	126.629	108.697	136.577	96.2064	96.1878	83.2202	81.7628	100.46	93.7652	100.272	90.818	102.99	101.196	84.9821	79.2597	92.4571	101.055	100.997	101.578	92.3249	99.5166	77.8746	83.0685	100.674	97.212	93.7499	85.1639
	66	98.7212	106.803	82.4695	106.656	136.125	136.293	115.085	126.027	104.929	90.8914	96.8298	108.214	133.91	136.266	123.71	116.674	100.161	100.509	93.8511	98.5845	127.112	126.702	108.098	136.41	96.6271	96.3622	82.9118	81.9342	100.236	93.4128	100.038	90.9985	102.983	101.196	85.152	79.2338	92.6258	100.809	101.173	101.761	92.0149	99.6065	77.9645	83.2269	100.812	97.2035	93.3069	84.8041
	66.1	98.5758	106.715	82.645	106.496	135.881	136.496	114.699	125.652	104.947	90.5146	96.4653	107.979	133.844	136.142	123.838	116.762	100.316	100.622	93.8785	98.4094	127.374	126.801	107.806	136.781	96.8731	96.4533	82.7183	81.9958	100.052	93.0626	99.9327	91.0183	102.999	101.147	85.255	79.2806	92.5477	100.724	101.257	101.782	91.7181	99.6769	77.8895	83.427	100.687	97.0935	92.9395	84.6026
	66.2	98.1424	106.44	82.8427	106.272	135.528	136.711	114.36	125.492	104.711	90.2095	96.1113	107.623	133.907	135.804	123.662	116.688	100.391	101.11	94.0296	98.579	127.591	126.858	107.582	137.221	97.0956	96.3646	82.4358	81.9362	99.8875	92.7462	99.755	90.9177	103.033	101.193	85.2643	79.3918	92.508	100.581	101.206	101.803	91.4203	99.637	77.5556	83.5184	100.351	96.8027	92.9076	84.2915
	66.3	97.9635	106.158	82.9995	106.225	135.25	136.666	114.017	125.309	104.548	90.3202	95.9394	107.375	133.87	135.685	123.213	116.856	100.403	101.698	94.2278	98.8962	127.613	127.02	107.679	137.665	97.1972	96.0693	82.1284	81.9358	99.6971	92.6668	99.705	90.7674	103.065	101.1	84.9384	79.5874	92.5768	100.426	101.12	101.887	91.2172	99.6966	77.3229	83.637	99.9484	96.4072	93.2931	84.2682
	66.4	98.0644	106.01	83.1545	106.225	135.266	136.729	113.697	125.367	104.441	90.3334	95.7928	106.968	133.731	135.339	122.807	117	100.188	102.099	94.2888	99.4452	127.632	127.188	107.823	137.837	97.2851	95.6723	81.7352	81.8775	99.7771	92.8197	99.6891	90.5752	102.918	100.967	84.6507	79.7257	92.6364	100.183	101.142	101.886	91.0303	99.7329	77.1442	83.5174	99.9516	96.0986	93.8721	84.3216
	66.5	98.1624	106.04	83.0788	106.277	135.07	136.869	113.698	125.484	104.47	90.6414	95.6879	106.609	133.662	135.112	122.453	117.007	99.9022	102.515	94.2125	100.078	127.704	127.204	107.989	137.73	97.1977	95.3178	81.4992	81.891	99.8227	92.9826	99.5802	90.1828	102.826	100.911	84.4068	79.8536	92.4119	100.152	101.028	101.467	90.9879	99.7001	76.9333	83.2184	99.9481	96.0004	94.357	84.3794
	66.6	98.2851	106.086	82.8354	106.582	134.874	136.677	114.139	125.704	104.655	90.7276	95.7649	106.714	133.738	135.006	122.467	117.003	99.7455	102.668	93.8269	100.688	127.671	127.063	108.089	137.431	96.9987	95.0832	81.5024	81.7534	99.9647	93.2859	99.291	90.0764	102.688	100.845	84.23	80.0873	92.5679	100.103	100.953	101.214	90.986	99.8132	76.7488	82.748	100.066	95.8933	94.7483	84.2156
	66.7	98.6081	106.046	82.5546	106.969	134.95	136.342	114.448	125.851	105	90.8516	95.9934	106.931	133.843	135	122.786	116.911	99.6468	102.566	93.3646	100.961	127.579	126.84	108.507	137.114	96.587	95.1692	81.527	81.7037	100.061	93.5937	99.1472	90.0399	102.532	100.72	84.0006	80.395	92.7795	100.111	100.993	100.927	90.8615	100.029	76.6054	82.2598	100.175	95.9426	94.7443	84.1336
	66.8	98.8302	105.933	82.4696	107.24	135.088	136.115	114.793	126.122	105.398	90.8786	95.9894	107.197	133.706	134.941	123.129	116.615	99.4794	102.255	93.0711	101.062	127.749	126.501	108.929	136.87	96.3126	95.4447	81.5933	81.7914	99.9928	93.8641	99.0934	90.0253	102.48	100.715	84.0005	80.5914	92.9751	100.328	101.066	100.455	90.5986	100.124	76.6459	81.6444	100.266	96.1033	94.5112	84.014
	66.9	98.8593	105.7	82.3084	107.417	135.088	135.958	115.308	126.123	105.733	91.1528	96.1633	107.701	133.529	135.006	123.269	116.369	99.3144	101.851	92.9046	101.039	127.884	126.349	109.259	136.862	96.2999	95.824	81.9018	81.9971	99.6716	93.8906	99.092	90.1793	102.599	100.752	83.9028	81.0126	93.1724	100.57	100.929	100.124	90.6453	100.155	76.7256	81.2611	100.294	96.2102	94.1709	83.948
	67	98.9183	105.395	82.5394	107.615	135.227	135.538	115.508	126.042	105.864	91.2288	96.5046	108.17	133.345	135.105	123.407	116.293	99.0304	101.364	92.9502	100.86	127.783	126.258	109.749	137.079	96.2036	96.2408	82.1797	82.2325	99.5761	93.894	99.121	90.5652	102.654	100.671	83.9268	81.5401	93.4607	100.644	100.844	100.189	90.8758	100.13	76.9176	81.0359	100.365	96.2035	93.8624	84.1782
	67.1	98.8505	105.139	82.9819	107.797	135.514	135.341	115.269	126.082	105.781	91.4593	96.7436	108.304	132.948	135.159	123.419	116.268	98.7143	101.077	93.3903	100.736	127.418	126.289	110.208	137.216	96.1598	96.562	82.2708	82.7146	99.6277	93.6156	99.172	90.7834	102.741	100.522	83.9328	81.6437	93.4709	100.524	100.654	100.164	91.213	100.069	77.2752	81.1482	100.264	96.3827	93.6765	84.5873
	67.2	98.753	105.078	83.4372	108.027	135.585	135.289	115.058	126.164	105.602	91.5469	96.7318	108.428	132.553	135.325	123.367	116.482	98.4842	101.03	93.7442	100.745	127.176	126.492	110.381	137.367	96.283	96.8242	82.3581	83.1361	99.968	93.2959	99.1224	90.9807	102.834	100.319	84.061	81.4841	93.3362	100.377	100.256	100.358	91.5949	100.137	77.804	81.4411	100.292	96.4477	93.6928	85.0686
	67.3	98.6155	104.994	83.5945	108.365	135.551	135.146	114.775	126.213	105.338	91.5382	96.9341	108.254	132.617	135.537	123.335	116.67	98.3491	101.099	93.7994	100.844	126.858	126.842	110.153	137.546	96.2518	97.0005	82.4381	83.3283	100.58	92.8442	99.1442	91.2124	102.855	100.092	84.1504	81.3919	93.1809	100.104	99.9568	100.682	91.9824	100.177	78.035	81.9227	100.567	96.5312	93.6003	85.4392
	67.4	98.358	105.024	83.649	108.731	135.623	134.933	114.053	126.388	105.245	91.3476	96.9774	107.946	132.745	135.612	123.494	116.724	98.4242	101.475	93.722	100.839	126.55	126.905	110.02	137.564	95.8143	97.0552	82.5705	83.2586	101.31	92.5082	98.9714	91.2256	102.657	99.8885	84.4013	81.2069	92.9961	99.9595	99.8984	100.851	92.0425	100.245	78.205	82.4764	100.536	96.6849	93.4682	85.7435
	67.5	98.0771	105.233	83.4363	108.977	135.686	135.328	113.35	126.517	105.371	91.3241	96.8269	107.609	132.791	135.569	123.707	116.495	98.7602	101.905	93.5051	100.817	126.456	126.885	109.772	137.452	95.531	97.0304	82.6919	83.0106	101.826	92.3204	98.8659	91.0242	102.487	99.849	84.4768	80.8253	92.7429	100.055	99.8814	100.927	91.6238	100.447	78.2001	83.0132	100.41	96.8763	93.3947	85.8705
	67.6	97.8648	105.516	83.1292	108.97	135.593	135.639	112.778	126.467	105.582	91.3038	96.5614	107.331	133.022	135.498	123.772	116.367	99.0512	102.204	92.994	100.891	126.794	126.848	109.466	137.483	95.4331	97.0634	82.7967	82.651	101.998	92.4755	98.82	90.6914	102.397	100.165	84.5435	80.7391	92.4763	100.319	99.823	101.049	90.9556	100.511	78.0293	83.3438	100.363	96.808	93.3392	85.9951
	67.7	97.4694	105.811	82.614	108.662	135.474	136.01	112.33	126.432	105.855	91.3916	96.4152	107.103	133.2	135.324	123.787	116.167	99.1543	102.245	92.3756	100.867	127.056	126.738	109.128	137.395	95.2904	96.9479	83.0689	82.1498	101.786	92.8056	98.7123	90.3241	102.344	100.704	84.5393	80.7804	92.1636	100.647	100.049	100.994	90.295	100.331	77.741	83.5928	100.194	96.8722	93.2687	85.8811
	67.8	97.1733	106.102	82.2456	108.3	135.386	136.359	112.149	126.311	106.031	91.4825	96.182	107.202	133.165	134.975	123.858	116.037	99.1696	102.325	92.0275	100.784	127.169	126.604	109.037	137.046	95.31	96.8798	83.3187	81.5471	101.522	93.088	98.4636	89.9541	102.321	101.146	84.5727	80.6648	91.8139	101.203	100.05	100.941	89.9224	100.187	77.7633	83.6749	99.6811	96.8818	93.3147	85.7798
	67.9	97.0602	106.183	81.9978	107.836	135.069	136.579	112.43	126.317	105.875	91.6041	95.9587	107.288	133.029	134.757	123.739	116.054	99.1113	102.308	91.9042	100.731	127.41	126.656	108.898	136.731	95.6696	96.7615	83.4298	81.1838	101.312	93.3929	98.5771	89.8454	102.457	101.441	84.6496	80.4567	91.5826	101.711	99.787	101.115	89.8269	100.068	77.8778	83.5064	99.4027	96.6607	93.3277	85.76
	68	96.9639	106.238	81.821	107.45	134.755	136.334	112.939	126.42	105.585	91.4213	95.8494	107.486	132.986	134.667	123.528	116.421	99.0359	102.335	91.9126	100.723	127.557	126.727	108.598	136.524	96.0167	96.5889	83.3751	80.9044	101.199	93.541	98.7138	89.9943	102.498	101.704	84.8434	80.3752	91.5568	101.917	99.5744	101.375	89.9998	99.818	78.0696	83.2318	99.1138	96.4989	93.3114	85.6589
	68.1	97.0493	106.167	81.5622	107.262	134.445	136.072	113.714	126.418	105.325	91.0958	96.0336	107.65	132.92	134.496	123.324	116.566	99.01	102.458	92.1229	100.5	127.435	126.764	108.379	136.09	96.1276	96.3496	83.1768	80.5678	101.378	93.4608	98.9073	90.3928	102.239	101.649	85.0117	80.3581	91.7594	101.953	99.6042	101.628	90.3908	99.5434	78.329	82.9811	98.9839	96.5892	93.1494	85.6609
	68.2	97.3872	106.007	81.5834	107.508	134.391	135.627	114.443	126.228	104.939	90.8202	96.2788	107.686	132.782	134.362	123.054	116.427	99.1354	102.73	92.7838	100.237	127.222	126.879	108.301	135.73	96.315	96.078	82.7348	80.4959	101.794	93.2303	99.3328	90.8302	101.94	101.265	85.2459	80.4226	92.286	101.811	99.5034	101.922	90.8471	99.2625	78.5784	82.5799	98.9653	96.6009	92.9165	85.7229
	68.3	97.7963	105.921	81.7256	107.549	134.251	135.354	114.83	126.028	104.58	90.6083	96.501	107.554	132.468	134.248	122.668	116.213	99.3447	102.719	93.5327	100.008	127.105	126.81	108.304	135.423	96.4498	95.7184	82.3124	80.7288	102.013	93.1254	99.8577	91.1002	101.601	100.723	85.2824	80.6133	92.9902	101.31	99.7063	102.416	91.115	99.0313	78.6224	82.1907	99.0714	96.5536	92.6502	85.7324
	68.4	98.2112	106.043	81.8312	107.585	134.237	135.186	114.865	125.63	104.5	90.486	96.676	107.343	132.207	134.1	122.398	116.041	99.4726	102.642	94.0658	99.8349	126.835	126.621	108.191	135.12	96.439	95.5159	81.7872	80.8426	102.07	92.942	100.125	91.1134	101.199	100.228	85.1923	80.7843	93.5705	100.763	100.087	102.547	91.2838	98.752	78.5272	81.8783	99.2008	96.7298	92.5554	85.5351
	68.5	98.5745	105.973	81.8825	107.663	134.251	135.222	114.445	125.182	104.392	90.6428	96.8854	107.029	131.924	133.981	122.126	115.571	99.5515	102.505	94.5001	99.8203	126.689	126.491	108.37	134.756	96.3976	95.3502	81.4442	81.0116	101.85	92.8484	100.49	90.8858	101.046	99.6626	85.1559	80.8907	94.0506	100.472	100.447	102.437	91.4624	98.5406	78.4906	81.6572	99.3399	96.9197	92.4619	85.3885
	68.6	98.6492	105.868	82.1047	107.637	134.31	135.212	113.688	124.958	104.157	90.9866	96.8404	106.711	131.563	134.101	121.827	115.406	99.6929	102.326	94.8004	99.822	126.699	126.364	108.478	134.712	96.5943	95.1266	81.3073	81.3317	101.453	92.799	100.792	90.5508	101.371	99.1708	84.9862	80.7504	94.3903	100.487	100.619	102.146	91.4308	98.5146	78.2752	81.3526	99.216	96.993	92.5106	84.9052
	68.7	98.6379	105.895	82.4082	107.321	134.124	135.245	112.894	125.005	104.168	91.1738	96.7212	106.457	131.383	134.174	121.769	115.684	99.746	102.036	94.6618	99.967	126.901	126.148	108.485	134.719	96.8406	95.0098	81.3223	81.6064	100.818	92.7094	100.851	90.2901	101.694	99.0295	84.7813	80.5004	94.4398	100.735	100.933	101.711	91.259	98.7755	77.9342	81.0556	99.0321	97.1014	92.5337	84.6488
	68.8	98.4404	105.956	82.5602	107.281	134.103	135.18	112.427	125.05	104.263	91.2581	96.5444	106.202	131.516	134.373	121.85	116.192	99.8132	102.009	94.2242	100.073	127.092	125.934	108.382	135.132	96.9794	94.9818	81.434	81.5667	100.287	92.5275	100.771	90.271	102.007	99.144	84.724	80.2803	94.1702	101.084	101.116	101.175	91.0185	99.1224	77.6968	80.9752	98.8601	97.4125	92.6353	84.4911
	68.9	98.1509	105.826	82.6813	107.397	134.11	135.262	112.221	125.189	104.176	91.269	96.3676	106.24	131.897	134.489	121.977	116.617	99.9654	102.007	93.931	100.133	127.303	125.64	108.343	135.697	97.0922	94.8302	81.7394	81.636	99.8404	92.3516	100.612	90.3582	102.478	99.3218	84.5152	80.0833	93.8274	101.326	101.182	100.927	90.5952	99.6241	77.6745	81.036	98.4952	97.7048	92.5893	84.5334
	69	97.8427	105.76	82.8044	107.411	133.95	135.261	112.382	125.338	104.129	91.2296	96.0008	106.199	132.324	134.482	122.299	117.052	99.8754	102.138	93.6302	99.959	127.38	125.285	108.078	136.164	97.1088	94.6999	82.0118	81.7444	99.7882	92.0466	100.224	90.5749	102.659	99.5921	84.0914	79.8769	93.4174	101.397	101.086	100.654	90.173	100.1	77.6287	81.2004	98.2392	97.7766	92.6235	84.6392
	69.1	97.6212	105.981	82.903	107.466	133.94	135.288	112.8	125.313	104.272	90.9922	95.8174	106.391	132.81	134.405	122.828	117.209	99.6276	102.265	93.3292	99.8716	127.435	125.043	107.919	136.406	96.8216	94.6976	82.3031	81.9666	99.8613	91.7729	99.8913	90.7672	102.441	99.9286	84.0548	79.782	92.9564	101.268	101.029	100.694	90.0006	100.451	77.835	81.485	98.2065	97.7153	92.5904	85.0985
	69.2	97.3404	105.973	82.7974	107.501	133.975	135.39	113.39	125.027	104.327	90.8714	95.75	106.615	133.286	134.484	123.243	117.109	99.4157	102.457	93.1959	99.7958	127.474	124.811	107.937	136.527	96.3289	94.6976	82.6662	82.1822	100.111	91.5742	99.5983	90.87	102.325	100.082	83.9412	79.7862	92.5003	100.95	100.629	100.977	90.0153	100.426	78.2568	81.8309	98.1742	97.6159	92.7932	85.4026
	69.3	97.1588	105.901	82.6795	107.523	134.032	135.451	113.641	124.864	104.437	90.9129	95.8795	107.006	133.656	134.541	123.599	116.823	99.1152	102.556	93.1818	99.6928	127.638	124.868	107.921	136.244	96.0033	94.6917	82.9044	82.7703	100.34	91.5821	99.4576	90.9324	102.388	100.219	83.792	79.7205	92.1711	100.796	100.317	101.102	90.1771	100.127	78.6456	81.8882	98.2181	97.2313	92.8658	85.643
	69.4	97.1682	106.034	82.7036	107.517	134.165	135.273	113.531	124.826	104.639	91.0073	96.1318	107.155	133.751	134.662	123.852	116.47	98.7028	102.722	93.1148	99.6515	127.901	125.147	107.942	135.899	95.7057	94.759	82.964	83.3366	100.619	91.7765	99.5353	91.0368	102.25	100.364	83.8136	79.7743	92.0326	100.812	100.213	101.174	90.5931	99.6192	78.8299	81.7977	98.6072	96.7335	93.0887	85.7644
	69.5	97.3323	106.232	82.8076	107.529	134.569	134.97	113.347	124.792	104.903	91.0704	96.4944	107.545	133.717	134.768	123.792	116.226	98.6742	102.694	93.0335	99.768	128.155	125.464	108.051	135.788	95.5355	94.8254	83.0037	83.7547	100.777	92.1999	99.6812	91.2239	102.243	100.42	83.9916	79.869	91.8377	100.782	100.251	101.358	91.0514	99.0638	78.9741	81.5425	99.0344	96.4956	93.1606	85.8175
	69.6	97.6917	106.145	82.8997	107.544	134.743	134.684	113.077	124.979	105.092	91.3366	96.7215	107.717	133.513	134.794	123.721	116.075	98.6922	102.46	92.9509	99.9491	128.32	125.679	108.147	135.653	95.5789	94.8914	82.9207	83.9603	100.846	92.6553	99.6104	91.5351	102.51	100.321	83.9122	79.9292	91.6626	100.596	100.327	101.32	91.4174	98.4254	78.9376	81.2652	99.4005	96.4421	93.2936	85.691
	69.7	98.228	106.286	82.8899	107.608	134.958	134.461	112.684	125.451	105.202	91.5209	96.7375	107.806	133.13	134.603	123.608	115.992	98.6537	102.138	92.7748	100.078	128.399	125.855	108.136	135.613	95.6913	94.989	82.7736	84.0708	100.973	93.097	99.574	91.8325	102.744	100.218	84.0289	79.989	91.5964	100.554	100.624	101.157	91.6446	98.0374	78.8121	81.1825	99.7509	96.3768	93.1621	85.5336
	69.8	98.694	106.431	82.8265	107.528	135.02	134.516	112.583	125.847	105.163	91.4926	96.568	107.699	132.897	134.392	123.437	115.874	98.6972	101.789	92.6392	100.349	128.335	125.782	108.234	135.674	95.7774	95.0682	82.6125	83.8332	101.008	93.1943	99.4005	91.9466	102.769	100.079	84.1716	80.1378	91.5991	100.192	100.693	101.1	91.7936	97.9631	78.5642	81.3721	100.018	96.4001	93.1589	85.4102
	69.9	99.0794	106.482	82.5888	107.287	134.926	134.654	112.765	126.075	105.191	91.4444	96.3067	107.862	132.765	134.225	123.305	115.731	98.9671	101.368	92.4858	100.625	128.122	125.62	108.353	135.703	95.9264	95.2505	82.534	83.358	100.993	92.9802	98.9706	91.9922	102.9	99.8963	84.425	80.2642	91.4806	99.6752	100.626	100.967	91.8456	98.1316	78.3175	81.7554	99.8516	96.472	93.0096	85.2951
	70	99.3748	106.661	82.2557	107.134	134.55	135.051	112.827	126.333	105.116	91.4564	96.0462	107.903	132.793	134.16	123.263	115.551	99.1345	101.002	92.2962	100.709	127.873	125.487	108.592	135.585	95.9837	95.4374	82.4776	83.0275	100.94	92.6132	98.537	91.8594	103.04	99.7969	84.7484	80.5318	91.677	99.4335	100.495	101.048	91.8874	98.5088	78.0677	82.2703	99.5883	96.355	93.026	85.1059
	70.1	99.4479	106.927	81.8508	107.013	134.452	135.743	112.824	126.325	105.136	91.2866	95.7309	107.819	133.012	133.994	123.159	115.283	99.6062	100.957	92.1719	100.611	127.591	125.23	108.837	135.607	96.0712	95.6372	82.4757	82.6186	100.976	92.1796	98.3298	91.5271	103.111	99.738	85.0945	81.009	92.0038	99.4214	100.289	101.267	91.8393	99.0694	77.8182	82.8377	99.4504	96.1519	92.7666	84.944
	70.2	99.2925	107.111	81.6683	107.017	134.509	136.421	112.691	125.874	105.071	91.0673	95.7855	107.814	133.441	133.917	122.947	115.022	100.124	100.987	92.1174	100.411	127.231	124.847	109.034	135.63	96.2438	95.8659	82.432	82.2443	100.864	91.8006	98.2964	91.2256	103.14	99.6934	85.1975	81.319	92.3178	99.2956	99.928	101.413	91.906	99.6054	77.6803	83.1095	99.37	95.9844	92.6453	84.7416
	70.3	99.2053	107.307	81.7516	107.043	134.458	136.609	112.372	125.403	105.083	91.0521	95.919	107.982	133.455	133.876	122.709	114.878	100.508	101.128	92.035	100.087	126.672	124.647	109.104	135.732	96.3254	95.999	82.5724	82.1045	100.957	91.8547	98.2786	91.1088	103.177	99.6958	85.3263	81.3985	92.596	99.4484	99.6665	101.443	91.9323	99.8728	77.607	83.1905	99.1678	95.9839	92.569	84.4786
	70.4	98.9363	107.484	81.9474	107.183	134.447	136.859	112.119	124.986	105.035	90.9718	96.0737	107.822	133.23	133.737	122.48	114.86	100.62	101.104	91.8586	99.7139	126.119	124.435	109.195	135.743	96.4518	95.8716	82.719	82.2182	101.07	92.149	98.5259	90.8771	103.129	99.6931	85.3717	81.3622	92.89	99.8291	99.2692	101.486	91.9284	99.9312	77.7112	83.0203	99.221	95.9696	92.5425	84.2783
	70.5	98.541	107.343	82.2185	107.283	134.582	136.872	111.992	124.542	105.045	90.7383	96.2584	107.464	132.808	133.69	122.392	114.944	100.584	101.163	91.8578	99.5498	125.602	124.191	109.161	135.838	96.7798	95.7883	82.8485	82.1214	101.216	92.4809	98.8713	90.6758	103.121	99.6151	85.3515	81.028	92.8301	99.9526	98.9993	101.236	91.815	99.758	77.8318	82.71	99.2194	96.1762	92.2464	84.3206
	70.6	98.1403	107.212	82.4664	107.388	134.389	136.368	111.935	124.295	104.715	90.6622	96.6114	107.347	132.354	133.9	122.144	115.192	100.223	101.014	91.8231	99.57	125.27	124.228	108.924	135.874	97.0406	95.7659	83.0915	82.0892	101.292	92.8822	99.1558	90.7014	102.994	99.6577	85.3451	80.442	92.6199	99.9158	98.8371	101.049	91.8054	99.4562	78.2454	82.386	98.9146	96.4136	92.3713	84.3112
	70.7	97.9209	106.969	82.598	107.392	133.974	135.791	111.922	124.382	104.455	90.7932	96.6472	107.118	131.706	134.128	122.174	115.342	99.9386	100.888	91.7819	99.7475	124.989	124.66	108.705	135.782	97.3458	95.7387	83.3269	82.0508	101.532	93.1466	99.2922	90.7776	102.824	99.6234	85.5311	79.9198	92.4124	99.8192	98.9538	101.017	91.7125	99.1075	78.3916	82.3854	98.4821	96.4983	92.5453	84.5049
	70.8	97.6936	106.638	82.5737	107.431	133.895	135.684	112.116	124.647	104.269	90.7403	96.6545	106.566	131.458	134.394	122.264	115.424	99.7656	100.763	91.7671	99.9256	125.076	124.902	108.621	135.657	97.6511	95.8066	83.3151	81.7867	101.68	93.0726	99.4414	90.796	102.768	99.395	85.5883	79.6039	92.2998	99.6434	99.1406	101.098	91.7078	98.9421	78.5834	82.5012	98.2041	96.5686	92.552	84.7586
	70.9	97.6129	106.246	82.5387	107.38	134.029	135.561	112.114	124.851	104.083	90.6962	96.7065	106.087	131.469	134.758	122.253	115.407	99.7428	100.982	91.9228	100.197	125.384	125.162	108.561	135.579	97.6591	96.0871	83.3336	81.4924	101.808	93.0254	99.4225	91.0058	102.771	99.3038	85.5661	79.2496	92.2016	99.2801	99.5779	101.077	91.7667	98.7562	78.6263	82.8046	97.9609	96.847	92.6527	84.9616
	71	97.8515	106.159	82.4948	107.261	134.236	135.477	112.1	125.147	103.853	90.8583	96.7514	105.965	131.547	134.83	122.136	115.258	99.8488	101.16	91.9347	100.328	125.786	125.466	108.353	135.391	97.4461	96.3156	83.3409	81.4176	101.814	92.9634	99.2587	91.3314	102.763	99.1466	85.4792	79.0872	92.1286	99.0188	99.9651	101.227	91.8123	98.6482	78.7488	83.1797	97.9089	96.9541	93.0617	84.9537
	71.1	98.3562	106.078	82.4532	107.112	134.533	135.72	112.091	125.436	103.922	90.9711	96.6954	105.848	131.545	134.78	122.252	115.02	99.9594	101.541	92.0126	100.351	125.882	125.606	108.185	135.006	97.1587	96.4282	83.2224	81.3988	101.796	92.9427	99.1135	91.4281	102.883	98.9365	85.2884	79.0949	92.104	98.864	100.306	101.155	91.6077	98.6616	78.571	83.35	98.1123	97.0228	93.1697	84.9275
	71.2	98.7396	106.153	82.4296	107.018	134.755	135.886	112.138	125.682	104.156	91.0294	96.6873	106.014	131.711	134.69	122.088	114.768	99.901	101.85	92.1938	100.189	125.97	125.547	107.993	134.74	96.6682	96.5772	83.1574	81.3981	101.498	93.0549	98.8372	91.2179	103.128	98.8311	84.8912	79.1922	92.1676	98.8189	100.549	100.833	91.3101	98.778	78.6126	83.061	98.5208	97.2958	93.1786	84.7016
	71.3	99.0611	106.338	82.329	106.931	134.592	135.95	111.903	125.631	104.34	91.2359	96.9204	106.646	131.647	134.22	121.999	114.43	99.804	102.057	92.2575	100.172	125.901	125.823	107.717	134.297	96.1268	96.8147	83.2399	81.5408	101.242	93.3457	98.7596	90.9318	103.153	99.0816	84.7308	79.3162	92.0435	98.877	100.698	100.386	90.9299	98.843	78.6469	82.5986	99.0459	97.4144	93.2583	84.5578
	71.4	99.4039	106.606	82.2812	106.93	134.225	135.887	111.905	125.656	104.523	91.4769	97.1254	107.377	131.615	133.654	122.126	114.151	99.5814	102.045	92.1442	100.05	125.63	126.081	107.278	134.068	95.6553	96.936	83.2054	81.6374	101.057	93.3642	98.9049	90.6229	103.095	99.1738	84.5393	79.5012	91.9449	98.9655	100.726	100.21	90.3327	99.0967	78.5817	82.0476	99.6023	97.2247	93.2249	84.4534
	71.5	99.4704	106.683	82.3992	107.075	133.734	135.812	111.84	125.536	104.752	91.5398	97.2364	107.88	131.611	133.288	122.294	113.941	99.2983	101.945	92.1133	100.053	125.409	126.27	107.006	133.946	95.171	96.958	83.1483	81.7178	100.966	93.3883	99.2292	90.1781	102.982	99.5315	84.3415	79.5904	92.1631	99.089	100.712	100	89.8218	99.4392	78.3926	81.5541	99.918	97.03	92.9743	84.4217
	71.6	99.2018	106.629	82.6326	107.222	133.392	135.623	111.686	125.222	105.025	91.513	97.4079	108.245	131.605	133.018	122.205	113.68	98.9795	101.63	92.1177	100.011	125.51	126.522	106.922	134.139	94.7602	96.8863	82.9794	81.7555	100.852	93.3653	99.475	89.8369	102.737	99.9451	84.3014	79.4058	92.5457	99.3498	100.735	99.8107	89.6625	99.7936	78.1046	81.2241	100.093	97.0436	92.8299	84.4785
	71.7	99.0201	106.497	82.9686	107.245	133.252	135.602	111.649	125.046	105.197	91.4176	97.5359	108.28	131.412	132.767	122.306	113.618	98.8567	101.467	91.9906	100.152	125.729	126.759	107.017	134.337	94.5636	96.6996	82.6777	81.9169	100.978	93.3196	99.8621	89.9356	102.358	100.387	84.394	79.2378	92.6895	99.6588	100.641	99.9498	89.8087	99.9232	77.6954	81.298	100.204	96.9081	92.6856	84.6043
	71.8	98.8966	106.374	83.442	107.268	133.51	135.336	111.918	125.069	105.235	91.2872	97.2296	108.14	131.346	132.998	122.442	113.785	98.8389	101.503	91.9976	100.098	126.022	126.63	107.241	134.835	94.5642	96.4172	82.3654	82.1472	101.029	93.1428	100.017	90.1697	102.381	100.478	84.2334	78.9492	93.0052	99.918	100.579	100.39	90.0299	99.9929	77.2577	81.5184	100.068	96.811	92.6418	84.6154
	71.9	98.5852	106.277	83.8007	107.421	133.739	135.274	112.013	124.939	105.153	91.1561	96.9837	107.98	131.173	133.363	122.46	113.869	99.0014	101.545	92.163	99.9884	126.331	126.694	107.551	135.077	94.9126	96.2459	82.1964	82.3136	100.972	93.2017	99.8459	90.4482	102.688	100.586	84.1343	78.7615	93.2916	100.358	100.375	100.705	90.5763	99.9746	76.9146	81.5566	99.7696	96.8709	92.6546	84.6842
	72	98.3413	106.132	83.8423	107.424	134.142	135.392	112.219	124.801	105.14	91.1826	96.8875	107.956	131.018	133.735	122.438	113.869	99.1486	101.707	92.234	99.7372	126.424	126.828	107.834	135.369	95.3414	96.2907	82.014	82.294	101.078	93.2387	99.506	90.7379	103.083	100.412	84.0065	78.664	93.2461	100.617	100.105	100.83	91.0776	99.7764	76.648	81.4125	99.547	96.8535	92.723	84.7473
	72.1	98.4142	106.005	83.7865	107.33	134.633	135.431	112.437	124.938	104.986	91.1485	96.7656	108.045	130.978	133.844	122.648	114.119	99.537	102.108	92.0821	99.5052	126.419	126.854	108.075	135.483	95.8301	96.4846	81.9638	82.3419	101.384	93.1634	99.293	91.0507	103.585	100.127	83.6932	78.9154	92.9622	100.758	99.8692	101.073	91.466	99.4621	76.6212	81.3398	99.3406	96.4735	92.8097	84.7861
	72.2	98.4233	105.849	83.5169	107.22	135.223	135.298	112.468	124.803	104.606	91.1619	96.73	108.282	131.127	134.109	122.757	114.186	99.8228	102.347	91.9556	99.2924	126.32	126.774	108.117	135.58	96.2071	96.635	81.9822	82.1932	101.685	93.182	99.0602	91.0353	104.124	99.6753	83.4563	79.1572	92.7291	100.903	99.7431	101.179	91.5056	99.4162	76.6911	81.0309	99.0267	96.256	92.9894	84.8766
	72.3	98.3661	105.54	83.1395	107.08	135.586	135.224	112.333	124.628	104.275	91.2	96.8724	108.422	131.196	134.238	122.785	114.166	99.9923	102.25	91.6824	99.2587	126.152	126.786	108.029	135.525	96.4051	96.8189	81.9752	82.0214	101.936	93.1969	98.8418	90.8549	104.298	99.4876	83.4345	79.4699	92.3616	100.907	99.5332	100.944	91.6226	99.3961	76.8126	80.716	98.8448	95.9804	92.9973	84.9725
	72.4	98.5625	105.115	82.8962	106.776	136.044	135.095	112.224	124.695	104.097	91.2533	96.7454	108.541	131.276	134.199	122.903	114.461	100.032	102.066	91.487	99.3998	126.035	126.458	108.005	135.496	96.3536	96.9236	81.8834	81.9492	102.167	93.2182	98.958	90.4087	104.102	99.3896	83.4774	79.8368	92.0358	100.609	99.5086	100.703	91.6405	99.2898	77.1449	80.7273	98.6547	95.6358	92.9569	85.0288
	72.5	98.8145	104.905	82.9184	106.521	136.295	134.73	112.036	124.809	103.819	91.256	96.5296	108.555	131.515	134.012	122.962	114.986	100.048	101.877	91.4355	99.4994	126.057	126.018	108.149	135.282	96.3029	96.9564	81.952	81.9824	102.257	93.3073	99.1608	90.0098	103.788	99.5176	83.6697	80.3044	91.7738	100.494	99.6142	100.698	91.8189	99.1986	77.4572	80.9648	98.4979	95.4808	92.9586	85.0426
	72.6	98.8401	104.906	82.9835	106.541	136.251	134.65	111.812	124.71	103.615	91.5645	96.2981	108.5	131.659	134.044	122.936	115.245	99.7652	101.48	91.6178	99.7766	126.07	125.814	108.298	135.098	96.1398	96.786	82.0536	82.029	102.124	93.4492	99.2426	89.5949	103.448	99.7058	84.1012	80.7274	91.5468	100.323	99.5076	100.62	91.9072	99.1095	77.6667	81.2513	98.4873	95.5702	92.912	84.9755
	72.7	98.7894	105.024	83.1568	106.795	135.852	134.614	111.658	124.72	103.767	91.7376	96.0899	108.486	131.579	133.965	122.968	115.589	99.4628	101.168	91.9358	99.9135	126.133	125.671	108.62	134.916	95.8477	96.5254	82.298	82.1482	102.043	93.4044	99.3221	89.5306	103.065	100.096	84.3811	81.0797	91.5614	100.075	99.4035	100.391	92.1557	98.909	77.8119	81.6661	98.8254	95.5071	92.8596	84.7671
	72.8	98.8958	105.342	83.4378	107.023	135.187	134.579	111.468	124.718	104.118	91.7638	96.0082	108.432	131.519	133.897	122.982	115.779	99.1932	101.022	92.4664	99.9582	126.264	125.587	108.926	134.773	95.6155	96.1837	82.5613	82.1654	102.112	93.538	99.4734	89.712	102.913	100.308	84.3803	81.3625	91.8275	99.9897	99.5841	100.301	92.2198	98.7719	77.8708	82.0295	99.3214	95.6707	92.8904	84.5169
	72.9	98.8726	105.775	83.6304	107.216	134.299	134.424	111.343	124.575	104.463	91.7052	96.2069	108.336	131.537	134	122.598	115.669	99.0206	101.212	92.8978	100.015	126.364	125.744	109.111	134.691	95.3313	95.8801	82.9482	82.1546	102.346	93.5002	99.3442	90.3164	102.871	100.427	84.3395	81.3558	91.9167	99.9958	99.6284	100.322	92.2756	98.7504	77.7218	82.1663	99.8752	95.8264	92.9374	84.2567
	73	98.8672	106.067	83.5416	107.514	133.415	134.535	111.241	124.361	104.914	91.3926	96.4801	108.28	131.244	134.258	122.357	115.338	98.9599	101.353	93.2458	100.319	126.475	126.042	109.052	134.716	95.1305	95.4716	83.1228	82.1859	102.351	93.2542	99.1475	90.9885	102.923	100.414	84.2276	81.1528	92.13	100.012	99.599	100.286	92.2253	98.909	77.4603	82.1615	100.441	95.8401	93.0723	84.0946
	73.1	98.9126	106.139	83.4274	107.709	132.596	134.411	111.258	124.302	105.325	90.7443	96.8066	108.19	131.027	134.507	122.05	115.189	99.1649	101.521	93.4403	100.543	126.441	126.044	109.036	134.72	94.8505	95.2176	83.3333	82.0729	102.314	92.96	99.0211	91.6677	102.962	100.425	83.9428	80.7052	92.4921	100.061	99.6808	100.279	92.1612	99.2002	77.3444	81.946	100.883	95.865	93.2632	84.2404
	73.2	99.0729	106.136	83.3856	107.778	131.919	134.507	111.169	124.338	105.599	90.1385	97.0028	107.903	131.016	134.575	121.704	115.086	99.4296	101.619	93.4755	100.842	126.361	126.202	108.843	134.651	94.773	95.2011	83.3532	81.9666	102.013	92.6507	98.9636	92.0315	103.004	100.333	83.722	80.3188	92.6455	100.181	99.6924	100.546	92.0466	99.359	77.3832	81.7736	100.839	96.1123	93.3172	84.4934
	73.3	98.959	105.958	83.1818	107.781	131.755	134.774	111.051	124.298	105.791	89.6715	96.8431	107.744	131.004	134.436	121.204	115.166	99.6967	101.697	93.4461	100.979	126.033	126.283	108.666	134.464	94.7968	95.1329	83.4096	81.9198	101.581	92.1672	98.8671	92.1298	102.835	100.302	83.7524	80.0665	92.4862	100.289	99.3615	100.802	91.9329	99.4223	77.5529	81.6201	100.519	96.1812	93.329	84.7819
	73.4	98.8664	105.672	82.8538	107.905	131.849	135.019	110.804	124.341	106.021	89.2315	96.556	107.675	130.993	134.237	121.104	115.294	99.9226	101.431	93.4292	100.785	125.716	126.199	108.495	134.309	94.9451	94.959	83.3376	81.9089	101.004	91.7982	98.8271	91.8665	102.805	100.289	83.8683	80.0387	92.4818	100.525	99.0967	100.796	91.7127	99.467	77.7665	81.734	100.257	96.3162	93.3724	85.0134
	73.5	98.6621	105.521	82.5476	107.844	132.09	135.131	110.683	124.725	106.196	89.1058	96.119	107.607	131.321	133.977	120.696	115.404	100.194	101.118	93.4023	100.372	125.248	125.98	108.38	134.05	95.1788	94.8567	83.449	81.8325	100.625	91.6811	98.916	91.4498	102.575	100.377	83.9708	80.1355	92.3878	100.767	98.7911	100.774	91.3462	99.3752	78.2022	82.0233	100.05	96.6122	93.3061	85.082
	73.6	98.3874	105.599	82.2234	107.593	132.392	135.298	110.674	124.928	106.303	89.1507	95.6076	107.481	131.625	133.805	120.357	115.368	100.29	100.83	93.4314	99.7996	124.862	125.768	108.071	133.859	95.6383	94.8426	83.4097	81.8122	100.366	91.6791	99.1287	91.0534	102.318	100.49	84.2164	80.414	92.1608	101.09	98.4868	100.684	91.0928	99.0679	78.4928	82.3981	99.831	96.8619	93.1138	84.8009
	73.7	98.0679	105.719	81.7986	107.265	132.78	135.173	110.893	124.886	106.465	89.4161	95.2411	107.454	131.952	133.896	119.995	115.427	100.268	100.615	93.5468	99.2311	124.53	125.366	107.919	133.779	96.1376	94.7509	83.4775	81.7312	100.277	91.8966	99.3796	90.6972	102.308	100.639	84.5182	80.6322	91.9379	101.332	98.179	100.359	90.9352	98.9262	78.5282	82.6987	99.8672	96.8786	92.9395	84.5022
	73.8	97.8934	106.05	81.5076	107.252	132.995	134.925	111.162	124.949	106.344	89.7536	95.1799	107.415	132.259	134.239	119.885	115.305	100.154	100.579	93.6342	98.8282	124.492	125.082	107.856	133.697	96.4284	94.8796	83.4453	81.6994	100.327	92.1778	99.6844	90.5099	102.447	100.774	84.6571	80.8303	91.9346	101.525	98.2925	99.9726	90.9358	98.8115	78.3776	83.0686	99.9621	96.8278	92.8626	84.3068
	73.9	97.7987	106.478	81.4117	107.18	133.078	134.845	111.574	124.823	105.931	90.2417	95.2076	107.295	132.331	134.479	119.707	115.223	100.067	100.82	93.634	98.7432	124.427	124.73	107.879	133.521	96.6391	95.1067	83.3822	81.7028	100.497	92.4448	100.027	90.57	102.466	100.834	84.5625	80.9842	92.0016	101.642	98.6174	99.7586	91.1044	98.652	78.1846	83.1926	100.039	96.7747	92.8472	84.0579
	74	97.6947	106.759	81.6314	107.166	133.069	134.436	111.808	124.35	105.448	90.6474	95.2595	107.068	131.981	134.601	119.878	115.367	99.7637	101.203	93.6155	98.8032	124.443	124.498	108.04	133.586	96.5398	95.3975	83.2137	81.8132	100.817	92.6098	100.302	90.6666	102.687	100.622	84.4827	81.102	92.1515	101.704	99.0661	99.6482	91.4328	98.6203	78.0378	83.1022	99.9723	96.5952	92.8757	84.017
	74.1	97.7192	106.729	81.9623	107.343	132.959	133.975	111.897	124.029	105.052	91.0992	95.1858	107.194	131.52	134.341	120.073	115.64	99.5109	101.733	93.5556	99.048	124.676	124.437	108.437	133.752	96.4794	95.546	83.012	81.9838	101.269	92.7893	100.4	90.72	102.998	100.243	84.2226	81.1647	92.4606	101.661	99.4611	99.7216	91.6513	98.8569	77.9707	83.0241	99.8767	96.2869	93.0154	84.0159
	74.2	97.8742	106.615	82.3927	107.698	132.762	133.731	112.03	124.142	104.418	91.2536	95.051	107.479	130.843	133.859	120.327	115.654	99.407	102.22	93.2988	99.2298	125.021	124.382	108.538	133.906	96.2684	95.7836	82.76	82.208	101.797	92.8267	100.412	90.8727	103.046	99.8417	83.8889	81.1597	92.8169	101.658	99.7942	99.9496	91.7323	99.04	77.9821	82.8334	99.6182	95.9832	93.341	84.0019
	74.3	98.1579	106.298	82.7813	107.839	132.586	133.513	112.316	124.222	104.127	91.1658	95.1354	107.708	130.36	133.152	120.368	115.825	99.4187	102.574	92.8881	99.4214	125.382	124.166	108.458	134.222	96.2542	95.8524	82.6122	82.4026	102.2	92.755	100.436	91.0597	103.041	99.4828	83.7136	80.9837	92.9747	101.568	99.6969	100.261	91.5974	99.4323	78.0751	82.4325	99.4341	95.9213	93.5772	83.9119
	74.4	98.2568	105.962	83.0714	107.999	132.588	133.143	112.452	124.409	104.185	90.9728	95.2636	107.898	129.968	132.604	120.31	115.849	99.311	102.633	92.5166	99.5287	125.751	124.261	108.341	134.606	96.3293	95.9434	82.7043	82.548	102.457	92.5881	100.635	91.13	103.131	99.2885	83.6807	80.7768	93.1382	101.567	99.467	100.519	91.3292	99.8664	78.1816	82.1671	99.2544	95.8635	93.6129	84.1172
	74.5	98.3464	105.702	83.154	108.066	132.613	133.26	112.692	124.643	104.317	90.653	95.5834	108.228	129.949	132.237	120.205	115.757	99.2386	102.426	92.1678	99.5506	126.31	124.23	108.027	134.582	96.5792	96.0529	82.8874	82.6692	102.502	92.431	100.76	91.3322	103.252	99.3534	83.6983	80.453	93.1505	101.403	99.1681	100.52	91.1236	100.167	77.9249	81.9492	99.1246	95.9425	93.4989	84.1693
	74.6	98.2966	105.748	82.9938	107.857	132.937	133.459	112.789	124.919	104.314	90.1734	96.2721	108.258	130.088	132.237	120.206	115.424	99.1766	101.955	91.8338	99.4893	126.586	124.192	107.534	134.319	96.6668	96.1662	83.359	82.7635	102.296	92.2114	100.905	91.5033	103.325	99.5047	83.8739	80.1648	92.8469	101.076	98.9718	100.484	91.0114	100.308	77.6246	81.787	98.9982	96.2967	93.3513	84.2748
	74.7	98.1583	105.915	82.626	107.543	133.365	133.472	112.595	124.632	104.278	89.962	96.9597	108.176	130.25	132.263	120.136	115.085	98.9983	101.498	91.6291	99.3976	126.566	124.261	107.433	134.099	96.8146	96.2756	83.878	82.8883	101.941	91.9056	101.069	91.62	103.483	99.6892	83.996	79.9771	92.4099	100.627	98.963	100.479	90.9305	100.44	77.3143	81.7635	99.1573	96.9136	92.9698	84.5584
	74.8	97.8263	106.344	82.2174	107.23	133.688	133.578	112.317	124.487	103.994	90.0078	97.1826	108.058	130.068	132.476	120.156	114.646	98.7473	101.042	91.6109	99.3452	126.329	124.462	107.534	133.989	96.7526	96.5298	84.2154	82.9094	101.652	91.7626	101.095	91.5273	103.666	99.6888	83.9288	79.8762	92.181	100.28	99.1533	100.579	91.0548	100.212	77.0279	81.9499	99.2589	97.3664	92.4698	84.8203
	74.9	97.8018	106.806	81.8442	106.917	133.65	133.785	112.016	124.307	103.54	90.0608	97.2121	108.083	129.966	132.557	120.338	114.469	98.5902	100.775	91.5879	99.2139	126.105	124.4	107.636	133.877	96.603	96.6259	84.2126	82.7892	101.375	91.8713	100.866	91.3266	103.849	99.4923	83.8203	79.9034	91.8226	99.7825	99.1326	100.759	91.1463	100.023	76.8814	82.0402	99.252	97.8357	92.0747	84.7934
	75	97.8966	107.273	81.4701	106.898	133.52	133.826	111.569	124.138	103.026	90.3342	97.0862	108.082	129.669	132.533	120.419	114.14	98.602	100.769	91.5446	99.1409	125.561	124.542	107.854	134.056	96.5238	96.4796	84.0313	82.57	101.153	91.9984	100.73	91.0182	103.945	99.2184	83.4765	79.9376	91.6503	99.5107	99.1353	101.16	91.1008	99.9345	77.0544	82.2471	99.3945	98.0731	91.7064	84.8504
	75.1	98.2496	107.626	81.3444	107.065	133.115	133.825	111.285	123.771	102.881	90.7257	96.6915	108.035	129.254	132.318	120.274	113.977	98.6631	101.042	91.5953	99.086	125.132	124.67	108.076	134.307	96.3456	96.3989	83.5919	82.385	101.133	92.2041	100.461	90.7543	104.031	98.9669	82.992	79.9295	91.6721	99.5849	99.261	101.383	90.9936	99.7842	77.1778	82.2953	99.7238	98.1254	91.2542	85.0283
	75.2	98.5338	107.771	81.44	107.12	132.617	133.827	111.237	123.769	103.089	90.9574	96.3674	107.929	129.086	132.303	120.151	113.799	98.783	101.198	91.7868	99.2738	124.832	124.836	108.009	134.269	96.227	96.1039	83.1284	82.1092	101.172	92.5615	99.9934	90.5473	104.034	98.5643	82.563	79.915	92.002	99.8687	99.3708	101.499	90.9987	99.6114	77.5135	82.3076	99.9054	97.8981	90.955	84.9167
	75.3	99.0903	107.523	81.655	107.224	132.202	133.699	110.993	123.452	103.479	90.9918	96.3097	107.891	129.265	132.187	120.179	113.739	99.0856	101.249	91.9457	99.3886	124.514	124.968	107.796	133.841	96.2721	95.6356	82.754	81.937	101.147	92.7785	99.6018	90.524	103.989	98.362	82.4065	80.0175	92.1713	100.173	99.473	101.45	90.9623	99.783	77.91	82.2931	100.09	97.5946	90.9284	84.773
	75.4	99.3488	107.087	81.9657	107.324	132.248	133.775	110.856	123.289	103.896	90.9647	96.3128	107.704	129.635	132.146	120.09	113.497	99.4451	101.218	92.092	99.5771	124.218	125.297	107.604	133.433	96.4232	95.3037	82.5185	81.9277	101.286	92.7896	99.2509	90.5454	103.849	98.4014	82.3746	80.0776	92.3033	100.534	99.8158	101.261	90.9146	99.8266	78.061	82.1687	100.416	97.0954	90.8321	84.6672
	75.5	99.681	106.594	82.4171	107.23	132.387	133.918	110.835	123.158	104.409	90.7647	96.3832	107.487	130.023	132.257	119.958	113.4	99.6988	101.021	92.1996	99.7433	124.231	125.516	107.499	132.92	96.381	95.129	82.4133	81.898	101.48	92.787	98.766	90.67	103.71	98.5807	82.7636	80.3202	92.2364	100.892	100.24	100.846	90.8506	99.818	78.0584	81.8137	100.471	96.8273	90.943	84.515
	75.6	99.6473	106.062	82.6392	107.205	132.501	134.121	110.793	123.288	104.626	90.5594	96.4438	107.438	130.478	132.613	119.808	113.329	99.8163	100.634	92.226	99.9798	124.352	125.643	107.609	132.707	96.4095	95.0158	82.255	81.7706	101.458	92.5728	98.4486	90.8119	103.611	98.814	83.29	80.6007	92.2786	100.879	100.418	100.4	90.8179	100.013	78.0643	81.6108	100.402	96.588	91.2868	84.2822
	75.7	99.5875	105.758	82.746	107.356	132.61	134.459	110.534	123.401	104.802	90.2822	96.3415	107.365	130.754	133.017	119.774	113.556	99.9318	100.492	92.2087	100.041	124.513	125.521	107.949	132.898	96.3541	95.0513	82.1355	81.7196	101.399	92.3304	98.2156	90.8976	103.616	99.1532	83.8964	80.8752	92.1344	100.718	100.485	99.863	90.7392	100.357	77.8835	81.4558	100.268	96.4375	91.5557	84.2112
	75.8	99.178	105.646	82.7121	107.444	132.581	134.734	110.493	123.767	105.025	90.0413	96.0915	107.397	130.774	133.423	119.627	113.713	99.798	100.51	92.2473	100.205	124.837	125.287	108.379	133.351	96.3555	95.0875	82.1339	81.57	101.552	92.2258	98.0182	90.9821	103.69	99.4931	84.265	81.0469	91.9858	100.505	100.688	99.4199	90.5753	100.459	77.7231	81.2474	100.182	96.5268	91.5345	84.2433
	75.9	98.7978	105.643	82.5472	107.397	132.136	134.697	110.685	123.953	105.255	89.922	96.0367	107.515	130.487	133.682	119.565	113.873	99.5639	100.625	92.1812	100.455	125.268	124.958	108.792	133.736	96.2953	95.1675	82.1586	81.425	101.58	92.2341	97.9062	91.2436	103.758	99.826	84.567	80.9508	92.0058	100.277	100.905	99.098	90.517	100.612	77.6604	81.2292	99.9637	96.8801	91.6616	84.4951
	76	98.2913	105.657	82.1955	107.419	131.672	134.652	111.014	124.268	105.305	89.9917	95.8916	107.64	130.272	133.81	119.773	114.116	99.3983	100.826	92.1379	100.529	125.469	124.509	108.965	134.272	96.2037	95.2816	82.0926	81.4143	101.523	92.3282	97.8734	91.3785	103.778	99.8886	84.534	80.8414	92.3009	99.9582	100.964	99.0137	90.5037	100.718	77.5198	81.4962	99.9209	97.0673	91.6523	84.845
	76.1	98.1411	105.632	82.1592	107.475	131.308	134.647	111.351	124.514	105.364	90.1442	95.8246	107.657	130.05	133.752	120.099	114.423	99.3781	100.929	92.1025	100.542	125.43	124.154	108.796	134.417	96.369	95.2624	82.2022	81.4889	101.553	92.624	97.8071	91.4999	103.693	99.9434	84.4019	80.7066	92.392	100.003	101.081	99.21	90.457	100.558	77.3366	81.715	99.7802	97.1167	91.464	85.1696
	76.2	98.1296	105.405	82.2026	107.415	131.077	134.72	111.878	124.655	105.169	90.4761	95.9525	107.809	129.845	133.364	120.364	114.498	99.2765	100.921	91.9677	100.478	125.267	124.126	108.481	134.365	96.5696	95.2478	82.2652	81.554	101.569	92.9216	97.9508	91.7232	103.623	100.099	84.141	80.6253	92.4311	100.062	101.233	99.6844	90.3866	100.303	77.1281	81.8513	99.6011	97.0779	91.4136	85.4256
	76.3	98.4338	105.257	82.2392	107.498	130.986	135.067	112.174	124.529	104.788	90.8802	96.1608	107.748	129.655	132.95	120.489	114.413	99.2697	100.849	91.7707	100.216	125.118	124.375	108.061	134.182	96.7893	95.4386	82.3055	81.7902	101.298	93.142	98.0726	91.7338	103.377	100.238	84.0069	80.4984	92.5591	100.052	101.041	100.138	90.4842	100.062	76.8702	81.8605	99.3766	96.762	91.7237	85.6682
	76.4	98.8384	105.228	82.2166	107.807	131.153	135.452	112.081	124.563	104.411	91.2117	96.0369	107.677	129.611	132.678	120.502	114.302	99.347	100.868	91.746	99.8149	124.806	124.55	107.695	134.101	96.9516	95.5598	82.2571	81.9744	100.984	93.0696	98.0548	91.4886	103.034	100.311	83.8061	80.6526	92.6294	100.051	100.622	100.439	90.6652	99.8458	76.7275	81.9136	99.3328	96.2858	91.9824	85.5816
	76.5	99.1093	105.192	82.3402	107.99	131.377	135.713	111.671	124.351	104.161	91.3688	95.9063	107.543	129.544	132.417	120.247	113.901	99.3203	101.002	91.8301	99.5849	124.658	124.821	107.439	133.978	97.3908	95.7973	82.3097	82.1174	100.691	92.7968	98.0526	91.3266	102.78	100.519	83.6342	80.6074	92.397	100.039	100.16	100.614	90.8551	99.6057	76.771	81.8366	99.3378	95.8824	92.2321	85.3363
	76.6	99.1756	105.322	82.2865	108.002	131.685	135.89	111.192	123.926	103.906	91.343	95.7066	107.443	129.457	132.09	119.972	113.427	99.2394	101.324	91.9486	99.2268	124.758	124.934	107.443	133.947	97.5266	96.1854	82.3229	82.2812	100.541	92.5062	98.2663	91.0841	102.683	100.524	83.6072	80.4759	92.235	99.9772	99.8273	100.582	91.201	99.4499	76.972	81.7276	99.5582	95.6536	92.5582	85.1788
	76.7	99.2415	105.636	82.1455	108.229	131.935	135.83	110.544	123.47	103.705	91.1588	95.3103	107.28	129.469	131.827	119.571	113.144	99.2747	101.606	92.0701	99.0343	125.065	124.819	107.39	133.981	97.6343	96.5193	82.3594	82.39	100.485	92.1248	98.3597	90.6474	102.431	100.516	83.696	80.1648	92.141	100.005	99.537	100.352	91.4847	99.1968	77.2357	81.7444	99.8282	95.5048	92.6602	85.1303
	76.8	99.0156	105.872	82.18	108.29	132.225	135.493	110.305	123.269	103.459	90.8994	95.051	107.241	129.576	131.662	119.306	113.166	99.2995	101.874	92.2636	99.0061	125.321	124.423	107.513	134.146	97.4547	96.665	82.3138	82.304	100.489	91.8319	98.4762	90.3696	102.363	100.5	83.6858	79.9396	92.1114	100.089	99.4769	100.116	91.506	98.992	77.4689	82.0717	100.137	95.4702	92.5405	84.9514
	76.9	98.7676	105.97	82.2739	108.346	132.481	135.143	110.224	123.005	103.059	90.543	95.0263	107.187	129.573	131.403	119	113.264	99.2257	101.981	92.5453	98.9828	125.552	124.073	107.622	134.228	97.2902	96.87	82.3718	82.2144	100.578	91.9531	98.8611	90.44	102.549	100.398	83.7262	79.6766	92.0315	100.155	99.6682	100.2	91.2823	98.7696	77.6834	82.2409	100.289	95.4644	92.3286	84.9984
	77	98.8408	106.049	82.2906	108.52	132.596	134.839	110.473	122.907	102.682	90.1942	95.1136	107.31	129.574	131.038	118.802	113.542	99.1915	101.893	92.7237	99.1191	125.57	123.778	107.826	134.38	97.0163	96.7902	82.3786	82.1569	100.749	92.1549	99.244	90.4858	102.685	100.396	83.9667	79.6998	92.1426	100.333	100.074	100.498	91.0782	98.703	77.8668	82.1964	100.296	95.4179	92.082	85.1258
	77.1	98.8192	105.948	82.318	108.734	132.536	134.436	110.918	122.813	102.415	89.956	95.2821	107.398	129.583	130.791	118.737	113.665	99.0907	101.816	92.8427	99.5535	125.379	123.798	107.889	134.576	96.9597	96.6318	82.376	82.08	100.817	92.2571	99.3198	90.7379	102.618	100.776	84.1172	79.8683	92.4098	100.331	100.325	100.774	90.6909	98.8078	78.0231	82.104	100.135	95.4331	91.7542	85.0655
	77.2	98.7154	105.76	82.4865	108.579	132.403	134.182	111.434	122.776	102.323	89.9473	95.7269	107.528	129.466	130.784	118.884	113.486	98.997	101.679	93.0224	99.8507	125.099	123.939	108.053	134.549	96.9164	96.3786	82.289	82.1012	100.928	92.3954	99.3082	91.1188	102.613	101.129	84.294	80.2875	92.743	100.263	100.395	101.06	90.3935	99.1116	78.1864	81.9612	100.102	95.5537	91.4978	84.85
	77.3	98.7511	105.549	82.5988	108.329	132.181	133.926	111.629	122.686	102.503	90.1299	95.9243	107.641	129.378	130.771	119.129	113.005	99.0351	101.445	93.1244	100.068	124.868	124.202	107.963	134.412	97.1738	96.1142	82.2441	82.3	101.07	92.4459	99.3581	91.4876	102.544	101.414	84.617	80.6211	92.9465	100.18	100.319	101.237	90.3074	99.6189	78.3032	81.5827	100.104	95.7699	91.1672	84.6542
	77.4	98.7815	105.536	82.7922	107.802	131.897	133.55	111.734	122.411	103.027	90.3975	96.091	107.845	129.602	130.979	119.516	112.67	99.0938	101.14	93.1276	100.401	124.772	124.546	107.769	134.289	97.6574	95.7832	82.3024	82.4326	101.132	92.3105	99.4176	91.4891	102.304	101.645	84.9753	80.8598	93.19	100.185	100.105	101.039	90.2465	100.153	78.3864	81.4137	100.165	96.0255	90.9042	84.3853
	77.5	98.5264	105.644	83.0038	107.332	131.661	133.09	111.484	121.964	103.601	90.6857	96.2098	108.001	129.843	131.431	119.804	112.446	99.2158	100.982	93.185	100.49	124.845	124.87	107.388	133.931	98.1709	95.6455	82.3754	82.4182	101.009	92.2676	99.6663	91.4253	101.971	101.772	85.1754	80.8559	93.3153	100.161	99.8287	100.416	90.1296	100.564	78.573	81.5899	100.269	96.2506	90.7726	84.0441
	77.6	98.5594	105.843	83.1998	106.945	131.582	132.728	110.948	121.678	104.094	90.9444	96.4131	108.314	130.177	131.996	119.885	112.384	99.5519	100.804	93.2793	100.28	124.919	124.911	107.018	133.551	98.5485	95.2725	82.3737	82.2519	100.869	92.3249	100.07	91.1607	101.784	101.646	85.3153	80.8569	93.1036	100.214	99.6503	99.9048	90.063	100.8	78.7768	81.914	100.385	96.4514	90.7334	83.8544
	77.7	98.4715	106.075	83.3773	106.709	131.502	132.181	110.396	121.526	104.697	90.9056	96.3422	108.471	130.549	132.338	119.762	112.511	99.8676	100.742	93.2951	100.048	124.939	124.682	106.493	133.595	98.9854	95.0338	82.4407	82.0612	100.521	92.4083	100.629	90.9044	101.628	101.391	85.3449	80.7015	92.5795	100.131	99.734	99.2027	90.025	100.813	78.9592	82.185	100.403	96.6417	90.6766	83.7186
	77.8	98.4428	106.414	83.454	106.784	131.352	131.979	109.938	121.443	105.293	90.6851	96.5195	108.673	130.754	132.729	119.424	112.843	99.9478	100.98	93.1899	99.815	124.836	124.466	106.122	133.655	99.1536	94.9017	82.524	81.8448	100.166	92.5374	100.925	90.6614	101.562	101.176	85.1727	80.5373	92.0467	100.203	99.9855	98.5406	89.9474	100.455	79.0755	82.6132	100.321	96.7591	90.7403	83.7775
	77.9	98.3662	106.518	83.5607	107.128	131.168	132.19	109.546	121.743	105.683	90.4983	96.7146	108.749	130.411	133.024	118.996	112.859	100.013	101.319	92.9339	99.5212	124.526	124.108	105.846	133.762	98.9359	94.7823	82.4778	81.796	100.039	92.5078	100.916	90.6923	101.544	101.022	84.9291	80.3287	91.4091	100.142	100.145	98.1353	90.147	99.9984	78.9562	82.8584	100.16	96.8928	90.8826	83.9454
	78	98.4253	106.468	83.6153	107.228	131.051	132.589	109.311	122.255	105.998	90.2654	97.0272	108.817	129.937	133.089	118.591	112.863	99.9751	101.676	92.6948	99.3926	124.239	123.651	105.746	133.931	98.5161	94.5246	82.5121	81.9382	100.228	92.3803	100.732	90.8282	101.729	100.874	84.6804	80.1078	90.9516	99.7758	100.148	98.1199	90.5004	99.5859	78.4597	83.0174	100.136	97.1416	90.9052	84.16
	78.1	98.326	106.41	83.7528	107.243	130.738	133.146	109.206	122.81	106.52	90.0868	97.1844	108.815	129.372	132.824	118.288	112.836	99.7188	101.96	92.5852	99.3867	124.074	123.372	105.763	134.094	98.0486	94.6766	82.75	82.2158	100.356	92.2078	100.524	91.0254	101.891	100.698	84.3888	79.7916	90.7883	99.3248	100.027	98.1843	90.9566	99.2697	77.8598	83.143	100.177	97.316	90.772	84.3244
	78.2	98.5887	106.409	83.6731	107.336	130.452	133.947	109.198	123.347	106.82	90.0436	97.3597	109.019	129.003	132.64	118.074	112.87	99.3166	102.117	92.436	99.3912	123.956	123.335	105.978	133.848	97.3784	95.0663	82.9975	82.4235	100.534	92.0329	100.262	91.2002	102.254	100.546	84.1476	79.4958	90.9292	99.1537	99.7994	98.5176	91.3787	99.0557	77.3349	83.239	100.177	97.3235	90.7959	84.569
	78.3	98.8523	106.252	83.6521	107.23	130.333	134.283	109.162	123.737	106.882	90.1028	97.2677	109.028	128.887	132.313	118.013	112.953	99.108	101.996	92.4654	99.4372	123.911	123.229	106.117	133.915	96.8028	95.446	83.117	82.6056	100.779	91.8322	100.215	91.3999	102.646	100.338	84.0273	79.4114	91.1338	98.8618	99.4779	98.9034	91.7825	99.1165	76.9529	83.2233	100.153	97.3446	90.9113	84.7071
	78.4	99.2596	106.076	83.4395	106.934	130.338	134.23	109.173	123.692	106.925	90.1963	97.131	108.996	129.093	131.891	118.019	113.186	98.9681	101.926	92.8016	99.4792	124.041	123.244	106.104	133.78	96.374	95.8016	83.1688	82.6918	100.802	92.0294	100.307	91.4645	103.022	100.117	83.9958	79.5125	91.4873	98.8508	99.4414	99.2384	91.9703	99.2625	76.8283	83.2271	100.295	97.1718	90.9836	84.6813
	78.5	99.6533	106.044	83.1873	106.822	130.399	134.056	109.257	123.538	107.05	90.4922	96.7816	108.73	129.222	131.584	118.118	113.125	98.8663	101.625	92.9989	99.2707	124.06	123.396	106.046	133.604	95.9934	96.1944	83.0794	82.6665	100.547	92.3255	100.319	91.4216	103.331	99.9578	84.0384	79.7339	91.755	99.2154	99.5965	99.5266	91.8604	99.3682	76.9567	83.1498	100.184	96.9358	91.2096	84.77
	78.6	99.9352	106.104	82.6625	106.9	130.785	133.491	109.451	123.233	106.738	90.6434	96.462	108.182	129.193	131.509	118.148	113.026	98.7544	101.417	92.91	99.0861	124.14	123.31	105.892	133.433	95.6019	96.3519	82.7948	82.6448	100.467	92.7316	100.23	91.226	103.682	99.9088	84.2786	79.9196	91.9674	99.8094	99.9043	99.7712	91.5222	99.531	77.2072	83.0366	99.887	96.6816	91.6184	84.9098
	78.7	99.9219	105.989	82.279	106.983	131.189	132.848	109.667	122.73	106.311	90.8099	96.3078	107.461	128.939	131.659	118.158	112.835	98.7797	101.382	93.0043	99.1553	124.223	123.161	105.786	133.376	95.319	96.1173	82.5424	82.6701	100.436	93.0822	100.19	90.8957	103.706	99.9302	84.4698	80.1942	92.196	100.191	100.165	100.124	91.0373	99.7994	77.3635	82.9135	99.5128	96.5982	91.9192	85.0673
	78.8	99.8562	105.961	81.9274	107.012	131.467	132.498	109.956	122.303	105.886	90.727	96.3919	107.007	128.482	132.021	118.268	112.6	98.7549	101.526	92.9426	99.2105	124.312	123.098	105.969	132.899	95.315	95.8539	82.4574	82.5392	100.381	93.4686	100.09	90.4489	103.448	100.063	84.7366	80.2851	92.3355	100.617	100.556	100.441	90.4344	99.8704	77.4554	82.7992	99.1494	96.4568	92.1189	85.2552
	78.9	99.5732	105.997	81.6239	107.159	131.734	132.374	110.298	122.192	105.504	90.6128	96.4048	106.634	128.099	132.312	118.387	112.439	98.7588	101.615	92.5316	99.3137	124.431	122.941	106.349	132.631	95.411	95.6342	82.4123	82.3647	100.368	93.546	99.8284	89.9161	103.235	100.366	84.9894	80.2891	92.3625	100.753	100.638	100.694	89.9277	100.003	77.463	82.7002	98.7285	96.648	92.2553	85.5671
	79	99.098	105.849	81.4282	107.205	131.872	132.178	110.623	122.184	104.79	90.3664	96.5577	106.314	127.977	132.411	118.587	112.646	98.7592	101.903	92.2818	99.6051	124.734	122.707	106.713	132.556	95.5535	95.4549	82.3886	82.1082	100.451	93.4918	99.7232	89.3883	103.002	100.594	85.0933	80.3773	92.3496	100.781	100.437	100.866	89.8628	100.125	77.3972	82.712	98.6564	96.8242	92.2703	85.7674
	79.1	98.8146	105.501	81.5414	107.03	131.703	132.317	110.784	122.232	104.336	90.2943	96.7697	106.3	127.973	132.321	118.835	112.903	98.8138	102.206	92.241	99.7856	124.825	122.648	106.996	132.499	95.7932	95.3236	82.4688	81.8491	100.326	93.1356	99.7302	89.0213	102.584	100.747	84.9752	80.644	92.3255	100.643	100.274	100.824	90.0254	100.007	77.1003	82.7099	98.9241	96.901	92.1774	85.9395
	79.2	98.6619	105.261	81.6827	106.8	131.538	132.494	110.838	122.229	104.029	90.2182	96.9001	106.281	127.888	131.803	119.07	113.163	98.868	102.483	92.1646	99.6539	124.823	122.593	107.125	132.419	96.0899	95.2838	82.4876	81.6356	100.276	92.948	99.6178	88.848	102.482	100.866	85.0412	80.793	92.2423	100.716	100.136	100.638	90.5031	99.6726	76.7208	82.7281	99.4346	96.7449	92.0727	85.8878
	79.3	98.434	105.083	81.7399	106.75	131.452	132.79	110.846	122.188	103.889	90.3359	96.7062	106.095	127.92	130.979	119.021	113.163	98.8764	102.686	92.3036	99.5786	124.81	122.403	107.006	132.343	95.9953	95.189	82.4166	81.528	100.141	92.6848	99.5206	88.84	102.62	100.962	85.0564	80.8596	92.3033	100.62	99.8021	100.719	91.2762	99.6592	76.4989	82.6599	99.9554	96.6258	91.8777	85.7465
	79.4	98.4518	105.14	82.033	106.685	131.33	133.096	110.779	122.052	103.798	90.5258	96.5694	106.007	127.992	130.276	118.861	112.948	98.9331	102.7	92.6914	99.4884	124.749	122.231	106.815	132.218	95.8426	95.0247	82.455	81.4394	100.015	92.567	99.6455	88.9658	102.744	100.908	85.0062	80.8881	92.5779	100.441	99.6256	100.861	91.8671	99.5956	76.51	82.6392	100.293	96.219	91.6751	85.4475
	79.5	98.7604	105.471	82.3842	106.633	131.317	133.599	110.606	121.697	104.115	90.7309	96.3075	106.273	128.162	129.877	118.296	112.436	99.0776	102.559	93.0109	99.3922	124.366	121.866	106.558	132.02	95.8631	94.869	82.6956	81.3992	99.8067	92.5726	99.4624	89.1717	102.825	100.831	85.0495	80.6469	92.8288	100.205	99.8098	100.863	91.9648	99.6106	76.6904	82.4911	100.233	95.9493	91.3851	85.045
	79.6	99.048	105.898	82.6931	106.55	131.453	134.054	110.438	121.298	104.526	90.8184	95.9666	106.488	128.617	129.66	117.795	111.884	99.3031	102.151	93.2395	99.5847	124.043	121.473	106.573	132.001	95.9671	94.6486	82.945	81.4444	99.7913	92.9117	99.3823	89.4603	103.017	100.651	85.19	80.2168	92.968	99.8934	99.6579	101.084	91.9101	99.8053	77.1188	82.3074	99.8846	95.7746	91.2214	84.6335
	79.7	99.1628	106.249	82.9117	106.548	131.563	134.294	110.182	121.178	104.93	90.8198	95.767	106.912	129.253	129.609	117.518	111.386	99.5937	101.631	93.3115	99.9992	123.847	121.248	106.725	132.184	96.1125	94.5349	83.2098	81.4134	99.7174	93.1082	99.3318	89.6681	103.026	100.549	85.0746	79.8086	93.0314	99.2956	99.3814	101.268	91.6016	100.091	77.8026	82.3173	99.3186	95.7476	91.1566	84.5418
	79.8	99.3553	106.516	83.1191	106.347	131.58	134.263	109.726	121.09	105.316	90.9109	96.0467	107.363	129.849	129.806	117.433	111.291	99.9828	101.089	93.282	100.221	123.648	121.25	106.763	132.613	96.5013	94.5105	83.4605	81.4059	99.7521	93.3444	99.2316	89.7295	103.051	100.333	84.9259	79.6337	93.0185	98.931	99.2134	101.138	90.964	99.9722	78.3219	82.4748	98.8471	95.8427	91.2166	84.5114
	79.9	99.3625	106.496	83.0625	106.114	131.486	134.109	109.198	121.033	105.561	90.7744	96.418	107.743	130.364	130.085	117.361	111.469	100.106	100.849	93.1617	100.254	123.419	121.456	106.713	133.241	96.8934	94.6599	83.7144	81.5131	99.742	93.4317	99.0277	89.7738	103.054	100.074	84.7496	79.5474	92.7096	98.8512	98.9173	100.888	90.536	99.6604	78.511	82.6476	98.5209	96.1747	91.3138	84.5649
	80	99.2358	106.141	82.8135	106.088	131.403	133.865	108.843	121.239	105.536	90.6416	96.8181	107.843	130.711	130.409	117.804	111.772	100.121	100.832	93.1884	100.22	123.459	122.117	106.672	133.968	97.1302	94.8843	83.634	81.7907	99.8211	93.4258	99.1297	89.7499	103.175	99.8132	84.5781	79.7707	92.4897	98.8378	98.4045	100.846	90.4583	99.3939	78.5634	82.9454	98.4201	96.3835	91.5376	84.8446
	80.1	99.0392	105.925	82.4326	106.168	131.325	133.544	108.69	121.606	105.261	90.6596	97.3303	107.978	130.61	130.78	118.343	112.031	100.054	101.099	93.2022	99.7679	123.625	122.877	106.439	134.515	97.1036	95.2971	83.3295	81.9442	99.8426	93.1734	98.915	89.6785	103.435	99.7529	84.3838	80.1084	92.4187	98.967	98.1949	100.585	90.6314	98.9734	78.4167	83.342	98.4624	96.7763	91.72	85.0809
	80.2	98.9502	106.028	82.1178	106.142	131.19	133.289	108.844	121.778	104.928	90.8615	97.491	108.038	130.352	131.197	118.669	112.221	99.8384	101.324	93.2388	99.3688	123.826	123.49	106.007	134.936	97.0395	95.6292	82.9504	82.1771	99.9408	92.9177	98.678	89.6588	103.644	99.57	84.2166	80.4399	92.4946	99.2847	98.1914	100.296	90.867	98.5285	78.0668	83.3546	98.6586	97.2304	91.9557	85.0539
	80.3	98.8004	106.289	81.9954	106.299	131.269	133.055	109.292	121.91	104.531	90.9686	97.1725	108.134	129.925	131.367	118.904	112.171	99.4688	101.452	93.195	99.2992	124.05	123.892	105.855	135.291	96.9764	95.9393	82.7252	82.5266	100.029	92.6022	98.5033	89.7884	103.664	99.4327	83.8882	80.5422	92.463	99.4235	98.221	100.111	91.2256	98.3426	77.7794	83.2296	98.8042	97.5048	92.1039	85.0517
	80.4	98.7521	106.57	82.0376	106.432	131.537	132.786	109.929	121.925	104.285	91.1142	96.7864	108.21	129.186	131.457	119.274	111.868	99.4959	101.462	93.2091	99.5281	124.232	123.995	105.871	135.356	96.8871	96.0422	82.3077	82.8048	100.302	92.2752	98.404	89.9332	103.733	99.3124	83.5393	80.4726	92.5801	99.3865	98.4876	99.9178	91.3754	98.5634	77.5656	82.9287	98.8696	97.6402	92.3347	85.2214
	80.5	98.7482	107.062	82.1241	106.347	131.53	132.402	110.368	121.951	104.199	91.0756	96.4767	108.336	128.292	131.238	119.232	111.545	99.5671	101.214	93.0263	99.7469	124.413	123.621	105.863	135.144	96.804	95.9084	82.1016	82.8619	100.658	91.9899	98.2536	90.2347	103.647	99.1592	83.278	80.2508	92.549	99.3745	98.6819	99.6208	91.3817	98.5636	77.4234	82.4113	98.8282	97.8307	92.5858	85.3033
	80.6	98.6521	107.257	82.1914	106.267	131.319	132.051	110.539	121.819	104.331	90.758	95.9566	108.312	127.652	130.894	118.826	111.354	99.7328	100.797	93.0652	100.226	124.641	123.007	105.889	134.715	96.9918	95.5115	82.1434	82.9955	100.949	91.9336	98.3204	90.544	103.35	98.9338	83.1803	79.8898	92.4478	99.3476	98.7668	99.5187	91.0816	98.7408	77.4907	81.7895	98.7641	97.7304	92.807	85.3924
	80.7	98.5924	107.002	82.4326	106.262	131.254	131.965	110.354	121.812	104.503	90.2996	95.7504	108.115	127.181	130.708	118.281	111.345	99.9878	100.635	93.2898	100.378	124.792	122.34	106.076	134.133	97.0904	95.1808	82.3461	83.1115	101.212	91.88	98.4336	90.7911	103.127	98.8566	83.2752	79.6108	92.2297	99.3344	98.7695	99.4578	90.7434	99.0228	77.6652	81.5785	98.5277	97.5425	92.8039	85.5022
	80.8	98.6646	106.419	82.5404	106.176	130.889	131.967	109.965	121.838	104.704	89.819	95.9299	107.826	126.997	130.72	117.751	111.422	100.459	100.768	93.5946	100.266	124.78	121.896	106.039	133.424	97.0385	94.9263	82.2992	83.1561	101.464	91.8933	98.5631	90.9914	103.132	98.8378	83.703	79.5235	92.3072	99.4167	98.7356	99.328	90.4605	99.1027	77.8202	81.5652	98.255	97.3523	92.9339	85.4893
	80.9	98.716	105.96	82.5033	106.178	130.309	132.014	109.41	121.847	104.817	89.5607	96.0942	107.45	127.209	130.678	117.094	111.712	100.508	101.001	93.806	99.8859	124.78	121.518	105.879	132.777	96.9816	94.723	82.45	83.1263	101.454	92.0927	98.6731	91.1566	103.127	99.0139	84.2505	79.5857	92.379	99.5688	98.5768	99.4696	90.3637	98.9084	78.0922	81.6559	98.0059	97.158	92.8841	85.1438
	81	98.6497	105.526	82.5581	106.194	130.05	132.152	109.1	121.582	104.829	89.6235	96.2737	106.969	127.616	130.849	116.562	112.216	100.487	101.474	93.9466	99.6009	124.658	121.498	105.954	132.268	96.8085	94.6804	82.5667	83.2226	101.419	92.1808	98.7024	91.0754	103.149	99.5442	84.7208	79.5279	92.6012	99.6379	98.7054	99.6846	90.2782	98.9652	78.2311	81.8608	97.8476	96.8302	92.806	84.7722
	81.1	98.8233	105.41	82.8573	106.29	129.955	132.111	109.045	121.27	104.841	90.0258	96.6055	106.744	128.002	131.204	116.306	112.723	100.277	102.154	93.7998	99.2362	124.166	121.607	106.082	132.234	96.5168	94.9918	82.5944	83.2528	101.534	91.966	98.6994	90.916	103.243	100.077	85.0607	79.6007	92.852	99.5881	98.9303	99.9708	90.2988	99.0808	78.2158	81.9914	97.5825	96.7004	92.6125	84.4316
	81.2	98.8712	105.555	82.8727	106.289	129.912	131.648	109.218	120.766	104.982	90.5219	96.6795	106.667	128.324	131.335	116.347	112.814	99.9717	102.727	93.4183	99.0343	123.635	121.757	106.205	132.415	96.3196	95.268	82.4772	83.0907	101.665	91.8614	98.6817	90.8306	103.288	100.499	85.3576	79.5336	93.1302	99.4624	99.1678	100.23	90.4662	99.2979	77.975	81.8852	97.613	96.5218	92.4091	84.1819
	81.3	98.6945	105.929	82.7433	106.271	130.11	131.108	109.578	120.141	105.011	91.0722	96.4396	106.716	128.514	131.496	116.449	112.875	99.4848	103.021	92.9084	98.9874	123.284	121.702	106.448	132.739	96.1096	95.3581	82.5929	82.7234	101.84	91.7912	98.6674	90.6646	103.087	100.891	85.441	79.4378	93.1443	99.4448	99.5065	100.526	90.7682	99.635	77.6718	81.86	97.7627	96.4845	92.0084	83.8678
	81.4	98.3562	106.374	82.6782	106.162	130.329	130.587	109.967	119.671	104.877	91.4375	96.1086	106.94	128.638	131.69	116.624	112.92	99.1708	103.06	92.388	99.1682	123.122	121.958	106.788	132.954	95.984	95.4788	82.5398	82.2584	102.113	91.501	98.6185	90.6496	102.712	101.084	85.51	79.3914	92.9288	99.5017	99.8186	100.737	91.0843	100.06	77.3084	81.9657	98.0238	96.4873	91.7998	83.666
	81.5	97.9988	106.775	82.5312	106.22	130.47	130.193	110.076	119.331	104.726	91.5584	95.6916	107.325	128.743	131.557	116.974	112.793	98.9834	102.951	92.1102	99.3688	123	122.018	107.023	133.204	96.1239	95.7518	82.5452	81.6936	102.144	91.4172	98.5508	90.8868	102.371	100.82	85.5585	79.5494	92.5648	99.511	99.9	100.878	91.405	100.325	77.157	82.1491	98.3344	96.5395	91.5112	83.382
	81.6	97.45	107.055	82.079	106.141	130.744	130.174	110.051	119.274	104.362	91.4122	95.3173	107.405	128.85	131.102	117.142	112.71	99.0253	102.575	92.0564	99.6932	123.116	122.074	107.107	132.994	96.1997	95.5893	82.6176	81.1597	101.884	91.6974	98.4534	91.0922	102.082	100.537	85.5878	79.8341	92.106	99.6257	99.887	100.844	91.7107	100.328	77.0205	82.5976	98.8411	96.4617	91.3814	83.1058
	81.7	97.104	107.264	81.6532	106.233	130.713	130.637	109.948	119.621	103.835	91.2127	95.3251	107.496	128.934	130.576	117.172	113	99.0954	102.049	92.1956	100.047	123.132	122.199	107.044	132.596	96.177	95.4362	82.6957	80.8572	101.298	91.9382	98.429	91.273	101.867	100.264	85.4107	80.25	91.5616	99.7996	99.8552	100.843	91.8373	99.9718	77.2344	83.1178	99.065	96.6202	91.3737	82.9046
	81.8	97.0487	107.549	81.5201	106.324	130.563	131.146	109.669	120.283	103.457	90.8241	95.5974	107.468	129.075	129.957	117.133	113.203	99.1582	101.504	92.4903	100.197	123.16	122.389	106.956	132.128	96.2588	95.3482	82.6029	80.6381	100.562	92.2458	98.4135	91.4671	101.725	100.047	85.2243	80.5868	91.1355	99.8427	99.5813	100.799	91.6675	99.8124	77.4804	83.2139	99.2595	96.7178	91.4255	83.0848
	81.9	97.1934	107.642	81.4325	106.556	130.657	131.752	109.397	121.055	103.401	90.4592	96.1414	107.223	129.173	129.34	117.094	113.355	99.1862	101.188	92.8494	100.128	123.012	122.317	106.767	131.865	96.3102	95.1273	82.6228	80.7895	100.02	92.7725	98.4318	91.4763	101.678	99.8792	85.0994	80.79	91.0173	99.623	99.2837	100.517	91.4692	99.603	77.7358	83.0659	99.5558	96.7878	91.4375	83.4938
	82	97.5751	107.656	81.4747	106.573	130.729	132.123	109.347	121.928	103.484	90.2234	96.7155	106.954	129.173	129.074	117.016	113.441	98.9739	101.017	93.0548	99.9634	122.768	122.418	106.295	131.629	96.1538	94.6291	82.4483	81.1406	99.7538	93.1845	98.581	91.3609	101.637	99.9492	85.061	80.8808	91.1748	99.5672	99.0742	100.138	91.2805	99.5494	77.8355	82.7384	99.8082	96.9272	91.6672	84.0164
	82.1	97.9542	107.572	81.6948	106.667	130.6	132.219	109.316	122.552	103.799	90.1703	97.1484	106.958	129.142	129.041	117.29	113.276	98.6194	101.105	93.0934	99.6847	122.575	122.793	105.882	131.589	96.203	94.3306	82.2899	81.502	99.8517	93.4257	98.7354	91.3698	101.513	99.9932	85.0414	80.7658	91.4774	99.5563	98.9799	99.6988	91.181	99.8185	78.0372	82.1203	99.9018	97.0957	91.8147	84.6183
	82.2	98.2037	107.485	82.0718	106.54	130.684	132.183	109.378	122.816	104.229	90.0503	97.216	106.799	129.082	129.161	117.545	112.92	98.4208	101.308	93.0488	99.3913	122.719	123.163	105.463	131.792	96.2796	93.9519	82.373	81.8639	100.475	93.5484	98.865	91.443	101.203	100.07	85.1704	80.5401	91.9578	99.5288	98.9092	99.2481	91.0898	100.411	78.0186	81.5432	100.195	97.0571	91.9204	85.2115
	82.3	98.2691	107.193	82.1738	106.486	130.701	132.286	109.594	122.918	104.672	90.1843	97.1244	106.74	129.023	129.341	117.762	112.54	98.3975	101.608	92.9252	99.3599	122.776	123.553	105.102	131.893	96.4286	93.7691	82.493	82.5366	101.278	93.4538	98.8876	91.6248	101.087	100.071	85.3495	80.3036	92.3021	99.5363	99.0388	98.9097	91.0494	100.656	78.0817	81.3066	100.431	96.941	92.1218	85.5031
	82.4	98.2728	106.934	82.2026	106.4	130.647	132.285	109.823	122.852	105.02	90.3814	96.7562	106.962	128.917	129.562	117.935	112.045	98.4472	101.658	92.8014	99.4509	122.883	123.853	104.888	131.958	96.5014	94.0142	82.6166	82.9175	101.842	93.2688	98.9595	91.7153	101.183	100.014	85.2364	80.0822	92.532	99.9236	99.2837	98.7903	90.9084	100.74	78.1398	81.2121	100.486	96.8769	92.0752	85.5346
	82.5	98.0961	106.76	82.2352	106.344	130.603	132.565	109.91	122.628	105.183	90.5284	96.3843	107.132	128.97	129.797	117.939	111.401	98.765	101.406	92.6932	99.441	123.126	124.009	105.005	131.907	96.6179	94.4721	82.9993	83.164	102.181	93.1458	99.0583	91.7214	101.394	99.9334	84.9293	79.8586	92.4312	100.306	99.6472	98.9884	90.8168	100.54	78.1548	81.3912	100.551	96.8144	91.5981	85.578
	82.6	98.0764	106.628	82.3685	106.192	130.657	132.949	109.96	122.317	105.21	90.509	96.0545	107.135	128.999	129.91	117.438	111.015	99.0632	100.922	92.5648	99.4108	123.357	123.774	105.228	131.886	96.4463	95.1509	83.2952	83.3215	102.189	92.9973	99.2009	91.587	101.707	100.003	84.6351	79.6791	92.2575	100.727	99.8751	99.3812	90.6492	100.013	78.07	81.8062	100.781	96.9201	91.0406	85.4724
	82.7	98.1544	106.408	82.543	106.272	130.745	133.028	109.887	121.964	104.994	90.5921	95.7936	107.384	129.169	130.132	117.025	110.82	99.2953	100.321	92.4102	99.4727	123.283	123.431	105.604	131.692	96.2903	95.9662	83.2276	83.2939	101.833	92.9325	99.311	91.2752	102.219	100.265	84.4592	79.5541	91.9145	101.116	100.043	99.8161	90.6814	99.2804	77.9462	82.0464	100.921	97.0088	90.5752	85.1202
	82.8	98.3193	106.261	83.0065	106.321	130.947	132.809	109.709	121.583	104.667	90.6386	95.6064	107.67	129.181	130.245	116.717	110.798	99.3362	99.8052	92.3555	99.3669	123.336	123.019	105.823	131.763	95.9966	96.6558	83.1738	82.9203	101.391	92.948	99.627	90.7677	102.444	100.755	84.3542	79.5351	91.7356	101.323	100.075	100.312	90.9136	98.6716	77.7431	82.0903	100.824	97.3017	90.1429	84.8407
	82.9	98.454	106.13	83.534	106.3	130.883	132.527	109.498	121.283	104.244	90.758	95.4571	107.85	129.071	130.363	116.475	110.755	99.3747	99.5479	92.3511	99.3116	123.272	122.746	105.791	131.939	95.6806	96.9283	83.1076	82.6411	100.981	92.7517	99.7874	90.5218	102.492	101.354	84.4705	79.6935	91.6758	101.299	100.036	100.732	91.2212	98.4334	77.4478	82.1348	100.606	97.5416	90.0546	84.6392
	83	98.691	105.912	83.9342	106.382	130.8	132.095	109.428	121.136	104.05	90.899	95.3801	108.047	128.885	130.351	116.353	110.982	99.4676	99.6762	92.3898	99.508	123.163	122.51	105.652	132.237	95.449	97.0772	82.9116	82.2597	100.692	92.3694	99.8415	90.4283	102.478	101.847	84.7952	80.0652	91.7082	101.107	99.7237	100.909	91.41	98.3538	77.2006	81.9579	100.378	97.729	90.219	84.5202
	83.1	98.7908	105.651	84.1196	106.559	130.692	131.588	109.376	121.389	103.831	91.0336	95.2903	108.323	128.559	130.458	116.785	111.045	99.7164	100.042	92.4953	99.8264	123.026	122.465	105.389	132.577	95.488	96.8412	82.6984	81.8418	100.584	91.9407	99.8427	90.4143	102.483	102.213	85.056	80.4777	91.7127	100.653	99.4654	101.113	91.6739	98.5706	77.0658	81.7501	99.9582	97.7678	90.51	84.4863
	83.2	98.6998	105.486	84.1003	106.582	130.534	131.354	109.397	121.957	103.874	91.1866	95.2885	108.452	128.045	130.245	117.107	111.025	99.8217	100.58	92.7484	100.07	123.149	122.603	105.198	133.041	95.6228	96.4916	82.7318	81.6076	100.663	91.5195	99.8011	90.4256	102.48	102.156	85.0833	80.8674	91.7711	100.069	99.4744	101.33	91.8299	98.9018	77.1094	81.634	99.4041	97.8249	90.6712	84.6916
	83.3	98.5411	105.385	83.7461	106.518	130.474	131.333	109.468	122.561	103.944	91.222	95.1794	108.495	127.811	130.181	117.431	111.026	99.9288	100.921	92.9178	100.286	123.192	122.719	105.053	133.434	95.7482	95.9871	82.6876	81.5094	100.639	91.1928	99.5314	90.4572	102.719	101.78	84.8711	81.133	91.7482	99.6826	99.5257	101.334	91.9422	99.3884	77.1932	81.5847	99.3105	97.5312	90.5077	84.8497
	83.4	98.4531	105.392	83.3713	106.349	130.793	131.441	109.534	123.033	104.127	91.0685	95.2039	108.395	127.871	130.064	117.696	111.267	100.028	101.278	92.9417	100.383	123.427	122.925	105.005	133.606	95.9877	95.6366	82.4456	81.3522	100.607	91.3518	99.3592	90.2838	102.973	101.279	84.6355	81.2148	91.583	99.2429	99.5861	101.435	92.087	99.7072	77.3897	81.5424	99.4496	97.2595	90.1564	85.0578
	83.5	98.2989	105.456	83.048	106.129	131.052	131.529	109.369	123.326	104.119	90.8806	95.1462	108.353	127.828	129.812	117.836	111.424	99.9155	101.337	92.9054	100.368	123.748	123.019	104.954	133.661	96.2216	95.5258	82.2308	81.4068	100.581	91.824	99.1889	89.9072	103.098	100.959	84.2892	80.9608	91.6296	98.954	99.8737	101.636	92.3882	100.135	77.6673	81.6304	99.4182	96.9216	90.0616	85.0684
	83.6	98.1955	105.54	82.7284	105.955	131.247	131.623	109.095	123.192	104.197	90.8336	95.2823	108.222	128.09	129.388	117.543	111.477	99.5929	101.279	92.8896	100.284	124.02	122.981	104.943	133.647	96.3773	95.7096	82.0861	81.6243	100.568	92.3761	98.9413	89.6202	103.13	100.695	84.0862	80.7377	91.8276	98.9268	100.128	101.632	92.6123	100.265	77.8196	81.5667	99.415	96.4718	89.9841	85.0394
	83.7	98.1978	105.637	82.4838	105.802	131.315	131.683	108.792	122.832	104.172	90.8478	95.5323	108.174	128.524	129.229	117.263	111.469	99.438	101.224	92.5584	100.085	123.911	122.72	104.762	133.499	96.4411	95.9112	81.8884	81.8238	100.449	92.8934	98.6244	89.5134	103.145	100.631	83.8886	80.7093	92.0574	99.1133	99.9391	101.404	92.8016	100.365	77.841	81.6786	99.6002	96.059	90.1625	84.9146
	83.8	98.0977	105.793	82.6106	105.674	131.088	131.75	108.515	122.356	104.155	90.896	95.9307	108.144	128.748	128.872	116.916	111.268	99.353	101.368	92.2187	99.9947	123.605	122.533	104.726	133.065	96.55	96.3106	81.8085	82.0775	100.514	93.3711	98.403	89.7283	103.071	100.672	83.901	80.7968	92.4121	99.2326	99.83	101.168	92.8242	100.173	77.9098	81.7748	99.4763	95.8846	90.786	84.8443
	83.9	97.9148	105.743	82.712	105.773	130.551	131.774	108.299	121.891	104.04	91.0698	96.2017	108.166	128.778	128.475	116.614	110.812	99.312	101.402	92.0395	100.013	123.304	122.116	104.785	132.558	96.6292	96.7997	82.0358	82.4933	100.727	93.5306	98.2837	89.9581	103.077	100.743	84.023	80.8576	92.8656	99.3985	99.7007	100.733	92.6724	99.8946	78.0908	81.8226	99.1754	95.6237	91.4264	84.7838
	84	97.6828	105.656	82.8044	106.03	129.814	131.682	108.228	121.453	104.138	91.3183	96.4048	108.135	128.962	128.391	116.502	110.422	99.309	101.474	92.0144	100.073	122.973	121.728	104.876	132.15	96.5833	96.9004	82.1926	82.7278	100.99	93.4354	98.1906	90.3084	103.144	100.662	84.1839	81.0654	93.1093	99.4681	99.4426	100.214	92.2824	99.6256	78.314	81.7993	98.95	95.3924	91.8528	84.8114
	84.1	97.3308	105.648	82.9768	106.269	129.046	131.654	108.39	121.278	104.356	91.5282	96.4114	108.158	129.047	128.444	116.644	110.373	99.4404	101.475	91.9793	100.104	122.76	121.532	105.063	131.649	96.3828	96.7896	82.2283	82.7949	101.125	93.2005	98.2686	90.5394	103.162	100.556	84.3385	81.1927	93.1243	99.3047	99.294	99.9224	91.795	99.5582	78.5904	81.9646	98.7408	95.251	92.2522	84.942
	84.2	97.0159	105.791	83.2234	106.581	128.435	131.545	108.446	121.084	104.624	91.4405	96.276	108.03	129.011	128.426	116.751	110.354	99.5018	101.414	92.0914	100.258	123.04	121.375	105.302	131.22	96.1638	96.8346	82.1716	82.6553	101.196	92.9831	98.5669	90.7024	103.237	100.578	84.7404	81.1049	93.2224	99.203	99.4034	99.9609	91.2264	99.5358	78.8734	82.0083	98.4272	95.2096	92.2617	85.1295
	84.3	96.9359	105.715	83.182	106.93	128.128	131.313	108.423	121.044	104.887	91.3198	96.0412	107.856	128.943	128.591	116.922	110.396	99.618	101.306	92.1632	100.28	123.53	121.229	105.546	131.182	96.0514	96.7637	82.1927	82.381	101.253	92.6896	98.9728	90.6484	103.406	100.787	85.1453	80.837	93.1033	99.1278	99.4666	100.166	90.6729	99.7101	79.0021	82.1356	98.1884	95.2435	91.9684	85.3257
	84.4	96.851	105.75	83.1585	107.184	127.895	130.99	108.438	121.1	105.124	91.0345	95.9782	107.733	128.817	128.852	116.933	110.638	99.5614	101.149	92.0978	100.201	123.835	121.255	105.847	131.455	96.0049	96.5106	82.1853	81.9662	101.159	92.3618	99.2414	90.8127	103.53	101.172	85.3002	80.7266	92.8434	99.0778	99.505	100.538	90.2401	99.7817	78.9477	82.2072	98.1181	95.4008	91.722	85.3002
	84.5	96.8534	105.765	83.0259	107.234	128.037	130.777	108.614	121.299	105.022	90.5965	96.174	107.625	128.396	128.963	116.818	110.851	99.5048	101.156	91.8522	99.9814	124.09	121.426	106.141	131.835	96.0505	96.463	82.2772	81.7188	101.03	92.0828	99.5976	91.0997	103.742	101.506	85.2471	80.6357	92.6516	99.071	99.5002	100.933	90.1295	99.6376	78.6841	82.1158	98.1579	95.6686	91.4334	85.1503
	84.6	97.1136	105.978	82.811	107.104	128.376	130.35	108.615	121.401	104.604	90.1299	96.4919	107.621	127.965	129.118	116.584	110.799	99.3426	101.31	91.5905	99.783	124.224	121.504	106.262	132.521	96.2034	96.616	82.5836	81.6506	101.058	92.0095	100.025	91.2888	104.086	101.596	84.9846	80.5738	92.4538	99.2201	99.4837	101.003	90.0522	99.4502	78.3458	81.7971	98.2075	96.0548	91.1015	84.8817
	84.7	97.4054	105.994	82.5562	107.01	128.601	129.965	108.737	121.618	104.064	89.8866	96.8391	107.659	127.656	129.288	116.298	110.719	99.0448	101.477	91.3984	99.5727	124.128	121.817	106.244	133.083	96.4223	96.6356	82.989	81.823	101.212	92.05	100.389	91.3316	104.401	101.551	84.4569	80.613	92.0908	99.2638	99.49	100.923	90.0684	99.063	78.0318	81.4283	98.3396	96.3782	90.9579	84.6209
	84.8	97.5778	105.968	82.4308	107.029	128.754	129.695	108.838	121.713	103.456	89.7117	97.1473	107.678	127.611	129.295	115.998	110.659	98.6991	101.65	91.2854	99.6158	124.048	122.281	106.008	133.326	96.4988	96.7525	83.3147	81.9232	101.2	92.0436	100.508	91.2714	104.479	101.147	83.8127	80.7642	92.12	99.405	99.422	100.821	90.2504	98.6884	77.8323	81.0222	98.4507	96.5506	91.0223	84.3025
	84.9	97.8524	105.98	82.3248	106.981	129.11	129.487	108.71	121.68	103.067	89.7604	97.3455	107.817	127.793	129.197	116.099	110.518	98.5164	101.846	91.2316	99.7758	123.929	122.781	105.506	133.496	96.5216	97.0167	83.3622	81.8722	101.28	92.196	100.497	90.9011	104.415	100.524	83.3387	80.7787	92.334	99.7428	99.3792	100.609	90.5641	98.6263	77.6847	80.7532	98.3754	96.6929	91.1378	84.2751
	85	98.1867	106.18	82.2652	106.913	129.51	129.37	108.351	121.547	103.034	89.898	97.3651	107.95	128.281	129.025	116.248	110.132	98.3032	101.871	91.1133	100.094	123.783	123.399	104.949	133.389	96.5295	97.277	83.298	81.5378	101.281	92.49	100.244	90.447	104.199	100.017	83.2537	80.7473	92.4418	100.155	99.3706	100.443	90.7313	98.6972	77.8115	80.8166	98.3218	96.8602	91.2104	84.434
	85.1	98.3834	106.152	82.3361	107.114	129.884	129.453	108.112	121.441	103.324	89.9452	97.2711	108.047	128.698	128.807	116.409	109.752	98.2506	101.663	90.906	100.32	123.63	124.061	104.606	133.098	96.4732	97.5577	83.0692	81.097	101.238	92.7284	99.8461	90.1805	103.894	100.007	83.2336	80.6786	92.7077	100.574	99.1694	100.457	91.0808	98.7541	78.0275	81.0777	98.4852	96.8906	91.2605	84.5733
	85.2	98.4855	106.135	82.2978	107.208	130.417	129.459	108.02	121.225	103.774	89.9027	97.1361	108.213	128.964	128.479	117.021	109.256	98.404	101.187	90.6431	100.474	123.184	124.489	104.488	133.019	96.289	97.8147	82.7467	80.3528	101.1	92.872	99.3524	89.8884	103.367	100.137	83.4018	80.5238	92.982	100.859	98.8255	100.403	91.5368	99.055	78.3703	81.2472	98.6192	96.7622	91.3567	84.5112
	85.3	98.5944	106.479	82.111	107.221	130.65	129.417	108.037	121.057	104.483	89.9008	97.1272	108.527	128.868	128.327	117.727	108.789	98.5266	100.65	90.5374	100.324	122.634	124.553	104.507	133.104	96.1515	97.877	82.3737	79.7154	101.092	93.2748	99.0554	89.7686	103.005	100.553	83.7278	80.4111	92.75	100.987	98.6584	100.242	91.9472	99.4464	78.6228	81.5017	99.0276	96.666	91.303	84.313
	85.4	98.5936	106.832	81.8374	107.377	130.619	129.287	108.226	121.013	104.991	89.8495	97.0096	108.623	128.617	128.304	117.992	108.423	98.5062	100.296	90.5114	99.9485	122.242	124.429	104.767	132.93	95.8428	97.7038	82.2846	79.4456	100.917	93.6158	99.0194	89.7798	102.706	101.169	84.0382	80.2817	92.4044	100.854	98.6099	100.125	92.3127	99.5792	78.6765	81.7692	99.6872	96.7226	91.1306	84.0568
	85.5	98.3757	107.013	81.7859	107.75	130.272	129.082	108.411	121.06	105.361	89.843	96.7987	108.78	128.314	128.269	118.103	108.483	98.5044	100.062	90.7433	99.4263	121.904	123.961	105.097	132.899	95.463	97.4731	82.3134	79.3624	100.728	93.6841	99.0933	89.6487	102.348	101.816	84.0276	80.2165	92.2204	100.558	98.7338	99.8939	92.6171	99.7382	78.385	81.973	100.321	96.7134	91.1632	83.8262
	85.6	98.2646	107.105	81.8412	107.906	129.755	129.095	108.523	121.153	105.455	90.0417	96.5488	108.764	127.994	128.146	118.147	108.714	98.322	100.035	91.1584	99.1018	121.61	123.369	105.253	132.797	95.2458	96.9462	82.4027	79.3118	100.374	93.6053	99.2391	89.5468	101.939	102.033	84.1086	80.1026	92.0798	100.255	99.0948	99.7476	92.8328	99.7943	78.0564	82.248	100.545	96.723	91.2664	83.829
	85.7	98.3038	107.214	82.0298	107.9	129.185	129.227	108.347	121.317	105.387	90.2909	96.3126	108.687	127.661	128.27	117.913	109.201	98.1092	100.305	91.6443	98.9316	121.626	122.819	105.373	132.516	95.2184	96.3501	82.7264	79.6425	100.086	93.4452	99.3893	89.6054	101.689	101.959	84.1163	79.9771	92.0964	100.145	99.5919	99.7218	92.9089	99.827	77.53	82.641	100.708	96.9232	91.3739	84.1822
	85.8	98.4576	107.069	82.3774	107.856	128.923	129.536	108.175	121.396	104.927	90.5042	95.9617	108.642	127.505	128.508	117.467	109.806	97.9084	100.497	91.9149	98.9342	121.701	122.484	105.498	132.249	95.2192	95.9469	83.0044	80.0787	99.6774	93.0586	99.4297	89.5273	101.506	101.815	83.9955	79.8581	92.2756	100.09	99.9514	99.9126	92.8609	99.6103	77.1528	82.9349	100.417	97.1452	91.4599	84.8682
	85.9	98.8181	106.983	82.8863	107.661	128.7	130.087	108.092	121.391	104.355	90.6567	95.7492	108.684	127.461	128.798	117.253	110.278	97.8418	100.484	91.99	99.2285	121.689	122.231	105.56	132.207	95.4894	95.7956	83.053	80.2	99.5546	92.5132	99.4158	89.5287	101.509	101.528	83.993	79.8837	92.4828	100.083	100.102	100.007	92.5272	99.4351	77.0554	83.178	99.9172	96.9348	91.4065	85.5116
	86	99.356	106.885	83.1723	107.276	128.719	130.618	108.179	121.199	103.622	90.6561	95.7029	108.449	127.476	129.267	117.327	110.489	97.8674	100.434	91.9097	99.6756	121.63	122.195	105.561	132.194	95.9904	95.839	82.9584	80.3889	99.6823	92.2323	99.4586	89.7396	101.945	101.128	84.3334	79.8092	92.5462	100.207	100.11	100.206	92.1922	99.297	77.1924	83.1673	99.4567	96.6892	90.9968	85.9901
	86.1	99.6076	106.778	83.1206	106.858	128.867	130.782	108.424	120.784	103.031	90.5193	95.7932	108.244	127.594	129.879	117.451	110.571	98.1083	100.335	91.8058	99.9184	121.534	122.145	105.49	132.167	96.4258	96.0009	82.7782	80.6178	100.145	92.1663	99.3516	89.8742	102.617	101.01	84.7254	79.8215	92.5418	100.255	99.9086	100.32	91.9107	99.3666	77.3887	82.9813	99.2843	96.6394	90.5101	86.1794
	86.2	99.7845	106.74	82.9482	106.674	128.931	130.868	108.919	120.246	102.499	90.3664	95.7912	108.107	127.947	130.149	117.342	110.48	98.1408	100.377	91.8974	100.026	121.369	122.085	105.287	132.115	96.7858	96.321	82.2906	80.6	100.647	92.084	99.4008	89.9424	103.41	101.104	85.1552	79.7982	92.4078	99.989	99.6516	100.384	91.59	99.3728	77.5727	82.963	99.2082	96.5253	89.9338	86.1553
	86.3	99.6844	106.664	82.7534	106.478	128.852	130.527	109.406	119.783	102.395	90.1283	95.811	107.694	128.368	130.089	117.263	110.193	98.1935	100.604	92.0454	100.178	121.445	122.017	104.976	132.021	97.0073	96.5894	81.9562	80.481	101.221	92.006	99.5494	90.0812	104.076	100.991	85.7173	79.6503	92.4808	99.6487	99.3426	100.215	91.4863	99.6297	77.6126	82.9062	99.4736	96.3152	89.5909	85.964
	86.4	99.396	106.311	82.3651	106.186	128.92	130.014	109.751	119.268	102.57	89.8601	95.8032	107.317	128.771	129.877	117.185	109.968	98.2265	100.806	92.3438	100.106	121.701	121.881	104.601	131.878	97.1164	96.698	81.9092	80.4675	101.565	92.0726	99.5441	90.2388	104.471	100.784	86.1182	79.4553	92.6036	99.2668	99.265	100.256	91.6807	100.05	77.6382	82.7685	99.9809	96.5289	89.6463	85.7282
	86.5	98.9483	105.896	82.034	105.874	128.923	129.703	109.951	118.946	102.902	89.8612	95.6821	107.268	129.014	129.463	116.826	109.792	98.1659	101.001	92.6502	99.9862	121.918	121.569	104.321	131.737	96.9908	96.4878	81.9511	80.4621	101.668	92.0665	99.5458	90.3742	104.409	100.628	86.2408	79.3988	92.751	98.9277	99.3271	100.285	91.8762	100.256	77.5524	82.8876	100.426	96.8427	90.0349	85.5242
	86.6	98.6777	105.636	81.9408	105.618	128.779	129.577	109.914	118.931	103.315	89.8475	95.4461	107.28	129.189	129.044	116.607	109.738	97.9458	101.298	92.8466	100.066	122.335	121.186	104.177	131.689	96.8329	96.4311	82.1016	80.424	101.436	91.9261	99.5897	90.5254	104.085	100.267	86.2665	79.3898	92.8662	98.7387	99.59	100.324	91.8978	100.41	77.2399	83.1634	100.752	96.8914	90.6339	85.4067
	86.7	98.0724	105.132	81.8826	105.338	128.663	129.553	109.672	119.344	103.84	89.8011	95.3401	107.306	129.177	128.924	116.593	109.763	97.997	101.208	92.7973	100.269	122.875	120.979	104.037	131.851	96.5947	96.2917	82.3948	80.4996	101.165	92.0265	99.3882	90.7852	103.636	99.8677	86.1948	79.5128	92.9614	98.847	99.9651	100.385	92.015	100.526	77.1105	83.2816	100.977	96.9417	91.2396	85.1352
	86.8	97.5614	104.775	81.6801	104.941	128.72	129.954	109.225	119.845	104.108	89.7116	95.3245	107.509	129.109	128.909	116.714	109.818	98.0943	100.994	92.7915	100.382	123.076	120.893	103.92	132.119	96.5422	96.1973	82.604	80.6324	101.004	92.3986	99.1674	91.0282	103.146	99.7484	85.995	79.7168	92.9982	99.0977	100.503	100.553	91.9589	100.422	77.0838	83.4227	100.977	97.1627	91.5434	84.8178
	86.9	96.9752	104.499	81.6951	104.912	128.708	130.449	108.812	120.588	104.235	89.6771	95.3987	107.526	128.819	128.889	116.685	109.89	98.2801	100.819	92.8366	100.602	123.109	120.973	103.875	132.497	96.4135	96.2776	82.5418	80.8453	100.889	92.7727	99.1155	91.1074	102.871	99.9459	85.6359	79.7791	92.7751	99.4319	100.859	100.597	91.8236	100.127	76.9739	83.5682	100.662	97.1546	91.5607	84.5752
	87	96.5921	104.389	81.719	104.883	128.67	130.53	108.455	121.259	104.203	89.4192	95.6965	107.52	128.571	128.885	116.755	109.978	98.6981	100.632	92.8875	100.772	123.235	121.219	103.76	132.864	96.3686	96.5665	82.4008	80.9085	100.9	93.0913	99.1278	91.0586	102.817	100.254	85.3918	79.727	92.6177	99.5895	100.959	100.66	91.6727	99.9392	76.9177	83.5986	100.214	97.066	91.3941	84.3469
	87.1	96.2057	104.286	81.6829	104.897	128.801	130.586	108.144	121.797	104.093	89.2165	96.135	107.602	128.421	128.812	116.55	109.92	99.156	100.215	93.0026	100.689	123.261	121.71	103.67	133.181	96.2585	96.7985	82.1077	81.0643	101.146	93.3822	99.2275	90.8185	102.887	100.529	85.241	79.5324	92.4035	99.5904	100.894	100.775	91.5427	99.5779	77.1825	83.2992	99.8883	97.1355	90.9729	84.1171
	87.2	96.4043	104.419	81.7961	104.967	129.076	130.539	107.873	121.786	103.937	89.1223	96.5191	107.513	128.295	128.742	116.222	109.964	99.5387	100.023	93.0062	100.392	123.183	121.81	103.785	133.36	96.1991	96.9968	81.8854	81.2859	101.41	93.3858	99.5612	90.4736	102.93	100.718	85.1332	79.2474	92.1715	99.459	100.572	100.713	91.299	99.1855	77.4279	82.9335	99.6553	97.2202	90.7176	84.0929
	87.3	96.7281	104.472	82.112	105.273	129.301	130.149	107.773	121.64	103.881	89.1884	96.8147	107.346	128.026	128.697	115.805	110.227	99.8314	100.004	92.8508	100.043	123.198	121.626	104.095	133.296	96.148	97.114	81.5913	81.3067	101.616	92.9545	99.9178	90.2146	103.014	100.754	84.9415	79.0226	91.6879	99.0743	100.129	100.463	91.087	98.8402	77.6281	82.5229	99.4454	97.3936	90.688	84.1521
	87.4	97.2401	104.603	82.1777	105.36	129.5	129.604	107.781	121.219	103.901	89.1872	96.9305	107.538	128.007	128.745	115.497	110.553	99.989	100.048	92.5697	99.8111	123.232	121.361	104.412	133.054	96.0689	96.9148	81.5551	81.2232	101.832	92.464	100.353	90.0544	103.022	100.606	84.9147	78.9684	91.4807	98.6432	99.6139	100.152	90.8343	98.6261	77.8255	82.2562	99.3719	97.565	90.7424	84.0713
	87.5	97.6926	104.828	82.2468	105.571	129.594	129.395	107.971	120.622	104.243	89.3528	96.7883	107.527	128.196	128.948	115.21	110.86	99.8013	100.239	92.2476	99.6683	123.338	121.008	104.798	132.772	96.011	96.7025	81.7115	81.3055	101.817	91.9994	100.725	89.901	102.974	100.353	84.7726	79.0372	91.3381	98.2163	99.1951	99.7914	90.7414	98.5418	78.0544	82.014	99.4167	97.6064	90.987	84.0262
	87.6	98.1226	104.935	82.2644	105.829	129.5	129.11	108.438	119.91	104.558	89.6808	96.6064	107.426	128.254	129.198	115.198	111.29	99.5796	100.609	91.9184	99.8831	123.31	120.721	105.194	132.484	96.1484	96.4328	82.0483	81.2145	101.627	91.6124	100.94	89.9931	102.814	100.402	84.568	79.261	91.1925	97.8377	98.8748	99.2321	90.7259	98.7128	78.1188	82.0174	99.2666	97.5188	91.3708	83.9377
	87.7	98.2116	104.894	82.2503	105.992	129.106	128.887	109.008	119.525	104.95	90.0207	96.4526	107.524	128.267	129.242	115.341	111.576	99.3342	101.011	91.7466	100.177	123.24	120.906	105.431	132.186	96.3956	96.2952	82.3141	80.9661	101.379	91.5089	100.981	90.1014	102.646	100.49	84.3971	79.546	91.0693	97.6469	98.7657	98.9093	90.7873	99.0739	78.0759	82.0145	99.0103	97.2176	91.592	83.8536
	87.8	98.2425	104.842	82.157	106.147	128.544	128.986	109.653	119.277	105.126	90.377	96.2948	107.808	128.264	129.375	115.443	111.608	99.2358	101.135	91.5944	100.464	123.168	121.277	105.487	132.097	96.3885	96.3382	82.6301	80.9196	101.197	91.8049	100.983	90.016	102.507	100.63	84.3552	79.7665	91.1045	97.8028	98.5822	98.826	90.7424	99.4372	78.0023	82.0285	98.8424	96.6373	91.6014	83.7326
	87.9	98.1933	104.826	82.2824	106.341	128.006	129.355	110.053	119.236	105.116	90.9078	96.2017	107.735	128.025	129.477	115.488	111.485	99.1627	101.257	91.4465	100.472	123.153	121.603	105.296	132.074	96.6422	96.648	82.7272	80.9682	101.09	92.2825	100.627	89.8755	102.389	100.513	84.5265	80.029	91.09	98.0066	98.6415	99.0161	90.6747	99.7513	77.884	81.9749	98.5838	96.1993	91.7274	83.6447
	88	98.0143	104.45	82.375	106.6	127.593	129.64	110.165	119.48	105.022	91.3159	96.1172	107.64	127.335	129.528	115.502	111.336	99.3029	101.118	91.4078	100.296	122.992	121.948	104.956	132.02	96.827	96.8083	82.7348	80.9572	101.115	92.7597	100.174	89.8144	102.329	100.312	84.754	80.2903	90.9051	98.3364	98.7886	99.281	90.3816	99.8667	77.7893	81.9844	98.2469	95.9197	91.718	83.451
	88.1	97.9505	104.086	82.6402	106.893	127.391	129.975	109.869	119.812	104.881	91.416	95.975	107.532	126.746	129.396	115.315	111.194	99.5077	100.907	91.3788	99.7322	122.94	122.079	104.48	132.034	96.8529	96.9397	82.6792	81.0277	101.324	93.467	99.9243	89.7225	102.411	99.8044	84.9078	80.496	90.7462	98.672	98.7753	99.8959	90.151	99.8558	77.7266	82.0497	98.1252	95.7679	91.7648	83.3654
	88.2	97.8984	103.943	82.7441	107.112	127.465	130.287	109.527	119.963	104.566	91.492	95.8088	107.351	126.309	129.364	115.12	111.004	99.5553	100.69	91.3186	99.285	122.902	121.956	103.89	132.215	96.6206	96.9522	82.6288	81.261	101.607	94.0113	99.7355	89.7278	102.711	99.2594	85.0481	80.8634	90.7654	98.9296	98.7244	100.428	89.9944	99.7725	77.6429	82.1622	98.1393	95.9774	91.8505	83.4095
	88.3	97.9204	103.917	82.7875	107.136	127.577	130.368	109.007	119.977	104.633	91.5273	95.7233	106.954	126.21	129.204	114.99	110.927	99.4636	100.698	91.2609	99.032	122.927	121.743	103.287	132.243	96.6052	96.6152	82.6312	81.5498	101.651	94.2374	99.4891	89.8775	103.022	98.7105	85.2665	81.2656	90.8118	98.9976	98.8416	100.862	89.9902	99.8442	77.5949	82.4574	98.132	96.2973	92.0962	83.4661
	88.4	98.003	103.918	82.7152	107.032	127.608	130.207	108.714	119.969	104.844	91.3744	95.7583	106.771	126.427	129.094	115.002	110.772	99.4541	100.647	91.231	98.9286	122.74	121.543	103.06	132.175	96.3212	96.2586	82.7387	81.8309	101.529	94.2863	99.5628	90.1953	103.337	98.5704	85.2401	81.4747	90.8309	99.0192	98.7956	100.968	90.078	99.9267	77.622	82.6519	98.2338	96.5407	92.0527	83.6256
	88.5	98.3207	104.375	82.7445	106.818	127.6	129.923	108.471	119.815	104.951	91.2536	95.88	106.872	127.089	128.942	115.085	110.618	99.3761	100.766	91.1623	98.9548	122.491	121.405	102.99	132.196	96.0946	96.0583	82.8076	82.0782	101.469	94.4148	99.5979	90.5072	103.587	98.5103	85.1916	81.4651	90.9177	99.0519	98.6612	100.958	90.3193	100.179	77.5627	82.6982	98.4004	96.8326	91.9572	83.9183
	88.6	98.5468	104.929	82.5212	106.45	127.37	129.674	108.448	119.763	105.015	91.2503	96.0221	107.012	127.768	128.971	115.068	110.263	99.1668	100.823	91.0496	99.2261	122.104	121.273	103.14	132.127	95.8996	95.8855	82.7952	82.2176	101.108	94.1963	99.5229	90.7328	103.757	98.612	85.141	81.3661	91.1987	99.0633	98.7286	100.64	90.5195	100.37	77.5175	82.573	98.4426	97.0339	91.6844	84.1342
	88.7	98.8292	105.109	82.2352	106.166	127.005	129.396	108.352	119.859	105.045	91.1405	96.1133	107.16	128.059	128.916	114.9	109.958	99.2787	100.739	91.0692	99.3338	121.643	121.144	103.557	131.757	95.9289	95.853	82.6882	82.2111	100.737	94.12	99.4567	90.8065	103.648	99.0116	85.1245	80.9769	91.3527	98.9811	98.6947	100.316	90.636	100.49	77.4725	82.3624	98.3341	97.048	91.3876	84.0489
	88.8	99.0896	105.201	81.8655	106.025	126.865	129.26	108.392	119.969	104.739	91.0826	96.141	107.578	128.113	129.02	114.795	109.624	99.3884	100.691	91.2787	99.1786	120.996	121.195	104.031	131.442	95.9519	96.0458	82.4903	82.0214	100.528	94.2926	99.2434	90.8648	103.625	99.516	85.0543	80.5076	91.4807	98.9571	98.6817	99.9838	90.6823	100.463	77.4526	82.0338	98.3616	96.9933	91.0978	83.9876
	88.9	99.2495	105.236	81.466	105.949	126.841	129.062	108.329	119.874	104.441	91.123	96.1144	107.999	127.906	128.96	114.495	109.476	99.2738	100.716	91.4738	99.0432	120.604	121.221	104.306	131.296	96.0879	96.1974	82.2262	81.5978	100.492	94.5069	98.9064	90.8136	103.395	99.7854	84.9312	80.1069	91.6337	98.9875	98.7475	99.8478	90.6936	100.467	77.38	81.8426	98.3862	96.9899	91.0503	83.9581
	89	99.2495	104.911	81.0737	105.884	126.769	128.891	108.318	119.918	103.955	91.1002	96.199	108.219	127.447	128.98	114.166	109.433	99.1116	100.674	91.7272	98.9876	120.294	121.265	104.447	130.987	96.2506	96.2441	81.9275	81.0847	100.517	94.5561	98.8387	90.8474	103.056	100.165	84.8219	79.9024	91.9172	98.9625	98.9307	99.7612	90.5993	100.341	77.2582	81.7238	98.4969	96.7389	91.0268	83.8484
	89.1	99.1349	104.457	80.859	105.957	126.887	128.668	108.207	120.007	103.652	91.0627	96.2112	108.567	126.854	128.991	114.087	109.59	98.9912	100.812	92.0705	98.7964	120.211	121.38	104.434	130.69	96.399	96.2677	81.8326	80.6832	100.964	94.699	98.8074	90.9046	102.842	100.49	84.848	79.775	92.0342	98.9956	99.1492	99.8966	90.4654	100.158	77.0278	81.7094	98.6294	96.4025	91.0235	83.807
	89.2	98.941	104.363	80.8119	105.94	126.933	128.536	108.182	119.949	103.578	90.9488	96.3206	108.968	126.702	129.011	114.118	109.84	98.5702	101.141	92.1736	98.8623	120.428	121.466	104.264	130.698	96.5836	96.2738	81.9586	80.2516	101.416	94.5459	98.8919	91.1116	102.734	100.522	84.8275	79.7395	92.2093	99.099	99.6067	100.065	90.3946	99.9622	76.9408	81.974	98.8106	96.11	90.9919	83.907
	89.3	98.6915	104.359	80.9929	105.828	126.833	128.366	108.064	119.927	103.725	90.6228	96.4391	109.051	126.531	128.776	113.96	110.004	98.0768	101.283	92.2059	99.0928	120.945	121.3	104.1	130.737	96.6493	96.2576	82.0924	79.9278	101.964	94.2202	99.2017	91.2784	102.519	100.446	84.7204	79.9066	92.4492	99.2299	99.9085	100.483	90.3071	99.8878	76.8588	82.2283	98.8138	95.9902	90.7381	83.9867
	89.4	98.509	104.54	81.3246	105.741	126.715	128.504	107.919	120.165	103.86	90.2722	96.4024	108.948	126.52	128.641	113.859	110.154	97.7687	101.462	92.3514	99.3	121.469	121.215	103.968	130.571	96.7054	96.2496	82.1708	79.9709	102.436	93.9388	99.4893	91.3026	102.558	100.477	84.7904	80.1736	92.637	99.3348	100.162	100.814	90.1968	99.9083	76.9647	82.4405	98.8244	95.7459	90.3495	83.9912
	89.5	98.3977	104.873	81.4852	105.573	126.891	128.936	107.696	120.422	104.219	89.986	96.1066	108.973	126.586	128.345	113.737	110.252	97.6473	101.775	92.4699	99.3752	122.129	121.044	103.98	130.514	96.8102	96.442	82.2864	80.2365	102.742	93.8424	99.5155	91.006	102.735	100.307	84.7985	80.3732	92.6194	99.3637	100.403	101.075	90.2661	100.025	77.1846	82.6564	98.7828	95.7767	90.0284	84.0703
	89.6	98.5075	105.339	81.631	105.282	127.103	129.412	107.508	120.509	104.405	89.8216	95.893	108.735	126.699	127.924	113.651	110.167	97.8464	101.928	92.5471	99.6452	122.577	120.854	103.885	130.544	96.8596	96.7036	82.1313	80.5799	102.589	93.8664	99.588	90.7746	102.77	100.151	84.6292	80.6346	92.6511	99.5143	100.476	101.171	90.4106	100.329	77.4837	82.8479	98.7812	96.0469	89.9083	84.1162
	89.7	98.864	105.873	81.7989	105.367	127.53	129.79	107.239	120.901	104.433	89.8756	95.7798	108.385	126.587	127.609	113.516	109.927	98.3508	101.992	92.7654	99.8108	122.806	120.946	103.871	130.315	96.6434	96.7136	81.7544	80.9624	102.247	93.9799	99.4217	90.487	102.8	100.116	84.395	80.8918	92.6402	99.6151	100.309	101.229	90.6475	100.64	77.614	82.8082	98.8997	96.2986	90.0086	84.124
	89.8	99.2315	106.256	81.8904	105.673	127.946	130.067	107.059	121.366	104.243	90.0529	95.8041	108.234	126.614	127.55	113.537	109.664	99.1212	102.158	92.9335	99.9816	122.817	121.382	103.981	130.026	96.5375	96.7426	81.562	81.2102	101.662	94.099	99.2439	90.3127	102.783	99.9385	84.213	80.8787	92.5051	99.6433	100.192	100.9	91.0274	100.759	77.66	82.733	99.0141	96.3914	90.3868	83.9832
	89.9	99.457	106.312	81.9005	106.175	128.331	130.13	106.904	121.624	104.078	90.2202	95.9243	108.336	126.607	127.526	113.689	109.334	99.8334	102.328	92.9696	100.137	122.636	121.786	104.249	130.14	96.4547	96.762	81.4463	81.0947	100.943	94.1473	99.0965	90.3982	102.712	99.7723	83.9452	80.7455	92.3622	99.577	100.119	100.691	91.417	100.612	77.4303	82.644	99.1316	96.5957	90.8643	83.7293
	90	99.5086	106.203	81.9908	106.758	128.418	129.923	106.872	121.655	104.072	90.4194	96.2119	108.312	126.646	127.611	113.966	108.93	100.319	102.381	92.8428	100.424	122.304	122.059	104.405	130.409	96.316	96.5692	81.3068	80.7819	100.311	94.0482	99.069	90.8666	102.728	99.6708	83.7258	80.7001	92.485	99.6719	99.938	100.619	91.7018	100.382	77.1575	82.5554	99.2677	96.7262	91.2825	83.4934
	90.1	99.4236	106.098	82.0402	107.452	128.367	129.626	106.8	121.683	104.162	90.589	96.4098	108.358	126.75	127.859	114.298	108.715	100.425	102.509	92.6826	100.555	122.016	122.243	104.666	130.619	96.3042	96.5071	81.4438	80.3144	100.108	93.6193	98.8194	91.288	102.855	99.7108	83.6415	80.61	92.6455	99.5578	99.7356	100.64	91.8862	99.9172	77.0012	82.4882	99.3501	96.7426	91.4908	83.4185
	90.2	98.937	105.733	82.111	107.758	128.174	129.367	106.832	121.432	104.178	90.6956	96.4124	108.308	127.135	128.004	114.936	108.696	100.297	102.506	92.5319	100.376	121.627	121.967	104.808	130.971	96.4992	96.7416	81.6031	79.9463	100.22	93.2638	98.6693	91.684	103.077	99.7902	83.6579	80.5976	92.7654	99.4844	99.3871	100.792	91.8942	99.4365	76.9405	82.4983	99.2538	96.6572	91.4439	83.3927
	90.3	98.3482	105.454	82.2457	107.895	127.929	129.104	106.87	121.008	104.195	90.8795	96.2626	108.157	127.38	127.824	115.516	108.863	99.855	102.298	92.4834	100.121	121.246	121.388	104.612	131.371	96.6403	96.8928	81.633	79.7321	100.417	92.9532	98.4053	91.9372	103.366	100.253	83.5943	80.8505	92.9905	99.5321	99.0532	101.237	91.8178	98.8858	77.0146	82.588	99.223	96.6178	91.383	83.5016
	90.4	97.9679	105.336	82.3304	107.68	127.707	128.731	106.925	120.698	104.106	91.0991	96.1548	107.731	127.502	127.654	115.804	109.057	99.4655	102.075	92.5249	99.8909	121.025	120.826	104.01	131.341	96.7848	97.047	81.6932	79.661	100.901	92.5862	98.118	92.004	103.604	100.704	83.6379	81.2203	93.2753	99.689	98.6844	101.495	91.7855	98.4366	77.2045	82.6506	99.0266	96.637	91.238	83.8044
	90.5	97.8011	105.512	82.4746	107.535	127.683	128.323	106.964	120.431	103.652	91.2548	95.8946	107.248	127.559	127.49	115.82	109.365	99.1344	101.761	92.7429	99.4627	120.92	120.57	103.299	131.239	96.6958	97.2554	81.9036	79.5921	101.444	92.1722	97.8189	91.8219	103.636	101.222	83.8214	81.4922	93.3114	99.6714	98.4292	101.58	91.6778	98.1721	77.3399	82.7656	98.6203	96.5976	91.1683	84.1667
	90.6	97.7067	105.6	82.6886	107.335	127.684	127.949	107.217	120.121	103.275	91.3689	95.7187	106.942	127.48	127.072	115.568	109.687	98.9019	101.388	93.0152	99.0096	120.917	120.339	102.698	131.162	96.48	97.1166	81.9641	79.5249	101.77	92.1511	97.7578	91.6066	103.552	101.564	83.8691	81.5996	93.1623	99.6432	98.3422	101.522	91.6896	98.248	77.3148	82.8983	98.2133	96.4242	91.2112	84.2896
	90.7	97.9394	105.756	82.838	107.14	127.667	127.539	107.236	119.841	103.074	91.5323	95.5226	106.819	126.991	126.871	114.844	109.902	98.75	101.128	93.2934	98.9835	121.176	120.325	102.187	131.144	96.2196	96.687	82.1942	79.283	101.759	92.2573	97.7976	91.2896	103.303	101.765	83.8072	81.5693	92.865	99.5691	98.6171	101.274	91.6749	98.3623	77.36	82.9061	98.0036	96.3186	91.335	84.3459
	90.8	98.3416	105.899	82.9969	106.981	127.672	127.166	107.159	119.718	103.048	91.552	95.2688	106.584	126.665	127.048	114.187	110.008	98.8666	100.989	93.5241	99.1124	121.479	120.197	102.054	131.271	96.0702	96.3576	82.3565	78.915	101.939	92.3541	98.0045	91.0826	103.063	101.699	83.8018	81.1948	92.5543	99.3744	99.0088	100.682	91.5803	98.7866	77.3438	82.7254	97.8256	96.163	91.2899	84.4076
	90.9	98.7585	106.071	83.1449	107.009	127.687	126.942	107.182	119.379	103.147	91.6012	95.0762	106.522	126.383	127.053	113.857	110.099	98.9709	100.531	93.6938	99.2639	121.675	120.109	102.288	131.527	95.8744	95.9628	82.6049	78.6849	101.949	92.481	98.358	90.9436	102.827	101.636	83.6896	80.5592	92.2037	99.1567	99.3463	100.229	91.4413	99.2675	77.3802	82.6286	98.0454	95.7763	91.3586	84.4217
	91	99.1484	106.077	83.1641	106.746	127.553	126.951	107.161	119.003	103.4	91.739	95.117	106.635	126.124	126.893	113.781	110.008	99.1491	100.229	93.692	99.5549	121.62	119.856	102.822	131.622	95.9418	95.6173	82.6626	78.6237	101.739	92.7162	98.6878	91.0426	102.794	101.514	83.3904	79.878	91.9147	99.0596	99.4082	100.034	91.3412	99.5031	77.61	82.4485	98.5953	95.4089	91.4736	84.1554
	91.1	99.5251	106.033	83.0394	106.445	127.556	126.98	106.978	118.659	103.496	91.8508	95.2334	106.558	126.007	127.212	113.766	109.706	99.374	99.9782	93.4469	99.9011	121.526	119.824	103.228	131.667	96.1942	95.5272	82.6775	78.8151	101.391	92.6151	98.956	91.0736	102.773	101.379	83.2602	79.4578	91.7711	99.0714	99.2763	100.077	91.194	99.6138	77.9002	82.1666	99.2816	95.2715	91.5906	83.8408
	91.2	99.8278	105.997	82.9468	106.214	127.697	127.052	107.076	118.238	103.405	91.7297	95.6058	106.477	126.174	127.407	114.01	109.359	99.5544	99.684	93.0833	99.9877	121.149	119.918	103.746	131.519	96.51	95.7895	82.454	79.1372	101.183	92.3287	99.1789	91.1879	102.739	101.202	83.2788	79.2741	91.9727	99.1137	98.9565	100.202	91.1094	99.7809	78.0657	82.0961	99.8876	95.1637	91.7421	83.6678
	91.3	100.04	105.926	82.6687	105.901	128.082	127.328	107.214	117.656	103.135	91.6492	96.1088	106.704	126.056	127.414	114.242	109.069	99.5576	99.5596	92.5947	99.8668	120.772	120.346	104.052	131.225	96.6604	96.0803	82.2736	79.6014	100.525	92.1615	99.421	91.1301	102.568	100.865	83.4065	79.362	92.2793	99.1521	98.4105	100.7	91.1036	99.809	78.1518	82.246	100.468	95.1078	92.0175	83.5956
	91.4	99.9166	105.862	82.3998	105.581	128.471	127.826	107.164	117.309	102.819	91.4202	96.5783	107.007	126.097	127.723	114.158	108.727	99.575	99.853	92.1726	99.6216	120.429	120.704	104.339	130.943	96.8392	96.449	81.985	80.0052	99.8651	92.1213	99.5781	91.0927	102.462	100.484	83.4933	79.7154	92.7187	99.2119	97.9591	101.023	91.077	99.88	78.1555	82.3014	100.58	95.229	92.0592	83.5802
	91.5	99.5974	105.8	82.1554	105.694	128.857	128.223	107.031	117.168	102.642	91.0477	96.9621	107.229	125.962	128.287	113.868	108.588	99.633	100.07	91.9608	99.2344	120.372	121.078	104.492	130.715	96.8837	96.7942	81.7628	80.281	99.4154	92.0946	99.6622	90.7308	102.233	100.139	83.7908	80.1011	93.2496	99.2268	97.6926	101.122	91.1463	100.066	78.0714	82.4724	100.514	95.3067	91.9733	83.9087
	91.6	99.1878	105.97	82.0035	106.035	129.125	128.715	106.821	117.169	102.629	90.5279	97.2236	107.435	125.749	128.479	113.607	108.571	99.6705	100.421	92.0733	98.894	120.295	121.045	104.66	130.558	96.7247	97.1692	81.5794	80.3161	99.16	92.3897	99.7246	90.6353	102.036	99.7996	84.0354	80.4466	93.7815	99.2154	97.5268	100.963	91.1221	100.034	78.0585	82.6033	100.258	95.323	91.7666	84.4963
	91.7	98.7315	106.042	81.8018	106.548	129.341	129.287	106.507	117.283	102.809	90.3742	97.1337	107.581	125.487	128.558	113.257	108.584	99.7034	100.771	92.2945	98.7207	120.501	120.961	104.65	130.569	96.5333	97.1326	81.5917	80.4148	98.8598	92.8706	99.8006	90.5244	102.021	99.6053	84.293	80.6152	94.0528	99.2077	97.5565	100.751	91.065	99.9204	78.1311	82.5287	99.8969	95.331	91.5123	85.0157
	91.8	98.2599	106.228	81.6478	107.232	129.195	129.58	106.1	117.564	103.22	90.291	96.9524	107.72	125.556	128.78	112.855	108.545	99.782	100.989	92.4664	98.6407	120.816	120.77	104.672	130.517	96.3443	96.9756	81.7404	80.4398	98.9176	93.203	99.7889	90.5026	102.208	99.677	84.5139	80.7042	94.0336	99.177	97.783	100.327	90.905	99.7292	78.3372	82.4206	99.3705	95.4275	91.0754	85.4588
	91.9	98.1358	106.368	81.6218	107.85	129.012	129.435	105.857	117.815	103.666	90.2758	96.5632	107.789	125.465	128.816	112.847	108.724	99.7596	100.948	92.5572	98.729	121.271	120.534	104.532	130.55	96.0425	96.8842	81.8084	80.3691	98.991	93.3295	99.7116	90.3352	102.496	99.6898	84.8413	80.7182	93.7677	99.1311	97.998	100.107	90.8224	99.3932	78.6985	82.417	99.0674	95.4186	90.8106	85.6955
	92	98.2379	106.516	81.733	108.03	128.839	129.295	105.882	118.089	104.072	90.429	96.1529	107.78	125.819	128.657	112.928	108.913	99.648	100.879	92.541	98.9533	121.577	120.354	104.271	130.612	95.8598	96.809	81.8834	80.2923	98.9989	93.4479	99.7433	90.2554	102.815	99.6653	84.9305	80.8333	93.3099	99.1065	98.3427	100.081	90.74	98.9694	79.0302	82.3125	98.8146	95.5118	90.5802	85.4722
	92.1	98.4726	106.393	81.7982	107.903	128.61	128.988	106.002	118.327	104.396	90.7848	95.7955	107.892	126.201	128.55	112.928	108.988	99.5322	100.582	92.4128	99.0254	121.888	120.46	104.022	130.572	95.8914	96.5096	81.95	80.274	98.9962	93.2956	99.7541	89.8954	103.292	99.6599	84.9889	80.8888	92.6794	98.9583	98.7903	100.321	90.7197	98.8438	79.1717	82.4645	98.6725	95.5138	90.4306	85.0822
	92.2	98.6955	106.421	81.9068	107.494	128.159	128.444	106.259	118.677	104.692	90.771	95.6934	108.091	126.435	128.453	112.945	108.967	99.5709	100.391	92.2258	98.9746	121.999	120.258	103.793	130.462	95.8818	96.6372	82.0467	80.1547	99.1748	92.8176	99.6292	89.6145	103.763	99.6706	84.9107	80.9256	92.1567	98.9231	98.8826	100.594	90.6783	98.7145	79.216	82.6561	98.706	95.6294	90.3	84.6198
	92.3	99.0319	106.354	82.0943	106.822	127.922	128.206	106.923	119.075	104.959	90.6504	95.5566	108.05	126.481	128.101	113.107	108.97	99.7288	100.271	92.2446	98.9383	121.951	119.889	103.528	130.5	96.0255	96.8799	81.9976	80.1417	99.4202	92.3568	99.5095	89.4663	104.201	99.753	84.7569	80.834	91.8361	98.844	98.8983	100.854	90.879	98.6577	79.2246	82.7	98.8608	95.6654	90.4087	84.1208
	92.4	99.2228	106.376	82.2186	106.216	127.583	128.384	107.474	119.609	105.191	90.5304	95.5672	107.916	126.587	127.68	113.058	108.892	99.929	100.33	92.2768	98.8636	121.677	119.539	103.348	130.543	96.371	96.8582	82.0613	80.153	99.8155	92.1338	99.4187	89.4892	104.367	99.9477	84.5107	80.7378	91.8316	98.7466	98.901	101.124	90.9935	98.6322	79.038	82.5485	99.0307	95.8386	90.5275	83.7259
	92.5	99.2986	106.308	82.2876	106.032	127.044	128.513	107.842	119.941	105.291	90.2488	95.6095	108.076	126.3	127.32	113.178	108.728	100.022	100.478	92.3136	98.8434	121.395	119.087	103.285	130.567	96.7115	96.7261	82.2195	80.1664	100.161	91.8676	99.3601	89.5709	104.458	100.211	84.4017	80.503	91.9118	98.5696	98.7818	101.147	90.9362	98.7328	78.6985	82.2291	99.2005	95.9286	90.5543	83.7472
	92.6	99.2428	106.32	82.3958	106.071	126.412	128.679	108.254	120.119	105.277	89.953	95.6886	108.168	126.112	126.735	113.529	108.841	100.005	100.773	92.2459	99.0775	120.964	118.692	103.177	130.604	96.8435	96.6813	82.4574	80.1287	100.386	91.6024	99.3308	89.8263	104.342	100.576	84.3325	80.1457	92.3529	98.5873	98.5716	100.921	90.9662	98.641	78.5291	81.6453	99.2535	96.0774	90.5346	83.8875
	92.7	99.1931	106.241	82.4113	106.271	126.12	129.062	108.622	120.054	105.262	89.914	95.6561	108.159	126.053	126.16	113.978	109.257	99.681	101.024	92.1683	99.4178	120.593	118.771	103.075	130.689	96.9539	96.2781	82.5349	80.3218	100.488	91.5706	99.394	89.9884	104.114	100.849	84.3938	79.8047	92.797	98.3385	98.7858	100.719	91.145	98.655	78.3919	81.0725	99.0819	96.0431	90.372	84.1256
	92.8	99.0302	106.052	82.4138	106.651	125.803	129.17	108.463	119.926	105.234	89.93	95.7006	108.043	125.879	125.678	114.207	109.704	99.2126	101.159	92.02	99.7386	120.299	119.001	102.94	130.567	96.9412	95.7459	82.6153	80.389	100.548	91.5262	99.375	89.9374	103.669	100.78	84.5092	79.7112	93.2496	98.1974	99.013	100.609	91.0622	98.8367	78.0581	80.6284	99.0452	95.86	90.0587	84.3334
	92.9	98.903	105.689	82.376	107.076	125.722	128.965	108.425	119.737	105.16	90.0337	95.707	107.867	125.567	125.285	114.363	109.934	98.7762	101.294	91.771	99.7813	120.284	119.253	102.695	130.254	96.7382	95.4836	82.5898	80.5446	100.482	91.4148	99.3619	89.8278	103.328	100.606	84.7081	79.822	93.452	97.9938	99.2954	100.345	91.049	99.2116	77.7002	80.4098	98.8336	95.5885	89.7482	84.5681
	93	98.8026	105.448	82.4028	107.153	125.981	128.823	108.41	119.659	105.131	90.2338	95.6505	107.364	125.377	125.115	114.341	110.054	98.5448	101.392	91.4552	99.7661	120.504	119.407	102.398	129.988	96.3692	95.3131	82.4094	80.7778	100.588	91.241	99.2237	89.8628	102.952	100.455	84.849	80.1162	93.7107	97.9232	99.6018	100.395	91.2471	99.537	77.6092	80.5558	98.4191	95.4767	89.6976	84.7217
	93.1	98.6643	105.262	82.5538	106.993	126.593	128.938	108.308	119.767	105.316	90.2879	95.6472	106.934	124.991	125.331	114.147	109.903	98.4668	101.379	91.363	99.576	120.896	119.466	102.274	129.877	96.0966	95.26	82.192	80.9694	100.944	91.2349	99.0844	89.7736	102.583	100.27	84.9926	80.5511	93.6072	97.7444	99.9973	100.7	91.221	100.009	77.4005	80.9009	98.1236	95.4375	89.8726	84.7302
	93.2	98.5932	105.213	82.833	106.933	127.066	128.948	107.95	120.002	105.435	90.2287	95.7064	106.724	124.694	125.803	113.817	109.367	98.5916	101.364	91.3653	99.3586	121.147	119.362	102.189	129.655	95.8875	95.5009	82.0409	80.6295	101.41	91.2271	98.9913	89.7883	102.212	100.086	85.046	80.9799	93.4132	97.9092	100.123	101.072	91.0504	100.413	77.1808	81.3719	98.016	95.4453	90.3968	84.6007
	93.3	98.5104	105.431	83.1336	106.855	127.582	129.066	107.807	120.106	105.377	90.3214	95.7199	106.885	124.702	126.365	113.633	108.773	98.7822	101.554	91.3236	99.1834	121.29	119.254	102.278	129.623	95.9014	95.7774	81.9284	80.4237	101.7	91.3312	98.9689	90.0364	102.071	100.126	85.0564	81.3154	93.0426	98.056	100.181	101.474	91.0977	100.543	77.1752	81.7152	97.8384	95.6953	91.0192	84.4783
	93.4	98.441	105.685	83.5353	106.707	127.956	129.304	107.426	119.89	105.221	90.2814	95.7233	107.209	125.091	126.899	113.513	108.418	98.9801	101.706	91.4483	99.5104	120.961	119.126	102.516	129.776	96.1197	95.9827	81.9475	80.2211	101.903	91.3934	99.0283	90.366	101.838	100.455	85.0279	81.1204	92.7028	98.4248	99.9768	101.902	91.1113	100.481	77.2812	81.8247	97.958	95.9589	91.6593	84.3617
	93.5	98.2934	105.904	83.818	106.839	128.186	129.494	106.999	119.587	105.036	90.1323	95.7859	107.631	125.468	127.212	113.388	108.214	99.0929	101.882	91.7261	99.86	120.257	119.225	102.617	129.929	96.4228	96.2662	82.0488	79.9089	102.039	91.6892	99.261	90.5323	101.73	100.65	85.1211	80.794	92.3441	98.8461	99.8112	102.049	91.0623	100.49	77.2094	81.6399	98.3875	95.9952	92.0178	84.133
	93.6	98.2731	106.2	83.9829	107.146	128.118	129.371	106.532	119.274	104.642	90.2869	95.5656	108.086	125.93	127.34	113.221	108.17	99.2401	102.241	91.8982	100.195	119.584	119.426	102.444	129.887	96.6415	96.4134	82.081	79.7312	102.061	92.0052	99.6228	90.7346	101.623	100.765	85.2075	80.5372	92.1418	99.2281	99.3914	101.935	91.2479	100.433	77.1634	81.4678	98.7849	95.9277	92.0639	83.9249
	93.7	98.2104	106.288	84.2152	107.468	128.006	129.27	106.199	119.082	104.277	90.3426	95.4464	108.192	126.18	127.104	113.162	108.36	99.4568	102.63	92.0014	100.534	119.343	119.558	102.17	129.942	96.8203	96.351	82.1116	79.9829	101.979	92.2871	100.027	90.8237	101.455	100.881	85.3282	80.439	92.0635	99.2436	99.0585	101.707	91.5883	100.445	77.1562	81.2352	99.1495	96.0078	91.9294	83.9541
	93.8	98.2314	106.176	84.4076	107.749	127.643	129.169	105.742	119.027	103.983	90.2486	95.4683	108.087	126.266	126.934	113.132	108.451	99.6908	102.715	92.2431	100.804	119.247	119.738	101.876	129.945	96.6952	96.3652	82.1434	80.1044	102.005	92.4946	100.466	90.7247	101.269	100.973	85.4174	80.3234	92.119	99.2511	98.7459	101.383	91.7379	100.52	77.2258	81.3365	99.348	96.1584	91.7778	84.0657
	93.9	98.3239	106.281	84.3465	107.937	127.376	129.002	105.528	119.212	103.925	90.3026	95.6875	107.877	126.016	126.756	113.184	108.46	99.9368	102.659	92.5365	100.784	119.656	120.106	101.764	129.845	96.4713	96.3917	82.1984	80.1421	102.122	92.6518	100.77	90.4636	101.237	100.589	85.4202	80.7008	92.234	99.1487	98.7075	101.197	91.7601	100.603	77.366	81.7576	99.3412	96.2921	91.4454	84.1874
	94	98.588	106.496	84.2287	107.855	127.156	128.654	105.435	119.424	103.971	90.5177	95.7926	107.661	125.749	126.431	113.254	108.358	100.246	102.625	92.7178	100.621	120.235	120.395	102.129	129.689	96.4613	96.3602	82.1437	80.288	102.025	92.5841	101.069	90.2889	101.098	100.229	85.3347	81.0522	92.4792	98.899	98.551	100.989	91.6554	100.533	77.5351	82.2981	99.077	96.513	91.2745	84.39
	94.1	98.8489	106.491	83.9468	107.786	126.979	128.385	105.493	119.528	104.145	90.4611	96.1317	107.367	125.349	126.268	113.518	108.079	100.536	102.273	92.7676	100.464	120.695	120.429	102.866	129.737	96.7344	96.3939	82.2136	80.4206	101.832	92.4354	101.242	90.1046	100.94	99.9299	85.2484	81.1326	92.8269	98.806	98.5918	100.741	91.4312	100.327	77.7722	82.6489	98.7453	96.7946	91.2152	84.6281
	94.2	99.0761	106.474	83.3537	107.263	126.663	128.158	105.751	119.412	104.283	90.6533	96.2439	107.235	125.135	126.323	113.738	107.78	100.73	101.87	92.822	100.234	120.746	120.395	103.729	129.747	97.171	96.3558	82.3924	80.3021	101.677	92.3361	101.267	90.0676	100.786	99.7978	85.079	80.9766	93.0026	98.7469	98.526	100.381	91.058	99.9264	77.9036	82.9681	98.4193	96.9284	90.9698	84.5811
	94.3	99.2384	106.497	82.6312	106.716	126.516	127.916	106.199	119.184	104.487	90.8416	96.2311	107.147	124.864	126.18	113.828	107.619	100.681	101.726	92.783	99.923	120.718	120.381	104.508	129.695	97.7477	96.3031	82.6265	80.1602	101.379	92.2568	101.195	90.1715	100.41	99.7922	85.1537	80.7161	93.2248	98.6604	98.4216	100.112	90.7768	99.6765	77.738	82.8892	98.2997	96.6691	90.609	84.4258
	94.4	99.1878	106.245	82.0382	106.383	126.1	127.873	106.52	118.922	104.512	90.999	95.9438	107.277	124.516	126.126	113.824	107.32	100.423	101.734	92.4831	99.5374	120.428	120.172	104.793	129.73	98.3216	96.0762	82.6657	80.0361	100.918	92.2497	101.021	90.2826	99.9863	100.088	85.3755	80.1414	93.315	98.4404	98.2044	99.7311	90.8113	99.4238	77.4888	82.5437	98.2351	96.4947	90.4178	84.1371
	94.5	98.9438	105.684	81.4904	106.209	125.563	128.102	106.686	118.66	104.522	91.1202	95.7597	107.542	124.13	126.425	113.904	107.138	100	101.62	92.1756	99.3487	120.256	119.877	104.653	129.918	98.6271	95.6498	82.7968	79.8872	100.707	92.2849	100.559	90.2558	99.6809	100.572	85.5067	79.6316	93.1658	98.2516	97.9746	99.571	91.0237	99.2482	77.272	82.3151	98.3456	96.3413	90.1279	83.8106
	94.6	98.5473	105.241	81.1505	106.01	125.18	128.403	106.85	118.278	104.553	91.4393	95.5134	107.884	123.996	126.561	113.924	107.071	99.4432	101.77	92.0178	99.2702	120.28	119.785	104.19	129.921	98.5832	95.1928	82.8271	79.7444	100.482	92.2746	100.002	90.2954	99.6425	100.945	85.5666	79.318	92.795	97.8819	97.7711	99.711	91.4163	99.1506	76.9987	82.2042	98.5861	96.0392	89.7836	83.4593
	94.7	98.1696	104.973	81.024	106.114	125.105	128.65	106.801	117.865	104.536	91.6248	95.3814	108.212	123.789	126.651	113.958	106.991	98.9012	101.861	91.8891	99.2933	120.339	119.695	103.705	130.052	98.1534	95.0737	82.7068	79.9025	100.239	92.2739	99.4698	90.3051	99.7418	101.134	85.6746	79.1936	92.585	97.7339	97.6856	100.032	91.9108	99.084	76.8742	82.0672	98.6868	95.8101	89.5995	83.2762
	94.8	97.7428	104.648	81.0059	106.294	125.128	128.866	106.787	117.468	104.524	91.8326	95.2273	108.48	123.608	126.774	114.028	106.988	98.696	101.813	91.7552	99.4648	120.262	119.436	103.042	130.33	97.6385	94.8396	82.412	80.1975	100.302	92.3176	99.0878	90.1945	100.043	101.093	85.4444	79.2842	92.3382	97.6438	97.7203	100.258	92.4798	98.8758	76.9672	82.1553	98.6814	95.8877	89.576	83.161
	94.9	97.4879	104.364	81.0848	106.166	125.392	128.808	106.921	117.084	104.684	91.8629	95.2149	108.529	123.612	126.718	114.195	107.175	98.7828	101.687	91.9756	99.7649	120.305	119.108	102.537	130.542	97.1618	94.8714	82.25	80.573	100.58	92.3853	99.0168	90.3035	100.477	101.006	85.1552	79.8313	92.2729	97.7288	97.866	100.516	92.7777	98.697	77.0318	82.3677	98.5596	95.8544	89.7666	83.3118
	95	97.4406	104.359	81.3009	106.044	125.78	128.519	107.058	116.64	104.74	91.7244	95.2242	108.307	123.807	126.321	114.3	107.321	99.0229	101.573	92.2403	99.8398	120.277	118.912	102.046	130.51	96.7914	95.1973	82.1532	80.9888	100.716	92.6076	99.1218	90.5535	100.927	100.594	85.0483	80.4715	92.2183	97.757	98.1738	100.693	92.7768	98.4366	77.1015	82.523	98.3553	95.8074	90.2266	83.5482
	95.1	97.6263	104.409	81.4713	105.945	126	128.067	107.161	116.504	104.81	91.4476	95.2612	108.012	123.958	126.002	114.353	107.634	99.2264	101.291	92.523	99.8166	119.927	118.701	101.606	130.695	96.5087	95.6091	82.1812	81.437	100.903	93.063	99.2948	90.8502	101.076	100.306	84.9638	81.0808	92.4323	97.8628	98.2657	100.8	92.4716	98.2913	77.3238	82.6734	98.0633	95.8788	90.896	83.8792
	95.2	97.7283	104.382	81.6483	105.948	126.181	127.66	107.344	116.664	104.949	91.1562	95.2696	107.867	124.015	125.685	114.386	107.949	99.3401	101.252	92.7165	99.577	119.561	118.64	101.202	130.837	96.517	95.8639	82.34	81.6854	101.092	93.2474	99.4331	91.0241	101.319	100.102	84.9178	81.4332	92.623	97.8911	98.293	100.92	92.0209	98.3057	77.5462	82.9257	97.9033	95.882	91.6051	84.169
	95.3	97.9557	104.383	81.9108	105.979	126.094	127.316	107.381	117.098	104.976	90.8776	95.3926	107.756	124.051	125.525	114.506	108.183	99.2353	101.258	92.8478	99.3296	119.496	118.784	101.118	130.961	96.6298	96.3271	82.673	81.7605	101.077	93.3478	99.391	91.1603	101.6	100.128	84.9762	81.5157	92.785	97.9434	98.3259	101.163	91.4973	98.3495	77.7966	83.1095	97.8026	95.8313	92.2011	84.4437
	95.4	97.9581	104.441	82.155	106.359	125.939	127.249	107.296	117.728	104.761	90.8122	95.602	107.684	123.956	125.602	114.496	108.393	99.0728	101.206	92.6924	99.0594	119.3	119.192	101.308	131.168	96.5711	96.7018	82.9472	81.7358	101.017	93.4156	99.2003	91.1249	101.637	100.203	84.9978	81.0902	92.8699	97.9772	98.3159	101.424	91.147	98.4018	78.0955	83.301	98.003	95.9536	92.4548	84.5749
	95.5	97.7446	104.407	82.1772	106.745	125.85	127.319	107.459	118.672	104.53	90.9635	95.6717	107.812	123.655	125.917	114.442	108.635	98.84	101.273	92.5398	99.1151	119.132	119.462	101.772	131.542	96.4273	96.9864	83.2122	81.6173	101.014	93.3483	99.1361	91.0753	101.63	100.475	84.8004	80.4596	93.1094	98.1018	98.1319	101.582	91.1315	98.5805	78.4115	83.3384	98.2251	96.0709	92.3226	84.7143
	95.6	97.484	104.407	82.0878	107.086	125.912	127.644	107.482	119.405	104.137	91.0903	95.7636	107.917	123.307	126.028	114.383	108.574	98.6858	101.593	92.2591	99.1884	119.265	119.69	102.401	131.666	96.2798	97.1873	83.3013	81.3352	101.026	92.9024	99.1675	90.9943	101.658	100.783	84.546	79.7585	93.0858	98.4466	98.2462	101.495	91.3637	98.7173	78.5424	83.2483	98.4208	96.1869	92.1031	84.903
	95.7	97.431	104.6	81.91	107.454	125.752	127.963	107.375	119.983	103.839	91.2172	95.9736	107.826	123.074	125.987	114.306	108.509	98.6392	101.488	92.0756	99.4058	119.57	119.973	102.883	131.593	96.048	97.3142	83.1419	81.1277	101.016	92.8148	99.3499	90.9256	101.392	100.929	84.2506	79.3066	93.0728	98.9792	98.3297	101.241	91.6256	98.7924	78.629	82.992	98.6263	96.2611	91.9561	85.1148
	95.8	97.3787	104.876	81.6928	107.767	125.883	128.213	107.319	120.228	103.647	91.2091	96.1872	107.784	122.993	125.836	114.017	108.268	98.7546	101.421	91.9805	99.6193	119.748	120.007	103.287	131.395	95.8806	97.2969	82.9318	81.1363	101.055	92.7571	99.5413	90.8895	101.055	100.825	84.0644	79.1178	92.9574	99.4672	98.3916	100.736	91.7916	98.8136	78.6087	82.7848	98.8299	96.174	91.7922	85.3445
	95.9	97.7071	105.18	81.3753	107.902	126.121	128.334	107.255	120.115	103.782	91.0191	96.2654	107.757	123.261	125.599	113.655	108.035	98.7759	101.504	92.0034	99.7566	120.069	119.966	103.57	131.091	95.8899	97.2558	82.7856	81.1972	101.034	92.6571	99.7667	90.8334	100.951	100.471	84.0748	79.1478	92.7926	99.8154	98.3256	100.136	91.6896	98.819	78.5199	82.4774	98.7224	95.829	91.6046	85.4934
	96	98.1276	105.396	81.2584	108.06	126.145	128.534	106.925	119.645	104.181	90.6697	96.4469	107.68	123.649	125.475	113.318	107.645	98.8431	101.531	92.0666	99.6514	120.225	120.215	103.532	130.814	95.9569	97.1676	82.4912	81.2468	100.847	92.5206	99.9582	90.745	100.962	100.188	84.2474	79.2628	92.5488	100.168	98.4459	99.644	91.4879	98.8505	78.4287	82.2316	98.5404	95.724	91.6372	85.4446
	96.1	98.477	105.587	81.3887	108.261	126.009	128.487	106.644	119.191	104.723	90.315	96.5517	107.628	124.096	125.724	112.996	107.432	99.0095	101.335	92.2692	99.6444	120.221	120.581	103.363	130.62	96.1443	97.0772	82.3634	81.5192	100.71	92.4794	99.9753	90.5996	101.187	99.62	84.6664	79.6558	92.3729	100.314	98.3958	99.3777	91.1644	98.7372	78.3908	82.1006	98.408	95.7466	91.4047	85.1364
	96.2	98.6615	105.658	81.51	108.195	126.124	128.399	106.524	118.655	105.131	90.0237	96.4499	107.616	124.534	126.303	112.658	107.197	99.2022	101.464	92.4238	99.707	120.228	120.687	103.333	130.48	96.4428	96.9875	82.5555	81.6786	100.536	92.2947	99.88	90.5164	101.598	99.1447	85.1858	80.1302	92.0083	100.315	98.4345	99.3124	91.0686	98.7206	78.4333	82.0298	98.356	95.8721	90.9823	84.8302
	96.3	98.7842	105.785	81.5768	108.019	126.181	128.353	106.393	118.172	105.544	89.8705	96.1509	107.665	124.796	127	112.564	107.172	99.2818	101.599	92.6368	99.7711	120.186	120.971	103.187	130.293	96.5826	96.8564	82.7054	81.5624	100.309	92.1381	99.9544	90.6862	102.002	98.8362	85.5753	80.4786	91.8349	100.391	98.477	99.4806	91.0405	98.8582	78.2382	81.8088	98.2367	96.0461	90.6164	84.574
	96.4	98.603	105.888	81.6617	107.904	126.184	128.194	106.335	117.721	105.636	89.8713	95.8722	107.765	124.751	127.612	112.713	107.06	99.3594	101.797	92.7425	99.9936	120.078	121.065	102.901	130.219	96.7403	96.7241	82.8415	81.3372	100.14	91.8908	99.8794	90.8974	102.314	98.7805	85.5902	80.6906	91.8116	100.615	98.7126	99.7148	91.3137	98.9818	78.0726	81.6442	98.3168	96.2978	90.4059	84.3568
	96.5	98.4294	106.202	81.648	107.568	126.419	128.083	106.279	117.503	105.461	89.9872	95.6496	107.915	124.552	127.821	112.931	107.012	99.4318	101.898	92.675	100.156	120.178	120.763	102.745	129.938	96.8879	96.6555	83.0356	81.1739	100.295	91.6805	99.5673	91.061	102.345	98.6027	85.4749	80.8813	91.7544	100.703	98.8742	99.9692	91.6094	98.8971	77.8909	81.5167	98.5988	96.1978	90.1815	84.2624
	96.6	98.1506	106.364	81.4283	107.019	126.765	128.041	106.361	117.379	105.195	90.1882	95.4068	108.016	124.122	127.737	113.113	106.92	99.5408	102.143	92.5682	100.127	120.352	120.13	102.614	129.695	97.0038	96.602	83.0615	80.7481	100.365	91.6837	99.3085	91.0713	102.221	98.8031	85.184	80.8654	91.7597	100.737	99.0047	100.186	91.8605	98.9353	77.6131	81.4537	98.8207	95.7269	90.3126	84.3746
	96.7	97.9508	106.402	81.3361	106.707	127.018	127.991	106.448	117.299	104.98	90.3203	95.2876	108.146	123.674	127.316	113.33	106.82	99.647	102.306	92.5127	99.9363	120.369	119.668	102.384	129.586	96.88	96.5438	82.8232	80.3521	100.476	91.6528	99.0268	90.9912	102.136	99.0632	84.6767	80.5928	91.9674	100.575	99.2118	100.201	91.9892	98.8002	77.1442	81.5473	98.7076	95.2511	90.5024	84.5373
	96.8	97.655	106.207	81.296	106.597	127.147	127.927	106.574	117.471	104.626	90.3928	95.3523	108.153	123.402	126.787	113.354	106.782	99.7749	102.309	92.3036	99.5874	120.409	119.15	102.15	129.557	96.6876	96.5631	82.6056	80.123	100.5	91.633	98.635	90.6446	101.96	99.2893	84.2333	80.4398	92.1554	100.345	99.3488	100.228	92.2781	98.647	77.0798	81.7498	98.6442	95.188	90.7673	84.5911
	96.9	97.4254	105.915	81.3788	106.493	127.17	128.086	106.587	118.1	104.469	90.3853	95.4191	108.143	123.073	126.352	113.272	106.852	100.051	102.171	92.2251	99.1663	120.327	118.867	102.007	129.378	96.3488	96.4846	82.3806	80.0324	100.551	91.925	98.4834	90.2999	101.751	99.6324	84.0202	80.5717	92.2446	99.9468	99.4515	100.303	92.3767	98.6538	77.0505	81.8854	98.4322	95.21	91.1513	84.7087
	97	97.2637	105.577	81.4912	106.604	127.056	128.153	106.596	118.554	104.341	90.3936	95.4694	108.137	123.004	126.06	113.027	107.085	100.285	102.104	92.2251	98.9131	120.218	118.918	101.913	129.432	96.0367	96.259	82.2758	79.9522	100.459	92.1853	98.5899	90.022	101.696	100.057	83.901	80.6655	92.496	99.8127	99.5092	100.307	92.4155	98.9502	77.0172	82.1273	98.0883	95.2647	91.4268	84.8232
	97.1	97.3982	105.438	81.7169	106.919	126.874	128.196	106.456	119.021	104.24	90.319	95.5446	108.235	123.165	125.823	112.845	107.364	100.291	101.756	92.1269	98.7549	120.187	119.199	101.795	129.538	95.8302	96.0891	82.325	80.0816	100.445	92.3504	98.8482	90.0246	101.63	100.29	83.8051	80.5832	92.8034	99.7313	99.7643	100.407	92.5918	99.25	77.0912	82.2957	97.927	95.7376	91.577	84.8881
	97.2	97.5348	105.43	81.926	106.951	126.42	128.25	106.214	119.562	104.015	90.2779	95.5289	108.356	123.35	125.905	112.8	107.716	100.14	101.419	91.9406	98.7536	120.234	119.402	101.806	129.578	95.9242	96.0089	82.5418	80.3914	100.419	92.4886	99.1648	90.2124	101.435	100.525	83.9152	80.6108	93.1172	99.8111	99.8274	100.779	92.615	99.672	77.1968	82.2906	98.1822	96.1867	91.8429	84.8649
	97.3	97.799	105.592	81.99	106.771	125.912	128.289	106.083	119.831	103.936	90.3172	95.347	108.481	123.588	125.886	112.861	108.041	99.9312	101.242	91.8019	98.9274	120.209	119.612	101.96	129.619	96.2823	95.8019	82.8484	80.7719	100.502	92.5736	99.5584	90.3676	101.491	100.725	84.0226	80.4888	93.4668	99.8822	99.9825	100.889	92.2924	99.9328	77.2388	82.4046	98.5174	96.2036	92.0541	84.8742
	97.4	98.1525	105.964	81.8319	106.416	125.527	128.018	106.062	119.618	103.757	90.4601	95.2168	108.472	124.067	125.74	112.881	108.249	99.5438	100.884	91.5808	99.0146	120.278	119.502	102.195	129.63	96.7133	95.7415	83.198	81.1532	100.536	92.3358	99.6898	90.559	101.506	100.646	84.1529	80.1339	93.6958	100.207	100.067	100.901	91.999	100.009	77.3721	82.6613	99.1248	96.2794	92.1154	84.6502
	97.5	98.5344	106.314	81.5407	105.975	125.235	127.549	106.276	119.51	103.726	90.65	95.1042	108.363	124.459	125.786	113.101	108.288	99.1668	100.601	91.4379	99.1099	120.09	119.184	102.457	129.583	97.1417	95.819	83.4738	81.5462	100.62	92.1227	99.5474	90.7507	101.471	100.404	84.3533	79.8498	93.7404	100.359	100.172	100.917	91.639	99.9786	77.537	82.6534	99.8577	96.5354	92.3043	84.3918
	97.6	98.522	106.38	81.1728	105.424	125.115	127.166	106.559	119.249	103.857	90.898	95.1632	108.126	124.659	125.953	113.24	108.212	98.9454	100.66	91.2774	99.4812	119.788	118.953	102.834	129.45	97.2902	95.8238	83.5644	81.898	100.72	91.7976	99.2946	90.7794	101.359	100.236	84.5448	79.8378	93.7167	100.415	100.044	100.62	91.2739	99.93	77.7484	82.5946	100.434	96.6107	92.3348	84.1407
	97.7	98.4487	106.283	80.5742	105.131	125.338	126.906	106.776	118.909	104.158	91.0922	95.3957	107.739	124.707	125.727	113.091	108.193	98.855	100.718	91.0985	99.857	119.525	118.831	103.177	129.349	97.2406	95.6349	83.5865	82.1053	100.8	91.6562	98.9724	90.5968	101.291	100.087	84.7103	79.7437	93.647	100.587	100.08	100.128	90.9327	99.7583	78.081	82.5573	100.666	96.8013	92.1226	83.782
	97.8	98.404	106.248	80.1167	105.033	125.817	126.608	106.606	118.45	104.36	91.182	95.8499	107.425	124.444	125.5	112.909	107.978	98.882	100.618	91.0263	100.263	119.404	118.789	103.35	129.319	96.8638	95.5498	83.3872	82.2352	100.949	91.5452	98.6198	90.499	101	100.056	84.8249	79.6386	93.3436	100.768	100.028	99.9843	90.8862	99.6109	78.386	82.3268	100.763	97.153	91.8195	83.3875
	97.9	98.2013	106.132	79.8482	105.025	126.273	126.491	106.358	118.096	104.647	91.1487	96.2947	107.327	123.842	125.476	112.728	107.834	98.8872	100.731	91.0546	100.814	119.33	119.068	103.314	129.542	96.4518	95.3411	83.0958	82.2529	100.968	91.4841	98.5006	90.4438	100.835	100.249	84.8415	79.4868	93.2174	100.721	99.9383	99.789	90.9475	99.4749	78.6438	82.0306	100.52	97.3278	91.4465	83.3396
	98	97.7228	105.802	79.8721	105	126.732	126.57	105.864	117.565	104.786	90.9584	96.5585	107.207	123.188	125.341	112.451	107.656	98.9226	100.798	91.0088	101.095	119.463	119.389	103.203	129.573	96.0291	95.011	82.7586	82.1537	100.794	91.5053	98.5779	90.3182	100.839	100.716	84.7329	79.476	93.1828	100.603	99.8676	99.6198	91.0485	99.3061	78.9148	81.9804	99.9972	97.4096	91.173	83.4335
	98.1	97.5064	105.681	79.9643	105.122	127.08	126.558	105.38	117.139	104.659	90.706	96.613	107.137	122.871	125.248	112.198	107.591	98.9598	100.706	91.1233	100.854	119.498	119.706	102.97	129.547	95.7096	94.7191	82.5631	81.8417	100.532	91.6952	98.6019	90.289	100.988	101.151	84.6329	79.3563	92.9058	100.594	99.9849	99.8555	91.0082	99.0886	79.1039	82.1644	99.4779	97.4422	91.1167	83.4836
	98.2	97.3611	105.564	80.4471	105.313	127.348	126.443	105.007	116.657	104.563	90.433	96.5366	107.217	122.886	125.625	112.061	107.326	98.9061	100.526	91.3652	100.629	119.429	119.953	102.598	129.607	95.5459	94.6803	82.3474	81.5016	100.316	91.68	98.898	90.5065	101.15	101.517	84.4414	79.3143	92.5394	100.268	99.9784	100.205	91.0503	98.8457	79.2428	82.4015	99.1571	97.2145	91.3086	83.5969
	98.3	97.1248	105.14	81.0703	105.407	127.52	126.504	104.96	116.493	104.669	90.2851	96.3866	107.175	123.119	126.101	112.016	107.05	98.8444	100.502	91.393	100.376	119.381	120.159	102.276	129.603	95.5871	94.8079	82.2796	81.0584	100.083	91.5844	99.0254	90.8598	101.338	101.699	84.2464	79.3649	92.2438	99.8381	100.036	100.384	91.0349	98.7659	79.2806	82.7822	98.831	96.8104	91.4468	83.767
	98.4	97.0877	104.539	81.7642	105.64	127.481	126.634	104.8	116.449	104.78	90.0417	96.3127	106.946	123.736	126.391	112.067	106.743	98.9586	100.471	91.3362	100.095	119.437	120.195	102.134	129.429	95.6417	95.0373	82.2158	80.7118	100.033	91.6931	98.9976	91.049	101.47	101.602	84.1031	79.7488	91.8626	99.4682	100.058	100.675	90.9577	98.8623	79.2792	83.2237	98.6917	96.5568	91.5055	83.822
	98.5	97.3025	104.112	82.2501	106.019	127.126	126.735	104.815	116.722	104.959	89.771	96.5121	106.724	124.342	126.564	112.083	106.636	98.9743	100.63	91.4364	100.076	119.551	120.216	102.007	129.528	95.7694	95.3078	82.0771	80.5453	100.248	91.7764	99.0026	91.2587	101.438	101.271	84.0328	79.886	91.4683	99.1076	99.9874	100.945	90.9477	98.9237	79.2291	83.5257	98.7856	96.3204	91.2718	83.7039
	98.6	97.5342	103.727	82.5767	106.335	126.707	127.075	104.885	117.045	105.226	89.6426	96.7538	106.495	124.752	126.54	112.086	106.625	98.9655	100.896	91.4121	100.205	119.84	119.911	101.893	129.696	95.9066	95.5918	81.8504	80.6462	100.526	91.7934	99.0537	91.4234	101.418	100.874	83.9503	80.1553	91.4866	98.731	99.7687	100.911	90.9689	99.064	79.1877	83.4652	98.8074	96.2578	91.0334	83.5552
	98.7	97.757	103.447	82.5747	106.374	126.262	127.54	104.857	117.55	105.374	89.739	96.9777	106.291	125.001	126.153	112.177	106.654	99.1122	101.298	91.2478	100.018	120.373	119.44	101.811	129.694	95.7723	95.7742	81.6131	80.7206	101.029	91.922	98.7878	91.3832	101.322	100.451	83.9653	80.3977	91.5949	98.6528	99.4556	100.692	91.0816	99.4664	79.2127	83.5216	98.6724	96.3135	90.69	83.4847
	98.8	98.1699	103.497	82.4514	106.544	125.826	127.987	104.631	117.941	105.325	89.7893	97.1464	106.101	125.193	125.934	112.102	106.735	99.2604	101.669	91.1849	99.8319	120.659	118.942	101.906	129.635	95.6937	95.8075	81.3139	80.8492	101.572	92.1421	98.6827	91.0818	101.368	100.008	84.2403	80.5906	91.9254	98.5812	99.0281	100.571	91.1458	99.7699	79.2956	83.5473	98.4928	96.5818	90.5687	83.4483
	98.9	98.5016	103.844	82.2941	106.683	125.779	128.292	104.738	118.258	105.106	90.1468	97.2028	106.028	125.258	125.724	111.94	106.805	99.3194	102.171	91.1836	99.4639	120.71	118.566	101.937	129.54	95.6357	95.8416	81.1298	80.844	102.056	92.2334	98.6722	90.86	101.306	99.7526	84.5241	80.4597	92.39	98.5381	98.7458	100.646	91.3346	99.8701	79.2591	83.4848	98.2021	96.7682	90.6866	83.3636
	99	98.7658	104.336	82.1399	106.679	126.031	128.657	104.753	118.368	104.828	90.6127	96.9754	106.146	125.287	125.587	111.827	106.756	99.4276	102.242	91.0839	99.0498	120.639	118.165	102.061	129.227	95.6085	95.8996	81.1371	80.6456	102.246	92.3273	98.6315	90.6755	101.174	99.4833	84.7524	80.3657	92.8062	98.6487	98.6121	100.774	91.492	99.9752	79.0375	83.4612	97.8426	96.9797	90.9389	83.29
	99.1	98.8955	104.645	82.2076	106.655	126.201	128.879	104.659	118.286	104.628	90.8906	96.75	106.349	125.094	125.445	111.786	106.57	99.4084	102.088	91.0494	98.8423	120.592	117.962	102.115	128.949	95.8067	95.8658	81.2409	80.3828	102.285	92.4511	98.6777	90.4256	101.035	99.2845	84.9273	80.084	92.8527	98.715	98.5739	100.961	91.6898	100.19	78.7957	83.7437	97.68	96.9571	91.1373	83.2742
	99.2	98.9888	104.98	82.4632	106.911	126.388	128.861	104.659	117.915	104.486	90.8758	96.6064	106.576	124.843	125.355	111.838	106.585	99.253	101.935	91.1713	99.0514	120.23	117.855	102.365	128.704	96.32	95.8982	81.3385	80.199	101.9	92.6198	98.8992	90.1301	101.059	99.2442	84.9919	79.8824	92.9011	98.5436	98.854	101.263	91.7609	100.183	78.4763	83.7502	97.7326	96.9396	91.3186	83.38
	99.3	98.723	105.186	82.6345	107.136	126.512	128.551	104.8	117.51	104.321	90.7774	96.4572	107.008	124.599	125.038	112.122	106.962	99.0821	101.739	91.2582	99.1568	120.113	117.64	102.481	128.551	96.7048	95.9079	81.4809	80.0975	101.369	92.8658	99.1706	89.8862	100.822	99.4456	84.702	79.717	92.6036	98.5052	99.3052	101.41	91.8341	100.195	78.2353	83.5596	97.9877	96.8082	91.421	83.4409
	99.4	98.3566	105.193	82.7193	107.257	126.348	128.3	104.643	117.097	104.278	90.3945	96.257	107.419	124.296	124.753	112.448	107.371	98.902	101.267	91.2646	99.508	119.958	117.342	102.705	128.451	97.1691	95.7852	81.4972	80.0545	100.823	93.1977	99.3075	89.6483	100.733	99.581	84.4234	79.6011	91.9574	98.457	99.7519	101.176	91.631	100.235	78.1334	83.3502	98.2938	96.8414	91.3804	83.4525
	99.5	98.0389	104.908	82.9224	107.303	126.01	127.966	104.456	116.653	104.311	89.957	96.2325	107.762	124.026	124.529	112.924	107.871	98.962	101.182	91.2934	99.975	119.852	117.233	102.822	128.478	97.5164	95.8784	81.4349	80.1147	100.423	93.4312	99.3695	89.3249	100.837	99.8437	84.1971	79.5015	91.3774	98.334	100.229	100.906	91.4583	100.298	78.2702	83.1632	98.6045	96.7932	91.3119	83.6352
	99.6	97.876	104.704	82.9803	107.359	125.803	127.701	104.218	116.324	104.232	89.7253	96.1364	108.015	124.107	124.269	113.444	108.293	99.2056	101.257	91.4452	100.211	119.41	117.192	103.177	128.419	97.5897	96.0135	81.4274	79.9811	100.157	93.5327	99.4051	89.1207	100.791	100.056	84.1534	79.3954	91.0273	98.3057	100.607	100.712	91.3776	100.177	78.5656	82.8288	98.8898	96.9499	91.1943	84.0228
	99.7	97.76	104.401	82.9308	107.235	125.532	127.629	104.134	116.343	104.019	89.638	96.0848	108.172	124.135	123.975	113.699	108.497	99.4454	101.214	91.4254	100.144	119.135	117.389	103.372	128.388	97.579	95.896	81.4585	79.8612	100.112	93.4415	99.4184	89.16	100.718	100.146	84.2598	79.256	90.752	98.3887	100.679	100.47	91.4004	100.201	78.7749	82.672	99.1015	97.1735	91.099	84.2329
	99.8	97.8583	104.117	82.811	106.917	125.205	127.918	104.004	116.388	103.905	89.6898	96.1686	108.106	124.145	123.567	113.81	108.186	99.5589	101.182	91.4925	100.163	118.72	117.803	103.406	128.342	97.7286	95.6741	81.5718	79.7076	100.202	93.161	99.4111	89.4543	101.055	100.274	84.5084	79.1176	90.7258	98.5284	100.629	100.258	91.374	100.158	78.7958	82.8109	99.2424	97.4565	91.0181	84.4346
	99.9	97.9727	103.932	82.5668	106.588	124.953	128.263	104.106	116.349	103.712	89.8329	96.2956	108.027	124.091	123.186	113.815	107.851	99.6699	101.43	91.578	99.9859	118.473	118.217	103.244	128.352	97.7541	95.7472	81.7606	79.5298	100.394	92.7476	99.5633	89.7344	101.36	100.454	84.7178	79.053	91.1026	98.6878	100.531	100.235	91.5259	100.201	78.7769	82.8133	99.3509	97.3865	91.0571	84.7879
	100	98.1924	103.952	82.2255	106.496	125.017	128.41	104.306	116.393	103.418	90.0382	96.3114	107.877	123.978	122.825	113.396	107.421	99.3047	101.525	91.632	99.4789	118.058	118.552	103.087	128.422	97.6251	95.6019	81.9373	79.3536	100.602	92.3754	99.8886	90.1996	101.623	100.743	84.886	79.0569	91.5213	98.808	100.191	100.184	91.5957	100.321	78.7944	82.7148	99.4749	97.2933	91.0495	84.977
	100.1	98.3901	104.162	81.9145	106.551	125.124	128.165	104.768	116.56	103.156	90.1242	96.5054	107.894	123.626	122.664	112.844	107.086	98.8509	101.595	91.6311	99.2504	118.053	118.941	102.748	128.625	97.5786	95.5796	81.9782	79.4503	100.859	92.1287	100.098	90.5714	101.899	101.136	84.7874	79.1374	92.0157	98.8861	99.8766	99.9804	91.5788	100.414	78.6078	82.632	99.447	96.9932	90.9676	84.8401
	100.2	98.559	104.581	81.6528	106.756	125.371	127.883	105.045	116.524	103.178	90.1123	96.4026	107.793	123.451	122.782	112.468	106.857	98.4833	101.766	91.8838	99.2516	117.91	119.169	102.466	128.791	97.3091	95.8027	82.2074	79.5788	101.212	92.0113	100.233	90.8038	101.949	101.496	84.5152	79.2293	92.3876	98.9506	99.6015	99.8447	91.6151	100.398	78.5577	82.5296	99.2588	96.4628	90.903	84.8205
	100.3	98.932	105.115	81.6944	107.032	125.703	127.343	105.358	116.644	103.22	90.0246	96.081	107.963	123.369	123.35	112.082	106.94	98.2668	101.899	92.273	99.1848	117.908	119.201	102.457	128.844	96.8722	96.1807	82.487	79.6599	101.46	91.8838	100.272	90.7445	101.575	101.633	84.1095	79.2681	92.7172	98.7701	99.3724	99.6526	91.823	100.434	78.6688	82.1274	98.9794	95.709	90.8754	84.7637
	100.4	99.4605	105.652	81.8123	107.389	126.112	126.879	105.497	117.094	103.433	90.1187	95.7327	108.246	123.335	124.09	111.772	107.001	98.0773	101.724	92.6974	99.3167	117.903	119.257	102.637	128.759	96.5578	96.1948	82.8951	79.9495	101.593	91.7489	100.152	90.771	101.166	101.717	83.8009	79.3301	92.9951	98.5172	99.0127	99.3811	91.9082	100.481	78.6822	81.9893	98.7754	95.2381	90.6707	84.6072
	100.5	99.6697	106.139	81.872	107.55	126.302	126.849	105.531	117.501	103.757	90.1714	95.4732	108.5	123.375	124.836	111.613	107.049	98.3607	101.518	93.0183	99.8232	118.174	119.272	102.69	128.58	96.4964	96.2898	83.3125	80.2365	101.767	91.6665	99.8904	90.6703	100.738	101.467	83.5241	79.5762	93.1951	98.2066	98.7881	99.0846	92.075	100.308	78.571	81.9541	98.5396	94.941	90.6532	84.524
	100.6	99.7408	106.281	82.0411	107.386	126.42	127.265	105.28	117.746	104.06	90.1815	95.2512	108.544	123.555	125.461	111.427	107.126	98.758	101.251	93.0796	100.201	118.16	119.087	102.73	128.197	96.4058	96.2573	83.7265	80.3746	101.911	91.6731	99.772	90.6189	100.486	101.097	83.4468	79.8787	93.2602	97.7479	98.5312	98.9951	92.2228	100.185	78.4858	81.99	98.4774	94.6974	90.8794	84.4583
	100.7	99.7783	106.286	82.2486	107.119	126.373	127.391	105.043	118.051	103.989	90.3668	95.3254	108.87	123.533	125.895	111.117	107.144	99.0644	100.866	92.8602	100.352	118.351	118.843	102.75	127.868	96.4082	96.2432	84.042	80.2753	101.99	91.8115	99.6242	90.5573	100.535	100.855	83.4287	80.1641	93.3863	97.278	98.47	98.9318	92.171	100.019	78.354	82.0298	98.5758	94.7387	91.014	84.3392
	100.8	99.5107	106.217	82.164	106.962	126.314	127.539	104.813	117.994	103.84	90.5054	95.5876	108.841	123.383	126.032	110.857	106.996	99.429	100.693	92.3671	100.498	118.352	118.592	102.633	127.81	96.4569	96.2355	84.2531	80.2009	102.041	92.1745	99.5945	90.6644	100.896	100.56	83.7028	80.5452	93.5409	96.9511	98.3656	99.0512	91.92	99.8484	78.0989	82.3828	98.6772	95.033	90.9271	84.2989
	100.9	99.3043	106.067	82.1486	106.701	126.101	127.55	104.697	117.629	103.644	90.3697	95.8933	108.449	123.357	125.891	110.761	106.934	99.8704	100.684	91.7877	100.495	118.35	118.344	102.28	127.752	96.2956	96.2766	84.1621	79.932	102.137	92.754	99.6615	90.6261	101.269	100.365	83.9607	80.8264	93.5005	96.7192	98.3542	99.294	91.6863	99.5177	78.1457	82.7129	98.8366	95.1712	91.0258	84.159
	101	99.345	105.862	82.1918	106.478	125.99	127.363	104.606	117.404	103.411	90.1544	96.1566	108.218	123.373	125.652	111.032	106.866	100.034	100.572	91.2728	100.274	118.45	118.102	102.131	127.659	95.9372	96.1418	84.0136	79.6249	102.189	93.4078	99.5983	90.5495	101.547	100.415	84.1076	80.8179	93.5386	96.6729	98.2999	99.8306	91.3339	99.3358	78.2818	83.2011	98.9431	95.0672	91.009	83.9017
	101.1	99.4647	105.939	82.1525	106.423	125.915	126.952	104.608	117.332	103.272	89.9995	96.2136	108.185	123.329	125.424	111.413	106.692	100.055	100.509	90.9674	100.019	118.778	118.123	101.949	127.784	95.6843	96.1304	83.8741	79.4235	102.082	93.9152	99.3998	90.348	101.738	100.49	84.2186	80.8485	93.5417	96.911	98.4594	100.252	90.9265	99.141	78.4726	83.3639	98.9686	95.0319	90.779	83.8484
	101.2	99.4983	105.997	82.0295	106.279	125.874	126.827	104.555	117.313	103.404	89.745	96.2381	107.98	123.412	125.217	111.851	106.507	100.18	100.54	90.9016	99.9573	118.923	118.134	101.645	127.713	95.5418	96.0126	83.5305	79.4538	101.758	94.1561	99.3902	90.1598	101.785	100.44	84.3998	80.8115	93.5214	97.2908	98.571	100.544	90.5215	98.9365	78.6884	83.4796	99.0379	94.9001	90.5745	83.7882
	101.3	99.6297	105.984	81.9776	106.175	125.824	126.739	104.481	117.538	103.669	89.539	96.14	108.077	123.407	124.954	112.11	106.533	100.166	100.263	91.1047	100.032	119.233	118.243	101.306	127.255	95.4104	95.7893	83.0082	79.533	101.456	94.1052	99.3302	90.0091	101.698	100.496	84.3324	80.6827	93.4214	97.6956	98.7554	100.697	90.3737	98.6831	78.9028	83.3916	99.2219	94.7369	90.4653	83.7001
	101.4	99.3662	105.978	81.8992	106.294	125.962	126.584	104.23	117.868	103.824	89.3821	95.9928	108.491	123.263	124.838	112.155	106.648	99.9116	100.05	91.5543	100.093	119.422	118.329	101.06	126.949	95.5492	95.7284	82.6872	79.6074	101.164	93.7142	99.3556	89.8846	101.582	100.519	84.1216	80.7604	93.2524	98.0185	99.0526	100.831	90.4867	98.6622	78.6392	83.2112	99.2952	94.6758	90.2141	83.8376
	101.5	98.8832	106.105	81.8508	106.578	125.934	126.422	103.926	117.925	104.034	89.3875	95.882	108.619	123.122	124.793	111.987	106.831	99.7213	100.174	92.0298	100.142	119.182	118.47	100.648	126.598	95.8726	95.8136	82.4034	79.7844	100.889	93.003	99.5838	89.882	101.532	100.493	84.1606	81.0072	92.8696	98.2715	99.3304	100.601	90.7728	98.7898	78.2726	82.6872	99.3904	94.84	89.9898	84.174
	101.6	98.4949	106.082	81.7052	106.865	125.864	126.372	103.641	117.786	104.251	89.3526	95.761	108.547	123.004	124.831	111.753	107.191	99.6106	100.428	92.4274	100.245	118.779	118.563	100.33	126.174	95.895	95.7376	82.1741	79.9594	100.882	92.2206	99.9231	90.0282	101.396	100.522	84.1812	81.2313	92.5861	98.4703	99.2556	100.335	91.3063	98.9983	77.827	82.4814	99.3872	95.0789	90.0337	84.3657
	101.7	98.2492	106.052	81.6501	107.139	125.925	126.35	103.602	117.626	104.419	89.3832	95.6138	108.399	122.94	124.803	111.551	107.508	99.6092	100.659	92.6577	100.343	118.61	118.895	100.372	126.166	95.872	95.6711	82.1405	80.1633	101.084	91.6222	99.8923	90.2405	101.315	100.546	84.1994	81.5752	92.2349	98.5602	99.0006	100.09	91.9466	99.412	77.39	82.2938	99.2837	95.417	90.2859	84.5371
	101.8	97.9775	105.936	81.6994	107.129	126.046	126.423	103.608	117.518	104.395	89.4702	95.5872	108.077	123.115	124.82	111.705	107.574	99.5768	101.152	92.6768	100.313	118.607	119.187	100.597	126.586	95.9122	95.6743	82.3067	80.4244	101.433	91.1808	99.7156	90.4159	101.279	100.585	84.4538	82.0541	92.0726	98.7298	98.5846	100.044	92.2416	100.022	77.1984	82.2096	99.0694	95.8764	90.6252	84.8256
	101.9	98.0748	105.869	81.7697	106.871	125.866	126.605	103.757	117.354	104.532	89.6698	95.6857	107.775	123.282	124.76	111.959	107.384	99.8888	101.588	92.4472	100.38	118.824	119.325	101.076	127.049	95.6933	95.6646	82.4272	80.8323	101.67	90.9819	99.3948	90.818	101.304	100.573	84.7645	82.3163	92.0904	99.0574	98.0562	100.01	92.2131	100.458	77.4105	82.2182	98.8924	96.4142	91.1578	84.9664
	102	98.398	105.76	81.7529	106.457	125.643	126.609	104.093	117.336	104.544	89.7285	95.7803	107.765	123.182	124.513	112.171	107.113	100.209	101.606	92.292	100.487	119.31	119.14	101.798	127.66	95.3651	95.5241	82.5845	81.0805	101.753	91.038	99.0235	91.2298	101.382	100.55	84.7282	82.4893	92.3377	99.3324	97.6676	100.088	92.0728	100.643	77.6424	82.5212	98.8862	96.8635	91.6589	84.934
	102.1	98.5778	105.64	81.7865	106.123	125.337	126.502	104.377	117.464	104.42	89.874	96.0137	107.827	122.984	124.234	112.454	106.789	100.424	101.278	92.2171	100.384	119.905	118.67	102.593	128.371	95.4326	95.3497	82.7605	81.1738	101.808	91.1356	98.4951	91.6672	101.575	100.407	84.5809	82.3969	92.4938	99.5078	97.5472	100.347	91.6657	100.715	78.0248	82.9167	98.9765	97.249	91.789	84.9996
	102.2	98.7884	105.508	81.7033	105.94	124.876	126.426	104.391	117.333	104.232	90.0521	96.0945	108.048	122.679	124.118	112.565	106.629	100.35	100.909	92.2315	100.091	120.222	117.962	103.141	128.803	95.4328	95.1862	82.7778	81.0794	101.781	91.1518	98.2295	91.9324	101.627	100.281	84.4136	82.0748	92.7273	99.8108	97.5854	100.781	91.1343	100.475	78.3269	83.3326	99.16	97.4563	91.7106	85.0814
	102.3	99.0094	105.544	81.4952	106.032	124.423	126.471	104.348	116.949	104.064	90.2048	95.9016	108.225	122.23	123.968	112.297	106.526	100.38	100.387	92.3061	99.8253	120.185	117.295	103.596	128.917	95.3419	95.0222	82.7358	80.8516	101.506	91.3752	98.1393	92.165	101.63	100.135	84.1174	81.6307	92.7133	100.007	97.7516	100.981	90.7268	100.007	78.3782	83.739	99.458	97.334	91.6331	84.9936
	102.4	99.1025	105.513	81.285	106.336	124.361	126.521	104.323	116.625	103.643	90.3769	95.5422	108.312	121.923	123.915	111.869	106.578	100.19	99.8526	92.4413	99.454	120.186	116.936	103.781	128.898	95.49	94.8706	82.6039	80.5529	101.311	91.6346	98.1342	92.1673	101.593	99.9542	83.7963	81.233	92.7554	100.158	97.9142	101.14	90.4607	99.4987	78.275	84.0311	99.6762	97.0122	91.4382	84.8186
	102.5	99.0687	105.32	81.2999	106.727	124.508	126.714	104.283	116.416	103.386	90.6658	95.0925	108.221	121.933	124.097	111.477	106.708	100.01	99.648	92.4875	99.0852	120.143	116.891	103.818	128.933	95.7724	94.8298	82.526	80.4265	101.307	91.9079	98.0888	91.9999	101.592	99.7702	83.793	80.7964	92.728	100.402	97.9695	101.374	90.2889	99.0605	78.2793	84.107	99.7931	96.6955	91.3312	84.7052
[truncated: 1,975 more rows]

## Sheet: Average rates
		Mean (s-1)	SD	N
	BiP	0.07402	0.010533	4
[truncated: 11 more rows]
