# Supplementary material for: Calcium depletion challenges endoplasmic reticulum proteostasis by destabilising BiP-substrate complexes
Source: eLife. 2020 Dec 9;9:e62601. doi: 10.7554/eLife.62601 (PMC7758071; doi:10.7554/eLife.62601)
Supplement: Supplementary file 6. [file elife-62601-supp6.xlsx]

## Sheet: Sheet1
Source data: Figure 7-figure supplement 2
1_BiPoligos_Inject_after_thaw		2_BiPoligos+ATP_10min_RT		3_BiP		4_BiP+ATP_10minRT		5_BiPoligos+ATP_30minRT		6_BiPoligos+ATP_1hRT		7_BiPoligos+ATP_2hRT		8_BiPoligos_2.5hIce_ATP_10minRT
Time (s)	A230	Time (s)	A230	Time (s)	A230	Time (s)	A230	Time (s)	A230	Time (s)	A230	Time (s)	A230	Time (s)	A230
0.00603333	0.418462	0.00645	0.220105	0.00125	1.55085	0.000833333	1.02431	0.00208333	0.282757	0.00458333	-0.746712	0.00458333	0.94714	0.00625	1.06934
0.0127	0.48016	0.0131167	0.356518	0.00791667	1.74382	0.0075	1.22786	0.00875	0.454485	0.01125	-0.551641	0.01125	1.15528	0.0129167	1.32782
0.0193667	0.540495	0.0197833	0.486985	0.0145833	1.95029	0.0141667	1.44665	0.0154167	0.642754	0.0179167	-0.344954	0.0179167	1.37238	0.0195833	1.58312
0.0260333	0.591896	0.02645	0.595249	0.02125	2.14852	0.0208333	1.65506	0.0220833	0.822395	0.0245833	-0.155382	0.0245833	1.56825	0.02625	1.80284
0.0327	0.627585	0.0331167	0.665829	0.0279167	2.31341	0.0275	1.826	0.02875	0.964172	0.03125	-0.0164658	0.03125	1.71084	0.0329167	1.95482
0.0393667	0.644423	0.0397833	0.693396	0.0345833	2.42251	0.0341667	1.93528	0.0354167	1.04243	0.0379167	0.0479221	0.0379167	1.77587	0.0395833	2.02201
0.0460333	0.646122	0.04645	0.688061	0.04125	2.46811	0.0408333	1.97405	0.0420833	1.05096	0.0445833	0.0385642	0.0445833	1.76452	0.04625	2.01465
0.0527	0.640683	0.0531167	0.666089	0.0479167	2.46429	0.0475	1.9558	0.04875	1.00786	0.05125	-0.0204444	0.05125	1.70133	0.0529167	1.96229
0.0593667	0.632711	0.0597833	0.6378	0.0545833	2.43363	0.0541667	1.90502	0.0554167	0.937715	0.0579167	-0.103742	0.0579167	1.61417	0.0595833	1.89238
0.0660333	0.623539	0.06645	0.60758	0.06125	2.39261	0.0608333	1.84027	0.0620833	0.85704	0.0645833	-0.199057	0.0645833	1.519	0.06625	1.81987
0.0727	0.612348	0.0731167	0.576511	0.0679167	2.34935	0.0675	1.7705	0.06875	0.772677	0.07125	-0.301935	0.07125	1.42045	0.0729167	1.74917
0.0793667	0.599176	0.0797833	0.544019	0.0745833	2.30565	0.0741667	1.69805	0.0754167	0.687085	0.0779167	-0.410765	0.0779167	1.31828	0.0795833	1.67999
0.0860333	0.585563	0.08645	0.509463	0.08125	2.26115	0.0808333	1.62277	0.0820833	0.600517	0.0845833	-0.523835	0.0845833	1.21208	0.08625	1.61122
0.0927	0.572808	0.0931167	0.473469	0.0879167	2.21687	0.0875	1.54489	0.08875	0.51257	0.09125	-0.63926	0.09125	1.10338	0.0929167	1.54402
0.0993667	0.560813	0.0997833	0.437364	0.0945833	2.17535	0.0941667	1.46692	0.0954167	0.424385	0.0979167	-0.754498	0.0979167	0.994295	0.0995833	1.47901
0.106033	0.549816	0.10645	0.402339	0.10125	2.13774	0.100833	1.39152	0.102083	0.338942	0.104583	-0.866011	0.104583	0.888318	0.10625	1.41752
0.1127	0.539452	0.113117	0.369541	0.107917	2.1031	0.1075	1.32064	0.10875	0.259407	0.11125	-0.971116	0.11125	0.788346	0.112917	1.36005
0.119367	0.528835	0.119783	0.339627	0.114583	2.07128	0.114167	1.25501	0.115417	0.186563	0.117917	-1.07031	0.117917	0.697352	0.119583	1.30669
0.126033	0.516765	0.12645	0.312507	0.12125	2.04331	0.120833	1.19516	0.122083	0.120759	0.124583	-1.16356	0.124583	0.6162	0.12625	1.25662
0.1327	0.502989	0.133117	0.288367	0.127917	2.01728	0.1275	1.14042	0.12875	0.0620559	0.13125	-1.25066	0.13125	0.546217	0.132917	1.20927
0.139367	0.488728	0.139783	0.266813	0.134583	1.99103	0.134167	1.08889	0.135417	0.0116155	0.137917	-1.33055	0.137917	0.487015	0.139583	1.16538
0.146033	0.473551	0.14645	0.247128	0.14125	1.96397	0.140833	1.0392	0.142083	-0.0312552	0.144583	-1.40402	0.144583	0.437103	0.14625	1.12431
0.1527	0.457801	0.153117	0.228152	0.147917	1.93732	0.1475	0.990771	0.14875	-0.0683665	0.15125	-1.47188	0.15125	0.395104	0.152917	1.08515
0.159367	0.441924	0.159783	0.209913	0.154583	1.91037	0.154167	0.943832	0.155417	-0.100143	0.157917	-1.53366	0.157917	0.359751	0.159583	1.04714
0.166033	0.425845	0.16645	0.193045	0.16125	1.88168	0.160833	0.898756	0.162083	-0.127524	0.164583	-1.58844	0.164583	0.33021	0.16625	1.01069
0.1727	0.409625	0.173117	0.178382	0.167917	1.85227	0.1675	0.857167	0.16875	-0.148796	0.17125	-1.63551	0.17125	0.304572	0.172917	0.977203
0.179367	0.392914	0.179783	0.166774	0.174583	1.82342	0.174167	0.820935	0.175417	-0.164203	0.177917	-1.67466	0.177917	0.282466	0.179583	0.947572
0.186033	0.377178	0.18645	0.158332	0.18125	1.79539	0.180833	0.790551	0.182083	-0.173941	0.184583	-1.7044	0.184583	0.262707	0.18625	0.922464
0.1927	0.363253	0.193117	0.153124	0.187917	1.76734	0.1875	0.765182	0.18875	-0.178516	0.19125	-1.72295	0.19125	0.243723	0.192917	0.90149
0.199367	0.350907	0.199783	0.151813	0.194583	1.73996	0.194167	0.743948	0.195417	-0.178374	0.197917	-1.72888	0.197917	0.22459	0.199583	0.884056
0.206033	0.340305	0.20645	0.155248	0.20125	1.71379	0.200833	0.726849	0.202083	-0.172719	0.204583	-1.72374	0.204583	0.20501	0.20625	0.87025
0.2127	0.331976	0.213117	0.163324	0.207917	1.68955	0.2075	0.713438	0.20875	-0.164114	0.21125	-1.70918	0.21125	0.184841	0.212917	0.860371
0.219367	0.326812	0.219783	0.176519	0.214583	1.66707	0.214167	0.702821	0.215417	-0.154577	0.217917	-1.6875	0.217917	0.164241	0.219583	0.854023
0.226033	0.324875	0.22645	0.195876	0.22125	1.64626	0.220833	0.695221	0.222083	-0.145569	0.224583	-1.6609	0.224583	0.144705	0.22625	0.849232
0.2327	0.326149	0.233117	0.221968	0.227917	1.62677	0.2275	0.690192	0.22875	-0.13639	0.23125	-1.63282	0.23125	0.128344	0.232917	0.845522
0.239367	0.330761	0.239783	0.253998	0.234583	1.60877	0.234167	0.686578	0.235417	-0.126705	0.237917	-1.60595	0.237917	0.11605	0.239583	0.843011
0.246033	0.338003	0.24645	0.290833	0.24125	1.59224	0.240833	0.682406	0.242083	-0.117615	0.244583	-1.5808	0.244583	0.108697	0.24625	0.842445
0.2527	0.346564	0.253117	0.332765	0.247917	1.5771	0.2475	0.677809	0.24875	-0.108823	0.25125	-1.5564	0.25125	0.107691	0.252917	0.842117
0.259367	0.35648	0.259783	0.378579	0.254583	1.5622	0.254167	0.67386	0.255417	-0.0999868	0.257917	-1.53072	0.257917	0.113986	0.259583	0.840649
0.266033	0.36791	0.26645	0.426389	0.26125	1.54581	0.260833	0.669666	0.262083	-0.0909939	0.264583	-1.50266	0.264583	0.128075	0.26625	0.838853
0.2727	0.380009	0.273117	0.474893	0.267917	1.52773	0.2675	0.664666	0.26875	-0.082463	0.27125	-1.47136	0.27125	0.14843	0.272917	0.8367
0.279367	0.391297	0.279783	0.523359	0.274583	1.50892	0.274167	0.659145	0.275417	-0.0754073	0.277917	-1.43623	0.277917	0.173263	0.279583	0.834264
0.286033	0.401445	0.28645	0.570275	0.28125	1.49089	0.280833	0.654139	0.282083	-0.0698343	0.284583	-1.39721	0.284583	0.198744	0.28625	0.831112
0.2927	0.410914	0.293117	0.613056	0.287917	1.47273	0.2875	0.649102	0.28875	-0.0660792	0.29125	-1.3549	0.29125	0.220716	0.292917	0.827655
0.299367	0.41879	0.299783	0.651218	0.294583	1.45429	0.294167	0.642419	0.295417	-0.063628	0.297917	-1.31111	0.297917	0.235692	0.299583	0.824131
0.306033	0.423752	0.30645	0.685237	0.30125	1.43809	0.300833	0.634201	0.302083	-0.0623837	0.304583	-1.26655	0.304583	0.242971	0.30625	0.82086
0.3127	0.425287	0.313117	0.714555	0.307917	1.42546	0.3075	0.62532	0.30875	-0.0622496	0.31125	-1.22128	0.31125	0.244267	0.312917	0.818737
0.319367	0.424378	0.319783	0.738174	0.314583	1.41574	0.314167	0.616491	0.315417	-0.0633299	0.317917	-1.17674	0.317917	0.240333	0.319583	0.817731
0.326033	0.421688	0.32645	0.756823	0.32125	1.4072	0.320833	0.606969	0.322083	-0.0669062	0.324583	-1.13361	0.324583	0.234082	0.32625	0.81706
0.3327	0.416927	0.333117	0.771783	0.327917	1.40005	0.3275	0.596486	0.32875	-0.0745803	0.33125	-1.09359	0.33125	0.230223	0.332917	0.815928
0.339367	0.408851	0.339783	0.783004	0.334583	1.39593	0.334167	0.585429	0.335417	-0.0876933	0.337917	-1.05738	0.337917	0.232659	0.339583	0.814587
0.346033	0.396878	0.34645	0.790015	0.34125	1.39362	0.340833	0.574373	0.342083	-0.105724	0.344583	-1.02597	0.344583	0.240535	0.34625	0.813112
0.3527	0.382595	0.353117	0.793621	0.347917	1.39218	0.3475	0.56278	0.34875	-0.129268	0.35125	-1.00038	0.35125	0.250511	0.352917	0.811502
0.359367	0.36718	0.359783	0.794835	0.354583	1.38991	0.354167	0.550352	0.355417	-0.157669	0.357917	-0.980012	0.357917	0.262409	0.359583	0.809677
0.366033	0.351779	0.36645	0.793695	0.36125	1.38647	0.360833	0.53823	0.362083	-0.188984	0.364583	-0.964388	0.364583	0.276737	0.36625	0.806548
0.3727	0.336796	0.373117	0.789717	0.367917	1.38136	0.3675	0.527024	0.36875	-0.21974	0.37125	-0.951283	0.37125	0.291429	0.372917	0.802808
0.379367	0.323422	0.379783	0.783369	0.374583	1.37378	0.374167	0.516653	0.375417	-0.247702	0.377917	-0.938214	0.377917	0.304461	0.379583	0.797823
0.386033	0.313073	0.38645	0.774615	0.38125	1.36399	0.380833	0.506066	0.382083	-0.272363	0.384583	-0.923112	0.384583	0.316136	0.38625	0.790194
0.3927	0.305362	0.393117	0.763252	0.387917	1.35245	0.3875	0.495315	0.38875	-0.291817	0.39125	-0.904977	0.39125	0.328653	0.392917	0.777841
0.399367	0.299886	0.399783	0.750095	0.394583	1.34082	0.394167	0.484988	0.395417	-0.306383	0.397917	-0.883706	0.397917	0.342026	0.399583	0.759795
0.406033	0.296541	0.40645	0.735804	0.40125	1.32997	0.400833	0.475824	0.402083	-0.31697	0.404583	-0.860102	0.404583	0.35511	0.40625	0.737272
0.4127	0.295751	0.413117	0.720829	0.407917	1.31942	0.4075	0.468574	0.40875	-0.3253	0.41125	-0.835657	0.41125	0.367999	0.412917	0.70969
0.419367	0.297822	0.419783	0.704072	0.414583	1.30845	0.414167	0.463001	0.415417	-0.331447	0.417917	-0.813775	0.417917	0.380285	0.419583	0.67725
0.426033	0.301883	0.42645	0.685826	0.42125	1.29608	0.420833	0.460334	0.422083	-0.335127	0.424583	-0.798807	0.424583	0.391655	0.42625	0.641815
0.4327	0.307873	0.433117	0.666656	0.427917	1.28255	0.4275	0.461154	0.42875	-0.33702	0.43125	-0.791997	0.43125	0.401013	0.432917	0.605769
0.439367	0.31653	0.439783	0.646509	0.434583	1.26819	0.434167	0.465401	0.435417	-0.336692	0.437917	-0.792287	0.437917	0.408135	0.439583	0.571124
0.446033	0.327088	0.44645	0.625372	0.44125	1.25322	0.440833	0.471719	0.442083	-0.33471	0.444583	-0.795633	0.444583	0.412032	0.44625	0.537969
0.4527	0.338532	0.453117	0.602938	0.447917	1.23906	0.4475	0.478692	0.44875	-0.331894	0.45125	-0.799254	0.45125	0.412837	0.452917	0.507511
0.459367	0.350654	0.459783	0.58037	0.454583	1.22628	0.454167	0.485905	0.455417	-0.329517	0.457917	-0.799976	0.457917	0.410639	0.459583	0.480153
0.466033	0.365257	0.46645	0.559084	0.46125	1.21516	0.460833	0.491731	0.462083	-0.326551	0.464583	-0.794202	0.464583	0.405475	0.46625	0.455089
0.4727	0.383288	0.473117	0.539474	0.467917	1.20439	0.4675	0.495039	0.46875	-0.322863	0.47125	-0.779554	0.47125	0.396706	0.472917	0.430606
0.479367	0.404358	0.479783	0.521265	0.474583	1.19232	0.474167	0.49483	0.475417	-0.319049	0.477917	-0.755422	0.477917	0.384614	0.479583	0.405036
0.486033	0.429079	0.48645	0.502951	0.48125	1.17814	0.480833	0.490345	0.482083	-0.314884	0.484583	-0.724383	0.484583	0.370681	0.48625	0.37811
0.4927	0.457868	0.493117	0.485145	0.487917	1.16137	0.4875	0.481457	0.48875	-0.309095	0.49125	-0.688918	0.49125	0.355013	0.492917	0.349
0.499367	0.490025	0.499783	0.468351	0.494583	1.14244	0.494167	0.468776	0.495417	-0.300758	0.497917	-0.650942	0.497917	0.338465	0.499583	0.317357
0.506033	0.523776	0.50645	0.452839	0.50125	1.1218	0.500833	0.453159	0.502083	-0.291668	0.504583	-0.611916	0.504583	0.321604	0.50625	0.282489
0.5127	0.558481	0.513117	0.438623	0.507917	1.0983	0.5075	0.434346	0.50875	-0.282019	0.51125	-0.573598	0.51125	0.305265	0.512917	0.245988
0.519367	0.594042	0.519783	0.425078	0.514583	1.07072	0.514167	0.412442	0.515417	-0.270844	0.517917	-0.537865	0.517917	0.289269	0.519583	0.209585
0.526033	0.629097	0.52645	0.412673	0.52125	1.03881	0.520833	0.388347	0.522083	-0.257298	0.524583	-0.505678	0.524583	0.273943	0.52625	0.173874
0.5327	0.662617	0.533117	0.402048	0.527917	1.00338	0.5275	0.363134	0.52875	-0.24268	0.53125	-0.476085	0.53125	0.260867	0.532917	0.139296
0.539367	0.694402	0.539783	0.395313	0.534583	0.964701	0.534167	0.337861	0.535417	-0.229195	0.537917	-0.447236	0.537917	0.250876	0.539583	0.107348
0.546033	0.725105	0.54645	0.392877	0.54125	0.923201	0.540833	0.313148	0.542083	-0.217095	0.544583	-0.418872	0.544583	0.243708	0.54625	0.0811592
0.5527	0.753619	0.553117	0.394203	0.547917	0.881337	0.5475	0.290595	0.54875	-0.205807	0.55125	-0.392154	0.55125	0.239447	0.552917	0.0610054
0.559367	0.778675	0.559783	0.398703	0.554583	0.841267	0.554167	0.271641	0.555417	-0.194632	0.557917	-0.367142	0.557917	0.238813	0.559583	0.0459924
0.566033	0.80049	0.56645	0.40742	0.56125	0.803761	0.560833	0.257492	0.562083	-0.183627	0.564583	-0.341639	0.564583	0.242464	0.56625	0.036709
0.5727	0.8201	0.573117	0.420325	0.567917	0.768356	0.5675	0.247933	0.56875	-0.172235	0.57125	-0.314876	0.57125	0.249006	0.572917	0.0338033
0.579367	0.837334	0.579783	0.434823	0.574583	0.736021	0.574167	0.241891	0.575417	-0.158884	0.577917	-0.288919	0.577917	0.256017	0.579583	0.0368729
0.586033	0.851296	0.58645	0.448599	0.58125	0.707924	0.580833	0.239208	0.582083	-0.143997	0.584583	-0.263788	0.584583	0.262313	0.58625	0.042446
0.5927	0.863276	0.593117	0.460781	0.587917	0.683211	0.5875	0.240102	0.58875	-0.128664	0.59125	-0.2378	0.59125	0.267595	0.592917	0.0495613
0.599367	0.874408	0.599783	0.471309	0.594583	0.661179	0.594167	0.243388	0.595417	-0.115208	0.597917	-0.209272	0.597917	0.271395	0.599583	0.0571012
0.606033	0.884734	0.60645	0.478856	0.60125	0.640802	0.600833	0.247724	0.602083	-0.104636	0.604583	-0.179052	0.604583	0.271313	0.60625	0.0631735
0.6127	0.89246	0.613117	0.482015	0.607917	0.621721	0.6075	0.252075	0.60875	-0.0968948	0.61125	-0.148222	0.61125	0.266492	0.612917	0.0657812
0.619367	0.897862	0.619783	0.480168	0.614583	0.602841	0.614167	0.256643	0.615417	-0.0923574	0.617917	-0.115409	0.617917	0.258103	0.619583	0.0642091
0.626033	0.901558	0.62645	0.47376	0.62125	0.584334	0.620833	0.261404	0.622083	-0.089772	0.624583	-0.0803098	0.624583	0.247128	0.62625	0.0602156
0.6327	0.903718	0.633117	0.463121	0.627917	0.568017	0.6275	0.266738	0.62875	-0.0888258	0.63125	-0.0441223	0.63125	0.233941	0.632917	0.0537634
0.639367	0.903606	0.639783	0.448853	0.634583	0.554733	0.634167	0.272982	0.635417	-0.0875741	0.637917	-0.00883639	0.637917	0.219017	0.639583	0.0459552
0.646033	0.901997	0.64645	0.431769	0.64125	0.544637	0.640833	0.28009	0.642083	-0.085257	0.644583	0.0239611	0.644583	0.203915	0.64625	0.0381172
0.6527	0.900321	0.653117	0.41274	0.647917	0.536881	0.6475	0.28839	0.64875	-0.0815466	0.65125	0.0551194	0.65125	0.188887	0.652917	0.0321791
0.659367	0.898831	0.659783	0.392415	0.654583	0.531591	0.654167	0.299402	0.655417	-0.0753999	0.657917	0.0845715	0.657917	0.173382	0.659583	0.0283048
0.666033	0.897489	0.66645	0.371031	0.66125	0.527881	0.660833	0.313841	0.662083	-0.0671595	0.664583	0.11155	0.664583	0.15752	0.66625	0.026308
0.6727	0.895701	0.673117	0.347905	0.667917	0.525117	0.6675	0.330888	0.66875	-0.0564456	0.67125	0.135541	0.67125	0.141516	0.672917	0.0261068
0.679367	0.894479	0.679783	0.322498	0.674583	0.523597	0.674167	0.350572	0.675417	-0.0437647	0.677917	0.156231	0.677917	0.12552	0.679583	0.0269338
0.686033	0.89334	0.68645	0.293836	0.68125	0.52356	0.680833	0.373319	0.682083	-0.0281036	0.684583	0.175141	0.684583	0.109337	0.68625	0.0277609
0.6927	0.892408	0.693117	0.261411	0.687917	0.526048	0.6875	0.400484	0.68875	-0.00921637	0.69125	0.191465	0.69125	0.0923797	0.692917	0.0269786
0.699367	0.891984	0.699783	0.225864	0.694583	0.530928	0.694167	0.430889	0.695417	0.0114217	0.697917	0.204355	0.697917	0.0748932	0.699583	0.024043
0.706033	0.892356	0.70645	0.188172	0.70125	0.537992	0.700833	0.463724	0.702083	0.0338778	0.704583	0.21217	0.704583	0.0572652	0.70625	0.0179932
0.7127	0.893325	0.713117	0.149809	0.707917	0.545971	0.7075	0.498369	0.70875	0.0582337	0.71125	0.215389	0.71125	0.0408664	0.712917	0.00914931
0.719367	0.893816	0.719783	0.112332	0.714583	0.55331	0.714167	0.534222	0.715417	0.0844449	0.717917	0.214651	0.717917	0.0253022	0.719583	-0.000208616
0.726033	0.893831	0.72645	0.0763461	0.72125	0.560082	0.720833	0.571378	0.722083	0.110283	0.724583	0.209764	0.724583	0.0103042	0.72625	-0.00816584
0.7327	0.893749	0.733117	0.0417531	0.727917	0.565641	0.7275	0.609033	0.72875	0.134781	0.73125	0.199504	0.73125	-0.00306219	0.732917	-0.0140369
0.739367	0.894107	0.739783	0.00769645	0.734583	0.569053	0.734167	0.646077	0.735417	0.158228	0.737917	0.183754	0.737917	-0.0133589	0.739583	-0.0192076
0.746033	0.895128	0.74645	-0.0255704	0.74125	0.569411	0.740833	0.680834	0.742083	0.180304	0.744583	0.164591	0.744583	-0.0196844	0.74625	-0.0235513
0.7527	0.896357	0.753117	-0.0568554	0.747917	0.5657	0.7475	0.712641	0.74875	0.2001	0.75125	0.142954	0.75125	-0.0226349	0.752917	-0.0260547
0.759367	0.89822	0.759783	-0.0874326	0.754583	0.558063	0.754167	0.741489	0.755417	0.217125	0.757917	0.11947	0.757917	-0.0219941	0.759583	-0.0279248
0.766033	0.900507	0.76645	-0.117362	0.76125	0.545606	0.760833	0.766046	0.762083	0.232719	0.764583	0.0945553	0.764583	-0.0178292	0.76625	-0.0307336
0.7727	0.903271	0.773117	-0.145525	0.767917	0.528693	0.7675	0.785142	0.76875	0.248045	0.77125	0.0704452	0.77125	-0.010848	0.772917	-0.034593
0.779367	0.905797	0.779783	-0.17038	0.774583	0.508554	0.774167	0.798754	0.775417	0.26428	0.777917	0.0485703	0.777917	-0.00364333	0.779583	-0.0365674
0.786033	0.907592	0.78645	-0.191905	0.78125	0.485711	0.780833	0.807837	0.782083	0.281624	0.784583	0.0292733	0.784583	0.00157207	0.78625	-0.0359863
0.7927	0.908159	0.793117	-0.212118	0.787917	0.461325	0.7875	0.812903	0.78875	0.299186	0.79125	0.0128597	0.79125	0.00333786	0.792917	-0.0340268
0.799367	0.907339	0.799783	-0.230841	0.794583	0.436522	0.794167	0.814386	0.795417	0.316441	0.797917	-0.000193715	0.797917	0.00184774	0.799583	-0.0317693
0.806033	0.905544	0.80645	-0.247695	0.80125	0.414133	0.800833	0.813827	0.802083	0.33281	0.804583	-0.0101328	0.804583	-0.00236183	0.80625	-0.02902
0.8127	0.901736	0.813117	-0.263296	0.807917	0.395127	0.8075	0.812888	0.80875	0.346959	0.81125	-0.0172853	0.81125	-0.00867248	0.812917	-0.025101
0.819367	0.895083	0.819783	-0.278682	0.814583	0.378408	0.814167	0.813067	0.815417	0.357345	0.817917	-0.0221208	0.817917	-0.0161156	0.819583	-0.0204593
0.826033	0.885114	0.82645	-0.294797	0.82125	0.363037	0.820833	0.815488	0.822083	0.363059	0.824583	-0.0245199	0.824583	-0.0246763	0.82625	-0.0156313
0.8327	0.874177	0.833117	-0.310577	0.827917	0.349425	0.8275	0.820577	0.82875	0.364922	0.83125	-0.0247732	0.83125	-0.0339821	0.832917	-0.0108778
0.839367	0.862047	0.839783	-0.325747	0.834583	0.337794	0.834167	0.828311	0.835417	0.363201	0.837917	-0.023298	0.837917	-0.0437871	0.839583	-0.005126
0.846033	0.848062	0.84645	-0.340611	0.84125	0.327557	0.840833	0.836812	0.842083	0.35841	0.844583	-0.0197291	0.844583	-0.053741	0.84625	0.00213087
0.8527	0.832424	0.853117	-0.354975	0.847917	0.31922	0.8475	0.843406	0.84875	0.352517	0.85125	-0.0148043	0.85125	-0.0648201	0.852917	0.0105202
0.859367	0.816442	0.859783	-0.368811	0.854583	0.313945	0.854167	0.845701	0.855417	0.346757	0.857917	-0.00897795	0.857917	-0.0779405	0.859583	0.0189766
0.866033	0.800617	0.86645	-0.382423	0.86125	0.312403	0.860833	0.842072	0.862083	0.342205	0.864583	-0.00252575	0.864583	-0.0922978	0.86625	0.0279322
0.8727	0.783205	0.873117	-0.396356	0.867917	0.31402	0.8675	0.830993	0.86875	0.339217	0.87125	0.00547618	0.87125	-0.10623	0.872917	0.0371113
0.879367	0.765488	0.879783	-0.40976	0.874583	0.319727	0.874167	0.81069	0.875417	0.339098	0.877917	0.0156611	0.877917	-0.118718	0.879583	0.0457168
0.886033	0.748254	0.88645	-0.421509	0.88125	0.329919	0.880833	0.782065	0.882083	0.341564	0.884583	0.0280589	0.884583	-0.129879	0.88625	0.0535622
0.8927	0.732094	0.893117	-0.43235	0.887917	0.343248	0.8875	0.747181	0.88875	0.34491	0.89125	0.0428185	0.89125	-0.138886	0.892917	0.0615492
0.899367	0.716306	0.899783	-0.442766	0.894583	0.358142	0.894167	0.707135	0.895417	0.348642	0.897917	0.0606403	0.897917	-0.144288	0.899583	0.0696704
0.906033	0.702322	0.90645	-0.451863	0.90125	0.373818	0.900833	0.662364	0.902083	0.352912	0.904583	0.0818372	0.904583	-0.145696	0.90625	0.0767931
0.9127	0.691988	0.913117	-0.459597	0.907917	0.389755	0.9075	0.614896	0.90875	0.358	0.91125	0.106014	0.91125	-0.14437	0.912917	0.0830591
0.919367	0.684902	0.919783	-0.467412	0.914583	0.403017	0.914167	0.56728	0.915417	0.362545	0.917917	0.132419	0.917917	-0.141889	0.919583	0.0889599
0.926033	0.68137	0.92645	-0.476785	0.92125	0.410616	0.920833	0.52046	0.922083	0.365533	0.924583	0.15986	0.924583	-0.138789	0.92625	0.0945479
0.9327	0.681922	0.933117	-0.486888	0.927917	0.411704	0.9275	0.47382	0.92875	0.366986	0.93125	0.186376	0.93125	-0.134341	0.932917	0.0995323
0.939367	0.687458	0.939783	-0.497542	0.934583	0.405982	0.934167	0.428475	0.935417	0.367574	0.937917	0.209883	0.937917	-0.128321	0.939583	0.104494
0.946033	0.697024	0.94645	-0.50965	0.94125	0.394404	0.940833	0.38635	0.942083	0.367761	0.944583	0.229843	0.944583	-0.120357	0.94625	0.110261
0.9527	0.709325	0.953117	-0.523493	0.947917	0.378124	0.9475	0.348389	0.94875	0.367895	0.95125	0.246257	0.95125	-0.109591	0.952917	0.116505
0.959367	0.724263	0.959783	-0.537358	0.954583	0.359878	0.954167	0.314511	0.955417	0.368021	0.957917	0.259914	0.957917	-0.0954345	0.959583	0.123009
0.966033	0.74172	0.96645	-0.550129	0.96125	0.341557	0.960833	0.284761	0.962083	0.368647	0.964583	0.270888	0.964583	-0.0772476	0.96625	0.129193
0.9727	0.761099	0.973117	-0.561424	0.967917	0.323884	0.9675	0.260502	0.96875	0.37092	0.97125	0.280574	0.97125	-0.0559613	0.972917	0.133365
0.979367	0.781864	0.979783	-0.570774	0.974583	0.307016	0.974167	0.242047	0.975417	0.375353	0.977917	0.289492	0.977917	-0.0322685	0.979583	0.134304
0.986033	0.803925	0.98645	-0.576638	0.98125	0.290997	0.980833	0.228599	0.982083	0.381775	0.984583	0.297599	0.984583	-0.00762939	0.98625	0.13227
0.9927	0.827119	0.993117	-0.579014	0.987917	0.275545	0.9875	0.219315	0.98875	0.390165	0.99125	0.304602	0.99125	0.0161156	0.992917	0.127994
0.999367	0.850134	0.999783	-0.578851	0.994583	0.259407	0.994167	0.215217	0.995417	0.400208	0.997917	0.309907	0.997917	0.0385419	0.999583	0.120722
1.00603	0.871755	1.00645	-0.577189	1.00125	0.241324	1.00083	0.217304	1.00208	0.412643	1.00458	0.313513	1.00458	0.0598729	1.00625	0.109844
1.0127	0.891112	1.01312	-0.574216	1.00792	0.220709	1.0075	0.224233	1.00875	0.427254	1.01125	0.316694	1.01125	0.0805482	1.01292	0.0952035
1.01937	0.908561	1.01978	-0.569649	1.01458	0.200041	1.01417	0.233993	1.01542	0.44328	1.01792	0.320807	1.01792	0.100292	1.01958	0.0777915
1.02603	0.923574	1.02645	-0.56389	1.02125	0.180312	1.02083	0.24458	1.02208	0.460006	1.02458	0.326417	1.02458	0.118665	1.02625	0.0580028
1.0327	0.935912	1.03312	-0.556238	1.02792	0.161044	1.0275	0.255108	1.02875	0.475615	1.03125	0.331722	1.03125	0.13639	1.03292	0.0363514
1.03937	0.945516	1.03978	-0.547364	1.03458	0.141054	1.03417	0.26305	1.03542	0.489771	1.03792	0.336774	1.03792	0.154287	1.03958	0.0129342
1.04603	0.952244	1.04645	-0.536434	1.04125	0.12134	1.04083	0.265554	1.04208	0.501759	1.04458	0.342593	1.04458	0.173062	1.04625	-0.0123605
1.0527	0.956759	1.05312	-0.523865	1.04792	0.102408	1.0475	0.262134	1.04875	0.510596	1.05125	0.349499	1.05125	0.193775	1.05292	-0.0388548
1.05937	0.958689	1.05978	-0.509493	1.05458	0.0813678	1.05417	0.253275	1.05542	0.51596	1.05792	0.356808	1.05792	0.21714	1.05958	-0.0657439
1.06603	0.958487	1.06645	-0.494257	1.06125	0.0567287	1.06083	0.240222	1.06208	0.51713	1.06458	0.36446	1.06458	0.243776	1.06625	-0.0928789
1.0727	0.955731	1.07312	-0.478856	1.06792	0.0302941	1.0675	0.222988	1.06875	0.514552	1.07125	0.374228	1.07125	0.273556	1.07292	-0.120424
1.07937	0.951566	1.07978	-0.462696	1.07458	0.00441074	1.07417	0.201106	1.07542	0.508972	1.07792	0.38524	1.07792	0.306226	1.07958	-0.147857
1.08603	0.946417	1.08645	-0.446513	1.08125	-0.020273	1.08083	0.175051	1.08208	0.500329	1.08458	0.395276	1.08458	0.340961	1.08625	-0.173956
1.0927	0.940263	1.09312	-0.430271	1.08792	-0.0441223	1.0875	0.144795	1.08875	0.489116	1.09125	0.40184	1.09125	0.376731	1.09292	-0.197299
1.09937	0.932768	1.09978	-0.414521	1.09458	-0.0657216	1.09417	0.110693	1.09542	0.475906	1.09792	0.405423	1.09792	0.412583	1.09958	-0.217631
1.10603	0.923485	1.10645	-0.396848	1.10125	-0.0836849	1.10083	0.0728369	1.10208	0.463128	1.10458	0.406414	1.10458	0.449635	1.10625	-0.235938
1.1127	0.913069	1.11312	-0.375435	1.10792	-0.09837	1.1075	0.0316352	1.10875	0.451729	1.11125	0.404365	1.11125	0.488944	1.11292	-0.252336
1.11937	0.901327	1.11978	-0.350498	1.11458	-0.109769	1.11417	-0.0115559	1.11542	0.44176	1.11792	0.400215	1.11792	0.530817	1.11958	-0.266053
1.12603	0.889122	1.12645	-0.322223	1.12125	-0.117972	1.12083	-0.0554025	1.12208	0.434235	1.12458	0.394732	1.12458	0.575282	1.12625	-0.275947
1.1327	0.876188	1.13312	-0.28988	1.12792	-0.120647	1.1275	-0.0993013	1.12875	0.430793	1.13125	0.388078	1.13125	0.622094	1.13292	-0.28269
1.13937	0.861391	1.13978	-0.25294	1.13458	-0.116713	1.13417	-0.143252	1.13542	0.431247	1.13792	0.379816	1.13792	0.670761	1.13958	-0.287361
1.14603	0.844412	1.14645	-0.213519	1.14125	-0.106916	1.14083	-0.186369	1.14208	0.433713	1.14458	0.370912	1.14458	0.719614	1.14625	-0.289626
1.1527	0.825733	1.15312	-0.173986	1.14792	-0.0930727	1.1475	-0.2276	1.14875	0.439487	1.15125	0.362664	1.15125	0.767529	1.15292	-0.289805
1.15937	0.805847	1.15978	-0.135198	1.15458	-0.0766069	1.15417	-0.265732	1.15542	0.450142	1.15792	0.354178	1.15792	0.813462	1.15958	-0.288926
1.16603	0.784449	1.16645	-0.0967681	1.16125	-0.0584126	1.16083	-0.301503	1.16208	0.465274	1.16458	0.34482	1.16458	0.855833	1.16625	-0.28912
1.1727	0.76168	1.17312	-0.0604838	1.16792	-0.0401139	1.1675	-0.335008	1.16875	0.482507	1.17125	0.335187	1.17125	0.89296	1.17292	-0.290811
1.17937	0.738278	1.17978	-0.026688	1.17458	-0.0227615	1.17417	-0.366986	1.17542	0.501566	1.17792	0.325195	1.17792	0.924818	1.17958	-0.293404
1.18603	0.714824	1.18645	0.00407547	1.18125	-0.00729412	1.18083	-0.398979	1.18208	0.522636	1.18458	0.313349	1.18458	0.950545	1.18625	-0.297017
1.1927	0.691444	1.19312	0.0323877	1.18792	0.00602752	1.1875	-0.431575	1.18875	0.543654	1.19125	0.298277	1.19125	0.96944	1.19292	-0.3023
1.19937	0.668131	1.19978	0.0584871	1.19458	0.016585	1.19417	-0.465408	1.19542	0.562713	1.19792	0.279836	1.19792	0.98072	1.19958	-0.310317
1.20603	0.645697	1.20645	0.0822321	1.20125	0.023894	1.20083	-0.499859	1.20208	0.580393	1.20458	0.259005	1.20458	0.985056	1.20625	-0.320867
1.2127	0.625633	1.21312	0.104405	1.20792	0.0267401	1.2075	-0.535384	1.20875	0.598185	1.21125	0.235759	1.21125	0.984132	1.21292	-0.333793
1.21937	0.609539	1.21978	0.124879	1.21458	0.023976	1.21417	-0.57184	1.21542	0.615492	1.21792	0.209451	1.21792	0.979595	1.21958	-0.350542
1.22603	0.597514	1.22645	0.14428	1.22125	0.0162572	1.22083	-0.608467	1.22208	0.630572	1.22458	0.178531	1.22458	0.974439	1.22625	-0.372425
1.2327	0.588693	1.23312	0.162832	1.22792	0.00466406	1.2275	-0.645839	1.22875	0.642836	1.23125	0.142351	1.23125	0.969835	1.23292	-0.400051
1.23937	0.583529	1.23978	0.181615	1.23458	-0.00978261	1.23417	-0.683837	1.23542	0.653341	1.23792	0.101827	1.23792	0.965558	1.23958	-0.432096
1.24603	0.582188	1.24645	0.20168	1.24125	-0.0260249	1.24083	-0.721775	1.24208	0.662461	1.24458	0.0581965	1.24458	0.96146	1.24625	-0.468038
1.2527	0.584275	1.25312	0.223652	1.24792	-0.0428036	1.2475	-0.757843	1.24875	0.669658	1.25125	0.0129566	1.25125	0.958033	1.25292	-0.508435
1.25937	0.588864	1.25978	0.247113	1.25458	-0.0595823	1.25417	-0.789881	1.25542	0.67547	1.25792	-0.03317	1.25792	0.95509	1.25958	-0.552751
1.26603	0.596061	1.26645	0.271142	1.26125	-0.0759438	1.26083	-0.817142	1.26208	0.681773	1.26458	-0.0791624	1.26458	0.951797	1.26625	-0.599481
1.2727	0.606708	1.27312	0.295229	1.26792	-0.0911057	1.2675	-0.838488	1.26875	0.689581	1.27125	-0.12368	1.27125	0.94828	1.27292	-0.647217
1.27937	0.620522	1.27978	0.318758	1.27458	-0.103548	1.27417	-0.853978	1.27542	0.698566	1.27792	-0.166319	1.27792	0.946559	1.27958	-0.695862
1.28603	0.635989	1.28645	0.341006	1.28125	-0.11307	1.28083	-0.864699	1.28208	0.708006	1.28458	-0.207782	1.28458	0.946596	1.28625	-0.744849
1.2927	0.650793	1.29312	0.360742	1.28792	-0.119783	1.2875	-0.87212	1.28875	0.71805	1.29125	-0.249647	1.29125	0.945486	1.29292	-0.792719
1.29937	0.66369	1.29978	0.377372	1.29458	-0.123173	1.29417	-0.877492	1.29542	0.728108	1.29792	-0.292063	1.29792	0.942424	1.29958	-0.838242
1.30603	0.674397	1.30645	0.390045	1.30125	-0.123233	1.30083	-0.881456	1.30208	0.738248	1.30458	-0.333965	1.30458	0.937834	1.30625	-0.881247
1.3127	0.682302	1.31312	0.398256	1.30792	-0.119939	1.3075	-0.886053	1.30875	0.749081	1.31125	-0.374287	1.31125	0.93244	1.31292	-0.921302
1.31937	0.686623	1.31978	0.401899	1.31458	-0.114292	1.31417	-0.89293	1.31542	0.760749	1.31792	-0.4142	1.31792	0.9249	1.31958	-0.957206
1.32603	0.686608	1.32645	0.401147	1.32125	-0.105955	1.32083	-0.90304	1.32208	0.771843	1.32458	-0.455029	1.32458	0.914596	1.32625	-0.987992
1.3327	0.682488	1.33312	0.396959	1.32792	-0.0949726	1.3275	-0.915743	1.32875	0.781558	1.33125	-0.497058	1.33125	0.904888	1.33292	-1.01332
1.33937	0.674389	1.33978	0.390626	1.33458	-0.0812709	1.33417	-0.931285	1.33542	0.789776	1.33792	-0.539511	1.33792	0.897326	1.33958	-1.03306
1.34603	0.662751	1.34645	0.384137	1.34125	-0.0647008	1.34083	-0.950113	1.34208	0.795968	1.34458	-0.582002	1.34458	0.891216	1.34625	-1.04676
1.3527	0.64823	1.35312	0.378892	1.34792	-0.045225	1.3475	-0.971645	1.34875	0.79836	1.35125	-0.625953	1.35125	0.884444	1.35292	-1.05415
1.35937	0.630721	1.35978	0.374734	1.35458	-0.0225455	1.35417	-0.99501	1.35542	0.796512	1.35792	-0.669897	1.35792	0.87662	1.35958	-1.05543
1.36603	0.610746	1.36645	0.371255	1.36125	0.00355393	1.36083	-1.01916	1.36208	0.791512	1.36458	-0.711985	1.36458	0.869952	1.36625	-1.05005
1.3727	0.589669	1.37312	0.368722	1.36792	0.0330806	1.3675	-1.0447	1.36875	0.784867	1.37125	-0.750855	1.37125	0.863984	1.37292	-1.03798
1.37937	0.56906	1.37978	0.367284	1.37458	0.0656247	1.37417	-1.07152	1.37542	0.777416	1.37792	-0.787117	1.37792	0.857696	1.37958	-1.01954
1.38603	0.548877	1.38645	0.366643	1.38125	0.0999272	1.38083	-1.09797	1.38208	0.769563	1.38458	-0.822492	1.38458	0.850178	1.38625	-0.995792
1.3927	0.52768	1.39312	0.36642	1.38792	0.135921	1.3875	-1.12235	1.38875	0.761837	1.39125	-0.856504	1.39125	0.842497	1.39292	-0.967205
1.39937	0.505872	1.39978	0.366934	1.39458	0.173628	1.39417	-1.14362	1.39542	0.75426	1.39792	-0.889435	1.39792	0.836216	1.39958	-0.934243
1.40603	0.483826	1.40645	0.368394	1.40125	0.213362	1.40083	-1.16189	1.40208	0.746951	1.40458	-0.921555	1.40458	0.830136	1.40625	-0.899665
1.4127	0.461891	1.41312	0.369489	1.40792	0.255339	1.4075	-1.1768	1.40875	0.739254	1.41125	-0.953309	1.41125	0.823468	1.41292	-0.865772
1.41937	0.439897	1.41978	0.368759	1.41458	0.299737	1.41417	-1.18812	1.41542	0.731871	1.41792	-0.985518	1.41792	0.816345	1.41958	-0.834987
1.42603	0.418194	1.42645	0.36566	1.42125	0.346906	1.42083	-1.19655	1.42208	0.725739	1.42458	-1.01779	1.42458	0.810593	1.42625	-0.808202
1.4327	0.397645	1.43312	0.360519	1.42792	0.396542	1.4275	-1.20232	1.42875	0.72217	1.43125	-1.05126	1.43125	0.807248	1.43292	-0.785984
1.43937	0.377774	1.43978	0.354245	1.43458	0.447407	1.43417	-1.20512	1.43542	0.721656	1.43792	-1.08567	1.43792	0.805646	1.43958	-0.768155
1.44603	0.358529	1.44645	0.347525	1.44125	0.49822	1.44083	-1.20329	1.44208	0.723764	1.44458	-1.12082	1.44458	0.806585	1.44625	-0.753865
1.4527	0.338867	1.45312	0.340693	1.44792	0.547051	1.4475	-1.19535	1.44875	0.726938	1.45125	-1.15701	1.45125	0.810899	1.45292	-0.742383
1.45937	0.317357	1.45978	0.333741	1.45458	0.594288	1.45417	-1.18048	1.45542	0.728421	1.45792	-1.19421	1.45792	0.819959	1.45958	-0.733547
1.46603	0.293091	1.46645	0.326902	1.46125	0.640467	1.46083	-1.15824	1.46208	0.726104	1.46458	-1.23163	1.46458	0.832886	1.46625	-0.726864
1.4727	0.26679	1.47312	0.319958	1.46792	0.6845	1.4675	-1.12787	1.46875	0.719376	1.47125	-1.26758	1.47125	0.84763	1.47292	-0.722267
1.47937	0.238739	1.47978	0.31209	1.47458	0.726148	1.47417	-1.08924	1.47542	0.707448	1.47792	-1.30165	1.47792	0.862673	1.47958	-0.720225
1.48603	0.208288	1.48645	0.302568	1.48125	0.764497	1.48083	-1.04294	1.48208	0.690371	1.48458	-1.33346	1.48458	0.876918	1.48625	-0.721075
1.4927	0.175312	1.49312	0.291407	1.48792	0.801466	1.4875	-0.991151	1.48875	0.66945	1.49125	-1.36293	1.49125	0.890881	1.49292	-0.72512
1.49937	0.141263	1.49978	0.280522	1.49458	0.83632	1.49417	-0.935085	1.49542	0.647418	1.49792	-1.38901	1.49792	0.903204	1.49958	-0.730105
1.50603	0.107102	1.50645	0.271149	1.50125	0.868507	1.50083	-0.8763	1.50208	0.625804	1.50458	-1.412	1.50458	0.913024	1.50625	-0.735082
1.5127	0.0723228	1.51312	0.263944	1.50792	0.899173	1.5075	-0.81706	1.50875	0.605352	1.51125	-1.43246	1.51125	0.92081	1.51292	-0.739545
1.51937	0.0371337	1.51978	0.25858	1.51458	0.92908	1.51417	-0.758857	1.51542	0.586495	1.51792	-1.4511	1.51792	0.929072	1.51958	-0.743814
1.52603	0.0032261	1.52645	0.254996	1.52125	0.958905	1.52083	-0.703074	1.52208	0.568561	1.52458	-1.46899	1.52458	0.939995	1.52625	-0.747167
1.5327	-0.0285953	1.53312	0.253968	1.52792	0.987478	1.5275	-0.648782	1.52875	0.550508	1.53125	-1.48463	1.53125	0.952907	1.53292	-0.748932
1.53937	-0.0584796	1.53978	0.255316	1.53458	1.01531	1.53417	-0.59595	1.53542	0.531711	1.53792	-1.49716	1.53792	0.967562	1.53958	-0.749692
1.54603	-0.0876561	1.54645	0.258826	1.54125	1.04437	1.54083	-0.544317	1.54208	0.512317	1.54458	-1.50526	1.54458	0.985205	1.54625	-0.749558
1.5527	-0.116326	1.55312	0.264376	1.54792	1.07402	1.5475	-0.493117	1.54875	0.492133	1.55125	-1.50774	1.55125	1.00702	1.55292	-0.748292
1.55937	-0.14472	1.55978	0.27208	1.55458	1.10304	1.55417	-0.442468	1.55542	0.470147	1.55792	-1.50458	1.55792	1.03161	1.55958	-0.745185
1.56603	-0.173032	1.56645	0.28152	1.56125	1.12987	1.56083	-0.392981	1.56208	0.44746	1.56458	-1.4958	1.56458	1.05648	1.56625	-0.740871
1.5727	-0.200957	1.57312	0.291839	1.56792	1.15465	1.5675	-0.345804	1.56875	0.425428	1.57125	-1.48303	1.57125	1.08146	1.57292	-0.735819
1.57937	-0.228941	1.57978	0.301942	1.57458	1.17724	1.57417	-0.301801	1.57542	0.405081	1.57792	-1.46598	1.57792	1.10718	1.57958	-0.730634
1.58603	-0.256799	1.58645	0.311092	1.58125	1.19609	1.58083	-0.260755	1.58208	0.386976	1.58458	-1.44477	1.58458	1.13258	1.58625	-0.725225
1.5927	-0.284411	1.59312	0.318892	1.58792	1.21146	1.5875	-0.223972	1.58875	0.371248	1.59125	-1.42079	1.59125	1.15664	1.59292	-0.719935
1.59937	-0.310719	1.59978	0.325471	1.59458	1.22298	1.59417	-0.192545	1.59542	0.359401	1.59792	-1.39501	1.59792	1.1791	1.59958	-0.715226
1.60603	-0.335336	1.60645	0.331521	1.60125	1.23008	1.60083	-0.167079	1.60208	0.351124	1.60458	-1.36739	1.60458	1.20088	1.60625	-0.711367
1.6127	-0.358343	1.61312	0.337034	1.60792	1.23301	1.6075	-0.147484	1.60875	0.346035	1.61125	-1.33646	1.61125	1.22124	1.61292	-0.708841
1.61937	-0.379883	1.61978	0.342235	1.61458	1.23356	1.61417	-0.133008	1.61542	0.342935	1.61792	-1.3031	1.61792	1.23931	1.61958	-0.707865
1.62603	-0.399791	1.62645	0.346817	1.62125	1.23326	1.62083	-0.123635	1.62208	0.340641	1.62458	-1.26836	1.62458	1.25578	1.62625	-0.709243
1.6327	-0.417307	1.63312	0.350289	1.62792	1.23096	1.6275	-0.118494	1.62875	0.33801	1.63125	-1.23315	1.63125	1.27045	1.63292	-0.712782
1.63937	-0.432462	1.63978	0.352368	1.63458	1.22643	1.63417	-0.116087	1.63542	0.33436	1.63792	-1.19604	1.63792	1.2832	1.63958	-0.717767
1.64603	-0.445254	1.64645	0.352688	1.64125	1.22122	1.64083	-0.115	1.64208	0.329643	1.64458	-1.15572	1.64458	1.29327	1.64625	-0.72363
1.6527	-0.456981	1.65312	0.35236	1.64792	1.21542	1.6475	-0.114448	1.64875	0.323996	1.65125	-1.11301	1.65125	1.30095	1.65292	-0.729322
1.65937	-0.466928	1.65978	0.35163	1.65458	1.2079	1.65417	-0.114202	1.65542	0.317551	1.65792	-1.06793	1.65792	1.30662	1.65958	-0.733733
1.66603	-0.473857	1.66645	0.350066	1.66125	1.19764	1.66083	-0.113644	1.66208	0.31177	1.66458	-1.02121	1.66458	1.30989	1.66625	-0.735216
1.6727	-0.477992	1.67312	0.347517	1.66792	1.18536	1.6675	-0.112034	1.66875	0.308856	1.67125	-0.97204	1.67125	1.31109	1.67292	-0.733897
1.67937	-0.481784	1.67978	0.343971	1.67458	1.17231	1.67417	-0.108749	1.67542	0.309847	1.67792	-0.922695	1.67792	1.31097	1.67958	-0.730865
1.68603	-0.487104	1.68645	0.340477	1.68125	1.15877	1.68083	-0.103243	1.68208	0.314914	1.68458	-0.875451	1.68458	1.31019	1.68625	-0.72626
1.6927	-0.491917	1.69312	0.337042	1.68792	1.14604	1.6875	-0.0959262	1.68875	0.323892	1.69125	-0.831112	1.69125	1.3084	1.69292	-0.719279
1.69937	-0.495575	1.69978	0.334352	1.69458	1.13285	1.69417	-0.0873283	1.69542	0.336938	1.69792	-0.790134	1.69792	1.30455	1.69958	-0.709534
1.70603	-0.499517	1.70645	0.333227	1.70125	1.11781	1.70083	-0.0778213	1.70208	0.352249	1.70458	-0.75198	1.70458	1.29791	1.70625	-0.698909
1.7127	-0.505507	1.71312	0.333741	1.70792	1.10058	1.7075	-0.0685453	1.70875	0.366993	1.71125	-0.717118	1.71125	1.29028	1.71292	-0.688851
1.71937	-0.512749	1.71978	0.33623	1.71458	1.08194	1.71417	-0.0602826	1.71542	0.380129	1.71792	-0.684962	1.71792	1.28271	1.71958	-0.679389
1.72603	-0.520572	1.72645	0.339821	1.72125	1.06278	1.72083	-0.0534356	1.72208	0.391975	1.72458	-0.656202	1.72458	1.2759	1.72625	-0.669032
1.7327	-0.529341	1.73312	0.344172	1.72792	1.042	1.7275	-0.0473857	1.72875	0.402234	1.73125	-0.632592	1.73125	1.27023	1.73292	-0.657134
1.73937	-0.538833	1.73978	0.34833	1.73458	1.02008	1.73417	-0.0409111	1.73542	0.409044	1.73792	-0.615038	1.73792	1.26636	1.73958	-0.64458
1.74603	-0.548728	1.74645	0.352696	1.74125	0.997901	1.74083	-0.0336394	1.74208	0.411496	1.74458	-0.60299	1.74458	1.2646	1.74625	-0.631623
1.7527	-0.558324	1.75312	0.358045	1.74792	0.9754	1.7475	-0.0241995	1.74875	0.41043	1.75125	-0.594735	1.75125	1.26304	1.75292	-0.61778
1.75937	-0.566646	1.75978	0.364065	1.75458	0.952229	1.75417	-0.0129491	1.75542	0.40631	1.75792	-0.589848	1.75792	1.25997	1.75958	-0.6015
1.76603	-0.571549	1.76645	0.37051	1.76125	0.926405	1.76083	-0.00119209	1.76208	0.39915	1.76458	-0.588514	1.76458	1.25506	1.76625	-0.584066
1.7727	-0.572458	1.77312	0.377439	1.76792	0.8974	1.7675	0.00976771	1.76875	0.389695	1.77125	-0.590123	1.77125	1.24855	1.77292	-0.567764
1.77937	-0.570901	1.77978	0.385568	1.77458	0.864476	1.77417	0.0191033	1.77542	0.37998	1.77792	-0.593744	1.77792	1.23957	1.77958	-0.553541
1.78603	-0.567302	1.78645	0.393741	1.78125	0.828788	1.78083	0.0268668	1.78208	0.372253	1.78458	-0.599392	1.78458	1.22772	1.78625	-0.539474
1.7927	-0.561498	1.79312	0.401333	1.78792	0.790708	1.7875	0.0321195	1.78875	0.367358	1.79125	-0.609487	1.79125	1.21228	1.79292	-0.523478
1.79937	-0.553086	1.79978	0.408933	1.79458	0.750013	1.79417	0.0343174	1.79542	0.365816	1.79792	-0.62564	1.79792	1.19347	1.79958	-0.507027
1.80603	-0.54352	1.80645	0.416875	1.80125	0.707768	1.80083	0.0339895	1.80208	0.367895	1.80458	-0.646949	1.80458	1.17022	1.80625	-0.49188
1.8127	-0.534244	1.81312	0.424661	1.80792	0.665538	1.8075	0.0321418	1.80875	0.373721	1.81125	-0.67234	1.81125	1.14162	1.81292	-0.478588
1.81937	-0.524998	1.81978	0.431791	1.81458	0.625454	1.81417	0.0294596	1.81542	0.383206	1.81792	-0.702277	1.81792	1.10946	1.81958	-0.466324
1.82603	-0.515267	1.82645	0.438742	1.82125	0.586845	1.82083	0.02601	1.82208	0.395738	1.82458	-0.737622	1.82458	1.07524	1.82625	-0.456773
1.8327	-0.504531	1.83312	0.444531	1.82792	0.55021	1.8275	0.0219196	1.82875	0.411525	1.83125	-0.777118	1.83125	1.0404	1.83292	-0.452392
1.83937	-0.493579	1.83978	0.448525	1.83458	0.515513	1.83417	0.0178143	1.83542	0.429504	1.83792	-0.818059	1.83792	1.00575	1.83958	-0.4538
1.84603	-0.482127	1.84645	0.450335	1.84125	0.48428	1.84083	0.0138655	1.84208	0.448406	1.84458	-0.859357	1.84458	0.972614	1.84625	-0.459224
1.8527	-0.469811	1.85312	0.450179	1.84792	0.456452	1.8475	0.0102222	1.84875	0.467665	1.85125	-0.900902	1.85125	0.942573	1.85292	-0.466444
1.85937	-0.456639	1.85978	0.447594	1.85458	0.431411	1.85417	0.00684708	1.85542	0.487193	1.85792	-0.942081	1.85792	0.914402	1.85958	-0.474796
1.86603	-0.443585	1.86645	0.443093	1.86125	0.409484	1.86083	0.00356138	1.86208	0.507012	1.86458	-0.981718	1.86458	0.887915	1.86625	-0.48203
1.8727	-0.431433	1.87312	0.437781	1.86792	0.391655	1.8675	0.000730157	1.86875	0.524908	1.87125	-1.01851	1.87125	0.863515	1.87292	-0.486188
1.87937	-0.420704	1.87978	0.431828	1.87458	0.379413	1.87417	-0.00142306	1.87542	0.539415	1.87792	-1.05328	1.87792	0.841796	1.87958	-0.484705
1.88603	-0.412121	1.88645	0.425518	1.88125	0.371031	1.88083	-0.0019595	1.88208	0.550225	1.88458	-1.08663	1.88458	0.82276	1.88625	-0.477664
1.8927	-0.406876	1.89312	0.418834	1.88792	0.364825	1.8875	-0.00151247	1.88875	0.557058	1.89125	-1.11867	1.89125	0.805907	1.89292	-0.465669
1.89937	-0.406243	1.89978	0.411808	1.89458	0.359893	1.89417	-0.00107288	1.89542	0.559494	1.89792	-1.14943	1.89792	0.791997	1.89958	-0.4493
1.90603	-0.410266	1.90645	0.403702	1.90125	0.356041	1.90083	-0.0012517	1.90208	0.556022	1.90458	-1.17983	1.90458	0.780351	1.90625	-0.430956
1.9127	-0.417635	1.91312	0.3931	1.90792	0.352494	1.9075	-0.00240654	1.90875	0.547618	1.91125	-1.21109	1.91125	0.770241	1.91292	-0.412725
1.91937	-0.427514	1.91978	0.378504	1.91458	0.348076	1.91417	-0.00493973	1.91542	0.536077	1.91792	-1.24315	1.91792	0.761569	1.91958	-0.397377
1.92603	-0.44021	1.92645	0.358716	1.92125	0.343122	1.92083	-0.0106022	1.92208	0.522524	1.92458	-1.27541	1.92458	0.755221	1.92625	-0.386074
1.9327	-0.455208	1.93312	0.333644	1.92792	0.337668	1.9275	-0.0196248	1.92875	0.506975	1.93125	-1.30817	1.93125	0.751302	1.93292	-0.380613
1.93937	-0.472054	1.93978	0.303574	1.93458	0.331812	1.93417	-0.0312328	1.93542	0.48919	1.93792	-1.34041	1.93792	0.749744	1.93958	-0.381224
1.94603	-0.489958	1.94645	0.267945	1.94125	0.324644	1.94083	-0.044778	1.94208	0.470147	1.94458	-1.37085	1.94458	0.750847	1.94625	-0.387326
1.9527	-0.510111	1.95312	0.228047	1.94792	0.315957	1.9475	-0.0606254	1.94875	0.449821	1.95125	-1.39803	1.95125	0.754774	1.95292	-0.397868
1.95937	-0.531785	1.95978	0.186414	1.95458	0.306144	1.95417	-0.0784844	1.95542	0.427589	1.95792	-1.42177	1.95792	0.761196	1.95958	-0.411831
1.96603	-0.55401	1.96645	0.145167	1.96125	0.295222	1.96083	-0.0975206	1.96208	0.402682	1.96458	-1.44117	1.96458	0.769652	1.96625	-0.427961
1.9727	-0.575654	1.97312	0.10588	1.96792	0.283502	1.9675	-0.115879	1.96875	0.374861	1.97125	-1.45418	1.97125	0.780329	1.97292	-0.443943
1.97937	-0.595167	1.97978	0.0695735	1.97458	0.270337	1.97417	-0.133097	1.97542	0.343882	1.97792	-1.46089	1.97792	0.792995	1.97958	-0.459224
1.98603	-0.612572	1.98645	0.0379831	1.98125	0.255592	1.98083	-0.149511	1.98208	0.309058	1.98458	-1.46227	1.98458	0.807151	1.98625	-0.473946
1.9927	-0.62833	1.99312	0.011526	1.98792	0.239395	1.9875	-0.165917	1.98875	0.271283	1.99125	-1.46009	1.99125	0.822574	1.99292	-0.488468
1.99937	-0.643477	1.99978	-0.00984222	1.99458	0.221692	1.99417	-0.182673	1.99542	0.231735	1.99792	-1.45447	1.99792	0.83898	1.99958	-0.502698
2.00603	-0.657804	2.00645	-0.0254139	2.00125	0.20282	2.00083	-0.199154	2.00208	0.19218	2.00458	-1.44634	2.00458	0.855766	2.00625	-0.516266
2.0127	-0.670426	2.01312	-0.0354275	2.00792	0.183254	2.0075	-0.216238	2.00875	0.153311	2.01125	-1.43676	2.01125	0.872768	2.01292	-0.529781
2.01937	-0.681415	2.01978	-0.0407249	2.01458	0.164531	2.01417	-0.235289	2.01542	0.116423	2.01792	-1.42685	2.01792	0.889547	2.01958	-0.543505
2.02603	-0.690743	2.02645	-0.0413582	2.02125	0.147782	2.02083	-0.256851	2.02208	0.083223	2.02458	-1.41688	2.02458	0.906482	2.02625	-0.556216
2.0327	-0.698142	2.03312	-0.0363365	2.02792	0.133127	2.0275	-0.28006	2.02875	0.0538677	2.03125	-1.40755	2.03125	0.924028	2.03292	-0.566788
2.03937	-0.70329	2.03978	-0.0259131	2.03458	0.119701	2.03417	-0.304513	2.03542	0.0279024	2.03792	-1.39932	2.03792	0.942215	2.03958	-0.574879
2.04603	-0.706114	2.04645	-0.0113919	2.04125	0.108242	2.04083	-0.330463	2.04208	0.00428408	2.04458	-1.39172	2.04458	0.960253	2.04625	-0.581801
2.0527	-0.706822	2.05312	0.00582635	2.04792	0.100061	2.0475	-0.359125	2.04875	-0.0177622	2.05125	-1.38402	2.05125	0.975713	2.05292	-0.588305
2.05937	-0.706419	2.05978	0.0261068	2.05458	0.0949353	2.05417	-0.38971	2.05542	-0.0393838	2.05792	-1.37528	2.05792	0.987194	2.05958	-0.594132
2.06603	-0.705823	2.06645	0.0498667	2.06125	0.0919625	2.06083	-0.420921	2.06208	-0.0618249	2.06458	-1.36521	2.06458	0.993066	2.06625	-0.599101
2.0727	-0.705272	2.07312	0.0768974	2.06792	0.0901073	2.0675	-0.451185	2.06875	-0.0856072	2.07125	-1.35286	2.07125	0.992887	2.07292	-0.603281
2.07937	-0.704594	2.07978	0.108257	2.07458	0.0902414	2.07417	-0.480078	2.07542	-0.110812	2.07792	-1.33698	2.07792	0.986256	2.07958	-0.607178
2.08603	-0.70408	2.08645	0.14358	2.08125	0.0917837	2.08083	-0.508375	2.08208	-0.137053	2.08458	-1.31799	2.08458	0.973091	2.08625	-0.610508
2.0927	-0.705294	2.09312	0.183463	2.08792	0.0938103	2.0875	-0.536032	2.08875	-0.162683	2.09125	-1.29721	2.09125	0.955187	2.09292	-0.612982
2.09937	-0.708722	2.09978	0.227526	2.09458	0.0964254	2.09417	-0.563055	2.09542	-0.187352	2.09792	-1.27591	2.09792	0.934124	2.09958	-0.61439
2.10603	-0.713535	2.10645	0.274375	2.10125	0.100635	2.10083	-0.589065	2.10208	-0.210807	2.10458	-1.25364	2.10458	0.911601	2.10625	-0.614651
2.1127	-0.718862	2.11312	0.322588	2.10792	0.10778	2.1075	-0.613935	2.10875	-0.233471	2.11125	-1.22973	2.11125	0.886746	2.11292	-0.61398
2.11937	-0.72524	2.11978	0.369586	2.11458	0.117421	2.11417	-0.637077	2.11542	-0.255048	2.11792	-1.20476	2.11792	0.85859	2.11958	-0.612602
2.12603	-0.733681	2.12645	0.41461	2.12125	0.129022	2.12083	-0.657618	2.12208	-0.274889	2.12458	-1.17875	2.12458	0.827536	2.12625	-0.611097
2.1327	-0.743799	2.13312	0.457153	2.12792	0.142232	2.1275	-0.673637	2.12875	-0.292525	2.13125	-1.15069	2.13125	0.794299	2.13292	-0.609525
2.13937	-0.754103	2.13978	0.497311	2.13458	0.156924	2.13417	-0.684462	2.13542	-0.307307	2.13792	-1.11958	2.13792	0.759743	2.13958	-0.608101
2.14603	-0.763632	2.14645	0.535384	2.14125	0.174023	2.14083	-0.689775	2.14208	-0.319123	2.14458	-1.08671	2.14458	0.723884	2.14625	-0.608101
2.1527	-0.772193	2.15312	0.56988	2.14792	0.193156	2.1475	-0.689529	2.14875	-0.328124	2.15125	-1.05365	2.15125	0.688799	2.15292	-0.610709
2.15937	-0.779428	2.15978	0.600033	2.15458	0.214584	2.15417	-0.683255	2.15542	-0.333324	2.15792	-1.0213	2.15792	0.656702	2.15958	-0.614986
2.16603	-0.784829	2.16645	0.625156	2.16125	0.23739	2.16083	-0.669762	2.16208	-0.334054	2.16458	-0.98943	2.16458	0.628464	2.16625	-0.619881
2.1727	-0.78804	2.17312	0.644691	2.16792	0.26121	2.1675	-0.650175	2.16875	-0.329524	2.17125	-0.958934	2.17125	0.603415	2.17292	-0.624731
2.17937	-0.789195	2.17978	0.657819	2.17458	0.285685	2.17417	-0.625409	2.17542	-0.319436	2.17792	-0.930272	2.17792	0.581354	2.17958	-0.629172
2.18603	-0.788622	2.18645	0.664122	2.18125	0.309132	2.18083	-0.596948	2.18208	-0.302814	2.18458	-0.902444	2.18458	0.56278	2.18625	-0.632443
2.1927	-0.786938	2.19312	0.665739	2.18792	0.330031	2.1875	-0.565104	2.18875	-0.279211	2.19125	-0.874572	2.19125	0.546336	2.19292	-0.633098
2.19937	-0.784345	2.19978	0.664838	2.19458	0.346318	2.19417	-0.530891	2.19542	-0.249557	2.19792	-0.846468	2.19792	0.530548	2.19958	-0.631668
2.20603	-0.780404	2.20645	0.664085	2.20125	0.358038	2.20083	-0.495791	2.20208	-0.215895	2.20458	-0.818051	2.20458	0.514172	2.20625	-0.627927
2.2127	-0.774853	2.21312	0.664629	2.20792	0.365265	2.2075	-0.460766	2.20875	-0.180431	2.21125	-0.788055	2.21125	0.497475	2.21292	-0.622362
2.21937	-0.768296	2.21978	0.667475	2.21458	0.367396	2.21417	-0.426352	2.21542	-0.144042	2.21792	-0.75537	2.21792	0.48048	2.21958	-0.615351
2.22603	-0.761166	2.22645	0.673398	2.22125	0.363708	2.22083	-0.394434	2.22208	-0.107929	2.22458	-0.719979	2.22458	0.463828	2.22625	-0.607863
2.2327	-0.753239	2.23312	0.682272	2.22792	0.354871	2.2275	-0.367172	2.22875	-0.0719577	2.23125	-0.682965	2.23125	0.448681	2.23292	-0.60191
2.23937	-0.744395	2.23978	0.693172	2.23458	0.342622	2.23417	-0.344664	2.23542	-0.0373274	2.23792	-0.645086	2.23792	0.435457	2.23958	-0.597551
2.24603	-0.73491	2.24645	0.704639	2.24125	0.3286	2.24083	-0.32606	2.24208	-0.00410527	2.24458	-0.608377	2.24458	0.424333	2.24625	-0.595063
2.2527	-0.726119	2.25312	0.715993	2.24792	0.312813	2.2475	-0.310704	2.24875	0.0272542	2.25125	-0.574909	2.25125	0.415817	2.25292	-0.593551
2.25937	-0.718534	2.25978	0.727445	2.25458	0.295721	2.25417	-0.299558	2.25542	0.0566542	2.25792	-0.546061	2.25792	0.41008	2.25958	-0.593521
2.26603	-0.71267	2.26645	0.737578	2.26125	0.276573	2.26083	-0.291757	2.26208	0.0833869	2.26458	-0.522234	2.26458	0.406466	2.26625	-0.594653
2.2727	-0.708759	2.27312	0.745438	2.26792	0.255525	2.2675	-0.28725	2.26875	0.105821	2.27125	-0.501812	2.27125	0.403687	2.27292	-0.595197
2.27937	-0.70677	2.27978	0.750154	2.27458	0.232734	2.27417	-0.285916	2.27542	0.123531	2.27792	-0.483826	2.27792	0.402138	2.27958	-0.595443
2.28603	-0.707261	2.28645	0.751145	2.28125	0.207178	2.28083	-0.287458	2.28208	0.137687	2.28458	-0.466622	2.28458	0.403002	2.28625	-0.595957
2.2927	-0.709489	2.29312	0.747822	2.28792	0.178292	2.2875	-0.291392	2.28875	0.149772	2.29125	-0.449471	2.29125	0.406191	2.29292	-0.597894
2.29937	-0.714079	2.29978	0.739269	2.29458	0.145681	2.29417	-0.296079	2.29542	0.160366	2.29792	-0.432521	2.29792	0.411071	2.29958	-0.601448
2.30603	-0.72144	2.30645	0.727408	2.30125	0.111885	2.30083	-0.301018	2.30208	0.169821	2.30458	-0.415958	2.30458	0.416383	2.30625	-0.606015
2.3127	-0.73126	2.31312	0.714011	2.30792	0.0783503	2.3075	-0.303894	2.30875	0.179723	2.31125	-0.4002	2.31125	0.421934	2.31292	-0.611819
2.31937	-0.742666	2.31978	0.701725	2.31458	0.0445172	2.31417	-0.305012	2.31542	0.19075	2.31792	-0.384212	2.31792	0.426002	2.31958	-0.618003
2.32603	-0.754304	2.32645	0.692561	2.32125	0.0103414	2.32083	-0.304751	2.32208	0.202157	2.32458	-0.367694	2.32458	0.428177	2.32625	-0.624828
2.3327	-0.766315	2.33312	0.688426	2.32792	-0.0232458	2.3275	-0.303864	2.32875	0.212699	2.33125	-0.350244	2.33125	0.428684	2.33292	-0.63239
2.33937	-0.777803	2.33978	0.689544	2.33458	-0.0555813	2.33417	-0.302881	2.33542	0.222683	2.33792	-0.33173	2.33792	0.427343	2.33958	-0.64005
2.34603	-0.788152	2.34645	0.693865	2.34125	-0.087589	2.34083	-0.302173	2.34208	0.232555	2.34458	-0.311814	2.34458	0.424691	2.34625	-0.646673
2.3527	-0.797018	2.35312	0.700153	2.34792	-0.119947	2.3475	-0.304006	2.34875	0.242986	2.35125	-0.290096	2.35125	0.420921	2.35292	-0.651196
2.35937	-0.805356	2.35978	0.707813	2.35458	-0.150628	2.35417	-0.30861	2.35542	0.254385	2.35792	-0.267848	2.35792	0.417814	2.35958	-0.653148
2.36603	-0.813872	2.36645	0.716083	2.36125	-0.177756	2.36083	-0.31665	2.36208	0.267126	2.36458	-0.245012	2.36458	0.415273	2.36625	-0.650734
2.3727	-0.822112	2.37312	0.722893	2.36792	-0.20019	2.3675	-0.327274	2.36875	0.280827	2.37125	-0.222355	2.37125	0.413045	2.37292	-0.64341
2.37937	-0.829846	2.37978	0.727676	2.37458	-0.216991	2.37417	-0.339396	2.37542	0.294618	2.37792	-0.198767	2.37792	0.411771	2.37958	-0.63055
2.38603	-0.836298	2.38645	0.731133	2.38125	-0.226974	2.38083	-0.351392	2.38208	0.308648	2.38458	-0.172004	2.38458	0.411518	2.38625	-0.613682
2.3927	-0.841483	2.39312	0.733085	2.38792	-0.229746	2.3875	-0.36256	2.38875	0.321403	2.39125	-0.140674	2.39125	0.412486	2.39292	-0.593938
2.39937	-0.845179	2.39978	0.732653	2.39458	-0.225753	2.39417	-0.374168	2.39542	0.332616	2.39792	-0.103101	2.39792	0.414424	2.39958	-0.57181
2.40603	-0.847973	2.40645	0.728935	2.40125	-0.21562	2.40083	-0.387378	2.40208	0.341877	2.40458	-0.0596792	2.40458	0.416763	2.40625	-0.548616
2.4127	-0.85102	2.41312	0.721797	2.40792	-0.200801	2.4075	-0.402942	2.40875	0.350103	2.41125	-0.00922382	2.41125	0.419416	2.41292	-0.523992
2.41937	-0.854544	2.41978	0.71118	2.41458	-0.182658	2.41417	-0.421837	2.41542	0.356697	2.41792	0.0481158	2.41792	0.422627	2.41958	-0.498816
2.42603	-0.858575	2.42645	0.697412	2.42125	-0.162691	2.42083	-0.445463	2.42208	0.36145	2.42458	0.110105	2.42458	0.427589	2.42625	-0.473119
2.4327	-0.86271	2.43312	0.681743	2.42792	-0.141665	2.4275	-0.472844	2.42875	0.365645	2.43125	0.17453	2.43125	0.434741	2.43292	-0.44781
2.43937	-0.866942	2.43978	0.663593	2.43458	-0.120834	2.43417	-0.501081	2.43542	0.370413	2.43792	0.240237	2.43792	0.444271	2.43958	-0.424184
2.44603	-0.871487	2.44645	0.64294	2.44125	-0.101015	2.44083	-0.527732	2.44208	0.375934	2.44458	0.307053	2.44458	0.455596	2.44625	-0.401191
2.4527	-0.875726	2.45312	0.621177	2.44792	-0.0820532	2.4475	-0.552349	2.44875	0.381753	2.45125	0.374131	2.45125	0.467345	2.45292	-0.379033
2.45937	-0.879653	2.45978	0.599675	2.45458	-0.0637323	2.45417	-0.574403	2.45542	0.388235	2.45792	0.440232	2.45792	0.478402	2.45958	-0.357769
2.46603	-0.883617	2.46645	0.579119	2.46125	-0.0454858	2.46083	-0.59206	2.46208	0.395387	2.46458	0.504136	2.46458	0.48852	2.46625	-0.337832
2.4727	-0.888191	2.47312	0.558883	2.46792	-0.0274554	2.4675	-0.604346	2.46875	0.403002	2.47125	0.565112	2.47125	0.498213	2.47292	-0.319175
2.47937	-0.893146	2.47978	0.540525	2.47458	-0.0104979	2.47417	-0.612475	2.47542	0.410952	2.47792	0.620447	2.47792	0.506654	2.47958	-0.301115
2.48603	-0.897601	2.48645	0.525497	2.48125	0.00444055	2.48083	-0.616744	2.48208	0.419855	2.48458	0.668541	2.48458	0.51365	2.48625	-0.285648
2.4927	-0.901975	2.49312	0.514023	2.48792	0.0177696	2.4875	-0.616513	2.48875	0.430696	2.49125	0.708163	2.49125	0.519648	2.49292	-0.273585
2.49937	-0.90678	2.49978	0.506081	2.49458	0.0297353	2.49417	-0.610471	2.49542	0.444293	2.49792	0.73982	2.49792	0.524849	2.49958	-0.265002
2.50603	-0.913121	2.50645	0.501722	2.50125	0.0404343	2.50083	-0.599667	2.50208	0.460461	2.50458	0.764668	2.50458	0.52882	2.50625	-0.25966
2.5127	-0.920892	2.51312	0.500746	2.50792	0.049226	2.5075	-0.586353	2.50875	0.478171	2.51125	0.782952	2.51125	0.531092	2.51292	-0.255741
2.51937	-0.930227	2.51978	0.502549	2.51458	0.0564903	2.51417	-0.571392	2.51542	0.496805	2.51792	0.795767	2.51792	0.532001	2.51958	-0.252426
2.52603	-0.941545	2.52645	0.506163	2.52125	0.0623241	2.52083	-0.555404	2.52208	0.516482	2.52458	0.804357	2.52458	0.53218	2.52625	-0.248015
2.5327	-0.954643	2.53312	0.511311	2.52792	0.0657886	2.5275	-0.538118	2.52875	0.537314	2.53125	0.810146	2.53125	0.531413	2.53292	-0.241794
2.53937	-0.96833	2.53978	0.516847	2.53458	0.0658408	2.53417	-0.52058	2.53542	0.559308	2.53792	0.812687	2.53792	0.530064	2.53958	-0.233755
2.54603	-0.981465	2.54645	0.522405	2.54125	0.0610799	2.54083	-0.502735	2.54208	0.582114	2.54458	0.811733	2.54458	0.529043	2.54625	-0.224017
2.5527	-0.994258	2.55312	0.528067	2.54792	0.0514612	2.5475	-0.484221	2.54875	0.605479	2.55125	0.806503	2.55125	0.529259	2.55292	-0.213593
2.55937	-1.00752	2.55978	0.533909	2.55458	0.0384524	2.55417	-0.464484	2.55542	0.628427	2.55792	0.798509	2.55792	0.530623	2.55958	-0.202522
2.56603	-1.0215	2.56645	0.539251	2.56125	0.0232458	2.56083	-0.444226	2.56208	0.649281	2.56458	0.78743	2.56458	0.531435	2.56625	-0.190347
2.5727	-1.03589	2.57312	0.544004	2.56792	0.00576675	2.5675	-0.424303	2.56875	0.665471	2.57125	0.773661	2.57125	0.531889	2.57292	-0.178218
2.57937	-1.05065	2.57978	0.548318	2.57458	-0.0139475	2.57417	-0.40473	2.57542	0.676051	2.57792	0.75686	2.57792	0.532322	2.57958	-0.165775
2.58603	-1.06546	2.58645	0.551581	2.58125	-0.0338256	2.58083	-0.386268	2.58208	0.681952	2.58458	0.736147	2.58458	0.532717	2.58625	-0.152238
2.5927	-1.08031	2.59312	0.552781	2.58792	-0.0528991	2.5875	-0.369512	2.58875	0.684671	2.59125	0.711553	2.59125	0.5325	2.59292	-0.137374
2.59937	-1.09536	2.59978	0.551634	2.59458	-0.0731722	2.59417	-0.354536	2.59542	0.684485	2.59792	0.682563	2.59792	0.531226	2.59958	-0.122391
2.60603	-1.1101	2.60645	0.549778	2.60125	-0.0957251	2.60083	-0.340477	2.60208	0.681736	2.60458	0.650704	2.60458	0.529669	2.60625	-0.109188
2.6127	-1.12306	2.61312	0.547118	2.60792	-0.118911	2.6075	-0.3272	2.60875	0.679053	2.61125	0.615731	2.61125	0.527285	2.61292	-0.0965819
2.61937	-1.13409	2.61978	0.543632	2.61458	-0.141419	2.61417	-0.315331	2.61542	0.677049	2.61792	0.579178	2.61792	0.52347	2.61958	-0.0840351
2.62603	-1.1434	2.62645	0.539504	2.62125	-0.165157	2.62083	-0.304587	2.62208	0.676773	2.62458	0.543207	2.62458	0.517488	2.62625	-0.0716448
2.6327	-1.1514	2.63312	0.536613	2.62792	-0.190534	2.6275	-0.295311	2.62875	0.677817	2.63125	0.50959	2.63125	0.509031	2.63292	-0.0585392
2.63937	-1.15754	2.63978	0.535846	2.63458	-0.21524	2.63417	-0.288166	2.63542	0.681497	2.63792	0.47823	2.63792	0.498705	2.63958	-0.0441149
2.64603	-1.16132	2.64645	0.536419	2.64125	-0.2378	2.64083	-0.283726	2.64208	0.68929	2.64458	0.448205	2.64458	0.487916	2.64625	-0.0270531
2.6527	-1.16341	2.65312	0.538401	2.64792	-0.259452	2.6475	-0.280902	2.64875	0.70139	2.65125	0.42022	2.65125	0.47712	2.65292	-0.00756234
2.65937	-1.16351	2.65978	0.541627	2.65458	-0.280924	2.65417	-0.278786	2.65542	0.718258	2.65792	0.394225	2.65792	0.465691	2.65958	0.0148043
2.66603	-1.16248	2.66645	0.545643	2.66125	-0.300758	2.66083	-0.2774	2.66208	0.738278	2.66458	0.369191	2.66458	0.452802	2.66625	0.0400692
2.6727	-1.16071	2.67312	0.549585	2.66792	-0.316843	2.6675	-0.276722	2.66875	0.761695	2.67125	0.34532	2.67125	0.437796	2.67292	0.0668615
2.67937	-1.15854	2.67978	0.554353	2.67458	-0.329629	2.67417	-0.27591	2.67542	0.78804	2.67792	0.324108	2.67792	0.420228	2.67958	0.0955388
2.68603	-1.15693	2.68645	0.56193	2.68125	-0.339471	2.68083	-0.273958	2.68208	0.816204	2.68458	0.306435	2.68458	0.399679	2.68625	0.125855
2.6927	-1.15682	2.69312	0.57172	2.68792	-0.346296	2.6875	-0.271618	2.68875	0.844263	2.69125	0.29204	2.69125	0.37685	2.69292	0.158094
2.69937	-1.15912	2.69978	0.582956	2.69458	-0.350647	2.69417	-0.269845	2.69542	0.871927	2.69792	0.280418	2.69792	0.352949	2.69958	0.19072
2.70603	-1.1629	2.70645	0.594996	2.70125	-0.353426	2.70083	-0.268124	2.70208	0.899486	2.70458	0.271797	2.70458	0.328548	2.70625	0.223882
2.7127	-1.16731	2.71312	0.608131	2.70792	-0.356354	2.7075	-0.265419	2.70875	0.925899	2.71125	0.26577	2.71125	0.304803	2.71292	0.258103
2.71937	-1.17204	2.71978	0.620984	2.71458	-0.359461	2.71417	-0.26086	2.71542	0.94939	2.71792	0.262052	2.71792	0.282682	2.71958	0.292554
2.72603	-1.17709	2.72645	0.631534	2.72125	-0.362687	2.72083	-0.254586	2.72208	0.968874	2.72458	0.260435	2.72458	0.261948	2.72625	0.326537
2.7327	-1.18171	2.73312	0.639588	2.72792	-0.36604	2.7275	-0.24534	2.72875	0.985377	2.73125	0.26083	2.73125	0.241317	2.73292	0.358723
2.73937	-1.1852	2.73978	0.645138	2.73458	-0.368729	2.73417	-0.232331	2.73542	0.997745	2.73792	0.262782	2.73792	0.219442	2.73958	0.389606
2.74603	-1.18762	2.74645	0.648476	2.74125	-0.370525	2.74083	-0.216171	2.74208	1.00513	2.74458	0.26647	2.74458	0.195853	2.74625	0.417642
2.7527	-1.18871	2.75312	0.649907	2.74792	-0.37092	2.7475	-0.197344	2.74875	1.00733	2.75125	0.271648	2.75125	0.169784	2.75292	0.441641
2.75937	-1.18943	2.75978	0.650153	2.75458	-0.369601	2.75417	-0.176556	2.75542	1.00724	2.75792	0.277877	2.75792	0.141025	2.75958	0.46169
2.76603	-1.19015	2.76645	0.649616	2.76125	-0.366017	2.76083	-0.153251	2.76208	1.00716	2.76458	0.284813	2.76458	0.110395	2.76625	0.478357
2.7727	-1.19161	2.77312	0.648819	2.76792	-0.358768	2.7675	-0.128634	2.76875	1.0071	2.77125	0.291899	2.77125	0.0795126	2.77292	0.49223
2.77937	-1.19388	2.77978	0.648931	2.77458	-0.346683	2.77417	-0.103876	2.77542	1.00825	2.77792	0.298776	2.77792	0.049822	2.77958	0.503048
2.78603	-1.19659	2.78645	0.651494	2.78125	-0.329189	2.78083	-0.0786707	2.78208	1.01184	2.78458	0.305019	2.78458	0.023365	2.78625	0.512242
2.7927	-1.20018	2.79312	0.656396	2.78792	-0.307515	2.7875	-0.0525638	2.78875	1.01911	2.79125	0.311397	2.79125	0.000931323	2.79292	0.52093
2.79937	-1.2036	2.79978	0.662684	2.79458	-0.283904	2.79417	-0.0248402	2.79542	1.02872	2.79792	0.318035	2.79792	-0.0173226	2.79958	0.529364
2.80603	-1.2071	2.80645	0.669613	2.80125	-0.259623	2.80083	0.00292808	2.80208	1.03866	2.80458	0.325002	2.80458	-0.0322163	2.80625	0.537463
2.8127	-1.2105	2.81312	0.676438	2.80792	-0.234596	2.8075	0.0296012	2.80875	1.04877	2.81125	0.332817	2.81125	-0.0436902	2.81292	0.546291
2.81937	-1.21538	2.81978	0.681914	2.81458	-0.208944	2.81417	0.0554323	2.81542	1.05789	2.81792	0.34225	2.81792	-0.0520051	2.81958	0.55553
2.82603	-1.22236	2.82645	0.685953	2.82125	-0.182539	2.82083	0.0799298	2.82208	1.06565	2.82458	0.353344	2.82458	-0.058271	2.82625	0.563383
2.8327	-1.23079	2.83312	0.688881	2.82792	-0.154398	2.8275	0.102222	2.82875	1.07179	2.83125	0.36528	2.83125	-0.063099	2.83292	0.569224
2.83937	-1.2399	2.83978	0.691175	2.83458	-0.123486	2.83417	0.120118	2.83542	1.07732	2.83792	0.378579	2.83792	-0.0667498	2.83958	0.573657
2.84603	-1.24766	2.84645	0.692174	2.84125	-0.0892729	2.84083	0.133291	2.84208	1.08433	2.84458	0.392459	2.84458	-0.0691935	2.84625	0.577211
2.8527	-1.25394	2.85312	0.691921	2.84792	-0.0530332	2.8475	0.142939	2.84875	1.09301	2.85125	0.405826	2.85125	-0.0701472	2.85292	0.579044
2.85937	-1.25772	2.85978	0.692435	2.85458	-0.0158921	2.85417	0.148907	2.85542	1.1045	2.85792	0.41803	2.85792	-0.0694171	2.85958	0.579529
2.86603	-1.25939	2.86645	0.692993	2.86125	0.0217929	2.86083	0.151537	2.86208	1.11951	2.86458	0.430197	2.86458	-0.0667349	2.86625	0.580825
2.8727	-1.26016	2.87312	0.691257	2.86792	0.0594407	2.8675	0.151515	2.86875	1.13858	2.87125	0.443332	2.87125	-0.0621155	2.87292	0.583813
2.87937	-1.26165	2.87978	0.685692	2.87458	0.0970885	2.87417	0.150219	2.87542	1.16124	2.87792	0.456721	2.87792	-0.0556111	2.87958	0.587977
2.88603	-1.26635	2.88645	0.678562	2.88125	0.13417	2.88083	0.147901	2.88208	1.1858	2.88458	0.469968	2.88458	-0.0469461	2.88625	0.592291
2.8927	-1.2742	2.89312	0.671744	2.88792	0.16921	2.8875	0.143901	2.88875	1.21186	2.89125	0.482537	2.89125	-0.0372678	2.89292	0.596881
2.89937	-1.28552	2.89978	0.664525	2.89458	0.201583	2.89417	0.139505	2.89542	1.23906	2.89792	0.494629	2.89792	-0.0264645	2.89958	0.601299
2.90603	-1.30022	2.90645	0.656366	2.90125	0.230759	2.90083	0.134572	2.90208	1.26663	2.90458	0.504784	2.90458	-0.014782	2.90625	0.603937
2.9127	-1.31865	2.91312	0.650167	2.90792	0.257	2.9075	0.128344	2.90875	1.29414	2.91125	0.512183	2.91125	-0.00210851	2.91292	0.603169
2.91937	-1.34019	2.91978	0.6475	2.91458	0.279769	2.91417	0.11947	2.91542	1.3207	2.91792	0.515796	2.91792	0.0106469	2.91958	0.598654
2.92603	-1.36374	2.92645	0.647008	2.92125	0.29958	2.92083	0.107214	2.92208	1.34619	2.92458	0.516593	2.92458	0.0233278	2.92625	0.59063
2.9327	-1.39008	2.93312	0.646681	2.92792	0.319012	2.9275	0.0918582	2.92875	1.36952	2.93125	0.516936	2.93125	0.0367165	2.93292	0.579387
2.93937	-1.41951	2.93978	0.645824	2.93458	0.339538	2.93417	0.0729635	2.93542	1.38976	2.93792	0.517711	2.93792	0.0505596	2.93958	0.565633
2.94603	-1.45184	2.94645	0.644907	2.94125	0.360548	2.94083	0.0516251	2.94208	1.40605	2.94458	0.51897	2.94458	0.0640377	2.94625	0.550501
2.9527	-1.48468	2.95312	0.641964	2.94792	0.381432	2.9475	0.0290275	2.94875	1.41606	2.95125	0.519454	2.95125	0.0766292	2.95292	0.534214
2.95937	-1.51631	2.95978	0.636213	2.95458	0.40292	2.95417	0.00733882	2.95542	1.4182	2.95792	0.519603	2.95792	0.0880137	2.95958	0.515662
2.96603	-1.54628	2.96645	0.628278	2.96125	0.425056	2.96083	-0.0104234	2.96208	1.41207	2.96458	0.519447	2.96458	0.0978932	2.96625	0.49445
2.9727	-1.57442	2.97312	0.619292	2.96792	0.446223	2.9675	-0.0243858	2.96875	1.39913	2.97125	0.517532	2.97125	0.105992	2.97292	0.471435
2.97937	-1.60023	2.97978	0.609927	2.97458	0.465304	2.97417	-0.0351071	2.97542	1.3801	2.97792	0.512265	2.97792	0.112392	2.97958	0.44734
2.98603	-1.6226	2.98645	0.600241	2.98125	0.481918	2.98083	-0.0435933	2.98208	1.3551	2.98458	0.503227	2.98458	0.118367	2.98625	0.422522
2.9927	-1.6415	2.99312	0.590526	2.98792	0.494681	2.9875	-0.0492856	2.98875	1.32528	2.99125	0.49071	2.99125	0.124648	2.99292	0.398099
2.99937	-1.65763	2.99978	0.581726	2.99458	0.501573	2.99417	-0.0525787	2.99542	1.29154	2.99792	0.474498	2.99792	0.13303	2.99958	0.375777
3.00603	-1.67154	3.00645	0.575013	3.00125	0.501379	3.00083	-0.0554323	3.00208	1.2549	3.00458	0.454441	3.00458	0.143893	3.00625	0.355683
3.0127	-1.68297	3.01312	0.571579	3.00792	0.495069	3.0075	-0.0574216	3.00875	1.21482	3.01125	0.431105	3.01125	0.156768	3.01292	0.335537
3.01937	-1.69127	3.01978	0.572063	3.01458	0.483766	3.01417	-0.0572652	3.01542	1.1705	3.01792	0.405706	3.01792	0.171341	3.01958	0.314258
3.02603	-1.69658	3.02645	0.576369	3.02125	0.46996	3.02083	-0.0545308	3.02208	1.12103	3.02458	0.378303	3.02458	0.186004	3.02625	0.291899
3.0327	-1.6993	3.03312	0.585377	3.02792	0.456132	3.0275	-0.0507087	3.02875	1.06593	3.03125	0.350103	3.03125	0.199877	3.03292	0.269346
3.03937	-1.69998	3.03978	0.599302	3.03458	0.444338	3.03417	-0.0464767	3.03542	1.00696	3.03792	0.322424	3.03792	0.212178	3.03958	0.247695
3.04603	-1.69844	3.04645	0.616997	3.04125	0.435755	3.04083	-0.0401214	3.04208	0.944667	3.04458	0.295453	3.04458	0.22316	3.04625	0.228636
3.0527	-1.69503	3.05312	0.63742	3.04792	0.430495	3.0475	-0.0311062	3.04875	0.879861	3.05125	0.268042	3.05125	0.233494	3.05292	0.214107
3.05937	-1.69025	3.05978	0.659831	3.05458	0.428475	3.05417	-0.0211	3.05542	0.813752	3.05792	0.239447	3.05792	0.242412	3.05958	0.205852
3.06603	-1.68556	3.06645	0.68415	3.06125	0.428736	3.06083	-0.0110492	3.06208	0.748955	3.06458	0.210293	3.06458	0.250809	3.06625	0.204474
3.0727	-1.68223	3.07312	0.71004	3.06792	0.431687	3.0675	-0.000178814	3.06875	0.687867	3.07125	0.180736	3.07125	0.259191	3.07292	0.209816
3.07937	-1.68085	3.07978	0.736549	3.07458	0.437252	3.07417	0.0123605	3.07542	0.630975	3.07792	0.150047	3.07792	0.267886	3.07958	0.220731
3.08603	-1.68076	3.08645	0.762723	3.08125	0.445955	3.08083	0.0255406	3.08208	0.578232	3.08458	0.118025	3.08458	0.275843	3.08625	0.235491
3.0927	-1.68073	3.09312	0.787146	3.08792	0.457458	3.0875	0.0381693	3.08875	0.529215	3.09125	0.0851154	3.09125	0.281207	3.09292	0.252835
3.09937	-1.68131	3.09978	0.809424	3.09458	0.471495	3.09417	0.0510886	3.09542	0.483498	3.09792	0.0519678	3.09792	0.28342	3.09958	0.270195
3.10603	-1.6827	3.10645	0.830106	3.10125	0.487037	3.10083	0.0646934	3.10208	0.440322	3.10458	0.0187755	3.10458	0.282072	3.10625	0.286818
3.1127	-1.68443	3.11312	0.848971	3.10792	0.501879	3.1075	0.0790134	3.10875	0.399493	3.11125	-0.0154376	3.11125	0.277482	3.11292	0.301689
3.11937	-1.68514	3.11978	0.865333	3.11458	0.514664	3.11417	0.0934601	3.11542	0.359438	3.11792	-0.0510365	3.11792	0.27021	3.11958	0.314899
3.12603	-1.68475	3.12645	0.878796	3.12125	0.524409	3.12083	0.108592	3.12208	0.318423	3.12458	-0.0874251	3.12458	0.26127	3.12625	0.327058
3.1327	-1.68429	3.13312	0.889428	3.12792	0.531241	3.1275	0.125736	3.12875	0.275448	3.13125	-0.123389	3.13125	0.251696	3.13292	0.339441
3.13937	-1.68341	3.13978	0.896275	3.13458	0.534758	3.13417	0.145003	3.13542	0.232175	3.13792	-0.15898	3.13792	0.241652	3.13958	0.353113
3.14603	-1.68134	3.14645	0.89813	3.14125	0.535168	3.14083	0.166535	3.14208	0.190213	3.14458	-0.194691	3.14458	0.231899	3.14625	0.367559
3.1527	-1.67897	3.15312	0.895269	3.14792	0.533558	3.1475	0.18958	3.14875	0.148952	3.15125	-0.229947	3.15125	0.222795	3.15292	0.382267
3.15937	-1.67863	3.15978	0.890024	3.15458	0.530854	3.15417	0.21439	3.15542	0.108592	3.15792	-0.264339	3.15792	0.214122	3.15958	0.397265
3.16603	-1.68268	3.16645	0.884488	3.16125	0.526741	3.16083	0.240386	3.16208	0.0709966	3.16458	-0.298239	3.16458	0.20507	3.16625	0.413559
3.1727	-1.69142	3.17312	0.879601	3.16792	0.520103	3.1675	0.267826	3.16875	0.0382066	3.17125	-0.332192	3.17125	0.195704	3.17292	0.431314
3.17937	-1.70501	3.17978	0.876747	3.17458	0.510342	3.17417	0.297137	3.17542	0.00932068	3.17792	-0.365444	3.17792	0.187017	3.17958	0.451349
3.18603	-1.72253	3.18645	0.876941	3.18125	0.498161	3.18083	0.328787	3.18208	-0.016816	3.18458	-0.39731	3.18458	0.17906	3.18625	0.473402
3.1927	-1.7423	3.19312	0.880487	3.18792	0.483461	3.1875	0.362791	3.18875	-0.0404343	3.19125	-0.428602	3.19125	0.171743	3.19292	0.498056
3.19937	-1.76293	3.19978	0.886478	3.19458	0.46619	3.19417	0.397228	3.19542	-0.0612959	3.19792	-0.460155	3.19792	0.165708	3.19958	0.524364
3.20603	-1.78335	3.20645	0.894003	3.20125	0.447109	3.20083	0.429556	3.20208	-0.0792742	3.20458	-0.492267	3.20458	0.162952	3.20625	0.550888
3.2127	-1.80314	3.21312	0.902928	3.20792	0.426985	3.2075	0.457354	3.20875	-0.0941753	3.21125	-0.525005	3.21125	0.165083	3.21292	0.576496
3.21937	-1.82161	3.21978	0.911444	3.21458	0.406563	3.21417	0.480115	3.21542	-0.105642	3.21792	-0.559963	3.21792	0.172563	3.21958	0.60001
3.22603	-1.83909	3.22645	0.918135	3.22125	0.384606	3.22083	0.497796	3.22208	-0.114895	3.22458	-0.598393	3.22458	0.184081	3.22625	0.621259
3.2327	-1.85675	3.23312	0.922956	3.22792	0.360496	3.2275	0.509314	3.22875	-0.122115	3.23125	-0.63917	3.23125	0.197262	3.23292	0.640057
3.23937	-1.87413	3.23978	0.926167	3.23458	0.334658	3.23417	0.514284	3.23542	-0.127099	3.23792	-0.68137	3.23792	0.210345	3.23958	0.657052
3.24603	-1.89042	3.24645	0.928178	3.24125	0.306711	3.24083	0.513181	3.24208	-0.129901	3.24458	-0.723951	3.24458	0.22158	3.24625	0.67243
3.2527	-1.90495	3.25312	0.928558	3.24792	0.27658	3.2475	0.506826	3.24875	-0.130497	3.25125	-0.766389	3.25125	0.230521	3.25292	0.686206
3.25937	-1.9185	3.25978	0.929154	3.25458	0.243865	3.25417	0.494719	3.25542	-0.128523	3.25792	-0.808112	3.25792	0.237122	3.25958	0.698298
3.26603	-1.93205	3.26645	0.93215	3.26125	0.209987	3.26083	0.475146	3.26208	-0.122987	3.26458	-0.848979	3.26458	0.242412	3.26625	0.708245
3.2727	-1.94525	3.27312	0.937797	3.26792	0.175506	3.2675	0.448756	3.26875	-0.11275	3.27125	-0.888951	3.27125	0.247359	3.27292	0.716105
3.27937	-1.95805	3.27978	0.945956	3.27458	0.14092	3.27417	0.416987	3.27542	-0.0971407	3.27792	-0.92715	3.27792	0.251792	3.27958	0.722207
3.28603	-1.97073	3.28645	0.95702	3.28125	0.106938	3.28083	0.382721	3.28208	-0.0763386	3.28458	-0.96377	3.28458	0.256911	3.28625	0.727274
3.2927	-1.98334	3.29312	0.972137	3.28792	0.0742003	3.2875	0.3471	3.28875	-0.0527427	3.29125	-0.999719	3.29125	0.263065	3.29292	0.731416
3.29937	-1.99466	3.29978	0.991292	3.29458	0.0431016	3.29417	0.31022	3.29542	-0.0285357	3.29792	-1.03415	3.29792	0.270069	3.29958	0.734776
3.30603	-2.00384	3.30645	1.01366	3.30125	0.0137538	3.30083	0.272974	3.30208	-0.00369549	3.30458	-1.06618	3.30458	0.277154	3.30625	0.738569
3.3127	-2.01179	3.31312	1.03889	3.30792	-0.0124276	3.3075	0.236146	3.30875	0.0218004	3.31125	-1.0965	3.31125	0.285111	3.31292	0.743076
3.31937	-2.02028	3.31978	1.06629	3.31458	-0.0359714	3.31417	0.200778	3.31542	0.0473559	3.31792	-1.12588	3.31792	0.295572	3.31958	0.748329
3.32603	-2.02866	3.32645	1.09443	3.32125	-0.0579208	3.32083	0.166968	3.32208	0.0716746	3.32458	-1.15482	3.32458	0.308231	3.32625	0.754125
3.3327	-2.03608	3.33312	1.12244	3.32792	-0.0780374	3.3275	0.134386	3.32875	0.095807	3.33125	-1.18317	3.33125	0.322104	3.33292	0.759669
3.33937	-2.04212	3.33978	1.15018	3.33458	-0.0958964	3.33417	0.102654	3.33542	0.121221	3.33792	-1.21177	3.33792	0.335976	3.33958	0.764087
3.34603	-2.04758	3.34645	1.178	3.34125	-0.111036	3.34083	0.0716448	3.34208	0.14893	3.34458	-1.24079	3.34458	0.349641	3.34625	0.766404
3.3527	-2.05279	3.35312	1.2055	3.34792	-0.124015	3.3475	0.0417233	3.34875	0.178792	3.35125	-1.26941	3.35125	0.363439	3.35292	0.766523
3.35937	-2.0574	3.35978	1.23336	3.35458	-0.133708	3.35417	0.0131652	3.35542	0.209607	3.35792	-1.29753	3.35792	0.376873	3.35958	0.763804
3.36603	-2.06184	3.36645	1.26199	3.36125	-0.137284	3.36083	-0.0150427	3.36208	0.241496	3.36458	-1.32433	3.36458	0.388548	3.36625	0.757605
3.3727	-2.06666	3.37312	1.29095	3.36792	-0.133753	3.3675	-0.0436082	3.36875	0.274532	3.37125	-1.34982	3.37125	0.397742	3.37292	0.748701
3.37937	-2.0722	3.37978	1.31916	3.37458	-0.121526	3.37417	-0.0715479	3.37542	0.30911	3.37792	-1.37457	3.37792	0.403993	3.37958	0.739098
3.38603	-2.07757	3.38645	1.34607	3.38125	-0.100307	3.38083	-0.0974834	3.38208	0.343658	3.38458	-1.39843	3.38458	0.406481	3.38625	0.729464
3.3927	-2.0816	3.39312	1.37219	3.38792	-0.0705495	3.3875	-0.120305	3.38875	0.376917	3.39125	-1.42079	3.39125	0.403263	3.39292	0.719346
3.39937	-2.08289	3.39978	1.39707	3.39458	-0.0327826	3.39417	-0.13978	3.39542	0.408307	3.39792	-1.44126	3.39792	0.394374	3.39958	0.707932
3.40603	-2.08208	3.40645	1.42075	3.40125	0.0115633	3.40083	-0.156887	3.40208	0.437923	3.40458	-1.46127	3.40458	0.381969	3.40625	0.69537
3.4127	-2.07876	3.41312	1.44388	3.40792	0.0613481	3.4075	-0.172667	3.40875	0.464939	3.41125	-1.4801	3.41125	0.366554	3.41292	0.682026
3.41937	-2.07436	3.41978	1.46758	3.41458	0.11383	3.41417	-0.189044	3.41542	0.488631	3.41792	-1.49551	3.41792	0.348359	3.41958	0.666842
3.42603	-2.06992	3.42645	1.49201	3.42125	0.166595	3.42083	-0.205815	3.42208	0.508323	3.42458	-1.50606	3.42458	0.328518	3.42625	0.649594
3.4327	-2.06617	3.43312	1.51626	3.42792	0.219174	3.4275	-0.223905	3.42875	0.523649	3.43125	-1.51212	3.43125	0.308752	3.43292	0.630803
3.43937	-2.06271	3.43978	1.53919	3.43458	0.270925	3.43417	-0.244461	3.43542	0.535846	3.43792	-1.51356	3.43792	0.288308	3.43958	0.611566
3.44603	-2.05807	3.44645	1.55977	3.44125	0.320688	3.44083	-0.267684	3.44208	0.546142	3.44458	-1.50965	3.44458	0.26495	3.44625	0.592463
3.4527	-2.05384	3.45312	1.57832	3.44792	0.366941	3.4475	-0.292152	3.44875	0.555716	3.45125	-1.50146	3.45125	0.238545	3.45292	0.573635
3.45937	-2.05002	3.45978	1.59483	3.45458	0.409573	3.45417	-0.315212	3.45542	0.563681	3.45792	-1.49018	3.45792	0.209749	3.45958	0.555627
3.46603	-2.0465	3.46645	1.60915	3.46125	0.450134	3.46083	-0.338271	3.46208	0.570916	3.46458	-1.47691	3.46458	0.178911	3.46625	0.537142
3.4727	-2.04234	3.47312	1.62145	3.46792	0.489712	3.4675	-0.361539	3.46875	0.578776	3.47125	-1.4622	3.47125	0.146315	3.47292	0.51643
3.47937	-2.03872	3.47978	1.63312	3.47458	0.528269	3.47417	-0.384137	3.47542	0.588618	3.47792	-1.4479	3.47792	0.113241	3.47958	0.493638
3.48603	-2.03699	3.48645	1.64501	3.48125	0.564575	3.48083	-0.404269	3.48208	0.599869	3.48458	-1.43497	3.48458	0.081189	3.48625	0.469156
3.4927	-2.03623	3.49312	1.6565	3.48792	0.59773	3.4875	-0.42256	3.48875	0.612631	3.49125	-1.42302	3.49125	0.050135	3.49292	0.443436
3.49937	-2.03637	3.49978	1.66701	3.49458	0.627734	3.49417	-0.441499	3.49542	0.628091	3.49792	-1.41151	3.49792	0.0203922	3.49958	0.416167
3.50603	-2.03768	3.50645	1.67696	3.50125	0.654273	3.50083	-0.460535	3.50208	0.646271	3.50458	-1.39964	3.50458	-0.00780821	3.50625	0.389449
3.5127	-2.04203	3.51312	1.68742	3.50792	0.67731	3.5075	-0.479721	3.50875	0.665925	3.51125	-1.38684	3.51125	-0.0349581	3.51292	0.364527
3.51937	-2.04996	3.51978	1.69766	3.51458	0.697821	3.51417	-0.499532	3.51542	0.685759	3.51792	-1.3717	3.51792	-0.0619739	3.51958	0.341222
3.52603	-2.06219	3.52645	1.7077	3.52125	0.717714	3.52083	-0.521243	3.52208	0.7063	3.52458	-1.35278	3.52458	-0.0888333	3.52625	0.319138
3.5327	-2.08068	3.53312	1.71732	3.52792	0.738353	3.5275	-0.544734	3.52875	0.725798	3.53125	-1.32917	3.53125	-0.11494	3.53292	0.298627
3.53937	-2.10622	3.53978	1.72678	3.53458	0.760324	3.53417	-0.568524	3.53542	0.741228	3.53792	-1.30176	3.53792	-0.140473	3.53958	0.280857
3.54603	-2.13756	3.54645	1.73425	3.54125	0.784561	3.54083	-0.592411	3.54208	0.751391	3.54458	-1.27205	3.54458	-0.166684	3.54625	0.265799
3.5527	-2.17192	3.55312	1.73777	3.54792	0.811405	3.5475	-0.615671	3.54875	0.758782	3.55125	-1.2409	3.55125	-0.193723	3.55292	0.255384
3.55937	-2.2082	3.55978	1.73665	3.55458	0.840627	3.55417	-0.638299	3.55542	0.765838	3.55792	-1.20869	3.55792	-0.219852	3.55958	0.250585
3.56603	-2.24668	3.56645	1.73041	3.56125	0.871859	3.56083	-0.660606	3.56208	0.77147	3.56458	-1.17698	3.56458	-0.244752	3.56625	0.25066
3.5727	-2.28568	3.57312	1.71922	3.56792	0.904955	3.5675	-0.683449	3.56875	0.775501	3.57125	-1.1472	3.57125	-0.267968	3.57292	0.25364
3.57937	-2.32267	3.57978	1.70385	3.57458	0.939243	3.57417	-0.708029	3.57542	0.780262	3.57792	-1.11905	3.57792	-0.289351	3.57958	0.257775
3.58603	-2.35674	3.58645	1.68582	3.58125	0.973091	3.58083	-0.734933	3.58208	0.787258	3.58458	-1.09201	3.58458	-0.307888	3.58625	0.263773
3.5927	-2.38815	3.59312	1.66591	3.58792	1.00578	3.5875	-0.764161	3.58875	0.79456	3.59125	-1.06669	3.59125	-0.323385	3.59292	0.271216
3.59937	-2.41606	3.59978	1.64466	3.59458	1.03687	3.59417	-0.795461	3.59542	0.797659	3.59792	-1.04336	3.59792	-0.33661	3.59958	0.279136
3.60603	-2.43837	3.60645	1.6231	3.60125	1.0661	3.60083	-0.827573	3.60208	0.795536	3.60458	-1.02157	3.60458	-0.346996	3.60625	0.287063
3.6127	-2.45439	3.61312	1.60317	3.60792	1.0945	3.6075	-0.858687	3.60875	0.789687	3.61125	-1.00078	3.61125	-0.35543	3.61292	0.295222
3.61937	-2.46495	3.61978	1.58519	3.61458	1.12284	3.61417	-0.886954	3.61542	0.780106	3.61792	-0.980861	3.61792	-0.362471	3.61958	0.30487
3.62603	-2.47131	3.62645	1.56825	3.62125	1.15161	3.62083	-0.911377	3.62208	0.766374	3.62458	-0.961937	3.62458	-0.366978	3.62625	0.315152
3.6327	-2.47368	3.63312	1.55191	3.62792	1.18031	3.6275	-0.931874	3.62875	0.747167	3.63125	-0.942566	3.63125	-0.367098	3.63292	0.324614
3.63937	-2.47261	3.63978	1.537	3.63458	1.20845	3.63417	-0.947826	3.63542	0.723824	3.63792	-0.923574	3.63792	-0.362523	3.63958	0.332937
3.64603	-2.46814	3.64645	1.52428	3.64125	1.23648	3.64083	-0.959001	3.64208	0.697091	3.64458	-0.905804	3.64458	-0.354365	3.64625	0.341274
3.6527	-2.46105	3.65312	1.51341	3.64792	1.26411	3.6475	-0.965558	3.64875	0.666901	3.65125	-0.890121	3.65125	-0.342138	3.65292	0.351131
3.65937	-2.45211	3.65978	1.50345	3.65458	1.292	3.65417	-0.967614	3.65542	0.63359	3.65792	-0.878662	3.65792	-0.325233	3.65958	0.362307
3.66603	-2.44185	3.66645	1.49407	3.66125	1.32116	3.66083	-0.96529	3.66208	0.596322	3.66458	-0.873365	3.66458	-0.305347	3.66625	0.373706
3.6727	-2.43144	3.67312	1.48575	3.66792	1.35162	3.6675	-0.958741	3.66875	0.55737	3.67125	-0.876583	3.67125	-0.284575	3.67292	0.38521
3.67937	-2.42238	3.67978	1.47867	3.67458	1.38312	3.67417	-0.948906	3.67542	0.519052	3.67792	-0.888221	3.67792	-0.263035	3.67958	0.397533
3.68603	-2.4167	3.68645	1.47275	3.68125	1.4153	3.68083	-0.936396	3.68208	0.483707	3.68458	-0.907101	3.68458	-0.240222	3.68625	0.411056
3.6927	-2.4146	3.69312	1.46692	3.68792	1.4492	3.6875	-0.921257	3.68875	0.451542	3.69125	-0.932701	3.69125	-0.215851	3.69292	0.423573
3.69937	-2.41476	3.69978	1.4612	3.69458	1.48544	3.69417	-0.903338	3.69542	0.421926	3.69792	-0.963755	3.69792	-0.190698	3.69958	0.43349
3.70603	-2.41583	3.70645	1.45629	3.70125	1.52353	3.70083	-0.88264	3.70208	0.39614	3.70458	-0.999913	3.70458	-0.16439	3.70625	0.440858
3.7127	-2.41734	3.71312	1.45241	3.70792	1.56301	3.7075	-0.859715	3.70875	0.374444	3.71125	-1.04029	3.71125	-0.137493	3.71292	0.445865
3.71937	-2.41956	3.71978	1.44915	3.71458	1.60372	3.71417	-0.834636	3.71542	0.355758	3.71792	-1.08297	3.71792	-0.110857	3.71958	0.447854
3.72603	-2.42189	3.72645	1.44511	3.72125	1.64542	3.72083	-0.806652	3.72208	0.337936	3.72458	-1.12717	3.72458	-0.0856593	3.72625	0.445791
3.7327	-2.42426	3.73312	1.43981	3.72792	1.68611	3.7275	-0.774905	3.72875	0.320107	3.73125	-1.17242	3.73125	-0.0631735	3.73292	0.440657
3.73937	-2.42734	3.73978	1.43274	3.73458	1.72305	3.73417	-0.739582	3.73542	0.304058	3.73792	-1.21742	3.73792	-0.0437871	3.73958	0.434011
3.74603	-2.43203	3.74645	1.42346	3.74125	1.75468	3.74083	-0.701115	3.74208	0.290677	3.74458	-1.25928	3.74458	-0.028111	3.74625	0.426203
3.7527	-2.43852	3.75312	1.41124	3.74792	1.78184	3.7475	-0.660293	3.74875	0.280142	3.75125	-1.29613	3.75125	-0.0157654	3.75292	0.417523
3.75937	-2.44601	3.75978	1.39488	3.75458	1.80543	3.75417	-0.618152	3.75542	0.272073	3.75792	-1.32839	3.75792	-0.00911951	3.75958	0.409067
3.76603	-2.45379	3.76645	1.37413	3.76125	1.82595	3.76083	-0.576571	3.76208	0.266053	3.76458	-1.35623	3.76458	-0.009574	3.76625	0.401519
3.7727	-2.46203	3.77312	1.34927	3.76792	1.84349	3.7675	-0.536405	3.76875	0.261456	3.77125	-1.37752	3.77125	-0.0180751	3.77292	0.395536
3.77937	-2.47134	3.77978	1.32073	3.77458	1.85893	3.77417	-0.49822	3.77542	0.256382	3.77792	-1.39187	3.77792	-0.033617	3.77958	0.39015
3.78603	-2.48202	3.78645	1.28936	3.78125	1.87298	3.78083	-0.463106	3.78208	0.250213	3.78458	-1.39969	3.78458	-0.0547692	3.78625	0.386283
3.7927	-2.49257	3.79312	1.25663	3.78792	1.88498	3.7875	-0.431918	3.78875	0.241838	3.79125	-1.40259	3.79125	-0.0811592	3.79292	0.384577
3.79937	-2.50115	3.79978	1.2235	3.79458	1.89369	3.79417	-0.404716	3.79542	0.23073	3.79792	-1.40122	3.79792	-0.110552	3.79958	0.383854
3.80603	-2.50754	3.80645	1.19035	3.80125	1.89806	3.80083	-0.381321	3.80208	0.217542	3.80458	-1.39645	3.80458	-0.141986	3.80625	0.383653
3.8127	-2.51112	3.81312	1.15608	3.80792	1.89853	3.8075	-0.362754	3.80875	0.204034	3.81125	-1.39014	3.81125	-0.173301	3.81292	0.38372
3.81937	-2.5111	3.81978	1.12145	3.81458	1.89689	3.81417	-0.348724	3.81542	0.191666	3.81792	-1.38295	3.81792	-0.203341	3.81958	0.383444
3.82603	-2.50666	3.82645	1.08771	3.82125	1.89491	3.82083	-0.338033	3.82208	0.179924	3.82458	-1.37562	3.82458	-0.232674	3.82625	0.380874
3.8327	-2.49995	3.83312	1.05562	3.82792	1.89349	3.8275	-0.329062	3.82875	0.16772	3.83125	-1.36729	3.83125	-0.261262	3.83292	0.374205
3.83937	-2.49333	3.83978	1.02566	3.83458	1.89334	3.83417	-0.320584	3.83542	0.154734	3.83792	-1.35843	3.83792	-0.289448	3.83958	0.364333
3.84603	-2.48695	3.84645	0.997737	3.84125	1.89476	3.84083	-0.312075	3.84208	0.14092	3.84458	-1.34851	3.84458	-0.315733	3.84625	0.35172
3.8527	-2.48022	3.85312	0.973508	3.84792	1.89812	3.8475	-0.30265	3.84875	0.127017	3.85125	-1.33689	3.85125	-0.340067	3.85292	0.336461
3.85937	-2.47343	3.85978	0.95389	3.85458	1.90272	3.85417	-0.292473	3.85542	0.112914	3.85792	-1.32184	3.85792	-0.363521	3.85958	0.319853
3.86603	-2.46727	3.86645	0.939369	3.86125	1.90758	3.86083	-0.281319	3.86208	0.0979528	3.86458	-1.30265	3.86458	-0.385955	3.86625	0.302844
3.8727	-2.46025	3.87312	0.929773	3.86792	1.91157	3.8675	-0.269376	3.86875	0.081867	3.87125	-1.27906	3.87125	-0.407062	3.87292	0.286601
3.87937	-2.45123	3.87978	0.924855	3.87458	1.91429	3.87417	-0.258185	3.87542	0.0647306	3.87792	-1.25089	3.87792	-0.426538	3.87958	0.271238
3.88603	-2.44125	3.88645	0.924572	3.88125	1.91797	3.88083	-0.247389	3.88208	0.0460595	3.88458	-1.21817	3.88458	-0.445306	3.88625	0.256926
3.8927	-2.43222	3.89312	0.929214	3.88792	1.92295	3.8875	-0.23555	3.88875	0.0246838	3.89125	-1.182	3.89125	-0.463963	3.89292	0.243053
3.89937	-2.42426	3.89978	0.938103	3.89458	1.92758	3.89417	-0.221126	3.89542	0.000365078	3.89792	-1.14471	3.89792	-0.480749	3.89958	0.229776
3.90603	-2.41639	3.90645	0.950508	3.90125	1.92915	3.90083	-0.205591	3.90208	-0.0253469	3.90458	-1.10725	3.90458	-0.495113	3.90625	0.219166
3.9127	-2.40835	3.91312	0.965737	3.90792	1.92782	3.9075	-0.190169	3.90875	-0.0488907	3.91125	-1.0707	3.91125	-0.507131	3.91292	0.212342
3.91937	-2.3997	3.91978	0.984088	3.91458	1.92463	3.91417	-0.174798	3.91542	-0.068143	3.91792	-1.0354	3.91792	-0.518091	3.91958	0.207886
3.92603	-2.38909	3.92645	1.00656	3.92125	1.91744	3.92083	-0.159249	3.92208	-0.0812486	3.92458	-1.0021	3.92458	-0.527456	3.92625	0.205025
3.9327	-2.37607	3.93312	1.03264	3.92792	1.90468	3.9275	-0.145718	3.92875	-0.0871643	3.93125	-0.971332	3.93125	-0.53449	3.93292	0.204861
3.93937	-2.36076	3.93978	1.06151	3.93458	1.88661	3.93417	-0.136346	3.93542	-0.0847578	3.93792	-0.943191	3.93792	-0.540175	3.93958	0.207551
3.94603	-2.34336	3.94645	1.0914	3.94125	1.8653	3.94083	-0.131108	3.94208	-0.073202	3.94458	-0.918441	3.94458	-0.545472	3.94625	0.210494
3.9527	-2.32421	3.95312	1.12057	3.94792	1.84076	3.9475	-0.128306	3.94875	-0.0535548	3.95125	-0.897691	3.95125	-0.550359	3.95292	0.212073
3.95937	-2.30454	3.95978	1.14771	3.95458	1.81305	3.95417	-0.125475	3.95542	-0.0262037	3.95792	-0.881083	3.95792	-0.553019	3.95958	0.212803
3.96603	-2.28549	3.96645	1.17152	3.96125	1.78377	3.96083	-0.122555	3.96208	0.00723451	3.96458	-0.868097	3.96458	-0.552833	3.96625	0.212014
3.9727	-2.26738	3.97312	1.19208	3.96792	1.75498	3.9675	-0.119492	3.96875	0.0437498	3.97125	-0.857443	3.97125	-0.550076	3.97292	0.207536
3.97937	-2.25019	3.97978	1.2092	3.97458	1.72745	3.97417	-0.115797	3.97542	0.0806674	3.97792	-0.849225	3.97792	-0.544913	3.97958	0.199184
3.98603	-2.23519	3.98645	1.22245	3.98125	1.70136	3.98083	-0.110038	3.98208	0.116527	3.98458	-0.843473	3.98458	-0.536479	3.98625	0.188239
3.9927	-2.22281	3.99312	1.23225	3.98792	1.67792	3.9875	-0.103191	3.98875	0.150546	3.99125	-0.839941	3.99125	-0.525147	3.99292	0.175439
3.99937	-2.21352	3.99978	1.23905	3.99458	1.65746	3.99417	-0.0966713	3.99542	0.18058	3.99792	-0.837862	3.99792	-0.512064	3.99958	0.16024
4.00603	-2.2069	4.00645	1.24358	4.00125	1.63861	4.00083	-0.0900403	4.00208	0.205994	4.00458	-0.837691	4.00458	-0.497922	4.00625	0.14291
4.0127	-2.20308	4.01312	1.2451	4.00792	1.61905	4.0075	-0.081338	4.00875	0.227794	4.01125	-0.841141	4.01125	-0.481948	4.01292	0.124283
4.01937	-2.20263	4.01978	1.24317	4.01458	1.59893	4.01417	-0.0700951	4.01542	0.246696	4.01792	-0.848539	4.01792	-0.463746	4.01958	0.1041
4.02603	-2.2051	4.02645	1.23838	4.02125	1.57894	4.02083	-0.0566542	4.02208	0.261173	4.02458	-0.858508	4.02458	-0.444621	4.02625	0.0821501
4.0327	-2.21015	4.03312	1.23164	4.02792	1.55899	4.0275	-0.0400022	4.02875	0.26989	4.03125	-0.870243	4.03125	-0.425301	4.03292	0.0586659
4.03937	-2.21587	4.03978	1.22374	4.03458	1.53795	4.03417	-0.0204816	4.03542	0.273094	4.03792	-0.883378	4.03792	-0.405729	4.03958	0.0347942
4.04603	-2.2222	4.04645	1.21438	4.04125	1.51591	4.04083	0.00155717	4.04208	0.272073	4.04458	-0.89813	4.04458	-0.38556	4.04625	0.0120252
4.0527	-2.22795	4.05312	1.20317	4.04792	1.49417	4.0475	0.0255257	4.04875	0.267349	4.05125	-0.912555	4.05125	-0.365406	4.05292	-0.00890344
4.05937	-2.23207	4.05978	1.1912	4.05458	1.47401	4.05417	0.0515282	4.05542	0.25852	4.05792	-0.925384	4.05792	-0.344984	4.05958	-0.0278503
4.06603	-2.23438	4.06645	1.18039	4.06125	1.4566	4.06083	0.0791773	4.06208	0.244908	4.06458	-0.937596	4.06458	-0.324085	4.06625	-0.0449046
4.0727	-2.23608	4.07312	1.17078	4.06792	1.44231	4.0675	0.107951	4.06875	0.227116	4.07125	-0.949703	4.07125	-0.302888	4.07292	-0.0594333
4.07937	-2.2384	4.07978	1.16165	4.07458	1.43166	4.07417	0.138395	4.07542	0.206389	4.07792	-0.963055	4.07792	-0.281595	4.07958	-0.070706
4.08603	-2.24052	4.08645	1.15287	4.08125	1.42552	4.08083	0.169724	4.08208	0.183113	4.08458	-0.976585	4.08458	-0.259668	4.08625	-0.0790954
4.0927	-2.24144	4.09312	1.14577	4.08792	1.42487	4.0875	0.200979	4.08875	0.156827	4.09125	-0.990056	4.09125	-0.236869	4.09292	-0.083454
4.09937	-2.24197	4.09978	1.14045	4.09458	1.4284	4.09417	0.232697	4.09542	0.12809	4.09792	-1.00296	4.09792	-0.213981	4.09958	-0.0825971
4.10603	-2.24183	4.10645	1.13497	4.10125	1.43273	4.10083	0.265524	4.10208	0.0991225	4.10458	-1.01475	4.10458	-0.189915	4.10625	-0.0764653
4.1127	-2.24073	4.11312	1.12892	4.10792	1.43549	4.1075	0.299357	4.10875	0.0712201	4.11125	-1.02548	4.11125	-0.162691	4.11292	-0.0663623
4.11937	-2.23894	4.11978	1.12318	4.11458	1.43549	4.11417	0.33436	4.11542	0.0445545	4.11792	-1.03427	4.11792	-0.131138	4.11958	-0.053212
4.12603	-2.23799	4.12645	1.11876	4.12125	1.43176	4.12083	0.37089	4.12208	0.0184327	4.12458	-1.03978	4.12458	-0.0967607	4.12625	-0.0360832
4.1327	-2.23903	4.13312	1.1153	4.12792	1.42363	4.1275	0.408448	4.12875	-0.00523031	4.13125	-1.04111	4.13125	-0.0607371	4.13292	-0.0155047
4.13937	-2.2404	4.13978	1.11214	4.13458	1.41098	4.13417	0.444435	4.13542	-0.0255704	4.13792	-1.03899	4.13792	-0.0228584	4.13958	0.0071153
4.14603	-2.24265	4.14645	1.1097	4.14125	1.39575	4.14083	0.478044	4.14208	-0.0422597	4.14458	-1.03349	4.14458	0.0164509	4.14625	0.0308454
4.1527	-2.24574	4.15312	1.10775	4.14792	1.37825	4.1475	0.509664	4.14875	-0.0555217	4.15125	-1.024	4.15125	0.0568852	4.15292	0.0550002
4.15937	-2.24954	4.15978	1.10552	4.15458	1.35859	4.15417	0.540003	4.15542	-0.064522	4.15792	-1.0094	4.15792	0.0970215	4.15958	0.0796765
4.16603	-2.2537	4.16645	1.10332	4.16125	1.33659	4.16083	0.569984	4.16208	-0.0679567	4.16458	-0.990979	4.16458	0.136688	4.16625	0.103272
4.1727	-2.25875	4.17312	1.10231	4.16792	1.31141	4.1675	0.600137	4.16875	-0.0660121	4.17125	-0.969179	4.17125	0.175618	4.17292	0.124477
4.17937	-2.26685	4.17978	1.10392	4.17458	1.28261	4.17417	0.632286	4.17542	-0.0584349	4.17792	-0.943094	4.17792	0.212215	4.17958	0.142038
4.18603	-2.27793	4.18645	1.10866	4.18125	1.24893	4.18083	0.666887	4.18208	-0.0453144	4.18458	-0.912115	4.18458	0.244856	4.18625	0.156559
4.1927	-2.29174	4.19312	1.11667	4.18792	1.21129	4.1875	0.703774	4.18875	-0.0270829	4.19125	-0.87671	4.19125	0.271179	4.19292	0.169352
4.19937	-2.30816	4.19978	1.12766	4.19458	1.17045	4.19417	0.741072	4.19542	-0.004448	4.19792	-0.836849	4.19792	0.290908	4.19958	0.181608
4.20603	-2.3267	4.20645	1.14091	4.20125	1.12667	4.20083	0.777096	4.20208	0.022091	4.20458	-0.792652	4.20458	0.303574	4.20625	0.194304
4.2127	-2.34724	4.21312	1.15619	4.20792	1.08021	4.2075	0.811443	4.20875	0.0514686	4.21125	-0.745498	4.21125	0.309259	4.21292	0.207782
4.21937	-2.36905	4.21978	1.17251	4.21458	1.03121	4.21417	0.8431	4.21542	0.0817627	4.21792	-0.69654	4.21792	0.308953	4.21958	0.221655
4.22603	-2.39297	4.22645	1.18845	4.22125	0.980385	4.22083	0.871442	4.22208	0.11187	4.22458	-0.646874	4.22458	0.304028	4.22625	0.235245
4.2327	-2.41878	4.23312	1.20272	4.22792	0.92797	4.2275	0.896387	4.22875	0.14209	4.23125	-0.596814	4.23125	0.295006	4.23292	0.249349
4.23937	-2.44568	4.23978	1.21542	4.23458	0.874281	4.23417	0.918187	4.23542	0.171863	4.23792	-0.54805	4.23792	0.282735	4.23958	0.263982
4.24603	-2.47233	4.24645	1.22662	4.24125	0.819549	4.24083	0.937589	4.24208	0.200488	4.24458	-0.500426	4.24458	0.269338	4.24625	0.27784
4.2527	-2.49673	4.25312	1.2357	4.24792	0.763826	4.2475	0.953995	4.24875	0.227138	4.25125	-0.453845	4.25125	0.256844	4.25292	0.289753
4.25937	-2.51788	4.25978	1.24218	4.25458	0.707291	4.25417	0.968933	4.25542	0.25209	4.25792	-0.408389	4.25792	0.245944	4.25958	0.30116
4.26603	-2.53408	4.26645	1.24692	4.26125	0.650659	4.26083	0.983089	4.26208	0.274532	4.26458	-0.364348	4.26458	0.236414	4.26625	0.313044
4.2727	-2.5449	4.27312	1.25167	4.26792	0.594266	4.2675	0.995159	4.26875	0.293978	4.27125	-0.32147	4.27125	0.230148	4.27292	0.324376
4.27937	-2.55002	4.27978	1.25692	4.27458	0.53937	4.27417	1.00425	4.27542	0.310726	4.27792	-0.280194	4.27792	0.228882	4.27958	0.333719
4.28603	-2.54975	4.28645	1.26136	4.28125	0.48776	4.28083	1.00866	4.28208	0.325851	4.28458	-0.241958	4.28458	0.233494	4.28625	0.341624
4.2927	-2.54561	4.29312	1.26303	4.28792	0.440605	4.2875	1.00943	4.28875	0.341348	4.29125	-0.206448	4.29125	0.243902	4.29292	0.348926
4.29937	-2.5384	4.29978	1.26141	4.29458	0.398561	4.29417	1.00567	4.29542	0.358604	4.29792	-0.173911	4.29792	0.26004	4.29958	0.354759
4.30603	-2.52852	4.30645	1.25603	4.30125	0.361584	4.30083	0.996366	4.30208	0.379272	4.30458	-0.144273	4.30458	0.281461	4.30625	0.358365
4.3127	-2.51681	4.31312	1.24548	4.30792	0.331089	4.3075	0.982292	4.30875	0.402763	4.31125	-0.117853	4.31125	0.306375	4.31292	0.358872
4.31937	-2.5037	4.31978	1.22914	4.31458	0.307031	4.31417	0.964478	4.31542	0.428058	4.31792	-0.0940859	4.31792	0.333168	4.31958	0.356942
4.32603	-2.48963	4.32645	1.20751	4.32125	0.289157	4.32083	0.945337	4.32208	0.453718	4.32458	-0.0715777	4.32458	0.359409	4.32625	0.353657
4.3327	-2.47435	4.33312	1.18168	4.32792	0.277244	4.3275	0.925362	4.32875	0.477925	4.33125	-0.0508055	4.33125	0.383198	4.33292	0.351451
4.33937	-2.45886	4.33978	1.15132	4.33458	0.270732	4.33417	0.903979	4.33542	0.499353	4.33792	-0.0312477	4.33792	0.403069	4.33958	0.351317
4.34603	-2.44451	4.34645	1.11622	4.34125	0.268914	4.34083	0.881739	4.34208	0.516079	4.34458	-0.0135973	4.34458	0.420004	4.34625	0.353679
4.3527	-2.43155	4.35312	1.07753	4.34792	0.26942	4.3475	0.860013	4.34875	0.527769	4.35125	0.00121444	4.35125	0.4353	4.35292	0.35964
4.35937	-2.42016	4.35978	1.03515	4.35458	0.270836	4.35417	0.840403	4.35542	0.534371	4.35792	0.0124127	4.35792	0.44854	4.35958	0.369631
4.36603	-2.41088	4.36645	0.989065	4.36125	0.270933	4.36083	0.822604	4.36208	0.536121	4.36458	0.0194907	4.36458	0.460021	4.36625	0.383258
4.3727	-2.40467	4.37312	0.939883	4.36792	0.268489	4.3675	0.805423	4.36875	0.533231	4.37125	0.0220388	4.37125	0.470966	4.37292	0.398561
4.37937	-2.40107	4.37978	0.889637	4.37458	0.263676	4.37417	0.789762	4.37542	0.525549	4.37792	0.0193864	4.37792	0.48317	4.37958	0.415266
4.38603	-2.39972	4.38645	0.839785	4.38125	0.257149	4.38083	0.776209	4.38208	0.513114	4.38458	0.0113547	4.38458	0.496678	4.38625	0.433199
4.3927	-2.4004	4.39312	0.790268	4.38792	0.250183	4.3875	0.764206	4.38875	0.495814	4.39125	-0.00146031	4.39125	0.512168	4.39292	0.452571
4.39937	-2.40293	4.39978	0.741594	4.39458	0.243217	4.39417	0.753343	4.39542	0.474446	4.39792	-0.0185966	4.39792	0.530854	4.39958	0.471704
4.40603	-2.40835	4.40645	0.694446	4.40125	0.23742	4.40083	0.744663	4.40208	0.449985	4.40458	-0.0396445	4.40458	0.553638	4.40625	0.488788
4.4127	-2.41639	4.41312	0.649653	4.40792	0.233963	4.4075	0.739843	4.40875	0.423387	4.41125	-0.0635087	4.41125	0.580601	4.41292	0.502251
4.41937	-2.42732	4.41978	0.607692	4.41458	0.233643	4.41417	0.739239	4.41542	0.394978	4.41792	-0.0903159	4.41792	0.612237	4.41958	0.511788
4.42603	-2.43965	4.42645	0.569612	4.42125	0.236414	4.42083	0.742629	4.42208	0.365511	4.42458	-0.119701	4.42458	0.648305	4.42625	0.517674
4.4327	-2.45228	4.43312	0.53551	4.42792	0.241287	4.4275	0.749633	4.42875	0.334844	4.43125	-0.150606	4.43125	0.686735	4.43292	0.518195
4.43937	-2.46549	4.43978	0.505149	4.43458	0.248462	4.43417	0.759639	4.43542	0.302941	4.43792	-0.181571	4.43792	0.726216	4.43958	0.513323
4.44603	-2.4787	4.44645	0.478968	4.44125	0.258006	4.44083	0.771098	4.44208	0.269488	4.44458	-0.211887	4.44458	0.766546	4.44625	0.503771
4.4527	-2.49166	4.45312	0.458047	4.44792	0.269011	4.4475	0.783168	4.44875	0.234358	4.45125	-0.241928	4.45125	0.807896	4.45292	0.491366
4.45937	-2.50375	4.45978	0.442639	4.45458	0.279285	4.45417	0.794716	4.45542	0.198342	4.45792	-0.270754	4.45792	0.848822	4.45958	0.475183
4.46603	-2.5156	4.46645	0.432014	4.46125	0.288151	4.46083	0.804327	4.46208	0.162102	4.46458	-0.29777	4.46458	0.887819	4.46625	0.453904
4.4727	-2.52835	4.47312	0.426382	4.46792	0.29622	4.4675	0.811815	4.46875	0.126198	4.47125	-0.323787	4.47125	0.924483	4.47292	0.428014
4.47937	-2.54174	4.47978	0.426412	4.47458	0.302389	4.47417	0.817575	4.47542	0.0893027	4.47792	-0.349551	4.47792	0.958361	4.47958	0.39883
4.48603	-2.55514	4.48645	0.431582	4.48125	0.305451	4.48083	0.822142	4.48208	0.0505224	4.48458	-0.375301	4.48458	0.988856	4.48625	0.367574
4.4927	-2.56794	4.49312	0.441119	4.48792	0.305578	4.4875	0.825271	4.48875	0.0109076	4.49125	-0.400826	4.49125	1.01414	4.49292	0.334039
4.49937	-2.57897	4.49978	0.454135	4.49458	0.304788	4.49417	0.826418	4.49542	-0.0296459	4.49792	-0.426255	4.49792	1.03397	4.49958	0.299528
4.50603	-2.58776	4.50645	0.469893	4.50125	0.303842	4.50083	0.826664	4.50208	-0.0723526	4.50458	-0.451557	4.50458	1.04821	4.50625	0.264987
4.5127	-2.59417	4.51312	0.487305	4.50792	0.30306	4.5075	0.825725	4.50875	-0.118054	4.51125	-0.475876	4.51125	1.05789	4.51292	0.231609
4.51937	-2.59899	4.51978	0.504717	4.51458	0.303179	4.51417	0.82276	4.51542	-0.165522	4.51792	-0.498421	4.51792	1.06329	4.51958	0.200048
4.52603	-2.60285	4.52645	0.521109	4.52125	0.305533	4.52083	0.816442	4.52208	-0.214703	4.52458	-0.519171	4.52458	1.06499	4.52625	0.170127
4.5327	-2.60643	4.53312	0.53557	4.52792	0.310957	4.5275	0.804268	4.52875	-0.267155	4.53125	-0.538006	4.53125	1.06333	4.53292	0.142492
4.53937	-2.6109	4.53978	0.548363	4.53458	0.319511	4.53417	0.785582	4.53542	-0.323042	4.53792	-0.555232	4.53792	1.05777	4.53958	0.118092
4.54603	-2.61661	4.54645	0.559464	4.54125	0.331216	4.54083	0.759669	4.54208	-0.380099	4.54458	-0.569813	4.54458	1.04974	4.54625	0.0971407
4.5527	-2.62302	4.55312	0.568509	4.54792	0.344977	4.5475	0.726819	4.54875	-0.435665	4.55125	-0.581242	4.55125	1.04	4.55292	0.0783876
4.55937	-2.62974	4.55978	0.576682	4.55458	0.359863	4.55417	0.686519	4.55542	-0.487491	4.55792	-0.589639	4.55792	1.03017	4.55958	0.0608936
4.56603	-2.63637	4.56645	0.584707	4.56125	0.373967	4.56083	0.63888	4.56208	-0.532232	4.56458	-0.594474	4.56458	1.01947	4.56625	0.0444427
4.5727	-2.64236	4.57312	0.592291	4.56792	0.38518	4.5675	0.586398	4.56875	-0.567056	4.57125	-0.595175	4.57125	1.00843	4.57292	0.0285432
4.57937	-2.64729	4.57978	0.598252	4.57458	0.392012	4.57417	0.530846	4.57542	-0.59019	4.57792	-0.591062	4.57792	0.9977	4.57958	0.0117347
4.58603	-2.65072	4.58645	0.602521	4.58125	0.394024	4.58083	0.473633	4.58208	-0.601463	4.58458	-0.583634	4.58458	0.987053	4.58625	-0.00496954
4.5927	-2.65361	4.59312	0.60676	4.58792	0.391111	4.5875	0.416189	4.58875	-0.601038	4.59125	-0.57444	4.59125	0.976048	4.59292	-0.0188798
4.59937	-2.65674	4.59978	0.611313	4.59458	0.383481	4.59417	0.36101	4.59542	-0.591092	4.59792	-0.564553	4.59792	0.964284	4.59958	-0.0285953
4.60603	-2.66065	4.60645	0.616863	4.60125	0.372365	4.60083	0.31051	4.60208	-0.574708	4.60458	-0.555411	4.60458	0.952572	4.60625	-0.0333637
4.6127	-2.66539	4.61312	0.624083	4.60792	0.359222	4.6075	0.265114	4.60875	-0.5555	4.61125	-0.547551	4.61125	0.941627	4.61292	-0.03279
4.61937	-2.67124	4.61978	0.633471	4.61458	0.344798	4.61417	0.224844	4.61542	-0.536107	4.61792	-0.541233	4.61792	0.932641	4.61958	-0.0245497
4.62603	-2.67964	4.62645	0.645235	4.62125	0.329643	4.62083	0.190154	4.62208	-0.519797	4.62458	-0.535481	4.62458	0.92636	4.62625	-0.00841171
4.6327	-2.69057	4.63312	0.658989	4.62792	0.315331	4.6275	0.161275	4.62875	-0.508033	4.63125	-0.528447	4.63125	0.923038	4.63292	0.0150502
4.63937	-2.70313	4.63978	0.674143	4.63458	0.302471	4.63417	0.13721	4.63542	-0.499539	4.63792	-0.518769	4.63792	0.922941	4.63958	0.0448674
4.64603	-2.71679	4.64645	0.69049	4.64125	0.291184	4.64083	0.115842	4.64208	-0.493266	4.64458	-0.50512	4.64458	0.927001	4.64625	0.0801012
4.6527	-2.73232	4.65312	0.70747	4.64792	0.281349	4.6475	0.0957996	4.64875	-0.489242	4.65125	-0.488408	4.65125	0.936009	4.65292	0.119008
4.65937	-2.7497	4.65978	0.725046	4.65458	0.273339	4.65417	0.077419	4.65542	-0.48703	4.65792	-0.469156	4.65792	0.948928	4.65958	0.158817
4.66603	-2.76756	4.66645	0.742473	4.66125	0.266887	4.66083	0.0607371	4.66208	-0.483729	4.66458	-0.447519	4.66458	0.96494	4.66625	0.198506
4.6727	-2.78437	4.67312	0.75911	4.66792	0.260867	4.6675	0.0453815	4.66875	-0.477299	4.67125	-0.424467	4.67125	0.983924	4.67292	0.236645
4.67937	-2.79932	4.67978	0.774667	4.67458	0.254773	4.67417	0.0309572	4.67542	-0.468001	4.67792	-0.401556	4.67792	1.0054	4.67958	0.270925
4.68603	-2.81253	4.68645	0.787243	4.68125	0.248216	4.68083	0.0181794	4.68208	-0.456691	4.68458	-0.380419	4.68458	1.02814	4.68625	0.299737
4.6927	-2.8234	4.69312	0.795648	4.68792	0.240631	4.6875	0.0083223	4.68875	-0.442371	4.69125	-0.361226	4.69125	1.05003	4.69292	0.323042
4.69937	-2.83149	4.69978	0.799417	4.69458	0.231311	4.69417	0.000394881	4.69542	-0.424318	4.69792	-0.344463	4.69792	1.06999	4.69958	0.342131
4.70603	-2.83696	4.70645	0.799589	4.70125	0.22015	4.70083	-0.00645965	4.70208	-0.402234	4.70458	-0.330277	4.70458	1.08775	4.70625	0.356697
4.7127	-2.84094	4.71312	0.796661	4.70792	0.207692	4.7075	-0.0132769	4.70875	-0.376679	4.71125	-0.319146	4.71125	1.10327	4.71292	0.366867
4.71937	-2.84514	4.71978	0.790954	4.71458	0.195436	4.71417	-0.0204742	4.71542	-0.348441	4.71792	-0.310399	4.71792	1.11611	4.71958	0.374109
4.72603	-2.84899	4.72645	0.784129	4.72125	0.184037	4.72083	-0.02864	4.72208	-0.317283	4.72458	-0.304915	4.72458	1.12593	4.72625	0.379883
4.7327	-2.85206	4.73312	0.77685	4.72792	0.173621	4.7275	-0.0375956	4.72875	-0.28272	4.73125	-0.302762	4.73125	1.1333	4.73292	0.385791
4.73937	-2.85556	4.73978	0.76852	4.73458	0.163525	4.73417	-0.0455603	4.73542	-0.24531	4.73792	-0.303365	4.73792	1.13909	4.73958	0.392072
4.74603	-2.86023	4.74645	0.75803	4.74125	0.153288	4.74083	-0.0526235	4.74208	-0.207268	4.74458	-0.305623	4.74458	1.14293	4.74625	0.398472
4.7527	-2.86547	4.75312	0.746176	4.74792	0.142433	4.7475	-0.0590831	4.74875	-0.169575	4.75125	-0.308551	4.75125	1.14445	4.75292	0.404947
4.75937	-2.8701	4.75978	0.733569	4.75458	0.130028	4.75417	-0.0643507	4.75542	-0.131868	4.75792	-0.31247	4.75792	1.14425	4.75958	0.412375
4.76603	-2.87517	4.76645	0.720017	4.76125	0.115618	4.76083	-0.0659525	4.76208	-0.0933856	4.76458	-0.31618	4.76458	1.14289	4.76625	0.42247
4.7727	-2.88269	4.77312	0.707321	4.76792	0.0989288	4.7675	-0.0632033	4.76875	-0.0552684	4.77125	-0.318922	4.77125	1.14035	4.77292	0.435218
4.77937	-2.89266	4.77978	0.697151	4.77458	0.0791326	4.77417	-0.0564381	4.77542	-0.017792	4.77792	-0.321537	4.77792	1.13601	4.77958	0.449941
4.78603	-2.9051	4.78645	0.689924	4.78125	0.055939	4.78083	-0.0450537	4.78208	0.0199601	4.78458	-0.326082	4.78458	1.13049	4.78625	0.466719
4.7927	-2.92038	4.79312	0.684611	4.78792	0.0291541	4.7875	-0.0283644	4.78875	0.0584945	4.79125	-0.333525	4.79125	1.12402	4.79292	0.485271
4.79937	-2.93901	4.79978	0.681348	4.79458	-0.000804663	4.79417	-0.00672042	4.79542	0.0978038	4.79792	-0.342794	4.79792	1.11675	4.79958	0.504807
4.80603	-2.96023	4.80645	0.68146	4.80125	-0.034146	4.80083	0.0176877	4.80208	0.13645	4.80458	-0.353493	4.80458	1.10938	4.80625	0.52271
4.8127	-2.98245	4.81312	0.683792	4.80792	-0.0698864	4.8075	0.0435039	4.80875	0.174202	4.81125	-0.365965	4.81125	1.10244	4.81292	0.537887
4.81937	-3.00459	4.81978	0.688061	4.81458	-0.105031	4.81417	0.0693128	4.81542	0.21024	4.81792	-0.379108	4.81792	1.09663	4.81958	0.550613
4.82603	-3.02657	4.82645	0.694968	4.82125	-0.136994	4.82083	0.0945628	4.82208	0.243232	4.82458	-0.392295	4.82458	1.09173	4.82625	0.561759
4.8327	-3.04802	4.83312	0.704512	4.82792	-0.164136	4.8275	0.119239	4.82875	0.271626	4.83125	-0.404455	4.83125	1.08915	4.83292	0.571758
4.83937	-3.06773	4.83978	0.716329	4.83458	-0.186019	4.83417	0.143617	4.83542	0.294358	4.83792	-0.416405	4.83792	1.08906	4.83958	0.580281
4.84603	-3.08478	4.84645	0.729524	4.84125	-0.202119	4.84083	0.167035	4.84208	0.310965	4.84458	-0.427946	4.84458	1.09053	4.84625	0.587441
4.8527	-3.09832	4.85312	0.744529	4.84792	-0.212952	4.8475	0.189312	4.84875	0.321023	4.85125	-0.439443	4.85125	1.09234	4.85292	0.593796
4.85937	-3.10801	4.85978	0.760458	4.85458	-0.218891	4.85417	0.21024	4.85542	0.324167	4.85792	-0.451274	4.85792	1.09511	4.85958	0.598572
4.86603	-3.11287	4.86645	0.776686	4.86125	-0.221126	4.86083	0.231139	4.86208	0.321008	4.86458	-0.463679	4.86458	1.09928	4.86625	0.600763
4.8727	-3.11276	4.87312	0.793472	4.86792	-0.221103	4.8675	0.252426	4.86875	0.311375	4.87125	-0.477217	4.87125	1.10276	4.87292	0.599921
4.87937	-3.10801	4.87978	0.811711	4.87458	-0.22056	4.87417	0.273868	4.87542	0.295512	4.87792	-0.490993	4.87792	1.1035	4.87958	0.595801
4.88603	-3.0984	4.88645	0.831135	4.88125	-0.219449	4.88083	0.294842	4.88208	0.273764	4.88458	-0.504382	4.88458	1.10157	4.88625	0.589572
4.8927	-3.08375	4.89312	0.850782	4.88792	-0.216313	4.8875	0.31469	4.88875	0.246771	4.89125	-0.516407	4.89125	1.0989	4.89292	0.581264
4.89937	-3.06485	4.89978	0.870898	4.89458	-0.211038	4.89417	0.334837	4.89542	0.21521	4.89792	-0.527233	4.89792	1.09579	4.89958	0.571802
4.90603	-3.04316	4.90645	0.891119	4.90125	-0.204466	4.90083	0.354163	4.90208	0.179119	4.90458	-0.535481	4.90458	1.09234	4.90625	0.561886
4.9127	-3.01931	4.91312	0.912316	4.90792	-0.196725	4.9075	0.371329	4.90875	0.140198	4.91125	-0.539593	4.91125	1.08911	4.91292	0.55258
4.91937	-2.99393	4.91978	0.933699	4.91458	-0.187434	4.91417	0.385702	4.91542	0.0990033	4.91792	-0.539318	4.91792	1.08768	4.91958	0.546306
4.92603	-2.96827	4.92645	0.955939	4.92125	-0.175744	4.92083	0.398673	4.92208	0.0553727	4.92458	-0.536636	4.92458	1.08723	4.92625	0.542745
4.9327	-2.94468	4.93312	0.97996	4.92792	-0.161596	4.9275	0.412054	4.92875	0.00872463	4.93125	-0.533201	4.93125	1.08695	4.93292	0.541687
4.93937	-2.9247	4.93978	1.00595	4.93458	-0.144184	4.93417	0.424683	4.93542	-0.0404119	4.93792	-0.529118	4.93792	1.08678	4.93958	0.542119
4.94603	-2.90842	4.94645	1.03501	4.94125	-0.123456	4.94083	0.435576	4.94208	-0.0900999	4.94458	-0.525191	4.94458	1.08751	4.94625	0.543945
4.9527	-2.89586	4.95312	1.06646	4.94792	-0.0986755	4.9475	0.444263	4.94875	-0.139818	4.95125	-0.523791	4.95125	1.09022	4.95292	0.546642
4.95937	-2.88659	4.95978	1.09995	4.95458	-0.0695437	4.95417	0.450648	4.95542	-0.188842	4.95792	-0.52768	4.95792	1.09347	4.95958	0.547737
4.96603	-2.88045	4.96645	1.13398	4.96125	-0.0368953	4.96083	0.455111	4.96208	-0.236362	4.96458	-0.537075	4.96458	1.09759	4.96625	0.546455
4.9727	-2.87662	4.97312	1.1669	4.96792	-0.00219792	4.9675	0.457279	4.96875	-0.280827	4.97125	-0.551075	4.97125	1.10213	4.97292	0.542946
4.97937	-2.87447	4.97978	1.19954	4.97458	0.0329092	4.97417	0.457883	4.97542	-0.321239	4.97792	-0.569426	4.97792	1.10719	4.97958	0.538245
4.98603	-2.87362	4.98645	1.23194	4.98125	0.0684932	4.98083	0.457354	4.98208	-0.357866	4.98458	-0.592731	4.98458	1.11236	4.98625	0.532515
4.9927	-2.8745	4.99312	1.26451	4.98792	0.102997	4.9875	0.455752	4.98875	-0.391625	4.99125	-0.62076	4.99125	1.11687	4.99292	0.524327
4.99937	-2.87759	4.99978	1.29635	4.99458	0.135474	4.99417	0.453994	4.99542	-0.423081	4.99792	-0.651836	4.99792	1.12076	4.99958	0.512533
5.00603	-2.8829	5.00645	1.32819	5.00125	0.165984	5.00083	0.451893	5.00208	-0.451587	5.00458	-0.684366	5.00458	1.12277	5.00625	0.496723
5.0127	-2.88951	5.01312	1.36103	5.00792	0.194408	5.0075	0.449263	5.00875	-0.476629	5.01125	-0.718199	5.01125	1.12177	5.01292	0.477575
5.01937	-2.89637	5.01978	1.39328	5.01458	0.220105	5.01417	0.44553	5.01542	-0.497974	5.01792	-0.753291	5.01792	1.11693	5.01958	0.45611
5.02603	-2.90285	5.02645	1.4242	5.02125	0.241354	5.02083	0.441171	5.02208	-0.515483	5.02458	-0.788286	5.02458	1.10759	5.02625	0.432774
5.0327	-2.90752	5.03312	1.45291	5.02792	0.258595	5.0275	0.438228	5.02875	-0.528239	5.03125	-0.821561	5.03125	1.09379	5.03292	0.408202
5.03937	-2.90895	5.03978	1.4804	5.03458	0.272661	5.03417	0.437915	5.03542	-0.536077	5.03792	-0.852205	5.03792	1.07586	5.03958	0.383995
5.04603	-2.9068	5.04645	1.50681	5.04125	0.283726	5.04083	0.441022	5.04208	-0.539228	5.04458	-0.880055	5.04458	1.05517	5.04625	0.361659
5.0527	-2.90085	5.05312	1.53169	5.04792	0.292227	5.0475	0.44737	5.04875	-0.537254	5.05125	-0.904612	5.05125	1.03296	5.05292	0.341199
5.05937	-2.89042	5.05978	1.55616	5.05458	0.299238	5.05417	0.458211	5.05542	-0.529617	5.05792	-0.925146	5.05792	1.0104	5.05958	0.321291
5.06603	-2.87484	5.06645	1.57978	5.06125	0.306882	5.06083	0.474885	5.06208	-0.516988	5.06458	-0.942022	5.06458	0.988141	5.06625	0.300556
5.0727	-2.85512	5.07312	1.60369	5.06792	0.315614	5.0675	0.496902	5.06875	-0.499569	5.07125	-0.955157	5.07125	0.966333	5.07292	0.279732
5.07937	-2.83299	5.07978	1.62811	5.07458	0.325084	5.07417	0.522815	5.07542	-0.477791	5.07792	-0.963636	5.07792	0.944845	5.07958	0.259906
5.08603	-2.80925	5.08645	1.65289	5.08125	0.334665	5.08083	0.552095	5.08208	-0.452355	5.08458	-0.966653	5.08458	0.924006	5.08625	0.240885
5.0927	-2.78441	5.09312	1.67806	5.08792	0.343971	5.0875	0.585891	5.08875	-0.424951	5.09125	-0.963815	5.09125	0.903673	5.09292	0.221759
5.09937	-2.75975	5.09978	1.7029	5.09458	0.352398	5.09417	0.623226	5.09542	-0.396982	5.09792	-0.956088	5.09792	0.882708	5.09958	0.203155
5.10603	-2.73682	5.10645	1.7269	5.10125	0.358663	5.10083	0.662848	5.10208	-0.368677	5.10458	-0.944093	5.10458	0.860527	5.10625	0.186674
5.1127	-2.71589	5.11312	1.74788	5.10792	0.361852	5.1075	0.703312	5.10875	-0.341162	5.11125	-0.928856	5.11125	0.836916	5.11292	0.172965
5.11937	-2.69595	5.11978	1.76521	5.11458	0.361629	5.11417	0.743806	5.11542	-0.314616	5.11792	-0.91213	5.11792	0.813499	5.11958	0.160933
5.12603	-2.67531	5.12645	1.77885	5.12125	0.358395	5.12083	0.782318	5.12208	-0.289202	5.12458	-0.894889	5.12458	0.791028	5.12625	0.150025
5.1327	-2.65336	5.13312	1.78964	5.12792	0.352919	5.1275	0.816621	5.12875	-0.265308	5.13125	-0.878602	5.13125	0.769809	5.13292	0.140063
5.13937	-2.62931	5.13978	1.79648	5.13458	0.344373	5.13417	0.84722	5.13542	-0.243694	5.13792	-0.862904	5.13792	0.749812	5.13958	0.130869
5.14603	-2.60214	5.14645	1.7985	5.14125	0.332996	5.14083	0.874855	5.14208	-0.22456	5.14458	-0.847548	5.14458	0.731103	5.14625	0.121944
5.1527	-2.57193	5.15312	1.79607	5.14792	0.320494	5.1475	0.900388	5.14875	-0.207402	5.15125	-0.832789	5.15125	0.714727	5.15292	0.112899
5.15937	-2.54007	5.15978	1.78991	5.15458	0.309303	5.15417	0.923321	5.15542	-0.192873	5.15792	-0.818834	5.15792	0.700518	5.15958	0.103675
5.16603	-2.50918	5.16645	1.77931	5.16125	0.300266	5.16083	0.943959	5.16208	-0.181854	5.16458	-0.806928	5.16458	0.687644	5.16625	0.0948235
5.1727	-2.48054	5.17312	1.76209	5.16792	0.292376	5.1675	0.962563	5.16875	-0.174157	5.17125	-0.797071	5.17125	0.676647	5.17292	0.0879765
5.17937	-2.4552	5.17978	1.73842	5.17458	0.287399	5.17417	0.978194	5.17542	-0.169523	5.17792	-0.790097	5.17792	0.668332	5.17958	0.0831783
5.18603	-2.43398	5.18645	1.71094	5.18125	0.286475	5.18083	0.989184	5.18208	-0.167638	5.18458	-0.785358	5.18458	0.663787	5.18625	0.0796616
5.1927	-2.41664	5.19312	1.68145	5.18792	0.289023	5.1875	0.995412	5.18875	-0.167966	5.19125	-0.781395	5.19125	0.661701	5.19292	0.0763461
5.19937	-2.40266	5.19978	1.64931	5.19458	0.292167	5.19417	0.998564	5.19542	-0.168547	5.19792	-0.776768	5.19792	0.662126	5.19958	0.0737458
5.20603	-2.39092	5.20645	1.61458	5.20125	0.294387	5.20083	1.00101	5.20208	-0.16775	5.20458	-0.77156	5.20458	0.665516	5.20625	0.0721663
5.2127	-2.38218	5.21312	1.57871	5.20792	0.29593	5.2075	1.00353	5.20875	-0.165053	5.21125	-0.765719	5.21125	0.671692	5.21292	0.0706762
5.21937	-2.3767	5.21978	1.54348	5.21458	0.295721	5.21417	1.00596	5.21542	-0.159748	5.21792	-0.758842	5.21792	0.6795	5.21958	0.068903
5.22603	-2.3749	5.22645	1.50935	5.22125	0.293374	5.22083	1.00842	5.22208	-0.151373	5.22458	-0.750788	5.22458	0.687733	5.22625	0.0664741
5.2327	-2.37685	5.23312	1.47615	5.22792	0.2883	5.2275	1.01154	5.22875	-0.140391	5.23125	-0.742488	5.23125	0.696756	5.23292	0.0634417
5.23937	-2.38238	5.23978	1.44434	5.23458	0.280693	5.23417	1.01511	5.23542	-0.127703	5.23792	-0.73491	5.23792	0.705272	5.23958	0.0588223
5.24603	-2.3912	5.24645	1.41471	5.24125	0.270464	5.24083	1.01849	5.24208	-0.113867	5.24458	-0.726931	5.24458	0.712067	5.24625	0.0525191
5.2527	-2.40155	5.25312	1.38854	5.24792	0.258505	5.2475	1.02247	5.24875	-0.0987723	5.25125	-0.718772	5.25125	0.717312	5.25292	0.0443012
5.25937	-2.41262	5.25978	1.36674	5.25458	0.247054	5.25417	1.02908	5.25542	-0.0821576	5.25792	-0.71013	5.25792	0.721537	5.25958	0.0336692
5.26603	-2.42393	5.26645	1.34885	5.26125	0.23672	5.26083	1.03875	5.26208	-0.0632778	5.26458	-0.700466	5.26458	0.724725	5.26625	0.0209287
5.2727	-2.43557	5.27312	1.3349	5.26792	0.227369	5.2675	1.04929	5.26875	-0.0414625	5.27125	-0.688806	5.27125	0.726432	5.27292	0.00666082
5.27937	-2.44735	5.27978	1.32608	5.27458	0.219166	5.27417	1.05955	5.27542	-0.017114	5.27792	-0.675566	5.27792	0.727773	5.27958	-0.00810623
5.28603	-2.45897	5.28645	1.32412	5.28125	0.213161	5.28083	1.0695	5.28208	0.0096336	5.28458	-0.661865	5.28458	0.730112	5.28625	-0.0236407
5.2927	-2.47089	5.29312	1.32823	5.28792	0.208735	5.2875	1.07846	5.28875	0.0380799	5.29125	-0.648052	5.29125	0.731662	5.29292	-0.0392944
5.29937	-2.48355	5.29978	1.33694	5.29458	0.203654	5.29417	1.08523	5.29542	0.0681654	5.29792	-0.633657	5.29792	0.731595	5.29958	-0.0541508
5.30603	-2.49673	5.30645	1.34863	5.30125	0.196561	5.30083	1.09044	5.30208	0.0986382	5.30458	-0.620149	5.30458	0.729471	5.30625	-0.0675097
5.3127	-2.51061	5.31312	1.36288	5.30792	0.187613	5.3075	1.09606	5.30875	0.129201	5.31125	-0.608787	5.31125	0.725649	5.31292	-0.0798553
5.31937	-2.52547	5.31978	1.37791	5.31458	0.177719	5.31417	1.10326	5.31542	0.159606	5.31792	-0.599749	5.31792	0.718668	5.31958	-0.0910535
5.32603	-2.54242	5.32645	1.39154	5.32125	0.16702	5.32083	1.111	5.32208	0.189126	5.32458	-0.591569	5.32458	0.706337	5.32625	-0.100985
5.3327	-2.56252	5.33312	1.40283	5.32792	0.155516	5.3275	1.1194	5.32875	0.217341	5.33125	-0.582218	5.33125	0.688955	5.33292	-0.110239
5.33937	-2.58591	5.33978	1.41054	5.33458	0.142254	5.33417	1.12814	5.33542	0.243932	5.33792	-0.571892	5.33792	0.666954	5.33958	-0.119194
5.34603	-2.61307	5.34645	1.41396	5.34125	0.127785	5.34083	1.13639	5.34208	0.268616	5.34458	-0.560775	5.34458	0.640929	5.34625	-0.128463
5.3527	-2.64312	5.35312	1.41241	5.34792	0.113741	5.3475	1.14419	5.34875	0.290208	5.35125	-0.548221	5.35125	0.610948	5.35292	-0.137702
5.35937	-2.6762	5.35978	1.40758	5.35458	0.102684	5.35417	1.15065	5.35542	0.308037	5.35792	-0.533074	5.35792	0.578098	5.35958	-0.148602
5.36603	-2.71162	5.36645	1.40086	5.36125	0.0943542	5.36083	1.15594	5.36208	0.32109	5.36458	-0.51672	5.36458	0.543989	5.36625	-0.161931
5.3727	-2.74777	5.37312	1.39263	5.36792	0.0887513	5.3675	1.15967	5.36875	0.32901	5.37125	-0.500686	5.37125	0.509366	5.37292	-0.176772
5.37937	-2.78331	5.37978	1.38316	5.37458	0.0866726	5.37417	1.16275	5.37542	0.330955	5.37792	-0.485227	5.37792	0.474453	5.37958	-0.192225
5.38603	-2.81724	5.38645	1.37394	5.38125	0.0889674	5.38083	1.1669	5.38208	0.327386	5.38458	-0.469565	5.38458	0.440113	5.38625	-0.20647
5.3927	-2.84973	5.39312	1.366	5.38792	0.0953972	5.3875	1.17318	5.38875	0.319421	5.39125	-0.454716	5.39125	0.406899	5.39292	-0.218906
5.39937	-2.88015	5.39978	1.35903	5.39458	0.104301	5.39417	1.18363	5.39542	0.307873	5.39792	-0.44176	5.39792	0.375807	5.39958	-0.227876
5.40603	-2.90733	5.40645	1.3519	5.40125	0.115089	5.40083	1.19964	5.40208	0.294484	5.40458	-0.430577	5.40458	0.346839	5.40625	-0.232041
5.4127	-2.93129	5.41312	1.34534	5.40792	0.12742	5.4075	1.22142	5.40875	0.280768	5.41125	-0.420518	5.41125	0.320539	5.41292	-0.230335
5.41937	-2.95249	5.41978	1.34125	5.41458	0.142194	5.41417	1.24844	5.41542	0.268511	5.41792	-0.411667	5.41792	0.297189	5.41958	-0.221968
5.42603	-2.97178	5.42645	1.33965	5.42125	0.159748	5.42083	1.27965	5.42208	0.258036	5.42458	-0.403605	5.42458	0.275768	5.42625	-0.208497
5.4327	-2.98939	5.43312	1.33925	5.42792	0.178561	5.4275	1.31383	5.42875	0.248112	5.43125	-0.395626	5.43125	0.255935	5.43292	-0.190437
5.43937	-3.00469	5.43978	1.33786	5.43458	0.197396	5.43417	1.34977	5.43542	0.23859	5.43792	-0.387557	5.43792	0.237212	5.43958	-0.167586
5.44603	-3.01731	5.44645	1.33566	5.44125	0.216357	5.44083	1.38621	5.44208	0.230208	5.44458	-0.378385	5.44458	0.220381	5.44625	-0.140041
5.4527	-3.027	5.45312	1.33312	5.44792	0.236243	5.4475	1.42266	5.44875	0.224233	5.45125	-0.367977	5.45125	0.205219	5.45292	-0.109598
5.45937	-3.0349	5.45978	1.33009	5.45458	0.256181	5.45417	1.45779	5.45542	0.220969	5.45792	-0.356063	5.45792	0.19186	5.45958	-0.0784323
5.46603	-3.04185	5.46645	1.32736	5.46125	0.274822	5.46083	1.49102	5.46208	0.22117	5.46458	-0.3445	5.46458	0.181757	5.46625	-0.0467375
5.4727	-3.04794	5.47312	1.32631	5.46792	0.292987	5.4675	1.52132	5.46875	0.226013	5.47125	-0.333235	5.47125	0.175625	5.47292	-0.01508
5.47937	-3.05361	5.47978	1.32819	5.47458	0.311665	5.47417	1.54804	5.47542	0.235602	5.47792	-0.321478	5.47792	0.173673	5.47958	0.0165552
5.48603	-3.06083	5.48645	1.33304	5.48125	0.330873	5.48083	1.57041	5.48208	0.248991	5.48458	-0.310026	5.48458	0.175193	5.48625	0.0479221
5.4927	-3.071	5.49312	1.33999	5.48792	0.349514	5.4875	1.58887	5.48875	0.26609	5.49125	-0.299923	5.49125	0.180513	5.49292	0.0796095
5.49937	-3.08319	5.49978	1.3492	5.49458	0.367574	5.49417	1.60367	5.49542	0.286877	5.49792	-0.291556	5.49792	0.18999	5.49958	0.111617
5.50603	-3.096	5.50645	1.36098	5.50125	0.385247	5.50083	1.61532	5.50208	0.310354	5.50458	-0.281945	5.50458	0.203229	5.50625	0.143513
5.5127	-3.11024	5.51312	1.37561	5.50792	0.402421	5.5075	1.62484	5.50875	0.335142	5.51125	-0.270724	5.51125	0.219308	5.51292	0.176318
5.51937	-3.12722	5.51978	1.39276	5.51458	0.418417	5.51417	1.63259	5.51542	0.359558	5.51792	-0.258617	5.51792	0.237264	5.51958	0.210568
5.52603	-3.14613	5.52645	1.4118	5.52125	0.433639	5.52083	1.63946	5.52208	0.382952	5.52458	-0.245035	5.52458	0.256278	5.52625	0.246502
5.5327	-3.16585	5.53312	1.43209	5.52792	0.448756	5.5275	1.64378	5.52875	0.403427	5.53125	-0.227973	5.53125	0.274934	5.53292	0.282533
5.53937	-3.18577	5.53978	1.45307	5.53458	0.463642	5.53417	1.64477	5.53542	0.420645	5.53792	-0.206262	5.53792	0.291884	5.53958	0.318758
5.54603	-3.20666	5.54645	1.47319	5.54125	0.478476	5.54083	1.64151	5.54208	0.433691	5.54458	-0.181101	5.54458	0.306524	5.54625	0.356451
5.5527	-3.22758	5.55312	1.4911	5.54792	0.49381	5.5475	1.63437	5.54875	0.441559	5.55125	-0.152908	5.55125	0.319183	5.55292	0.395939
5.55937	-3.24798	5.55978	1.50756	5.55458	0.511162	5.55417	1.62369	5.55542	0.444964	5.55792	-0.121154	5.55792	0.32977	5.55958	0.435933
5.56603	-3.26727	5.56645	1.52316	5.56125	0.531614	5.56083	1.60869	5.56208	0.444502	5.56458	-0.087209	5.56458	0.33889	5.56625	0.475518
5.5727	-3.28497	5.57312	1.53952	5.56792	0.5555	5.5675	1.58963	5.56875	0.441387	5.57125	-0.0534207	5.57125	0.348039	5.57292	0.515044
5.57937	-3.30075	5.57978	1.55678	5.57458	0.583582	5.57417	1.56681	5.57542	0.434734	5.57792	-0.0212789	5.57792	0.35838	5.57958	0.554167
5.58603	-3.31386	5.58645	1.57624	5.58125	0.61629	5.58083	1.54022	5.58208	0.424981	5.58458	0.00848621	5.58458	0.370517	5.58625	0.59136
5.5927	-3.32439	5.59312	1.59785	5.58792	0.65352	5.5875	1.50923	5.58875	0.413805	5.59125	0.0351444	5.59125	0.383578	5.59292	0.624515
5.59937	-3.33187	5.59978	1.62129	5.59458	0.693463	5.59417	1.47453	5.59542	0.402048	5.59792	0.0574142	5.59792	0.396788	5.59958	0.652835
5.60603	-3.33597	5.60645	1.6465	5.60125	0.733547	5.60083	1.4376	5.60208	0.389248	5.60458	0.0763983	5.60458	0.409588	5.60625	0.675783
5.6127	-3.33648	5.61312	1.6717	5.60792	0.772089	5.6075	1.39956	5.60875	0.37346	5.61125	0.0930727	5.61125	0.421628	5.61292	0.694044
5.61937	-3.33358	5.61978	1.69645	5.61458	0.808425	5.61417	1.36095	5.61542	0.354633	5.61792	0.107467	5.61792	0.432767	5.61958	0.70858
5.62603	-3.32709	5.62645	1.71988	5.62125	0.841781	5.62083	1.32366	5.62208	0.333704	5.62458	0.119403	5.62458	0.441588	5.62625	0.719428
5.6327	-3.31675	5.63312	1.74254	5.62792	0.871241	5.6275	1.28853	5.62875	0.310674	5.63125	0.129163	5.63125	0.447981	5.63292	0.72664
5.63937	-3.30287	5.63978	1.76367	5.63458	0.89597	5.63417	1.25536	5.63542	0.285119	5.63792	0.138342	5.63792	0.453182	5.63958	0.730447
5.64603	-3.2874	5.64645	1.78301	5.64125	0.916488	5.64083	1.22273	5.64208	0.258304	5.64458	0.147507	5.64458	0.457719	5.64625	0.731699
5.6527	-3.27172	5.65312	1.80111	5.64792	0.934385	5.6475	1.19106	5.64875	0.232942	5.65125	0.157721	5.65125	0.4614	5.65292	0.730537
5.65937	-3.25706	5.65978	1.81749	5.65458	0.950448	5.65417	1.16167	5.65542	0.209458	5.65792	0.170261	5.65792	0.463933	5.65958	0.727274
5.66603	-3.24413	5.66645	1.83154	5.66125	0.965729	5.66083	1.13421	5.66208	0.186265	5.66458	0.185475	5.66458	0.466138	5.66625	0.722304
5.6727	-3.23343	5.67312	1.84267	5.66792	0.979774	5.6675	1.10841	5.66875	0.164069	5.67125	0.202626	5.67125	0.468157	5.67292	0.715956
5.67937	-3.22536	5.67978	1.85127	5.67458	0.992663	5.67417	1.08343	5.67542	0.144362	5.67792	0.219777	5.67792	0.469603	5.67958	0.708014
5.68603	-3.21939	5.68645	1.85798	5.68125	1.00401	5.68083	1.0599	5.68208	0.126272	5.68458	0.236556	5.68458	0.47069	5.68625	0.698678
5.6927	-3.21559	5.69312	1.8636	5.68792	1.01309	5.6875	1.03723	5.68875	0.108004	5.69125	0.25285	5.69125	0.471242	5.69292	0.687443
5.69937	-3.21289	5.69978	1.86837	5.69458	1.0198	5.69417	1.01474	5.69542	0.0901148	5.69792	0.268176	5.69792	0.470676	5.69958	0.672765
5.70603	-3.2104	5.70645	1.87228	5.70125	1.02349	5.70083	0.992052	5.70208	0.0749454	5.70458	0.282496	5.70458	0.468478	5.70625	0.654697
5.7127	-3.20756	5.71312	1.87486	5.70792	1.02415	5.7075	0.96947	5.70875	0.0623241	5.71125	0.297293	5.71125	0.465482	5.71292	0.635147
5.71937	-3.20379	5.71978	1.87658	5.71458	1.02323	5.71417	0.947736	5.71542	0.0513196	5.71792	0.314601	5.71792	0.462115	5.71958	0.615679
5.72603	-3.20008	5.72645	1.87749	5.72125	1.02259	5.72083	0.927389	5.72208	0.0431612	5.72458	0.334114	5.72458	0.457473	5.72625	0.595868
5.7327	-3.19566	5.73312	1.87682	5.72792	1.02313	5.7275	0.909187	5.72875	0.0392571	5.73125	0.354663	5.73125	0.451371	5.73292	0.575915
5.73937	-3.19081	5.73978	1.87507	5.73458	1.02436	5.73417	0.8922	5.73542	0.0390336	5.73792	0.375912	5.73792	0.444911	5.73958	0.556774
5.74603	-3.18494	5.74645	1.87295	5.74125	1.02642	5.74083	0.875965	5.74208	0.0402033	5.74458	0.396609	5.74458	0.438765	5.74625	0.538968
5.7527	-3.17855	5.75312	1.87175	5.74792	1.03108	5.7475	0.859901	5.74875	0.0411943	5.75125	0.41423	5.75125	0.432327	5.75292	0.520699
5.75937	-3.17207	5.75978	1.87173	5.75458	1.03908	5.75417	0.84357	5.75542	0.0417158	5.75792	0.425838	5.75792	0.42408	5.75958	0.50085
5.76603	-3.164	5.76645	1.87346	5.76125	1.04968	5.76083	0.826403	5.76208	0.042066	5.76458	0.43124	5.76458	0.415221	5.76625	0.480518
5.7727	-3.15543	5.77312	1.87773	5.76792	1.06302	5.7675	0.80739	5.76875	0.0431463	5.77125	0.431679	5.77125	0.406511	5.77292	0.460505
5.77937	-3.1478	5.77978	1.88354	5.77458	1.07936	5.77417	0.787757	5.77542	0.0454411	5.77792	0.426829	5.77792	0.397503	5.77958	0.441231
5.78603	-3.14231	5.78645	1.8903	5.78125	1.10094	5.78083	0.768244	5.78208	0.0489056	5.78458	0.417076	5.78458	0.388056	5.78625	0.42291
5.7927	-3.13784	5.79312	1.89795	5.78792	1.12831	5.7875	0.748828	5.78875	0.0549331	5.79125	0.403151	5.79125	0.379756	5.79292	0.406034
5.79937	-3.13371	5.79978	1.9075	5.79458	1.16207	5.79417	0.729531	5.79542	0.0641048	5.79792	0.386126	5.79792	0.375658	5.79958	0.391617
5.80603	-3.13181	5.80645	1.91879	5.80125	1.20229	5.80083	0.709966	5.80208	0.0752136	5.80458	0.366211	5.80458	0.376716	5.80625	0.379674
5.8127	-3.1324	5.81312	1.93107	5.80792	1.24709	5.8075	0.690699	5.80875	0.0856742	5.81125	0.343136	5.81125	0.382073	5.81292	0.371173
5.81937	-3.13389	5.81978	1.94419	5.81458	1.29487	5.81417	0.670895	5.81542	0.0950471	5.81792	0.319242	5.81792	0.391454	5.81958	0.36639
5.82603	-3.13573	5.82645	1.95799	5.82125	1.34189	5.82083	0.650182	5.82208	0.103839	5.82458	0.296399	5.82458	0.405207	5.82625	0.364579
5.8327	-3.1388	5.83312	1.97262	5.82792	1.38559	5.8275	0.628822	5.82875	0.111543	5.83125	0.276178	5.83125	0.423171	5.83292	0.365473
5.83937	-3.14331	5.83978	1.98705	5.83458	1.42296	5.83417	0.607274	5.83542	0.117593	5.83792	0.259854	5.83792	0.444435	5.83958	0.368737
5.84603	-3.14683	5.84645	2.0001	5.84125	1.4518	5.84083	0.585772	5.84208	0.12216	5.84458	0.247642	5.84458	0.468105	5.84625	0.373758
5.8527	-3.14771	5.85312	2.01099	5.84792	1.47185	5.8475	0.563726	5.84875	0.125125	5.85125	0.239551	5.85125	0.495292	5.85292	0.378795
5.85937	-3.14645	5.85978	2.0197	5.85458	1.48372	5.85417	0.540666	5.85542	0.126414	5.85792	0.233226	5.85792	0.525571	5.85958	0.383809
5.86603	-3.14269	5.86645	2.02576	5.86125	1.48917	5.86083	0.516392	5.86208	0.127152	5.86458	0.226662	5.86458	0.556193	5.86625	0.389136
5.8727	-3.13604	5.87312	2.02862	5.86792	1.48951	5.8675	0.491731	5.86875	0.128329	5.87125	0.218548	5.87125	0.584058	5.87292	0.393875
5.87937	-3.1267	5.87978	2.02823	5.87458	1.48611	5.87417	0.466906	5.87542	0.129983	5.87792	0.208326	5.87792	0.607155	5.87958	0.397213
5.88603	-3.11588	5.88645	2.02561	5.88125	1.48059	5.88083	0.443347	5.88208	0.13154	5.88458	0.195883	5.88458	0.62535	5.88625	0.398077
5.8927	-3.10469	5.89312	2.02113	5.88792	1.47475	5.8875	0.421517	5.88875	0.133485	5.89125	0.18093	5.89125	0.638641	5.89292	0.39617
5.89937	-3.09353	5.89978	2.01575	5.89458	1.47039	5.89417	0.401631	5.89542	0.134744	5.89792	0.16427	5.89792	0.647955	5.89958	0.388257
5.90603	-3.08292	5.90645	2.01034	5.90125	1.46724	5.90083	0.383087	5.90208	0.134975	5.90458	0.146396	5.90458	0.654936	5.90625	0.373848
5.9127	-3.07265	5.91312	2.0055	5.90792	1.46545	5.9075	0.364147	5.90875	0.134103	5.91125	0.127517	5.91125	0.660799	5.91292	0.35461
5.91937	-3.06226	5.91978	2.00033	5.91458	1.46525	5.91417	0.343099	5.91542	0.132583	5.91792	0.10784	5.91792	0.667334	5.91958	0.331901
5.92603	-3.05275	5.92645	1.99358	5.92125	1.46745	5.92083	0.318021	5.92208	0.129916	5.92458	0.0892207	5.92458	0.675239	5.92625	0.30677
5.9327	-3.0447	5.93312	1.98423	5.92792	1.47263	5.9275	0.288256	5.92875	0.125721	5.93125	0.0719428	5.93125	0.685282	5.93292	0.279635
5.93937	-3.03788	5.93978	1.97189	5.93458	1.47974	5.93417	0.254117	5.93542	0.119723	5.93792	0.0556037	5.93792	0.697099	5.93958	0.253424
5.94603	-3.03212	5.94645	1.95715	5.94125	1.48787	5.94083	0.216231	5.94208	0.110567	5.94458	0.0406951	5.94458	0.711925	5.94625	0.228673
5.9527	-3.02822	5.95312	1.94007	5.94792	1.49461	5.9475	0.175923	5.94875	0.0963882	5.95125	0.0283197	5.95125	0.731416	5.95292	0.205293
5.95937	-3.02762	5.95978	1.92145	5.95458	1.4991	5.95417	0.134848	5.95542	0.0761673	5.95792	0.0189096	5.95792	0.755437	5.95958	0.182346
5.96603	-3.02985	5.96645	1.9018	5.96125	1.50131	5.96083	0.0934377	5.96208	0.0495166	5.96458	0.0106469	5.96458	0.782281	5.96625	0.160068
5.9727	-3.03511	5.97312	1.88296	5.96792	1.5007	5.9675	0.0529662	5.96875	0.0170469	5.97125	0.00313669	5.97125	0.809215	5.97292	0.138827
5.97937	-3.0439	5.97978	1.86625	5.97458	1.49684	5.97417	0.0148192	5.97542	-0.0199154	5.97792	-0.00312179	5.97792	0.836134	5.97958	0.118472
5.98603	-3.05648	5.98645	1.85233	5.98125	1.49004	5.98083	-0.0194386	5.98208	-0.0598356	5.98458	-0.00800192	5.98458	0.863187	5.98625	0.0986159
5.9927	-3.07218	5.99312	1.84183	5.98792	1.48182	5.9875	-0.0486448	5.98875	-0.101611	5.99125	-0.011377	5.99125	0.889383	5.99292	0.0792369
5.99937	-3.08918	5.99978	1.8357	5.99458	1.4729	5.99417	-0.0727028	5.99542	-0.144988	5.99792	-0.0139698	5.99792	0.913784	5.99958	0.0601783
6.00603	-3.10619	6.00645	1.83504	6.00125	1.46241	6.00083	-0.0900403	6.00208	-0.189856	6.00458	-0.0154078	6.00458	0.937104	6.00625	0.0404492
6.0127	-3.12136	6.01312	1.83935	6.00792	1.44903	6.0075	-0.101104	6.00875	-0.235178	6.01125	-0.0146925	6.01125	0.960618	6.01292	0.0195652
6.01937	-3.13426	6.01978	1.84587	6.01458	1.43293	6.01417	-0.10629	6.01542	-0.27965	6.01792	-0.0102669	6.01792	0.983901	6.01958	-0.00233203
6.02603	-3.14501	6.02645	1.85217	6.02125	1.41507	6.02083	-0.106305	6.02208	-0.322744	6.02458	-0.00174344	6.02458	1.0052	6.02625	-0.0245199
6.0327	-3.15366	6.03312	1.85643	6.02792	1.39575	6.0275	-0.102282	6.02875	-0.365257	6.03125	0.00941753	6.03125	1.02426	6.03292	-0.0465512
6.03937	-3.16022	6.03978	1.85846	6.03458	1.37369	6.03417	-0.0943989	6.03542	-0.407971	6.03792	0.0216439	6.03792	1.04093	6.03958	-0.0677407
6.04603	-3.16533	6.04645	1.8578	6.04125	1.34957	6.04083	-0.0841469	6.04208	-0.449404	6.04458	0.0335127	6.04458	1.05421	6.04625	-0.0876412
6.0527	-3.16986	6.05312	1.85489	6.04792	1.32588	6.0475	-0.0713989	6.04875	-0.489771	6.05125	0.0446513	6.05125	1.06326	6.05292	-0.106722
6.05937	-3.17298	6.05978	1.85221	6.05458	1.30376	6.05417	-0.0573471	6.05542	-0.529625	6.05792	0.0537485	6.05792	1.06902	6.05958	-0.125527
6.06603	-3.17442	6.06645	1.85187	6.06125	1.28239	6.06083	-0.0439659	6.06208	-0.570424	6.06458	0.0601932	6.06458	1.07234	6.06625	-0.144958
6.0727	-3.17468	6.07312	1.85506	6.06792	1.26158	6.0675	-0.0324622	6.06875	-0.61129	6.07125	0.064075	6.07125	1.07346	6.07292	-0.166588
6.07937	-3.17493	6.07978	1.85915	6.07458	1.2426	6.07417	-0.0233203	6.07542	-0.650711	6.07792	0.0670627	6.07792	1.07217	6.07958	-0.190914
6.08603	-3.17451	6.08645	1.8621	6.08125	1.2262	6.08083	-0.0157952	6.08208	-0.687763	6.08458	0.0700206	6.08458	1.06961	6.08625	-0.217788
6.0927	-3.17264	6.09312	1.86267	6.08792	1.21167	6.0875	-0.0103861	6.08875	-0.722401	6.09125	0.0719503	6.09125	1.06726	6.09292	-0.246964
6.09937	-3.17007	6.09978	1.86031	6.09458	1.19933	6.09417	-0.00724196	6.09542	-0.754647	6.09792	0.0722855	6.09792	1.0655	6.09958	-0.279121
6.10603	-3.16782	6.10645	1.85402	6.10125	1.19033	6.10083	-0.00641495	6.10208	-0.783265	6.10458	0.070475	6.10458	1.06412	6.10625	-0.31396
6.1127	-3.16565	6.11312	1.84214	6.10792	1.18567	6.1075	-0.00780076	6.10875	-0.806987	6.11125	0.0662729	6.11125	1.06267	6.11292	-0.349738
6.11937	-3.16316	6.11978	1.8255	6.11458	1.18502	6.11417	-0.0109971	6.11542	-0.823975	6.11792	0.0590086	6.11792	1.06157	6.11958	-0.385918
6.12603	-3.16115	6.12645	1.8054	6.12125	1.18705	6.12083	-0.0138655	6.12208	-0.8341	6.12458	0.0483617	6.12458	1.06106	6.12625	-0.422515
6.1327	-3.16042	6.13312	1.78253	6.12792	1.19013	6.1275	-0.014089	6.12875	-0.837676	6.13125	0.0338405	6.13125	1.06146	6.13292	-0.45976
6.13937	-3.16033	6.13978	1.75581	6.13458	1.19335	6.13417	-0.00961125	6.13542	-0.835329	6.13792	0.0143424	6.13792	1.06318	6.13958	-0.496395
6.14603	-3.15955	6.14645	1.72572	6.14125	1.19589	6.14083	0.000417233	6.14208	-0.826798	6.14458	-0.00935793	6.14458	1.06759	6.14625	-0.530966
6.1527	-3.15809	6.15312	1.69443	6.14792	1.19661	6.1475	0.0157356	6.14875	-0.811383	6.15125	-0.0353754	6.15125	1.0754	6.15292	-0.562482
6.15937	-3.15659	6.15978	1.66364	6.15458	1.19428	6.15417	0.0360683	6.15542	-0.791103	6.15792	-0.060983	6.15792	1.08697	6.15958	-0.589371
6.16603	-3.15501	6.16645	1.63397	6.16125	1.18835	6.16083	0.0584647	6.16208	-0.768118	6.16458	-0.0842735	6.16458	1.10181	6.16625	-0.611275
6.1727	-3.15259	6.17312	1.60661	6.16792	1.1793	6.1675	0.0804216	6.16875	-0.743315	6.17125	-0.103034	6.17125	1.11949	6.17292	-0.627592
6.17937	-3.14898	6.17978	1.58476	6.17458	1.16686	6.17417	0.100084	6.17542	-0.715964	6.17792	-0.115156	6.17792	1.13808	6.17958	-0.638299
6.18603	-3.14429	6.18645	1.57019	6.18125	1.15056	6.18083	0.117376	6.18208	-0.686109	6.18458	-0.119589	6.18458	1.15533	6.18625	-0.644088
6.1927	-3.13985	6.19312	1.56216	6.18792	1.13104	6.1875	0.133395	6.18875	-0.655375	6.19125	-0.116378	6.19125	1.16982	6.19292	-0.646345
6.19937	-3.13538	6.19978	1.55921	6.19458	1.10976	6.19417	0.146993	6.19542	-0.62345	6.19792	-0.106961	6.19792	1.18048	6.19958	-0.646979
6.20603	-3.13006	6.20645	1.5614	6.20125	1.08769	6.20083	0.157796	6.20208	-0.589564	6.20458	-0.0912622	6.20458	1.18592	6.20625	-0.645928
6.2127	-3.12355	6.21312	1.56905	6.20792	1.06431	6.2075	0.166364	6.20875	-0.552714	6.21125	-0.0686869	6.21125	1.185	6.21292	-0.643075
6.21937	-3.1167	6.21978	1.57981	6.21458	1.03907	6.21417	0.174388	6.21542	-0.513561	6.21792	-0.0382289	6.21792	1.1797	6.21958	-0.63929
6.22603	-3.1103	6.22645	1.5905	6.22125	1.01157	6.22083	0.183925	6.22208	-0.473157	6.22458	-0.00026077	6.22458	1.17224	6.22625	-0.635251
6.2327	-3.1039	6.23312	1.6005	6.22792	0.981539	6.2275	0.196896	6.22875	-0.432163	6.23125	0.0441968	6.23125	1.16357	6.23292	-0.630833
6.23937	-3.09772	6.23978	1.61161	6.23458	0.94986	6.23417	0.215851	6.23542	-0.391454	6.23792	0.0938922	6.23792	1.15416	6.23958	-0.626057
6.24603	-3.09315	6.24645	1.62449	6.24125	0.917353	6.24083	0.242516	6.24208	-0.351116	6.24458	0.147901	6.24458	1.14557	6.24625	-0.621073
6.2527	-3.09195	6.25312	1.63902	6.24792	0.883982	6.2475	0.276685	6.24875	-0.311576	6.25125	0.204615	6.25125	1.1397	6.25292	-0.616536
6.25937	-3.09392	6.25978	1.65512	6.25458	0.848293	6.25417	0.317693	6.25542	-0.273295	6.25792	0.262685	6.25792	1.13666	6.25958	-0.611715
6.26603	-3.0989	6.26645	1.67386	6.26125	0.810571	6.26083	0.364661	6.26208	-0.237055	6.26458	0.319906	6.26458	1.1358	6.26625	-0.607006
6.2727	-3.10585	6.27312	1.69551	6.26792	0.772007	6.2675	0.41493	6.26875	-0.202507	6.27125	0.375129	6.27125	1.13781	6.27292	-0.603348
6.27937	-3.11413	6.27978	1.7191	6.27458	0.733219	6.27417	0.466004	6.27542	-0.168756	6.27792	0.428535	6.27792	1.14319	6.27958	-0.600837
6.28603	-3.12203	6.28645	1.74315	6.28125	0.694036	6.28083	0.5164	6.28208	-0.135601	6.28458	0.479922	6.28458	1.15275	6.28625	-0.599496
6.2927	-3.12772	6.29312	1.76593	6.28792	0.655755	6.2875	0.56643	6.28875	-0.103503	6.29125	0.52917	6.29125	1.16597	6.29292	-0.599086
6.29937	-3.13113	6.29978	1.78773	6.29458	0.620961	6.29417	0.615299	6.29542	-0.0734776	6.29792	0.57476	6.29792	1.18147	6.29958	-0.59998
6.30603	-3.13175	6.30645	1.80919	6.30125	0.591971	6.30083	0.660546	6.30208	-0.045307	6.30458	0.617772	6.30458	1.19974	6.30625	-0.60223
6.3127	-3.12987	6.31312	1.83021	6.30792	0.56947	6.3075	0.701308	6.30875	-0.0198409	6.31125	0.659928	6.31125	1.22116	6.31292	-0.60527
6.31937	-3.12533	6.31978	1.85064	6.31458	0.552982	6.31417	0.737362	6.31542	0.00227988	6.31792	0.702657	6.31792	1.24764	6.31958	-0.609264
6.32603	-3.1188	6.32645	1.87052	6.32125	0.542626	6.32083	0.769138	6.32208	0.0211075	6.32458	0.74517	6.32458	1.27735	6.32625	-0.614345
6.3327	-3.11078	6.33312	1.89029	6.32792	0.539176	6.3275	0.795662	6.32875	0.0367761	6.33125	0.786774	6.33125	1.30899	6.33292	-0.621408
6.33937	-3.10126	6.33978	1.90953	6.33458	0.544168	6.33417	0.816956	6.33542	0.0507012	6.33792	0.827409	6.33792	1.34233	6.33958	-0.631087
6.34603	-3.08981	6.34645	1.92784	6.34125	0.557467	6.34083	0.834569	6.34208	0.0629202	6.34458	0.866659	6.34458	1.37749	6.34625	-0.642784
6.3527	-3.07523	6.35312	1.94526	6.34792	0.577569	6.3475	0.84994	6.34875	0.0748038	6.35125	0.904374	6.35125	1.4138	6.35292	-0.655688
6.35937	-3.05774	6.35978	1.96103	6.35458	0.603542	6.35417	0.864401	6.35542	0.0864267	6.35792	0.939988	6.35792	1.44758	6.35958	-0.668585
6.36603	-3.03841	6.36645	1.97539	6.36125	0.634588	6.36083	0.877656	6.36208	0.0973046	6.36458	0.974059	6.36458	1.47797	6.36625	-0.681408
6.3727	-3.01936	6.37312	1.98788	6.36792	0.668779	6.3675	0.891291	6.36875	0.107251	6.37125	1.00639	6.37125	1.50365	6.37292	-0.693075
6.37937	-3.00168	6.37978	1.99793	6.37458	0.703558	6.37417	0.905983	6.37542	0.115879	6.37792	1.03758	6.37792	1.52321	6.37958	-0.703022
6.38603	-2.9856	6.38645	2.00563	6.38125	0.737704	6.38083	0.921786	6.38208	0.123754	6.38458	1.06781	6.38458	1.53489	6.38625	-0.71124
6.3927	-2.97133	6.39312	2.01067	6.38792	0.771903	6.3875	0.938095	6.38875	0.130676	6.39125	1.096	6.39125	1.5377	6.39292	-0.717491
6.39937	-2.95992	6.39978	2.01319	6.39458	0.806704	6.39417	0.95515	6.39542	0.13677	6.39792	1.12114	6.39792	1.53288	6.39958	-0.72176
6.40603	-2.95259	6.40645	2.01255	6.40125	0.842661	6.40083	0.973195	6.40208	0.142664	6.40458	1.14353	6.40458	1.52041	6.40625	-0.723511
6.4127	-2.94926	6.41312	2.00979	6.40792	0.88048	6.4075	0.991009	6.40875	0.148907	6.41125	1.16376	6.41125	1.50142	6.41292	-0.722989
6.41937	-2.94874	6.41978	2.00724	6.41458	0.921182	6.41417	1.00753	6.41542	0.156045	6.41792	1.18187	6.41792	1.47752	6.41958	-0.719823
6.42603	-2.95126	6.42645	2.00529	6.42125	0.964828	6.42083	1.02261	6.42208	0.164621	6.42458	1.19788	6.42458	1.44867	6.42625	-0.713855
6.4327	-2.95822	6.43312	2.00354	6.42792	1.01138	6.4275	1.03603	6.42875	0.175267	6.43125	1.21275	6.43125	1.41574	6.43292	-0.706255
6.43937	-2.96879	6.43978	2.00234	6.43458	1.06139	6.43417	1.04679	6.43542	0.188597	6.43792	1.22804	6.43792	1.37969	6.43958	-0.696875
6.44603	-2.98057	6.44645	2.00392	6.44125	1.11515	6.44083	1.0552	6.44208	0.204824	6.44458	1.24348	6.44458	1.34381	6.44625	-0.686064
6.4527	-2.99148	6.45312	2.00968	6.44792	1.17271	6.4475	1.06225	6.44875	0.224419	6.45125	1.25921	6.45125	1.30944	6.45292	-0.673622
6.45937	-3.00238	6.45978	2.01818	6.45458	1.23294	6.45417	1.06961	6.45542	0.247777	6.45792	1.27554	6.45792	1.27716	6.45958	-0.659831
6.46603	-3.01319	6.46645	2.02805	6.46125	1.29472	6.46083	1.07732	6.46208	0.274636	6.46458	1.29259	6.46458	1.24738	6.46625	-0.644691
6.4727	-3.02234	6.47312	2.04024	6.46792	1.35772	6.4675	1.08596	6.46875	0.30335	6.47125	1.30995	6.47125	1.22054	6.47292	-0.628591
6.47937	-3.02866	6.47978	2.05516	6.47458	1.42098	6.47417	1.09597	6.47542	0.332274	6.47792	1.32738	6.47792	1.19606	6.47958	-0.612915
6.48603	-3.03254	6.48645	2.07098	6.48125	1.48412	6.48083	1.1069	6.48208	0.360839	6.48458	1.34552	6.48458	1.17185	6.48625	-0.597209
6.4927	-3.0352	6.49312	2.08639	6.48792	1.5465	6.4875	1.11753	6.48875	0.38857	6.49125	1.36498	6.49125	1.14672	6.49292	-0.579149
6.49937	-3.03674	6.49978	2.1017	6.49458	1.60928	6.49417	1.12606	6.49542	0.415005	6.49792	1.38529	6.49792	1.11897	6.49958	-0.558563
6.50603	-3.03764	6.50645	2.11754	6.50125	1.67355	6.50083	1.13215	6.50208	0.438772	6.50458	1.40674	6.50458	1.08952	6.50625	-0.536323
6.5127	-3.0385	6.51312	2.13365	6.50792	1.73994	6.5075	1.13484	6.50875	0.459015	6.51125	1.42945	6.51125	1.05925	6.51292	-0.512332
6.51937	-3.04027	6.51978	2.15019	6.51458	1.80792	6.51417	1.13361	6.51542	0.476055	6.51792	1.45182	6.51792	1.02996	6.51958	-0.484385
6.52603	-3.04394	6.52645	2.16713	6.52125	1.87685	6.52083	1.12955	6.52208	0.489272	6.52458	1.47224	6.52458	1.00204	6.52625	-0.452369
6.5327	-3.04922	6.53312	2.18335	6.52792	1.94711	6.5275	1.12436	6.52875	0.498332	6.53125	1.48965	6.53125	0.975557	6.53292	-0.419594
6.53937	-3.05633	6.53978	2.19793	6.53458	2.01791	6.53417	1.11893	6.53542	0.503674	6.53792	1.50524	6.53792	0.951745	6.53958	-0.387564
6.54603	-3.06556	6.54645	2.21105	6.54125	2.08912	6.54083	1.11286	6.54208	0.507548	6.54458	1.51827	6.54458	0.931069	6.54625	-0.355475
6.5527	-3.07743	6.55312	2.22269	6.54792	2.15825	6.5475	1.10659	6.54875	0.512175	6.55125	1.52802	6.55125	0.913247	6.55292	-0.322081
6.55937	-3.09219	6.55978	2.23304	6.55458	2.22521	6.55417	1.10179	6.55542	0.517823	6.55792	1.53442	6.55792	0.896715	6.55958	-0.289157
6.56603	-3.10809	6.56645	2.24308	6.56125	2.28936	6.56083	1.09785	6.56208	0.524454	6.56458	1.53842	6.56458	0.881009	6.56625	-0.258908
6.5727	-3.12506	6.57312	2.25388	6.56792	2.35086	6.5675	1.09431	6.56875	0.532895	6.57125	1.54058	6.57125	0.86695	6.57292	-0.230044
6.57937	-3.14172	6.57978	2.26592	6.57458	2.41002	6.57417	1.09058	6.57542	0.542104	6.57792	1.53954	6.57792	0.855505	6.57958	-0.200868
6.58603	-3.15715	6.58645	2.27908	6.58125	2.46626	6.58083	1.08757	6.58208	0.54989	6.58458	1.5358	6.58458	0.84646	6.58625	-0.17108
6.5927	-3.1708	6.59312	2.29248	6.58792	2.52002	6.5875	1.08675	6.58875	0.554927	6.59125	1.5298	6.59125	0.838749	6.59292	-0.142038
6.59937	-3.1826	6.59978	2.3056	6.59458	2.57117	6.59417	1.0879	6.59542	0.55778	6.59792	1.52154	6.59792	0.832163	6.59958	-0.114411
6.60603	-3.19309	6.60645	2.3182	6.60125	2.62082	6.60083	1.09217	6.60208	0.560656	6.60458	1.51052	6.60458	0.828259	6.60625	-0.0864416
6.6127	-3.2011	6.61312	2.33039	6.60792	2.6686	6.6075	1.09916	6.60875	0.563502	6.61125	1.49647	6.61125	0.827238	6.61292	-0.0585169
6.61937	-3.20667	6.61978	2.34226	6.61458	2.71395	6.61417	1.10933	6.61542	0.566937	6.61792	1.48039	6.61792	0.829339	6.61958	-0.0307187
6.62603	-3.21002	6.62645	2.35337	6.62125	2.75706	6.62083	1.1228	6.62208	0.571996	6.62458	1.46196	6.62458	0.834748	6.62625	-0.00357628
6.6327	-3.21186	6.63312	2.36434	6.62792	2.79918	6.6275	1.13814	6.62875	0.579305	6.63125	1.44099	6.63125	0.844546	6.63292	0.0231862
6.63937	-3.21198	6.63978	2.37454	6.63458	2.84094	6.63417	1.15454	6.63542	0.589058	6.63792	1.41877	6.63792	0.85932	6.63958	0.0506863
6.64603	-3.21031	6.64645	2.38314	6.64125	2.8818	6.64083	1.17037	6.64208	0.60074	6.64458	1.39705	6.64458	0.877425	6.64625	0.0790507
6.6527	-3.20693	6.65312	2.38897	6.64792	2.92241	6.6475	1.18564	6.64875	0.614882	6.65125	1.37746	6.65125	0.897489	6.65292	0.109017
6.65937	-3.20171	6.65978	2.39071	6.65458	2.96432	6.65417	1.20125	6.65542	0.631966	6.65792	1.36027	6.65792	0.917032	6.65958	0.140816
6.66603	-3.19429	6.66645	2.38863	6.66125	3.00851	6.66083	1.21749	6.66208	0.651397	6.66458	1.34517	6.66458	0.935264	6.66625	0.174537
6.6727	-3.18495	6.67312	2.384	6.66792	3.05409	6.6675	1.23584	6.66875	0.673503	6.67125	1.33269	6.67125	0.951789	6.67292	0.210166
6.67937	-3.17458	6.67978	2.37816	6.67458	3.10028	6.67417	1.25708	6.67542	0.698529	6.67792	1.32333	6.67792	0.965536	6.67958	0.246868
6.68603	-3.16403	6.68645	2.37107	6.68125	3.14774	6.68083	1.28203	6.68208	0.725329	6.68458	1.31685	6.68458	0.975929	6.68625	0.283182
6.6927	-3.15434	6.69312	2.3629	6.68792	3.19733	6.6875	1.311	6.68875	0.752553	6.69125	1.31303	6.69125	0.983424	6.69292	0.318065
6.69937	-3.14606	6.69978	2.35601	6.69458	3.24897	6.69417	1.34325	6.69542	0.779197	6.69792	1.31173	6.69792	0.989988	6.69958	0.350952
6.70603	-3.139	6.70645	2.35248	6.70125	3.30181	6.70083	1.37832	6.70208	0.806071	6.70458	1.31432	6.70458	0.995874	6.70625	0.38182
6.7127	-3.13123	6.71312	2.35233	6.70792	3.35813	6.7075	1.41477	6.70875	0.832781	6.71125	1.3212	6.71125	1.00031	6.71292	0.410415
6.71937	-3.12175	6.71978	2.35491	6.71458	3.4194	6.71417	1.4508	6.71542	0.858307	6.71792	1.33173	6.71792	1.00406	6.71958	0.436381
6.72603	-3.11051	6.72645	2.35986	6.72125	3.48575	6.72083	1.48603	6.72208	0.88305	6.72458	1.34468	6.72458	1.00785	6.72625	0.461102
6.7327	-3.0981	6.73312	2.36631	6.72792	3.55655	6.7275	1.52008	6.72875	0.907578	6.73125	1.35757	6.73125	1.01145	6.73292	0.48504
6.73937	-3.08461	6.73978	2.37346	6.73458	3.63203	6.73417	1.55273	6.73542	0.932351	6.73792	1.36978	6.73792	1.01368	6.73958	0.508718
6.74603	-3.07069	6.74645	2.38005	6.74125	3.7137	6.74083	1.58312	6.74208	0.957027	6.74458	1.38219	6.74458	1.01366	6.74625	0.532329
6.7527	-3.05696	6.75312	2.38597	6.74792	3.80091	6.7475	1.61088	6.74875	0.982352	6.75125	1.39619	6.75125	1.01109	6.75292	0.556417
6.75937	-3.04331	6.75978	2.39158	6.75458	3.89338	6.75417	1.63731	6.75542	1.00996	6.75792	1.41067	6.75792	1.00539	6.75958	0.581786
6.76603	-3.02932	6.76645	2.39833	6.76125	3.99189	6.76083	1.66281	6.76208	1.03993	6.76458	1.4246	6.76458	0.995852	6.76625	0.608332
6.7727	-3.01497	6.77312	2.4075	6.76792	4.09713	6.7675	1.68729	6.76875	1.07199	6.77125	1.43794	6.77125	0.982881	6.77292	0.635855
6.77937	-3.00021	6.77978	2.41853	6.77458	4.20978	6.77417	1.7109	6.77542	1.1066	6.77792	1.45057	6.77792	0.966564	6.77958	0.663802
6.78603	-2.98464	6.78645	2.43087	6.78125	4.32963	6.78083	1.73495	6.78208	1.14439	6.78458	1.46047	6.78458	0.948273	6.78625	0.691779
6.7927	-2.96865	6.79312	2.44466	6.78792	4.45607	6.7875	1.76105	6.78875	1.18464	6.79125	1.46458	6.79125	0.928901	6.79292	0.720024
6.79937	-2.95357	6.79978	2.46046	6.79458	4.58822	6.79417	1.79008	6.79542	1.22566	6.79792	1.4623	6.79792	0.909217	6.79958	0.748448
6.80603	-2.94061	6.80645	2.47878	6.80125	4.72476	6.80083	1.82131	6.80208	1.2671	6.80458	1.4542	6.80458	0.891045	6.80625	0.775822
6.8127	-2.92905	6.81312	2.50049	6.80792	4.86553	6.8075	1.85452	6.80875	1.30766	6.81125	1.4416	6.81125	0.875801	6.81292	0.802562
6.81937	-2.91824	6.81978	2.52549	6.81458	5.01	6.81417	1.88905	6.81542	1.34576	6.81792	1.42554	6.81792	0.865564	6.81958	0.829451
6.82603	-2.9082	6.82645	2.55319	6.82125	5.1569	6.82083	1.92346	6.82208	1.38036	6.82458	1.40697	6.82458	0.860013	6.82625	0.857711
6.8327	-2.89971	6.83312	2.58226	6.82792	5.30563	6.8275	1.95595	6.82875	1.41207	6.83125	1.38795	6.83125	0.858366	6.83292	0.887267
6.83937	-2.89221	6.83978	2.61214	6.83458	5.45685	6.83417	1.98457	6.83542	1.4414	6.83792	1.37016	6.83792	0.860237	6.83958	0.918217
6.84603	-2.88437	6.84645	2.64217	6.84125	5.61211	6.84083	2.00942	6.84208	1.468	6.84458	1.35522	6.84458	0.866659	6.84625	0.950433
6.8527	-2.87572	6.85312	2.67125	6.84792	5.77156	6.8475	2.03062	6.84875	1.49342	6.85125	1.34304	6.85125	0.878096	6.85292	0.981651
6.85937	-2.86616	6.85978	2.69994	6.85458	5.9339	6.85417	2.0485	6.85542	1.51903	6.85792	1.3328	6.85792	0.894442	6.85958	1.01108
6.86603	-2.85565	6.86645	2.72883	6.86125	6.09947	6.86083	2.0634	6.86208	1.54532	6.86458	1.32348	6.86458	0.915989	6.86625	1.03797
6.8727	-2.84354	6.87312	2.75788	6.86792	6.26857	6.8675	2.07478	6.86875	1.57104	6.87125	1.31476	6.87125	0.944346	6.87292	1.06287
6.87937	-2.82986	6.87978	2.78627	6.87458	6.44149	6.87417	2.08198	6.87542	1.59663	6.87792	1.30814	6.87792	0.980839	6.87958	1.08484
6.88603	-2.81417	6.88645	2.81316	6.88125	6.61775	6.88083	2.08485	6.88208	1.62186	6.88458	1.30314	6.88458	1.02473	6.88625	1.10476
6.8927	-2.7957	6.89312	2.83933	6.88792	6.79664	6.8875	2.08332	6.88875	1.64586	6.89125	1.30071	6.89125	1.07607	6.89292	1.12475
6.89937	-2.77475	6.89978	2.86555	6.89458	6.97874	6.89417	2.07686	6.89542	1.66733	6.89792	1.30069	6.89792	1.13409	6.89958	1.14574
6.90603	-2.75218	6.90645	2.89214	6.90125	7.16386	6.90083	2.06478	6.90208	1.68695	6.90458	1.30384	6.90458	1.19845	6.90625	1.16706
6.9127	-2.72883	6.91312	2.91992	6.90792	7.35272	6.9075	2.04801	6.90875	1.70638	6.91125	1.30973	6.91125	1.26772	6.91292	1.18722
6.91937	-2.70434	6.91978	2.9492	6.91458	7.54479	6.91417	2.02826	6.91542	1.72623	6.91792	1.31629	6.91792	1.34002	6.91958	1.20604
6.92603	-2.67949	6.92645	2.98014	6.92125	7.73836	6.92083	2.00535	6.92208	1.74855	6.92458	1.32351	6.92458	1.41363	6.92625	1.22415
6.9327	-2.65598	6.93312	3.01235	6.92792	7.93245	6.9275	1.97897	6.92875	1.77561	6.93125	1.32982	6.93125	1.48767	6.93292	1.24137
6.93937	-2.63444	6.93978	3.0457	6.93458	8.12665	6.93417	1.95004	6.93542	1.80963	6.93792	1.33606	6.93792	1.56227	6.93958	1.2572
6.94603	-2.61363	6.94645	3.08113	6.94125	8.32024	6.94083	1.92002	6.94208	1.84998	6.94458	1.34201	6.94458	1.63731	6.94625	1.27216
6.9527	-2.59168	6.95312	3.11882	6.94792	8.5112	6.9475	1.89042	6.94875	1.89549	6.95125	1.34818	6.95125	1.71194	6.95292	1.28691
6.95937	-2.56851	6.95978	3.16019	6.95458	8.69893	6.95417	1.86243	6.95542	1.94527	6.95792	1.35511	6.95792	1.78615	6.95958	1.30232
6.96603	-2.54442	6.96645	3.20628	6.96125	8.88417	6.96083	1.83822	6.96208	1.99779	6.96458	1.36311	6.96458	1.86151	6.96625	1.31772
6.9727	-2.51886	6.97312	3.25817	6.96792	9.06747	6.9675	1.81905	6.96875	2.05125	6.97125	1.37377	6.97125	1.93774	6.97292	1.3333
6.97937	-2.49184	6.97978	3.31596	6.97458	9.24829	6.97417	1.80536	6.97542	2.10283	6.97792	1.3869	6.97792	2.0138	6.97958	1.34917
6.98603	-2.4635	6.98645	3.3792	6.98125	9.42802	6.98083	1.79805	6.98208	2.15127	6.98458	1.40306	6.98458	2.08783	6.98625	1.36577
6.9927	-2.43461	6.99312	3.44851	6.98792	9.60828	6.9875	1.79711	6.98875	2.19565	6.99125	1.42273	6.99125	2.16024	6.99292	1.38398
6.99937	-2.40529	6.99978	3.52271	6.99458	9.79017	6.99417	1.80144	6.99542	2.23658	6.99792	1.44649	6.99792	2.23222	6.99958	1.40481
7.00603	-2.37411	7.00645	3.60044	7.00125	9.97474	7.00083	1.8093	7.00208	2.27439	7.00458	1.47456	7.00458	2.30303	7.00625	1.42783
7.0127	-2.33983	7.01312	3.67995	7.00792	10.162	7.0075	1.81942	7.00875	2.30914	7.01125	1.50531	7.01125	2.37221	7.01292	1.45245
7.01937	-2.30103	7.01978	3.76052	7.01458	10.353	7.01417	1.83116	7.01542	2.34076	7.01792	1.53813	7.01792	2.43988	7.01958	1.47827
7.02603	-2.25852	7.02645	3.84106	7.02125	10.5469	7.02083	1.84307	7.02208	2.3684	7.02458	1.57305	7.02458	2.50757	7.02625	1.50497
7.0327	-2.21253	7.03312	3.92009	7.02792	10.7451	7.0275	1.85396	7.02875	2.39342	7.03125	1.61049	7.03125	2.57617	7.03292	1.53167
7.03937	-2.16261	7.03978	3.99732	7.03458	10.9475	7.03417	1.86249	7.03542	2.41583	7.03792	1.65077	7.03792	2.6435	7.03958	1.55707
7.04603	-2.10983	7.04645	4.07346	7.04125	11.153	7.04083	1.86832	7.04208	2.43618	7.04458	1.69239	7.04458	2.70833	7.04625	1.58267
7.0527	-2.05568	7.05312	4.14927	7.04792	11.3622	7.0475	1.87165	7.04875	2.45412	7.05125	1.73594	7.05125	2.77025	7.05292	1.61002
7.05937	-2.00137	7.05978	4.22496	7.05458	11.5758	7.05417	1.87244	7.05542	2.47142	7.05792	1.78017	7.05792	2.82989	7.05958	1.64086
7.06603	-1.94603	7.06645	4.30171	7.06125	11.795	7.06083	1.87005	7.06208	2.49111	7.06458	1.82365	7.06458	2.88714	7.06625	1.67593
7.0727	-1.88964	7.07312	4.37974	7.06792	12.0184	7.0675	1.86406	7.06875	2.51373	7.07125	1.86477	7.07125	2.94071	7.07292	1.71559
7.07937	-1.83299	7.07978	4.45957	7.07458	12.2466	7.07417	1.85417	7.07542	2.54002	7.07792	1.90334	7.07792	2.99153	7.07958	1.76051
7.08603	-1.77674	7.08645	4.54175	7.08125	12.4812	7.08083	1.84061	7.08208	2.5703	7.08458	1.94027	7.08458	3.0404	7.08625	1.81039
7.0927	-1.72116	7.09312	4.62669	7.08792	12.7227	7.0875	1.82365	7.08875	2.60708	7.09125	1.97538	7.09125	3.08738	7.09292	1.86445
7.09937	-1.66619	7.09978	4.71474	7.09458	12.9708	7.09417	1.80463	7.09542	2.65239	7.09792	2.00965	7.09792	3.13191	7.09958	1.92313
7.10603	-1.61216	7.10645	4.80516	7.10125	13.2237	7.10083	1.78471	7.10208	2.70689	7.10458	2.04495	7.10458	3.17416	7.10625	1.98673
7.1127	-1.55882	7.11312	4.89837	7.10792	13.4812	7.1075	1.76354	7.10875	2.76951	7.11125	2.08171	7.11125	3.21492	7.11292	2.05568
7.11937	-1.50596	7.11978	4.99358	7.11458	13.7419	7.11417	1.74141	7.11542	2.83767	7.11792	2.11954	7.11792	3.25488	7.11958	2.12905
7.12603	-1.45246	7.12645	5.08983	7.12125	14.0039	7.12083	1.71815	7.12208	2.90913	7.12458	2.15754	7.12458	3.29416	7.12625	2.20522
7.1327	-1.39695	7.13312	5.18589	7.12792	14.266	7.1275	1.6938	7.12875	2.98122	7.13125	2.19553	7.13125	3.33351	7.13292	2.28388
7.13937	-1.33939	7.13978	5.28082	7.13458	14.5274	7.13417	1.66761	7.13542	3.0513	7.13792	2.23347	7.13792	3.3739	7.13958	2.36385
7.14603	-1.27989	7.14645	5.37439	7.14125	14.7884	7.14083	1.63966	7.14208	3.11755	7.14458	2.27069	7.14458	3.41595	7.14625	2.44508
7.1527	-1.21884	7.15312	5.46574	7.14792	15.0478	7.1475	1.61114	7.14875	3.17963	7.15125	2.30746	7.15125	3.46088	7.15292	2.52721
7.15937	-1.15533	7.15978	5.55607	7.15458	15.3045	7.15417	1.58294	7.15542	3.23846	7.15792	2.3441	7.15792	3.50918	7.15958	2.61077
7.16603	-1.08893	7.16645	5.64548	7.16125	15.5583	7.16083	1.55512	7.16208	3.29536	7.16458	2.38249	7.16458	3.56116	7.16625	2.6975
7.1727	-1.01918	7.17312	5.73543	7.16792	15.8101	7.1675	1.5281	7.16875	3.35212	7.17125	2.42507	7.17125	3.61685	7.17292	2.7889
7.17937	-0.944205	7.17978	5.82628	7.17458	16.0607	7.17417	1.50145	7.17542	3.40976	7.17792	2.47385	7.17792	3.67524	7.17958	2.88467
7.18603	-0.862494	7.18645	5.91814	7.18125	16.3118	7.18083	1.47557	7.18208	3.46939	7.18458	2.53034	7.18458	3.73667	7.18625	2.98343
7.1927	-0.773363	7.19312	6.01132	7.18792	16.5657	7.1875	1.45105	7.18875	3.53263	7.19125	2.59531	7.19125	3.80079	7.19292	3.08461
7.19937	-0.676885	7.19978	6.10559	7.19458	16.8244	7.19417	1.42809	7.19542	3.601	7.19792	2.67003	7.19792	3.86718	7.19958	3.18915
7.20603	-0.571527	7.20645	6.20217	7.20125	17.0883	7.20083	1.4068	7.20208	3.67469	7.20458	2.75483	7.20458	3.93572	7.20625	3.29708
7.2127	-0.456534	7.21312	6.30034	7.20792	17.3557	7.2075	1.38734	7.20875	3.7526	7.21125	2.84947	7.21125	4.00732	7.21292	3.40797
7.21937	-0.332713	7.21978	6.39939	7.21458	17.6258	7.21417	1.37036	7.21542	3.8344	7.21792	2.95196	7.21792	4.08377	7.21958	3.52265
7.22603	-0.202321	7.22645	6.49869	7.22125	17.8974	7.22083	1.35565	7.22208	3.92009	7.22458	3.06072	7.22458	4.16385	7.22625	3.64274
7.2327	-0.0654086	7.23312	6.59906	7.22792	18.1695	7.2275	1.34203	7.22875	4.0091	7.23125	3.17512	7.23125	4.24576	7.23292	3.76875
7.23937	0.0783727	7.23978	6.70069	7.23458	18.4414	7.23417	1.32921	7.23542	4.10024	7.23792	3.29506	7.23792	4.33018	7.23958	3.90046
7.24603	0.227861	7.24645	6.80292	7.24125	18.7125	7.24083	1.31798	7.24208	4.19366	7.24458	3.41951	7.24458	4.4192	7.24625	4.03668
7.2527	0.381023	7.25312	6.90536	7.24792	18.9836	7.2475	1.30848	7.24875	4.29092	7.25125	3.54653	7.25125	4.51187	7.25292	4.1768
7.25937	0.536576	7.25978	7.00837	7.25458	19.2547	7.25417	1.30087	7.25542	4.39338	7.25792	3.67672	7.25792	4.60605	7.25958	4.31924
7.26603	0.694513	7.26645	7.11221	7.26125	19.5261	7.26083	1.29543	7.26208	4.50055	7.26458	3.81003	7.26458	4.70252	7.26625	4.46284
7.2727	0.854686	7.27312	7.21602	7.26792	19.798	7.2675	1.29315	7.26875	4.61182	7.27125	3.94621	7.27125	4.80281	7.27292	4.60714
7.27937	1.0169	7.27978	7.31953	7.27458	20.0705	7.27417	1.29545	7.27542	4.72718	7.27792	4.08373	7.27792	4.90586	7.27958	4.75214
7.28603	1.18035	7.28645	7.42268	7.28125	20.3448	7.28083	1.30198	7.28208	4.847	7.28458	4.2228	7.28458	5.00938	7.28625	4.89783
7.2927	1.34446	7.29312	7.52596	7.28792	20.6209	7.2875	1.31222	7.28875	4.97033	7.29125	4.36522	7.29125	5.1144	7.29292	5.04325
7.29937	1.50995	7.29978	7.62868	7.29458	20.8984	7.29417	1.32575	7.29542	5.09502	7.29792	4.51151	7.29792	5.22207	7.29958	5.18857
7.30603	1.67906	7.30645	7.73127	7.30125	21.1769	7.30083	1.34195	7.30208	5.22029	7.30458	4.66198	7.30458	5.33146	7.30625	5.33424
7.3127	1.85248	7.31312	7.8349	7.30792	21.4563	7.3075	1.36002	7.30875	5.3465	7.31125	4.81653	7.31125	5.44158	7.31292	5.48058
7.31937	2.0292	7.31978	7.94033	7.31458	21.7364	7.31417	1.37874	7.31542	5.47455	7.31792	4.97507	7.31792	5.55296	7.31958	5.62781
7.32603	2.2083	7.32645	8.04777	7.32125	22.015	7.32083	1.39796	7.32208	5.60407	7.32458	5.13698	7.32458	5.66676	7.32625	5.77675
7.3327	2.39113	7.33312	8.15754	7.32792	22.2907	7.3275	1.41769	7.32875	5.7335	7.33125	5.30045	7.33125	5.78142	7.33292	5.92894
7.33937	2.57797	7.33978	8.27132	7.33458	22.5632	7.33417	1.43675	7.33542	5.86312	7.33792	5.46437	7.33792	5.89599	7.33958	6.08443
7.34603	2.76793	7.34645	8.38995	7.34125	22.8326	7.34083	1.455	7.34208	5.9938	7.34458	5.62862	7.34458	6.01088	7.34625	6.24271
7.3527	2.95959	7.35312	8.5131	7.34792	23.0974	7.3475	1.47198	7.34875	6.12722	7.35125	5.79356	7.35125	6.12746	7.35292	6.40405
7.35937	3.15319	7.35978	8.6413	7.35458	23.3568	7.35417	1.48626	7.35542	6.26375	7.35792	5.95864	7.35792	6.24679	7.35958	6.56796
7.36603	3.34921	7.36645	8.77522	7.36125	23.6128	7.36083	1.49701	7.36208	6.40394	7.36458	6.12316	7.36458	6.36804	7.36625	6.73418
7.3727	3.5466	7.37312	8.91481	7.36792	23.8687	7.3675	1.50459	7.36875	6.54822	7.37125	6.28773	7.37125	6.49218	7.37292	6.90144
7.37937	3.74458	7.37978	9.06053	7.37458	24.1259	7.37417	1.51052	7.37542	6.69642	7.37792	6.45387	7.37792	6.61976	7.37958	7.07079
7.38603	3.94297	7.38645	9.21288	7.38125	24.3846	7.38083	1.5137	7.38208	6.84769	7.38458	6.62146	7.38458	6.75105	7.38625	7.24255
7.3927	4.14356	7.39312	9.37259	7.38792	24.6458	7.3875	1.51382	7.38875	7.00122	7.39125	6.79091	7.39125	6.88542	7.39292	7.41594
7.39937	4.34713	7.39978	9.53882	7.39458	24.9099	7.39417	1.51177	7.39542	7.1563	7.39792	6.96362	7.39792	7.02269	7.39958	7.59055
7.40603	4.5542	7.40645	9.71076	7.40125	25.1764	7.40083	1.50876	7.40208	7.3128	7.40458	7.14097	7.40458	7.16542	7.40625	7.76686
7.4127	4.76611	7.41312	9.88959	7.40792	25.4453	7.4075	1.50472	7.40875	7.47174	7.41125	7.32259	7.41125	7.31371	7.41292	7.94624
7.41937	4.98477	7.41978	10.0757	7.41458	25.7167	7.41417	1.49894	7.41542	7.63379	7.41792	7.50753	7.41792	7.46681	7.41958	8.12878
7.42603	5.21094	7.42645	10.2682	7.42125	25.9907	7.42083	1.49285	7.42208	7.79916	7.42458	7.69652	7.42458	7.62372	7.42625	8.31433
7.4327	5.44307	7.43312	10.4655	7.42792	26.2677	7.4275	1.48613	7.42875	7.96732	7.43125	7.8885	7.43125	7.78518	7.43292	8.50424
7.43937	5.67991	7.43978	10.6662	7.43458	26.5491	7.43417	1.47945	7.43542	8.13771	7.43792	8.08167	7.43792	7.95175	7.43958	8.69894
7.44603	5.92076	7.44645	10.8715	7.44125	26.8353	7.44083	1.47255	7.44208	8.30875	7.44458	8.2745	7.44458	8.12174	7.44625	8.89904
7.4527	6.16407	7.45312	11.0809	7.44792	27.1267	7.4475	1.46718	7.44875	8.4798	7.45125	8.46756	7.45125	8.29487	7.45292	9.1051
7.45937	6.40694	7.45978	11.2944	7.45458	27.4224	7.45417	1.4654	7.45542	8.65074	7.45792	8.66105	7.45792	8.47258	7.45958	9.31703
7.46603	6.64807	7.46645	11.5115	7.46125	27.7225	7.46083	1.46915	7.46208	8.8218	7.46458	8.85397	7.46458	8.65641	7.46625	9.53492
7.4727	6.88768	7.47312	11.7327	7.46792	28.0272	7.4675	1.48104	7.46875	8.99254	7.47125	9.04692	7.47125	8.84615	7.47292	9.75724
7.47937	7.12683	7.47978	11.959	7.47458	28.3362	7.47417	1.502	7.47542	9.16376	7.47792	9.24118	7.47792	9.04045	7.47958	9.98412
7.48603	7.36602	7.48645	12.19	7.48125	28.6505	7.48083	1.53247	7.48208	9.33746	7.48458	9.43822	7.48458	9.23867	7.48625	10.2154
7.4927	7.60572	7.49312	12.4252	7.48792	28.9688	7.4875	1.57154	7.48875	9.51414	7.49125	9.63859	7.49125	9.44047	7.49292	10.4508
7.49937	7.84592	7.49978	12.6635	7.49458	29.2909	7.49417	1.61763	7.49542	9.69369	7.49792	9.84251	7.49792	9.64544	7.49958	10.6906
7.50603	8.08597	7.50645	12.9057	7.50125	29.6174	7.50083	1.66944	7.50208	9.87611	7.50458	10.0503	7.50458	9.85347	7.50625	10.9363
7.5127	8.32648	7.51312	13.1524	7.50792	29.949	7.5075	1.72577	7.50875	10.0619	7.51125	10.2607	7.51125	10.0647	7.51292	11.1896
7.51937	8.56763	7.51978	13.403	7.51458	30.2854	7.51417	1.78521	7.51542	10.2515	7.51792	10.4735	7.51792	10.2795	7.51958	11.4506
7.52603	8.81016	7.52645	13.6564	7.52125	30.625	7.52083	1.84752	7.52208	10.4442	7.52458	10.6892	7.52458	10.498	7.52625	11.7177
7.5327	9.05482	7.53312	13.913	7.52792	30.9676	7.5275	1.91143	7.52875	10.6401	7.53125	10.9074	7.53125	10.7199	7.53292	11.9898
7.53937	9.30387	7.53978	14.1741	7.53458	31.3128	7.53417	1.9773	7.53542	10.8396	7.53792	11.1265	7.53792	10.9443	7.53958	12.2659
7.54603	9.55842	7.54645	14.4408	7.54125	31.6603	7.54083	2.04447	7.54208	11.0427	7.54458	11.3452	7.54458	11.1704	7.54625	12.5445
7.5527	9.81797	7.55312	14.7133	7.54792	32.01	7.5475	2.113	7.54875	11.2499	7.55125	11.5648	7.55125	11.3965	7.55292	12.8244
7.55937	10.0816	7.55978	14.9922	7.55458	32.3621	7.55417	2.1833	7.55542	11.46	7.55792	11.7861	7.55792	11.6222	7.55958	13.1057
7.56603	10.3496	7.56645	15.2784	7.56125	32.7175	7.56083	2.25435	7.56208	11.6738	7.56458	12.008	7.56458	11.8458	7.56625	13.3893
7.5727	10.6218	7.57312	15.5701	7.56792	33.0768	7.5675	2.32596	7.56875	11.8923	7.57125	12.2286	7.57125	12.0666	7.57292	13.675
7.57937	10.8975	7.57978	15.8663	7.57458	33.4405	7.57417	2.39701	7.57542	12.1163	7.57792	12.4477	7.57792	12.2836	7.57958	13.9619
7.58603	11.176	7.58645	16.1648	7.58125	33.8069	7.58083	2.46738	7.58208	12.3459	7.58458	12.6655	7.58458	12.4976	7.58625	14.2489
7.5927	11.4581	7.59312	16.4639	7.58792	34.1749	7.5875	2.53625	7.58875	12.58	7.59125	12.8817	7.59125	12.7095	7.59292	14.5349
7.59937	11.7447	7.59978	16.7621	7.59458	34.5436	7.59417	2.60222	7.59542	12.8198	7.59792	13.096	7.59792	12.9191	7.59958	14.82
7.60603	12.0361	7.60645	17.0587	7.60125	34.9125	7.60083	2.66472	7.60208	13.0643	7.60458	13.3086	7.60458	13.1292	7.60625	15.1049
7.6127	12.3326	7.61312	17.3542	7.60792	35.2812	7.6075	2.72272	7.60875	13.3122	7.61125	13.5211	7.61125	13.3412	7.61292	15.3896
7.61937	12.6343	7.61978	17.6488	7.61458	35.6484	7.61417	2.77656	7.61542	13.5624	7.61792	13.7351	7.61792	13.5574	7.61958	15.6737
7.62603	12.9417	7.62645	17.9427	7.62125	36.0138	7.62083	2.82614	7.62208	13.8146	7.62458	13.9521	7.62458	13.7771	7.62625	15.9581
7.6327	13.2543	7.63312	18.2367	7.62792	36.3776	7.6275	2.87154	7.62875	14.0692	7.63125	14.1728	7.63125	14.0019	7.63292	16.2446
7.63937	13.5717	7.63978	18.5318	7.63458	36.7392	7.63417	2.91415	7.63542	14.326	7.63792	14.3979	7.63792	14.2338	7.63958	16.5319
7.64603	13.8944	7.64645	18.8283	7.64125	37.0981	7.64083	2.95518	7.64208	14.585	7.64458	14.629	7.64458	14.4722	7.64625	16.8188
7.6527	14.2218	7.65312	19.1263	7.64792	37.4537	7.6475	2.99612	7.64875	14.8456	7.65125	14.8678	7.65125	14.7162	7.65292	17.1054
7.65937	14.5528	7.65978	19.4253	7.65458	37.8057	7.65417	3.03625	7.65542	15.1053	7.65792	15.115	7.65792	14.9652	7.65958	17.3938
7.66603	14.8867	7.66645	19.725	7.66125	38.154	7.66083	3.07546	7.66208	15.3634	7.66458	15.37	7.66458	15.2198	7.66625	17.6868
7.6727	15.2238	7.67312	20.0259	7.66792	38.4978	7.6675	3.11519	7.66875	15.6193	7.67125	15.6327	7.67125	15.4783	7.67292	17.9843
7.67937	15.5637	7.67978	20.3286	7.67458	38.8379	7.67417	3.15593	7.67542	15.8723	7.67792	15.902	7.67792	15.7384	7.67958	18.2871
7.68603	15.9059	7.68645	20.6332	7.68125	39.1728	7.68083	3.19754	7.68208	16.122	7.68458	16.1769	7.68458	15.9983	7.68625	18.5964
7.6927	16.2516	7.69312	20.9393	7.68792	39.5024	7.6875	3.24014	7.68875	16.3691	7.69125	16.4558	7.69125	16.258	7.69292	18.9134
7.69937	16.6012	7.69978	21.2475	7.69458	39.8274	7.69417	3.28465	7.69542	16.6166	7.69792	16.7378	7.69792	16.5191	7.69958	19.2382
7.70603	16.9544	7.70645	21.5598	7.70125	40.1475	7.70083	3.3315	7.70208	16.8645	7.70458	17.0227	7.70458	16.7819	7.70625	19.569
7.7127	17.3103	7.71312	21.8765	7.70792	40.4615	7.7075	3.37948	7.70875	17.1131	7.71125	17.3106	7.71125	17.047	7.71292	19.9058
7.71937	17.6681	7.71978	22.1957	7.71458	40.7689	7.71417	3.42819	7.71542	17.3623	7.71792	17.6004	7.71792	17.3142	7.71958	20.2494
7.72603	18.0266	7.72645	22.5161	7.72125	41.0705	7.72083	3.47765	7.72208	17.6117	7.72458	17.8911	7.72458	17.5845	7.72625	20.5991
7.7327	18.3848	7.73312	22.8371	7.72792	41.3657	7.7275	3.5264	7.72875	17.8611	7.73125	18.1822	7.73125	17.8578	7.73292	20.9528
7.73937	18.7431	7.73978	23.1591	7.73458	41.6538	7.73417	3.57255	7.73542	18.1106	7.73792	18.474	7.73792	18.1318	7.73958	21.3084
7.74603	19.1022	7.74645	23.4819	7.74125	41.9362	7.74083	3.61559	7.74208	18.3609	7.74458	18.767	7.74458	18.4058	7.74625	21.6659
7.7527	19.4627	7.75312	23.8057	7.74792	42.2146	7.7475	3.65592	7.74875	18.6113	7.75125	19.0603	7.75125	18.6808	7.75292	22.0249
7.75937	19.8246	7.75978	24.131	7.75458	42.4899	7.75417	3.69294	7.75542	18.8616	7.75792	19.354	7.75792	18.9582	7.75958	22.3845
7.76603	20.1872	7.76645	24.4586	7.76125	42.7624	7.76083	3.72557	7.76208	19.1118	7.76458	19.648	7.76458	19.2384	7.76625	22.7446
7.7727	20.5494	7.77312	24.79	7.76792	43.0328	7.7675	3.75448	7.76875	19.3615	7.77125	19.942	7.77125	19.5229	7.77292	23.1059
7.77937	20.9104	7.77978	25.1249	7.77458	43.3013	7.77417	3.78213	7.77542	19.6097	7.77792	20.2356	7.77792	19.8136	7.77958	23.4697
7.78603	21.2704	7.78645	25.4615	7.78125	43.5667	7.78083	3.80873	7.78208	19.8559	7.78458	20.5283	7.78458	20.1114	7.78625	23.8355
7.7927	21.6305	7.79312	25.7982	7.78792	43.8291	7.7875	3.83362	7.78875	20.0994	7.79125	20.8216	7.79125	20.4148	7.79292	24.2025
7.79937	21.9911	7.79978	26.137	7.79458	44.0892	7.79417	3.85681	7.79542	20.3403	7.79792	21.1184	7.79792	20.724	7.79958	24.5703
7.80603	22.3519	7.80645	26.4787	7.80125	44.3475	7.80083	3.87955	7.80208	20.5803	7.80458	21.4194	7.80458	21.0395	7.80625	24.9396
7.8127	22.7125	7.81312	26.8218	7.80792	44.6042	7.8075	3.9015	7.80875	20.8201	7.81125	21.724	7.81125	21.3613	7.81292	25.3115
7.81937	23.0721	7.81978	27.1652	7.81458	44.8594	7.81417	3.92056	7.81542	21.0597	7.81792	22.0312	7.81792	21.6889	7.81958	25.6854
7.82603	23.4304	7.82645	27.5099	7.82125	45.1136	7.82083	3.93555	7.82208	21.3008	7.82458	22.3408	7.82458	22.022	7.82625	26.0614
7.8327	23.786	7.83312	27.8576	7.82792	45.3668	7.8275	3.94835	7.82875	21.5465	7.83125	22.6529	7.83125	22.3614	7.83292	26.4389
7.83937	24.1389	7.83978	28.208	7.83458	45.6182	7.83417	3.96049	7.83542	21.7995	7.83792	22.9653	7.83792	22.7058	7.83958	26.817
7.84603	24.4912	7.84645	28.5614	7.84125	45.8664	7.84083	3.97196	7.84208	22.0586	7.84458	23.2775	7.84458	23.0542	7.84625	27.195
7.8527	24.8451	7.85312	28.9181	7.84792	46.111	7.8475	3.98325	7.84875	22.323	7.85125	23.5908	7.85125	23.4059	7.85292	27.5719
7.85937	25.2029	7.85978	29.2793	7.85458	46.3536	7.85417	3.99662	7.85542	22.5932	7.85792	23.9062	7.85792	23.7592	7.85958	27.9471
7.86603	25.5649	7.86645	29.6451	7.86125	46.5961	7.86083	4.01387	7.86208	22.8694	7.86458	24.2239	7.86458	24.1132	7.86625	28.3196
7.8727	25.9315	7.87312	30.0152	7.86792	46.8384	7.8675	4.03439	7.86875	23.1512	7.87125	24.5414	7.87125	24.4685	7.87292	28.6903
7.87937	26.3022	7.87978	30.3891	7.87458	47.0796	7.87417	4.05814	7.87542	23.4363	7.87792	24.8587	7.87792	24.8255	7.87958	29.0608
7.88603	26.6773	7.88645	30.7658	7.88125	47.3209	7.88083	4.08756	7.88208	23.7241	7.88458	25.1751	7.88458	25.1839	7.88625	29.431
7.8927	27.0576	7.89312	31.1451	7.88792	47.564	7.8875	4.12424	7.88875	24.014	7.89125	25.49	7.89125	25.5416	7.89292	29.8004
7.89937	27.4418	7.89978	31.5267	7.89458	47.8088	7.89417	4.16779	7.89542	24.306	7.89792	25.8037	7.89792	25.8978	7.89958	30.1695
7.90603	27.8303	7.90645	31.9097	7.90125	48.0542	7.90083	4.21765	7.90208	24.5996	7.90458	26.1174	7.90458	26.2526	7.90625	30.5385
7.9127	28.2226	7.91312	32.2951	7.90792	48.3004	7.9075	4.27504	7.90875	24.895	7.91125	26.4328	7.91125	26.6048	7.91292	30.9068
7.91937	28.6196	7.91978	32.6825	7.91458	48.5488	7.91417	4.34005	7.91542	25.1933	7.91792	26.7496	7.91792	26.9539	7.91958	31.2734
7.92603	29.0204	7.92645	33.0728	7.92125	48.7993	7.92083	4.41056	7.92208	25.4954	7.92458	27.0706	7.92458	27.3008	7.92625	31.6387
7.9327	29.424	7.93312	33.467	7.92792	49.0496	7.9275	4.48586	7.92875	25.803	7.93125	27.3971	7.93125	27.6467	7.93292	32.0041
7.93937	29.831	7.93978	33.8659	7.93458	49.2982	7.93417	4.56606	7.93542	26.1166	7.93792	27.7296	7.93792	27.9928	7.93958	32.3697
7.94603	30.2402	7.94645	34.2693	7.94125	49.5451	7.94083	4.65141	7.94208	26.4356	7.94458	28.0673	7.94458	28.3397	7.94625	32.7367
7.9527	30.6521	7.95312	34.6753	7.94792	49.7906	7.9475	4.73952	7.94875	26.7594	7.95125	28.411	7.95125	28.6885	7.95292	33.1066
7.95937	31.0659	7.95978	35.0844	7.95458	50.0339	7.95417	4.82751	7.95542	27.088	7.95792	28.7626	7.95792	29.0394	7.95958	33.4798
7.96603	31.4822	7.96645	35.4972	7.96125	50.2748	7.96083	4.91401	7.96208	27.4216	7.96458	29.1218	7.96458	29.3928	7.96625	33.8551
7.9727	31.9013	7.97312	35.9128	7.96792	50.5144	7.9675	4.99783	7.96875	27.7594	7.97125	29.4883	7.97125	29.7489	7.97292	34.2322
7.97937	32.3233	7.97978	36.3299	7.97458	50.753	7.97417	5.07886	7.97542	28.1033	7.97792	29.8623	7.97792	30.1081	7.97958	34.6123
7.98603	32.7491	7.98645	36.7488	7.98125	50.9911	7.98083	5.15638	7.98208	28.4547	7.98458	30.2442	7.98458	30.4691	7.98625	34.9964
7.9927	33.1792	7.99312	37.1708	7.98792	51.2286	7.9875	5.2302	7.98875	28.8142	7.99125	30.6331	7.99125	30.8324	7.99292	35.384
7.99937	33.614	7.99978	37.5962	7.99458	51.466	7.99417	5.30161	7.99542	29.1805	7.99792	31.0282	7.99792	31.1997	7.99958	35.7748
8.00603	34.053	8.00645	38.0242	8.00125	51.7031	8.00083	5.3711	8.00208	29.553	8.00458	31.4293	8.00458	31.5709	8.00625	36.1691
8.0127	34.4965	8.01312	38.4549	8.00792	51.9384	8.0075	5.43784	8.00875	29.9318	8.01125	31.8363	8.01125	31.9454	8.01292	36.5662
8.01937	34.9433	8.01978	38.8897	8.01458	52.172	8.01417	5.50055	8.01542	30.315	8.01792	32.248	8.01792	32.3233	8.01958	36.9651
8.02603	35.3935	8.02645	39.329	8.02125	52.4042	8.02083	5.55928	8.02208	30.7004	8.02458	32.6645	8.02458	32.7049	8.02625	37.3649
8.0327	35.8465	8.03312	39.7724	8.02792	52.6359	8.0275	5.61509	8.02875	31.0869	8.03125	33.0859	8.03125	33.0885	8.03292	37.7664
8.03937	36.3023	8.03978	40.2195	8.03458	52.8679	8.03417	5.66823	8.03542	31.4752	8.03792	33.5101	8.03792	33.4727	8.03958	38.1705
8.04603	36.76	8.04645	40.6711	8.04125	53.1011	8.04083	5.71913	8.04208	31.8656	8.04458	33.9345	8.04458	33.8571	8.04625	38.5783
8.0527	37.2189	8.05312	41.1264	8.04792	53.3376	8.0475	5.76983	8.04875	32.2572	8.05125	34.3579	8.05125	34.243	8.05292	38.9904
8.05937	37.6784	8.05978	41.5832	8.05458	53.5792	8.05417	5.82146	8.05542	32.6504	8.05792	34.7817	8.05792	34.6296	8.05958	39.4061
8.06603	38.1377	8.06645	42.0398	8.06125	53.8269	8.06083	5.87448	8.06208	33.0458	8.06458	35.2052	8.06458	35.0167	8.06625	39.8248
8.0727	38.5963	8.07312	42.4963	8.06792	54.0808	8.0675	5.92785	8.06875	33.4418	8.07125	35.6278	8.07125	35.4043	8.07292	40.2457
8.07937	39.0534	8.07978	42.9528	8.07458	54.3407	8.07417	5.98145	8.07542	33.8363	8.07792	36.0515	8.07792	35.7931	8.07958	40.6688
8.08603	39.5084	8.08645	43.4065	8.08125	54.6073	8.08083	6.03548	8.08208	34.2286	8.08458	36.4792	8.08458	36.1841	8.08625	41.0925
8.0927	39.9605	8.09312	43.8561	8.08792	54.8802	8.0875	6.08937	8.08875	34.6191	8.09125	36.9113	8.09125	36.5759	8.09292	41.5159
8.09937	40.4098	8.09978	44.3014	8.09458	55.1585	8.09417	6.14207	8.09542	35.0072	8.09792	37.3456	8.09792	36.9685	8.09958	41.9388
8.10603	40.8558	8.10645	44.742	8.10125	55.4401	8.10083	6.19231	8.10208	35.3908	8.10458	37.7815	8.10458	37.3615	8.10625	42.3608
8.1127	41.2974	8.11312	45.1763	8.10792	55.7231	8.1075	6.24085	8.10875	35.7703	8.11125	38.2183	8.11125	37.7554	8.11292	42.7801
8.11937	41.7334	8.11978	45.6027	8.11458	56.0066	8.11417	6.28906	8.11542	36.1483	8.11792	38.6537	8.11792	38.1501	8.11958	43.1946
8.12603	42.1631	8.12645	46.0213	8.12125	56.2908	8.12083	6.33787	8.12208	36.5259	8.12458	39.0847	8.12458	38.5443	8.12625	43.6042
8.1327	42.587	8.13312	46.4319	8.12792	56.5778	8.1275	6.38797	8.12875	36.9024	8.13125	39.5094	8.13125	38.9374	8.13292	44.0085
8.13937	43.006	8.13978	46.8347	8.13458	56.8676	8.13417	6.44007	8.13542	37.276	8.13792	39.9272	8.13792	39.3288	8.13958	44.4058
8.14603	43.4203	8.14645	47.2294	8.14125	57.1618	8.14083	6.49676	8.14208	37.647	8.14458	40.3377	8.14458	39.7197	8.14625	44.7939
8.1527	43.8305	8.15312	47.6149	8.14792	57.4603	8.1475	6.55889	8.14875	38.0154	8.15125	40.7397	8.15125	40.1095	8.15292	45.1723
8.15937	44.2366	8.15978	47.991	8.15458	57.7635	8.15417	6.62632	8.15542	38.3801	8.15792	41.1336	8.15792	40.4961	8.15958	45.541
8.16603	44.6383	8.16645	48.3582	8.16125	58.0709	8.16083	6.69861	8.16208	38.7392	8.16458	41.519	8.16458	40.8781	8.16625	45.8996
8.1727	45.0347	8.17312	48.7177	8.16792	58.3813	8.1675	6.77574	8.16875	39.0917	8.17125	41.897	8.17125	41.2543	8.17292	46.247
8.17937	45.4251	8.17978	49.0687	8.17458	58.6948	8.17417	6.85804	8.17542	39.4376	8.17792	42.2676	8.17792	41.6253	8.17958	46.5842
8.18603	45.8094	8.18645	49.4098	8.18125	59.0107	8.18083	6.944	8.18208	39.7754	8.18458	42.6316	8.18458	41.9889	8.18625	46.9119
8.1927	46.1867	8.19312	49.7408	8.18792	59.3276	8.1875	7.03331	8.18875	40.1042	8.19125	42.9897	8.19125	42.3438	8.19292	47.2297
8.19937	46.5566	8.19978	50.0621	8.19458	59.6446	8.19417	7.12508	8.19542	40.4227	8.19792	43.3418	8.19792	42.6889	8.19958	47.5356
8.20603	46.9184	8.20645	50.3747	8.20125	59.9591	8.20083	7.21843	8.20208	40.731	8.20458	43.6879	8.20458	43.0239	8.20625	47.8295
8.2127	47.2721	8.21312	50.6787	8.20792	60.2692	8.2075	7.31175	8.20875	41.0286	8.21125	44.0282	8.21125	43.3502	8.21292	48.1134
8.21937	47.6176	8.21978	50.9747	8.21458	60.5724	8.21417	7.40447	8.21542	41.3165	8.21792	44.3628	8.21792	43.6676	8.21958	48.388
8.22603	47.9548	8.22645	51.2635	8.22125	60.8665	8.22083	7.49626	8.22208	41.5961	8.22458	44.6897	8.22458	43.9776	8.22625	48.6531
8.2327	48.2837	8.23312	51.5462	8.22792	61.1502	8.2275	7.58696	8.22875	41.8672	8.23125	45.0081	8.23125	44.282	8.23292	48.9095
8.23937	48.605	8.23978	51.8226	8.23458	61.4223	8.23417	7.67726	8.23542	42.1298	8.23792	45.3178	8.23792	44.5824	8.23958	49.1592
8.24603	48.9207	8.24645	52.0924	8.24125	61.6828	8.24083	7.76869	8.24208	42.3837	8.24458	45.6207	8.24458	44.8796	8.24625	49.4026
8.2527	49.2317	8.25312	52.3557	8.24792	61.9312	8.2475	7.86224	8.24875	42.6297	8.25125	45.9179	8.25125	45.1735	8.25292	49.6393
8.25937	49.5379	8.25978	52.6135	8.25458	62.166	8.25417	7.95796	8.25542	42.8678	8.25792	46.2112	8.25792	45.4646	8.25958	49.8697
8.26603	49.8396	8.26645	52.8676	8.26125	62.3875	8.26083	8.05646	8.26208	43.0969	8.26458	46.503	8.26458	45.7544	8.26625	50.0963
8.2727	50.1384	8.27312	53.1183	8.26792	62.5947	8.2675	8.15796	8.26875	43.317	8.27125	46.7942	8.27125	46.0419	8.27292	50.3204
8.27937	50.4365	8.27978	53.3651	8.27458	62.7863	8.27417	8.26223	8.27542	43.5288	8.27792	47.086	8.27792	46.3276	8.27958	50.5424
8.28603	50.7343	8.28645	53.6089	8.28125	62.9602	8.28083	8.36793	8.28208	43.7339	8.28458	47.3785	8.28458	46.6119	8.28625	50.7629
8.2927	51.0322	8.29312	53.8511	8.28792	63.1151	8.2875	8.47508	8.28875	43.9336	8.29125	47.6729	8.29125	46.8952	8.29292	50.9835
8.29937	51.3317	8.29978	54.0936	8.29458	63.2502	8.29417	8.58341	8.29542	44.1293	8.29792	47.9694	8.29792	47.1782	8.29958	51.2061
8.30603	51.6326	8.30645	54.3366	8.30125	63.3642	8.30083	8.69124	8.30208	44.3234	8.30458	48.2683	8.30458	47.4608	8.30625	51.4319
8.3127	51.9357	8.31312	54.5814	8.30792	63.4577	8.3075	8.79642	8.30875	44.5181	8.31125	48.5701	8.31125	47.7447	8.31292	51.6646
8.31937	52.2409	8.31978	54.8314	8.31458	63.5317	8.31417	8.89768	8.31542	44.7157	8.31792	48.875	8.31792	48.0309	8.31958	51.9072
8.32603	52.5507	8.32645	55.0891	8.32125	63.5859	8.32083	8.99492	8.32208	44.918	8.32458	49.1834	8.32458	48.32	8.32625	52.1627
8.3327	52.8666	8.33312	55.3561	8.32792	63.6197	8.3275	9.08774	8.32875	45.1262	8.33125	49.4938	8.33125	48.6135	8.33292	52.4329
8.33937	53.1892	8.33978	55.6336	8.33458	63.6342	8.33417	9.17558	8.33542	45.341	8.33792	49.8062	8.33792	48.9123	8.33958	52.7196
8.34603	53.5191	8.34645	55.9239	8.34125	63.6295	8.34083	9.25872	8.34208	45.5627	8.34458	50.1211	8.34458	49.2178	8.34625	53.0242
8.3527	53.8576	8.35312	56.2288	8.34792	63.6056	8.3475	9.33884	8.34875	45.7927	8.35125	50.4413	8.35125	49.5313	8.35292	53.3454
8.35937	54.2062	8.35978	56.5485	8.35458	63.5627	8.35417	9.41665	8.35542	46.032	8.35792	50.7685	8.35792	49.8546	8.35958	53.6826
8.36603	54.5639	8.36645	56.8824	8.36125	63.5022	8.36083	9.49185	8.36208	46.281	8.36458	51.1024	8.36458	50.1904	8.36625	54.035
8.3727	54.9299	8.37312	57.2315	8.36792	63.425	8.3675	9.56255	8.36875	46.54	8.37125	51.4445	8.37125	50.541	8.37292	54.402
8.37937	55.305	8.37978	57.5972	8.37458	63.3323	8.37417	9.62849	8.37542	46.81	8.37792	51.7972	8.37792	50.9086	8.37958	54.7811
8.38603	55.6906	8.38645	57.9803	8.38125	63.2266	8.38083	9.68976	8.38208	47.0933	8.38458	52.1631	8.38458	51.2944	8.38625	55.1708
8.3927	56.086	8.39312	58.3799	8.38792	63.1096	8.3875	9.74616	8.38875	47.3903	8.39125	52.5431	8.39125	51.6973	8.39292	55.5708
8.39937	56.4892	8.39978	58.7949	8.39458	62.9828	8.39417	9.79774	8.39542	47.7008	8.39792	52.9373	8.39792	52.1154	8.39958	55.9817
8.40603	56.8992	8.40645	59.2249	8.40125	62.8475	8.40083	9.84425	8.40208	48.0251	8.40458	53.3487	8.40458	52.5479	8.40625	56.4024
8.4127	57.3162	8.41312	59.6702	8.40792	62.7059	8.4075	9.88721	8.40875	48.3646	8.41125	53.778	8.41125	52.9936	8.41292	56.832
8.41937	57.7406	8.41978	60.1294	8.41458	62.559	8.41417	9.92747	8.41542	48.7208	8.41792	54.2236	8.41792	53.4503	8.41958	57.269
8.42603	58.1725	8.42645	60.6016	8.42125	62.4064	8.42083	9.9647	8.42208	49.0934	8.42458	54.6829	8.42458	53.915	8.42625	57.7125
8.4327	58.6122	8.43312	61.0864	8.42792	62.2486	8.4275	9.99817	8.42875	49.4821	8.43125	55.1547	8.43125	54.387	8.43292	58.1612
8.43937	59.0601	8.43978	61.5837	8.43458	62.0859	8.43417	10.0272	8.43542	49.8873	8.43792	55.6384	8.43792	54.8664	8.43958	58.6132
8.44603	59.5168	8.44645	62.0918	8.44125	61.9201	8.44083	10.0531	8.44208	50.3096	8.44458	56.1303	8.44458	55.3525	8.44625	59.0678
8.4527	59.9823	8.45312	62.6076	8.44792	61.7516	8.4475	10.077	8.44875	50.7482	8.45125	56.6278	8.45125	55.8437	8.45292	59.5251
8.45937	60.4553	8.45978	63.1296	8.45458	61.5824	8.45417	10.1	8.45542	51.2021	8.45792	57.1299	8.45792	56.3391	8.45958	59.9866
8.46603	60.9334	8.46645	63.6558	8.46125	61.413	8.46083	10.124	8.46208	51.6702	8.46458	57.6357	8.46458	56.8387	8.46625	60.4523
8.4727	61.4144	8.47312	64.1849	8.46792	61.2451	8.4675	10.1503	8.46875	52.1527	8.47125	58.1428	8.47125	57.3422	8.47292	60.9222
8.47937	61.8965	8.47978	64.7141	8.47458	61.0795	8.47417	10.1792	8.47542	52.6489	8.47792	58.6493	8.47792	57.8506	8.47958	61.3959
8.48603	62.377	8.48645	65.2423	8.48125	60.9155	8.48083	10.2102	8.48208	53.1564	8.48458	59.1545	8.48458	58.362	8.48625	61.8724
8.4927	62.8531	8.49312	65.7682	8.48792	60.7535	8.4875	10.2434	8.48875	53.6718	8.49125	59.6574	8.49125	58.8763	8.49292	62.3493
8.49937	63.3223	8.49978	66.2906	8.49458	60.596	8.49417	10.2795	8.49542	54.1916	8.49792	60.1569	8.49792	59.3903	8.49958	62.8248
8.50603	63.7824	8.50645	66.808	8.50125	60.4461	8.50083	10.3191	8.50208	54.7132	8.50458	60.6515	8.50458	59.9031	8.50625	63.298
8.5127	64.2328	8.51312	67.3189	8.50792	60.3053	8.5075	10.3624	8.50875	55.2327	8.51125	61.1404	8.51125	60.4124	8.51292	63.7659
8.51937	64.6726	8.51978	67.8229	8.51458	60.1762	8.51417	10.4107	8.51542	55.7464	8.51792	61.6217	8.51792	60.9163	8.51958	64.2264
8.52603	65.1009	8.52645	68.3194	8.52125	60.0625	8.52083	10.466	8.52208	56.2522	8.52458	62.0937	8.52458	61.4149	8.52625	64.6788
8.5327	65.5159	8.53312	68.8073	8.52792	59.9681	8.5275	10.5291	8.52875	56.75	8.53125	62.555	8.53125	61.9054	8.53292	65.1229
8.53937	65.9168	8.53978	69.2868	8.53458	59.8944	8.53417	10.5999	8.53542	57.24	8.53792	63.0056	8.53792	62.3866	8.53958	65.5563
8.54603	66.3043	8.54645	69.7573	8.54125	59.8417	8.54083	10.6788	8.54208	57.7205	8.54458	63.4446	8.54458	62.8563	8.54625	65.9769
8.5527	66.6781	8.55312	70.2181	8.54792	59.8119	8.5475	10.7665	8.54875	58.1904	8.55125	63.8696	8.55125	63.3139	8.55292	66.3847
8.55937	67.0393	8.55978	70.6692	8.55458	59.8072	8.55417	10.8619	8.55542	58.649	8.55792	64.2799	8.55792	63.7581	8.55958	66.7789
8.56603	67.3872	8.56645	71.1098	8.56125	59.8287	8.56083	10.962	8.56208	59.0948	8.56458	64.6757	8.56458	64.1853	8.56625	67.1568
8.5727	67.7223	8.57312	71.5395	8.56792	59.8774	8.5675	11.0653	8.56875	59.5262	8.57125	65.0558	8.57125	64.5942	8.57292	67.5177
8.57937	68.0445	8.57978	71.9568	8.57458	59.9535	8.57417	11.1708	8.57542	59.9416	8.57792	65.4182	8.57792	64.9837	8.57958	67.8618
8.58603	68.3538	8.58645	72.3617	8.58125	60.0594	8.58083	11.2796	8.58208	60.3411	8.58458	65.7609	8.58458	65.3526	8.58625	68.1878
8.5927	68.6491	8.59312	72.7537	8.58792	60.1953	8.5875	11.3919	8.58875	60.7238	8.59125	66.0843	8.59125	65.6991	8.59292	68.4936
8.59937	68.9269	8.59978	73.1311	8.59458	60.3618	8.59417	11.5088	8.59542	61.0882	8.59792	66.3876	8.59792	66.0209	8.59958	68.7773
8.60603	69.1868	8.60645	73.4924	8.60125	60.5594	8.60083	11.6335	8.60208	61.4339	8.60458	66.6696	8.60458	66.3175	8.60625	69.0391
8.6127	69.4297	8.61312	73.8364	8.60792	60.7879	8.6075	11.7682	8.60875	61.7612	8.61125	66.9312	8.61125	66.5888	8.61292	69.2777
8.61937	69.6558	8.61978	74.1615	8.61458	61.0468	8.61417	11.9144	8.61542	62.0704	8.61792	67.1716	8.61792	66.8347	8.61958	69.4925
8.62603	69.864	8.62645	74.4663	8.62125	61.3343	8.62083	12.0712	8.62208	62.3594	8.62458	67.3904	8.62458	67.0563	8.62625	69.6827
8.6327	70.0536	8.63312	74.7488	8.62792	61.6511	8.6275	12.2402	8.62875	62.6266	8.63125	67.5862	8.63125	67.2548	8.63292	69.8487
8.63937	70.226	8.63978	75.0087	8.63458	61.9967	8.63417	12.4222	8.63542	62.8741	8.63792	67.7599	8.63792	67.4321	8.63958	69.9921
8.64603	70.3816	8.64645	75.2452	8.64125	62.3702	8.64083	12.6165	8.64208	63.1036	8.64458	67.912	8.64458	67.5895	8.64625	70.1146
8.6527	70.5201	8.65312	75.4589	8.64792	62.7718	8.6475	12.822	8.64875	63.3152	8.65125	68.0405	8.65125	67.7281	8.65292	70.2162
8.65937	70.6404	8.65978	75.649	8.65458	63.2015	8.65417	13.0393	8.65542	63.5052	8.65792	68.1458	8.65792	67.8503	8.65958	70.295
8.66603	70.7429	8.66645	75.8161	8.66125	63.6589	8.66083	13.2697	8.66208	63.6728	8.66458	68.2295	8.66458	67.9566	8.66625	70.352
8.6727	70.8274	8.67312	75.962	8.66792	64.1427	8.6675	13.5132	8.66875	63.8199	8.67125	68.2941	8.67125	68.0479	8.67292	70.3887
8.67937	70.8942	8.67978	76.0887	8.67458	64.6517	8.67417	13.7694	8.67542	63.9468	8.67792	68.3406	8.67792	68.1247	8.67958	70.406
8.68603	70.9438	8.68645	76.1982	8.68125	65.1838	8.68083	14.0382	8.68208	64.0512	8.68458	68.3698	8.68458	68.1866	8.68625	70.4024
8.6927	70.9764	8.69312	76.2905	8.68792	65.7366	8.6875	14.3201	8.68875	64.1309	8.69125	68.382	8.69125	68.2326	8.69292	70.3791
8.69937	70.993	8.69978	76.3678	8.69458	66.3098	8.69417	14.6141	8.69542	64.189	8.69792	68.3762	8.69792	68.2617	8.69958	70.3391
8.70603	70.993	8.70645	76.4291	8.70125	66.9022	8.70083	14.9186	8.70208	64.2288	8.70458	68.3509	8.70458	68.2729	8.70625	70.2845
8.7127	70.9769	8.71312	76.4735	8.70792	67.5111	8.7075	15.2313	8.70875	64.2514	8.71125	68.3057	8.71125	68.2651	8.71292	70.2161
8.71937	70.9454	8.71978	76.5003	8.71458	68.1331	8.71417	15.5505	8.71542	64.2552	8.71792	68.2412	8.71792	68.2366	8.71958	70.1353
8.72603	70.8994	8.72645	76.5101	8.72125	68.7663	8.72083	15.875	8.72208	64.2411	8.72458	68.1574	8.72458	68.1883	8.72625	70.0444
8.7327	70.8386	8.73312	76.503	8.72792	69.4081	8.7275	16.204	8.72875	64.2118	8.73125	68.0546	8.73125	68.1221	8.73292	69.9439
8.73937	70.762	8.73978	76.4781	8.73458	70.0539	8.73417	16.5363	8.73542	64.1682	8.73792	67.9347	8.73792	68.0385	8.73958	69.8336
8.74603	70.671	8.74645	76.4351	8.74125	70.7001	8.74083	16.8705	8.74208	64.1091	8.74458	67.7994	8.74458	67.9382	8.74625	69.7128
8.7527	70.5672	8.75312	76.3744	8.74792	71.3443	8.7475	17.2052	8.74875	64.0345	8.75125	67.6505	8.75125	67.8207	8.75292	69.5825
8.75937	70.4508	8.75978	76.2966	8.75458	71.9846	8.75417	17.5396	8.75542	63.9463	8.75792	67.4899	8.75792	67.6869	8.75958	69.4434
8.76603	70.3214	8.76645	76.2007	8.76125	72.6179	8.76083	17.8725	8.76208	63.846	8.76458	67.3209	8.76458	67.5375	8.76625	69.2956
8.7727	70.1812	8.77312	76.0869	8.76792	73.2417	8.7675	18.2027	8.76875	63.7343	8.77125	67.1462	8.77125	67.3733	8.77292	69.1393
8.77937	70.0322	8.77978	75.957	8.77458	73.8521	8.77417	18.5296	8.77542	63.6134	8.77792	66.9666	8.77792	67.1958	8.77958	68.9757
8.78603	69.8742	8.78645	75.8141	8.78125	74.4456	8.78083	18.8522	8.78208	63.4859	8.78458	66.7829	8.78458	67.0058	8.78625	68.8059
8.7927	69.7069	8.79312	75.66	8.78792	75.019	8.7875	19.1698	8.78875	63.3534	8.79125	66.594	8.79125	66.8061	8.79292	68.6303
8.79937	69.5303	8.79978	75.495	8.79458	75.5699	8.79417	19.48	8.79542	63.2154	8.79792	66.3996	8.79792	66.598	8.79958	68.4489
8.80603	69.345	8.80645	75.3185	8.80125	76.0959	8.80083	19.7808	8.80208	63.07	8.80458	66.1984	8.80458	66.3828	8.80625	68.261
8.8127	69.15	8.81312	75.1304	8.80792	76.593	8.8075	20.0709	8.80875	62.9165	8.81125	65.991	8.81125	66.1613	8.81292	68.0662
8.81937	68.9466	8.81978	74.9312	8.81458	77.0592	8.81417	20.3497	8.81542	62.7546	8.81792	65.78	8.81792	65.9338	8.81958	67.8627
8.82603	68.7364	8.82645	74.7214	8.82125	77.4933	8.82083	20.6166	8.82208	62.5849	8.82458	65.5673	8.82458	65.7001	8.82625	67.6504
8.8327	68.5209	8.83312	74.5015	8.82792	77.8928	8.8275	20.8708	8.82875	62.4068	8.83125	65.3545	8.83125	65.4604	8.83292	67.4298
8.83937	68.3007	8.83978	74.2721	8.83458	78.2542	8.83417	21.1128	8.83542	62.2211	8.83792	65.1412	8.83792	65.2159	8.83958	67.2006
8.84603	68.0763	8.84645	74.0351	8.84125	78.5736	8.84083	21.3432	8.84208	62.0304	8.84458	64.9282	8.84458	64.9675	8.84625	66.9629
8.8527	67.8482	8.85312	73.7916	8.84792	78.8497	8.8475	21.5624	8.84875	61.8365	8.85125	64.7165	8.85125	64.7178	8.85292	66.7168
8.85937	67.6149	8.85978	73.5419	8.85458	79.0836	8.85417	21.7692	8.85542	61.6388	8.85792	64.506	8.85792	64.4681	8.85958	66.4641
8.86603	67.3761	8.86645	73.2851	8.86125	79.275	8.86083	21.9619	8.86208	61.4357	8.86458	64.2972	8.86458	64.2204	8.86625	66.2067
8.8727	67.1319	8.87312	73.0213	8.86792	79.4233	8.8675	22.1398	8.86875	61.2279	8.87125	64.0911	8.87125	63.9748	8.87292	65.9451
8.87937	66.8838	8.87978	72.7518	8.87458	79.5289	8.87417	22.3032	8.87542	61.0176	8.87792	63.889	8.87792	63.7317	8.87958	65.6806
8.88603	66.6334	8.88645	72.4785	8.88125	79.5929	8.88083	22.4532	8.88208	60.8063	8.88458	63.6915	8.88458	63.4928	8.88625	65.4146
8.8927	66.382	8.89312	72.2036	8.88792	79.6158	8.8875	22.5889	8.88875	60.595	8.89125	63.4975	8.89125	63.258	8.89292	65.1504
8.89937	66.1315	8.89978	71.9289	8.89458	79.596	8.89417	22.7093	8.89542	60.3857	8.89792	63.3073	8.89792	63.0286	8.89958	64.8898
8.90603	65.8836	8.90645	71.6554	8.90125	79.5325	8.90083	22.8148	8.90208	60.1811	8.90458	63.1212	8.90458	62.8056	8.90625	64.6325
8.9127	65.6408	8.91312	71.3858	8.90792	79.427	8.9075	22.907	8.90875	59.9828	8.91125	62.9395	8.91125	62.5913	8.91292	64.3779
8.91937	65.4044	8.91978	71.123	8.91458	79.2807	8.91417	22.9864	8.91542	59.7912	8.91792	62.763	8.91792	62.3873	8.91958	64.1269
8.92603	65.1756	8.92645	70.8686	8.92125	79.0945	8.92083	23.0526	8.92208	59.6069	8.92458	62.5919	8.92458	62.1937	8.92625	63.8814
8.9327	64.9543	8.93312	70.6227	8.92792	78.8691	8.9275	23.1061	8.92875	59.4304	8.93125	62.4278	8.93125	62.0121	8.93292	63.6425
8.93937	64.7409	8.93978	70.3864	8.93458	78.6062	8.93417	23.1488	8.93542	59.2611	8.93792	62.2707	8.93792	61.8439	8.93958	63.4111
8.94603	64.5357	8.94645	70.1611	8.94125	78.3078	8.94083	23.1828	8.94208	59.0967	8.94458	62.1201	8.94458	61.6903	8.94625	63.1887
8.9527	64.339	8.95312	69.9477	8.94792	77.9746	8.9475	23.2088	8.94875	58.937	8.95125	61.9765	8.95125	61.5531	8.95292	62.9785
8.95937	64.1506	8.95978	69.7463	8.95458	77.6086	8.95417	23.2272	8.95542	58.7831	8.95792	61.8425	8.95792	61.4326	8.95958	62.7821
8.96603	63.9714	8.96645	69.5584	8.96125	77.2125	8.96083	23.2384	8.96208	58.6346	8.96458	61.7213	8.96458	61.3288	8.96625	62.6009
8.9727	63.8024	8.97312	69.3861	8.96792	76.7886	8.9675	23.2437	8.96875	58.4921	8.97125	61.6147	8.97125	61.2406	8.97292	62.4349
8.97937	63.6451	8.97978	69.2296	8.97458	76.338	8.97417	23.2437	8.97542	58.356	8.97792	61.5241	8.97792	61.1681	8.97958	62.2838
8.98603	63.5013	8.98645	69.0901	8.98125	75.8626	8.98083	23.2386	8.98208	58.2286	8.98458	61.4519	8.98458	61.113	8.98625	62.1485
8.9927	63.3737	8.99312	68.9682	8.98792	75.3648	8.9875	23.229	8.98875	58.1117	8.99125	61.4005	8.99125	61.0756	8.99292	62.0296
8.99937	63.2643	8.99978	68.8658	8.99458	74.8468	8.99417	23.2155	8.99542	58.0059	8.99792	61.3704	8.99792	61.0551	8.99958	61.928
9.00603	63.1734	9.00645	68.7832	9.00125	74.3102	9.00083	23.1984	9.00208	57.913	9.00458	61.3619	9.00458	61.0512	9.00625	61.8428
9.0127	63.1019	9.01312	68.7208	9.00792	73.7581	9.0075	23.1765	9.00875	57.8347	9.01125	61.376	9.01125	61.0651	9.01292	61.7745
9.01937	63.0518	9.01978	68.6809	9.01458	73.1931	9.01417	23.1488	9.01542	57.7736	9.01792	61.415	9.01792	61.0992	9.01958	61.7263
9.02603	63.025	9.02645	68.6648	9.02125	72.6163	9.02083	23.1138	9.02208	57.7323	9.02458	61.4806	9.02458	61.154	9.02625	61.7002
9.0327	63.0202	9.03312	68.6738	9.02792	72.0286	9.0275	23.0721	9.02875	57.7128	9.03125	61.5732	9.03125	61.2314	9.03292	61.6963
9.03937	63.0373	9.03978	68.7083	9.03458	71.4305	9.03417	23.0235	9.03542	57.7164	9.03792	61.6926	9.03792	61.3345	9.03958	61.7134
9.04603	63.0775	9.04645	68.7691	9.04125	70.8226	9.04083	22.9678	9.04208	57.744	9.04458	61.84	9.04458	61.4682	9.04625	61.754
9.0527	63.1423	9.05312	68.8566	9.04792	70.2041	9.0475	22.9057	9.04875	57.7966	9.05125	62.0175	9.05125	61.6375	9.05292	61.8194
9.05937	63.2325	9.05978	68.9699	9.05458	69.5766	9.05417	22.8387	9.05542	57.876	9.05792	62.2267	9.05792	61.844	9.05958	61.911
9.06603	63.3473	9.06645	69.1096	9.06125	68.9414	9.06083	22.7685	9.06208	57.9838	9.06458	62.4682	9.06458	62.0893	9.06625	62.0299
9.0727	63.4878	9.07312	69.2772	9.06792	68.3003	9.0675	22.694	9.06875	58.1218	9.07125	62.7428	9.07125	62.3741	9.07292	62.1784
9.07937	63.6551	9.07978	69.4729	9.07458	67.6539	9.07417	22.6138	9.07542	58.2908	9.07792	63.0522	9.07792	62.6982	9.07958	62.3592
9.08603	63.8505	9.08645	69.6976	9.08125	67.0025	9.08083	22.5282	9.08208	58.4915	9.08458	63.3964	9.08458	63.0606	9.08625	62.573
9.0927	64.0745	9.09312	69.9516	9.08792	66.3466	9.0875	22.4373	9.08875	58.7253	9.09125	63.7756	9.09125	63.4592	9.09292	62.8191
9.09937	64.3269	9.09978	70.2358	9.09458	65.6857	9.09417	22.3413	9.09542	58.9937	9.09792	64.1895	9.09792	63.8934	9.09958	63.0959
9.10603	64.6086	9.10645	70.5493	9.10125	65.0214	9.10083	22.2394	9.10208	59.2971	9.10458	64.6389	9.10458	64.363	9.10625	63.4024
9.1127	64.9195	9.11312	70.8922	9.10792	64.3552	9.1075	22.133	9.10875	59.6348	9.11125	65.1237	9.11125	64.8673	9.11292	63.7377
9.11937	65.2582	9.11978	71.2643	9.11458	63.6893	9.11417	22.0236	9.11542	60.0074	9.11792	65.6445	9.11792	65.4065	9.11958	64.0995
9.12603	65.6215	9.12645	71.6629	9.12125	63.0247	9.12083	21.9124	9.12208	60.4136	9.12458	66.2003	9.12458	65.9798	9.12625	64.4857
9.1327	66.0075	9.13312	72.0858	9.12792	62.3618	9.1275	21.8002	9.12875	60.8515	9.13125	66.7894	9.13125	66.5862	9.13292	64.8958
9.13937	66.4155	9.13978	72.5324	9.13458	61.6999	9.13417	21.6872	9.13542	61.3168	9.13792	67.4083	9.13792	67.2241	9.13958	65.3284
9.14603	66.8432	9.14645	73.0033	9.14125	61.0391	9.14083	21.5737	9.14208	61.8073	9.14458	68.0533	9.14458	67.8919	9.14625	65.7809
9.1527	67.2878	9.15312	73.4947	9.14792	60.3791	9.1475	21.4599	9.14875	62.3204	9.15125	68.7215	9.15125	68.587	9.15292	66.2497
9.15937	67.7468	9.15978	74.0026	9.15458	59.7197	9.15417	21.3469	9.15542	62.8529	9.15792	69.4077	9.15792	69.3078	9.15958	66.7328
9.16603	68.219	9.16645	74.5252	9.16125	59.0602	9.16083	21.2346	9.16208	63.4037	9.16458	70.1098	9.16458	70.0518	9.16625	67.228
9.1727	68.7031	9.17312	75.0621	9.16792	58.4003	9.1675	21.1216	9.16875	63.9708	9.17125	70.8246	9.17125	70.815	9.17292	67.7331
9.17937	69.1961	9.17978	75.6105	9.17458	57.7419	9.17417	21.0071	9.17542	64.5525	9.17792	71.5496	9.17792	71.5919	9.17958	68.2457
9.18603	69.6952	9.18645	76.1663	9.18125	57.0854	9.18083	20.8916	9.18208	65.144	9.18458	72.2805	9.18458	72.3768	9.18625	68.7622
9.1927	70.1981	9.19312	76.728	9.18792	56.4311	9.1875	20.7743	9.18875	65.7412	9.19125	73.0133	9.19125	73.167	9.19292	69.2801
9.19937	70.7016	9.19978	77.2946	9.19458	55.7789	9.19417	20.6519	9.19542	66.3404	9.19792	73.7446	9.19792	73.9584	9.19958	69.7954
9.20603	71.2027	9.20645	77.8631	9.20125	55.1301	9.20083	20.5233	9.20208	66.937	9.20458	74.4684	9.20458	74.7461	9.20625	70.3045
9.2127	71.6969	9.21312	78.4285	9.20792	54.4868	9.2075	20.3895	9.20875	67.5274	9.21125	75.1807	9.21125	75.525	9.21292	70.8028
9.21937	72.18	9.21978	78.9868	9.21458	53.8495	9.21417	20.2524	9.21542	68.1085	9.21792	75.8778	9.21792	76.2906	9.21958	71.2854
9.22603	72.6474	9.22645	79.5344	9.22125	53.2181	9.22083	20.112	9.22208	68.677	9.22458	76.5562	9.22458	77.0392	9.22625	71.748
9.2327	73.0948	9.23312	80.0669	9.22792	52.5916	9.2275	19.9682	9.22875	69.2281	9.23125	77.2122	9.23125	77.7647	9.23292	72.1867
9.23937	73.5194	9.23978	80.5803	9.23458	51.9687	9.23417	19.8223	9.23542	69.7597	9.23792	77.8422	9.23792	78.4622	9.23958	72.5983
9.24603	73.9177	9.24645	81.0711	9.24125	51.3502	9.24083	19.6757	9.24208	70.2704	9.24458	78.4446	9.24458	79.1291	9.24625	72.9805
9.2527	74.2861	9.25312	81.5361	9.24792	50.7372	9.2475	19.53	9.24875	70.7581	9.25125	79.0154	9.25125	79.7637	9.25292	73.3324
9.25937	74.6227	9.25978	81.9734	9.25458	50.131	9.25417	19.3854	9.25542	71.221	9.25792	79.5522	9.25792	80.3639	9.25958	73.6529
9.26603	74.926	9.26645	82.38	9.26125	49.5329	9.26083	19.2435	9.26208	71.6581	9.26458	80.0534	9.26458	80.9262	9.26625	73.9421
9.2727	75.1937	9.27312	82.7533	9.26792	48.9431	9.2675	19.1074	9.26875	72.07	9.27125	80.5174	9.27125	81.4481	9.27292	74.1991
9.27937	75.4243	9.27978	83.0899	9.27458	48.3631	9.27417	18.9809	9.27542	72.454	9.27792	80.9425	9.27792	81.9272	9.27958	74.4237
9.28603	75.6169	9.28645	83.387	9.28125	47.7941	9.28083	18.8658	9.28208	72.8079	9.28458	81.3258	9.28458	82.3609	9.28625	74.6159
9.2927	75.7713	9.29312	83.644	9.28792	47.2362	9.2875	18.7623	9.28875	73.1293	9.29125	81.6649	9.29125	82.7466	9.29292	74.7742
9.29937	75.8855	9.29978	83.8581	9.29458	46.6886	9.29417	18.6713	9.29542	73.416	9.29792	81.957	9.29792	83.0833	9.29958	74.8975
9.30603	75.9584	9.30645	84.0272	9.30125	46.1497	9.30083	18.5934	9.30208	73.6672	9.30458	82.2008	9.30458	83.3703	9.30625	74.9851
9.3127	75.9898	9.31312	84.1496	9.30792	45.6197	9.3075	18.5278	9.30875	73.8811	9.31125	82.3964	9.31125	83.6076	9.31292	75.0369
9.31937	75.9797	9.31978	84.2251	9.31458	45.0989	9.31417	18.4736	9.31542	74.0578	9.31792	82.5437	9.31792	83.7946	9.31958	75.0515
9.32603	75.9276	9.32645	84.2539	9.32125	44.5879	9.32083	18.4316	9.32208	74.1964	9.32458	82.6419	9.32458	83.9307	9.32625	75.0261
9.3327	75.8333	9.33312	84.2352	9.32792	44.0864	9.3275	18.4026	9.32875	74.2954	9.33125	82.6909	9.33125	84.0145	9.33292	74.9593
9.33937	75.6979	9.33978	84.1696	9.33458	43.594	9.33417	18.3857	9.33542	74.3536	9.33792	82.6916	9.33792	84.046	9.33958	74.8512
9.34603	75.5224	9.34645	84.0582	9.34125	43.1106	9.34083	18.3791	9.34208	74.3706	9.34458	82.6442	9.34458	84.0257	9.34625	74.7031
9.3527	75.3081	9.35312	83.9021	9.34792	42.6368	9.3475	18.3815	9.34875	74.3467	9.35125	82.5479	9.35125	83.9544	9.35292	74.5168
9.35937	75.0552	9.35978	83.7019	9.35458	42.173	9.35417	18.3926	9.35542	74.2808	9.35792	82.4029	9.35792	83.833	9.35958	74.2938
9.36603	74.7646	9.36645	83.4583	9.36125	41.7187	9.36083	18.4112	9.36208	74.1717	9.36458	82.2102	9.36458	83.6625	9.36625	74.0349
9.3727	74.4375	9.37312	83.1726	9.36792	41.2737	9.3675	18.4371	9.36875	74.0189	9.37125	81.972	9.37125	83.4453	9.37292	73.7419
9.37937	74.0758	9.37978	82.8456	9.37458	40.8391	9.37417	18.4699	9.37542	73.8234	9.37792	81.6901	9.37792	83.1825	9.37958	73.4158
9.38603	73.6814	9.38645	82.4778	9.38125	40.4169	9.38083	18.51	9.38208	73.5855	9.38458	81.3669	9.38458	82.876	9.38625	73.0581
9.3927	73.2576	9.39312	82.0689	9.38792	40.0082	9.3875	18.5581	9.38875	73.3068	9.39125	81.0046	9.39125	82.528	9.39292	72.6697
9.39937	72.807	9.39978	81.6202	9.39458	39.6143	9.39417	18.614	9.39542	72.9896	9.39792	80.6051	9.39792	82.1408	9.39958	72.2517
9.40603	72.3313	9.40645	81.1339	9.40125	39.2359	9.40083	18.6782	9.40208	72.6368	9.40458	80.1698	9.40458	81.7168	9.40625	71.8071
9.4127	71.8304	9.41312	80.6128	9.40792	38.8724	9.4075	18.7519	9.40875	72.2511	9.41125	79.7008	9.41125	81.258	9.41292	71.3375
9.41937	71.3056	9.41978	80.0597	9.41458	38.5232	9.41417	18.8358	9.41542	71.8346	9.41792	79.1997	9.41792	80.7665	9.41958	70.8448
9.42603	70.7571	9.42645	79.4784	9.42125	38.1881	9.42083	18.9309	9.42208	71.3888	9.42458	78.669	9.42458	80.2451	9.42625	70.3288
9.4327	70.1833	9.43312	78.875	9.42792	37.8661	9.4275	19.039	9.42875	70.9155	9.43125	78.1111	9.43125	79.696	9.43292	69.7909
9.43937	69.5835	9.43978	78.2525	9.43458	37.5549	9.43417	19.1624	9.43542	70.4165	9.43792	77.5286	9.43792	79.1218	9.43958	69.2328
9.44603	68.9595	9.44645	77.6137	9.44125	37.2531	9.44083	19.3024	9.44208	69.8941	9.44458	76.9255	9.44458	78.5235	9.44625	68.6563
9.4527	68.3154	9.45312	76.9607	9.44792	36.9612	9.4475	19.4579	9.44875	69.3498	9.45125	76.304	9.45125	77.9032	9.45292	68.063
9.45937	67.6509	9.45978	76.2963	9.45458	36.6791	9.45417	19.6293	9.45542	68.7852	9.45792	75.6657	9.45792	77.2628	9.45958	67.4532
9.46603	66.9677	9.46645	75.622	9.46125	36.4063	9.46083	19.8172	9.46208	68.2019	9.46458	75.0114	9.46458	76.6023	9.46625	66.8289
9.4727	66.2689	9.47312	74.9377	9.46792	36.1426	9.4675	20.0228	9.46875	67.6004	9.47125	74.3433	9.47125	75.9215	9.47292	66.1914
9.47937	65.5586	9.47978	74.2444	9.47458	35.8885	9.47417	20.2467	9.47542	66.9823	9.47792	73.6638	9.47792	75.2209	9.47958	65.5416
9.48603	64.8392	9.48645	73.5426	9.48125	35.6435	9.48083	20.4896	9.48208	66.349	9.48458	72.9737	9.48458	74.5031	9.48625	64.8802
9.4927	64.1108	9.49312	72.8321	9.48792	35.4081	9.4875	20.7534	9.48875	65.7027	9.49125	72.2742	9.49125	73.7699	9.49292	64.2089
9.49937	63.3761	9.49978	72.1129	9.49458	35.1814	9.49417	21.0403	9.49542	65.0455	9.49792	71.5672	9.49792	73.0226	9.49958	63.5306
9.50603	62.6366	9.50645	71.3862	9.50125	34.9631	9.50083	21.3533	9.50208	64.3793	9.50458	70.8547	9.50458	72.2624	9.50625	62.8463
9.5127	61.8932	9.51312	70.6542	9.50792	34.7537	9.5075	21.6939	9.50875	63.7068	9.51125	70.1354	9.51125	71.4916	9.51292	62.1572
9.51937	61.1476	9.51978	69.9188	9.51458	34.5545	9.51417	22.0636	9.51542	63.0292	9.51792	69.4083	9.51792	70.7116	9.51958	61.4651
9.52603	60.3998	9.52645	69.1818	9.52125	34.3666	9.52083	22.4639	9.52208	62.347	9.52458	68.6738	9.52458	69.9234	9.52625	60.7724
9.5327	59.6515	9.53312	68.4435	9.52792	34.1897	9.5275	22.8976	9.52875	61.6614	9.53125	67.9326	9.53125	69.1283	9.53292	60.0805
9.53937	58.9031	9.53978	67.7047	9.53458	34.0252	9.53417	23.3671	9.53542	60.9743	9.53792	67.1863	9.53792	68.328	9.53958	59.3896
9.54603	58.1558	9.54645	66.9661	9.54125	33.876	9.54083	23.8744	9.54208	60.2875	9.54458	66.4359	9.54458	67.5262	9.54625	58.7003
9.5527	57.4102	9.55312	66.2285	9.54792	33.7424	9.5475	24.4214	9.54875	59.6009	9.55125	65.6846	9.55125	66.7248	9.55292	58.0137
9.55937	56.6655	9.55978	65.493	9.55458	33.6244	9.55417	25.0095	9.55542	58.915	9.55792	64.9332	9.55792	65.9253	9.55958	57.3307
9.56603	55.9235	9.56645	64.761	9.56125	33.5224	9.56083	25.6414	9.56208	58.2322	9.56458	64.181	9.56458	65.1276	9.56625	56.6514
9.5727	55.1845	9.57312	64.0342	9.56792	33.4365	9.5675	26.3183	9.56875	57.5533	9.57125	63.4282	9.57125	64.3332	9.57292	55.9753
9.57937	54.4489	9.57978	63.3122	9.57458	33.3663	9.57417	27.0403	9.57542	56.8782	9.57792	62.6749	9.57792	63.5441	9.57958	55.3019
9.58603	53.7153	9.58645	62.5947	9.58125	33.3104	9.58083	27.8079	9.58208	56.2072	9.58458	61.9216	9.58458	62.7598	9.58625	54.6305
9.5927	52.9836	9.59312	61.8819	9.58792	33.2699	9.5875	28.6242	9.58875	55.5415	9.59125	61.168	9.59125	61.9802	9.59292	53.9607
9.59937	52.2546	9.59978	61.1733	9.59458	33.2448	9.59417	29.4934	9.59542	54.8817	9.59792	60.4158	9.59792	61.2065	9.59958	53.2926
9.60603	51.5288	9.60645	60.4671	9.60125	33.2344	9.60083	30.4189	9.60208	54.2272	9.60458	59.667	9.60458	60.4413	9.60625	52.6267
9.6127	50.8066	9.61312	59.763	9.60792	33.2386	9.6075	31.4045	9.60875	53.5782	9.61125	58.9219	9.61125	59.6855	9.61292	51.9641
9.61937	50.0889	9.61978	59.0637	9.61458	33.2575	9.61417	32.4557	9.61542	52.9348	9.61792	58.1808	9.61792	58.9403	9.61958	51.3053
9.62603	49.3775	9.62645	58.3711	9.62125	33.2919	9.62083	33.5784	9.62208	52.2968	9.62458	57.4448	9.62458	58.208	9.62625	50.6515
9.6327	48.6752	9.63312	57.6844	9.62792	33.3404	9.6275	34.7772	9.62875	51.6636	9.63125	56.7148	9.63125	57.4901	9.63292	50.0033
9.63937	47.9828	9.63978	57.0028	9.63458	33.4014	9.63417	36.056	9.63542	51.0362	9.63792	55.9905	9.63792	56.7866	9.63958	49.3609
9.64603	47.2989	9.64645	56.3279	9.64125	33.4745	9.64083	37.4184	9.64208	50.4146	9.64458	55.2716	9.64458	56.0967	9.64625	48.724
9.6527	46.6225	9.65312	55.6604	9.64792	33.5595	9.6475	38.8691	9.64875	49.7992	9.65125	54.5601	9.65125	55.4196	9.65292	48.0917
9.65937	45.9539	9.65978	54.9993	9.65458	33.6579	9.65417	40.4101	9.65542	49.1913	9.65792	53.8581	9.65792	54.7538	9.65958	47.4636
9.66603	45.294	9.66645	54.3429	9.66125	33.7694	9.66083	42.0414	9.66208	48.5944	9.66458	53.1659	9.66458	54.0978	9.66625	46.8405
9.6727	44.6414	9.67312	53.6918	9.66792	33.8945	9.6675	43.7624	9.66875	48.0112	9.67125	52.482	9.67125	53.4497	9.67292	46.2224
9.67937	43.9943	9.67978	53.0461	9.67458	34.0331	9.67417	45.5717	9.67542	47.4434	9.67792	51.8061	9.67792	52.8088	9.67958	45.6088
9.68603	43.3533	9.68645	52.4059	9.68125	34.1862	9.68083	47.467	9.68208	46.8919	9.68458	51.139	9.68458	52.1738	9.68625	44.9989
9.6927	42.7198	9.69312	51.7704	9.68792	34.3538	9.6875	49.4456	9.68875	46.3567	9.69125	50.48	9.69125	51.5437	9.69292	44.3935
9.69937	42.0939	9.69978	51.14	9.69458	34.5339	9.69417	51.5056	9.69542	45.8372	9.69792	49.8266	9.69792	50.9175	9.69958	43.7944
9.70603	41.4745	9.70645	50.5145	9.70125	34.7252	9.70083	53.6459	9.70208	45.3308	9.70458	49.1773	9.70458	50.2942	9.70625	43.2012
9.7127	40.8614	9.71312	49.8935	9.70792	34.9269	9.7075	55.8635	9.70875	44.8357	9.71125	48.5338	9.71125	49.6742	9.71292	42.6138
9.71937	40.255	9.71978	49.2782	9.71458	35.1392	9.71417	58.1555	9.71542	44.3509	9.71792	47.8977	9.71792	49.0571	9.71958	42.0331
9.72603	39.6559	9.72645	48.6697	9.72125	35.36	9.72083	60.518	9.72208	43.8764	9.72458	47.2709	9.72458	48.4425	9.72625	41.4604
9.7327	39.0639	9.73312	48.0686	9.72792	35.5861	9.7275	62.9461	9.72875	43.4137	9.73125	46.6543	9.73125	47.8303	9.73292	40.8966
9.73937	38.4791	9.73978	47.4746	9.73458	35.8153	9.73417	65.4335	9.73542	42.9619	9.73792	46.0482	9.73792	47.2205	9.73958	40.3401
9.74603	37.9008	9.74645	46.8889	9.74125	36.0454	9.74083	67.9724	9.74208	42.52	9.74458	45.4523	9.74458	46.6142	9.74625	39.7909
9.7527	37.3285	9.75312	46.3114	9.74792	36.2744	9.7475	70.5539	9.74875	42.0862	9.75125	44.8656	9.75125	46.0119	9.75292	39.2492
9.75937	36.7624	9.75978	45.74	9.75458	36.4992	9.75417	73.1678	9.75542	41.6598	9.75792	44.2879	9.75792	45.4133	9.75958	38.7136
9.76603	36.2028	9.76645	45.1733	9.76125	36.7181	9.76083	75.8036	9.76208	41.2394	9.76458	43.7181	9.76458	44.8195	9.76625	38.1825
9.7727	35.6492	9.77312	44.6111	9.76792	36.9303	9.7675	78.4504	9.76875	40.8227	9.77125	43.156	9.77125	44.2322	9.77292	37.6549
9.77937	35.1015	9.77978	44.0547	9.77458	37.1343	9.77417	81.0984	9.77542	40.4092	9.77792	42.602	9.77792	43.6525	9.77958	37.131
9.78603	34.56	9.78645	43.5036	9.78125	37.3293	9.78083	83.7374	9.78208	39.9989	9.78458	42.0575	9.78458	43.0802	9.78625	36.6096
9.7927	34.0252	9.79312	42.9583	9.78792	37.5136	9.7875	86.3575	9.78875	39.5917	9.79125	41.5229	9.79125	42.5146	9.79292	36.0898
9.79937	33.4968	9.79978	42.4207	9.79458	37.6858	9.79417	88.9479	9.79542	39.1866	9.79792	40.9979	9.79792	41.9569	9.79958	35.5718
9.80603	32.9742	9.80645	41.8917	9.80125	37.8455	9.80083	91.4979	9.80208	38.7822	9.80458	40.4803	9.80458	41.4074	9.80625	35.0571
9.8127	32.4579	9.81312	41.371	9.80792	37.9928	9.8075	93.9966	9.80875	38.3782	9.81125	39.9694	9.81125	40.8661	9.81292	34.5464
9.81937	31.9484	9.81978	40.8574	9.81458	38.1284	9.81417	96.4337	9.81542	37.9743	9.81792	39.4645	9.81792	40.3329	9.81958	34.0415
9.82603	31.4455	9.82645	40.3509	9.82125	38.2506	9.82083	98.7987	9.82208	37.5711	9.82458	38.9651	9.82458	39.8074	9.82625	33.5439
9.8327	30.9488	9.83312	39.8499	9.82792	38.3591	9.8275	101.082	9.82875	37.1692	9.83125	38.4701	9.83125	39.2908	9.83292	33.0554
9.83937	30.4576	9.83978	39.3526	9.83458	38.4546	9.83417	103.274	9.83542	36.7693	9.83792	37.9797	9.83792	38.7825	9.83958	32.5763
9.84603	29.9711	9.84645	38.8582	9.84125	38.5374	9.84083	105.369	9.84208	36.3728	9.84458	37.496	9.84458	38.2817	9.84625	32.1074
9.8527	29.4887	9.85312	38.3669	9.84792	38.6061	9.8475	107.361	9.84875	35.9806	9.85125	37.019	9.85125	37.7868	9.85292	31.6492
9.85937	29.0097	9.85978	37.877	9.85458	38.6592	9.85417	109.243	9.85542	35.5926	9.85792	36.5484	9.85792	37.2959	9.85958	31.2008
9.86603	28.5343	9.86645	37.3871	9.86125	38.6962	9.86083	111.01	9.86208	35.2086	9.86458	36.0834	9.86458	36.8088	9.86625	30.7628
9.8727	28.0631	9.87312	36.8977	9.86792	38.7166	9.8675	112.657	9.86875	34.8275	9.87125	35.6265	9.87125	36.325	9.87292	30.3351
9.87937	27.5964	9.87978	36.4102	9.87458	38.7194	9.87417	114.183	9.87542	34.4491	9.87792	35.179	9.87792	35.8446	9.87958	29.9177
9.88603	27.1344	9.88645	35.9251	9.88125	38.7036	9.88083	115.585	9.88208	34.0727	9.88458	34.7389	9.88458	35.3656	9.88625	29.5095
9.8927	26.6769	9.89312	35.4425	9.88792	38.6697	9.8875	116.861	9.88875	33.6988	9.89125	34.3049	9.89125	34.8879	9.89292	29.1092
9.89937	26.2249	9.89978	34.964	9.89458	38.619	9.89417	118.011	9.89542	33.3292	9.89792	33.8776	9.89792	34.4119	9.89958	28.7163
9.90603	25.7778	9.90645	34.4904	9.90125	38.5532	9.90083	119.037	9.90208	32.9656	9.90458	33.4575	9.90458	33.9378	9.90625	28.3307
9.9127	25.3347	9.91312	34.0211	9.90792	38.4722	9.9075	119.94	9.90875	32.6099	9.91125	33.0424	9.91125	33.465	9.91292	27.9512
9.91937	24.8963	9.91978	33.5556	9.91458	38.3762	9.91417	120.72	9.91542	32.262	9.91792	32.6293	9.91792	32.9935	9.91958	27.5759
9.92603	24.4632	9.92645	33.0937	9.92125	38.2658	9.92083	121.377	9.92208	31.9218	9.92458	32.2181	9.92458	32.526	9.92625	27.2042
9.9327	24.0362	9.93312	32.6366	9.92792	38.1417	9.9275	121.913	9.92875	31.5882	9.93125	31.8096	9.93125	32.0634	9.93292	26.8364
9.93937	23.6144	9.93978	32.1846	9.93458	38.0044	9.93417	122.332	9.93542	31.259	9.93792	31.402	9.93792	31.6068	9.93958	26.4724
9.94603	23.1987	9.94645	31.7372	9.94125	37.8542	9.94083	122.637	9.94208	30.9327	9.94458	30.9942	9.94458	31.1565	9.94625	26.1096
9.9527	22.7894	9.95312	31.2939	9.94792	37.6919	9.9475	122.832	9.94875	30.6081	9.95125	30.5869	9.95125	30.7128	9.95292	25.7475
9.95937	22.3859	9.95978	30.8552	9.95458	37.5182	9.95417	122.921	9.95542	30.2851	9.95792	30.1819	9.95792	30.2748	9.95958	25.3874
9.96603	21.9868	9.96645	30.4213	9.96125	37.3343	9.96083	122.905	9.96208	29.9634	9.96458	29.7802	9.96458	29.8406	9.96625	25.0308
9.9727	21.5912	9.97312	29.991	9.96792	37.1399	9.9675	122.79	9.96875	29.6425	9.97125	29.3825	9.97125	29.4095	9.97292	24.6784
9.97937	21.1985	9.97978	29.5651	9.97458	36.9355	9.97417	122.578	9.97542	29.3212	9.97792	28.9904	9.97792	28.9814	9.97958	24.3302
9.98603	20.8083	9.98645	29.1466	9.98125	36.7205	9.98083	122.274	9.98208	28.9967	9.98458	28.6044	9.98458	28.5566	9.98625	23.9875
9.9927	20.4202	9.99312	28.7384	9.98792	36.4949	9.9875	121.883	9.98875	28.6677	9.99125	28.2239	9.99125	28.1362	9.99292	23.6507
9.99937	20.0349	9.99978	28.3419	9.99458	36.259	9.99417	121.409	9.99542	28.3329	9.99792	27.8483	9.99792	27.7216	9.99958	23.3206
10.006	19.6524	10.0064	27.9582	10.0013	36.0125	10.0008	120.86	10.0021	27.9921	10.0046	27.4768	10.0046	27.3129	10.0062	22.9982
10.0127	19.2727	10.0131	27.588	10.0079	35.7568	10.0075	120.242	10.0087	27.6451	10.0113	27.1087	10.0113	26.9102	10.0129	22.6831
10.0194	18.8954	10.0198	27.2313	10.0146	35.4938	10.0142	119.56	10.0154	27.2927	10.0179	26.744	10.0179	26.514	10.0196	22.3752
10.026	18.5219	10.0265	26.8866	10.0213	35.2258	10.0208	118.817	10.0221	26.9369	10.0246	26.3833	10.0246	26.1248	10.0262	22.0769
10.0327	18.1521	10.0331	26.5532	10.0279	34.9557	10.0275	118.018	10.0288	26.5777	10.0312	26.0268	10.0312	25.743	10.0329	21.7895
10.0394	17.7862	10.0398	26.2306	10.0346	34.6848	10.0342	117.167	10.0354	26.2166	10.0379	25.6734	10.0379	25.3682	10.0396	21.5121
10.046	17.4244	10.0465	25.9182	10.0412	34.4155	10.0408	116.269	10.0421	25.8547	10.0446	25.3224	10.0446	25.0013	10.0463	21.243
10.0527	17.0671	10.0531	25.6155	10.0479	34.147	10.0475	115.324	10.0488	25.4938	10.0512	24.974	10.0512	24.643	10.0529	20.9822
10.0594	16.714	10.0598	25.3233	10.0546	33.8785	10.0542	114.338	10.0554	25.135	10.0579	24.6287	10.0579	24.2926	10.0596	20.7296
10.066	16.3646	10.0664	25.0414	10.0612	33.6094	10.0608	113.316	10.0621	24.7792	10.0646	24.286	10.0646	23.9496	10.0663	20.4827
10.0727	16.0199	10.0731	24.7685	10.0679	33.3416	10.0675	112.261	10.0687	24.4283	10.0712	23.9464	10.0712	23.6134	10.0729	20.2381
10.0794	15.68	10.0798	24.5026	10.0746	33.0769	10.0742	111.175	10.0754	24.0839	10.0779	23.6111	10.0779	23.2848	10.0796	19.994
10.086	15.346	10.0864	24.2425	10.0813	32.8158	10.0808	110.062	10.0821	23.7463	10.0846	23.2806	10.0846	22.9642	10.0862	19.7506
10.0927	15.0184	10.0931	23.9867	10.0879	32.5607	10.0875	108.926	10.0887	23.4151	10.0913	22.9531	10.0913	22.6515	10.0929	19.507
10.0994	14.6995	10.0998	23.7332	10.0946	32.3124	10.0942	107.773	10.0954	23.0918	10.0979	22.6272	10.0979	22.3476	10.0996	19.2617
10.106	14.391	10.1065	23.4801	10.1013	32.0717	10.1008	106.604	10.1021	22.7798	10.1046	22.3037	10.1046	22.0519	10.1062	19.0137
10.1127	14.0932	10.1131	23.2274	10.1079	31.837	10.1075	105.424	10.1088	22.4798	10.1113	21.982	10.1113	21.7629	10.1129	18.7654
10.1194	13.8064	10.1198	22.9766	10.1146	31.608	10.1142	104.234	10.1154	22.1917	10.1179	21.6615	10.1179	21.4801	10.1196	18.5178
10.126	13.53	10.1265	22.7286	10.1212	31.3834	10.1208	103.037	10.1221	21.9143	10.1246	21.3435	10.1246	21.2041	10.1263	18.2705
10.1327	13.2636	10.1331	22.4839	10.1279	31.162	10.1275	101.833	10.1288	21.6474	10.1312	21.0318	10.1312	20.9348	10.1329	18.0226
10.1394	13.0049	10.1398	22.2425	10.1346	30.9434	10.1342	100.625	10.1354	21.3897	10.1379	20.7291	10.1379	20.6703	10.1396	17.7739
10.146	12.7527	10.1464	22.0052	10.1412	30.7267	10.1408	99.4134	10.1421	21.138	10.1446	20.4345	10.1446	20.4083	10.1463	17.5257
10.1527	12.5066	10.1531	21.7724	10.1479	30.5103	10.1475	98.201	10.1487	20.8911	10.1512	20.1485	10.1512	20.1489	10.1529	17.2775
10.1594	12.2681	10.1598	21.5435	10.1546	30.2925	10.1542	96.9907	10.1554	20.6491	10.1579	19.8733	10.1579	19.893	10.1596	17.0289
10.166	12.0375	10.1664	21.318	10.1613	30.0725	10.1608	95.787	10.1621	20.4135	10.1646	19.6109	10.1646	19.6402	10.1662	16.7799
10.1727	11.8155	10.1731	21.095	10.1679	29.8493	10.1675	94.592	10.1687	20.1851	10.1713	19.361	10.1713	19.3893	10.1729	16.5319
10.1794	11.6023	10.1798	20.8758	10.1746	29.6205	10.1742	93.407	10.1754	19.9638	10.1779	19.1216	10.1779	19.1401	10.1796	16.2864
10.186	11.3981	10.1865	20.6615	10.1813	29.3857	10.1808	92.2315	10.1821	19.7499	10.1846	18.8915	10.1846	18.8953	10.1862	16.0449
10.1927	11.2026	10.1931	20.4522	10.1879	29.1461	10.1875	91.067	10.1888	19.5441	10.1913	18.6706	10.1913	18.6565	10.1929	15.8093
10.1994	11.0144	10.1998	20.2479	10.1946	28.9039	10.1942	89.9139	10.1954	19.3454	10.1979	18.4577	10.1979	18.4225	10.1996	15.5805
10.206	10.8329	10.2065	20.0484	10.2012	28.6604	10.2008	88.771	10.2021	19.1528	10.2046	18.2495	10.2046	18.1924	10.2063	15.3585
10.2127	10.6578	10.2131	19.8549	10.2079	28.418	10.2075	87.6365	10.2088	18.9648	10.2112	18.0431	10.2112	17.9668	10.2129	15.1431
10.2194	10.489	10.2198	19.6674	10.2146	28.1796	10.2142	86.5092	10.2154	18.7801	10.2179	17.8386	10.2179	17.7465	10.2196	14.9355
10.226	10.3257	10.2264	19.4855	10.2212	27.9465	10.2208	85.3897	10.2221	18.5981	10.2246	17.6371	10.2246	17.5301	10.2263	14.7343
10.2327	10.1671	10.2331	19.3078	10.2279	27.719	10.2275	84.2791	10.2287	18.4171	10.2312	17.4379	10.2312	17.3166	10.2329	14.5378
10.2394	10.0122	10.2398	19.1334	10.2346	27.4966	10.2342	83.1794	10.2354	18.2375	10.2379	17.2404	10.2379	17.106	10.2396	14.346
10.246	9.86101	10.2464	18.9625	10.2413	27.2782	10.2408	82.0913	10.2421	18.0582	10.2446	17.0454	10.2446	16.898	10.2462	14.1602
10.2527	9.71287	10.2531	18.7954	10.2479	27.0623	10.2475	81.0151	10.2487	17.8785	10.2513	16.8548	10.2513	16.6924	10.2529	13.9823
10.2594	9.56765	10.2598	18.6318	10.2546	26.8477	10.2542	79.9498	10.2554	17.6981	10.2579	16.6688	10.2579	16.4891	10.2596	13.8114
10.266	9.42561	10.2665	18.4715	10.2613	26.6342	10.2608	78.8955	10.2621	17.5167	10.2646	16.4867	10.2646	16.2886	10.2662	13.6478
10.2727	9.28596	10.2731	18.3148	10.2679	26.423	10.2675	77.8518	10.2688	17.3354	10.2713	16.3086	10.2713	16.0919	10.2729	13.492
10.2794	9.14882	10.2798	18.1623	10.2746	26.2136	10.2742	76.8165	10.2754	17.1536	10.2779	16.1349	10.2779	15.8996	10.2796	13.3437
10.286	9.01332	10.2865	18.0146	10.2812	26.0059	10.2808	75.7879	10.2821	16.9721	10.2846	15.9654	10.2846	15.7122	10.2863	13.2026
10.2927	8.88028	10.2931	17.871	10.2879	25.8003	10.2875	74.7659	10.2888	16.7917	10.2912	15.7994	10.2912	15.5303	10.2929	13.067
10.2994	8.75048	10.2998	17.7311	10.2946	25.5976	10.2942	73.7524	10.2954	16.6131	10.2979	15.6378	10.2979	15.3552	10.2996	12.9362
10.306	8.62447	10.3064	17.5946	10.3012	25.398	10.3008	72.7458	10.3021	16.437	10.3046	15.4825	10.3046	15.1872	10.3063	12.8084
10.3127	8.5025	10.3131	17.4615	10.3079	25.2001	10.3075	71.7457	10.3087	16.2632	10.3112	15.3329	10.3112	15.0238	10.3129	12.6827
10.3194	8.38407	10.3198	17.3313	10.3146	25.0042	10.3142	70.7532	10.3154	16.0923	10.3179	15.1884	10.3179	14.8629	10.3196	12.5586
10.326	8.26999	10.3264	17.2029	10.3212	24.8111	10.3208	69.7696	10.3221	15.9245	10.3246	15.0494	10.3246	14.7046	10.3262	12.4361
10.3327	8.16008	10.3331	17.076	10.3279	24.623	10.3275	68.7963	10.3287	15.7594	10.3313	14.9158	10.3313	14.5501	10.3329	12.3152
10.3394	8.05297	10.3398	16.9501	10.3346	24.4395	10.3342	67.8328	10.3354	15.5967	10.3379	14.7862	10.3379	14.3994	10.3396	12.1966
10.346	7.94712	10.3465	16.8249	10.3413	24.2578	10.3408	66.8808	10.3421	15.4372	10.3446	14.6592	10.3446	14.2517	10.3462	12.0824
10.3527	7.84267	10.3531	16.6994	10.3479	24.075	10.3475	65.9405	10.3488	15.2812	10.3513	14.5368	10.3513	14.108	10.3529	11.9724
10.3594	7.74088	10.3598	16.5748	10.3546	23.8889	10.3542	65.0116	10.3554	15.1289	10.3579	14.4199	10.3579	13.9705	10.3596	11.8662
10.366	7.64193	10.3665	16.4516	10.3613	23.6969	10.3608	64.0947	10.3621	14.981	10.3646	14.3077	10.3646	13.8405	10.3663	11.763
10.3727	7.5454	10.3731	16.3297	10.3679	23.4963	10.3675	63.1903	10.3688	14.8406	10.3712	14.1992	10.3712	13.7165	10.3729	11.6616
10.3794	7.45244	10.3798	16.2092	10.3746	23.2857	10.3742	62.3002	10.3754	14.7095	10.3779	14.0944	10.3779	13.5965	10.3796	11.5603
10.386	7.36365	10.3864	16.0918	10.3812	23.0653	10.3808	61.4234	10.3821	14.588	10.3846	13.9938	10.3846	13.4808	10.3863	11.4575
10.3927	7.27818	10.3931	15.9791	10.3879	22.8362	10.3875	60.5598	10.3887	14.4761	10.3912	13.8957	10.3912	13.3701	10.3929	11.3531
10.3994	7.19444	10.3998	15.8704	10.3946	22.5995	10.3942	59.7106	10.3954	14.3743	10.3979	13.7992	10.3979	13.2641	10.3996	11.2472
10.406	7.11254	10.4064	15.7648	10.4012	22.3563	10.4008	58.8771	10.4021	14.2818	10.4046	13.7037	10.4046	13.1606	10.4062	11.1392
10.4127	7.03292	10.4131	15.6622	10.4079	22.1076	10.4075	58.0595	10.4087	14.1961	10.4113	13.61	10.4113	13.0598	10.4129	11.0296
10.4194	6.95419	10.4198	15.5636	10.4146	21.8555	10.4142	57.2572	10.4154	14.1151	10.4179	13.5189	10.4179	12.9634	10.4196	10.9184
10.426	6.87546	10.4265	15.468	10.4213	21.6036	10.4208	56.4713	10.4221	14.0377	10.4246	13.4304	10.4246	12.8733	10.4262	10.8053
10.4327	6.79738	10.4331	15.3749	10.4279	21.355	10.4275	55.7018	10.4288	13.9631	10.4313	13.3445	10.4313	12.7895	10.4329	10.6909
10.4394	6.72068	10.4398	15.2853	10.4346	21.1111	10.4342	54.9468	10.4354	13.8908	10.4379	13.2606	10.4379	12.7119	10.4396	10.5762
10.446	6.64498	10.4465	15.2005	10.4413	20.874	10.4408	54.2043	10.4421	13.8203	10.4446	13.1795	10.4446	12.642	10.4462	10.4641
10.4527	6.57019	10.4531	15.1195	10.4479	20.646	10.4475	53.4758	10.4488	13.7512	10.4512	13.1005	10.4512	12.5811	10.4529	10.3557
10.4594	6.49808	10.4598	15.0408	10.4546	20.4284	10.4542	52.7613	10.4554	13.6839	10.4579	13.0229	10.4579	12.5296	10.4596	10.2525
10.466	6.43025	10.4665	14.9638	10.4612	20.2201	10.4608	52.0604	10.4621	13.6183	10.4646	12.9454	10.4646	12.4869	10.4663	10.1566
10.4727	6.36623	10.4731	14.8884	10.4679	20.0203	10.4675	51.3711	10.4688	13.5541	10.4712	12.8672	10.4712	12.4528	10.4729	10.0701
10.4794	6.30503	10.4798	14.8136	10.4746	19.8294	10.4742	50.6946	10.4754	13.4901	10.4779	12.7886	10.4779	12.4262	10.4796	9.99345
10.486	6.24609	10.4864	14.739	10.4812	19.6477	10.4808	50.032	10.4821	13.4263	10.4846	12.7092	10.4846	12.4055	10.4863	9.92542
10.4927	6.18985	10.4931	14.6661	10.4879	19.4731	10.4875	49.3817	10.4887	13.3623	10.4913	12.6293	10.4913	12.3887	10.4929	9.86507
10.4994	6.13526	10.4998	14.5965	10.4946	19.3039	10.4942	48.7428	10.4954	13.2976	10.4979	12.5485	10.4979	12.3749	10.4996	9.81253
10.506	6.08107	10.5064	14.5313	10.5013	19.1399	10.5008	48.1142	10.5021	13.232	10.5046	12.4679	10.5046	12.3635	10.5062	9.76746
10.5127	6.02704	10.5131	14.4698	10.5079	18.982	10.5075	47.498	10.5087	13.1656	10.5113	12.3887	10.5113	12.354	10.5129	9.72836
10.5194	5.97475	10.5198	14.4123	10.5146	18.8295	10.5142	46.8938	10.5154	13.0987	10.5179	12.3114	10.5179	12.3473	10.5196	9.69272
10.526	5.9253	10.5265	14.3587	10.5213	18.6809	10.5208	46.2998	10.5221	13.0309	10.5246	12.2362	10.5246	12.3437	10.5262	9.6589
10.5327	5.87678	10.5331	14.3092	10.5279	18.5366	10.5275	45.7157	10.5288	12.9623	10.5312	12.162	10.5312	12.3442	10.5329	9.62771
10.5394	5.82879	10.5398	14.2636	10.5346	18.3963	10.5342	45.142	10.5354	12.8926	10.5379	12.0885	10.5379	12.3484	10.5396	9.59921
10.546	5.78134	10.5465	14.2211	10.5412	18.2591	10.5408	44.5806	10.5421	12.8221	10.5446	12.0147	10.5446	12.3551	10.5463	9.57282
10.5527	5.73654	10.5531	14.1822	10.5479	18.1237	10.5475	44.0308	10.5488	12.7511	10.5512	11.9407	10.5512	12.3623	10.5529	9.54697
10.5594	5.69359	10.5598	14.147	10.5546	17.9897	10.5542	43.4923	10.5554	12.6786	10.5579	11.8669	10.5579	12.3695	10.5596	9.52283
10.566	5.65135	10.5664	14.1159	10.5612	17.858	10.5608	42.9661	10.5621	12.605	10.5646	11.794	10.5646	12.3766	10.5663	9.50088
10.5727	5.61039	10.5731	14.0883	10.5679	17.729	10.5675	42.4529	10.5687	12.531	10.5712	11.7238	10.5712	12.3829	10.5729	9.47946
10.5794	5.57105	10.5798	14.0634	10.5746	17.6045	10.5742	41.9529	10.5754	12.4593	10.5779	11.6589	10.5779	12.3879	10.5796	9.45713
10.586	5.53405	10.5864	14.0414	10.5813	17.4852	10.5808	41.4649	10.5821	12.3915	10.5846	11.6011	10.5846	12.3935	10.5862	9.43401
10.5927	5.49869	10.5931	14.0216	10.5879	17.3714	10.5875	40.9884	10.5887	12.3291	10.5913	11.5511	10.5913	12.4029	10.5929	9.41119
10.5994	5.46539	10.5998	14.0032	10.5946	17.2649	10.5942	40.523	10.5954	12.2734	10.5979	11.5099	10.5979	12.4172	10.5996	9.38725
10.606	5.4348	10.6065	13.9848	10.6013	17.1662	10.6008	40.0681	10.6021	12.2239	10.6046	11.4784	10.6046	12.4363	10.6062	9.36113
10.6127	5.40667	10.6131	13.9659	10.6079	17.0747	10.6075	39.622	10.6088	12.1797	10.6113	11.456	10.6113	12.4622	10.6129	9.33342
10.6194	5.38201	10.6198	13.9461	10.6146	16.9881	10.6142	39.1827	10.6154	12.1385	10.6179	11.4419	10.6179	12.4978	10.6196	9.30566
10.626	5.36171	10.6265	13.9255	10.6212	16.9058	10.6208	38.7502	10.6221	12.1002	10.6246	11.4362	10.6246	12.5433	10.6263	9.27802
10.6327	5.34544	10.6331	13.9048	10.6279	16.8279	10.6275	38.3252	10.6288	12.0637	10.6312	11.4391	10.6312	12.5974	10.6329	9.25106
10.6394	5.33269	10.6398	13.8849	10.6346	16.7532	10.6342	37.908	10.6354	12.0286	10.6379	11.4496	10.6379	12.6607	10.6396	9.22643
10.646	5.32269	10.6464	13.8658	10.6412	16.6801	10.6408	37.497	10.6421	11.9966	10.6446	11.4657	10.6446	12.7348	10.6463	9.20565
10.6527	5.31656	10.6531	13.8488	10.6479	16.6082	10.6475	37.092	10.6487	11.9705	10.6512	11.4864	10.6512	12.8186	10.6529	9.18836
10.6594	5.31367	10.6598	13.8349	10.6546	16.5383	10.6542	36.6927	10.6554	11.9523	10.6579	11.5112	10.6579	12.9093	10.6596	9.17335
10.666	5.31351	10.6664	13.8243	10.6613	16.4713	10.6608	36.299	10.6621	11.9407	10.6646	11.54	10.6646	13.0064	10.6662	9.16097
10.6727	5.31523	10.6731	13.8165	10.6679	16.4067	10.6675	35.9101	10.6687	11.9352	10.6713	11.5718	10.6713	13.1106	10.6729	9.15124
10.6794	5.31768	10.6798	13.812	10.6746	16.3445	10.6742	35.5256	10.6754	11.9375	10.6779	11.6066	10.6779	13.2213	10.6796	9.14332
10.686	5.32044	10.6865	13.8118	10.6813	16.2855	10.6808	35.1457	10.6821	11.9473	10.6846	11.6459	10.6846	13.337	10.6862	9.13655
10.6927	5.32295	10.6931	13.8157	10.6879	16.2308	10.6875	34.7694	10.6888	11.9633	10.6913	11.692	10.6913	13.4565	10.6929	9.13186
10.6994	5.32617	10.6998	13.8229	10.6946	16.1804	10.6942	34.3966	10.6954	11.9856	10.6979	11.7456	10.6979	13.5809	10.6996	9.13014
10.706	5.32981	10.7065	13.8323	10.7012	16.1337	10.7008	34.0249	10.7021	12.015	10.7046	11.8065	10.7046	13.7102	10.7063	9.13144
10.7127	5.3338	10.7131	13.8436	10.7079	16.0908	10.7075	33.6539	10.7088	12.0523	10.7112	11.8752	10.7112	13.8436	10.7129	9.13546
10.7194	5.33978	10.7198	13.8552	10.7146	16.0522	10.7142	33.2815	10.7154	12.096	10.7179	11.9531	10.7179	13.9798	10.7196	9.14294
10.726	5.34889	10.7264	13.8653	10.7212	16.0185	10.7208	32.9069	10.7221	12.1457	10.7246	12.0397	10.7246	14.118	10.7263	9.15354
10.7327	5.36159	10.7331	13.8726	10.7279	15.9897	10.7275	32.53	10.7287	12.2014	10.7312	12.1339	10.7312	14.2582	10.7329	9.16673
10.7394	5.37563	10.7398	13.8773	10.7346	15.9661	10.7342	32.1512	10.7354	12.2622	10.7379	12.2342	10.7379	14.3999	10.7396	9.18232
10.746	5.39017	10.7464	13.8809	10.7413	15.9482	10.7408	31.7721	10.7421	12.3262	10.7446	12.3393	10.7446	14.5416	10.7462	9.19945
10.7527	5.40607	10.7531	13.8838	10.7479	15.9358	10.7475	31.3922	10.7487	12.391	10.7513	12.4475	10.7513	14.6829	10.7529	9.21626
10.7594	5.42239	10.7598	13.8871	10.7546	15.9281	10.7542	31.0134	10.7554	12.4558	10.7579	12.5571	10.7579	14.8236	10.7596	9.23165
10.766	5.43813	10.7665	13.8914	10.7613	15.9228	10.7608	30.6369	10.7621	12.5209	10.7646	12.6676	10.7646	14.9634	10.7662	9.24739
10.7727	5.45246	10.7731	13.8966	10.7679	15.9179	10.7675	30.2637	10.7688	12.5862	10.7713	12.7785	10.7713	15.1014	10.7729	9.26522
10.7794	5.46617	10.7798	13.9012	10.7746	15.9121	10.7742	29.8935	10.7754	12.6515	10.7779	12.8901	10.7779	15.2364	10.7796	9.28481
10.786	5.48039	10.7865	13.903	10.7812	15.904	10.7808	29.5256	10.7821	12.7175	10.7846	13.0014	10.7846	15.3685	10.7863	9.30451
10.7927	5.49398	10.7931	13.9002	10.7879	15.8926	10.7875	29.1613	10.7888	12.7855	10.7912	13.1117	10.7912	15.4969	10.7929	9.32432
10.7994	5.50775	10.7998	13.8921	10.7946	15.8754	10.7942	28.8004	10.7954	12.8567	10.7979	13.2202	10.7979	15.6214	10.7996	9.34512
10.806	5.52065	10.8064	13.8787	10.8012	15.8525	10.8008	28.443	10.8021	12.9301	10.8046	13.3262	10.8046	15.7435	10.8063	9.36531
10.8127	5.5326	10.8131	13.8602	10.8079	15.8231	10.8075	28.0902	10.8087	13.0044	10.8112	13.4282	10.8112	15.8638	10.8129	9.38185
10.8194	5.54295	10.8198	13.8373	10.8146	15.7866	10.8142	27.7432	10.8154	13.0776	10.8179	13.5248	10.8179	15.9822	10.8196	9.39351
10.826	5.55097	10.8264	13.8103	10.8212	15.7447	10.8208	27.4034	10.8221	13.1488	10.8246	13.6155	10.8246	16.0986	10.8262	9.40143
10.8327	5.55655	10.8331	13.7799	10.8279	15.6995	10.8275	27.0721	10.8287	13.2168	10.8313	13.7011	10.8313	16.2139	10.8329	9.40661
10.8394	5.5588	10.8398	13.7459	10.8346	15.6534	10.8342	26.7504	10.8354	13.2806	10.8379	13.7803	10.8379	16.3291	10.8396	9.40742
10.846	5.55895	10.8465	13.7084	10.8413	15.6074	10.8408	26.4381	10.8421	13.3397	10.8446	13.8527	10.8446	16.4415	10.8462	9.40415
10.8527	5.55696	10.8531	13.6681	10.8479	15.5642	10.8475	26.1333	10.8488	13.3934	10.8513	13.917	10.8513	16.5498	10.8529	9.39972
10.8594	5.55292	10.8598	13.6256	10.8546	15.5242	10.8542	25.835	10.8554	13.4423	10.8579	13.974	10.8579	16.6539	10.8596	9.39643
10.866	5.54589	10.8665	13.5817	10.8613	15.4868	10.8608	25.5439	10.8621	13.4861	10.8646	14.0241	10.8646	16.7538	10.8663	9.39447
10.8727	5.53538	10.8731	13.5364	10.8679	15.4495	10.8675	25.2591	10.8688	13.5249	10.8712	14.068	10.8712	16.8472	10.8729	9.39323
10.8794	5.52166	10.8798	13.4893	10.8746	15.4115	10.8742	24.9803	10.8754	13.5584	10.8779	14.1072	10.8779	16.9324	10.8796	9.39406
10.886	5.5052	10.8864	13.44	10.8812	15.3726	10.8808	24.7068	10.8821	13.5864	10.8846	14.1412	10.8846	17.0094	10.8863	9.39763
10.8927	5.48555	10.8931	13.3879	10.8879	15.332	10.8875	24.4398	10.8887	13.6098	10.8912	14.1709	10.8912	17.0793	10.8929	9.40226
10.8994	5.46231	10.8998	13.3333	10.8946	15.2895	10.8942	24.1797	10.8954	13.6287	10.8979	14.1962	10.8979	17.1398	10.8996	9.4053
10.906	5.43597	10.9064	13.2767	10.9012	15.2426	10.9008	23.926	10.9021	13.6446	10.9046	14.2176	10.9046	17.188	10.9062	9.40552
10.9127	5.40873	10.9131	13.2198	10.9079	15.1909	10.9075	23.6782	10.9087	13.6571	10.9113	14.2345	10.9113	17.2223	10.9129	9.40347
10.9194	5.38051	10.9198	13.1651	10.9146	15.1329	10.9142	23.435	10.9154	13.6661	10.9179	14.245	10.9179	17.2432	10.9196	9.39931
10.926	5.35053	10.9265	13.1147	10.9213	15.0682	10.9208	23.1972	10.9221	13.6714	10.9246	14.2501	10.9246	17.251	10.9262	9.3917
10.9327	5.31987	10.9331	13.0701	10.9279	14.9955	10.9275	22.9646	10.9288	13.673	10.9313	14.2494	10.9313	17.2441	10.9329	9.37898
10.9394	5.29071	10.9398	13.0308	10.9346	14.9148	10.9342	22.7372	10.9354	13.6715	10.9379	14.2424	10.9379	17.2227	10.9396	9.36078
10.946	5.26435	10.9465	12.997	10.9413	14.8265	10.9408	22.5143	10.9421	13.6662	10.9446	14.2265	10.9446	17.1888	10.9462	9.33692
10.9527	5.23897	10.9531	12.9687	10.9479	14.7311	10.9475	22.2968	10.9488	13.656	10.9512	14.2012	10.9512	17.145	10.9529	9.30695
10.9594	5.21346	10.9598	12.9439	10.9546	14.6297	10.9542	22.0854	10.9554	13.6409	10.9579	14.1684	10.9579	17.0918	10.9596	9.27027
10.966	5.18786	10.9665	12.9215	10.9612	14.5236	10.9608	21.8784	10.9621	13.622	10.9646	14.1292	10.9646	17.0296	10.9663	9.22727
10.9727	5.16142	10.9731	12.9002	10.9679	14.4139	10.9675	21.6741	10.9688	13.5998	10.9712	14.0848	10.9712	16.9598	10.9729	9.17799
10.9794	5.13323	10.9798	12.8808	10.9746	14.2996	10.9742	21.472	10.9754	13.5736	10.9779	14.0362	10.9779	16.8838	10.9796	9.12274
10.986	5.102	10.9864	12.8643	10.9812	14.1816	10.9808	21.2721	10.9821	13.5434	10.9846	13.9844	10.9846	16.8023	10.9863	9.06277
10.9927	5.06857	10.9931	12.8504	10.9879	14.0615	10.9875	21.0737	10.9887	13.5107	10.9913	13.9293	10.9913	16.7139	10.9929	8.99976
10.9994	5.03334	10.9998	12.84	10.9946	13.9411	10.9942	20.8761	10.9954	13.4768	10.9979	13.8713	10.9979	16.6177	10.9996	8.93451
11.006	4.99547	11.0064	12.8331	11.0013	13.8206	11.0008	20.6802	11.0021	13.4412	11.0046	13.8096	11.0046	16.5136	11.0062	8.86682
11.0127	4.95504	11.0131	12.8302	11.0079	13.6988	11.0075	20.4866	11.0087	13.4022	11.0113	13.7431	11.0113	16.4014	11.0129	8.79709
11.0194	4.91142	11.0198	12.8299	11.0146	13.5783	11.0142	20.2957	11.0154	13.3589	11.0179	13.6716	11.0179	16.2809	11.0196	8.72581
11.026	4.86633	11.0265	12.8302	11.0213	13.4607	11.0208	20.1088	11.0221	13.3108	11.0246	13.5963	11.0246	16.1524	11.0262	8.65237
11.0327	4.81969	11.0331	12.8304	11.0279	13.347	11.0275	19.9267	11.0288	13.2584	11.0312	13.5174	11.0312	16.0171	11.0329	8.57583
11.0394	4.77234	11.0398	12.8282	11.0346	13.2352	11.0342	19.7491	11.0354	13.2018	11.0379	13.4333	11.0379	15.8767	11.0396	8.49595
11.046	4.7247	11.0465	12.8218	11.0412	13.1246	11.0408	19.5744	11.0421	13.1409	11.0446	13.3429	11.0446	15.7318	11.0463	8.41378
11.0527	4.67642	11.0531	12.8106	11.0479	13.0164	11.0475	19.4025	11.0488	13.0763	11.0512	13.2469	11.0512	15.5831	11.0529	8.33143
11.0594	4.62783	11.0598	12.7952	11.0546	12.912	11.0542	19.2338	11.0554	13.0088	11.0579	13.1469	11.0579	15.4332	11.0596	8.25127
11.066	4.57744	11.0664	12.7756	11.0612	12.811	11.0608	19.0681	11.0621	12.941	11.0646	13.0437	11.0646	15.2842	11.0663	8.17469
11.0727	4.52572	11.0731	12.7501	11.0679	12.7123	11.0675	18.904	11.0687	12.8746	11.0712	12.9393	11.0712	15.1379	11.0729	8.10137
11.0794	4.47149	11.0798	12.7189	11.0746	12.6166	11.0742	18.7391	11.0754	12.8097	11.0779	12.8359	11.0779	14.9935	11.0796	8.031
11.086	4.4151	11.0864	12.6833	11.0813	12.5245	11.0808	18.5743	11.0821	12.7447	11.0846	12.734	11.0846	14.8519	11.0862	7.96283
11.0927	4.3565	11.0931	12.6442	11.0879	12.4357	11.0875	18.41	11.0887	12.6786	11.0913	12.6327	11.0913	14.7131	11.0929	7.89598
11.0994	4.29607	11.0998	12.6006	11.0946	12.3494	11.0942	18.2467	11.0954	12.6119	11.0979	12.5315	11.0979	14.5759	11.0996	7.82884
11.106	4.23445	11.1065	12.5504	11.1013	12.2656	11.1008	18.0822	11.1021	12.5437	11.1046	12.4294	11.1046	14.4392	11.1062	7.76064
11.1127	4.17062	11.1131	12.4946	11.1079	12.1856	11.1075	17.9161	11.1088	12.4726	11.1113	12.3247	11.1113	14.3026	11.1129	7.69169
11.1194	4.1055	11.1198	12.4354	11.1146	12.111	11.1142	17.7501	11.1154	12.3965	11.1179	12.2163	11.1179	14.1682	11.1196	7.62304
11.126	4.04047	11.1265	12.3738	11.1212	12.0425	11.1208	17.5855	11.1221	12.3168	11.1246	12.1056	11.1246	14.0367	11.1263	7.55552
11.1327	3.97774	11.1331	12.309	11.1279	11.9792	11.1275	17.4227	11.1288	12.236	11.1312	11.9944	11.1312	13.9094	11.1329	7.4888
11.1394	3.91753	11.1398	12.24	11.1346	11.9188	11.1342	17.2608	11.1354	12.1554	11.1379	11.8831	11.1379	13.7869	11.1396	7.42197
11.146	3.85928	11.1464	12.1682	11.1412	11.8617	11.1408	17.1	11.1421	12.0742	11.1446	11.7721	11.1446	13.6695	11.1463	7.35351
11.1527	3.8027	11.1531	12.0946	11.1479	11.8076	11.1475	16.941	11.1487	11.9921	11.1512	11.6624	11.1512	13.5573	11.1529	7.28297
11.1594	3.7479	11.1598	12.0183	11.1546	11.7551	11.1542	16.7857	11.1554	11.91	11.1579	11.5548	11.1579	13.4482	11.1596	7.2094
11.166	3.69412	11.1664	11.9382	11.1613	11.7017	11.1608	16.6348	11.1621	11.8289	11.1646	11.4502	11.1646	13.3409	11.1662	7.13276
11.1727	3.64076	11.1731	11.8552	11.1679	11.647	11.1675	16.4873	11.1687	11.7489	11.1713	11.3495	11.1713	13.2343	11.1729	7.05414
11.1794	3.58772	11.1798	11.7719	11.1746	11.5923	11.1742	16.3412	11.1754	11.6701	11.1779	11.2541	11.1779	13.1279	11.1796	6.97535
11.186	3.53523	11.1865	11.6903	11.1813	11.5364	11.1808	16.1958	11.1821	11.5916	11.1846	11.1639	11.1846	13.0218	11.1862	6.89843
11.1927	3.48388	11.1931	11.6111	11.1879	11.478	11.1875	16.0512	11.1888	11.5133	11.1913	11.0779	11.1913	12.9154	11.1929	6.82295
11.1994	3.43435	11.1998	11.5343	11.1946	11.417	11.1942	15.9065	11.1954	11.4348	11.1979	10.9965	11.1979	12.809	11.1996	6.74786
11.206	3.38741	11.2065	11.4609	11.2012	11.355	11.2008	15.7603	11.2021	11.3558	11.2046	10.9198	11.2046	12.7027	11.2063	6.6722
11.2127	3.34242	11.2131	11.3895	11.2079	11.2926	11.2075	15.613	11.2088	11.2753	11.2112	10.8472	11.2112	12.597	11.2129	6.59546
11.2194	3.29848	11.2198	11.3187	11.2146	11.2299	11.2142	15.4666	11.2154	11.1913	11.2179	10.776	11.2179	12.4919	11.2196	6.51701
11.226	3.25535	11.2264	11.2468	11.2212	11.1662	11.2208	15.3214	11.2221	11.1042	11.2246	10.7054	11.2246	12.3868	11.2263	6.43682
11.2327	3.21403	11.2331	11.174	11.2279	11.1017	11.2275	15.1763	11.2287	11.015	11.2312	10.6368	11.2312	12.2821	11.2329	6.35592
11.2394	3.17358	11.2398	11.1018	11.2346	11.037	11.2342	15.0311	11.2354	10.9246	11.2379	10.5706	11.2379	12.1779	11.2396	6.27649
11.246	3.13221	11.2464	11.0294	11.2413	10.9731	11.2408	14.8873	11.2421	10.8332	11.2446	10.5053	11.2446	12.0742	11.2462	6.20019
11.2527	3.08945	11.2531	10.9561	11.2479	10.9101	11.2475	14.7445	11.2487	10.7423	11.2513	10.4393	11.2513	11.9707	11.2529	6.12794
11.2594	3.04594	11.2598	10.8832	11.2546	10.8492	11.2542	14.6032	11.2554	10.6533	11.2579	10.3736	11.2579	11.8676	11.2596	6.06012
11.266	3.00175	11.2665	10.8119	11.2613	10.7918	11.2608	14.4635	11.2621	10.5661	11.2646	10.3095	11.2646	11.7646	11.2662	5.99688
11.2727	2.956	11.2731	10.7429	11.2679	10.7381	11.2675	14.3266	11.2688	10.4794	11.2713	10.2461	11.2713	11.6608	11.2729	5.93936
11.2794	2.91017	11.2798	10.6763	11.2746	10.6864	11.2742	14.1928	11.2754	10.3926	11.2779	10.1818	11.2779	11.5561	11.2796	5.88731
11.286	2.86636	11.2865	10.6134	11.2812	10.6362	11.2808	14.0601	11.2821	10.306	11.2846	10.1167	11.2846	11.4503	11.2863	5.84024
11.2927	2.82468	11.2931	10.5564	11.2879	10.5872	11.2875	13.9277	11.2888	10.2199	11.2912	10.0512	11.2912	11.3429	11.2929	5.79742
11.2994	2.78503	11.2998	10.5054	11.2946	10.5384	11.2942	13.796	11.2954	10.1349	11.2979	9.98474	11.2979	11.2339	11.2996	5.75929
11.306	2.74881	11.3064	10.4615	11.3012	10.4881	11.3008	13.6666	11.3021	10.0519	11.3046	9.91657	11.3046	11.1238	11.3063	5.72602
11.3127	2.71752	11.3131	10.4239	11.3079	10.4354	11.3075	13.5397	11.3087	9.97251	11.3112	9.84669	11.3112	11.013	11.3129	5.69604
11.3194	2.6899	11.3198	10.391	11.3146	10.3808	11.3142	13.4139	11.3154	9.89707	11.3179	9.77444	11.3179	10.9016	11.3196	5.66845
11.326	2.66384	11.3264	10.3625	11.3212	10.3239	11.3208	13.2883	11.3221	9.82583	11.3246	9.69905	11.3246	10.7901	11.3262	5.64259
11.3327	2.63882	11.3331	10.3378	11.3279	10.2642	11.3275	13.1618	11.3287	9.75735	11.3313	9.62117	11.3313	10.6799	11.3329	5.6183
11.3394	2.61452	11.3398	10.3163	11.3346	10.202	11.3342	13.0326	11.3354	9.69017	11.3379	9.5433	11.3379	10.5722	11.3396	5.59457
11.346	2.58842	11.3465	10.296	11.3413	10.1389	11.3408	12.8989	11.3421	9.62296	11.3446	9.46739	11.3446	10.4679	11.3462	5.56984
11.3527	2.55804	11.3531	10.2772	11.3479	10.0768	11.3475	12.7595	11.3488	9.55472	11.3513	9.39322	11.3513	10.3679	11.3529	5.54381
11.3594	2.52295	11.3598	10.261	11.3546	10.0162	11.3542	12.6151	11.3554	9.48438	11.3579	9.32154	11.3579	10.271	11.3596	5.51679
11.366	2.48493	11.3665	10.2476	11.3613	9.95807	11.3608	12.4673	11.3621	9.41172	11.3646	9.2545	11.3646	10.1754	11.3663	5.48962
11.3727	2.44458	11.3731	10.2368	11.3679	9.90336	11.3675	12.3185	11.3688	9.33725	11.3712	9.19307	11.3712	10.0806	11.3729	5.4622
11.3794	2.40158	11.3798	10.23	11.3746	9.85207	11.3742	12.1706	11.3754	9.26065	11.3779	9.13554	11.3779	9.98637	11.3796	5.43334
11.386	2.35672	11.3864	10.2277	11.3812	9.80206	11.3808	12.0251	11.3821	9.18206	11.3846	9.08062	11.3846	9.89259	11.3863	5.40332
11.3927	2.3114	11.3931	10.2281	11.3879	9.75274	11.3875	11.8843	11.3887	9.10156	11.3912	9.02865	11.3912	9.79789	11.3929	5.37239
11.3994	2.26636	11.3998	10.2287	11.3946	9.70488	11.3942	11.75	11.3954	9.01979	11.3979	8.97969	11.3979	9.7024	11.3996	5.34143
11.406	2.21983	11.4064	10.2275	11.4012	9.65837	11.4008	11.6244	11.4021	8.93643	11.4046	8.93229	11.4046	9.60653	11.4062	5.3101
11.4127	2.17143	11.4131	10.2237	11.4079	9.61225	11.4075	11.5074	11.4087	8.85101	11.4113	8.88427	11.4113	9.50993	11.4129	5.2778
11.4194	2.12149	11.4198	10.2154	11.4146	9.56625	11.4142	11.3992	11.4154	8.76325	11.4179	8.83423	11.4179	9.41201	11.4196	5.24551
11.426	2.07038	11.4265	10.2011	11.4213	9.5221	11.4208	11.2989	11.4221	8.67226	11.4246	8.78046	11.4246	9.31122	11.4262	5.21412
11.4327	2.01736	11.4331	10.1802	11.4279	9.4812	11.4275	11.205	11.4288	8.57818	11.4313	8.72231	11.4313	9.20828	11.4329	5.18487
11.4394	1.96206	11.4398	10.1526	11.4346	9.44366	11.4342	11.1158	11.4354	8.48153	11.4379	8.65942	11.4379	9.10461	11.4396	5.15711
11.446	1.90621	11.4465	10.1186	11.4413	9.40892	11.4408	11.0301	11.4421	8.38254	11.4446	8.59205	11.4446	9.00149	11.4462	5.12952
11.4527	1.85097	11.4531	10.0773	11.4479	9.3764	11.4475	10.9472	11.4488	8.28134	11.4512	8.52074	11.4512	8.89843	11.4529	5.10245
11.4594	1.79721	11.4598	10.0283	11.4546	9.34605	11.4542	10.8651	11.4554	8.17901	11.4579	8.4462	11.4579	8.79306	11.4596	5.0754
11.466	1.74559	11.4665	9.9727	11.4612	9.31767	11.4608	10.782	11.4621	8.07691	11.4646	8.36946	11.4646	8.68598	11.4663	5.04719
11.4727	1.69692	11.4731	9.91174	11.4679	9.29023	11.4675	10.6973	11.4688	7.97672	11.4712	8.29048	11.4712	8.57778	11.4729	5.01622
11.4794	1.6517	11.4798	9.84629	11.4746	9.26234	11.4742	10.6108	11.4754	7.87947	11.4779	8.20984	11.4779	8.46966	11.4796	4.98131
11.486	1.60935	11.4864	9.77661	11.4812	9.23332	11.4808	10.5226	11.4821	7.78645	11.4846	8.12938	11.4846	8.36274	11.4863	4.94327
11.4927	1.56972	11.4931	9.70352	11.4879	9.20471	11.4875	10.4324	11.4887	7.69851	11.4913	8.05104	11.4913	8.25791	11.4929	4.90162
11.4994	1.5328	11.4998	9.62922	11.4946	9.17715	11.4942	10.3425	11.4954	7.61455	11.4979	7.97702	11.4979	8.15756	11.4996	4.85615
11.506	1.49768	11.5064	9.55369	11.5013	9.14939	11.5008	10.2551	11.5021	7.53483	11.5046	7.9086	11.5046	8.06283	11.5062	4.80714
11.5127	1.46352	11.5131	9.47737	11.5079	9.11859	11.5075	10.1706	11.5087	7.45858	11.5113	7.8474	11.5113	7.97436	11.5129	4.75565
11.5194	1.42895	11.5198	9.40162	11.5146	9.08422	11.5142	10.0888	11.5154	7.38667	11.5179	7.79436	11.5179	7.89042	11.5196	4.70354
11.526	1.39401	11.5265	9.3274	11.5213	9.04724	11.5208	10.0082	11.5221	7.31904	11.5246	7.74852	11.5246	7.80968	11.5262	4.65119
11.5327	1.35831	11.5331	9.25474	11.5279	9.00866	11.5275	9.92848	11.5288	7.25523	11.5312	7.7092	11.5312	7.73313	11.5329	4.59878
11.5394	1.32118	11.5398	9.18293	11.5346	8.96826	11.5342	9.84893	11.5354	7.19653	11.5379	7.67379	11.5379	7.66174	11.5396	4.54736
11.546	1.28313	11.5465	9.11172	11.5412	8.92615	11.5408	9.76969	11.5421	7.14341	11.5446	7.64004	11.5446	7.59604	11.5463	4.49802
11.5527	1.2447	11.5531	9.04163	11.5479	8.88447	11.5475	9.69052	11.5488	7.09685	11.5512	7.60554	11.5512	7.53567	11.5529	4.45067
11.5594	1.20761	11.5598	8.97181	11.5546	8.8442	11.5542	9.61152	11.5554	7.05476	11.5579	7.56907	11.5579	7.4812	11.5596	4.40502
11.566	1.17161	11.5664	8.90221	11.5612	8.80572	11.5608	9.53307	11.5621	7.01489	11.5646	7.52997	11.5646	7.43231	11.5663	4.36144
11.5727	1.13551	11.5731	8.83199	11.5679	8.76826	11.5675	9.45677	11.5687	6.97553	11.5712	7.48668	11.5712	7.38811	11.5729	4.32041
11.5794	1.09798	11.5798	8.75994	11.5746	8.73247	11.5742	9.38299	11.5754	6.9357	11.5779	7.43984	11.5779	7.34835	11.5796	4.28067
11.586	1.05827	11.5864	8.68501	11.5813	8.70073	11.5808	9.31029	11.5821	6.8948	11.5846	7.39109	11.5846	7.31209	11.5862	4.2414
11.5927	1.01683	11.5931	8.60734	11.5879	8.6741	11.5875	9.23885	11.5887	6.85208	11.5913	7.34251	11.5913	7.27874	11.5929	4.20363
11.5994	0.973389	11.5998	8.52921	11.5946	8.65229	11.5942	9.16959	11.5954	6.80746	11.5979	7.29398	11.5979	7.24799	11.5996	4.16808
11.606	0.927411	11.6065	8.45195	11.6013	8.63388	11.6008	9.1038	11.6021	6.76209	11.6046	7.24508	11.6046	7.22093	11.6062	4.13384
11.6127	0.880189	11.6131	8.37612	11.6079	8.61905	11.6075	9.04152	11.6088	6.71799	11.6113	7.19596	11.6113	7.19714	11.6129	4.10029
11.6194	0.834458	11.6198	8.30275	11.6146	8.60792	11.6142	8.98209	11.6154	6.67669	11.6179	7.14641	11.6179	7.17446	11.6196	4.06871
11.626	0.791363	11.6265	8.23444	11.6212	8.59924	11.6208	8.92657	11.6221	6.6389	11.6246	7.09606	11.6246	7.15075	11.6263	4.04046
11.6327	0.750251	11.6331	8.17174	11.6279	8.59221	11.6275	8.87486	11.6288	6.60403	11.6312	7.04391	11.6312	7.12561	11.6329	4.01532
11.6394	0.710852	11.6398	8.11242	11.6346	8.58761	11.6342	8.82675	11.6354	6.5723	11.6379	6.98951	11.6379	7.09951	11.6396	3.9923
11.646	0.675008	11.6464	8.05487	11.6412	8.58696	11.6408	8.78198	11.6421	6.5434	11.6446	6.93201	11.6446	7.07202	11.6463	3.97167
11.6527	0.642754	11.6531	8.0002	11.6479	8.58943	11.6475	8.74034	11.6487	6.51766	11.6512	6.8725	11.6512	7.04299	11.6529	3.95419
11.6594	0.61252	11.6598	7.94829	11.6546	8.59398	11.6542	8.70148	11.6554	6.49429	11.6579	6.81188	11.6579	7.0129	11.6596	3.94017
11.666	0.583246	11.6664	7.89795	11.6613	8.60026	11.6608	8.66391	11.6621	6.47247	11.6646	6.75081	11.6646	6.98385	11.6662	3.92903
11.6727	0.555798	11.6731	7.84758	11.6679	8.60728	11.6675	8.62789	11.6687	6.45165	11.6713	6.68926	11.6713	6.95637	11.6729	3.91987
11.6794	0.530772	11.6798	7.7989	11.6746	8.61347	11.6742	8.5943	11.6754	6.43125	11.6779	6.62757	11.6779	6.93017	11.6796	3.91165
11.686	0.50737	11.6865	7.7526	11.6813	8.61765	11.6808	8.56404	11.6821	6.4117	11.6846	6.56622	11.6846	6.90421	11.6862	3.90326
11.6927	0.485286	11.6931	7.70731	11.6879	8.62025	11.6875	8.53681	11.6888	6.39223	11.6913	6.50547	11.6913	6.87776	11.6929	3.89361
11.6994	0.464313	11.6998	7.66224	11.6946	8.62171	11.6942	8.51326	11.6954	6.37382	11.6979	6.44642	11.6979	6.85048	11.6996	3.88199
11.706	0.445083	11.7065	7.6163	11.7012	8.62187	11.7008	8.494	11.7021	6.35756	11.7046	6.39087	11.7046	6.82247	11.7063	3.86813
11.7127	0.426754	11.7131	7.56999	11.7079	8.62139	11.7075	8.47809	11.7088	6.34501	11.7112	6.34016	11.7112	6.7934	11.7129	3.85188
11.7194	0.408463	11.7198	7.52223	11.7146	8.62068	11.7142	8.46417	11.7154	6.33653	11.7179	6.29572	11.7179	6.76167	11.7196	3.83484
11.726	0.389412	11.7264	7.47374	11.7212	8.62013	11.7208	8.45025	11.7221	6.3308	11.7246	6.2609	11.7246	6.7267	11.7263	3.81852
11.7327	0.369079	11.7331	7.42651	11.7279	8.61968	11.7275	8.4352	11.7287	6.32669	11.7312	6.23669	11.7312	6.68884	11.7329	3.80451
11.7394	0.348471	11.7398	7.38271	11.7346	8.61931	11.7342	8.41833	11.7354	6.32294	11.7379	6.22334	11.7379	6.6501	11.7396	3.79298
11.746	0.32834	11.7464	7.34379	11.7413	8.61849	11.7408	8.40052	11.7421	6.31756	11.7446	6.21886	11.7446	6.60963	11.7462	3.7835
11.7527	0.309691	11.7531	7.30938	11.7479	8.61592	11.7475	8.38318	11.7487	6.3087	11.7513	6.22375	11.7513	6.56702	11.7529	3.77635
11.7594	0.292435	11.7598	7.27946	11.7546	8.61192	11.7542	8.36599	11.7554	6.29498	11.7579	6.23819	11.7579	6.52303	11.7596	3.77084
11.766	0.276886	11.7665	7.25383	11.7613	8.60644	11.7608	8.34933	11.7621	6.27621	11.7646	6.26039	11.7646	6.4787	11.7662	3.76679
11.7727	0.263631	11.7731	7.23256	11.7679	8.59894	11.7675	8.33472	11.7688	6.25321	11.7713	6.28766	11.7713	6.43431	11.7729	3.76348
11.7794	0.252366	11.7798	7.21477	11.7746	8.58822	11.7742	8.32318	11.7754	6.22546	11.7779	6.3173	11.7779	6.38805	11.7796	3.76158
11.786	0.241749	11.7865	7.20055	11.7812	8.57412	11.7808	8.31386	11.7821	6.19408	11.7846	6.34788	11.7846	6.34041	11.7863	3.76195
11.7927	0.232041	11.7931	7.19068	11.7879	8.55761	11.7875	8.30537	11.7888	6.16009	11.7912	6.37721	11.7912	6.29195	11.7929	3.76379
11.7994	0.225119	11.7998	7.18474	11.7946	8.53964	11.7942	8.29841	11.7954	6.12634	11.7979	6.40338	11.7979	6.24341	11.7996	3.76595
11.806	0.221819	11.8064	7.18138	11.8012	8.52099	11.8008	8.29393	11.8021	6.09457	11.8046	6.42452	11.8046	6.19582	11.8063	3.7673
11.8127	0.22117	11.8131	7.17857	11.8079	8.50227	11.8075	8.29045	11.8087	6.06414	11.8112	6.44039	11.8112	6.15046	11.8129	3.767
11.8194	0.222072	11.8198	7.1758	11.8146	8.48334	11.8142	8.28752	11.8154	6.03522	11.8179	6.45087	11.8179	6.10758	11.8196	3.76407
11.826	0.225209	11.8264	7.17247	11.8212	8.46495	11.8208	8.28464	11.8221	6.00764	11.8246	6.45648	11.8246	6.06597	11.8262	3.75756
11.8327	0.230074	11.8331	7.16855	11.8279	8.44883	11.8275	8.28347	11.8287	5.98177	11.8313	6.45818	11.8313	6.02503	11.8329	3.74789
11.8394	0.234619	11.8398	7.16414	11.8346	8.43494	11.8342	8.28383	11.8354	5.956	11.8379	6.45607	11.8379	5.98542	11.8396	3.73614
11.846	0.236869	11.8465	7.15953	11.8413	8.42185	11.8408	8.2847	11.8421	5.92902	11.8446	6.45118	11.8446	5.94737	11.8462	3.72289
11.8527	0.237592	11.8531	7.15544	11.8479	8.40851	11.8475	8.28482	11.8488	5.90086	11.8513	6.44437	11.8513	5.91122	11.8529	3.70947
11.8594	0.237606	11.8598	7.15275	11.8546	8.39601	11.8542	8.28218	11.8554	5.87153	11.8579	6.43576	11.8579	5.87784	11.8596	3.69696
11.866	0.236832	11.8665	7.15172	11.8613	8.38462	11.8608	8.27684	11.8621	5.84062	11.8646	6.42478	11.8646	5.84766	11.8663	3.68602
11.8727	0.233702	11.8731	7.15189	11.8679	8.3732	11.8675	8.26737	11.8688	5.80768	11.8712	6.40958	11.8712	5.82024	11.8729	3.67716
11.8794	0.228427	11.8798	7.15354	11.8746	8.3603	11.8742	8.2522	11.8754	5.7729	11.8779	6.38971	11.8779	5.79418	11.8796	3.67045
11.886	0.222221	11.8864	7.1575	11.8812	8.3453	11.8808	8.23001	11.8821	5.73701	11.8846	6.36429	11.8846	5.76862	11.8863	3.66585
11.8927	0.214688	11.8931	7.16444	11.8879	8.32767	11.8875	8.20142	11.8887	5.70036	11.8912	6.33316	11.8912	5.74221	11.8929	3.6623
11.8994	0.205033	11.8998	7.17335	11.8946	8.30735	11.8942	8.16782	11.8954	5.66403	11.8979	6.29801	11.8979	5.71395	11.8996	3.65862
11.906	0.193231	11.9064	7.18377	11.9012	8.28375	11.9008	8.12953	11.9021	5.62981	11.9046	6.26077	11.9046	5.68297	11.9062	3.65466
11.9127	0.180565	11.9131	7.196	11.9079	8.25695	11.9075	8.08736	11.9087	5.59882	11.9113	6.22353	11.9113	5.64902	11.9129	3.64966
11.9194	0.166178	11.9198	7.20958	11.9146	8.22873	11.9142	8.04351	11.9154	5.57193	11.9179	6.18686	11.9179	5.61161	11.9196	3.64234
11.926	0.149459	11.9265	7.22424	11.9213	8.20082	11.9208	7.99979	11.9221	5.54966	11.9246	6.15222	11.9246	5.57104	11.9262	3.63245
11.9327	0.131346	11.9331	7.2389	11.9279	8.17443	11.9275	7.95724	11.9288	5.53314	11.9313	6.12072	11.9313	5.52688	11.9329	3.62039
11.9394	0.112854	11.9398	7.25404	11.9346	8.14983	11.9342	7.9165	11.9354	5.52263	11.9379	6.09166	11.9379	5.47948	11.9396	3.60572
11.946	0.0932962	11.9465	7.27054	11.9413	8.12834	11.9408	7.87825	11.9421	5.51816	11.9446	6.06313	11.9446	5.4298	11.9462	3.58753
11.9527	0.0716299	11.9531	7.28863	11.9479	8.11081	11.9475	7.84181	11.9488	5.5182	11.9512	6.03439	11.9512	5.37983	11.9529	3.56583
11.9594	0.0500381	11.9598	7.30888	11.9546	8.09556	11.9542	7.80579	11.9554	5.5209	11.9579	6.00524	11.9579	5.33053	11.9596	3.54242
11.966	0.0303313	11.9665	7.33108	11.9612	8.08132	11.9608	7.76961	11.9621	5.52592	11.9646	5.97501	11.9646	5.28103	11.9663	3.51795
11.9727	0.0118092	11.9731	7.35569	11.9679	8.06724	11.9675	7.73241	11.9688	5.53396	11.9712	5.94226	11.9712	5.23244	11.9729	3.49213
11.9794	-0.00640005	11.9798	7.38217	11.9746	8.05281	11.9742	7.69377	11.9754	5.54486	11.9779	5.90696	11.9779	5.18579	11.9796	3.46524
11.986	-0.0246018	11.9864	7.40889	11.9812	8.03686	11.9808	7.65315	11.9821	5.55576	11.9846	5.87113	11.9846	5.14227	11.9863	3.4381
11.9927	-0.0406355	11.9931	7.43375	11.9879	8.01754	11.9875	7.61151	11.9887	5.56591	11.9913	5.83553	11.9913	5.10012	11.9929	3.41097
11.9994	-0.0536963	11.9998	7.45612	11.9946	7.995	11.9942	7.56989	11.9954	5.57654	11.9979	5.80033	11.9979	5.05813	11.9996	3.38132
12.006	-0.0650585	12.0064	7.47498	12.0013	7.96966	12.0008	7.52834	12.0021	5.5878	12.0046	5.76466	12.0046	5.01732	12.0062	3.34812
12.0127	-0.0754148	12.0131	7.49007	12.0079	7.94253	12.0075	7.4881	12.0087	5.59814	12.0113	5.72888	12.0113	4.97694	12.0129	3.31183
12.0194	-0.0852495	12.0198	7.50034	12.0146	7.91374	12.0142	7.44951	12.0154	5.60715	12.0179	5.69412	12.0179	4.9357	12.0196	3.27362
12.026	-0.0929758	12.0265	7.50648	12.0213	7.88327	12.0208	7.41316	12.0221	5.61729	12.0246	5.66031	12.0246	4.89195	12.0262	3.23395
12.0327	-0.099346	12.0331	7.51049	12.0279	7.85153	12.0275	7.37959	12.0288	5.62957	12.0312	5.62704	12.0312	4.84622	12.0329	3.19372
12.0394	-0.105239	12.0398	7.51249	12.0346	7.8183	12.0342	7.34843	12.0354	5.64266	12.0379	5.59477	12.0379	4.80007	12.0396	3.1554
12.046	-0.110179	12.0465	7.51296	12.0412	7.7834	12.0408	7.32011	12.0421	5.65501	12.0446	5.56549	12.0446	4.75337	12.0463	3.11953
12.0527	-0.113688	12.0531	7.51238	12.0479	7.74636	12.0475	7.29473	12.0488	5.66726	12.0512	5.5409	12.0512	4.70696	12.0529	3.08615
12.0594	-0.114113	12.0598	7.51304	12.0546	7.70645	12.0542	7.27317	12.0554	5.67938	12.0579	5.5197	12.0579	4.66114	12.0596	3.05536
12.066	-0.113063	12.0664	7.51544	12.0612	7.66364	12.0608	7.25641	12.0621	5.69075	12.0646	5.50102	12.0646	4.61672	12.0663	3.02763
12.0727	-0.111677	12.0731	7.51933	12.0679	7.61873	12.0675	7.24354	12.0687	5.70203	12.0712	5.48548	12.0712	4.57384	12.0729	3.00278
12.0794	-0.110969	12.0798	7.52581	12.0746	7.57331	12.0742	7.23501	12.0754	5.71565	12.0779	5.47386	12.0779	4.53305	12.0796	2.98085
12.086	-0.111379	12.0864	7.53625	12.0813	7.52883	12.0808	7.23021	12.0821	5.73467	12.0846	5.46603	12.0846	4.49425	12.0862	2.96229
12.0927	-0.112712	12.0931	7.5503	12.0879	7.48593	12.0875	7.23033	12.0887	5.75969	12.0913	5.46125	12.0913	4.45796	12.0929	2.94764
12.0994	-0.117406	12.0998	7.56774	12.0946	7.44606	12.0942	7.23593	12.0954	5.79118	12.0979	5.4598	12.0979	4.42541	12.0996	2.93721
12.106	-0.125371	12.1065	7.58874	12.1013	7.40825	12.1008	7.24727	12.1021	5.82898	12.1046	5.46259	12.1046	4.39854	12.1062	2.93079
12.1127	-0.136562	12.1131	7.61429	12.1079	7.37161	12.1075	7.2645	12.1088	5.87198	12.1113	5.46946	12.1113	4.37886	12.1129	2.9282
12.1194	-0.151582	12.1198	7.64456	12.1146	7.3352	12.1142	7.28741	12.1154	5.91844	12.1179	5.48135	12.1179	4.36702	12.1196	2.92962
12.126	-0.170961	12.1265	7.68022	12.1212	7.29844	12.1208	7.31762	12.1221	5.9664	12.1246	5.49863	12.1246	4.365	12.1263	2.93741
12.1327	-0.193886	12.1331	7.72294	12.1279	7.26137	12.1275	7.35484	12.1288	6.01558	12.1312	5.52244	12.1312	4.3733	12.1329	2.95387
12.1394	-0.218056	12.1398	7.77488	12.1346	7.22389	12.1342	7.39907	12.1354	6.06612	12.1379	5.55465	12.1379	4.39162	12.1396	2.9804
12.146	-0.242941	12.1464	7.83831	12.1412	7.1881	12.1408	7.44958	12.1421	6.11861	12.1446	5.59632	12.1446	4.42042	12.1463	3.01816
12.1527	-0.268944	12.1531	7.91422	12.1479	7.15545	12.1475	7.50711	12.1487	6.17496	12.1512	5.64931	12.1512	4.46078	12.1529	3.06869
12.1594	-0.296049	12.1598	8.00345	12.1546	7.1274	12.1542	7.57378	12.1554	6.23614	12.1579	5.71399	12.1579	4.51391	12.1596	3.13356
12.166	-0.322811	12.1664	8.10655	12.1613	7.10476	12.1608	7.6513	12.1621	6.30362	12.1646	5.79206	12.1646	4.57952	12.1662	3.21392
12.1727	-0.349097	12.1731	8.22509	12.1679	7.08839	12.1675	7.7415	12.1687	6.37849	12.1713	5.885	12.1713	4.65854	12.1729	3.31146
12.1794	-0.374727	12.1798	8.35854	12.1746	7.07774	12.1742	7.84552	12.1754	6.46351	12.1779	5.99301	12.1779	4.75349	12.1796	3.42724
12.186	-0.400387	12.1865	8.50742	12.1813	7.07104	12.1808	7.96471	12.1821	6.56224	12.1846	6.11737	12.1846	4.86597	12.1862	3.5625
12.1927	-0.425376	12.1931	8.67344	12.1879	7.06618	12.1875	8.10022	12.1888	6.67726	12.1913	6.25932	12.1913	4.99725	12.1929	3.71963
12.1994	-0.447929	12.1998	8.85918	12.1946	7.06133	12.1942	8.25224	12.1954	6.81122	12.1979	6.42154	12.1979	5.14825	12.1996	3.90086
12.206	-0.46771	12.2065	9.06751	12.2012	7.05568	12.2008	8.42017	12.2021	6.96622	12.2046	6.60601	12.2046	5.32053	12.2063	4.10727
12.2127	-0.485703	12.2131	9.30051	12.2079	7.0477	12.2075	8.60431	12.2088	7.14451	12.2112	6.81412	12.2112	5.51631	12.2129	4.33827
12.2194	-0.502691	12.2198	9.56105	12.2146	7.03683	12.2142	8.80542	12.2154	7.34768	12.2179	7.0485	12.2179	5.73715	12.2196	4.59548
12.226	-0.517093	12.2264	9.85117	12.2212	7.02303	12.2208	9.02609	12.2221	7.57757	12.2246	7.31117	12.2246	5.98507	12.2263	4.88131
12.2327	-0.527911	12.2331	10.173	12.2279	7.00756	12.2275	9.26962	12.2287	7.83706	12.2312	7.60409	12.2312	6.26162	12.2329	5.19762
12.2394	-0.536658	12.2398	10.5283	12.2346	6.99005	12.2342	9.53871	12.2354	8.12941	12.2379	7.92791	12.2379	6.56866	12.2396	5.54666
12.246	-0.545546	12.2464	10.9182	12.2413	6.96943	12.2408	9.83641	12.2421	8.45725	12.2446	8.28351	12.2446	6.90821	12.2462	5.93098
12.2527	-0.554942	12.2531	11.3432	12.2479	6.94495	12.2475	10.165	12.2487	8.82173	12.2513	8.67293	12.2513	7.28152	12.2529	6.35412
12.2594	-0.564754	12.2598	11.8044	12.2546	6.91769	12.2542	10.528	12.2554	9.22399	12.2579	9.09749	12.2579	7.69019	12.2596	6.81841
12.266	-0.575207	12.2665	12.3036	12.2613	6.88926	12.2608	10.9281	12.2621	9.66515	12.2646	9.55921	12.2646	8.13513	12.2662	7.32622
12.2727	-0.585966	12.2731	12.8423	12.2679	6.86041	12.2675	11.3672	12.2688	10.1464	12.2713	10.0584	12.2713	8.61834	12.2729	7.87896
12.2794	-0.59519	12.2798	13.4231	12.2746	6.83288	12.2742	11.847	12.2754	10.6692	12.2779	10.5962	12.2779	9.14022	12.2796	8.47918
12.286	-0.601627	12.2865	14.0489	12.2812	6.80745	12.2808	12.369	12.2821	11.2349	12.2846	11.1746	12.2846	9.70168	12.2863	9.129
12.2927	-0.605397	12.2931	14.7227	12.2879	6.78498	12.2875	12.9358	12.2888	11.8447	12.2912	11.7957	12.2912	10.3041	12.2929	9.83083
12.2994	-0.60606	12.2998	15.4474	12.2946	6.76407	12.2942	13.5494	12.2954	12.4999	12.2979	12.461	12.2979	10.9495	12.2996	10.5871
12.306	-0.603966	12.3064	16.2257	12.3012	6.74437	12.3008	14.2113	12.3021	13.2004	12.3046	13.1713	12.3046	11.6396	12.3063	11.401
12.3127	-0.600167	12.3131	17.0607	12.3079	6.72503	12.3075	14.9231	12.3087	13.9473	12.3112	13.9289	12.3112	12.3741	12.3129	12.2752
12.3194	-0.596486	12.3198	17.9536	12.3146	6.70561	12.3142	15.6869	12.3154	14.7406	12.3179	14.7358	12.3179	13.1549	12.3196	13.2099
12.326	-0.592798	12.3264	18.9054	12.3212	6.68573	12.3208	16.5055	12.3221	15.5828	12.3246	15.5939	12.3246	13.9835	12.3262	14.2075
12.3327	-0.588037	12.3331	19.9183	12.3279	6.66661	12.3275	17.3806	12.3287	16.4763	12.3313	16.504	12.3313	14.8612	12.3329	15.2717
12.3394	-0.582069	12.3398	20.9937	12.3346	6.64867	12.3342	18.3137	12.3354	17.4231	12.3379	17.4688	12.3379	15.7878	12.3396	16.4052
12.346	-0.575222	12.3465	22.1343	12.3413	6.63122	12.3408	19.3067	12.3421	18.4269	12.3446	18.491	12.3446	16.7646	12.3462	17.6088
12.3527	-0.567883	12.3531	23.3418	12.3479	6.6136	12.3475	20.3622	12.3488	19.4911	12.3513	19.5731	12.3513	17.7947	12.3529	18.8849
12.3594	-0.560194	12.3598	24.6199	12.3546	6.59453	12.3542	21.4822	12.3554	20.6202	12.3579	20.7173	12.3579	18.8819	12.3596	20.2381
12.366	-0.552803	12.3665	25.9716	12.3613	6.57461	12.3608	22.6692	12.3621	21.8165	12.3646	21.9259	12.3646	20.0299	12.3663	21.6712
12.3727	-0.546865	12.3731	27.3992	12.3679	6.55332	12.3675	23.9264	12.3688	23.0853	12.3712	23.2016	12.3712	21.2413	12.3729	23.1848
12.3794	-0.542872	12.3798	28.9068	12.3746	6.53214	12.3742	25.2571	12.3754	24.4308	12.3779	24.548	12.3779	22.5194	12.3796	24.7819
12.386	-0.541613	12.3864	30.4977	12.3812	6.51146	12.3808	26.6647	12.3821	25.8562	12.3846	25.9693	12.3846	23.869	12.3863	26.466
12.3927	-0.542171	12.3931	32.1751	12.3879	6.49255	12.3875	28.1531	12.3887	27.3635	12.3912	27.4697	12.3912	25.2947	12.3929	28.2409
12.3994	-0.544503	12.3998	33.9409	12.3946	6.47741	12.3942	29.7268	12.3954	28.9556	12.3979	29.0523	12.3979	26.7993	12.3996	30.1099
12.406	-0.548638	12.4064	35.7986	12.4012	6.46731	12.4008	31.3904	12.4021	30.6369	12.4046	30.7202	12.4046	28.3861	12.4062	32.0774
12.4127	-0.555605	12.4131	37.7534	12.4079	6.46328	12.4075	33.1479	12.4087	32.4094	12.4113	32.4783	12.4113	30.0596	12.4129	34.1488
12.4194	-0.566229	12.4198	39.8098	12.4146	6.46521	12.4142	35.0042	12.4154	34.2758	12.4179	34.3307	12.4179	31.8258	12.4196	36.3288
12.426	-0.578426	12.4265	41.973	12.4213	6.47394	12.4208	36.9635	12.4221	36.2389	12.4246	36.2799	12.4246	33.6888	12.4262	38.624
12.4327	-0.591449	12.4331	44.2481	12.4279	6.4889	12.4275	39.0301	12.4288	38.3025	12.4313	38.3295	12.4313	35.6521	12.4329	41.0412
12.4394	-0.60524	12.4398	46.6423	12.4346	6.50822	12.4342	41.2077	12.4354	40.4707	12.4379	40.484	12.4379	37.7208	12.4396	43.5871
12.446	-0.620991	12.4465	49.1623	12.4413	6.52962	12.4408	43.5	12.4421	42.7479	12.4446	42.7495	12.4446	39.9013	12.4462	46.2682
12.4527	-0.637606	12.4531	51.8145	12.4479	6.55049	12.4475	45.9109	12.4488	45.1397	12.4512	45.1313	12.4512	42.2006	12.4529	49.0925
12.4594	-0.653371	12.4598	54.6055	12.4546	6.5693	12.4542	48.4454	12.4554	47.6535	12.4579	47.6359	12.4579	44.6245	12.4596	52.0678
12.466	-0.669241	12.4665	57.5431	12.4612	6.58501	12.4608	51.1083	12.4621	50.2978	12.4646	50.2725	12.4646	47.1811	12.4663	55.2021
12.4727	-0.686504	12.4731	60.6355	12.4679	6.59715	12.4675	53.9059	12.4688	53.0814	12.4712	53.0508	12.4712	49.879	12.4729	58.5041
12.4794	-0.705324	12.4798	63.8906	12.4746	6.60617	12.4742	56.8456	12.4754	56.0116	12.4779	55.9813	12.4779	52.7274	12.4796	61.9856
12.486	-0.724748	12.4864	67.318	12.4812	6.61161	12.4808	59.9367	12.4821	59.0971	12.4846	59.0733	12.4846	55.7361	12.4863	65.6592
12.4927	-0.74441	12.4931	70.9285	12.4879	6.61308	12.4875	63.1891	12.4887	62.349	12.4913	62.3364	12.4913	58.9146	12.4929	69.5368
12.4994	-0.76364	12.4998	74.7334	12.4946	6.61091	12.4942	66.6138	12.4954	65.7786	12.4979	65.7793	12.4979	62.2741	12.4996	73.6302
12.506	-0.781633	12.5064	78.7435	12.5013	6.60528	12.5008	70.2227	12.5021	69.3963	12.5046	69.4109	12.5046	65.8244	12.5062	77.9531
12.5127	-0.798434	12.5131	82.9703	12.5079	6.59708	12.5075	74.0269	12.5087	73.213	12.5113	73.2419	12.5113	69.5775	12.5129	82.5188
12.5194	-0.814185	12.5198	87.4273	12.5146	6.58526	12.5142	78.0367	12.5154	77.2418	12.5179	77.2836	12.5179	73.5442	12.5196	87.3388
12.526	-0.82805	12.5265	92.1261	12.5213	6.57011	12.5208	82.2644	12.5221	81.4969	12.5246	81.5495	12.5246	77.7355	12.5262	92.4231
12.5327	-0.839487	12.5331	97.077	12.5279	6.55355	12.5275	86.7229	12.5288	85.9891	12.5312	86.0523	12.5312	82.1614	12.5329	97.7833
12.5394	-0.849821	12.5398	102.29	12.5346	6.53716	12.5342	91.4242	12.5354	90.7294	12.5379	90.8049	12.5379	86.8312	12.5396	103.433
12.546	-0.860736	12.5465	107.778	12.5412	6.52146	12.5408	96.3792	12.5421	95.7289	12.5446	95.819	12.5446	91.7544	12.5463	109.382
12.5527	-0.871539	12.5531	113.552	12.5479	6.50648	12.5475	101.599	12.5488	101	12.5512	101.104	12.5512	96.937	12.5529	115.641
12.5594	-0.881277	12.5598	119.619	12.5546	6.49393	12.5542	107.096	12.5554	106.554	12.5579	106.666	12.5579	102.385	12.5596	122.218
12.566	-0.889145	12.5664	125.986	12.5612	6.48467	12.5608	112.88	12.5621	112.395	12.5646	112.51	12.5646	108.104	12.5663	129.117
12.5727	-0.8948	12.5731	132.66	12.5679	6.47763	12.5675	118.952	12.5687	118.53	12.5712	118.636	12.5712	114.098	12.5729	136.341
12.5794	-0.898428	12.5798	139.643	12.5746	6.46989	12.5742	125.316	12.5754	124.963	12.5779	125.045	12.5779	120.37	12.5796	143.886
12.586	-0.899233	12.5864	146.934	12.5813	6.46055	12.5808	131.969	12.5821	131.697	12.5846	131.732	12.5846	126.914	12.5862	151.747
12.5927	-0.897922	12.5931	154.527	12.5879	6.44927	12.5875	138.91	12.5887	138.729	12.5913	138.69	12.5913	133.727	12.5929	159.914
12.5994	-0.894159	12.5998	162.413	12.5946	6.43656	12.5942	146.132	12.5954	146.054	12.5979	145.912	12.5979	140.799	12.5996	168.371
12.606	-0.889316	12.6065	170.579	12.6013	6.42262	12.6008	153.624	12.6021	153.662	12.6046	153.386	12.6046	148.117	12.6062	177.1
12.6127	-0.884123	12.6131	179.004	12.6079	6.40798	12.6075	161.37	12.6088	161.541	12.6113	161.095	12.6113	155.665	12.6129	186.076
12.6194	-0.878446	12.6198	187.664	12.6146	6.39428	12.6142	169.355	12.6154	169.672	12.6179	169.02	12.6179	163.426	12.6196	195.273
12.626	-0.871629	12.6265	196.532	12.6212	6.38157	12.6208	177.556	12.6221	178.031	12.6246	177.138	12.6246	171.378	12.6263	204.658
12.6327	-0.86458	12.6331	205.575	12.6279	6.36943	12.6275	185.946	12.6288	186.591	12.6312	185.422	12.6312	179.496	12.6329	214.196
12.6394	-0.858493	12.6398	214.758	12.6346	6.35751	12.6342	194.496	12.6354	195.321	12.6379	193.842	12.6379	187.753	12.6396	223.853
12.646	-0.853114	12.6464	224.041	12.6412	6.34568	12.6408	203.172	12.6421	204.188	12.6446	202.363	12.6446	196.117	12.6463	233.589
12.6527	-0.847779	12.6531	233.388	12.6479	6.33261	12.6475	211.938	12.6487	213.158	12.6512	210.947	12.6512	204.558	12.6529	243.366
12.6594	-0.842594	12.6598	242.759	12.6546	6.31706	12.6542	220.757	12.6554	222.197	12.6579	219.558	12.6579	213.038	12.6596	253.142
12.666	-0.839435	12.6664	252.11	12.6613	6.29923	12.6608	229.591	12.6621	231.267	12.6646	228.16	12.6646	221.524	12.6662	262.876
12.6727	-0.83825	12.6731	261.401	12.6679	6.28014	12.6675	238.401	12.6687	240.33	12.6713	236.717	12.6713	229.982	12.6729	272.527
12.6794	-0.839211	12.6798	270.593	12.6746	6.25939	12.6742	247.149	12.6754	249.346	12.6779	245.193	12.6779	238.38	12.6796	282.053
12.686	-0.842698	12.6865	279.648	12.6813	6.23605	12.6808	255.798	12.6821	258.278	12.6846	253.553	12.6846	246.685	12.6862	291.417
12.6927	-0.849105	12.6931	288.529	12.6879	6.21216	12.6875	264.312	12.6888	267.09	12.6913	261.766	12.6913	254.866	12.6929	300.581
12.6994	-0.857748	12.6998	297.201	12.6946	6.19022	12.6942	272.656	12.6954	275.746	12.6979	269.802	12.6979	262.892	12.6996	309.514
12.706	-0.867106	12.7065	305.636	12.7012	6.17148	12.7008	280.797	12.7021	284.211	12.7046	277.633	12.7046	270.735	12.7063	318.186
12.7127	-0.876345	12.7131	313.809	12.7079	6.15555	12.7075	288.703	12.7088	292.453	12.7112	285.233	12.7112	278.369	12.7129	326.569
12.7194	-0.885576	12.7198	321.697	12.7146	6.14174	12.7142	296.349	12.7154	300.445	12.7179	292.577	12.7179	285.77	12.7196	334.639
12.726	-0.895098	12.7264	329.279	12.7212	6.13122	12.7208	303.71	12.7221	308.161	12.7246	299.649	12.7246	292.915	12.7263	342.373
12.7327	-0.904985	12.7331	336.54	12.7279	6.12478	12.7275	310.765	12.7287	315.581	12.7312	306.432	12.7312	299.786	12.7329	349.754
12.7394	-0.91552	12.7398	343.468	12.7346	6.12205	12.7342	317.496	12.7354	322.684	12.7379	312.913	12.7379	306.369	12.7396	356.766
12.746	-0.926971	12.7464	350.052	12.7413	6.12224	12.7408	323.893	12.7421	329.456	12.7446	319.078	12.7446	312.649	12.7462	363.396
12.7527	-0.939623	12.7531	356.281	12.7479	6.12513	12.7475	329.943	12.7487	335.886	12.7513	324.915	12.7513	318.619	12.7529	369.638
12.7594	-0.952572	12.7598	362.148	12.7546	6.13102	12.7542	335.638	12.7554	341.962	12.7579	330.417	12.7579	324.269	12.7596	375.484
12.766	-0.965521	12.7665	367.647	12.7613	6.14015	12.7608	340.968	12.7621	347.677	12.7646	335.577	12.7646	329.595	12.7662	380.93
12.7727	-0.978142	12.7731	372.774	12.7679	6.15124	12.7675	345.929	12.7688	353.022	12.7713	340.393	12.7713	334.592	12.7729	385.974
12.7794	-0.991181	12.7798	377.528	12.7746	6.1634	12.7742	350.519	12.7754	357.992	12.7779	344.859	12.7779	339.254	12.7796	390.62
12.786	-1.00449	12.7865	381.908	12.7812	6.17605	12.7808	354.738	12.7821	362.584	12.7846	348.977	12.7846	343.578	12.7863	394.872
12.7927	-1.01831	12.7931	385.916	12.7879	6.18952	12.7875	358.584	12.7888	366.799	12.7912	352.75	12.7912	347.56	12.7929	398.731
12.7994	-1.0336	12.7998	389.555	12.7946	6.20393	12.7942	362.06	12.7954	370.642	12.7979	356.181	12.7979	351.201	12.7996	402.201
12.806	-1.05011	12.8064	392.831	12.8012	6.21688	12.8008	365.171	12.8021	374.115	12.8046	359.269	12.8046	354.5	12.8063	405.289
12.8127	-1.06853	12.8131	395.746	12.8079	6.22698	12.8075	367.922	12.8087	377.223	12.8112	362.019	12.8112	357.461	12.8129	408.001
12.8194	-1.08802	12.8198	398.31	12.8146	6.2339	12.8142	370.323	12.8154	379.967	12.8179	364.436	12.8179	360.086	12.8196	410.342
12.826	-1.10886	12.8264	400.529	12.8212	6.23732	12.8208	372.381	12.8221	382.356	12.8246	366.525	12.8246	362.38	12.8262	412.317
12.8327	-1.13083	12.8331	402.411	12.8279	6.23555	12.8275	374.103	12.8287	384.396	12.8313	368.29	12.8313	364.35	12.8329	413.937
12.8394	-1.15371	12.8398	403.965	12.8346	6.22798	12.8342	375.501	12.8354	386.093	12.8379	369.739	12.8379	366.003	12.8396	415.213
12.846	-1.17772	12.8465	405.203	12.8413	6.21647	12.8408	376.585	12.8421	387.457	12.8446	370.883	12.8446	367.346	12.8462	416.155
12.8527	-1.20255	12.8531	406.138	12.8479	6.2023	12.8475	377.366	12.8488	388.498	12.8513	371.73	12.8513	368.382	12.8529	416.775
12.8594	-1.22845	12.8598	406.78	12.8546	6.18583	12.8542	377.854	12.8554	389.229	12.8579	372.288	12.8579	369.12	12.8596	417.088
12.866	-1.25542	12.8665	407.137	12.8613	6.16778	12.8608	378.061	12.8621	389.662	12.8646	372.569	12.8646	369.569	12.8663	417.104
12.8727	-1.28273	12.8731	407.219	12.8679	6.14949	12.8675	378.001	12.8688	389.807	12.8712	372.584	12.8712	369.74	12.8729	416.835
12.8794	-1.30946	12.8798	407.038	12.8746	6.13154	12.8742	377.685	12.8754	389.675	12.8779	372.341	12.8779	369.638	12.8796	416.291
12.886	-1.33529	12.8864	406.603	12.8812	6.11474	12.8808	377.126	12.8821	389.278	12.8846	371.852	12.8846	369.272	12.8863	415.485
12.8927	-1.36076	12.8931	405.927	12.8879	6.1	12.8875	376.337	12.8887	388.631	12.8912	371.13	12.8912	368.657	12.8929	414.429
12.8994	-1.3855	12.8998	405.021	12.8946	6.0876	12.8942	375.329	12.8954	387.746	12.8979	370.187	12.8979	367.808	12.8996	413.135
12.906	-1.4096	12.9064	403.897	12.9012	6.07752	12.9008	374.111	12.9021	386.633	12.9046	369.037	12.9046	366.737	12.9062	411.614
12.9127	-1.43249	12.9131	402.567	12.9079	6.06962	12.9075	372.694	12.9087	385.303	12.9113	367.69	12.9113	365.454	12.9129	409.884
12.9194	-1.45375	12.9198	401.042	12.9146	6.06421	12.9142	371.094	12.9154	383.767	12.9179	366.157	12.9179	363.968	12.9196	407.959
12.926	-1.47288	12.9265	399.334	12.9213	6.05996	12.9208	369.324	12.9221	382.038	12.9246	364.445	12.9246	362.292	12.9262	405.853
12.9327	-1.48891	12.9331	397.457	12.9279	6.05653	12.9275	367.394	12.9288	380.132	12.9313	362.566	12.9313	360.434	12.9329	403.577
12.9394	-1.50292	12.9398	395.418	12.9346	6.05442	12.9342	365.319	12.9354	378.06	12.9379	360.532	12.9379	358.405	12.9396	401.144
12.946	-1.51449	12.9465	393.229	12.9413	6.05354	12.9408	363.112	12.9421	375.835	12.9446	358.353	12.9446	356.214	12.9462	398.568
12.9527	-1.52426	12.9531	390.9	12.9479	6.05354	12.9475	360.784	12.9488	373.469	12.9512	356.039	12.9512	353.874	12.9529	395.863
12.9594	-1.53203	12.9598	388.445	12.9546	6.05384	12.9542	358.343	12.9554	370.975	12.9579	353.604	12.9579	351.401	12.9596	393.038
12.966	-1.53743	12.9665	385.871	12.9612	6.05655	12.9608	355.799	12.9621	368.365	12.9646	351.06	12.9646	348.807	12.9663	390.105
12.9727	-1.5414	12.9731	383.189	12.9679	6.06229	12.9675	353.162	12.9688	365.649	12.9712	348.418	12.9712	346.107	12.9729	387.073
12.9794	-1.54354	12.9798	380.41	12.9746	6.07049	12.9742	350.44	12.9754	362.835	12.9779	345.686	12.9779	343.311	12.9796	383.957
12.986	-1.5443	12.9864	377.544	12.9812	6.08006	12.9808	347.64	12.9821	359.936	12.9846	342.873	12.9846	340.431	12.9863	380.766
12.9927	-1.54243	12.9931	374.598	12.9879	6.09081	12.9875	344.775	12.9887	356.963	12.9913	339.989	12.9913	337.474	12.9929	377.508
12.9994	-1.53781	12.9998	371.583	12.9946	6.10405	12.9942	341.852	12.9954	353.924	12.9979	337.044	12.9979	334.455	12.9996	374.192
13.006	-1.53066	13.0064	368.505	13.0013	6.1185	13.0008	338.878	13.0021	350.828	13.0046	334.049	13.0046	331.384	13.0062	370.83
13.0127	-1.52034	13.0131	365.372	13.0079	6.13162	13.0075	335.859	13.0087	347.682	13.0113	331.012	13.0113	328.268	13.0129	367.431
13.0194	-1.50611	13.0198	362.189	13.0146	6.14192	13.0142	332.805	13.0154	344.492	13.0179	327.938	13.0179	325.114	13.0196	364
13.026	-1.48629	13.0265	358.962	13.0213	6.15014	13.0208	329.723	13.0221	341.266	13.0246	324.834	13.0246	321.931	13.0262	360.547
13.0327	-1.4619	13.0331	355.703	13.0279	6.15749	13.0275	326.619	13.0288	338.011	13.0312	321.708	13.0312	318.73	13.0329	357.078
13.0394	-1.43381	13.0398	352.416	13.0346	6.16266	13.0342	323.497	13.0354	334.732	13.0379	318.566	13.0379	315.516	13.0396	353.601
13.046	-1.40271	13.0465	349.108	13.0412	6.16407	13.0408	320.364	13.0421	331.434	13.0446	315.41	13.0446	312.293	13.0463	350.121
13.0527	-1.36863	13.0531	345.786	13.0479	6.16305	13.0475	317.229	13.0488	328.122	13.0512	312.247	13.0512	309.068	13.0529	346.644
13.0594	-1.33213	13.0598	342.457	13.0546	6.16089	13.0542	314.097	13.0554	324.802	13.0579	309.087	13.0579	305.846	13.0596	343.174
13.066	-1.29507	13.0664	339.124	13.0612	6.15788	13.0608	310.973	13.0621	321.481	13.0646	305.936	13.0646	302.631	13.0663	339.715
13.0727	-1.2587	13.0731	335.792	13.0679	6.15247	13.0675	307.859	13.0687	318.165	13.0712	302.795	13.0712	299.426	13.0729	336.27
13.0794	-1.22368	13.0798	332.465	13.0746	6.14487	13.0742	304.762	13.0754	314.861	13.0779	299.669	13.0779	296.234	13.0796	332.844
13.086	-1.19137	13.0864	329.147	13.0813	6.13717	13.0808	301.685	13.0821	311.575	13.0846	296.56	13.0846	293.063	13.0862	329.442
13.0927	-1.16179	13.0931	325.841	13.0879	6.12947	13.0875	298.628	13.0887	308.311	13.0913	293.472	13.0913	289.916	13.0929	326.066
13.0994	-1.1349	13.0998	322.552	13.0946	6.12161	13.0942	295.594	13.0954	305.074	13.0979	290.406	13.0979	286.8	13.0996	322.719
13.106	-1.11073	13.1065	319.284	13.1013	6.11313	13.1008	292.585	13.1021	301.865	13.1046	287.364	13.1046	283.719	13.1062	319.404
13.1127	-1.08833	13.1131	316.04	13.1079	6.10549	13.1075	289.602	13.1088	298.687	13.1113	284.349	13.1113	280.679	13.1129	316.123
13.1194	-1.06787	13.1198	312.825	13.1146	6.09961	13.1142	286.647	13.1154	295.54	13.1179	281.363	13.1179	277.679	13.1196	312.876
13.126	-1.04708	13.1265	309.639	13.1212	6.0955	13.1208	283.721	13.1221	292.425	13.1246	278.407	13.1246	274.72	13.1263	309.665
13.1327	-1.02565	13.1331	306.483	13.1279	6.09373	13.1275	280.827	13.1288	289.342	13.1312	275.484	13.1312	271.805	13.1329	306.49
13.1394	-1.00287	13.1398	303.36	13.1346	6.09494	13.1342	277.966	13.1354	286.294	13.1379	272.594	13.1379	268.935	13.1396	303.353
13.146	-0.979193	13.1464	300.271	13.1412	6.0995	13.1408	275.14	13.1421	283.282	13.1446	269.736	13.1446	266.112	13.1463	300.254
13.1527	-0.955448	13.1531	297.219	13.1479	6.10657	13.1475	272.35	13.1487	280.305	13.1512	266.914	13.1512	263.335	13.1529	297.195
13.1594	-0.930063	13.1598	294.2	13.1546	6.11483	13.1542	269.597	13.1554	277.366	13.1579	264.129	13.1579	260.605	13.1596	294.178
13.166	-0.903204	13.1664	291.212	13.1613	6.1231	13.1608	266.879	13.1621	274.469	13.1646	261.384	13.1646	257.922	13.1662	291.202
13.1727	-0.875324	13.1731	288.256	13.1679	6.13005	13.1675	264.196	13.1687	271.616	13.1713	258.681	13.1713	255.286	13.1729	288.266
13.1794	-0.849098	13.1798	285.331	13.1746	6.13515	13.1742	261.547	13.1754	268.805	13.1779	256.021	13.1779	252.695	13.1796	285.371
13.186	-0.824071	13.1865	282.436	13.1813	6.13797	13.1808	258.933	13.1821	266.034	13.1846	253.403	13.1846	250.146	13.1862	282.518
13.1927	-0.799023	13.1931	279.57	13.1879	6.13956	13.1875	256.354	13.1888	263.302	13.1913	250.826	13.1913	247.637	13.1929	279.704
13.1994	-0.774756	13.1998	276.733	13.1946	6.14046	13.1942	253.806	13.1954	260.611	13.1979	248.288	13.1979	245.165	13.1996	276.927
13.206	-0.753142	13.2065	273.925	13.2012	6.141	13.2008	251.289	13.2021	257.957	13.2046	245.785	13.2046	242.728	13.2063	274.182
13.2127	-0.735551	13.2131	271.146	13.2079	6.14108	13.2075	248.802	13.2088	255.337	13.2112	243.314	13.2112	240.321	13.2129	271.469
13.2194	-0.719443	13.2198	268.392	13.2146	6.14029	13.2142	246.342	13.2154	252.751	13.2179	240.875	13.2179	237.943	13.2196	268.786
13.226	-0.704989	13.2264	265.663	13.2212	6.13905	13.2208	243.904	13.2221	250.197	13.2246	238.464	13.2246	235.591	13.2263	266.132
13.2327	-0.694163	13.2331	262.959	13.2279	6.1375	13.2275	241.487	13.2287	247.674	13.2312	236.082	13.2312	233.261	13.2329	263.502
13.2394	-0.688948	13.2398	260.282	13.2346	6.13599	13.2342	239.091	13.2354	245.177	13.2379	233.727	13.2379	230.953	13.2396	260.895
13.246	-0.688724	13.2464	257.631	13.2413	6.13502	13.2408	236.712	13.2421	242.705	13.2446	231.4	13.2446	228.667	13.2462	258.309
13.2527	-0.692628	13.2531	255.005	13.2479	6.13556	13.2475	234.35	13.2487	240.254	13.2513	229.098	13.2513	226.404	13.2529	255.743
13.2594	-0.702314	13.2598	252.403	13.2546	6.13887	13.2542	232.002	13.2554	237.827	13.2579	226.819	13.2579	224.16	13.2596	253.195
13.266	-0.7184	13.2665	249.825	13.2613	6.1454	13.2608	229.669	13.2621	235.422	13.2646	224.561	13.2646	221.932	13.2662	250.664
13.2727	-0.739202	13.2731	247.266	13.2679	6.15417	13.2675	227.351	13.2688	233.038	13.2713	222.321	13.2713	219.72	13.2729	248.149
13.2794	-0.762269	13.2798	244.726	13.2746	6.16401	13.2742	225.047	13.2754	230.677	13.2779	220.095	13.2779	217.523	13.2796	245.648
13.286	-0.78696	13.2865	242.204	13.2812	6.17336	13.2808	222.756	13.2821	228.337	13.2846	217.882	13.2846	215.335	13.2863	243.16
13.2927	-0.813335	13.2931	239.698	13.2879	6.18033	13.2875	220.479	13.2888	226.015	13.2912	215.679	13.2912	213.156	13.2929	240.685
13.2994	-0.840038	13.2998	237.209	13.2946	6.18334	13.2942	218.217	13.2954	223.709	13.2979	213.489	13.2979	210.985	13.2996	238.222
13.306	-0.864625	13.3064	234.735	13.3012	6.18169	13.3008	215.969	13.3021	221.419	13.3046	211.309	13.3046	208.824	13.3063	235.771
13.3127	-0.887044	13.3131	232.276	13.3079	6.17504	13.3075	213.737	13.3087	219.144	13.3112	209.139	13.3112	206.673	13.3129	233.331
[truncated: 1,753 more rows]
