# Supplementary material for: Calcium depletion challenges endoplasmic reticulum proteostasis by destabilising BiP-substrate complexes
Source: eLife. 2020 Dec 9;9:e62601. doi: 10.7554/eLife.62601 (PMC7758071; doi:10.7554/eLife.62601)
Supplement: Supplementary file 7. [file elife-62601-supp7.xlsx]

## Sheet: Sheet1
Table of plasmids
ID	Plasmid name	Description	Encoded protein	Reference
UK173	haBiP_27-654_pQE10	Bacterial expression of His-tagged Chinese hamster BiP amino acids 27-654	BiP	PMID: 18923430
UK838	haBiP_27-654_T229A_pQE10	Bacterial expression of His-tagged ATPase deficient mutant Chinese hamster BiP amino acids 27-654	BiPT229A	PMID: 26473973
UK1965	mP58_390-455_WT_AviTag_pET-30a	Bacterial expression of minimal murine ERdj6 J-domain WT amino acids 390-455 with C-term AviTag-His6	J	This study
UK1966	mP58_390-455_H422Q_AviTag_pET-30a	Bacterial expression of minimal murine ERdj6 J-domain amino acids 390-455 with C-term AviTag-His6 and a H422Q mutation	JQPD	This study
UK1983	yUlp1(402-621)-StrepII_pET24a	Bacterial expression vector for the production of yeast Ulp1 protease with a C-terminal StrepII tag	Ulp1-StrepII	PMID: 31531998
UK2039	haBiP_28-413_WT_pQE30_Smt3	Bacterial expression of Chinese hamster BiP NBD (amino acids 28-413) without acidic N-term	BiP NBD	This study
UK2090	haBiP_28-549_T229A_V461F_pQE30_pSmt3	Bacterial experssion of ATPase and substrate binding deficient, lid truncated BiP (N-terminal H6-Smt3 fusion)	Lidless BiP	This study
UK2093	hsHYPE_104-445_L258D_H363A_pSmt3_pET28b	Bacterial expression of inactive and monomeric human H363A mutant of His6-Smt3-HYPE_104-445	FICD	PMID: 31531998
UK2225	huORP150_33-999_pCA833	Bacterial expression of human ORP150/Grp170 (from Claes Andreasson) with N-terminal His6-Smt3	Grp170	Gift from Claes Andréasson lab
UK2243	pSUMO-DnaK	Bacterial expression of E. coli DnaK carrying N-terminal His6-Smt3 on a pET-24-derivative	DnaK	PMID: 29064368
UK2354	dBiP_29-635_pQE30_Smt3	Bacterial expression of Drosophila melanogaster BiP amino acids 29-635 with N-terminal His6-SUMO	dBiP	This study
UK2469	FLAGM1_TCRa_22-243_IL2RA-TM-Tq_pBABEpu	Mammalian expression of TCRalpha (source sequence PMID 3027582) FLAG-M1- and turquoise-tagged with a transmembrane domain of IL2RA	TCRalpha	This study
UK2470	EcDnaJ_1-72_AviTag_pET30a	Bacterial Expression of isolated J-domain of E. coli DnaJ (amino acids 1-72) as a fusion with AviTag-His6	DnaJ	This study
UK2510	pCA528-hsHsp70	Bacterial expression of full-length human HSPA1A (Hsp70) (natural variant E110D)	Hsp70	Gift from Matthias P. Mayer lab
UK2511	pCA528-hsHsc70	Bacterial expression of full-length human HSPA8 (Hsc70)	Hsc70	Gift from Matthias P. Mayer lab
UK2520	FLAGM1_TCRa_22-243_N/Q_IL2RA-TM-Tq_pBABEpu	Mammalian expression of non-glycosylated version of TCRalpha-n/Q FLAG-M1- and turquoise-tagged with a transmembrane domain of IL2RA	TCRalpha-N/Q	This study
UK2531	pSUMO-DnaK-1-388	Bacterial expression of E. coli DnaK NBD amino acids 1-388 with N-terminal Smt3-His6 tag	DnaK NBD	This study
UK2532	pSUMO-Hsp70-1-390	Bacterial expression of human Hsp70 NBD amino acids 1-390 with N-terminal Smt3-His6 tag (natural variant E110D)	Hsp70 NBD	This study
UK2533	pSUMO-Hsc70_1-390	Bacterial expression of human Hsc70 NBD amino acids 1-390 with N-terminal Smt3-His6 tag	Hsc70 NBD	This study
UK2534	dBiP-NBD_pQE30-H6-Smt3	Bacterial expression of Drosophila melanogaster dBiP NBD with N-terminal Smt3-His6 tag	dBiP NBD	This study
UK2606	Kar2_42-433_pCA528_pET24a_Smt3	Bacterial expression Saccharomyces cerevisiae Kar2 NBD amino acids 42-433 with N-terminal Smt3-His6 tag	Kar2 NBD	This study
UK2819	haBiP_27-654_D257A_pQE10	Bacterial expression of D257A mutant His-tagged Chinese hamster BiP amino acids 27-654	BiPD257A	This study
UK2820	haBiP_27-654_D257N_pQE10	Bacterial expression of D257N mutant His-tagged Chinese hamster BiP amino acids 27-654	BiPD257N	This study
